# Supplementary material for: A Study into the Collision-induced Dissociation (CID) Behavior of Cross-Linked Peptides
Source: PubMed Central journal article supplement (PMC4813691; doi:10.1074/mcp.m115.049296), 2015-12-30

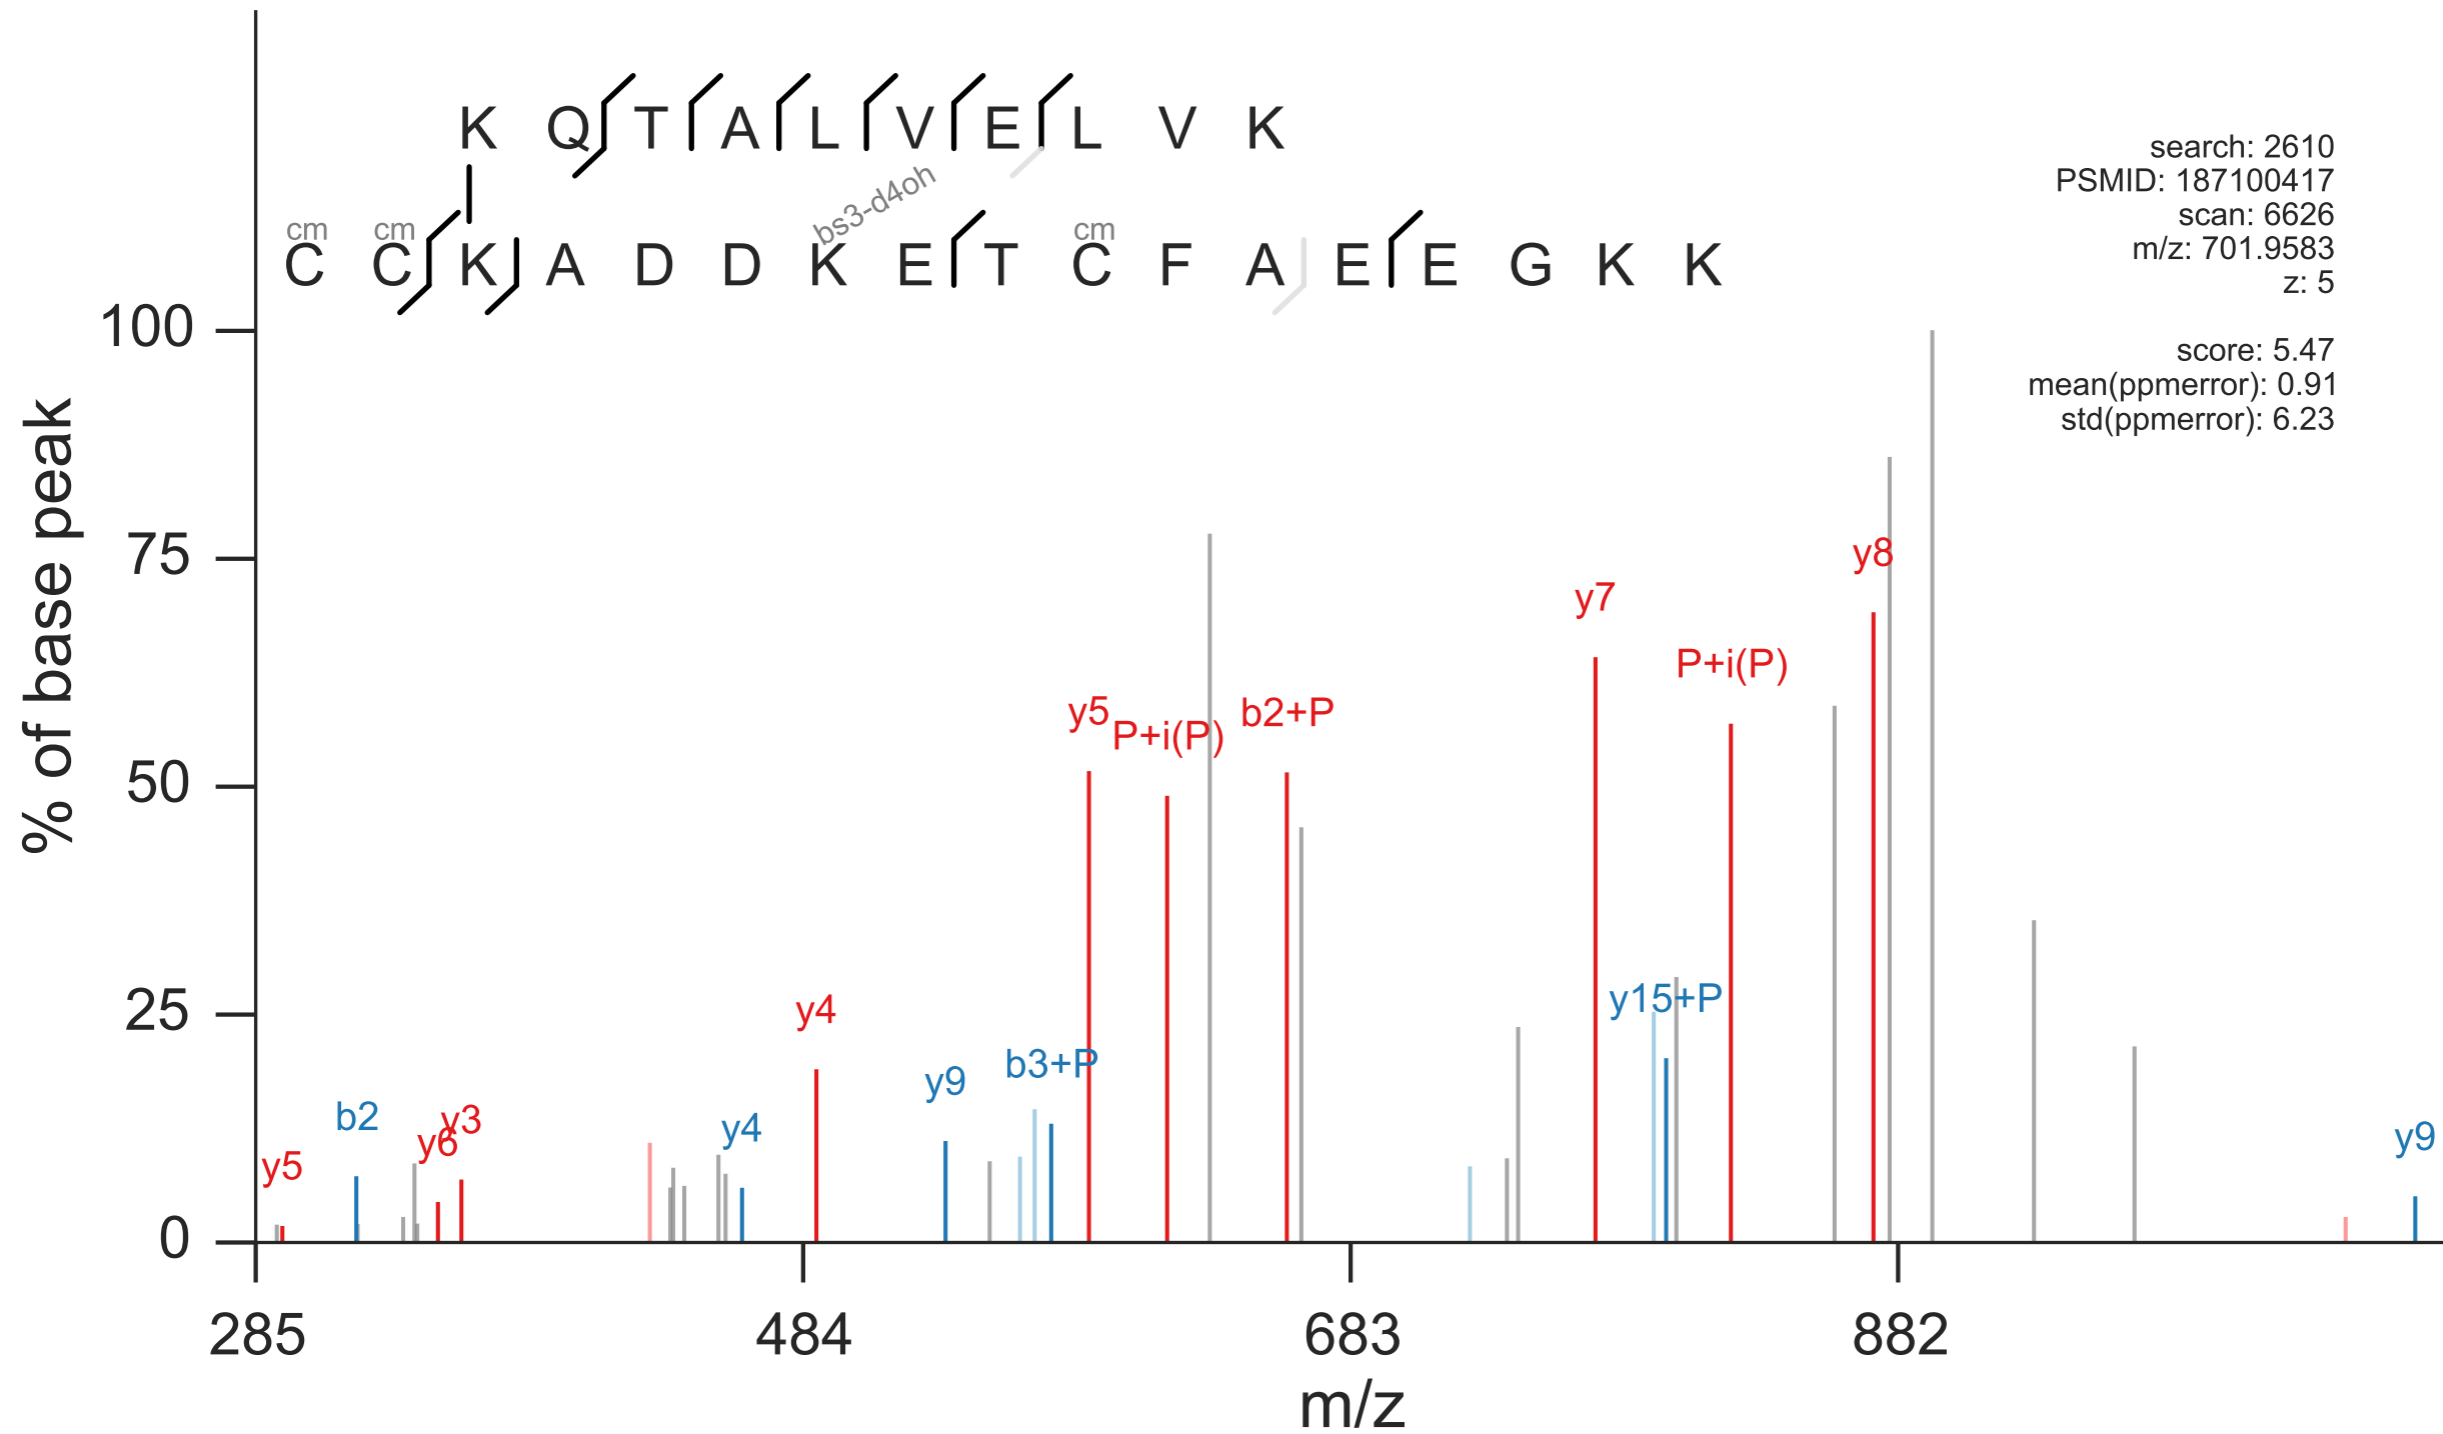

search: 2610  
 PSMID: 187100417  
 scan: 6626  
 m/z: 701.9583  
 z: 5

score: 5.47  
 mean(ppmerror): 0.91  
 std(ppmerror): 6.23

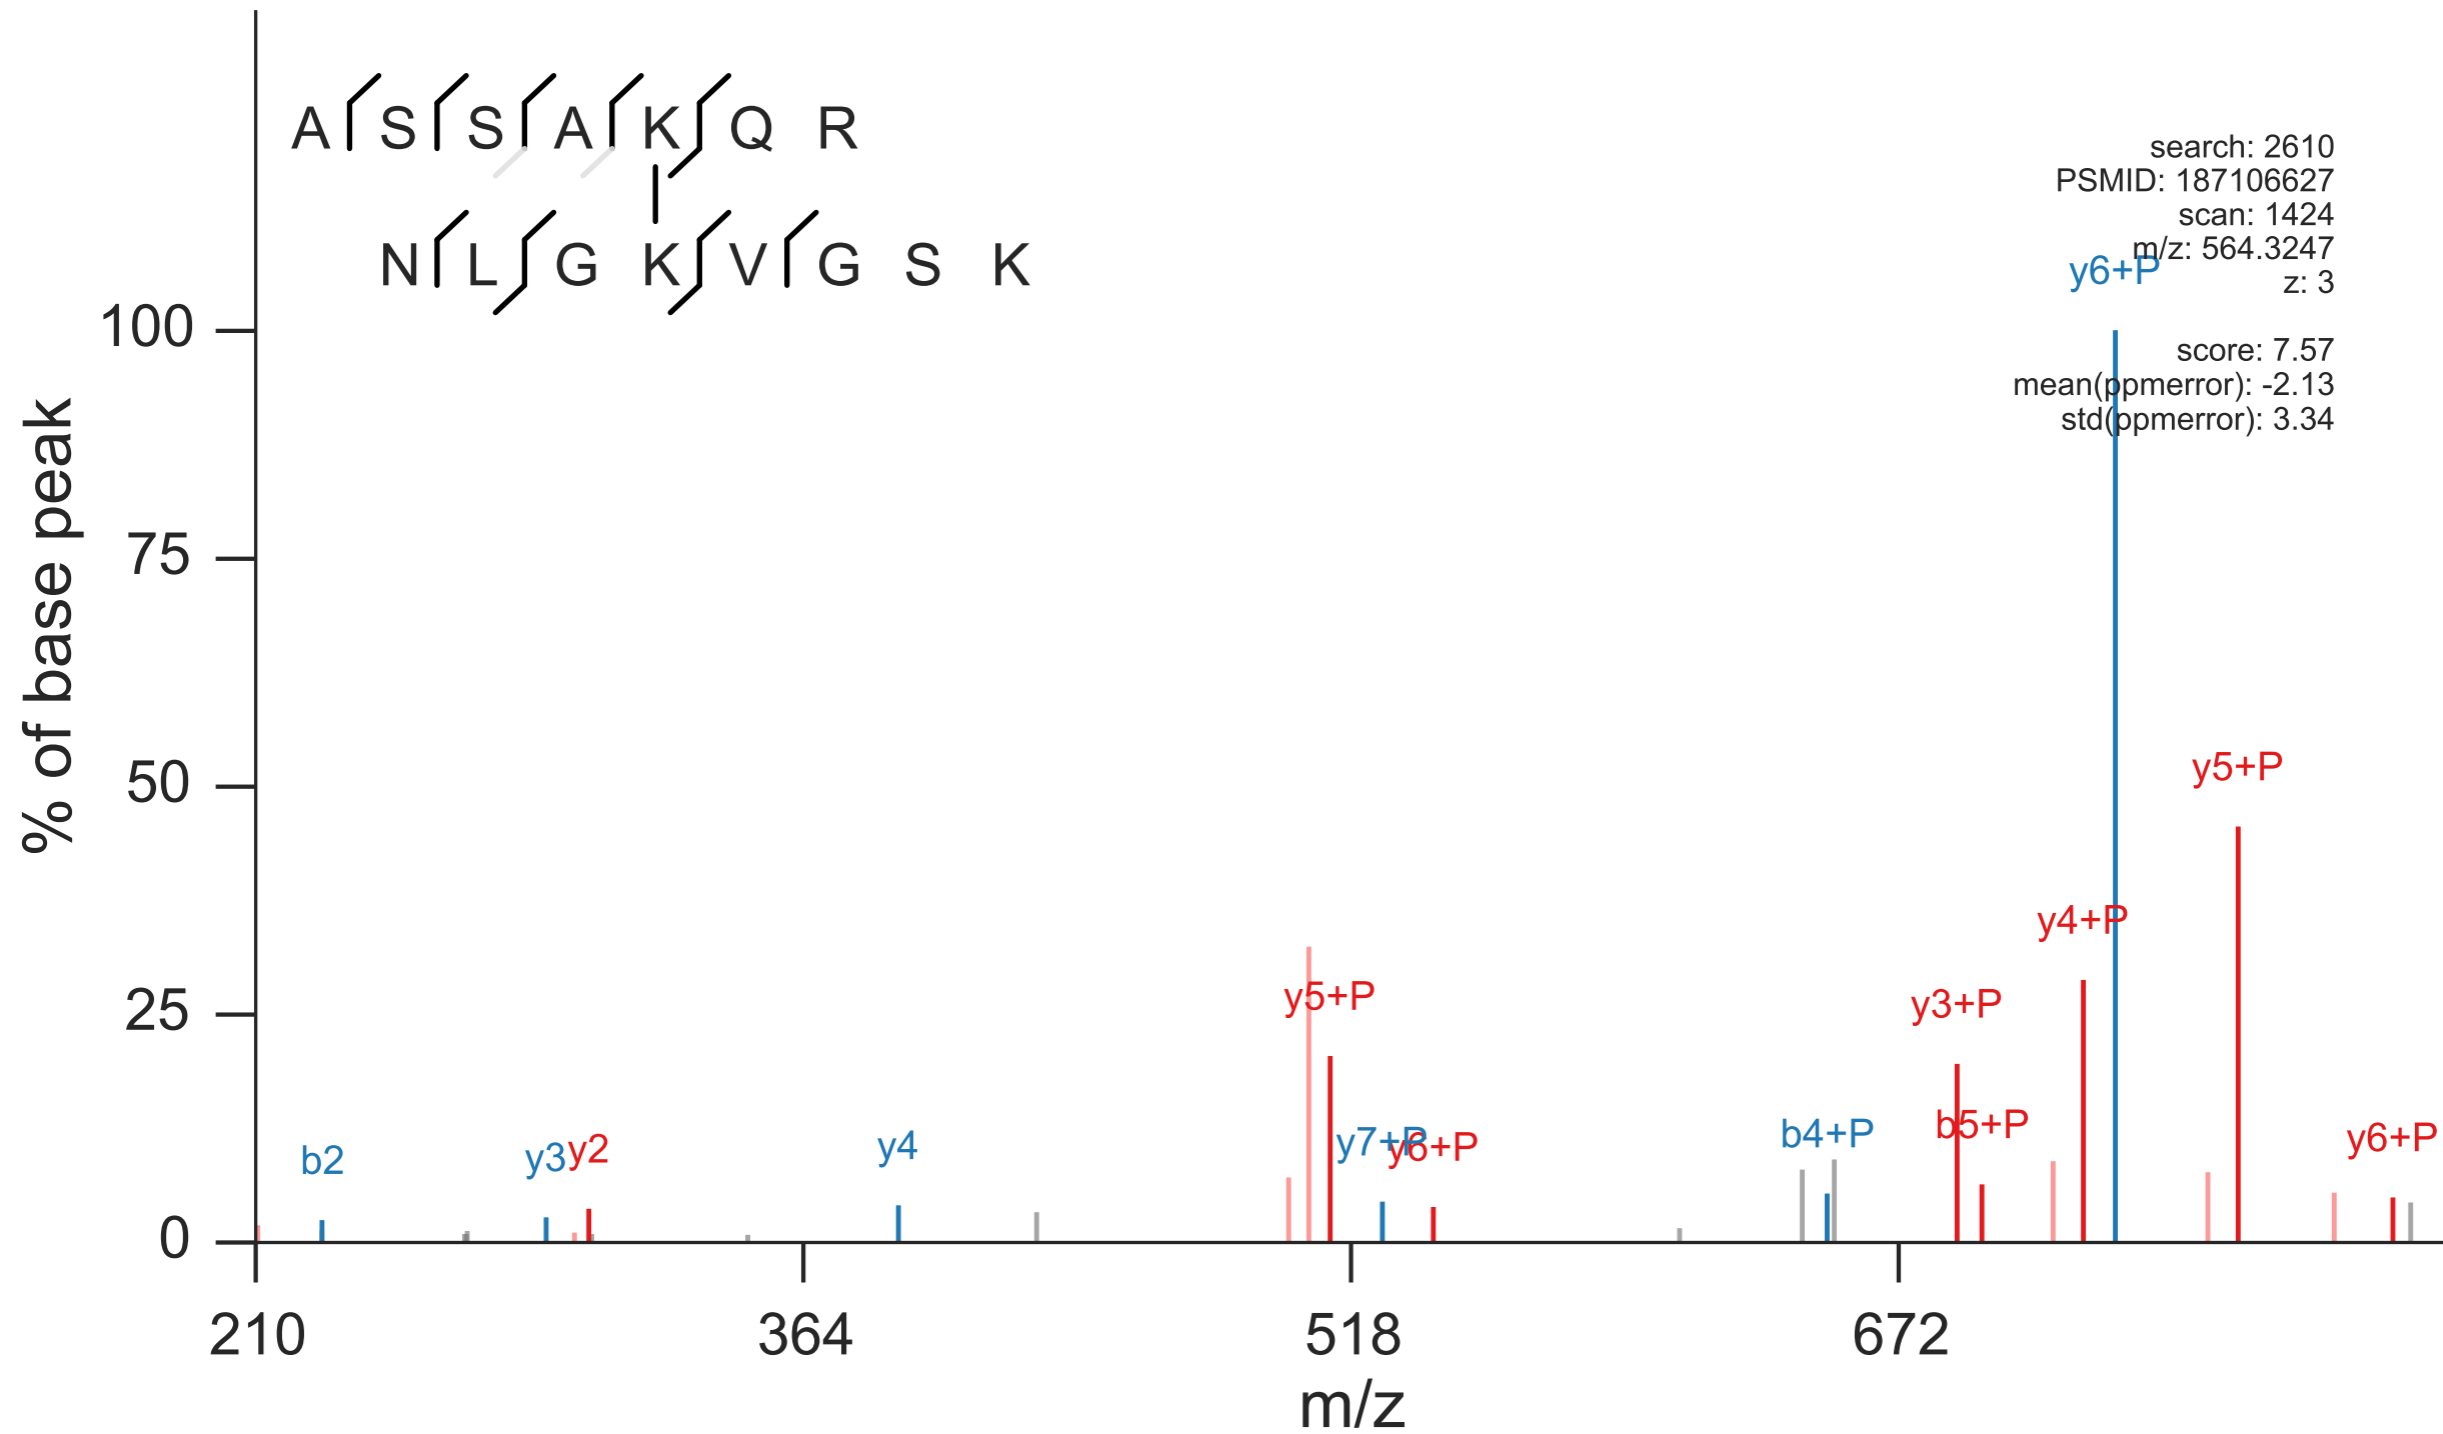

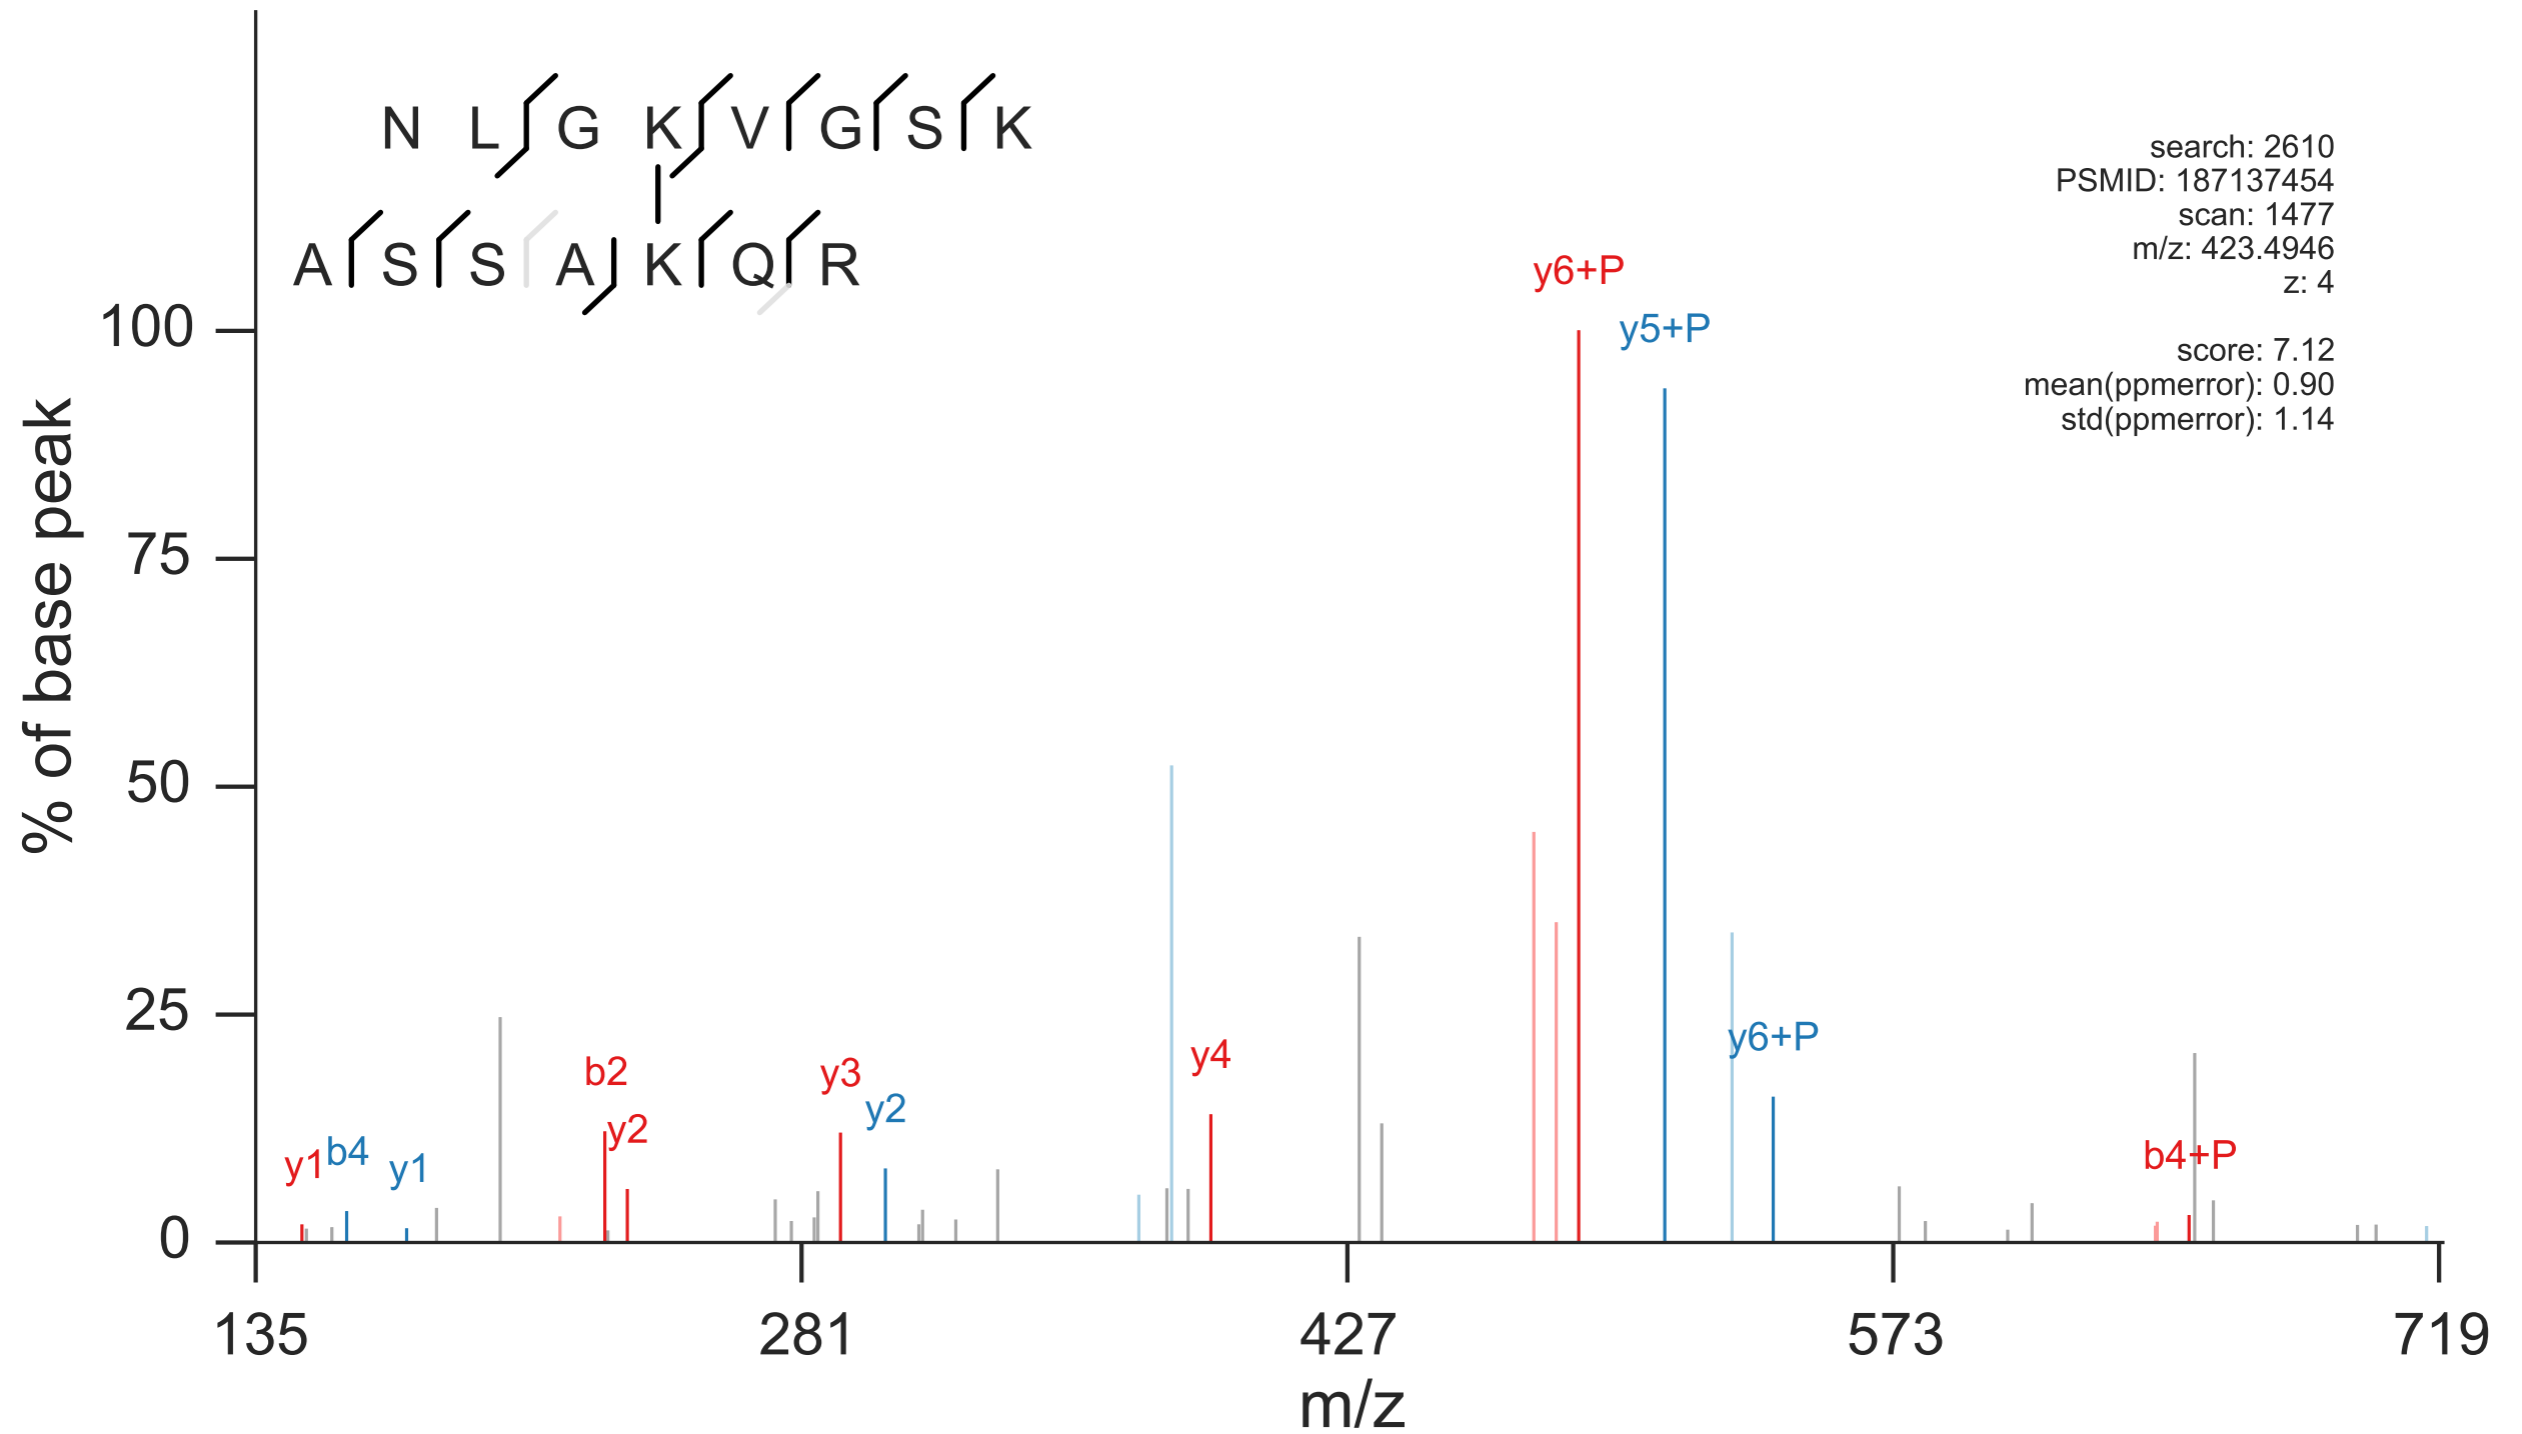

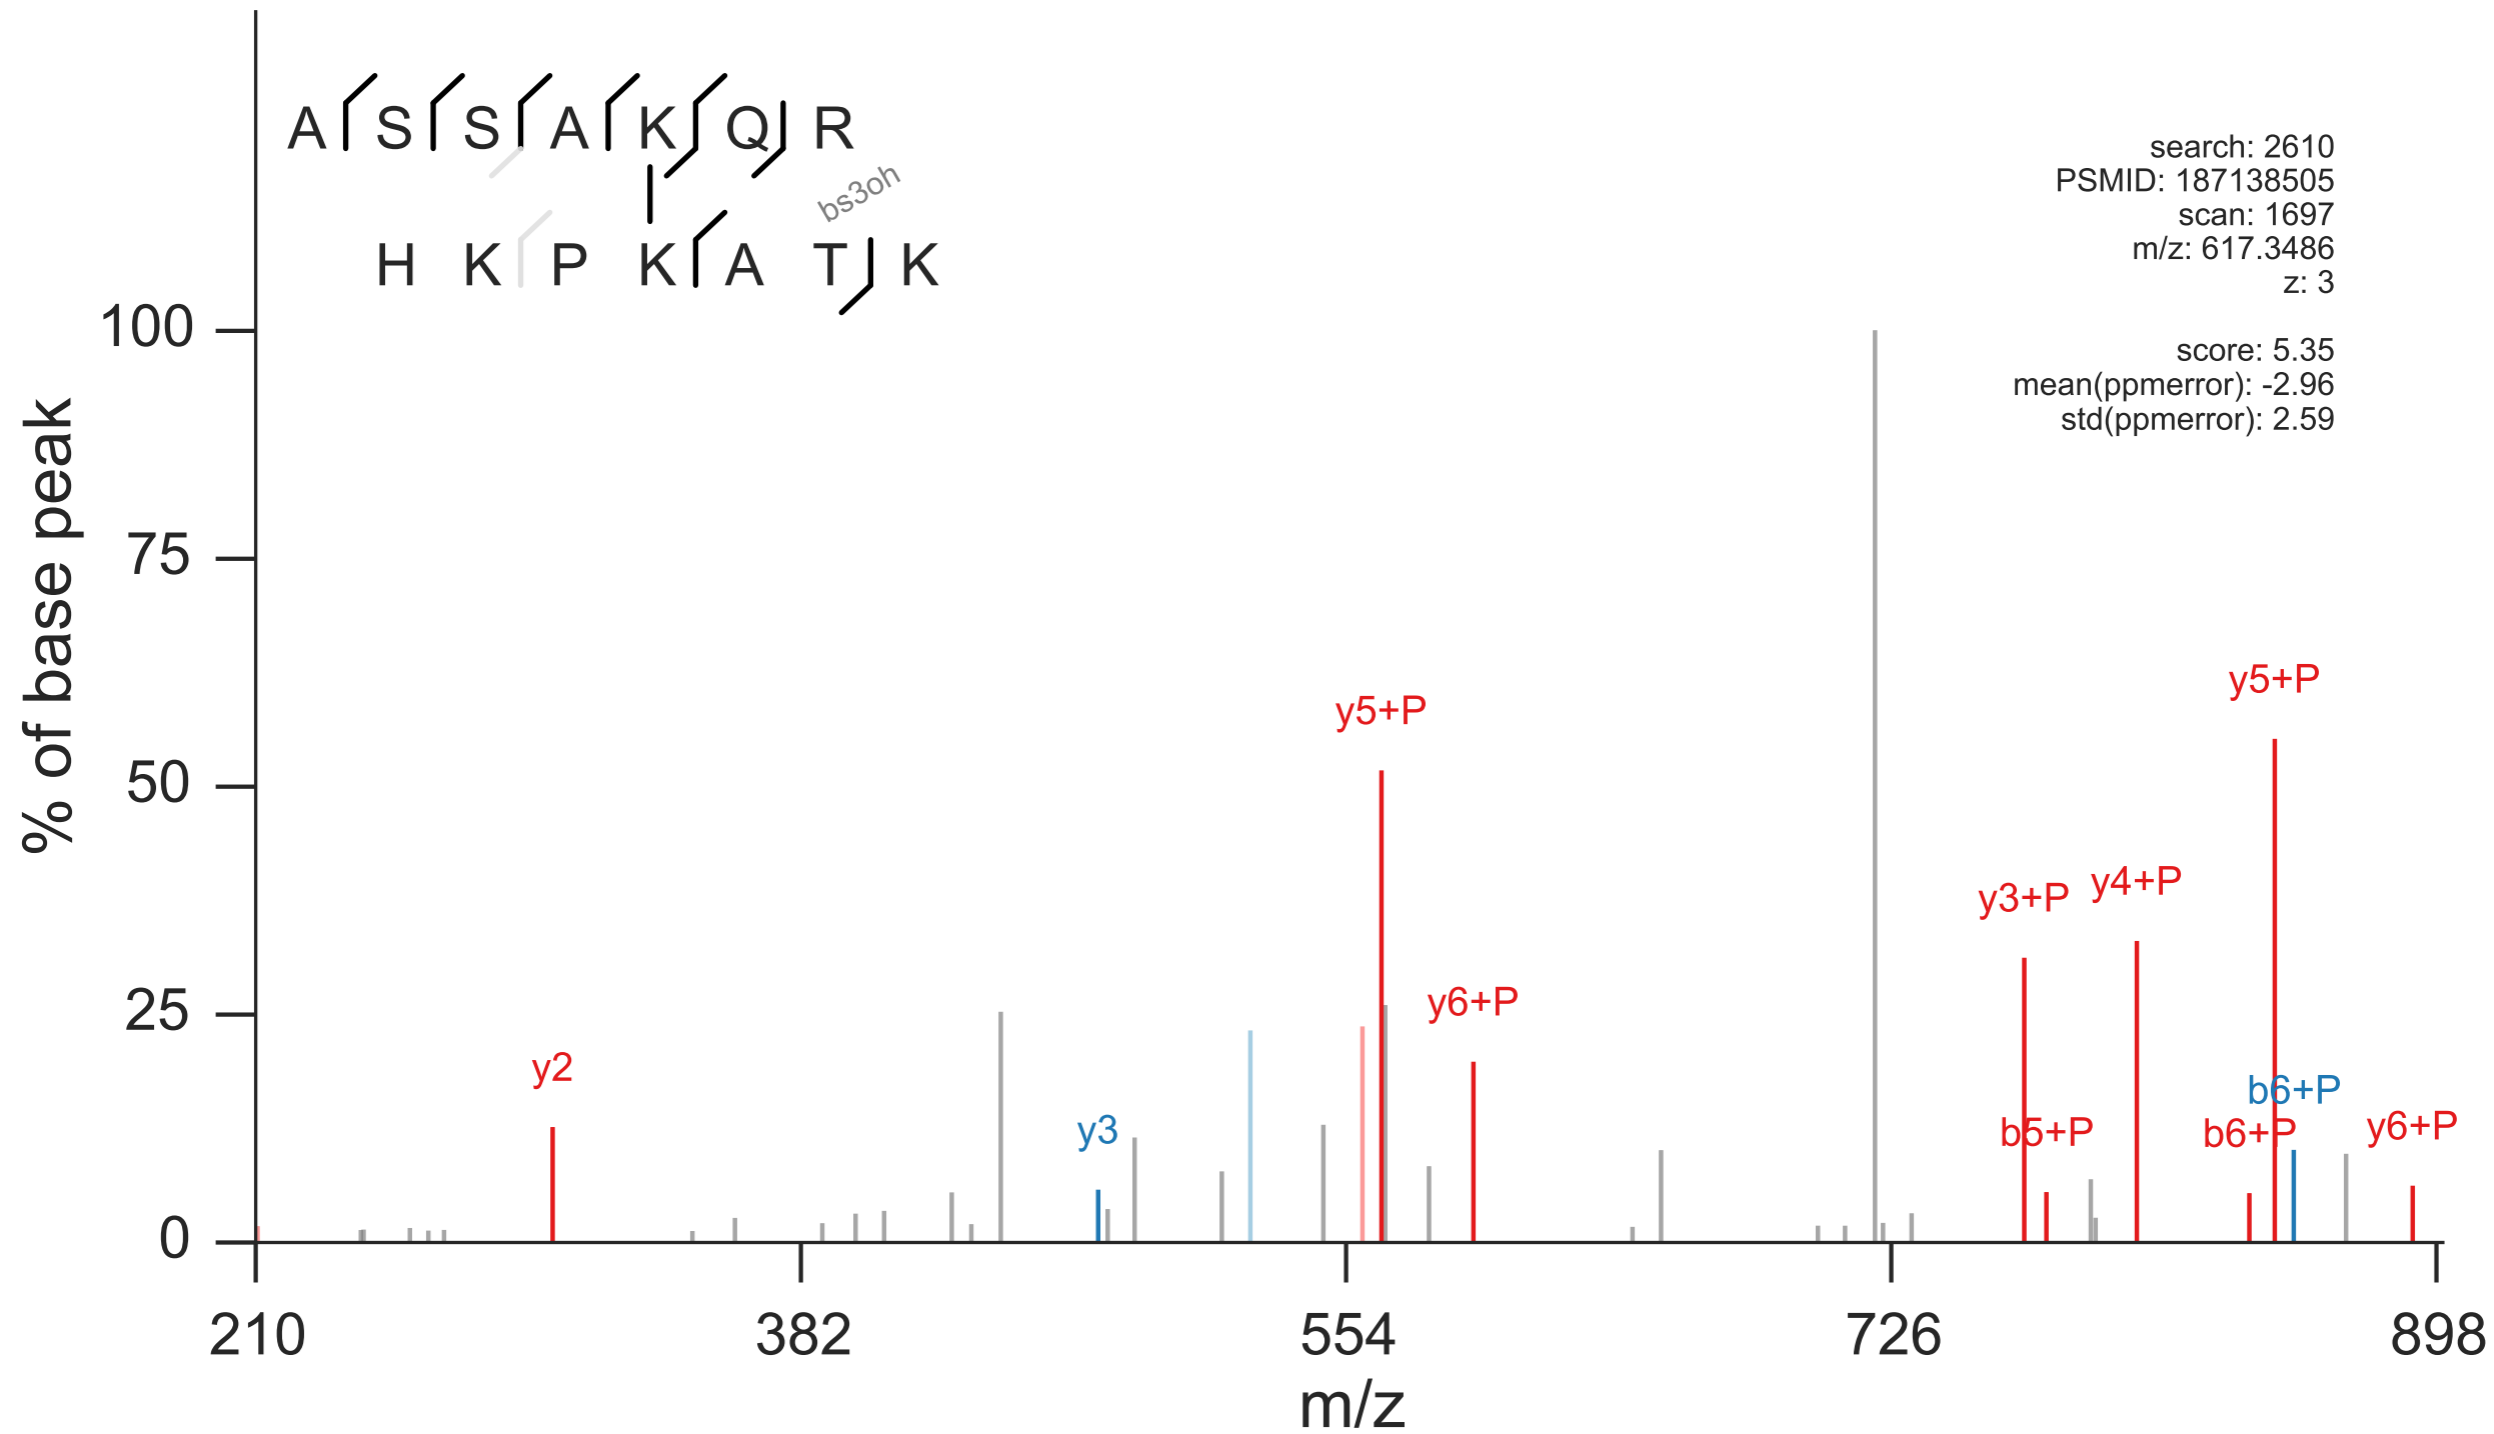

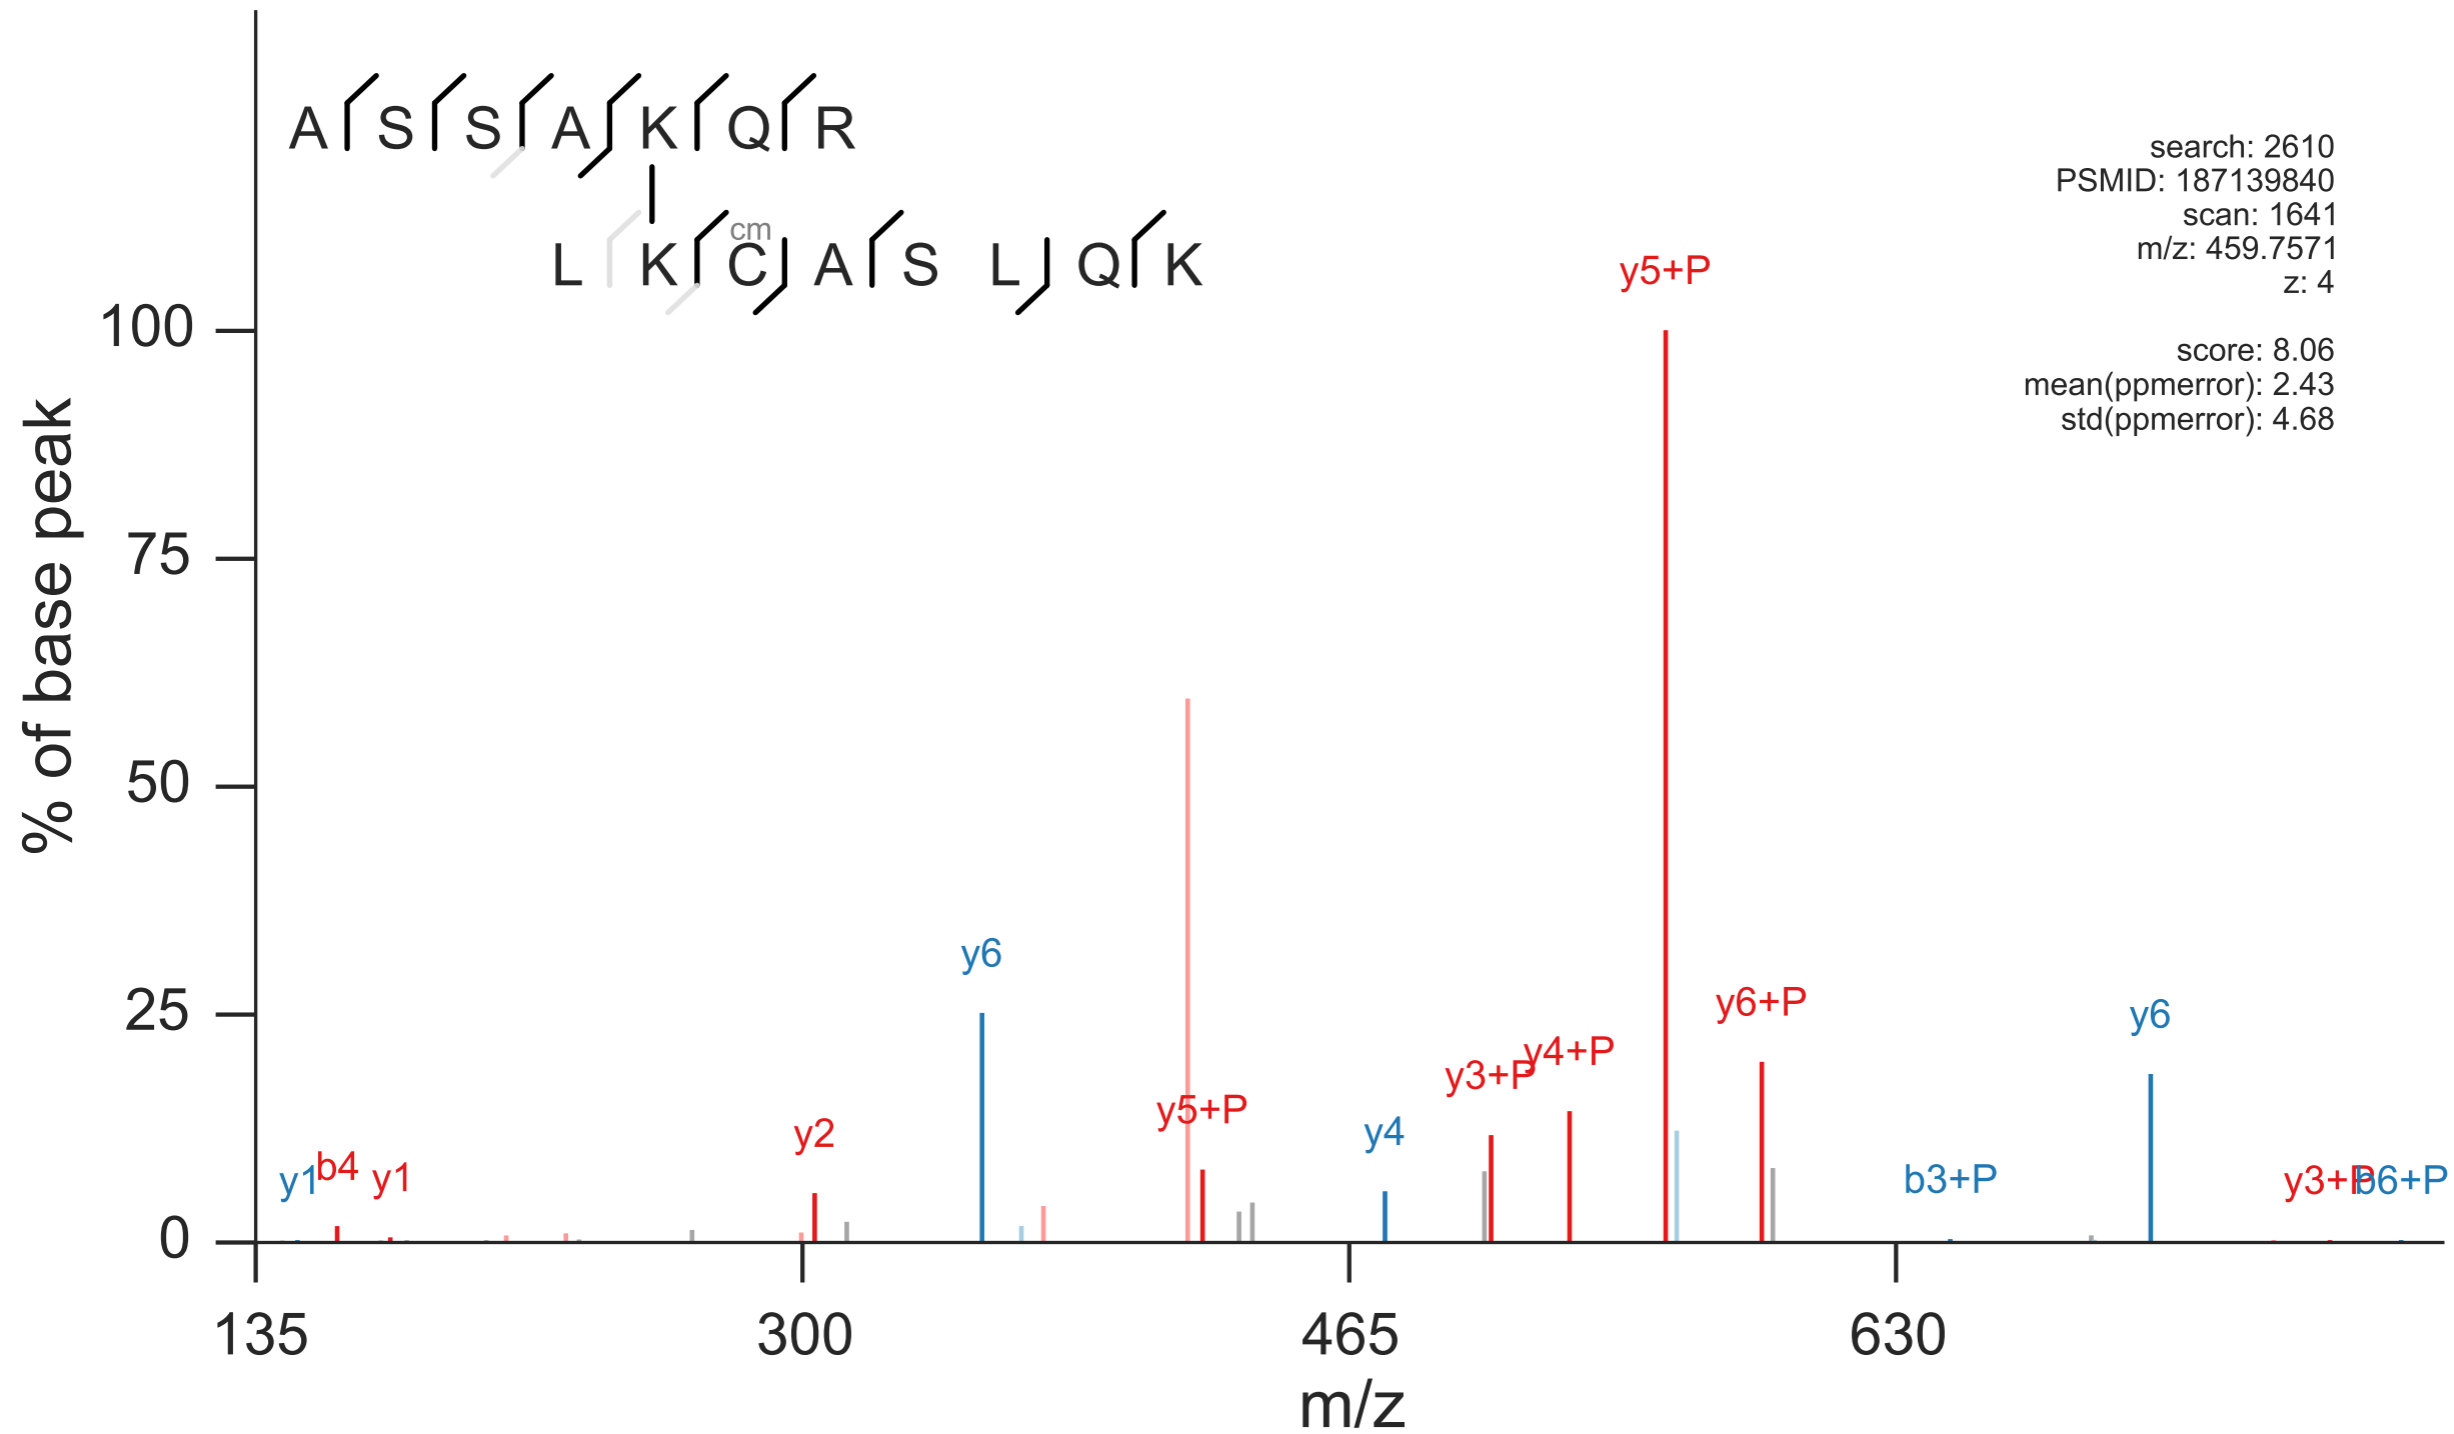

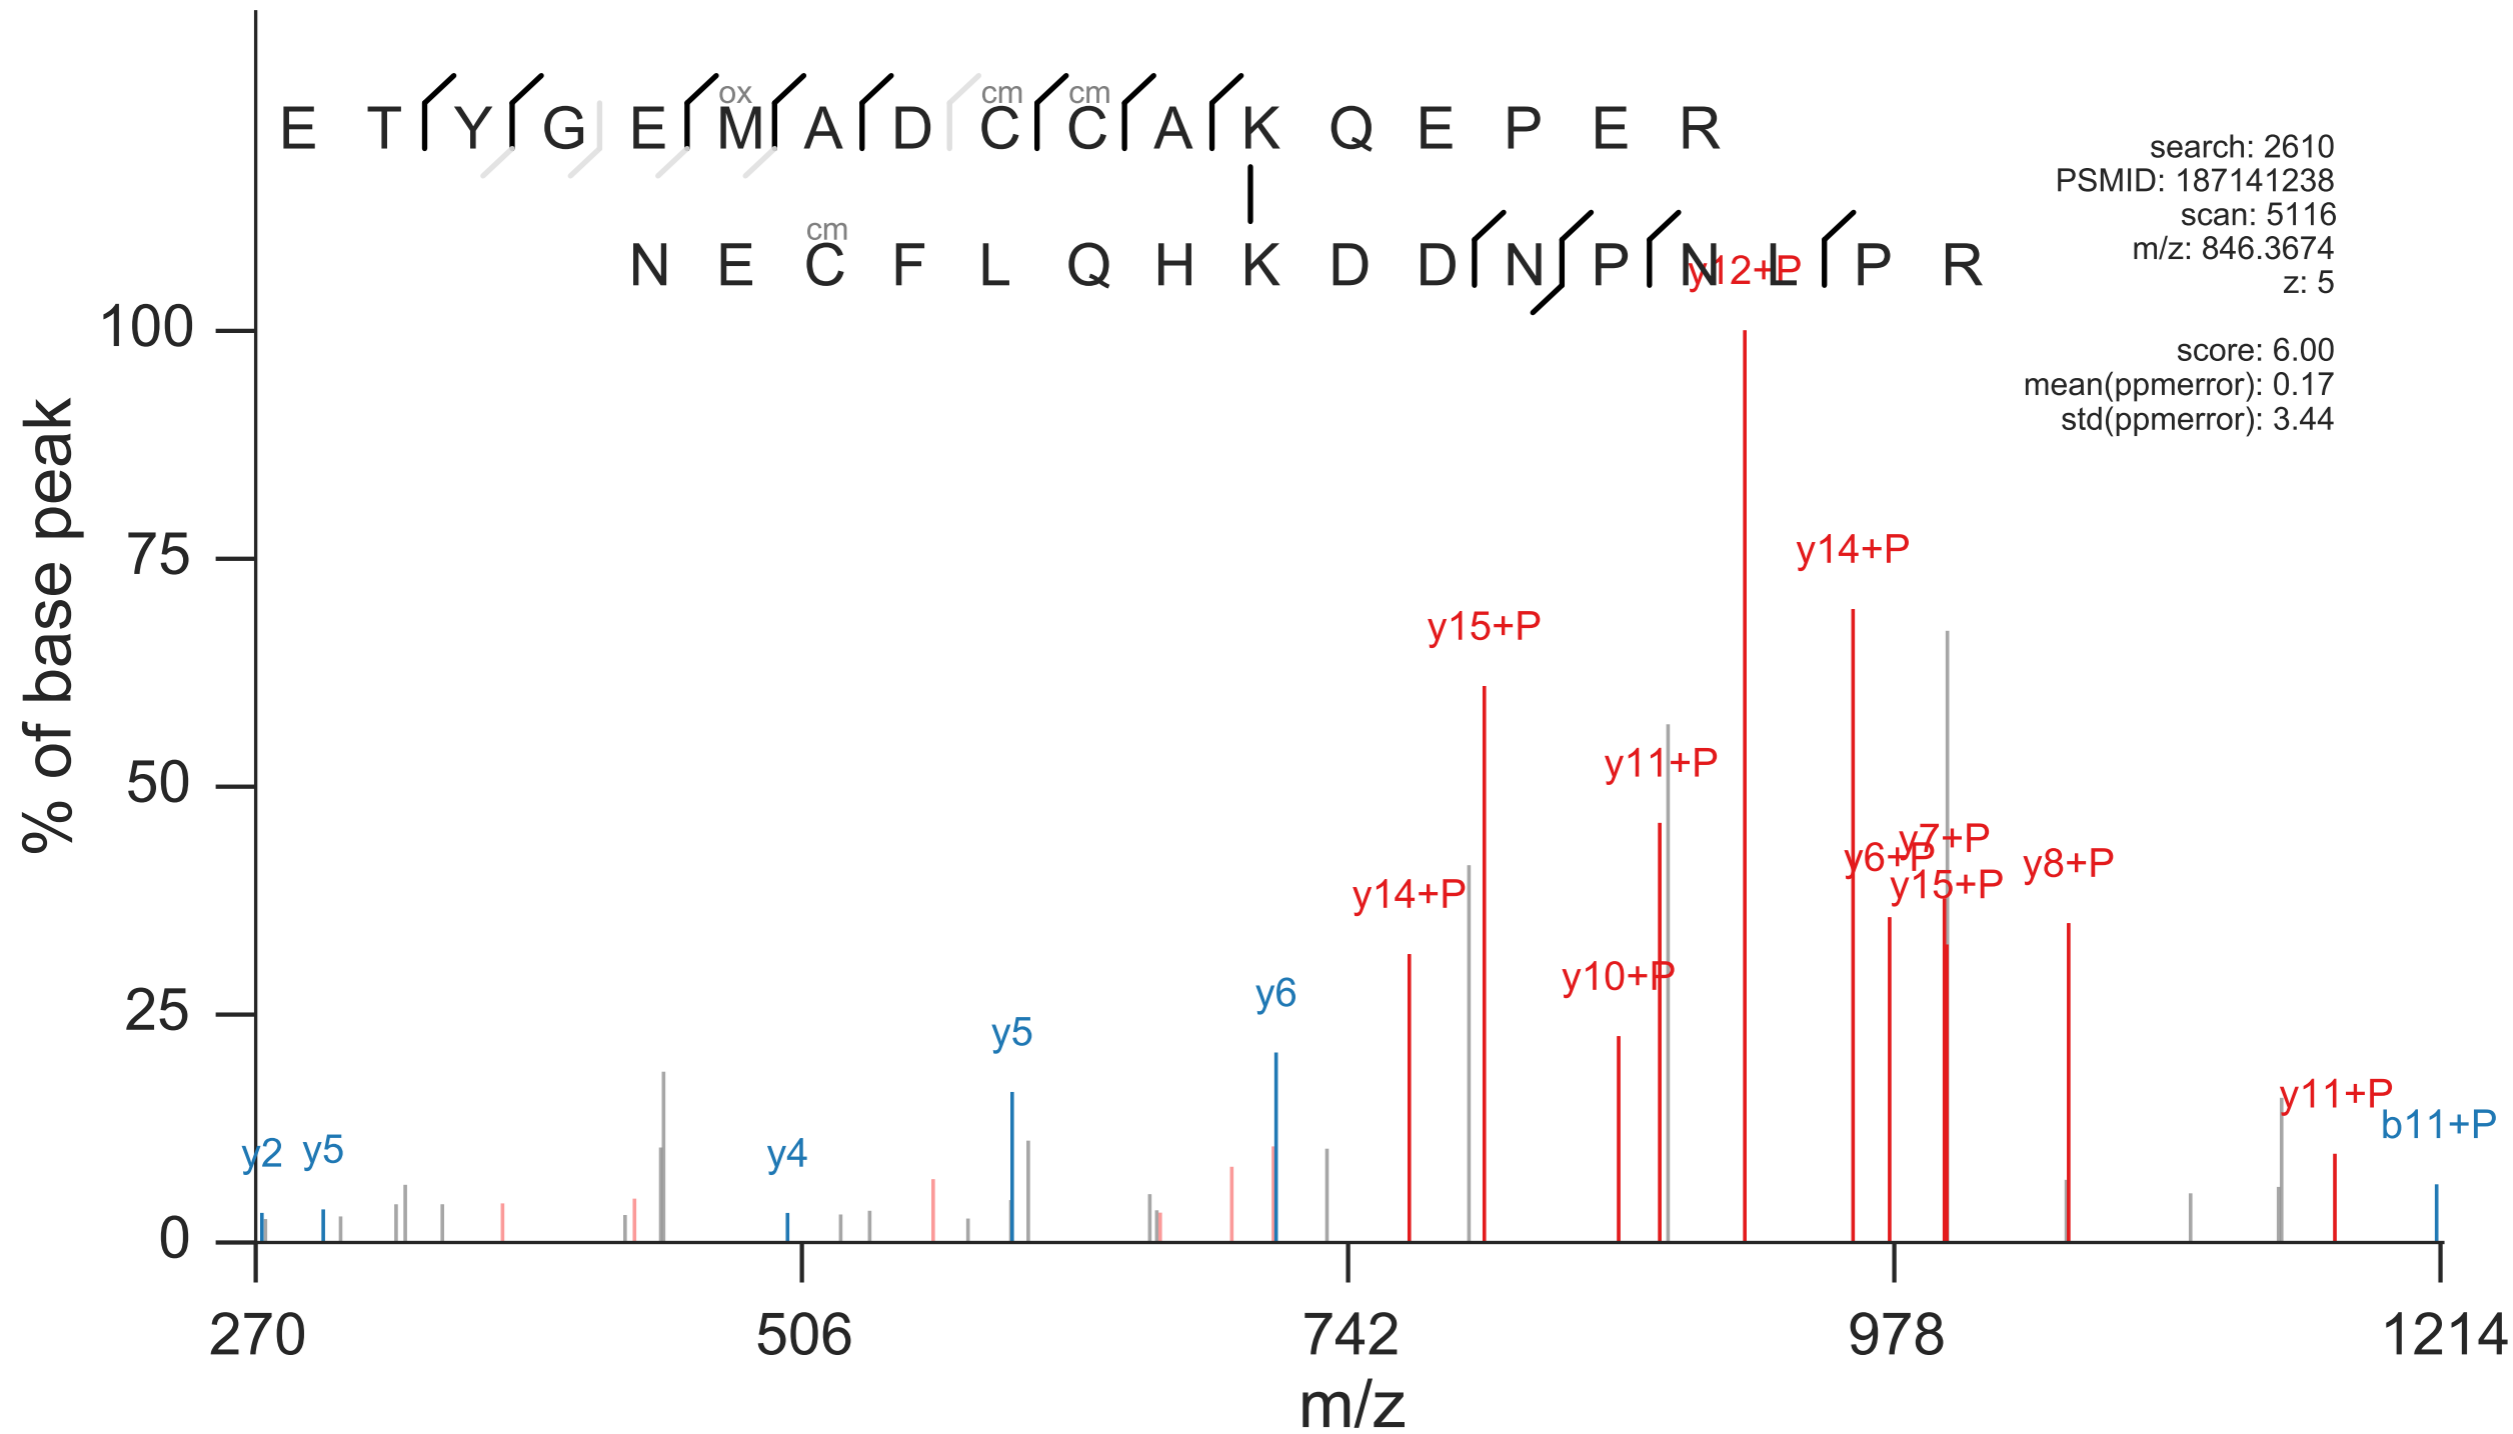

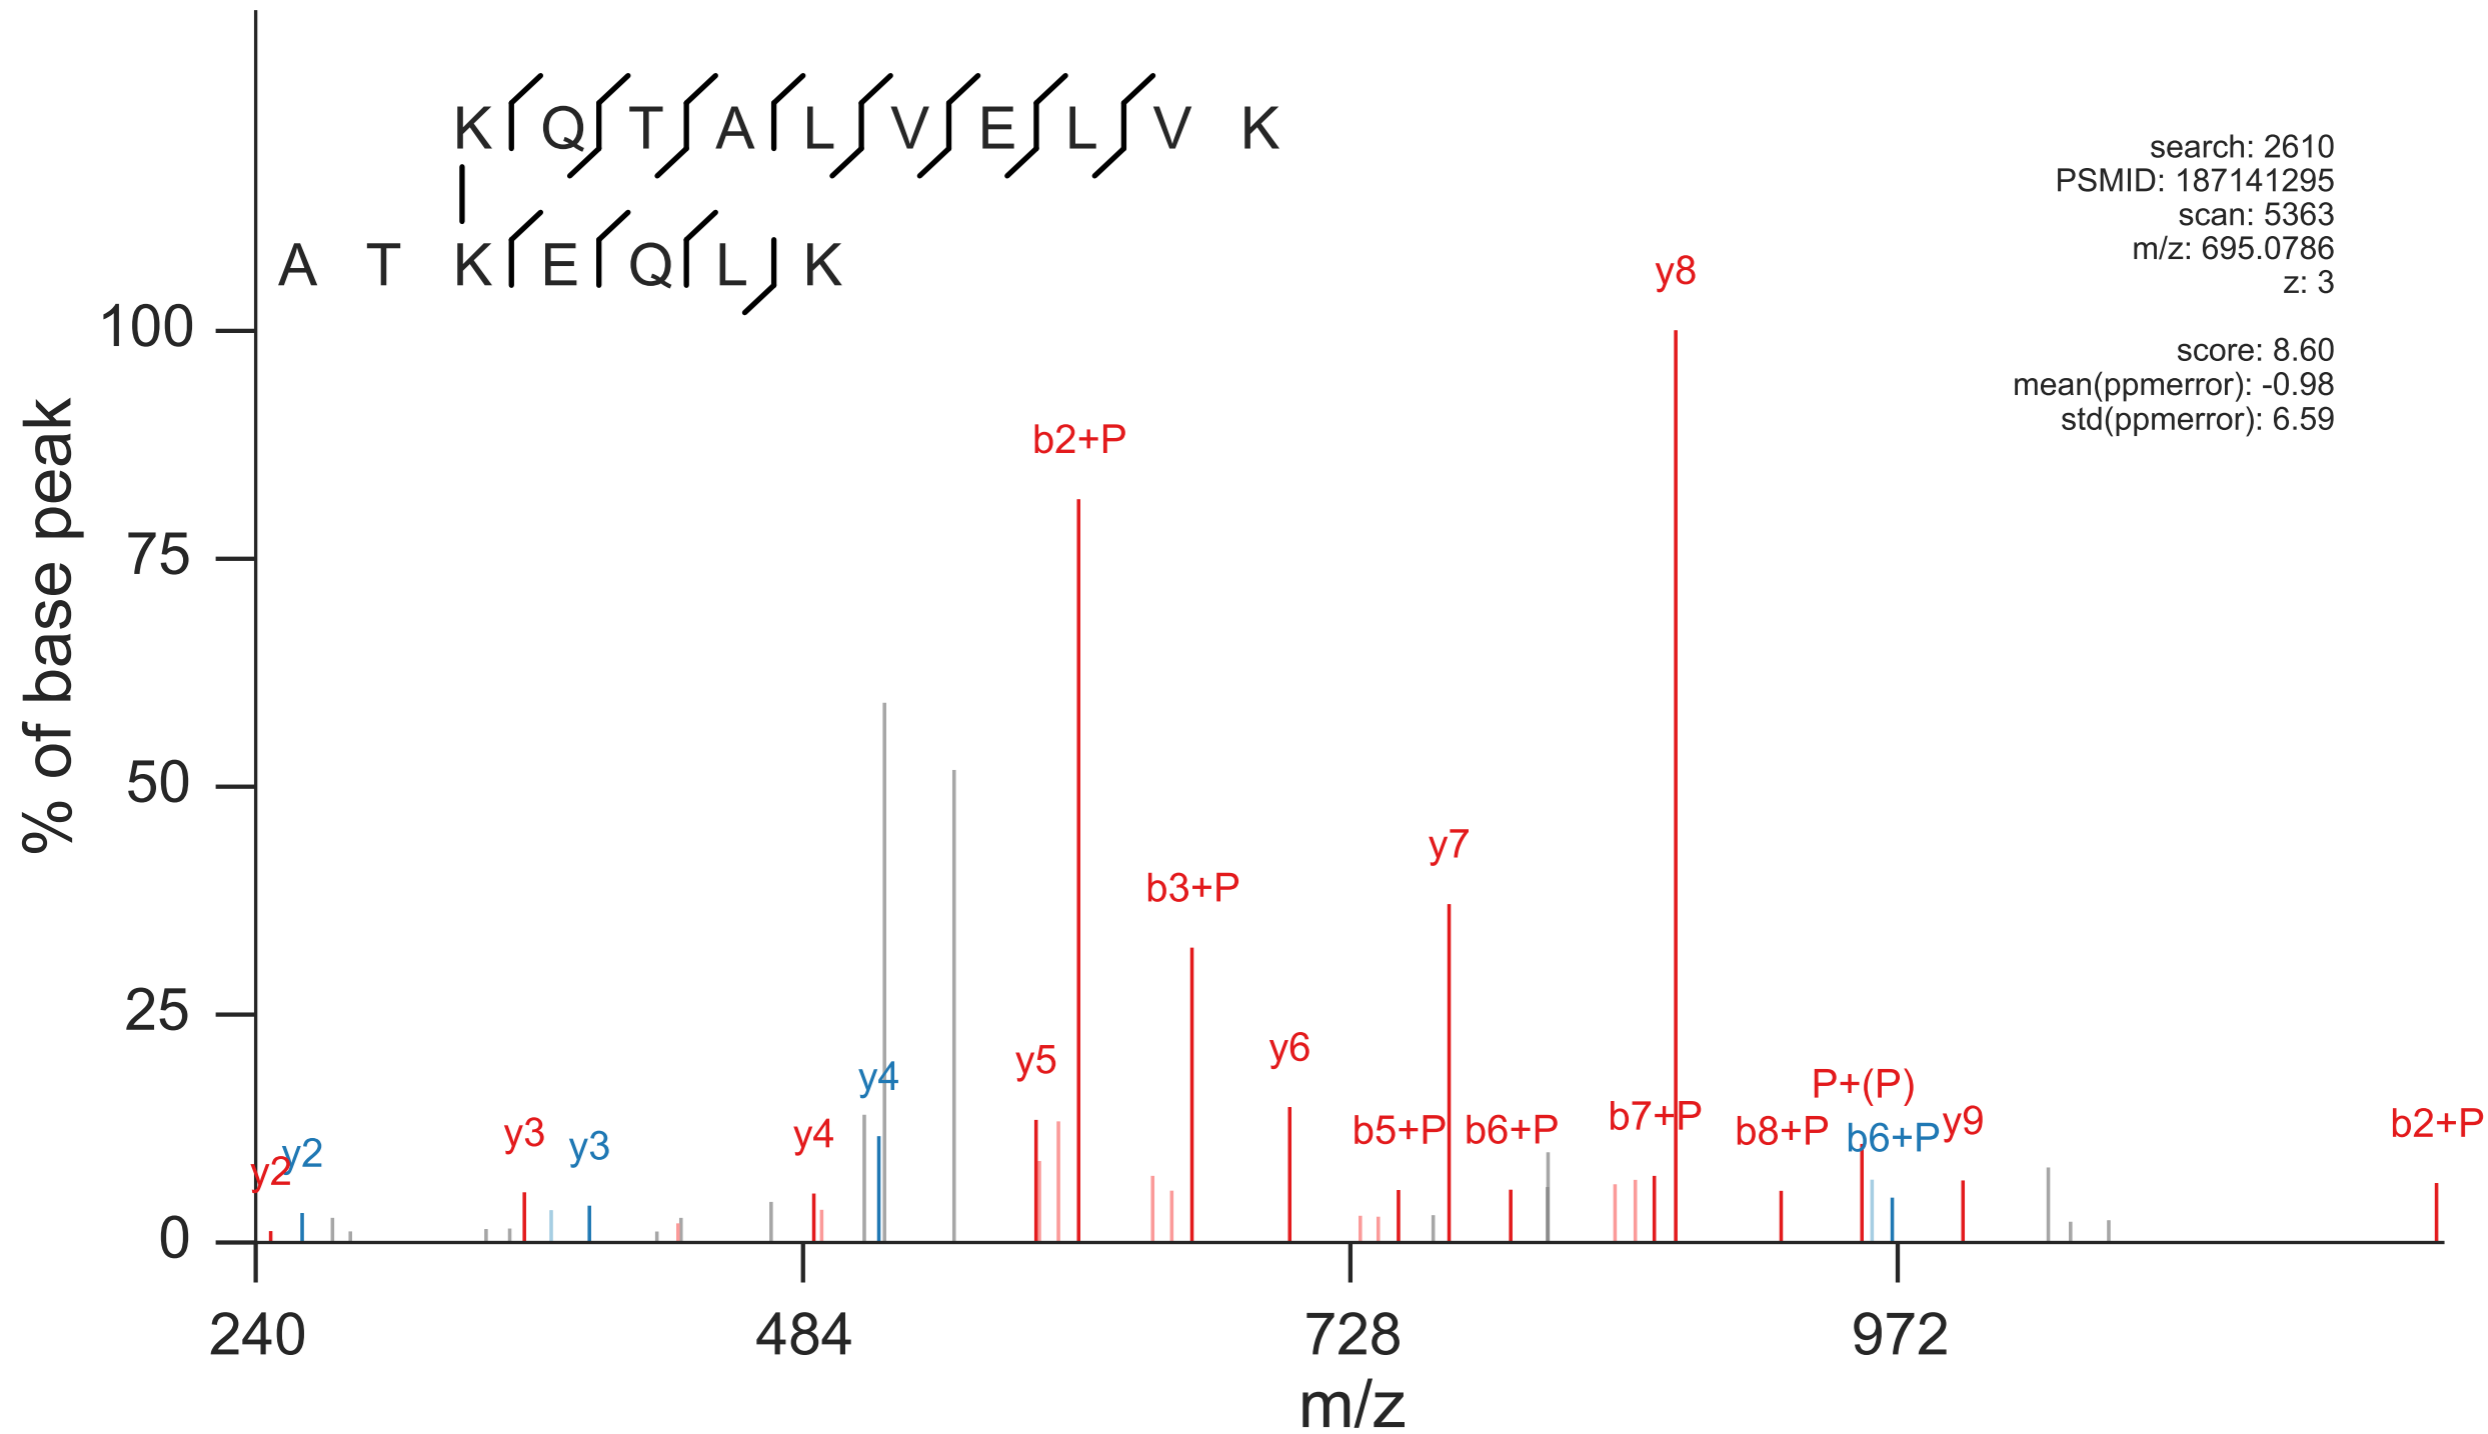

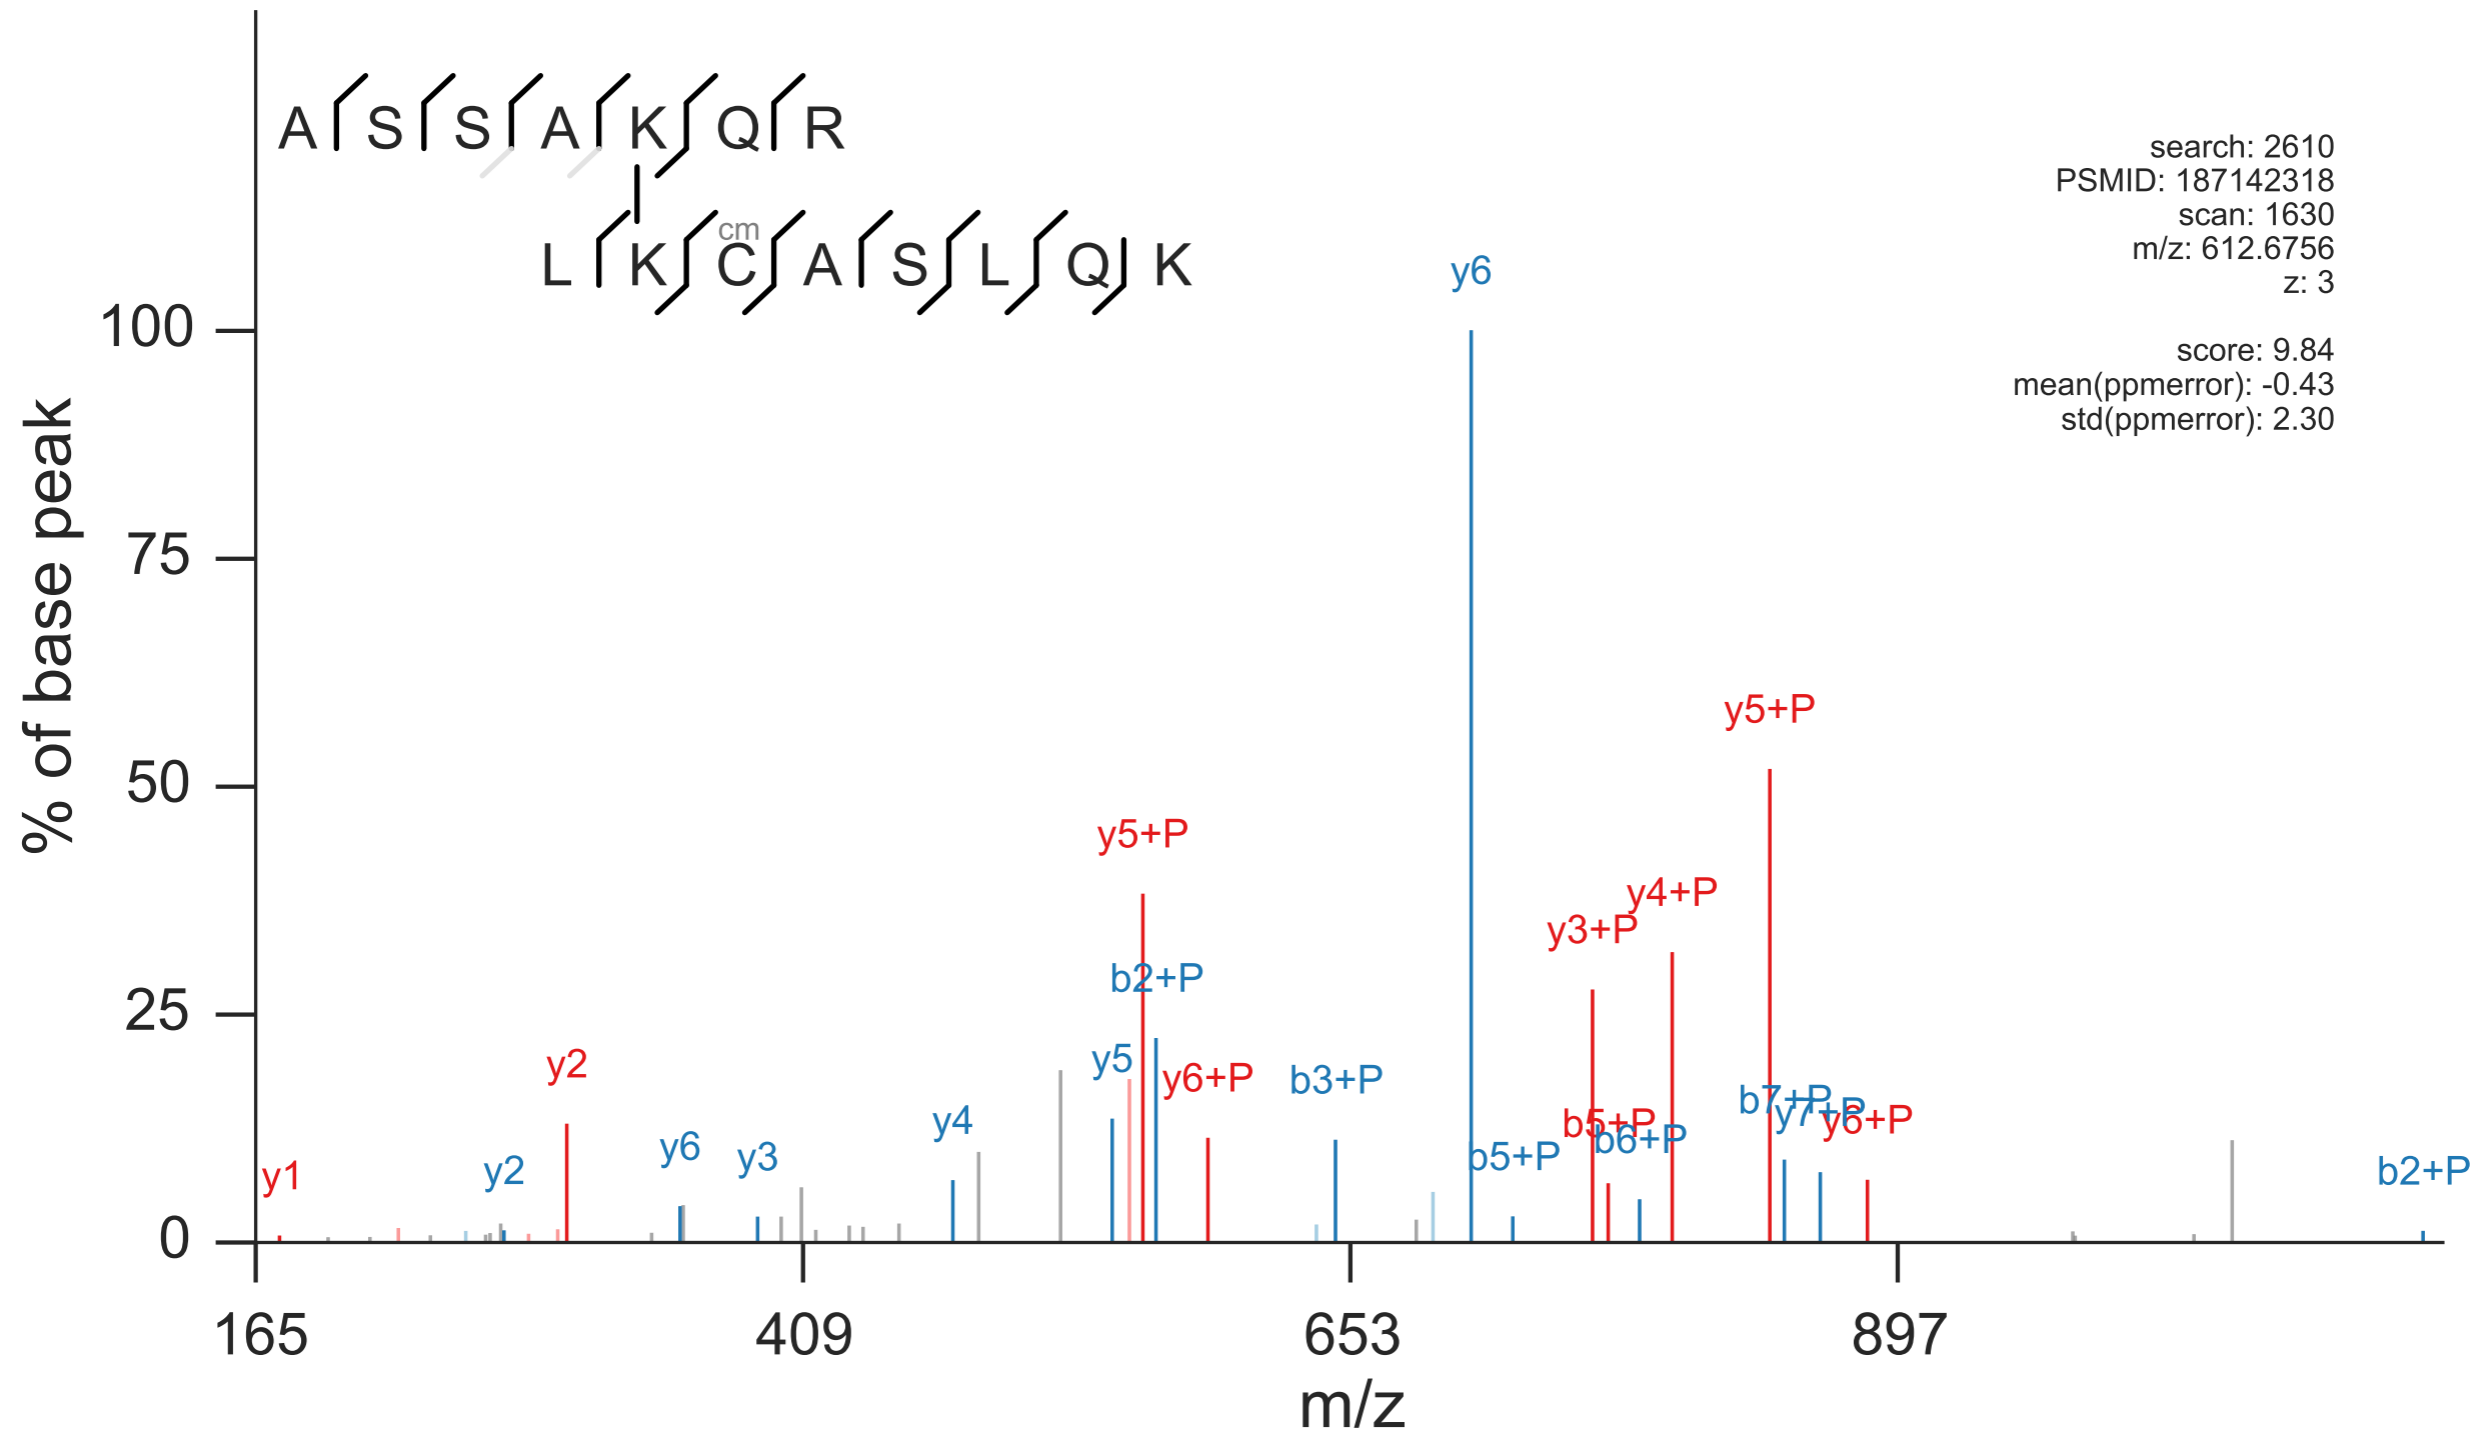

search: 2610  
 PSMID: 187142318  
 scan: 1630  
 m/z: 612.6756  
 z: 3  
  
 score: 9.84  
 mean(ppmerror): -0.43  
 std(ppmerror): 2.30



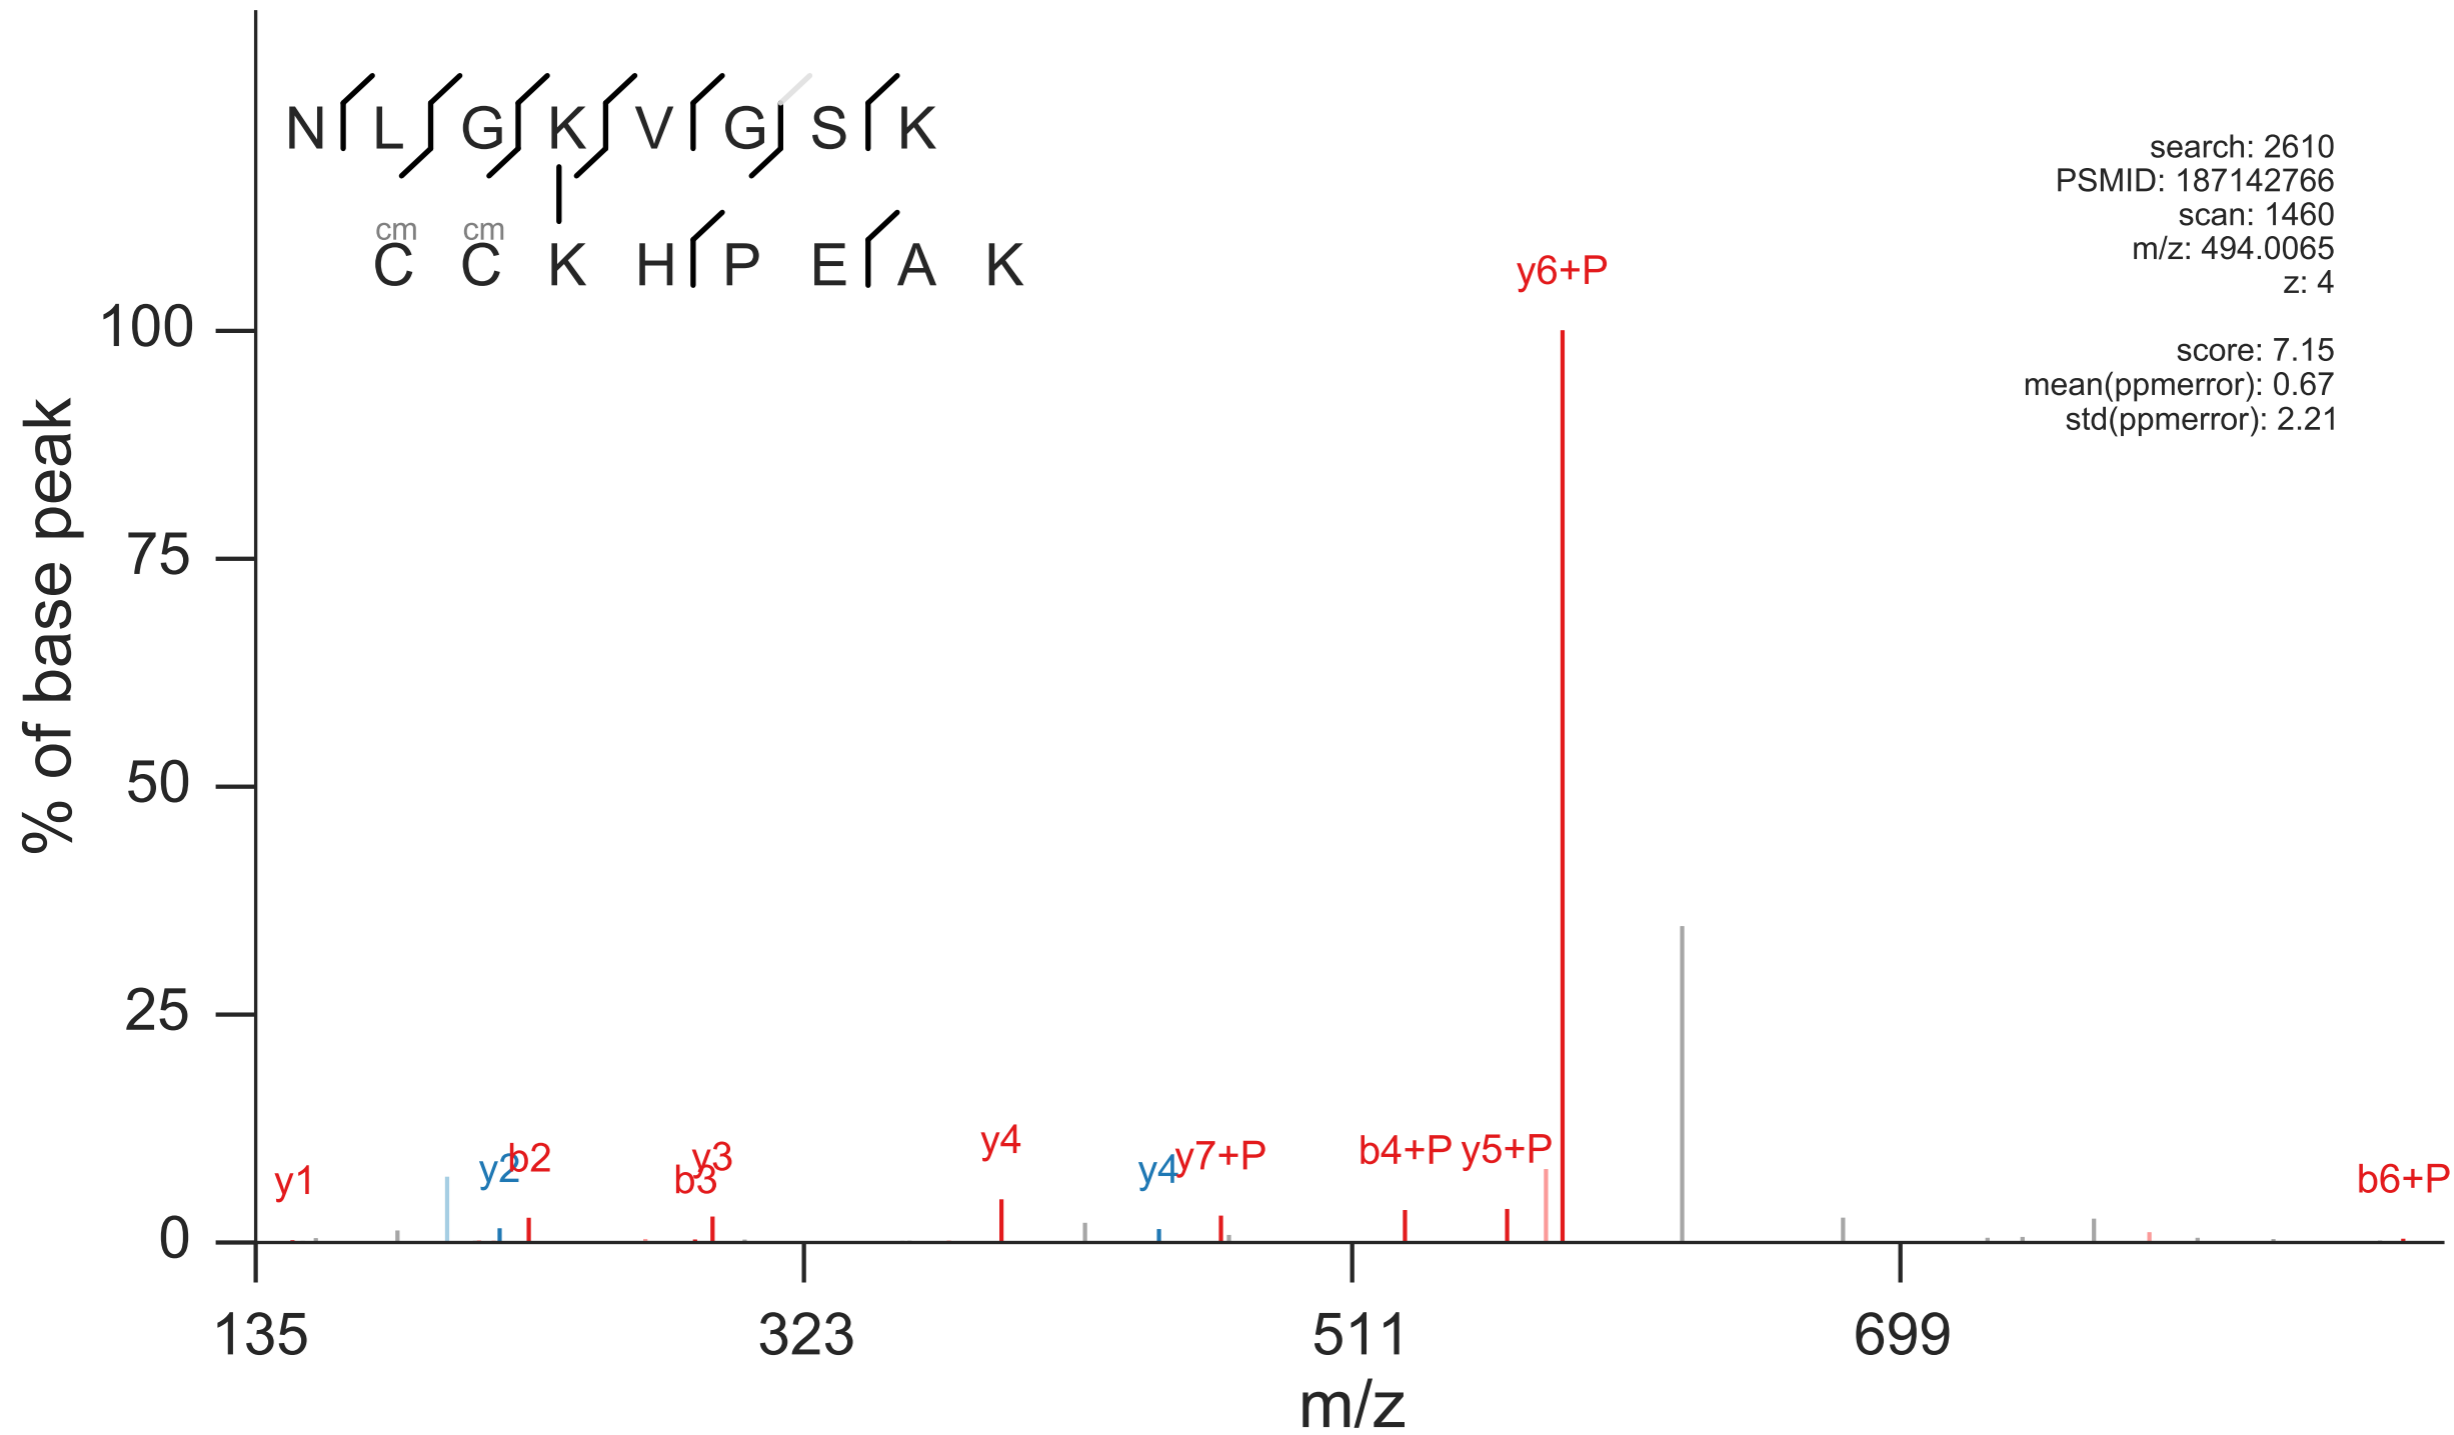

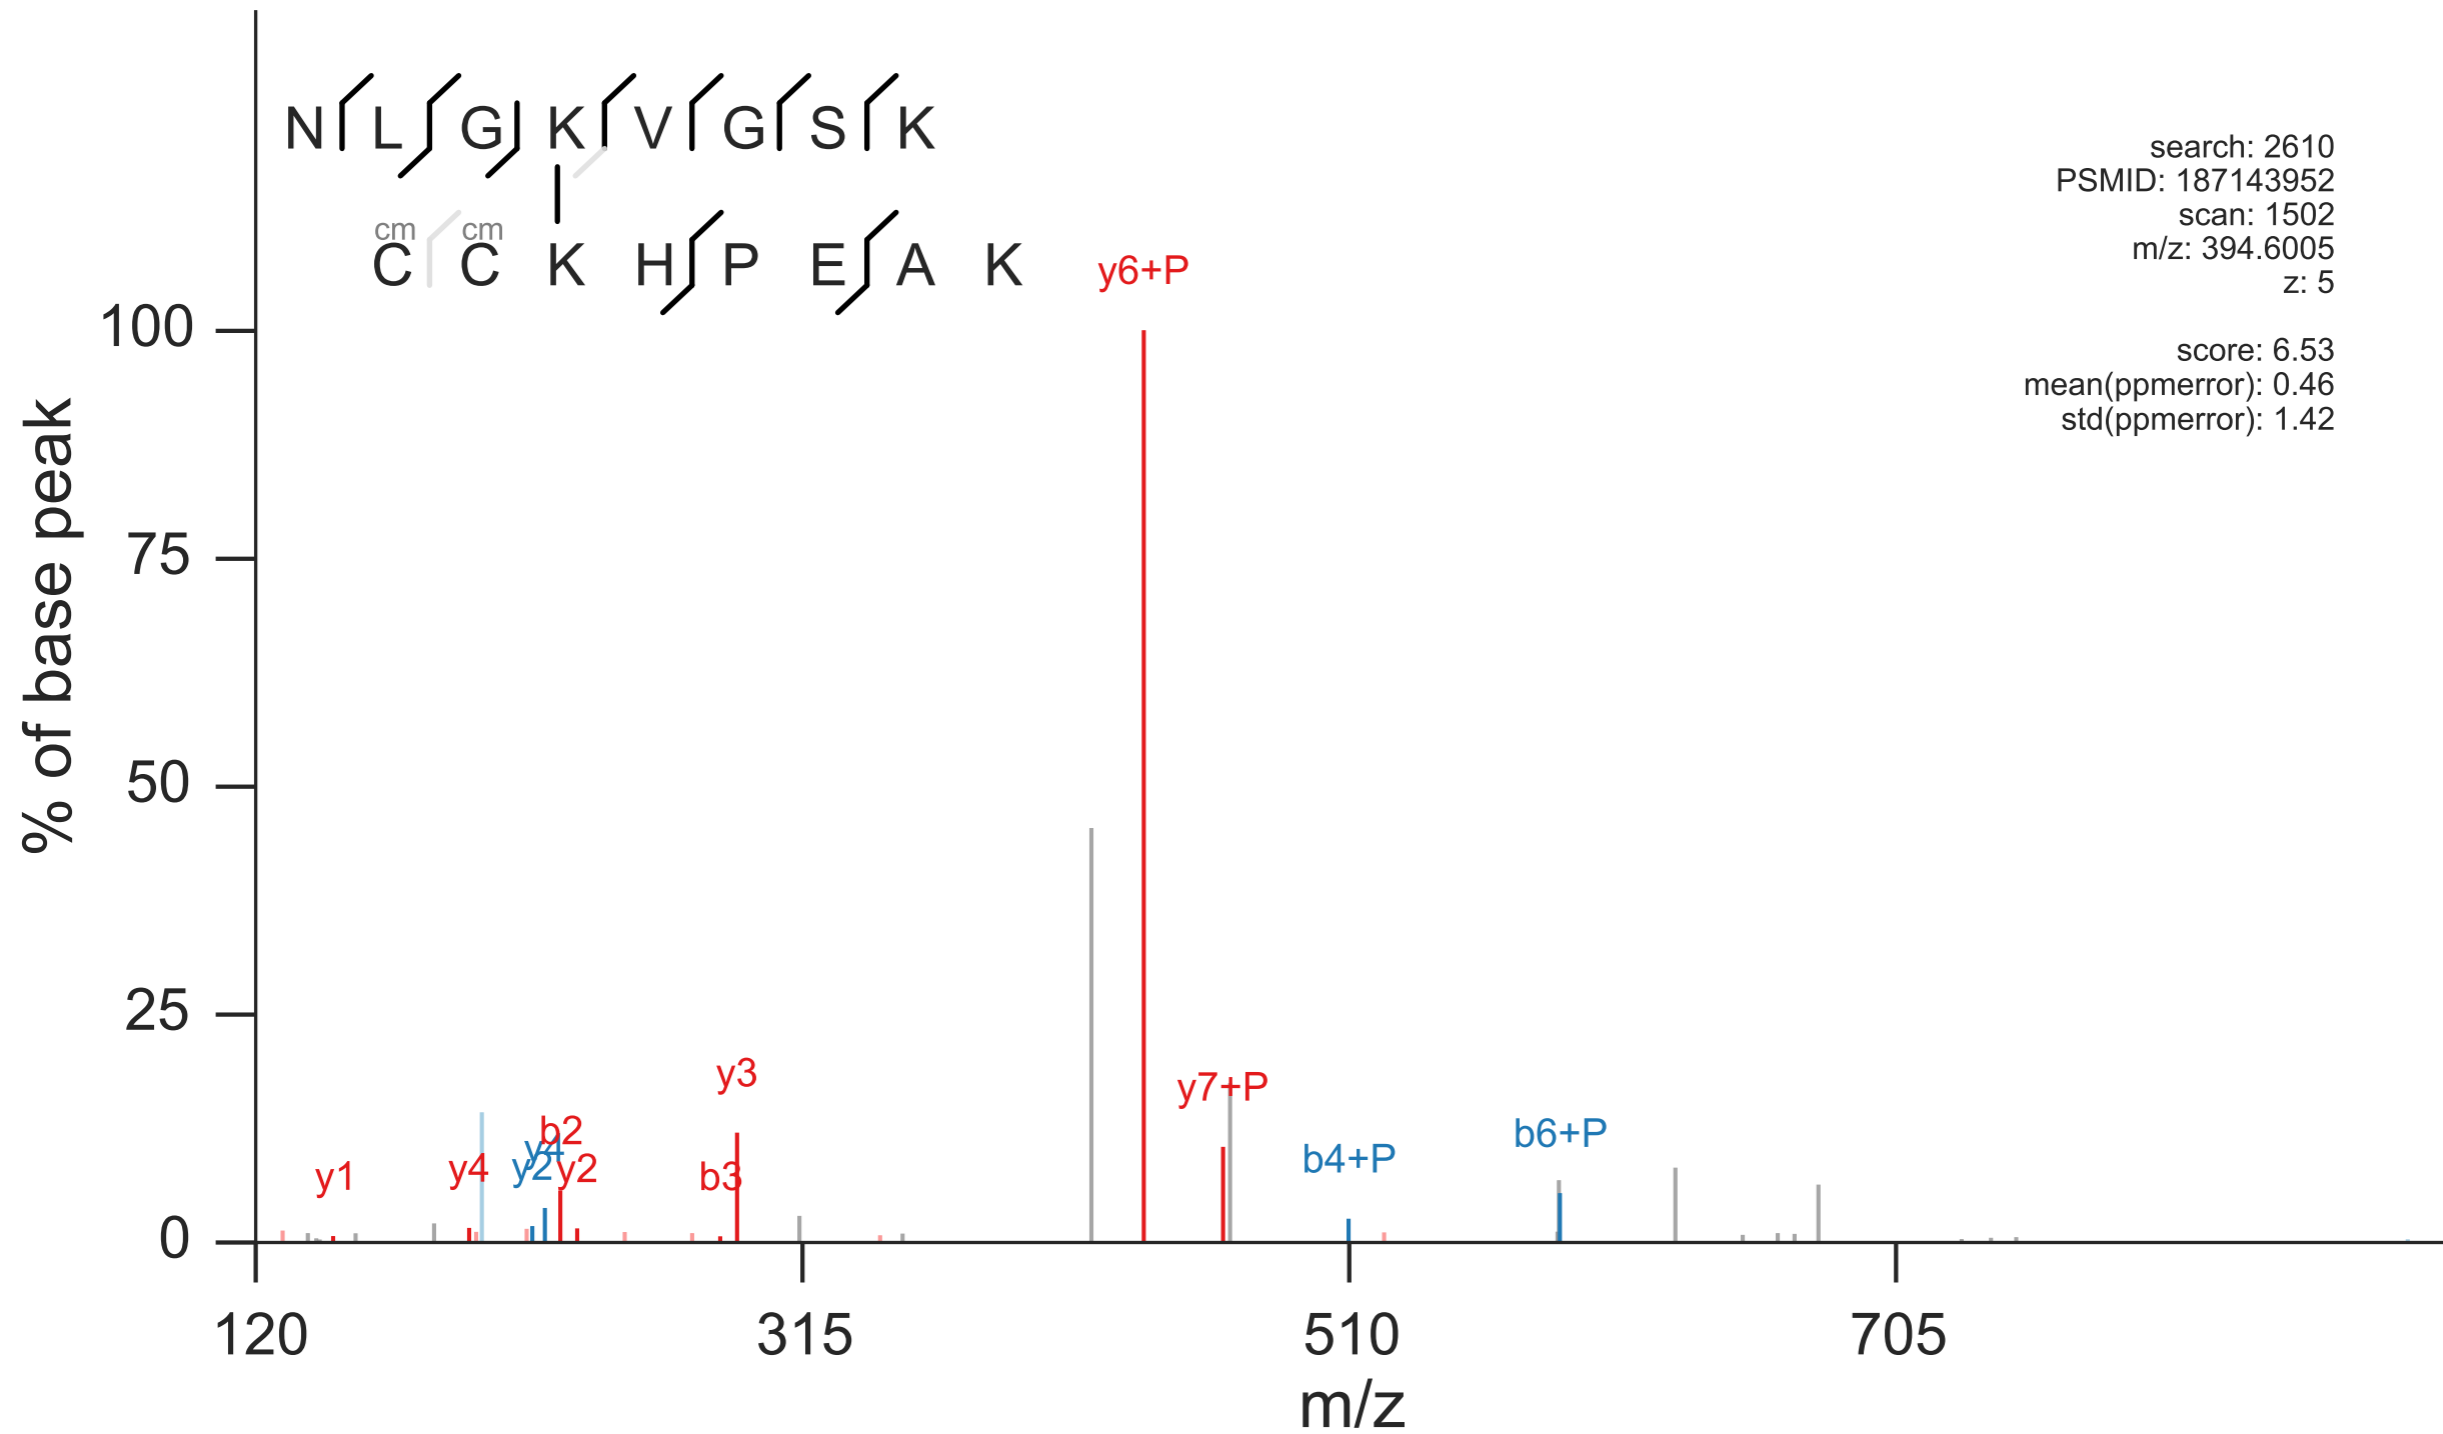

search: 2610  
 PSMID: 187143952  
 scan: 1502  
 m/z: 394.6005  
 z: 5

score: 6.53  
 mean(ppmerror): 0.46  
 std(ppmerror): 1.42

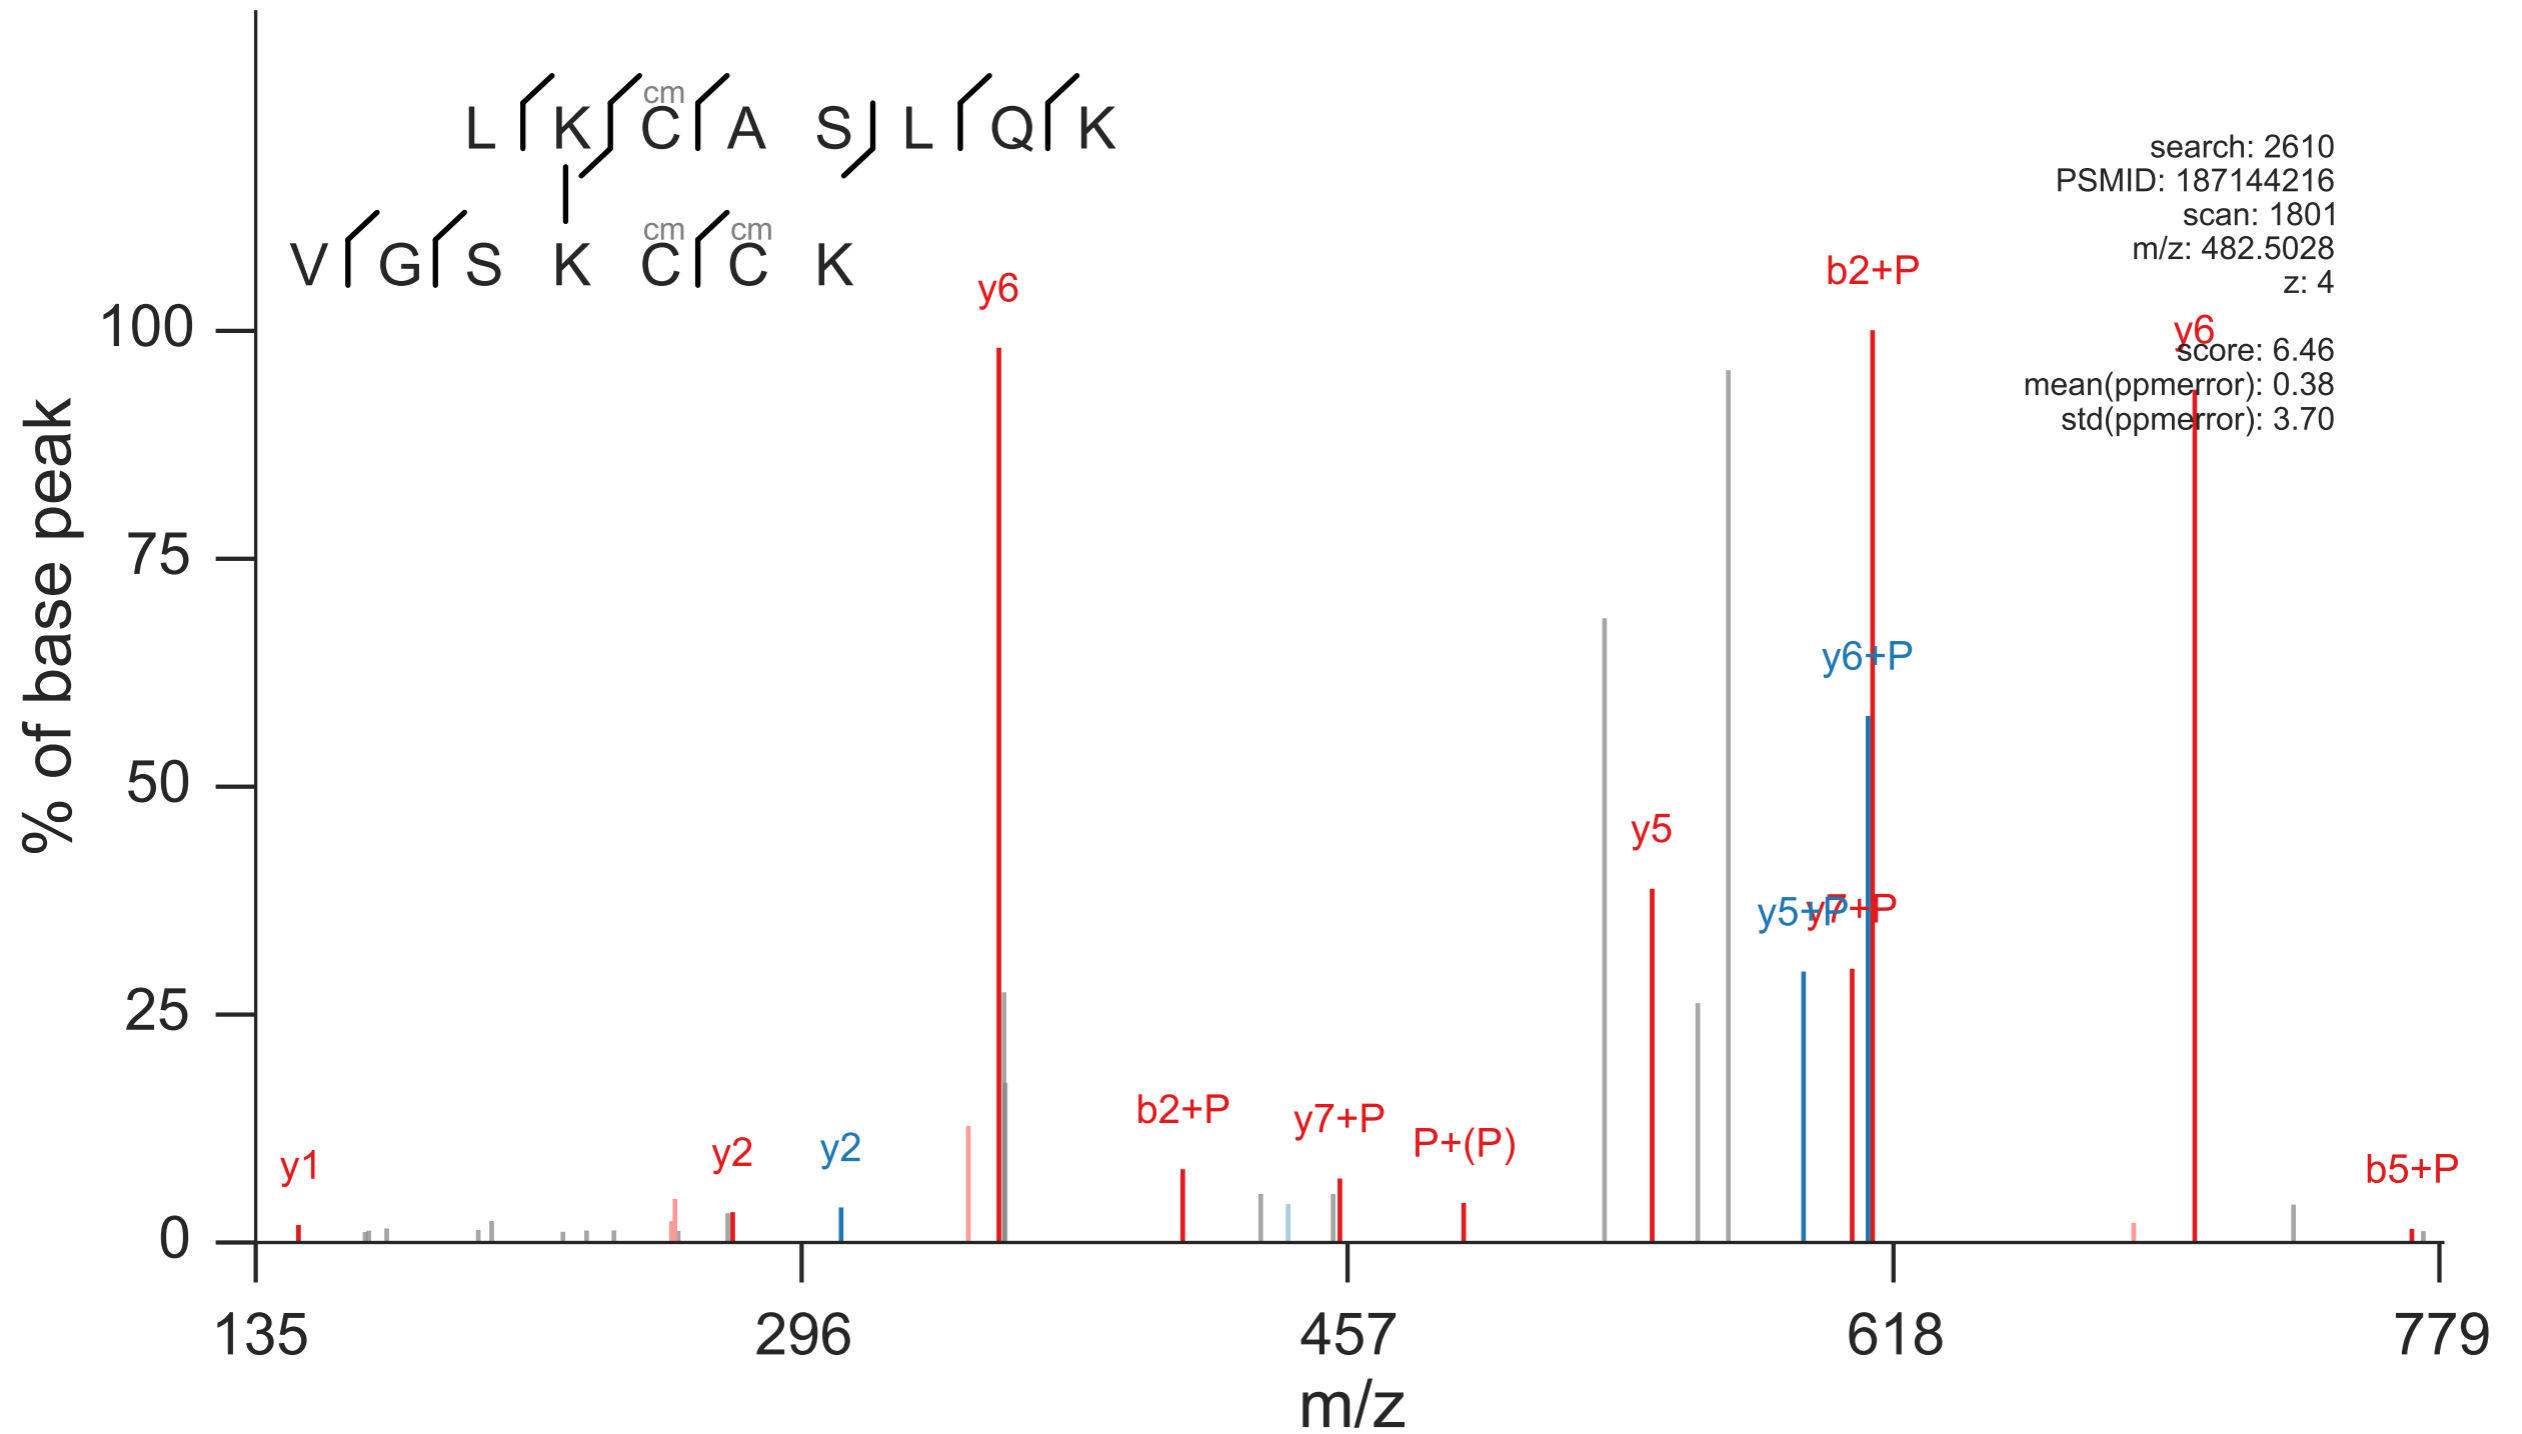

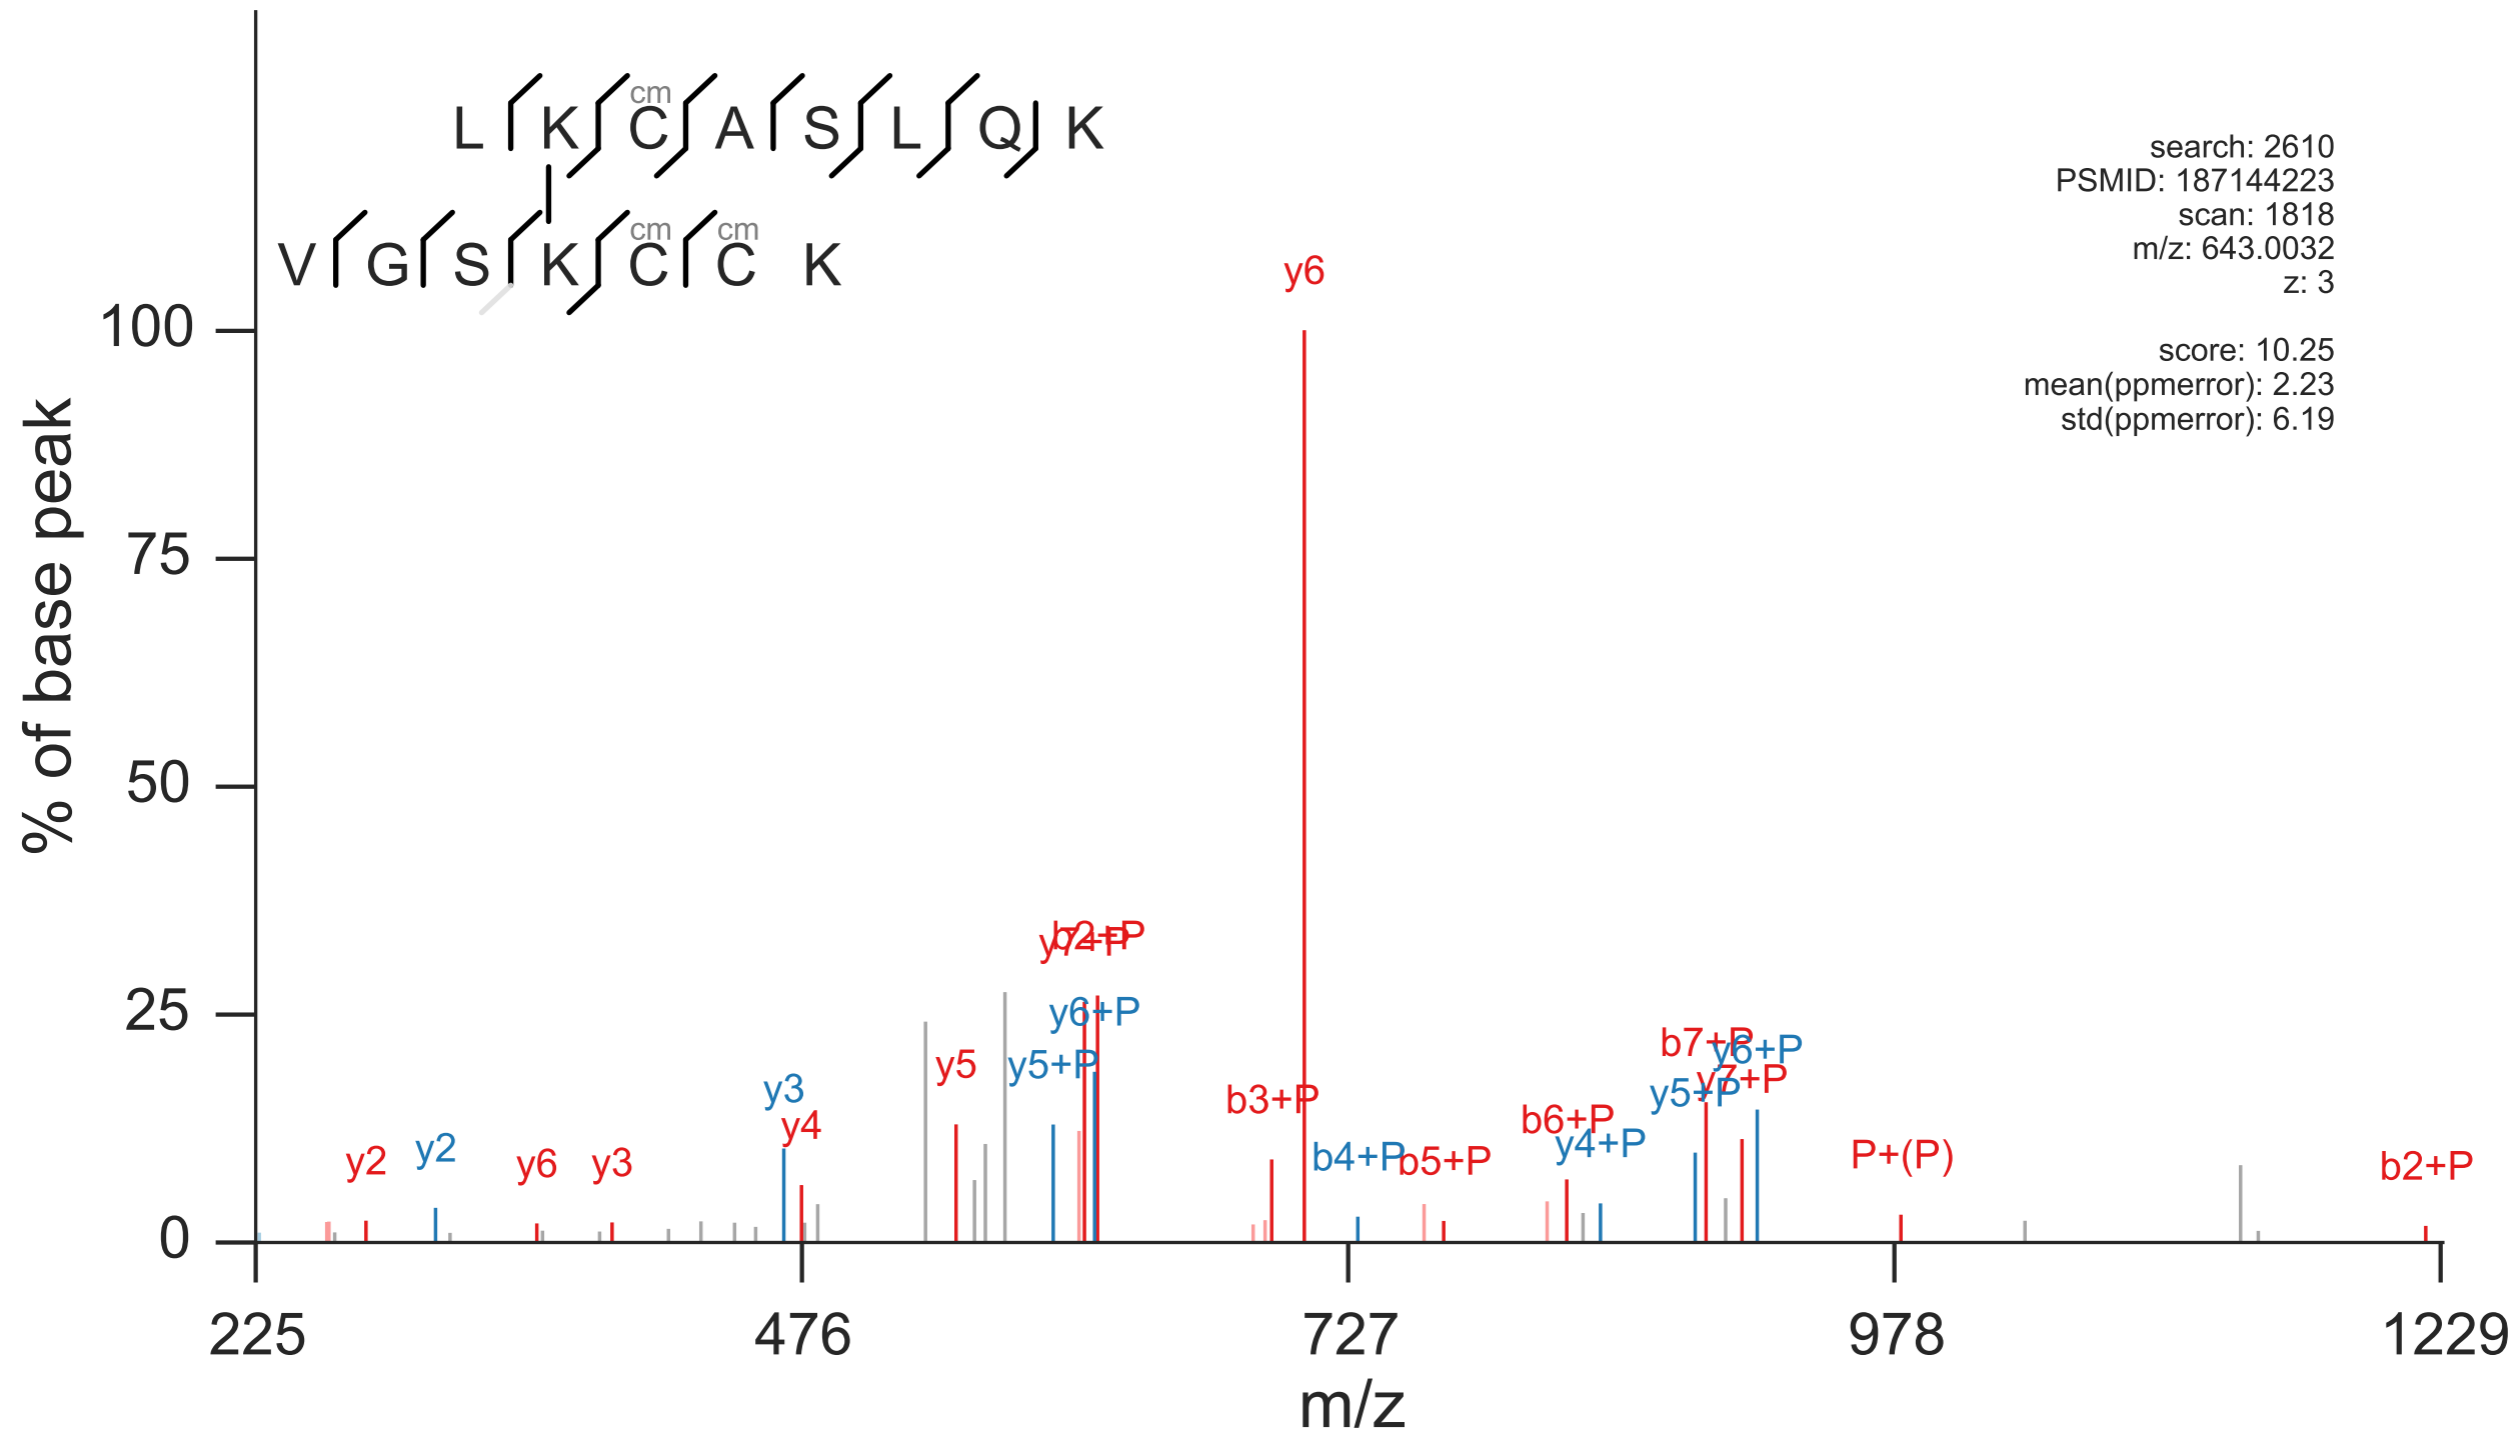

search: 2610  
 PSMID: 187144223  
 scan: 1818  
 m/z: 643.0032  
 z: 3

score: 10.25  
 mean(ppmerror): 2.23  
 std(ppmerror): 6.19

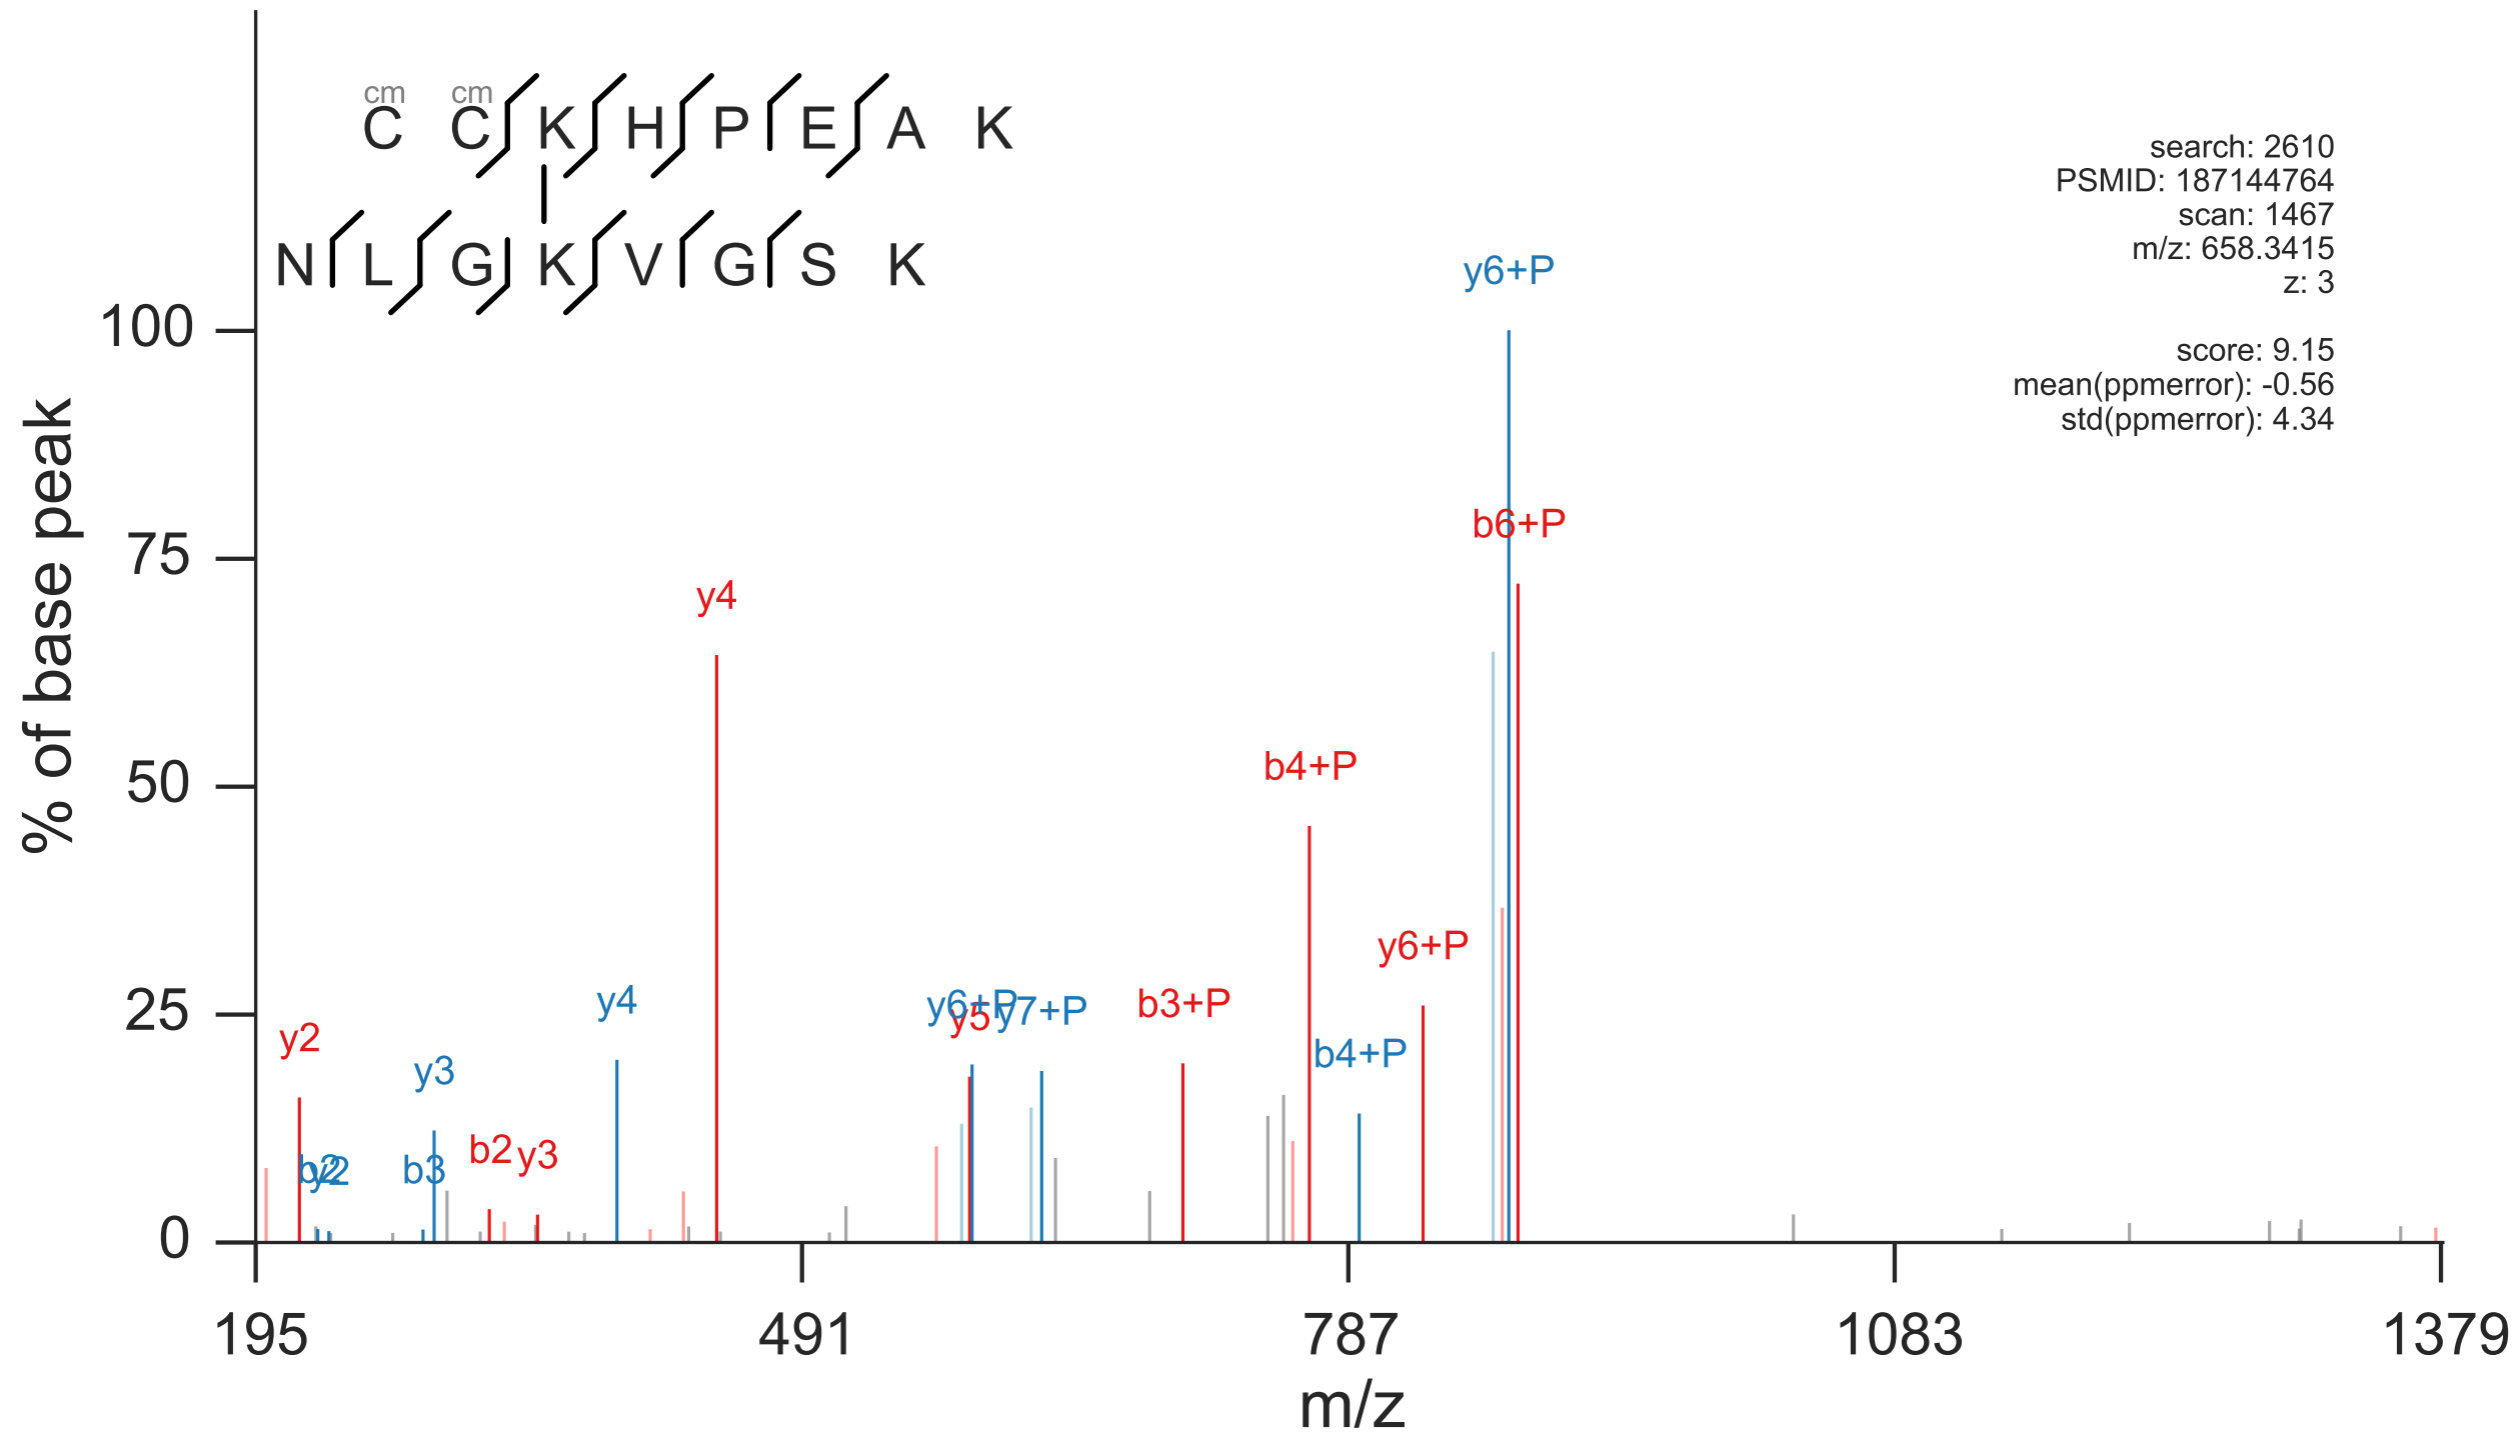

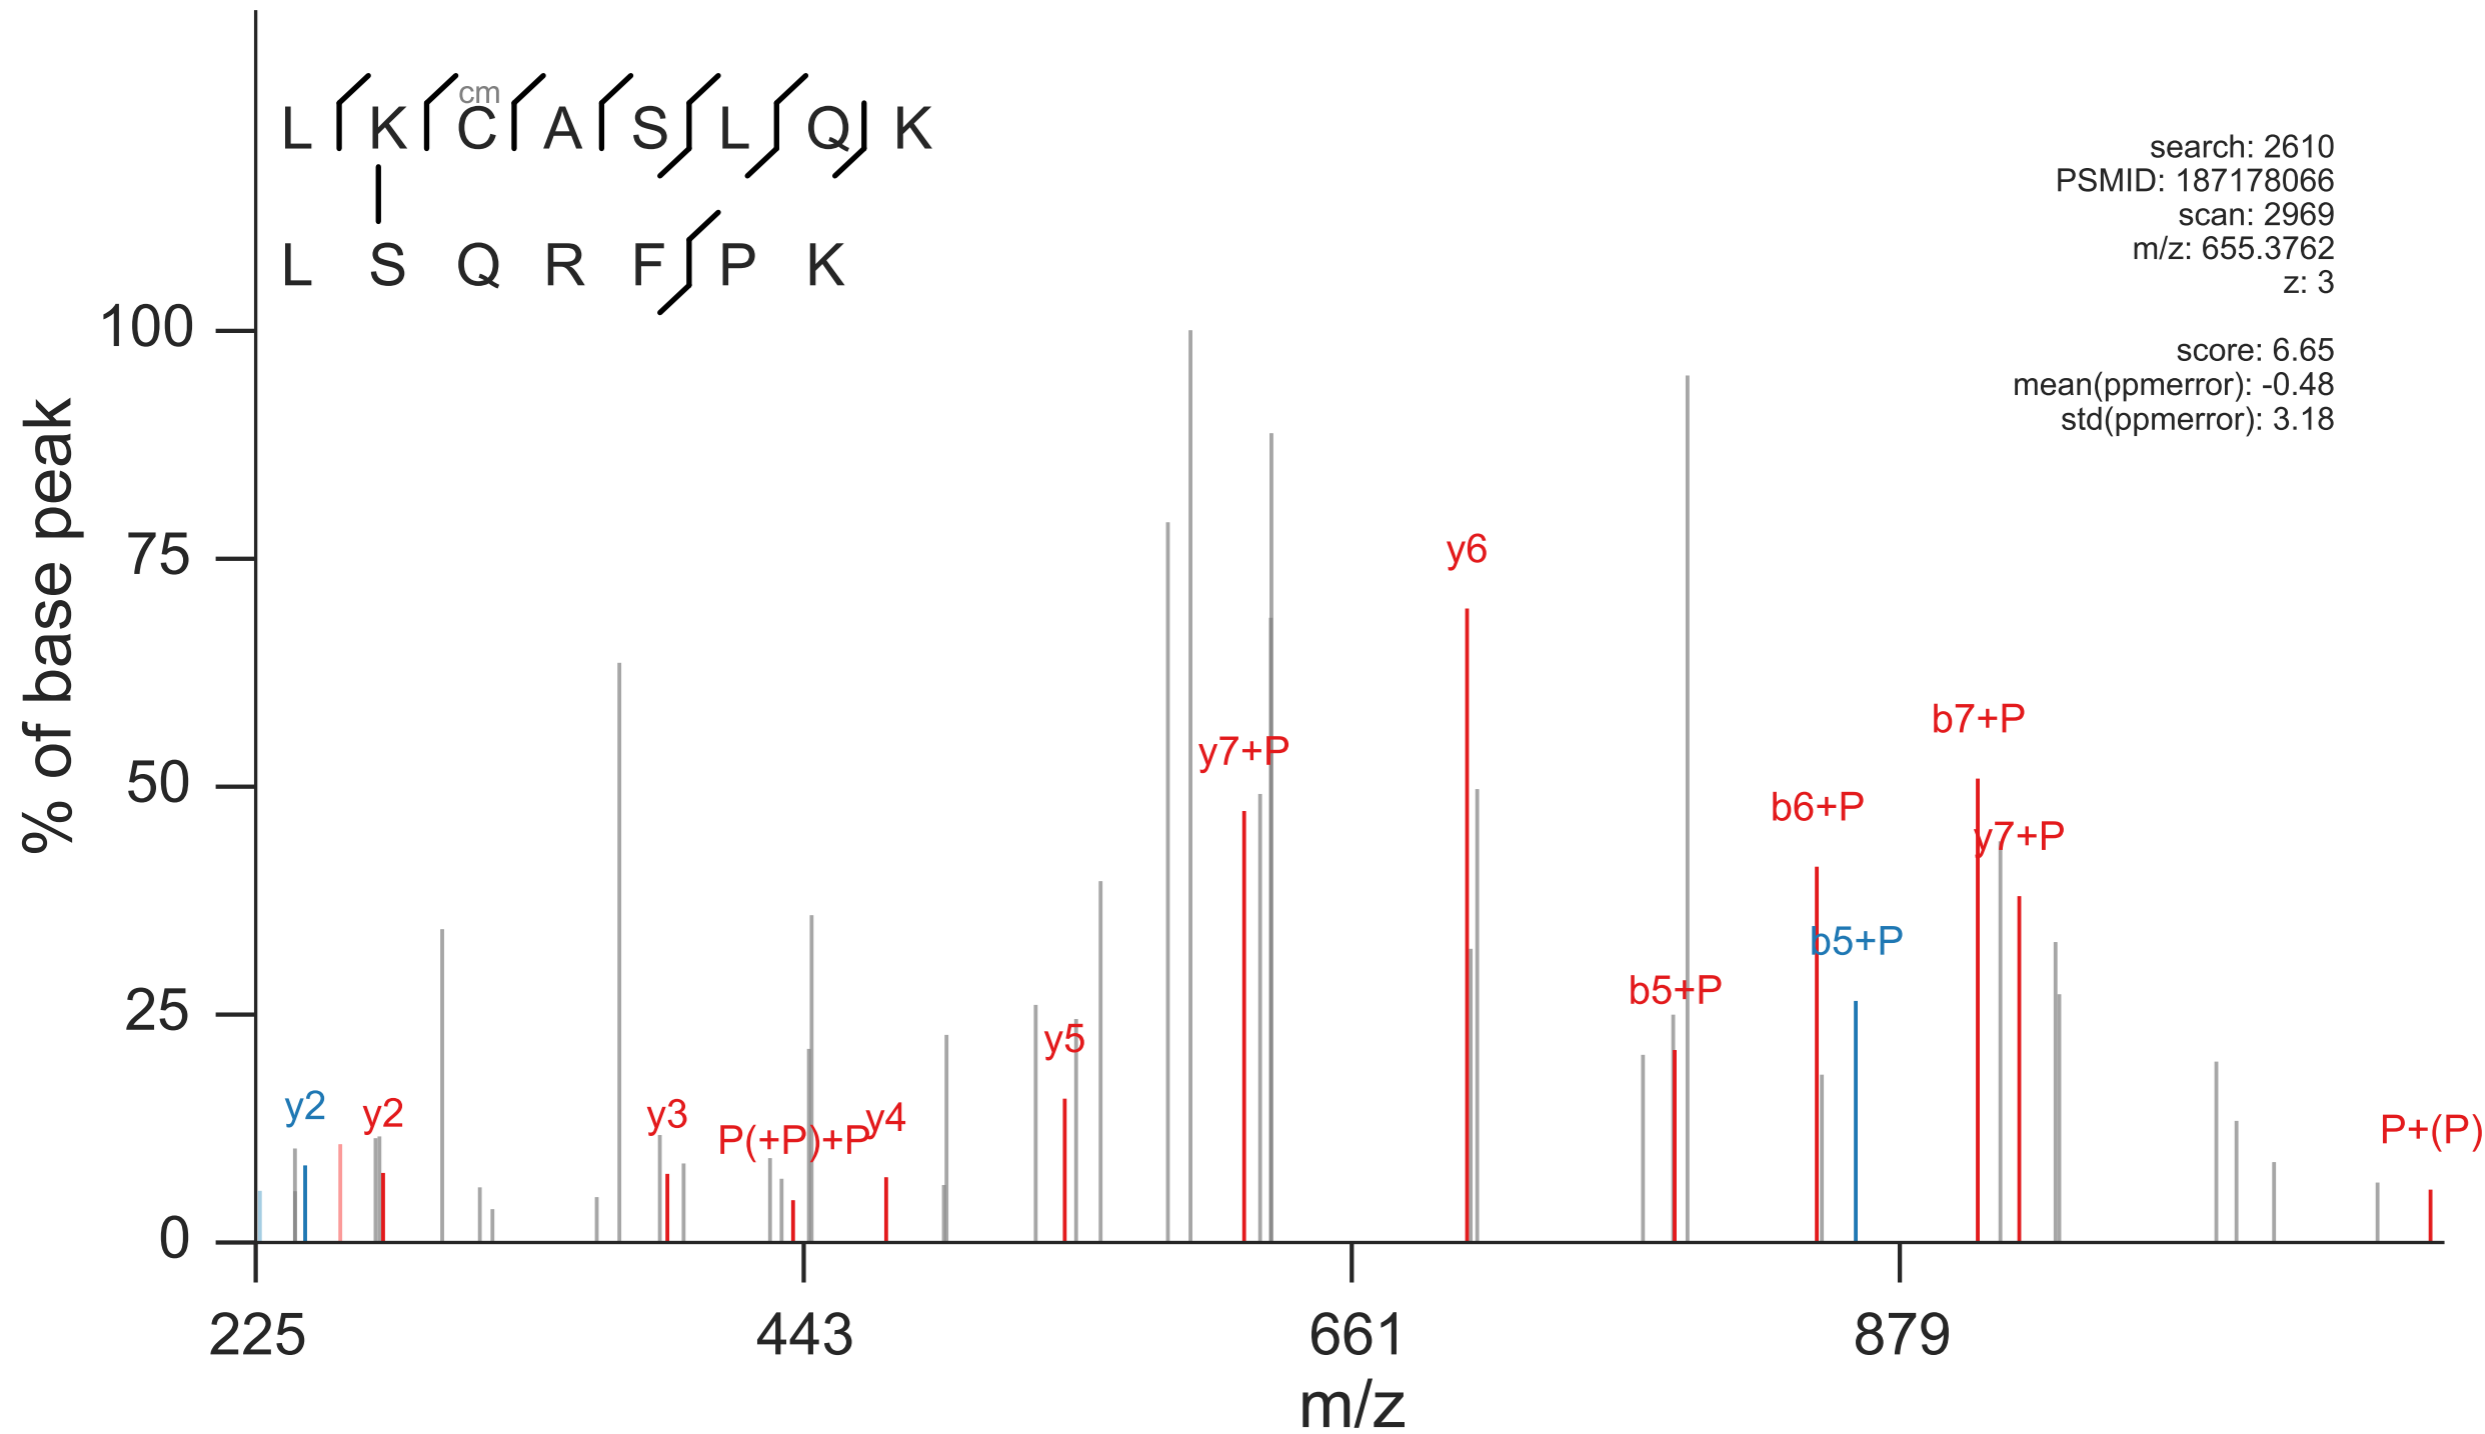

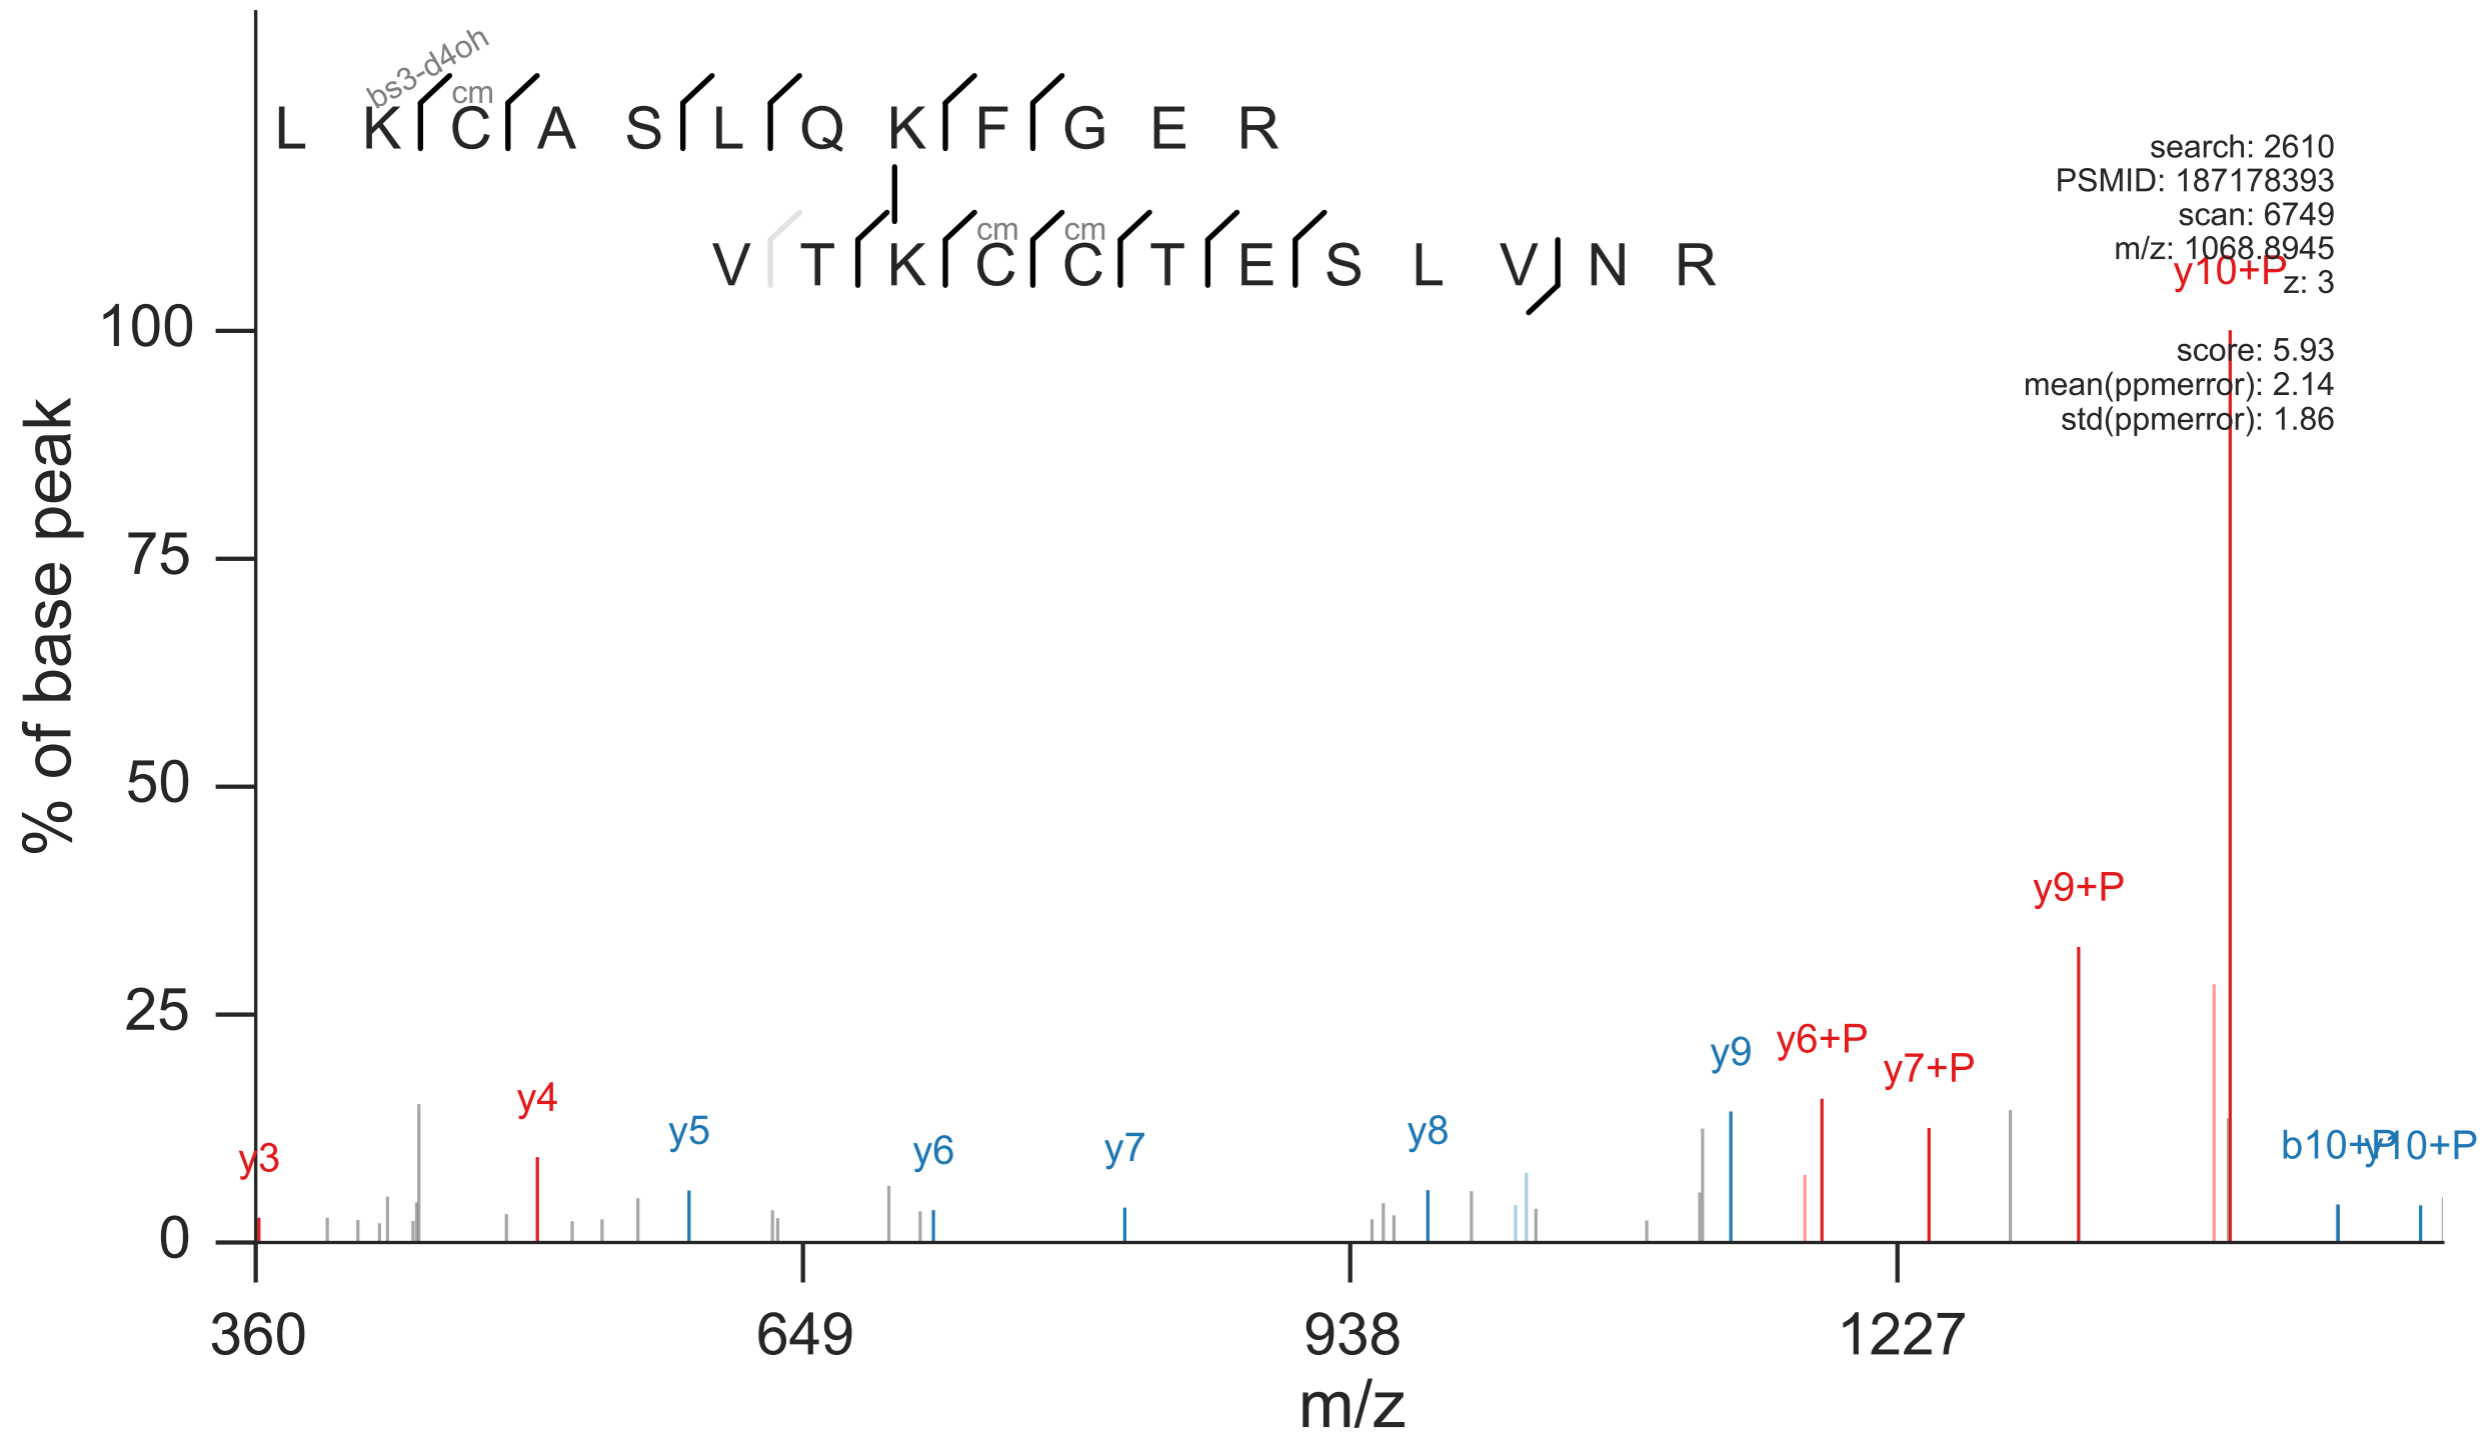

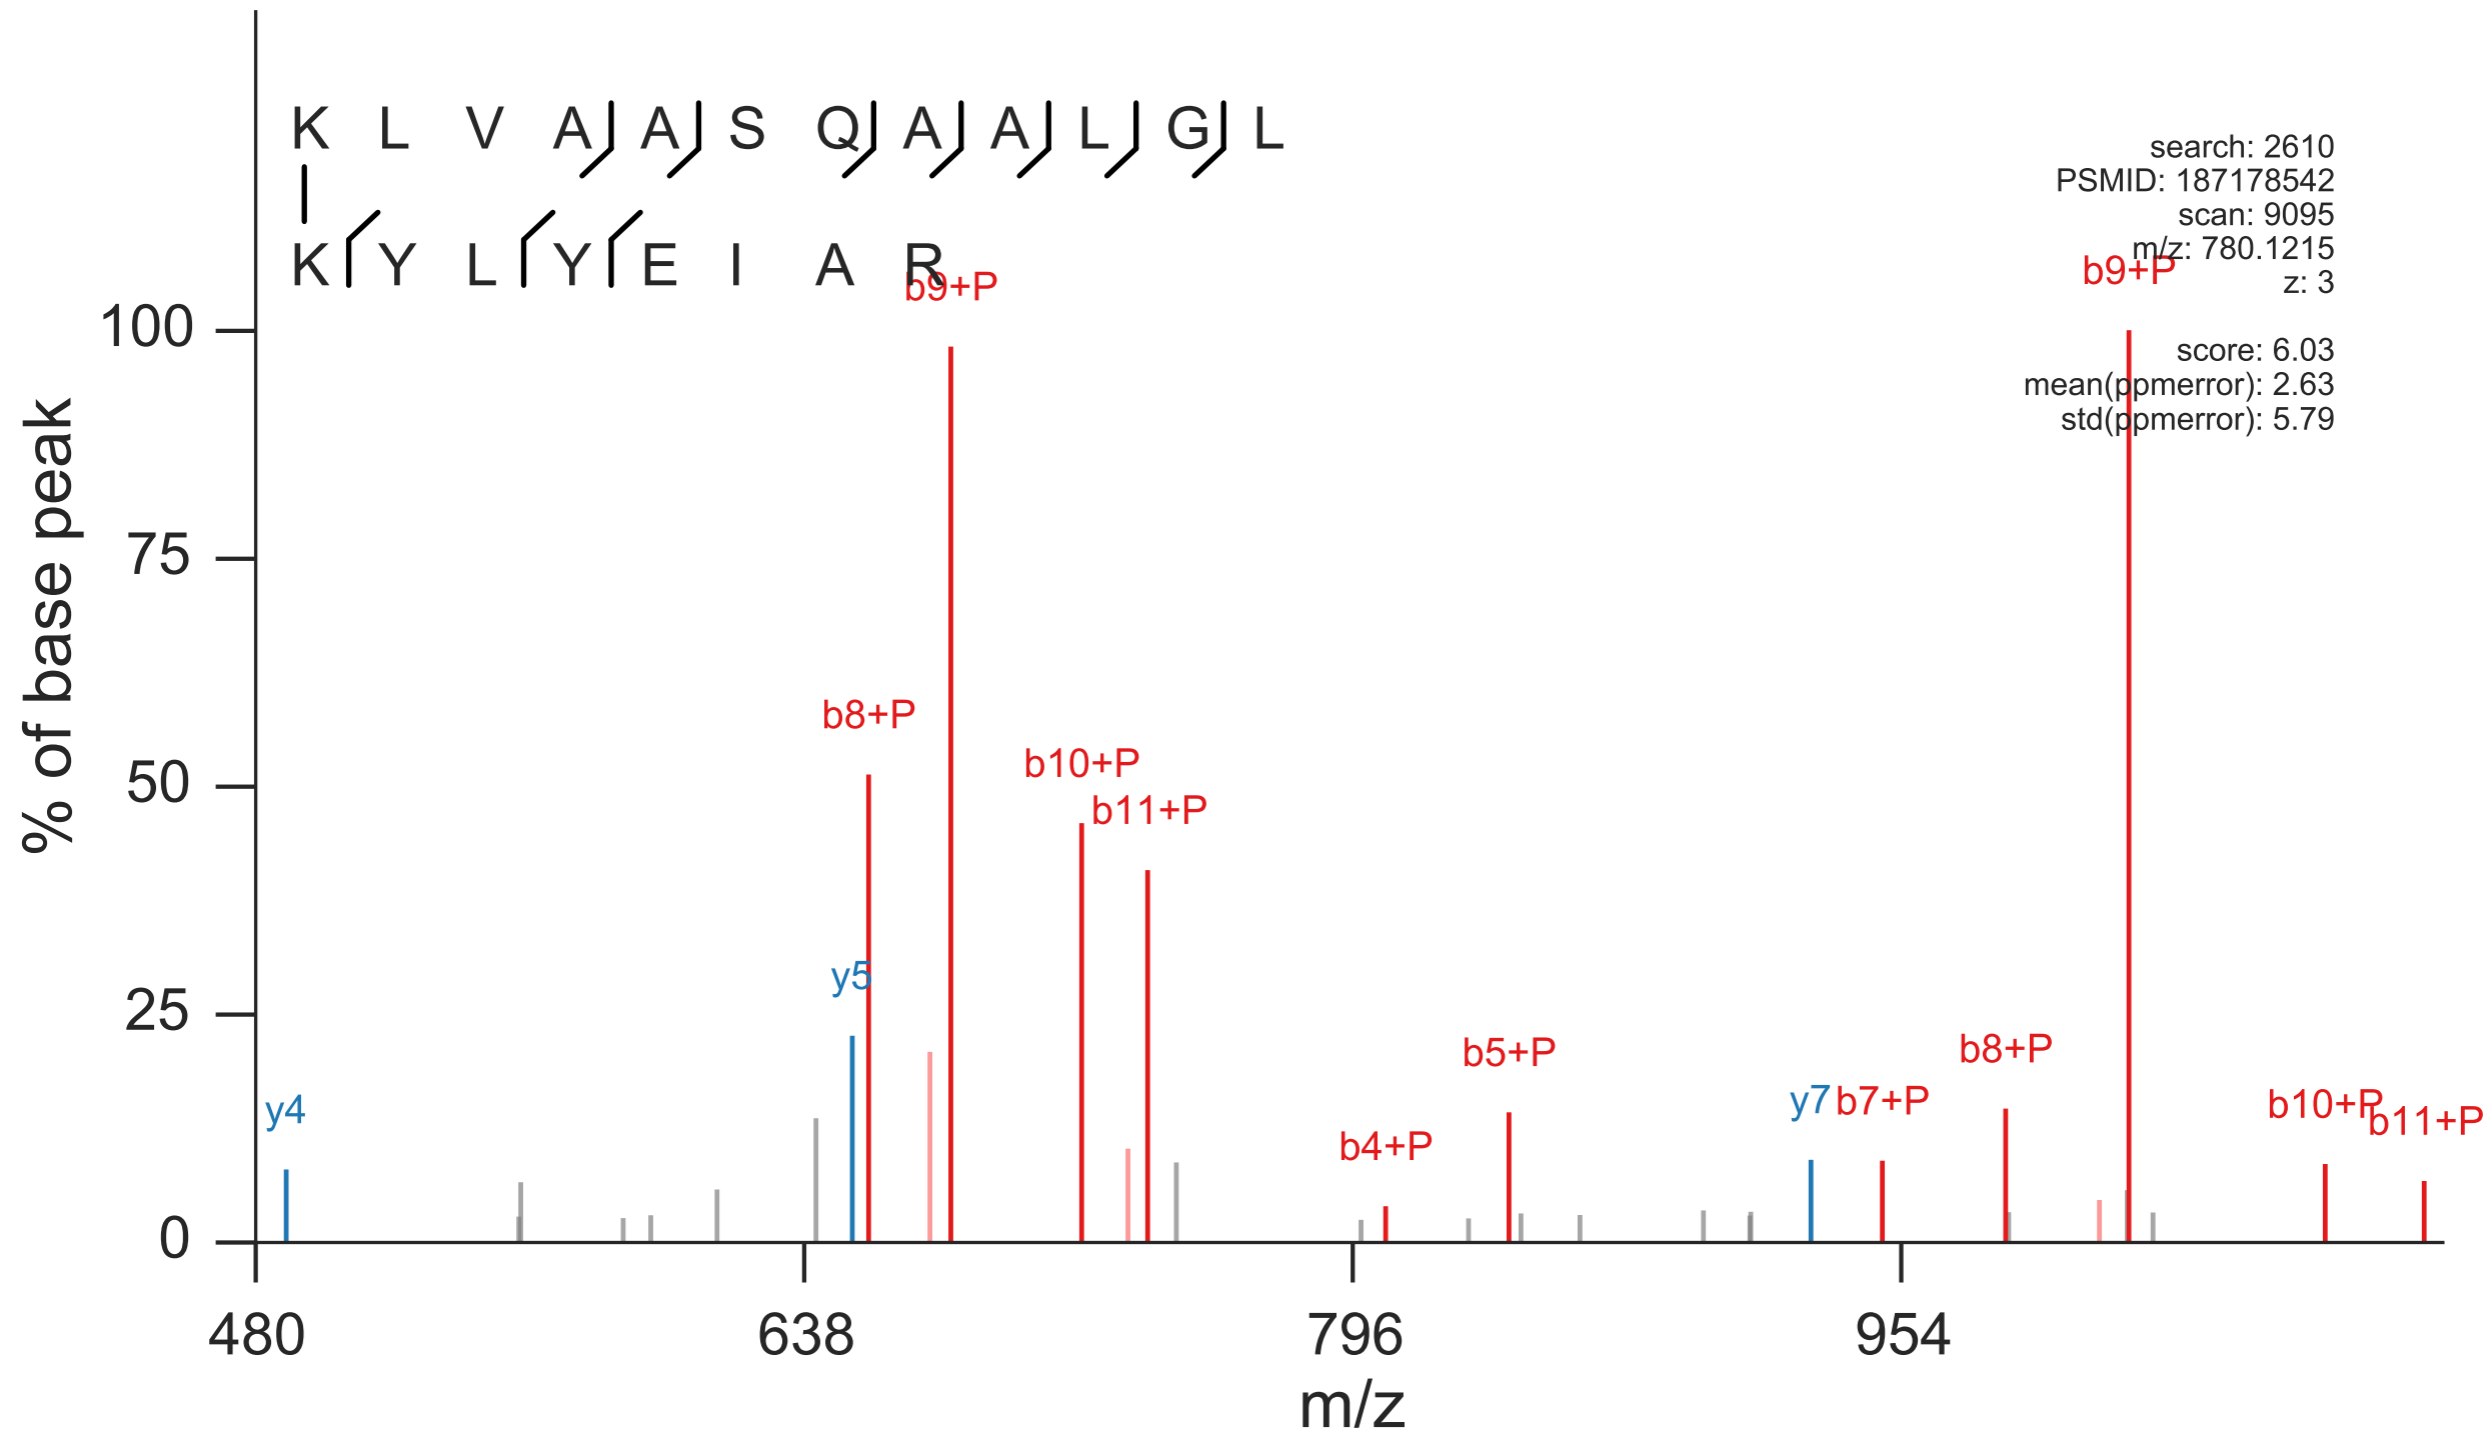



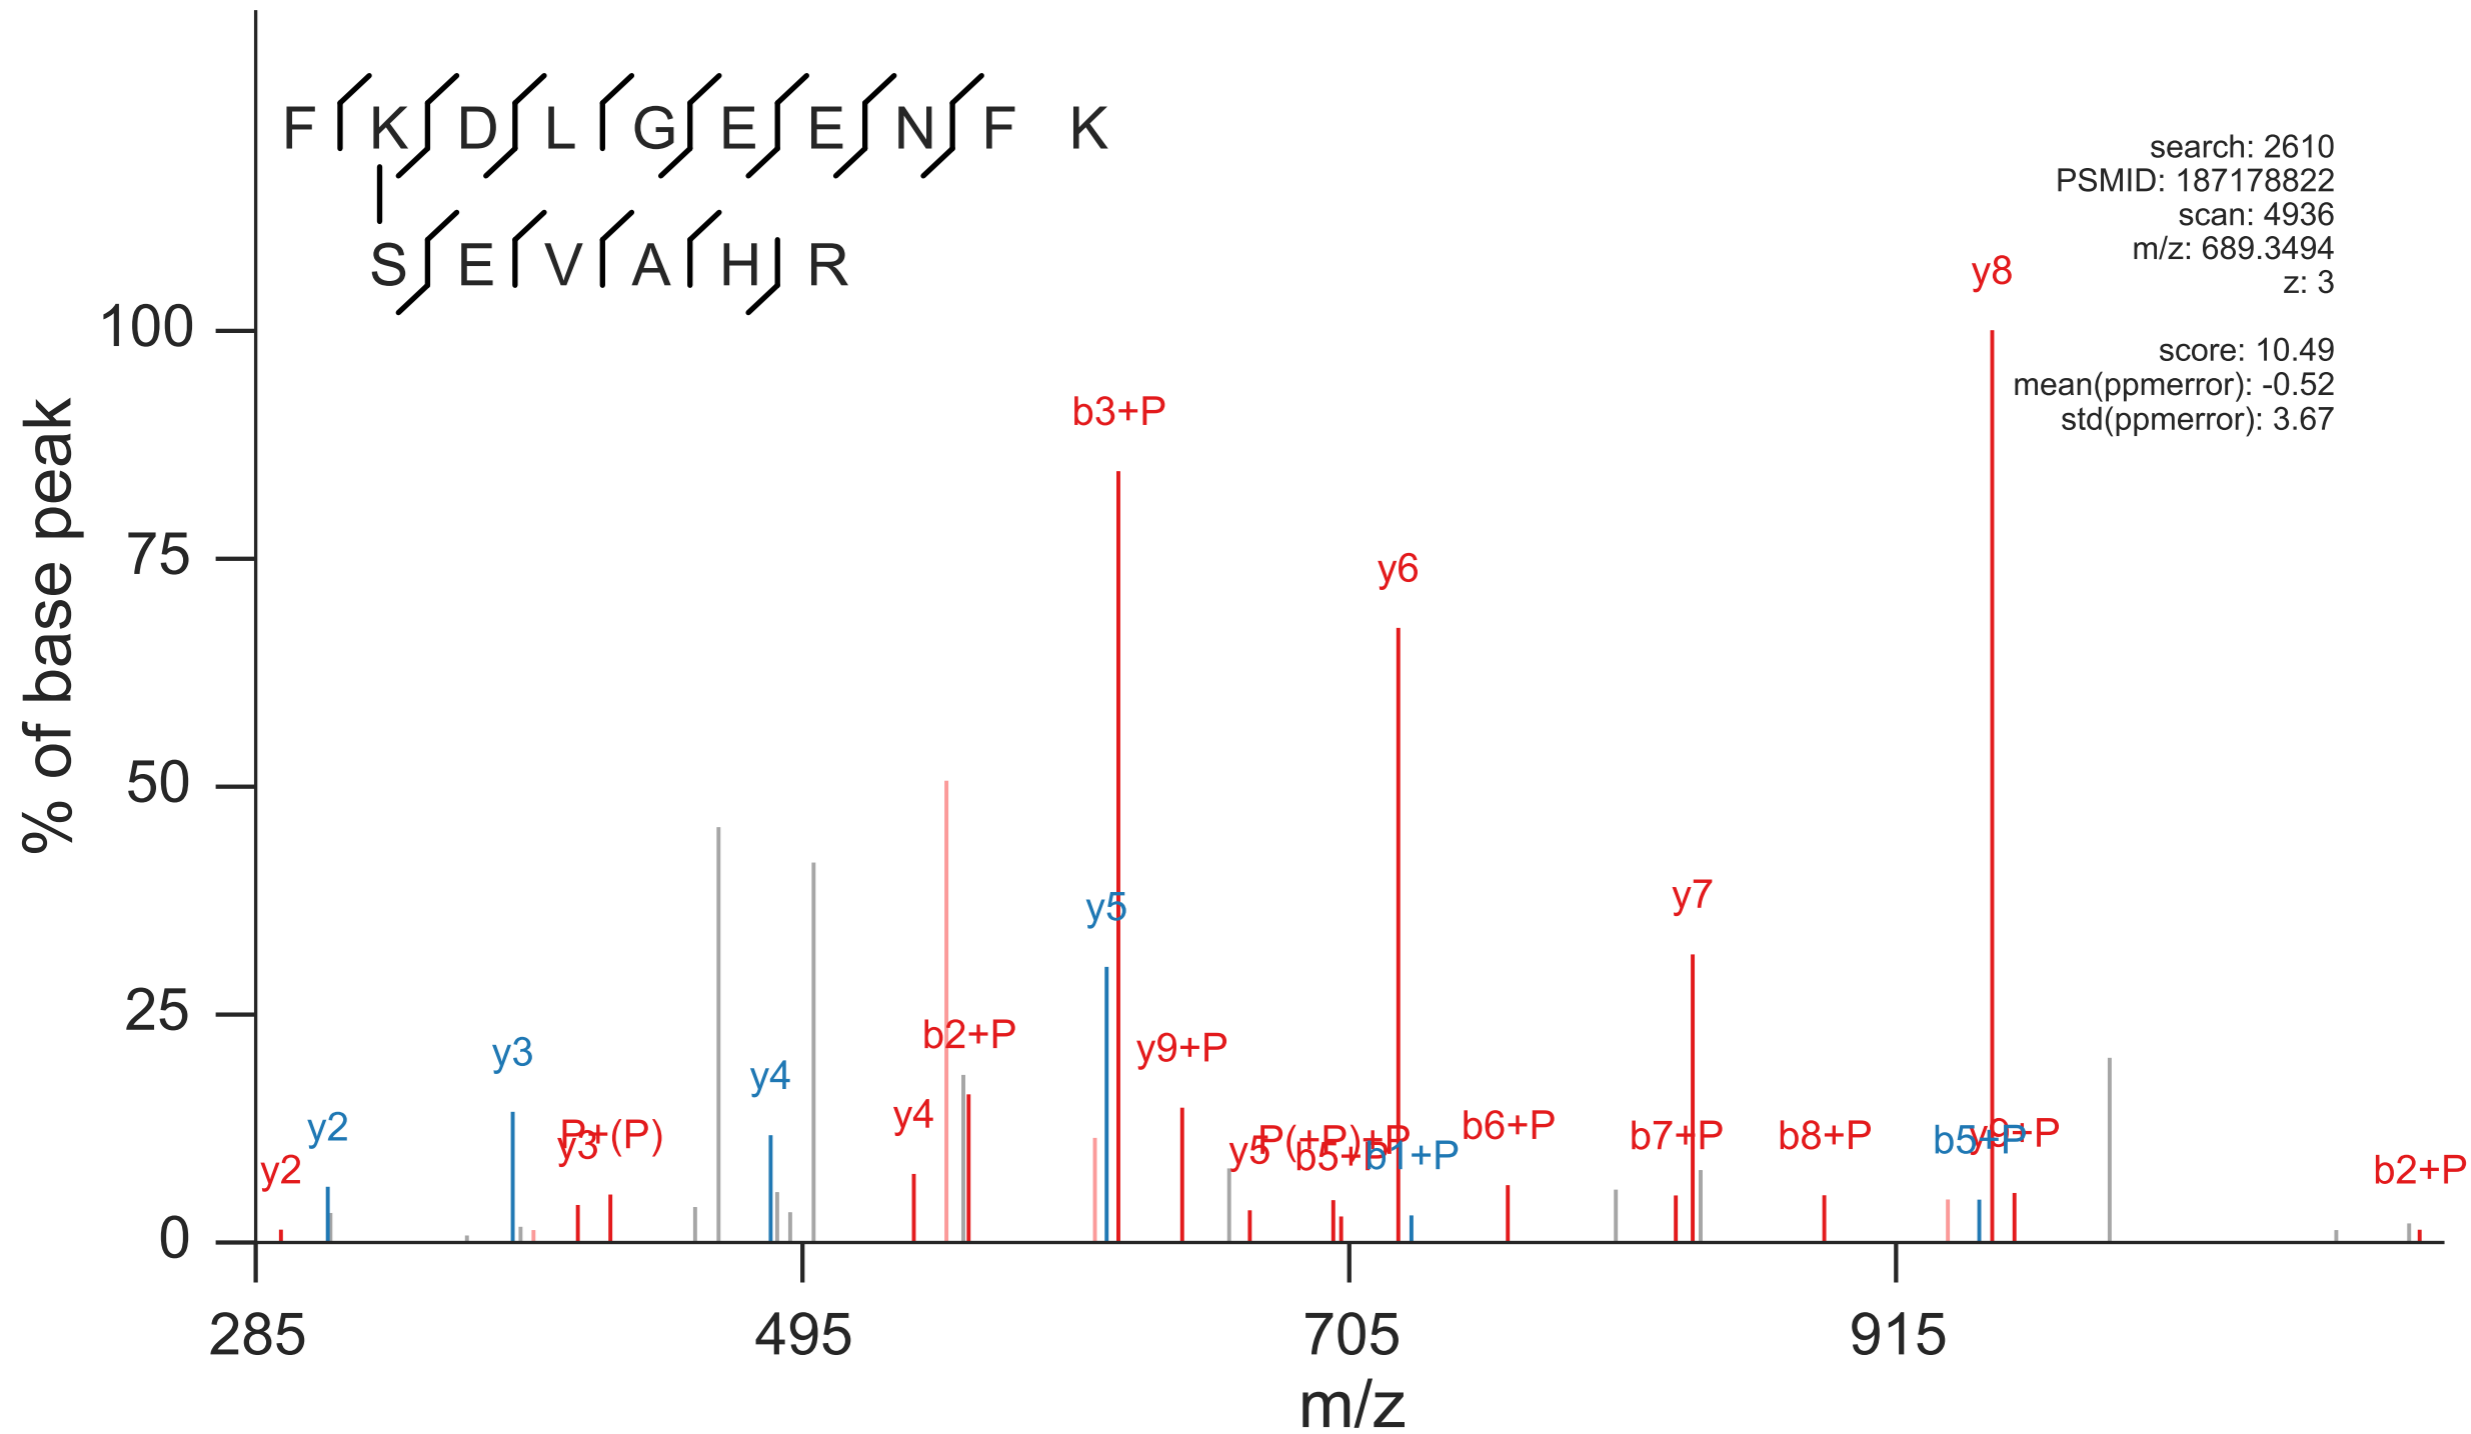

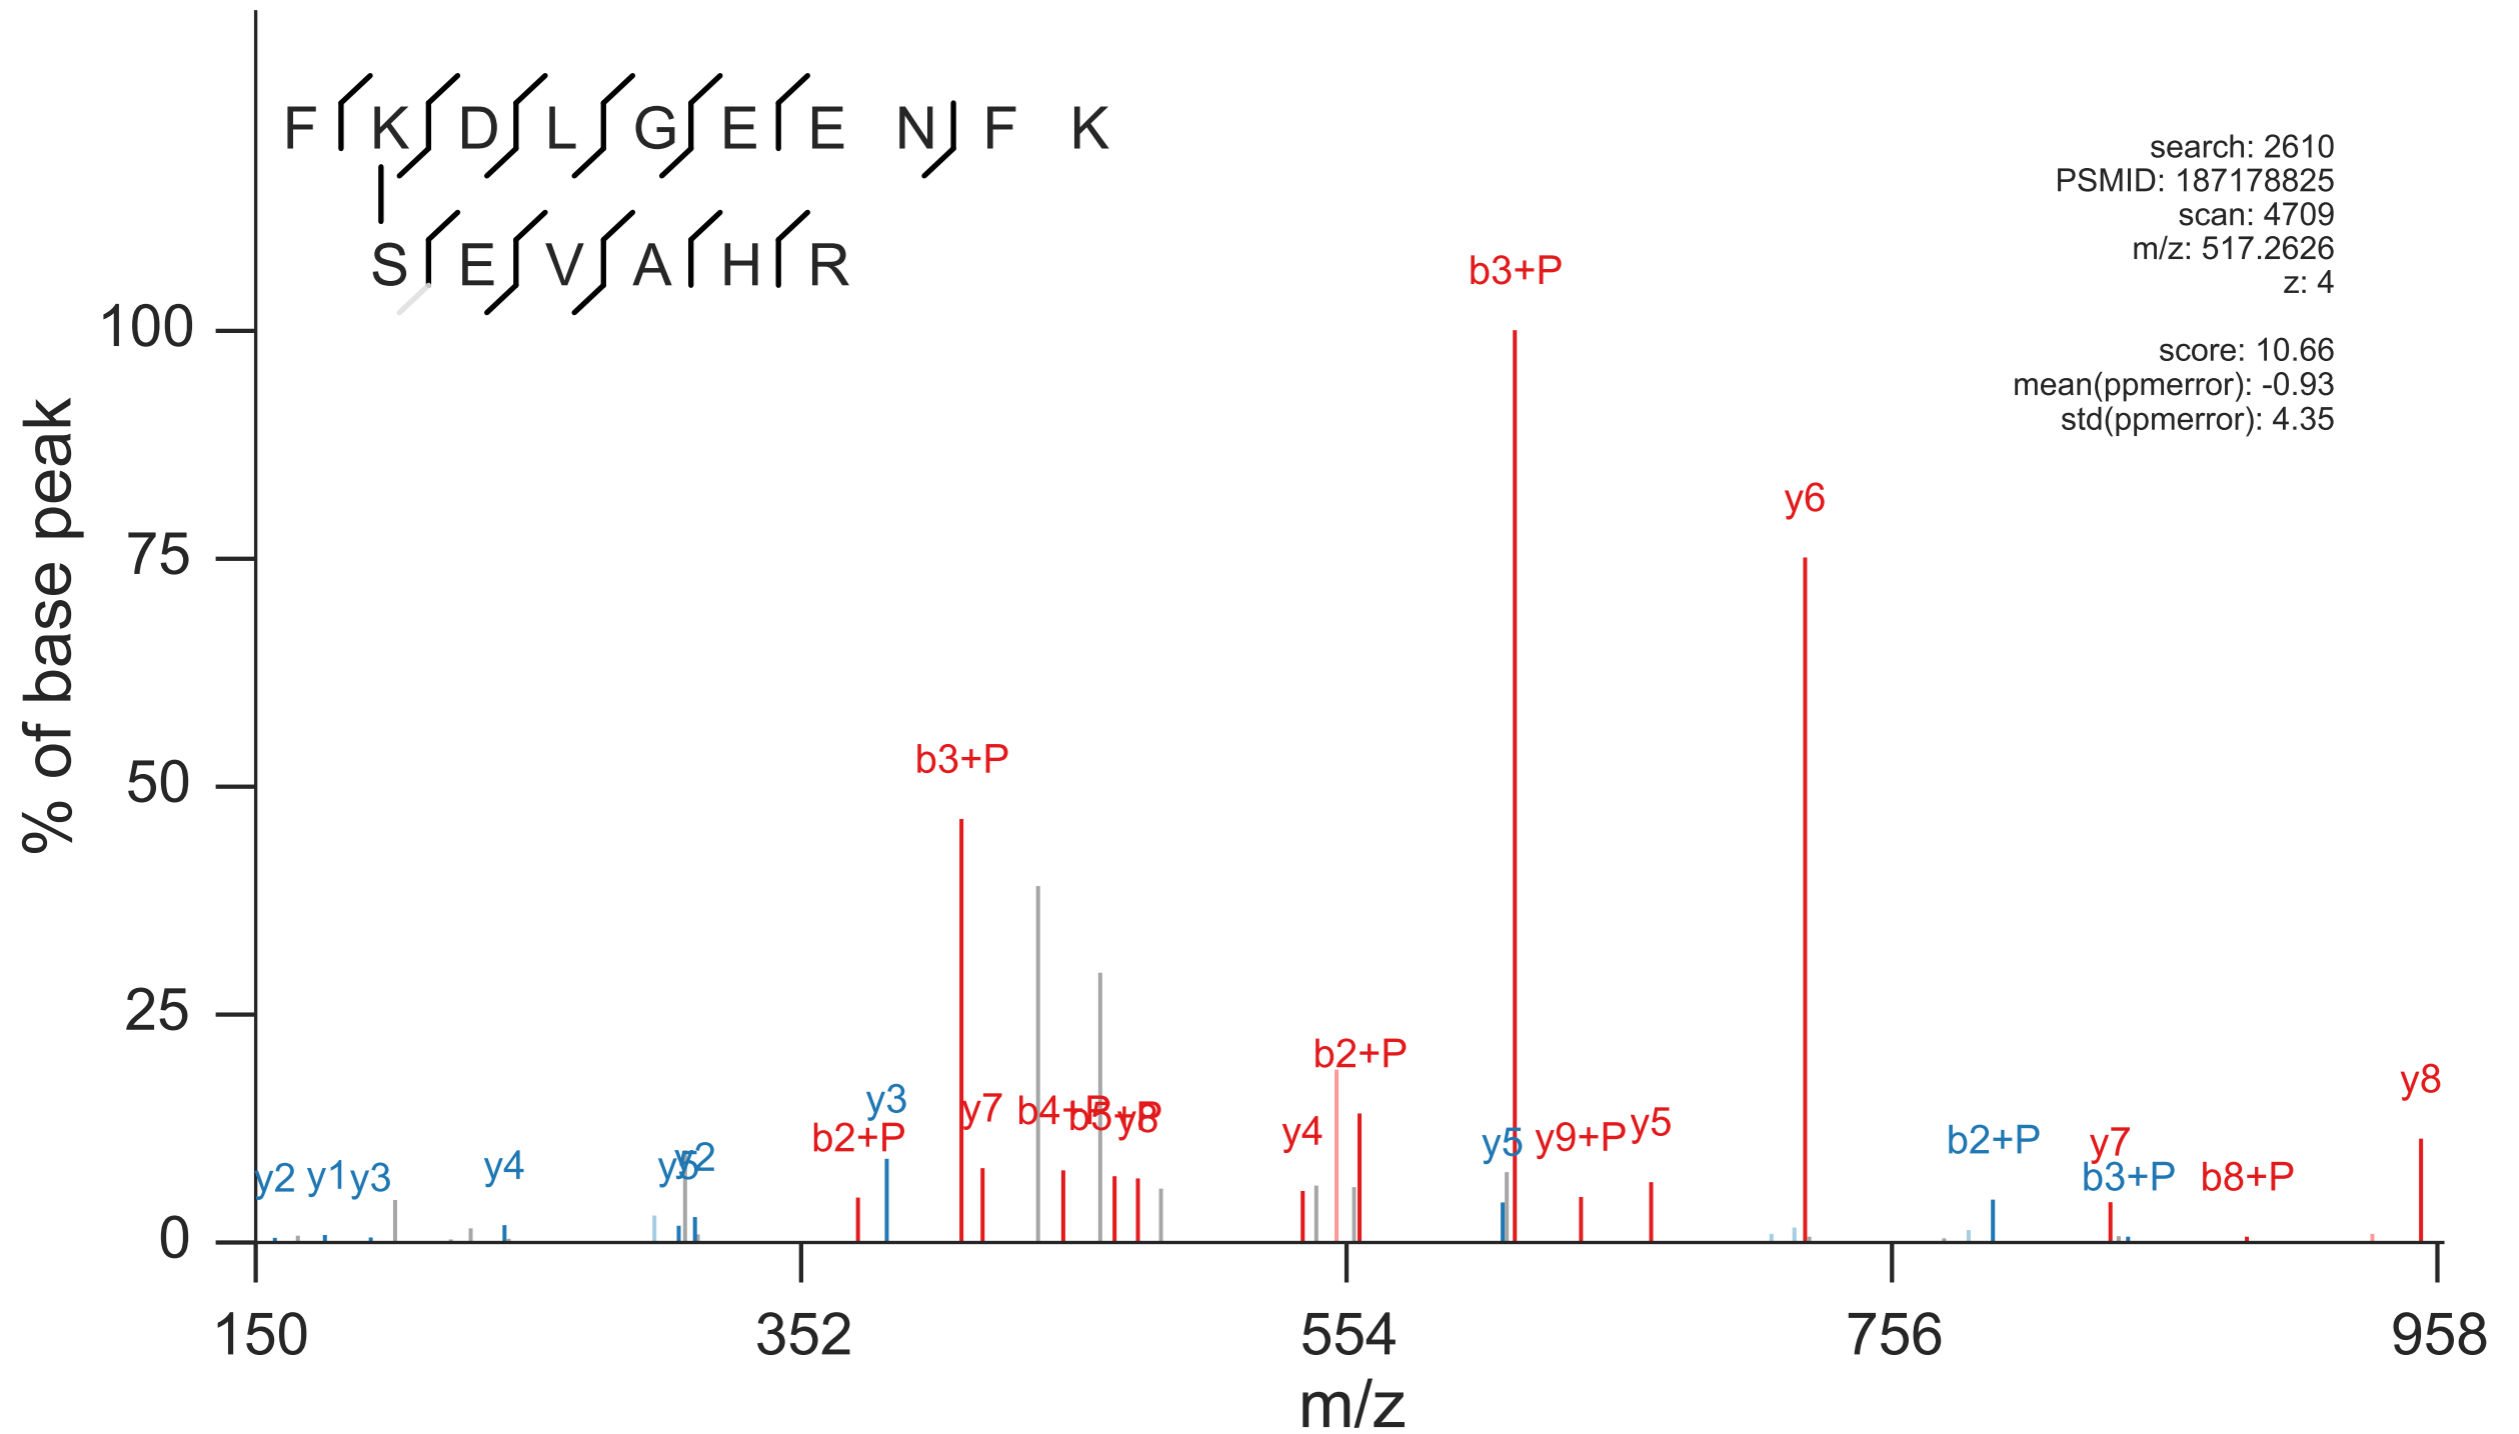

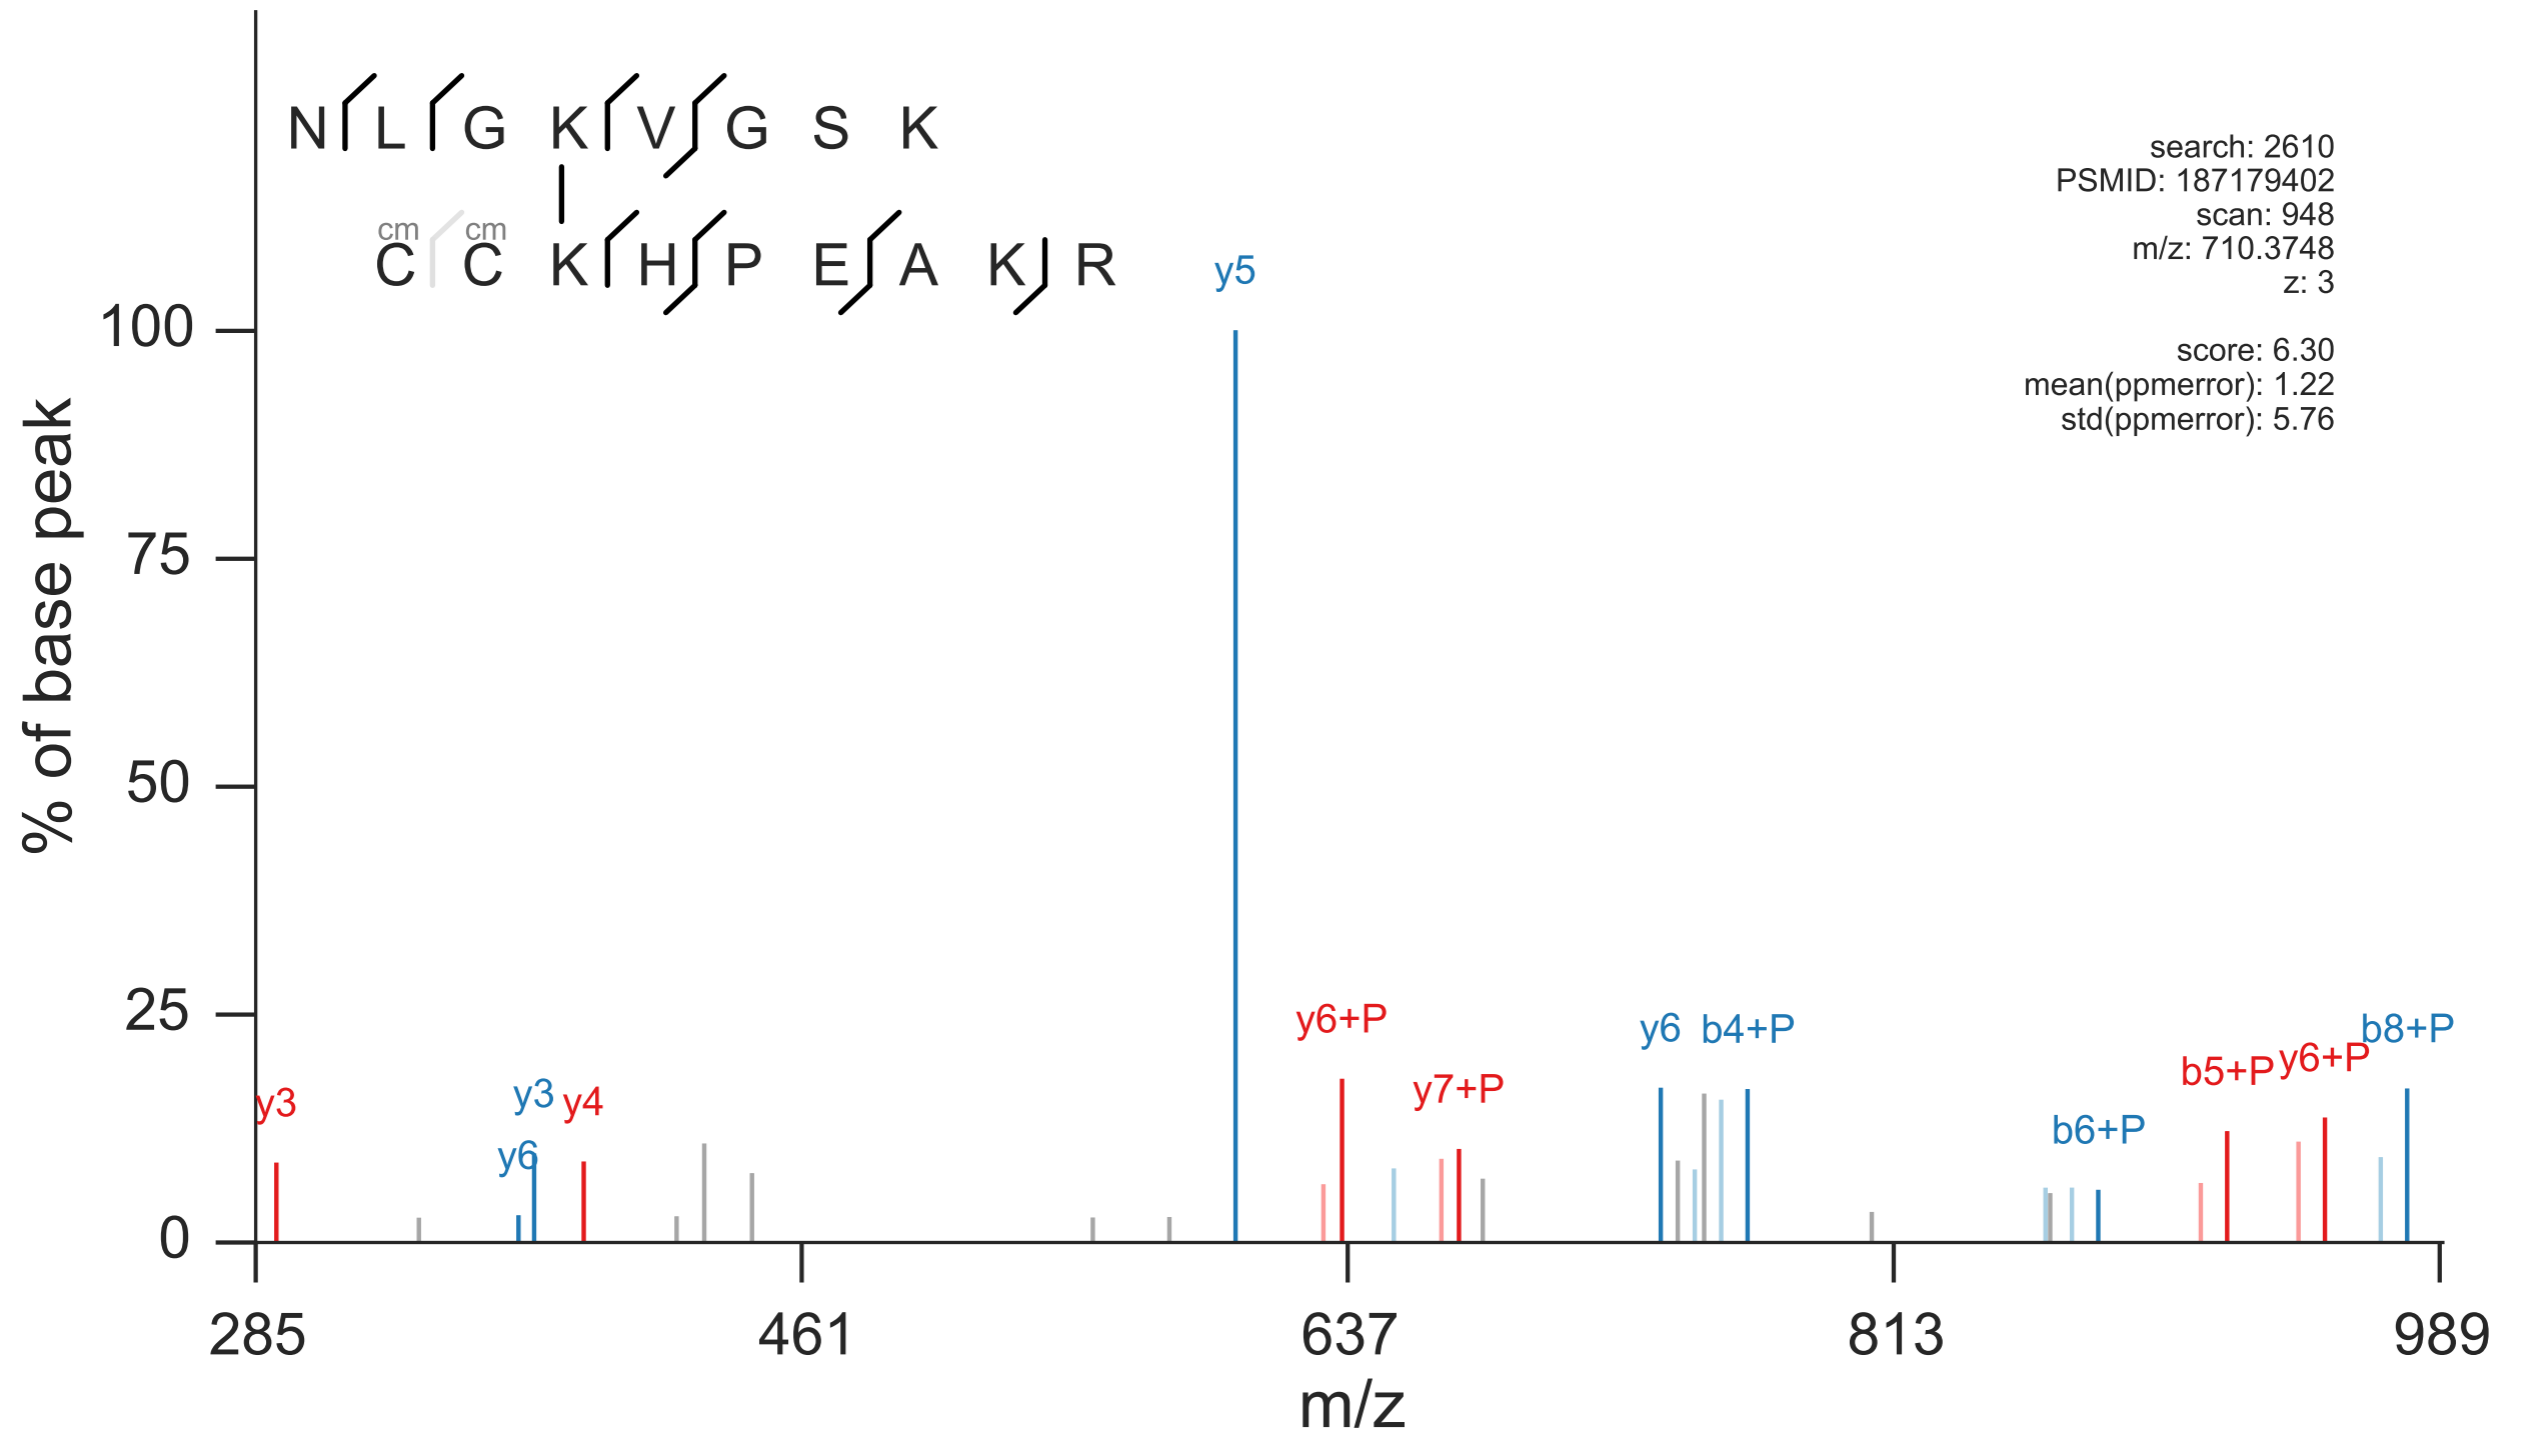

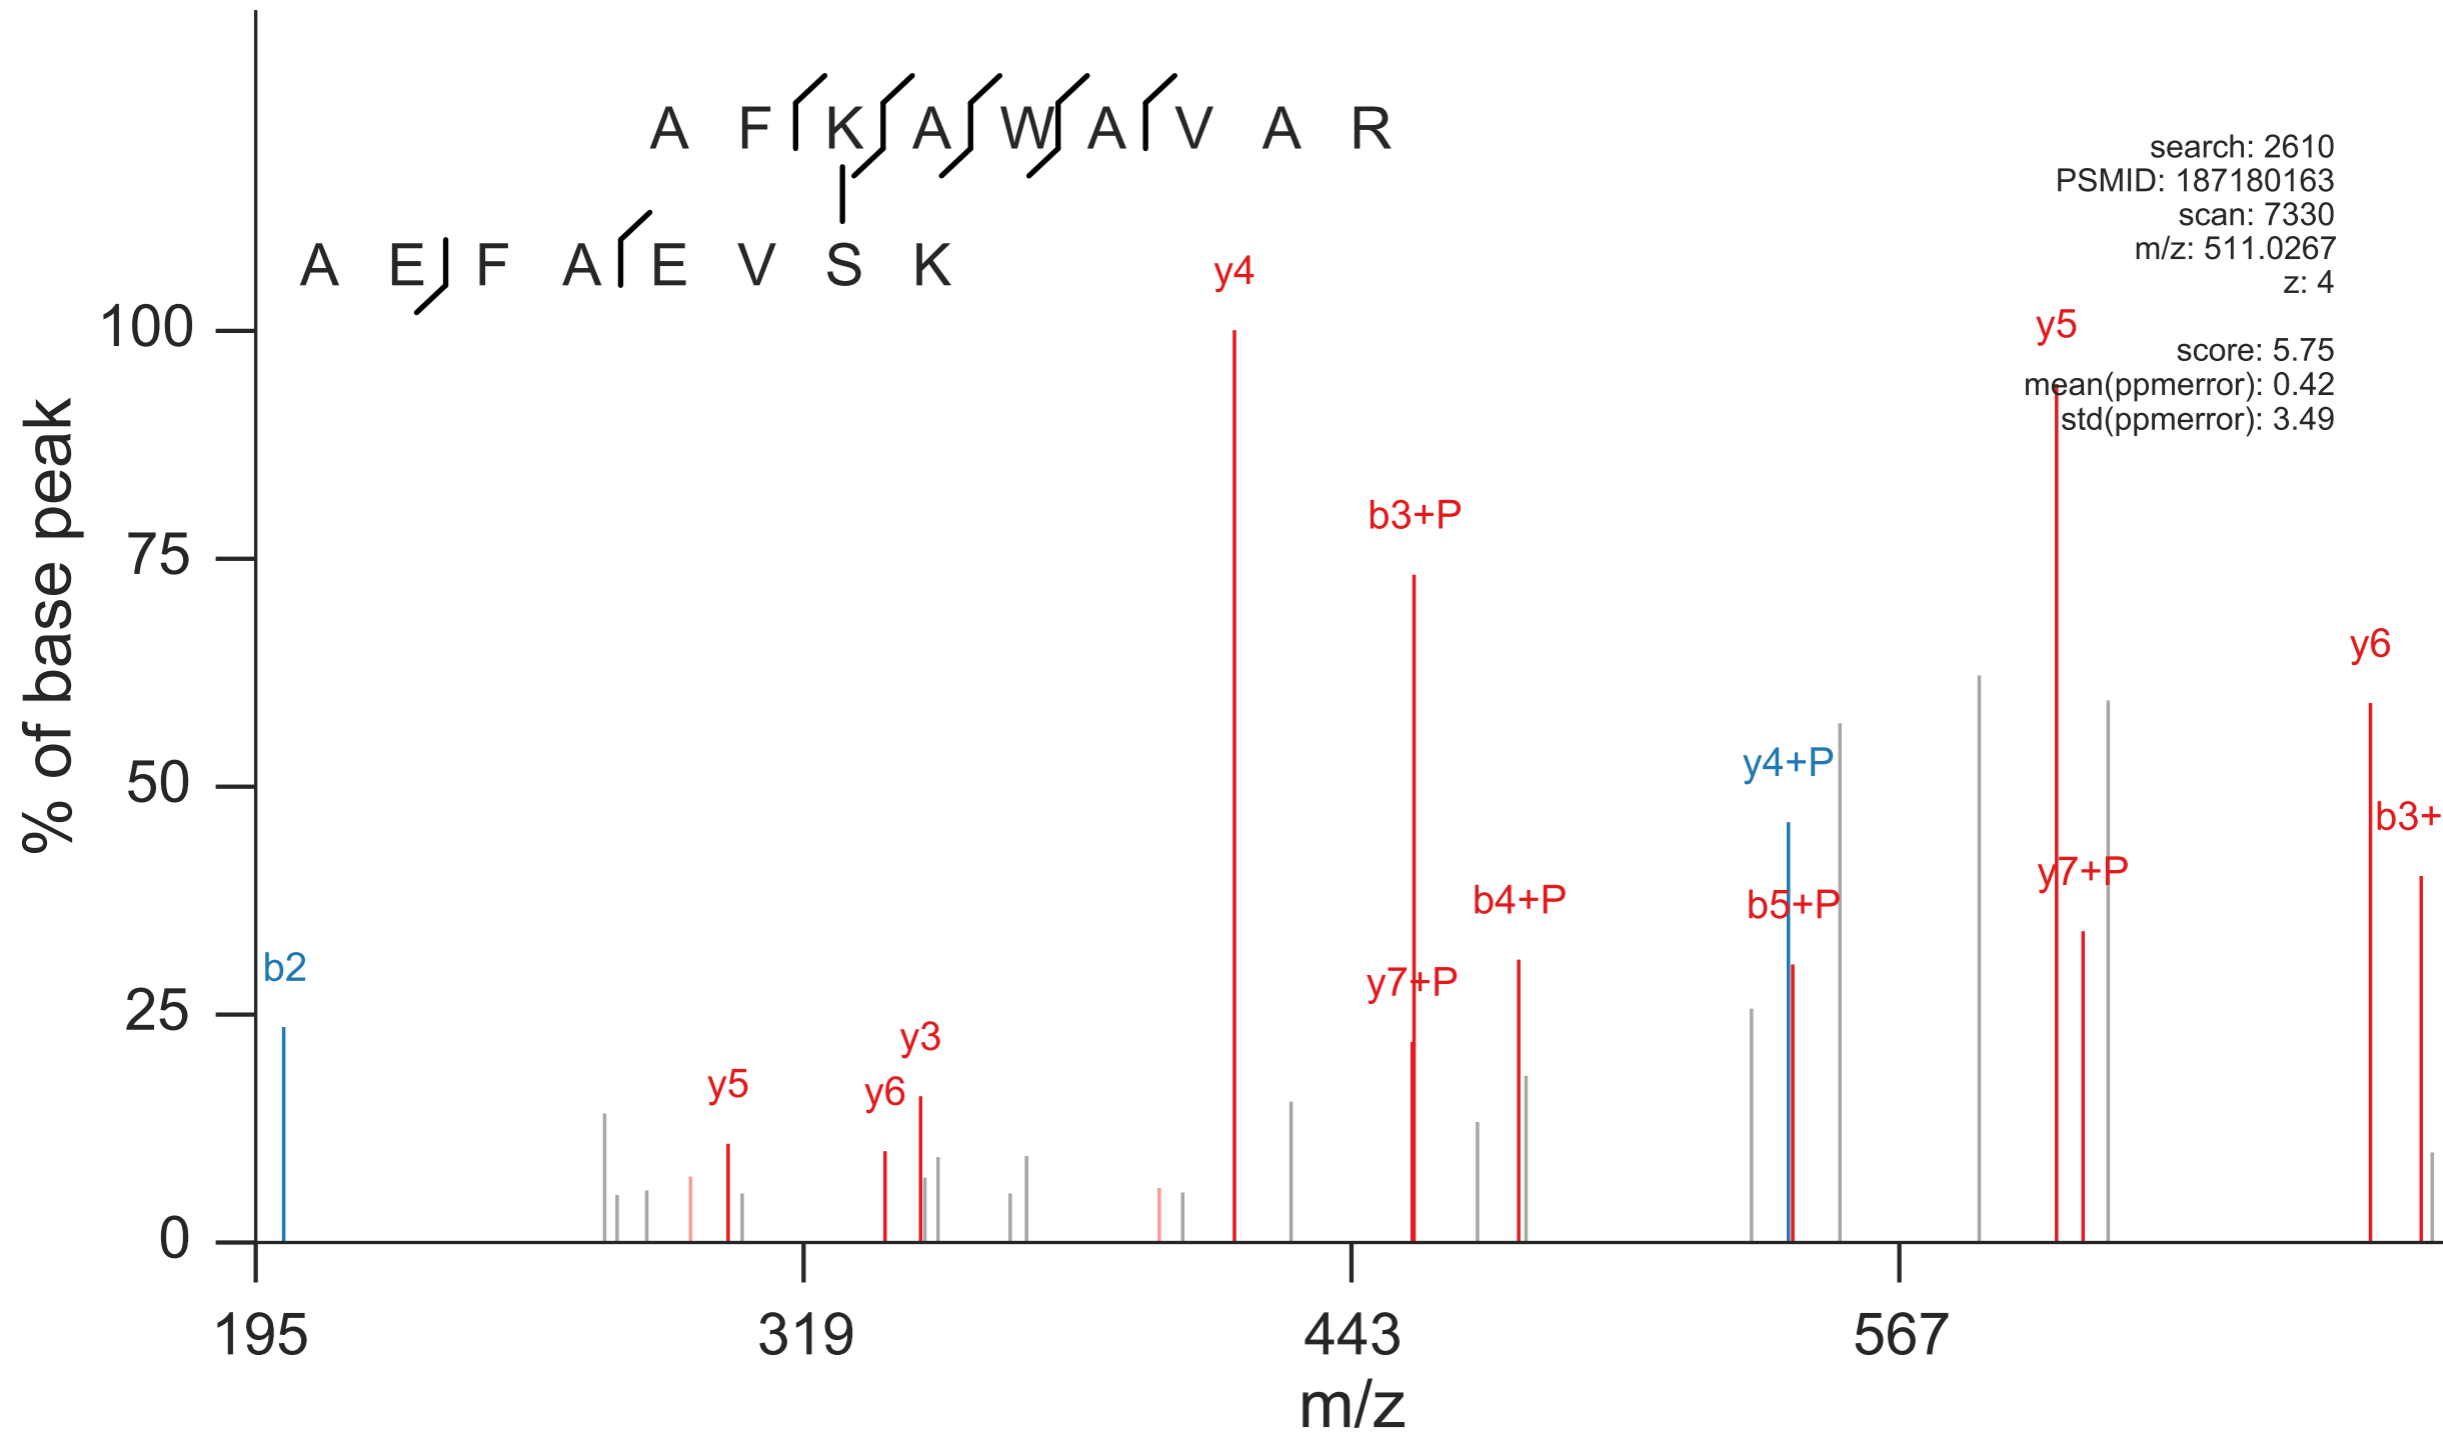

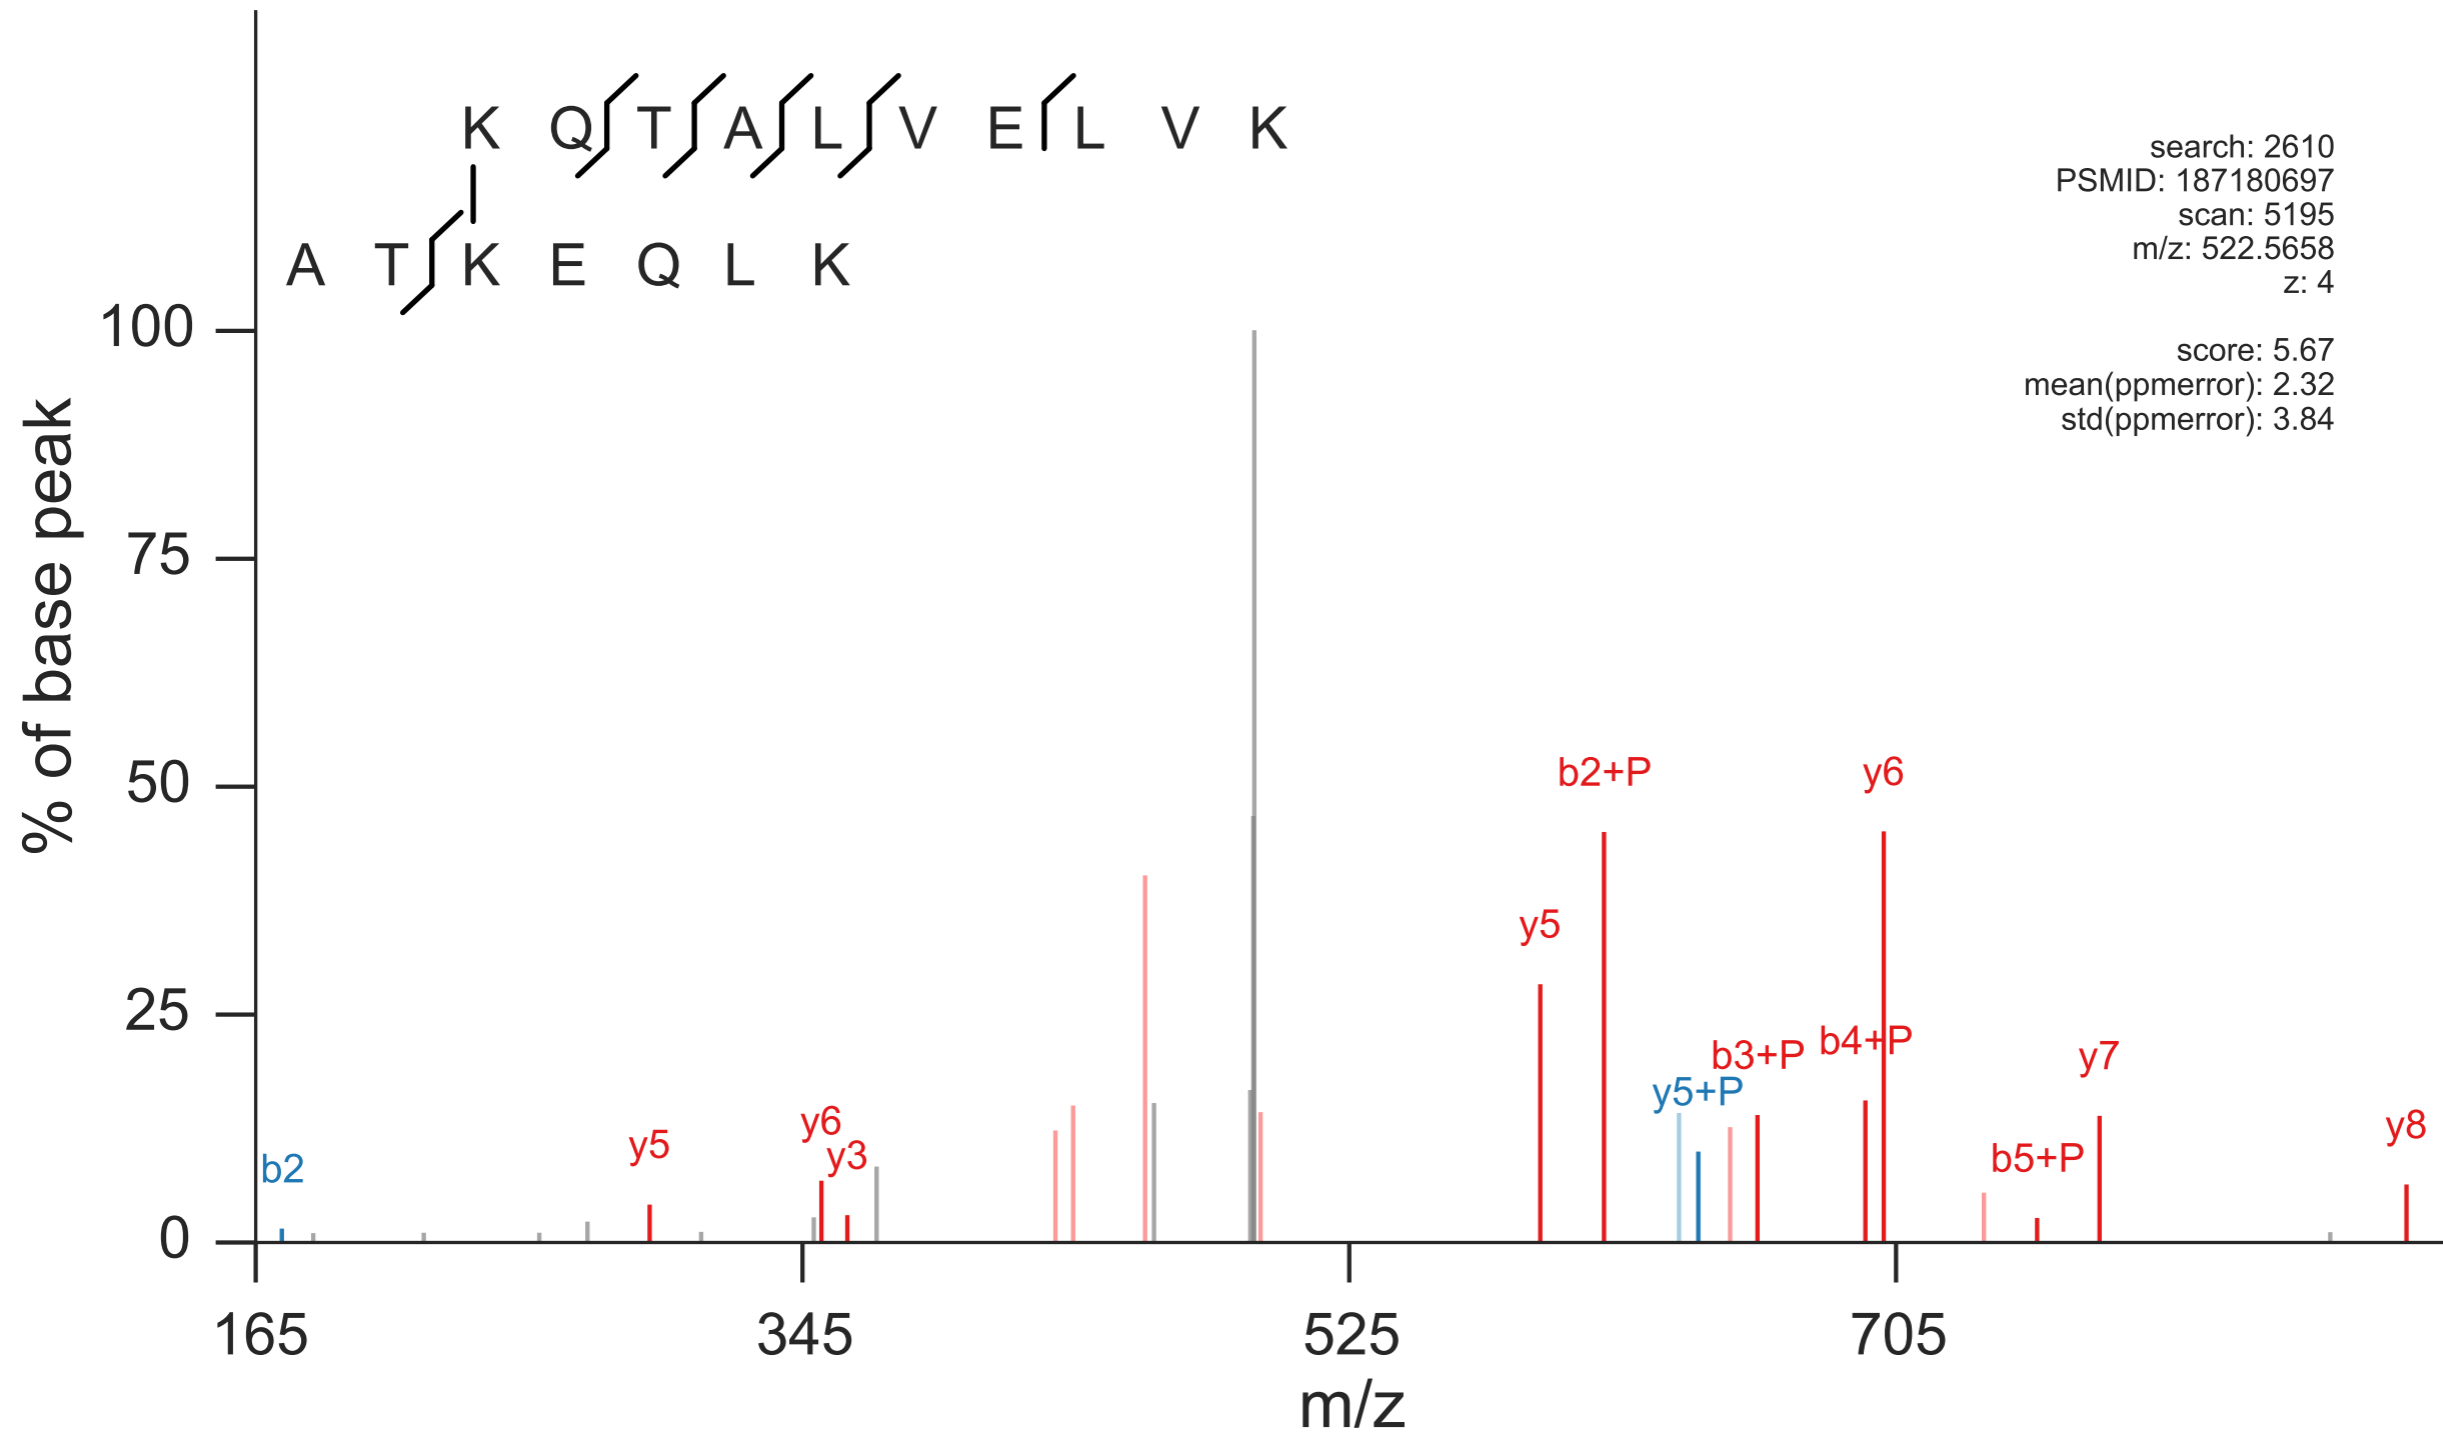

search: 2610  
 PSMID: 187180697  
 scan: 5195  
 m/z: 522.5658  
 z: 4

score: 5.67  
 mean(ppmerror): 2.32  
 std(ppmerror): 3.84

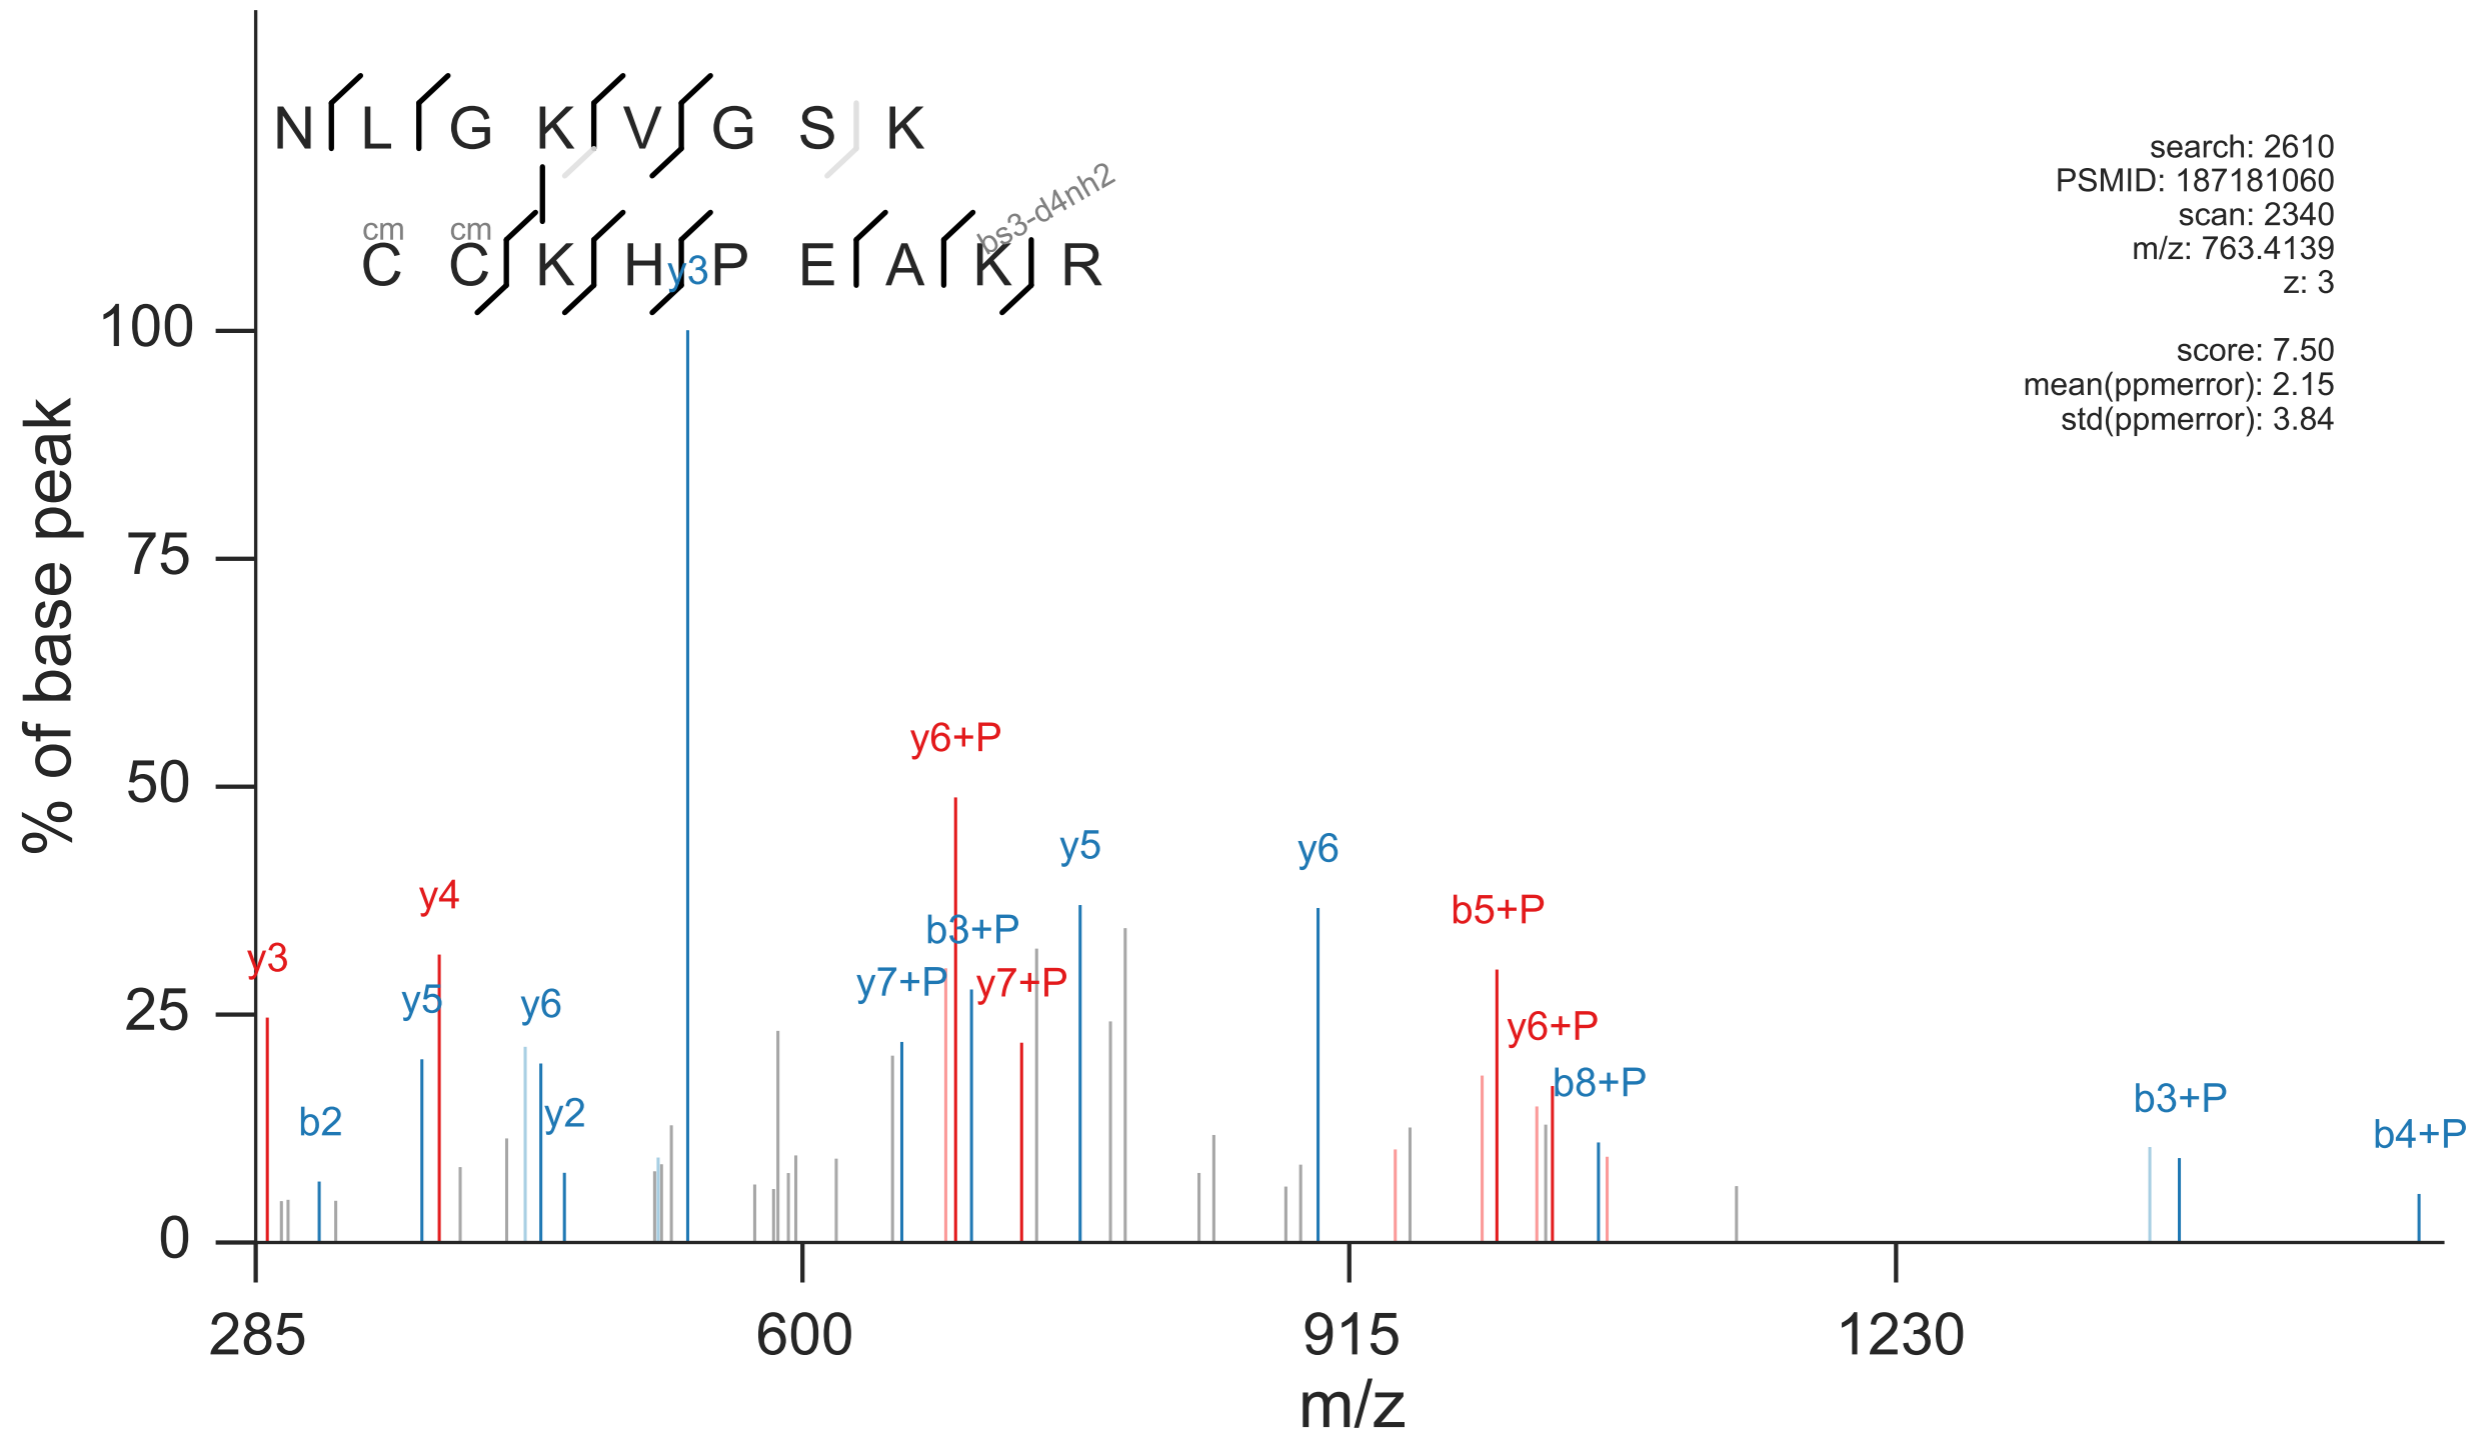

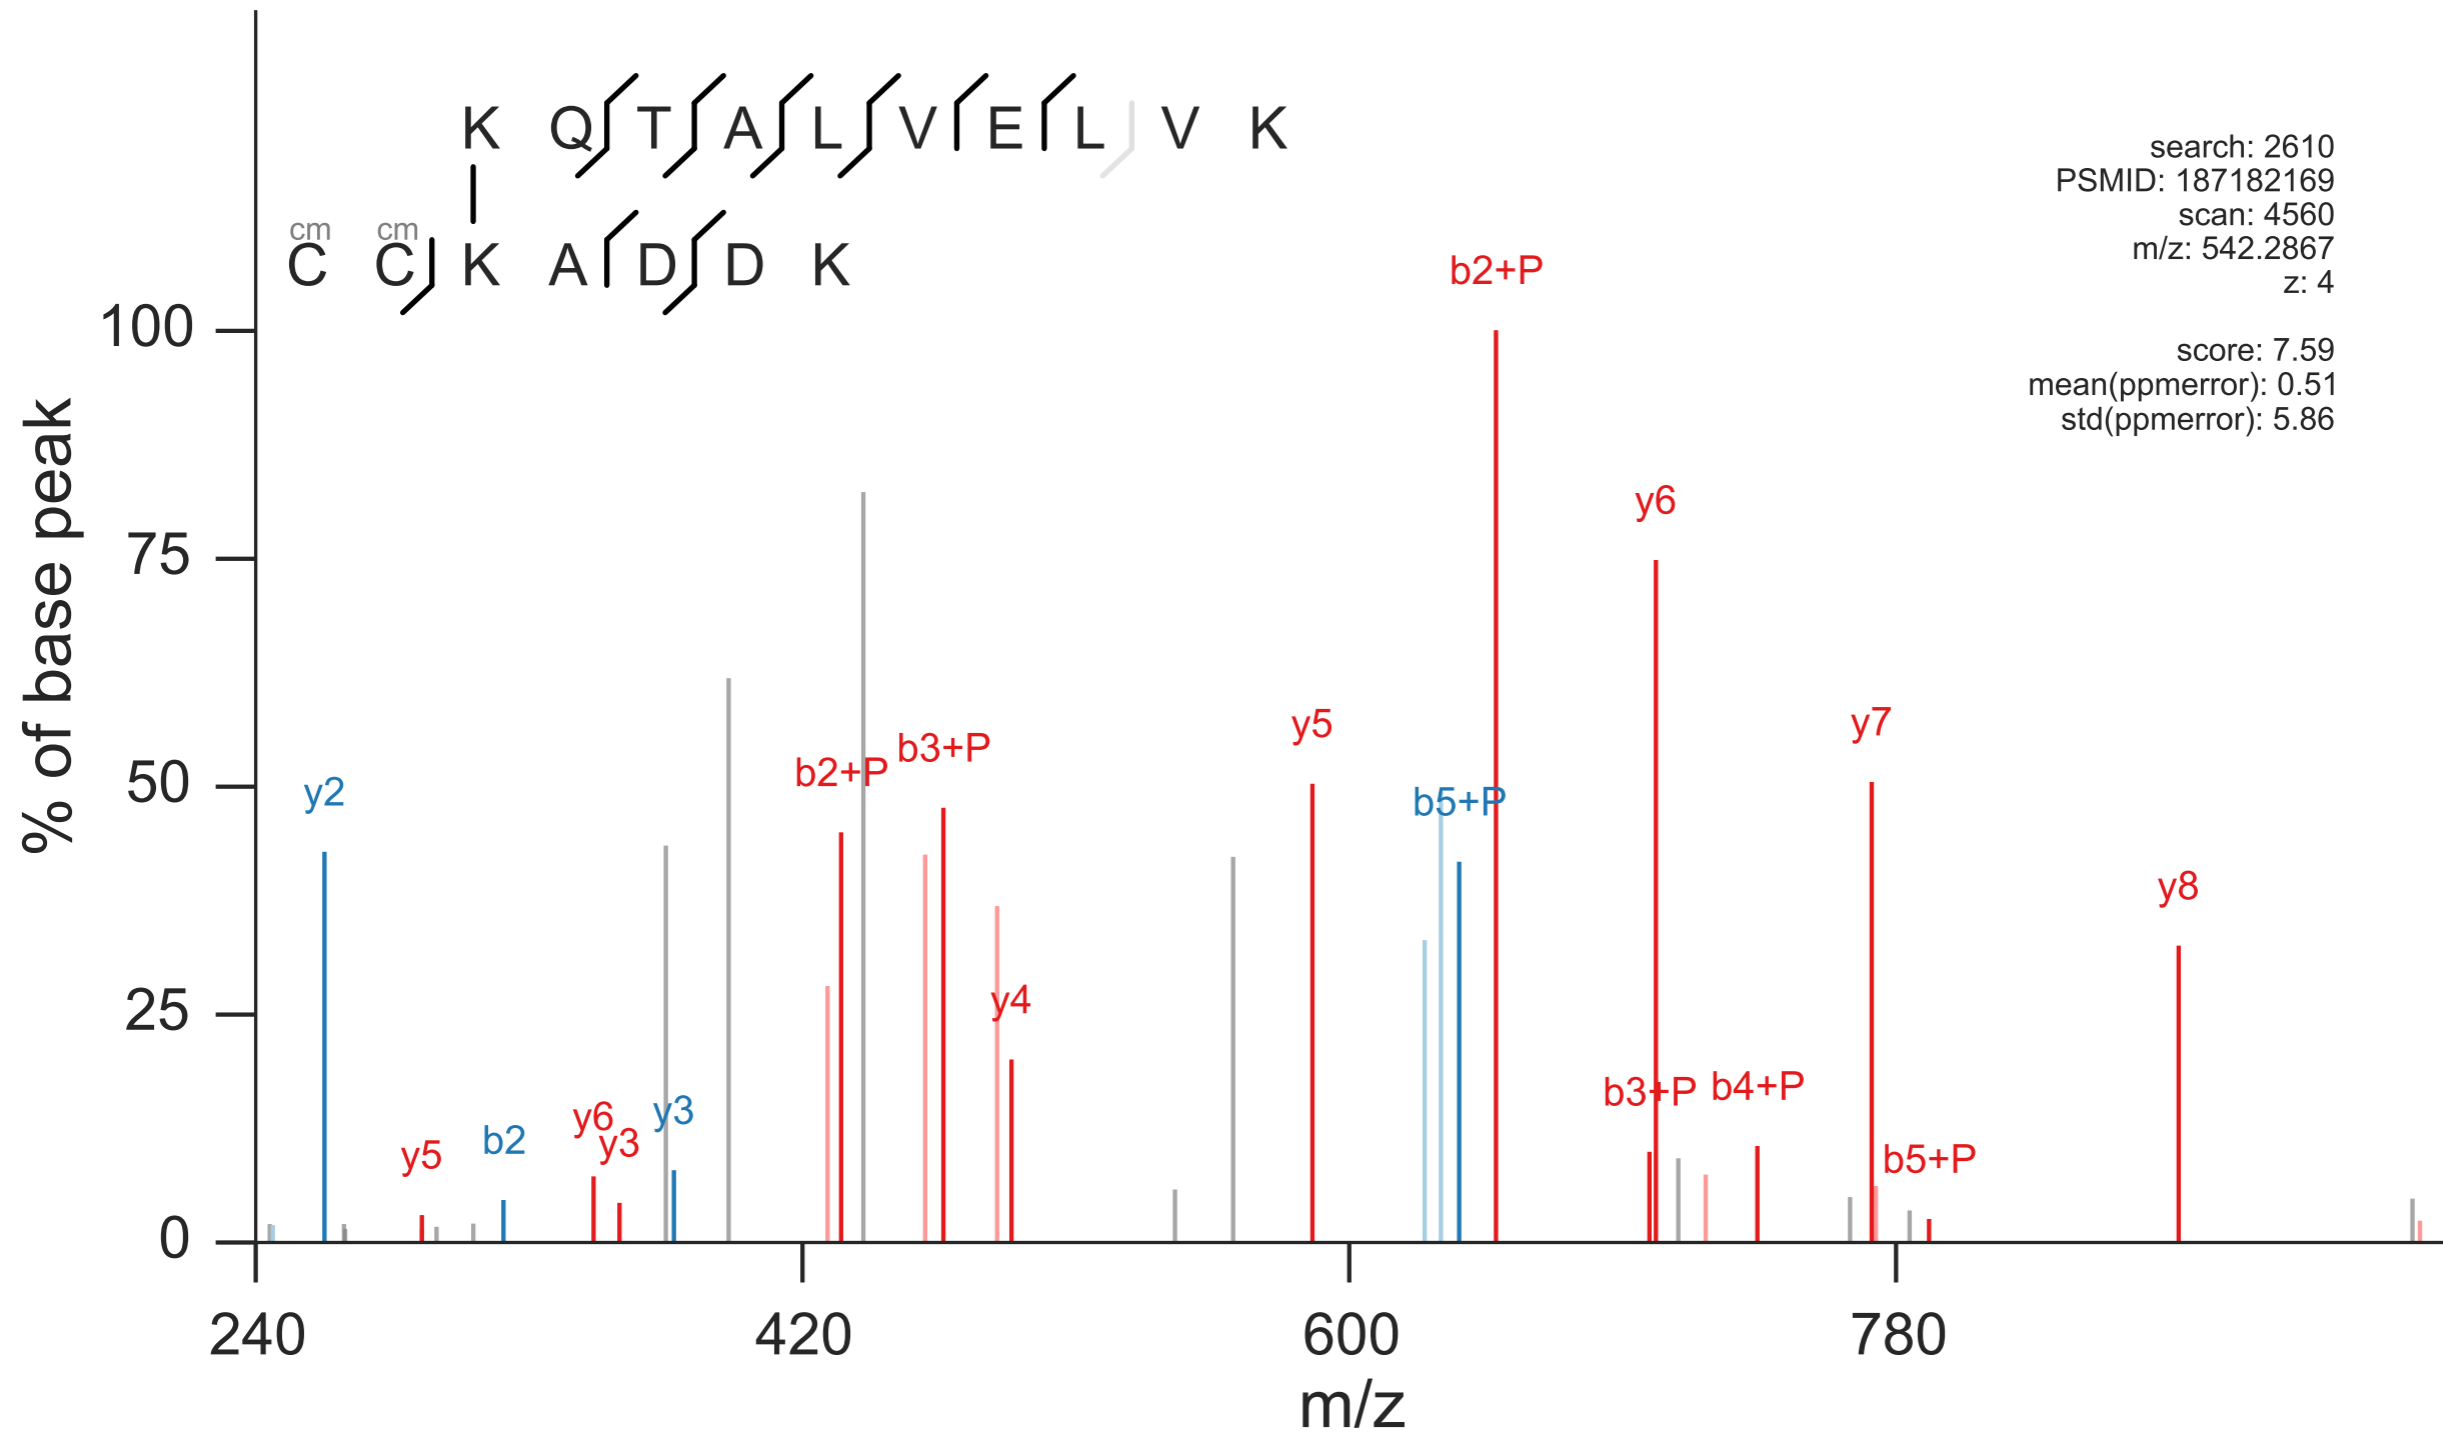

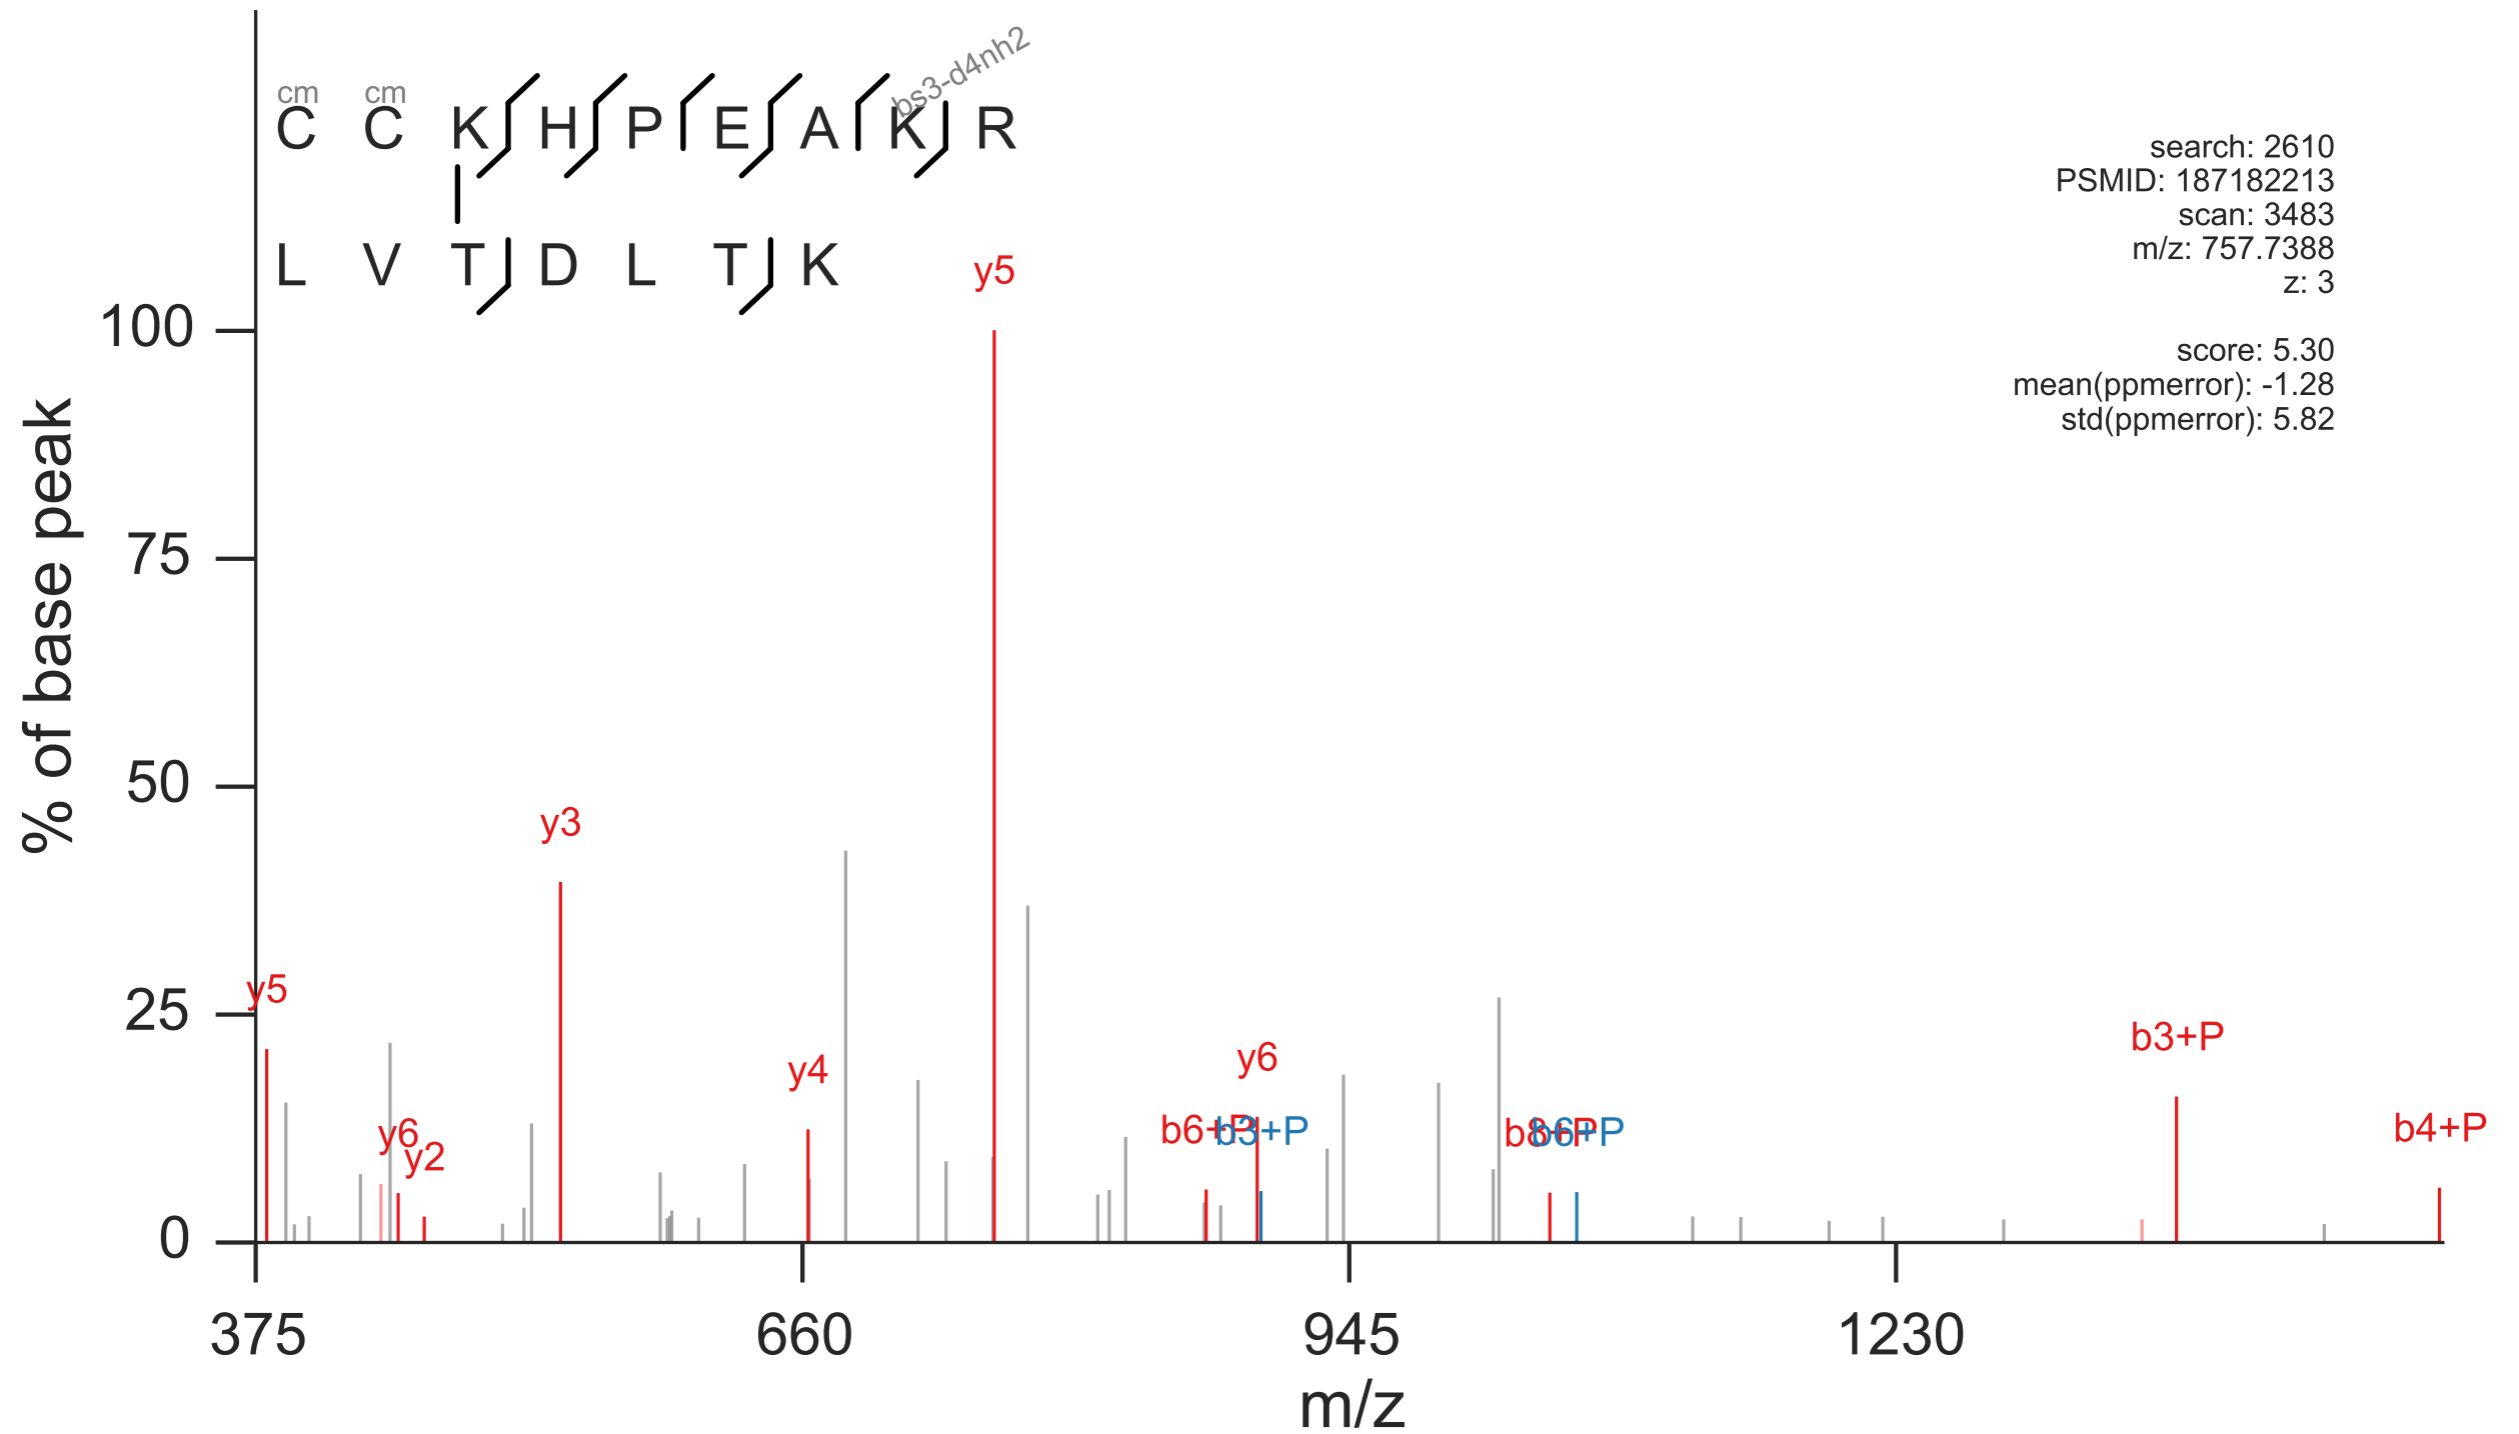



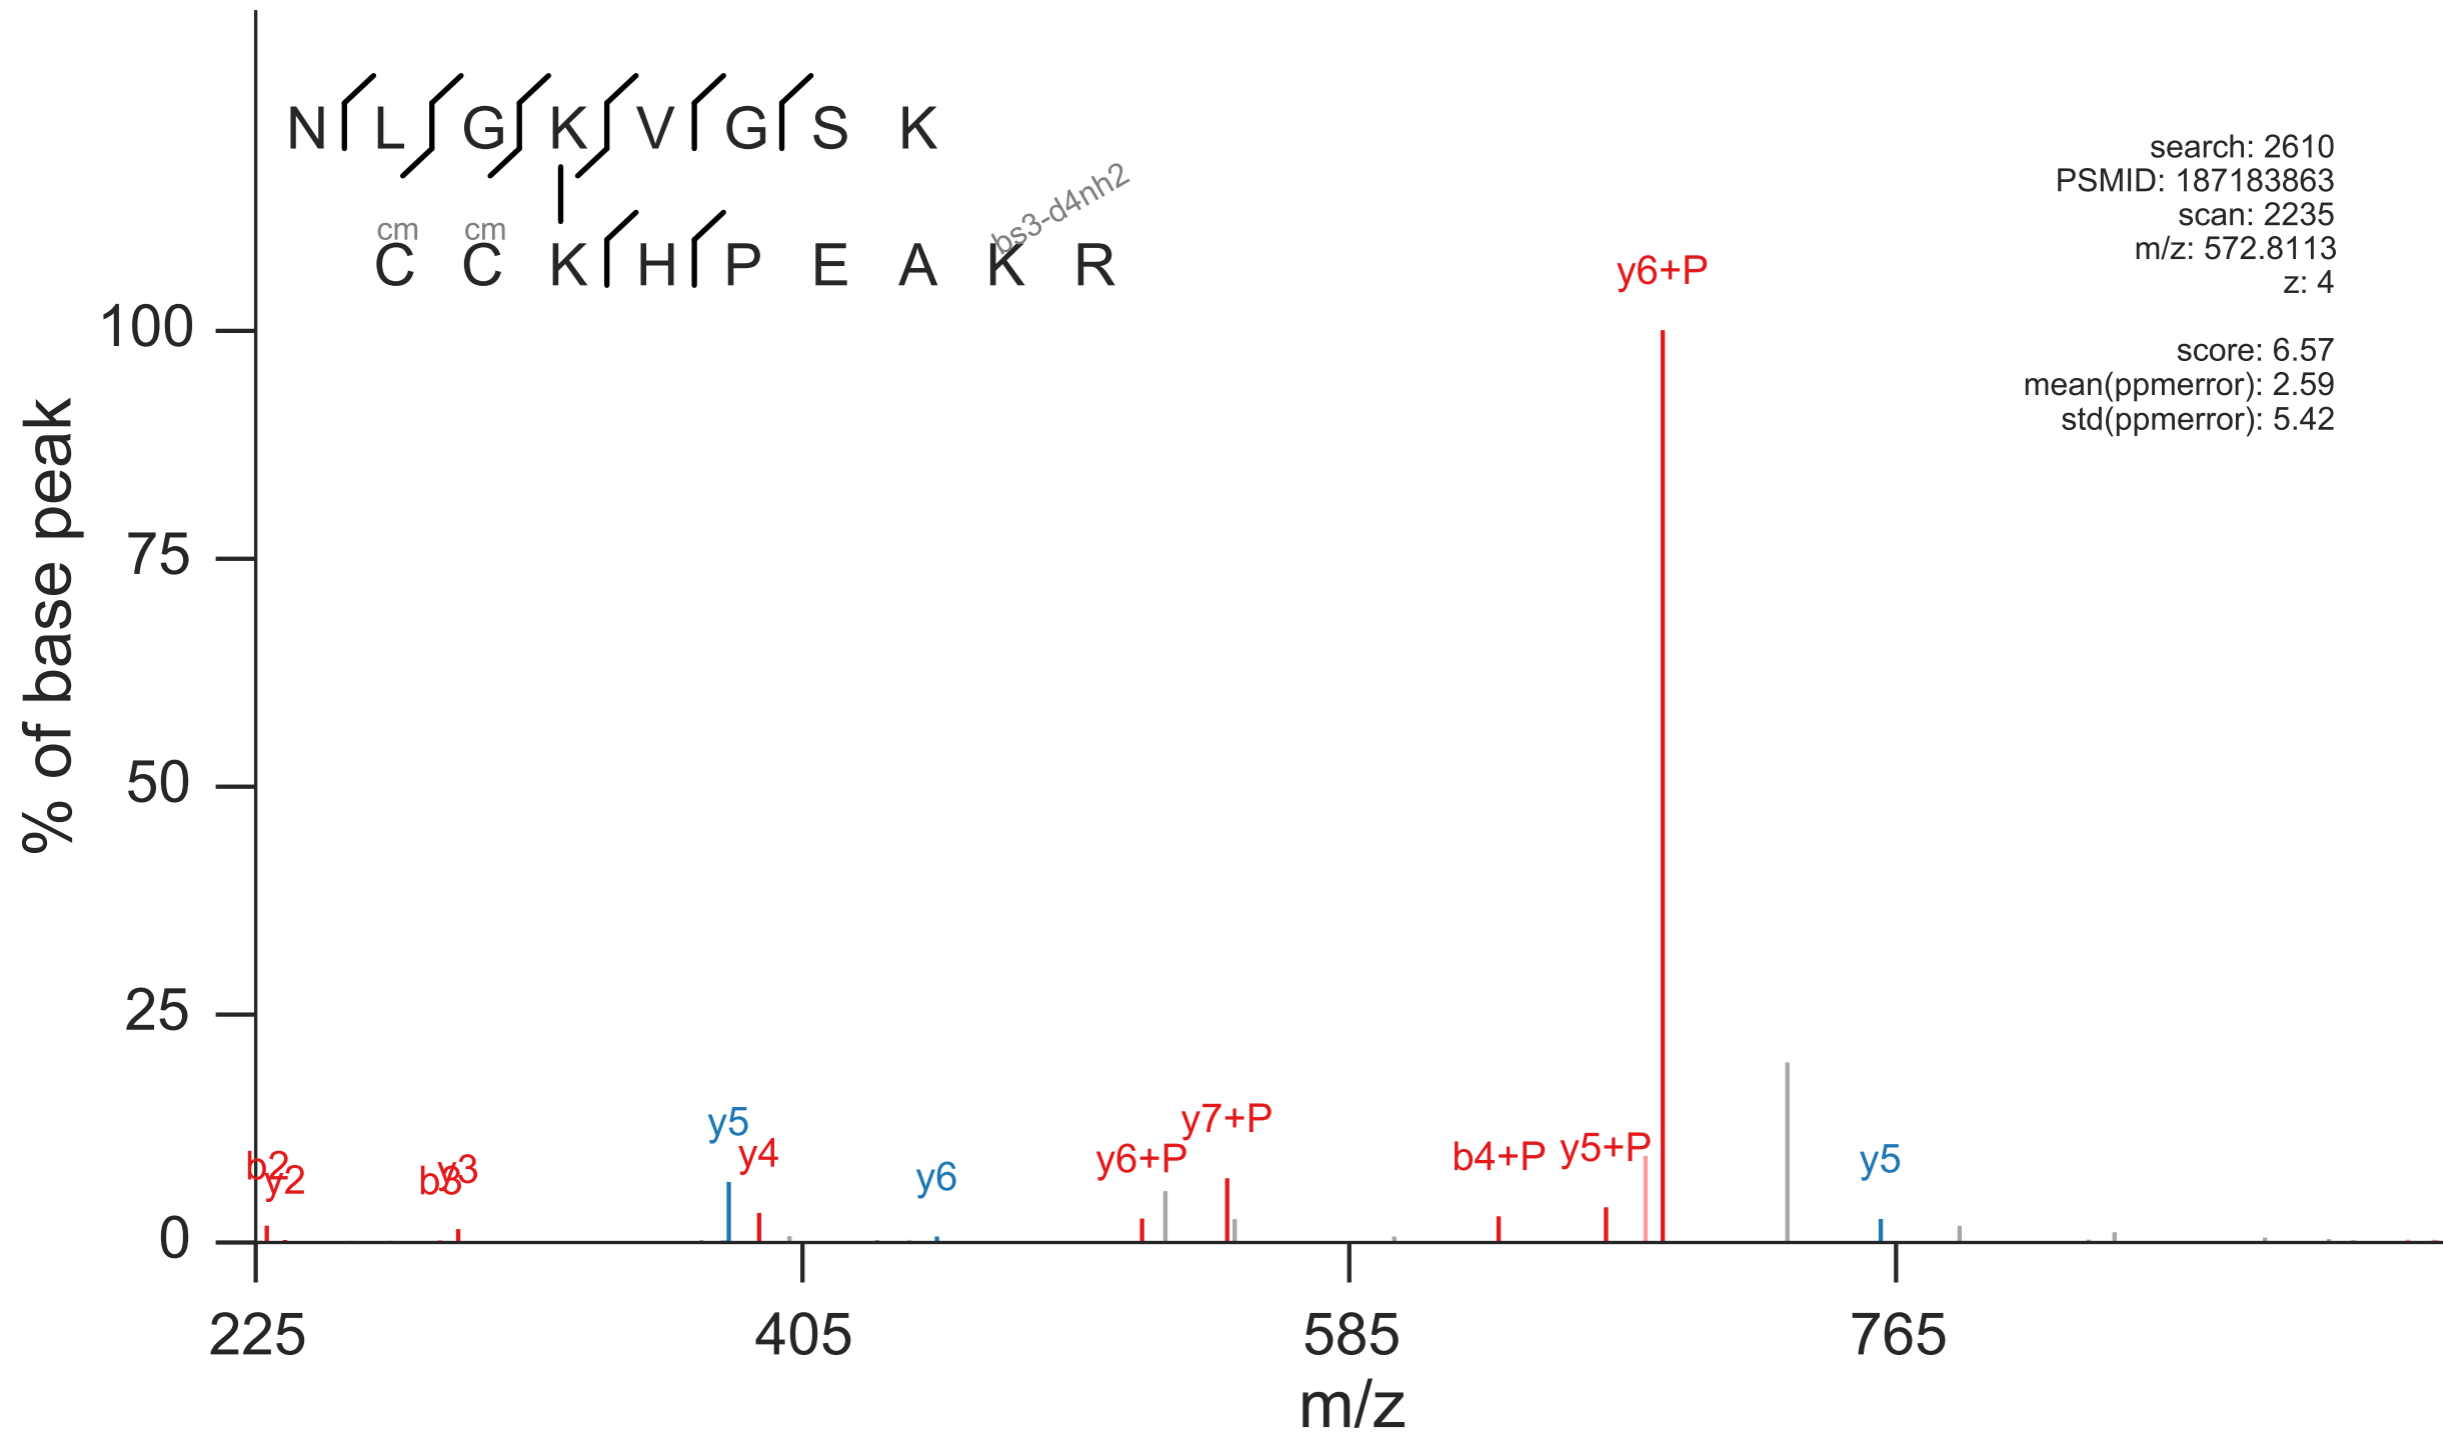

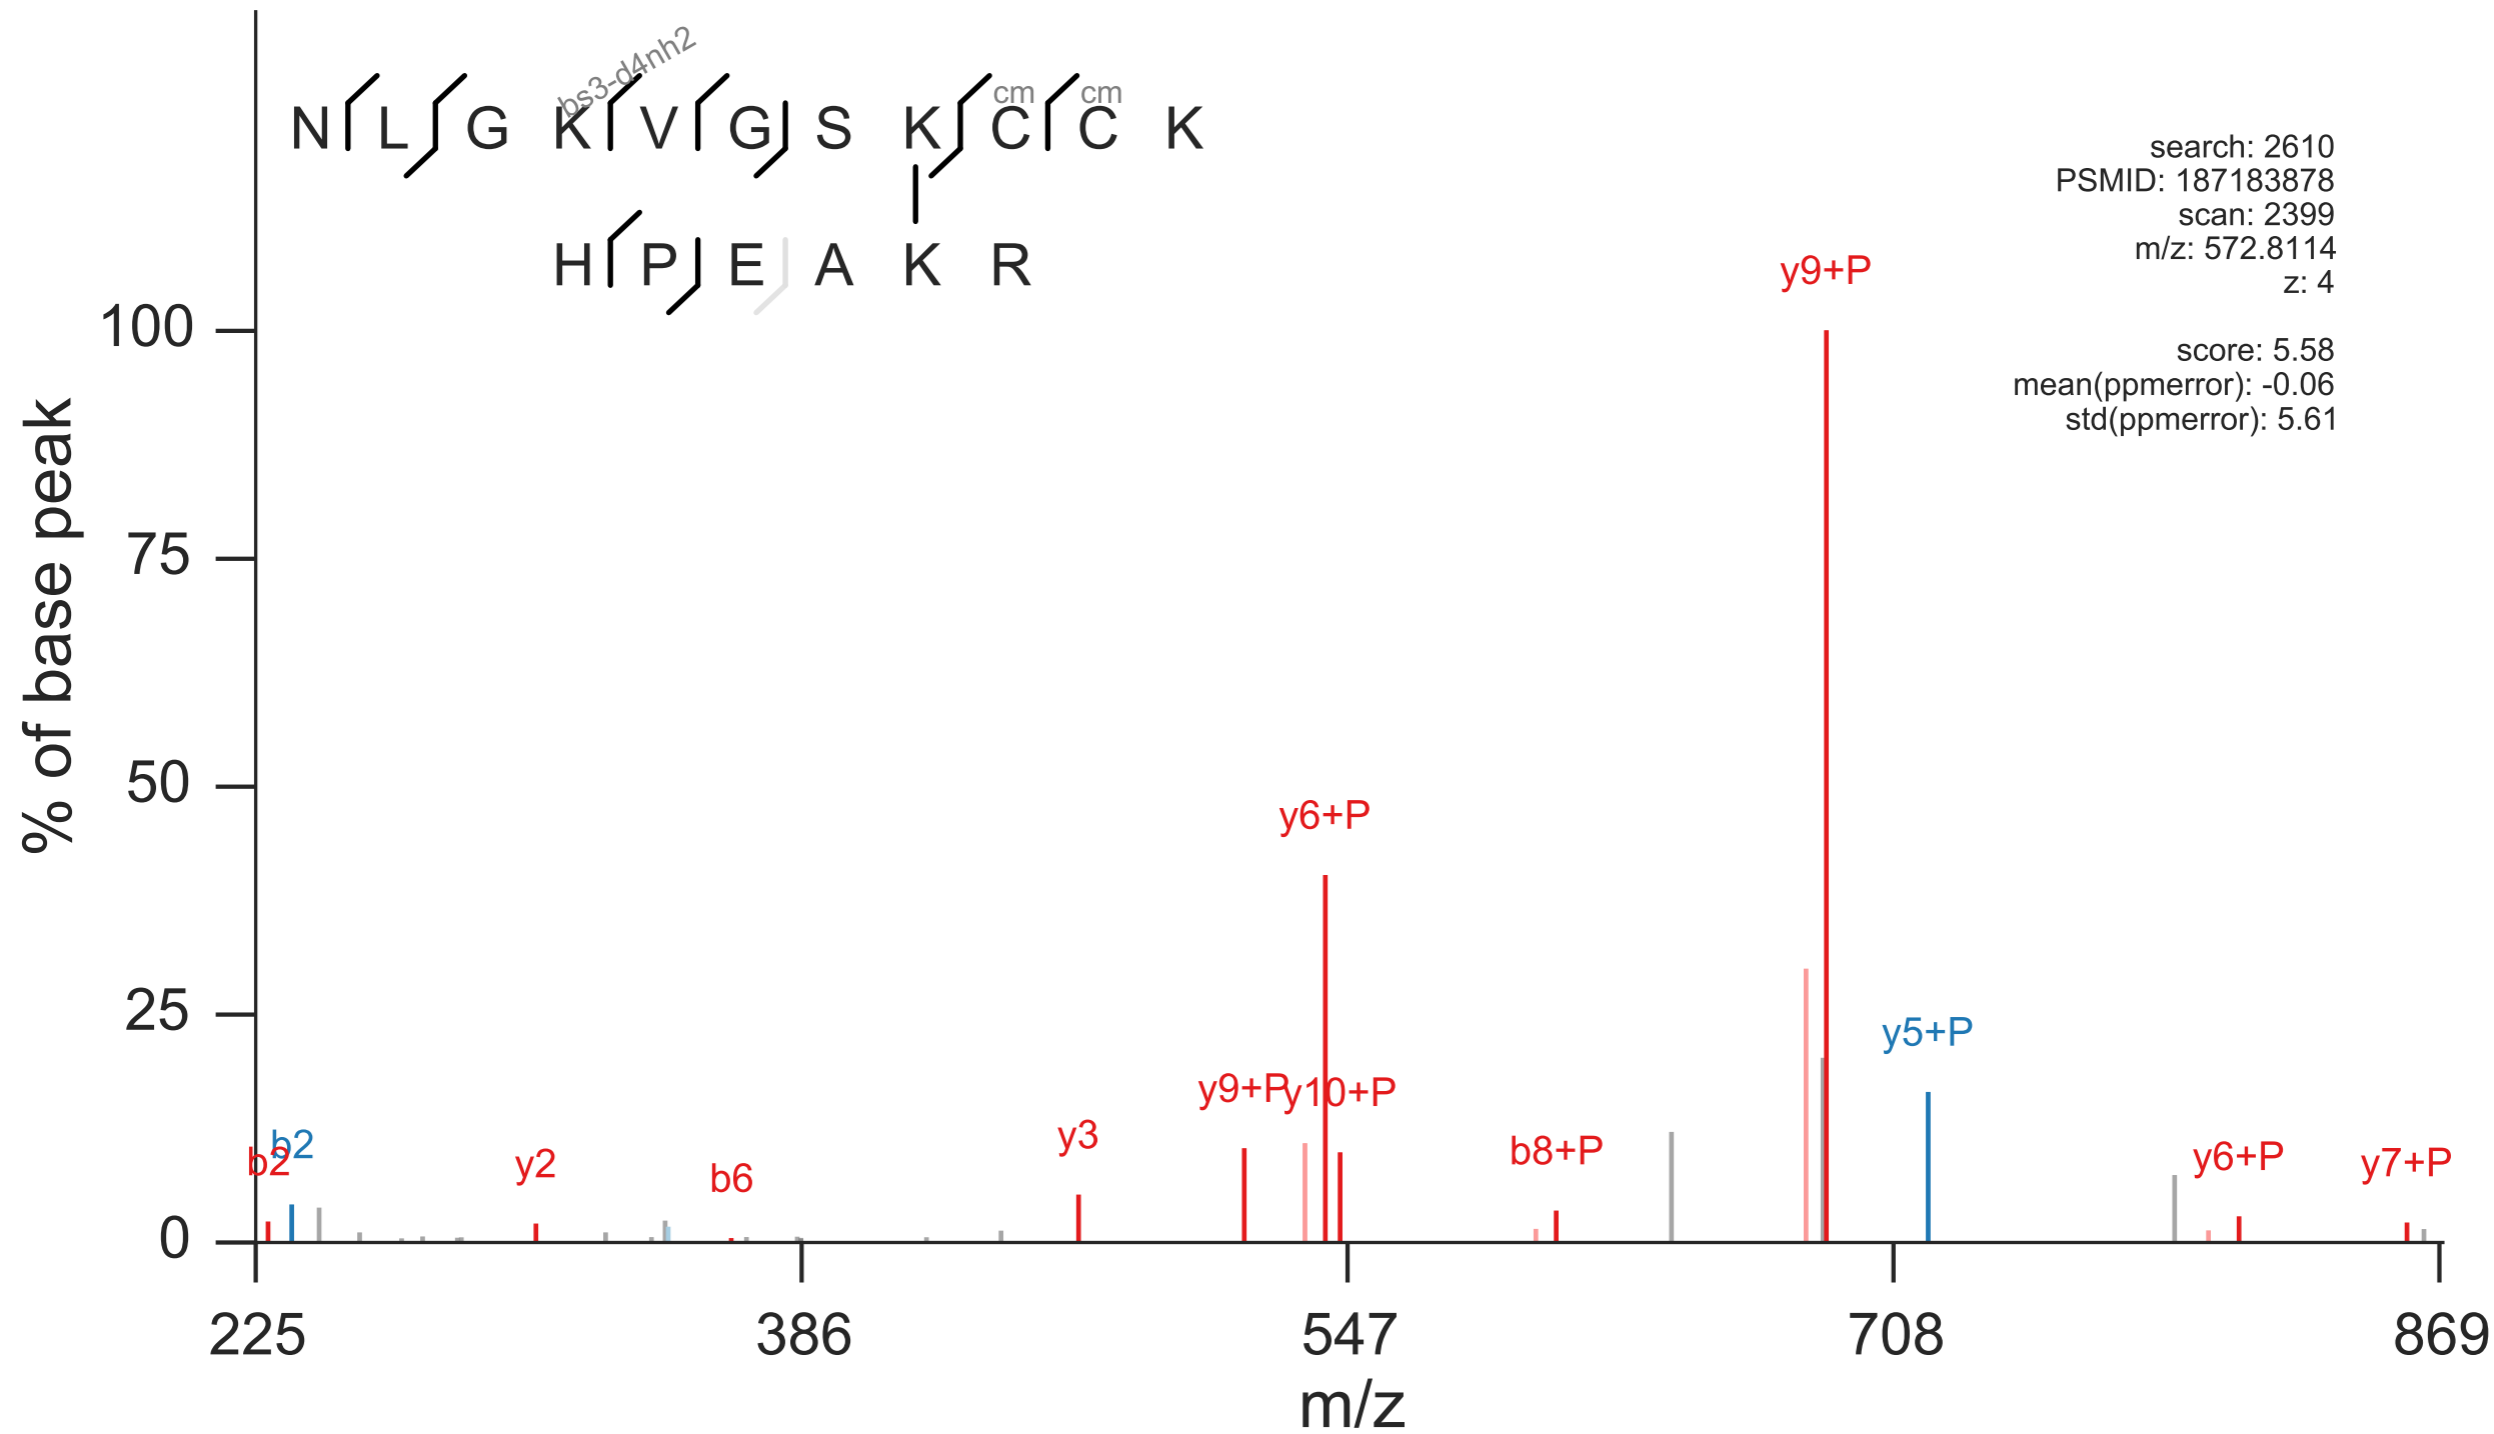

search: 2610  
 PSMID: 187183878  
 scan: 2399  
 m/z: 572.8114  
 z: 4

score: 5.58  
 mean(ppmerror): -0.06  
 std(ppmerror): 5.61

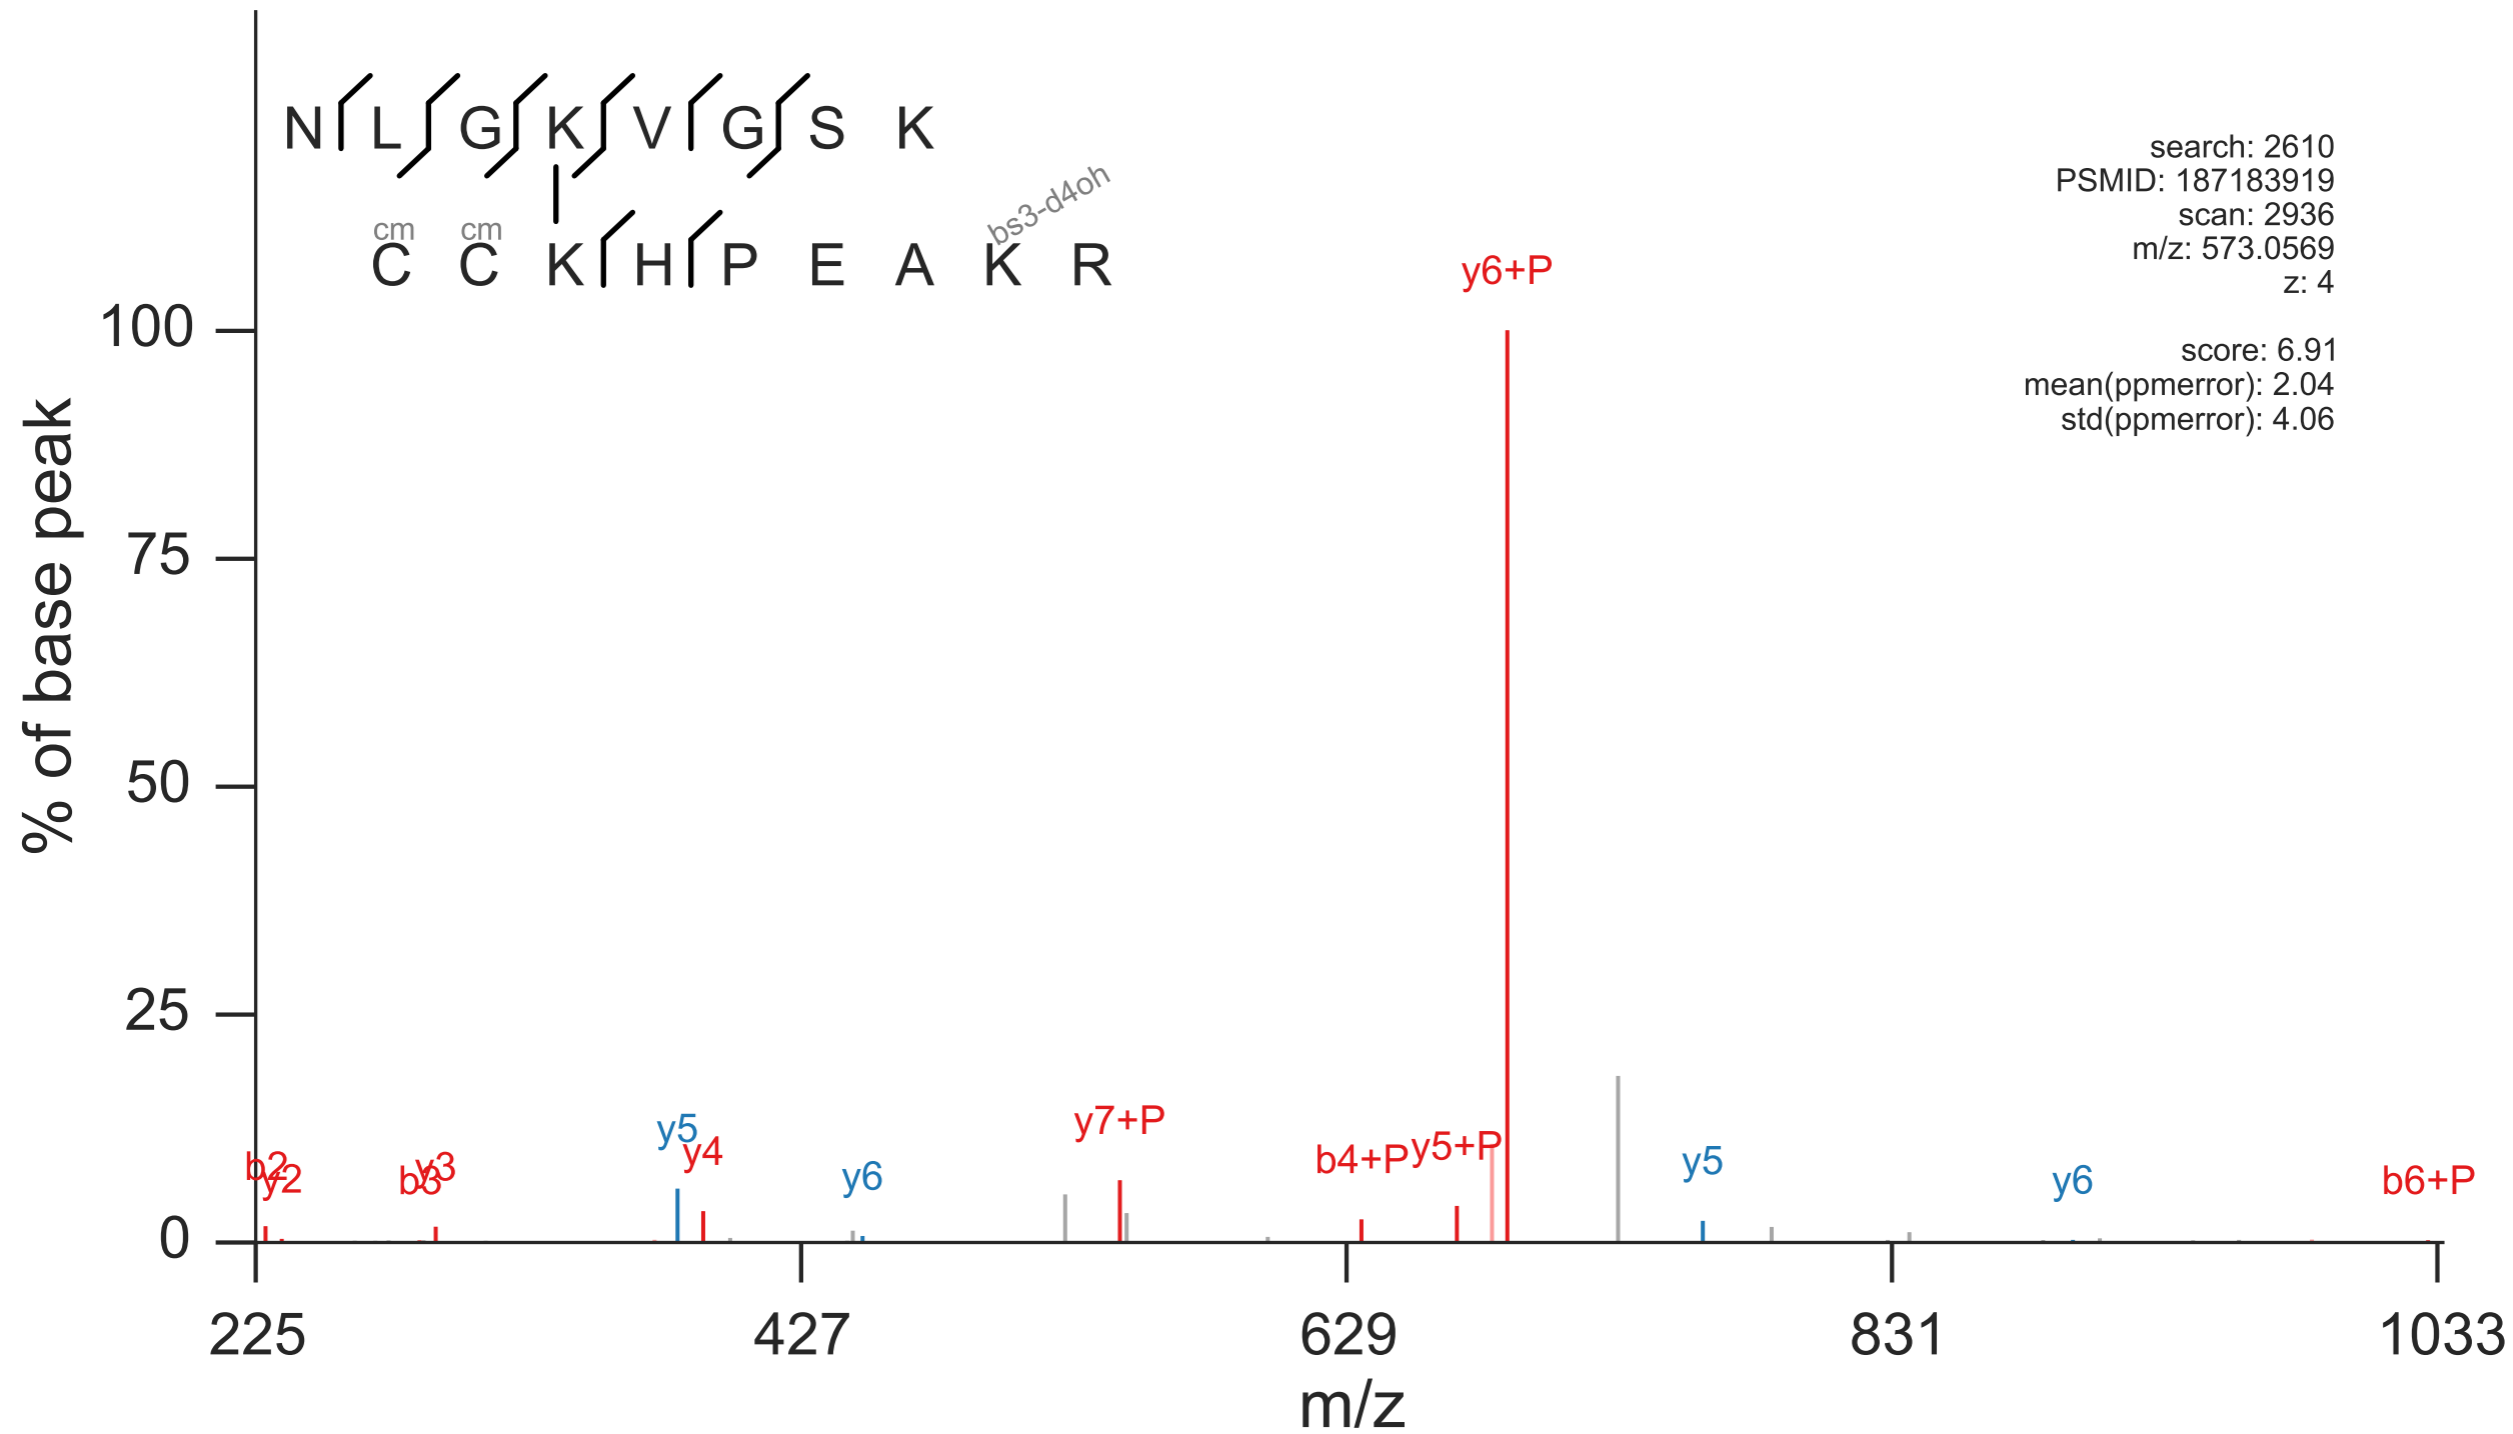

search: 2610  
 PSMID: 187183919  
 scan: 2936  
 m/z: 573.0569  
 z: 4  
 score: 6.91  
 mean(ppmerror): 2.04  
 std(ppmerror): 4.06

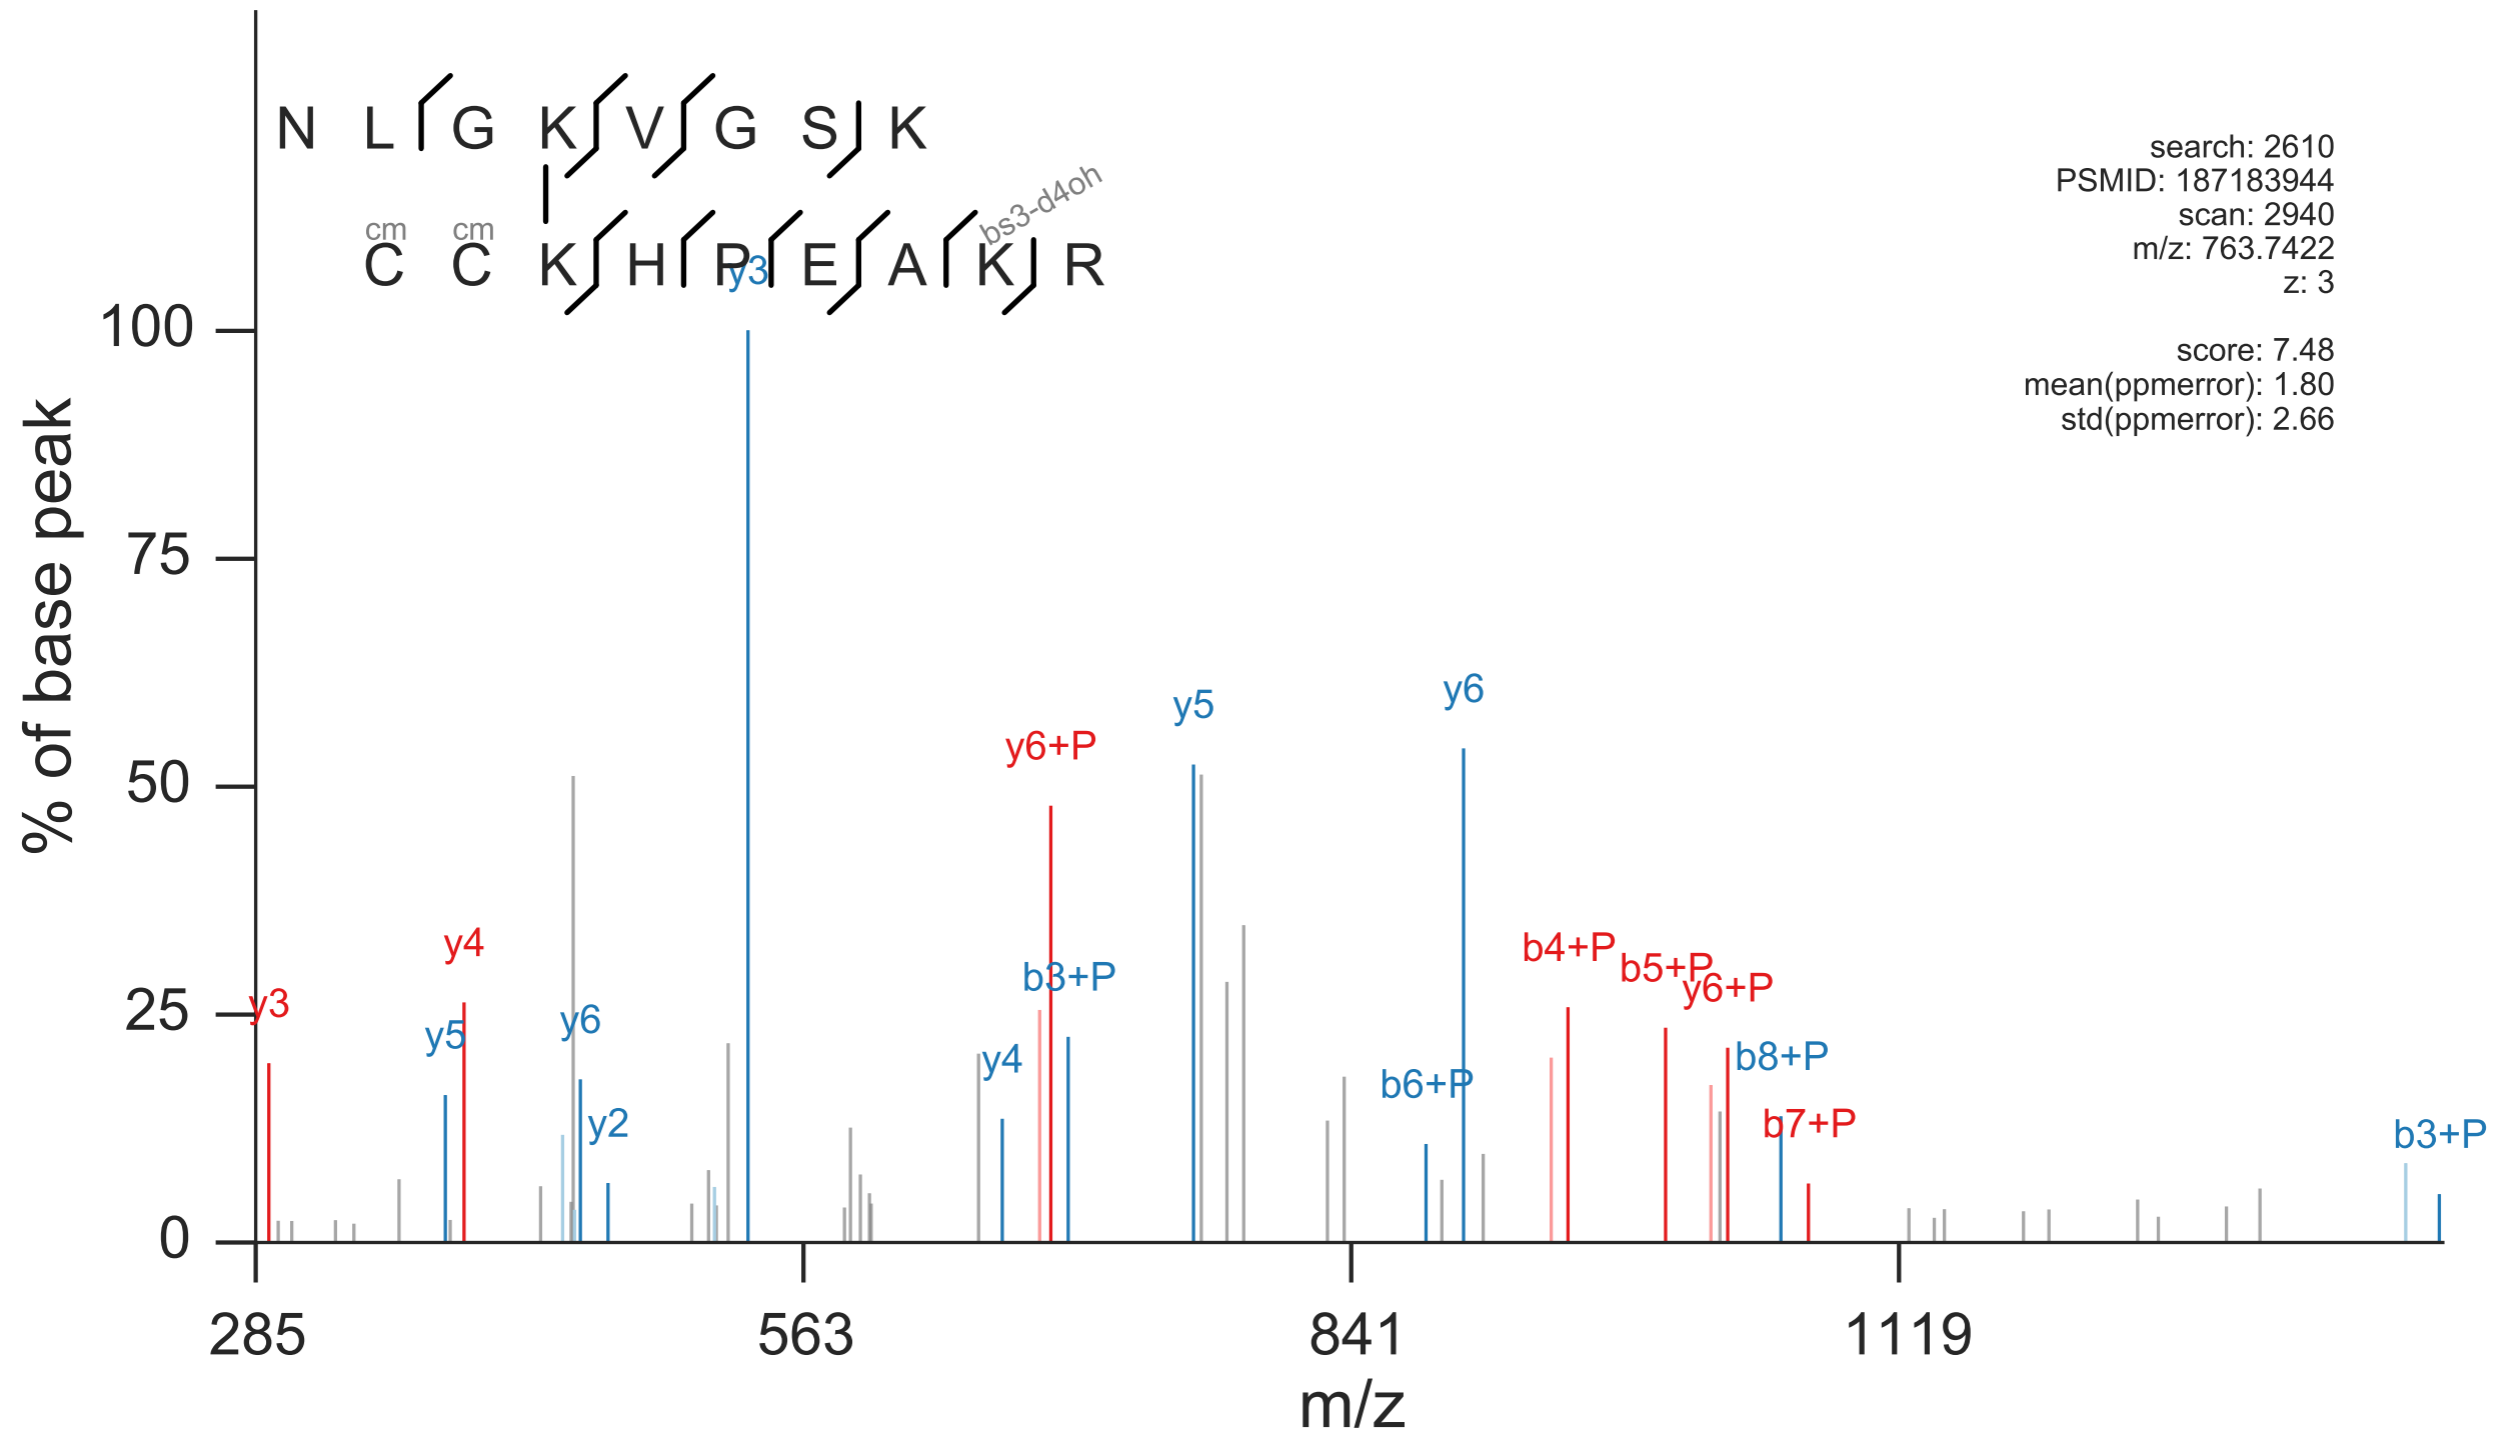

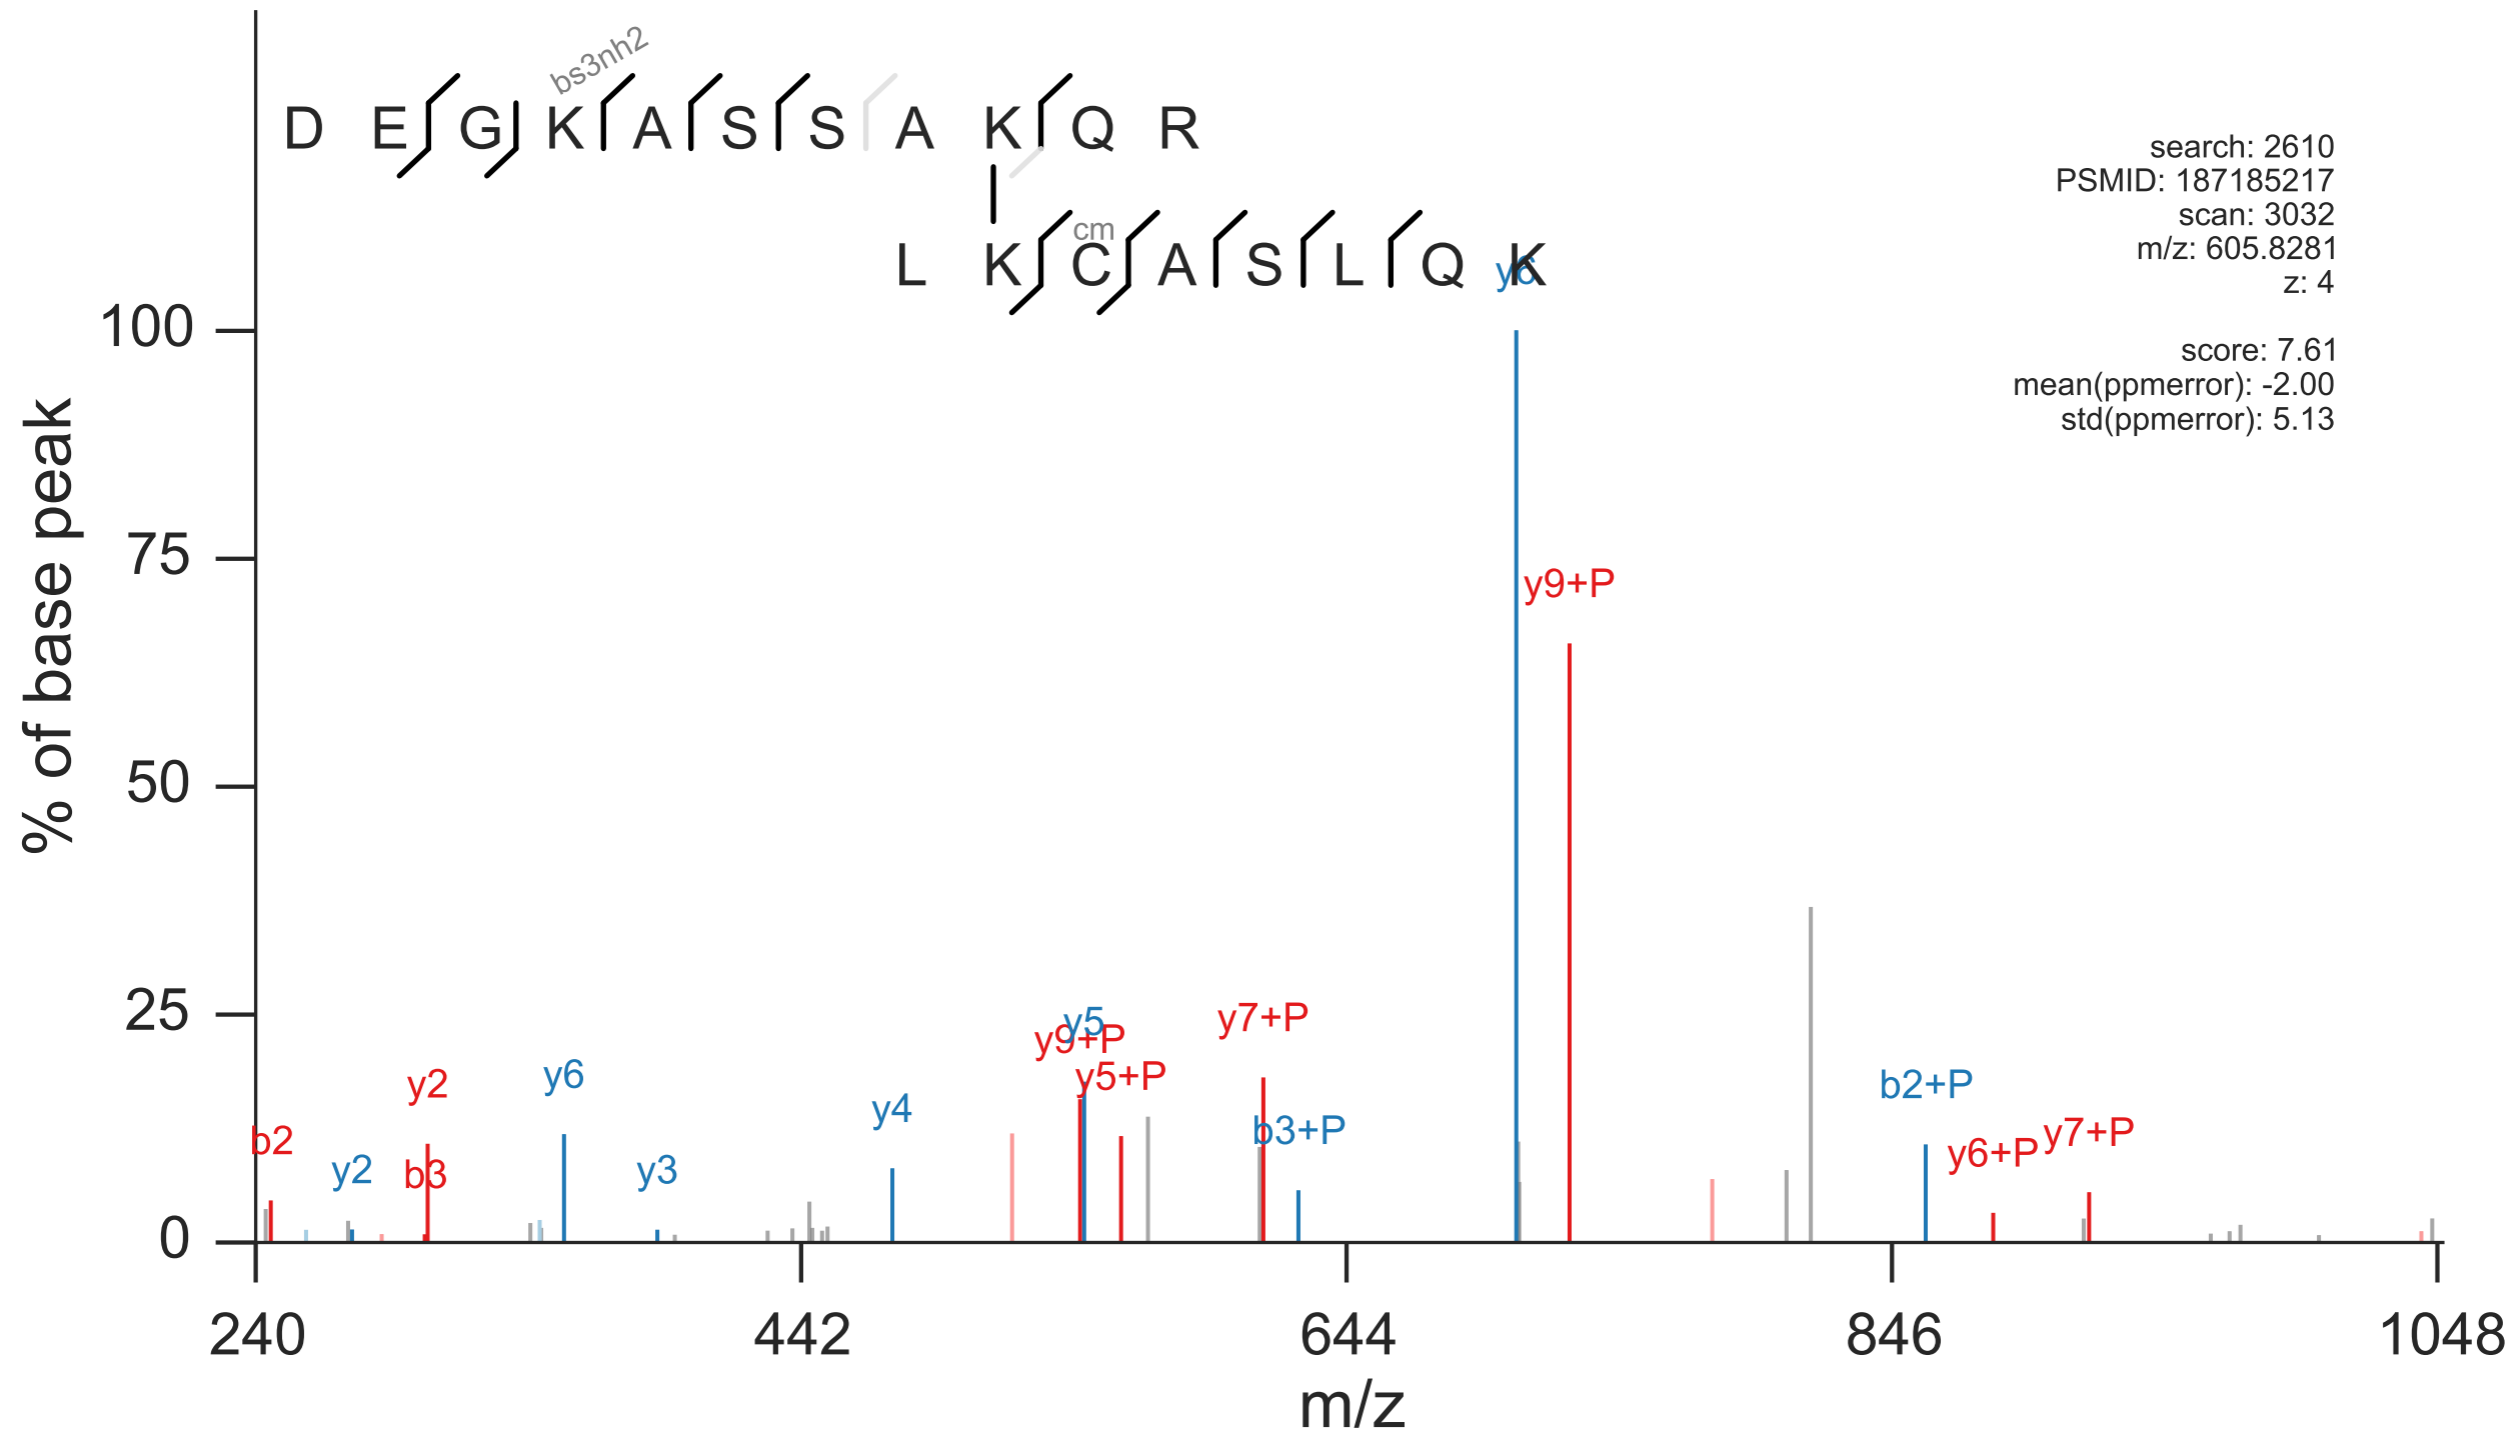

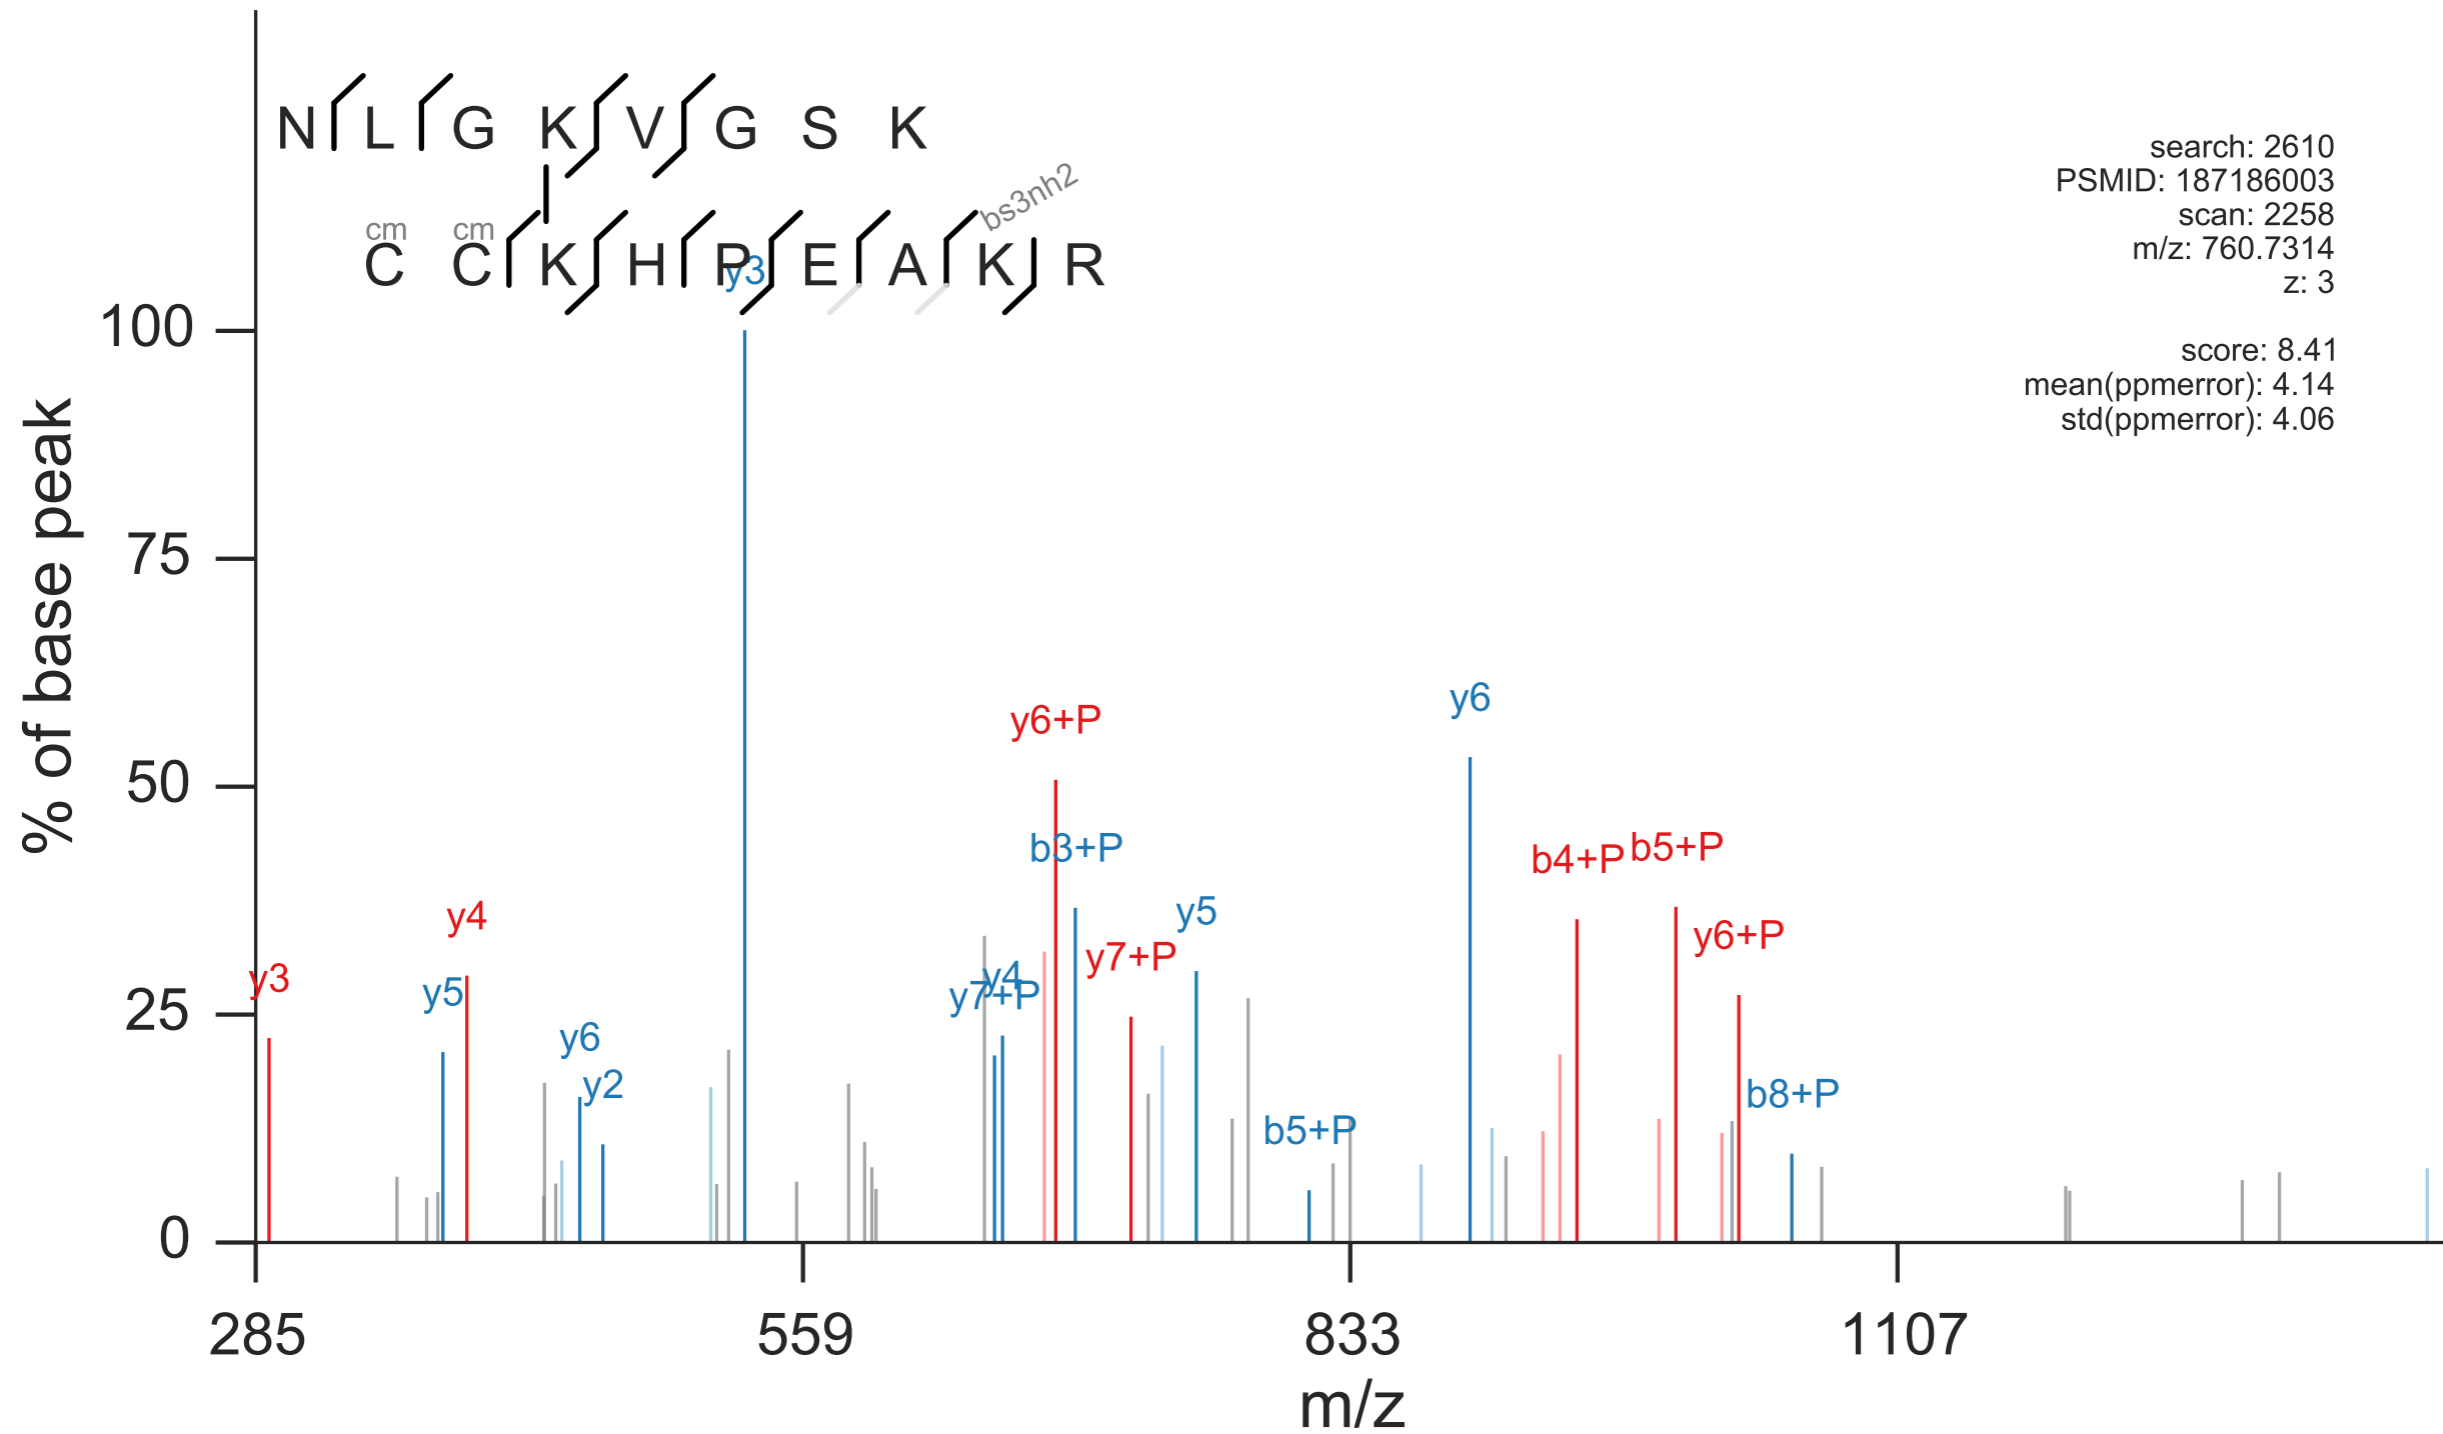

search: 2610  
 PSMID: 187186003  
 scan: 2258  
 m/z: 760.7314  
 z: 3

score: 8.41  
 mean(ppmerror): 4.14  
 std(ppmerror): 4.06

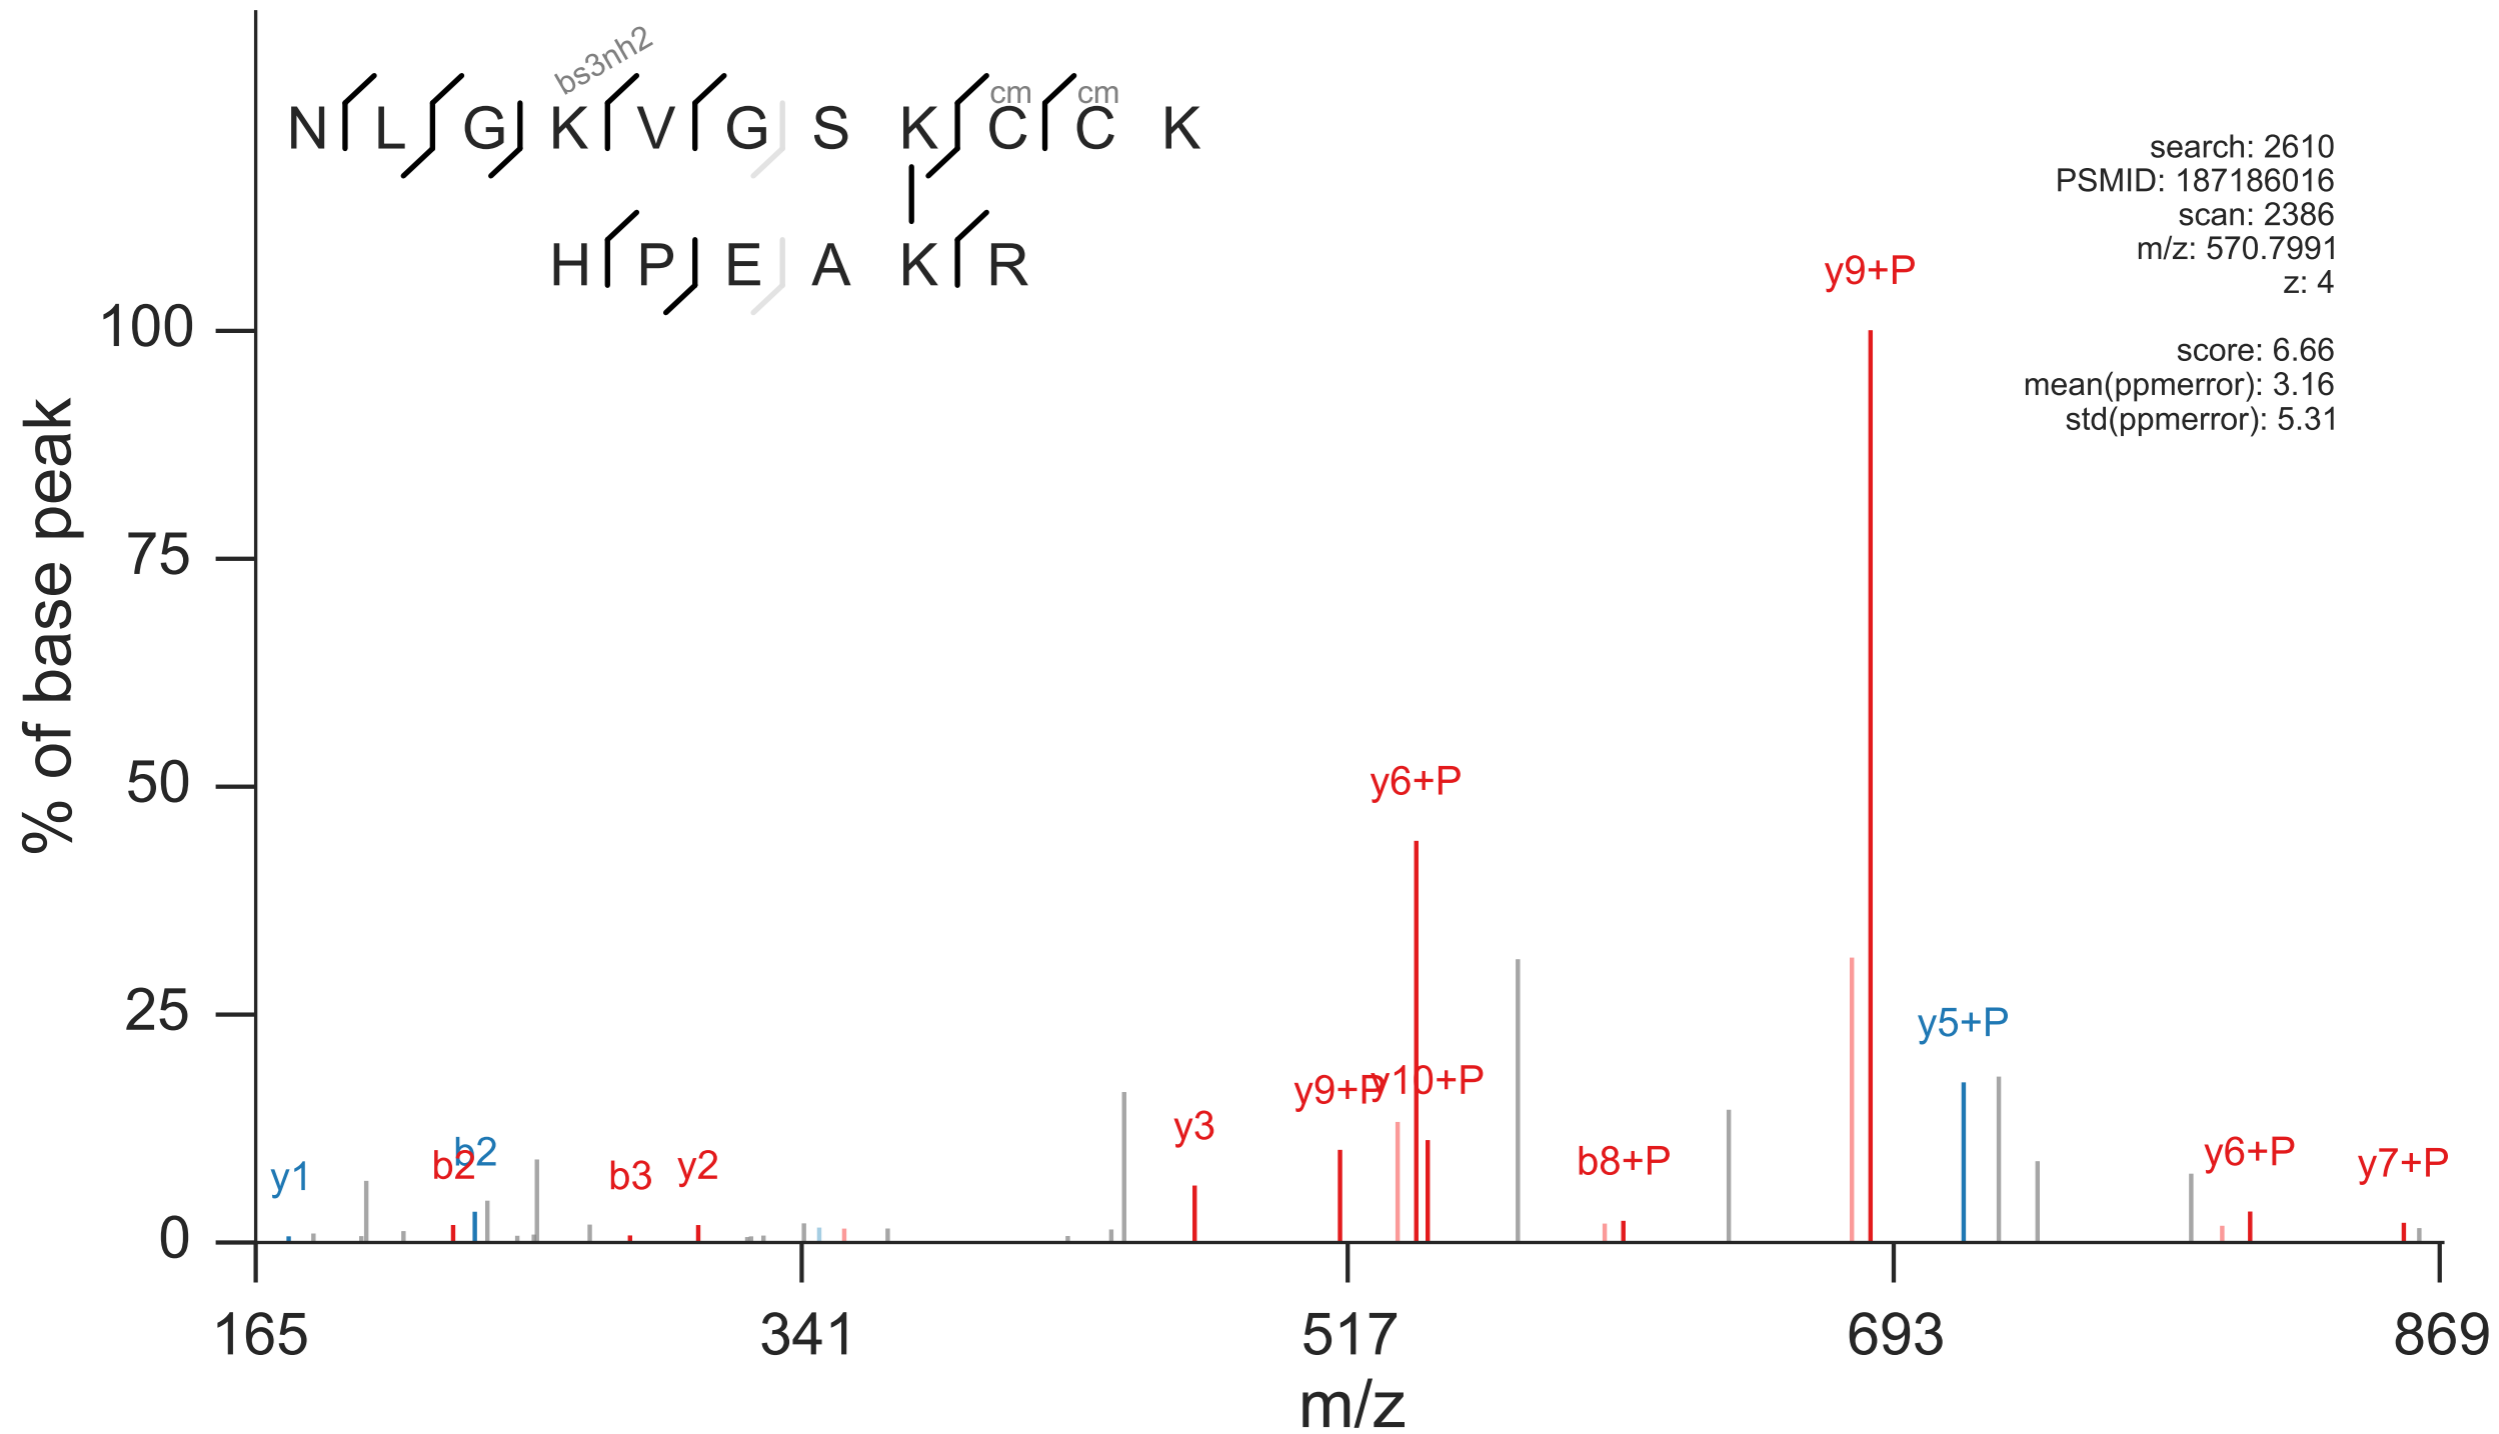

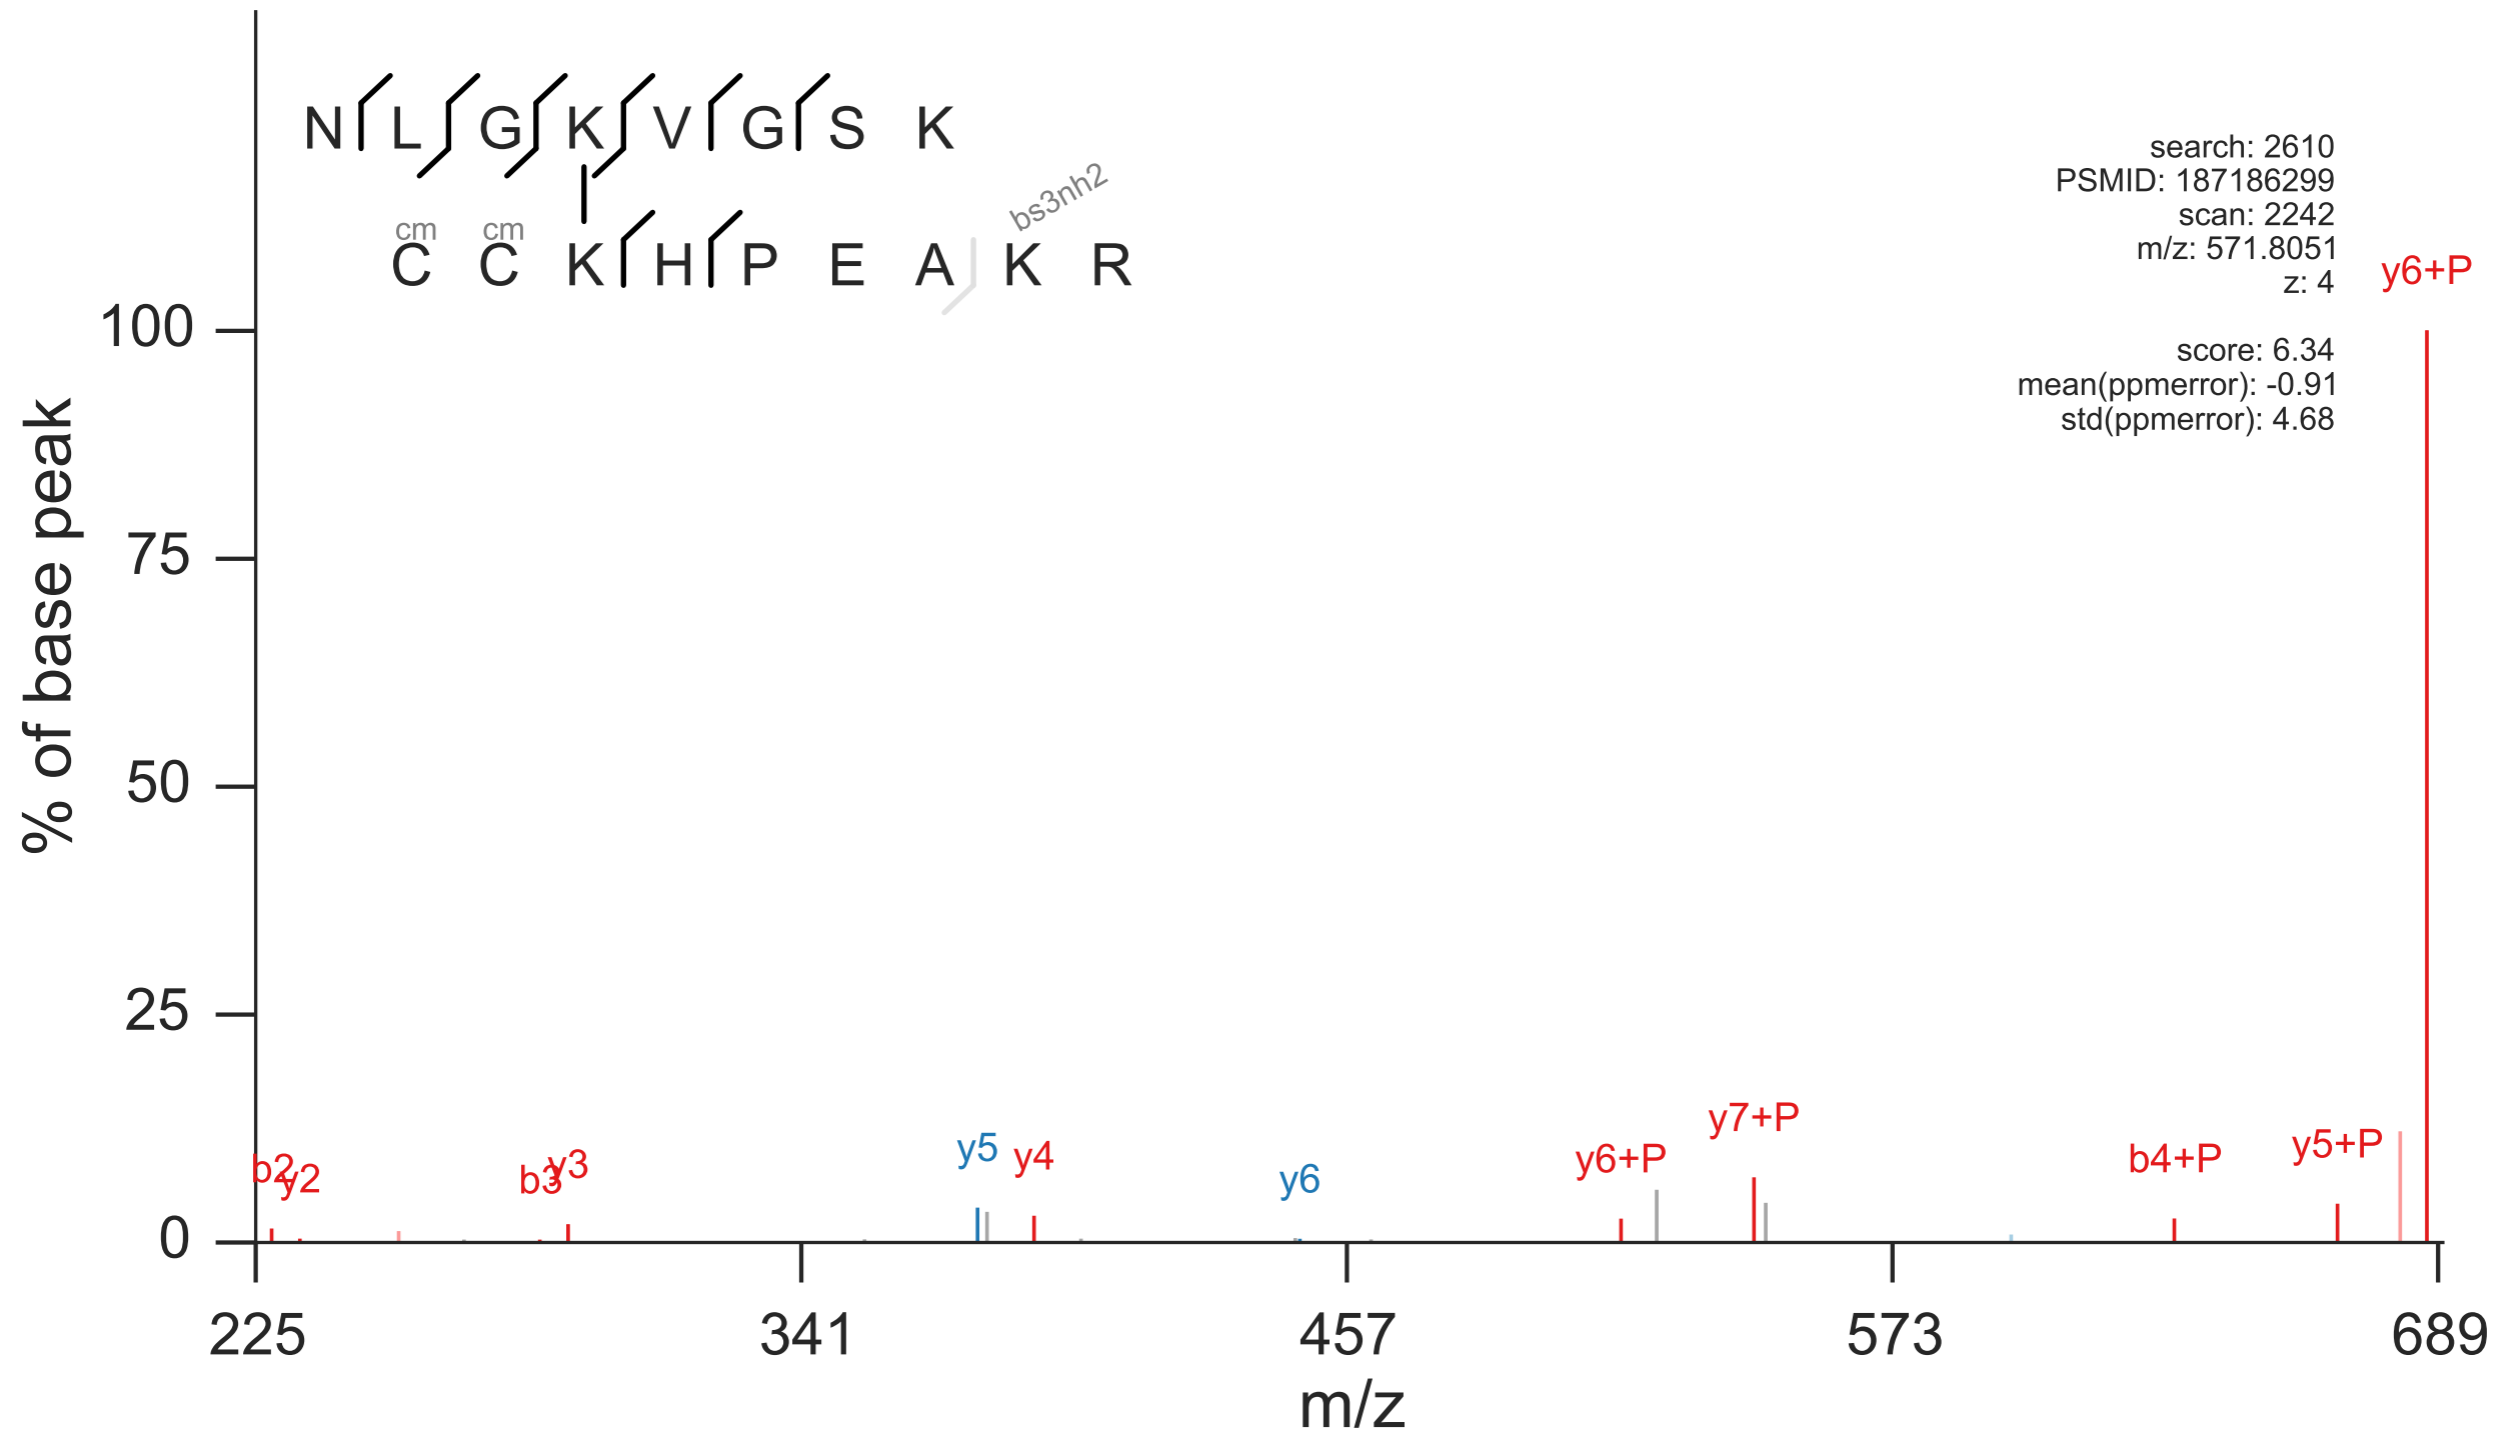



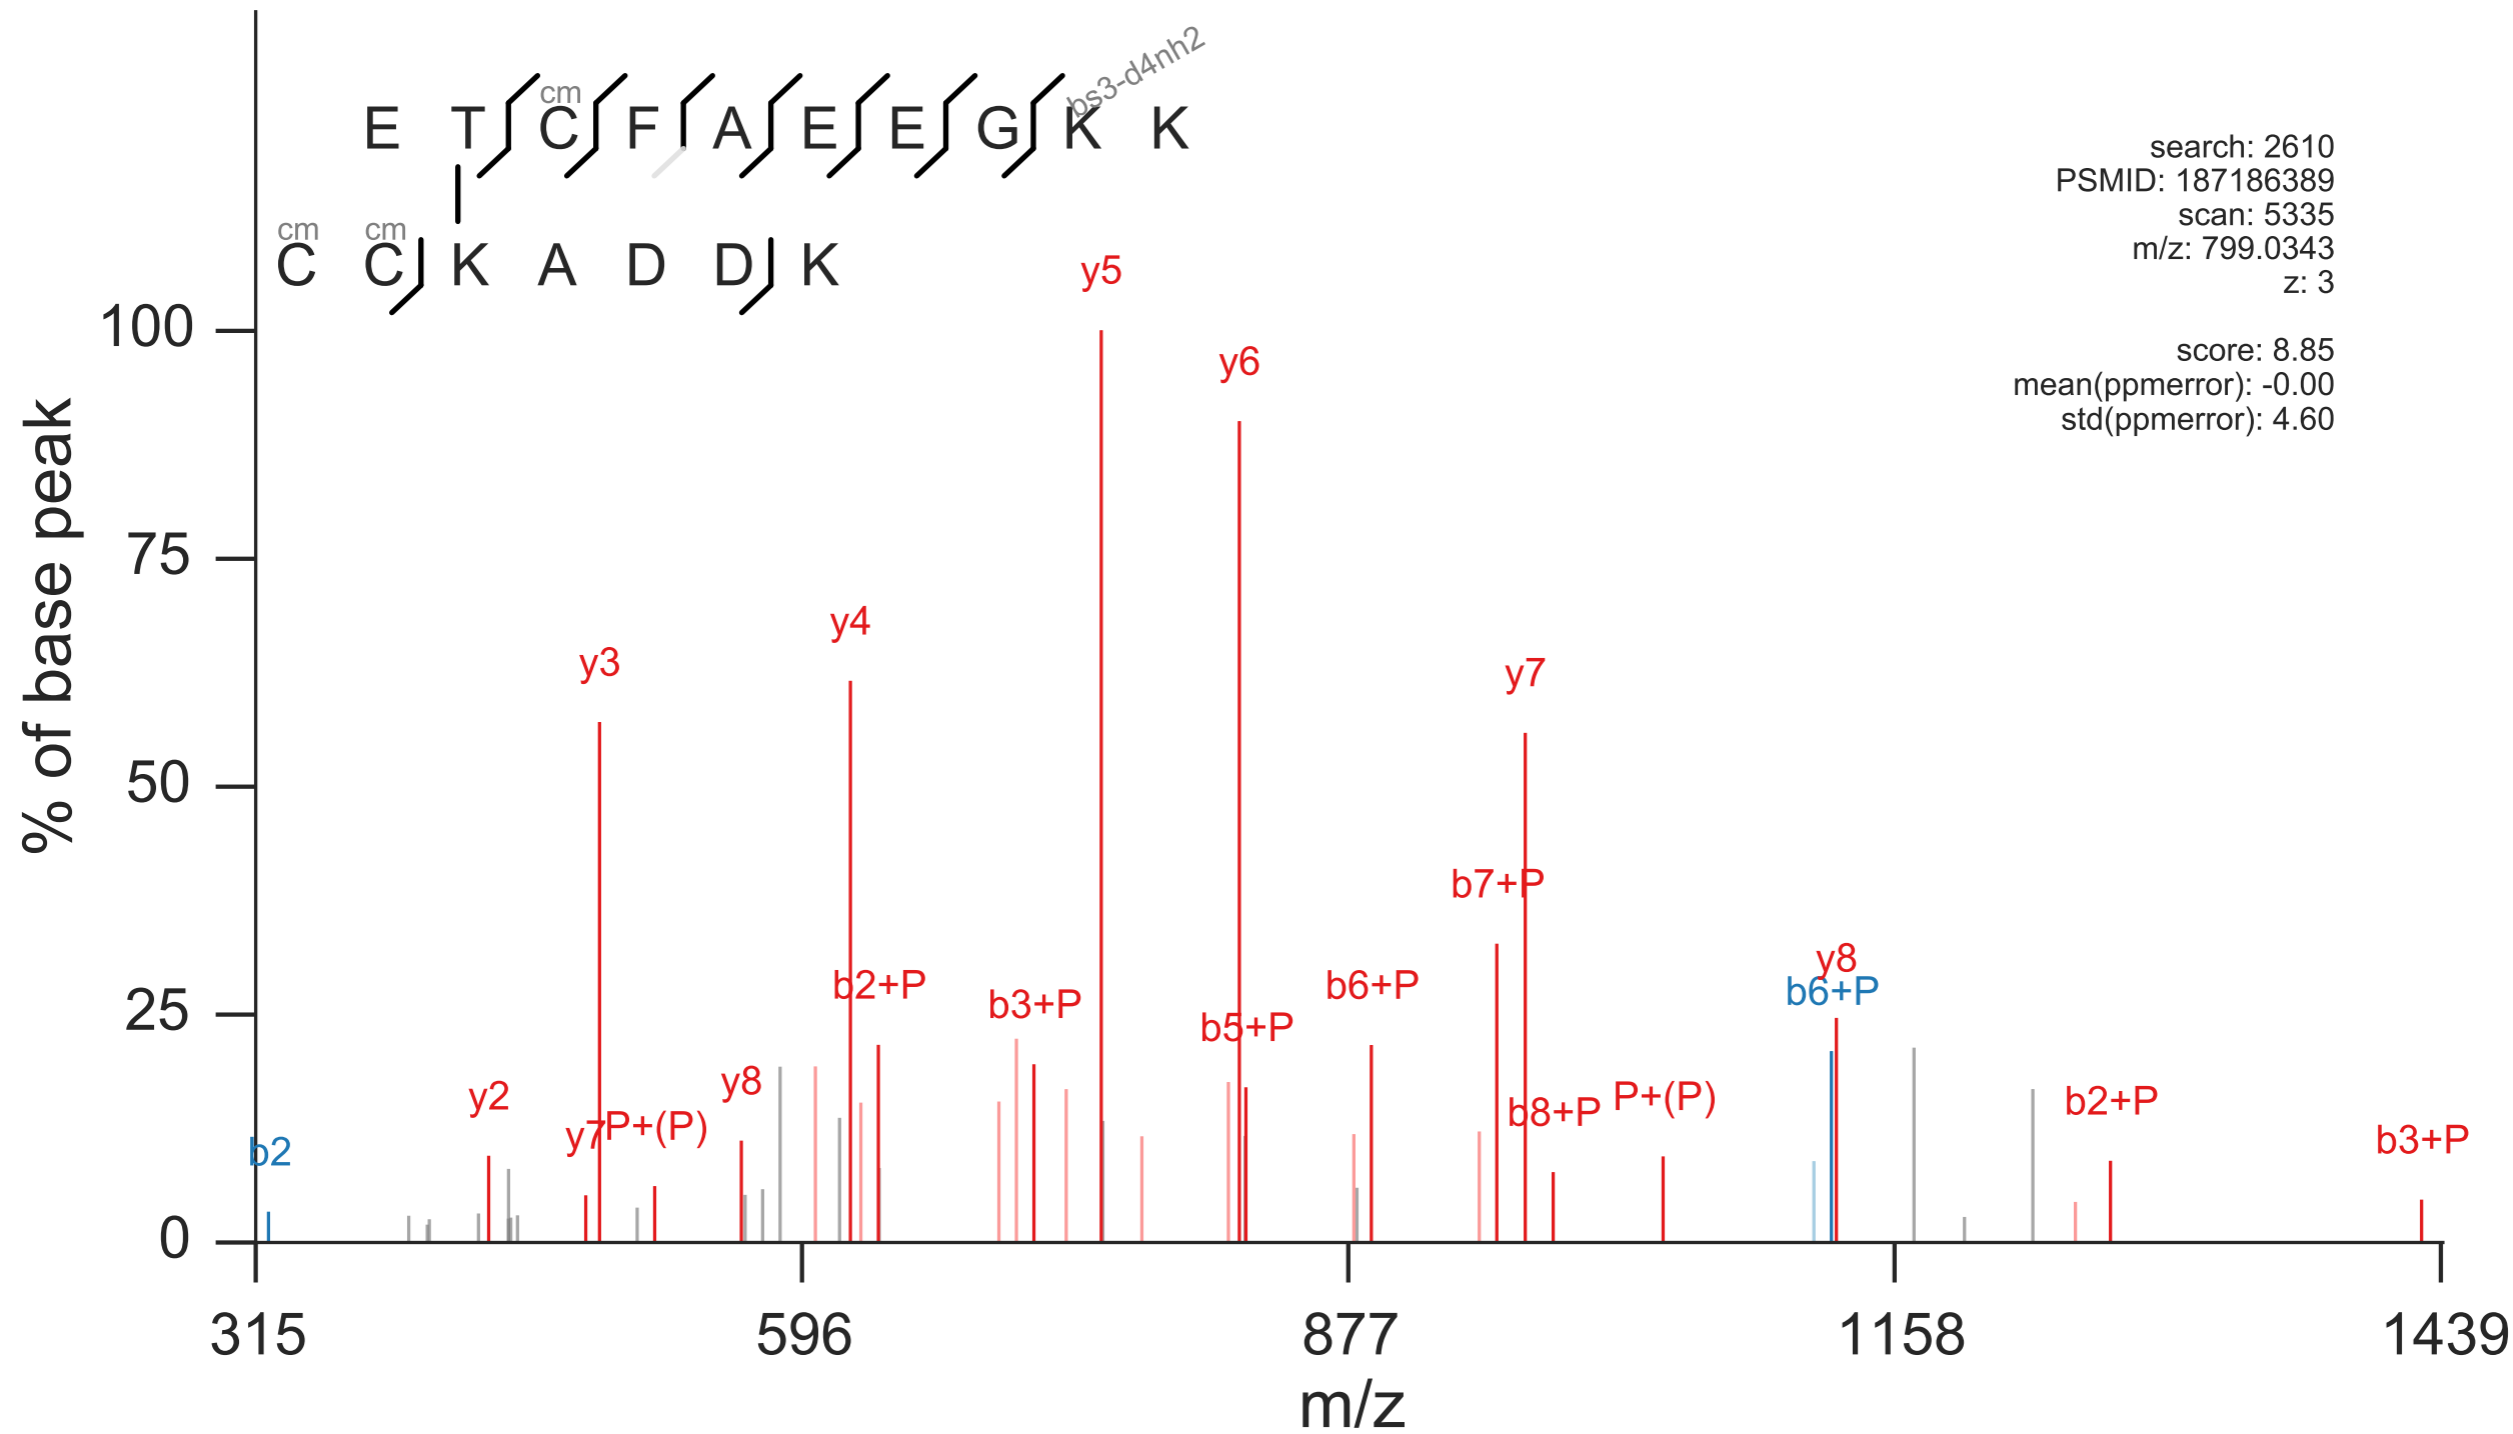

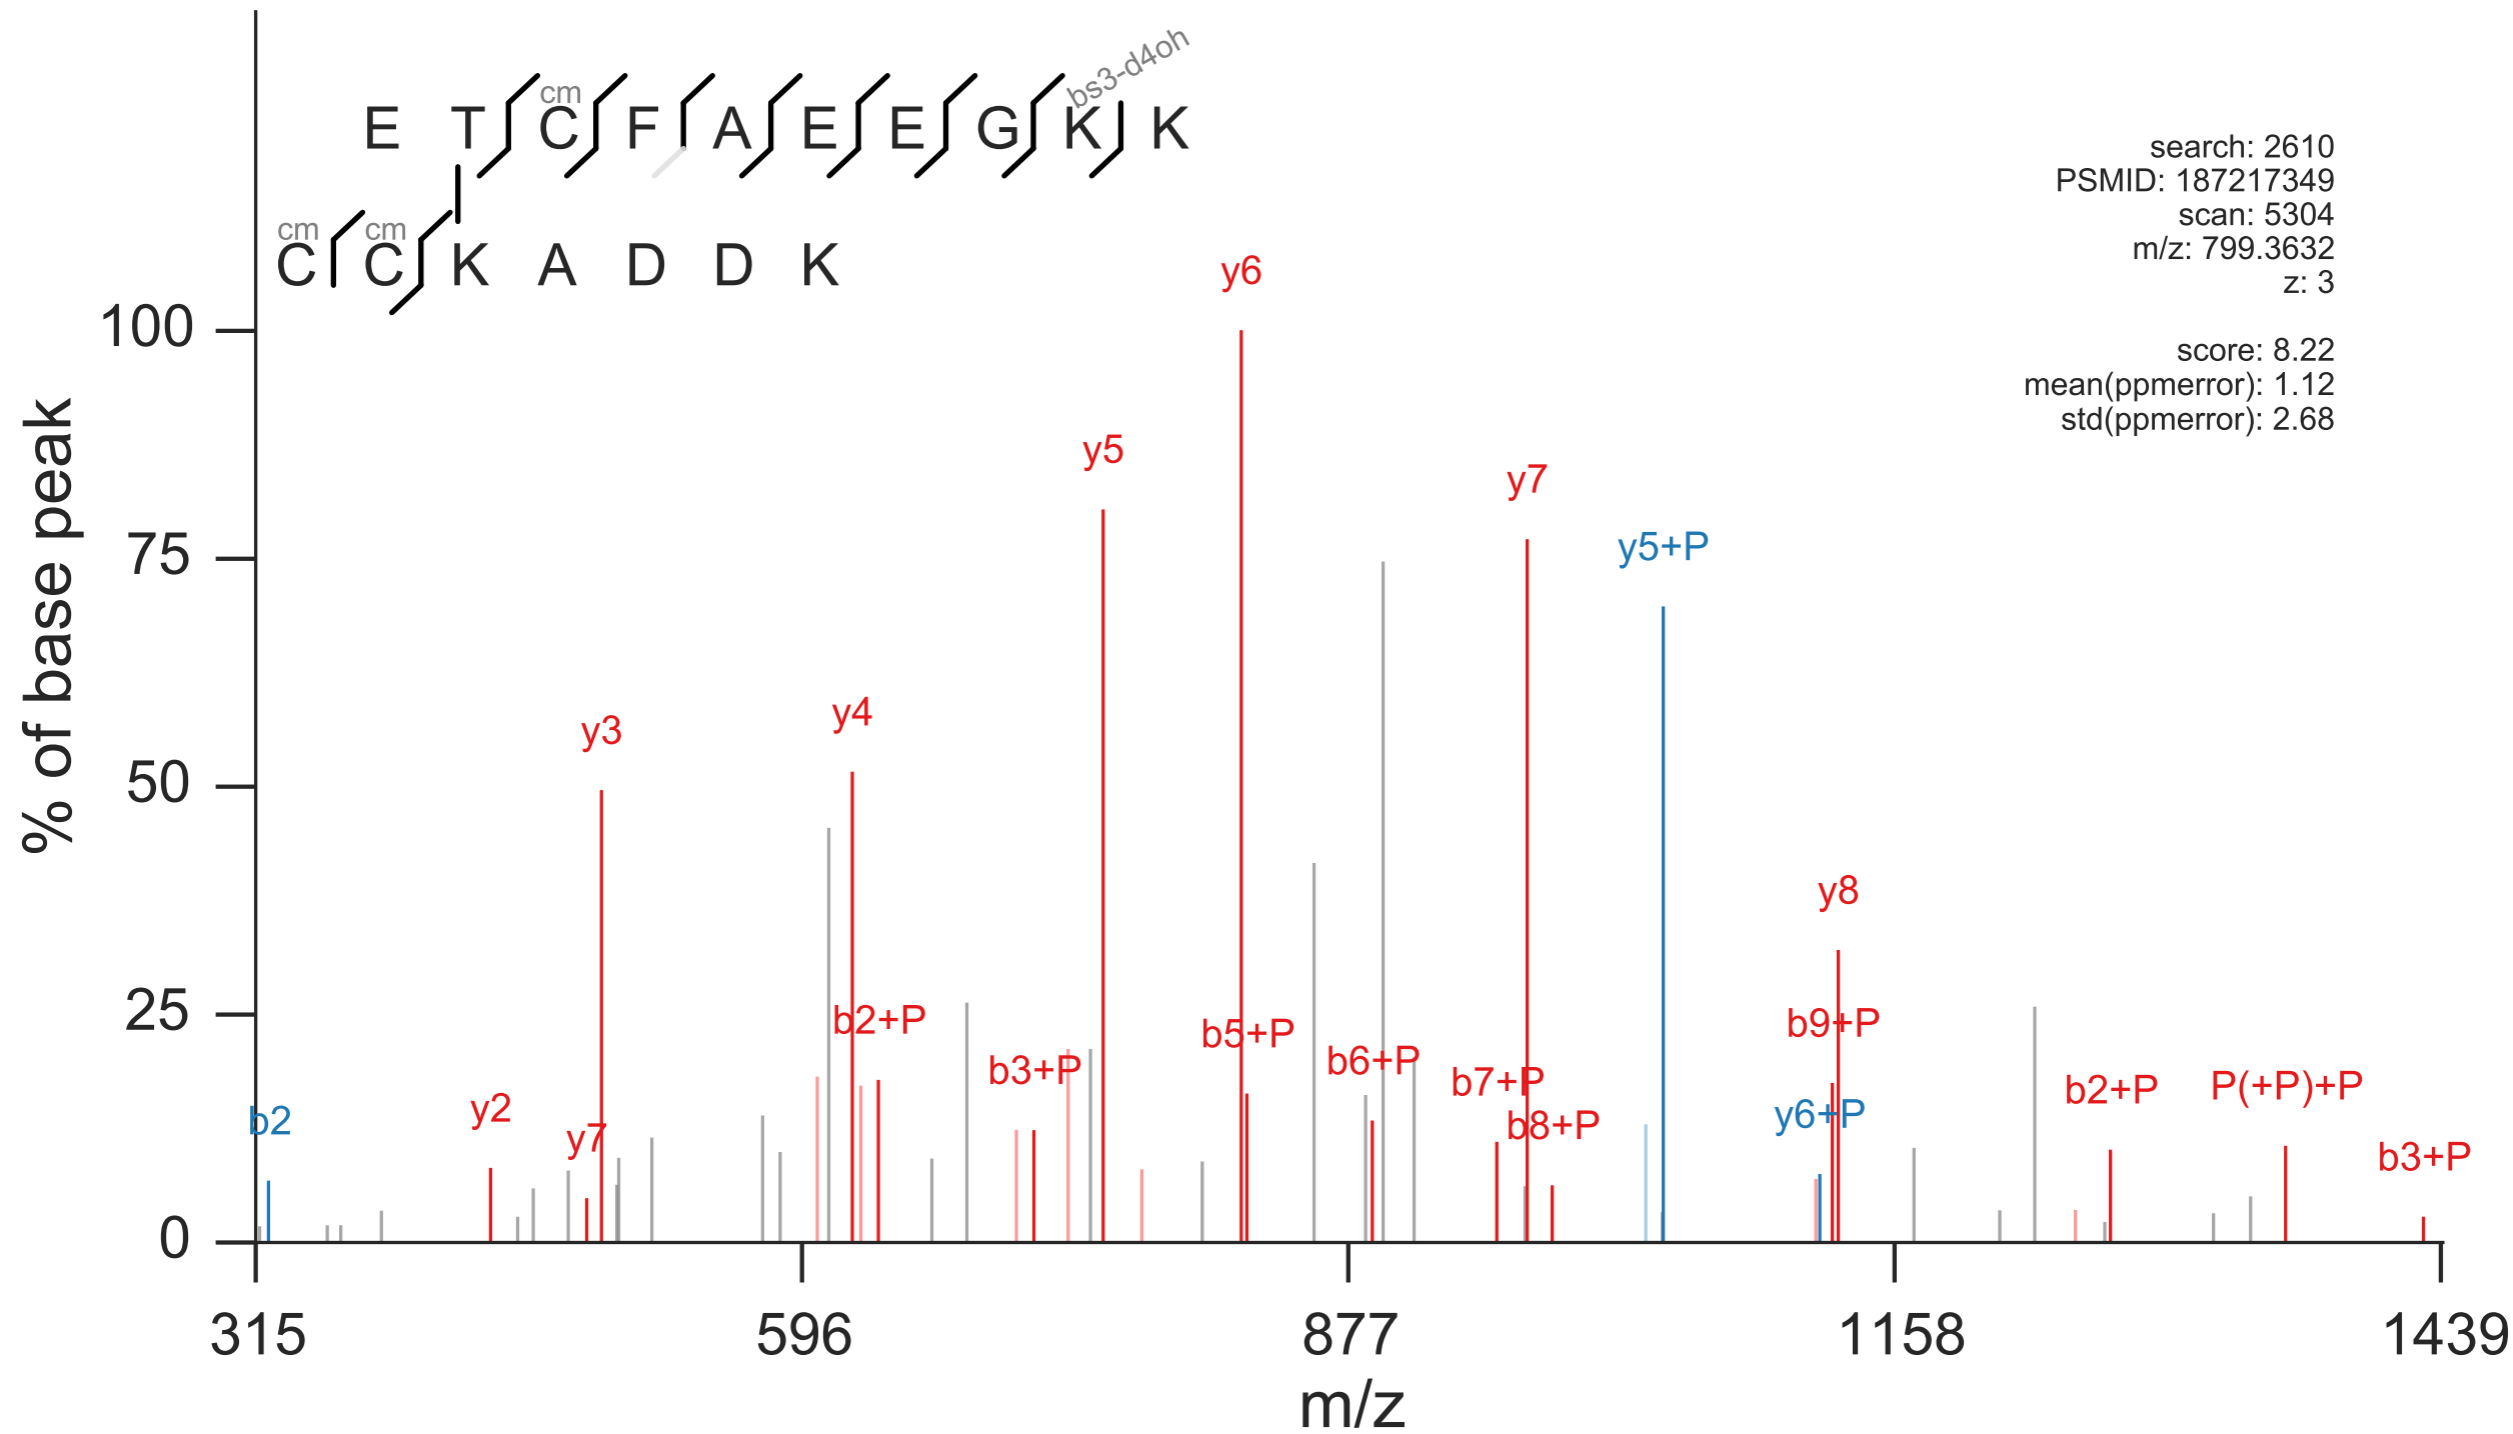

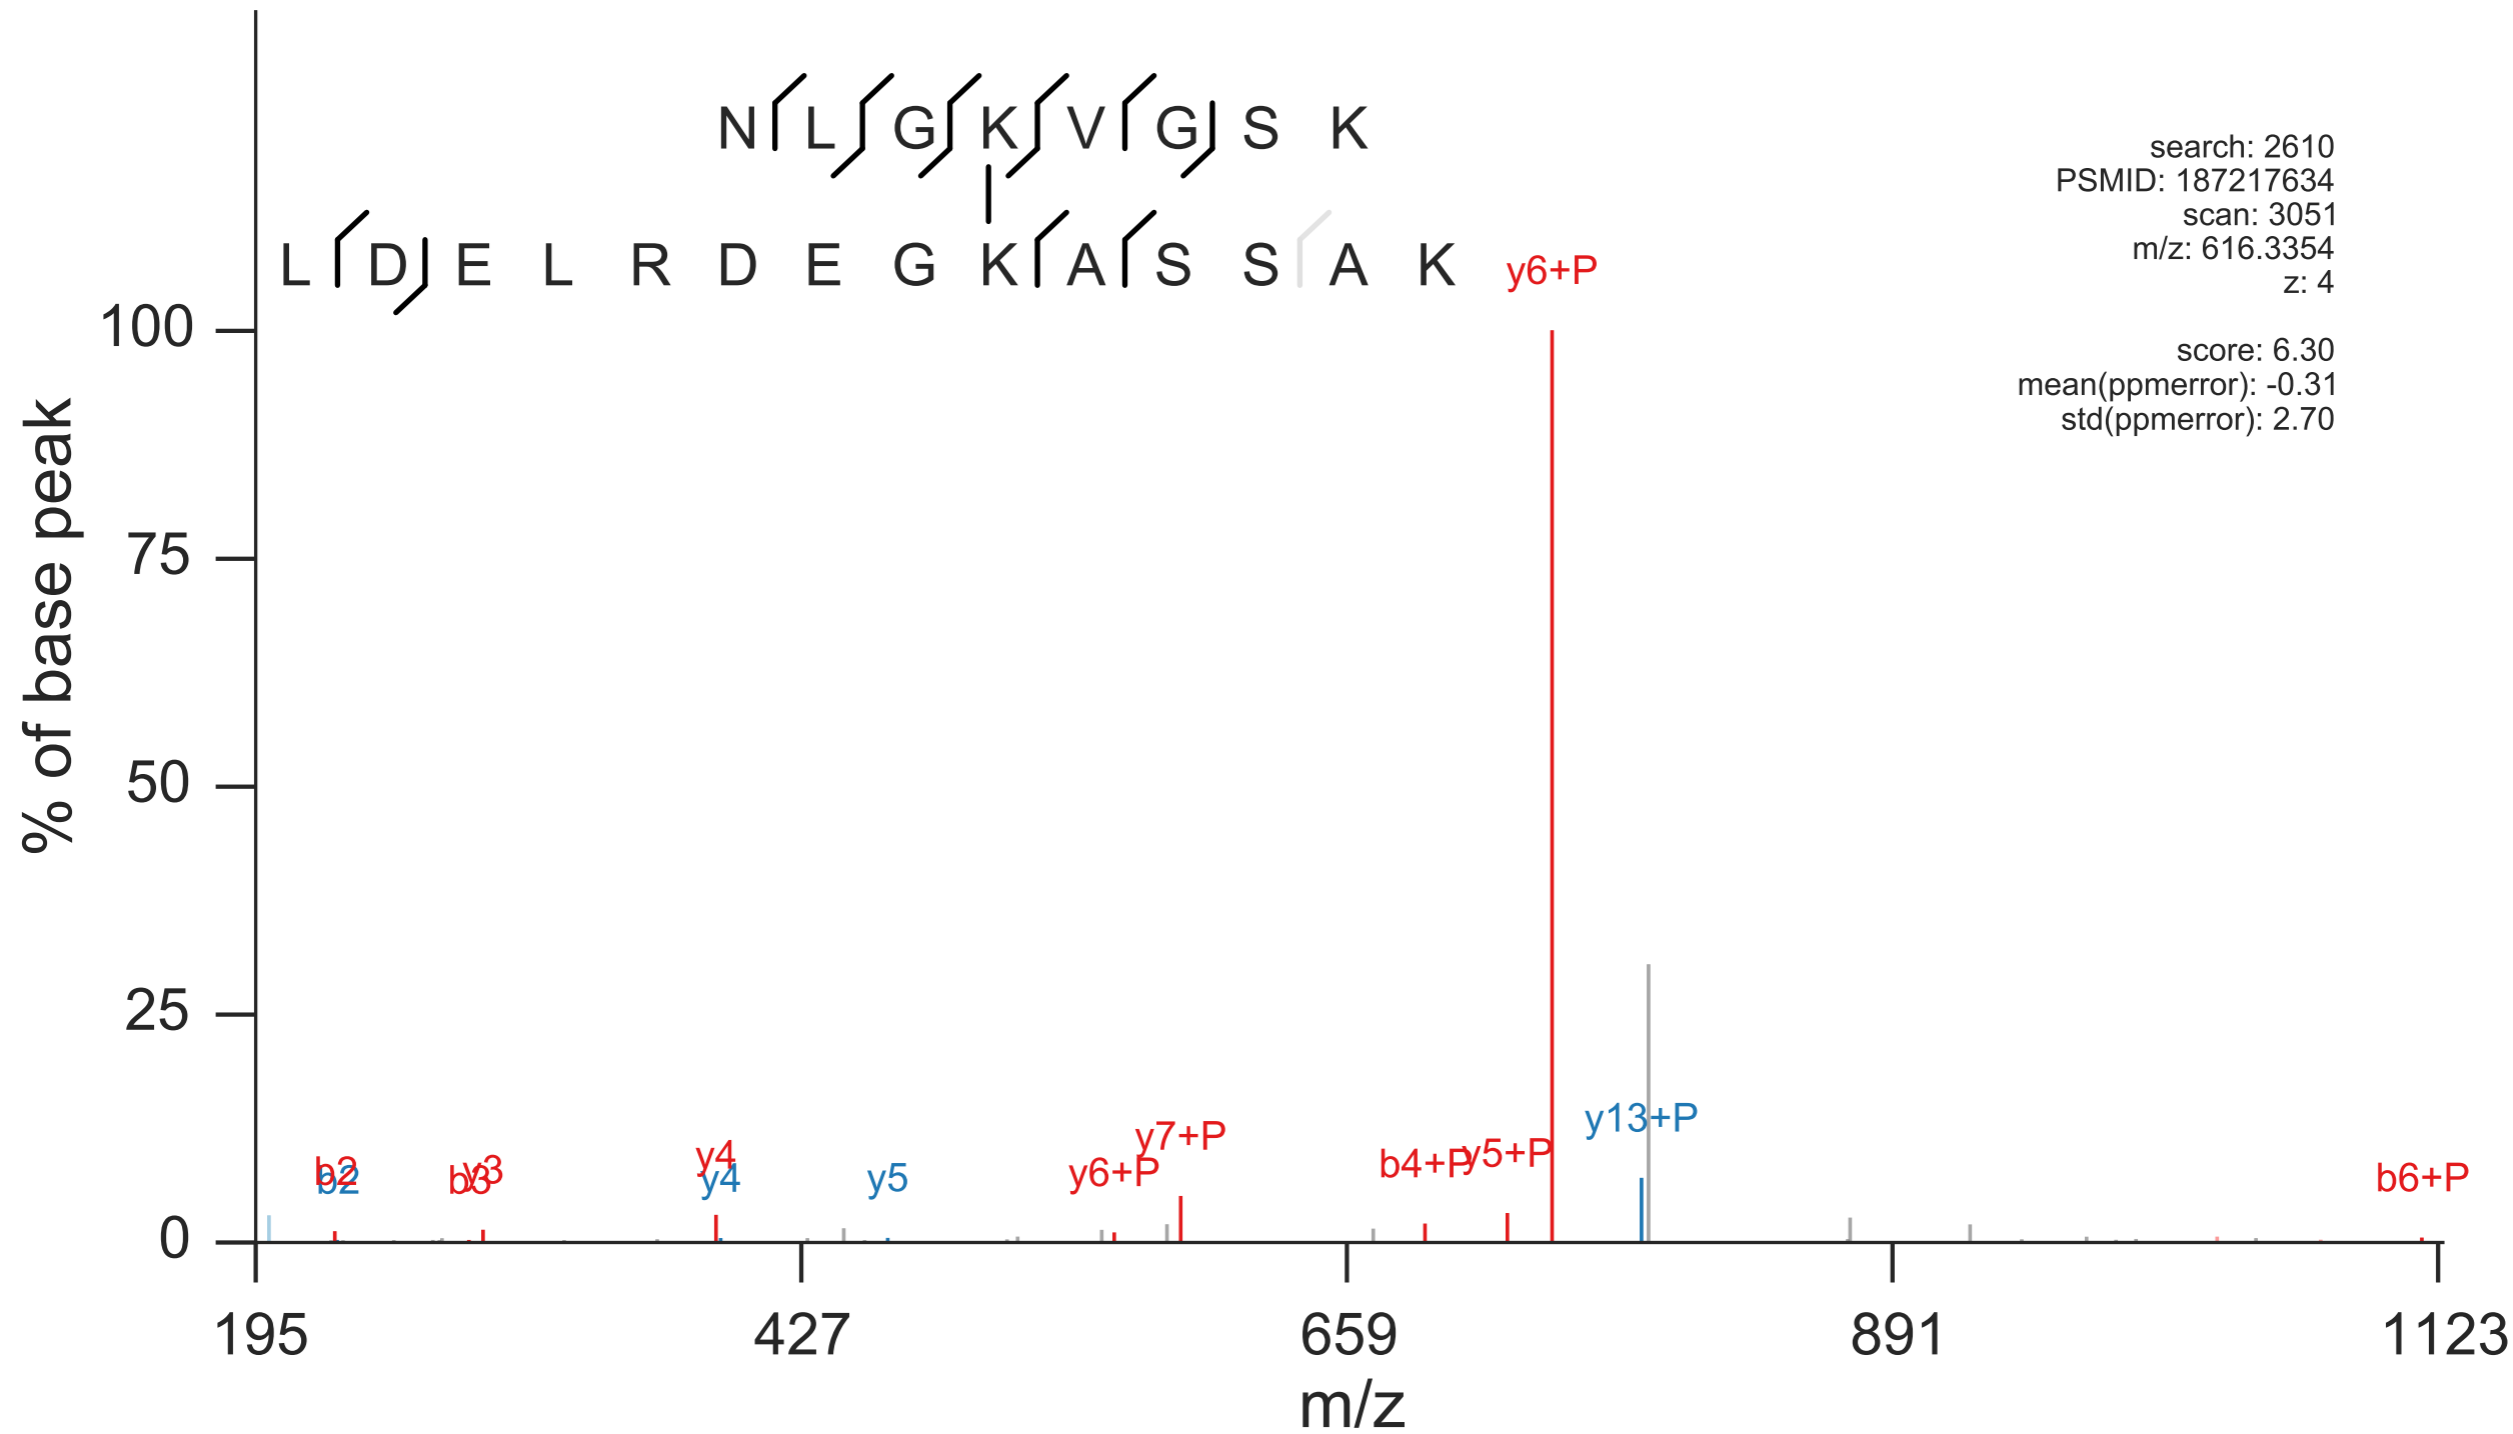

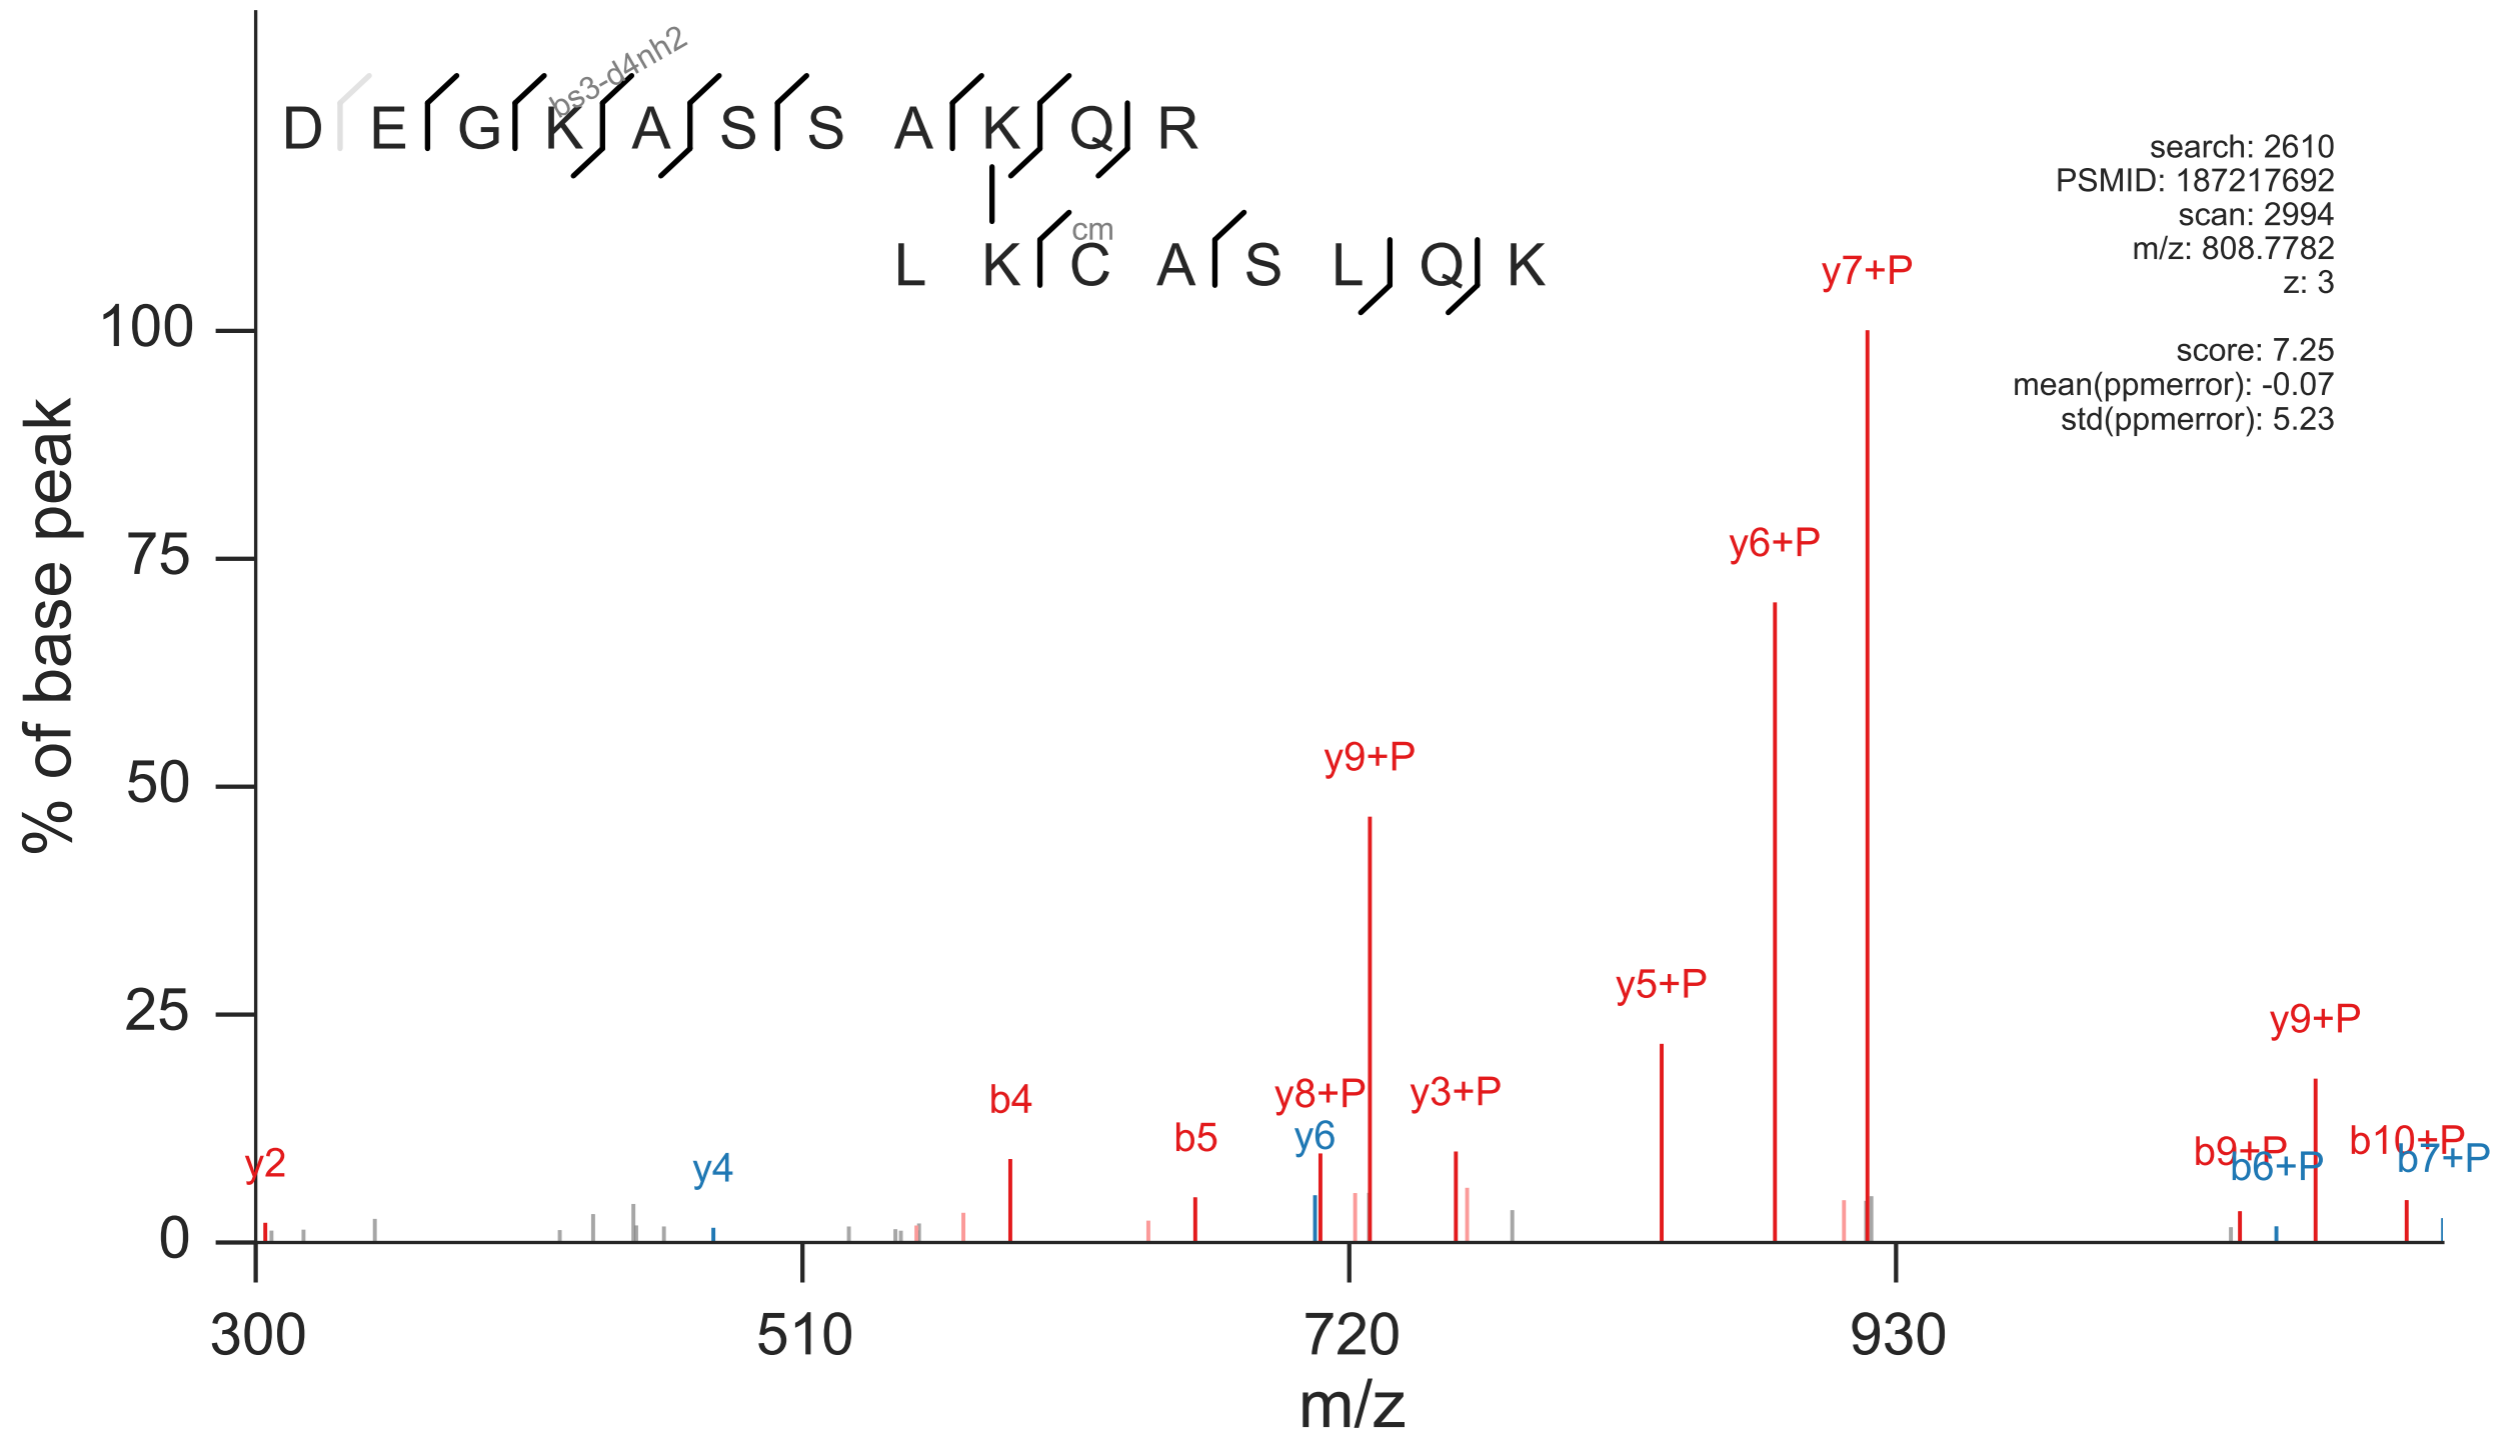

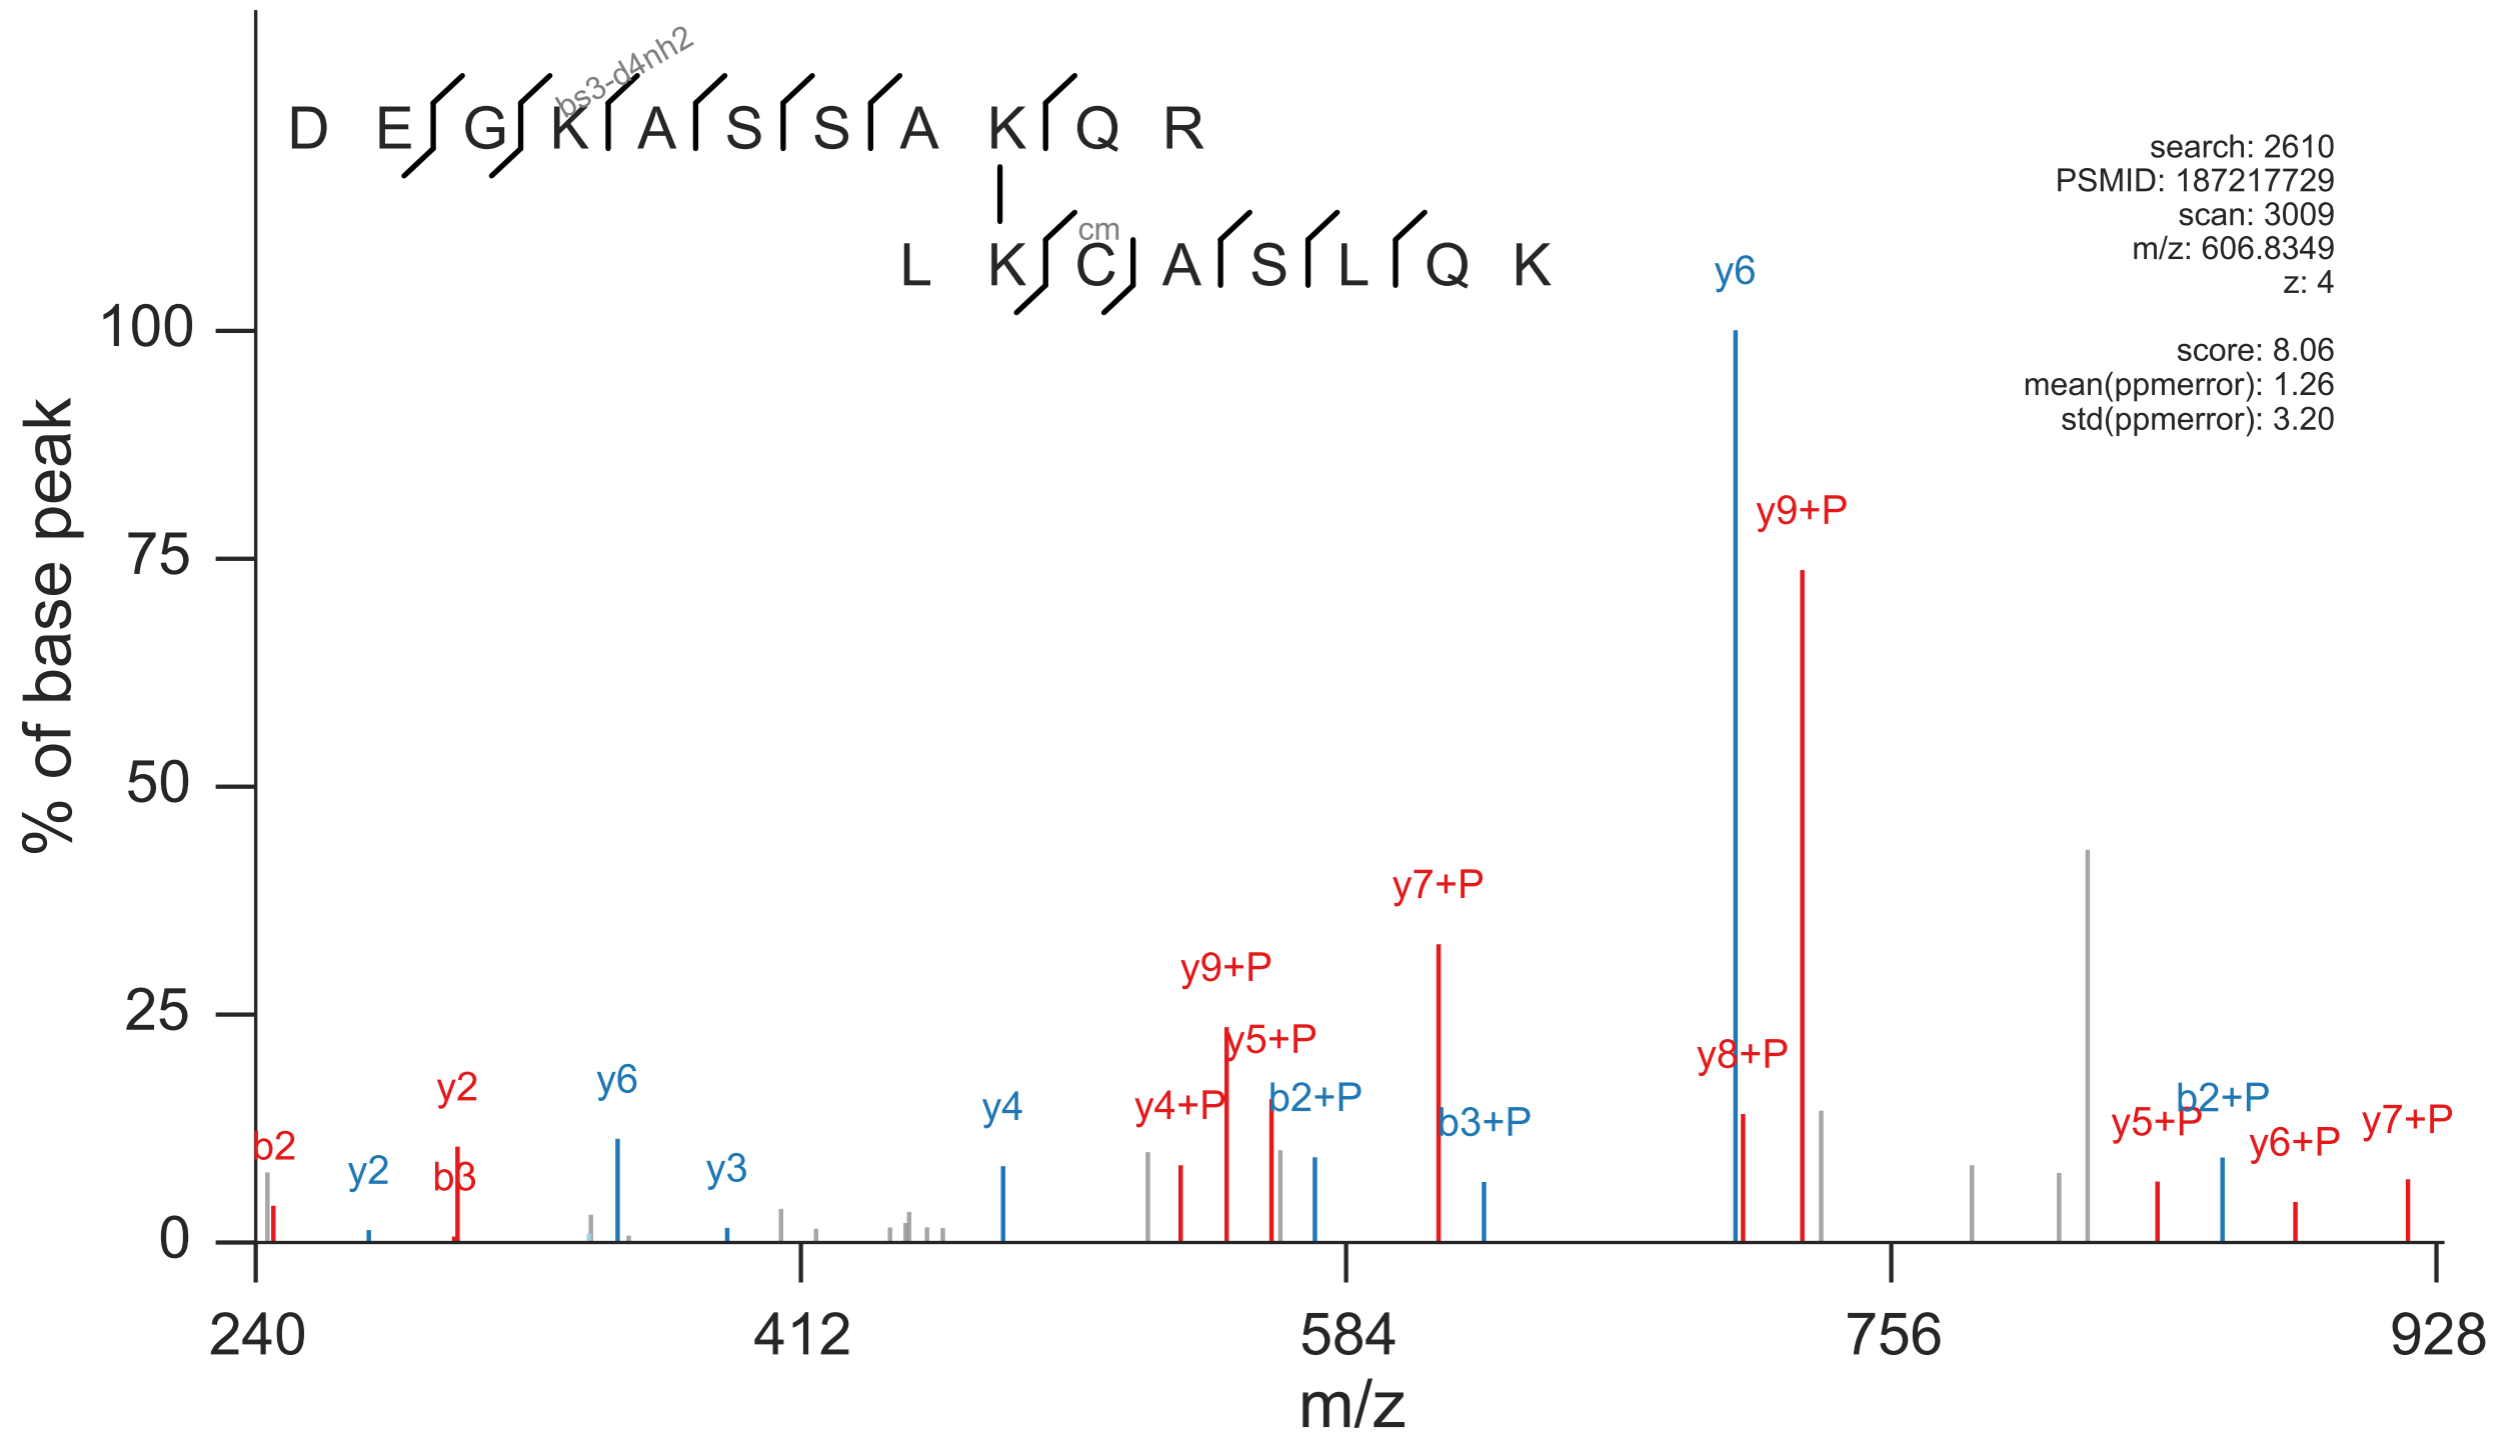

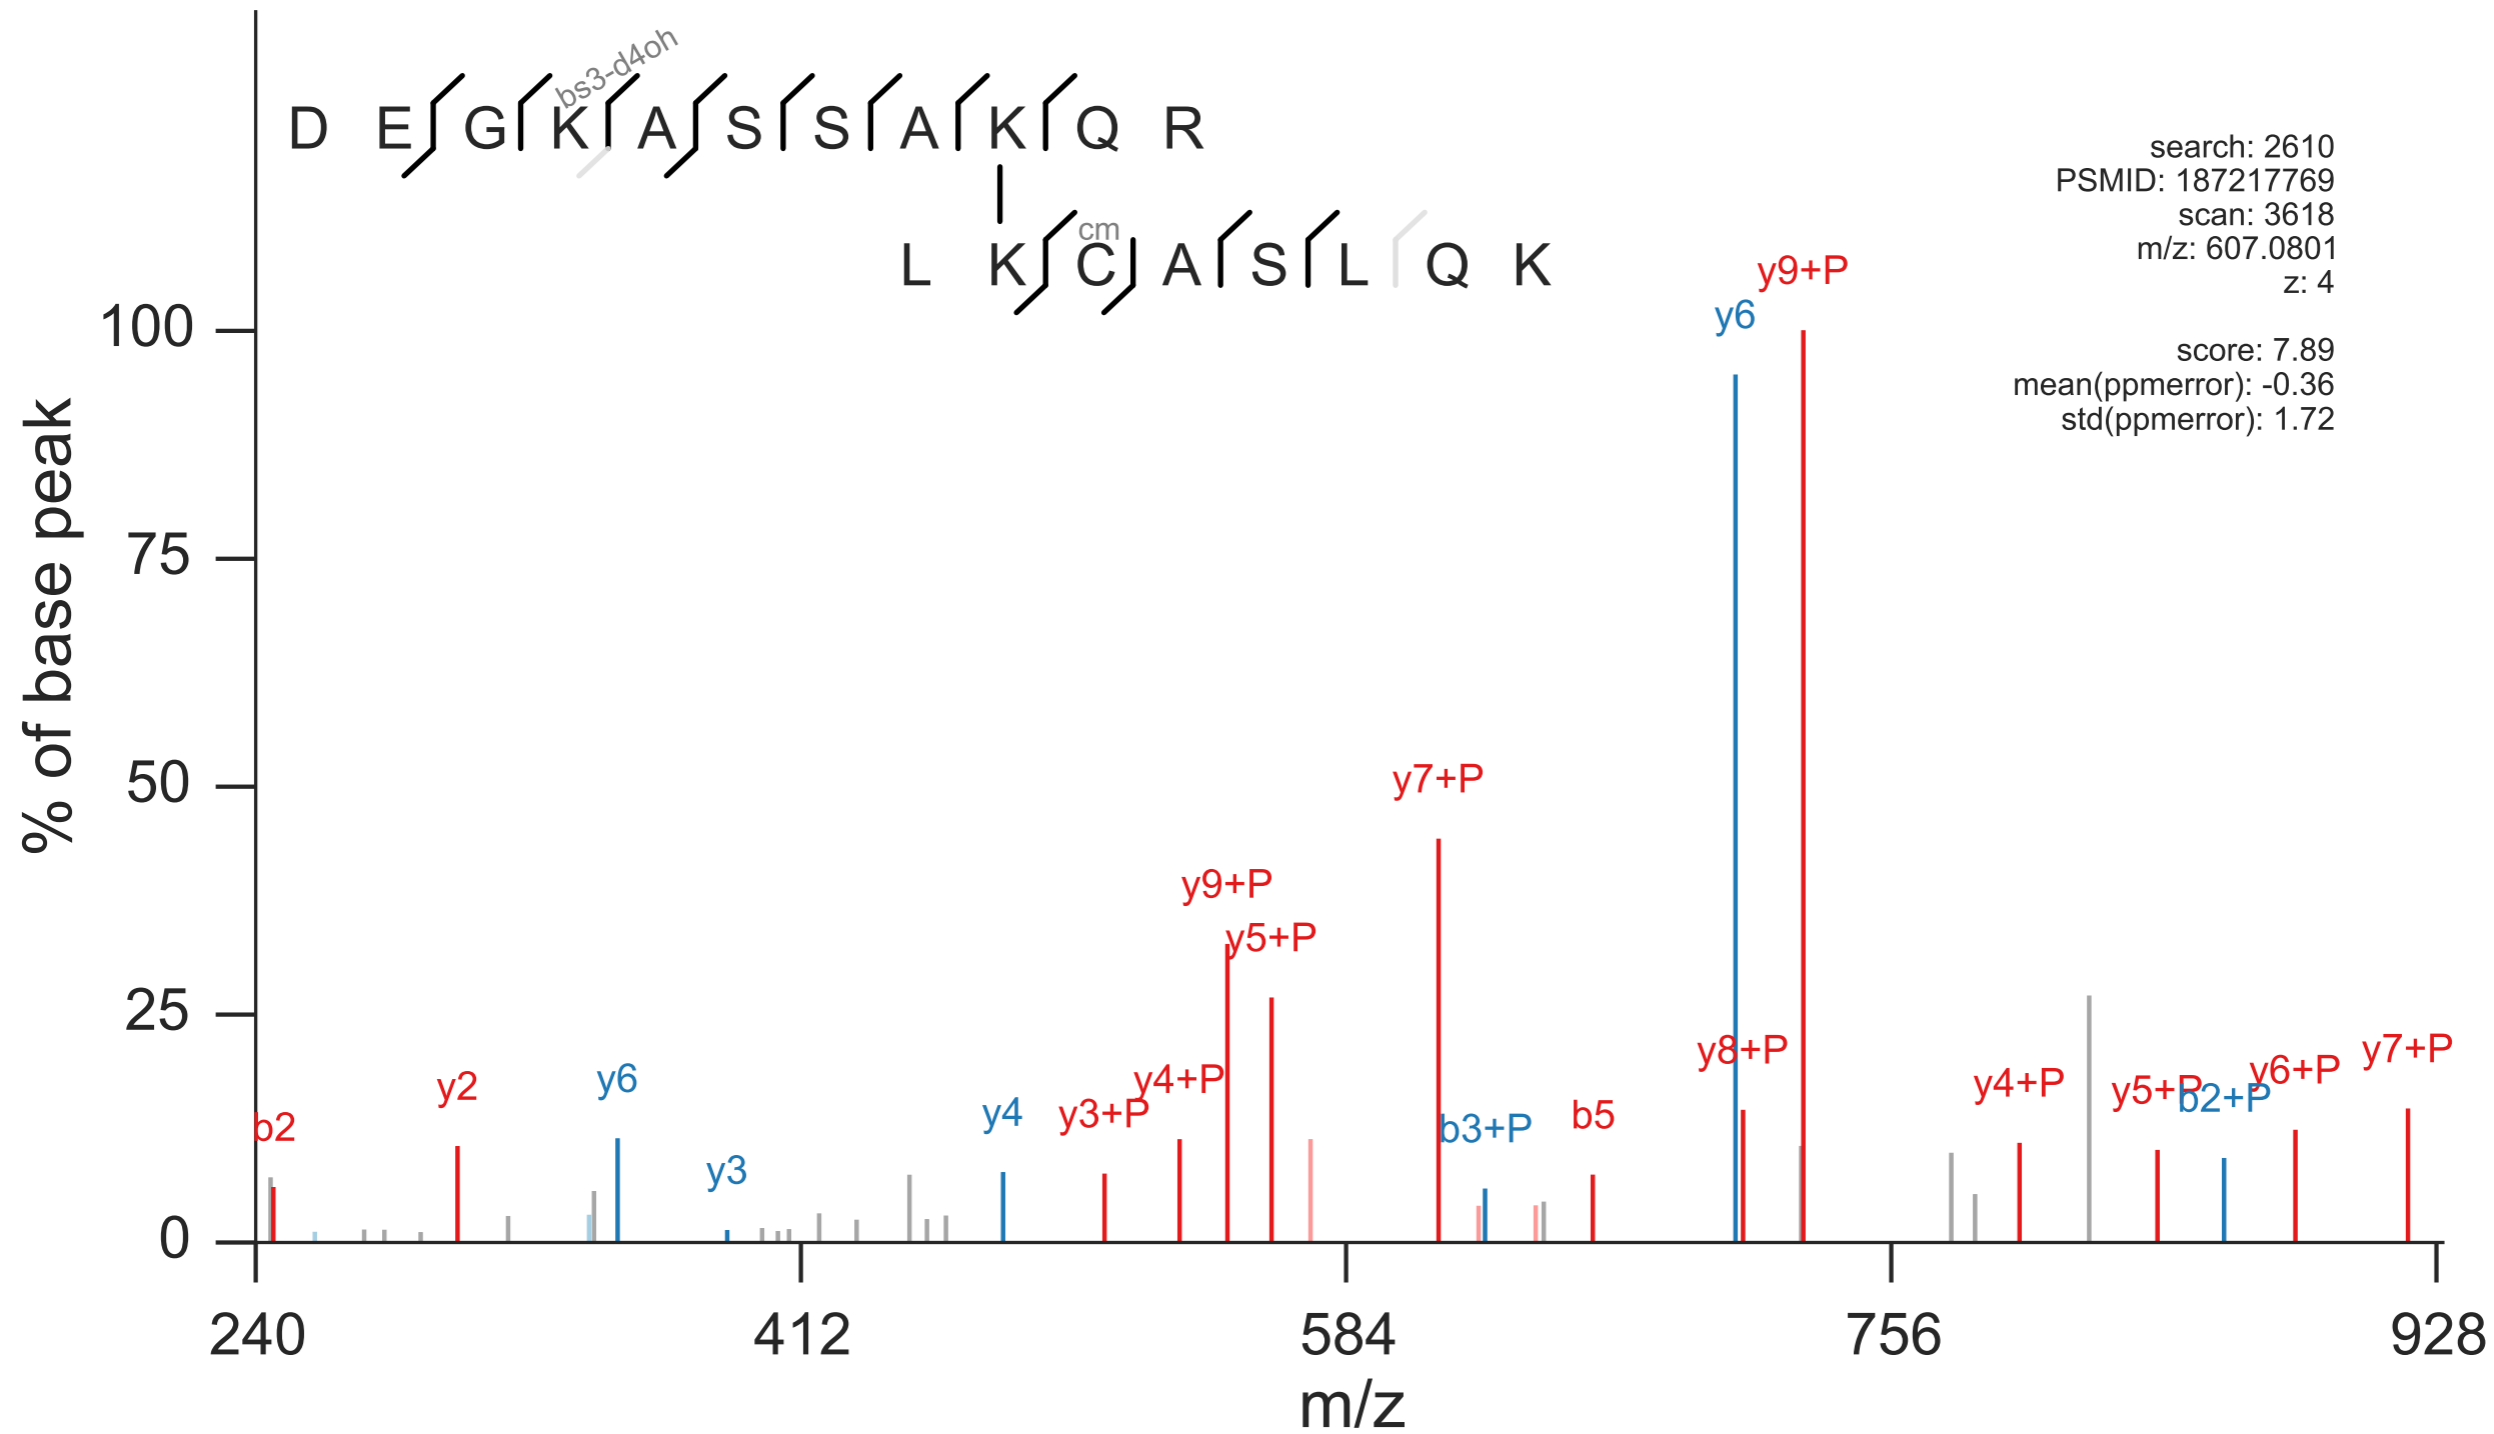

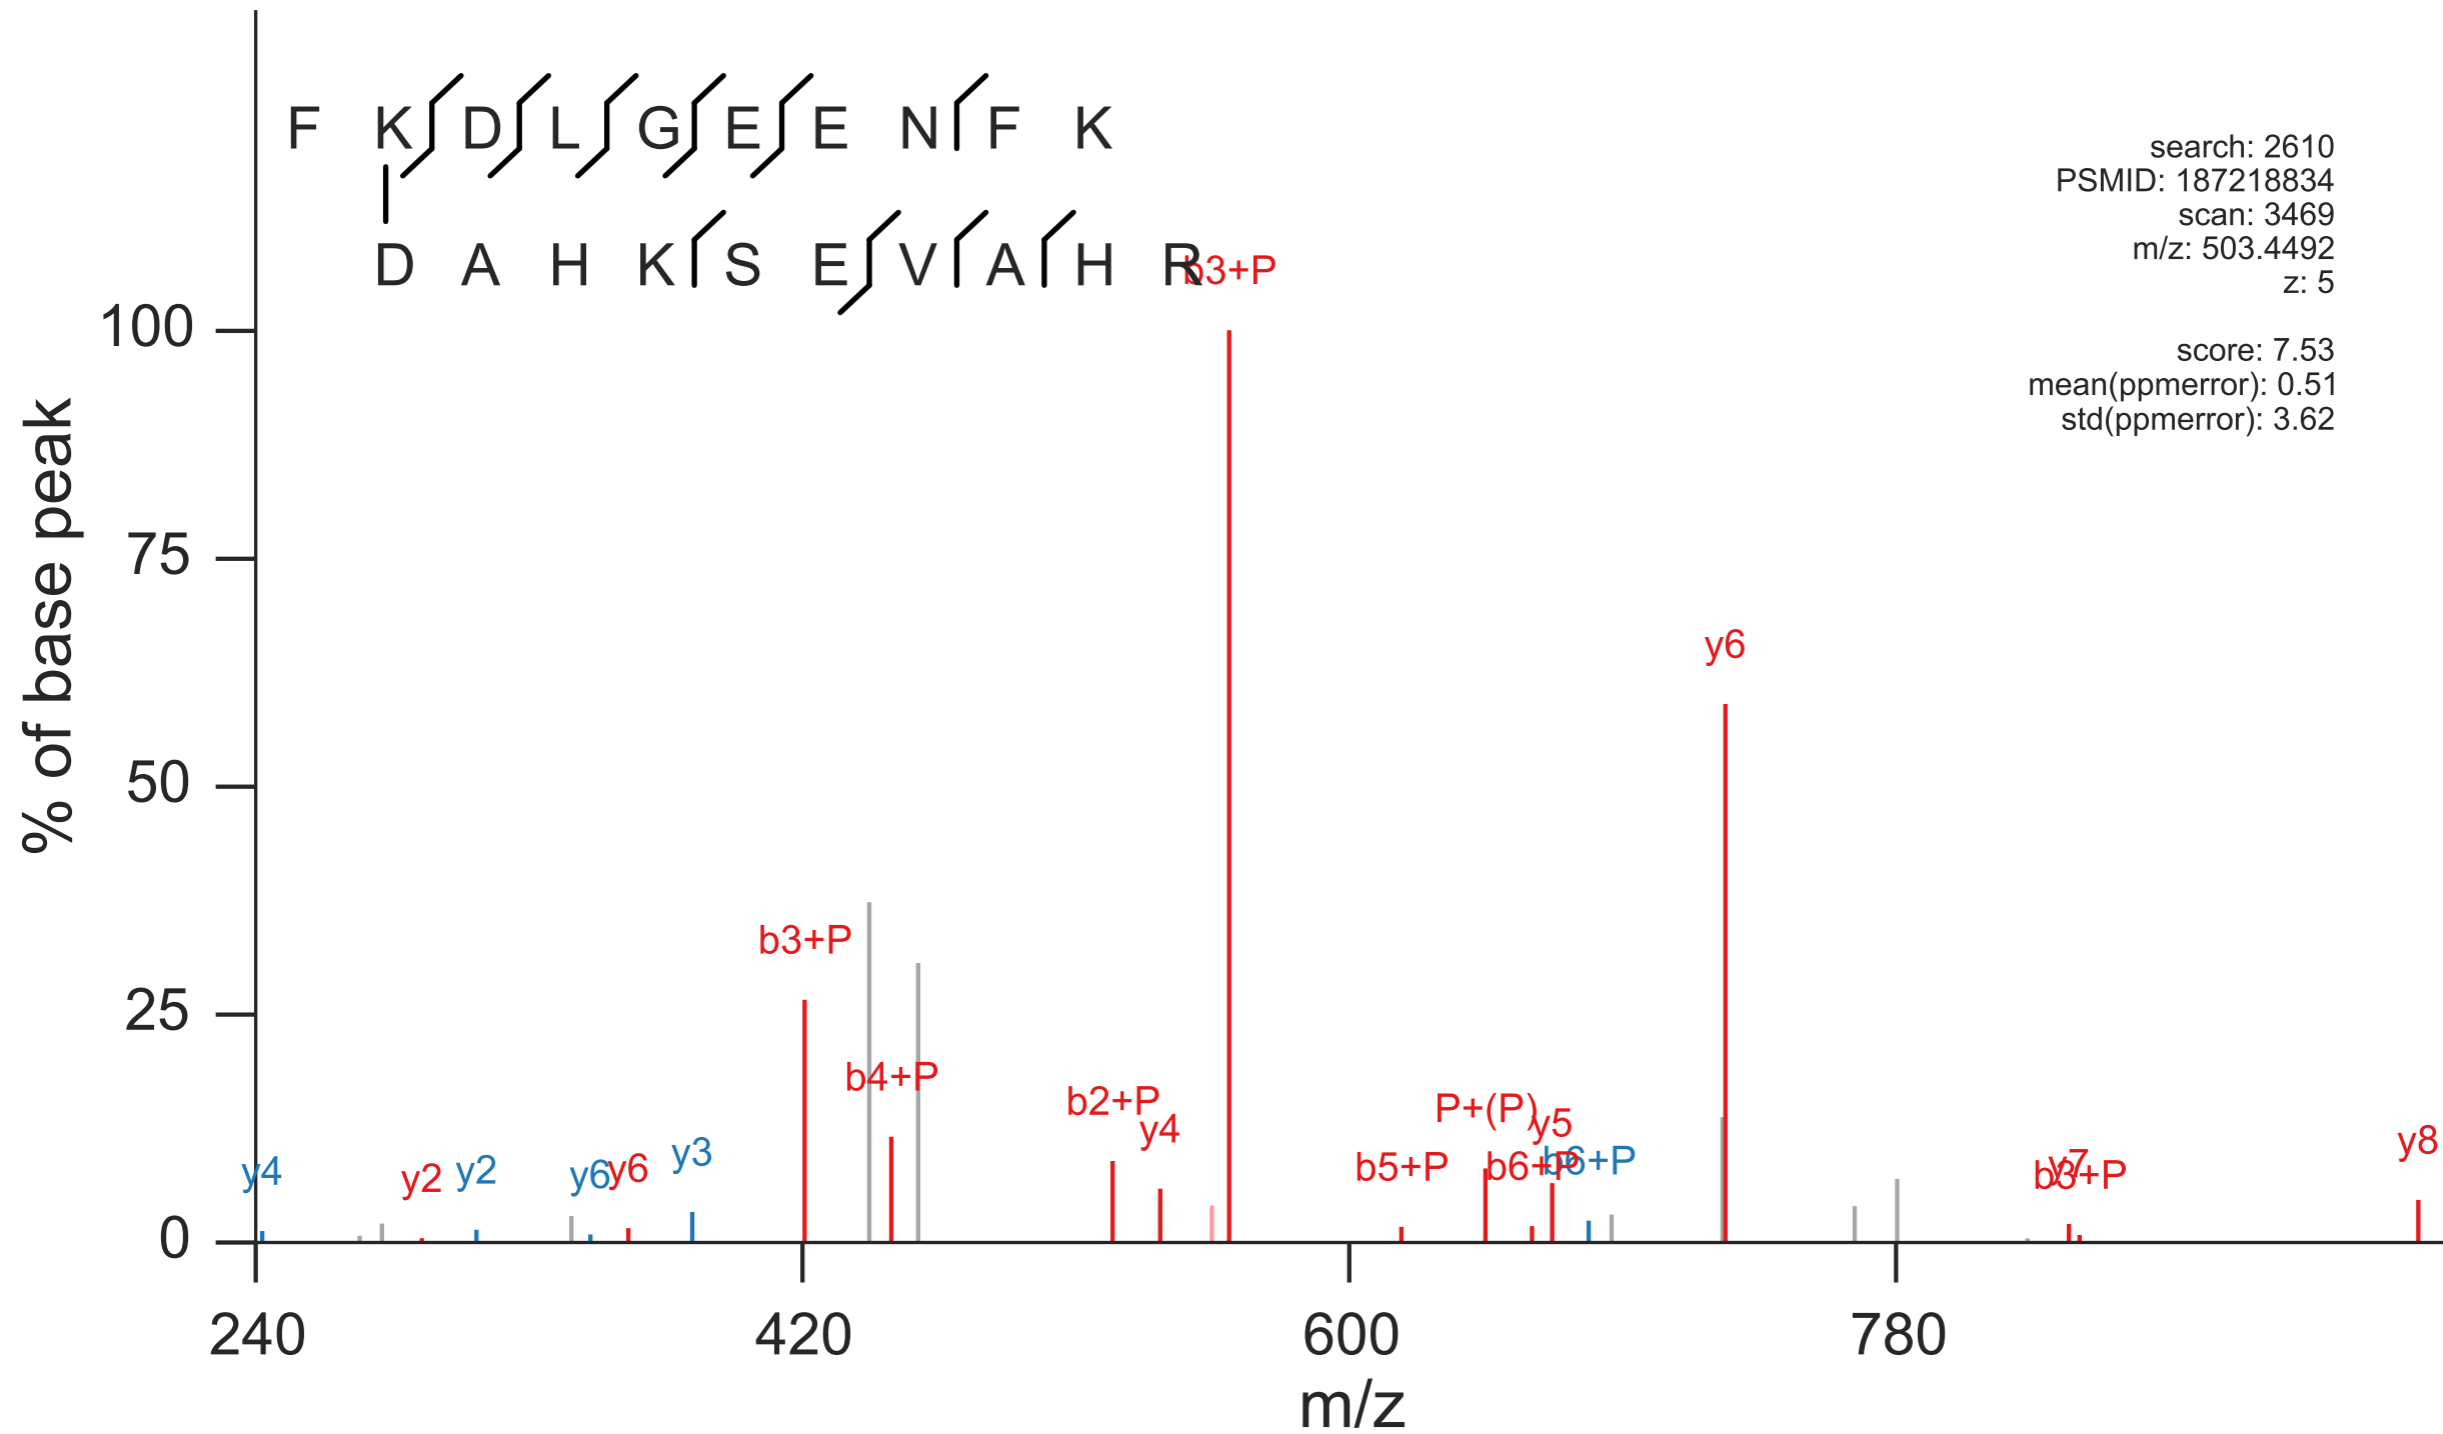

search: 2610  
 PSMID: 187218834  
 scan: 3469  
 m/z: 503.4492  
 z: 5

score: 7.53  
 mean(ppmerror): 0.51  
 std(ppmerror): 3.62

F K D L G E E N F K  
 | / / / / / / / / / /  
 D A H K S E V A H R

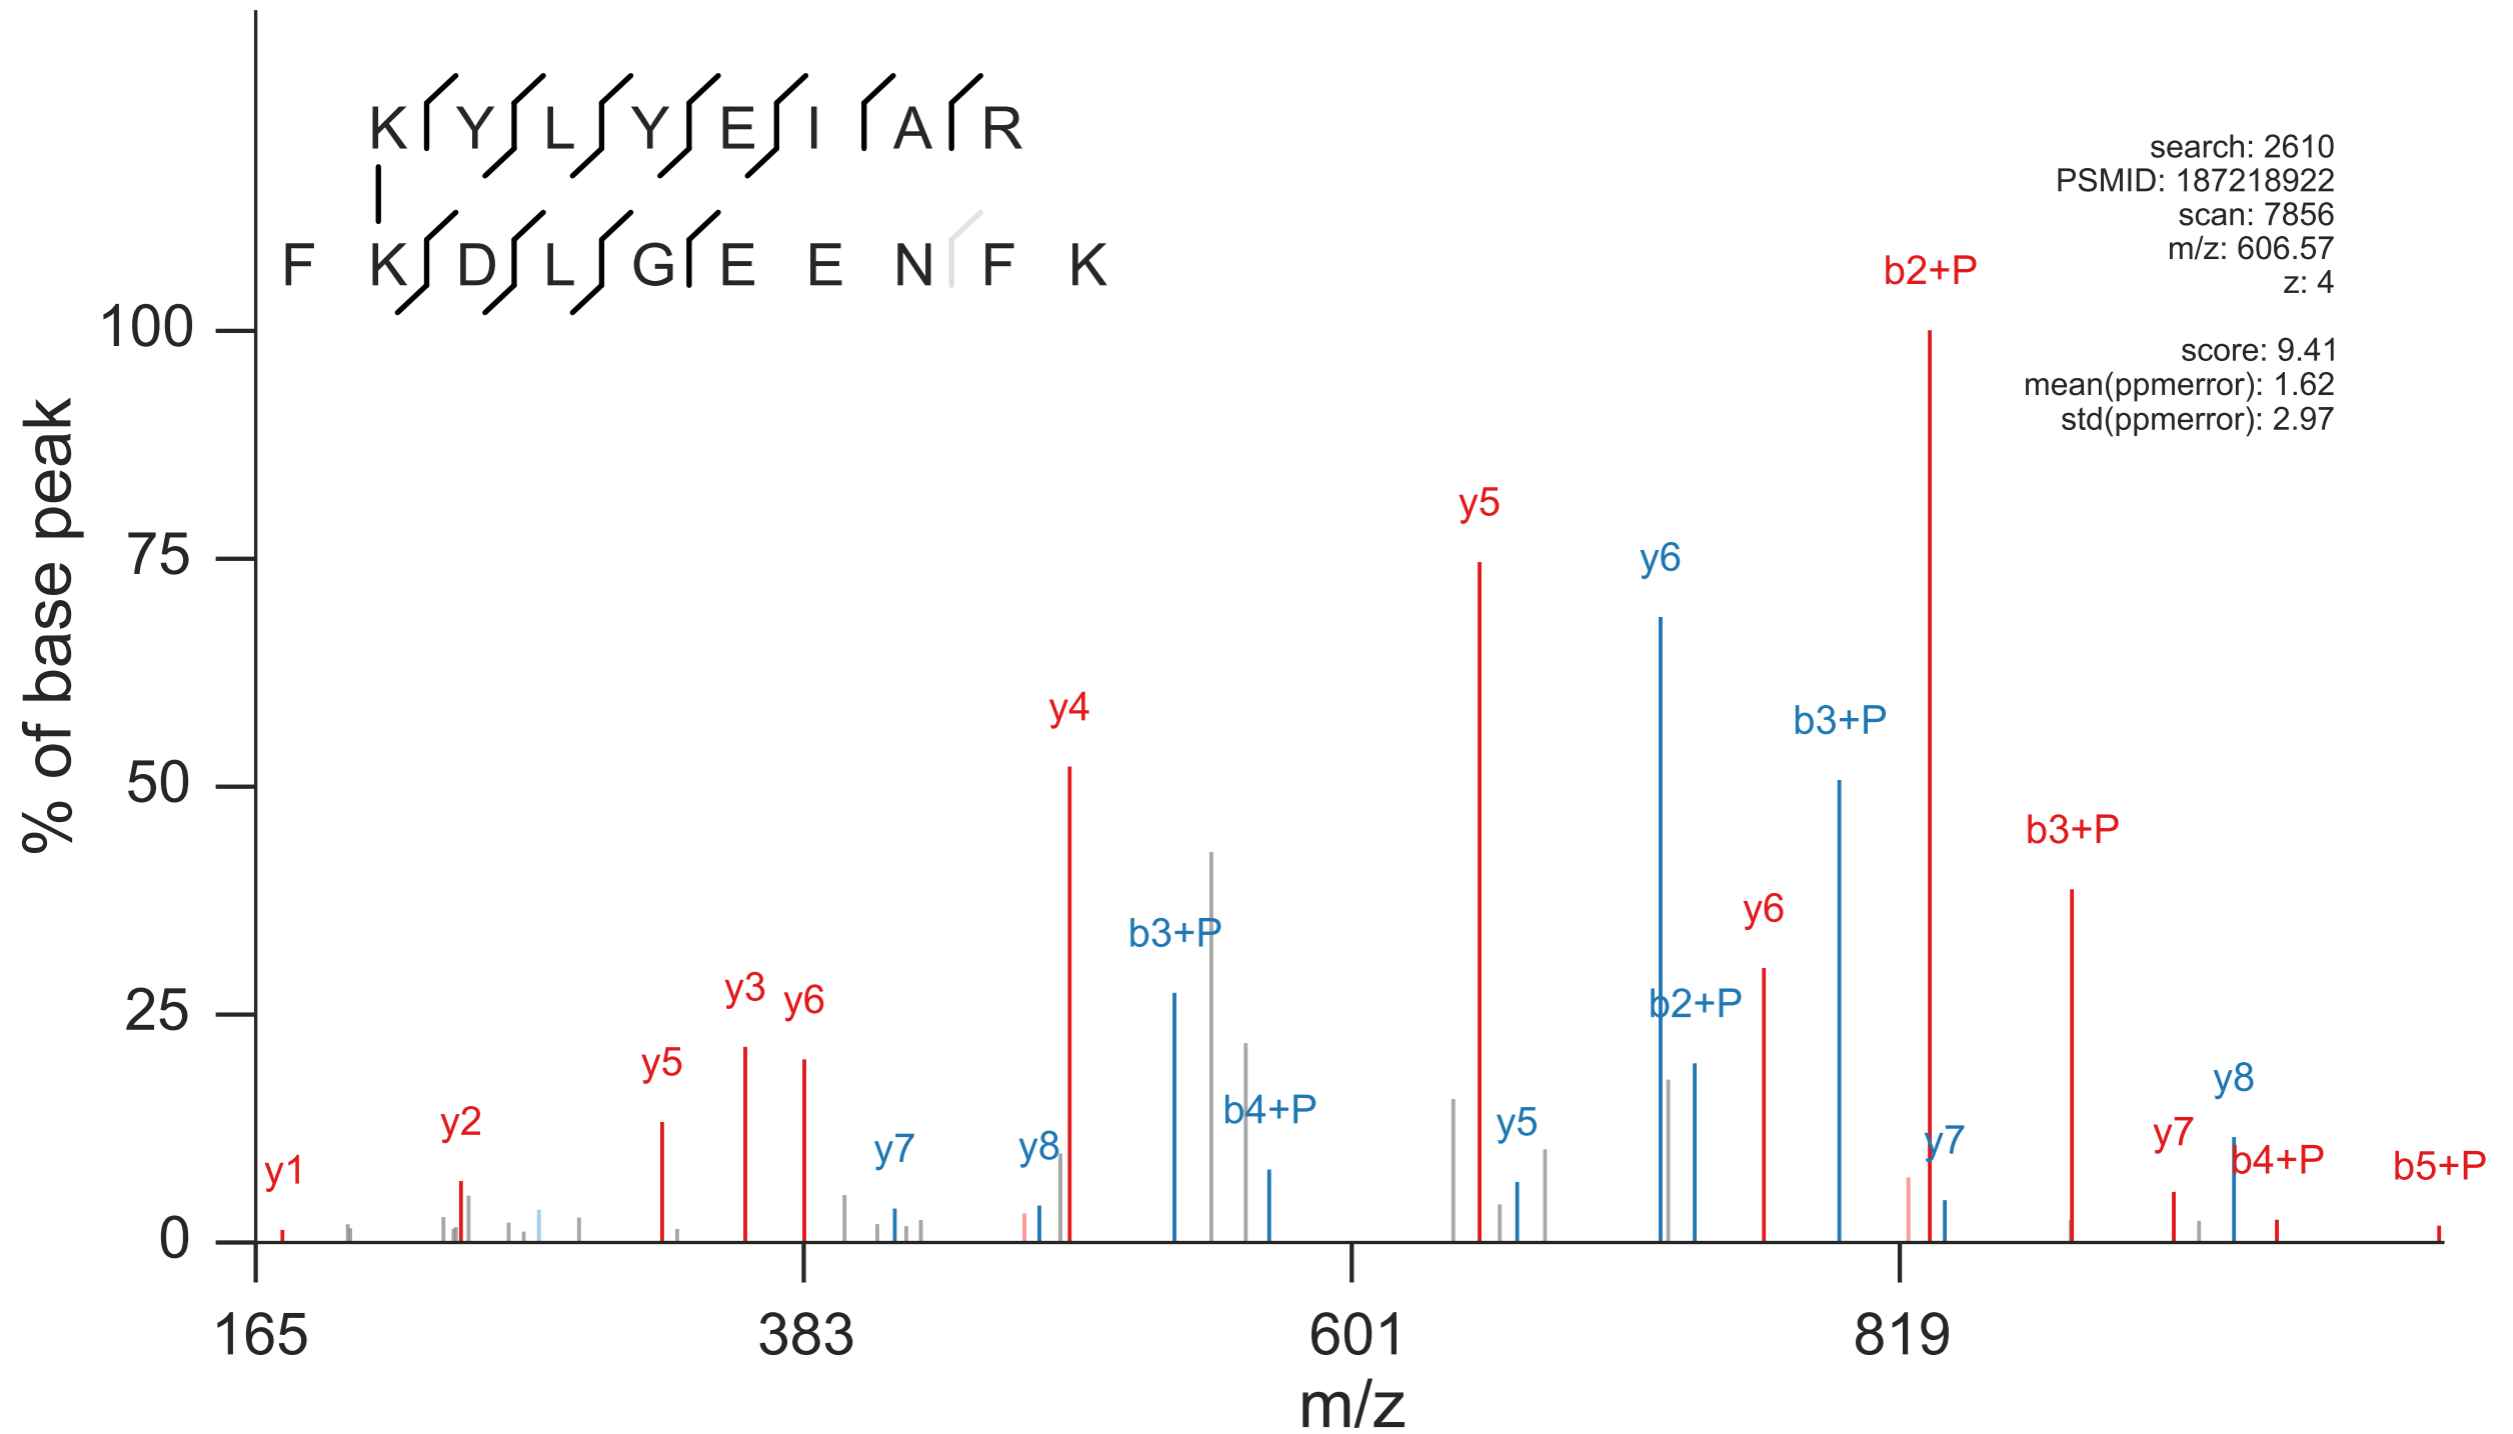



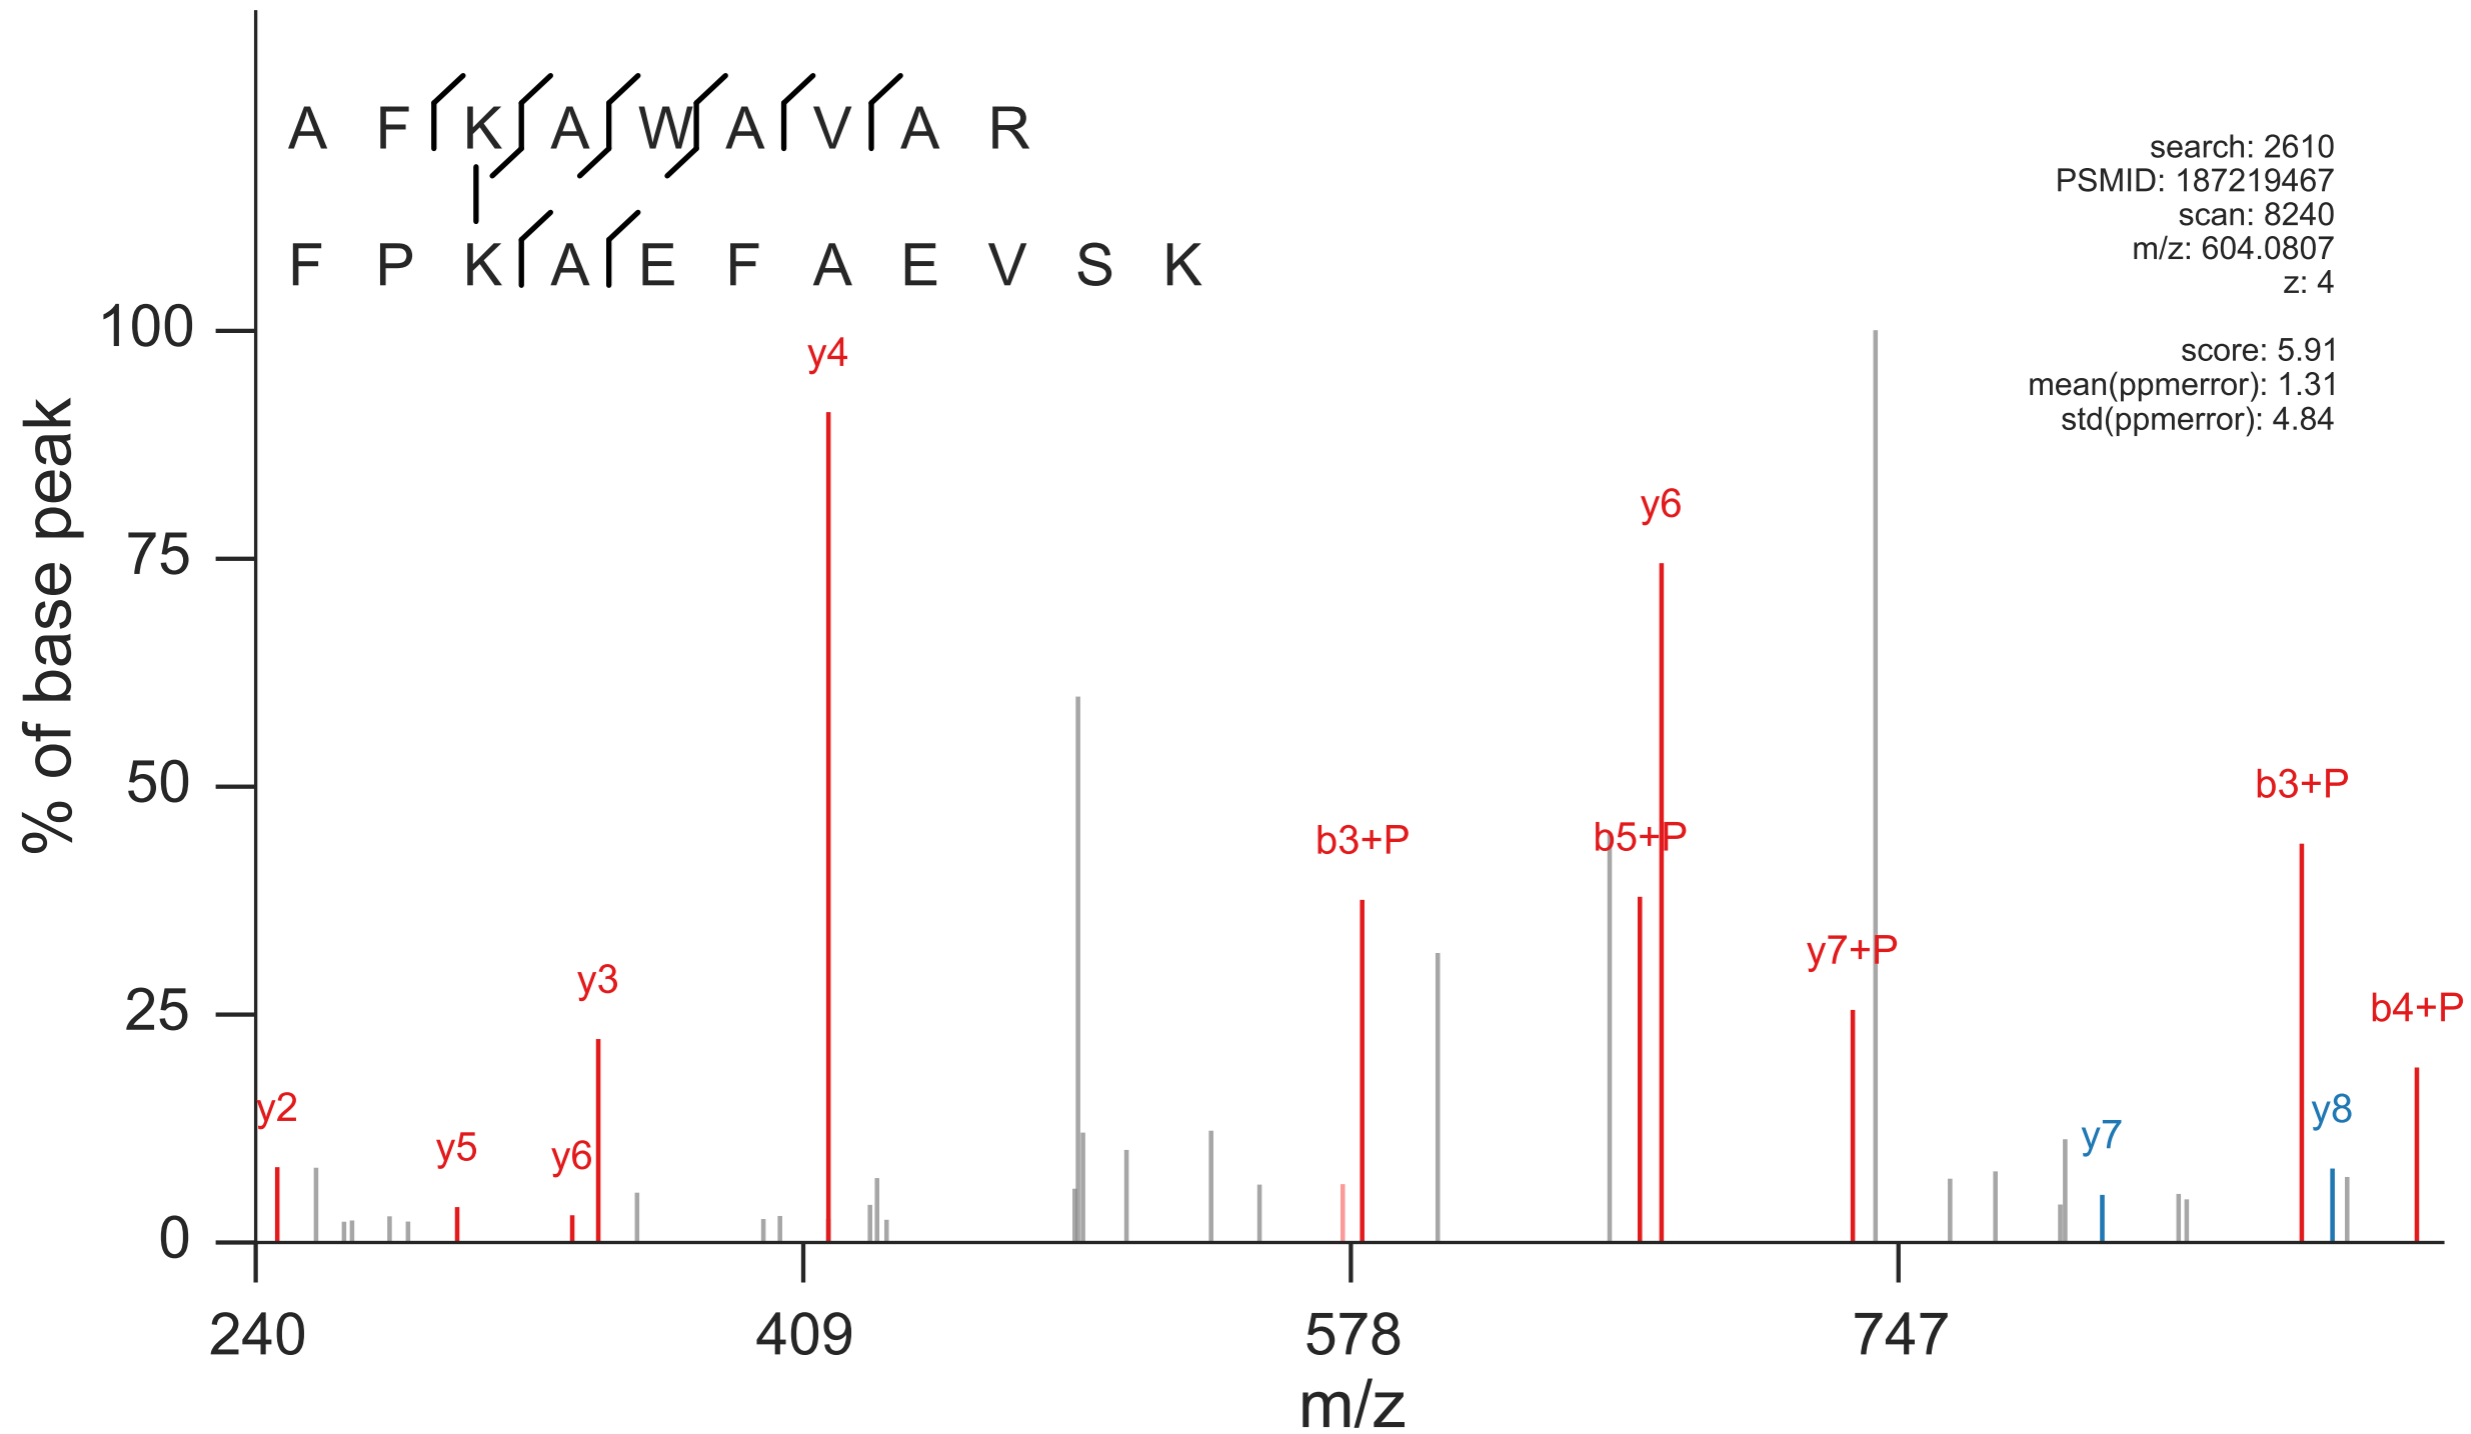

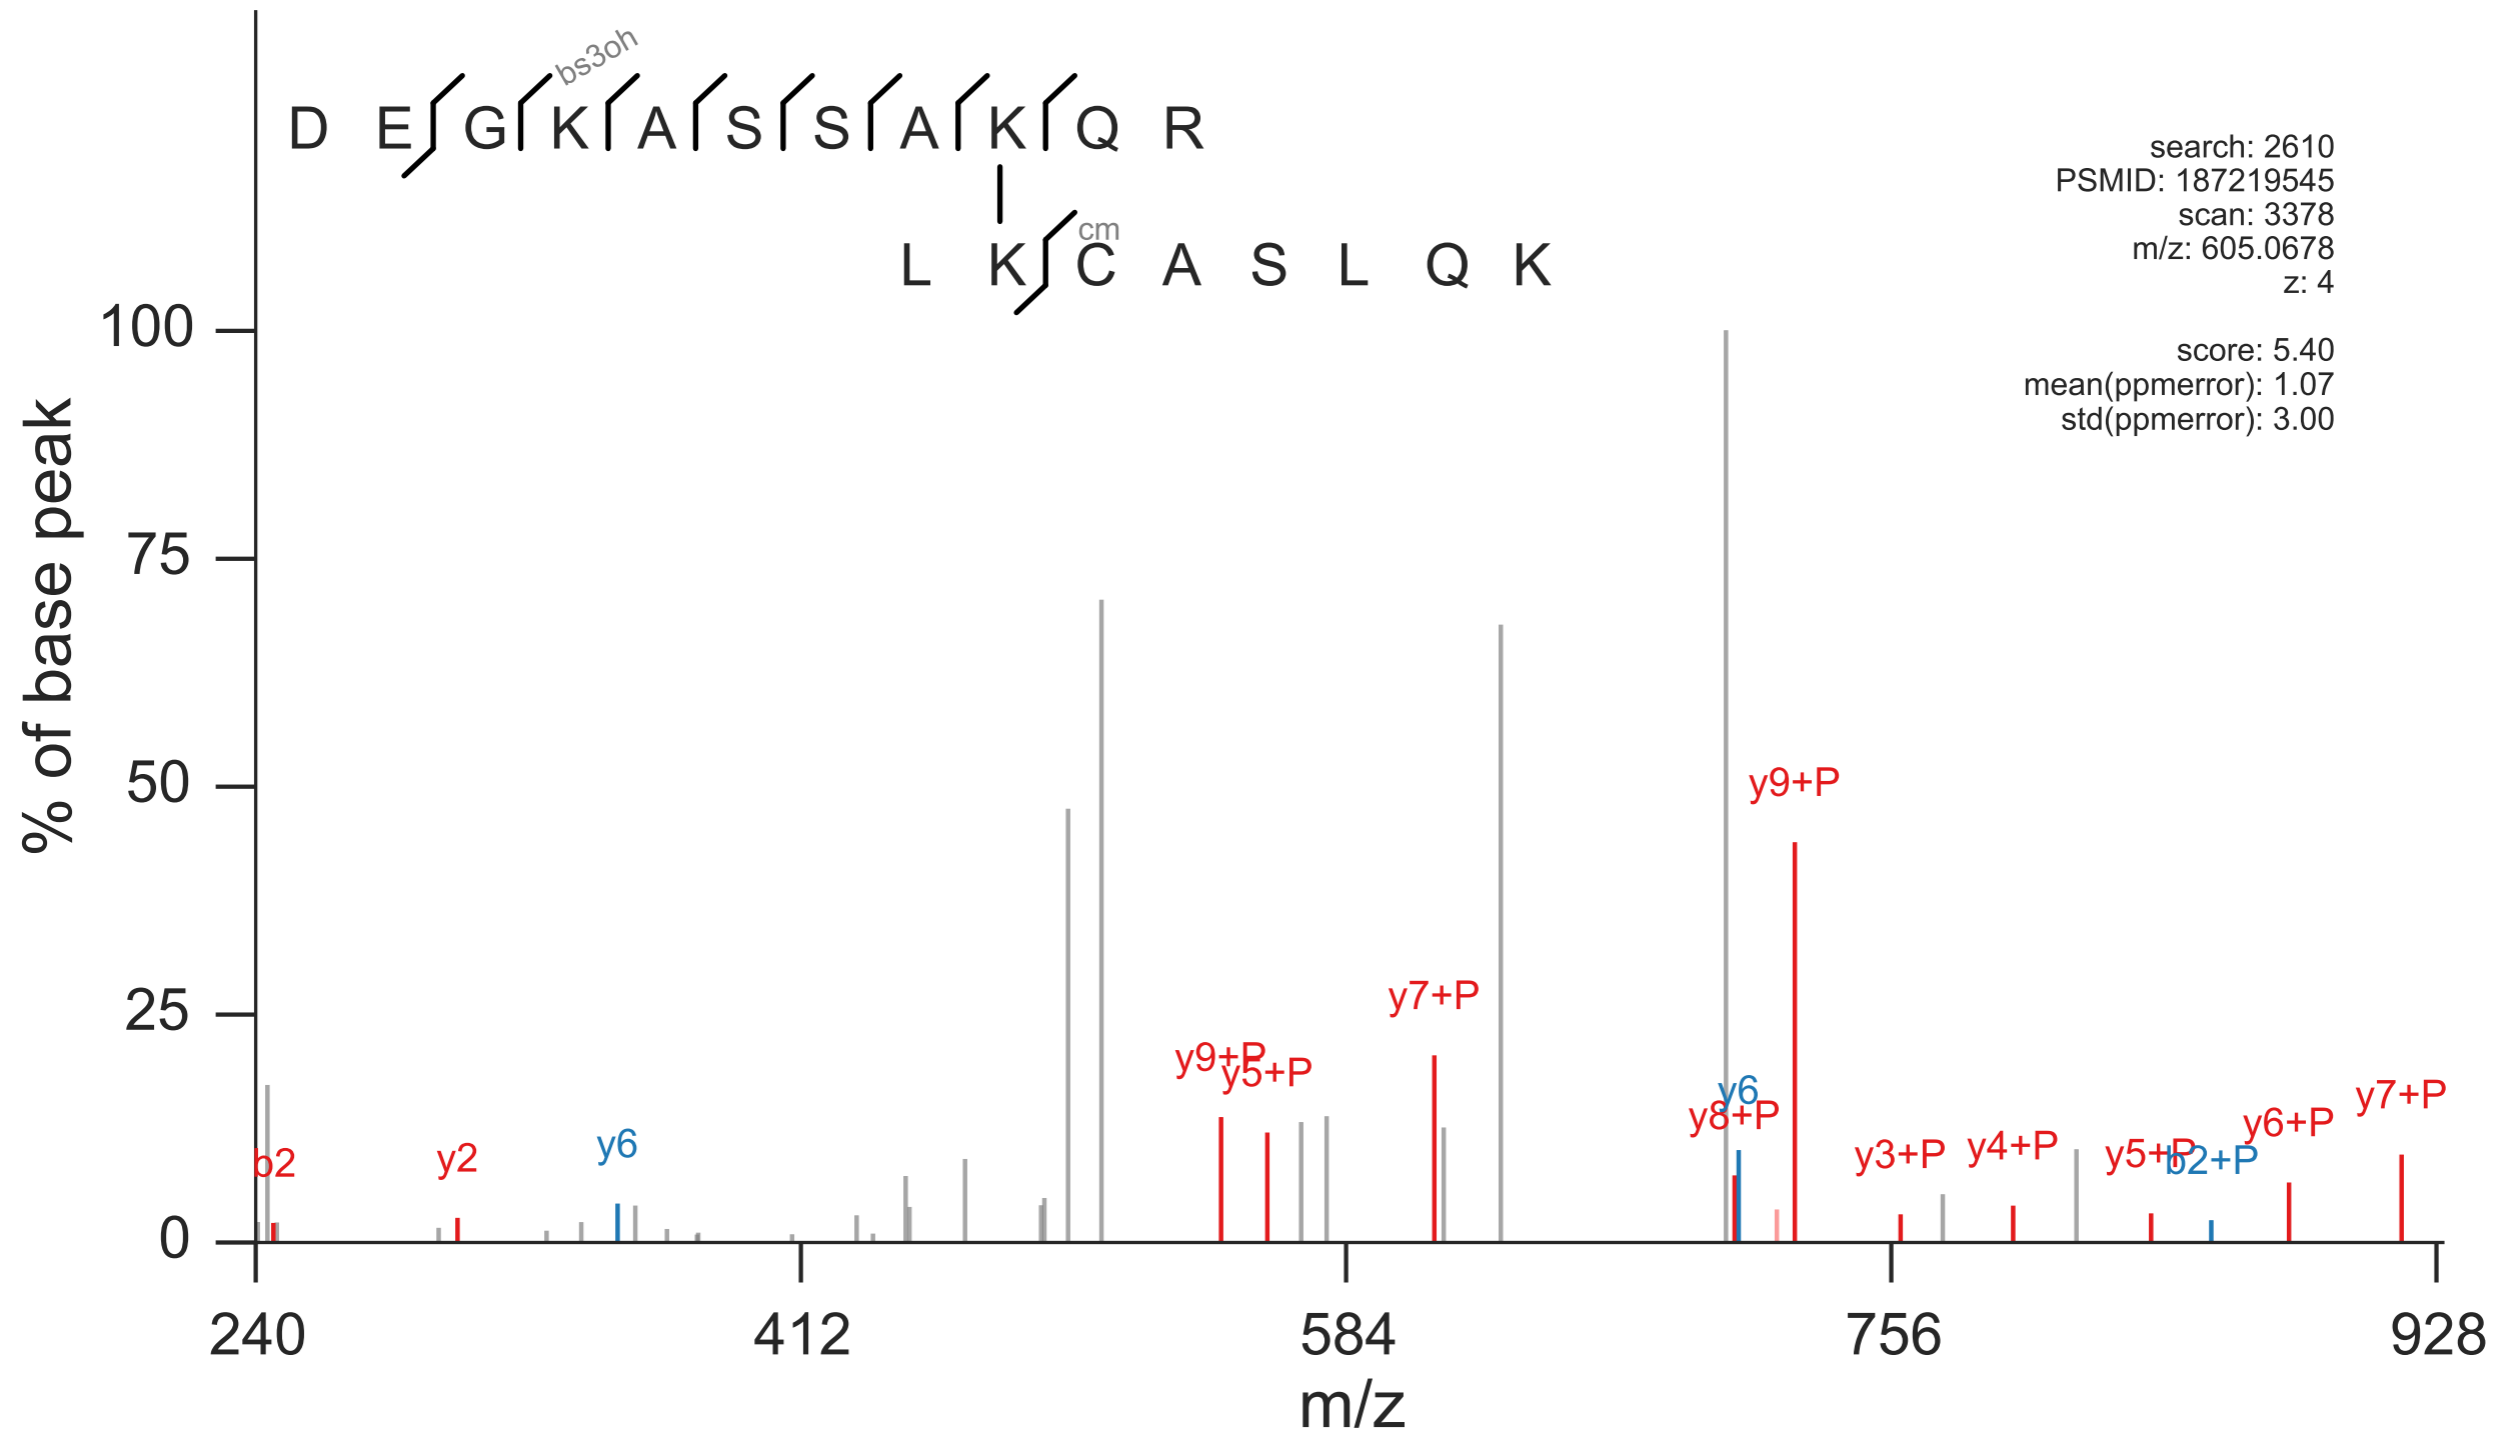

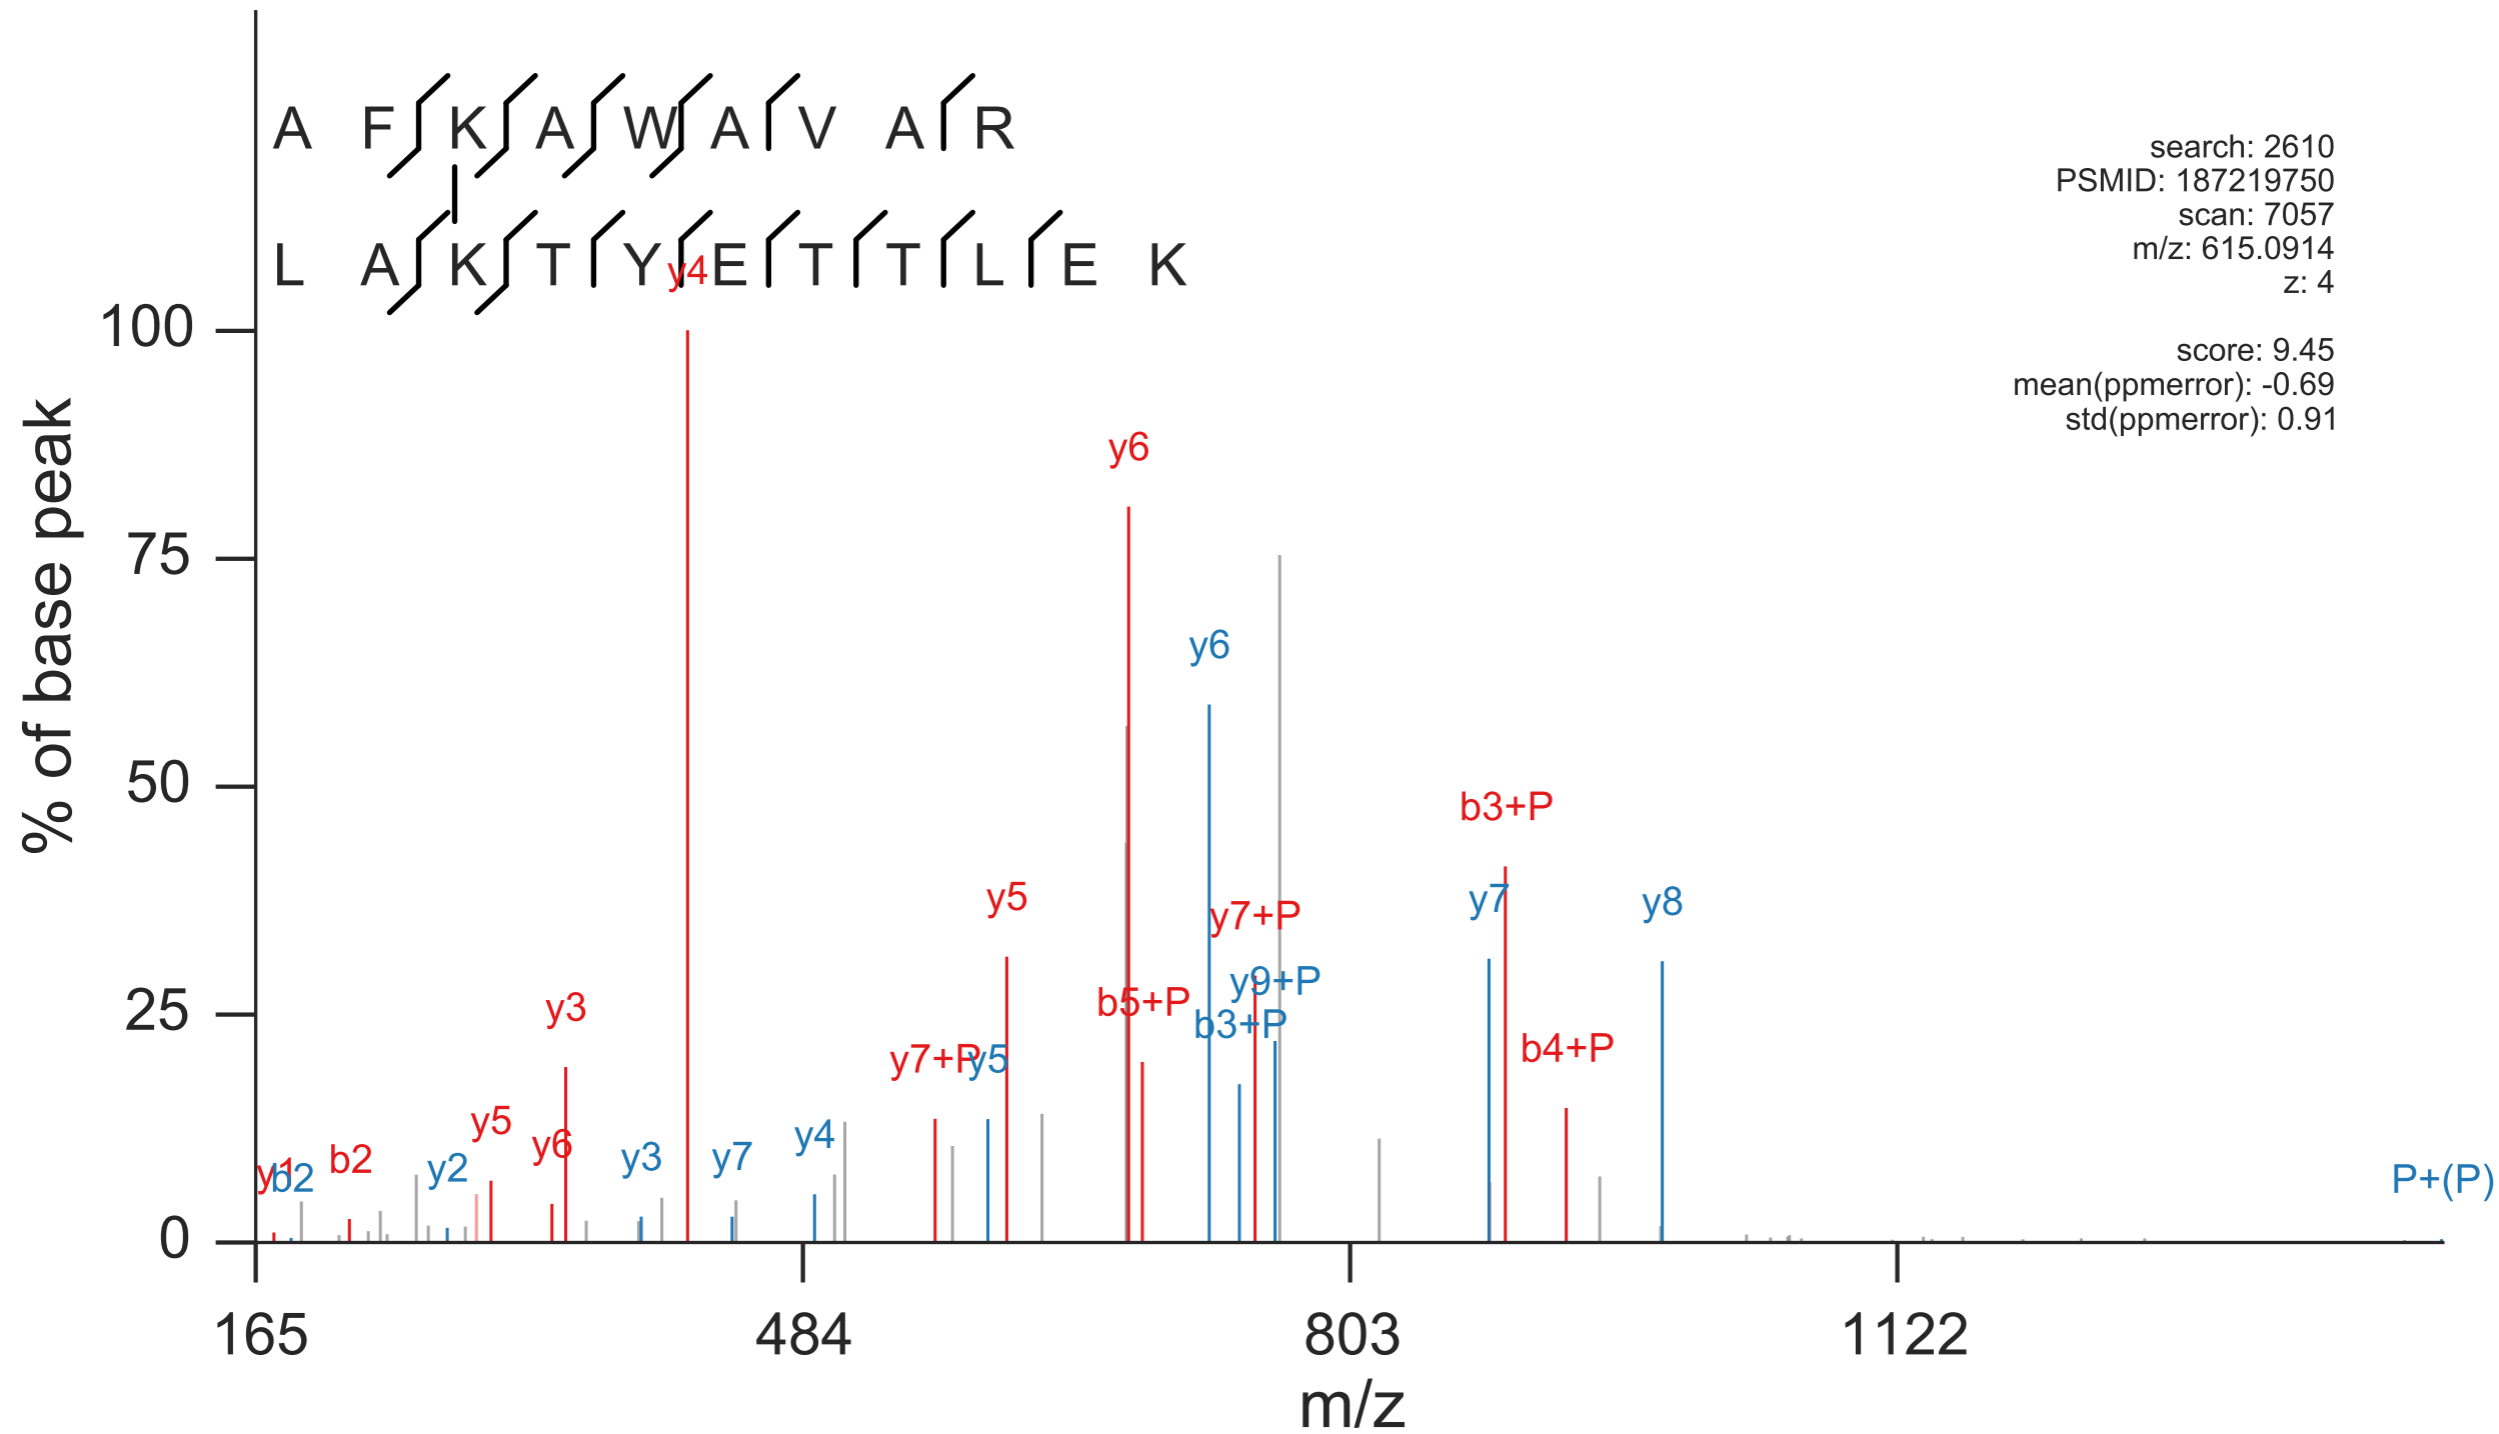

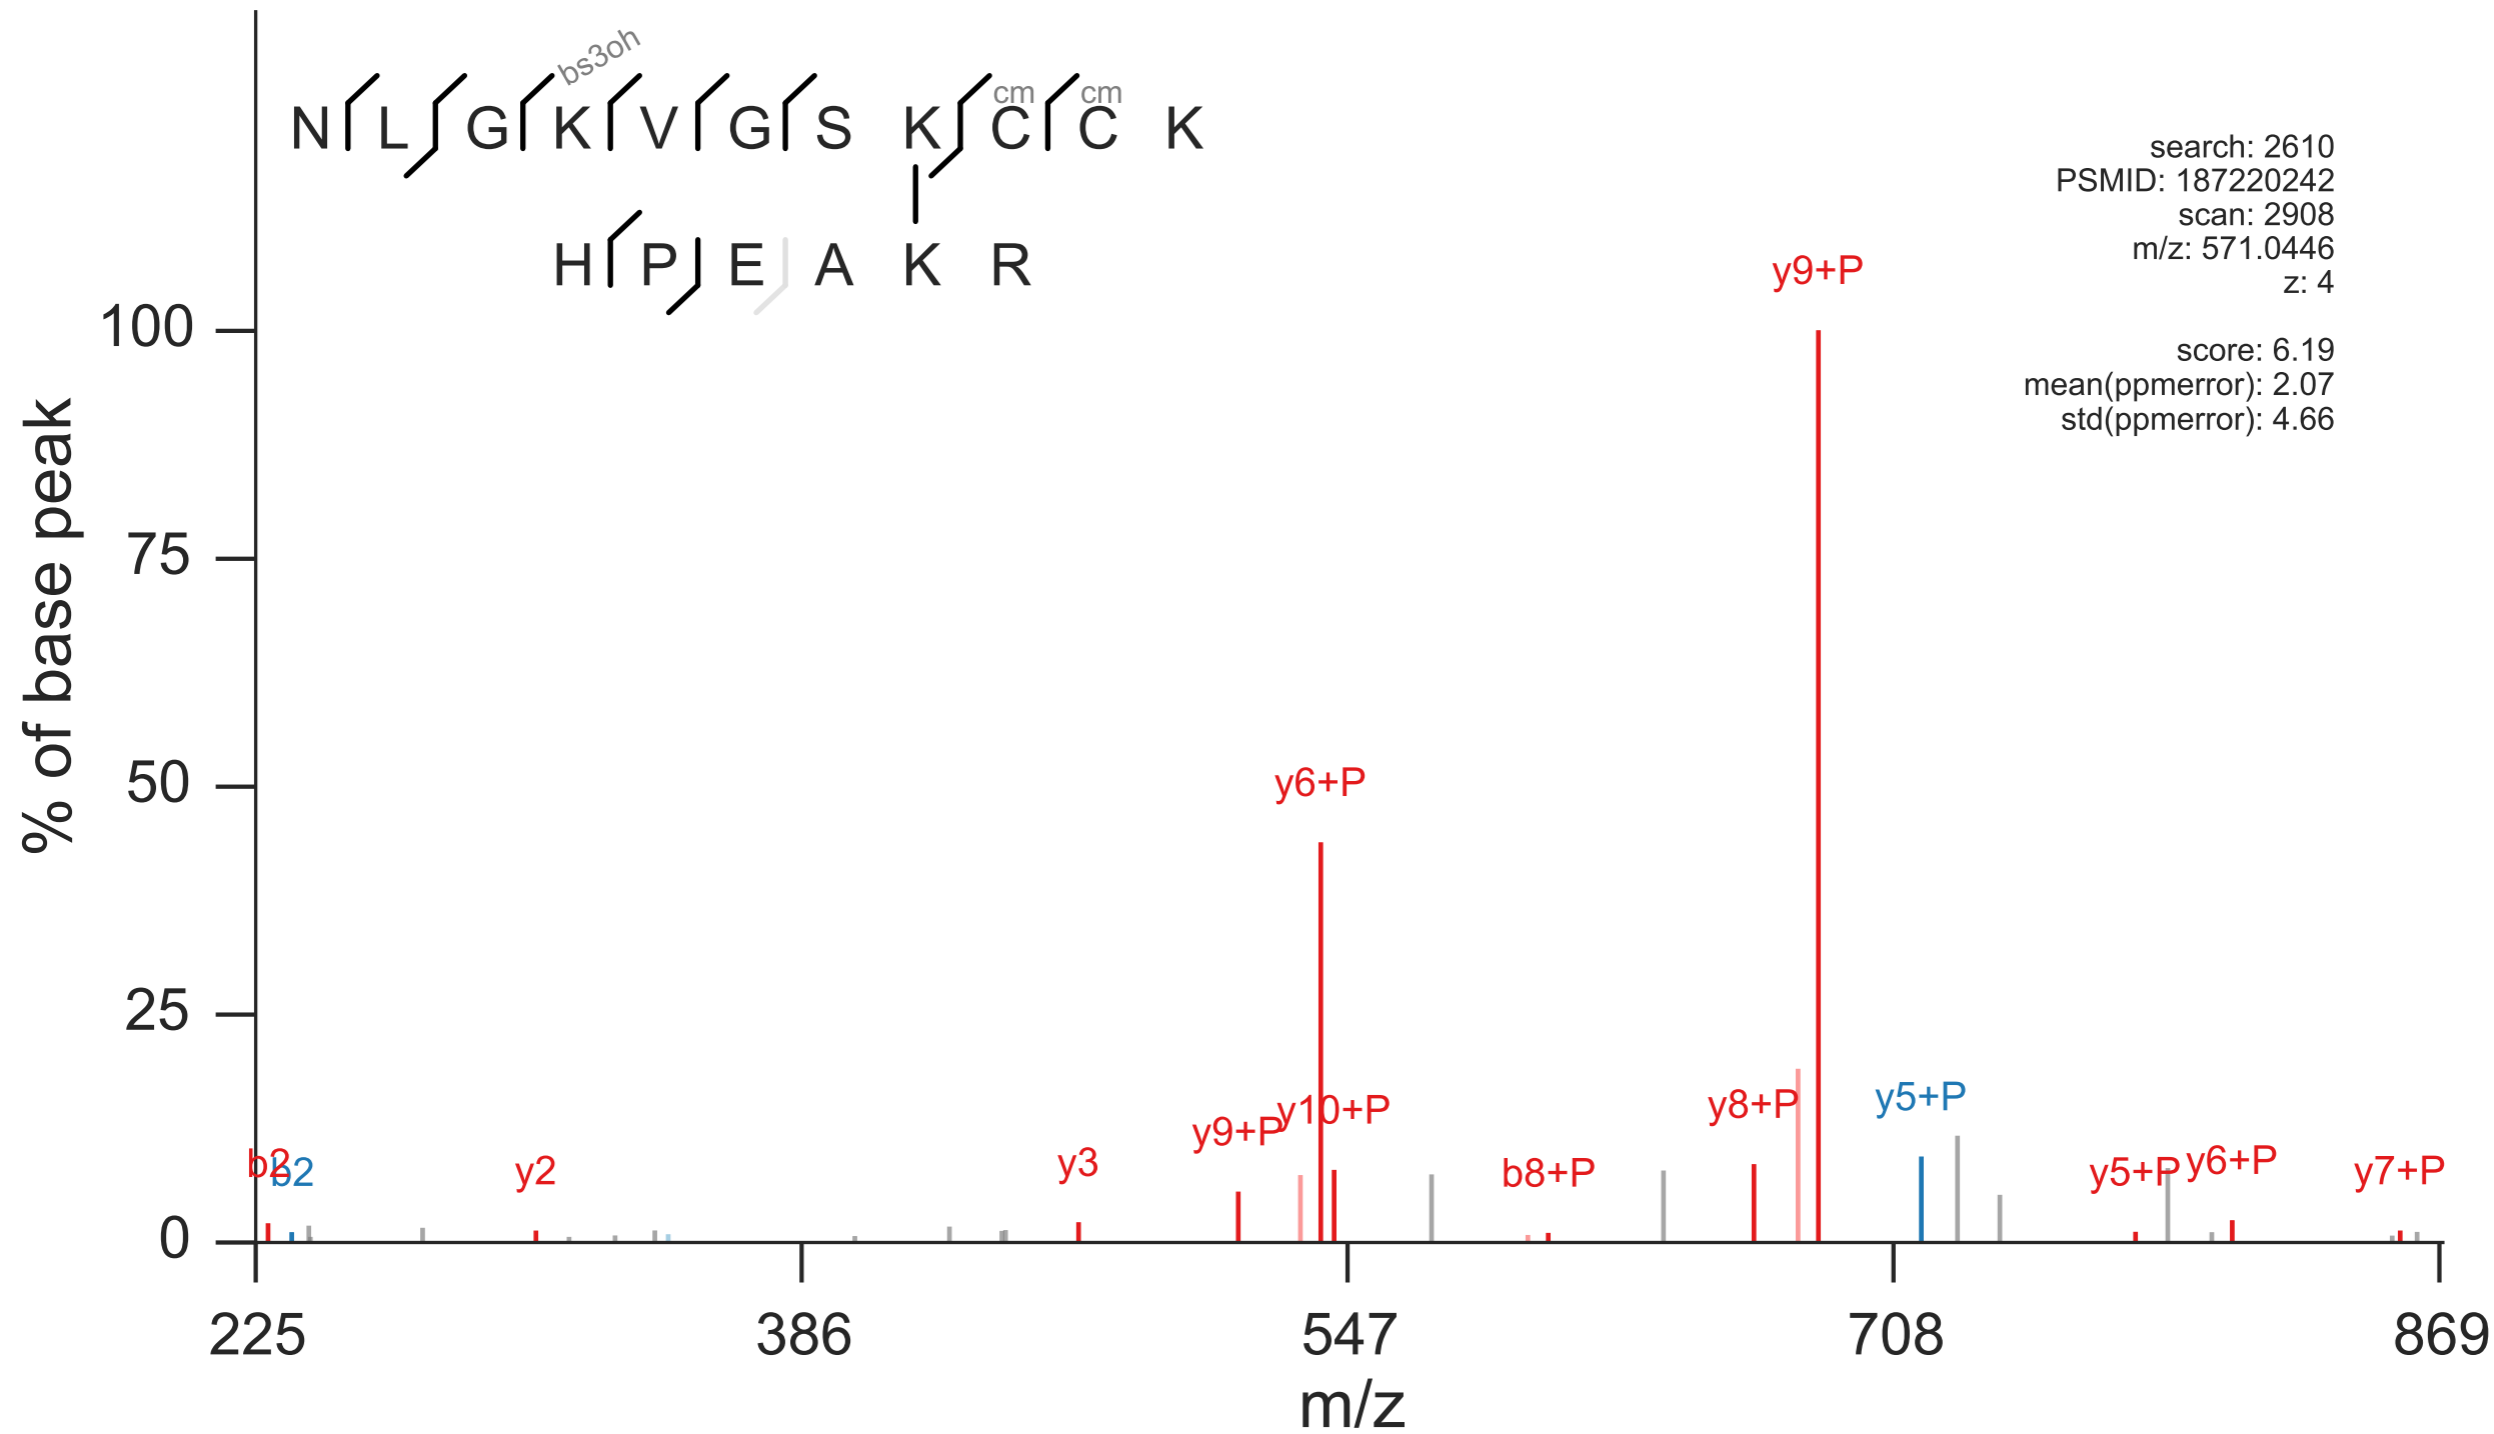

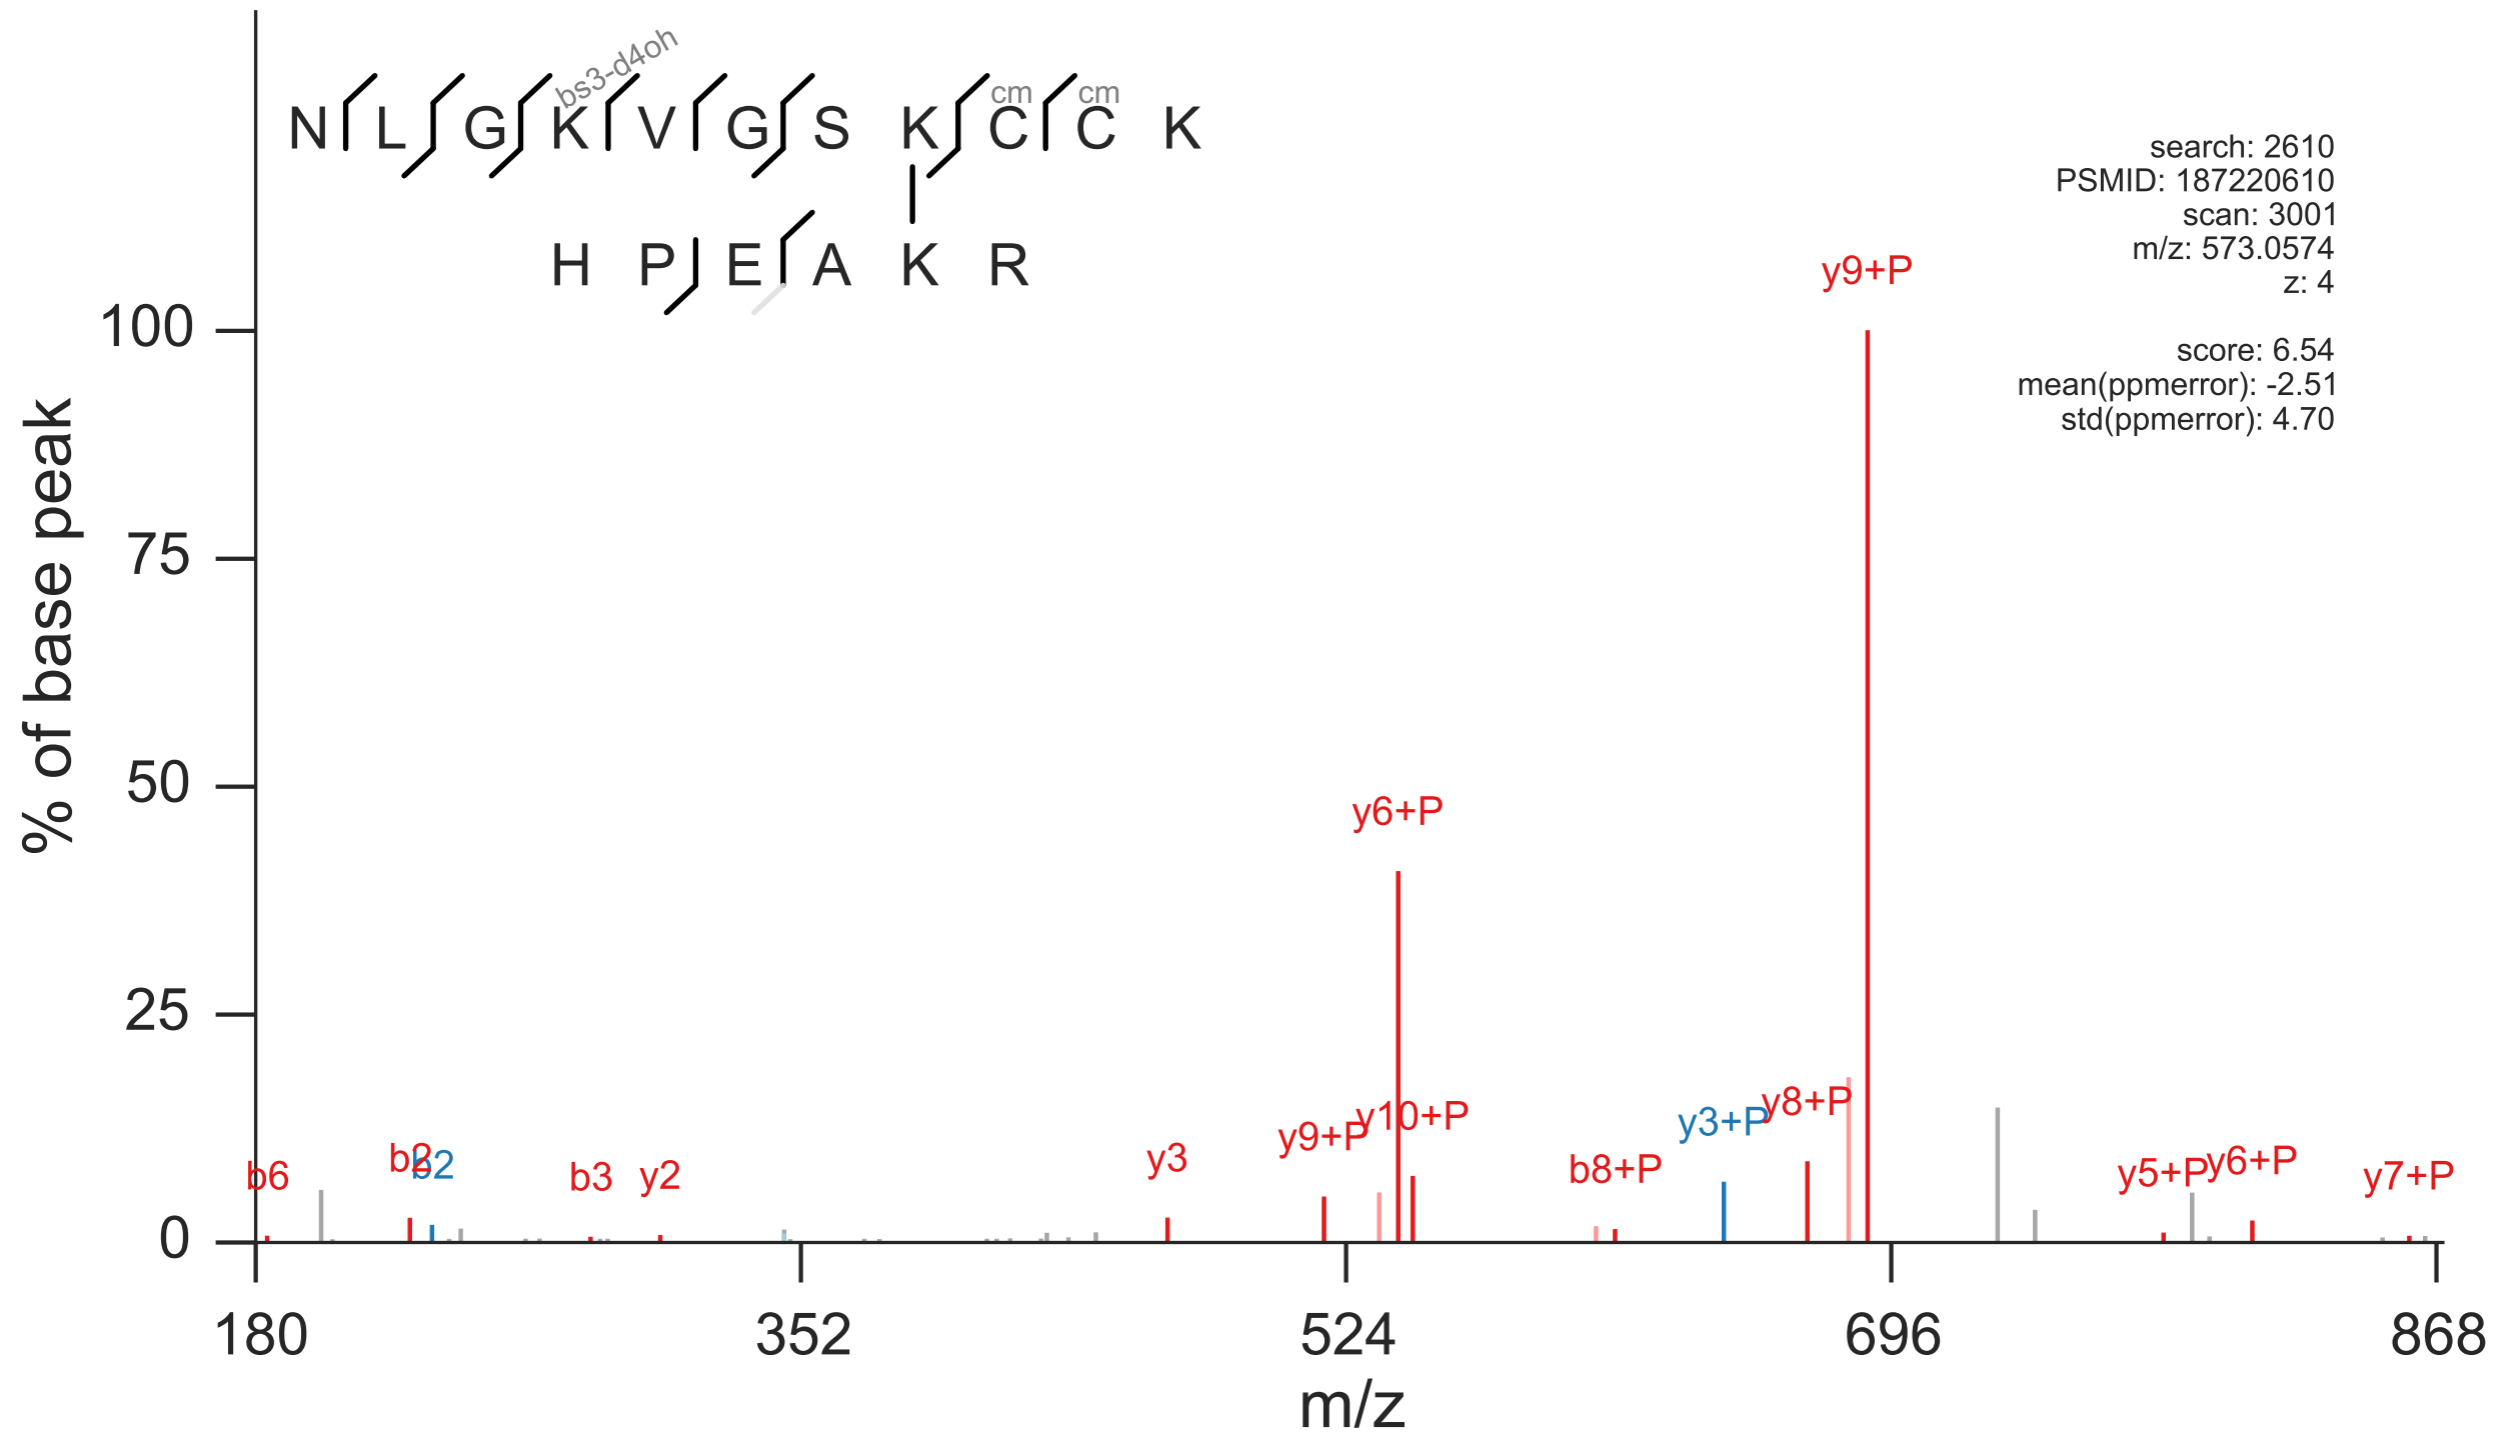

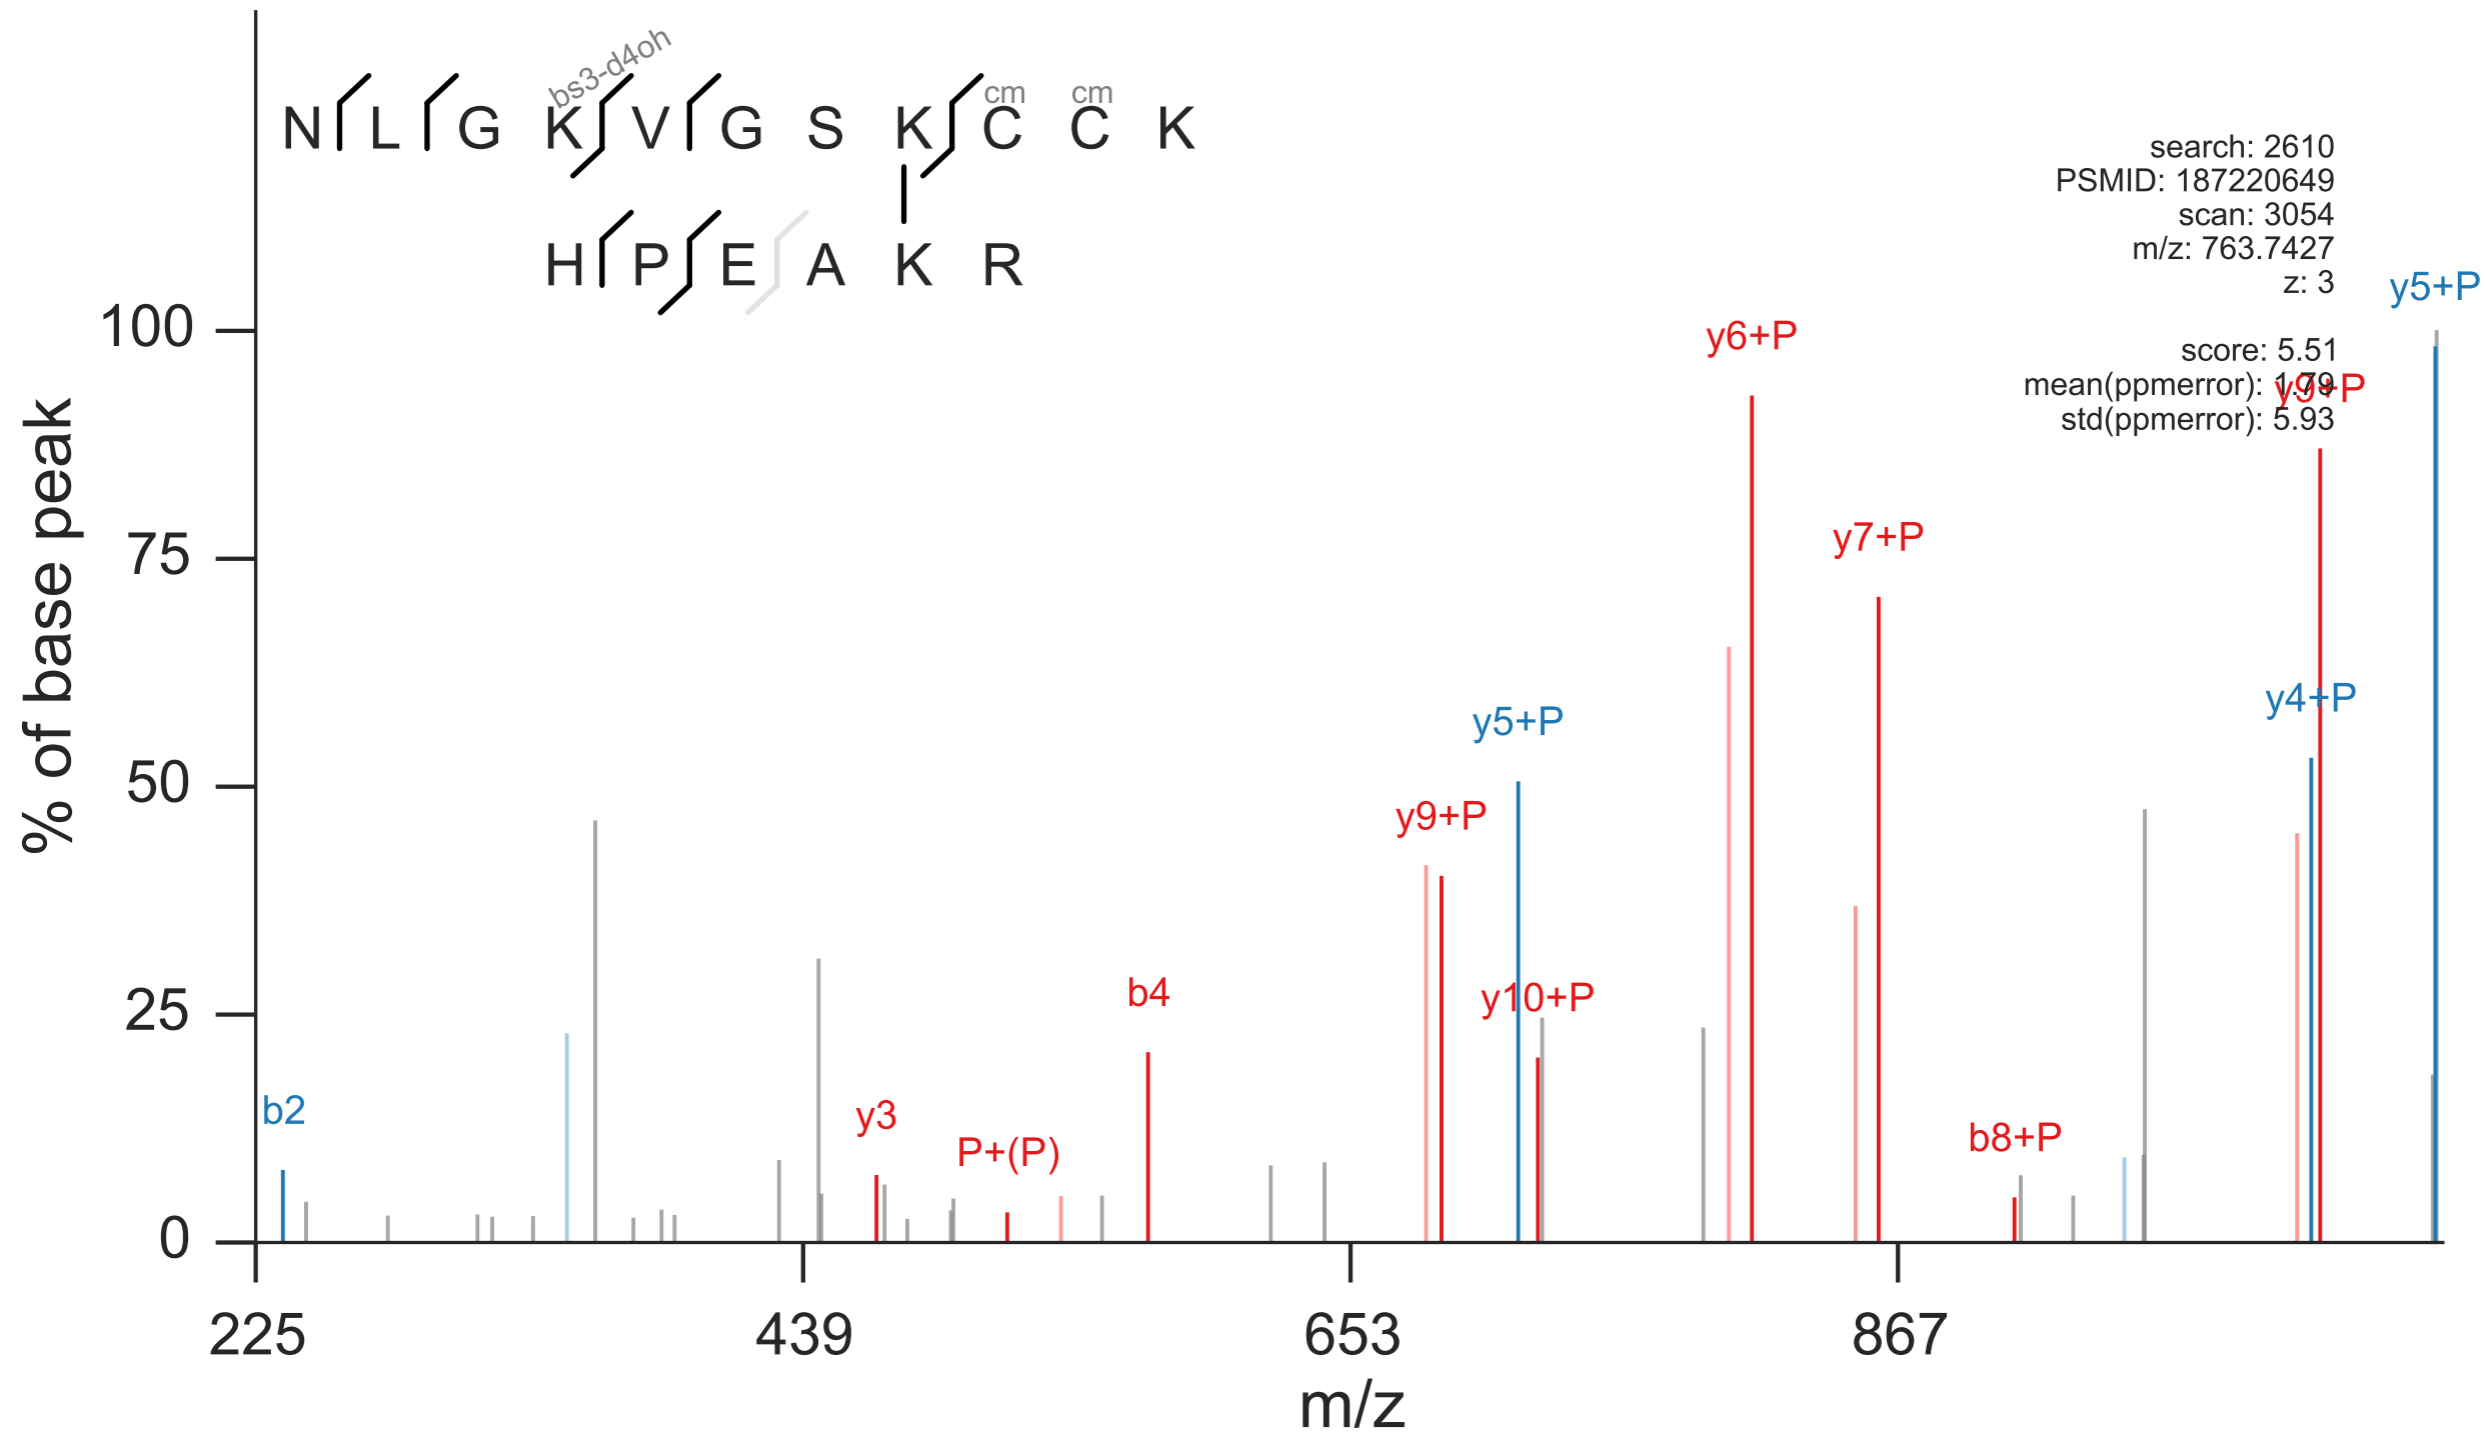

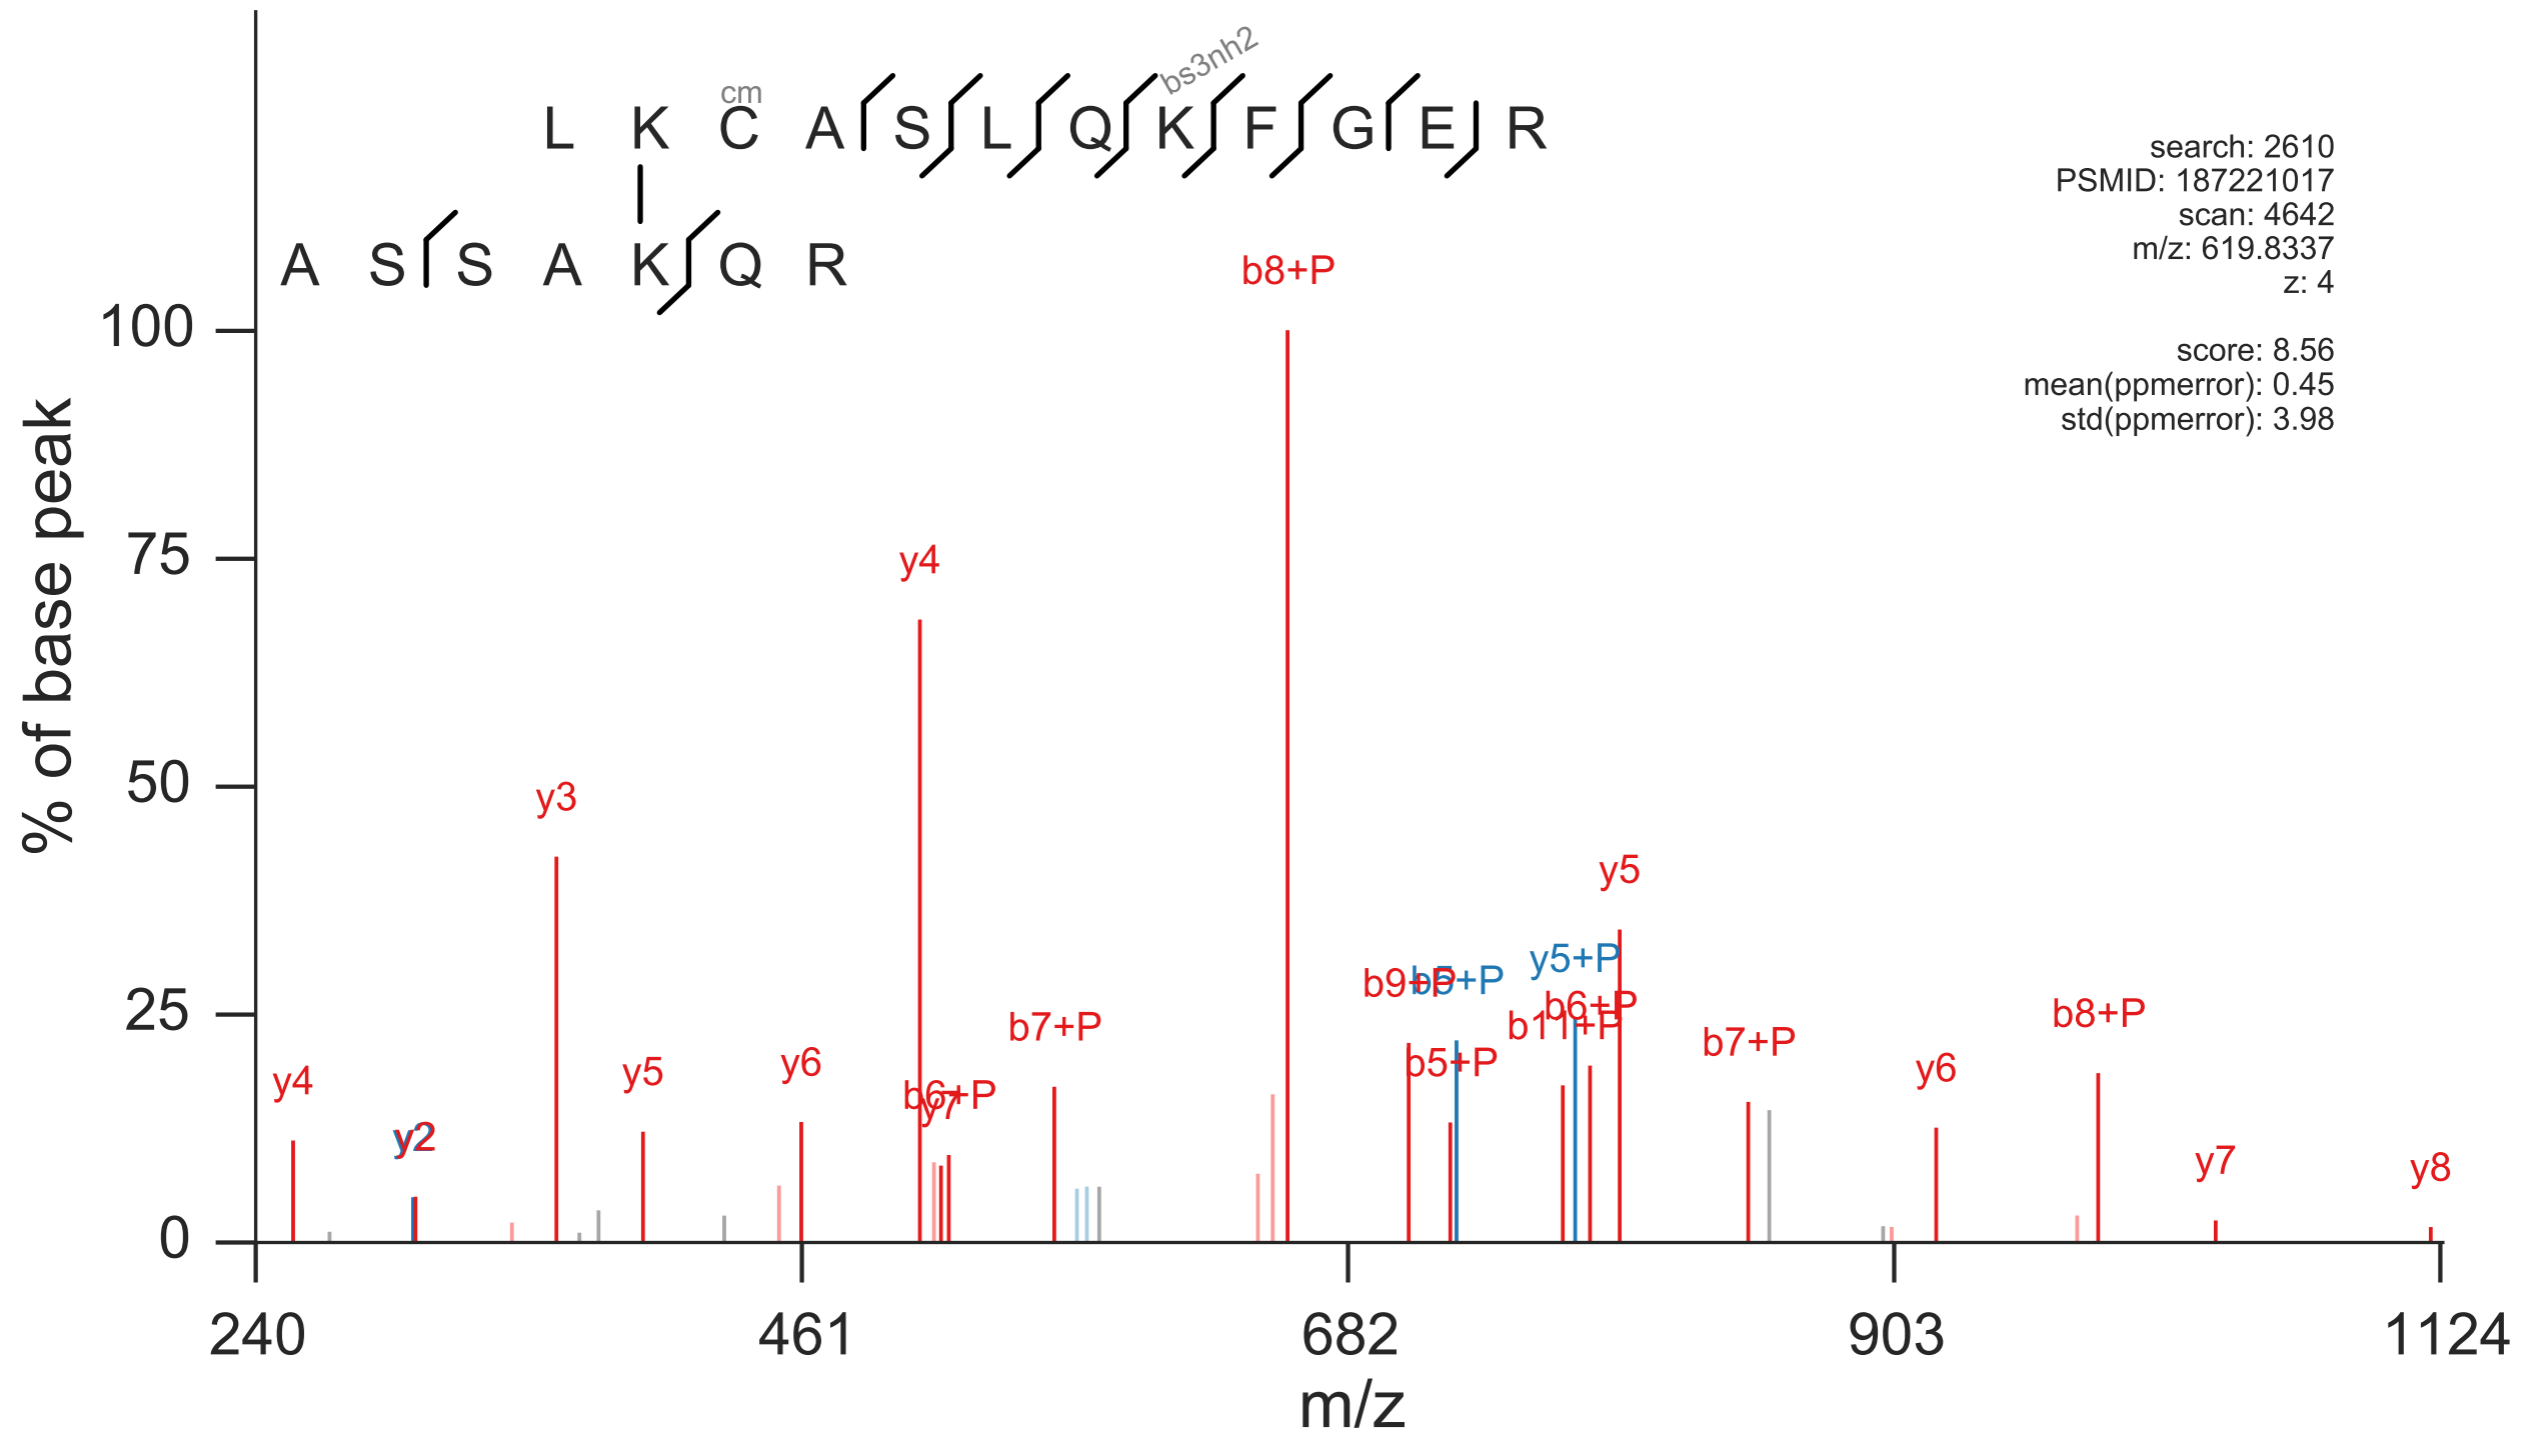

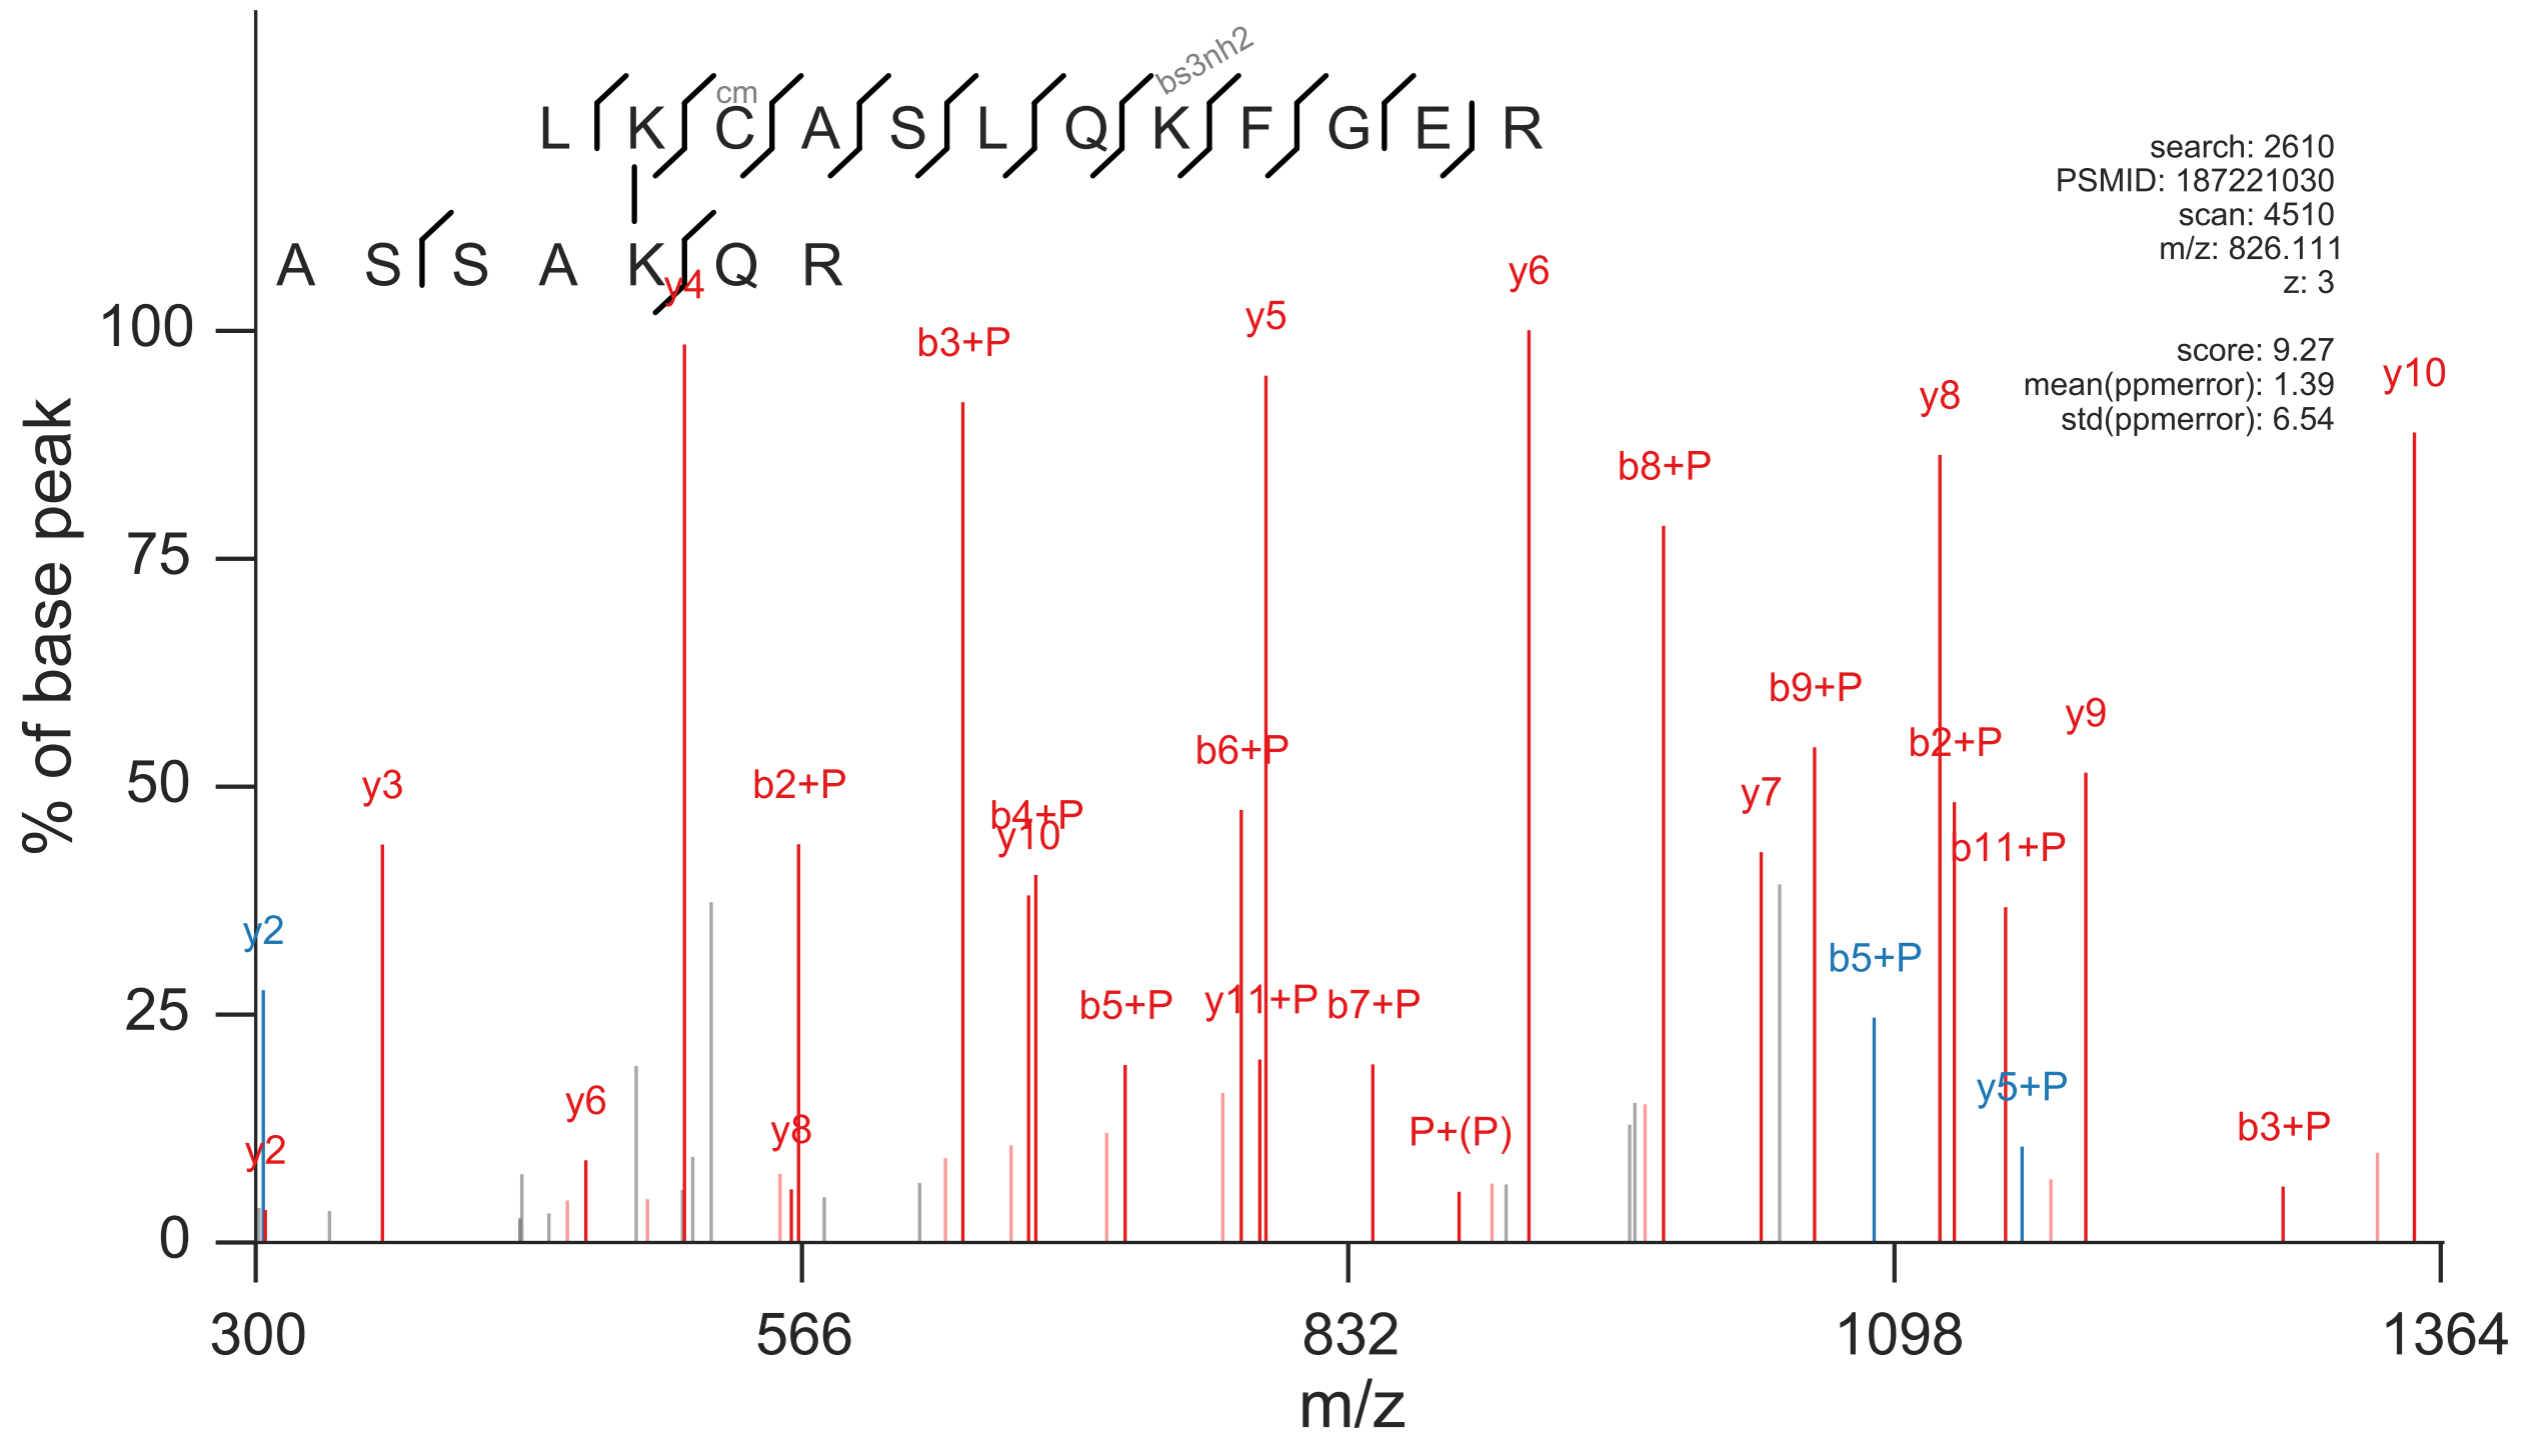



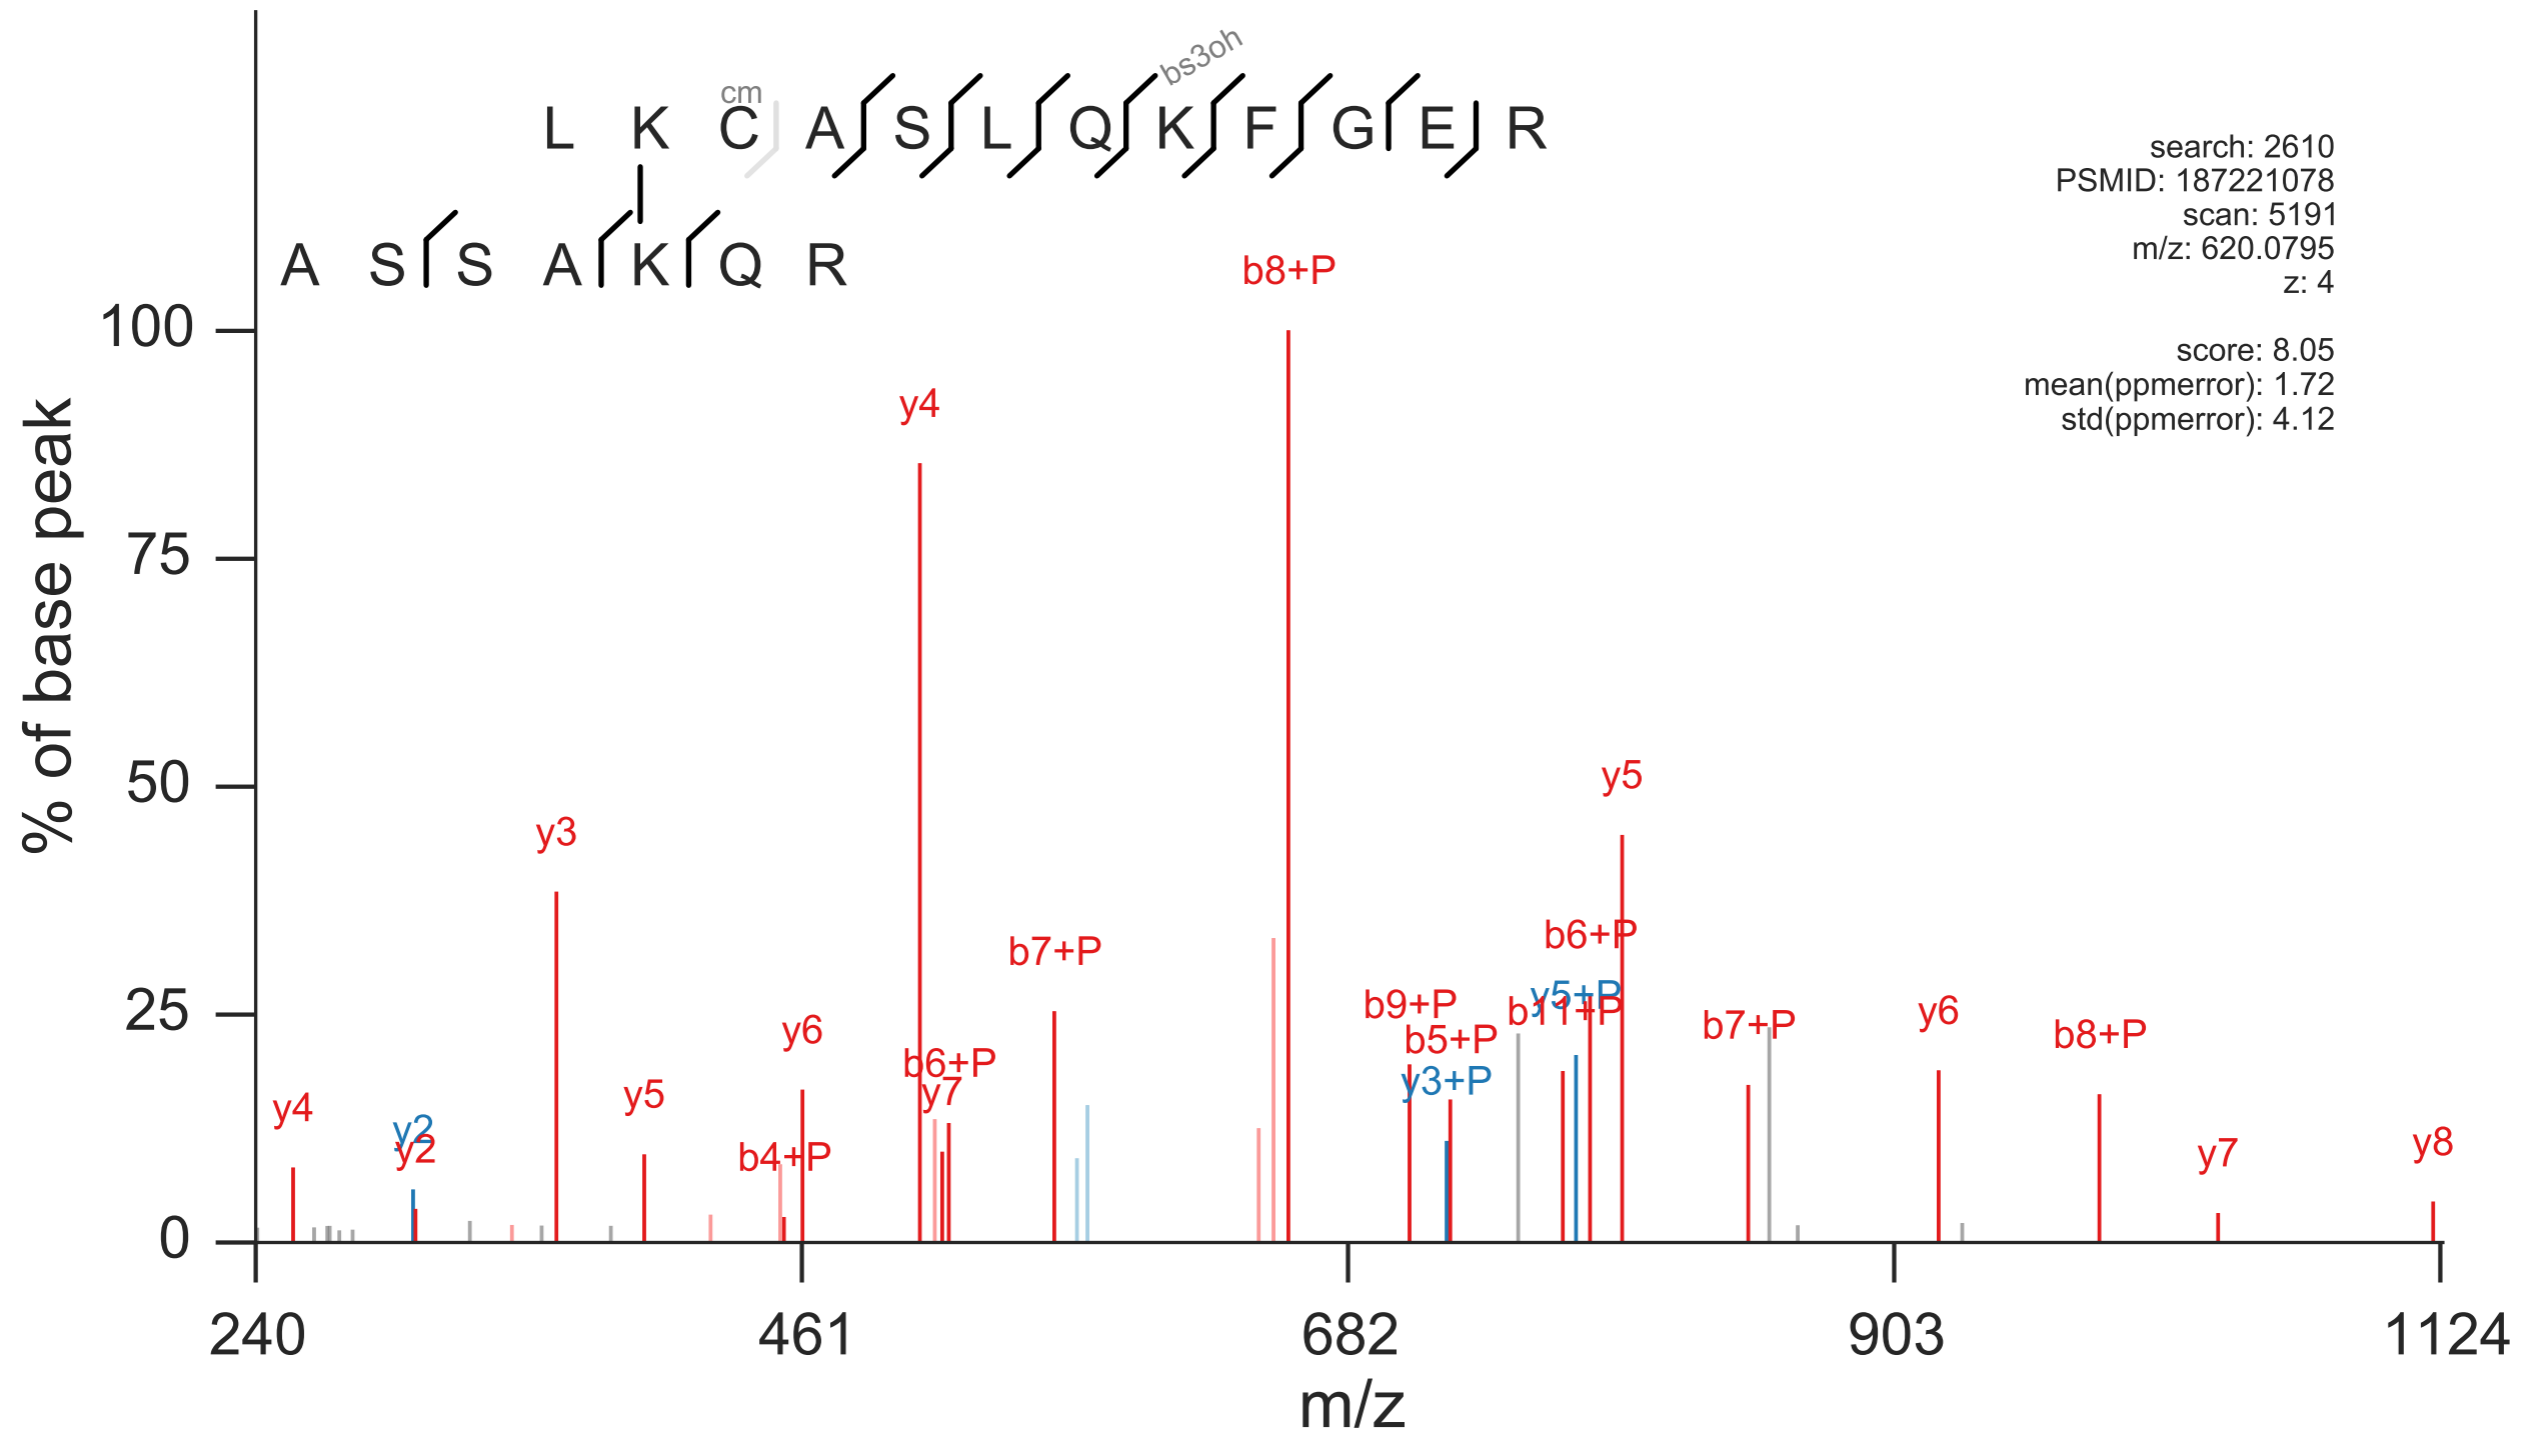

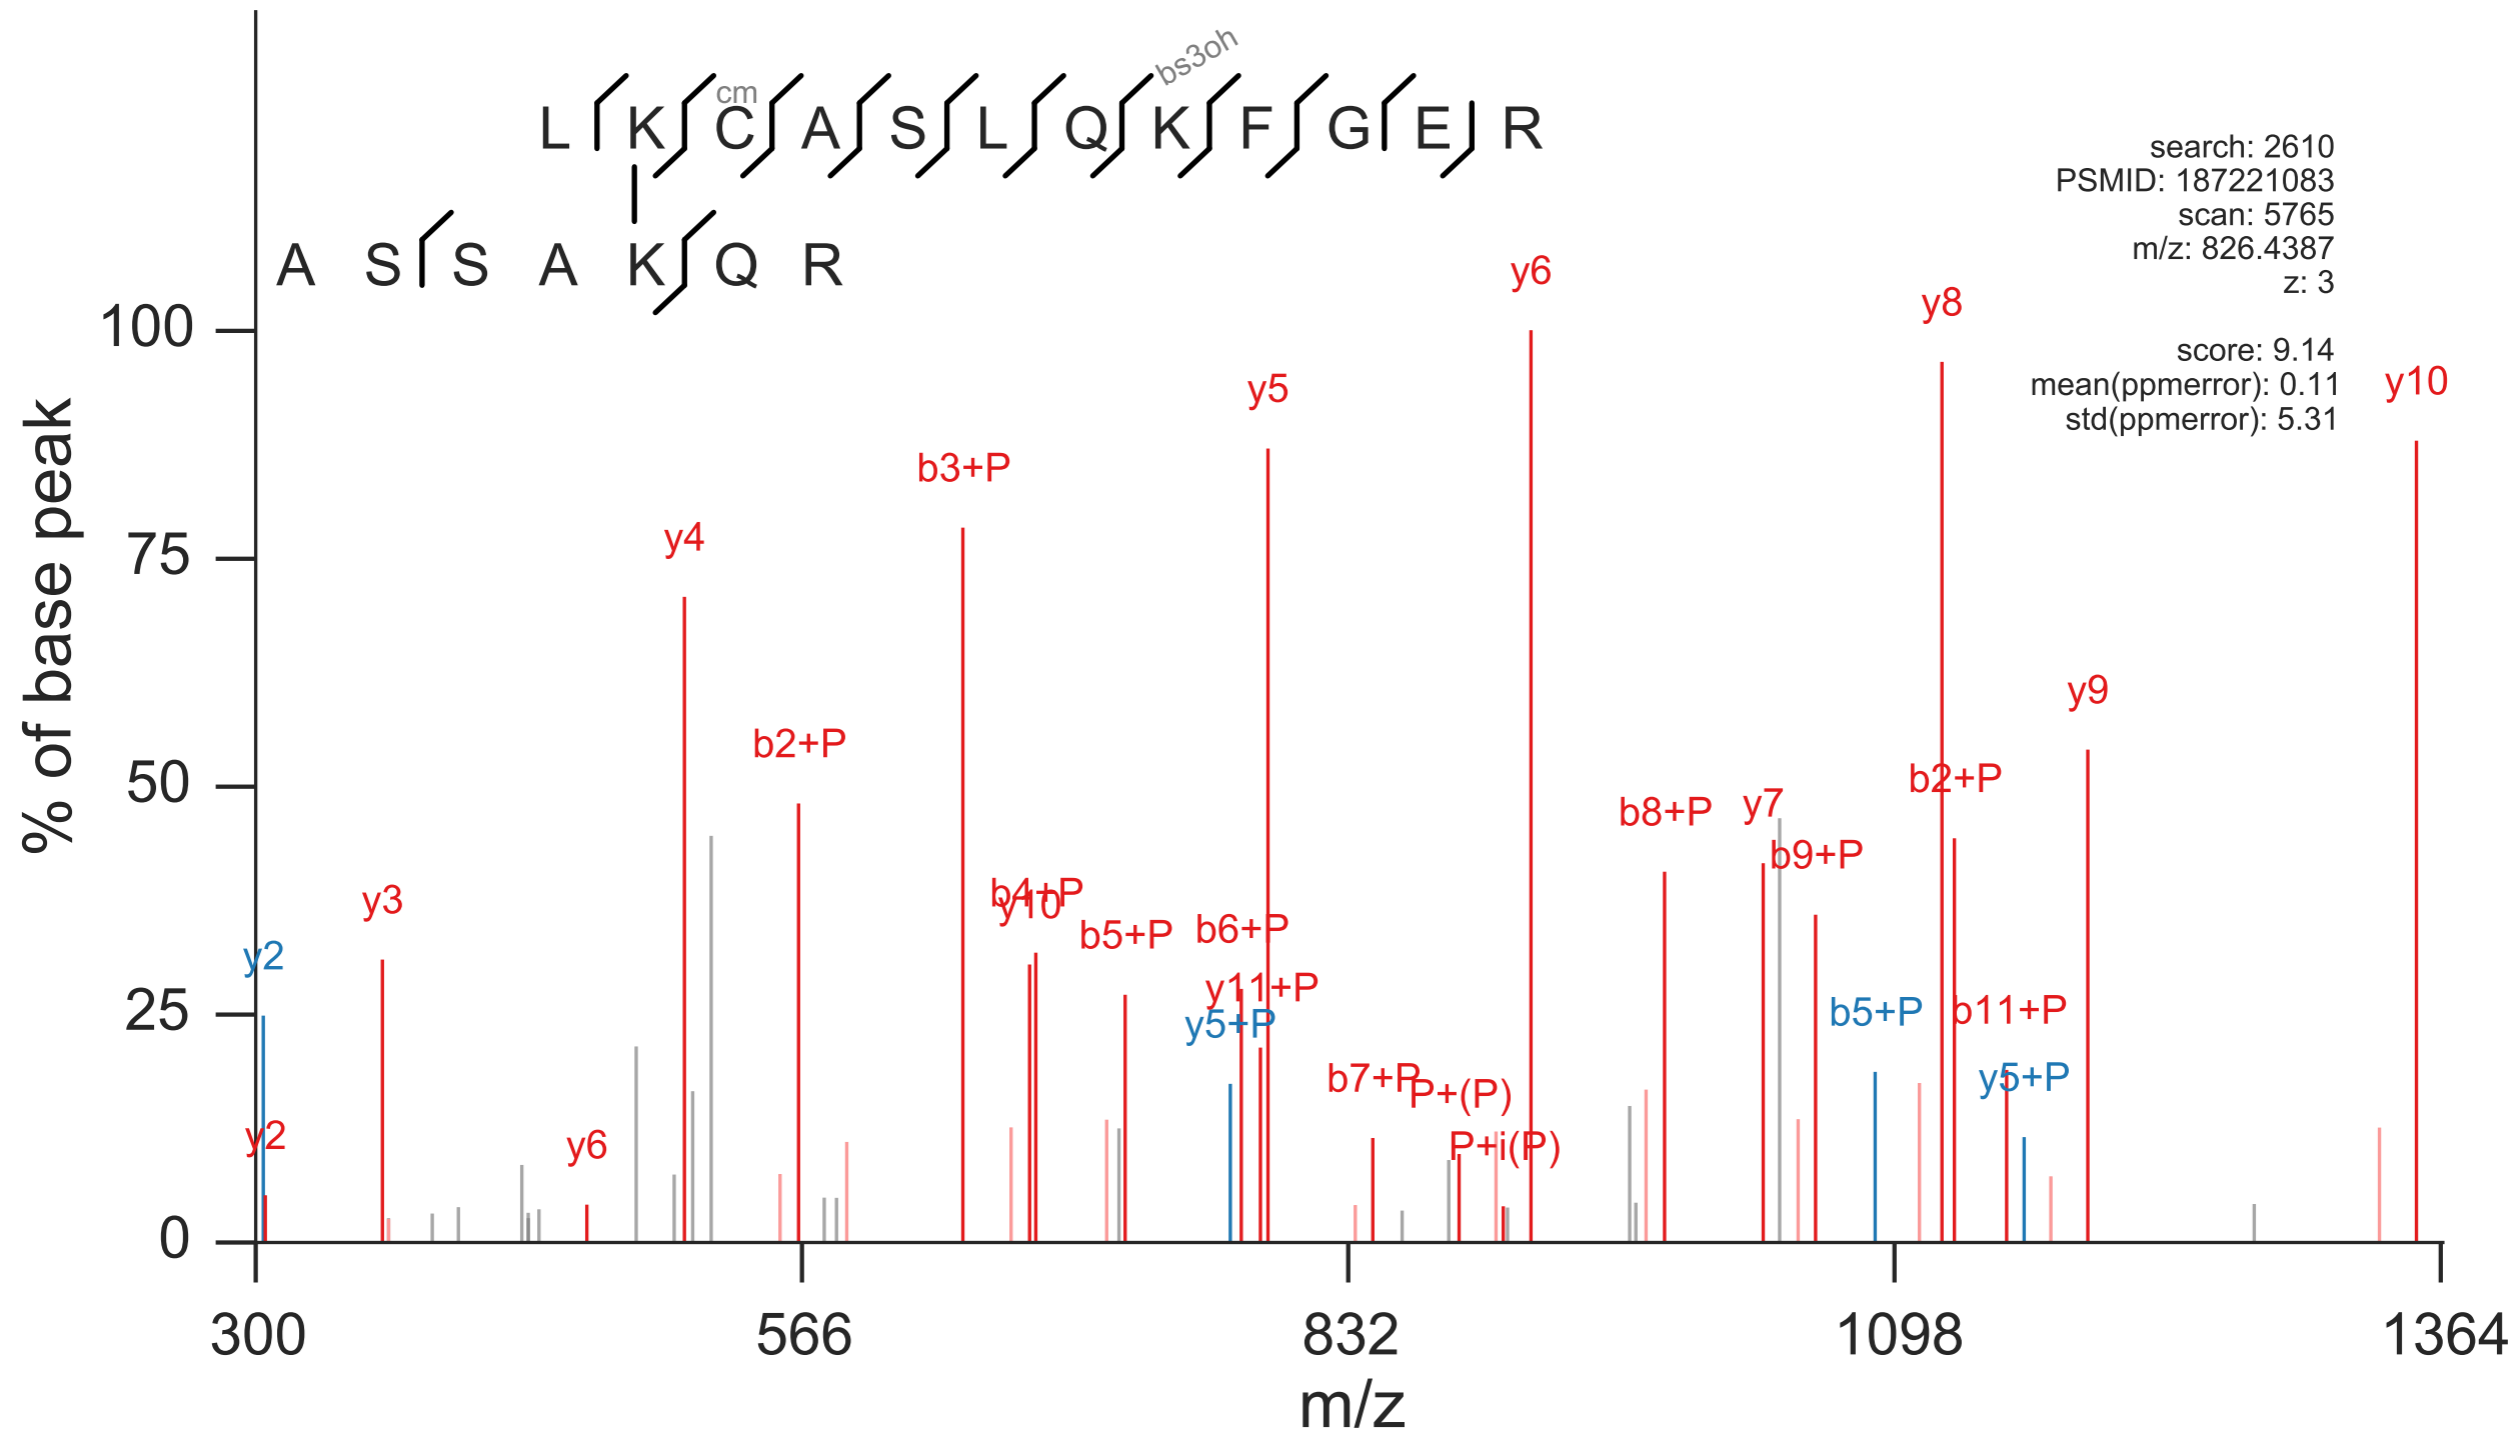

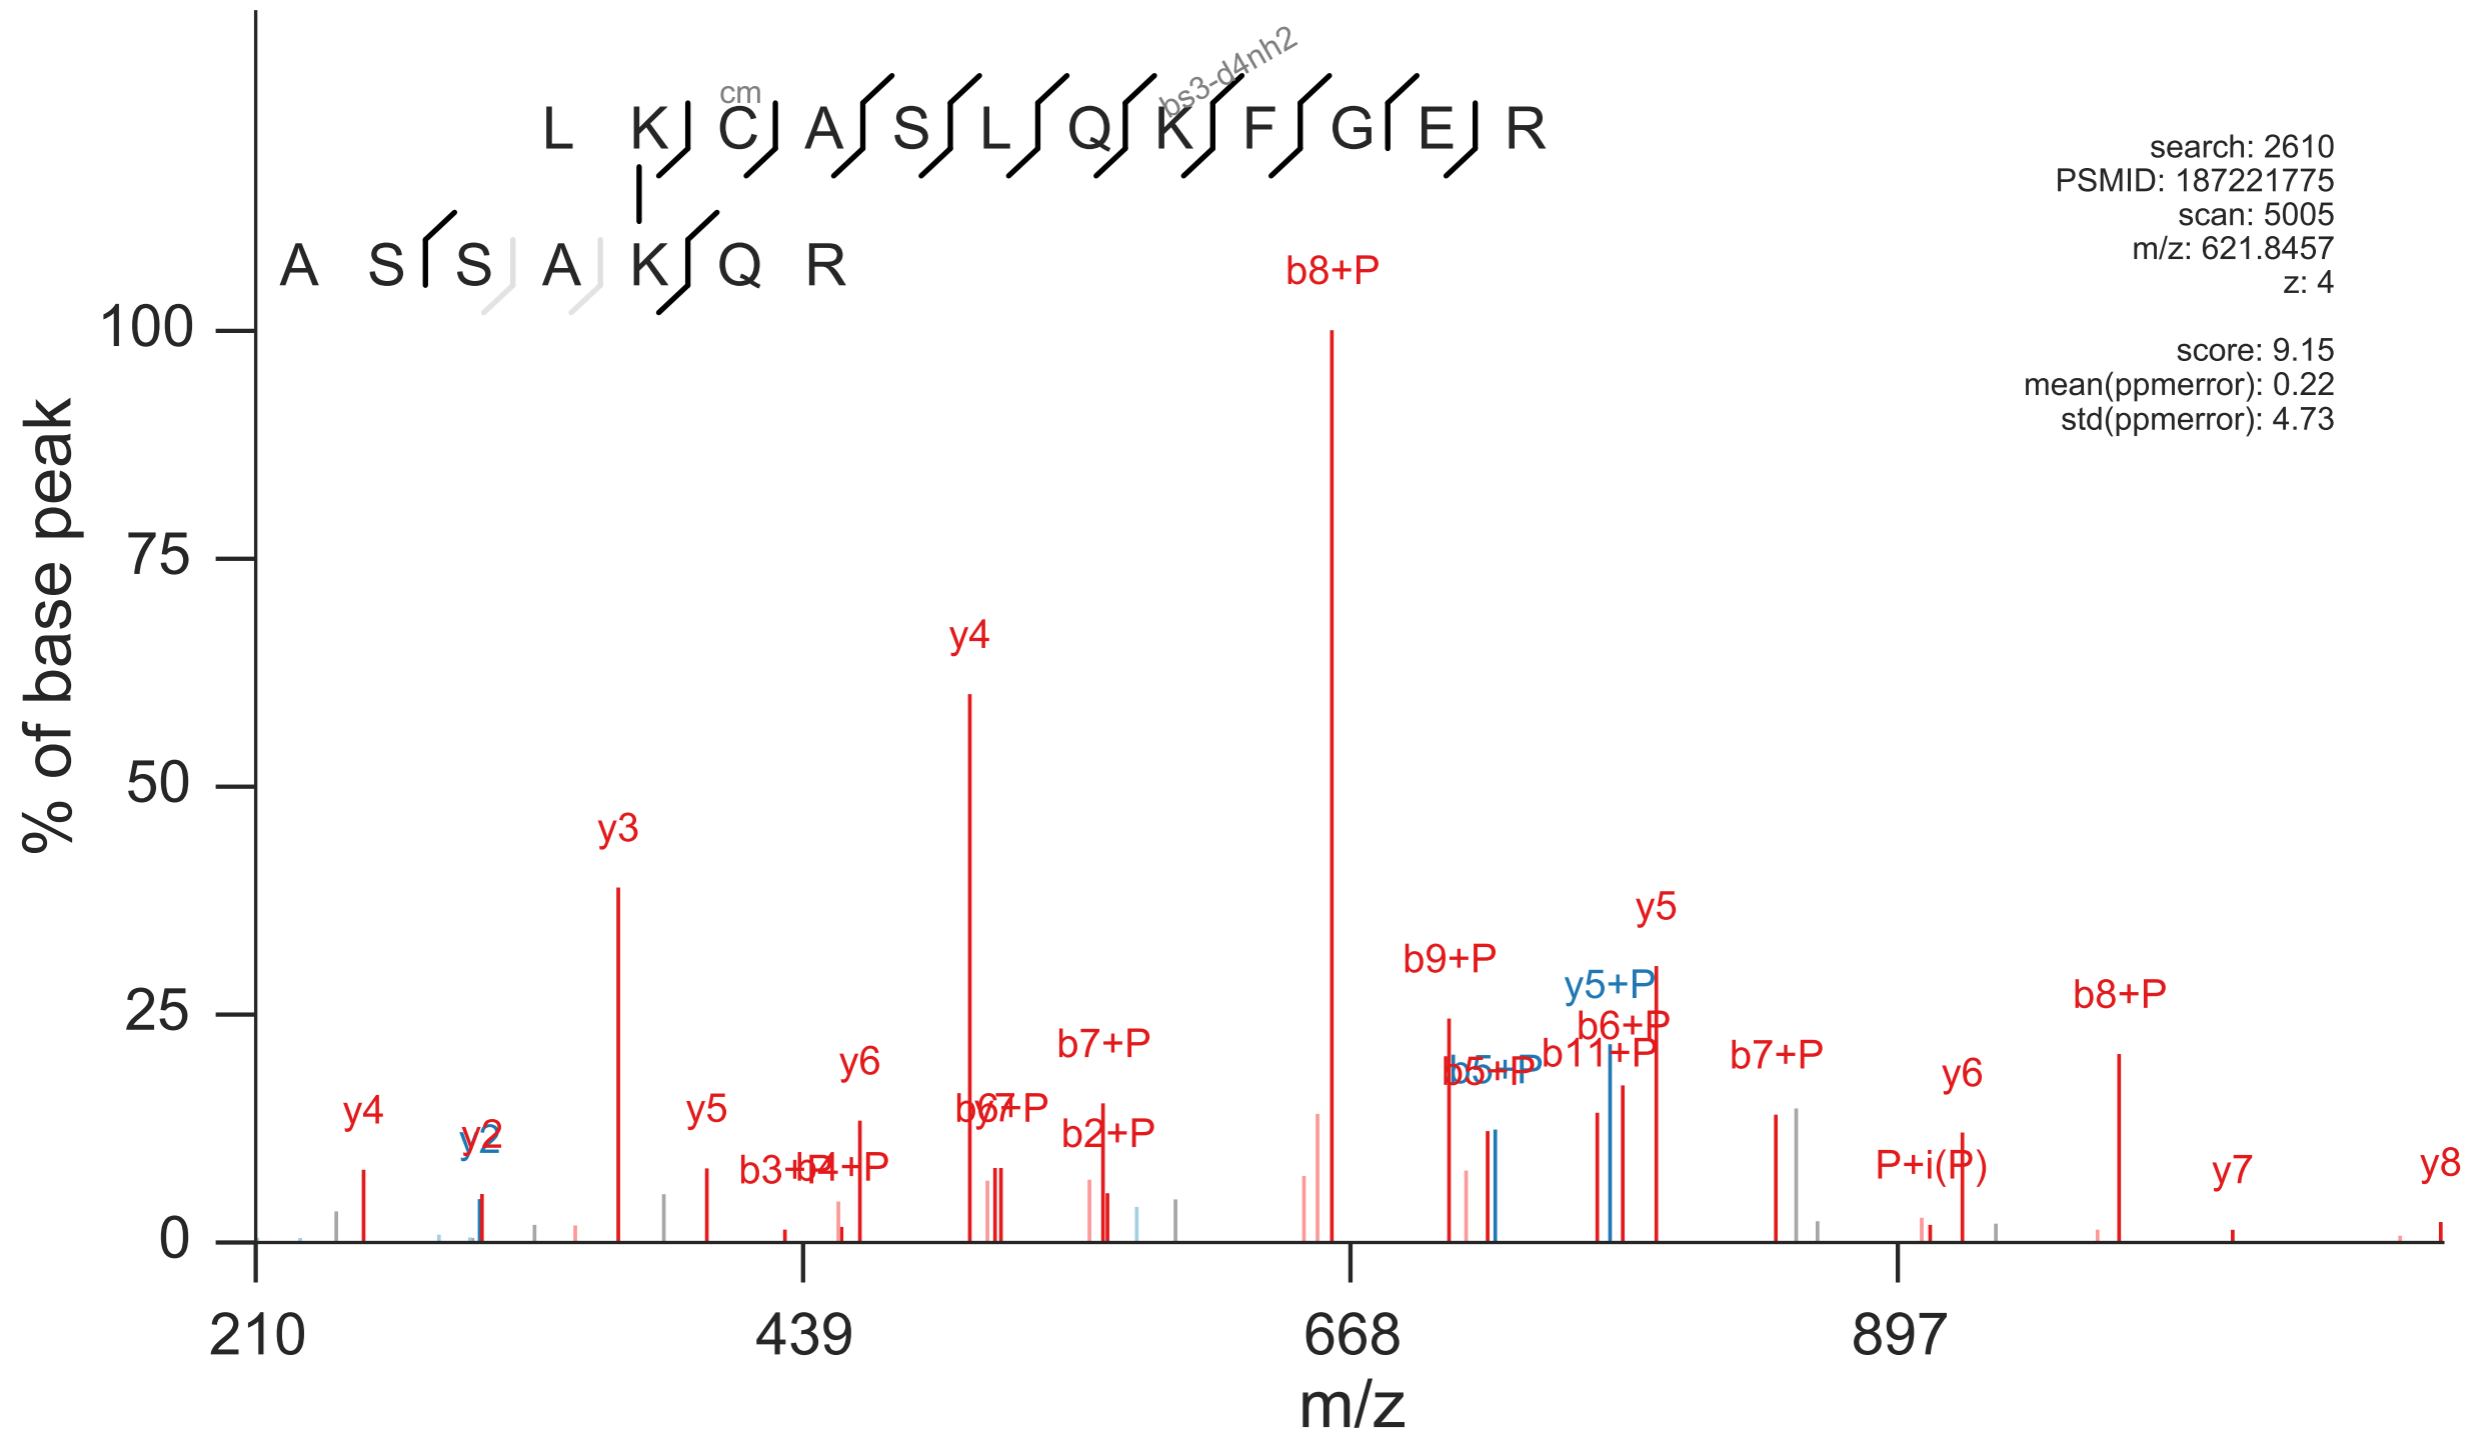

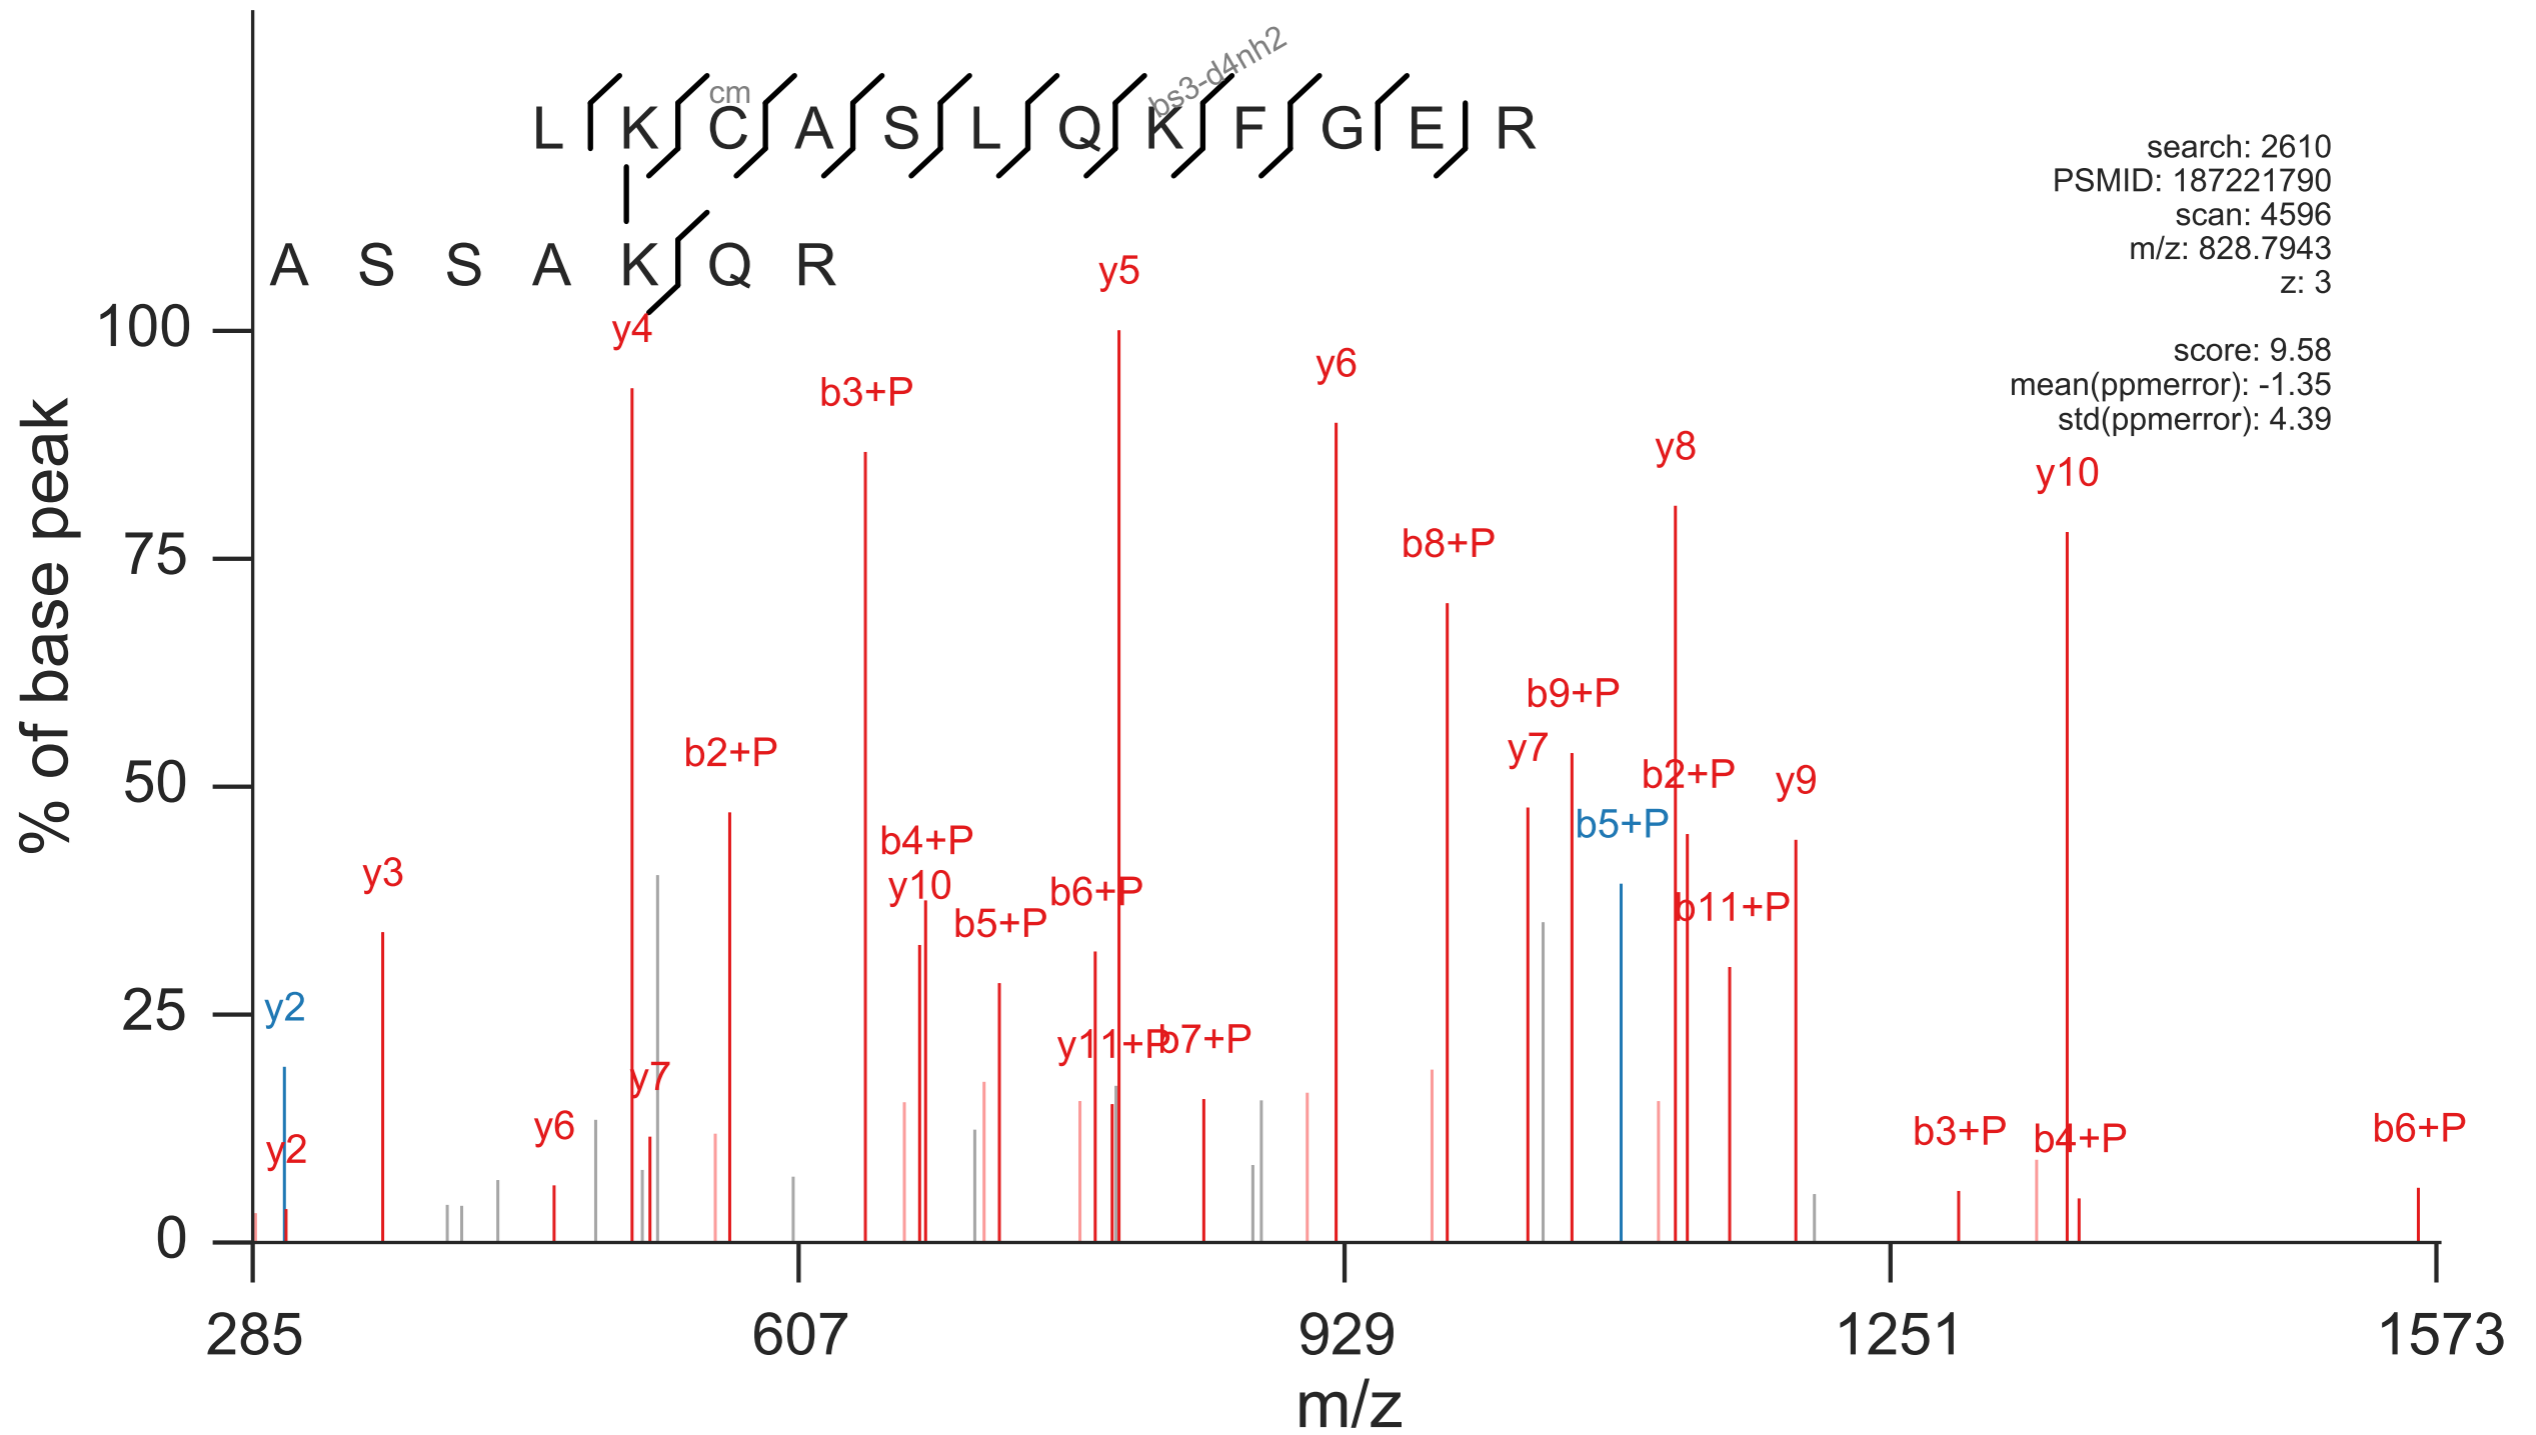

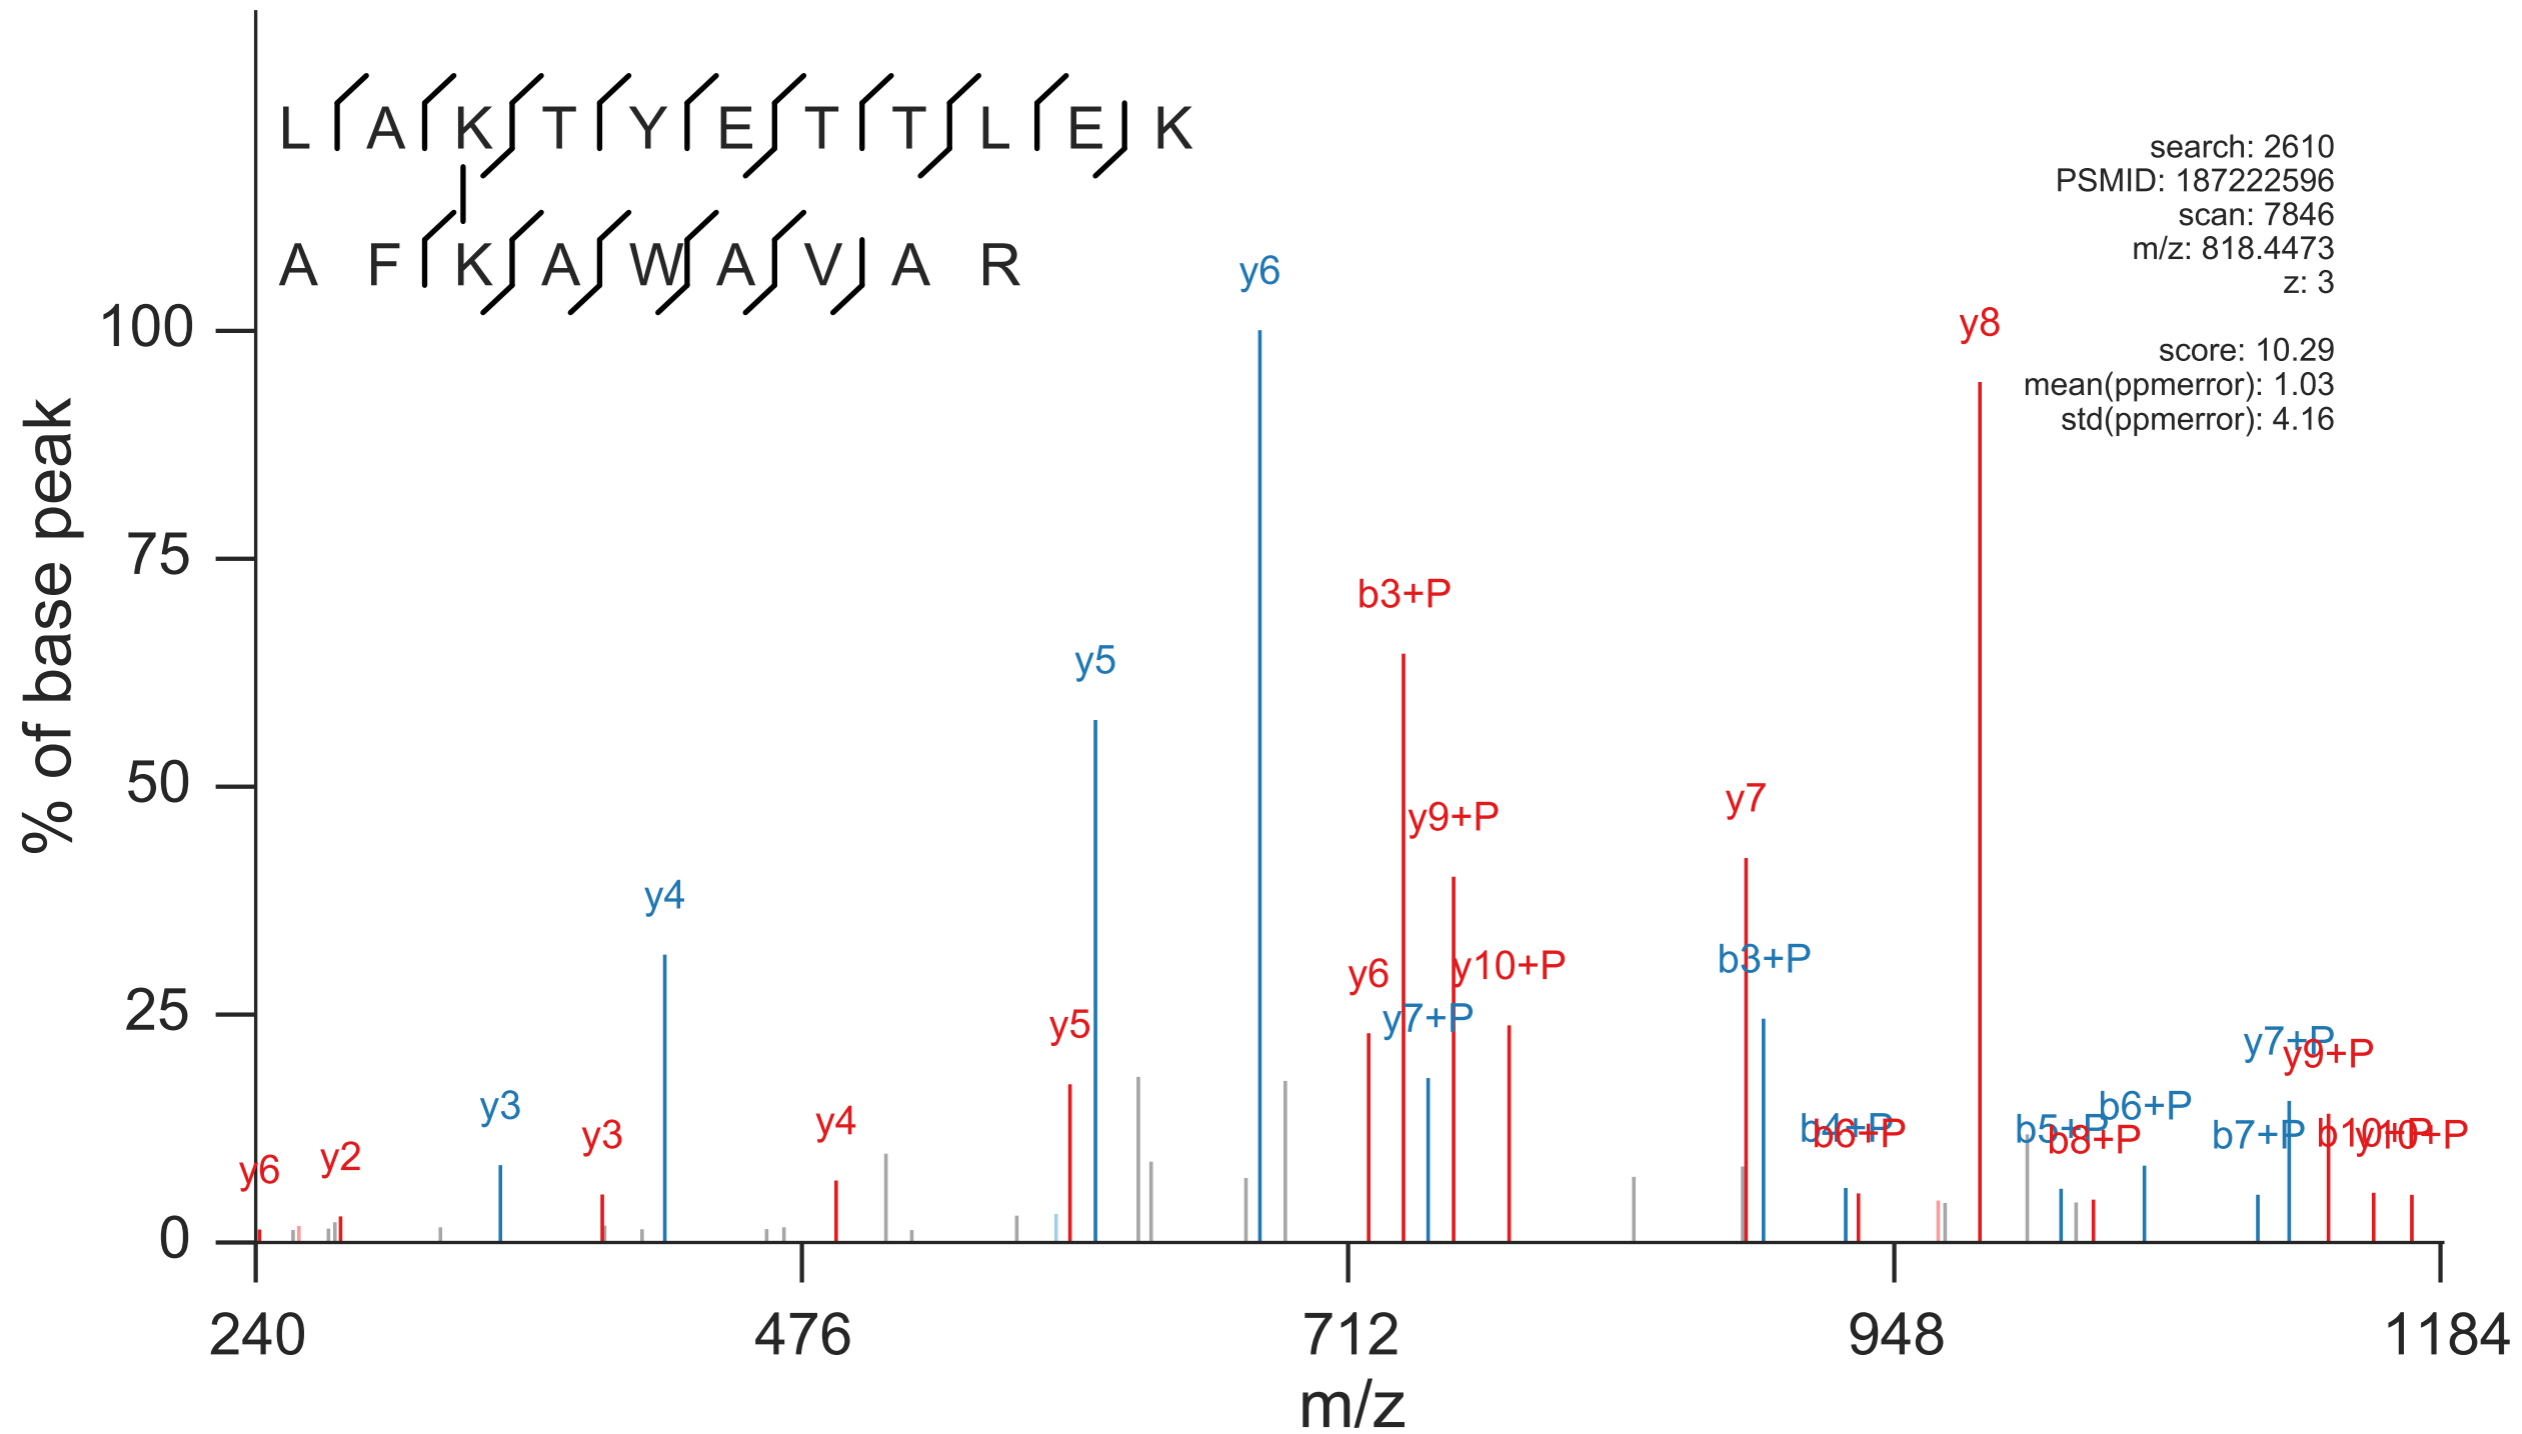

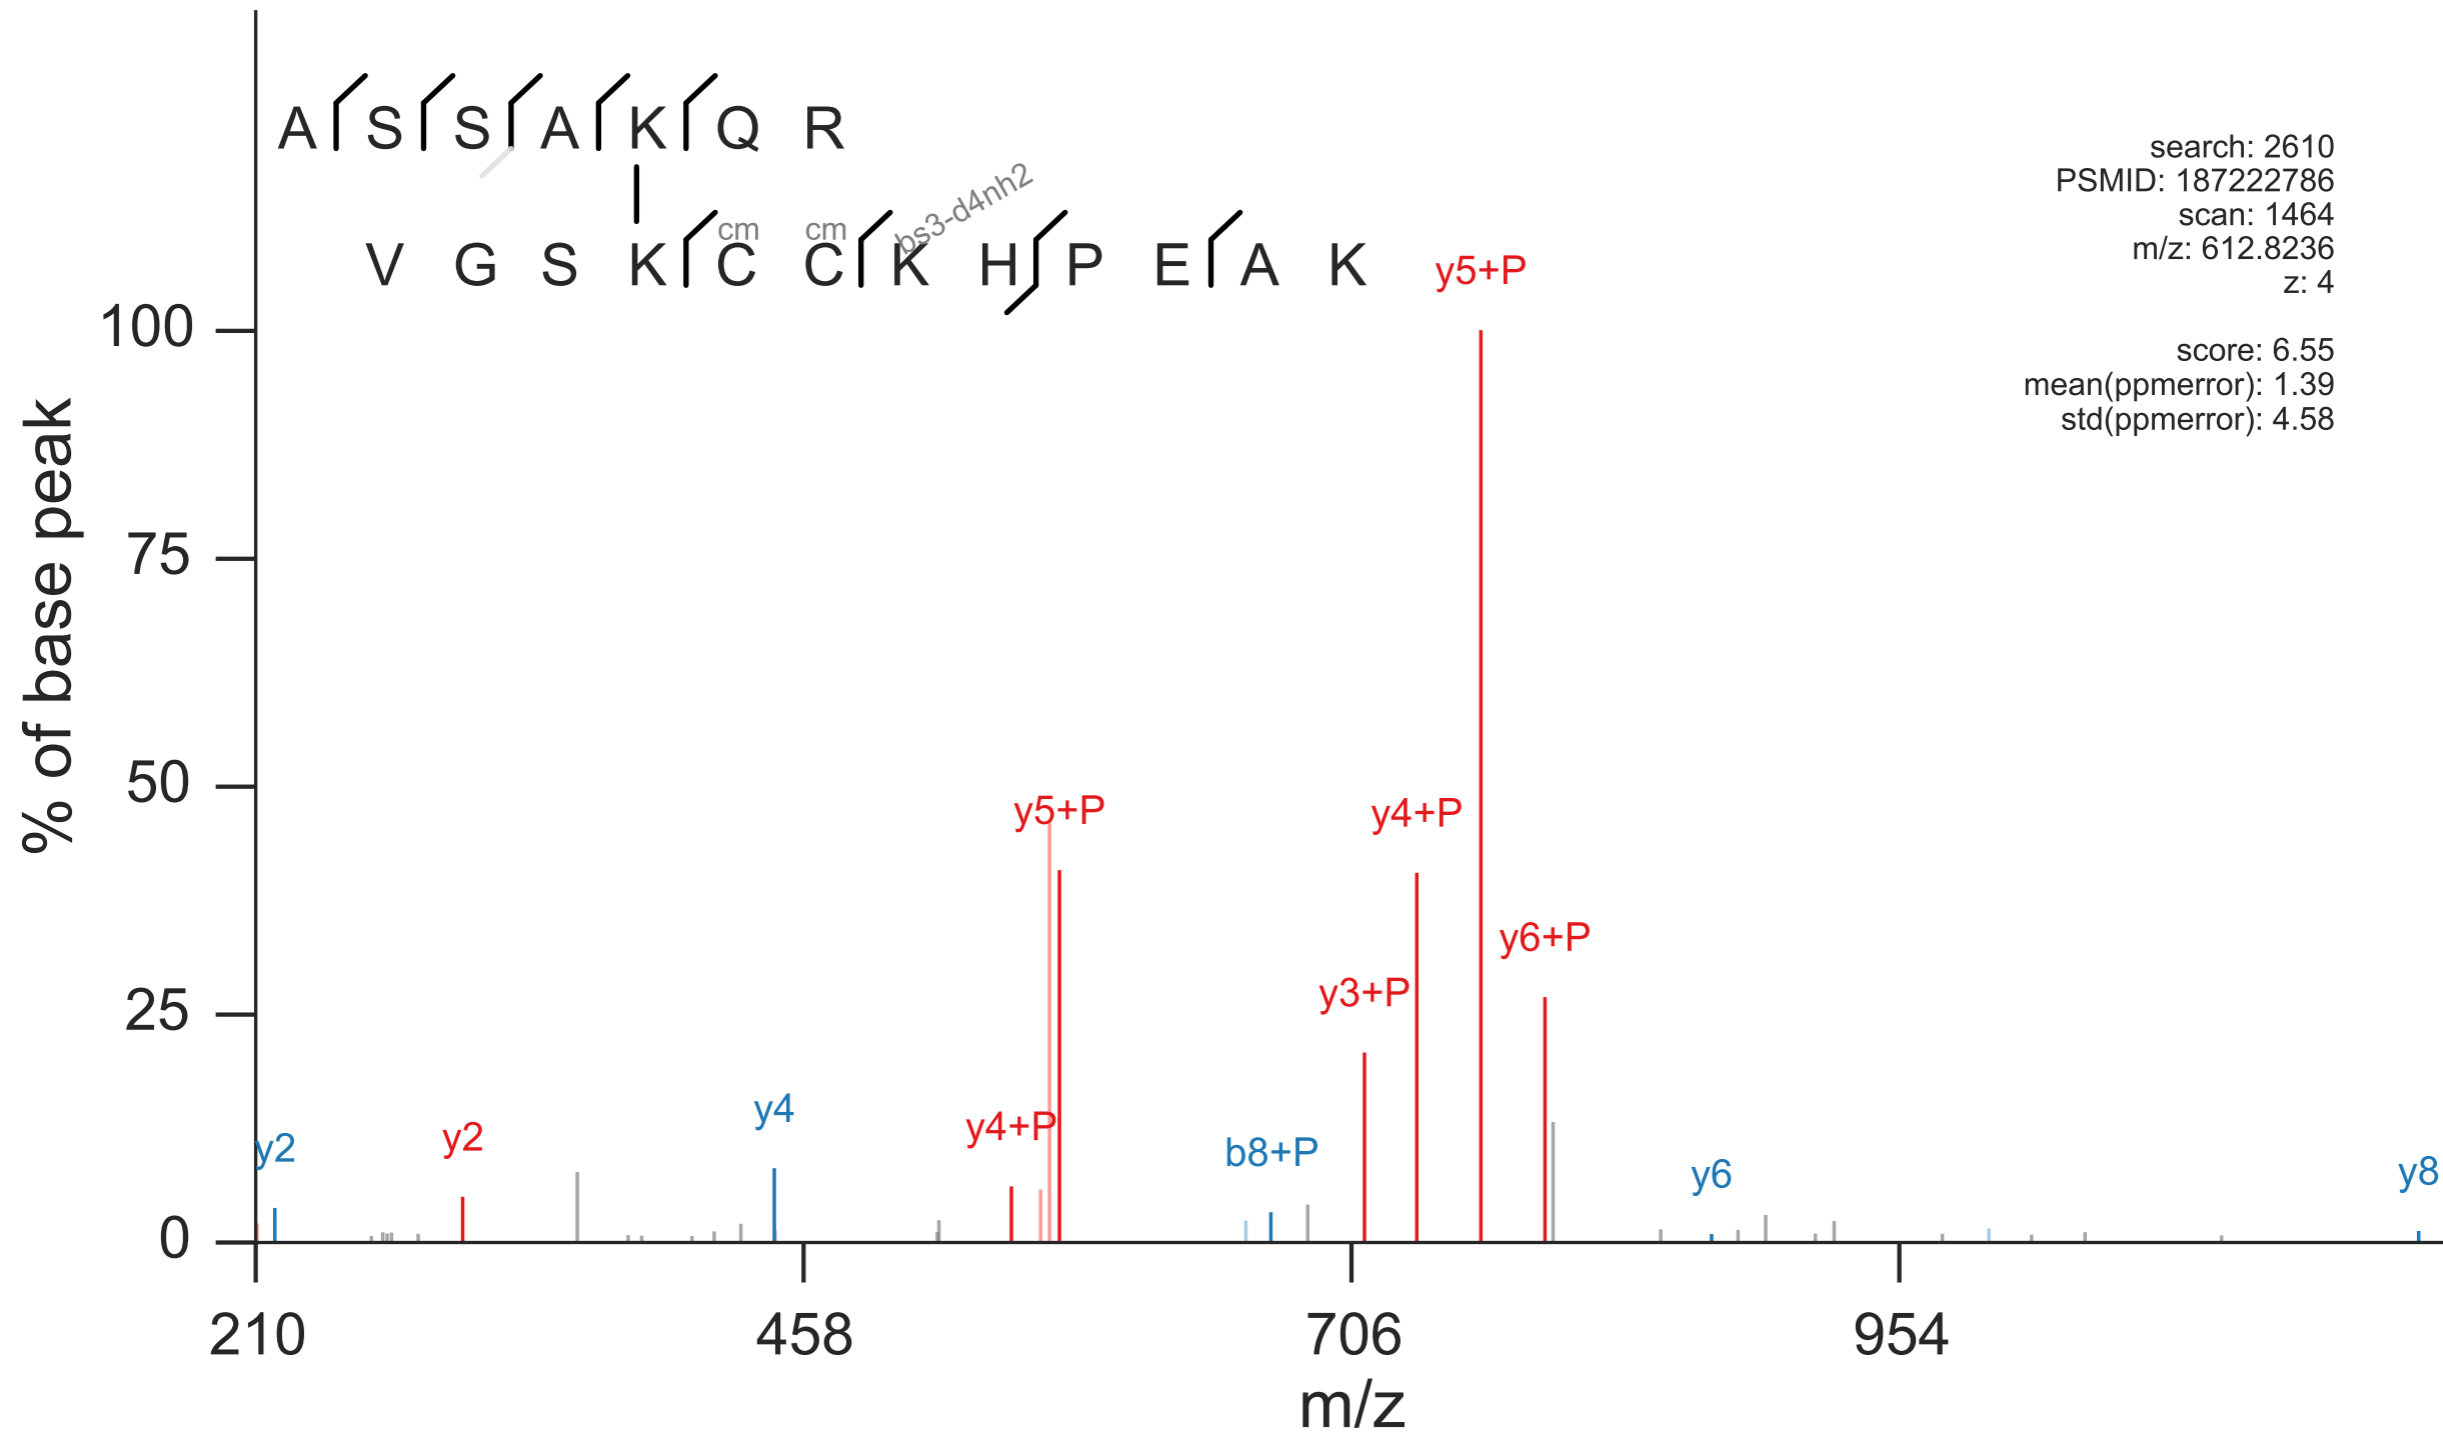

search: 2610  
 PSMID: 187222786  
 scan: 1464  
 m/z: 612.8236  
 z: 4

score: 6.55  
 mean(ppmerror): 1.39  
 std(ppmerror): 4.58

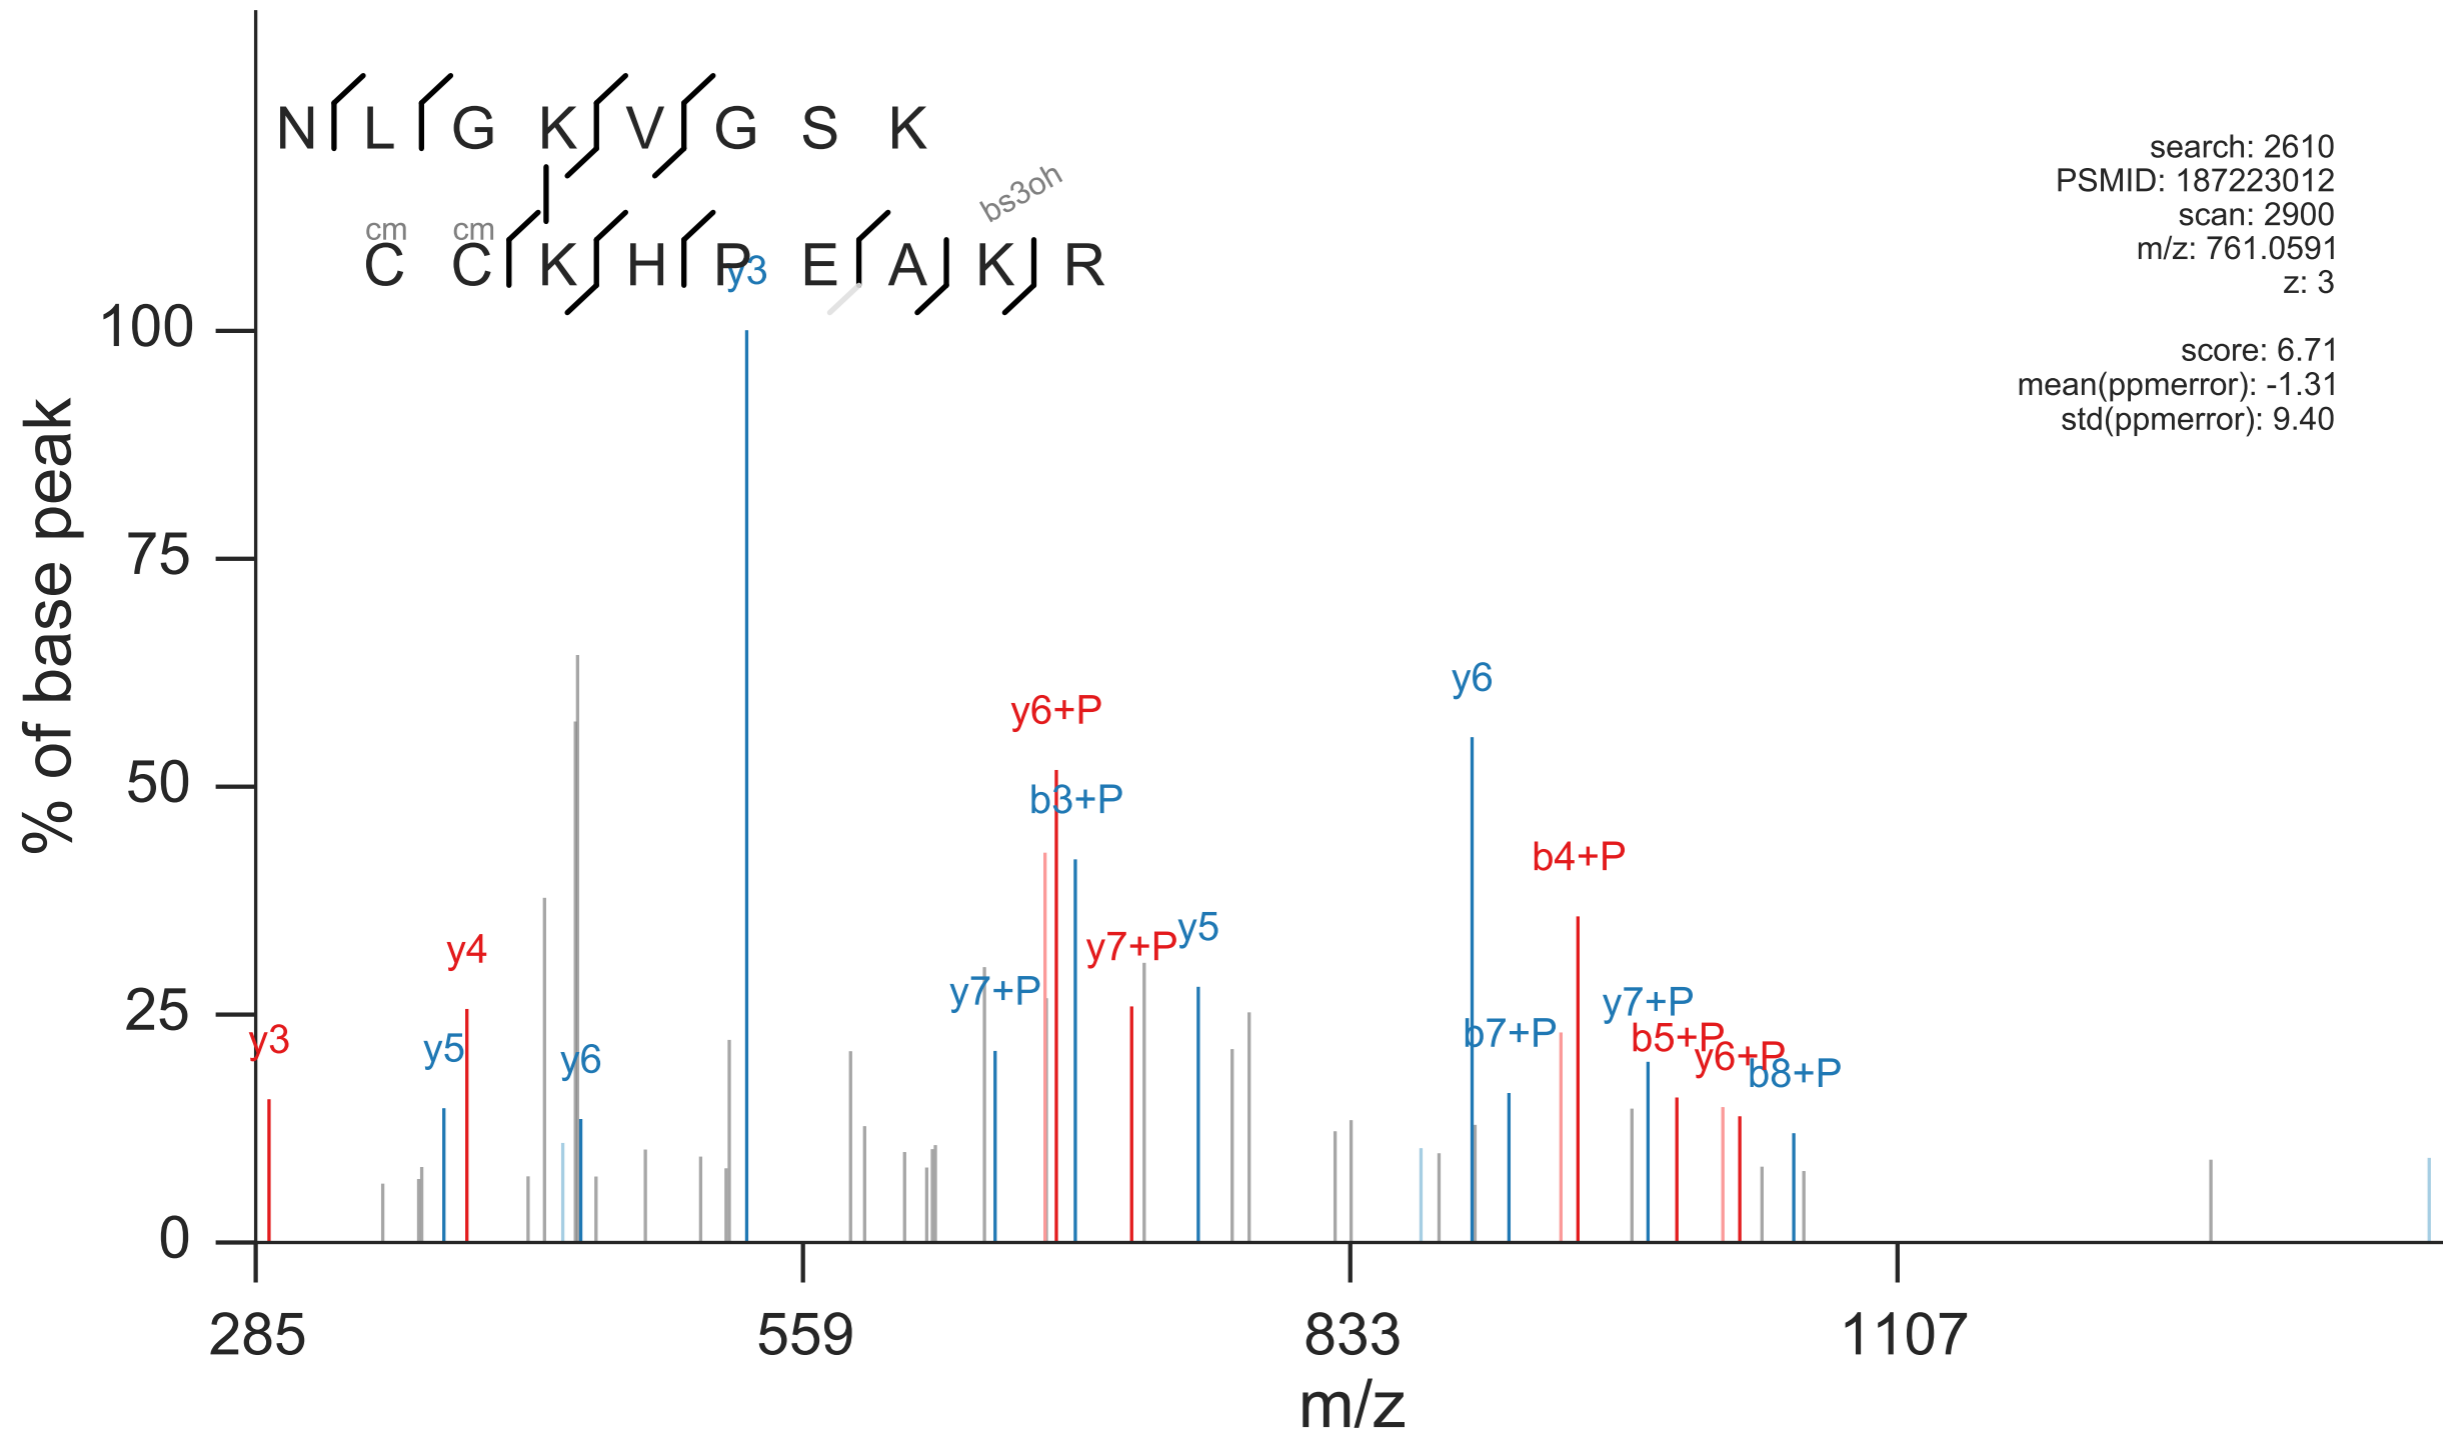

search: 2610  
 PSMID: 187223012  
 scan: 2900  
 m/z: 761.0591  
 z: 3

score: 6.71  
 mean(ppmerror): -1.31  
 std(ppmerror): 9.40

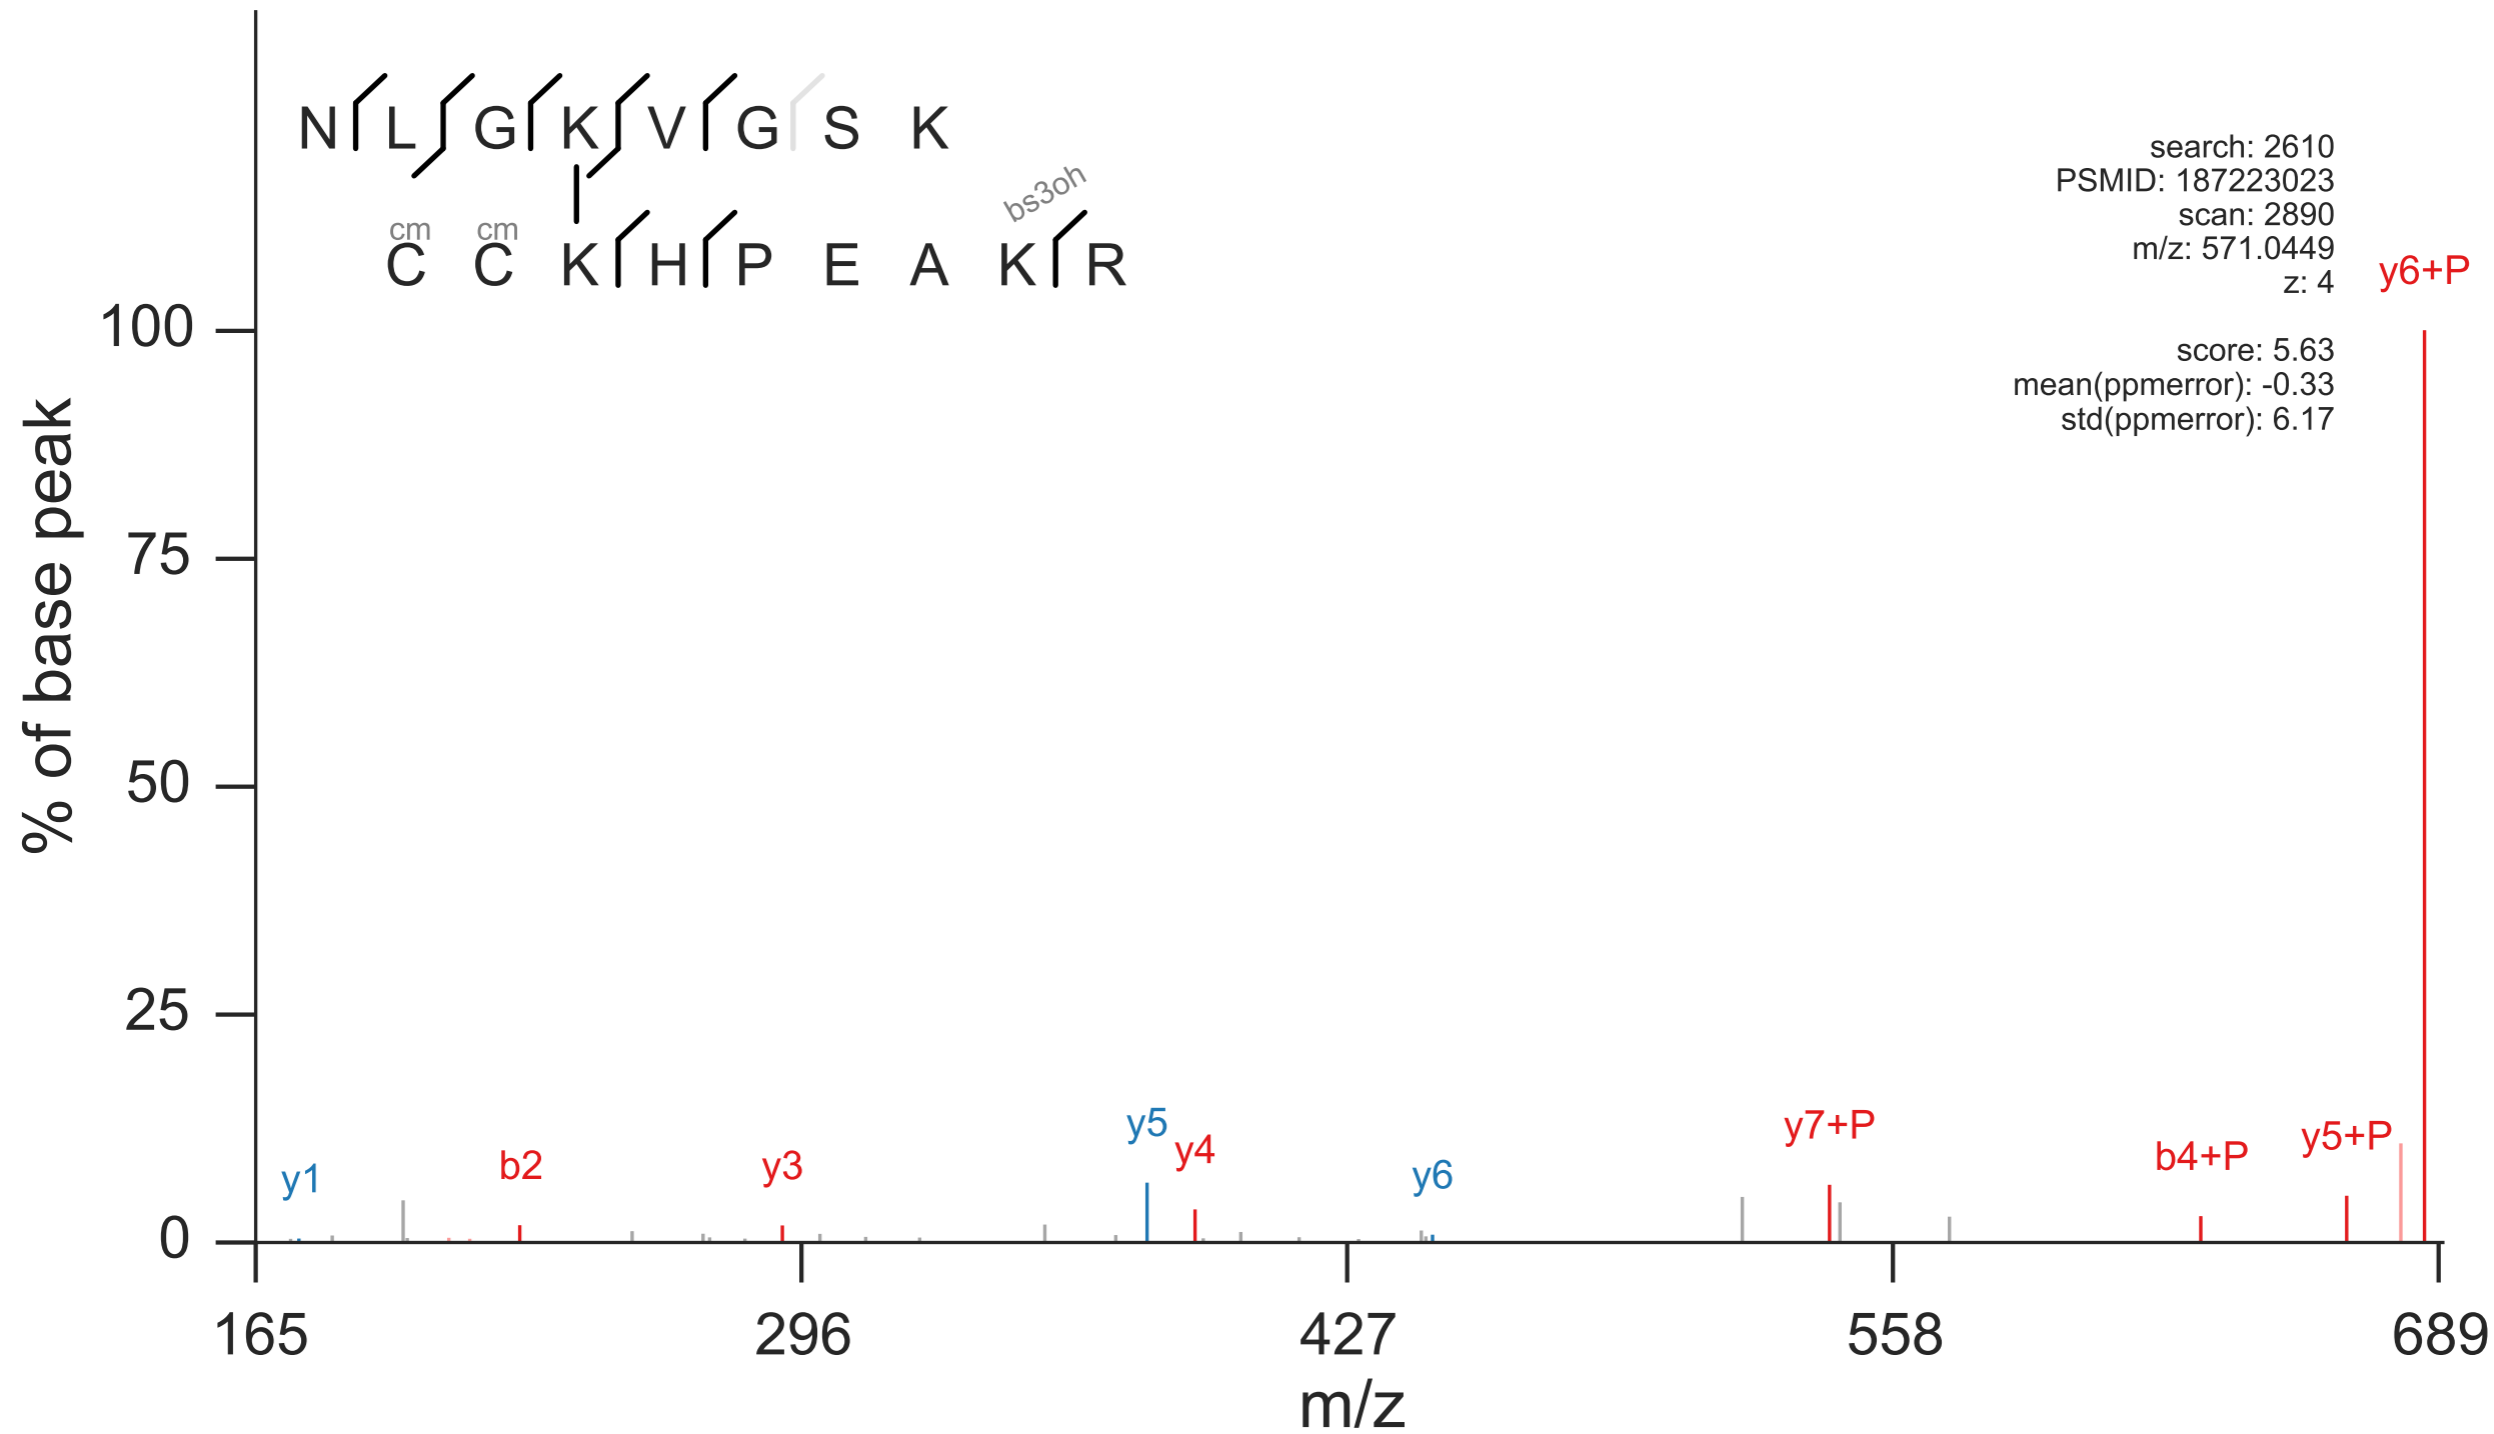



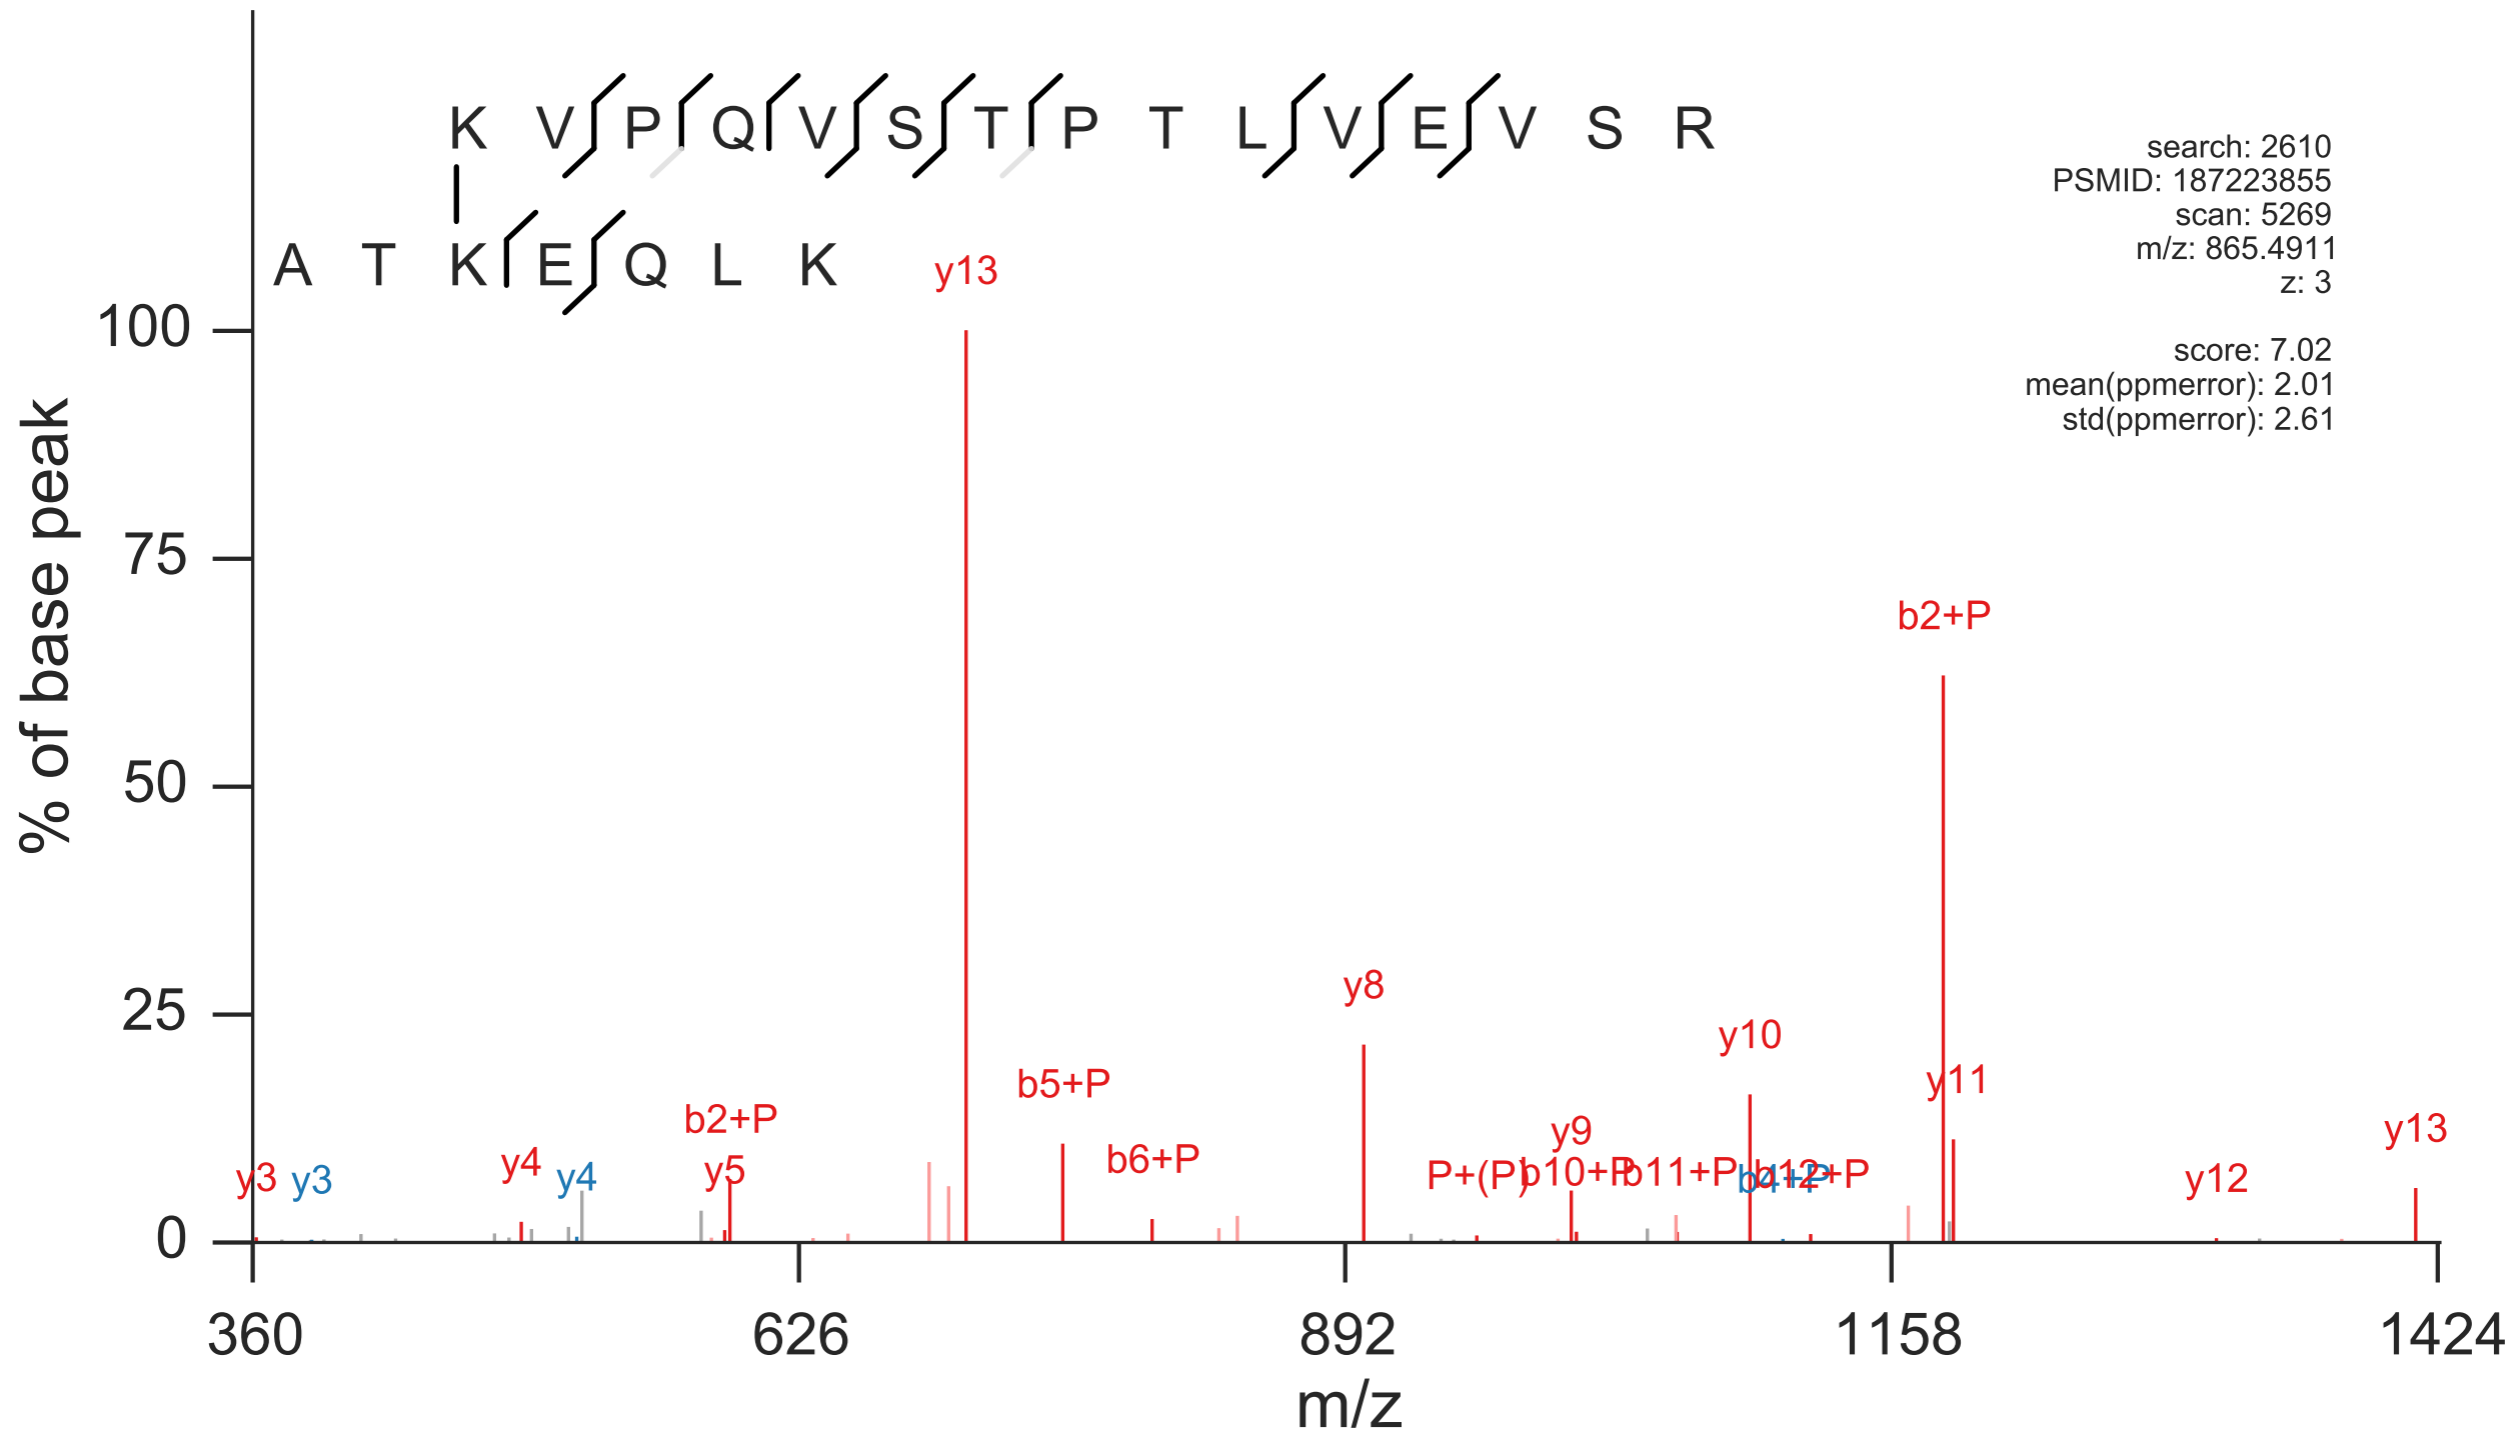

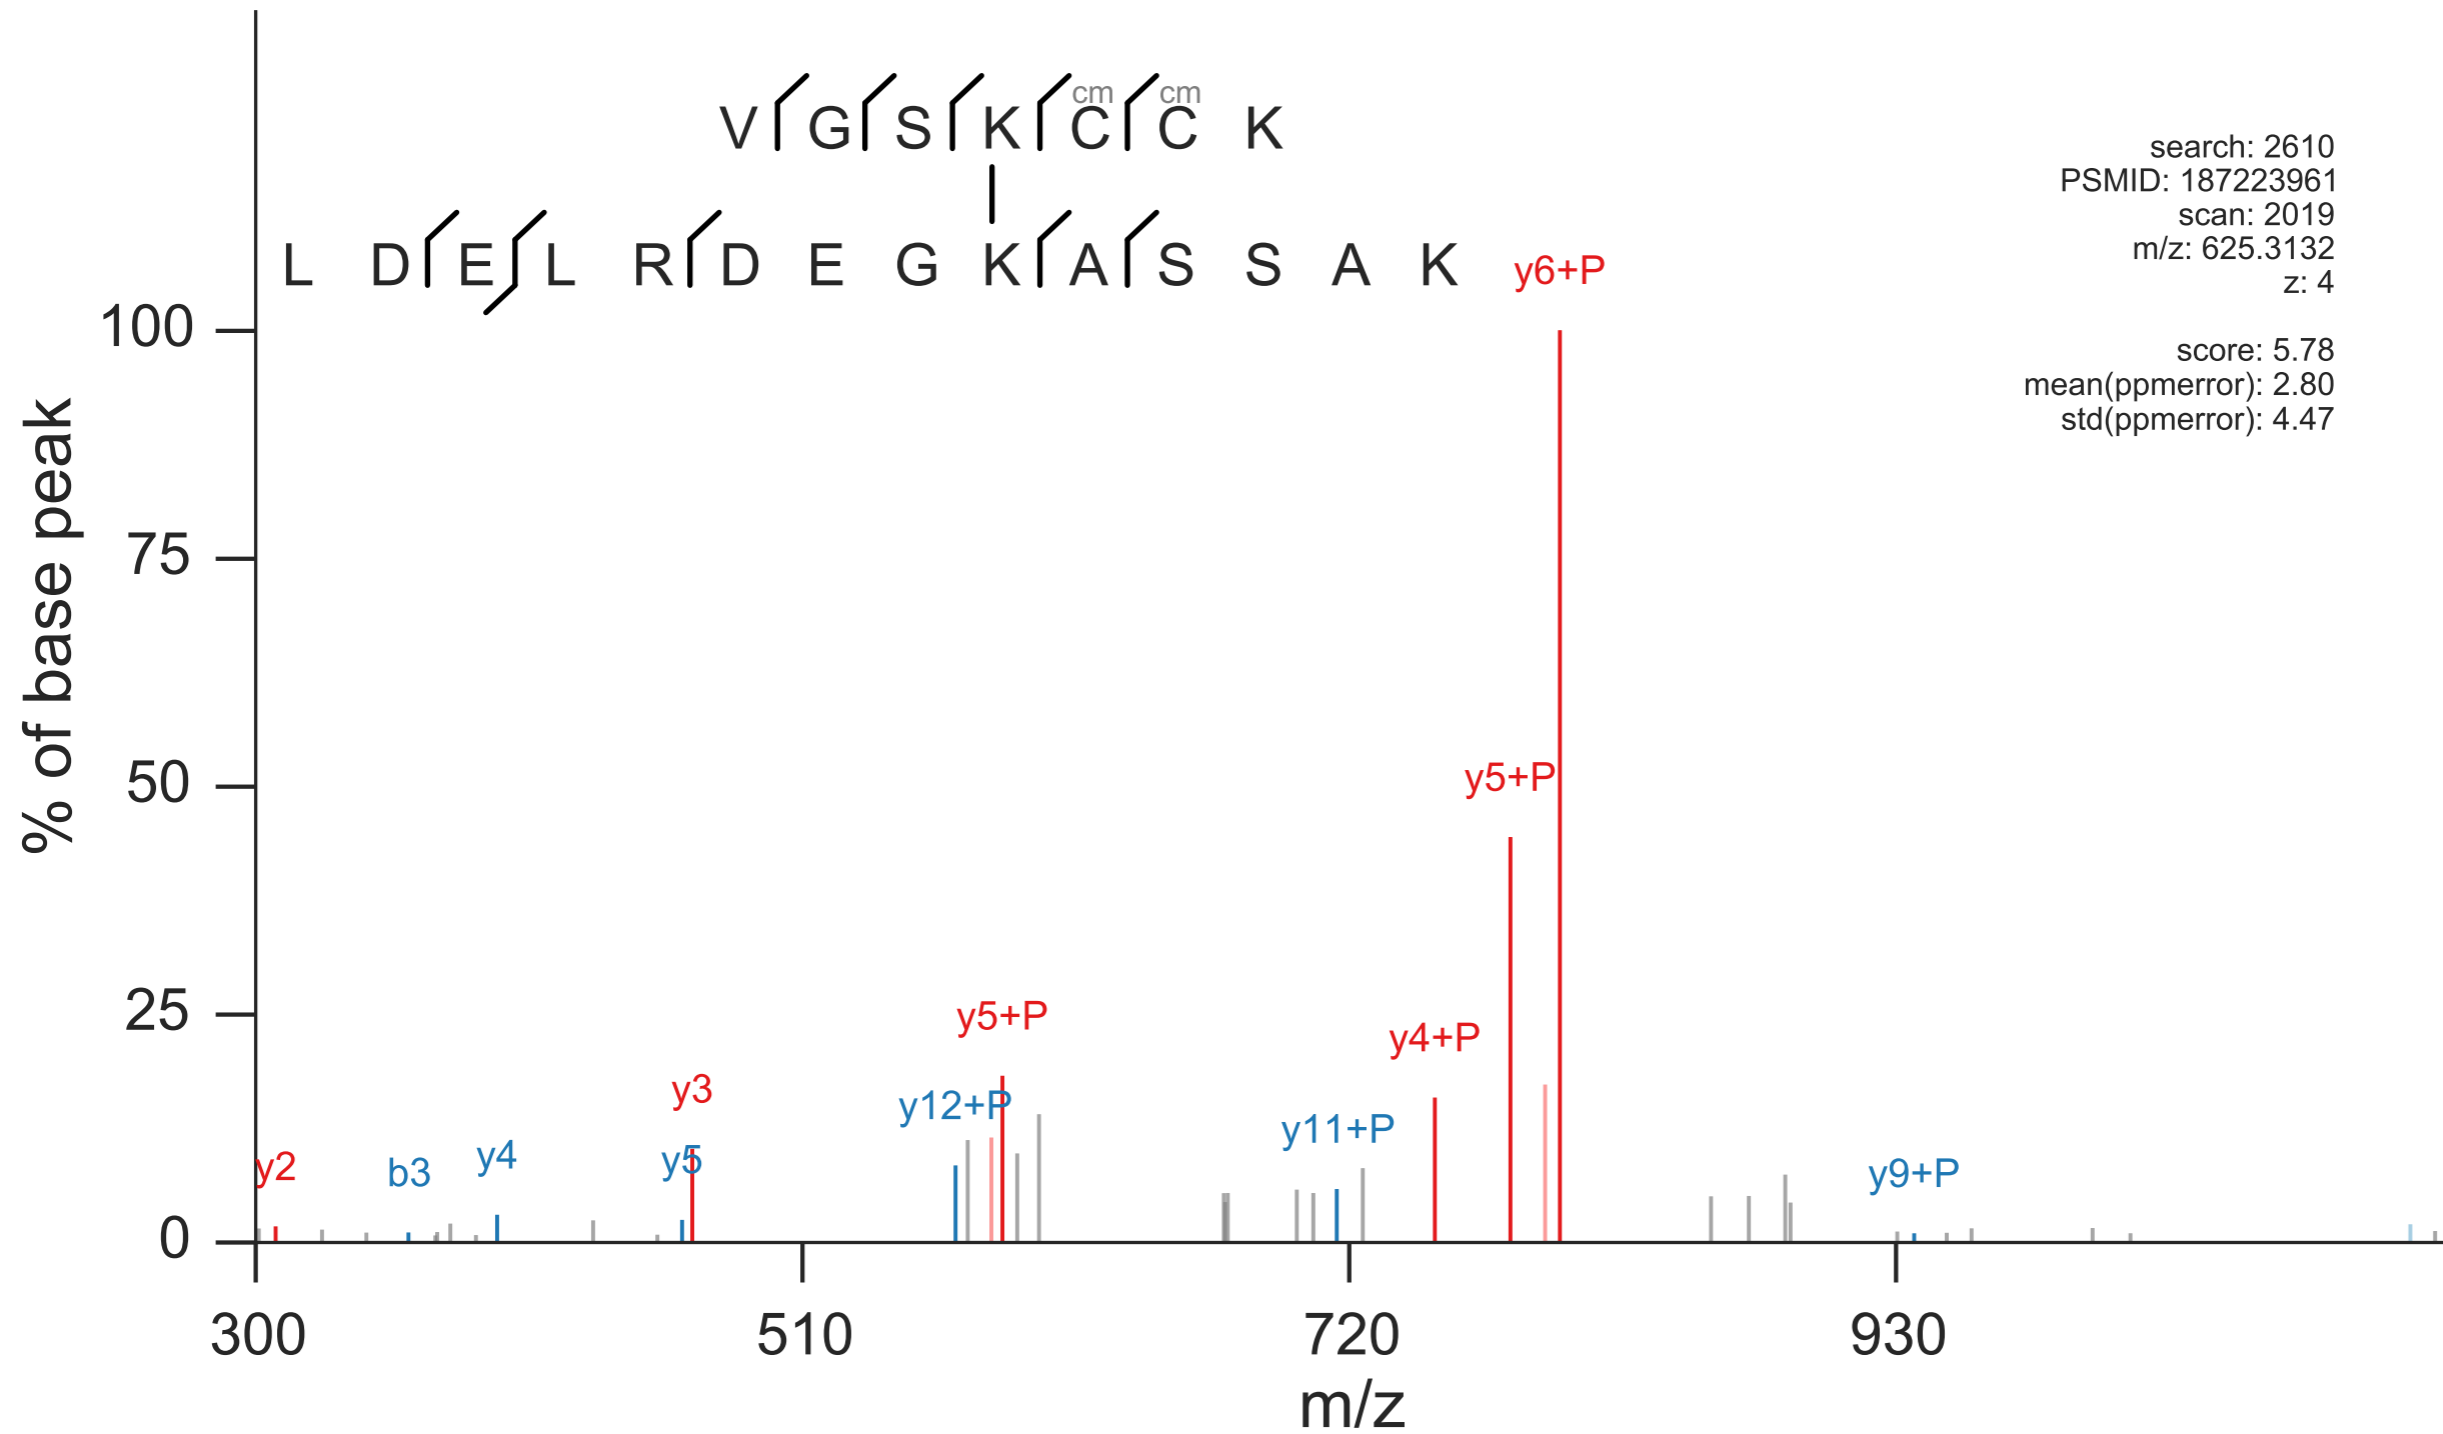

search: 2610  
 PSMID: 187223961  
 scan: 2019  
 m/z: 625.3132  
 z: 4

score: 5.78  
 mean(ppmerror): 2.80  
 std(ppmerror): 4.47

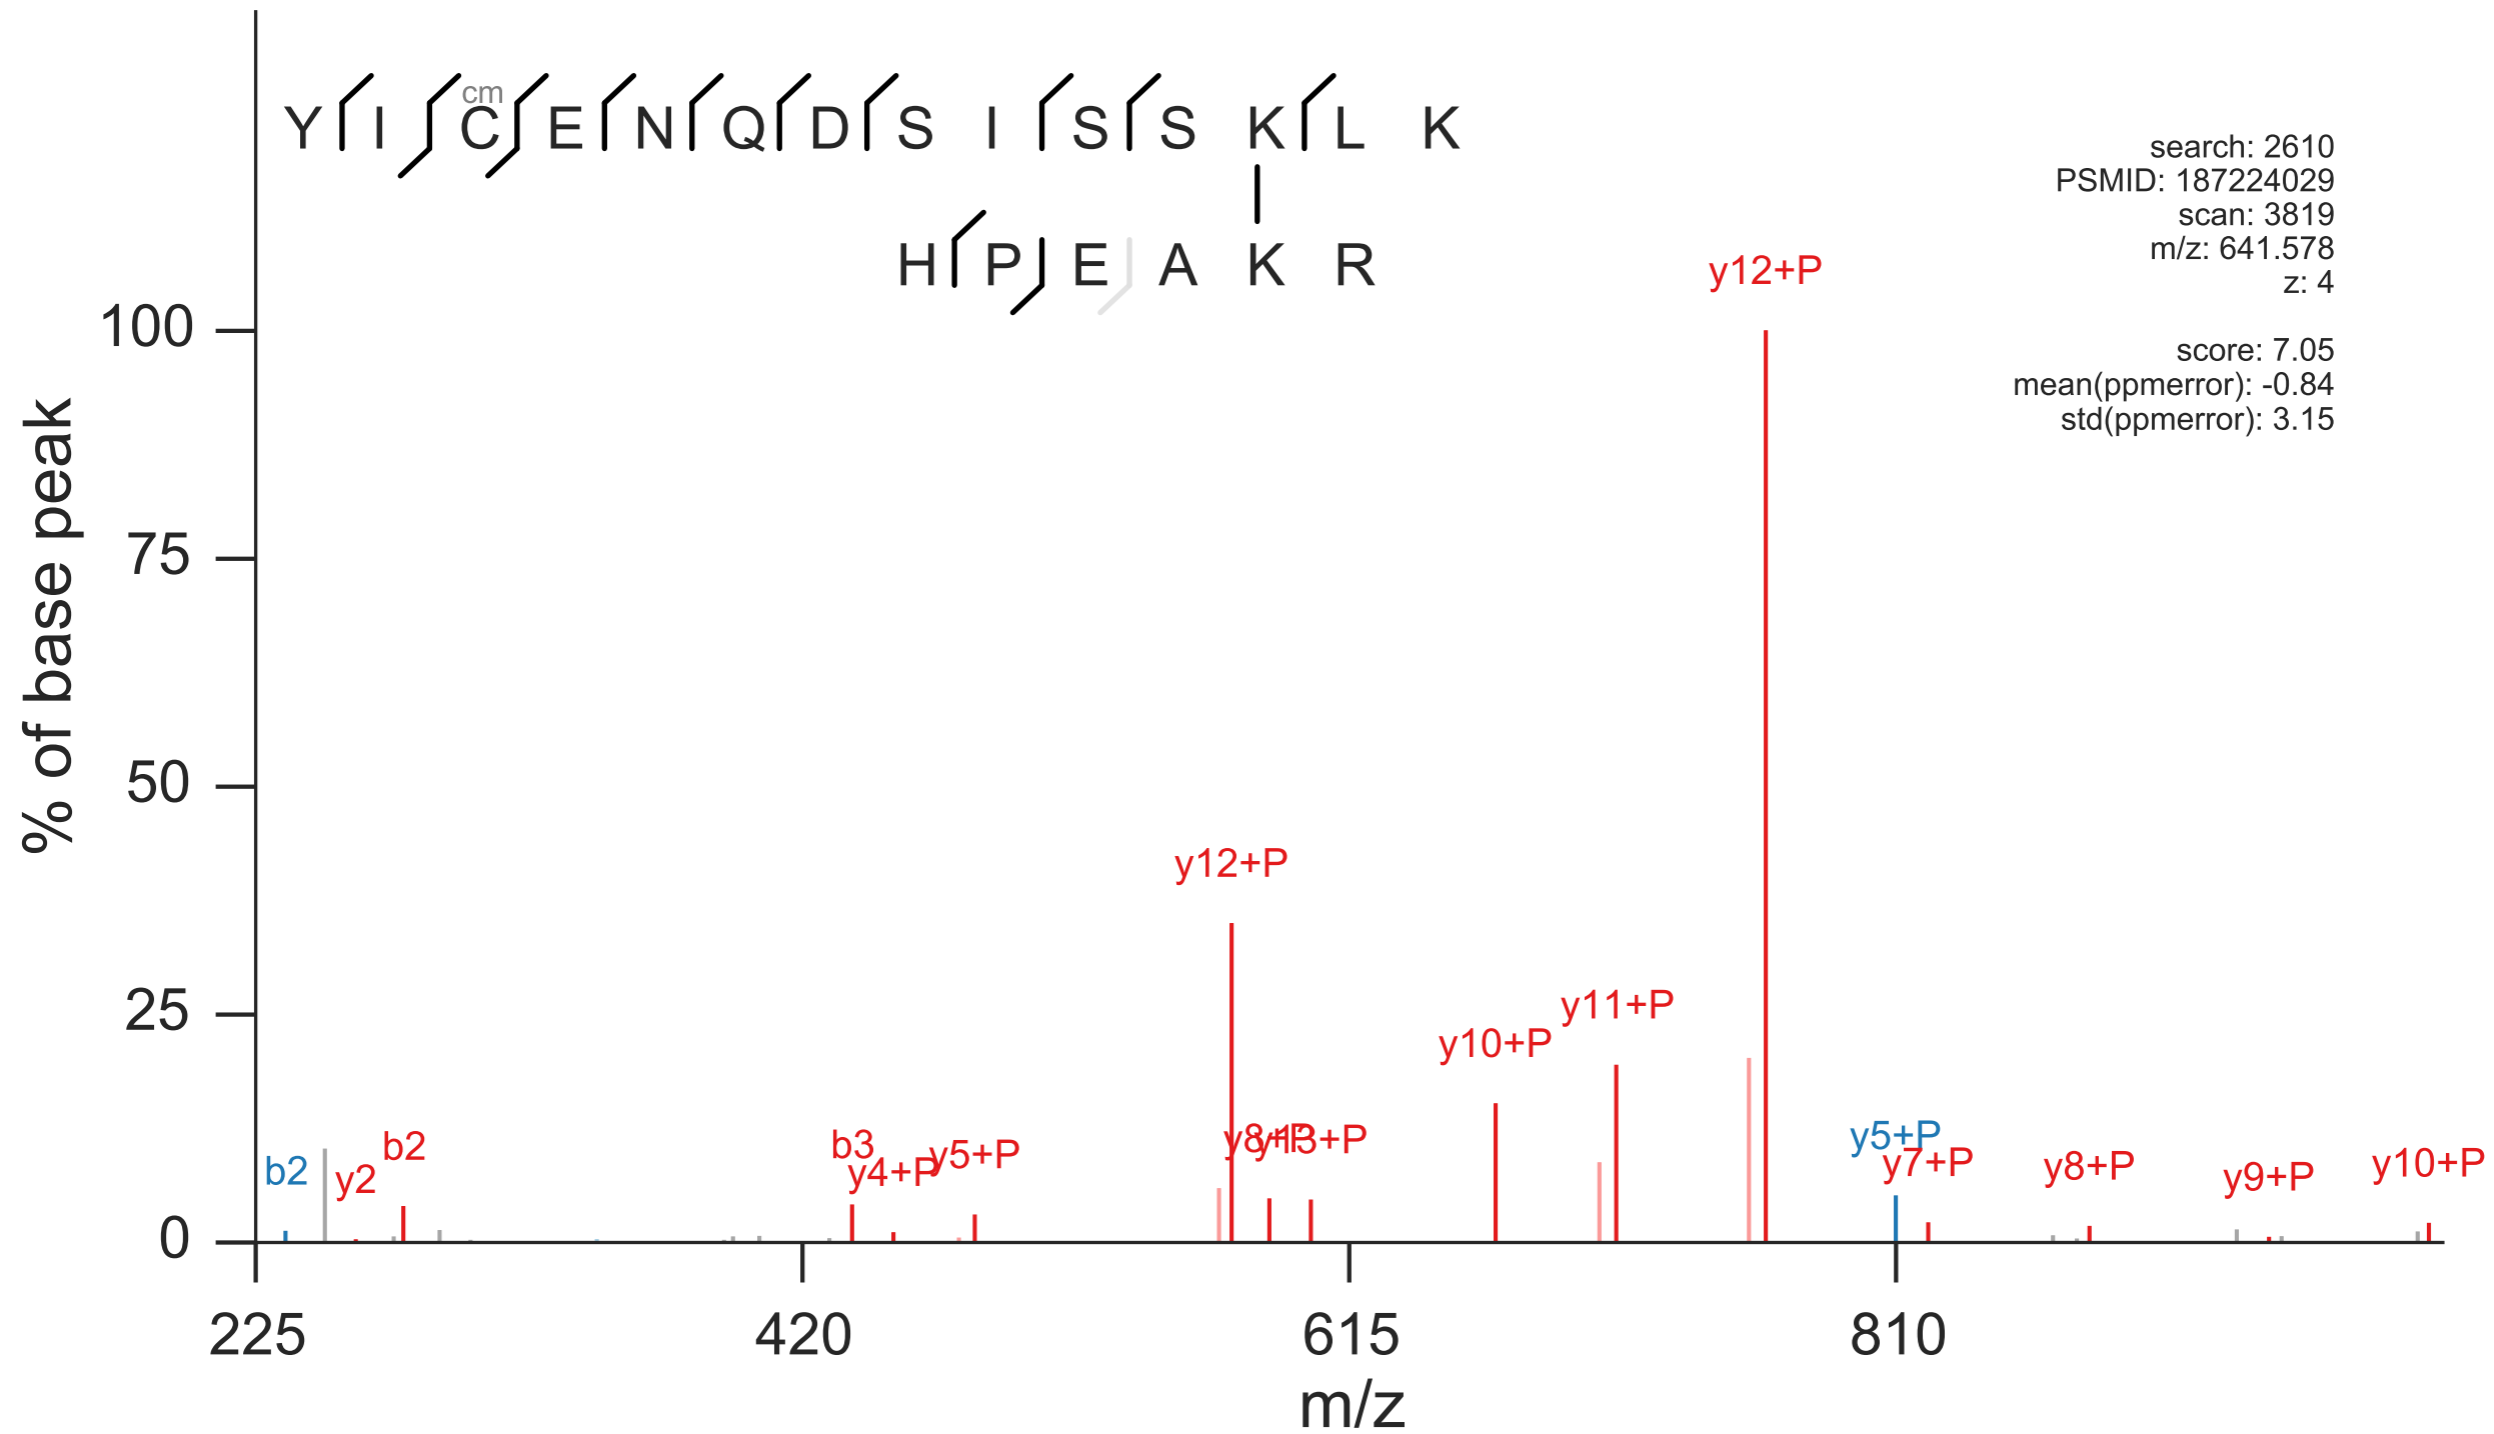

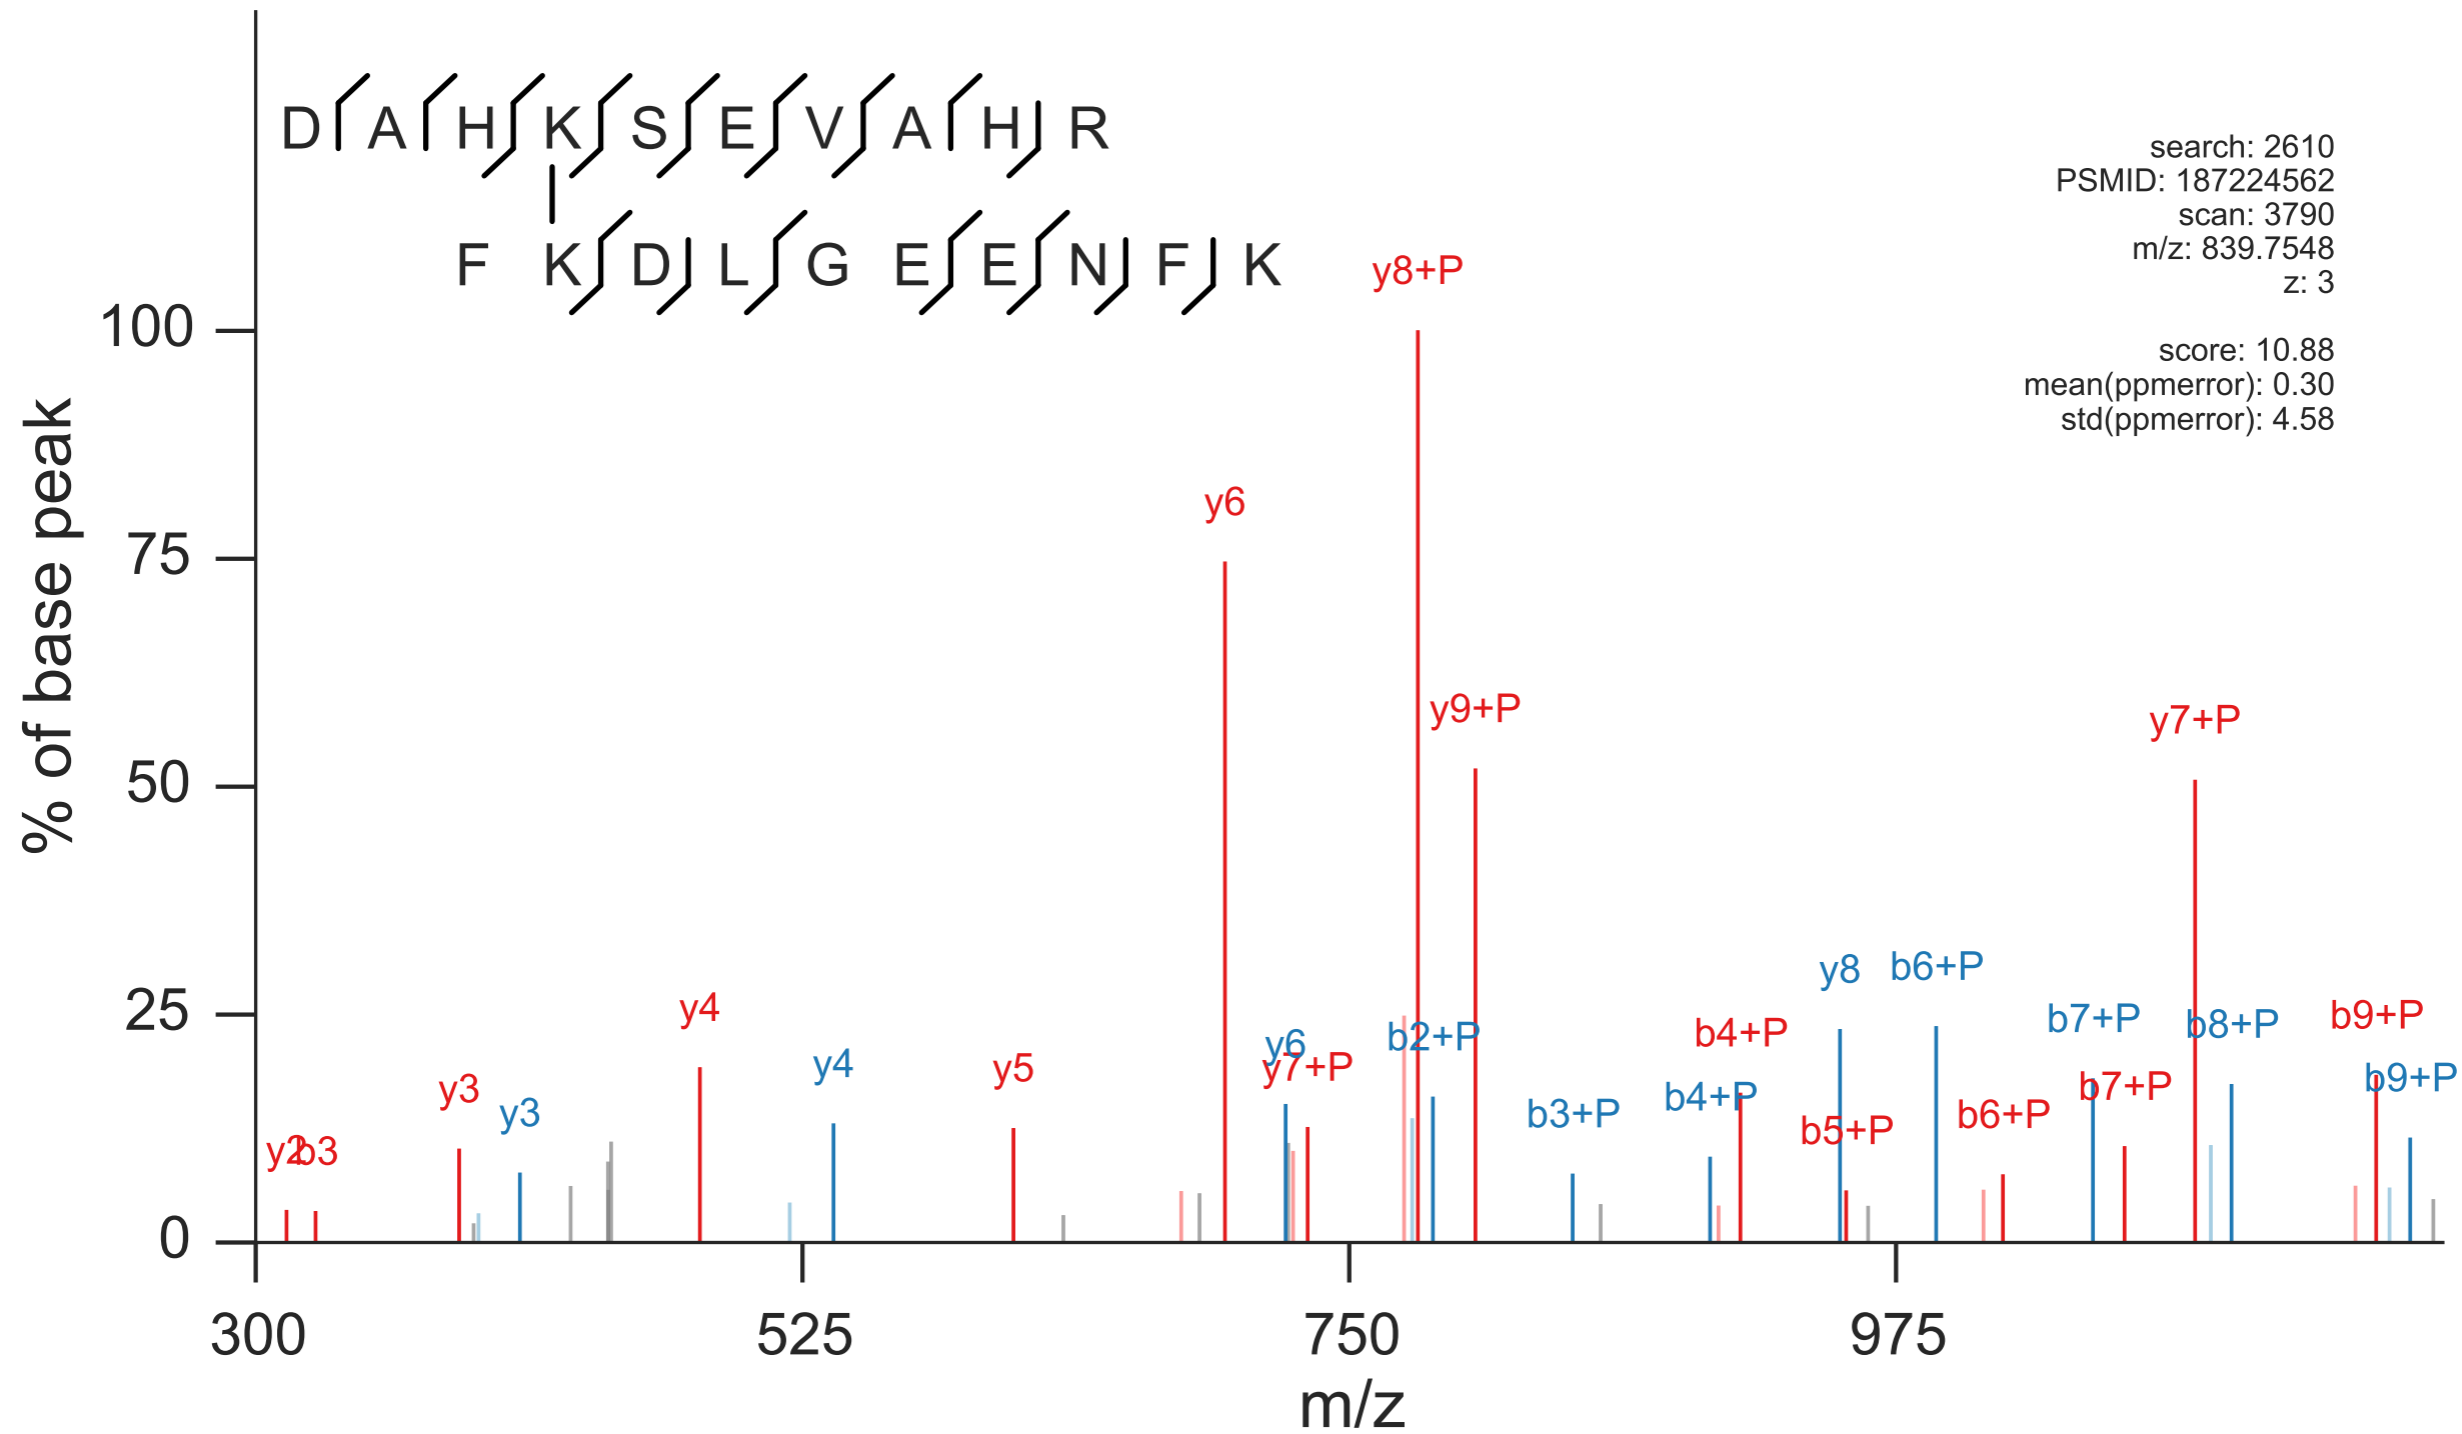

F K D L G E E N F K  
D A H I K S E V I A H R

search: 2610  
PSMID: 187224566  
scan: 3219  
m/z: 630.0666  
z: 4  
score: 8.27  
mean(ppmerror): 1.66  
std(ppmerror): 6.51

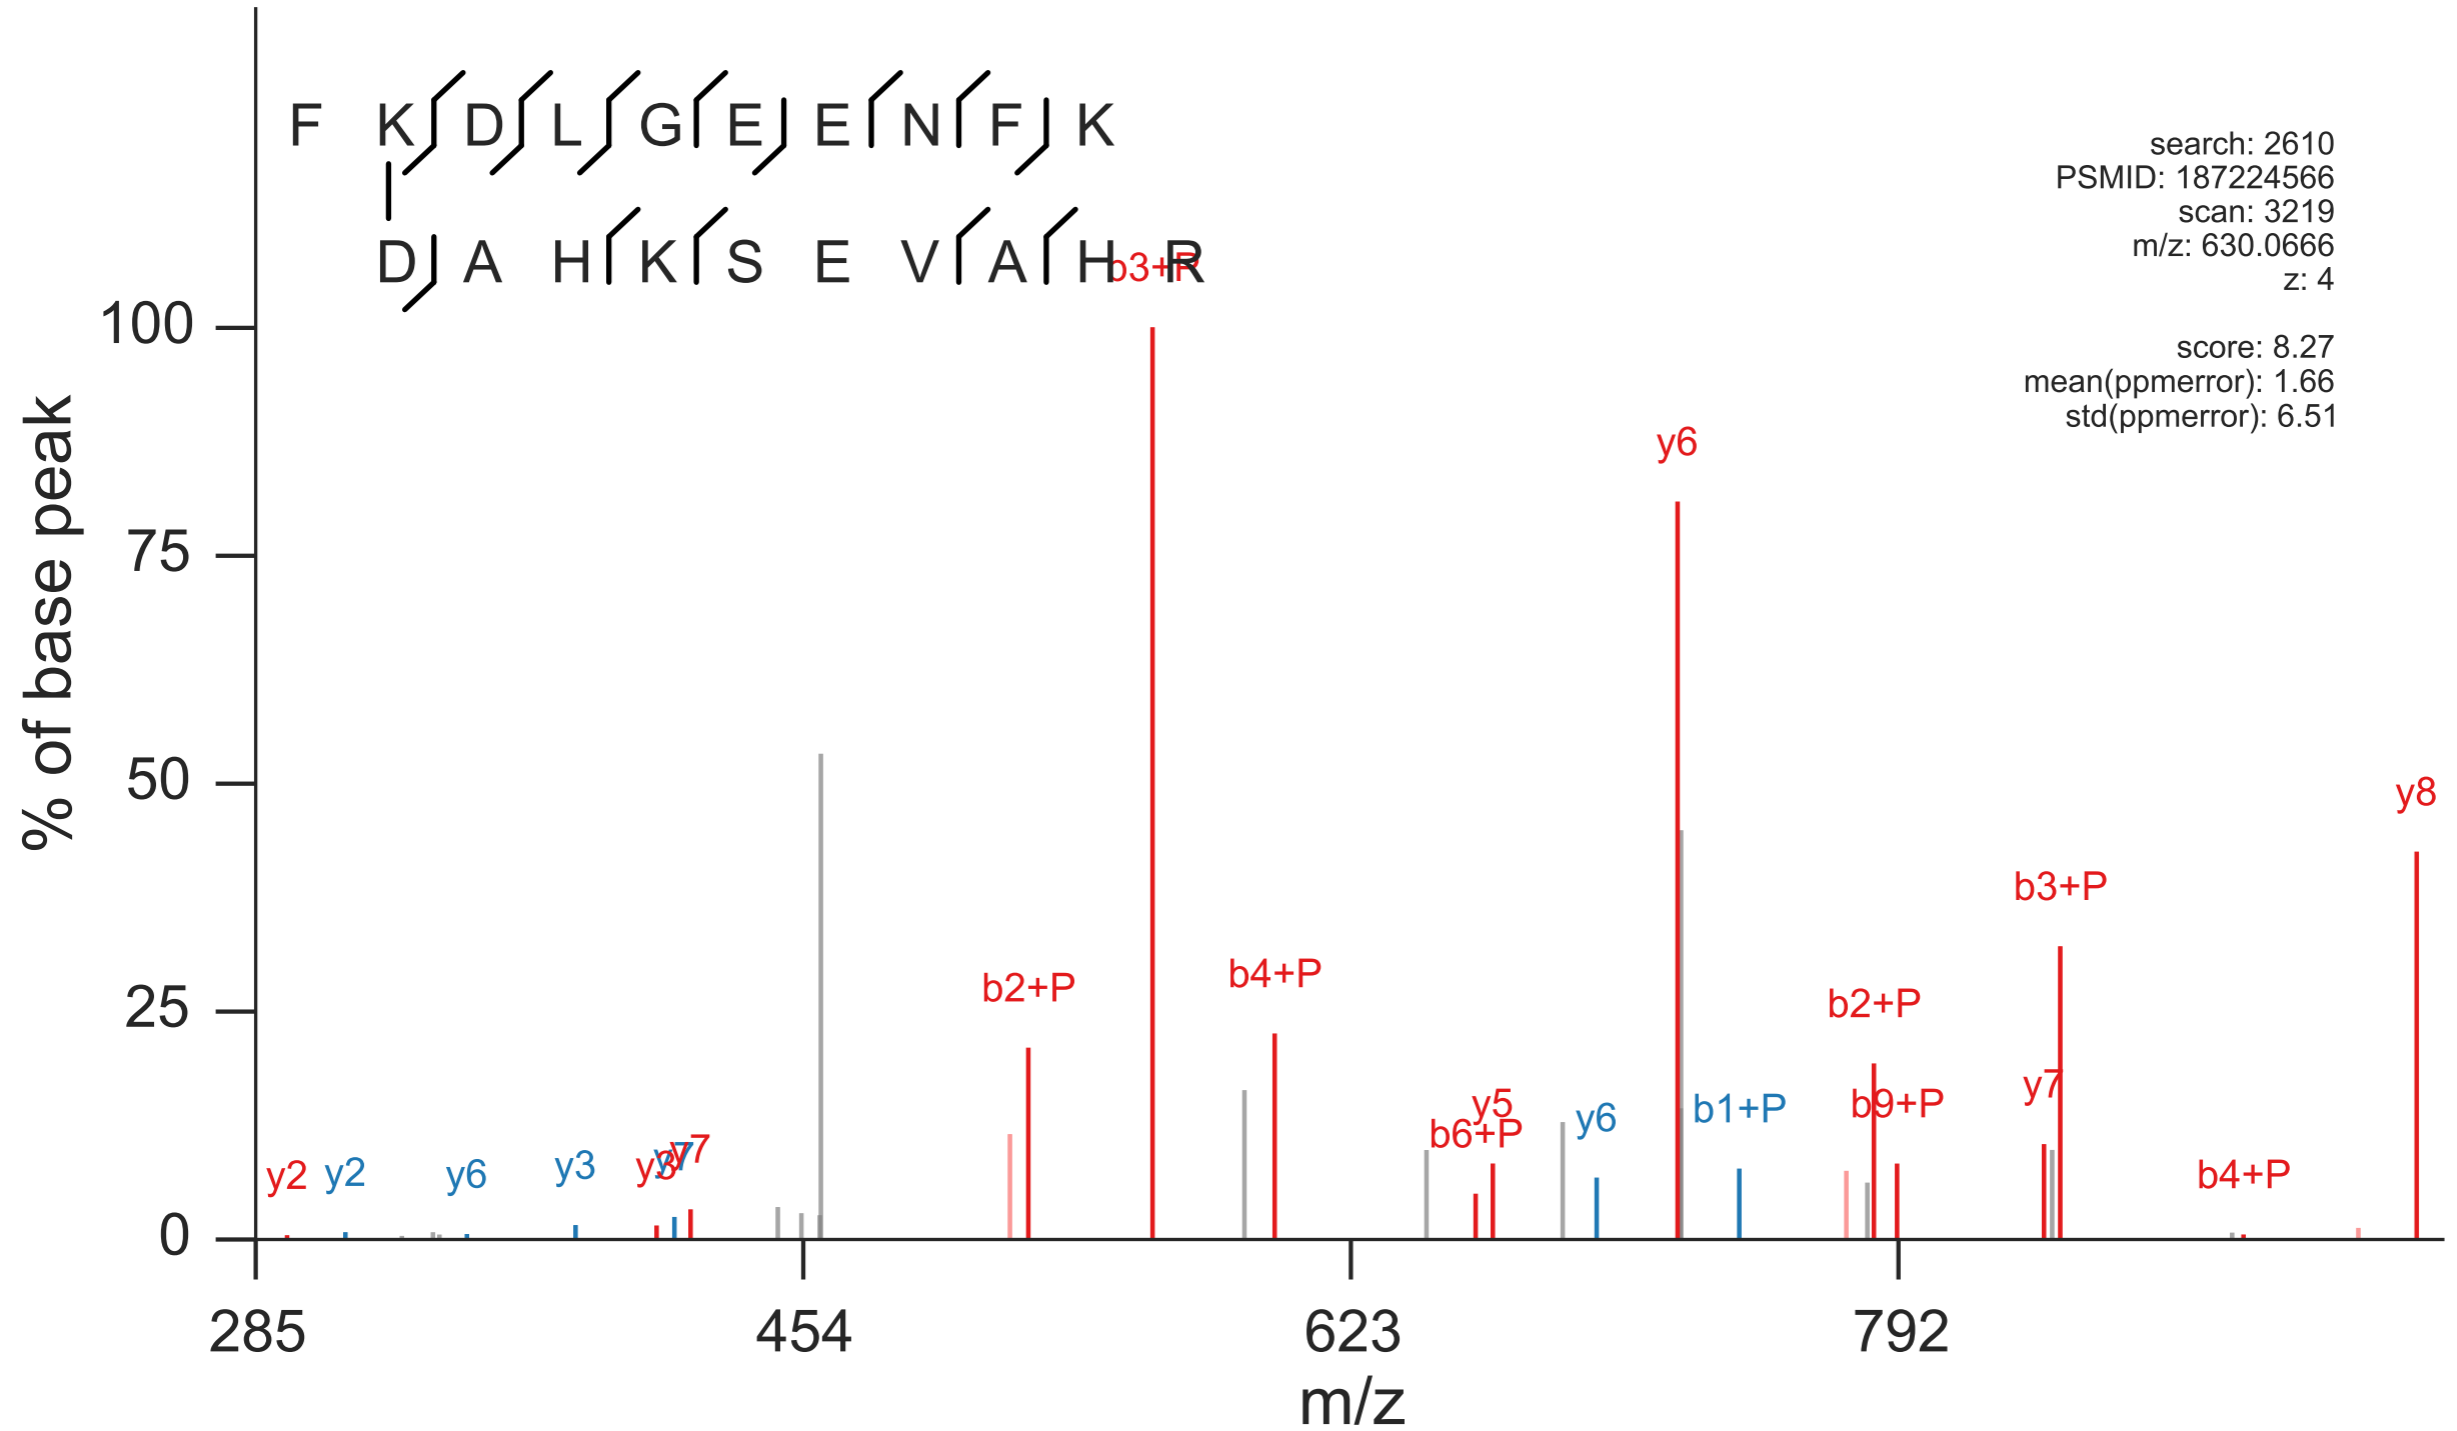

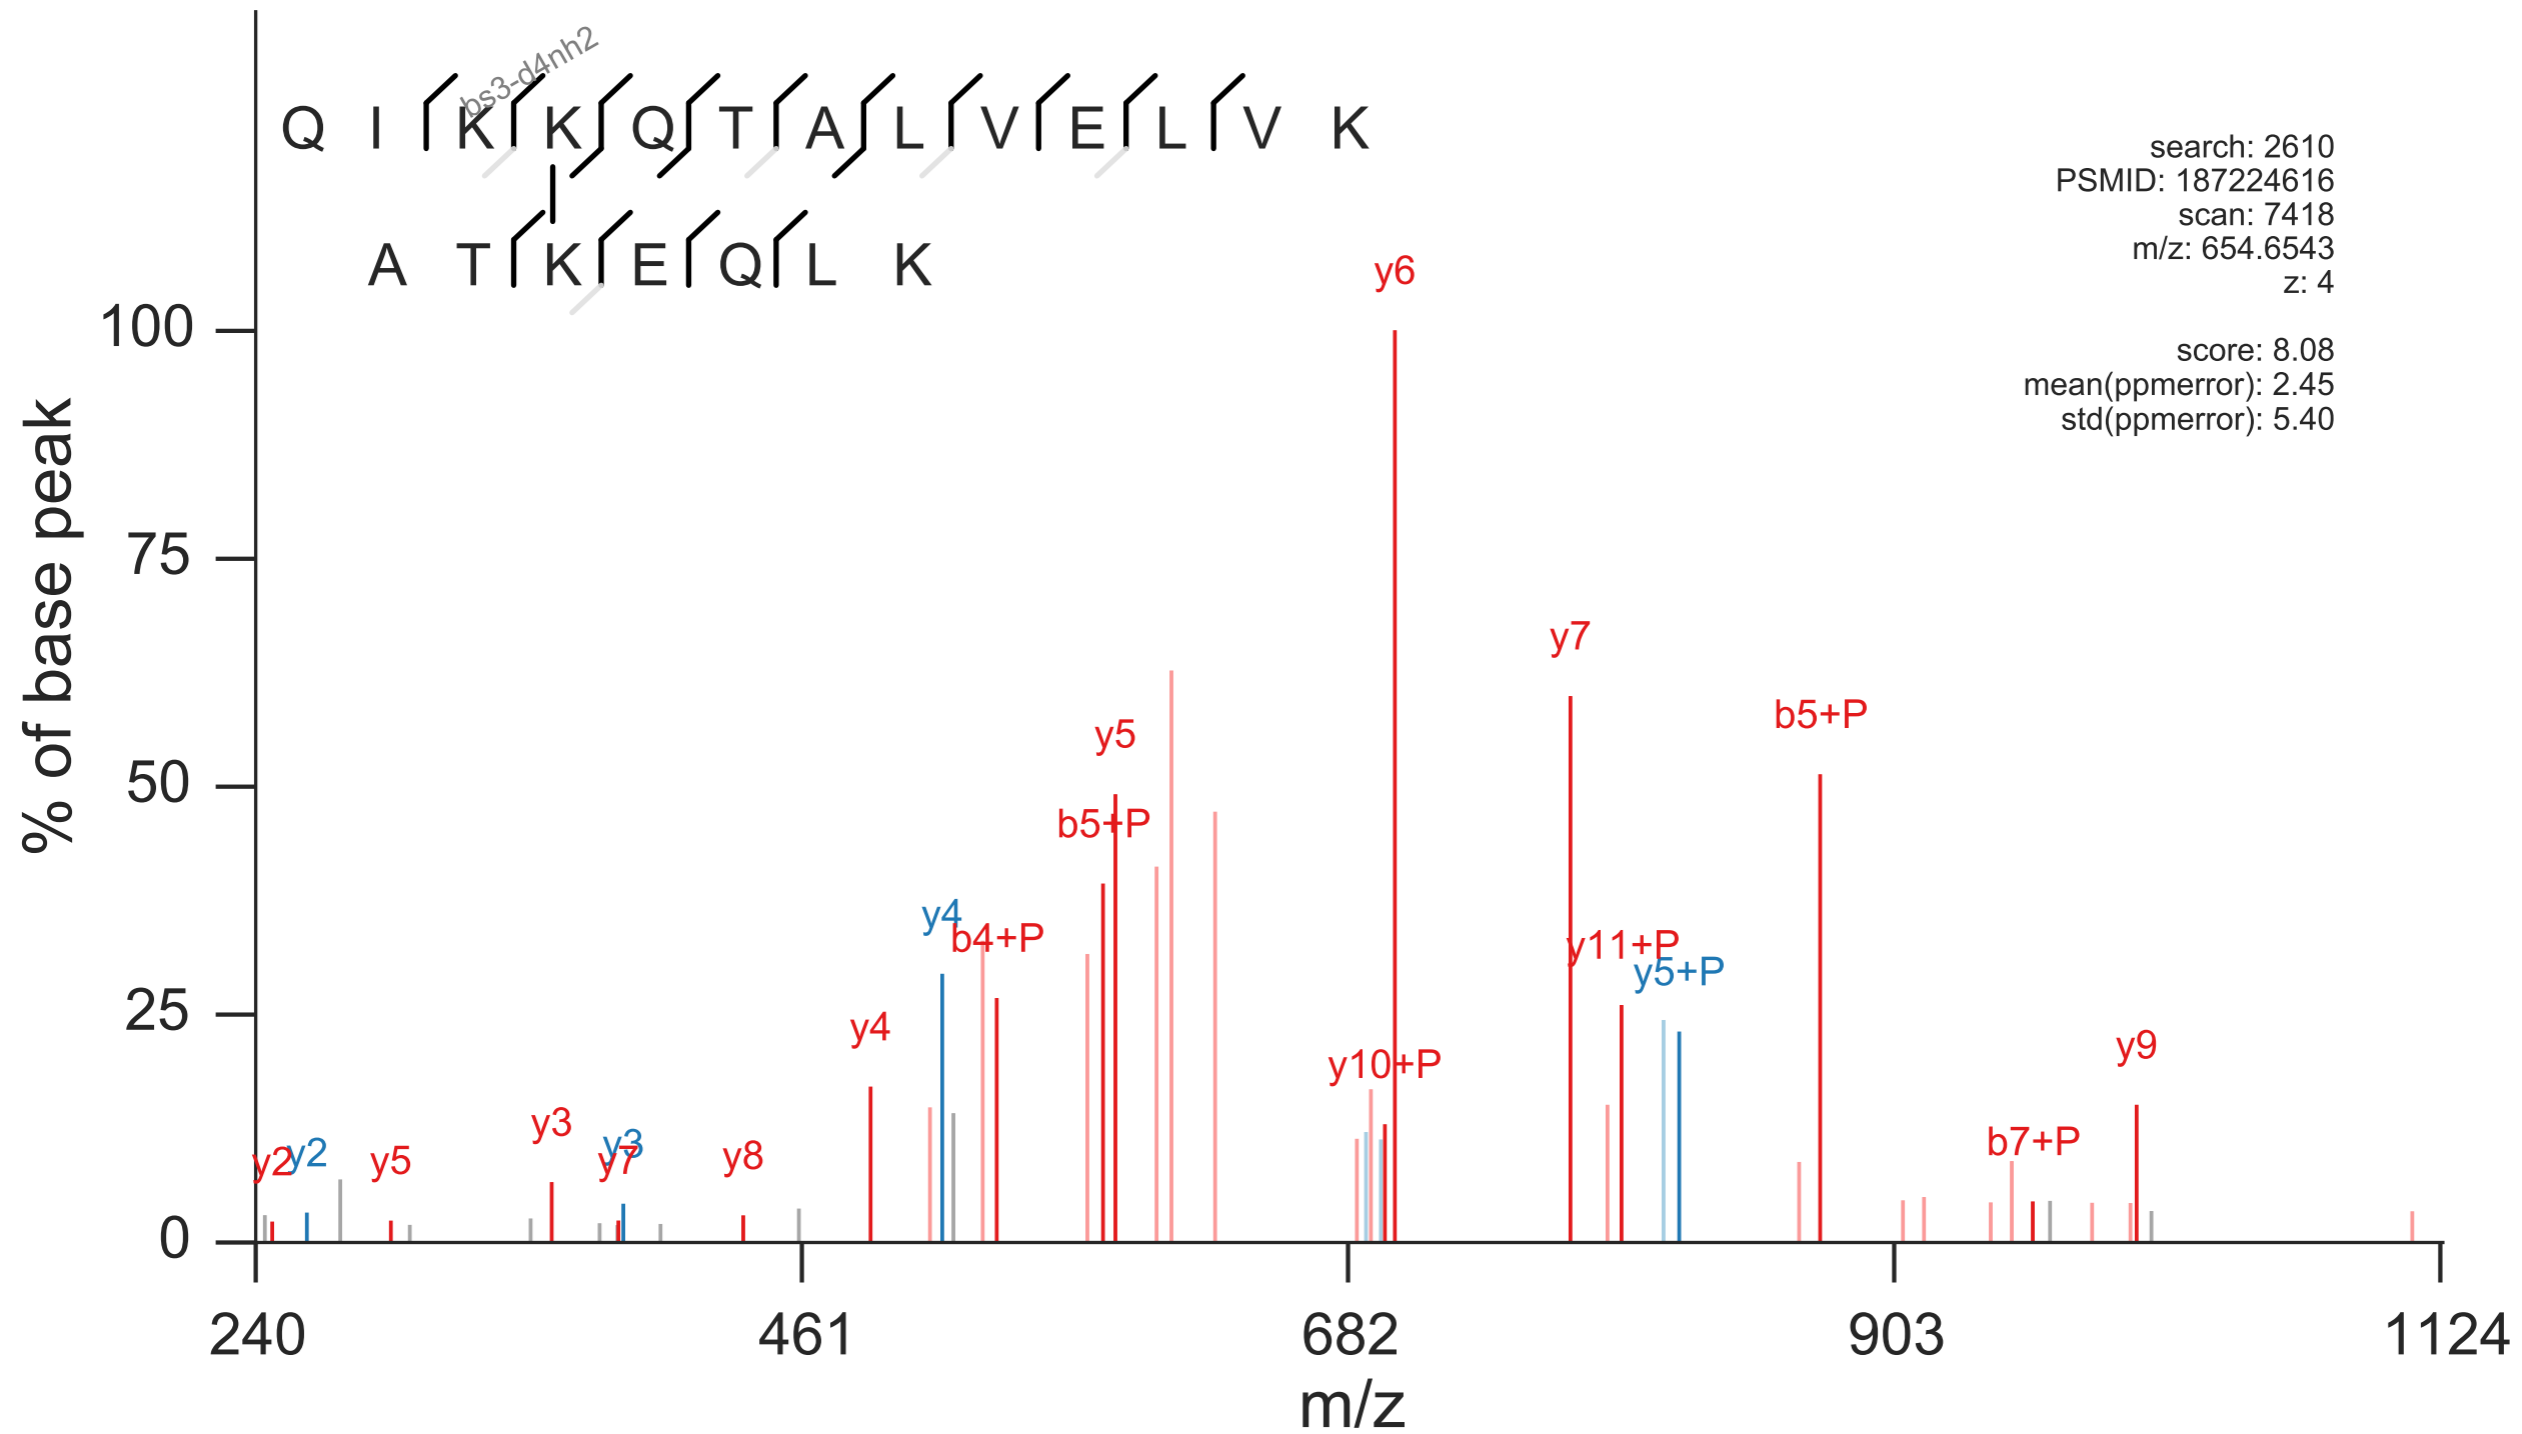

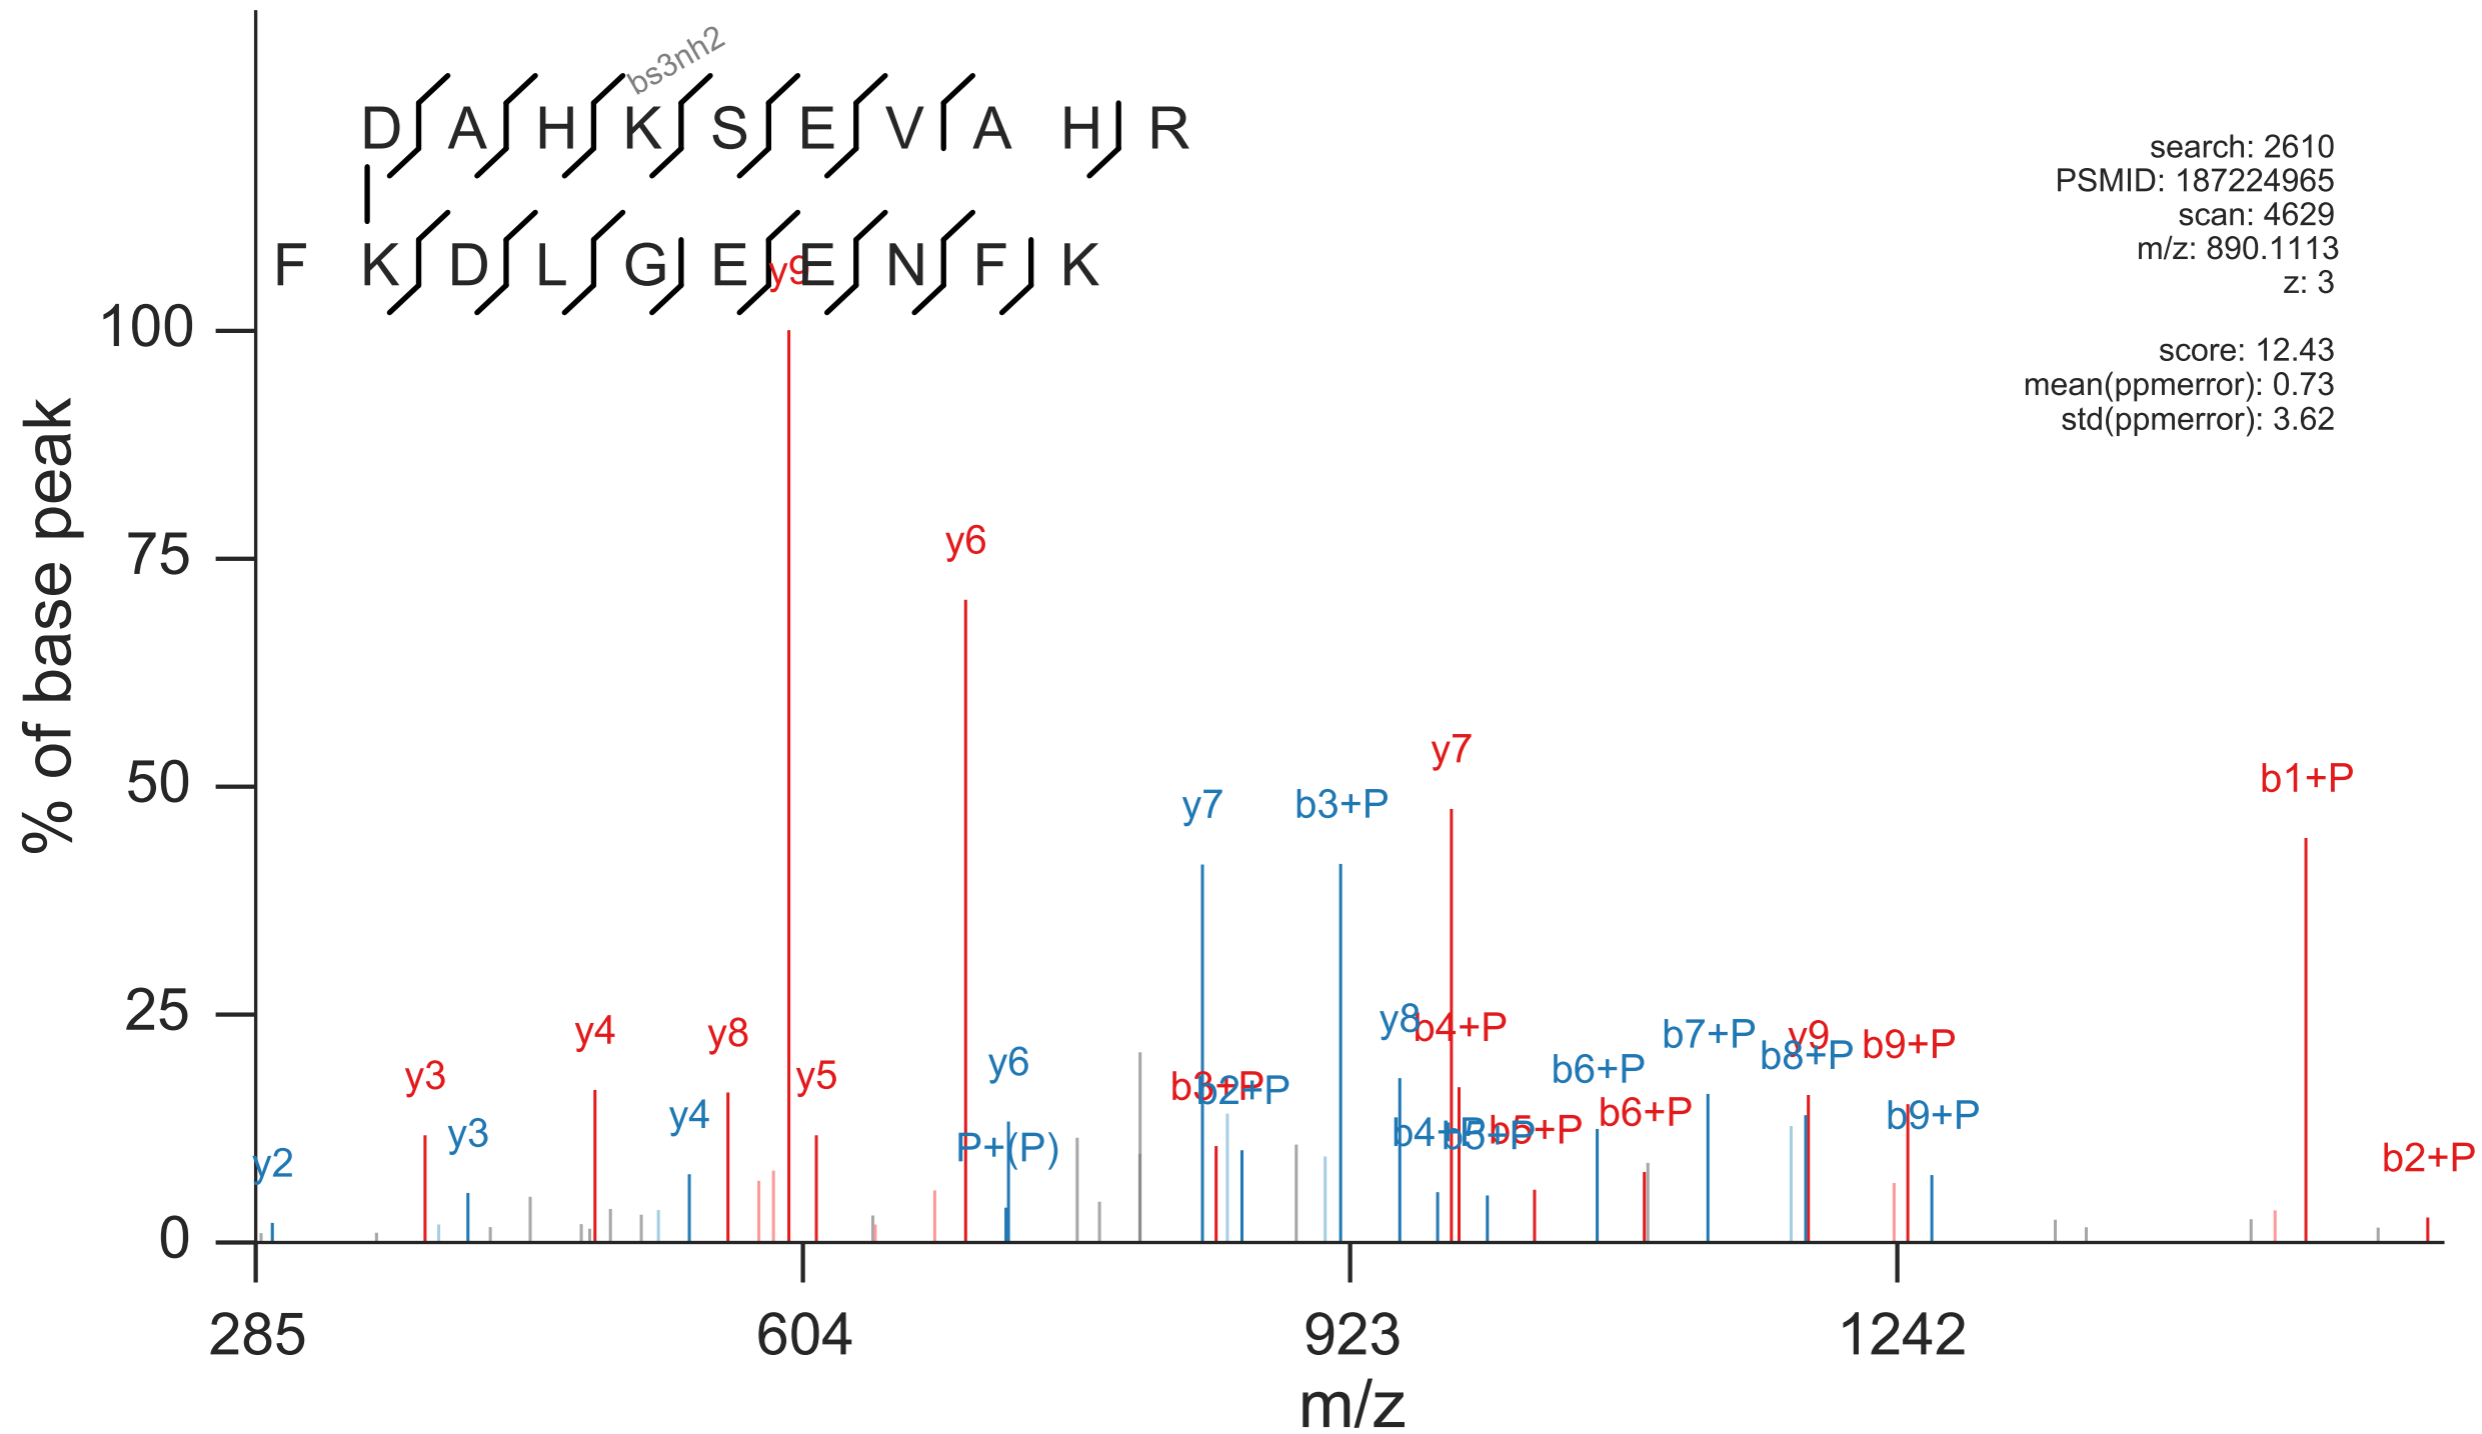

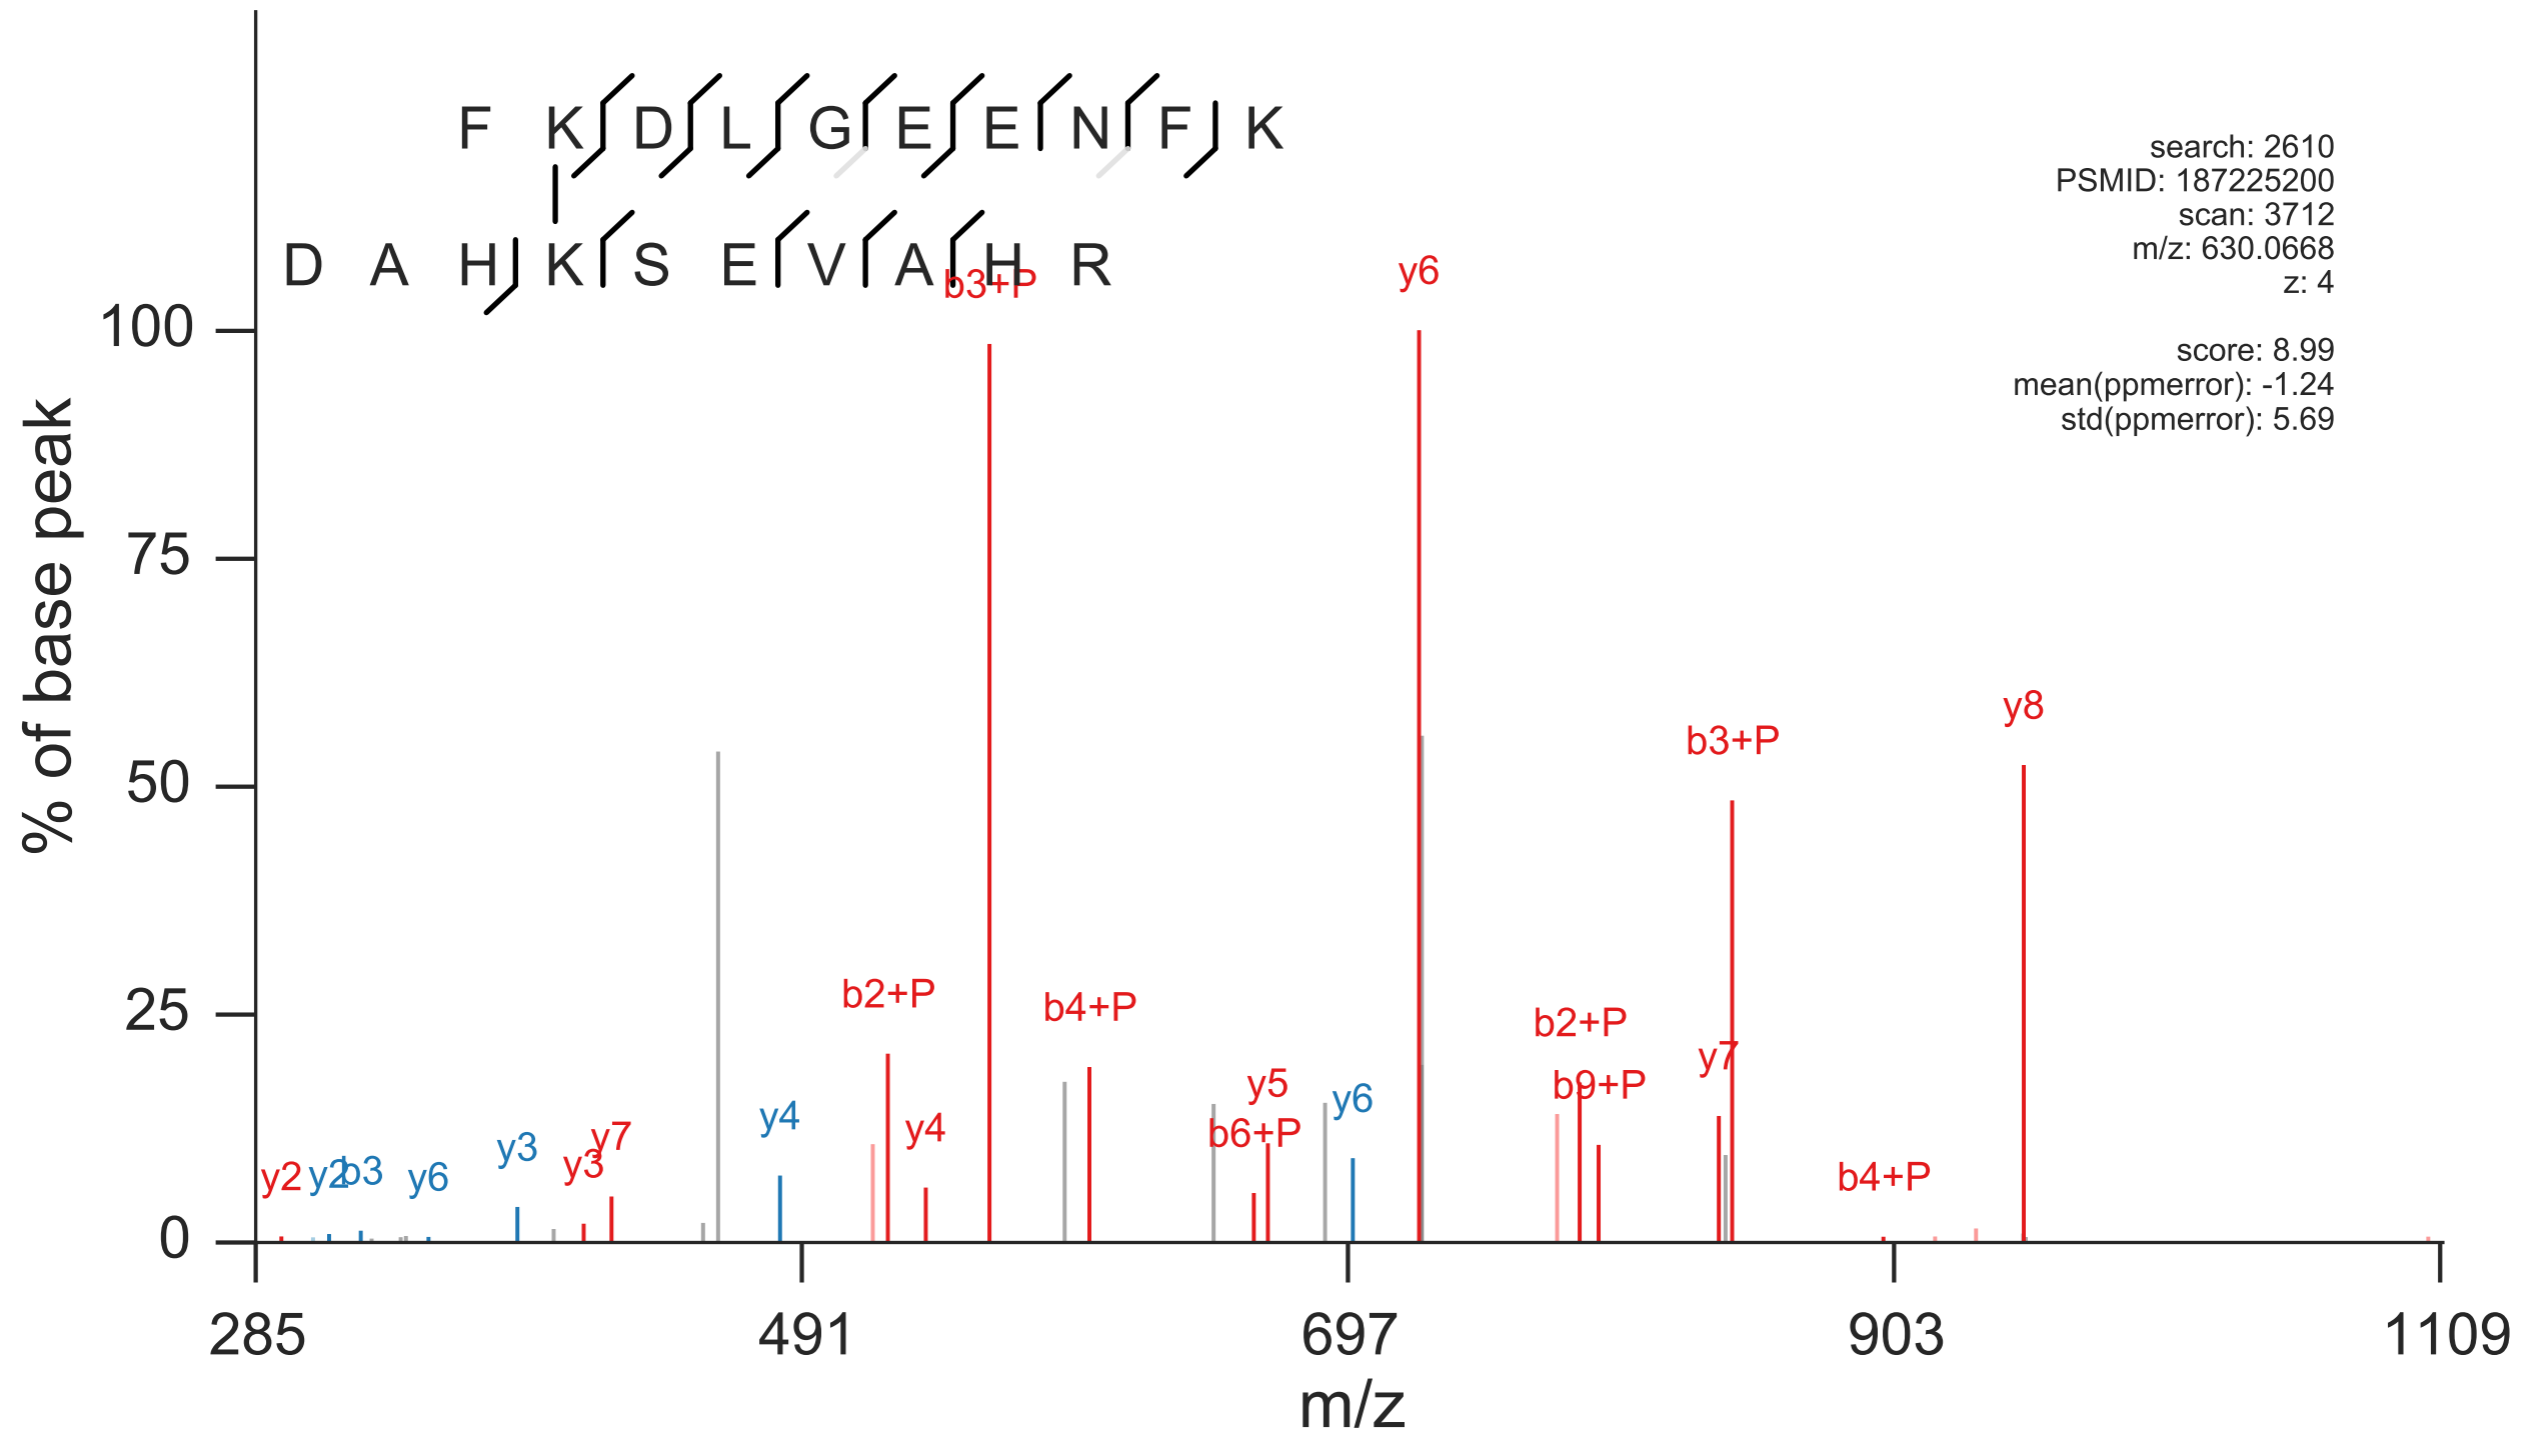



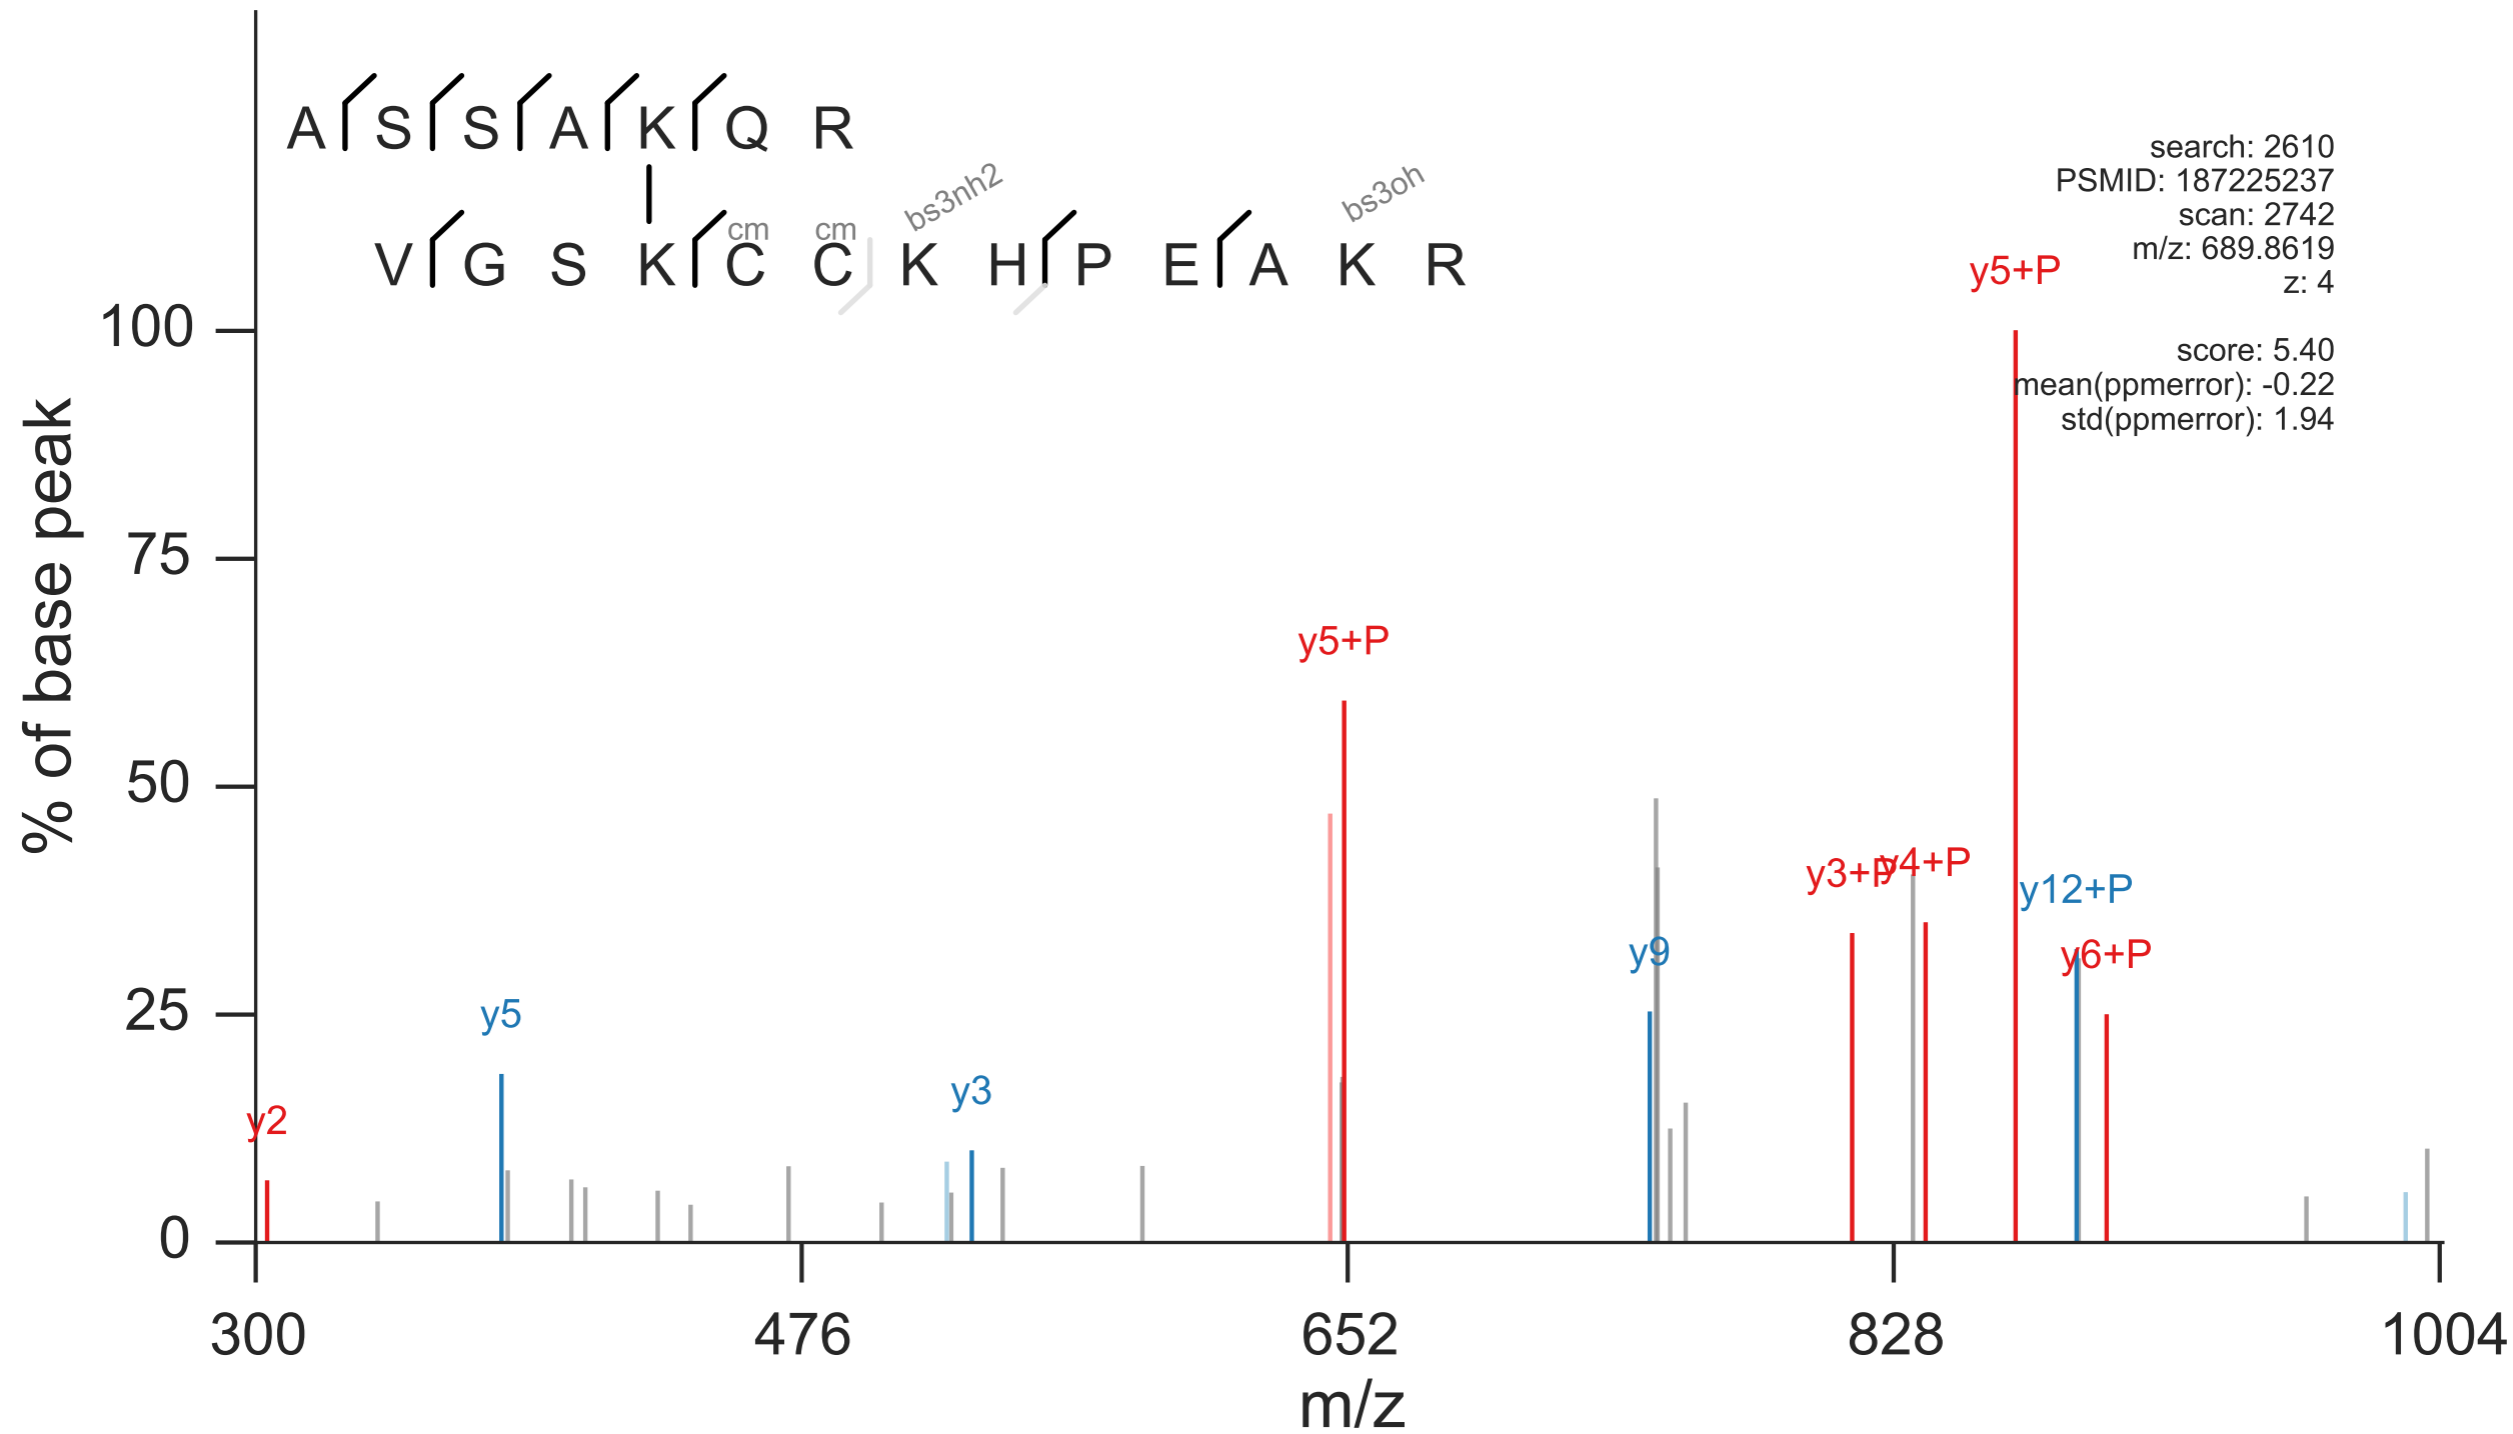

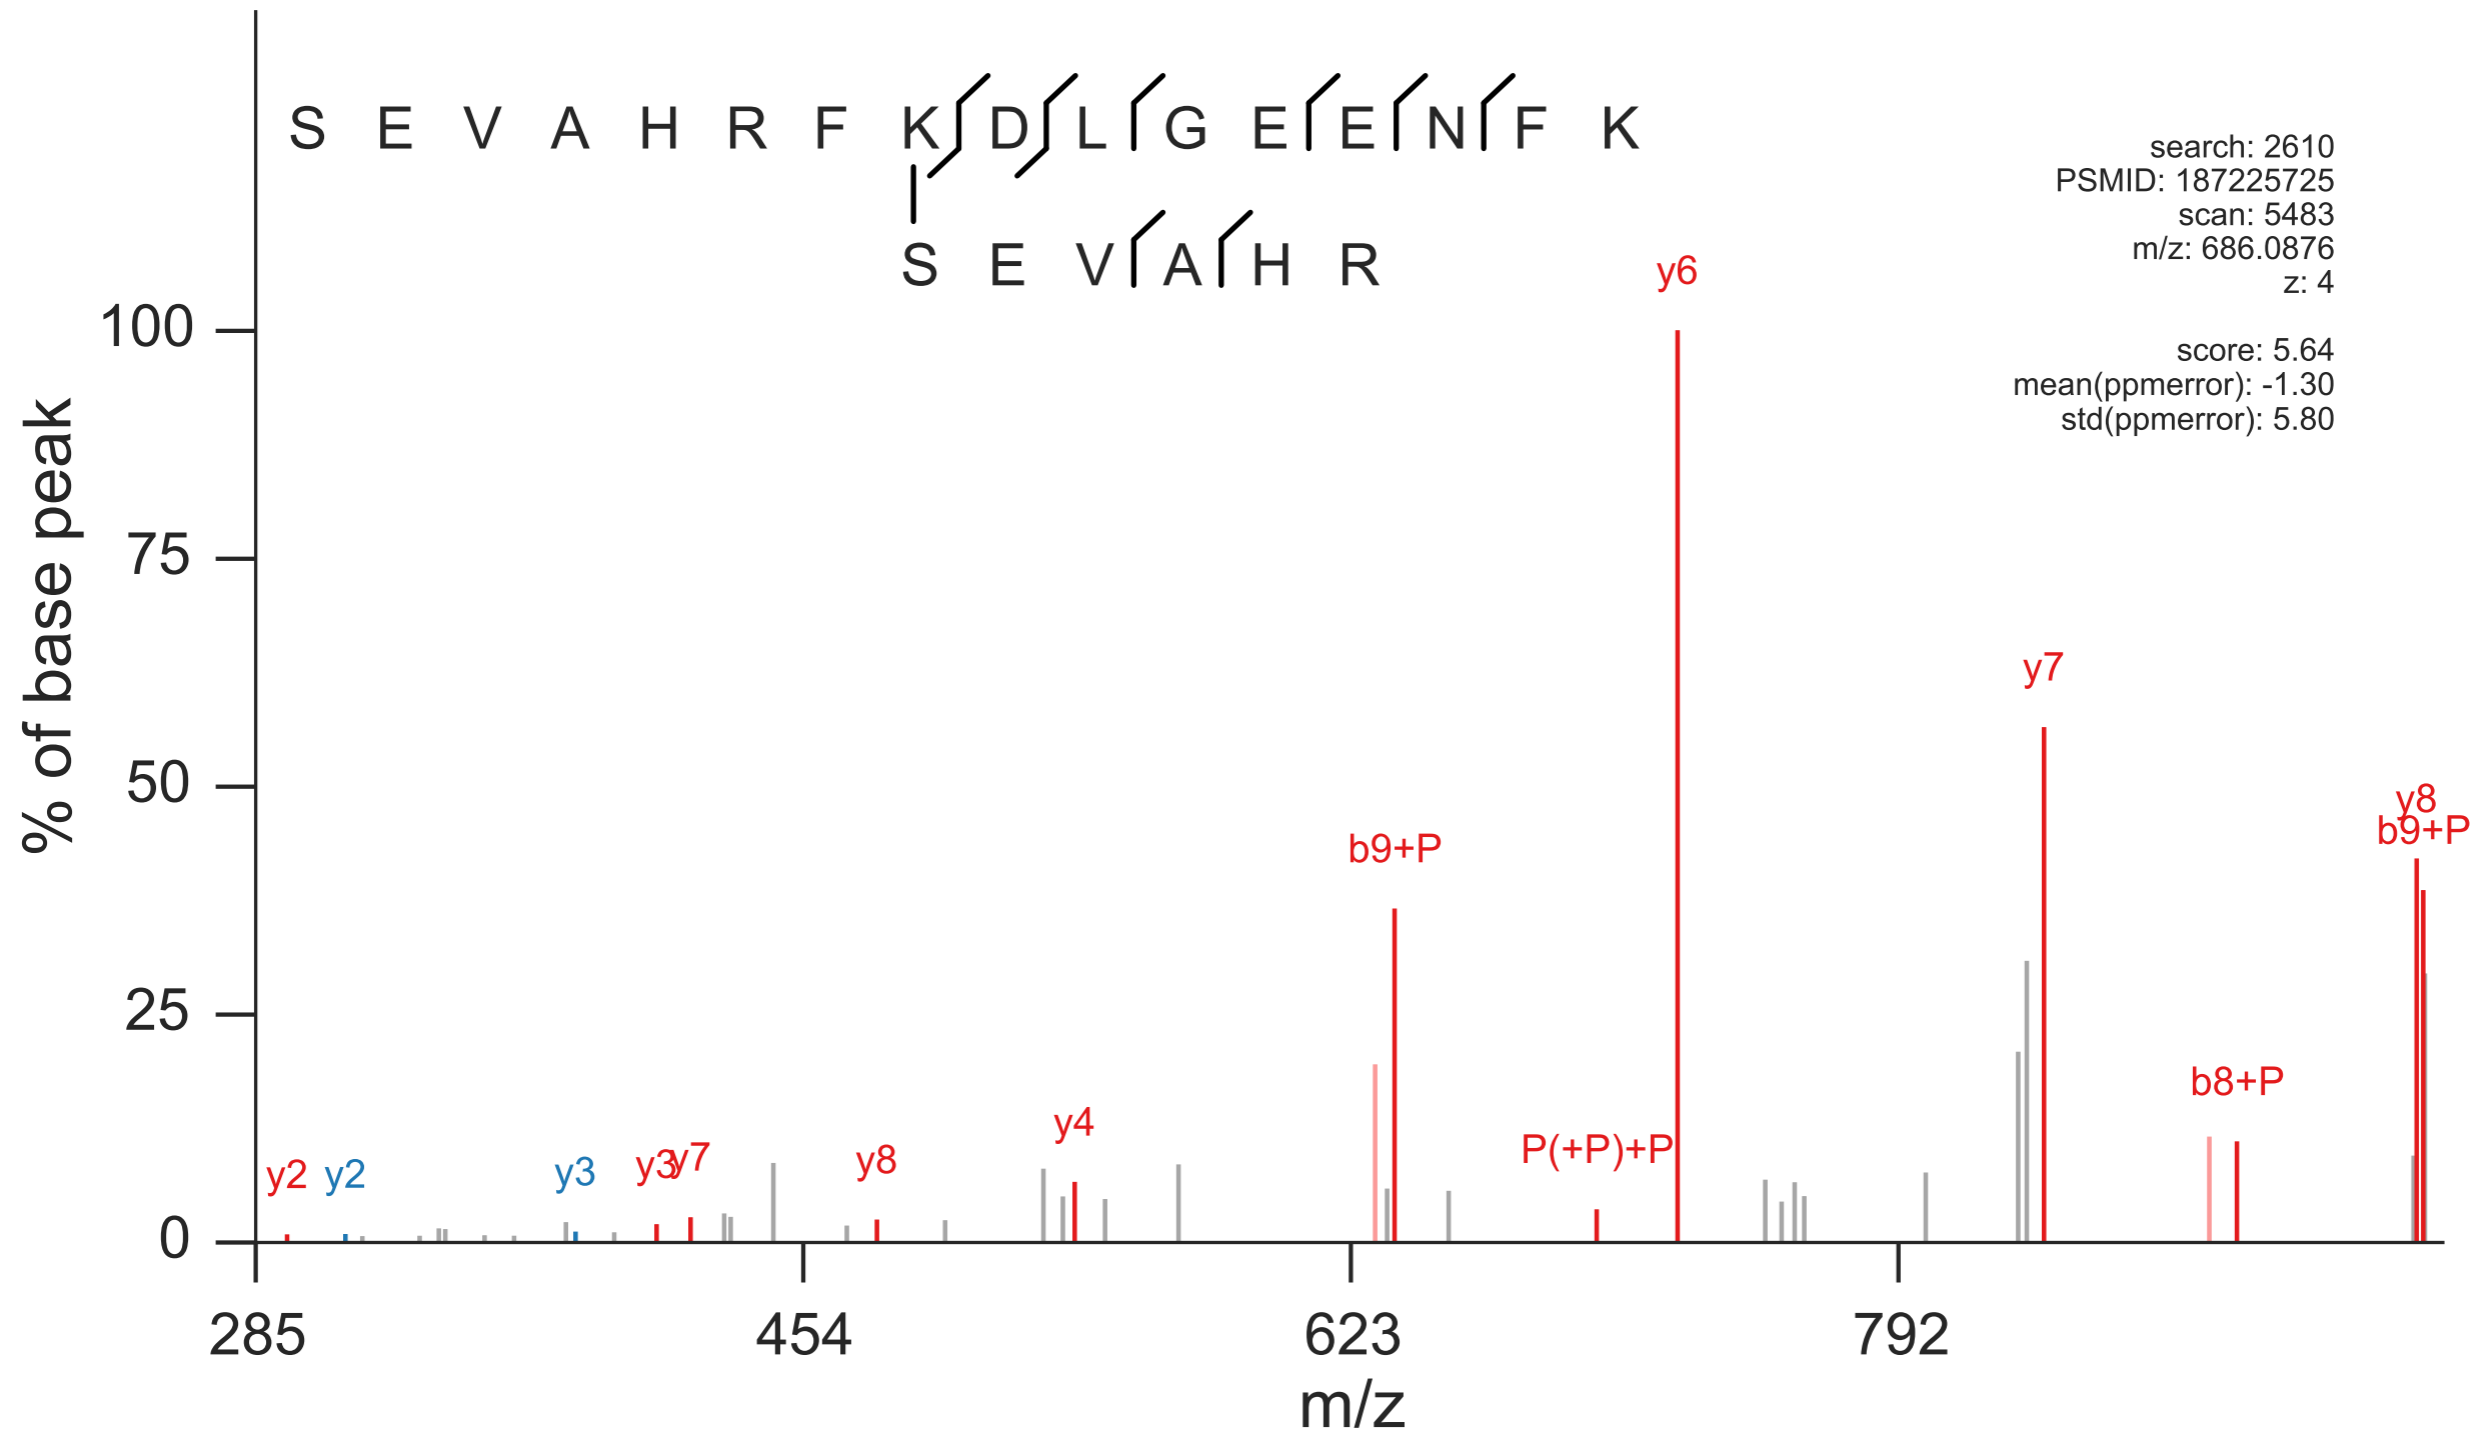

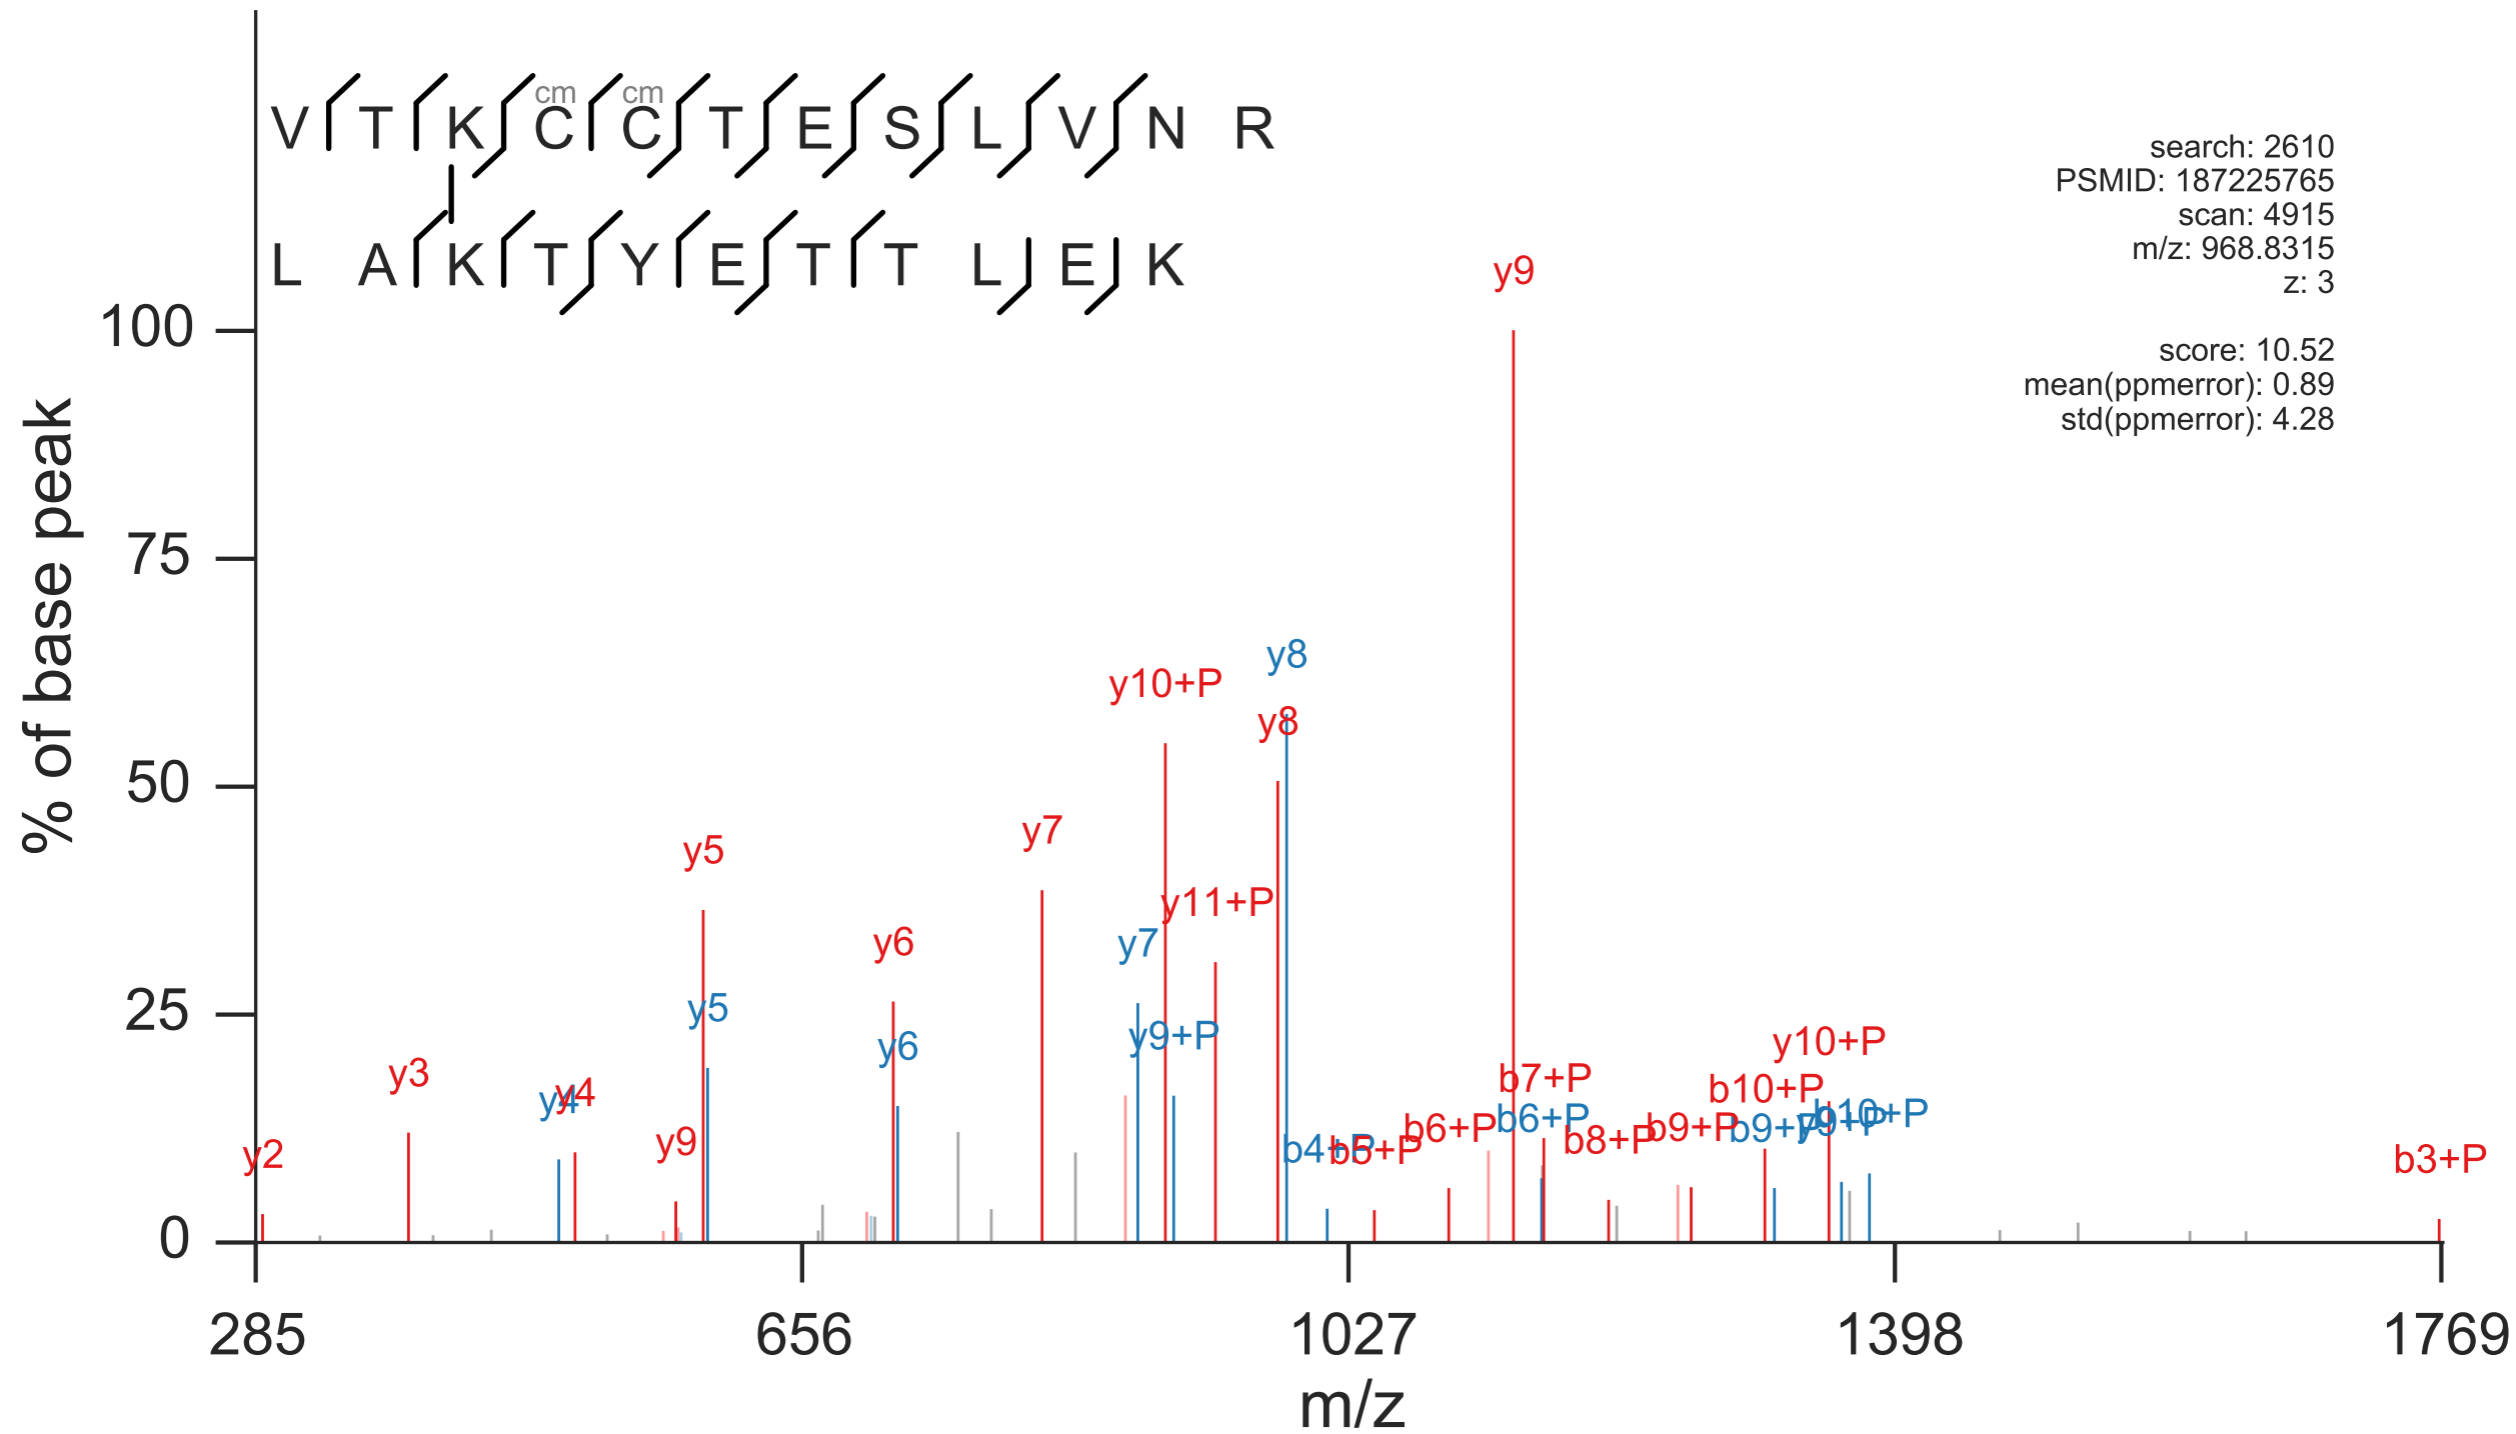

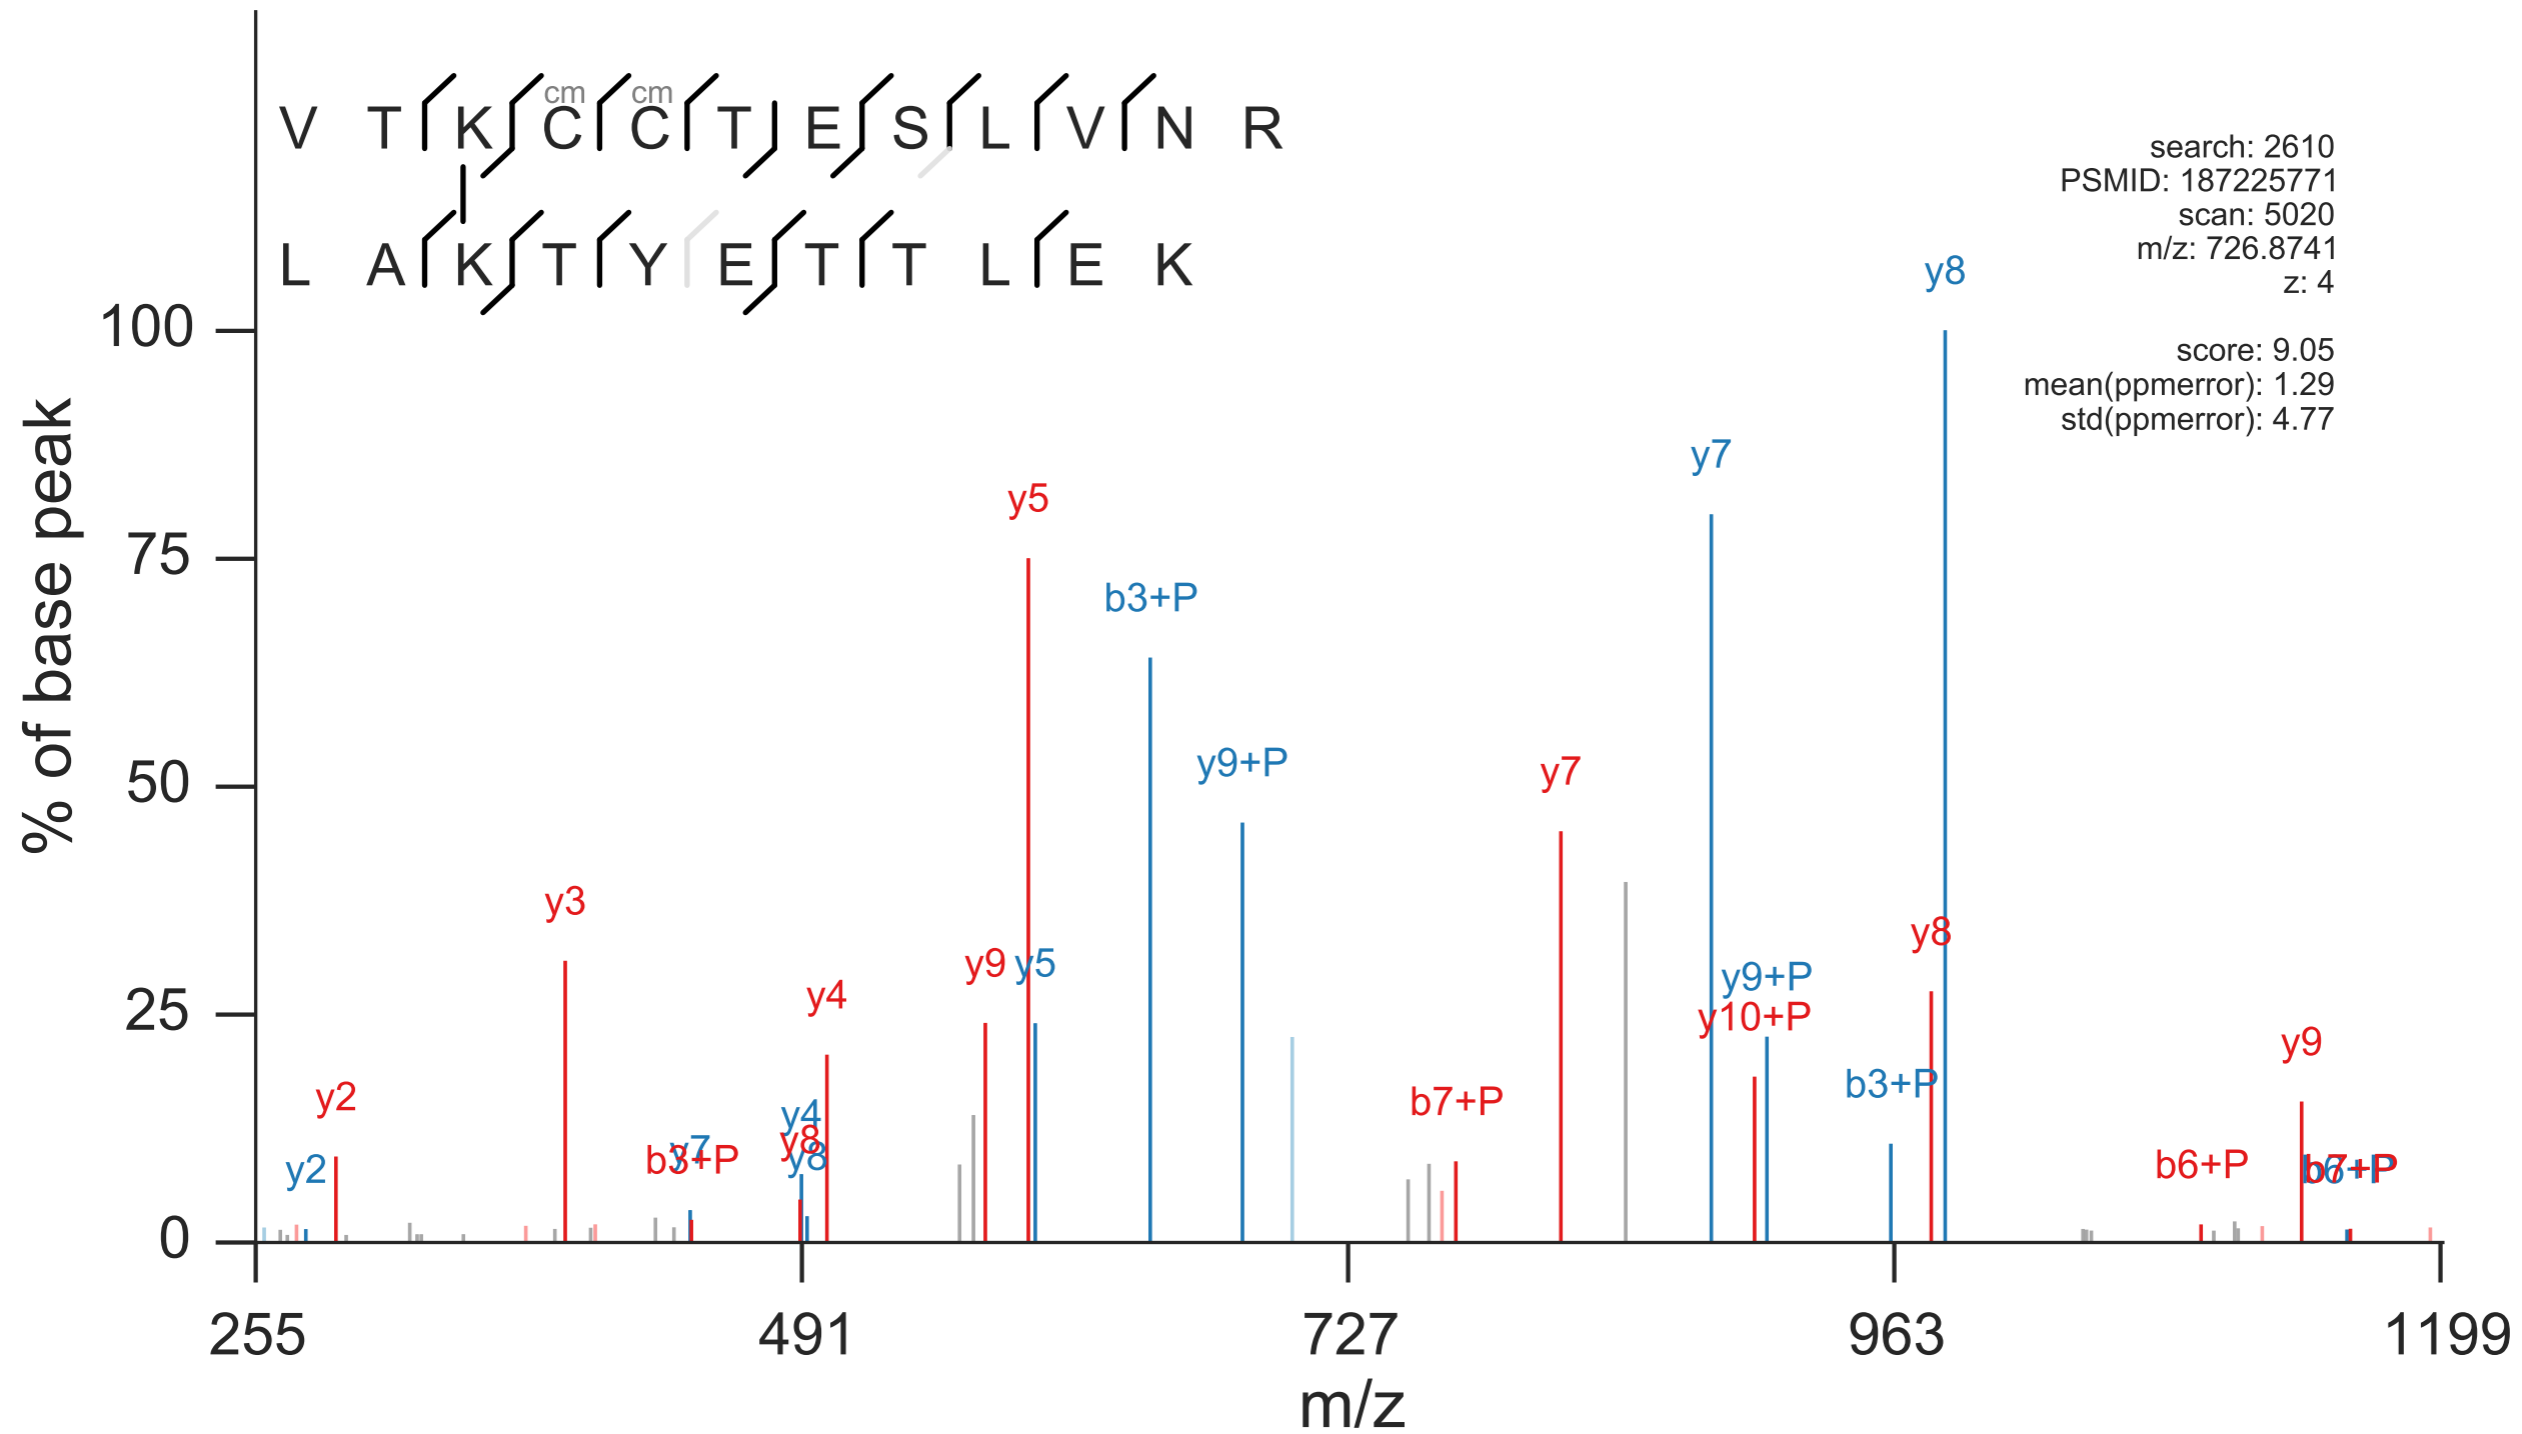

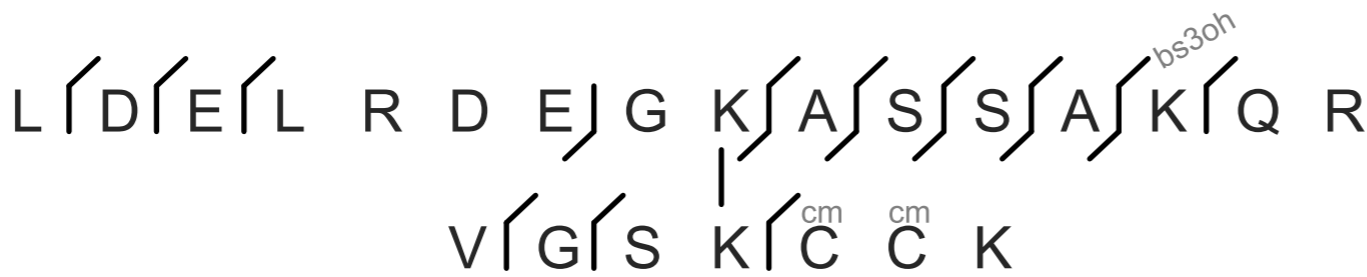

search: 2610  
 PSMID: 187226311  
 scan: 3427  
 m/z: 734.3664  
 z: 4

score: 7.12  
 mean(ppmerror): -0.96  
 std(ppmerror): 7.41

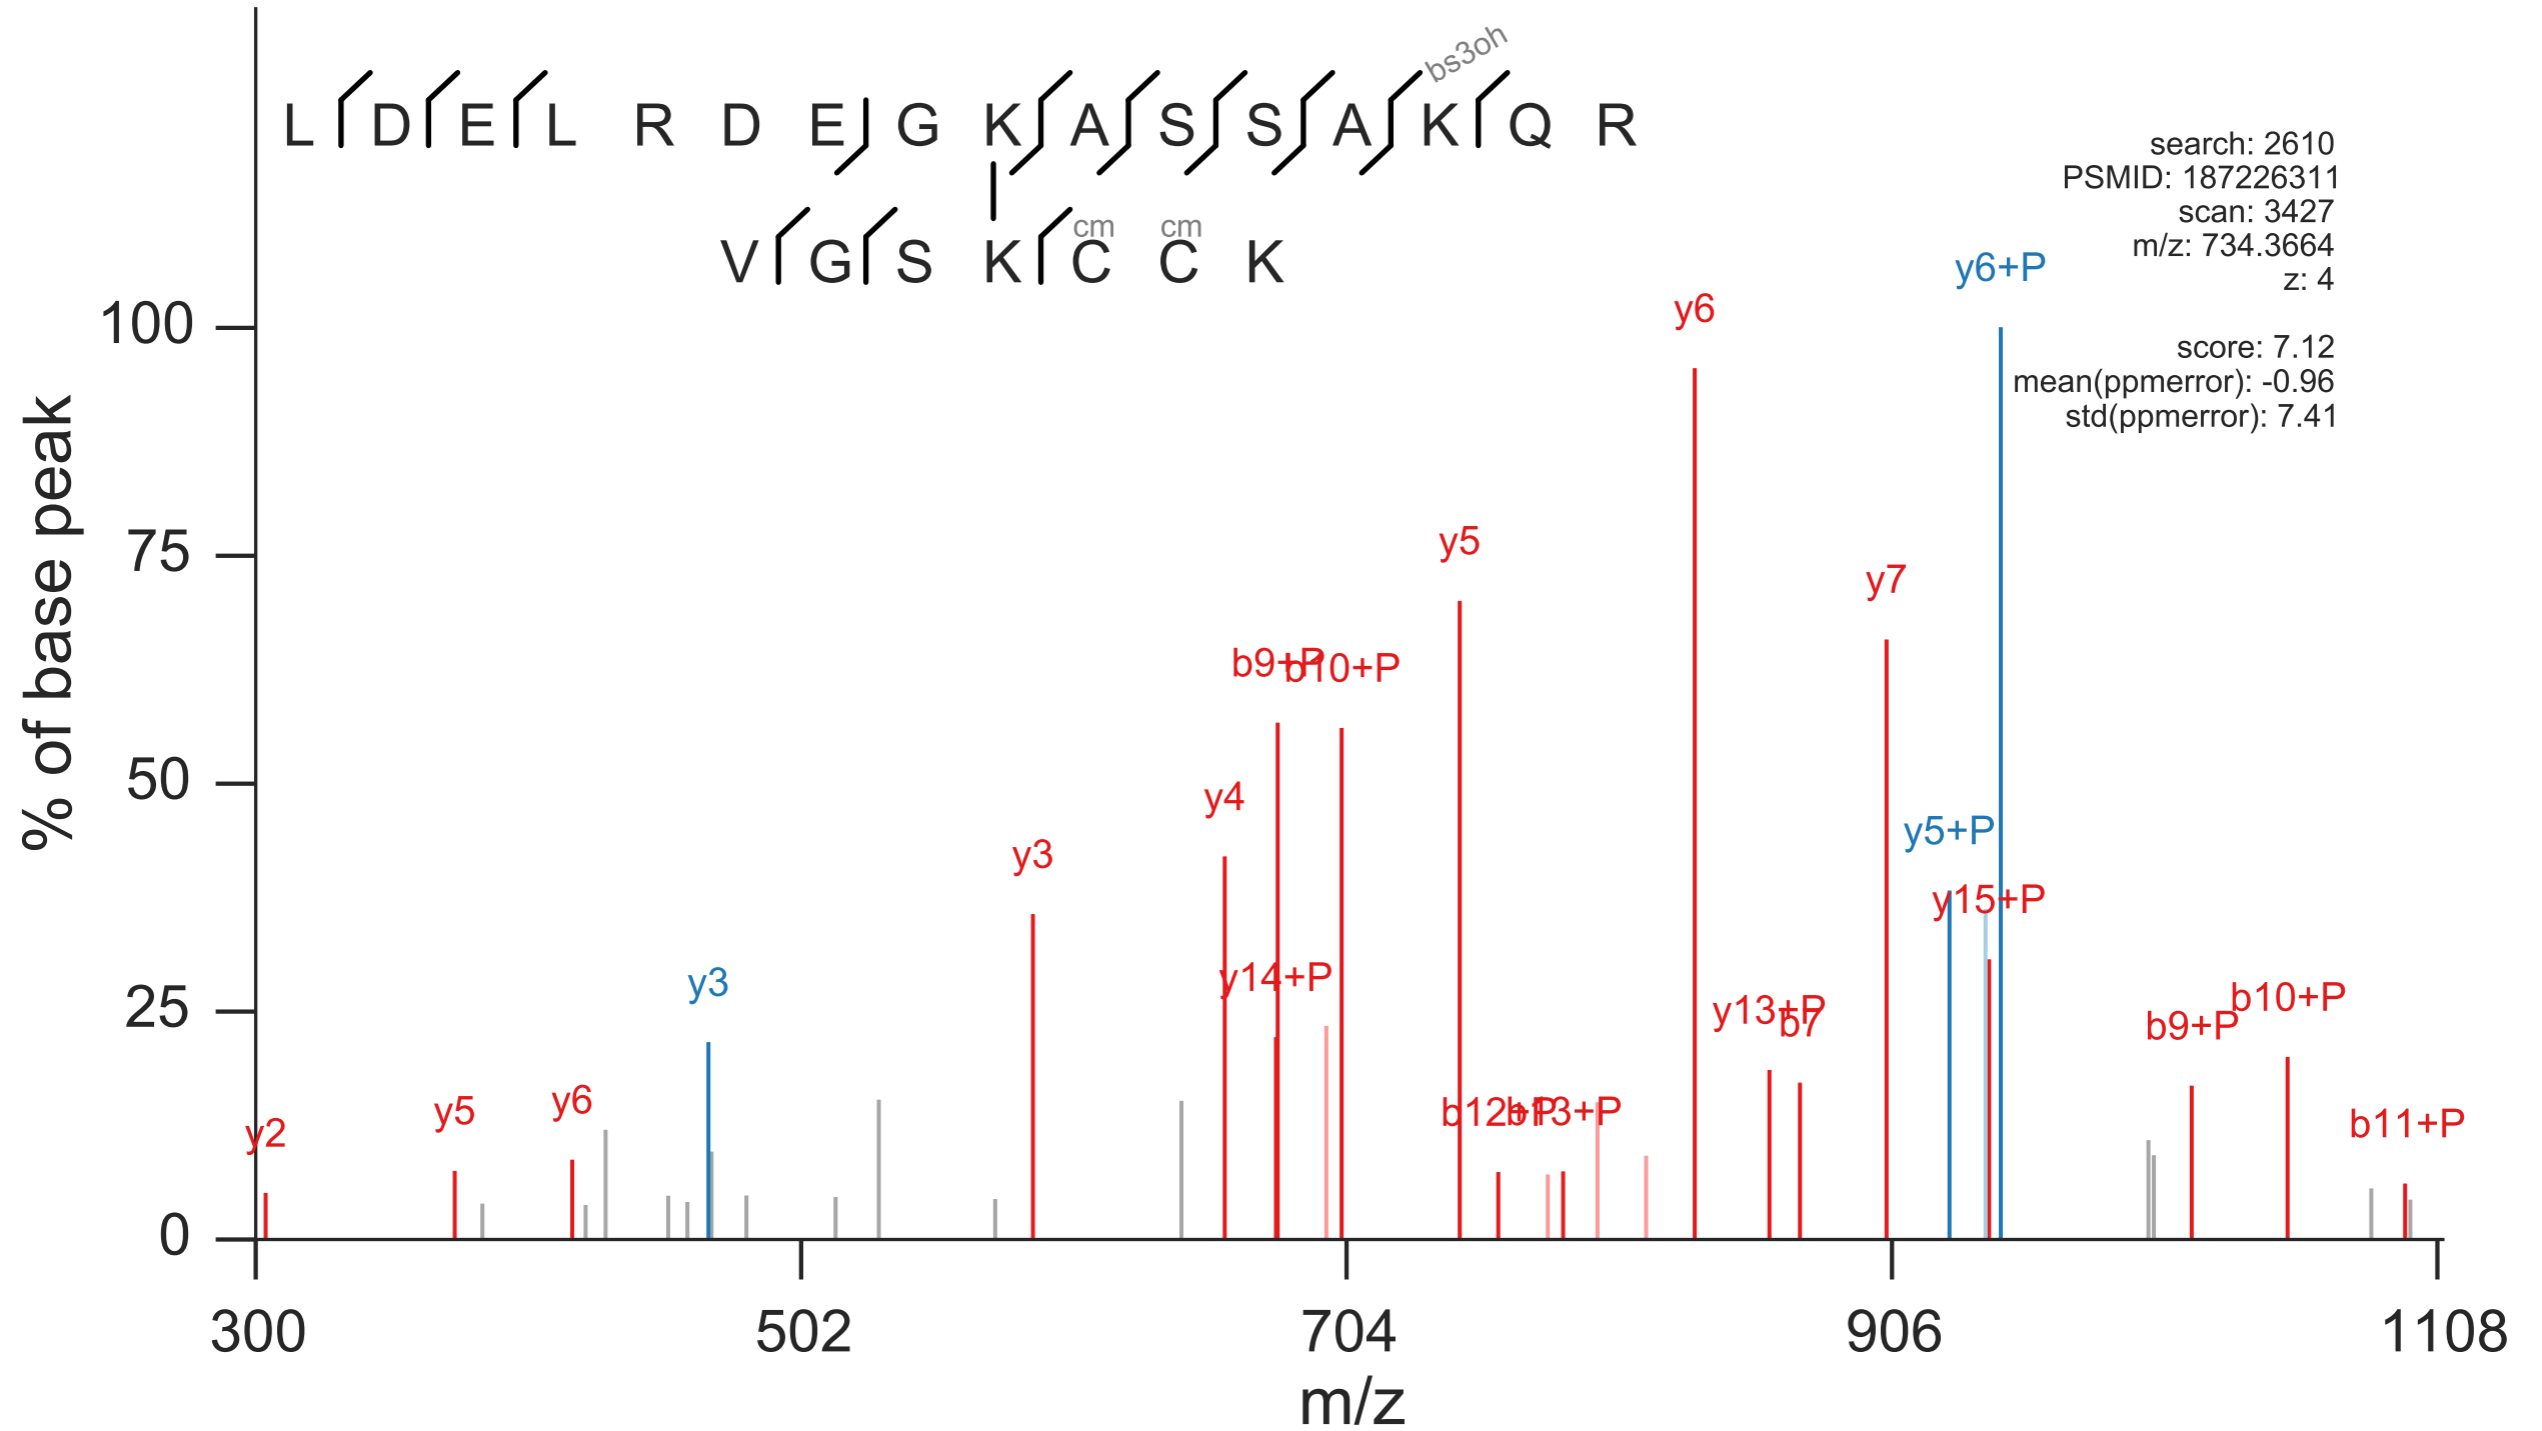

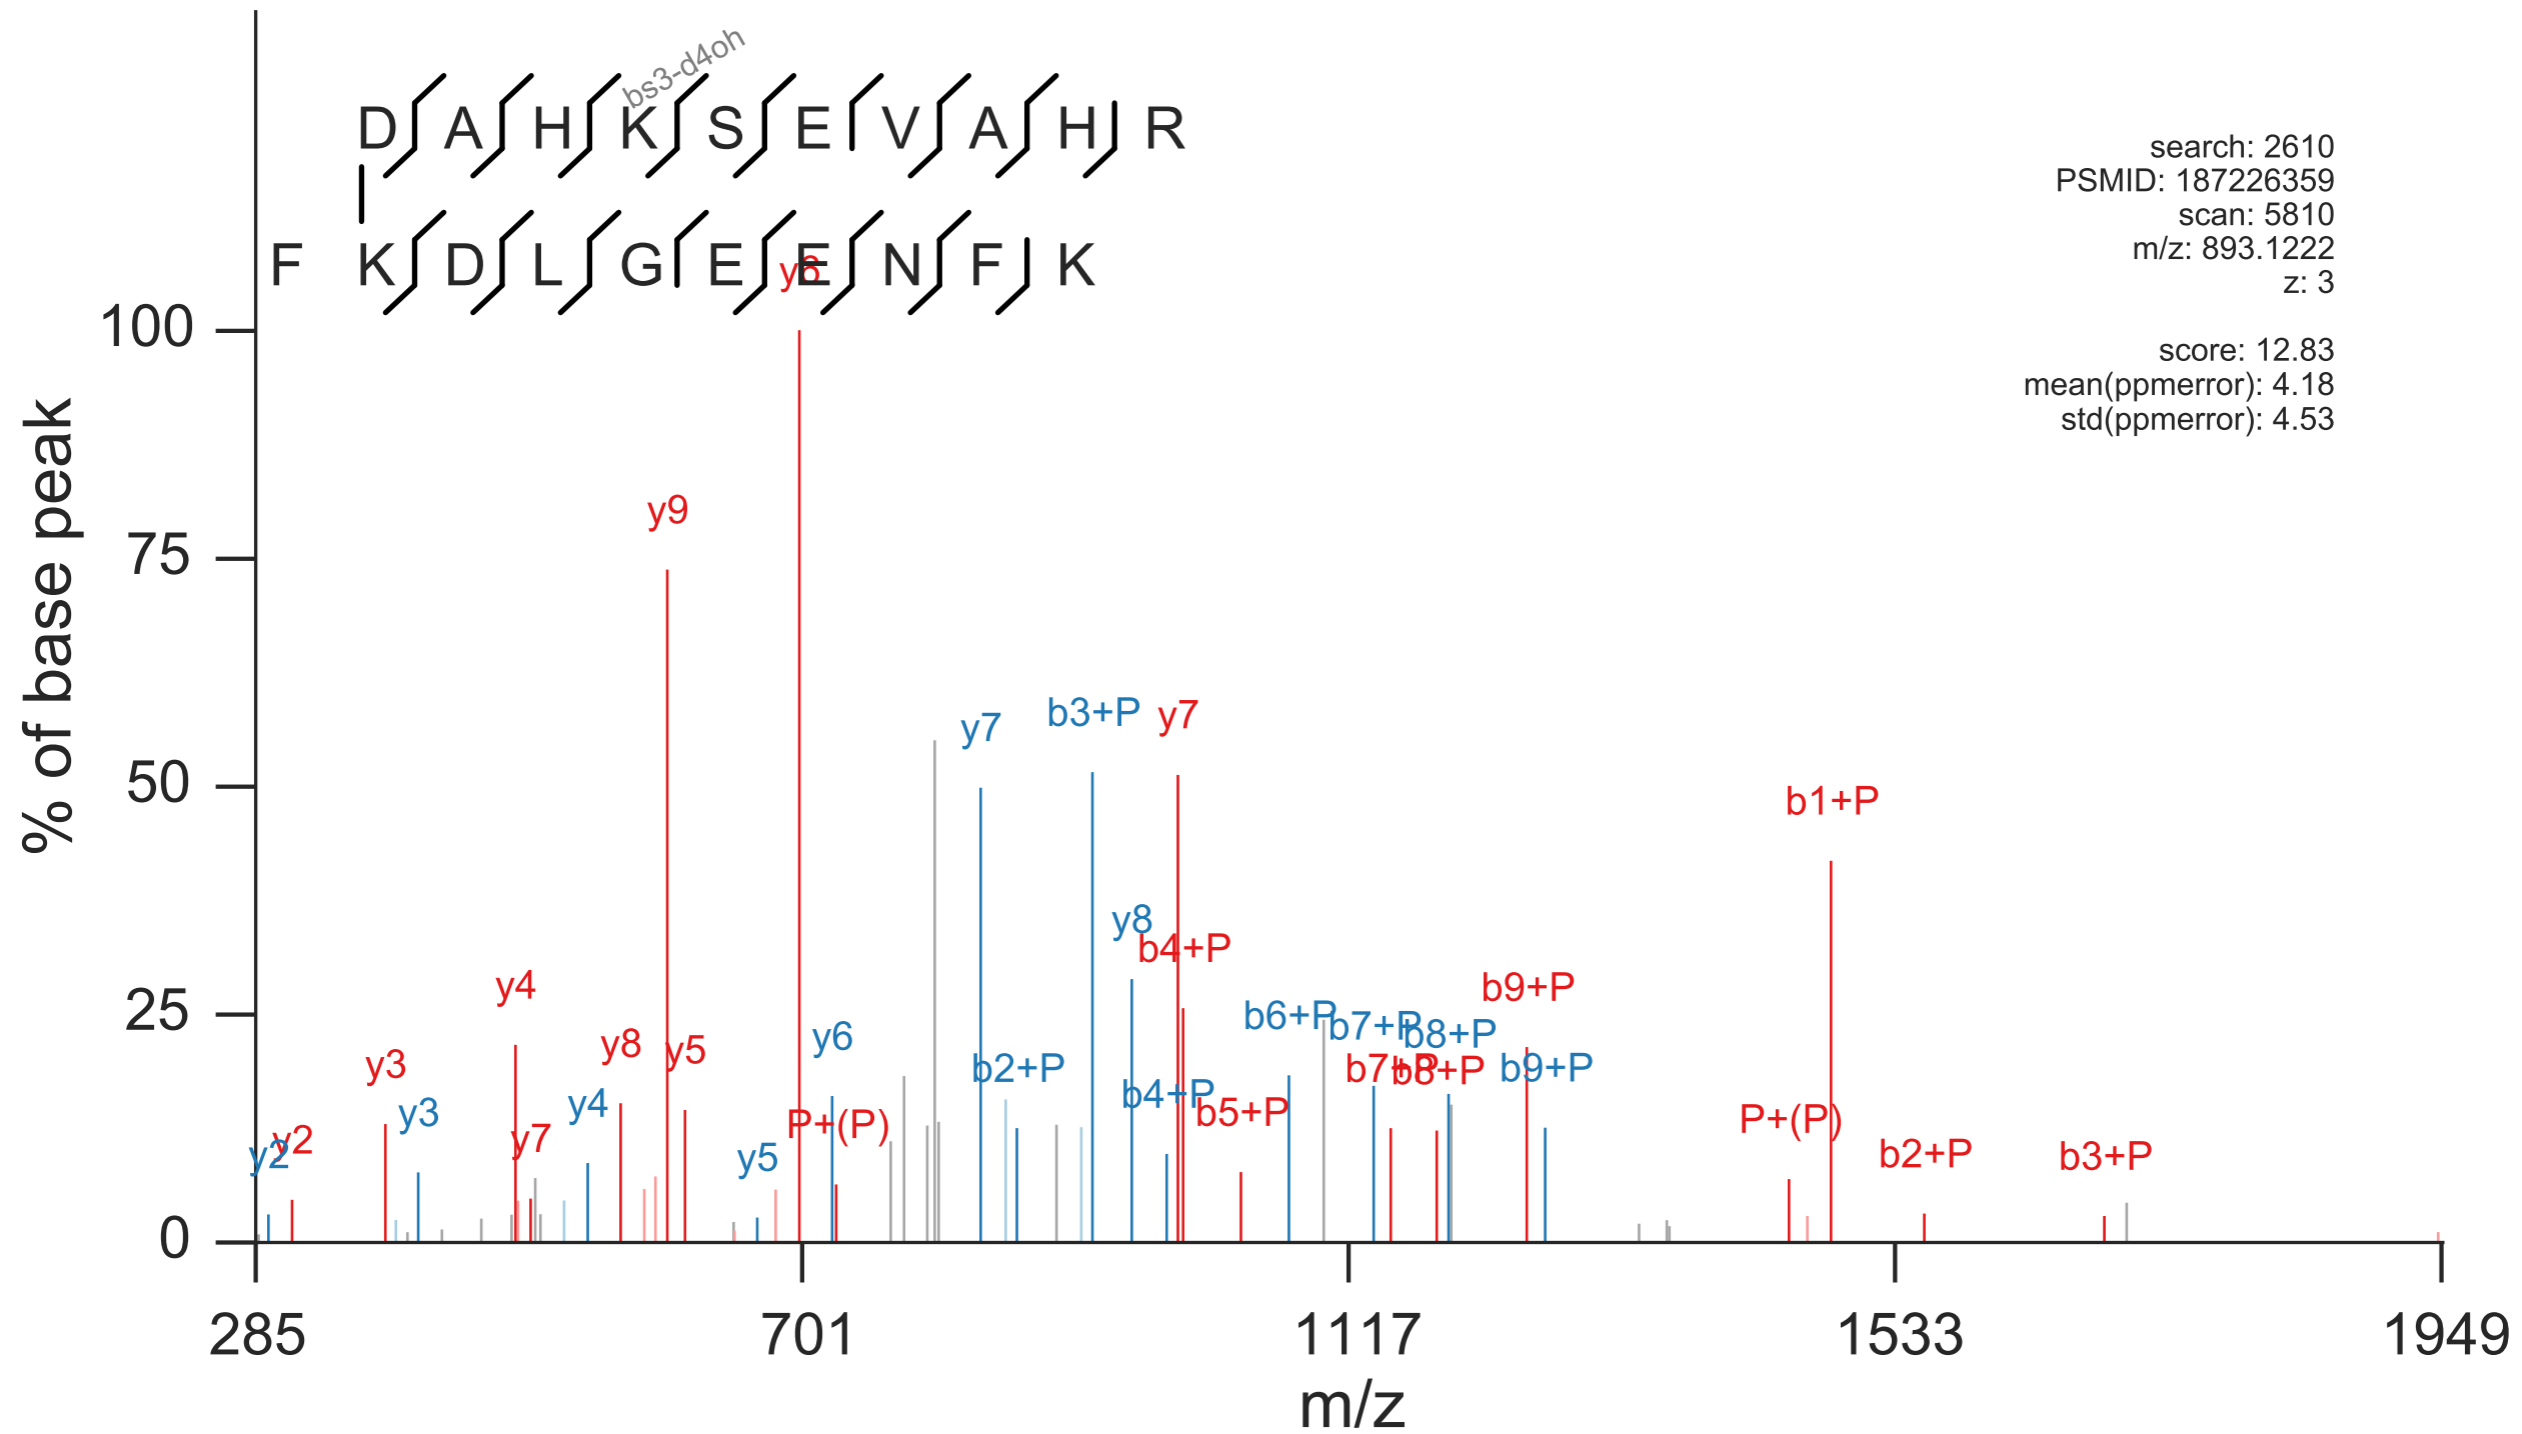

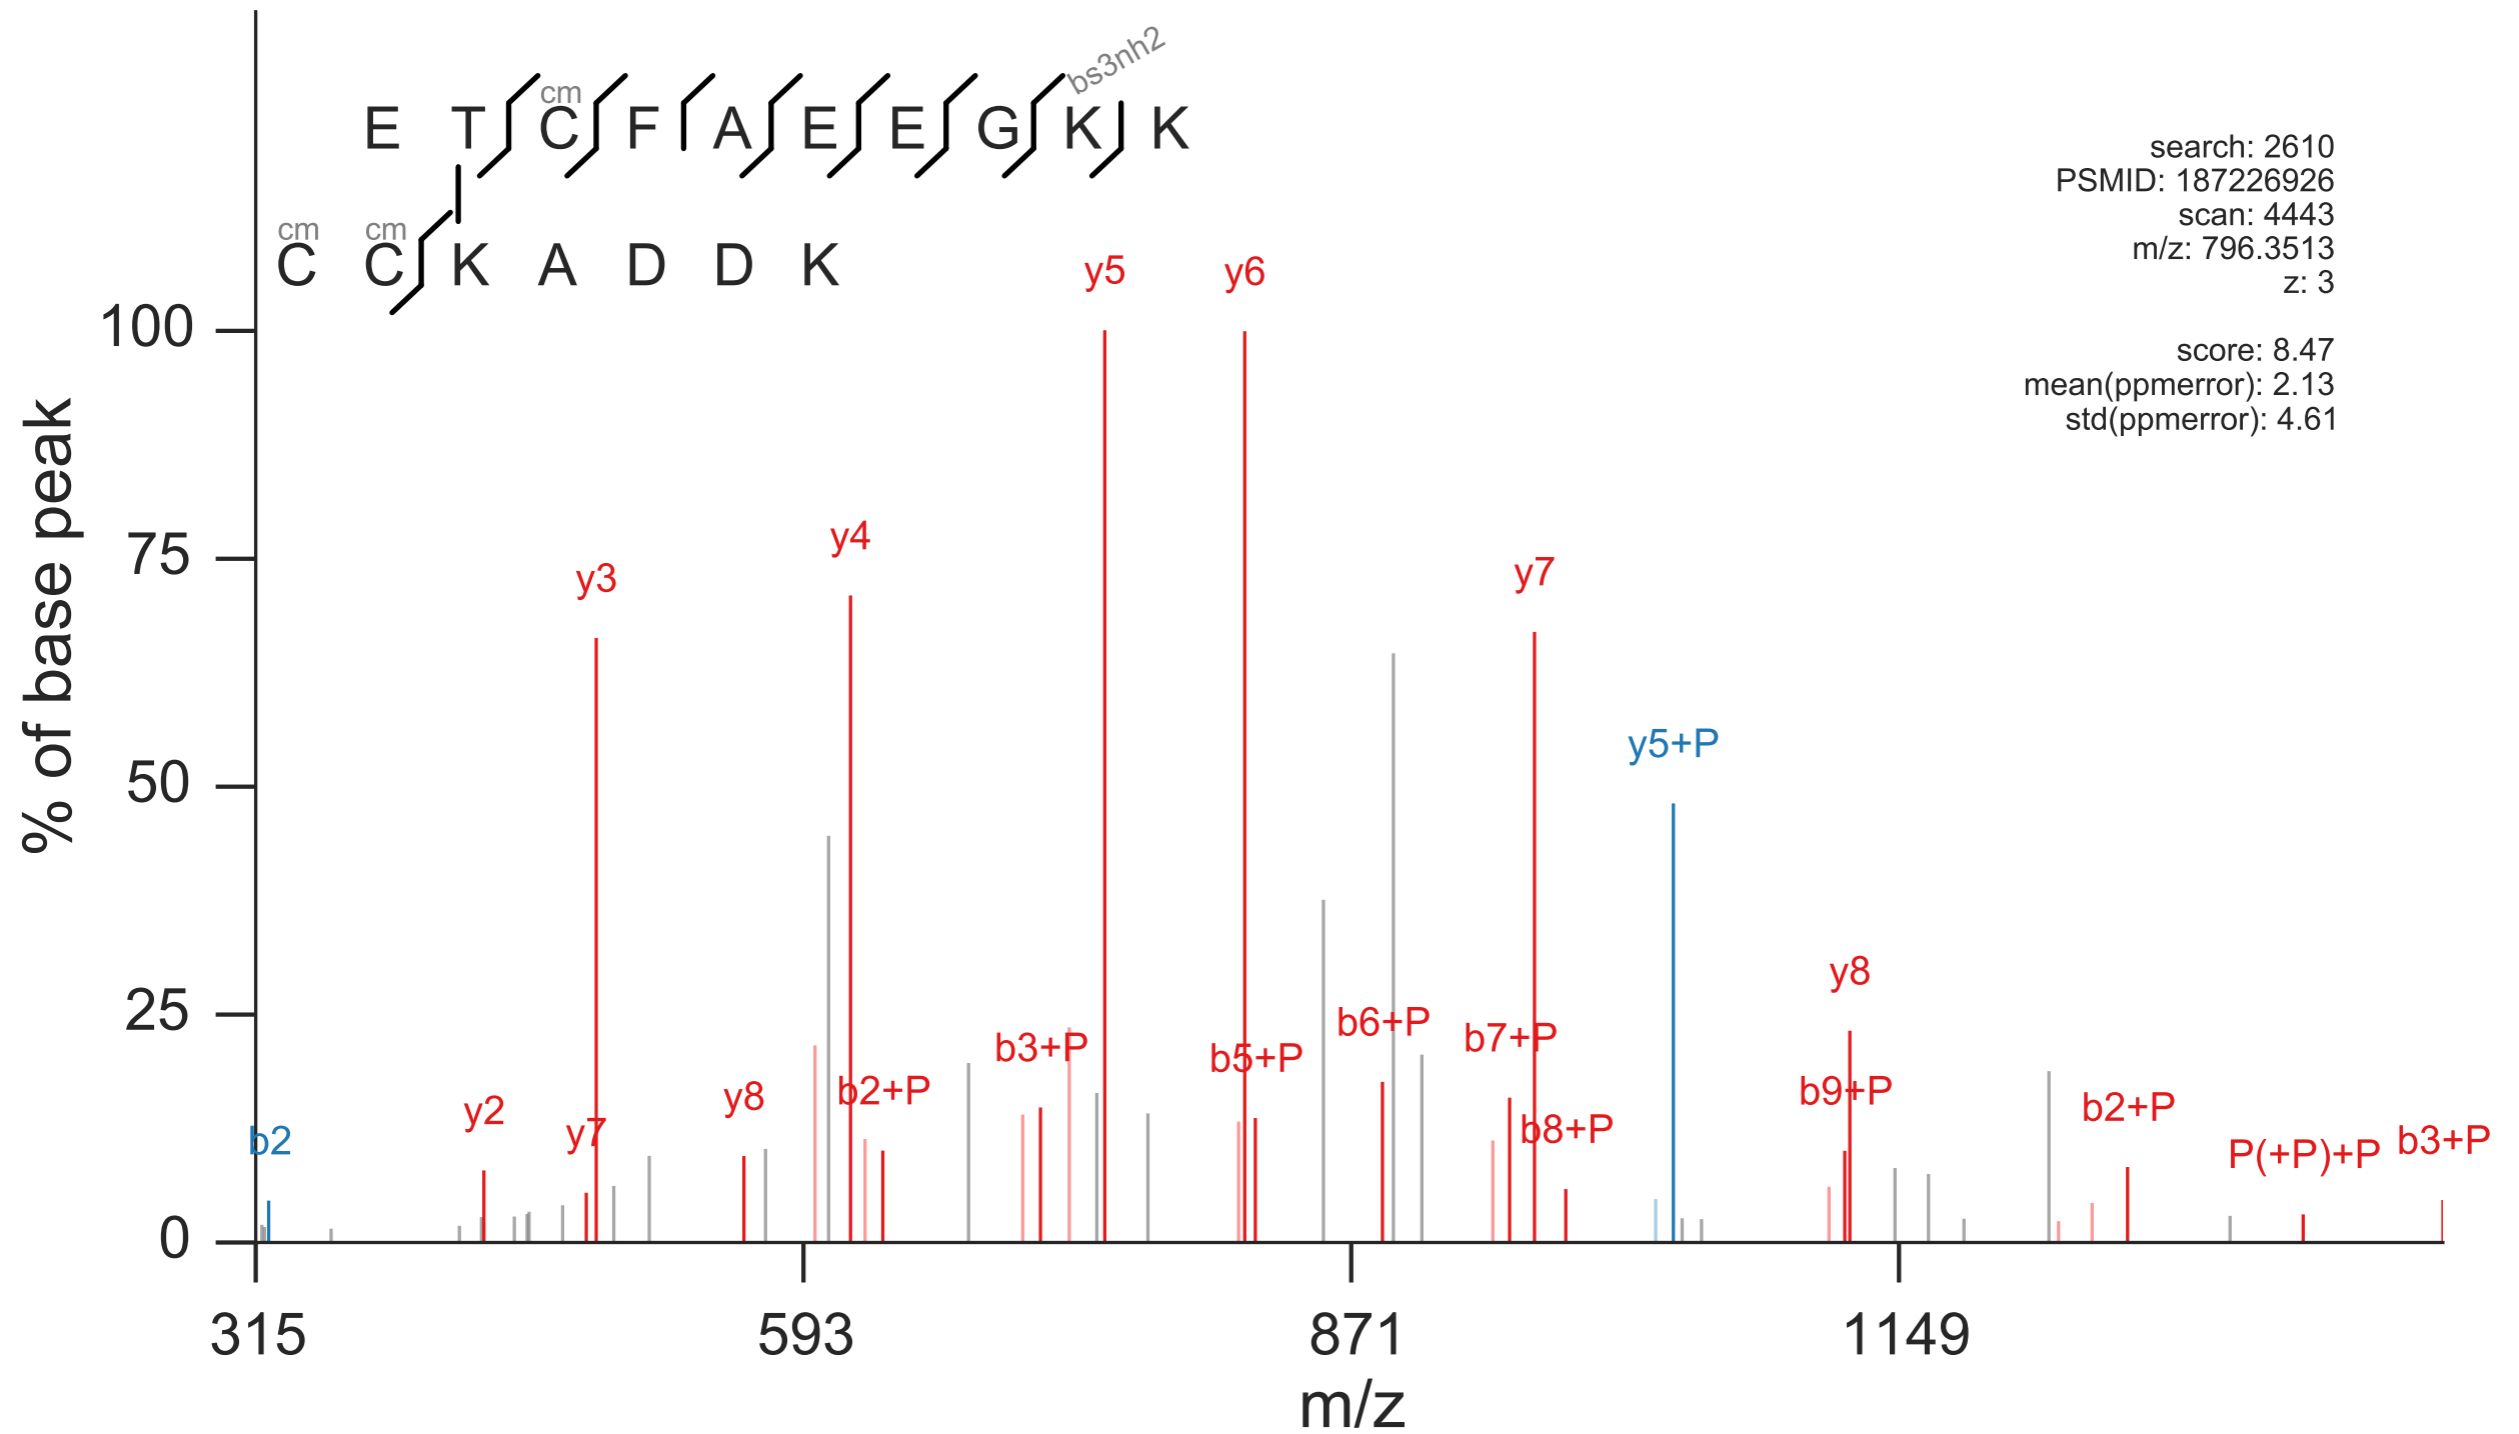

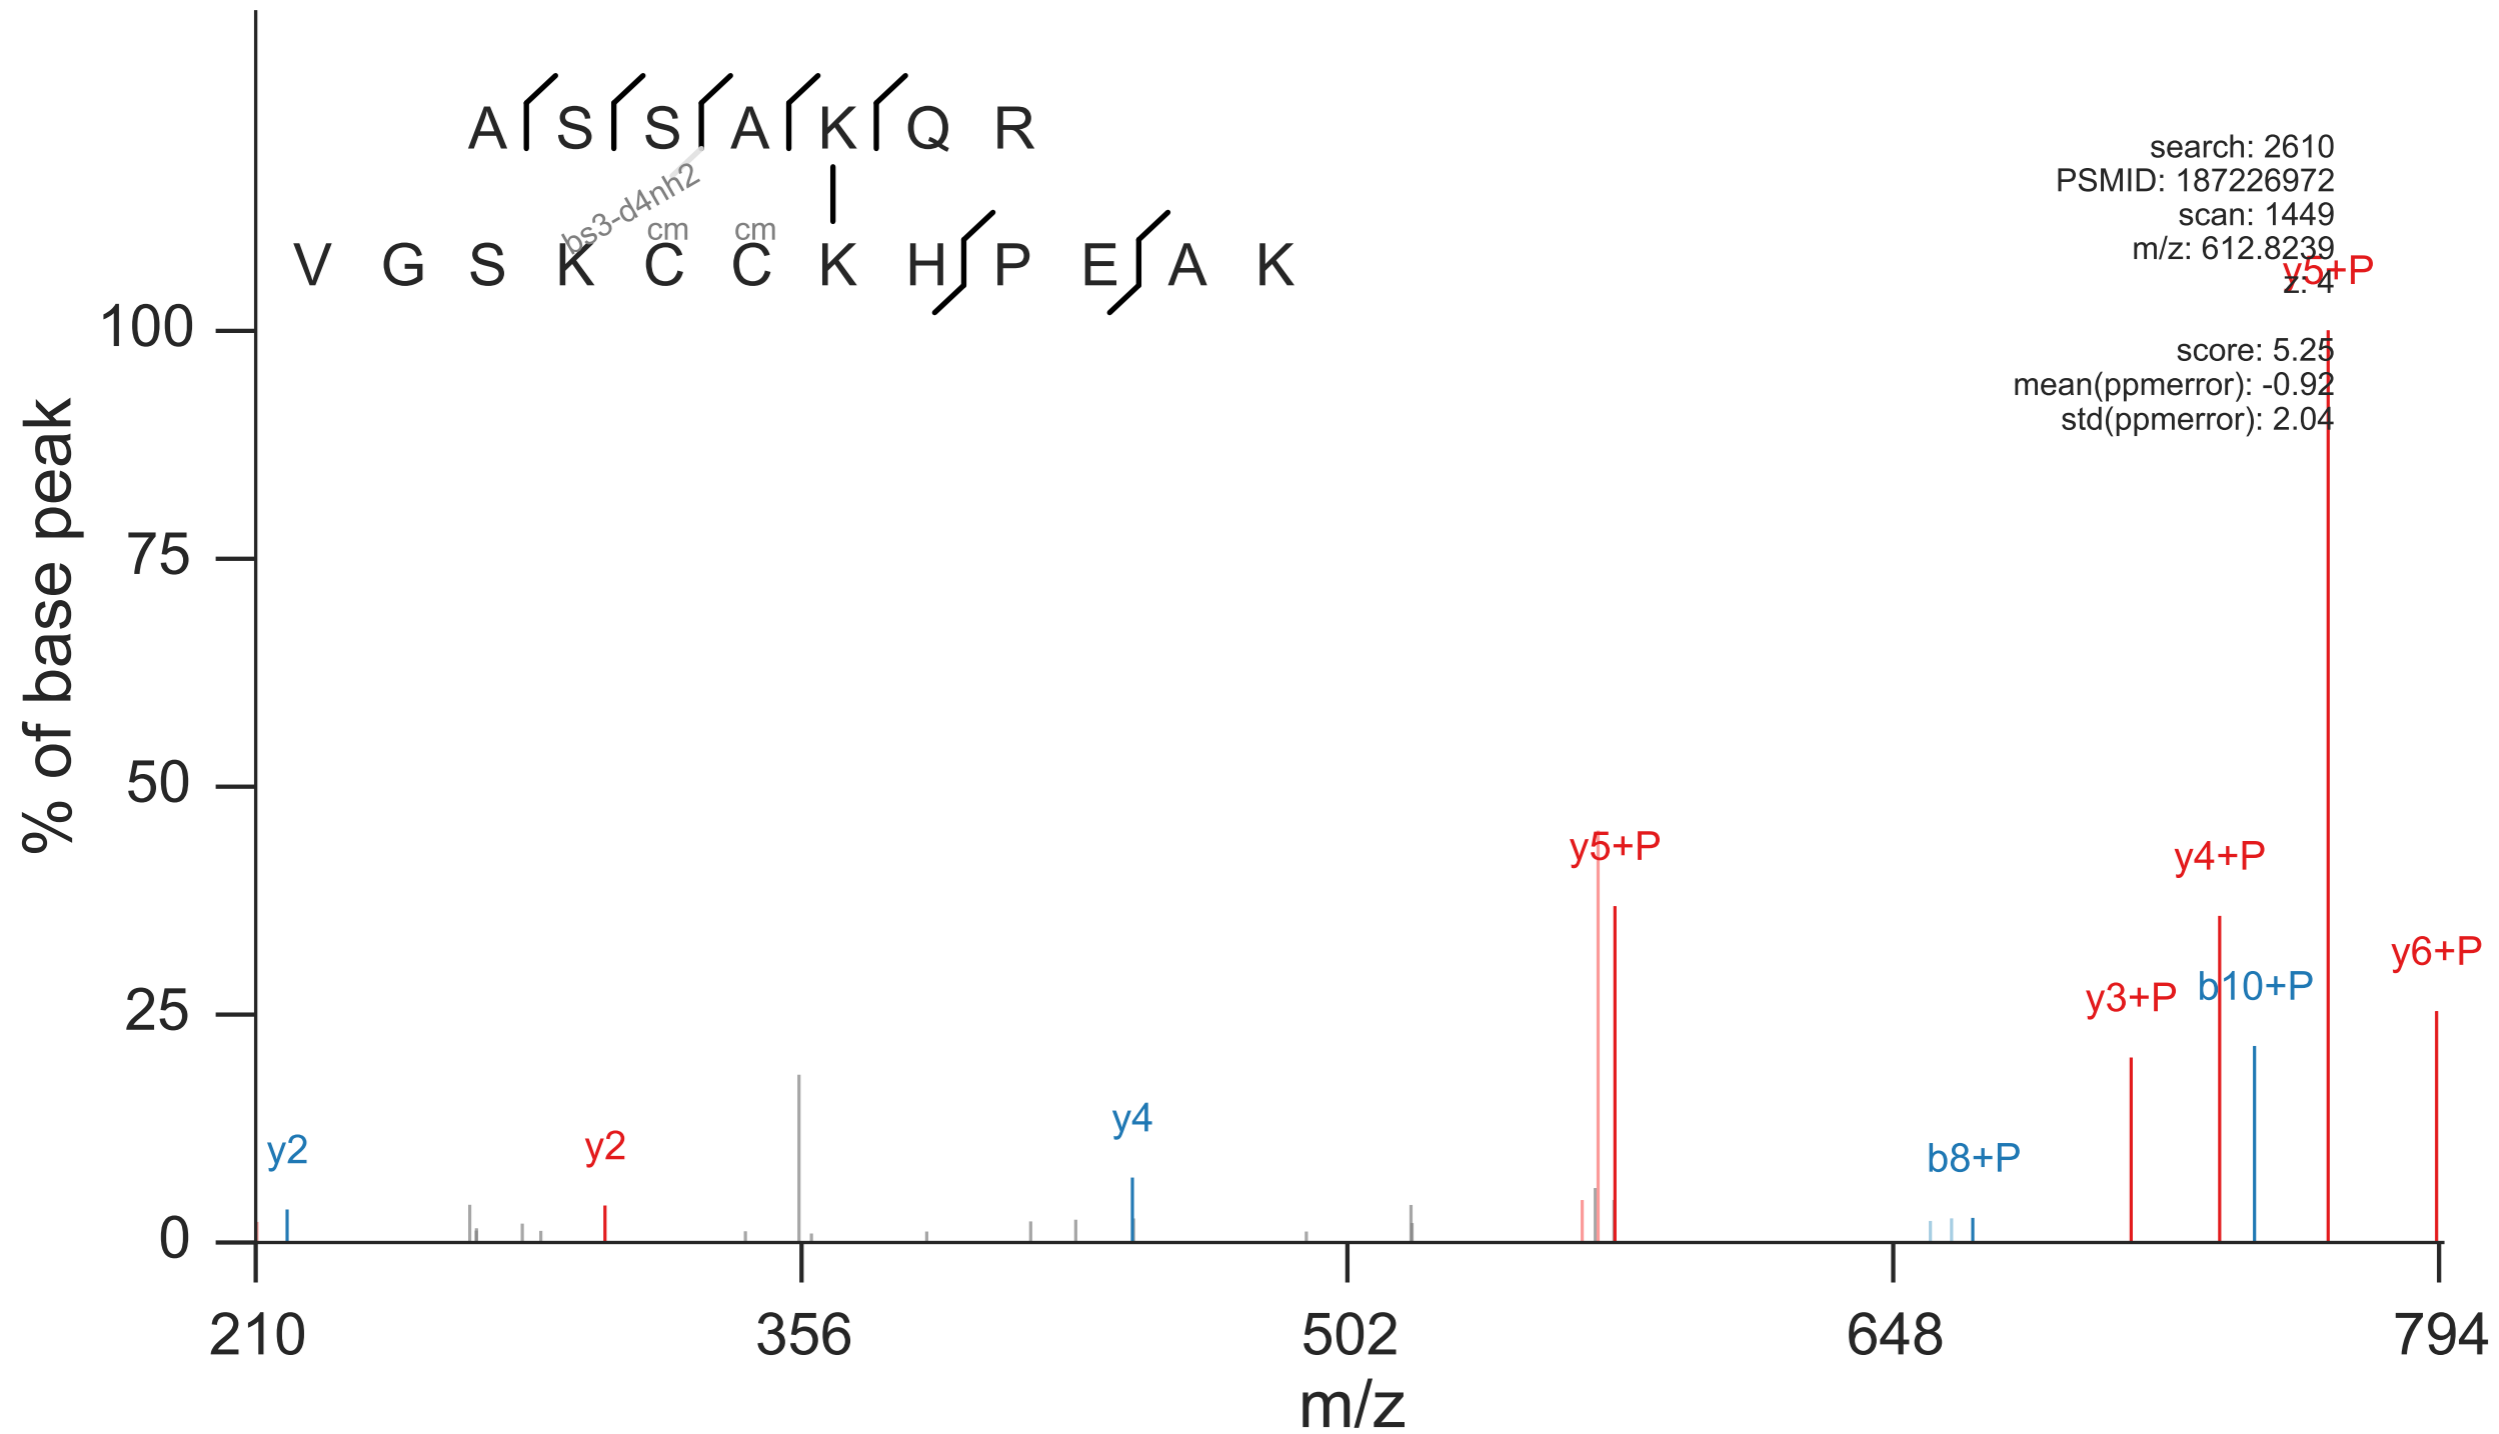



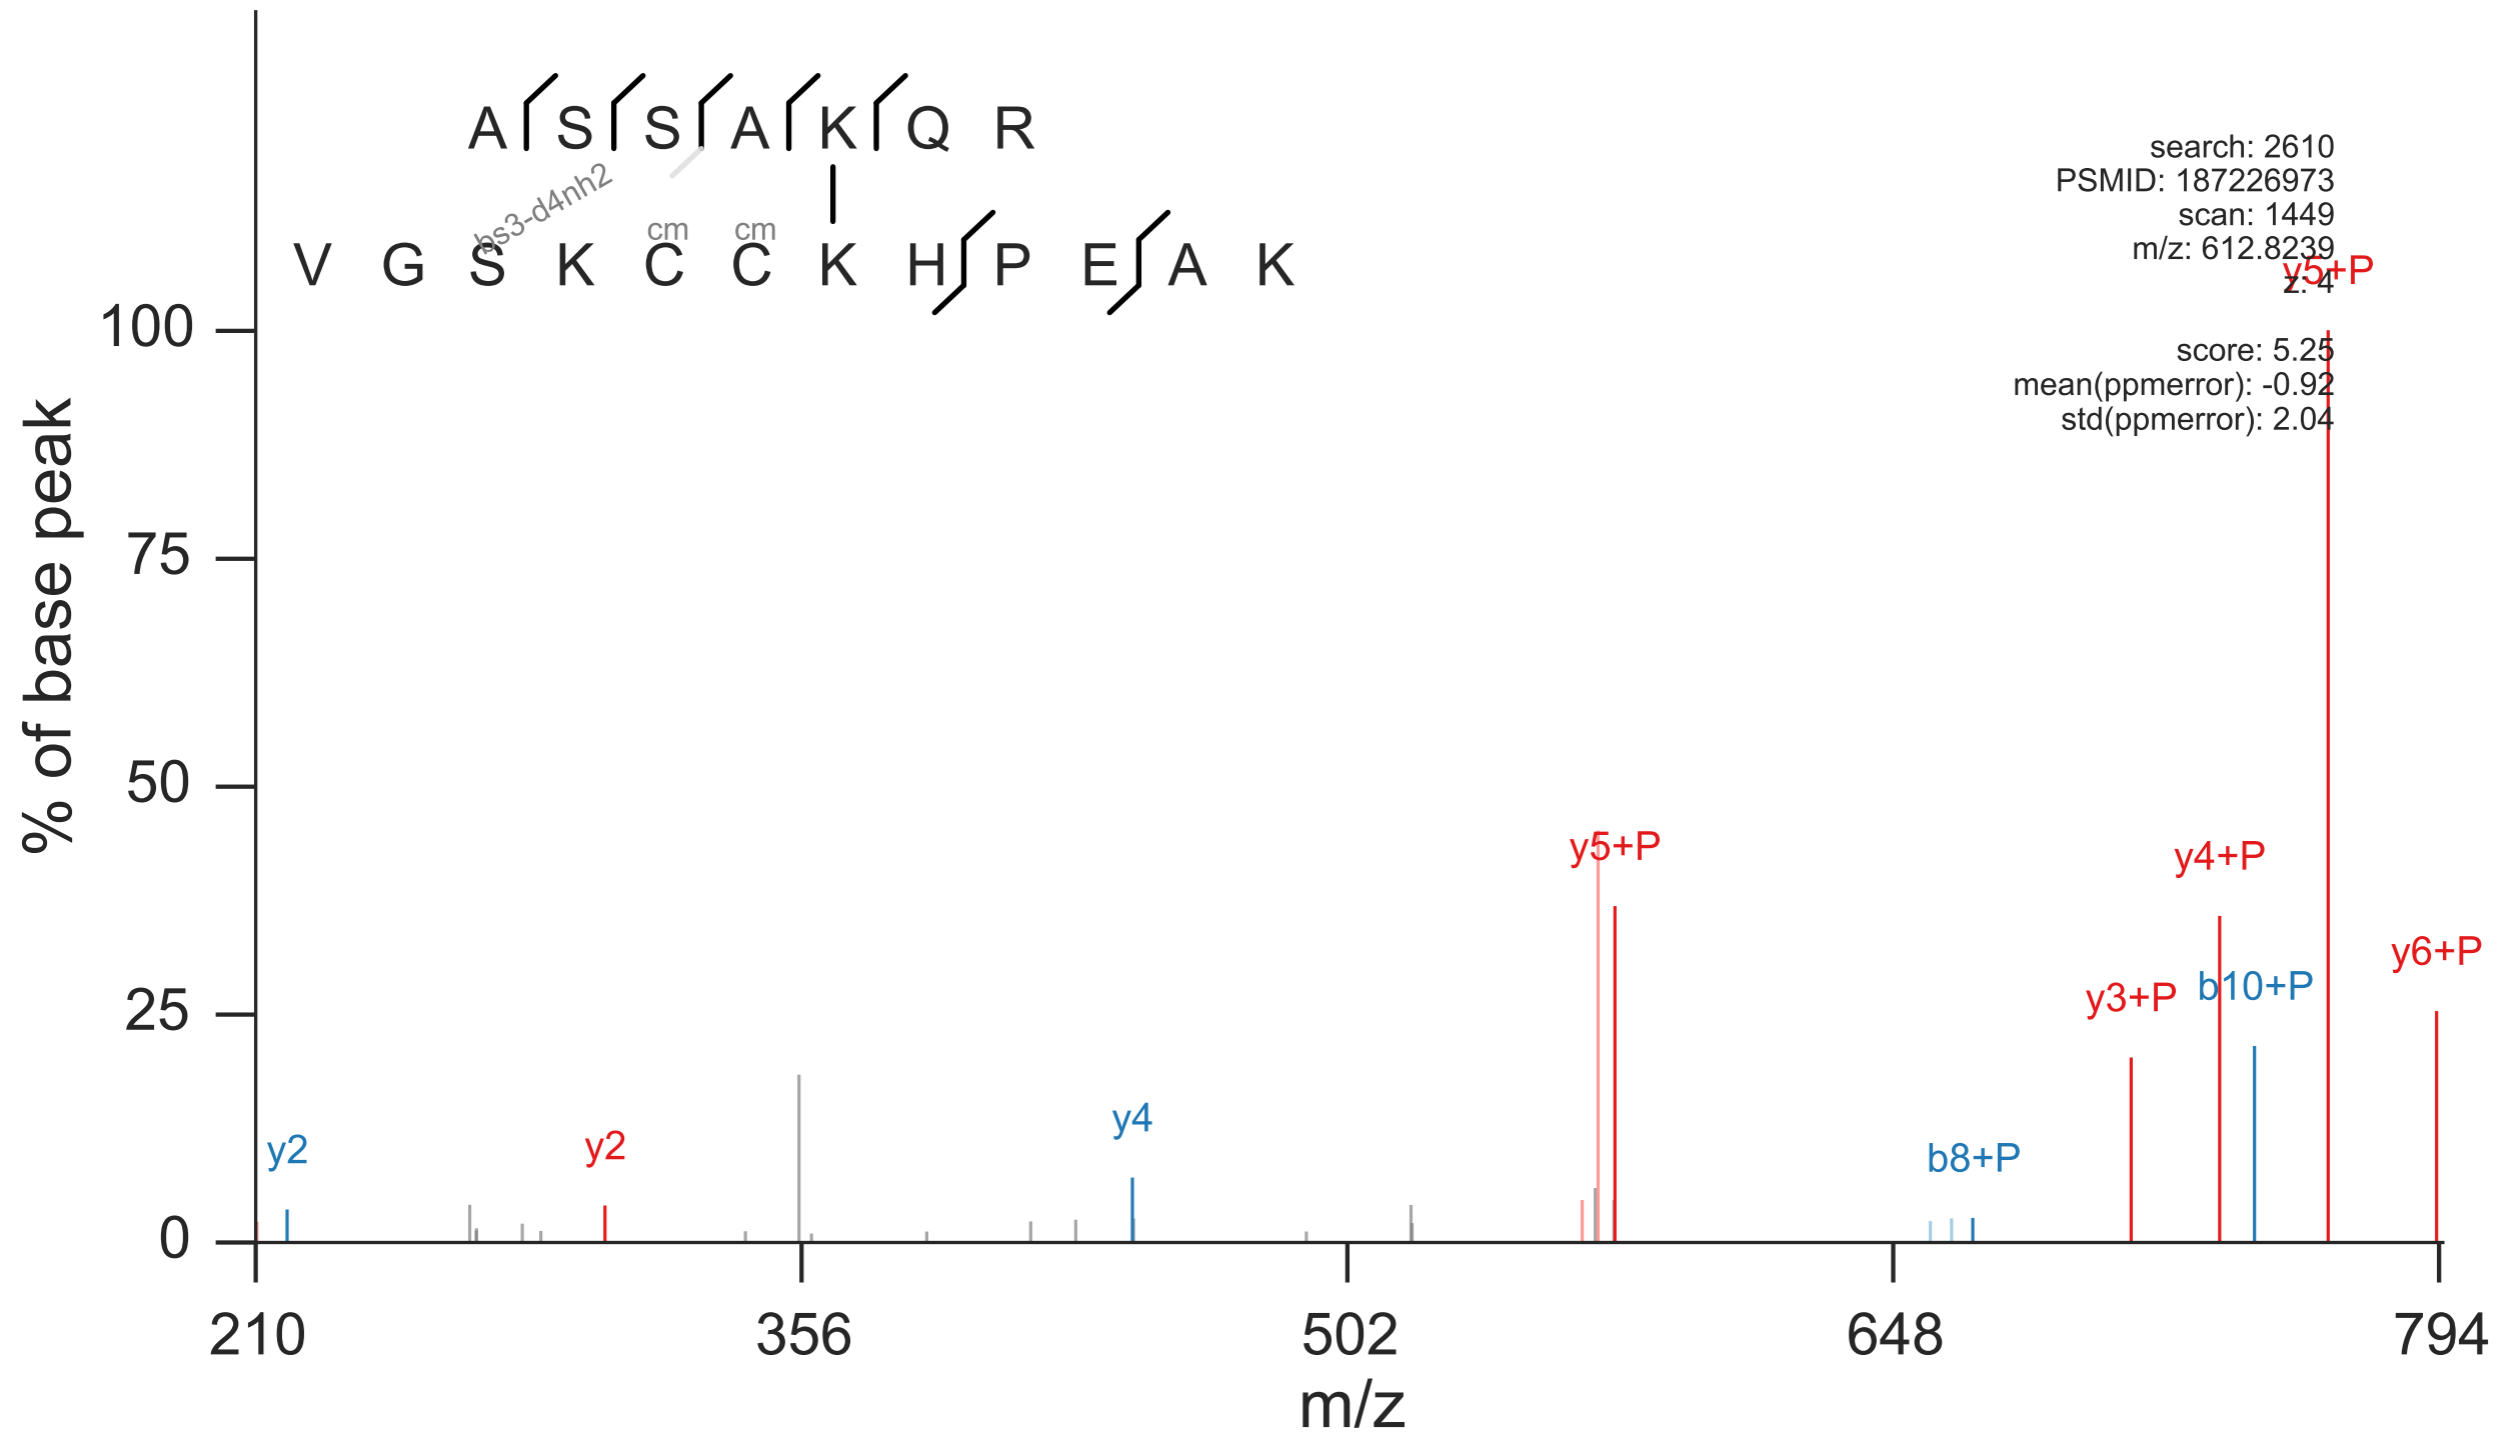

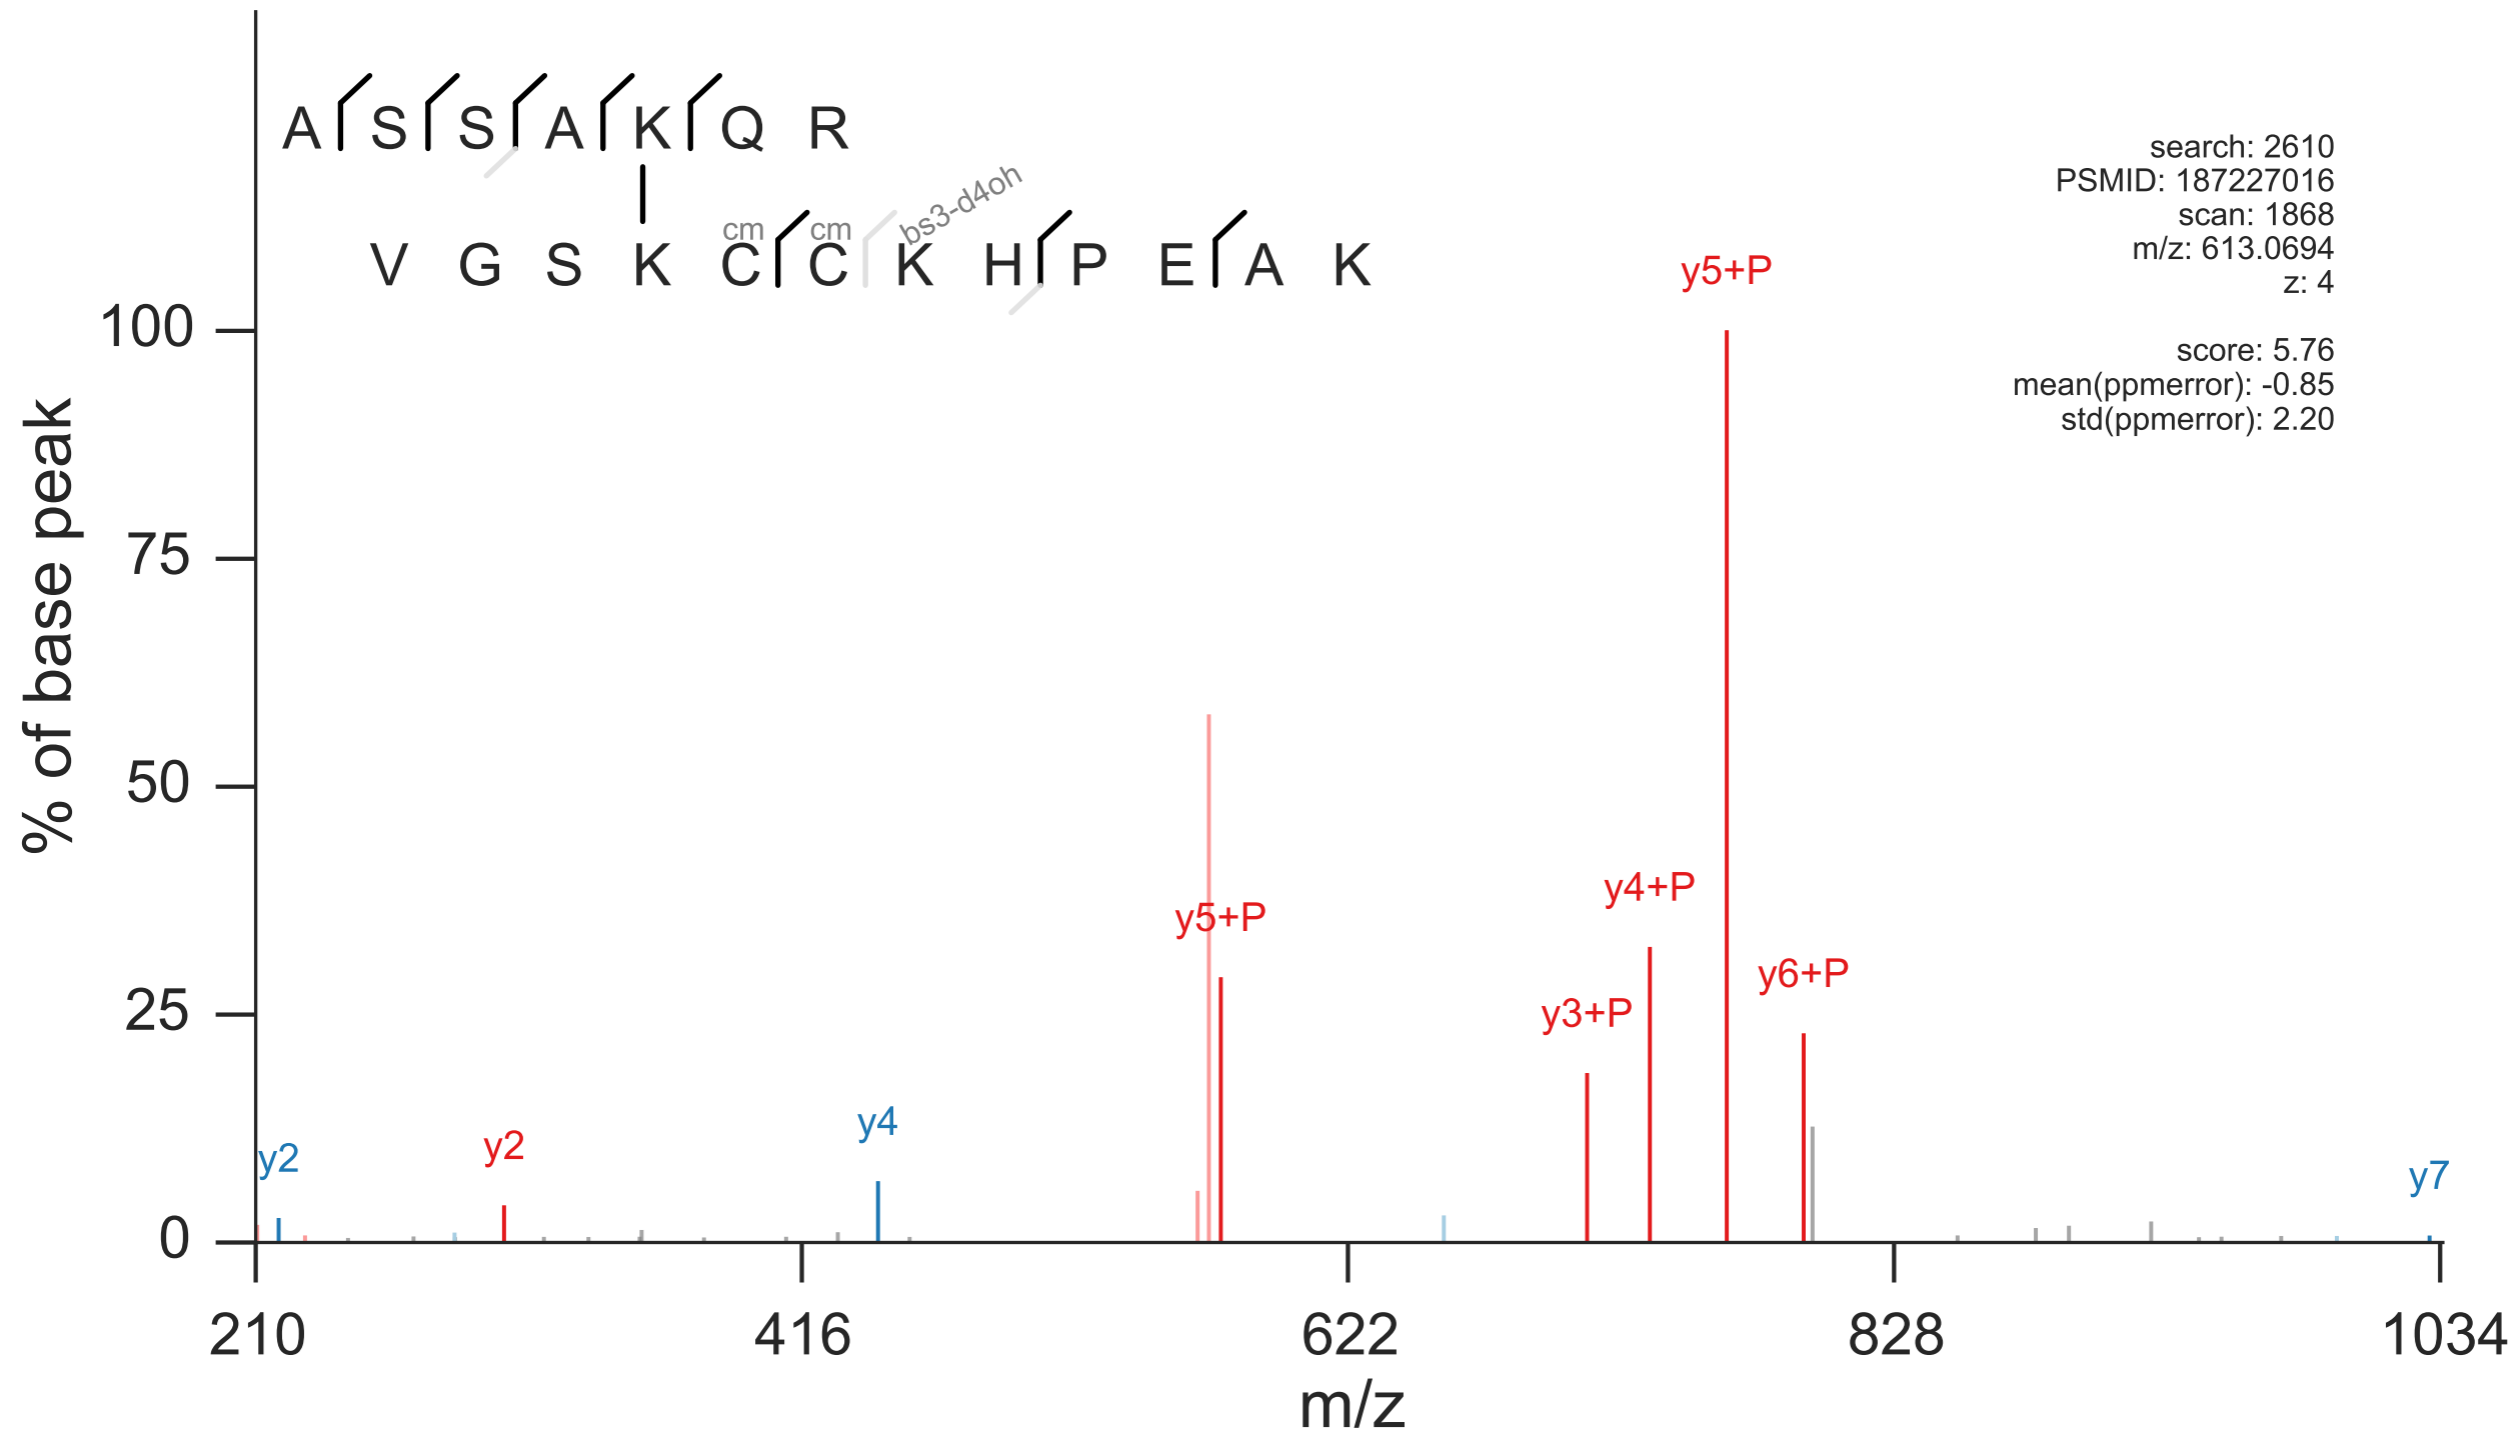

search: 2610  
PSMID: 187227016  
scan: 1868  
m/z: 613.0694  
z: 4  
score: 5.76  
mean(ppmerror): -0.85  
std(ppmerror): 2.20

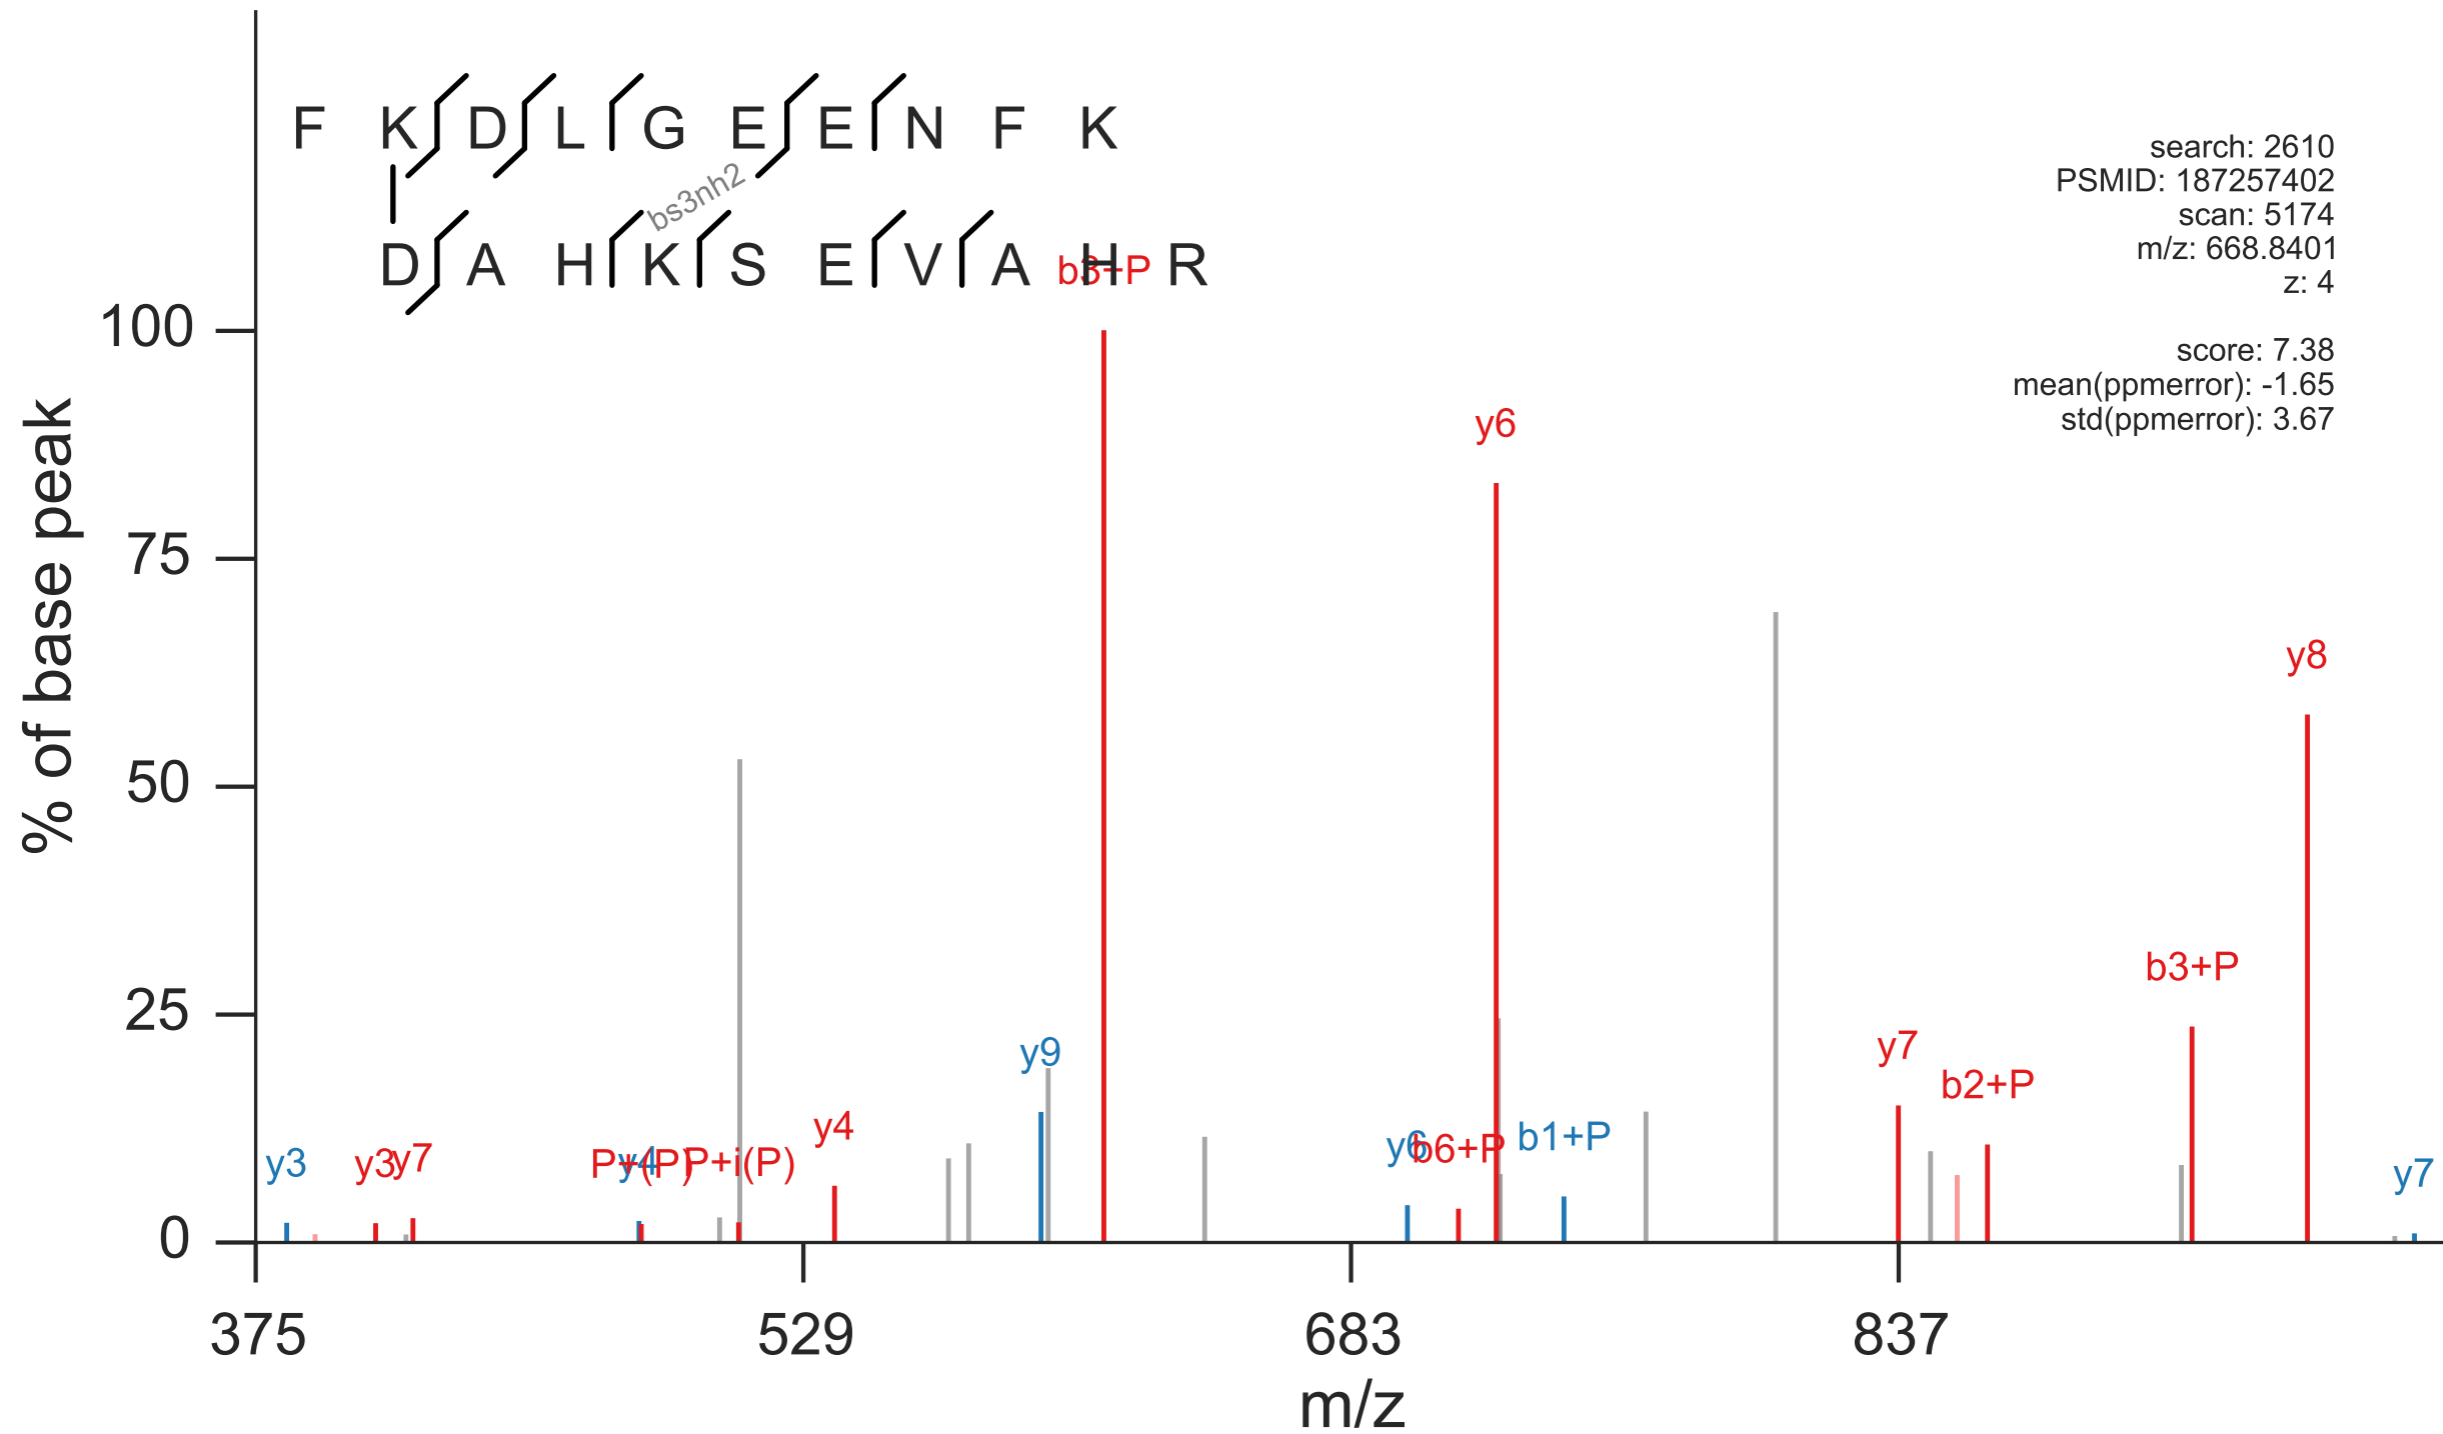

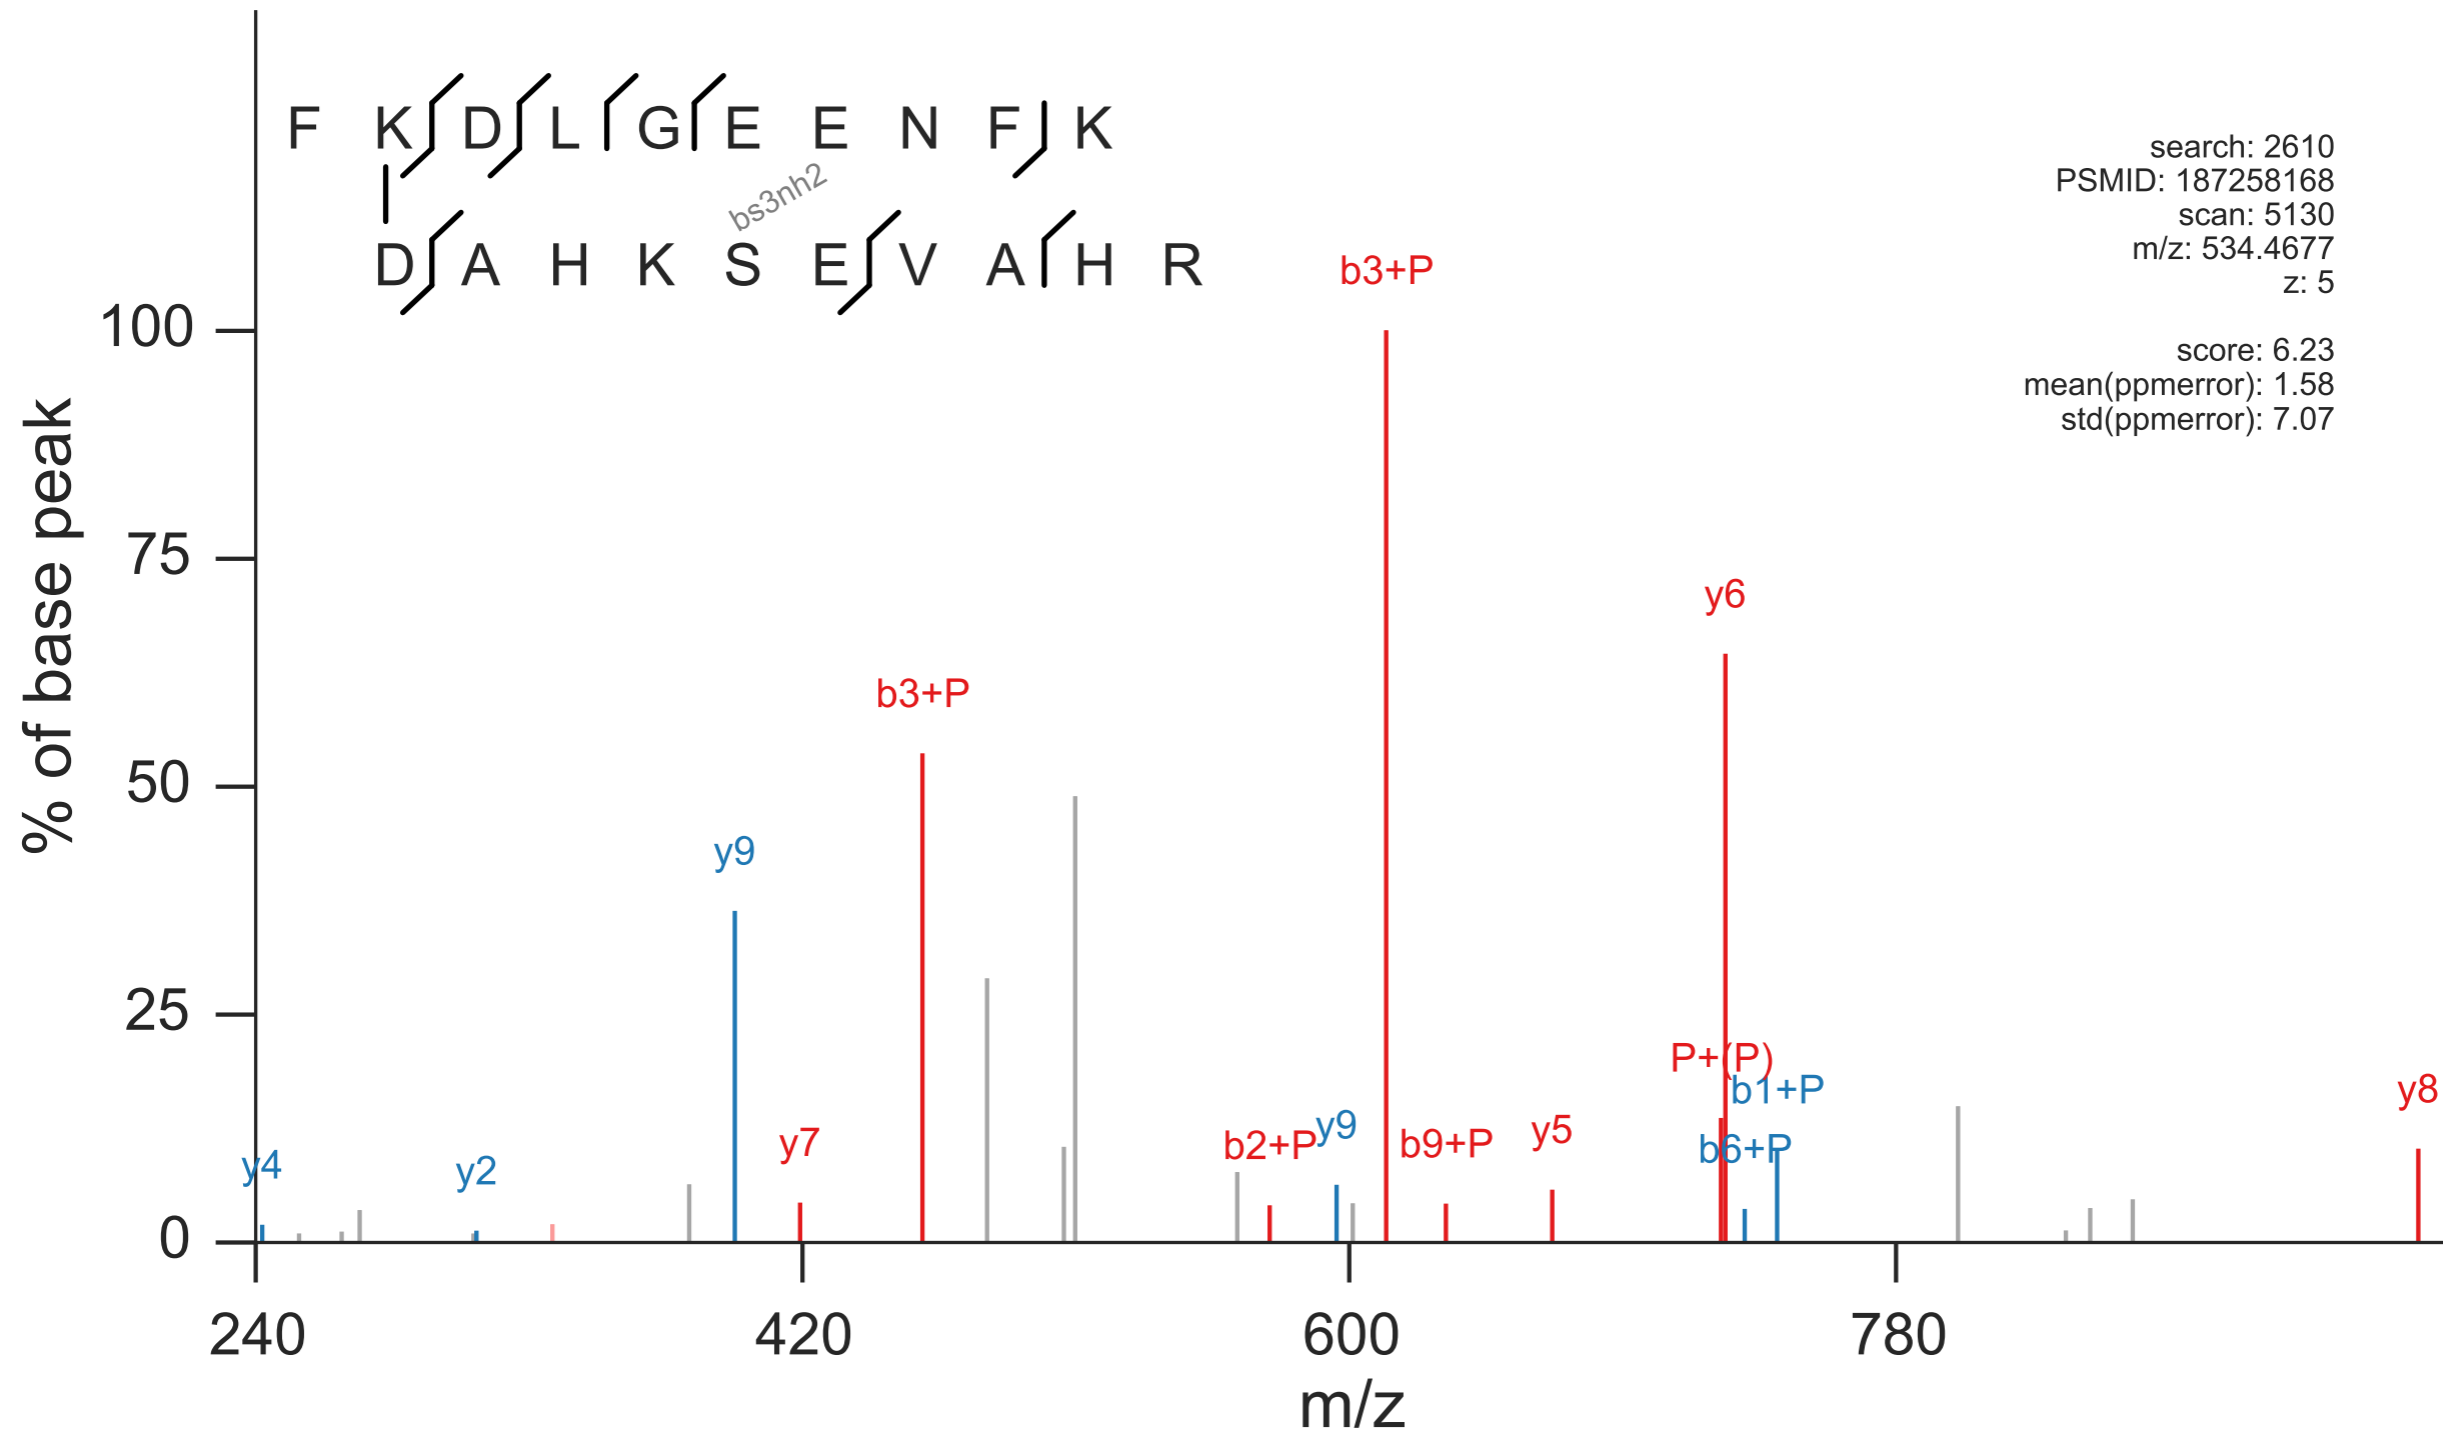

search: 2610  
 PSMID: 187258168  
 scan: 5130  
 m/z: 534.4677  
 z: 5

score: 6.23  
 mean(ppmerror): 1.58  
 std(ppmerror): 7.07

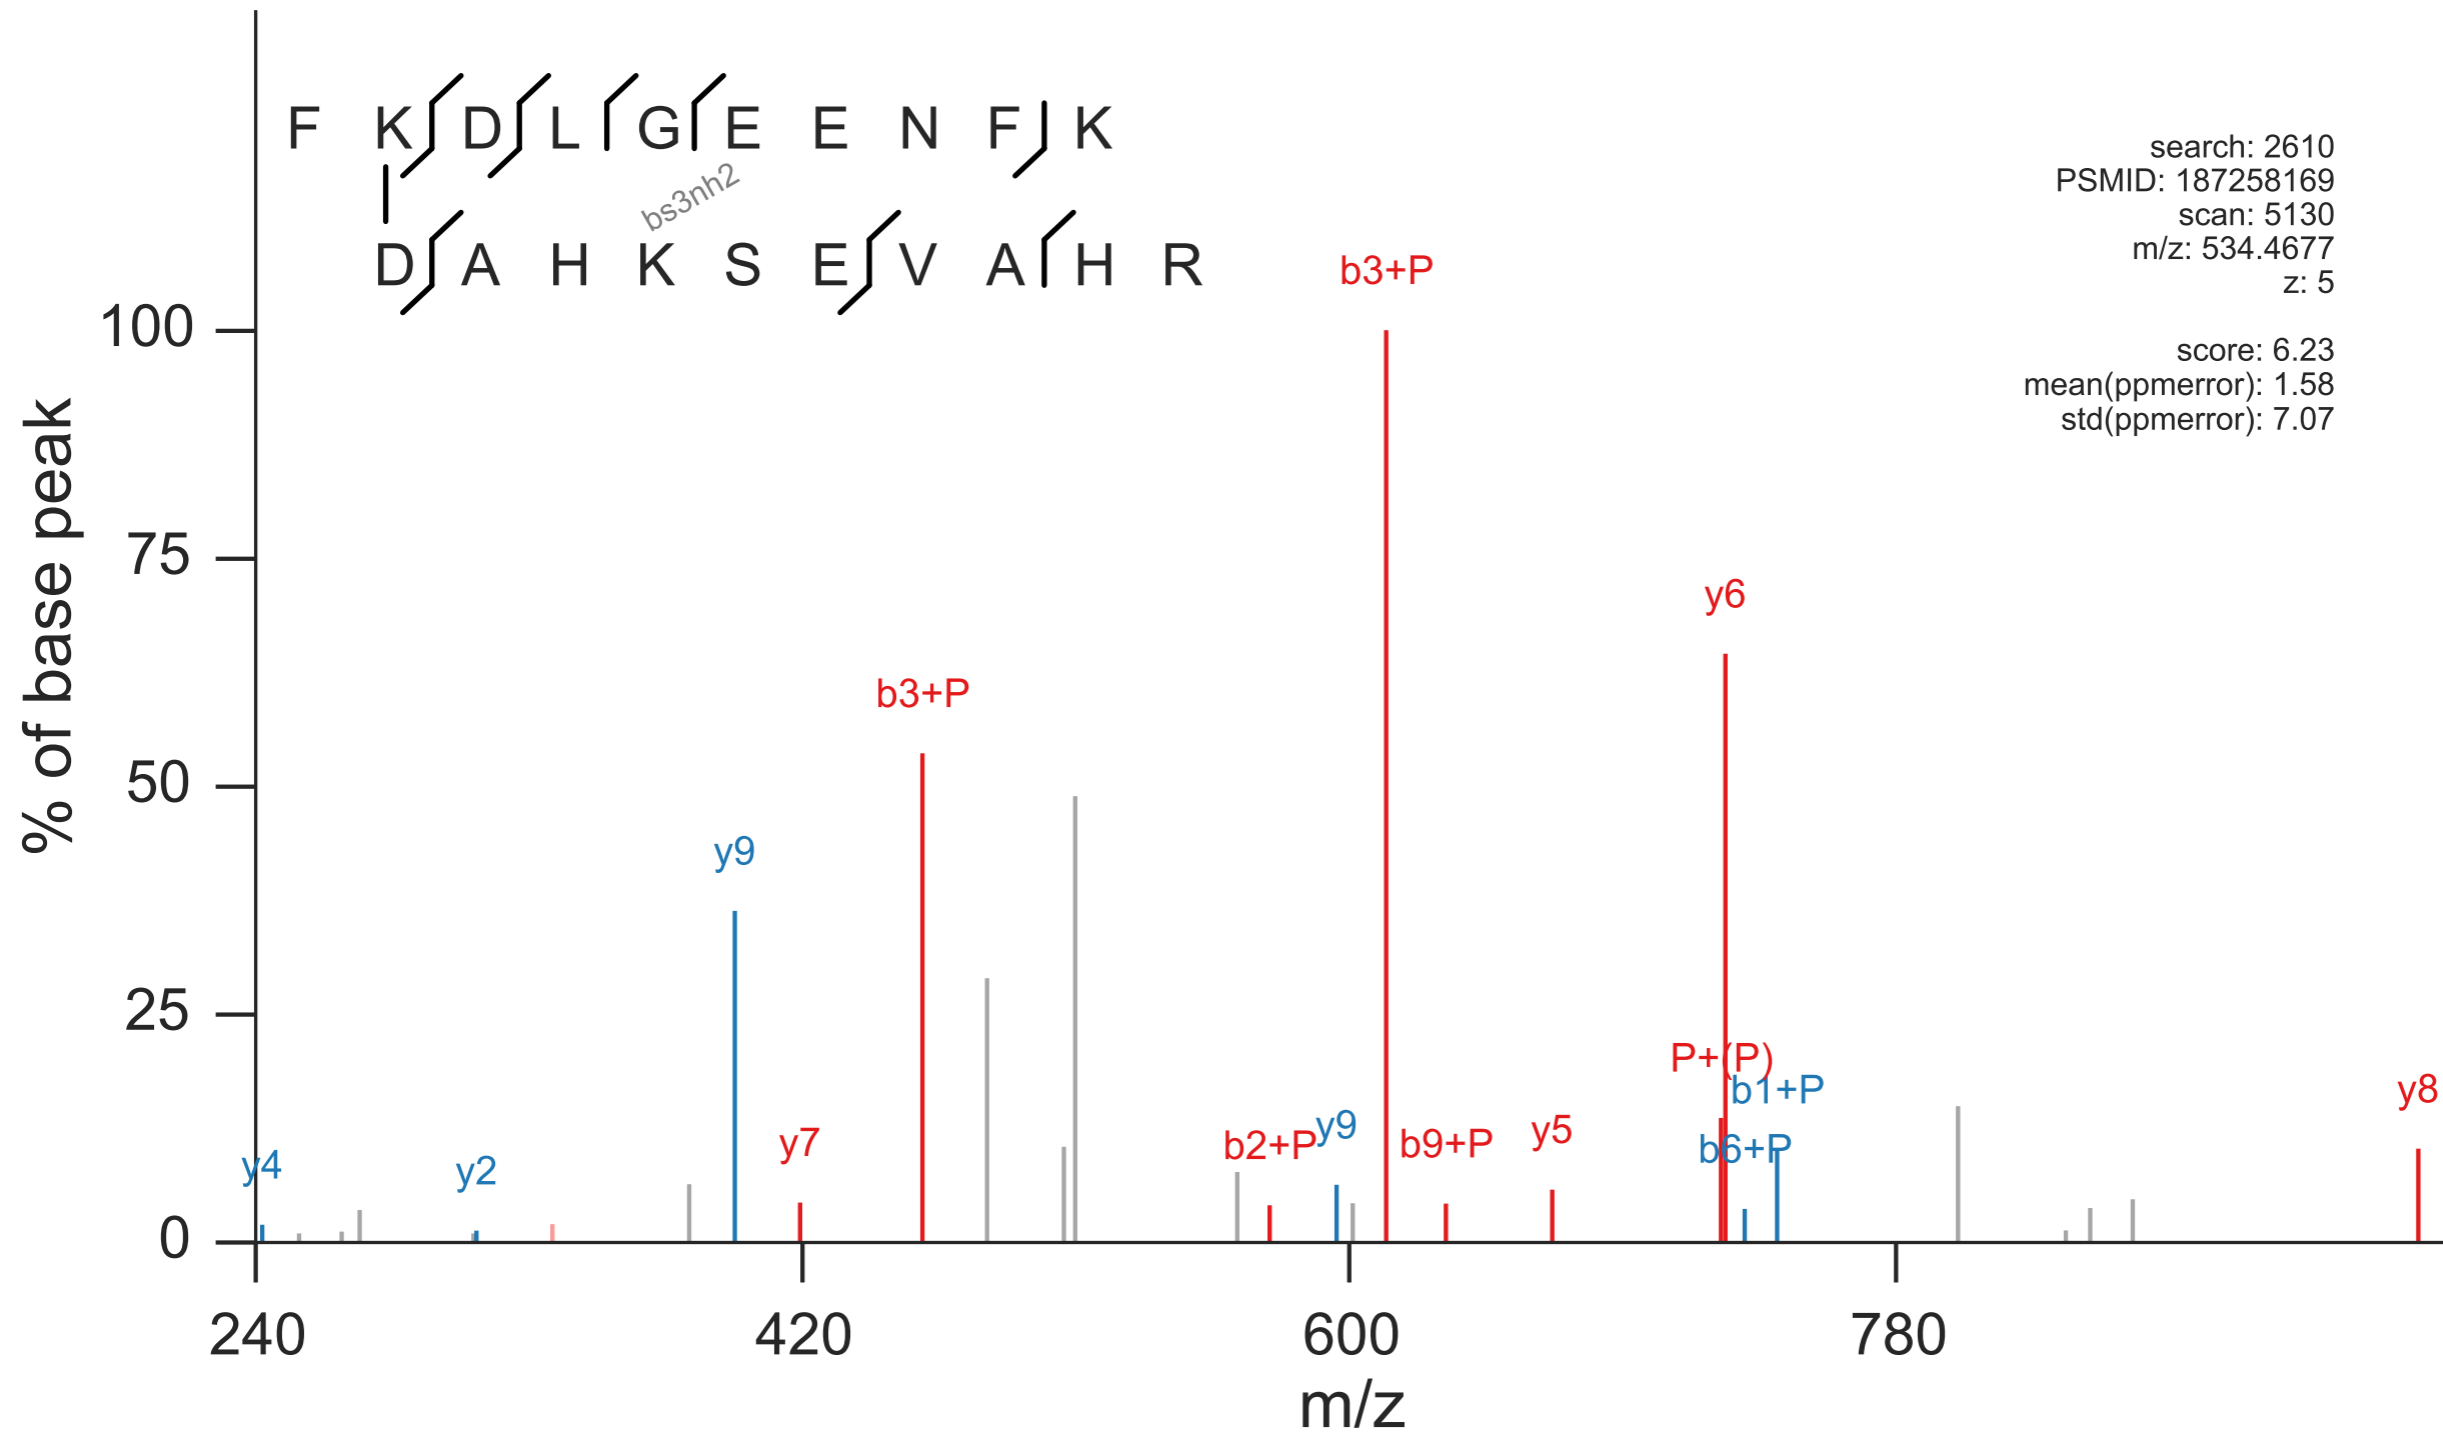

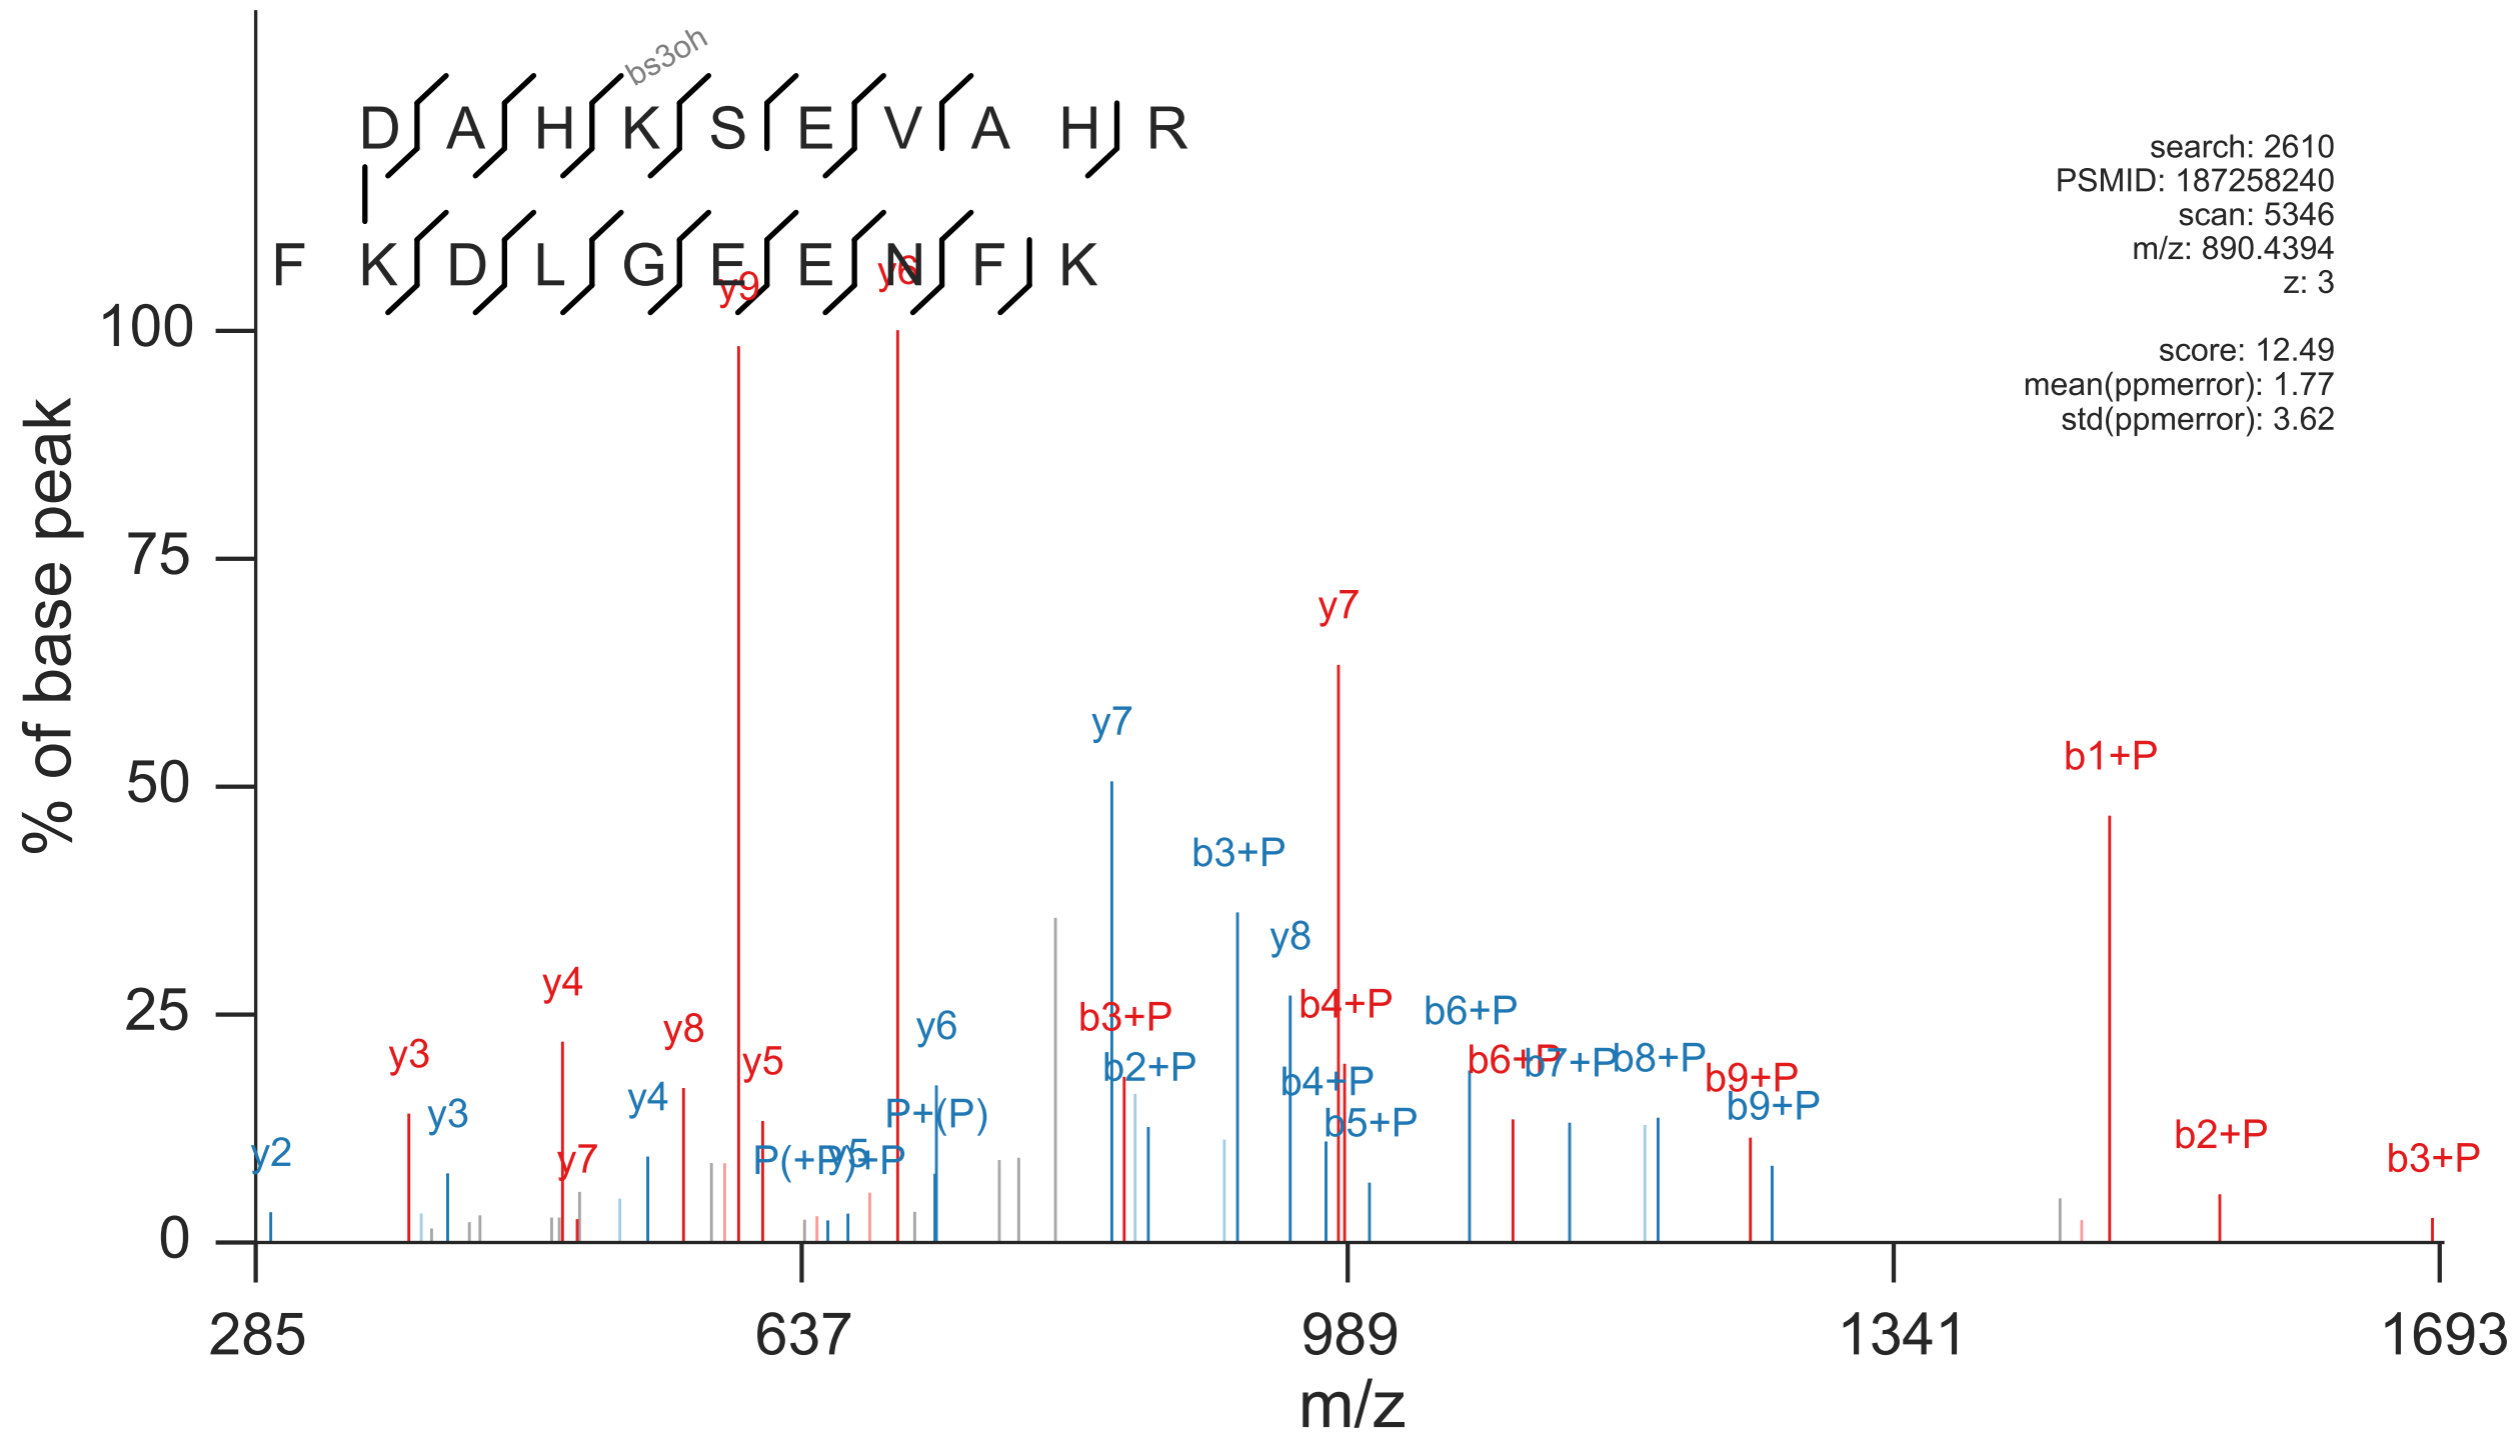

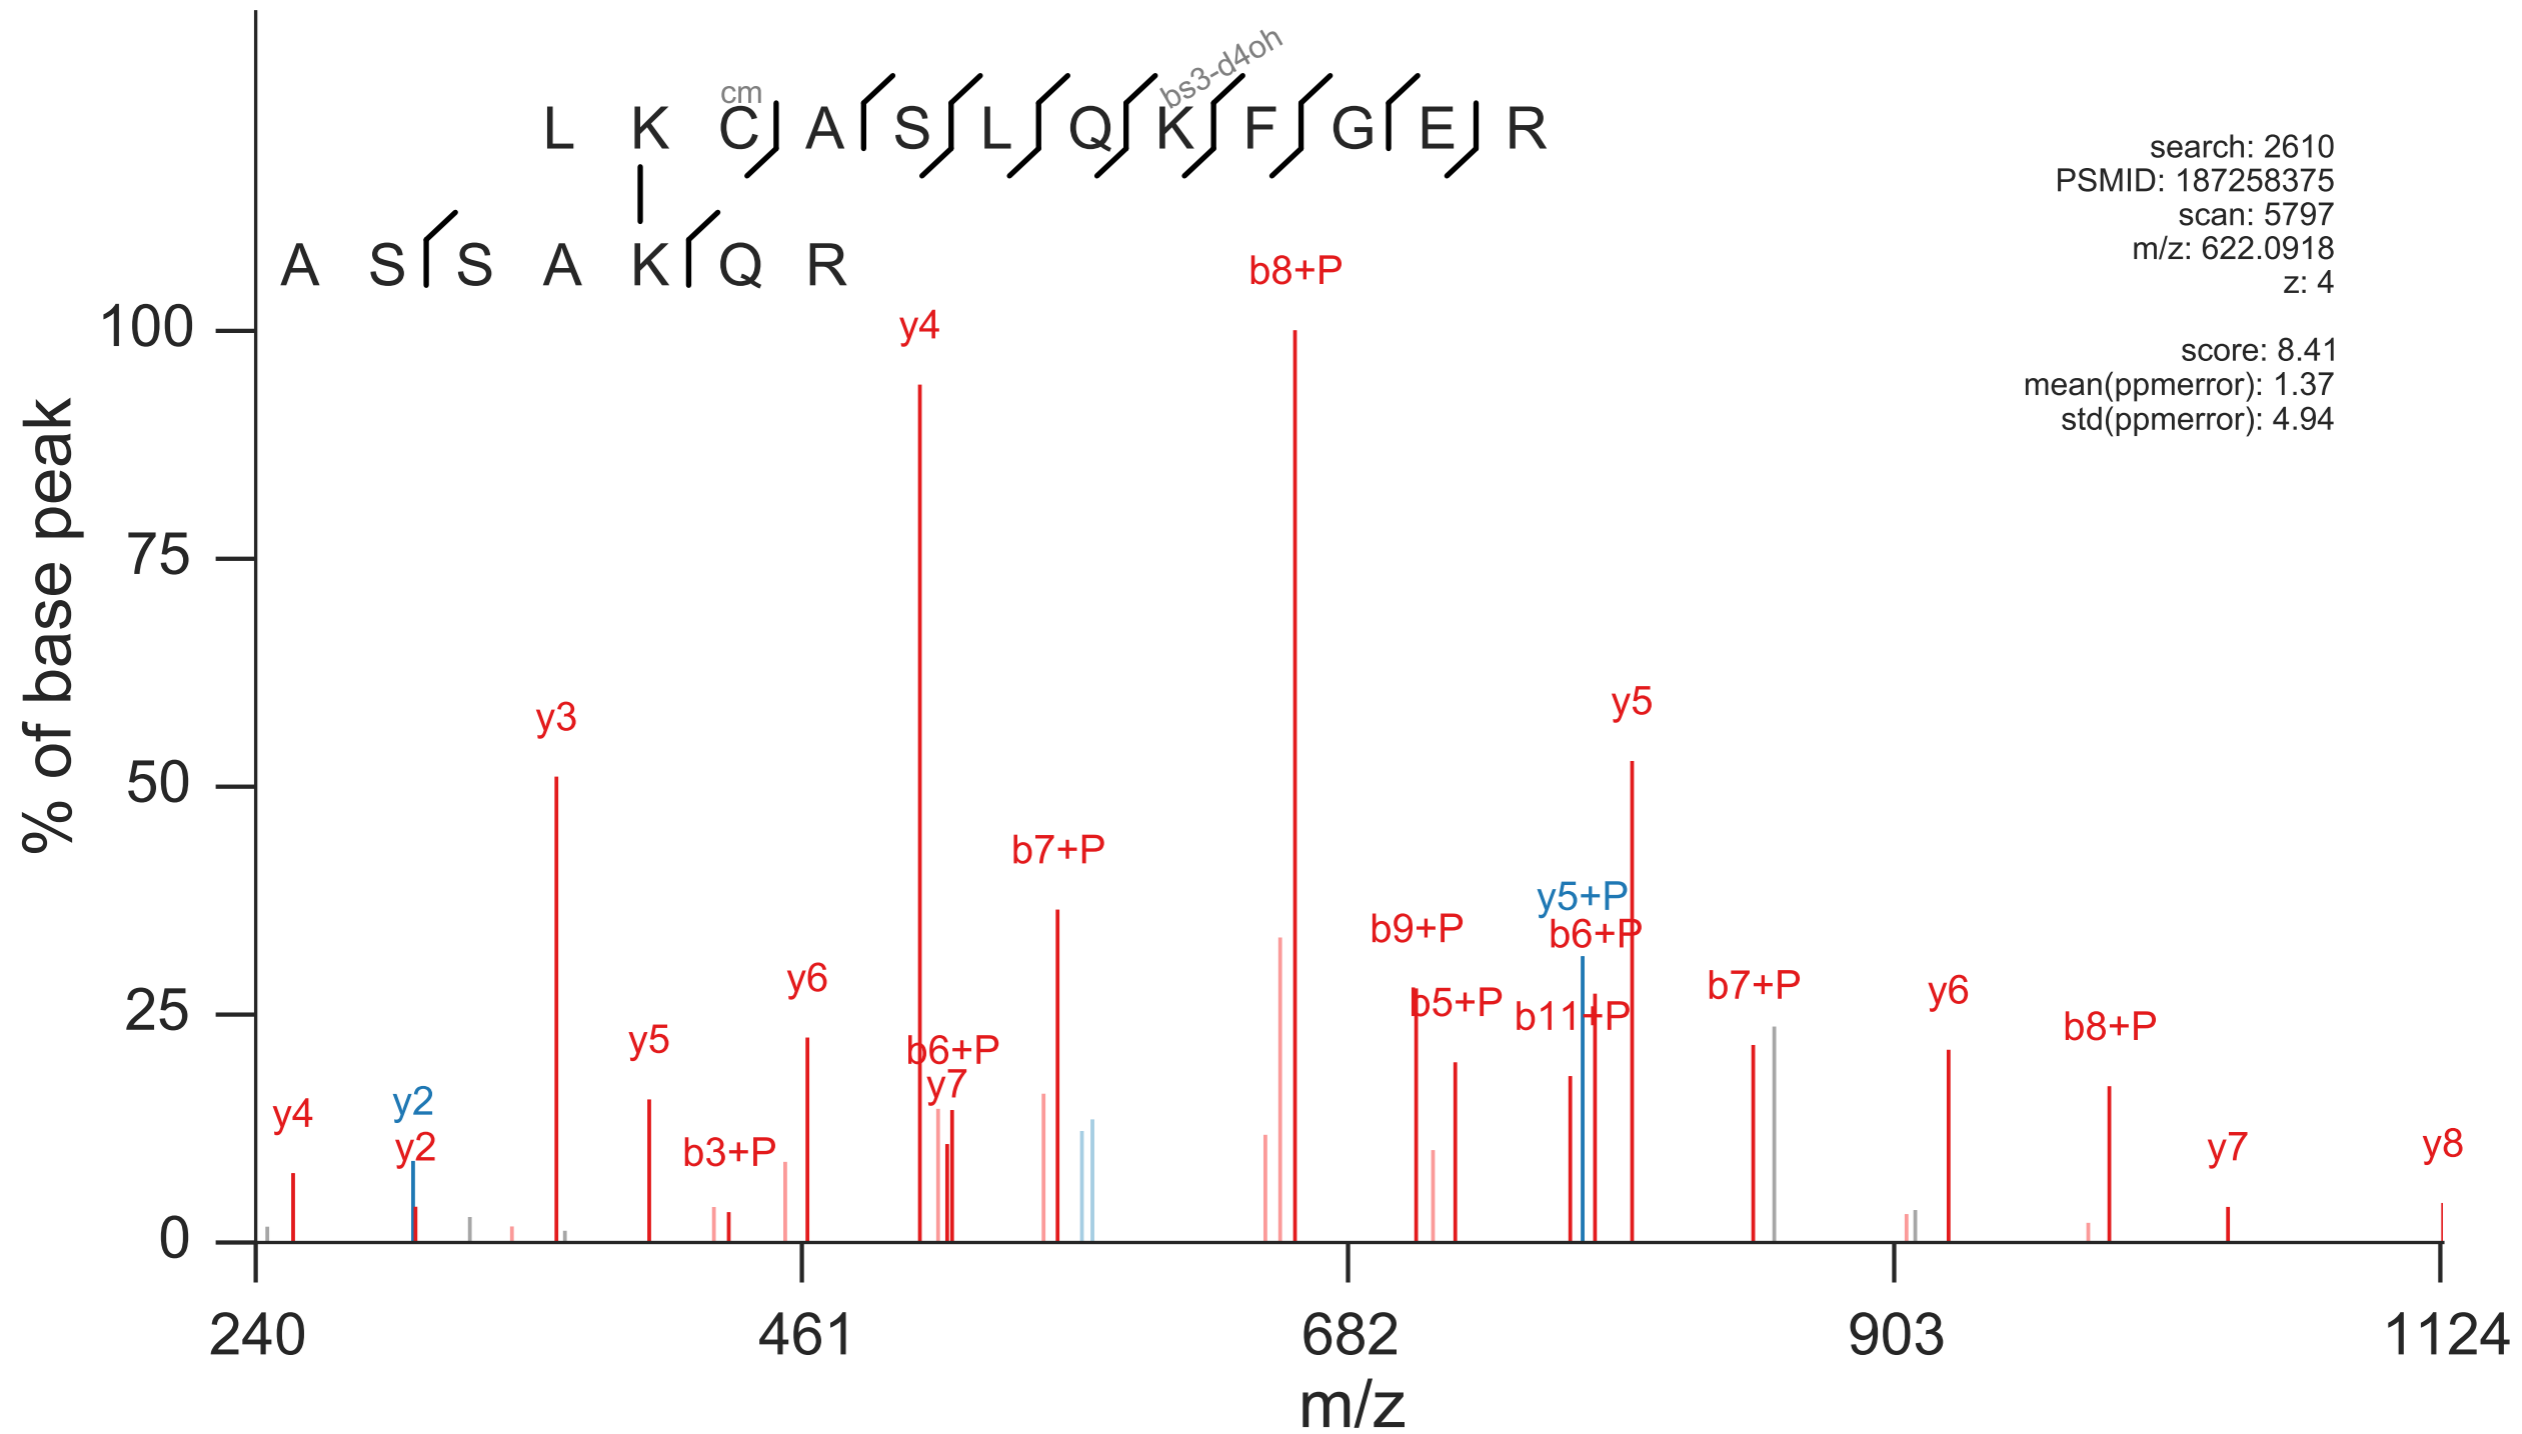

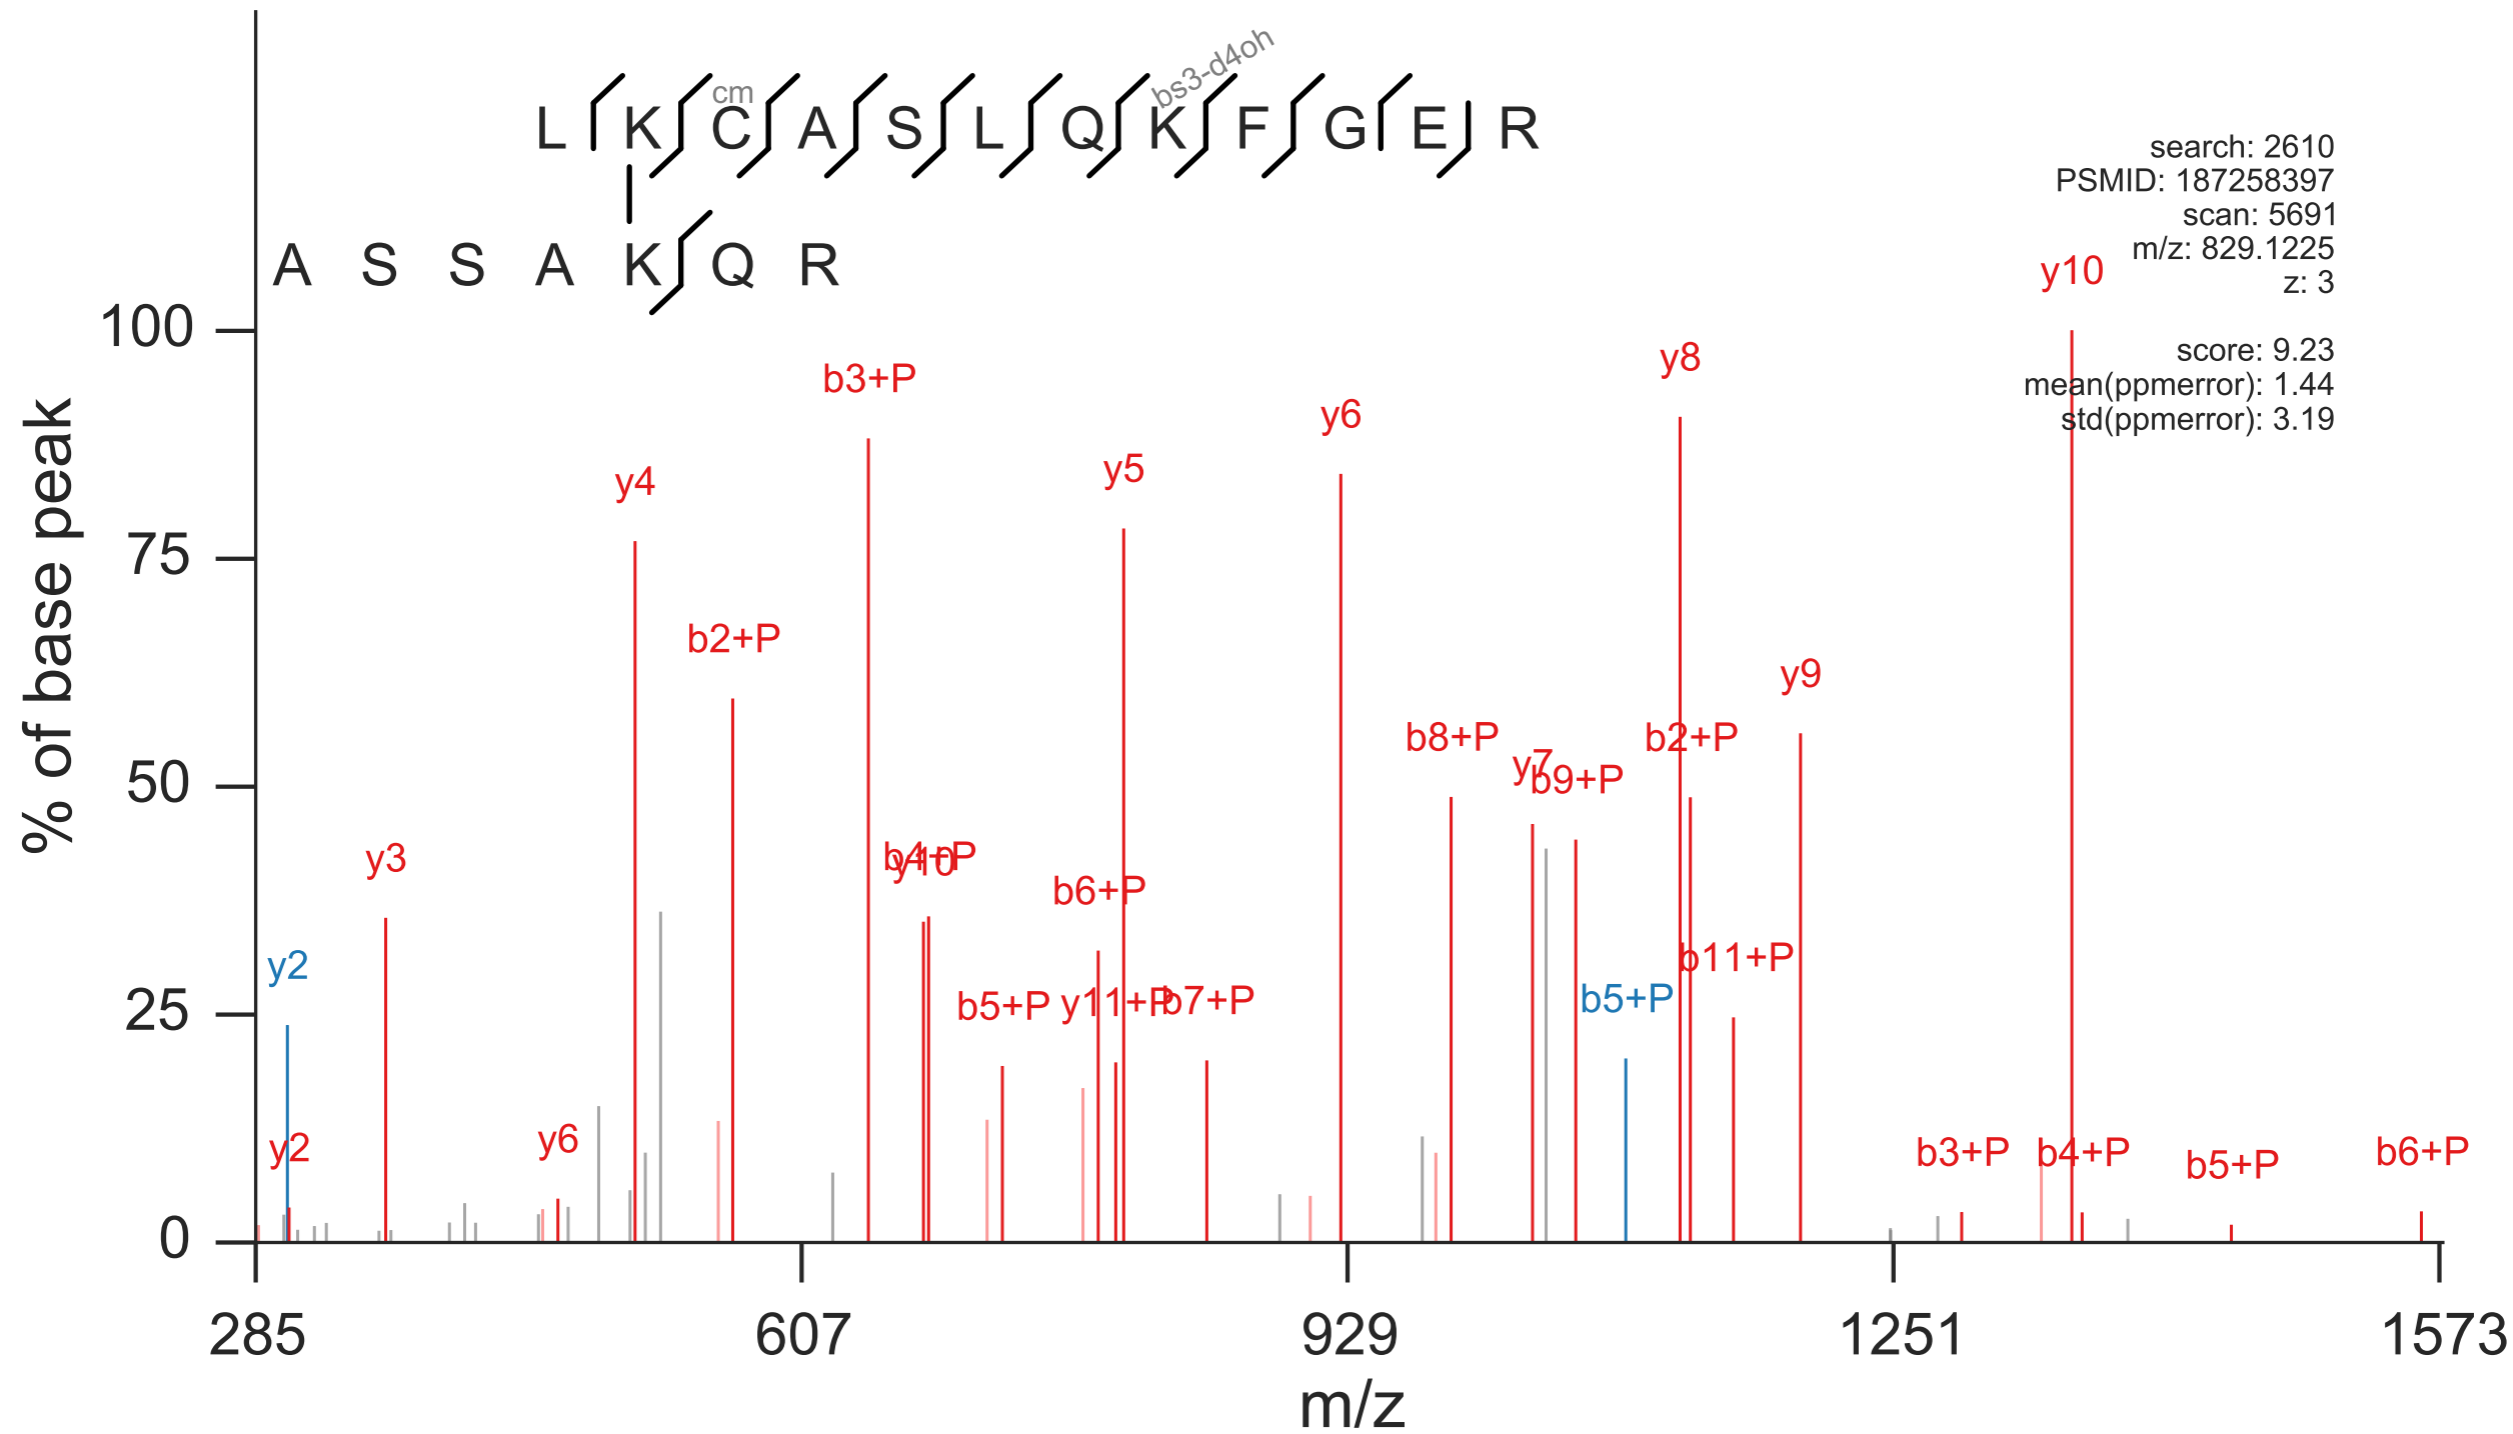



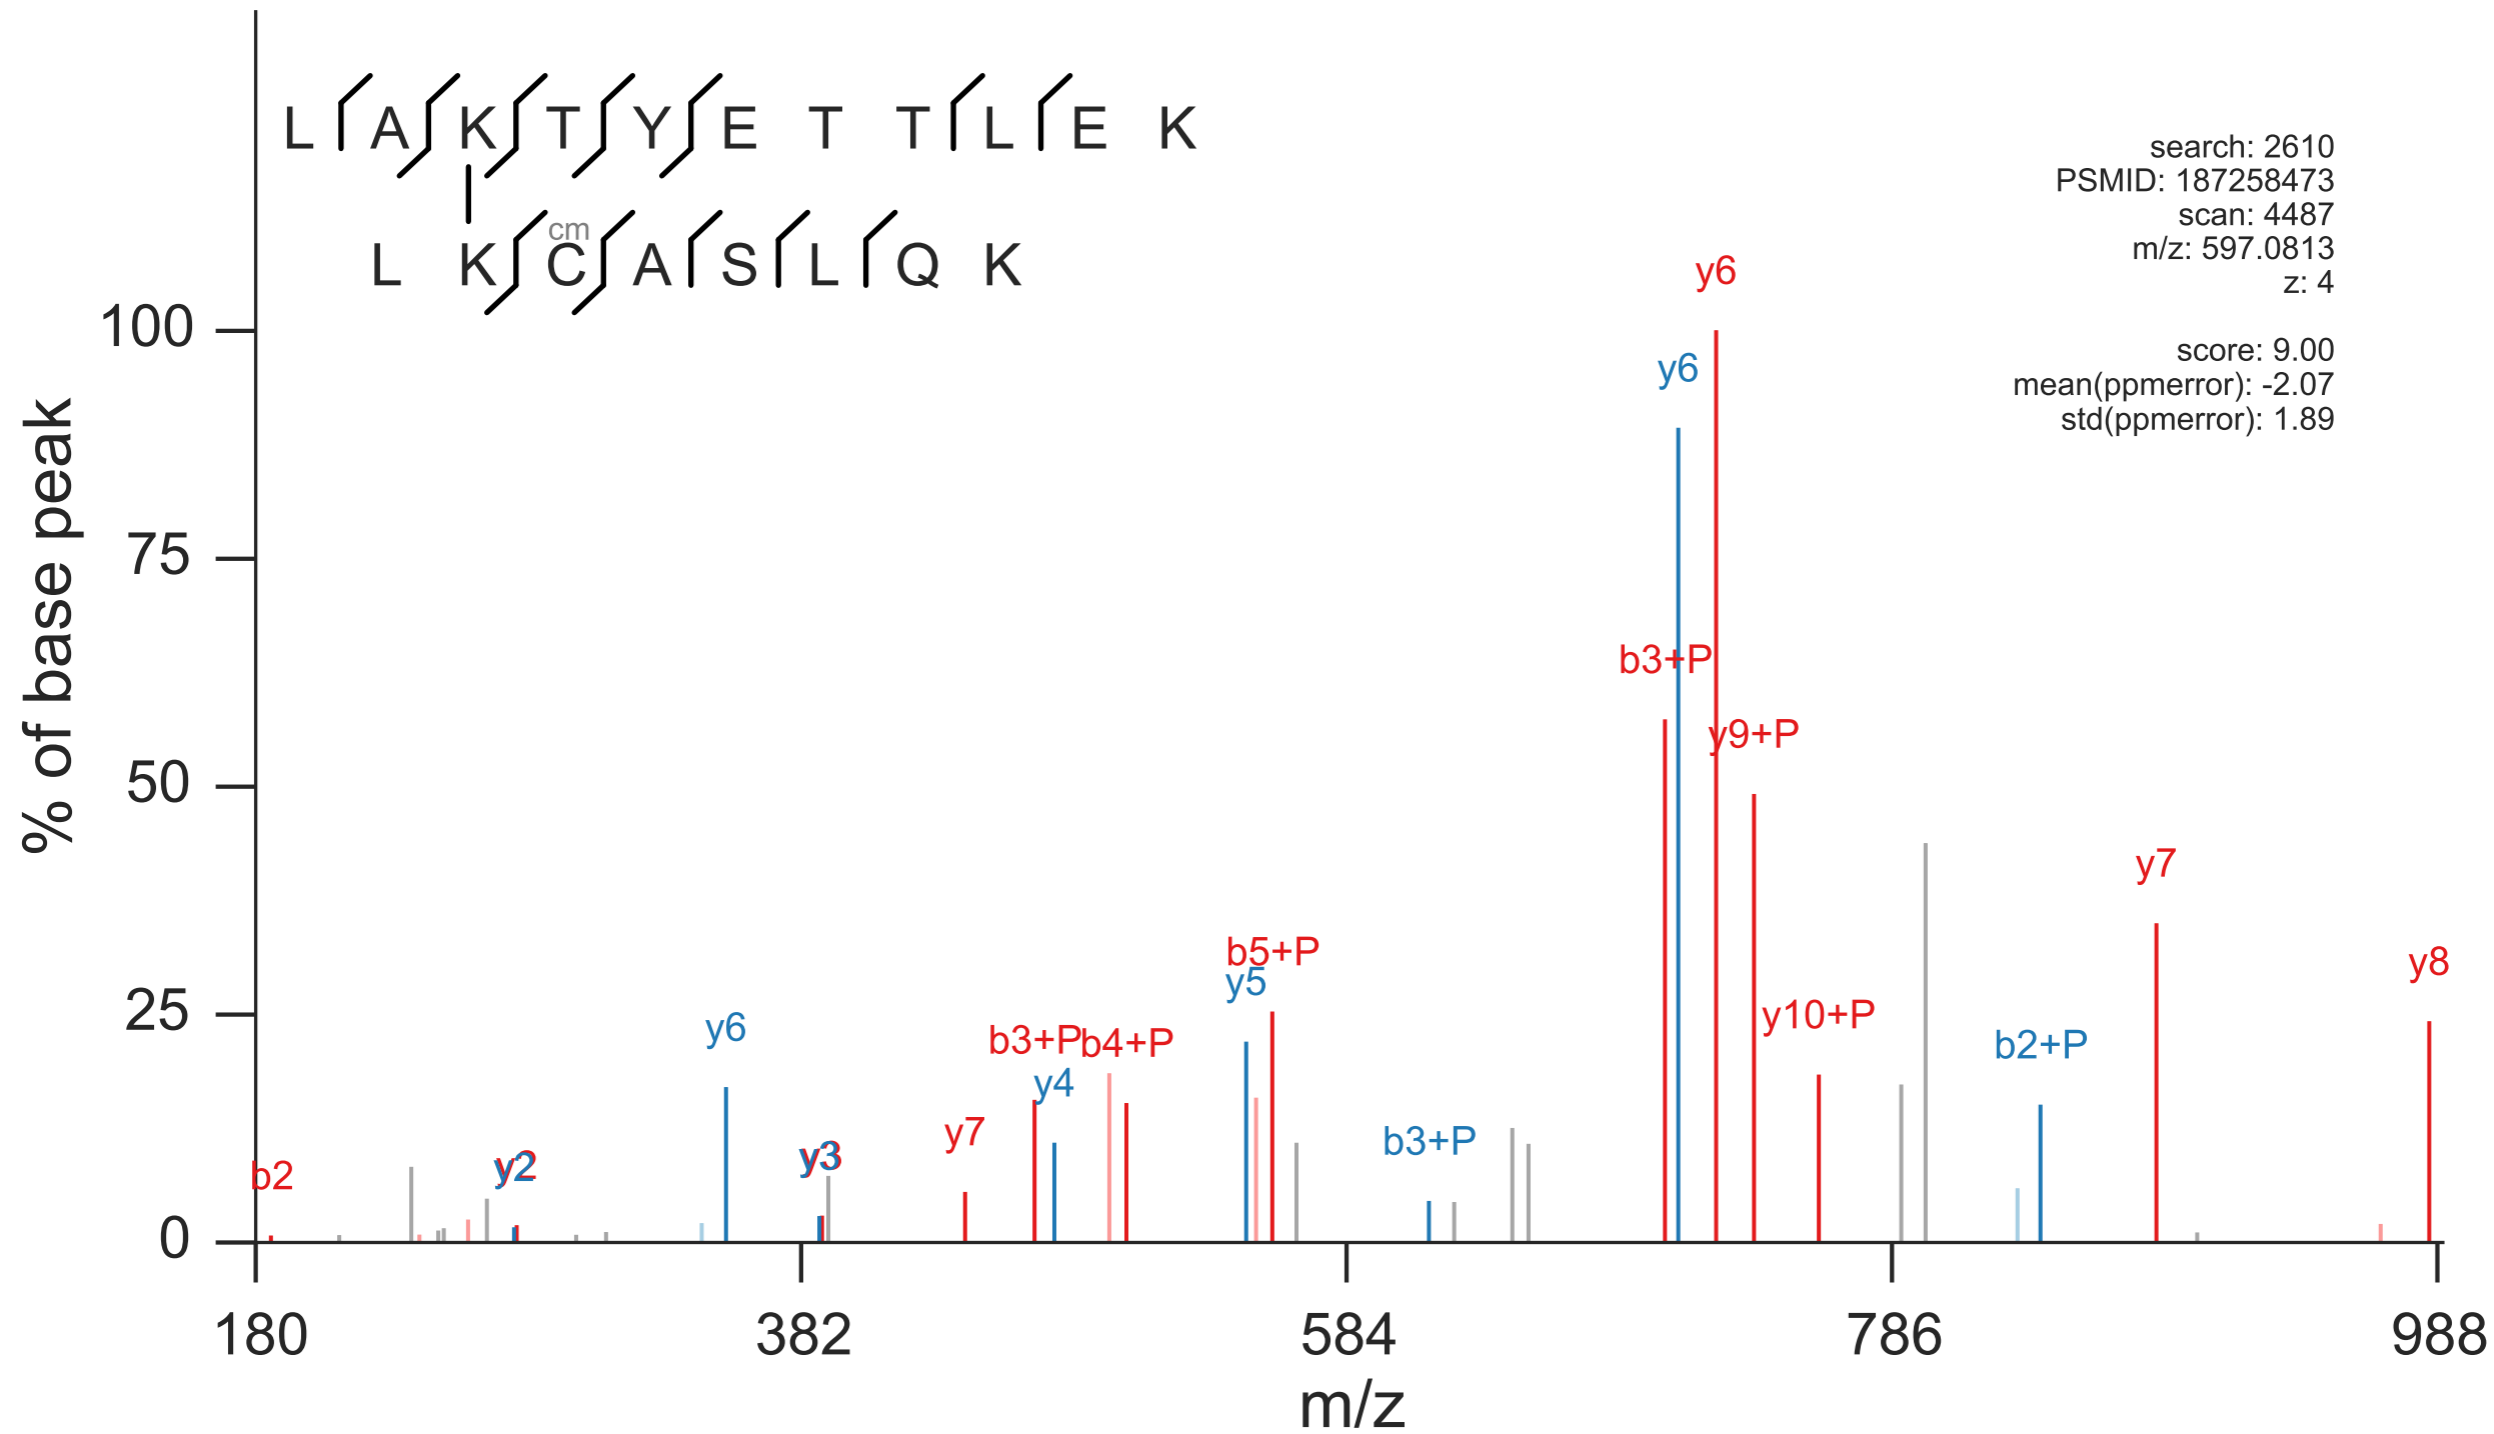

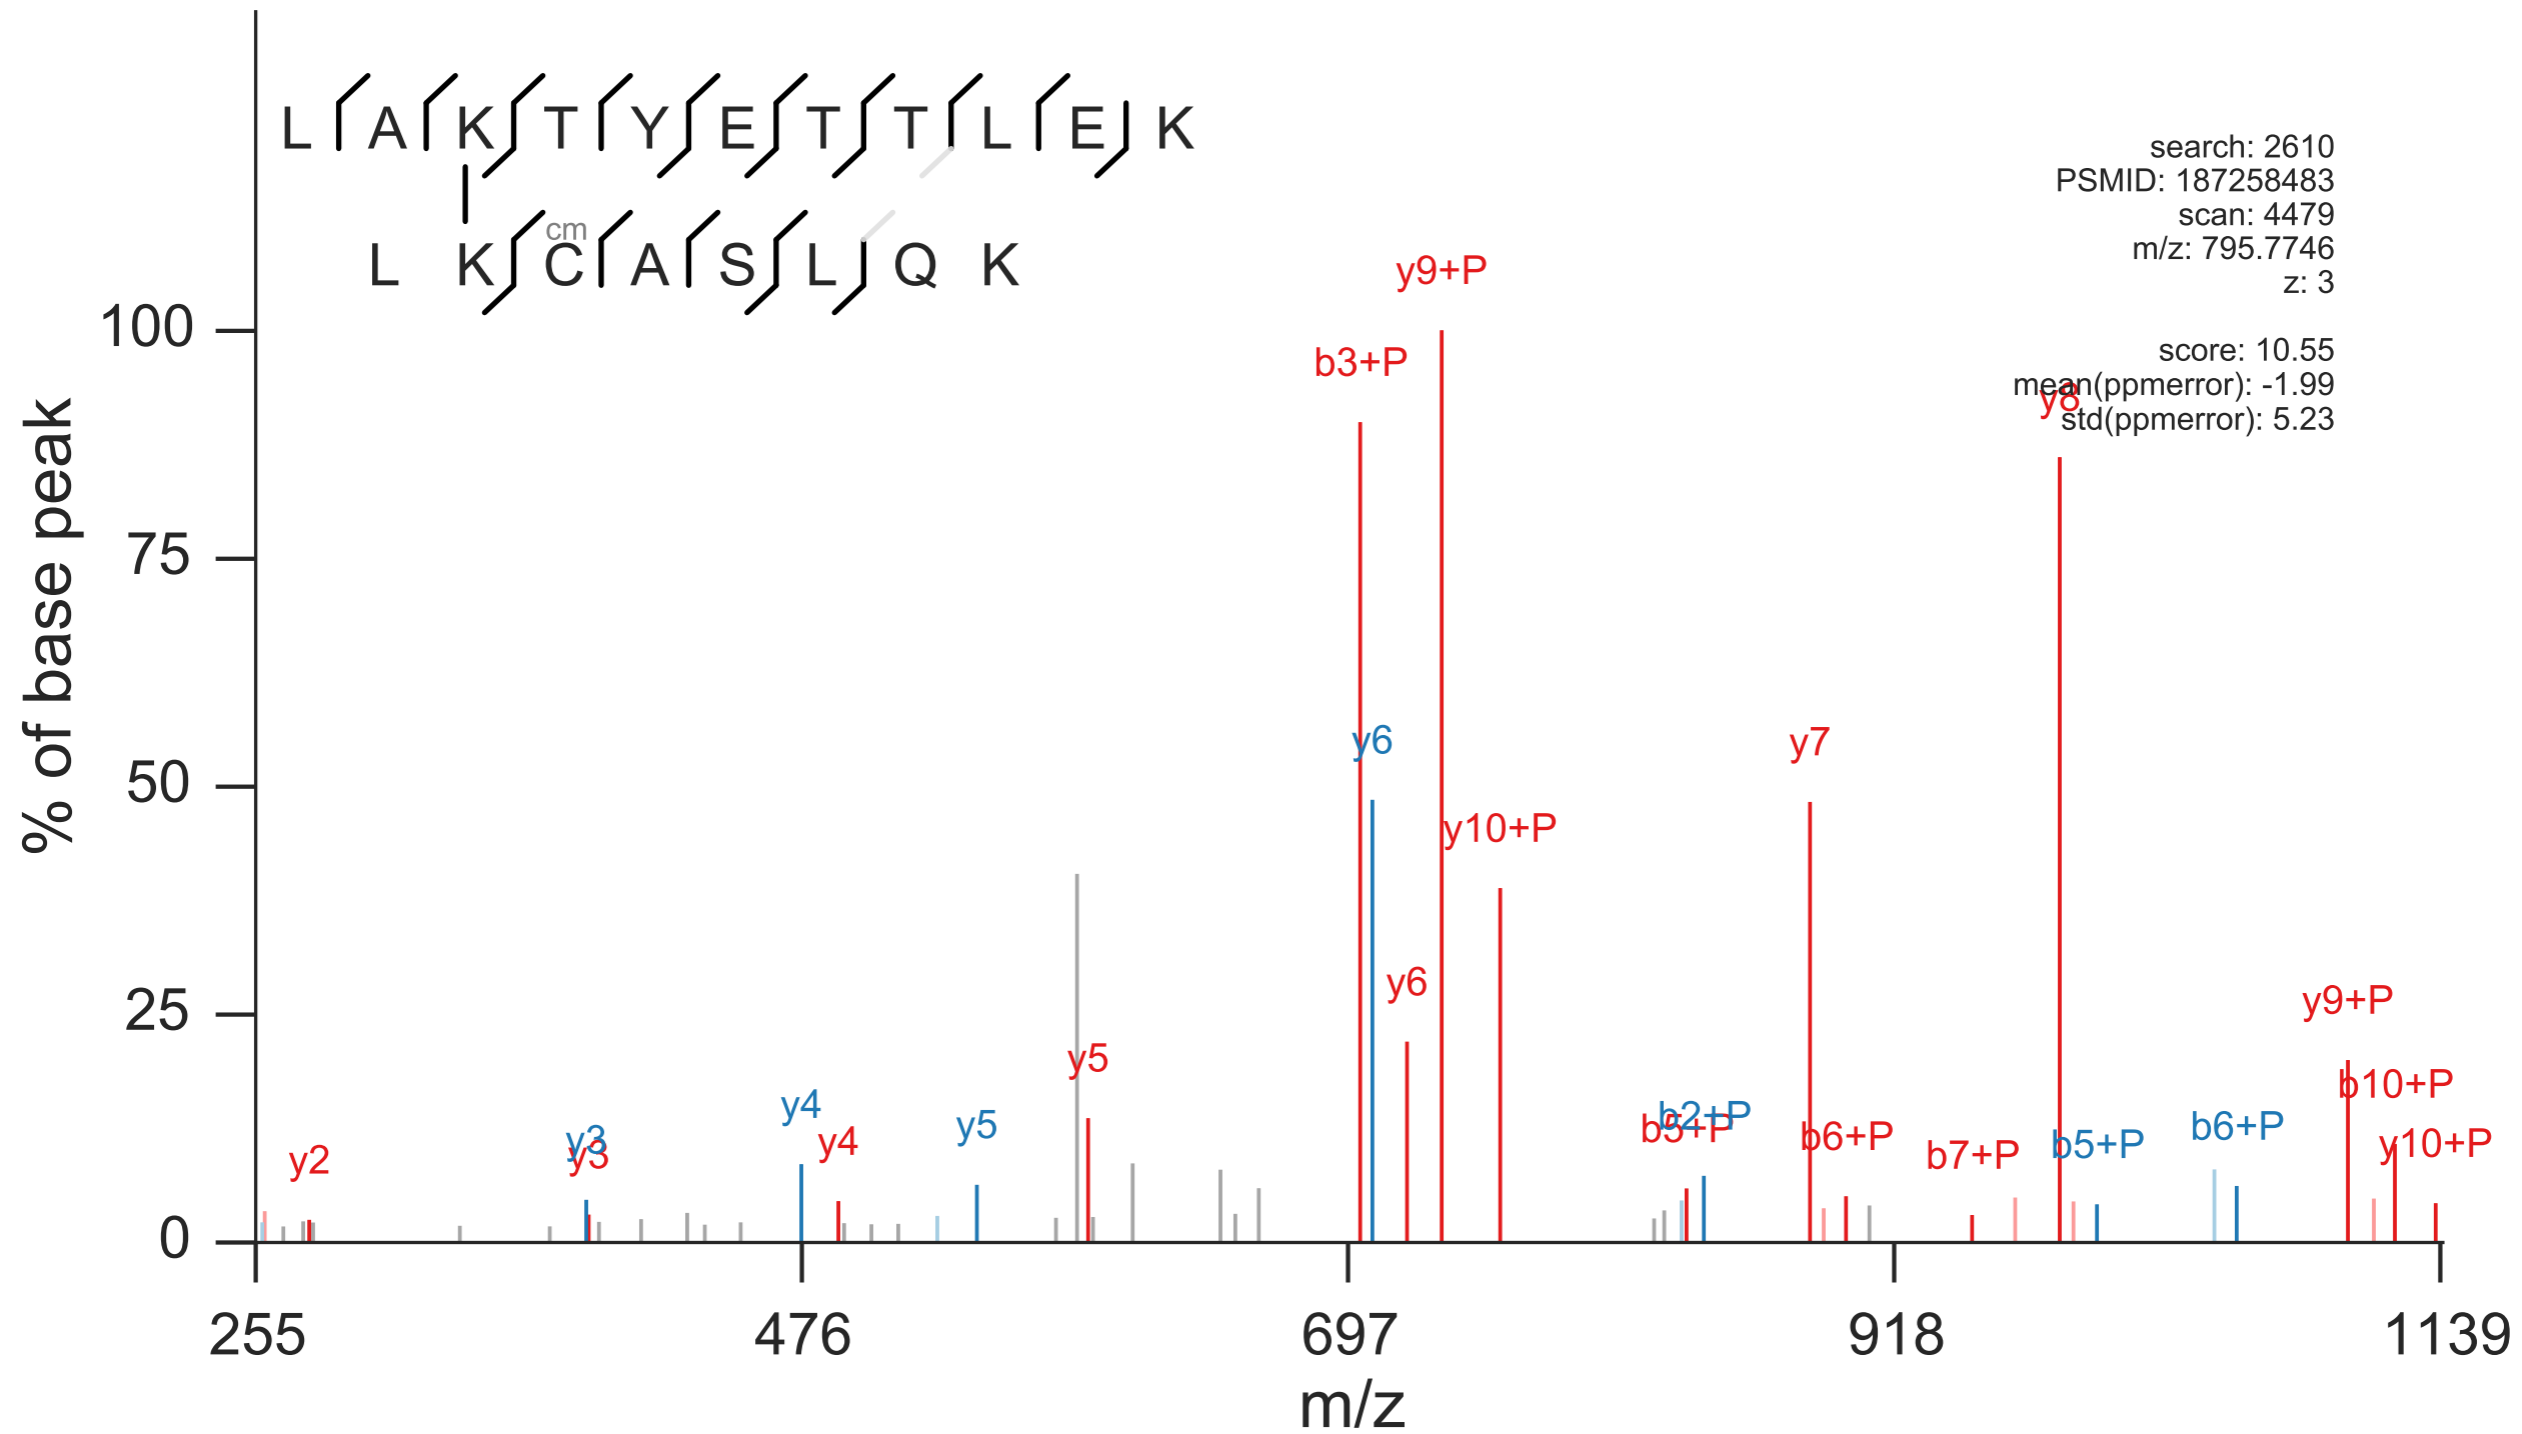

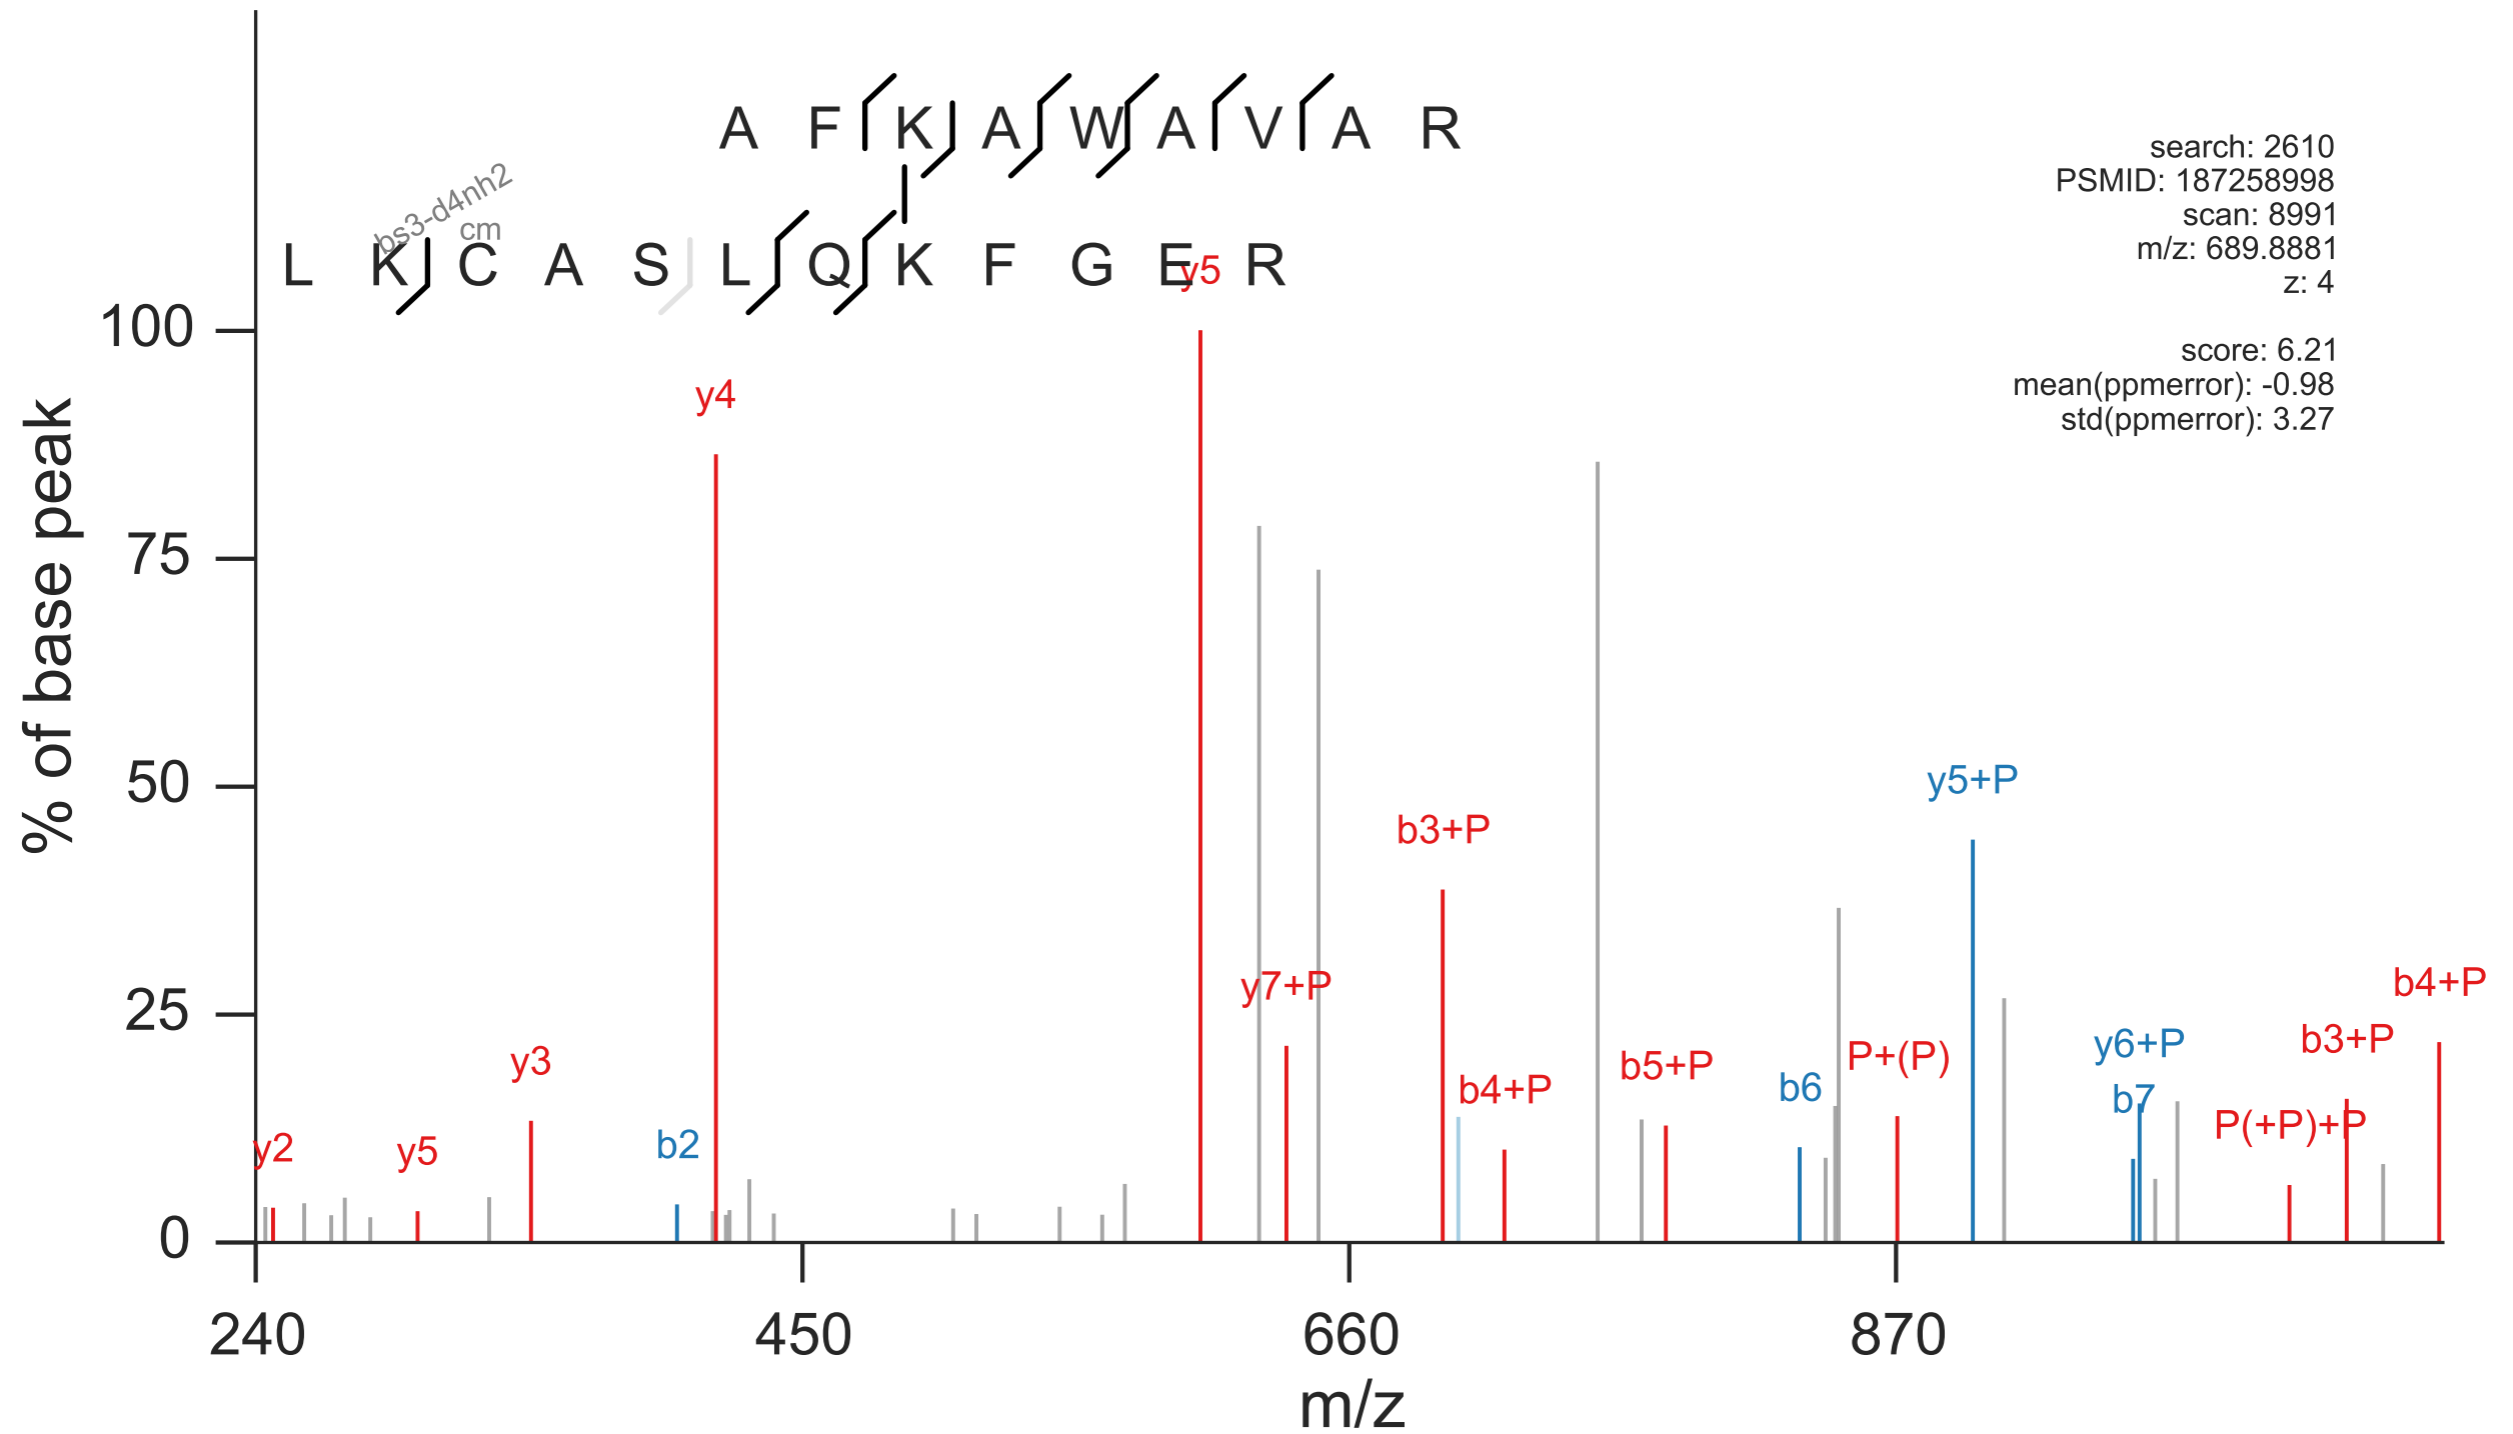

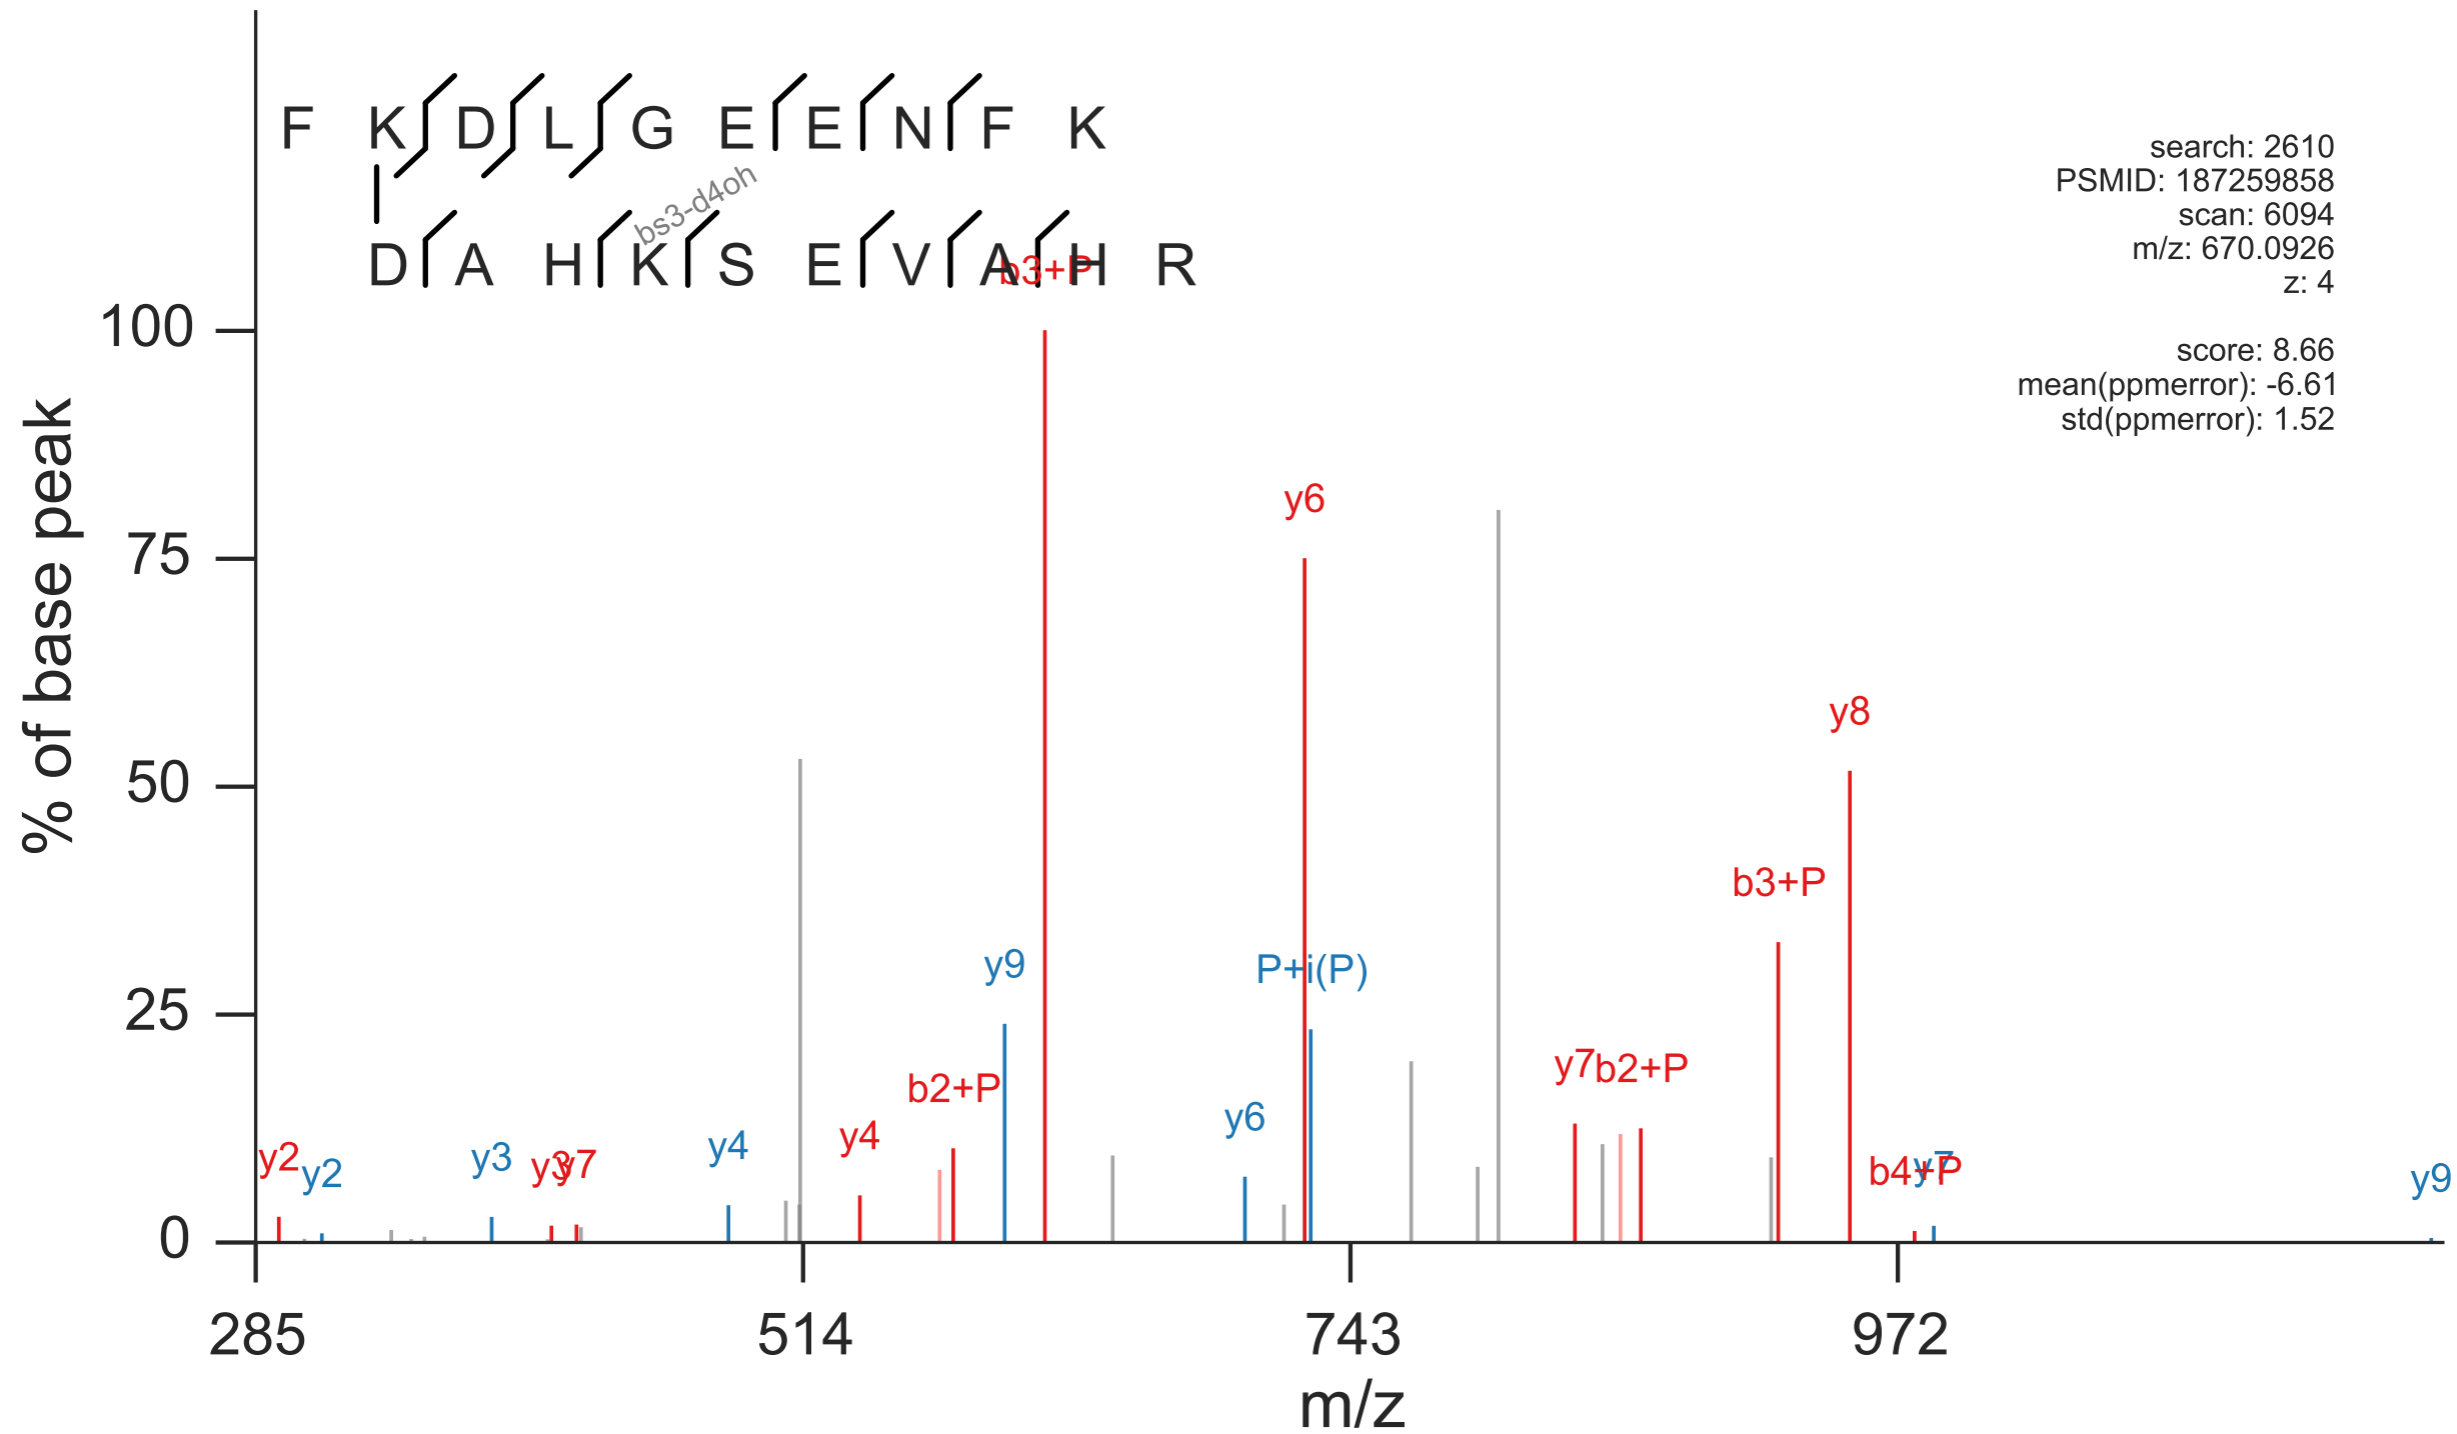

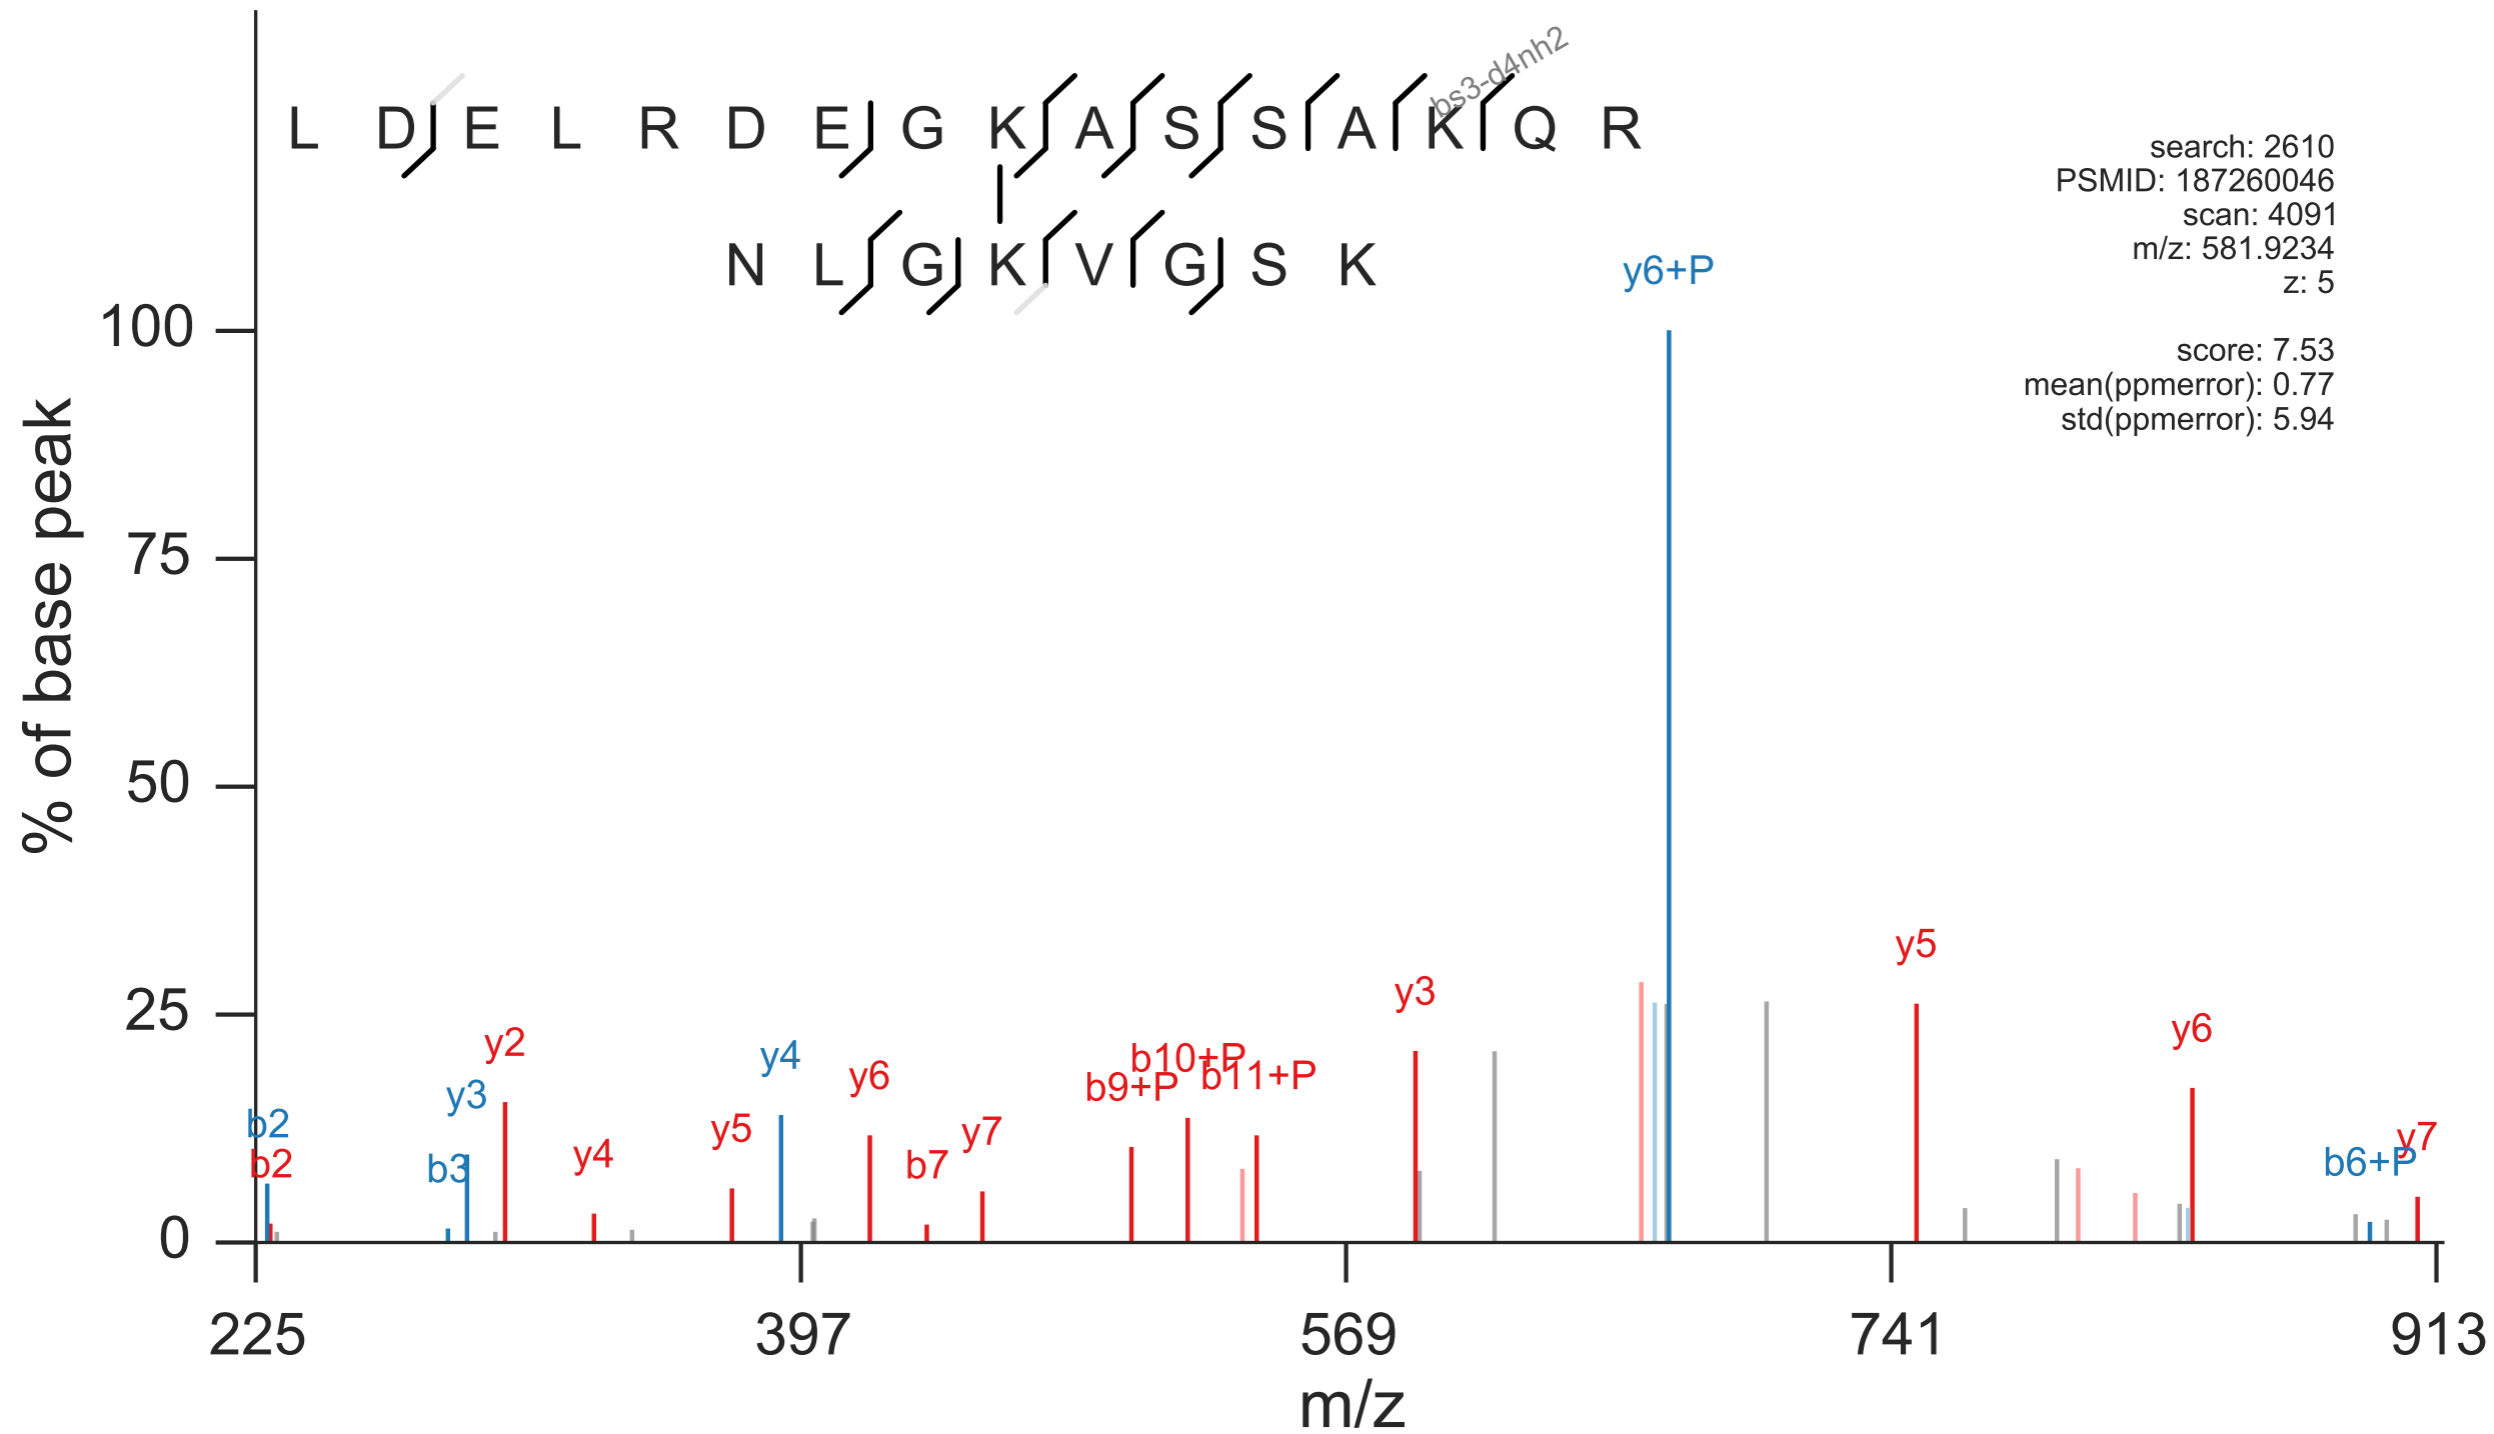

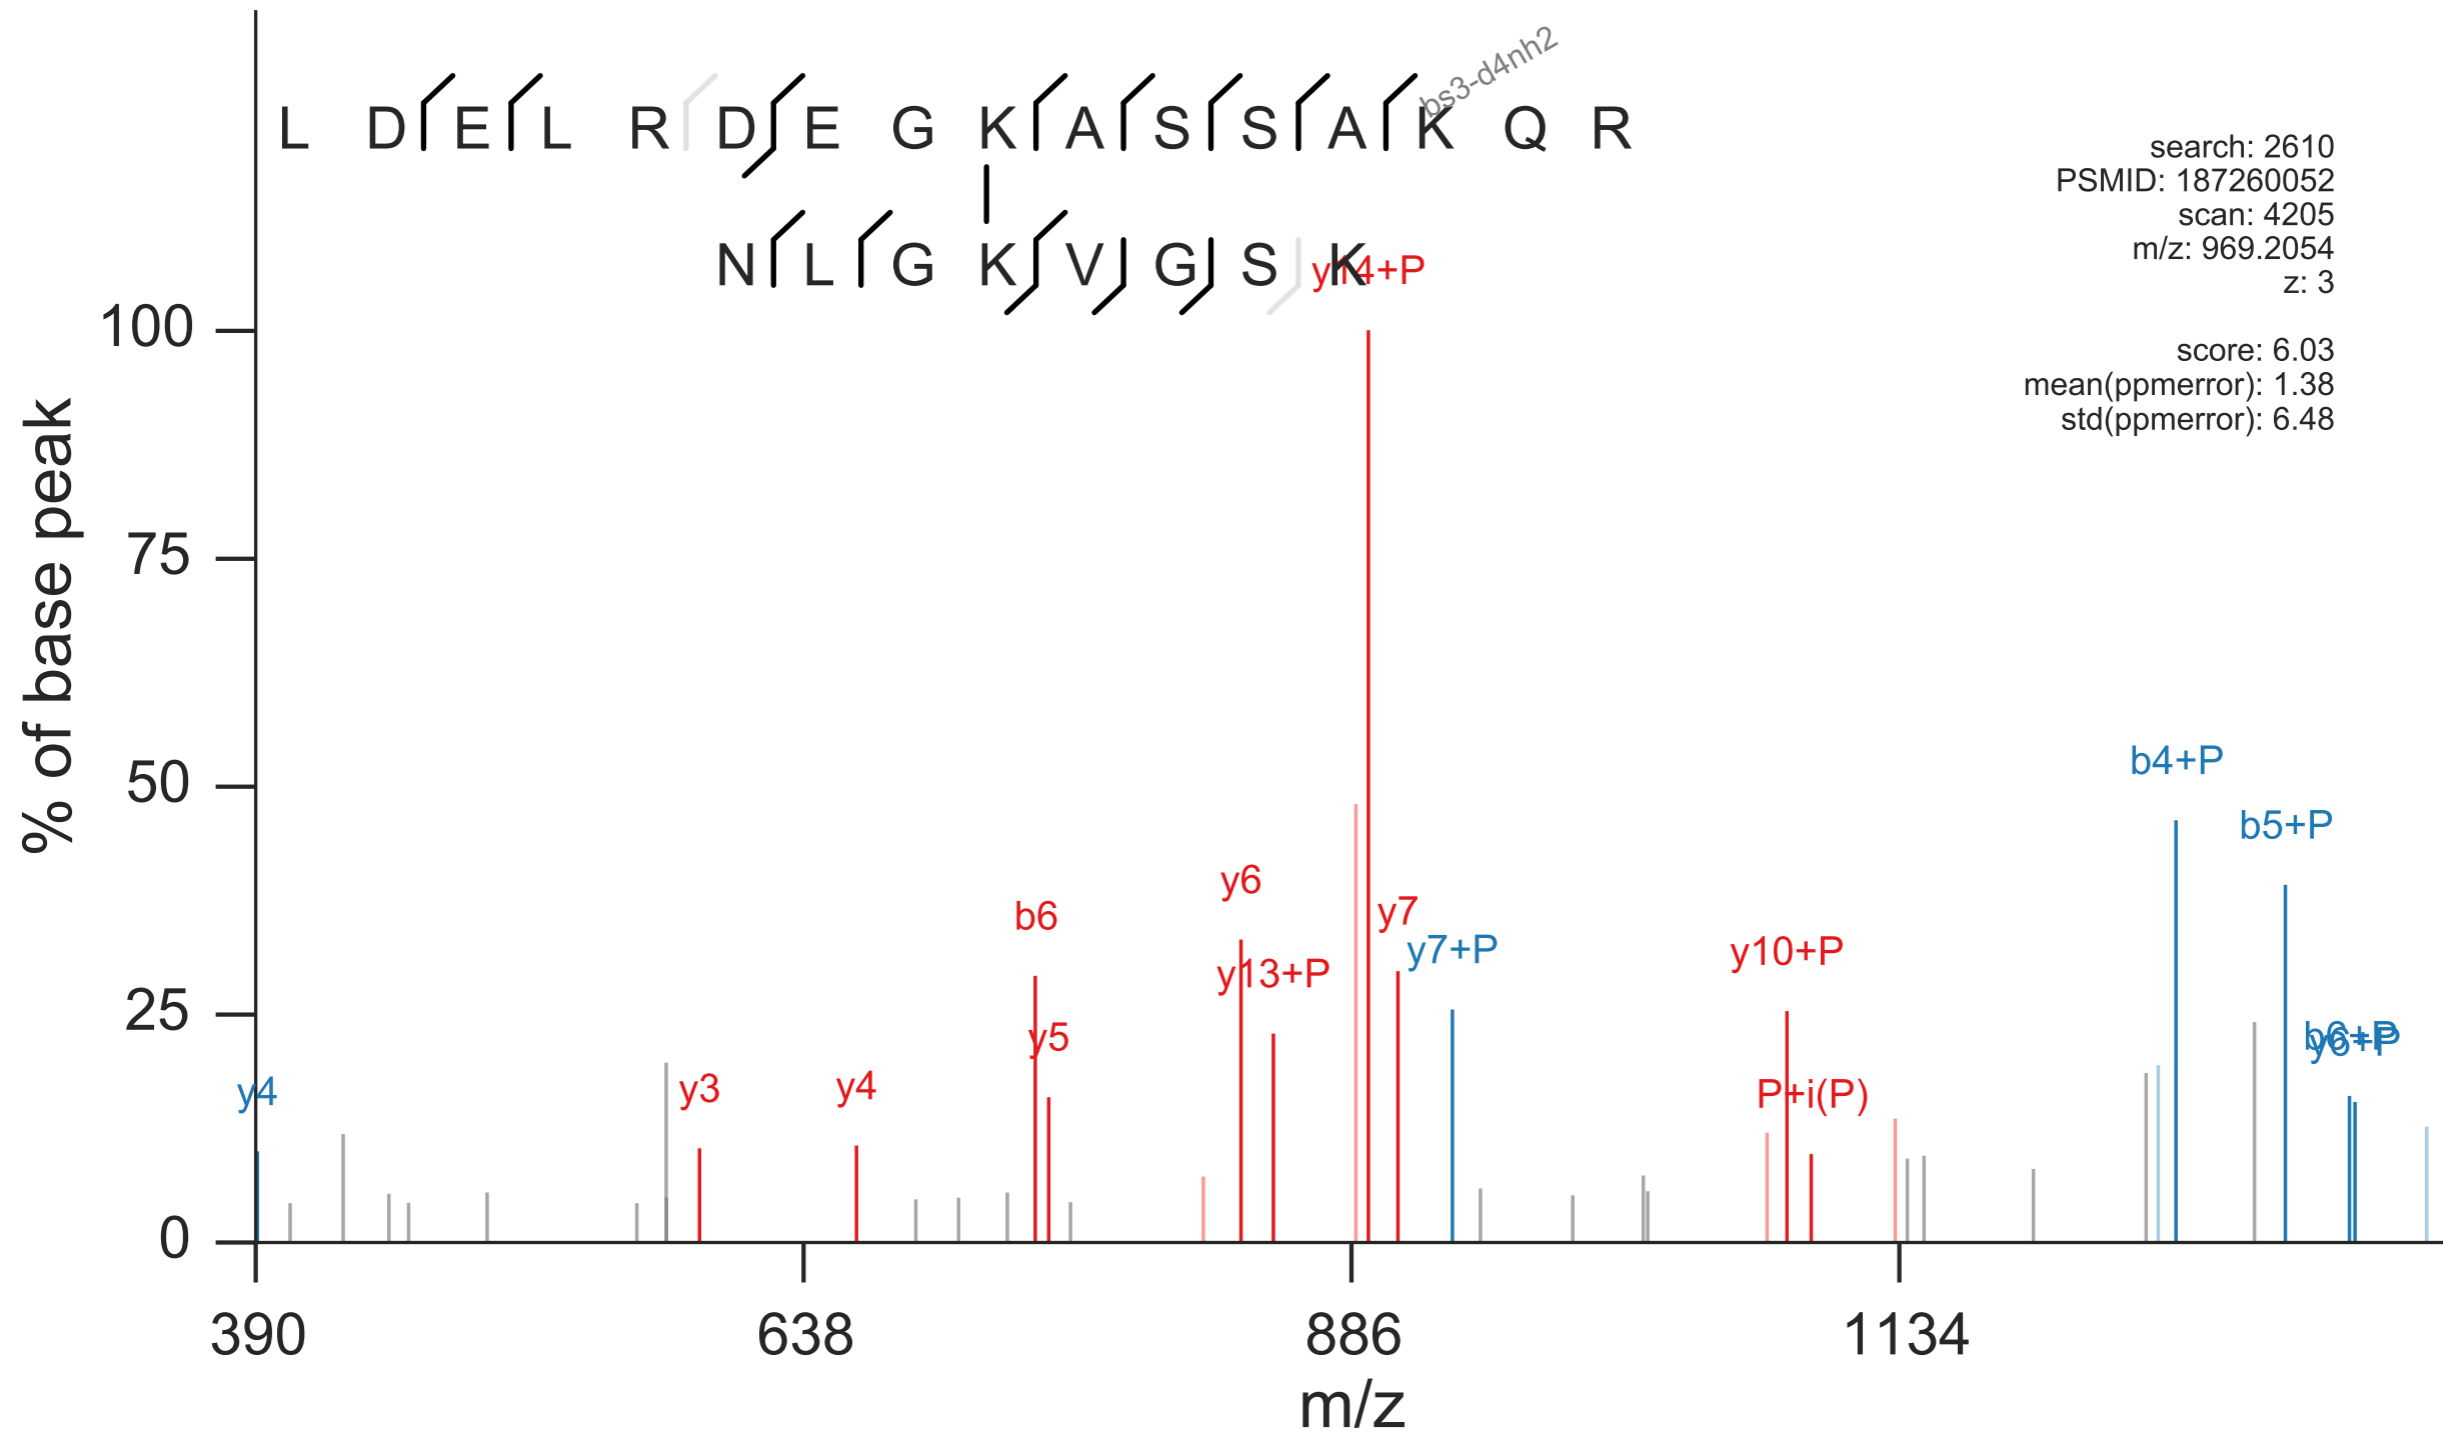

search: 2610  
 PSMID: 187260052  
 scan: 4205  
 m/z: 969.2054  
 z: 3  
  
 score: 6.03  
 mean(ppmerror): 1.38  
 std(ppmerror): 6.48

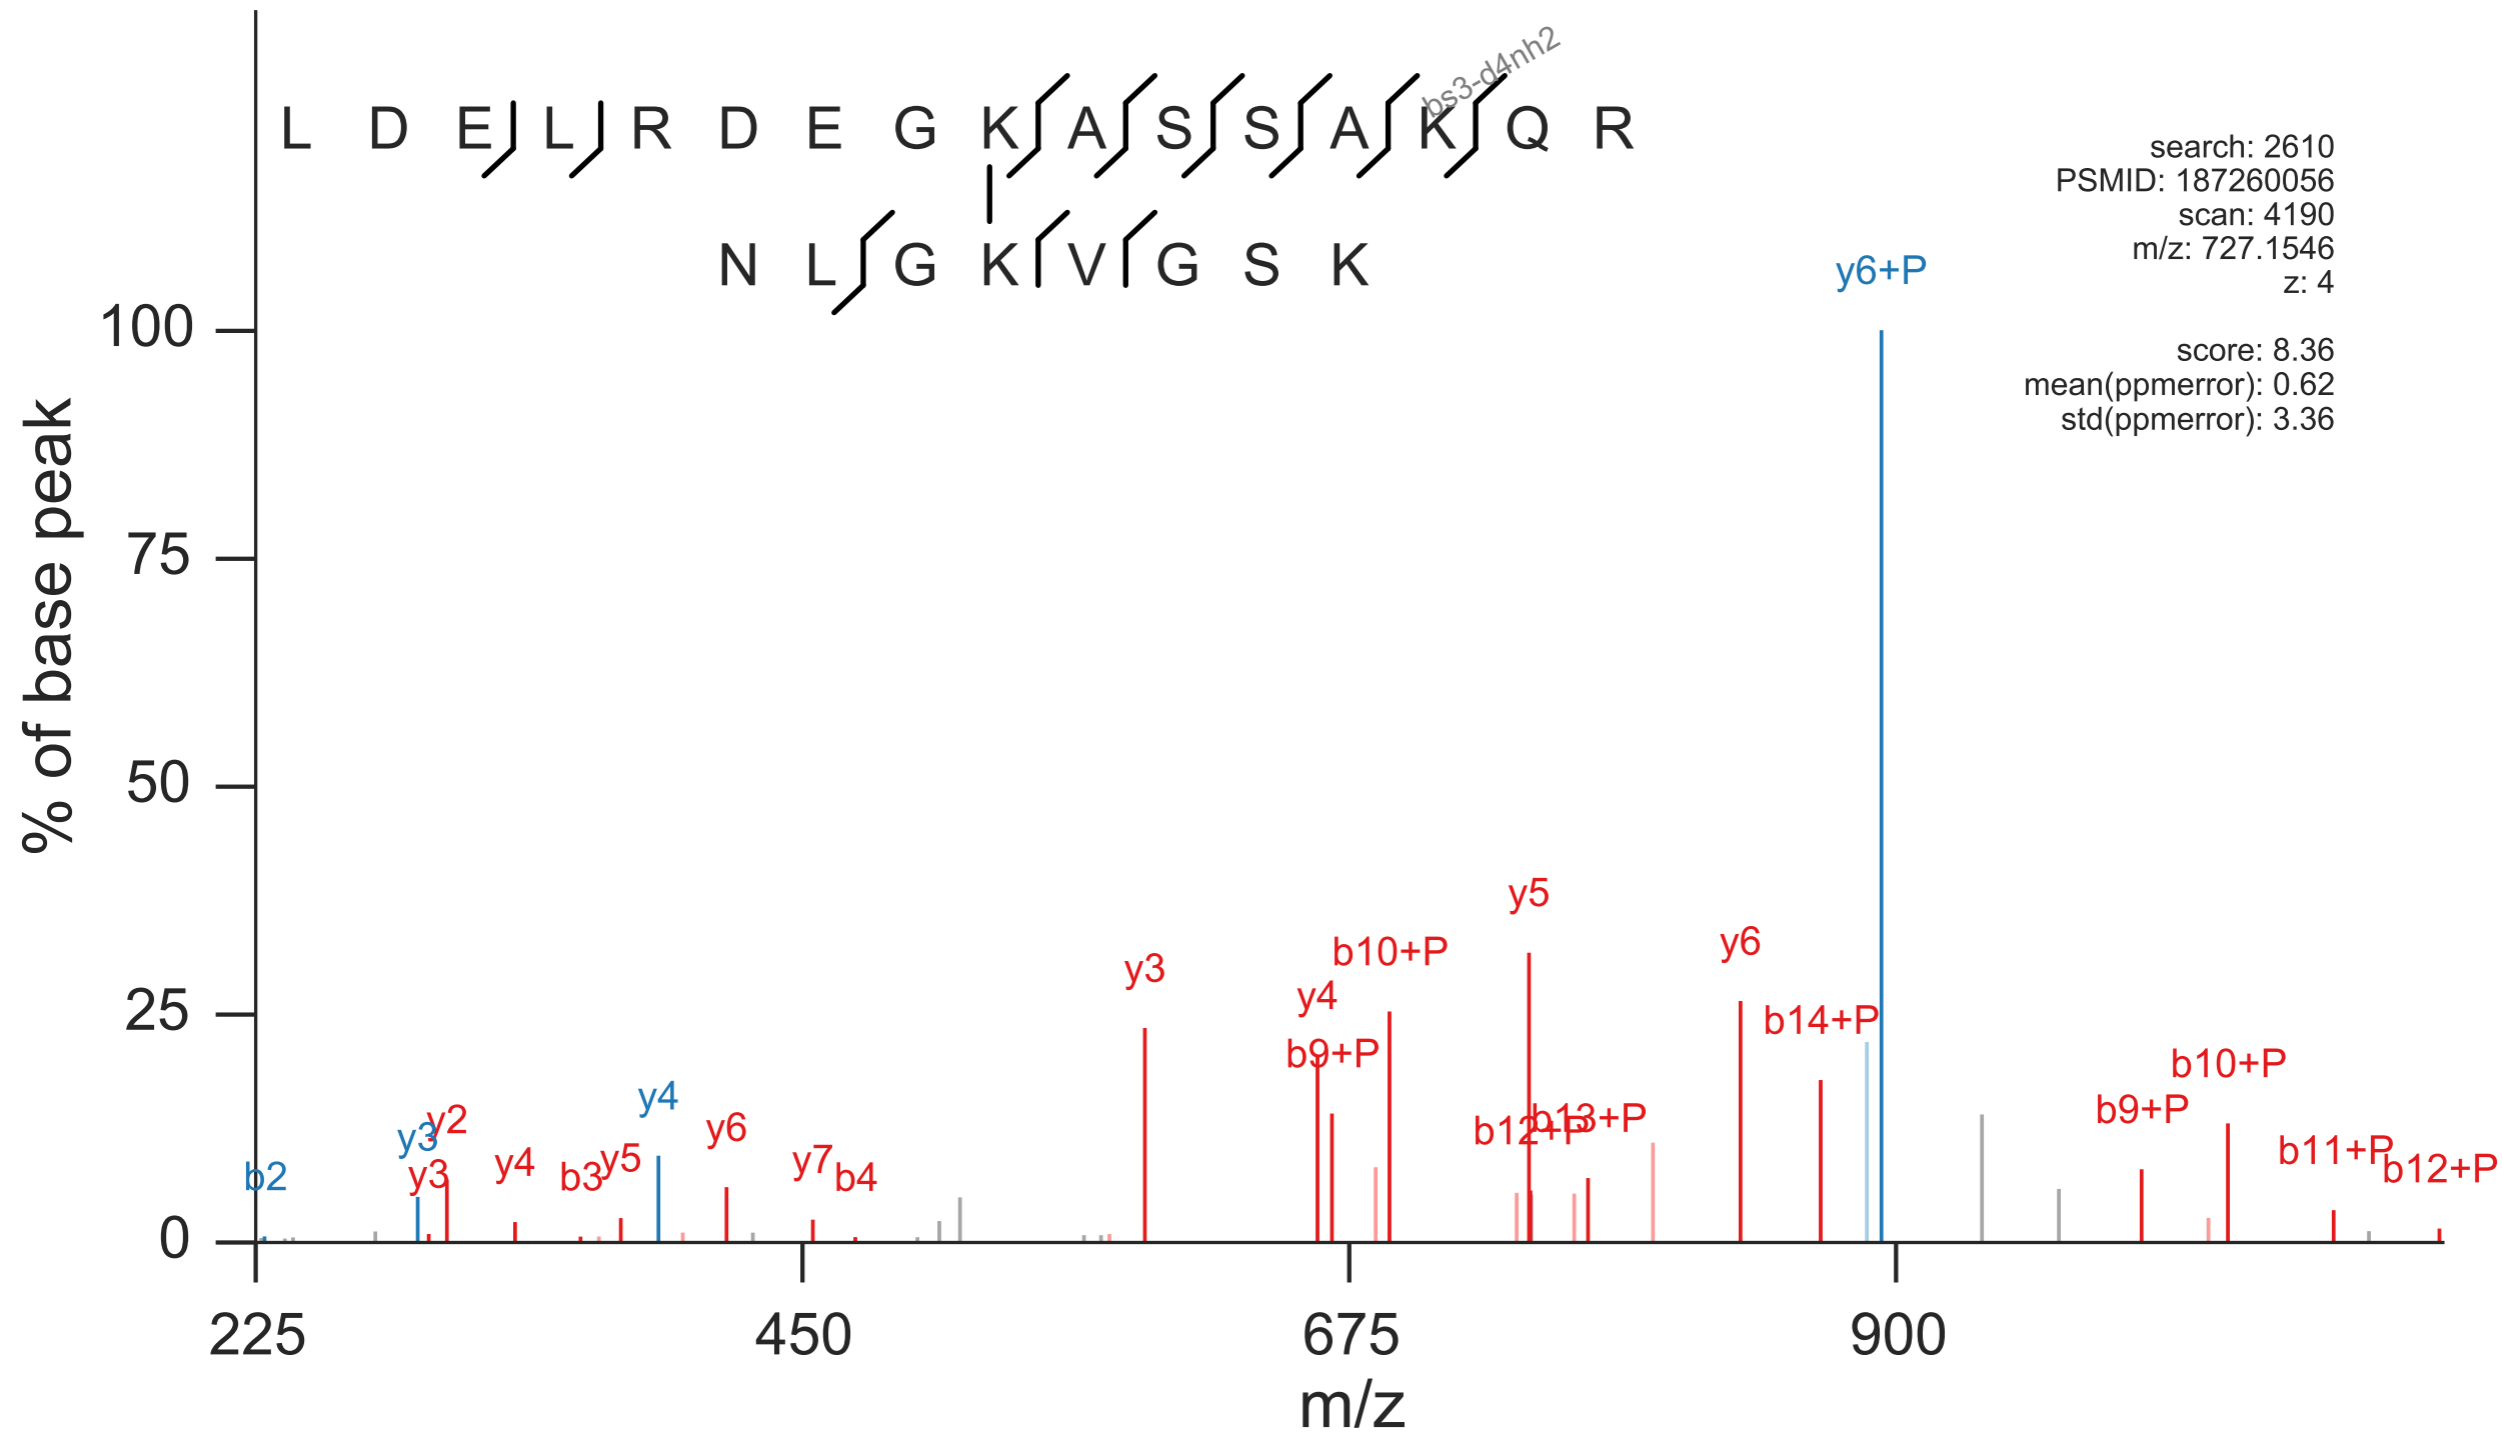

search: 2610  
 PSMID: 187260056  
 scan: 4190  
 m/z: 727.1546  
 z: 4

score: 8.36  
 mean(ppmerror): 0.62  
 std(ppmerror): 3.36

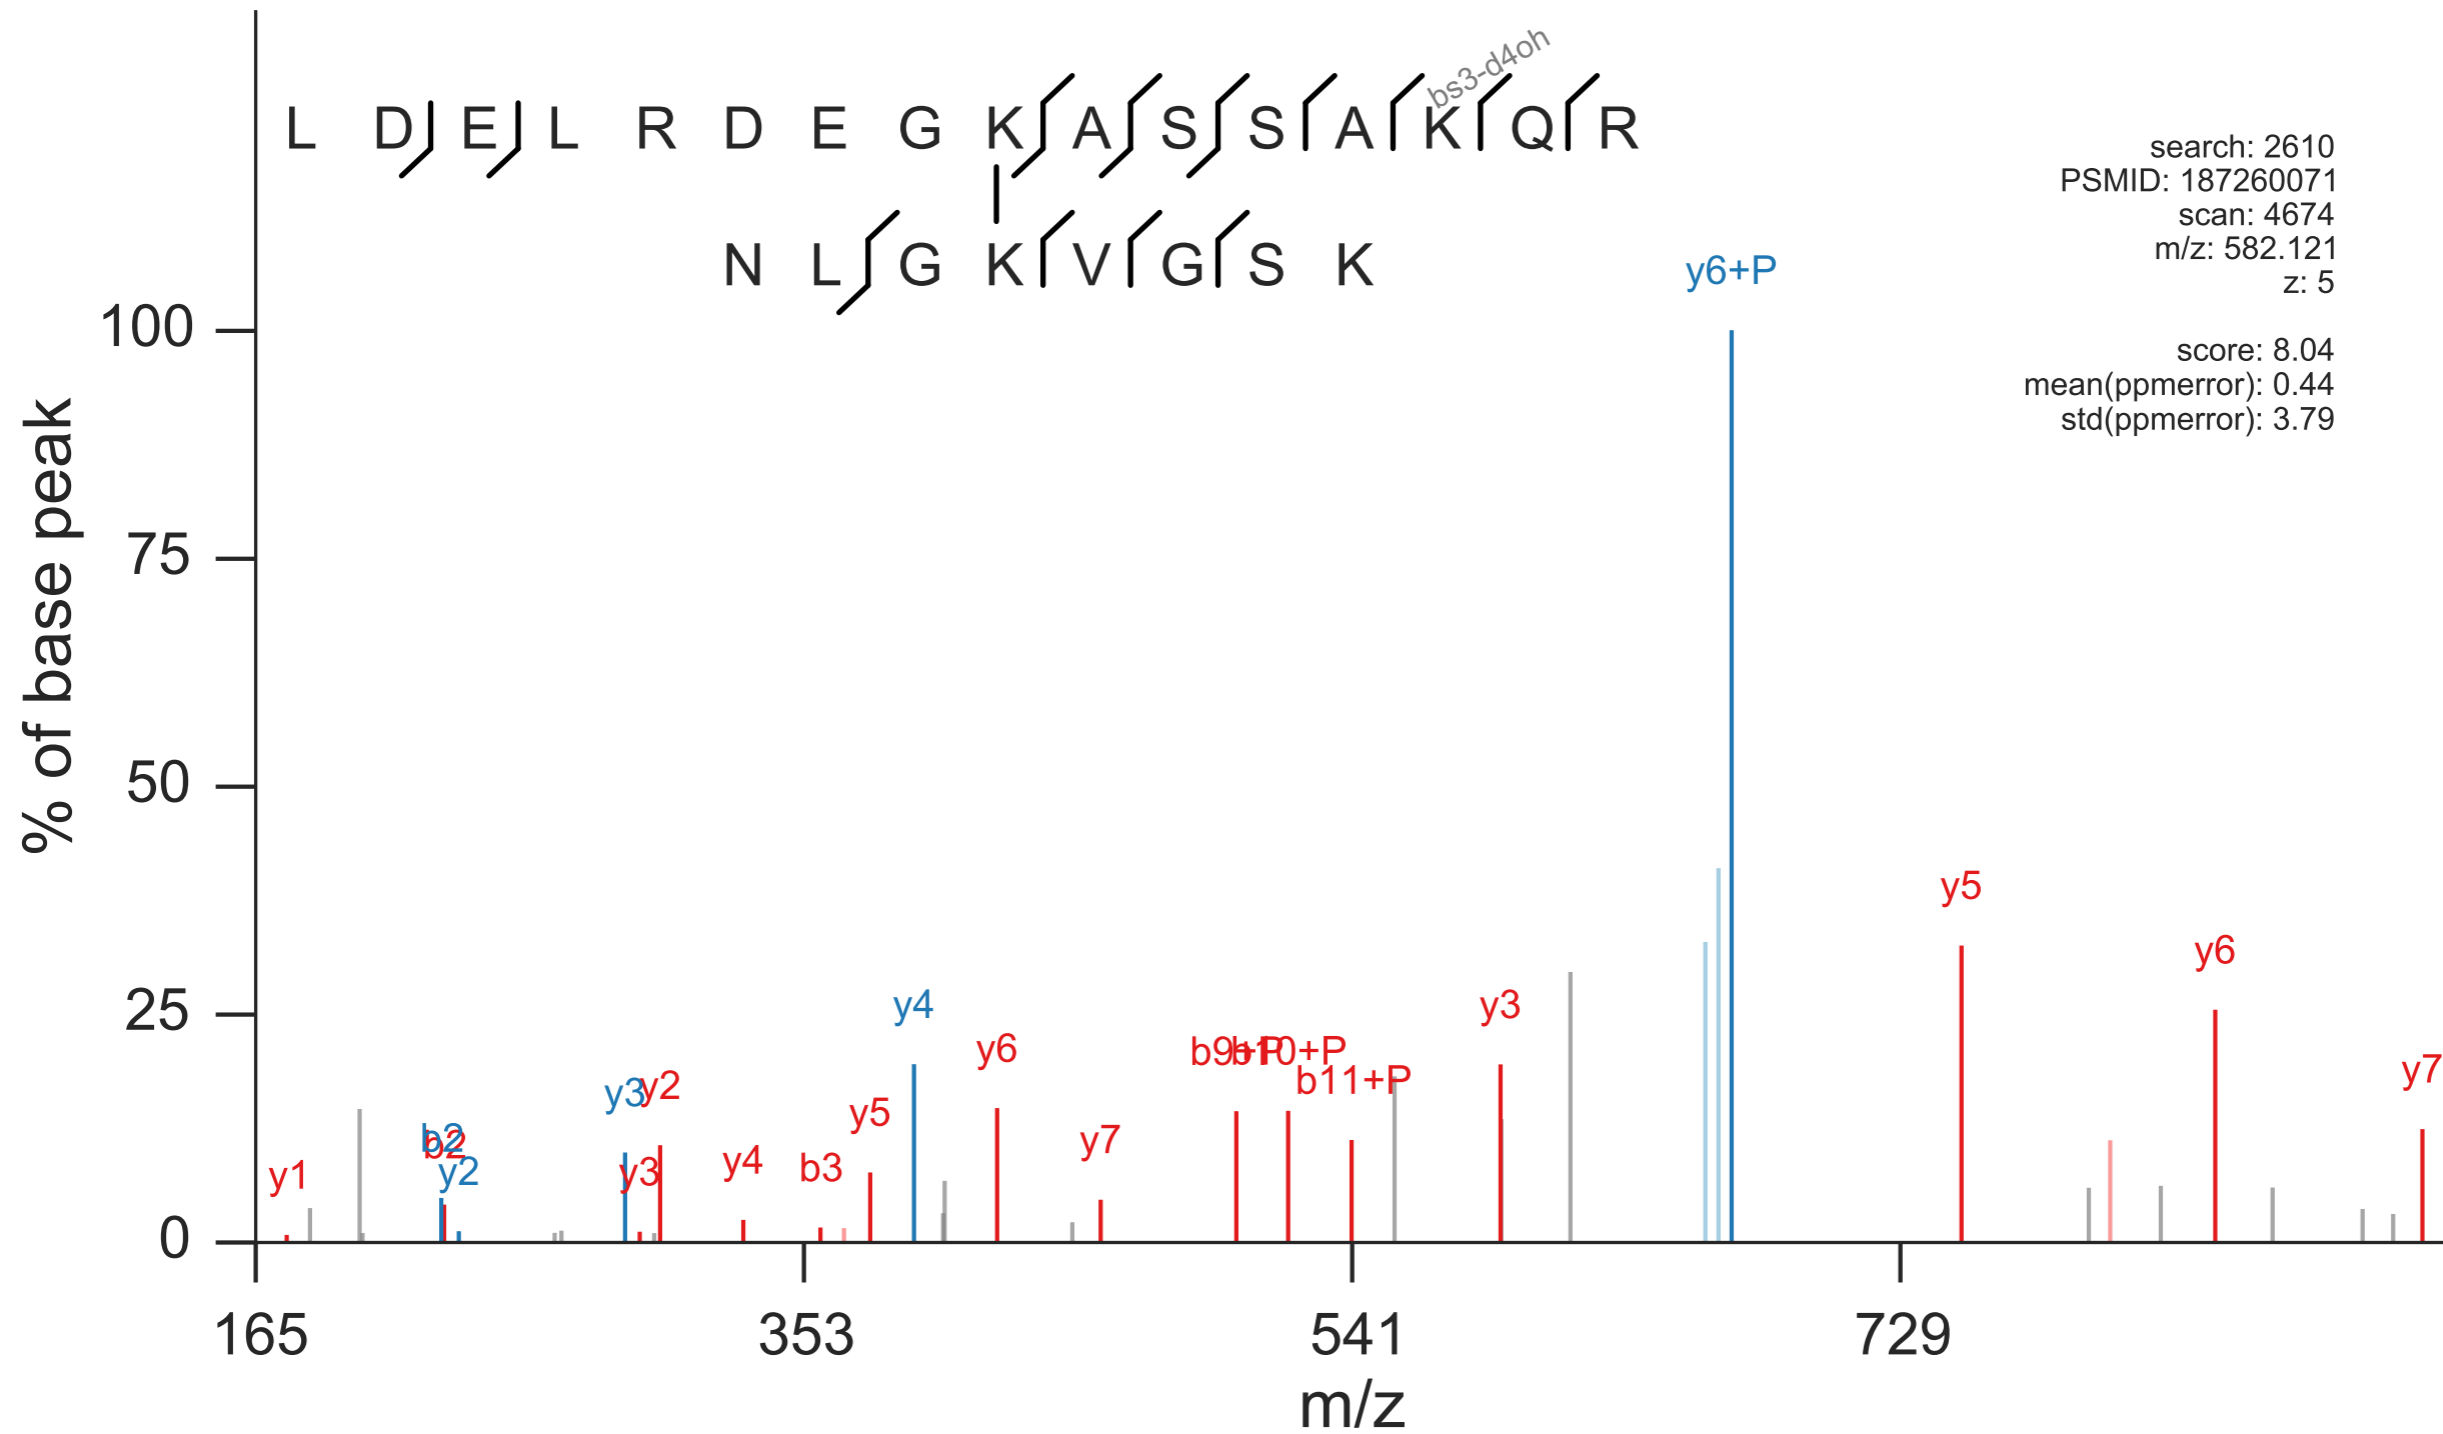





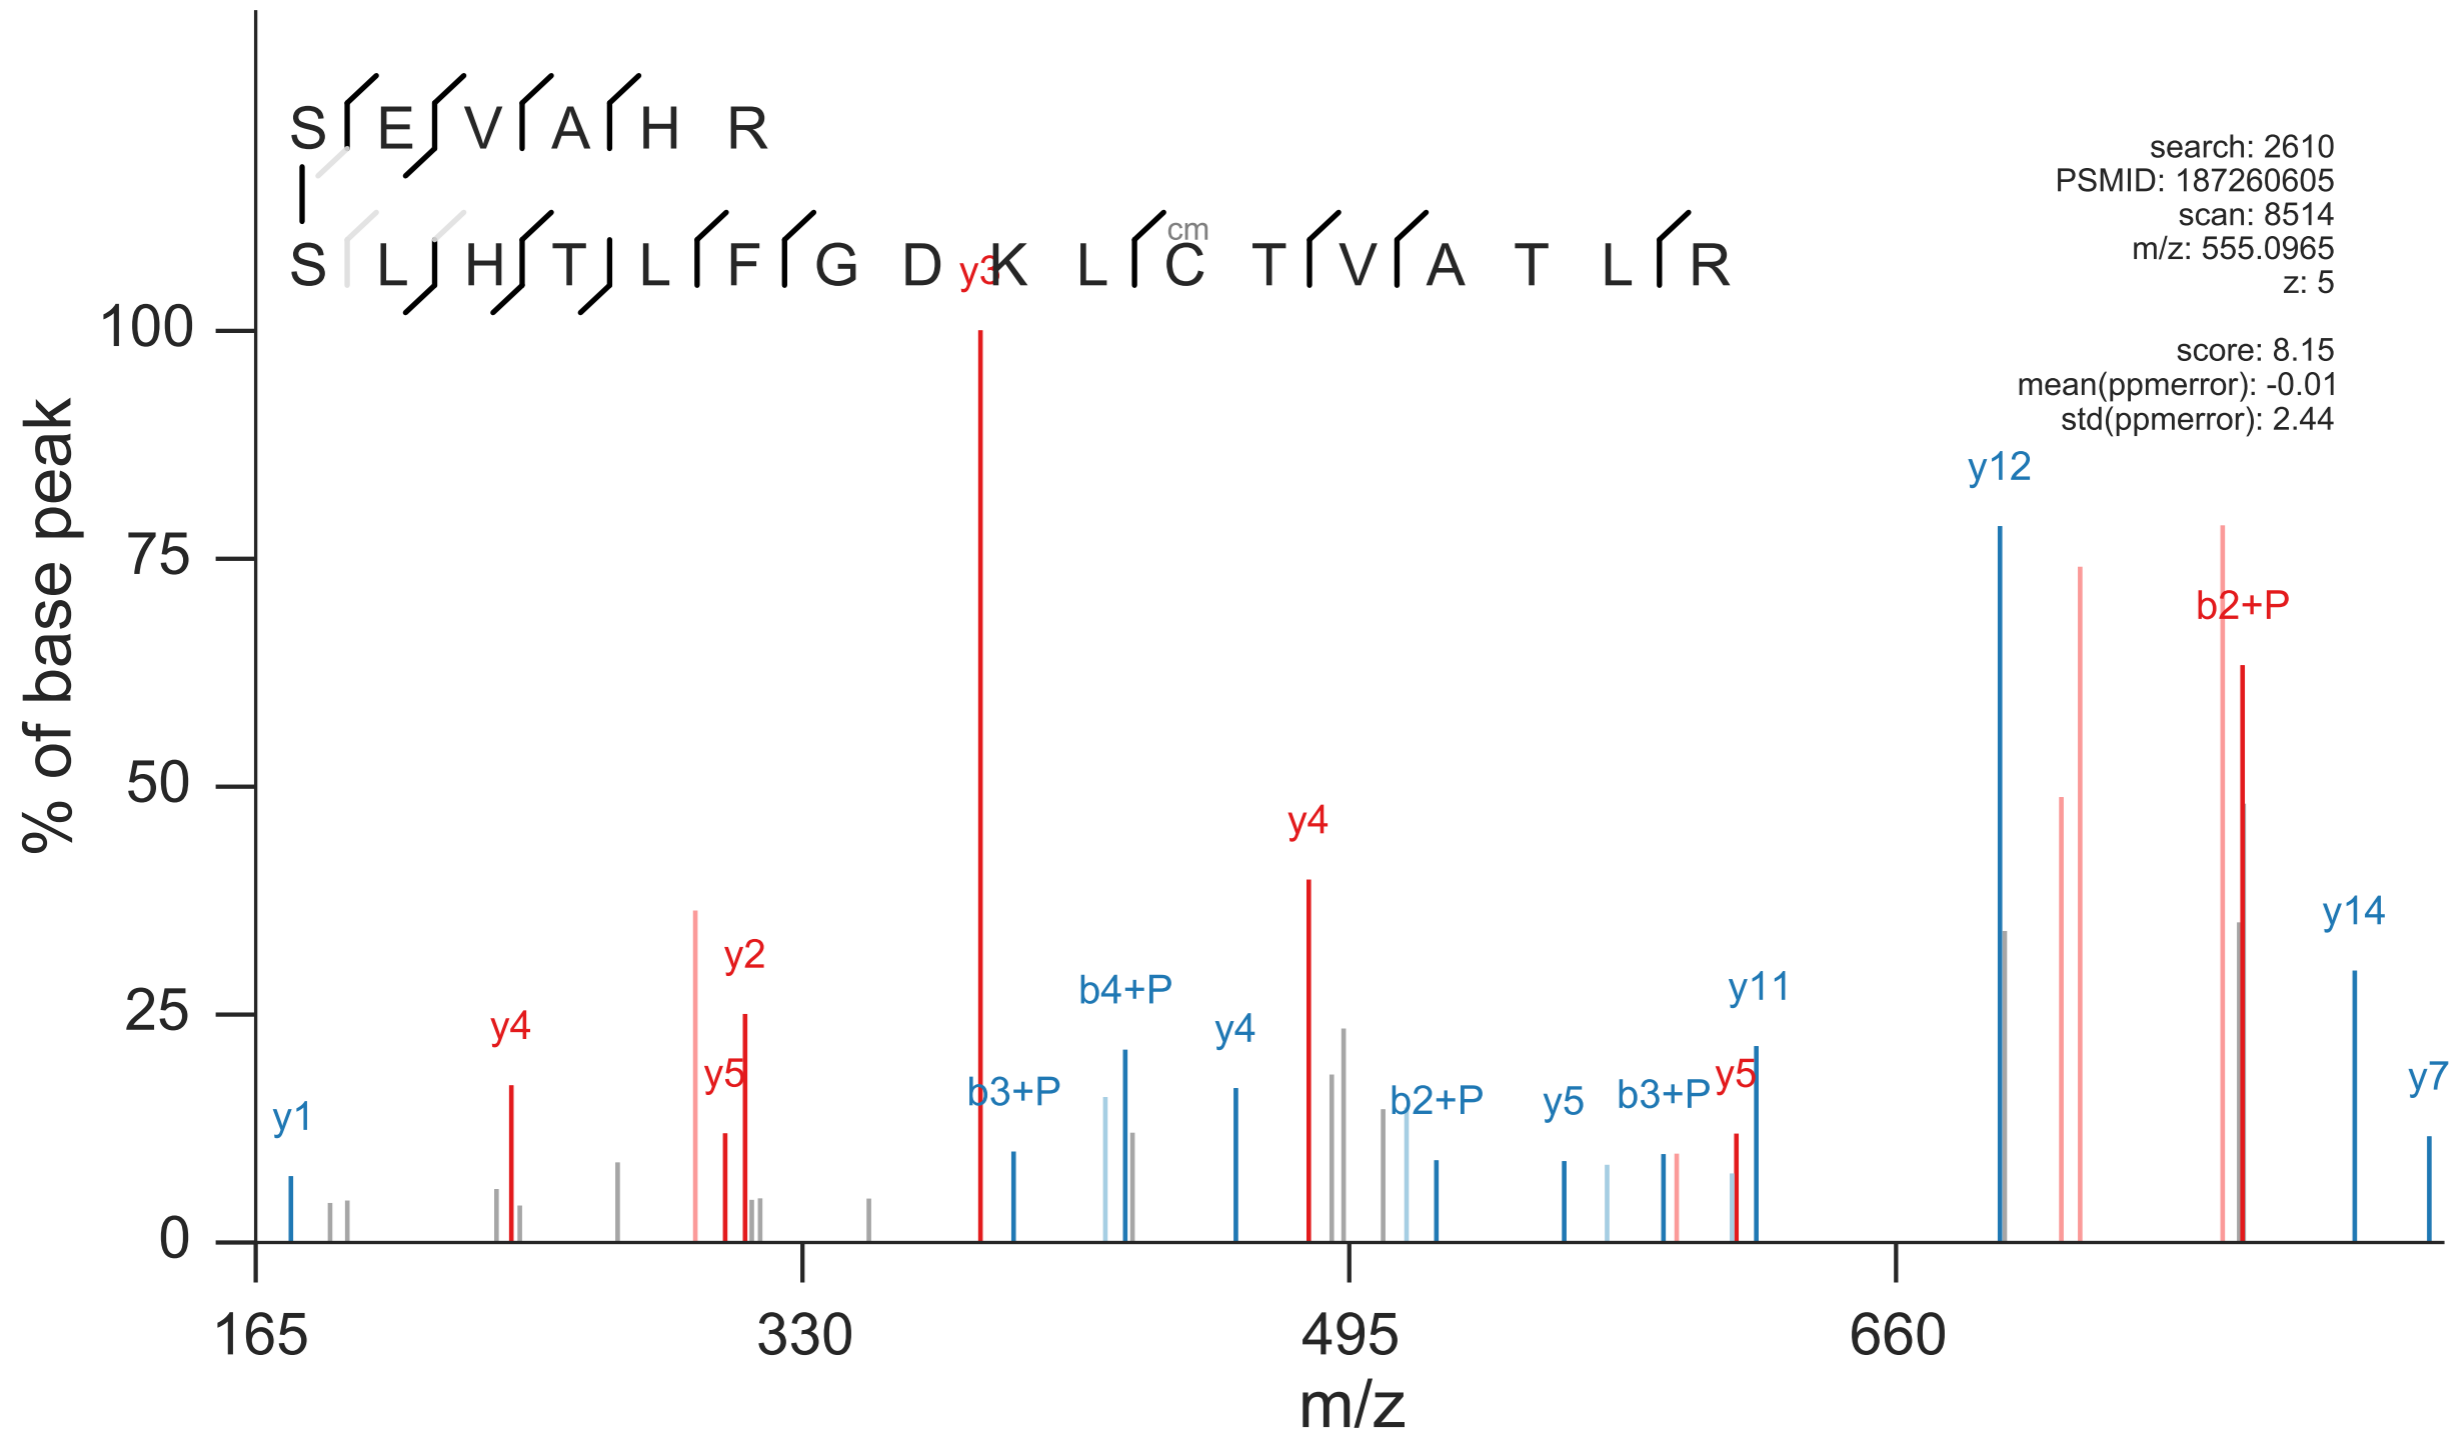

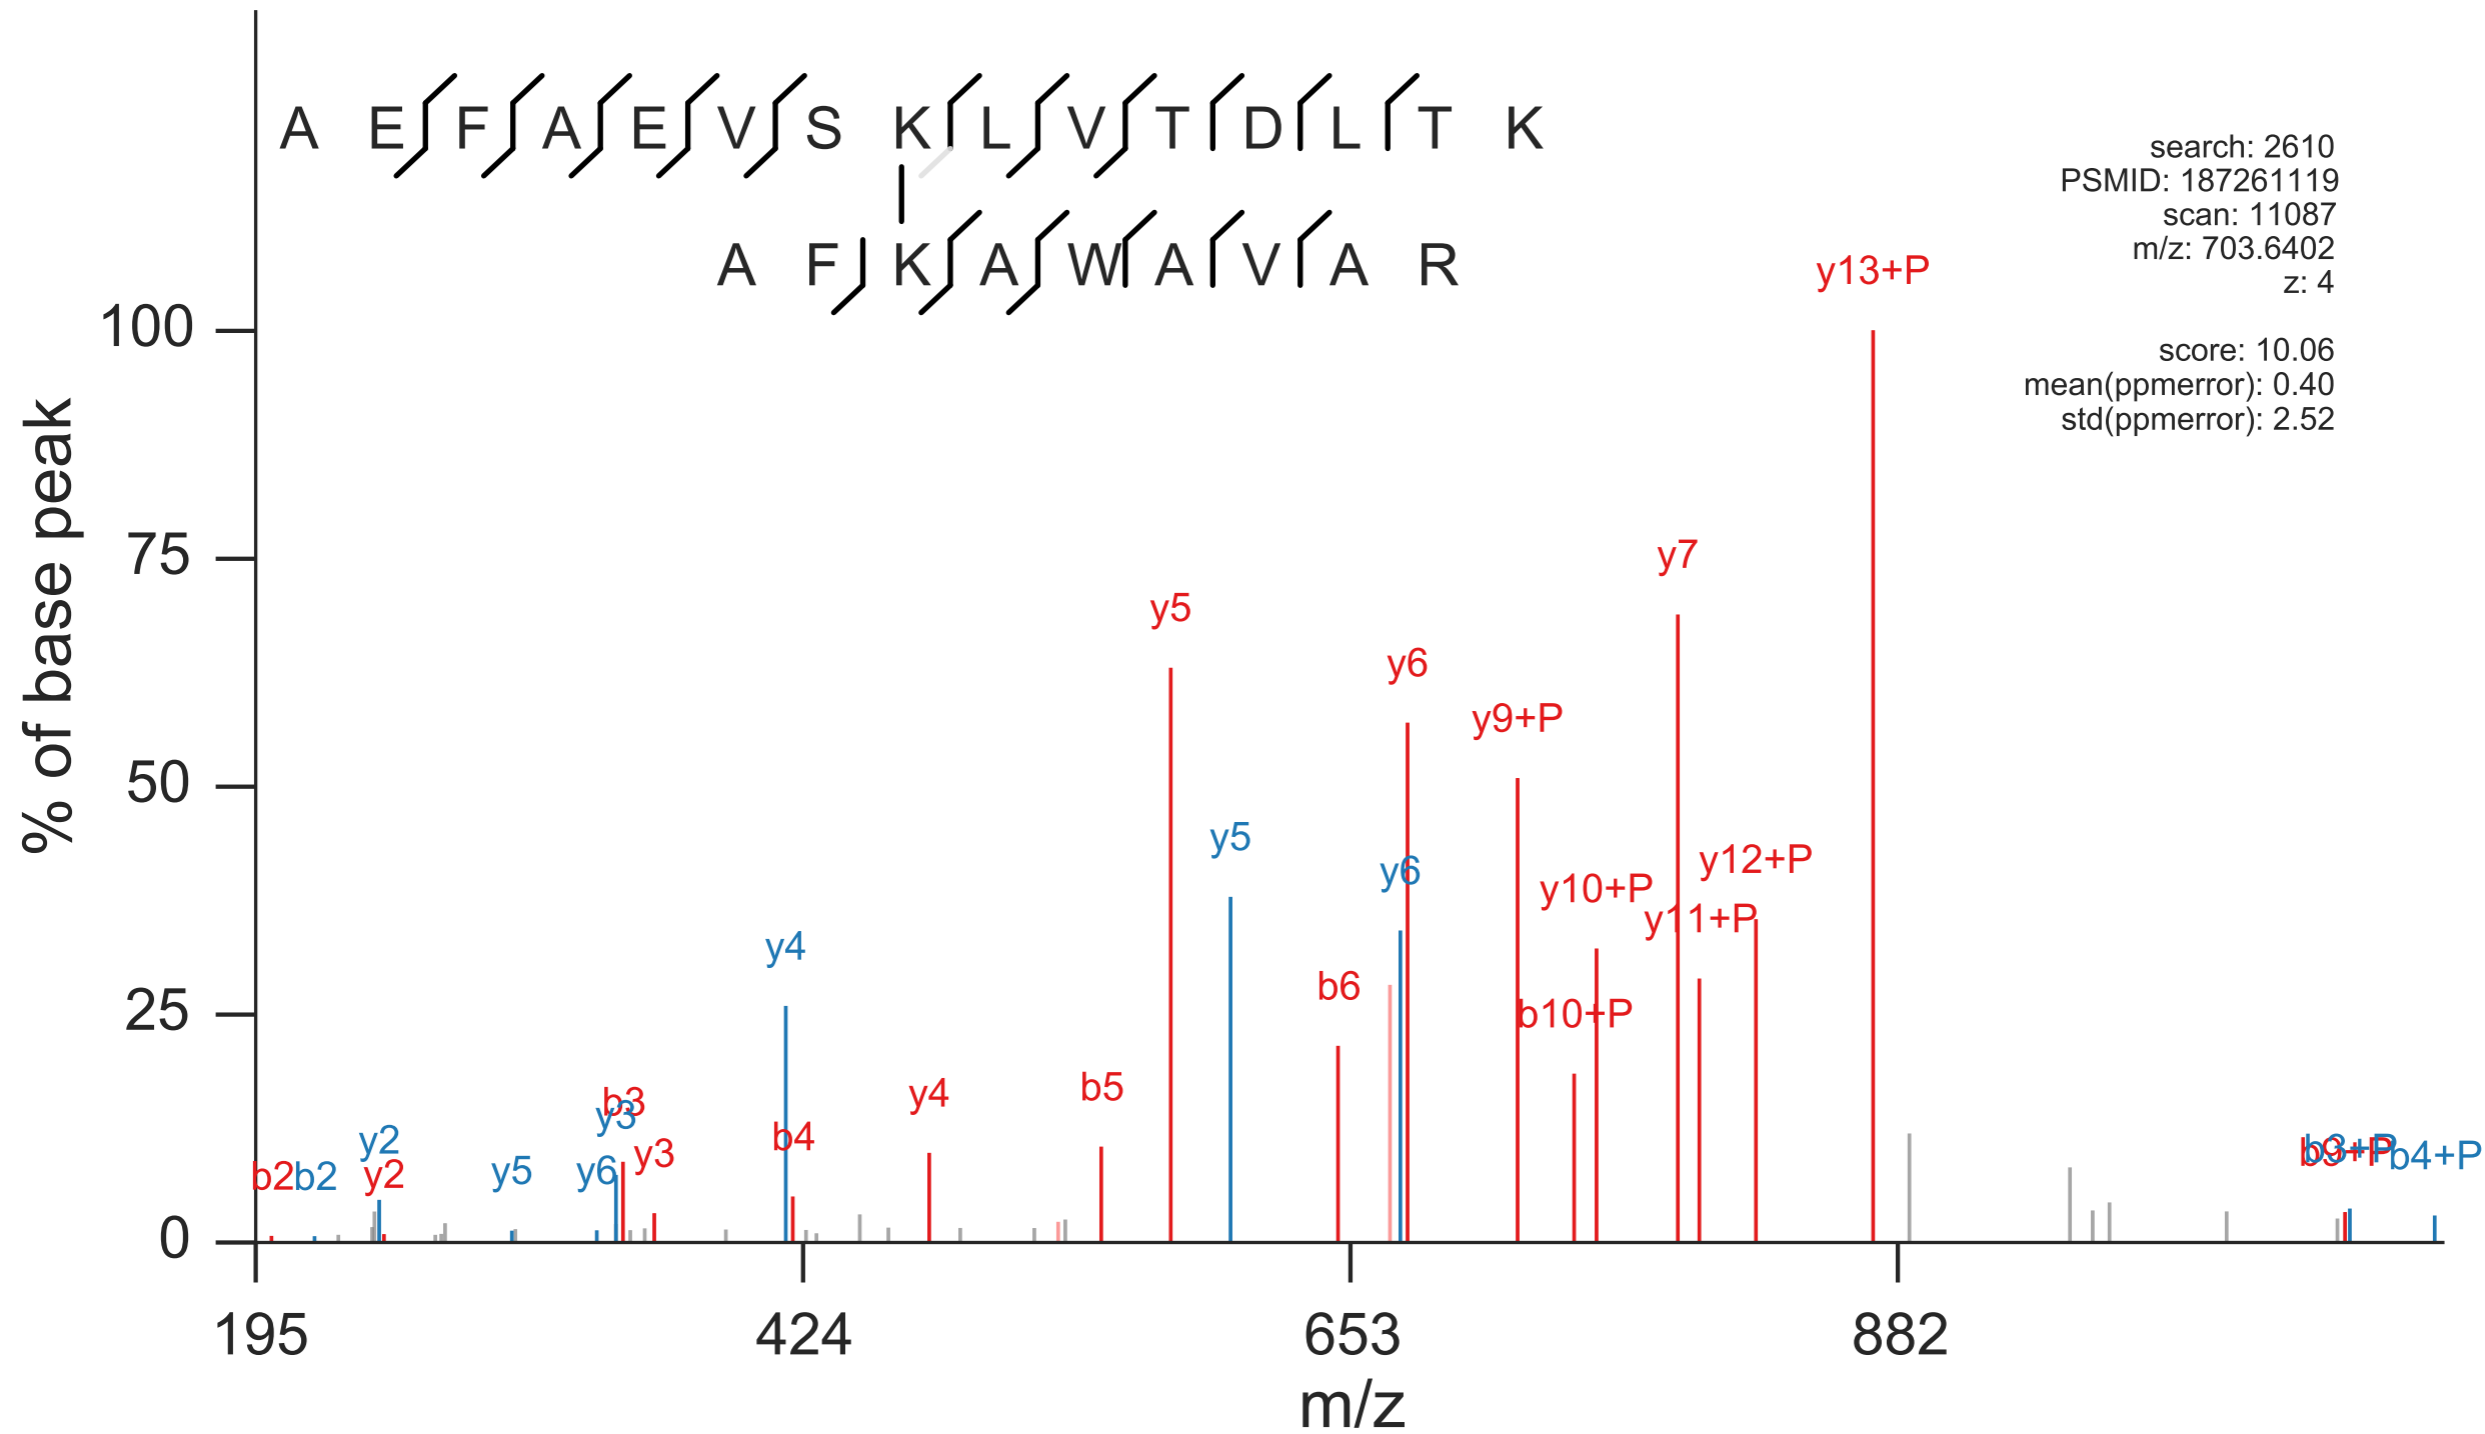

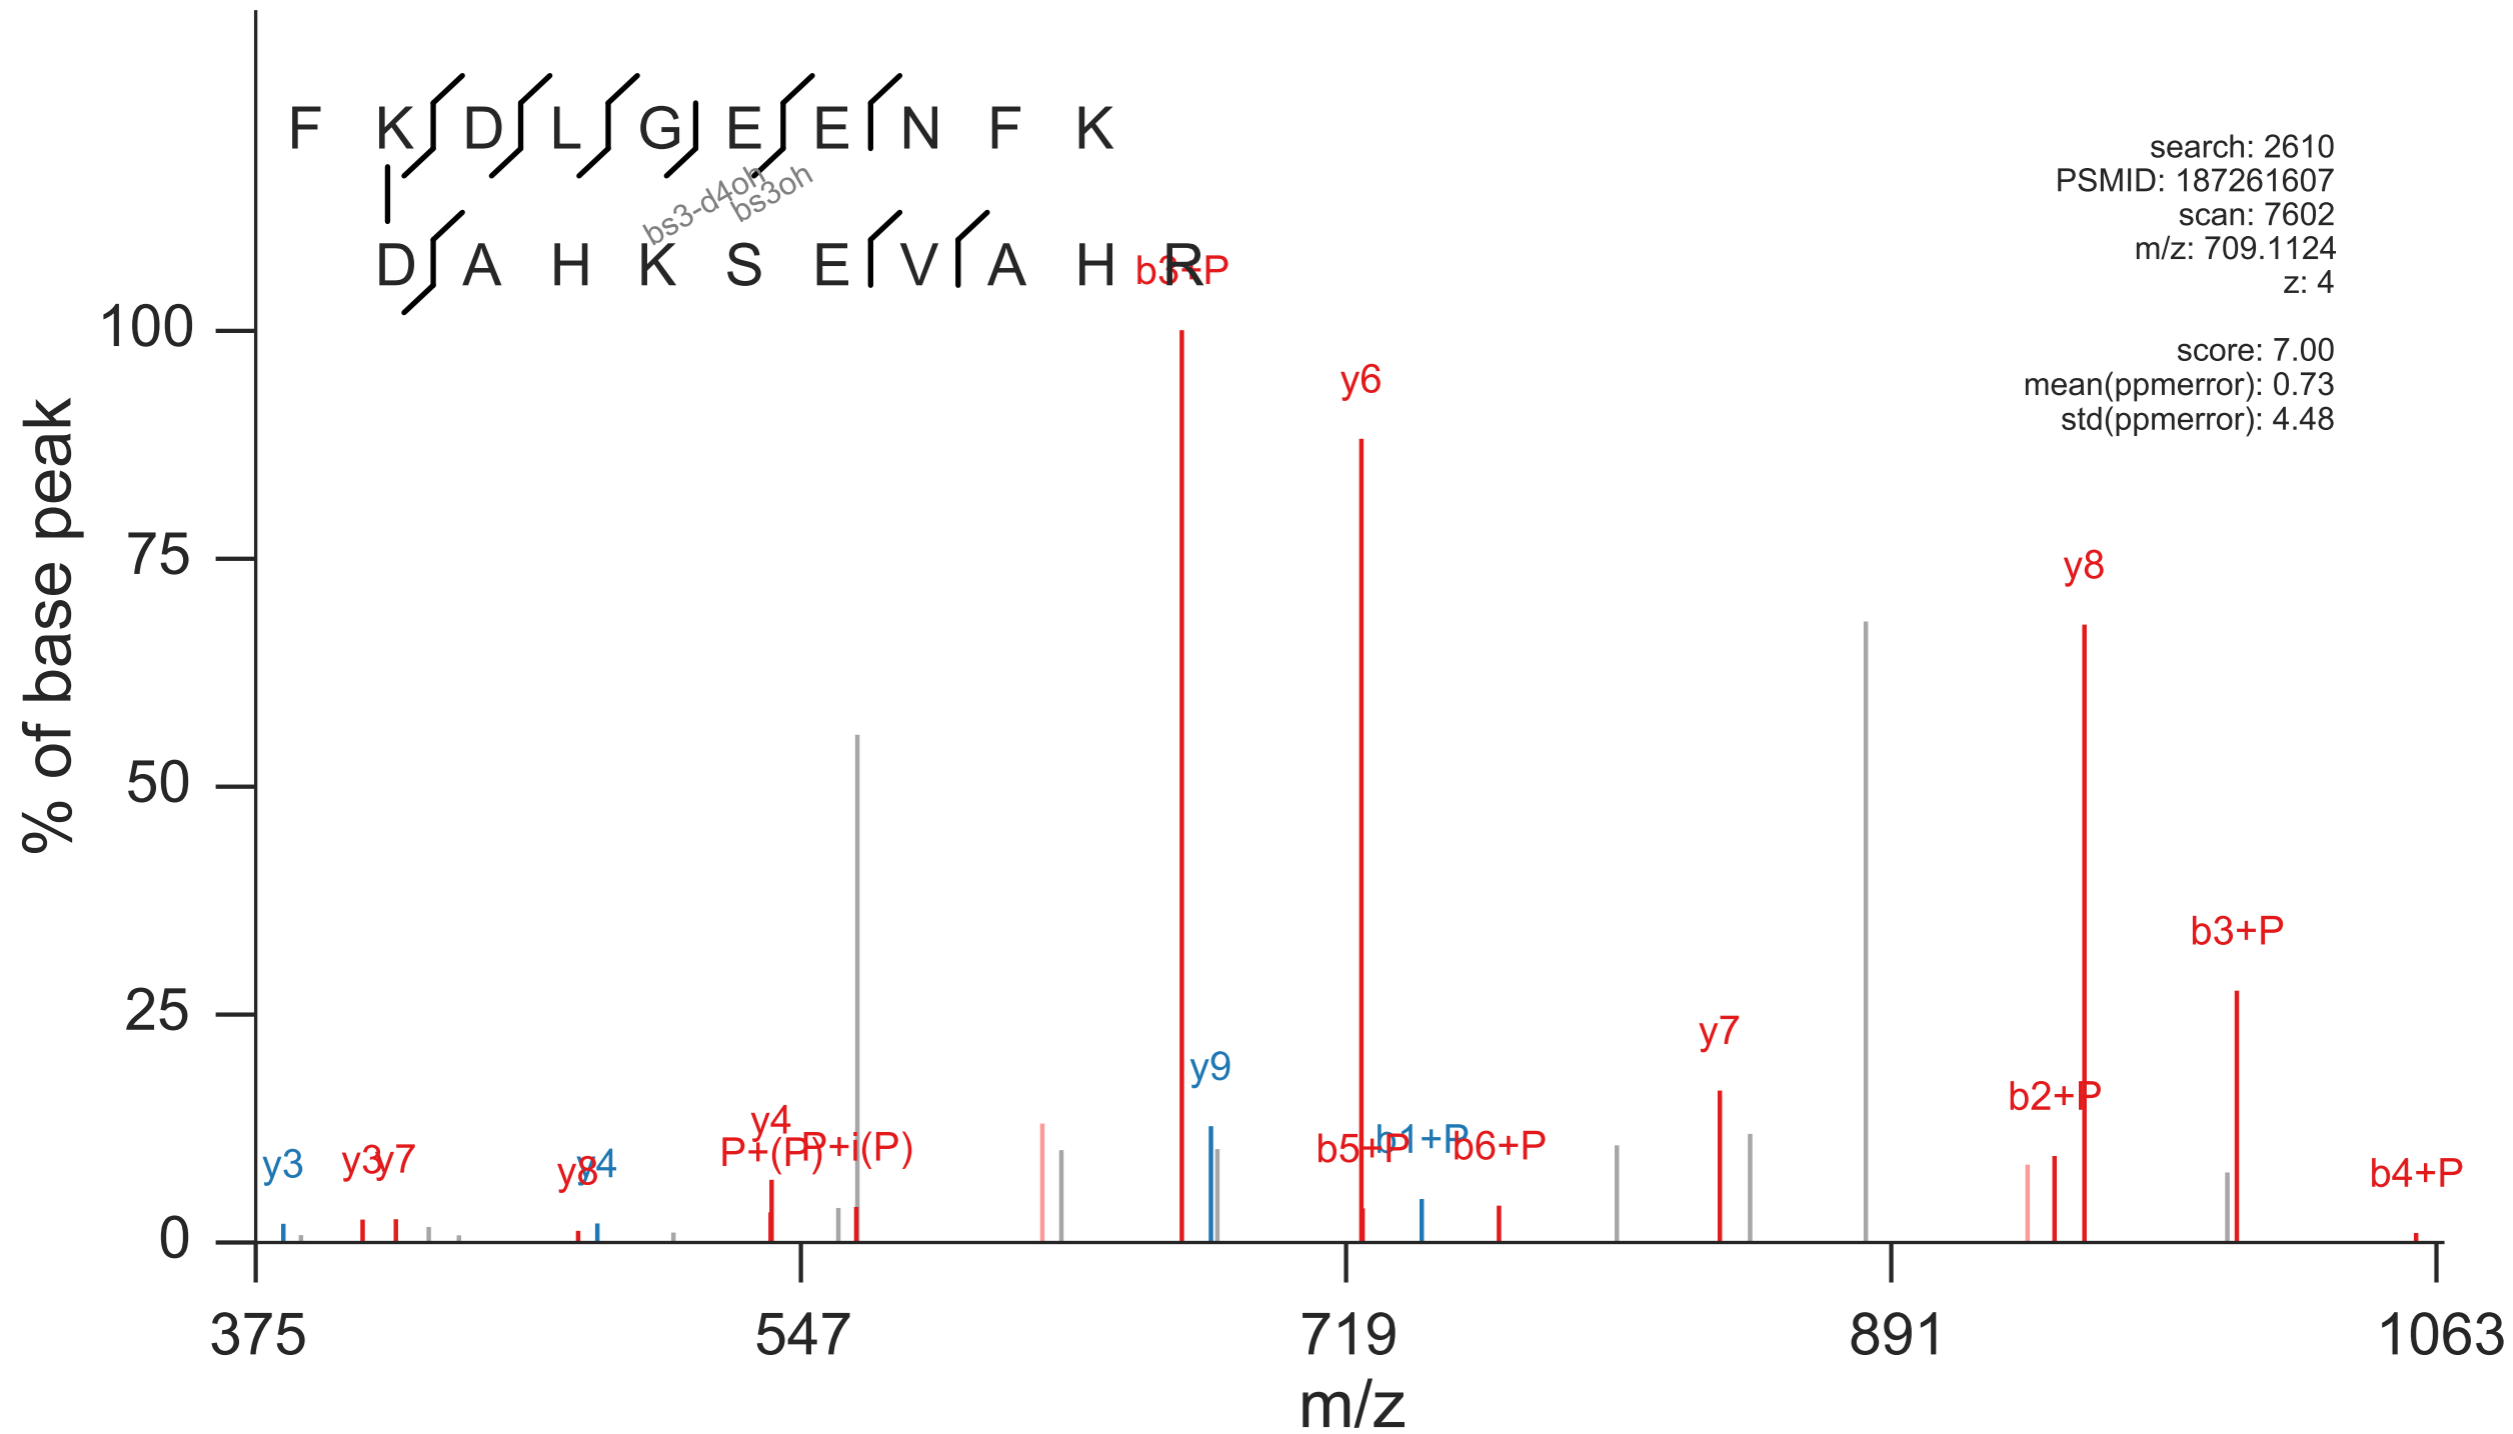

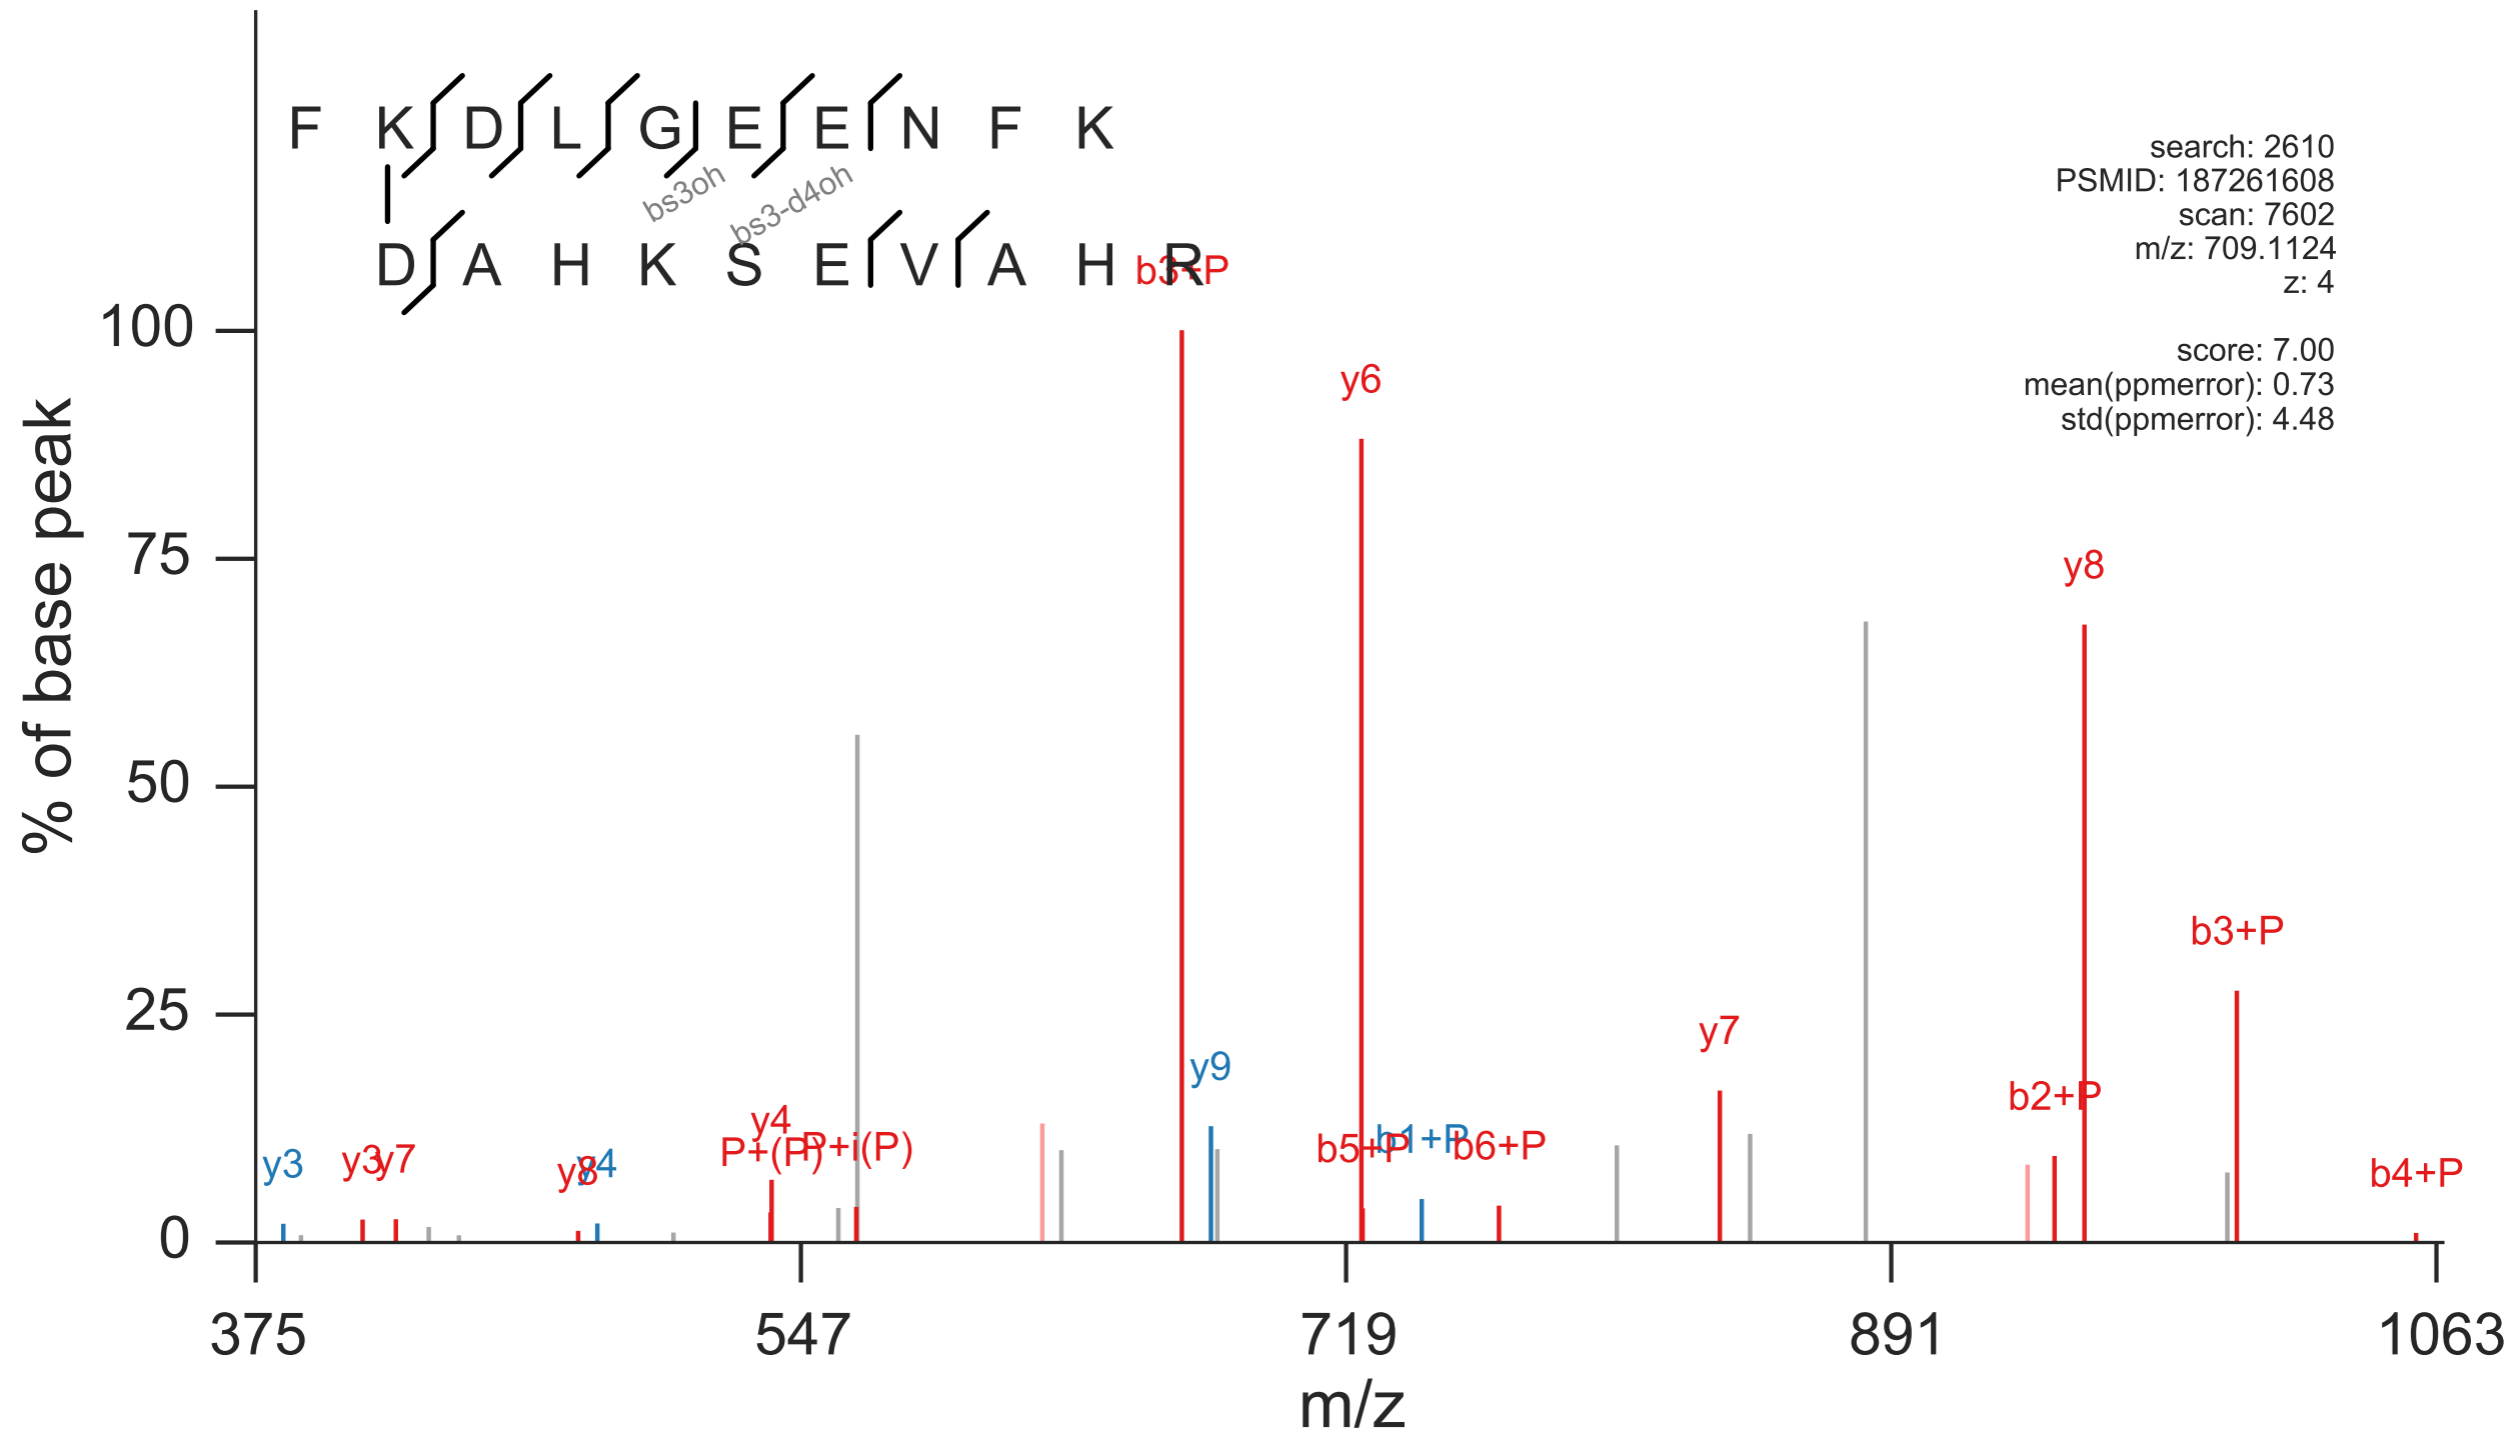

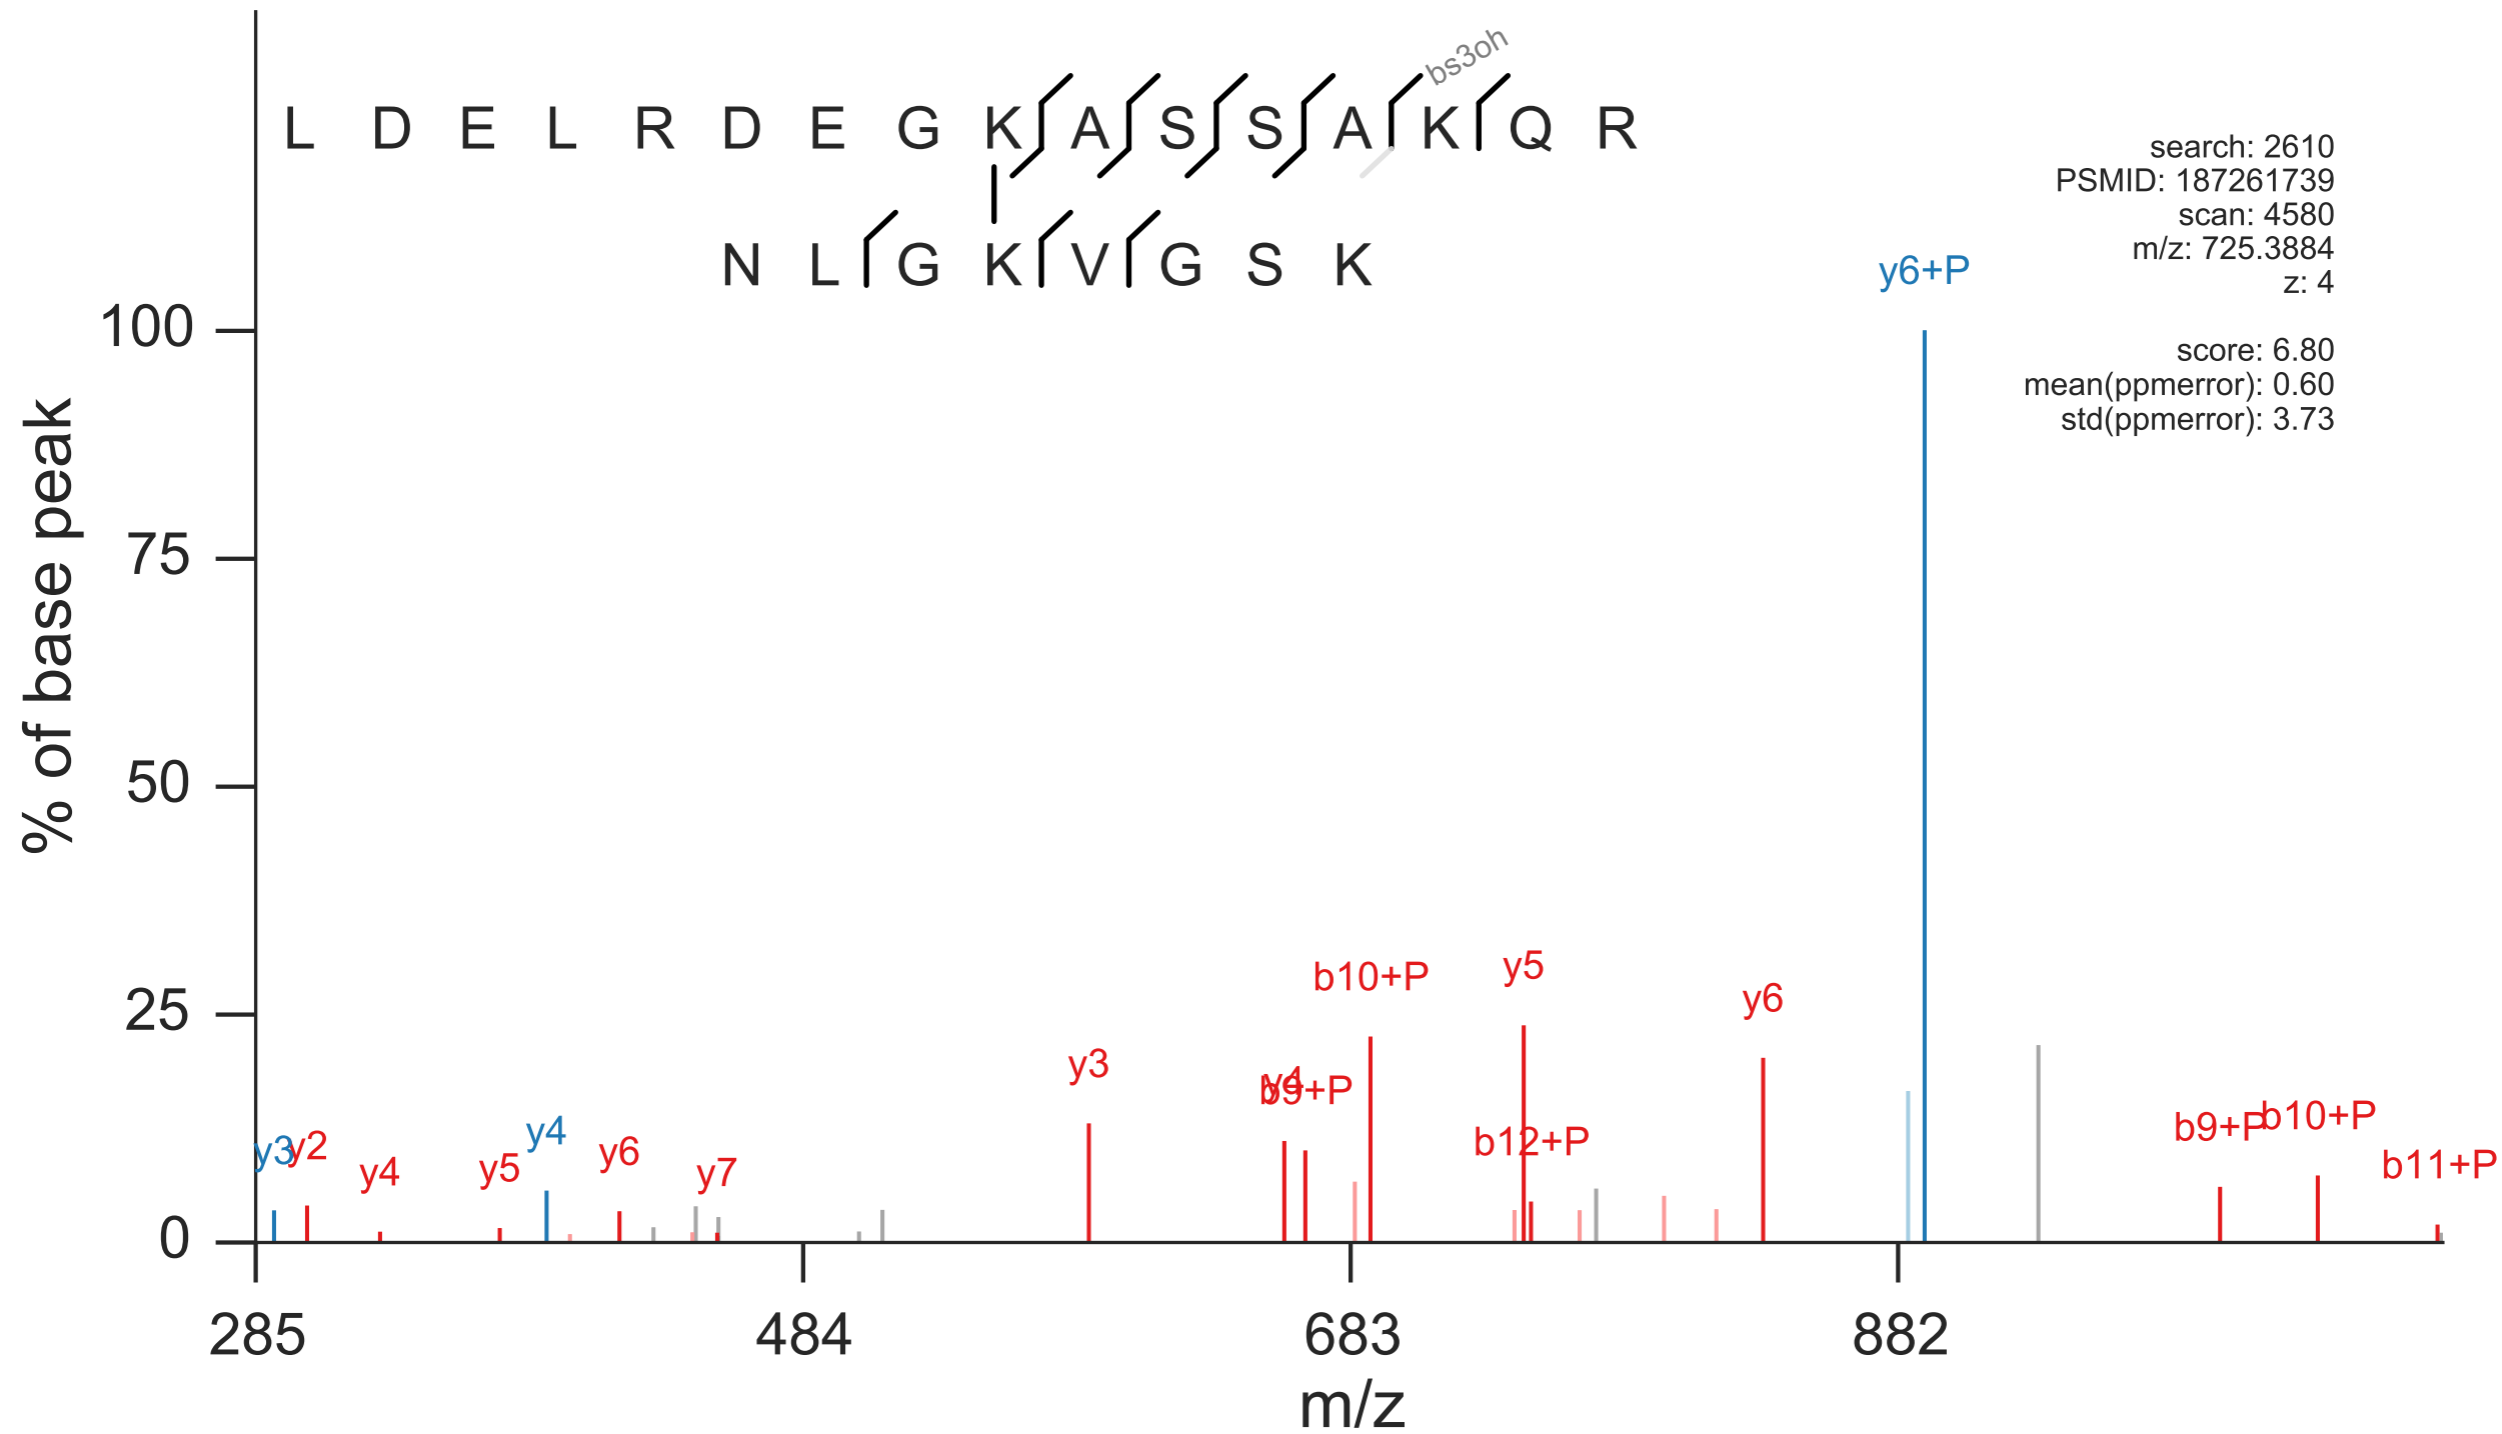

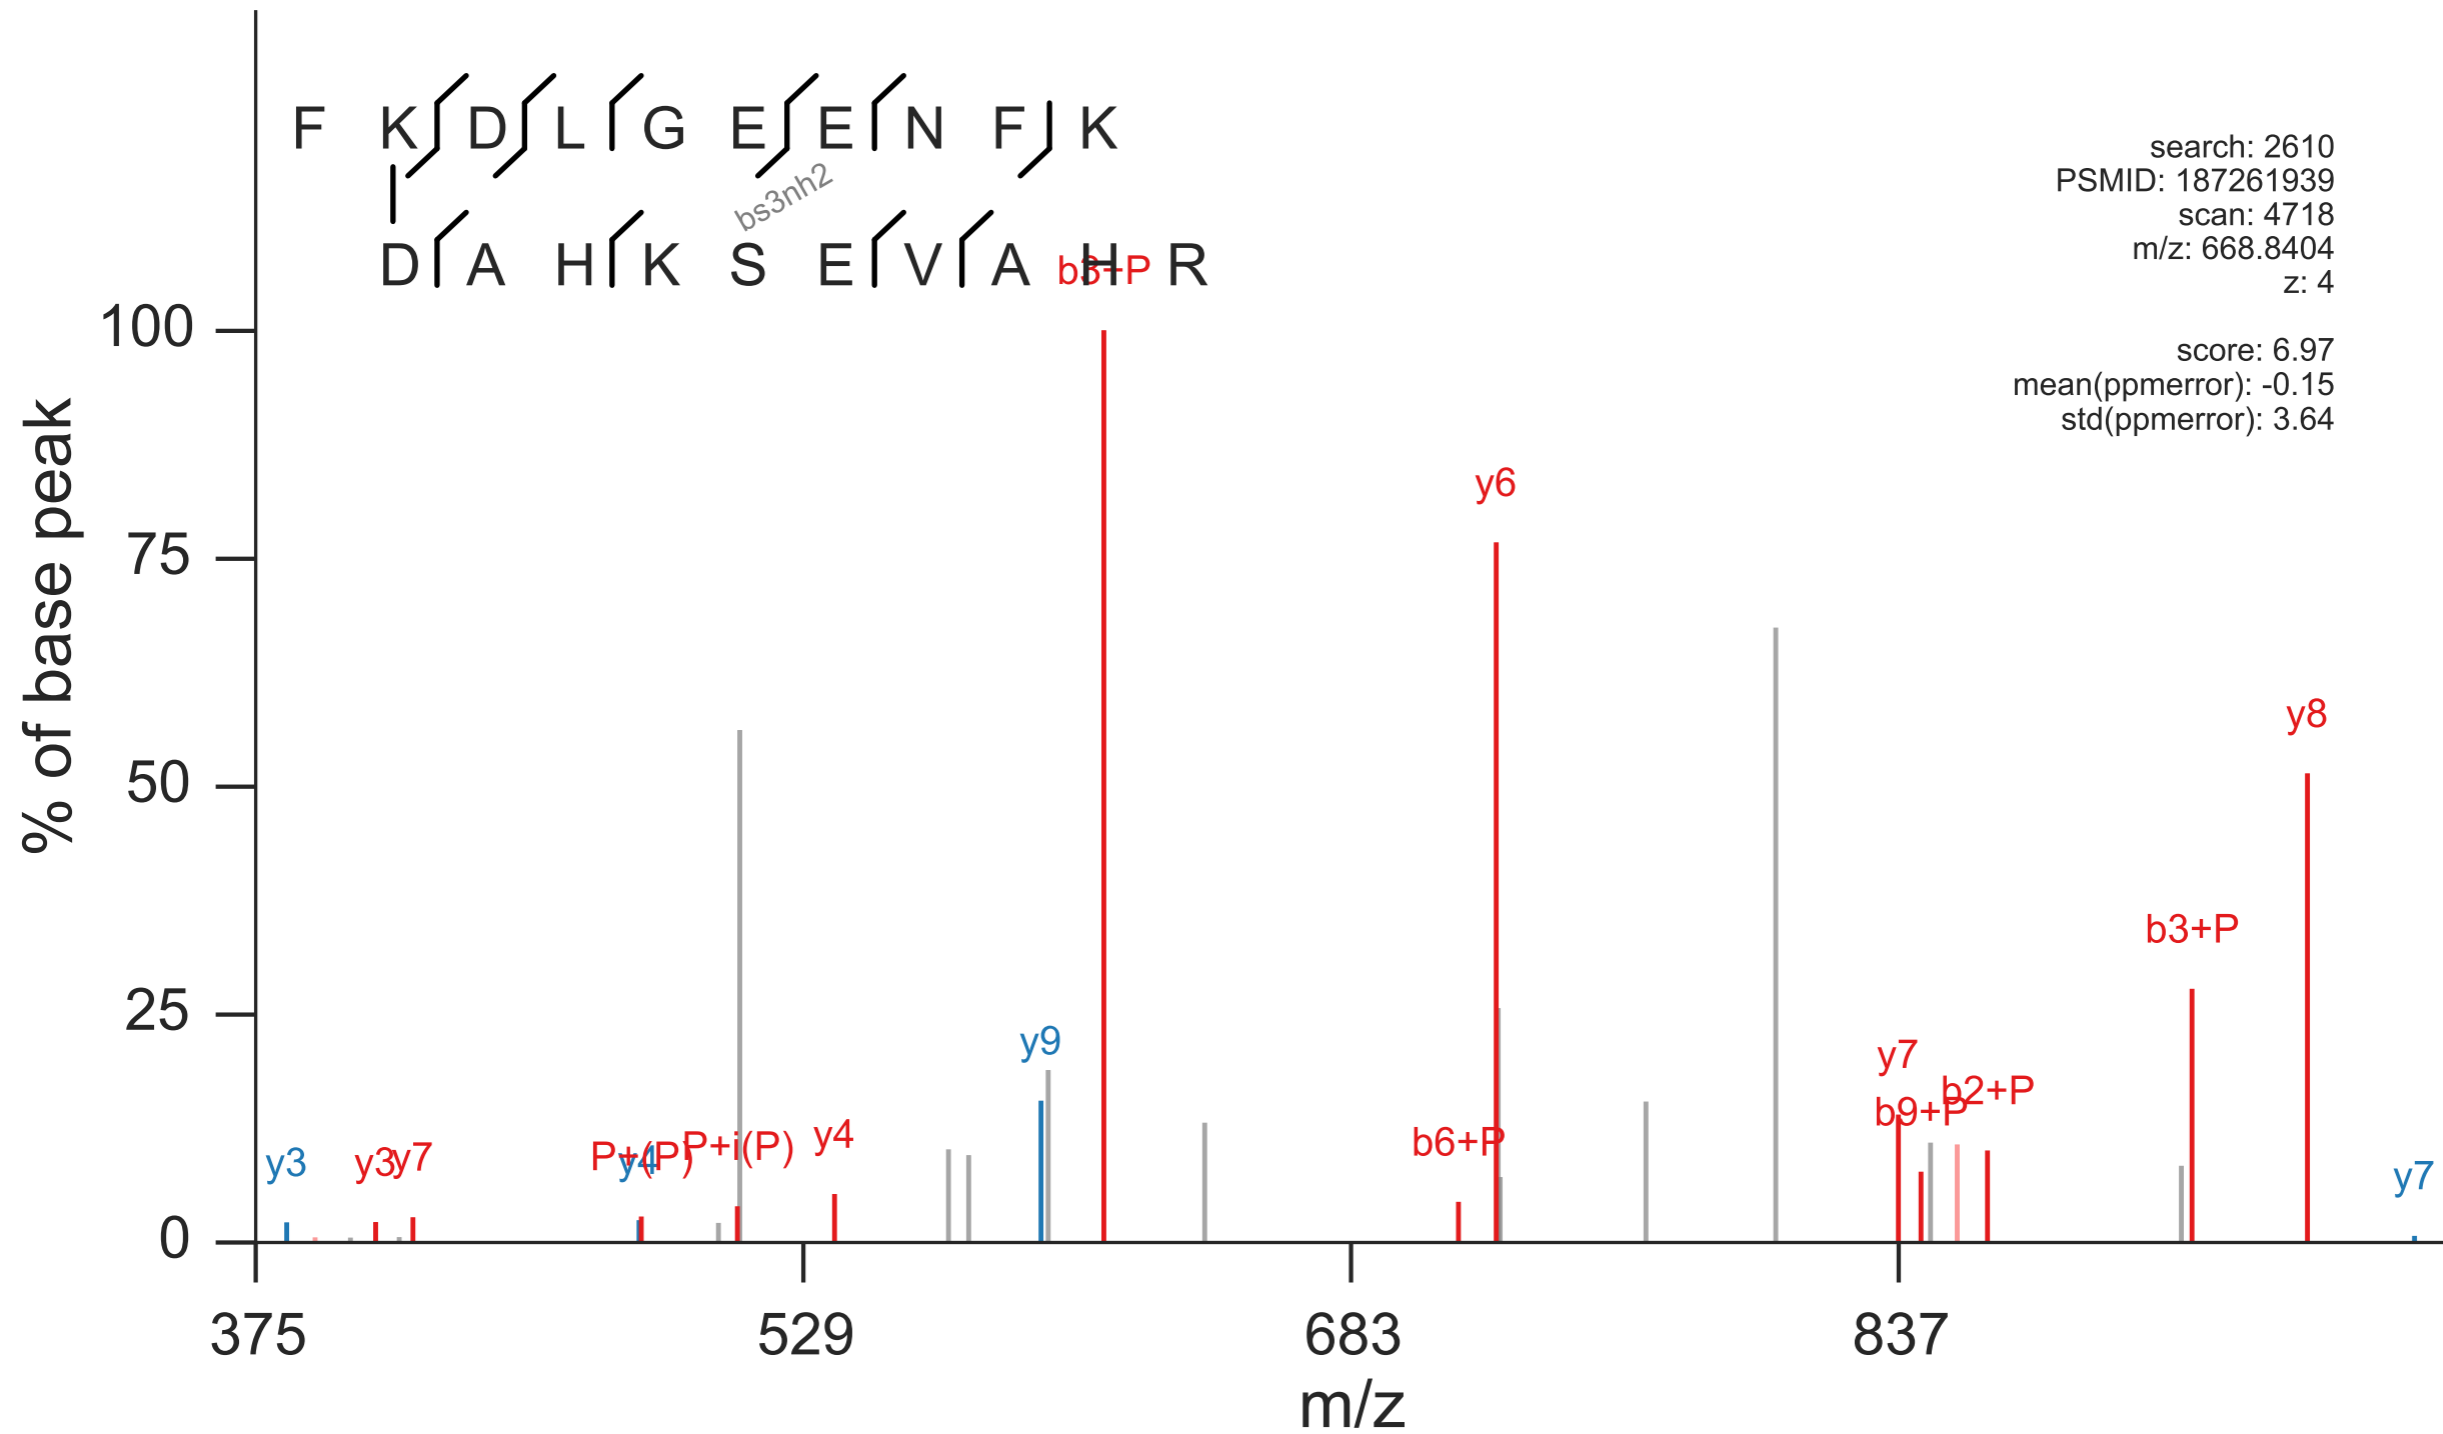

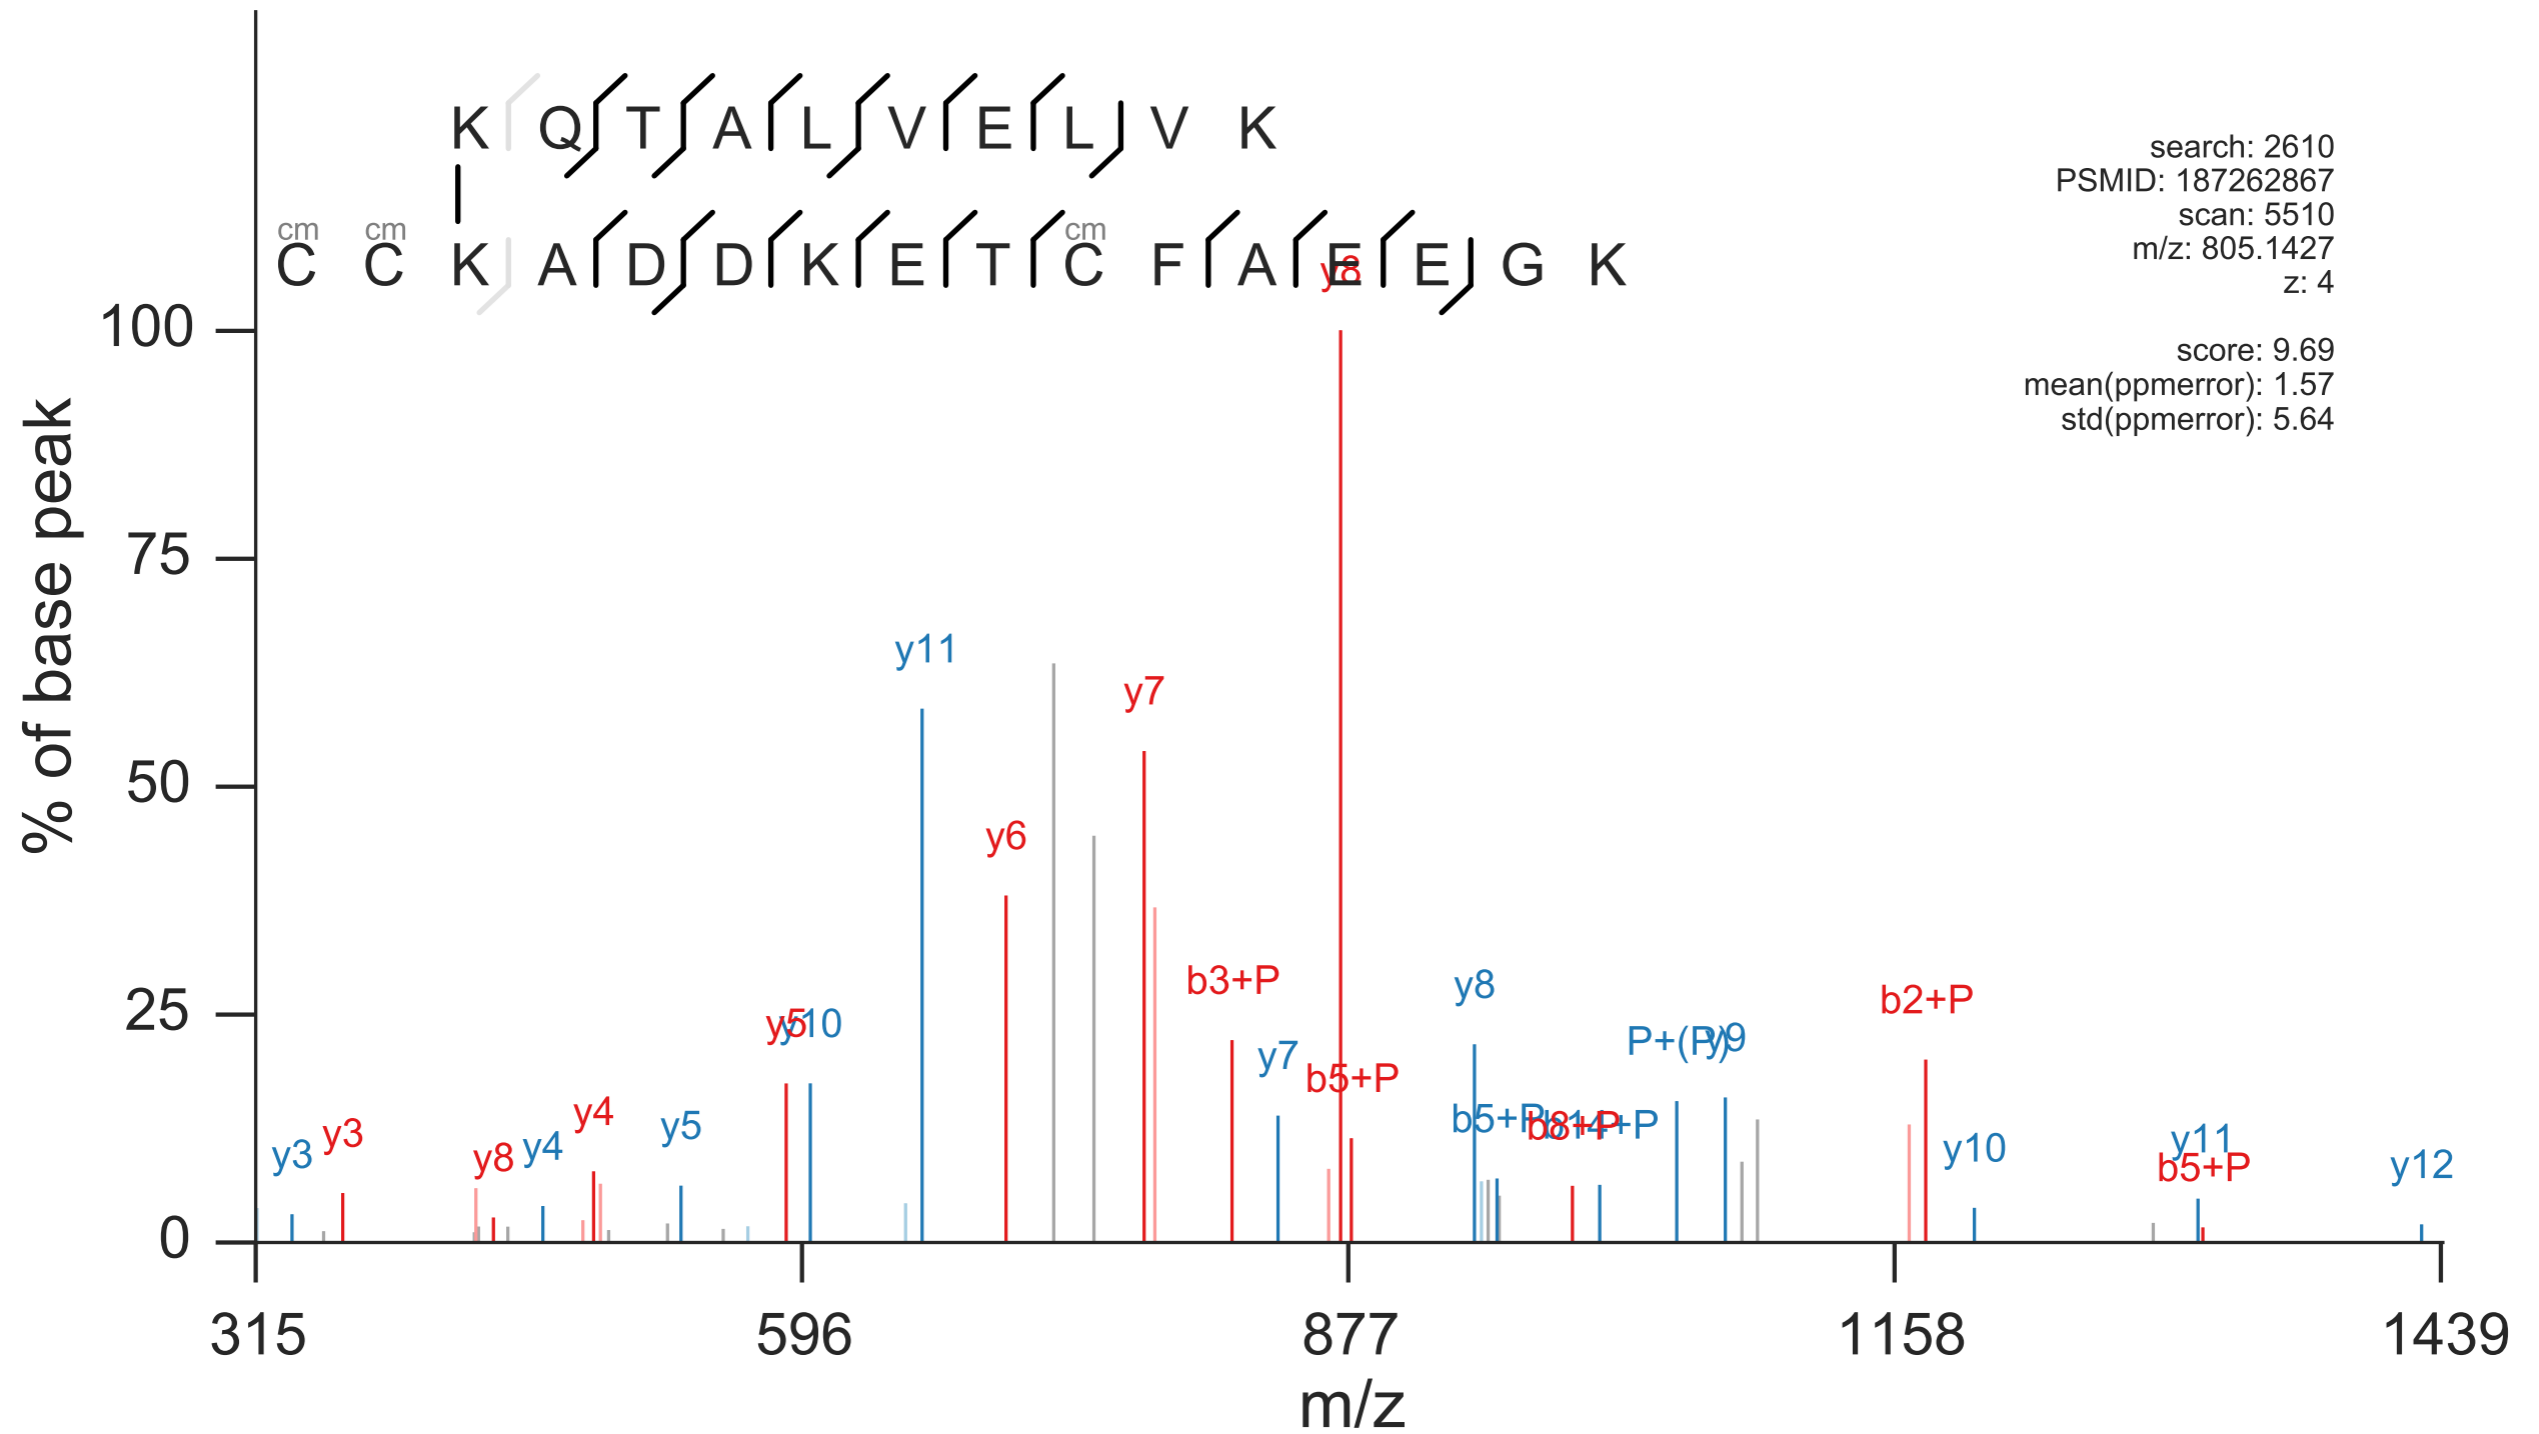



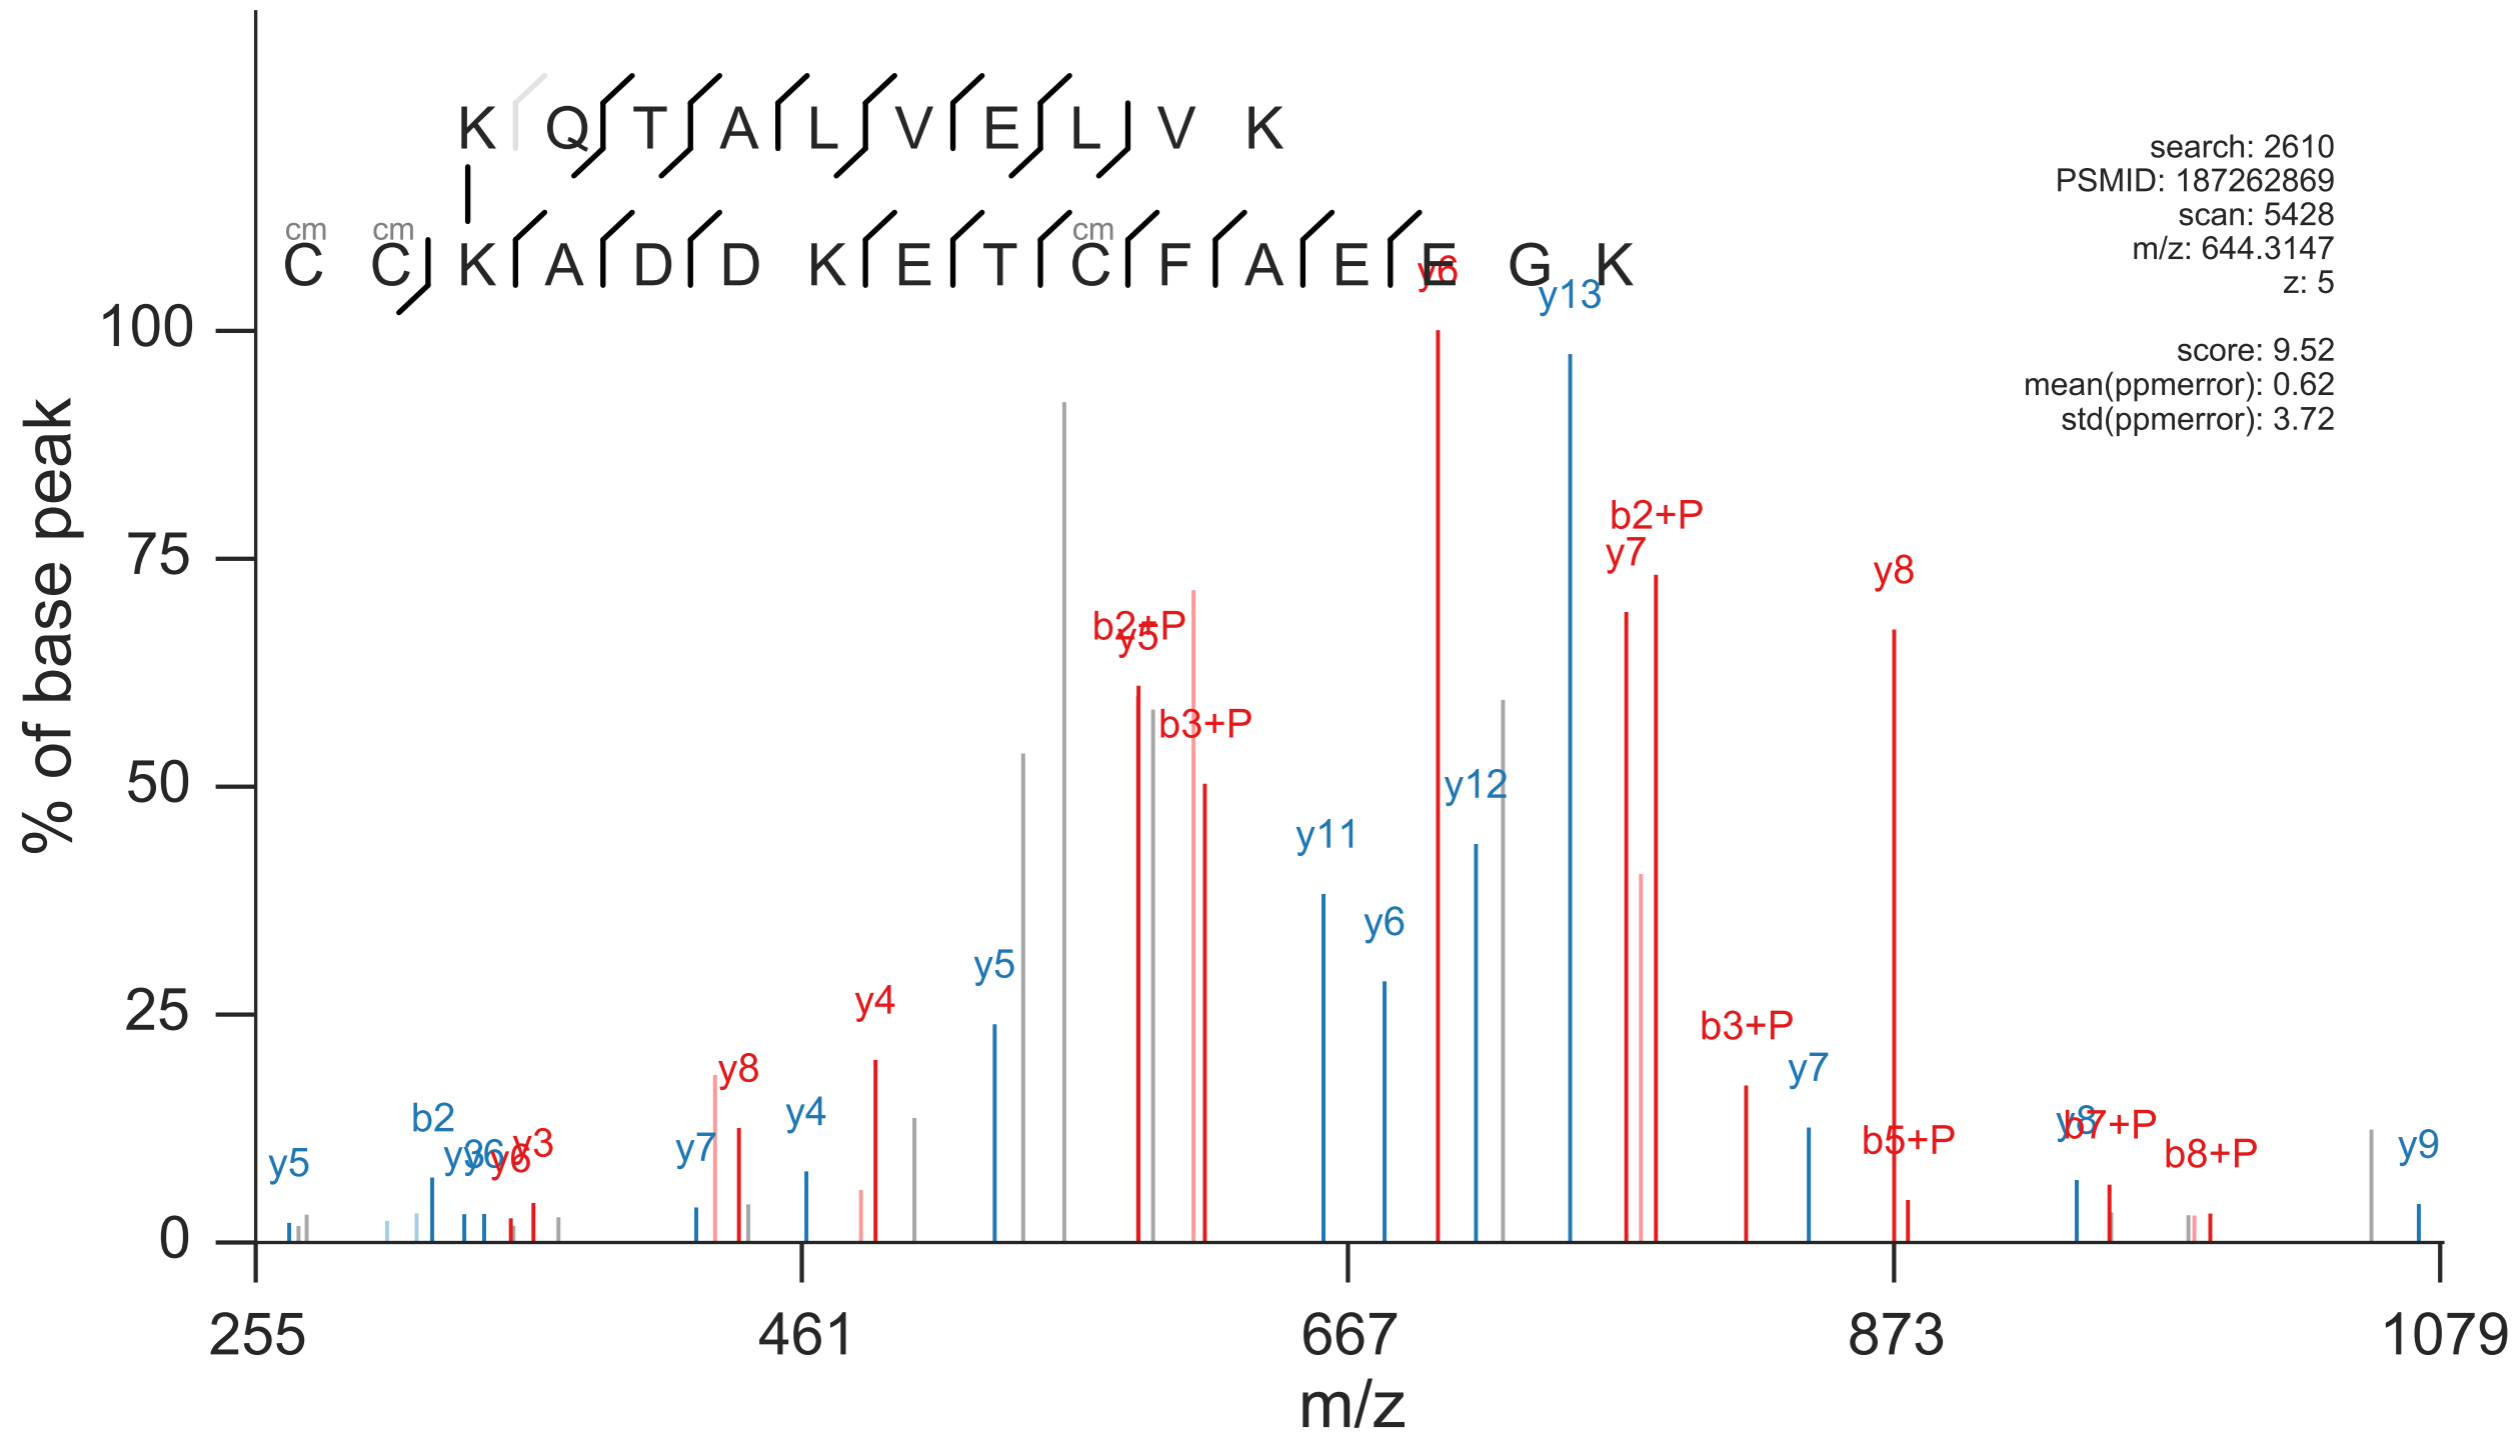

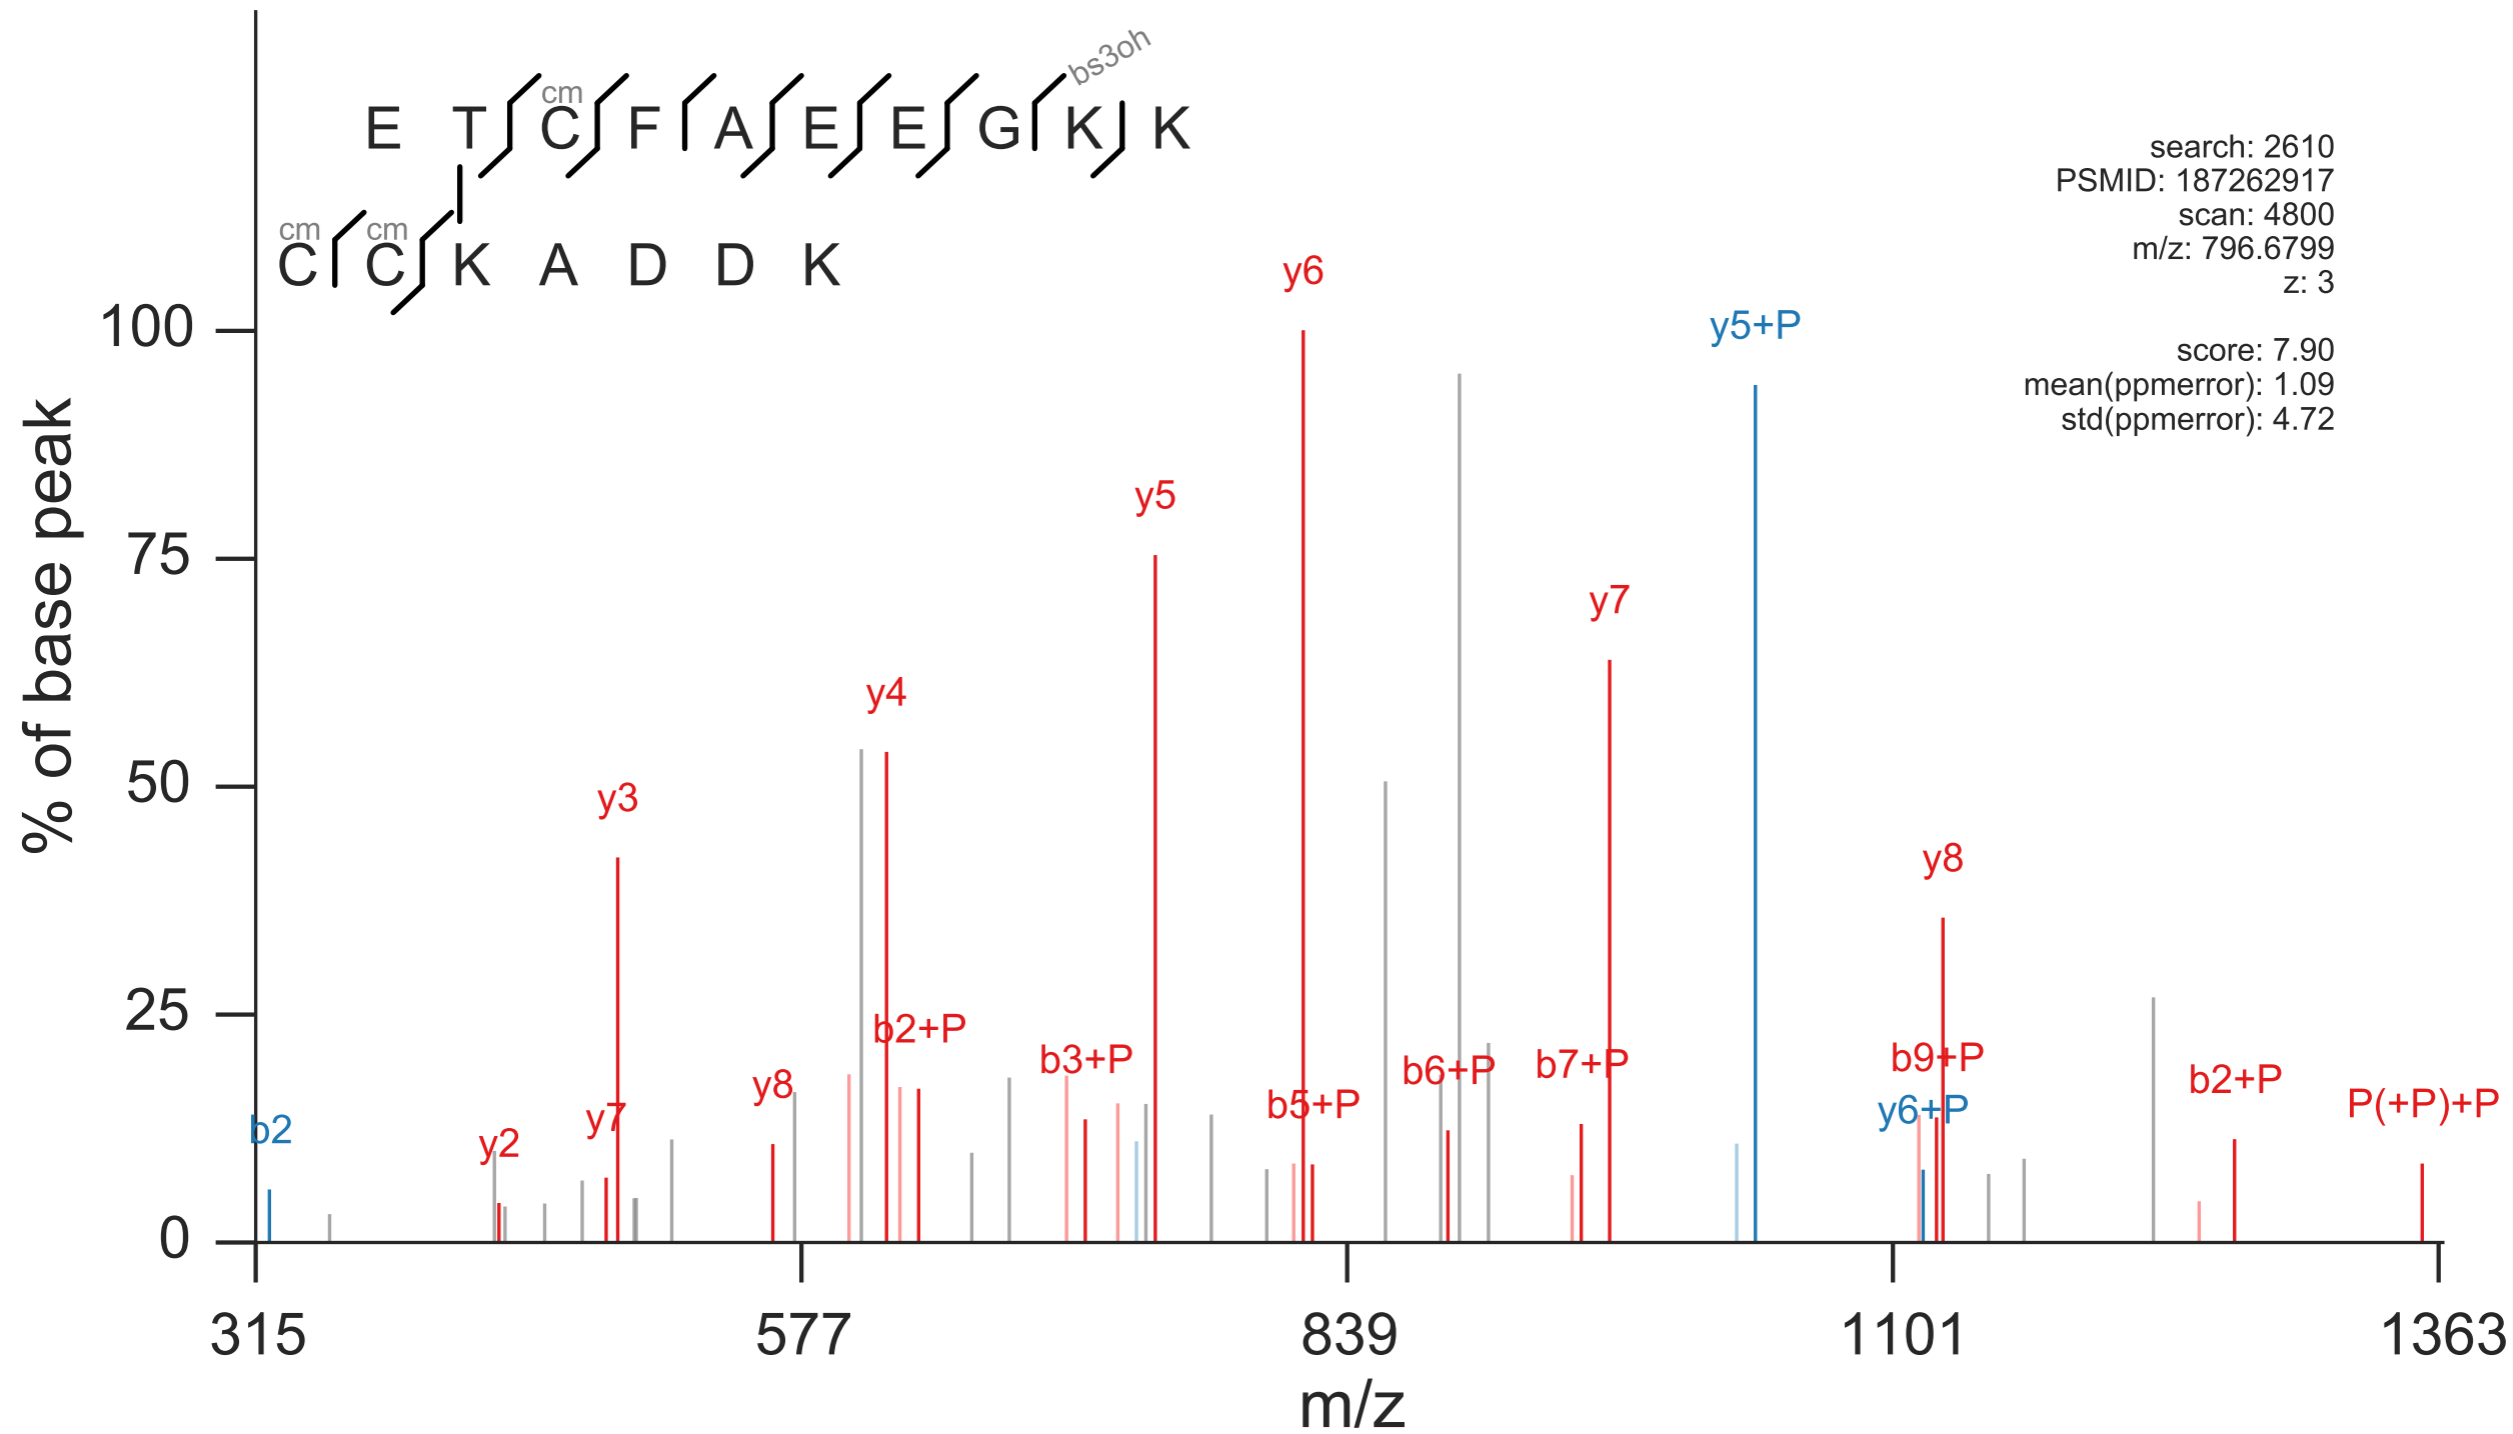

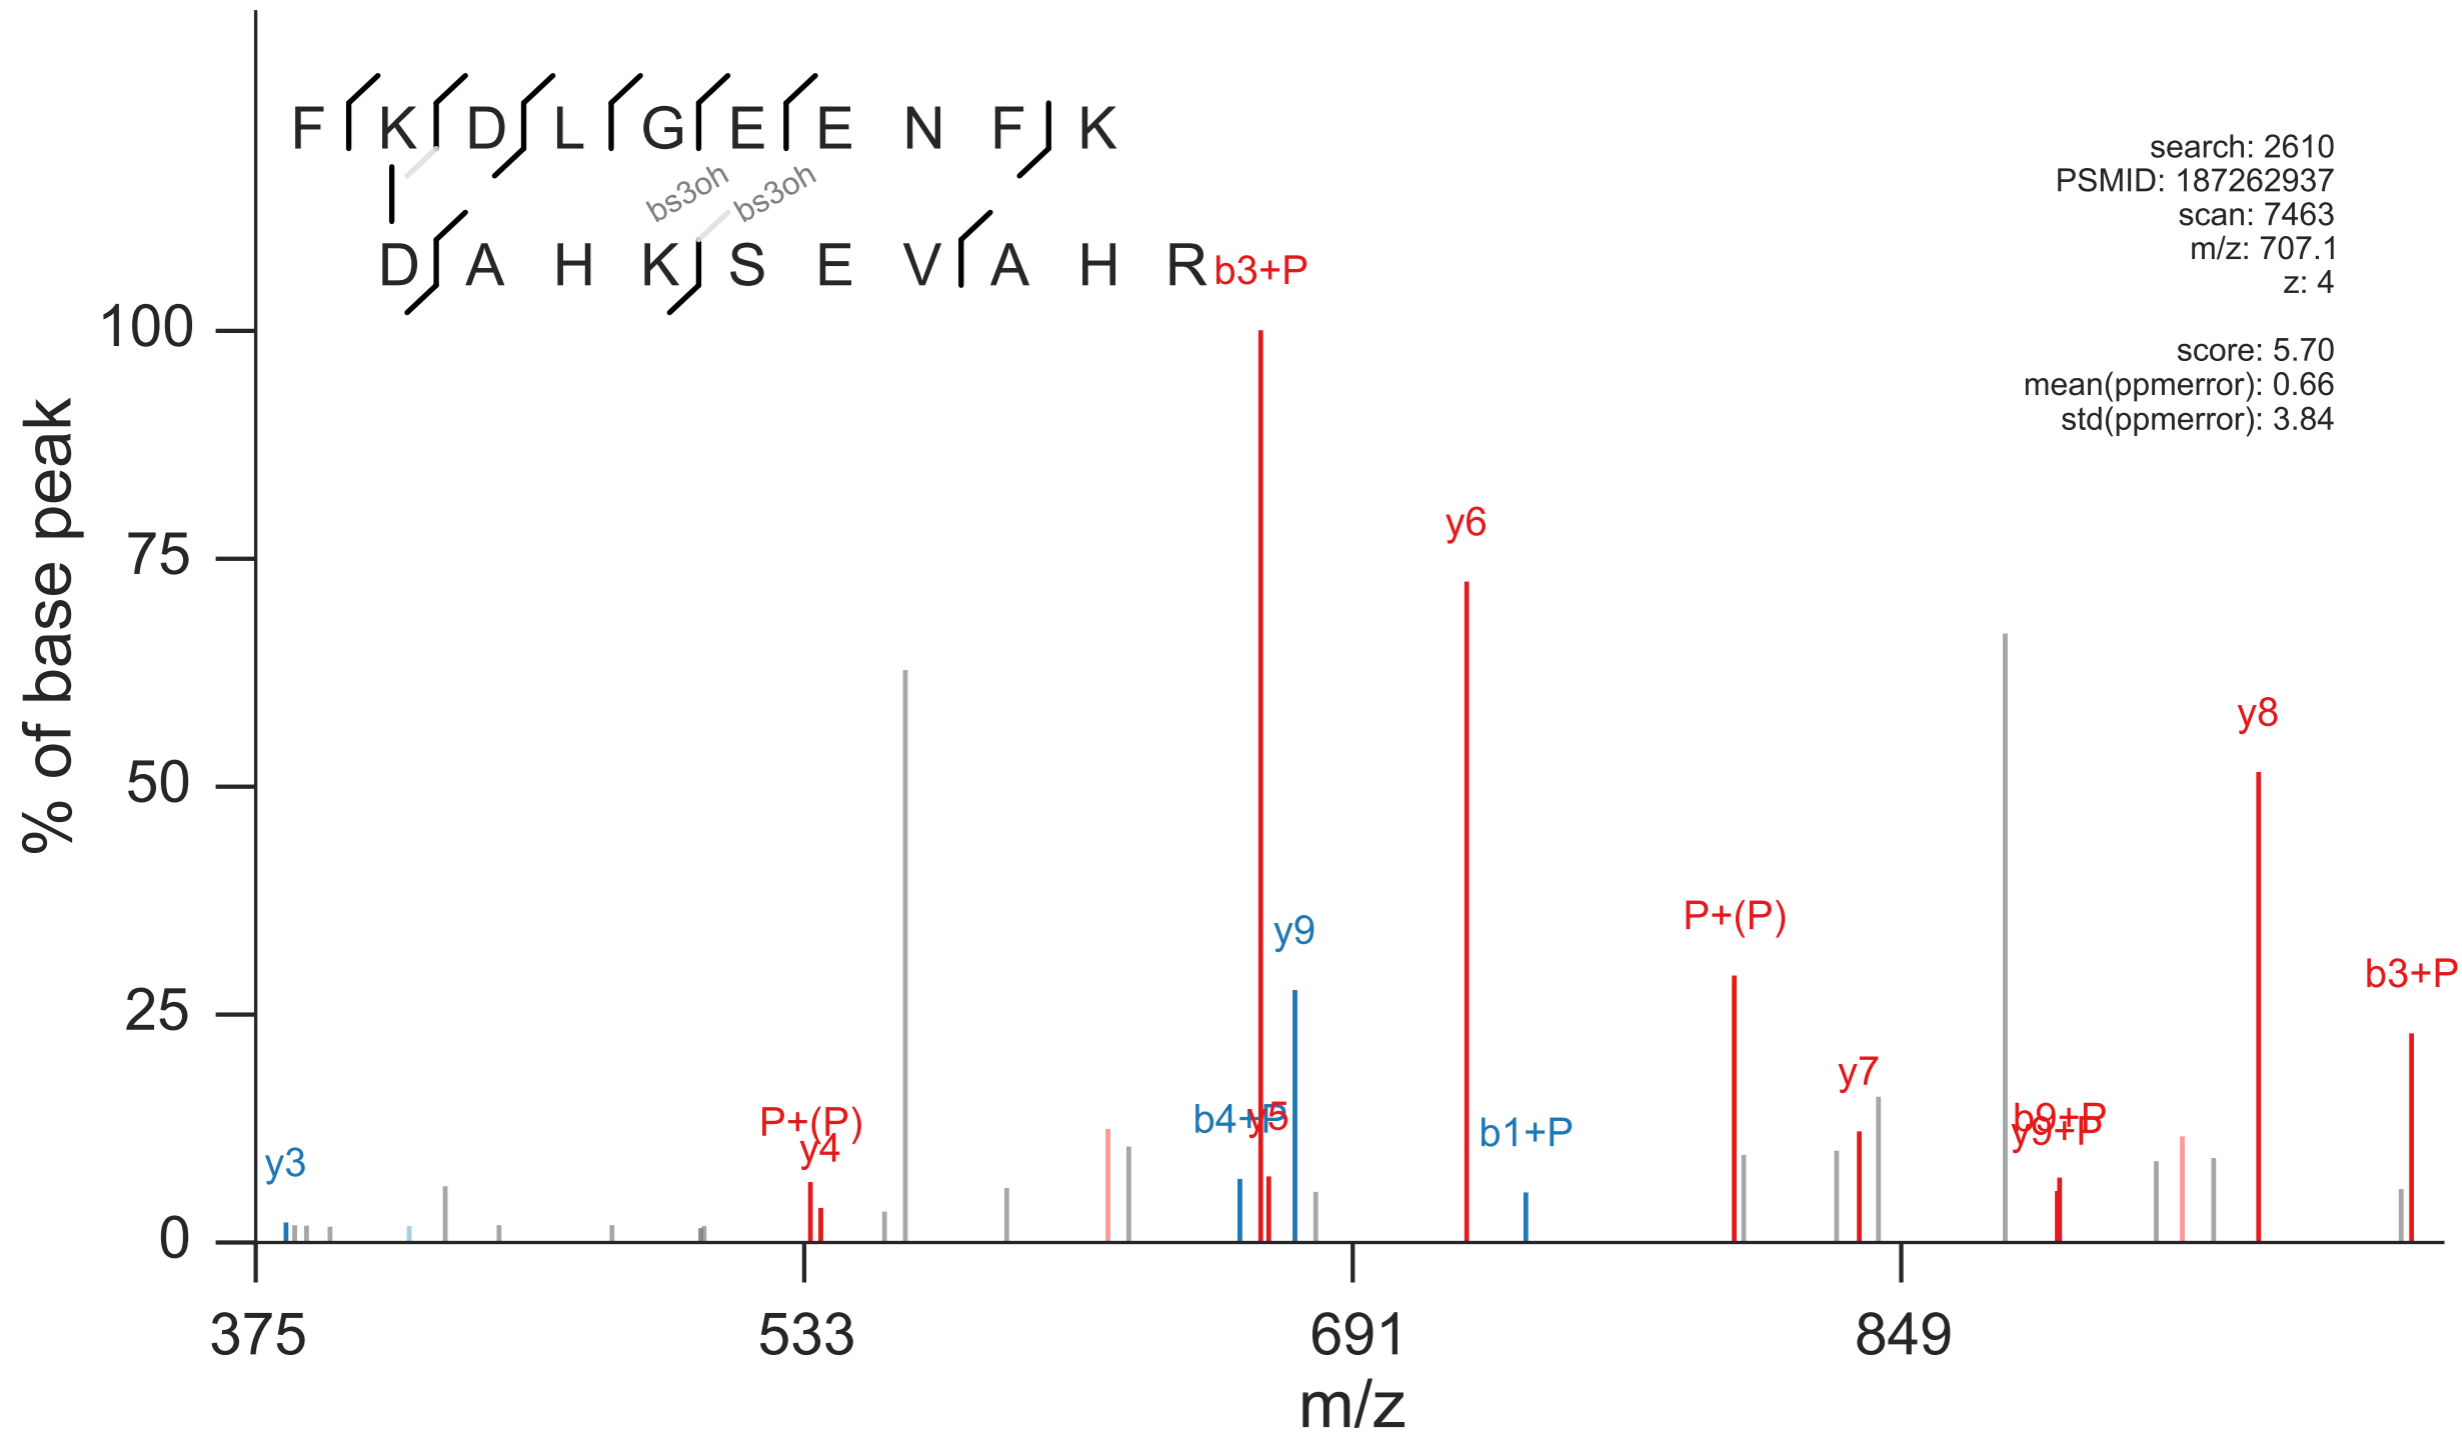

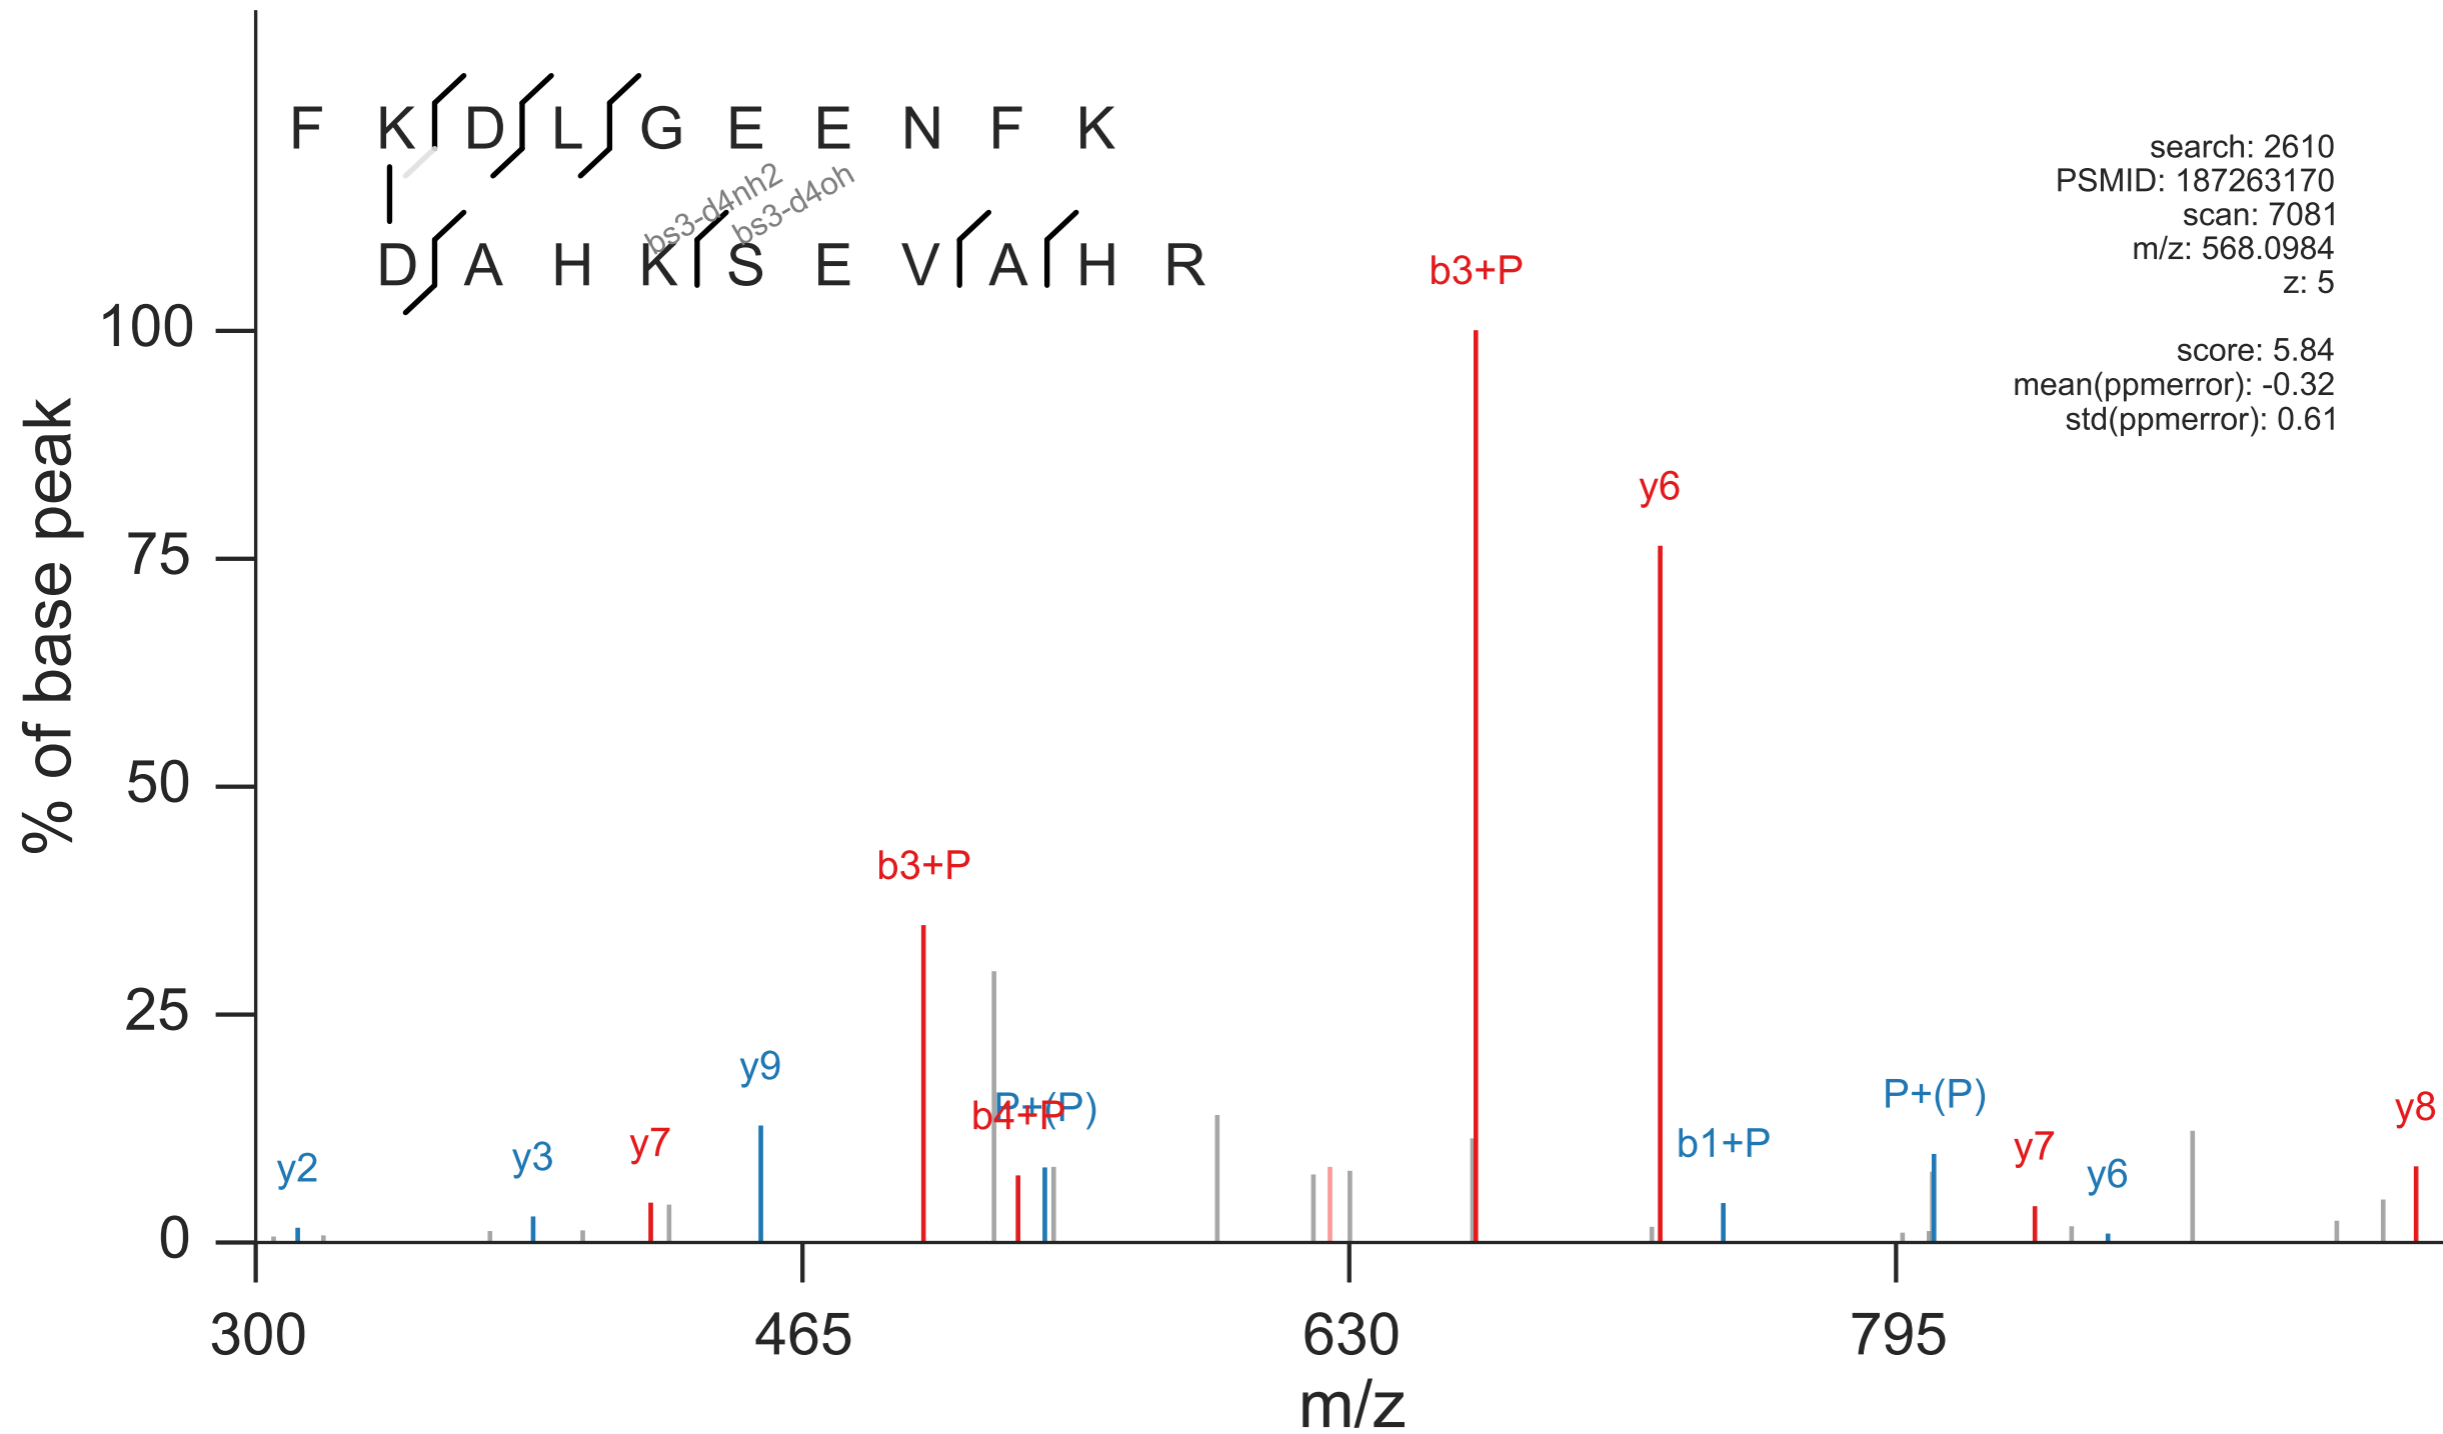

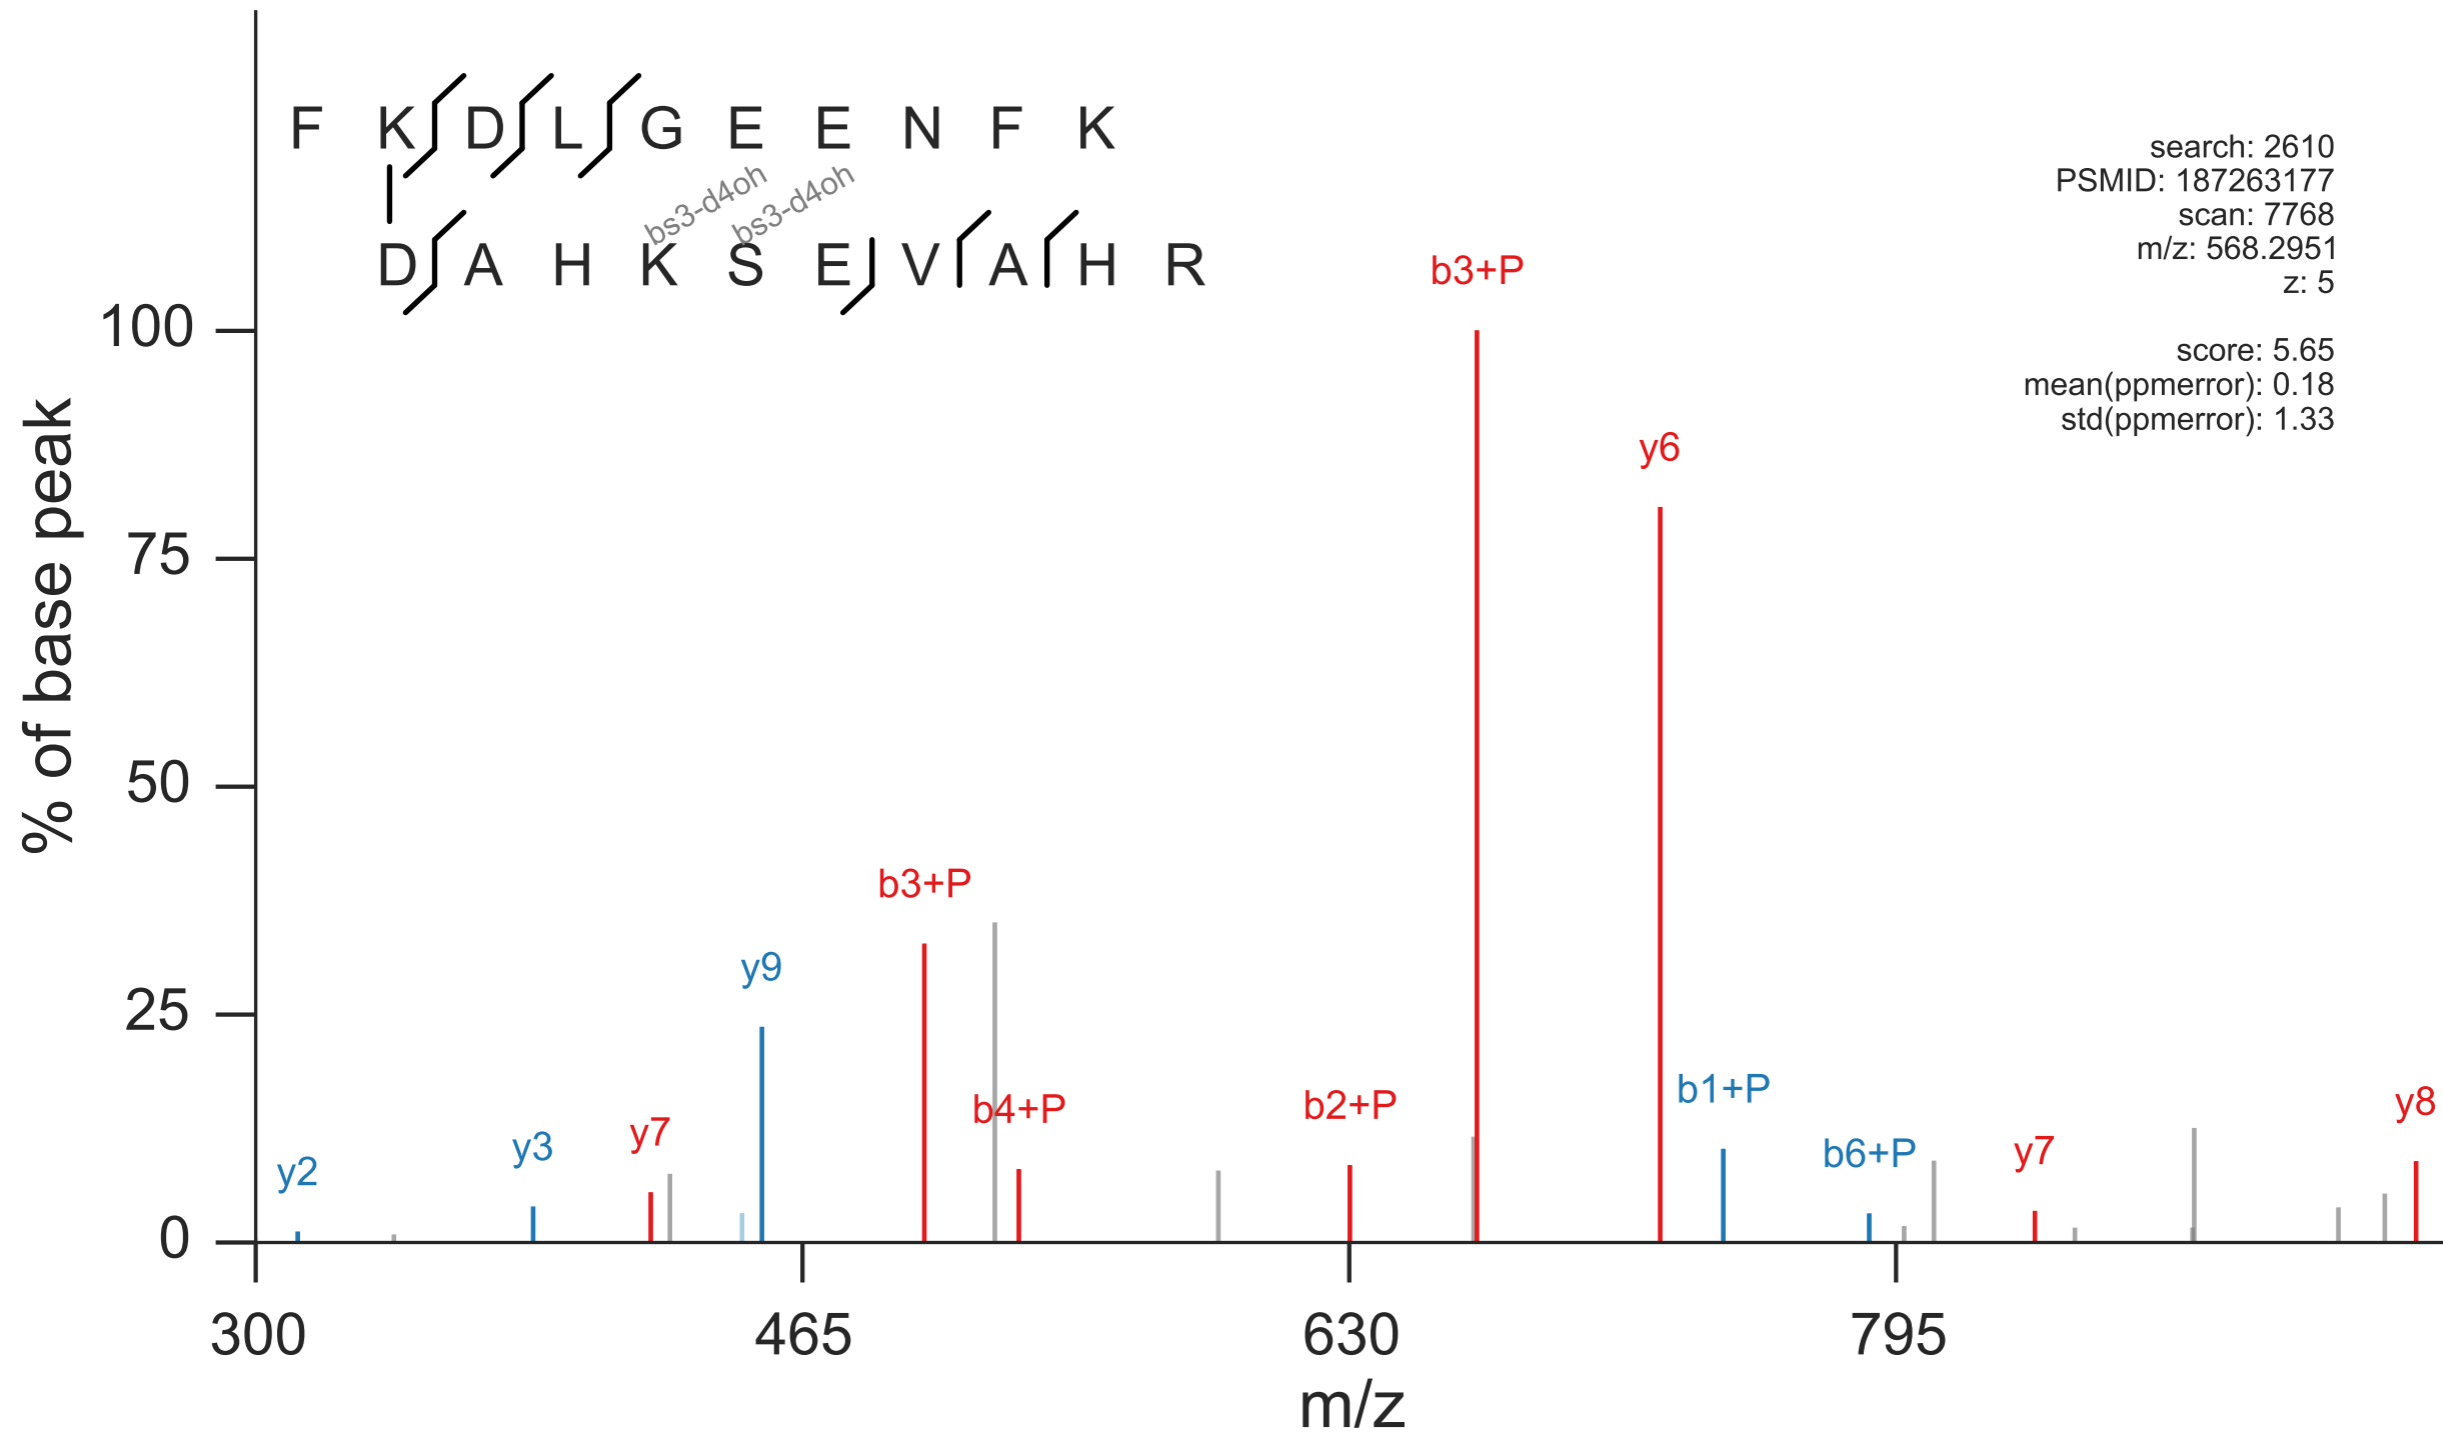

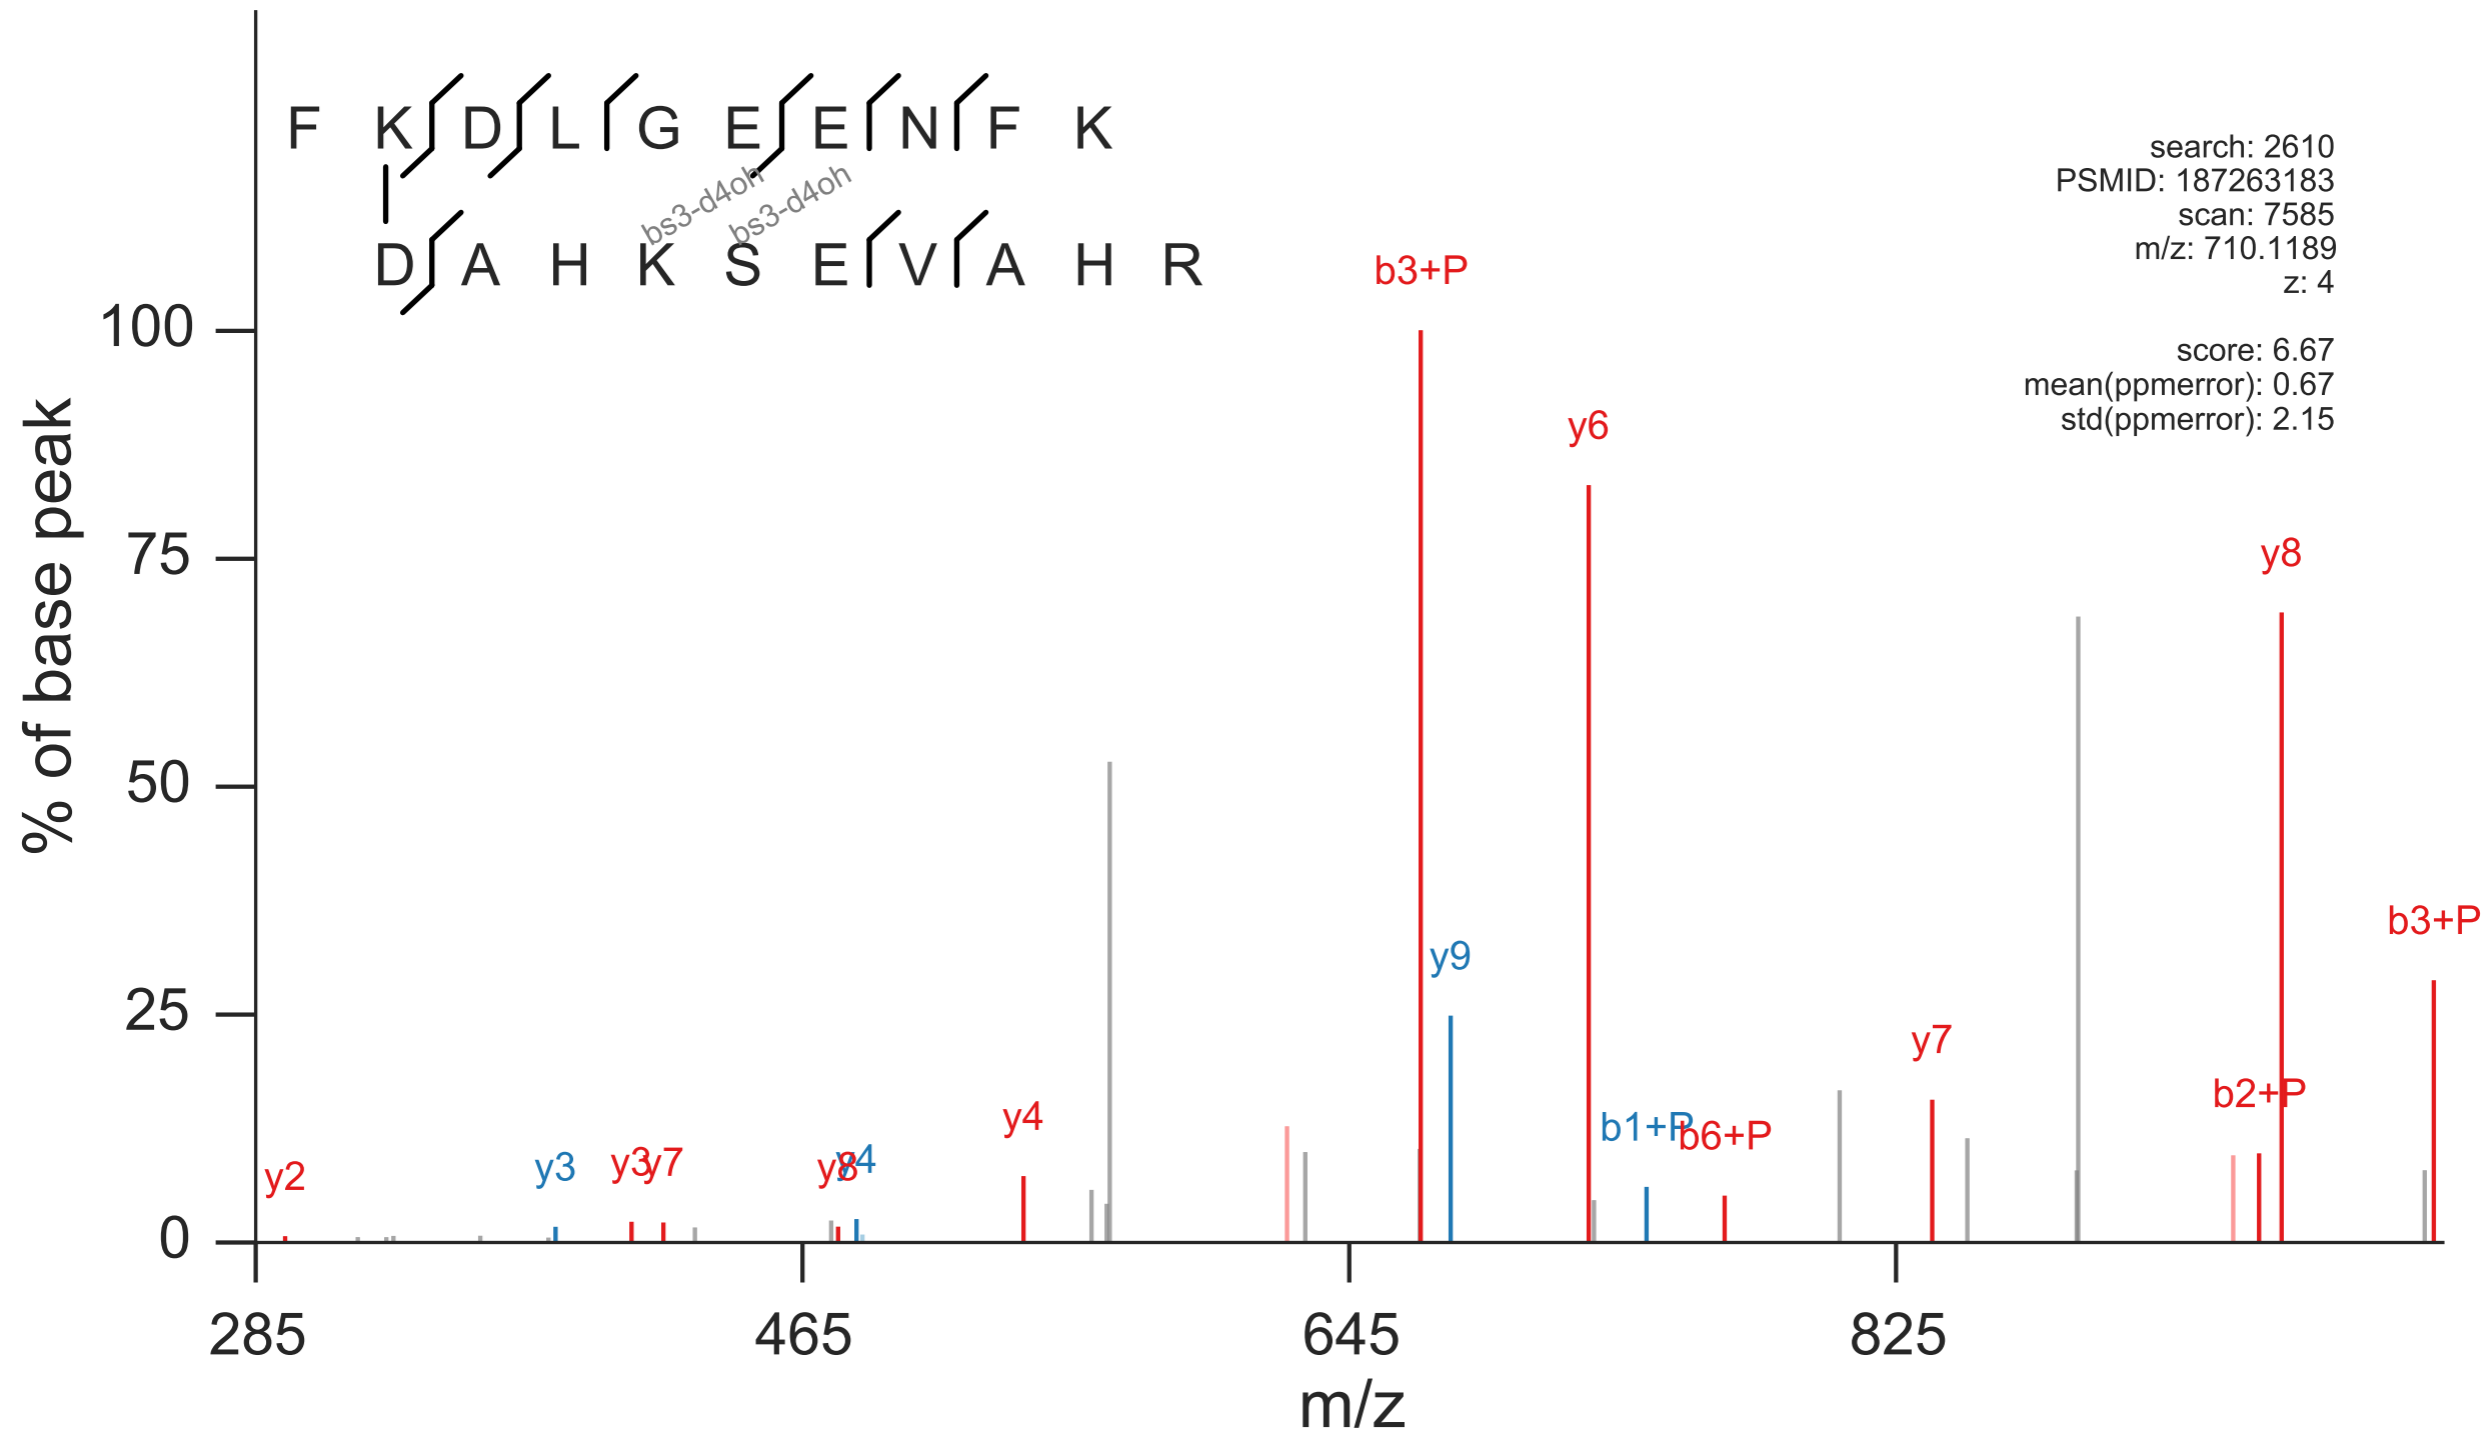

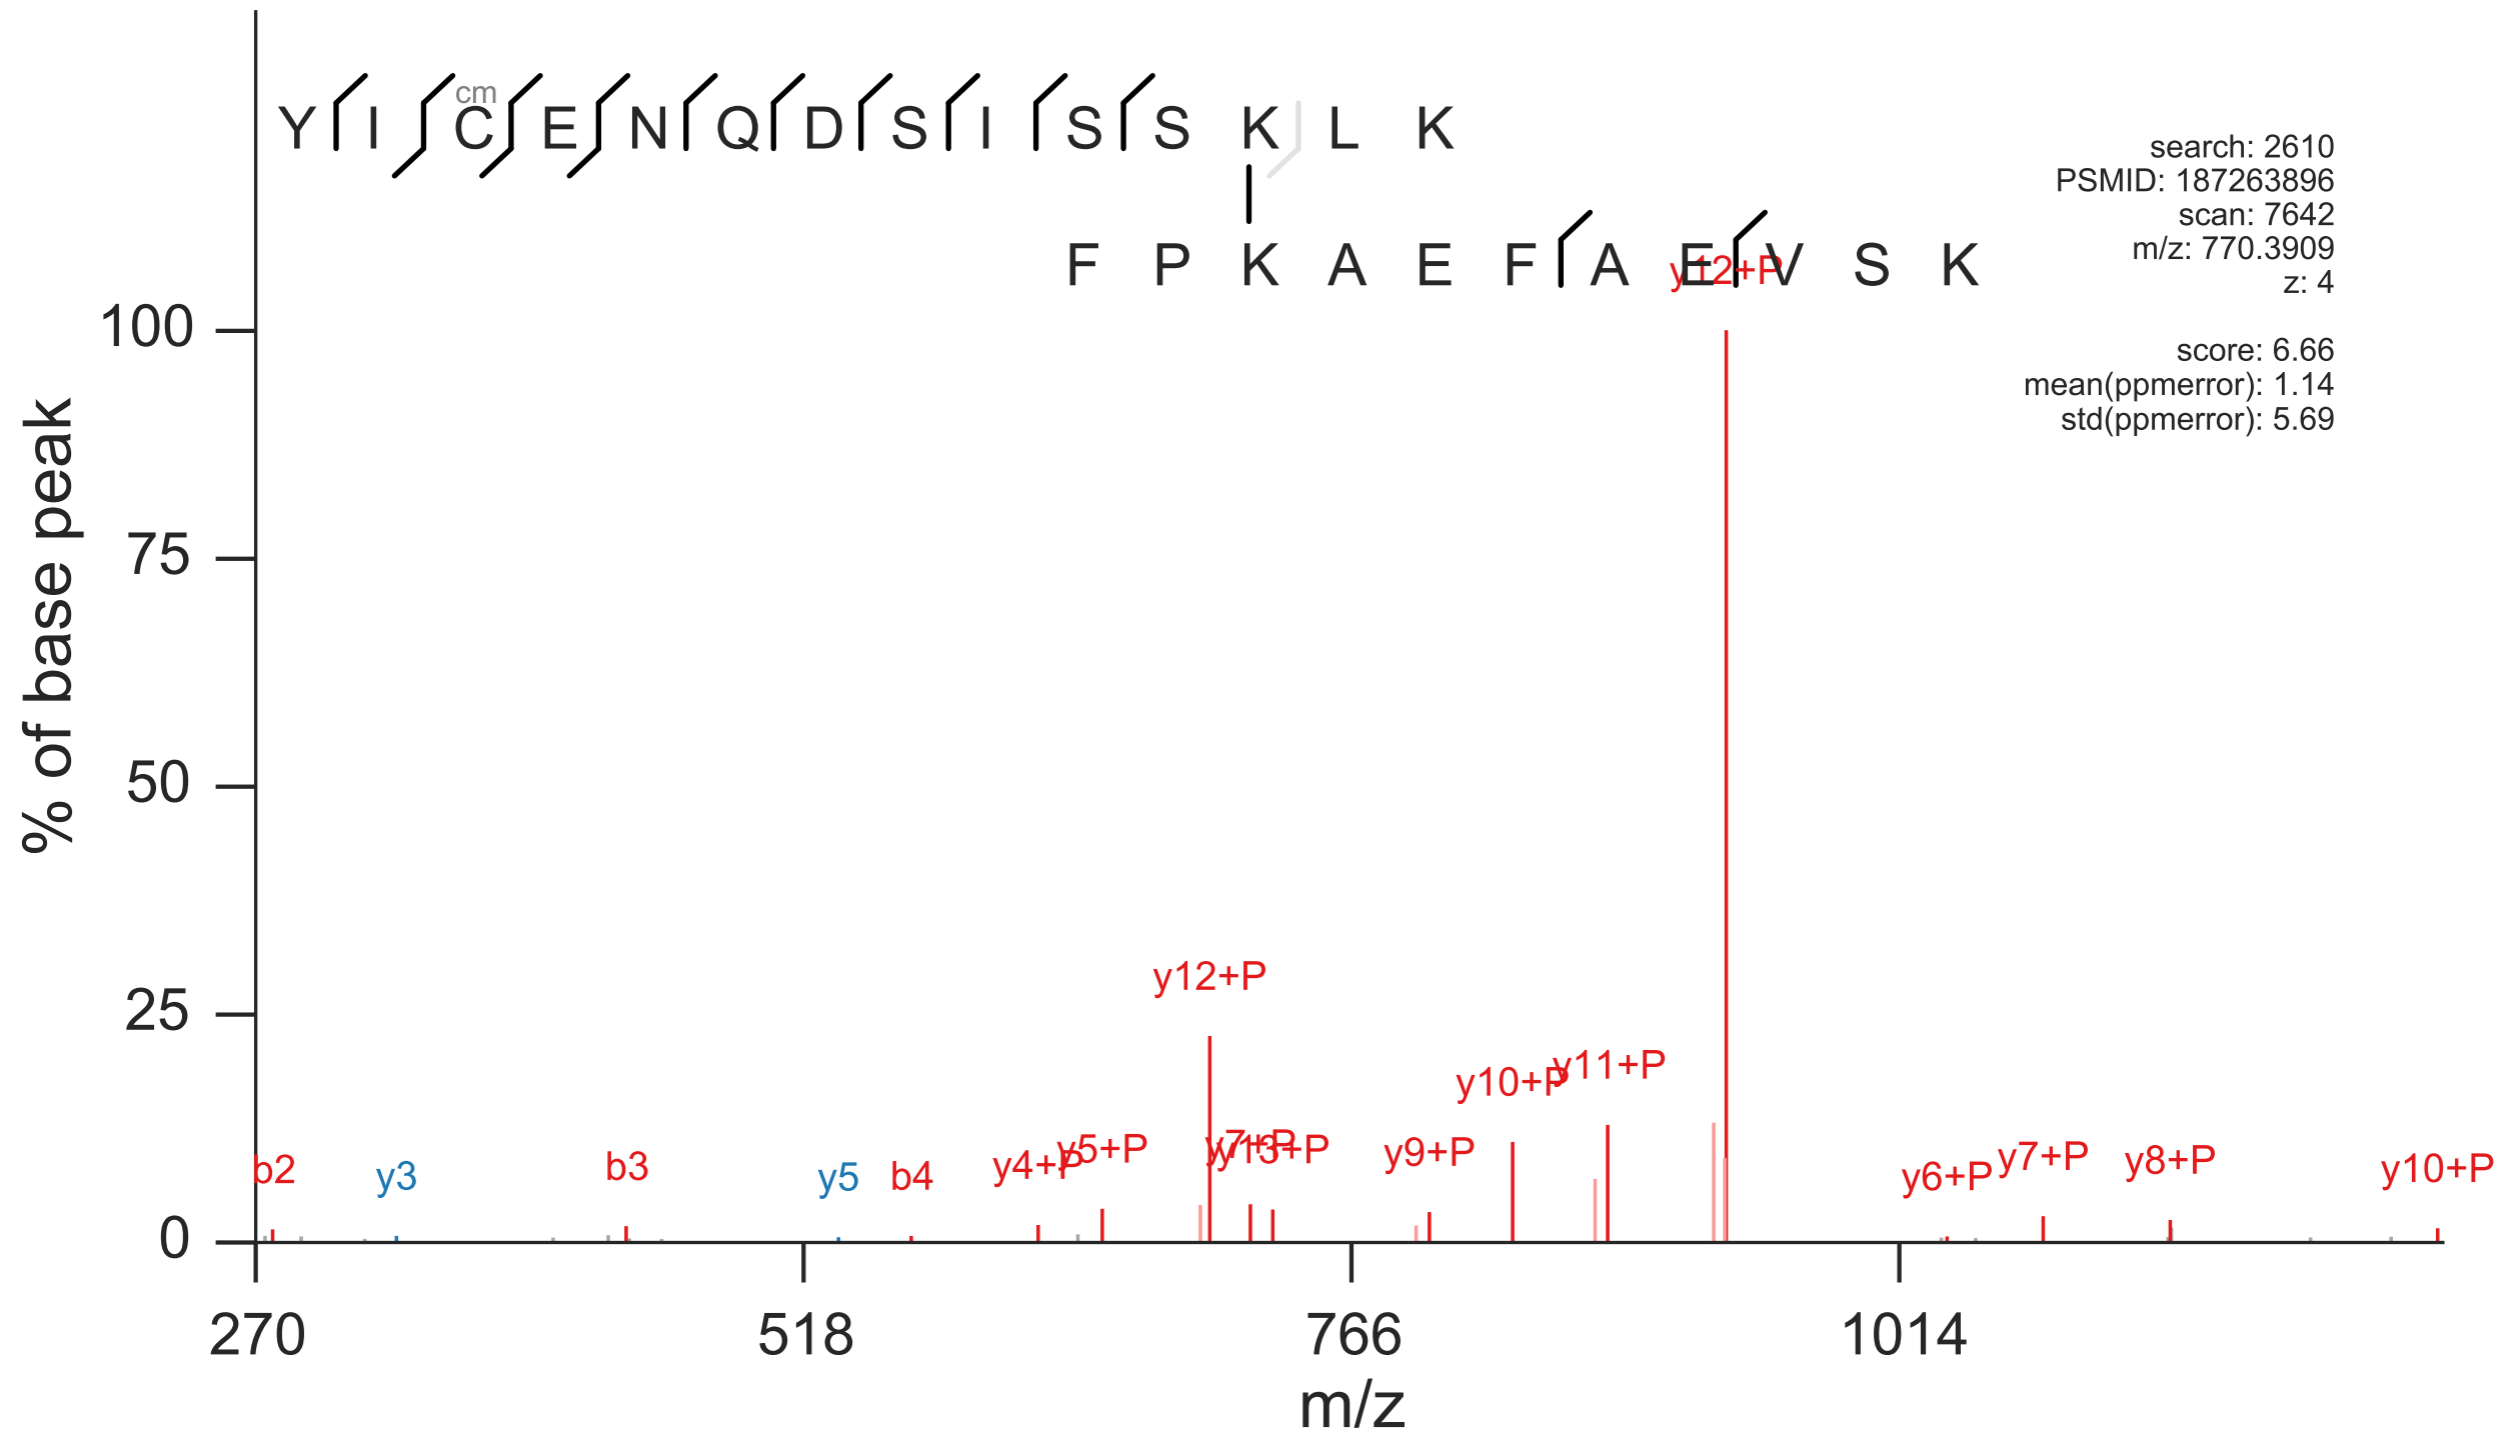

search: 2610  
 PSMID: 187263896  
 scan: 7642  
 m/z: 770.3909  
 z: 4

score: 6.66  
 mean(ppmerror): 1.14  
 std(ppmerror): 5.69

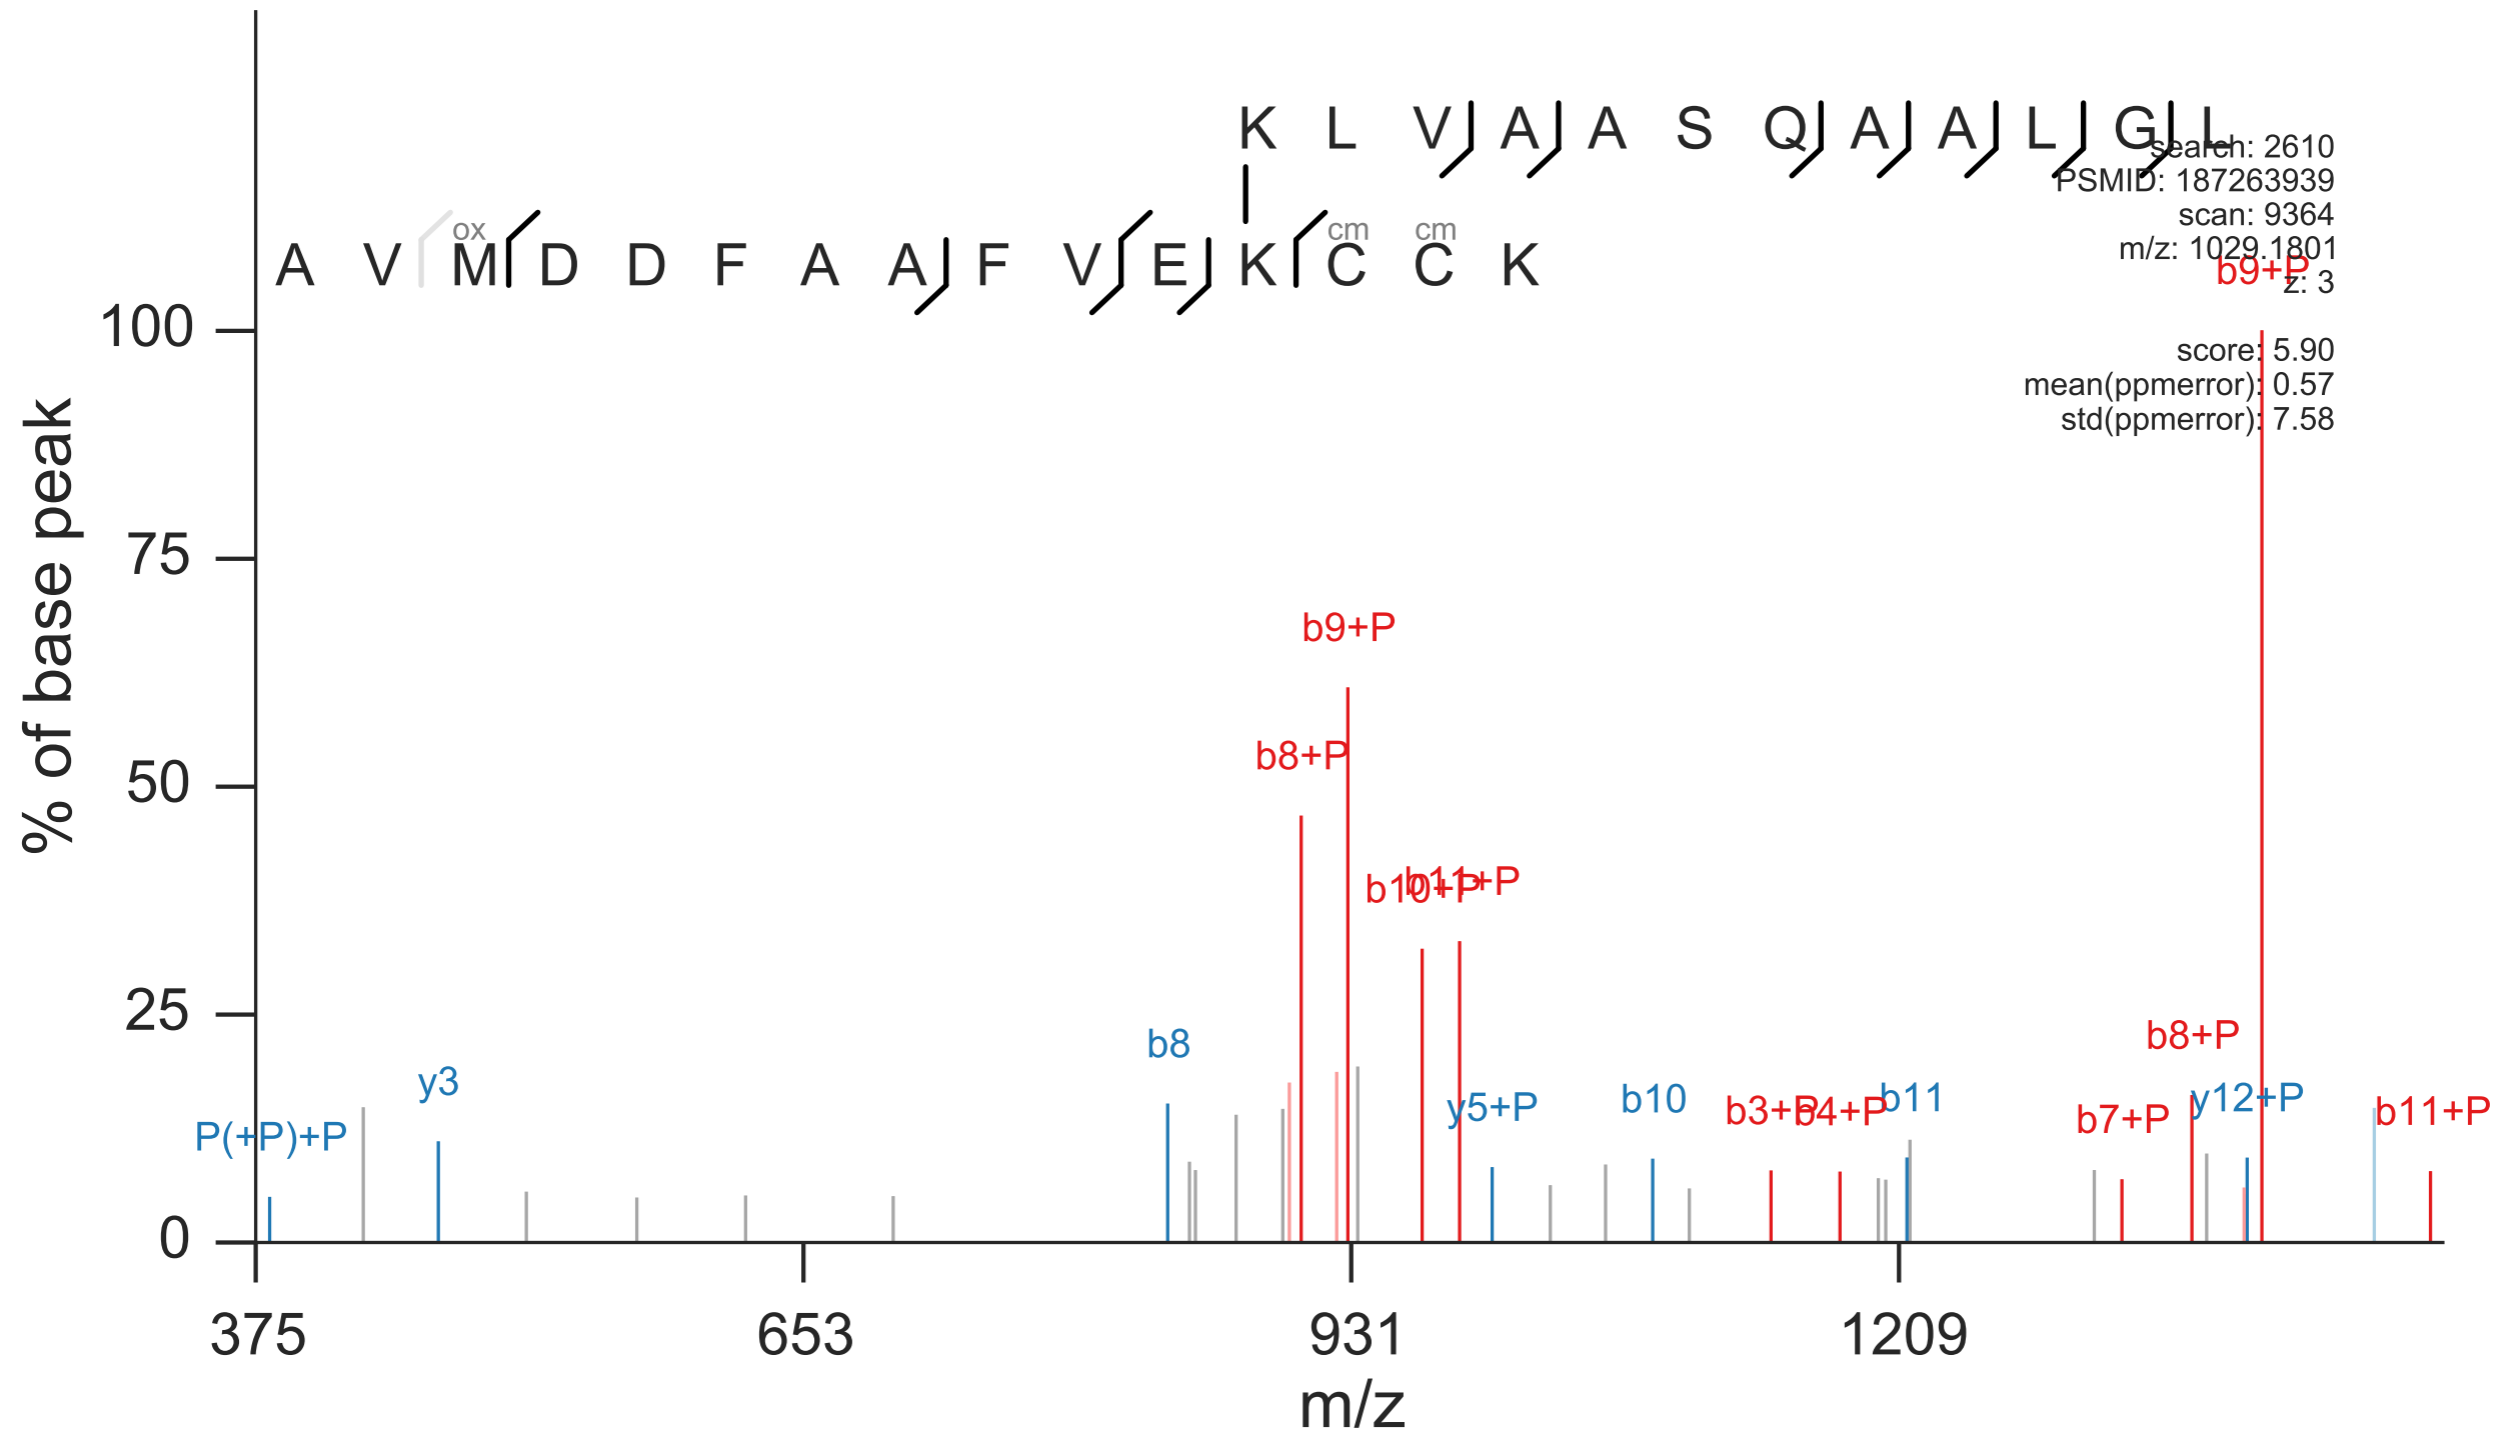



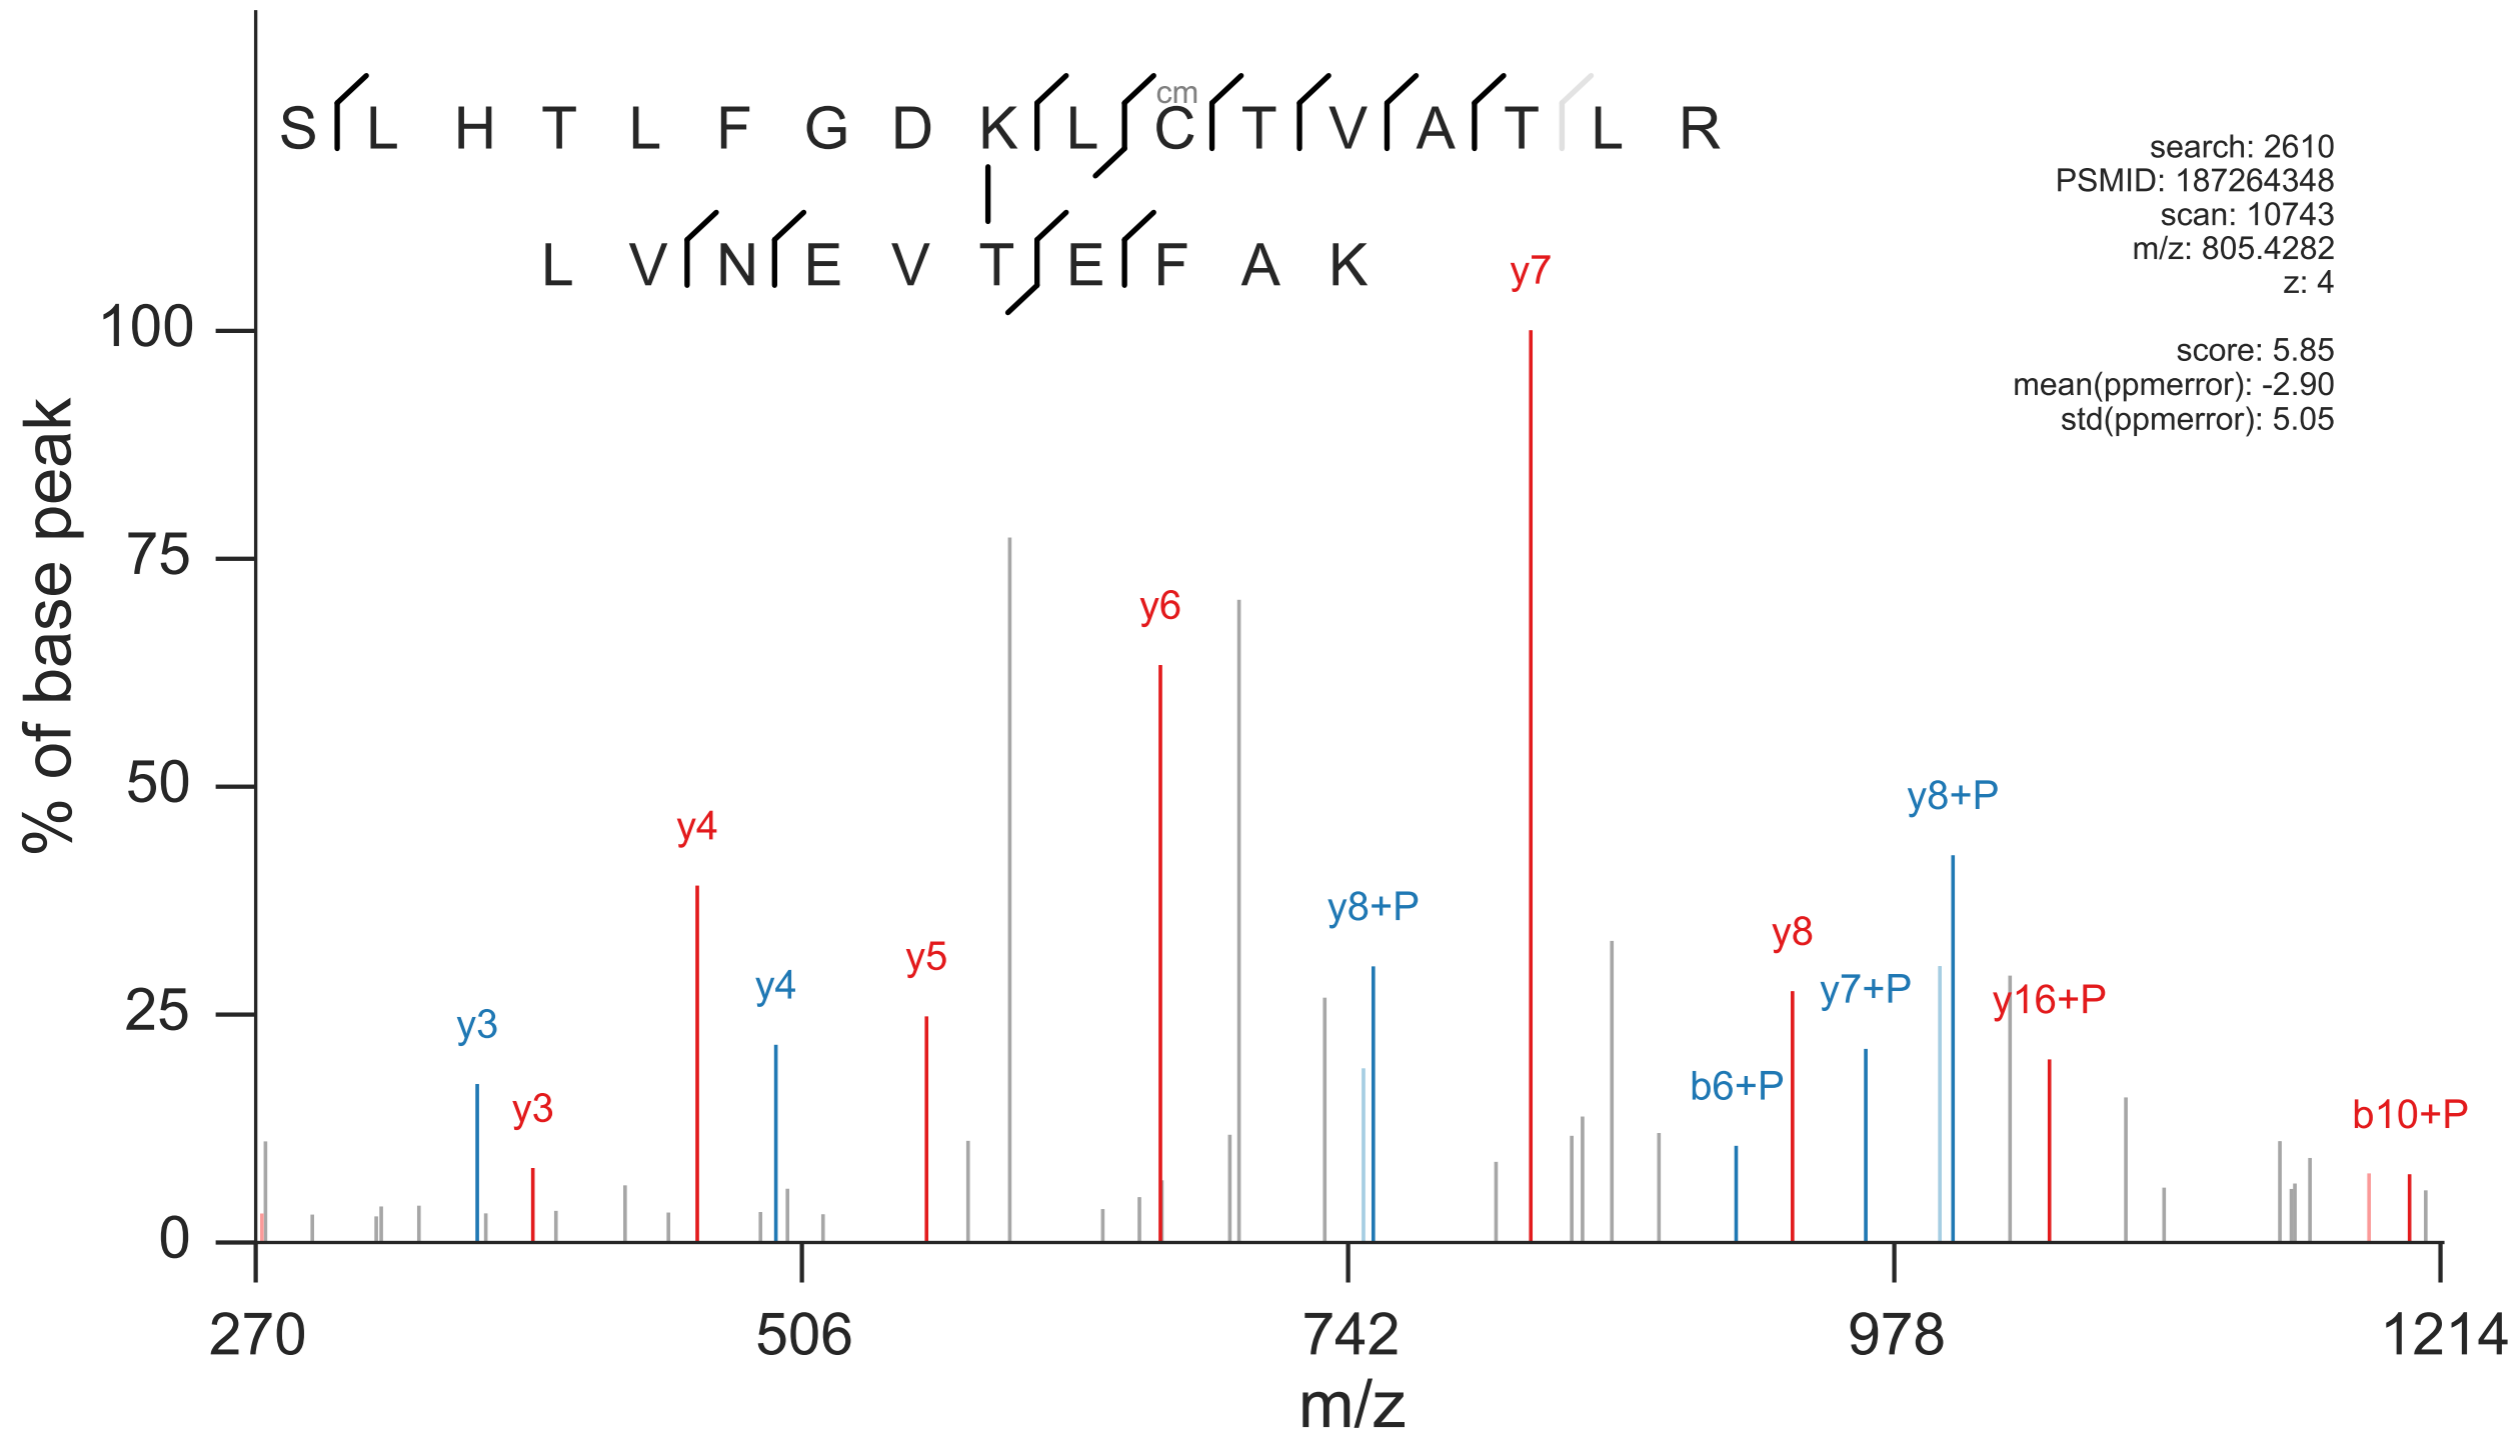

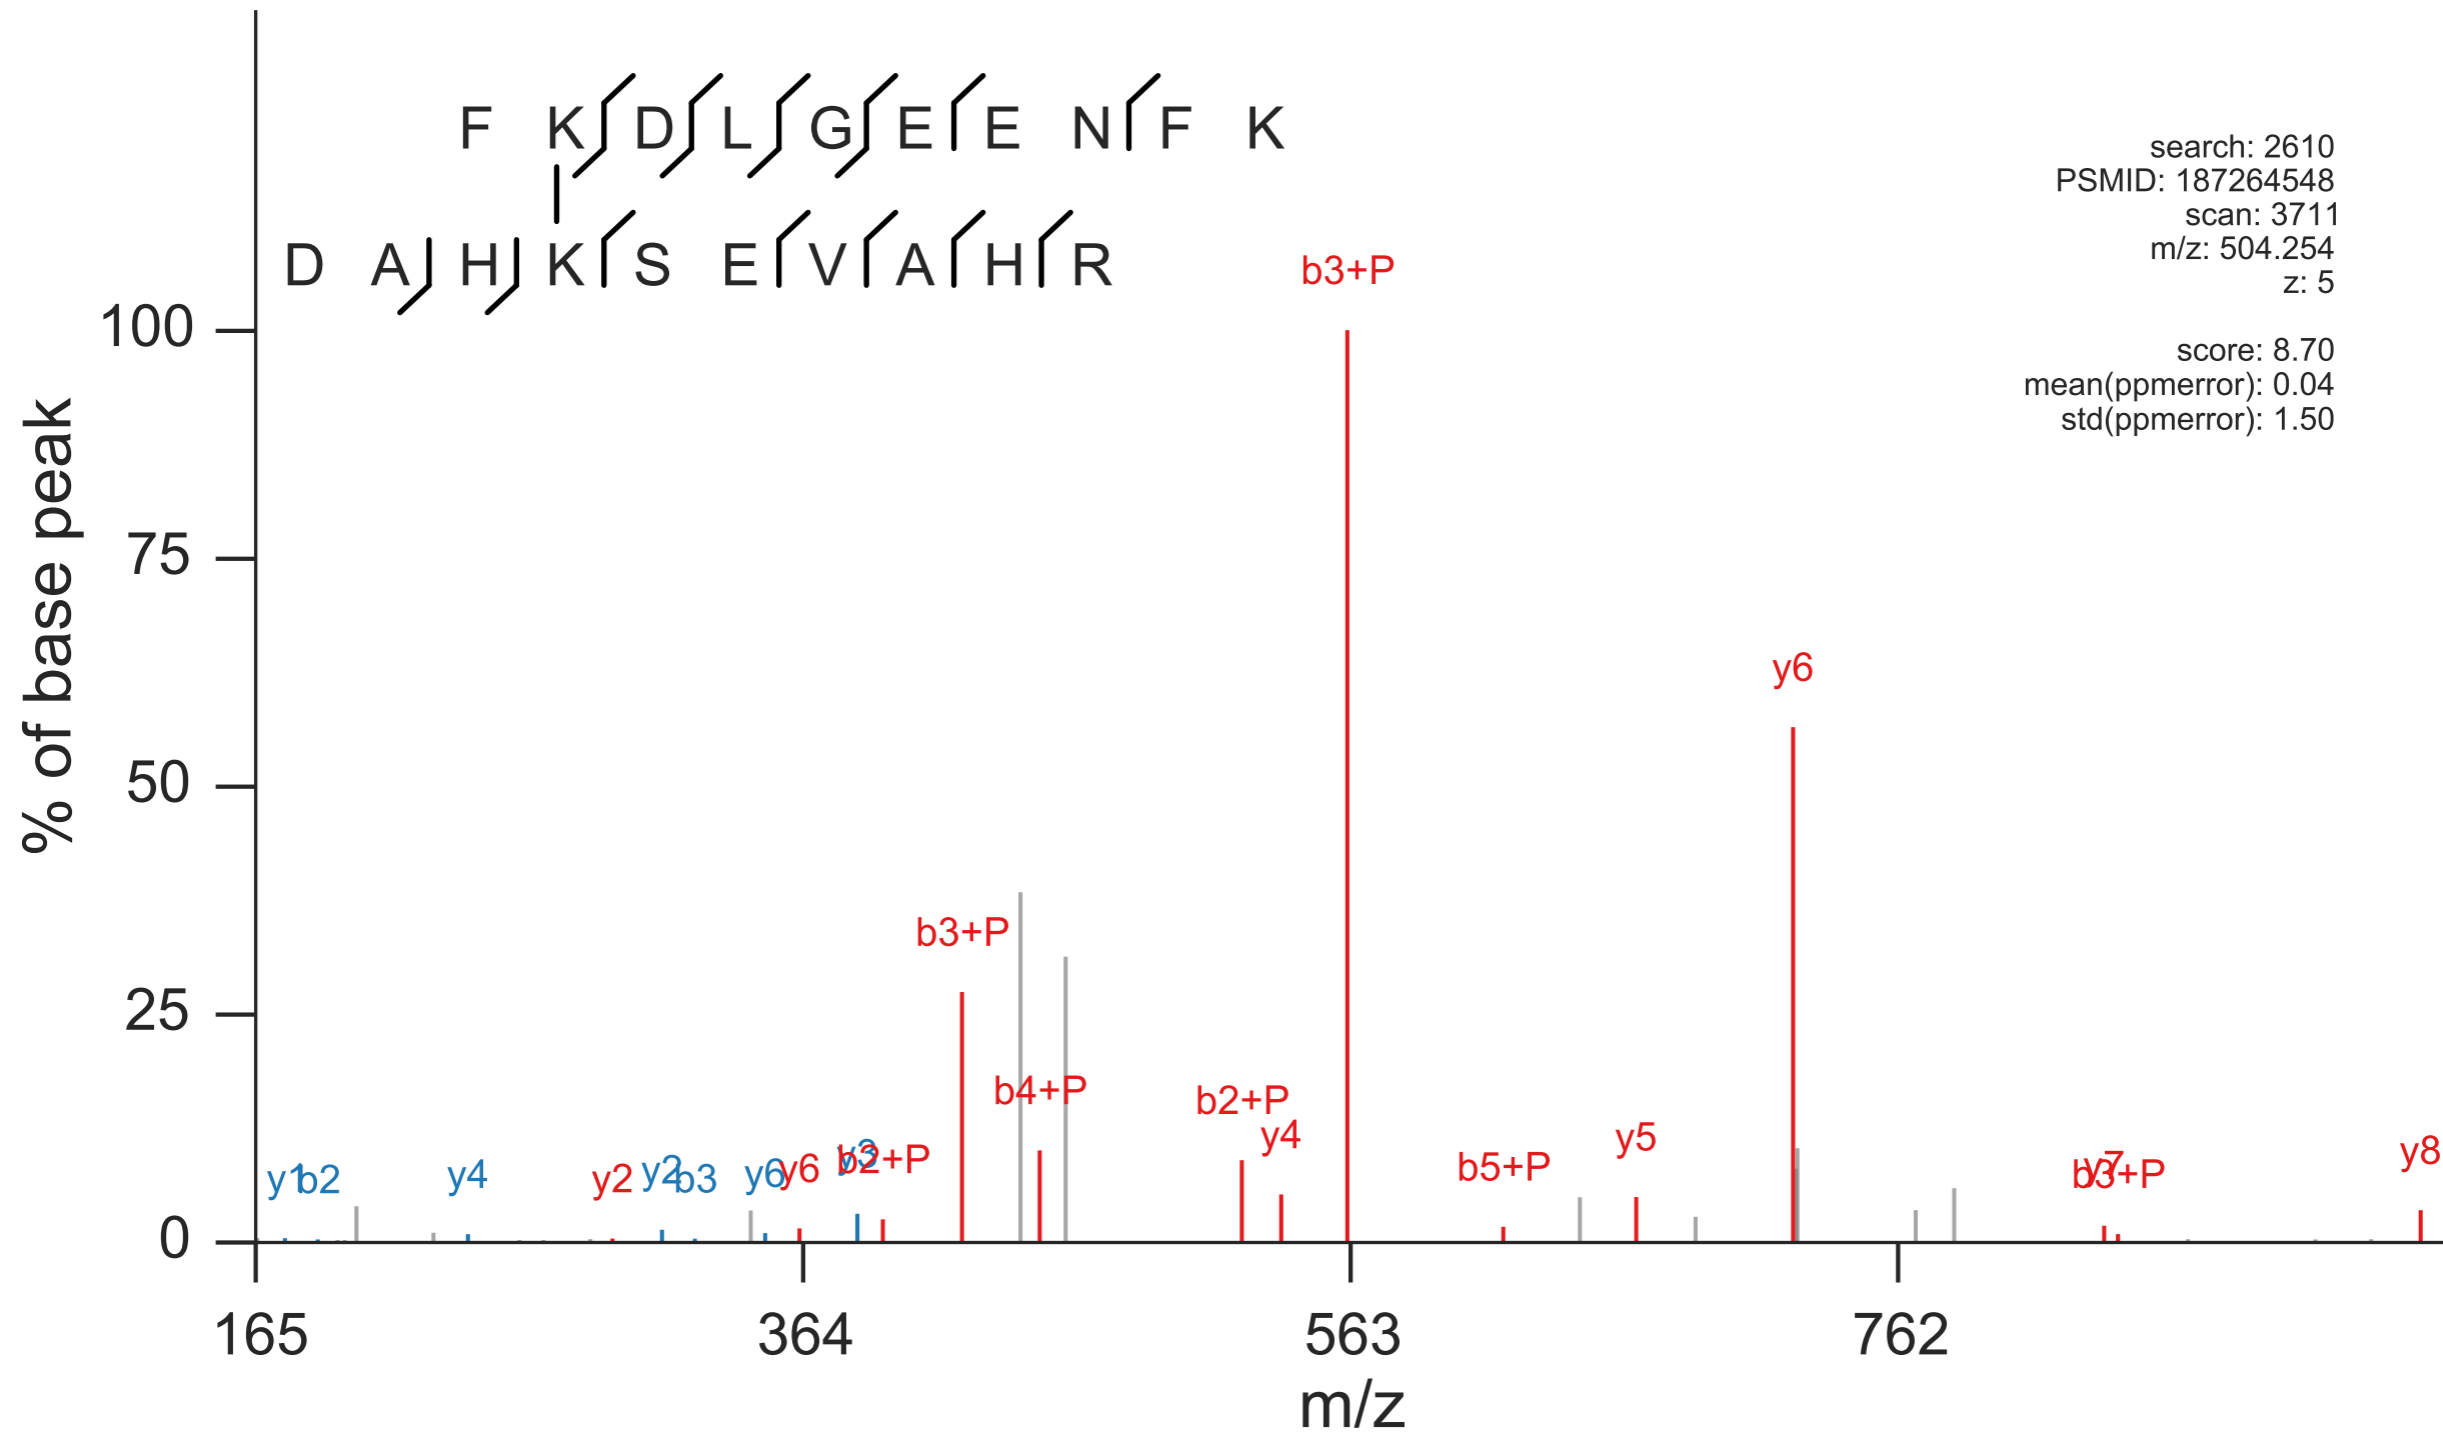

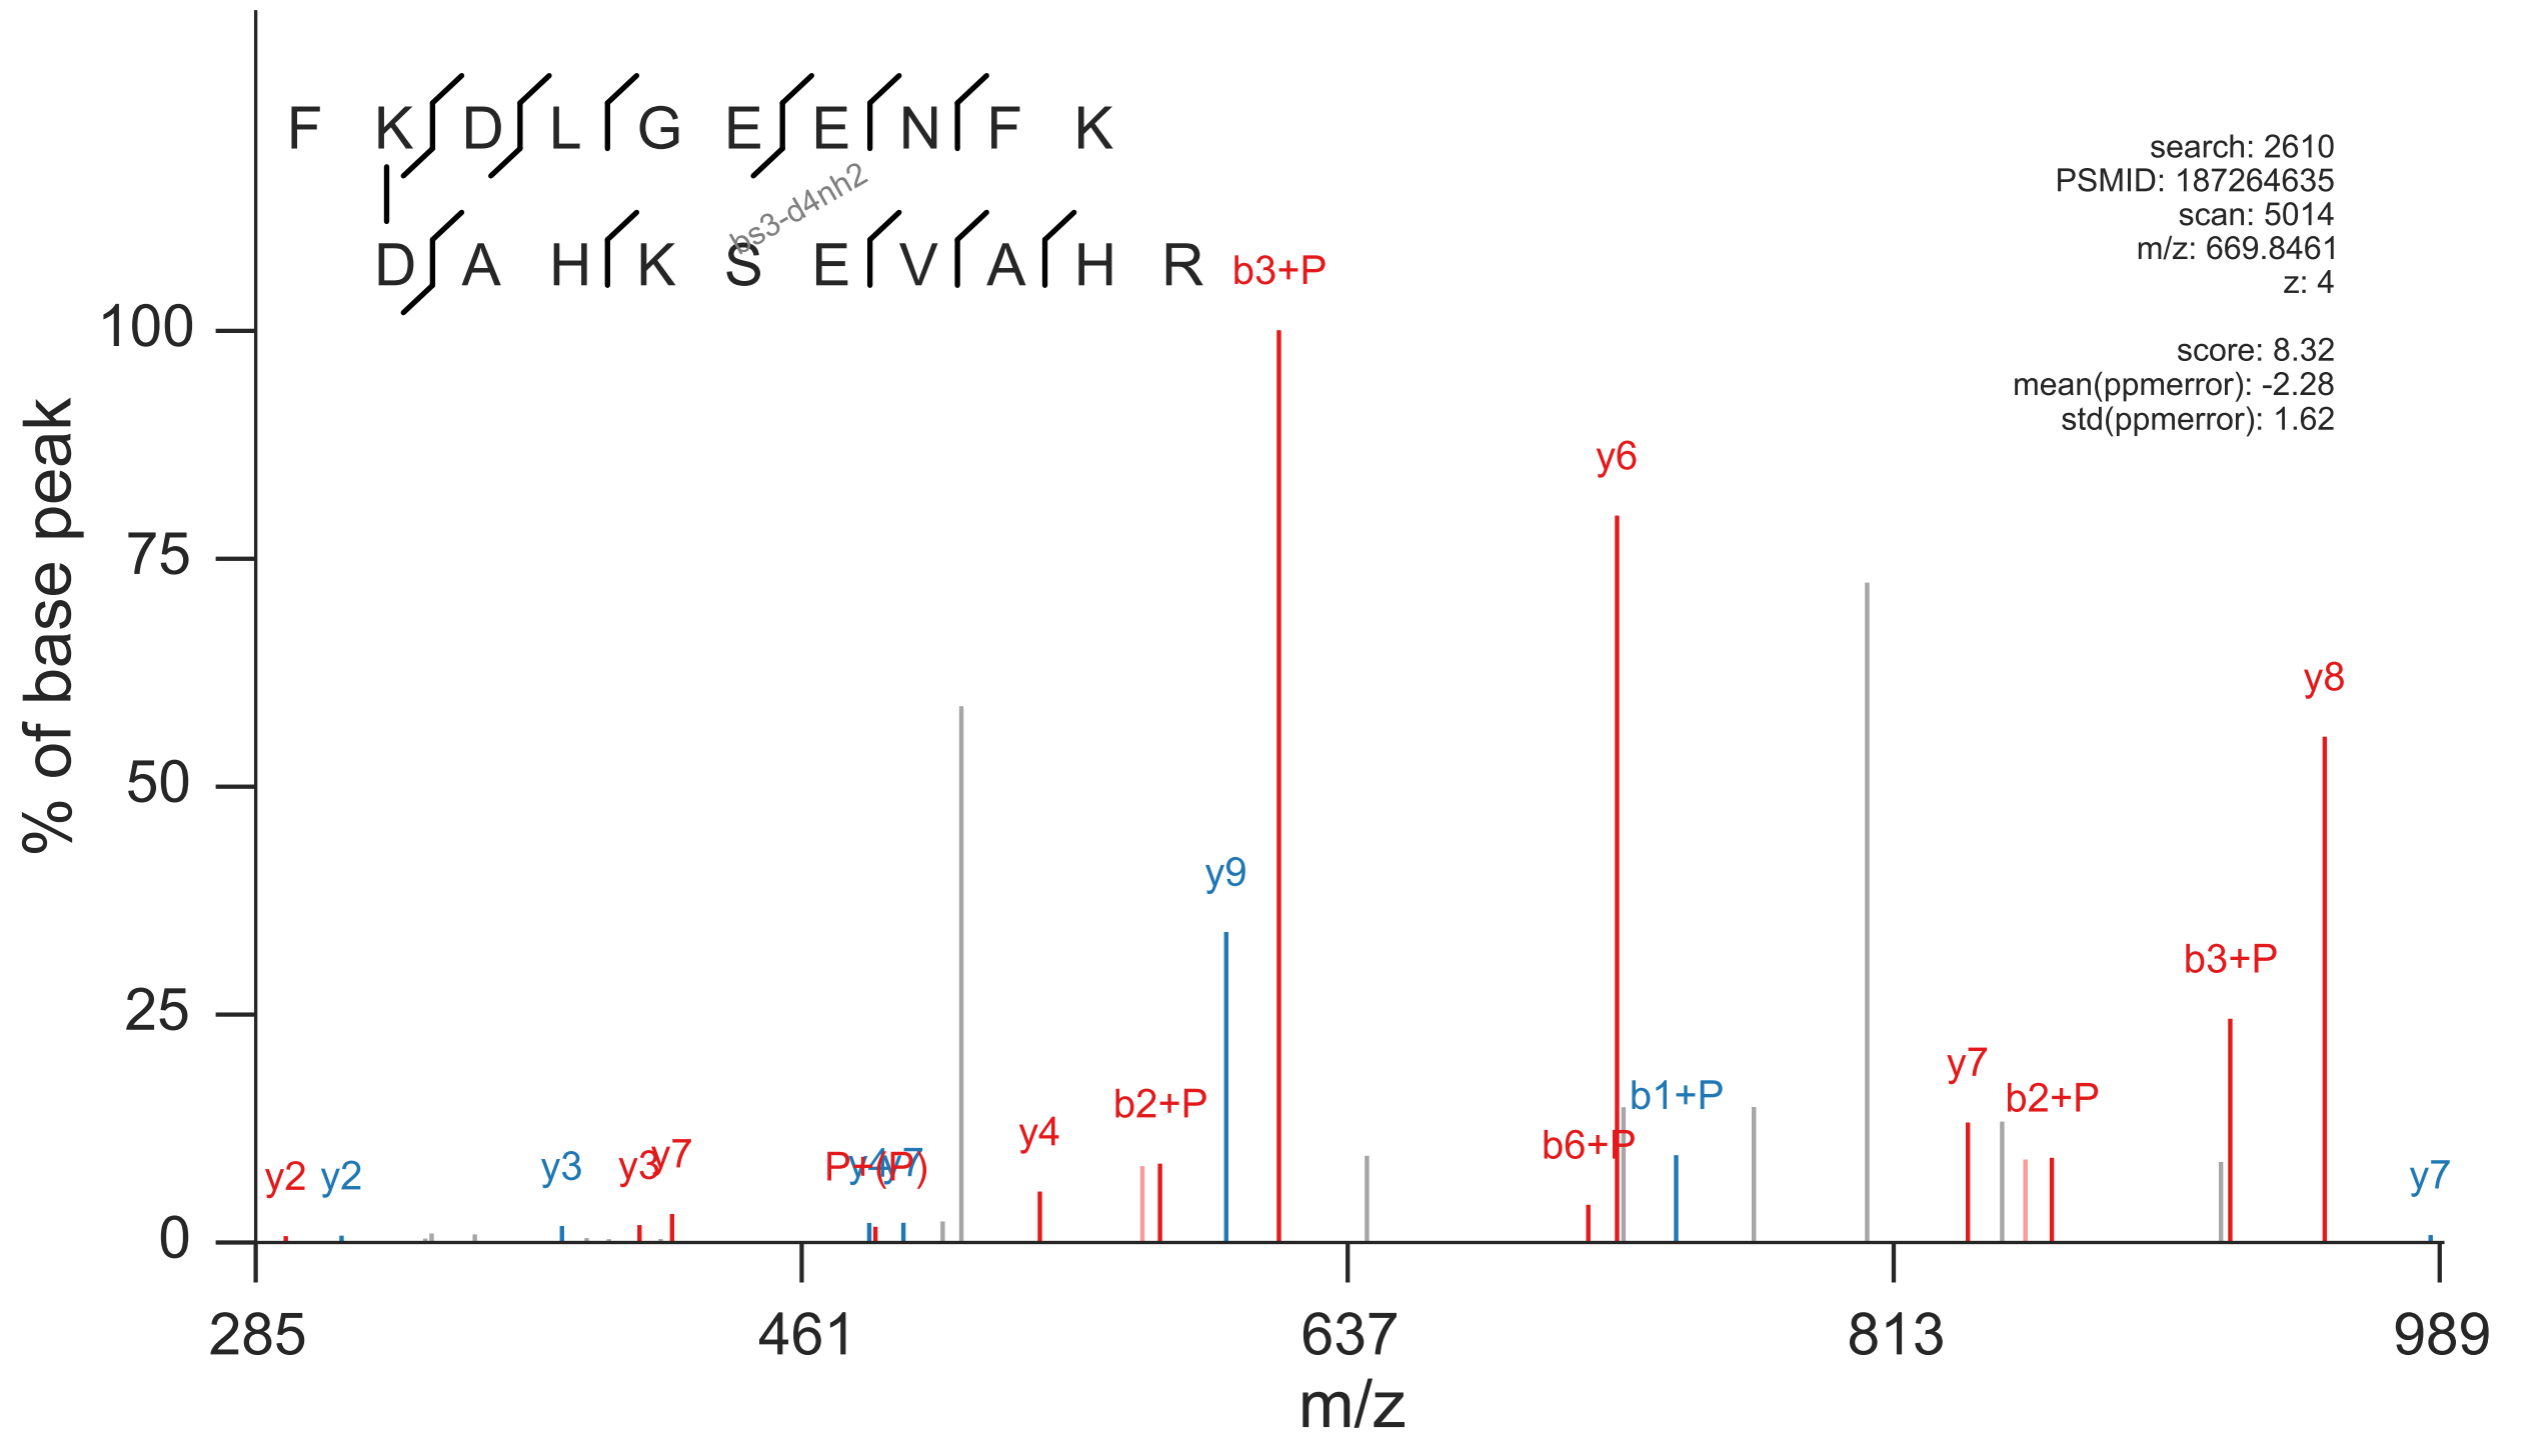

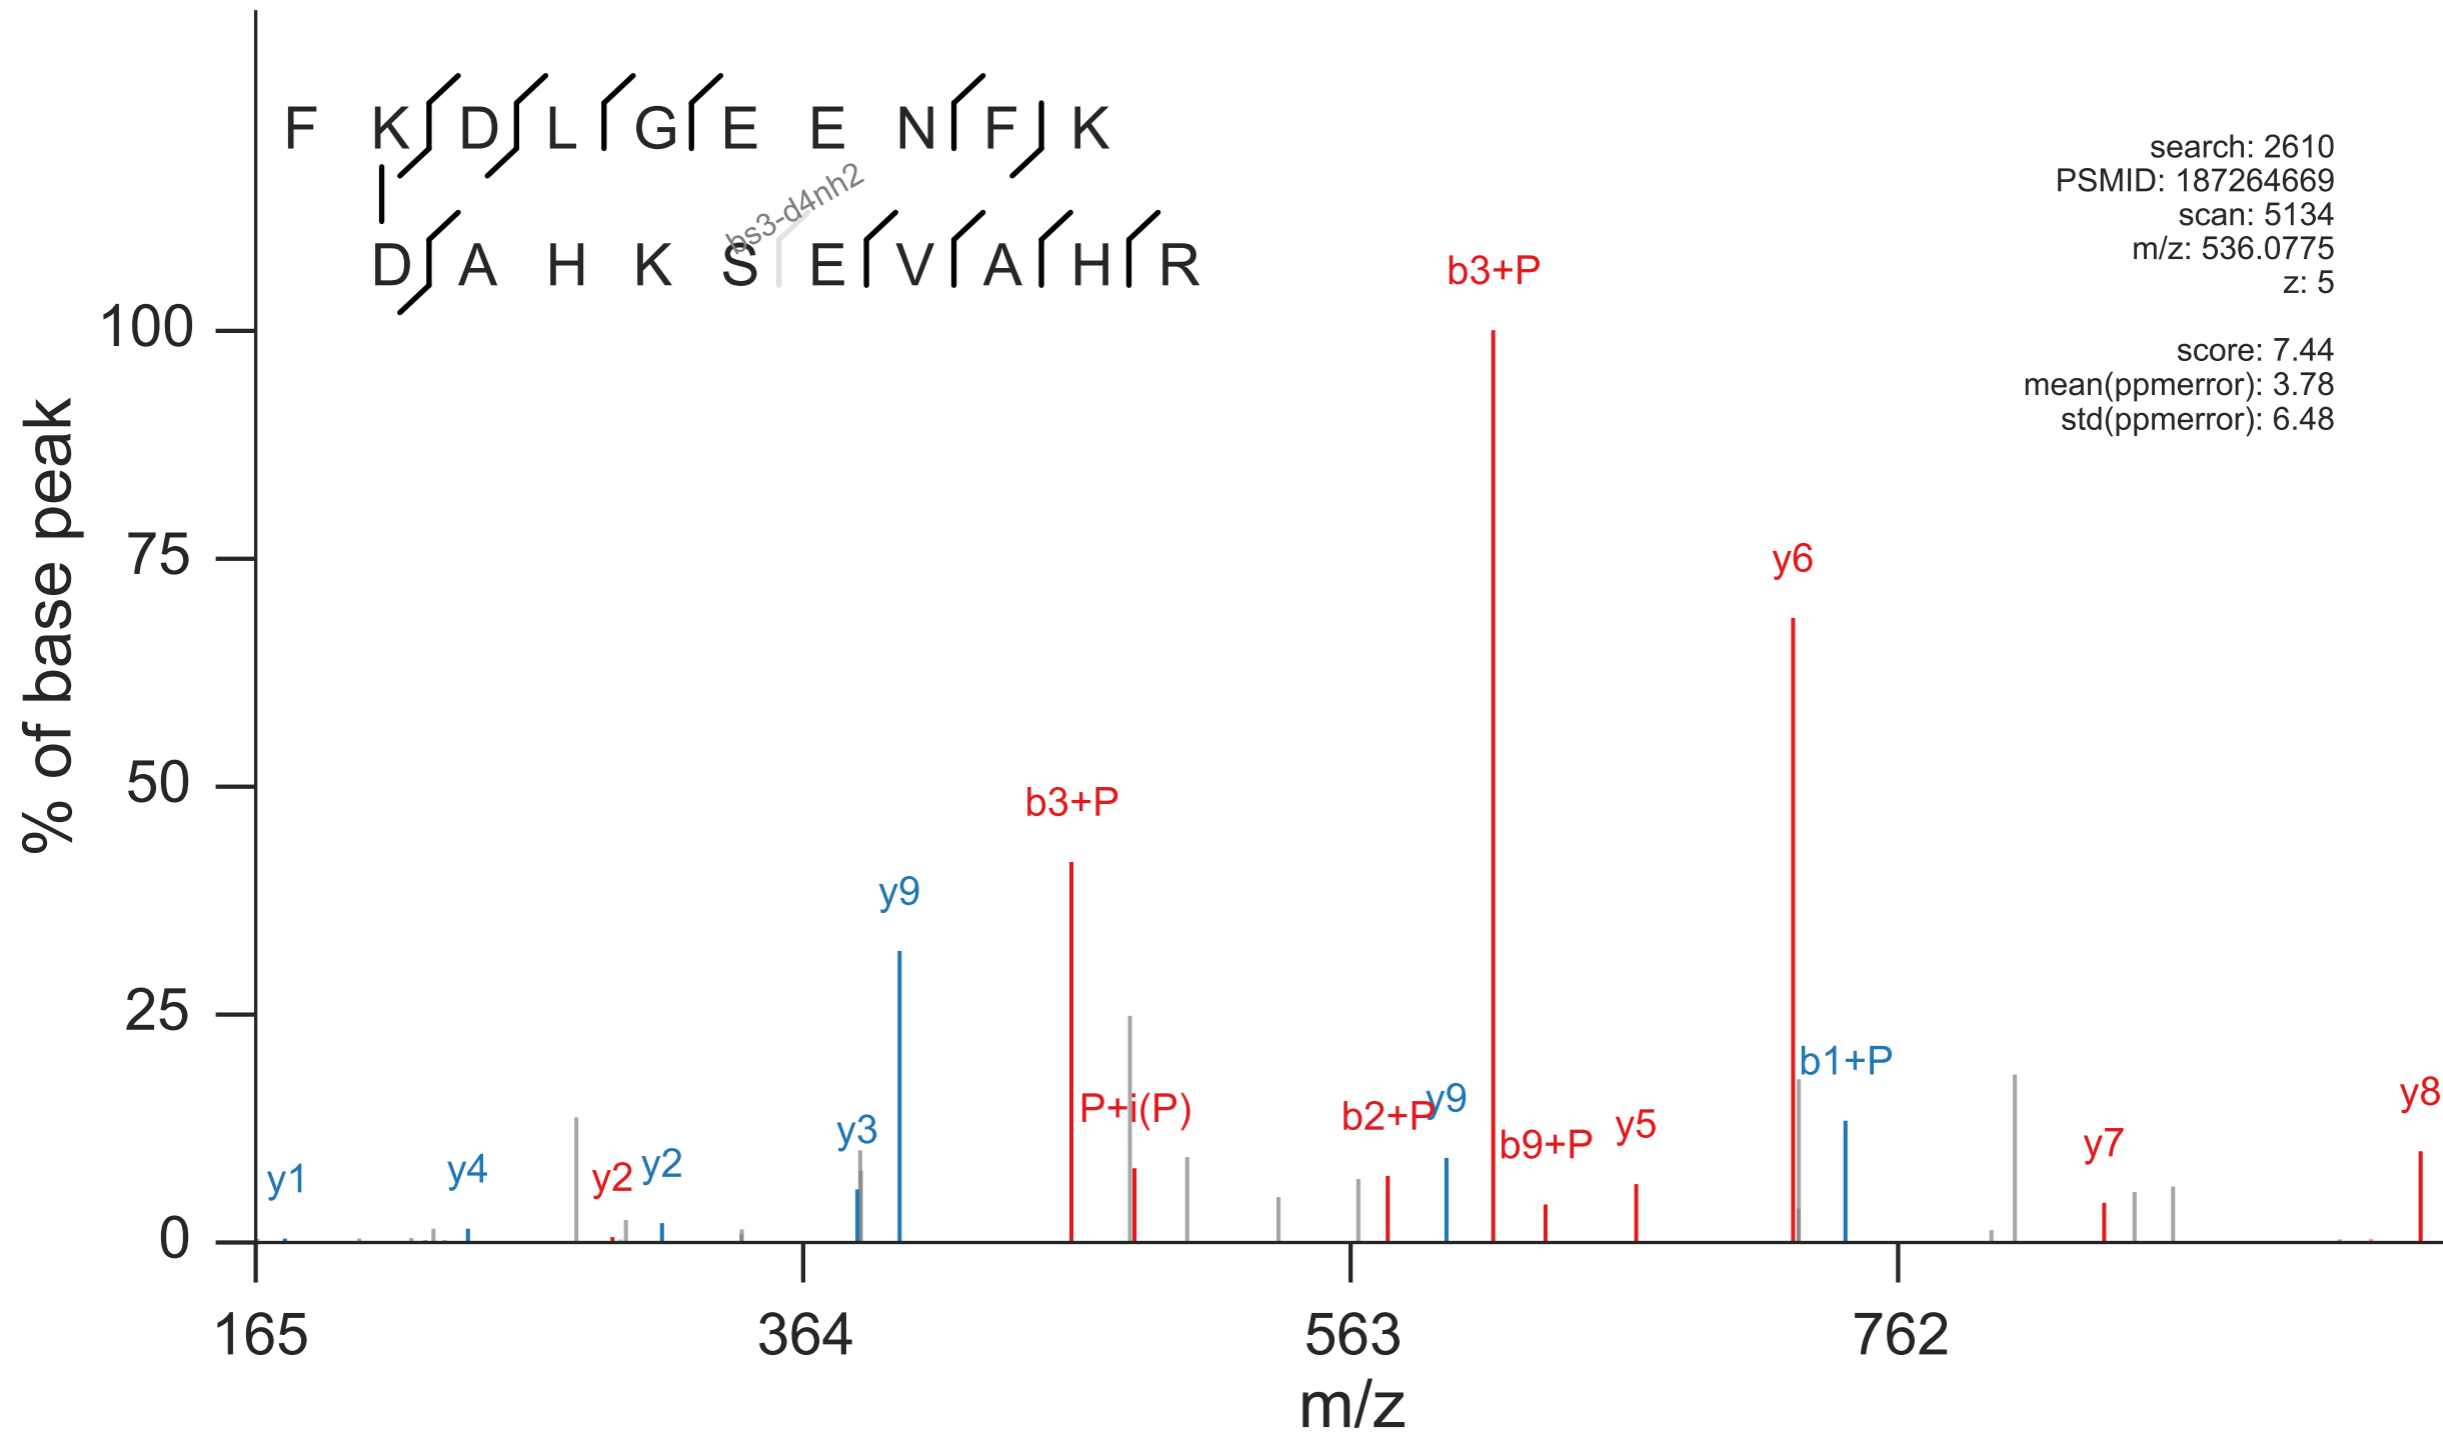

search: 2610  
 PSMID: 187264669  
 scan: 5134  
 m/z: 536.0775  
 z: 5

score: 7.44  
 mean(ppmerror): 3.78  
 std(ppmerror): 6.48

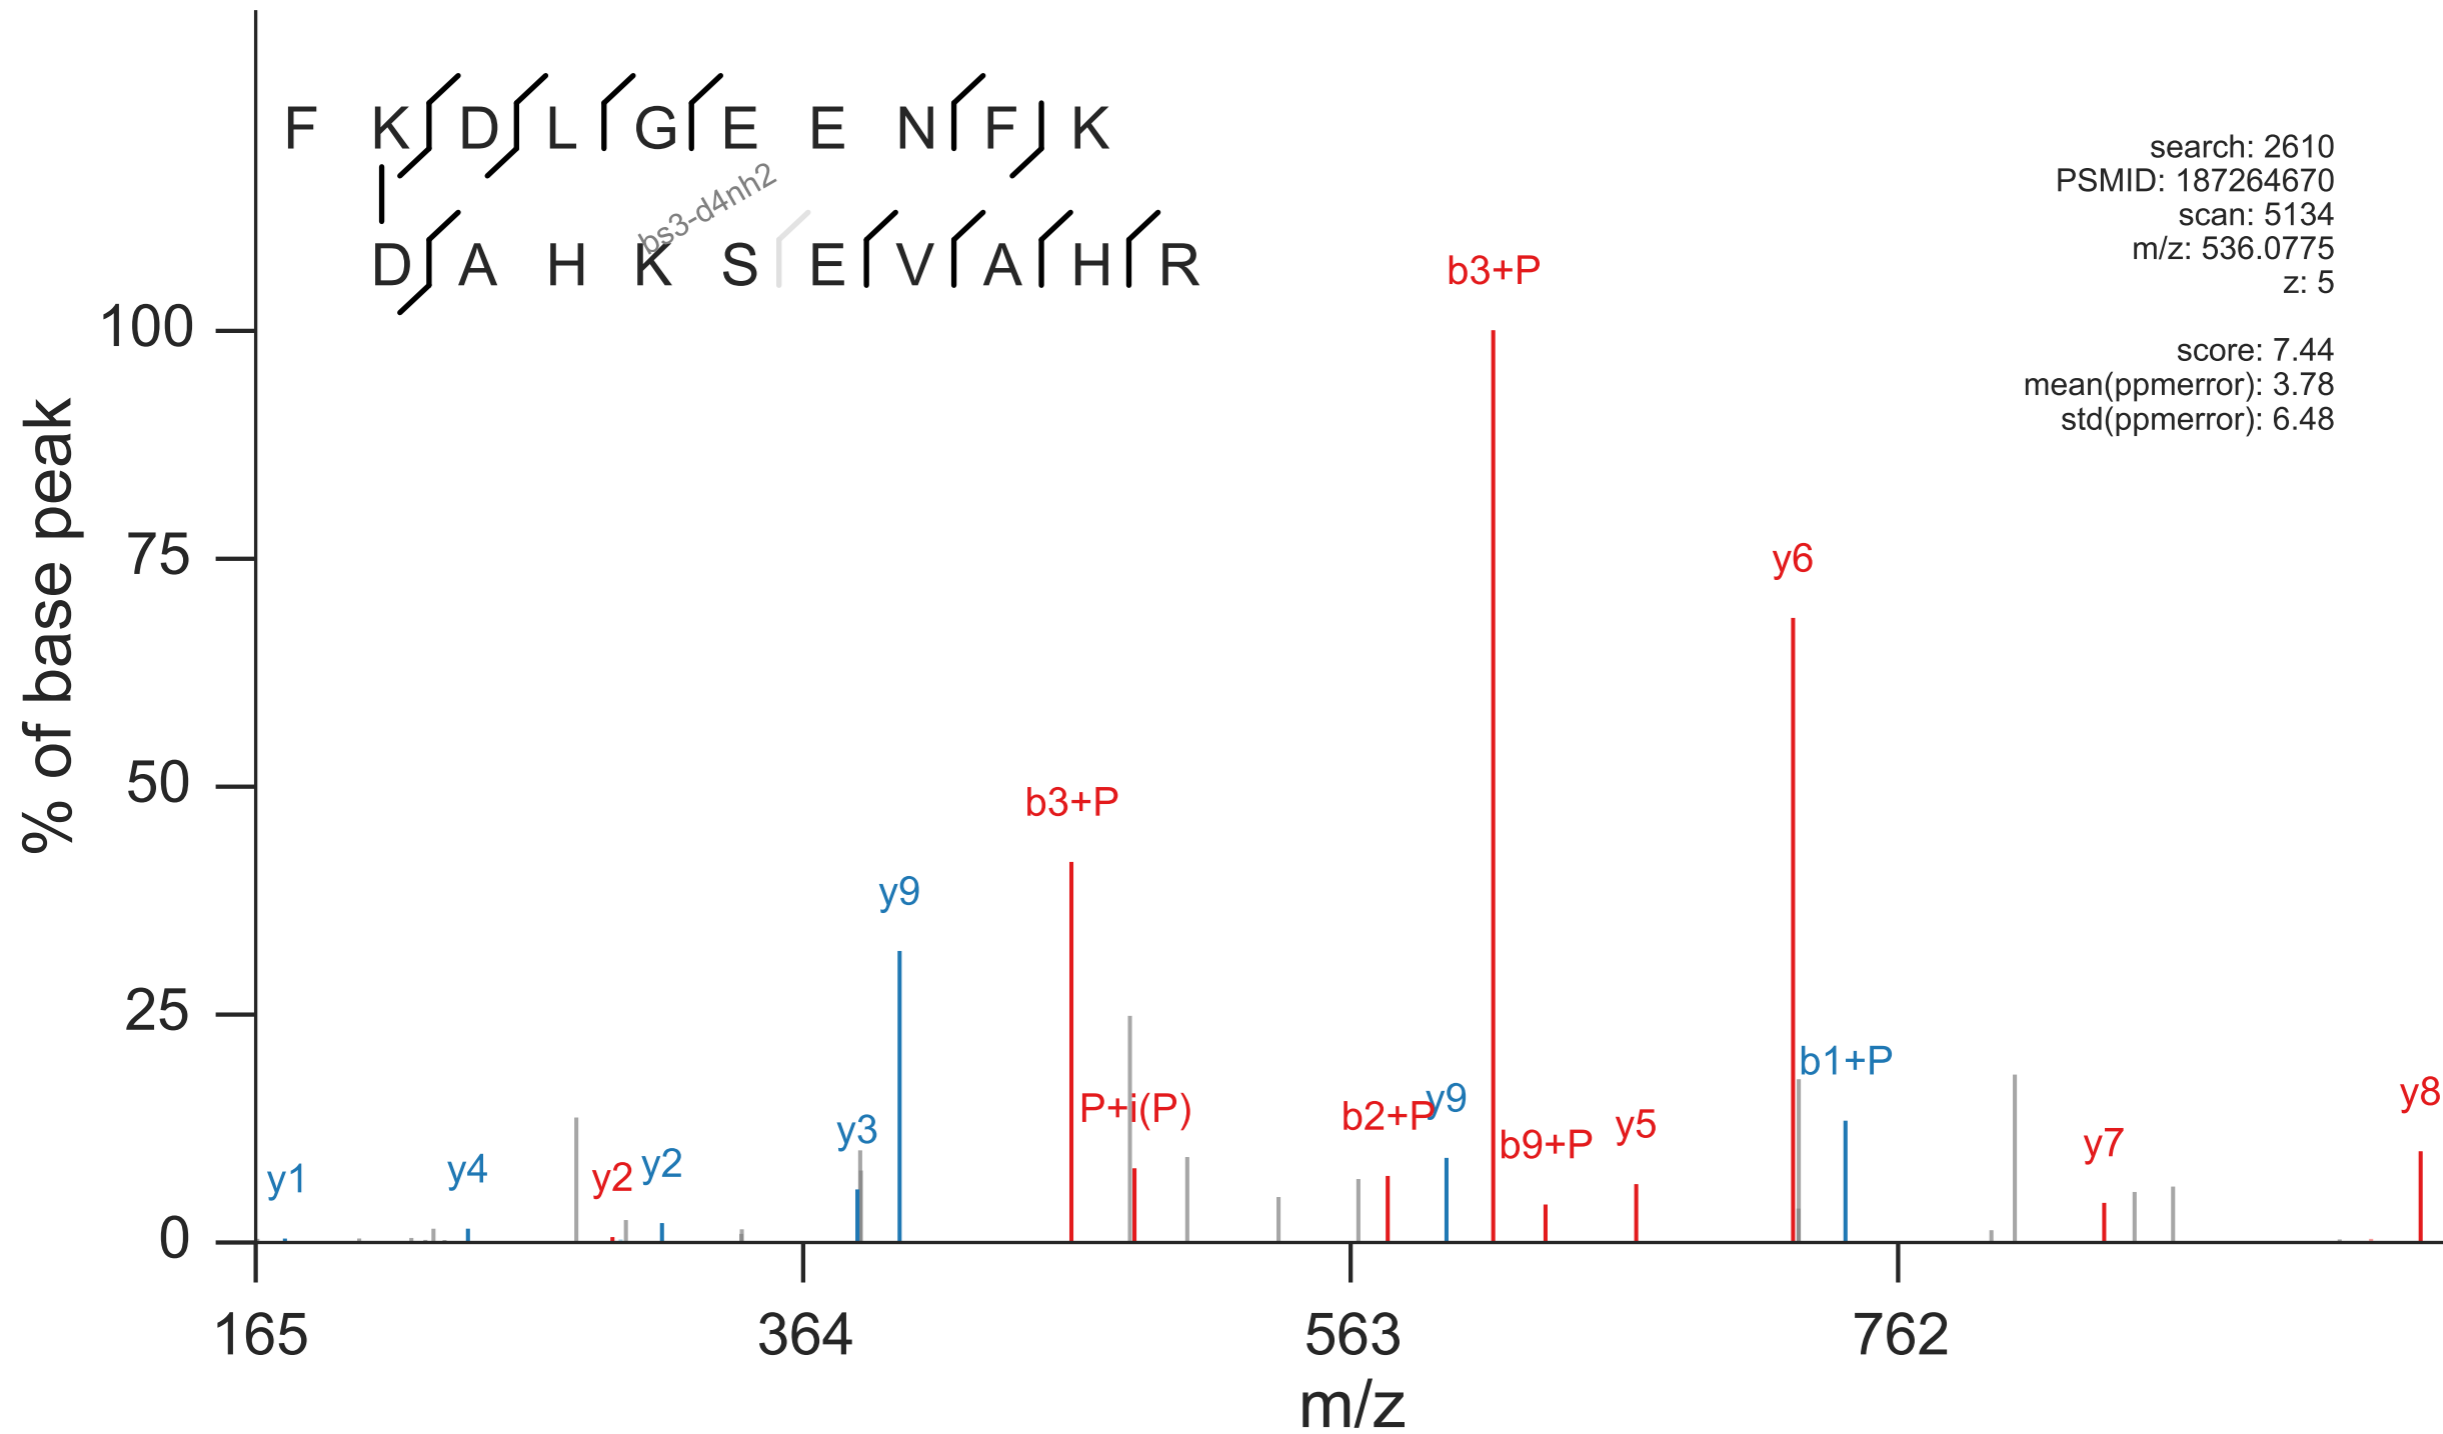

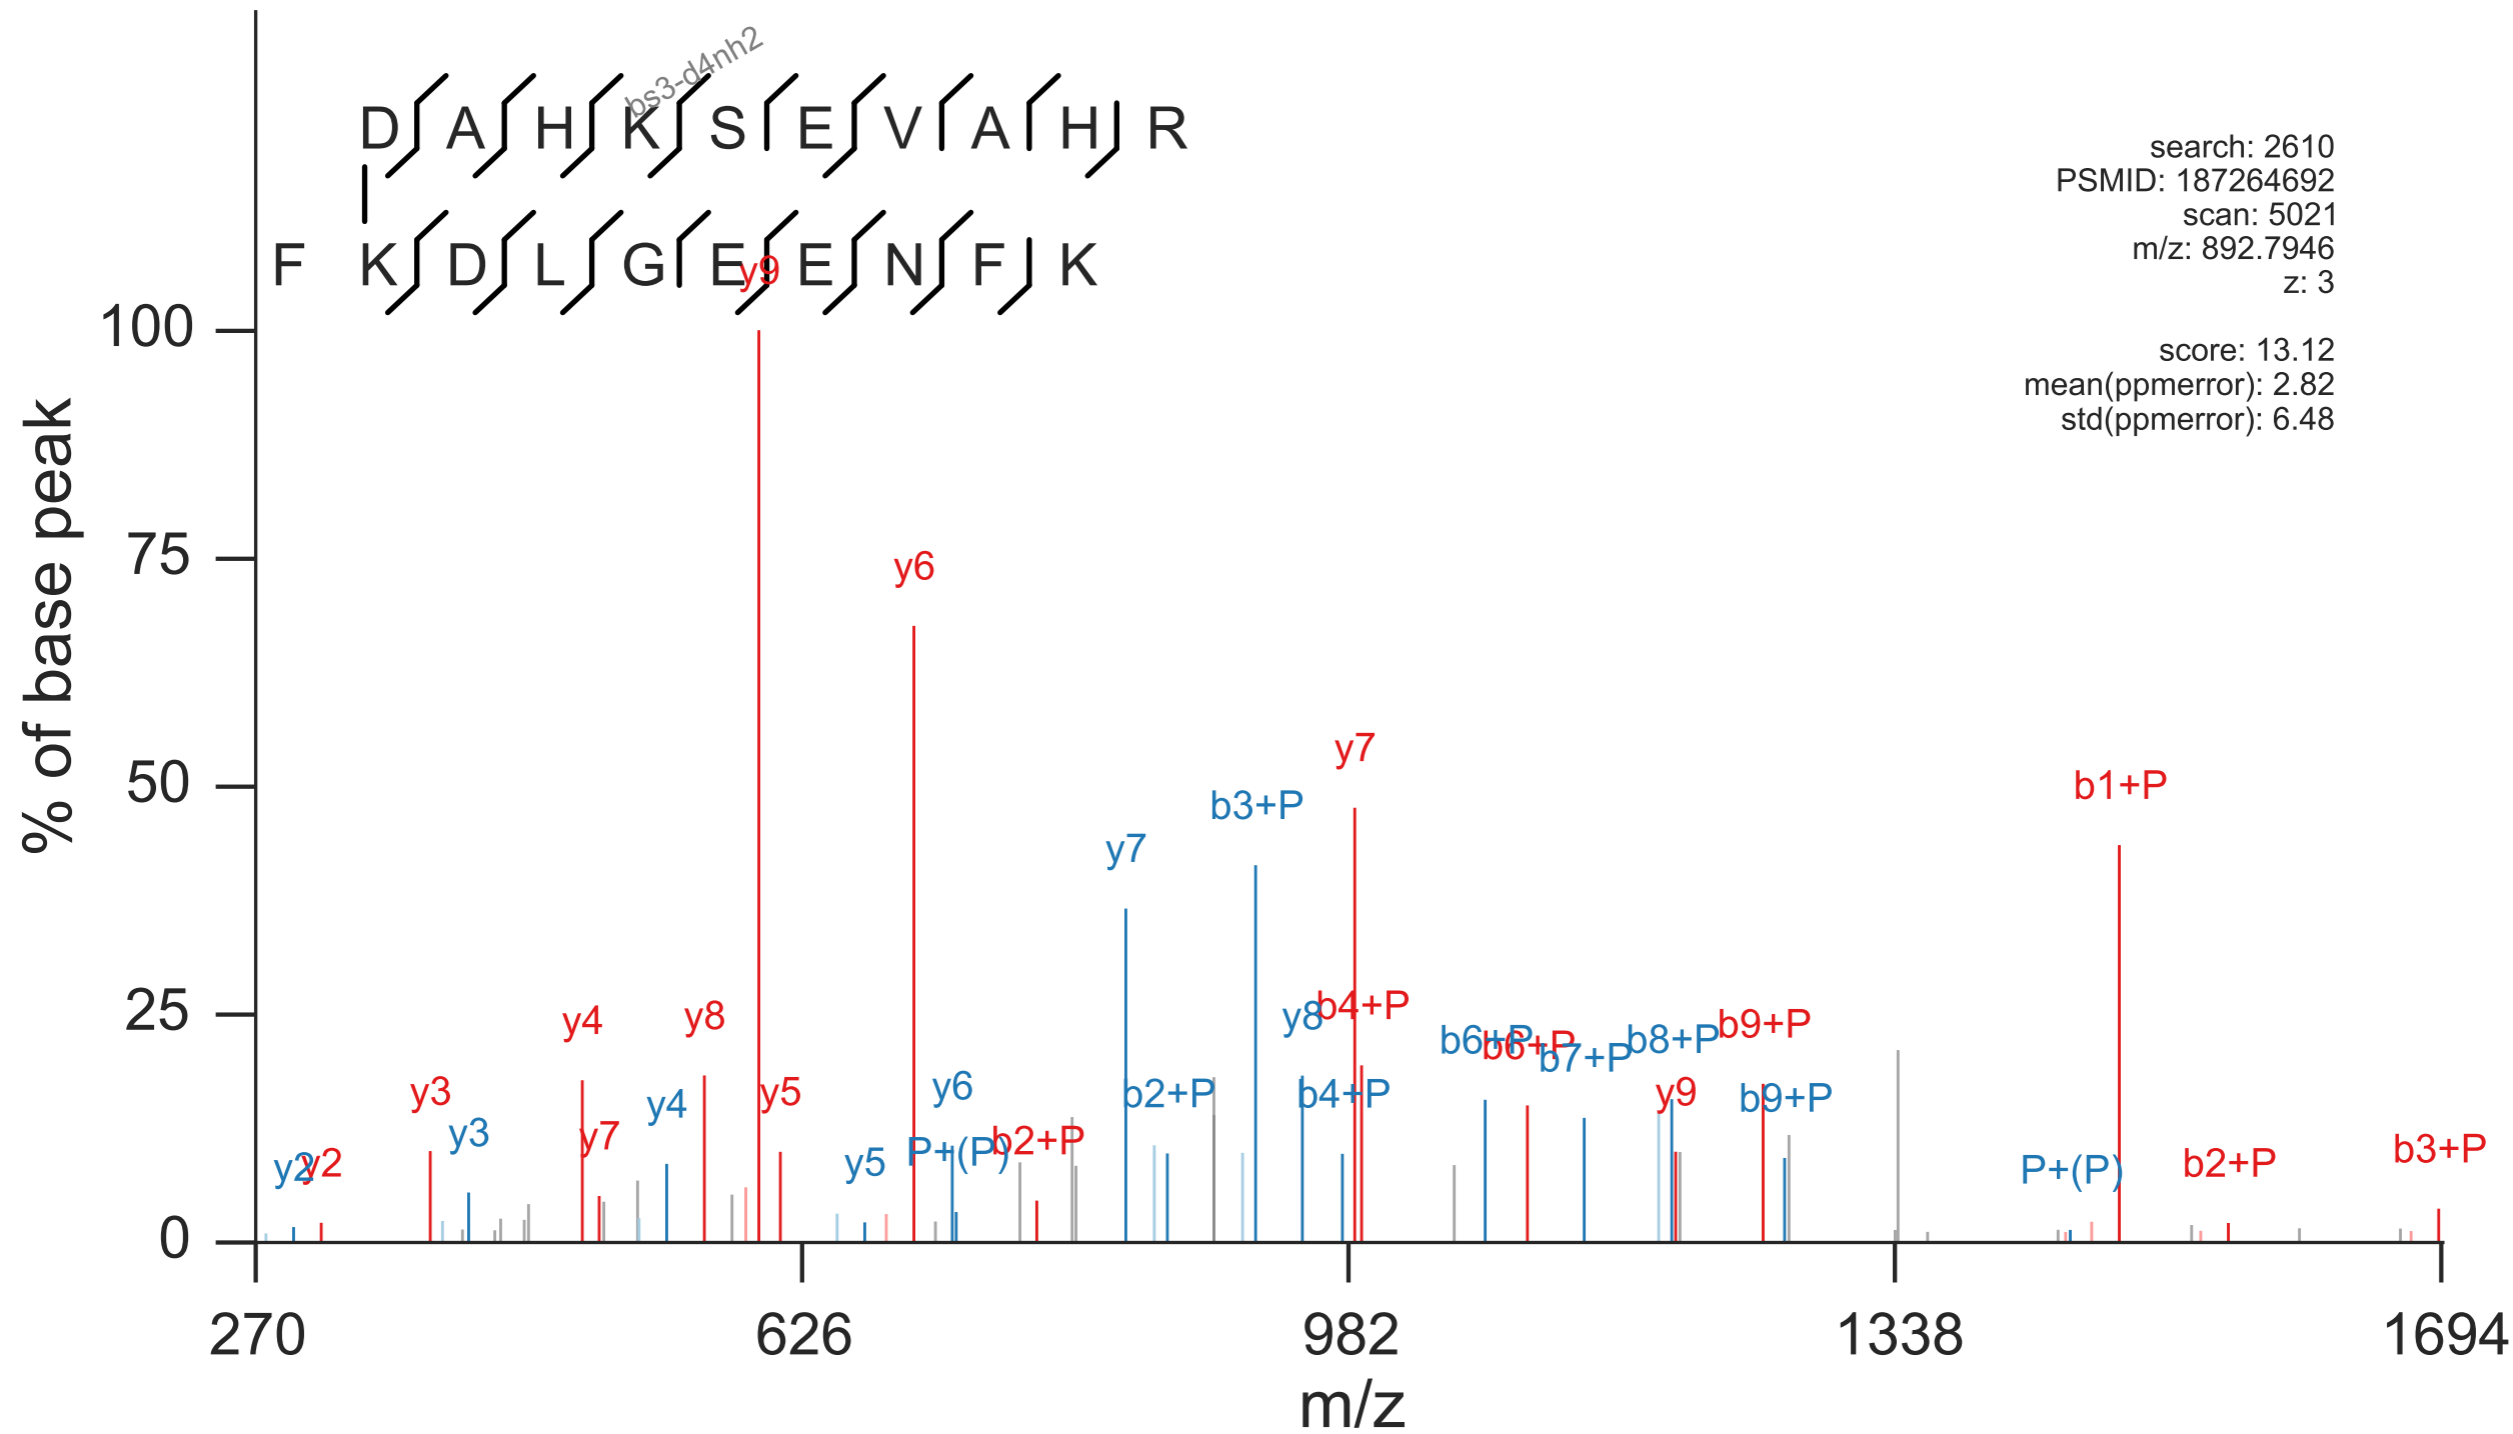

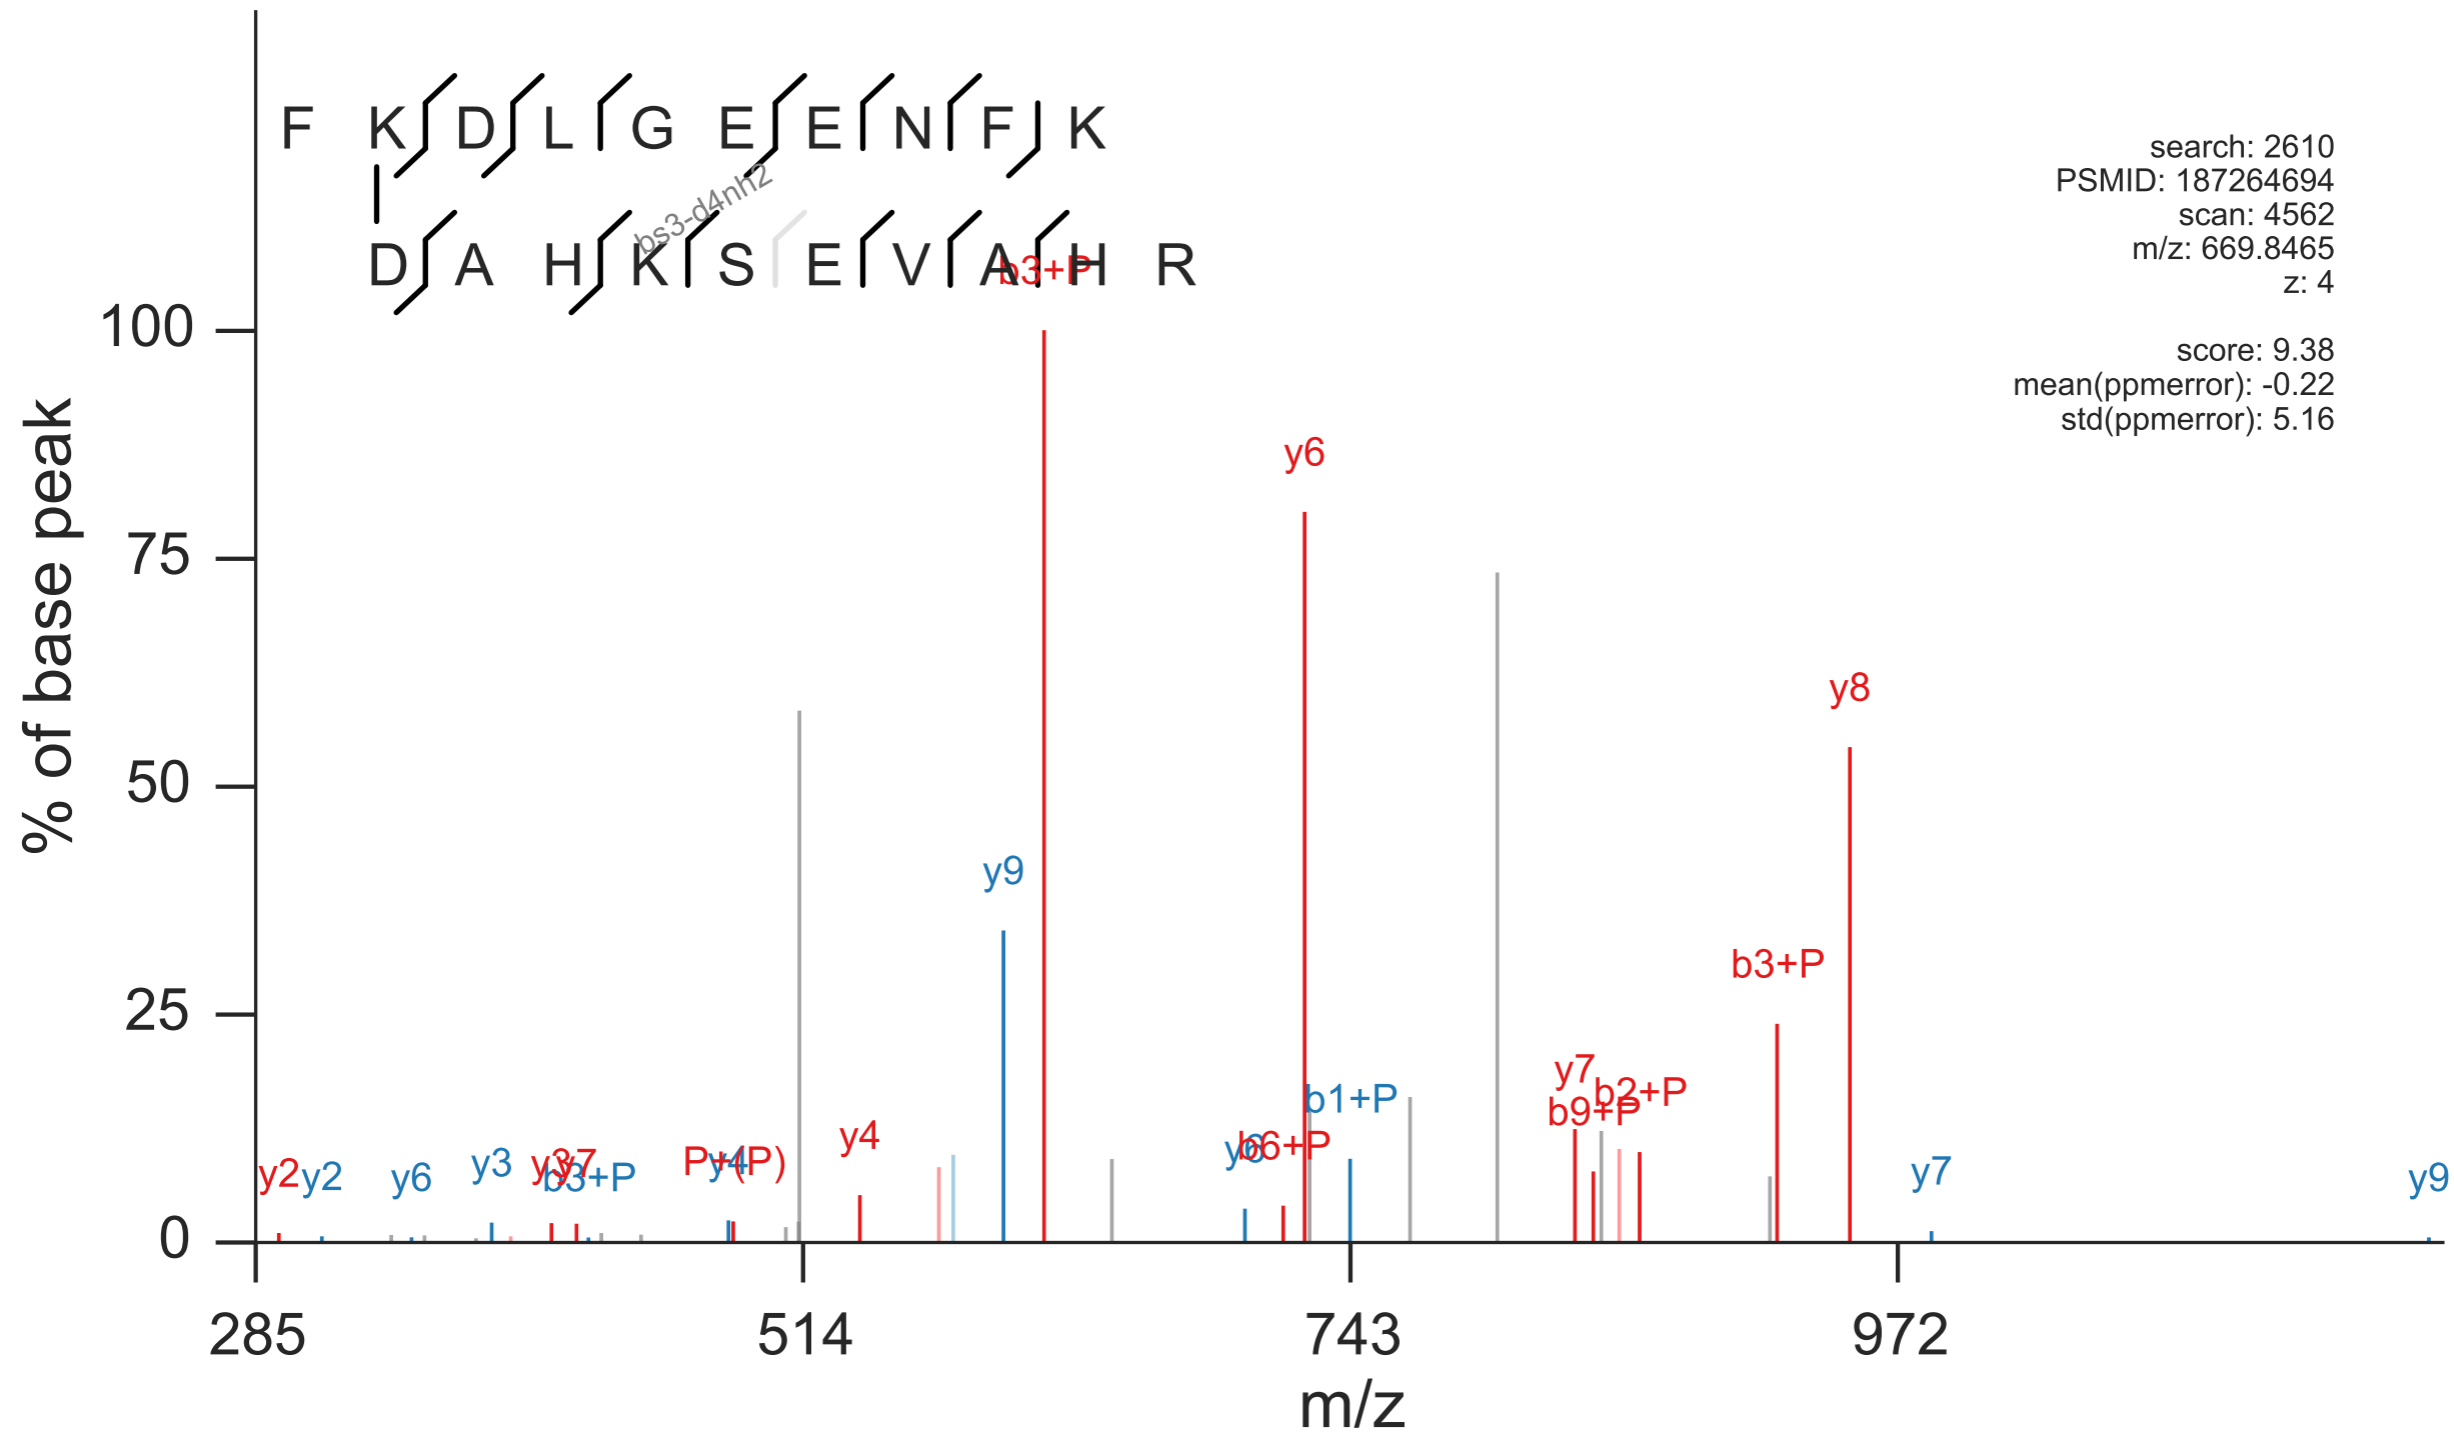

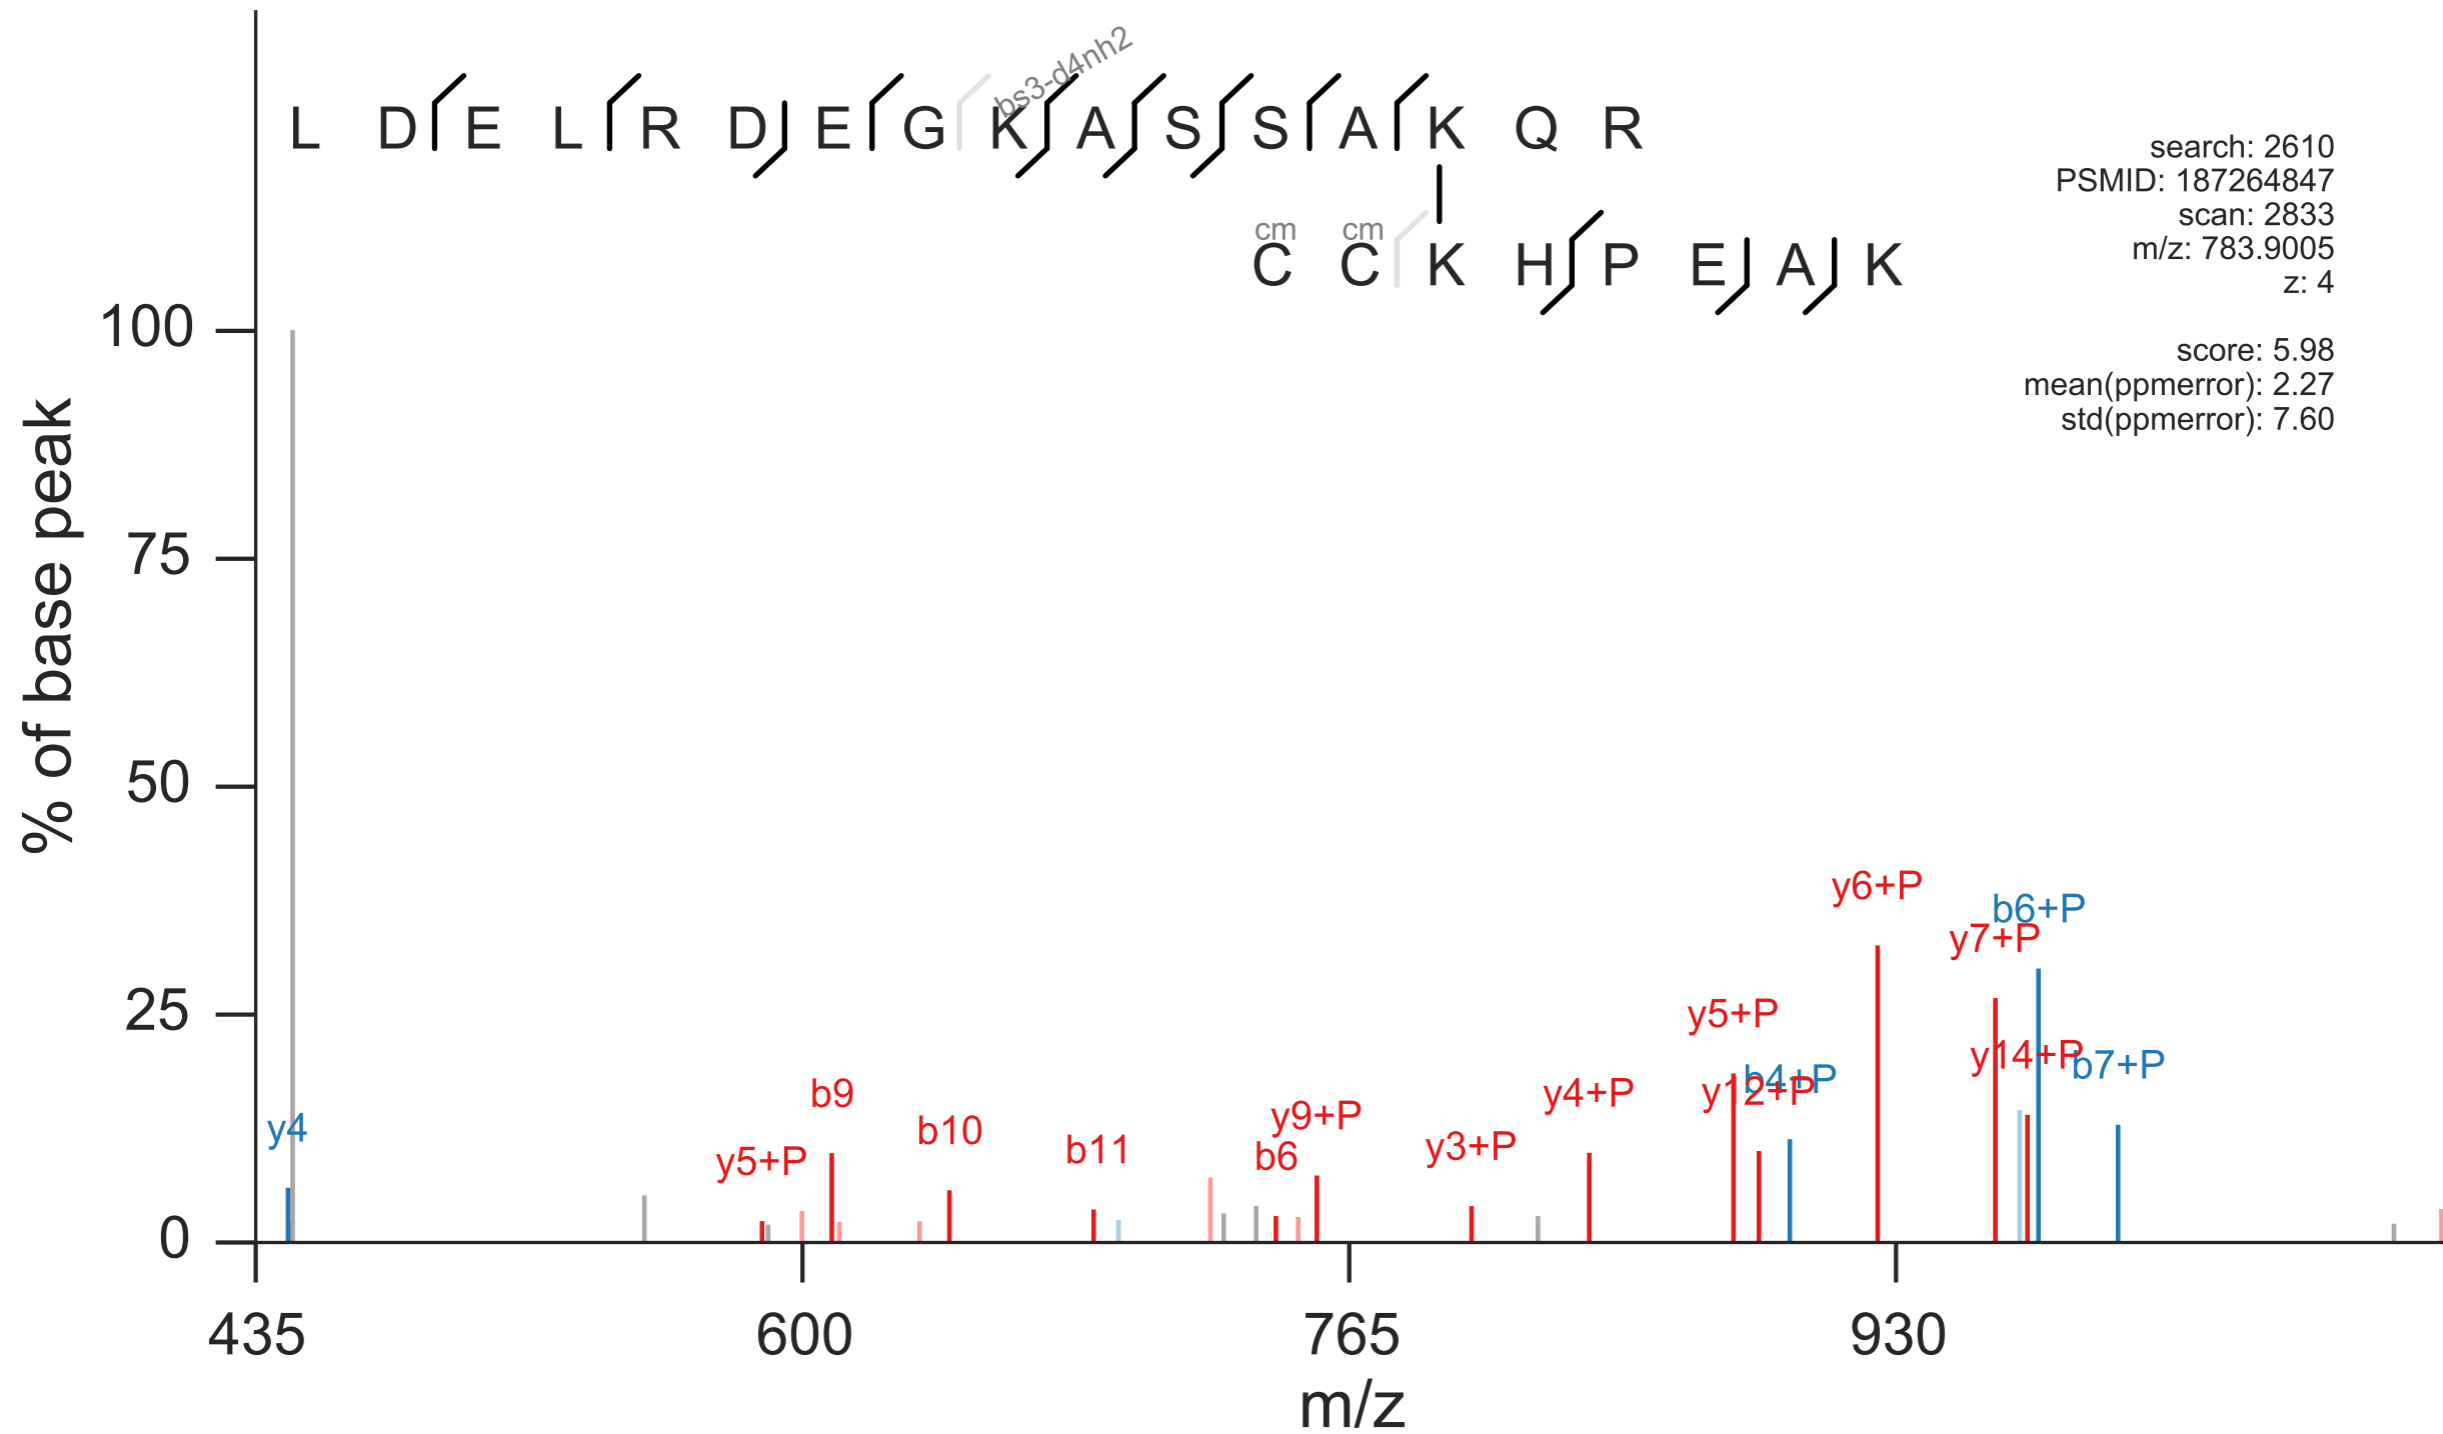

search: 2610  
 PSMID: 187264847  
 scan: 2833  
 m/z: 783.9005  
 z: 4

score: 5.98  
 mean(ppmerror): 2.27  
 std(ppmerror): 7.60



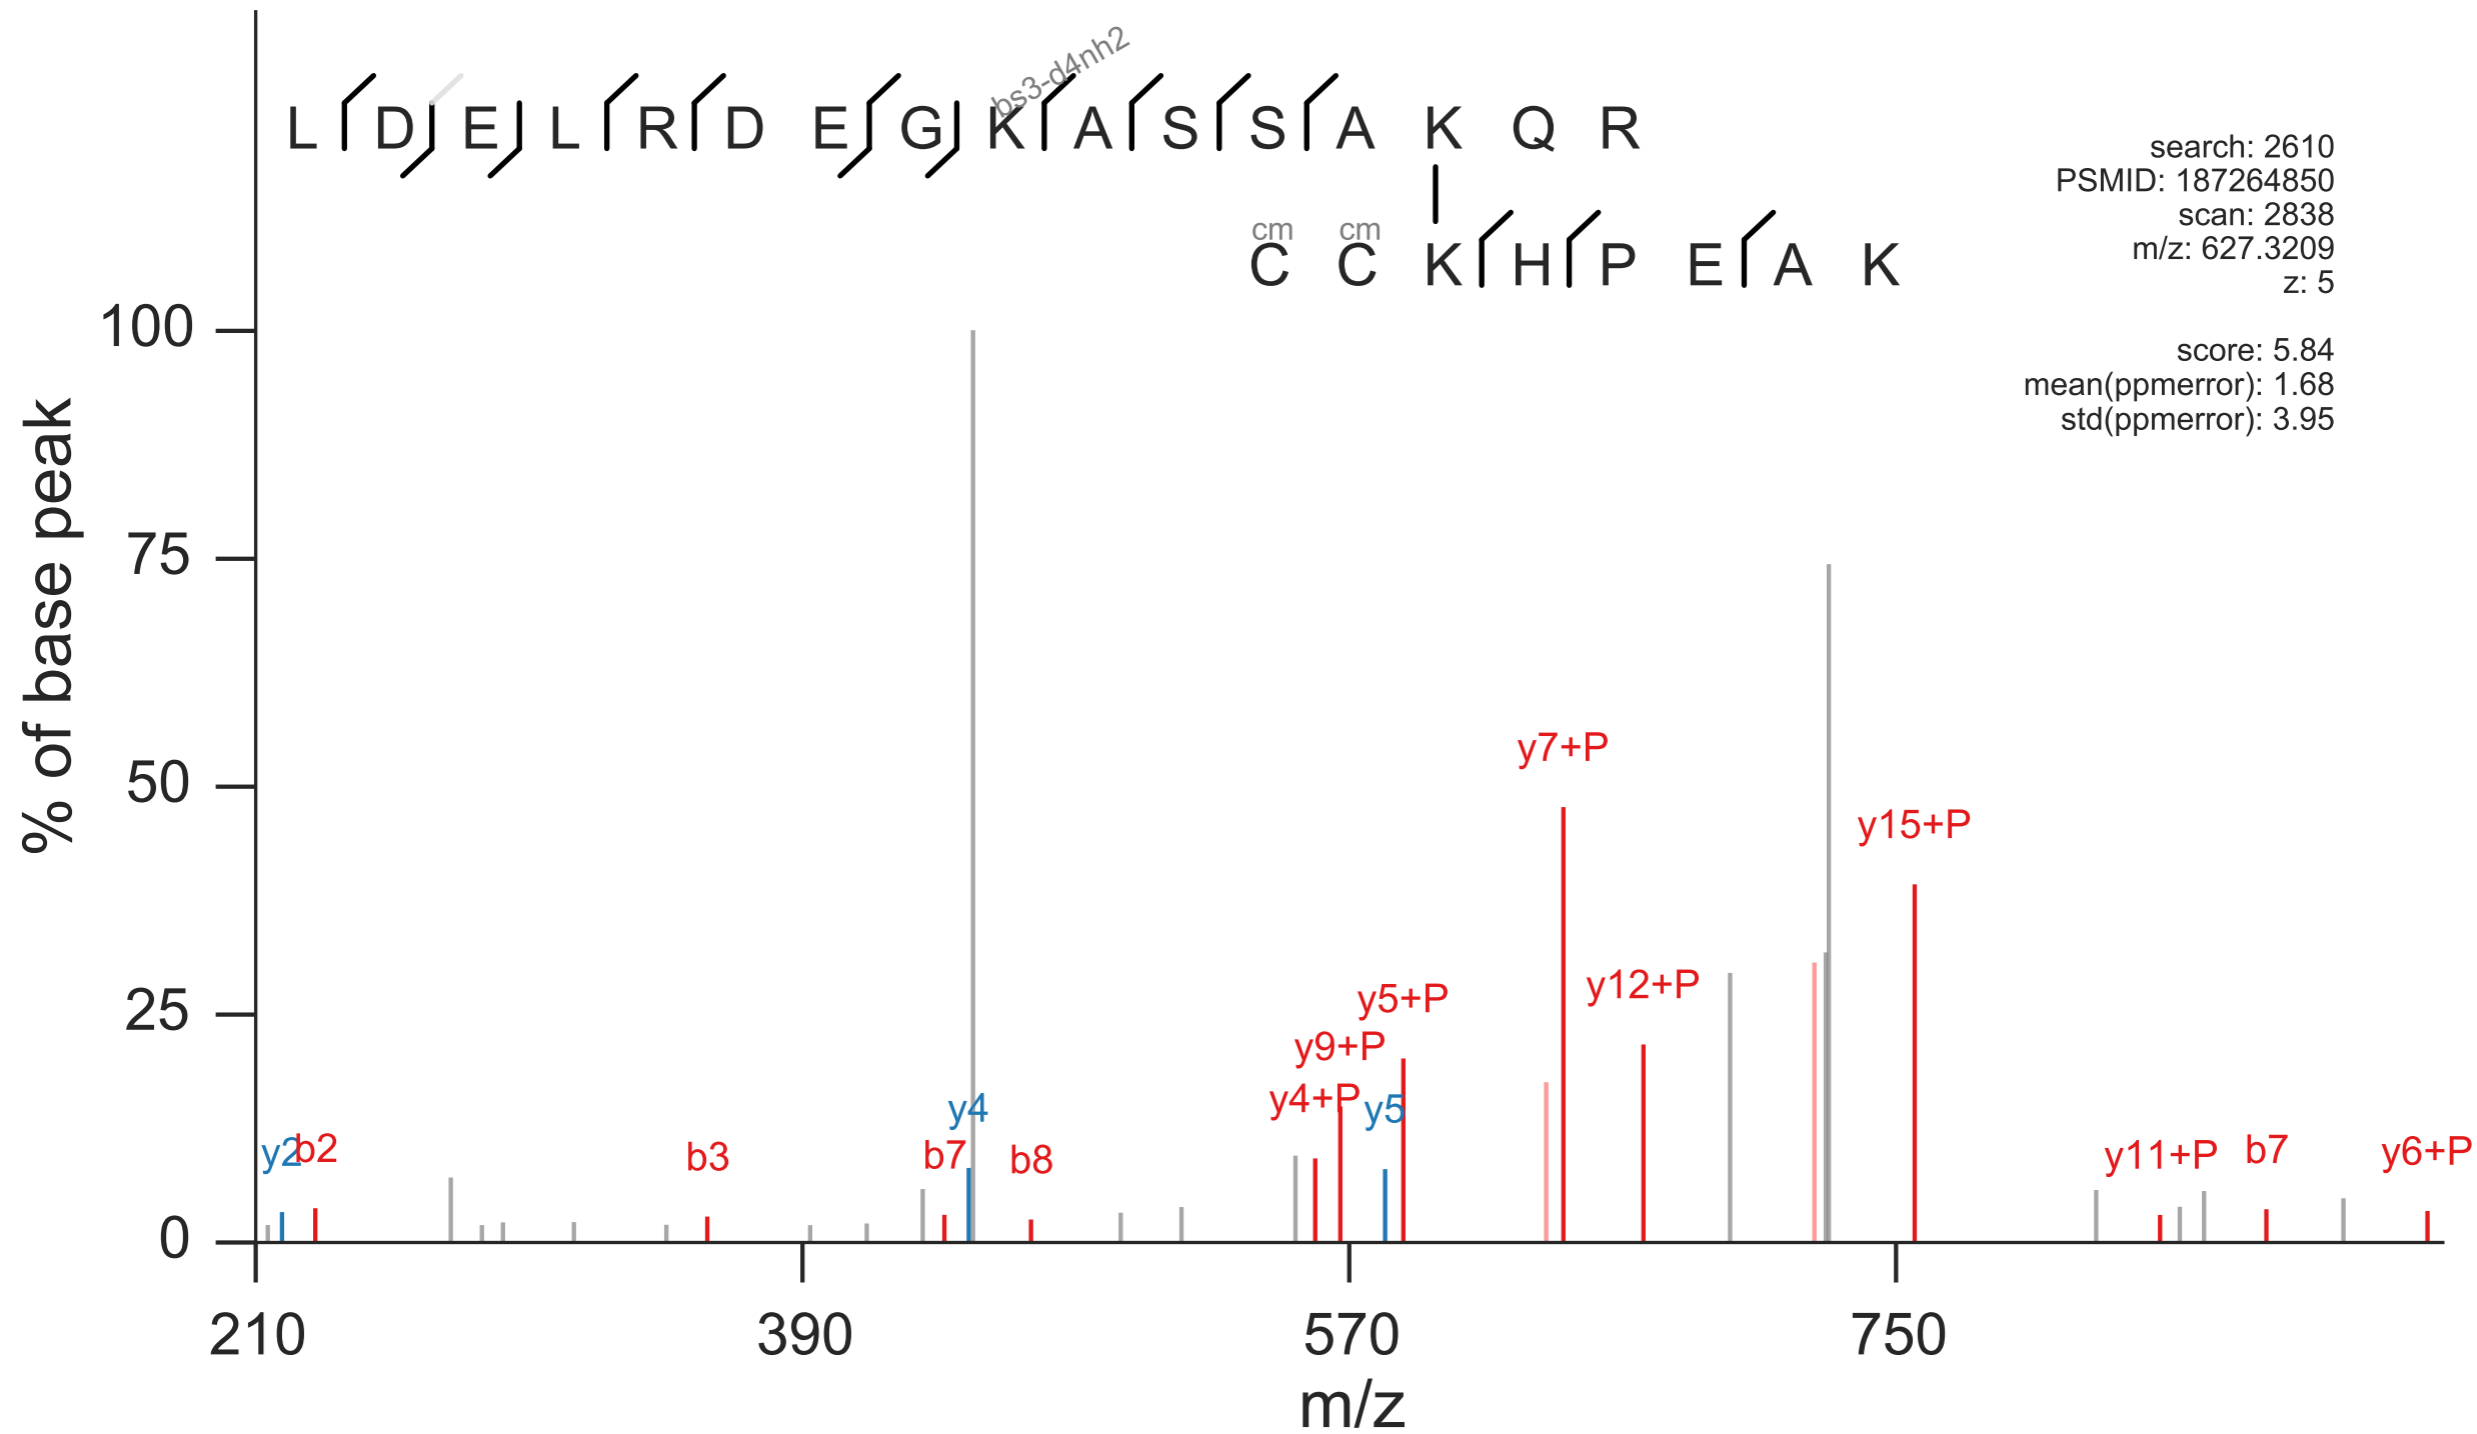

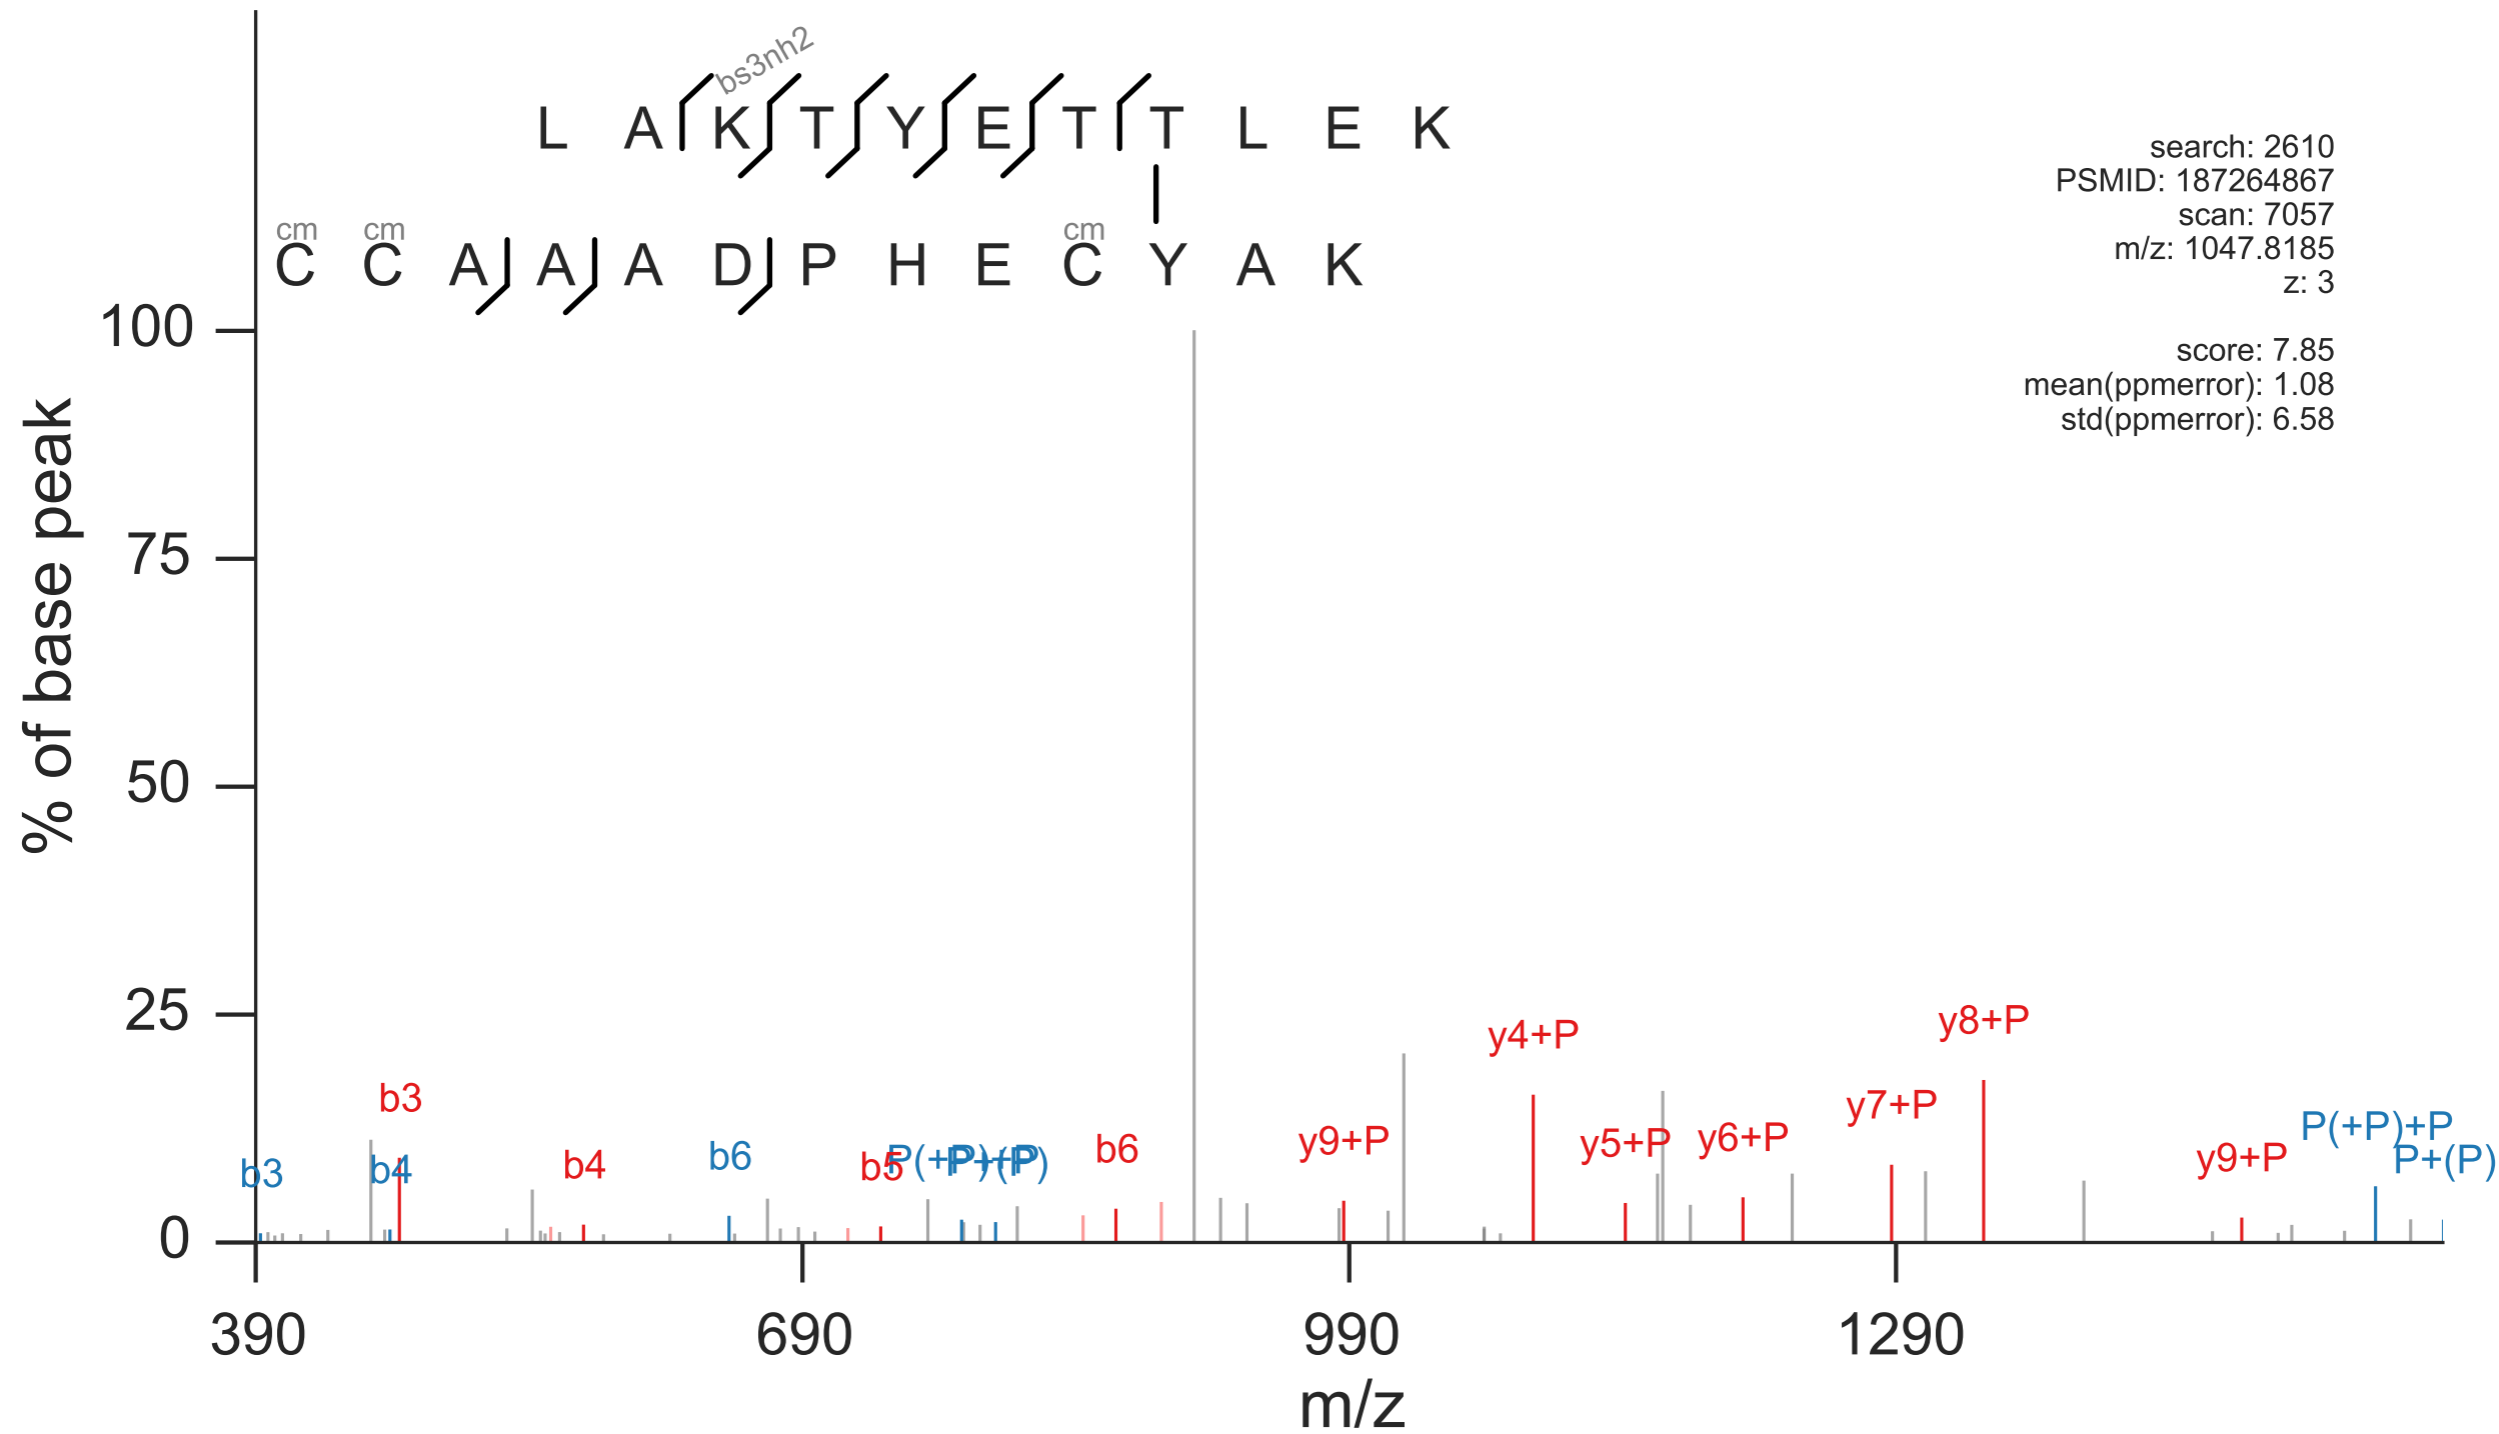

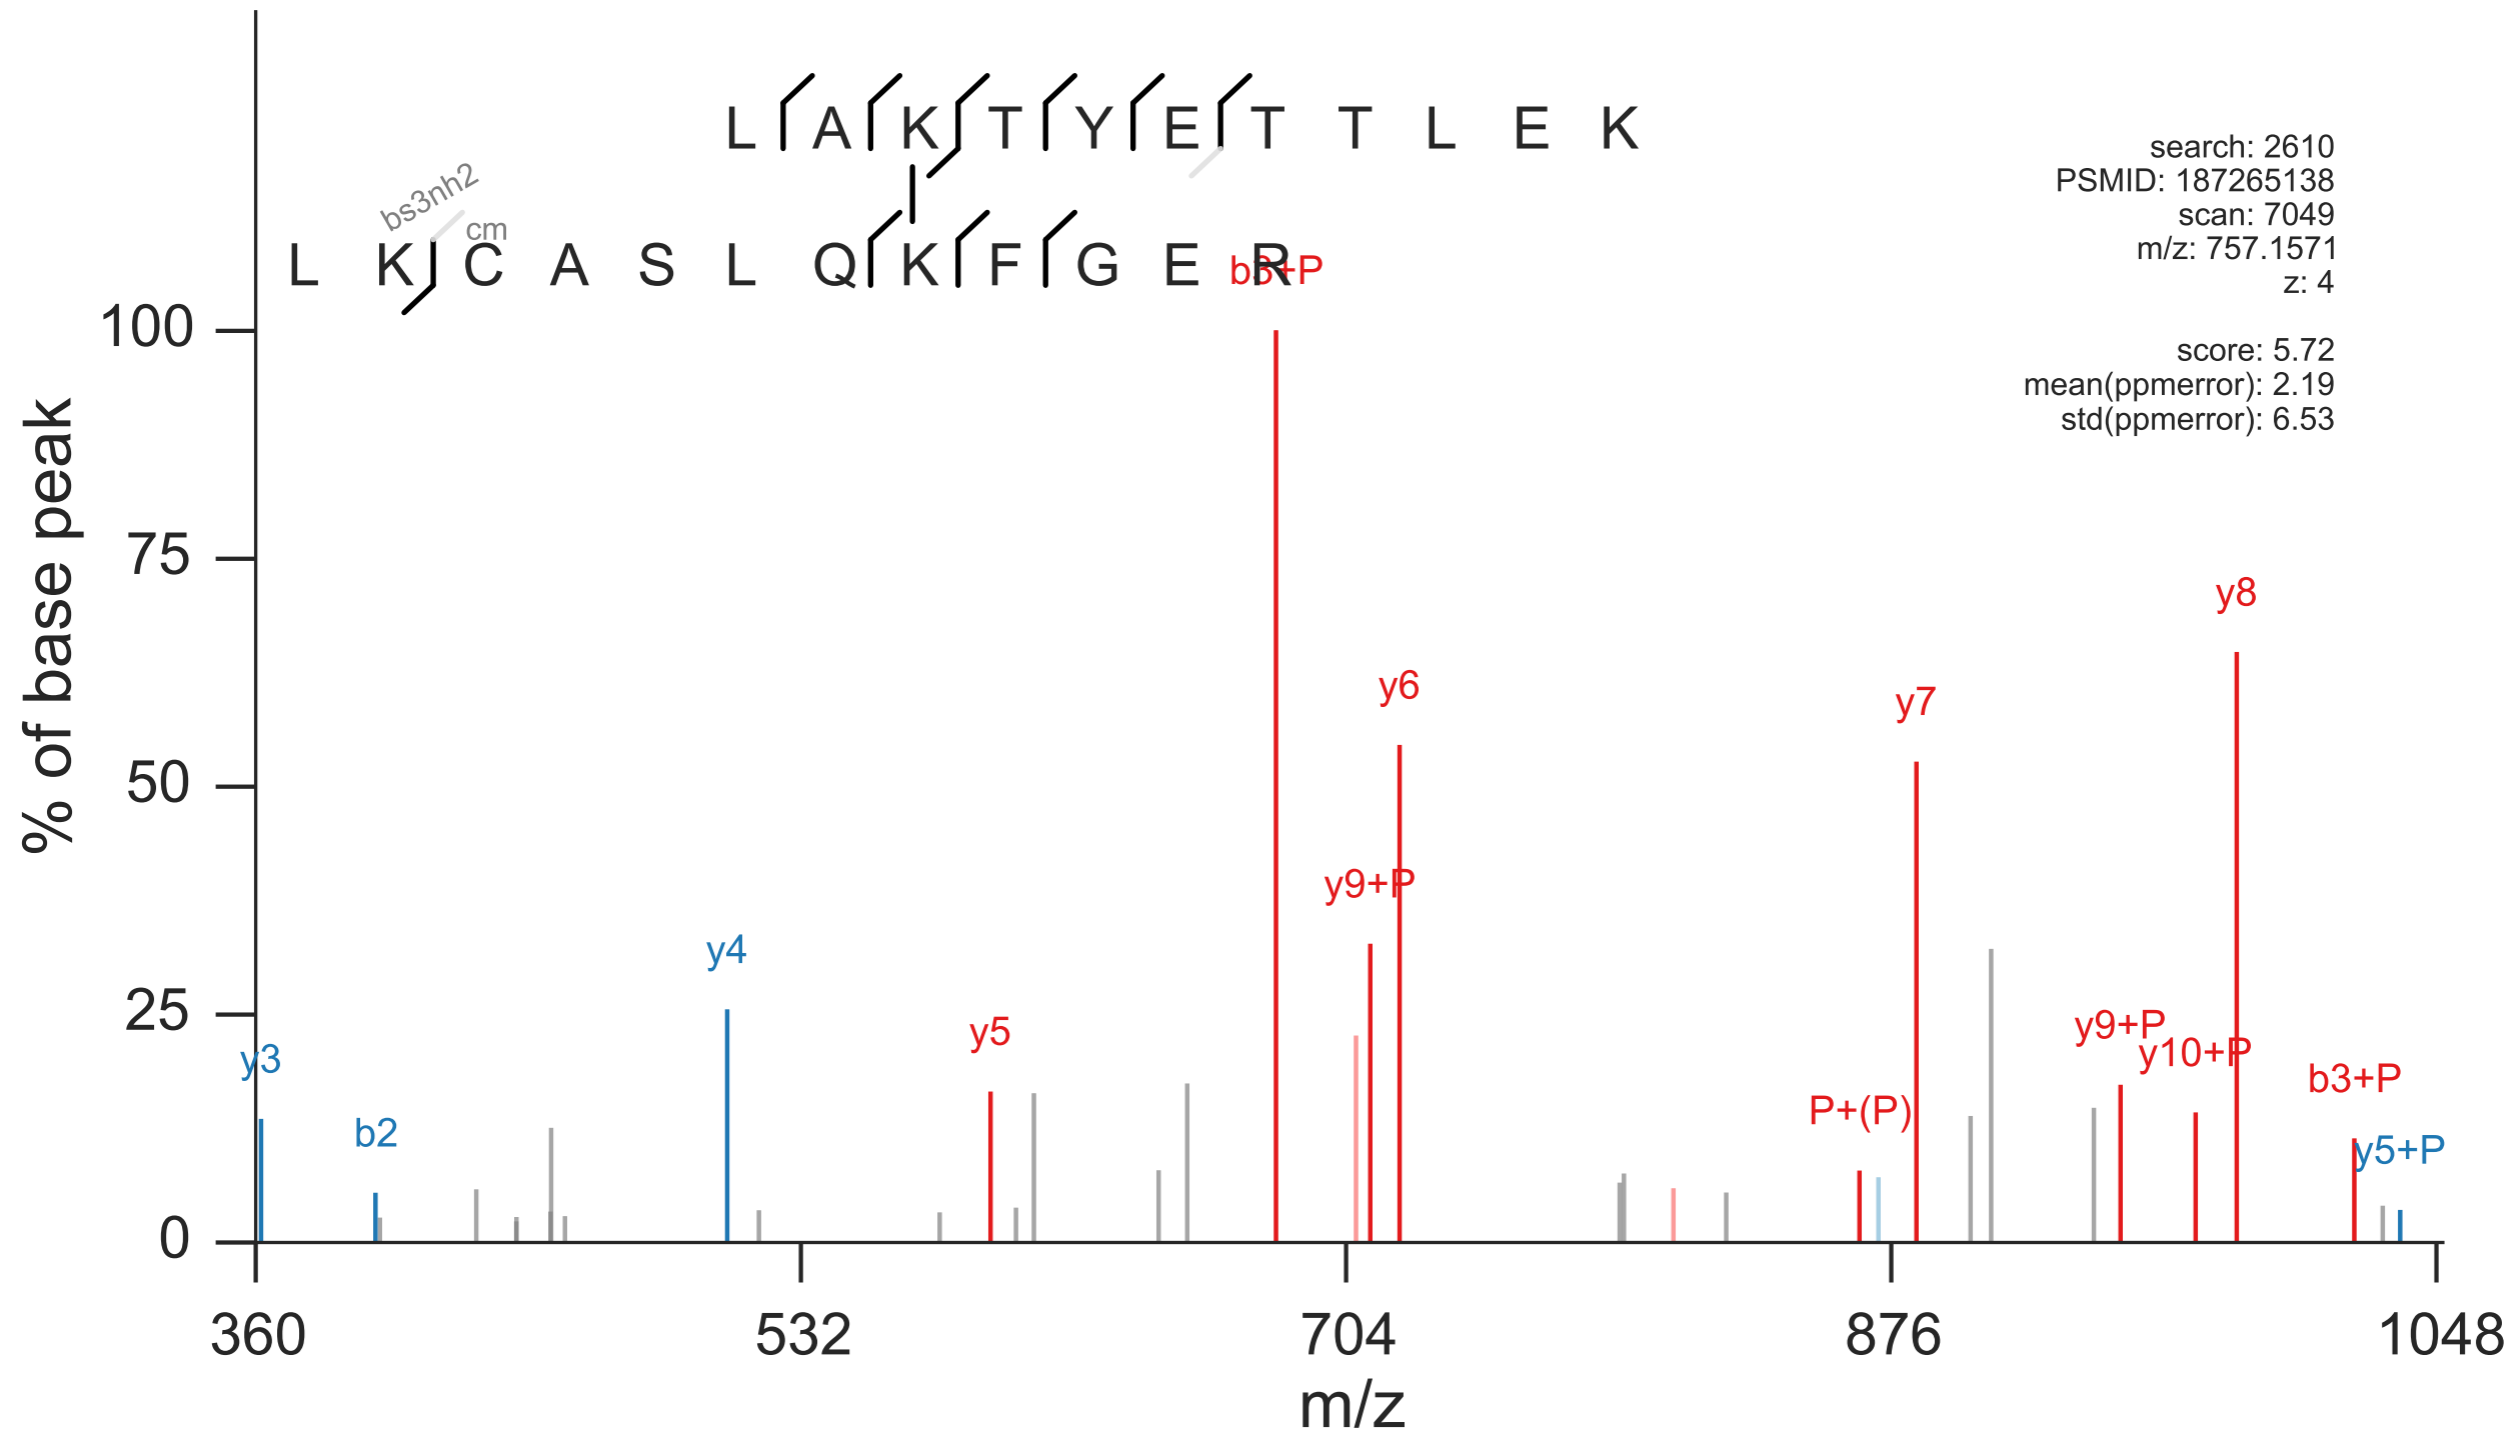

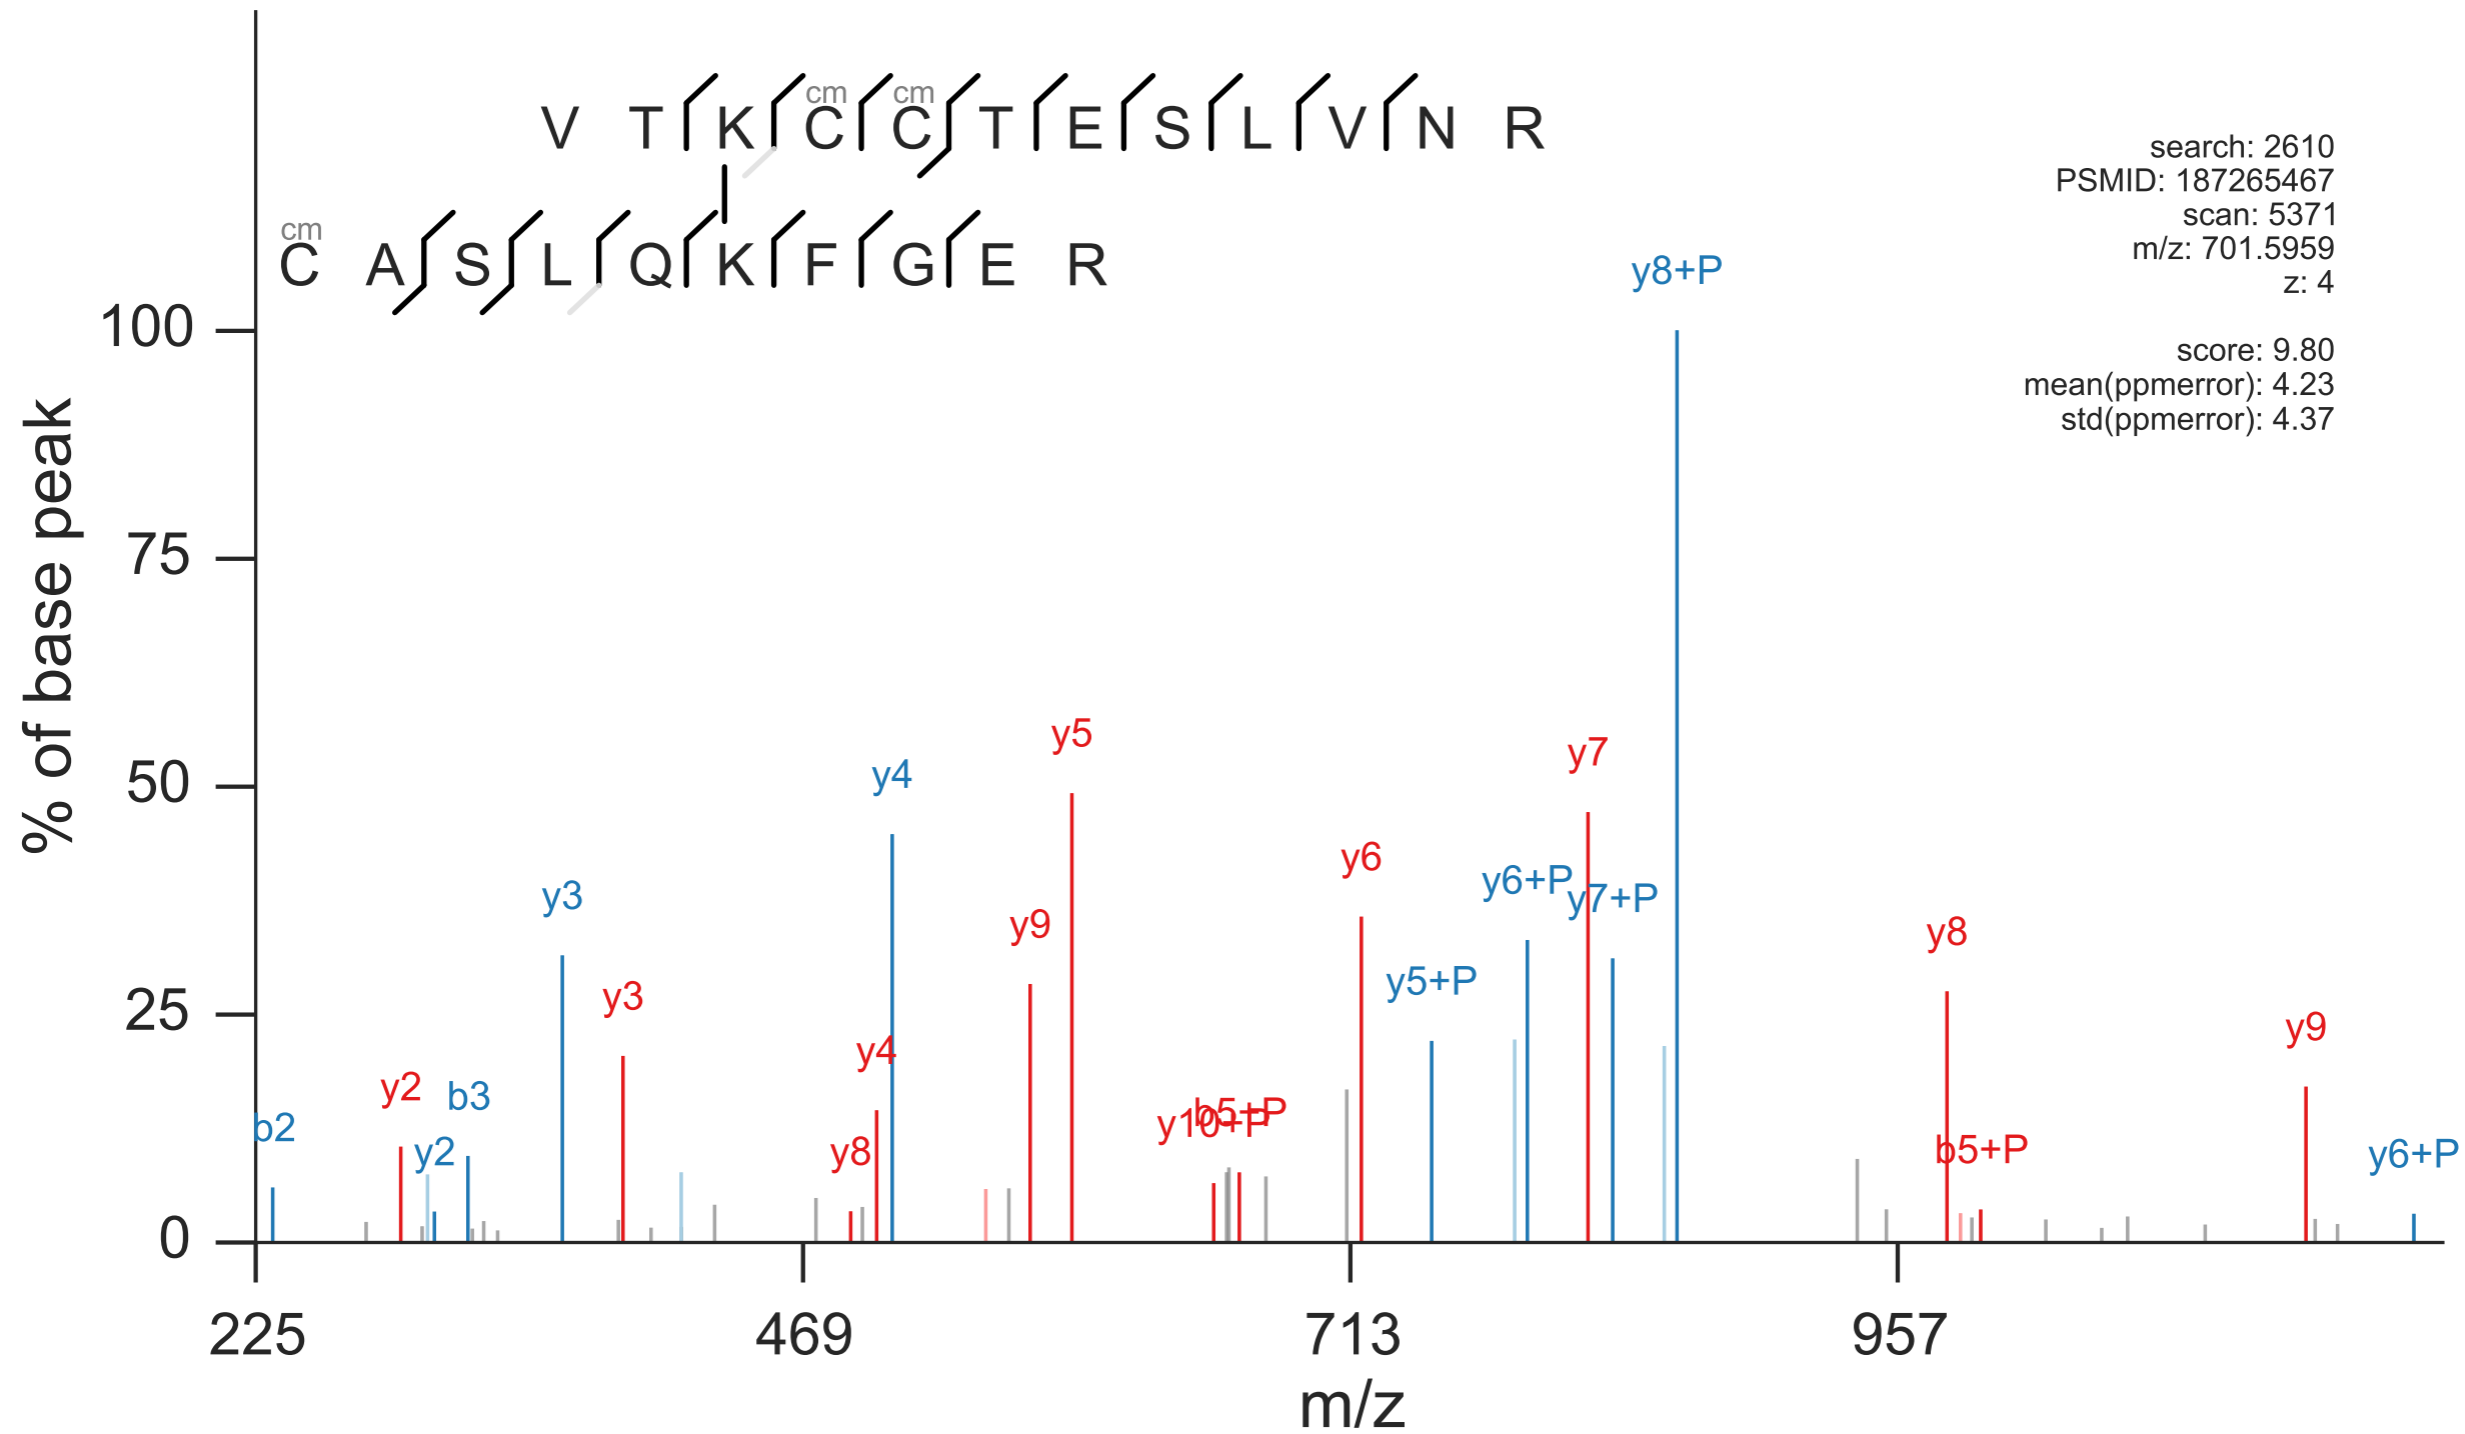

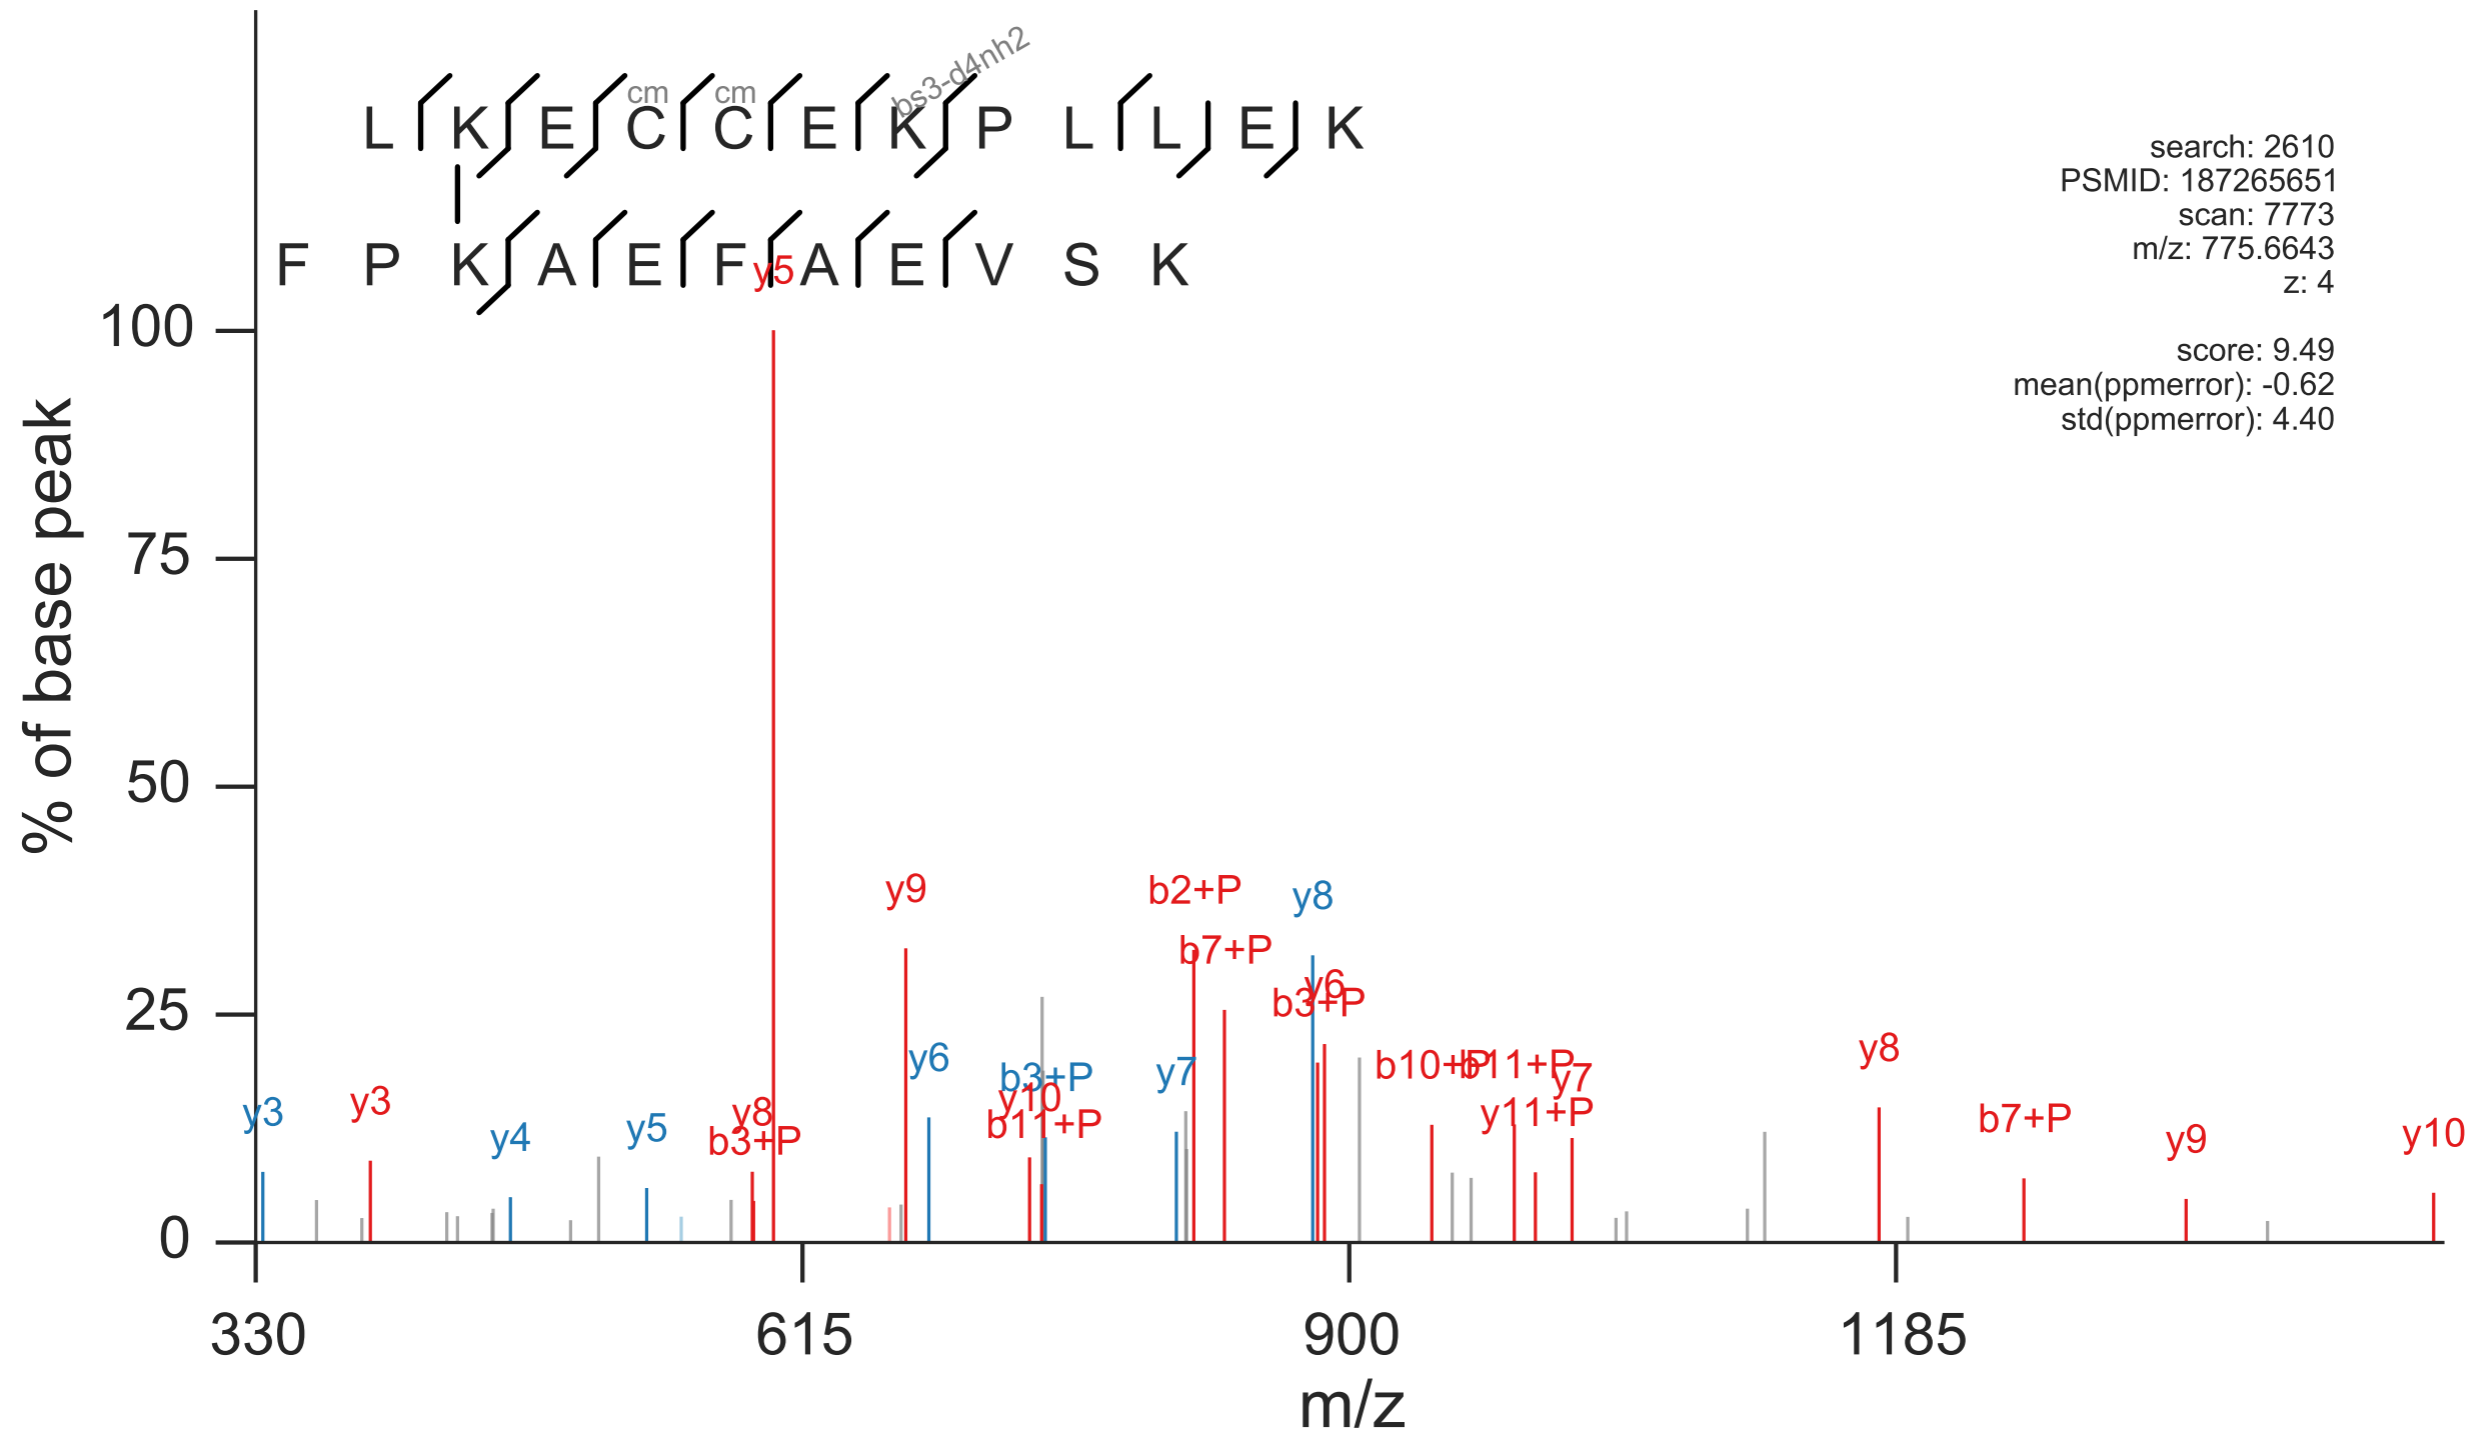

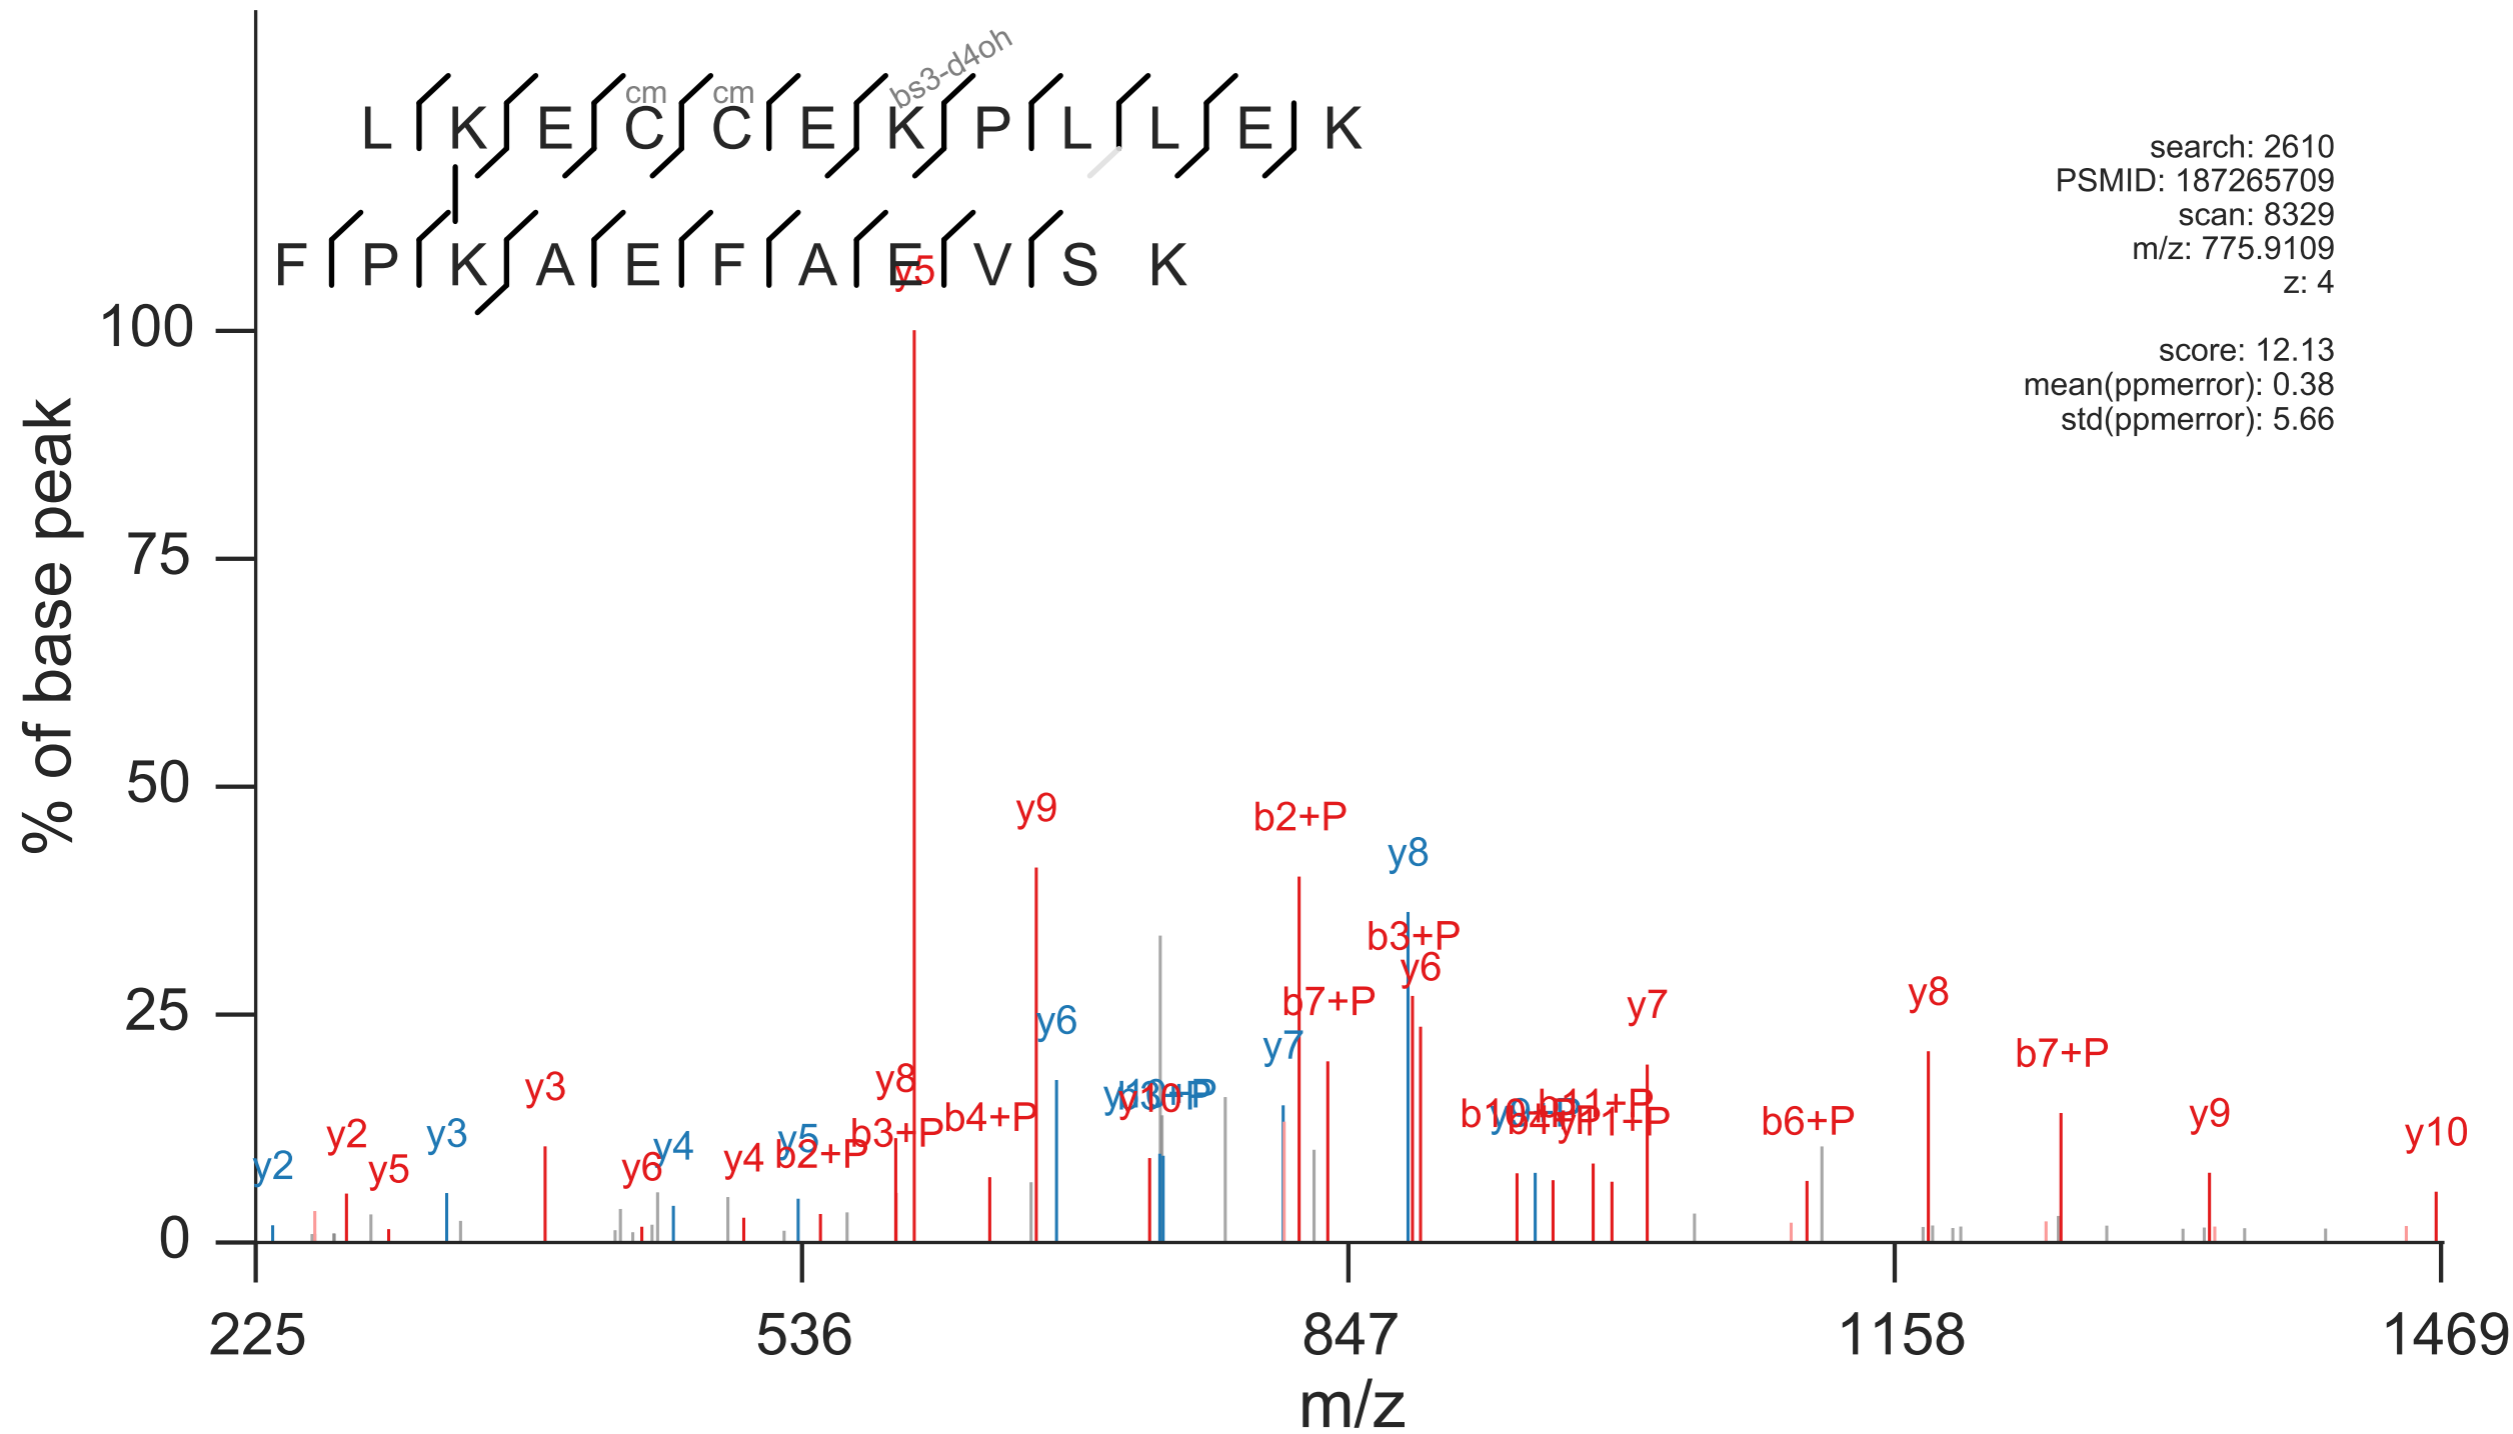

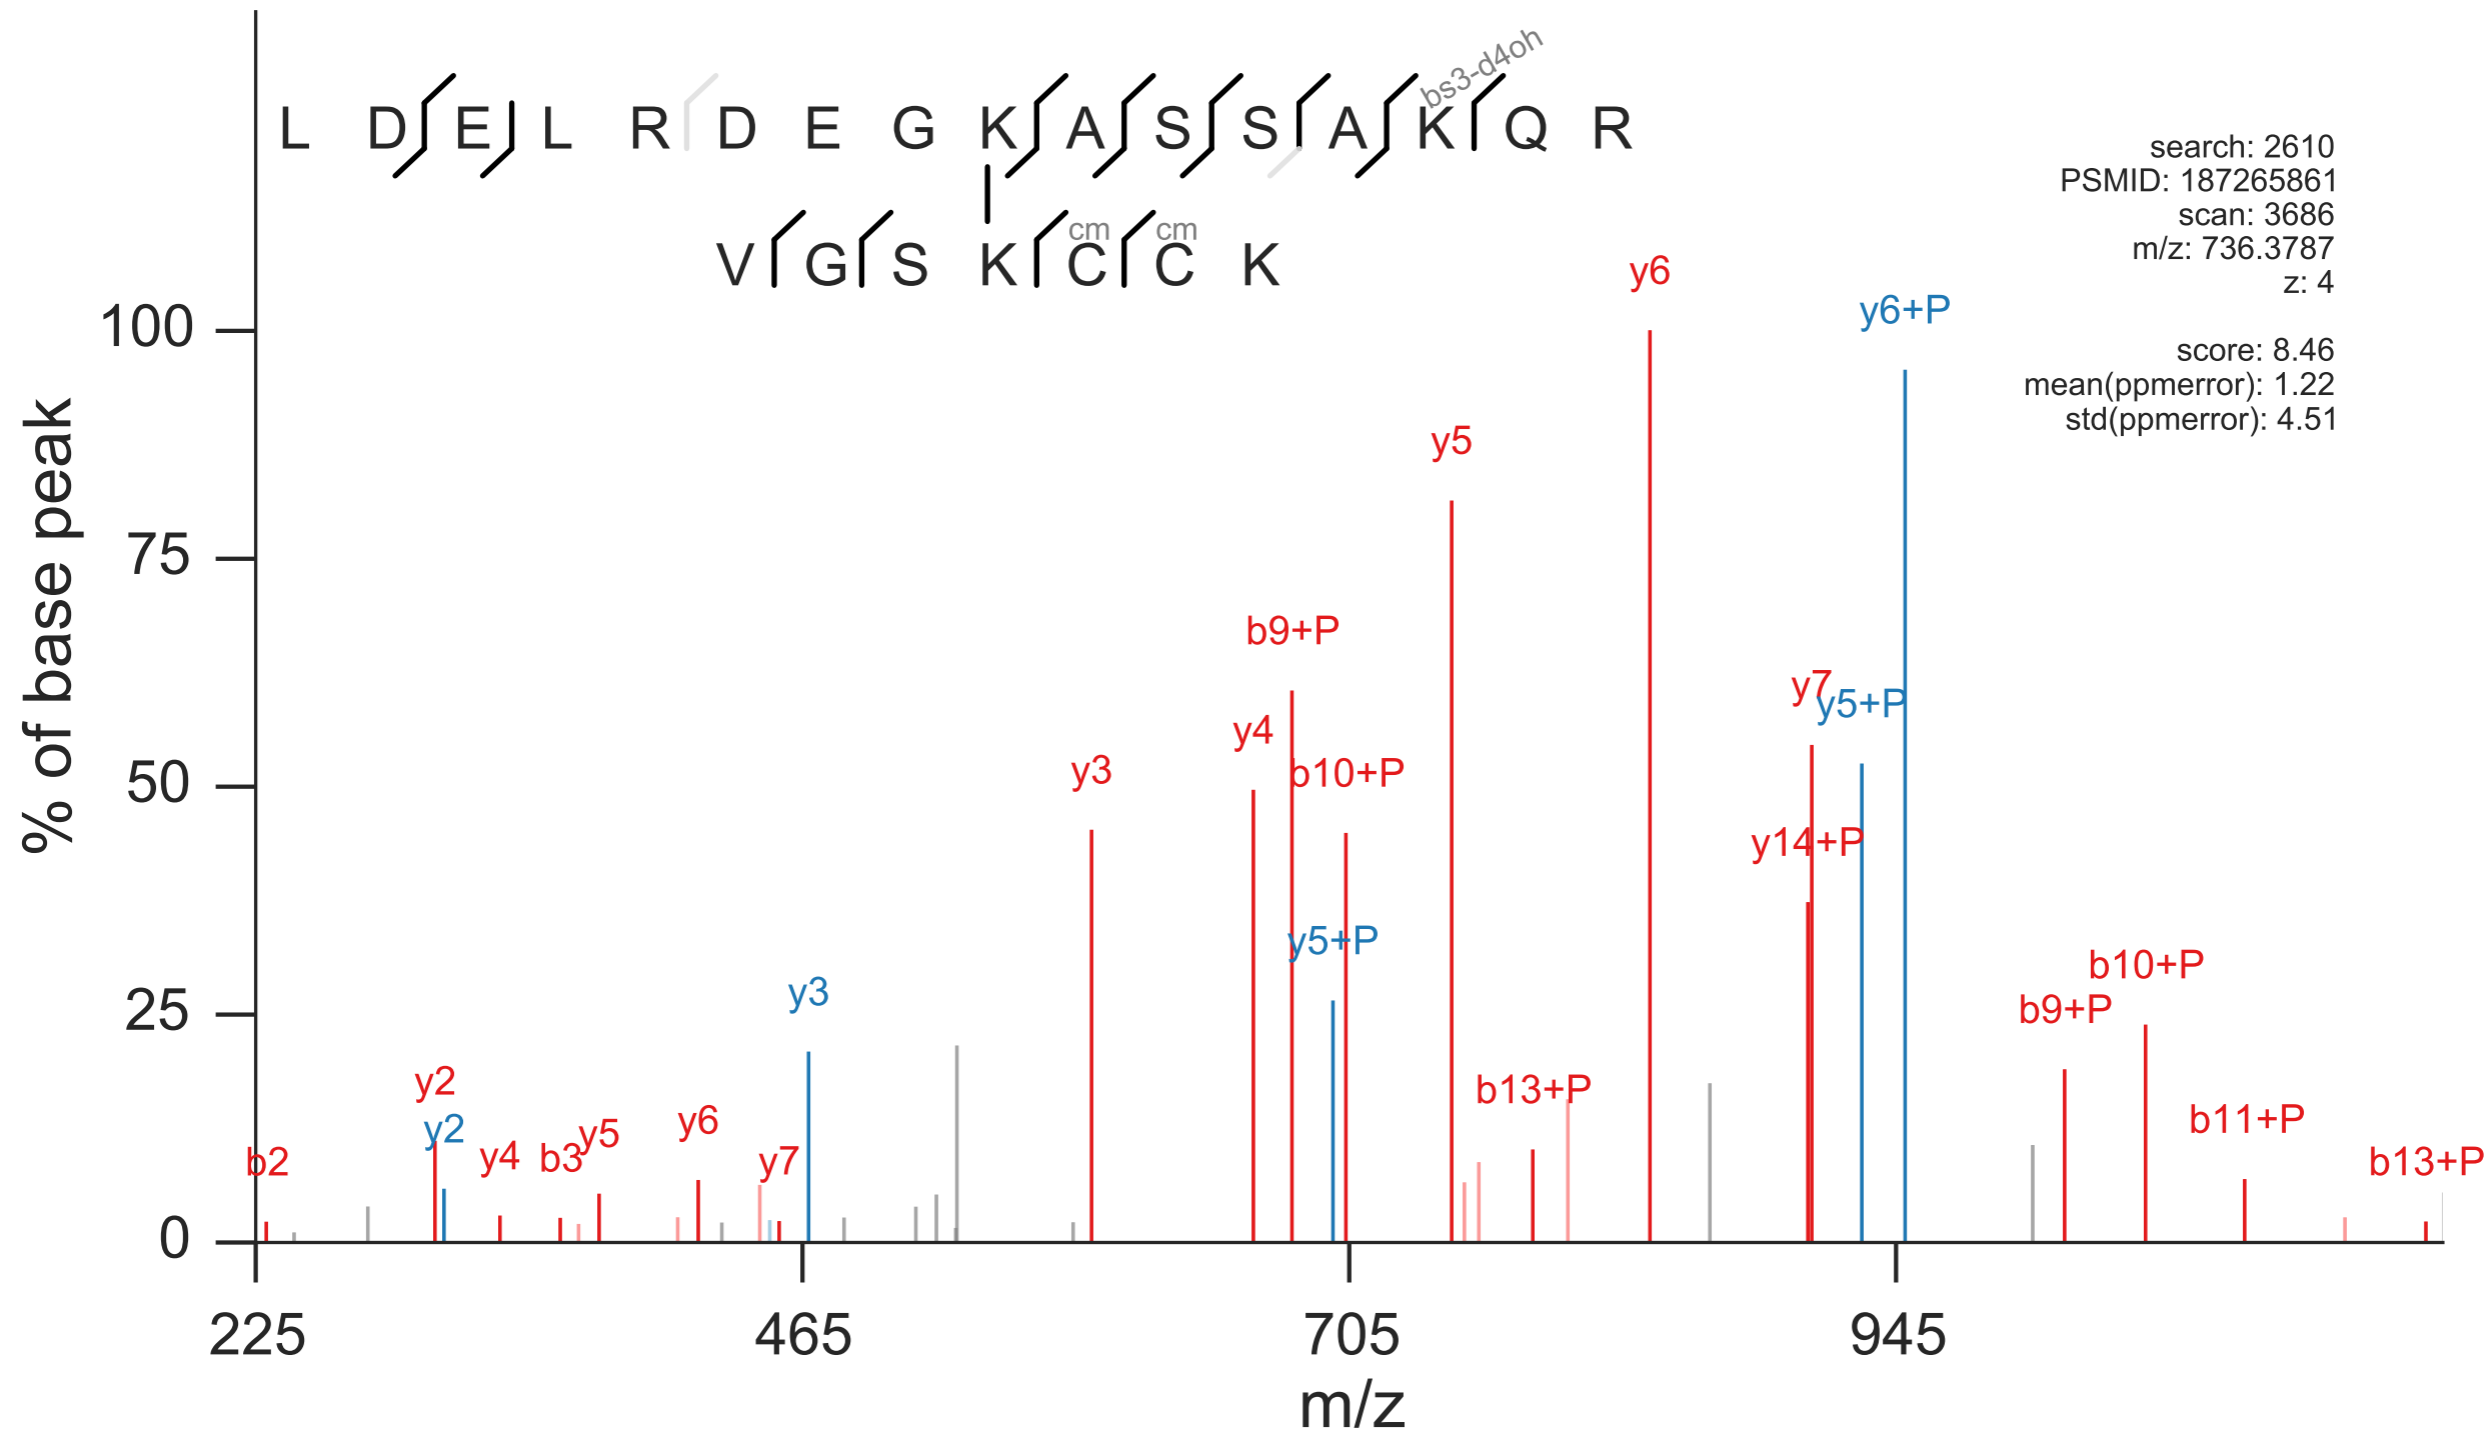

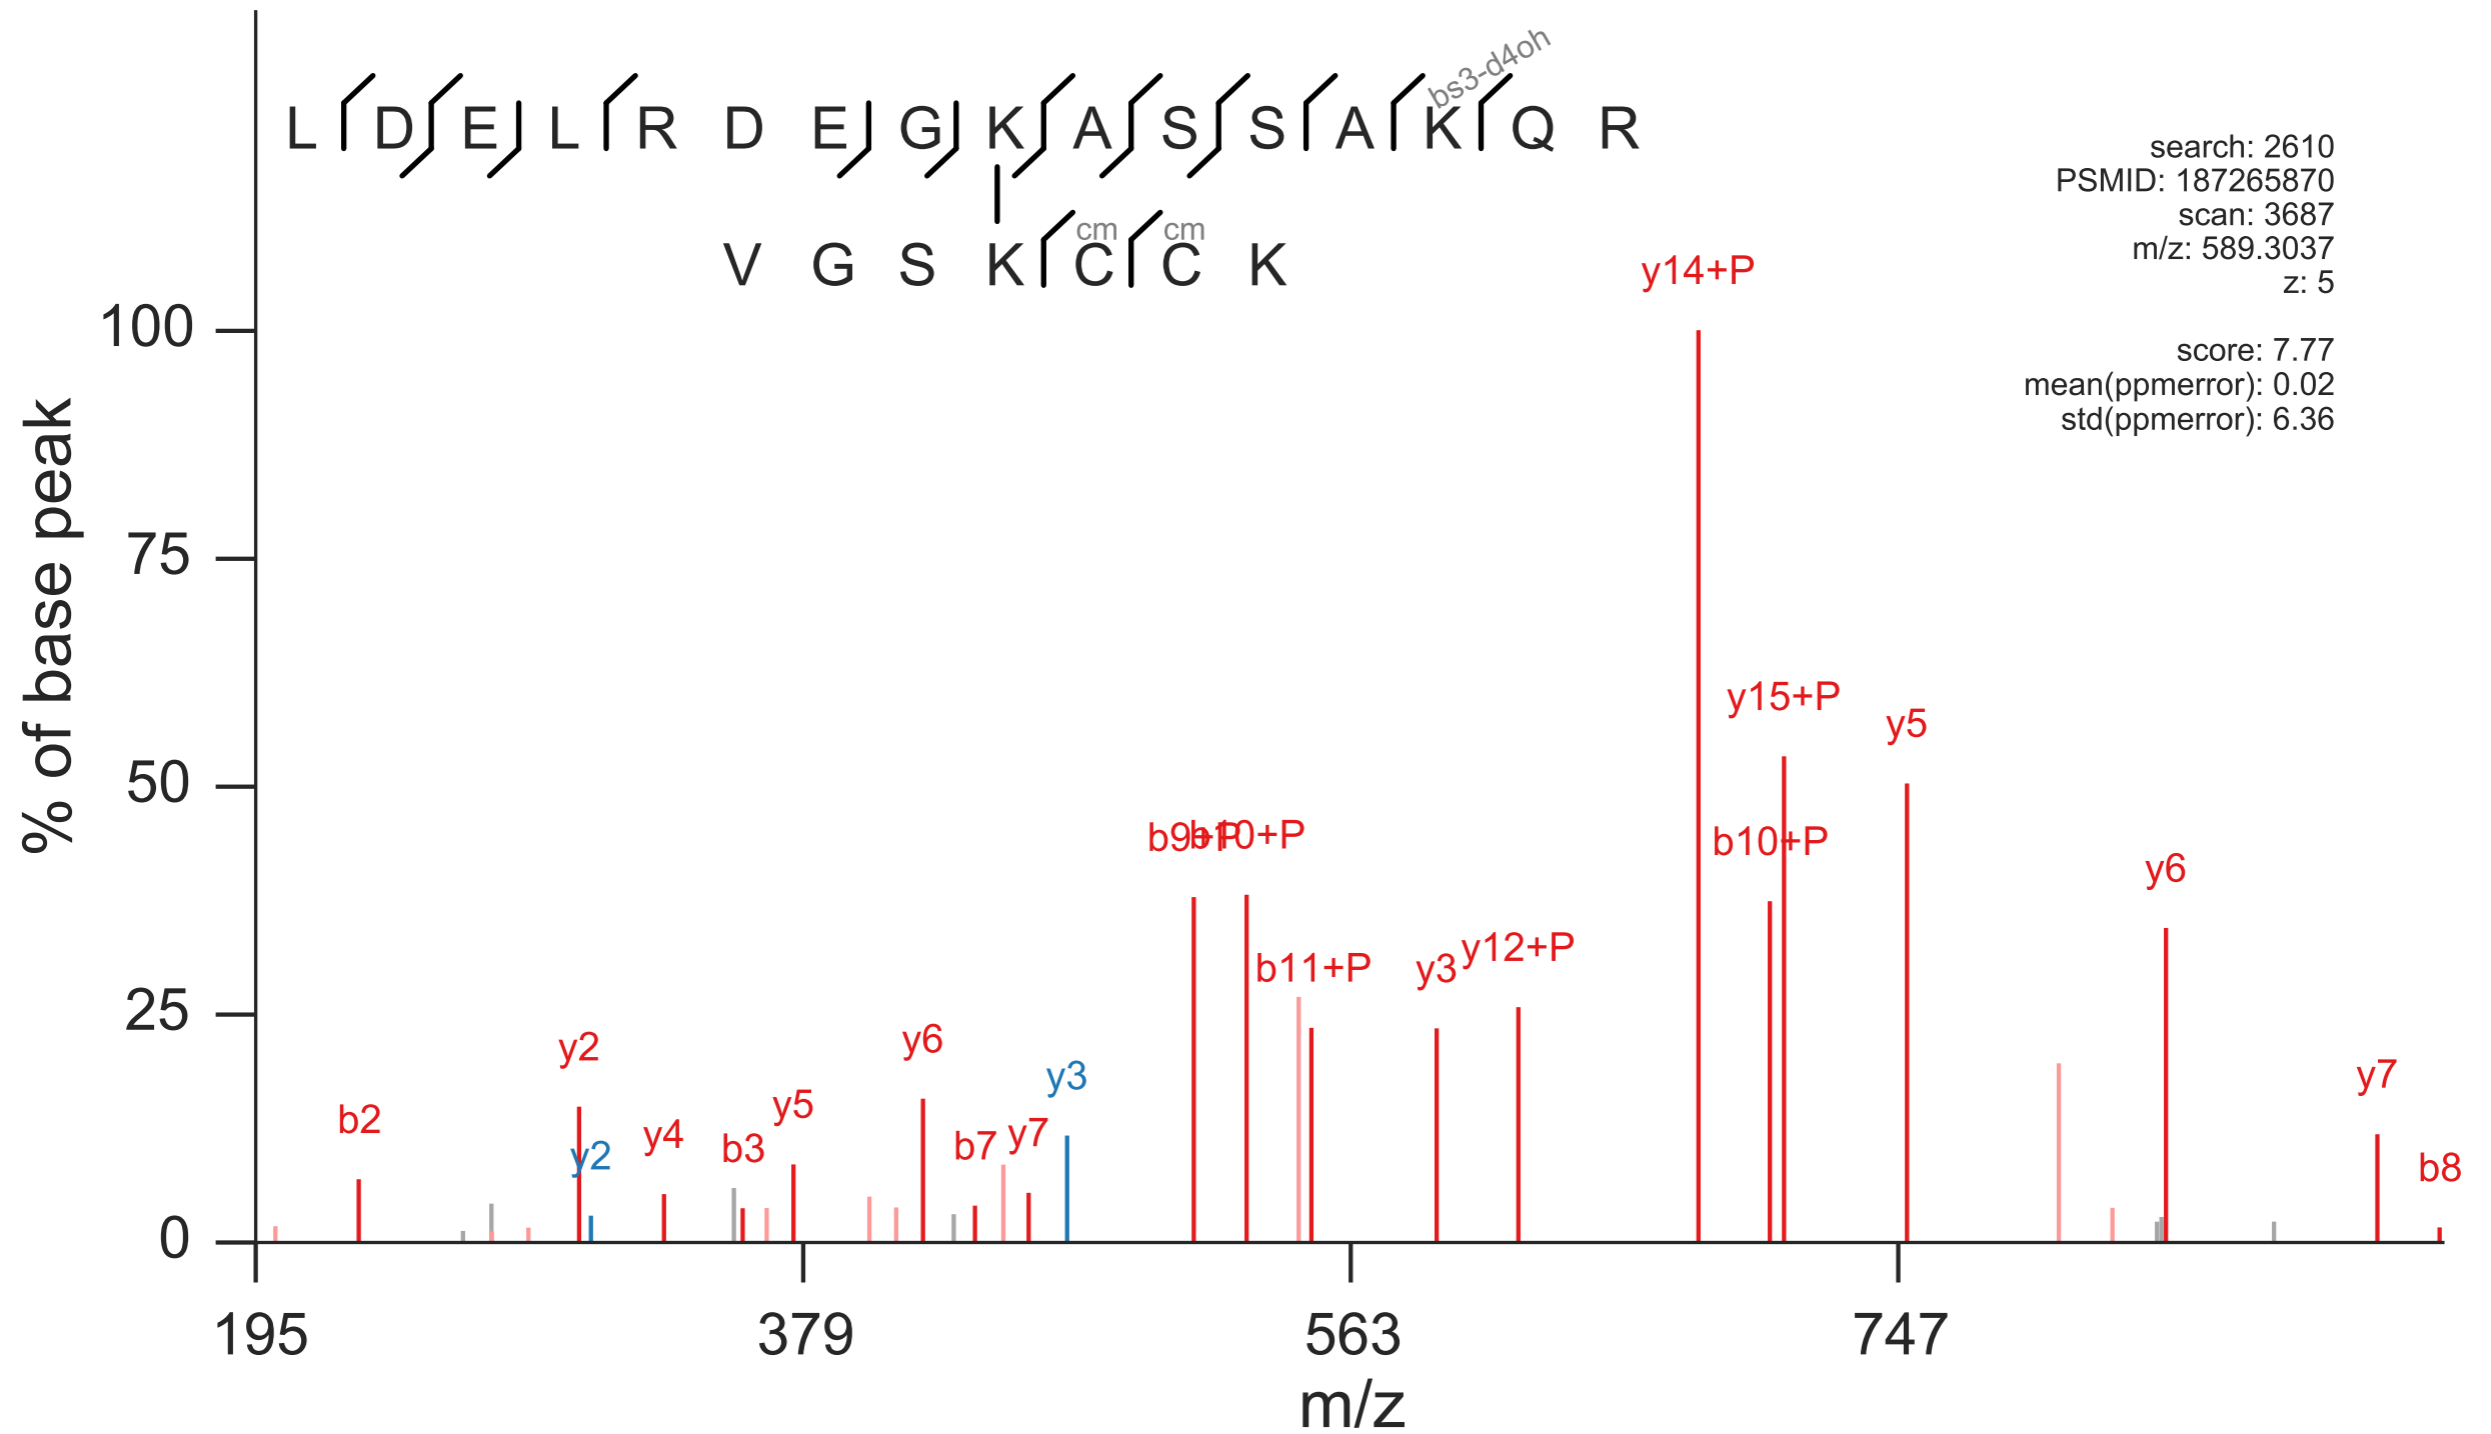



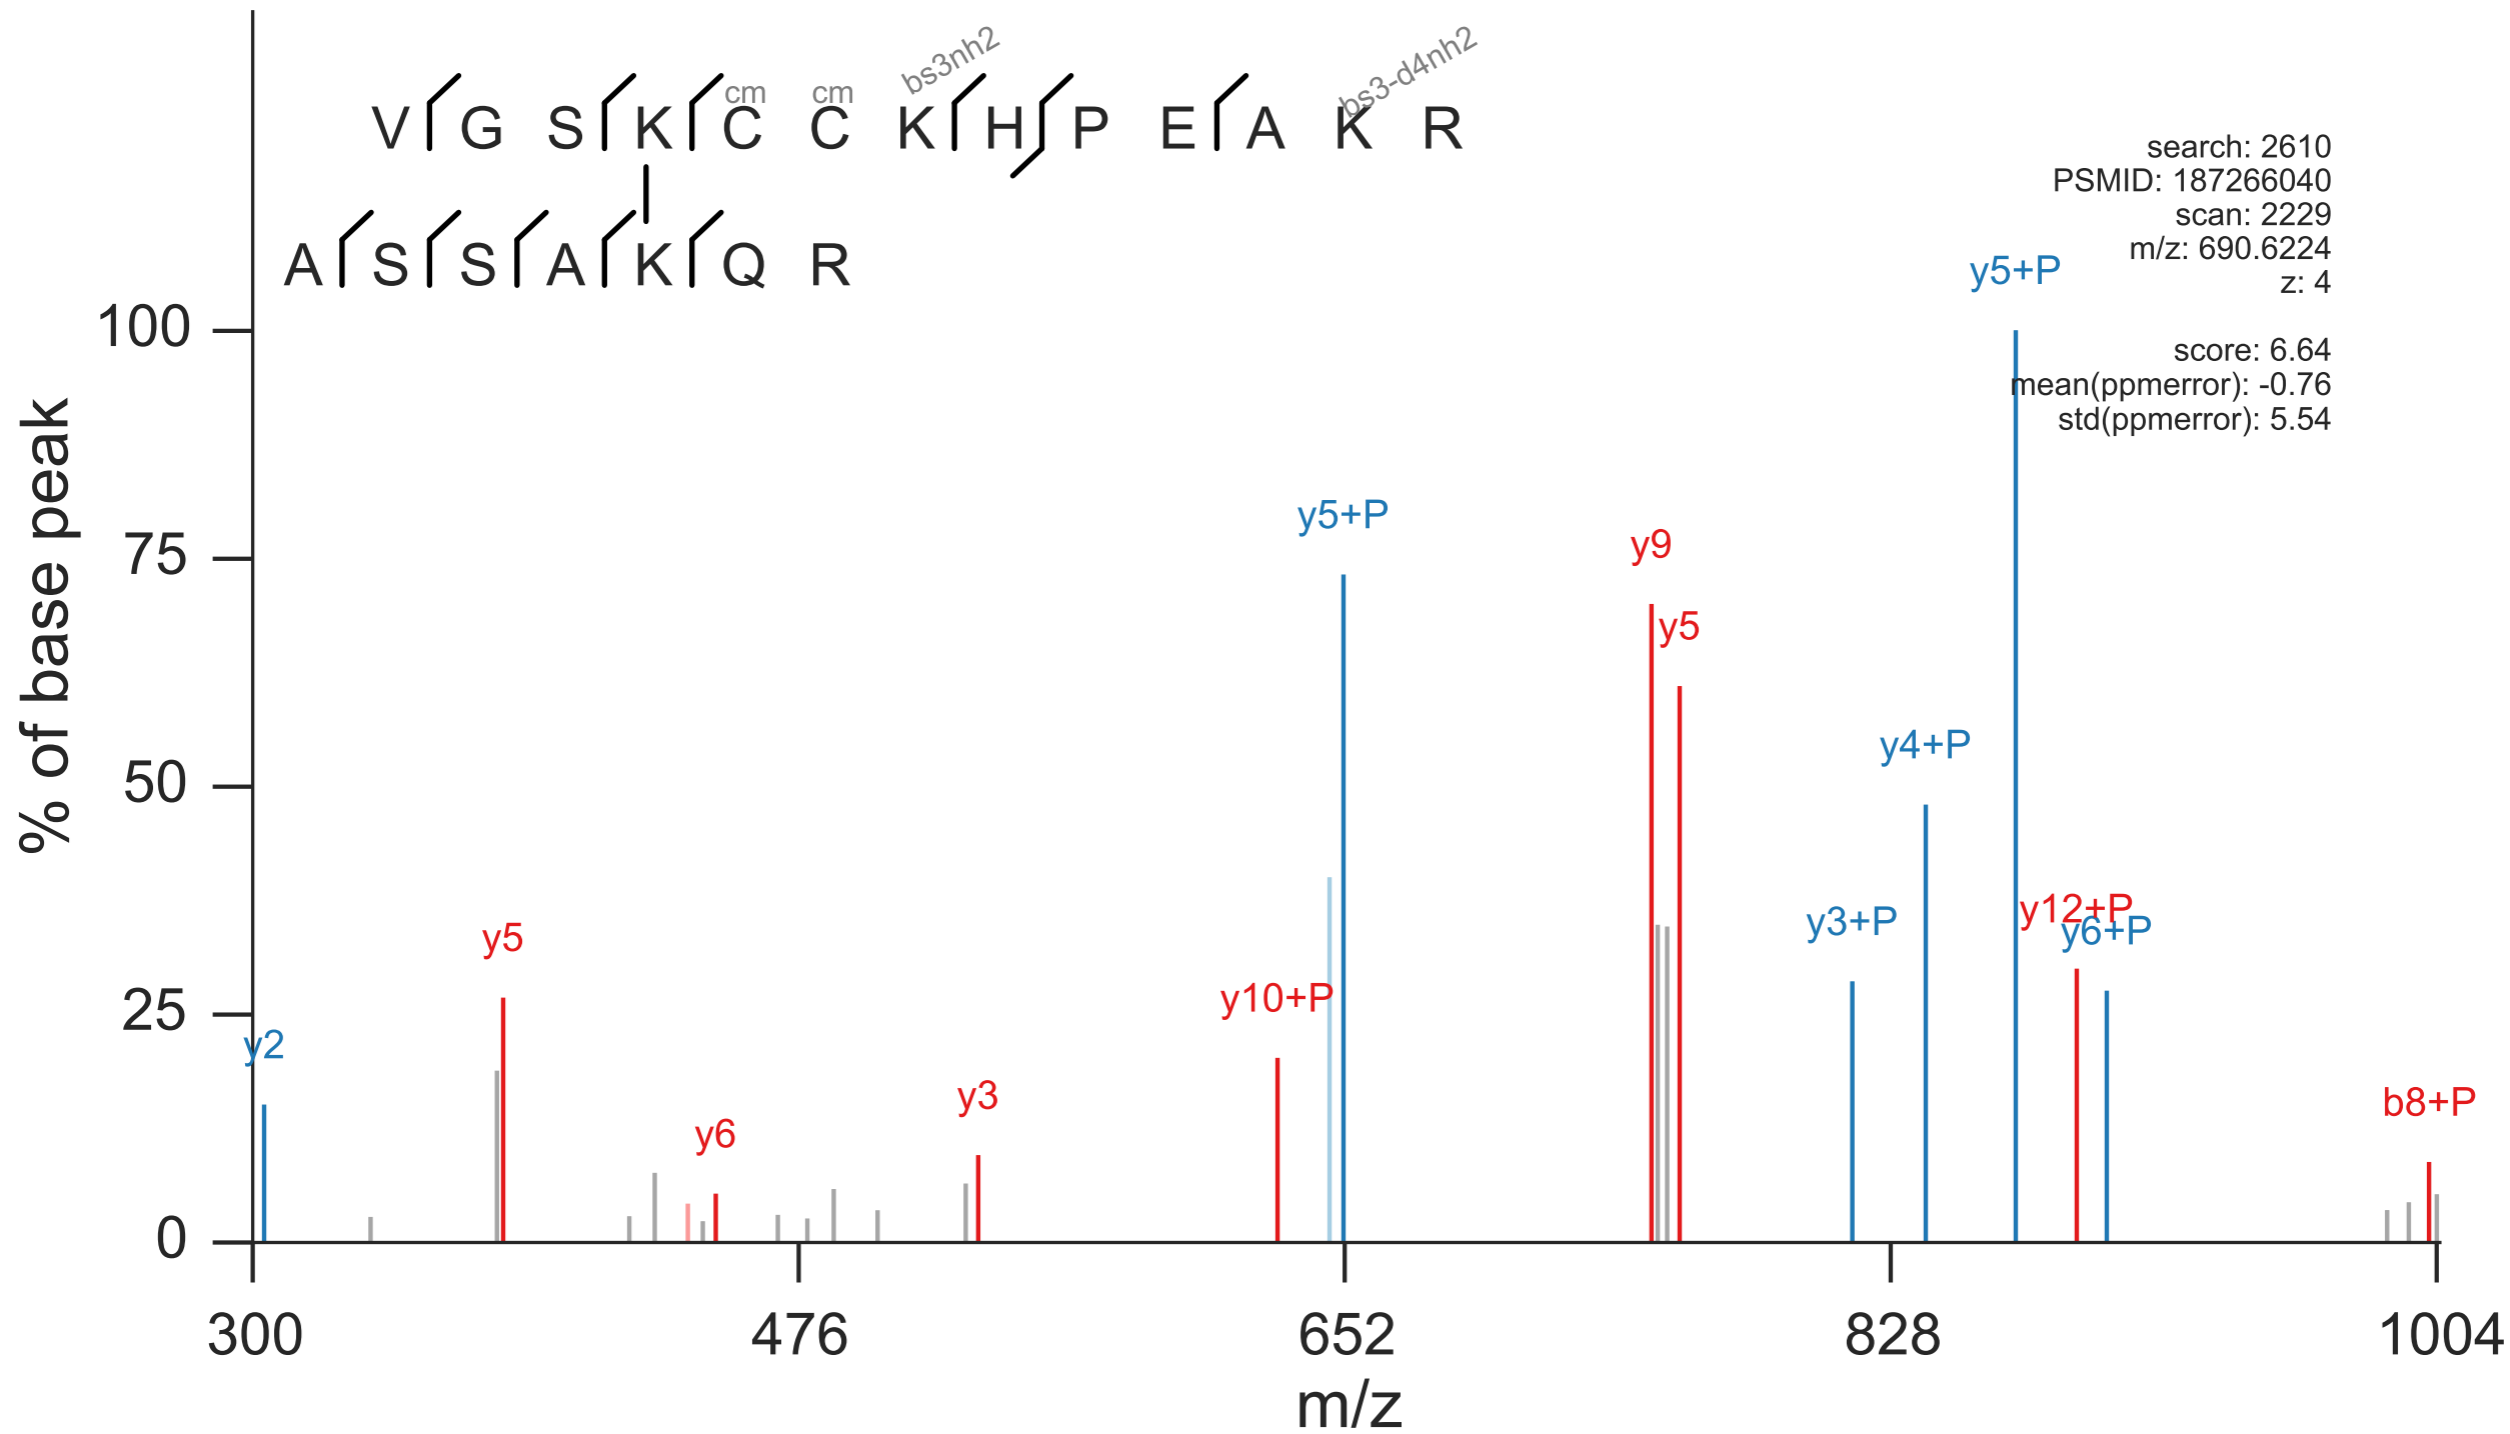

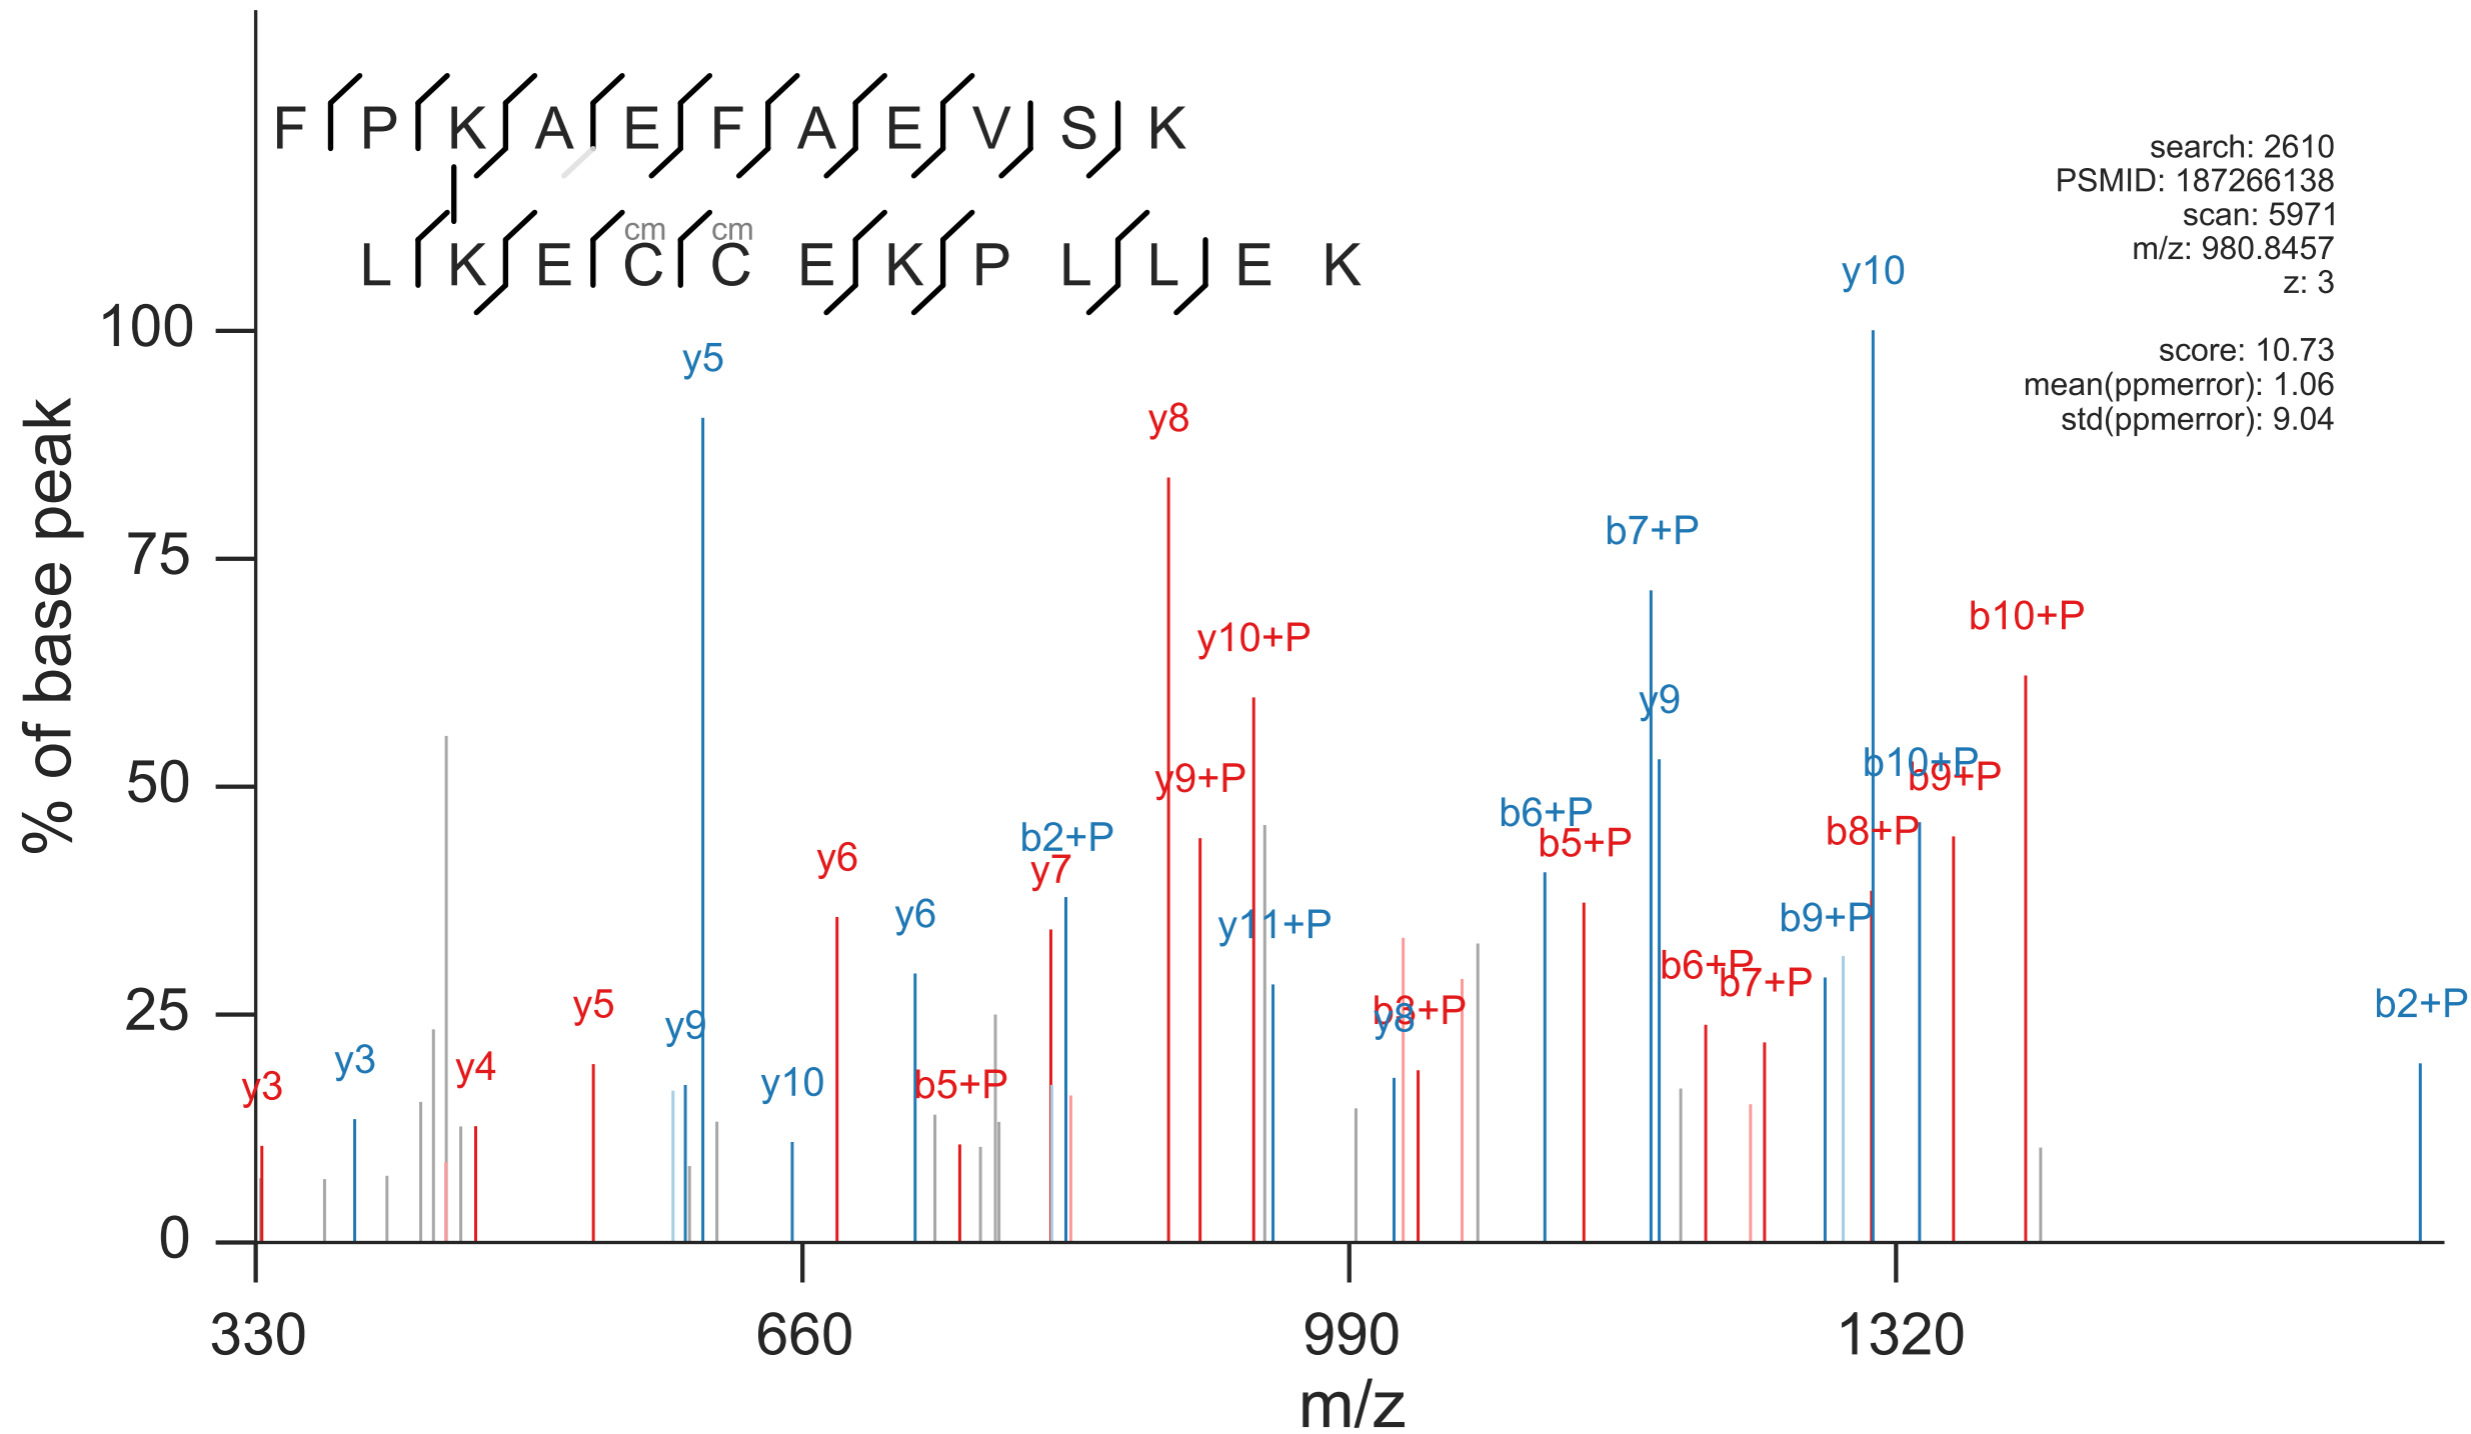

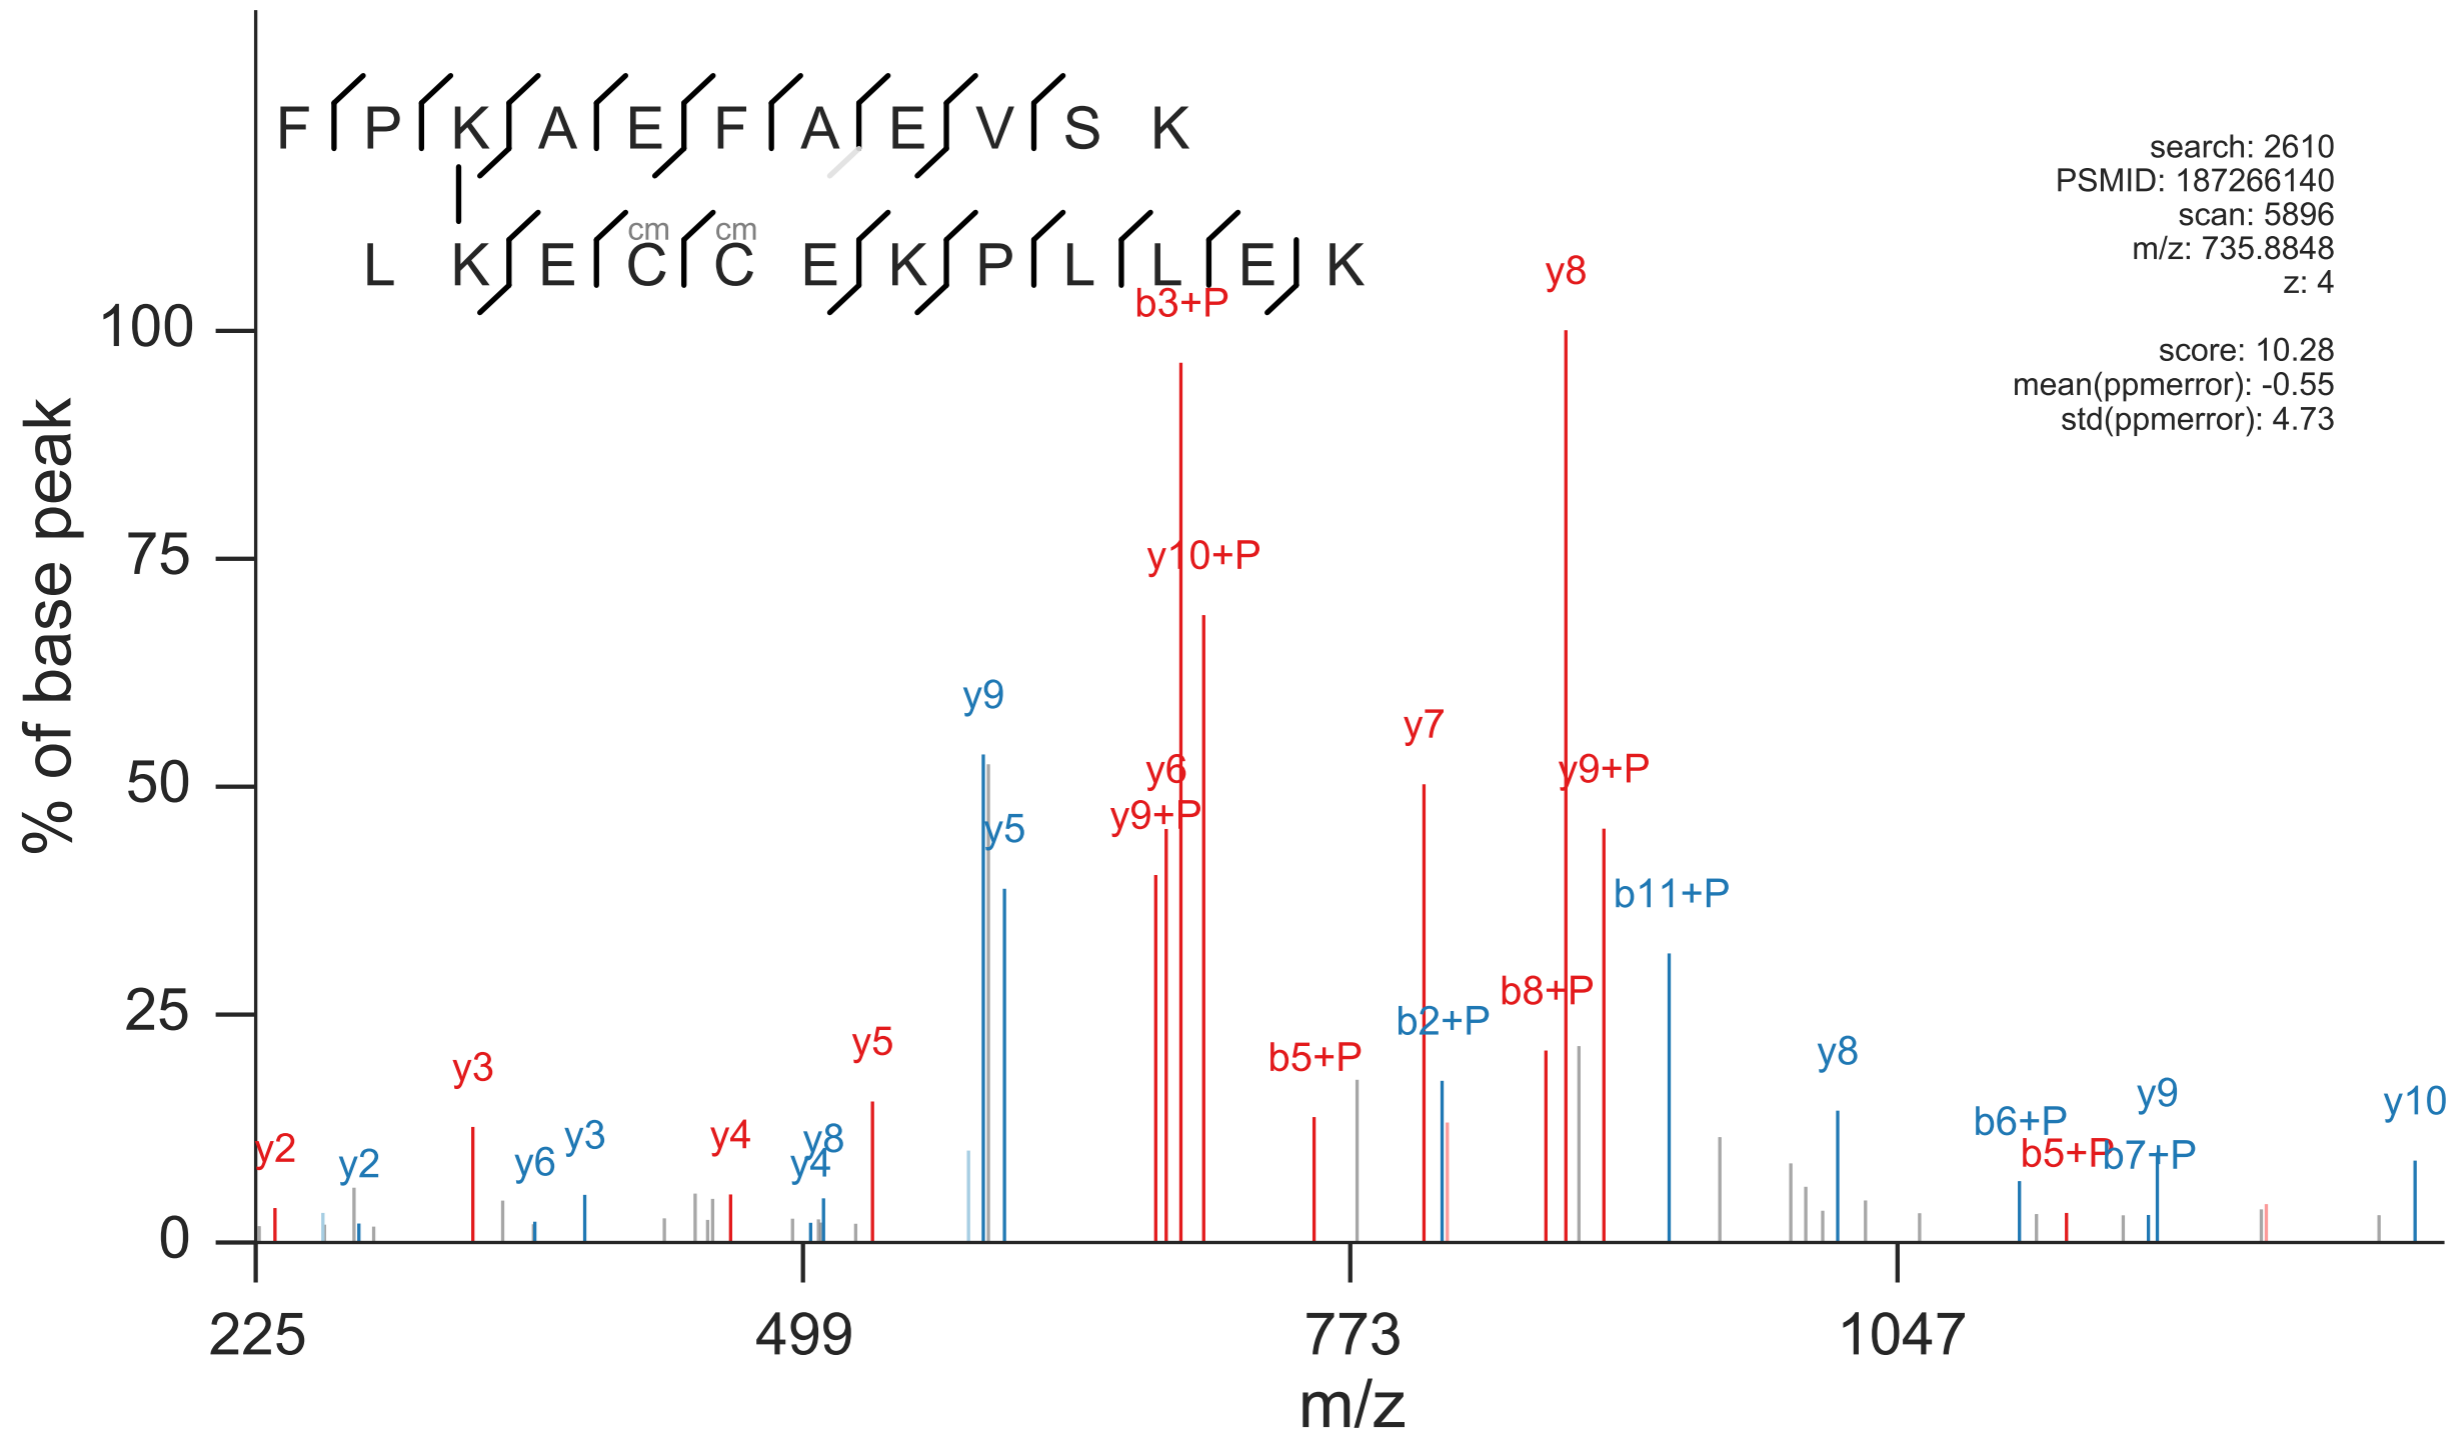

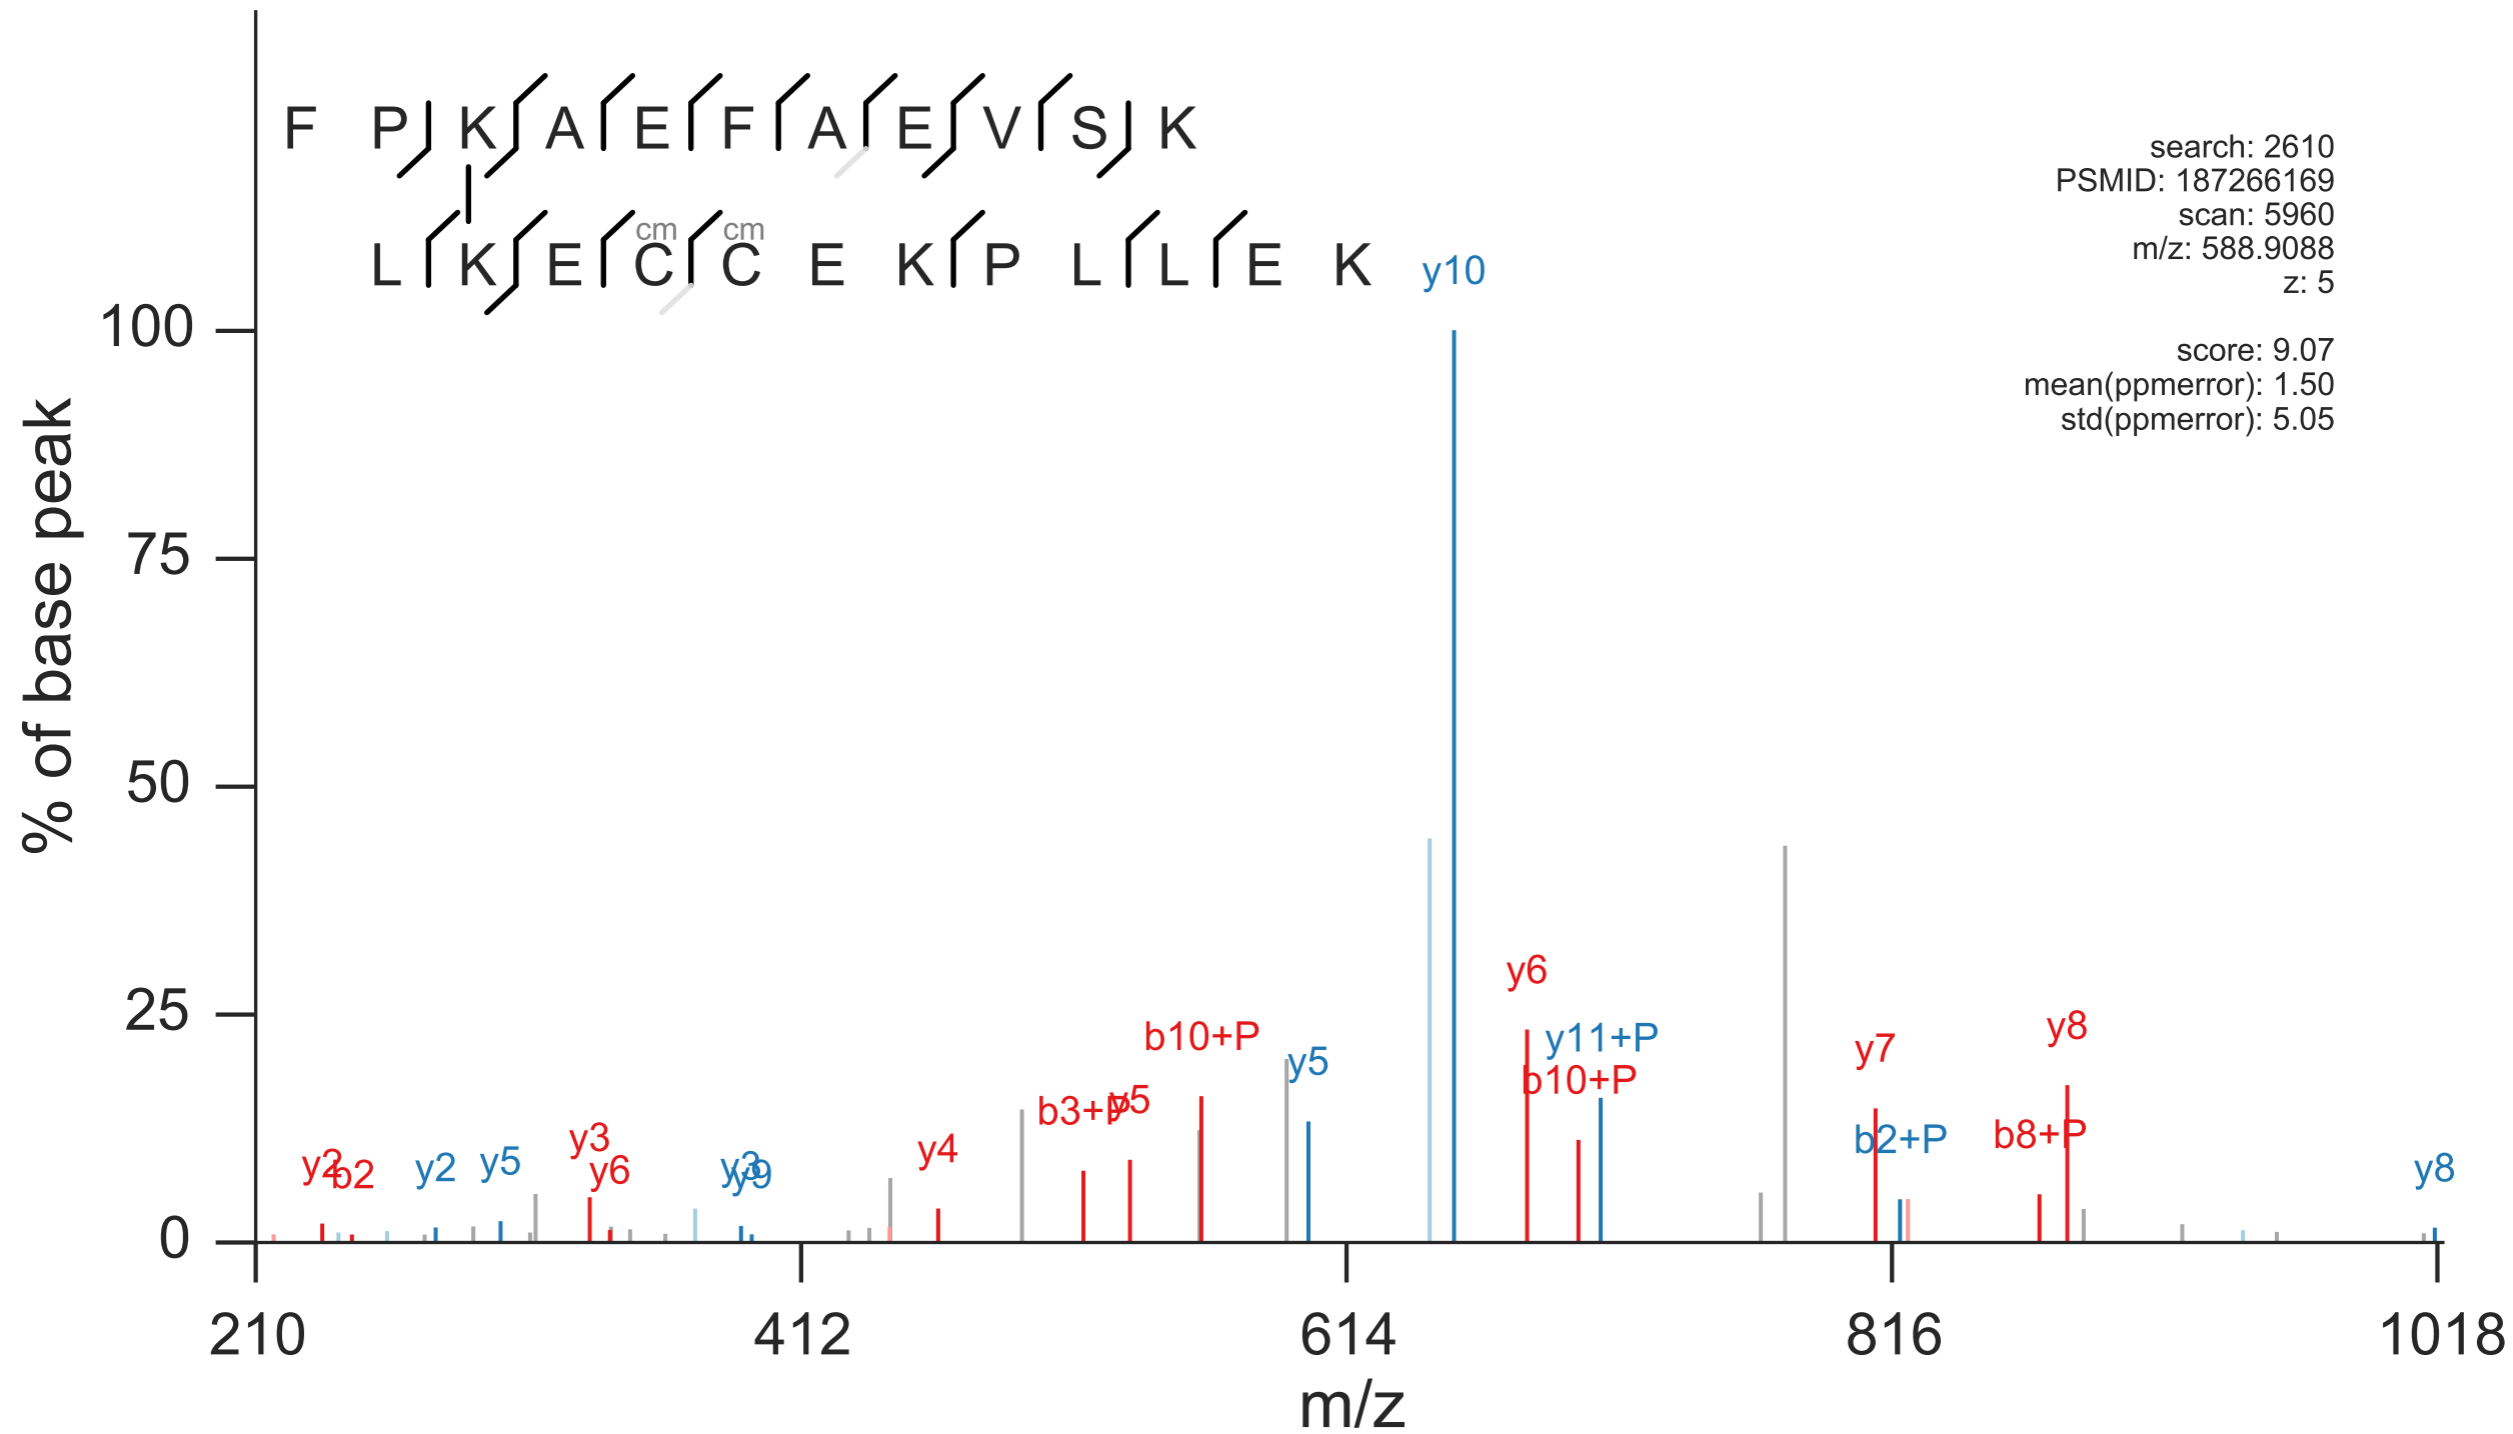

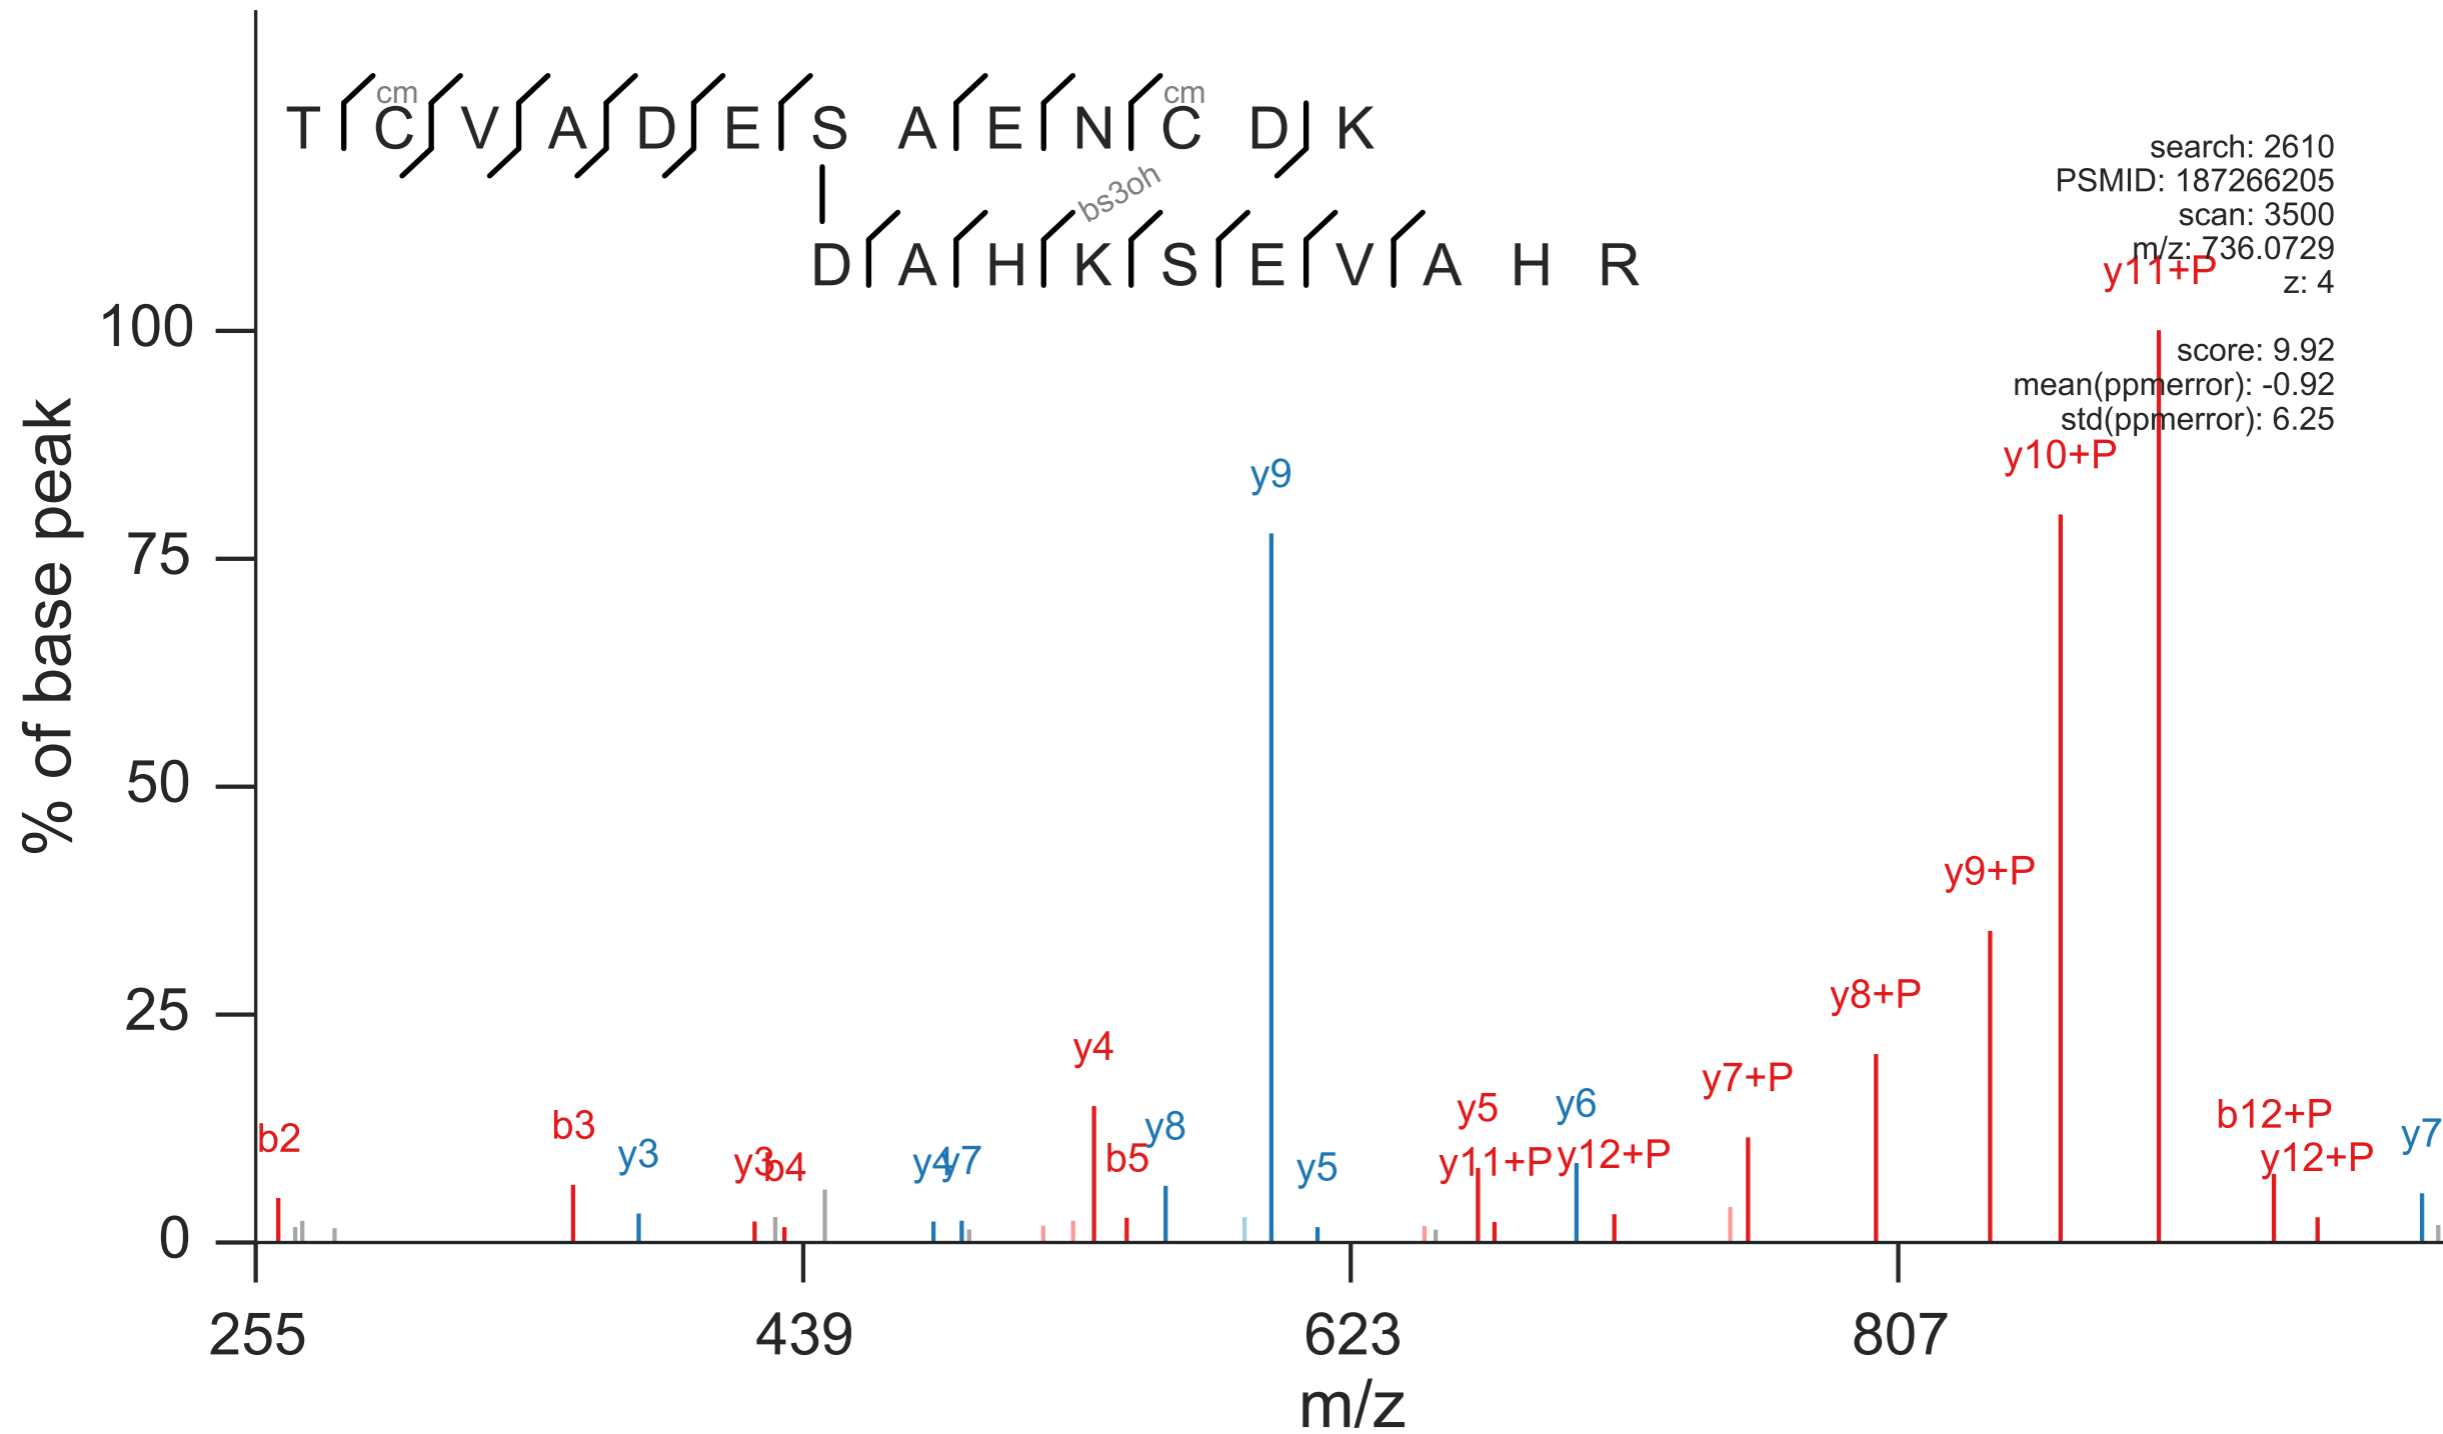



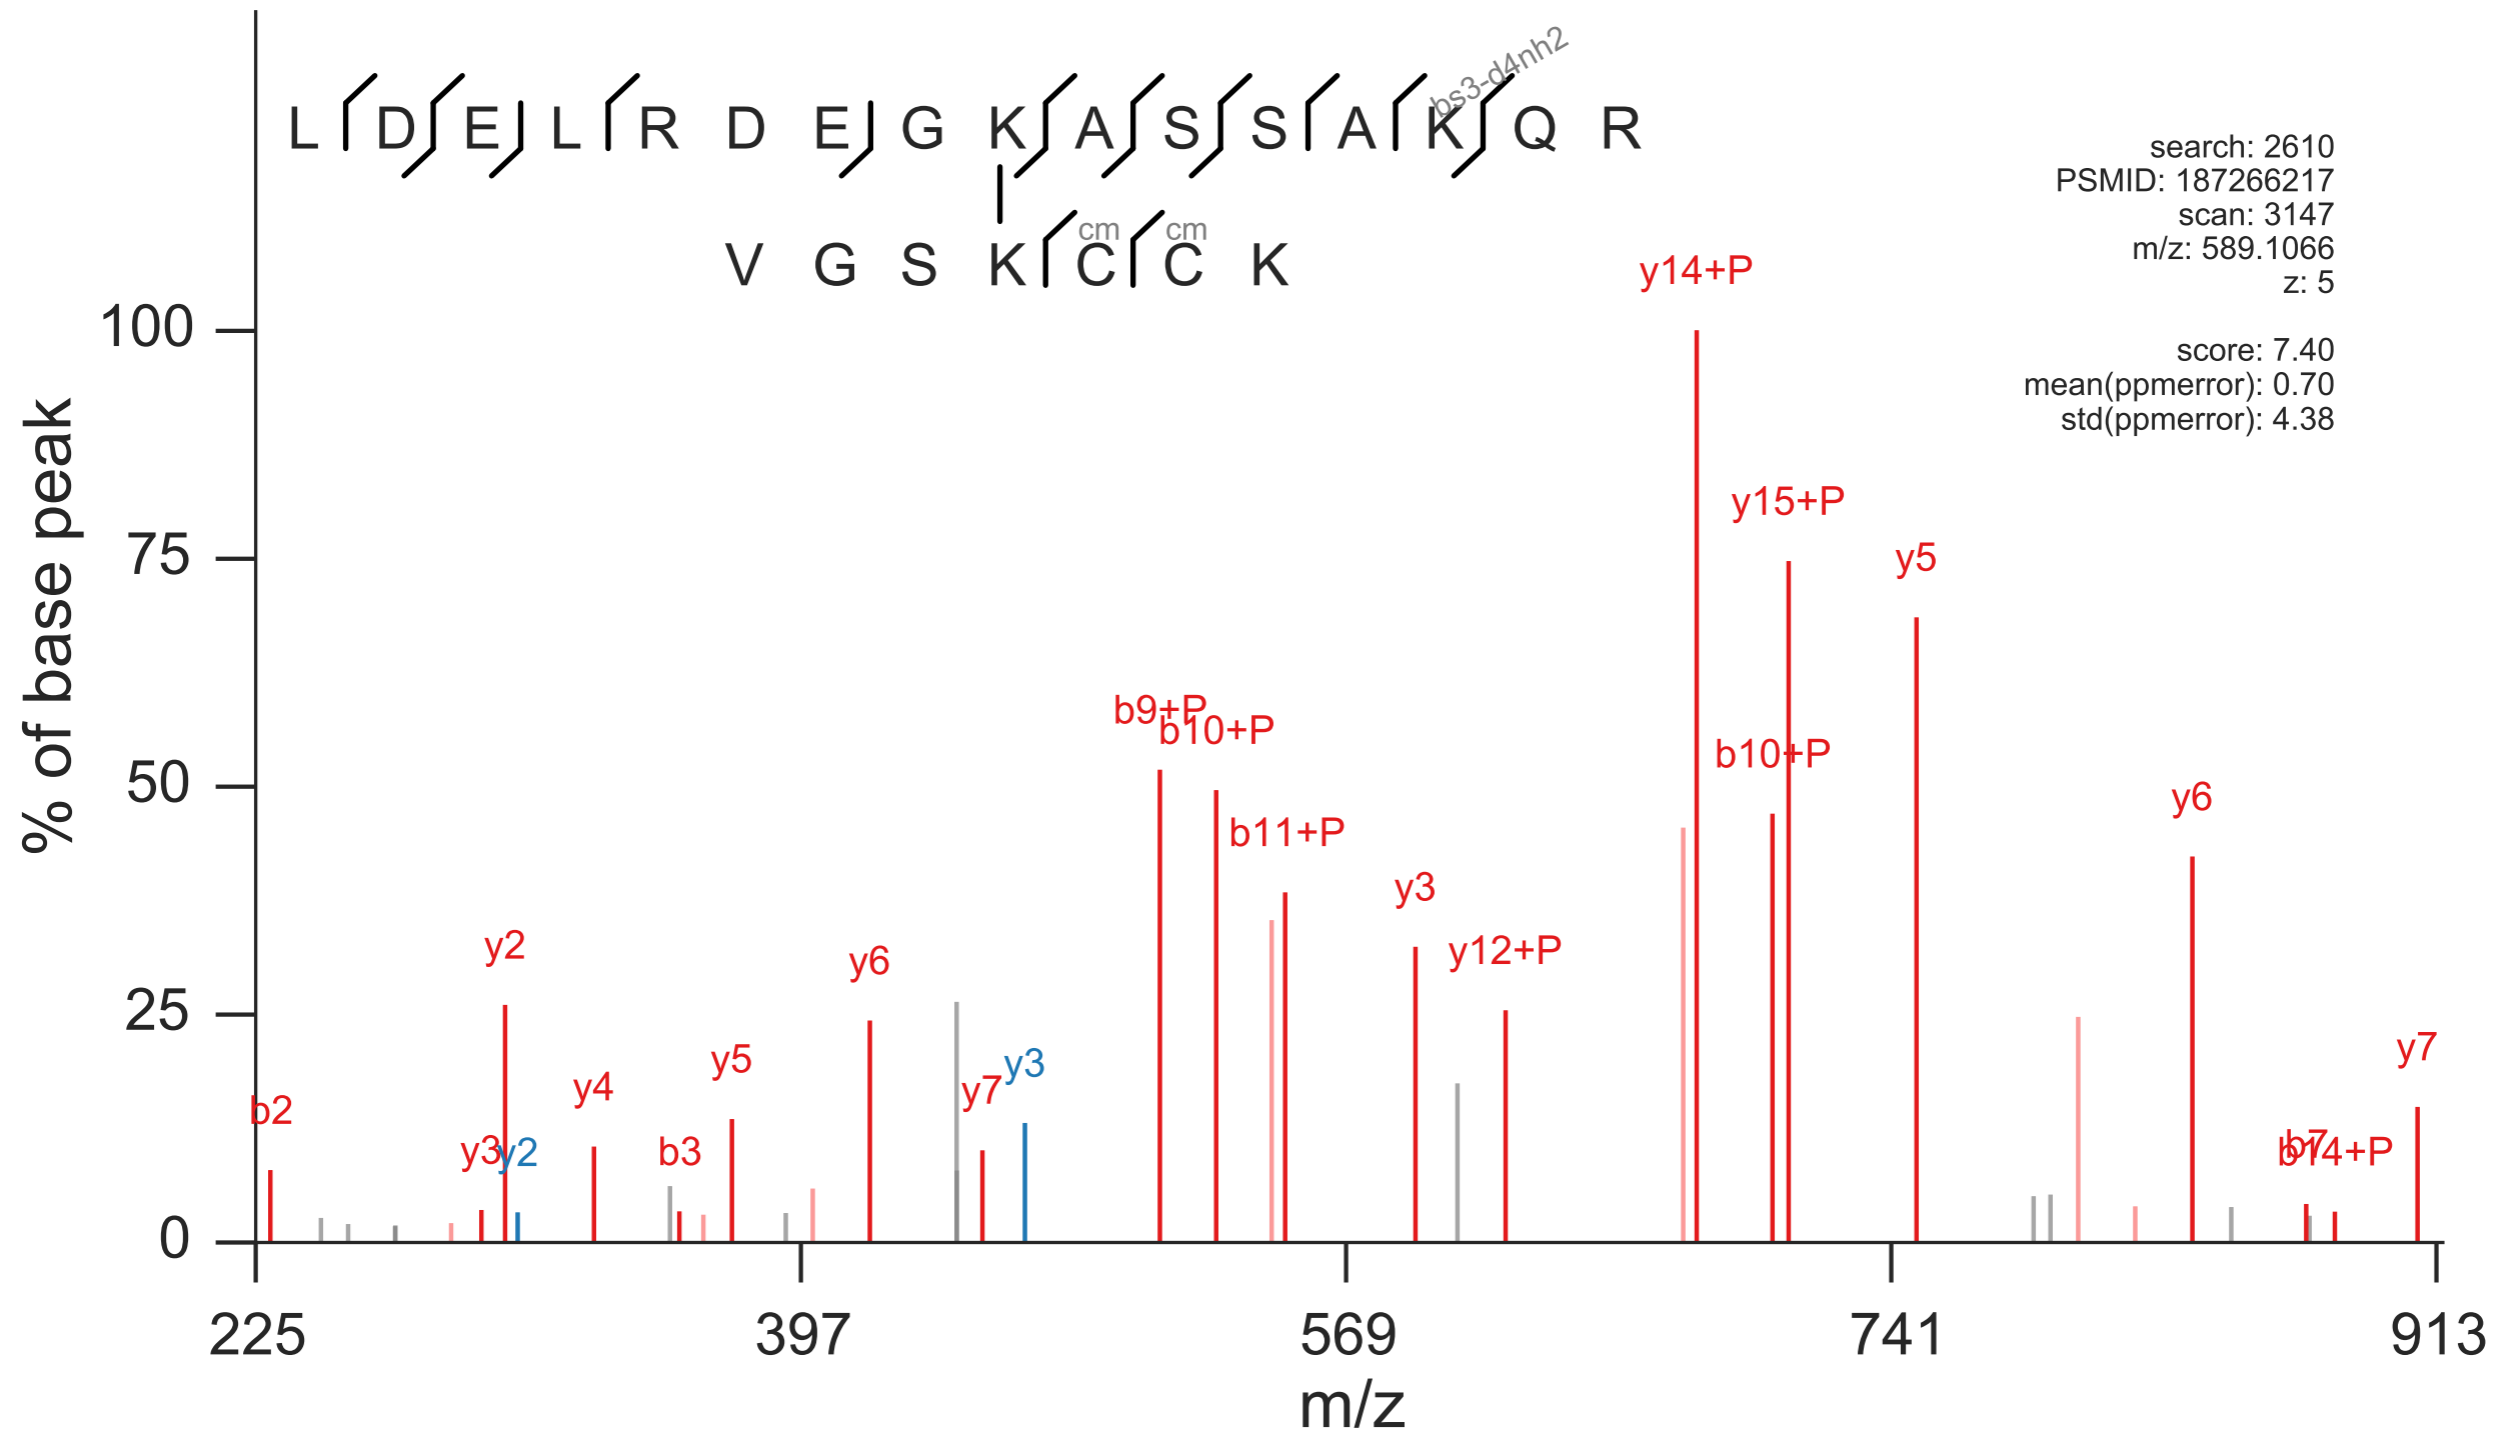

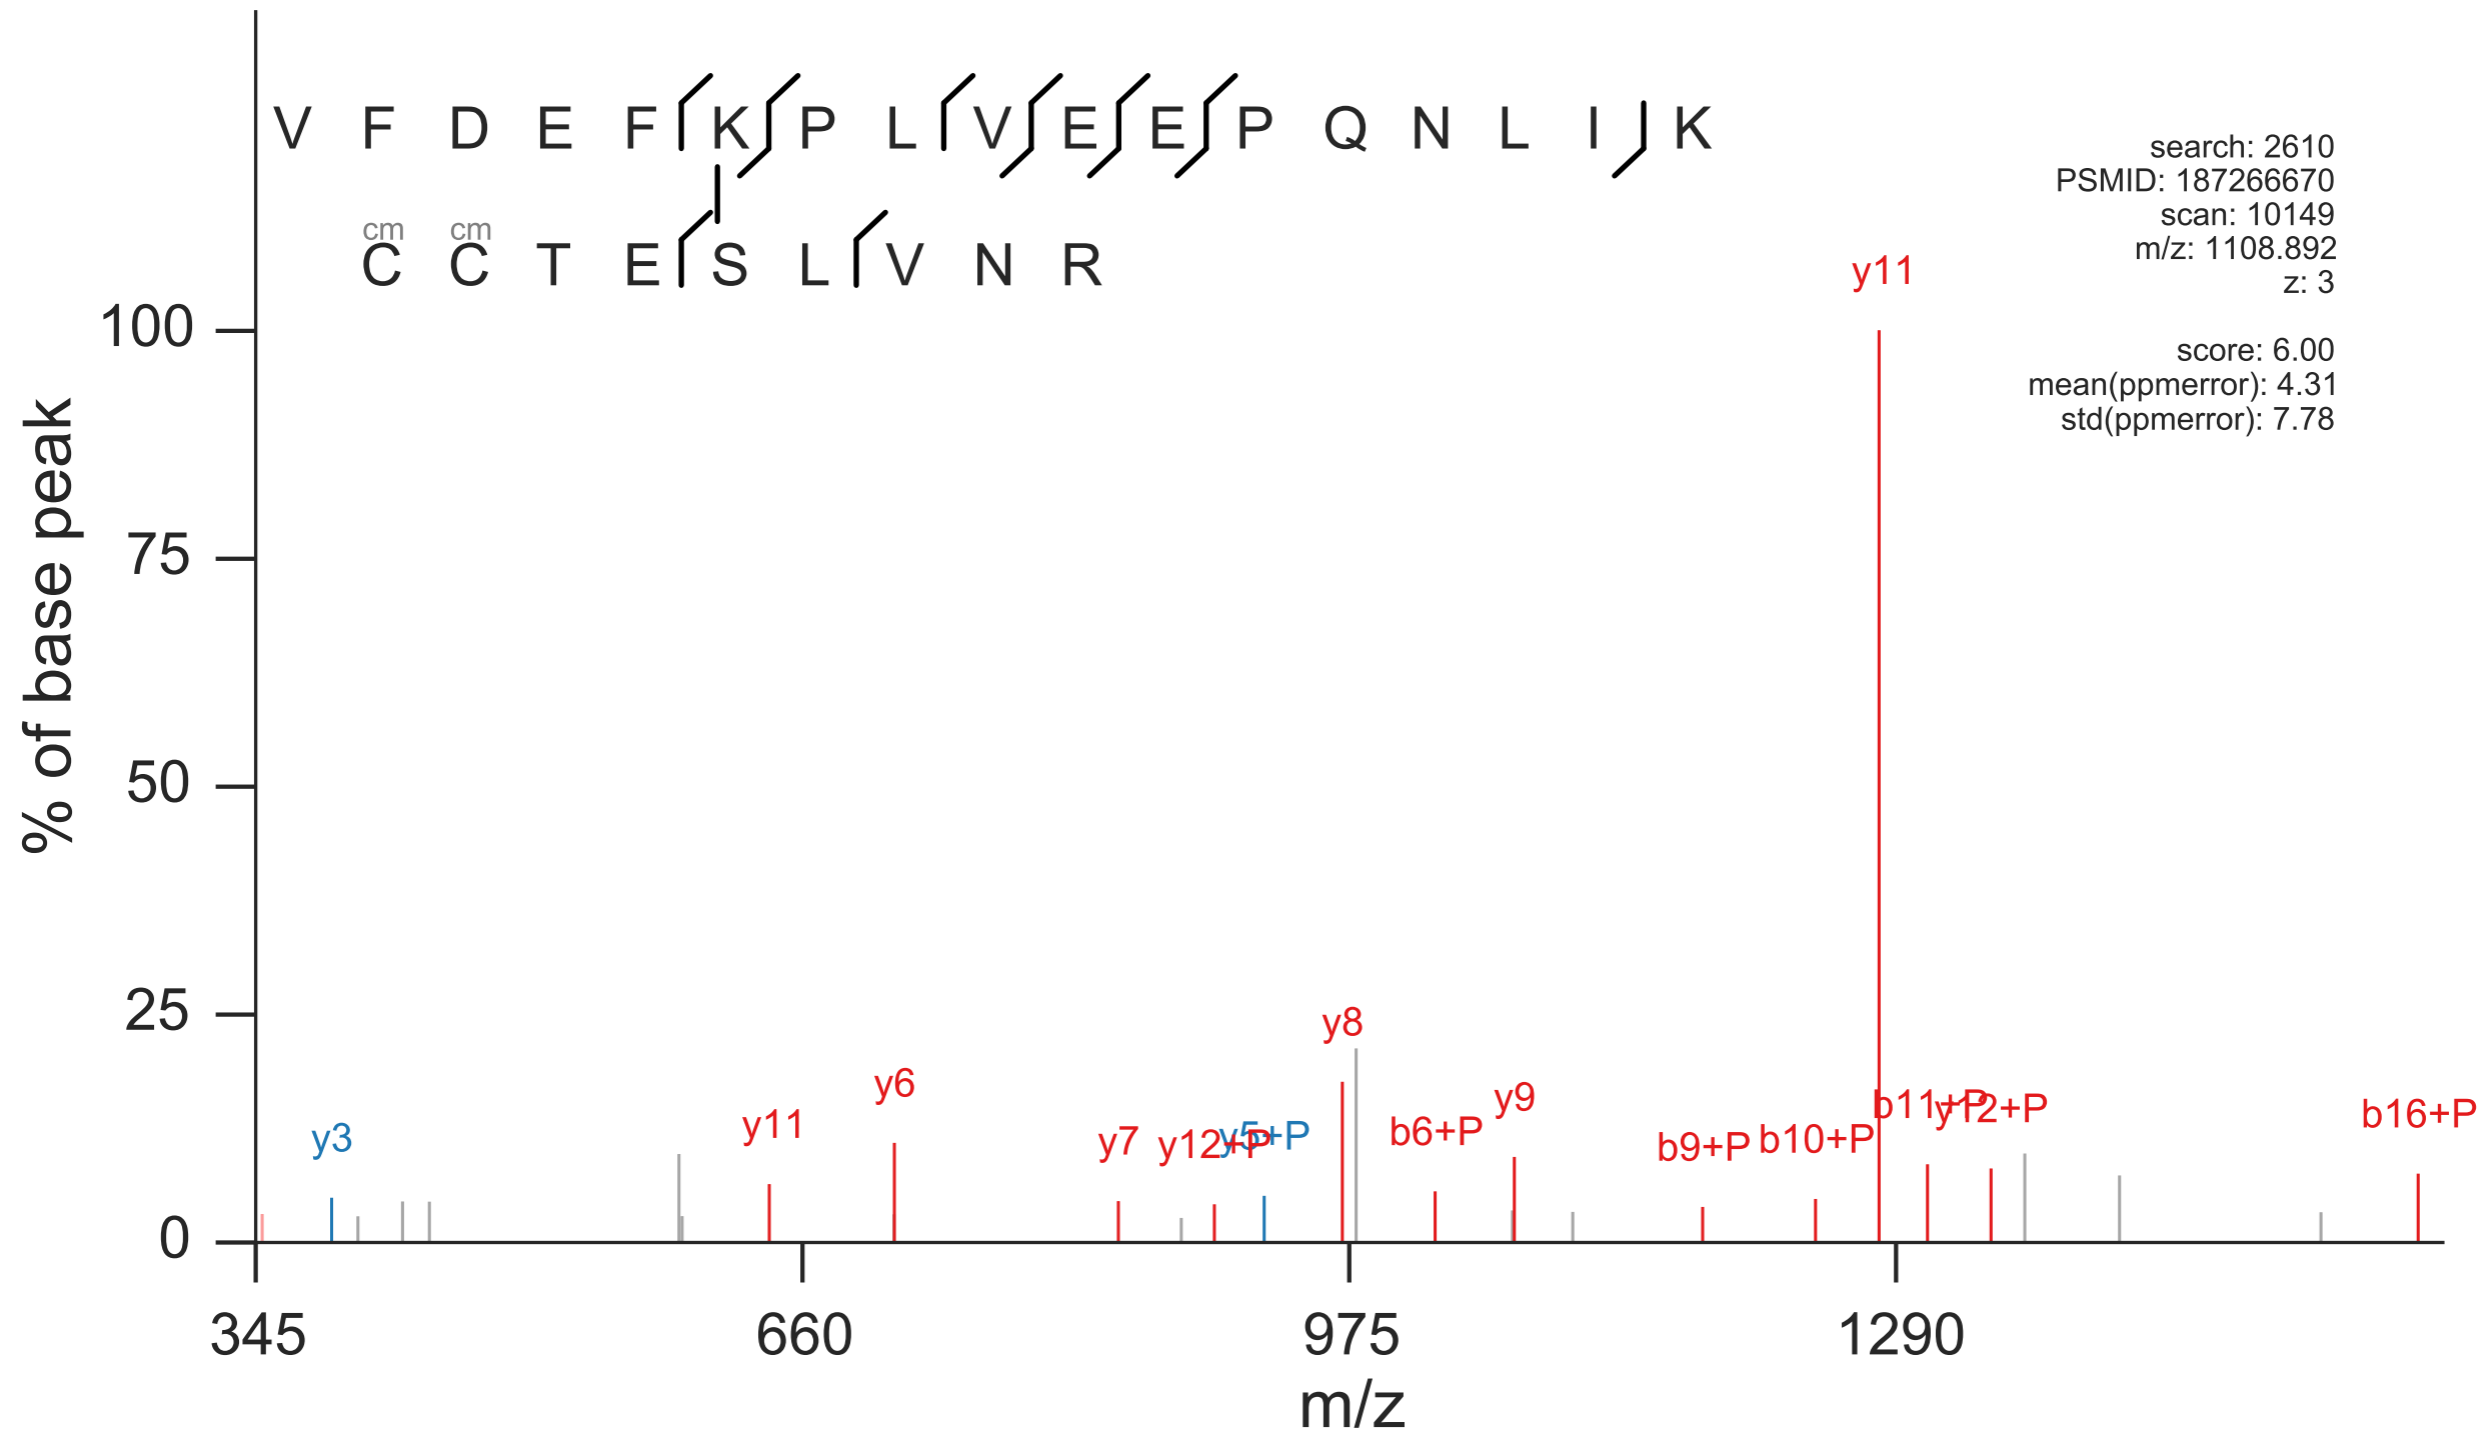



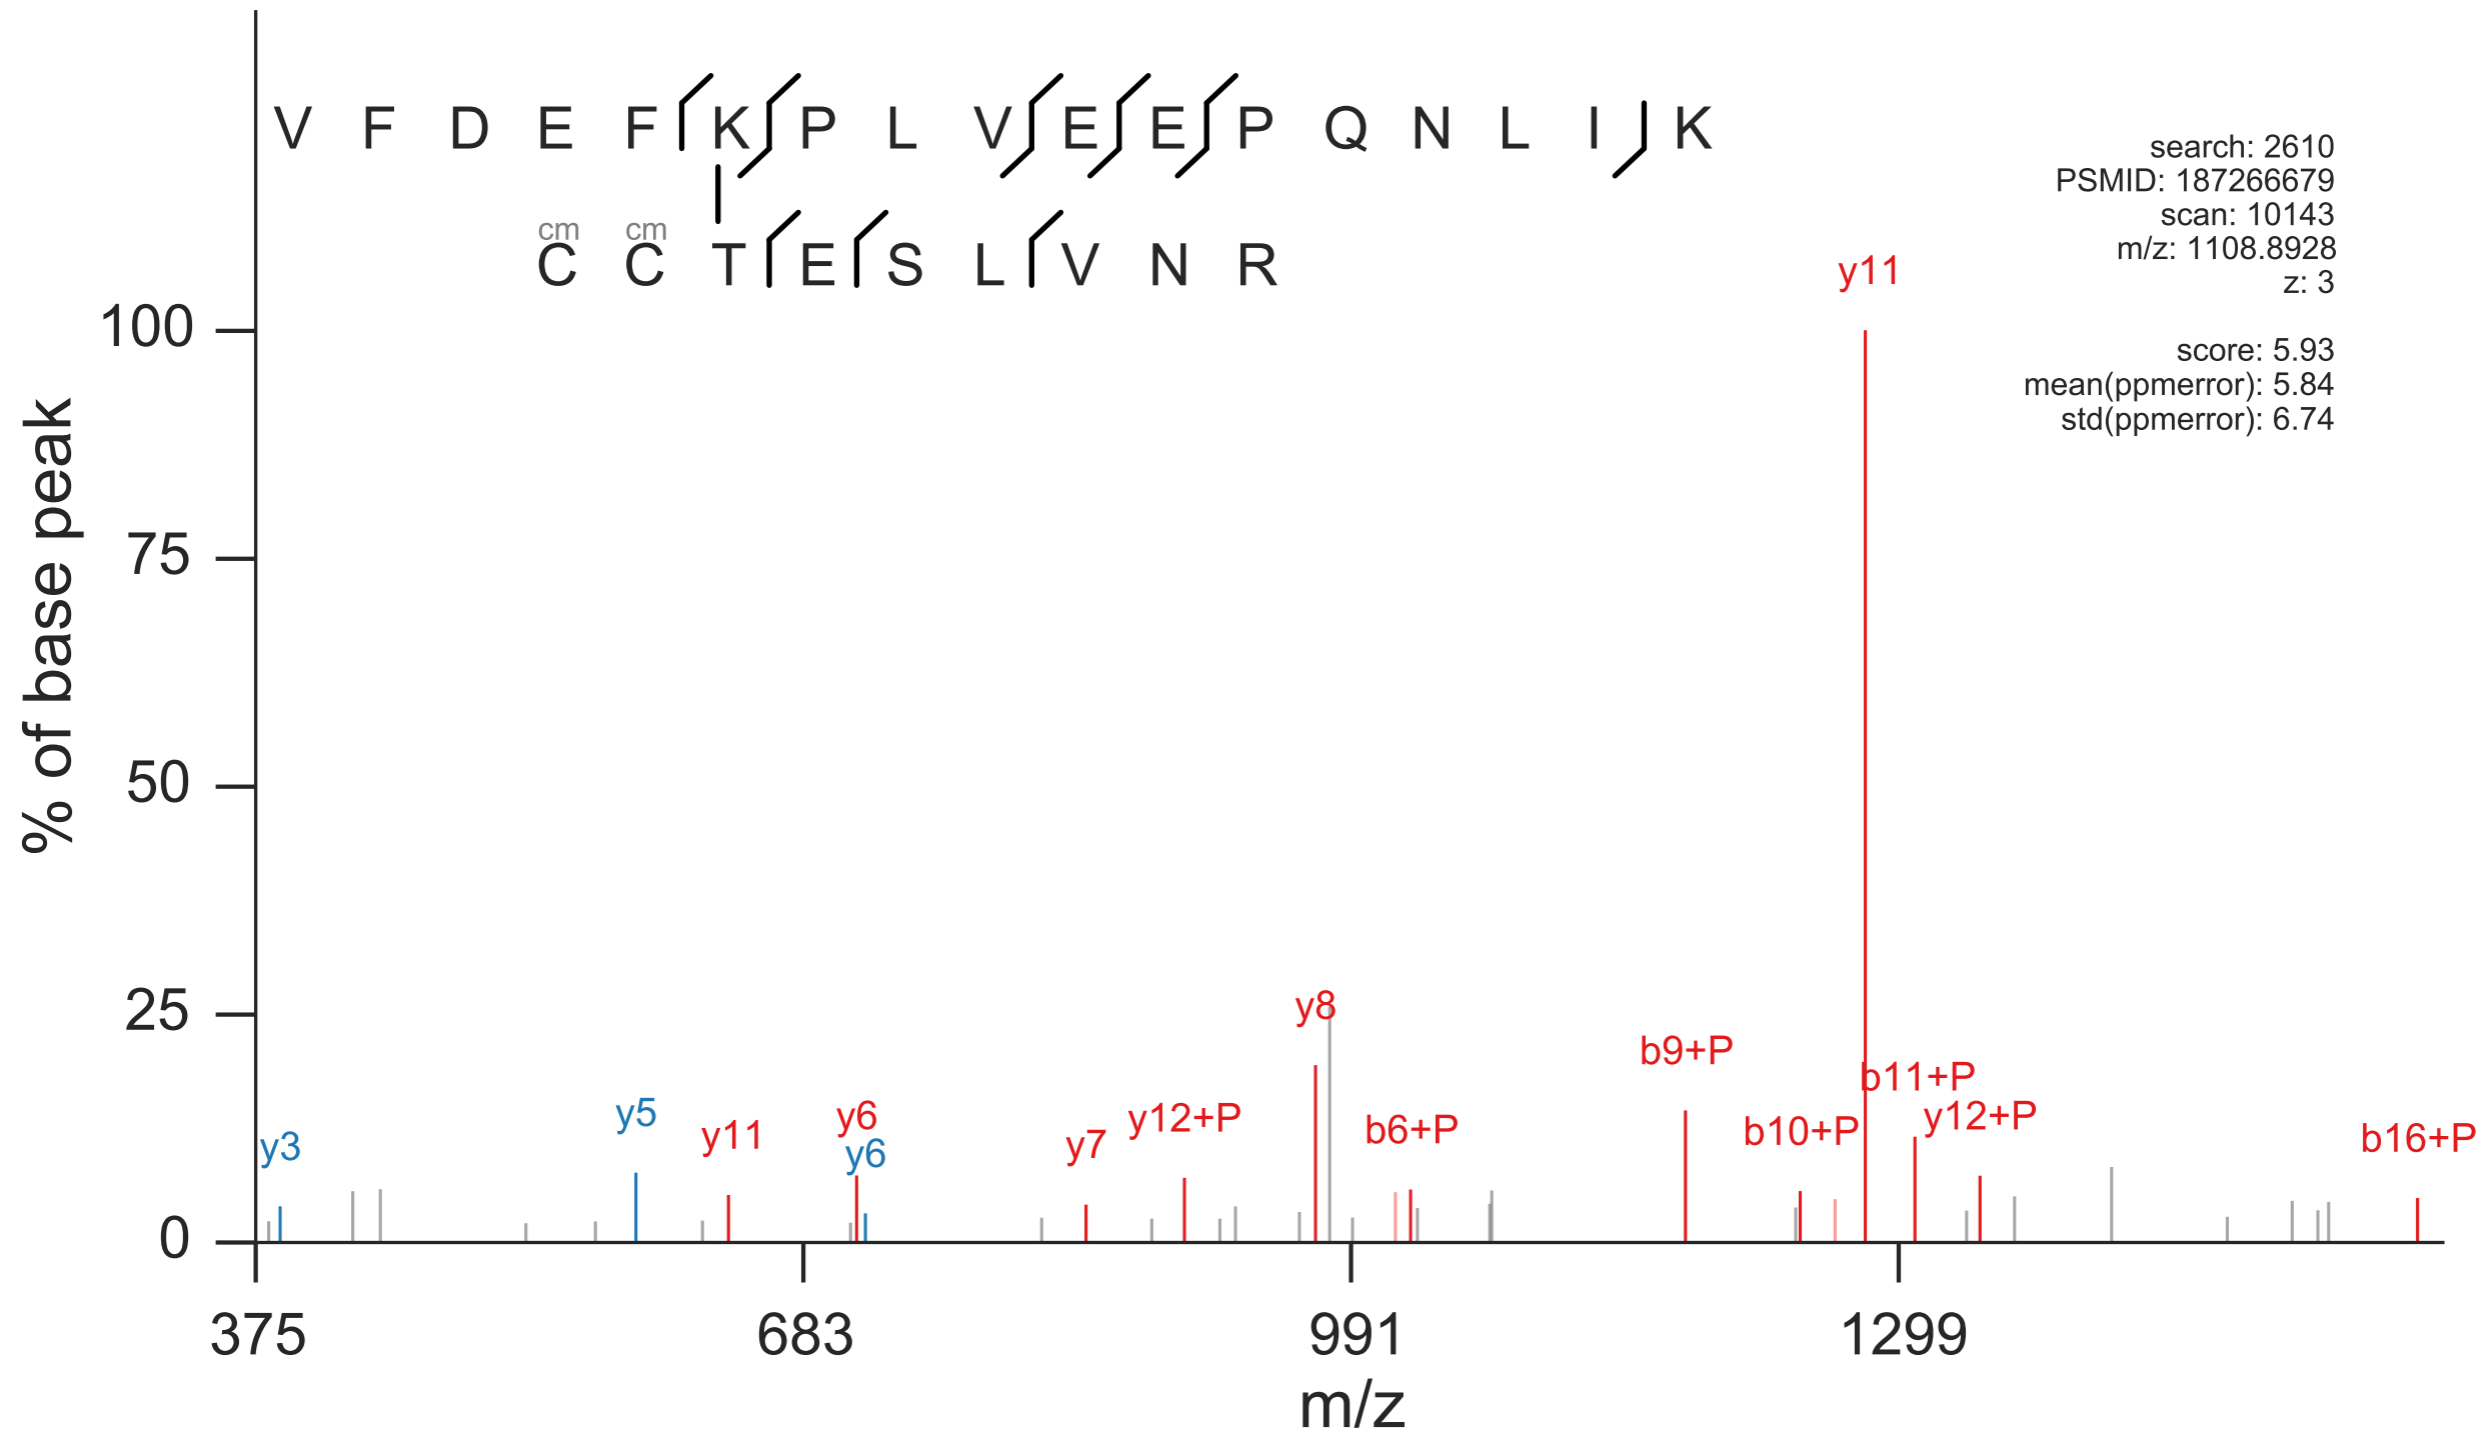

V F D E F K P L V E E P Q N L I K  
C C T E S L V N R

search: 2610  
PSMID: 187266679  
scan: 10143  
m/z: 1108.8928  
z: 3  
score: 5.93  
mean(ppmerror): 5.84  
std(ppmerror): 6.74

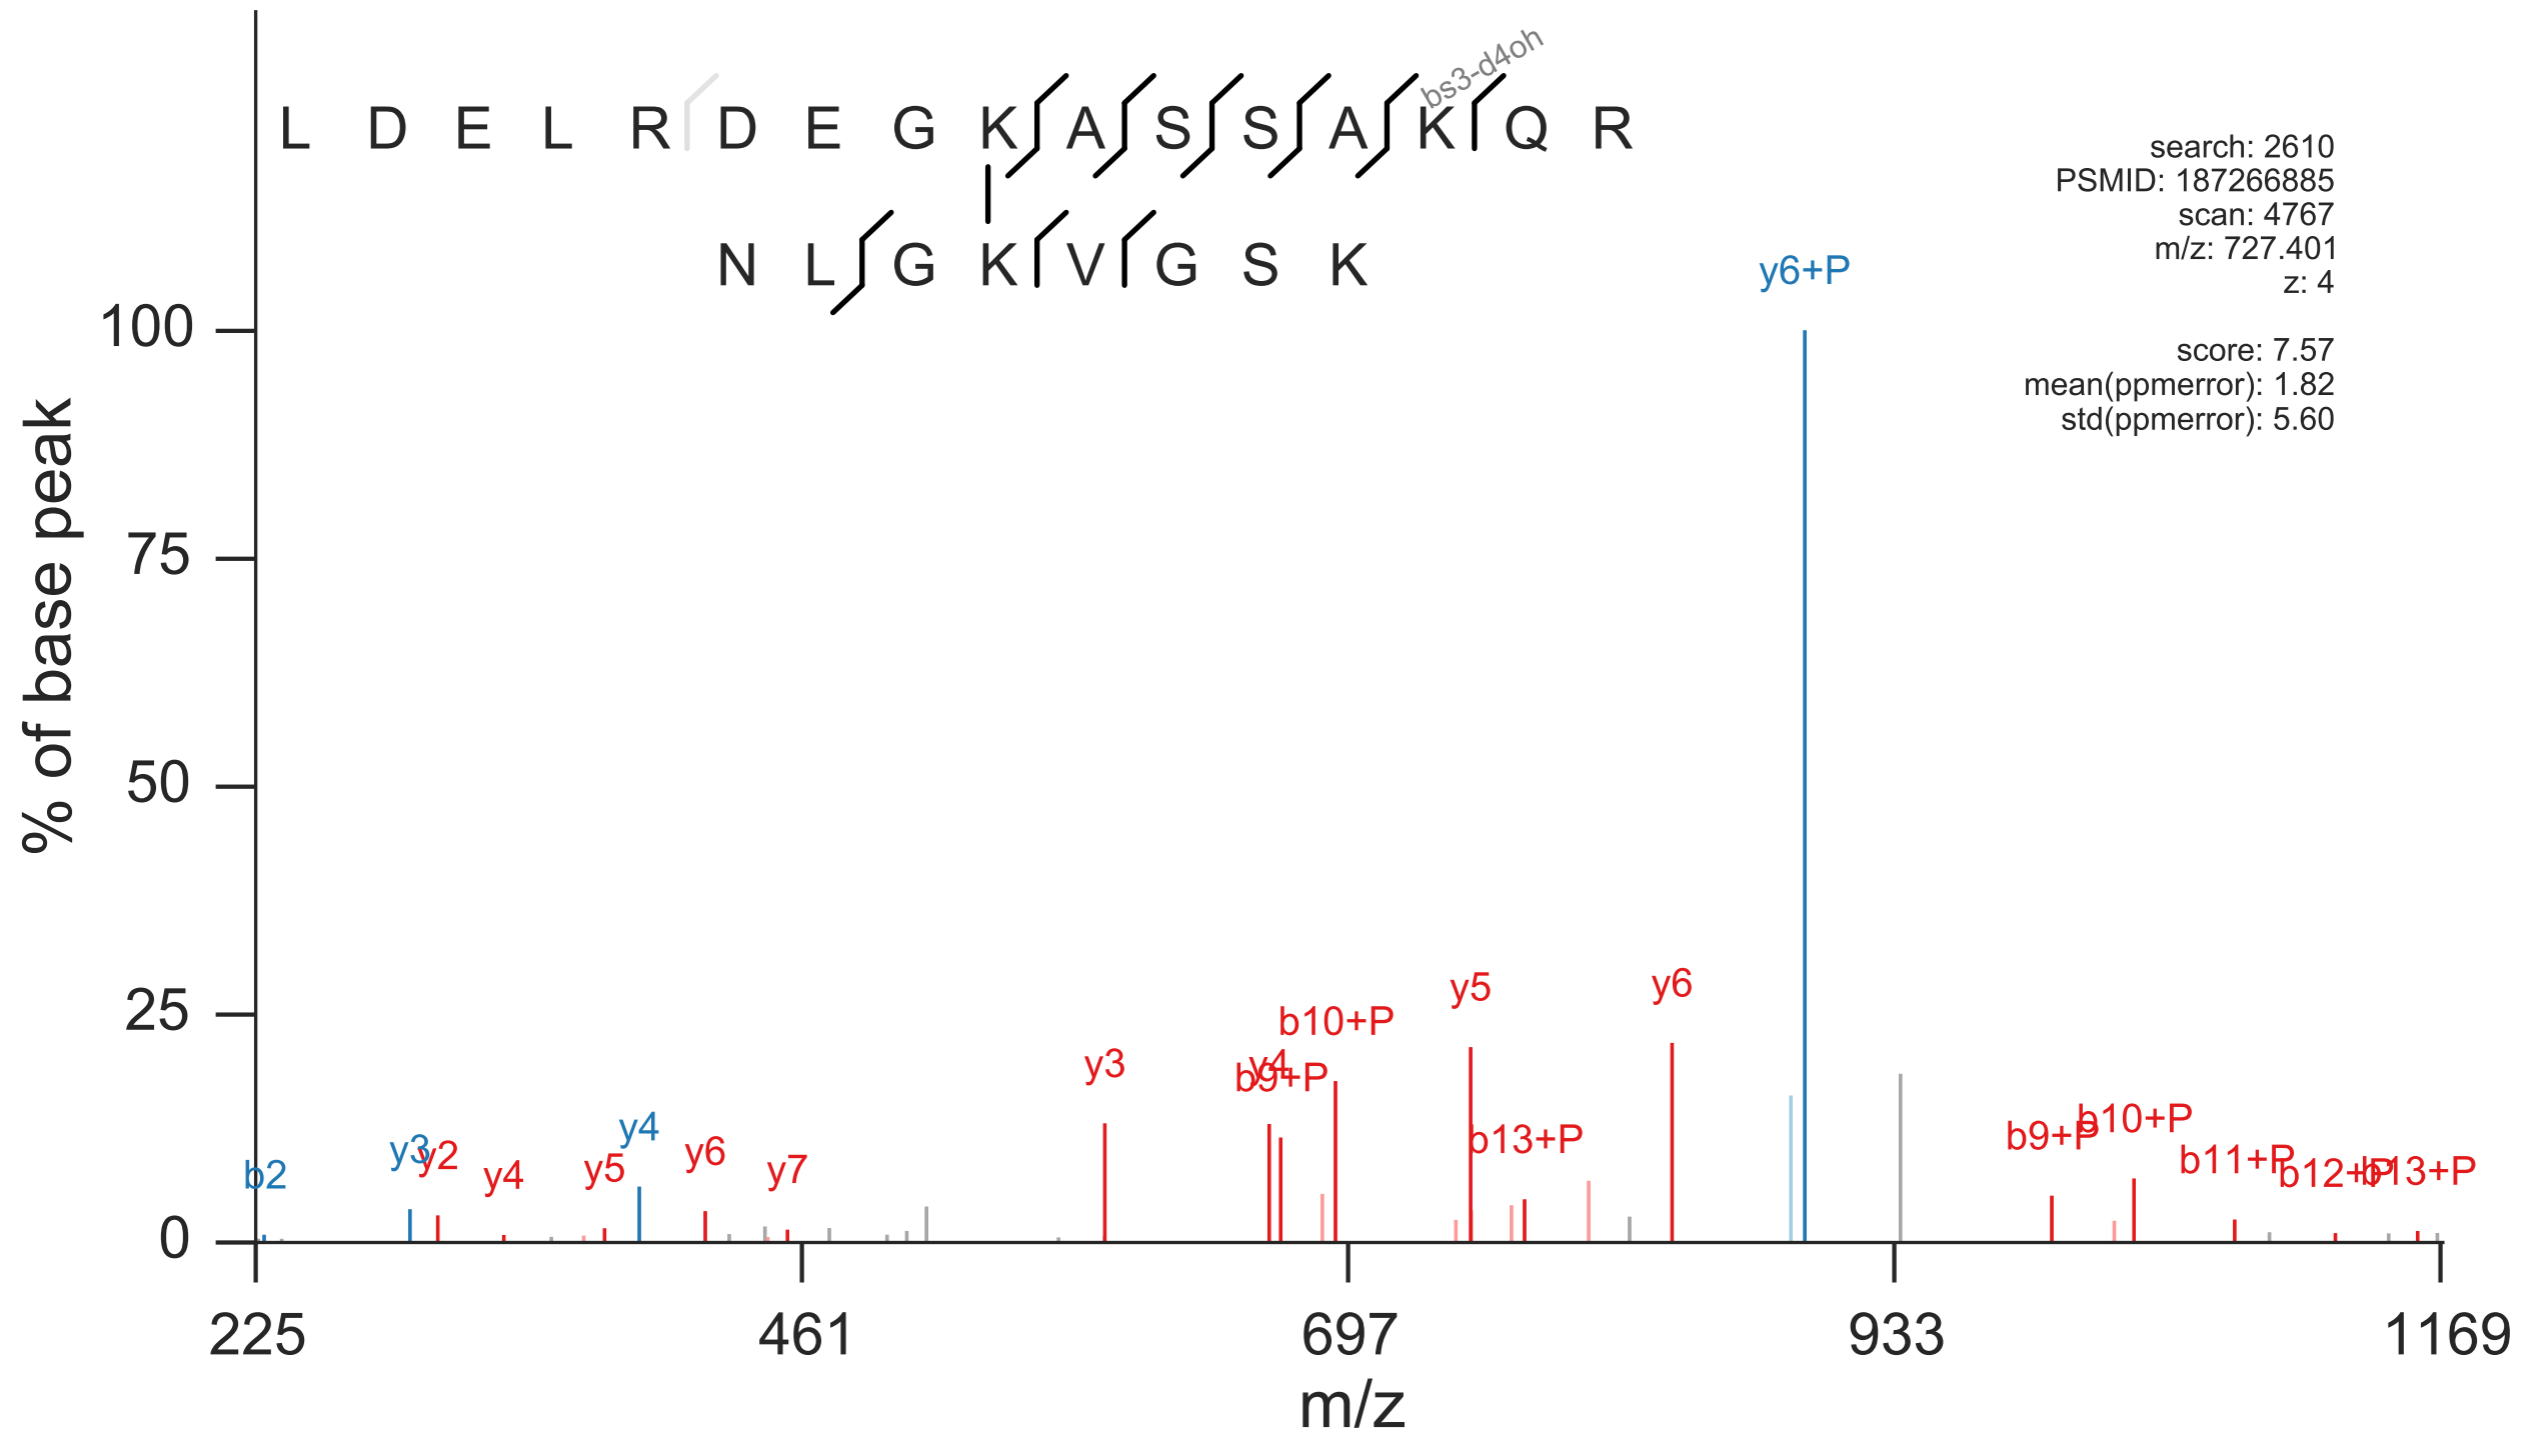

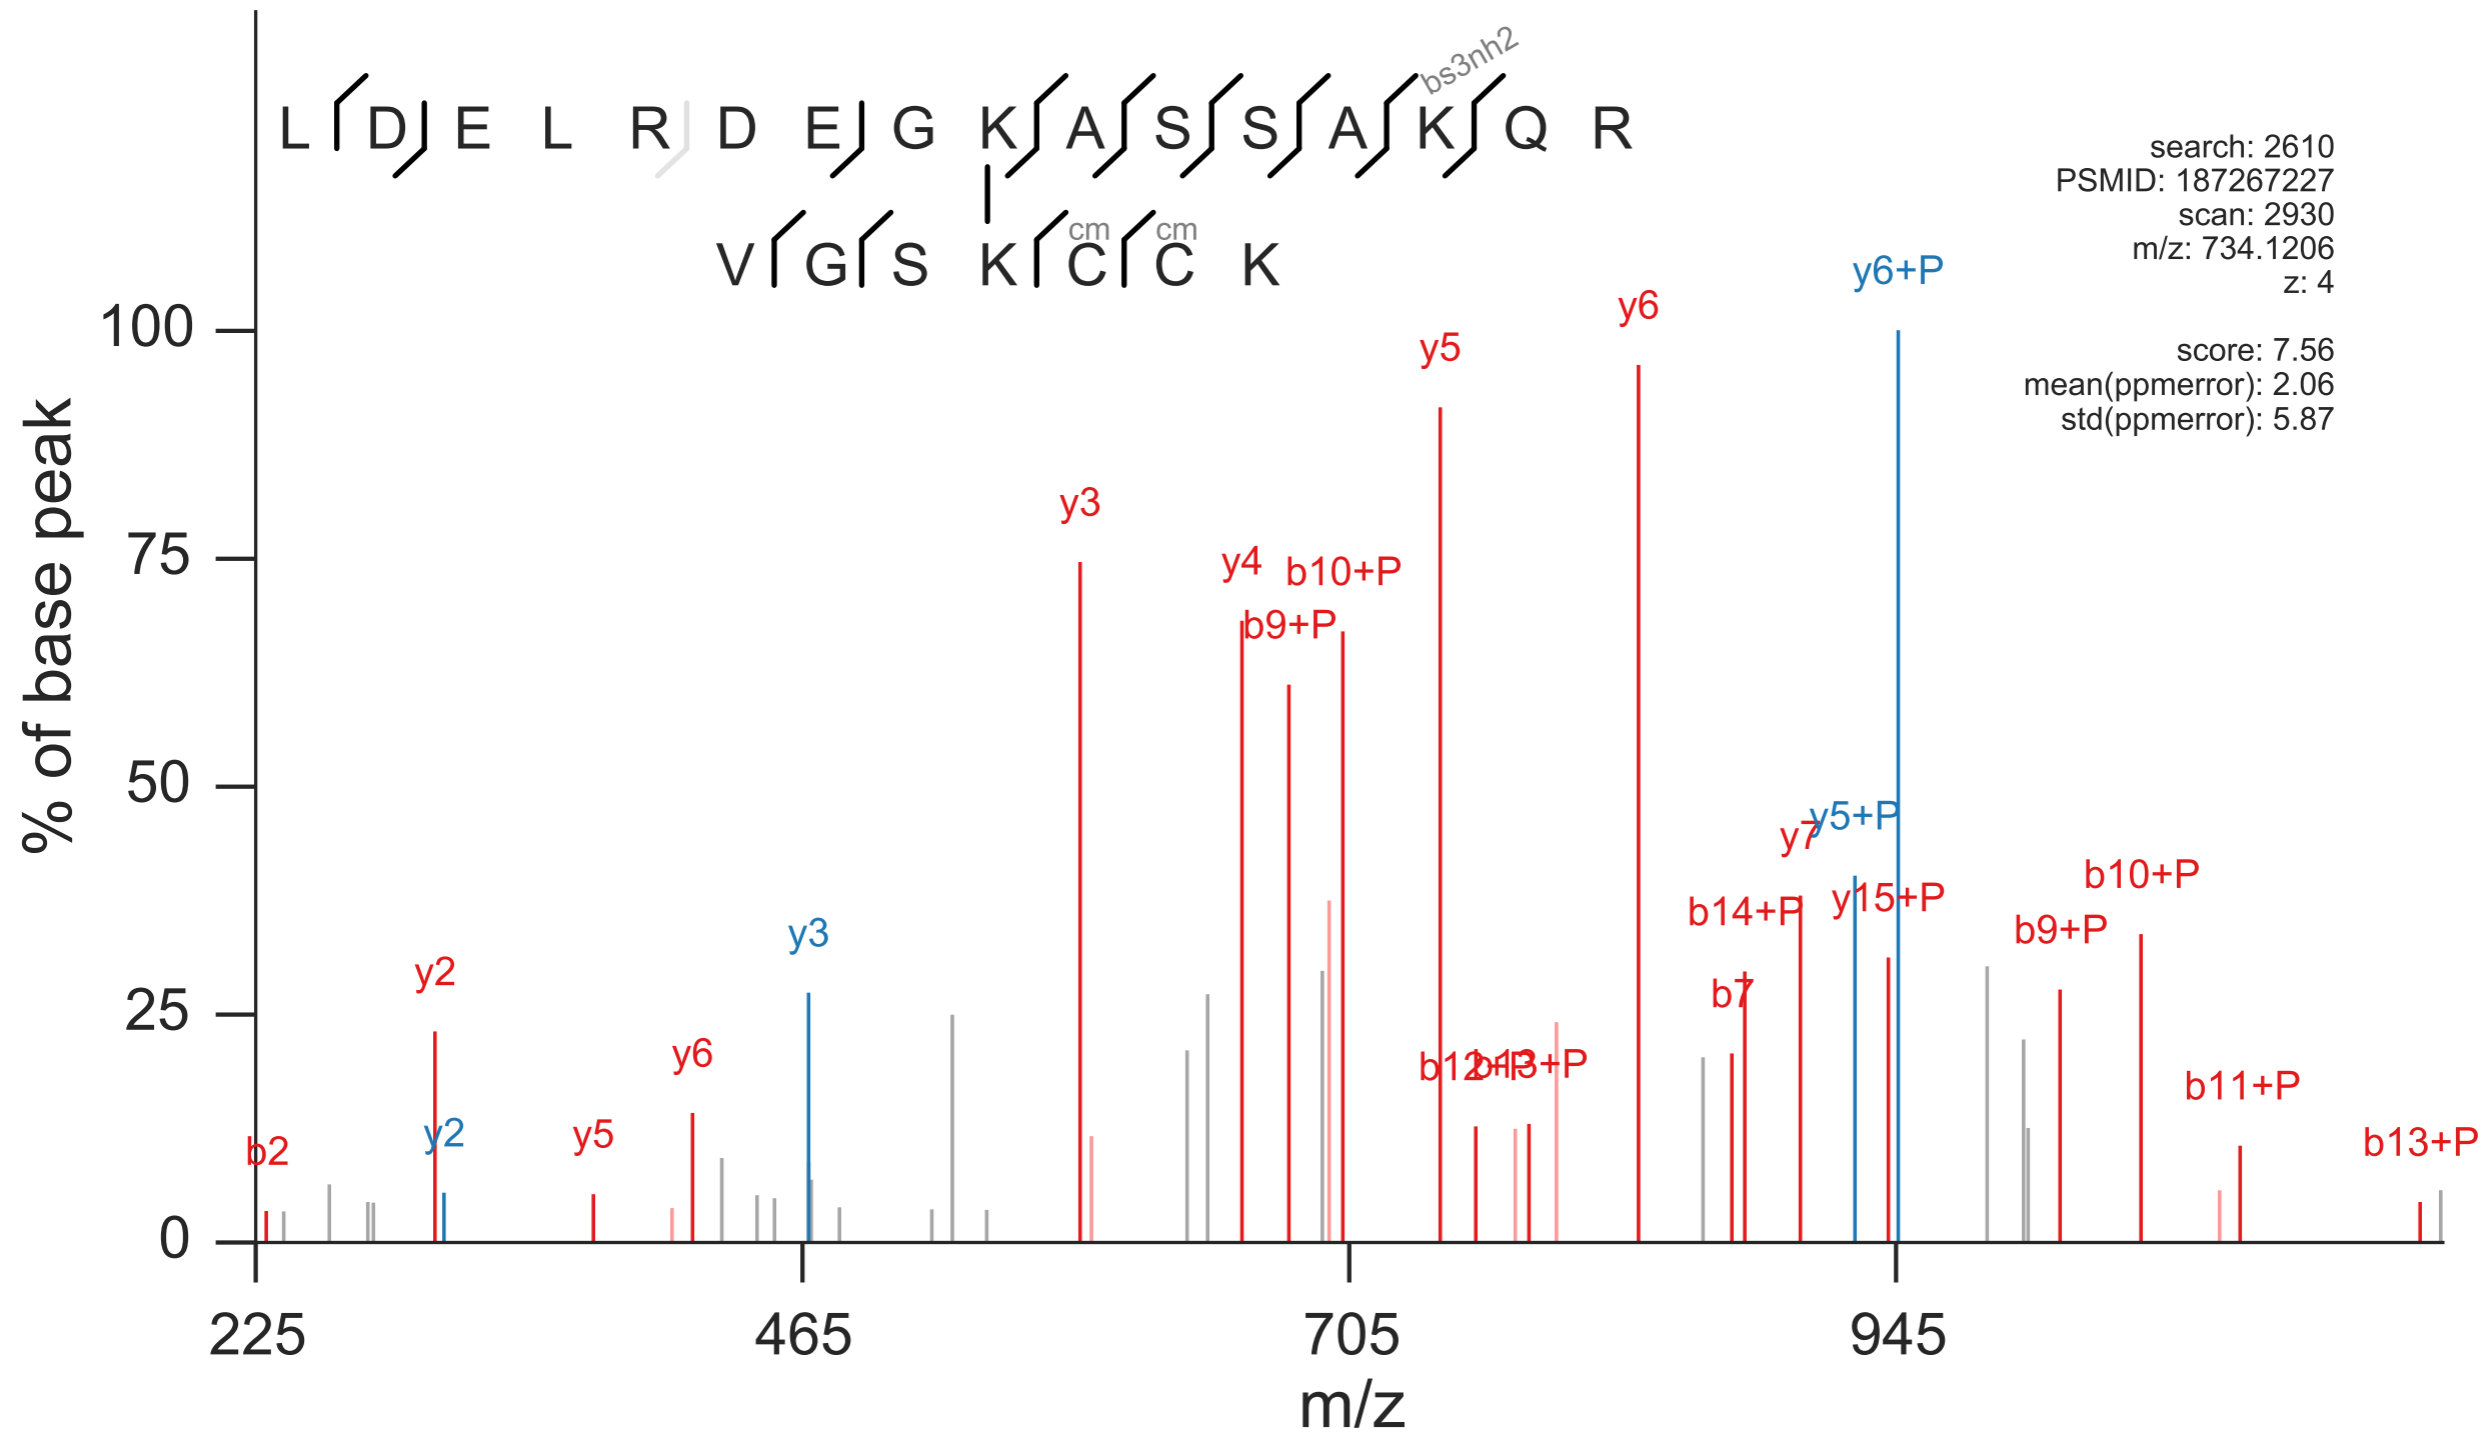

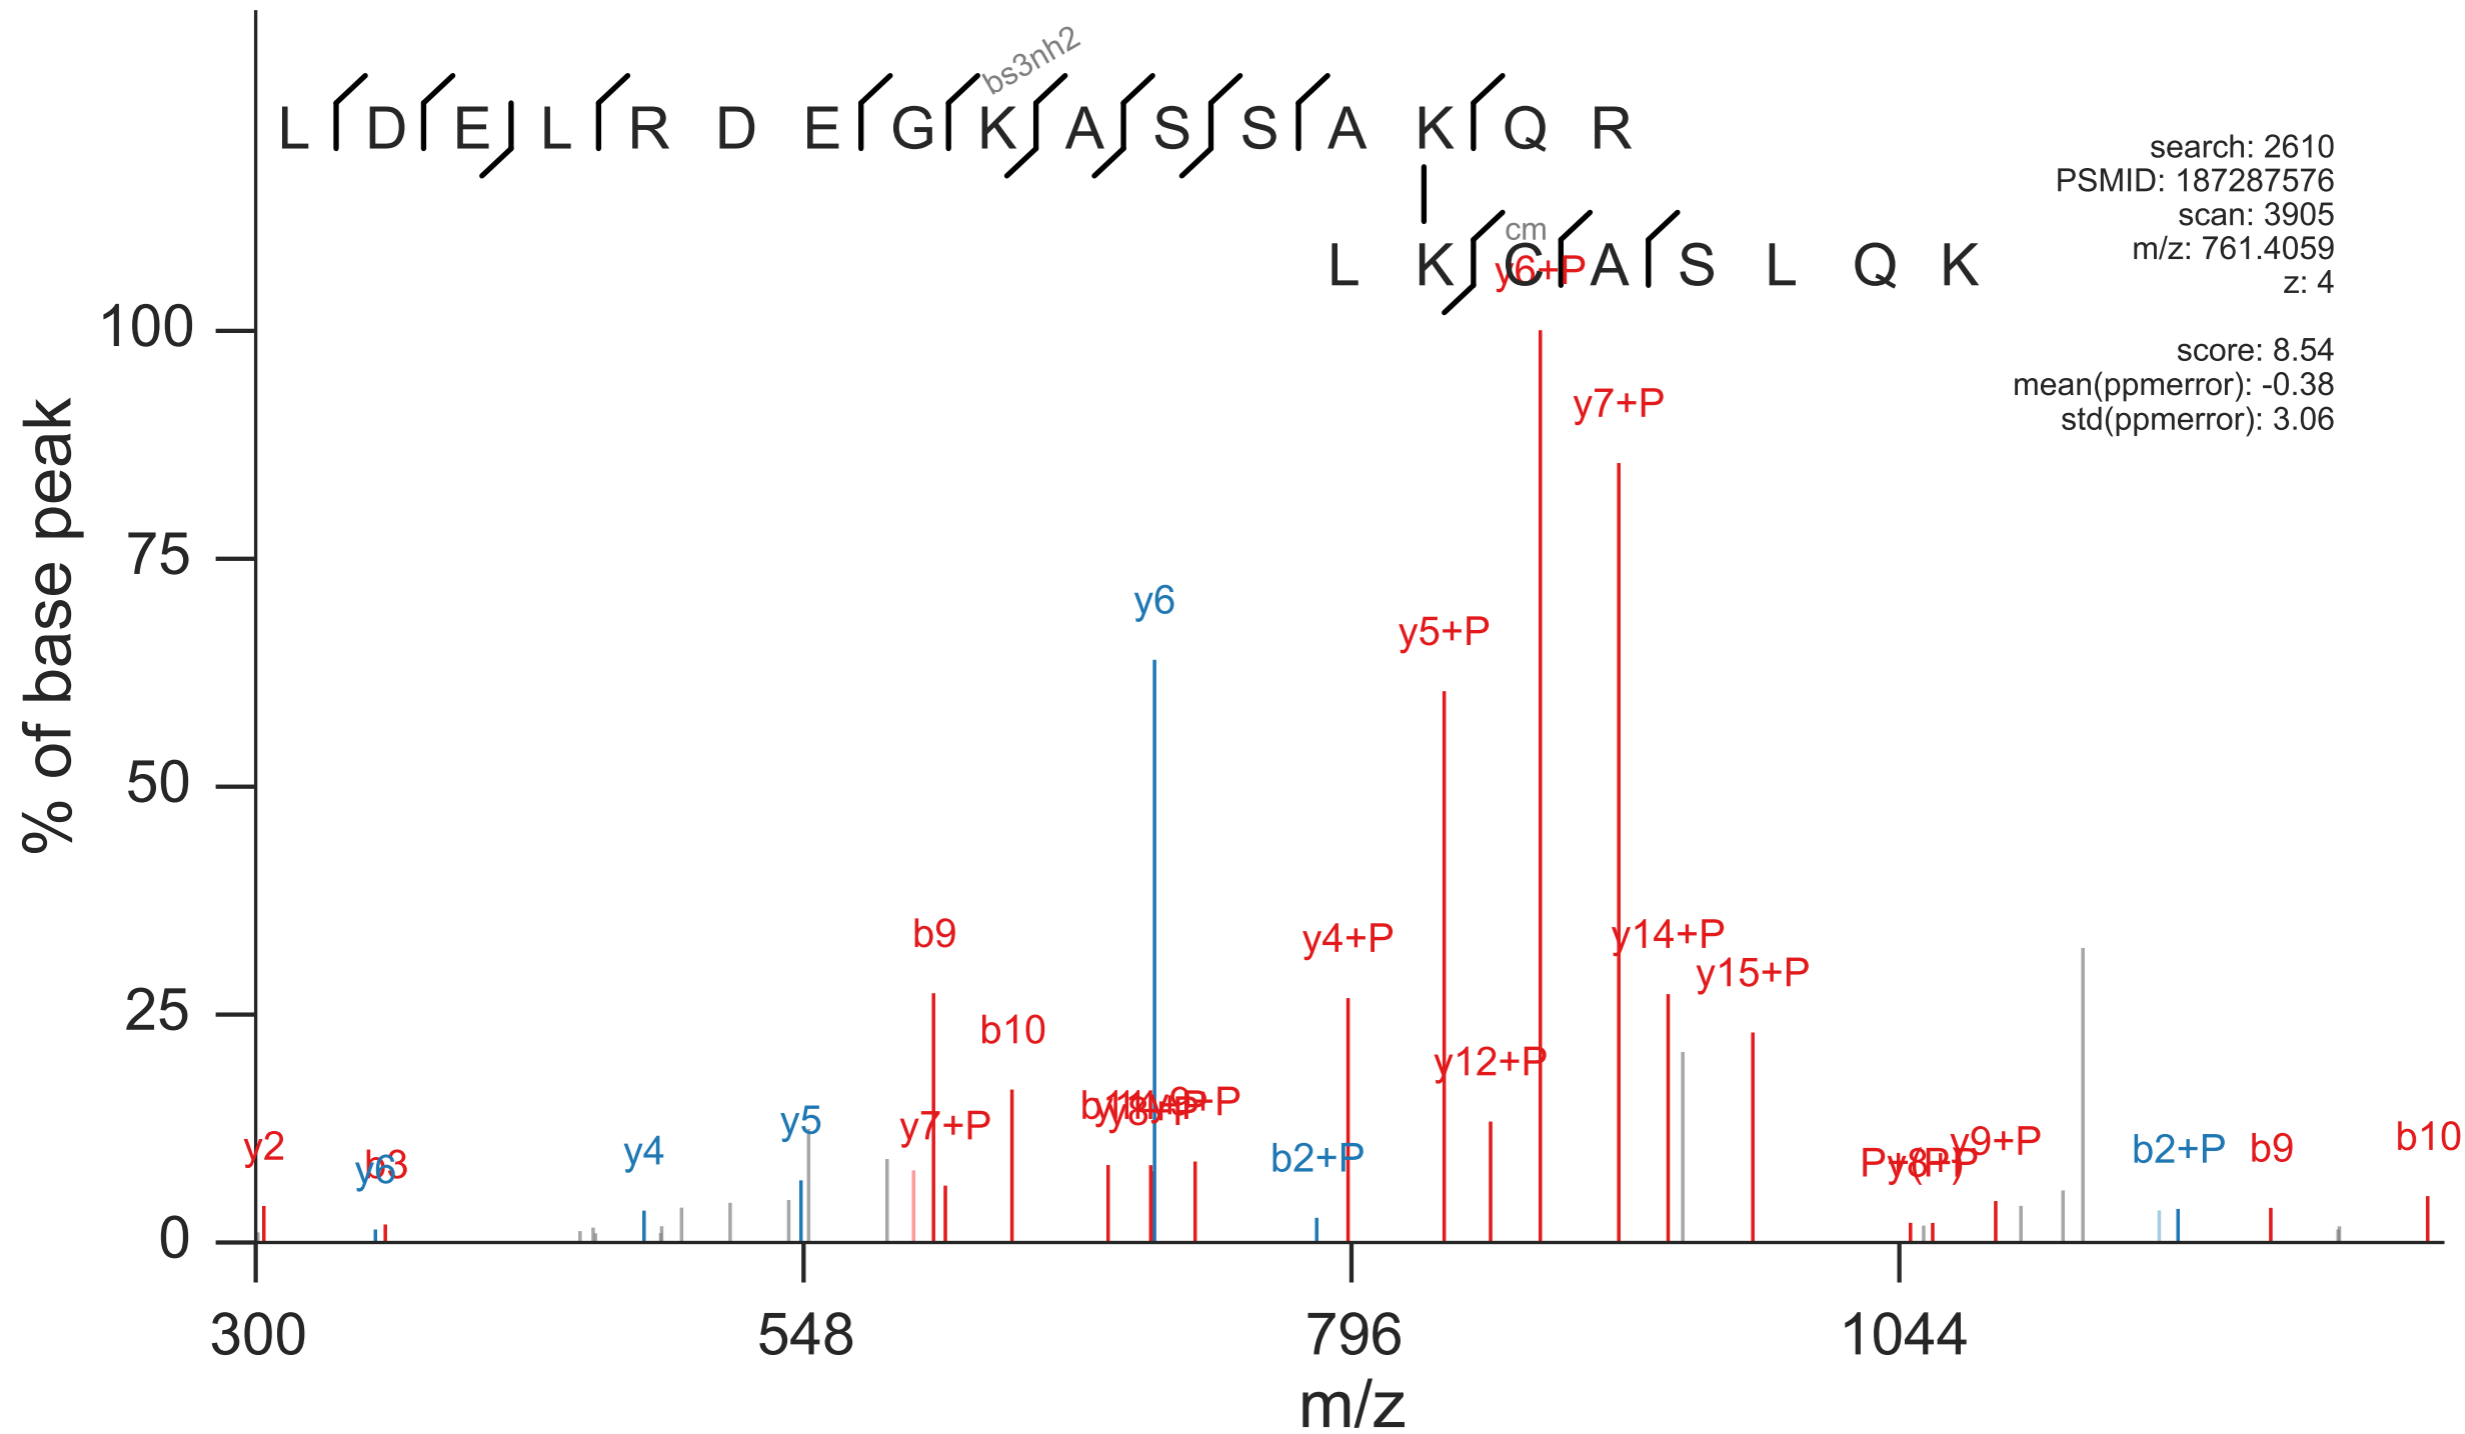

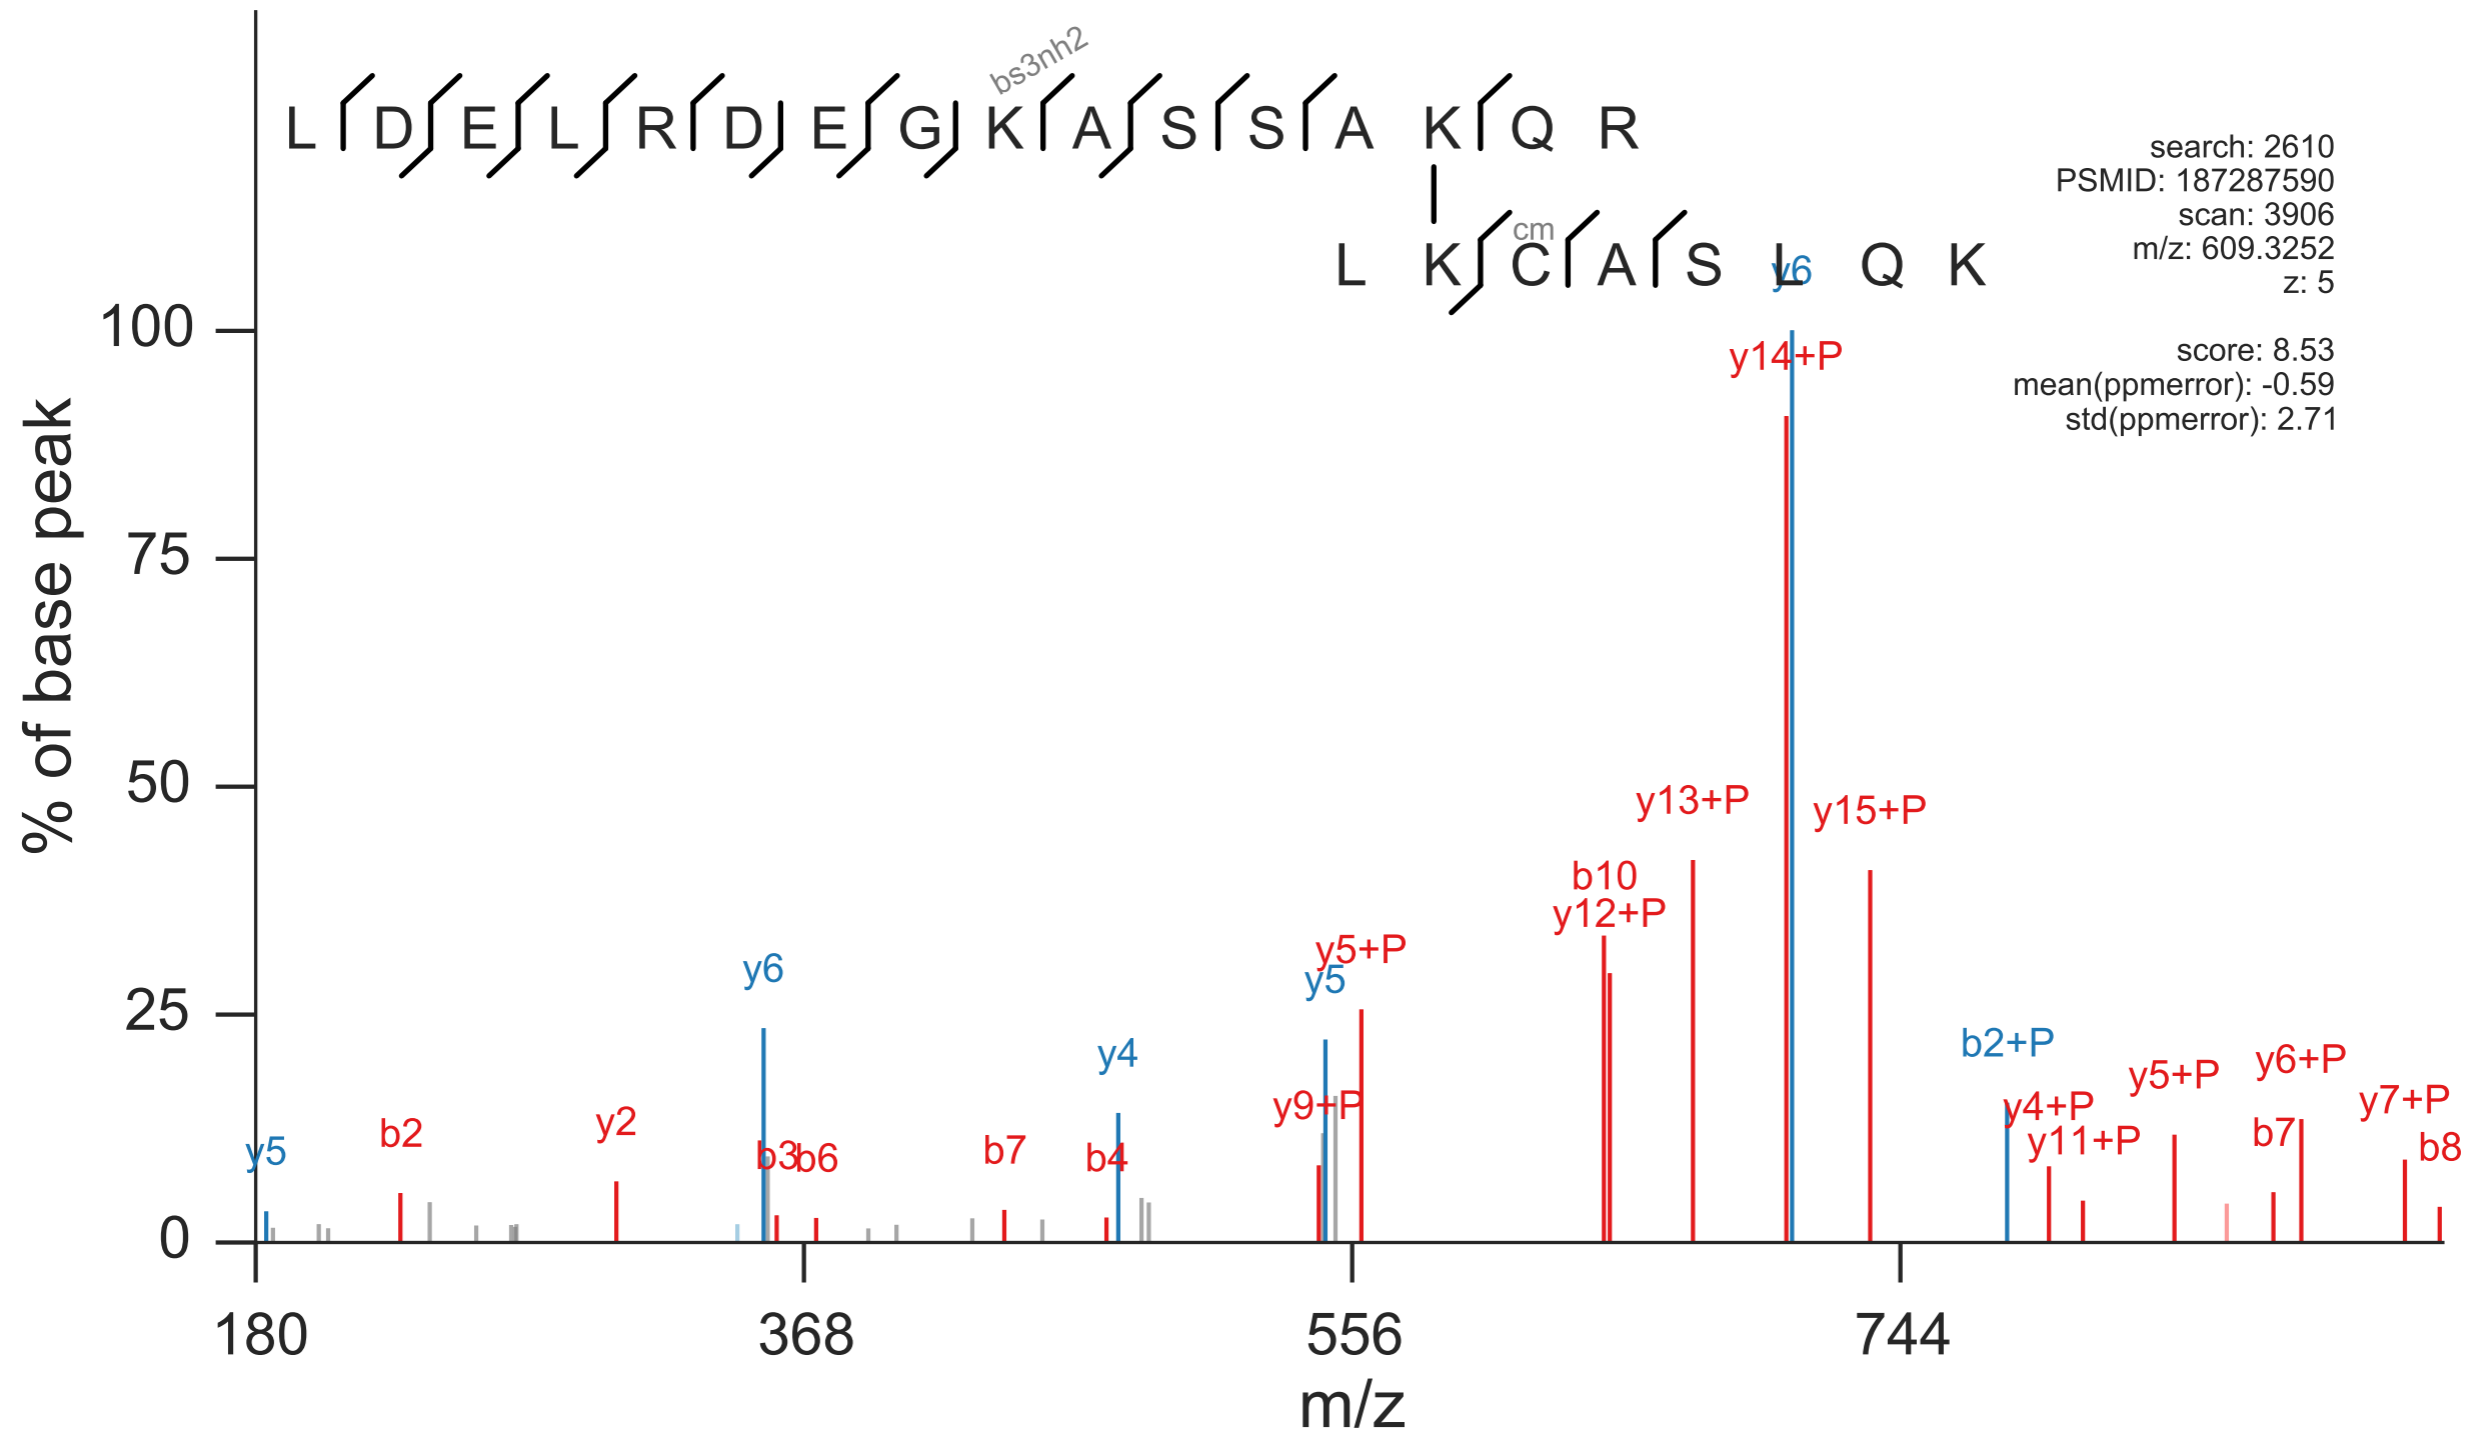

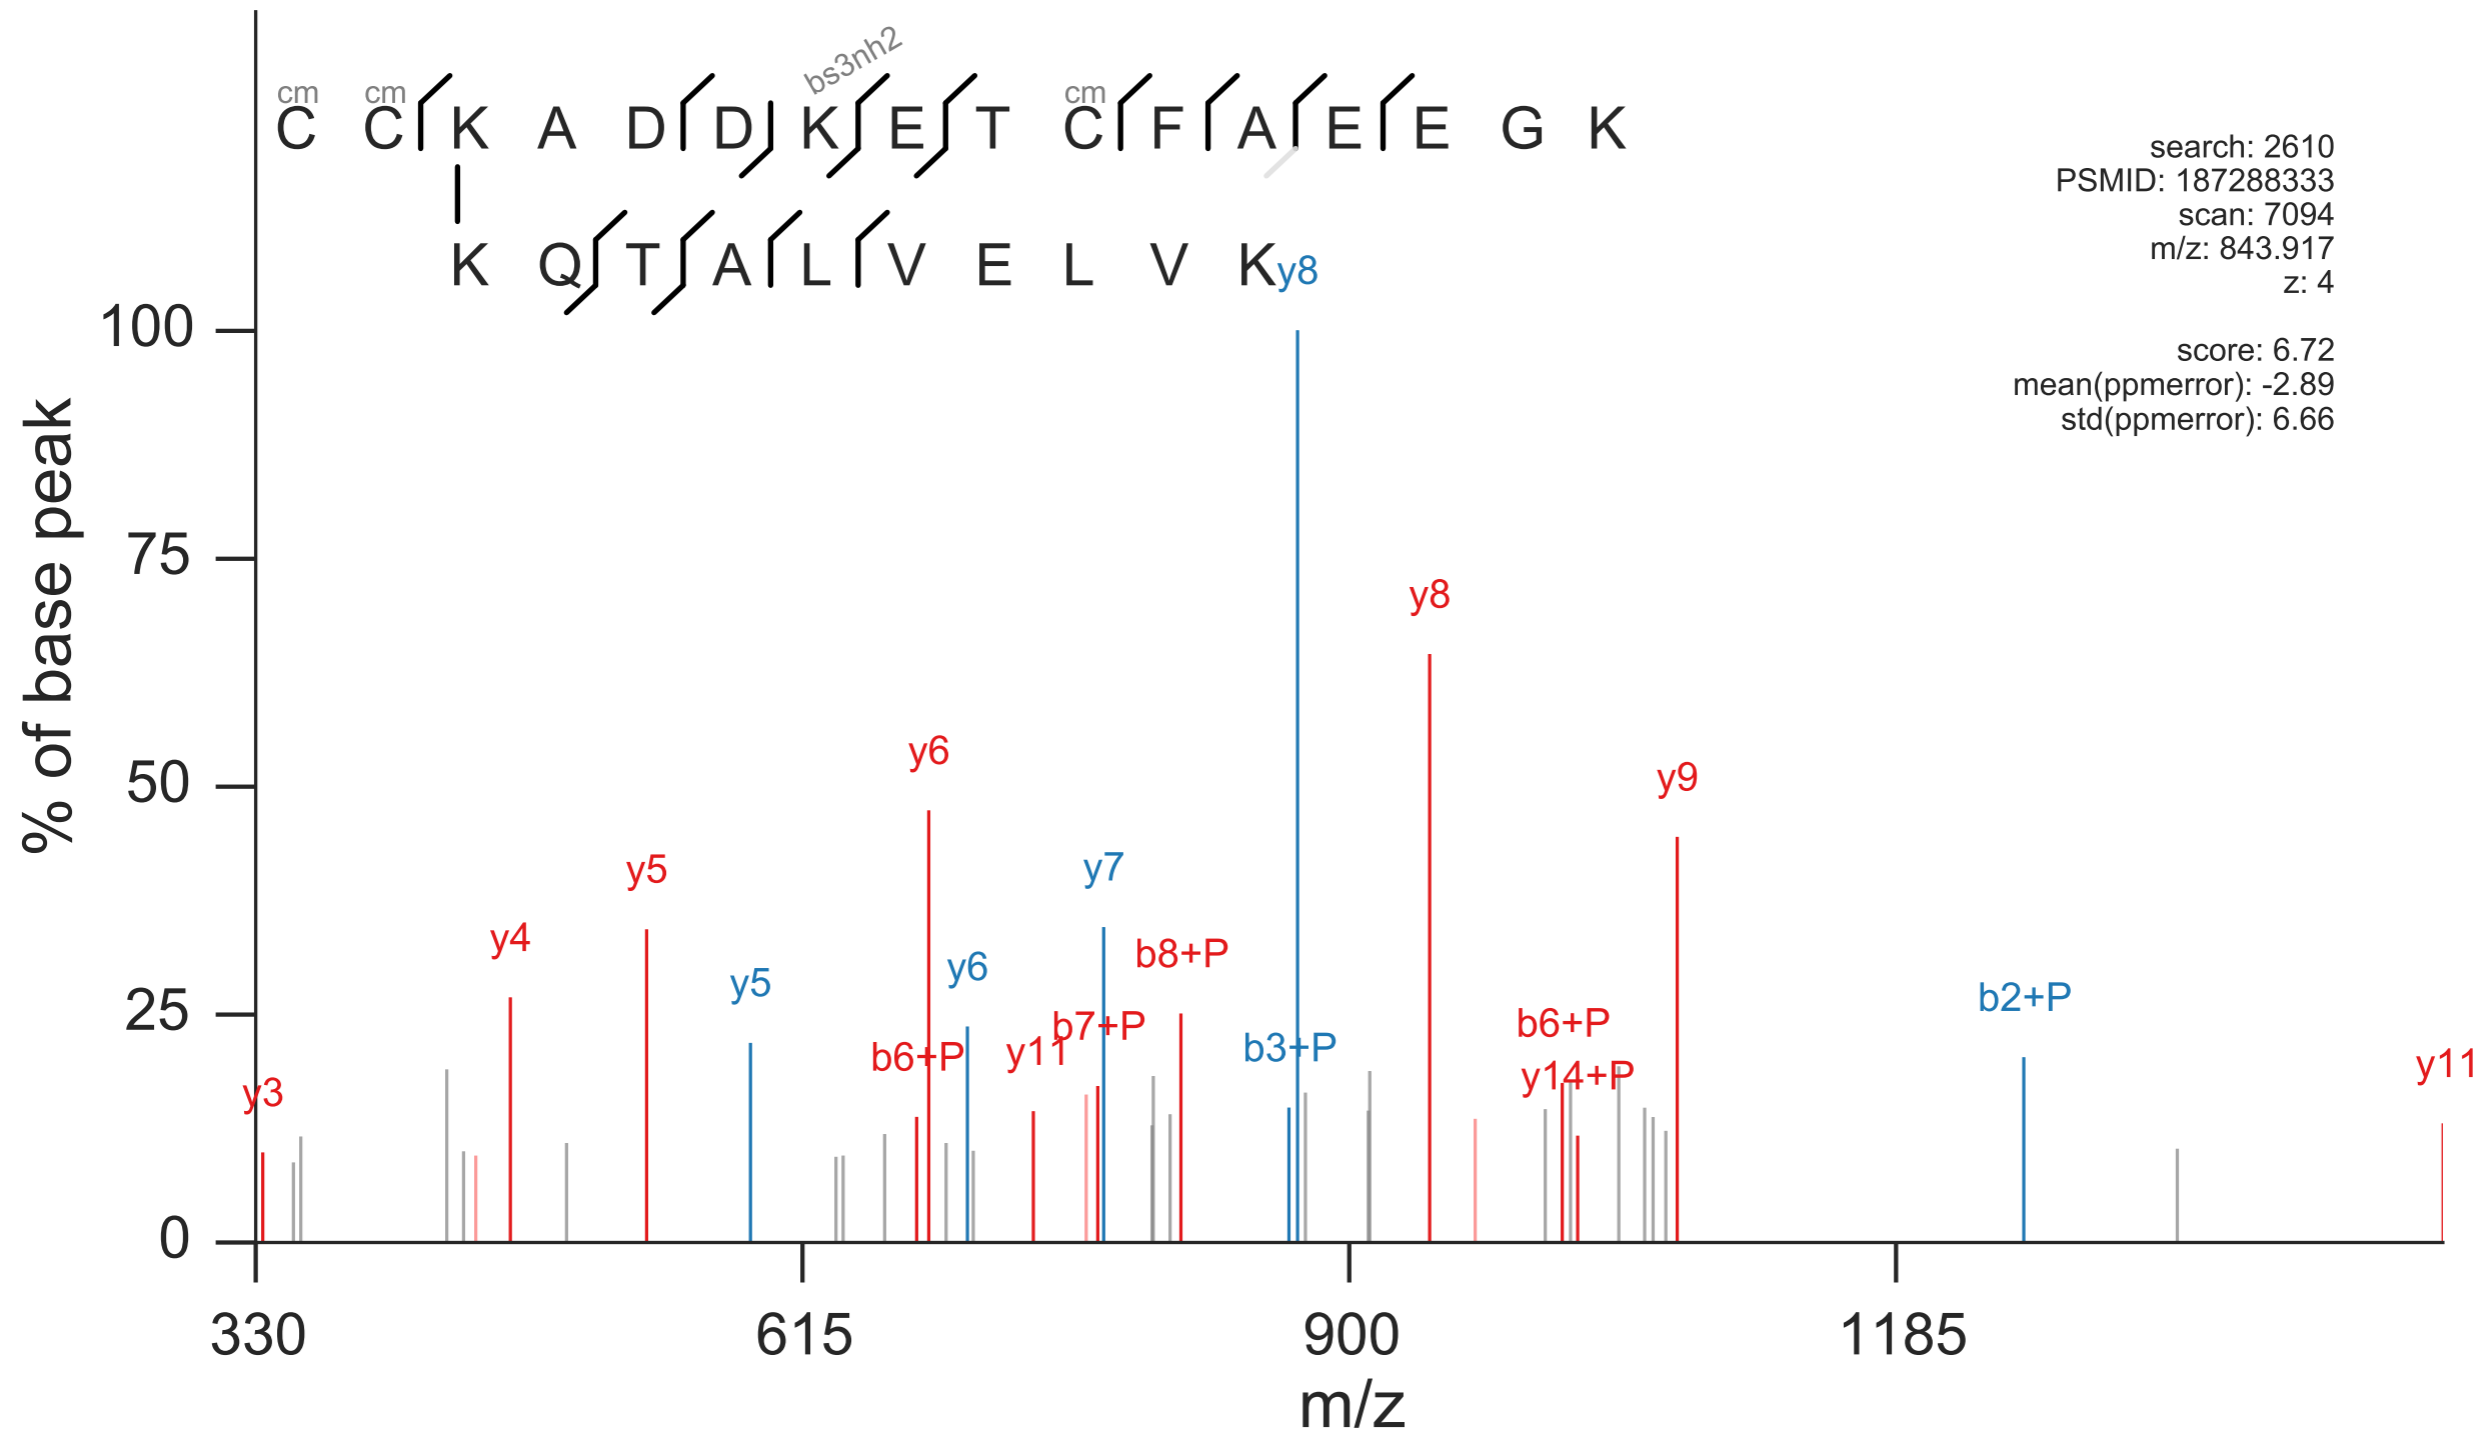

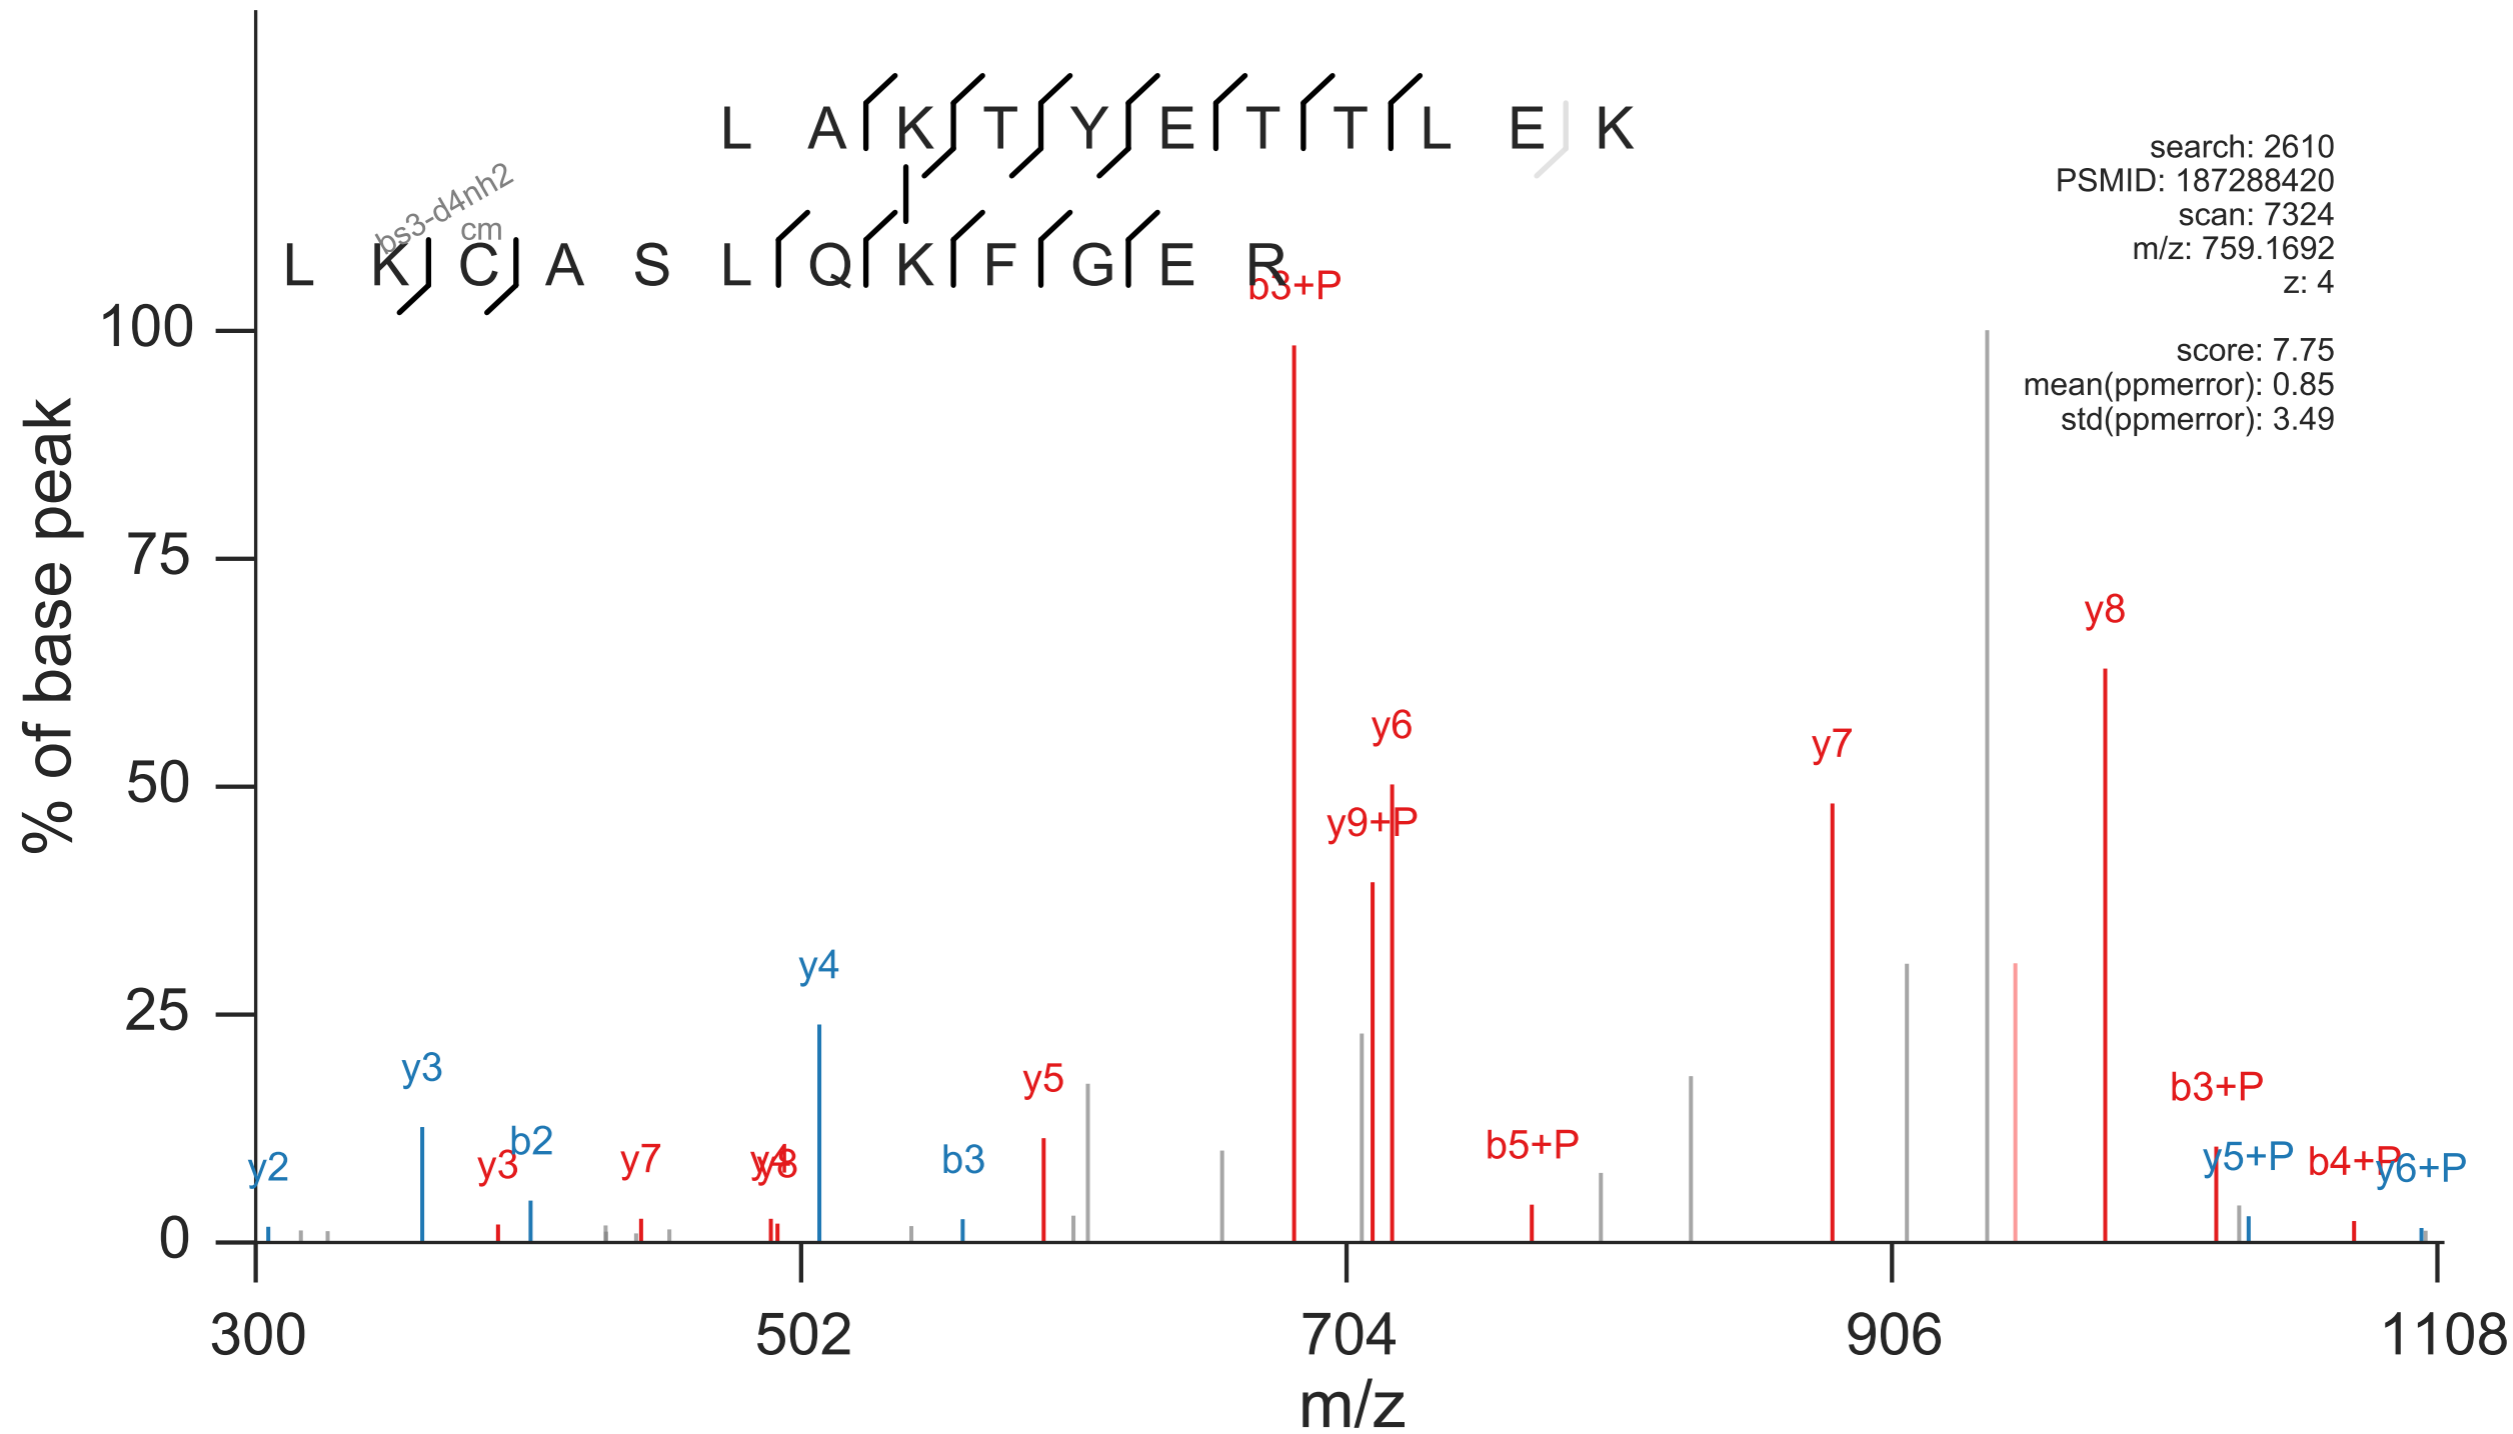

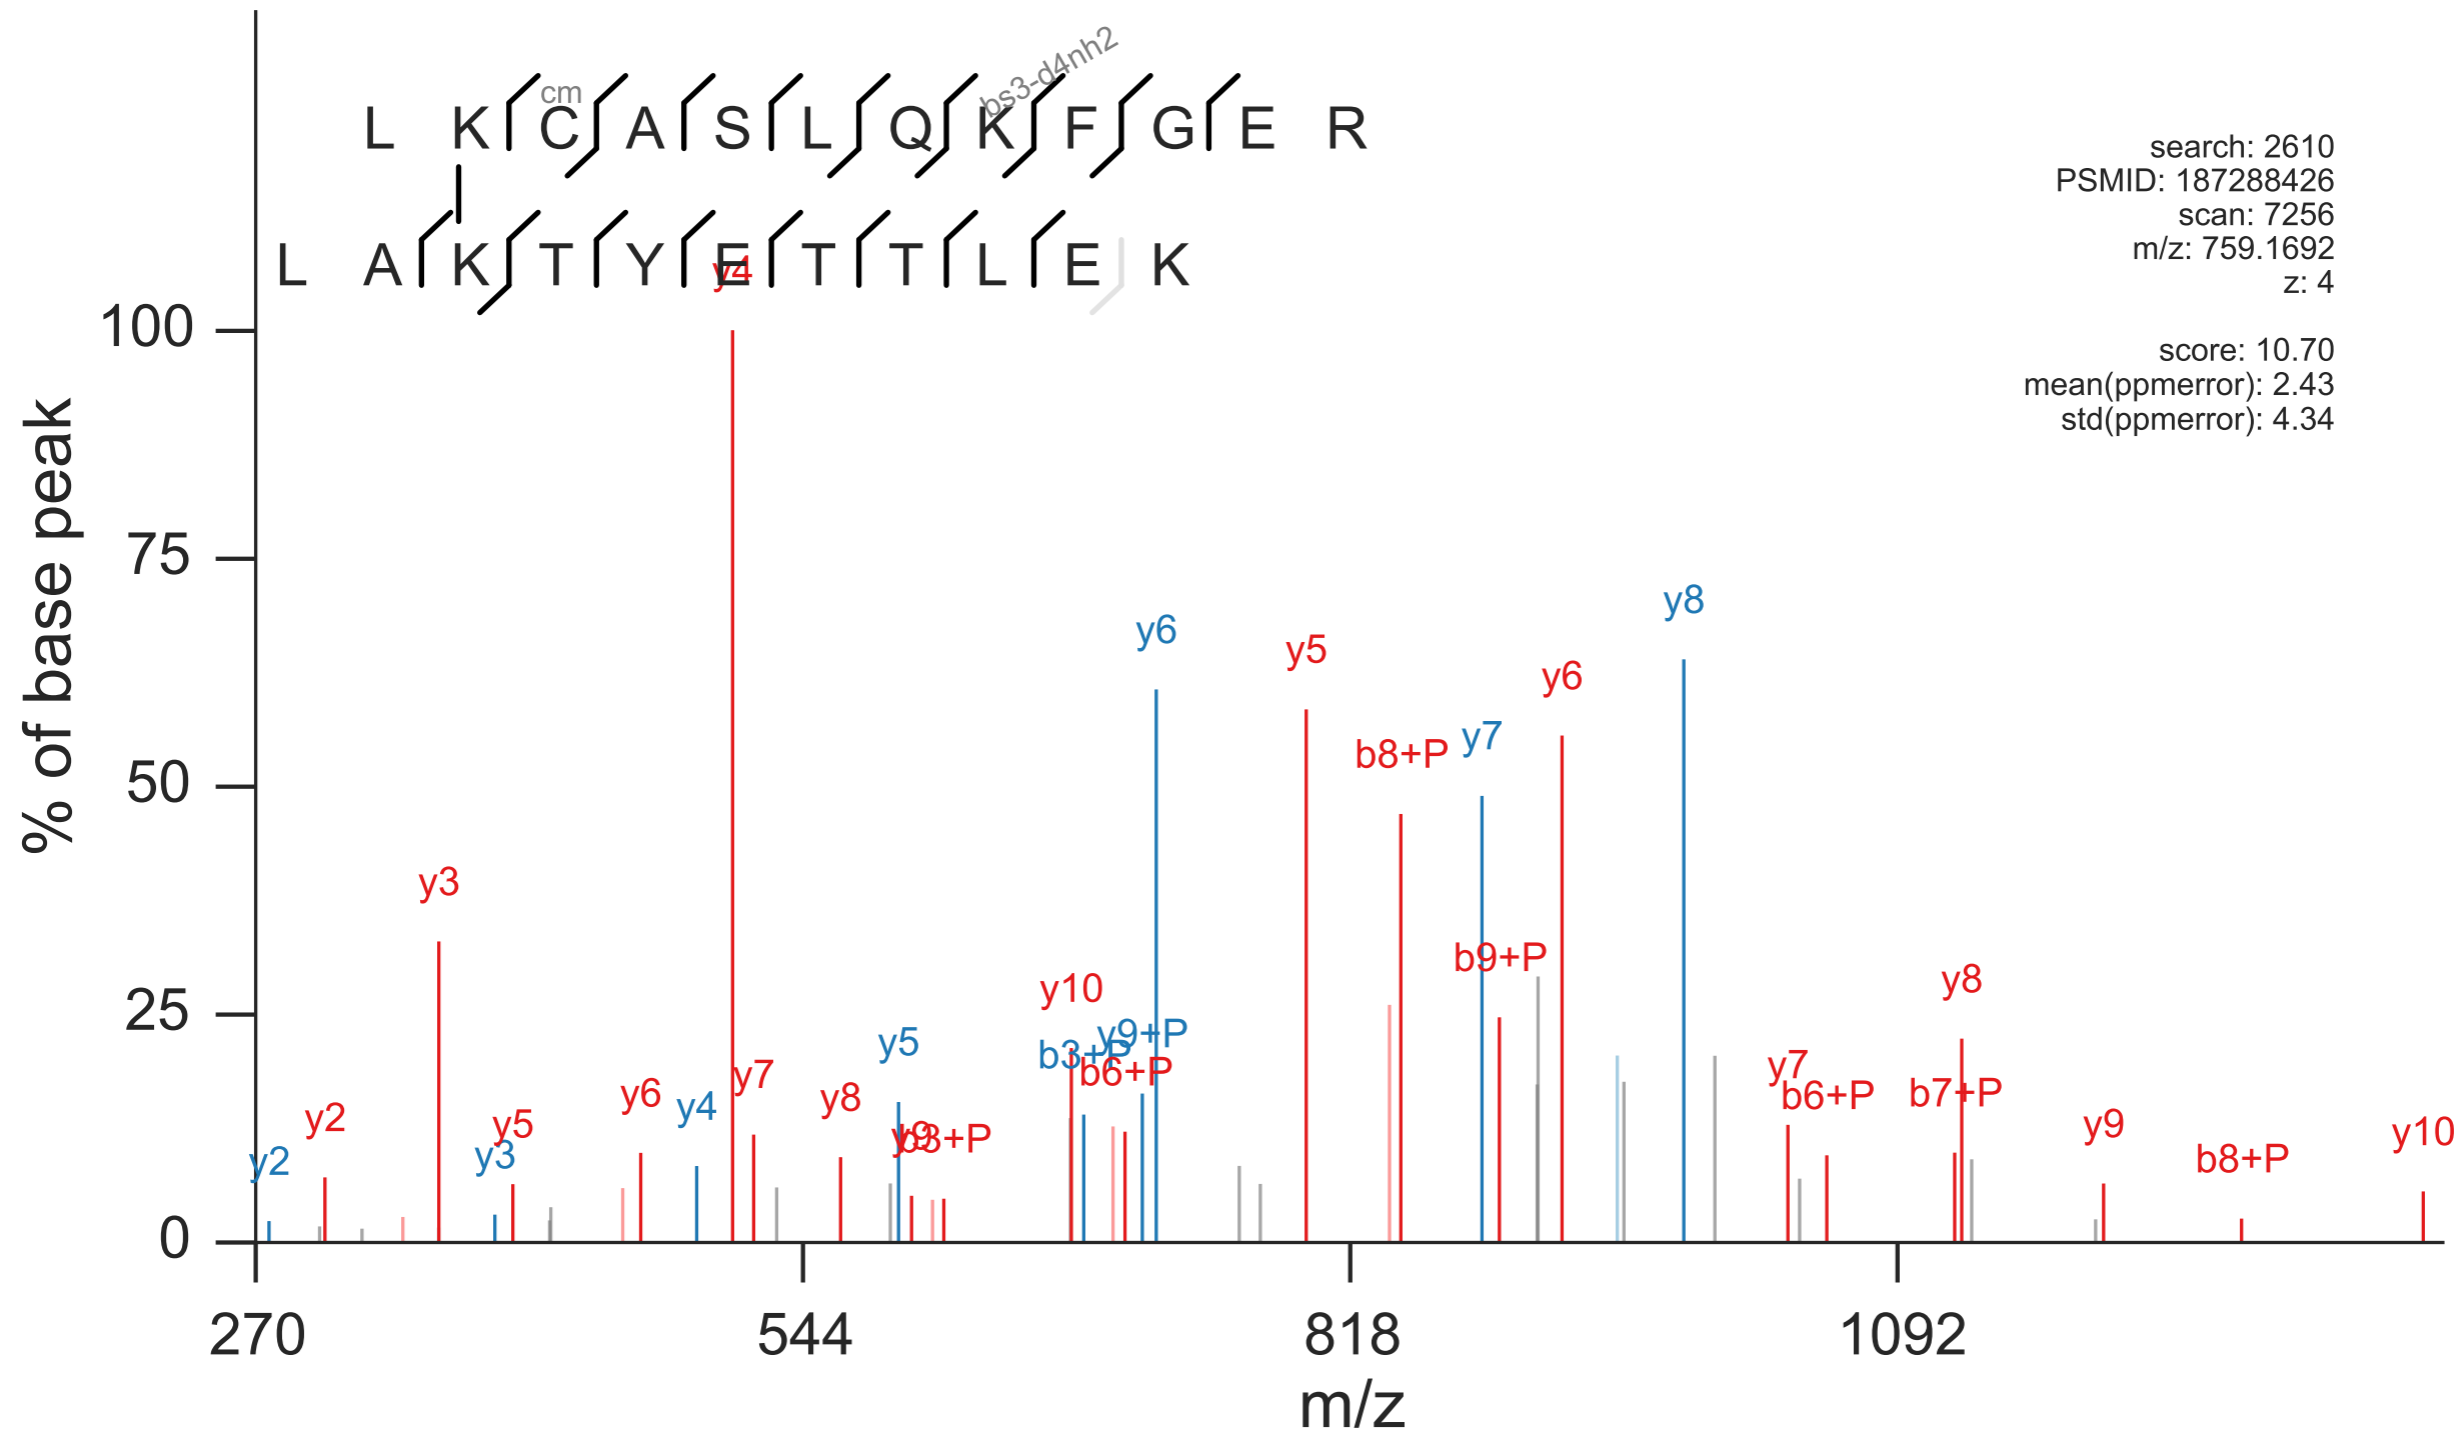



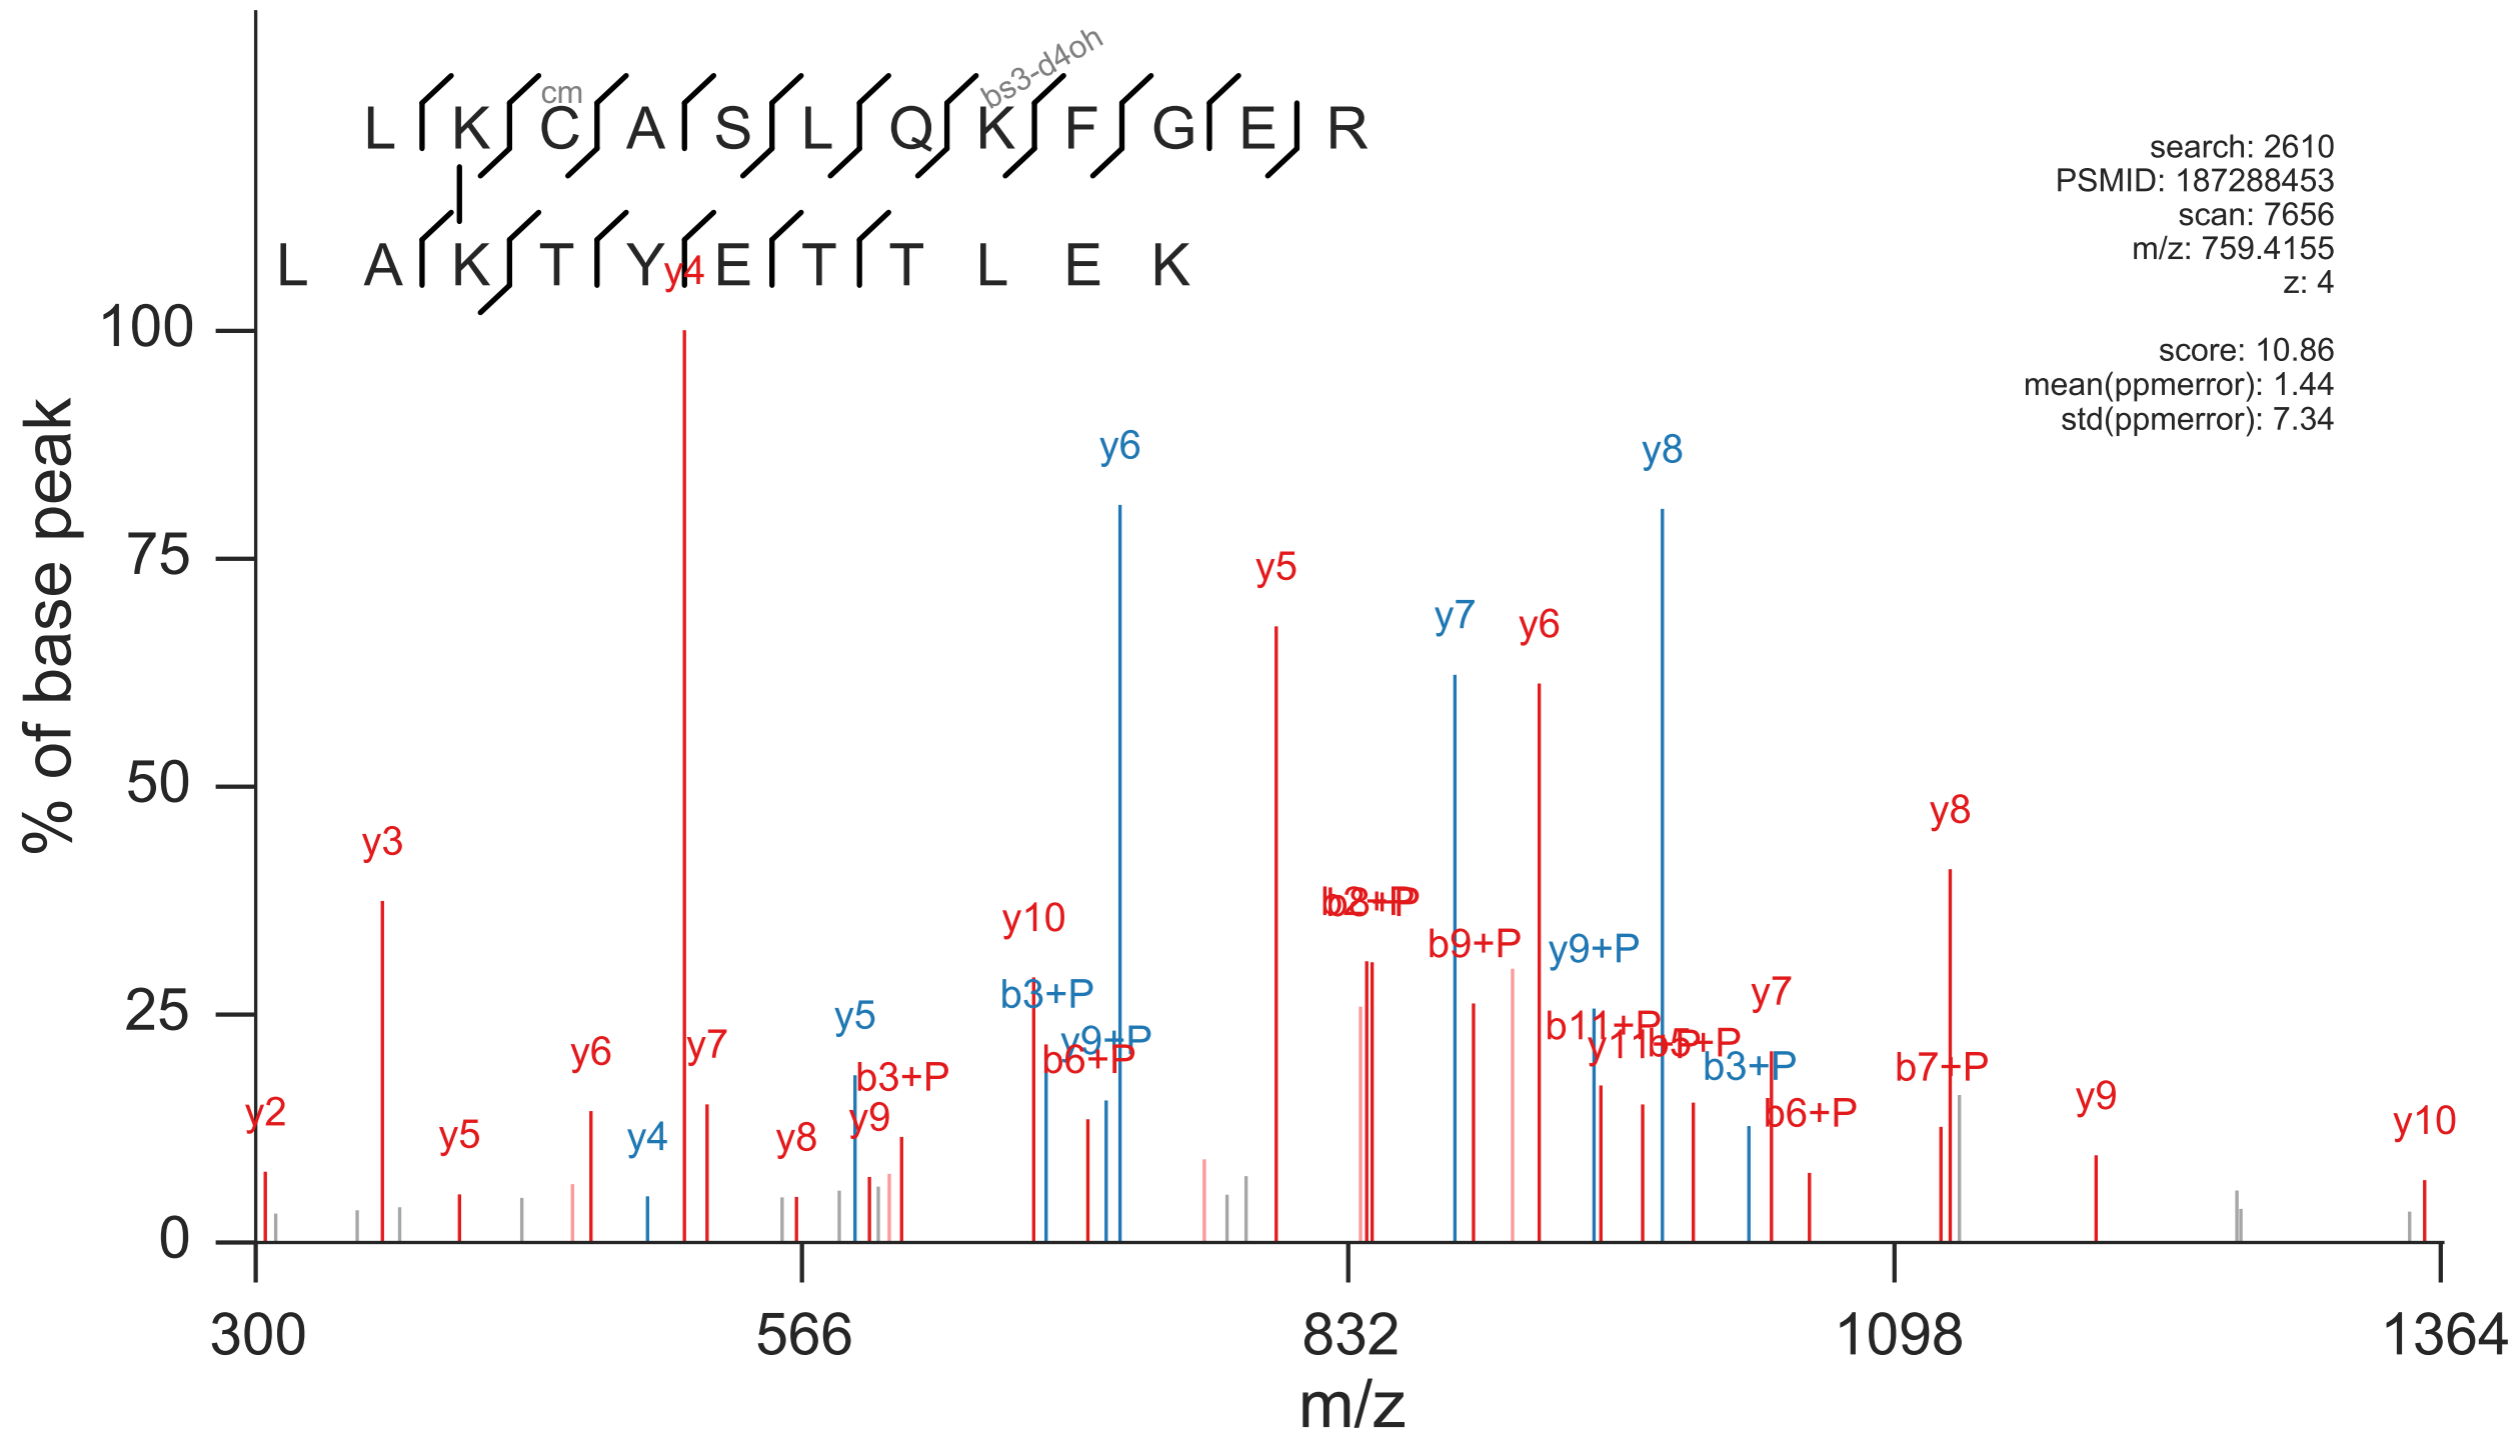

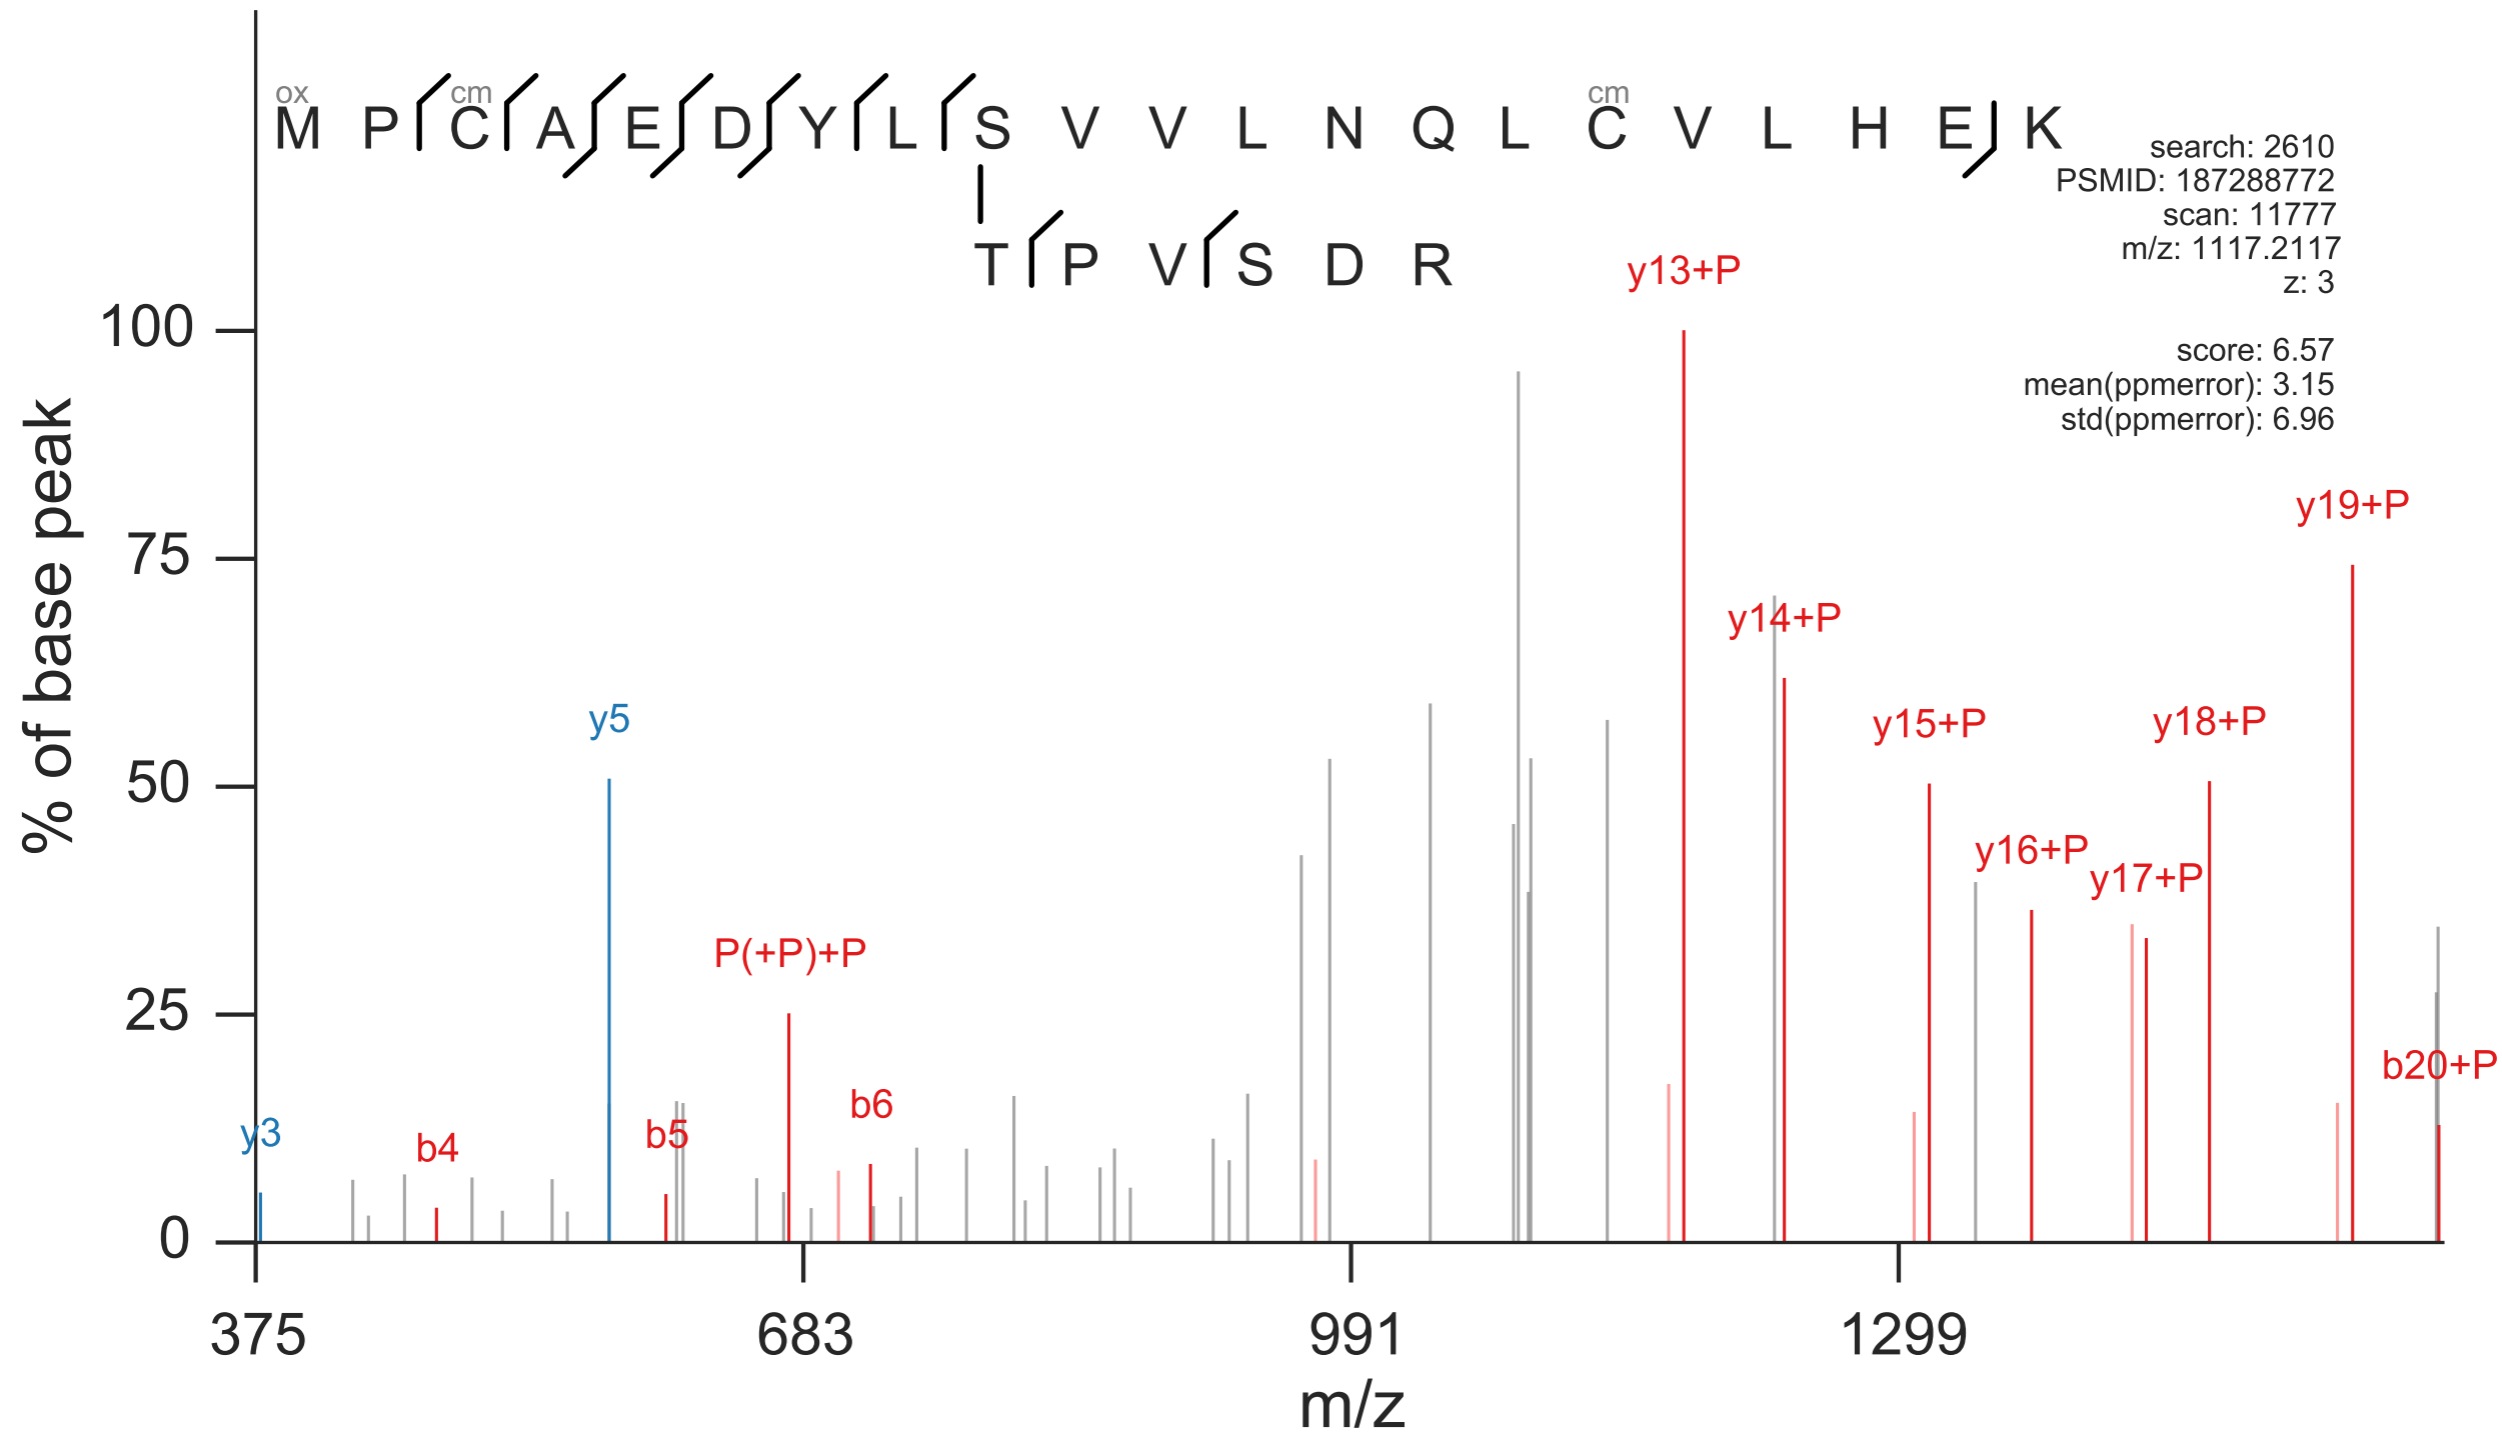

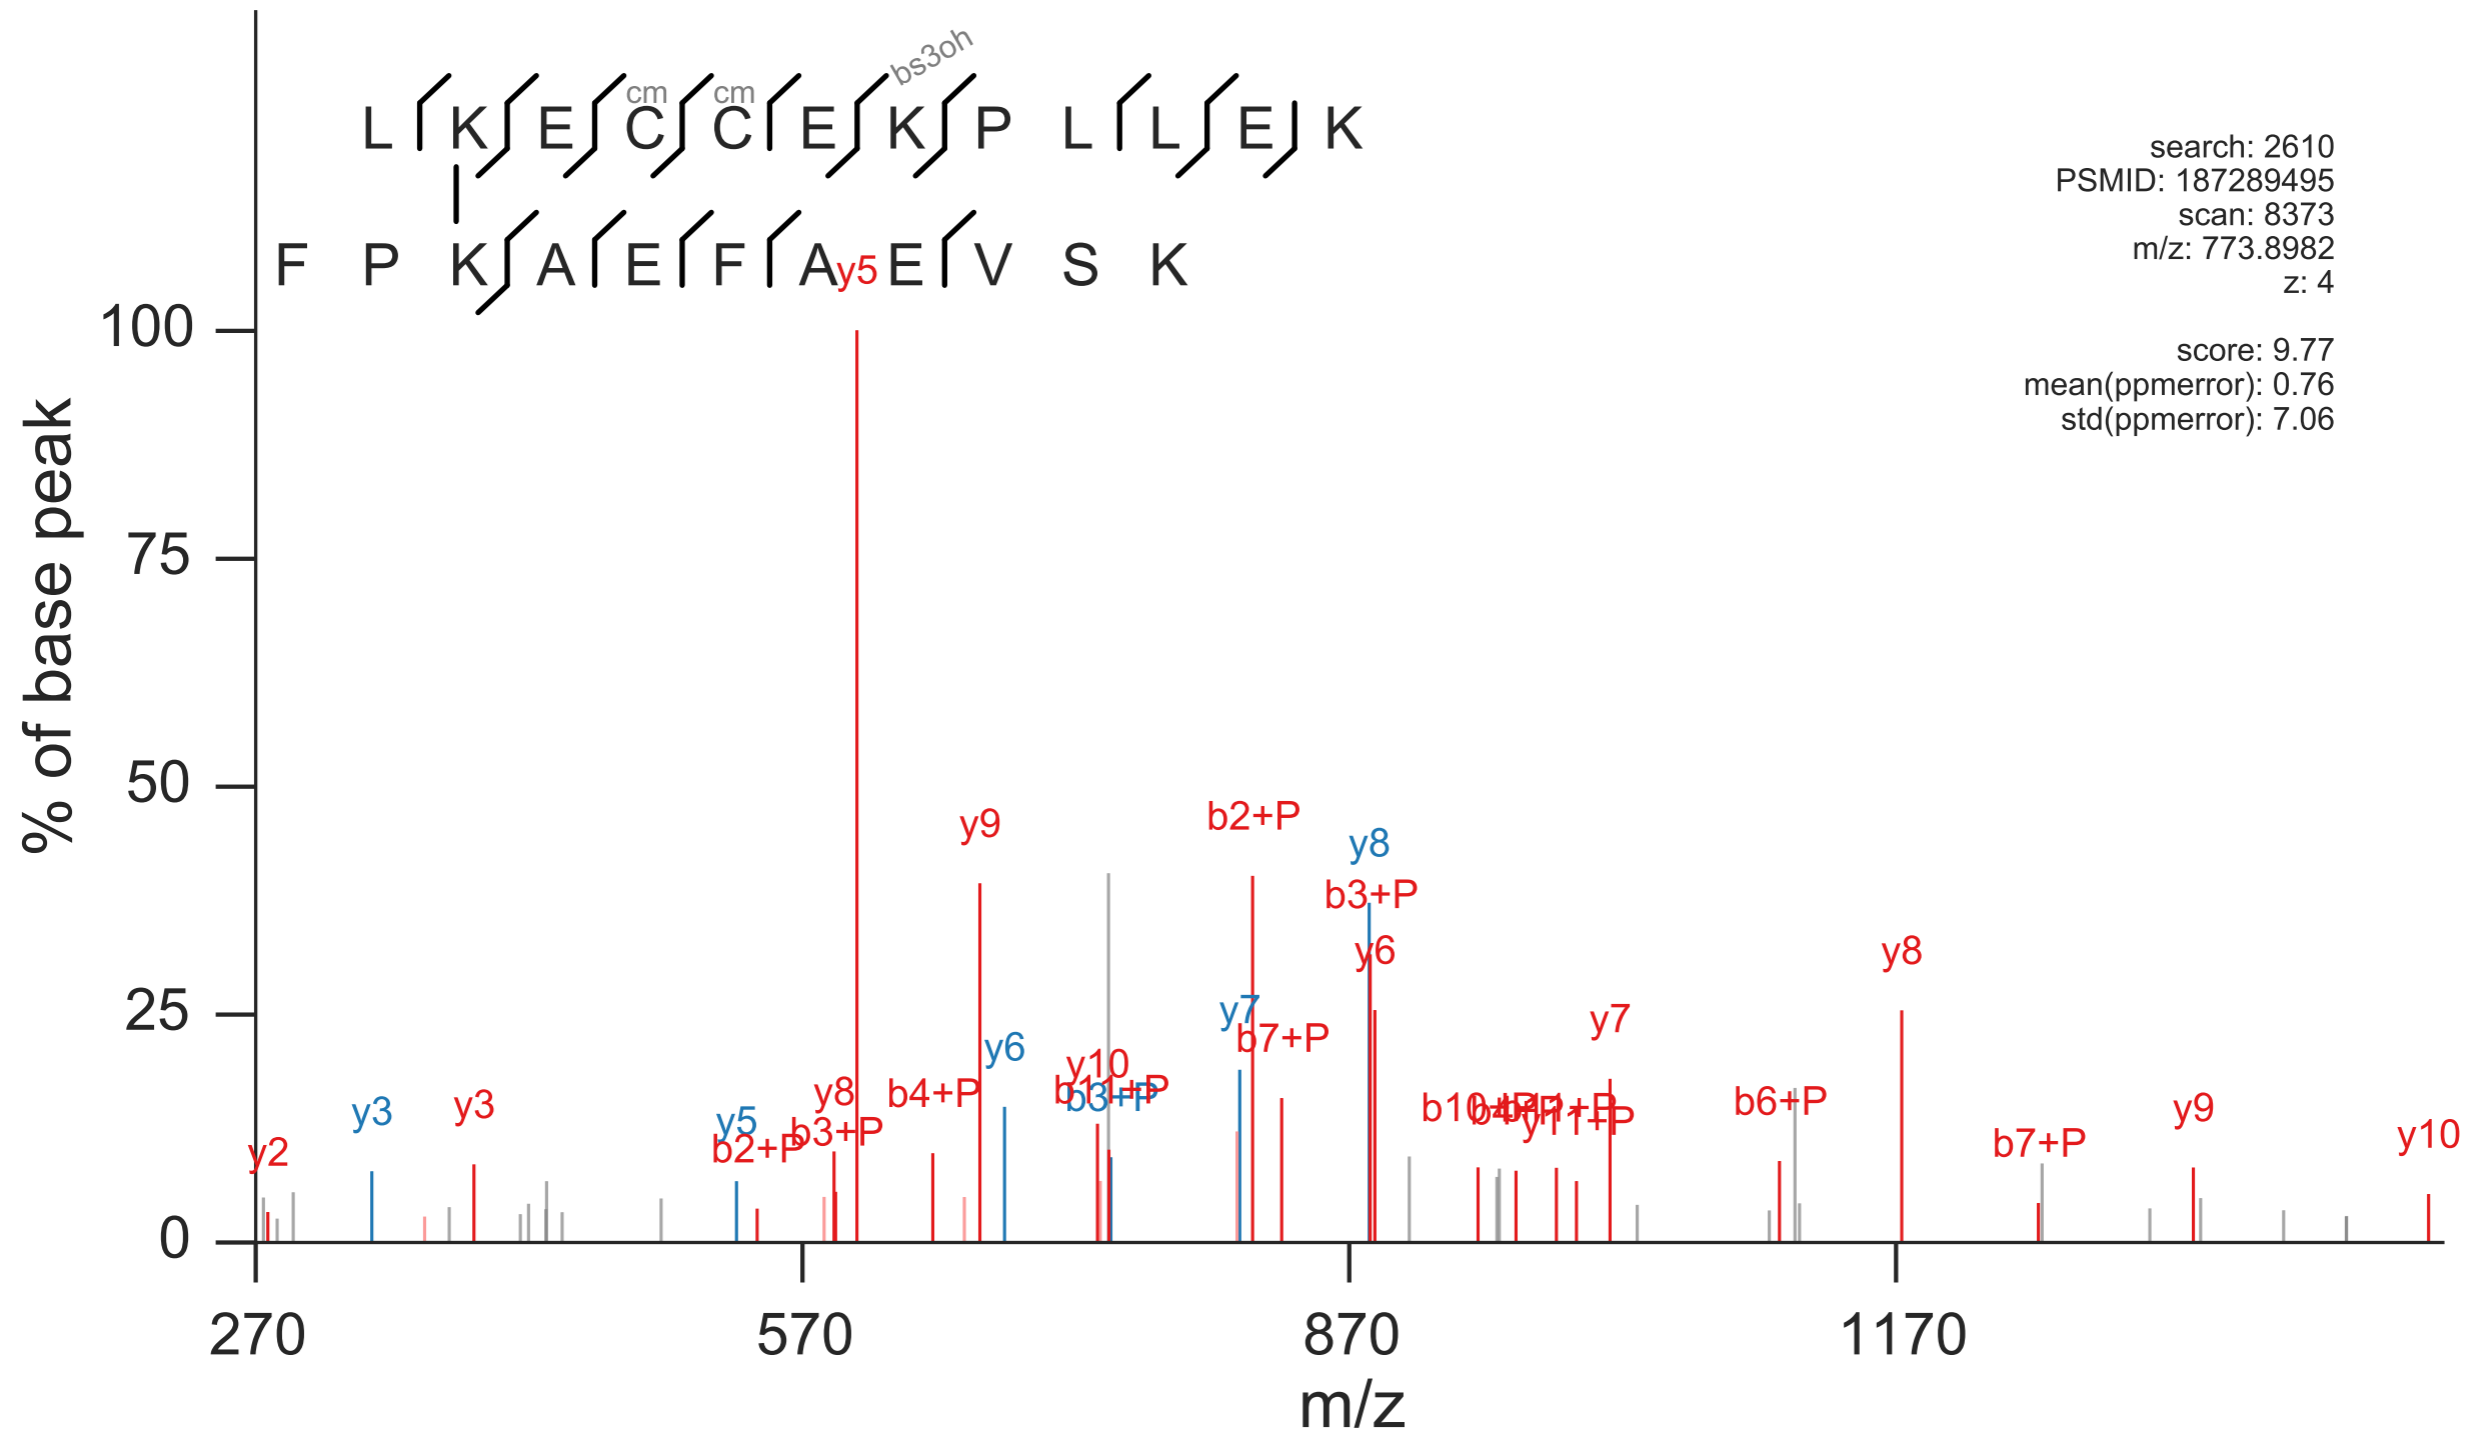

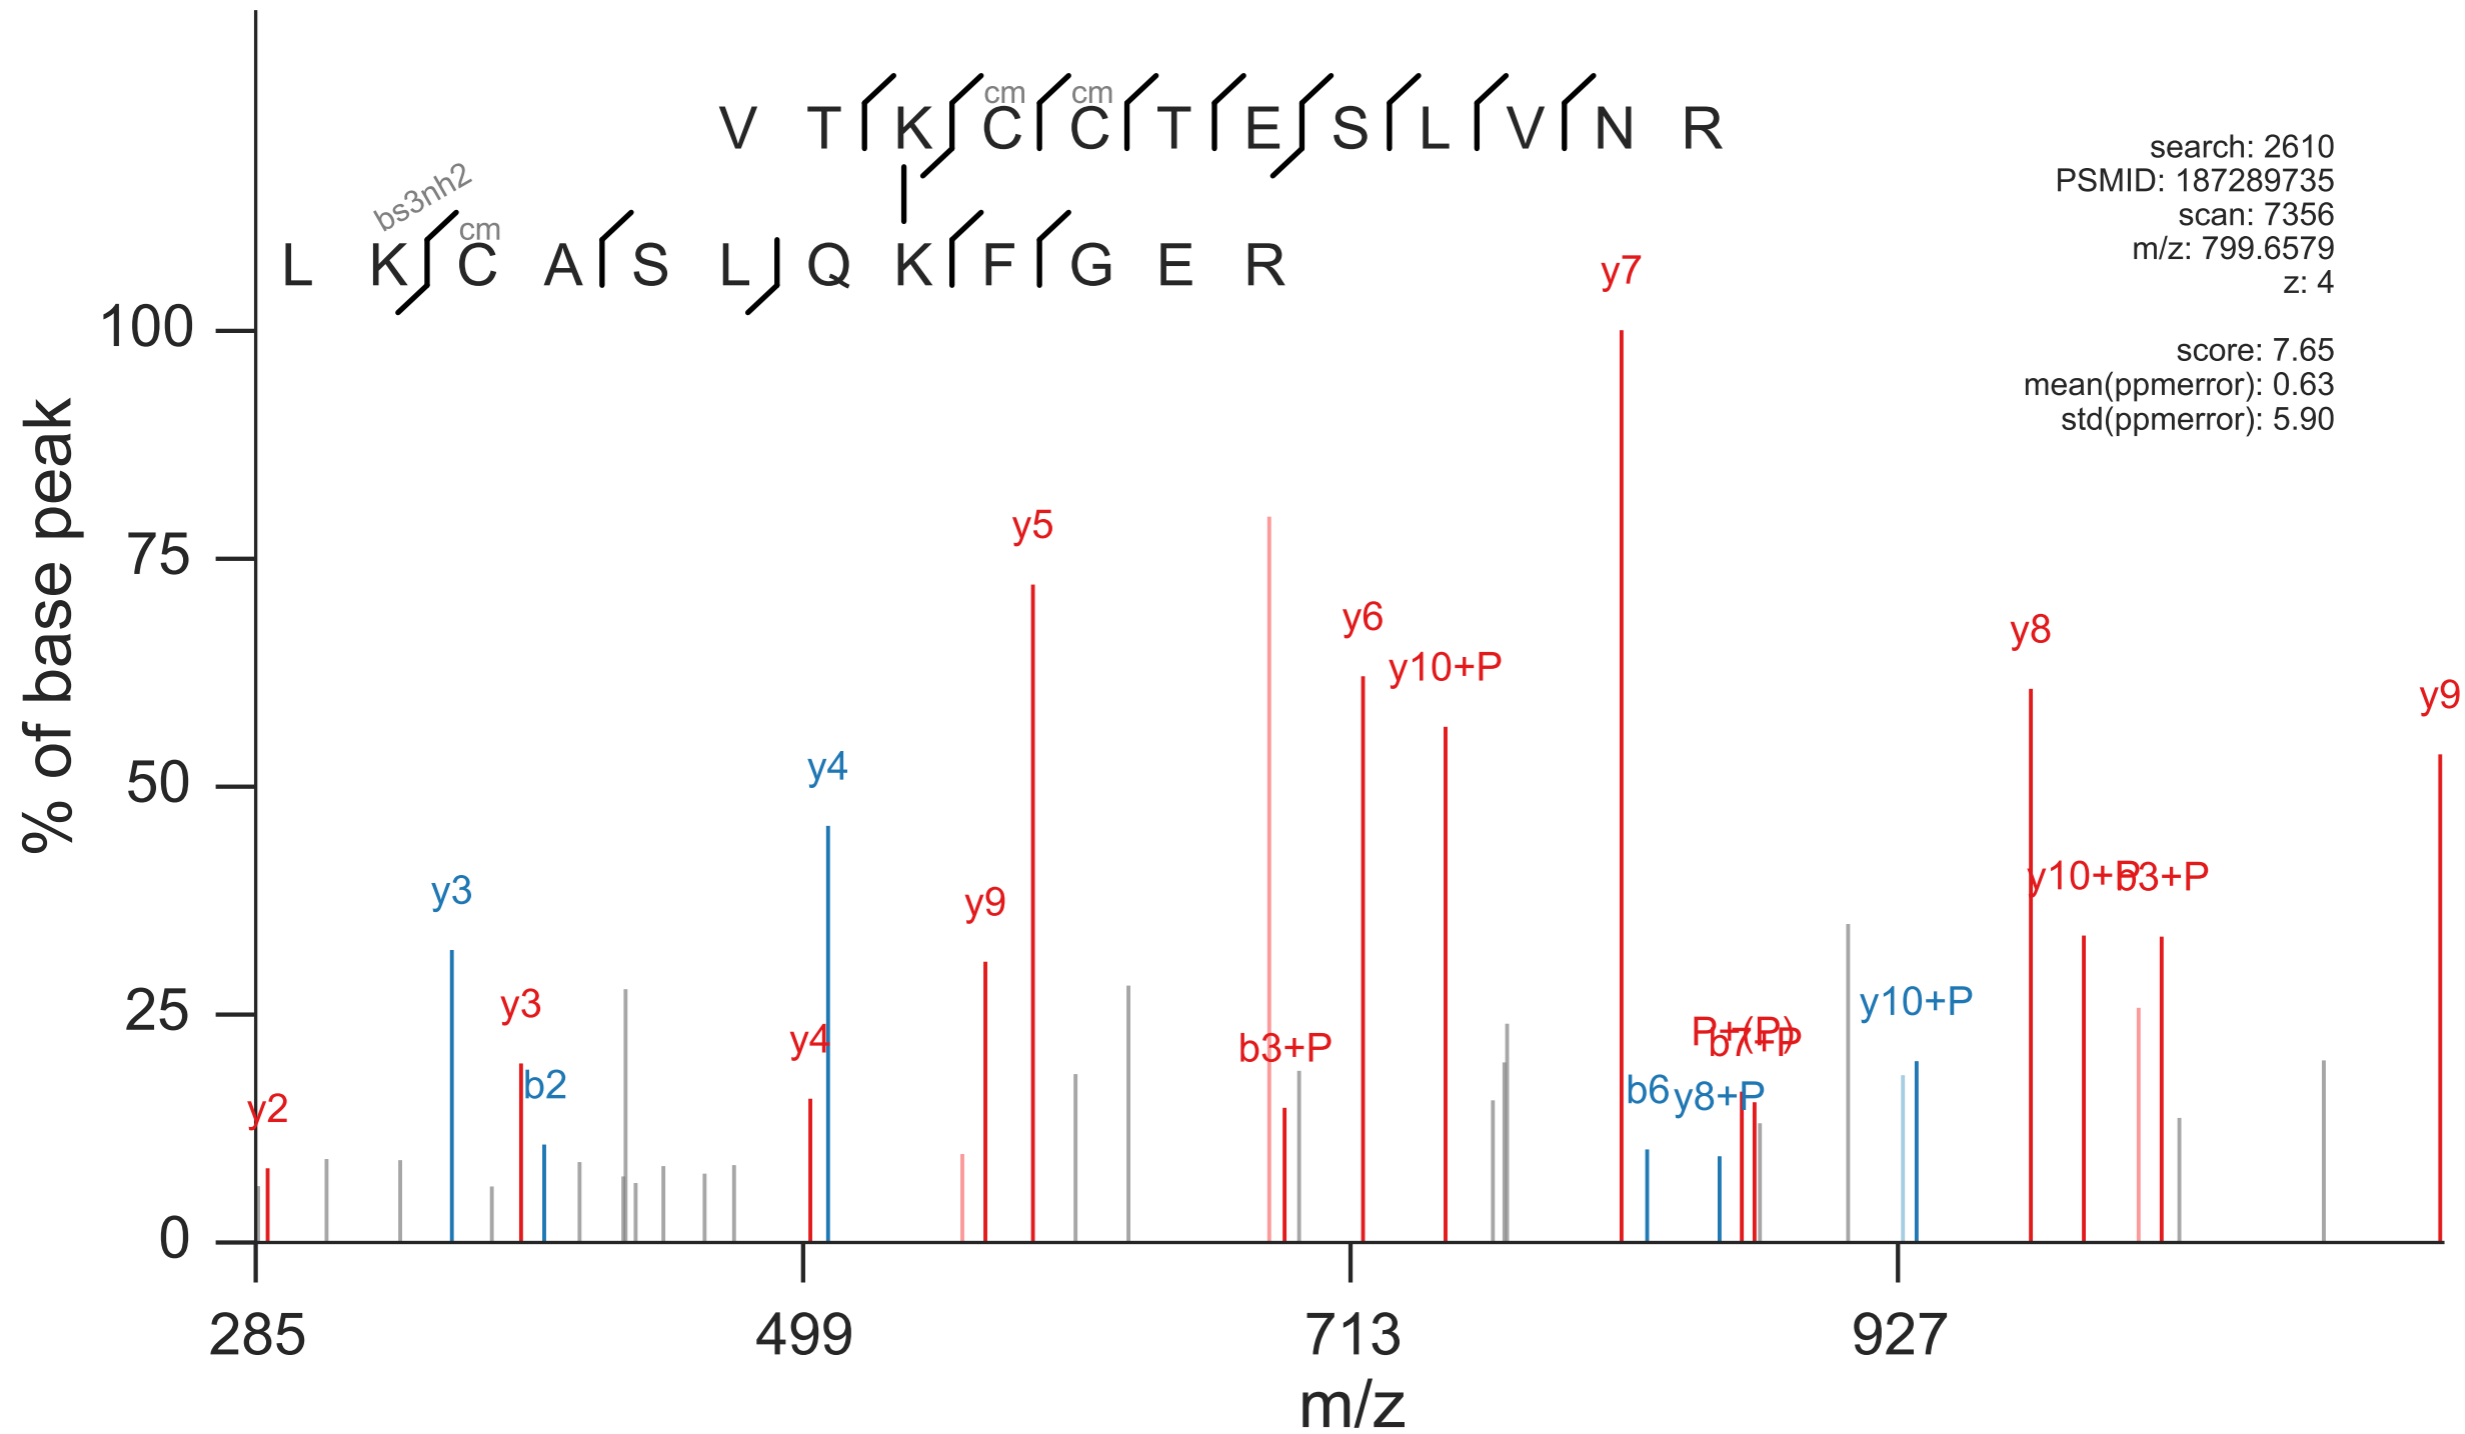

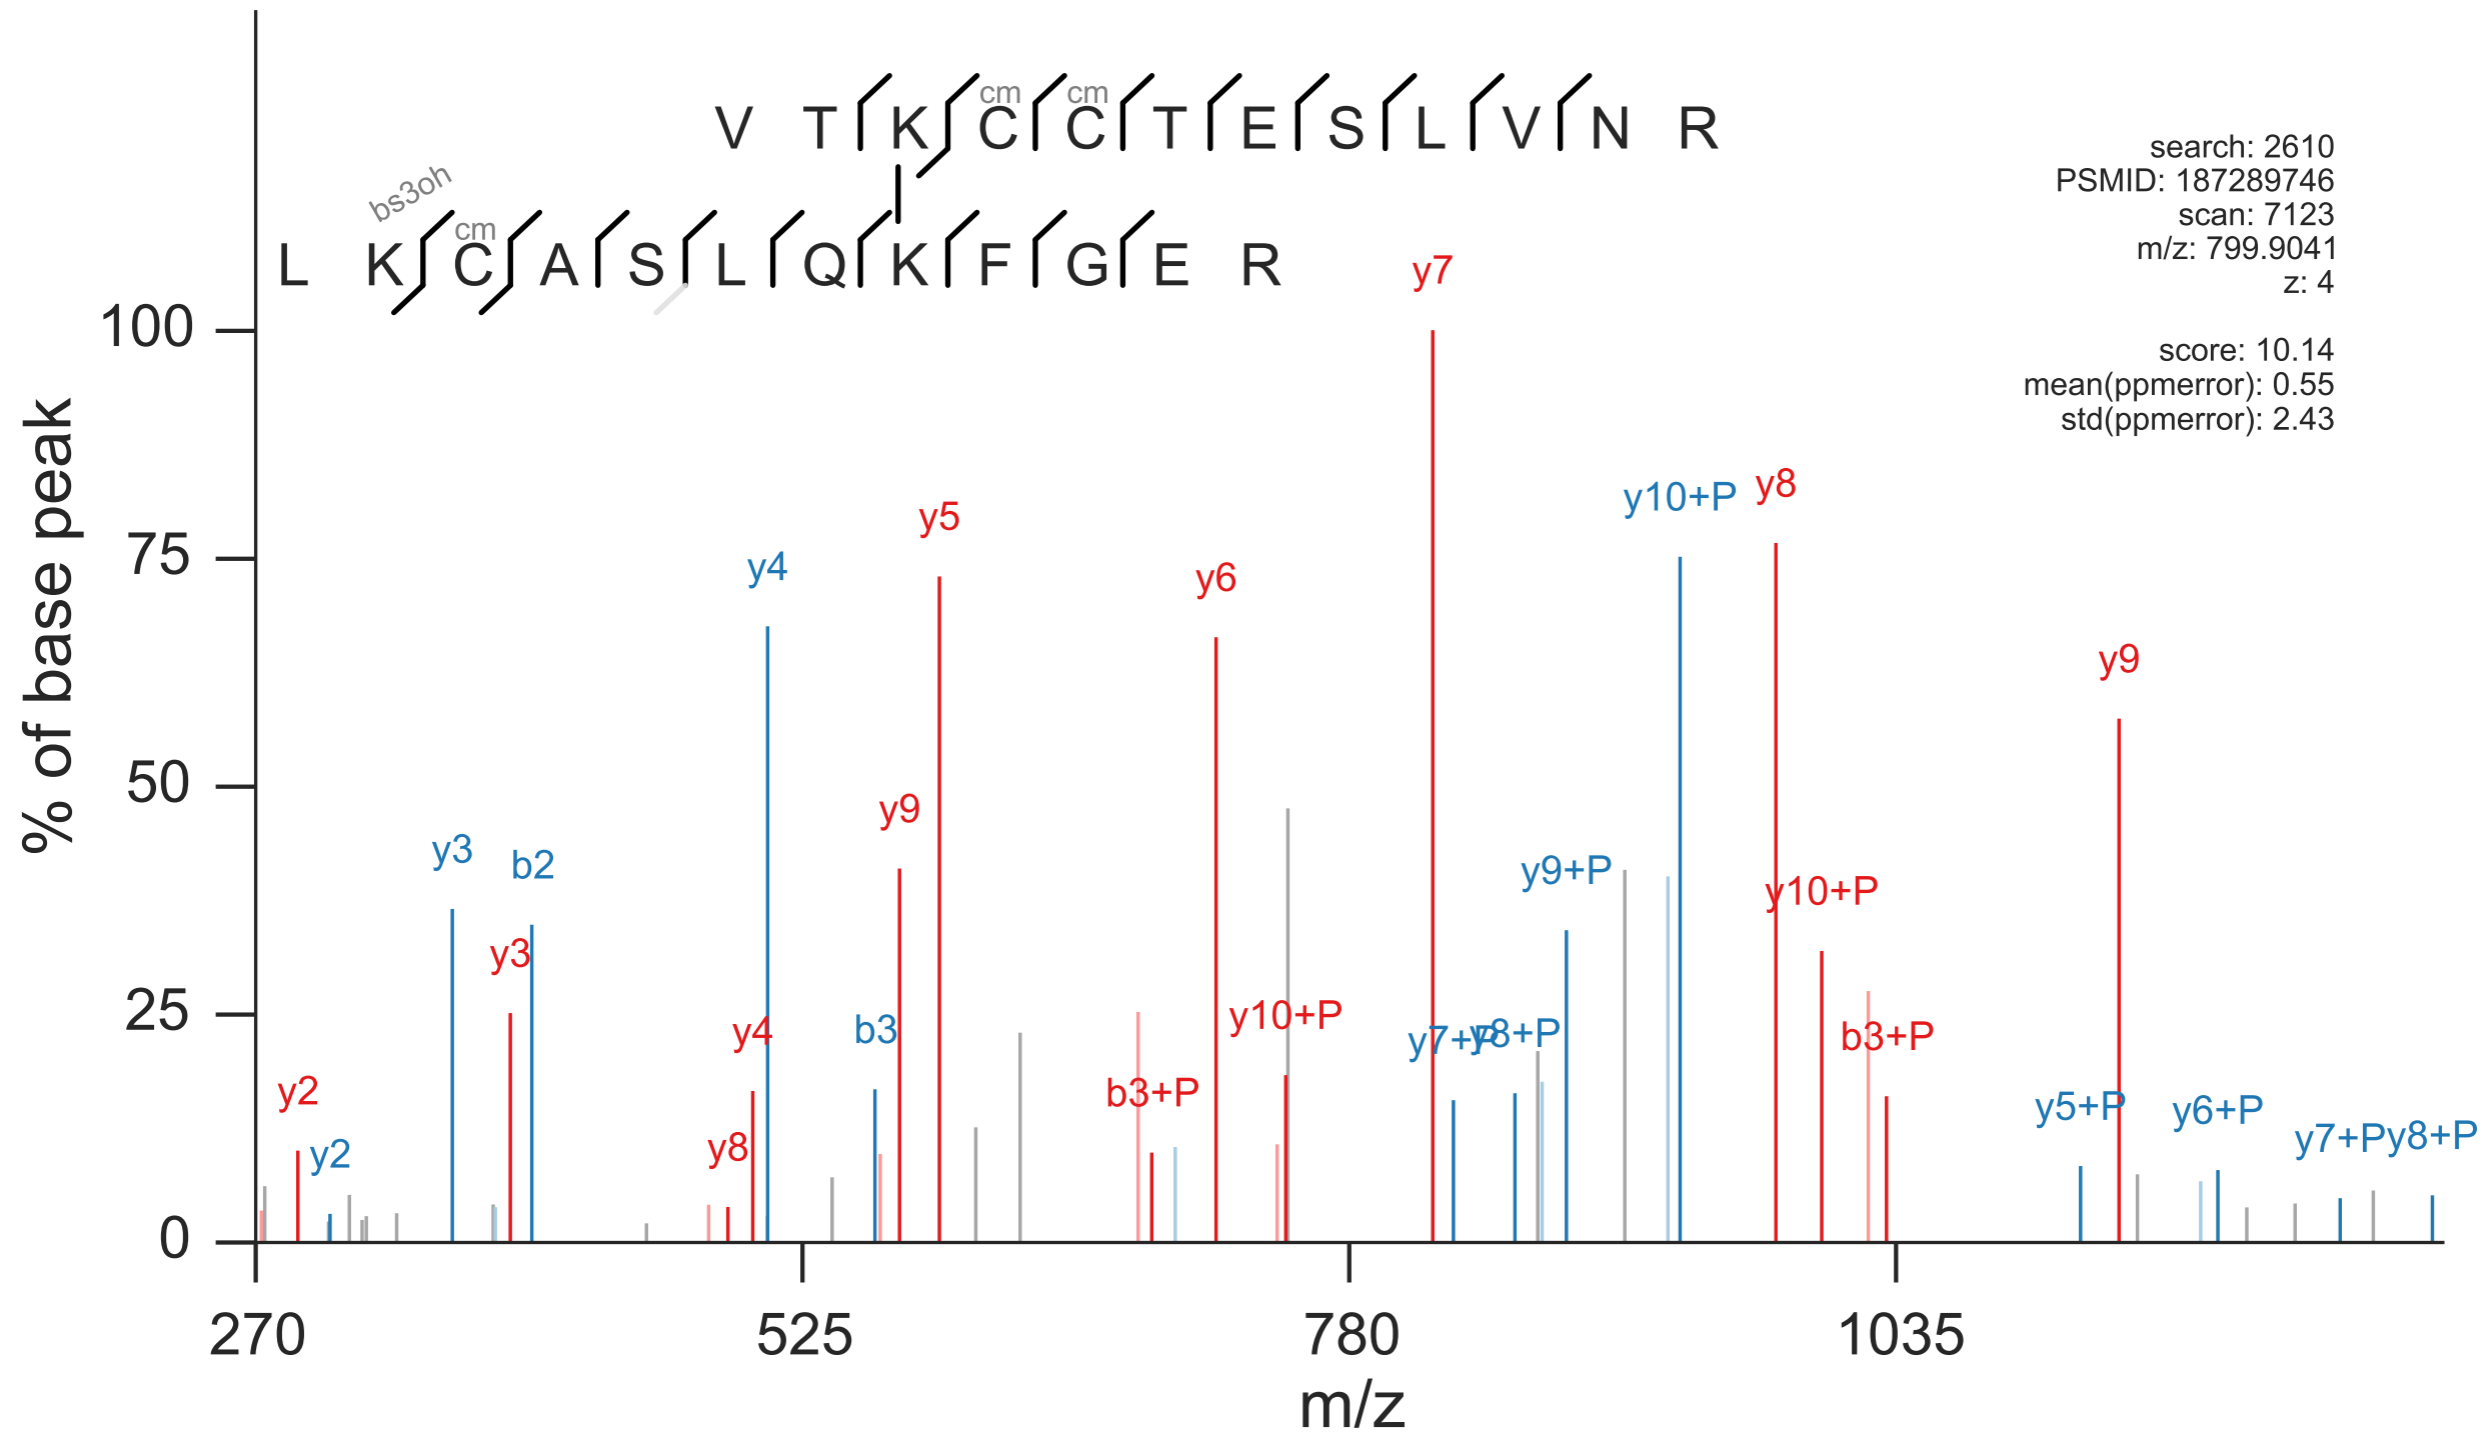

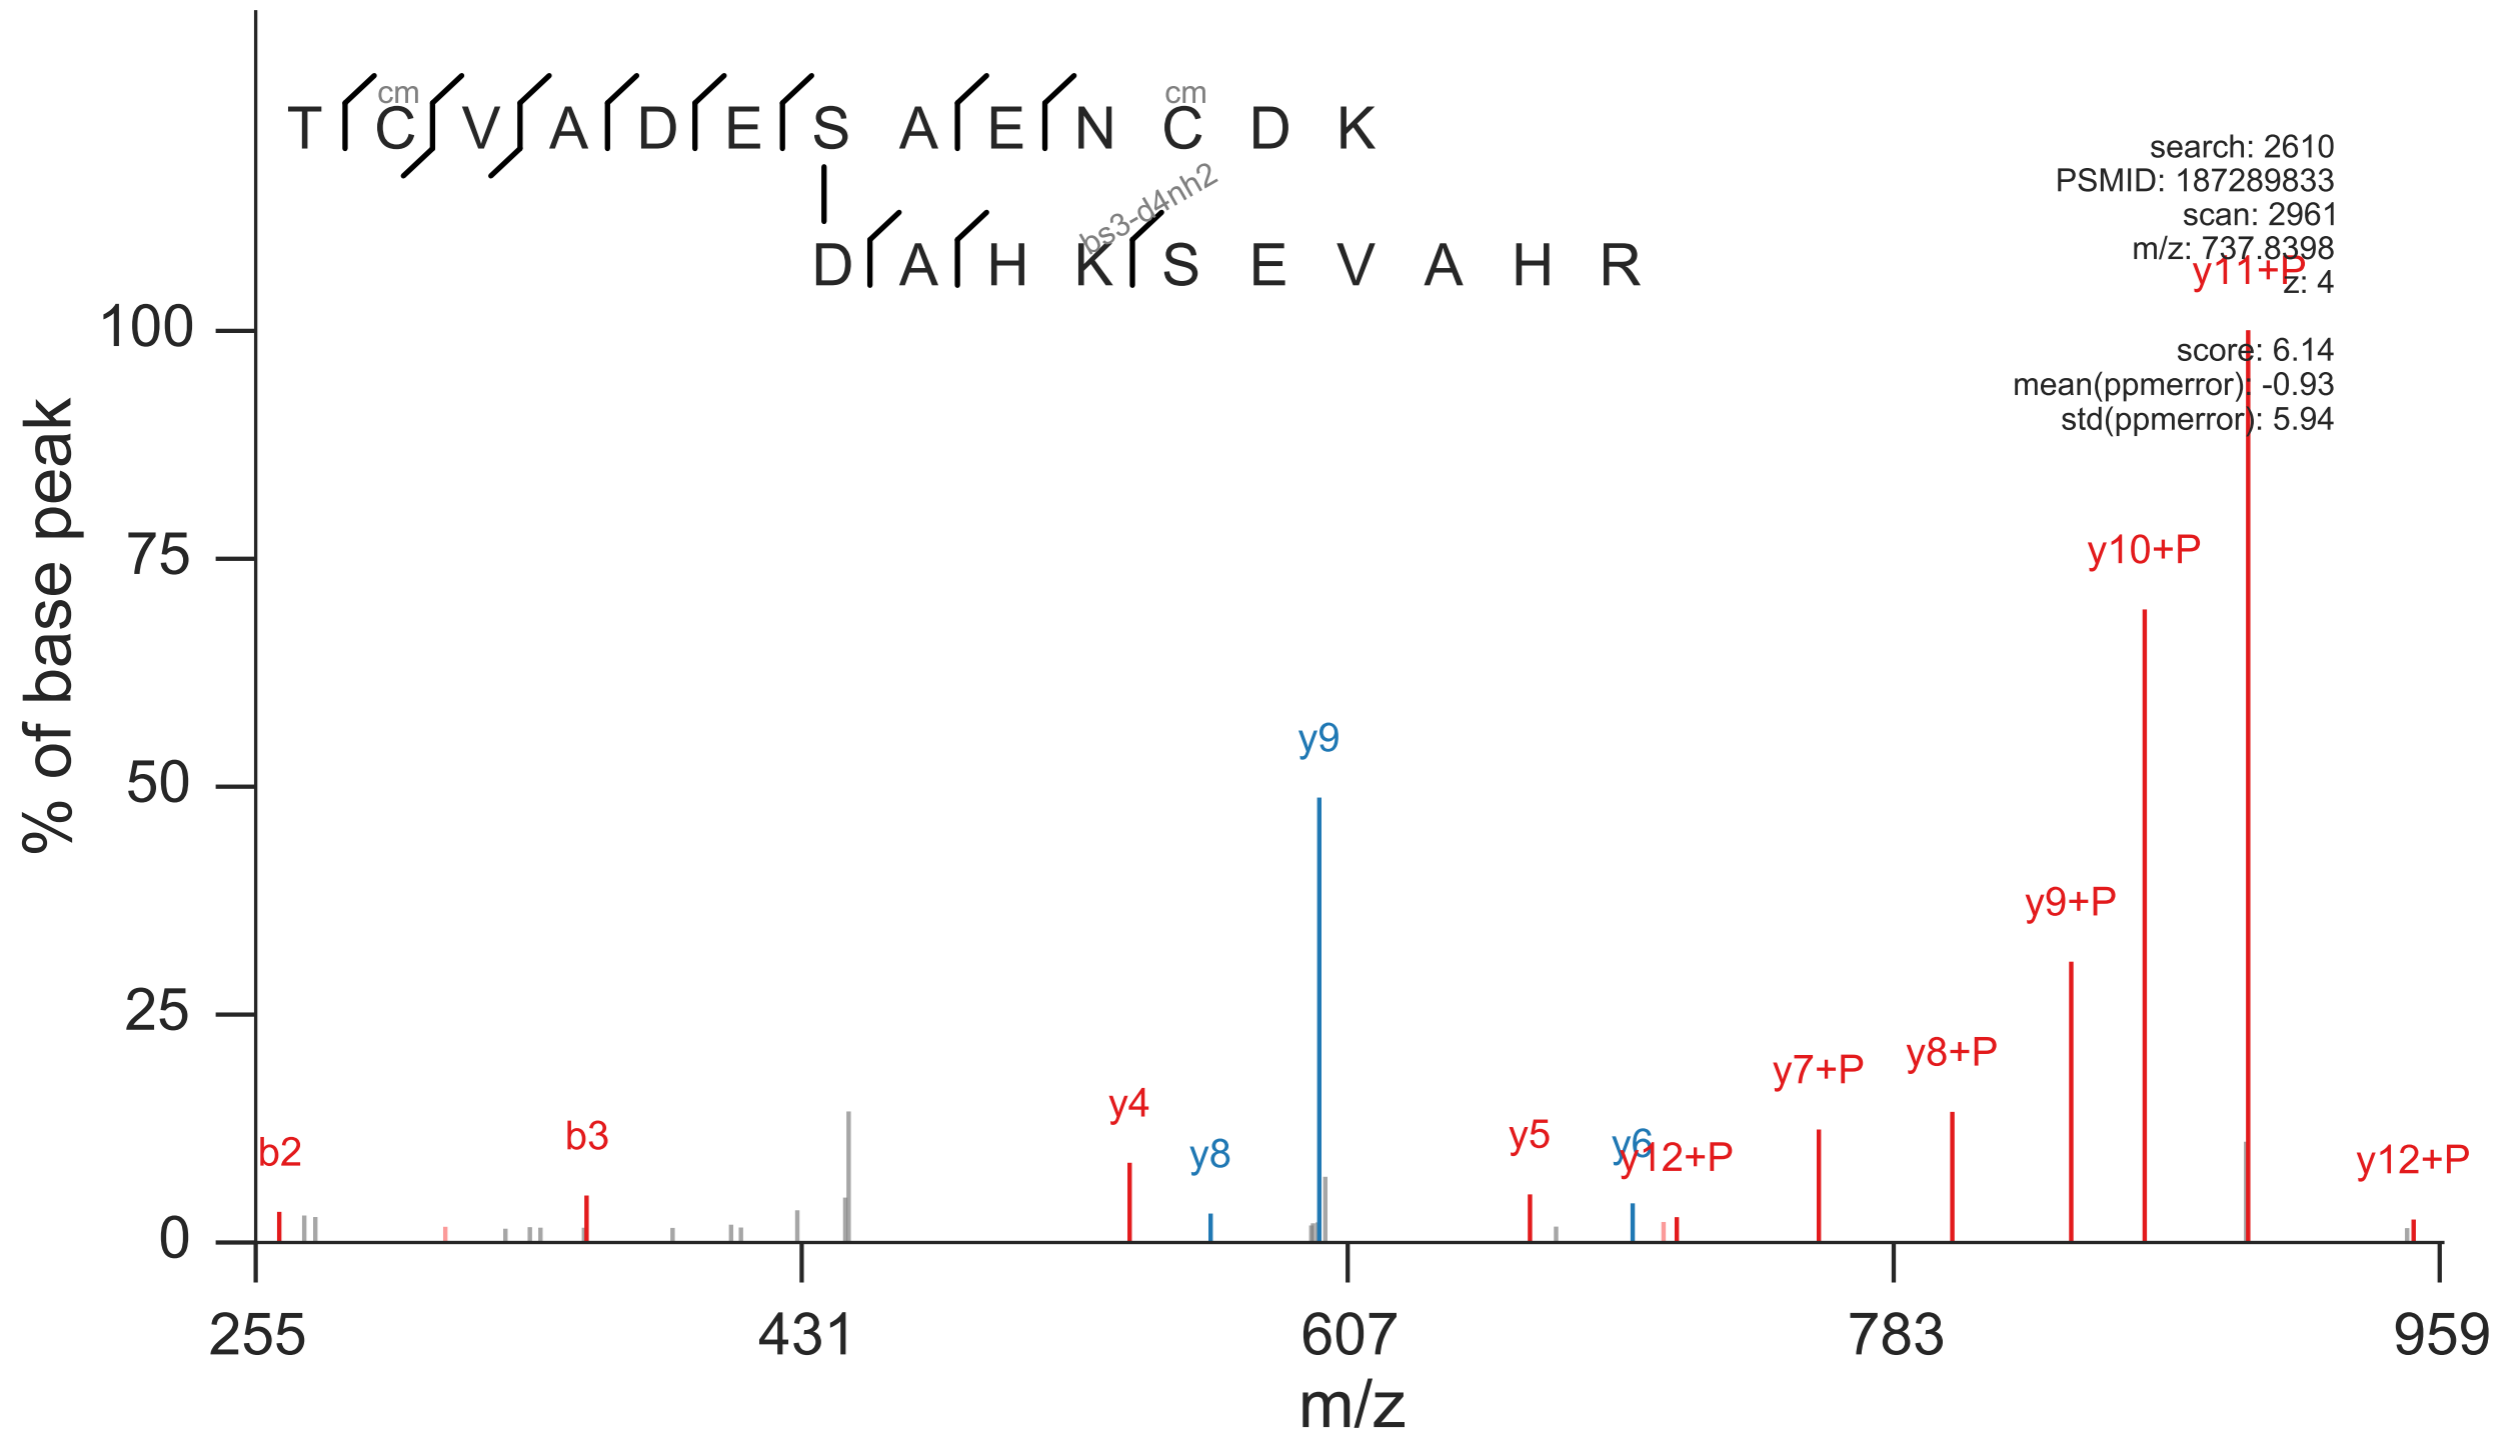

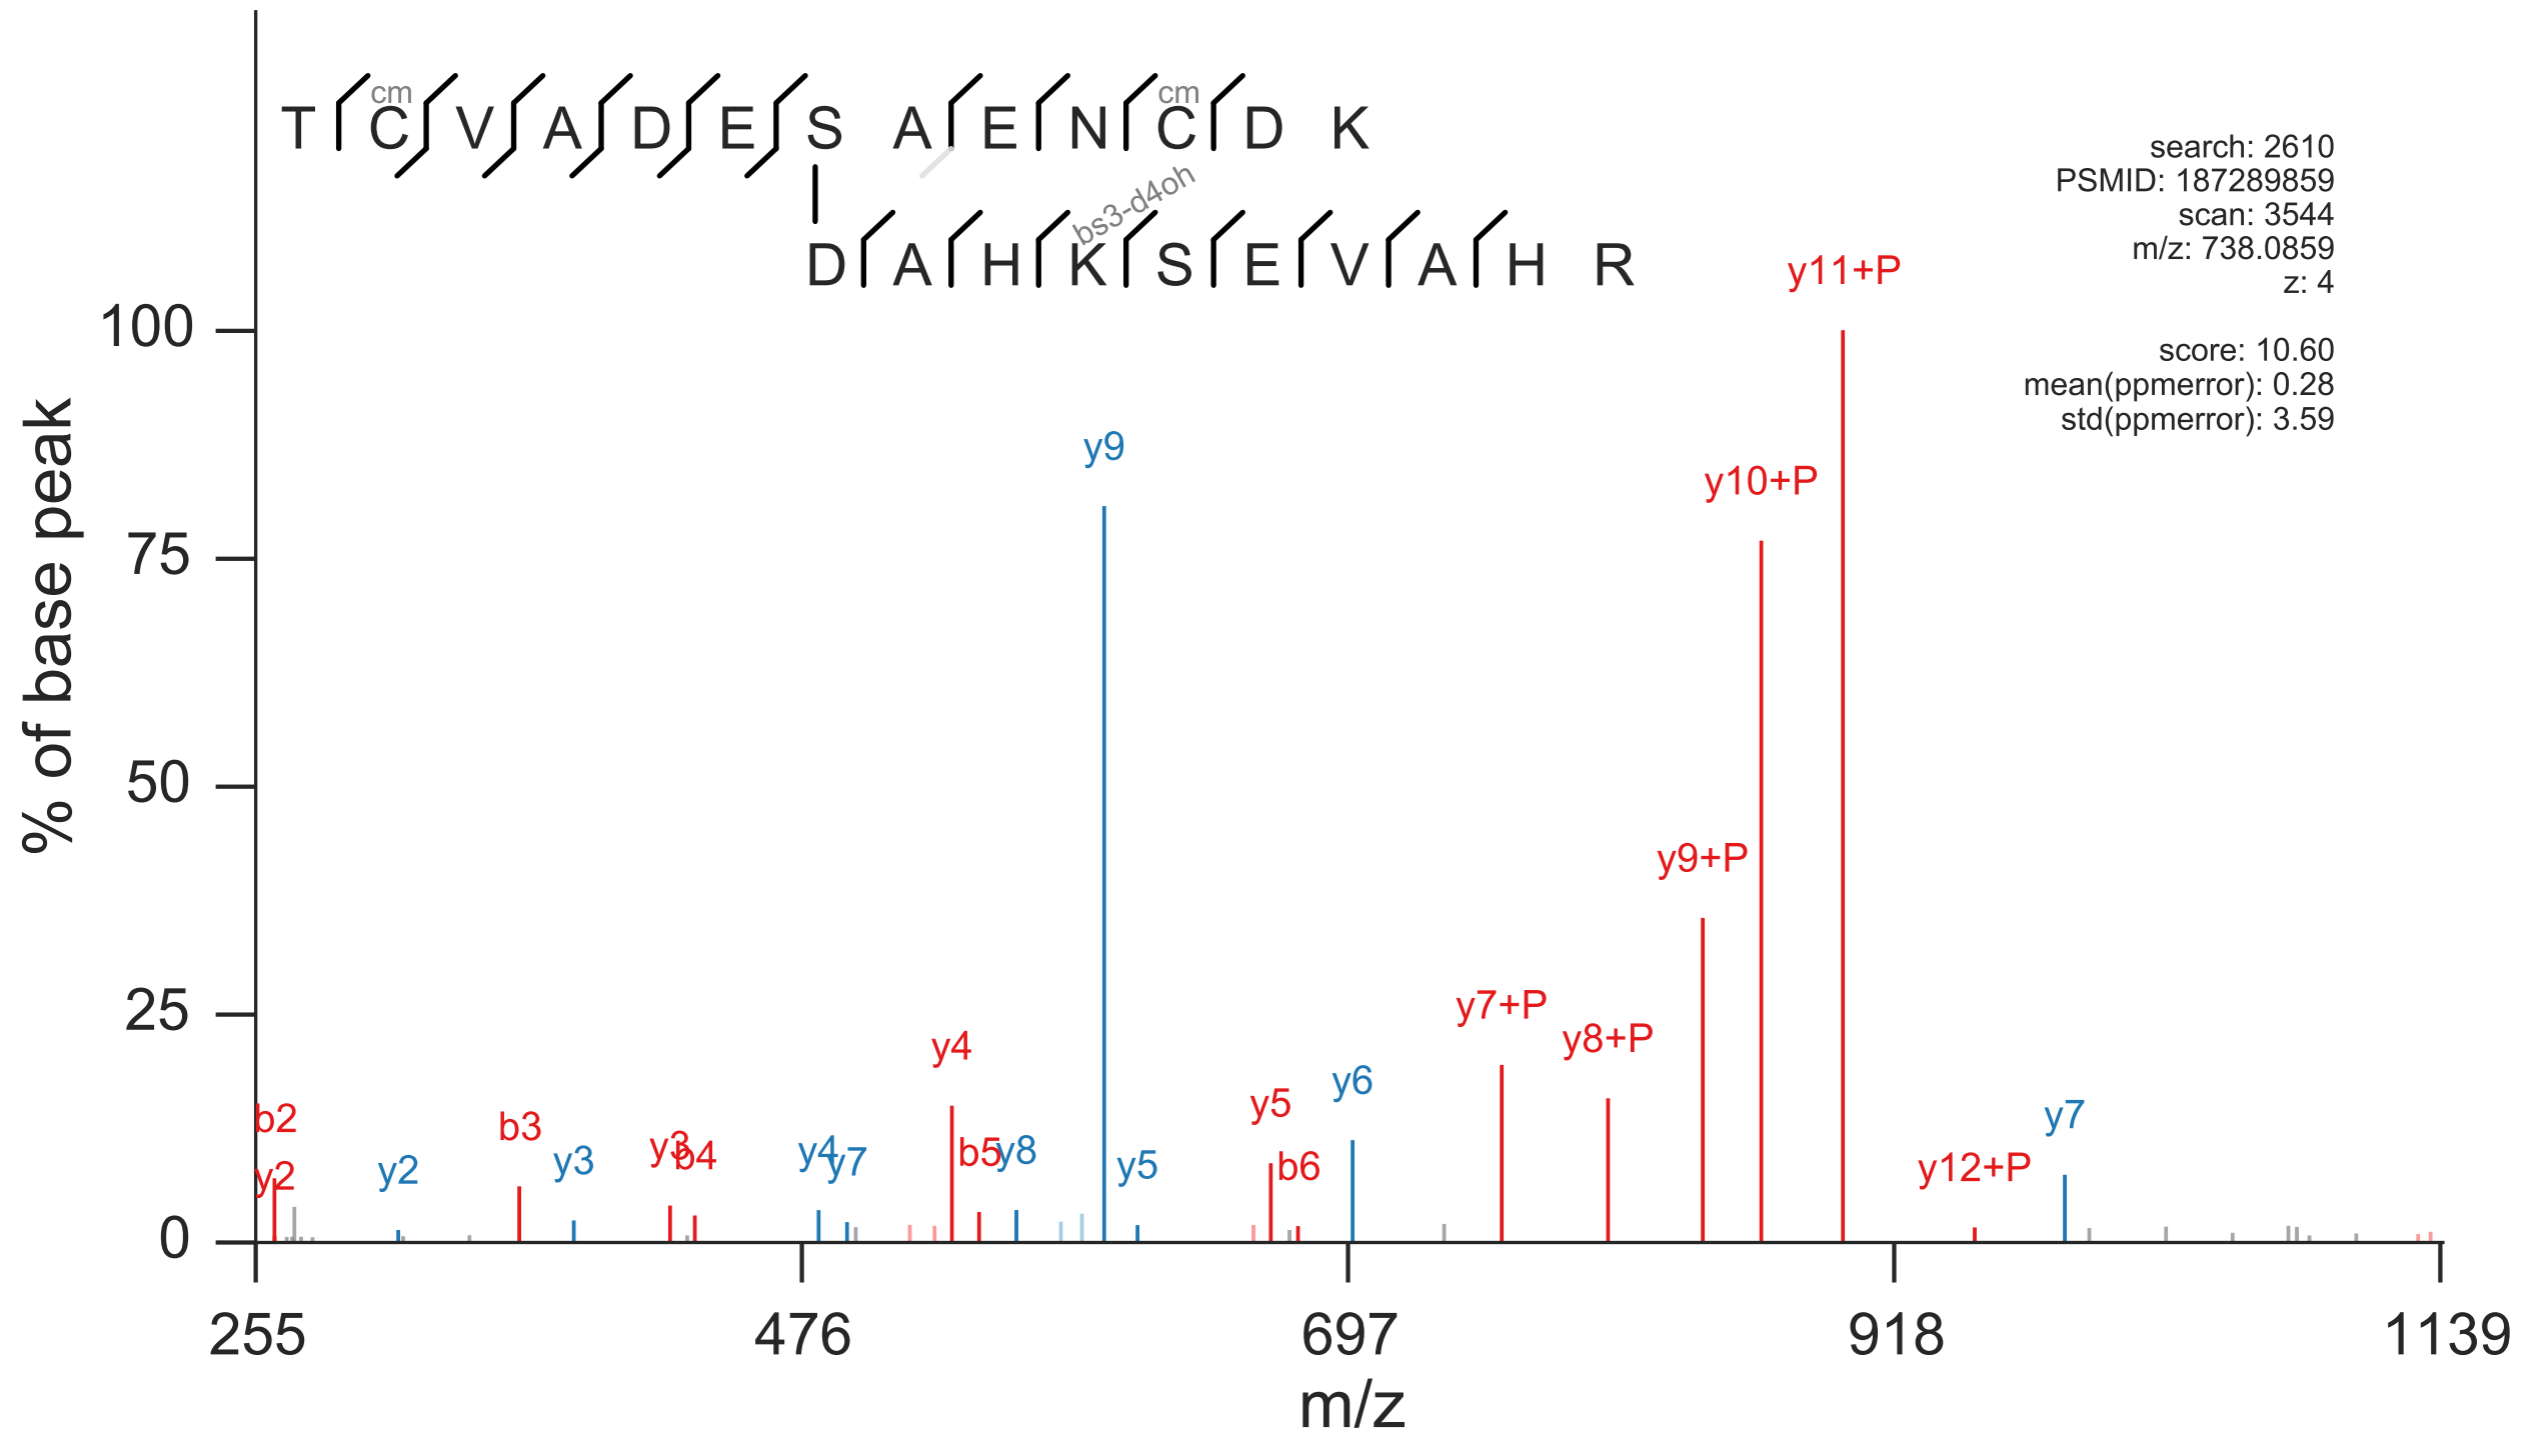

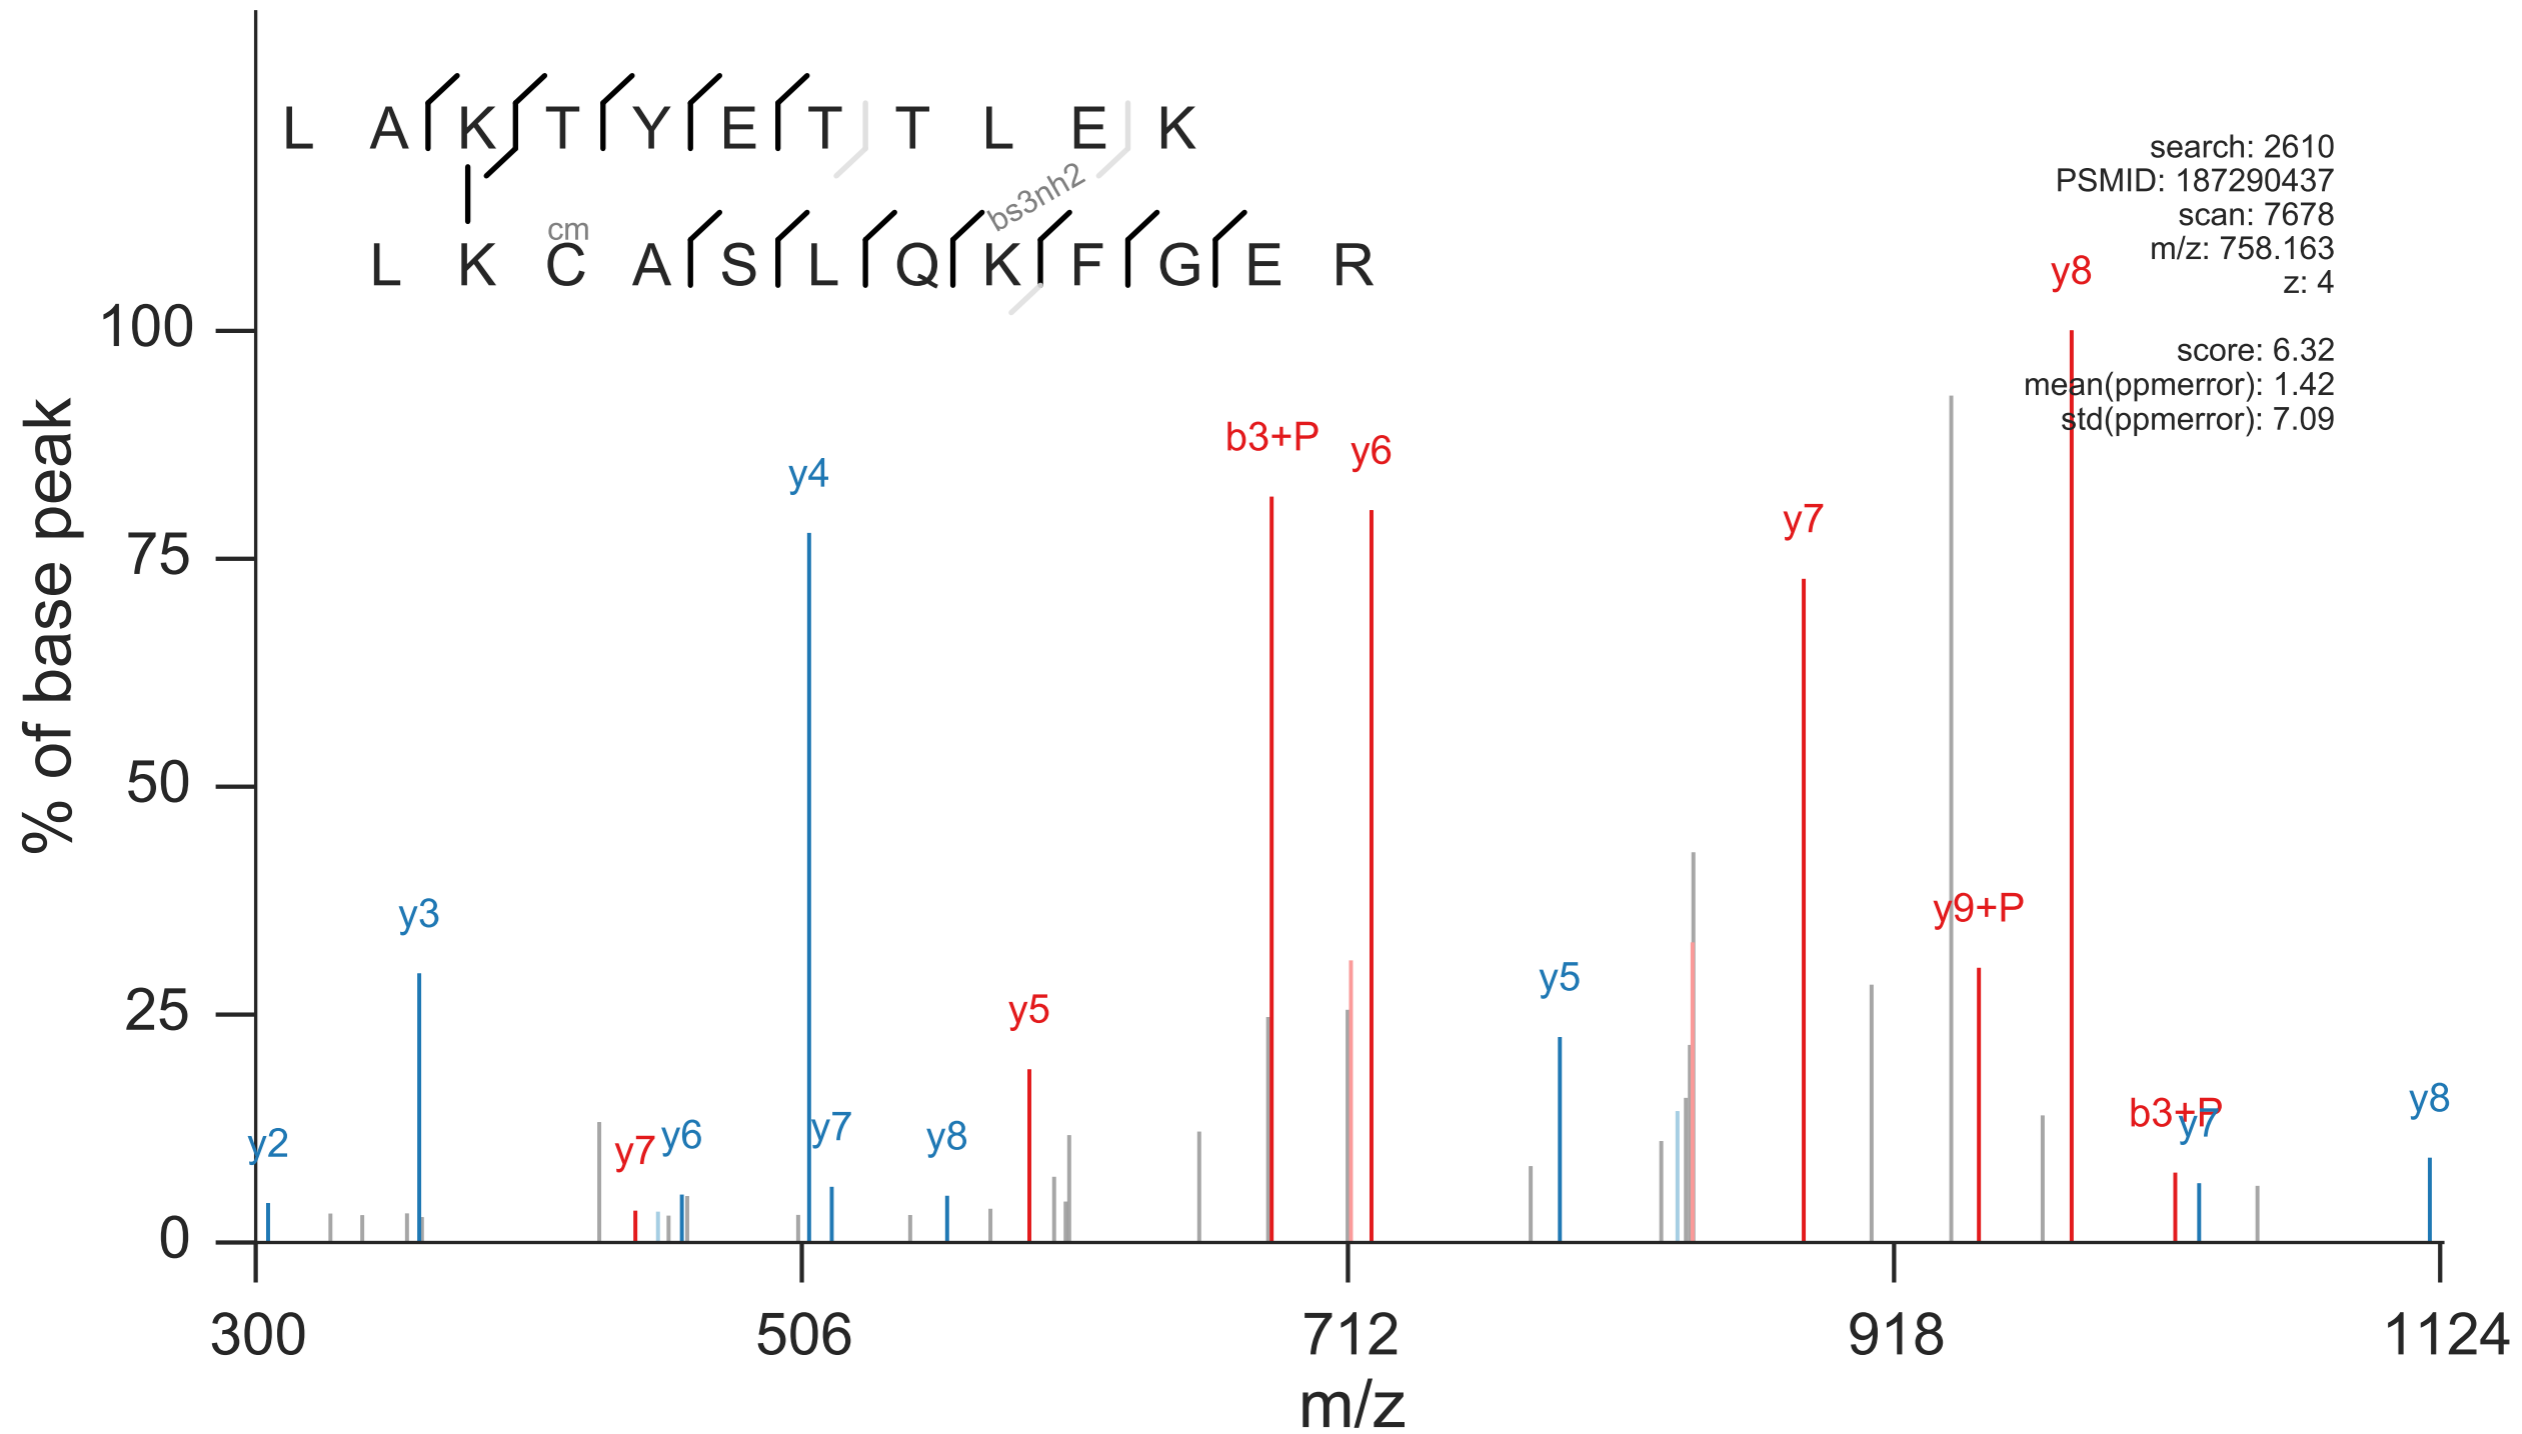



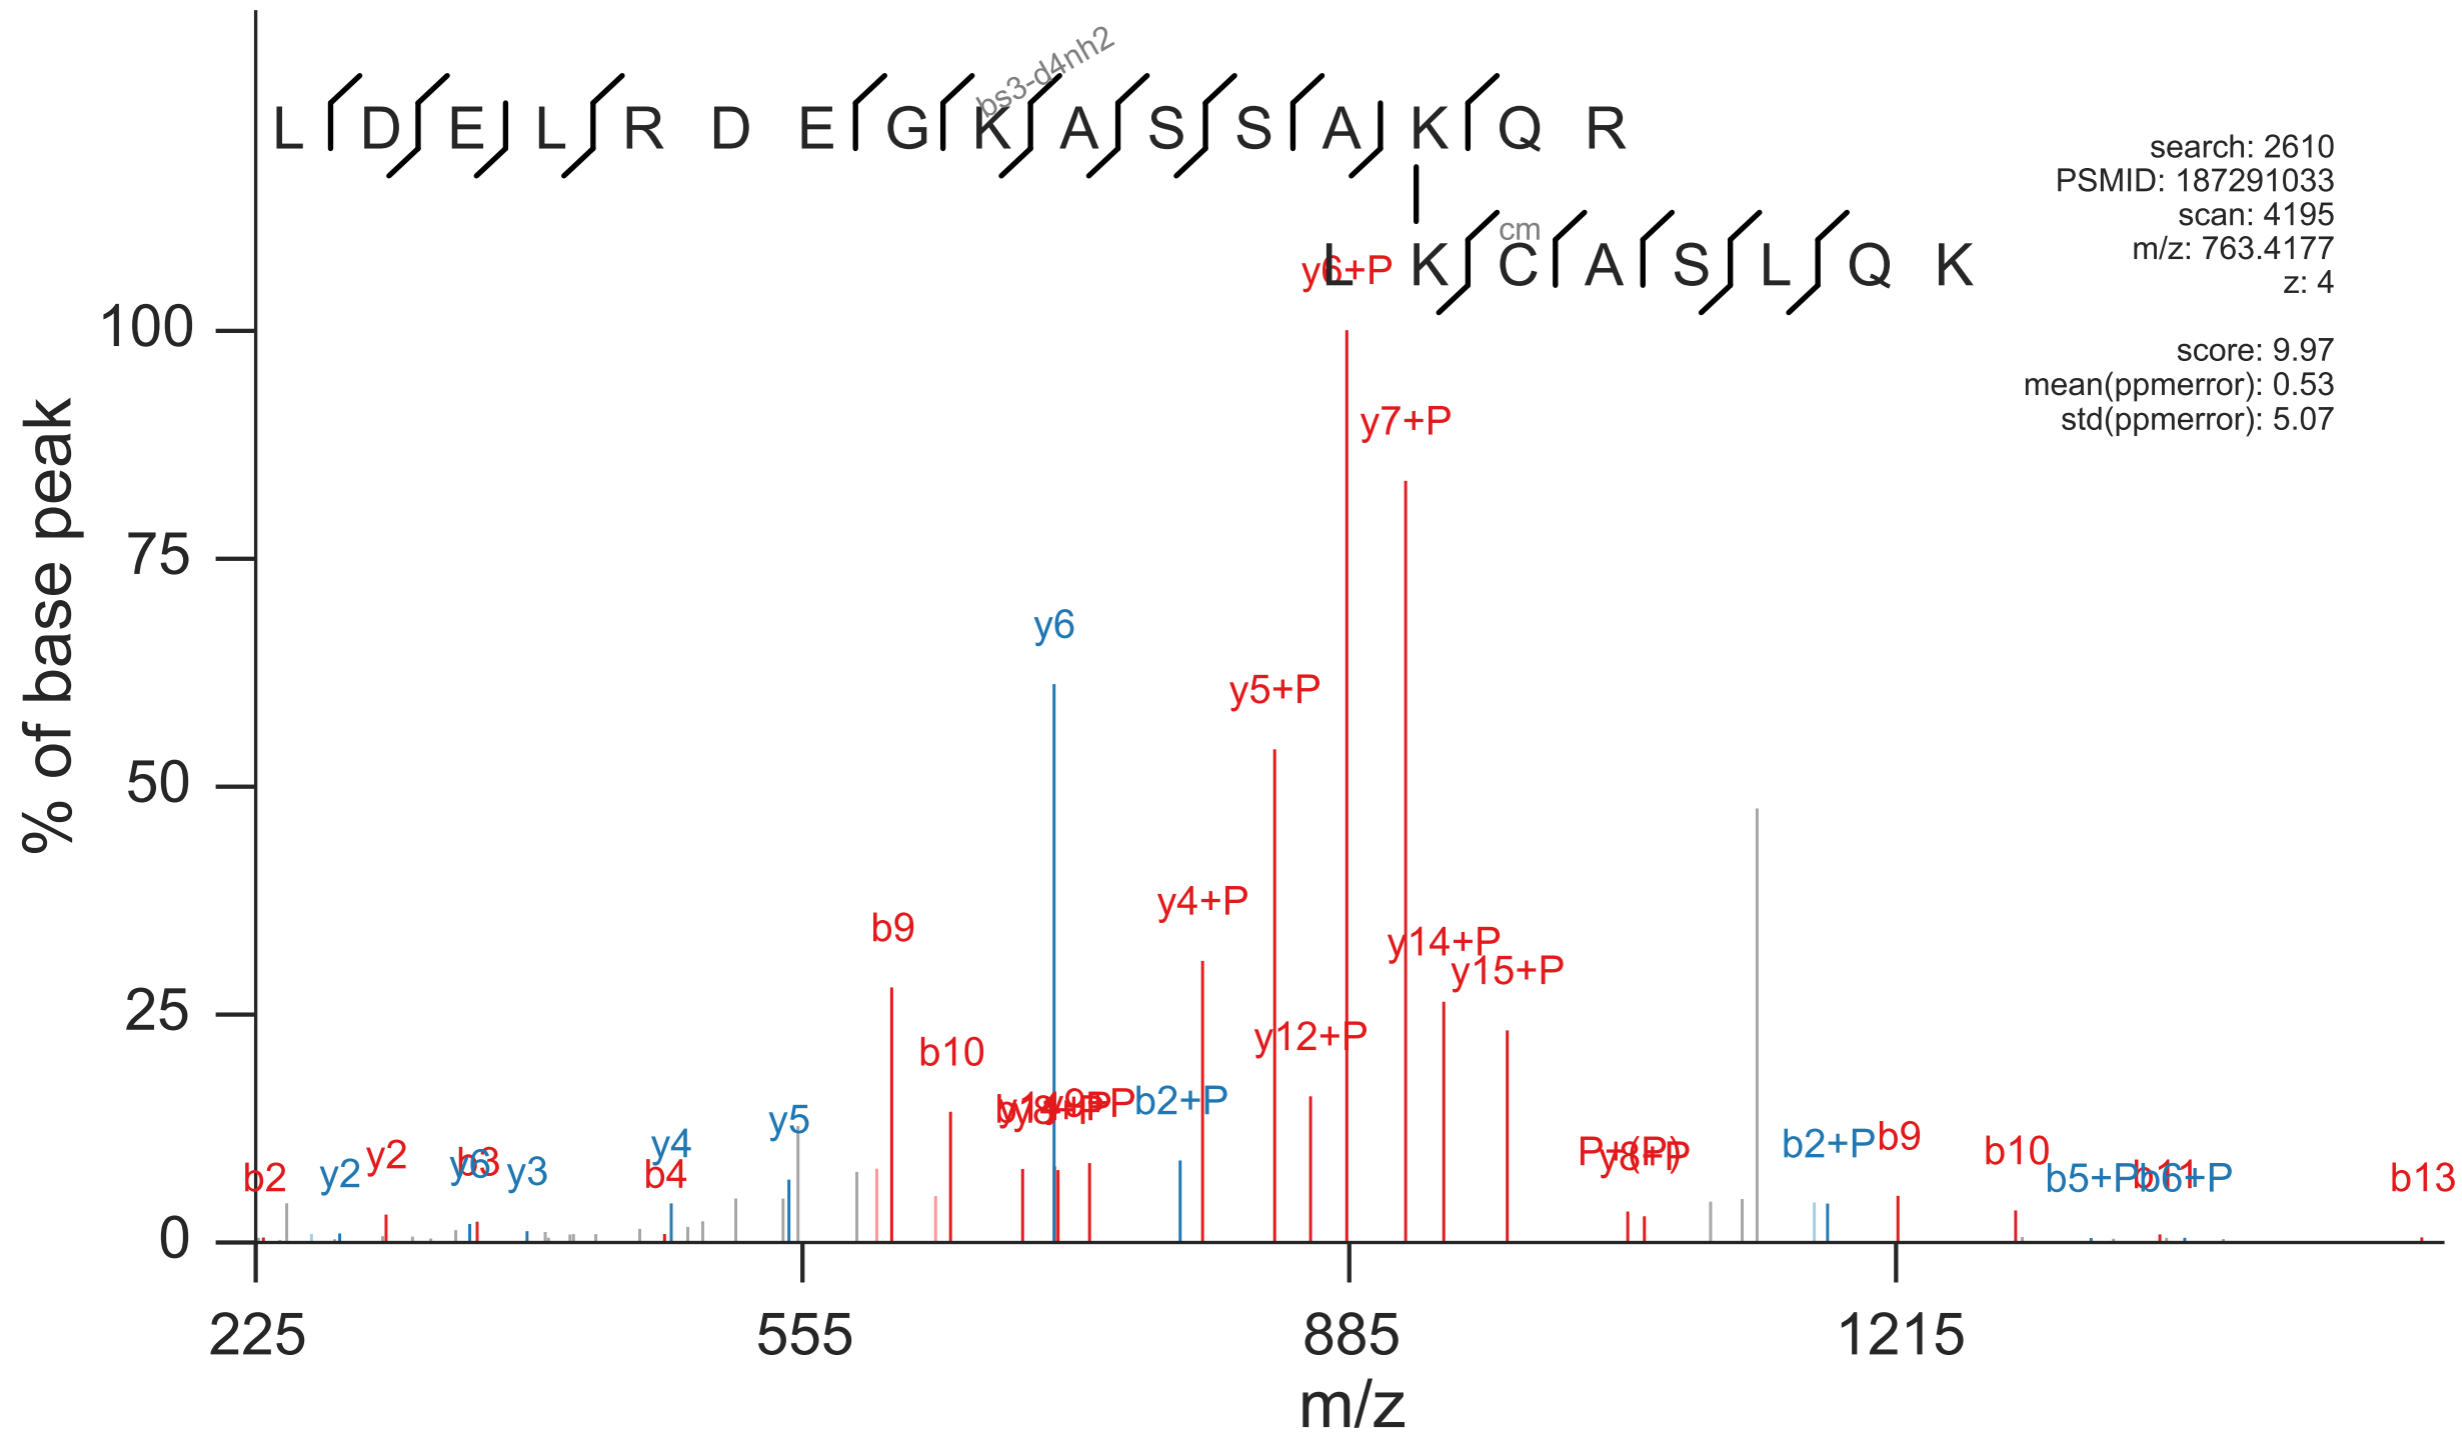

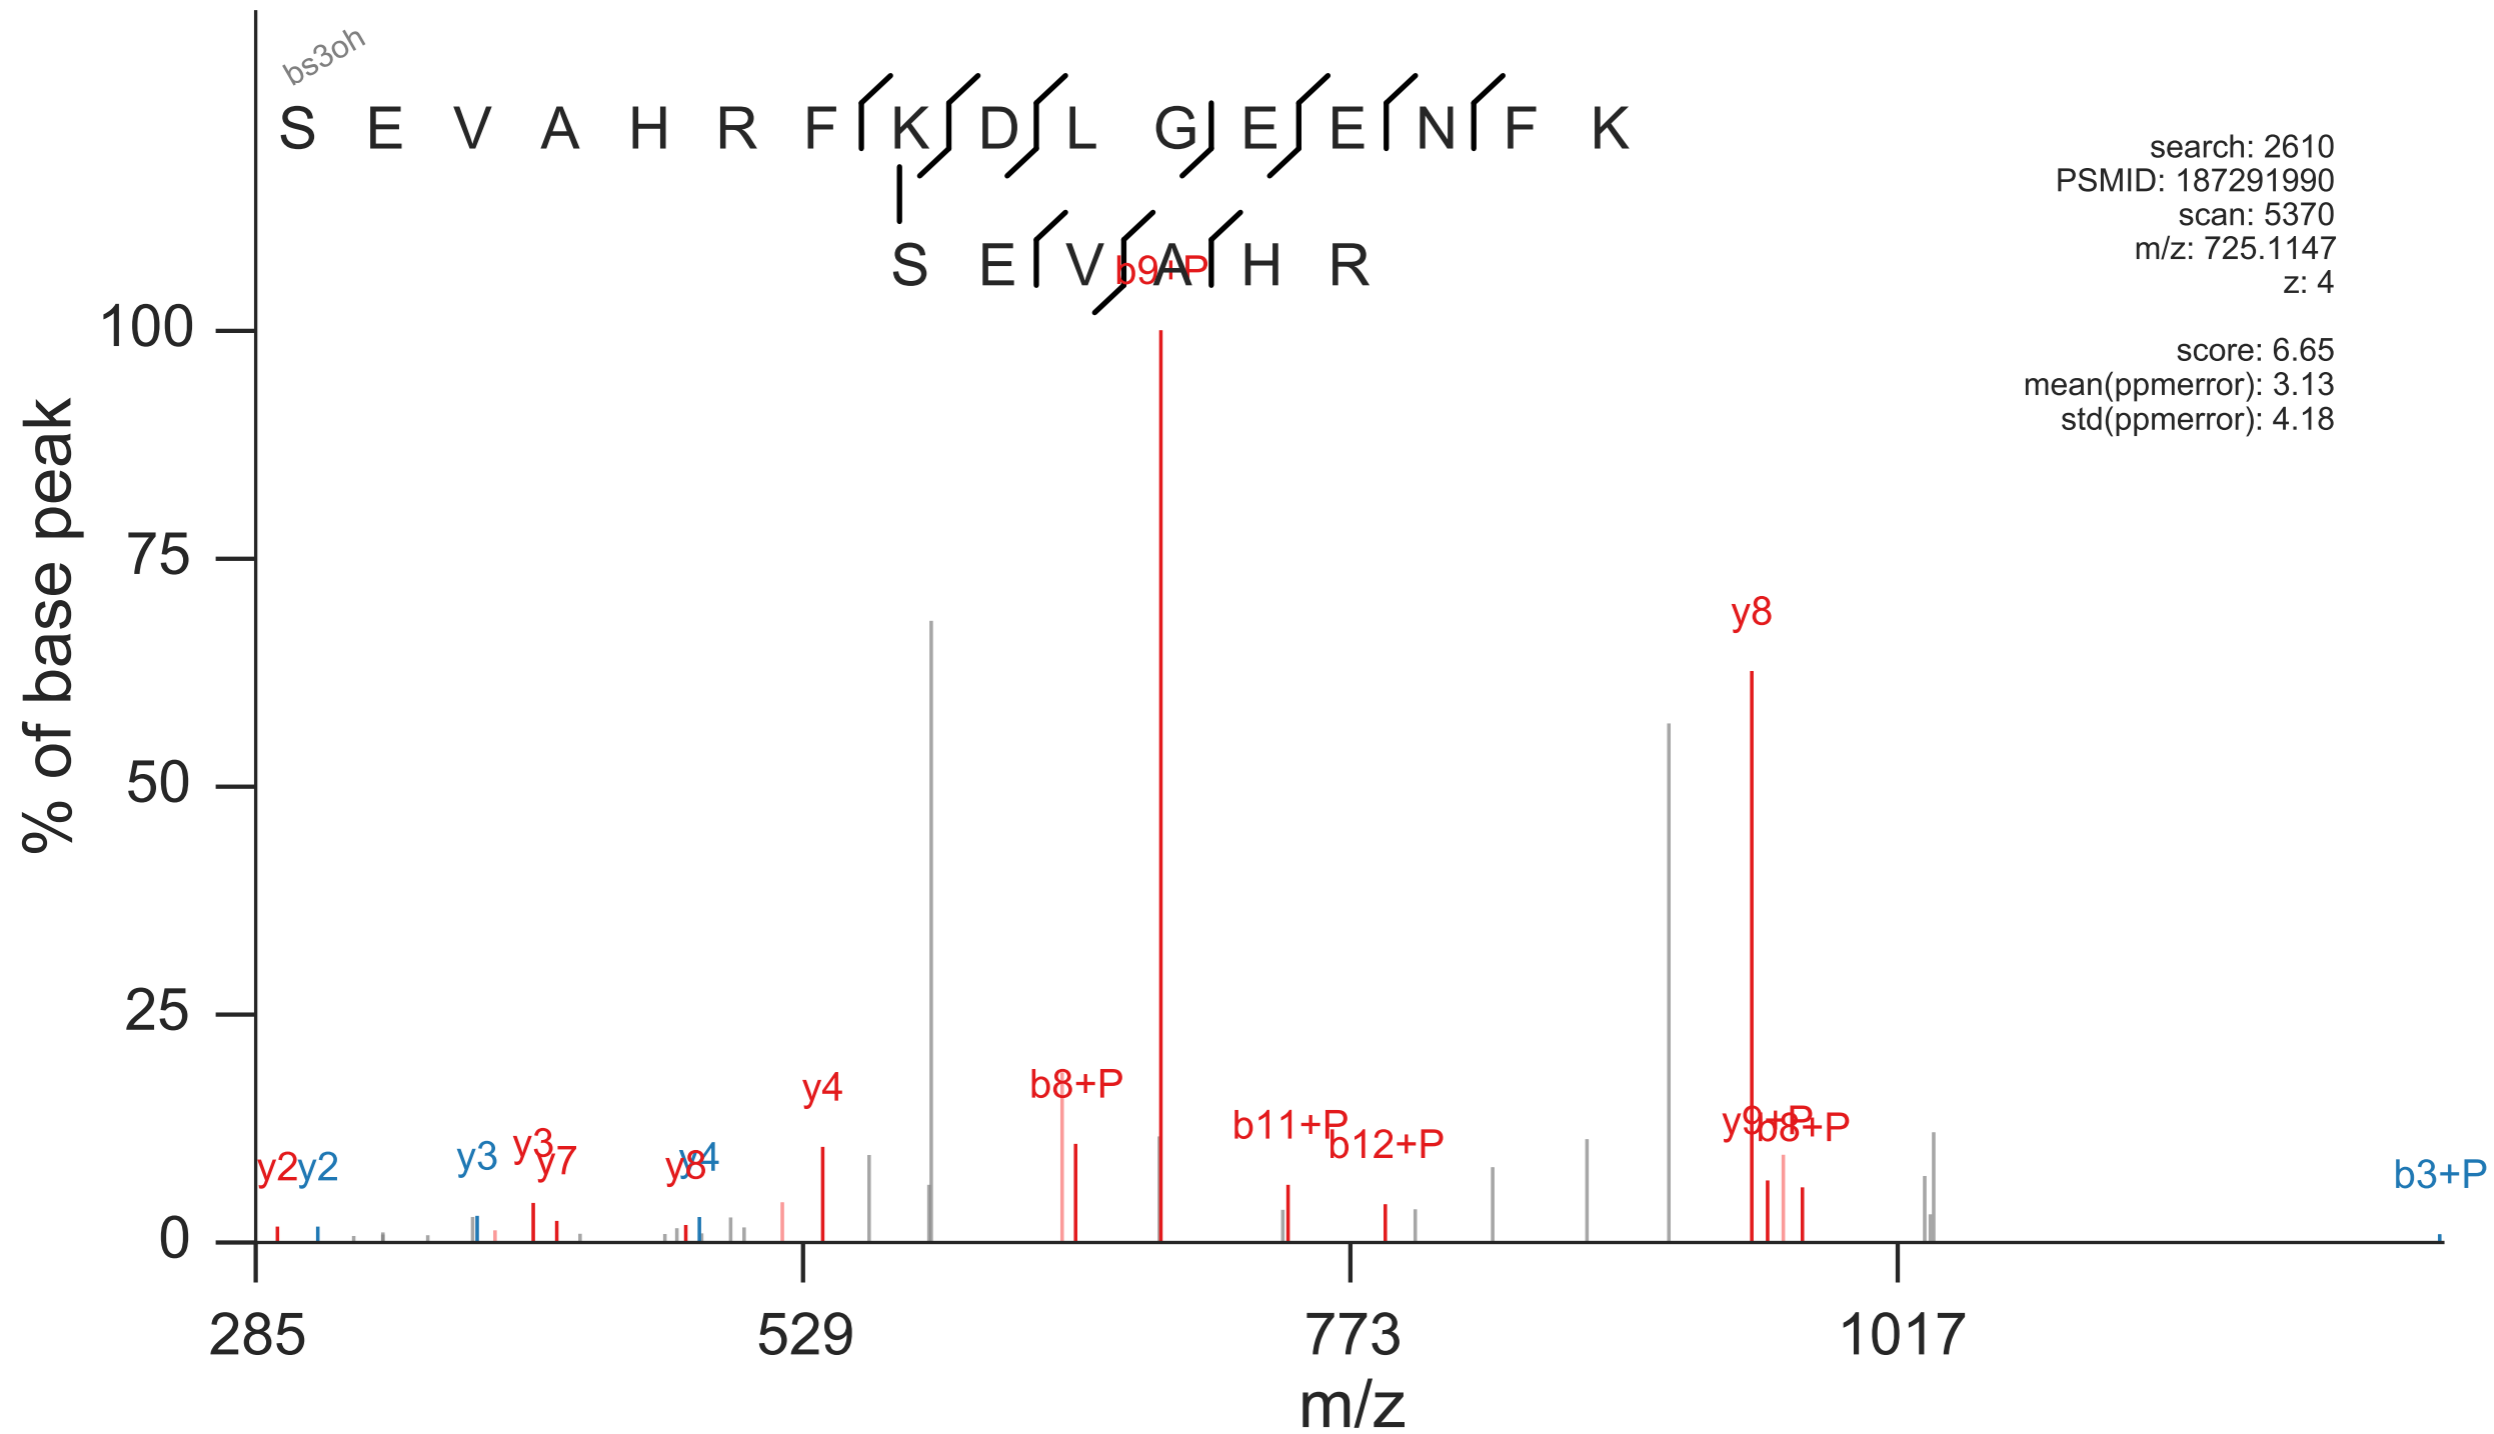

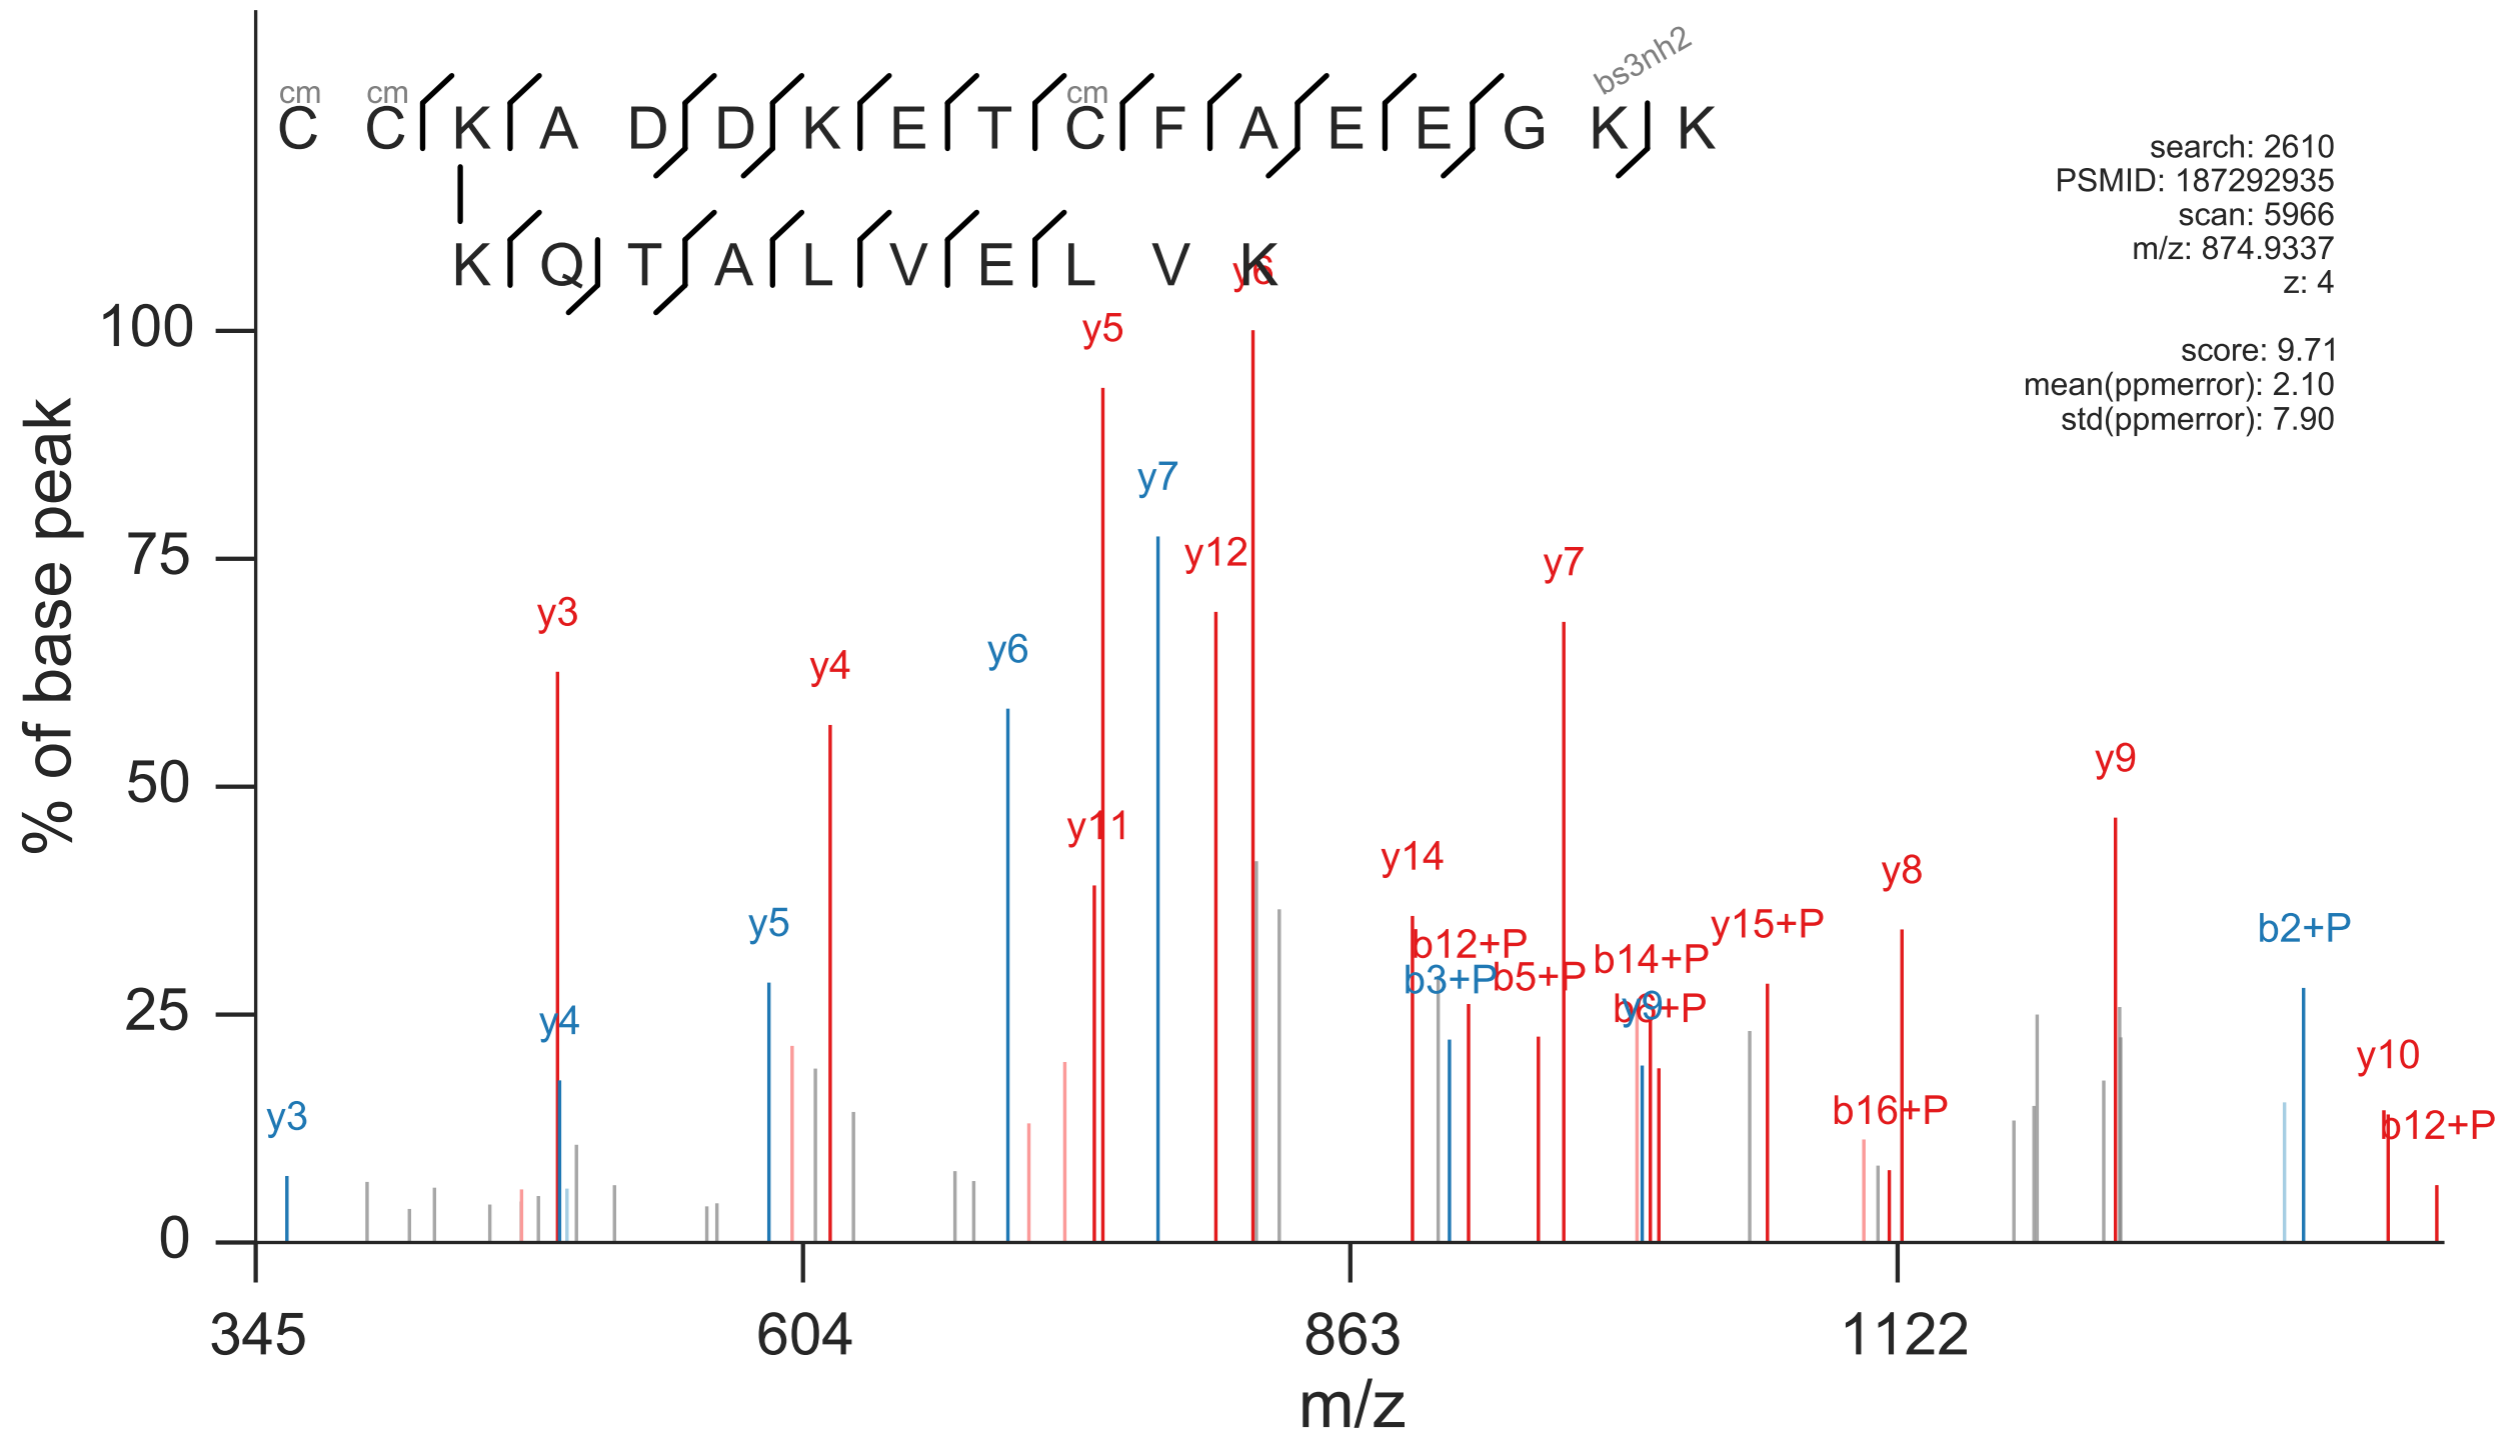

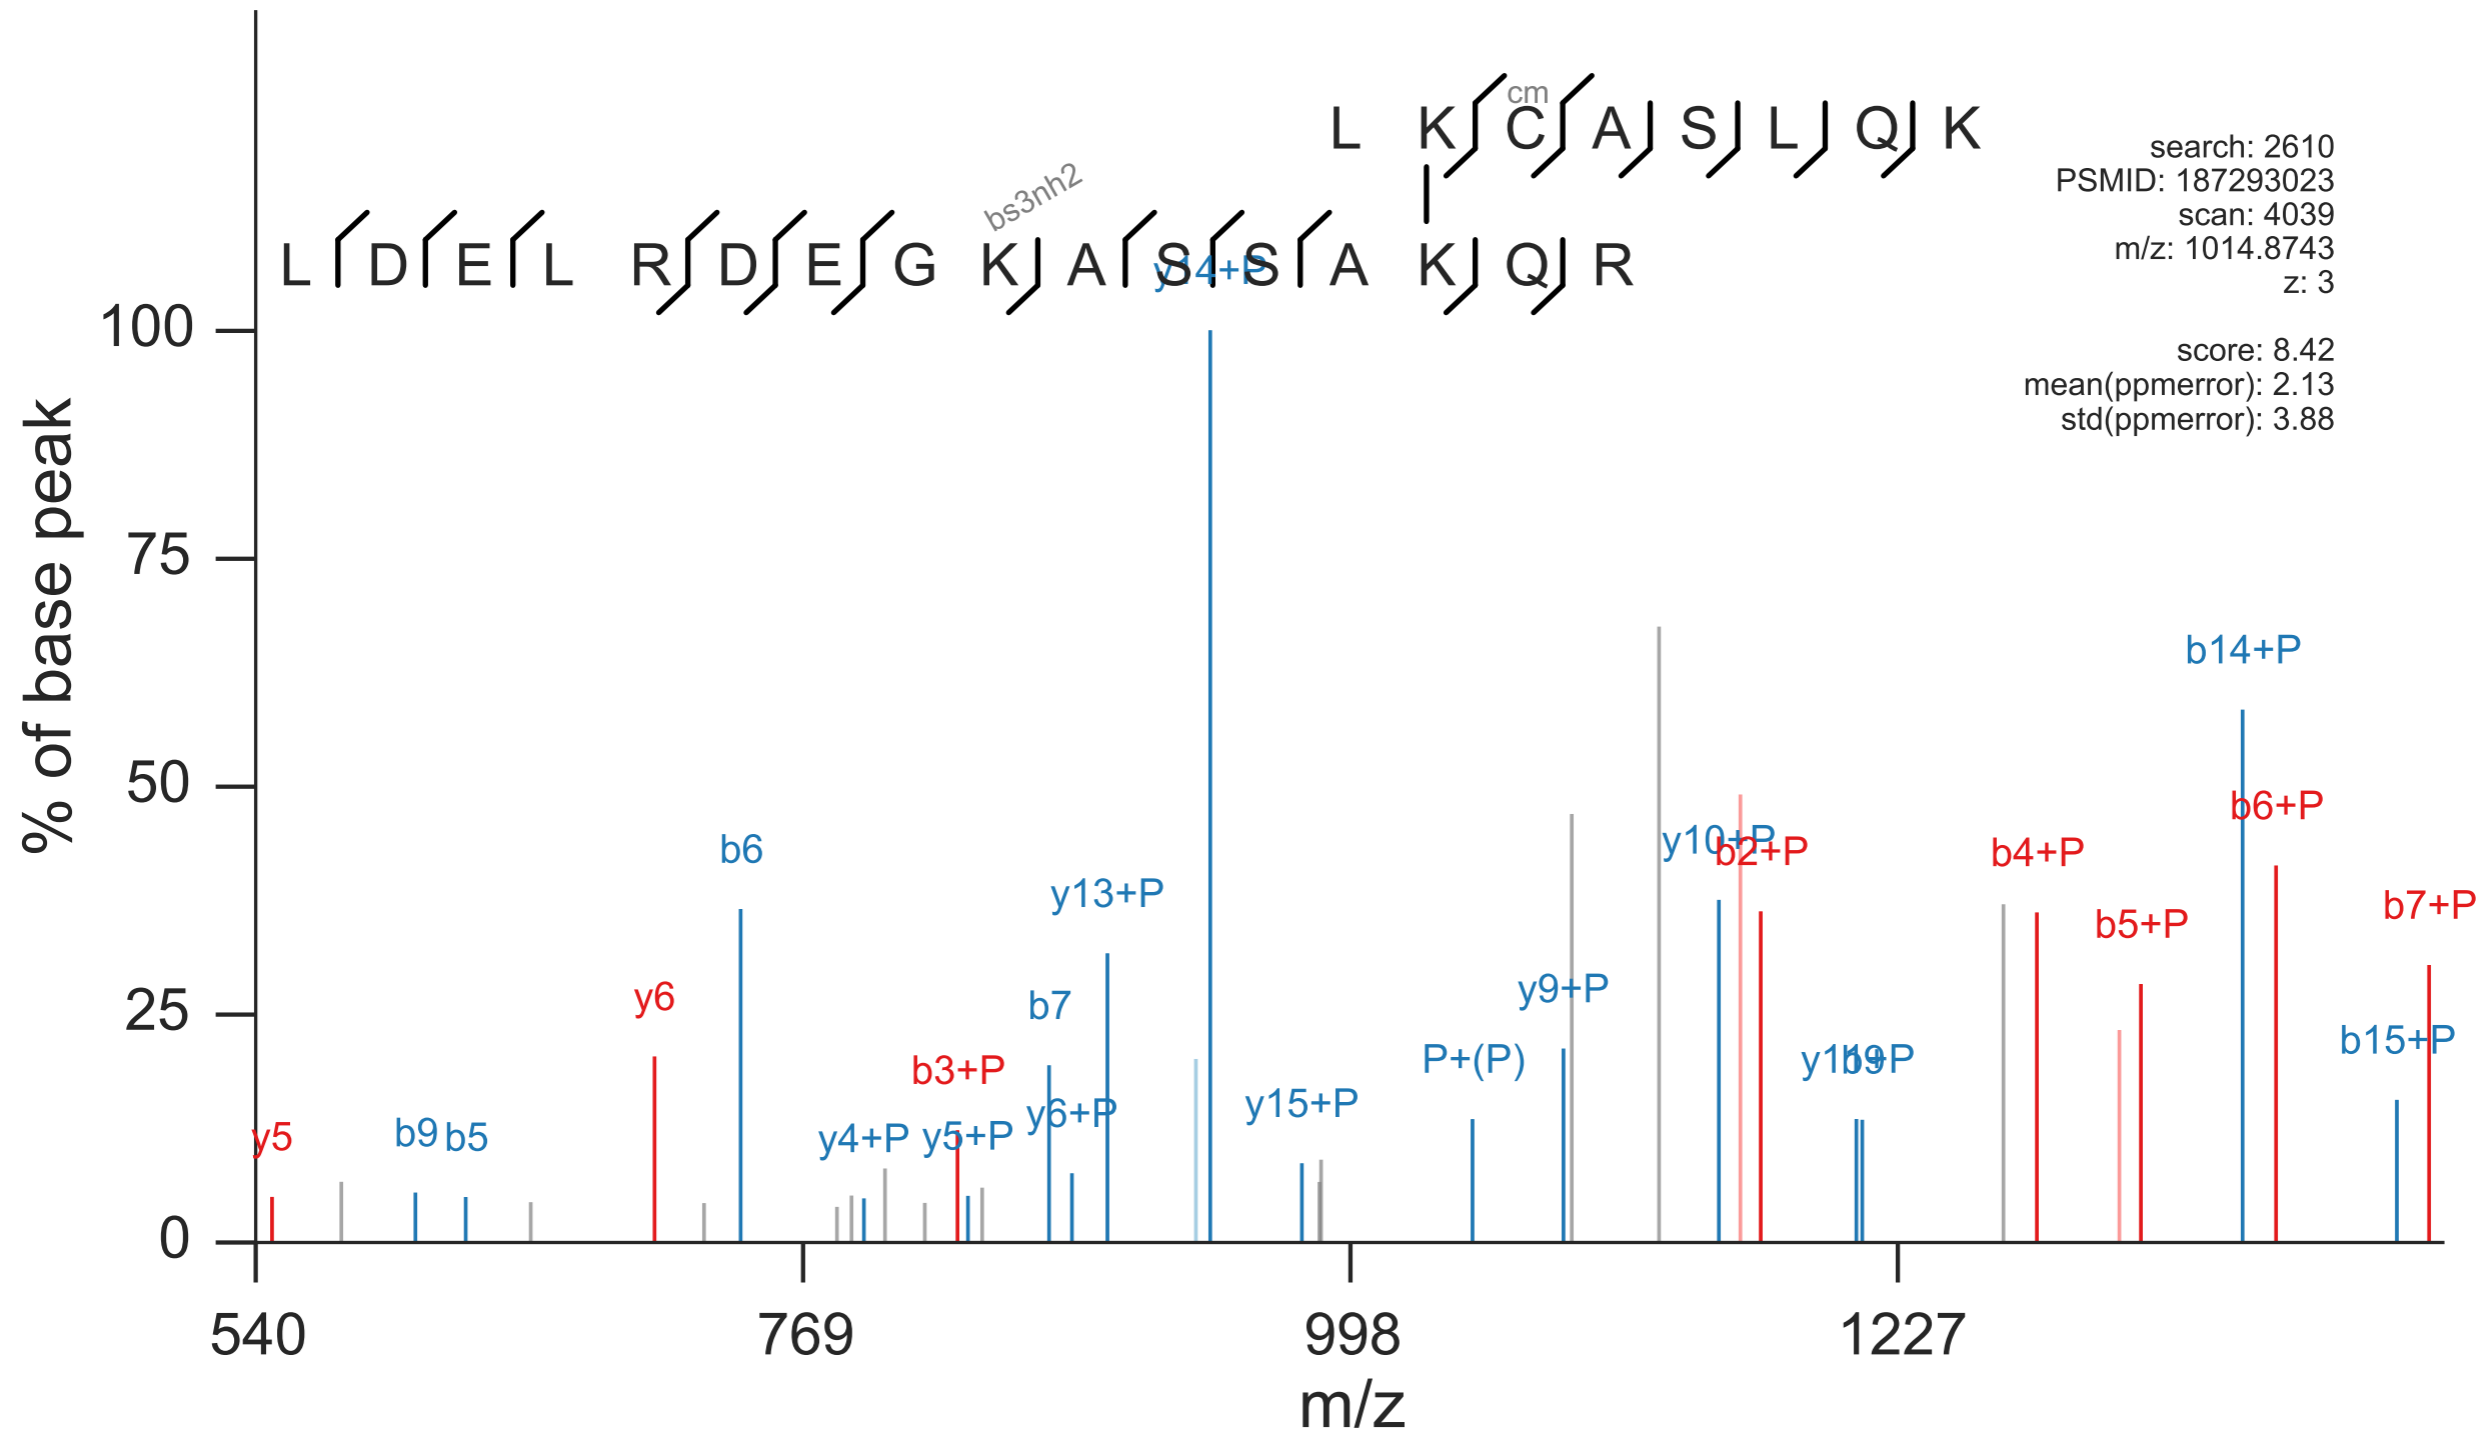

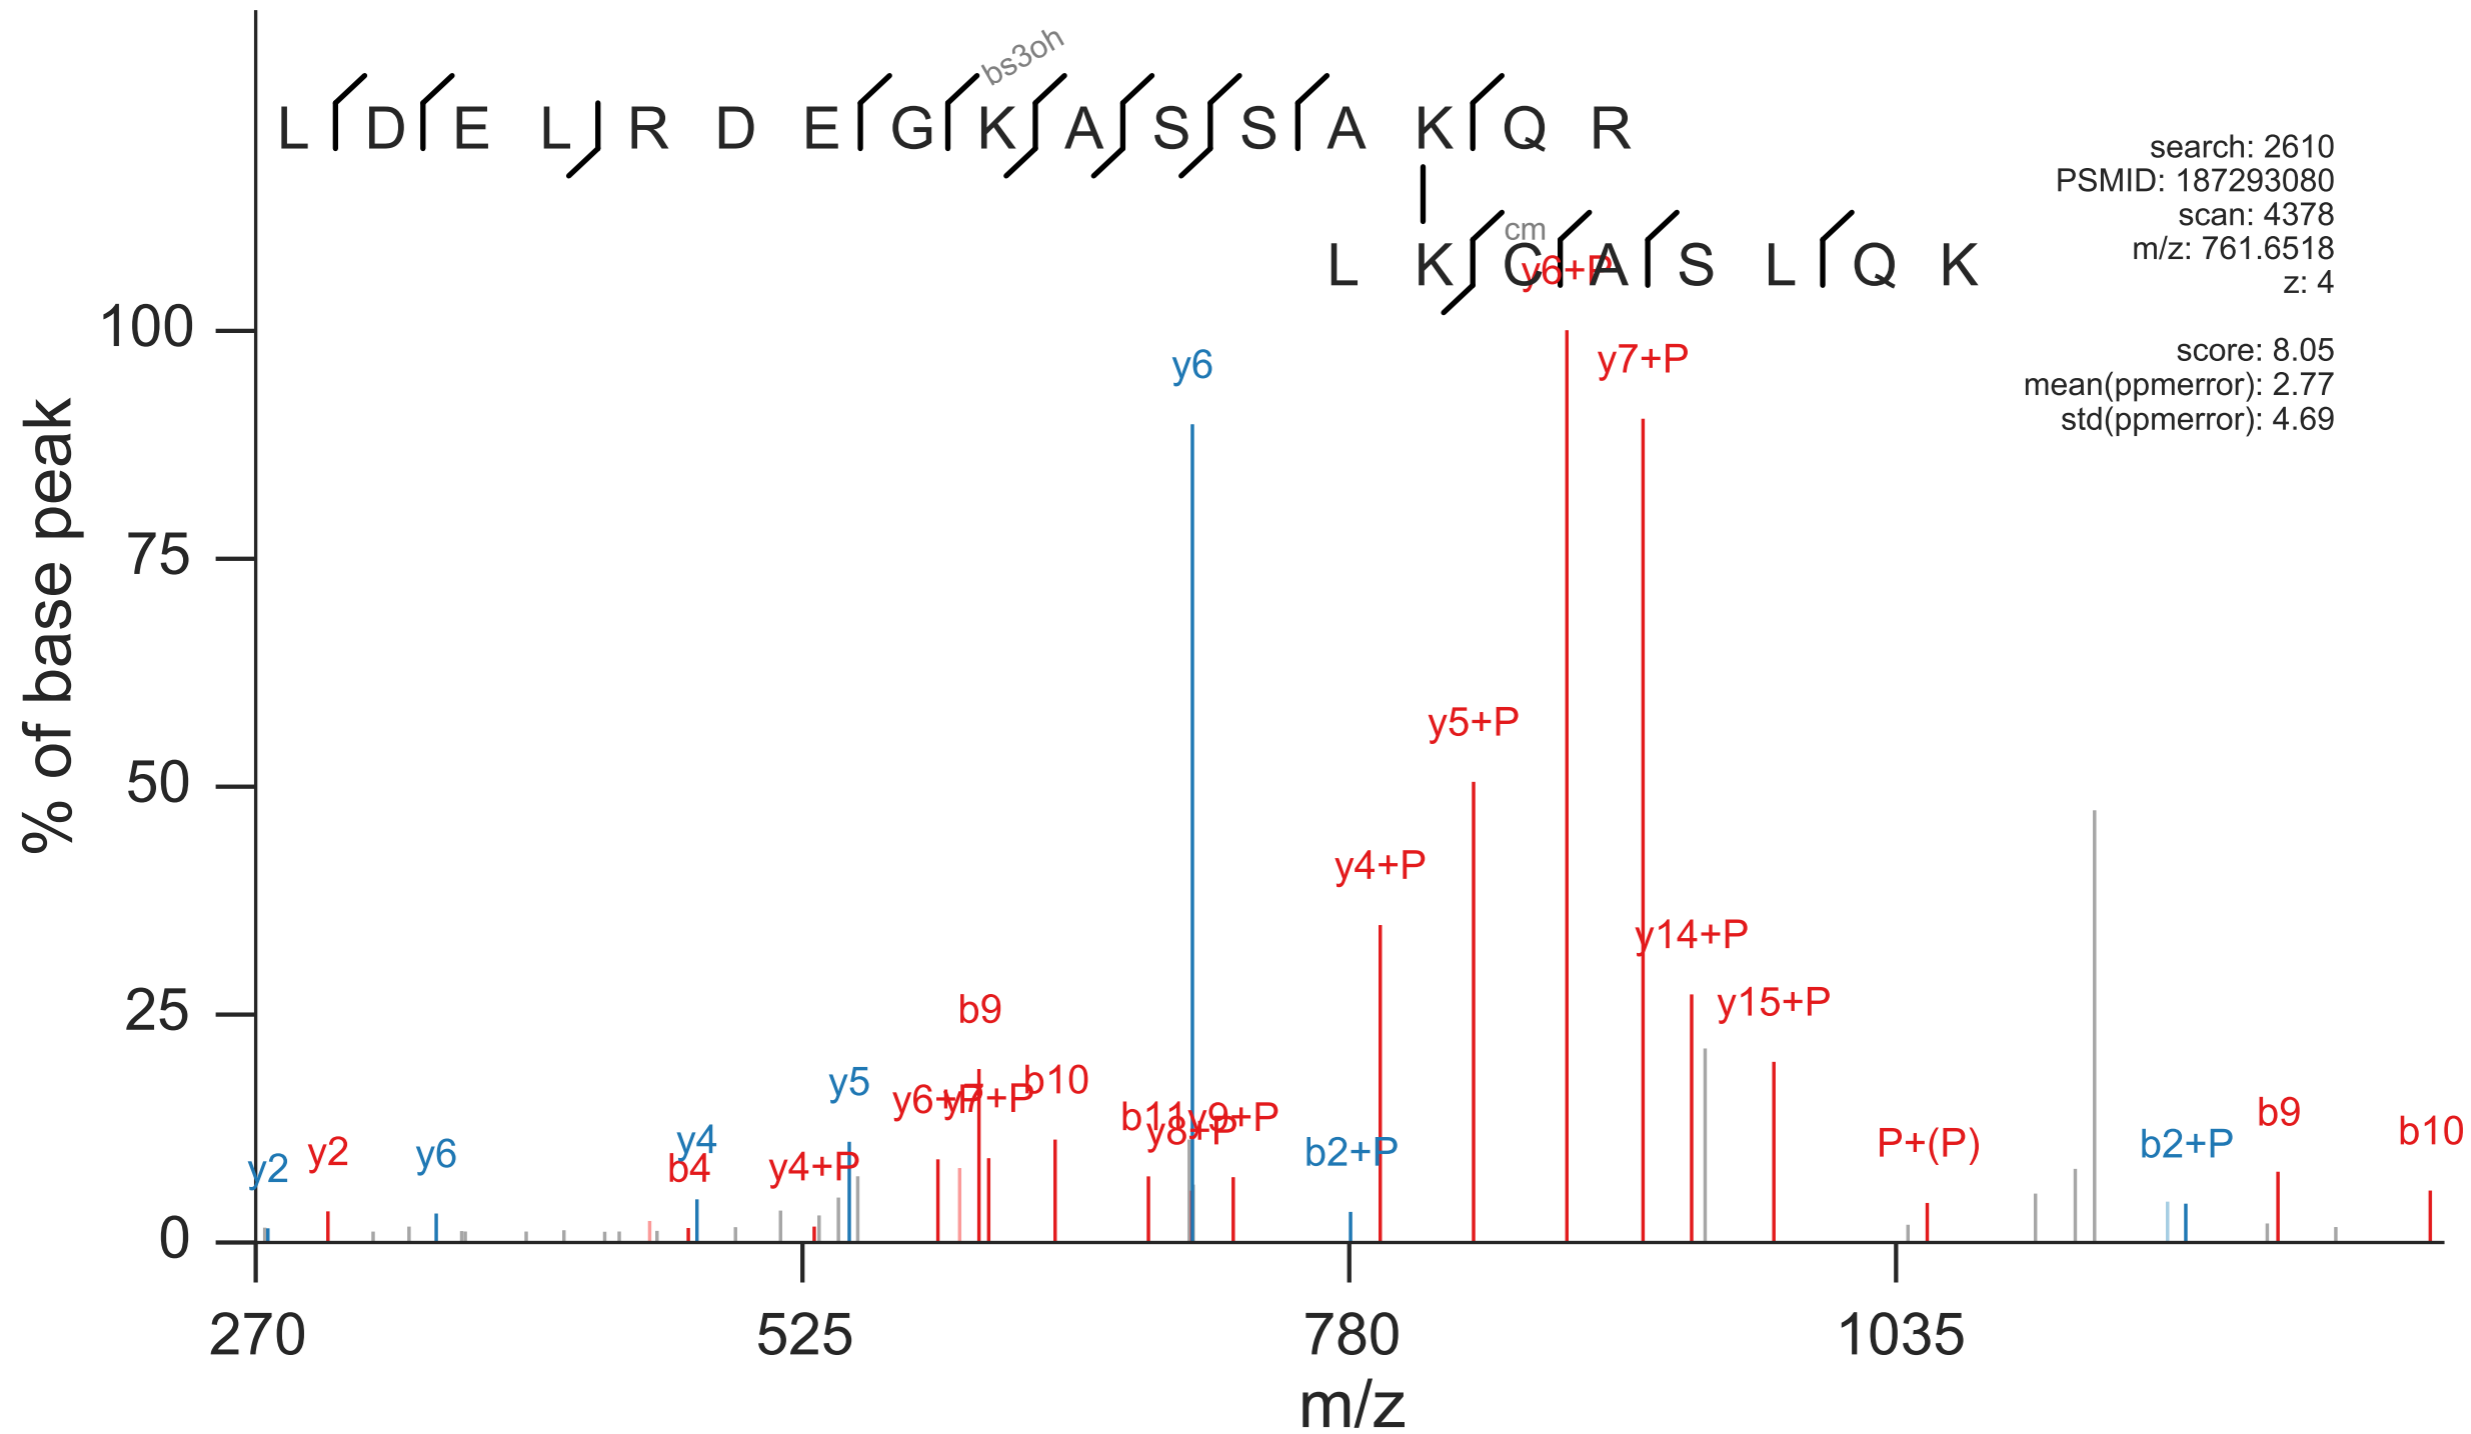

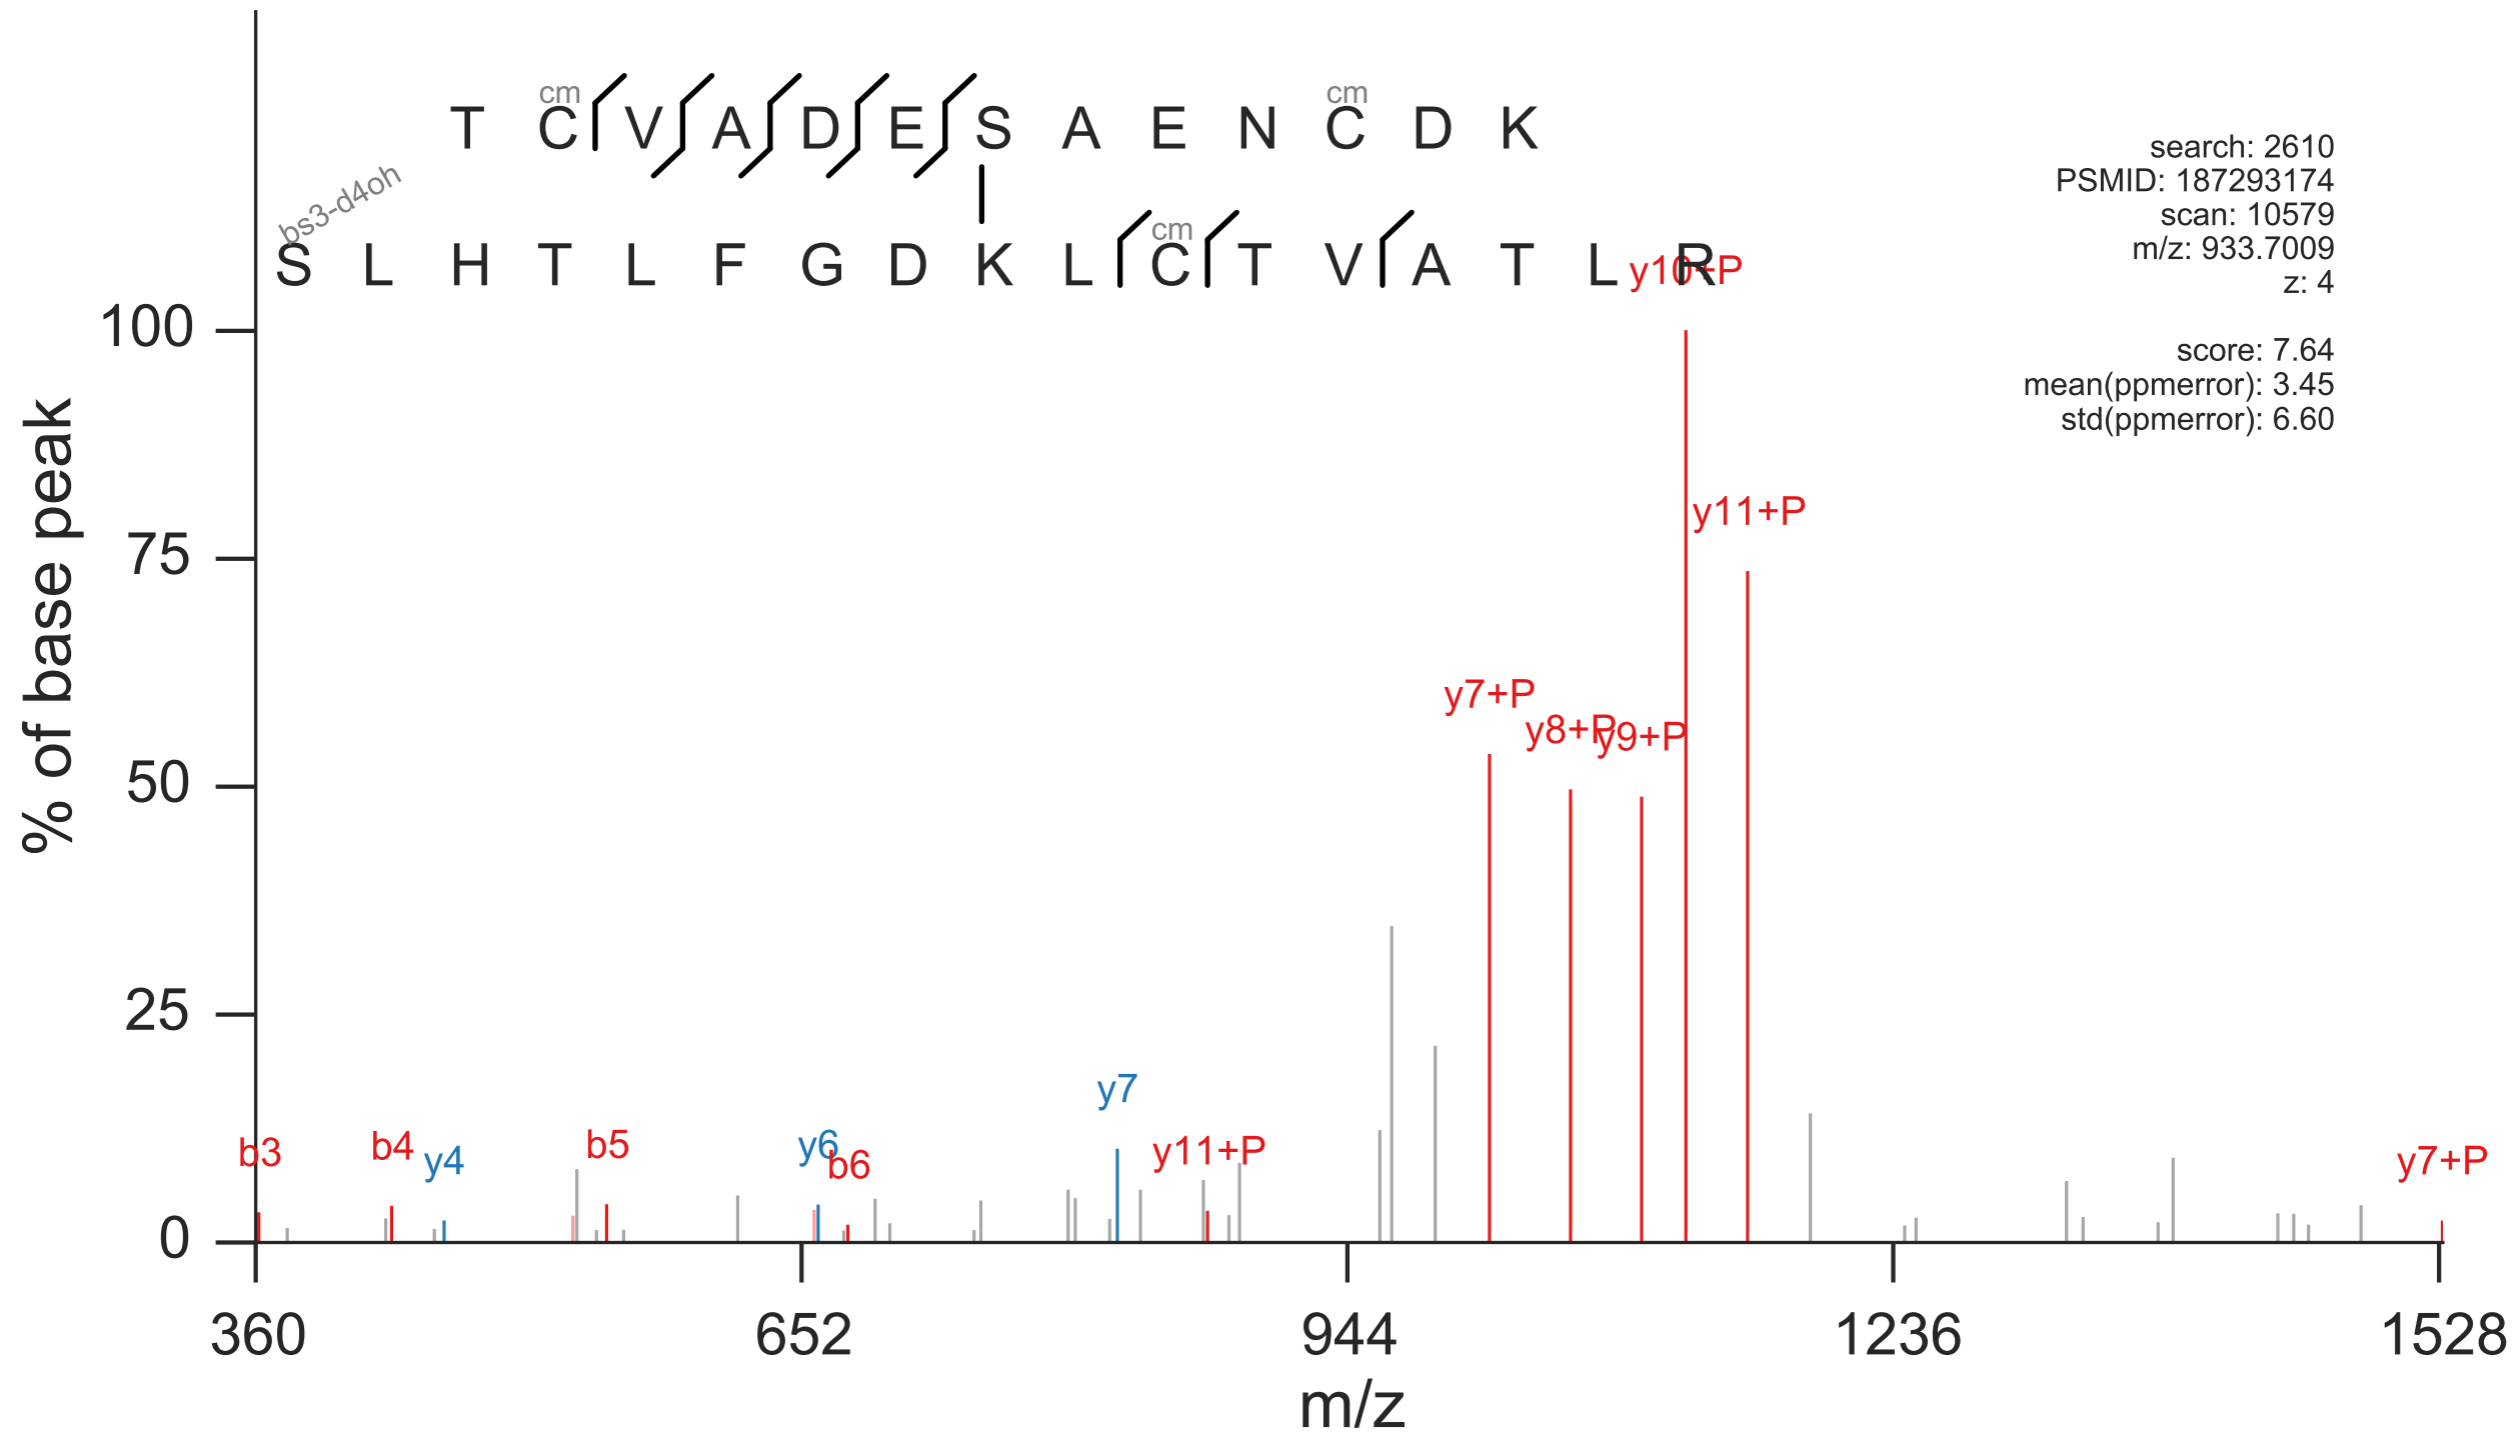

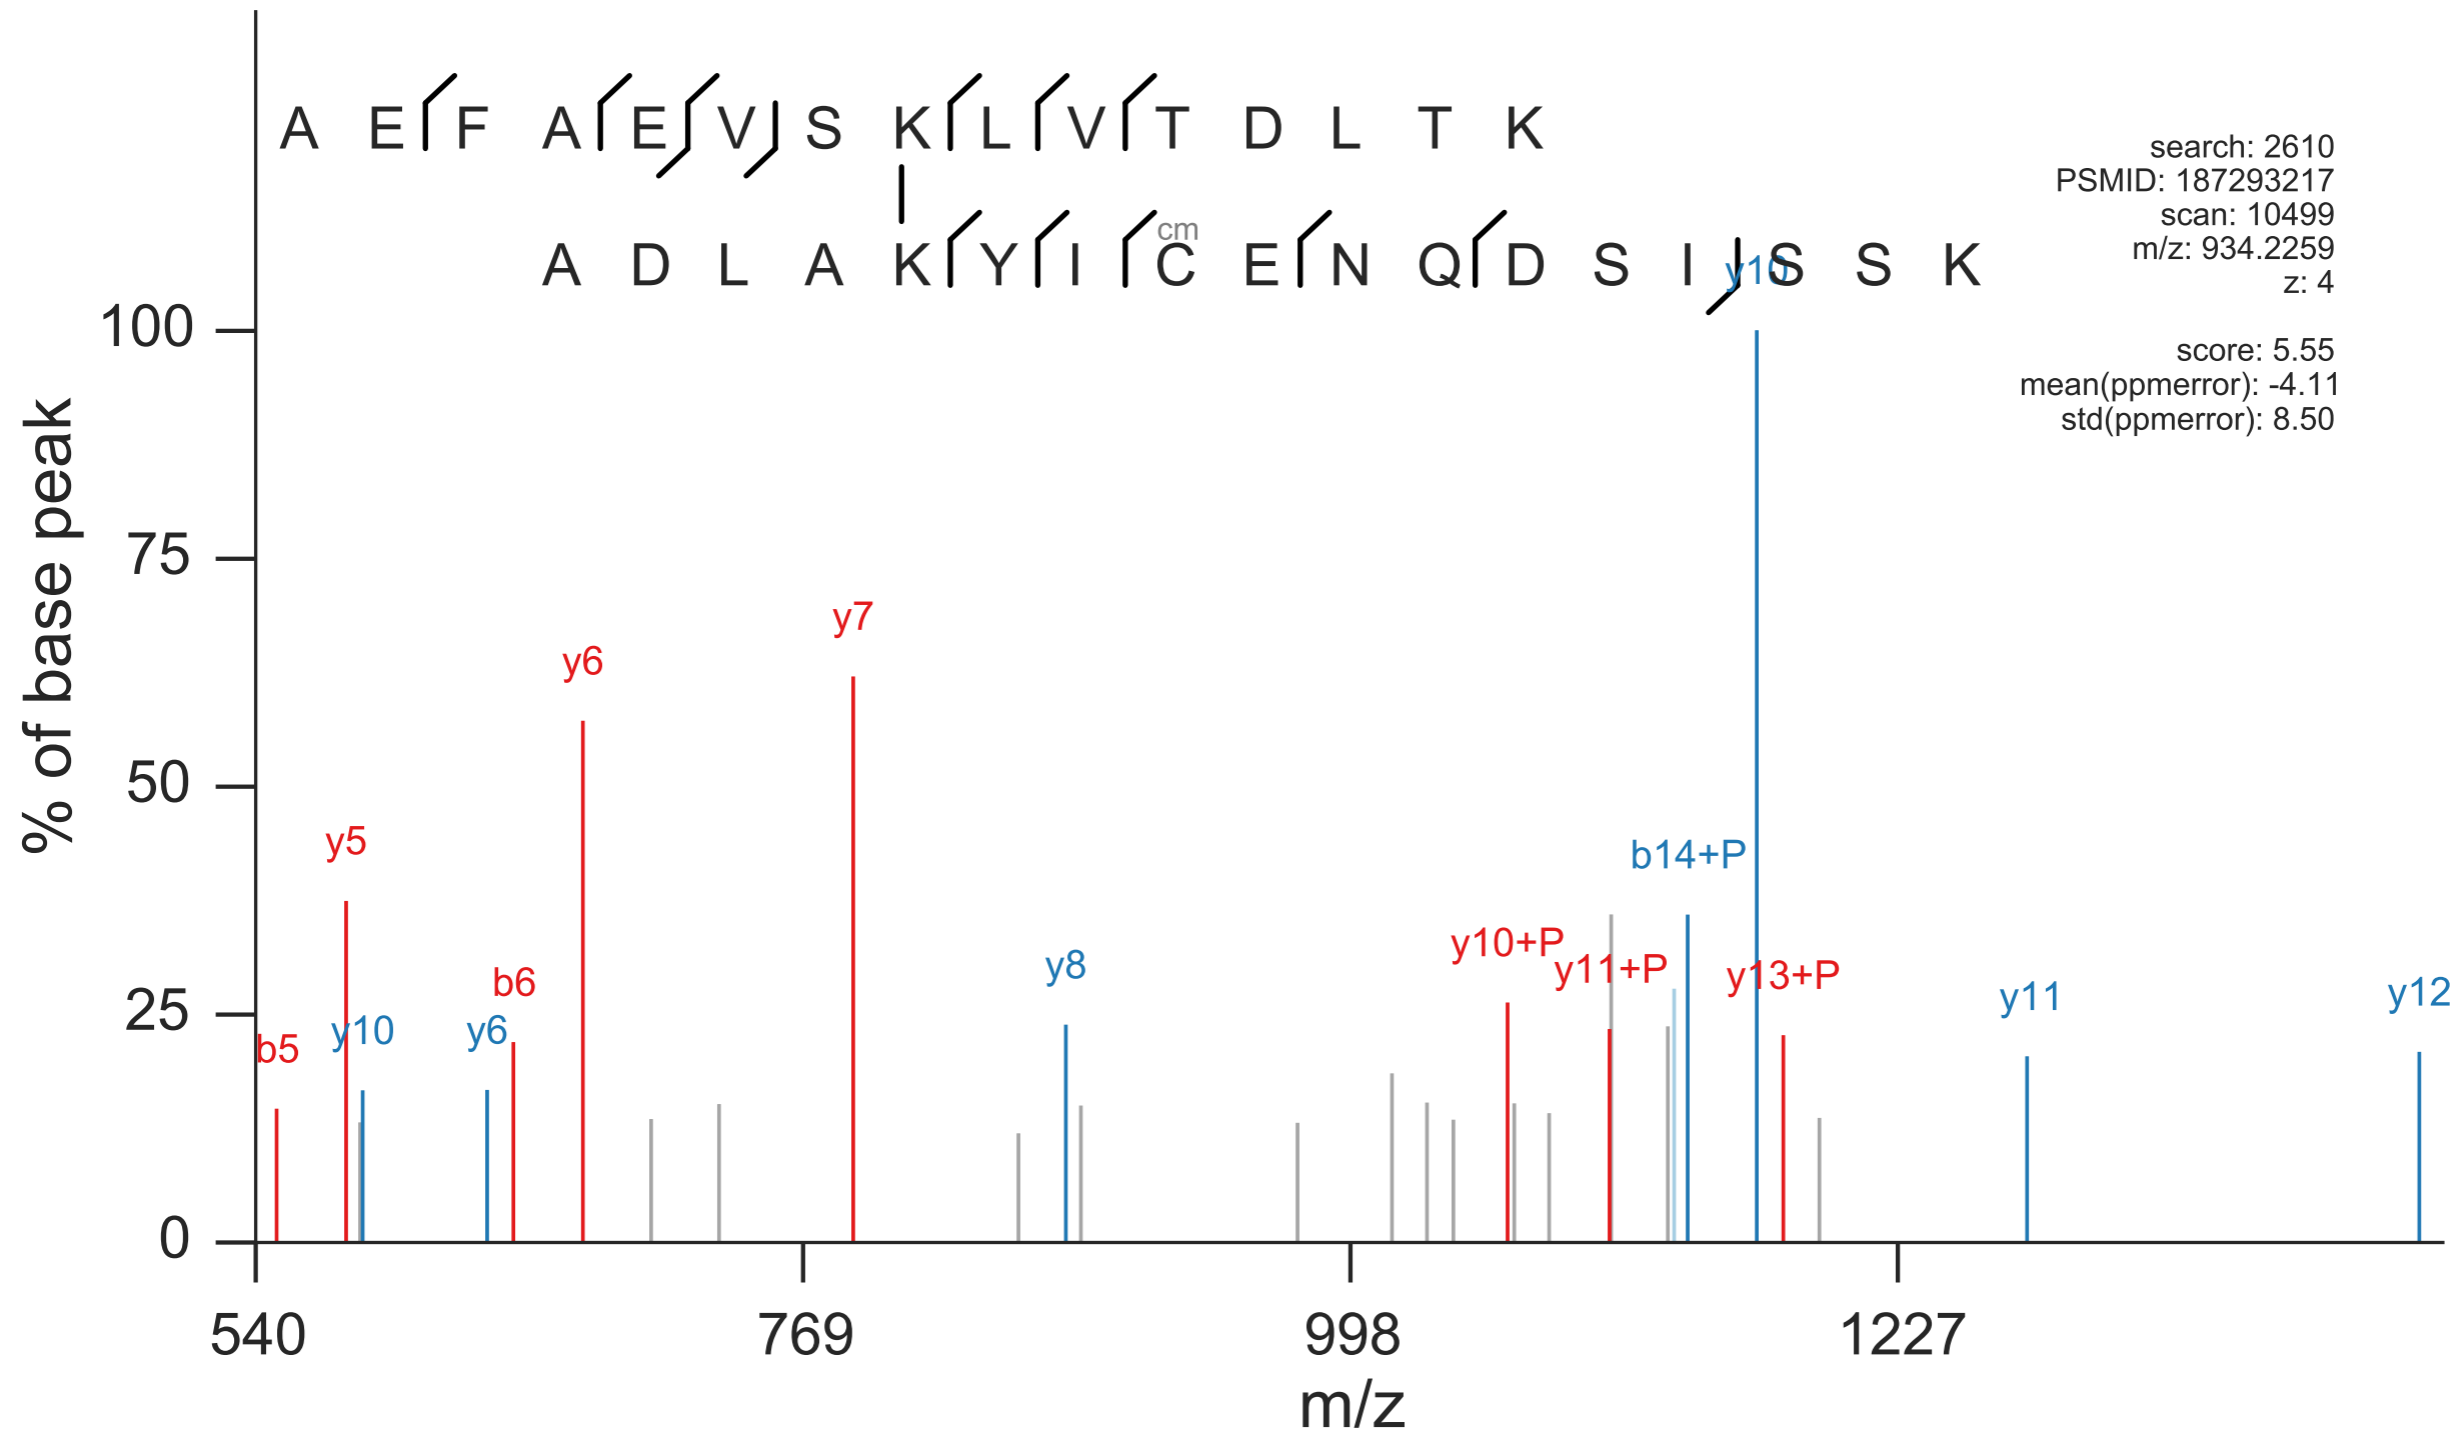

A E F A E V S K L V T D L T K

A D L A K Y I C E N Q D S I S S K

search: 2610  
 PSMID: 187293217  
 scan: 10499  
 m/z: 934.2259  
 z: 4

score: 5.55  
 mean(ppmerror): -4.11  
 std(ppmerror): 8.50

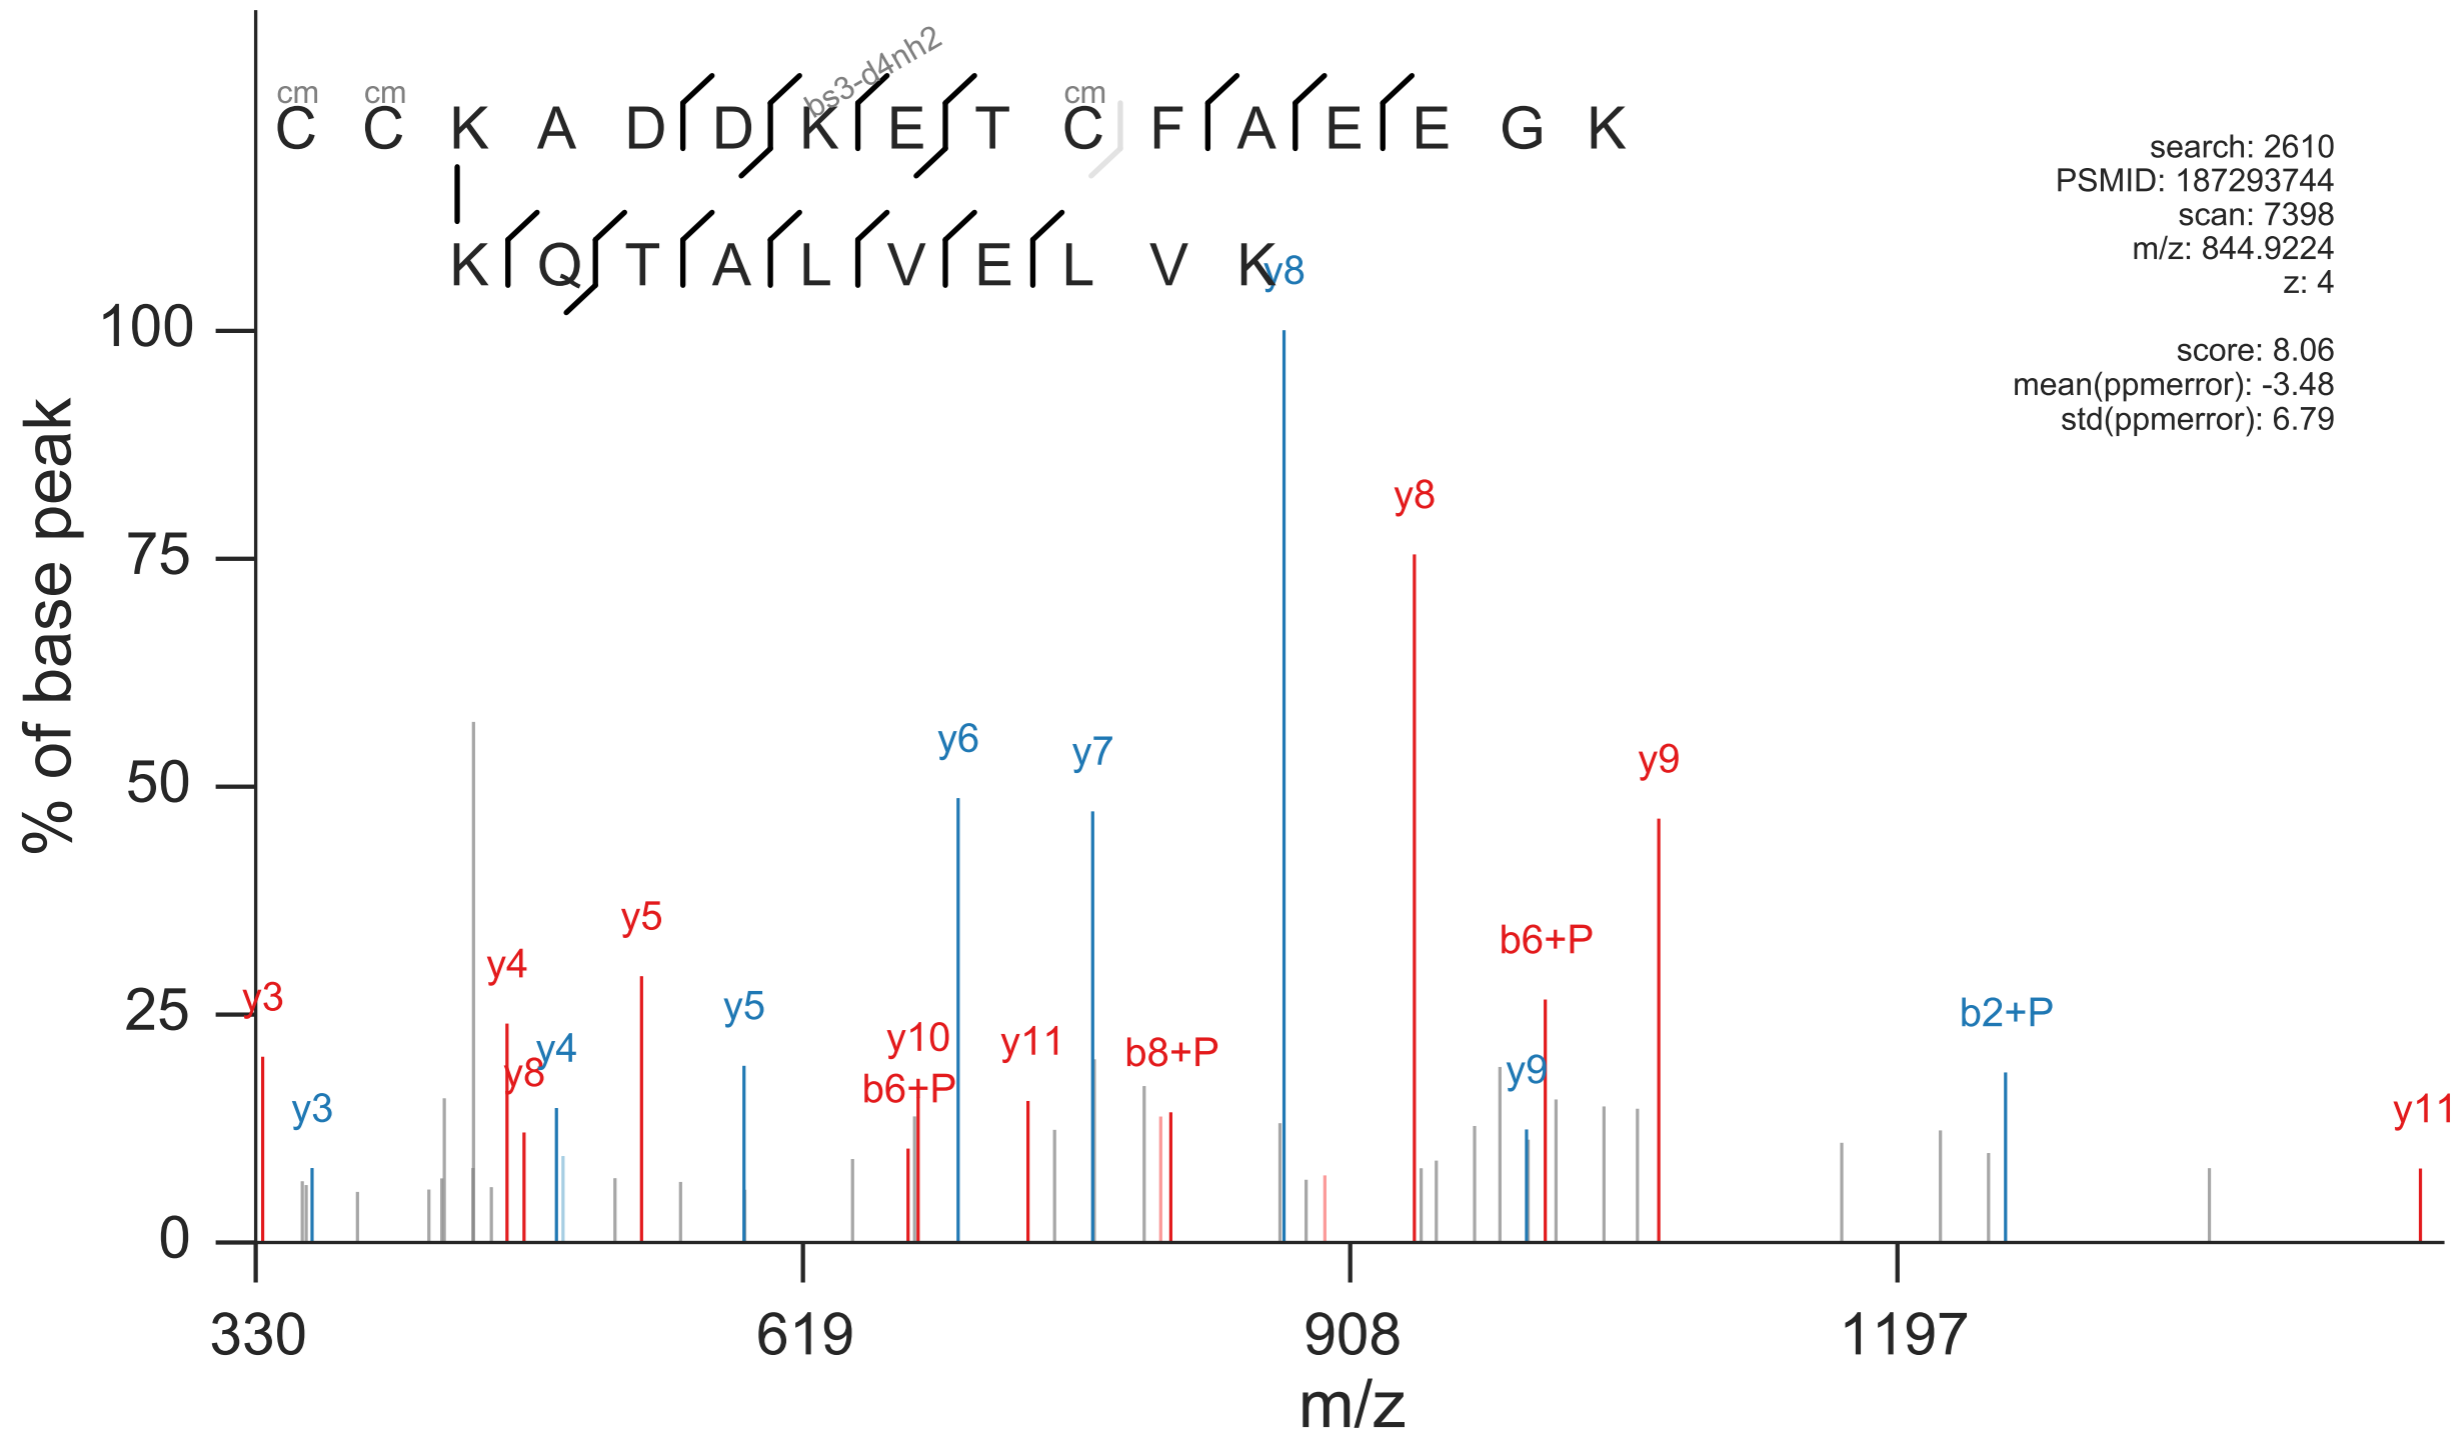



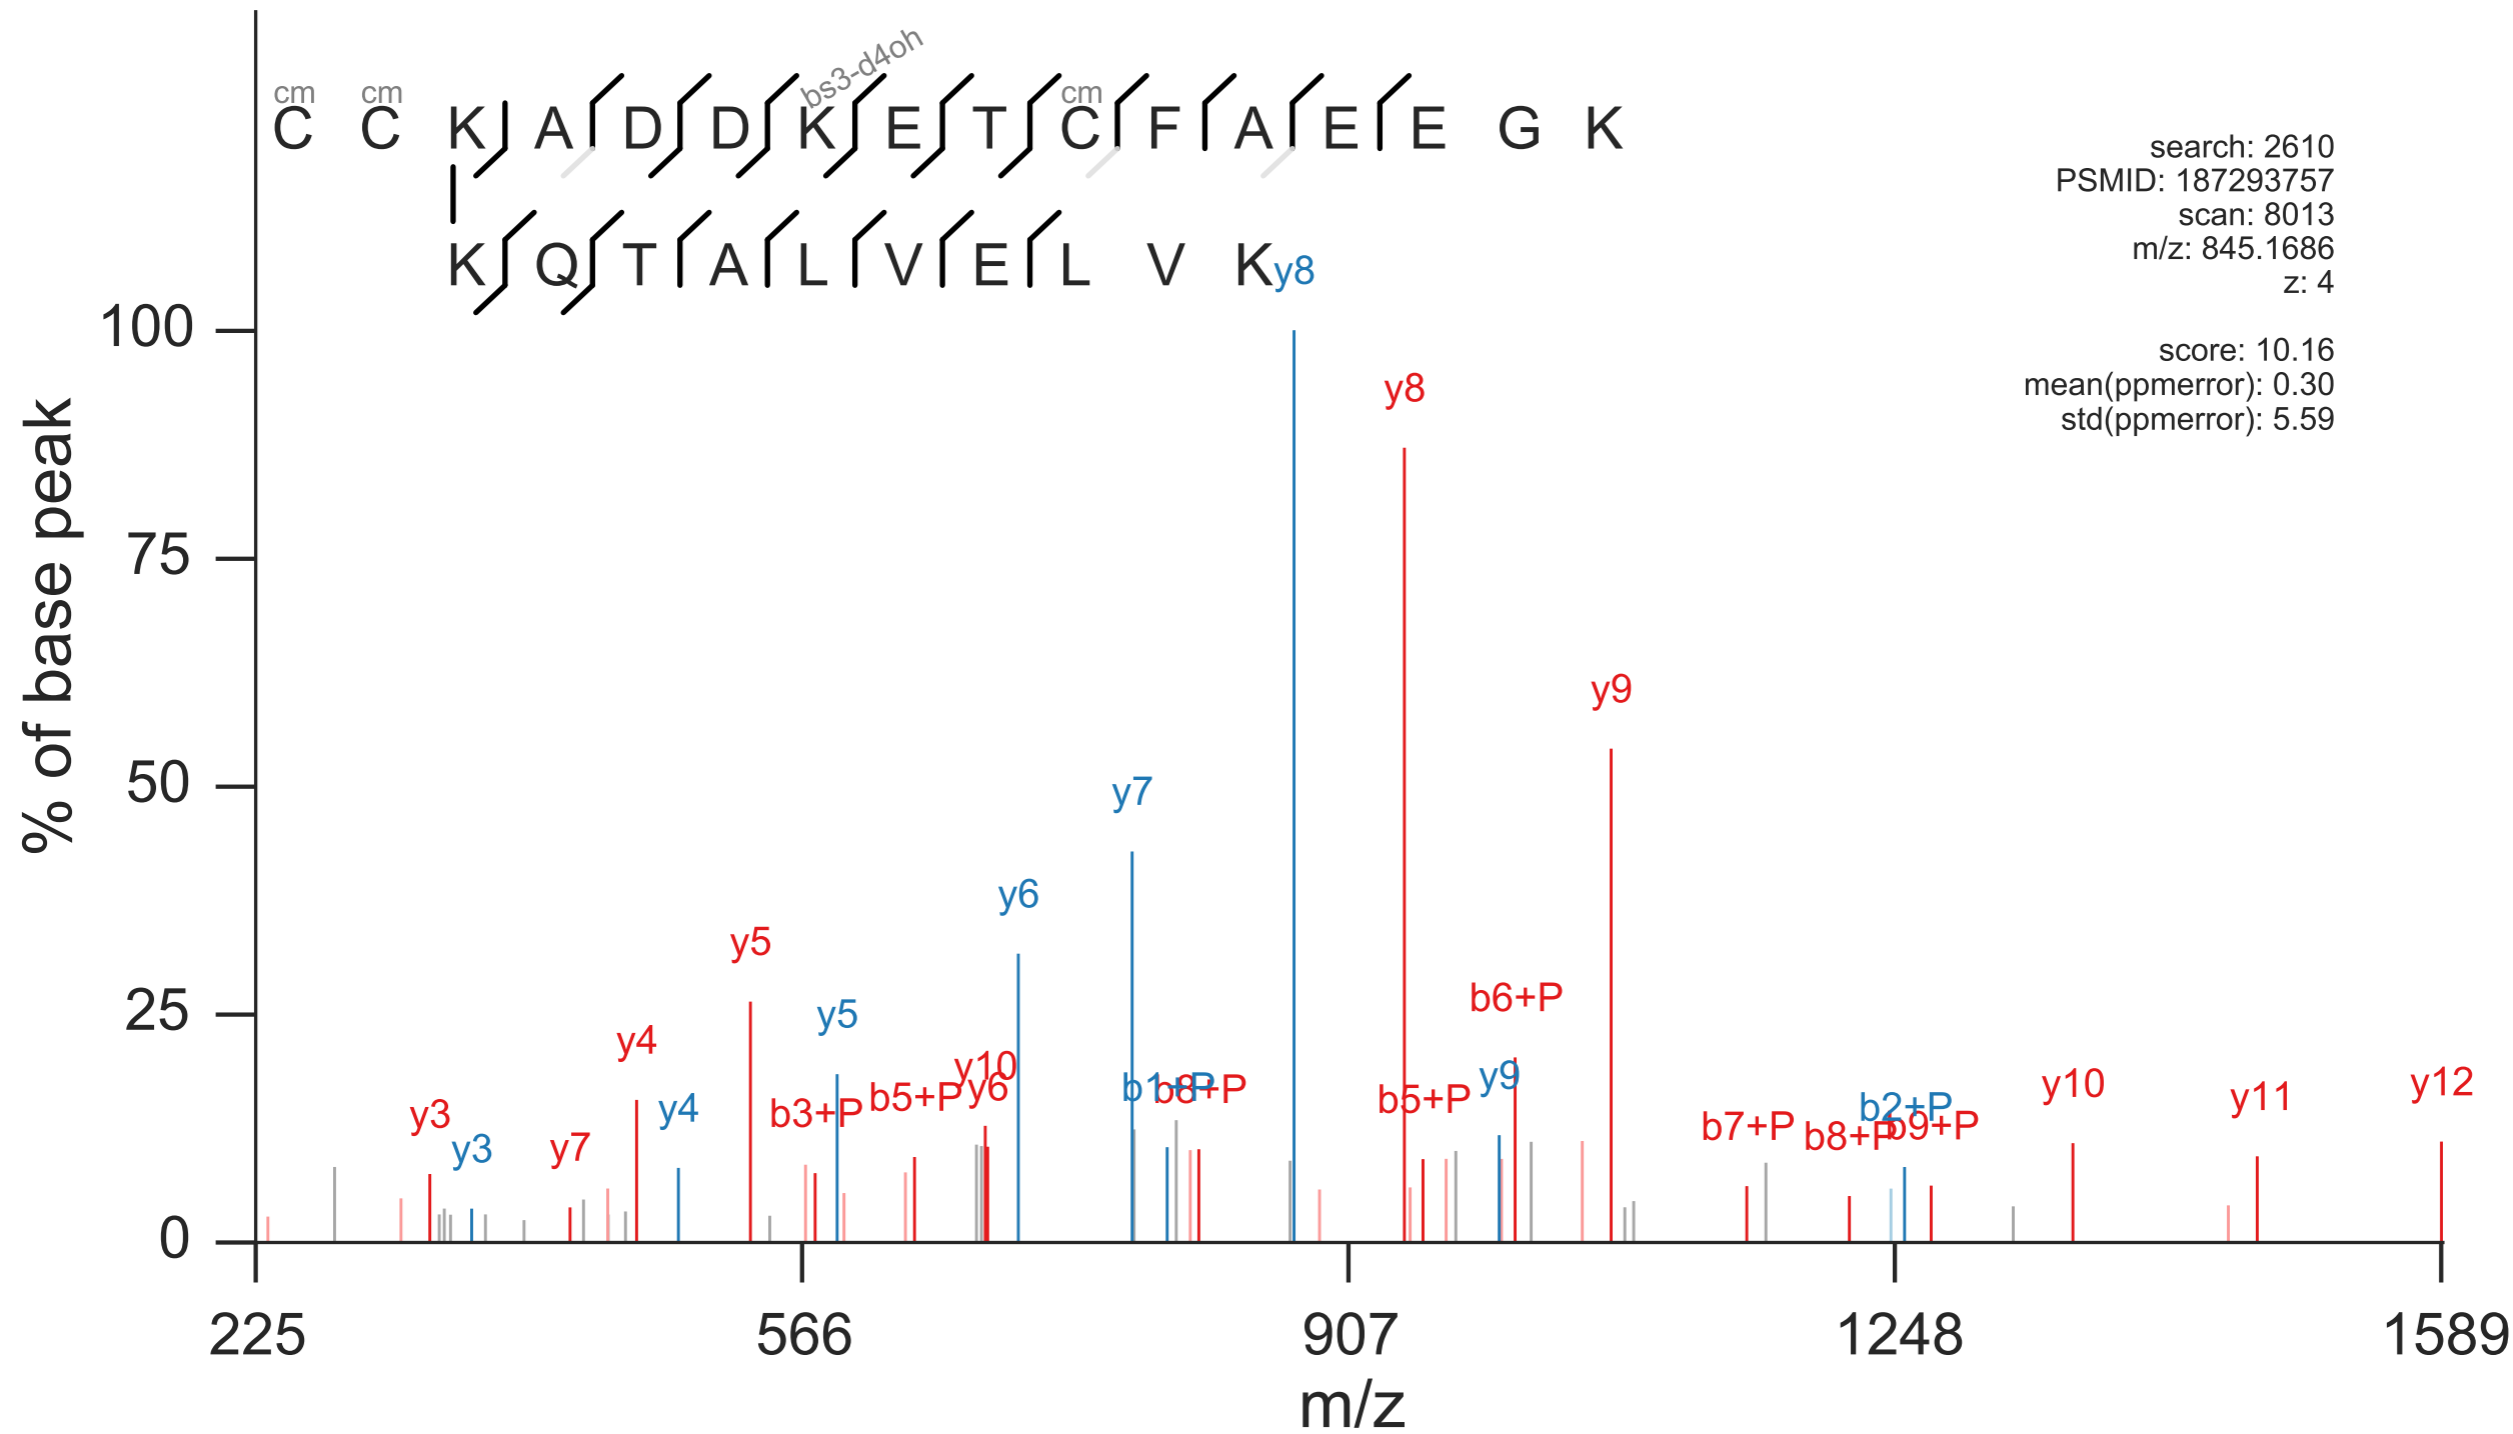

search: 2610  
 PSMID: 187293757  
 scan: 8013  
 m/z: 845.1686  
 z: 4

score: 10.16  
 mean(ppmerror): 0.30  
 std(ppmerror): 5.59

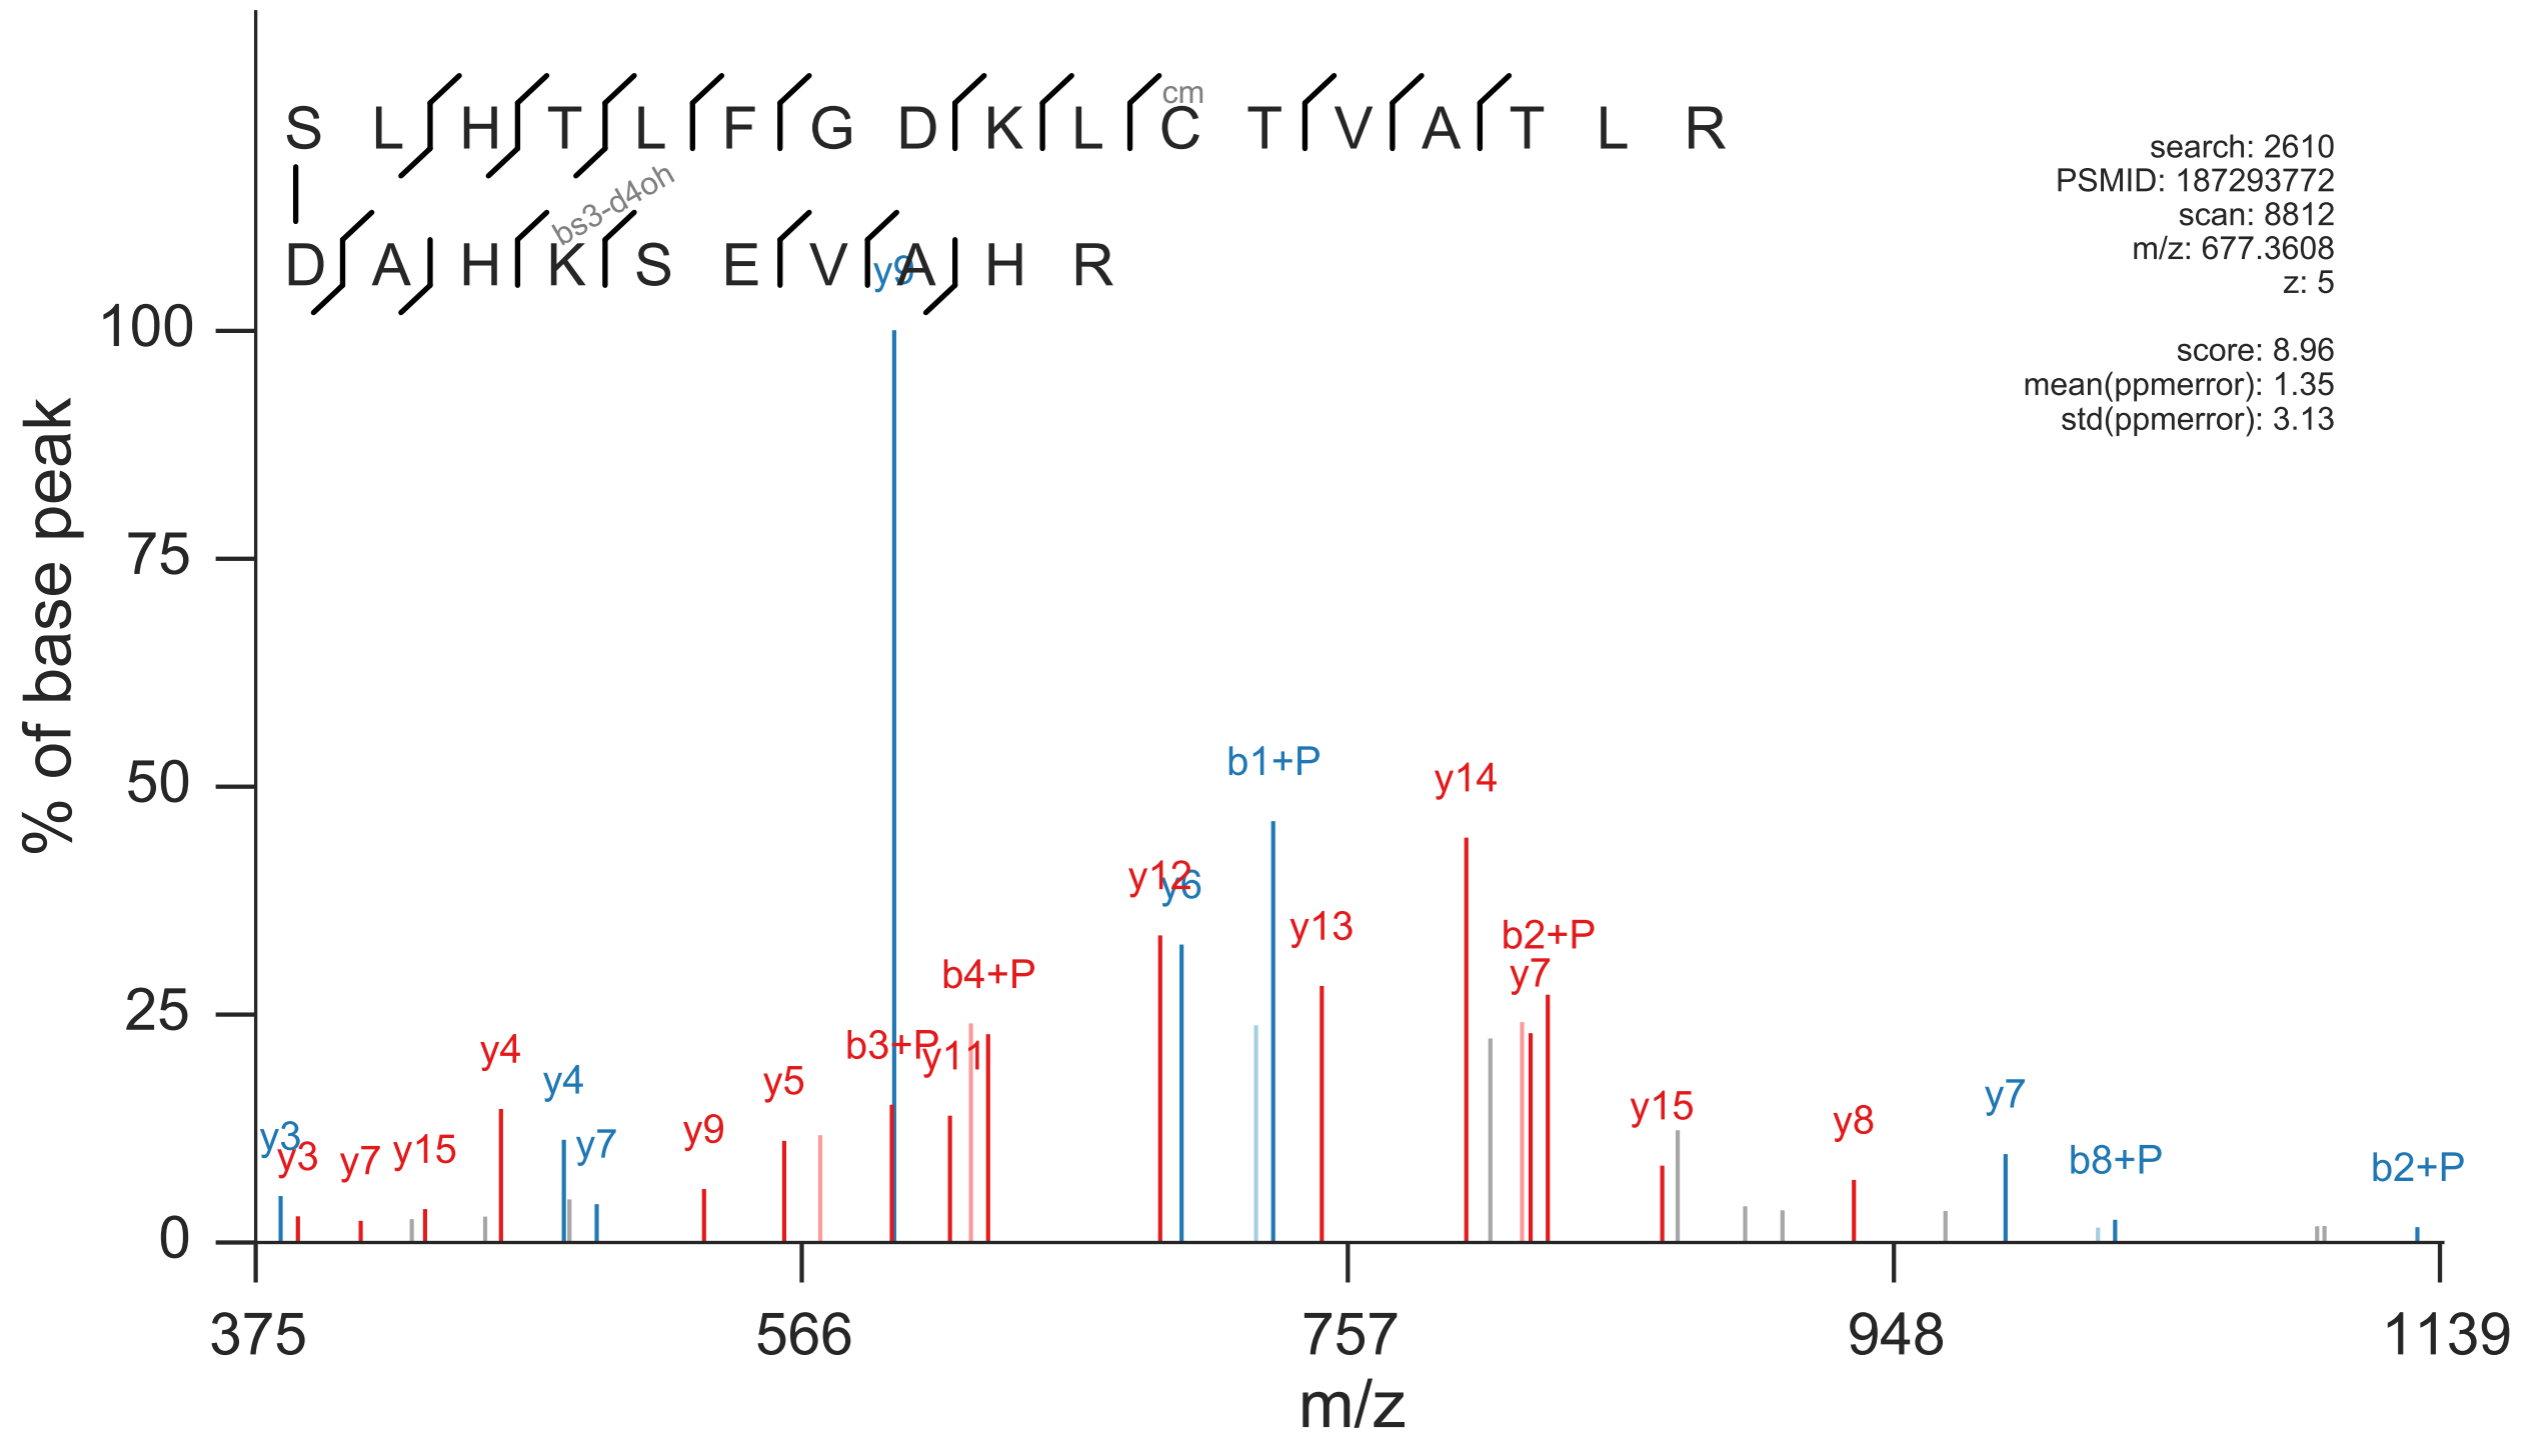

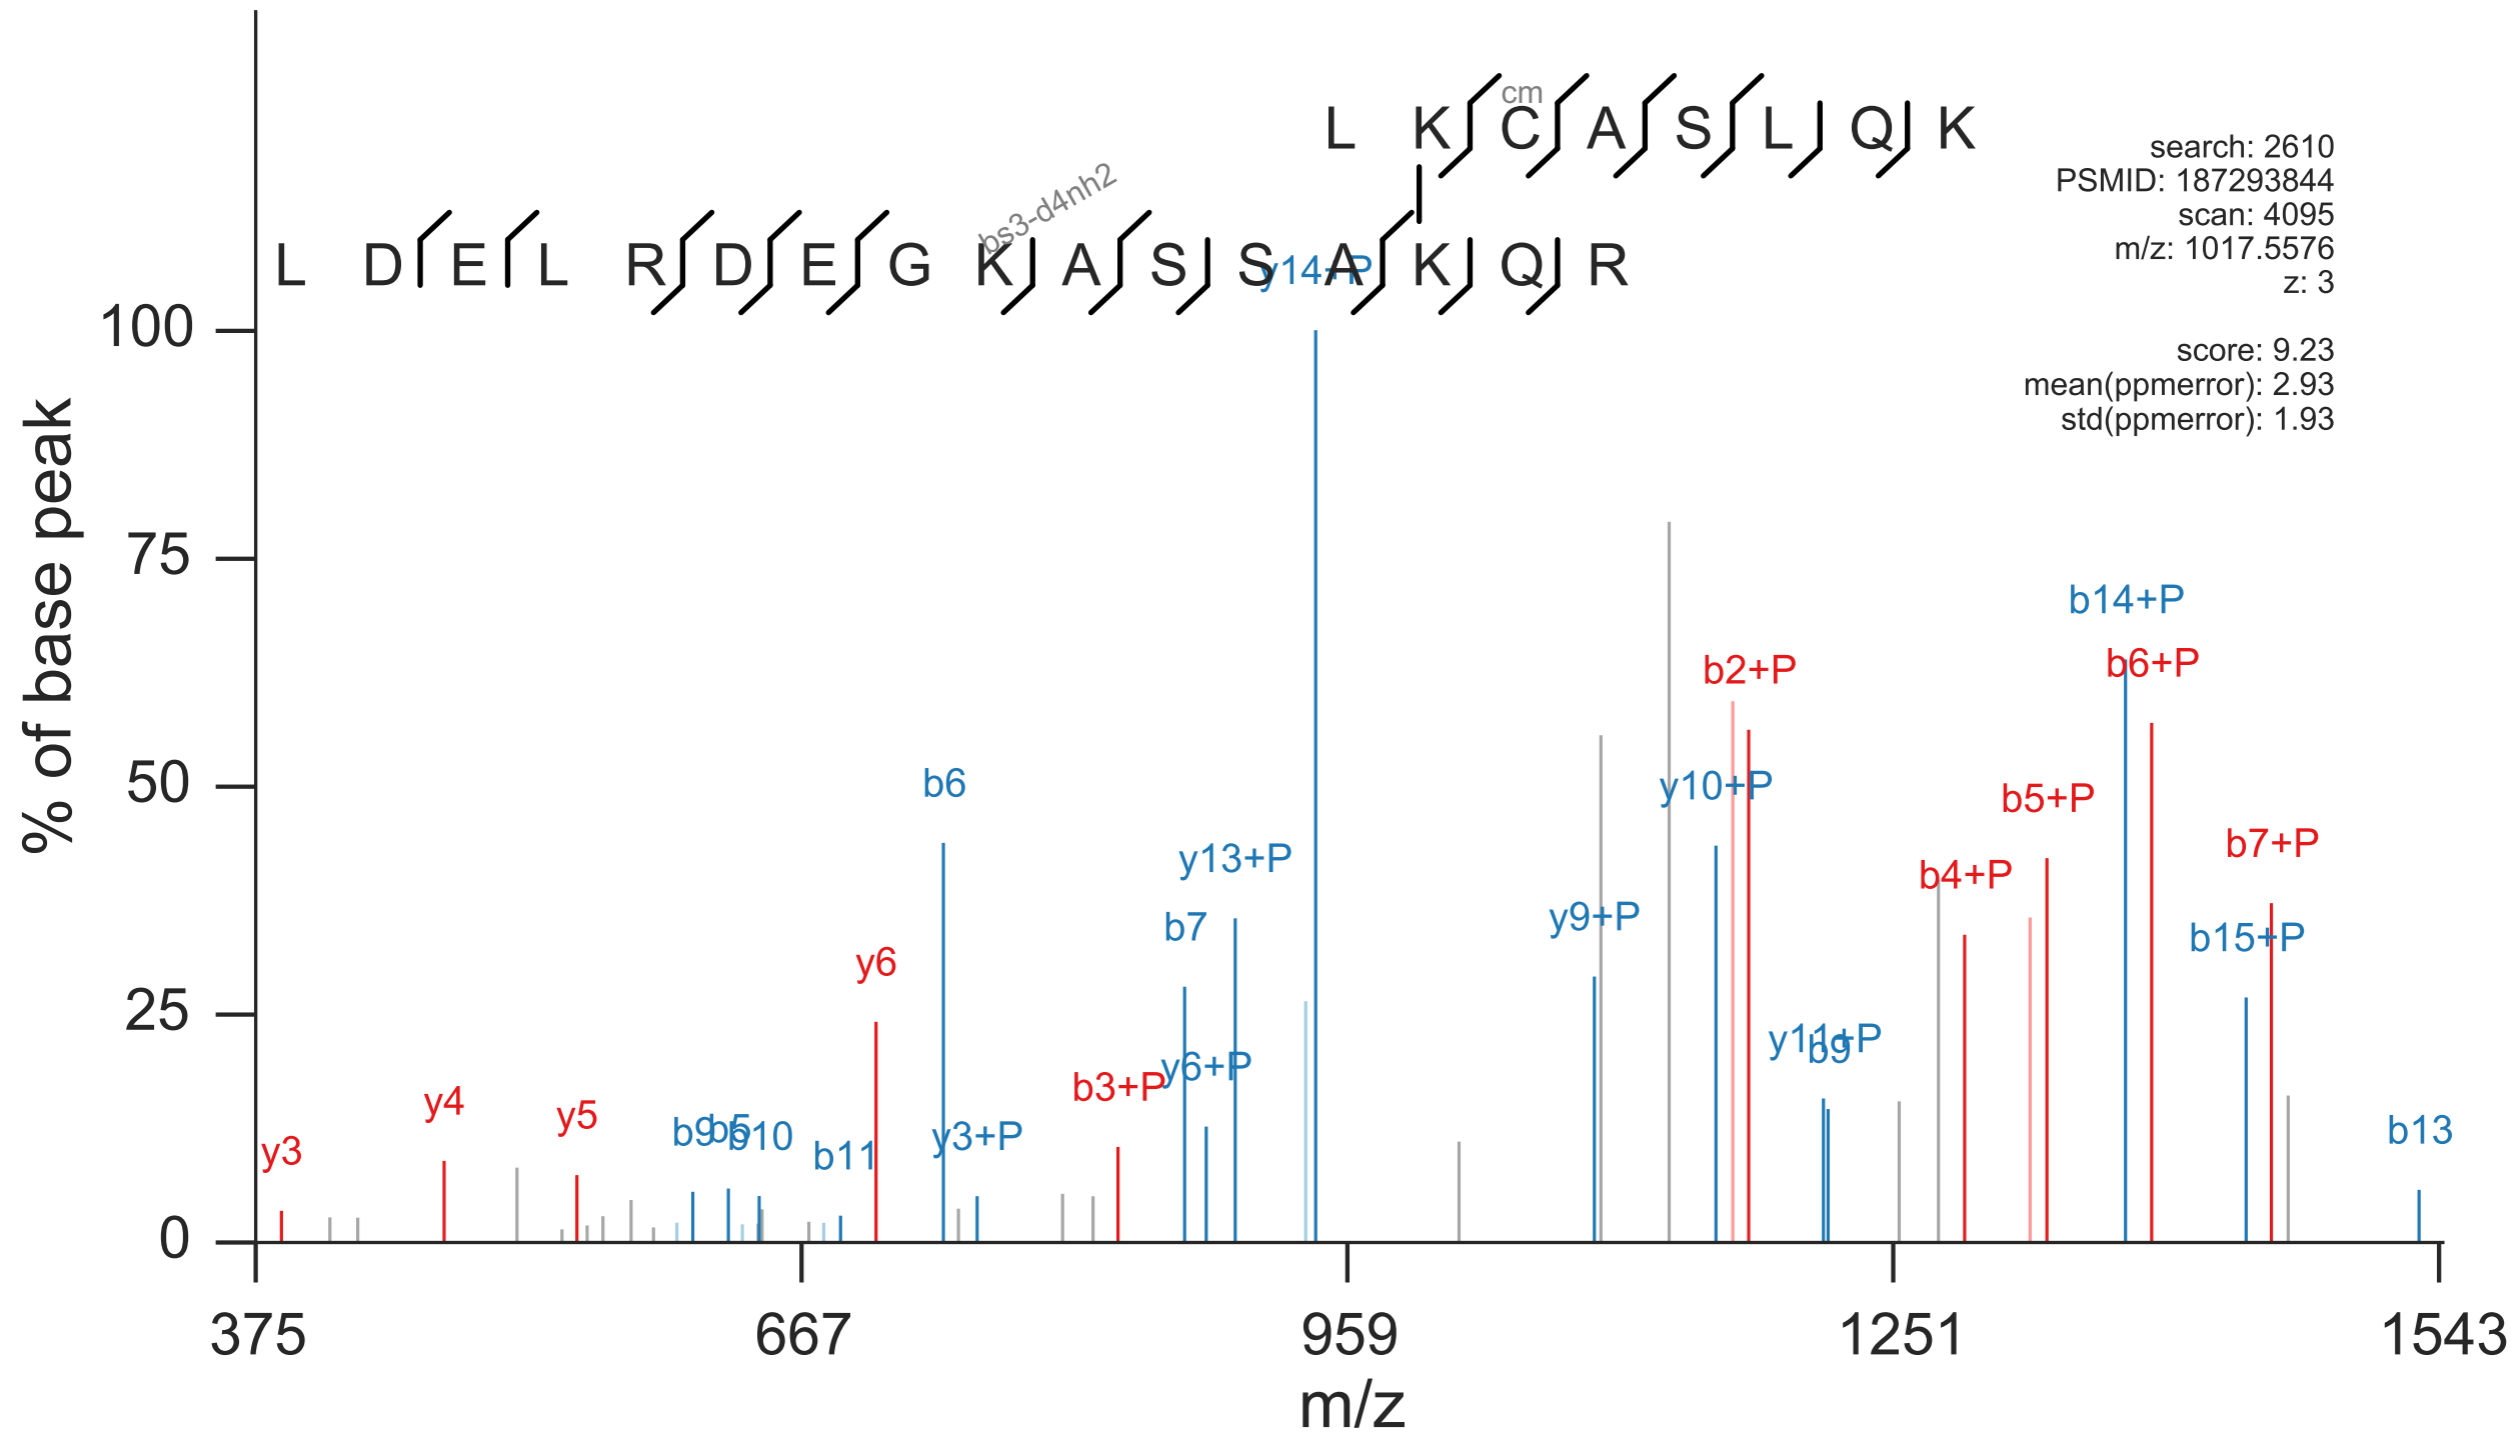

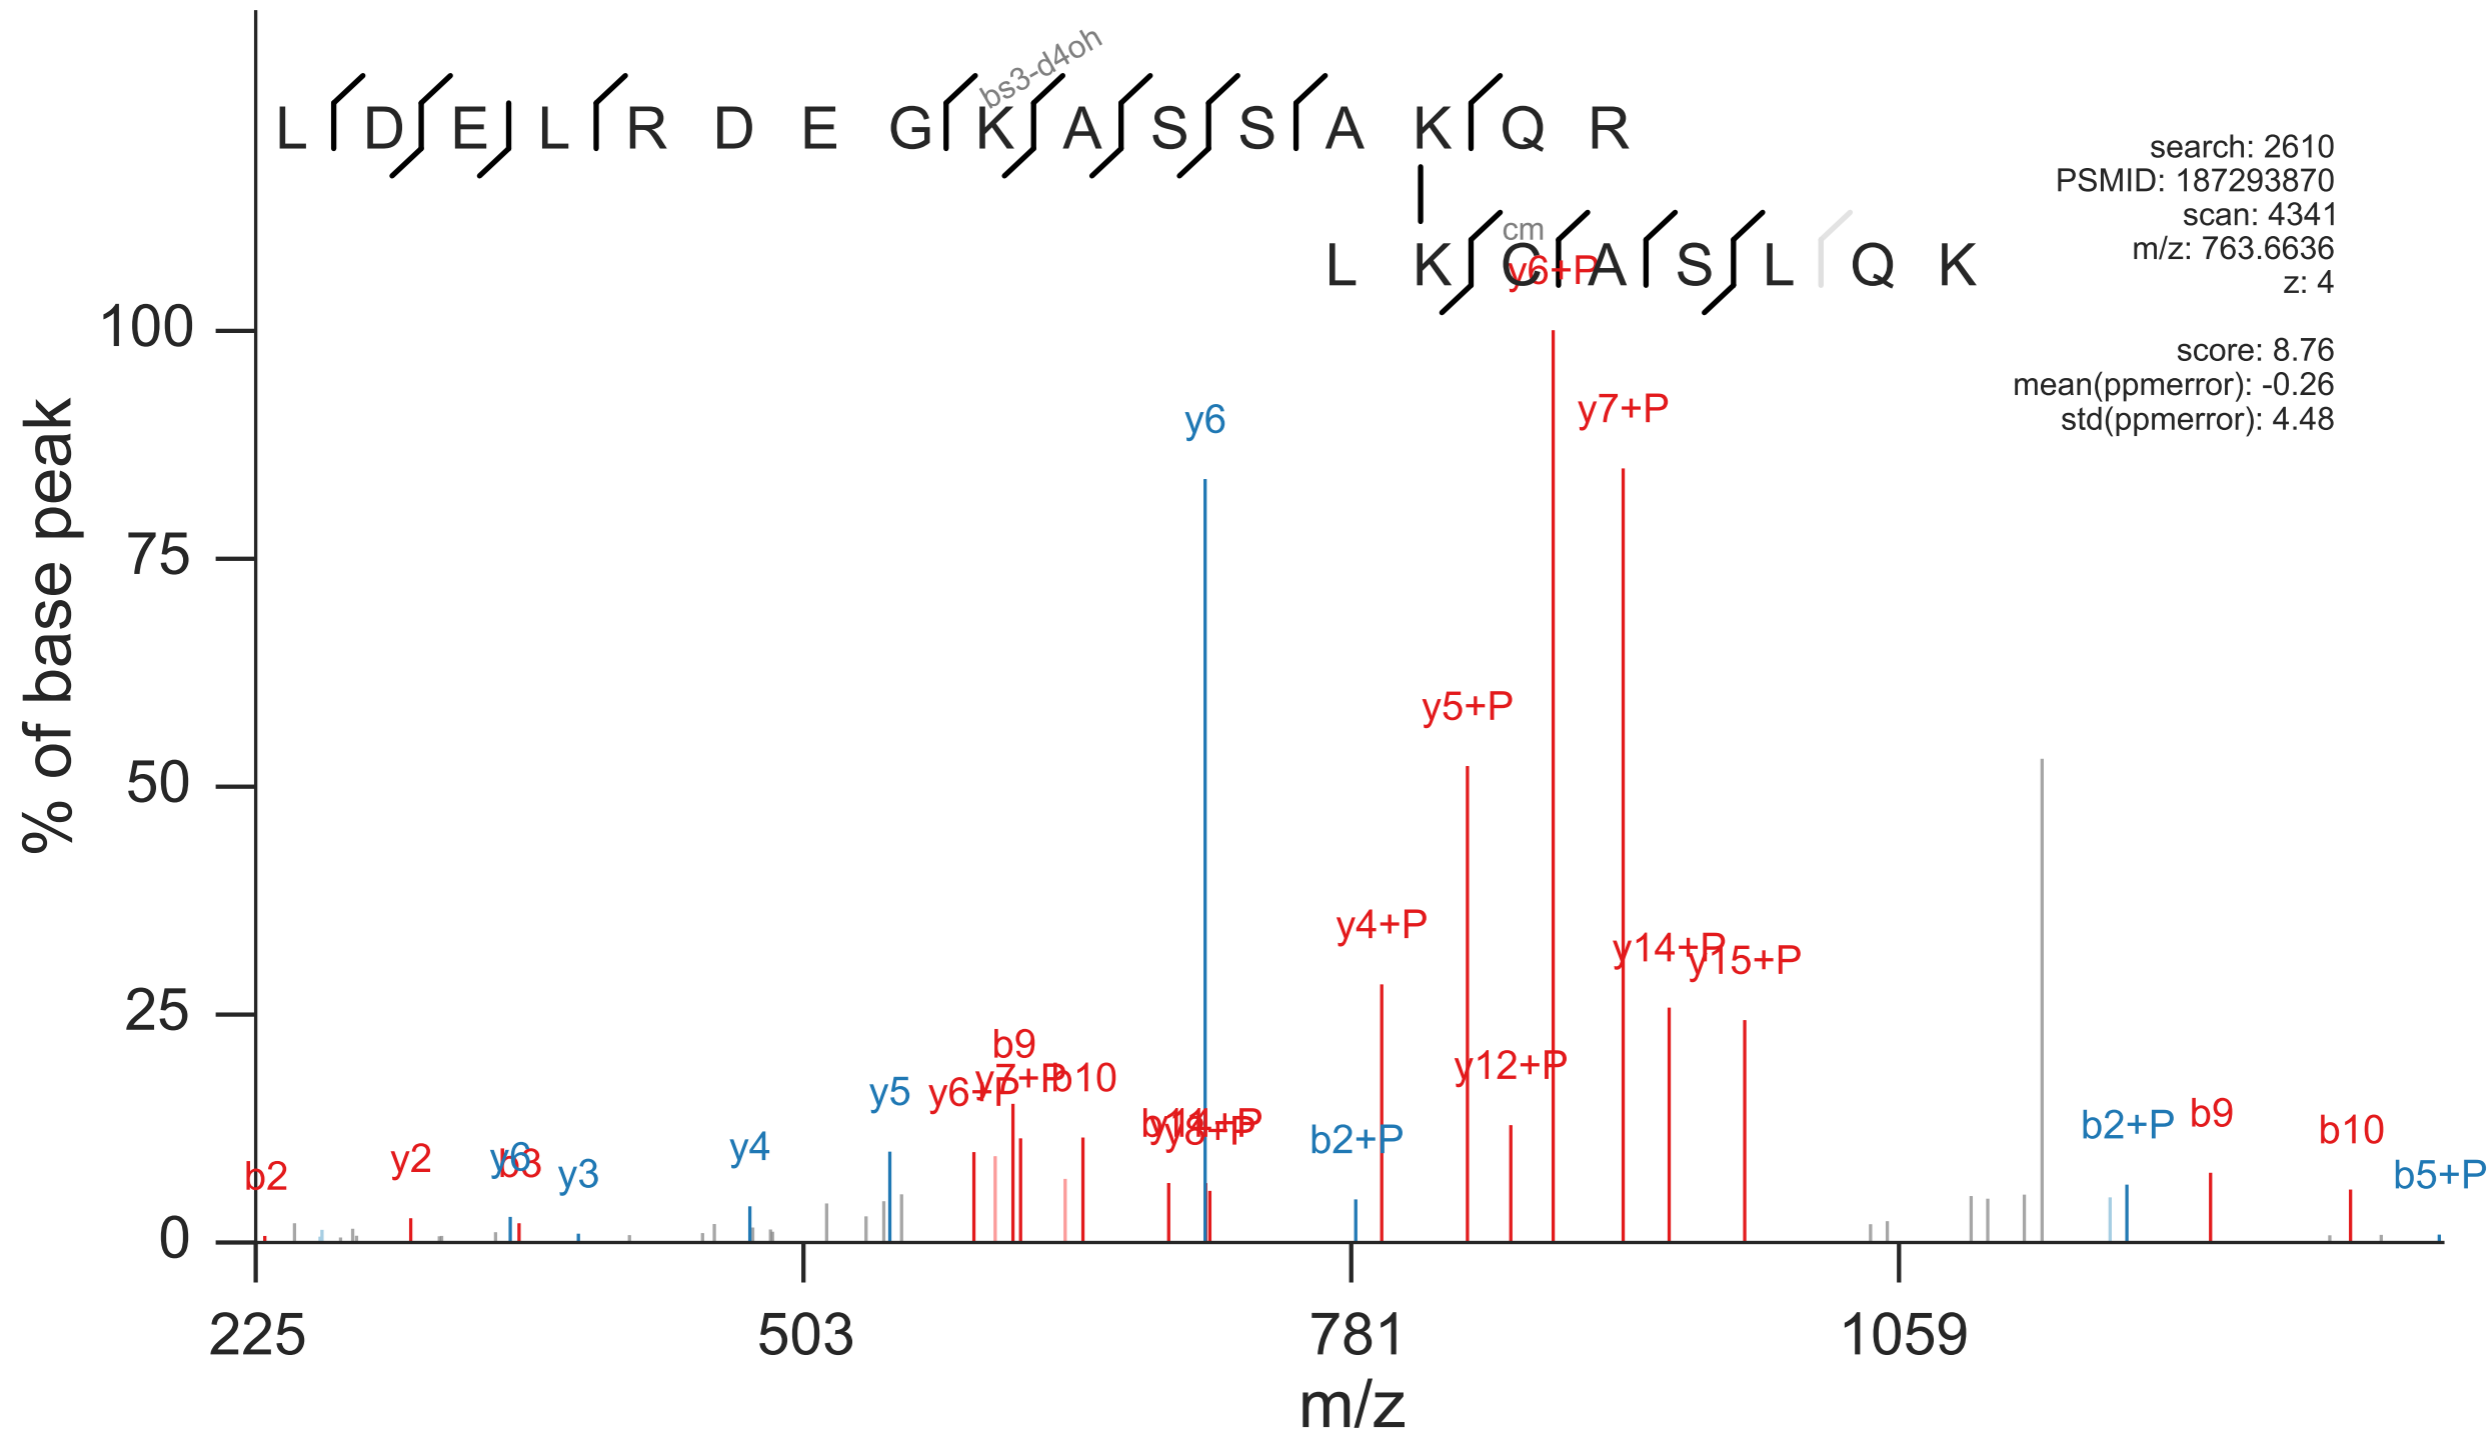

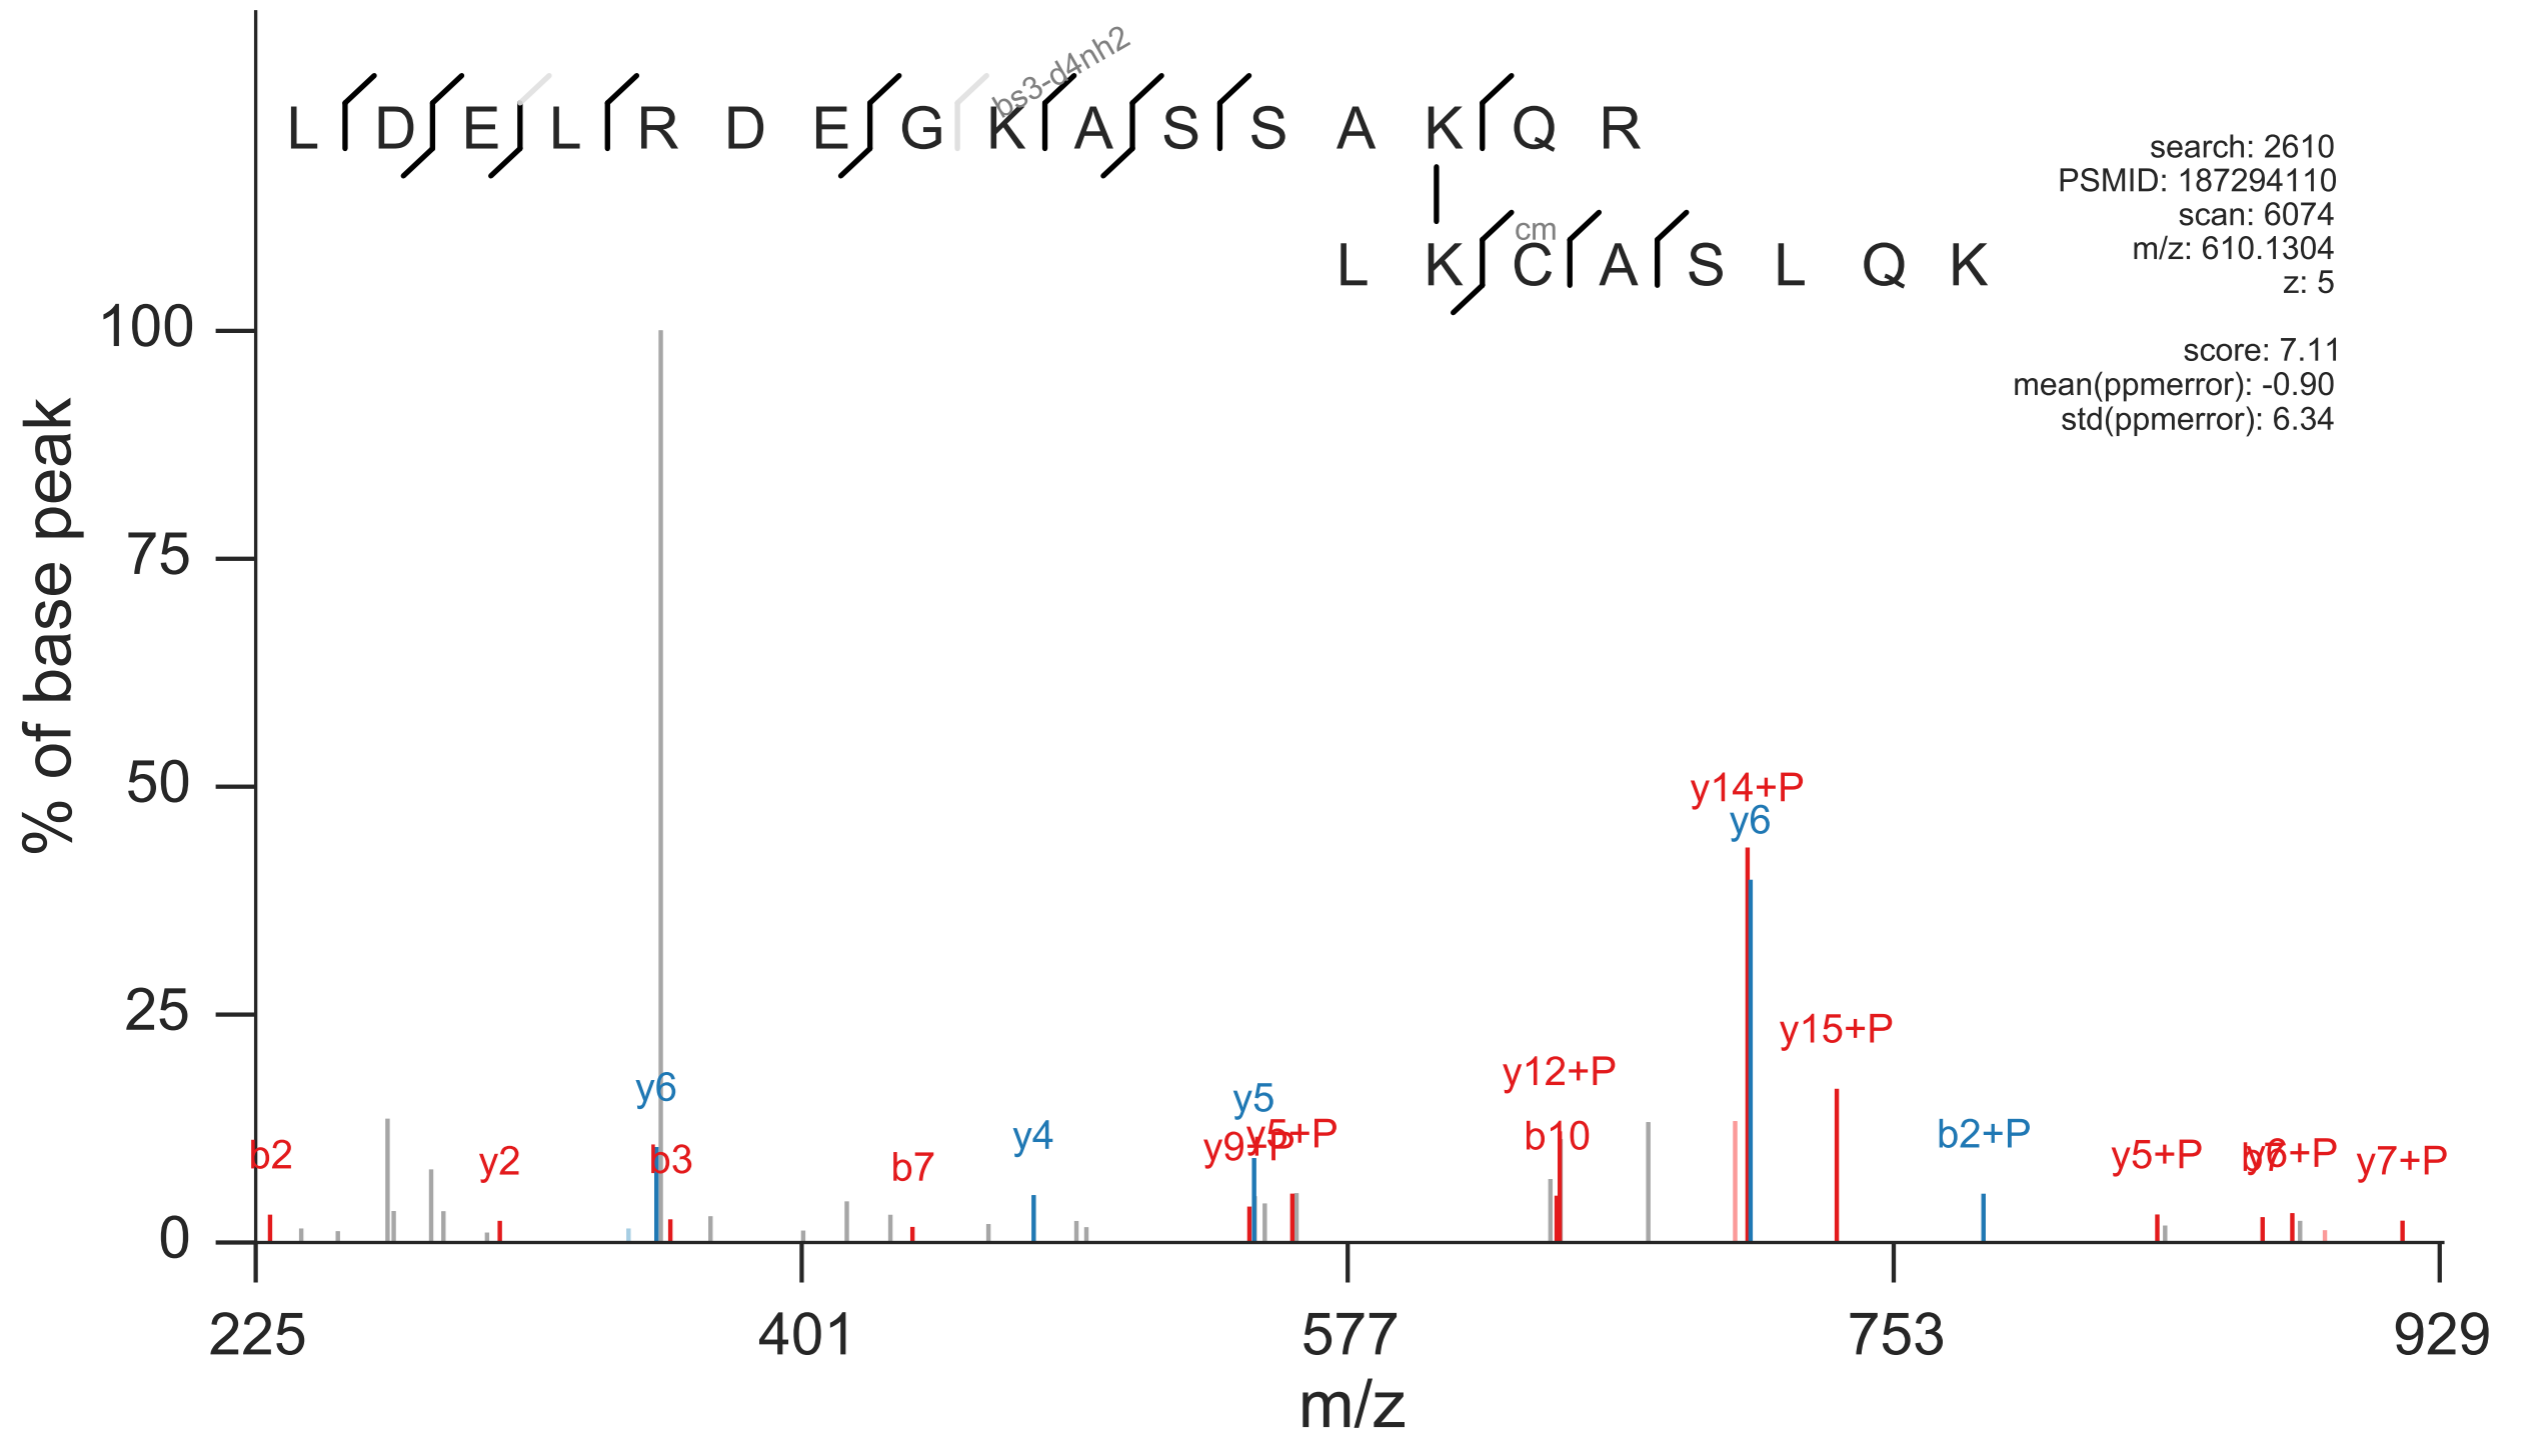

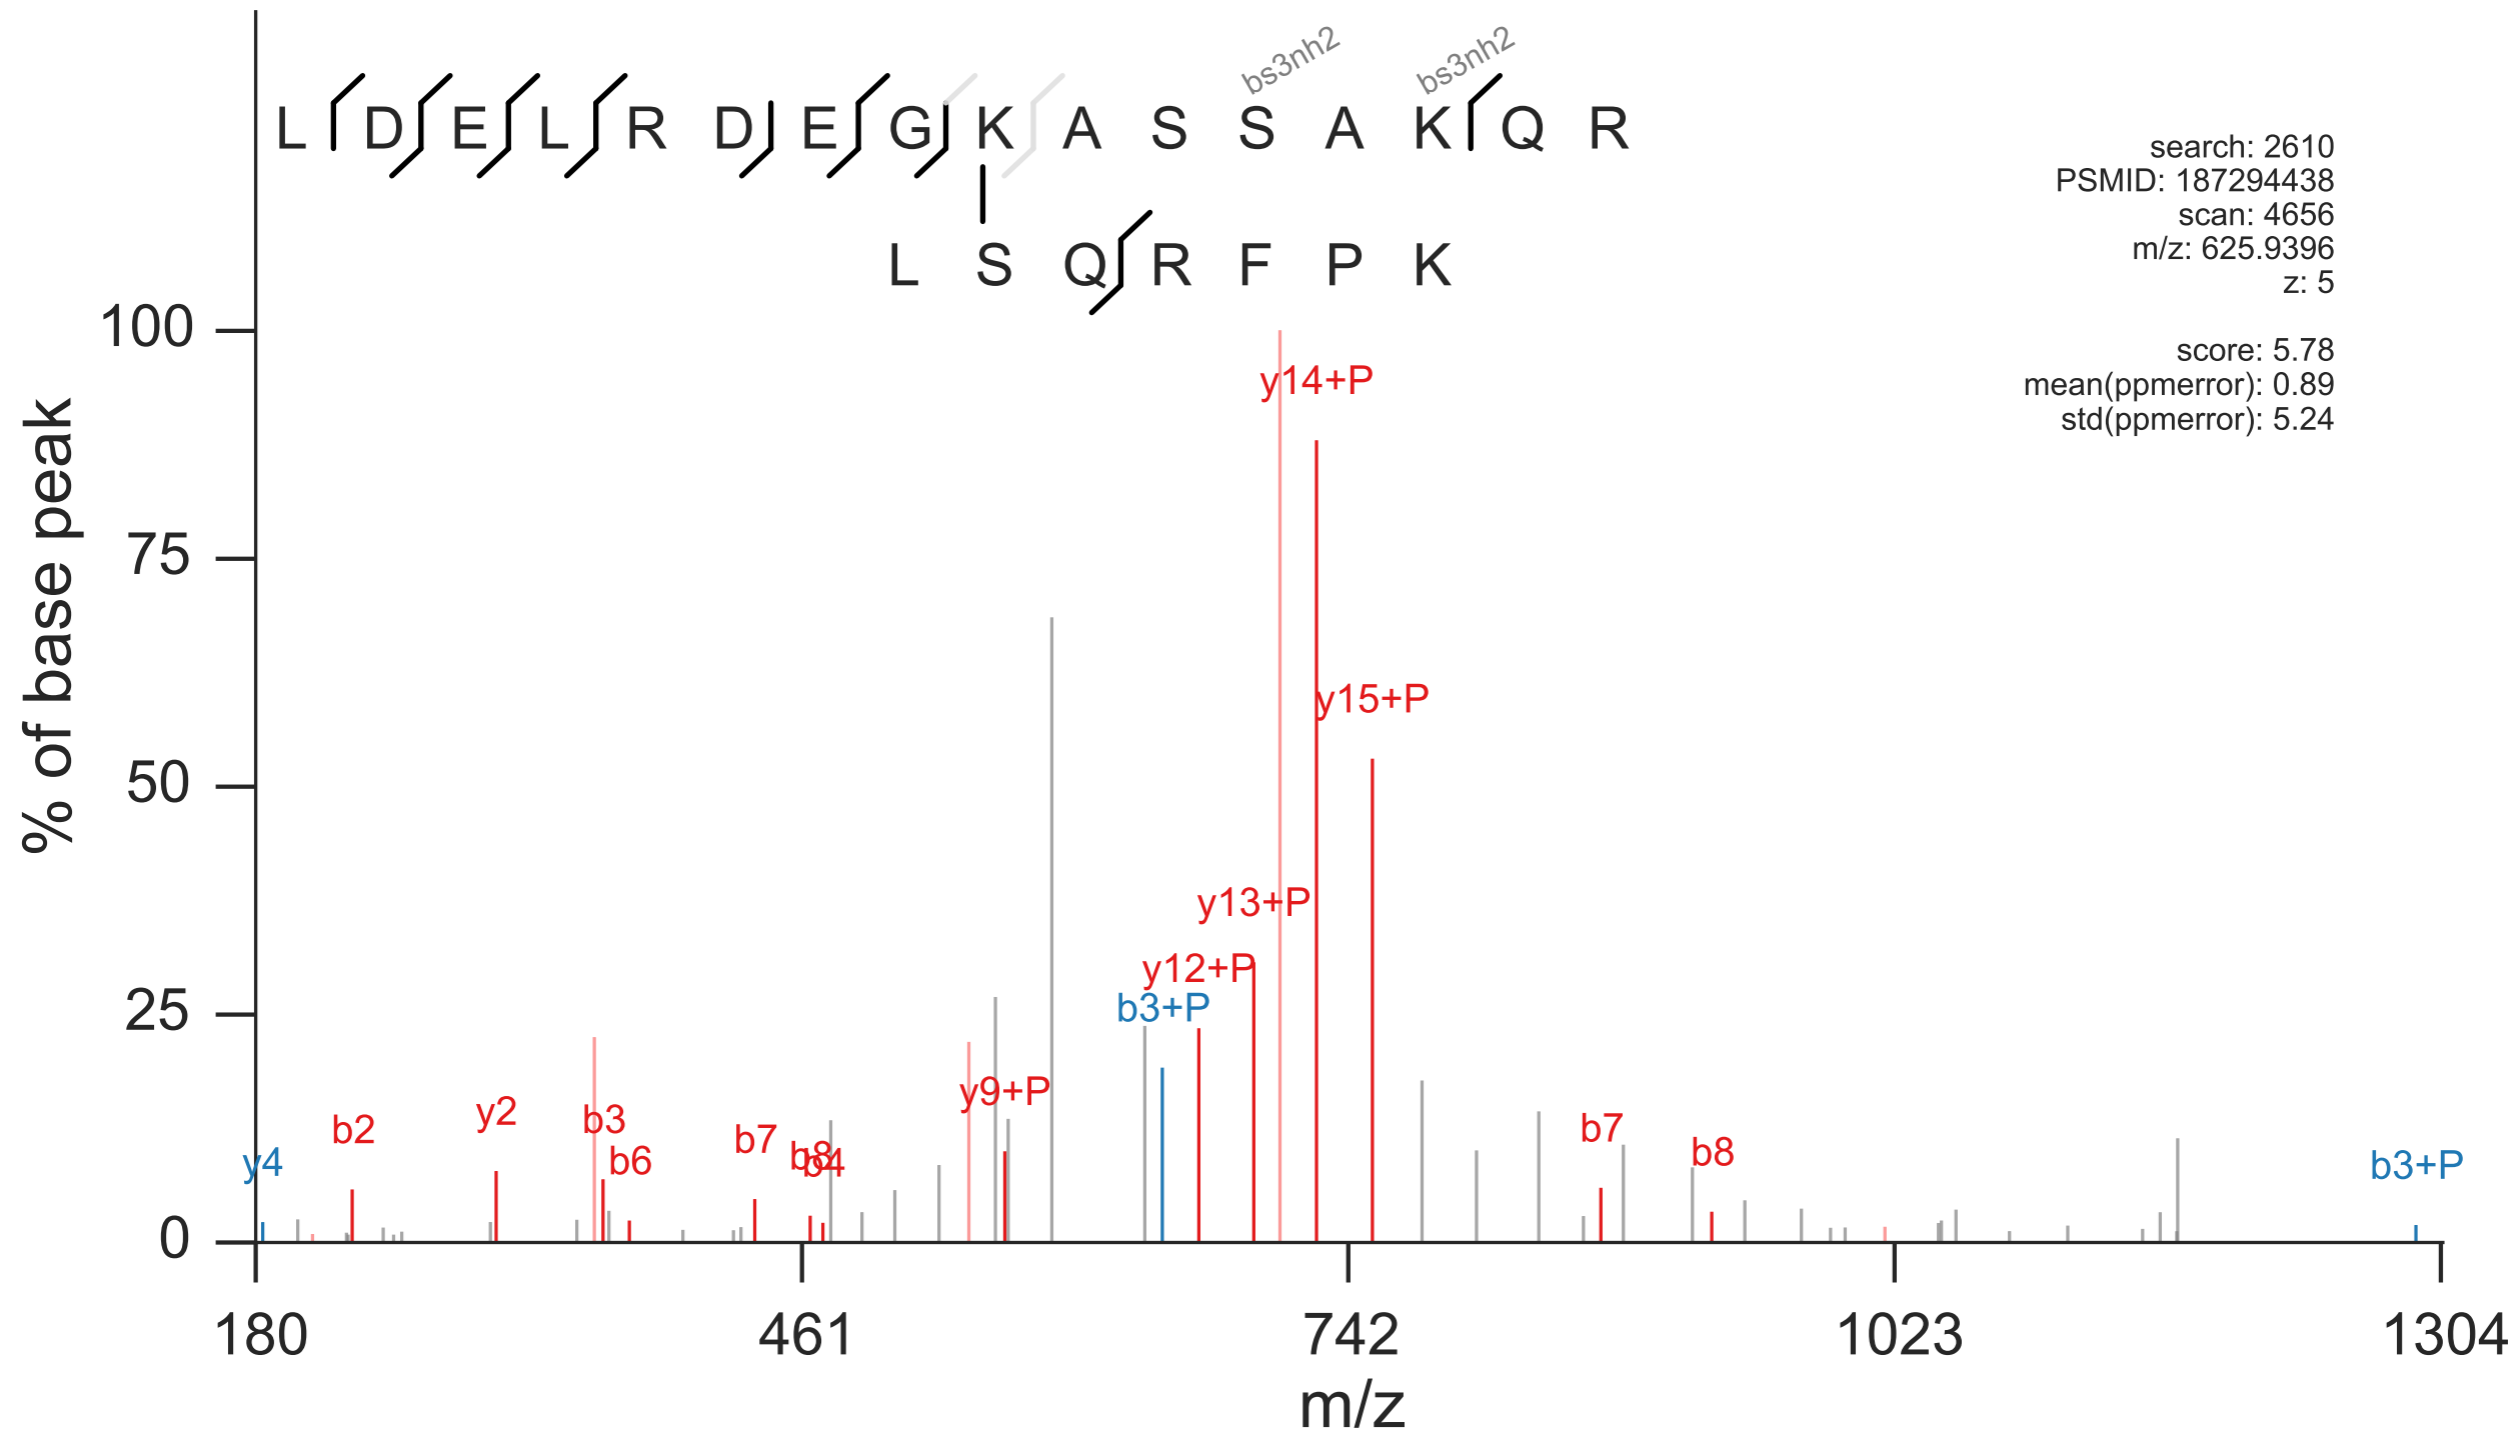

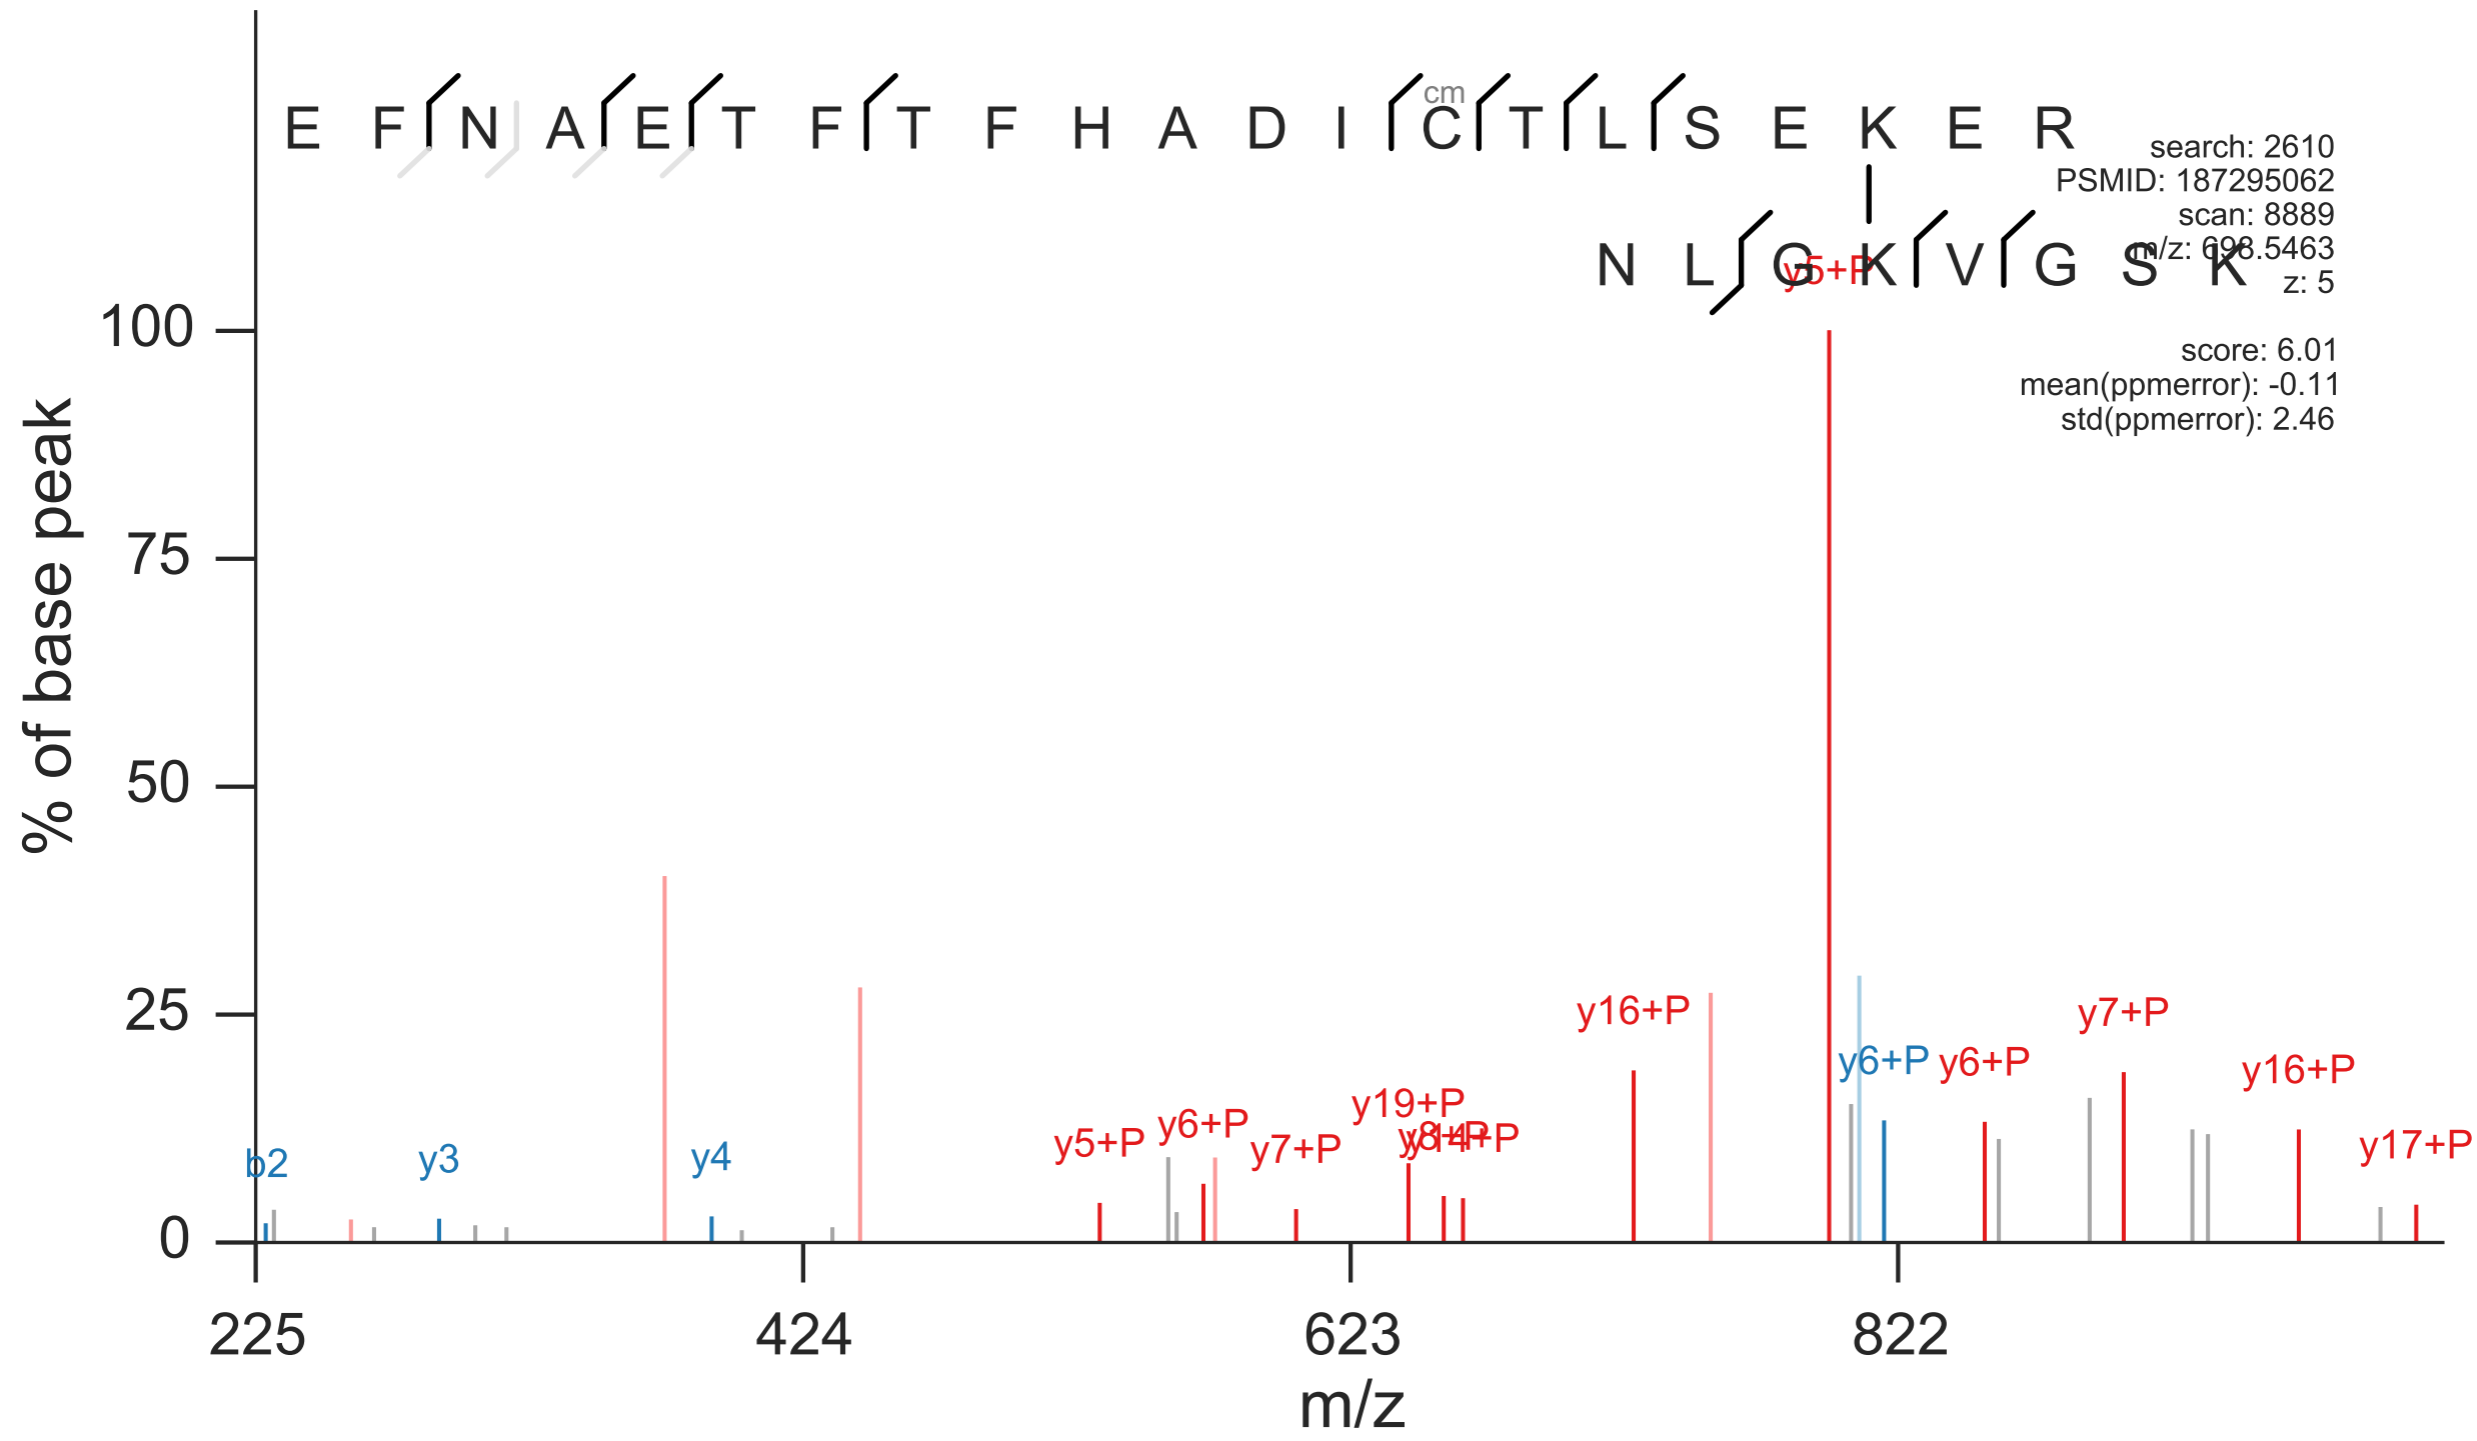

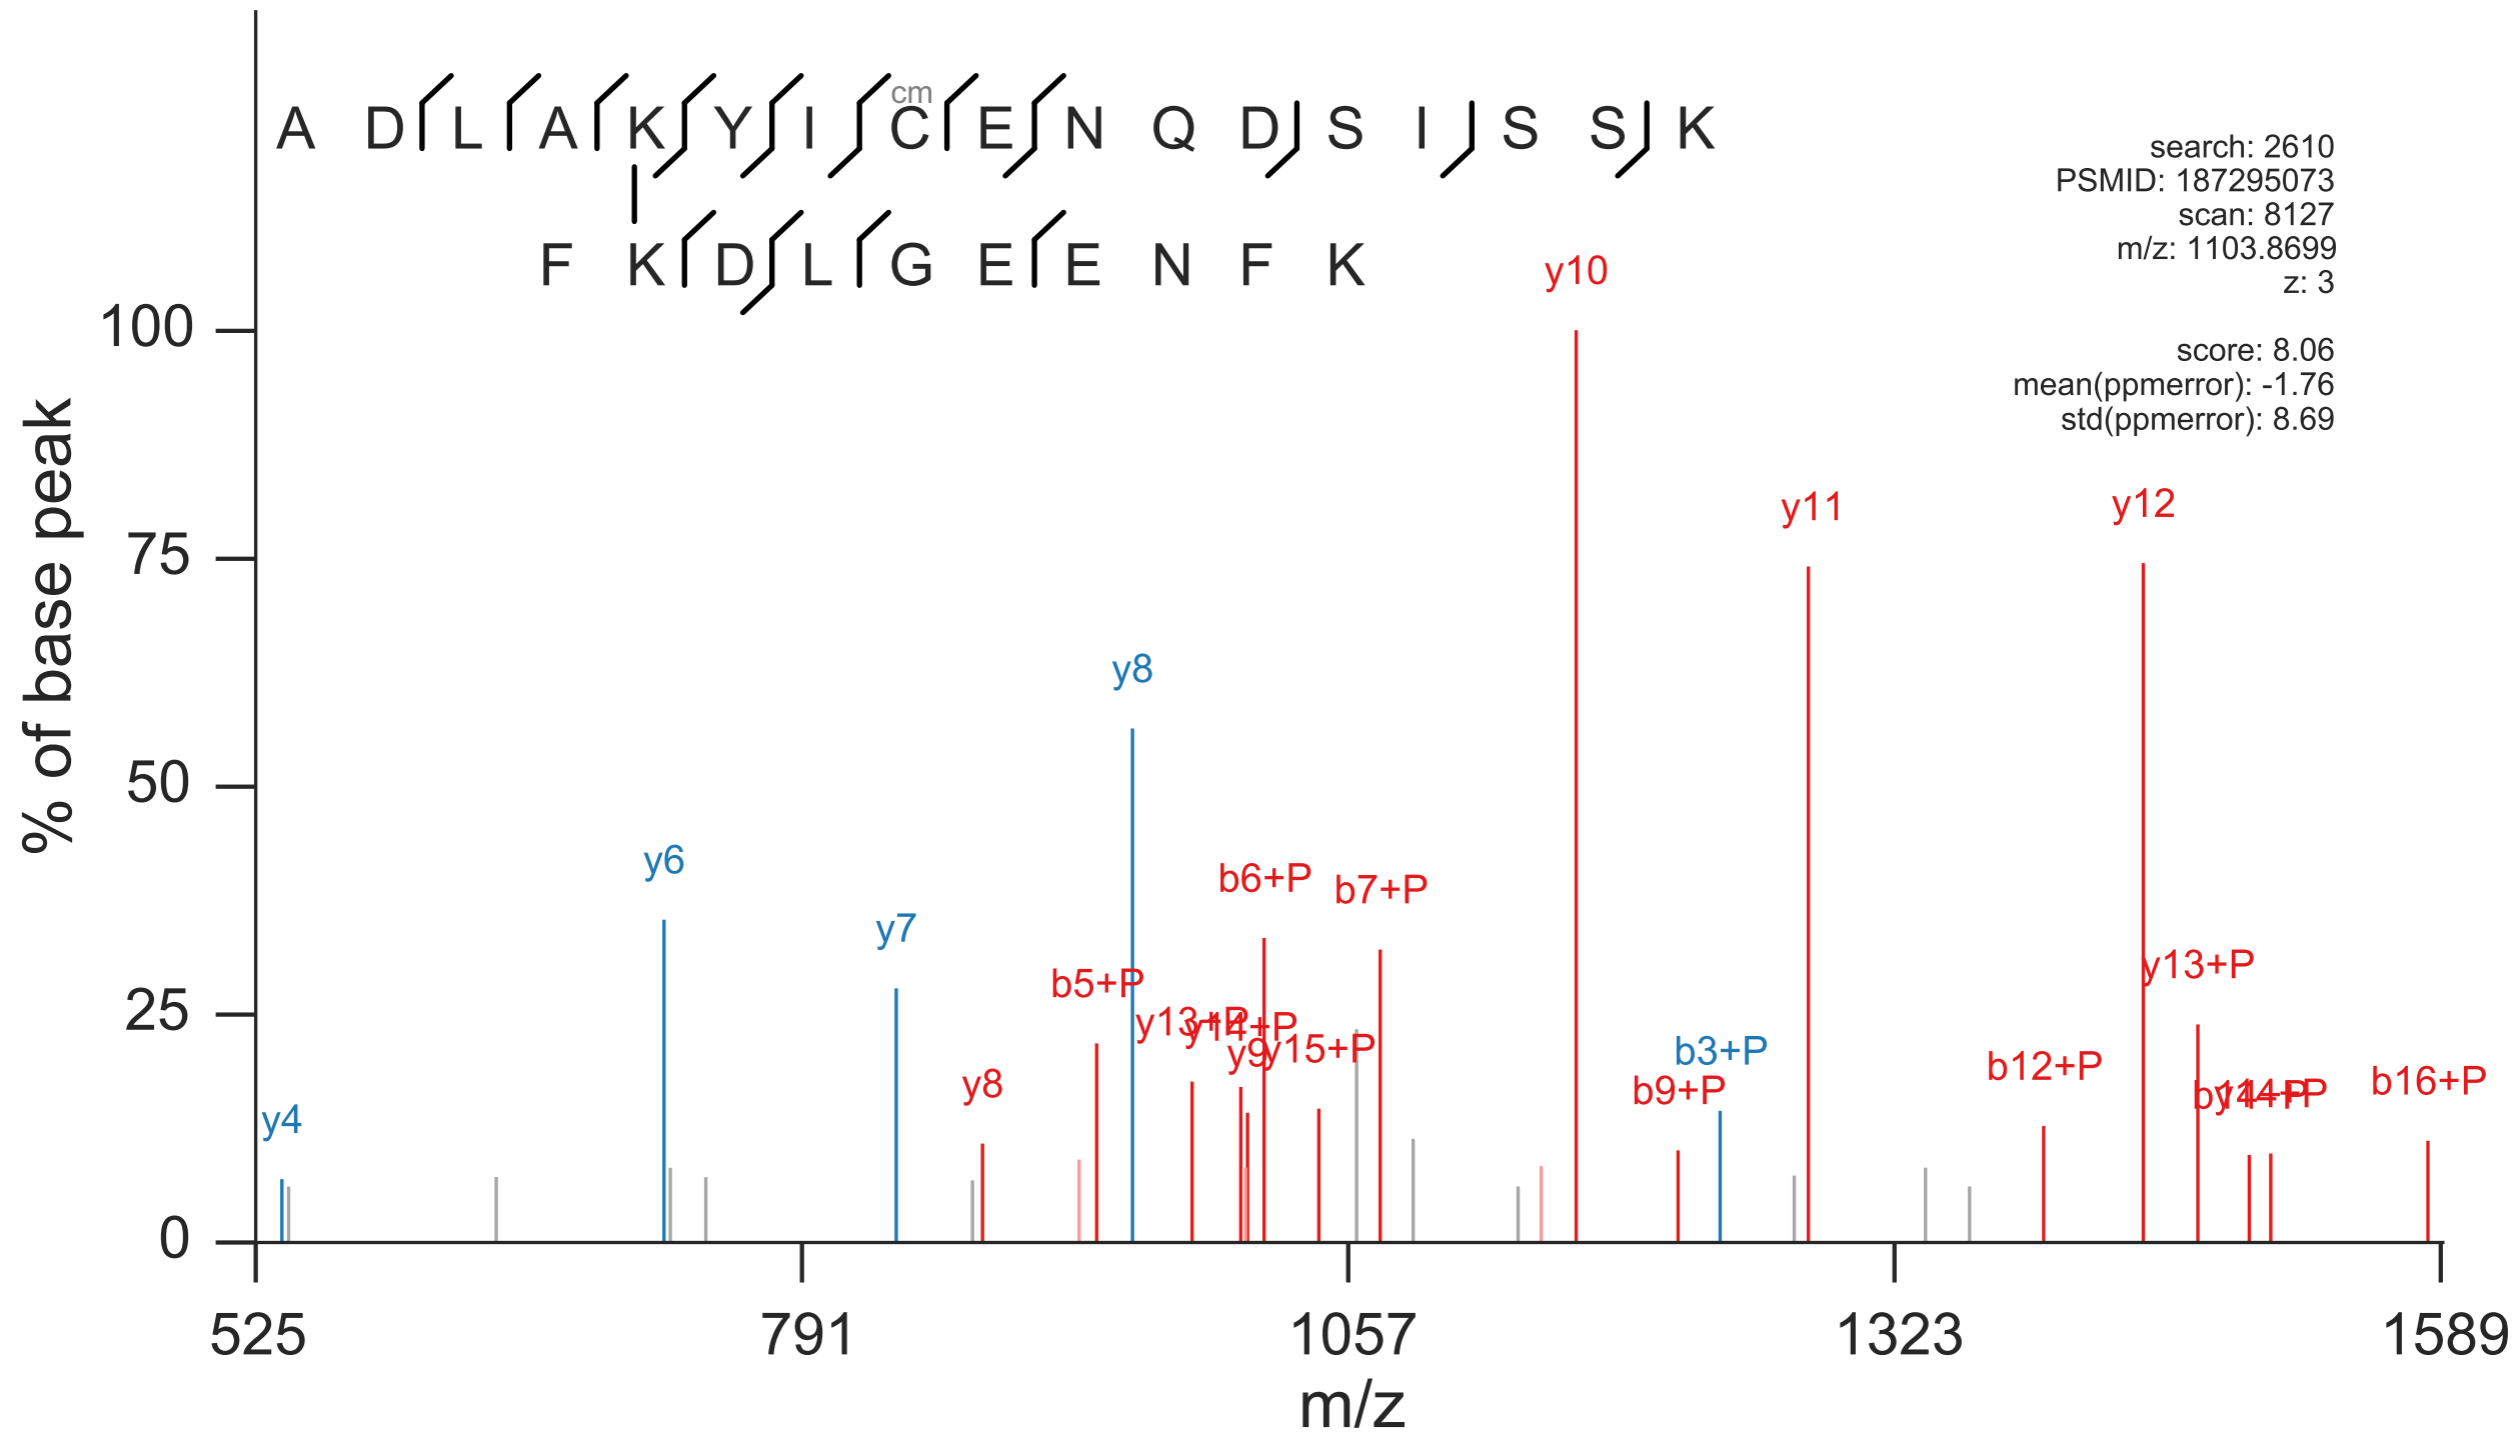



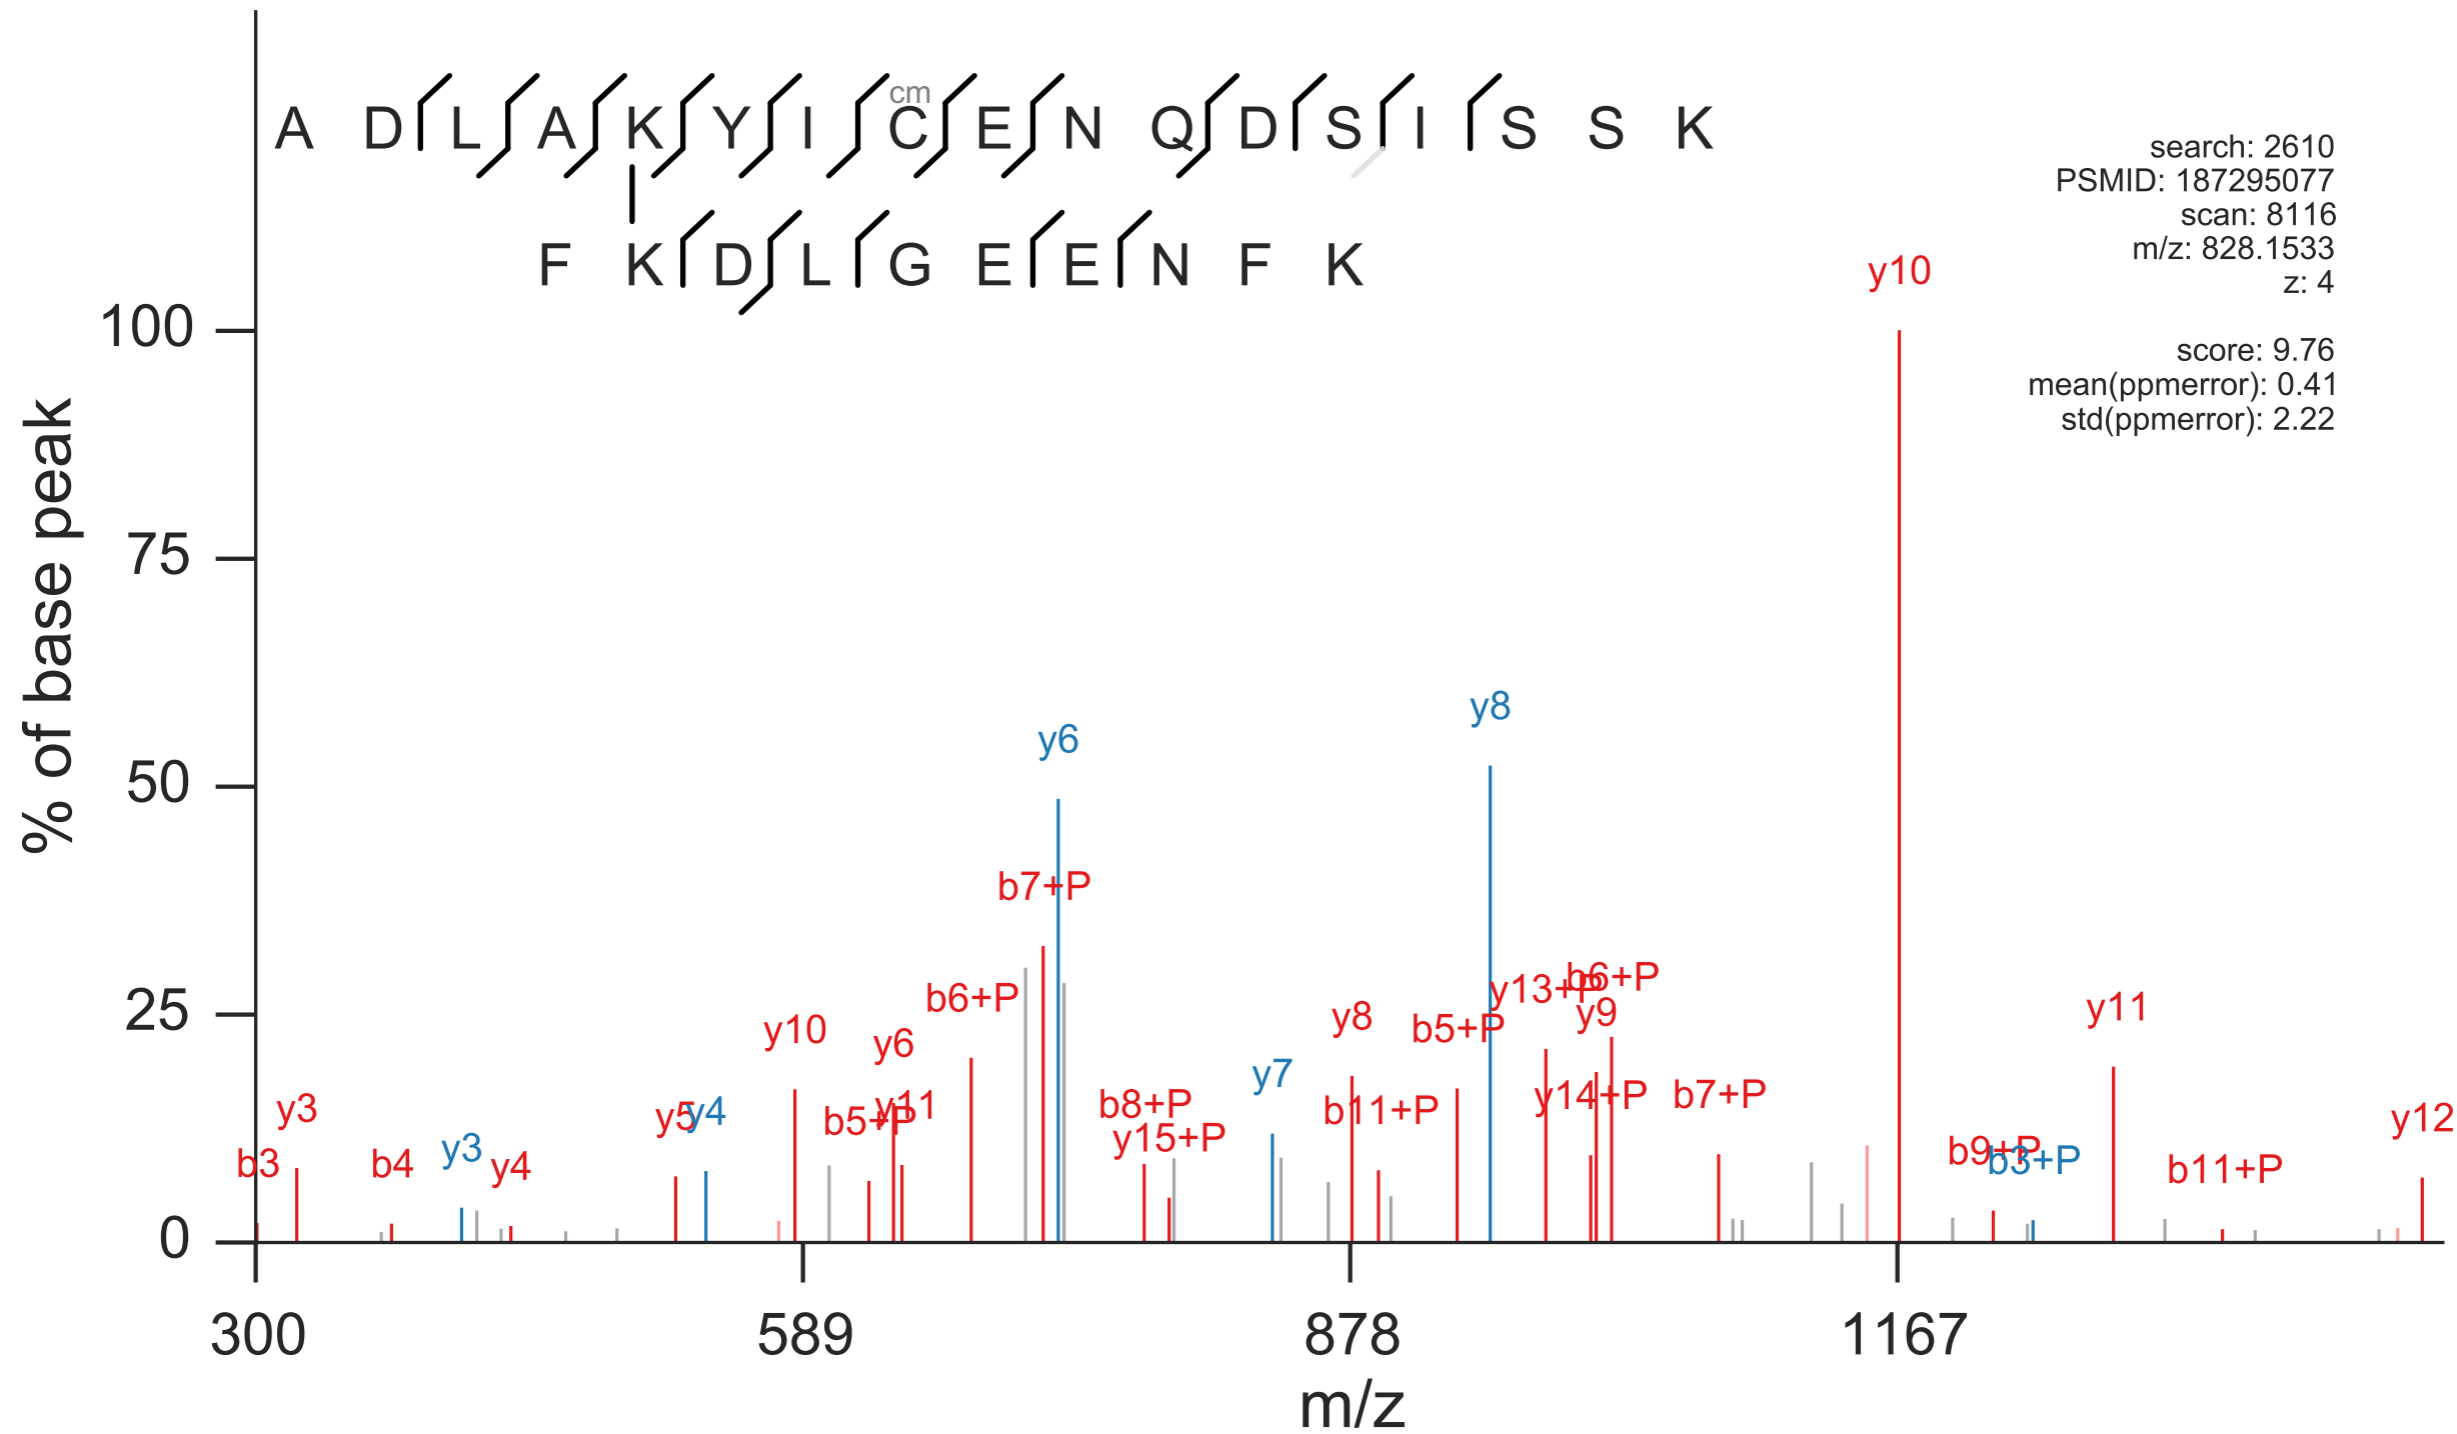

Q N C<sup>cm</sup> E L F E Q L G E Y K F Q N A L L V R  
 A T K E Q L K y12+P

search: 2610  
 PSMID: 187296089  
 scan: 10561  
 m/z: 890.214  
 z: 4  
 score: 8.10  
 mean(ppmerror): 1.88  
 std(ppmerror): 3.06

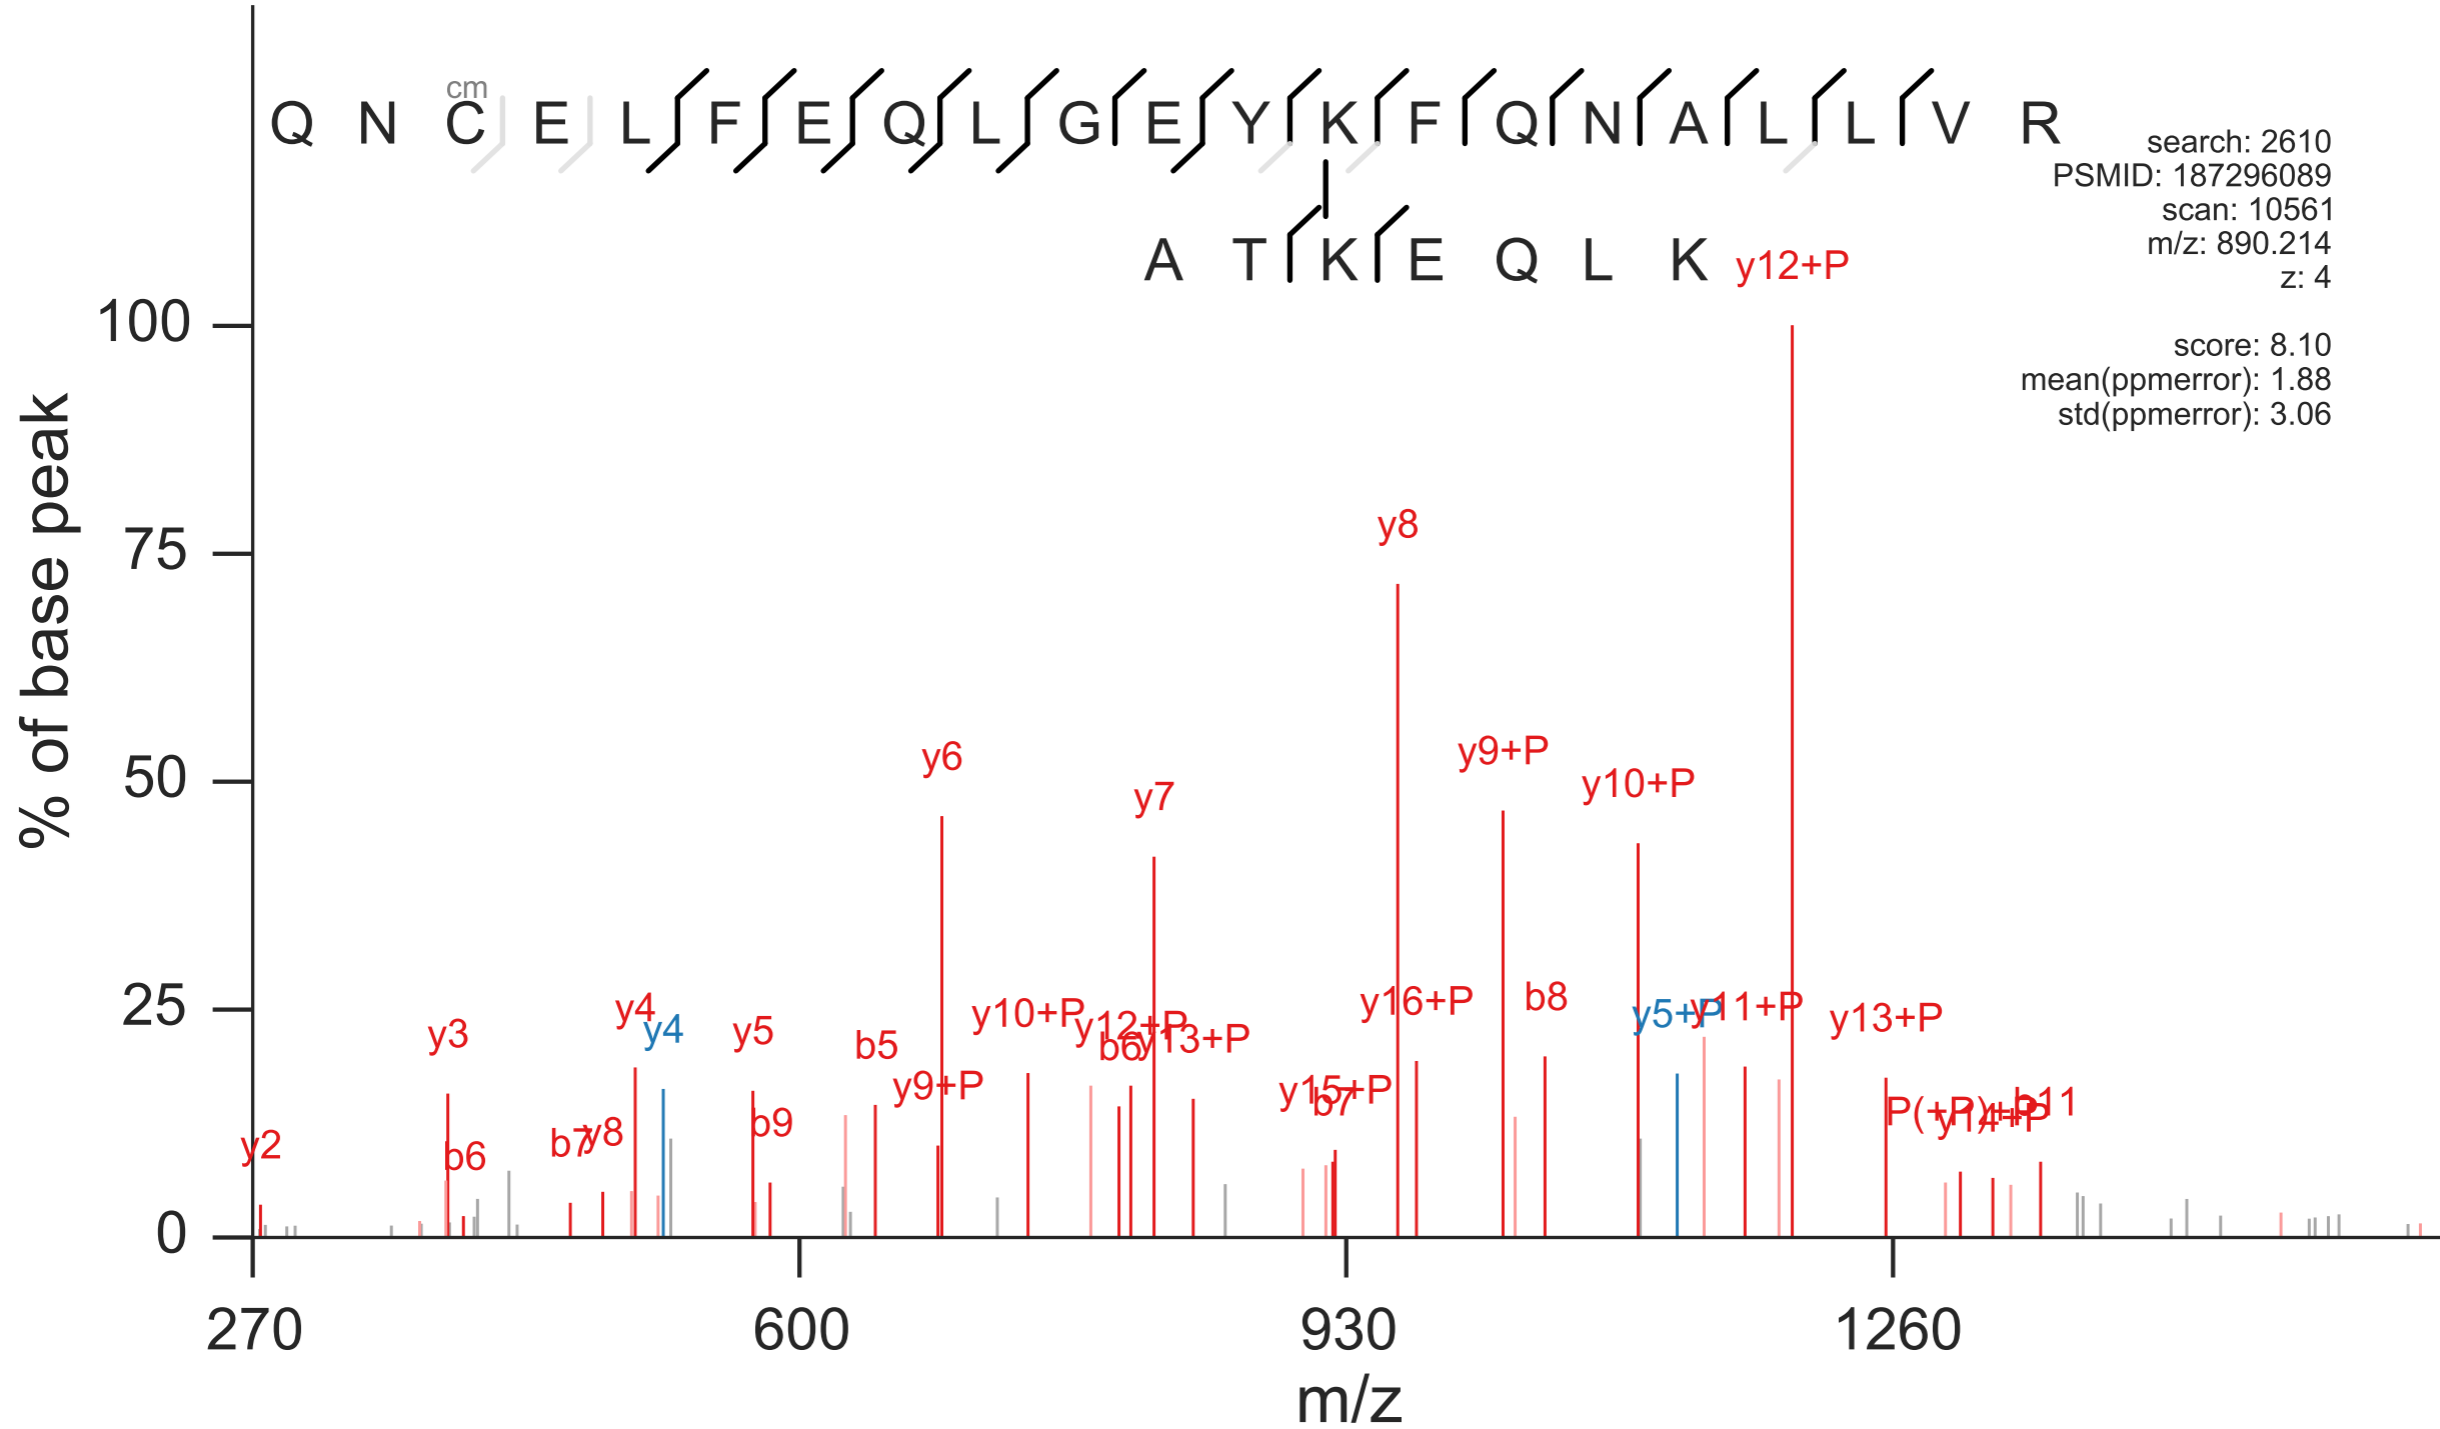

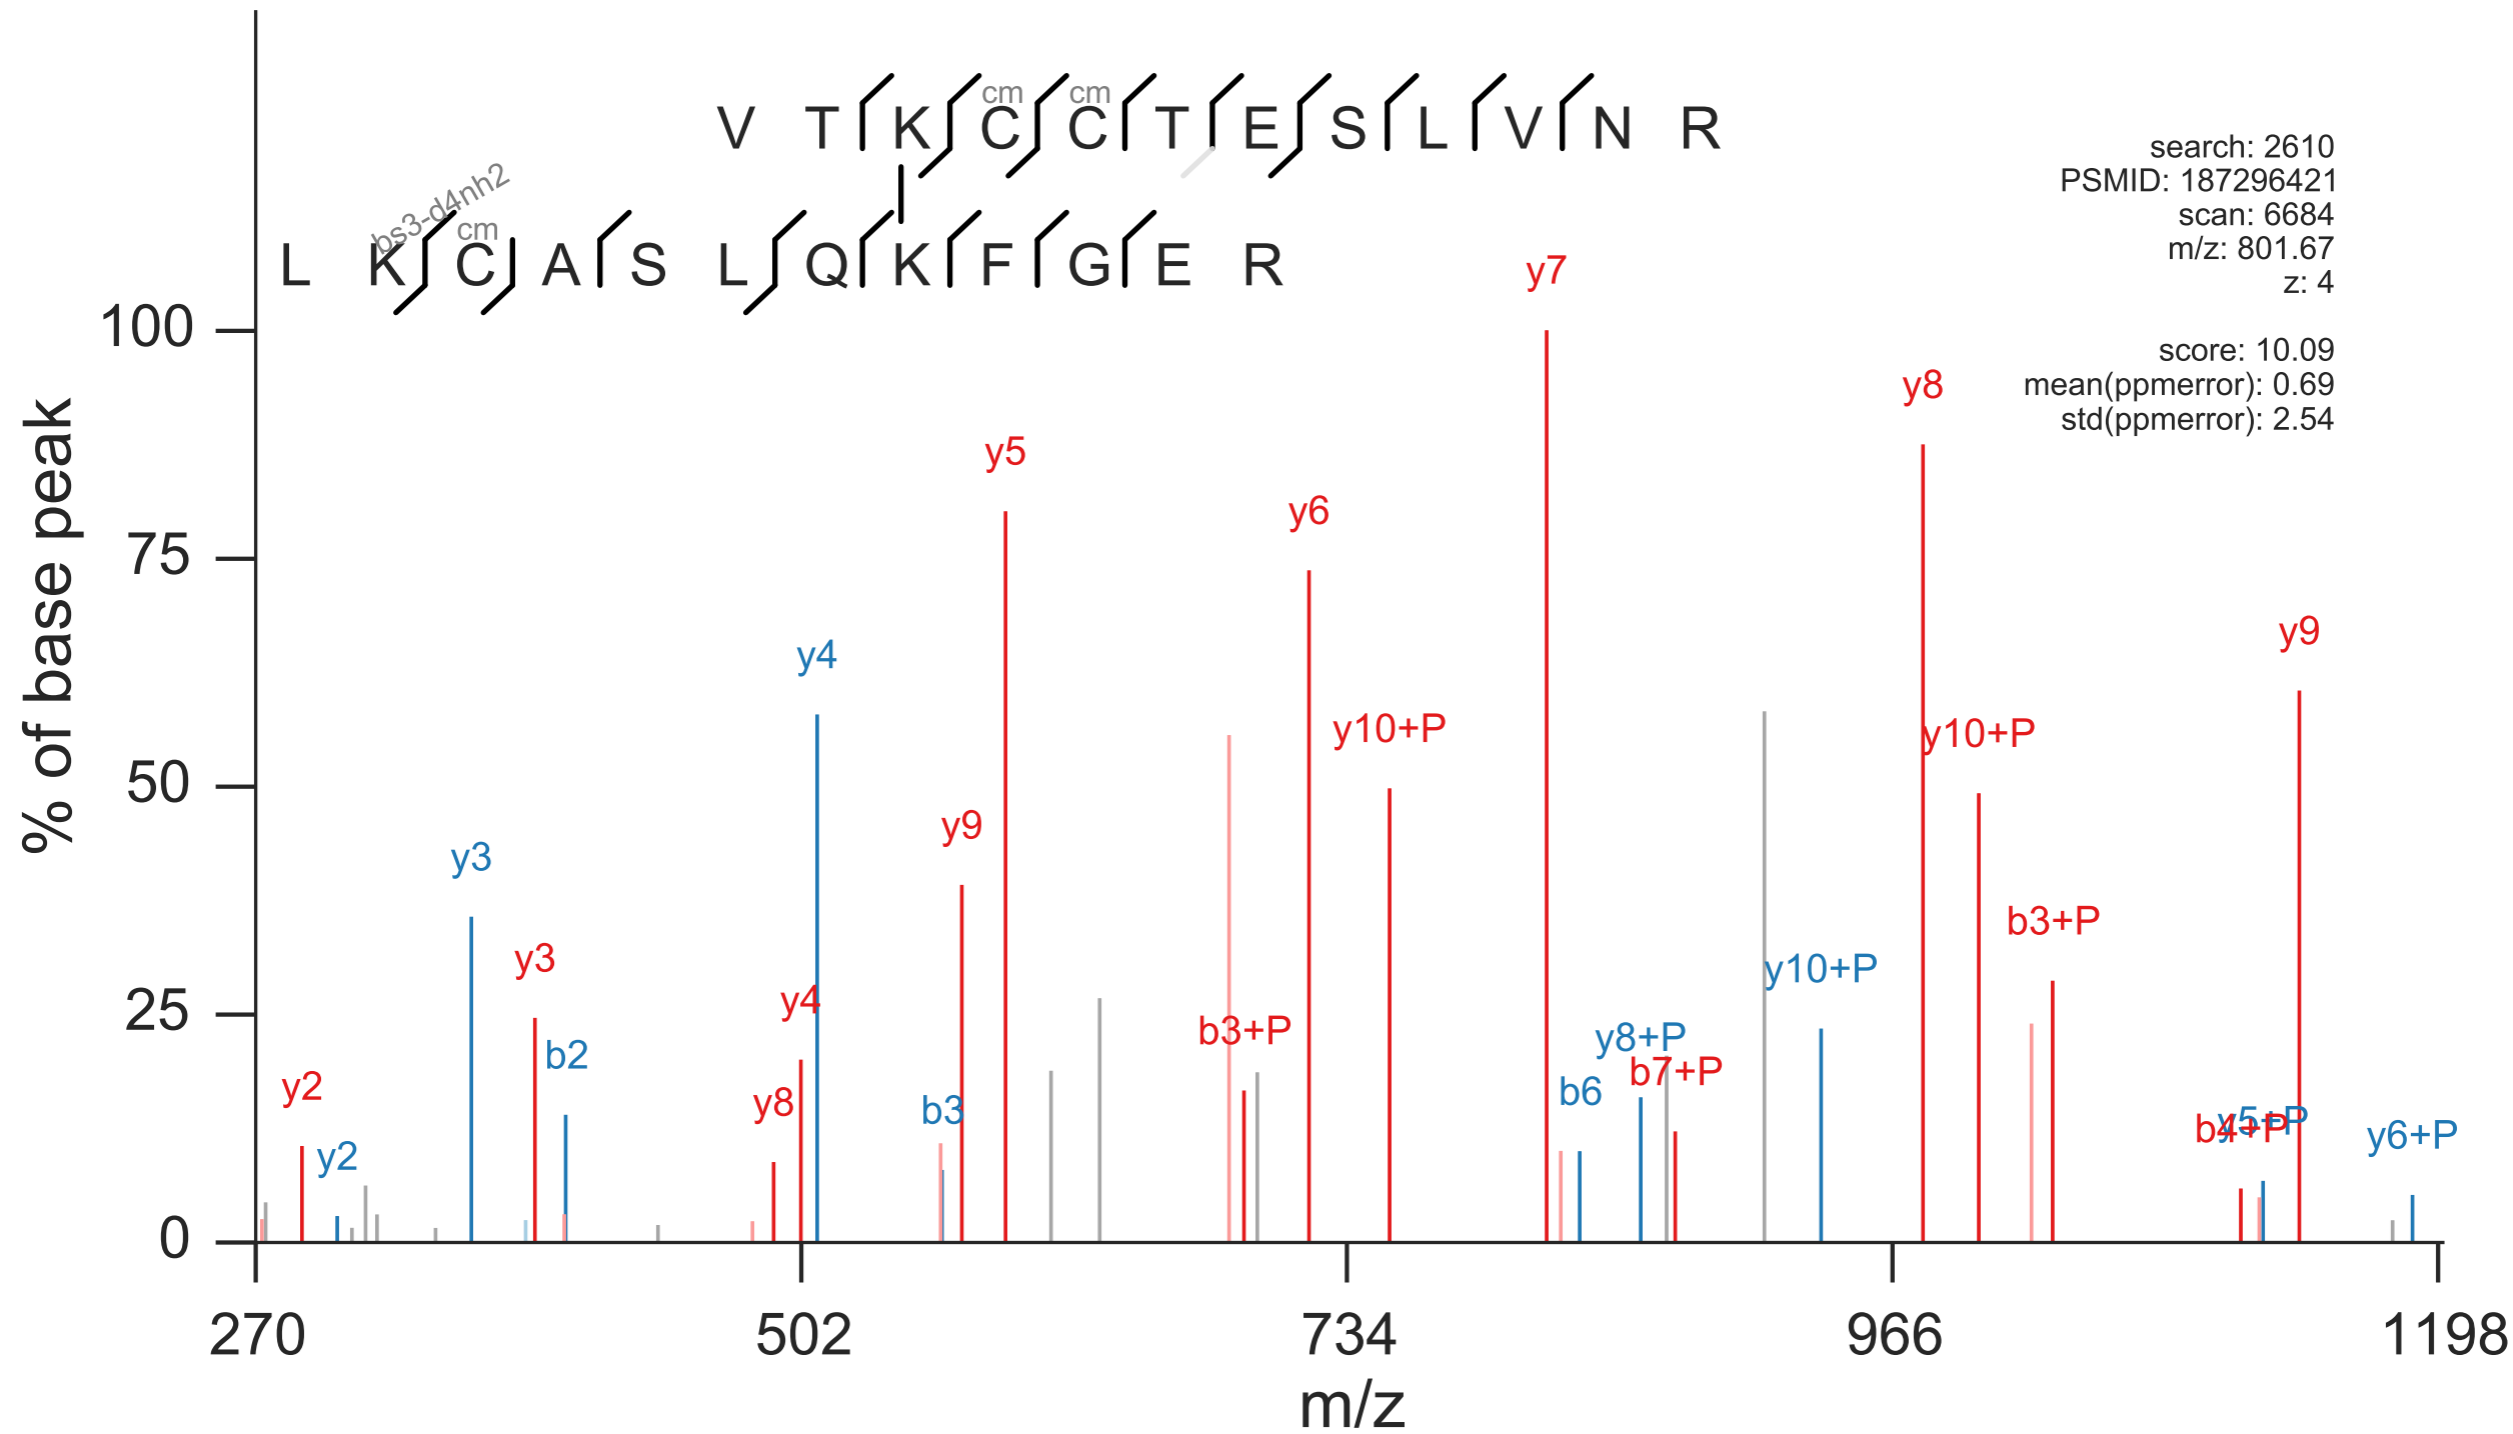

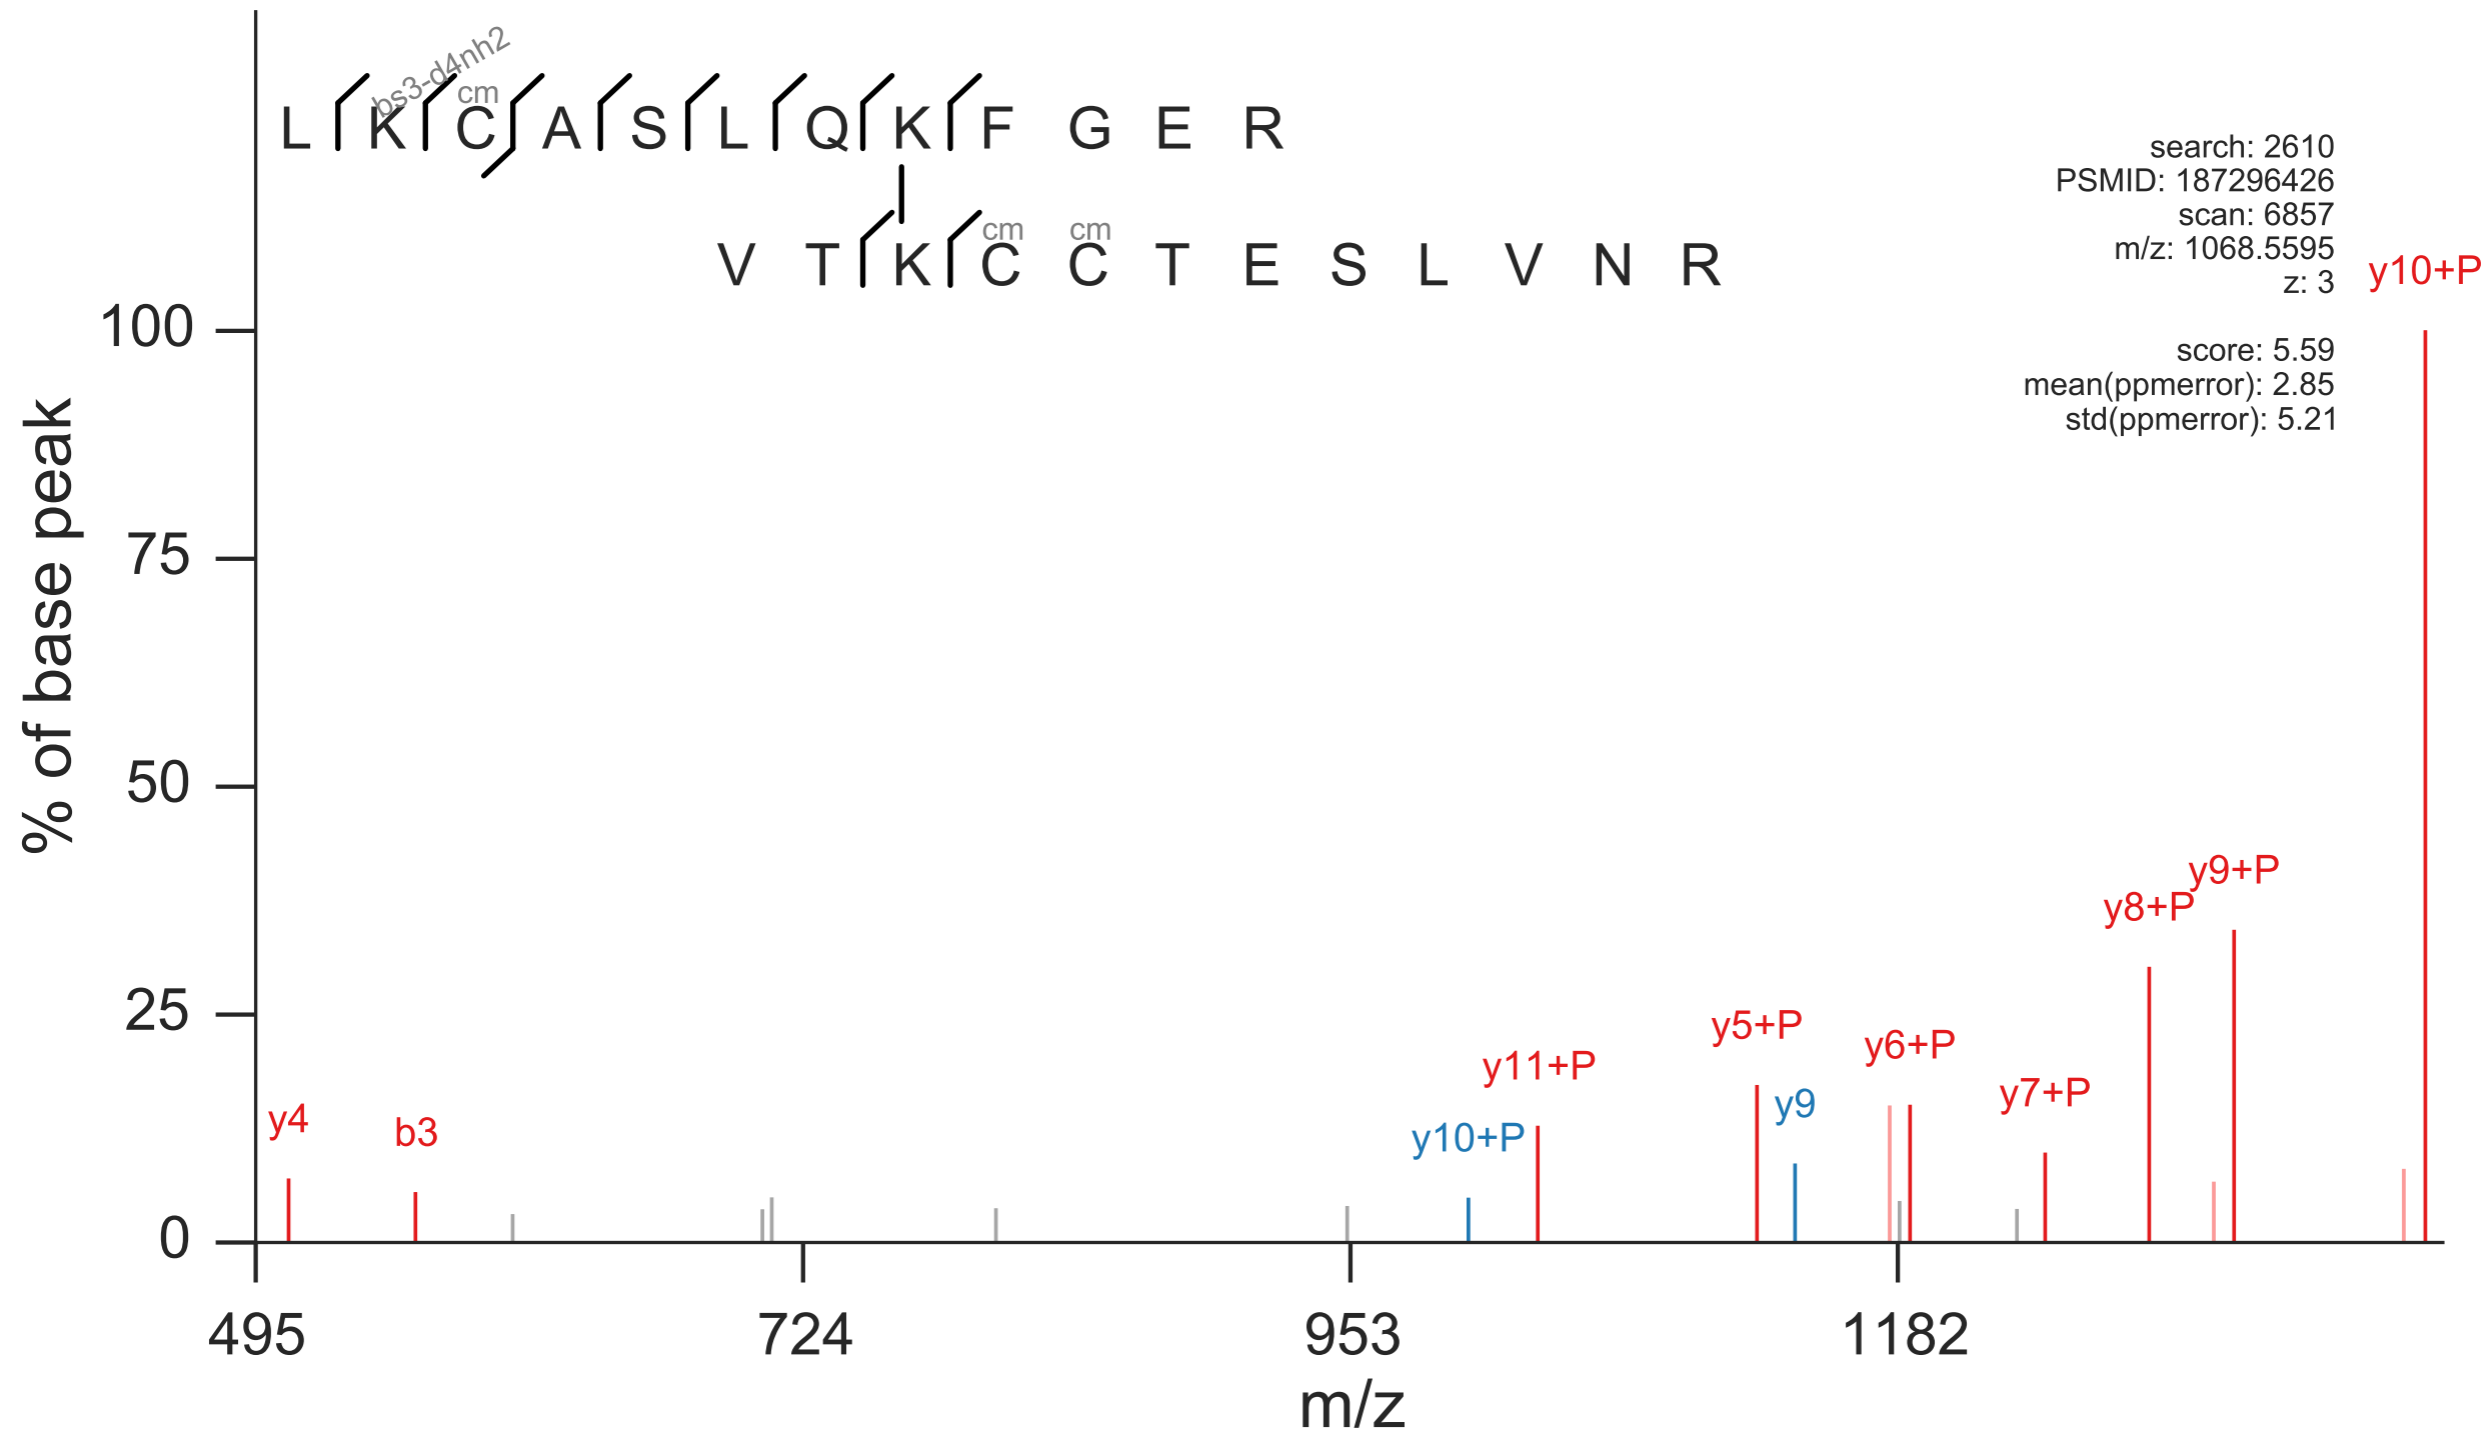

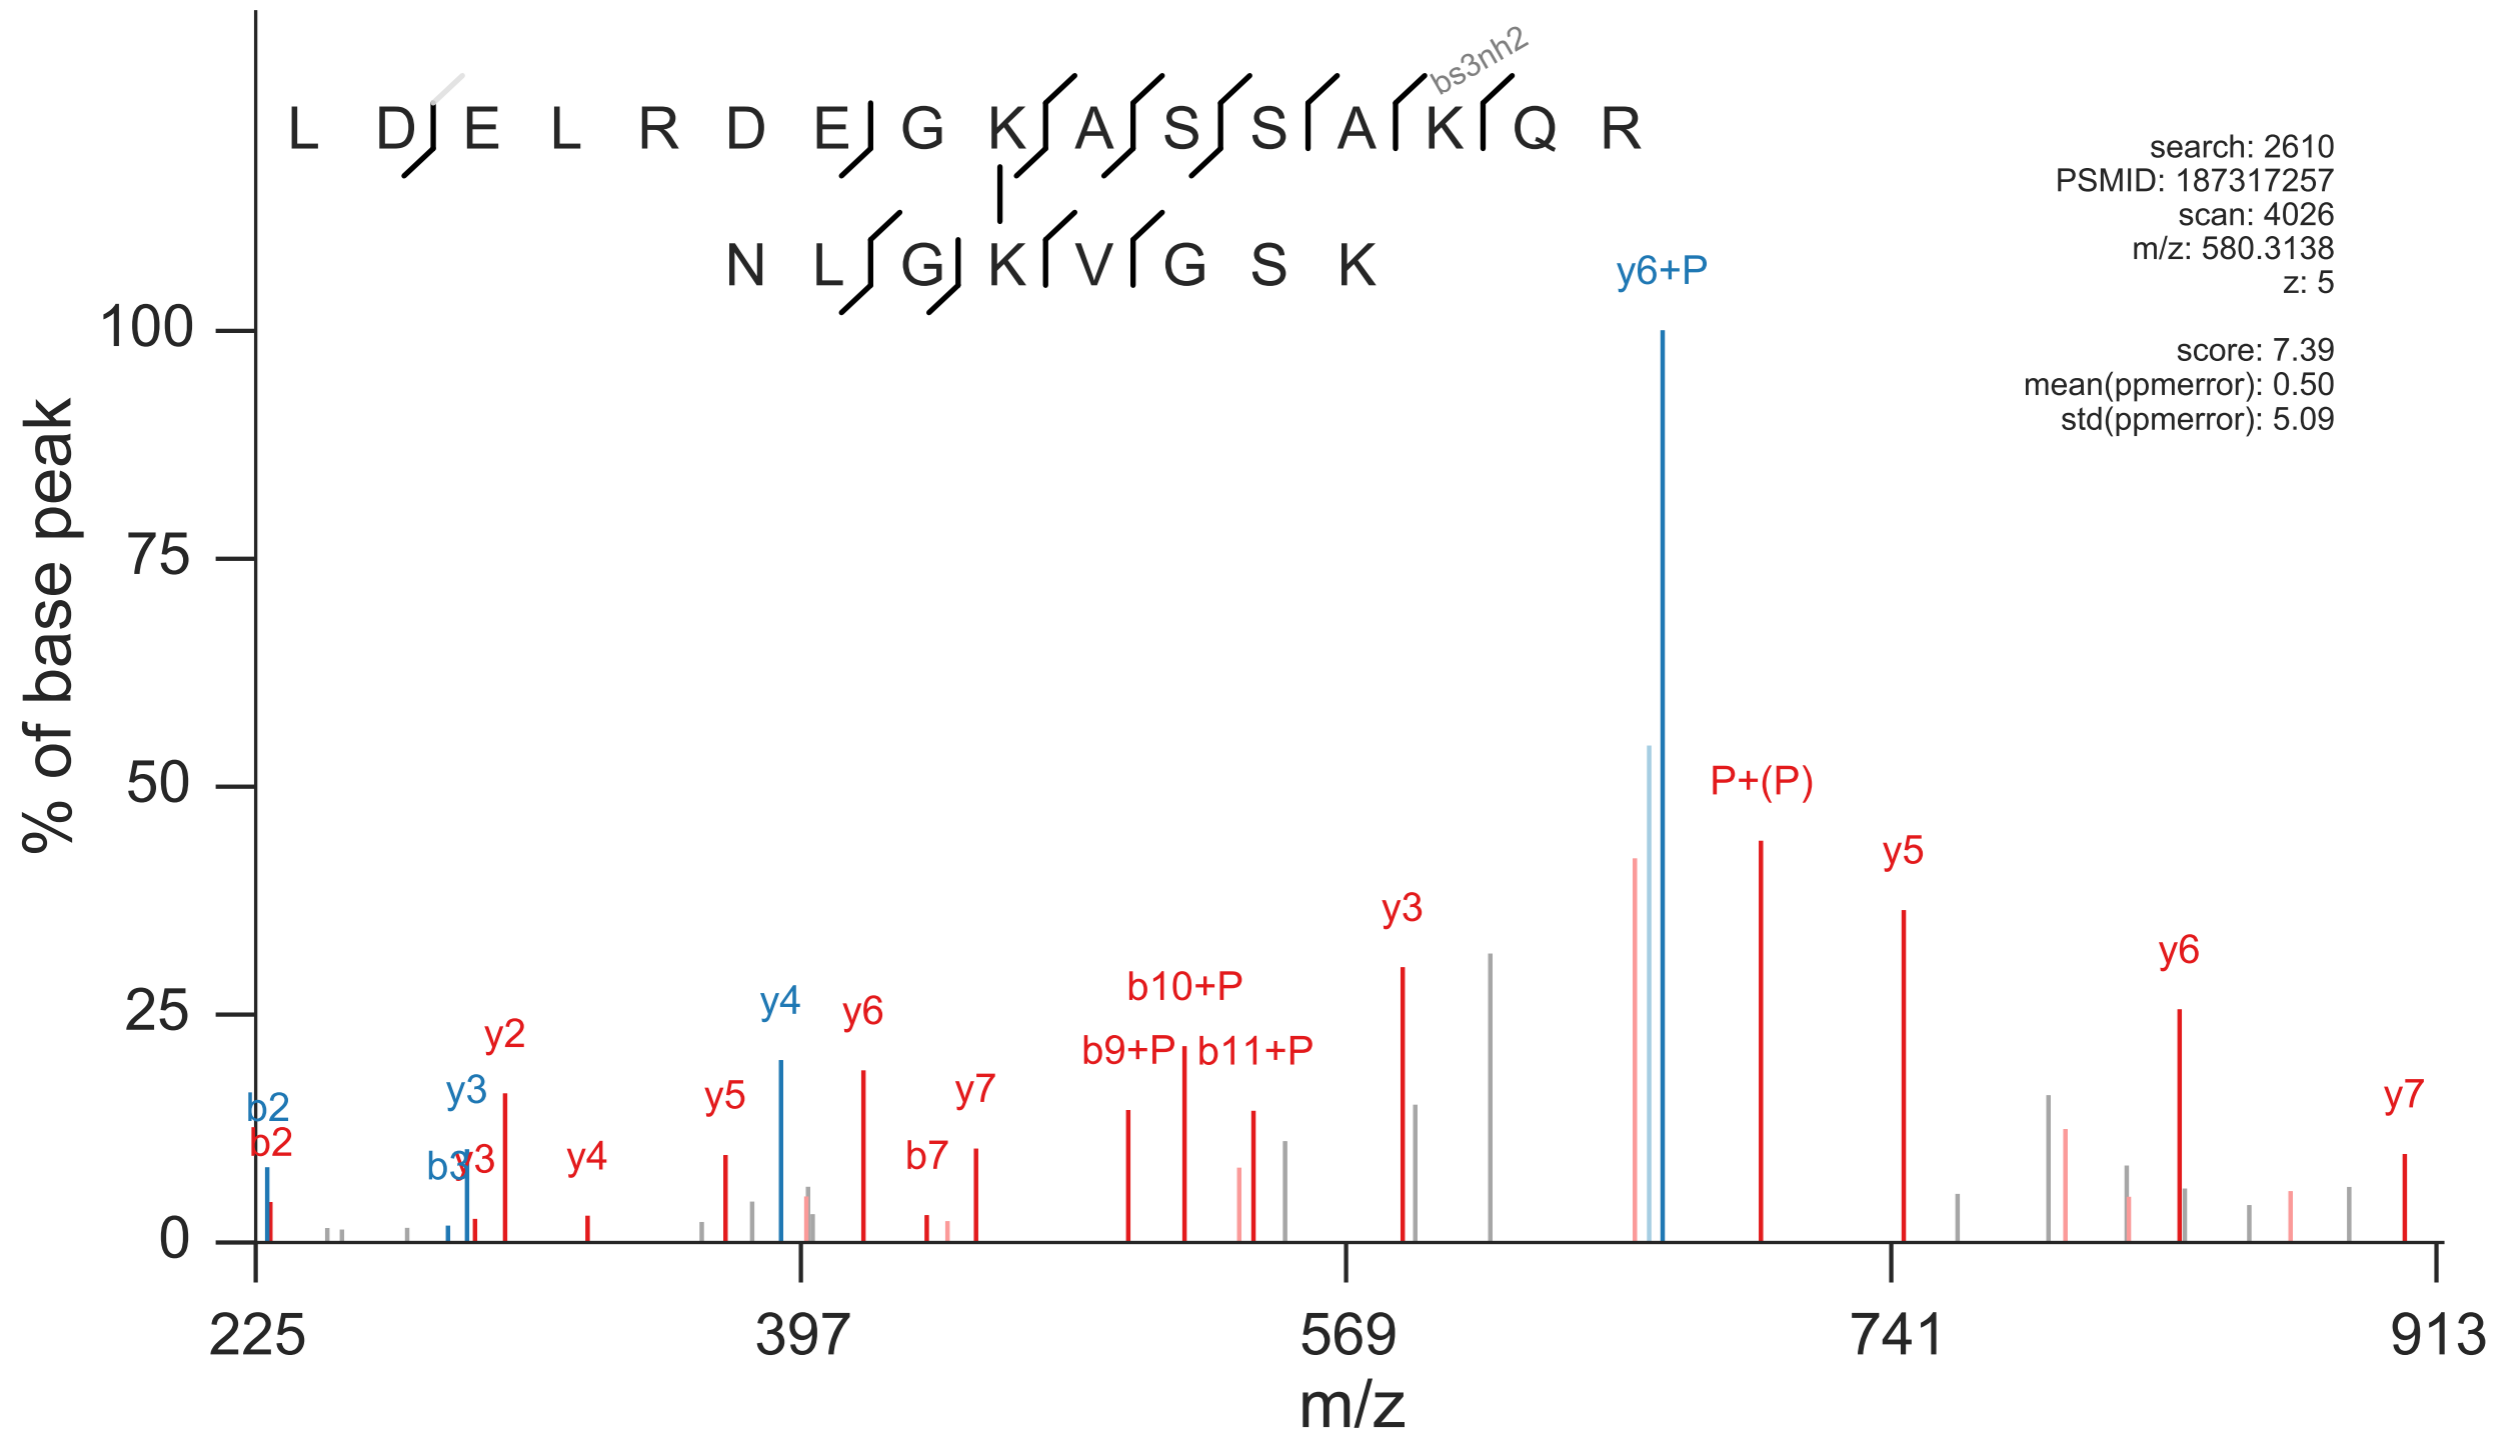

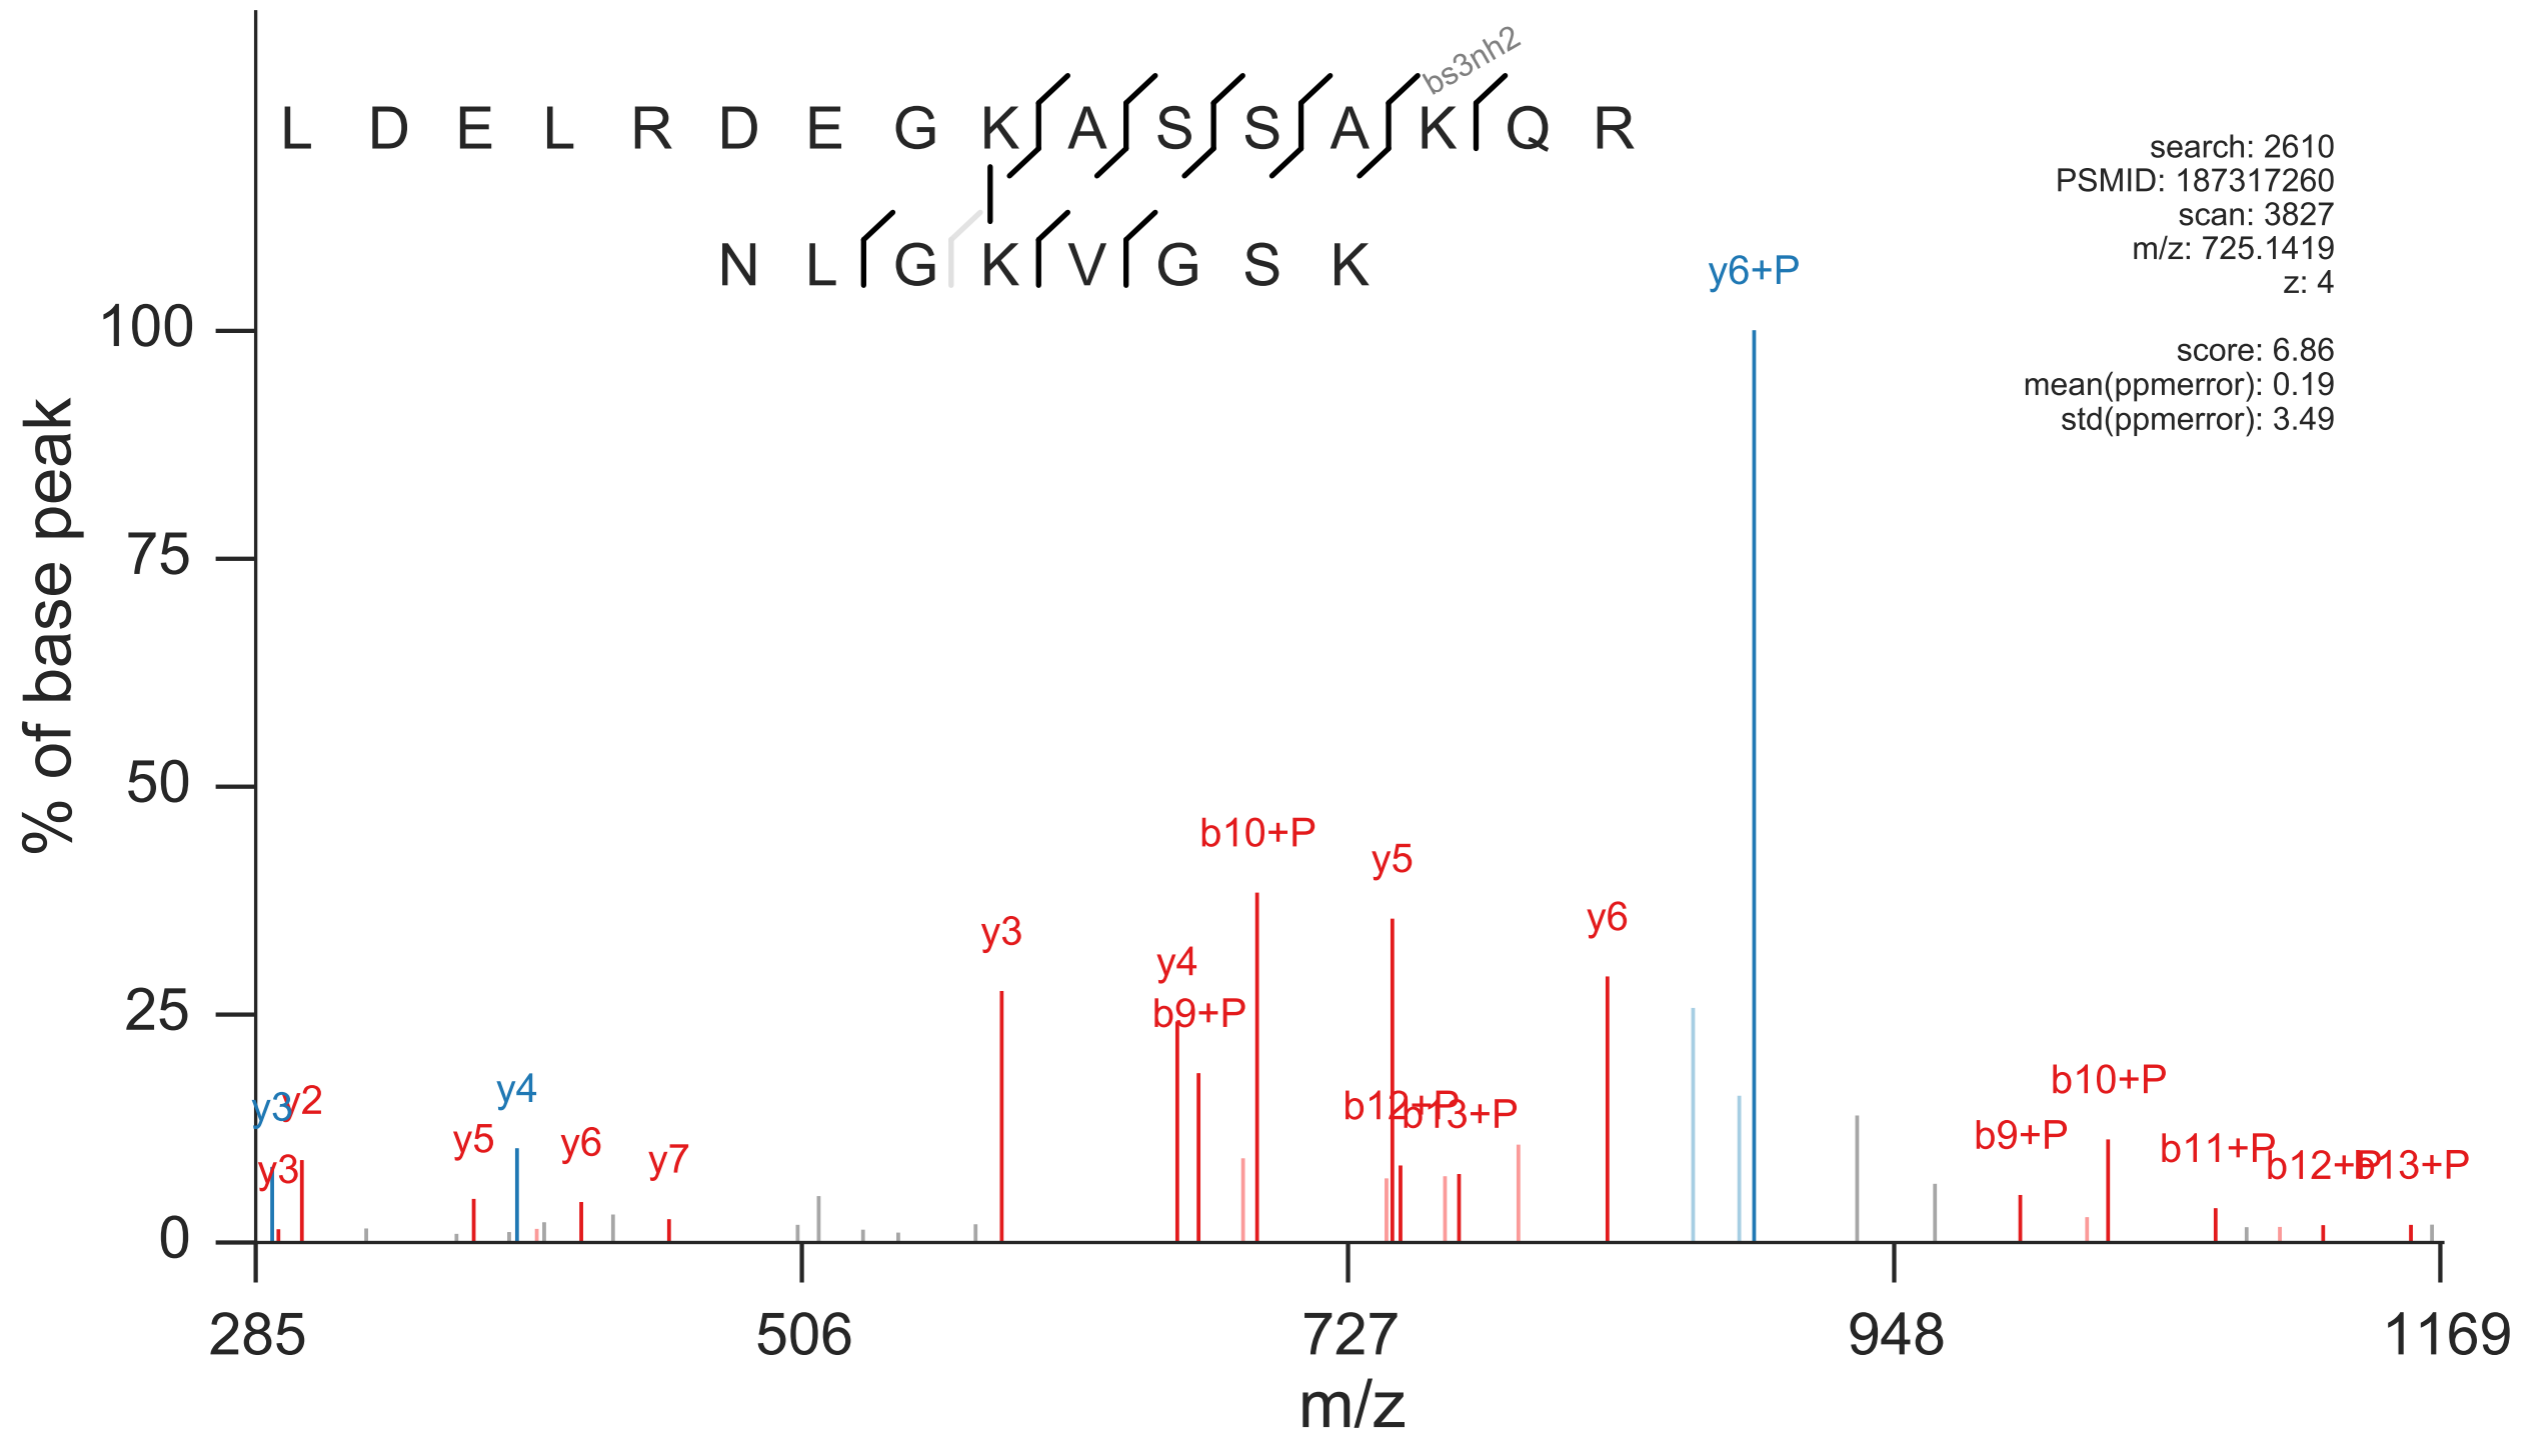

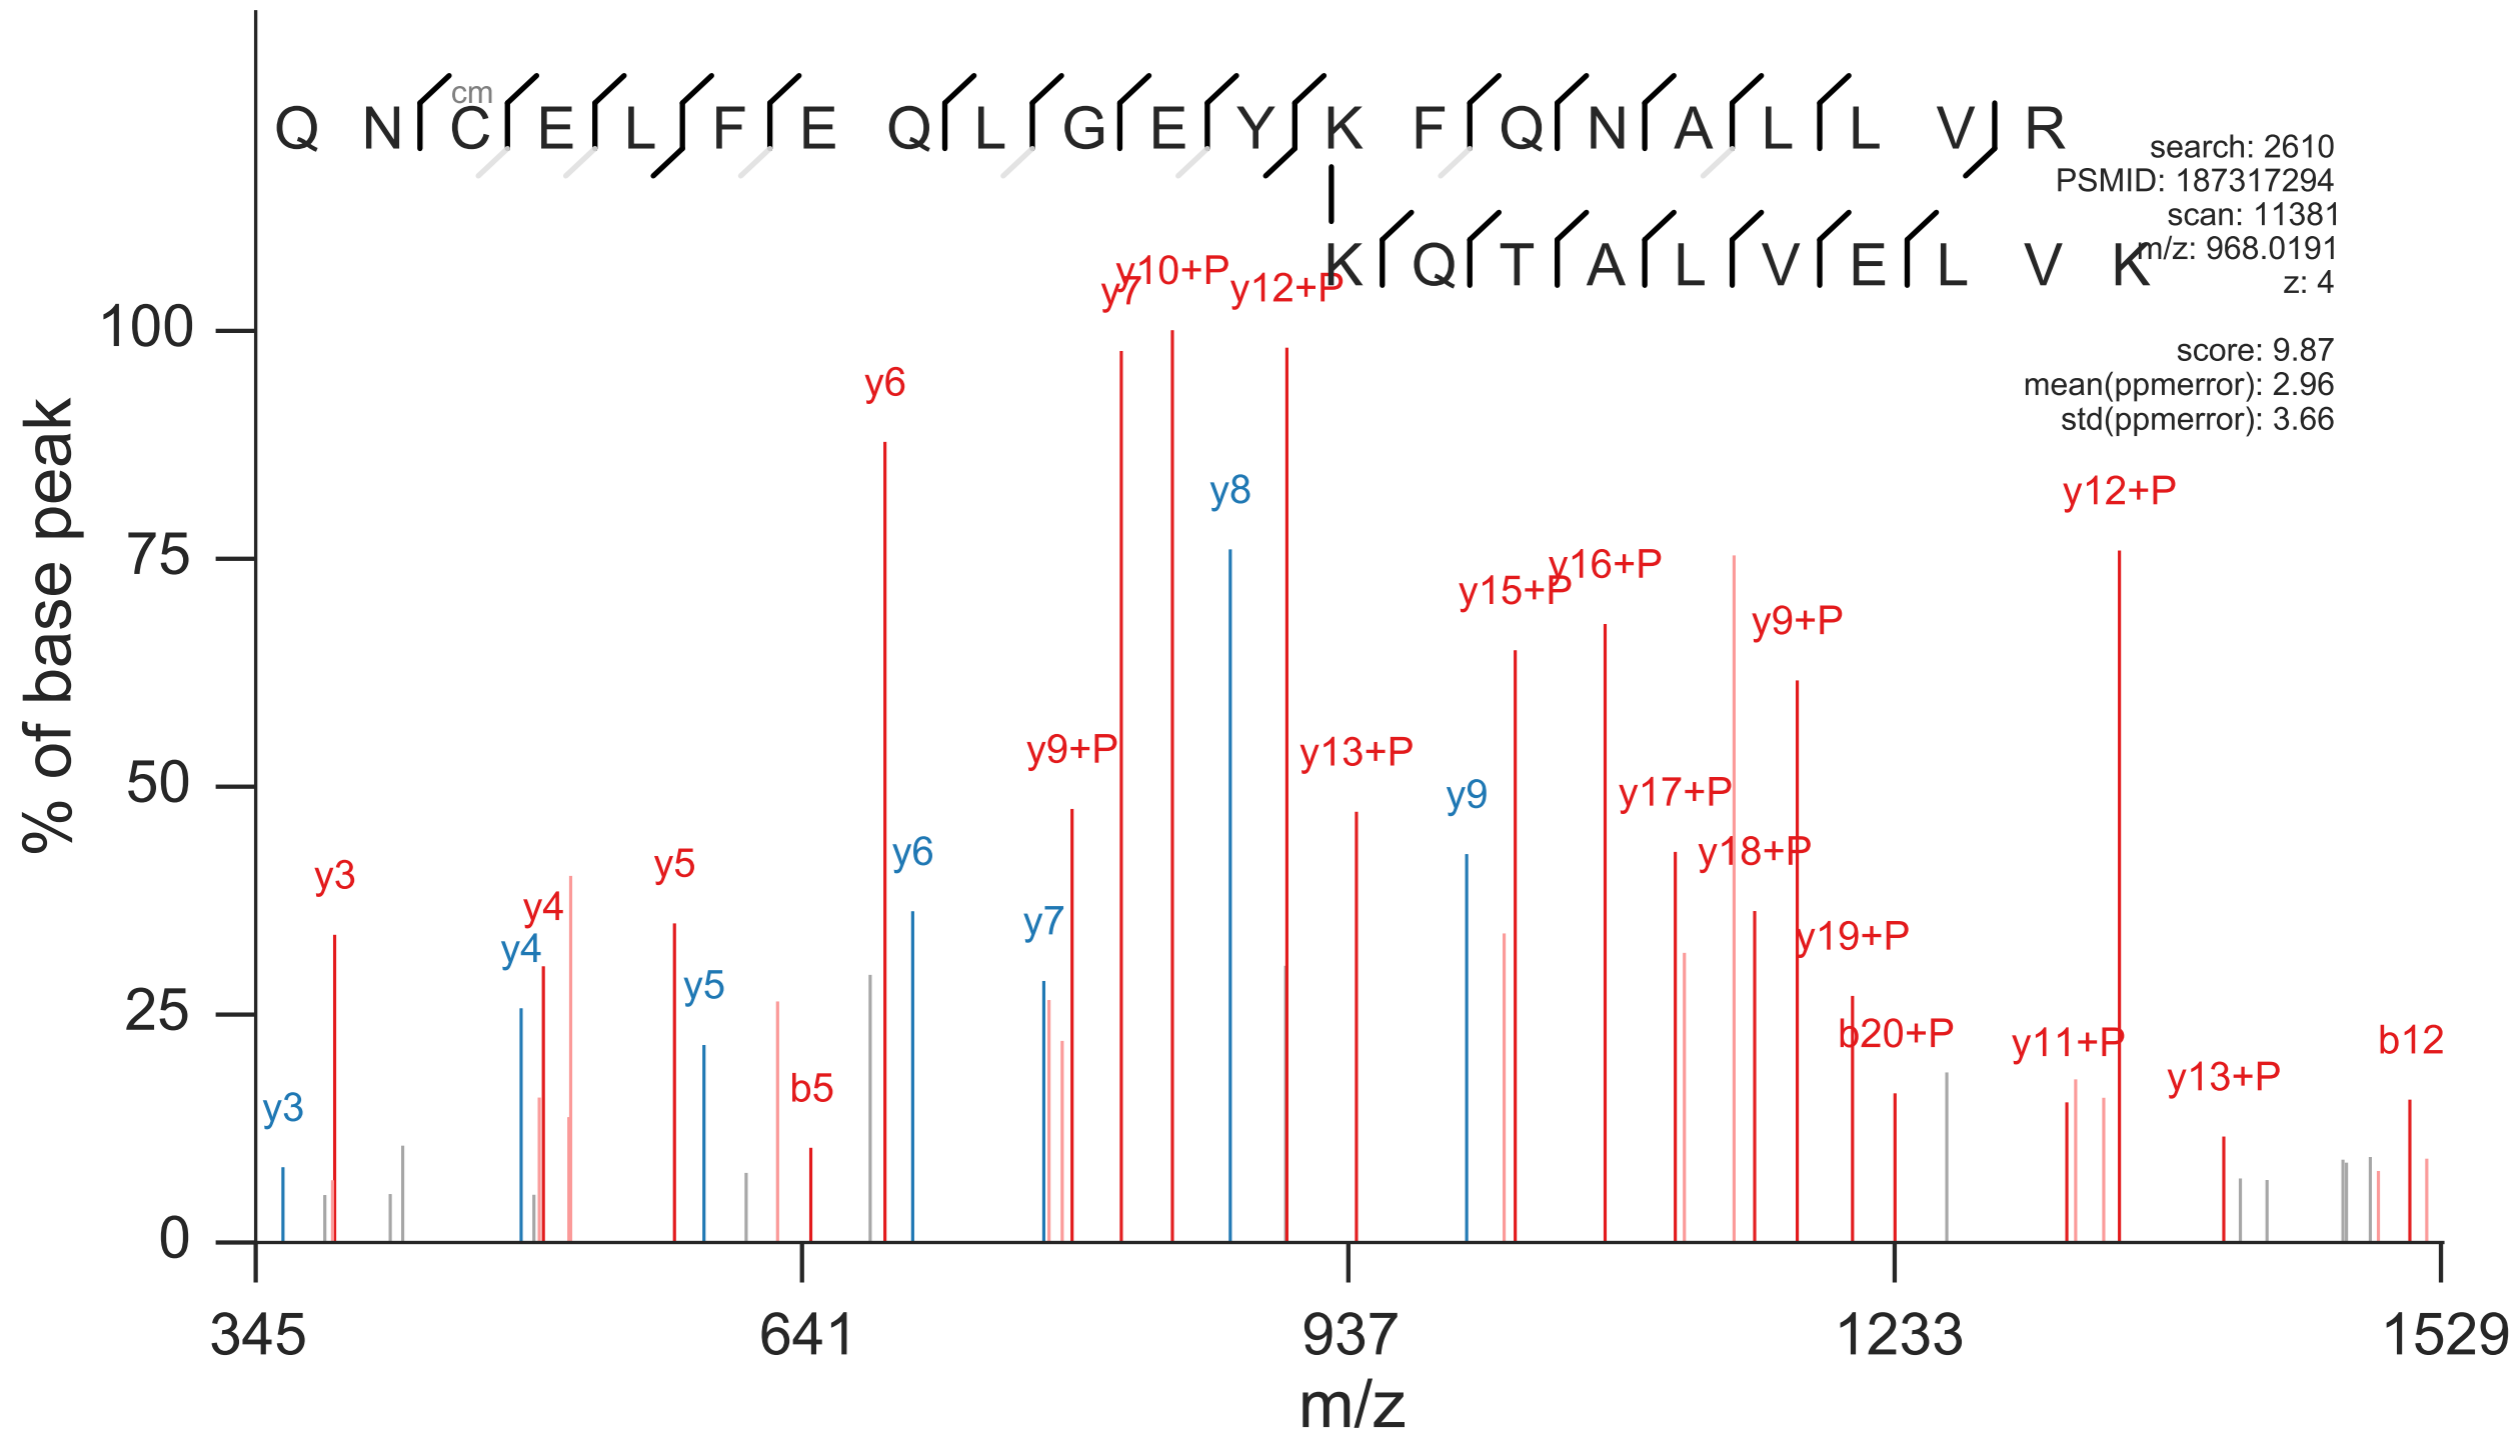

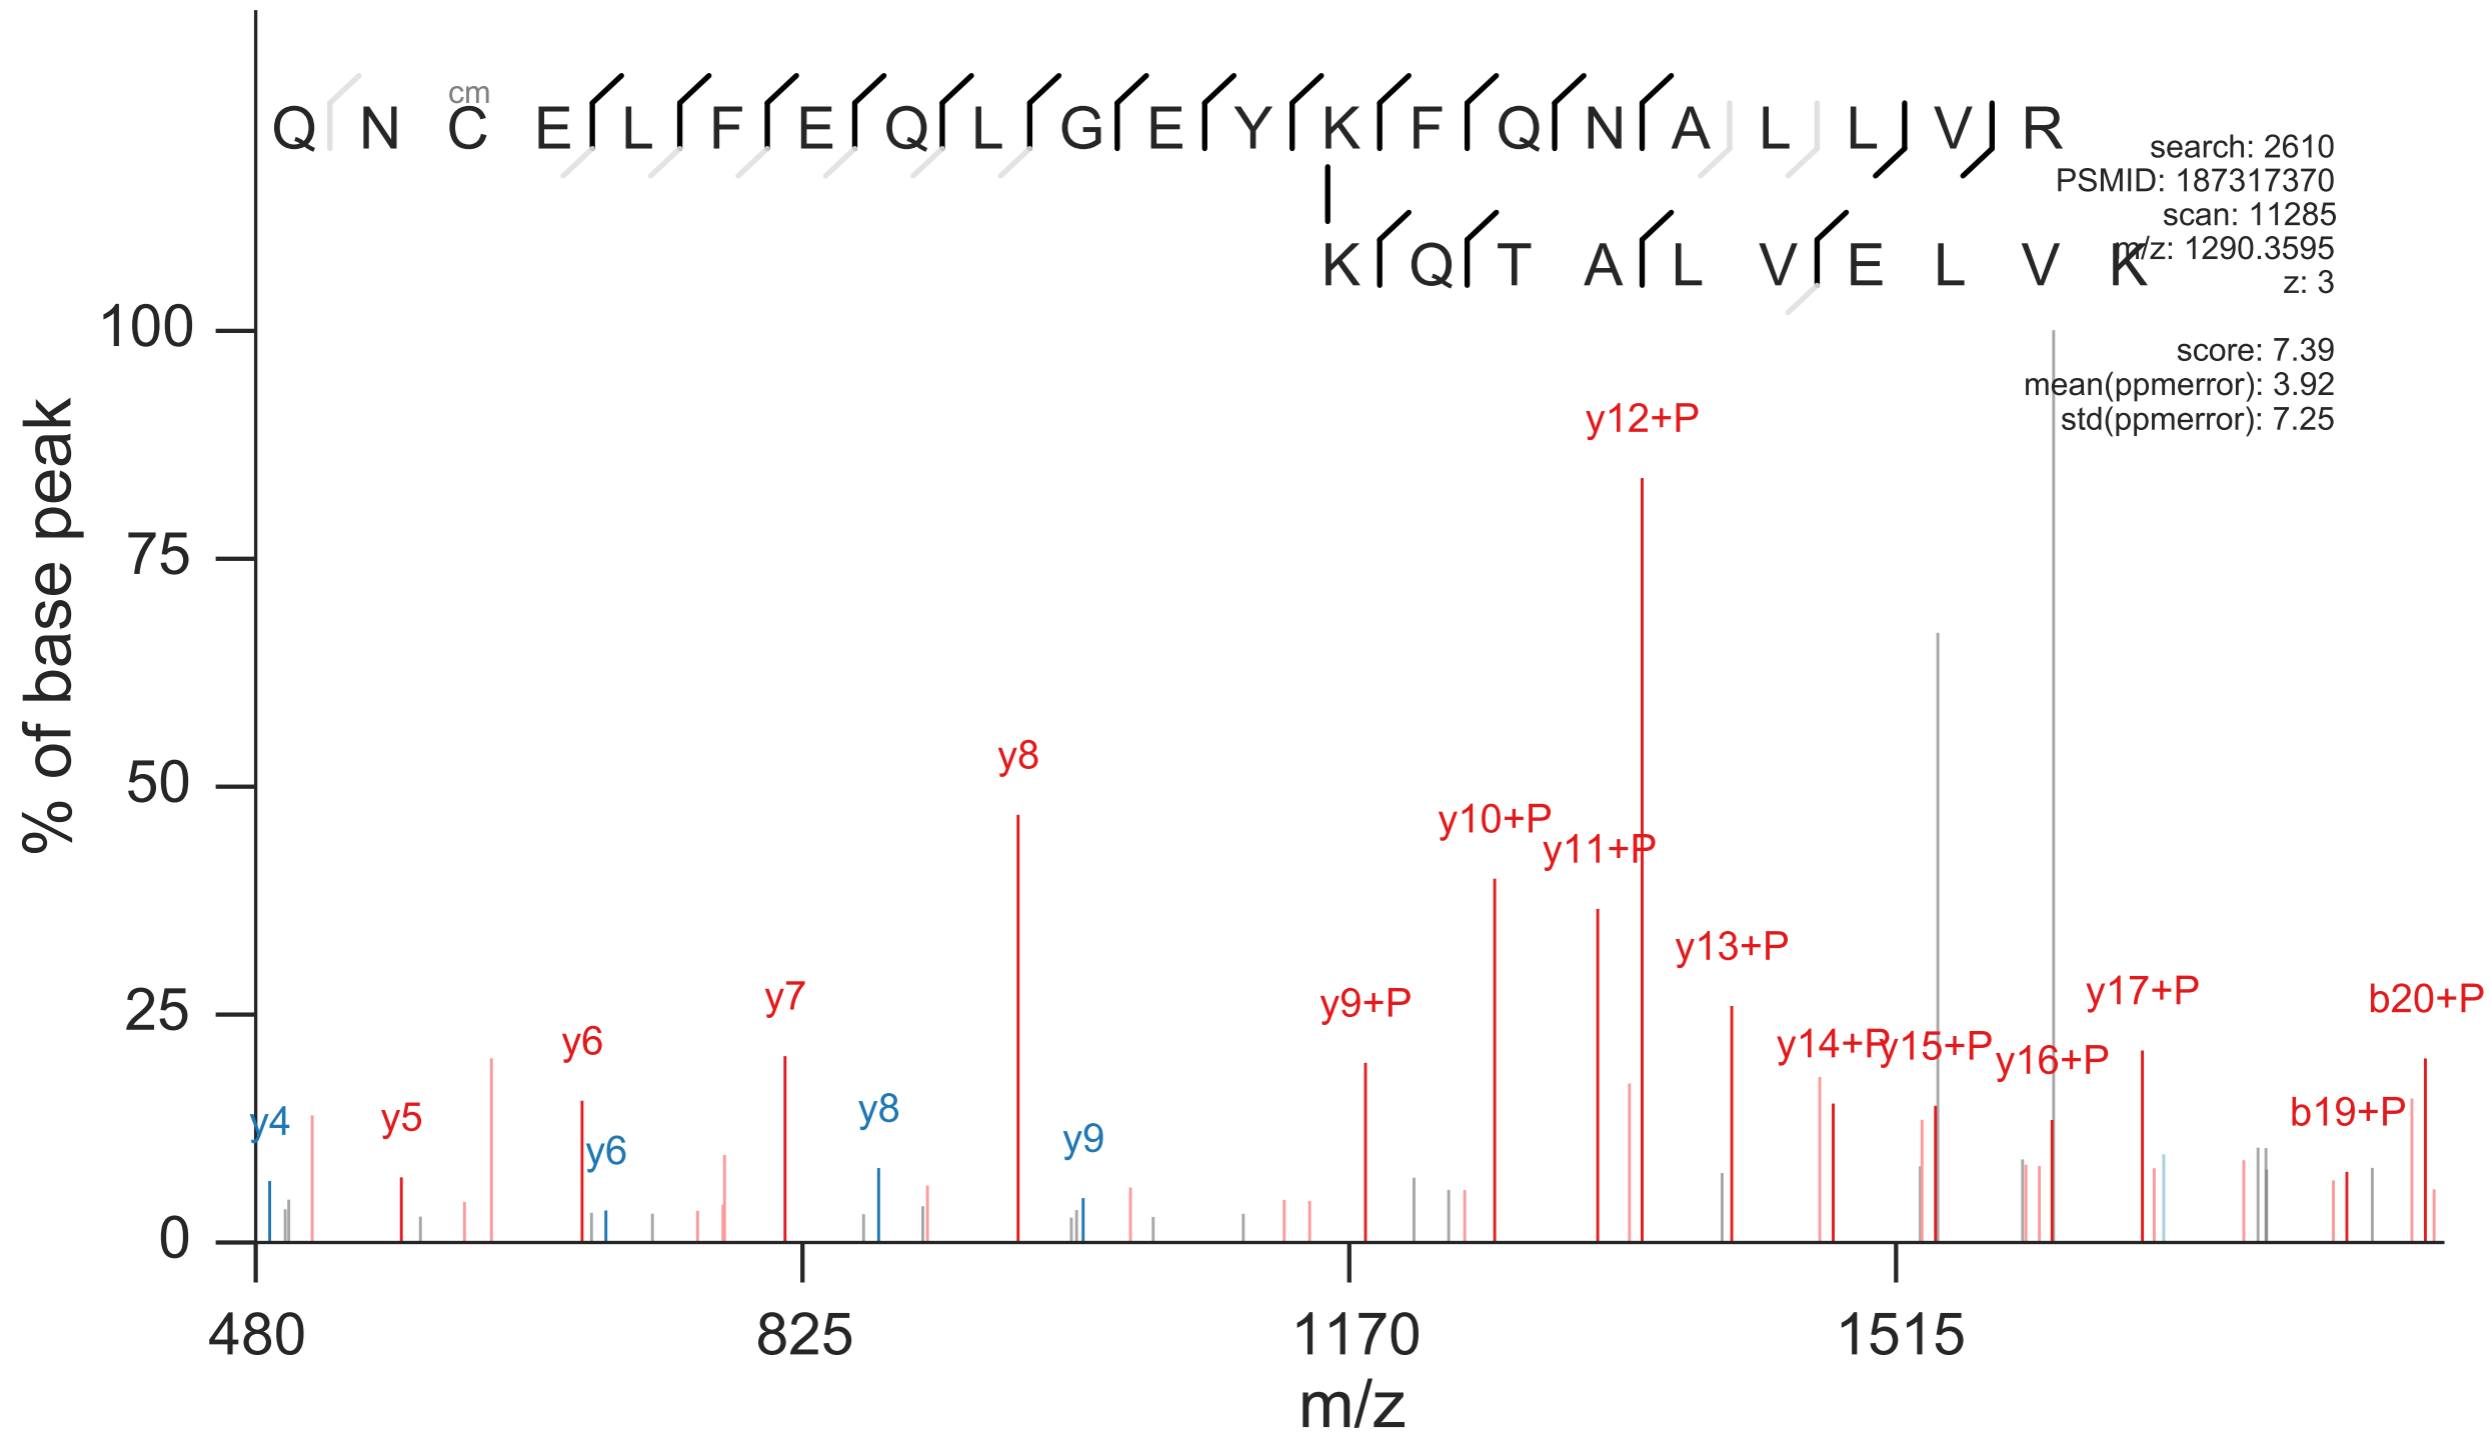



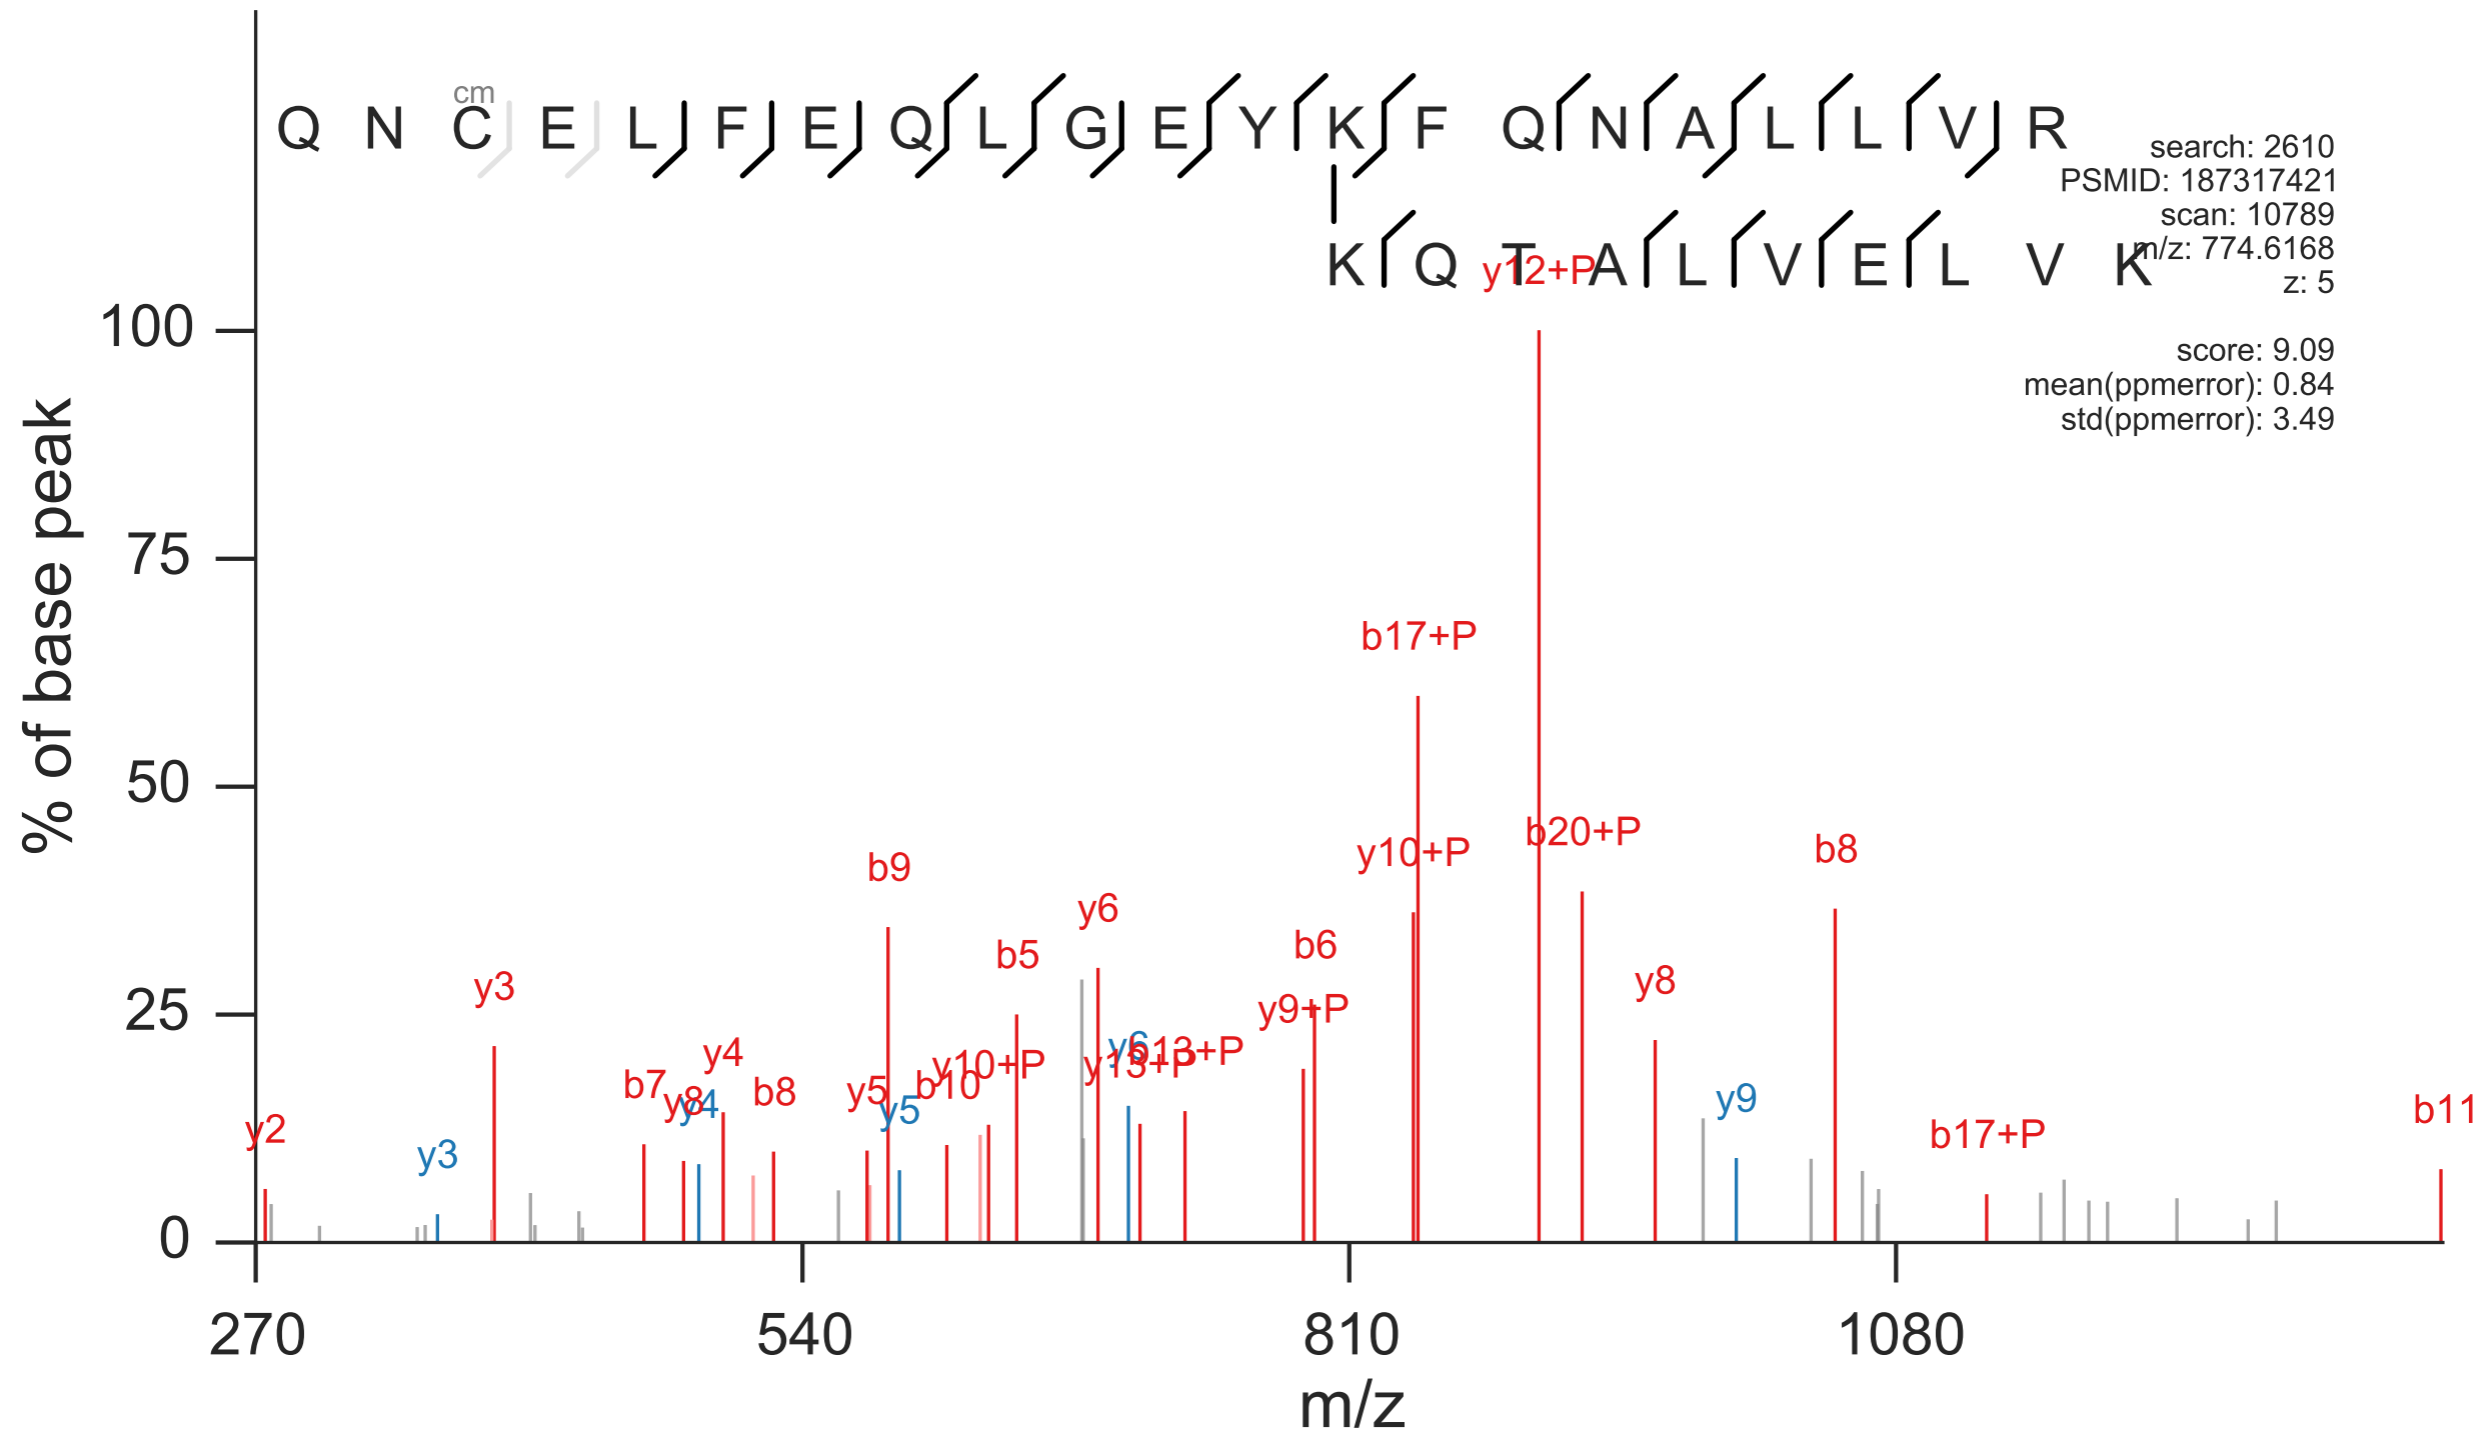

N Y A E A K D V F L G M<sup>ox</sup> F L Y E Y A R  
 L A K T Y E T T L E K

search: 2610  
 PSMID: 187317883  
 scan: 11014  
 m/z: 938.2179  
 z: 4

score: 8.23  
 mean(ppmerror): 0.69  
 std(ppmerror): 6.12

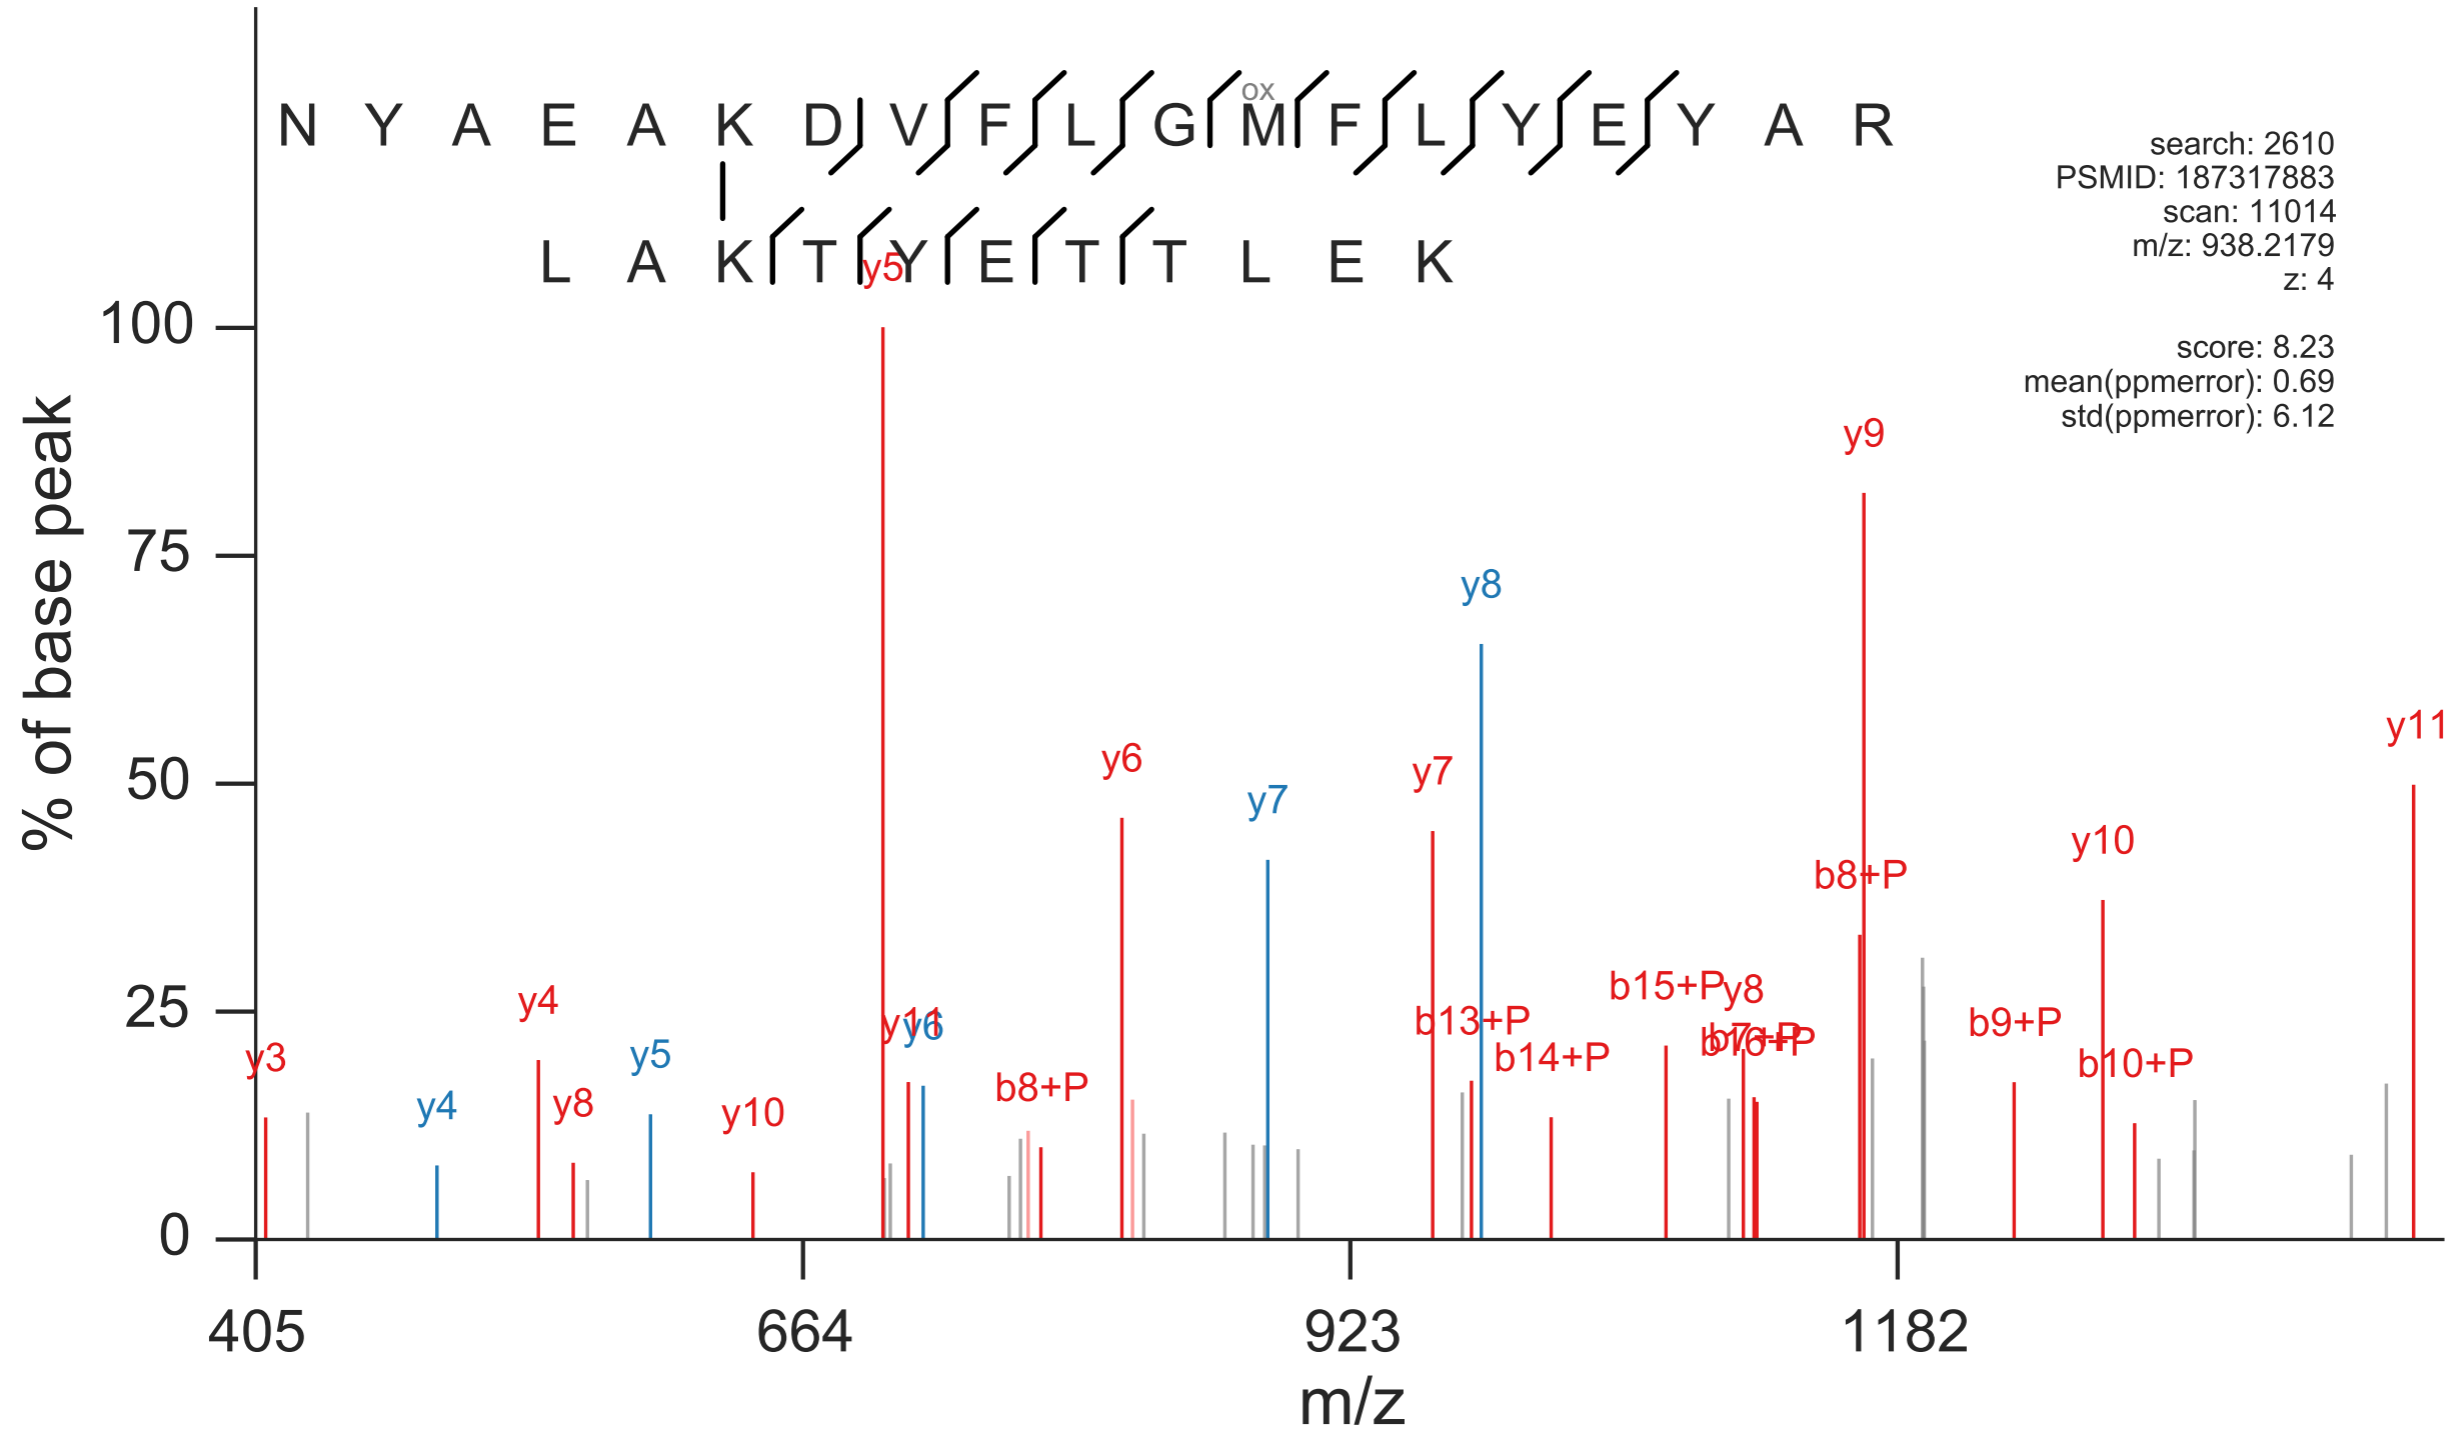

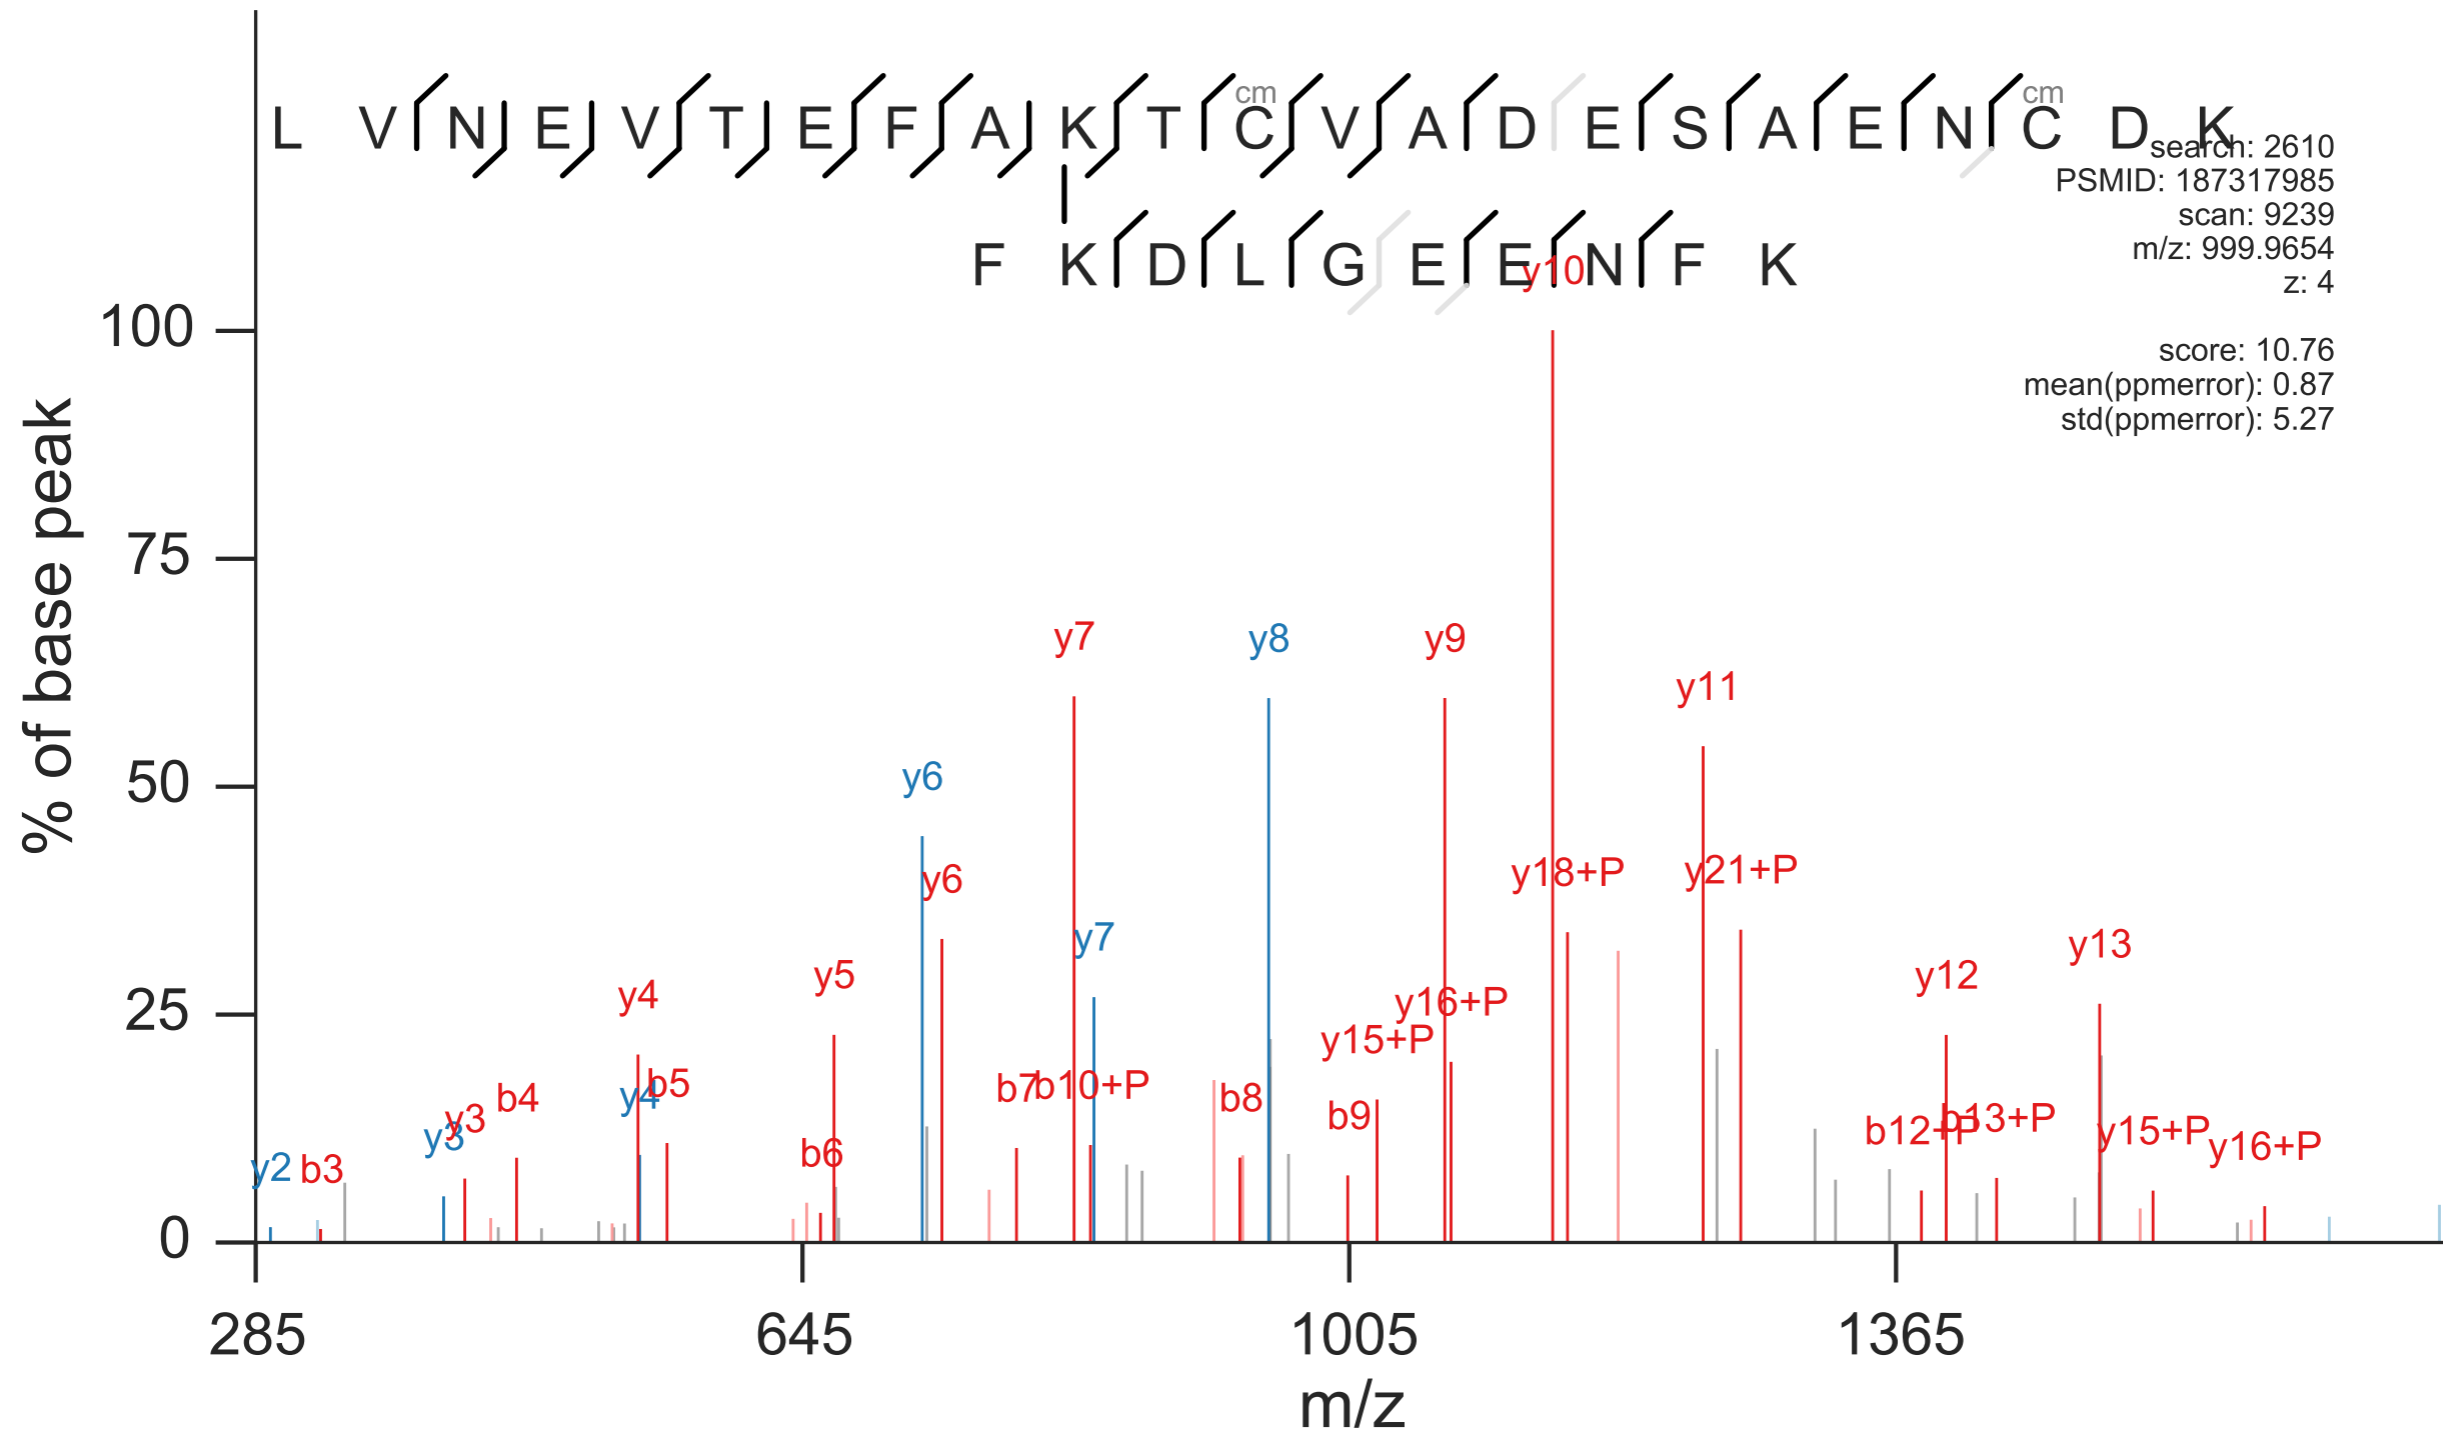

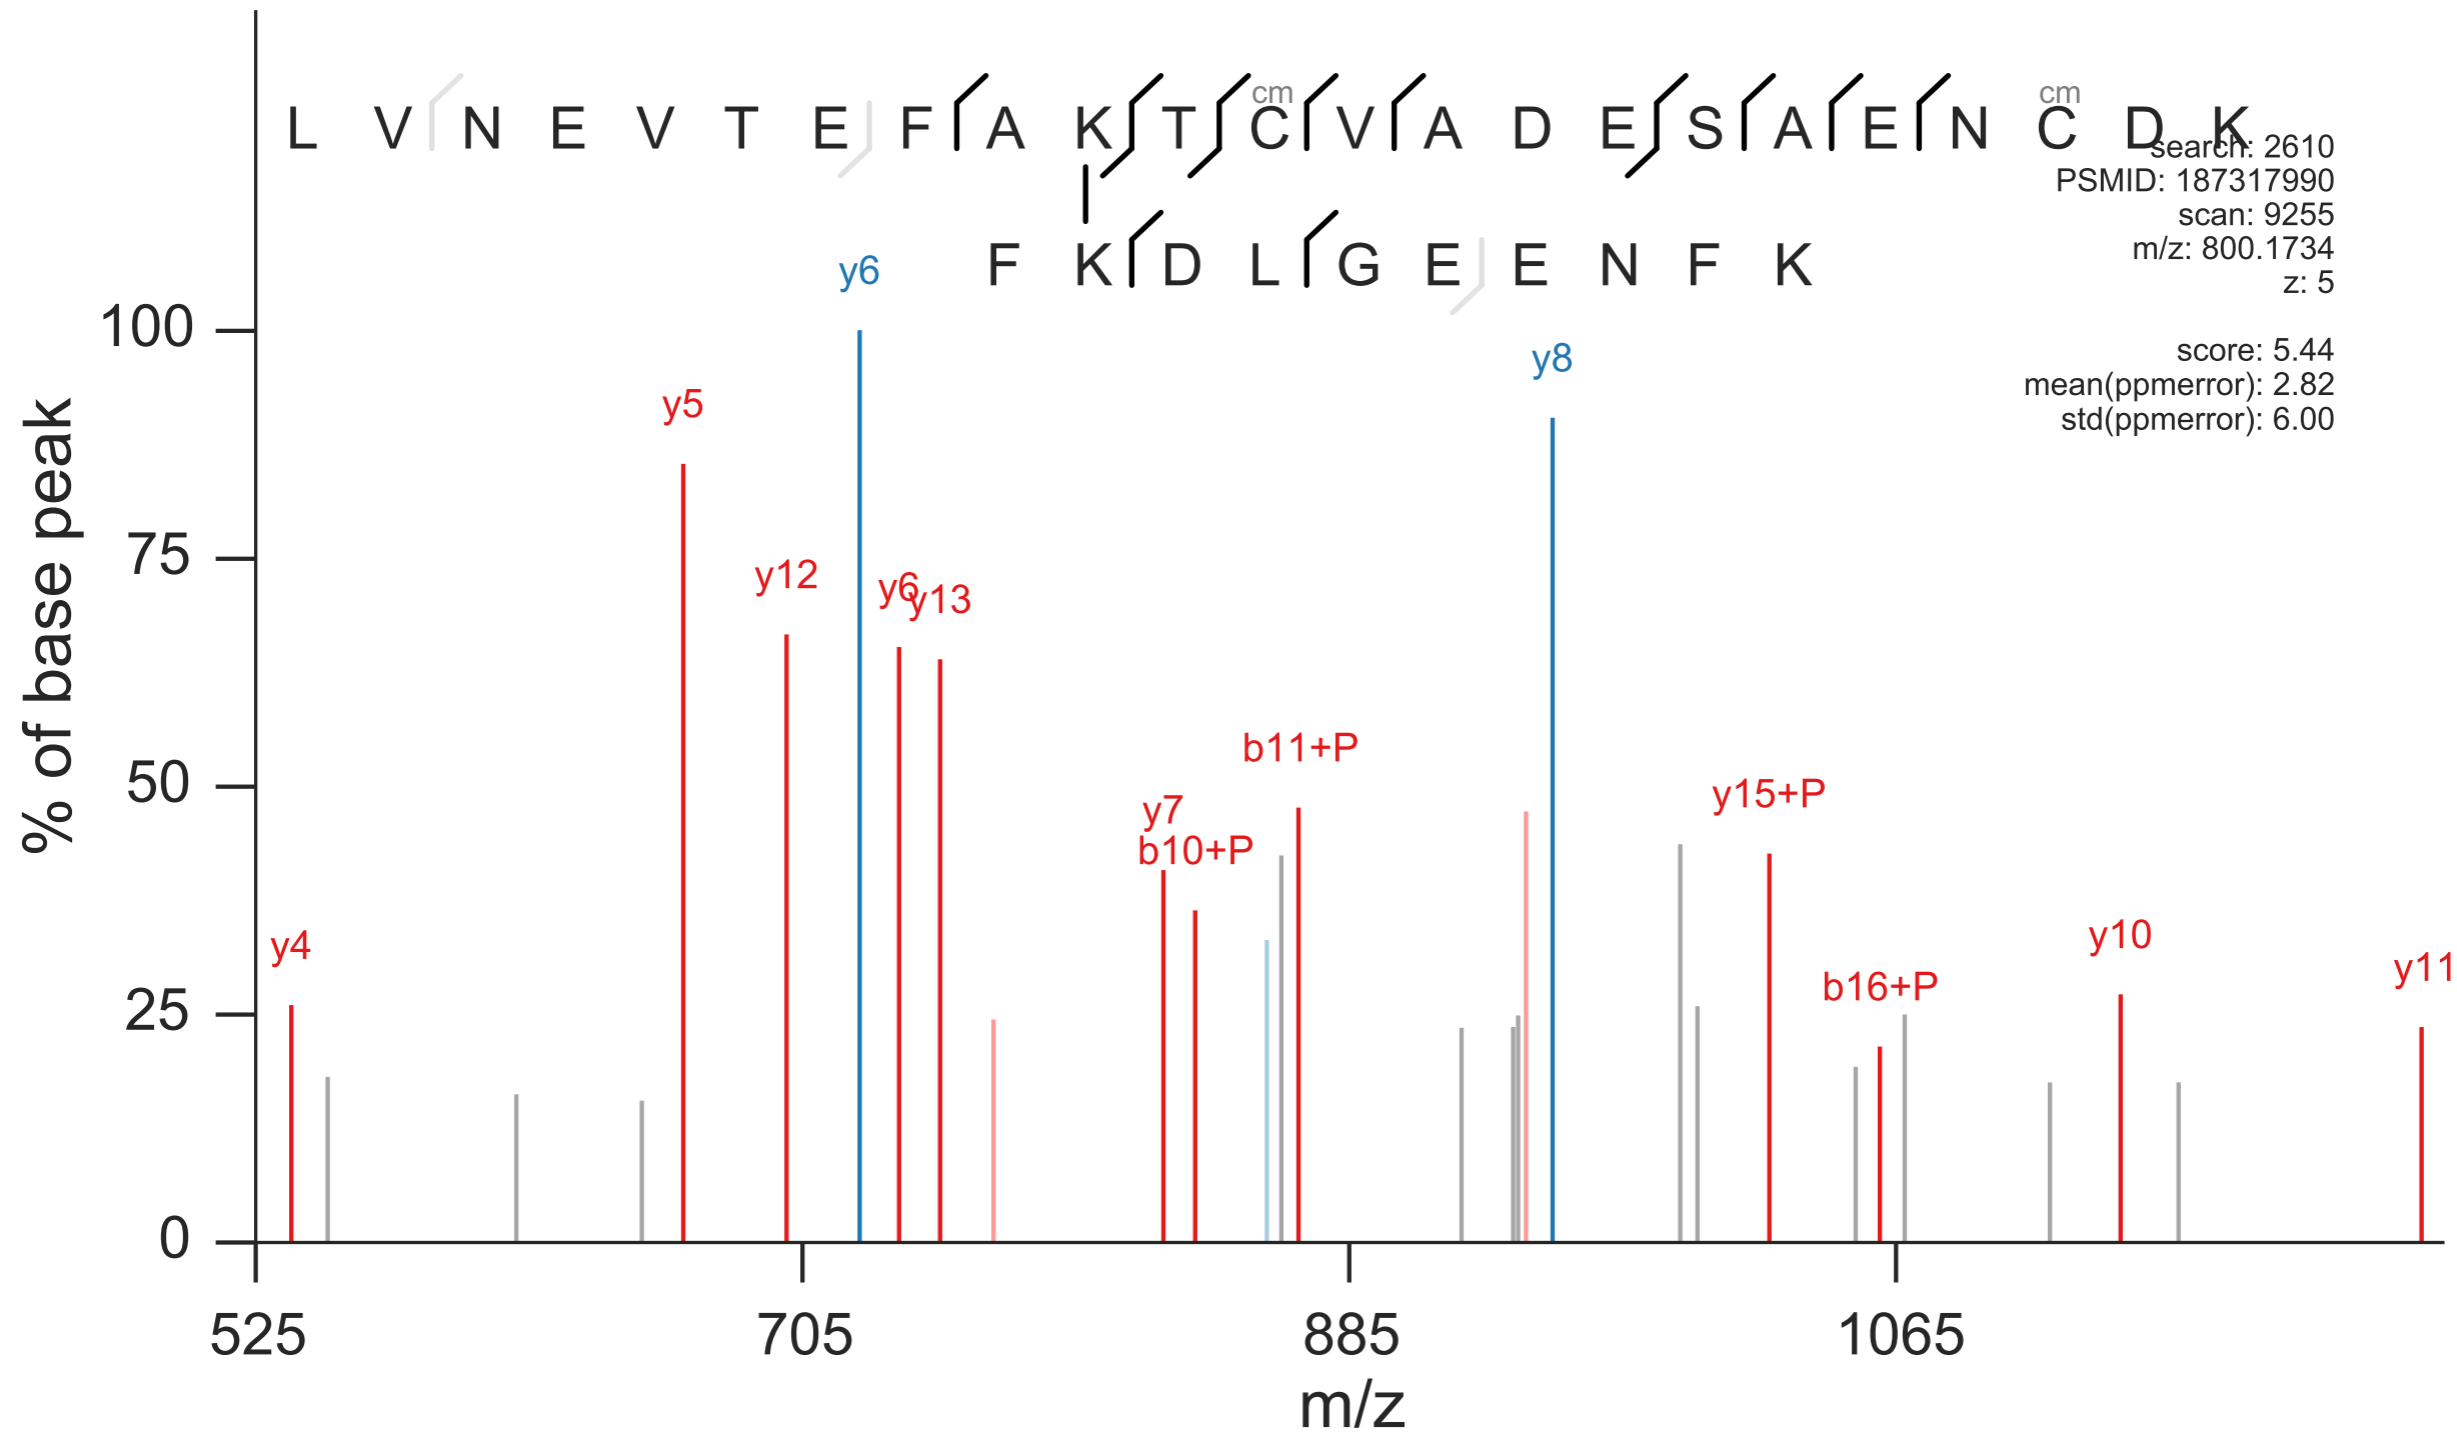

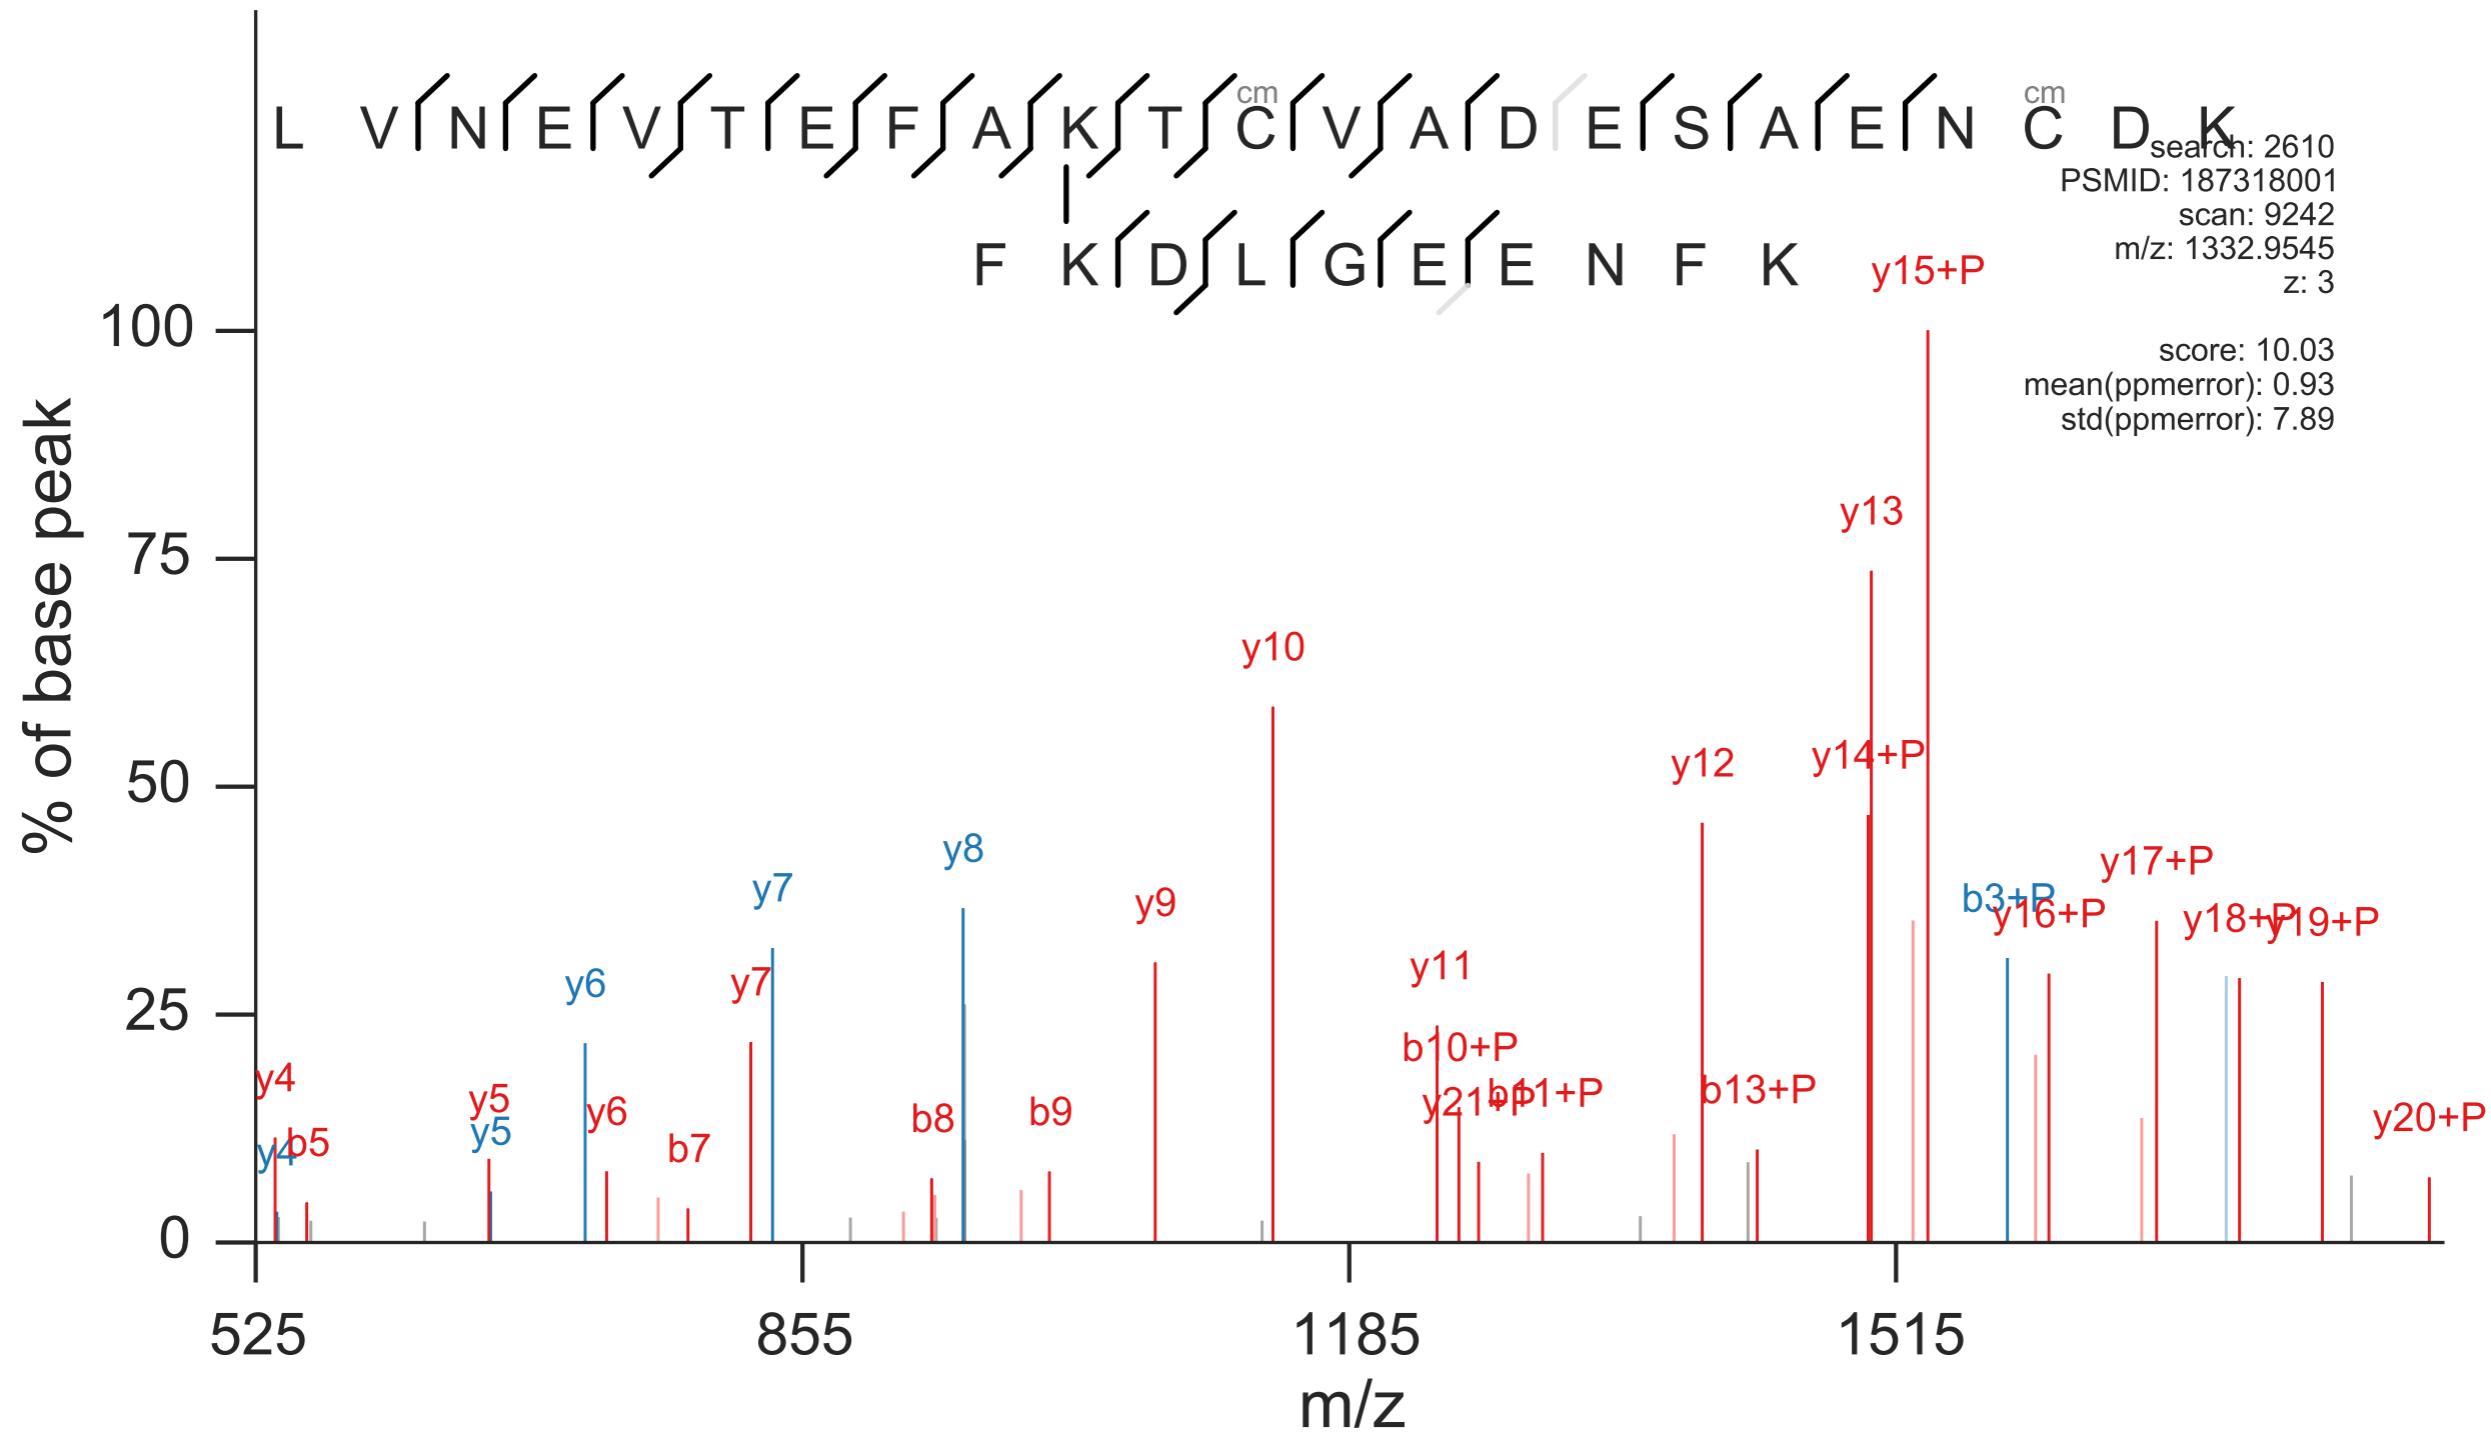

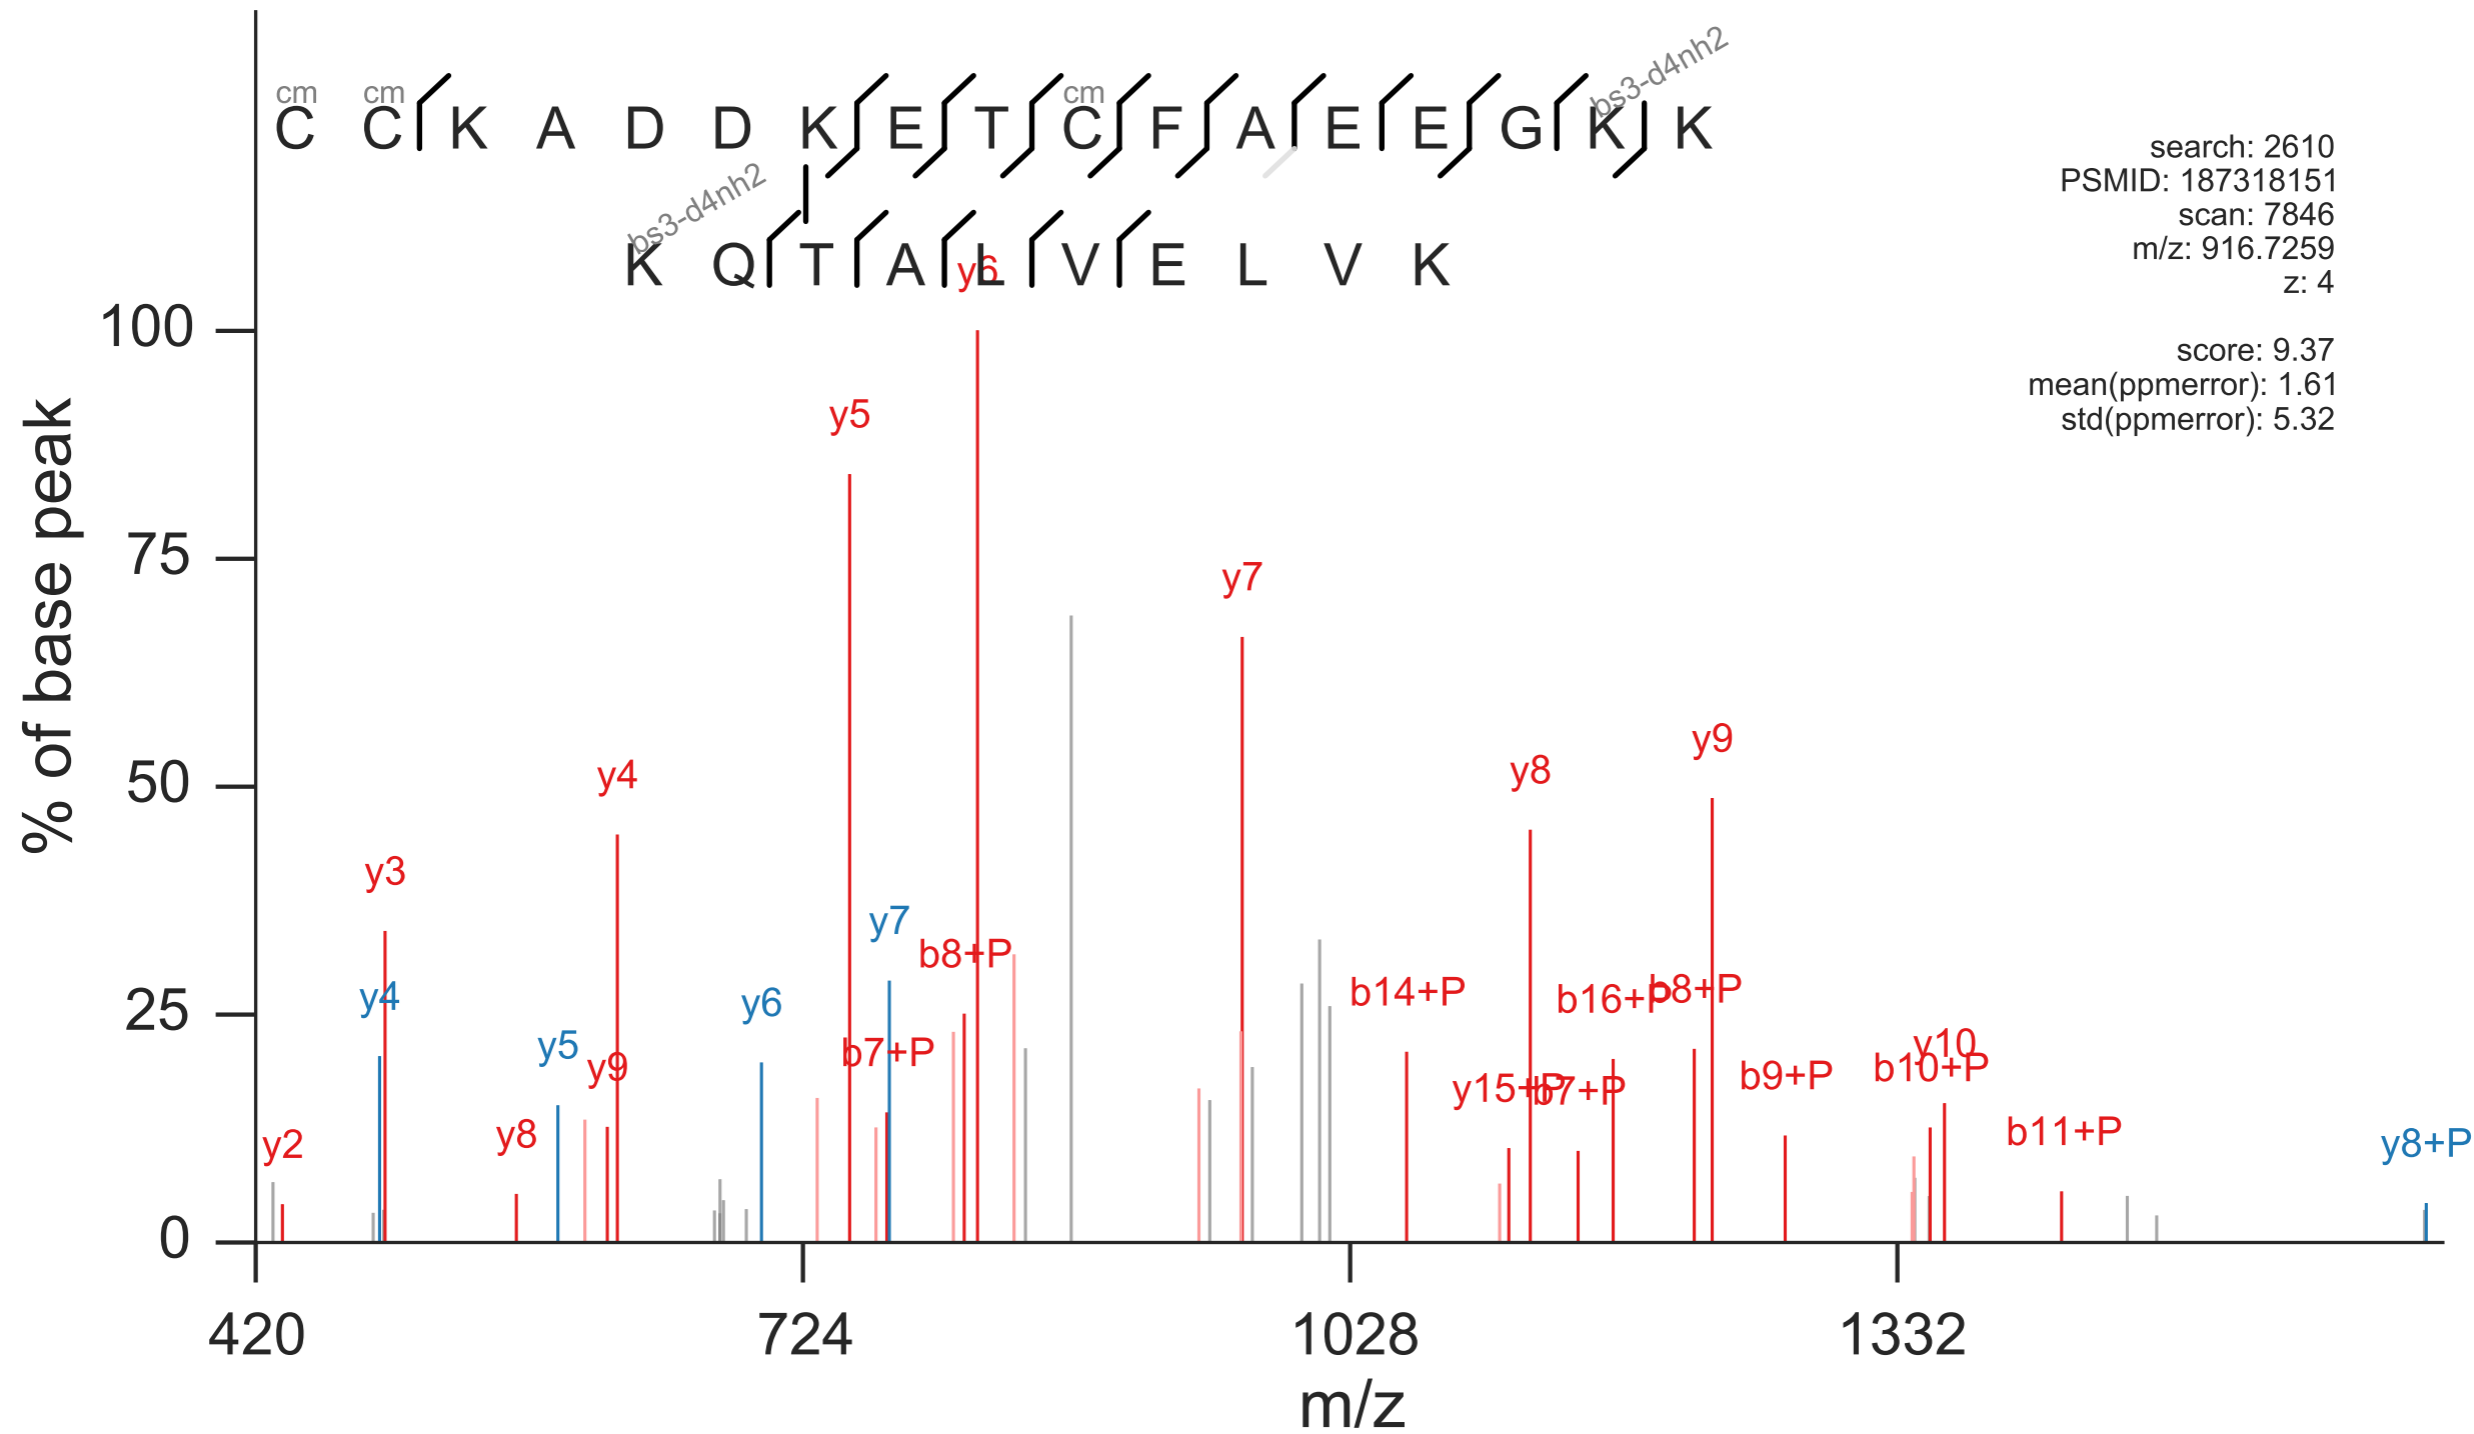

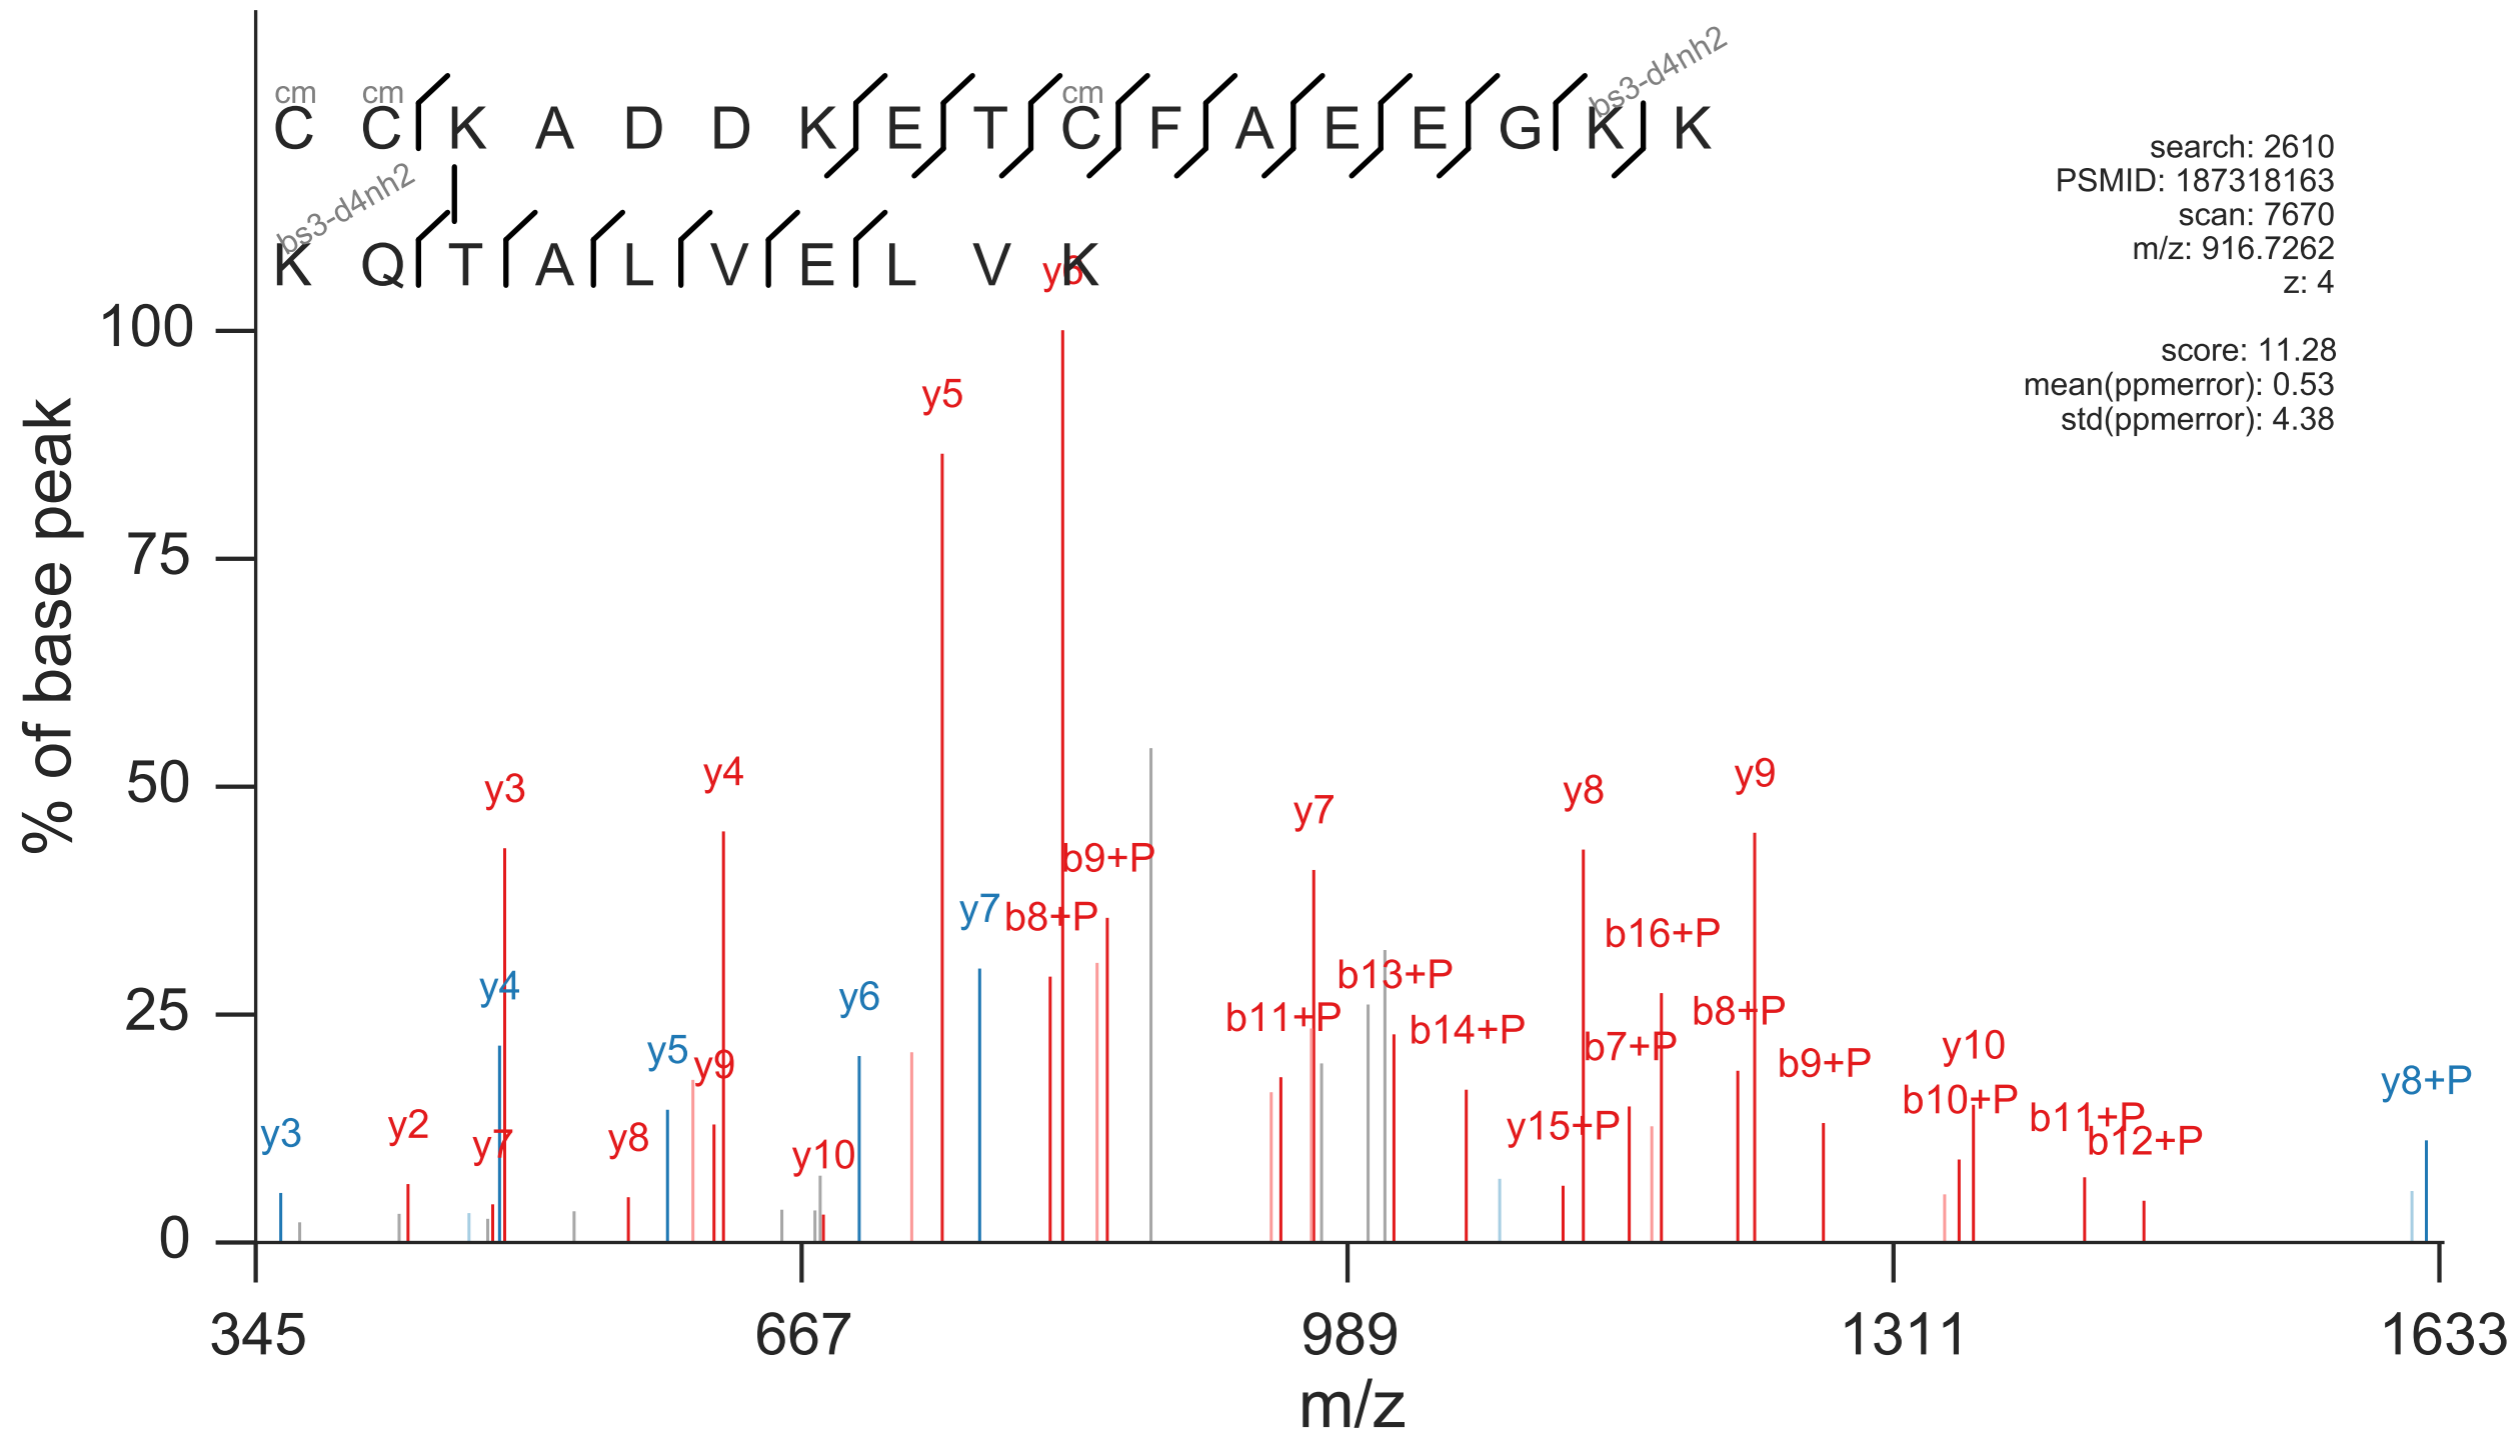

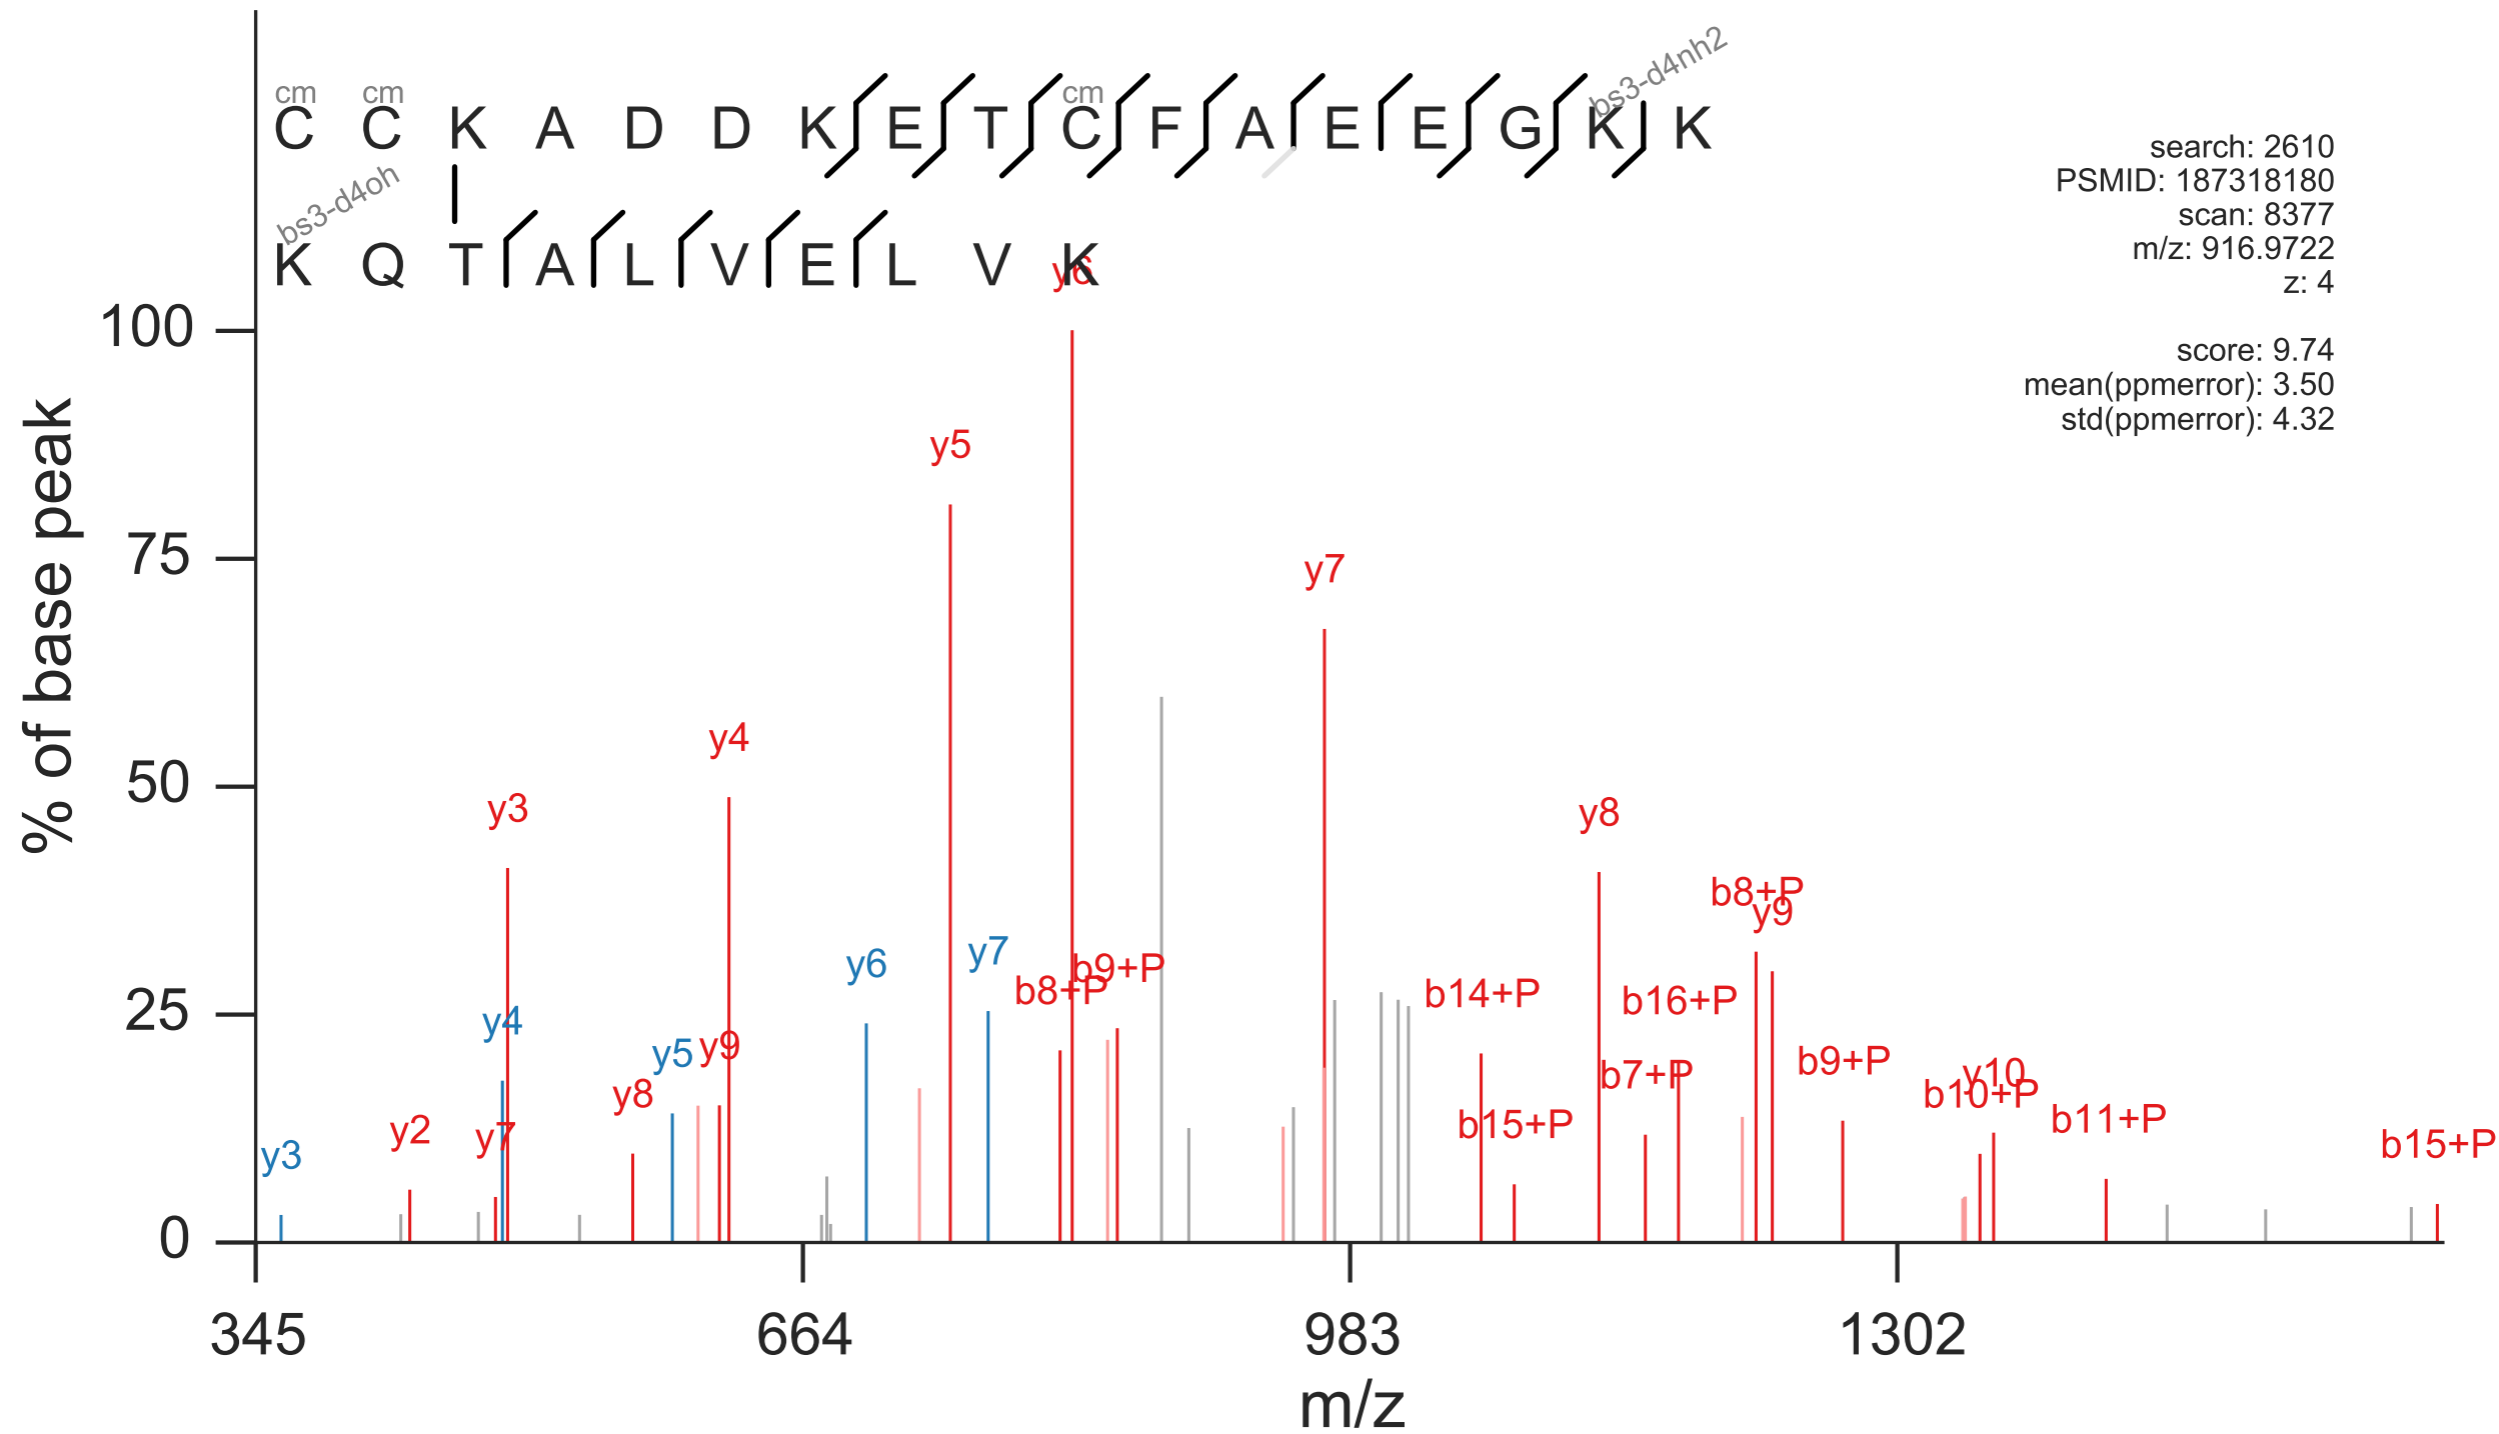

search: 2610  
 PSMID: 187318180  
 scan: 8377  
 m/z: 916.9722  
 z: 4  
 score: 9.74  
 mean(ppmerror): 3.50  
 std(ppmerror): 4.32



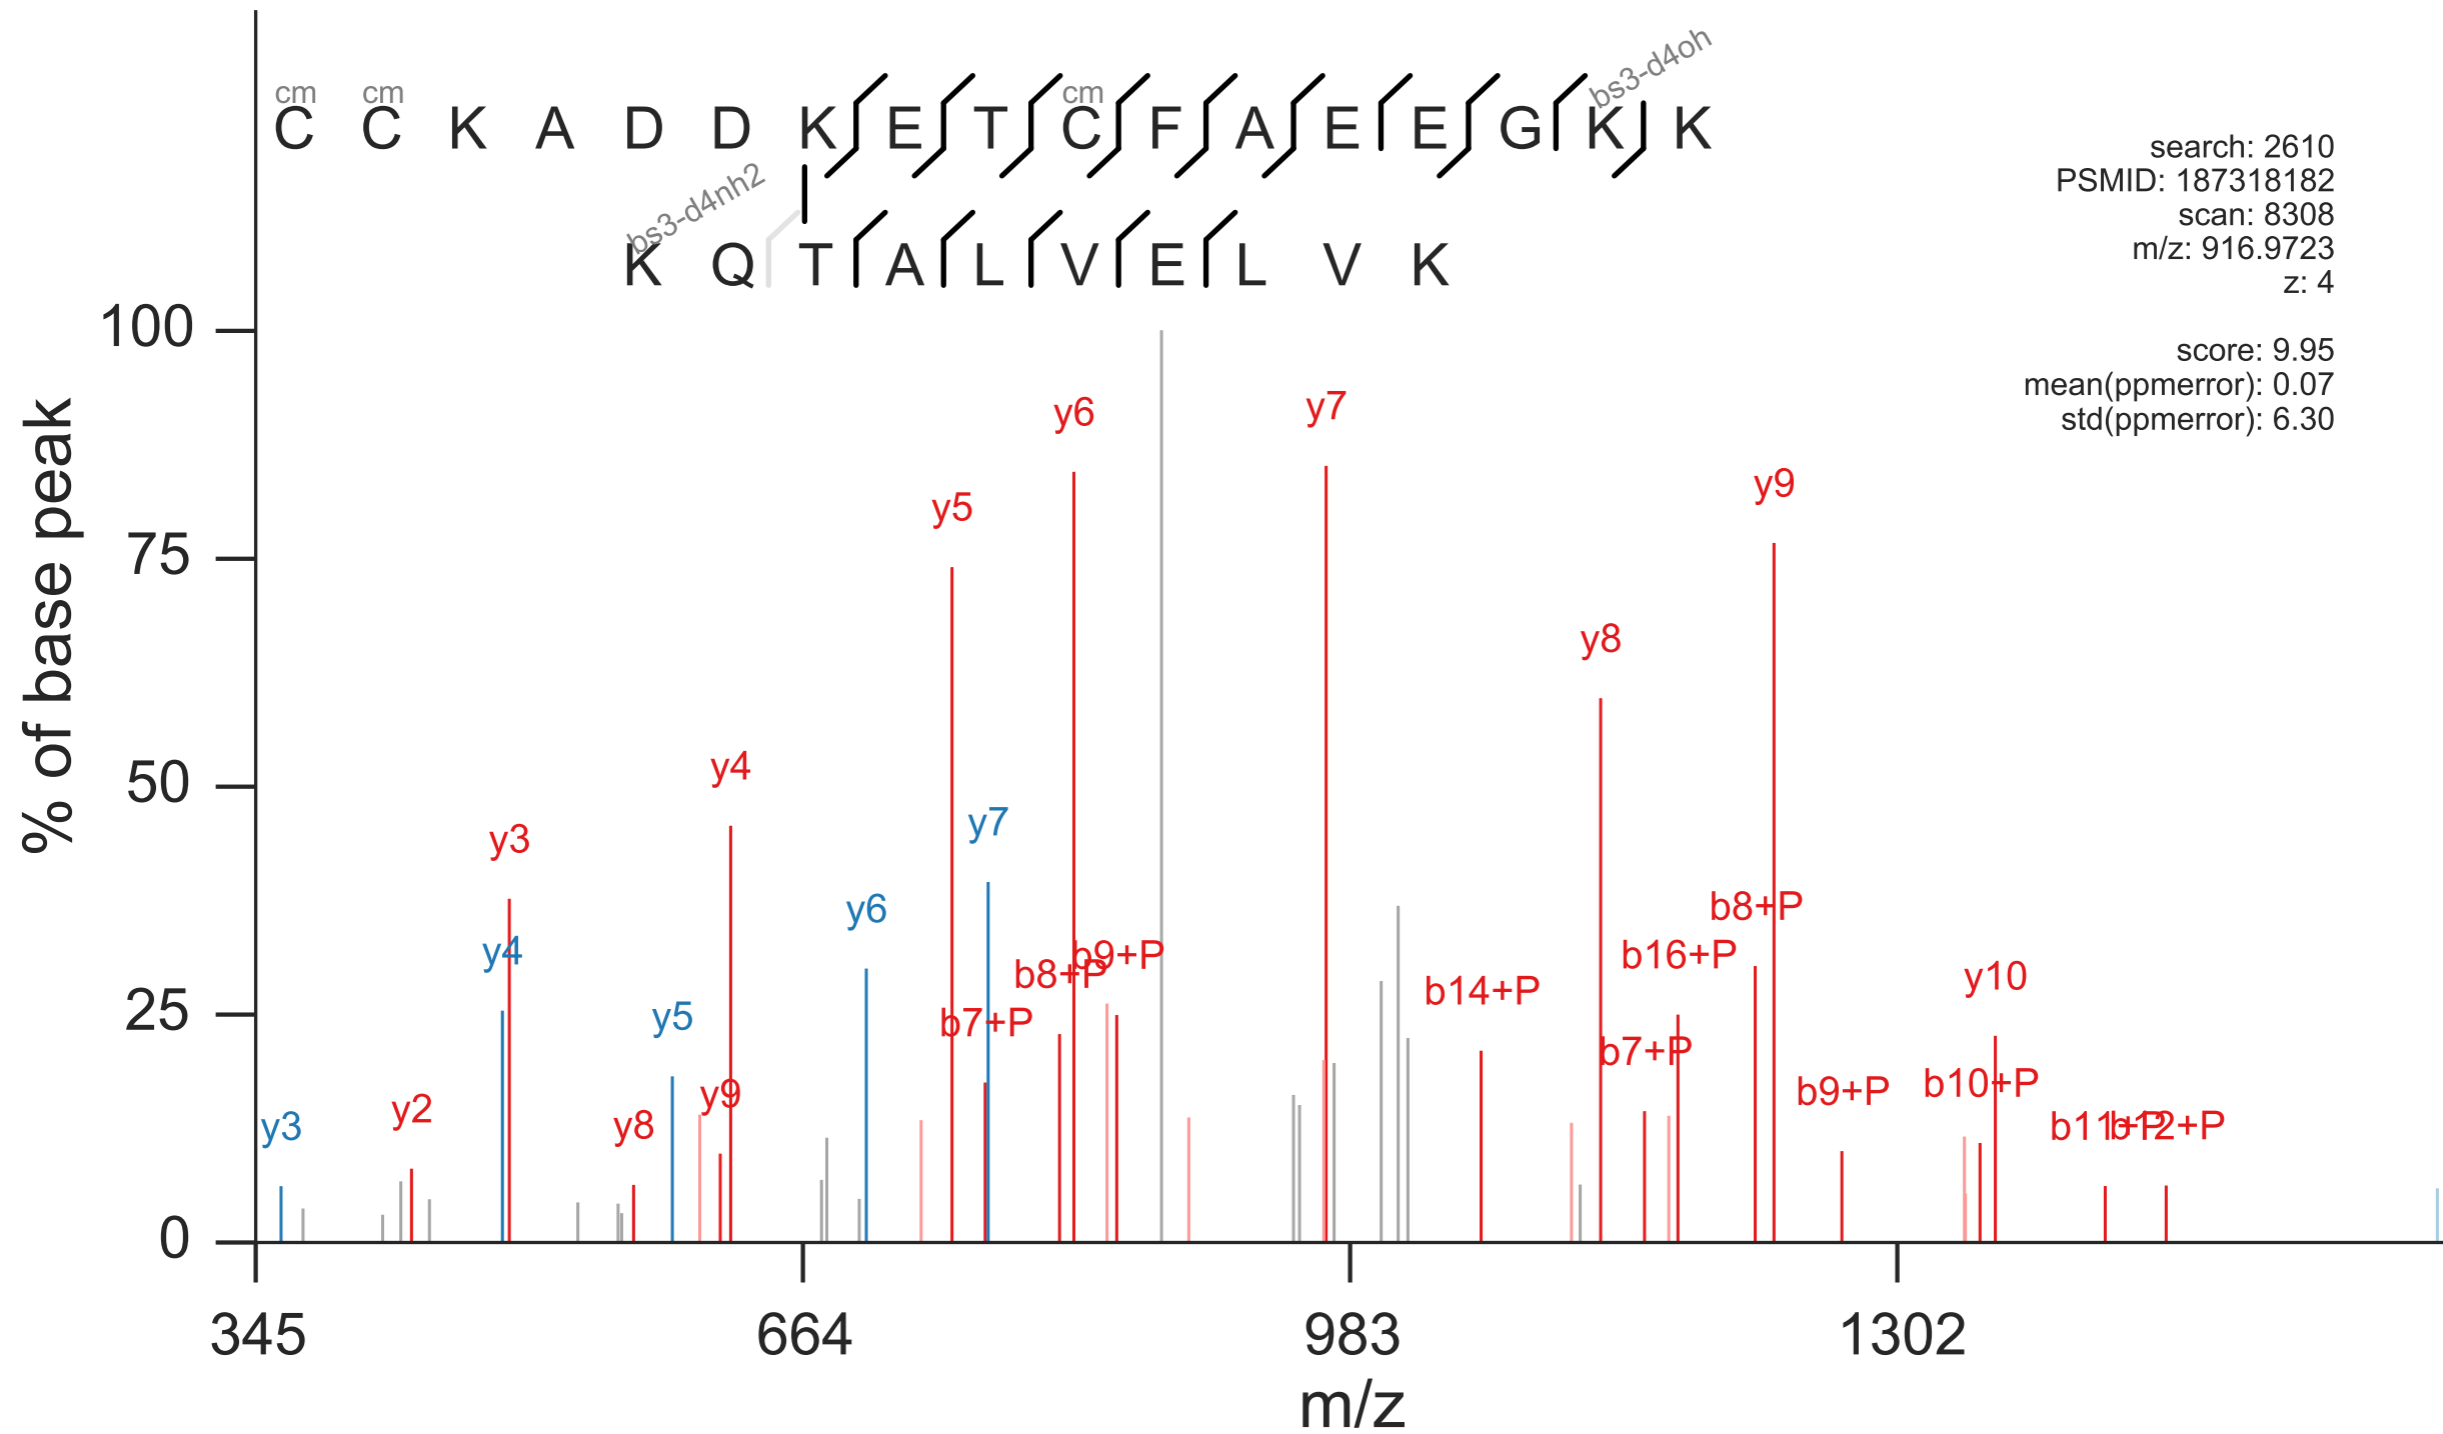

search: 2610  
 PSMID: 187318182  
 scan: 8308  
 m/z: 916.9723  
 z: 4

score: 9.95  
 mean(ppmerror): 0.07  
 std(ppmerror): 6.30

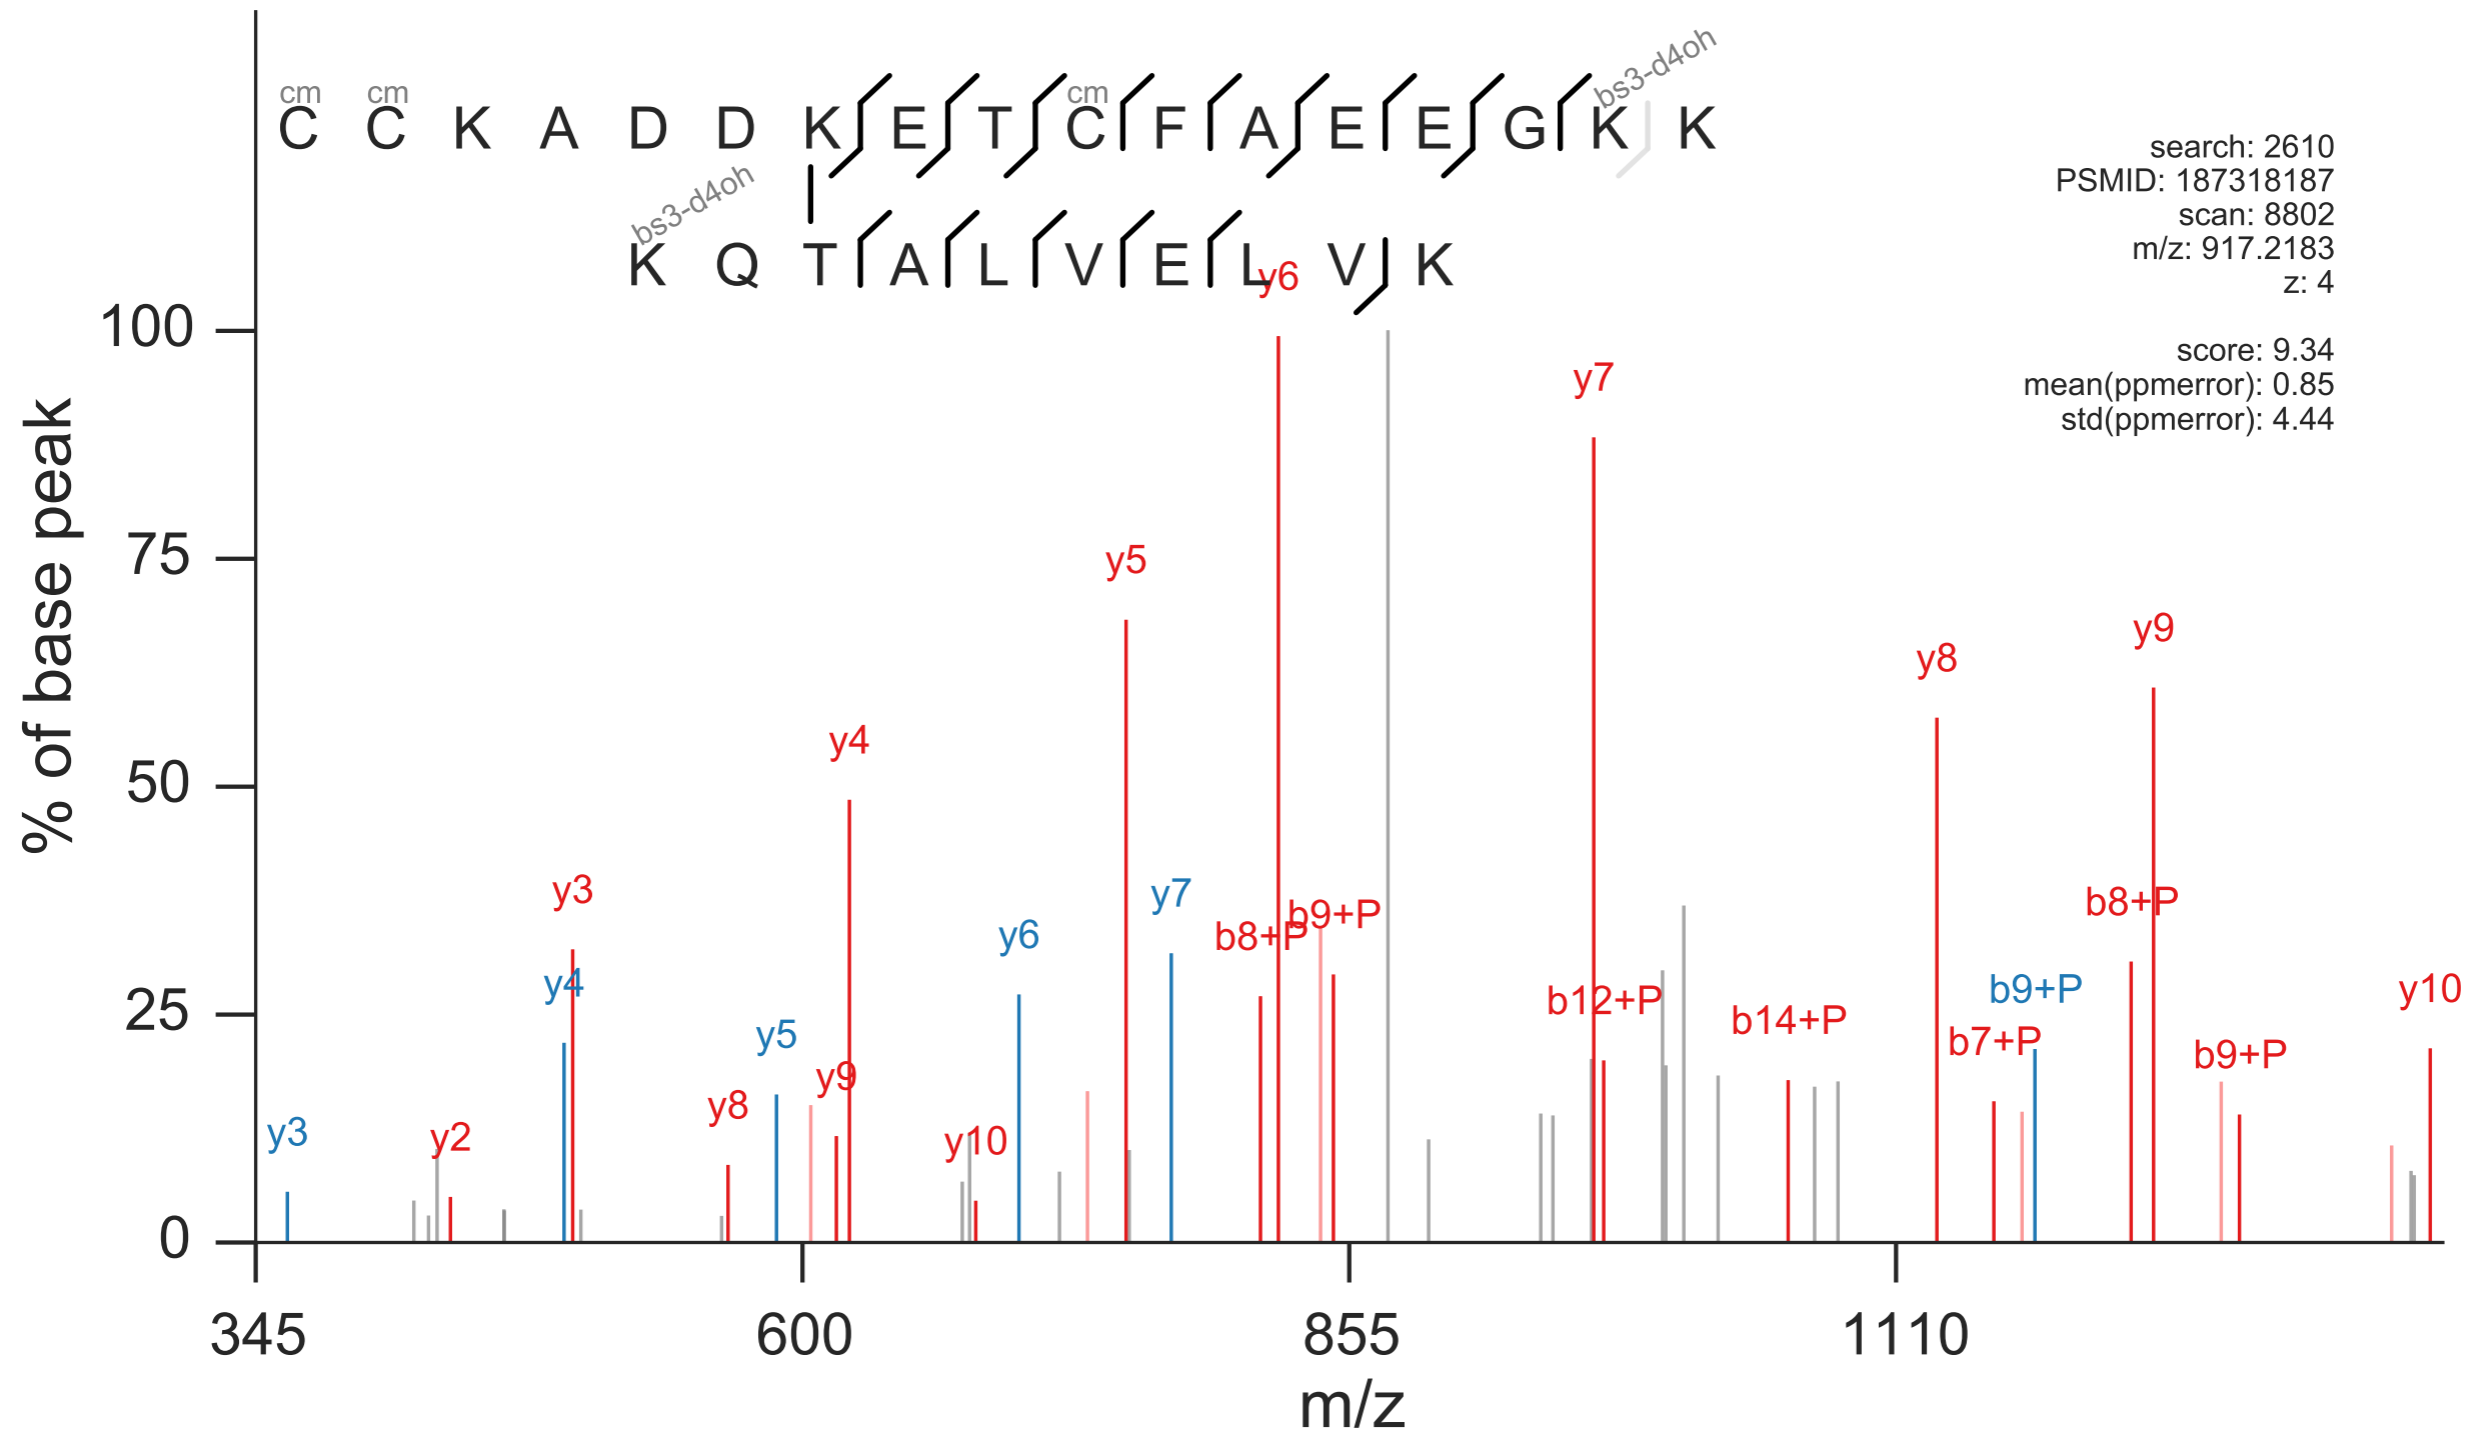

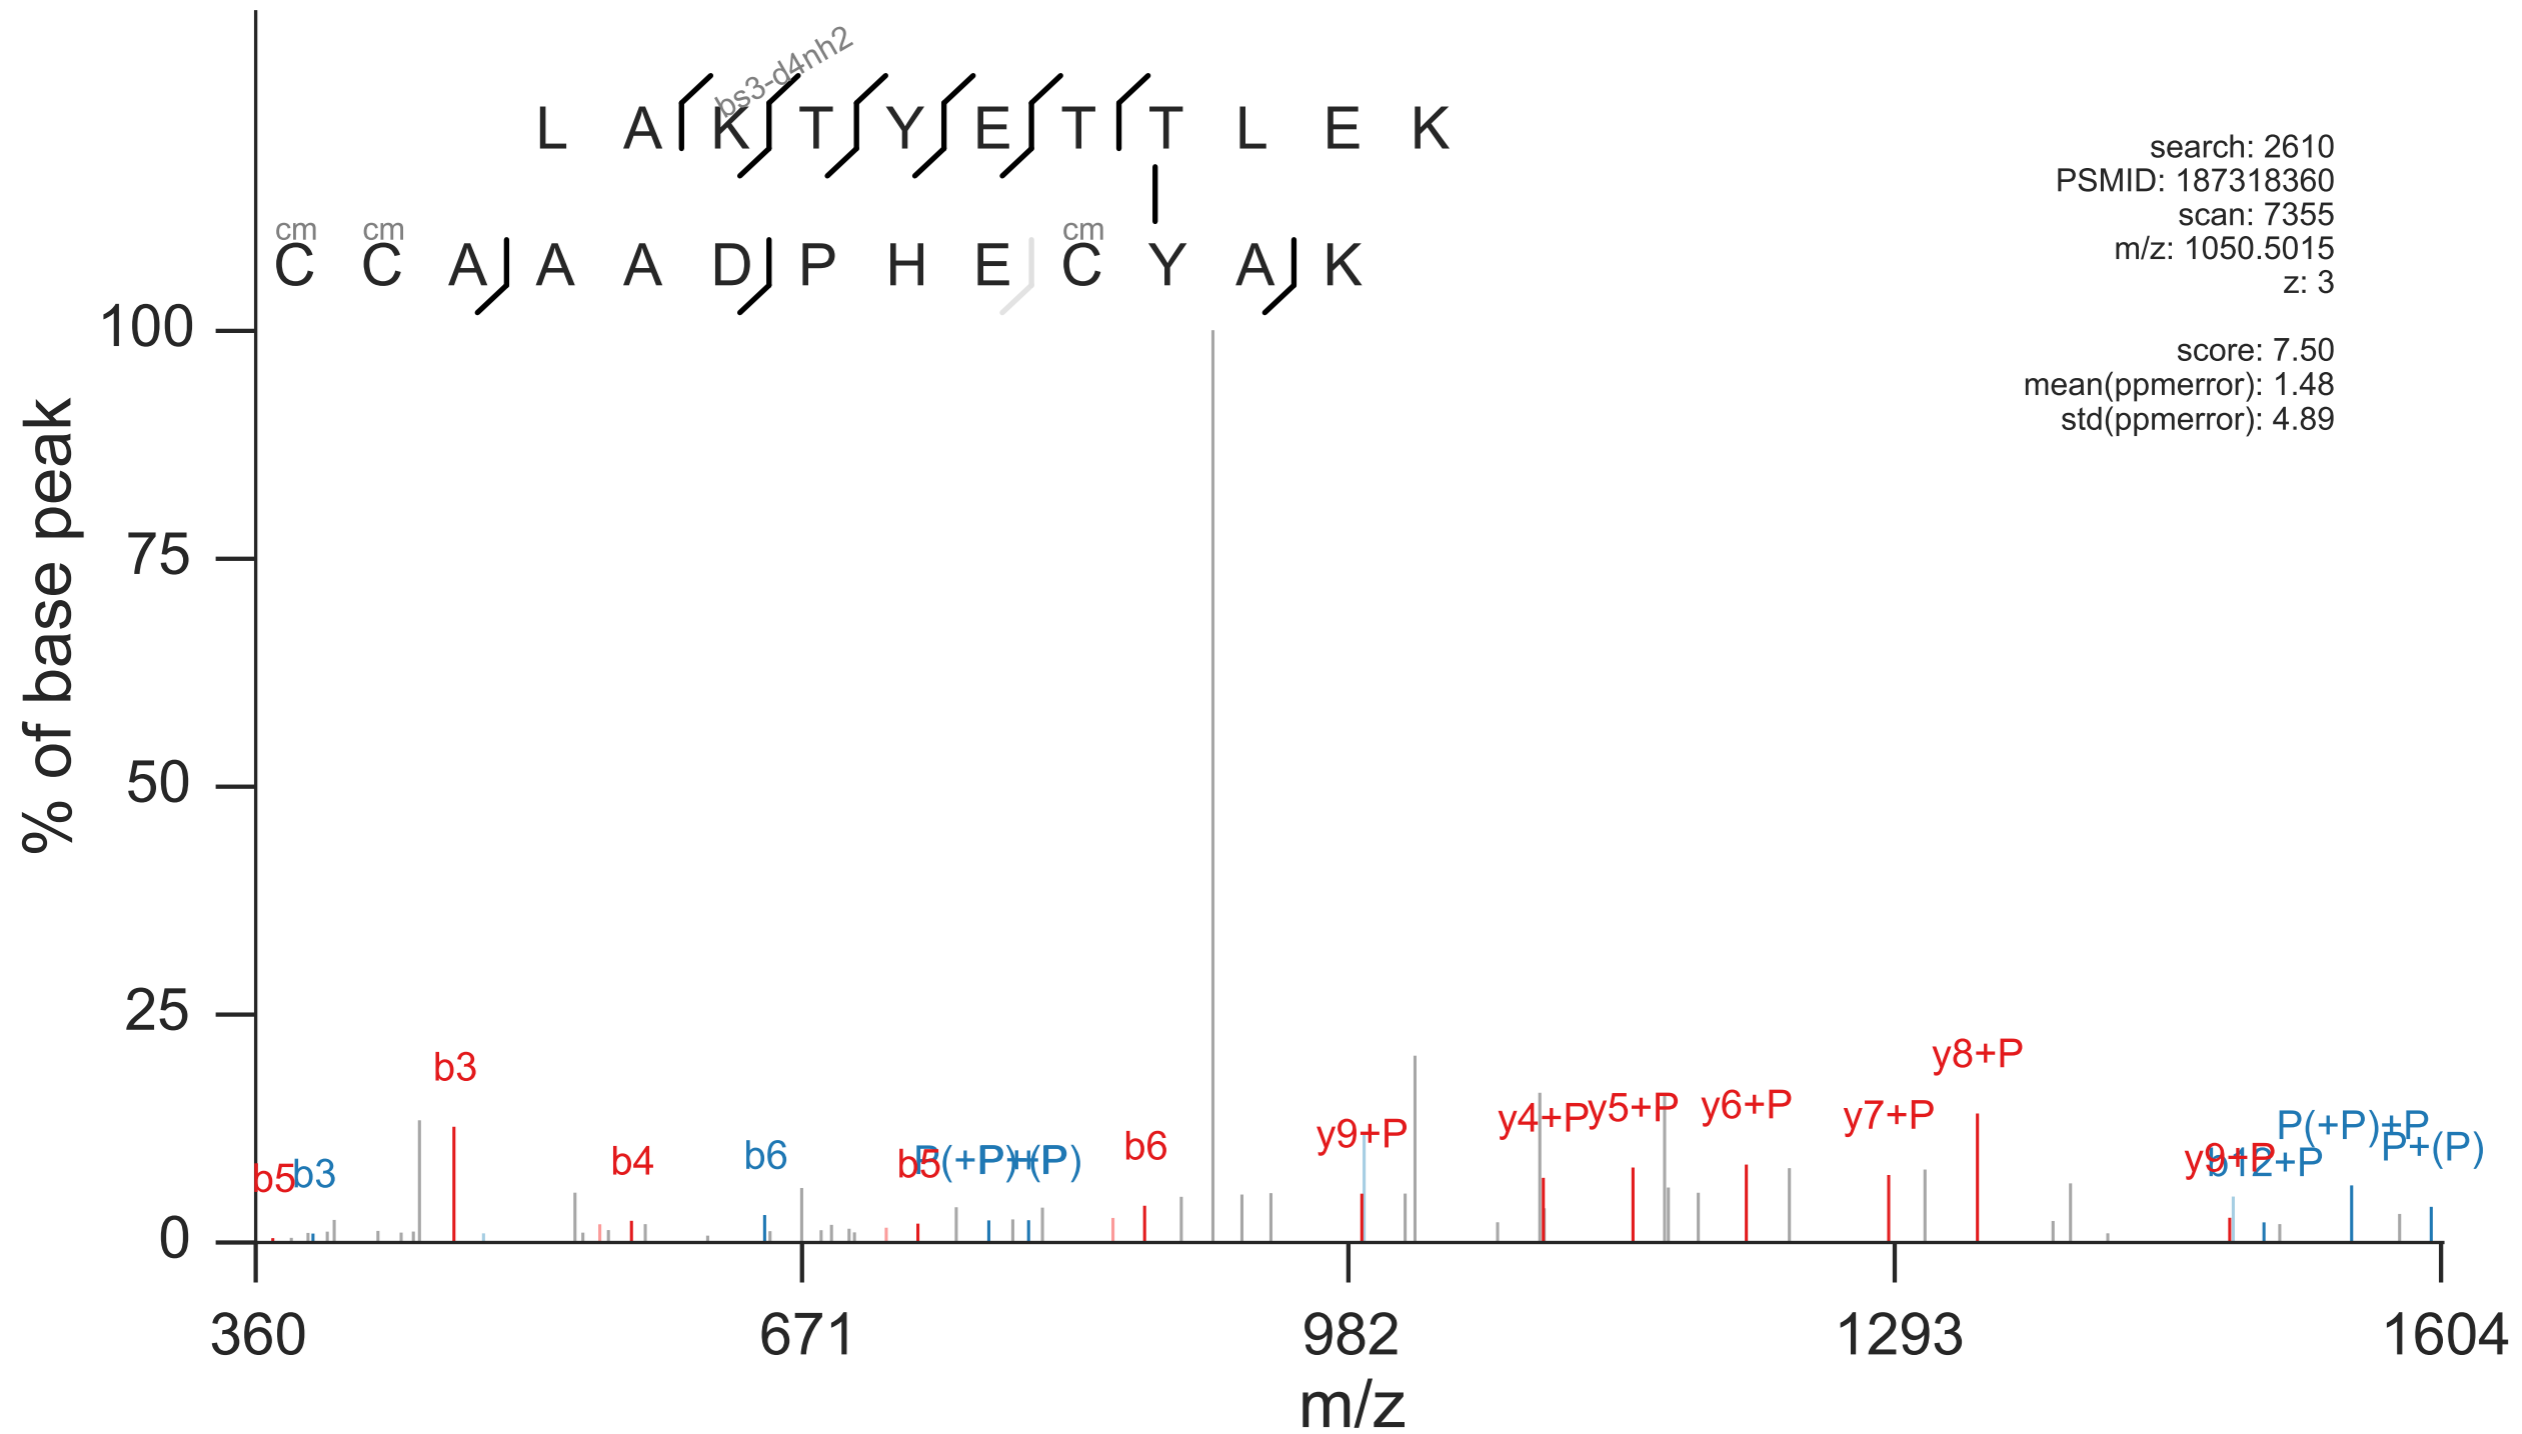

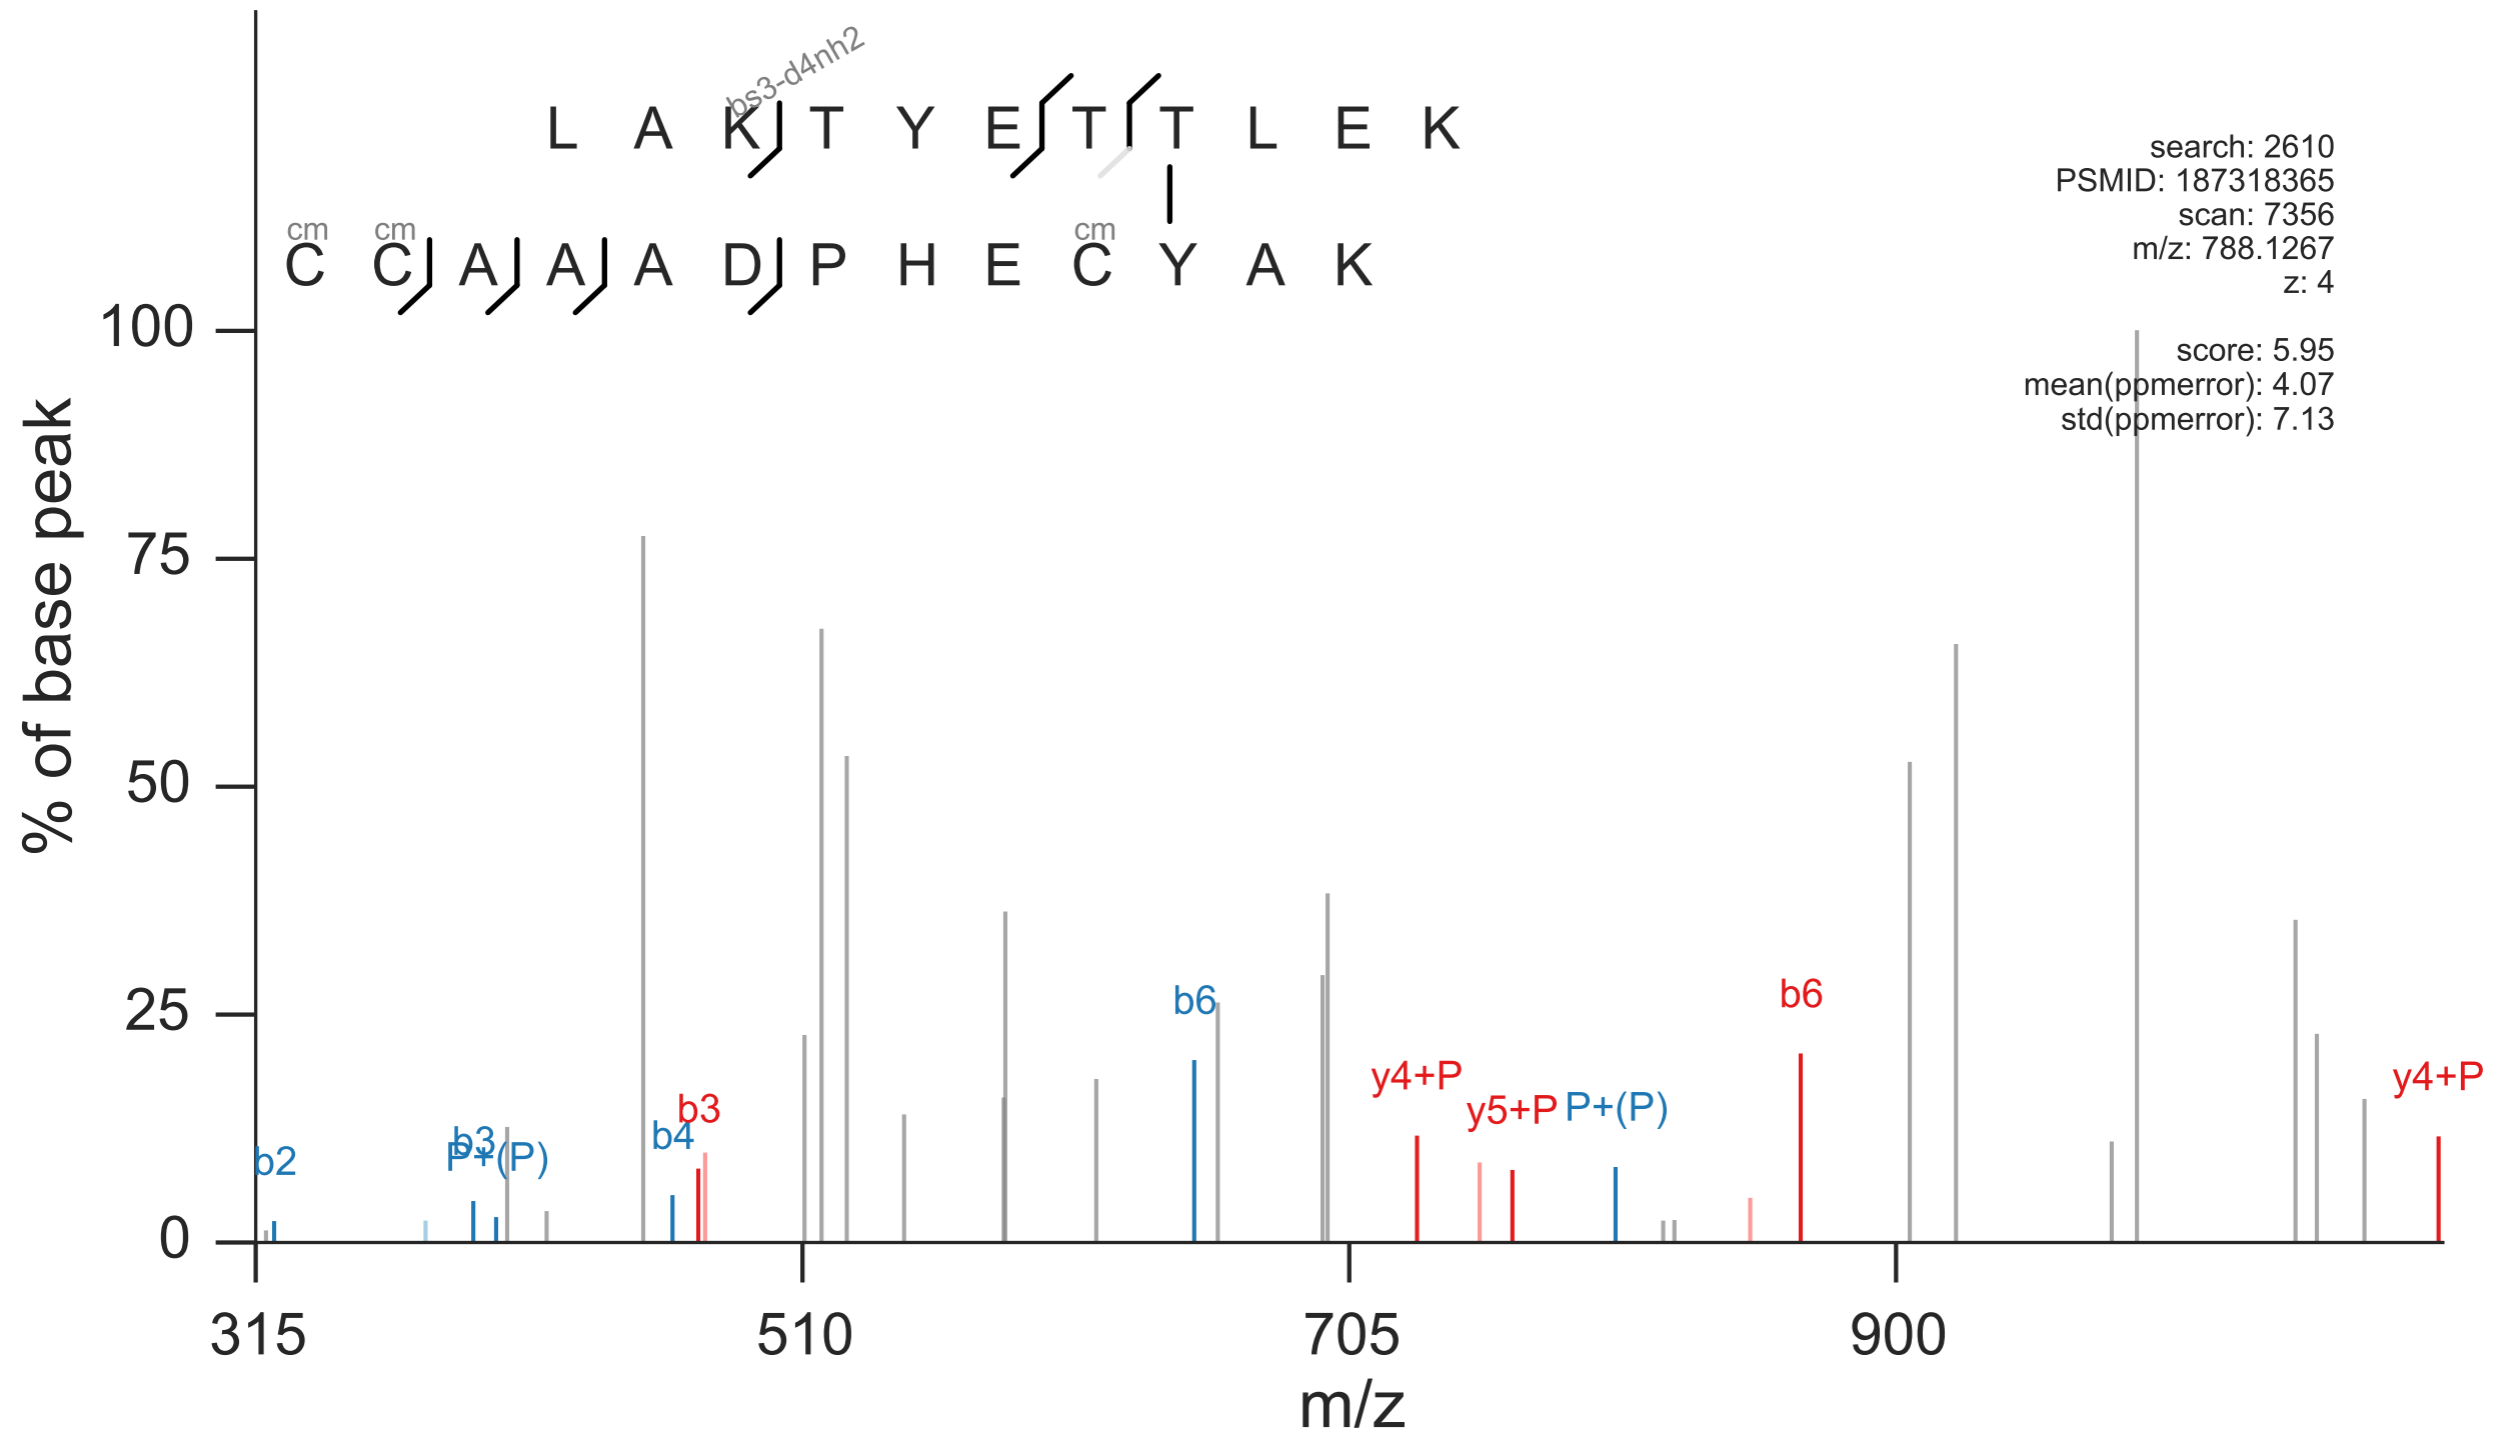

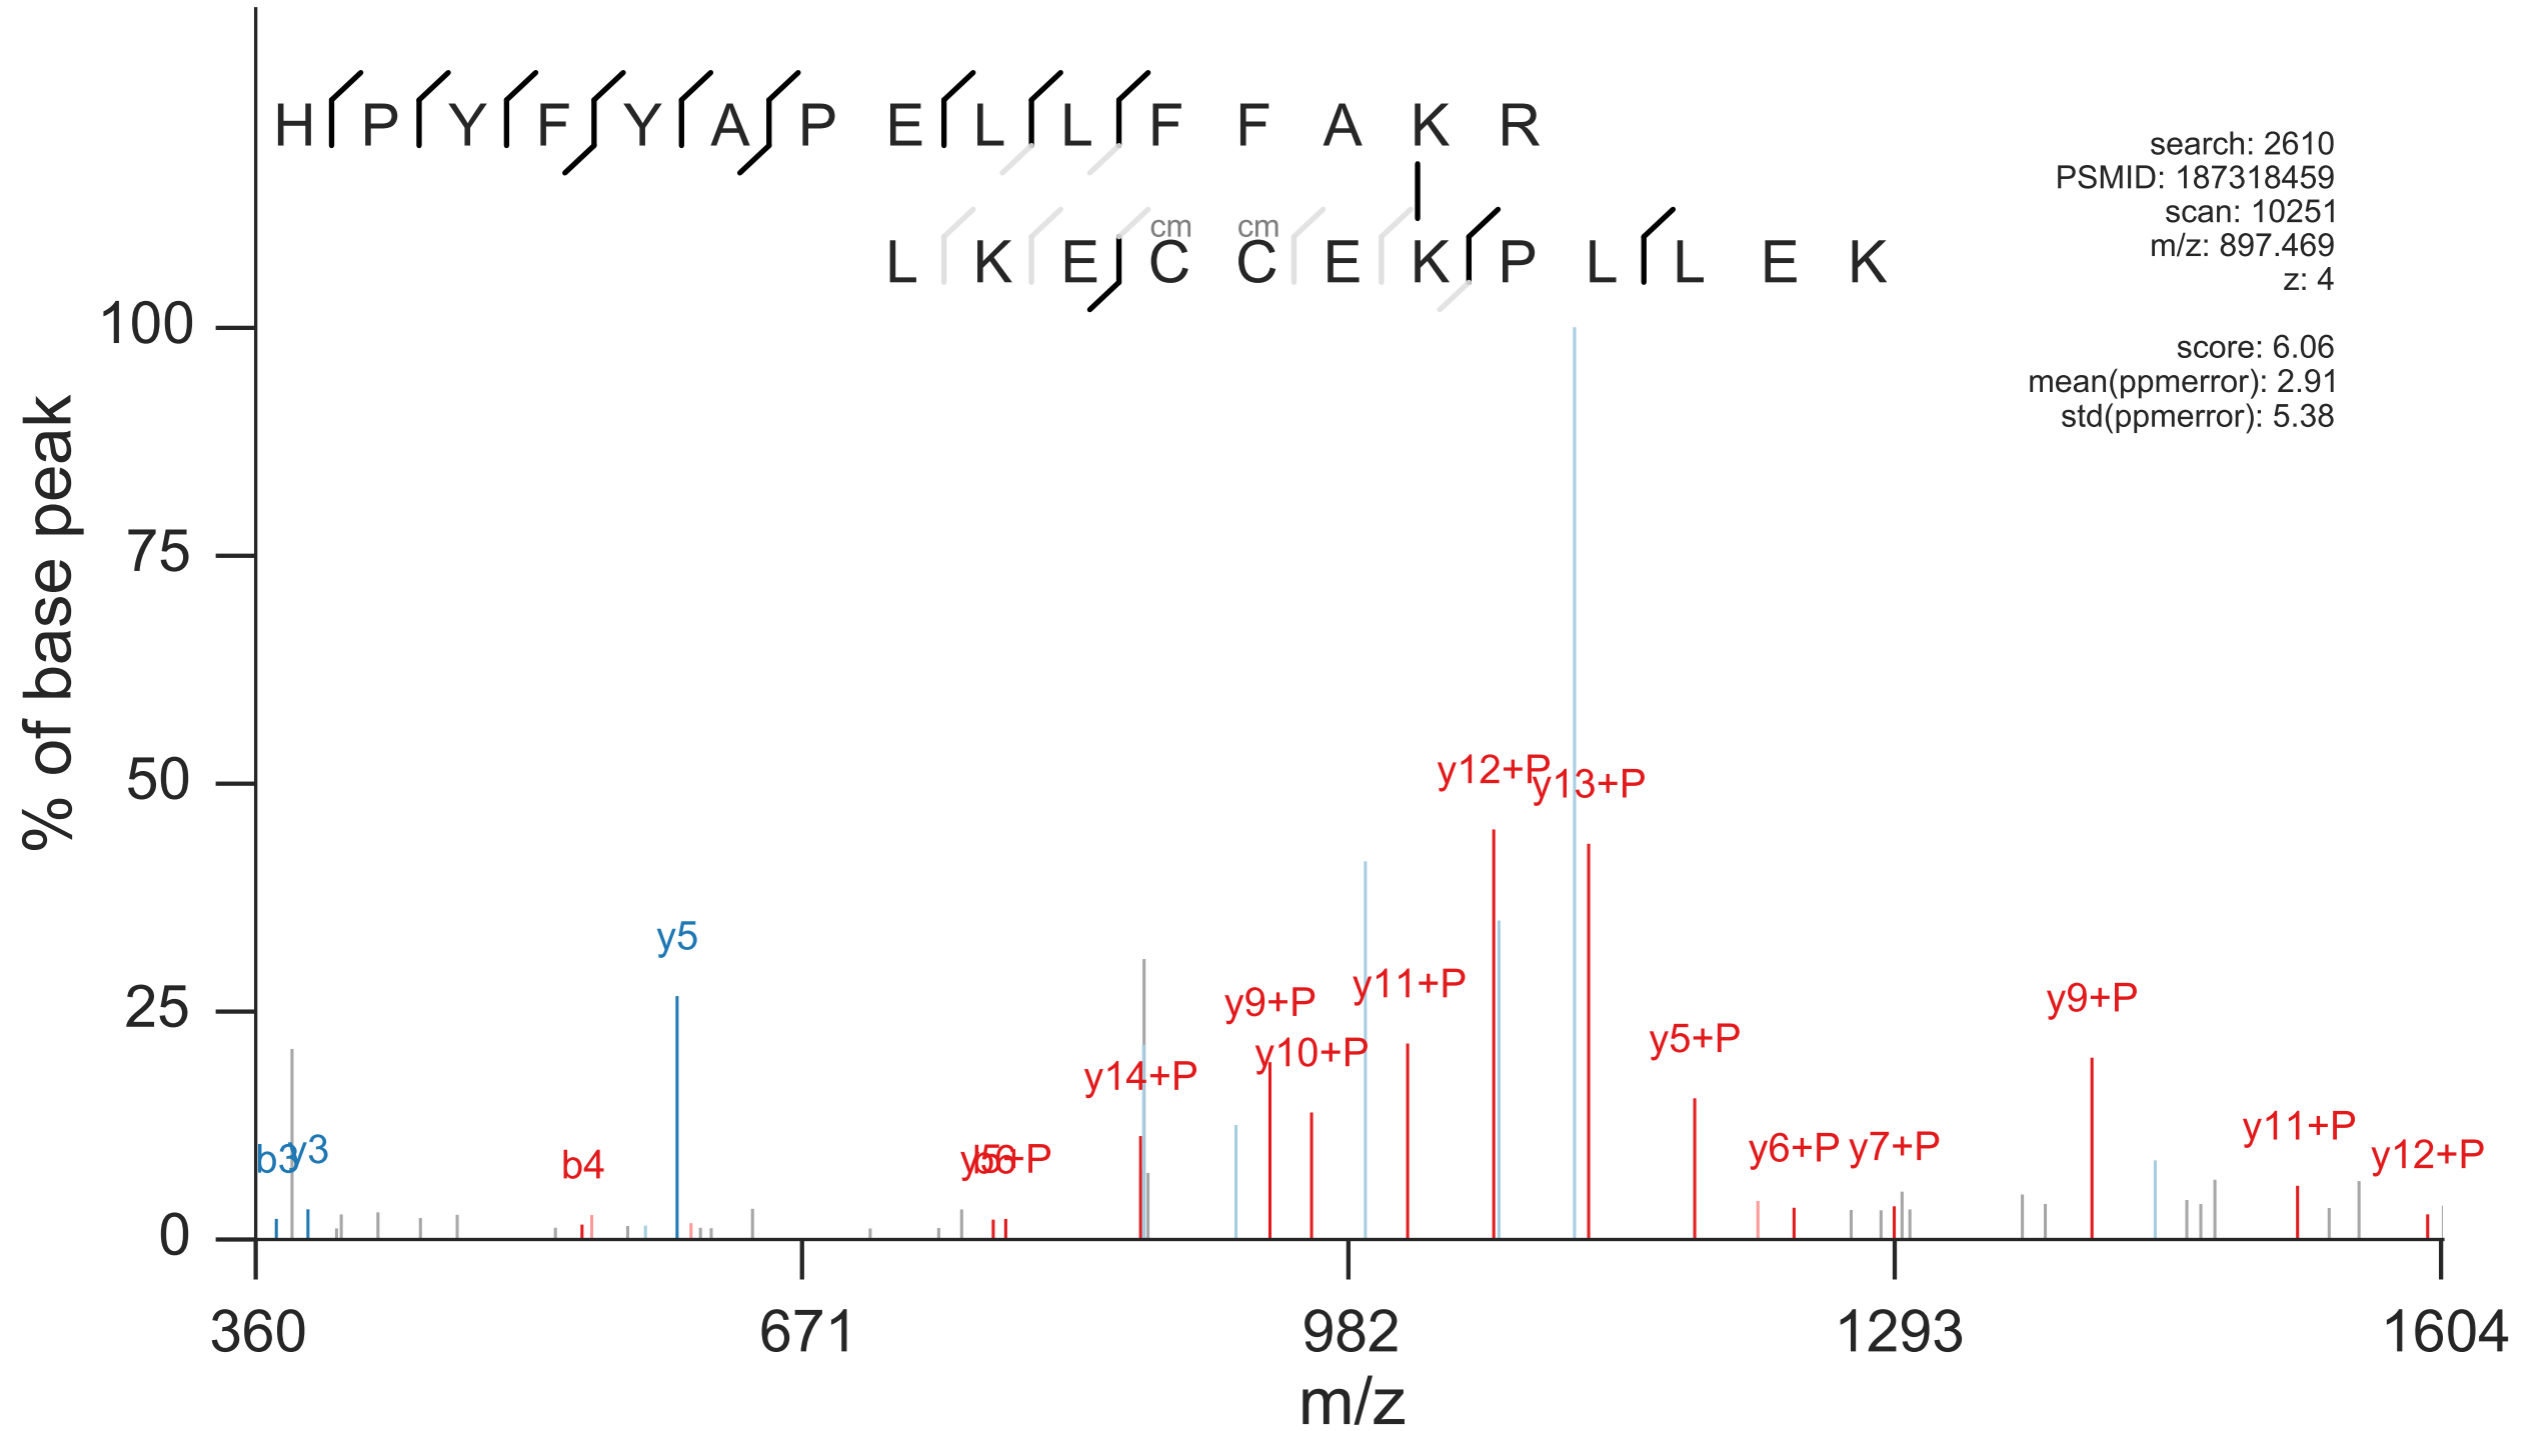

H|P|Y|F|Y|A|P E|L|L|F F A K R  
L|K|E|C<sup>cm</sup> C<sup>cm</sup>|E|K|P L|L E K

search: 2610  
PSMID: 187318459  
scan: 10251  
m/z: 897.469  
z: 4  
score: 6.06  
mean(ppmerror): 2.91  
std(ppmerror): 5.38

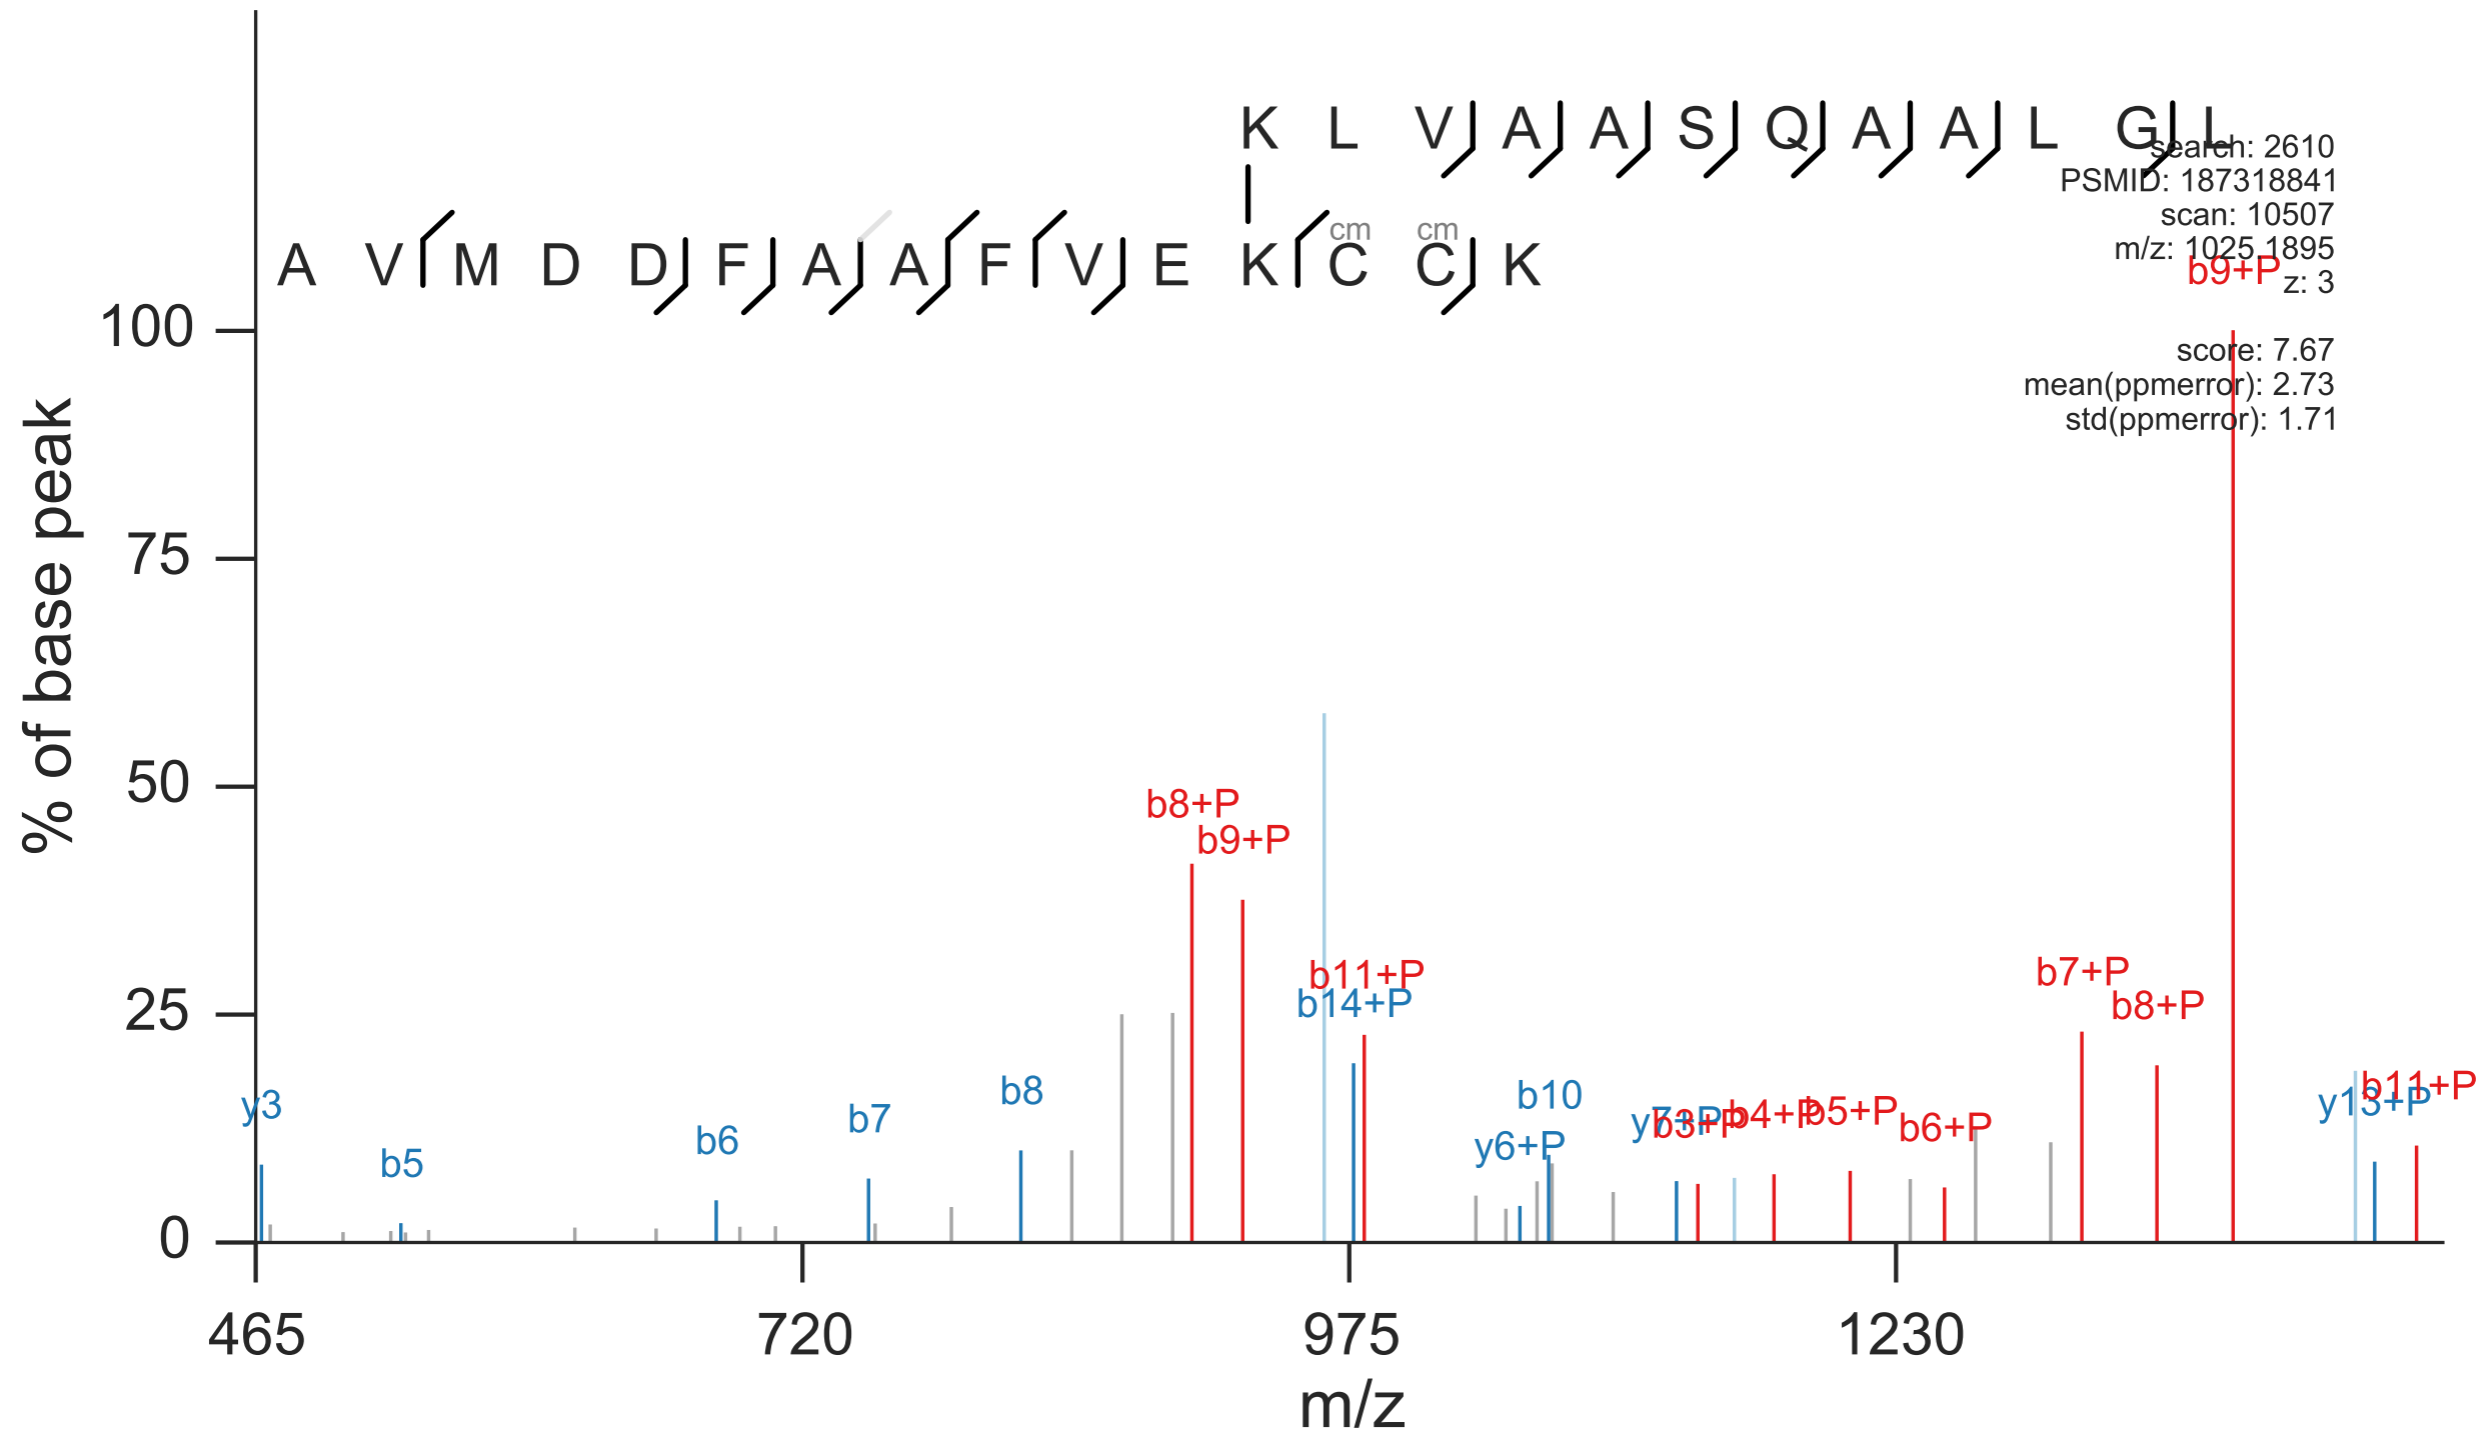

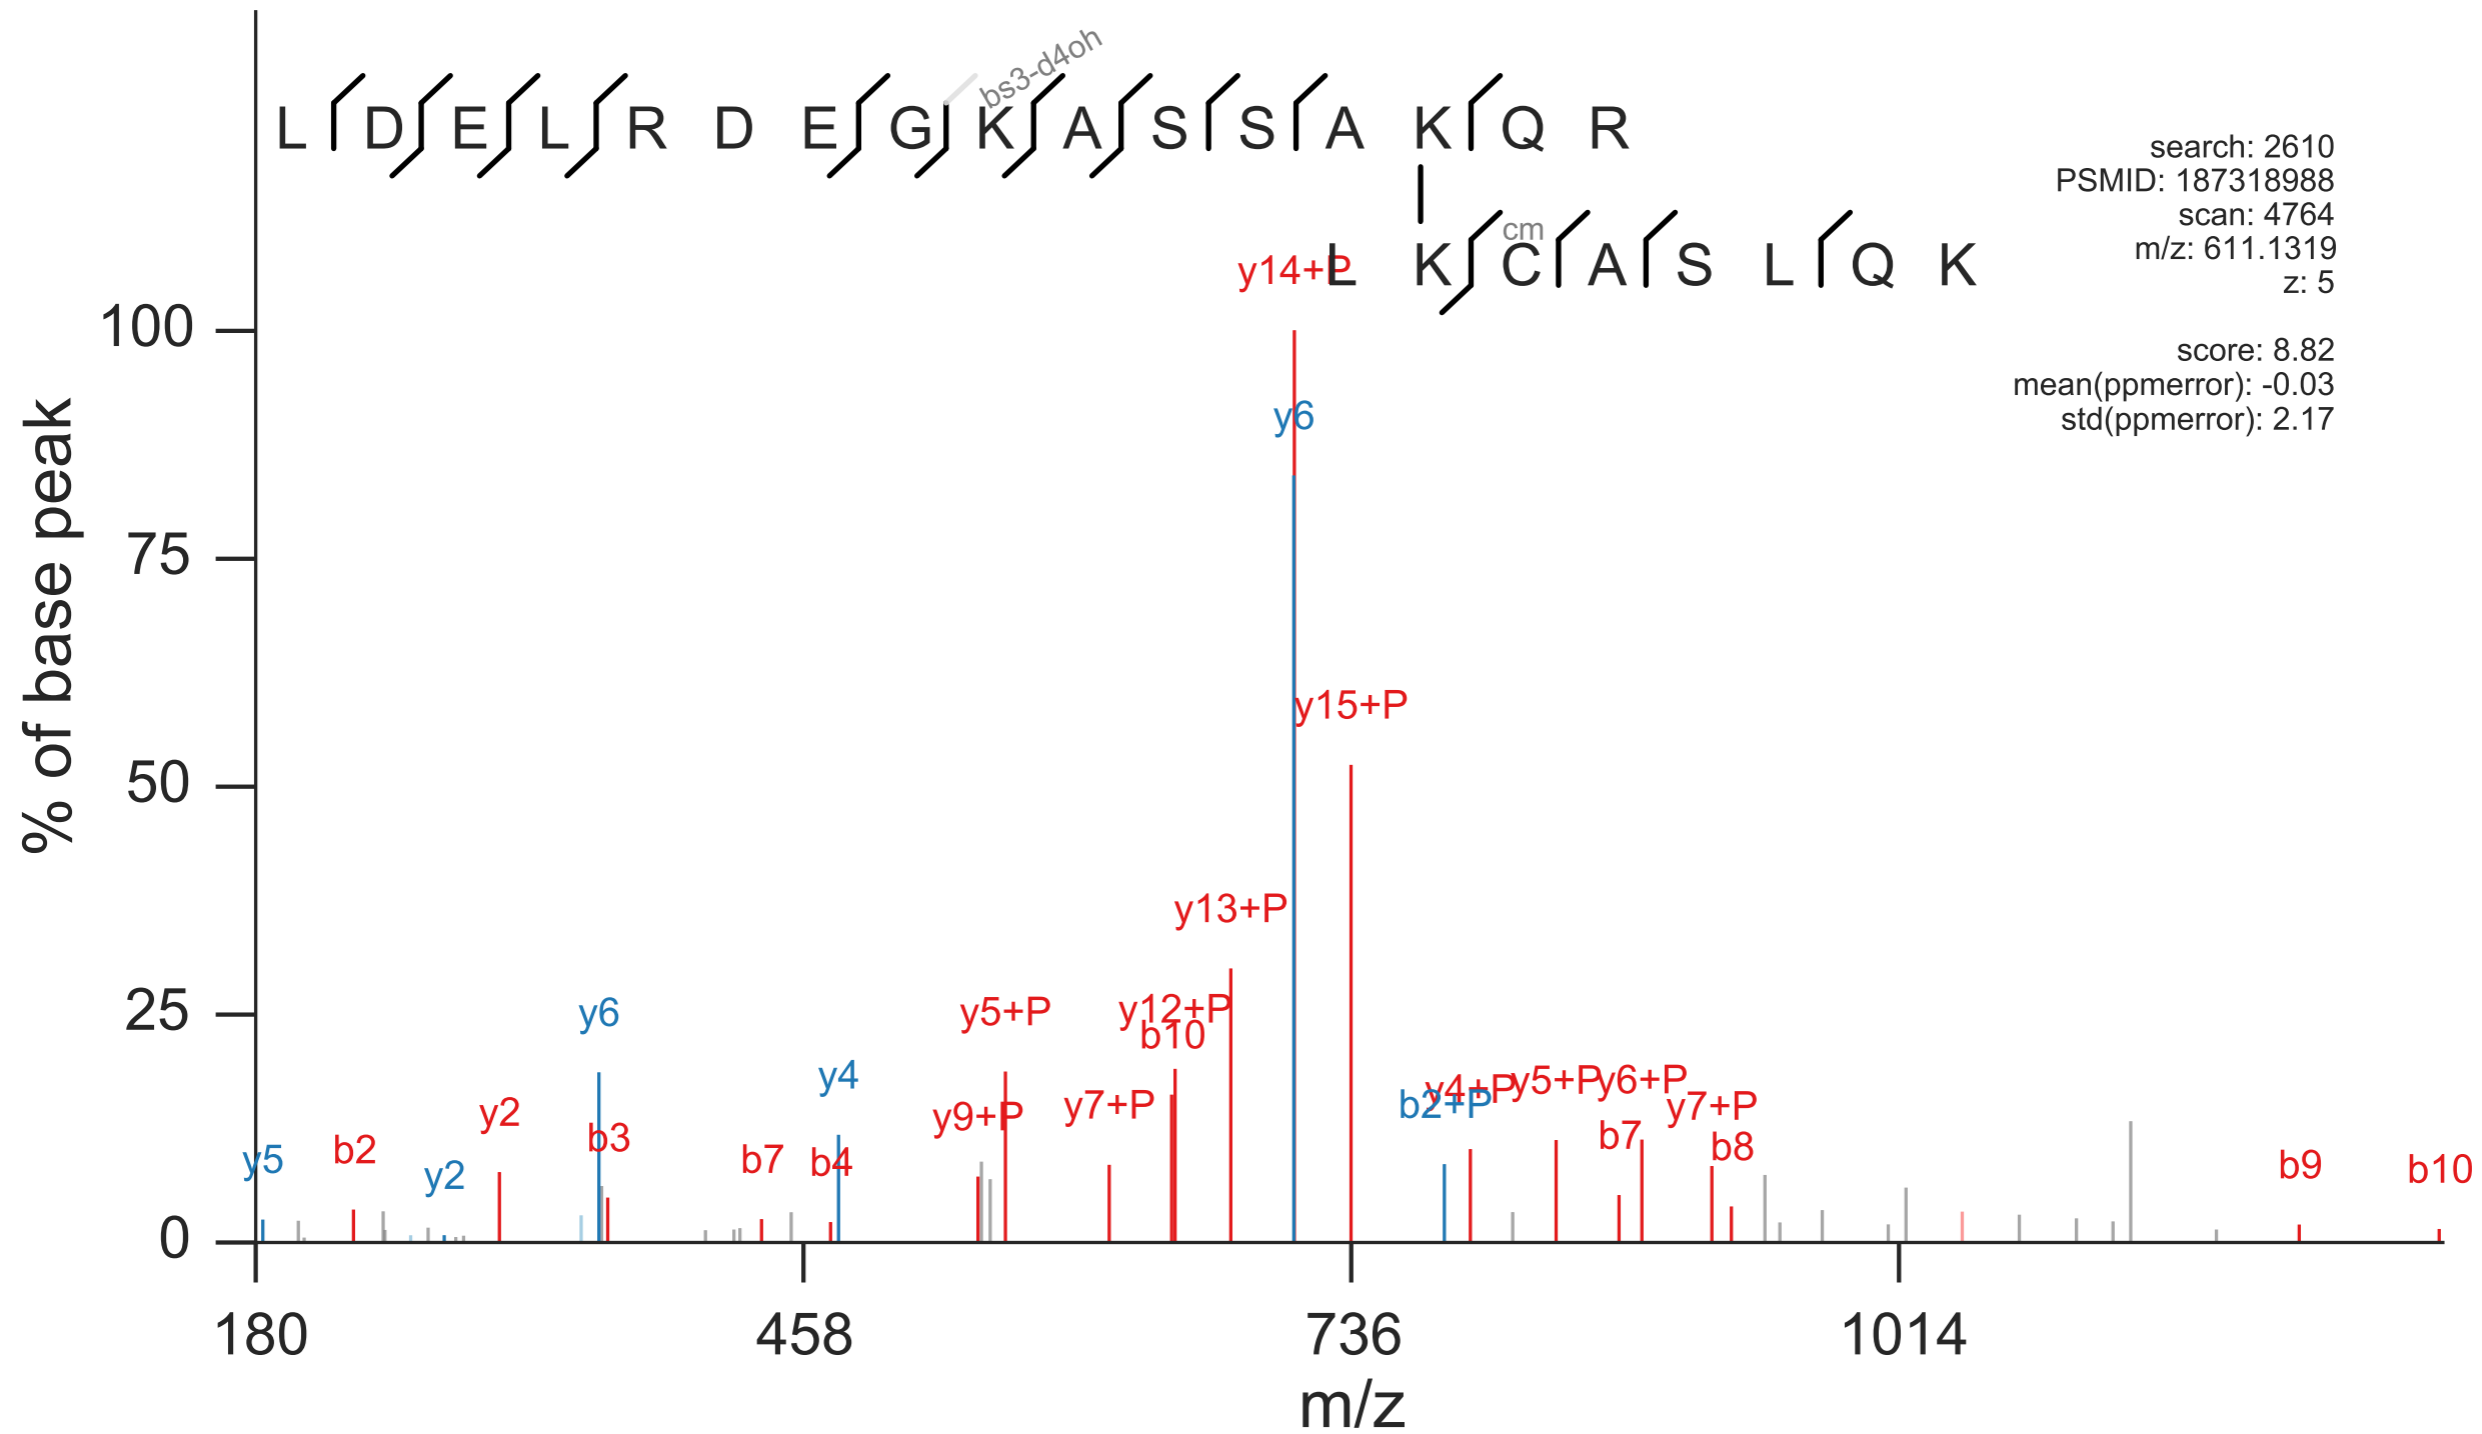

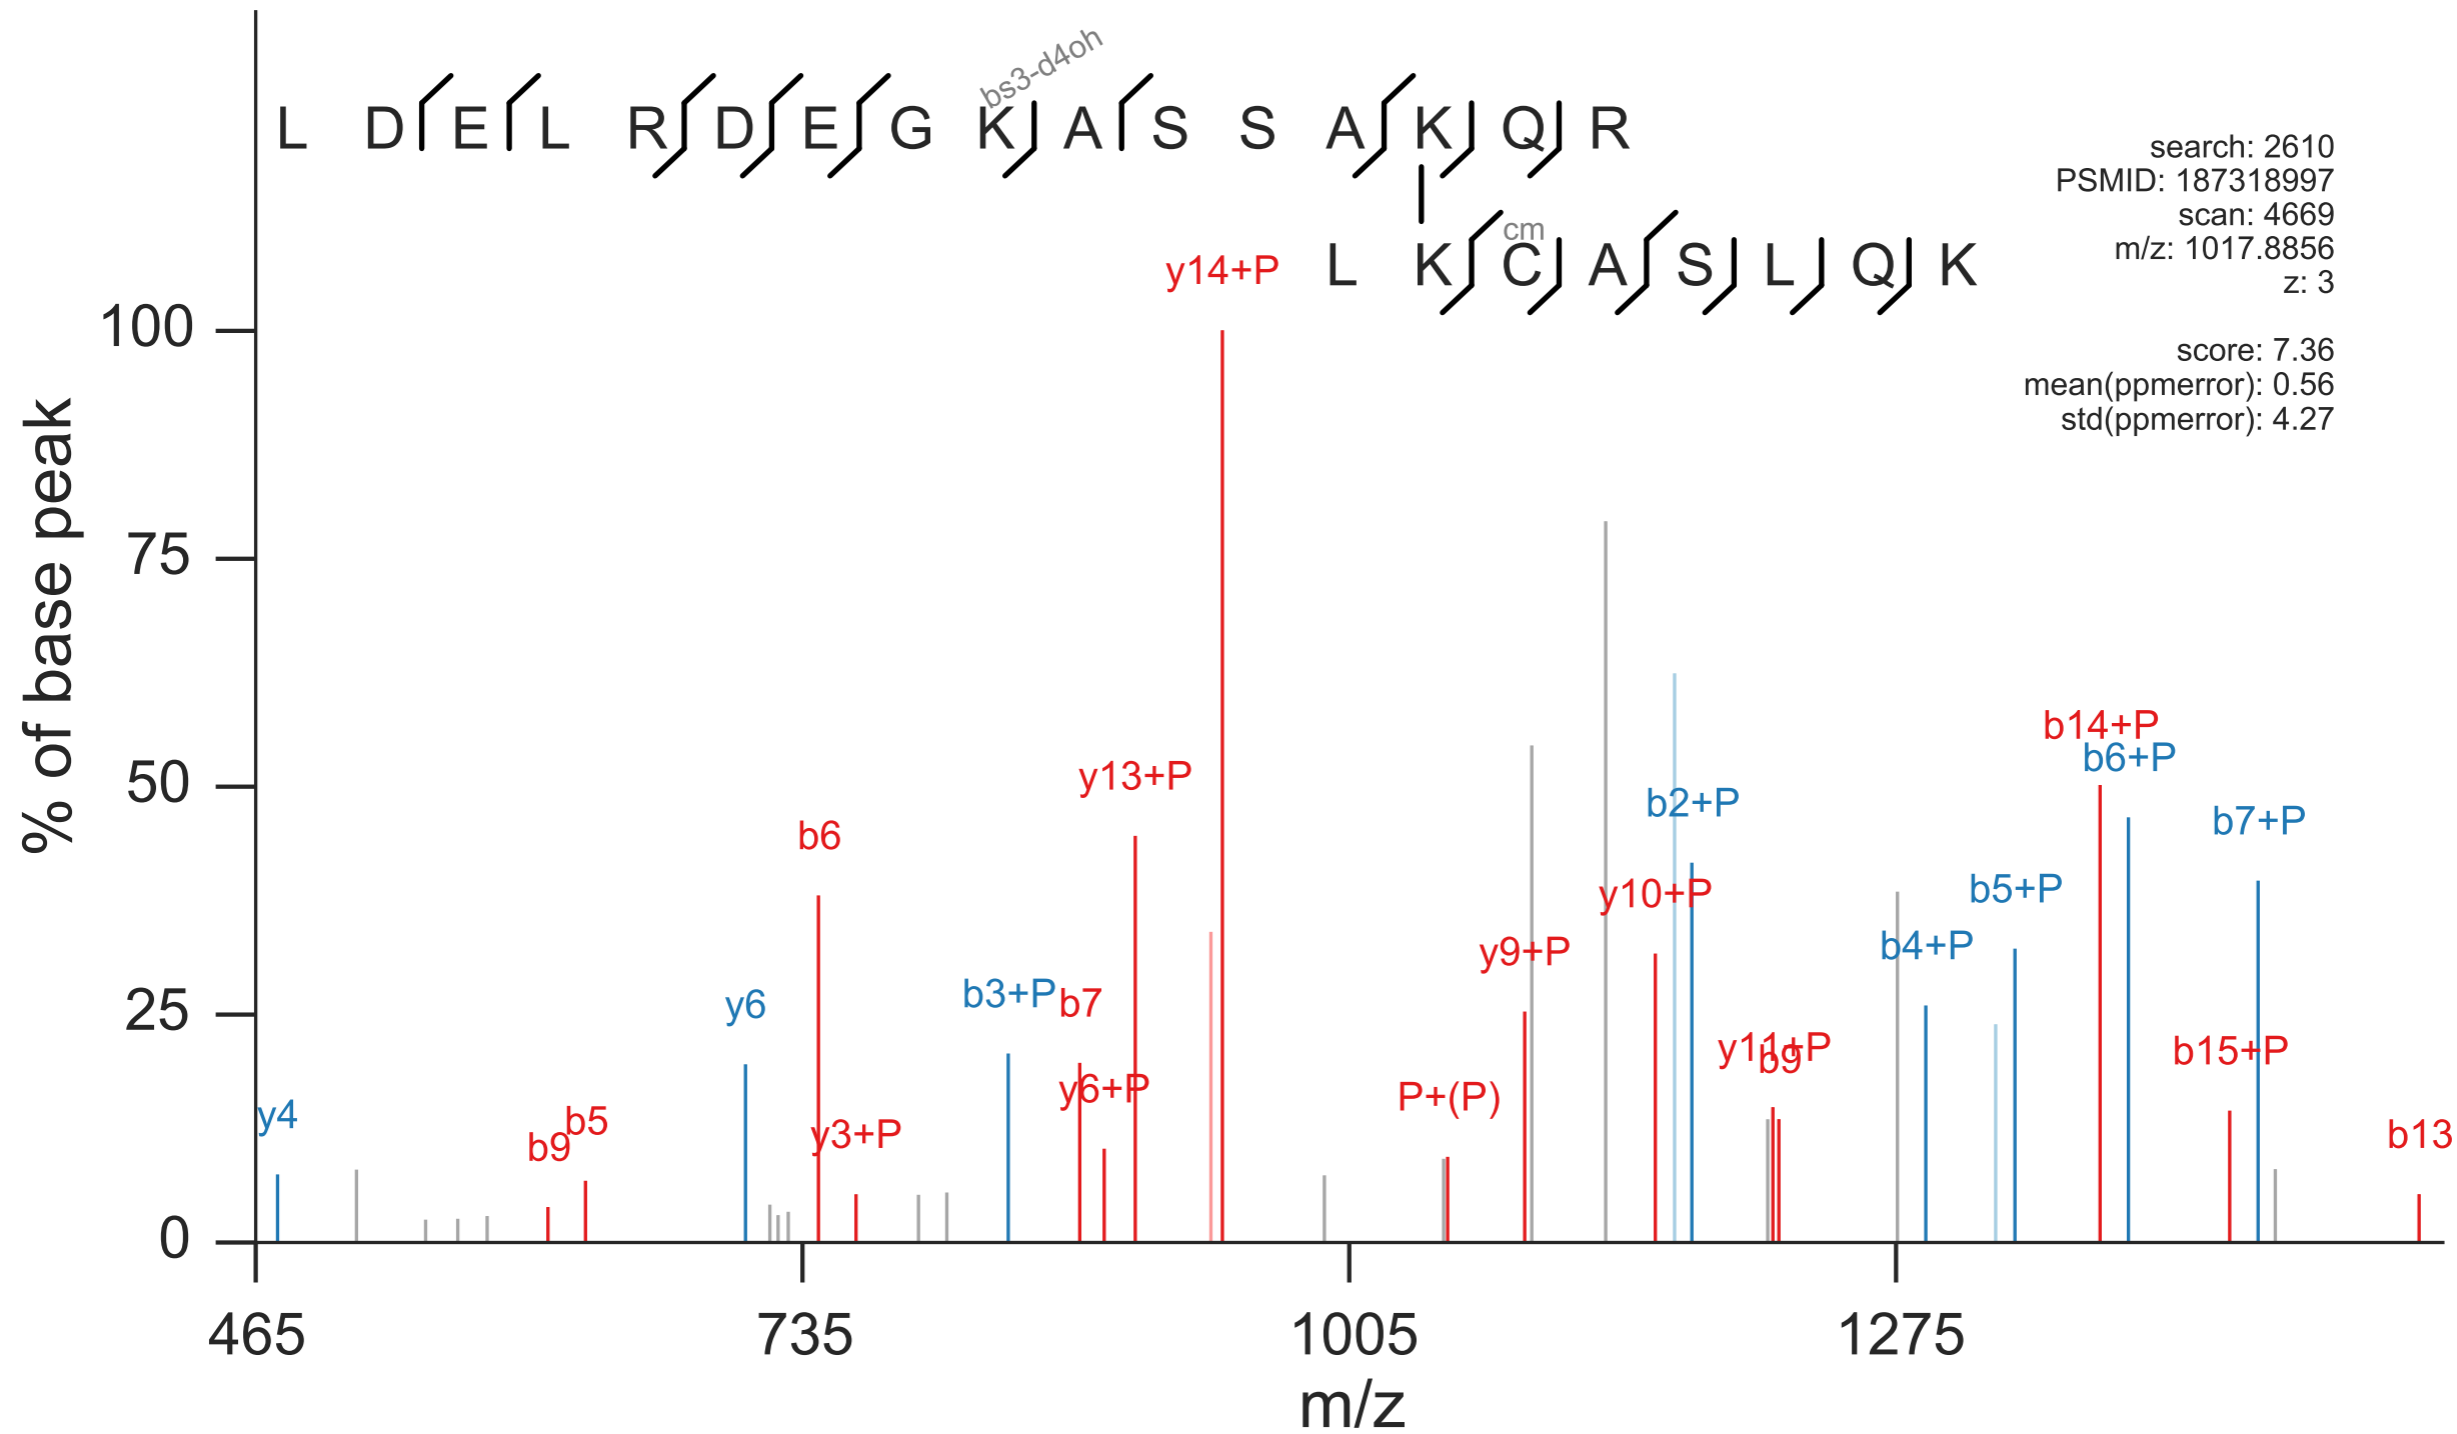



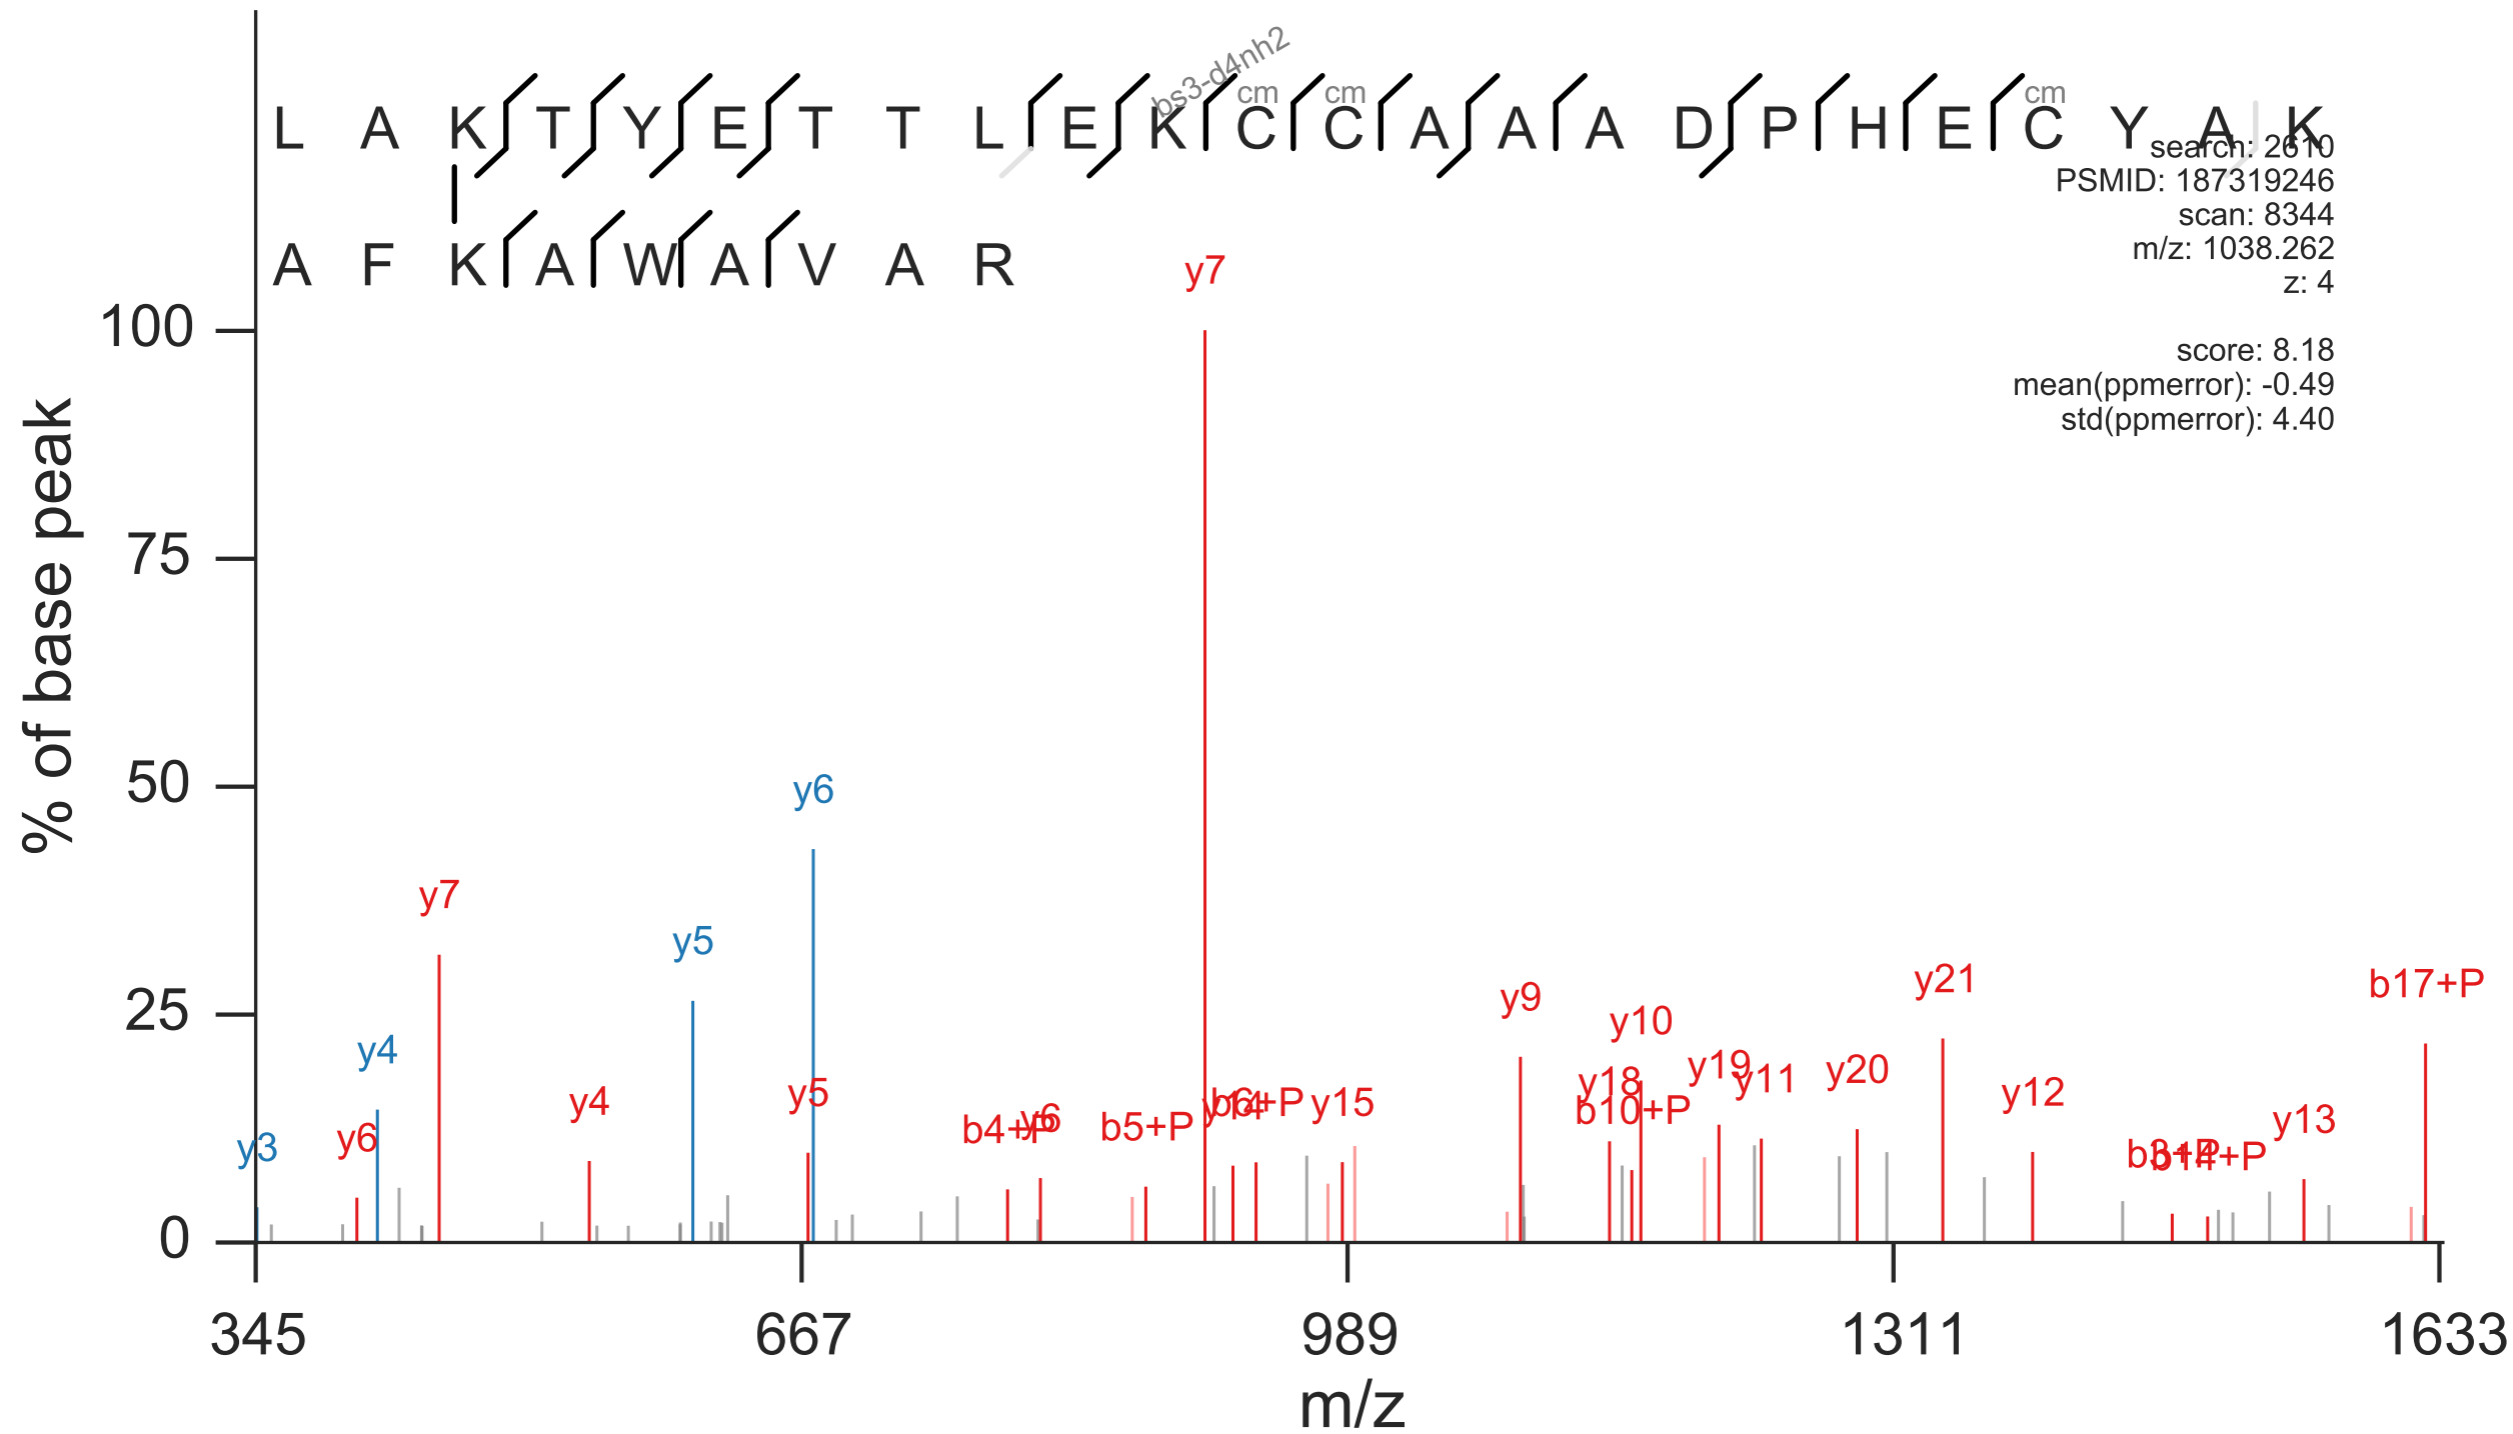

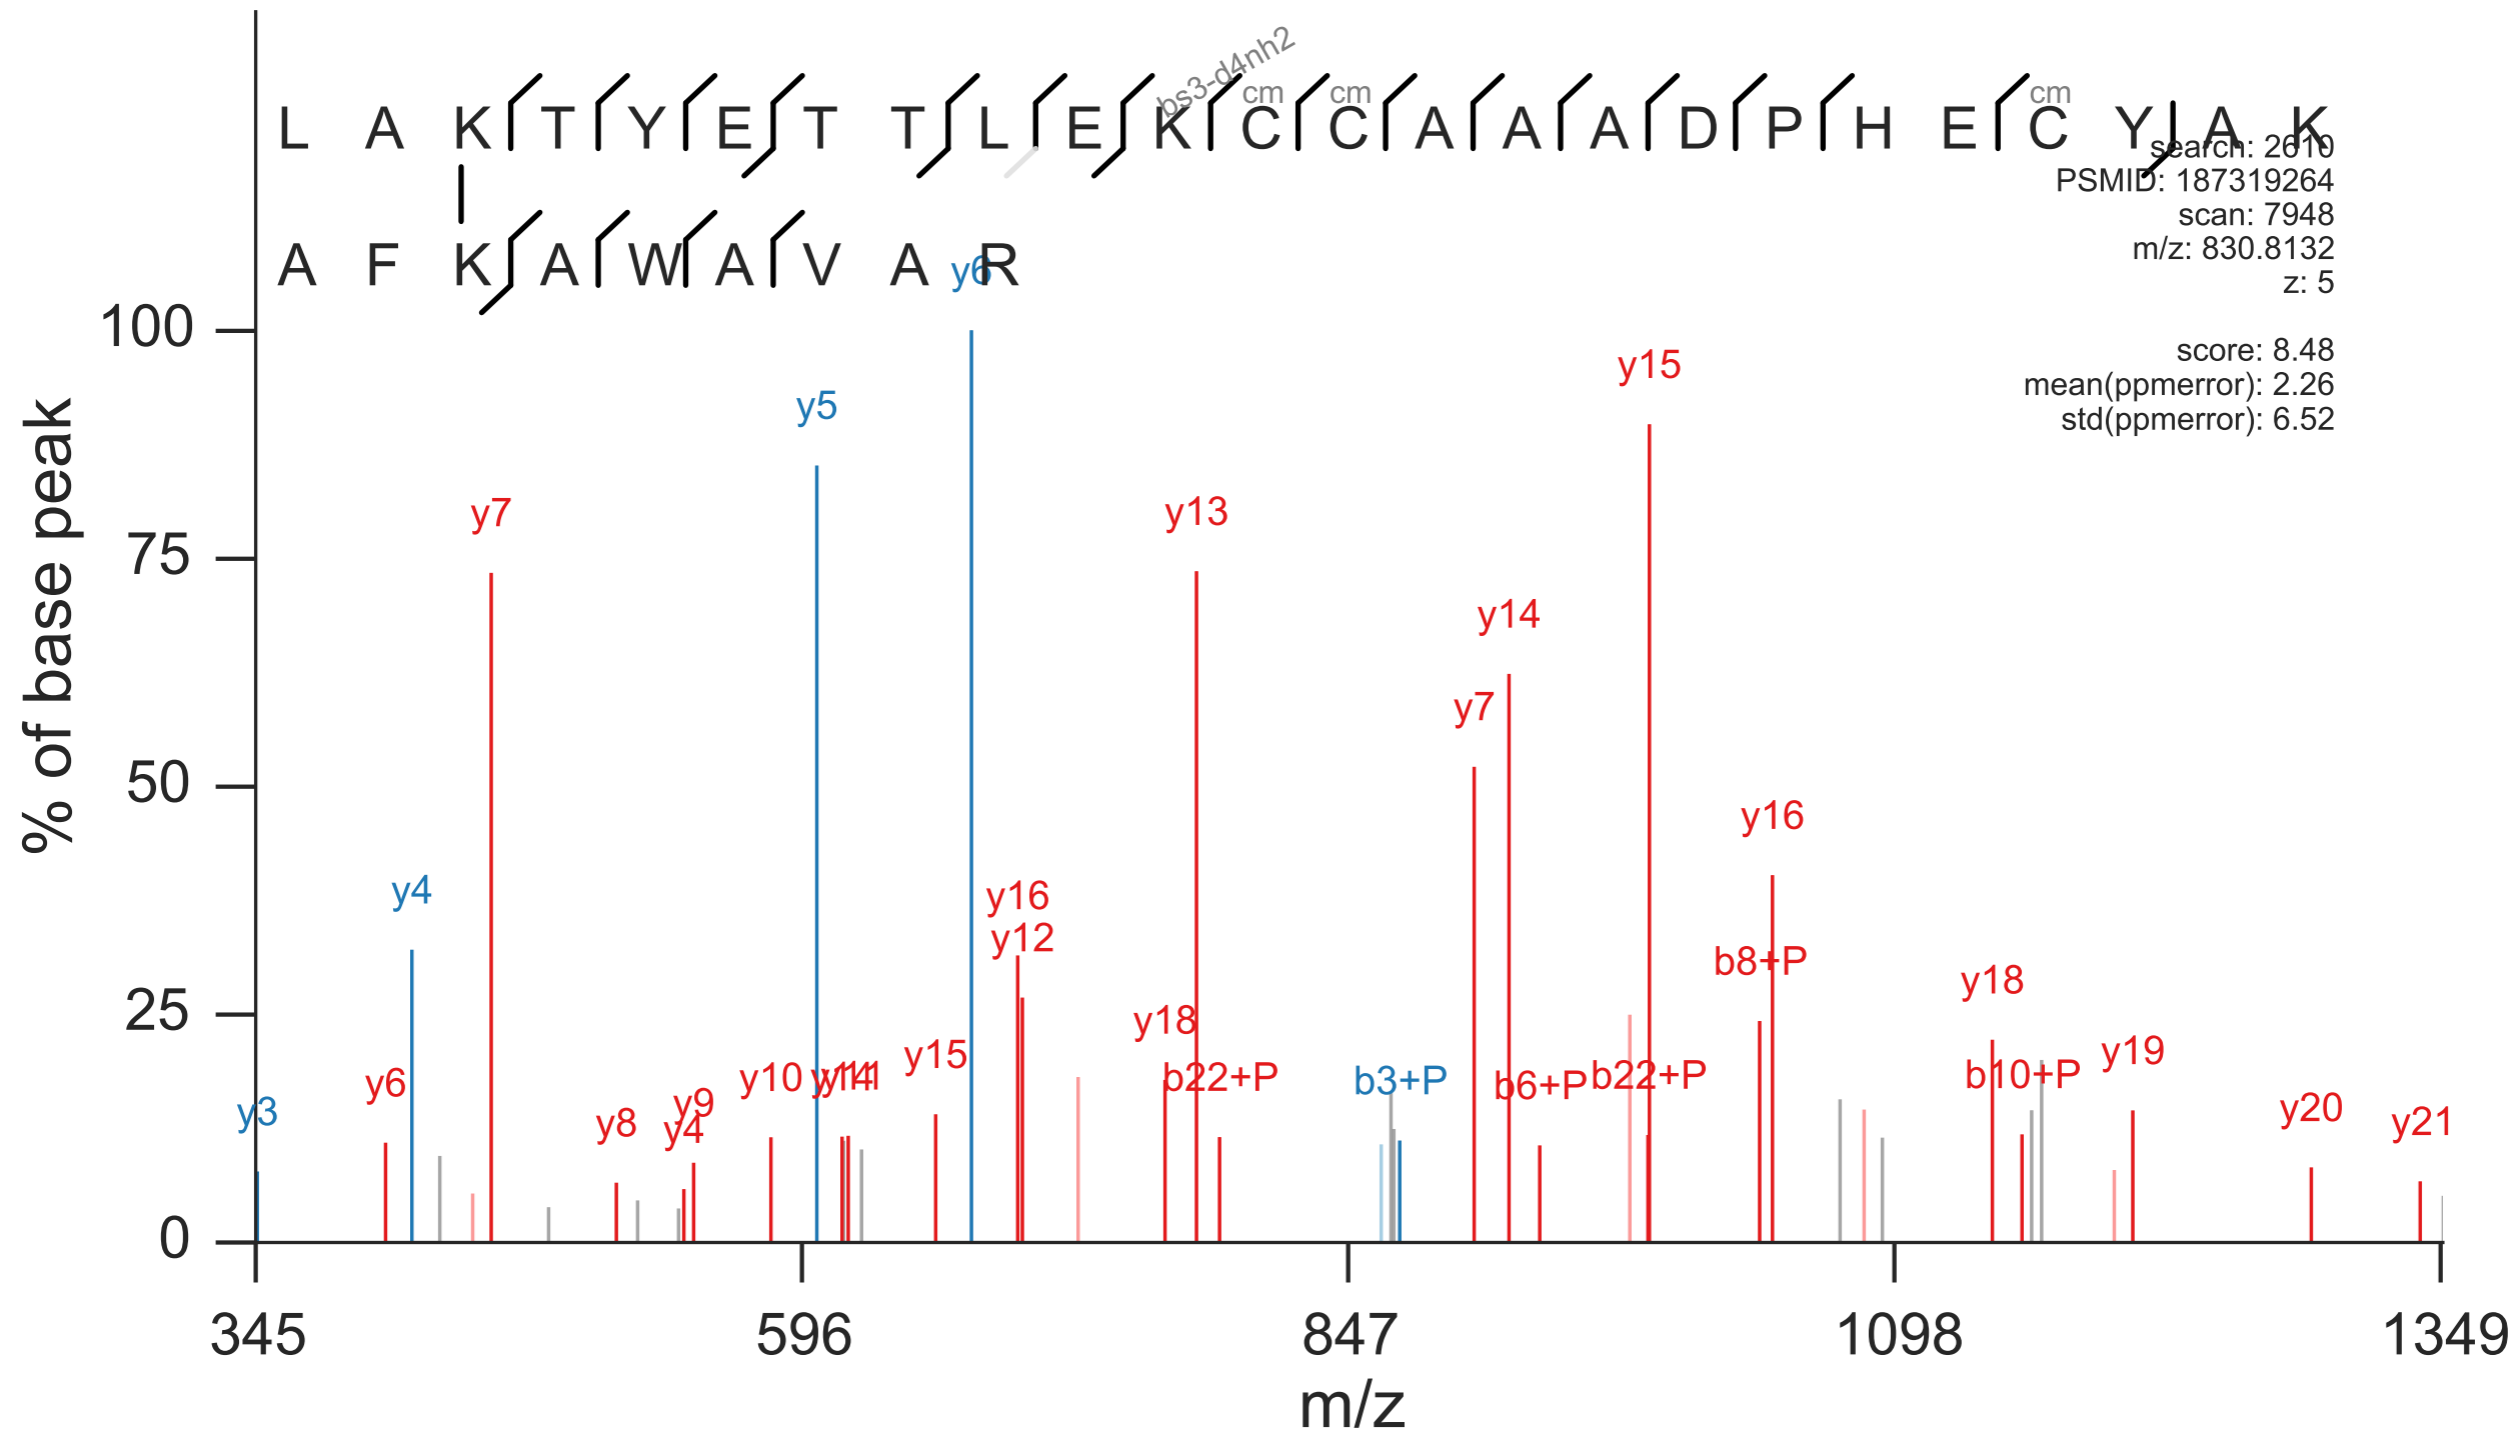

N Y A E A K D V F L G M F L Y E Y A R  
 L A K T Y E T T L E K

search: 2610  
 PSMID: 187319433  
 scan: 11985  
 m/z: 935.2238  
 z: 4  
 score: 9.81  
 mean(ppmerror): 1.42  
 std(ppmerror): 5.04

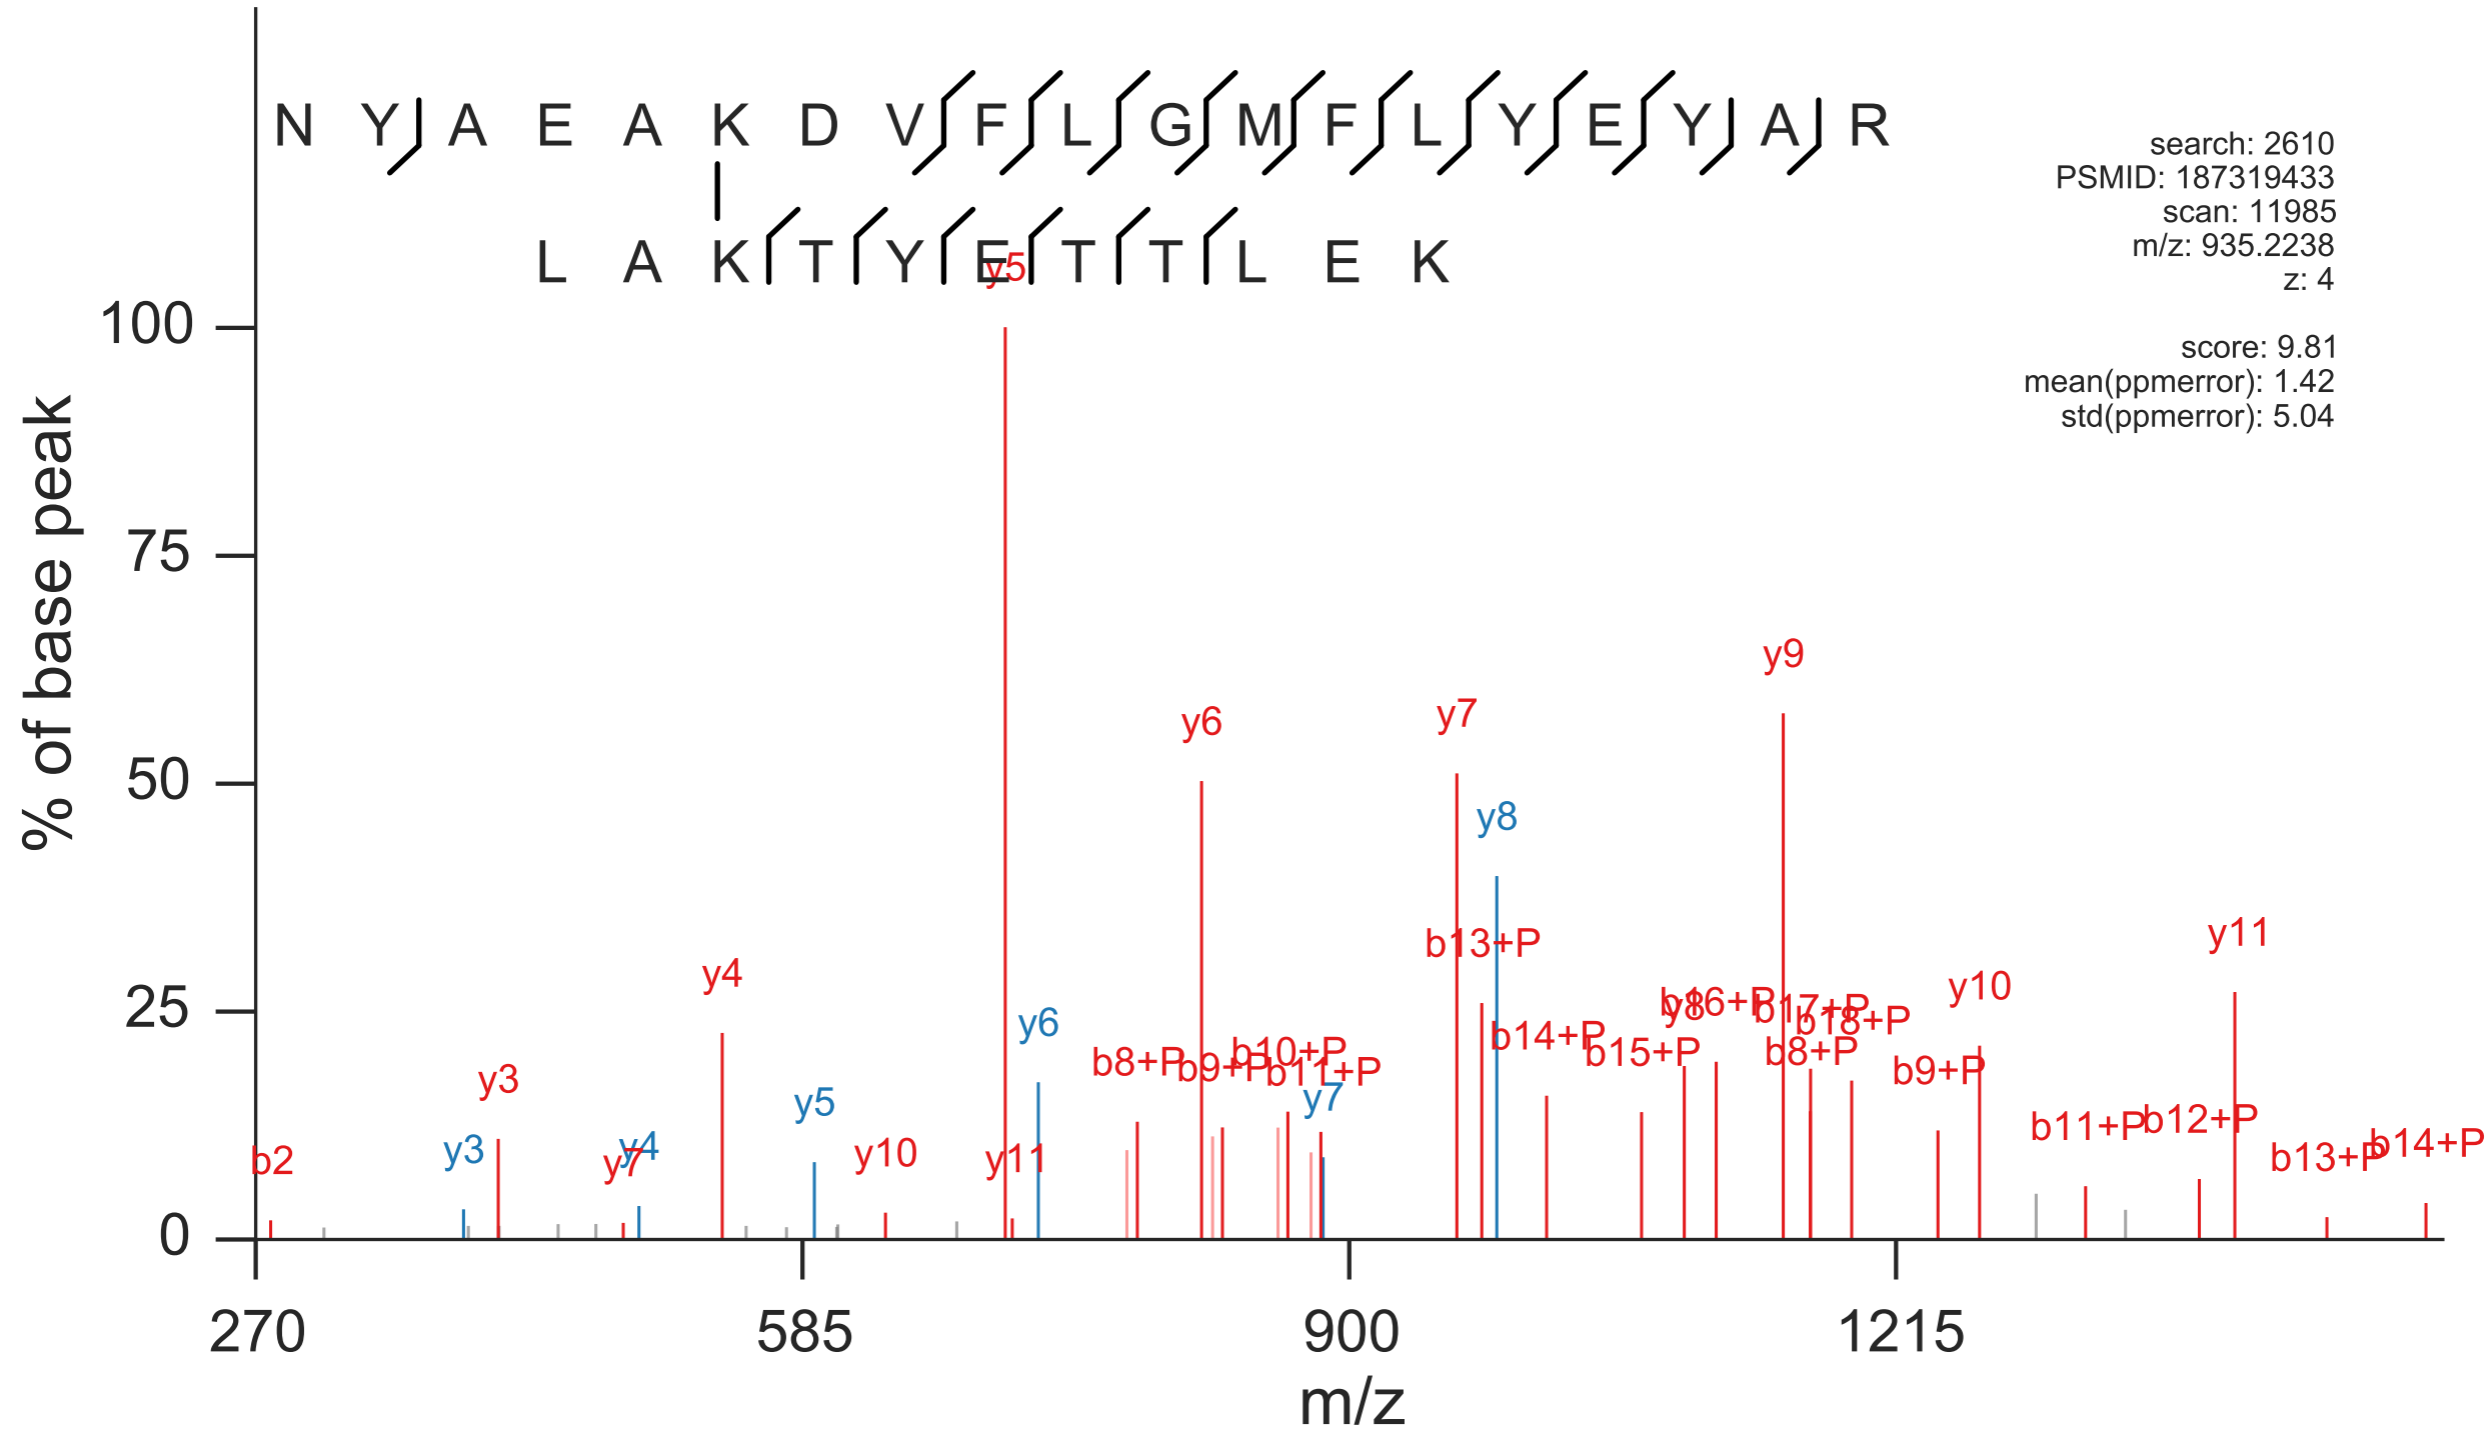

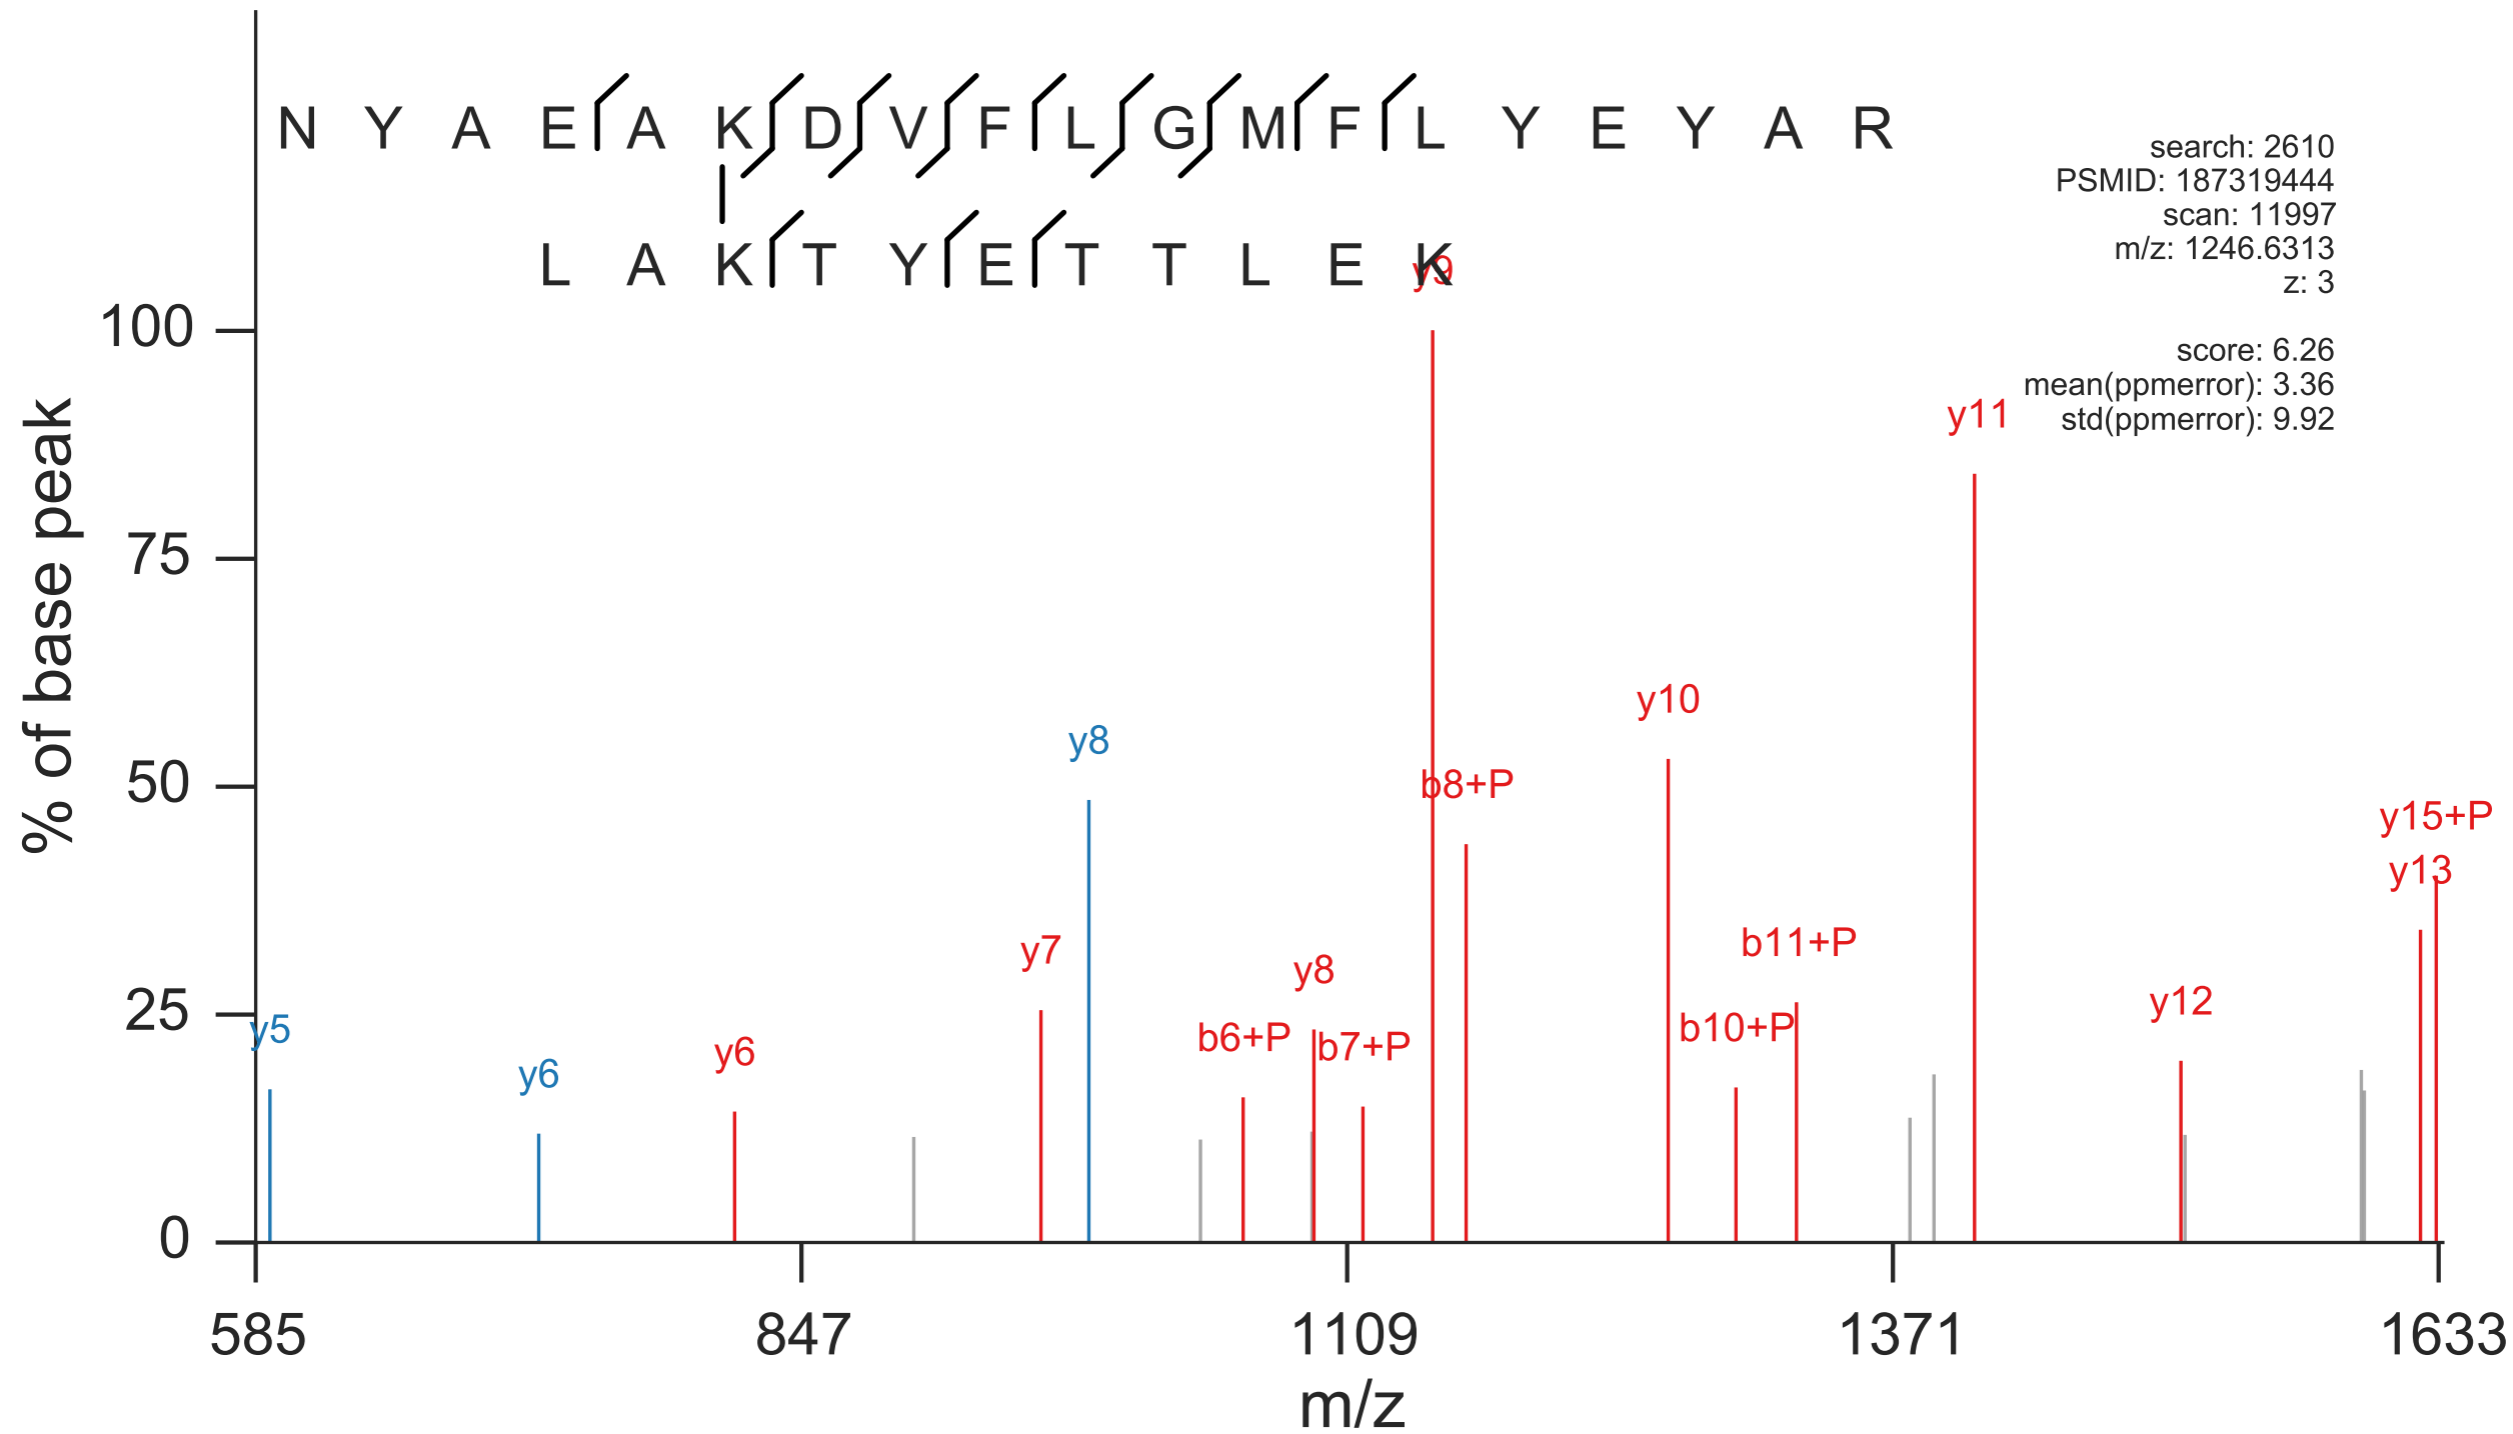

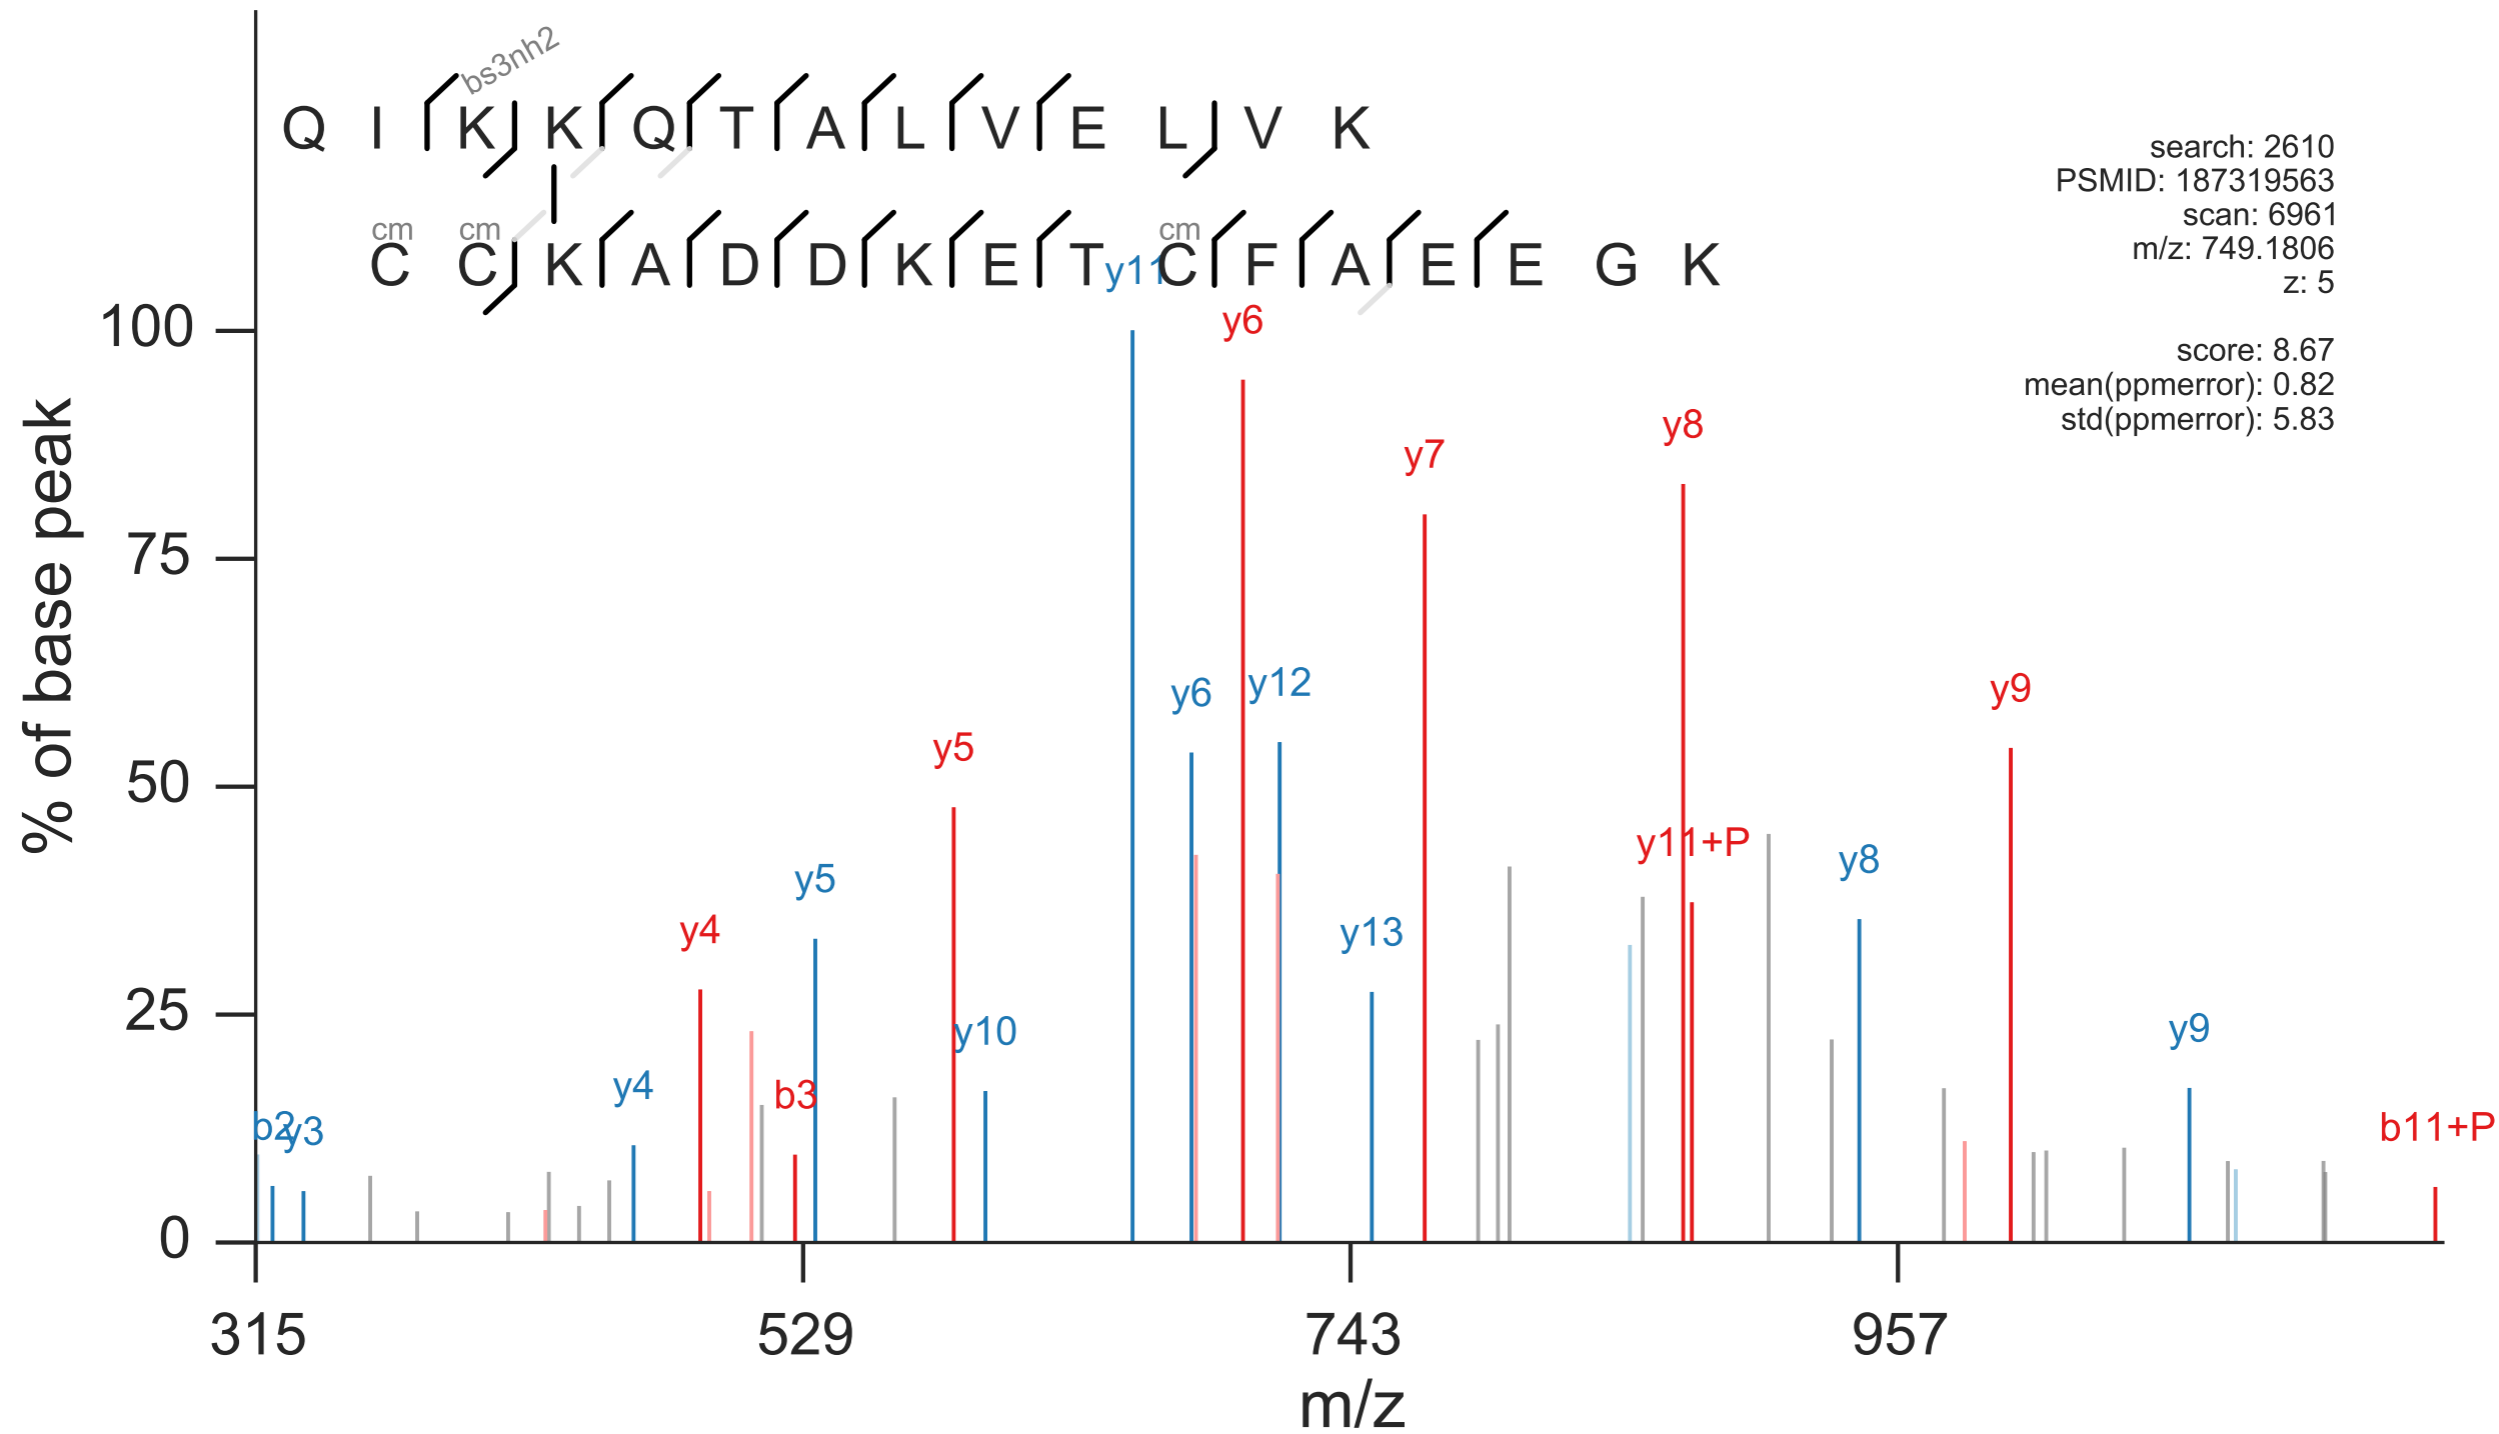



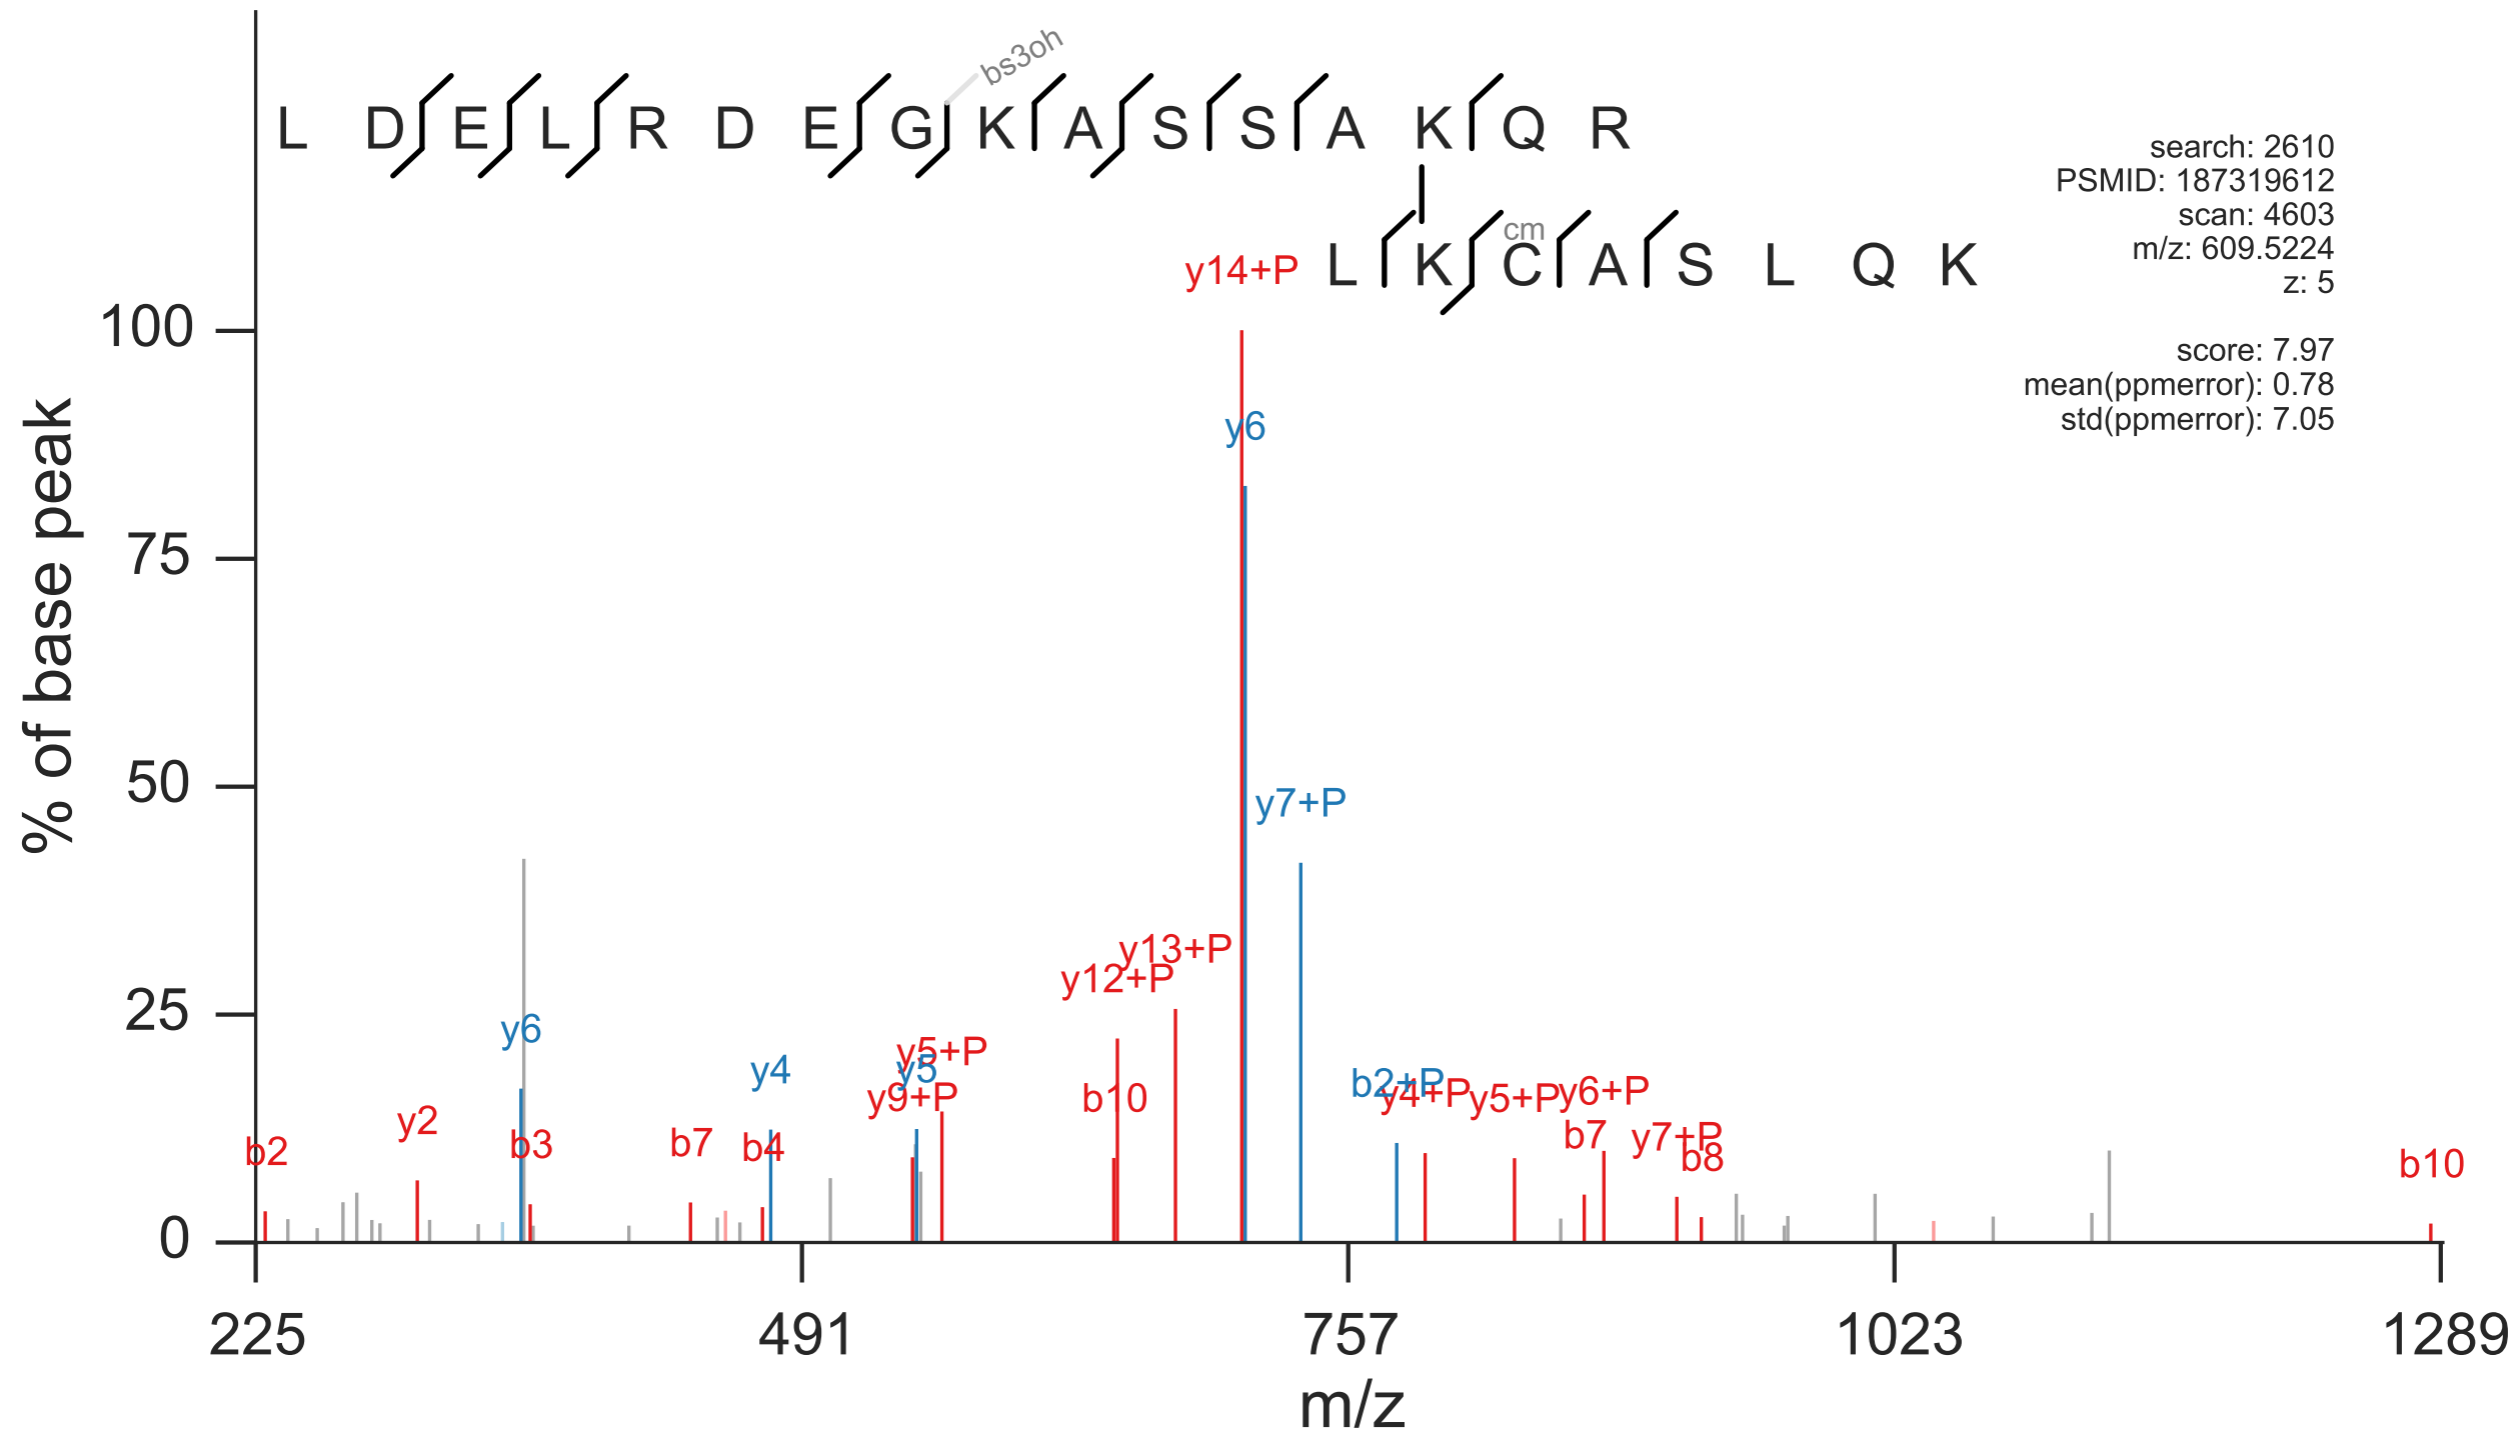

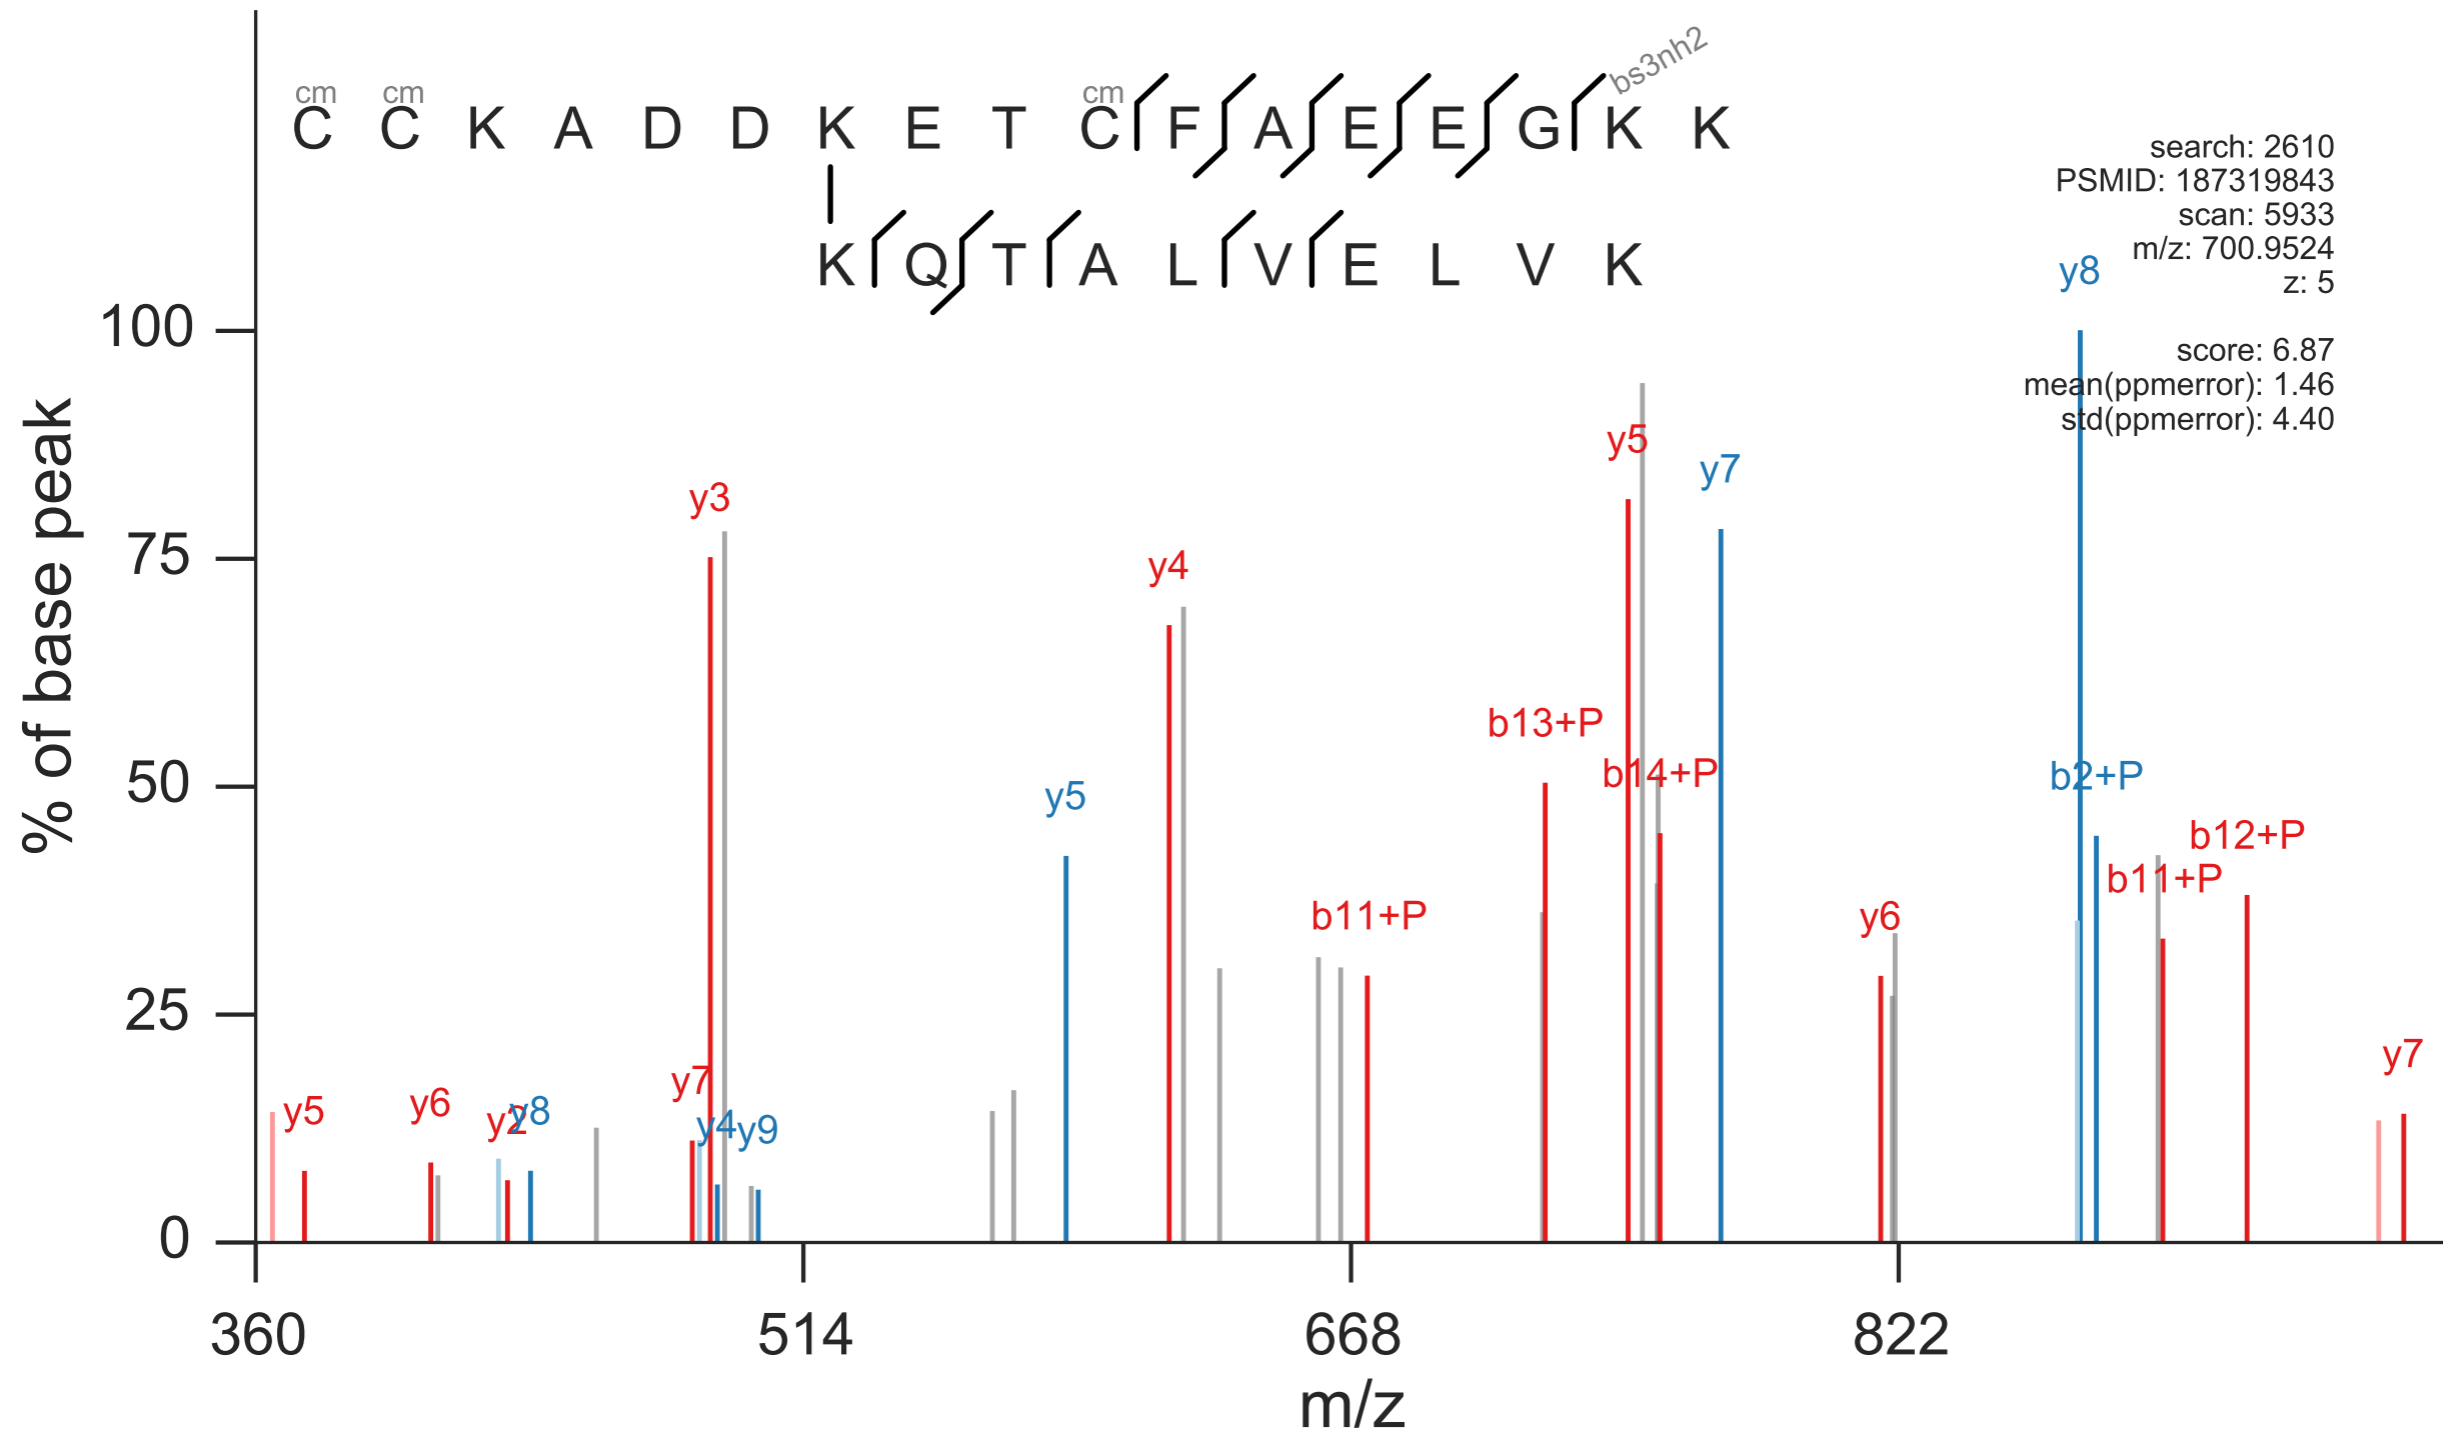



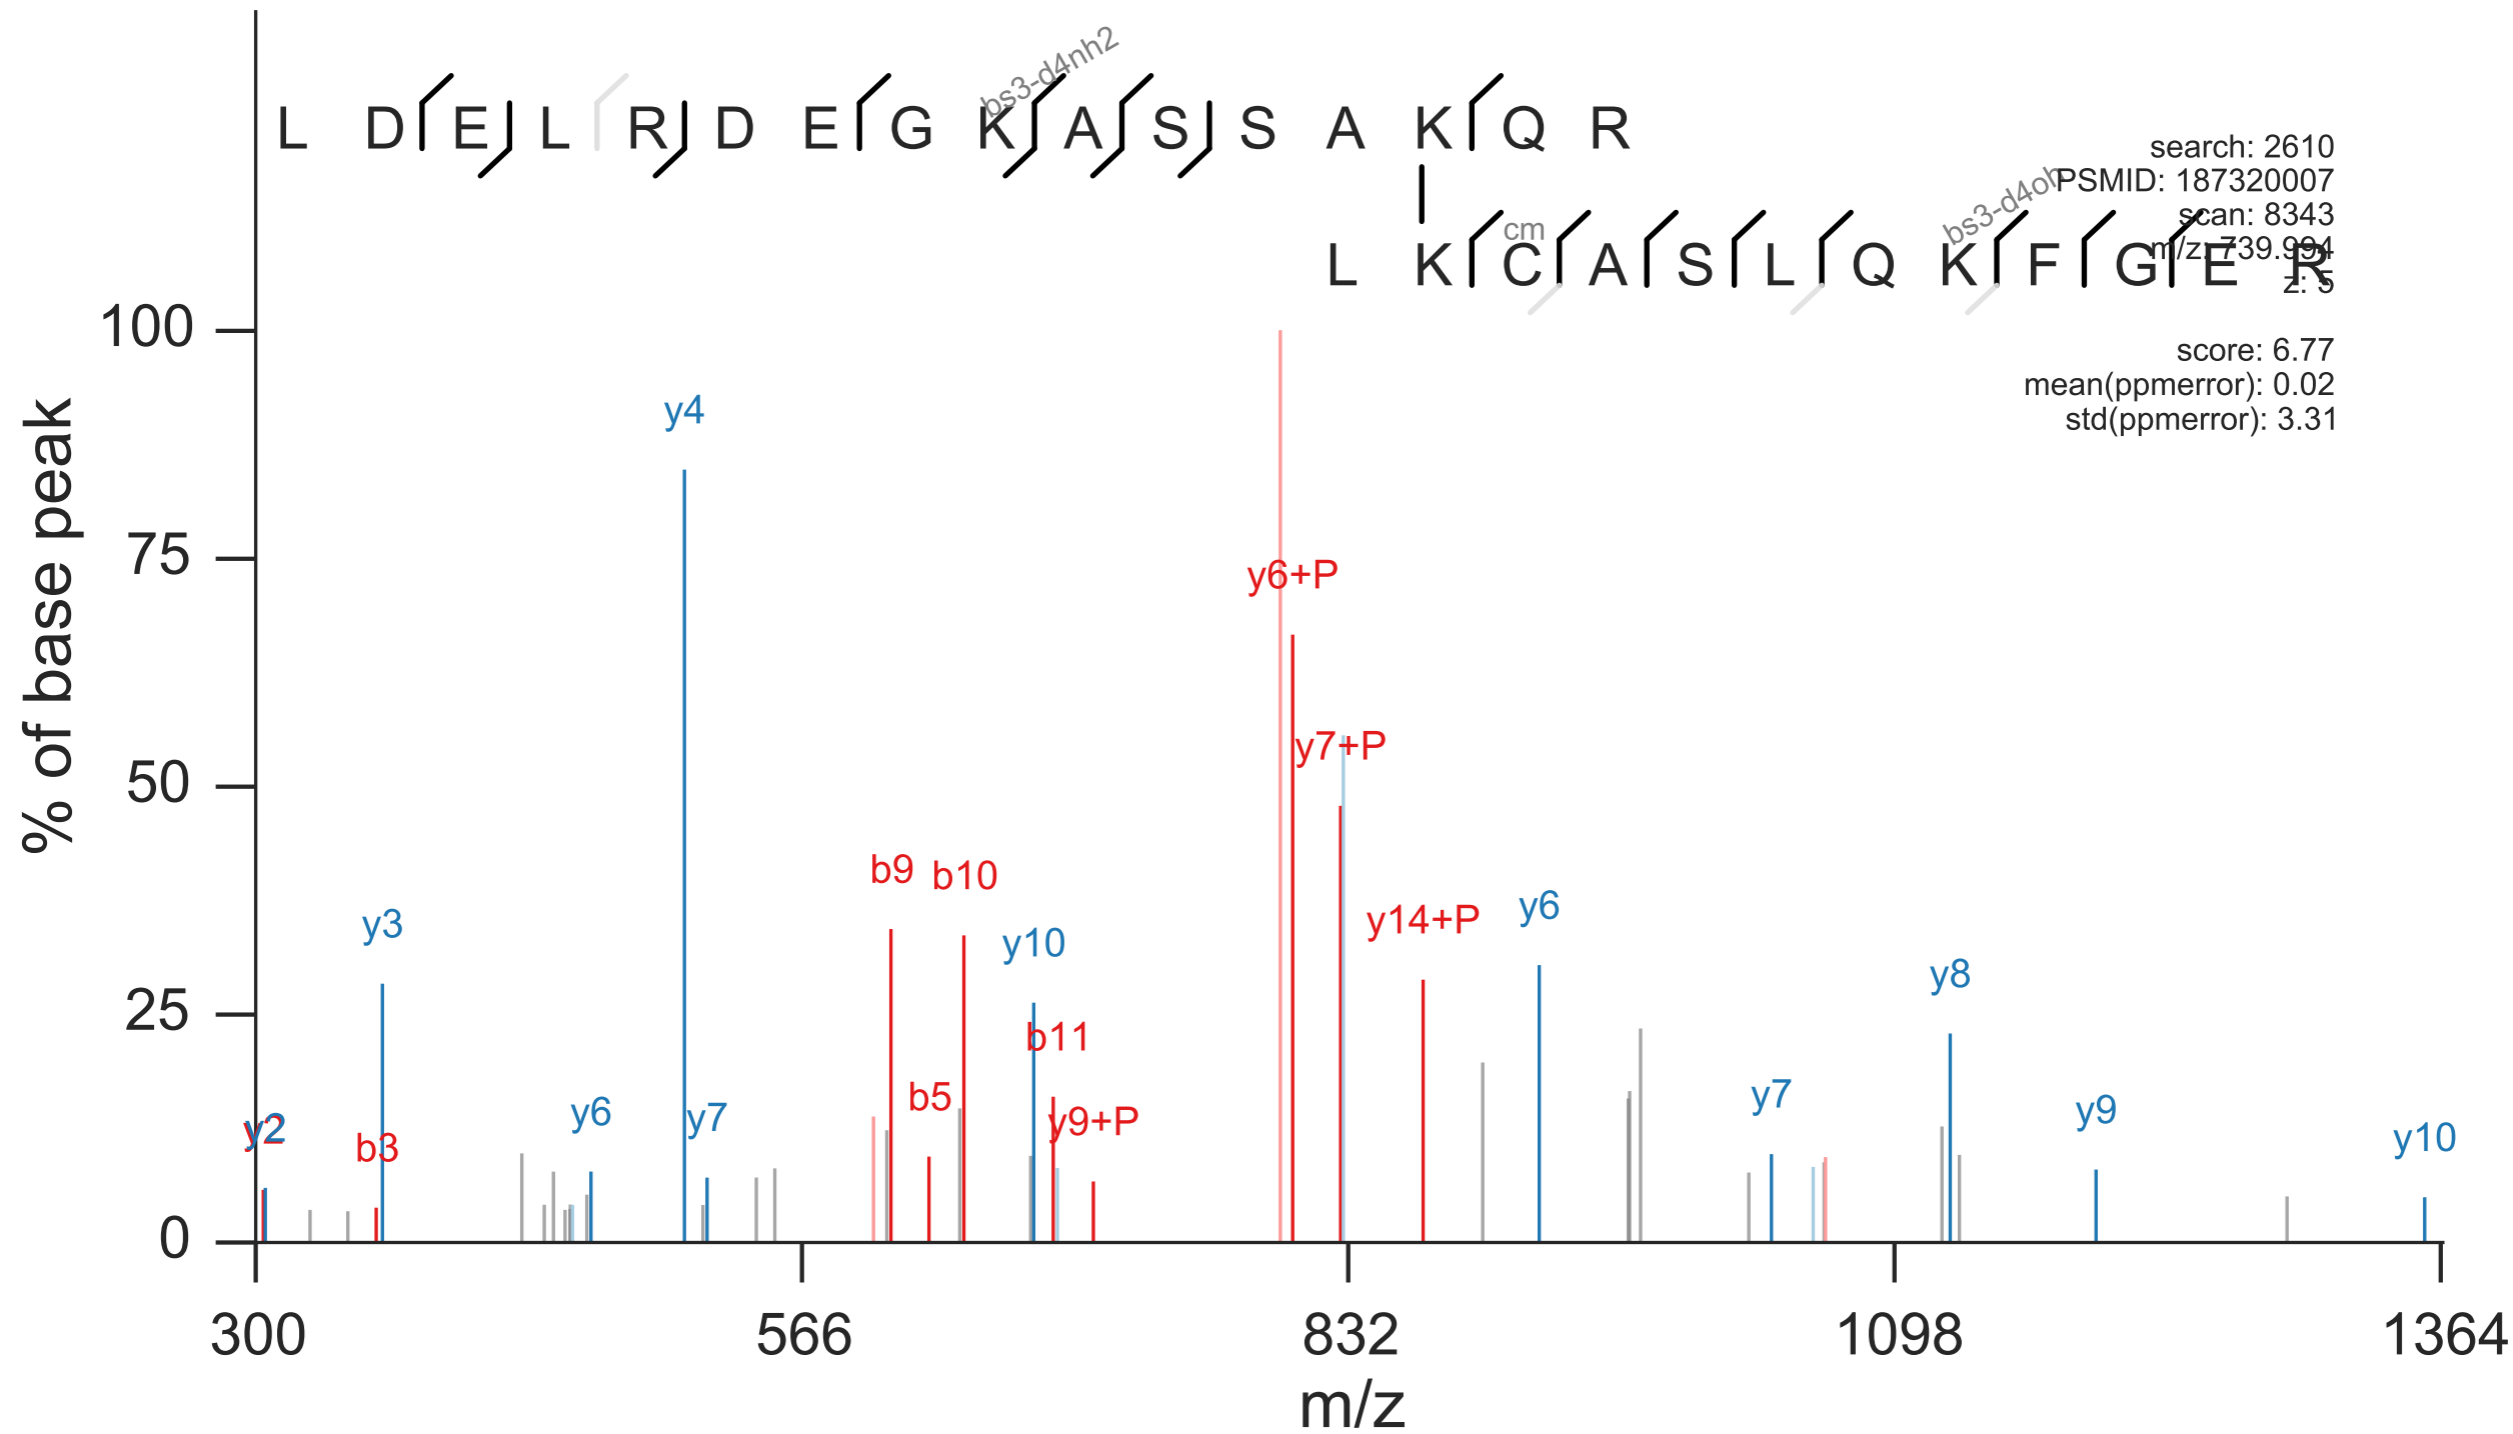

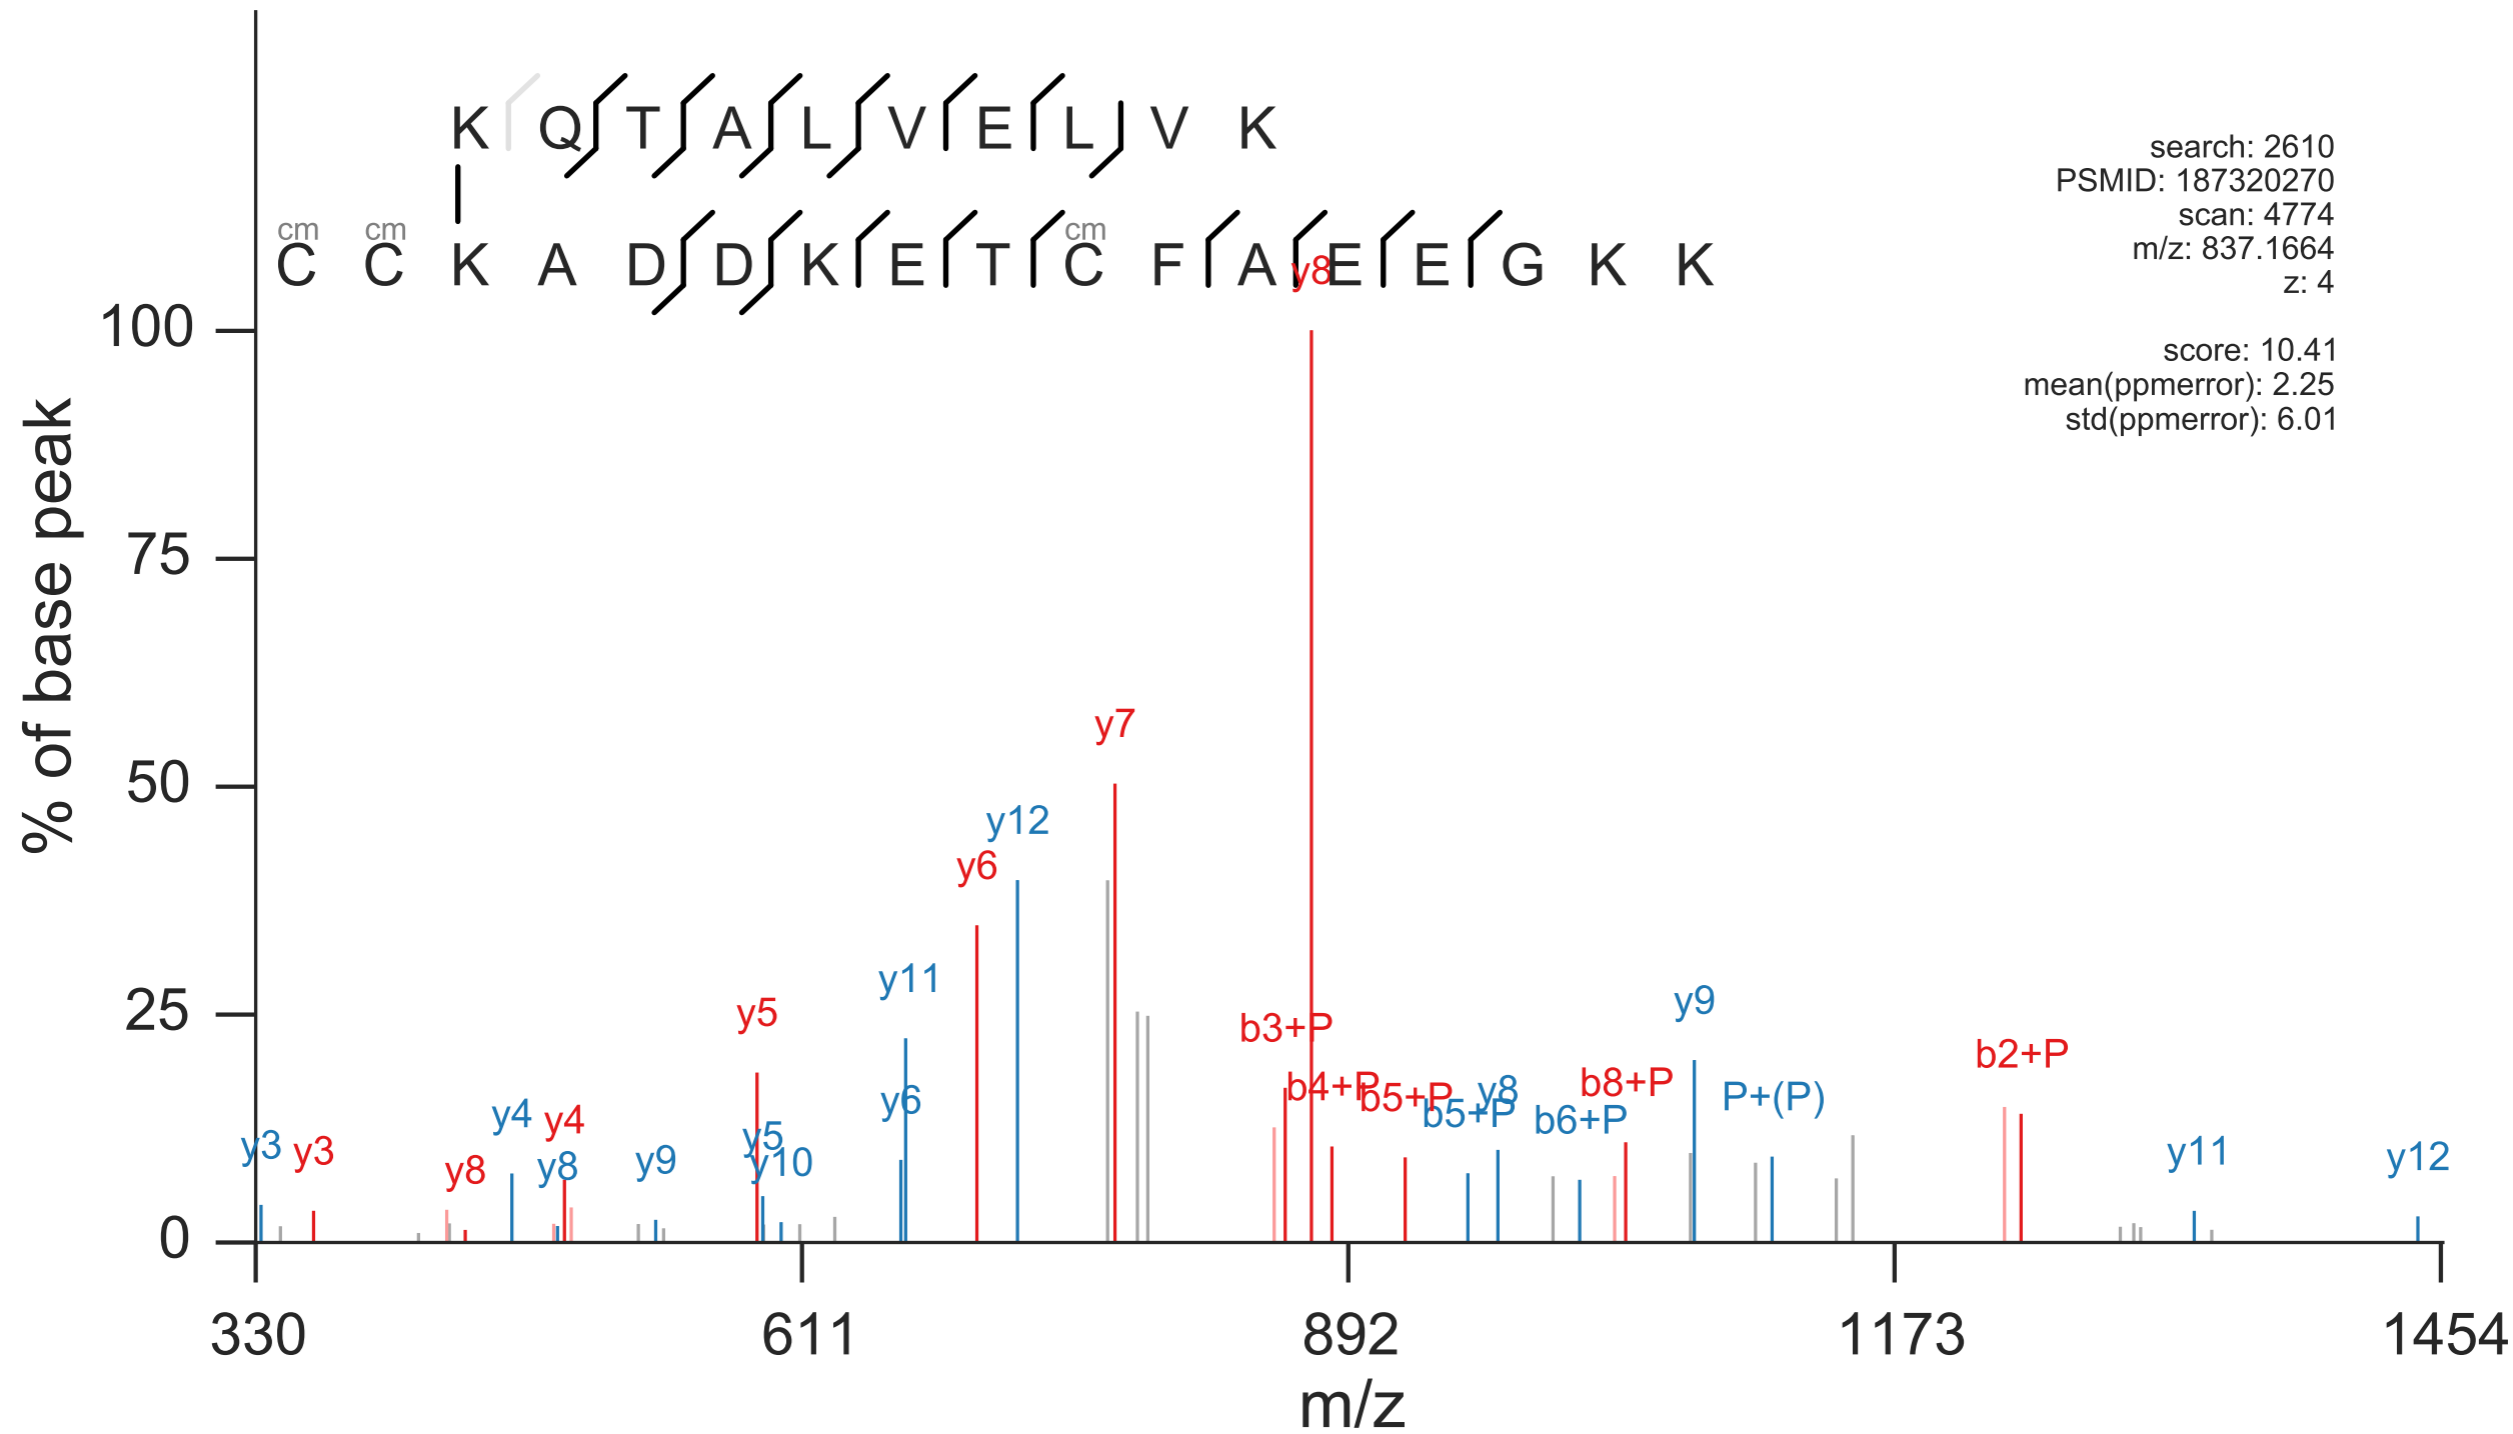

search: 2610  
 PSMID: 187320270  
 scan: 4774  
 m/z: 837.1664  
 z: 4

score: 10.41  
 mean(ppmerror): 2.25  
 std(ppmerror): 6.01

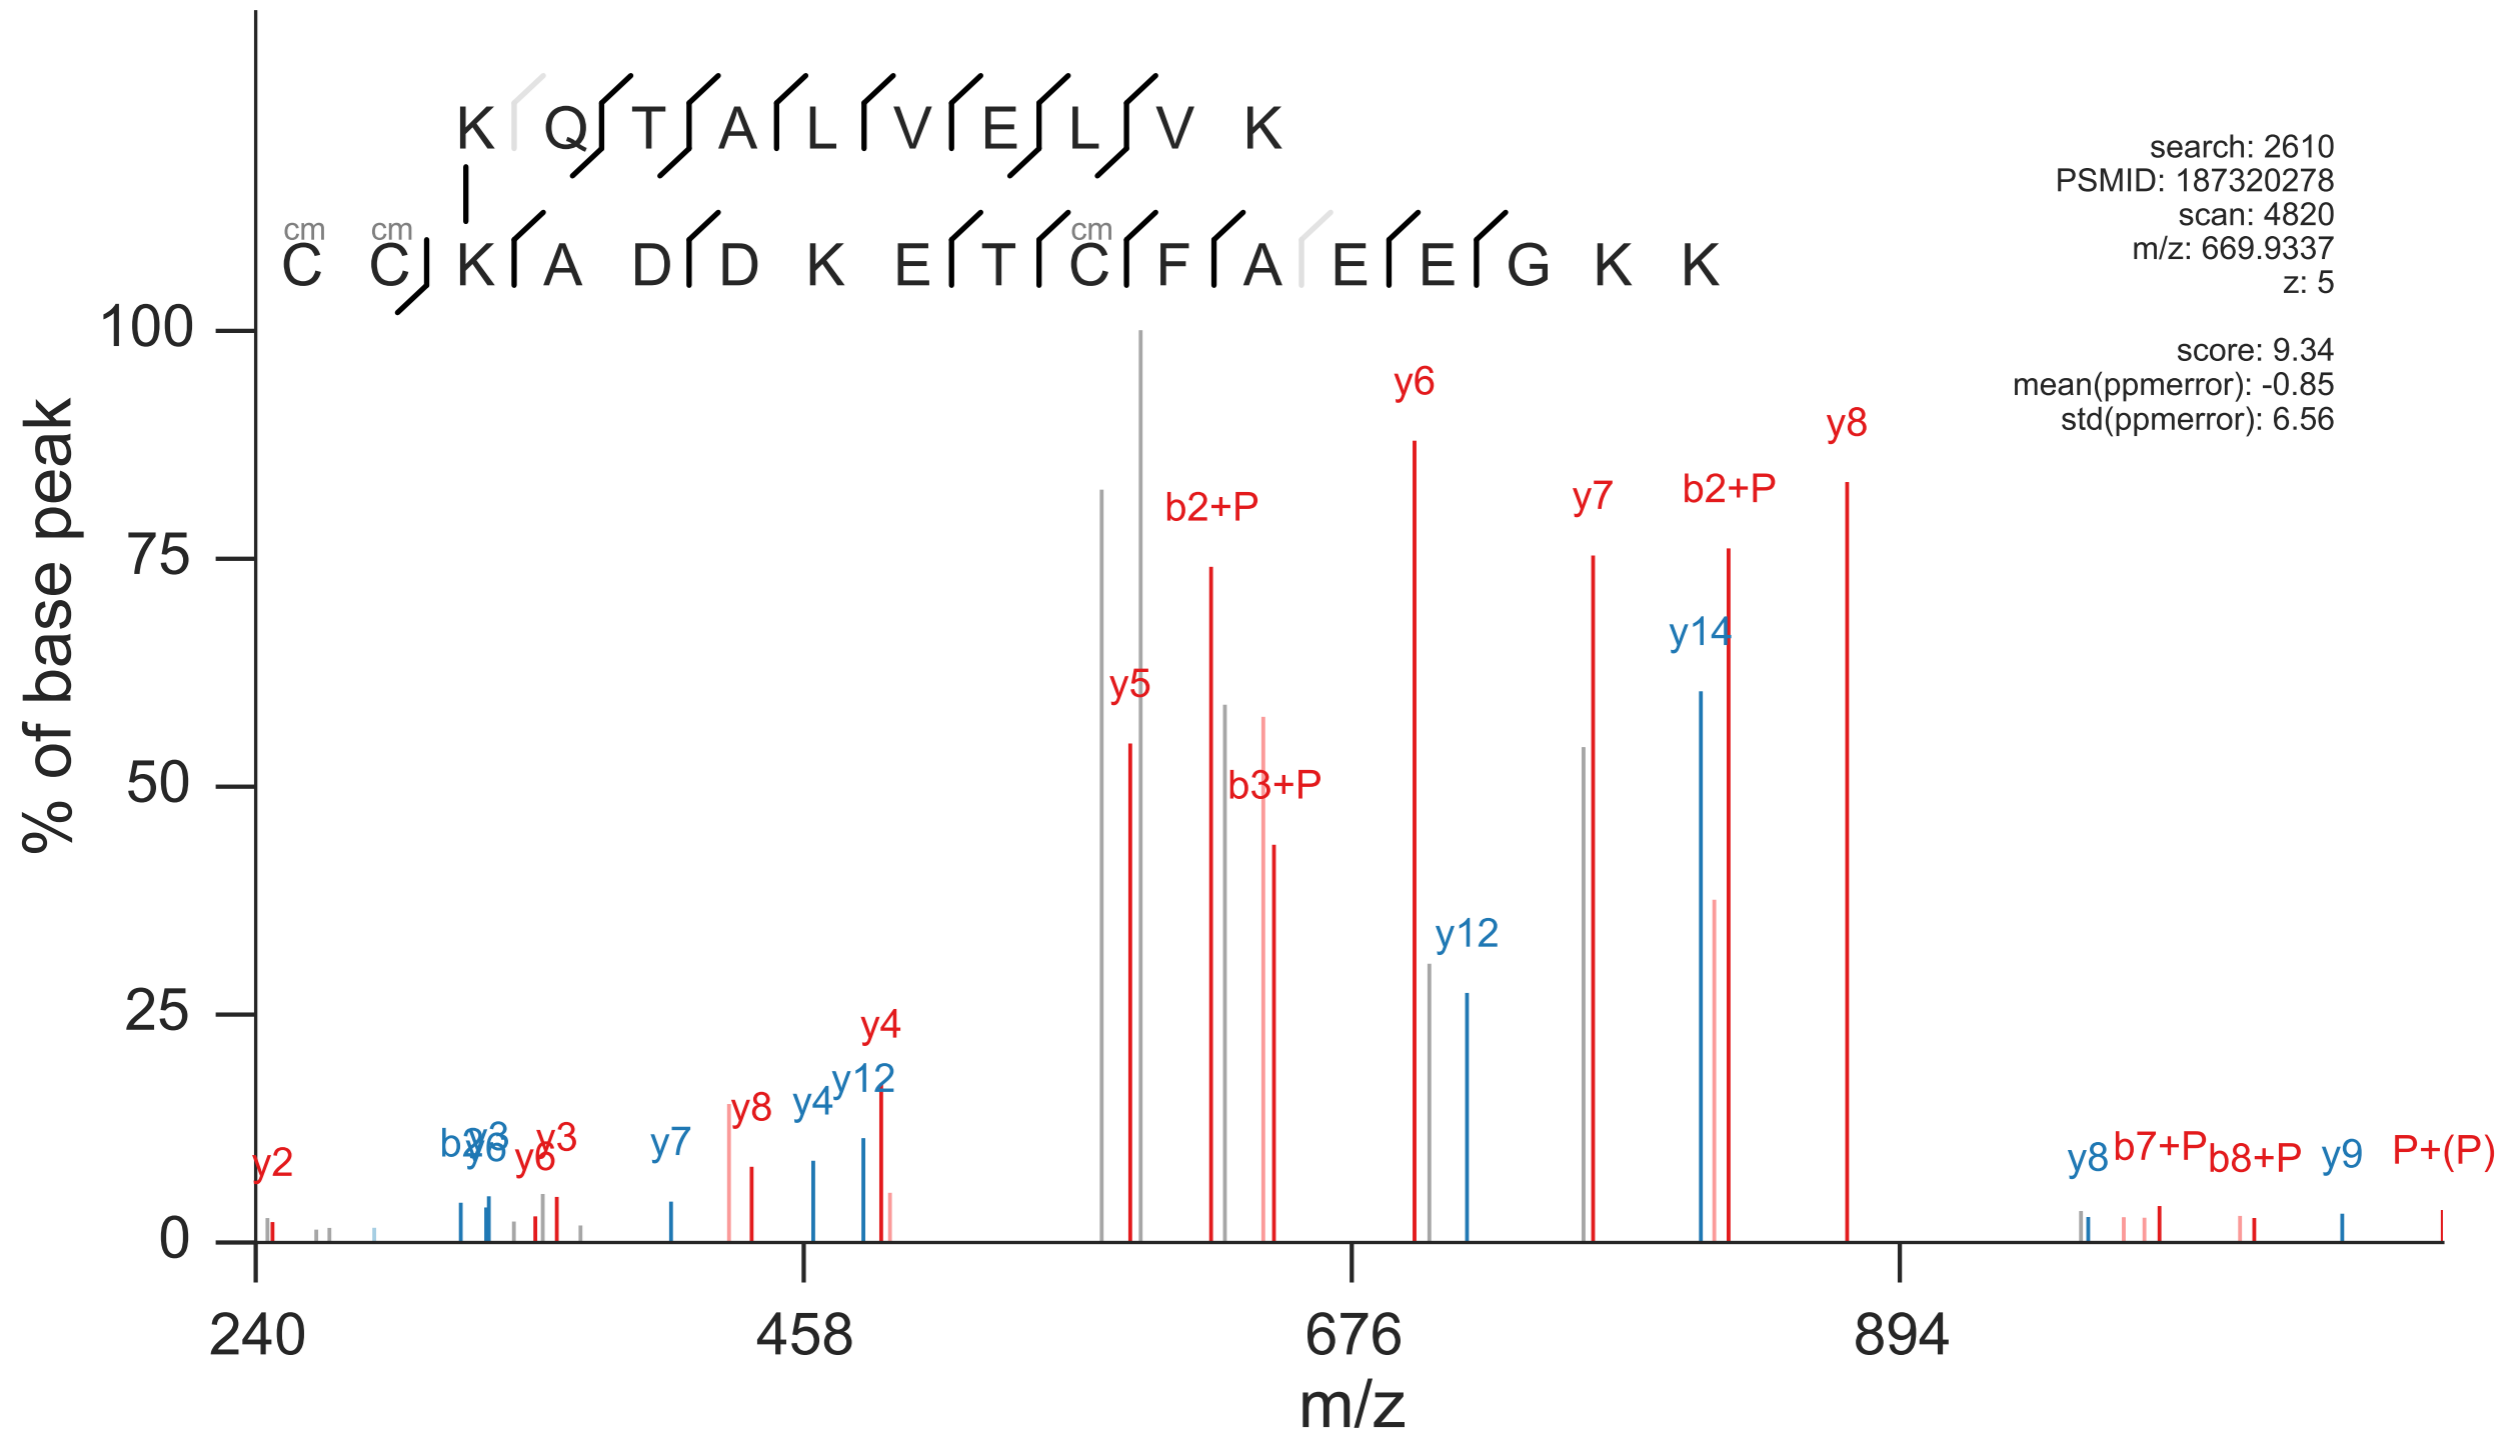

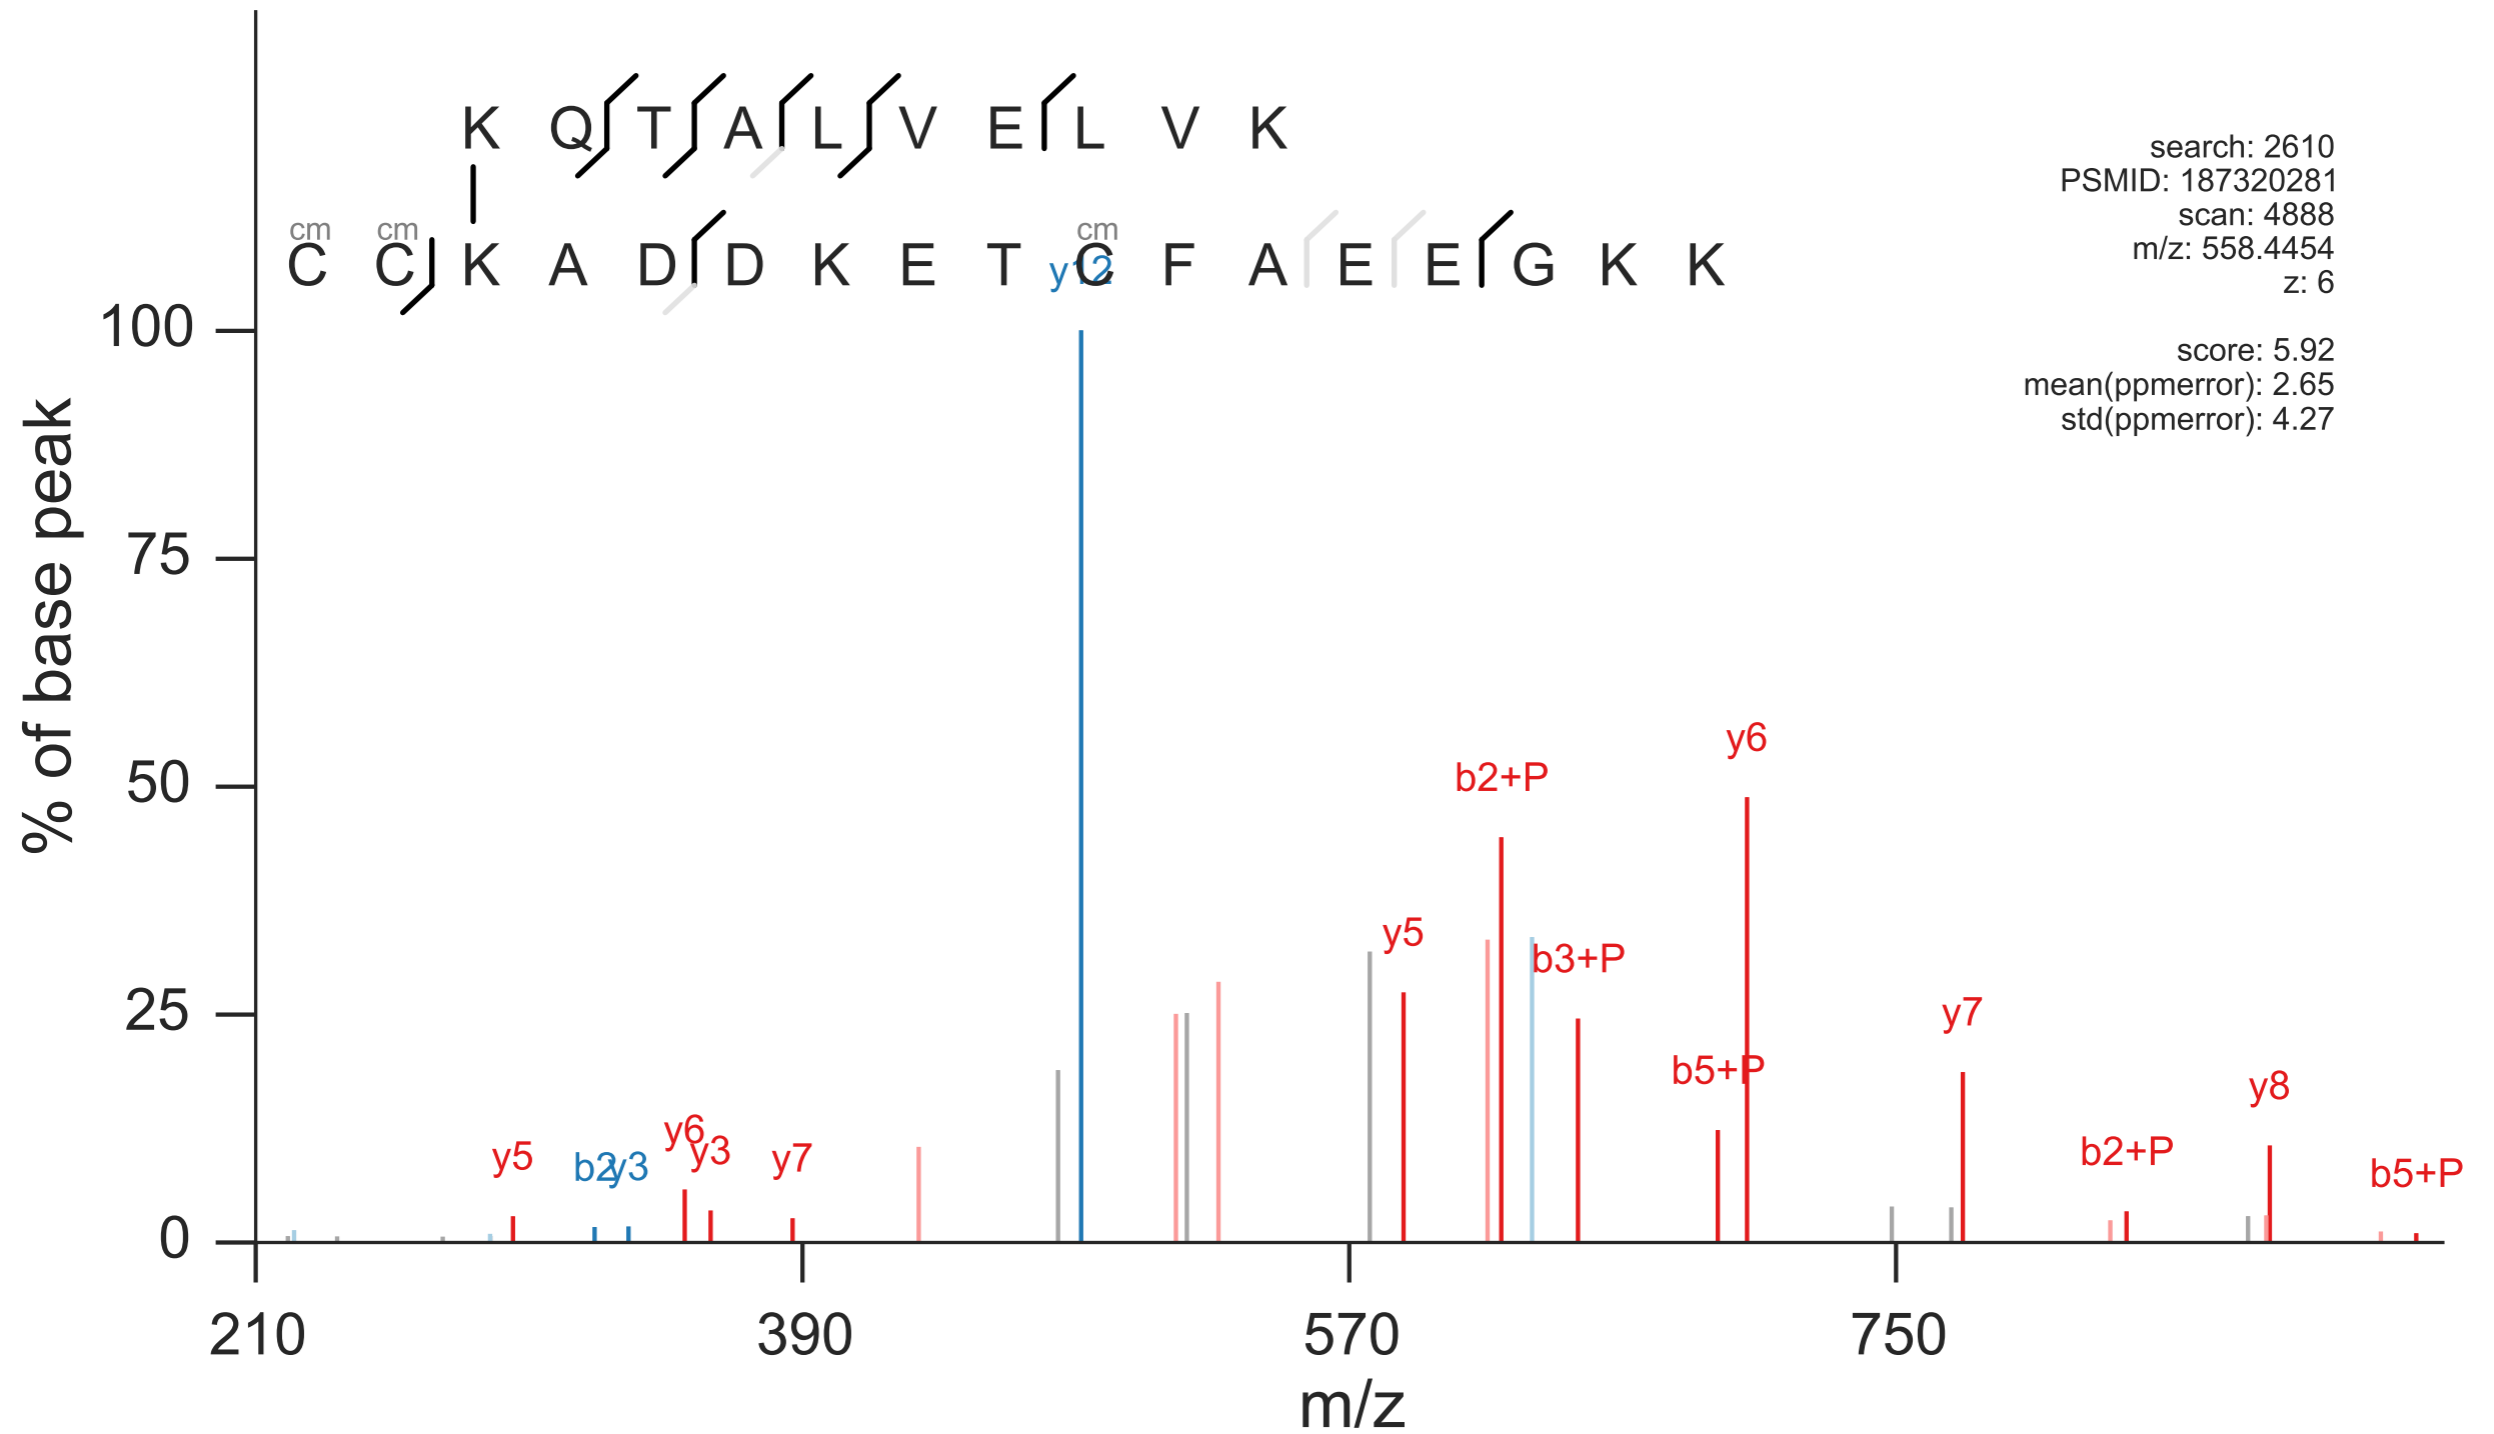

search: 2610  
 PSMID: 187320281  
 scan: 4888  
 m/z: 558.4454  
 z: 6

score: 5.92  
 mean(ppmerror): 2.65  
 std(ppmerror): 4.27

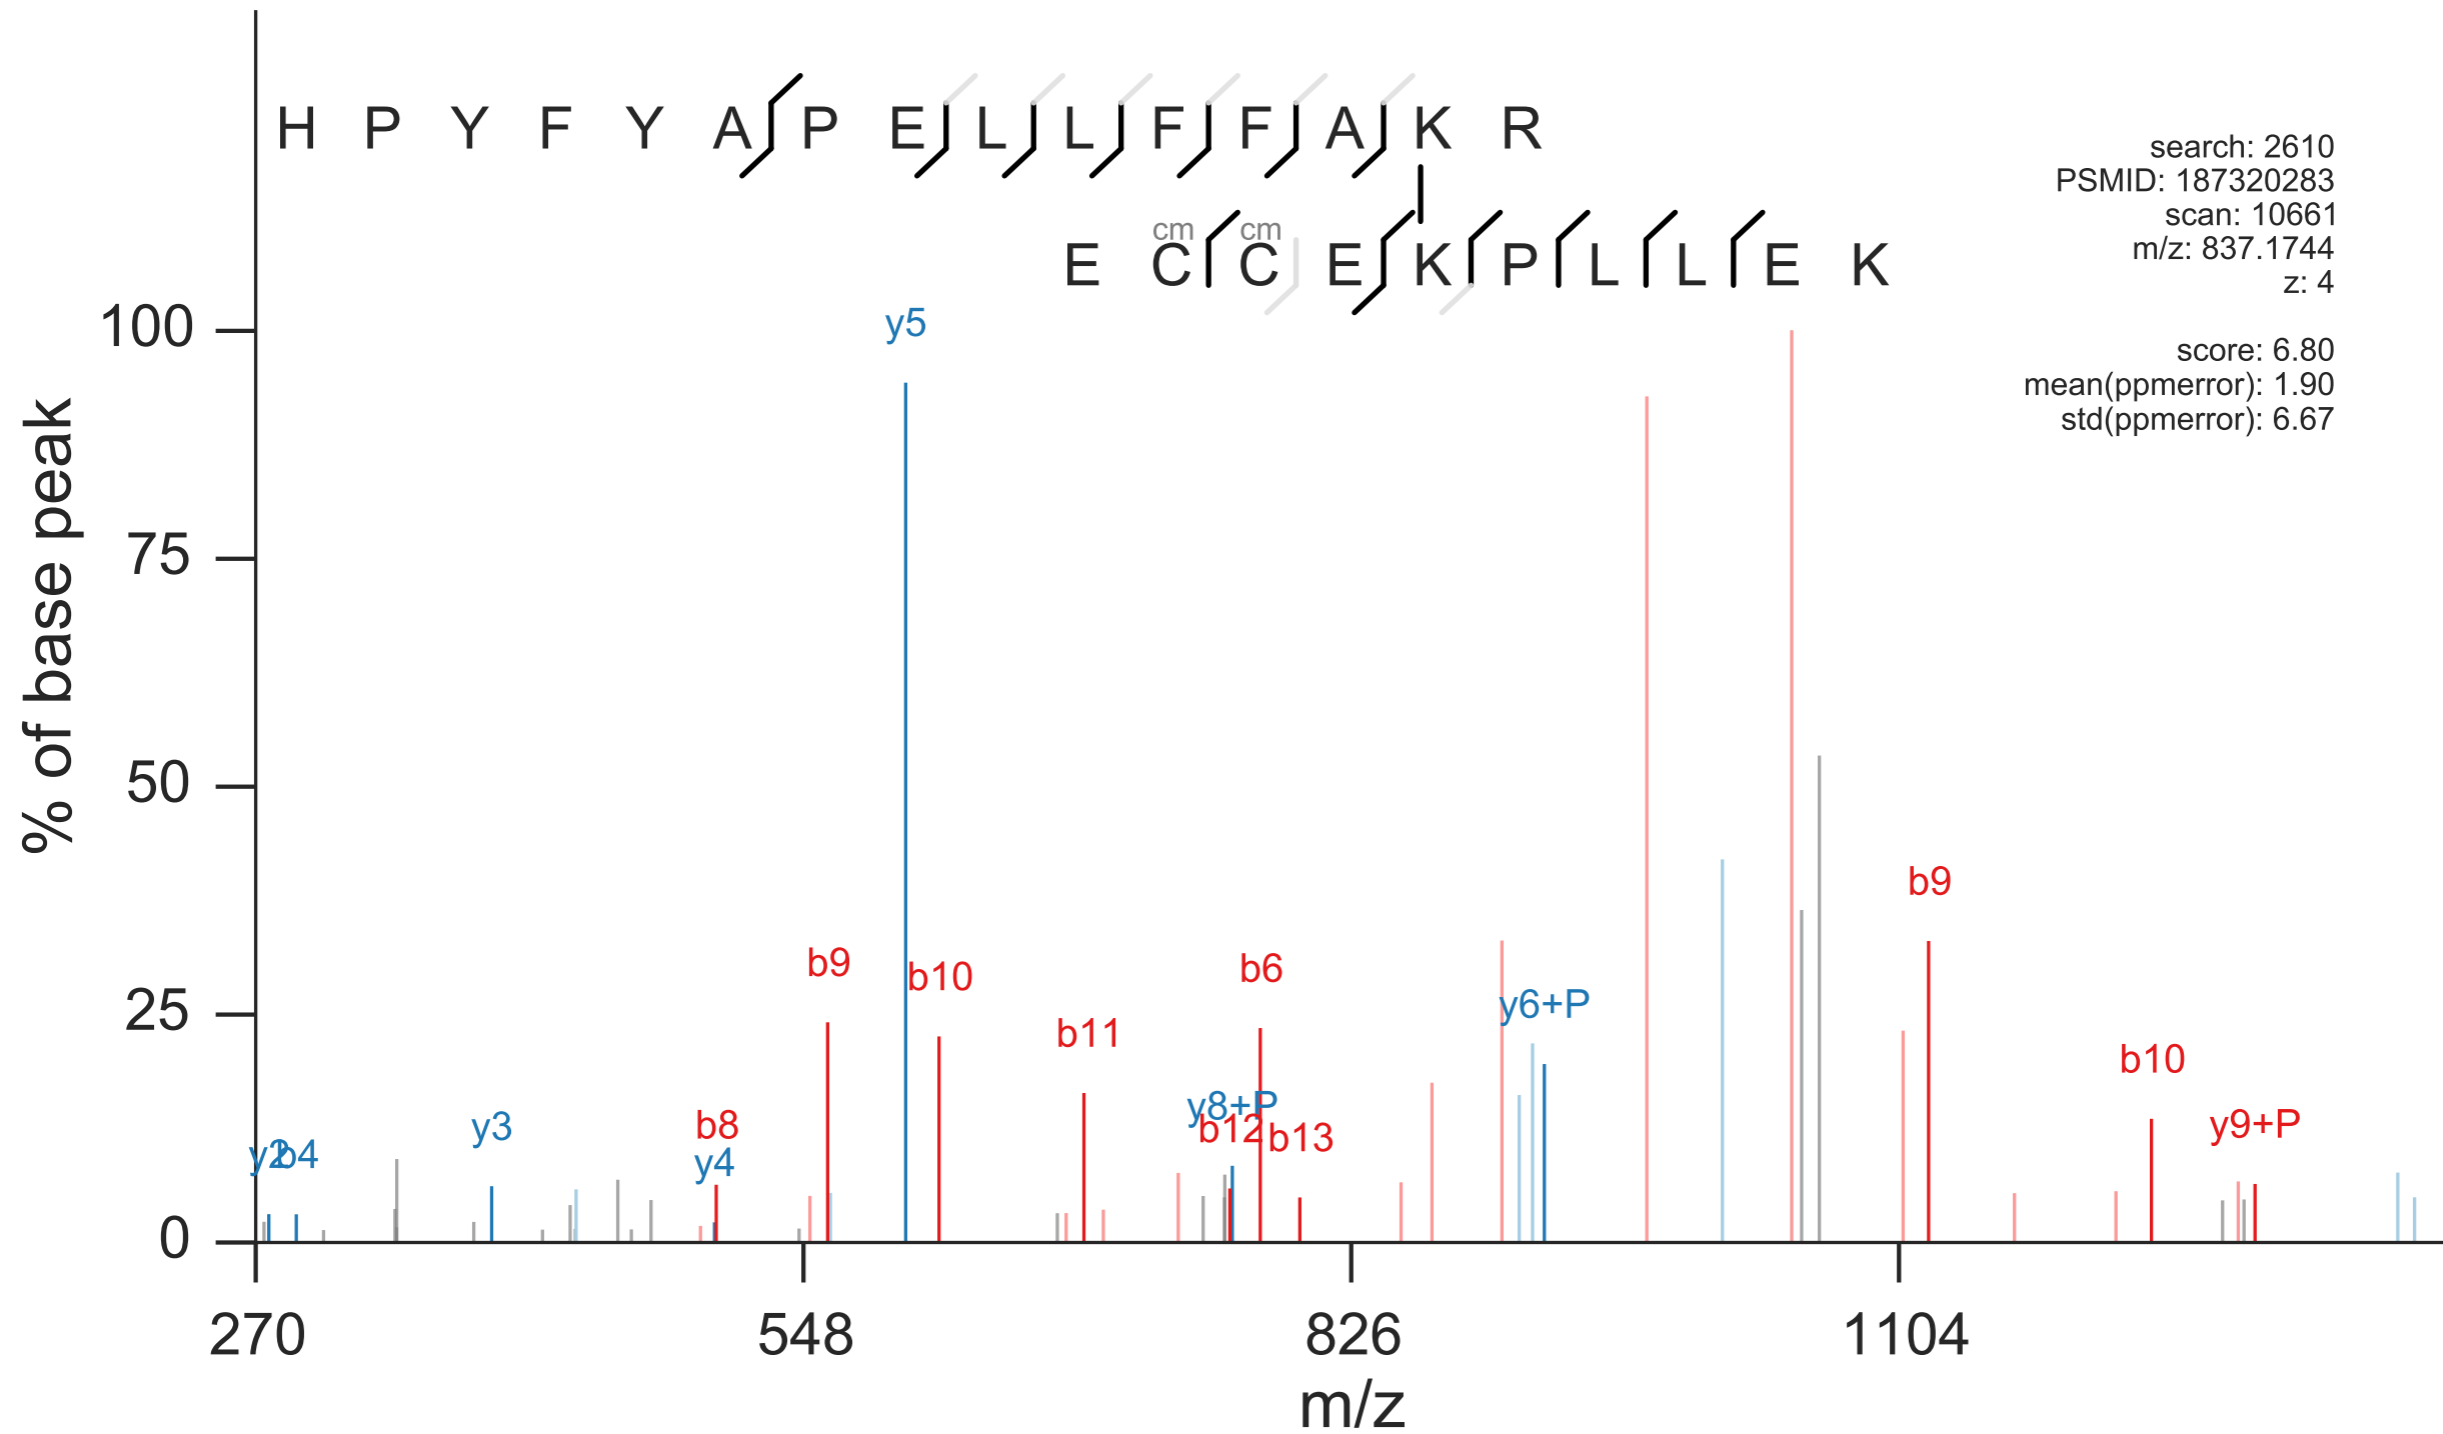

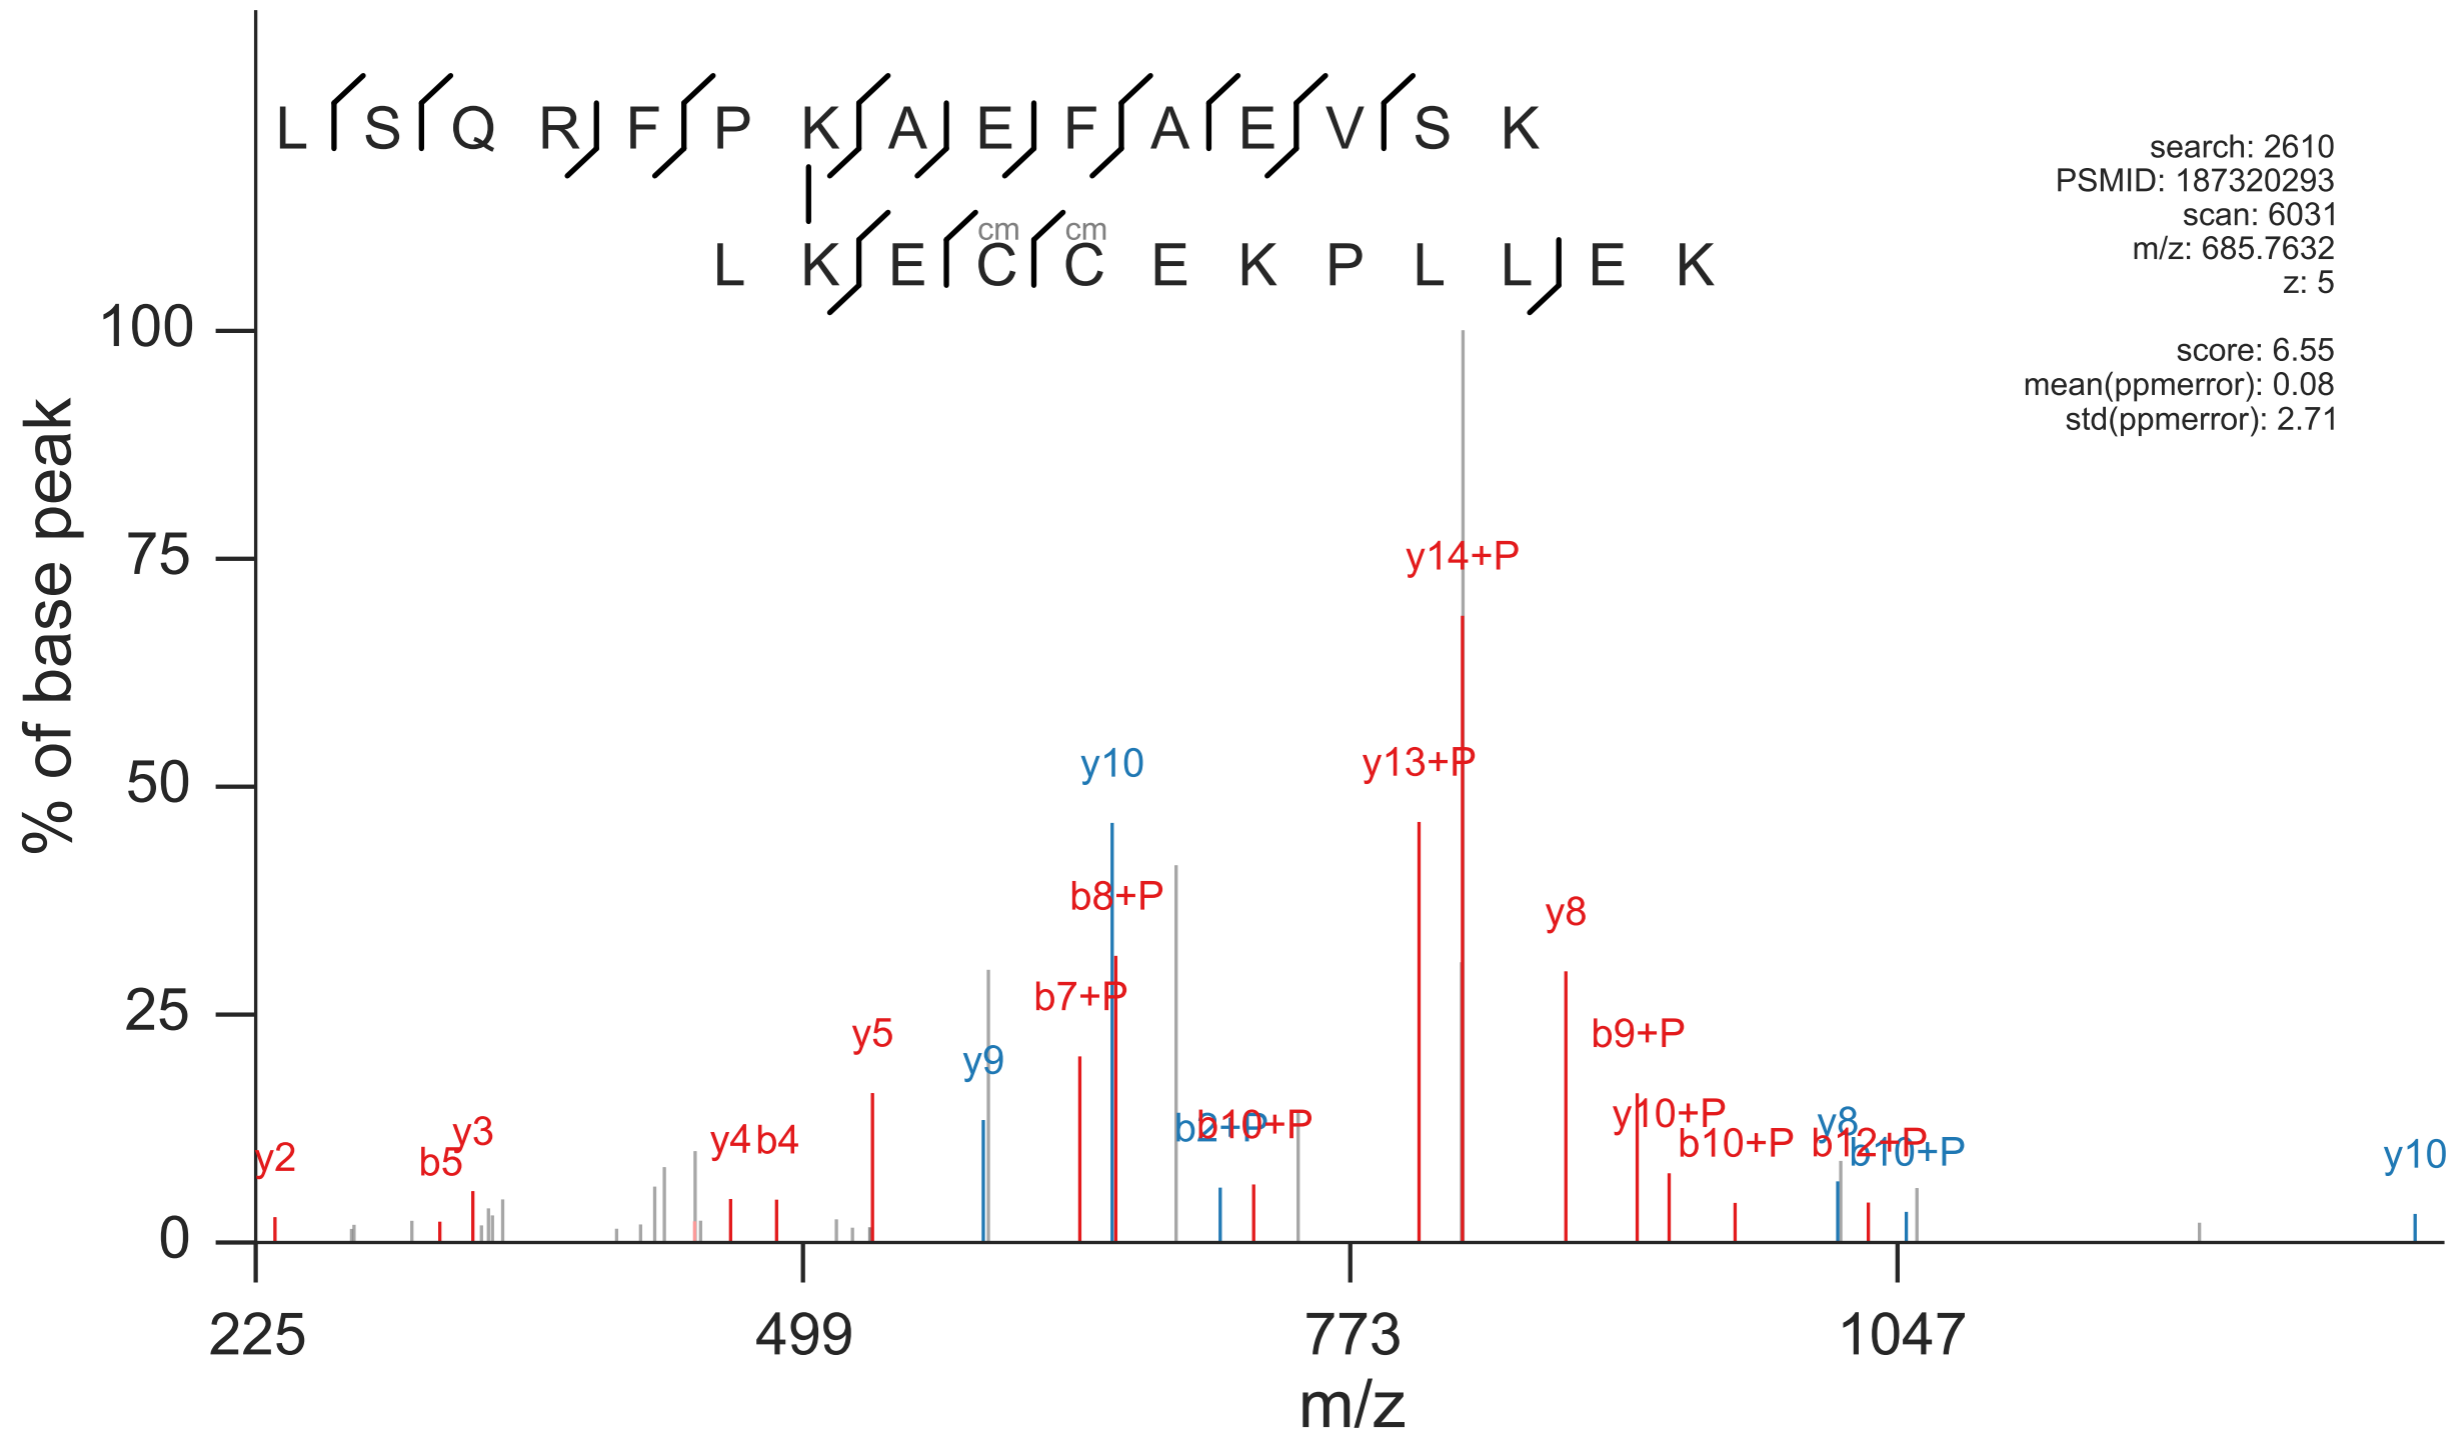

L | S | Q R | F | P K | A | E | F | A | E | V | S K  
 L K | E | C | C | E | K | P | L | L | E | K

search: 2610  
 PSMID: 187320293  
 scan: 6031  
 m/z: 685.7632  
 z: 5

score: 6.55  
 mean(ppmerror): 0.08  
 std(ppmerror): 2.71

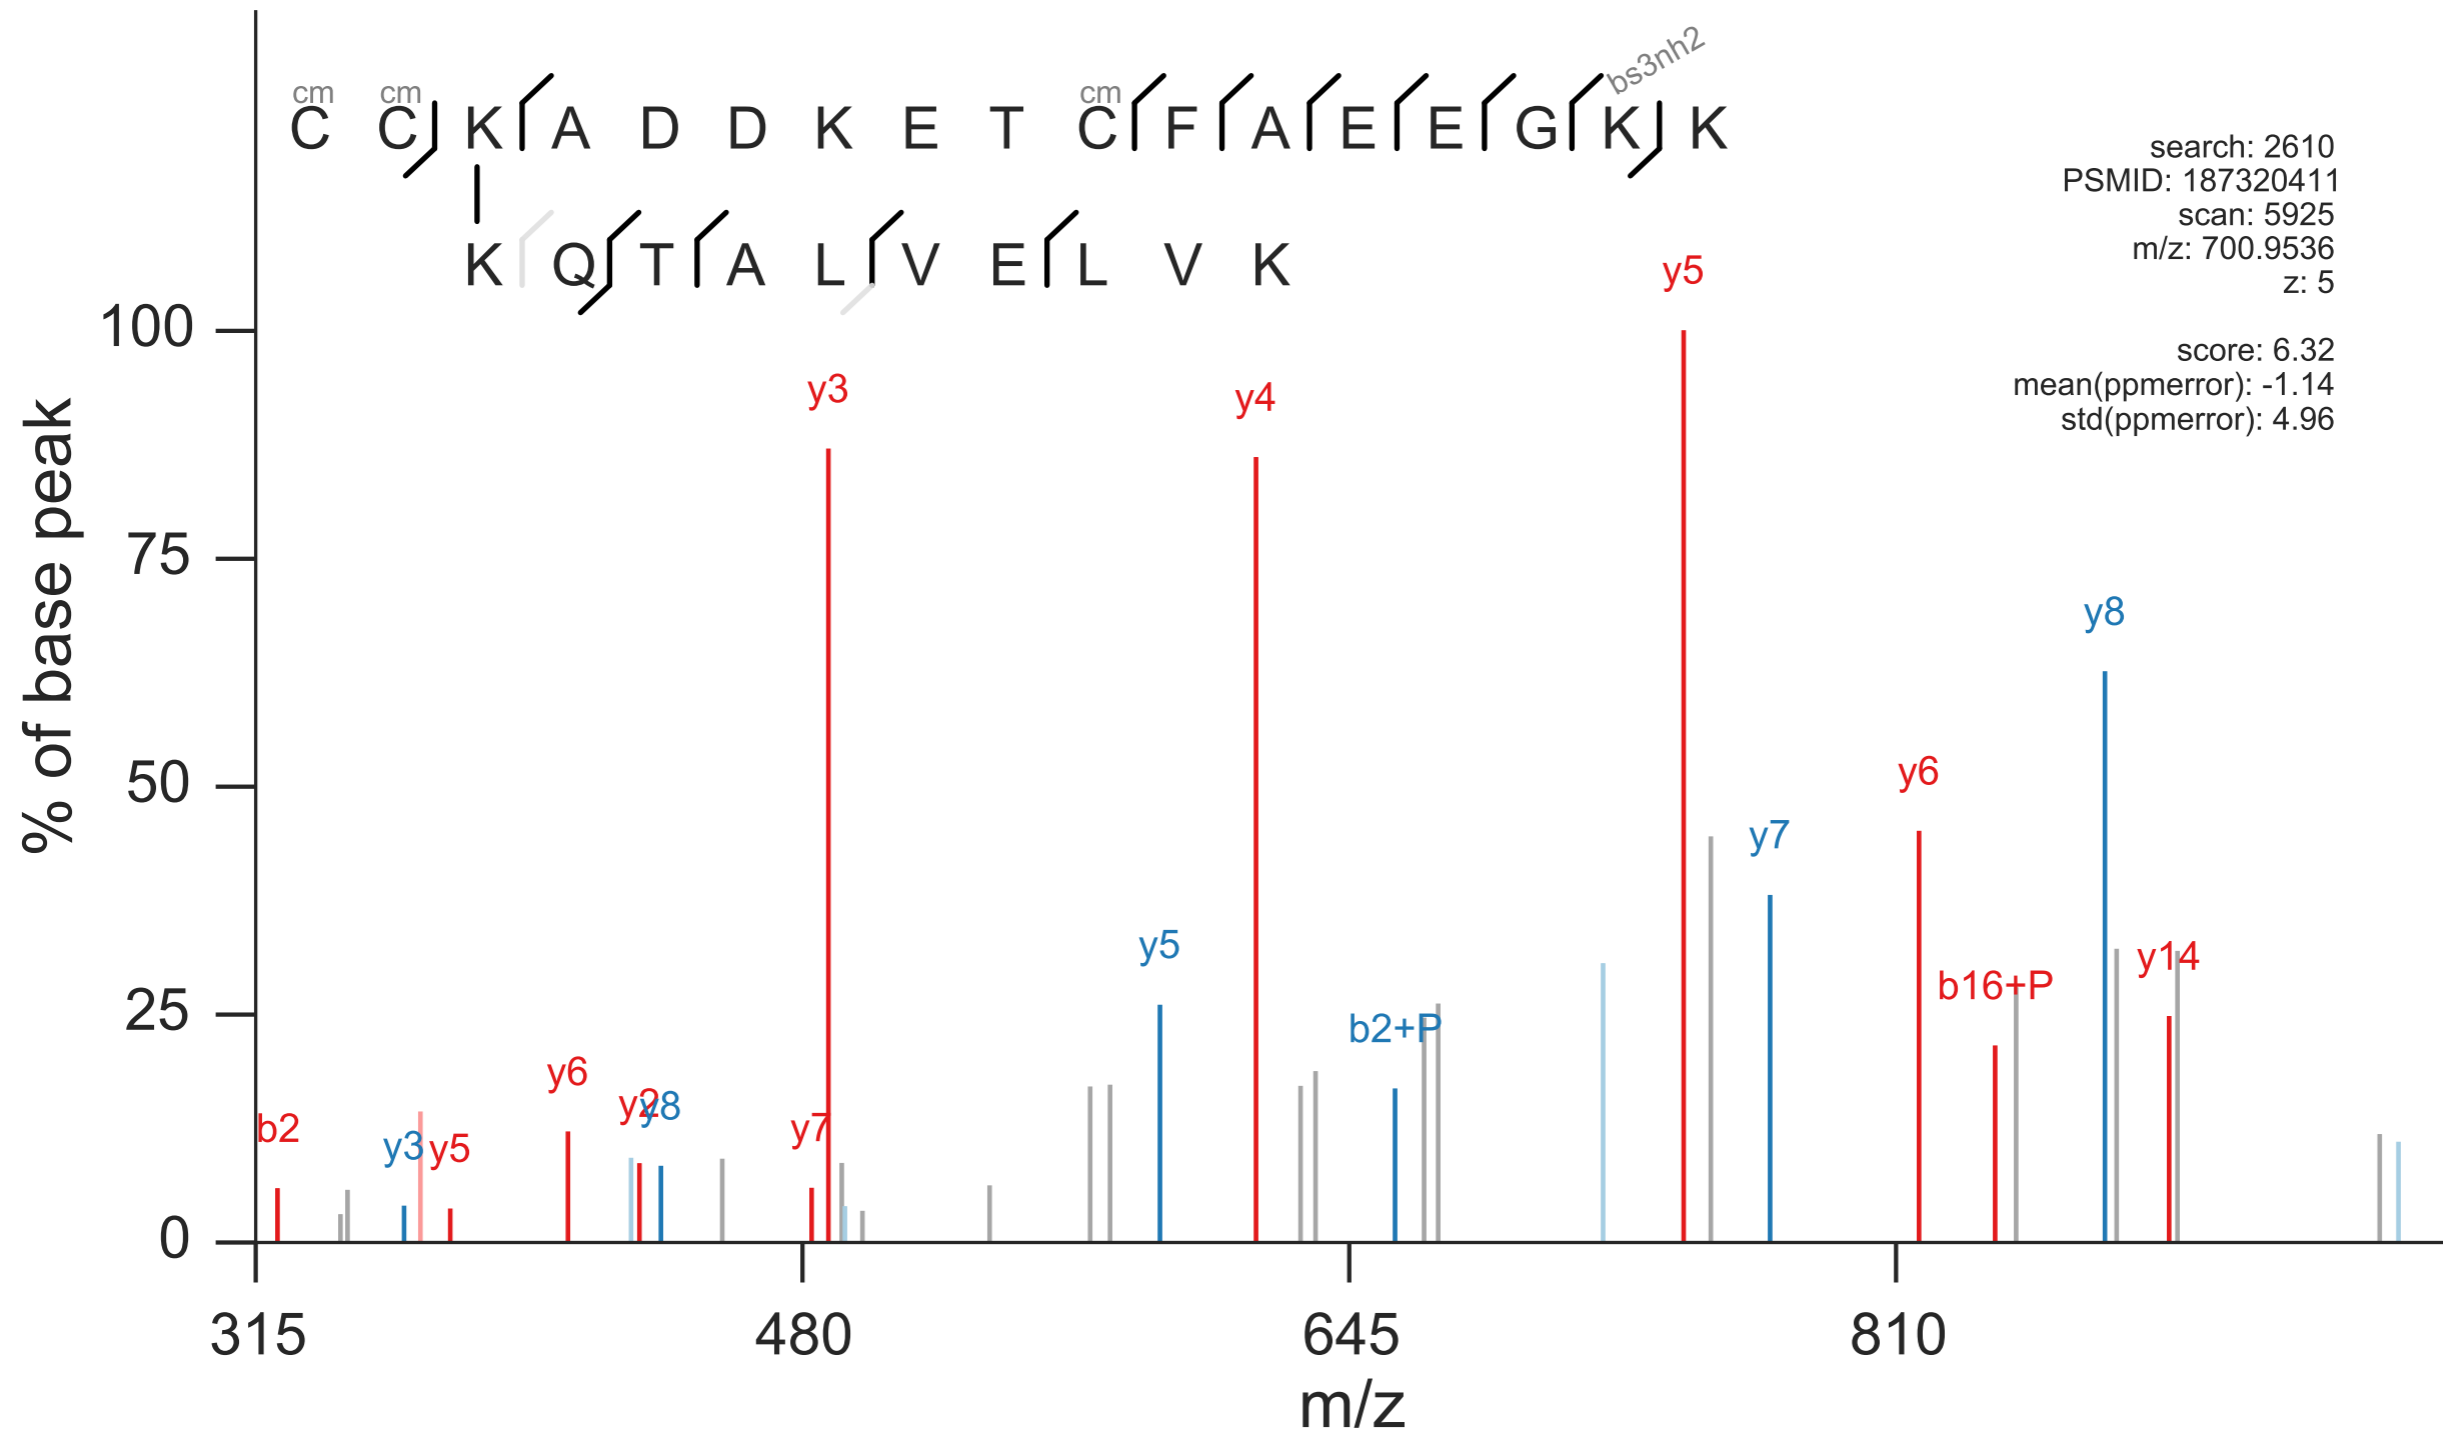

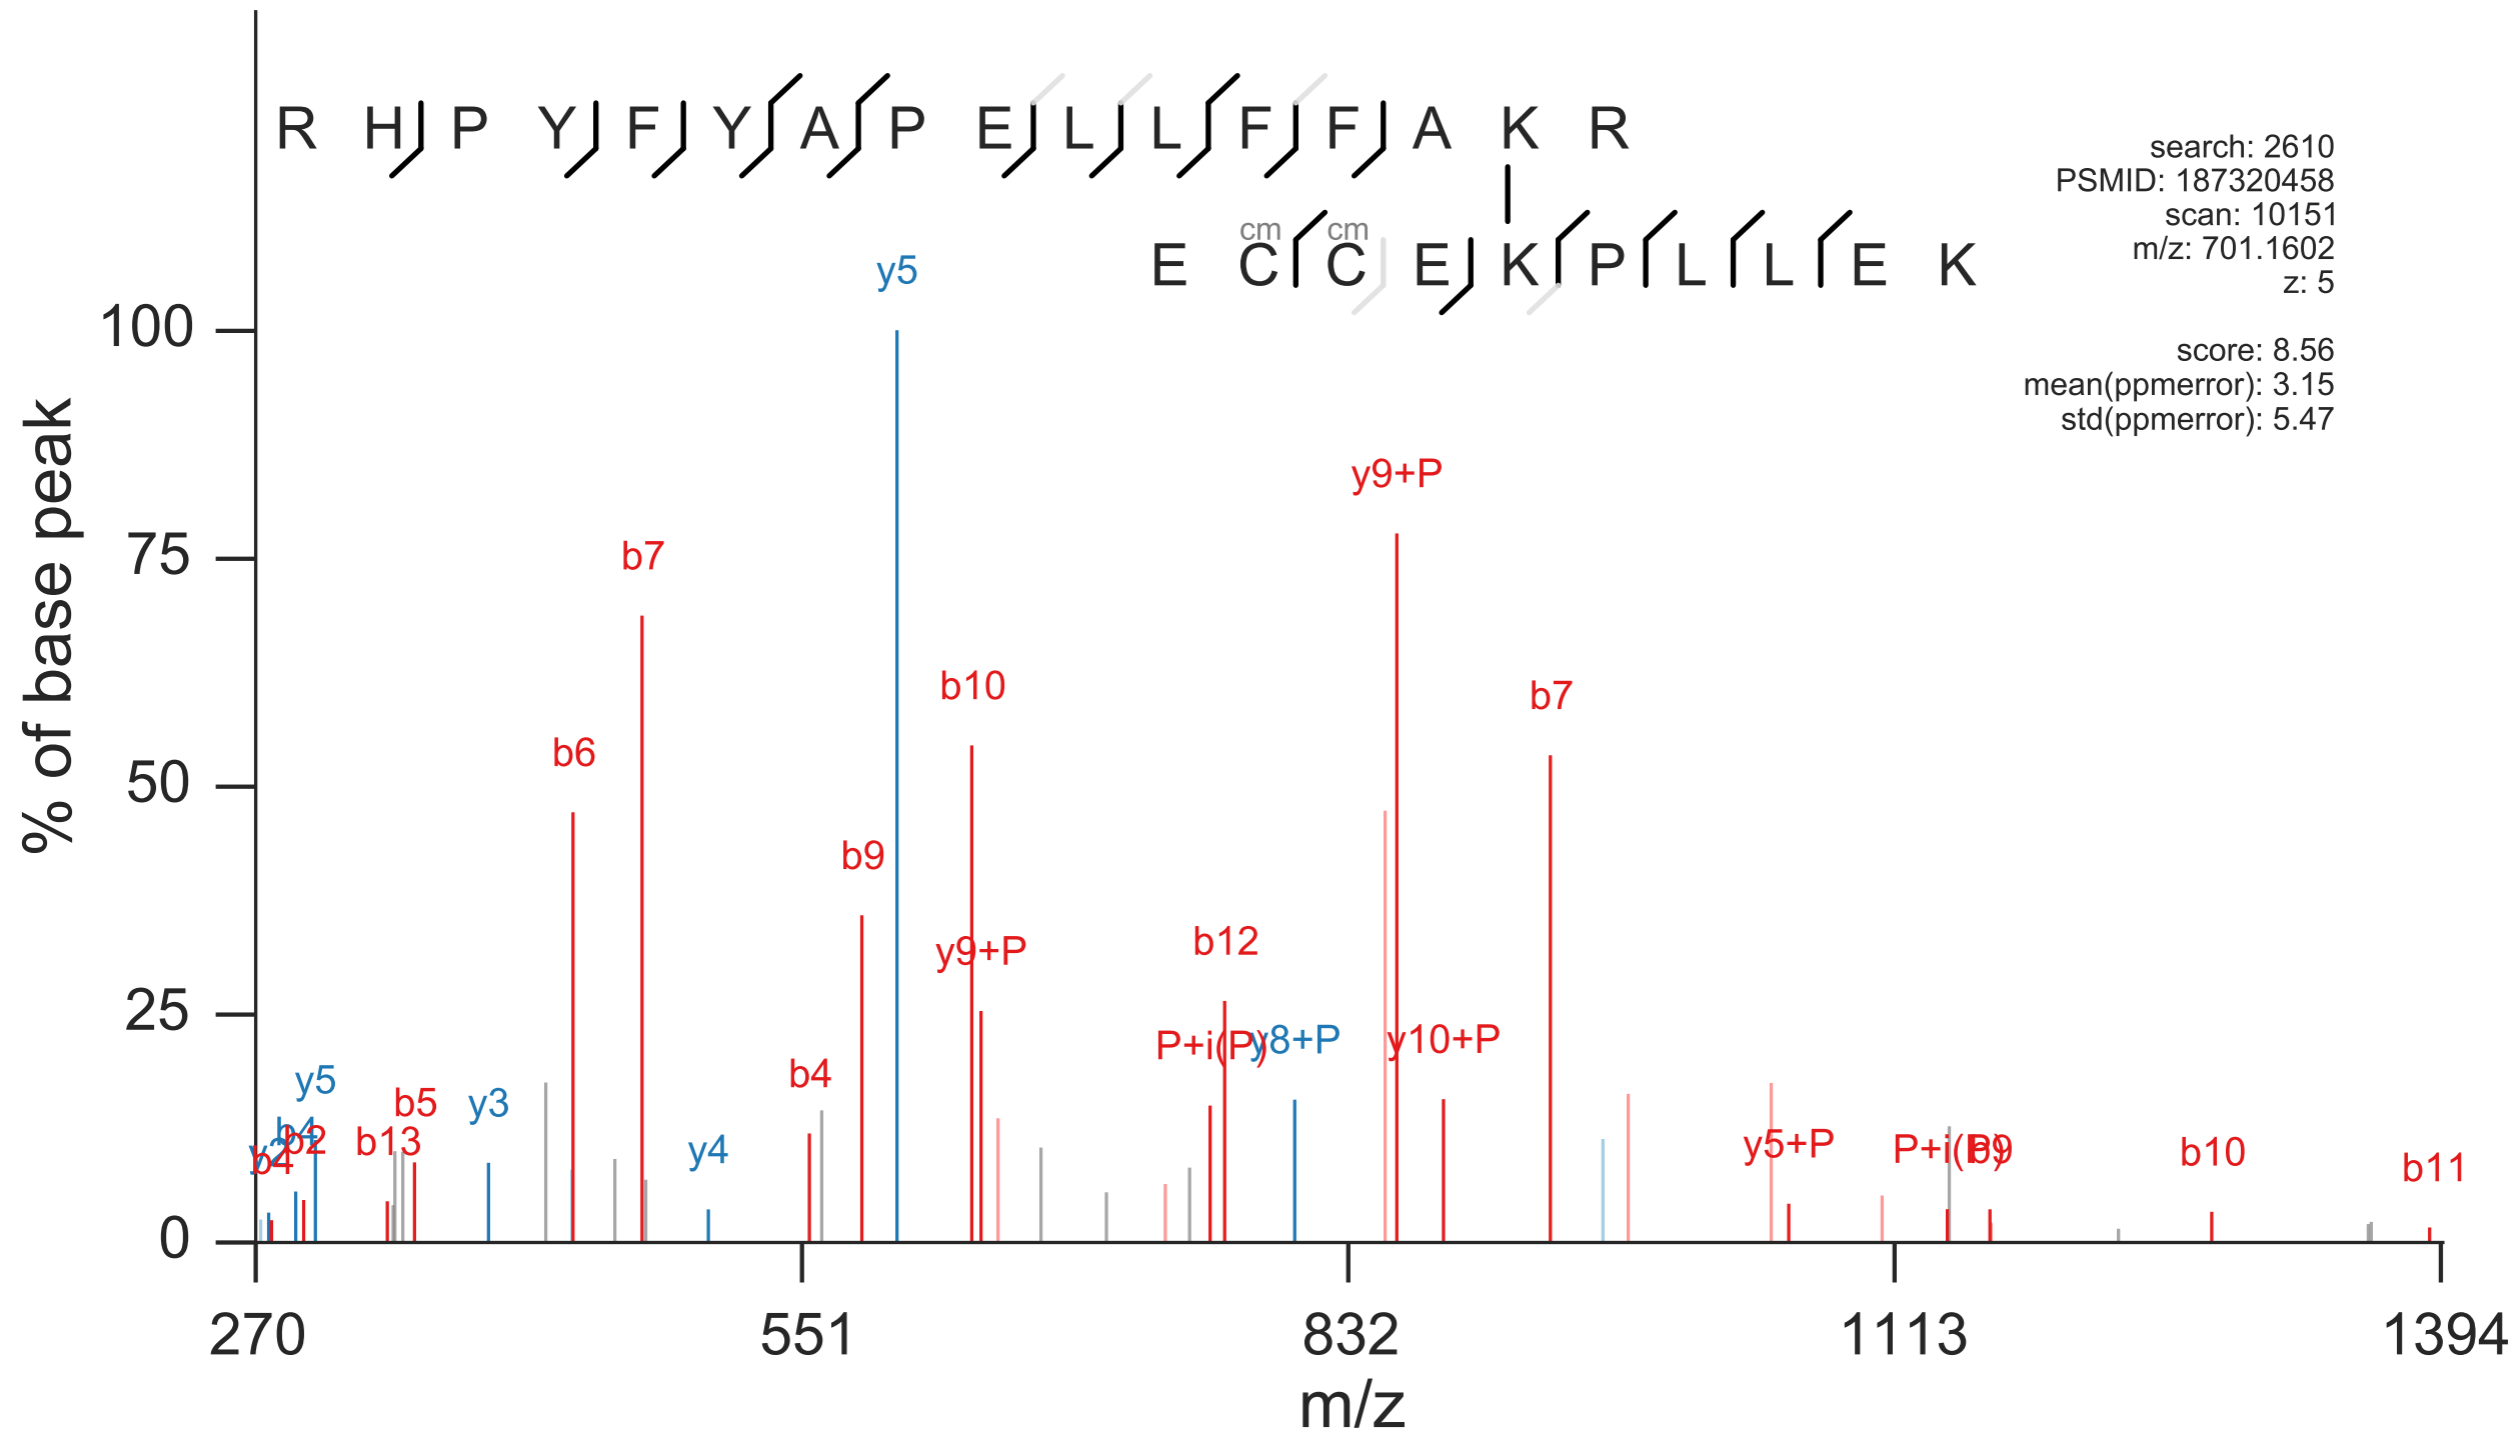



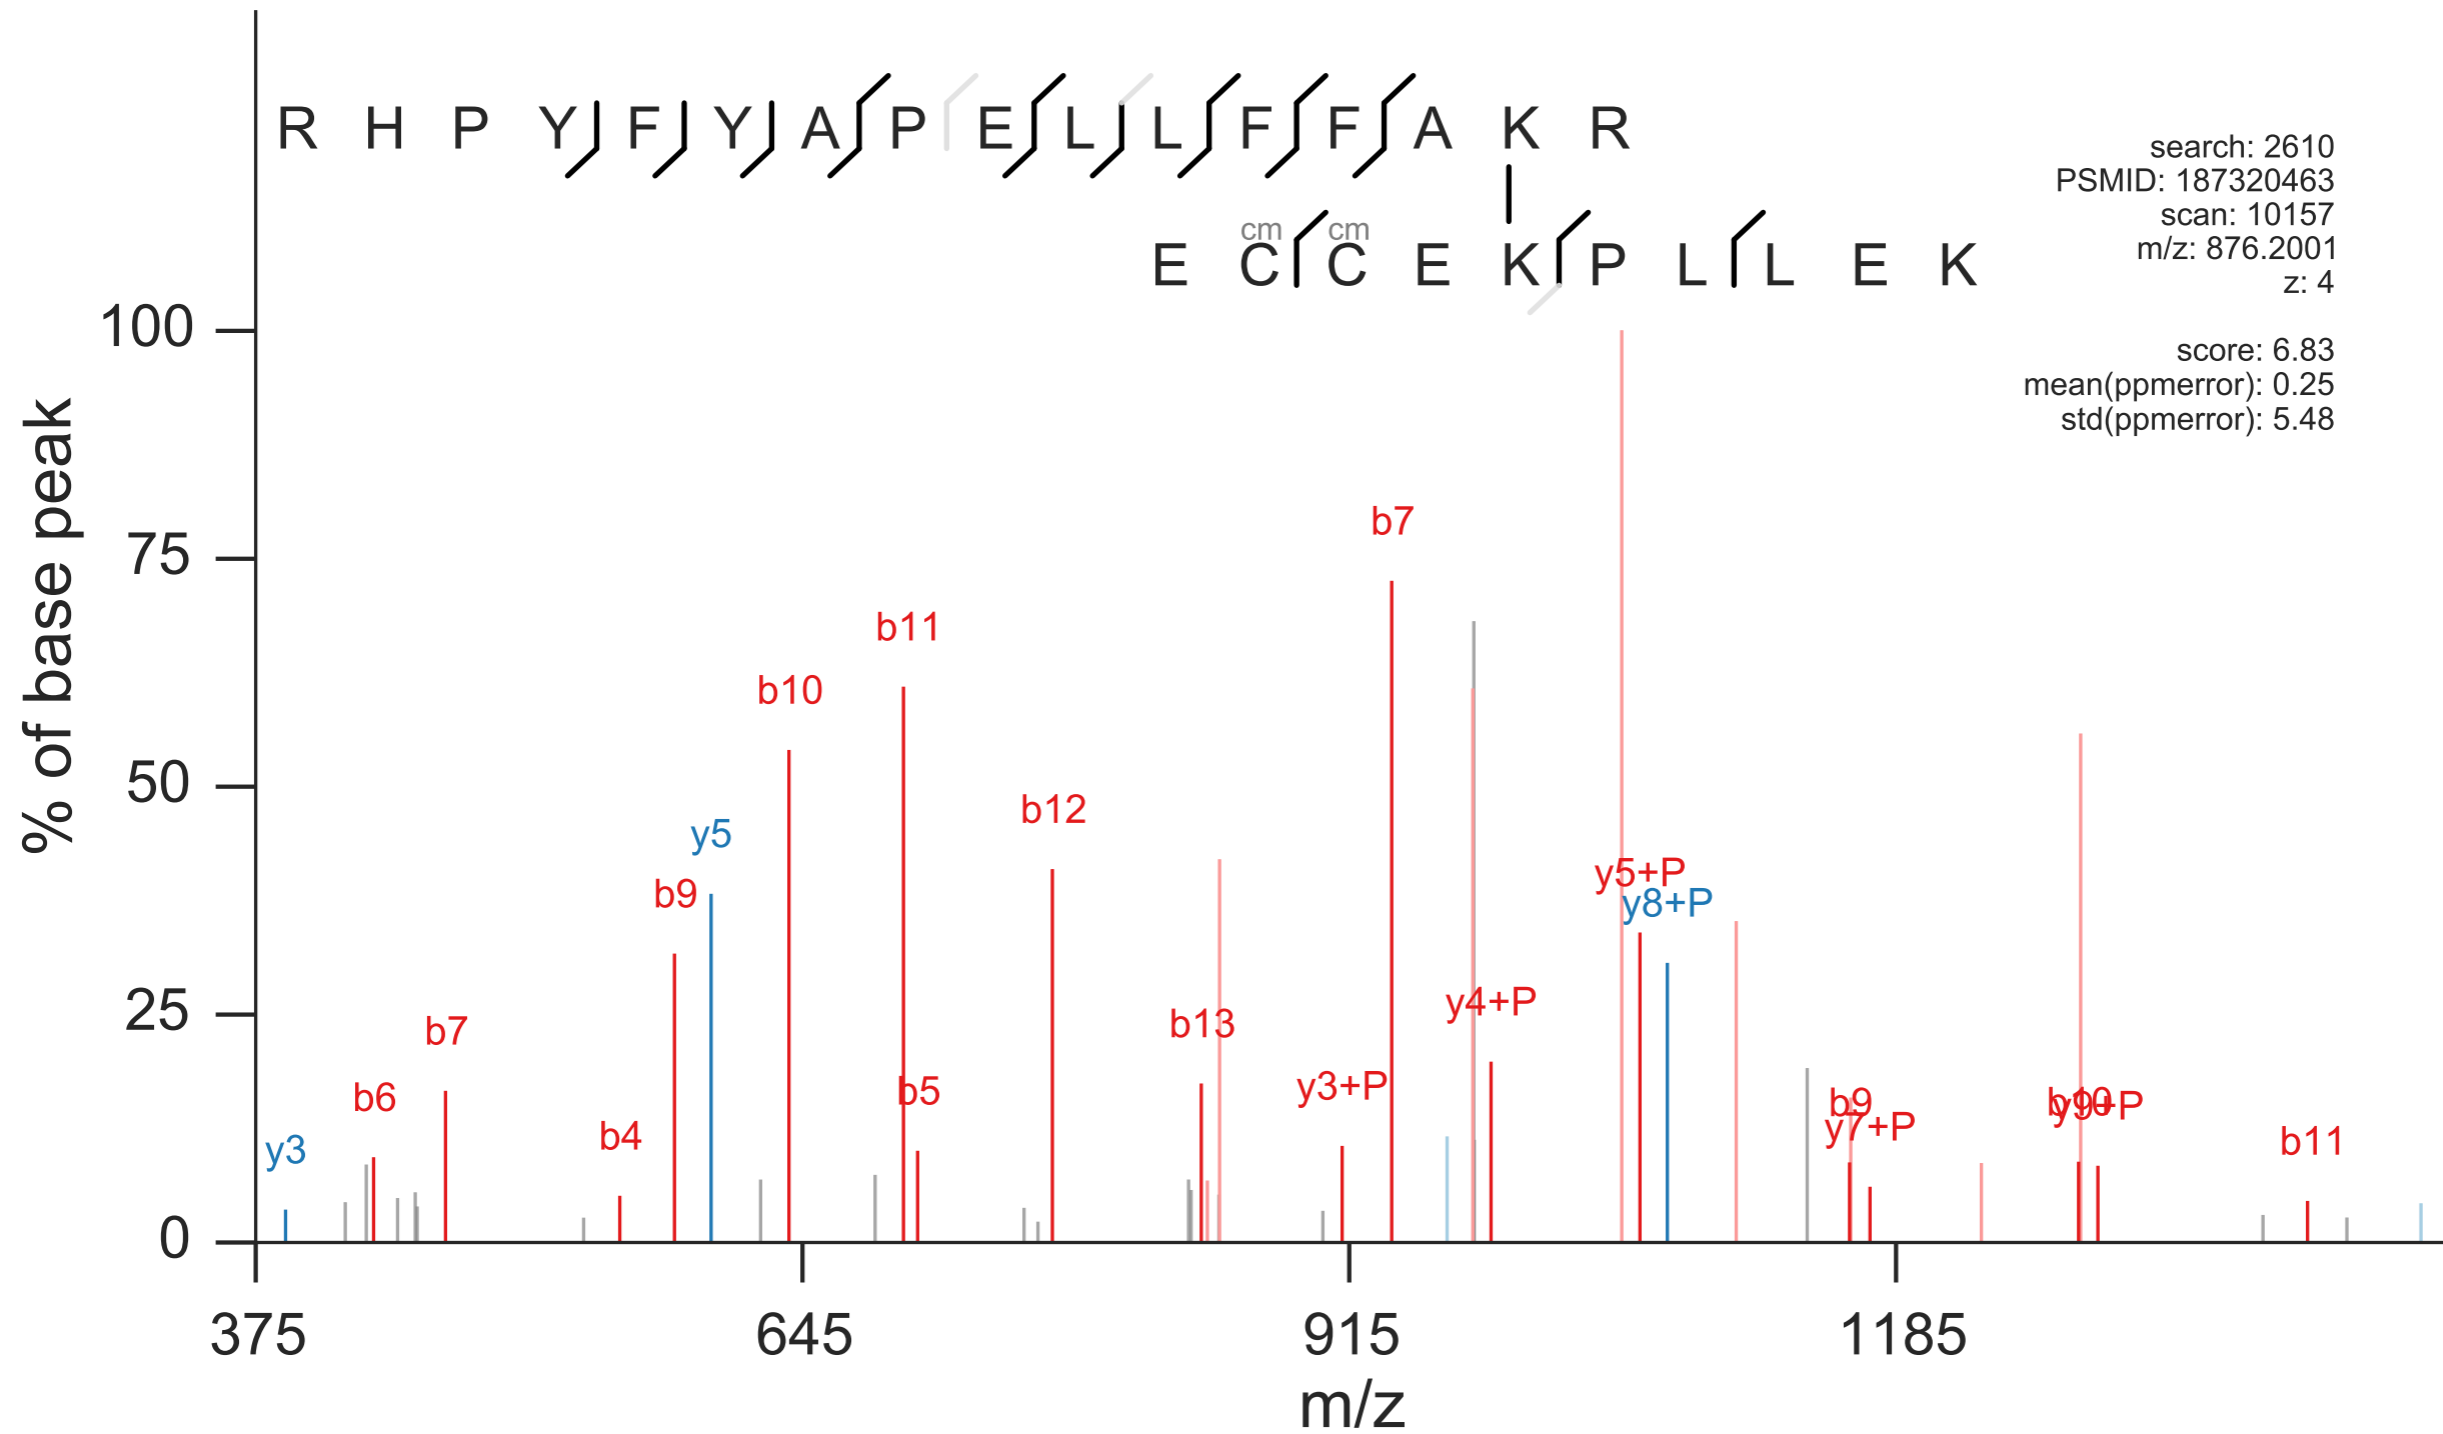

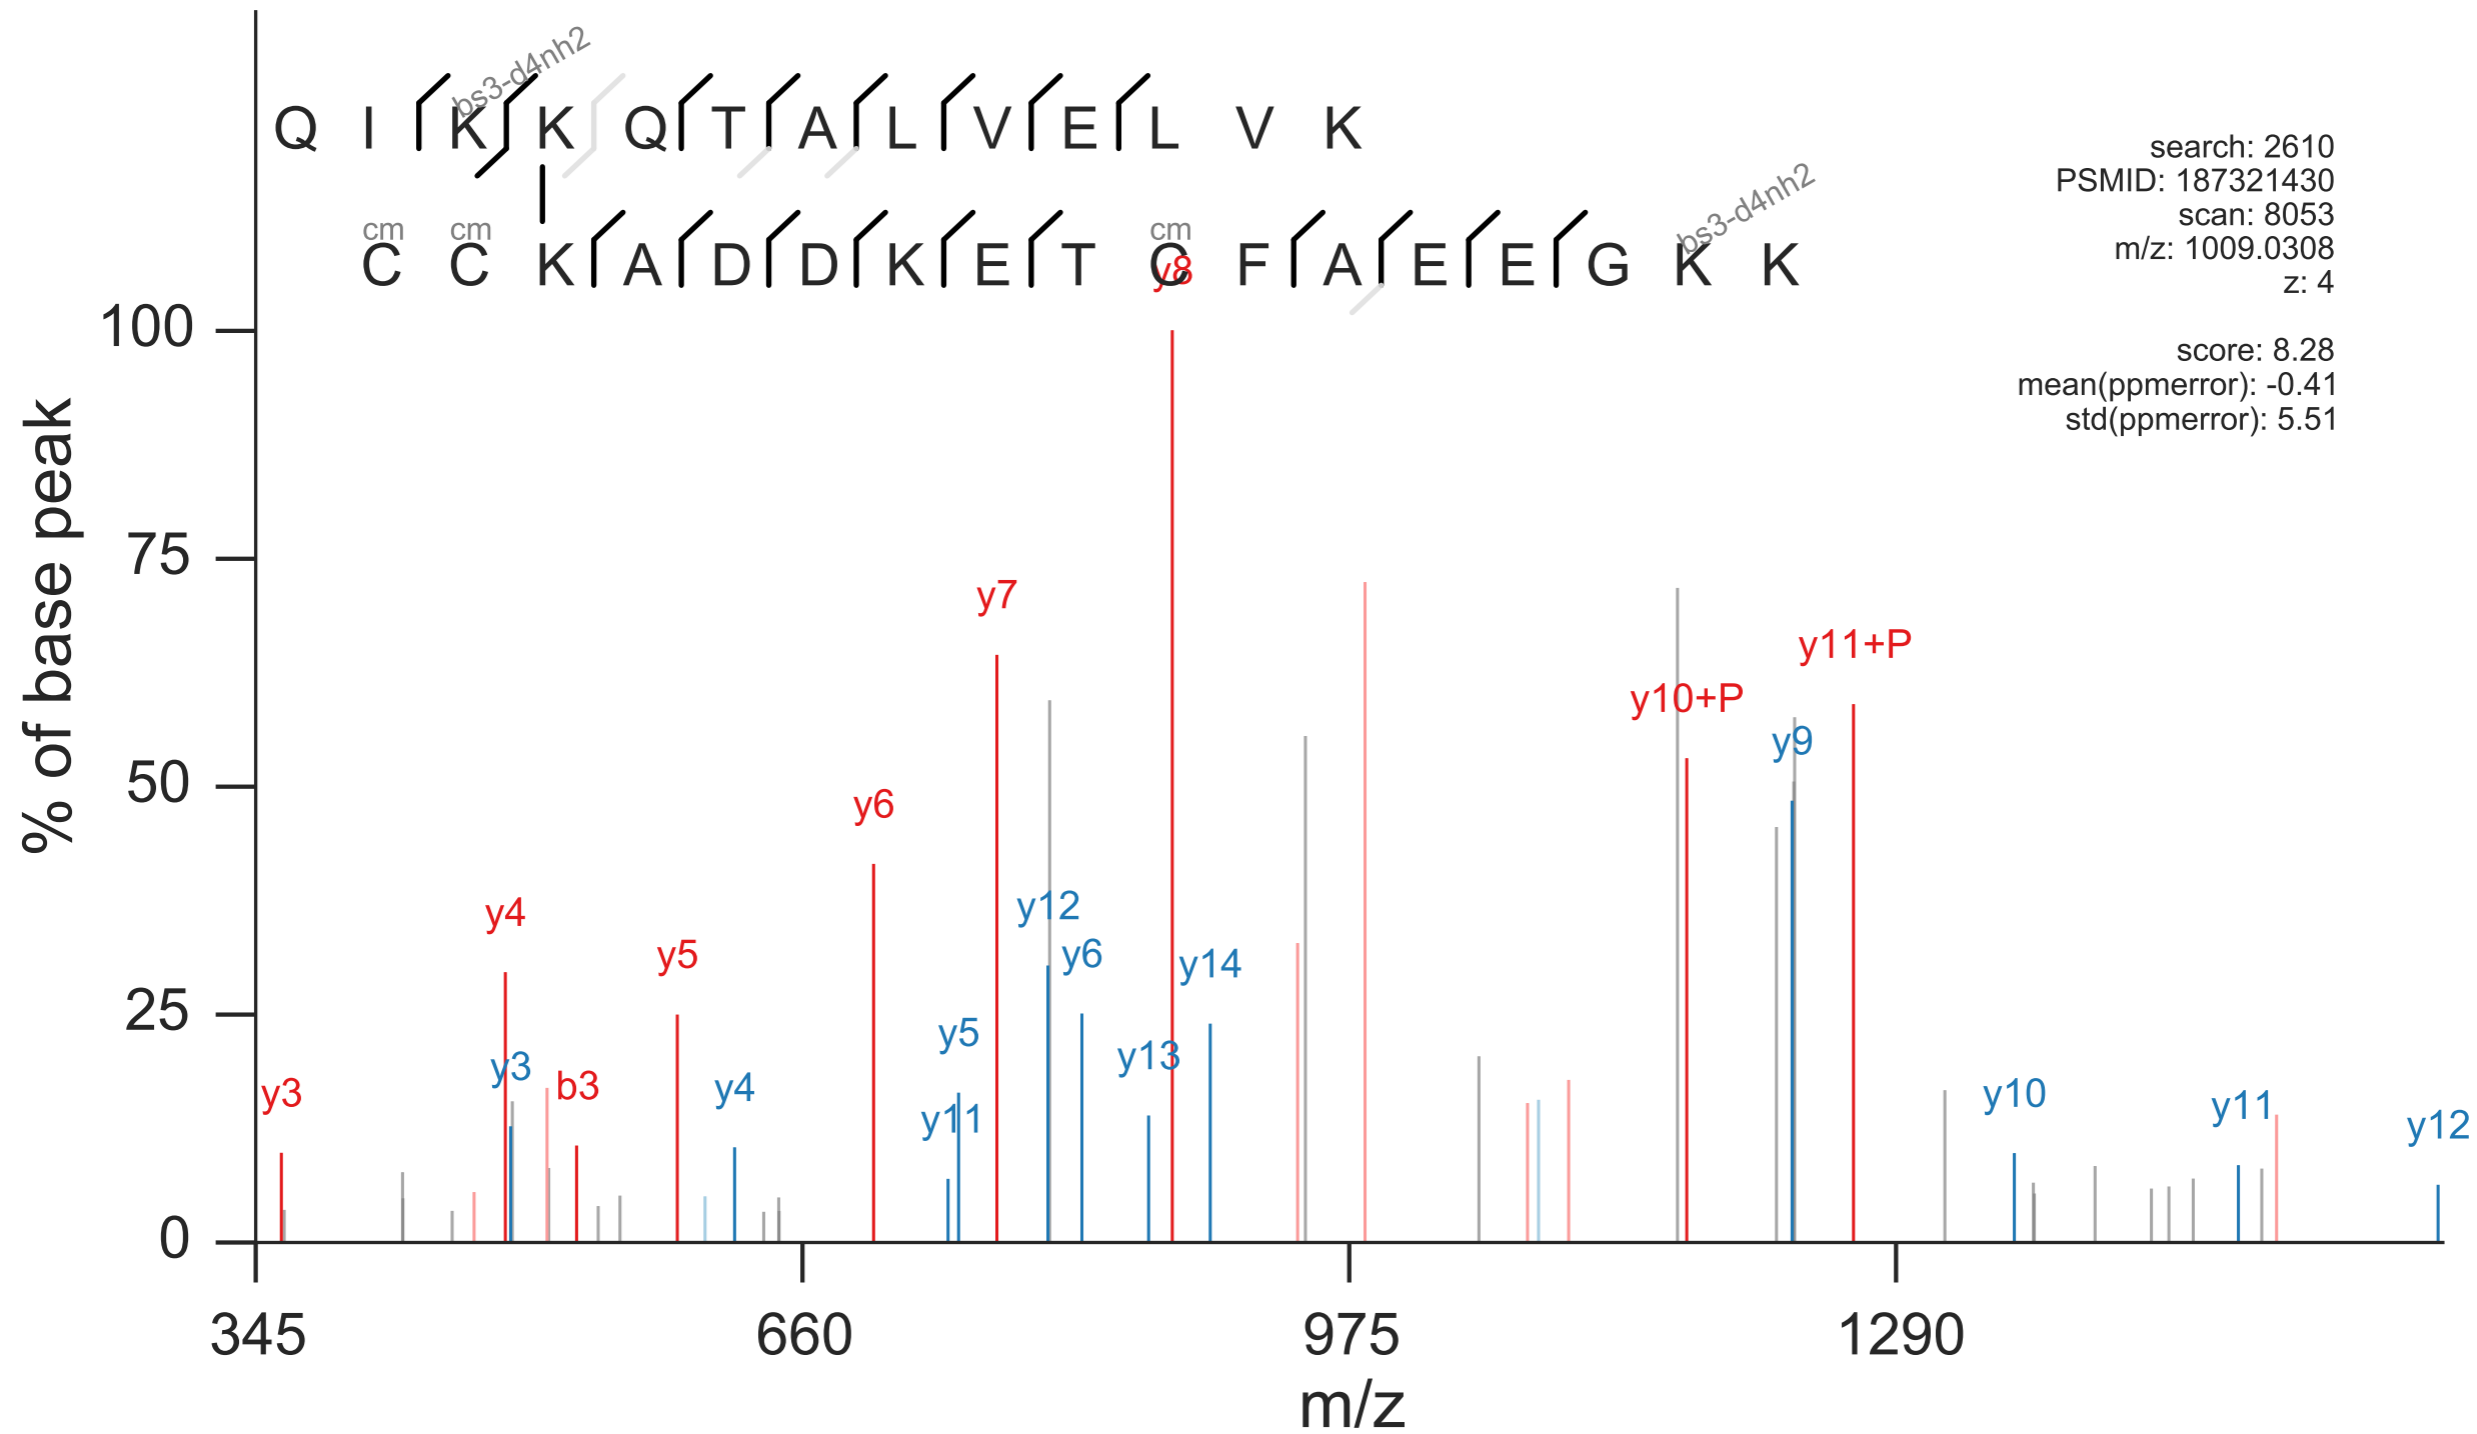

search: 2610  
 PSMID: 187321430  
 scan: 8053  
 m/z: 1009.0308  
 z: 4

score: 8.28  
 mean(ppmerror): -0.41  
 std(ppmerror): 5.51

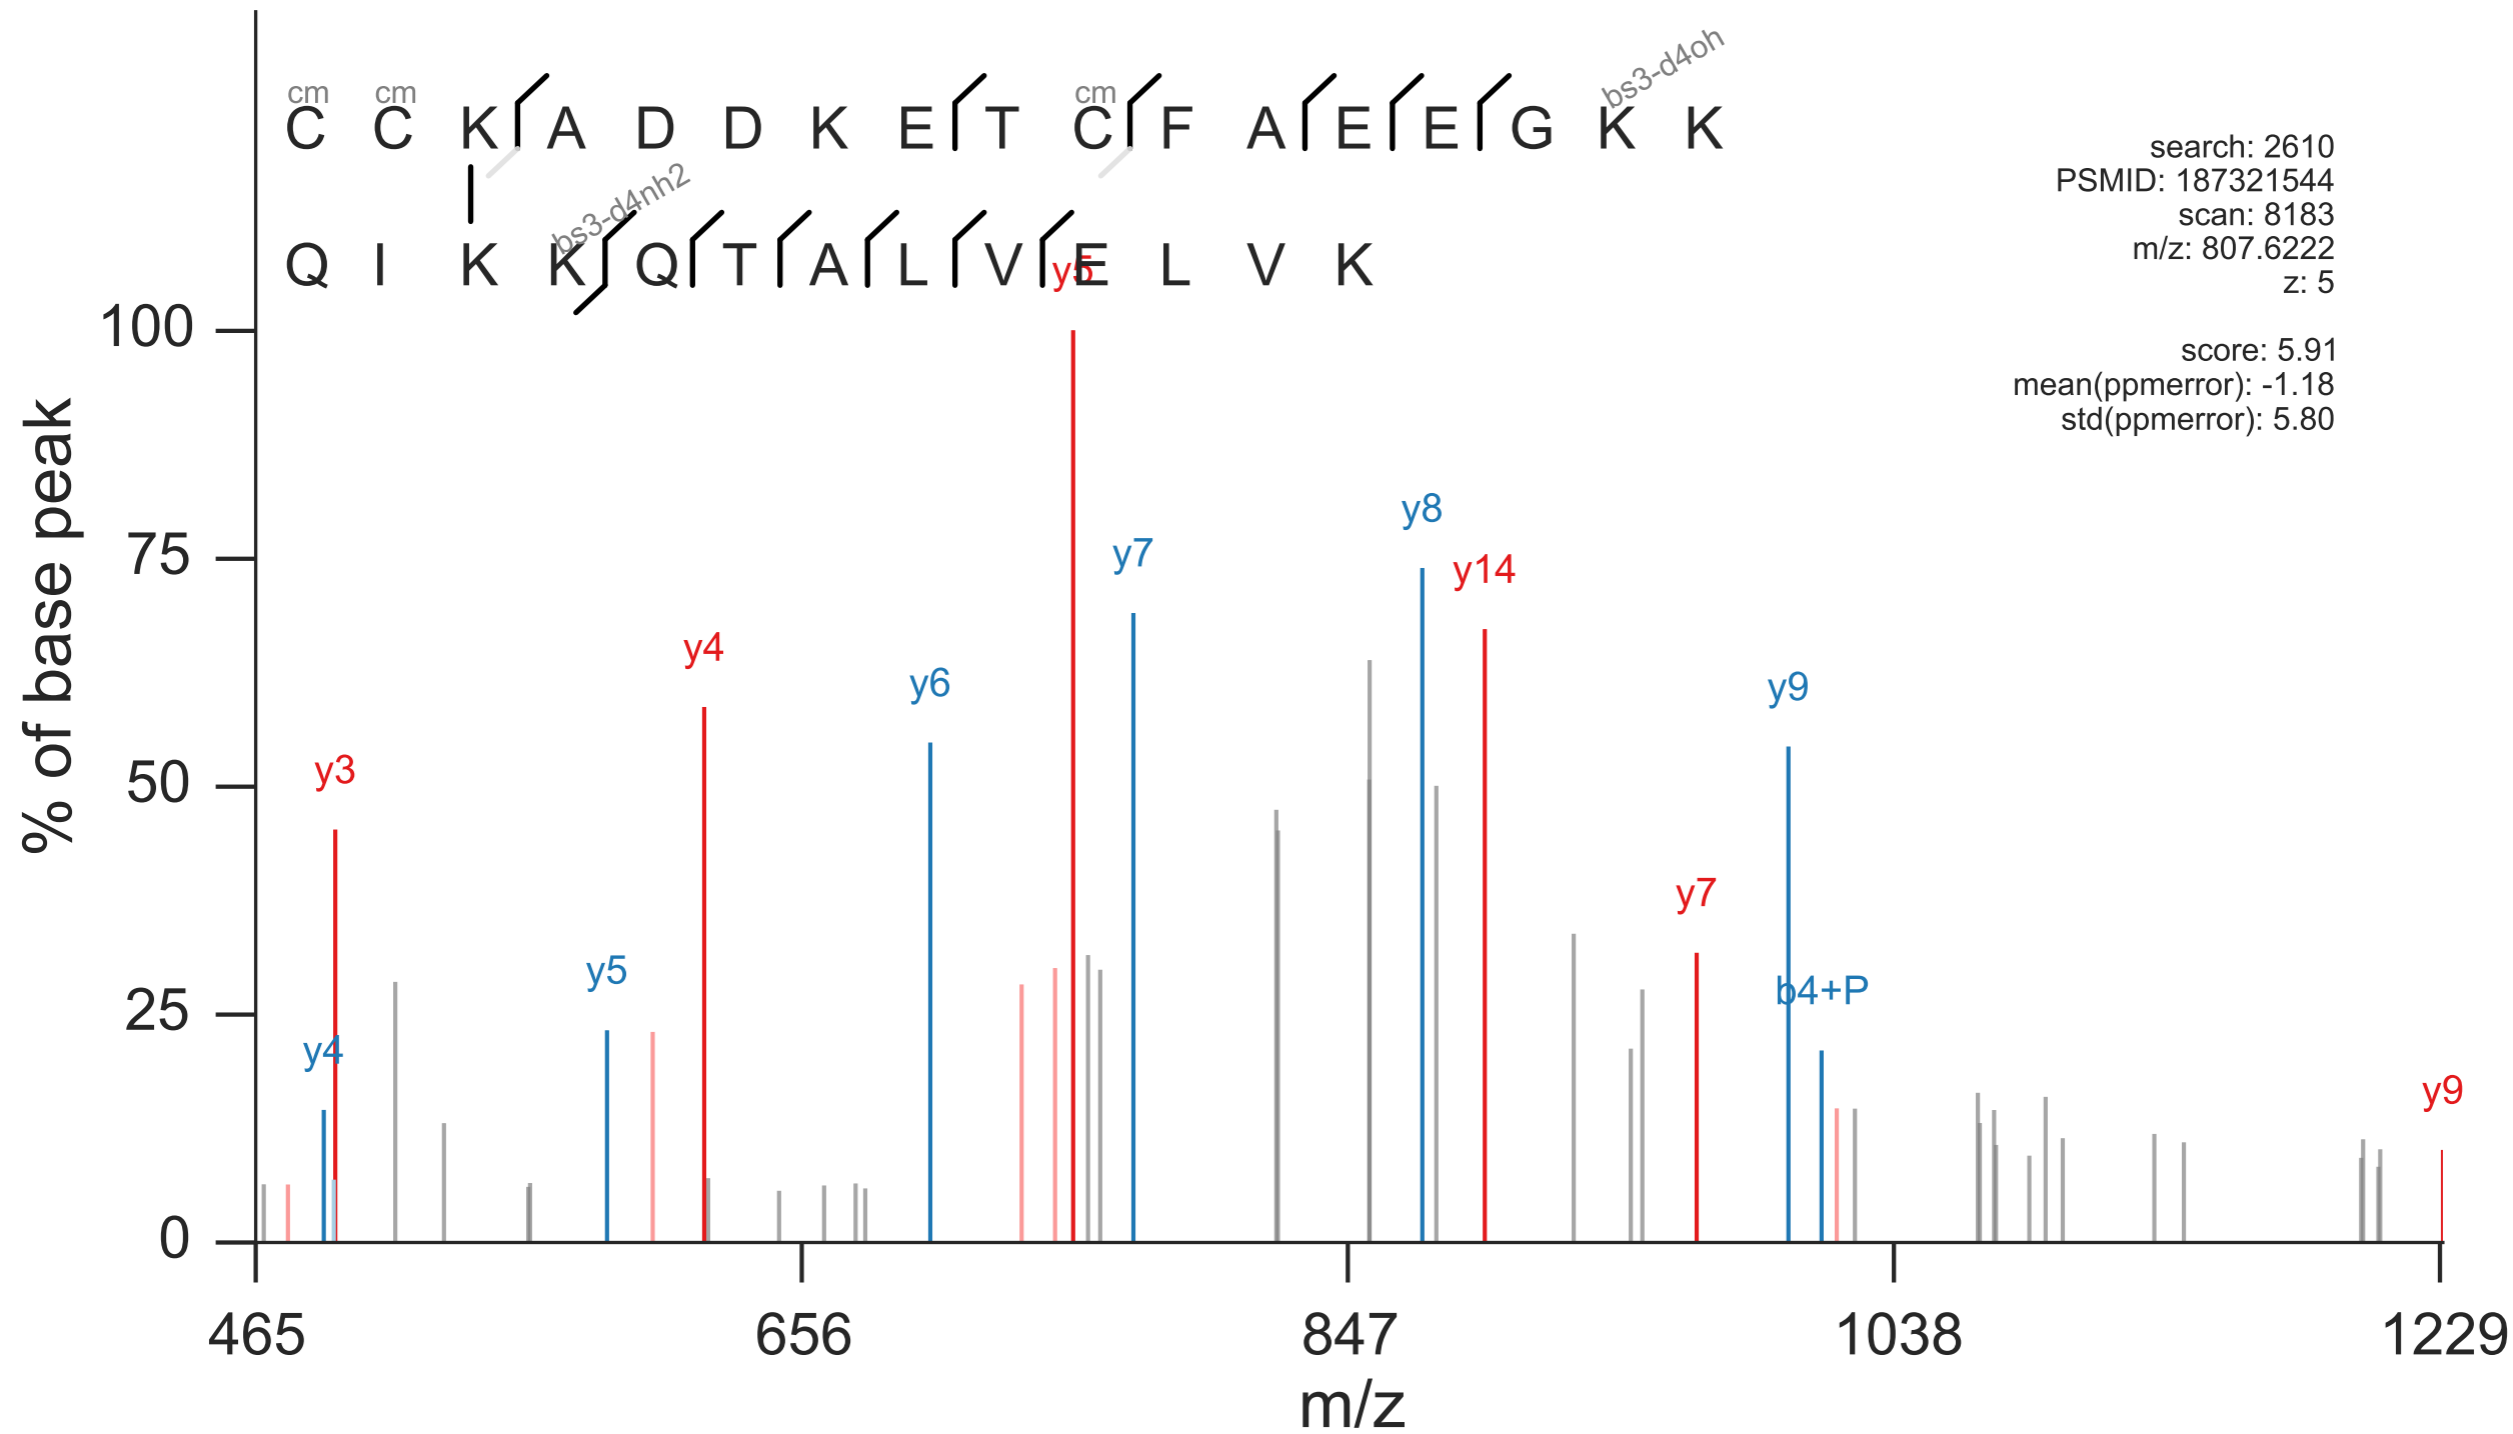

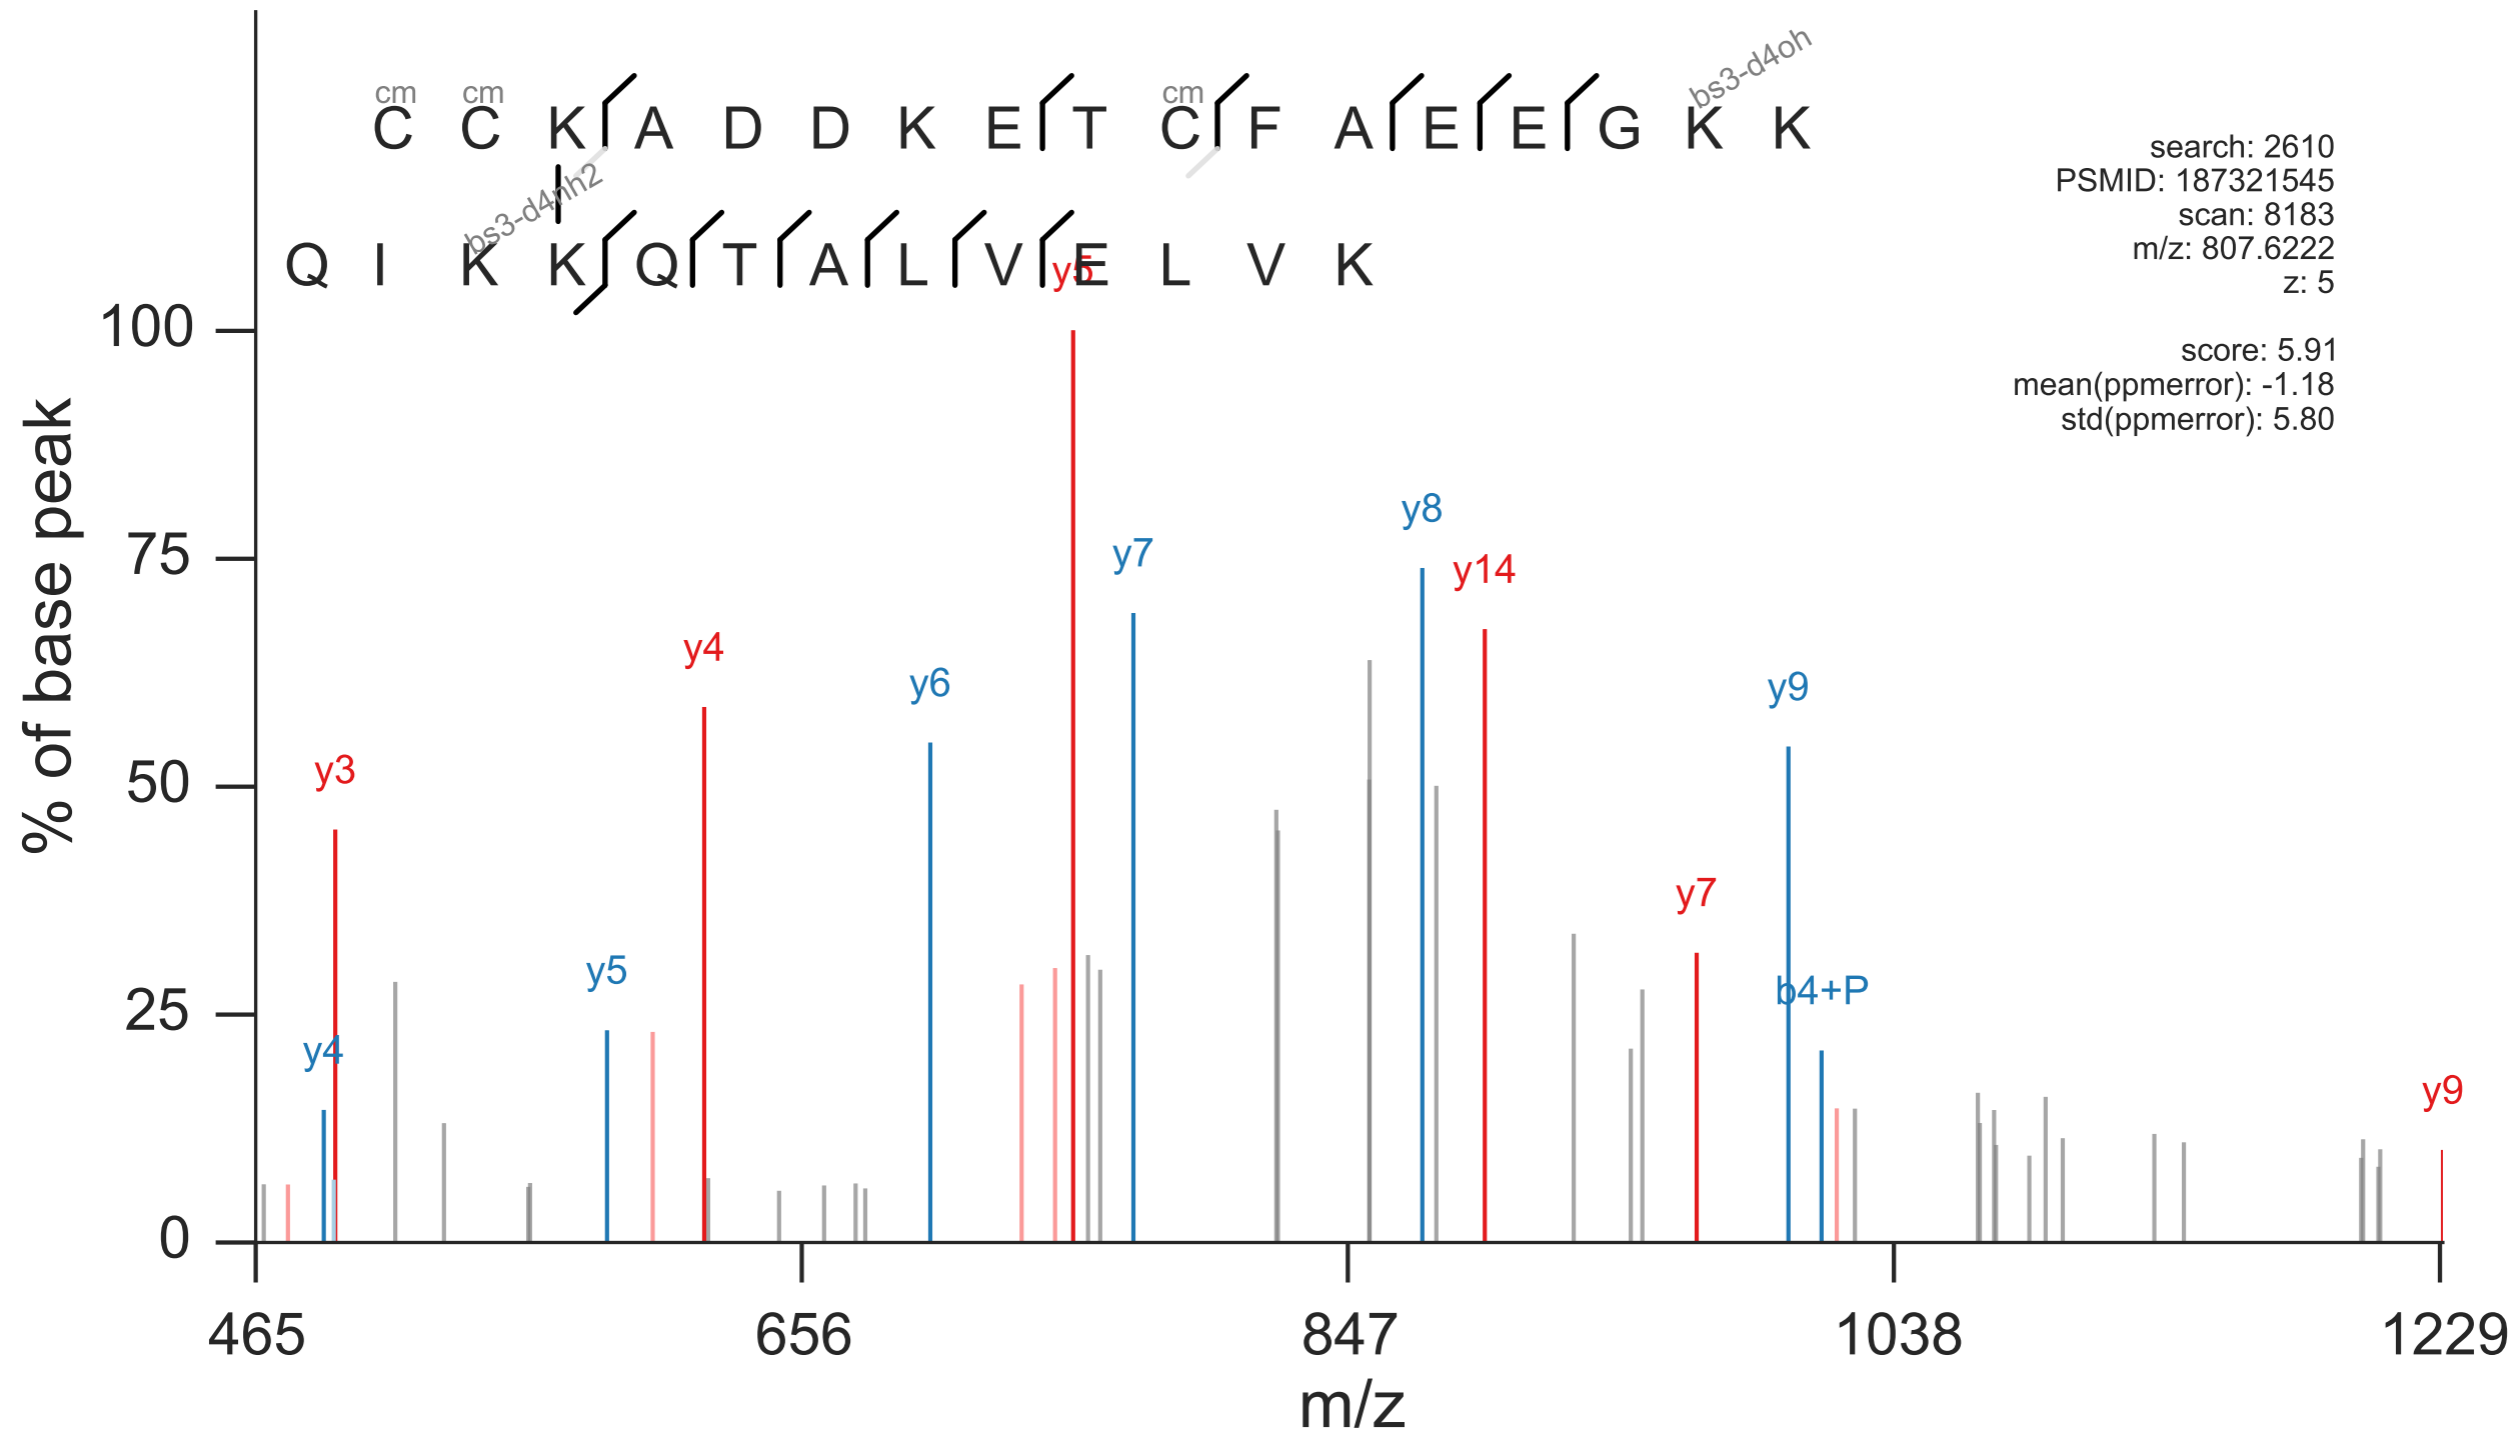

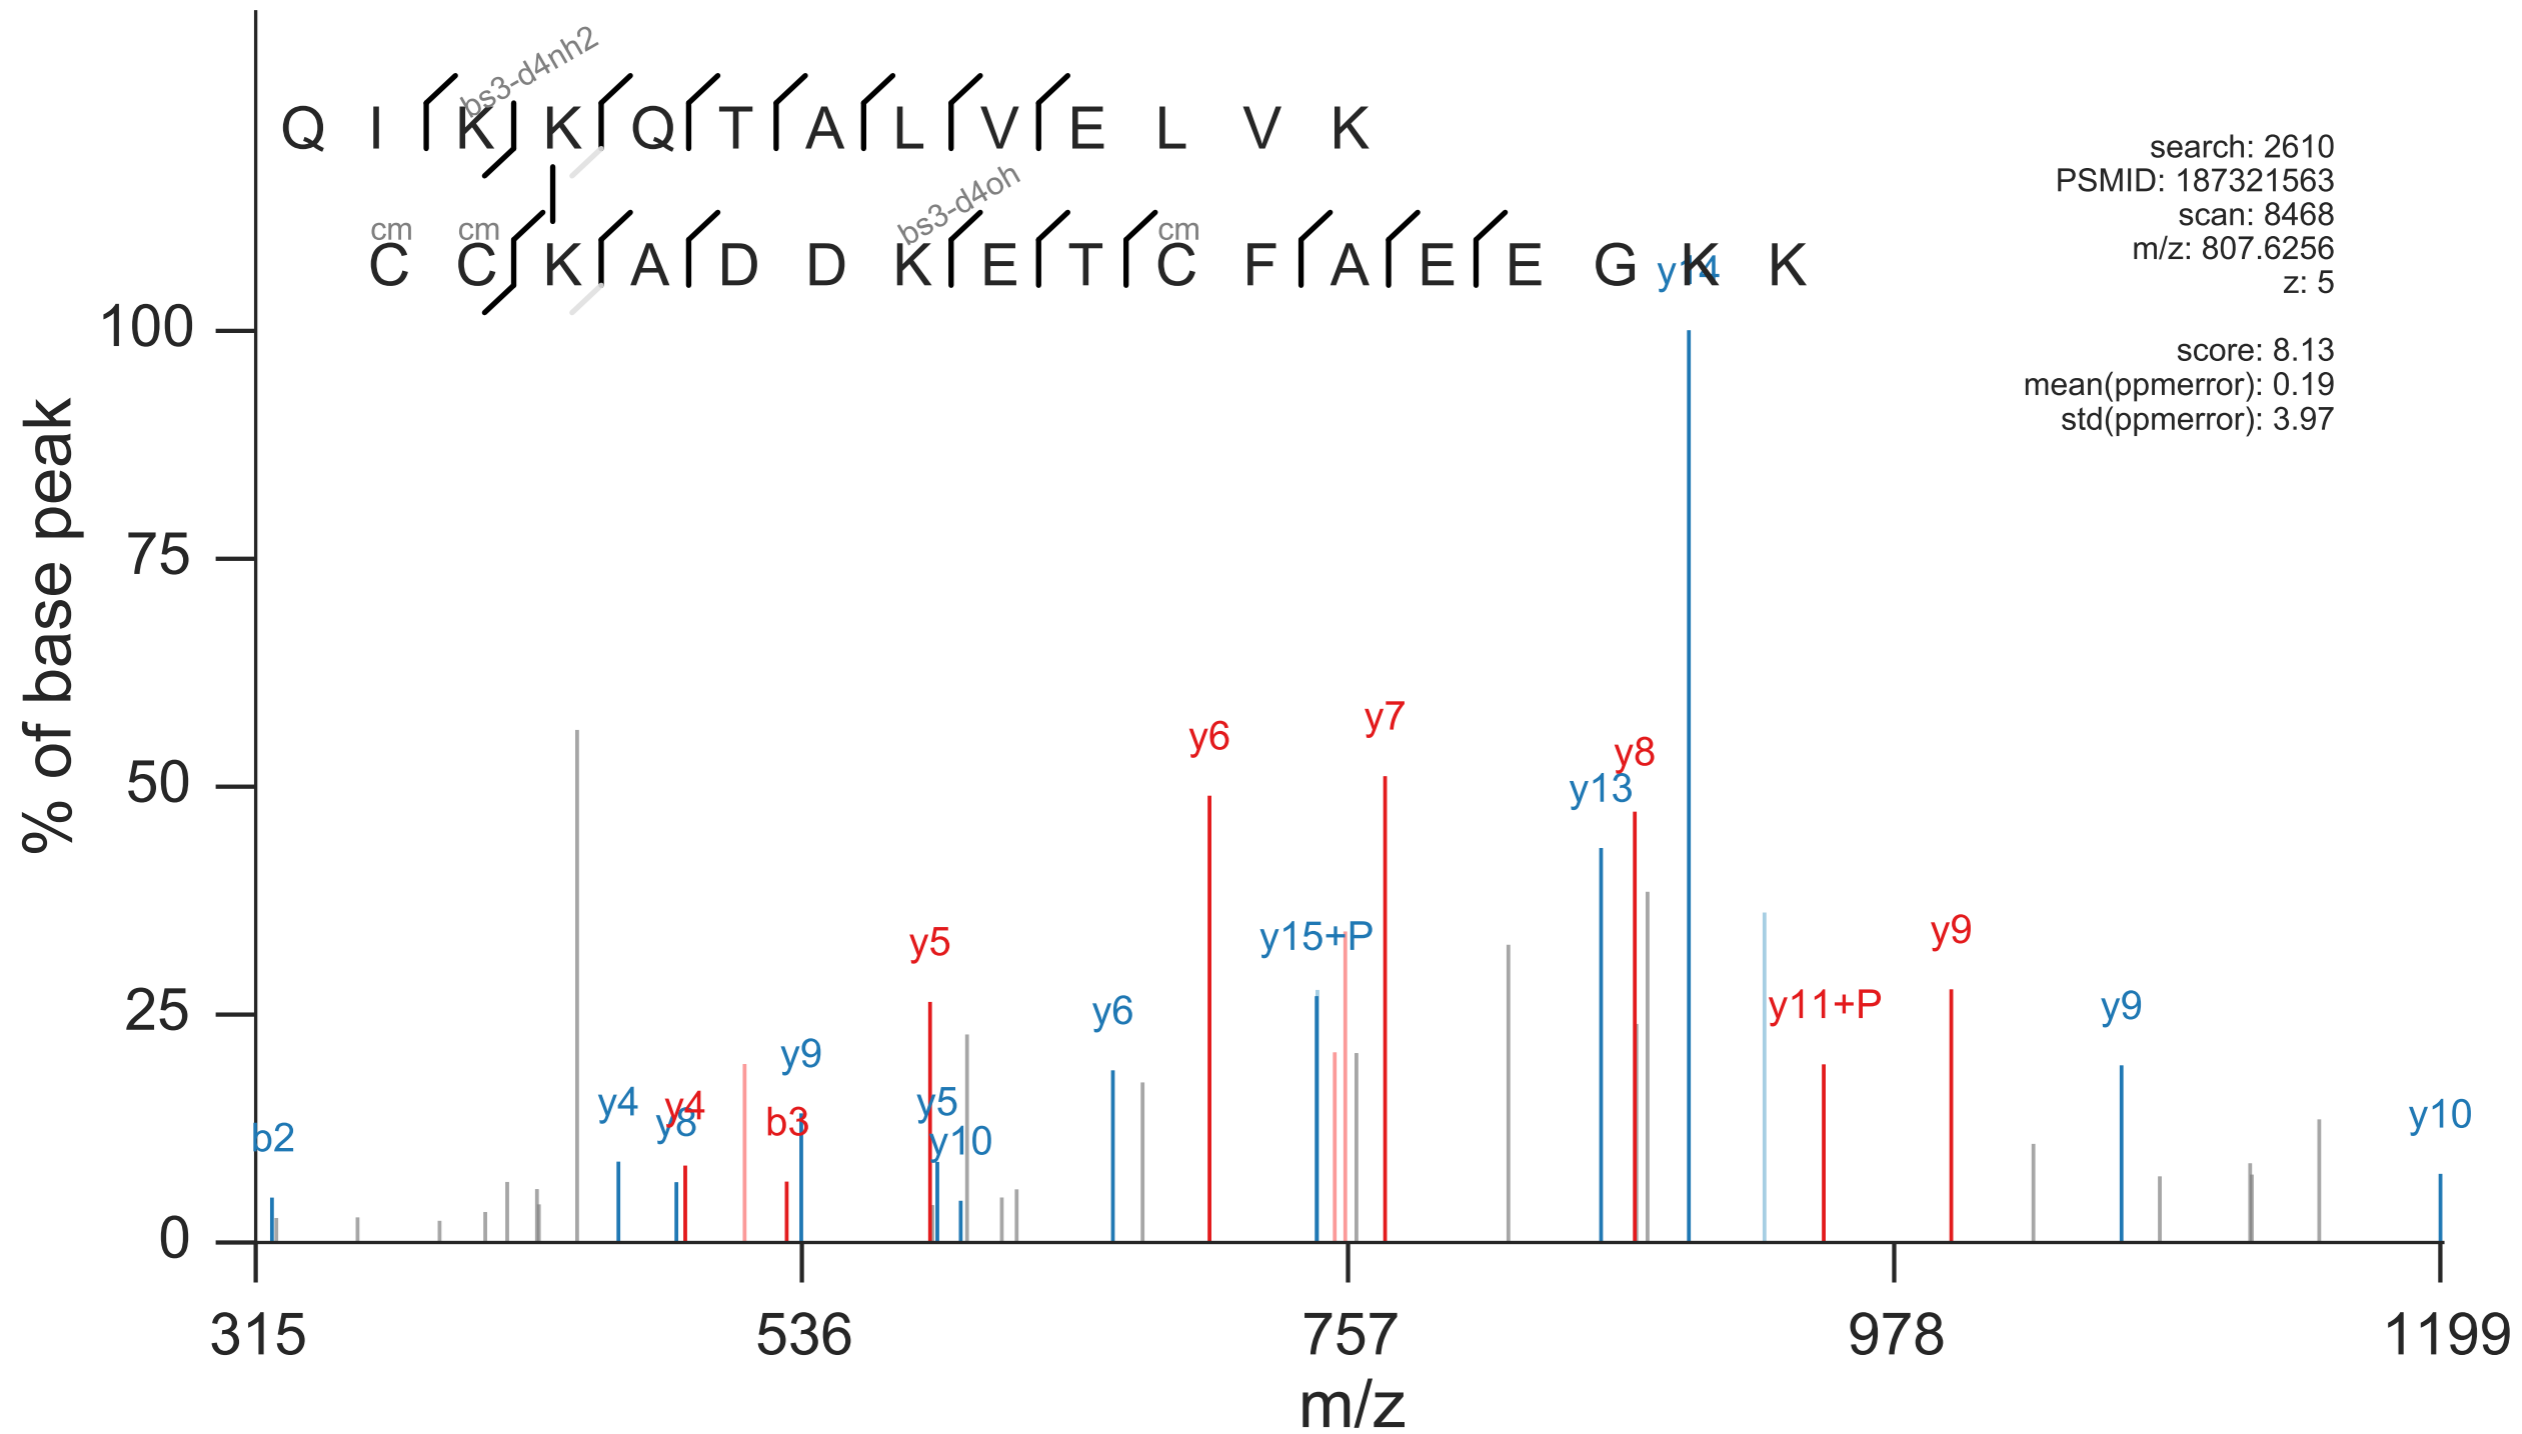

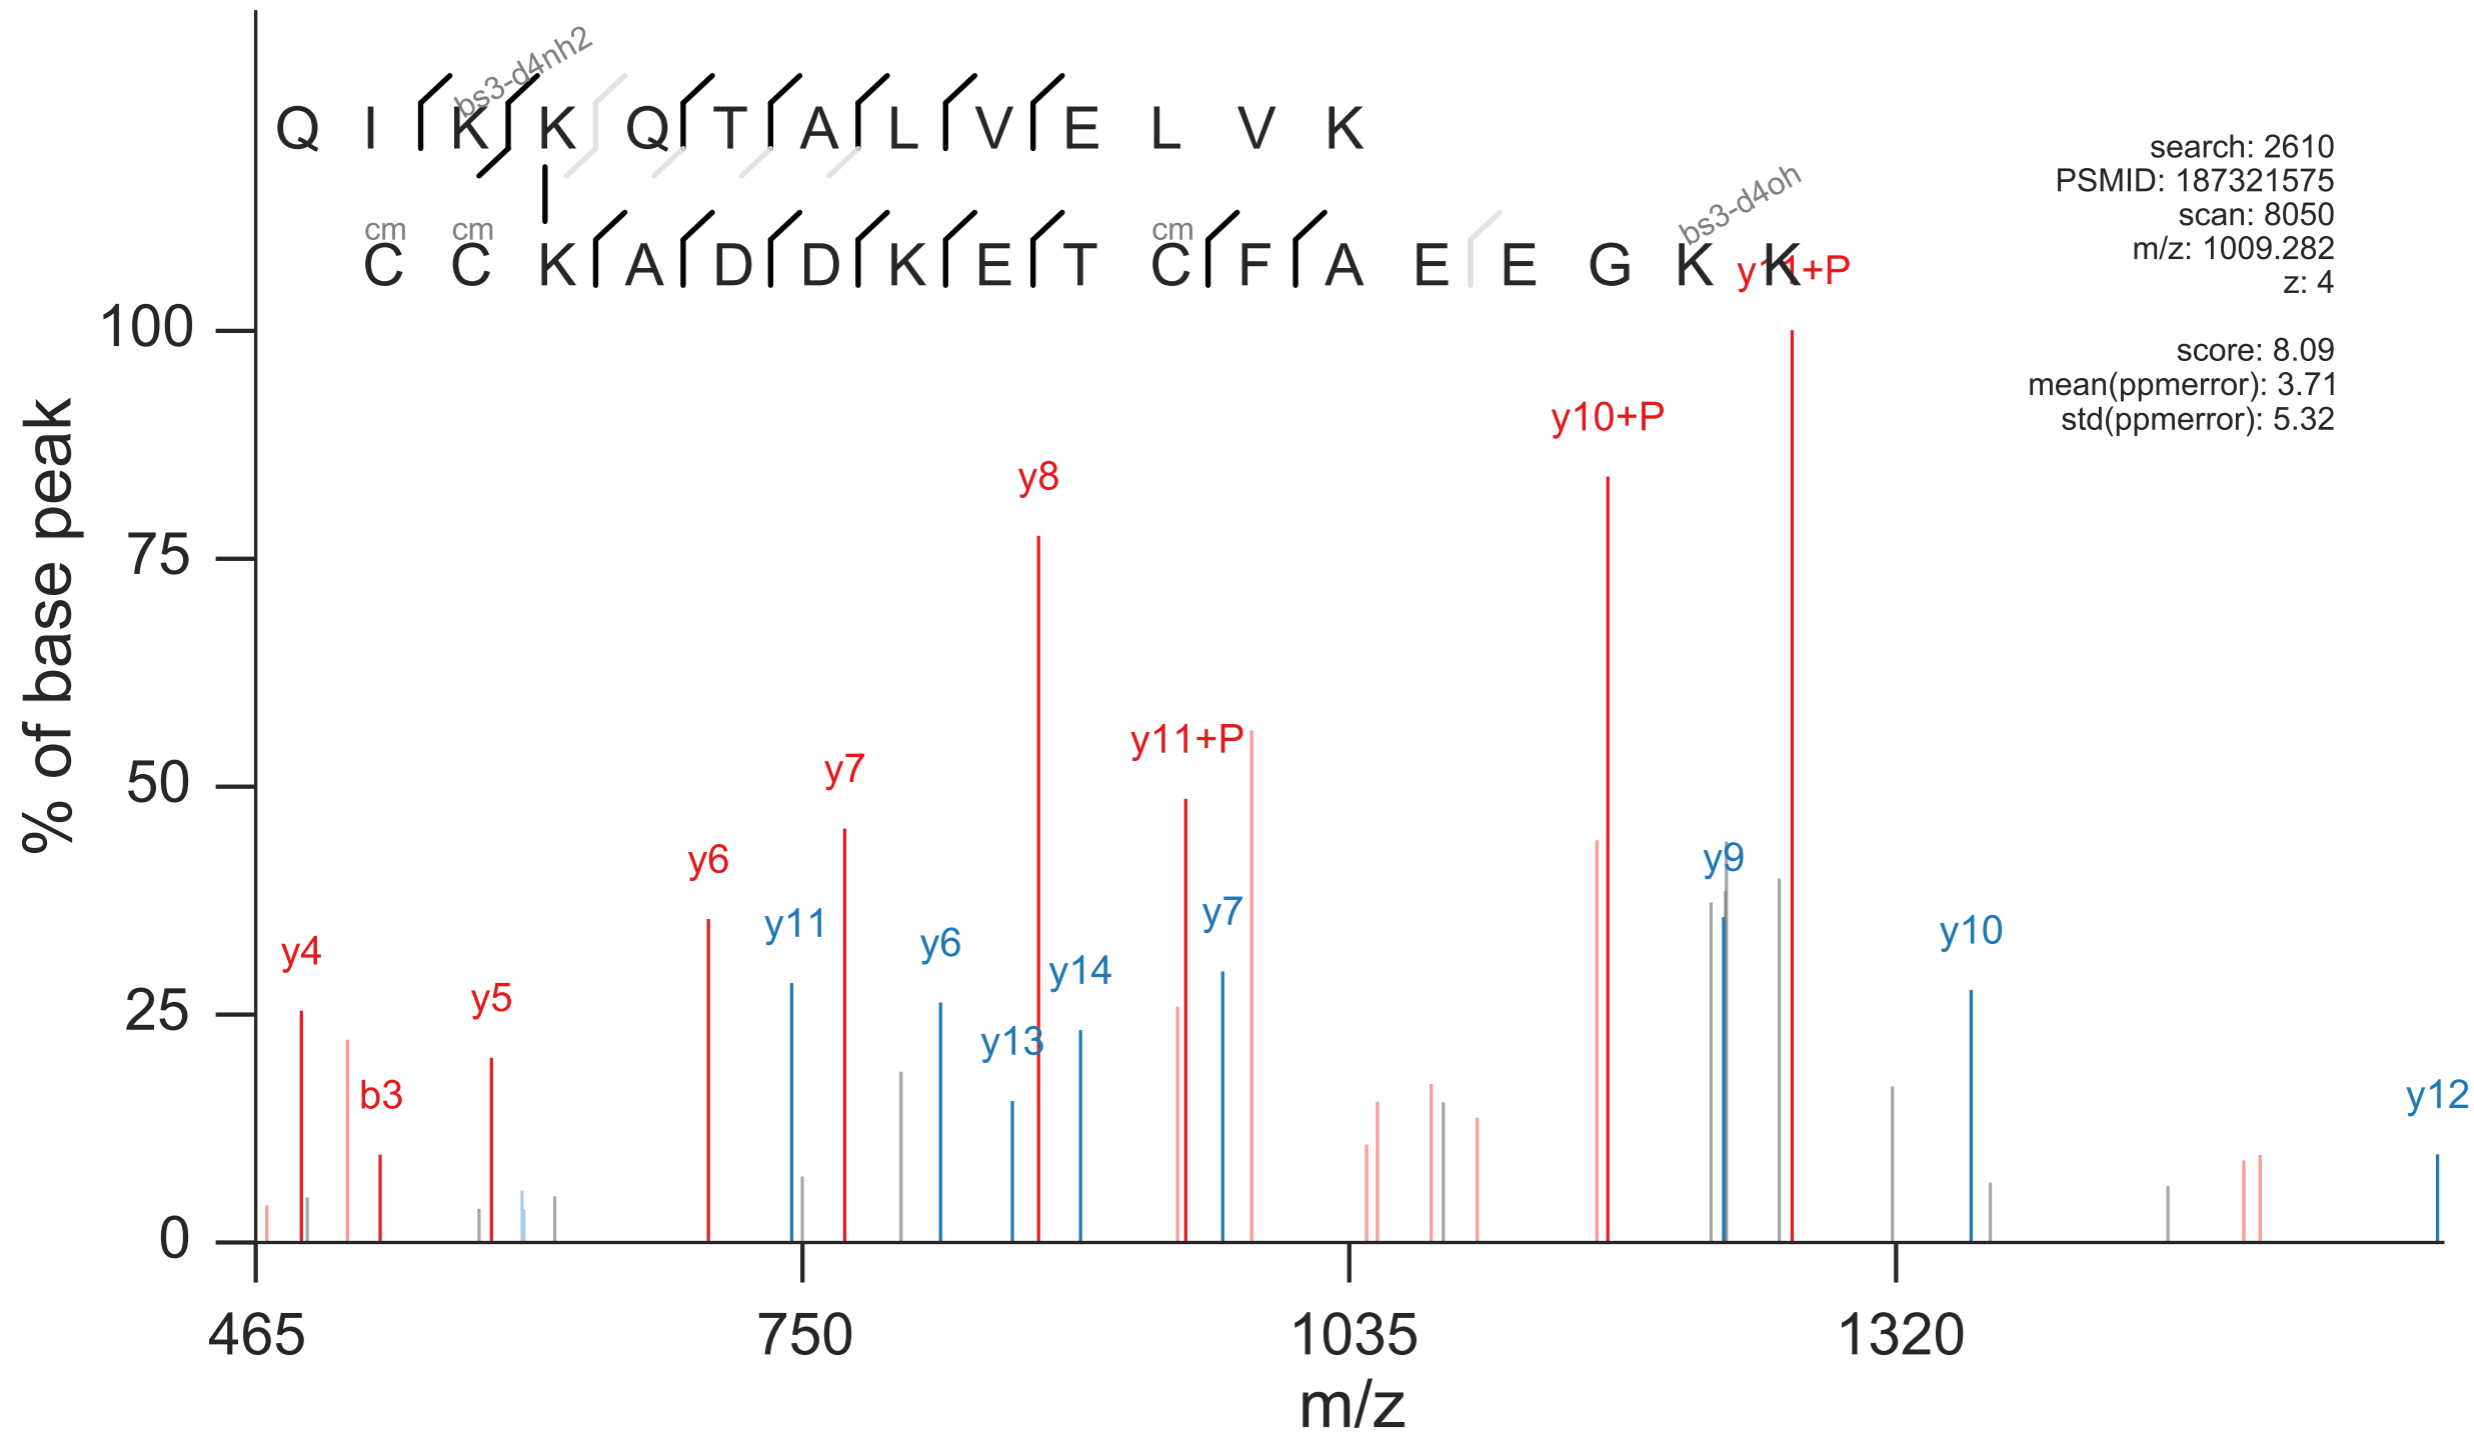

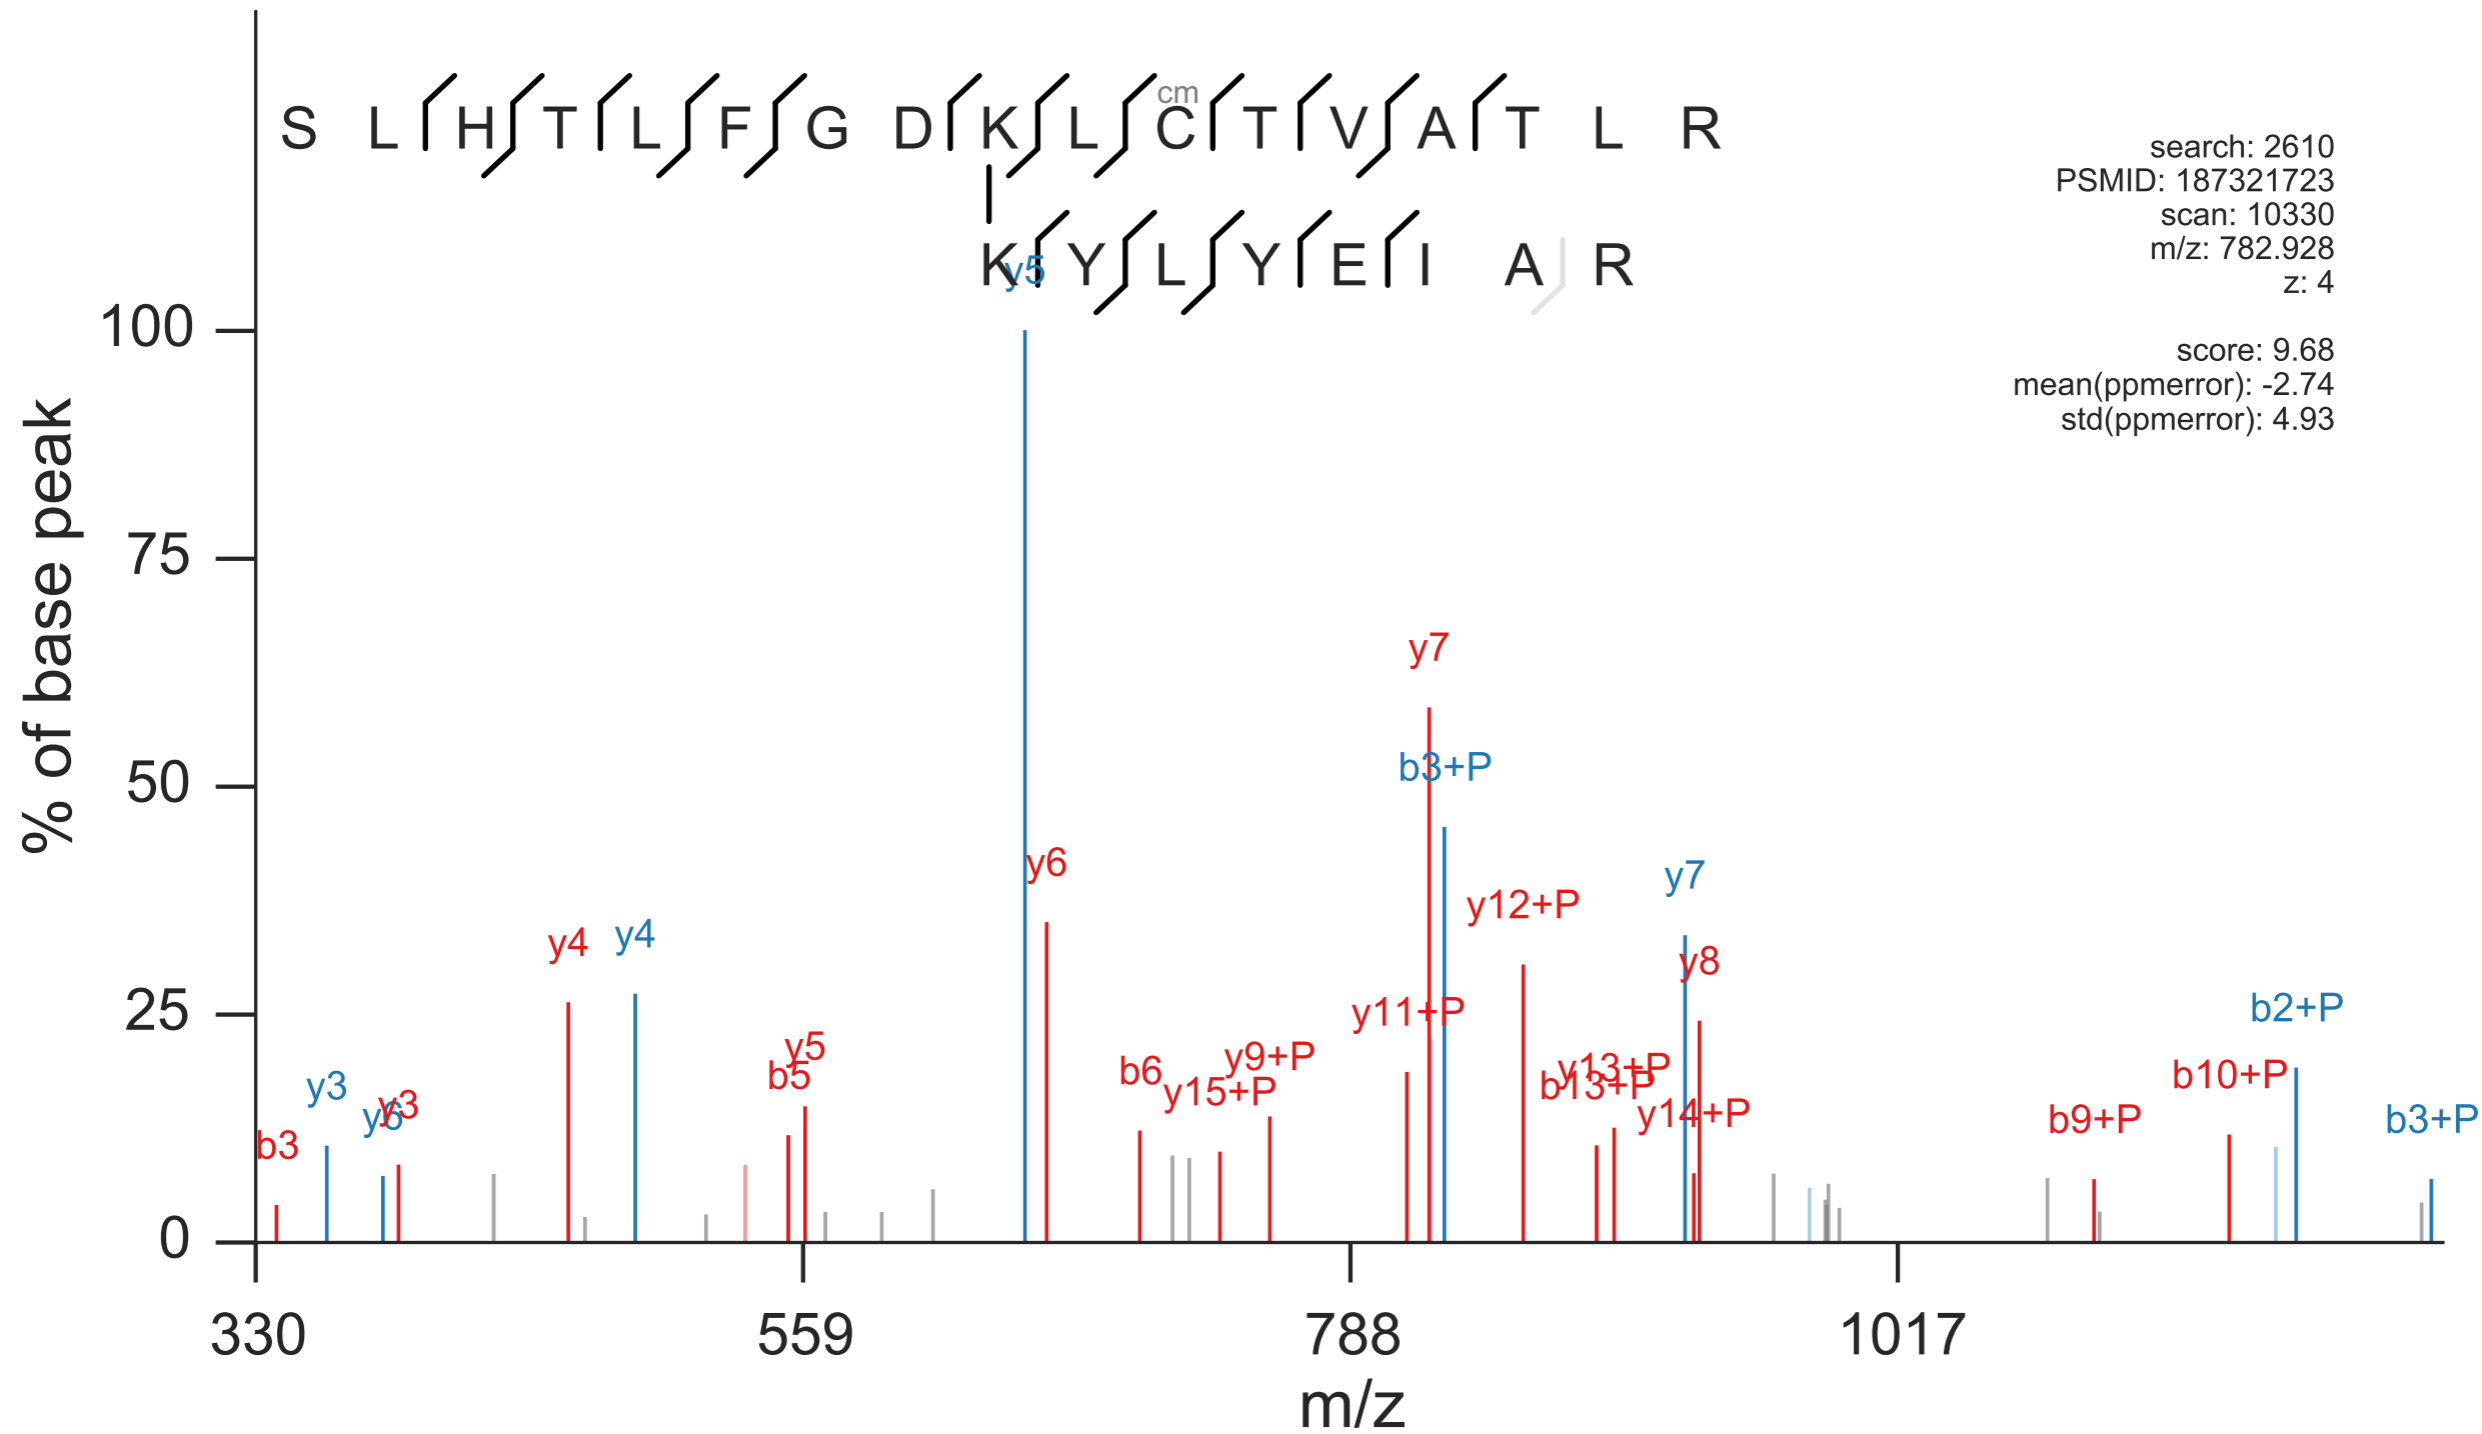

S L (H) T (L) F (G) D (K) L (C) T (V) A (T) L R  
 |  
 K (Y) L (Y) E (I) A (R)

search: 2610  
 PSMID: 187321723  
 scan: 10330  
 m/z: 782.928  
 z: 4  
 score: 9.68  
 mean(ppmerror): -2.74  
 std(ppmerror): 4.93

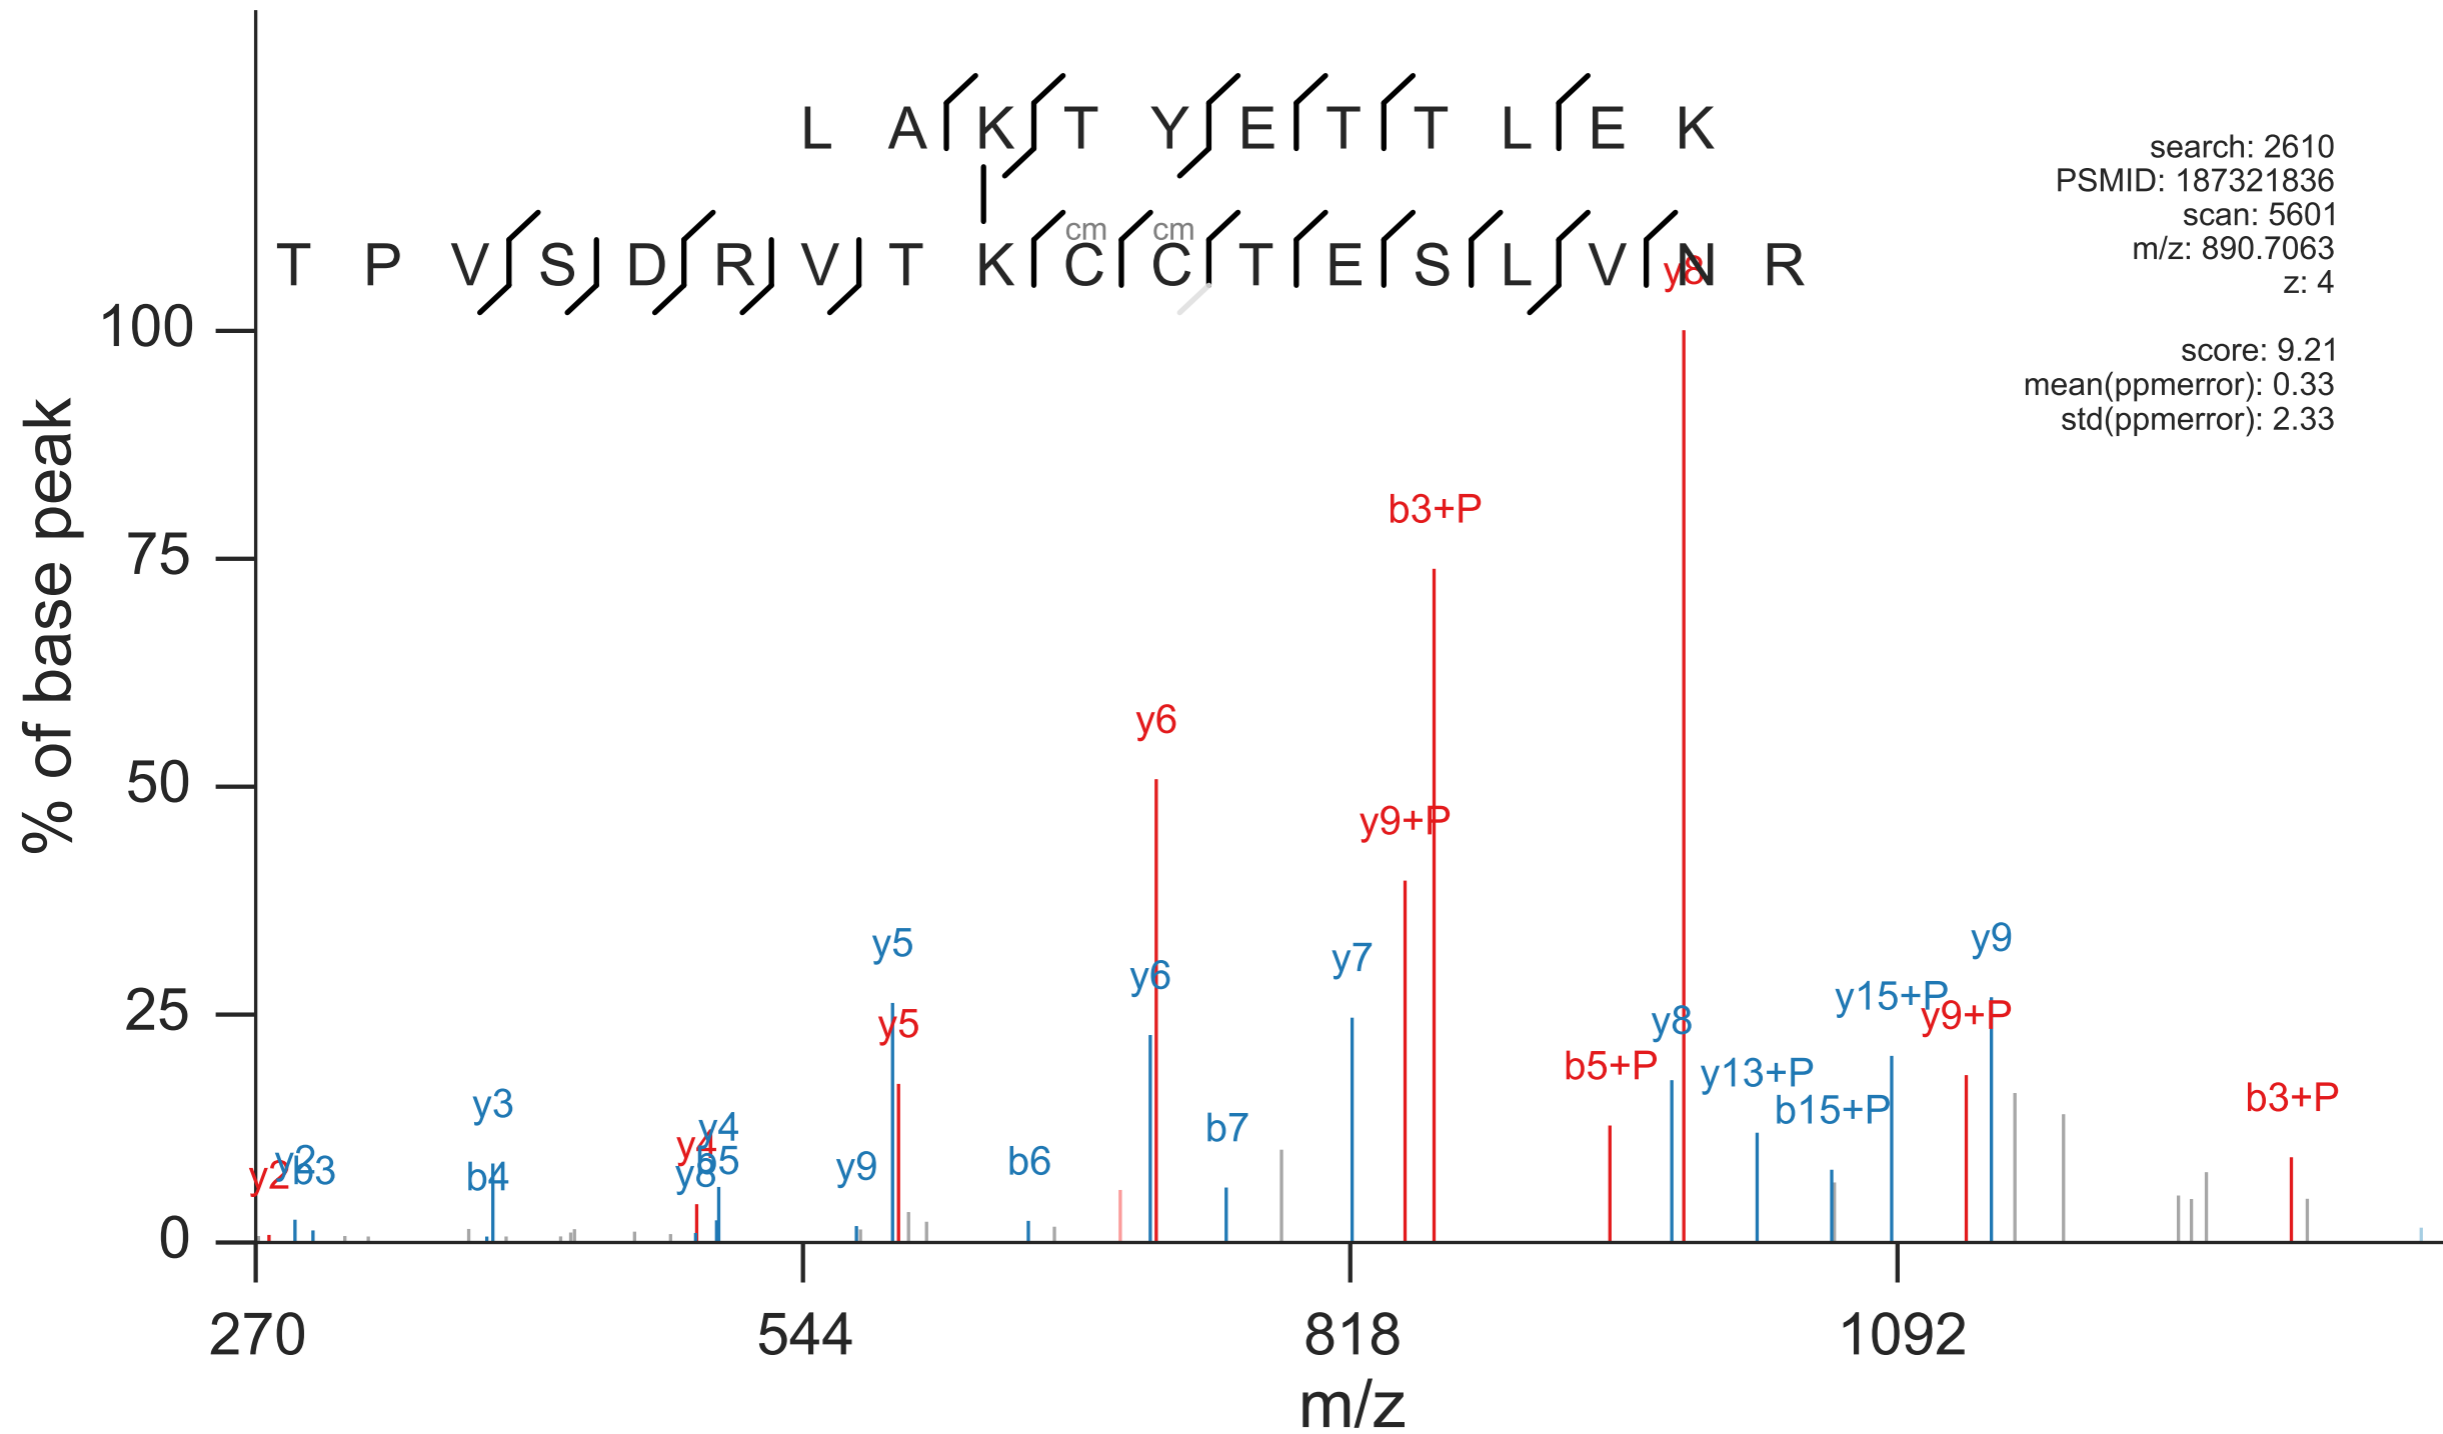

search: 2610  
 PSMID: 187321836  
 scan: 5601  
 m/z: 890.7063  
 z: 4

score: 9.21  
 mean(ppmerror): 0.33  
 std(ppmerror): 2.33



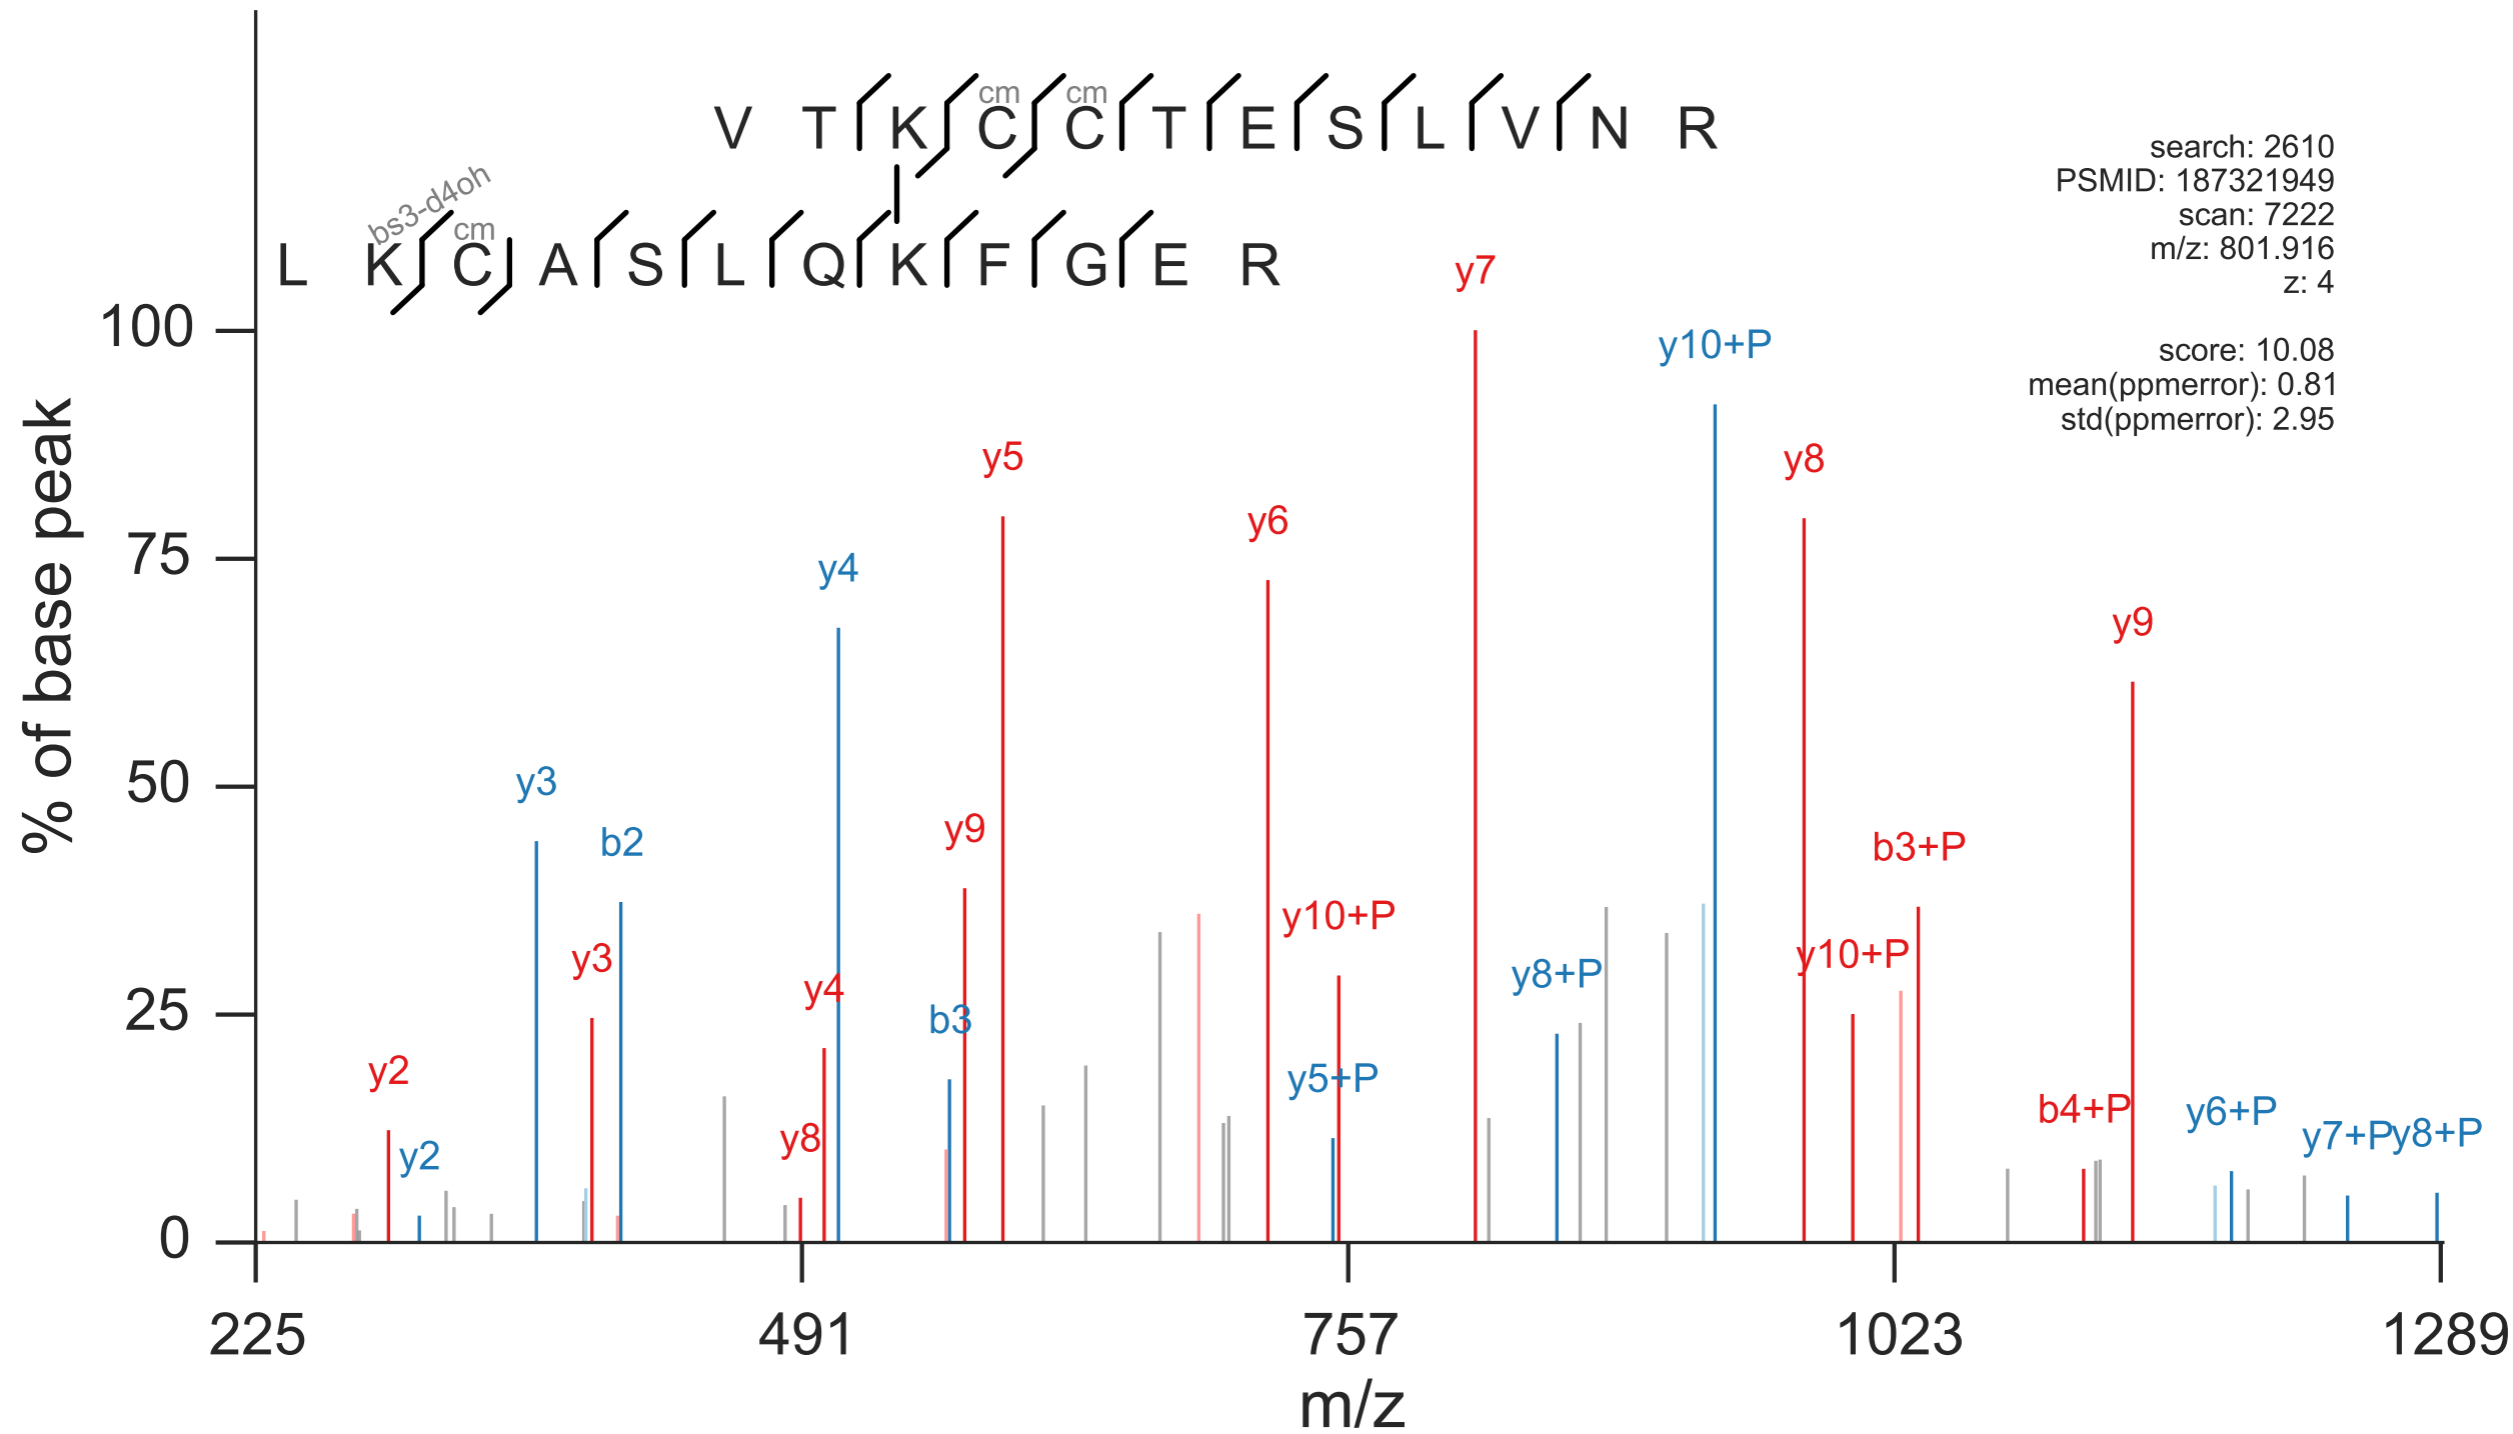

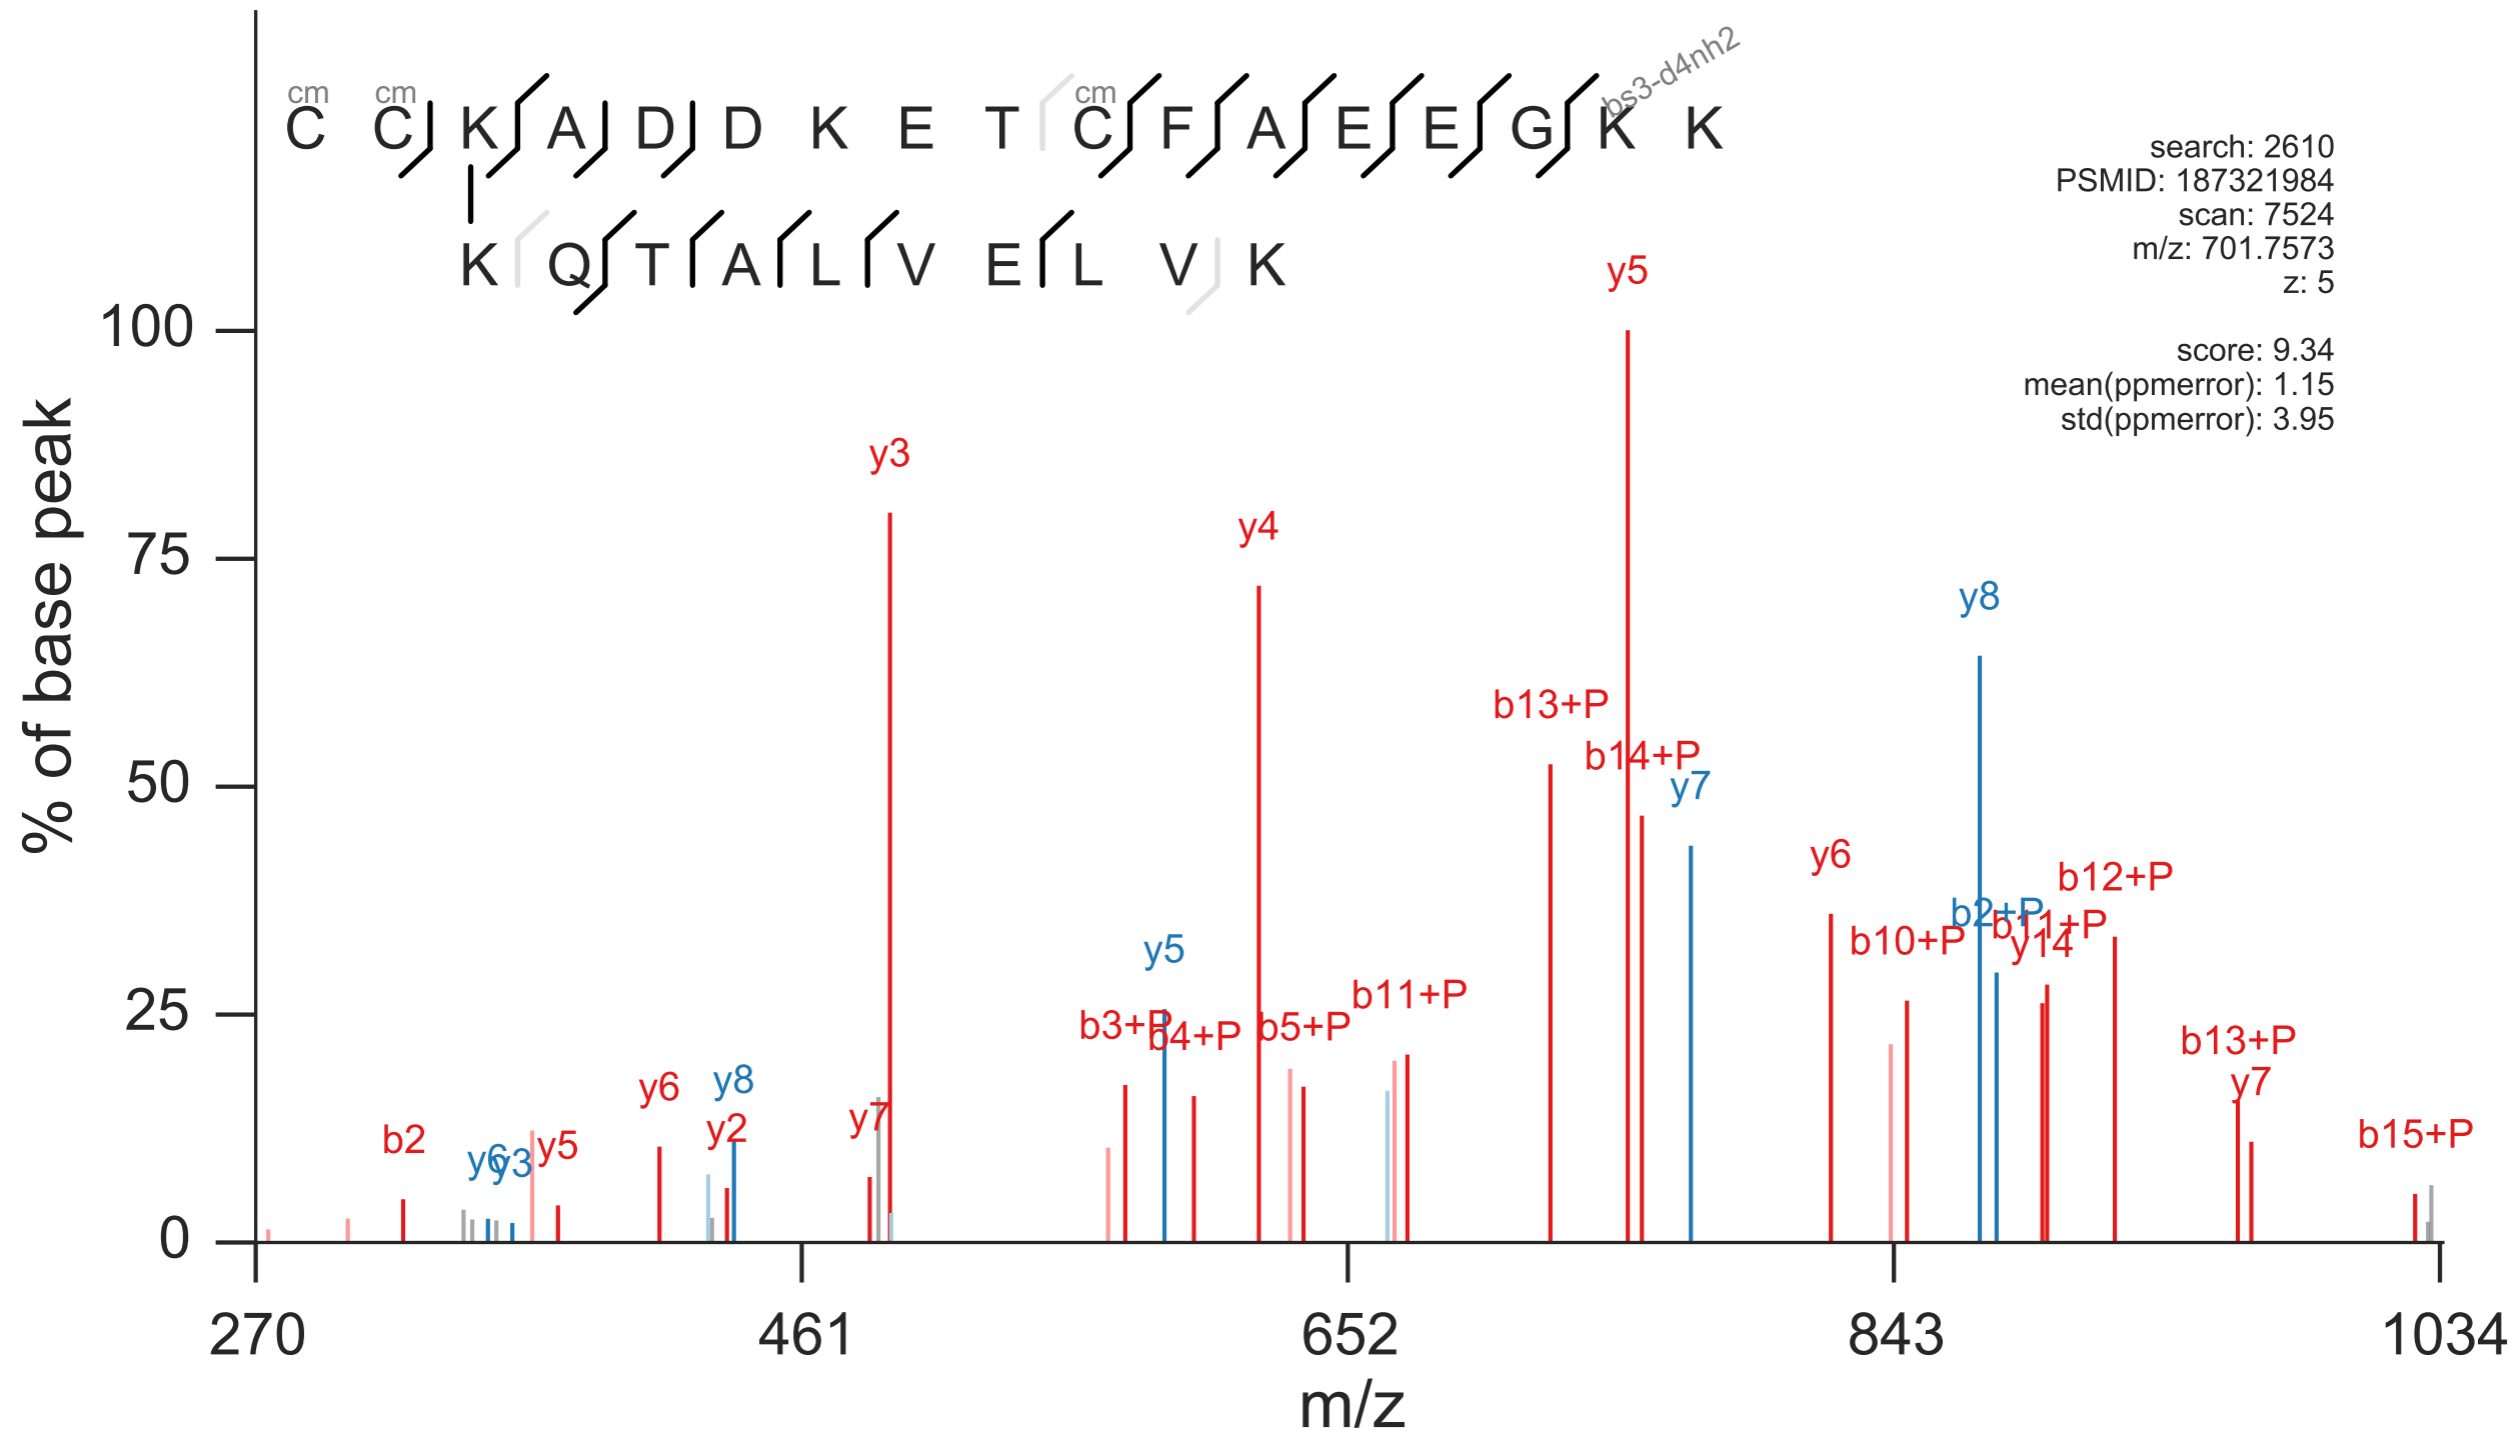

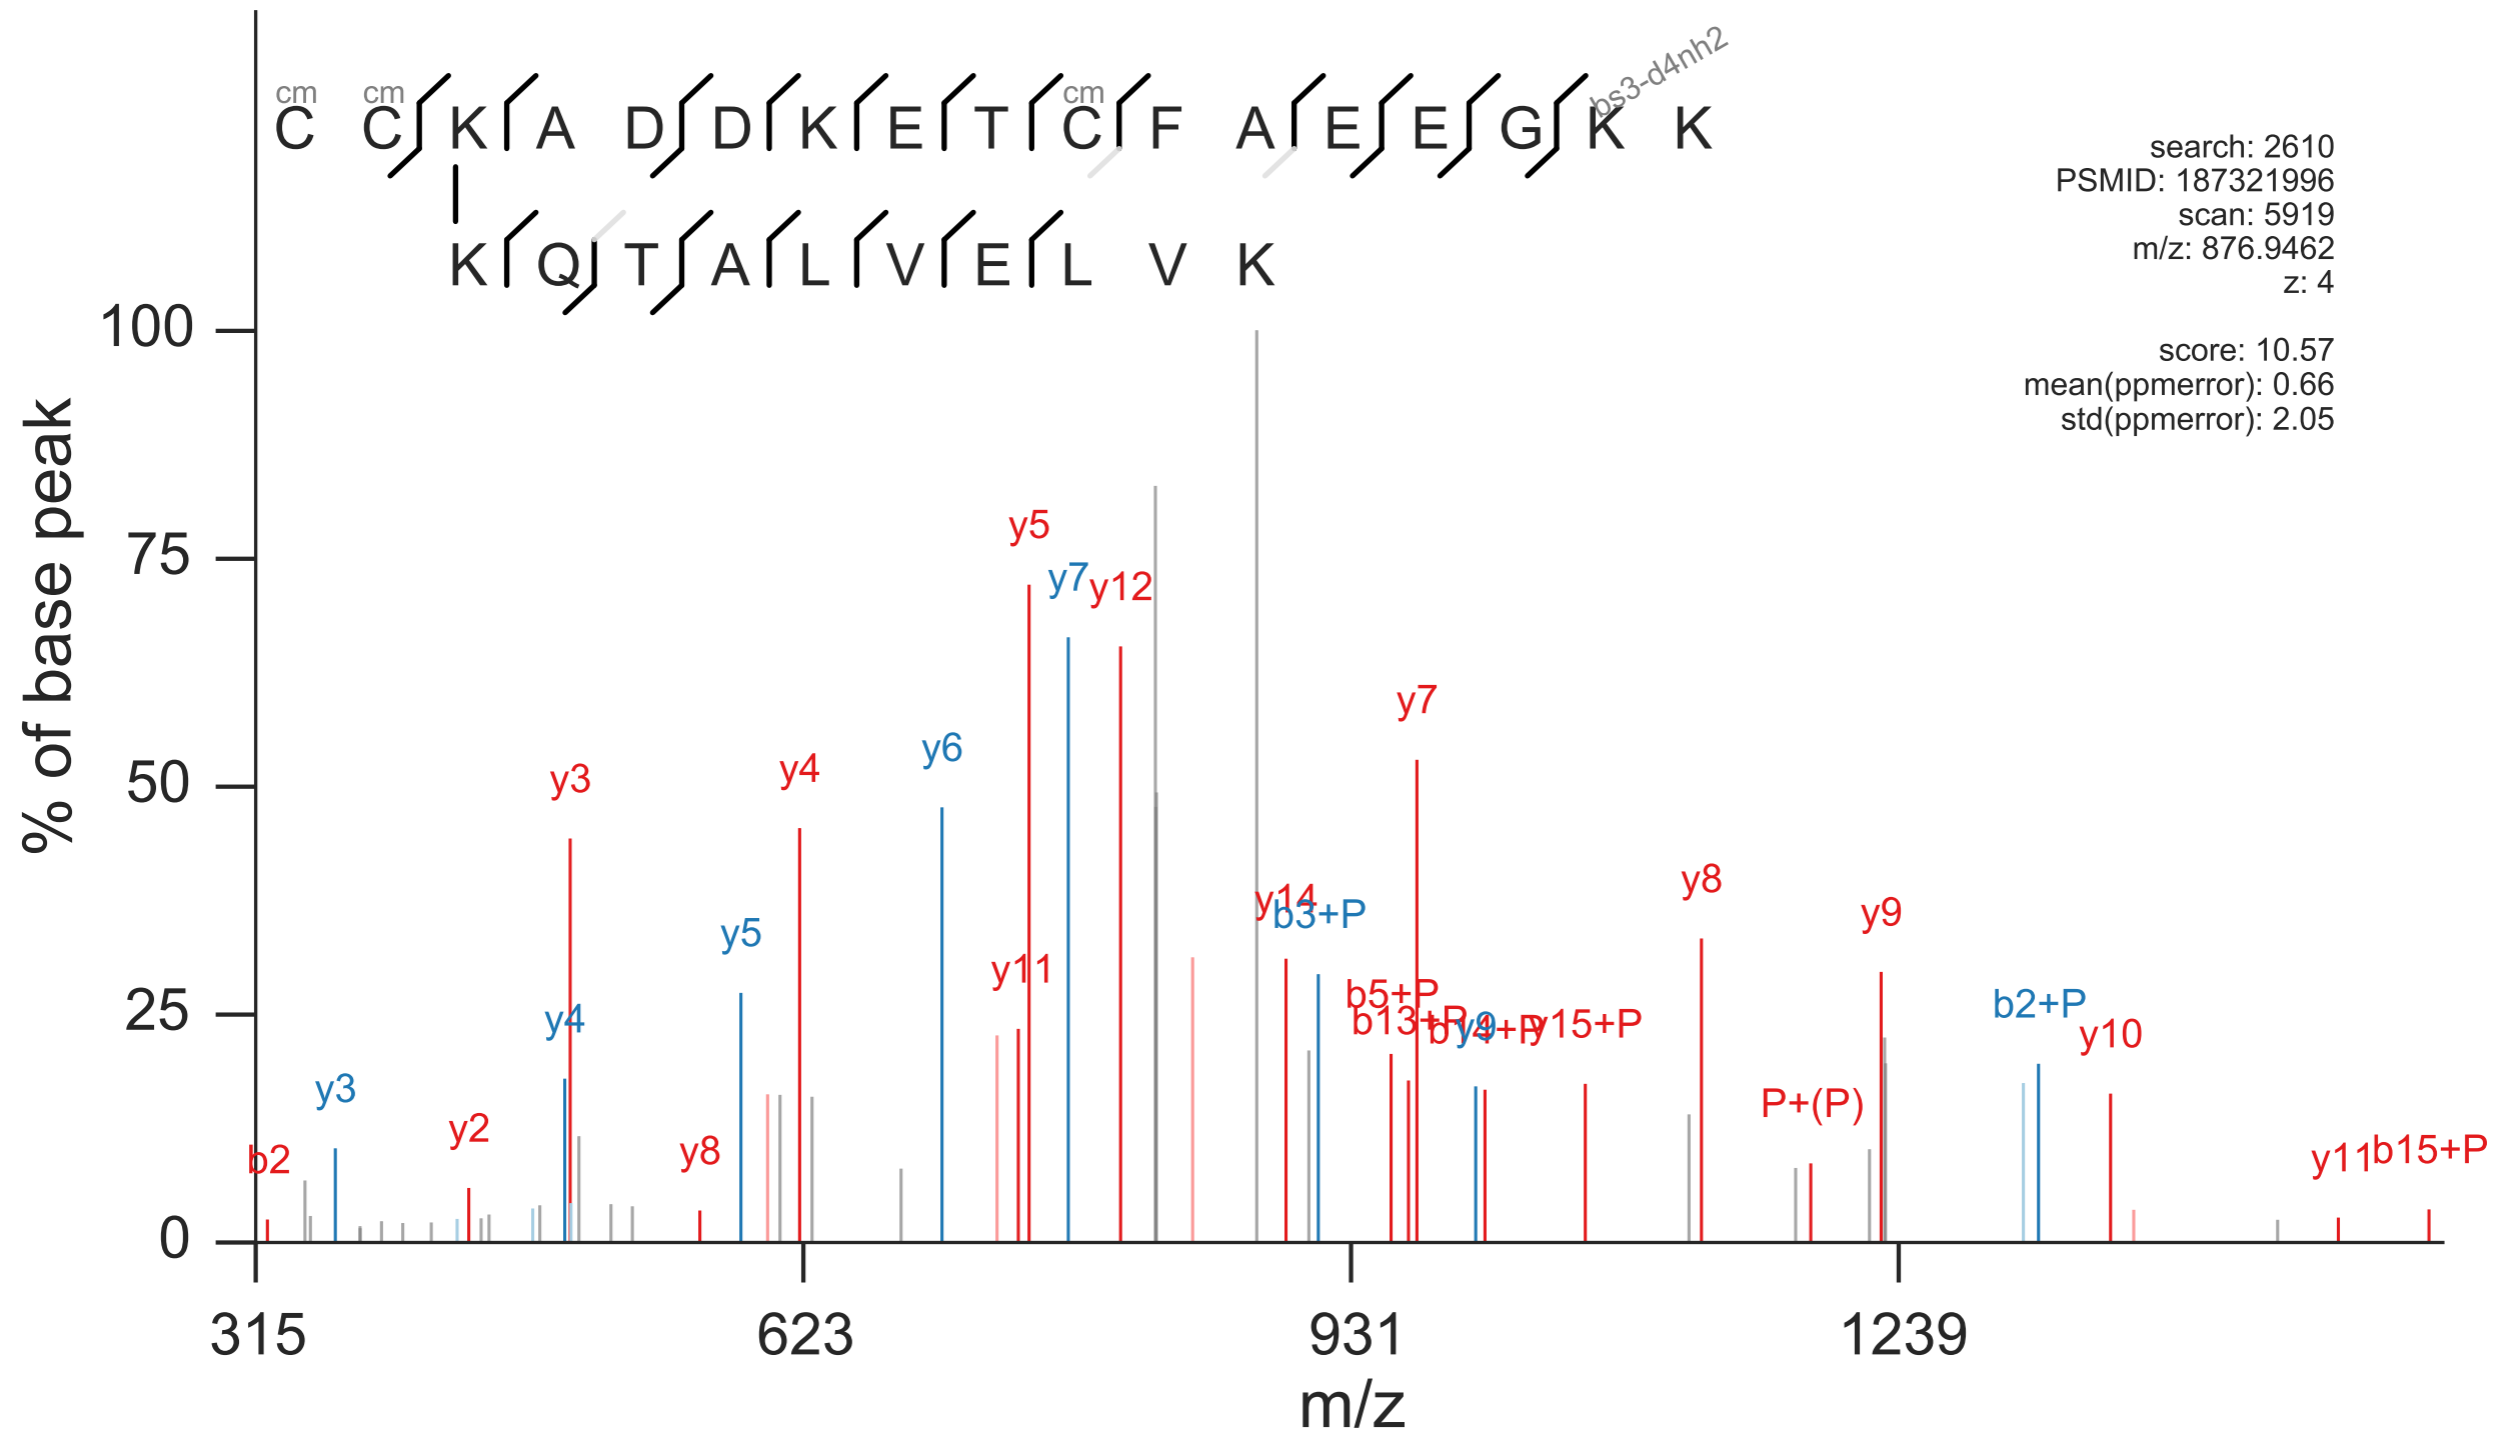

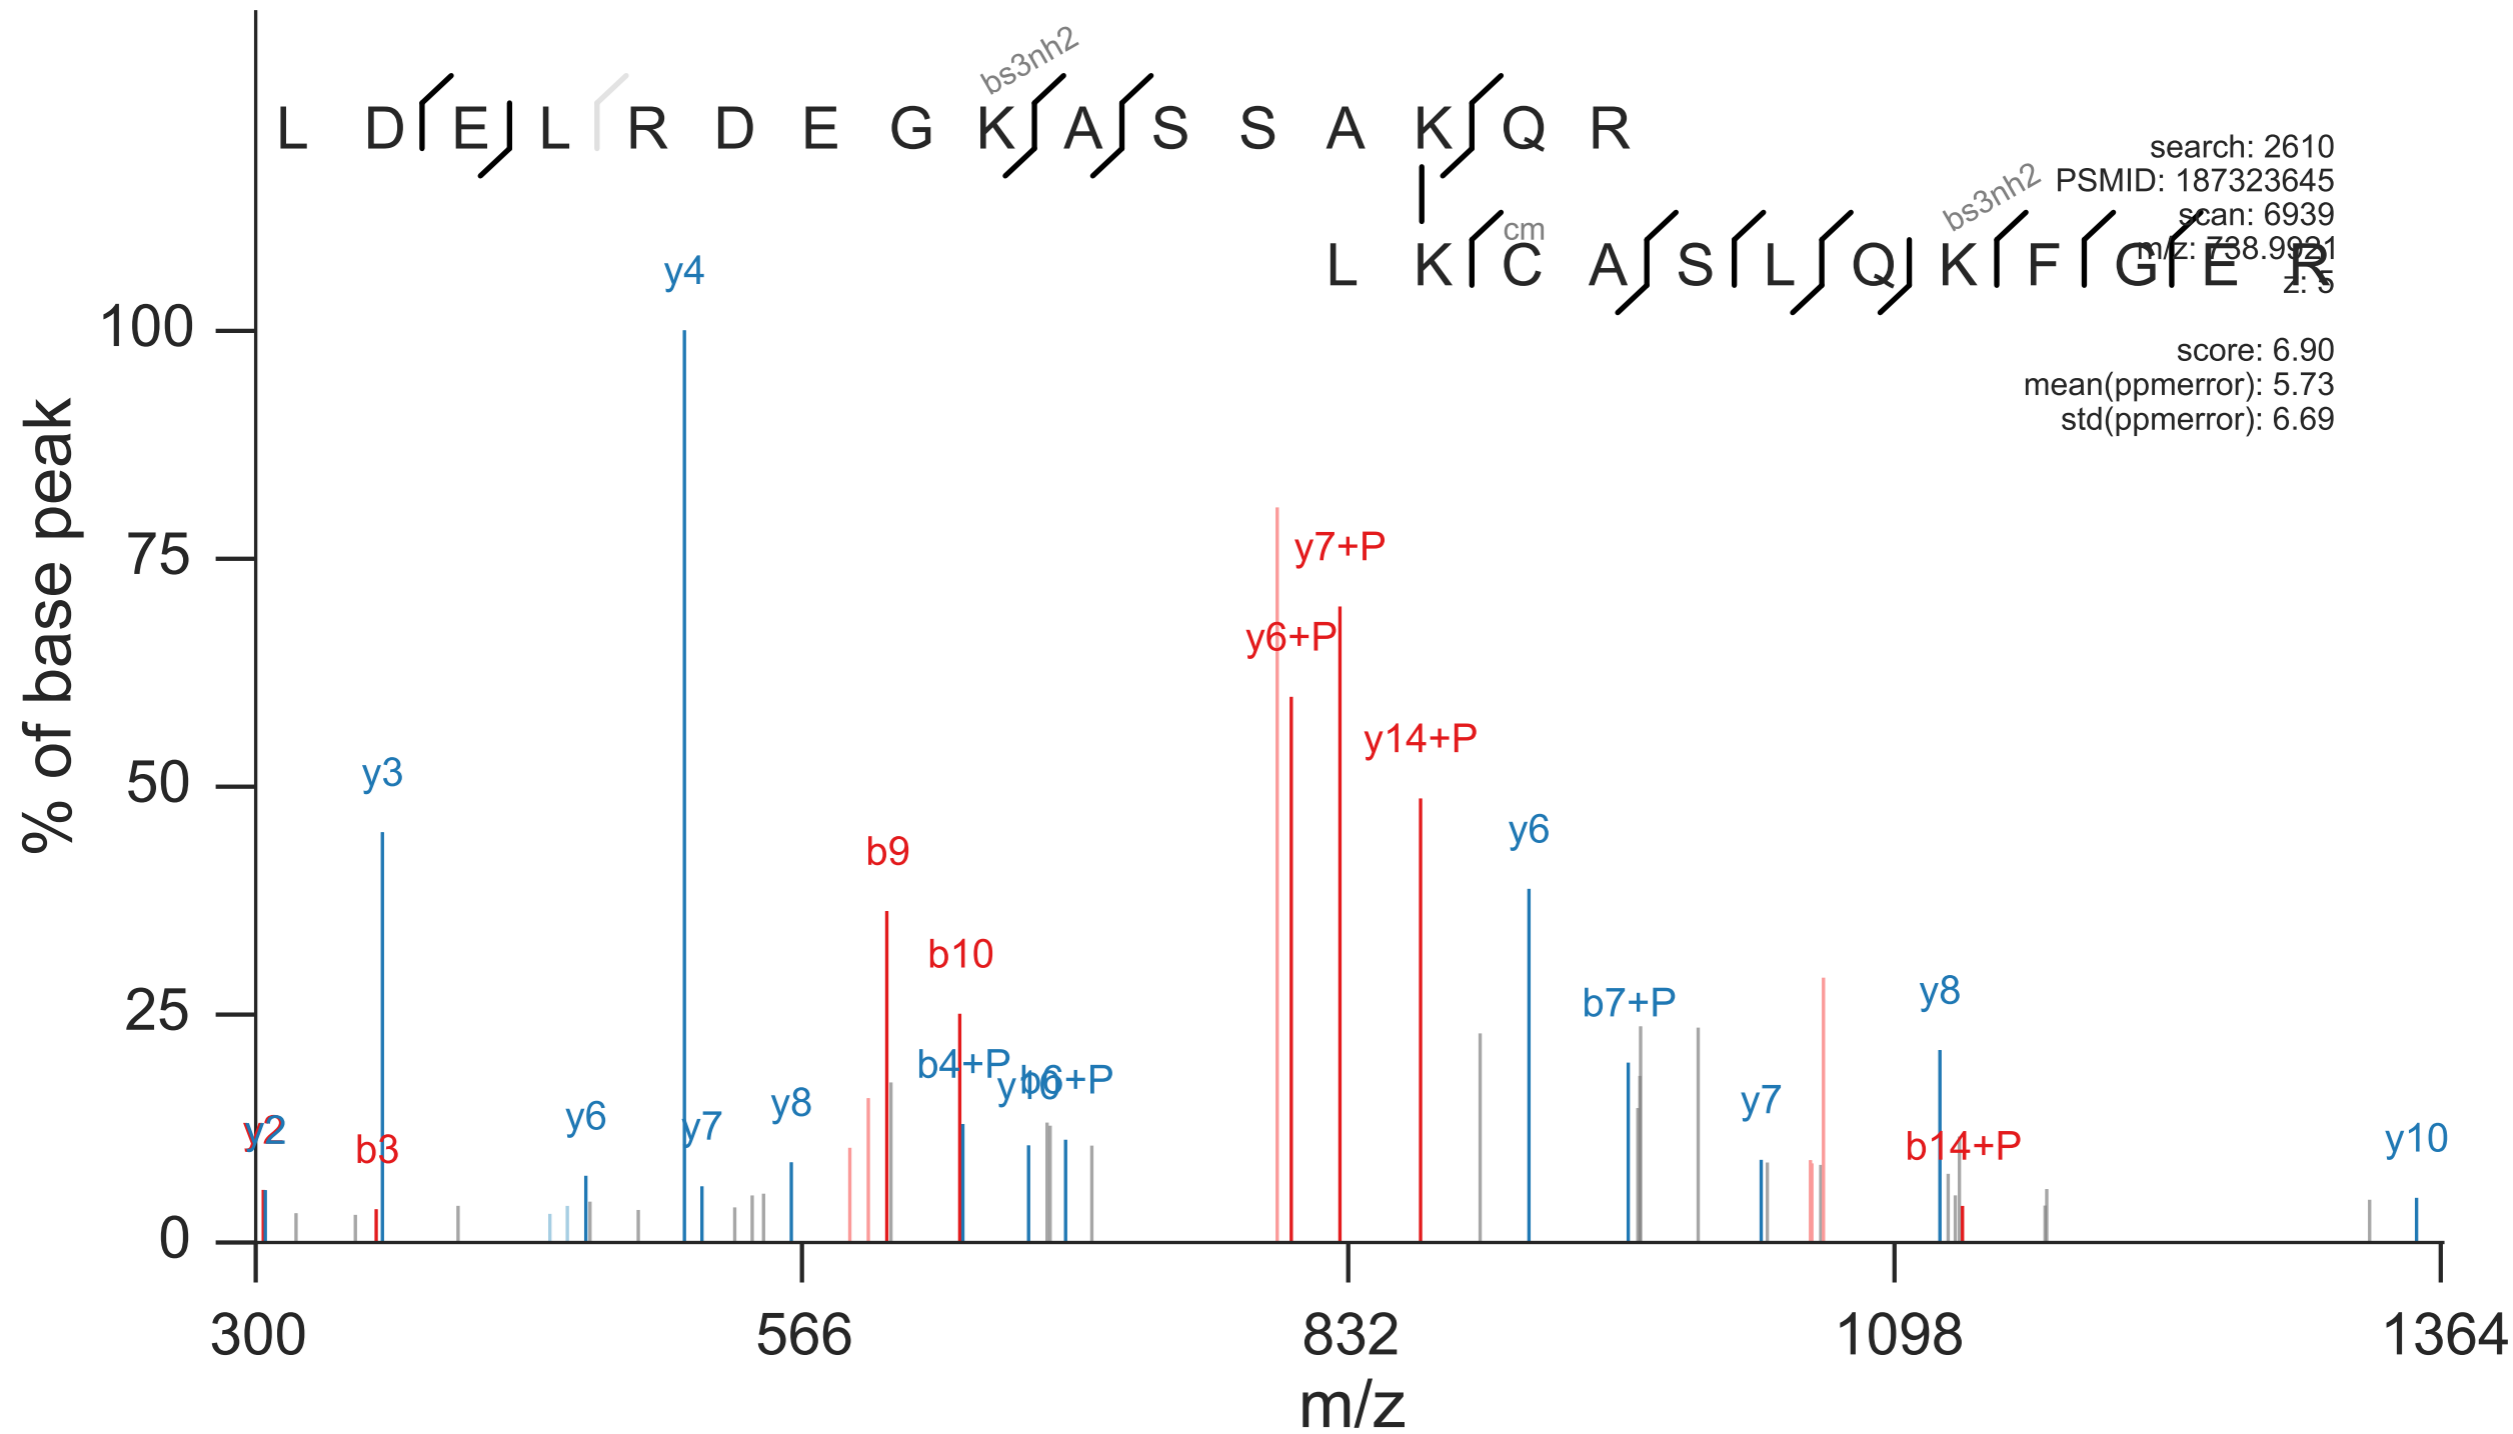

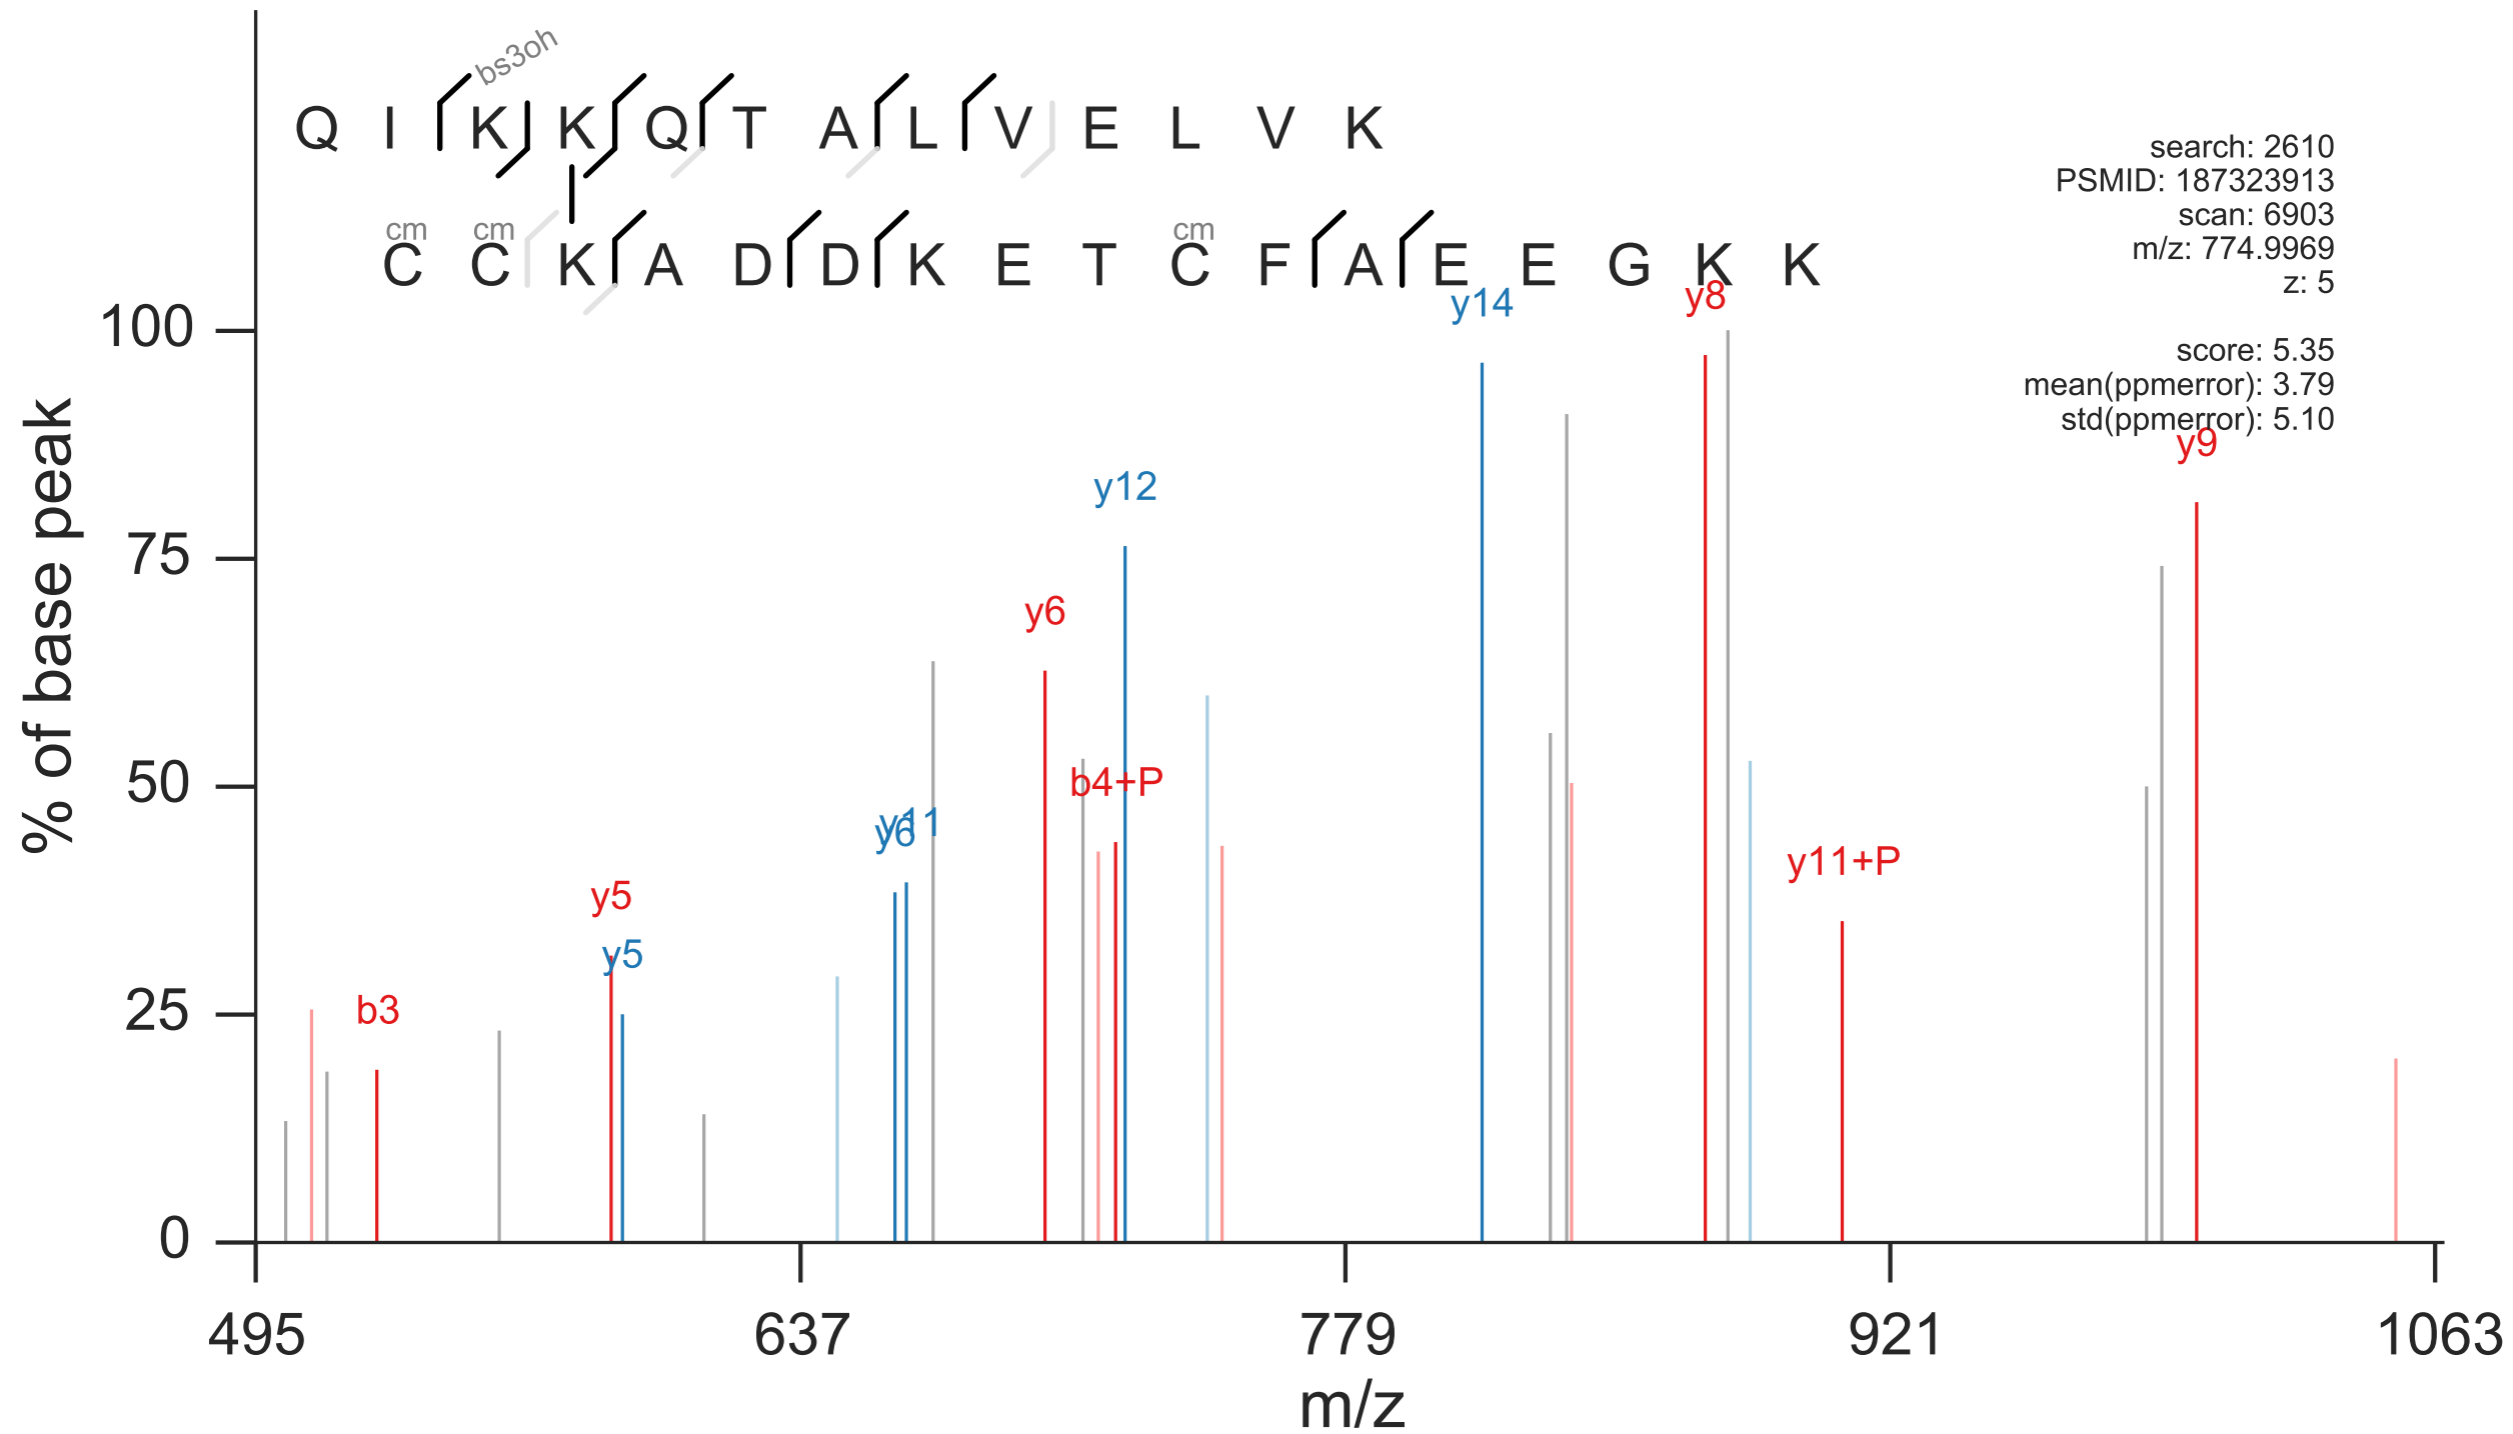

search: 2610  
 PSMID: 187323913  
 scan: 6903  
 m/z: 774.9969  
 z: 5

score: 5.35  
 mean(ppmerror): 3.79  
 std(ppmerror): 5.10

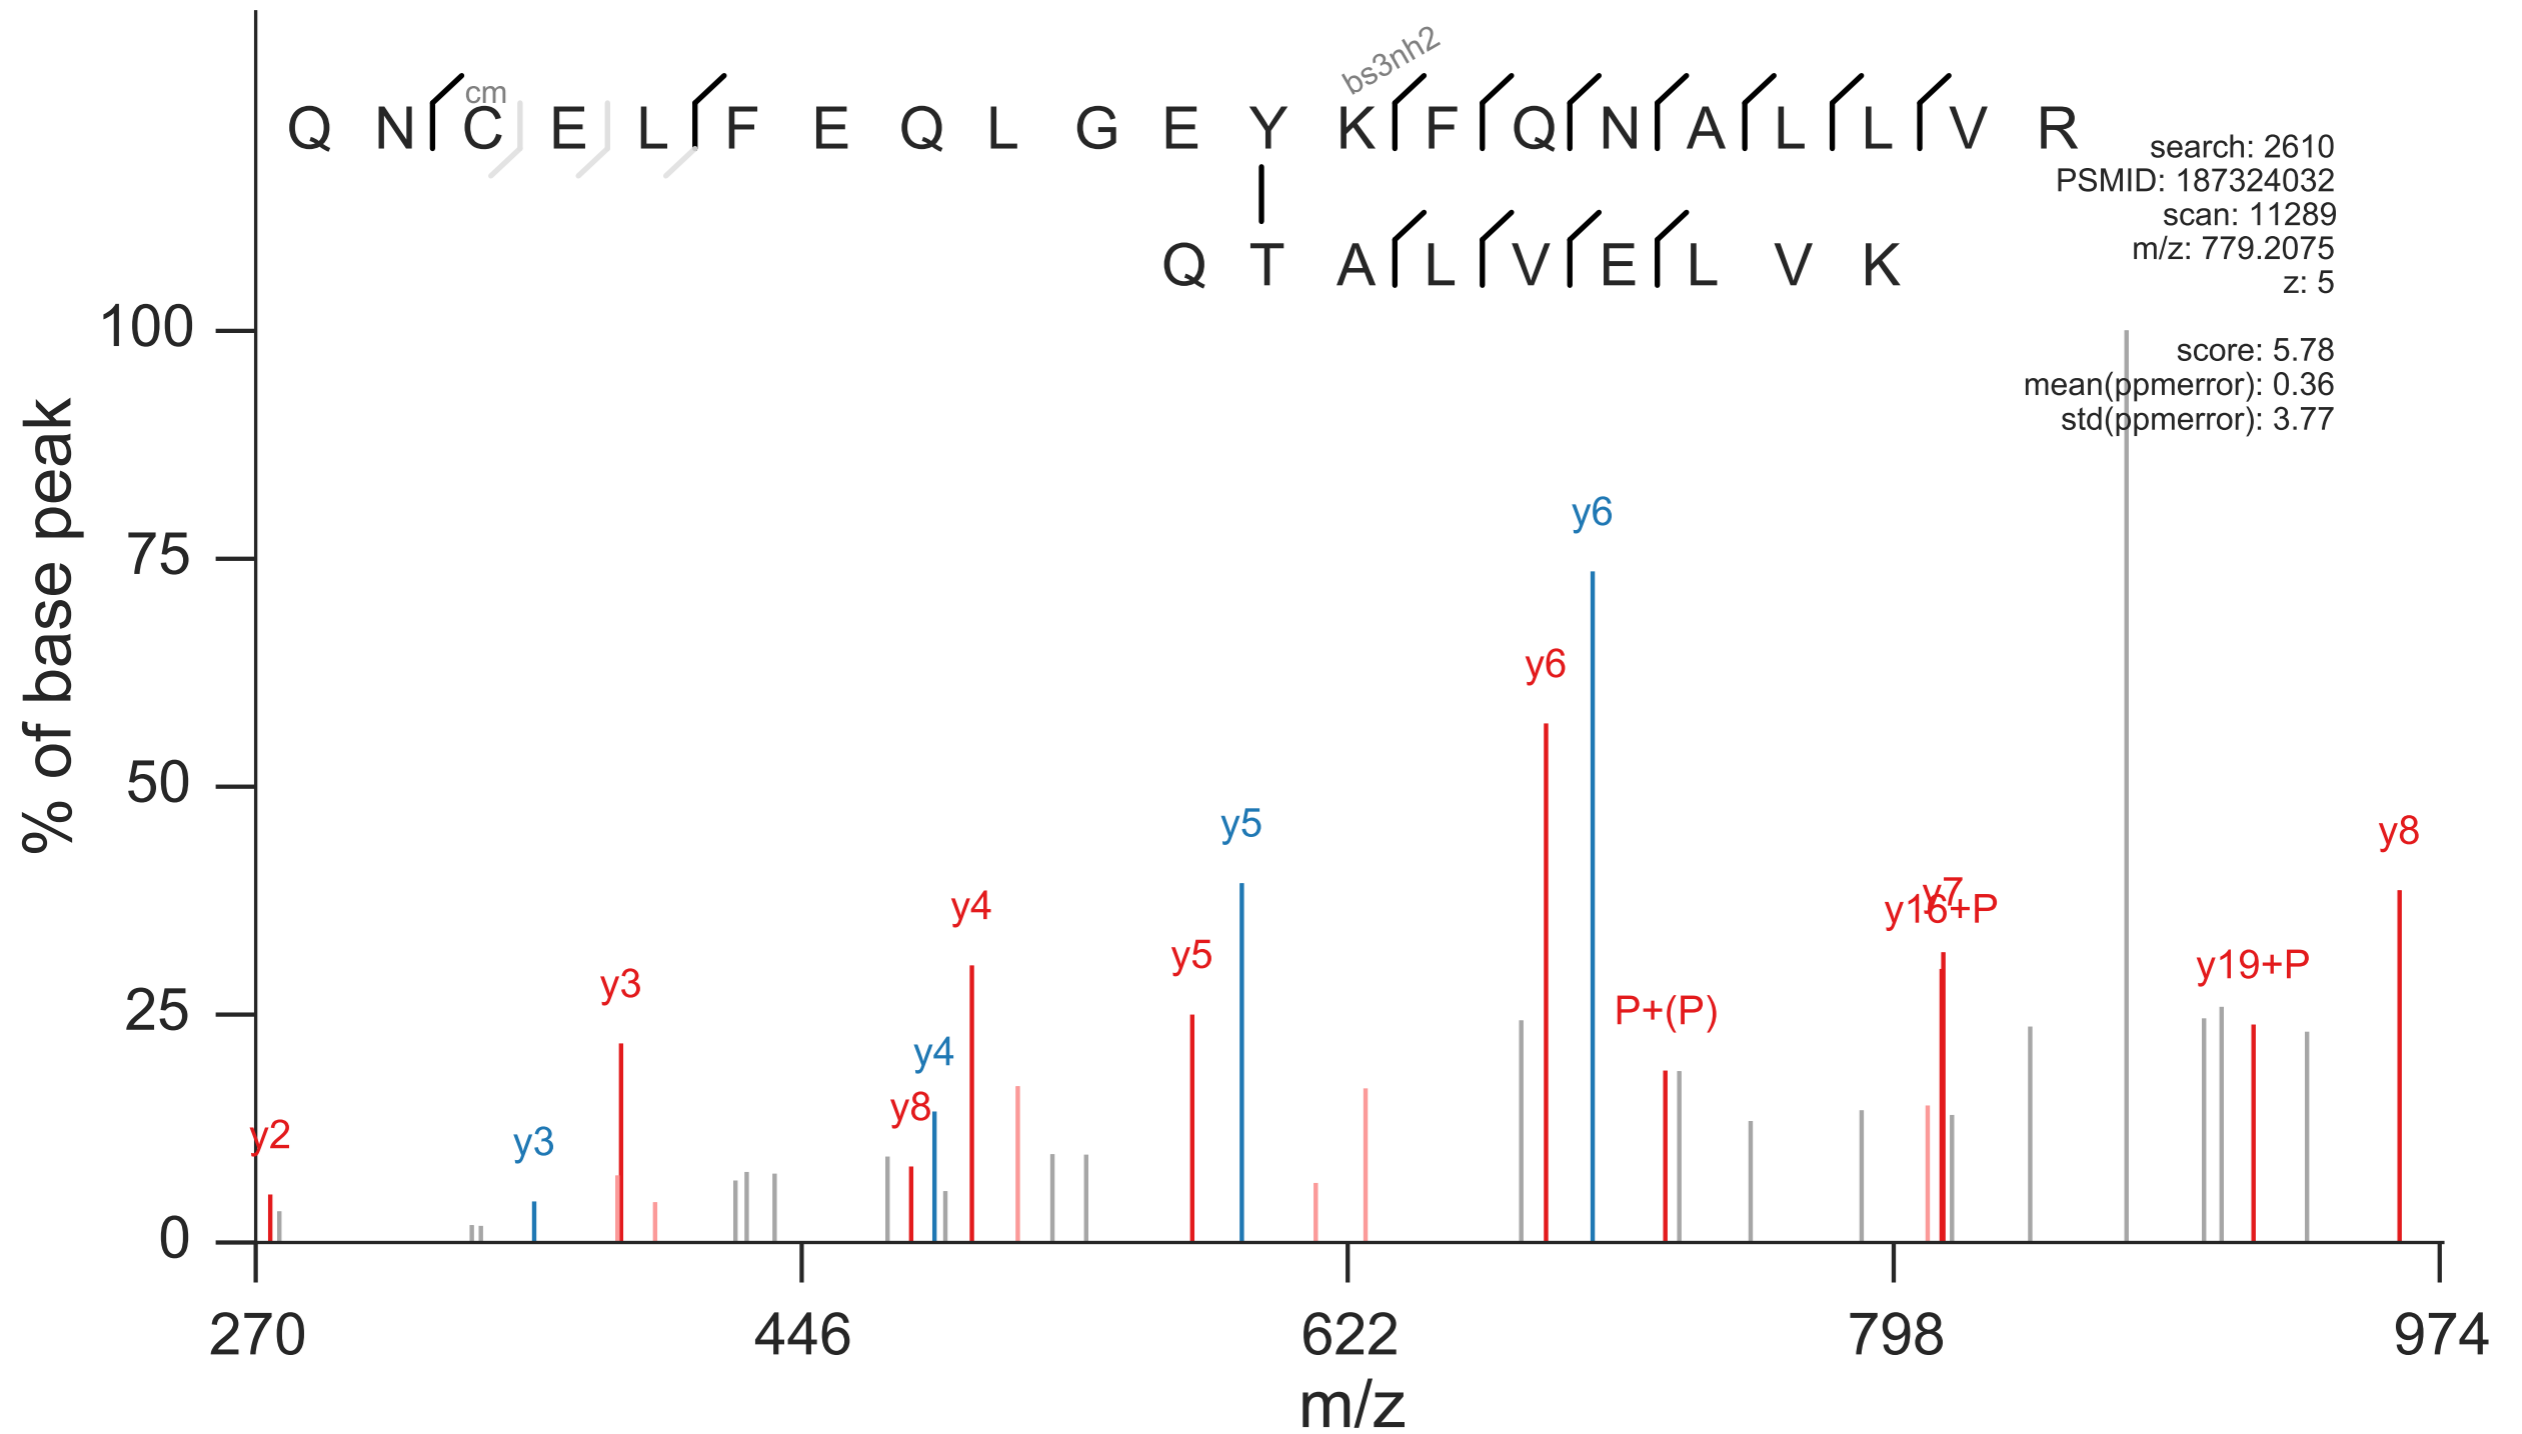

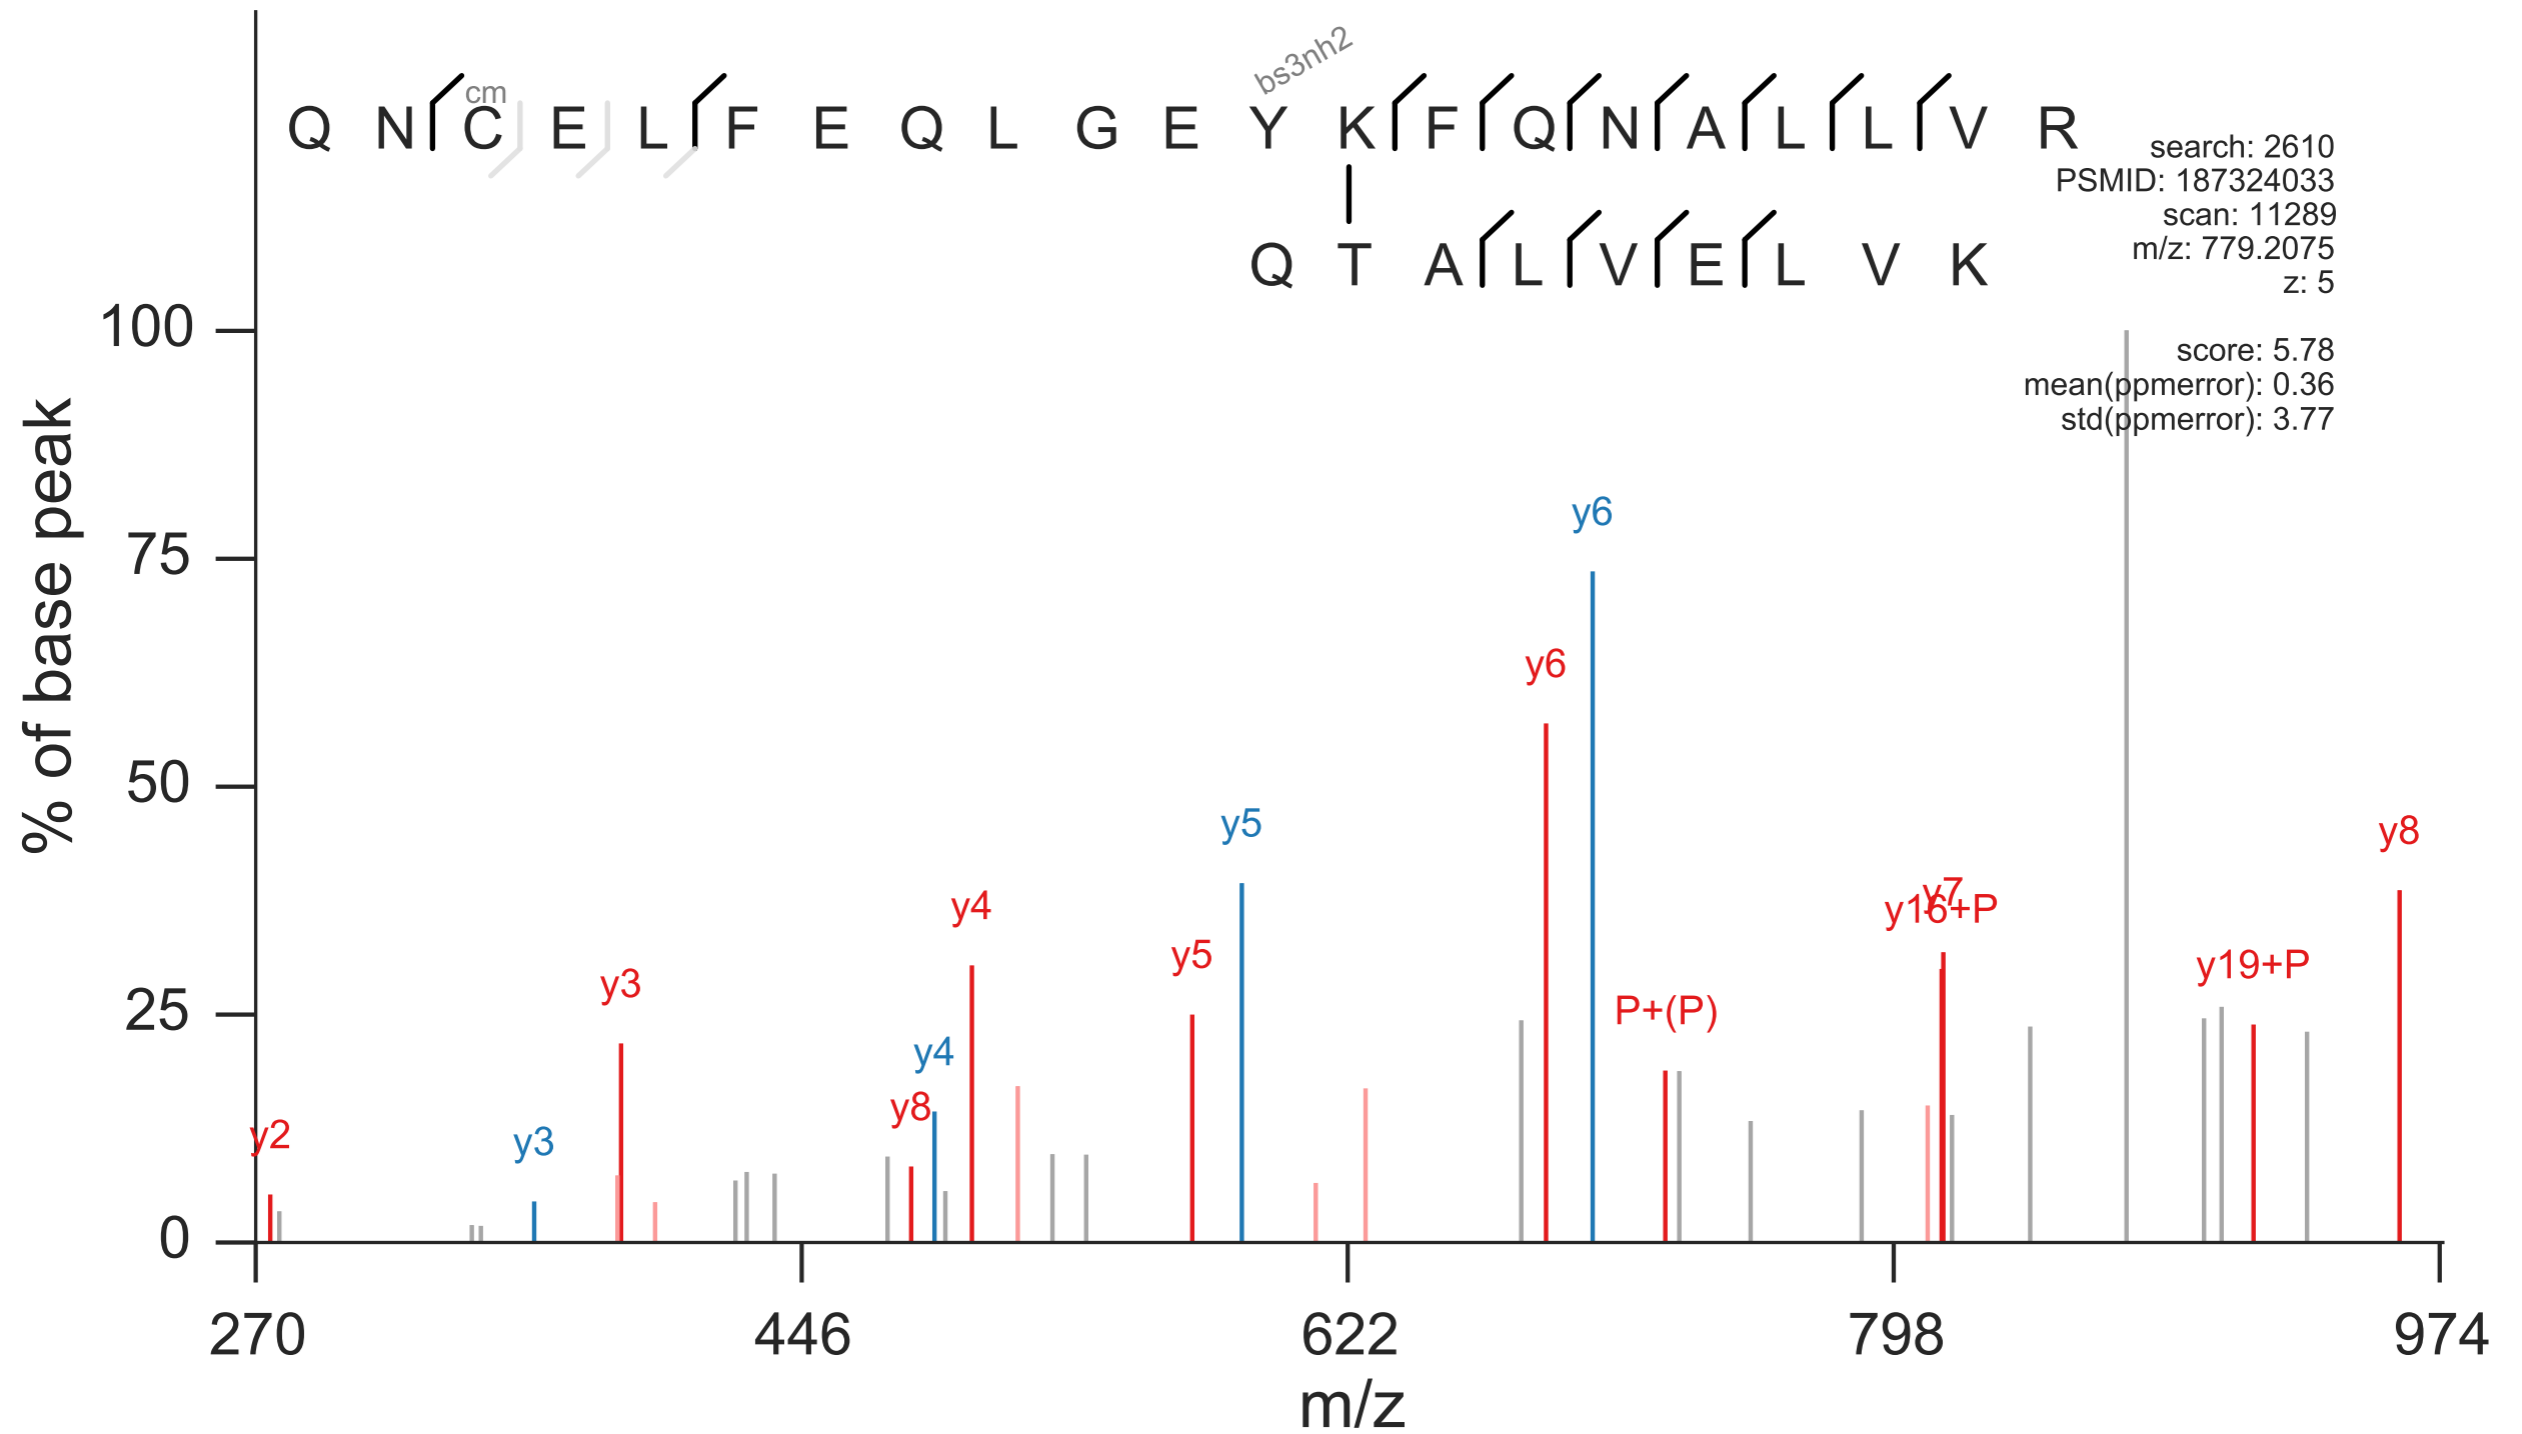

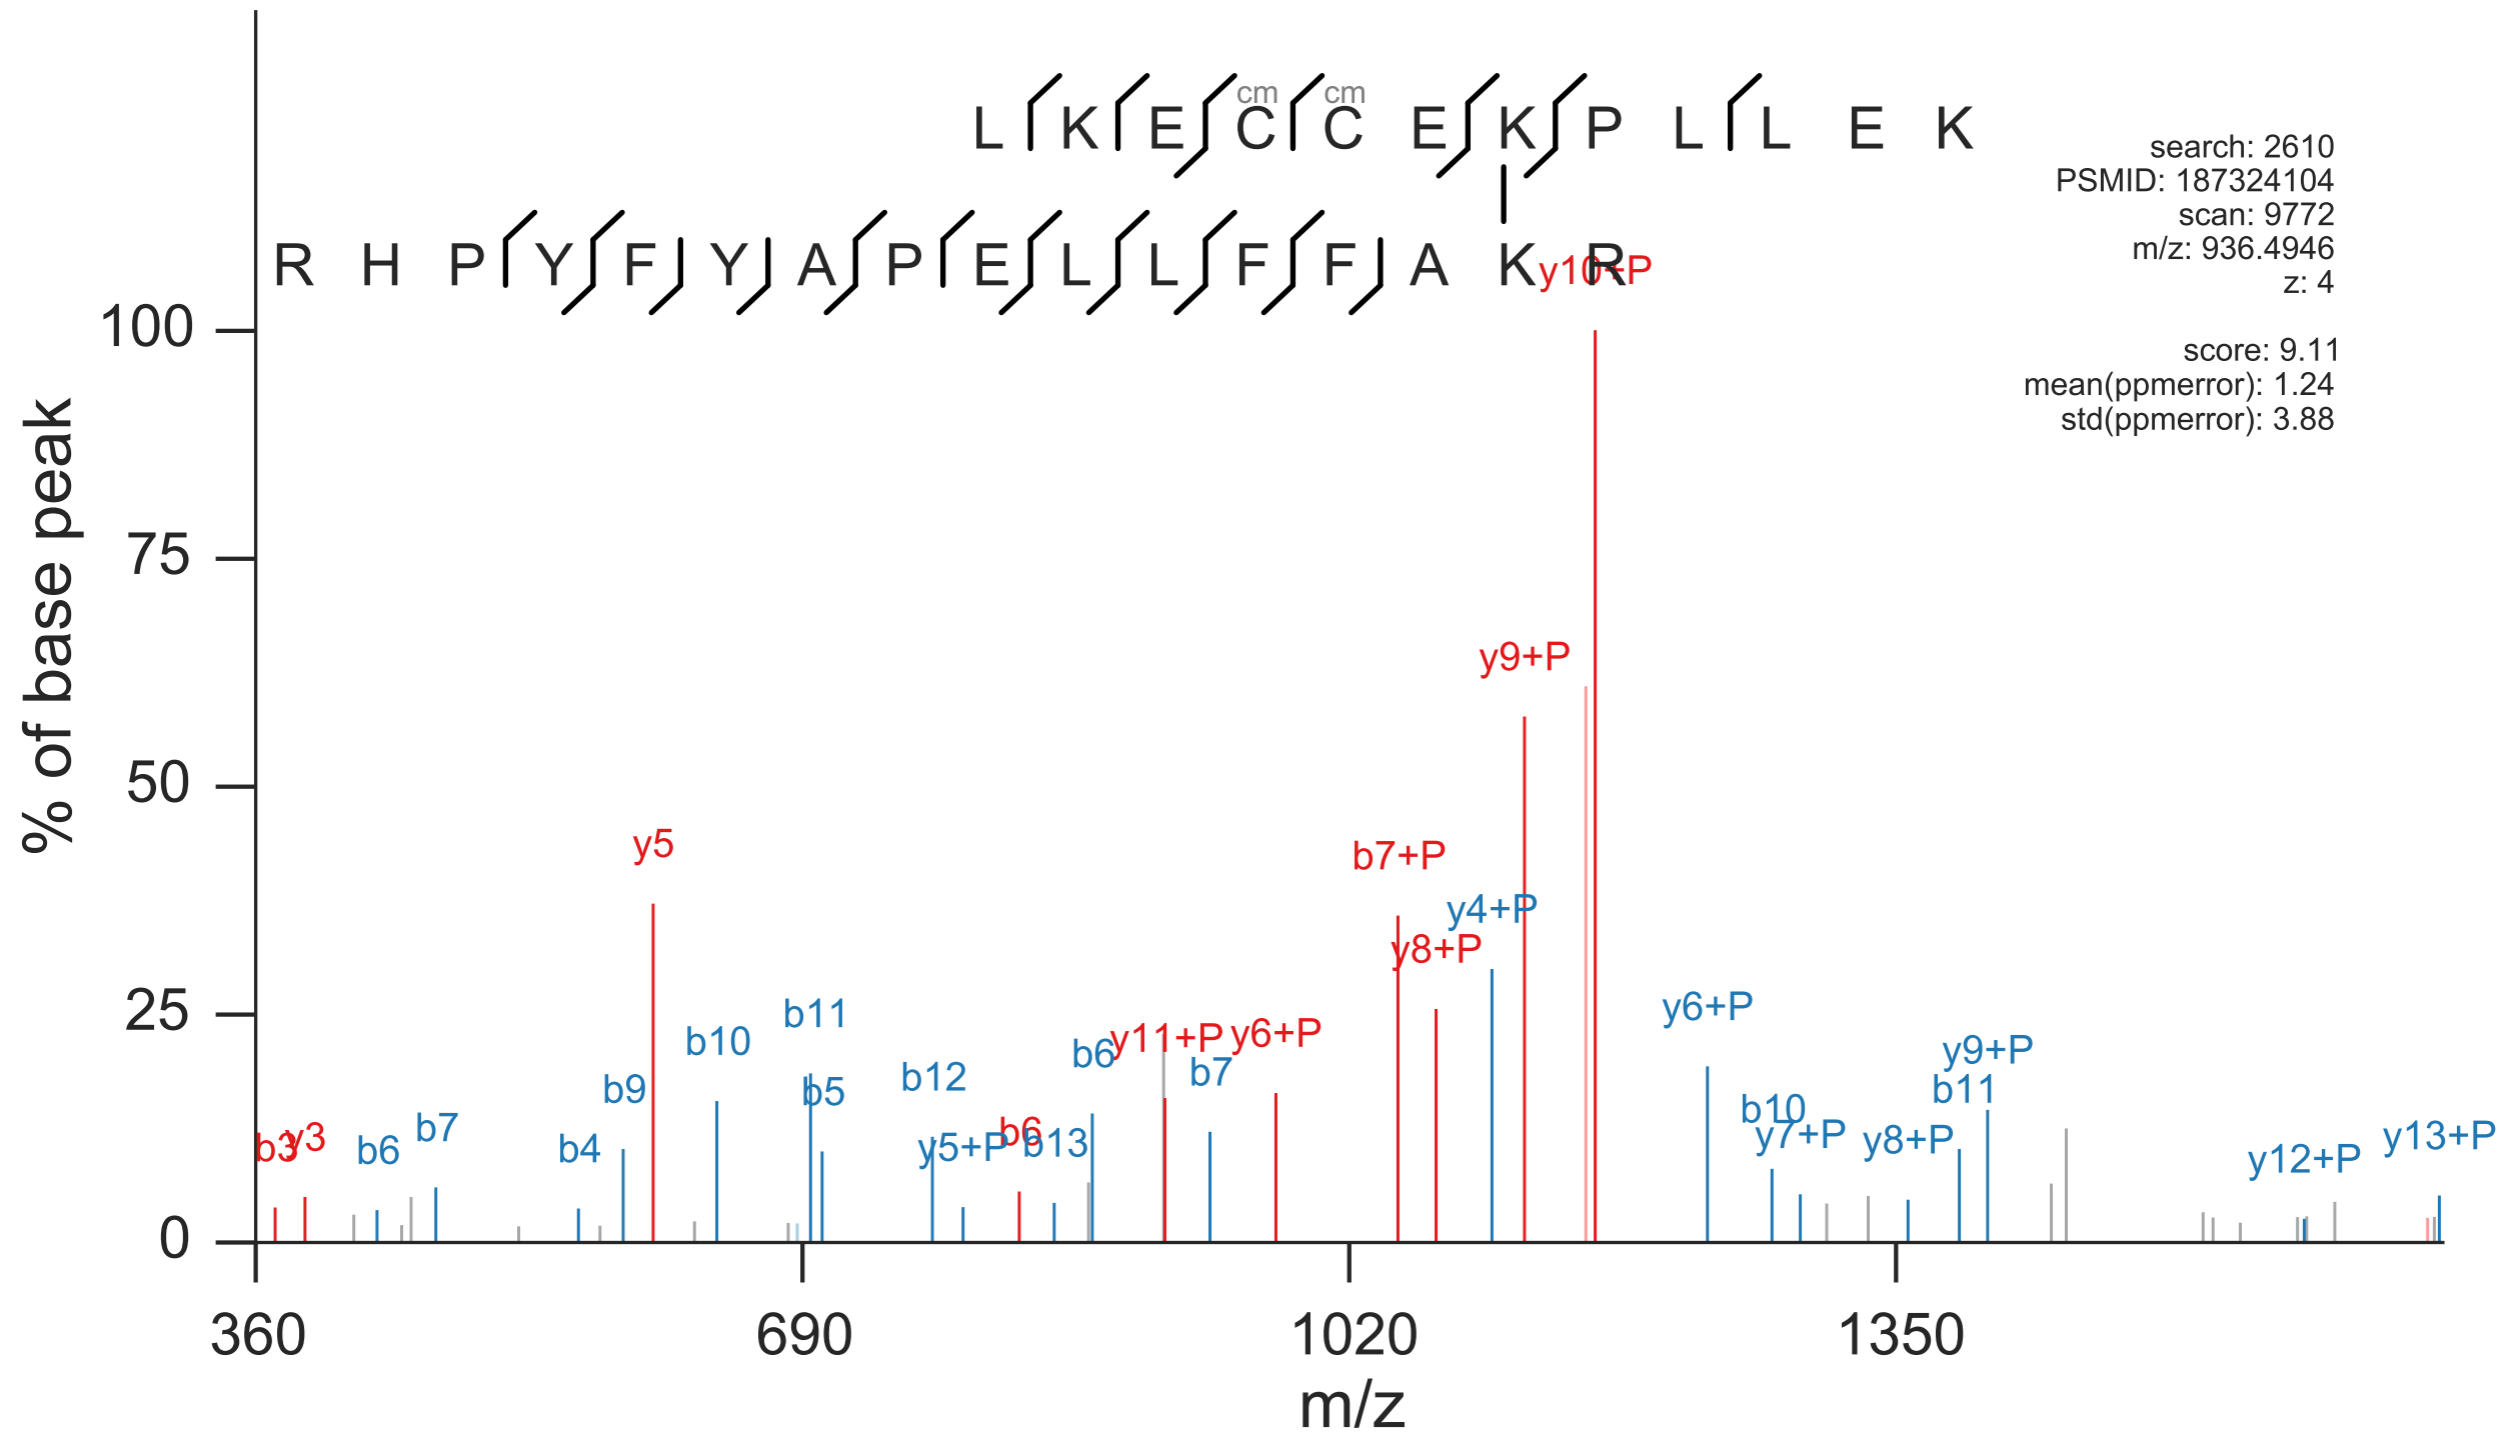



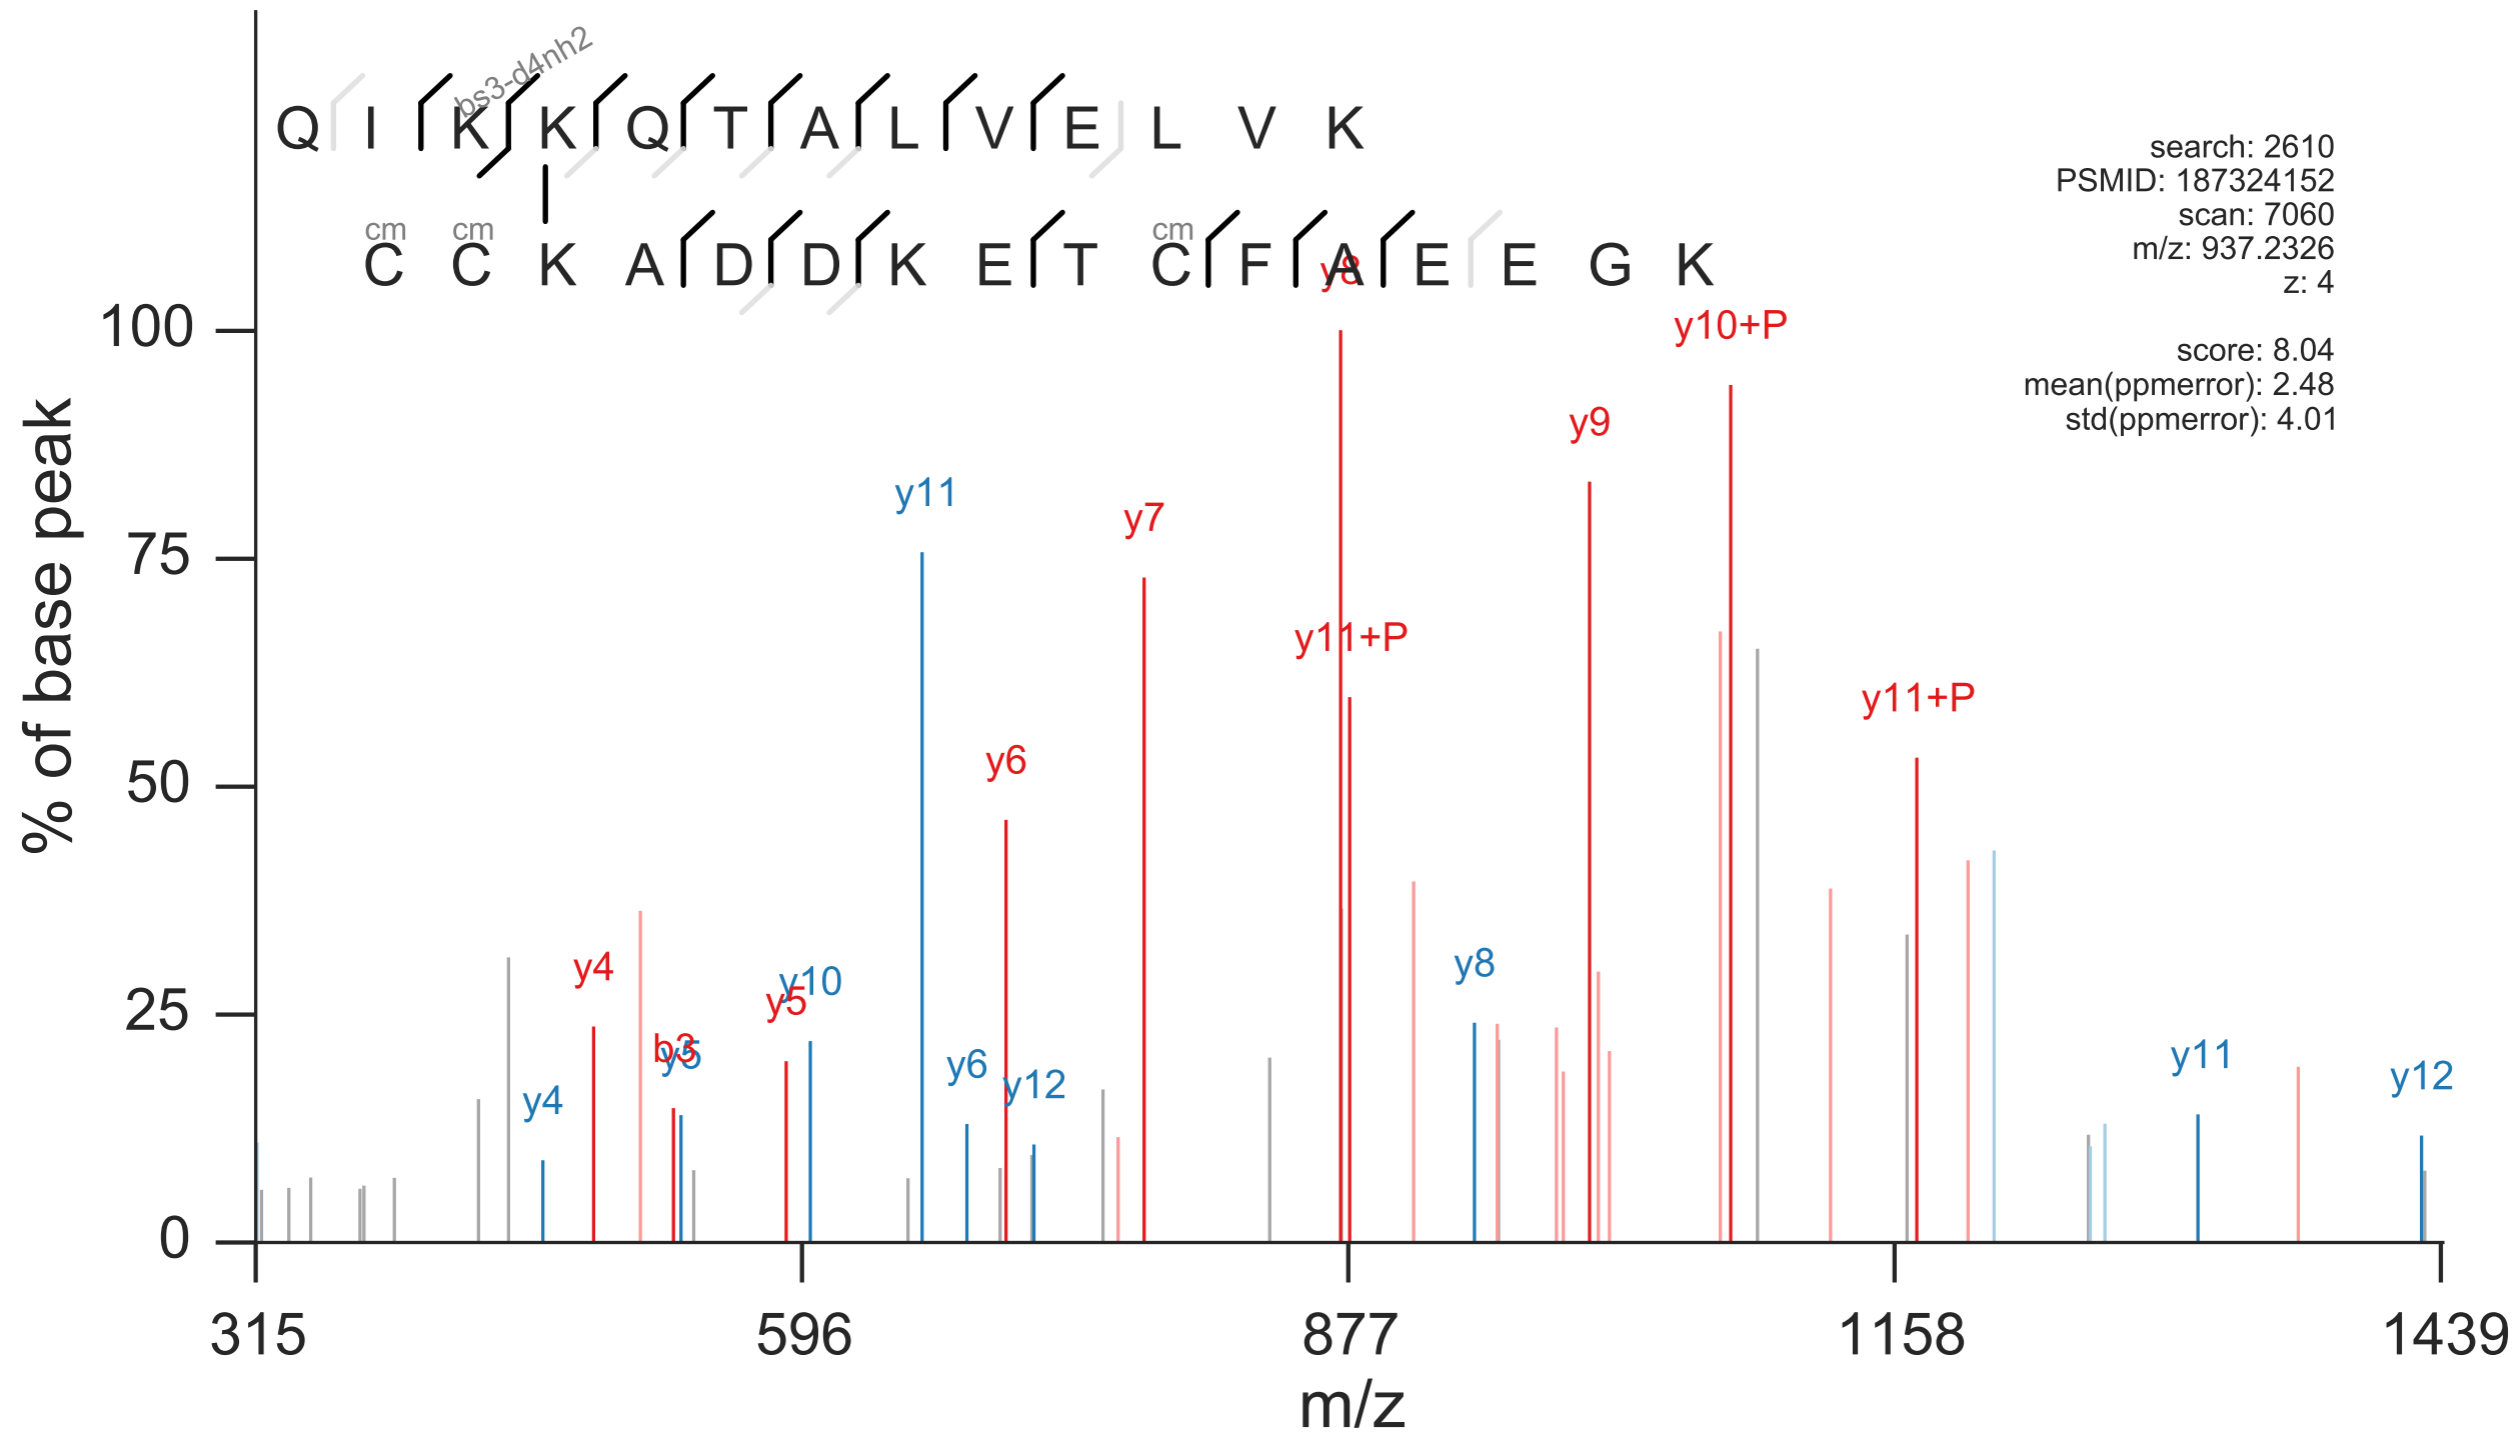

search: 2610  
 PSMID: 187324152  
 scan: 7060  
 m/z: 937.2326  
 z: 4  
 score: 8.04  
 mean(ppmerror): 2.48  
 std(ppmerror): 4.01

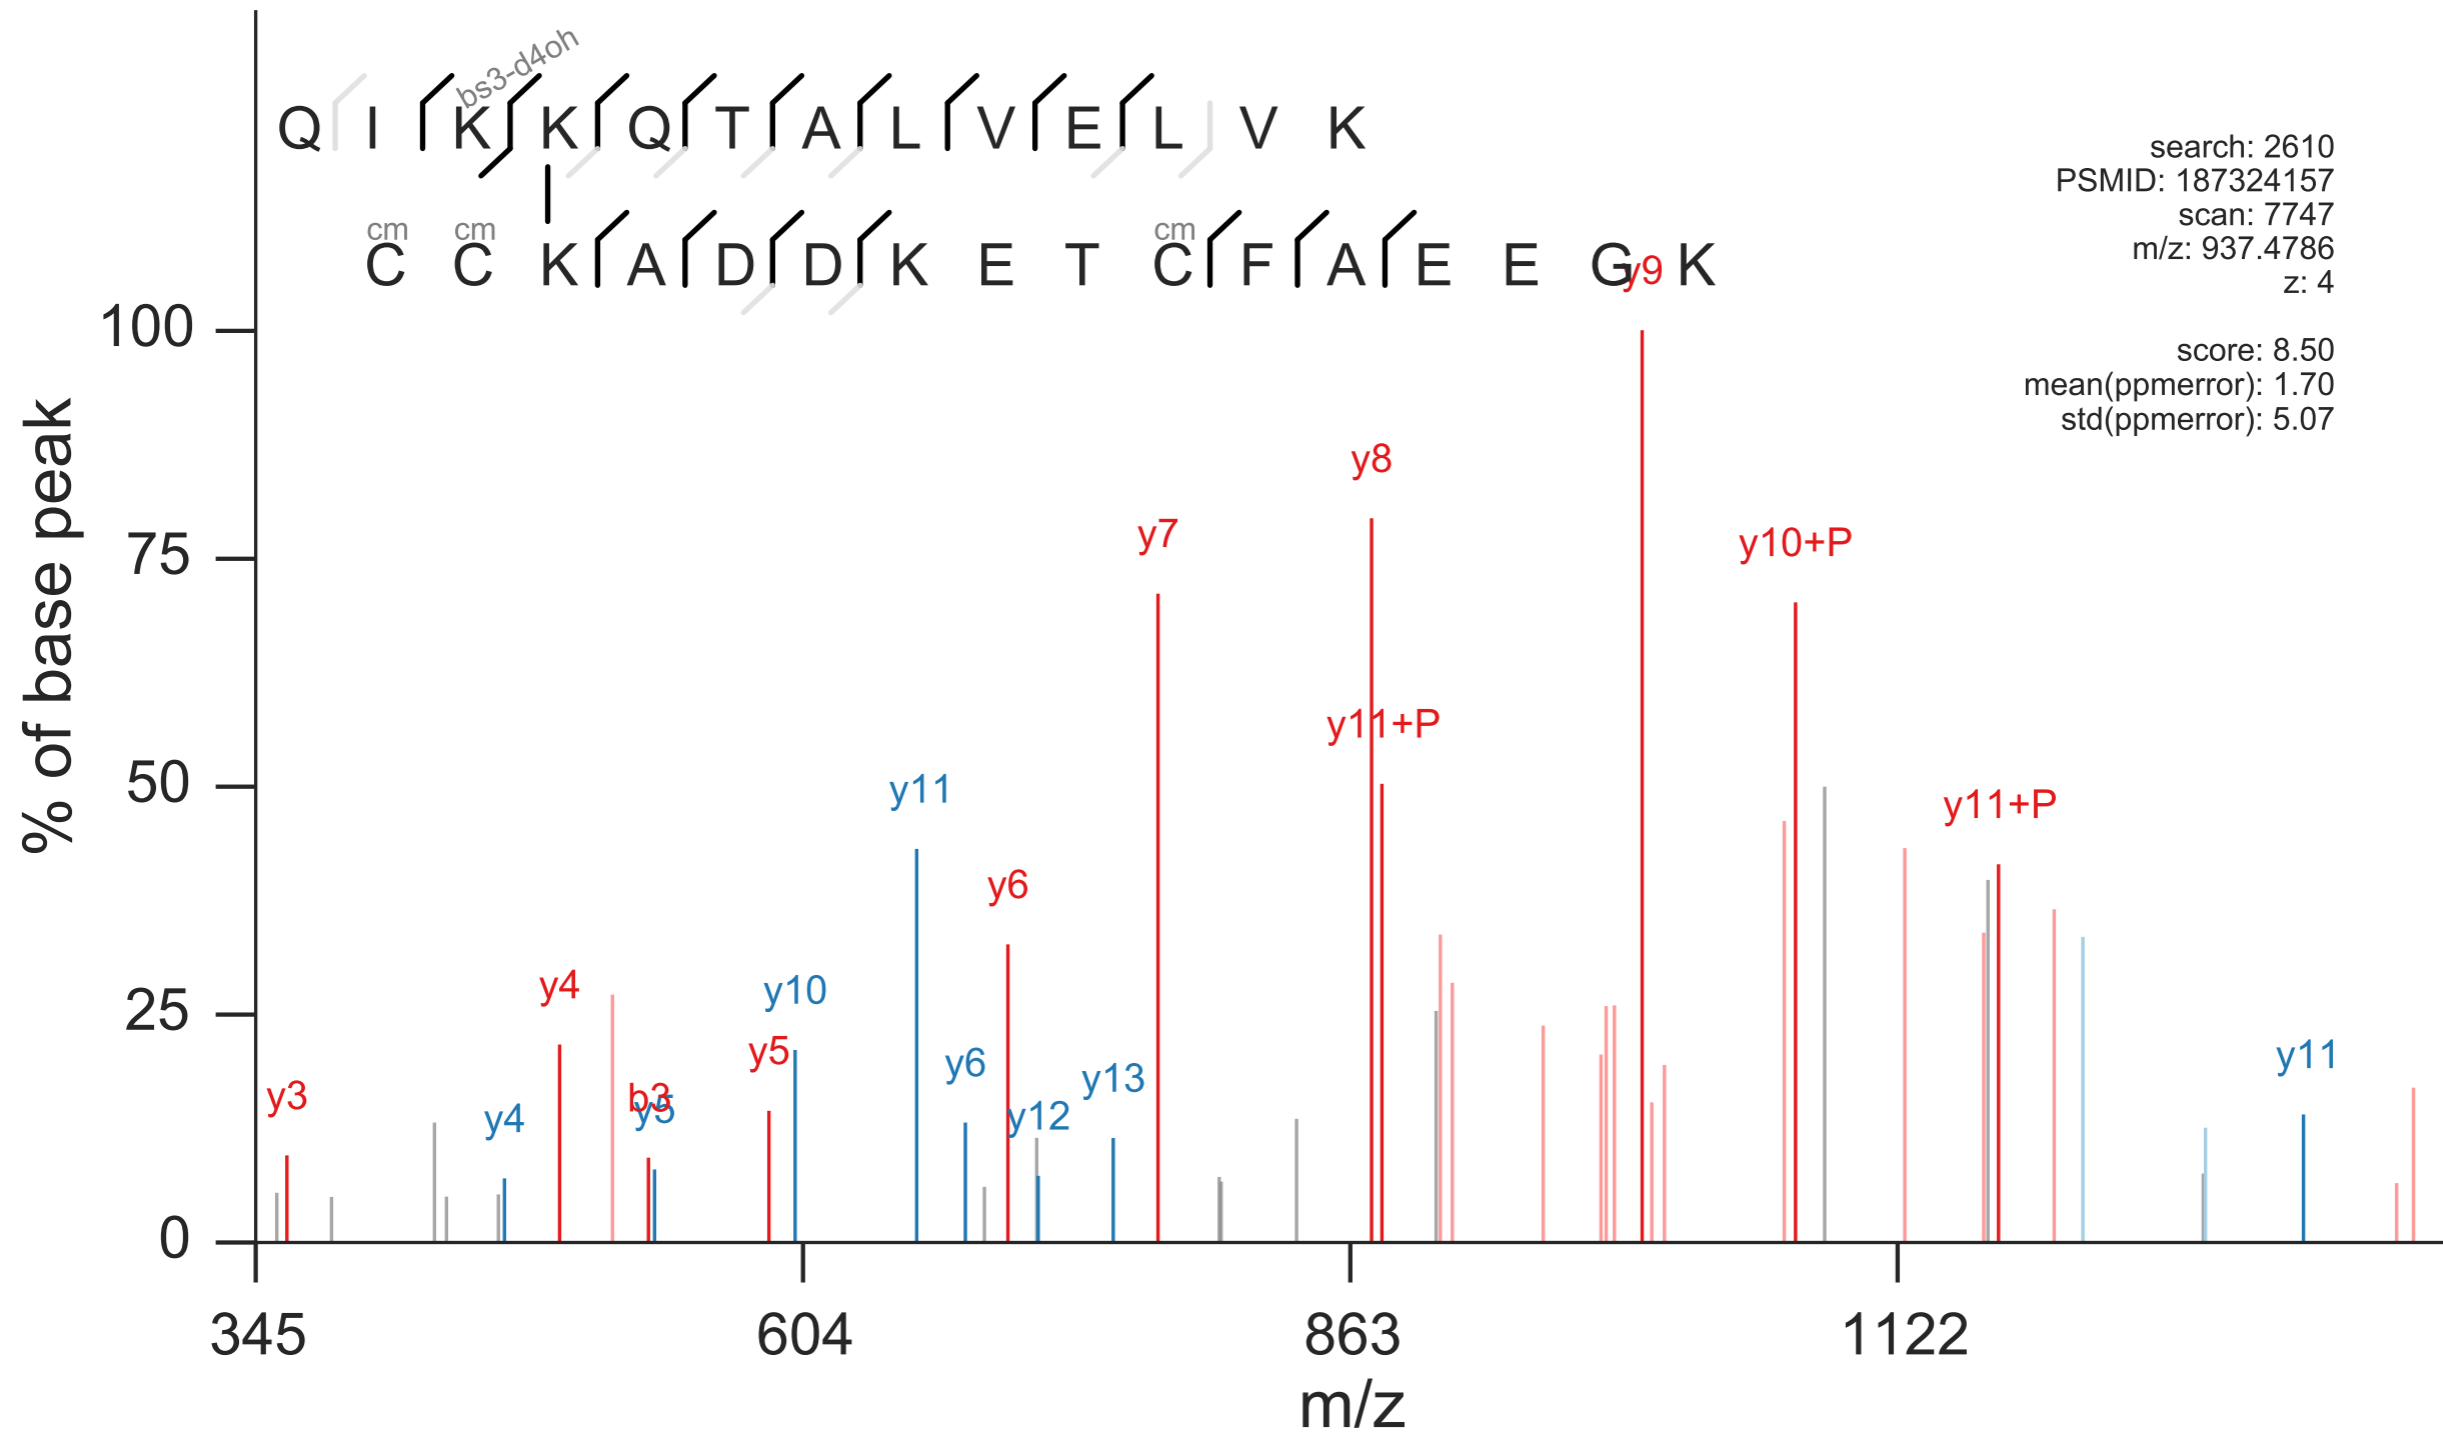

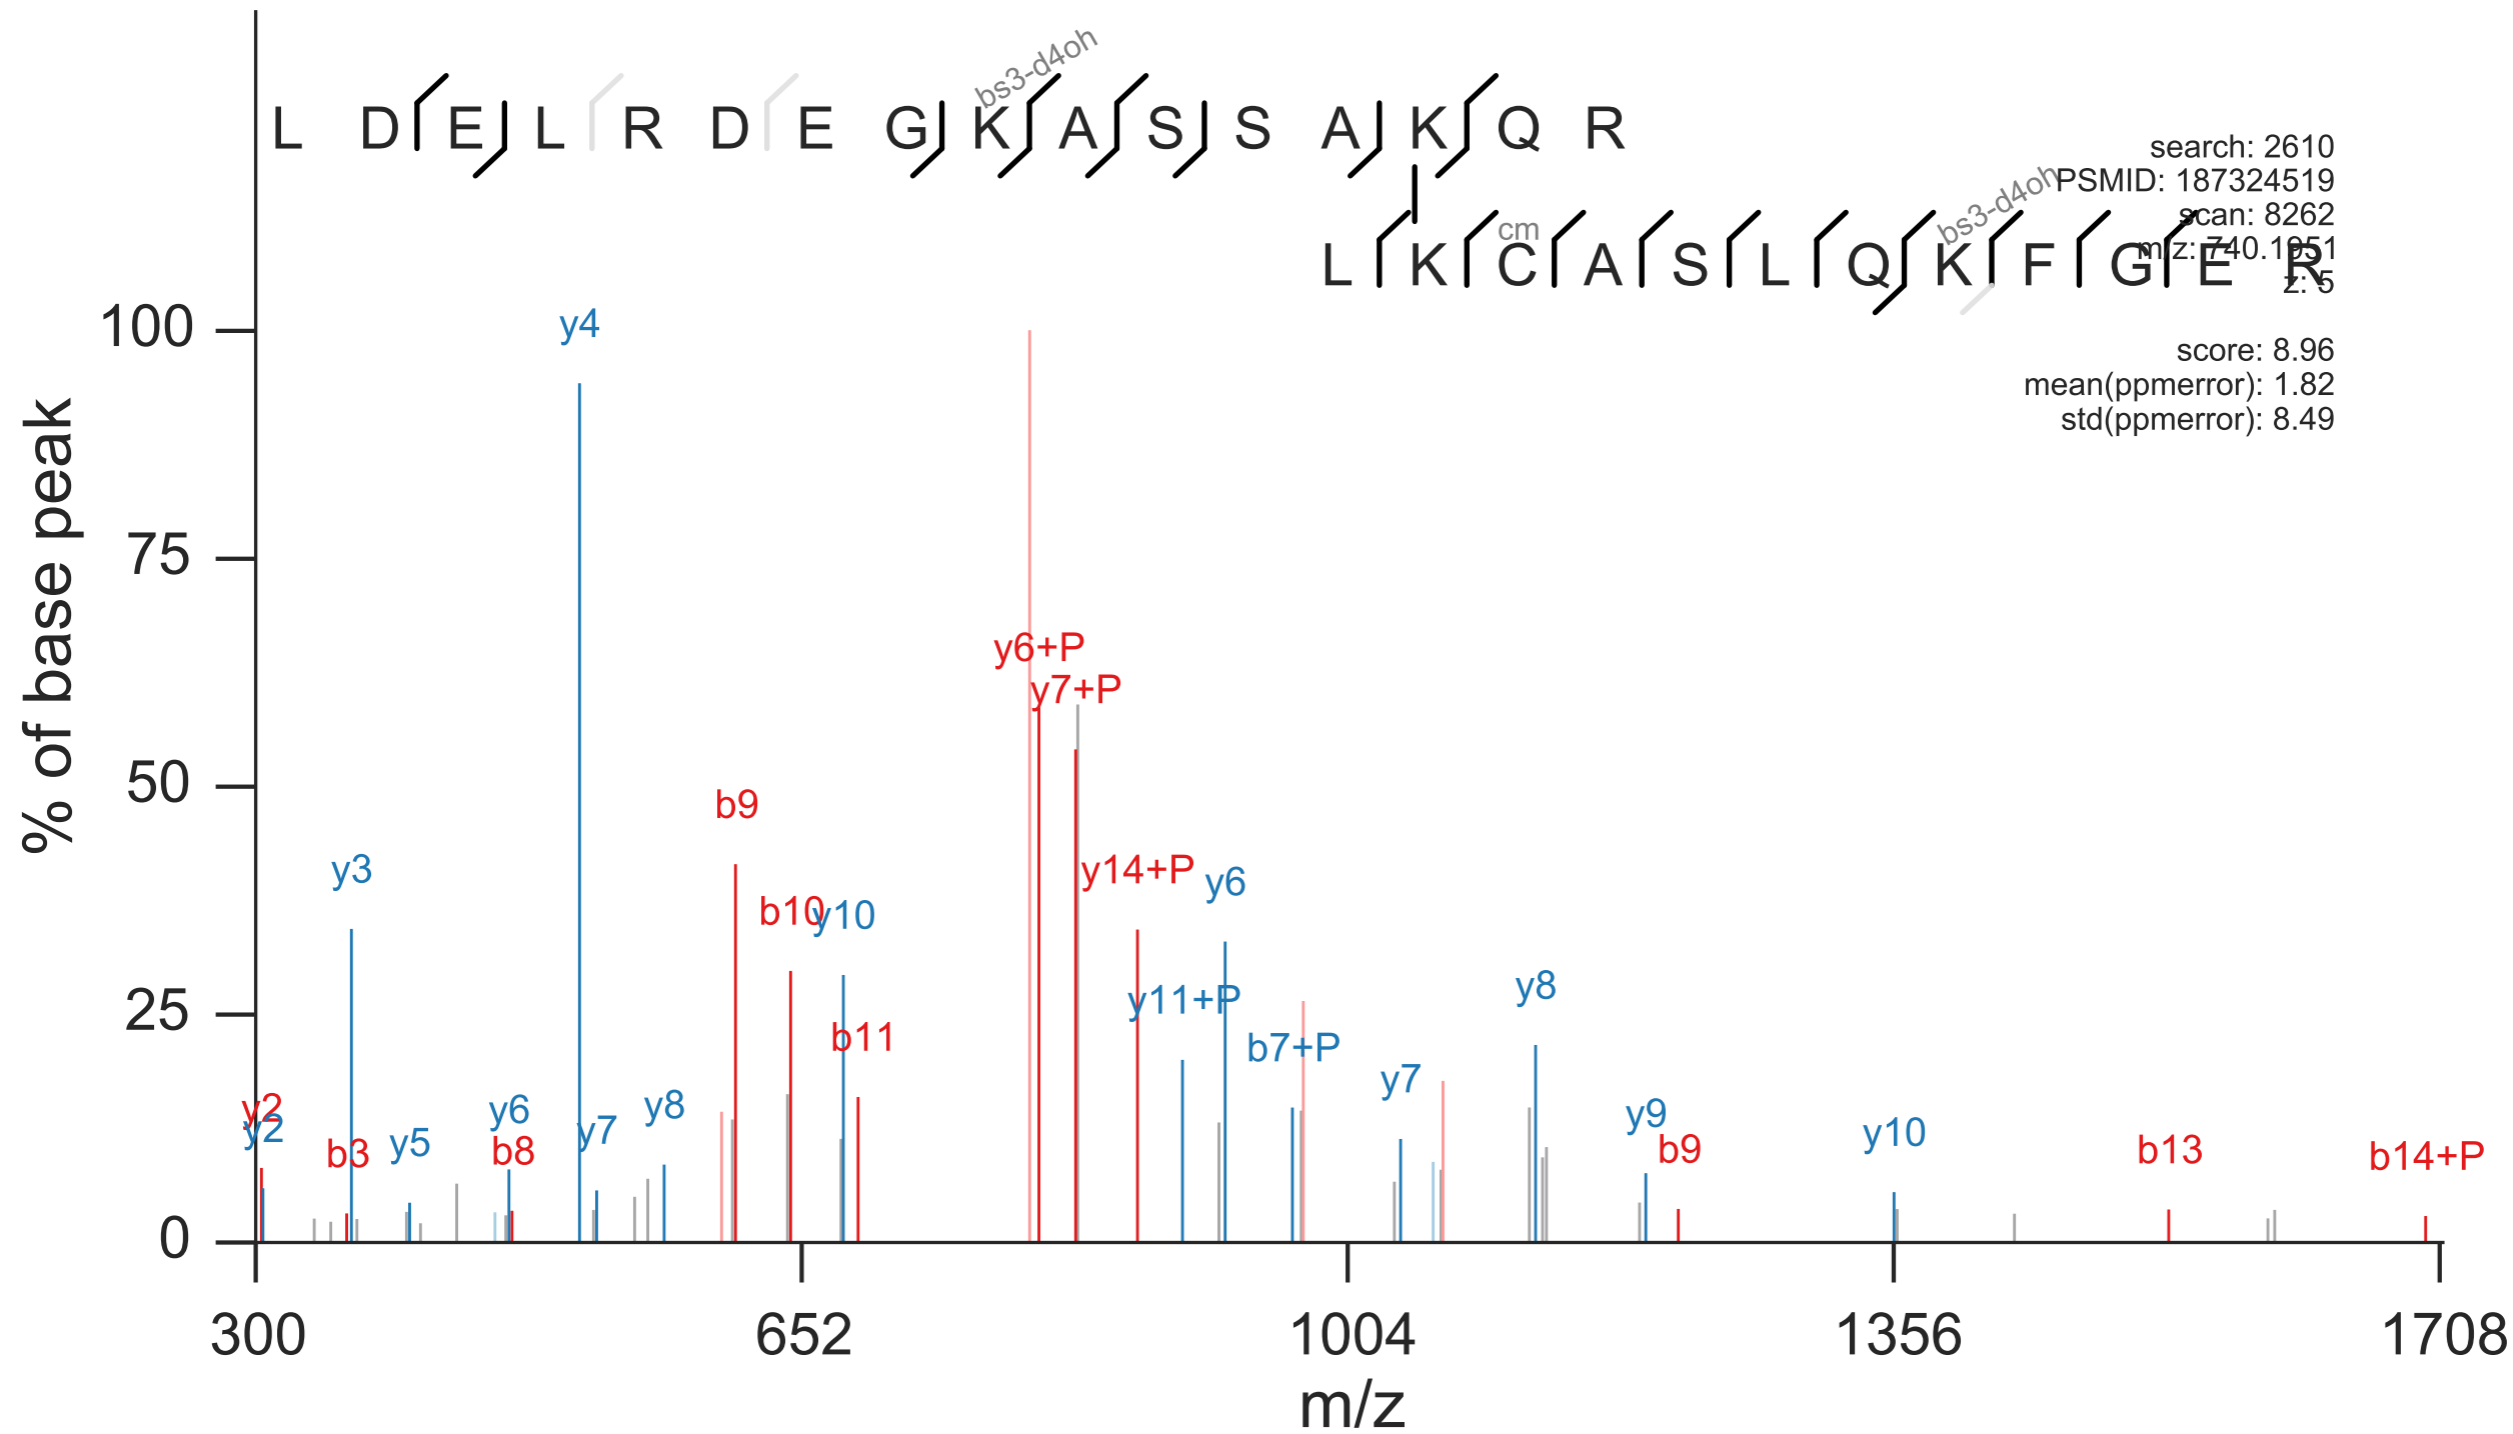

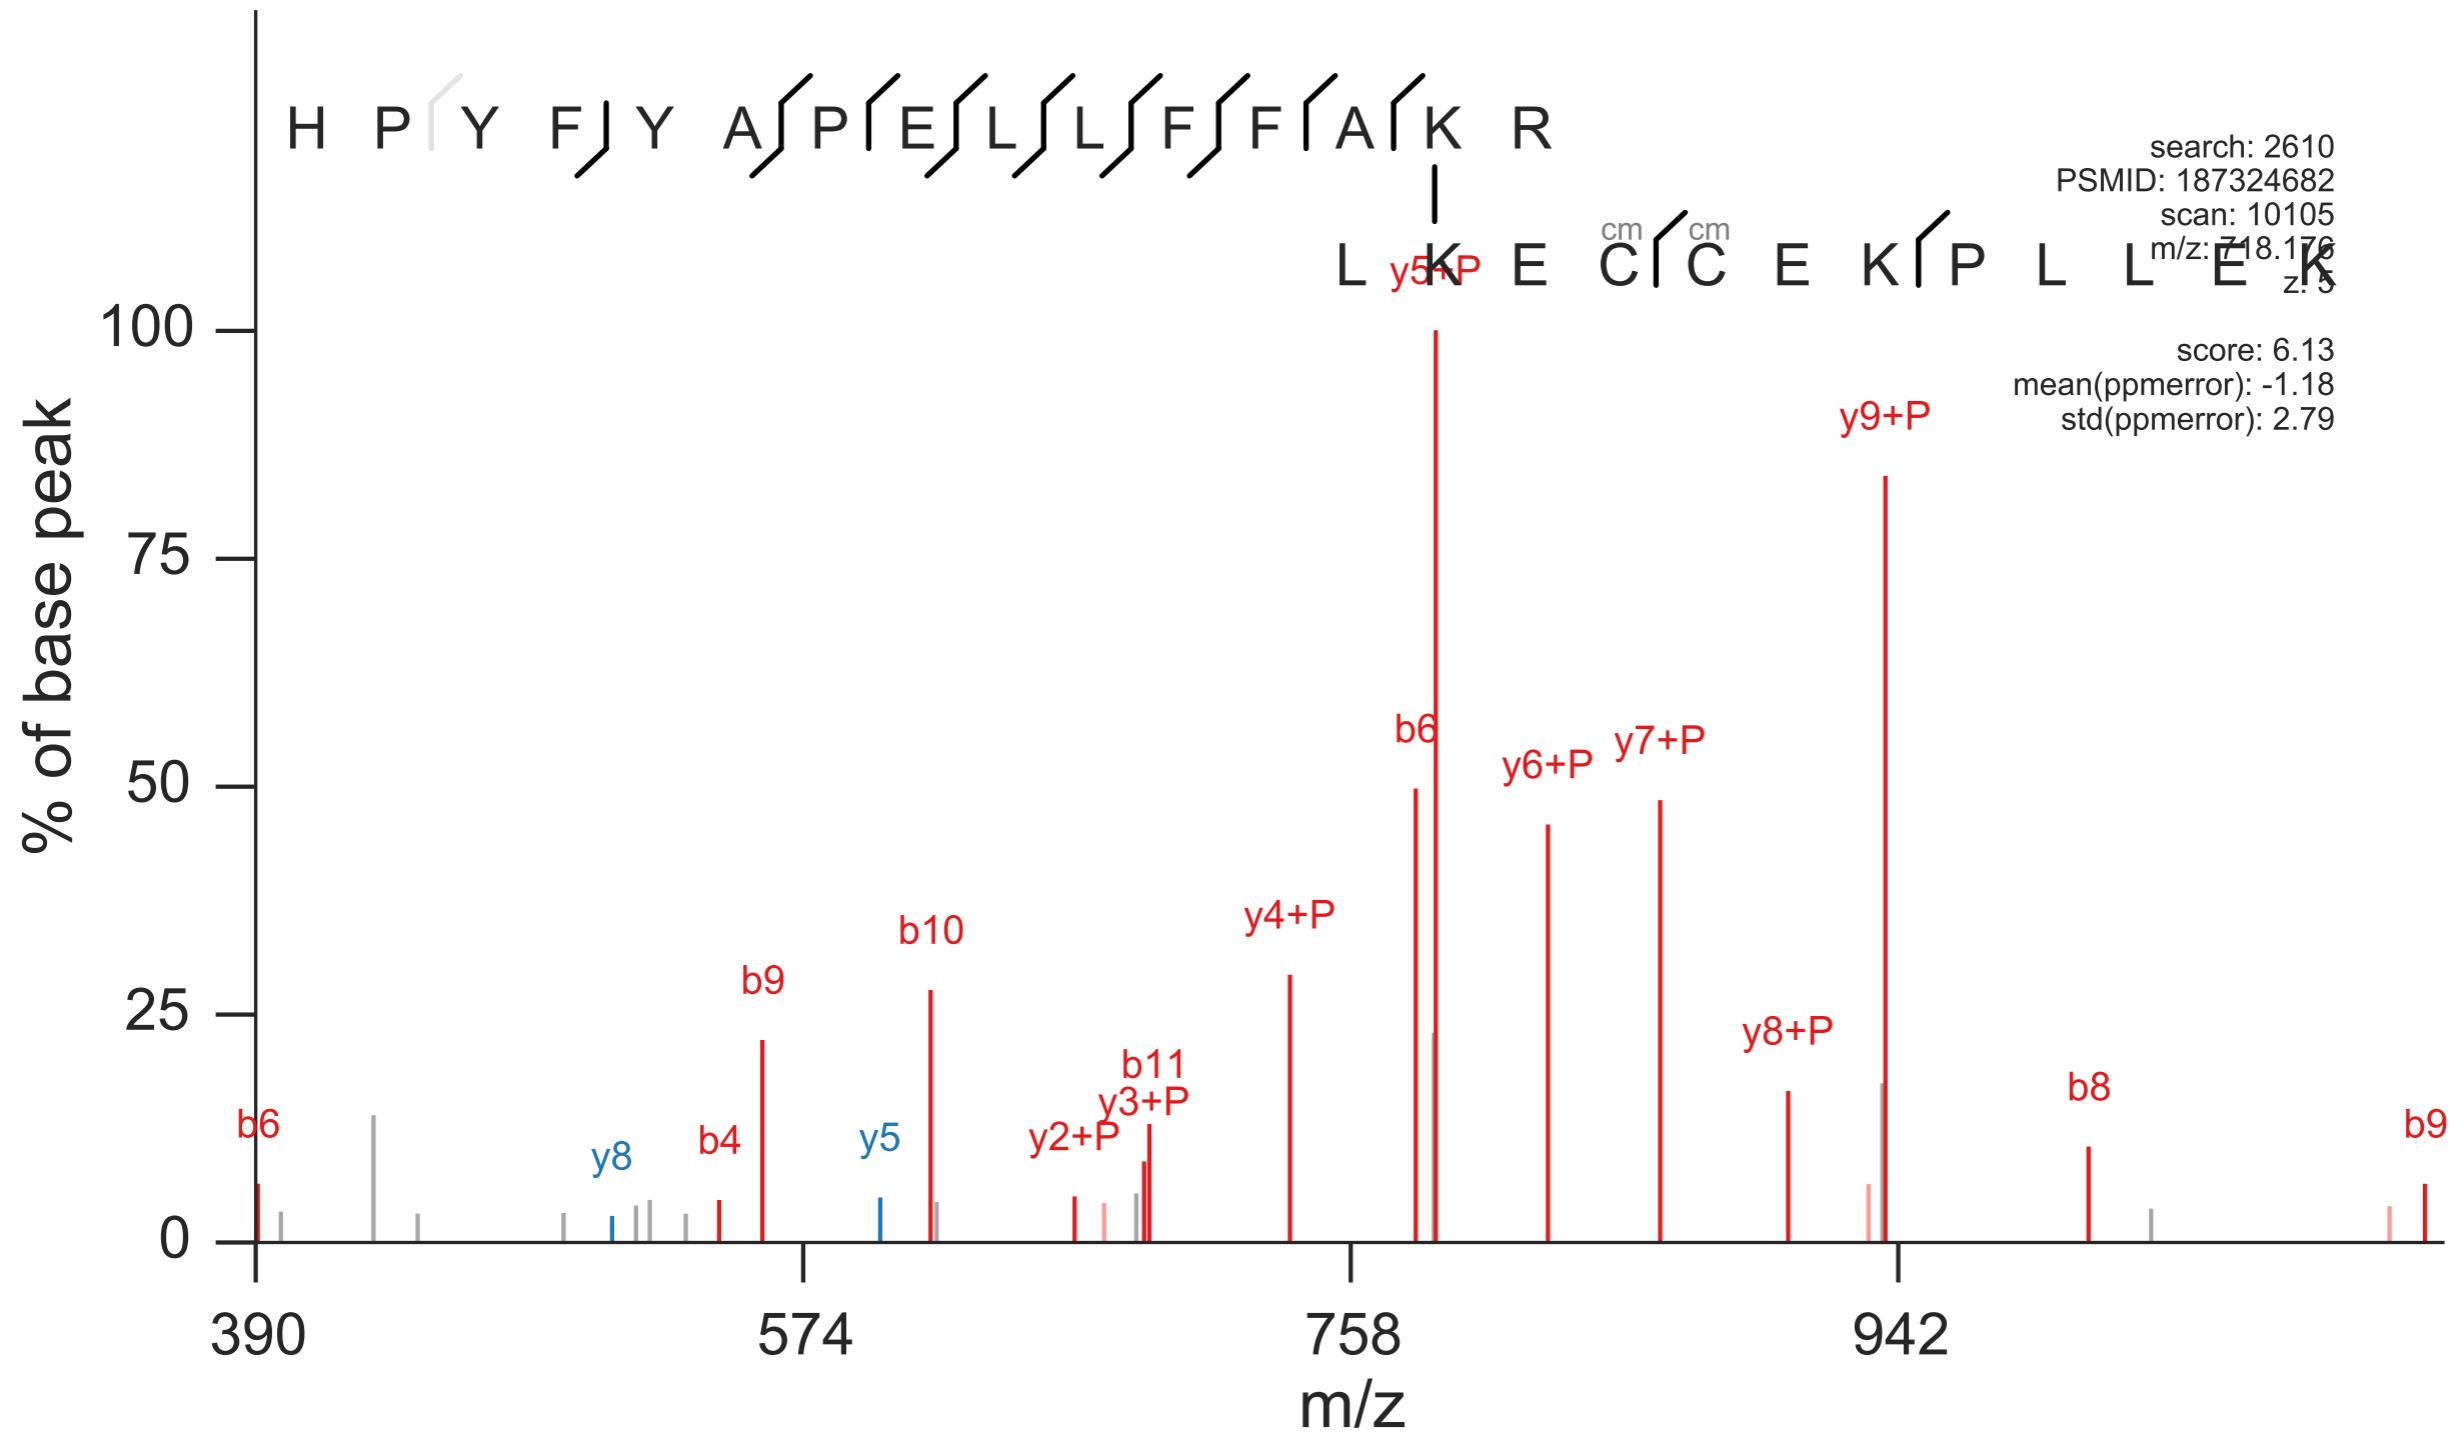

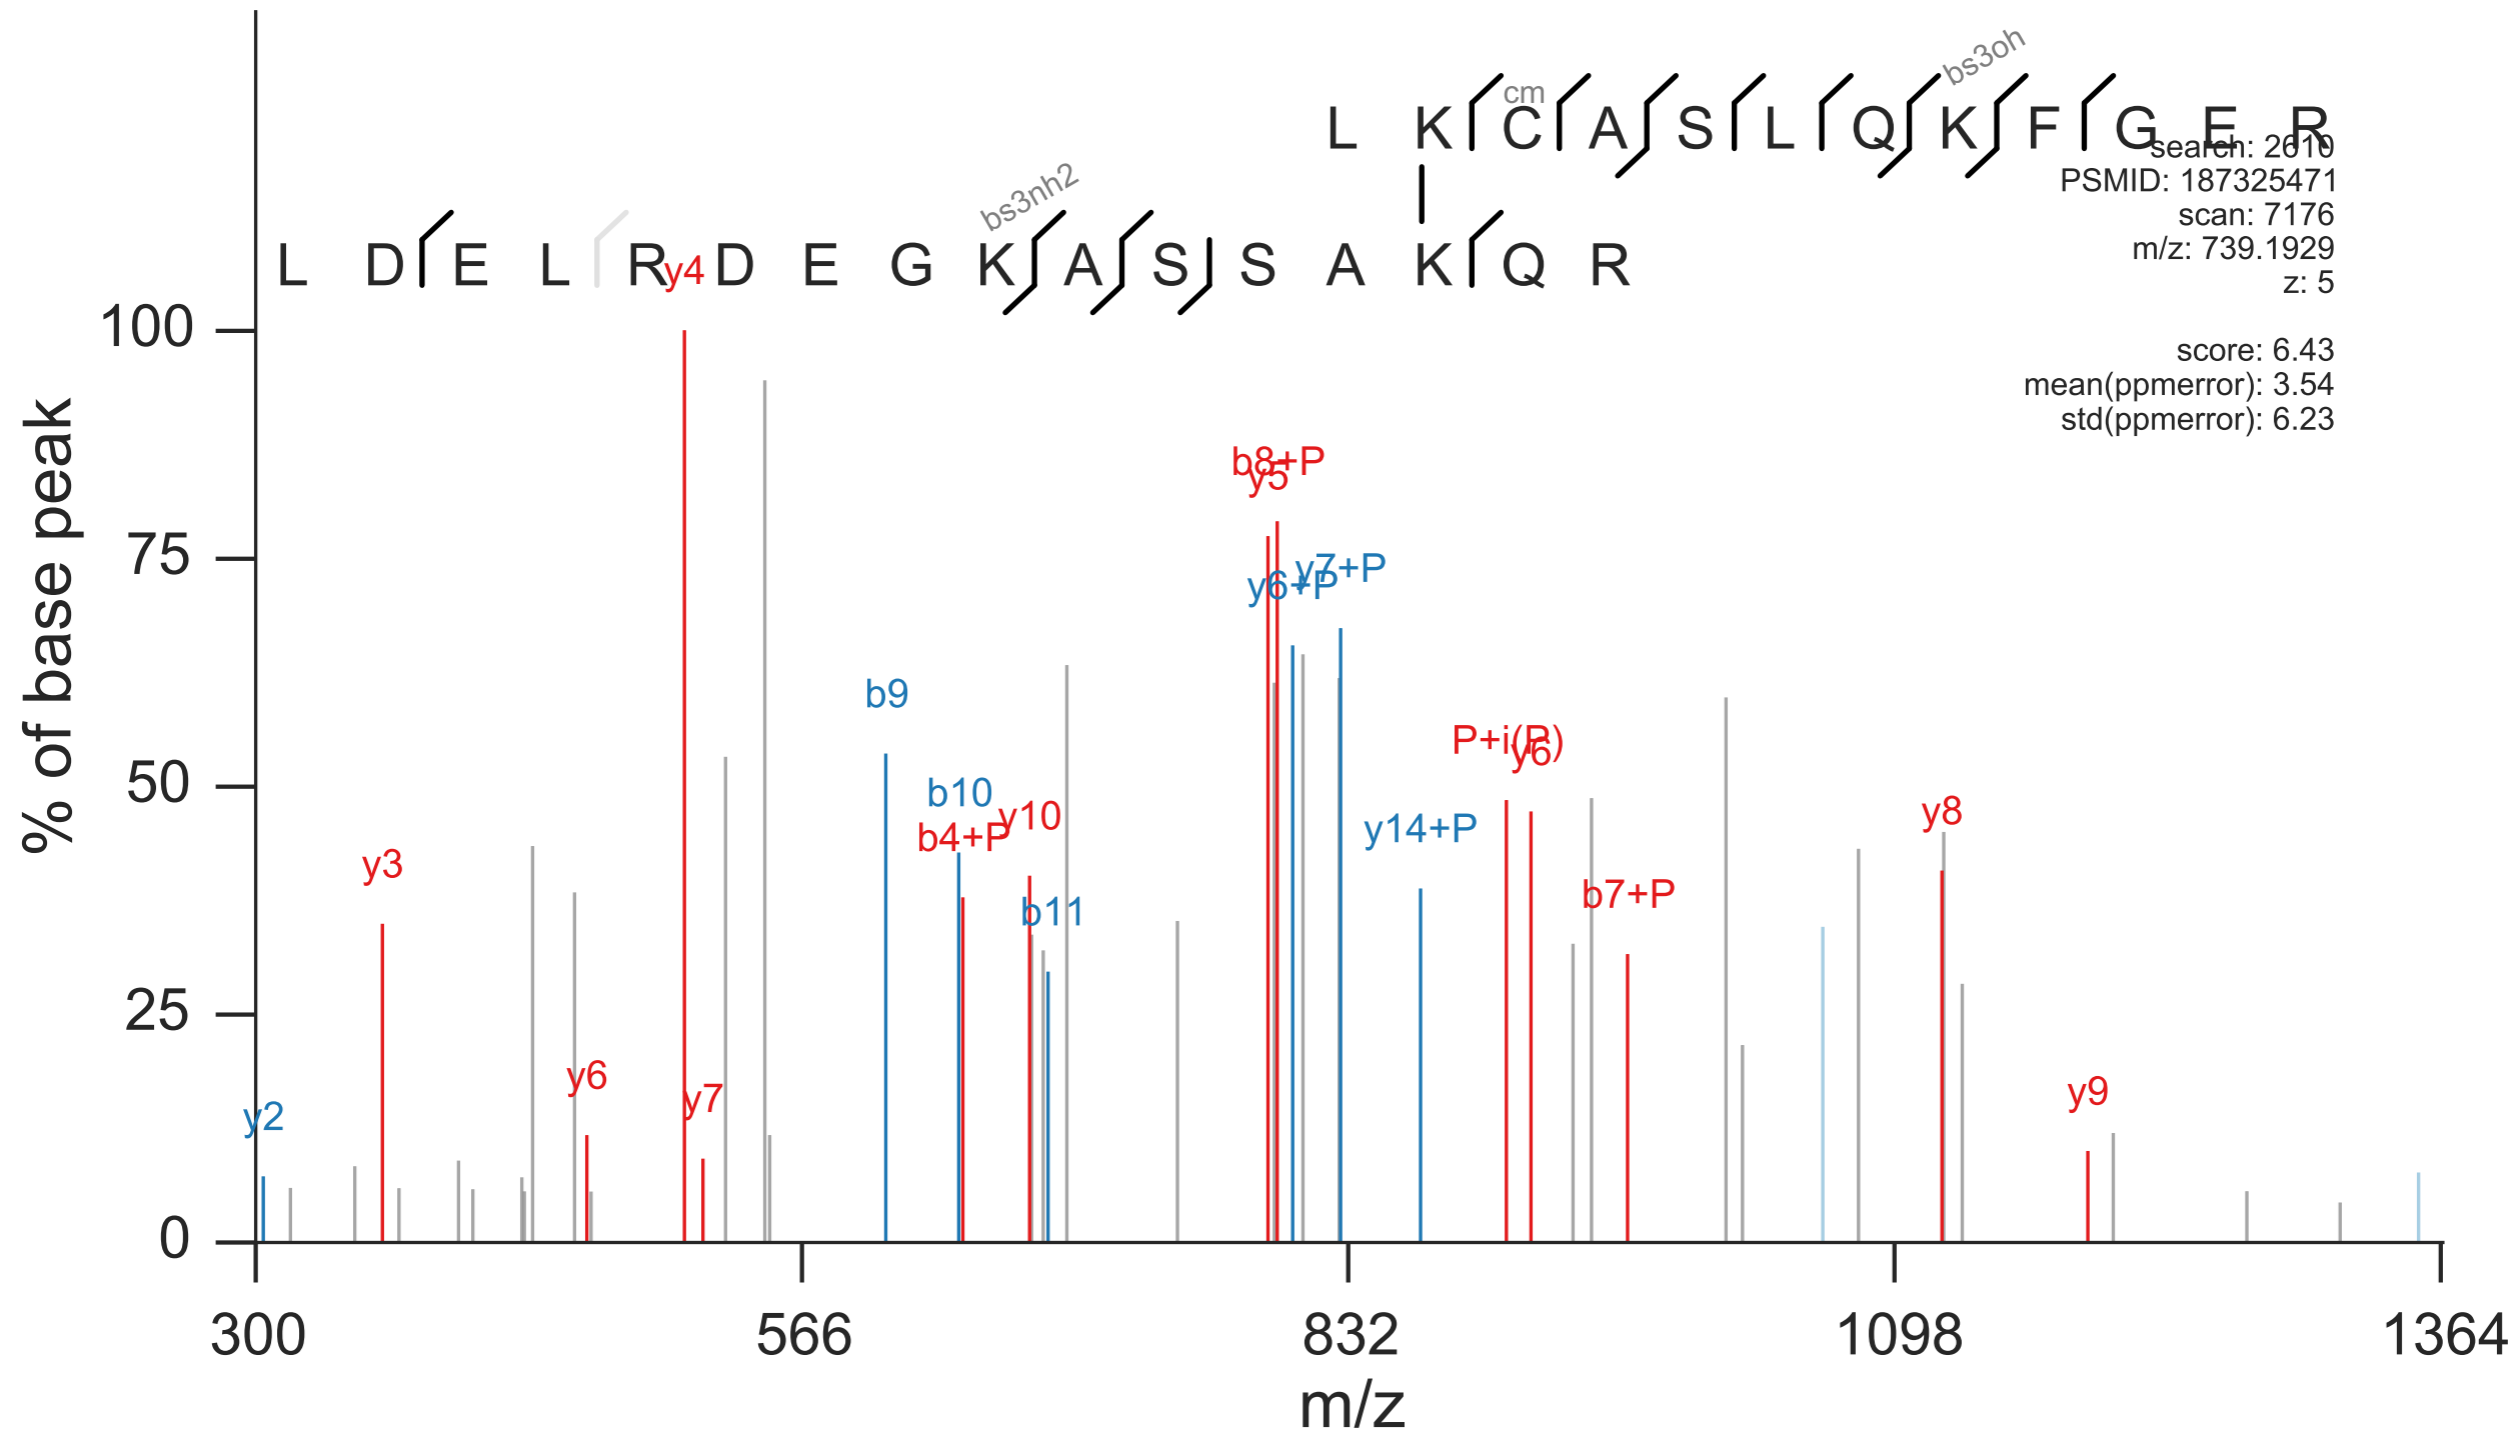

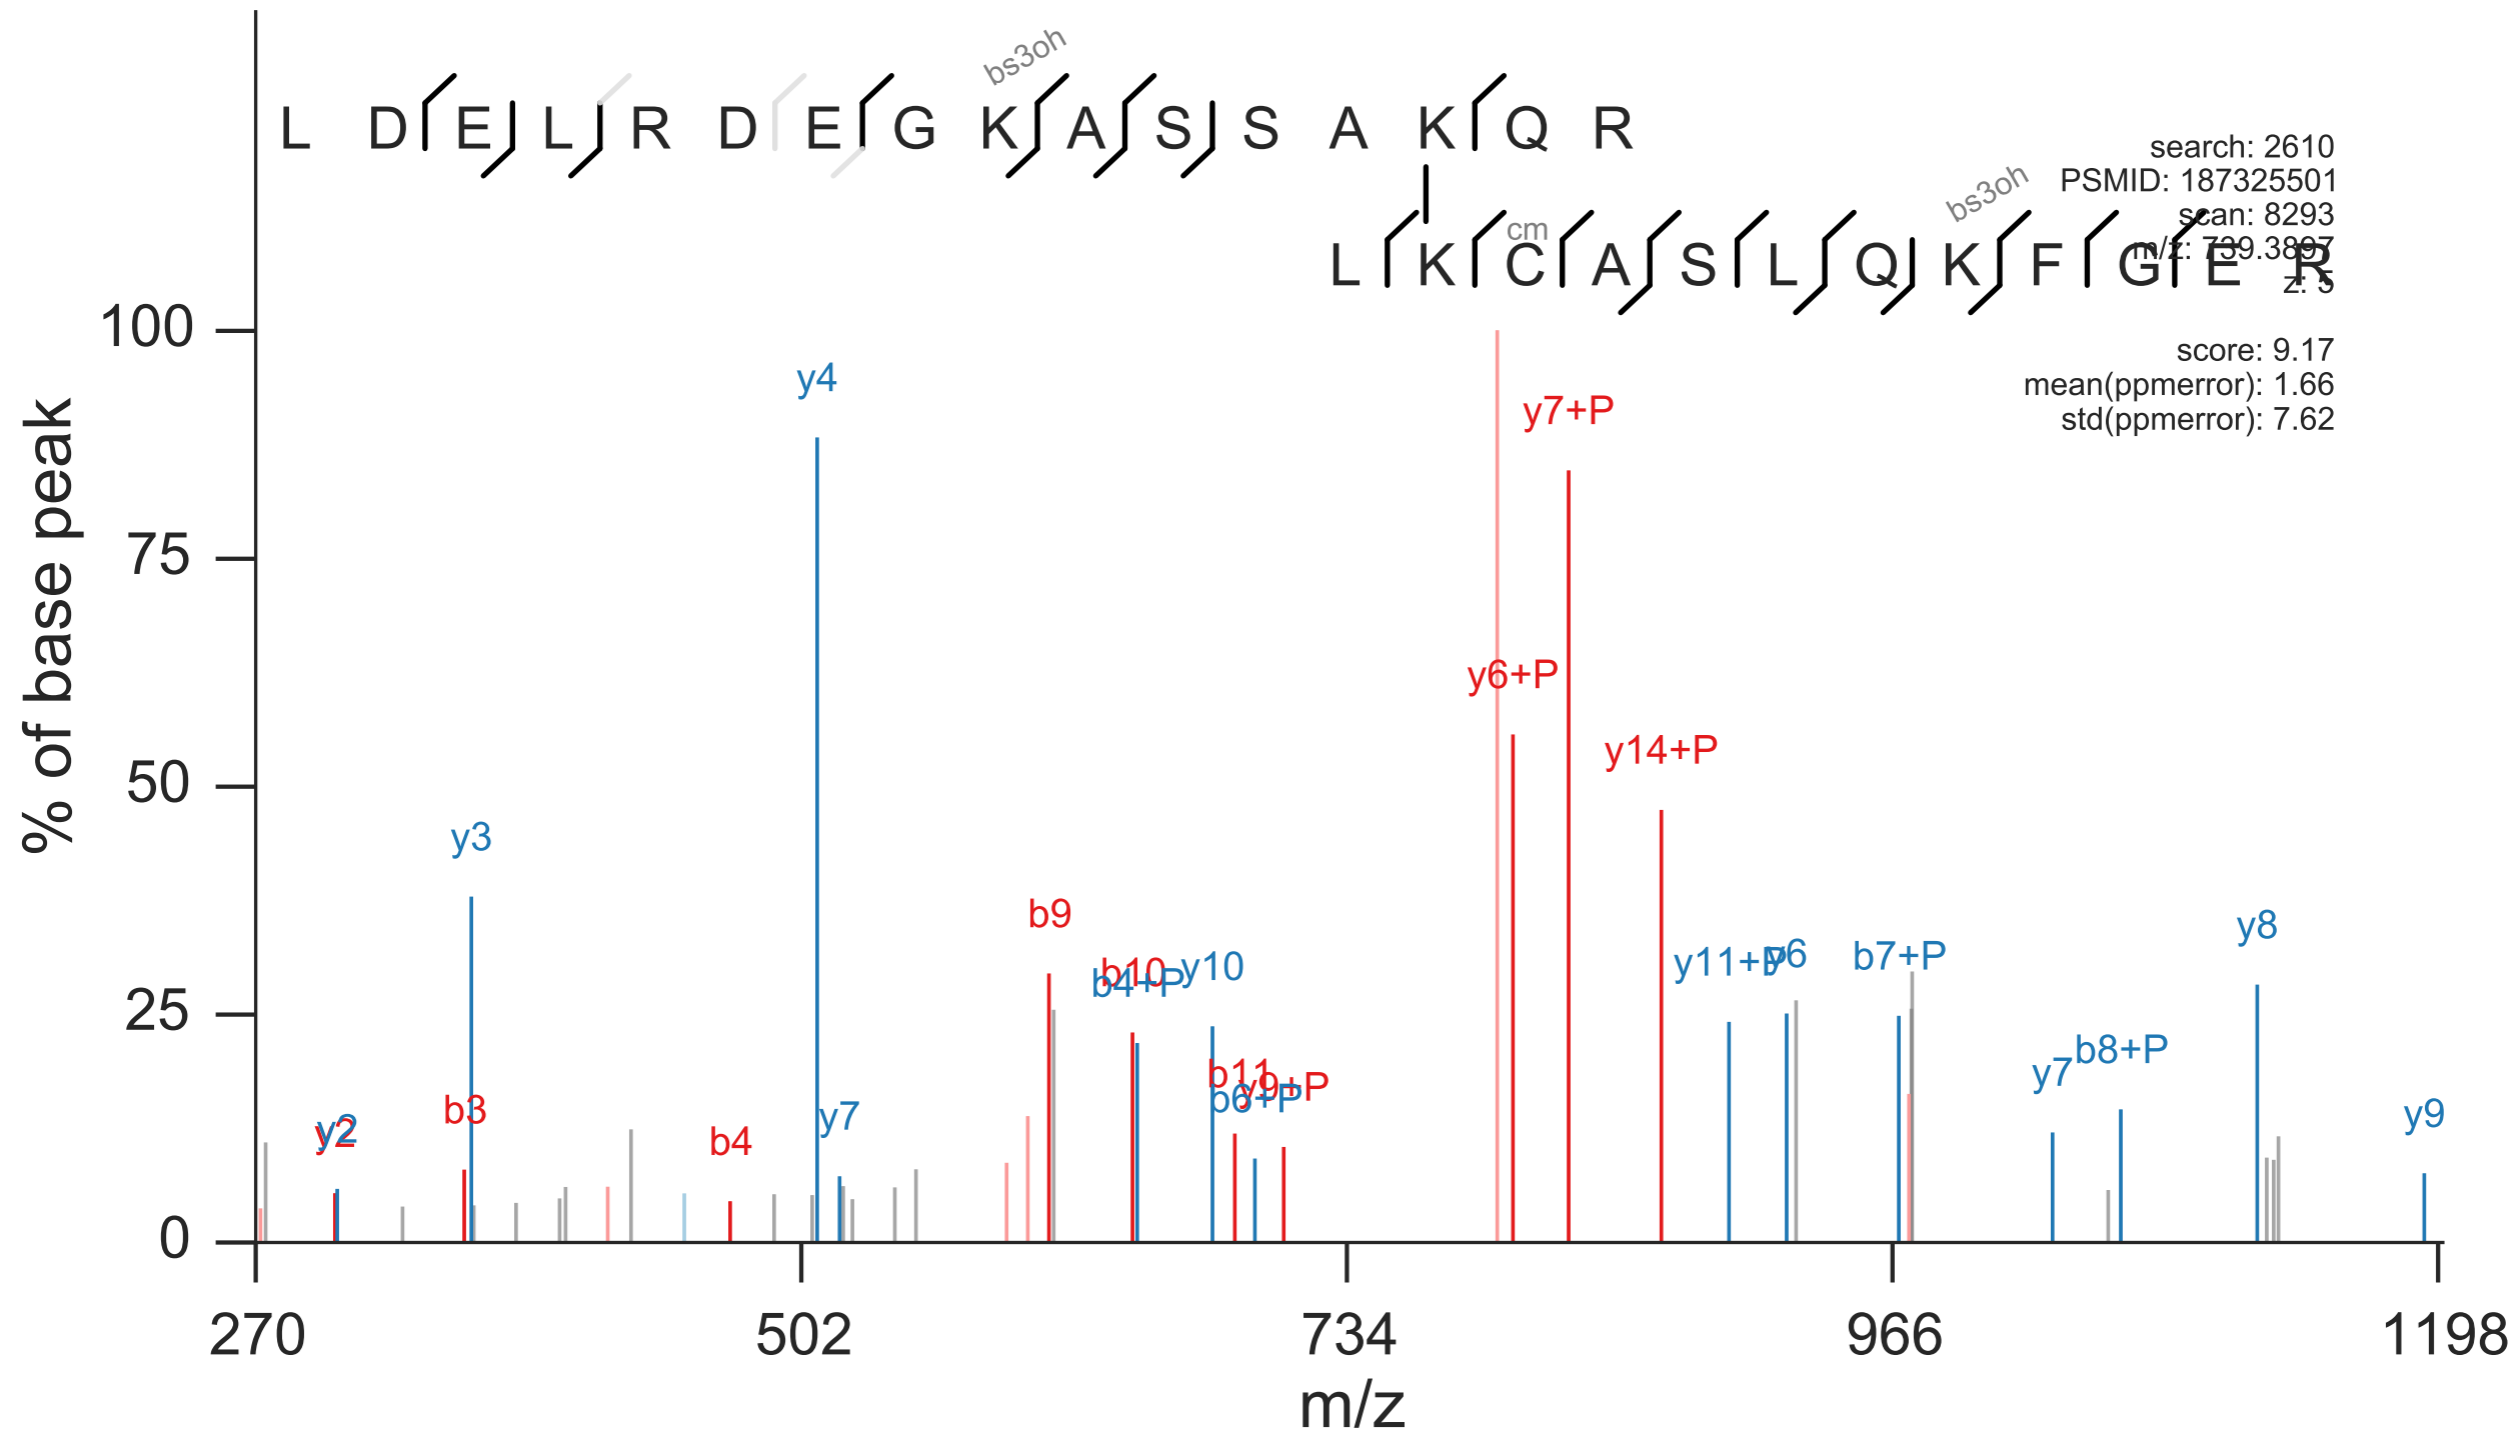

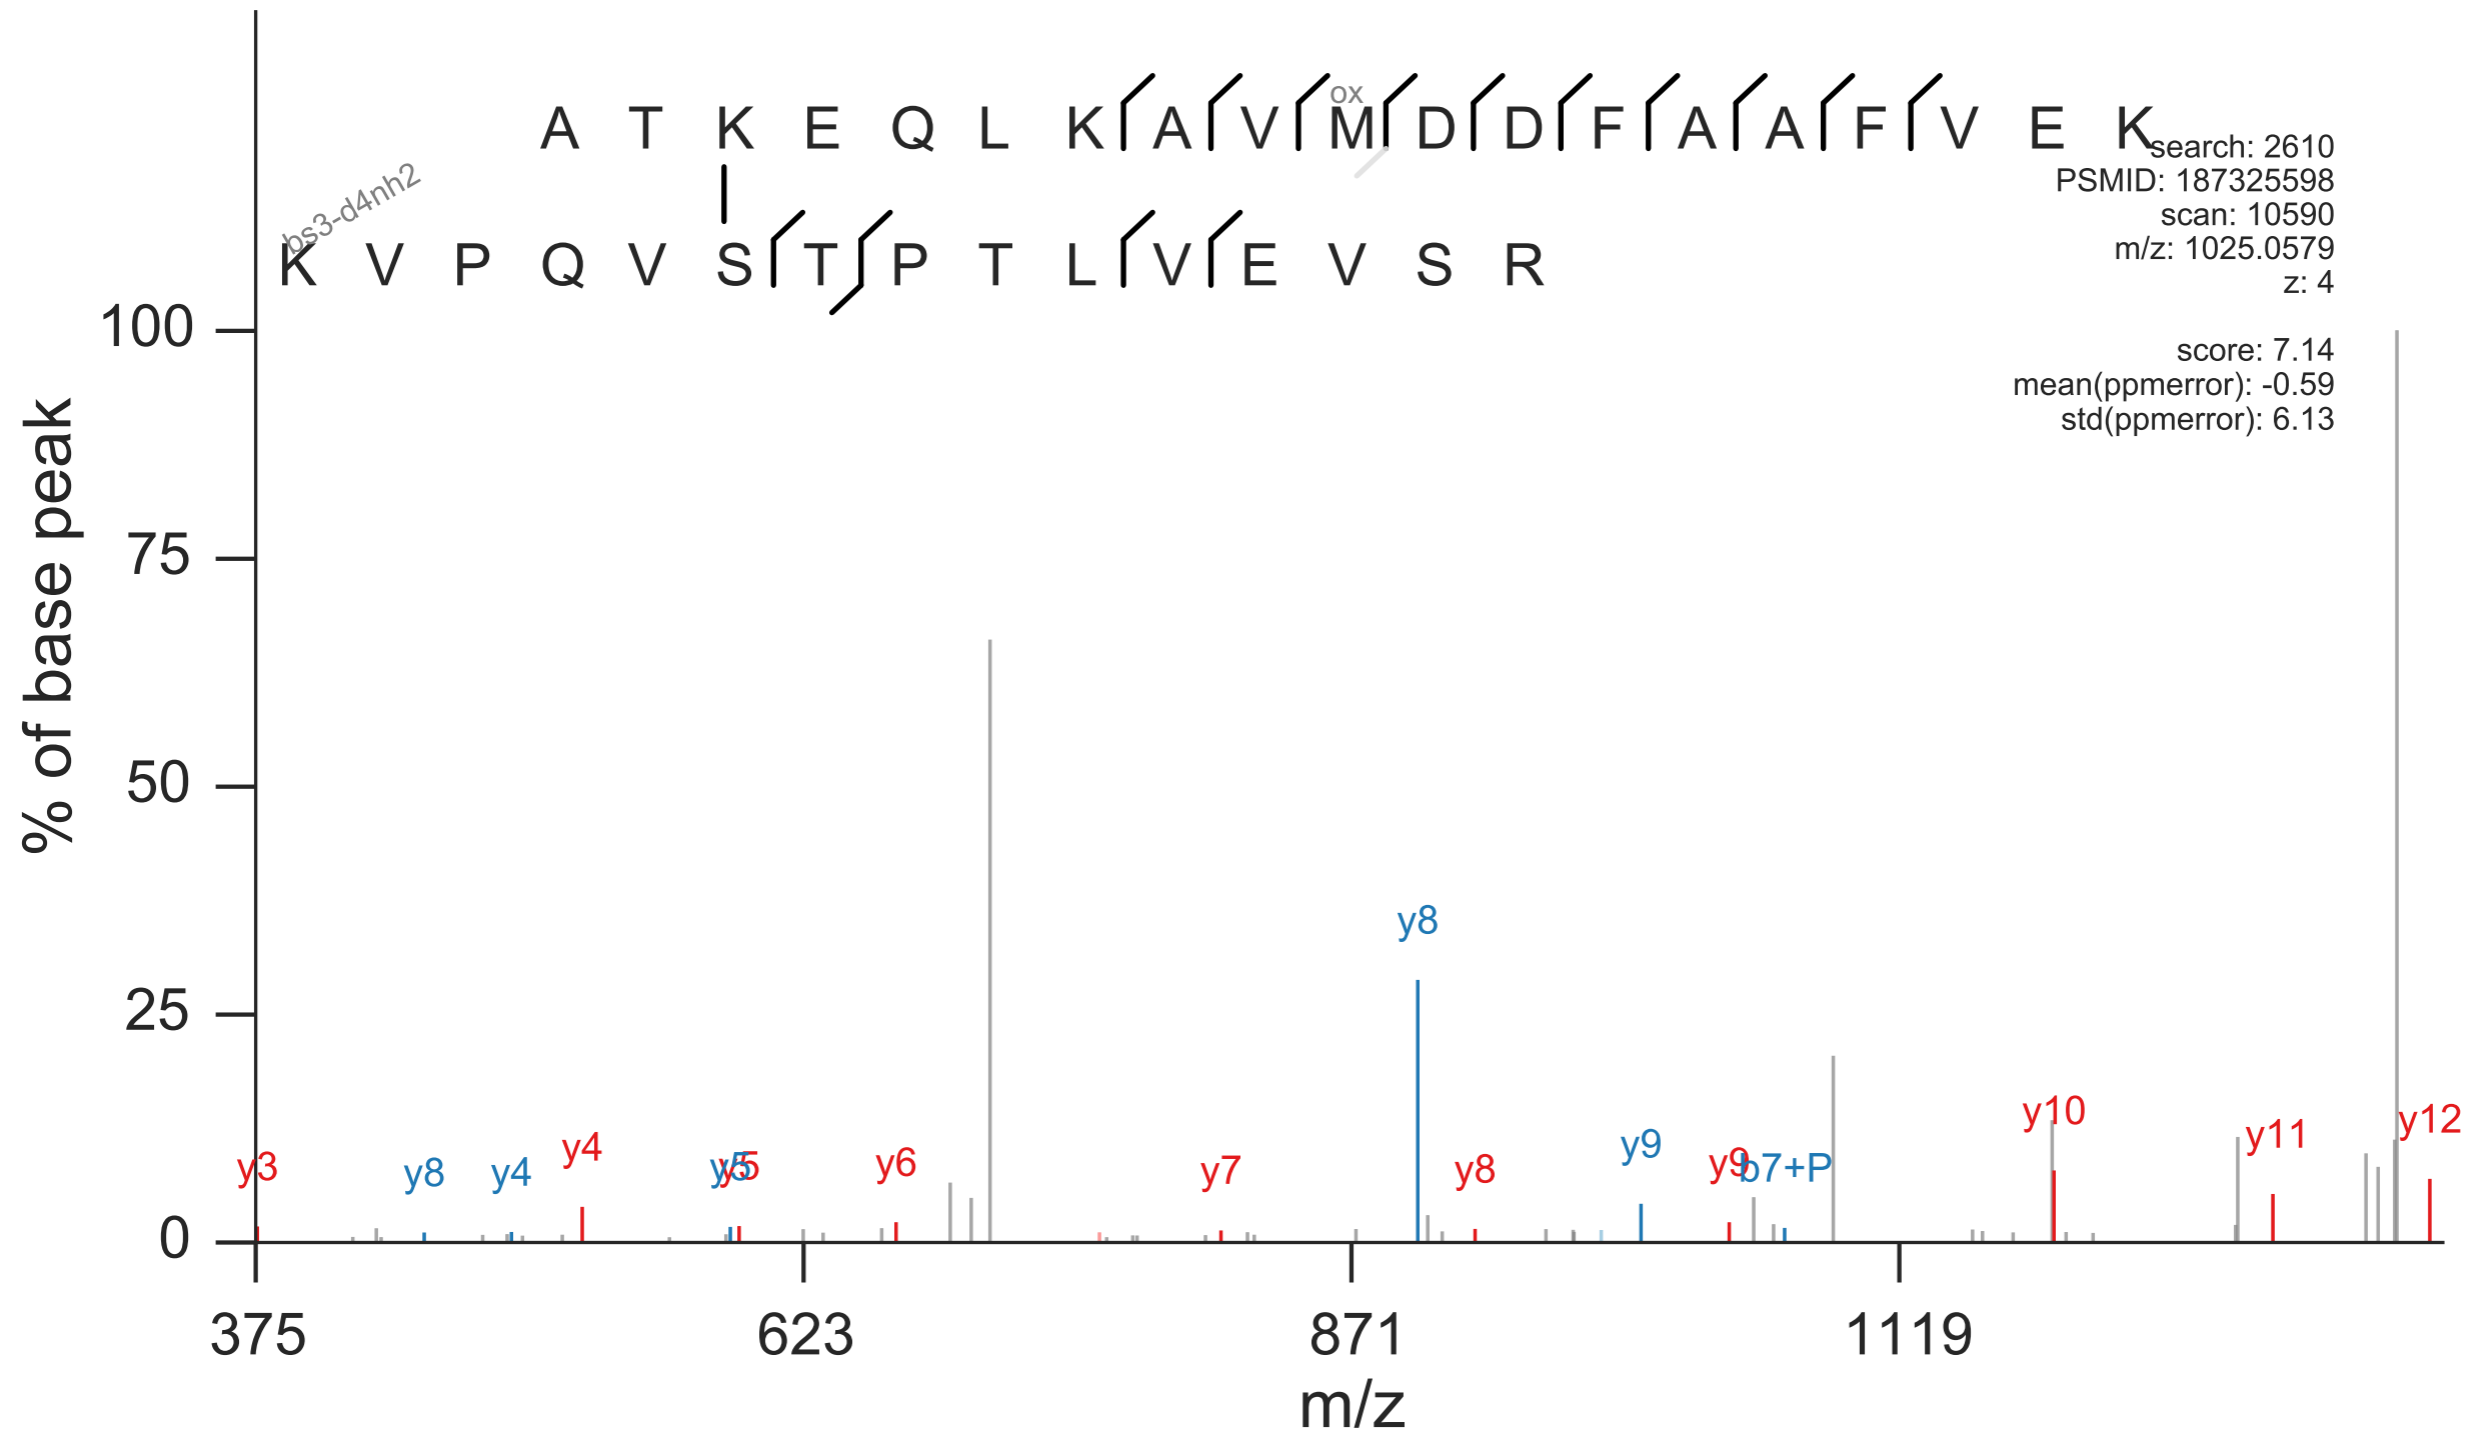

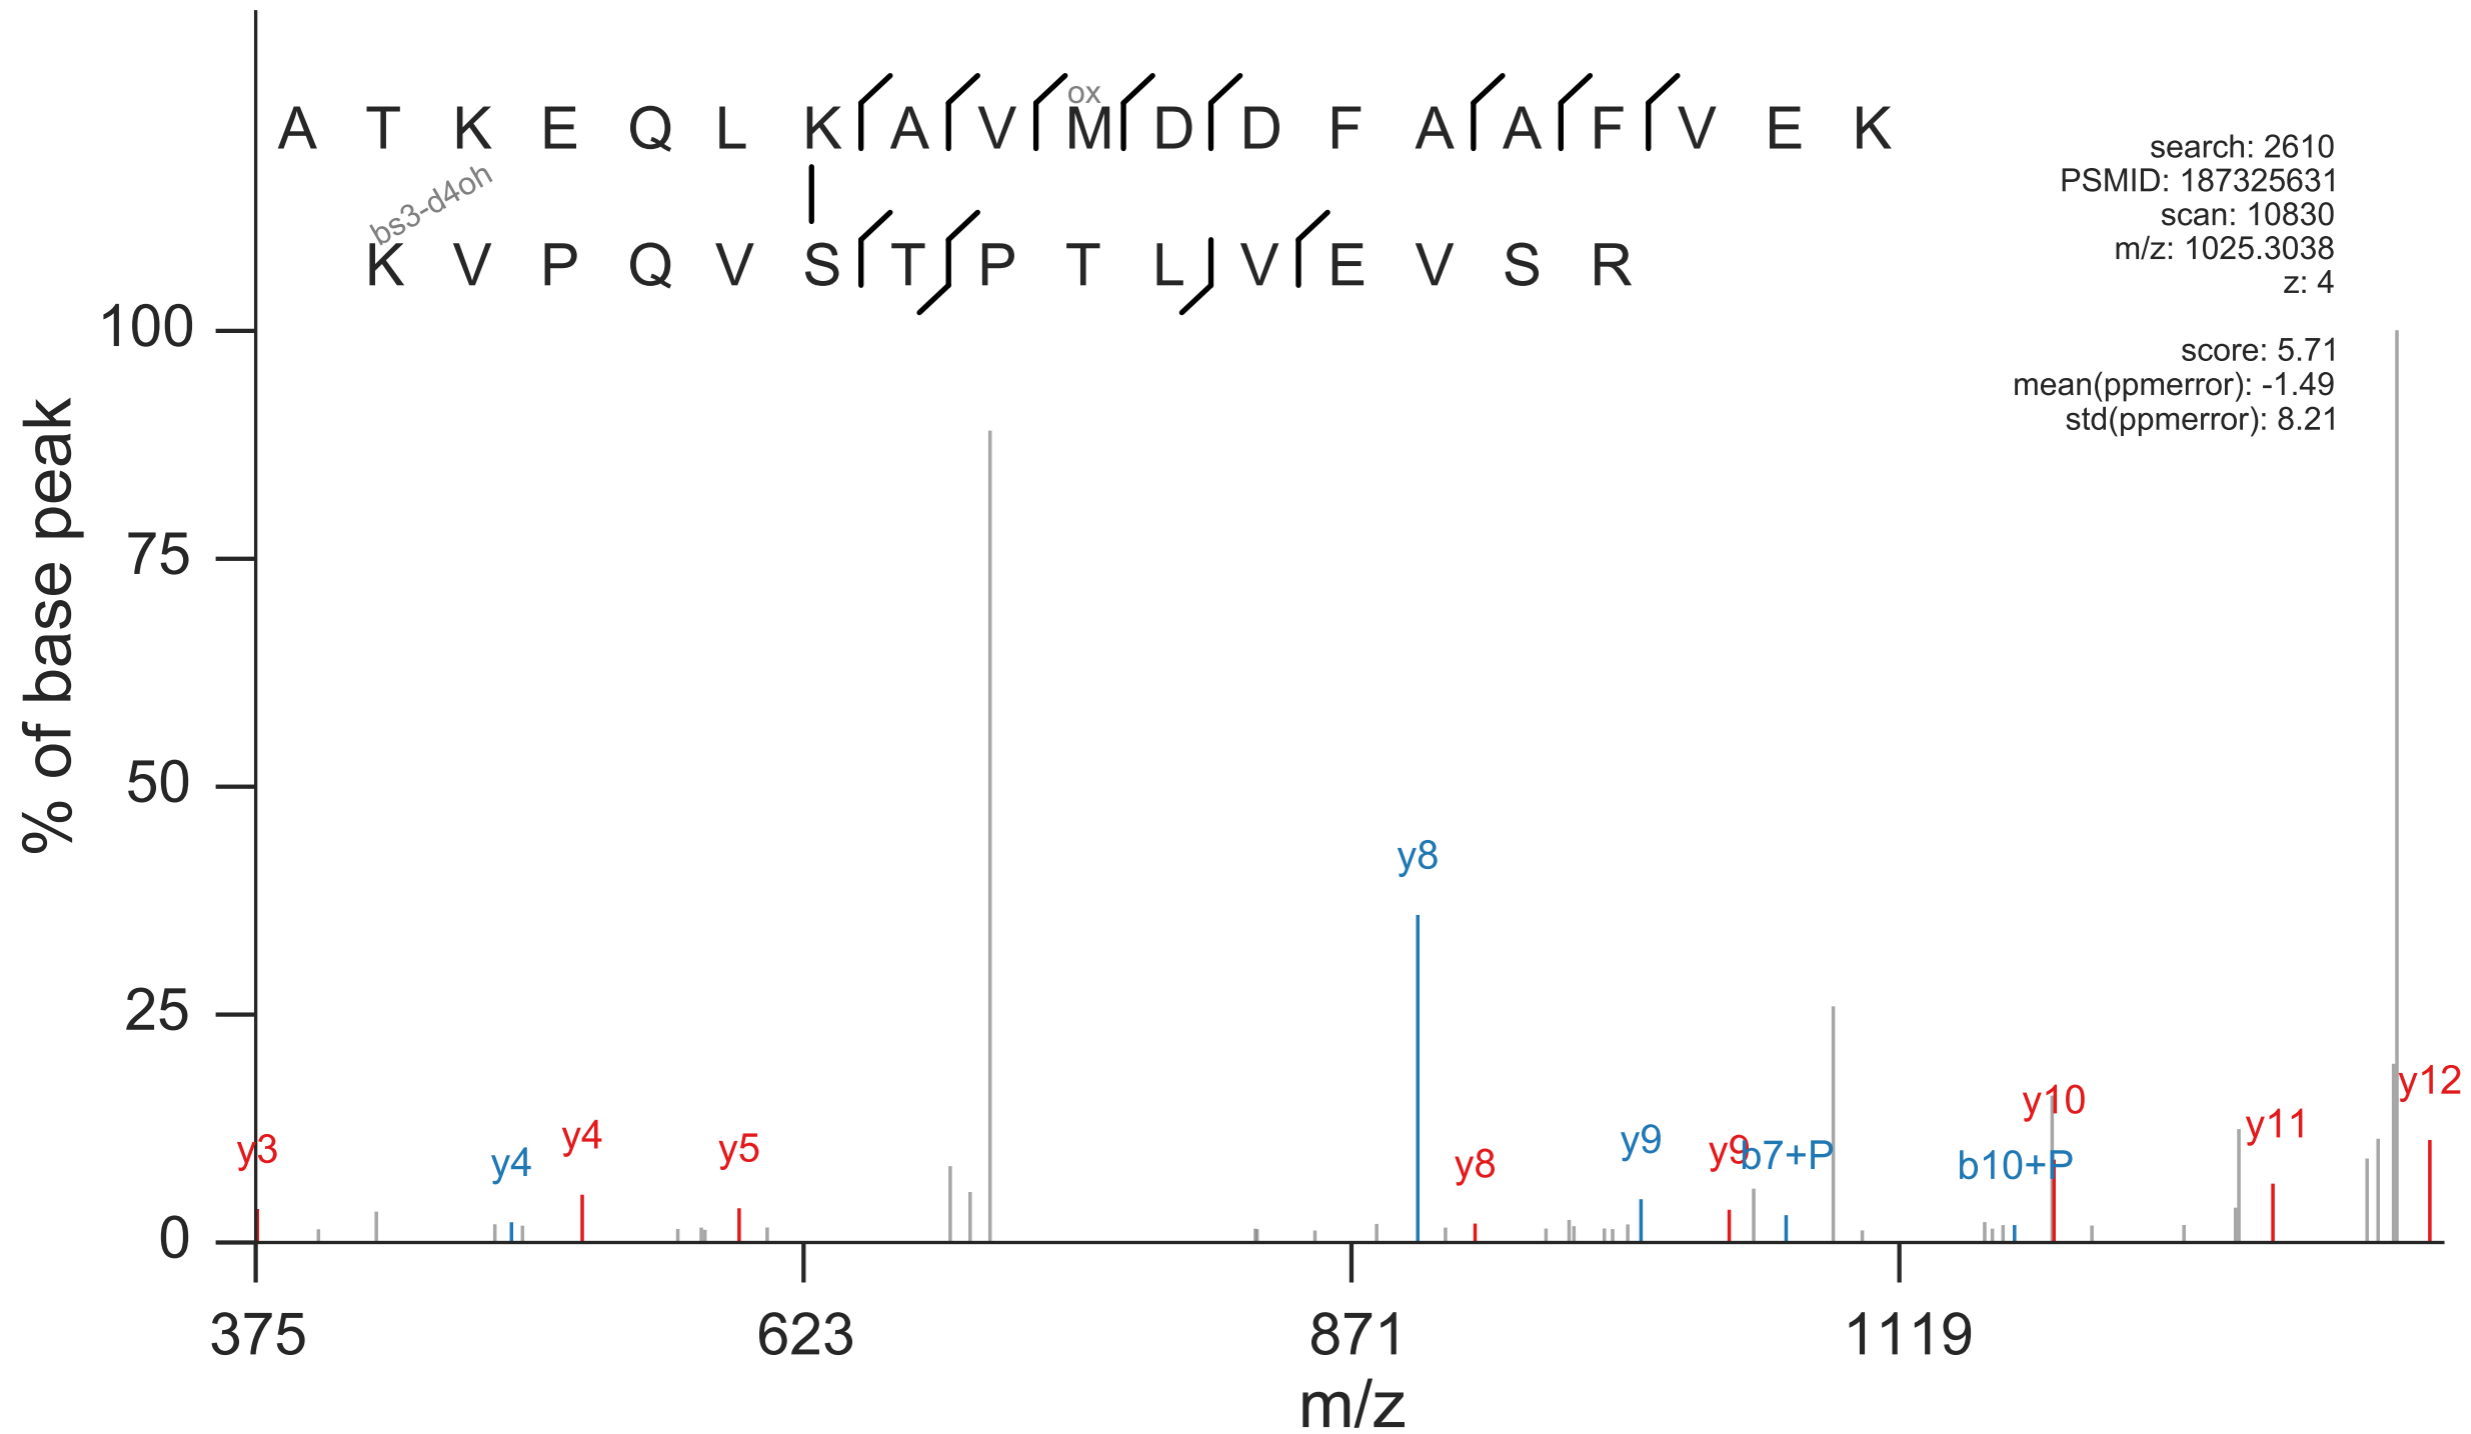



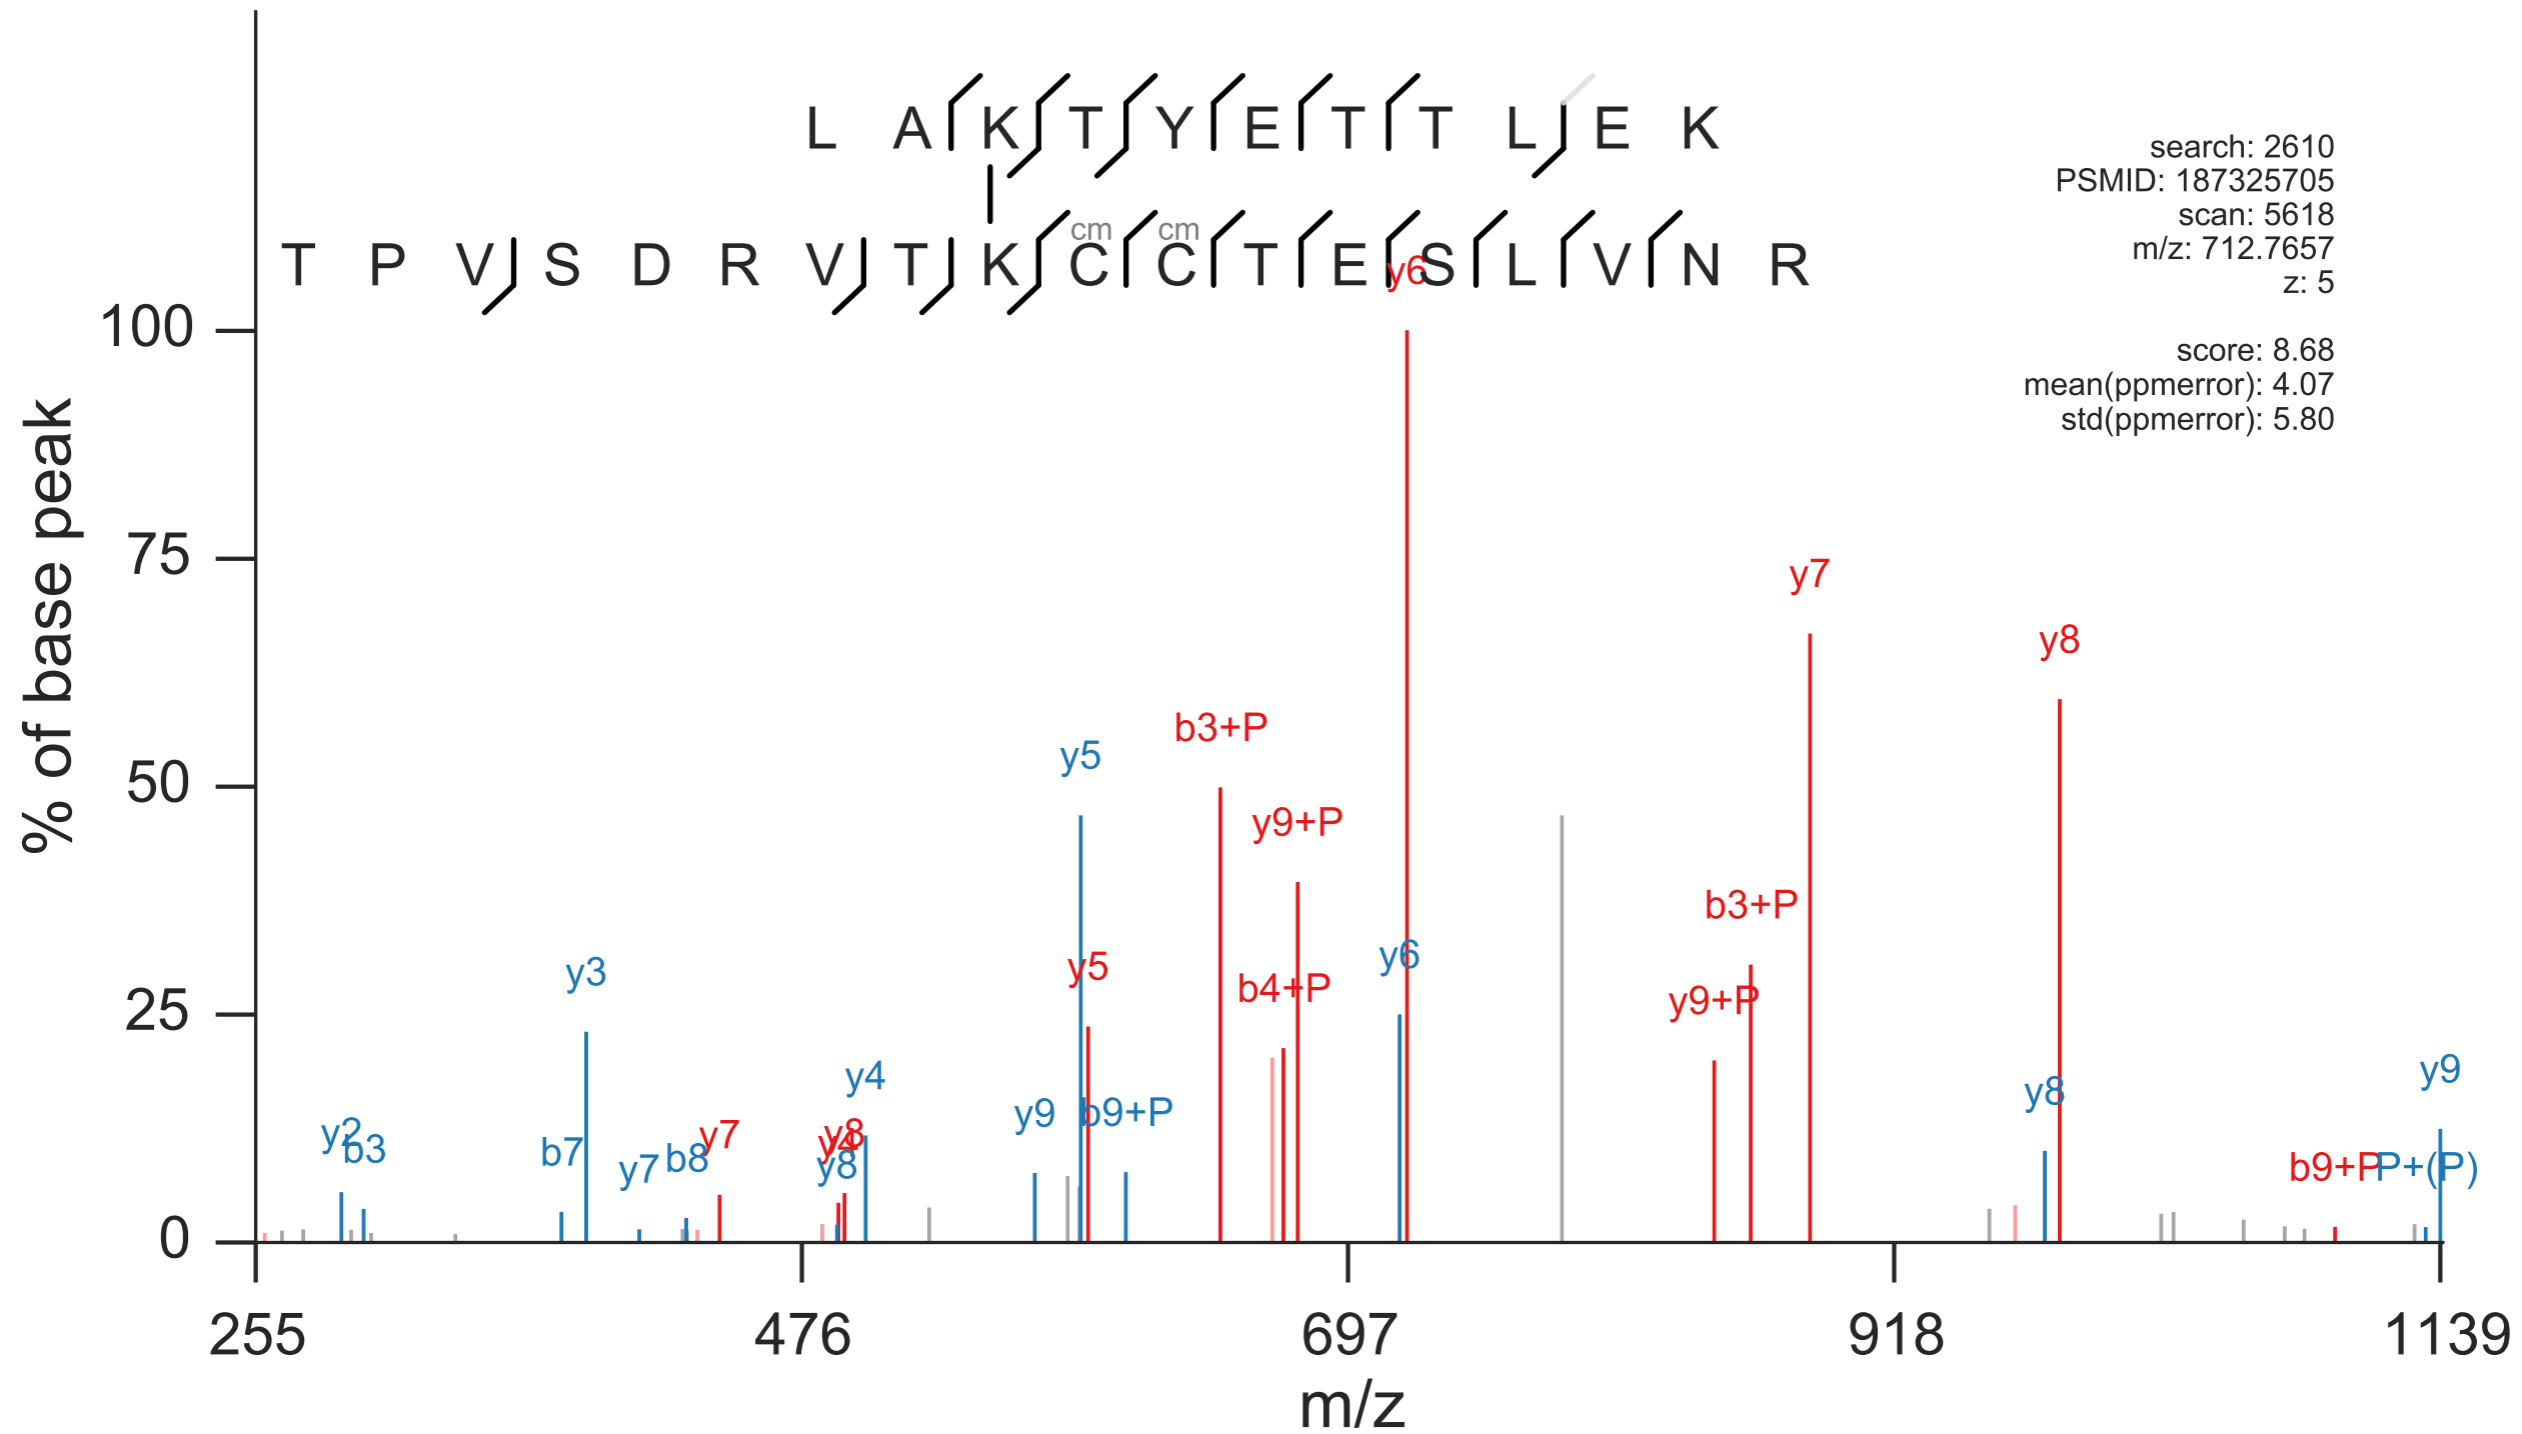

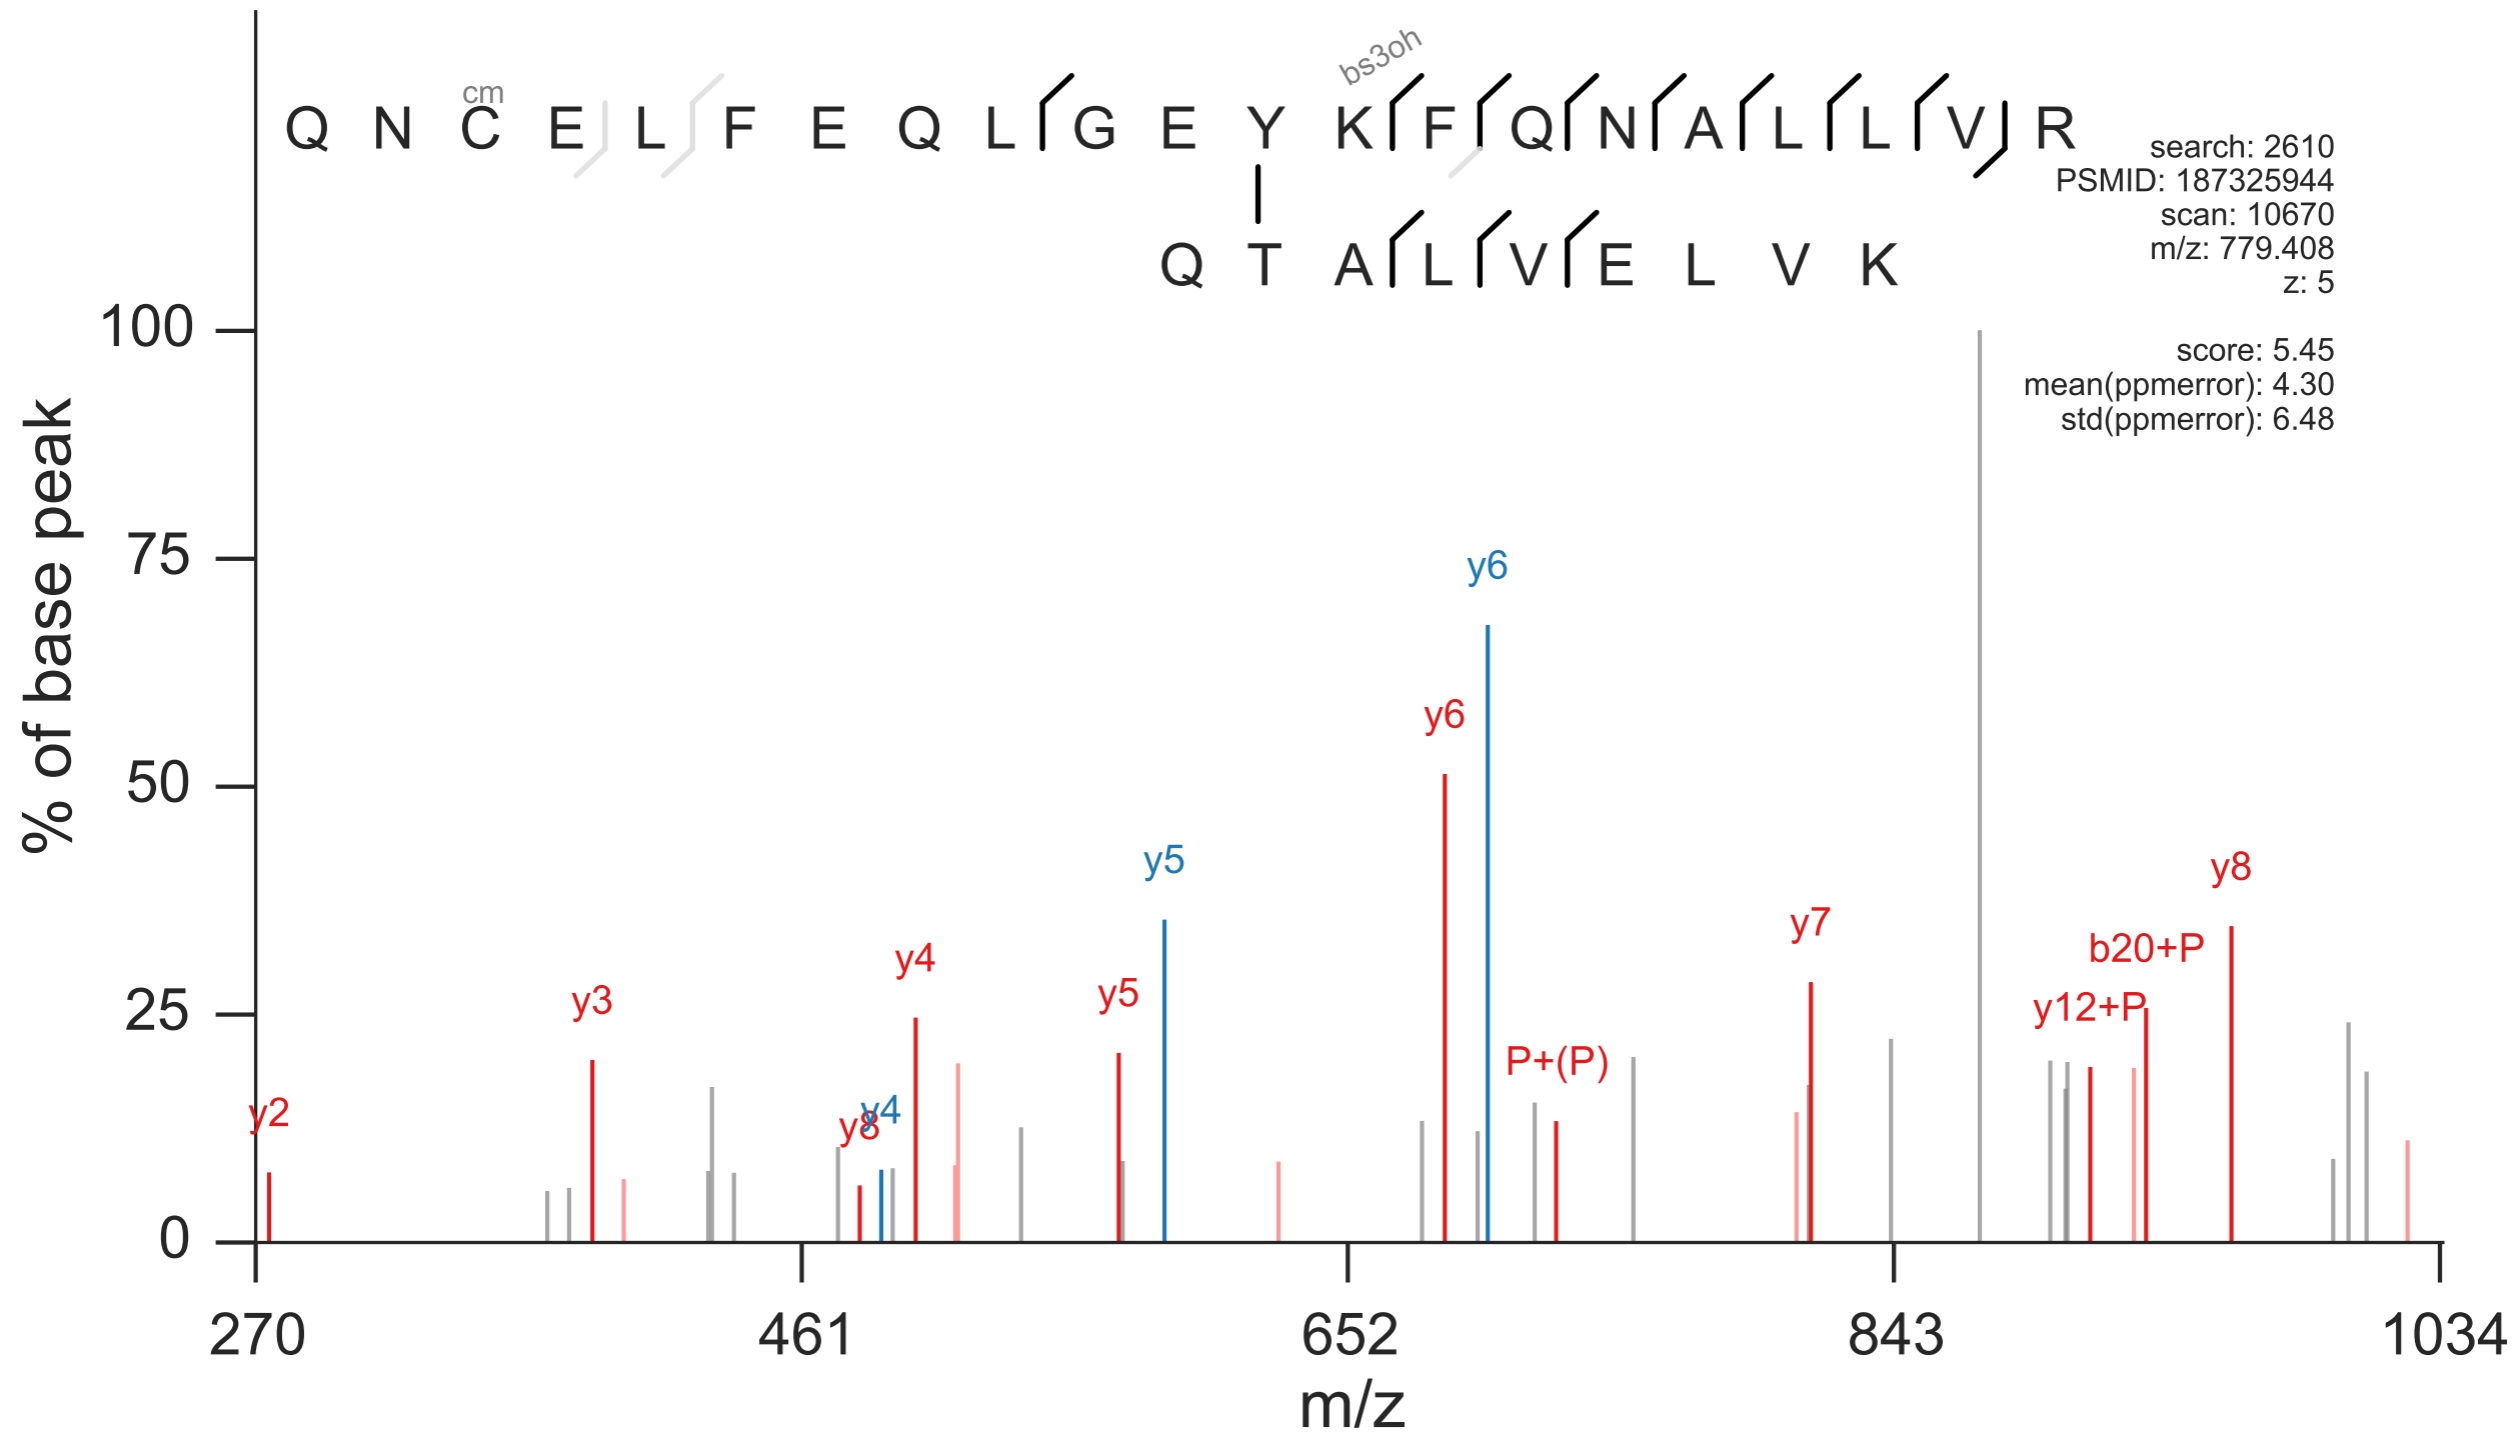

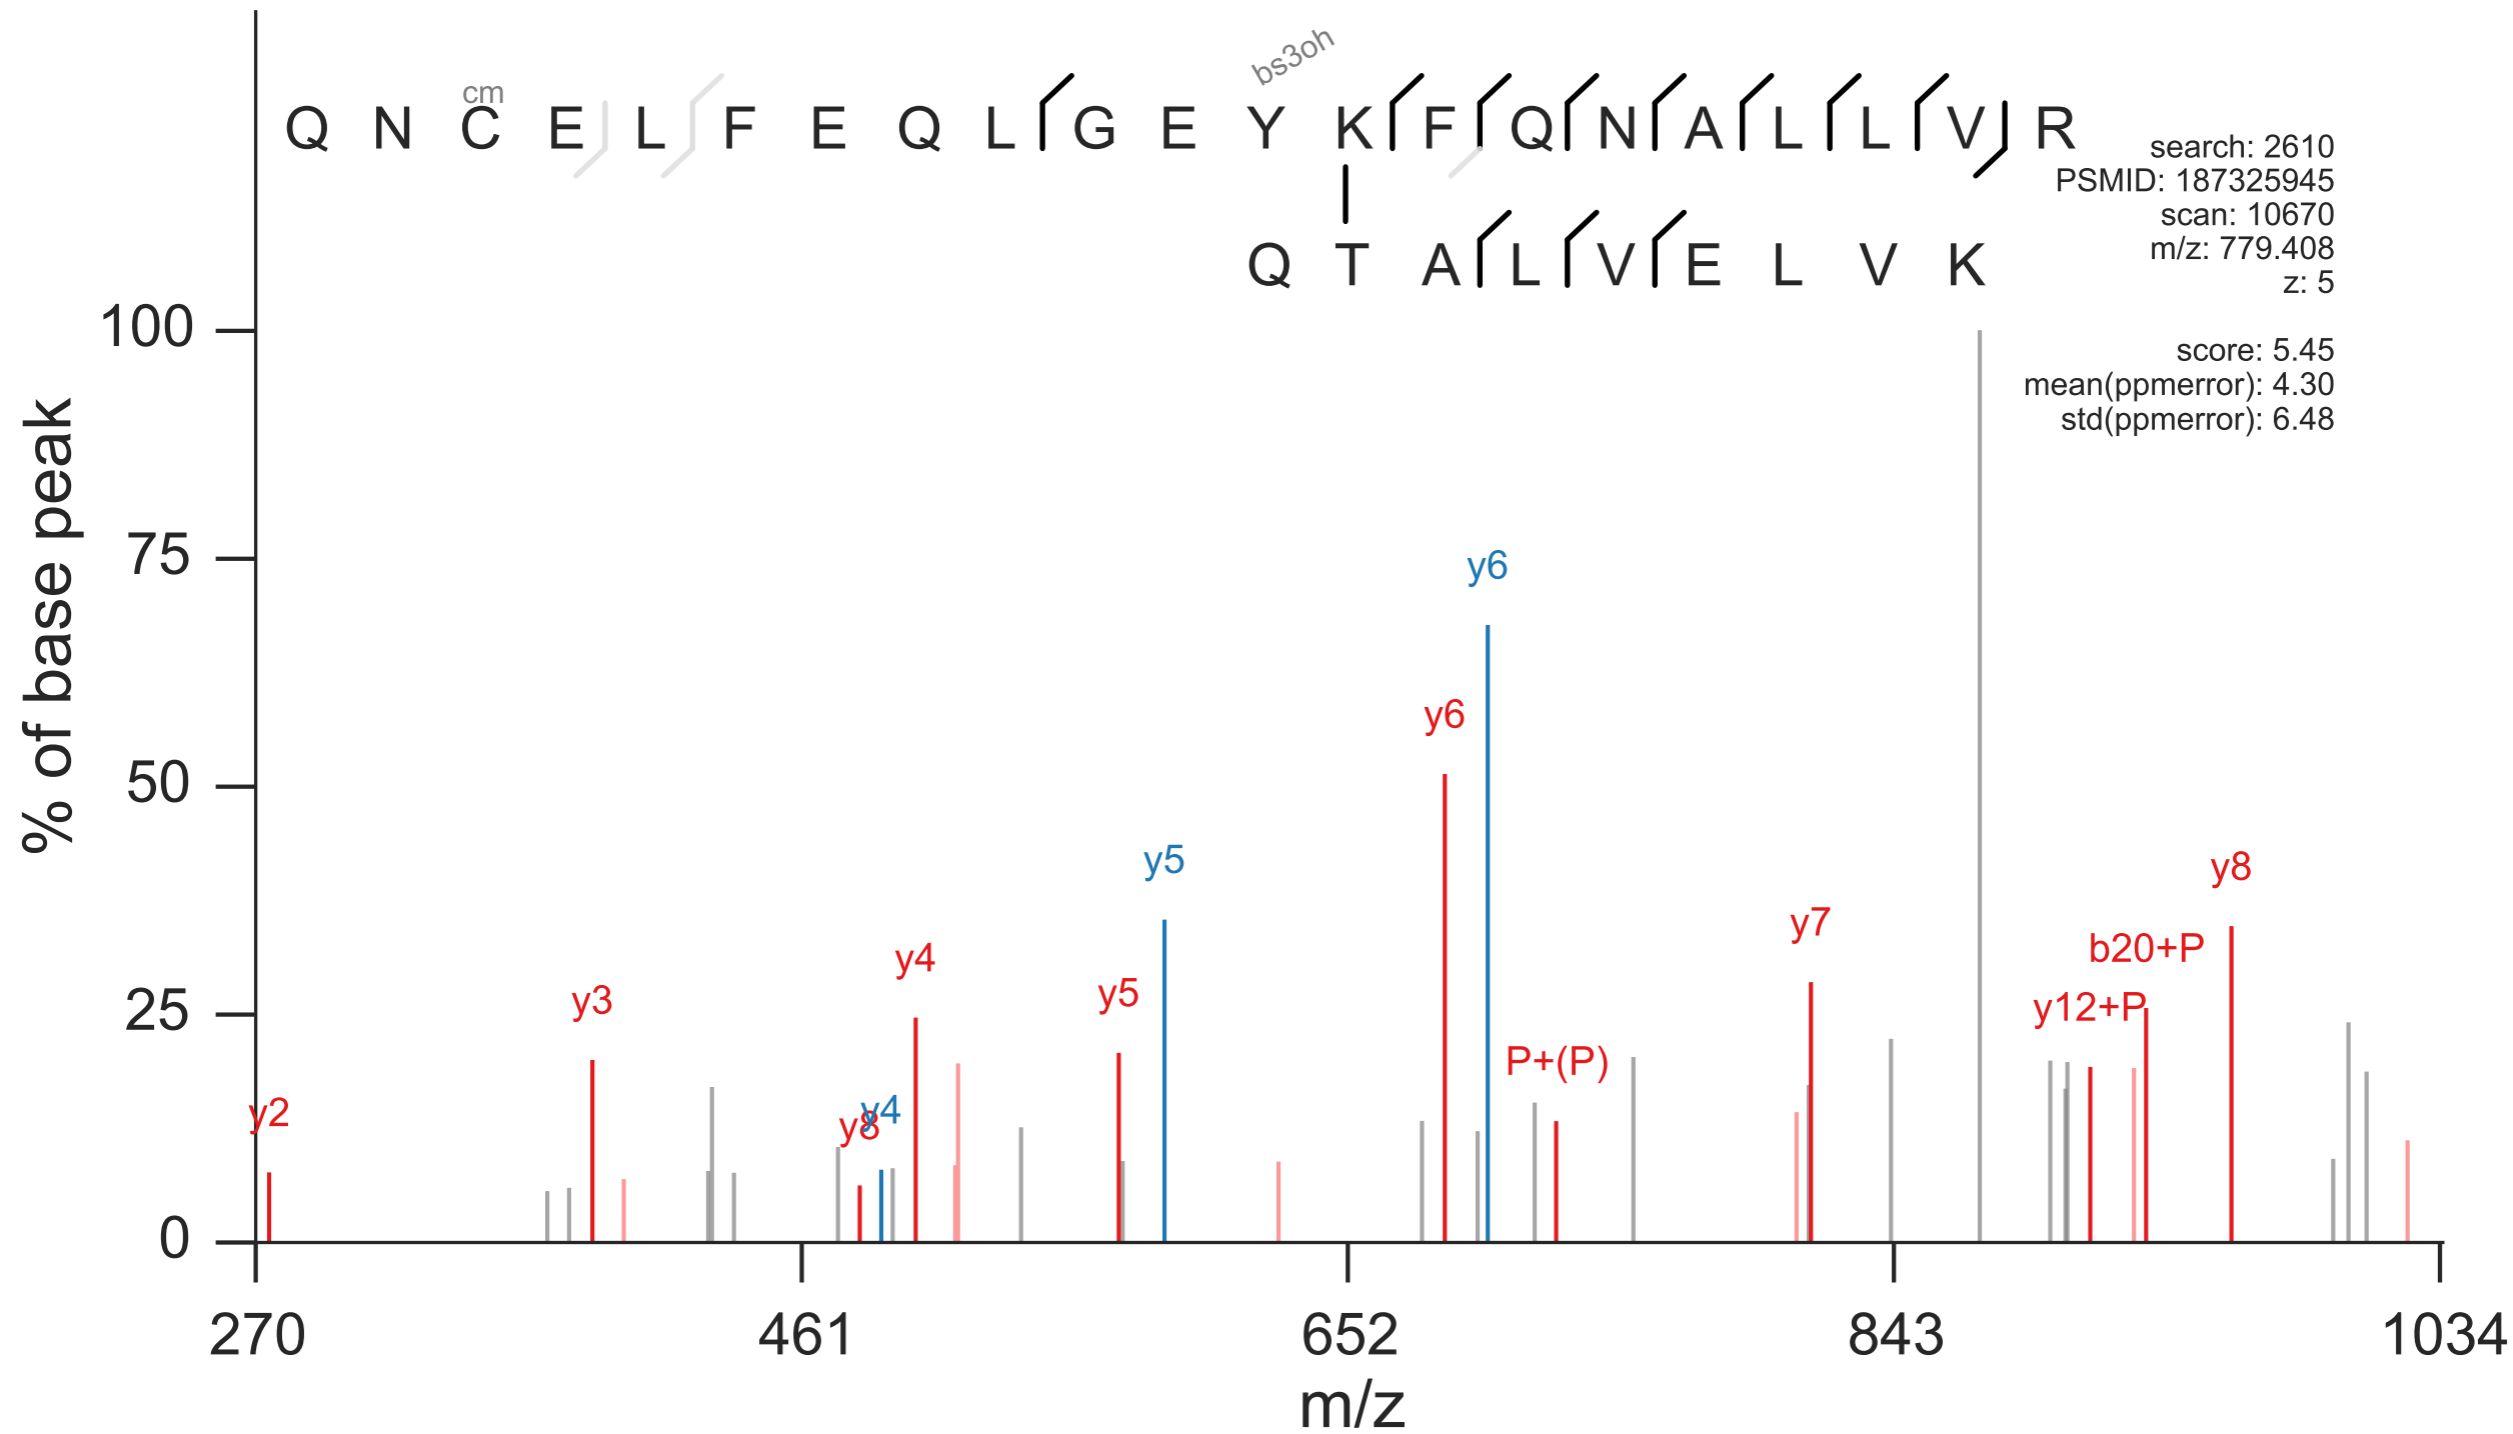



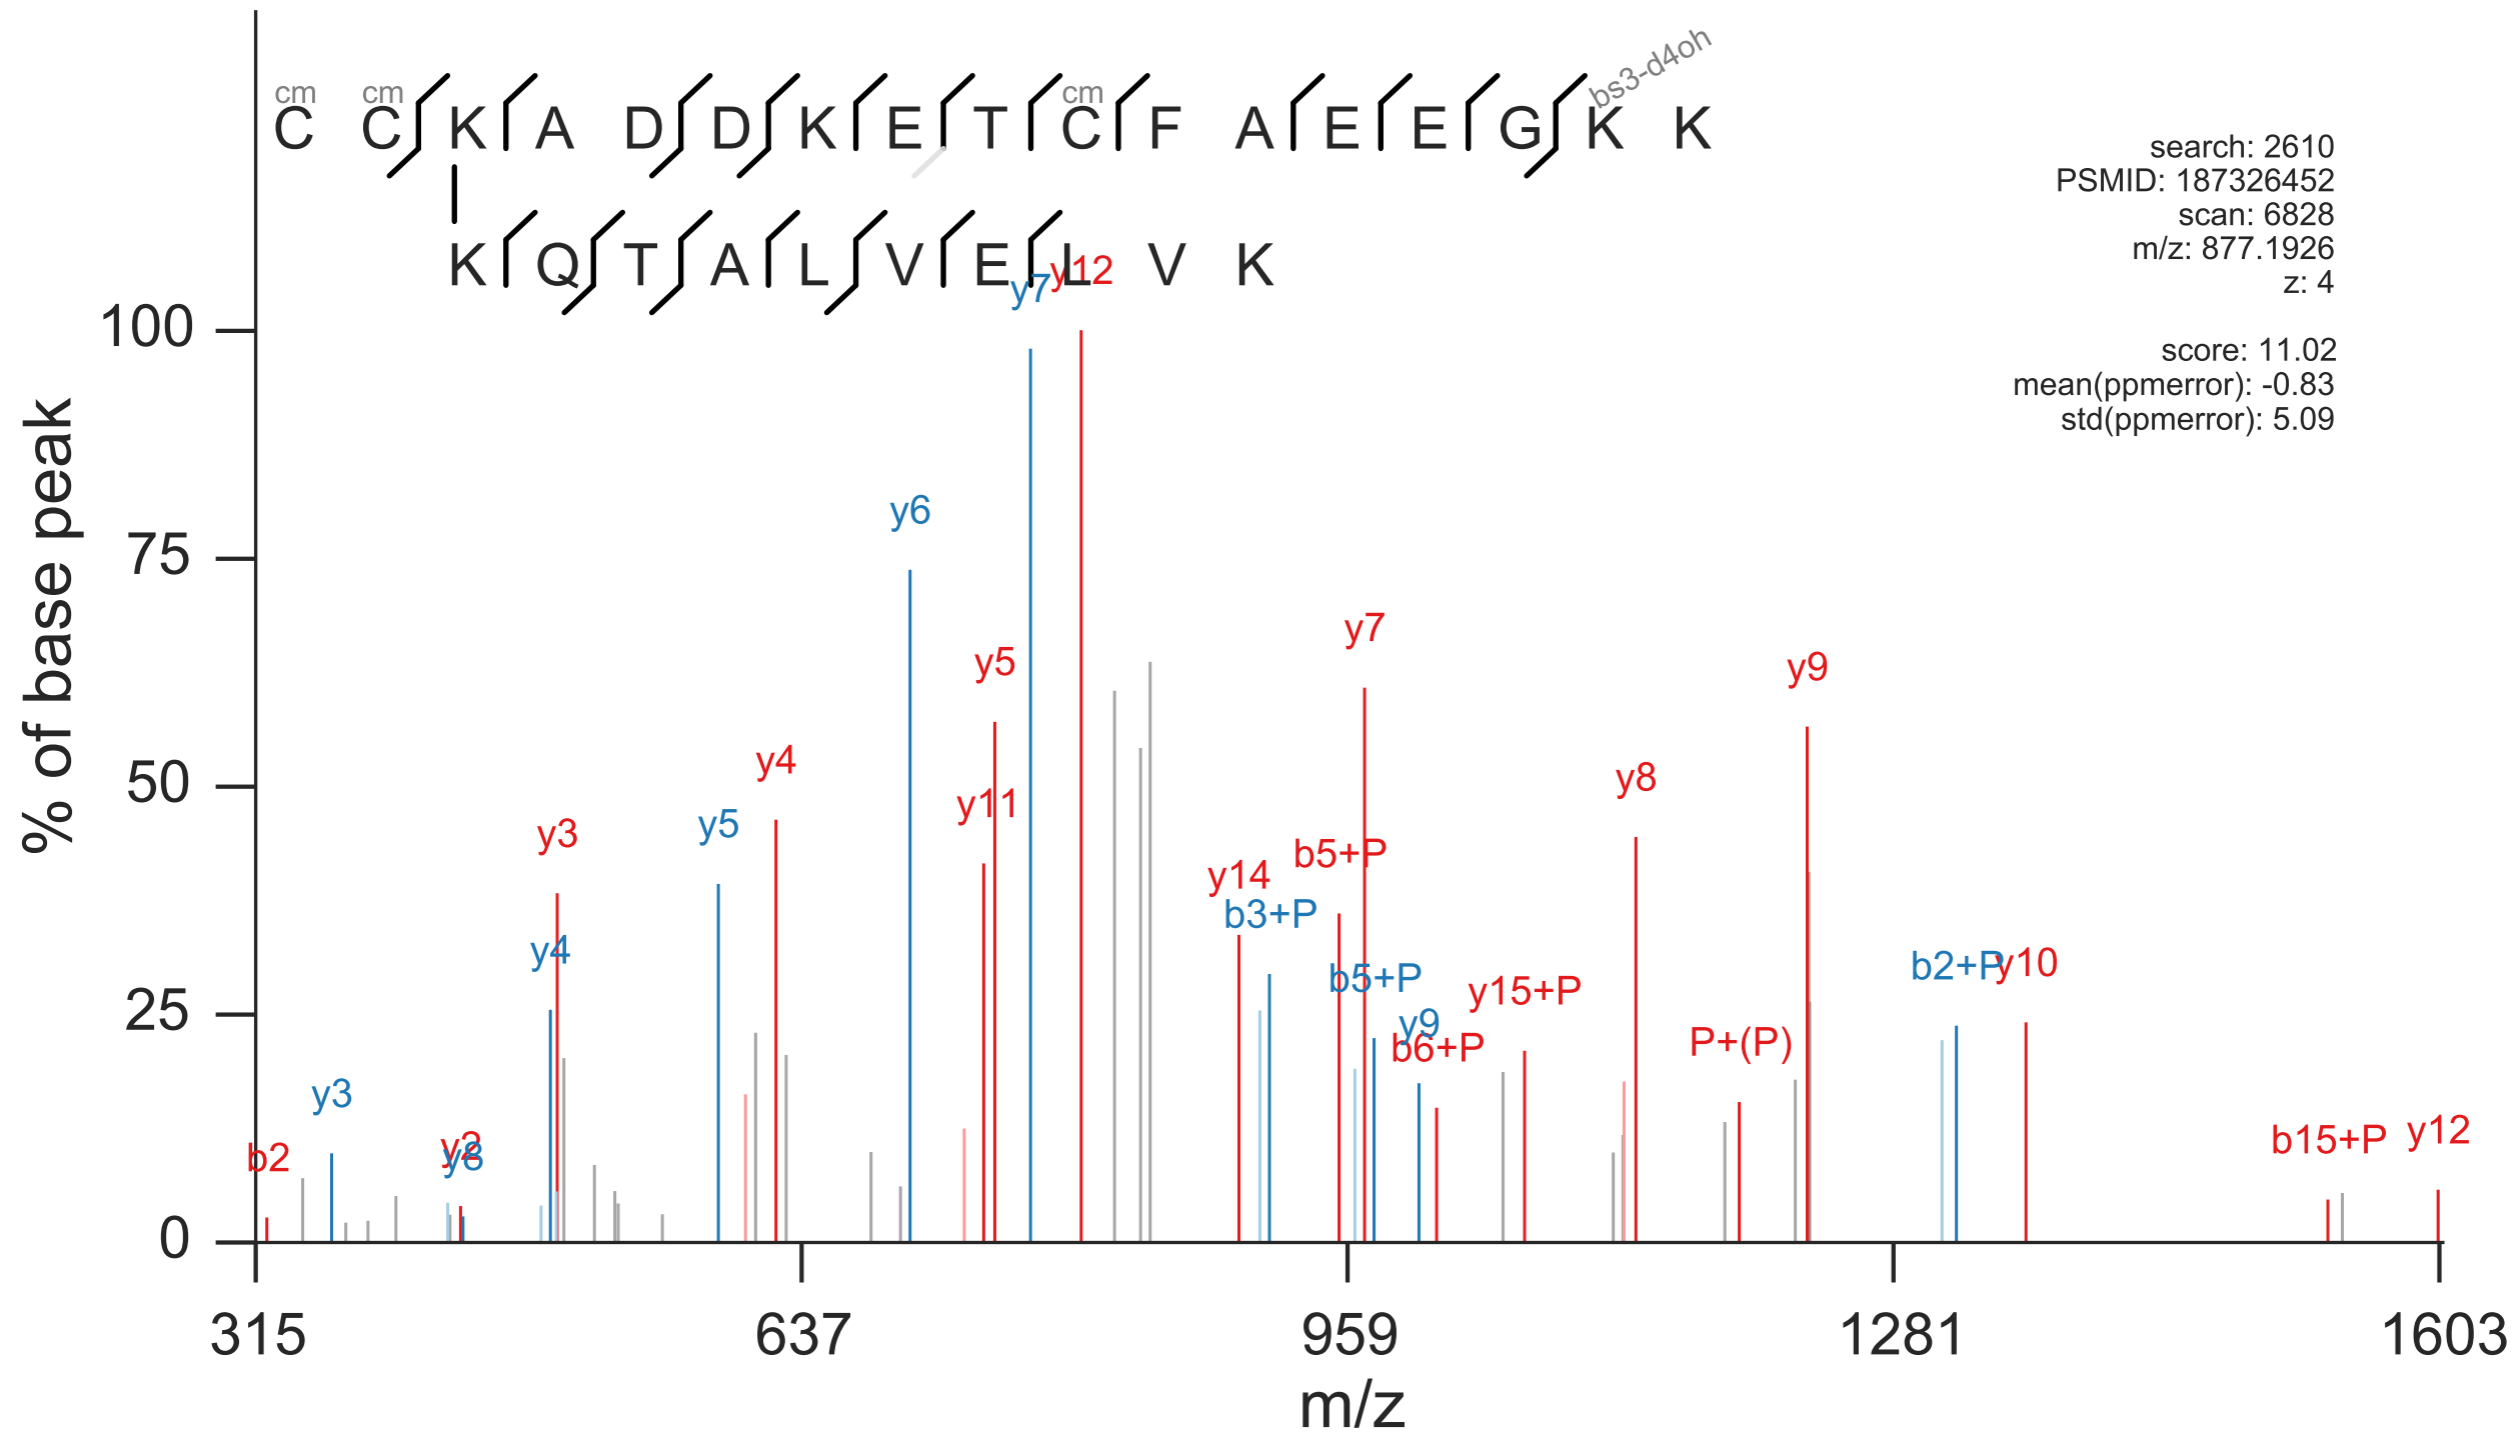

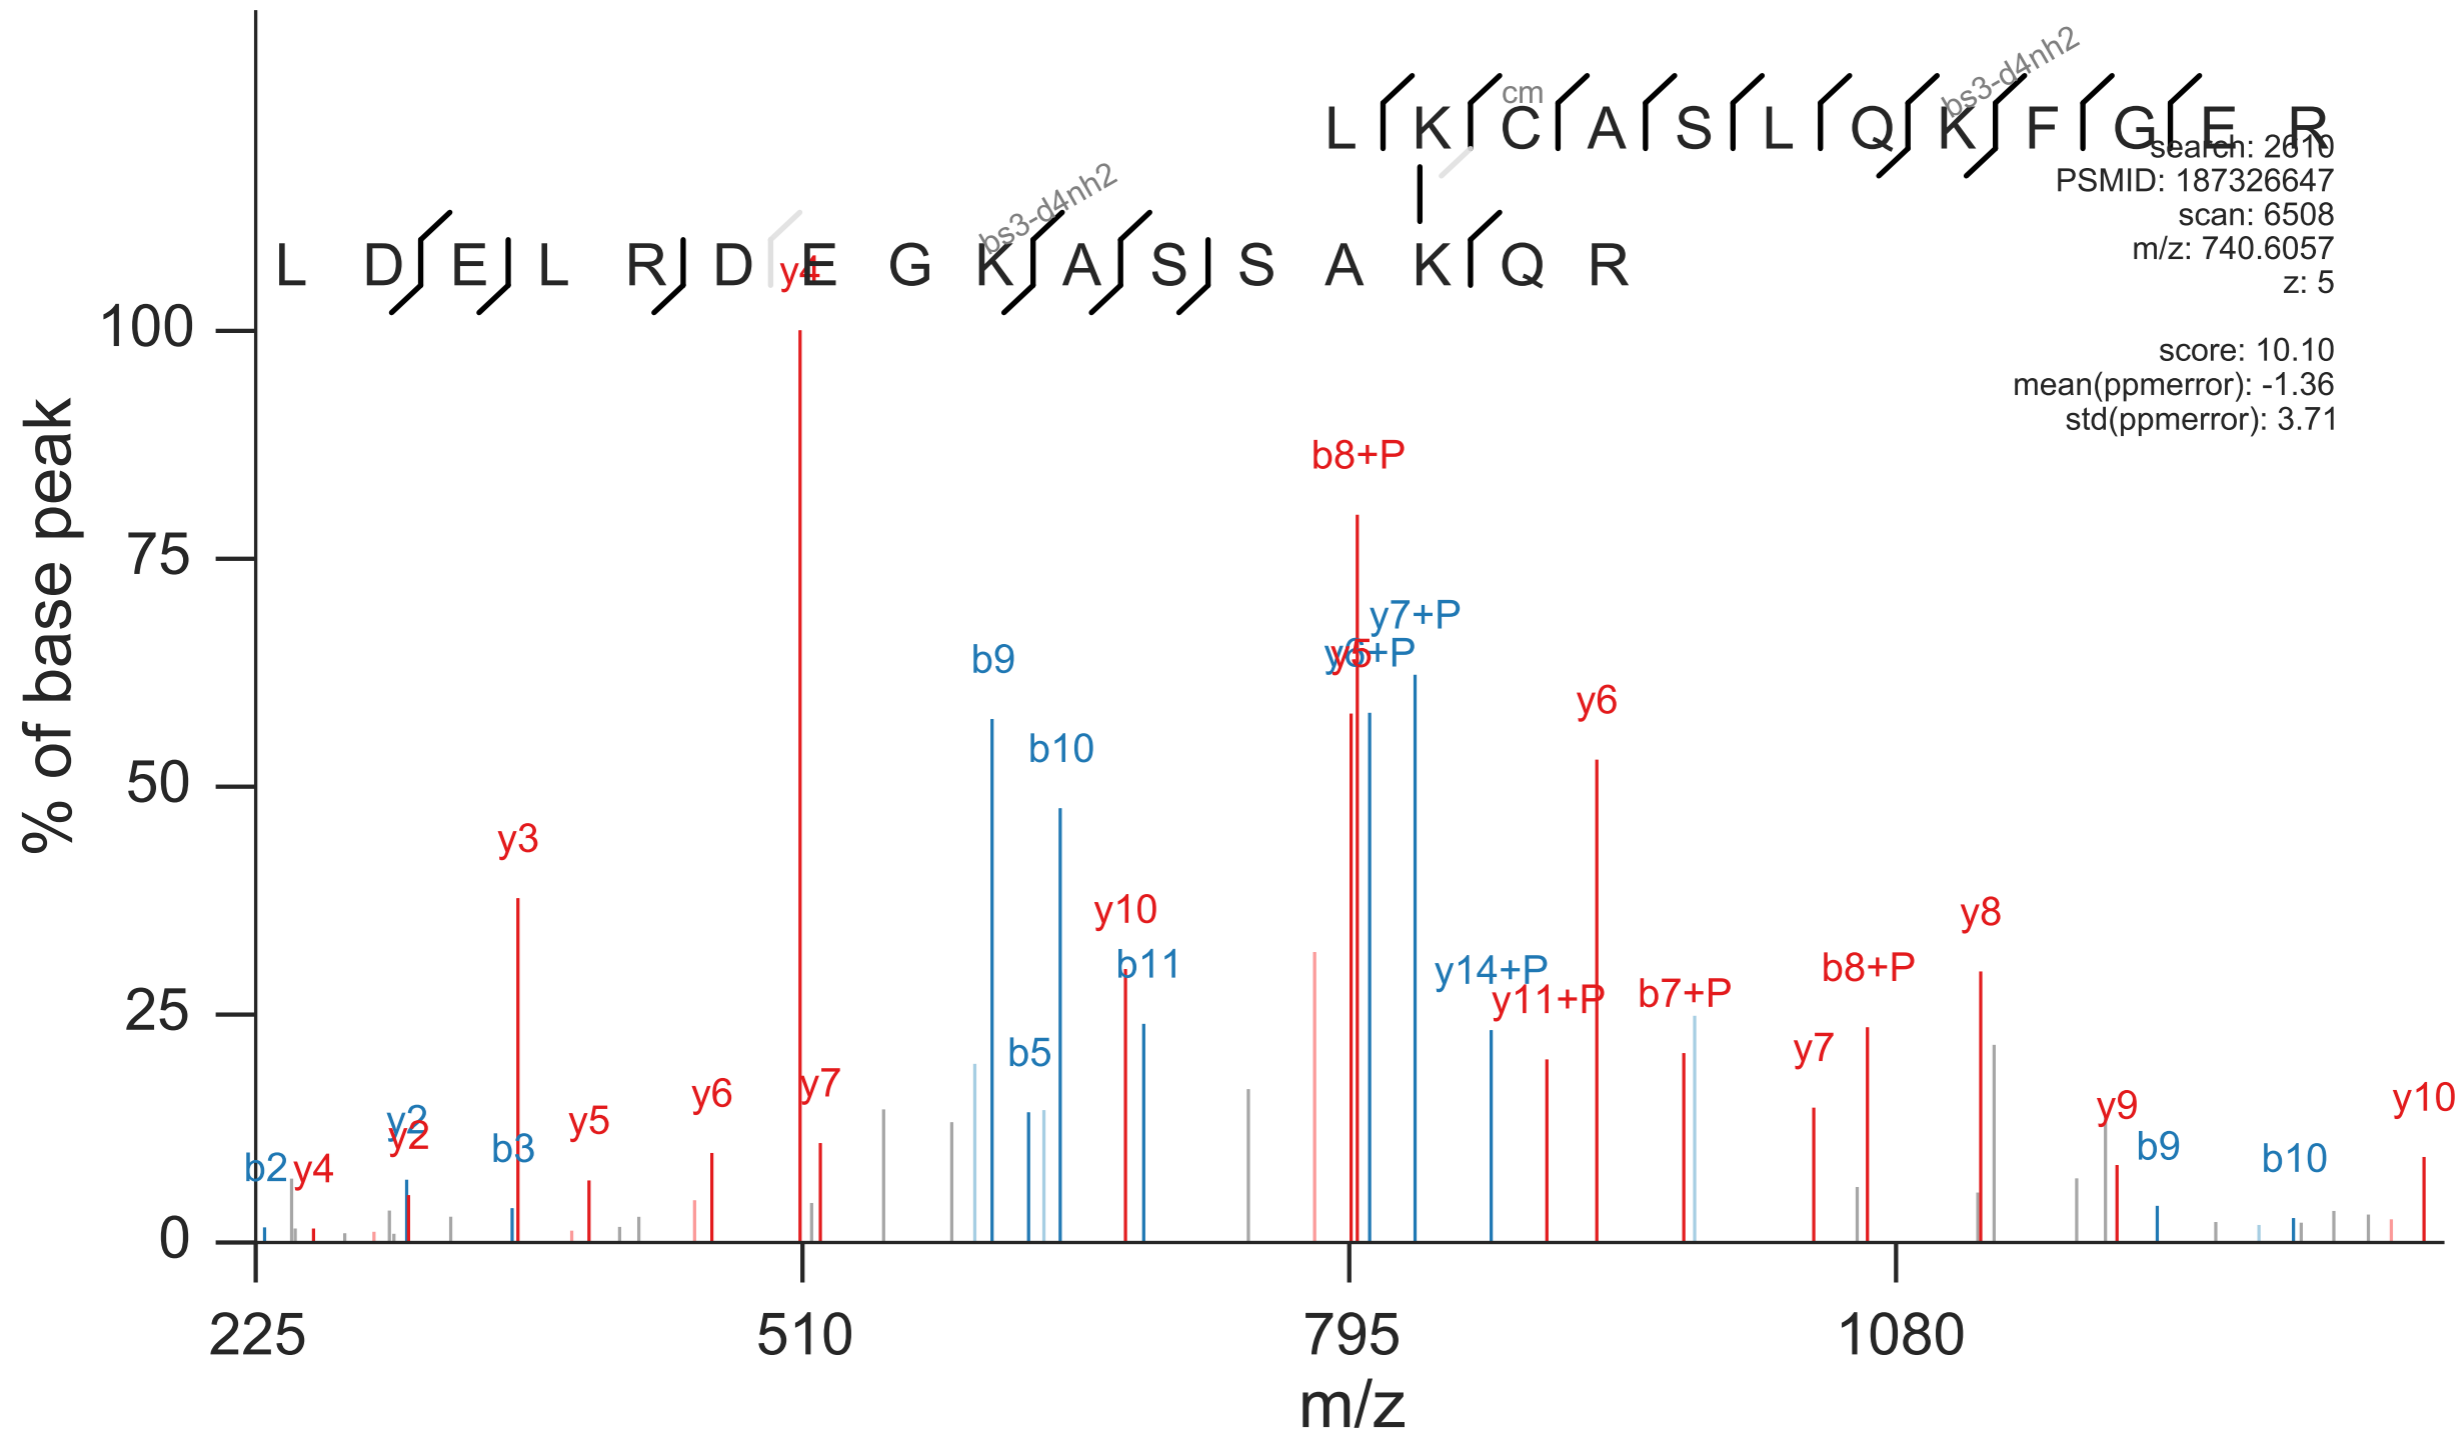

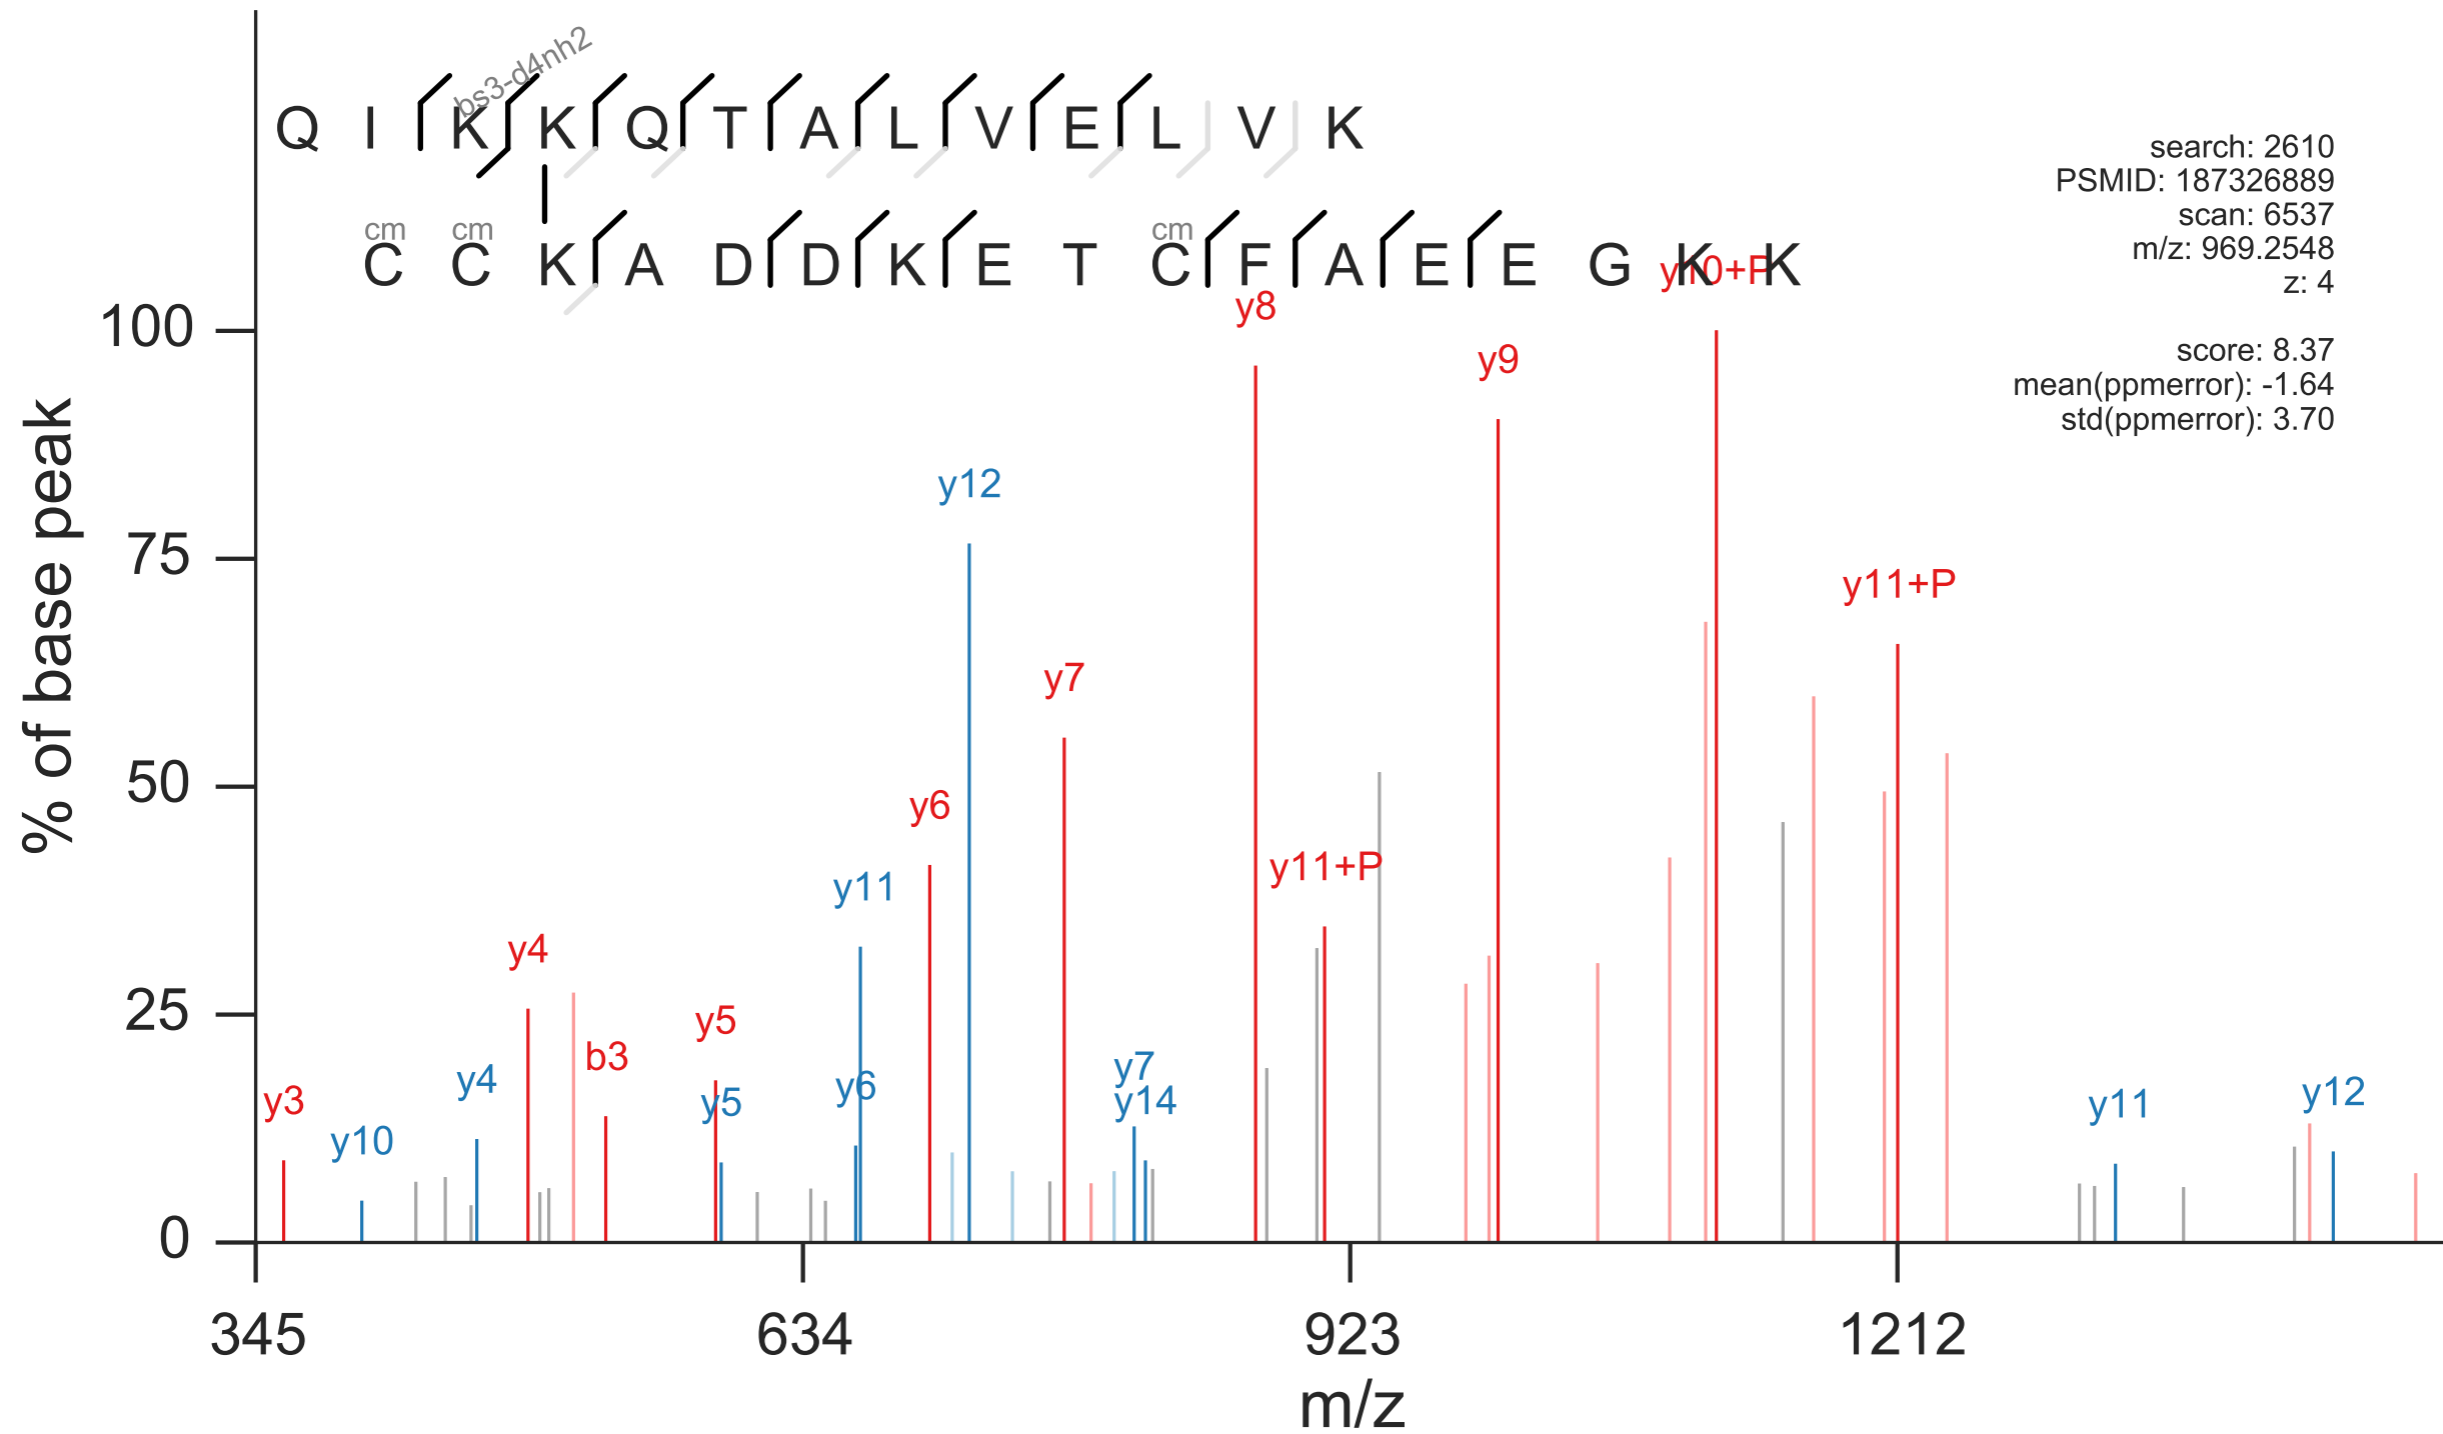

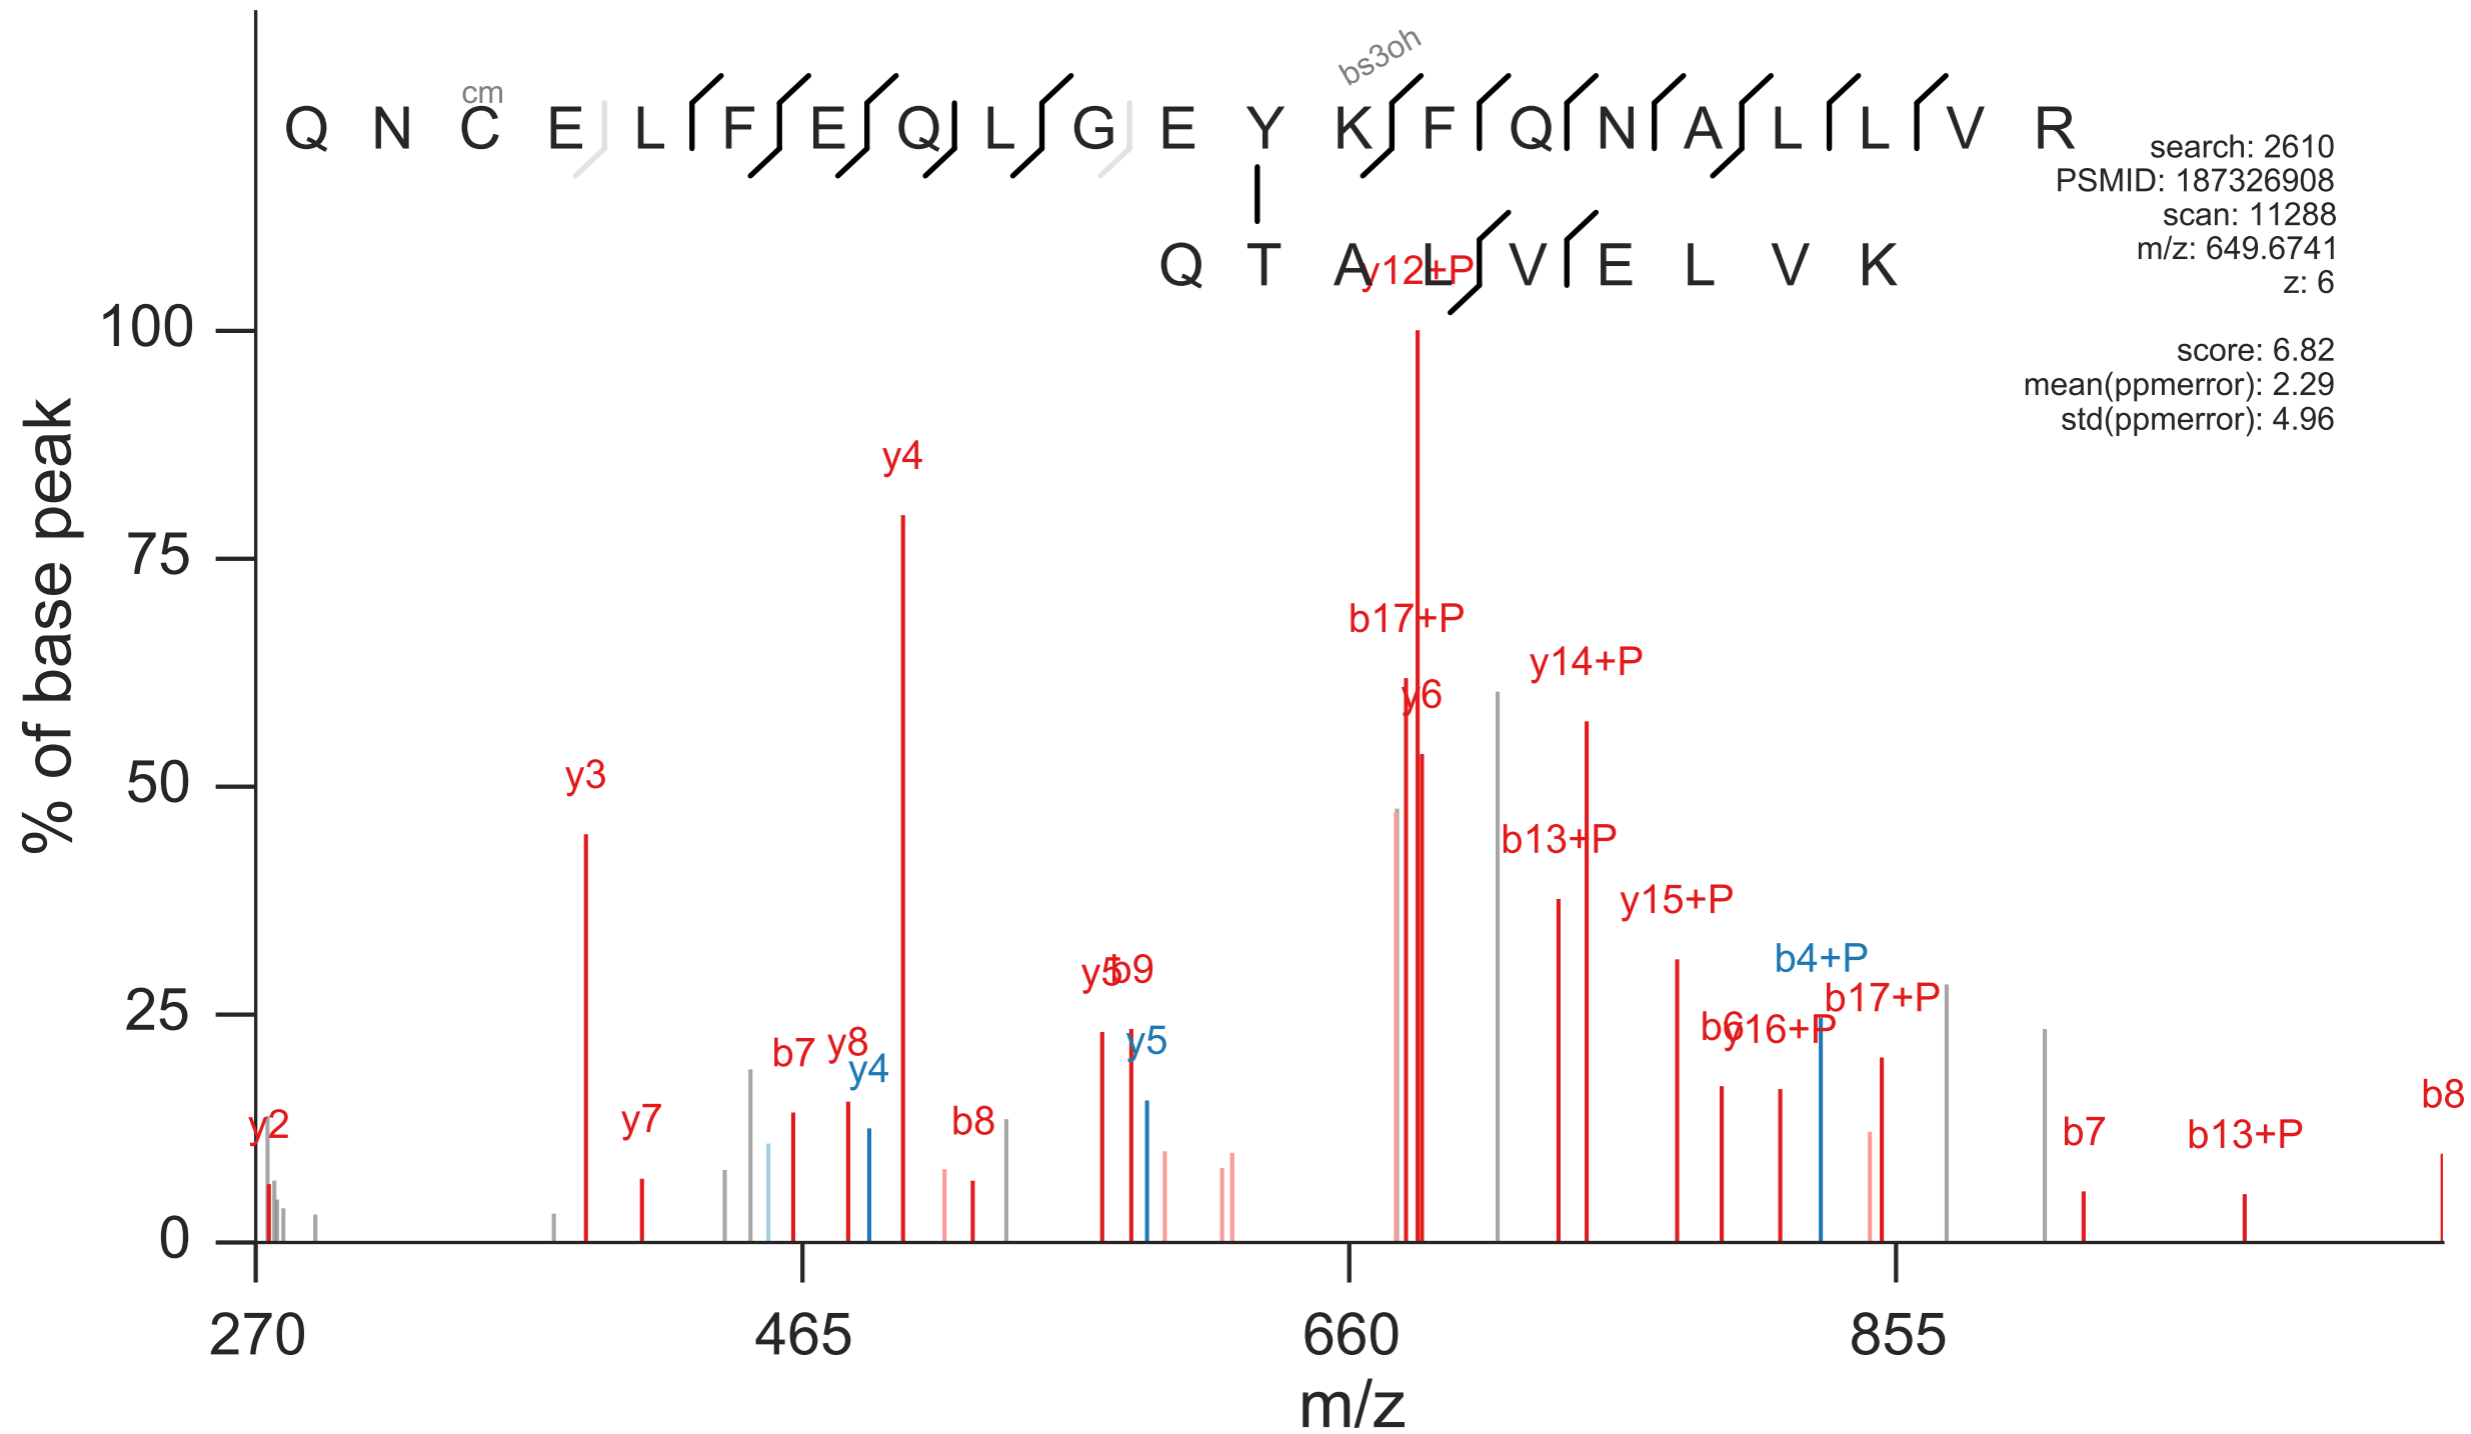



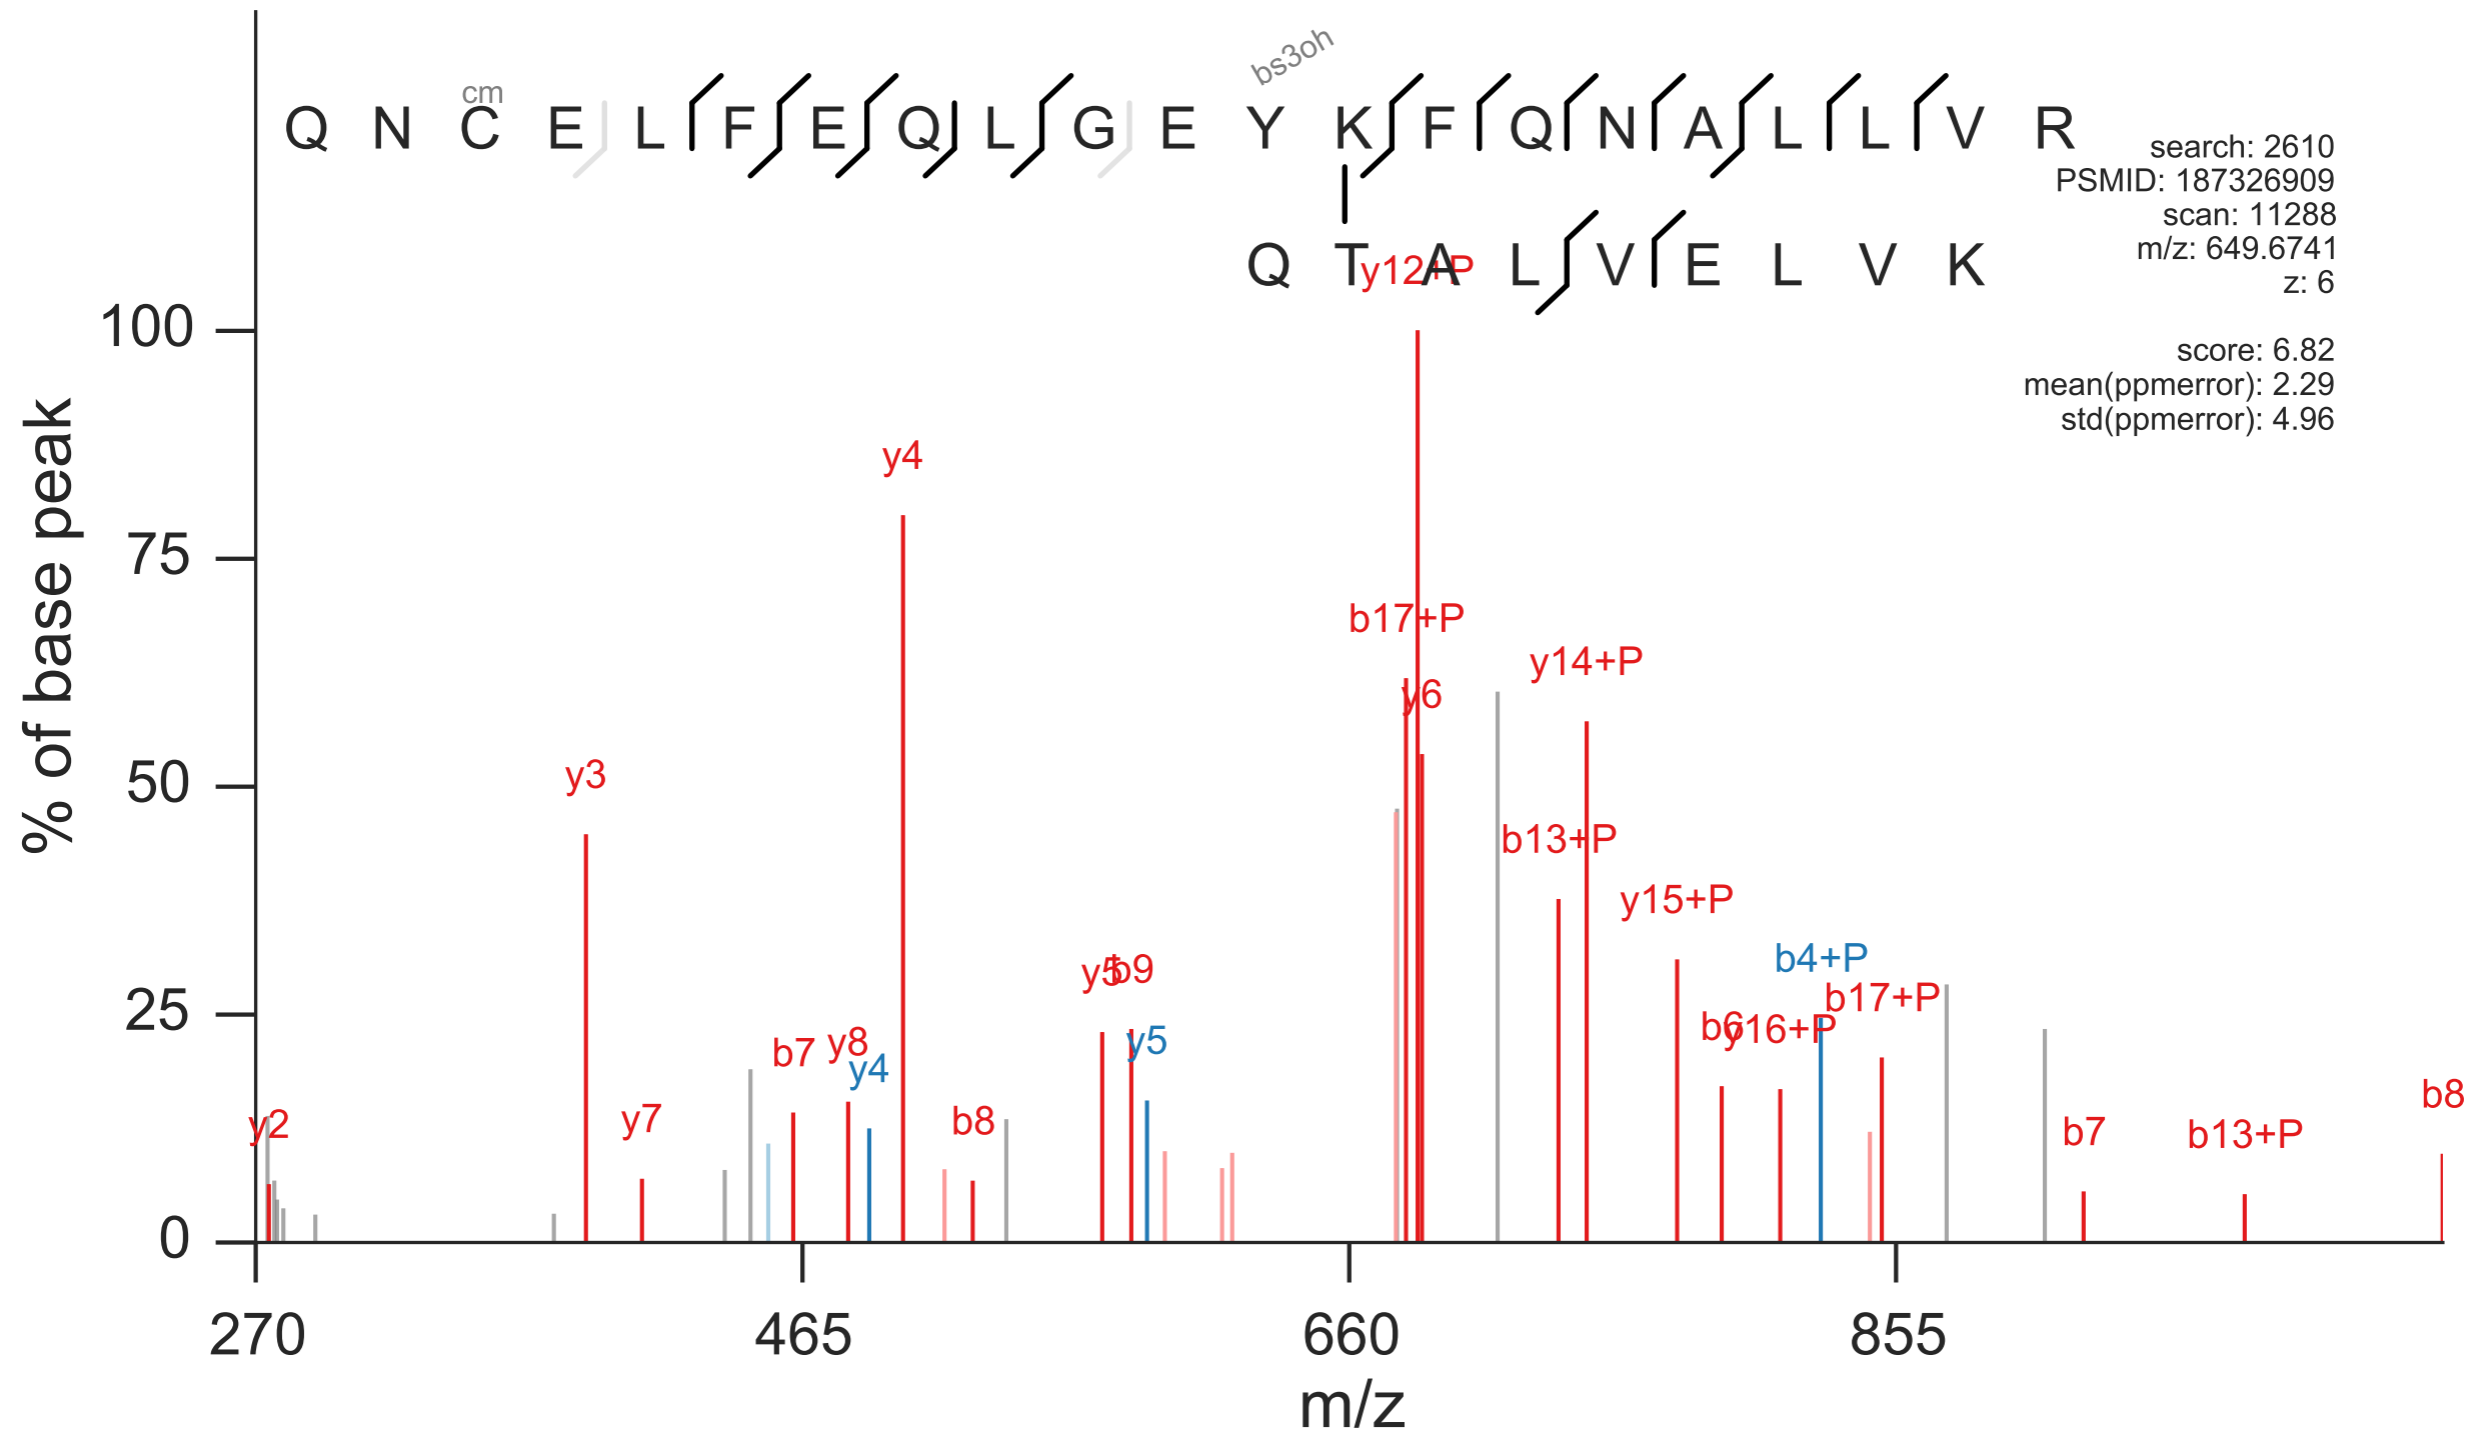

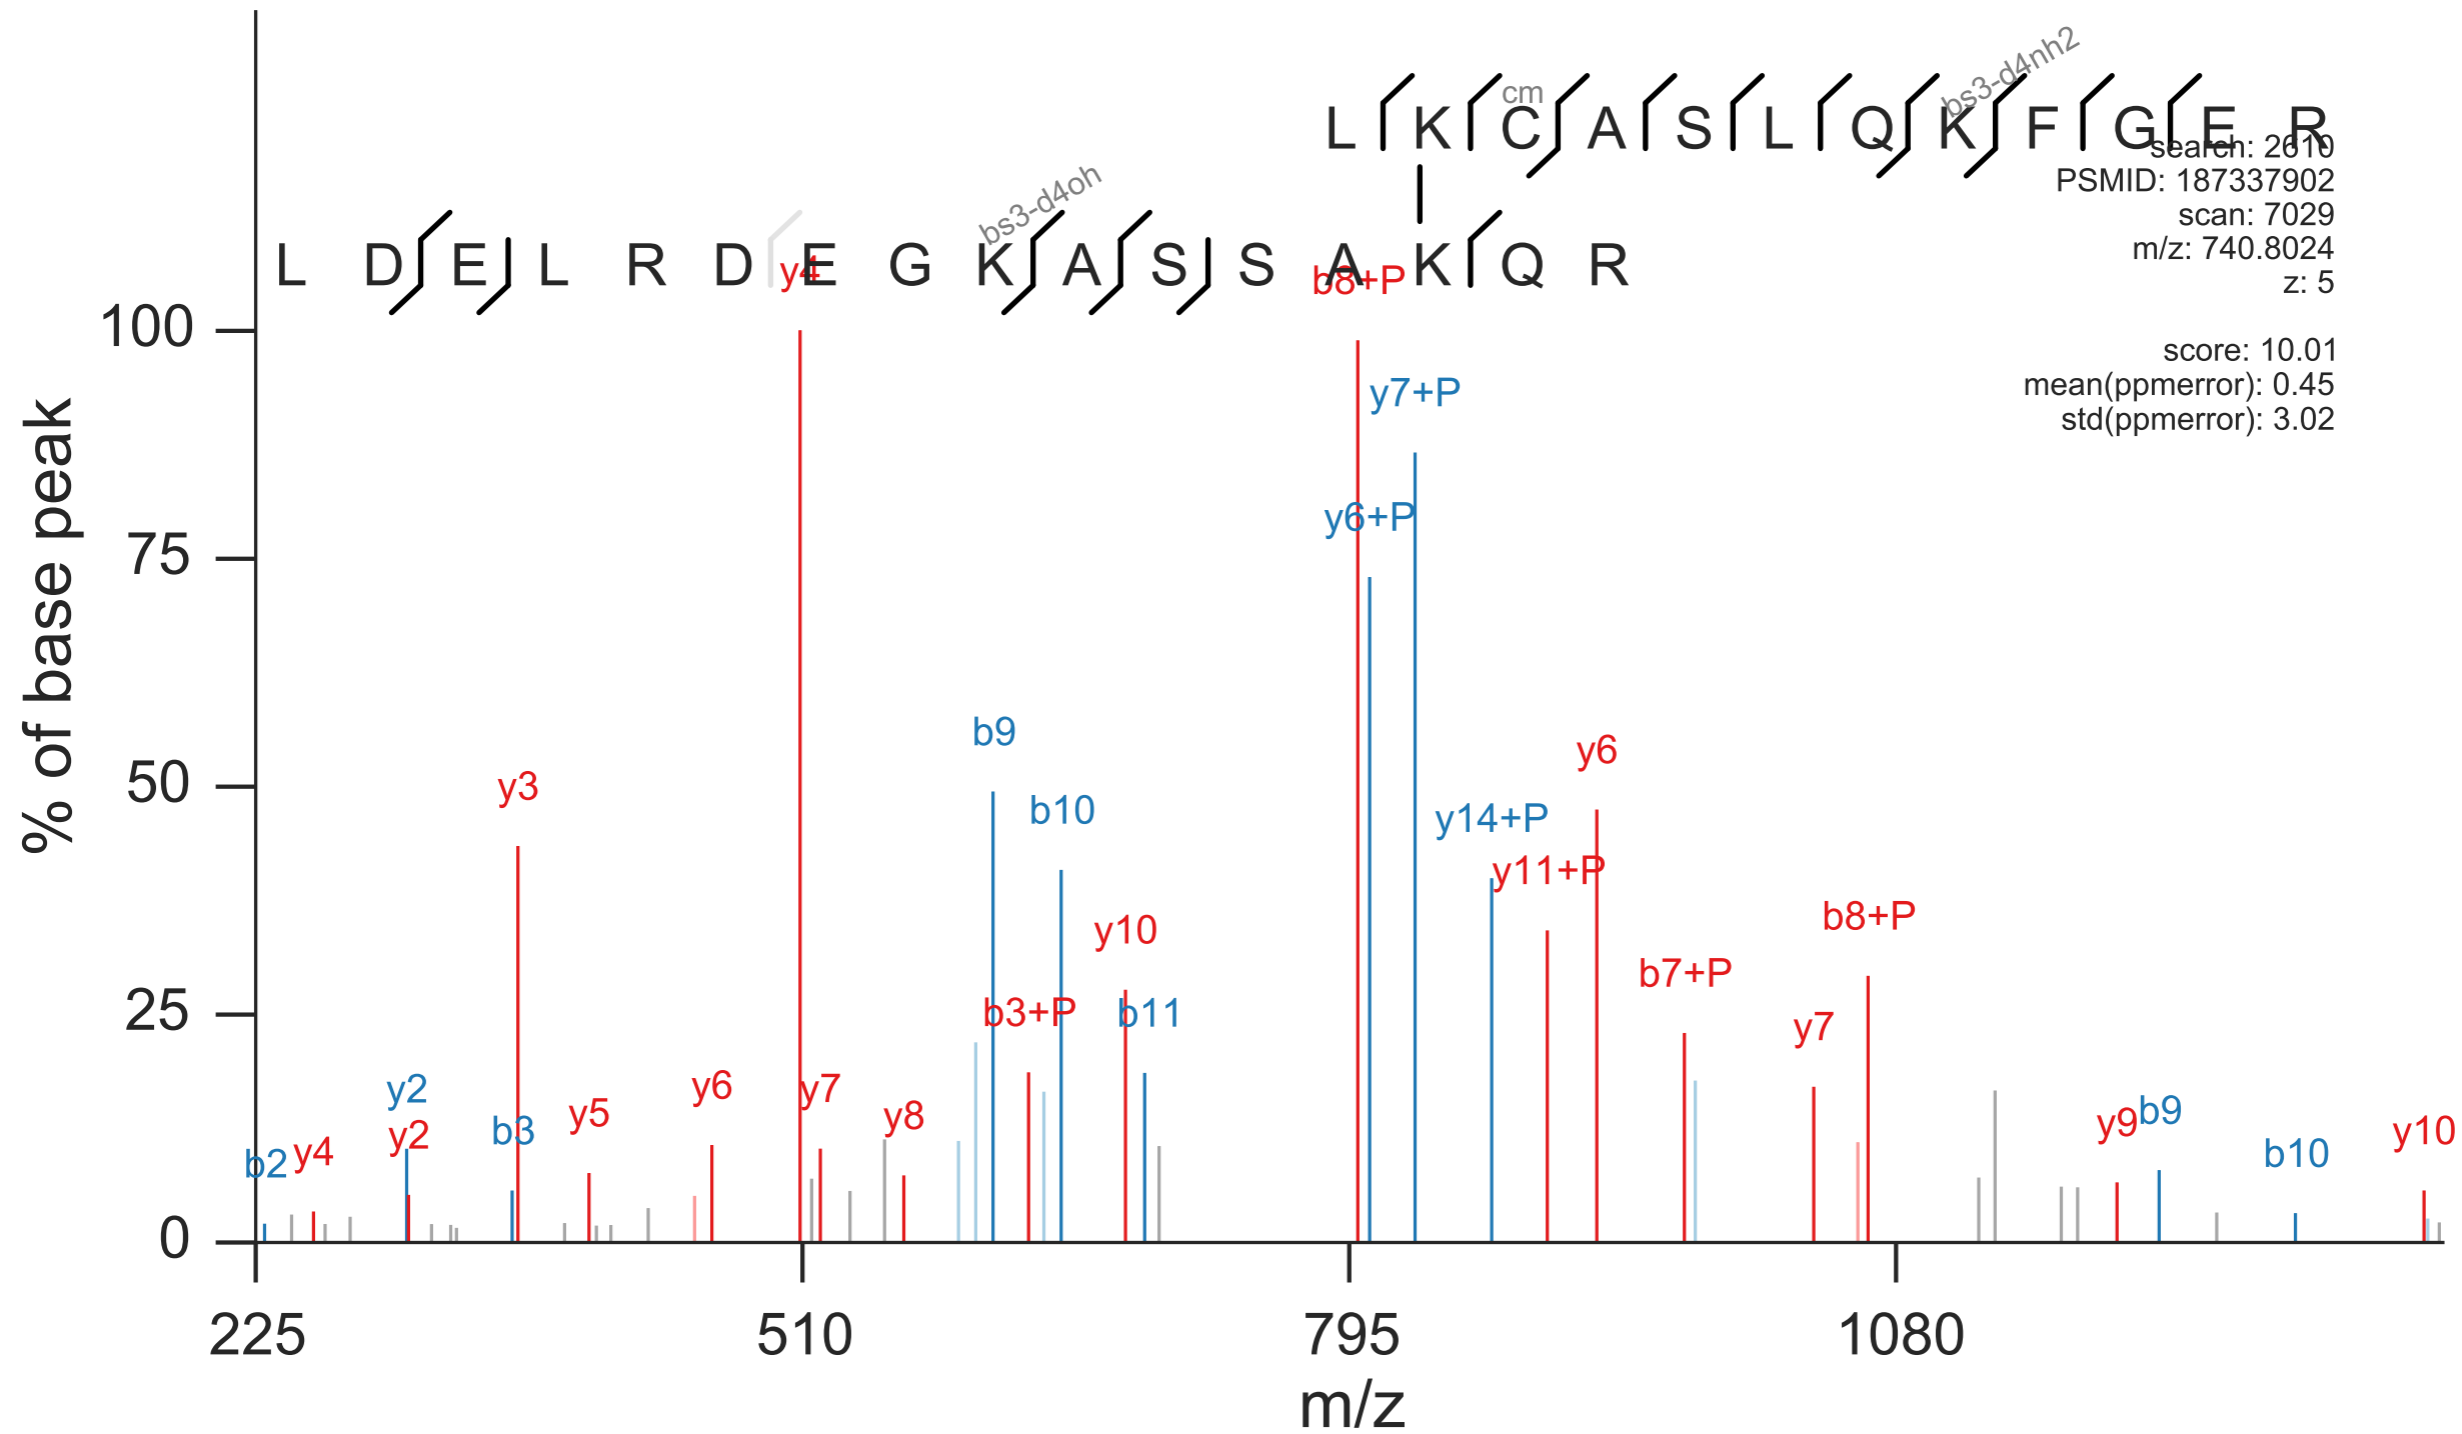

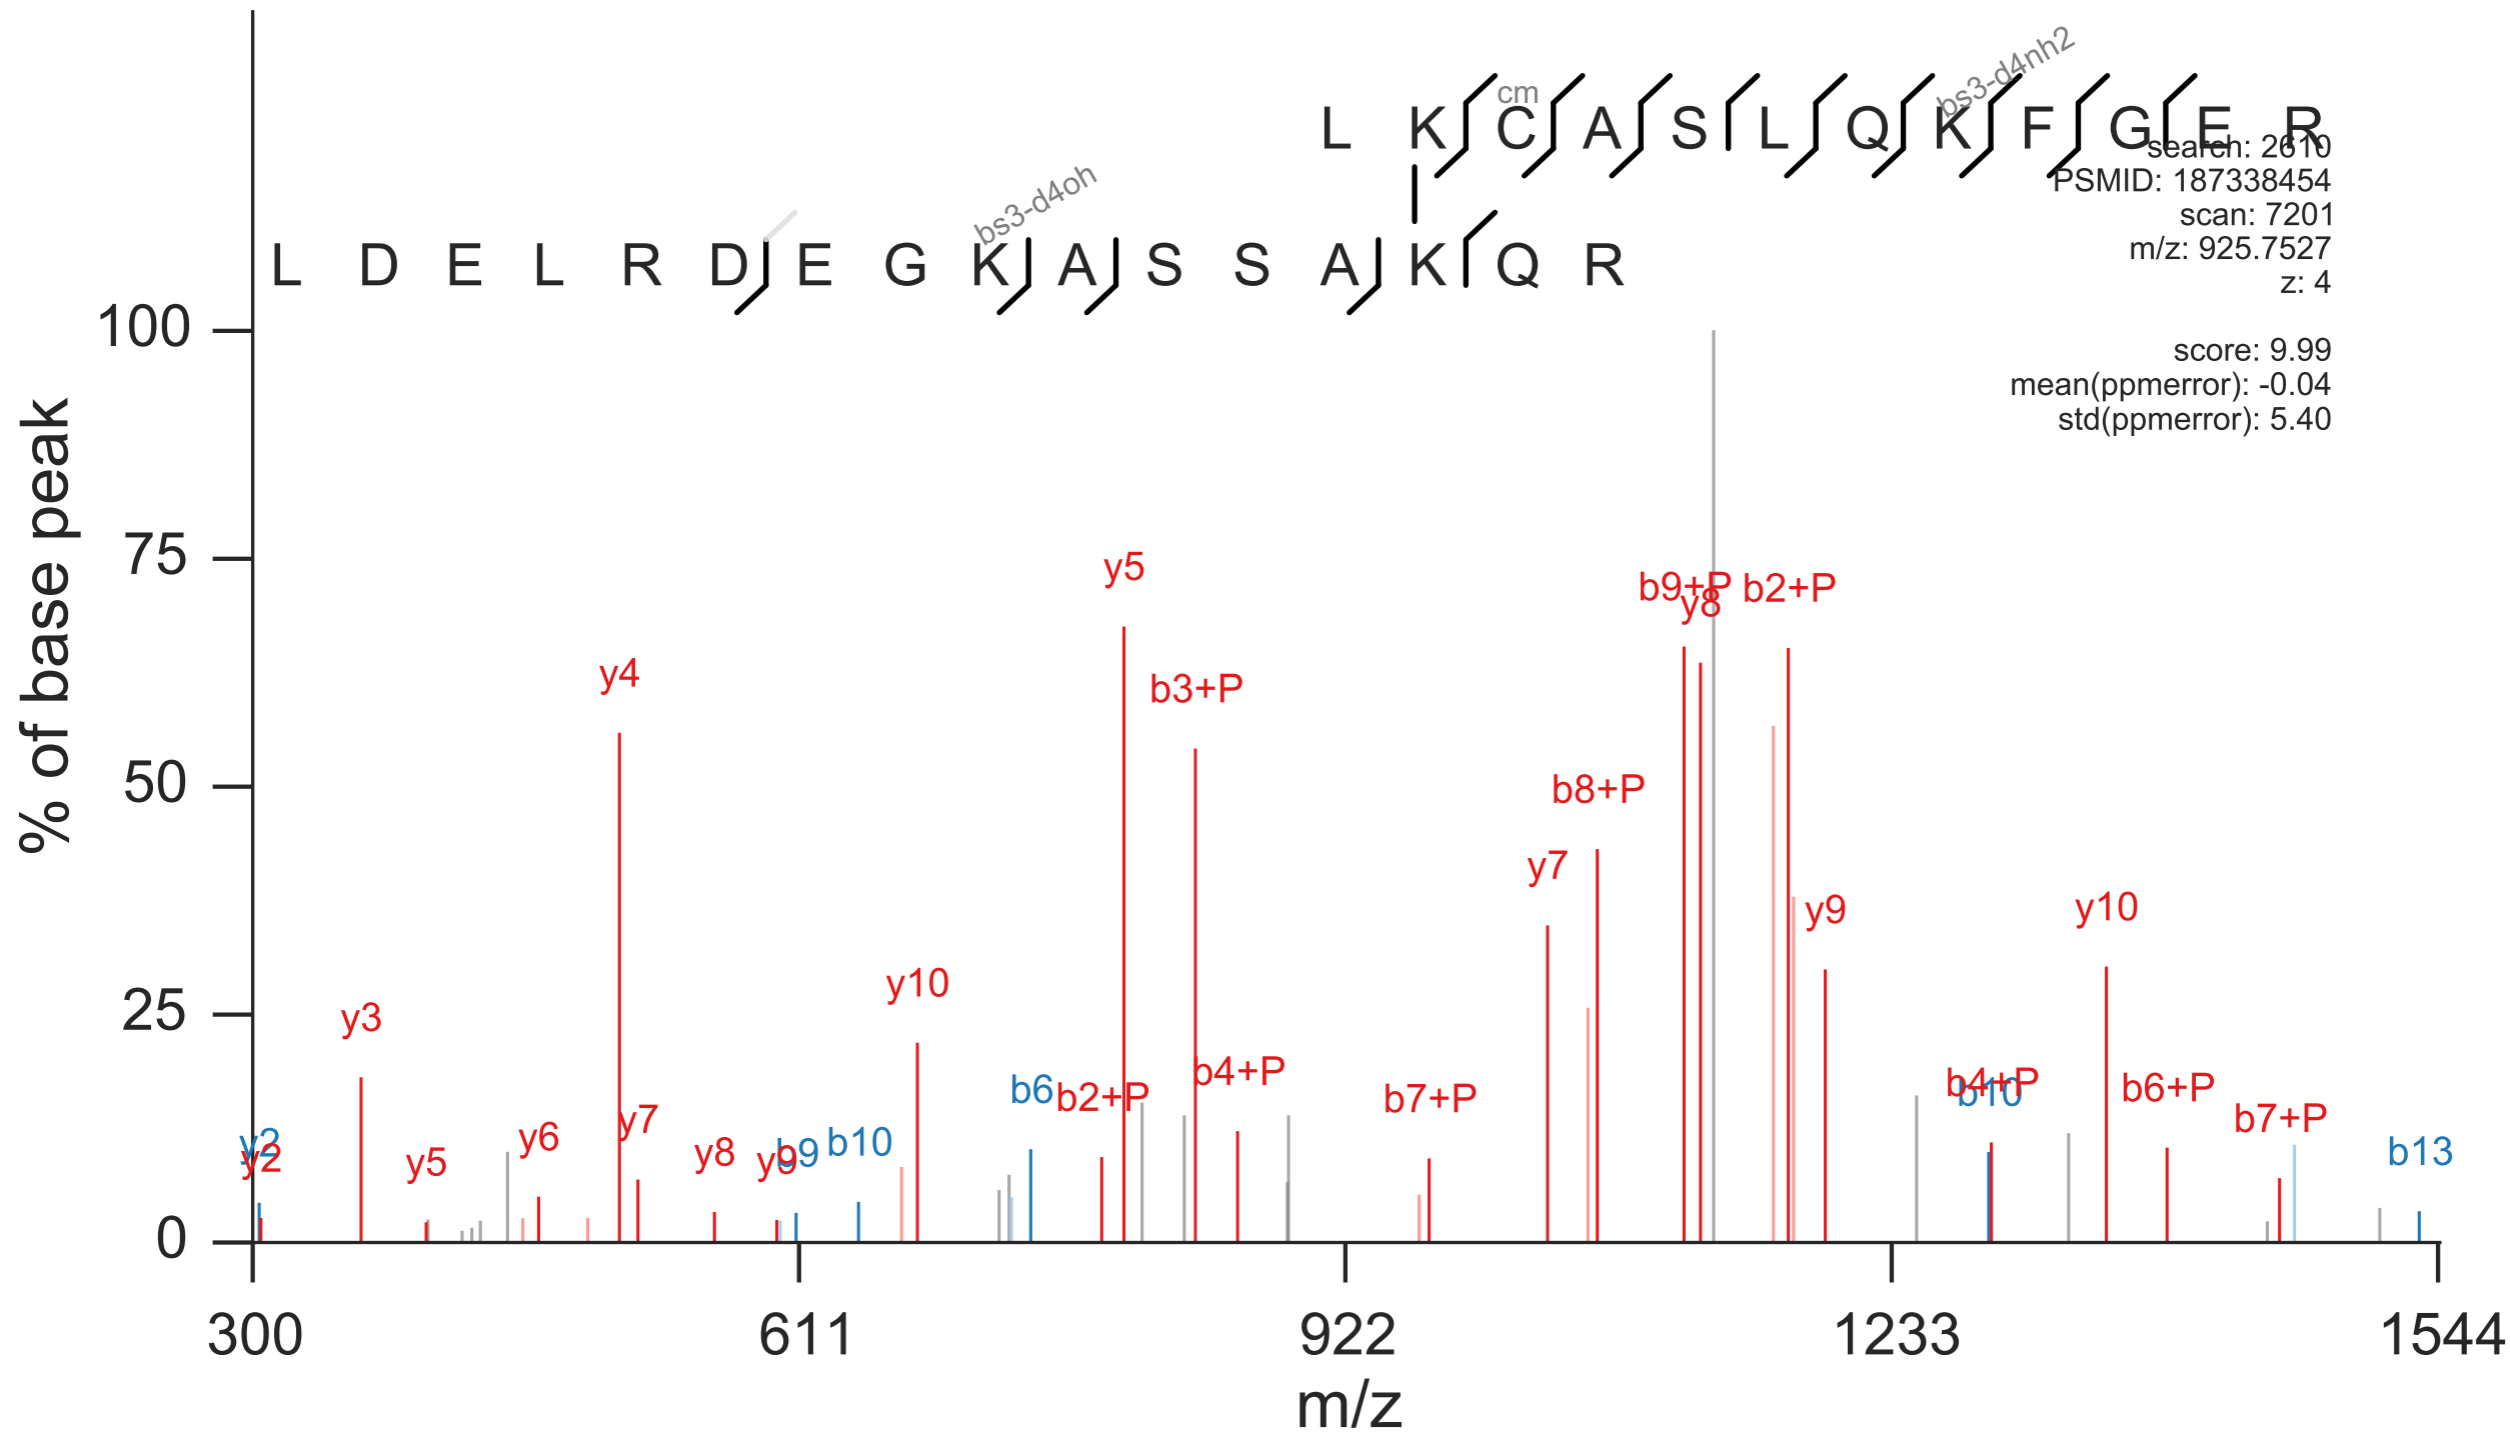

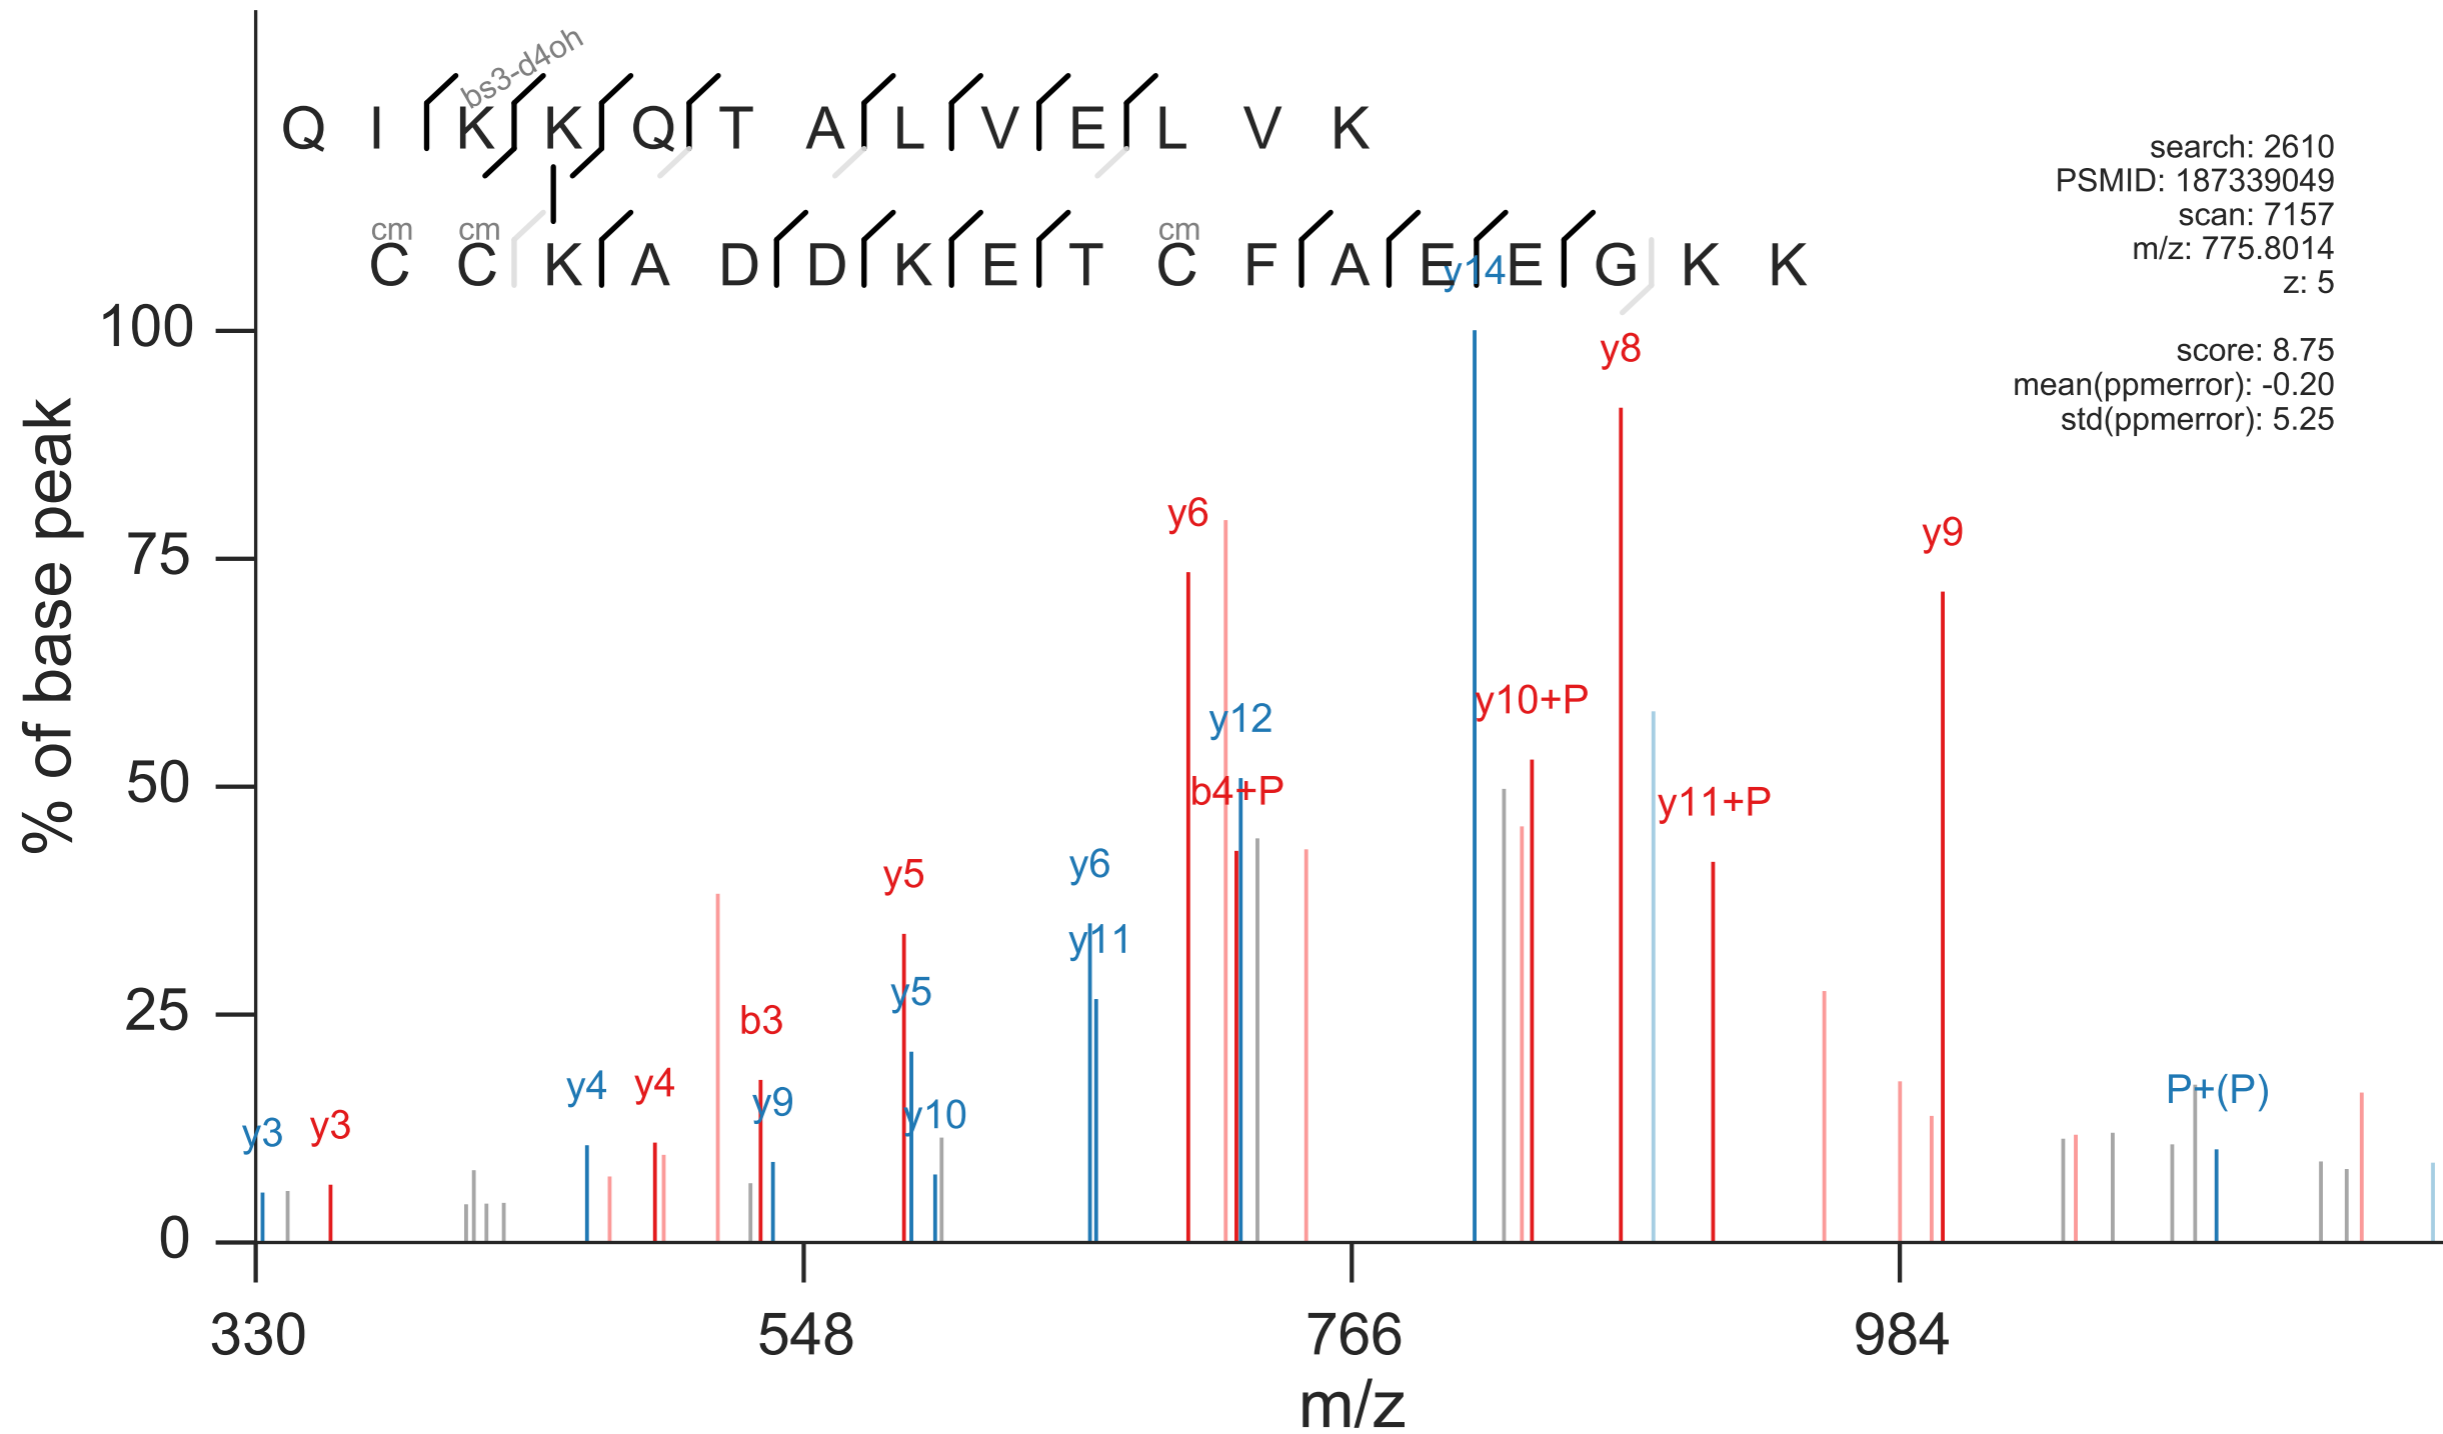

search: 2610  
 PSMID: 187339049  
 scan: 7157  
 m/z: 775.8014  
 z: 5

score: 8.75  
 mean(ppmerror): -0.20  
 std(ppmerror): 5.25

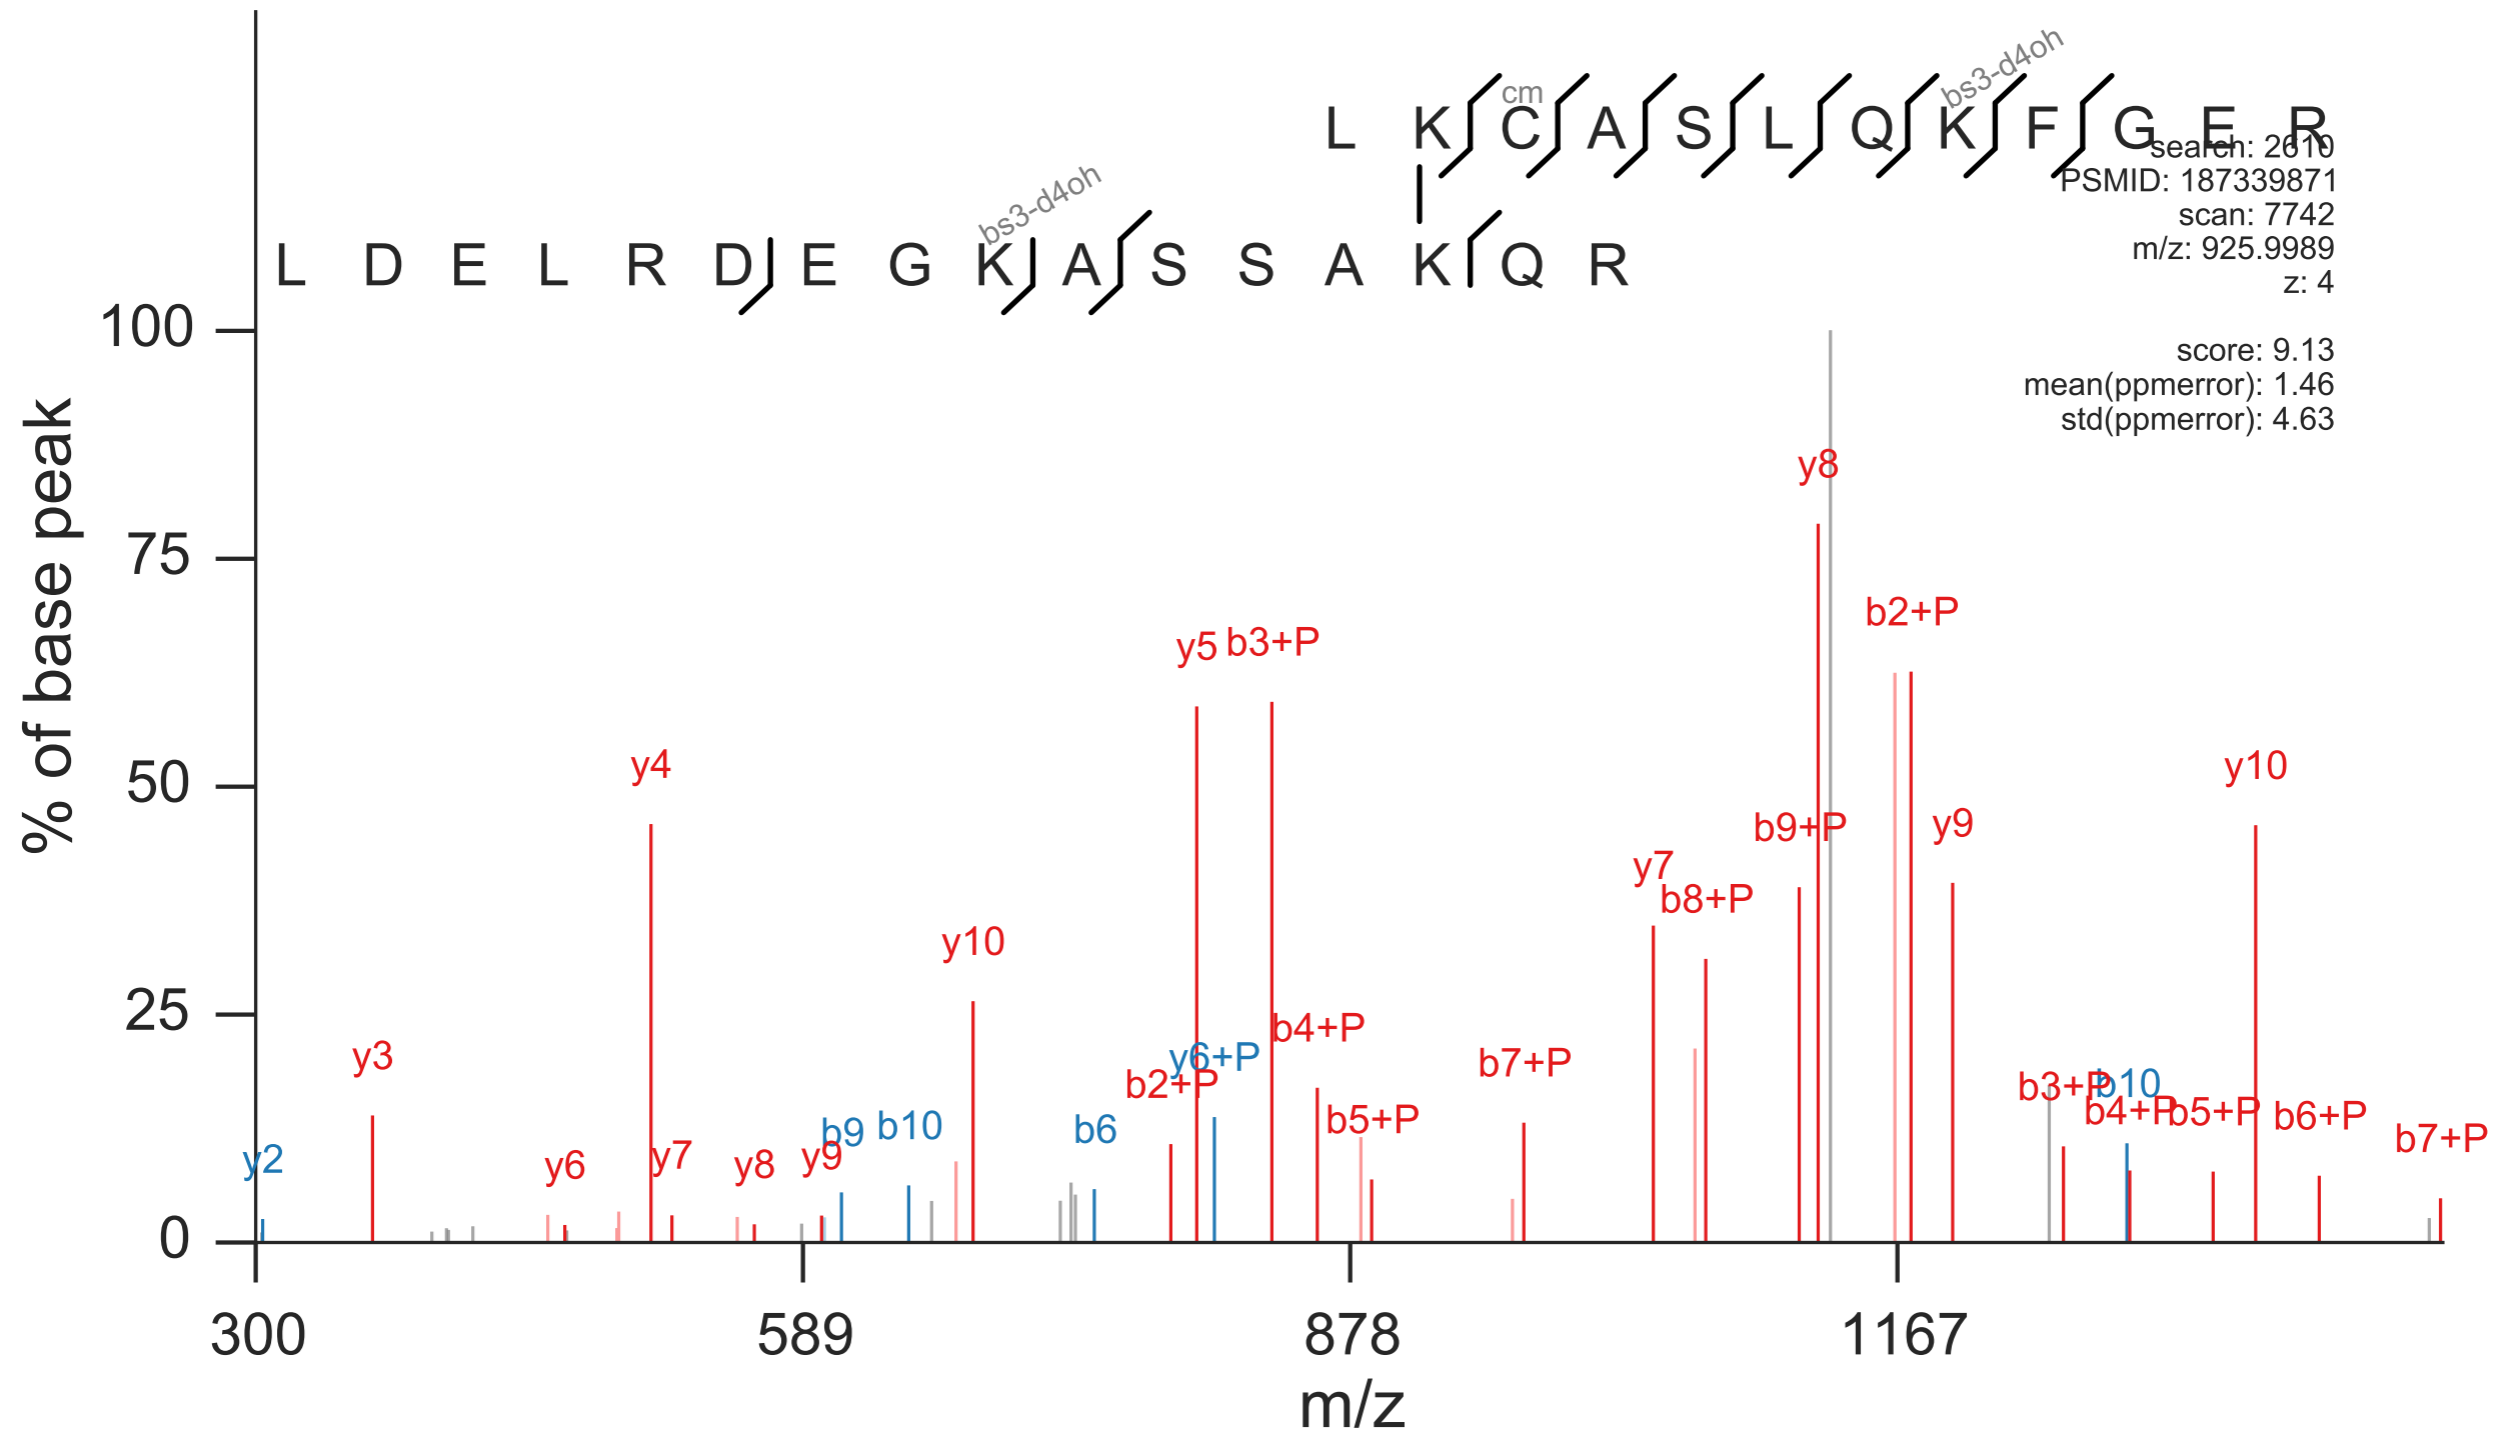

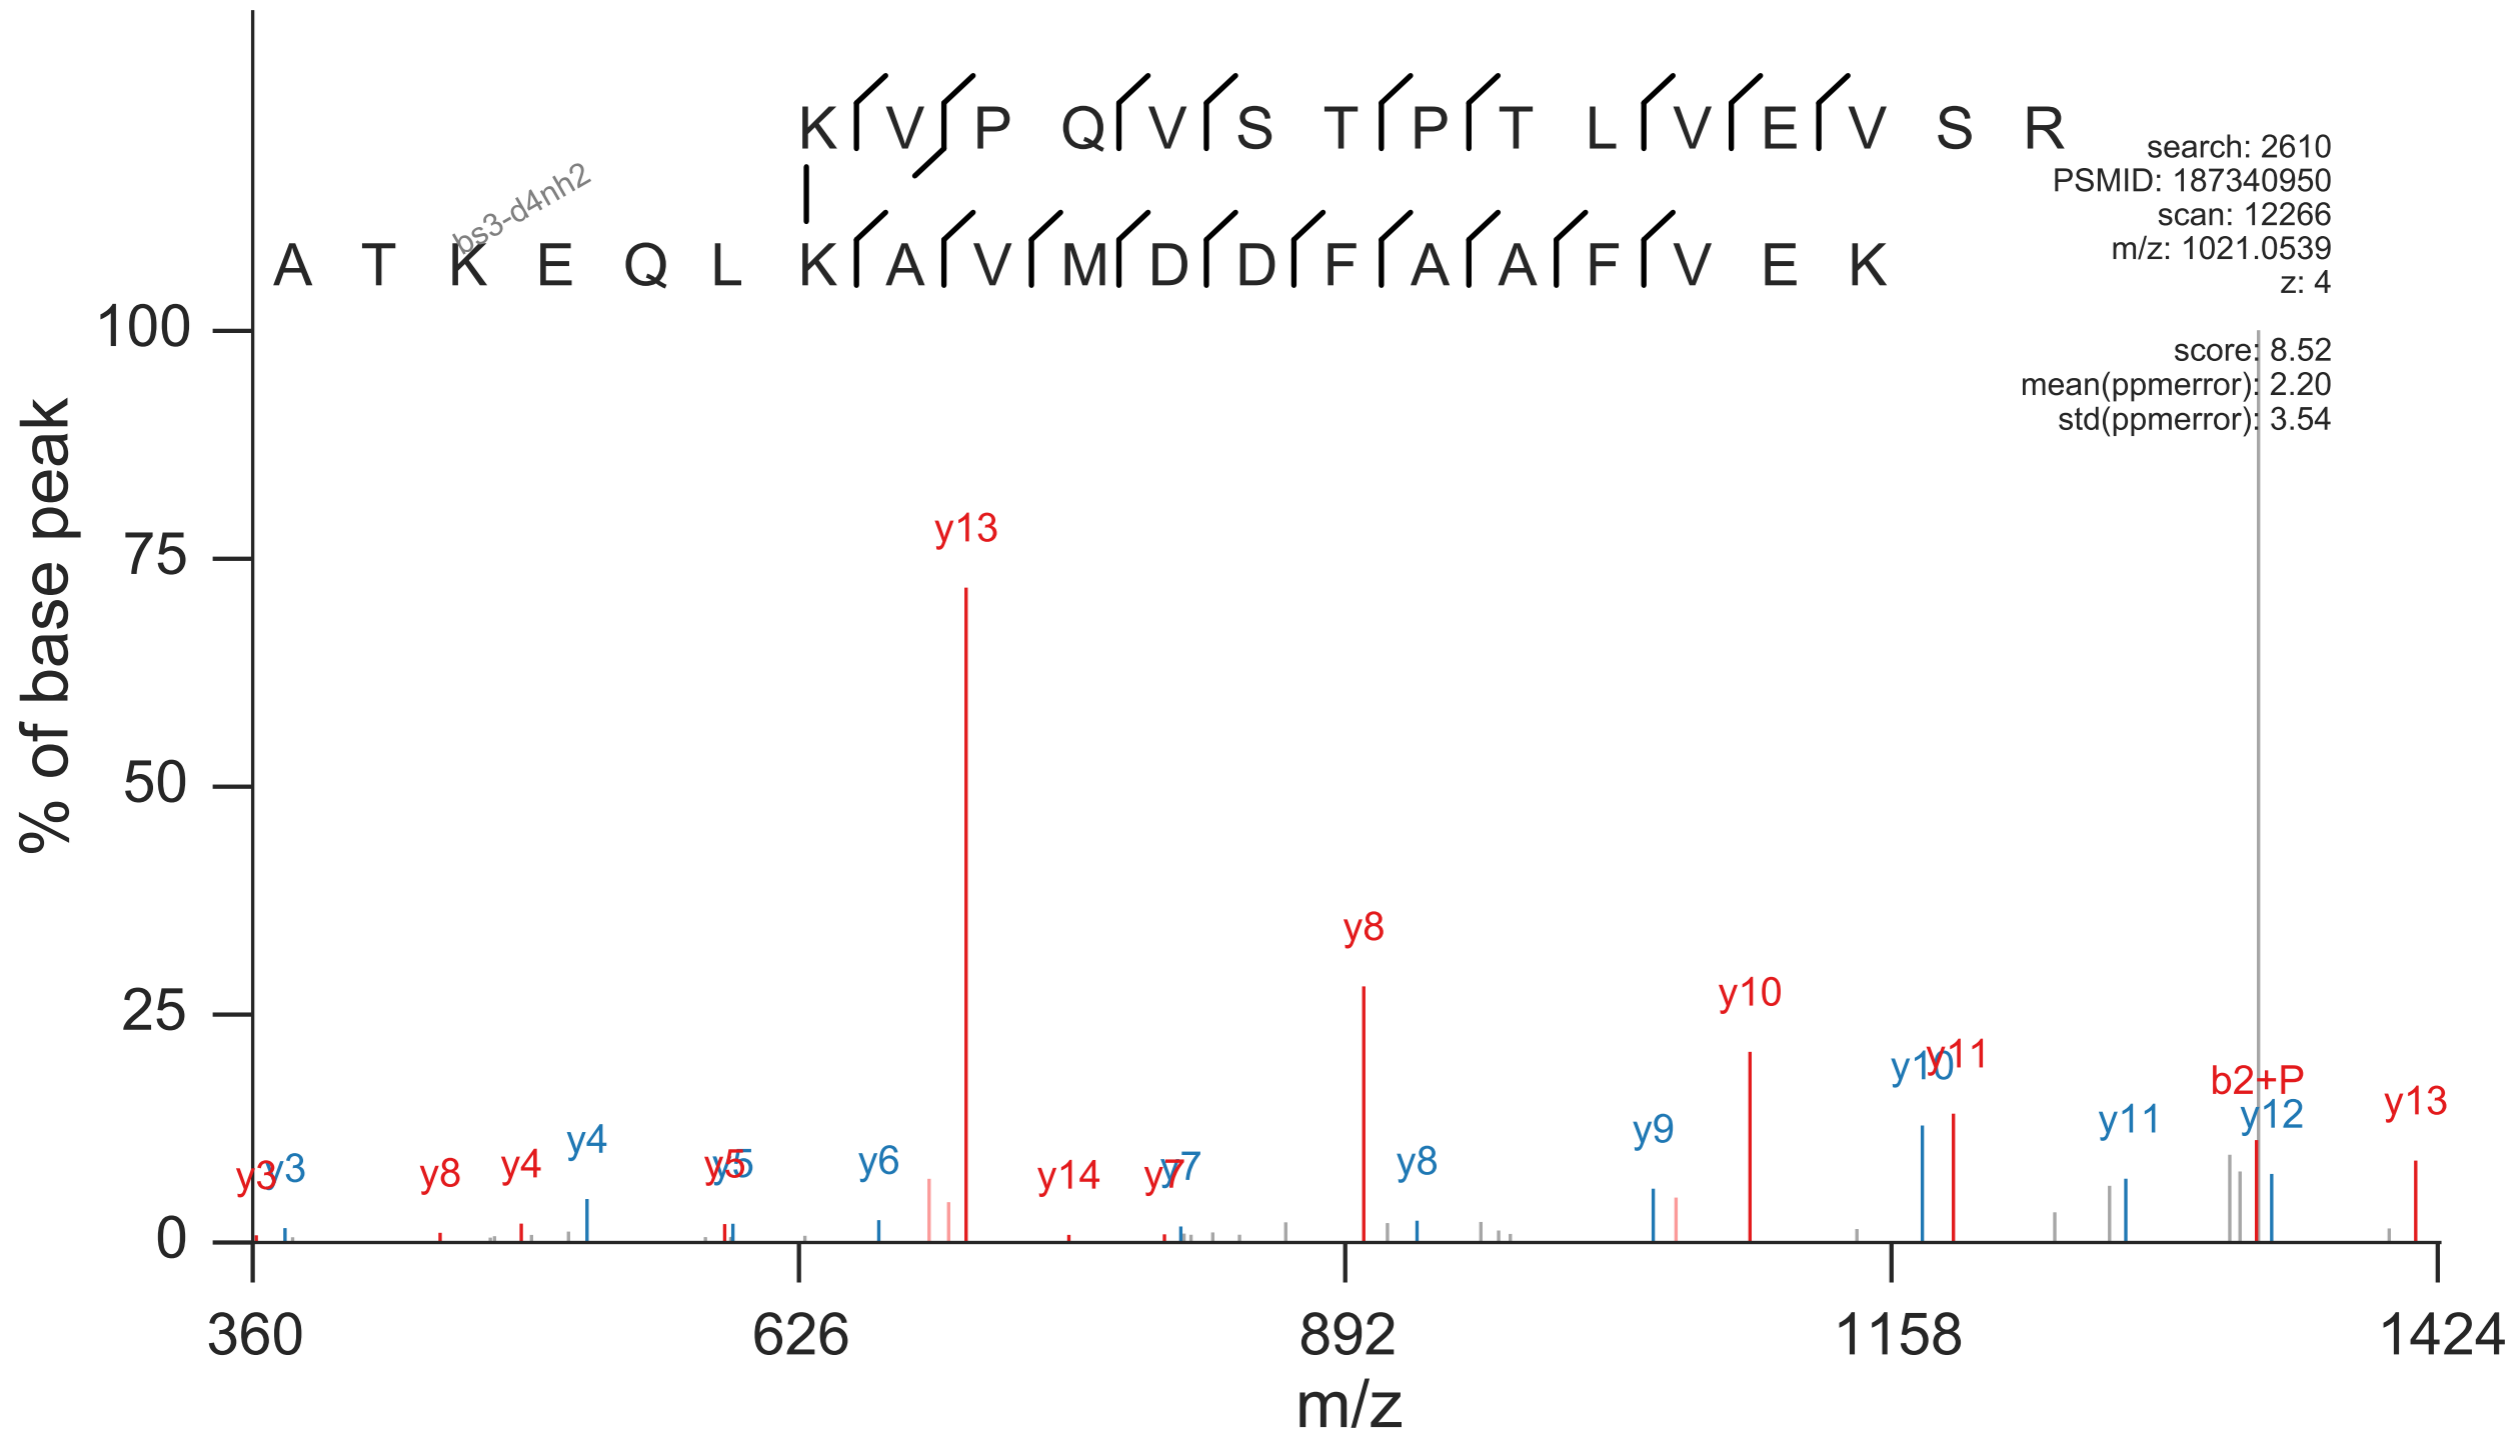

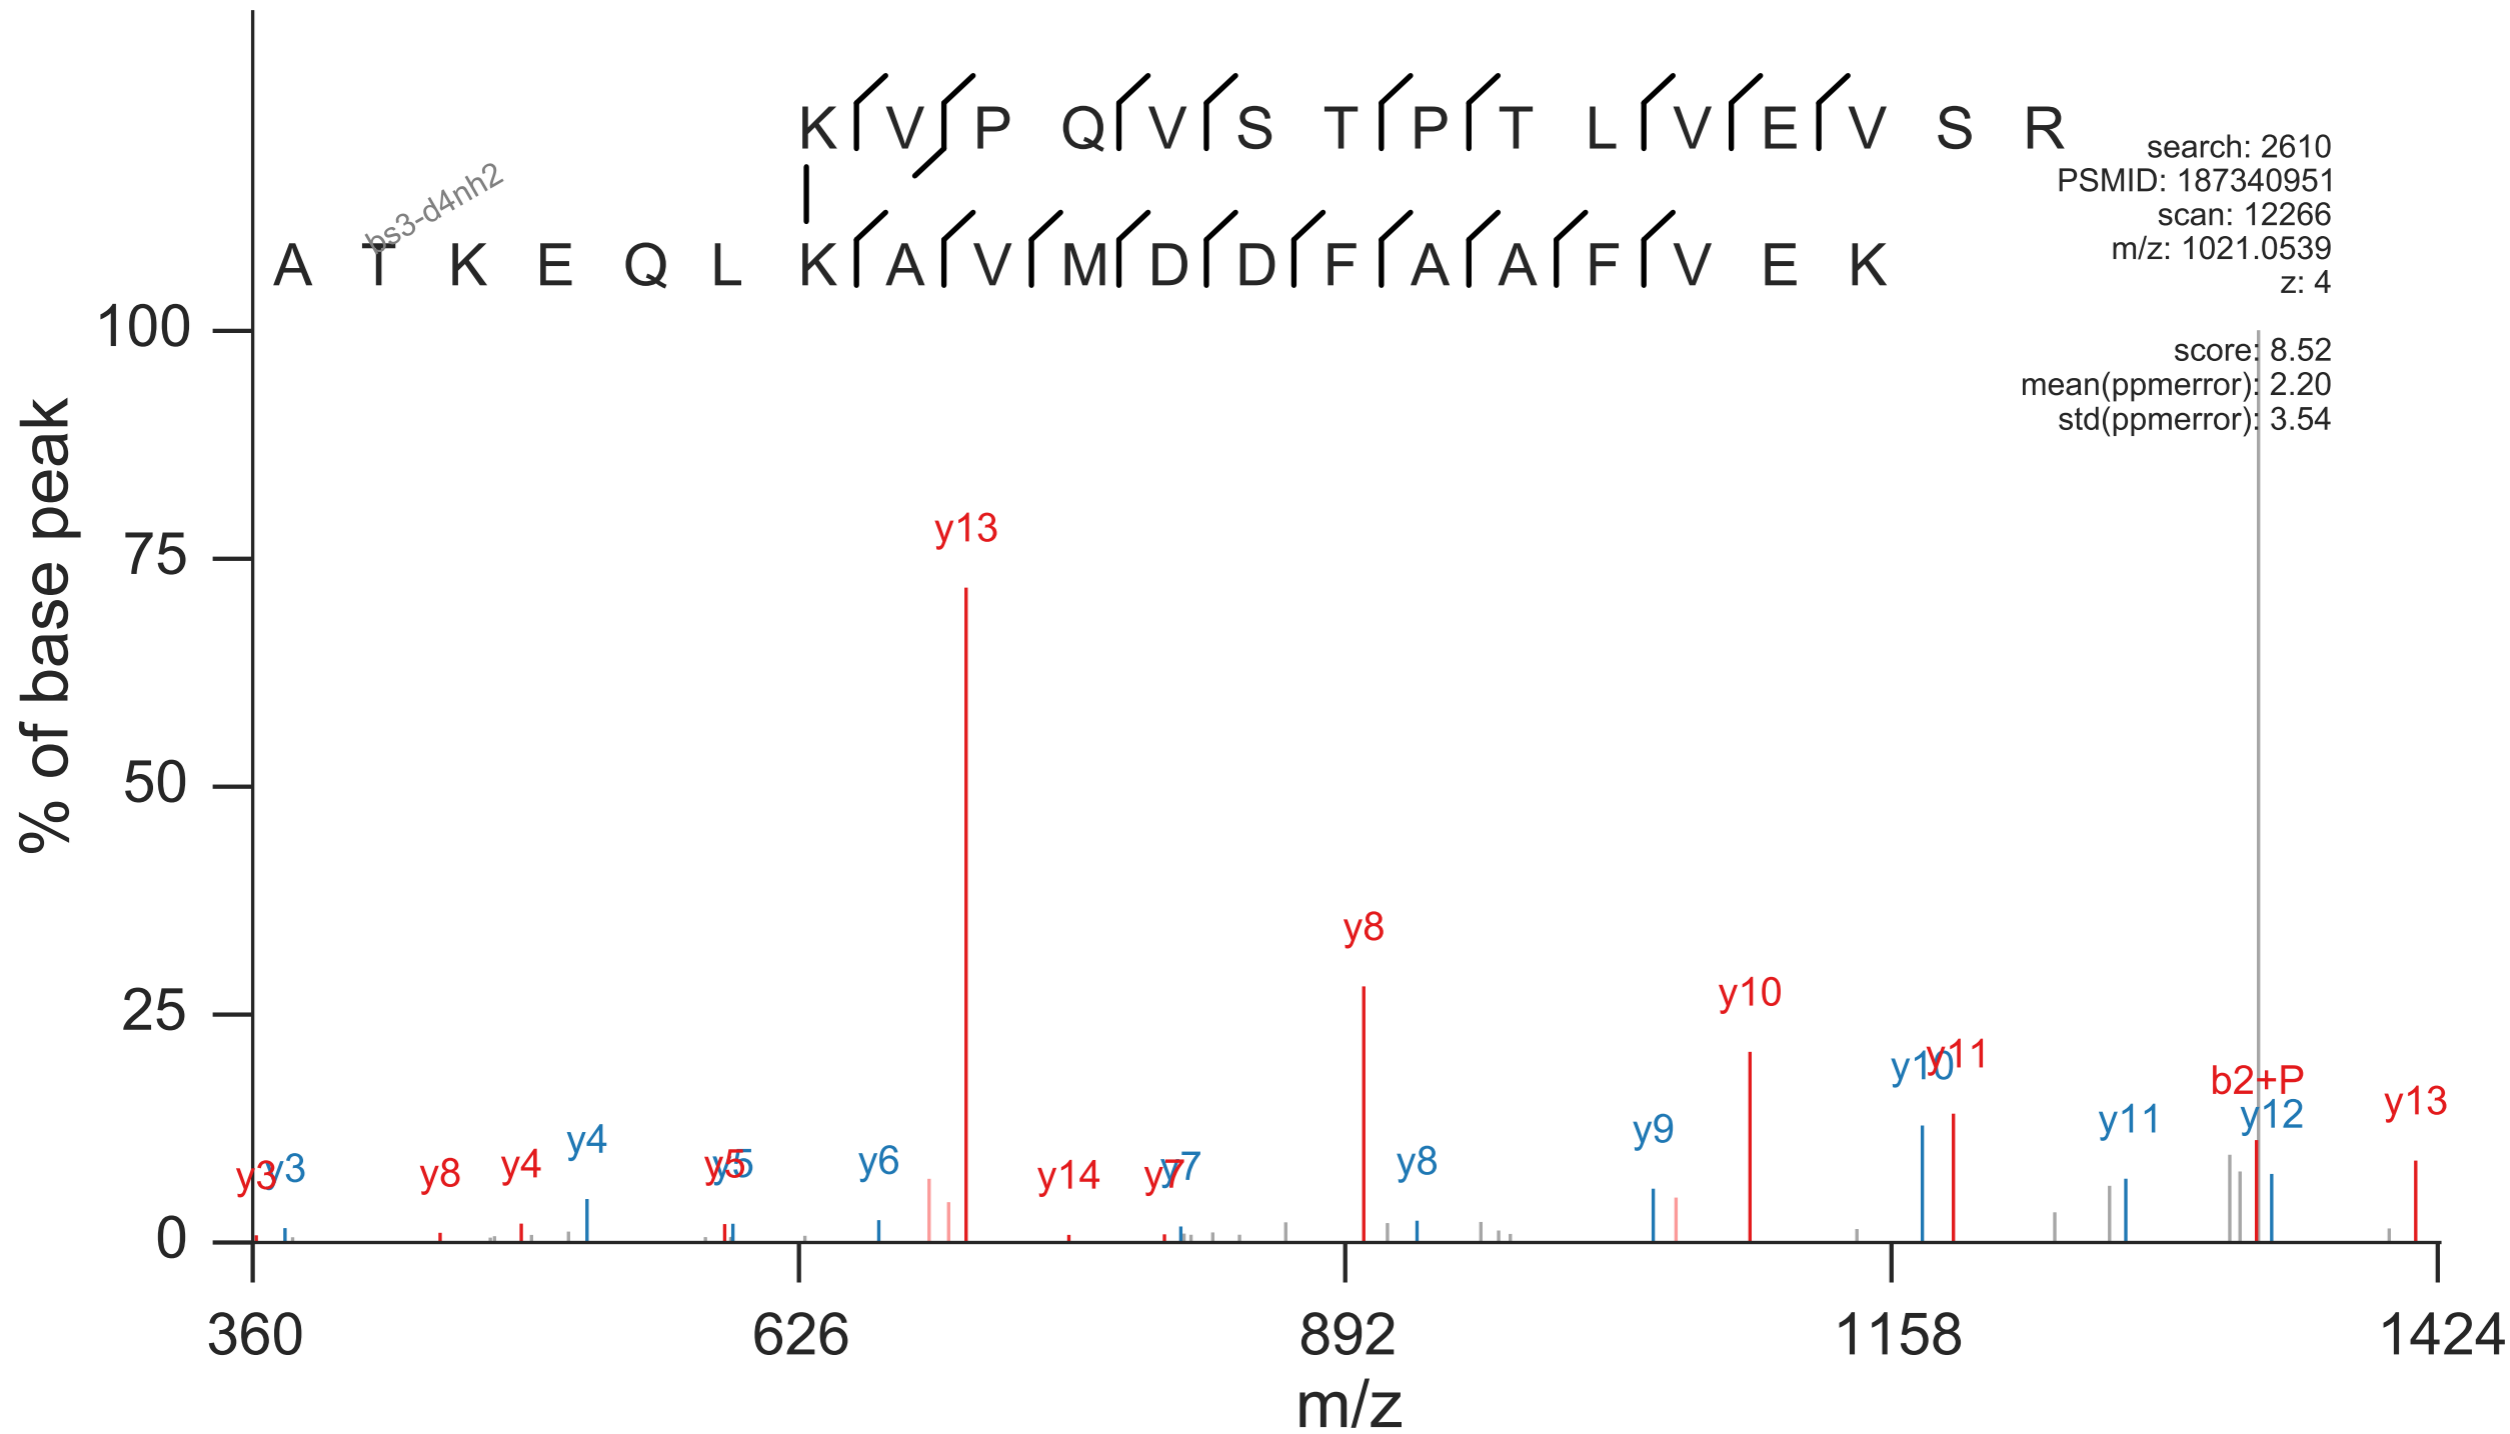

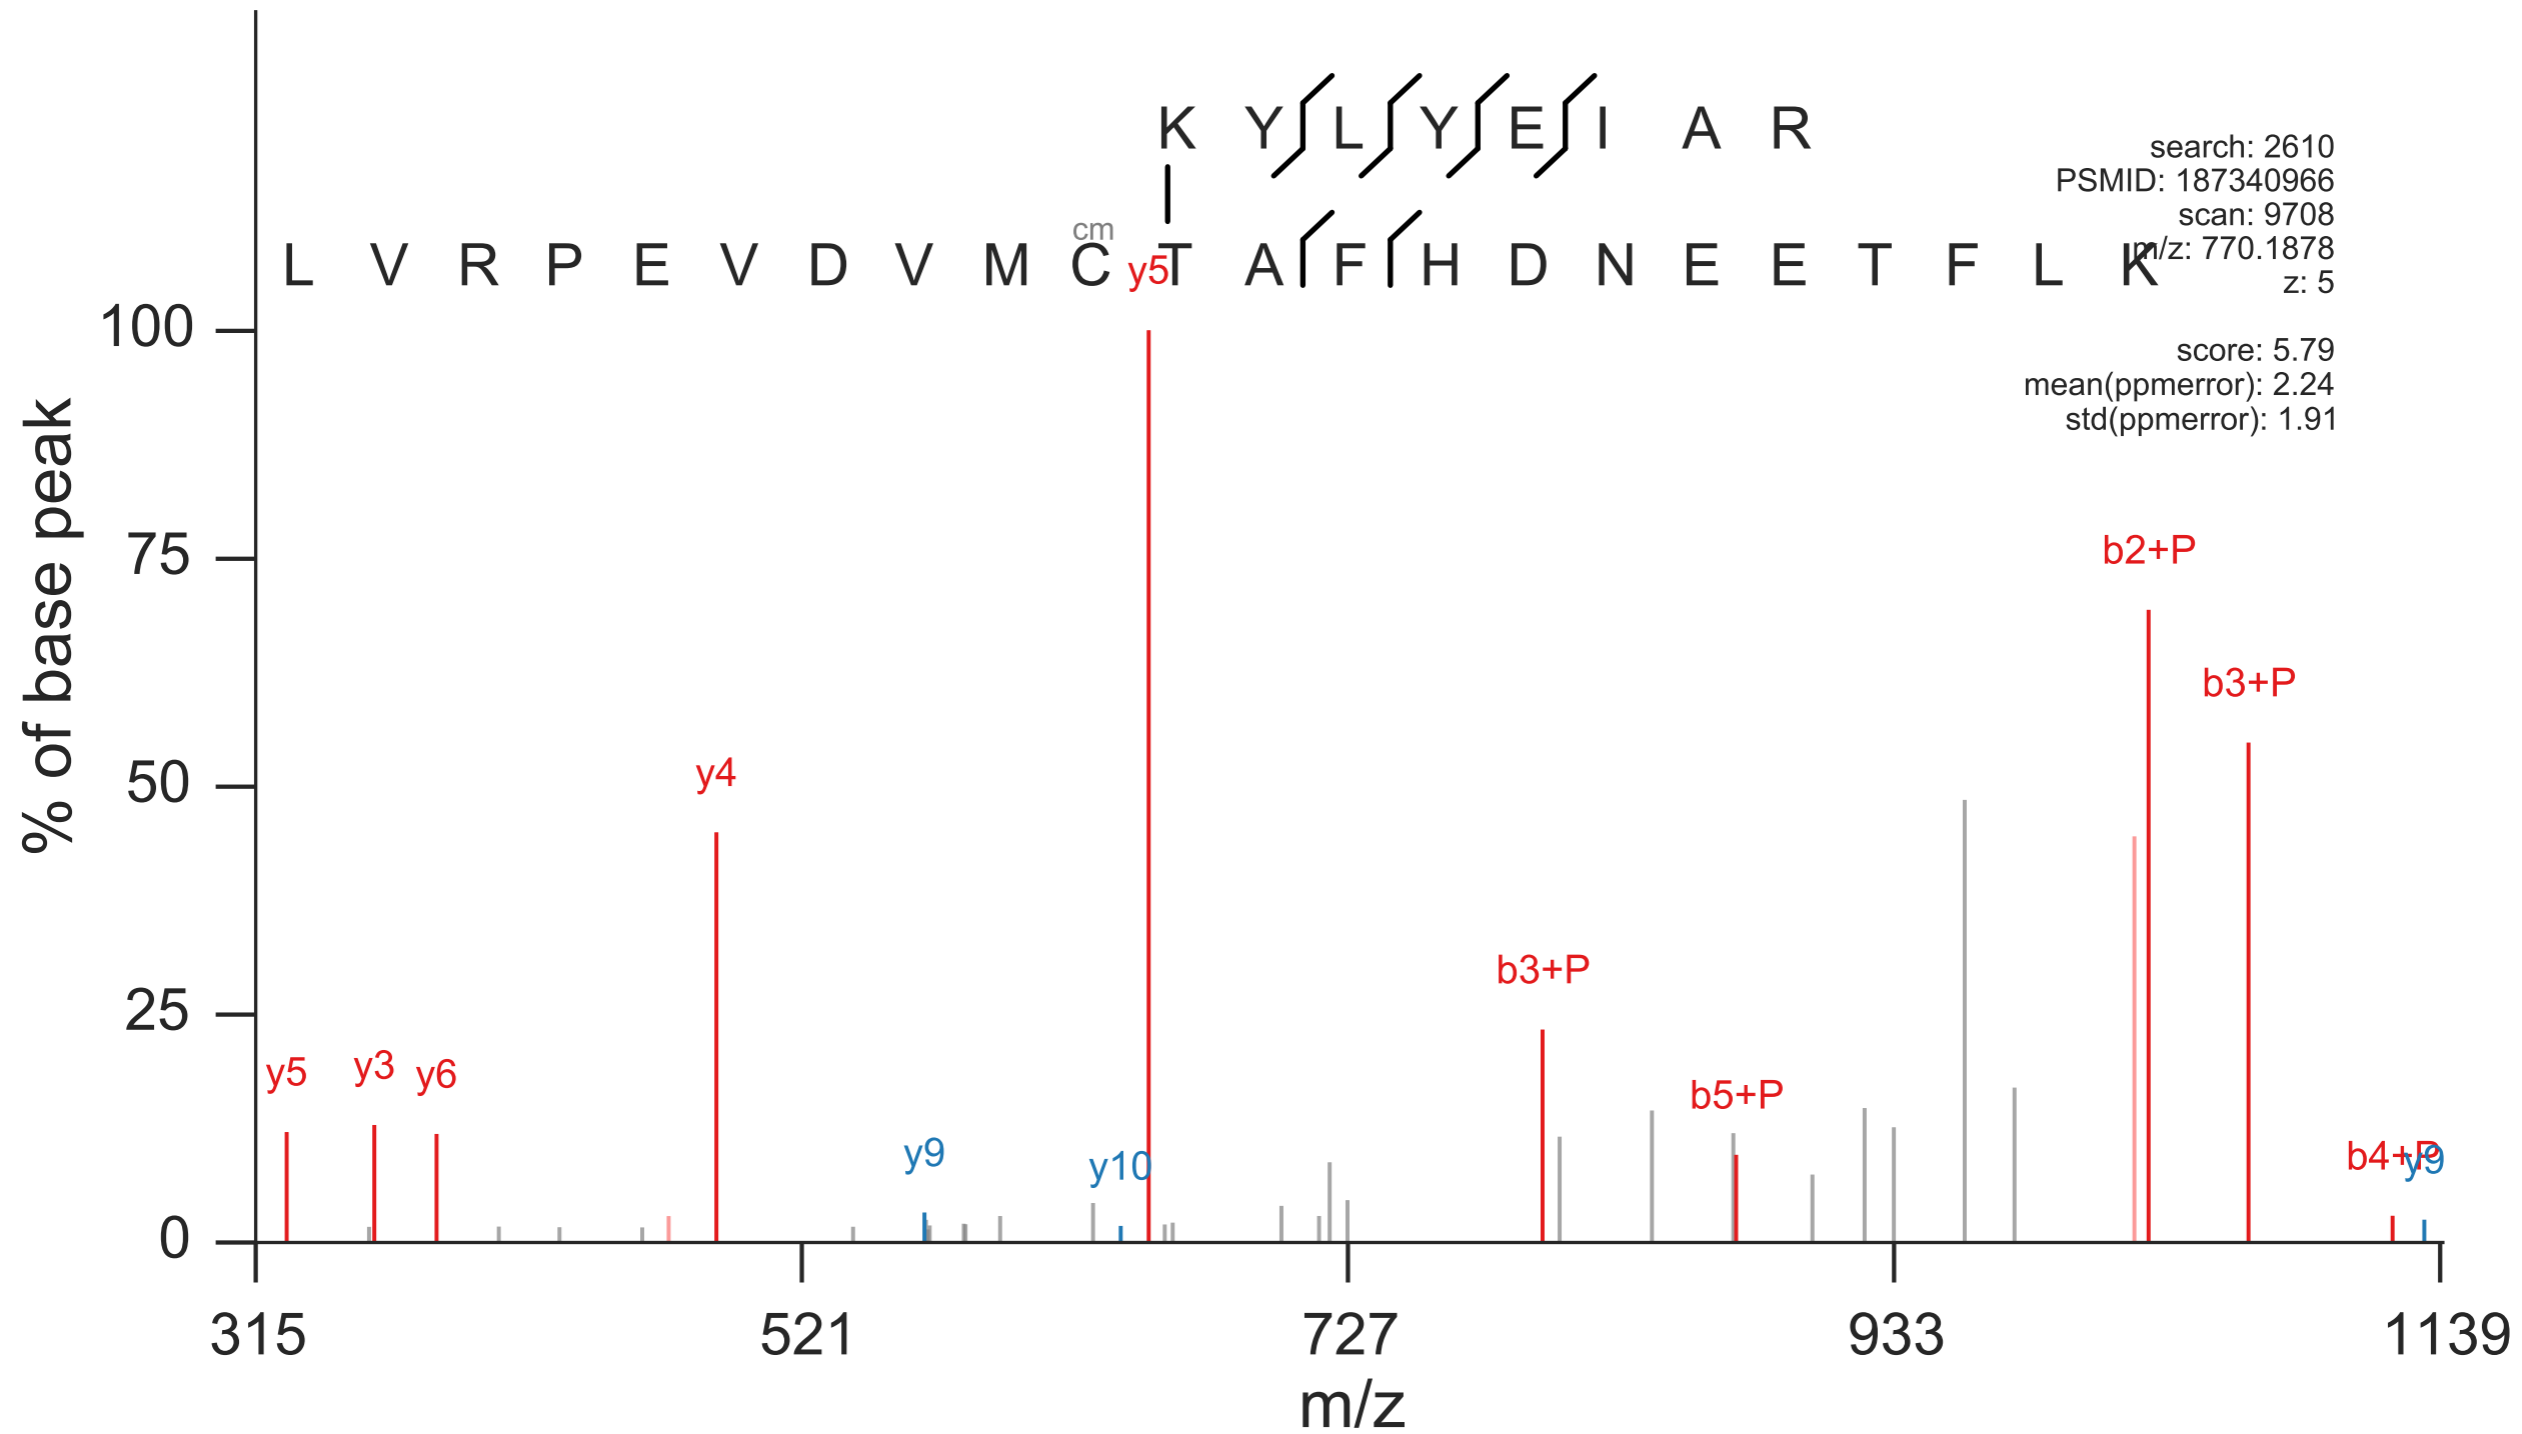



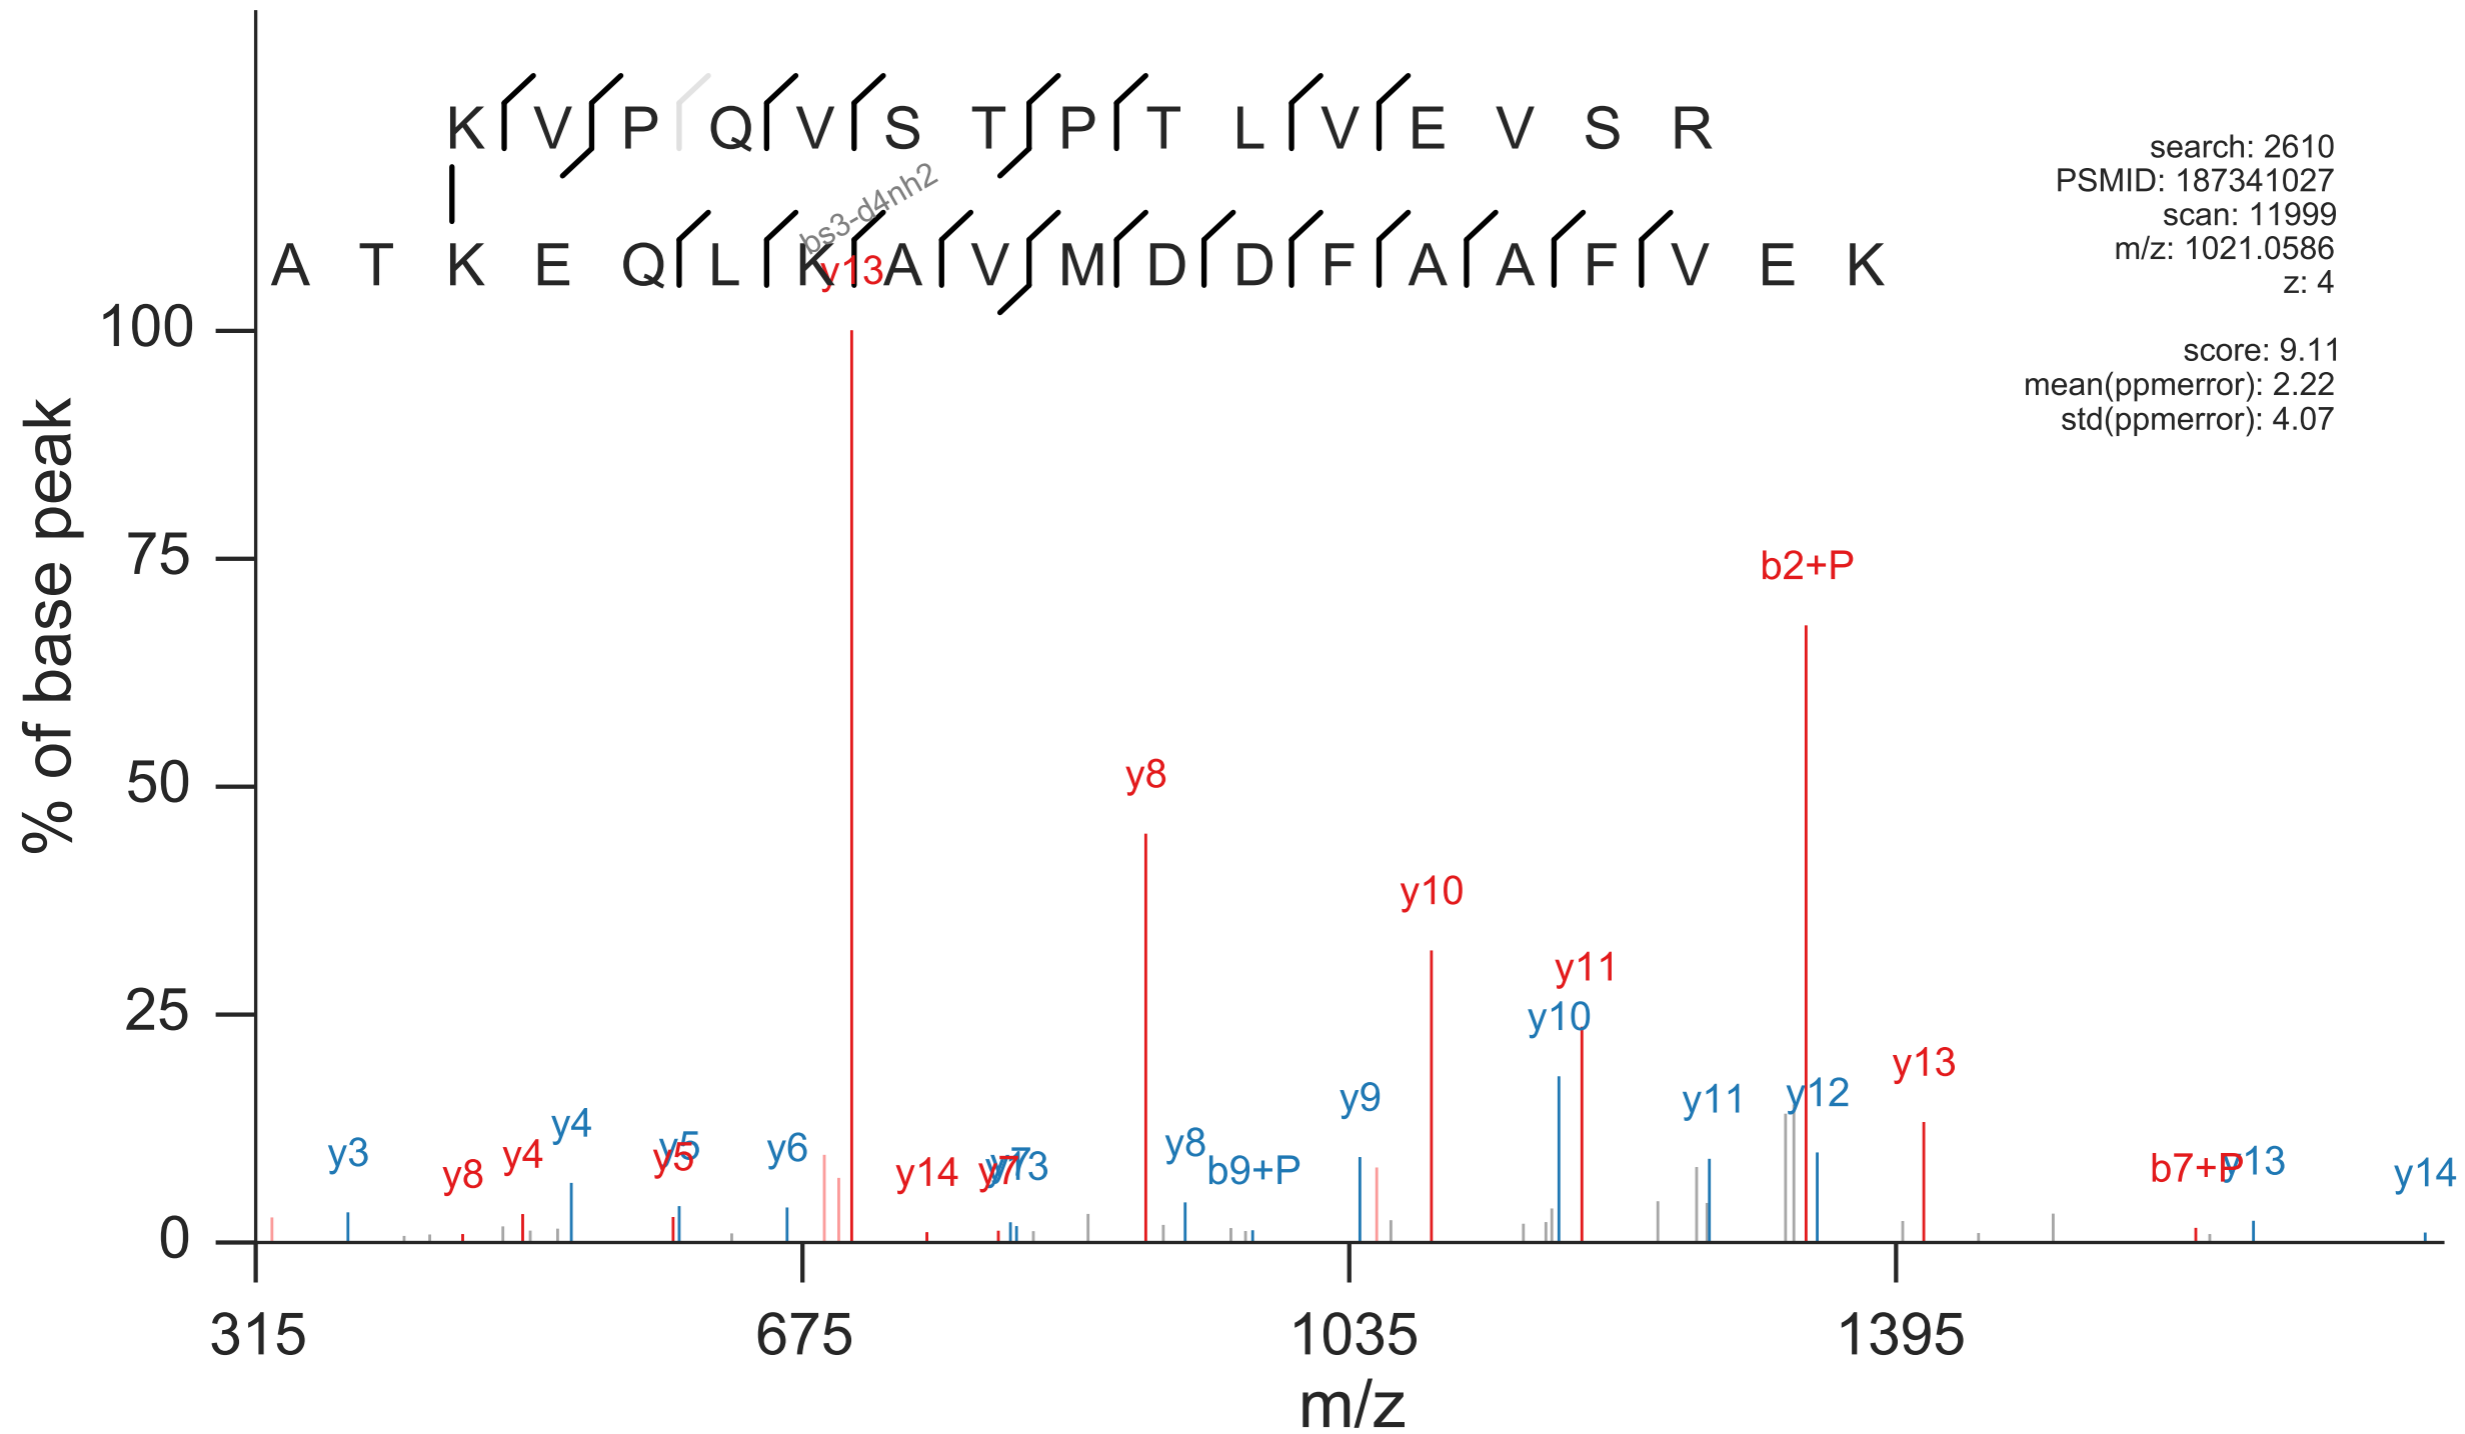

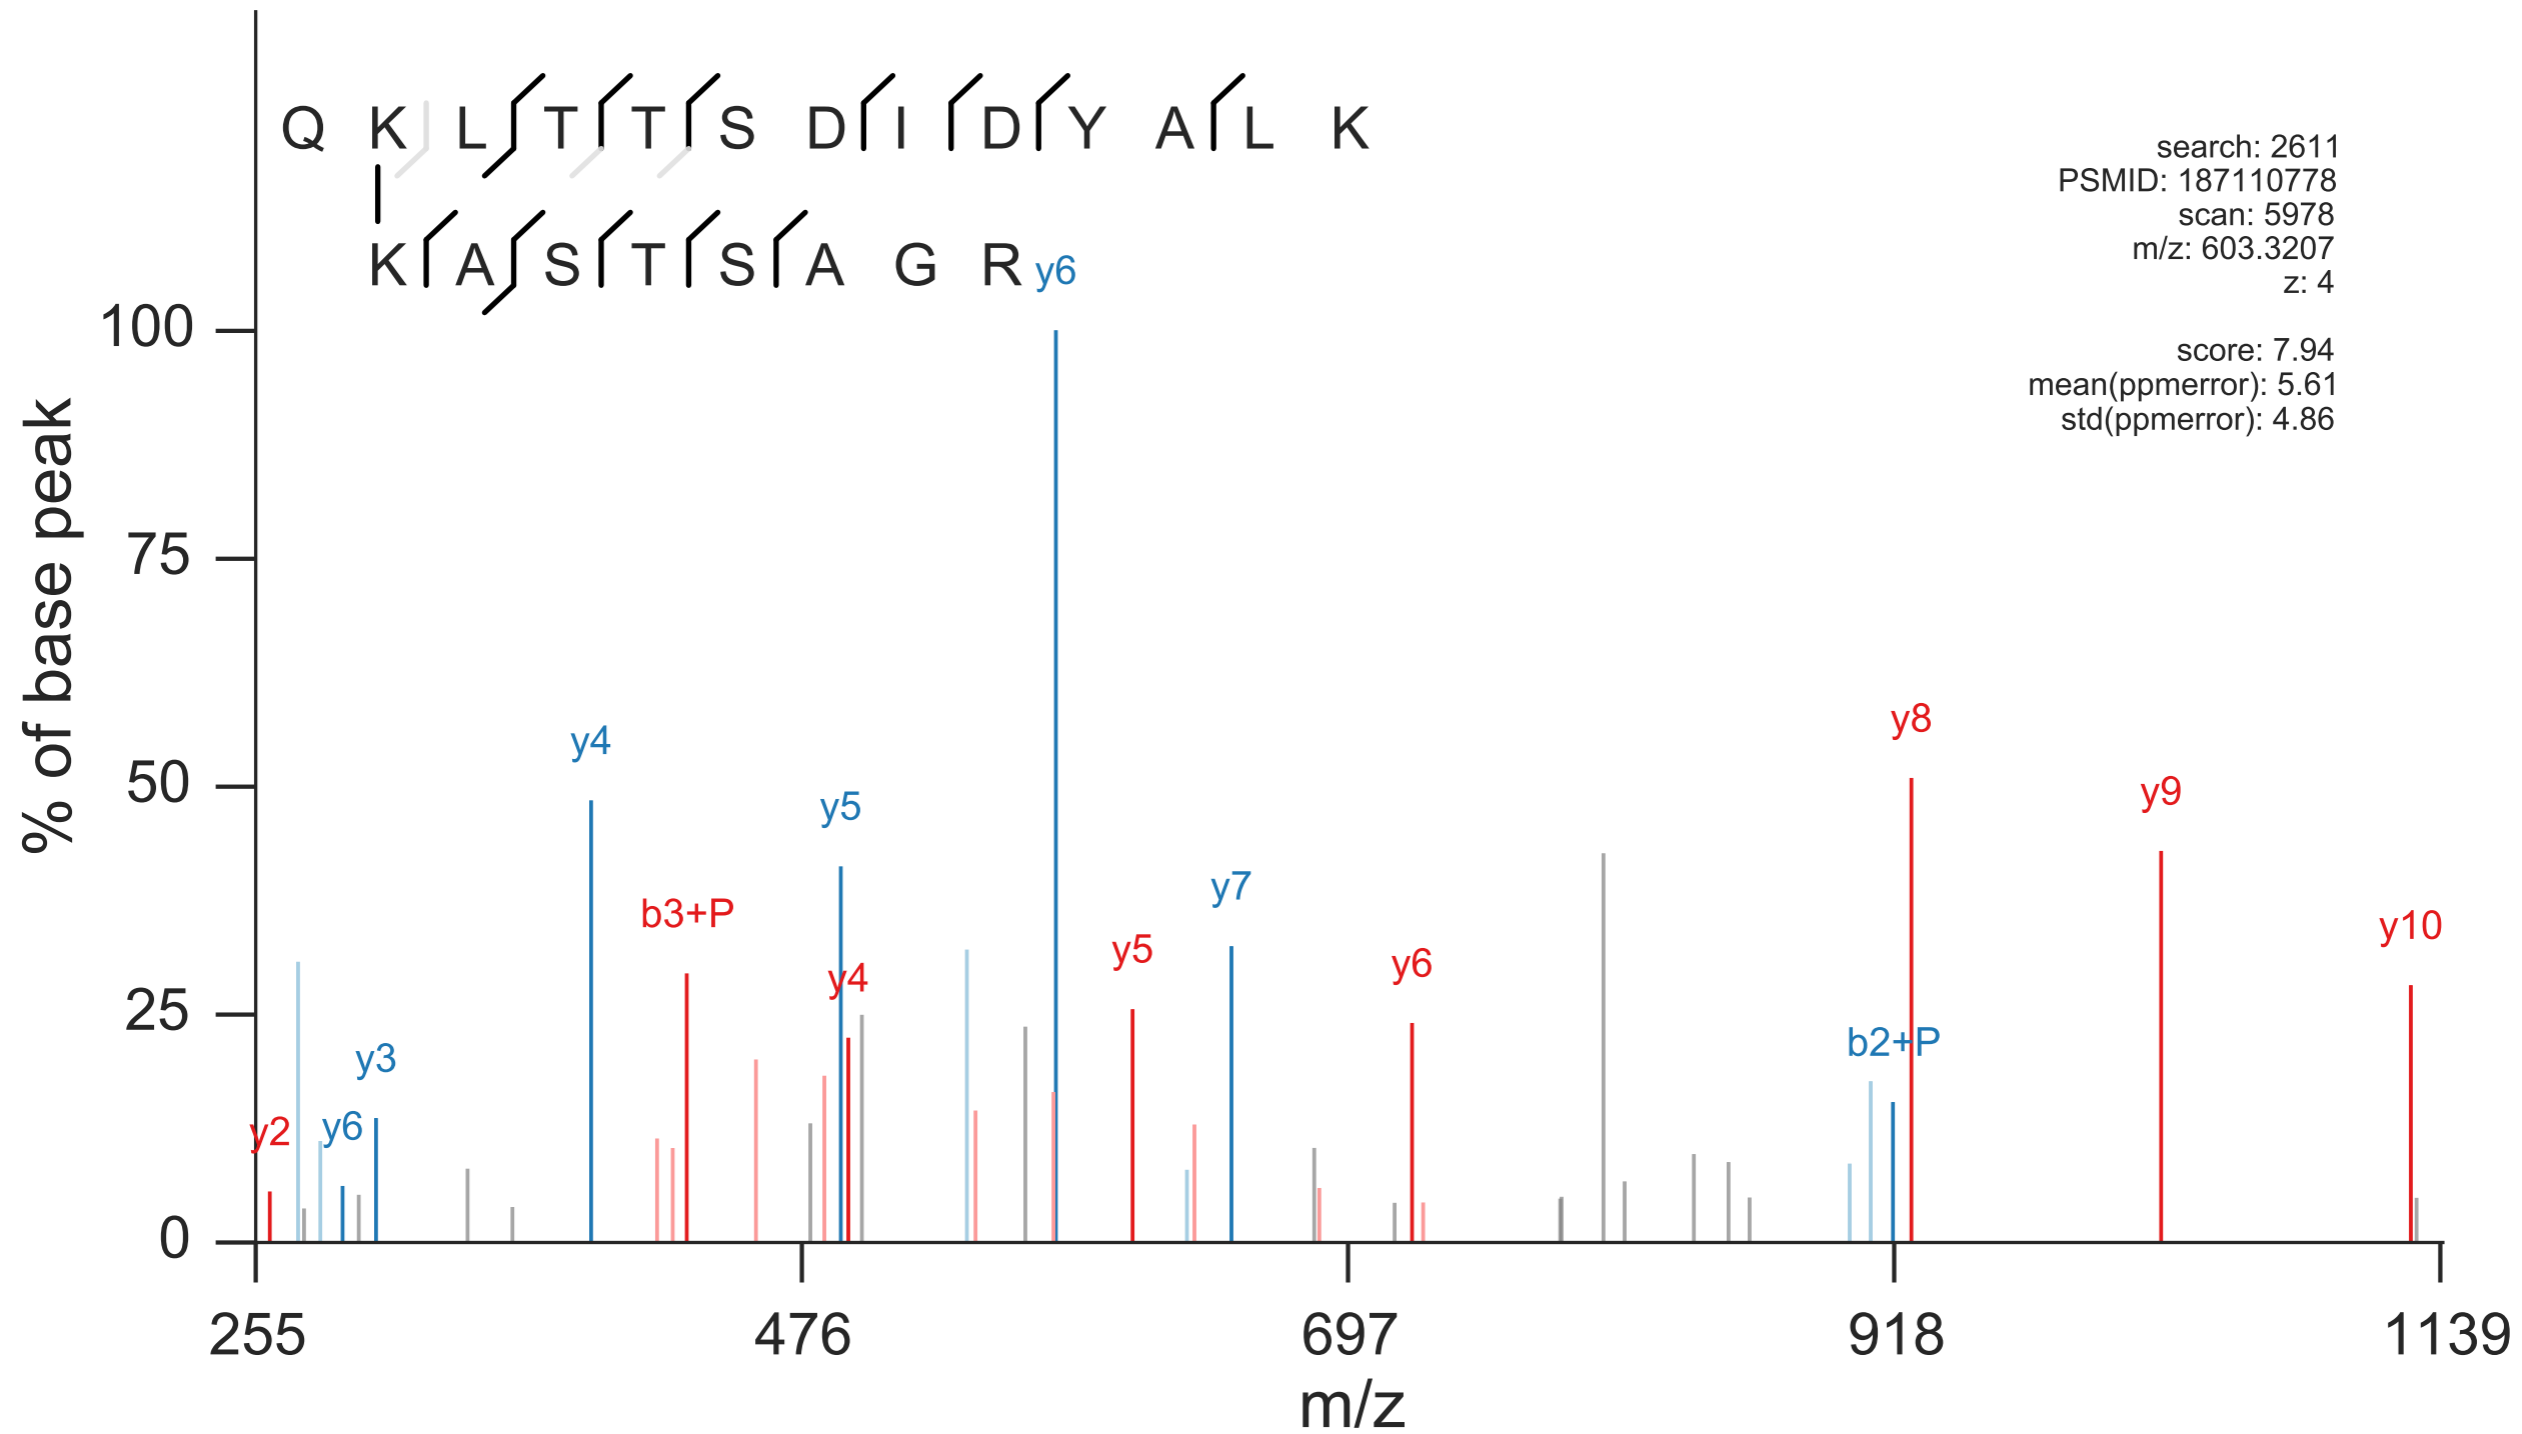

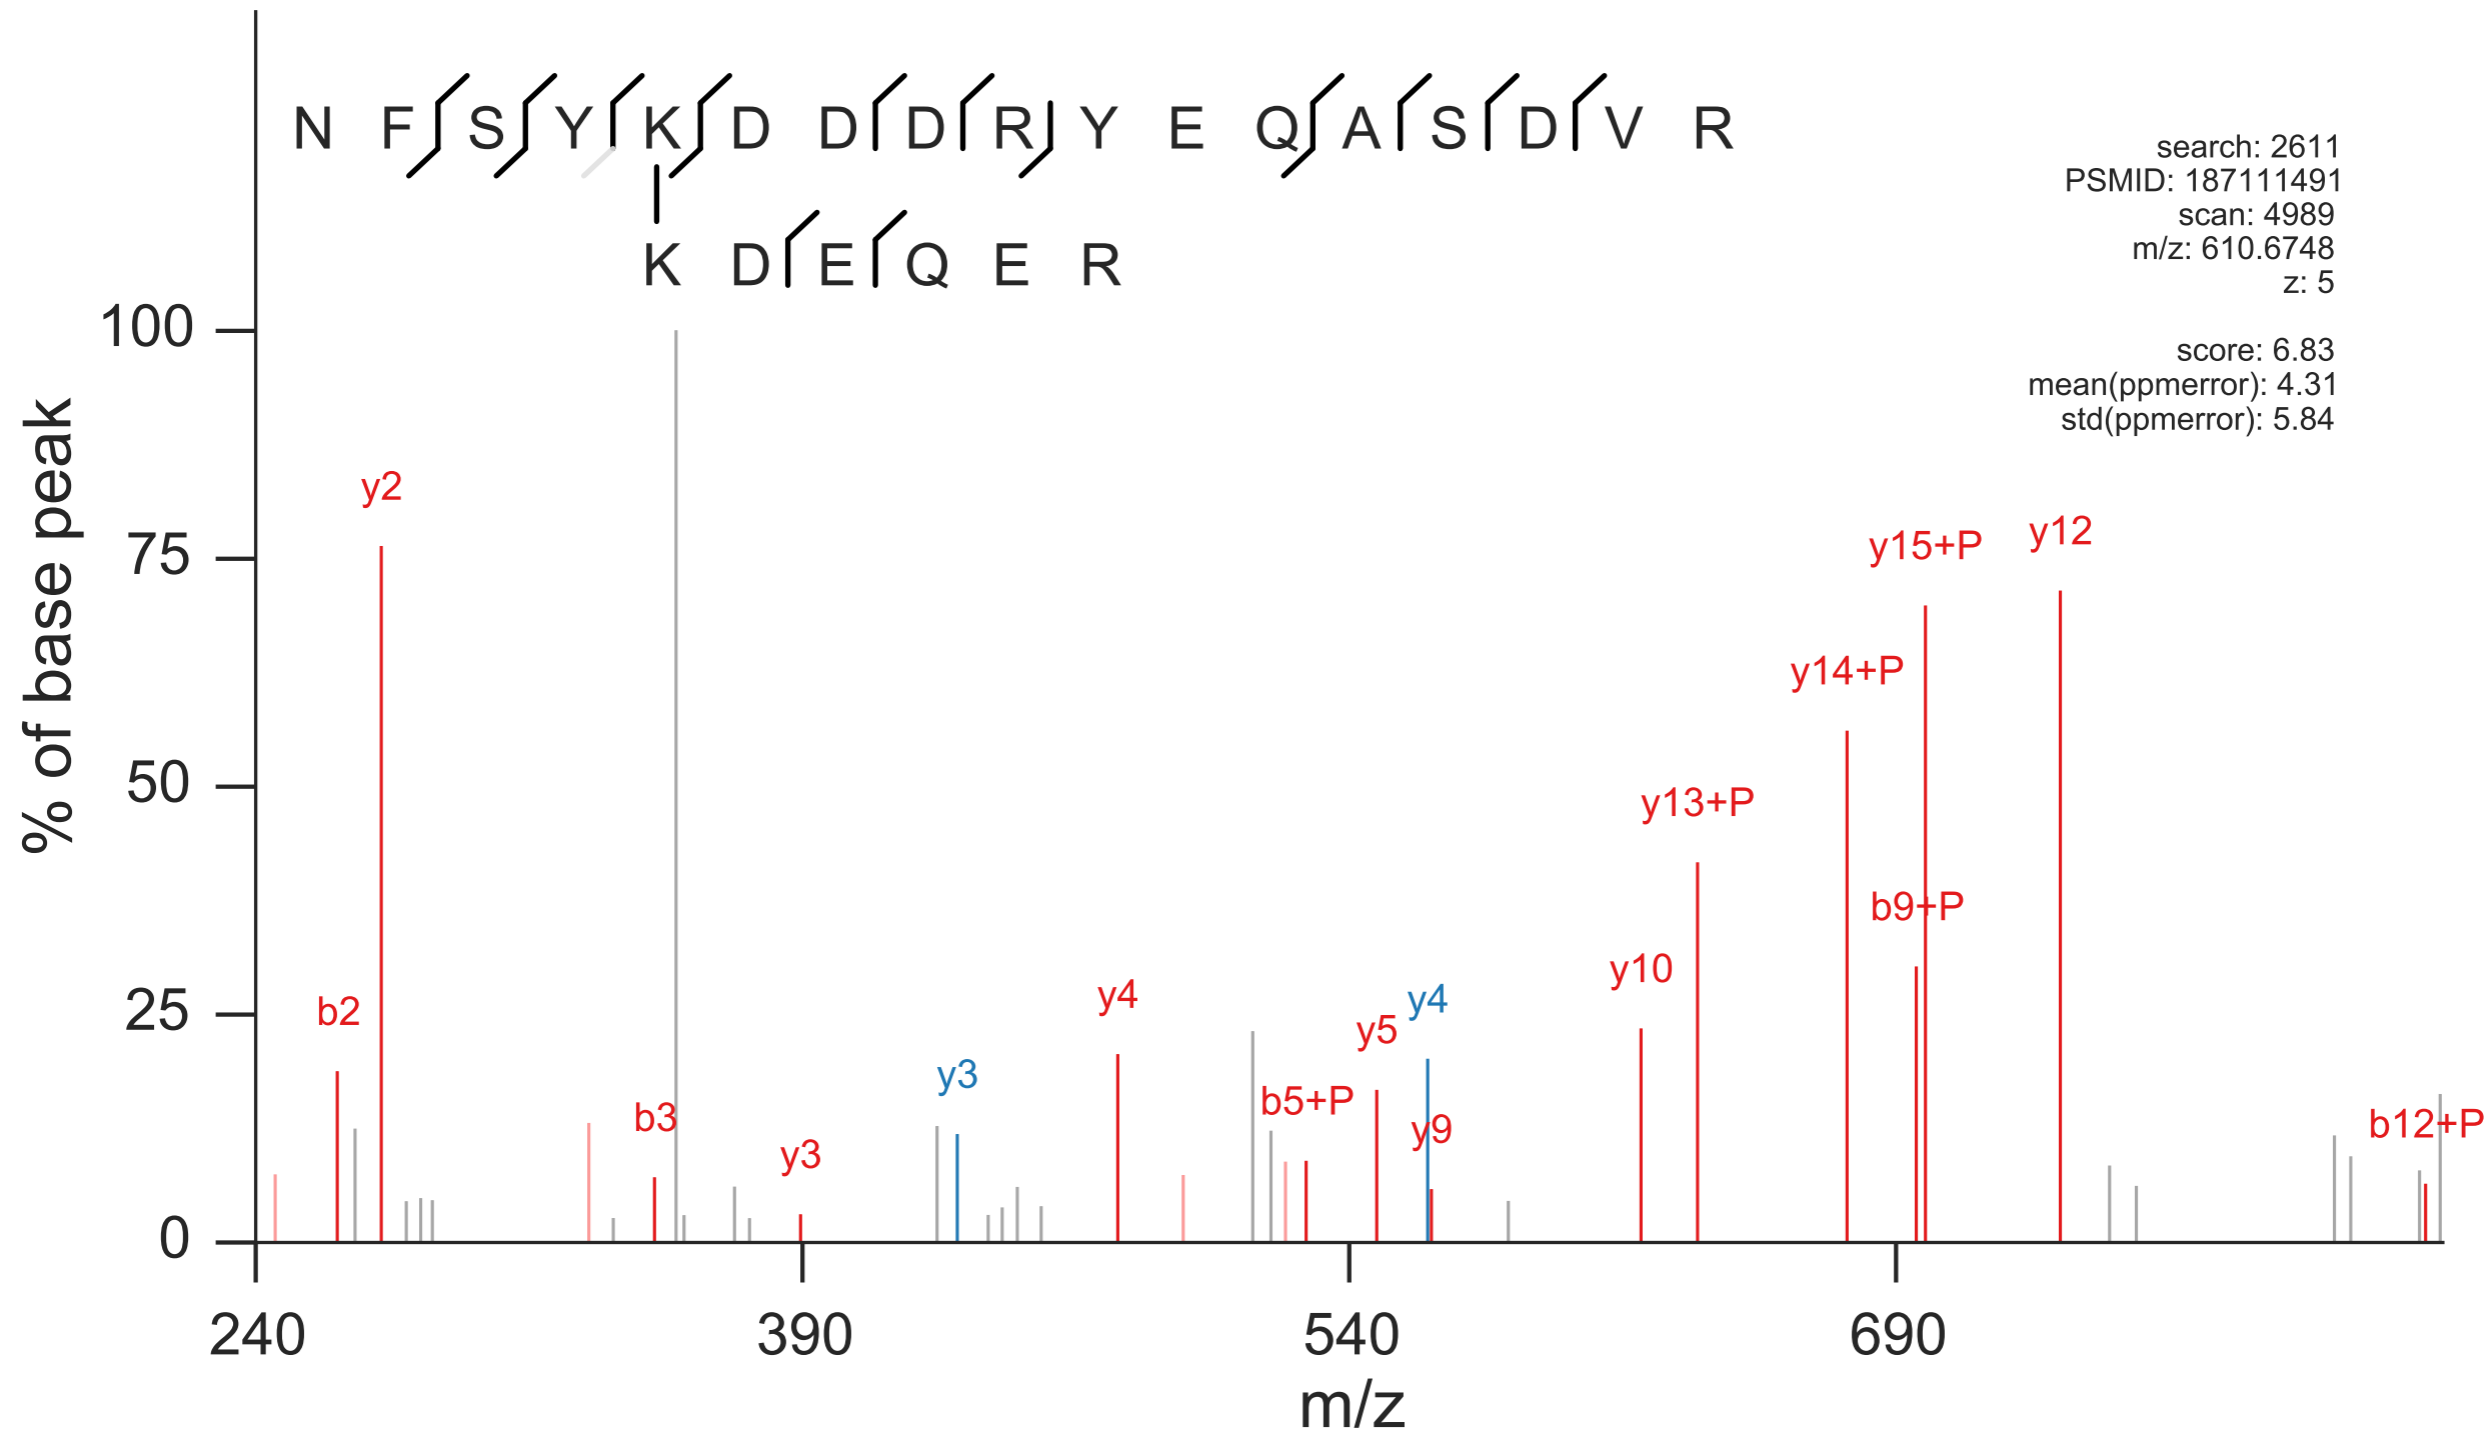

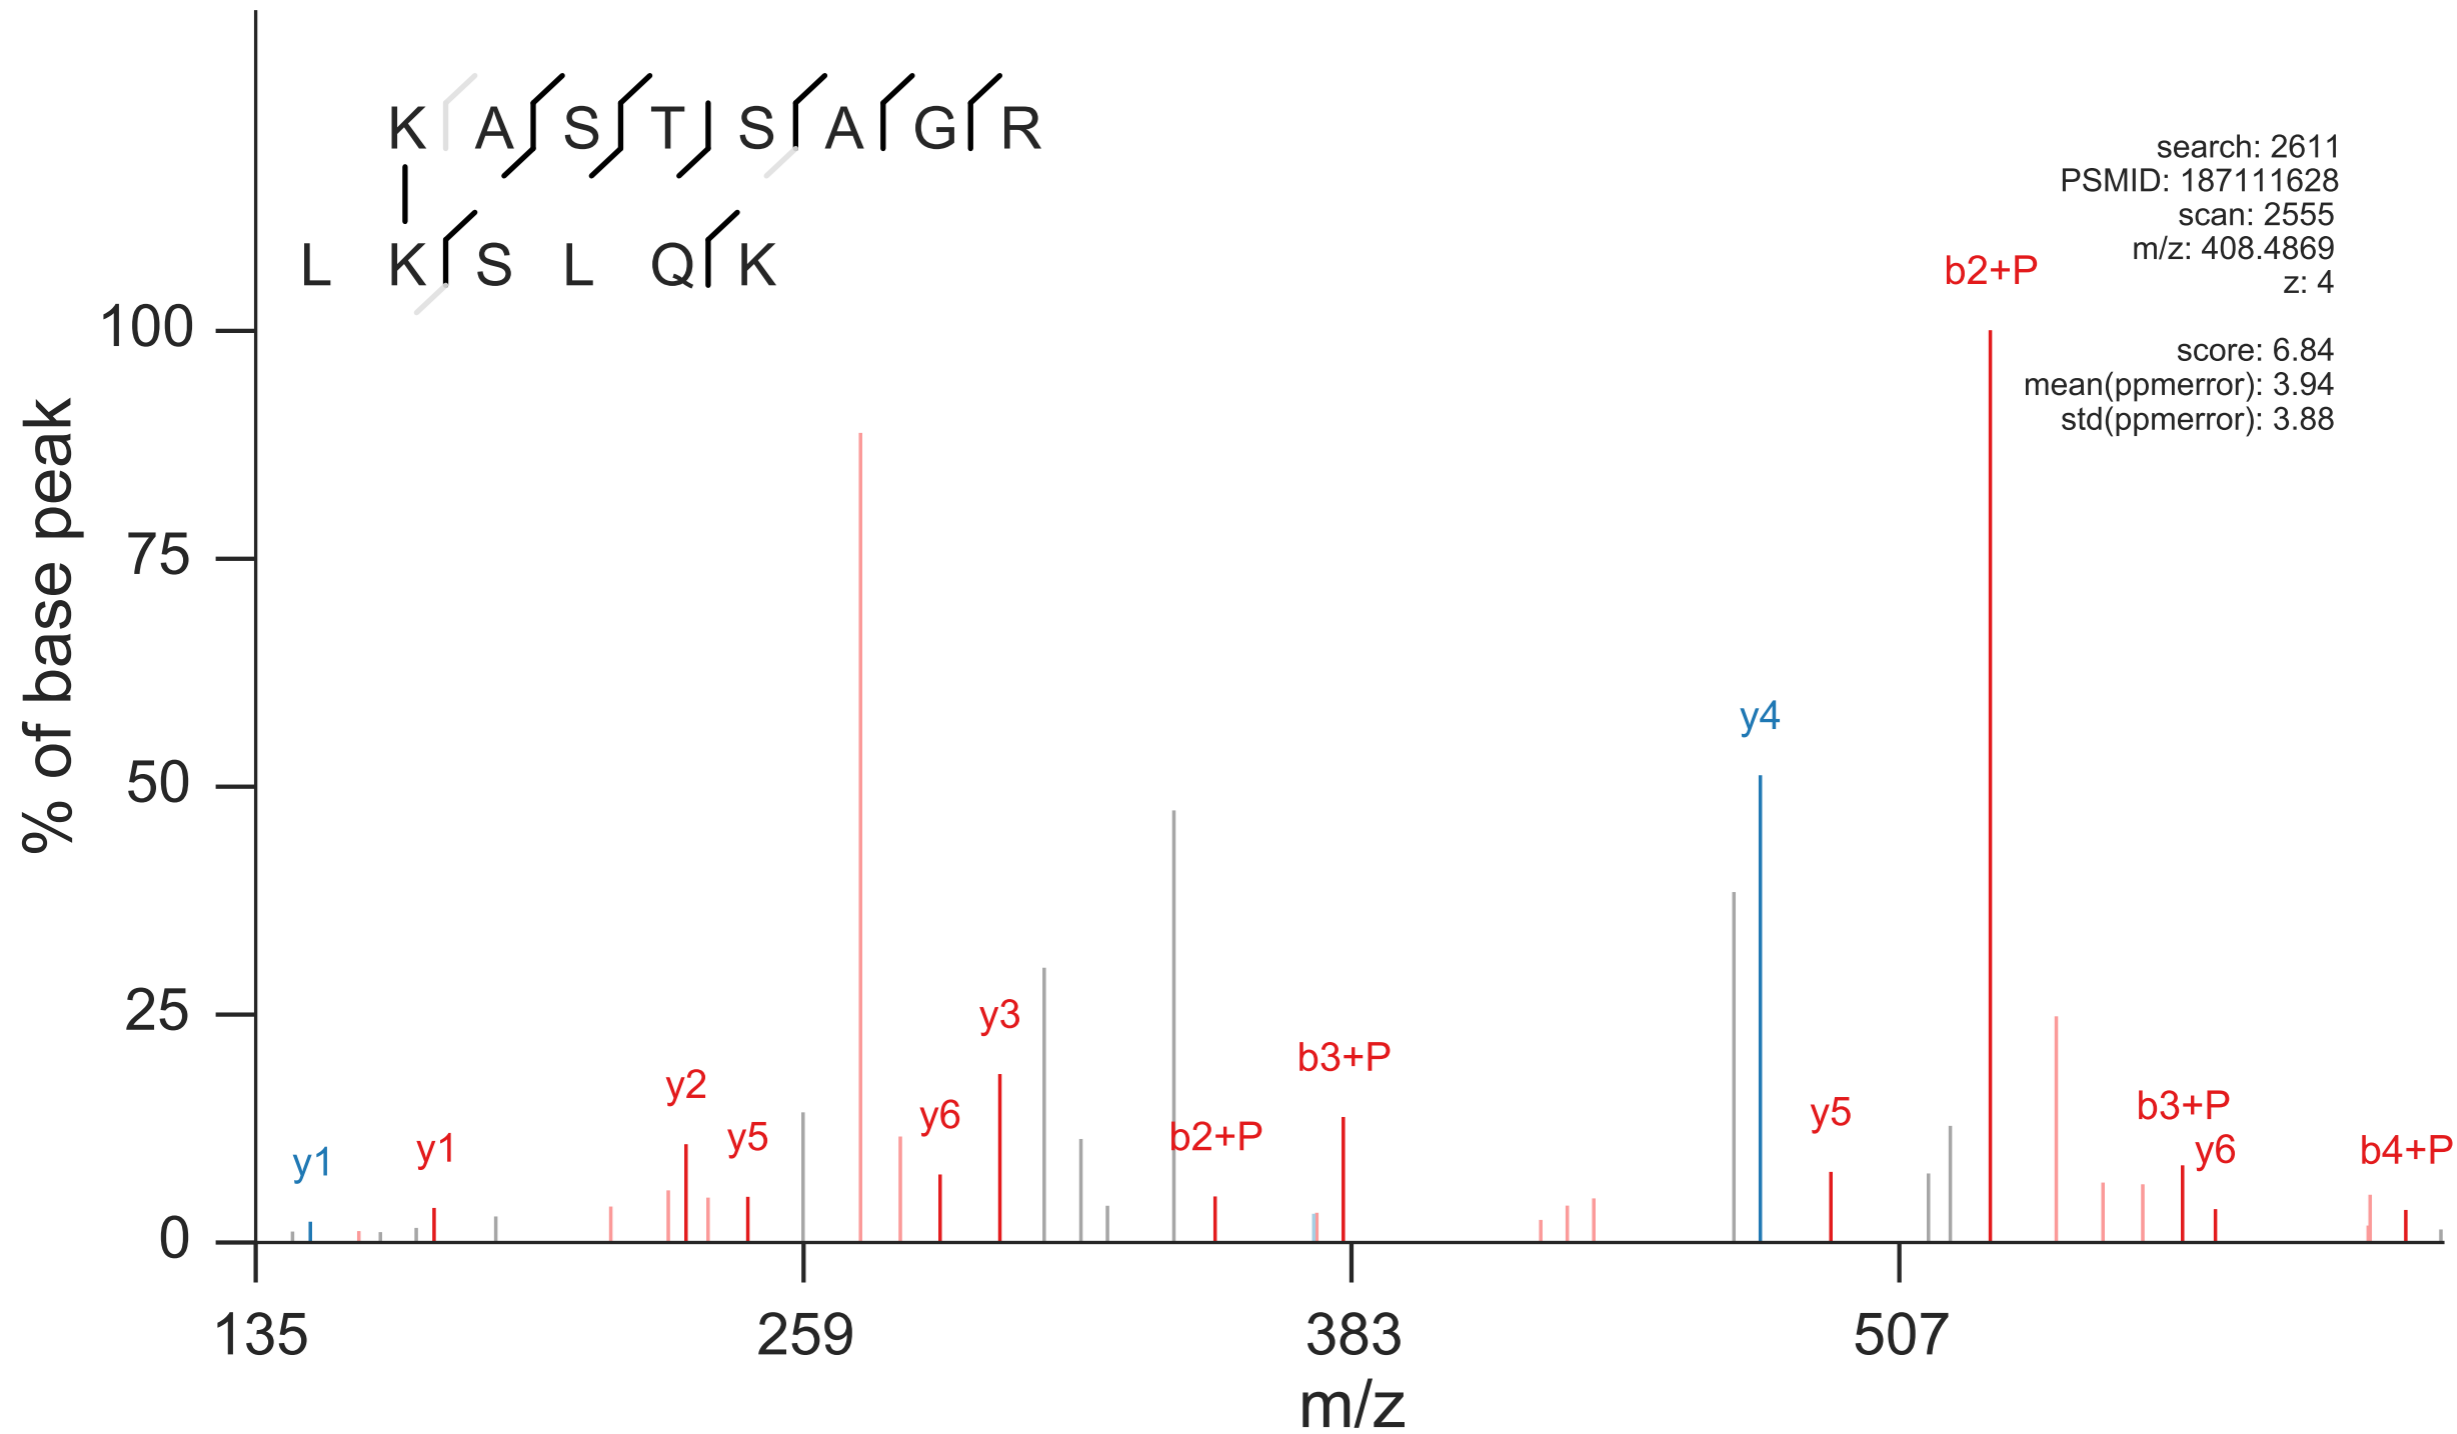

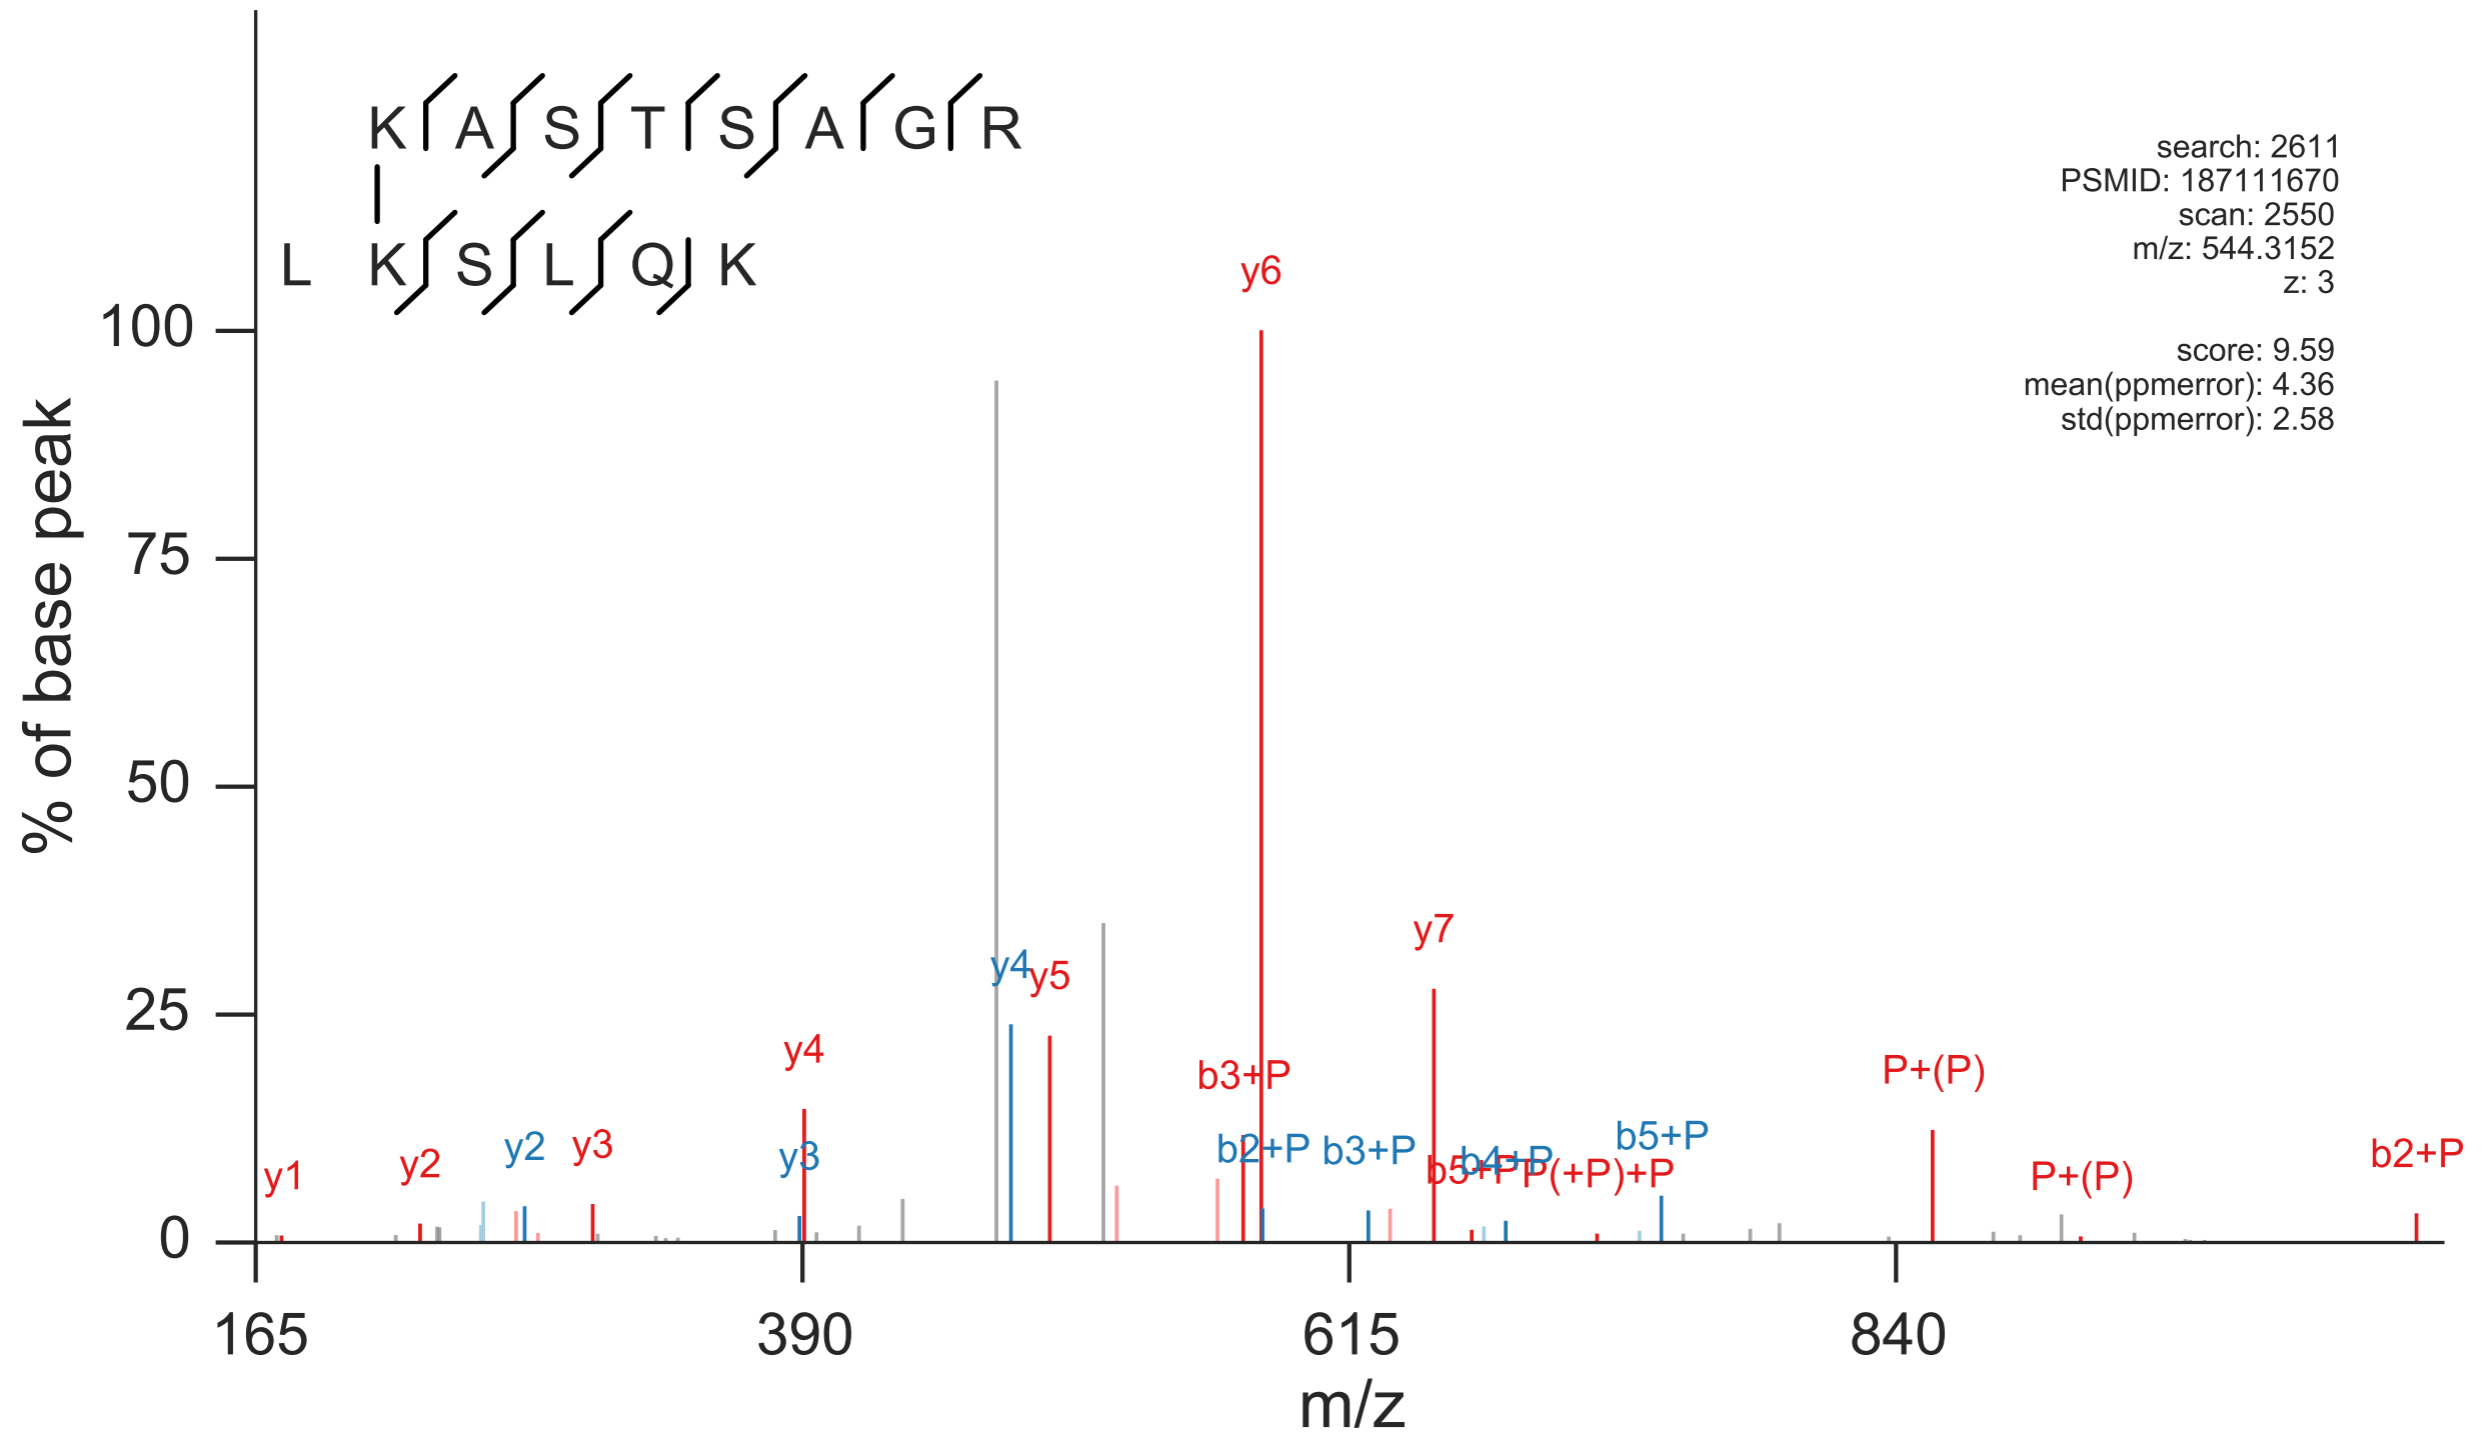

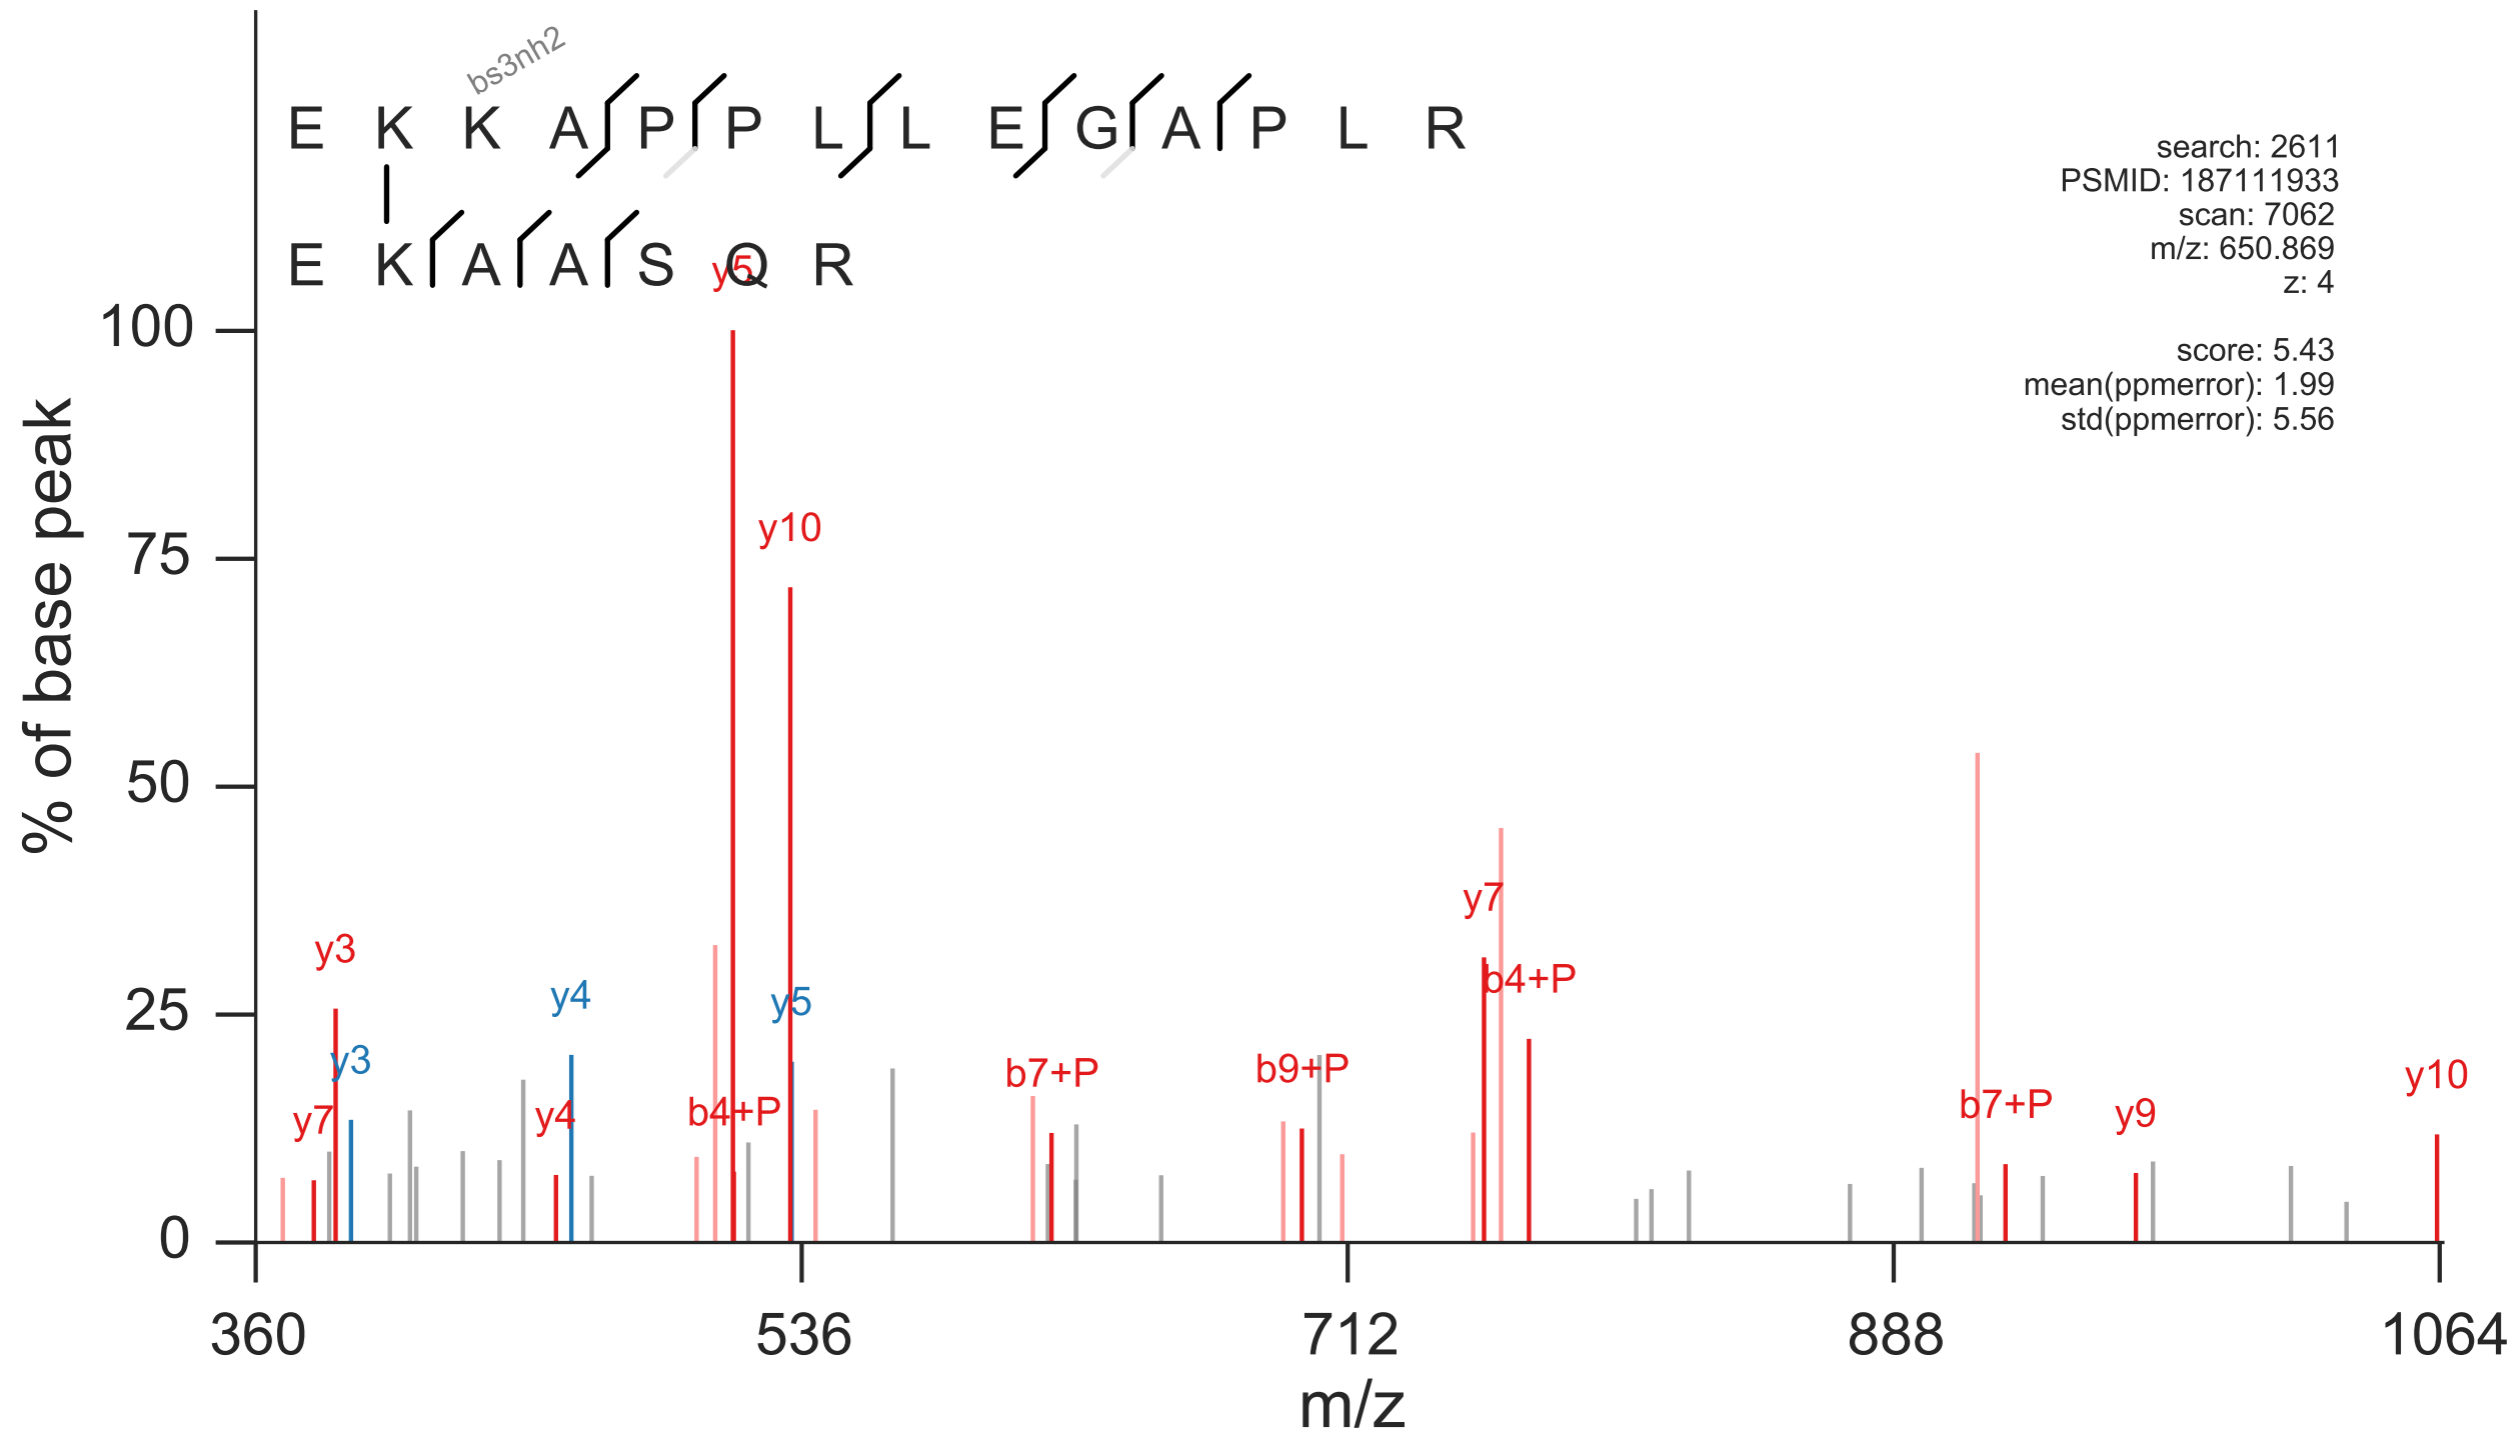

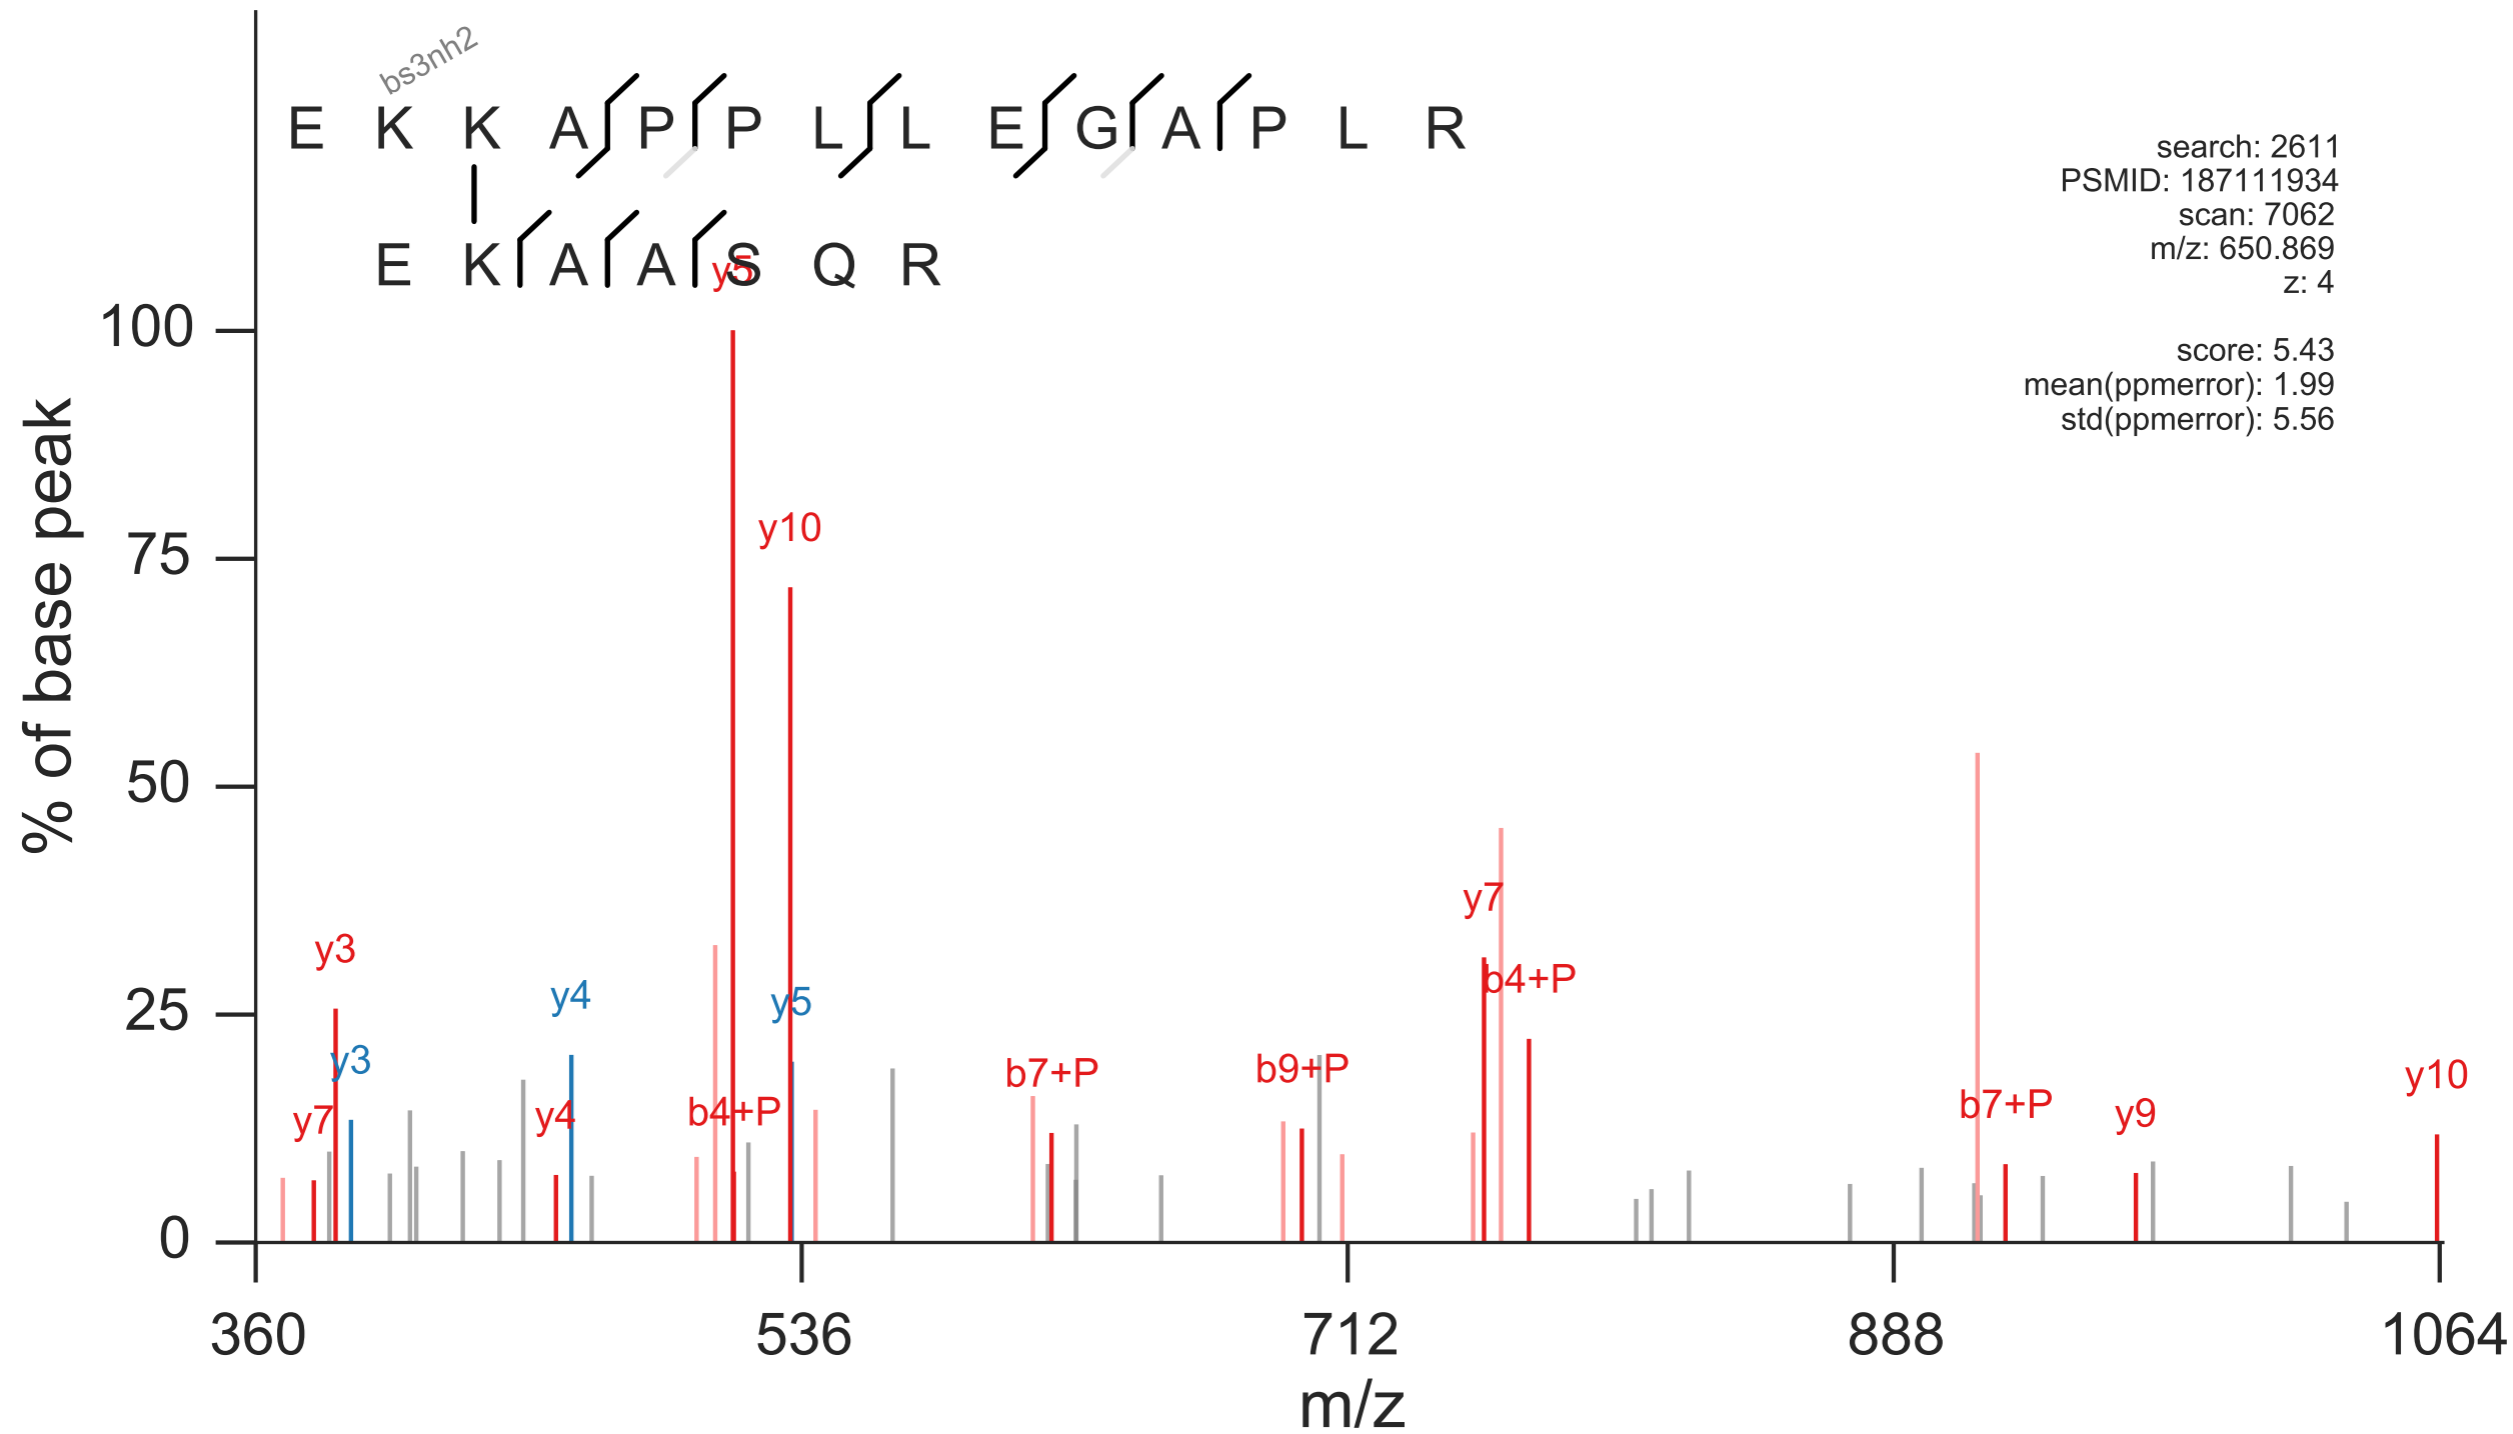

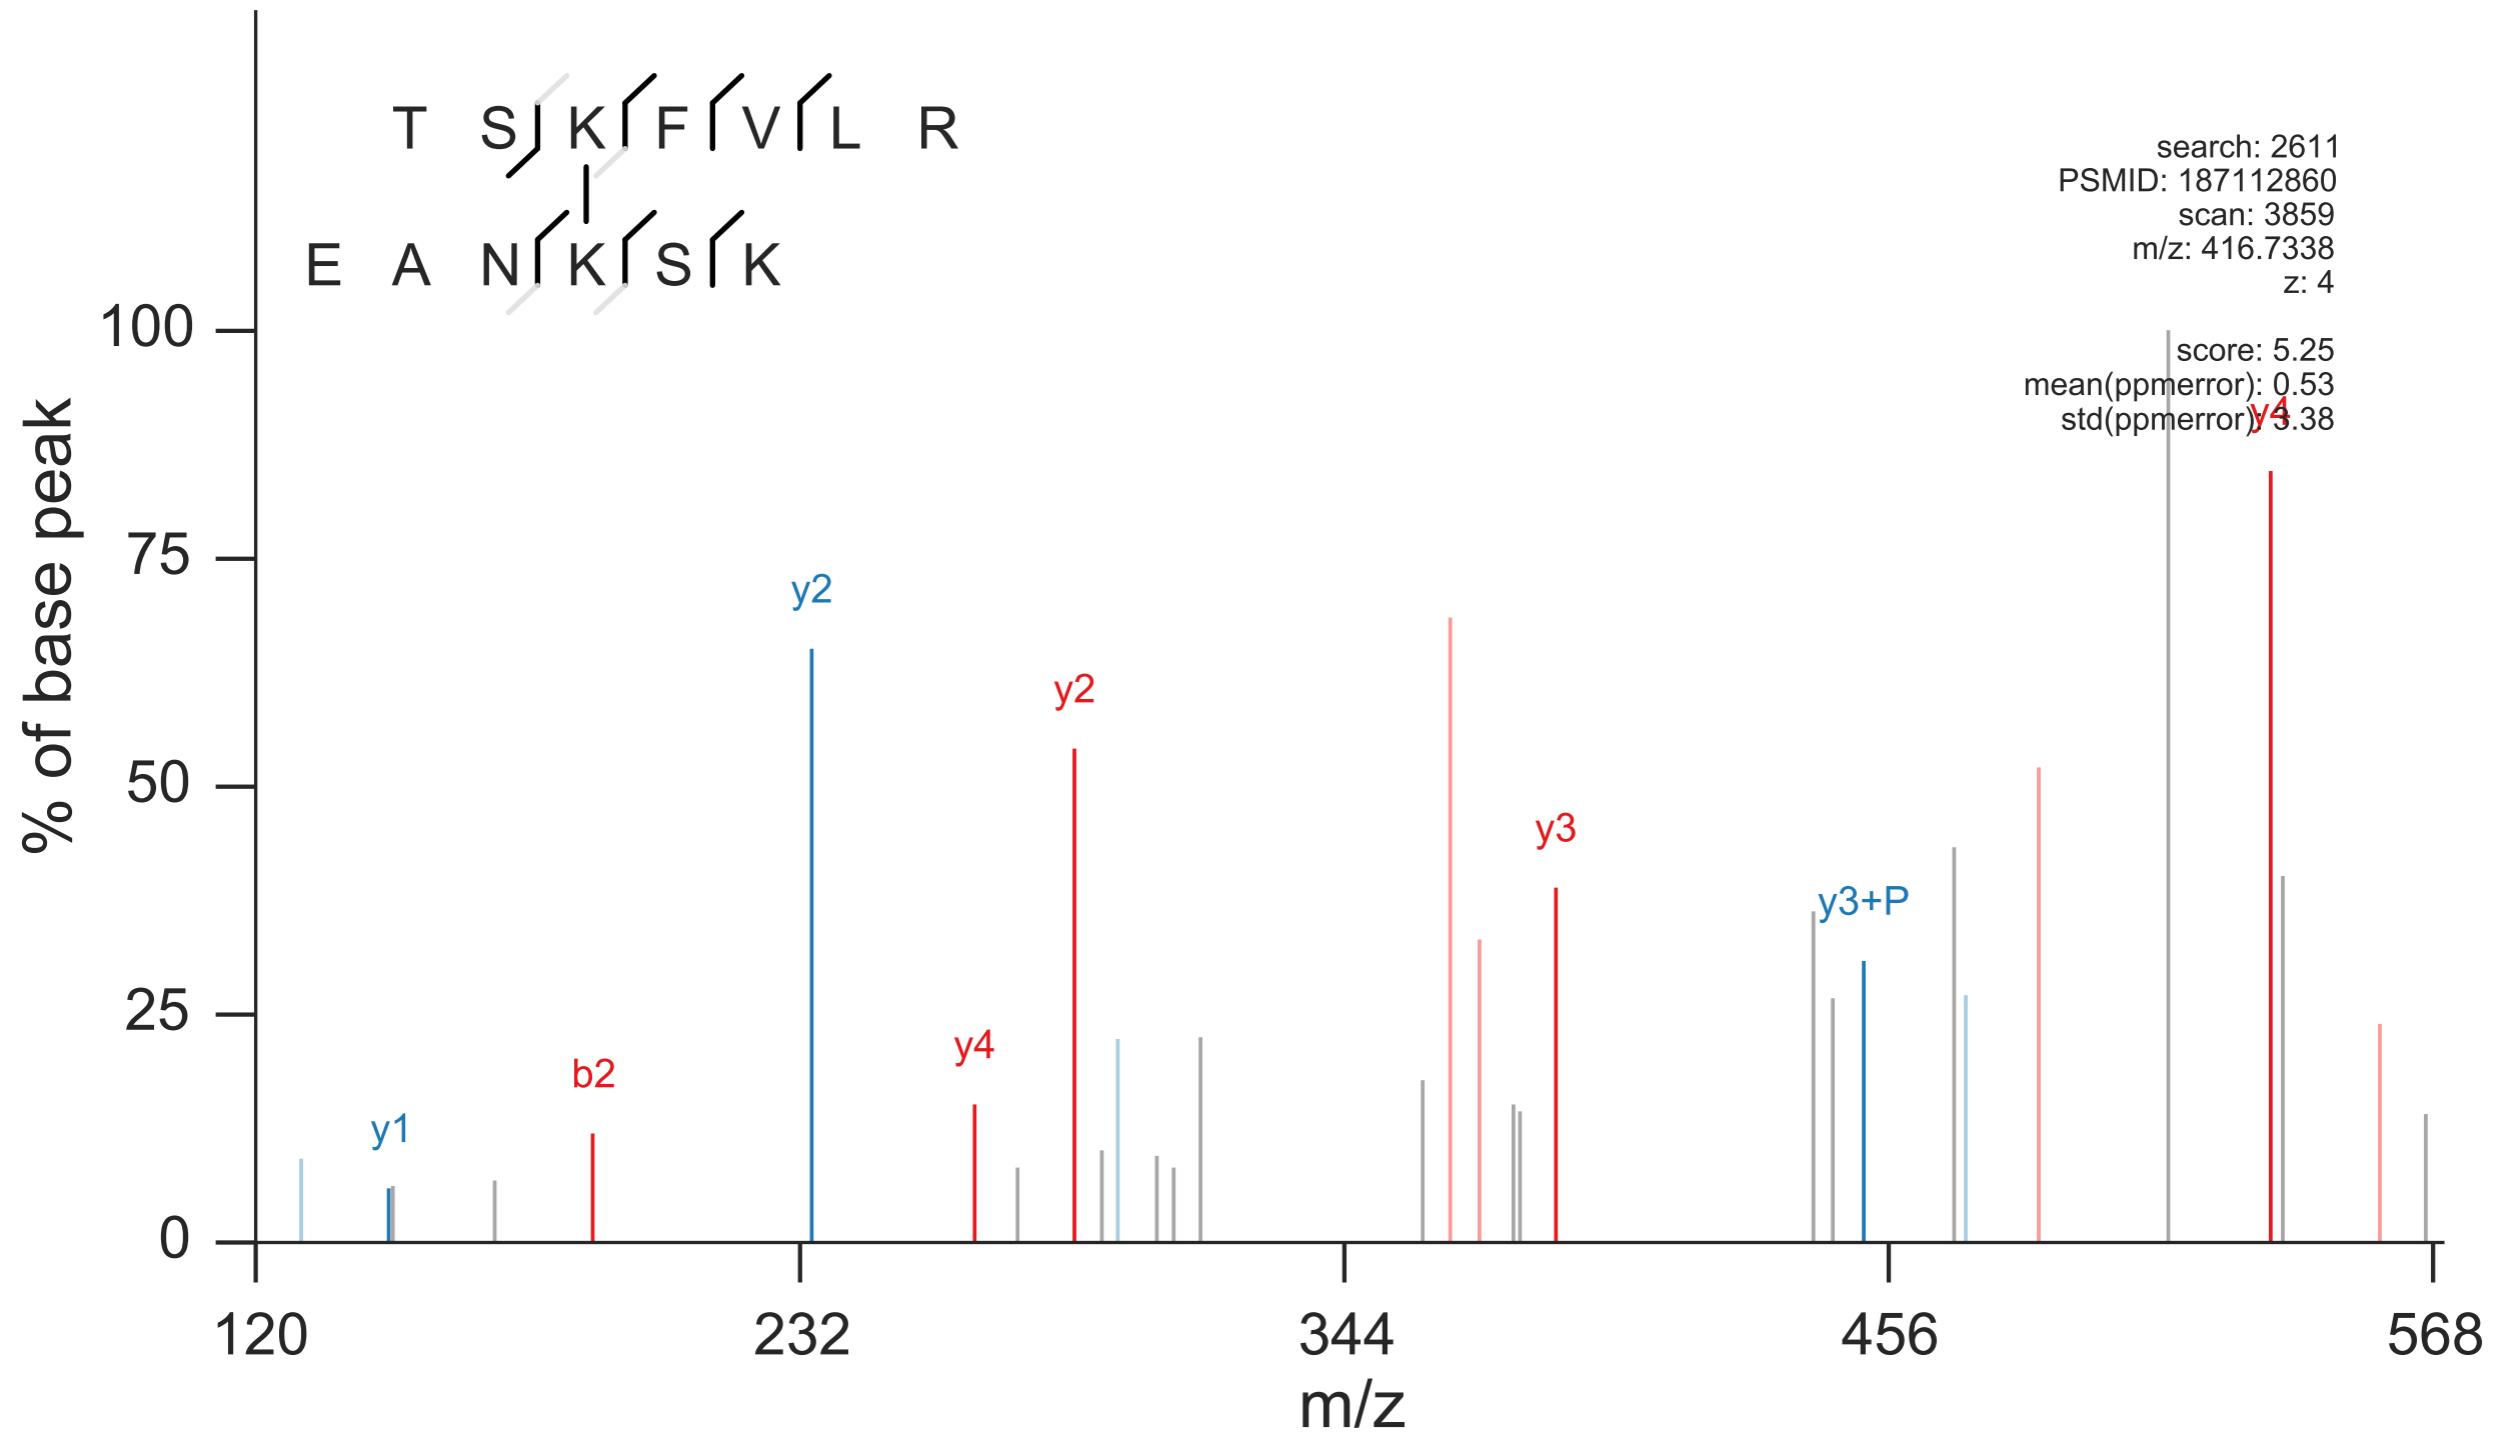



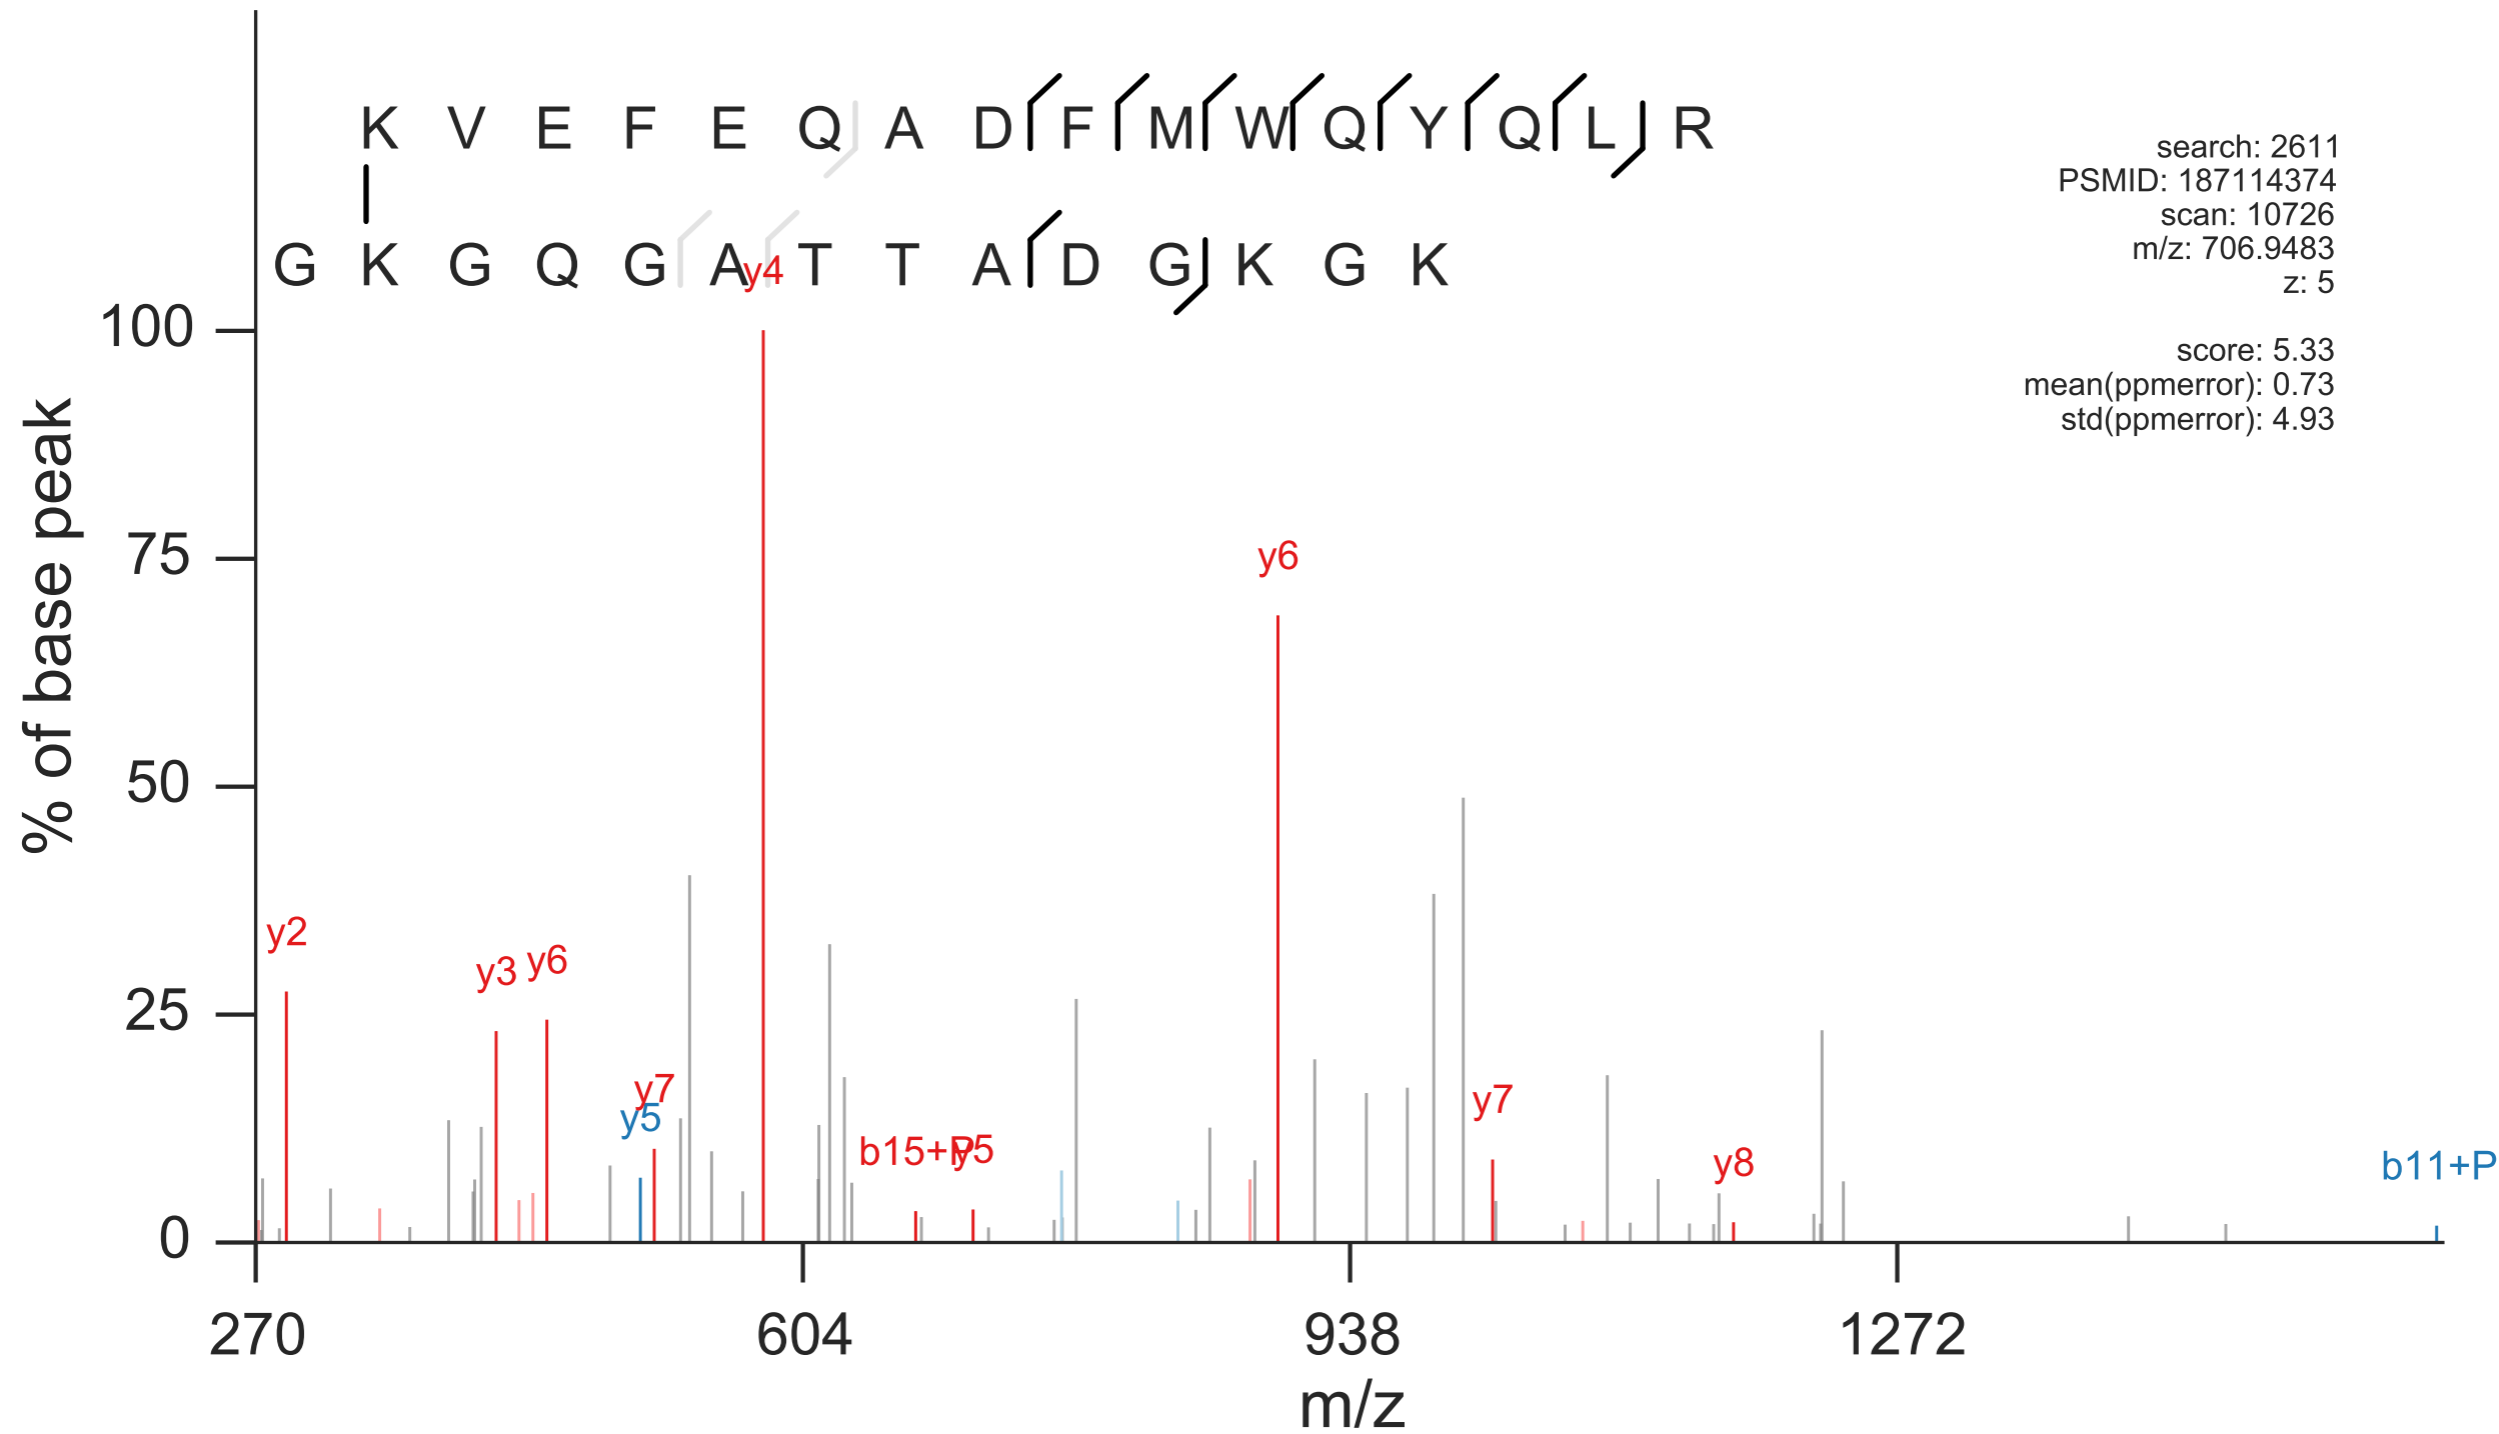

search: 2611  
 PSMID: 187114374  
 scan: 10726  
 m/z: 706.9483  
 z: 5  
 score: 5.33  
 mean(ppmerror): 0.73  
 std(ppmerror): 4.93

K V E F E Q A D F M W Q Y Q L R  
 G K G Q G A T T A D G K G K  
 (Note: 'A' at position 10 is highlighted in red in the original image)

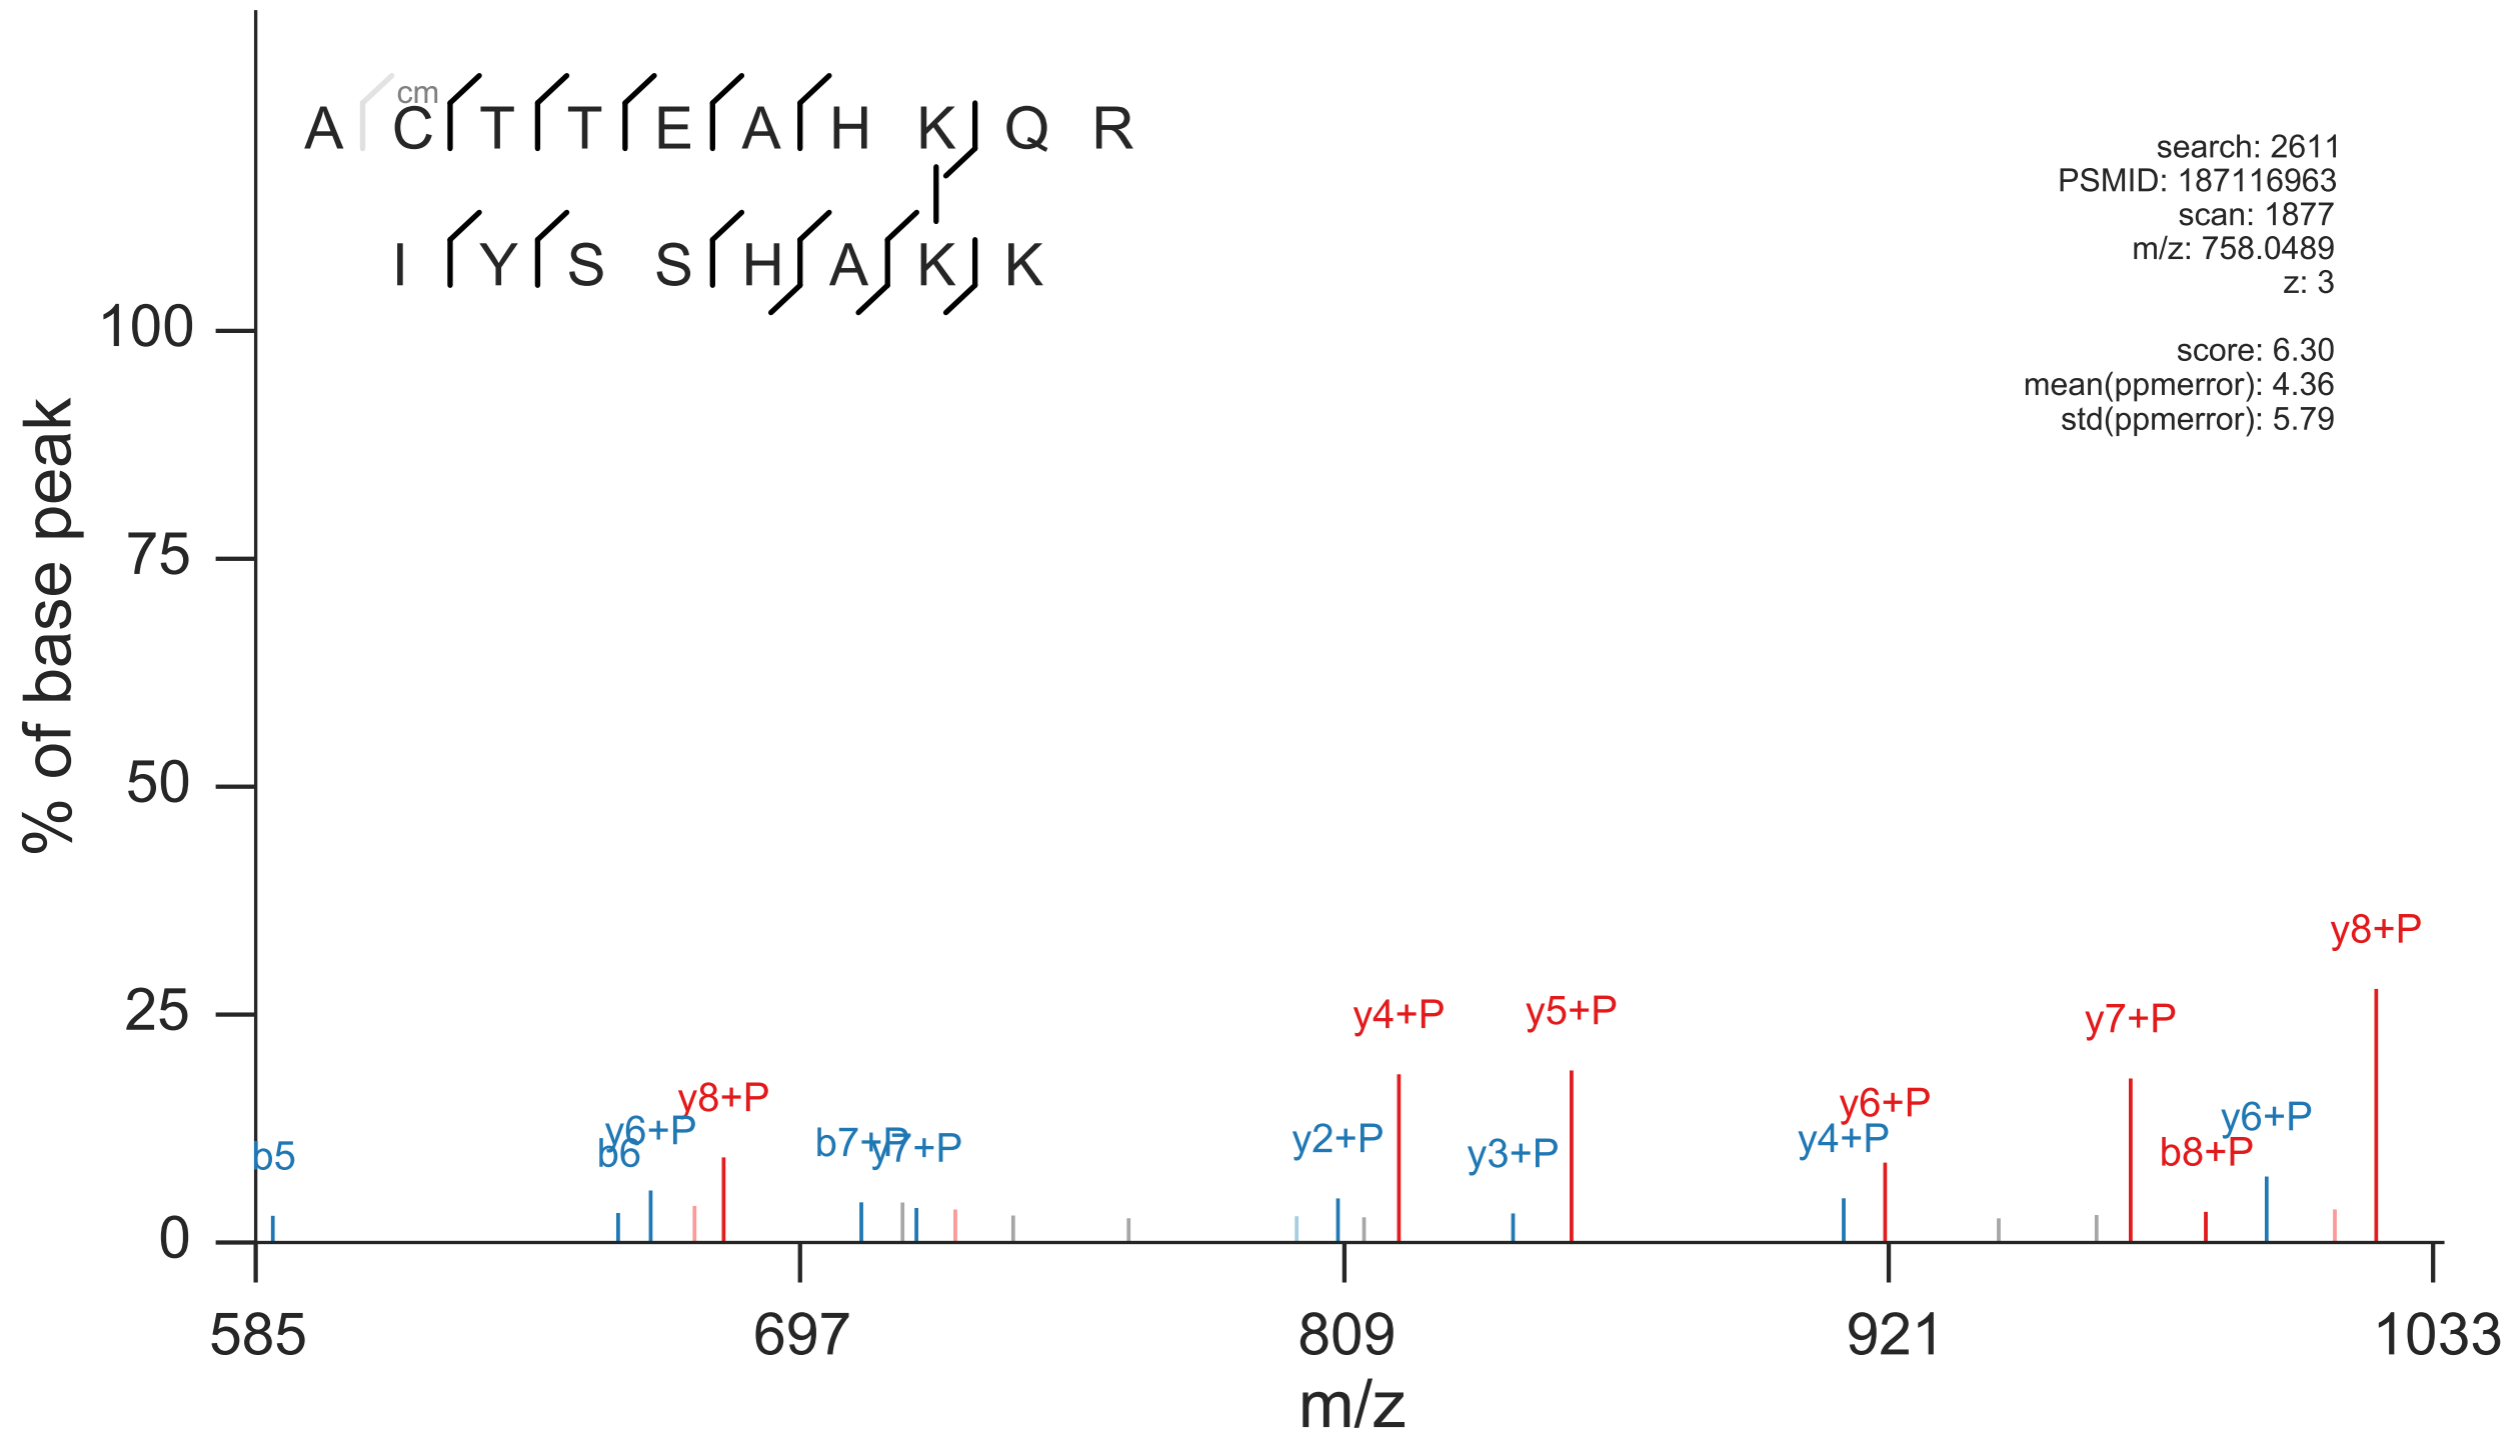

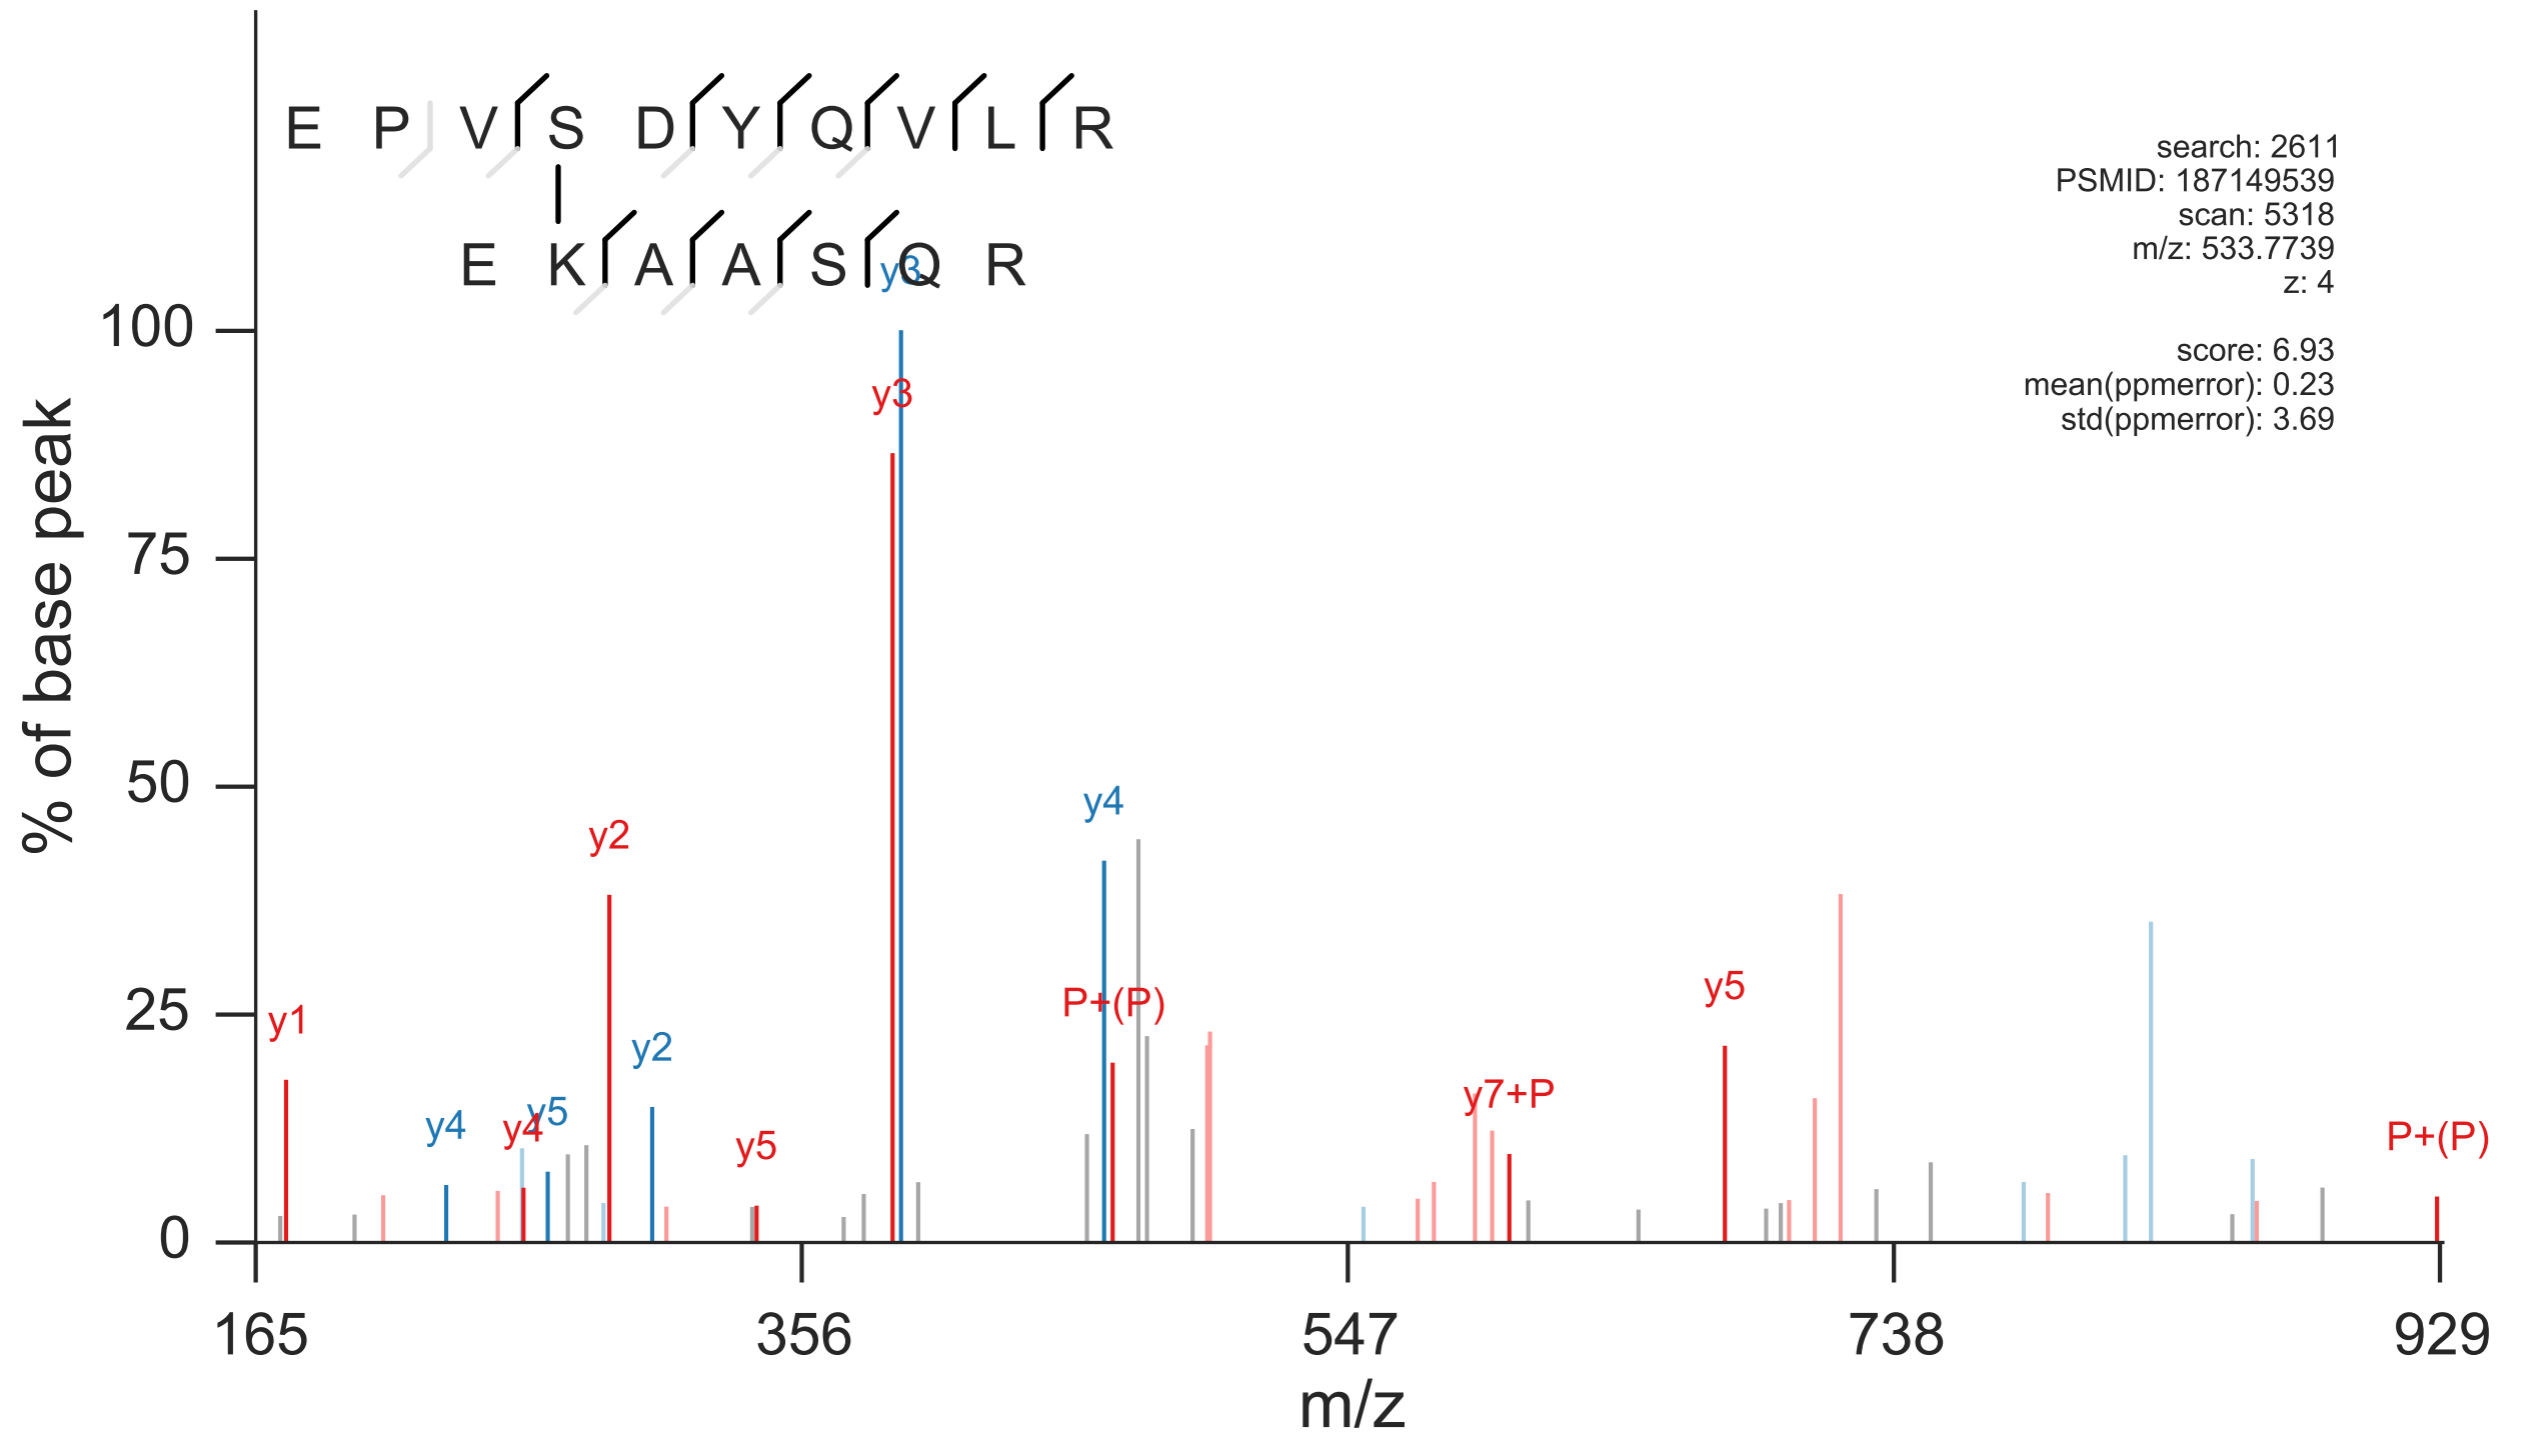

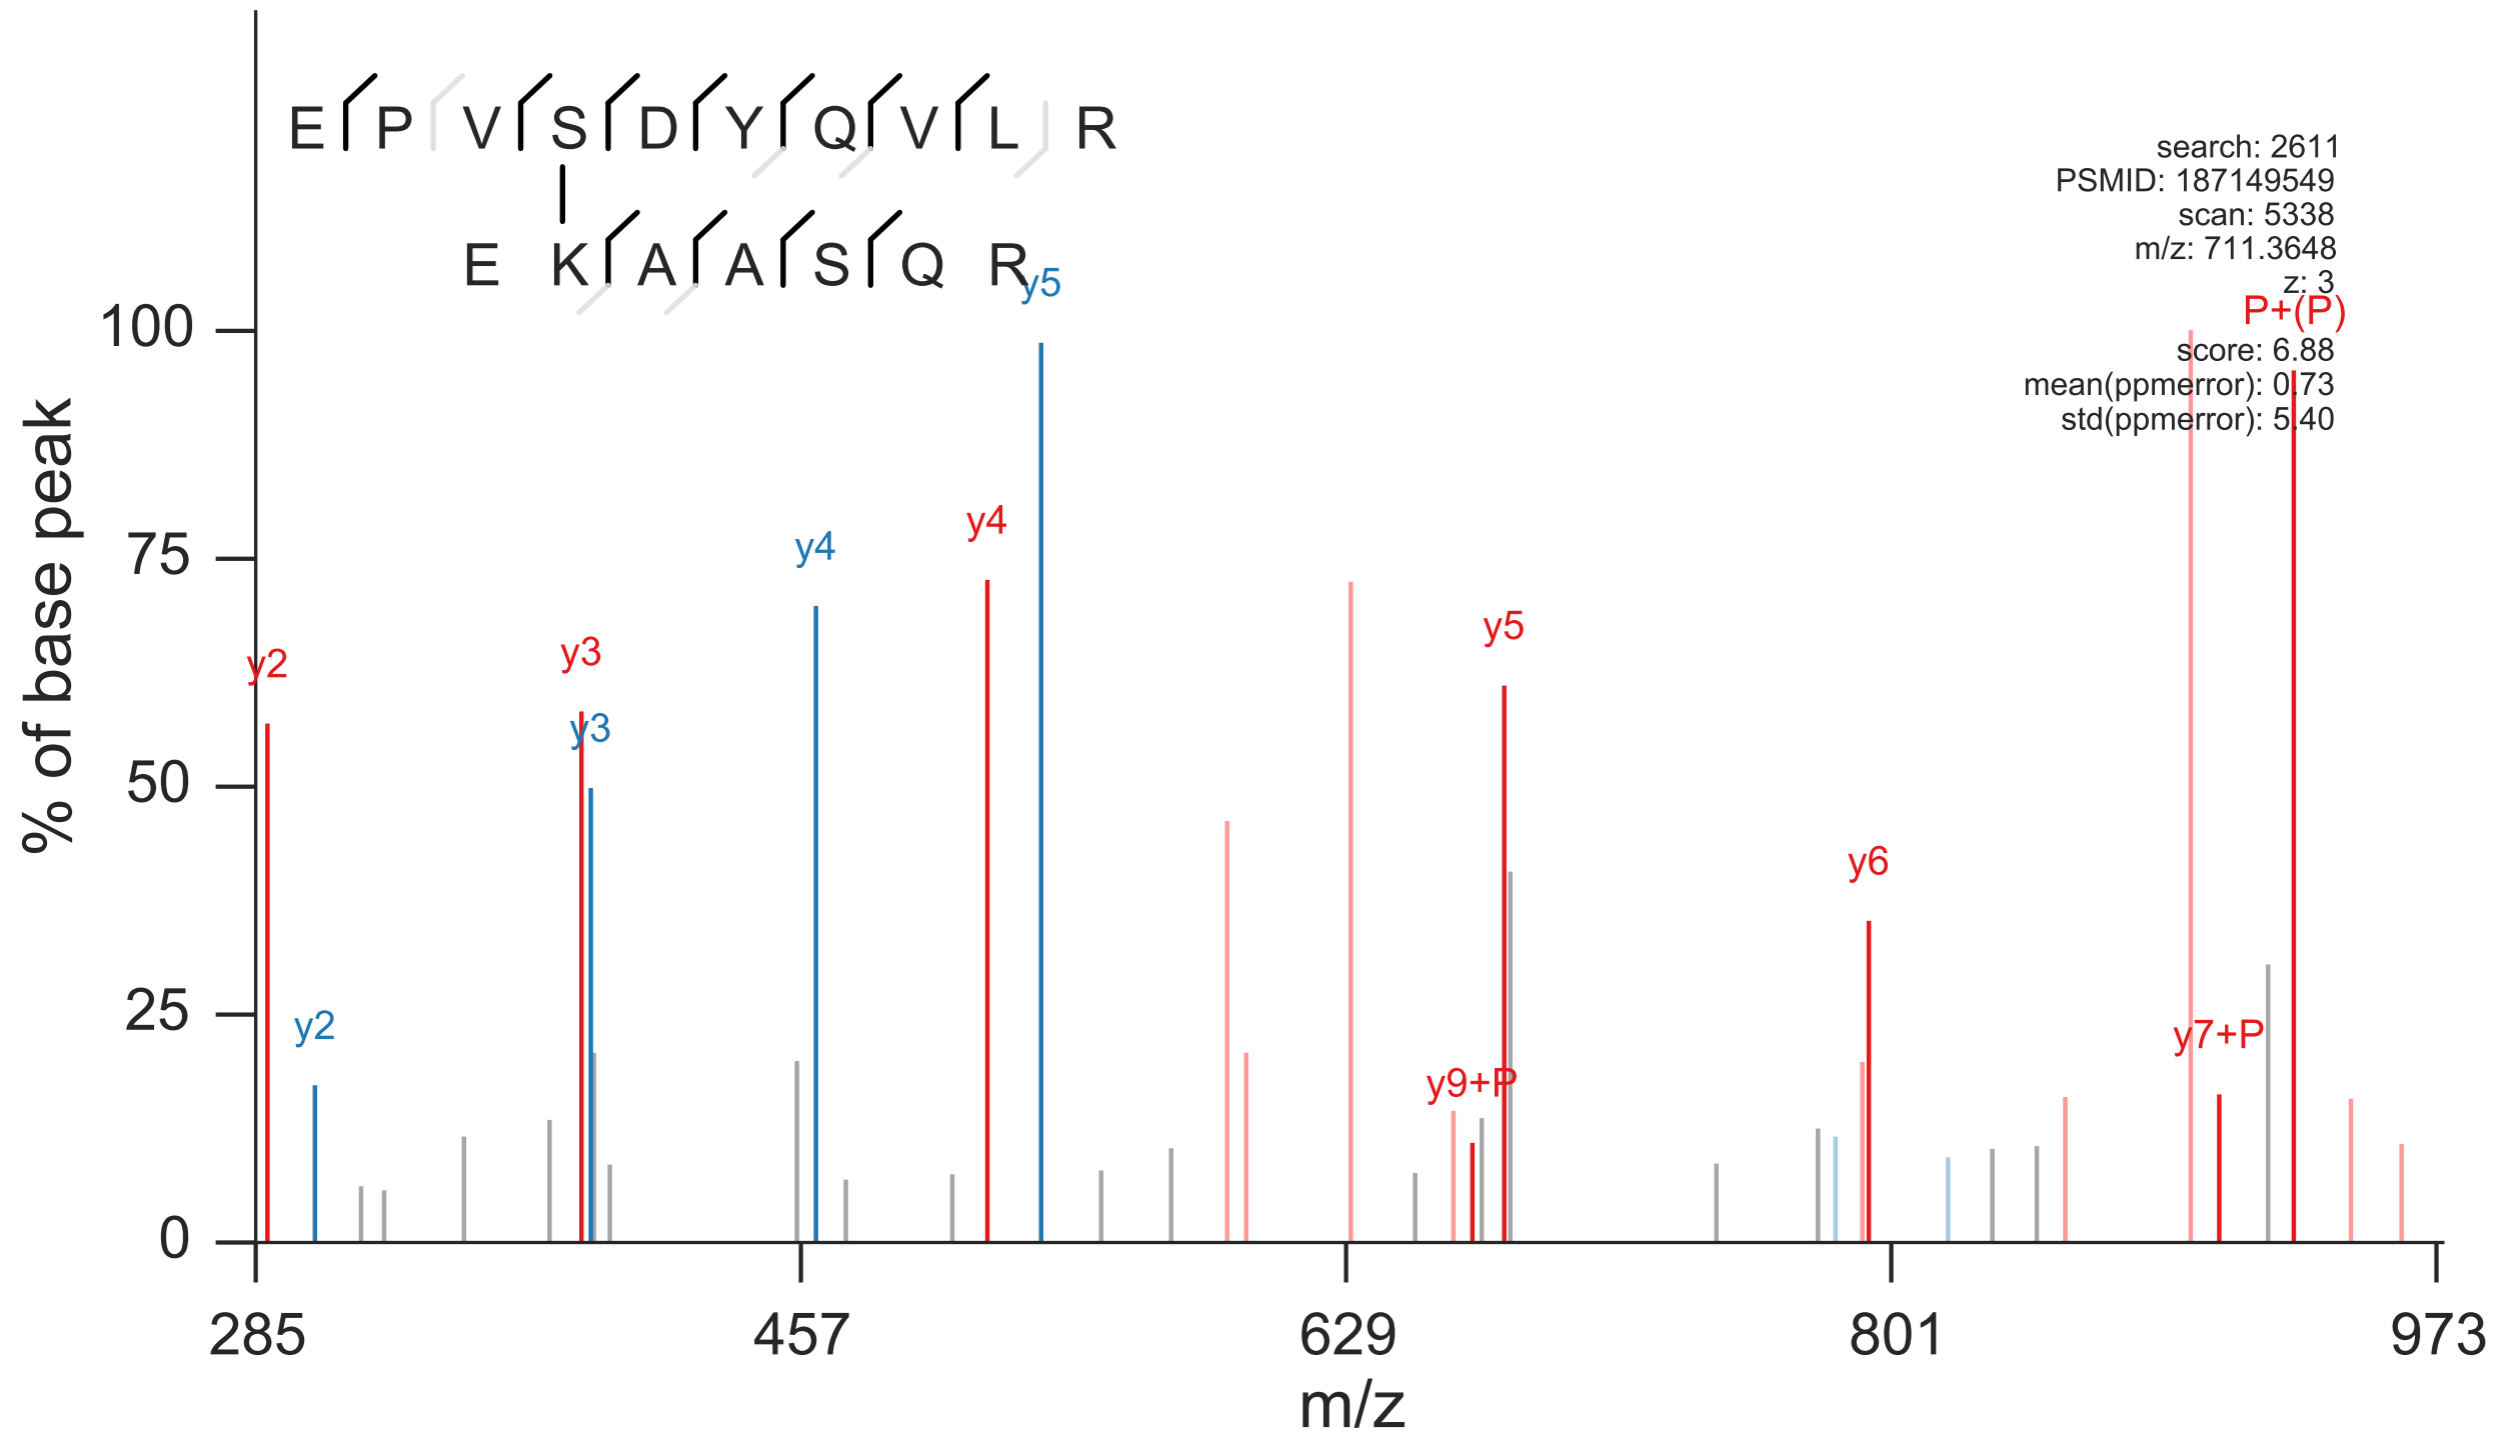

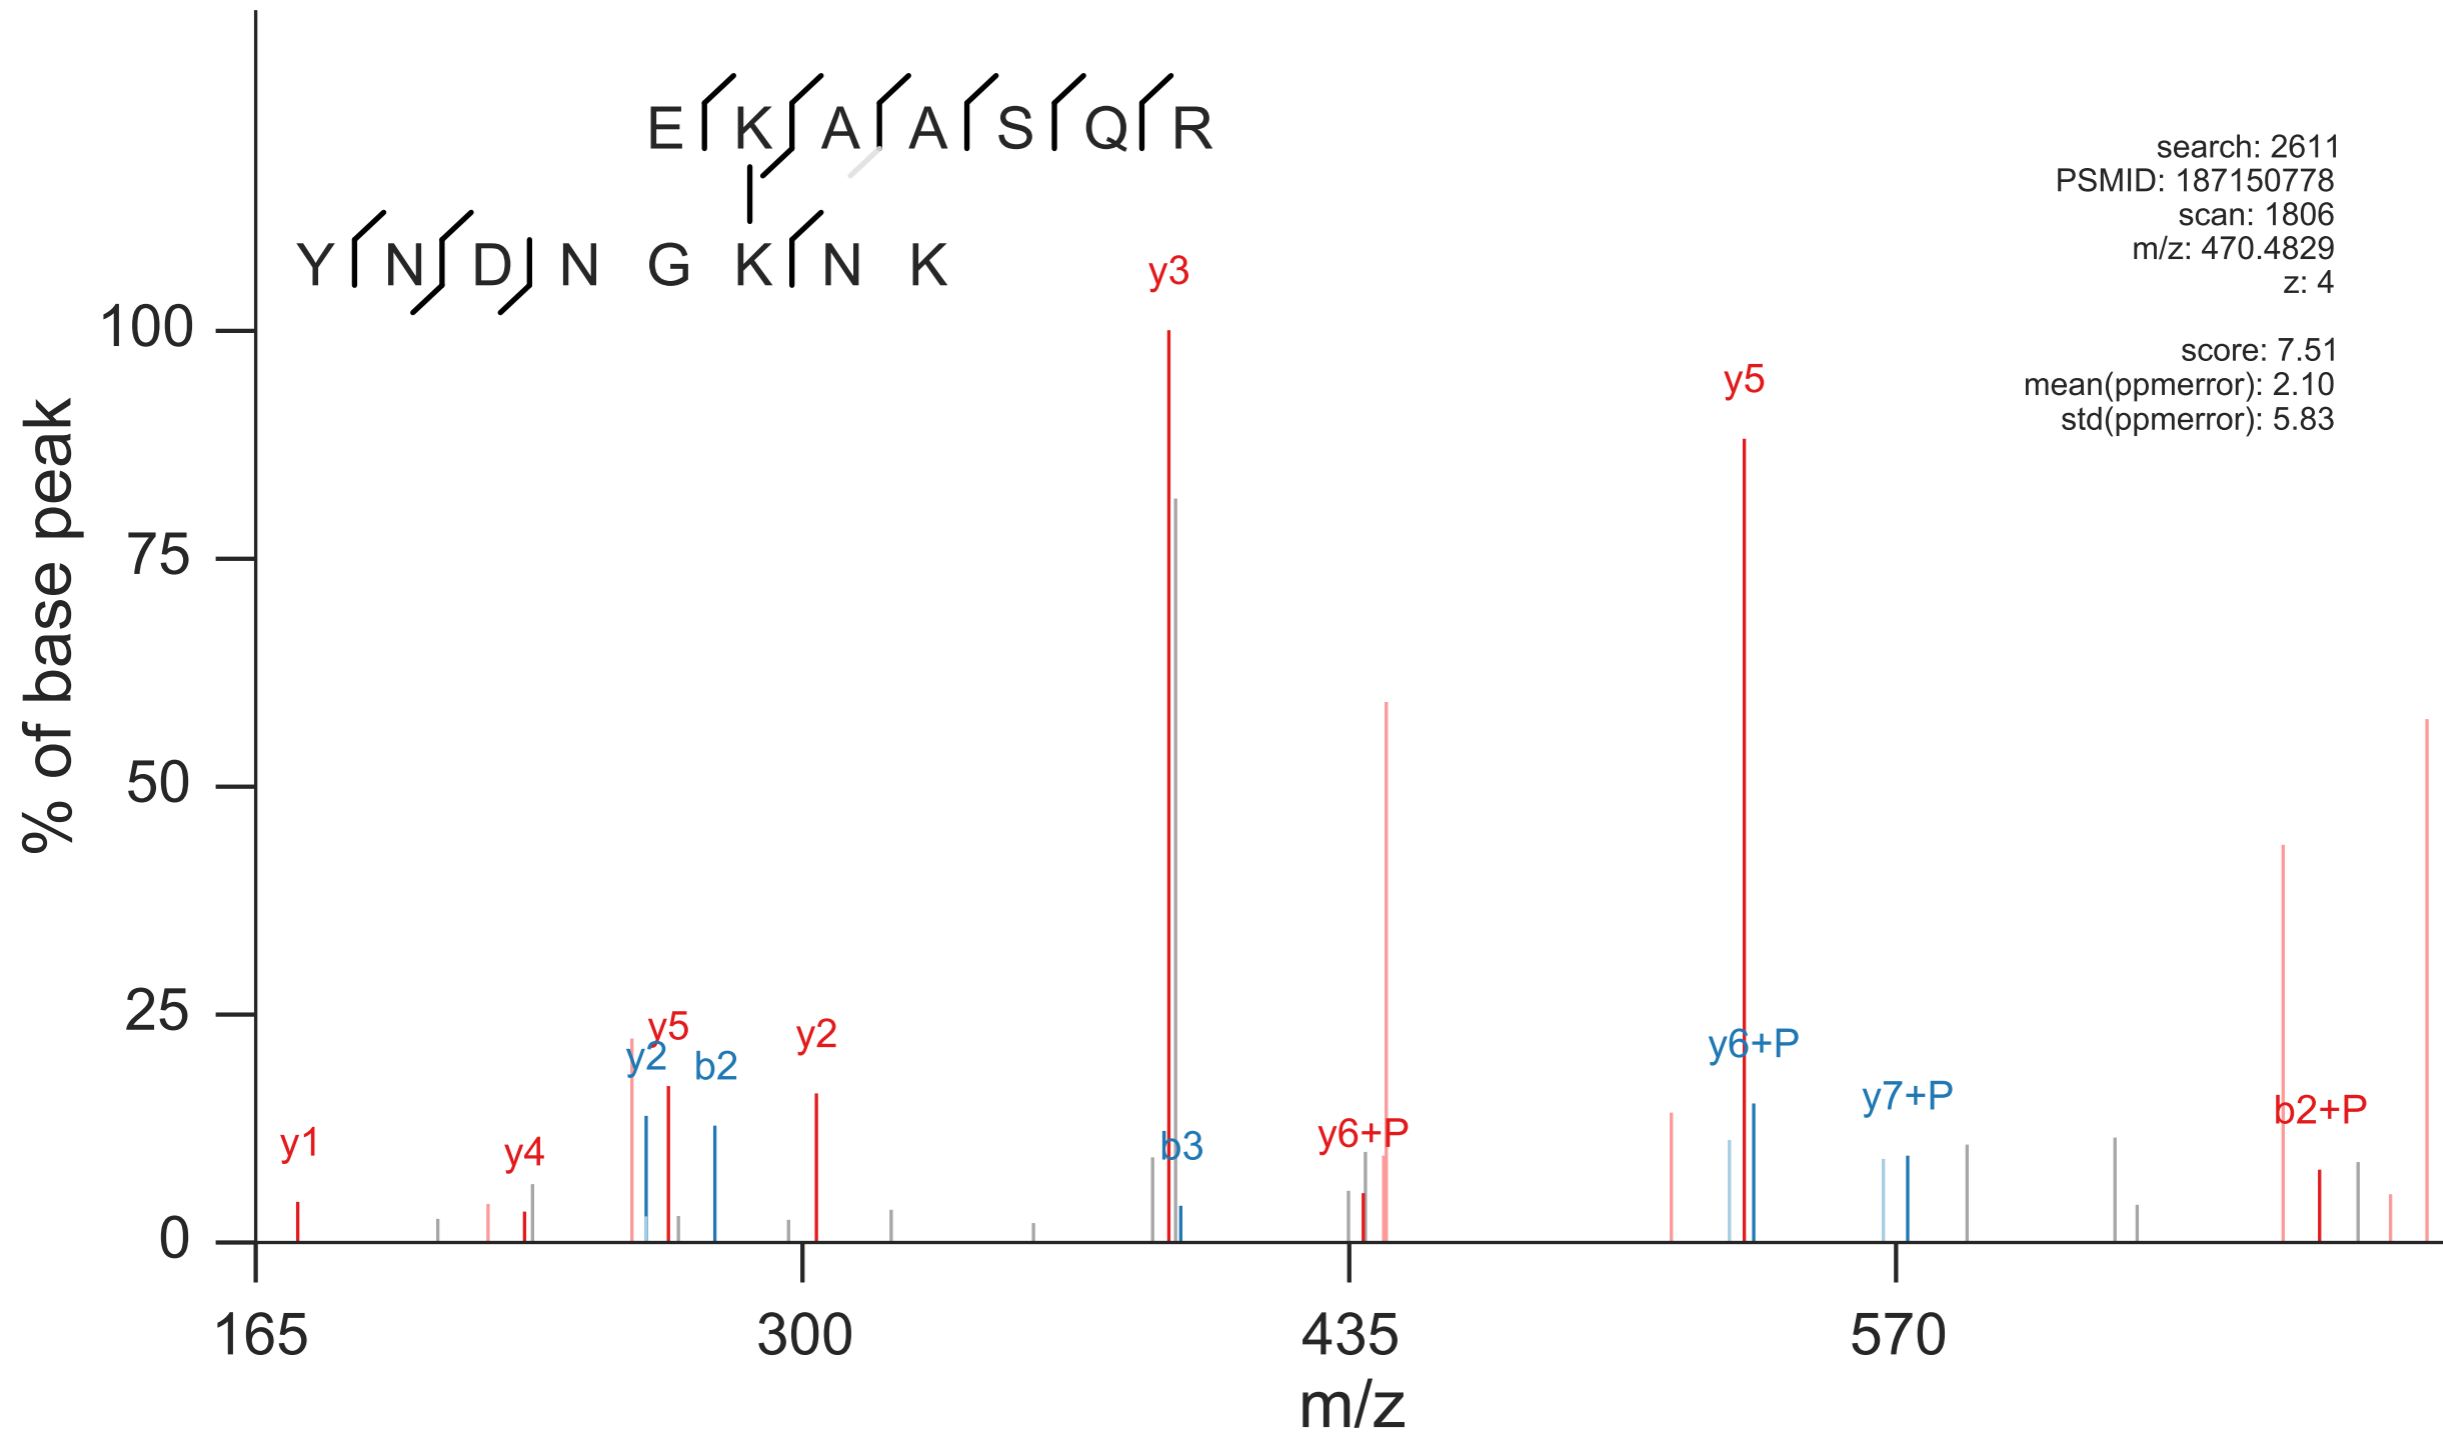

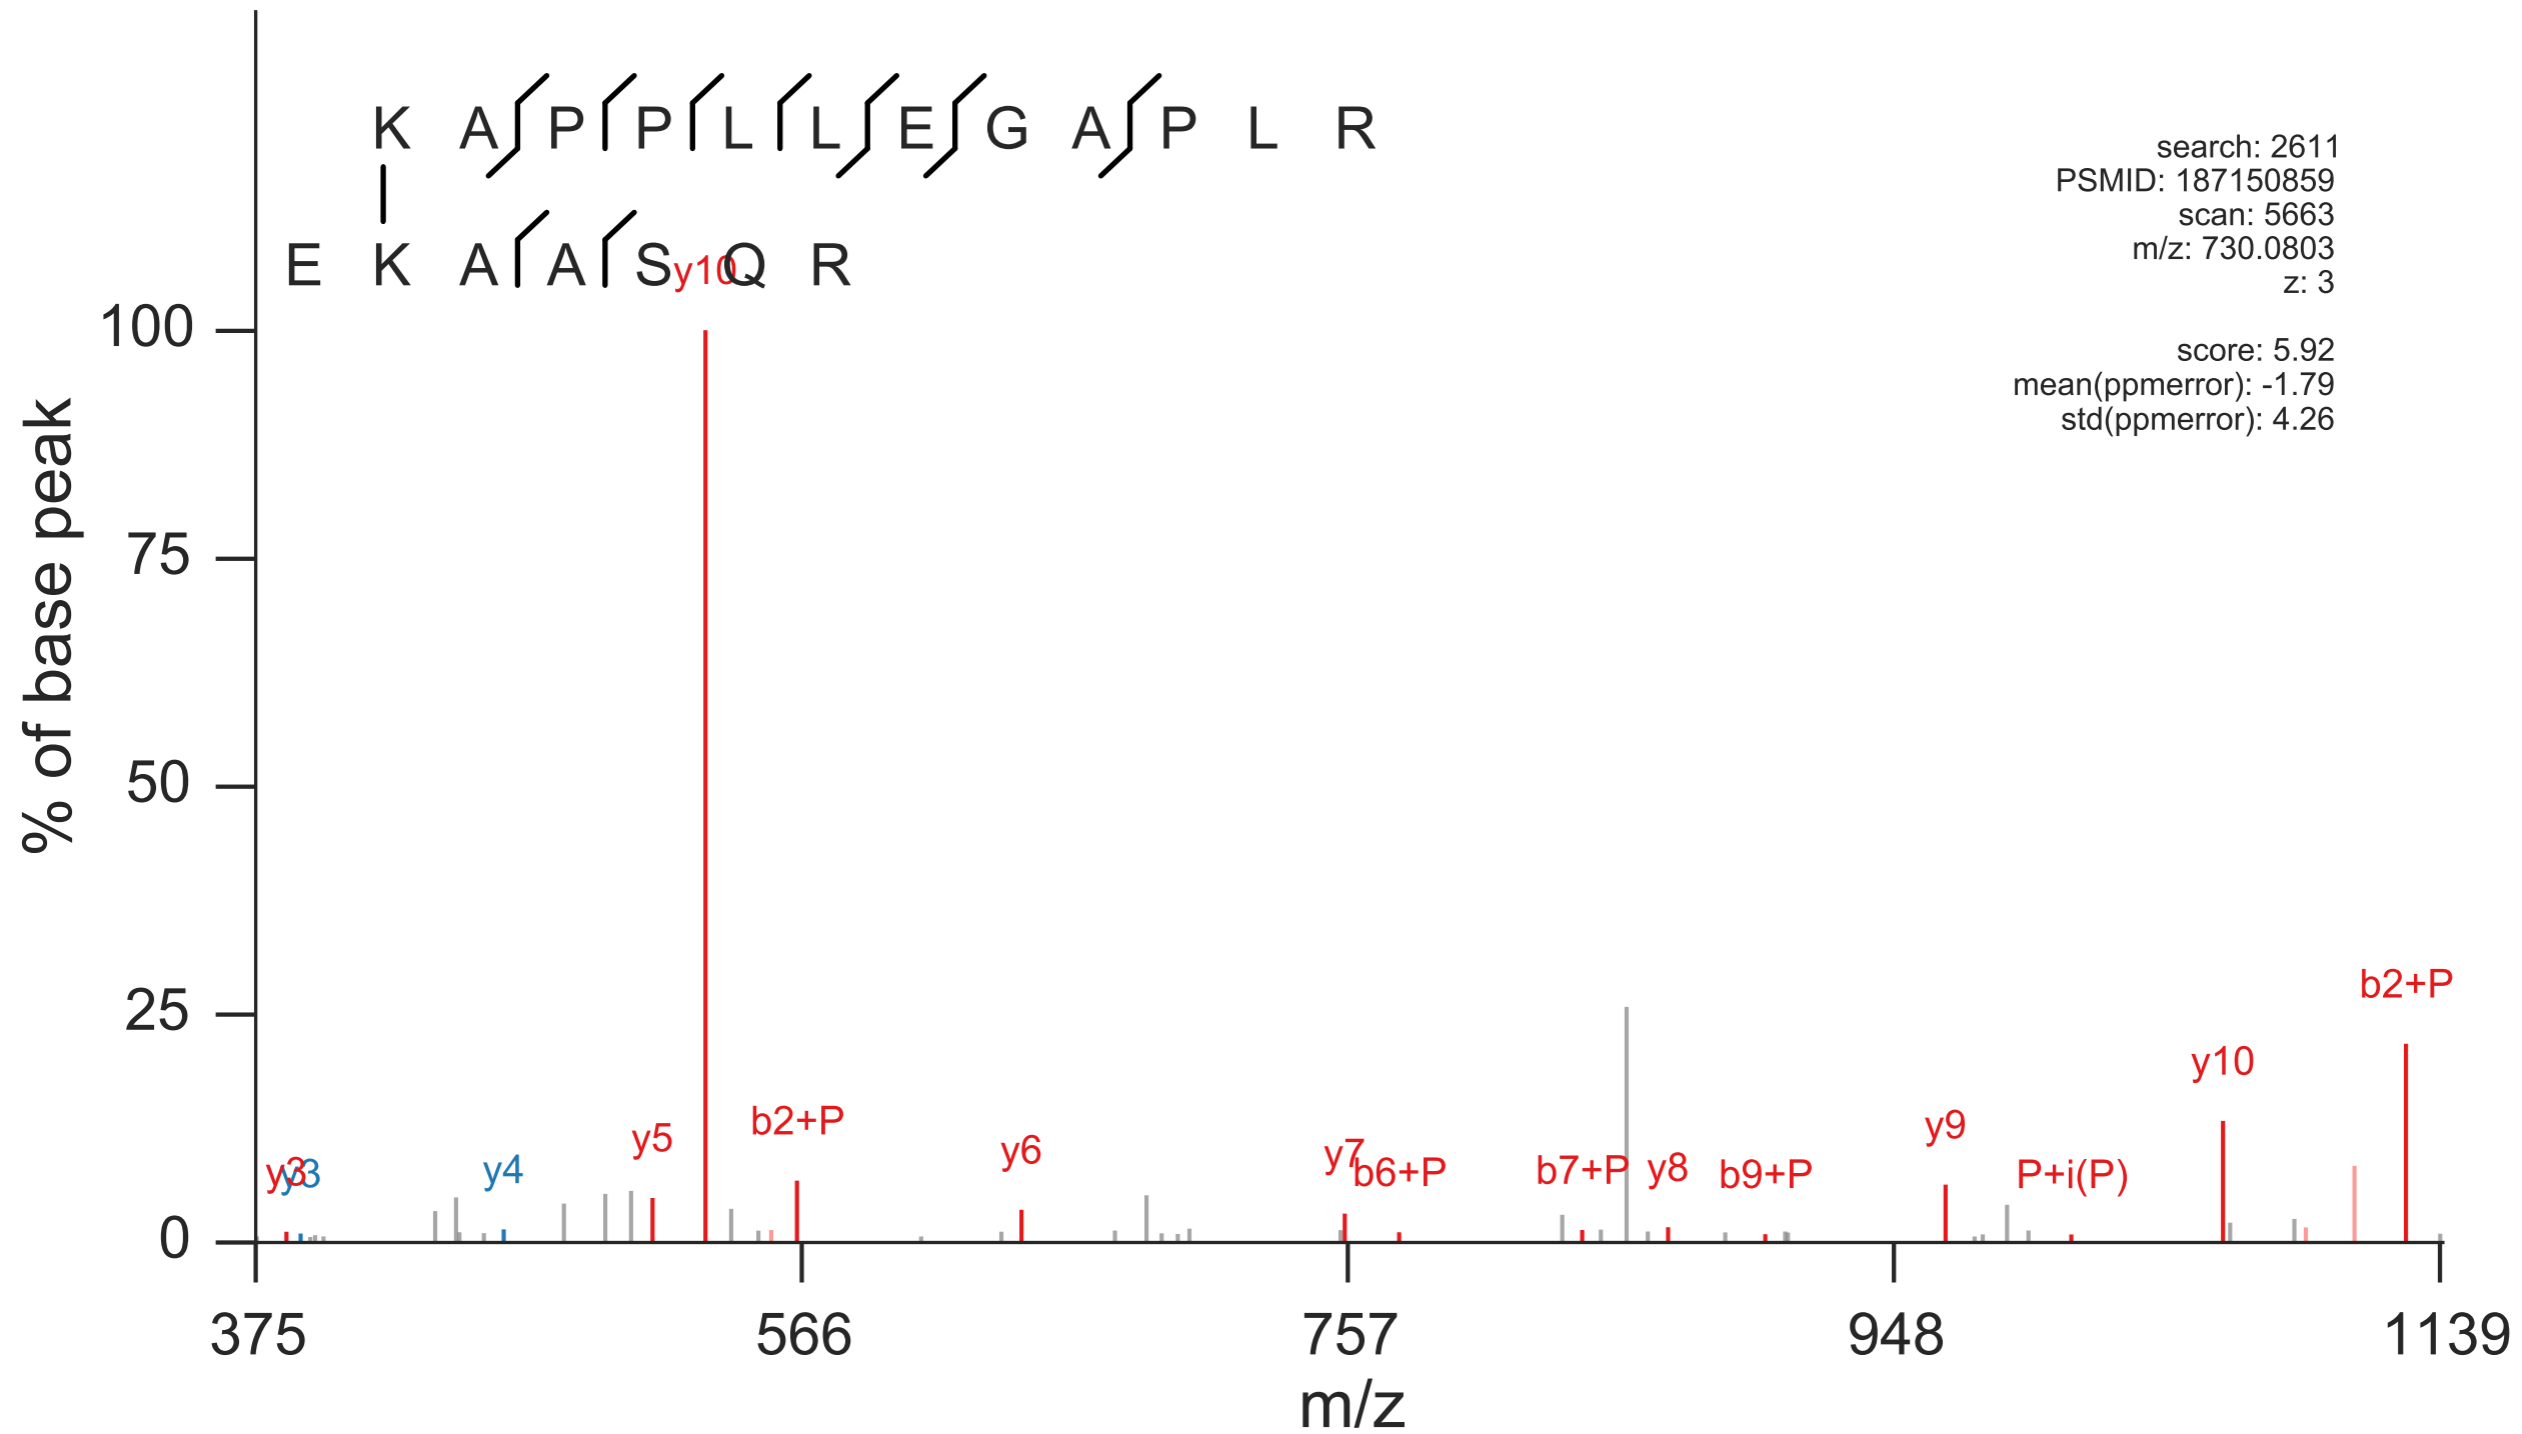

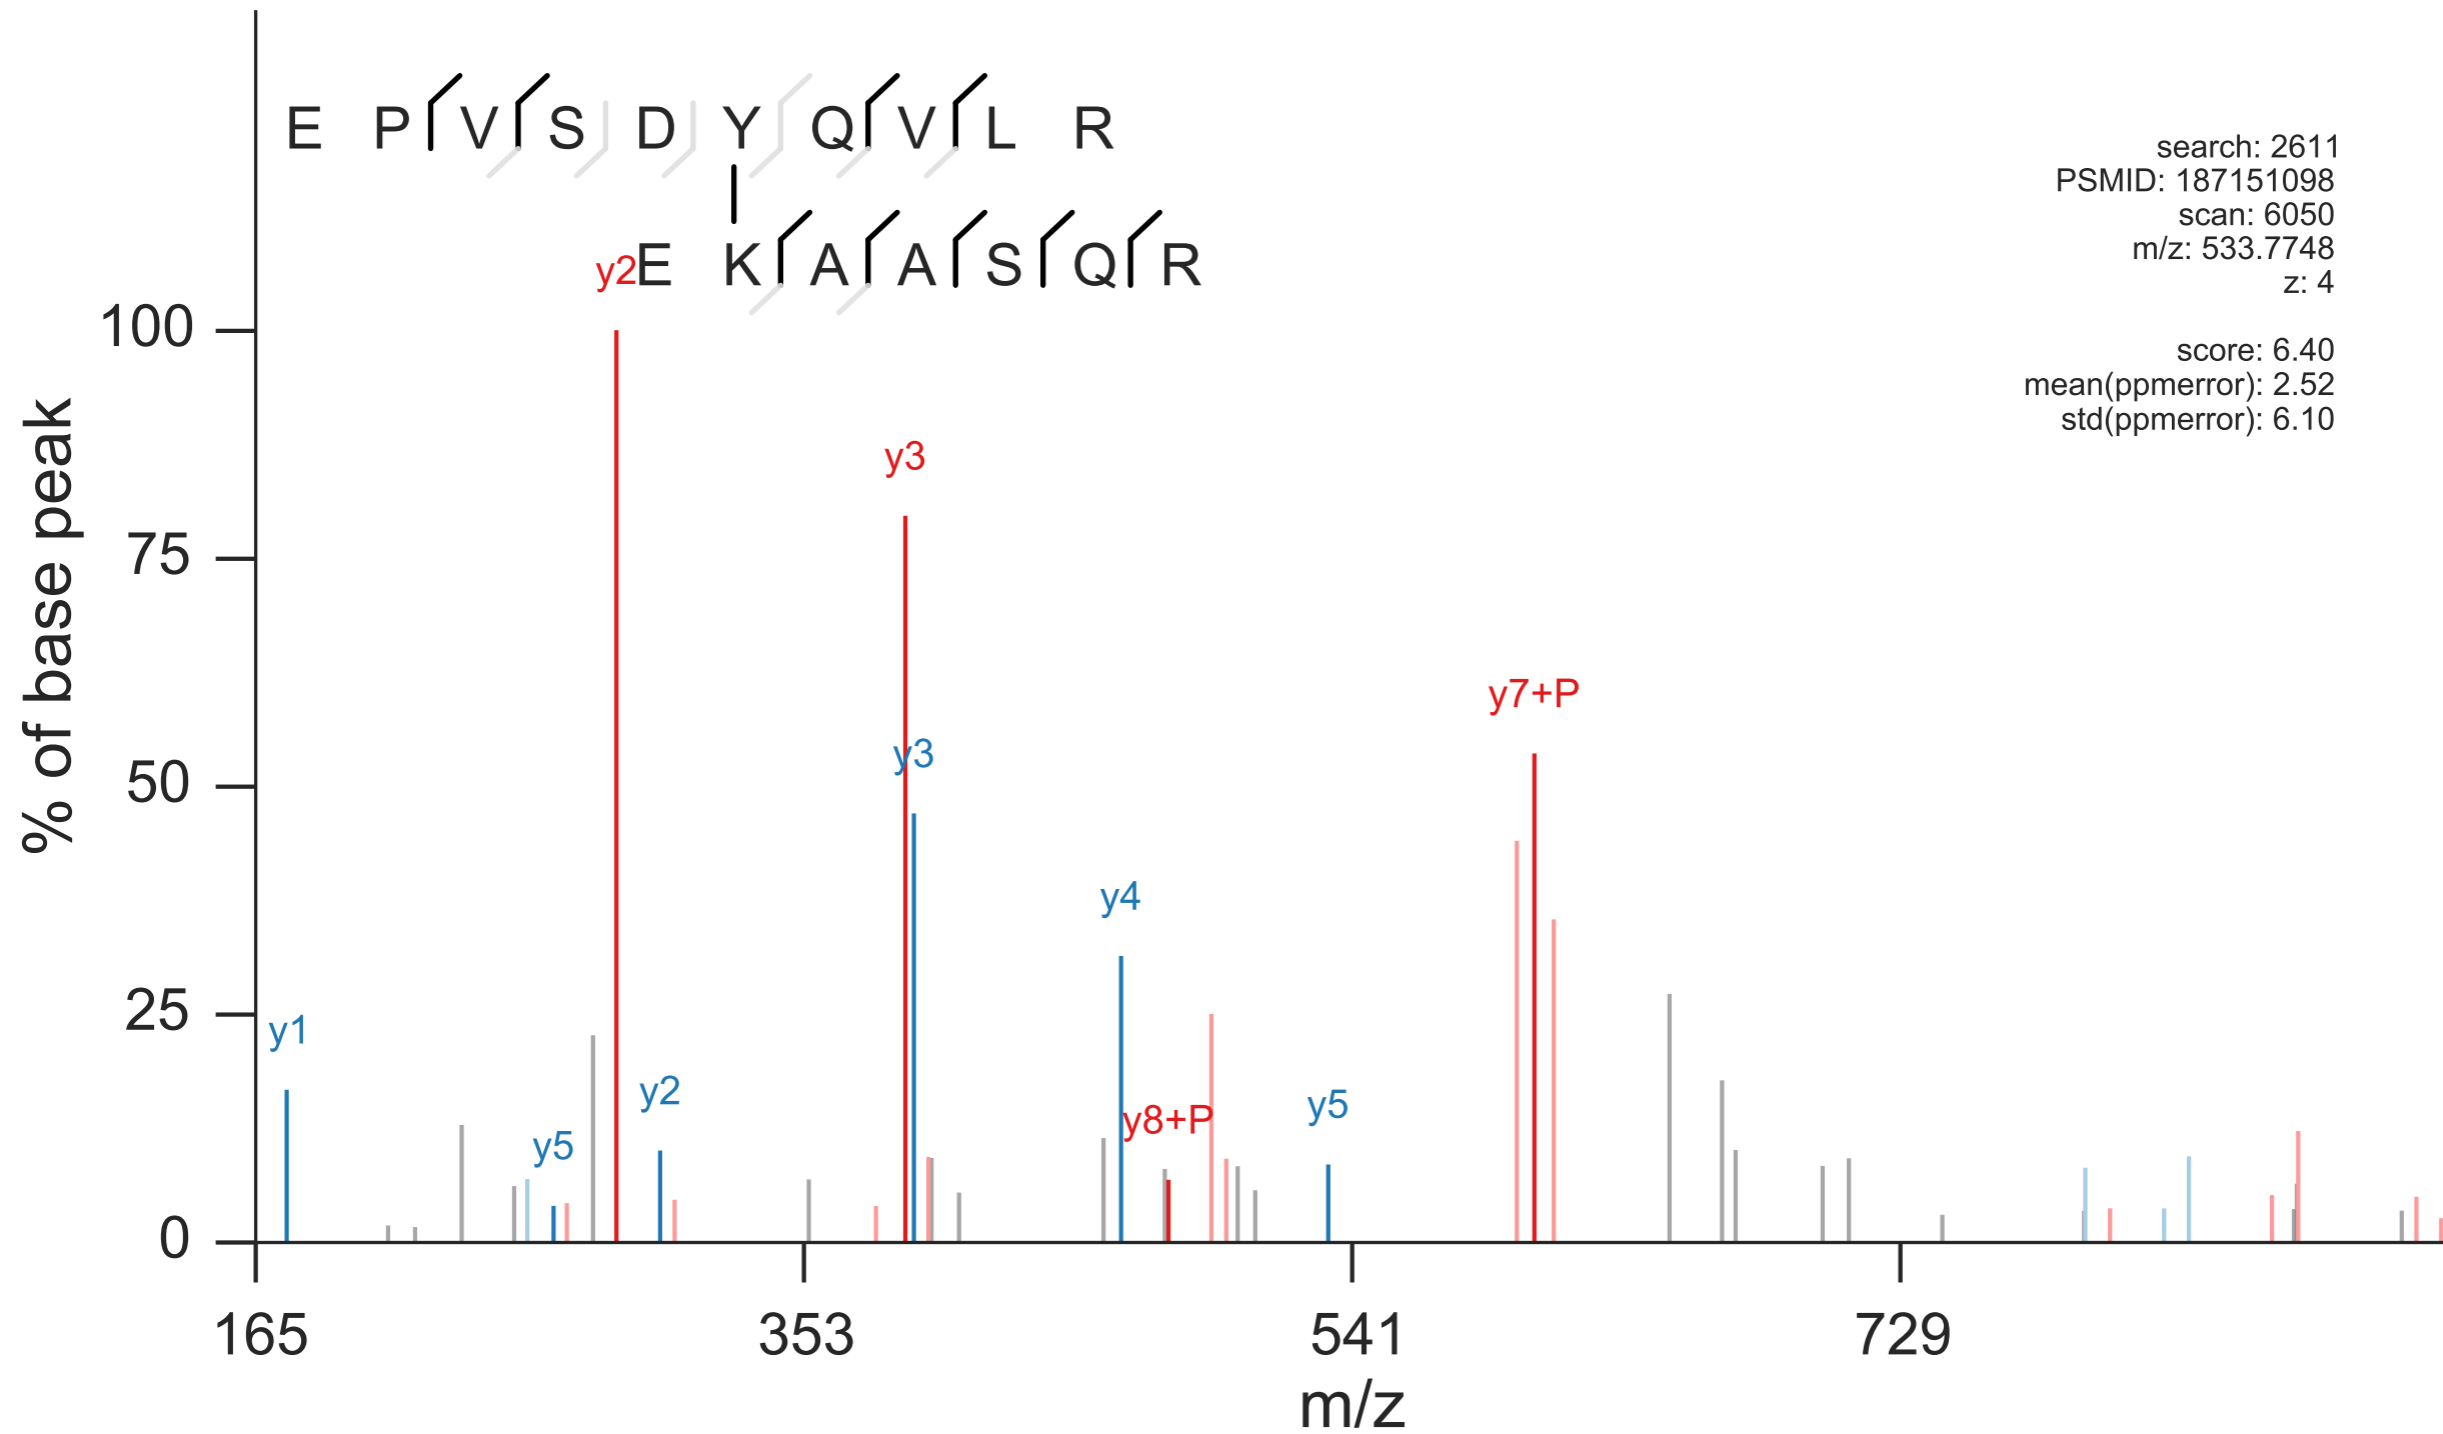

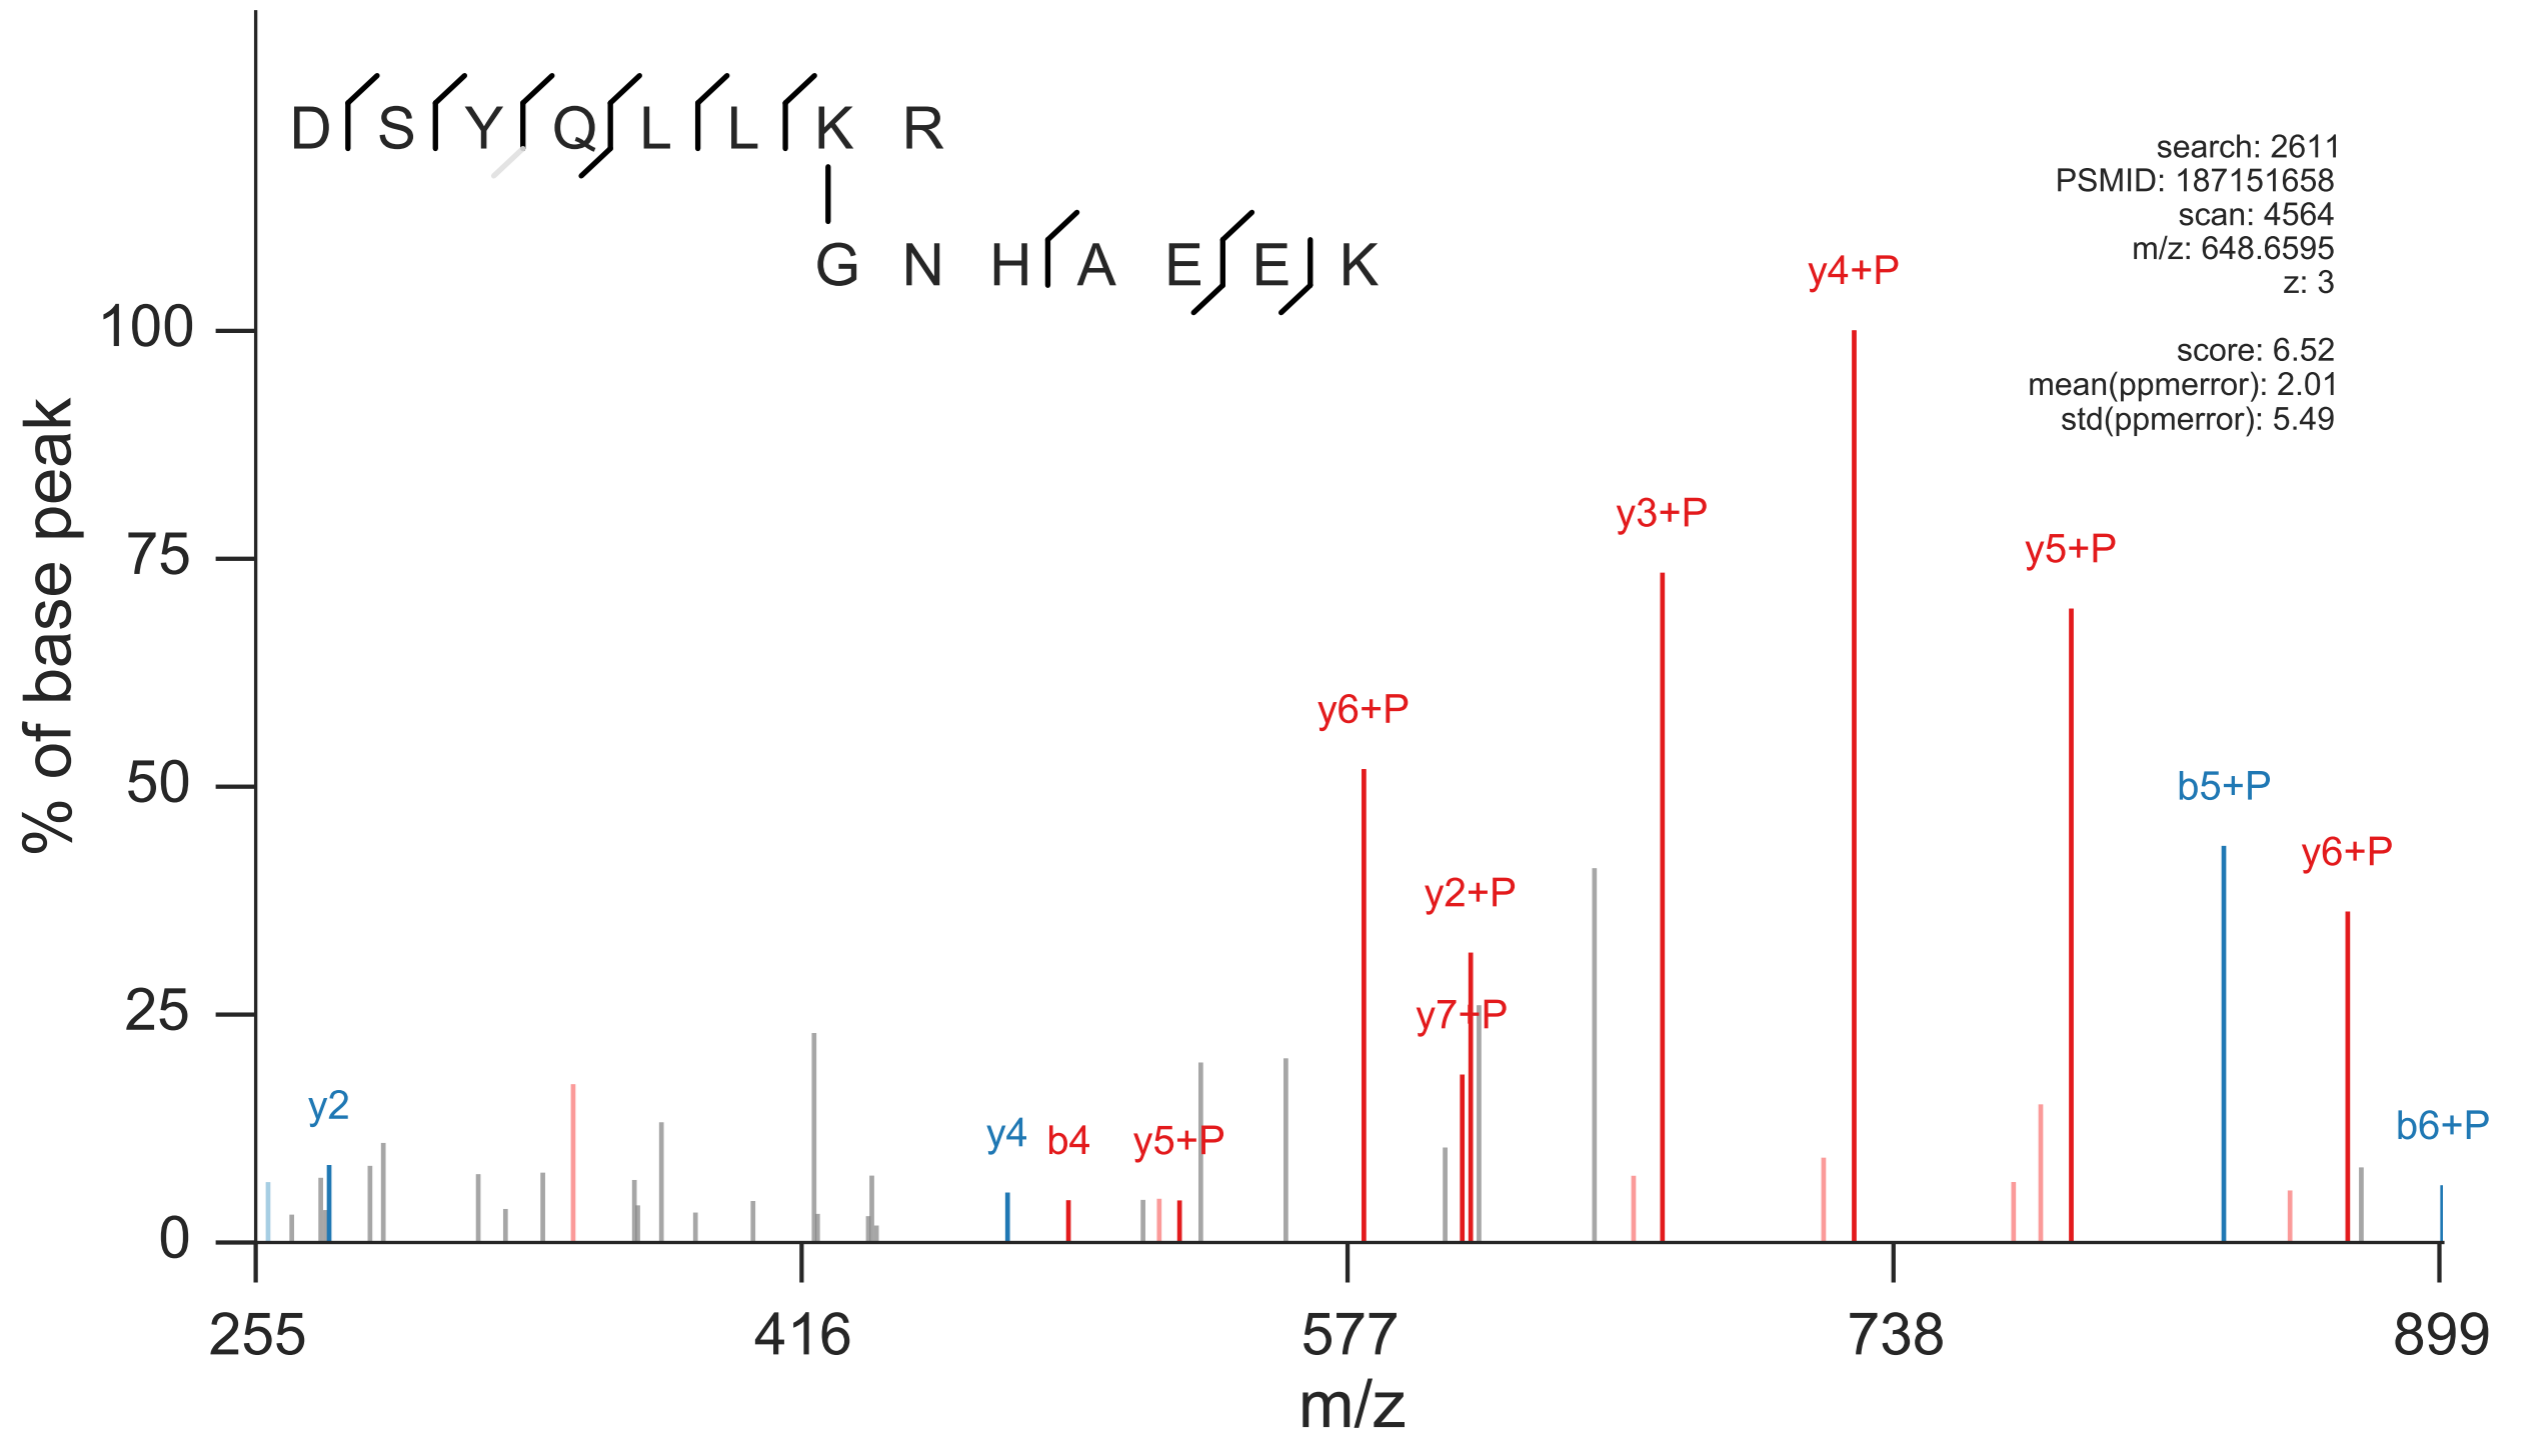



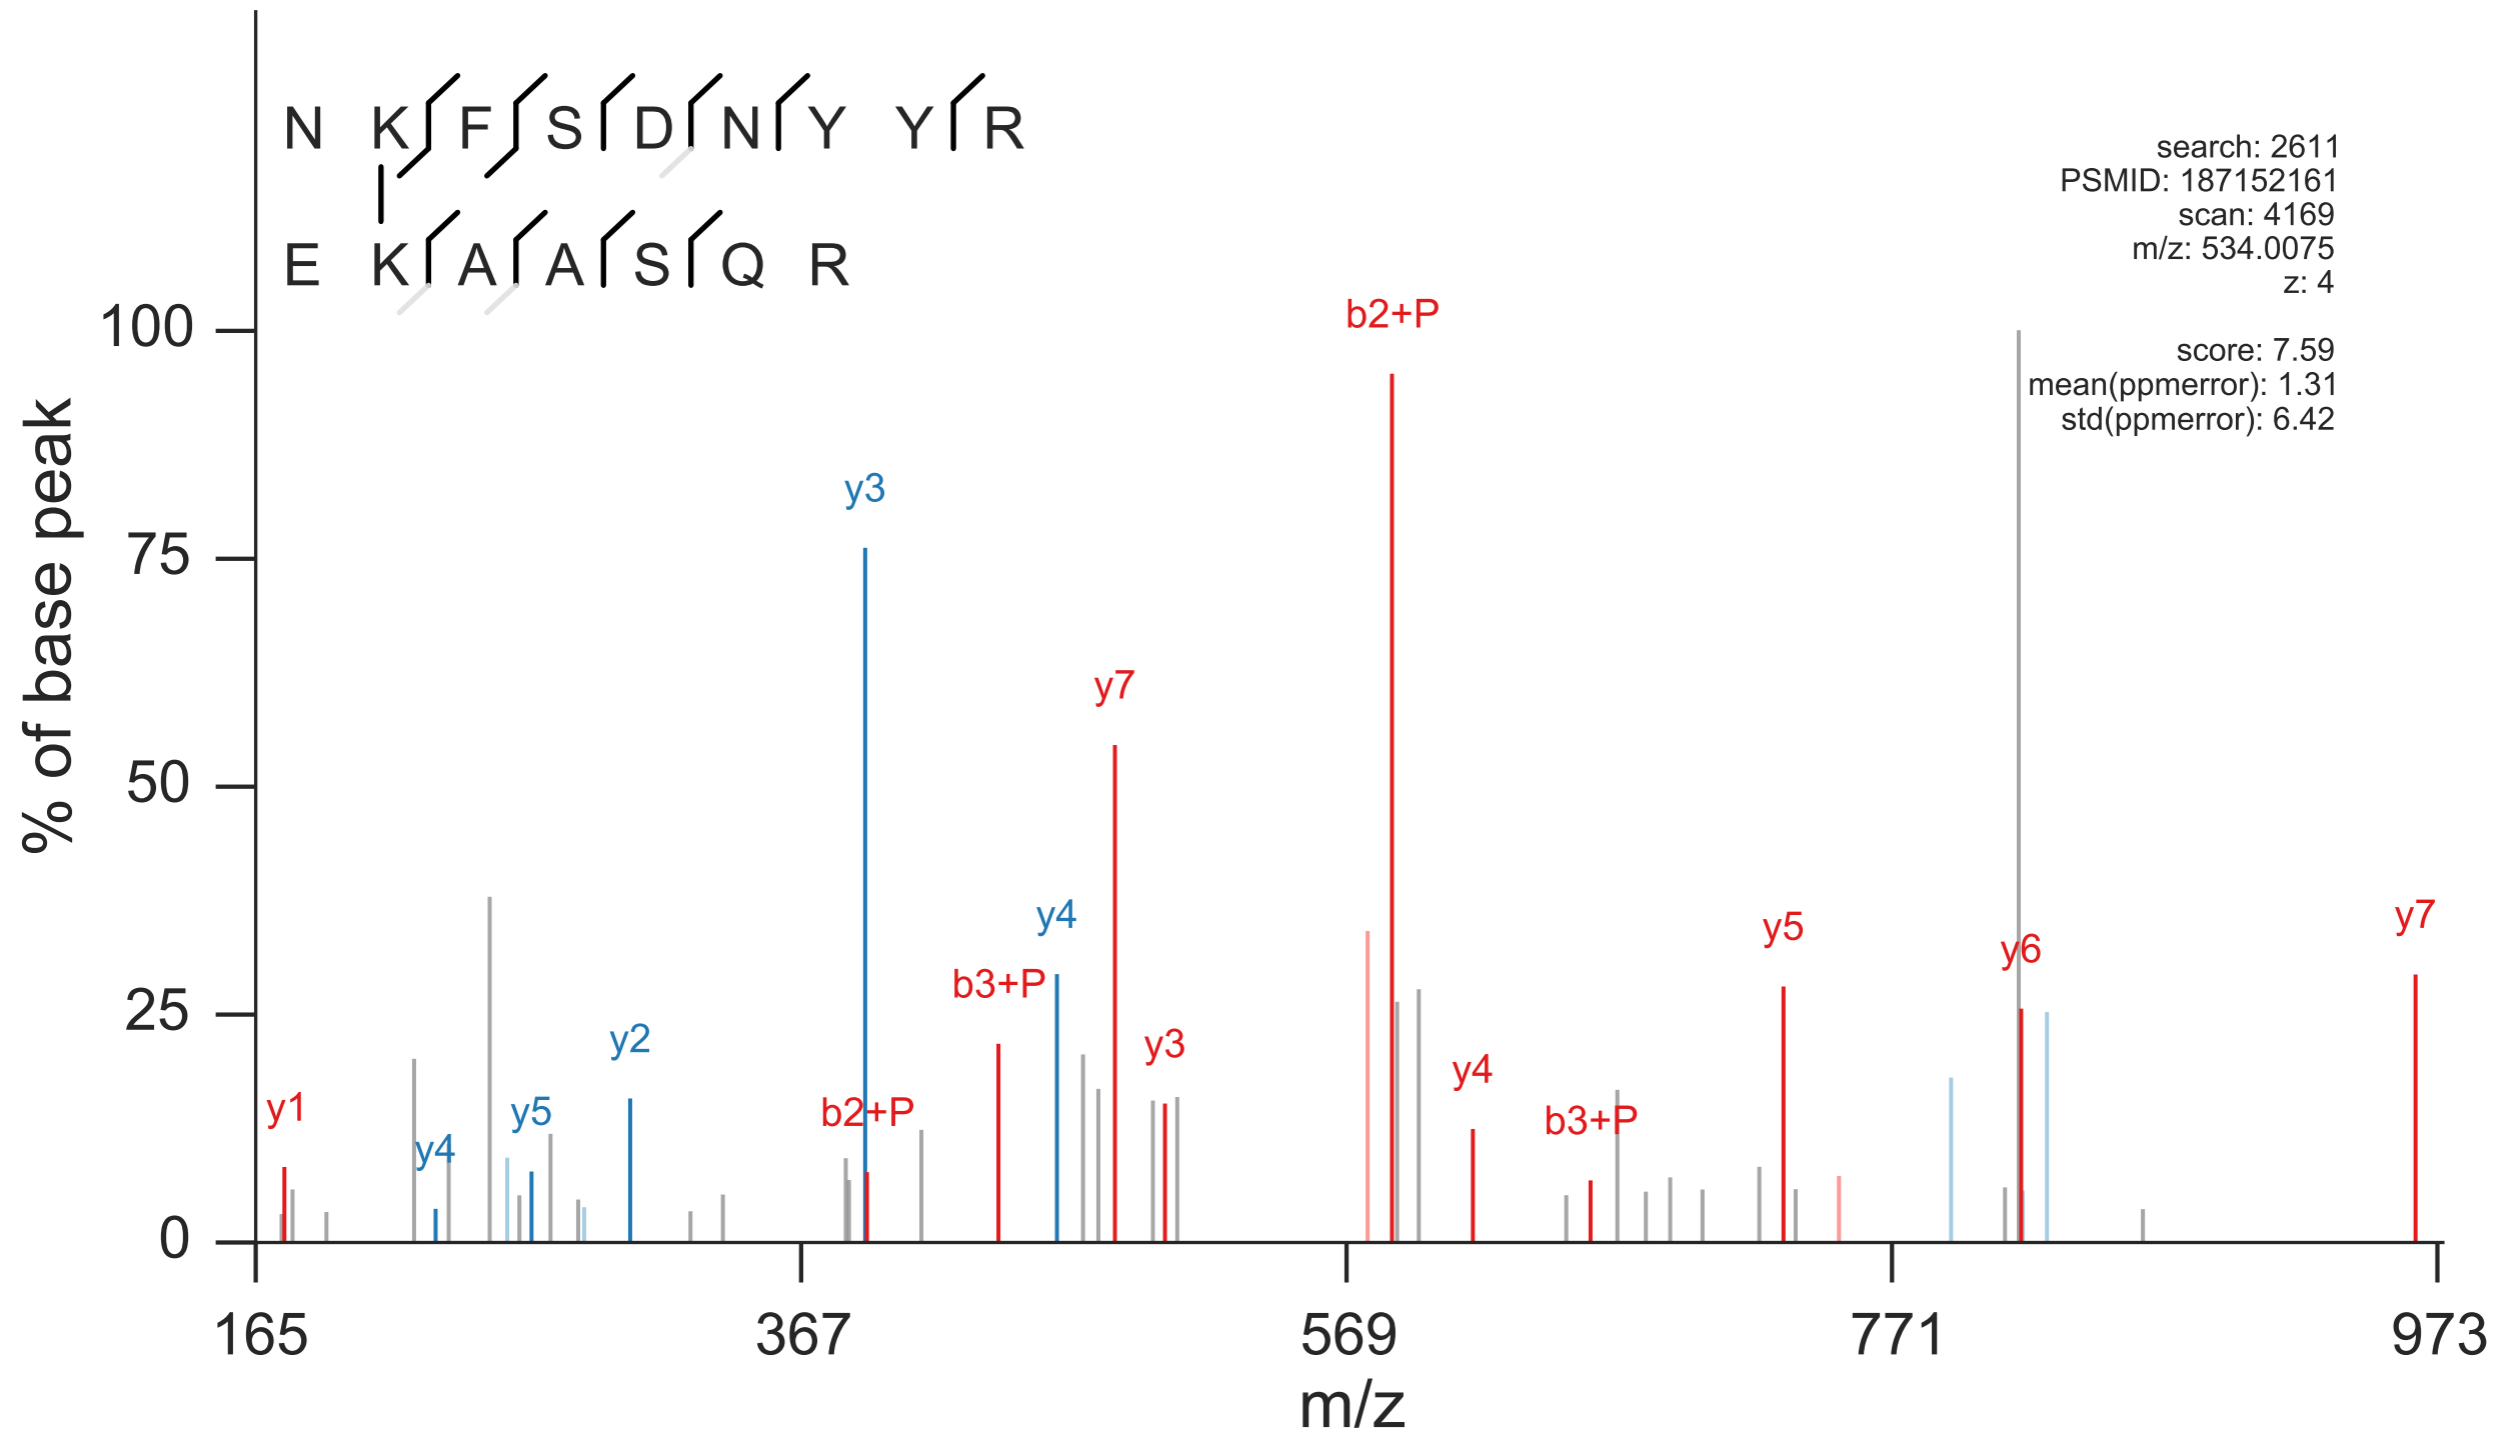

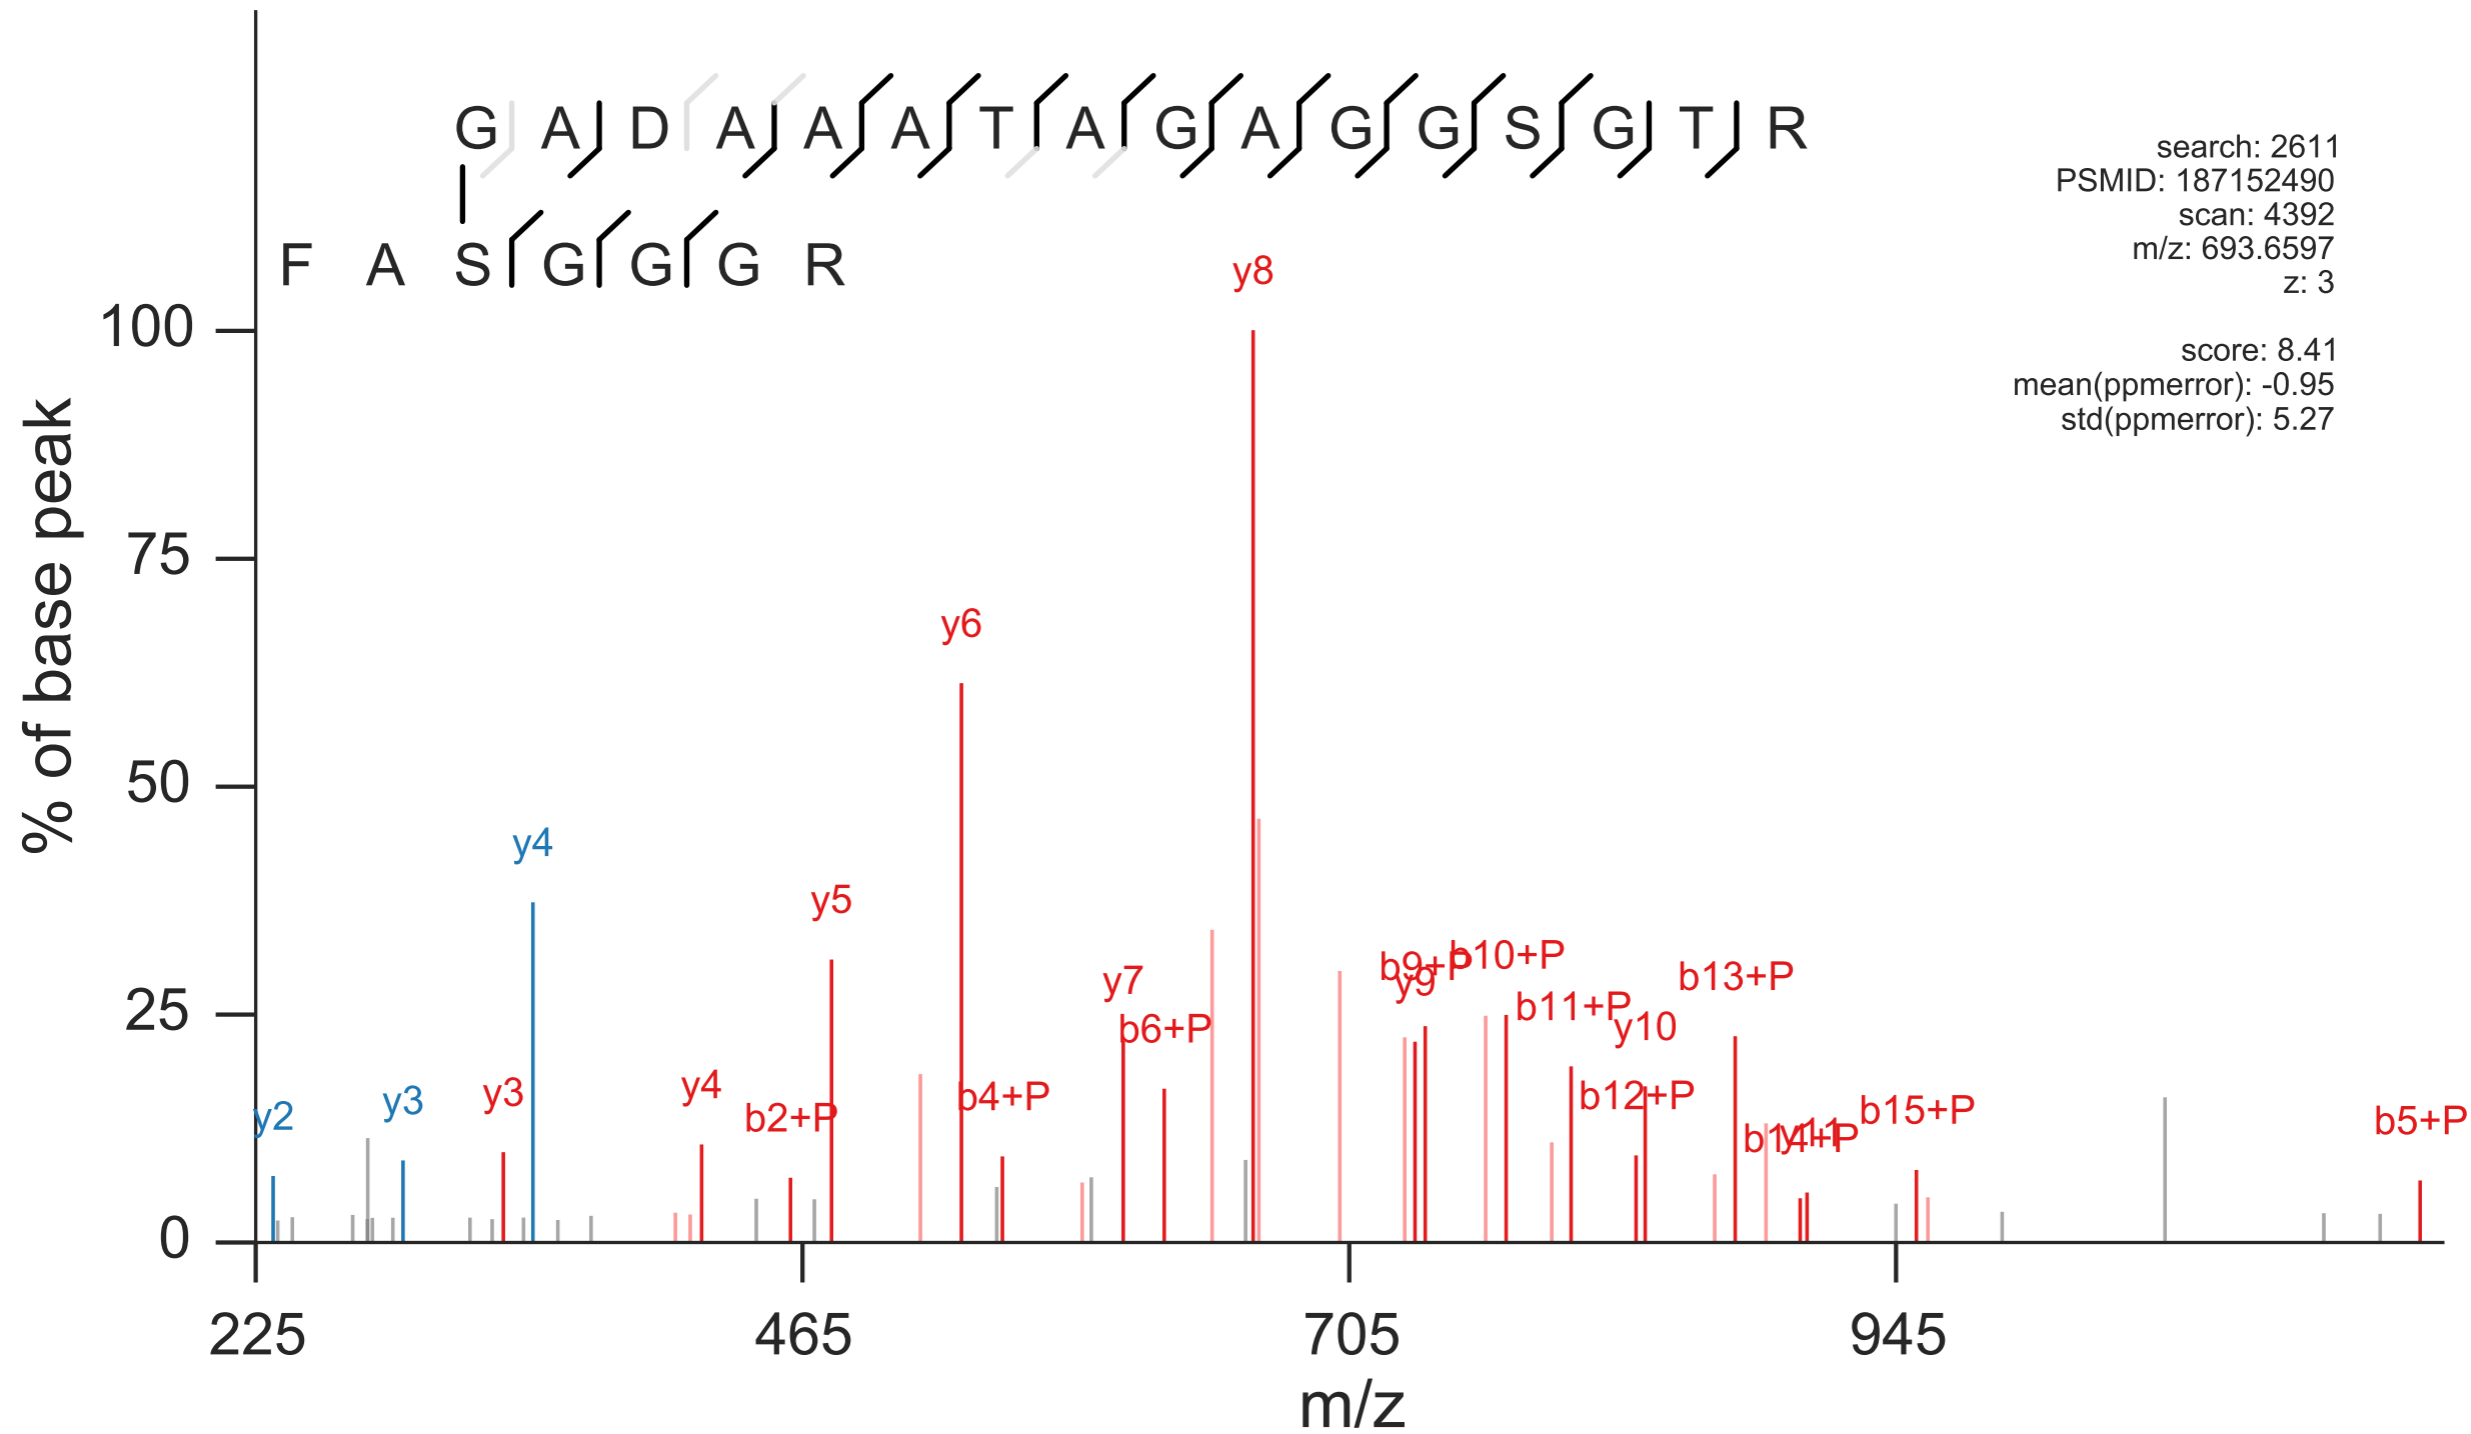

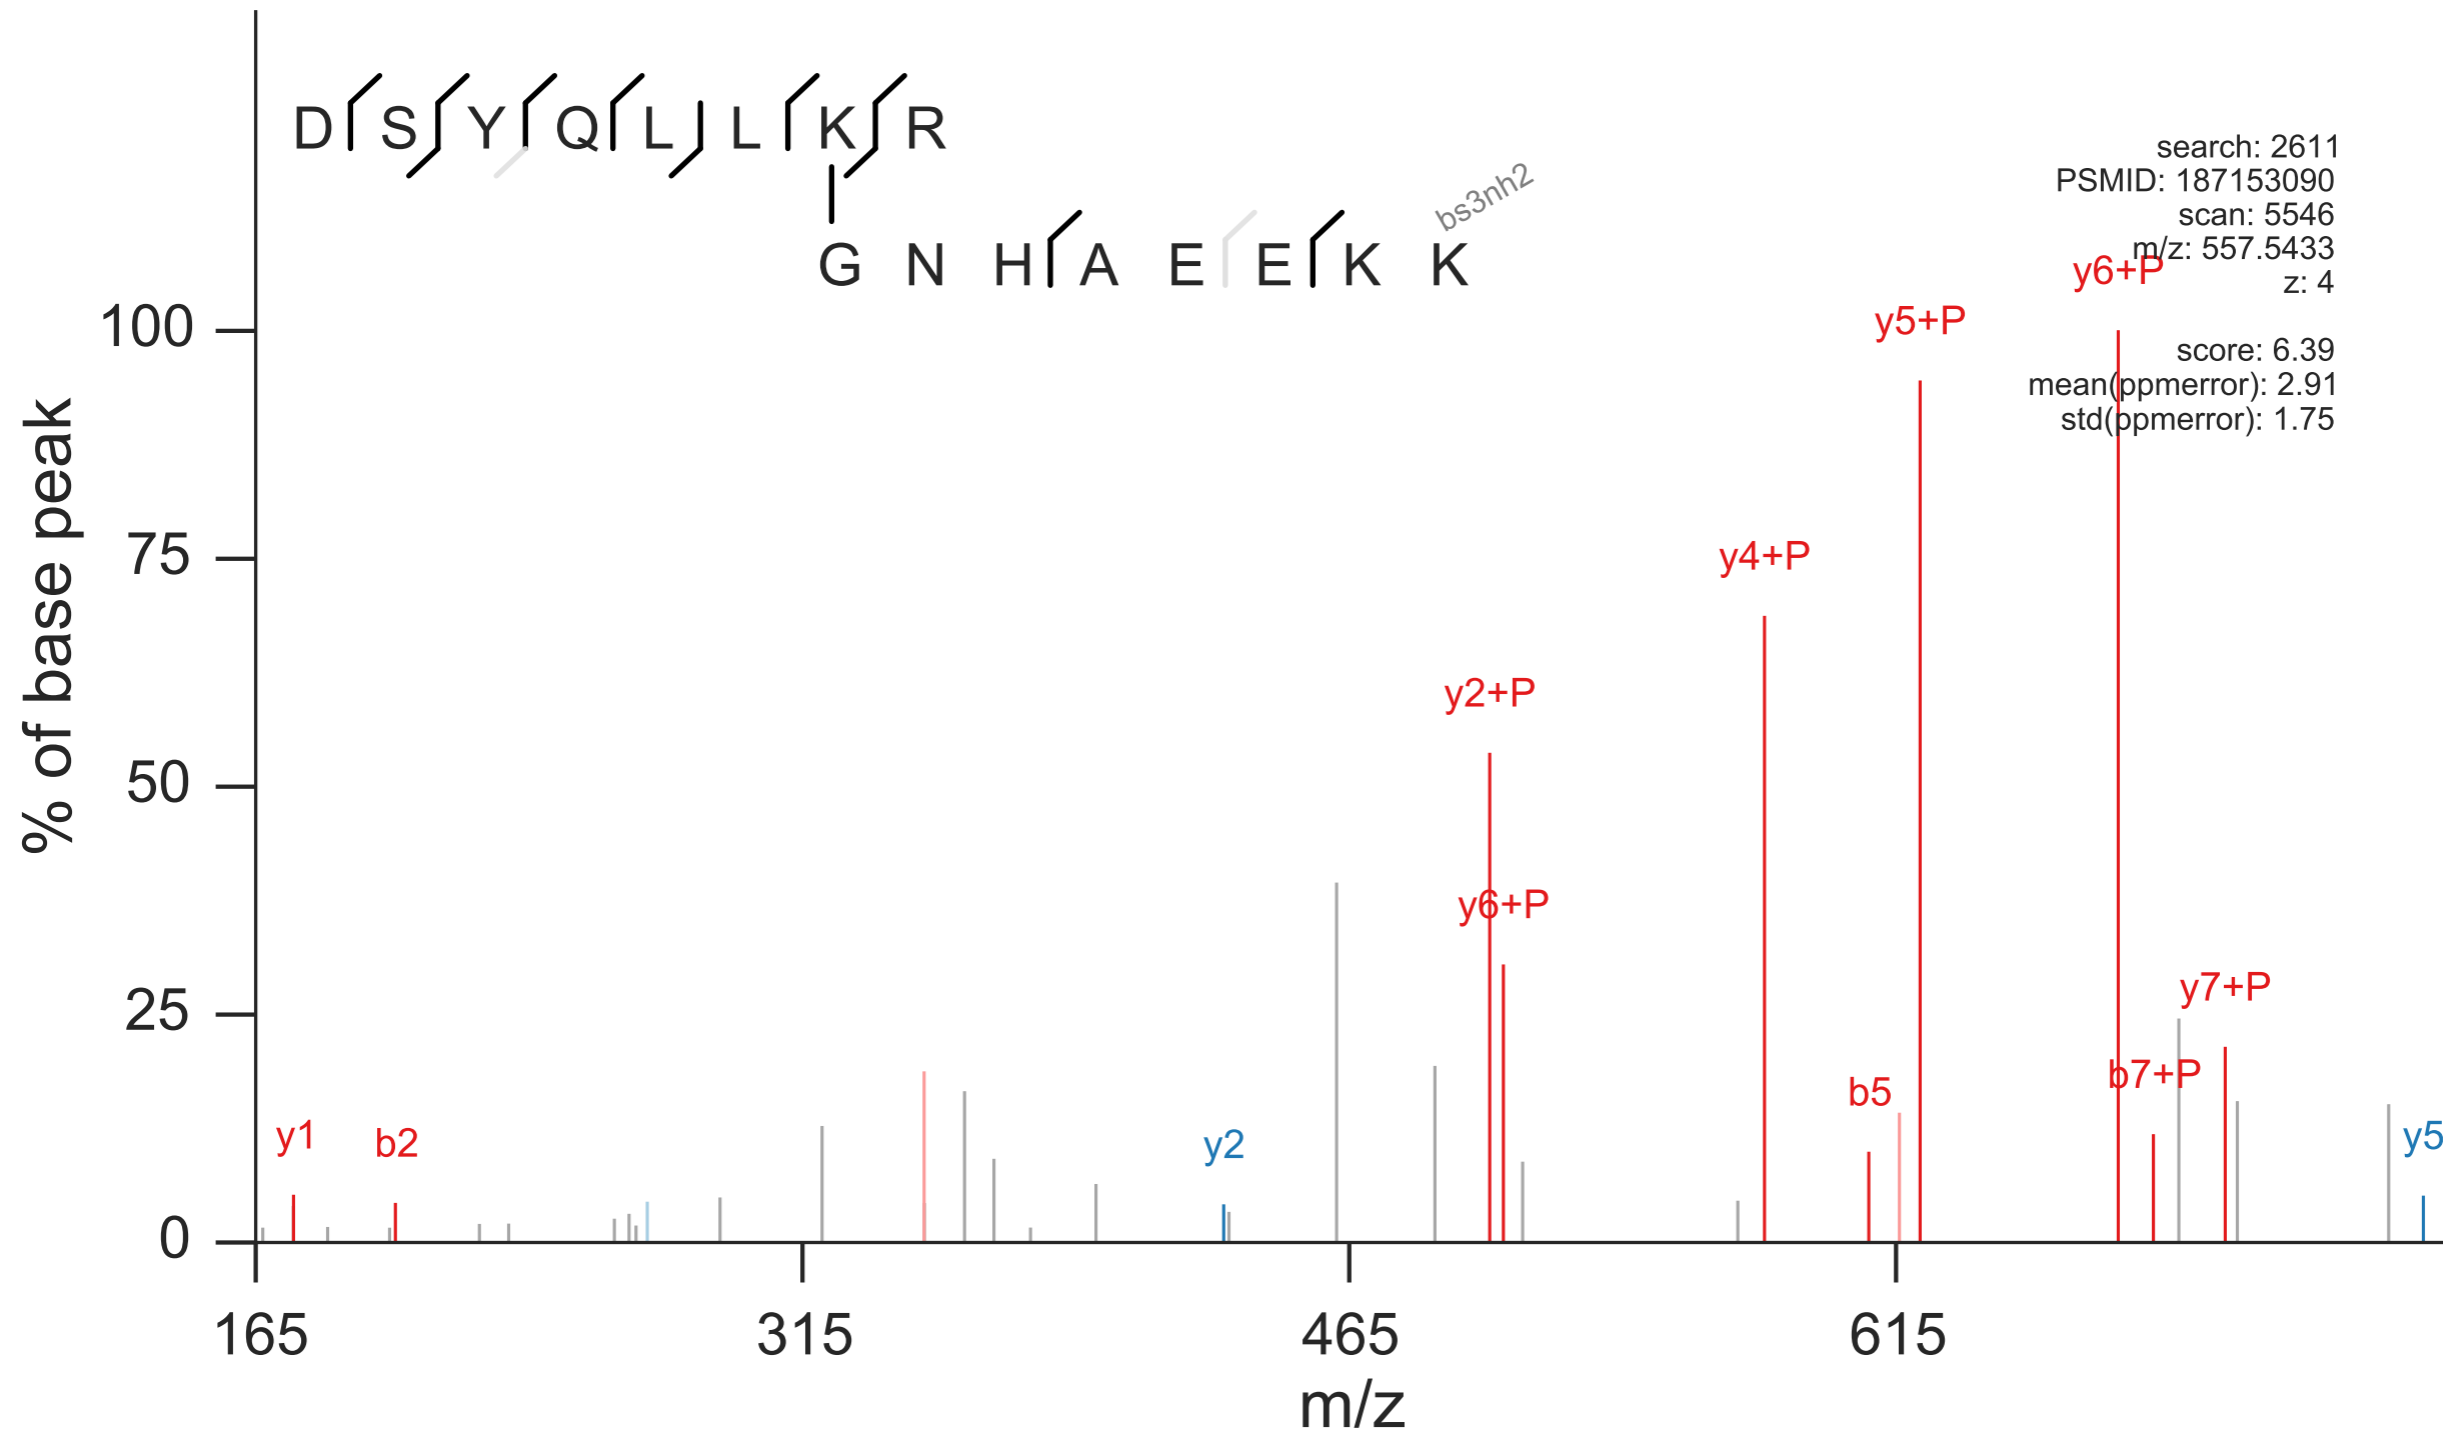

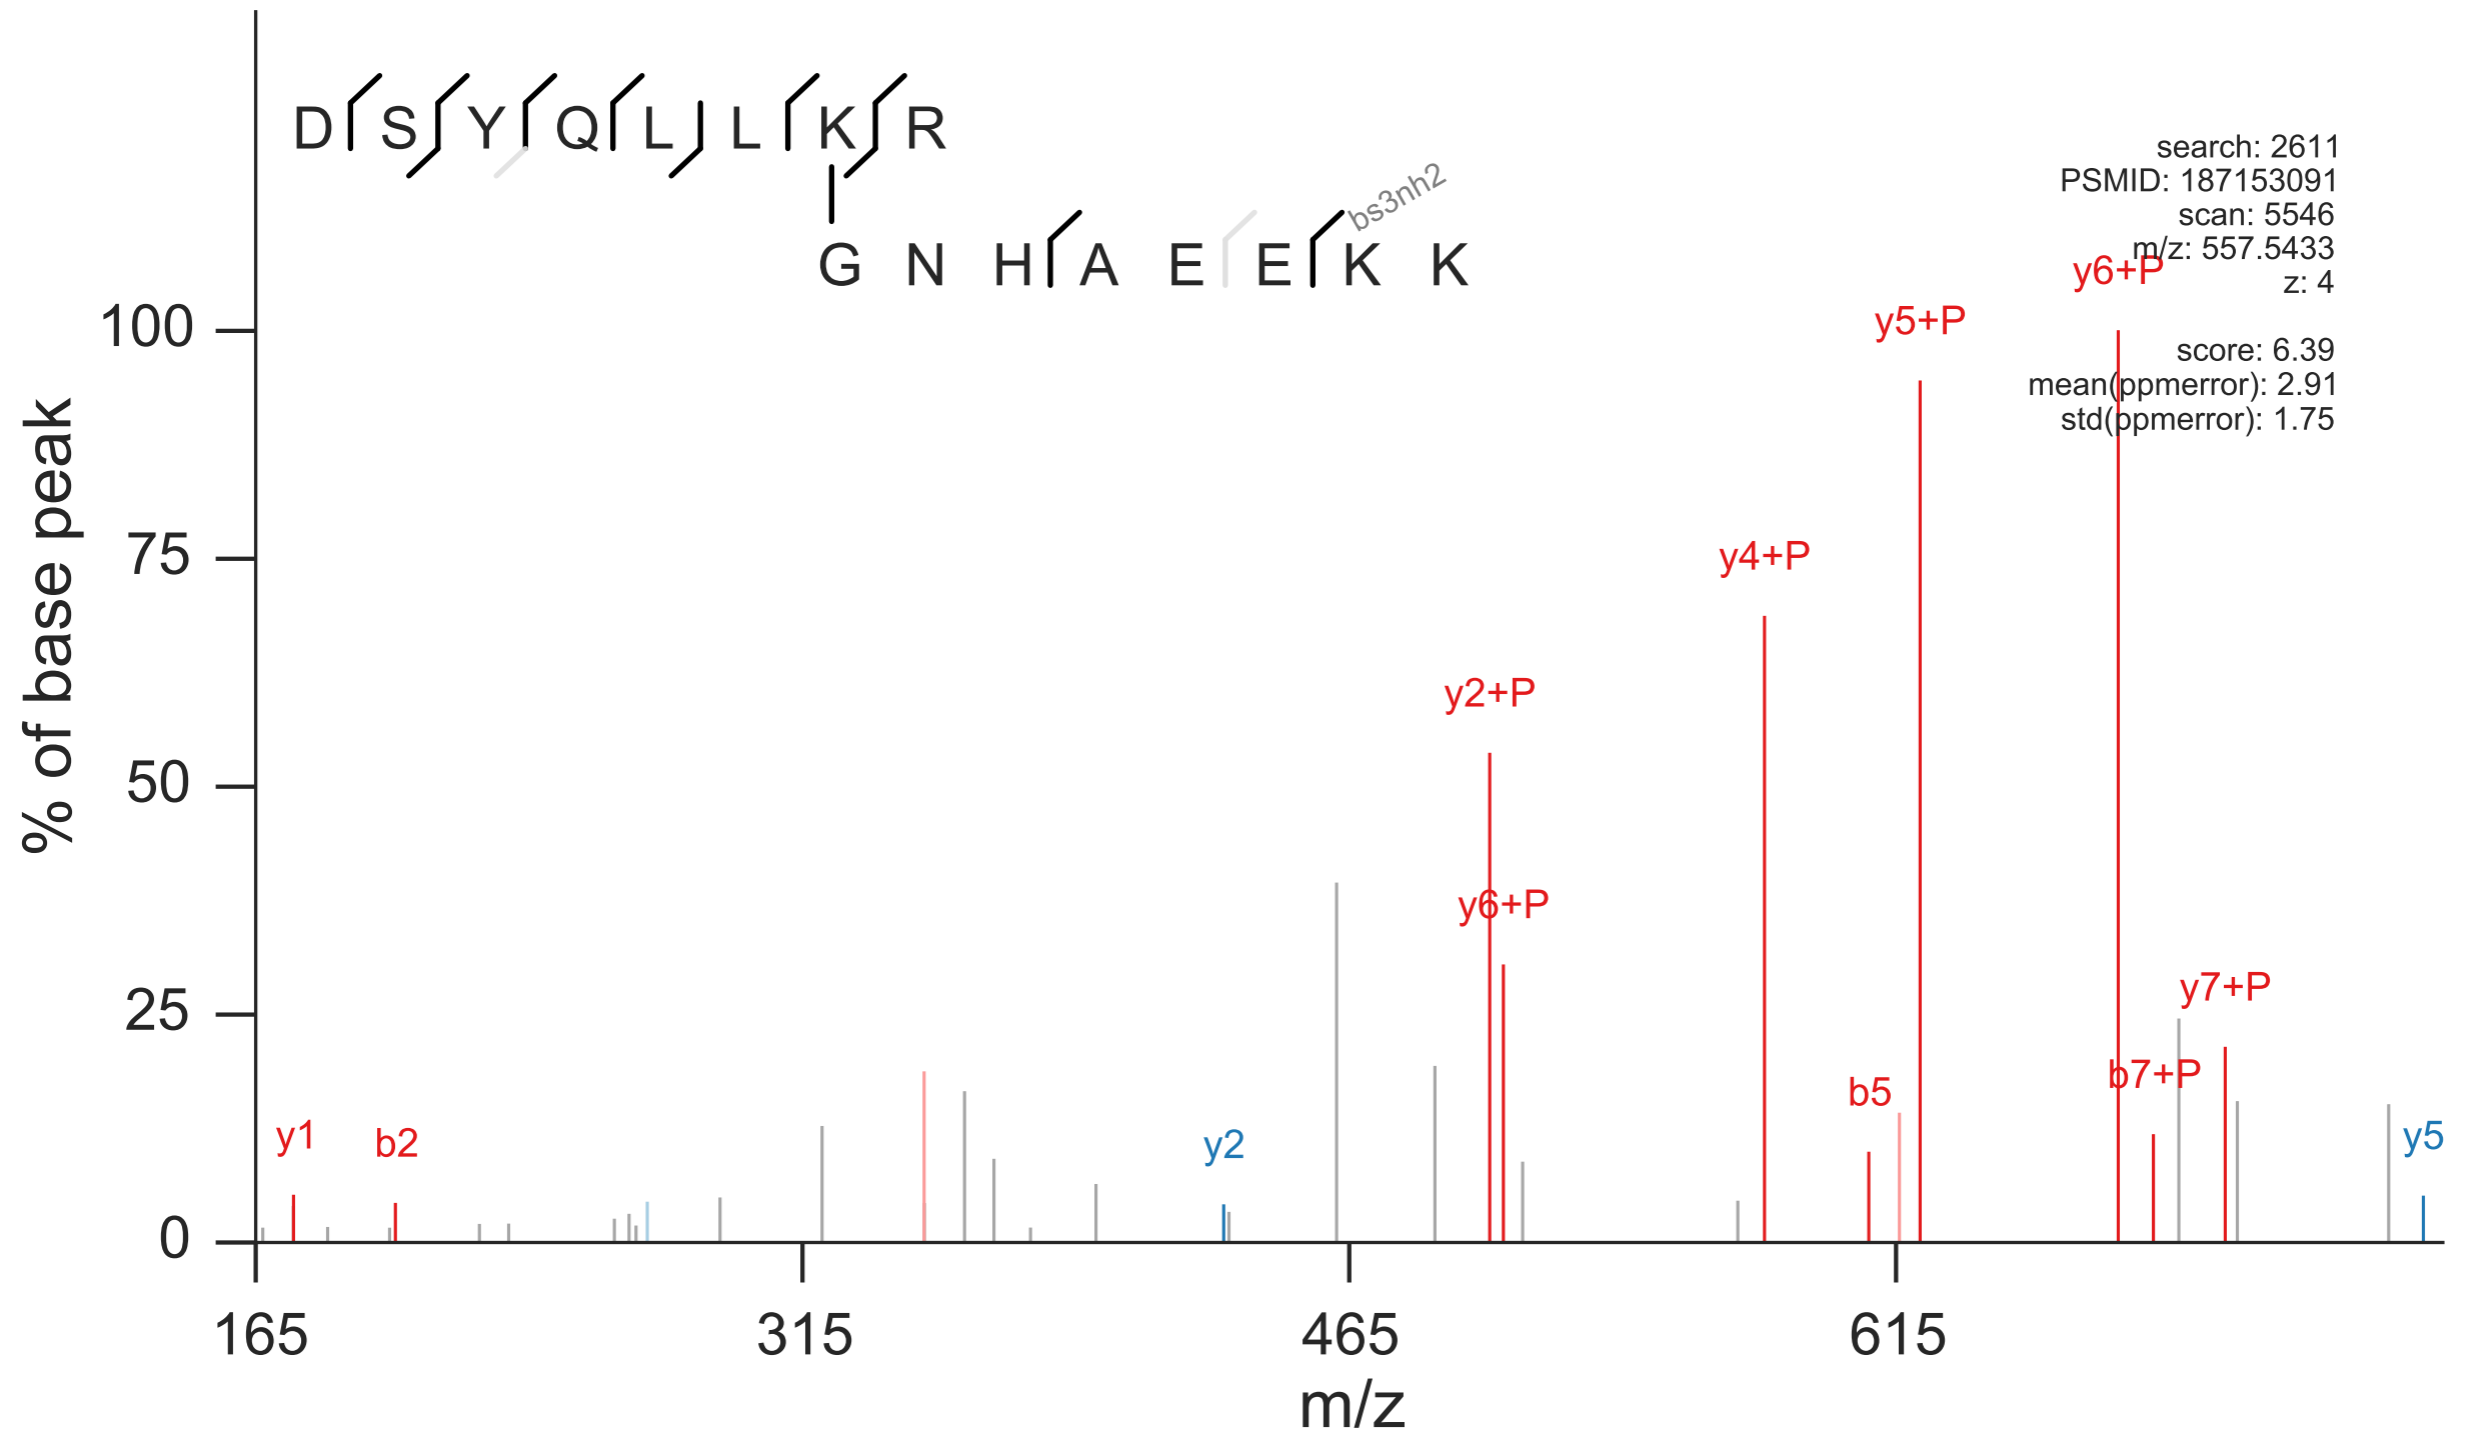

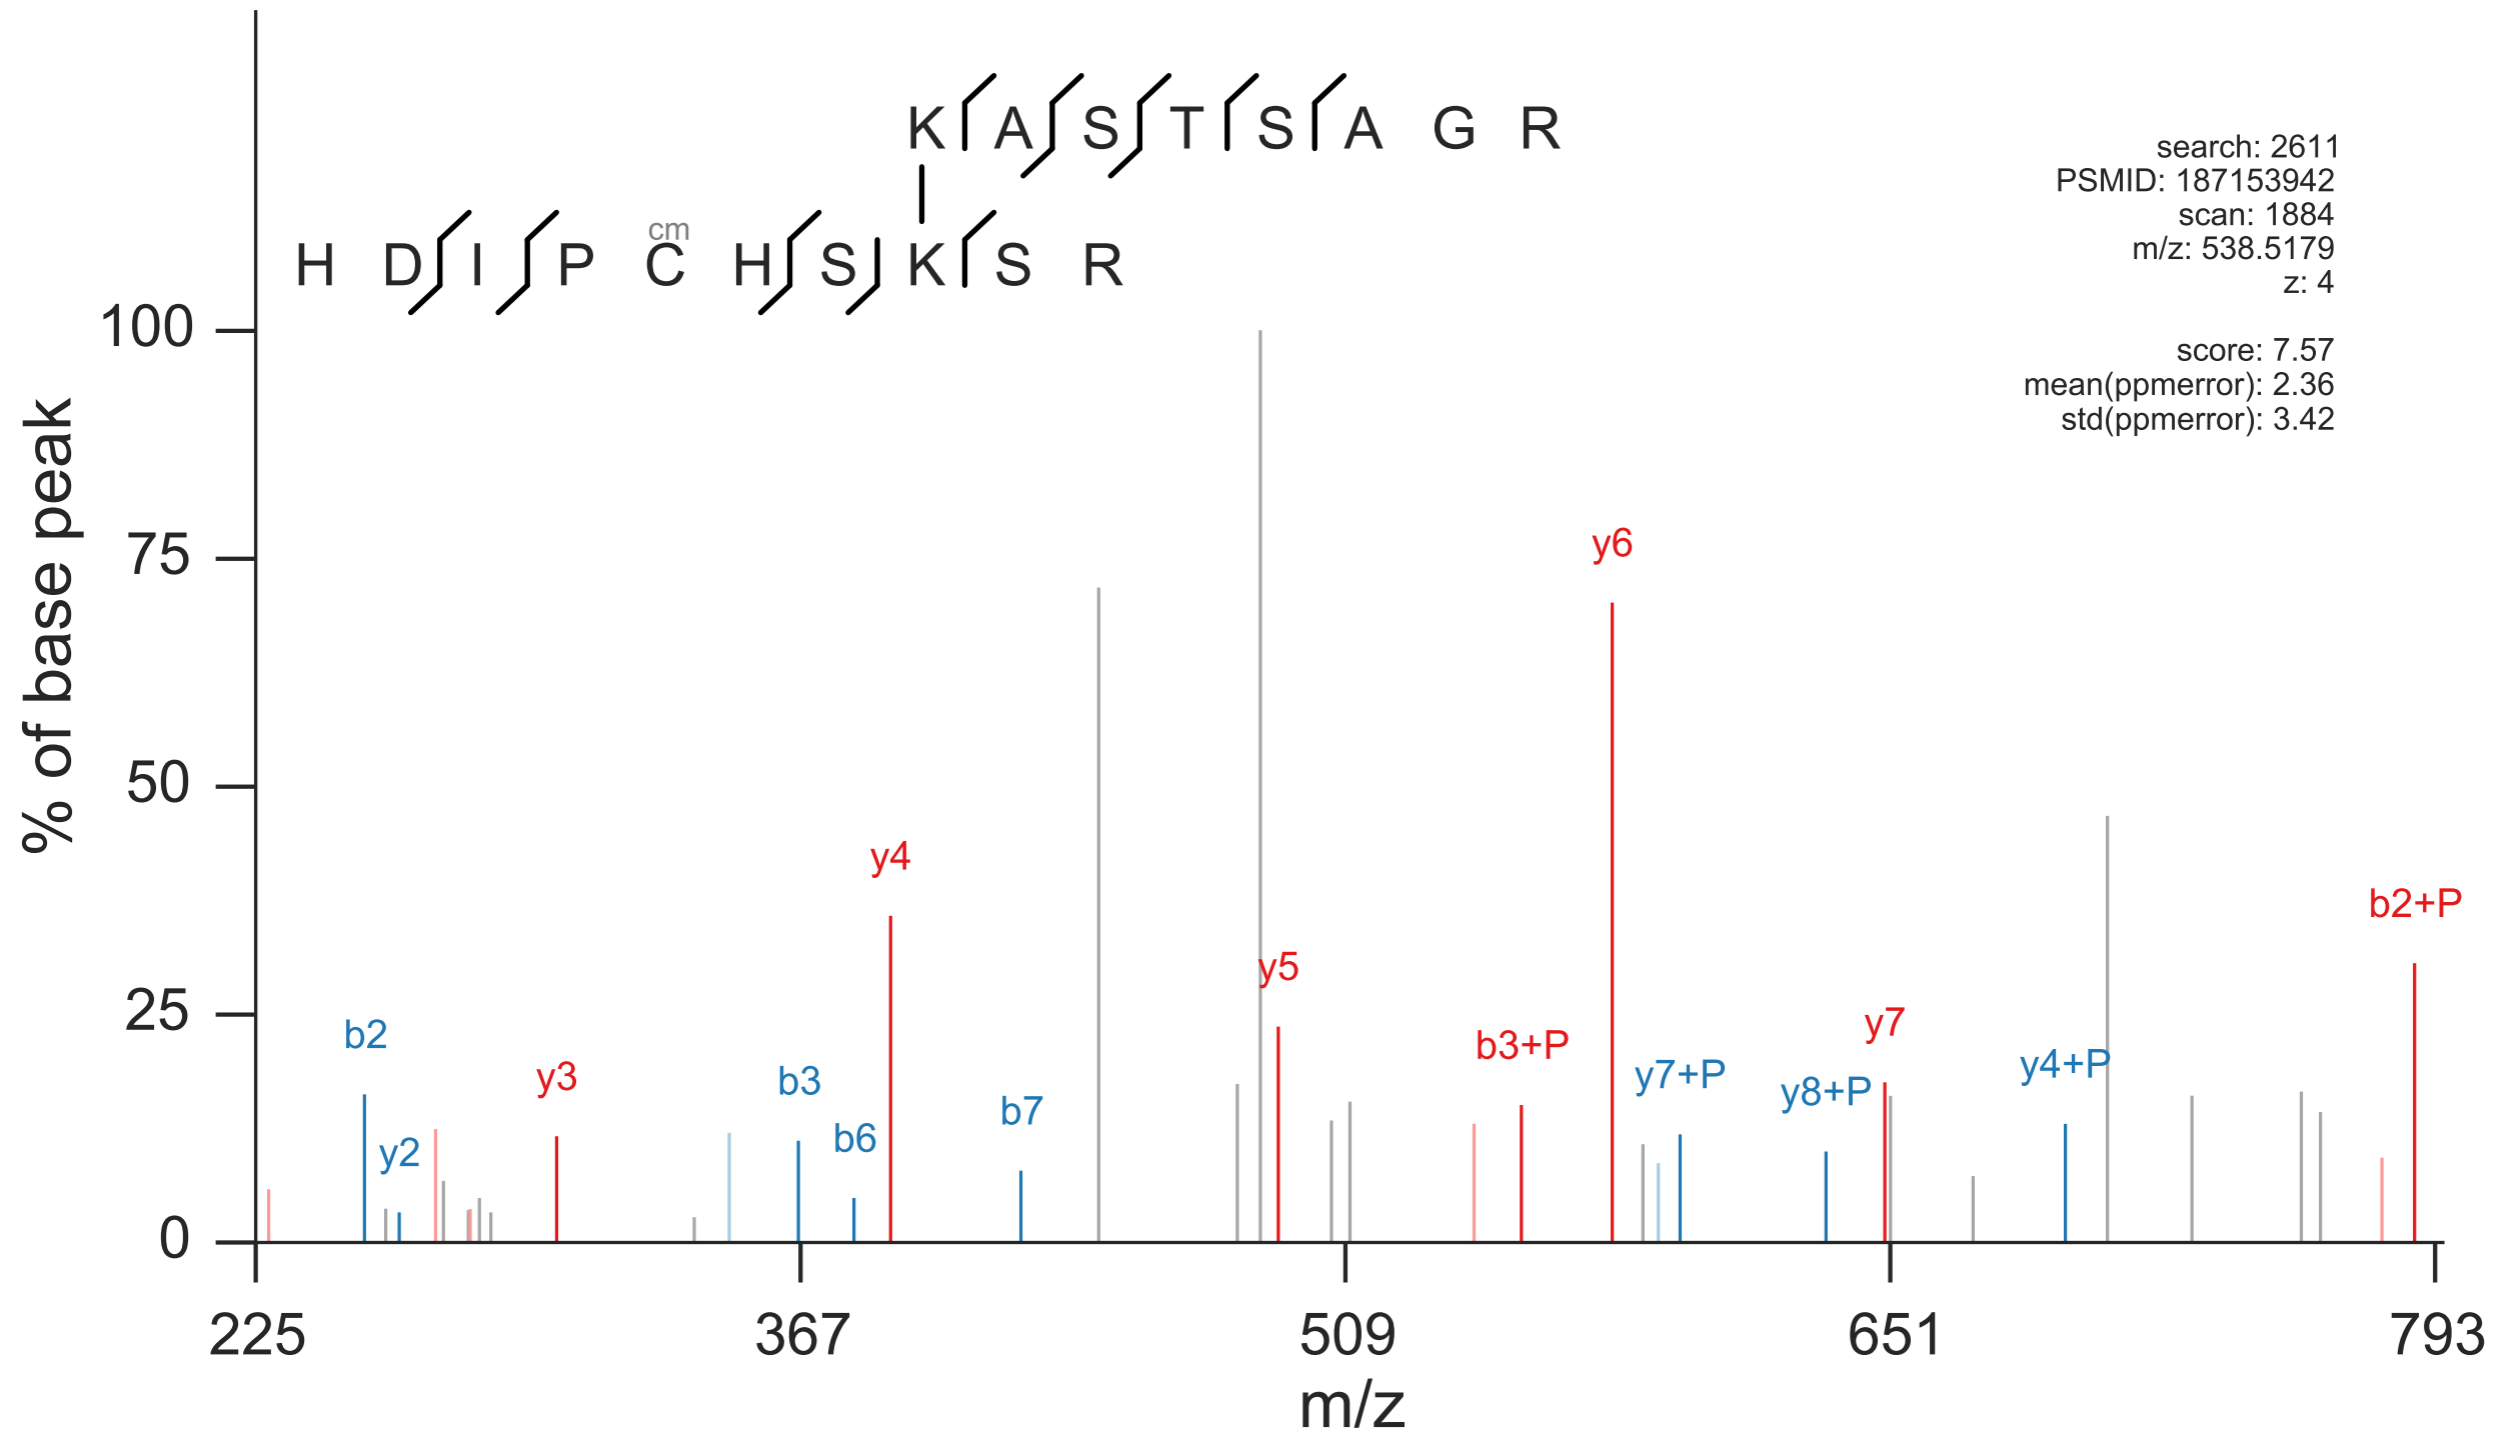

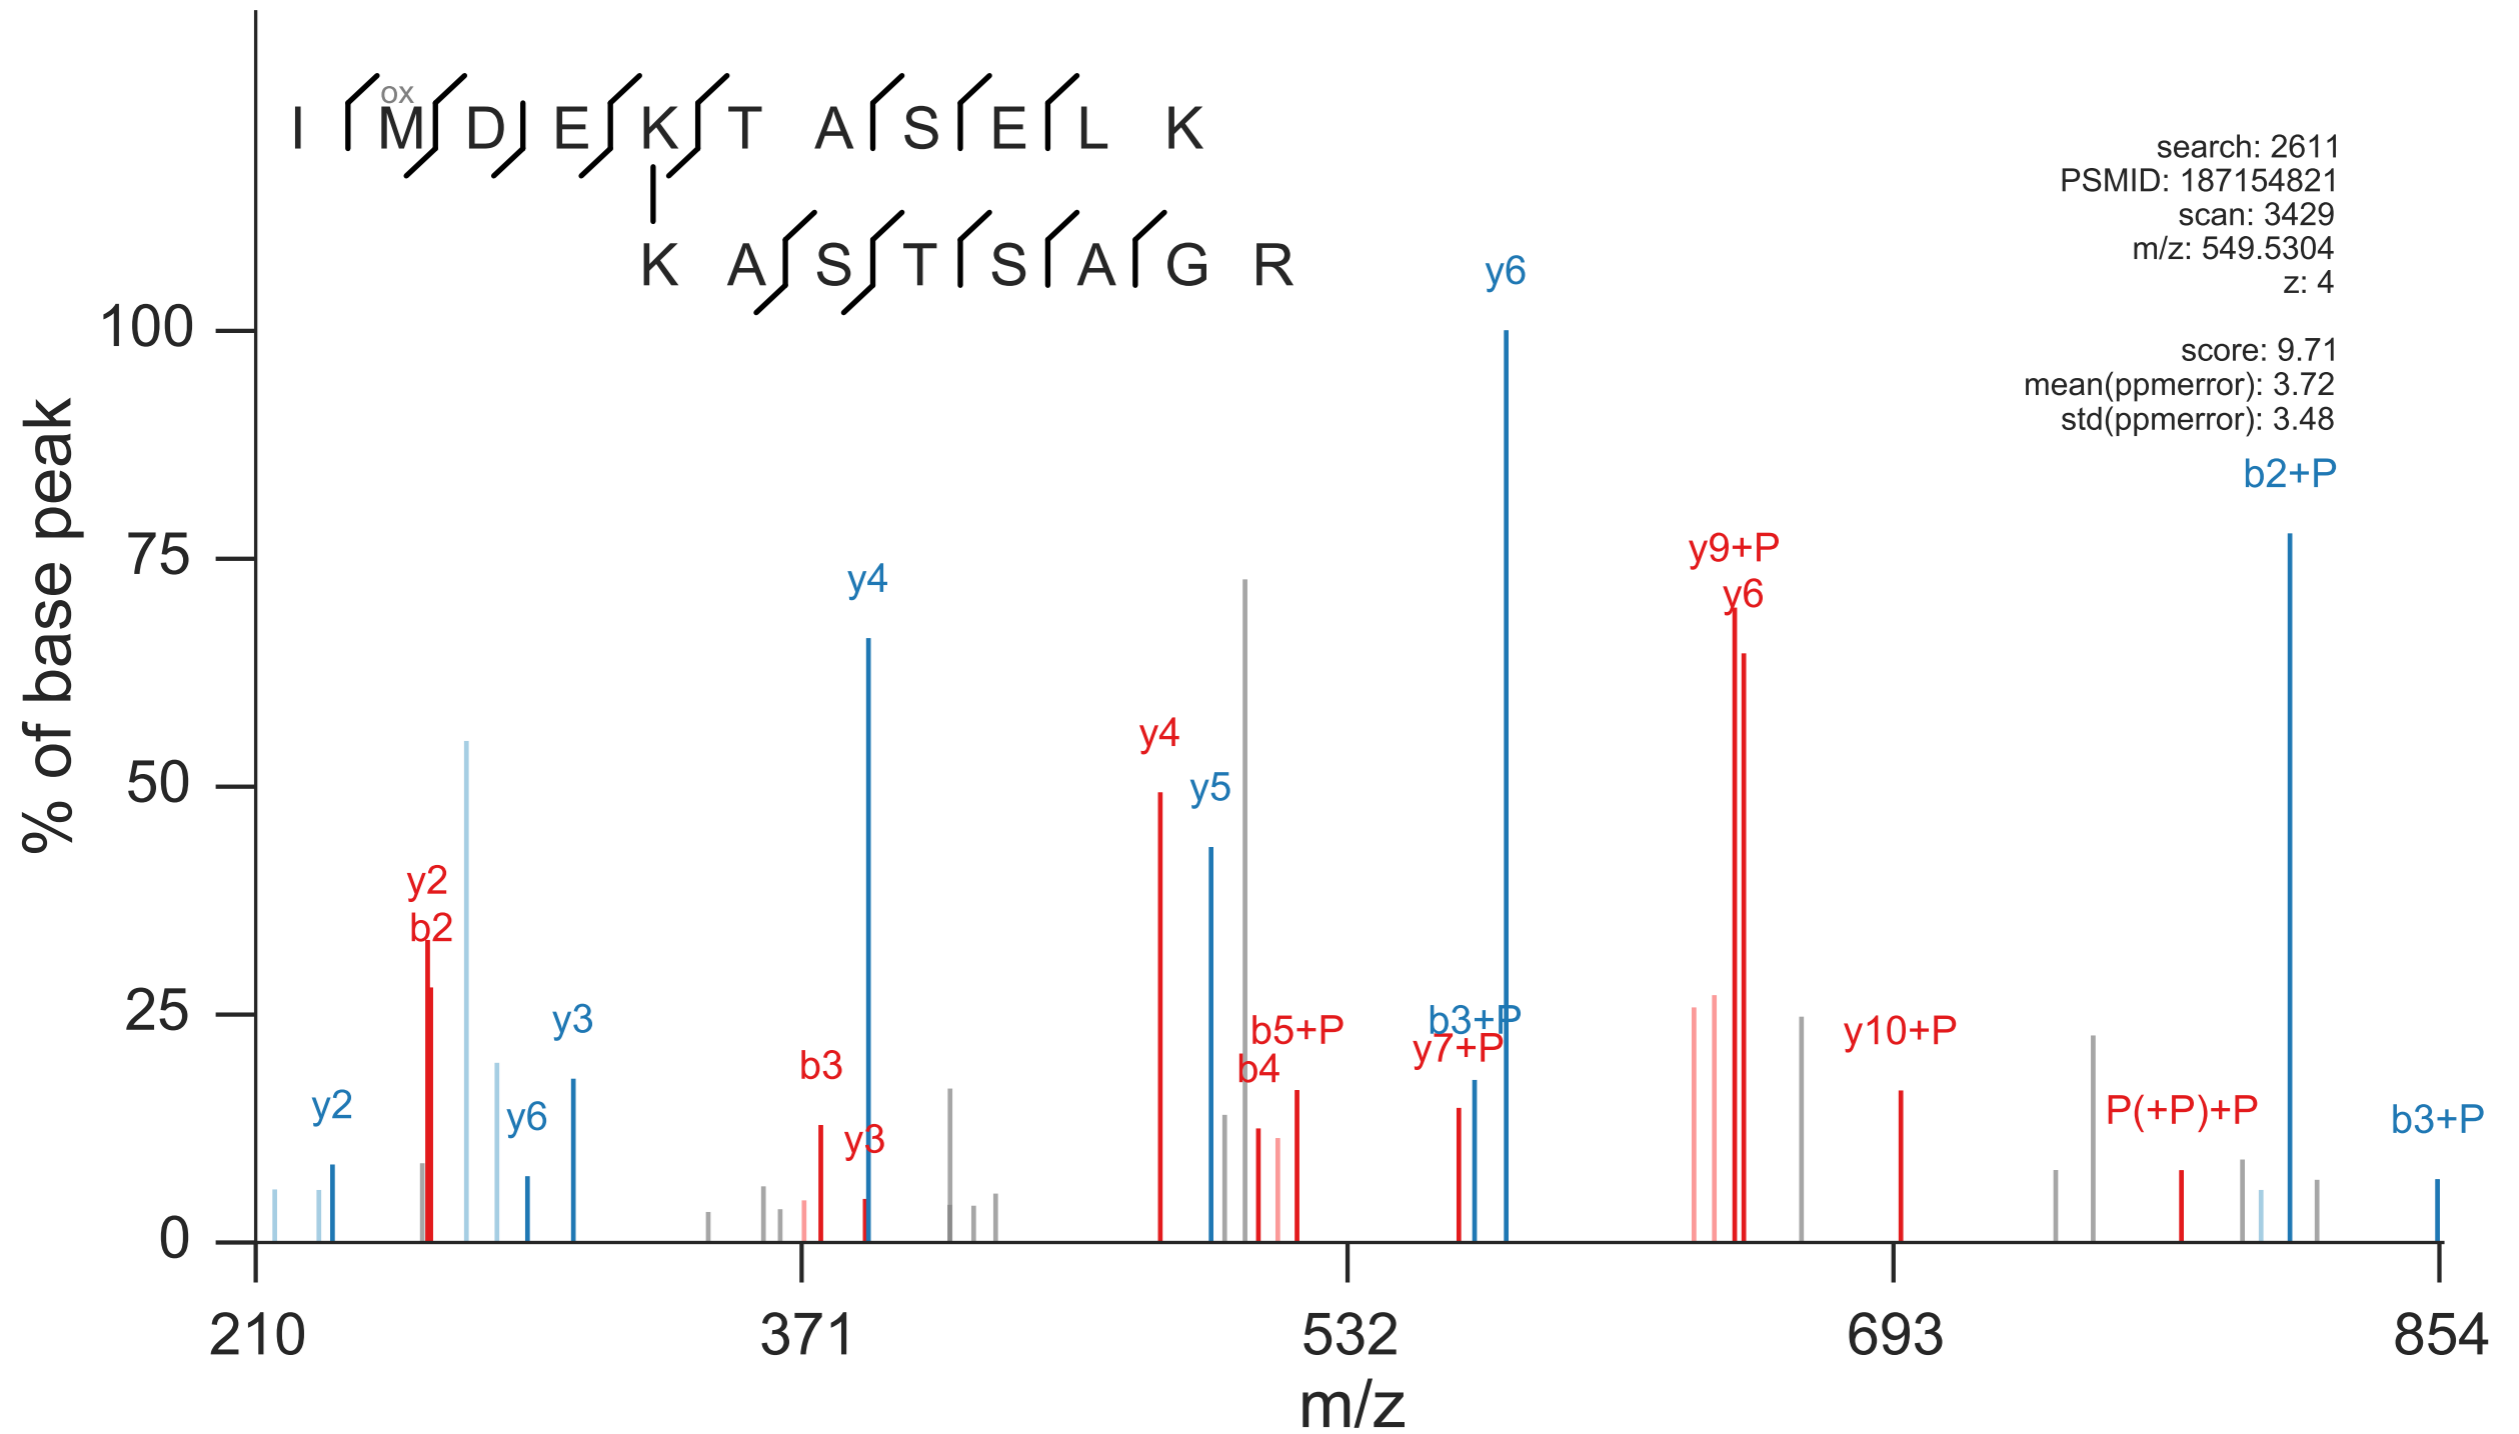

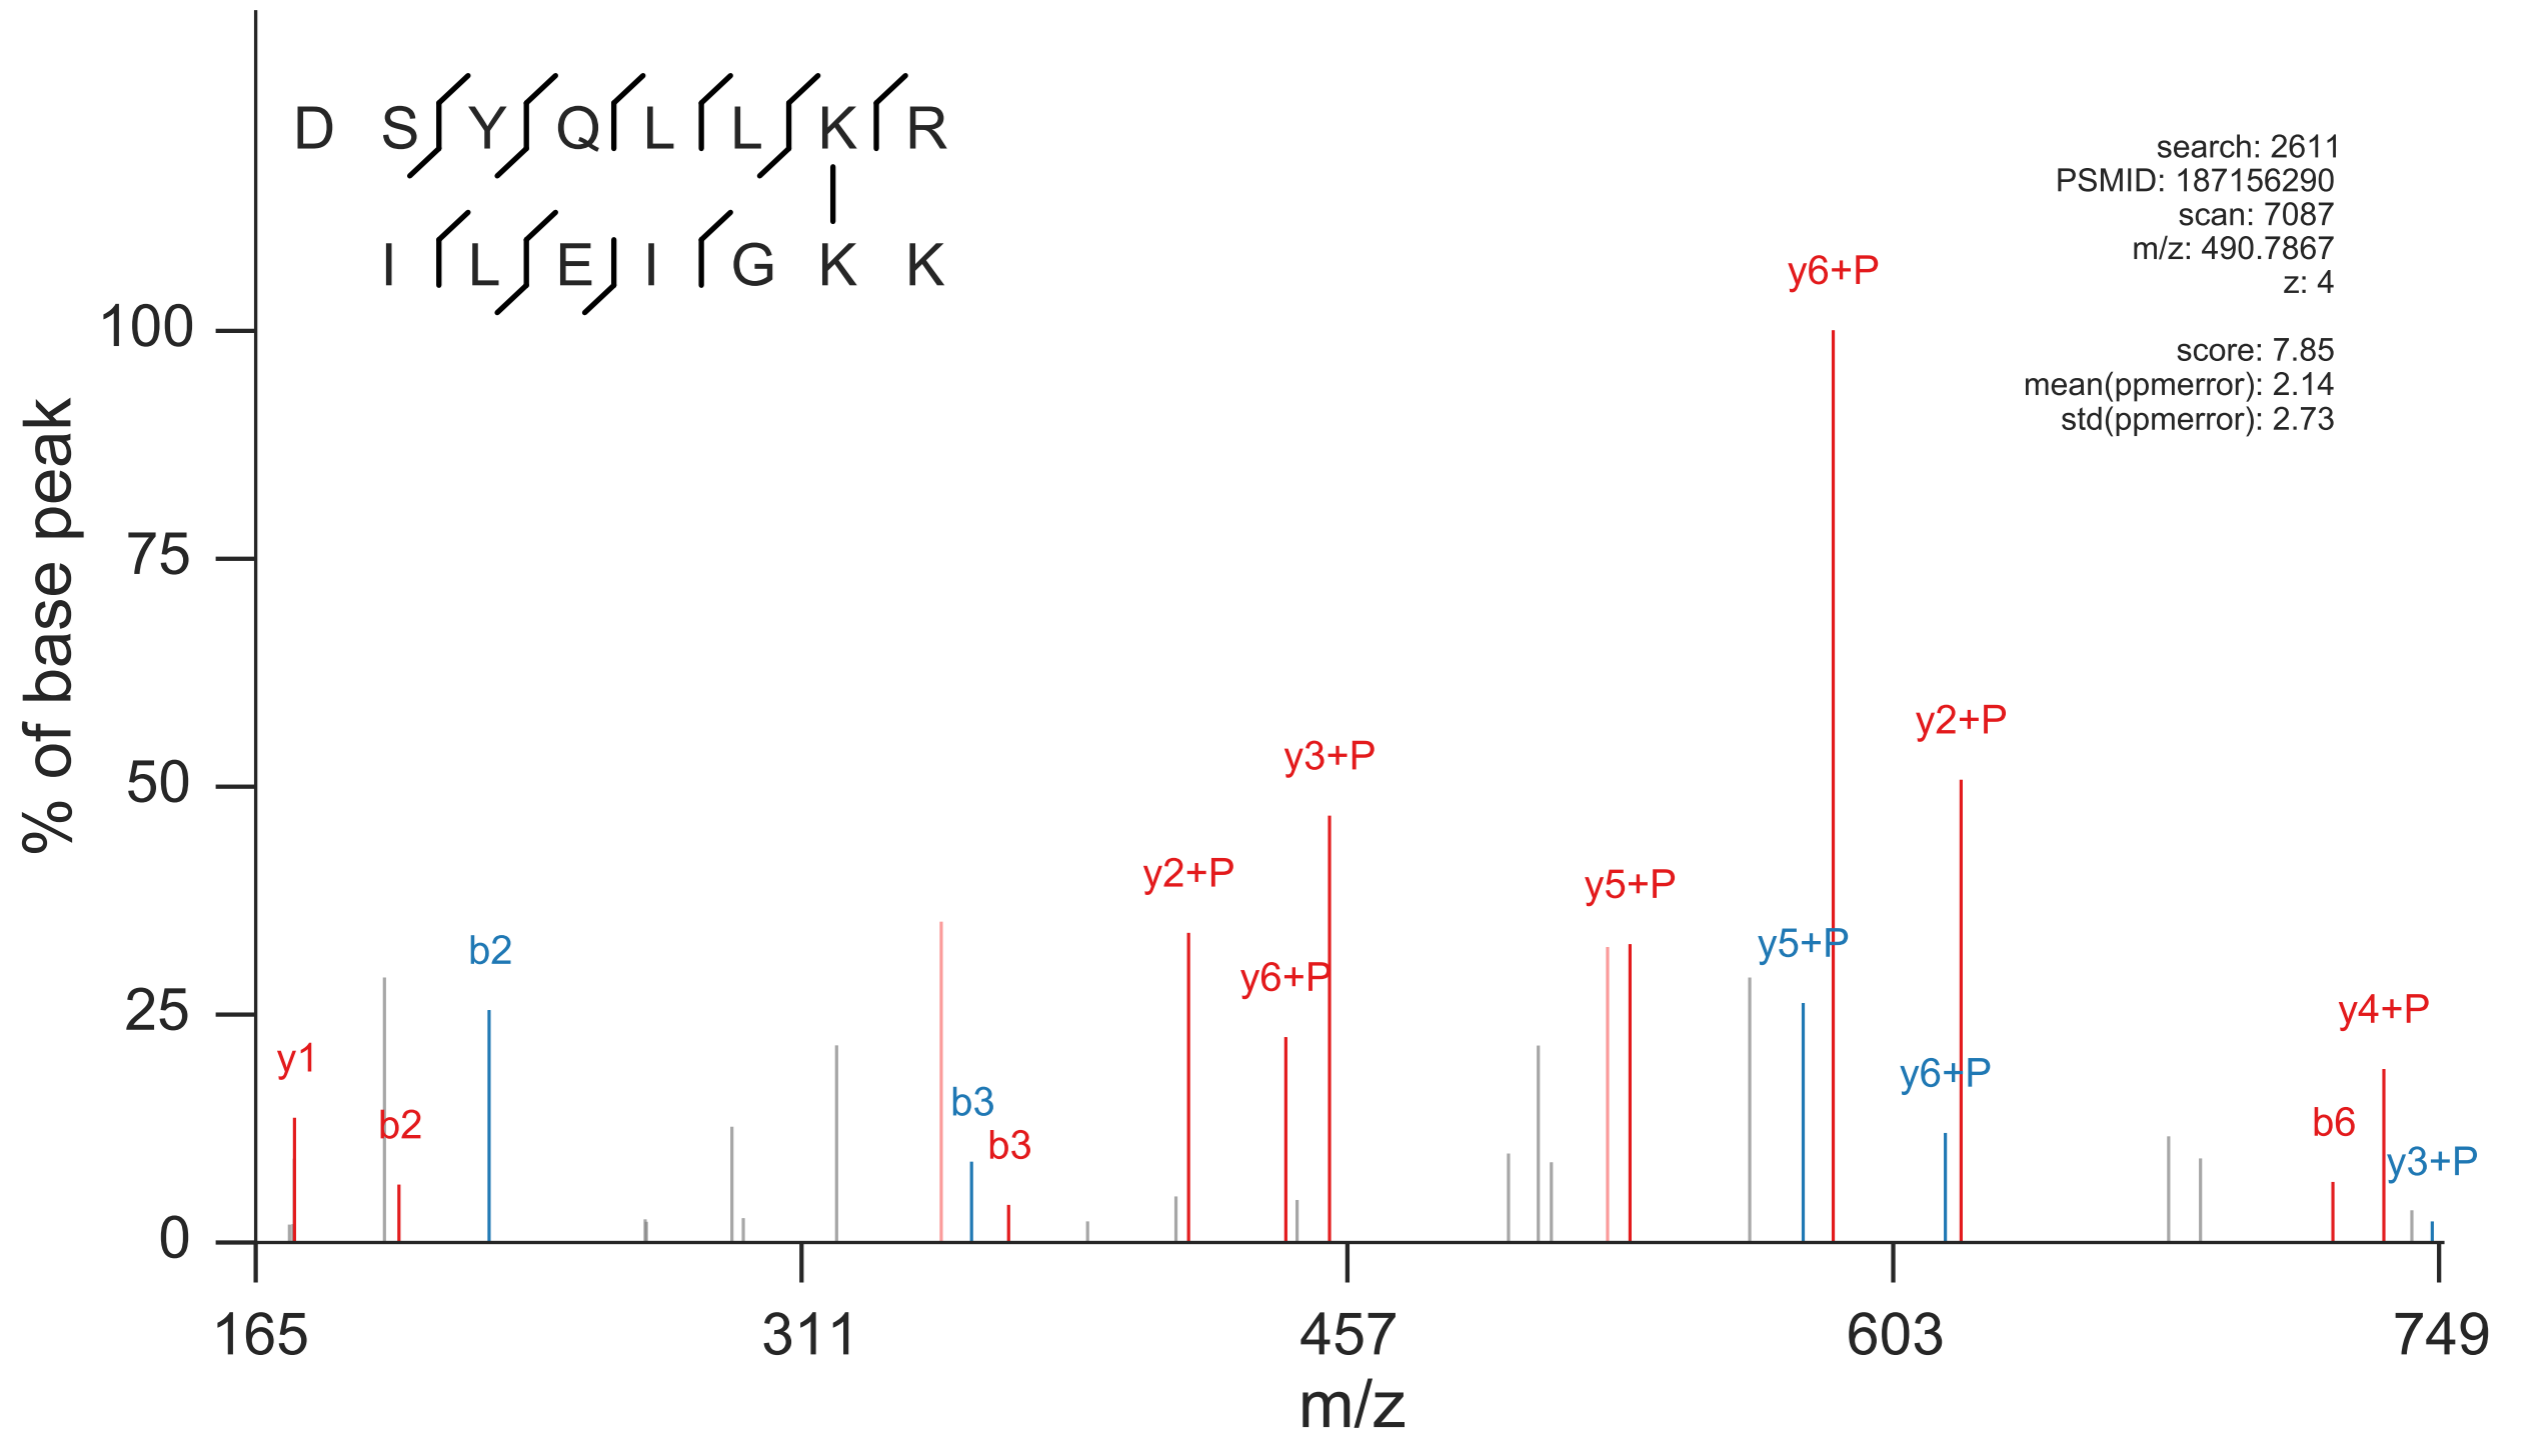

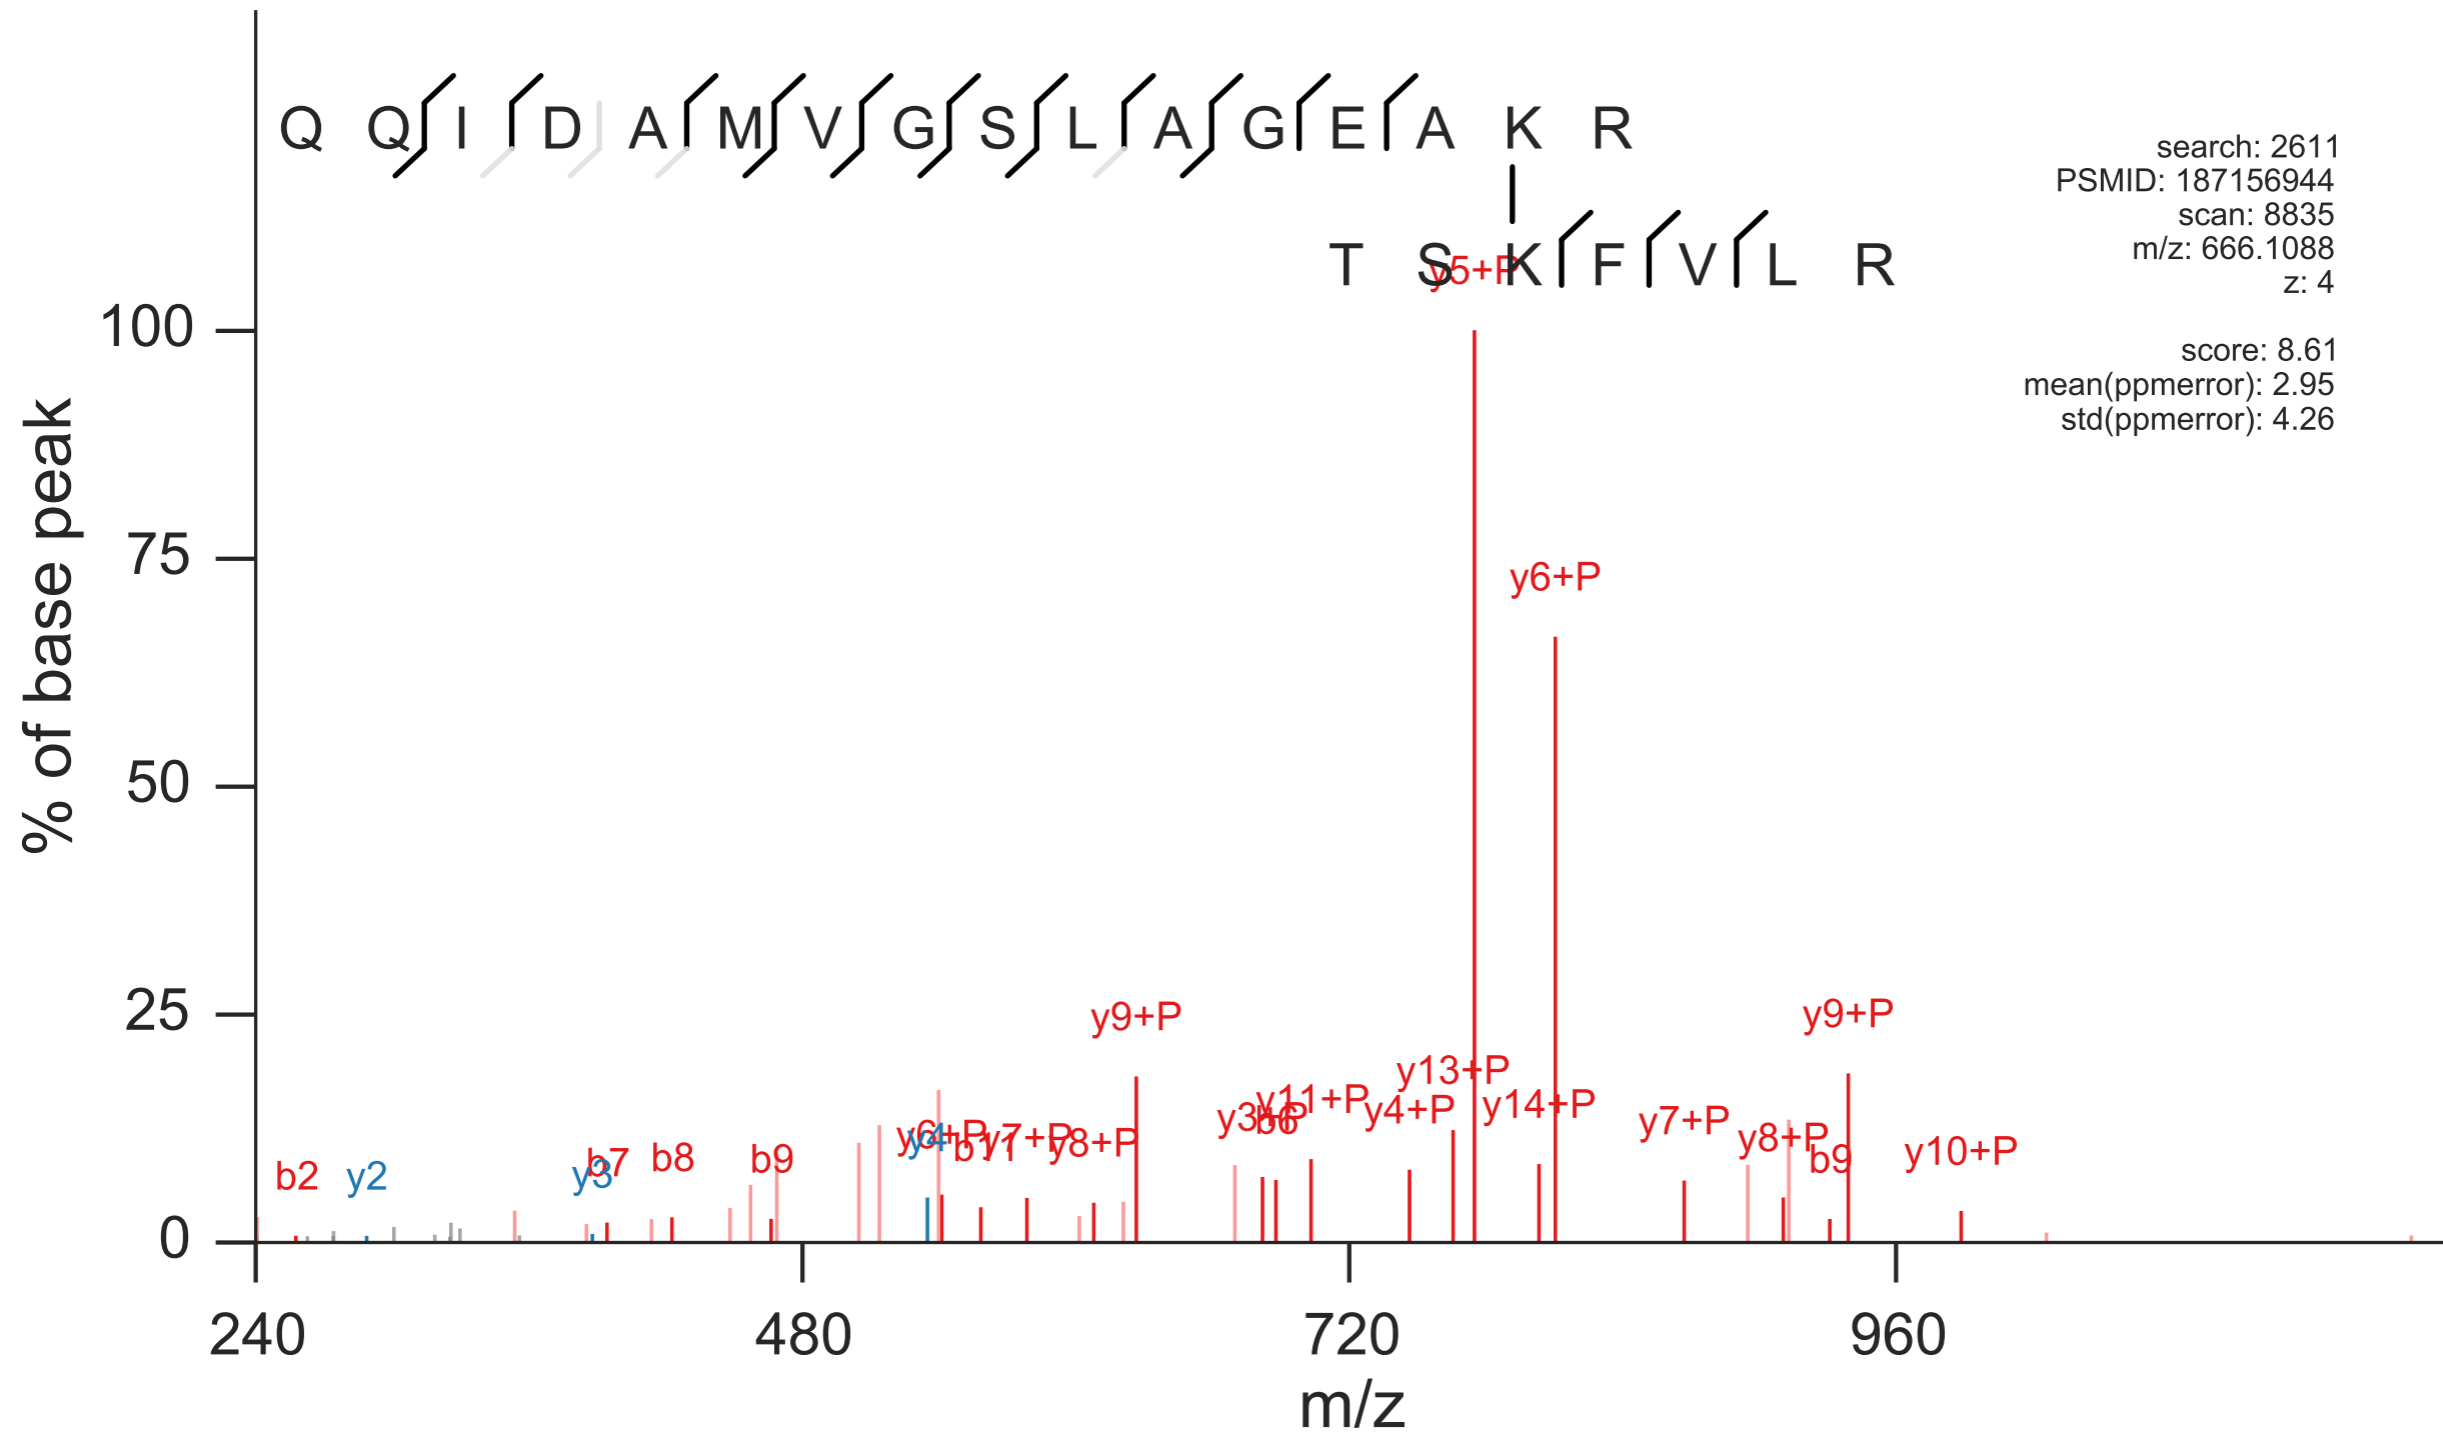

search: 2611  
 PSMID: 187156944  
 scan: 8835  
 m/z: 666.1088  
 z: 4  
  
 score: 8.61  
 mean(ppmerror): 2.95  
 std(ppmerror): 4.26

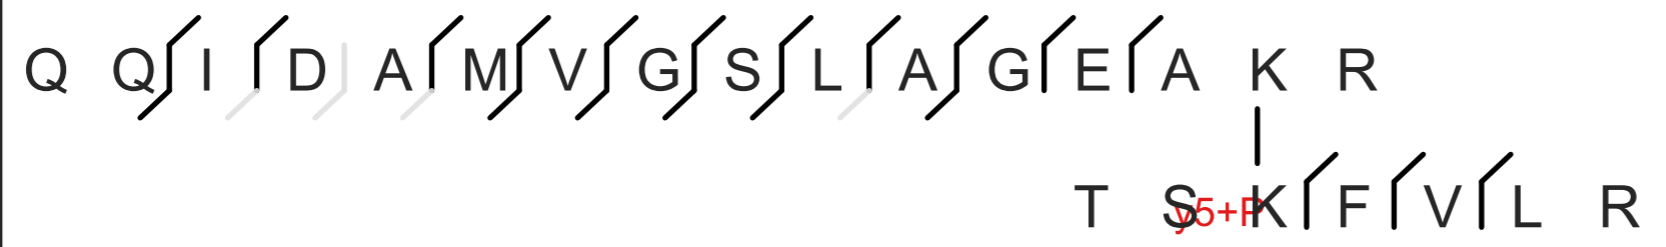



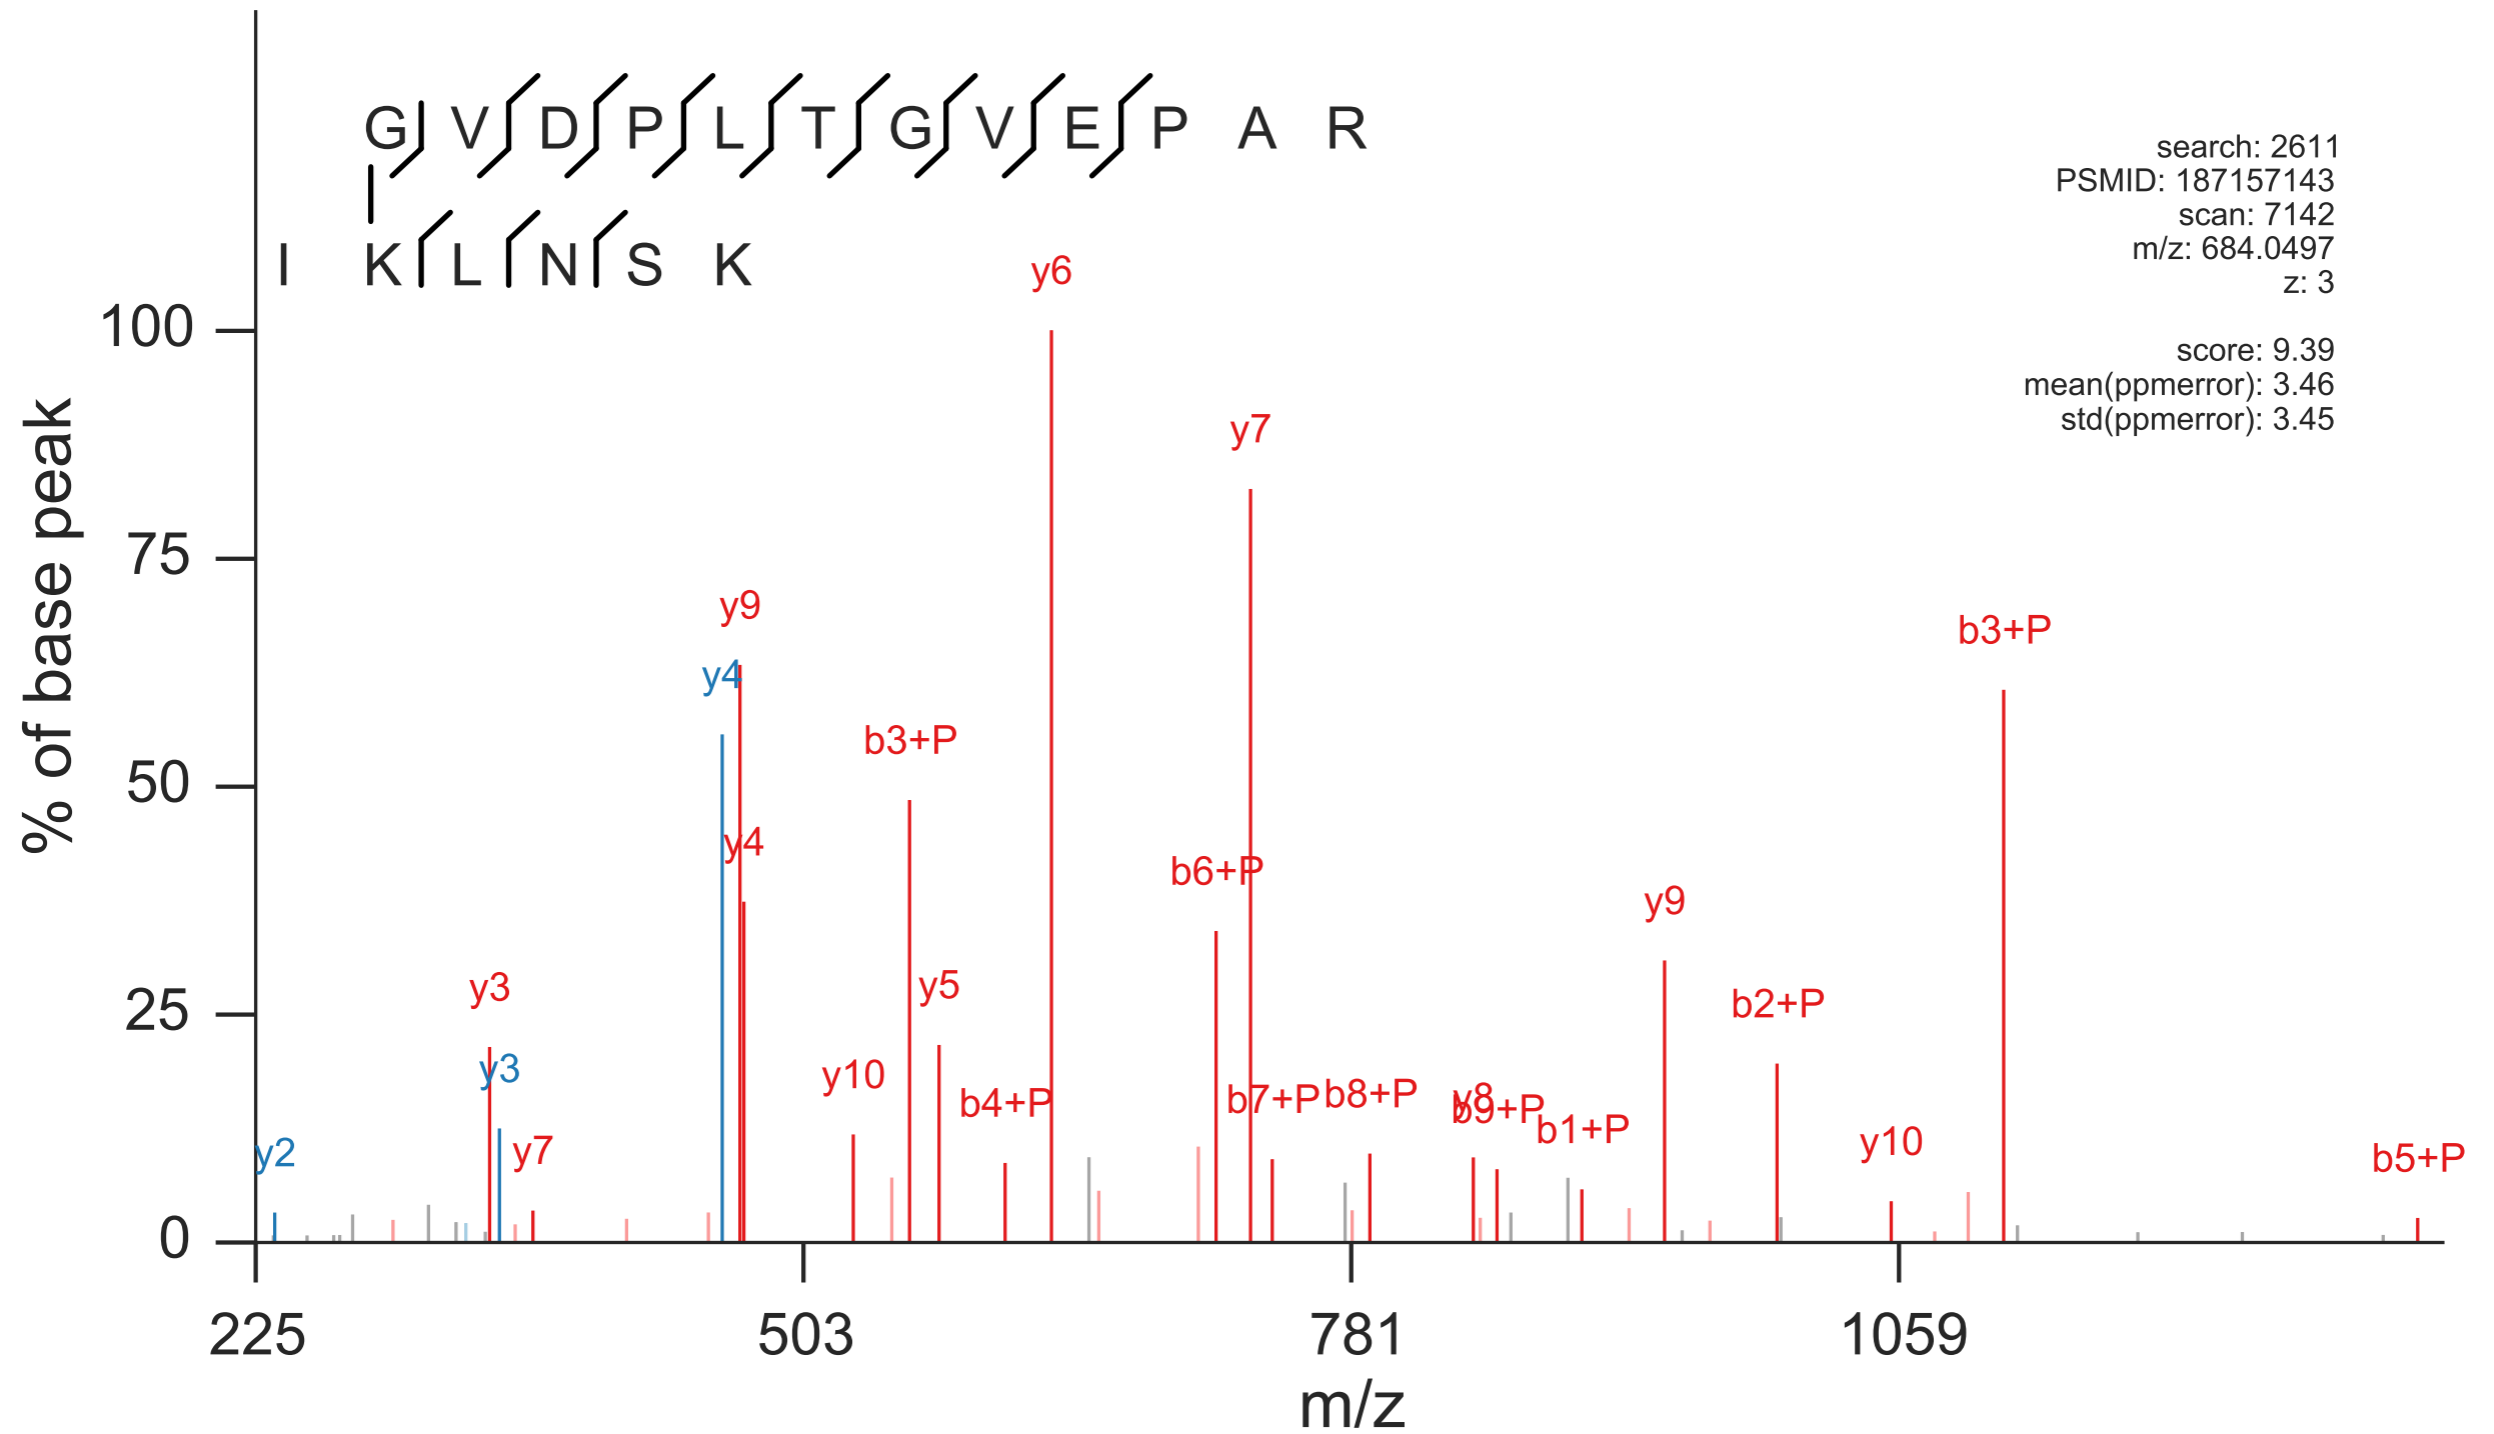

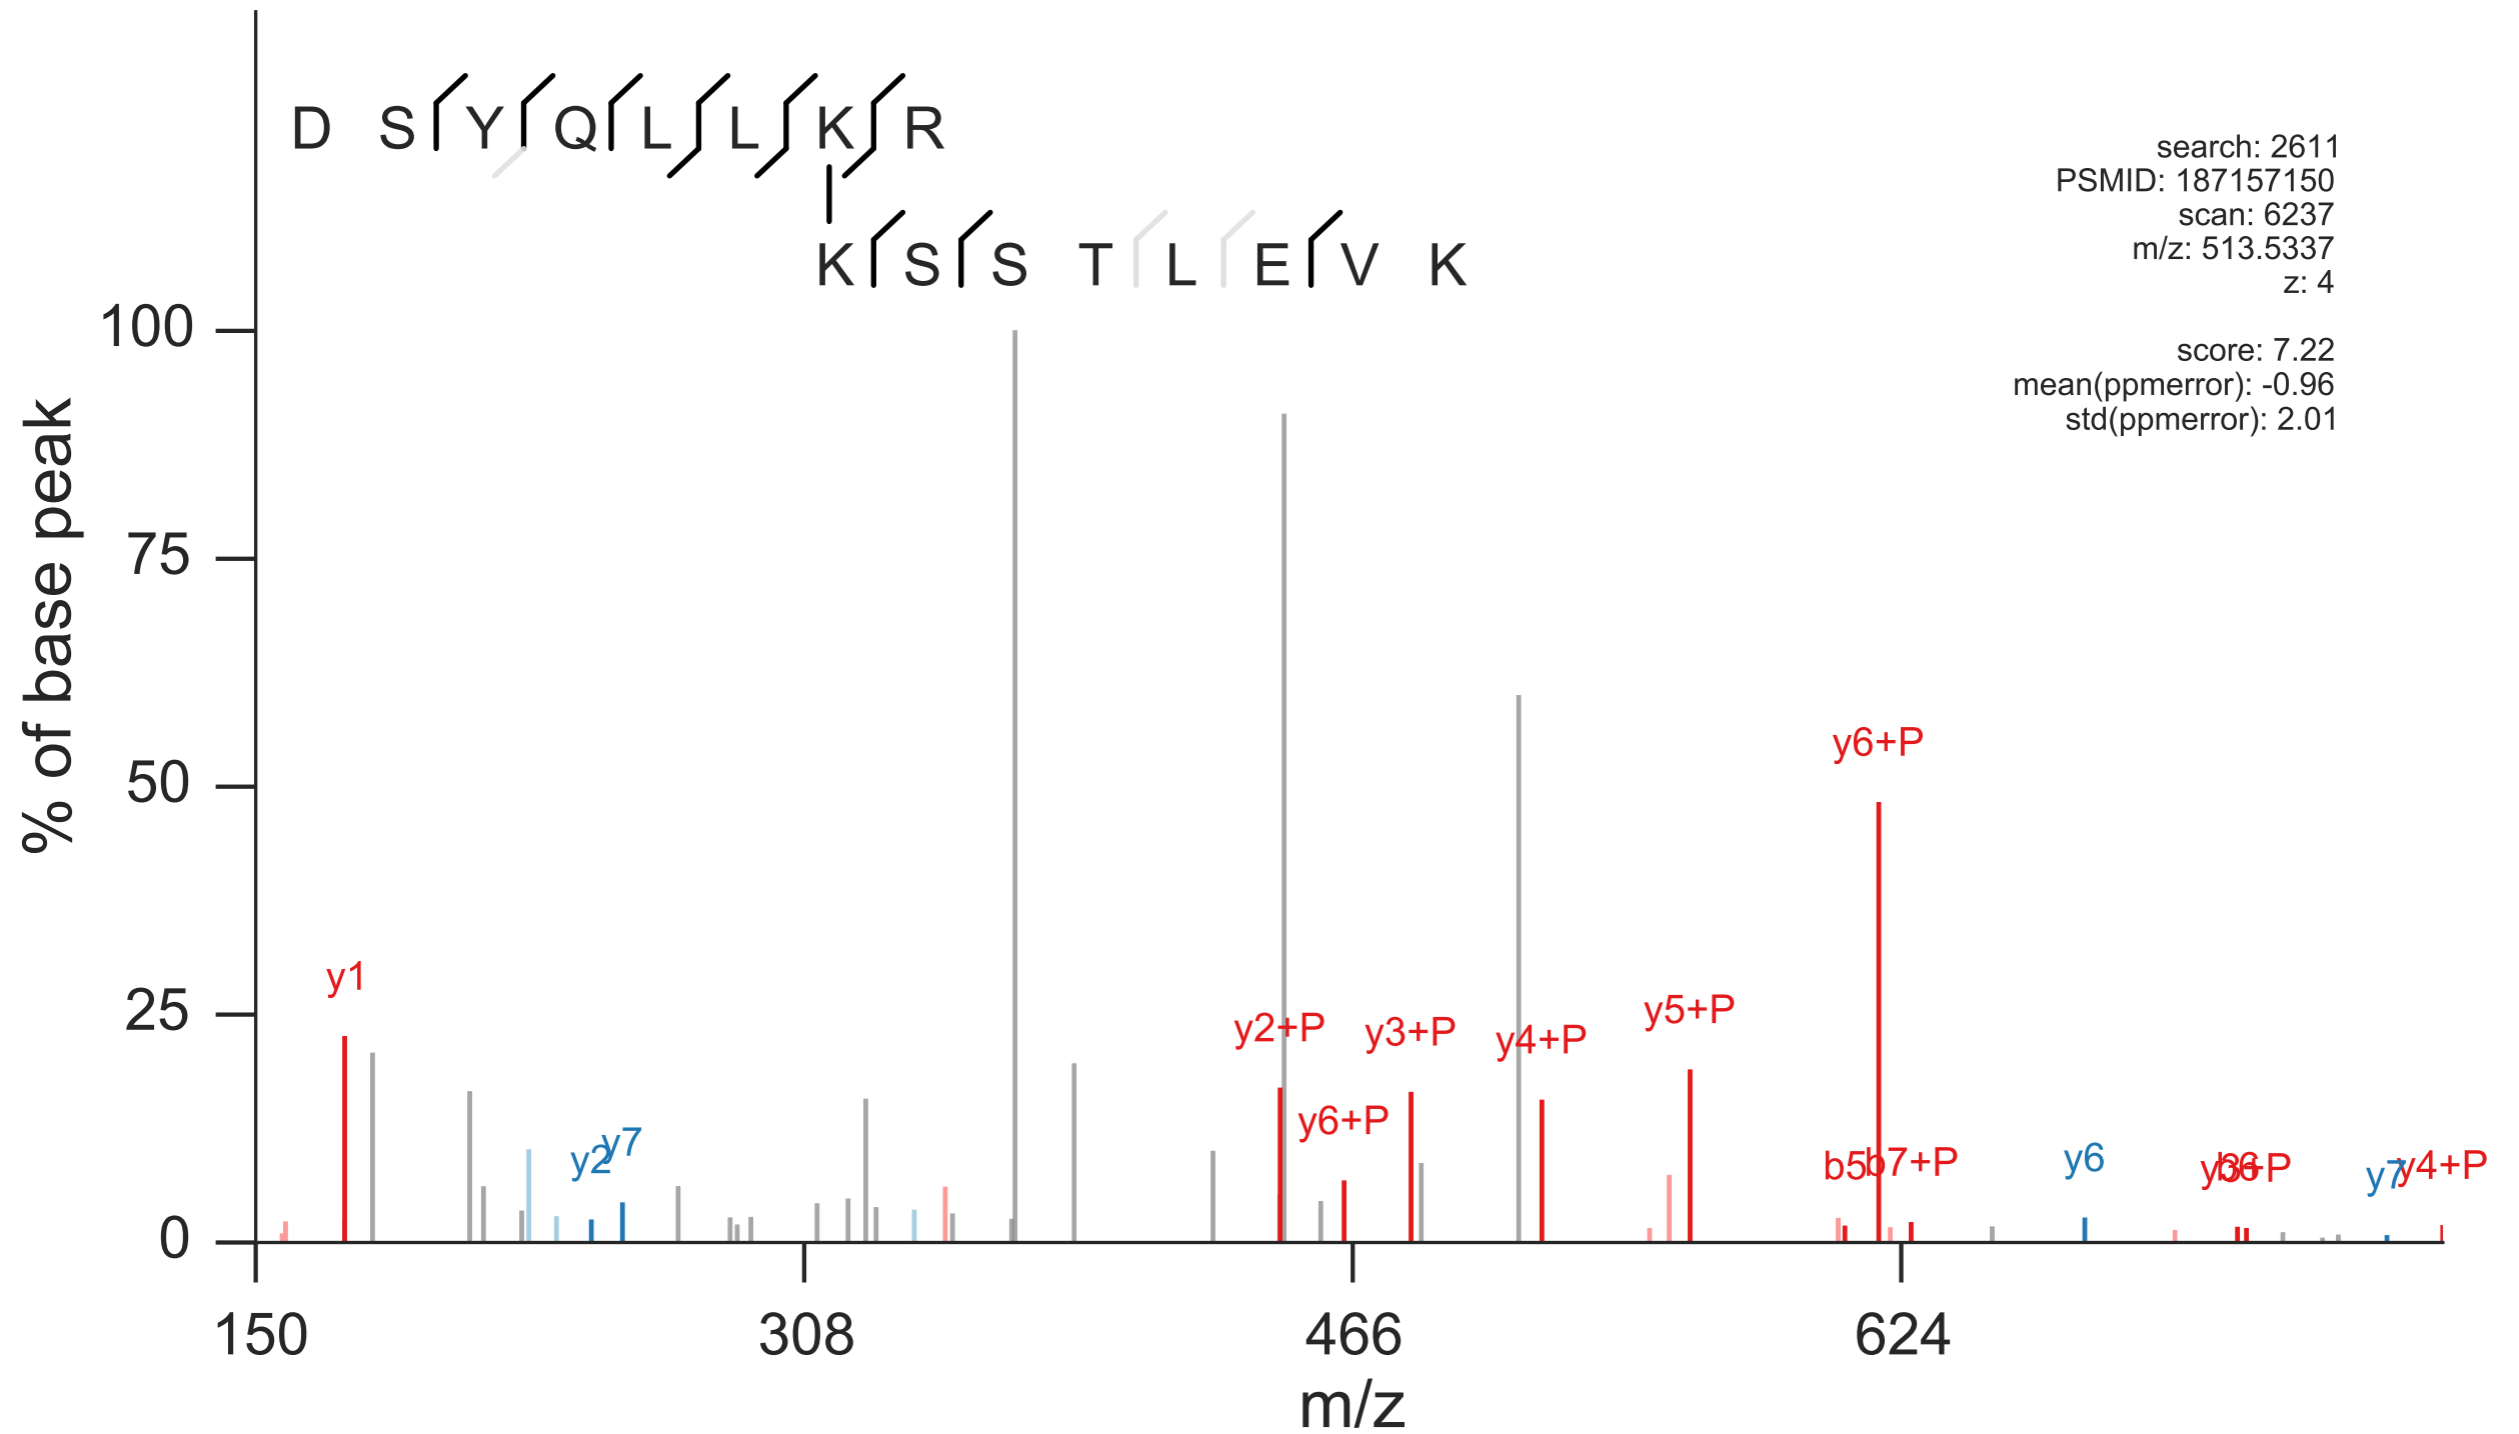

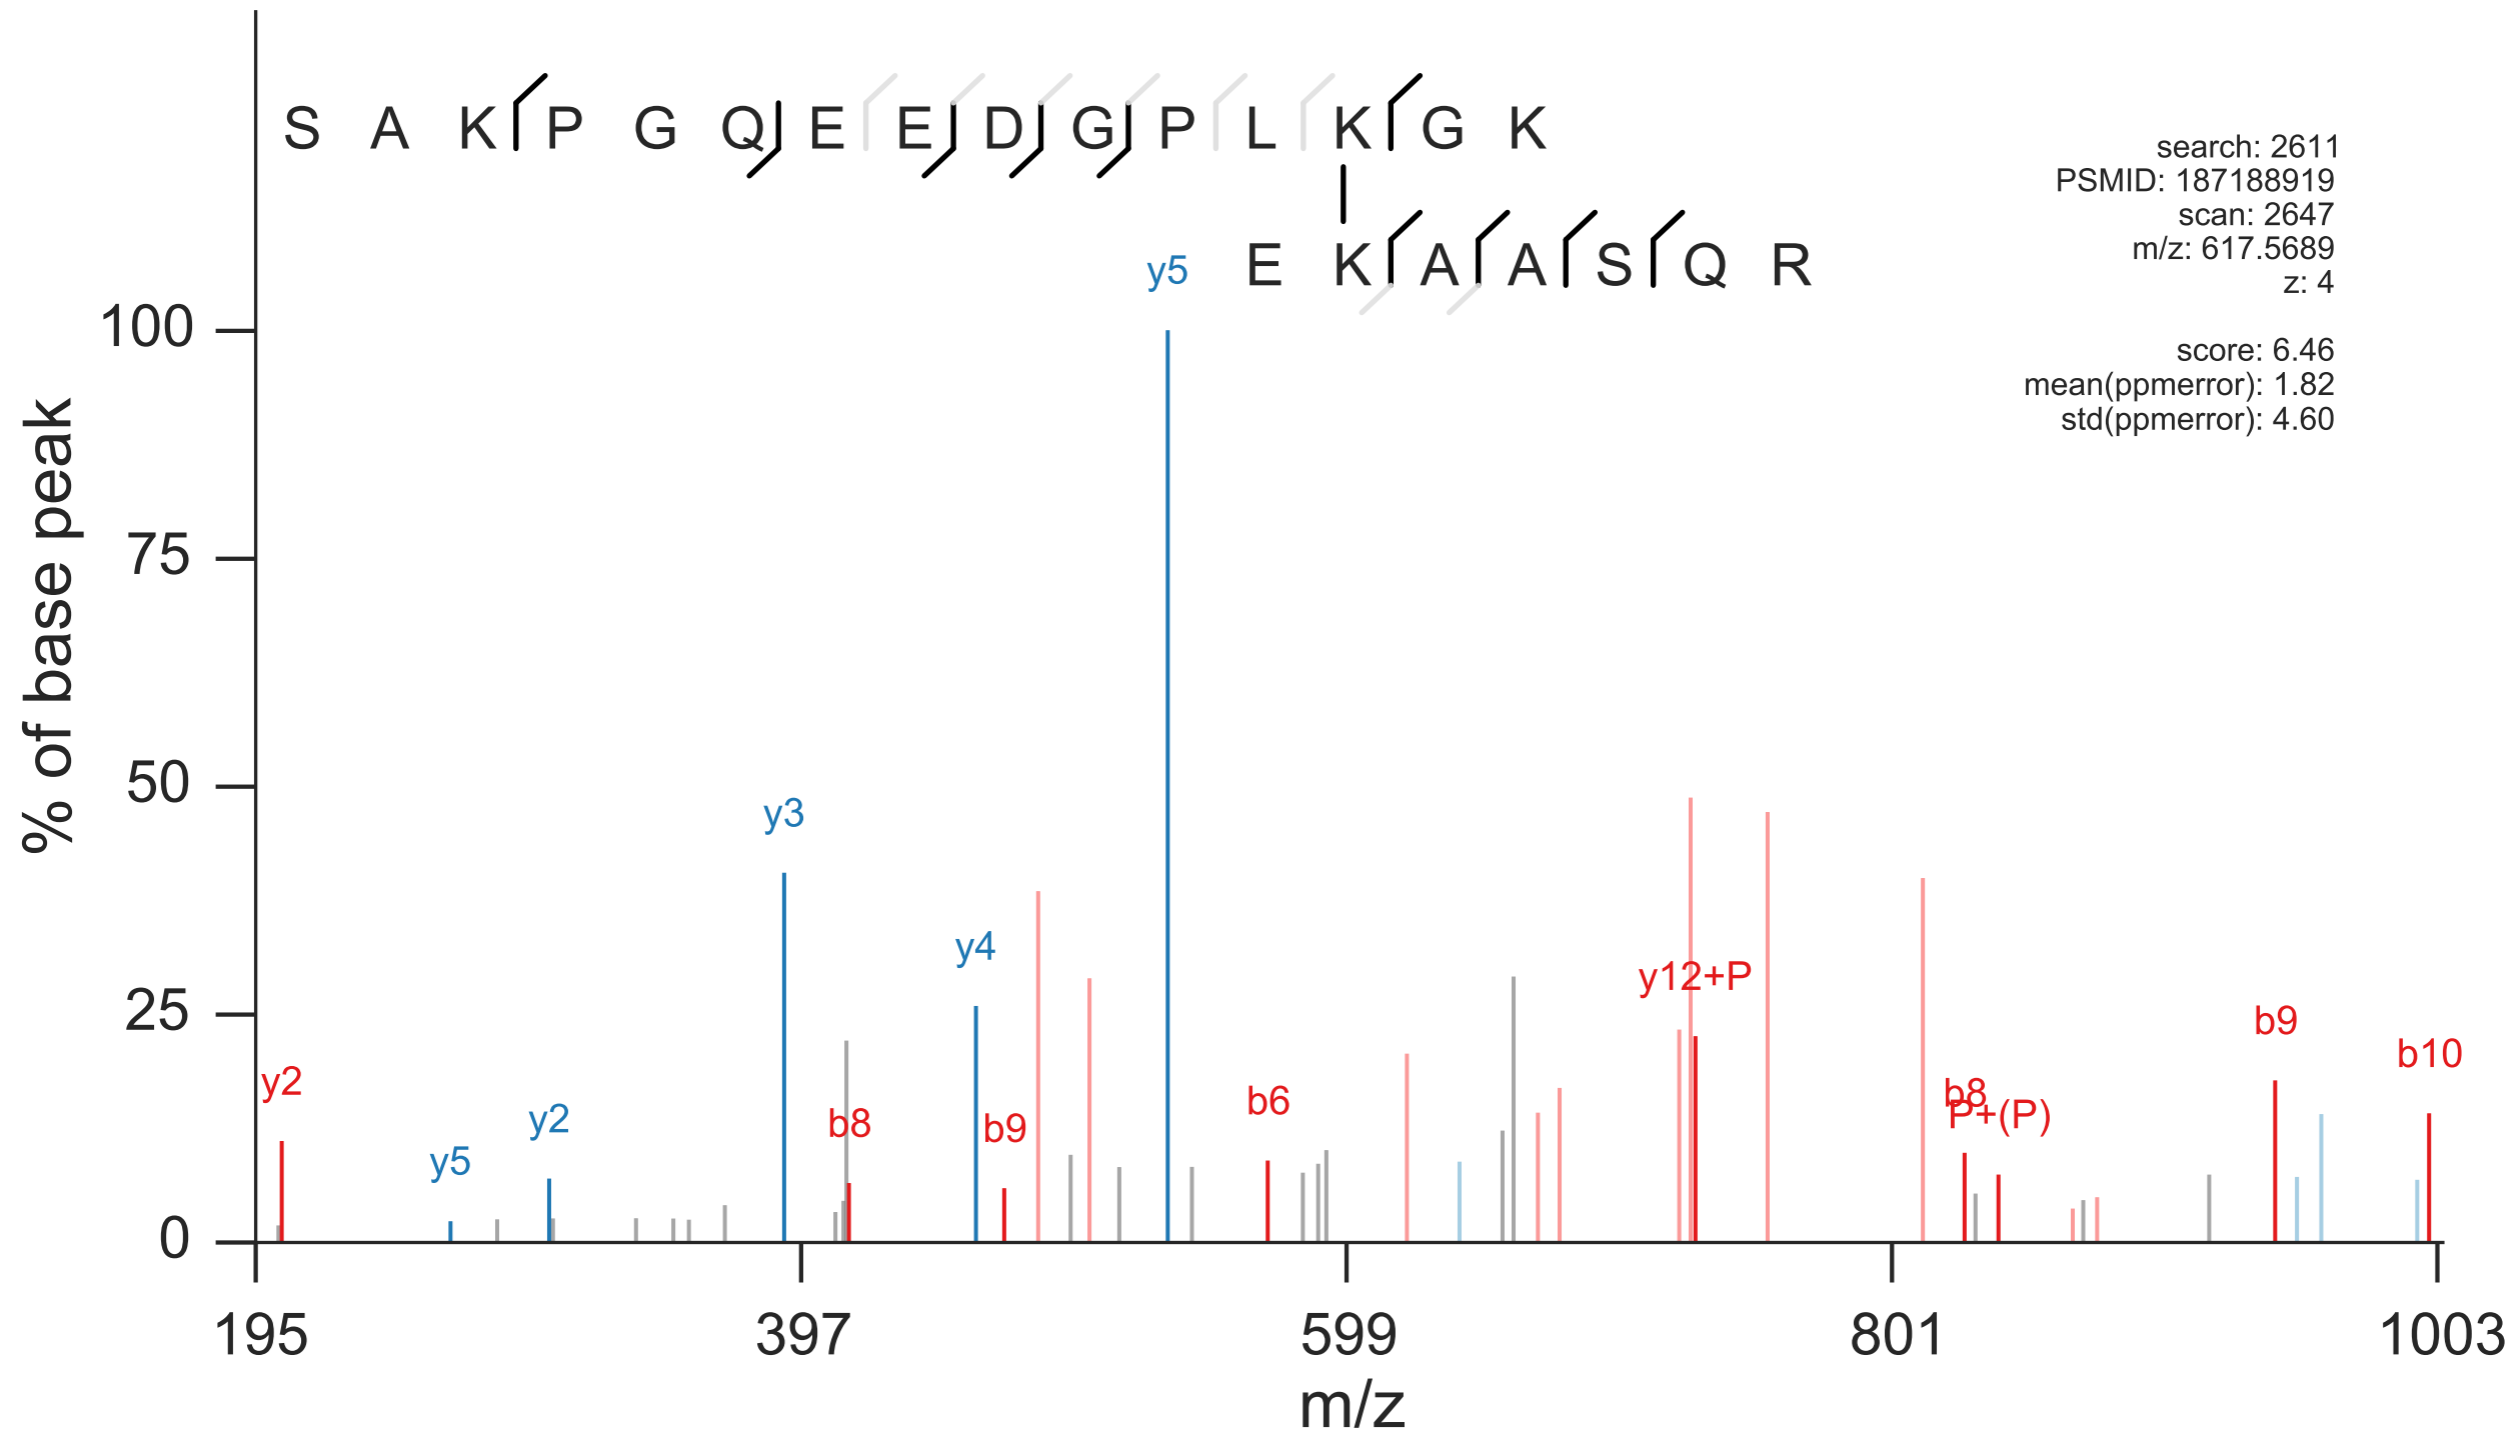

search: 2611  
 PSMID: 187188919  
 scan: 2647  
 m/z: 617.5689  
 z: 4

score: 6.46  
 mean(ppmerror): 1.82  
 std(ppmerror): 4.60

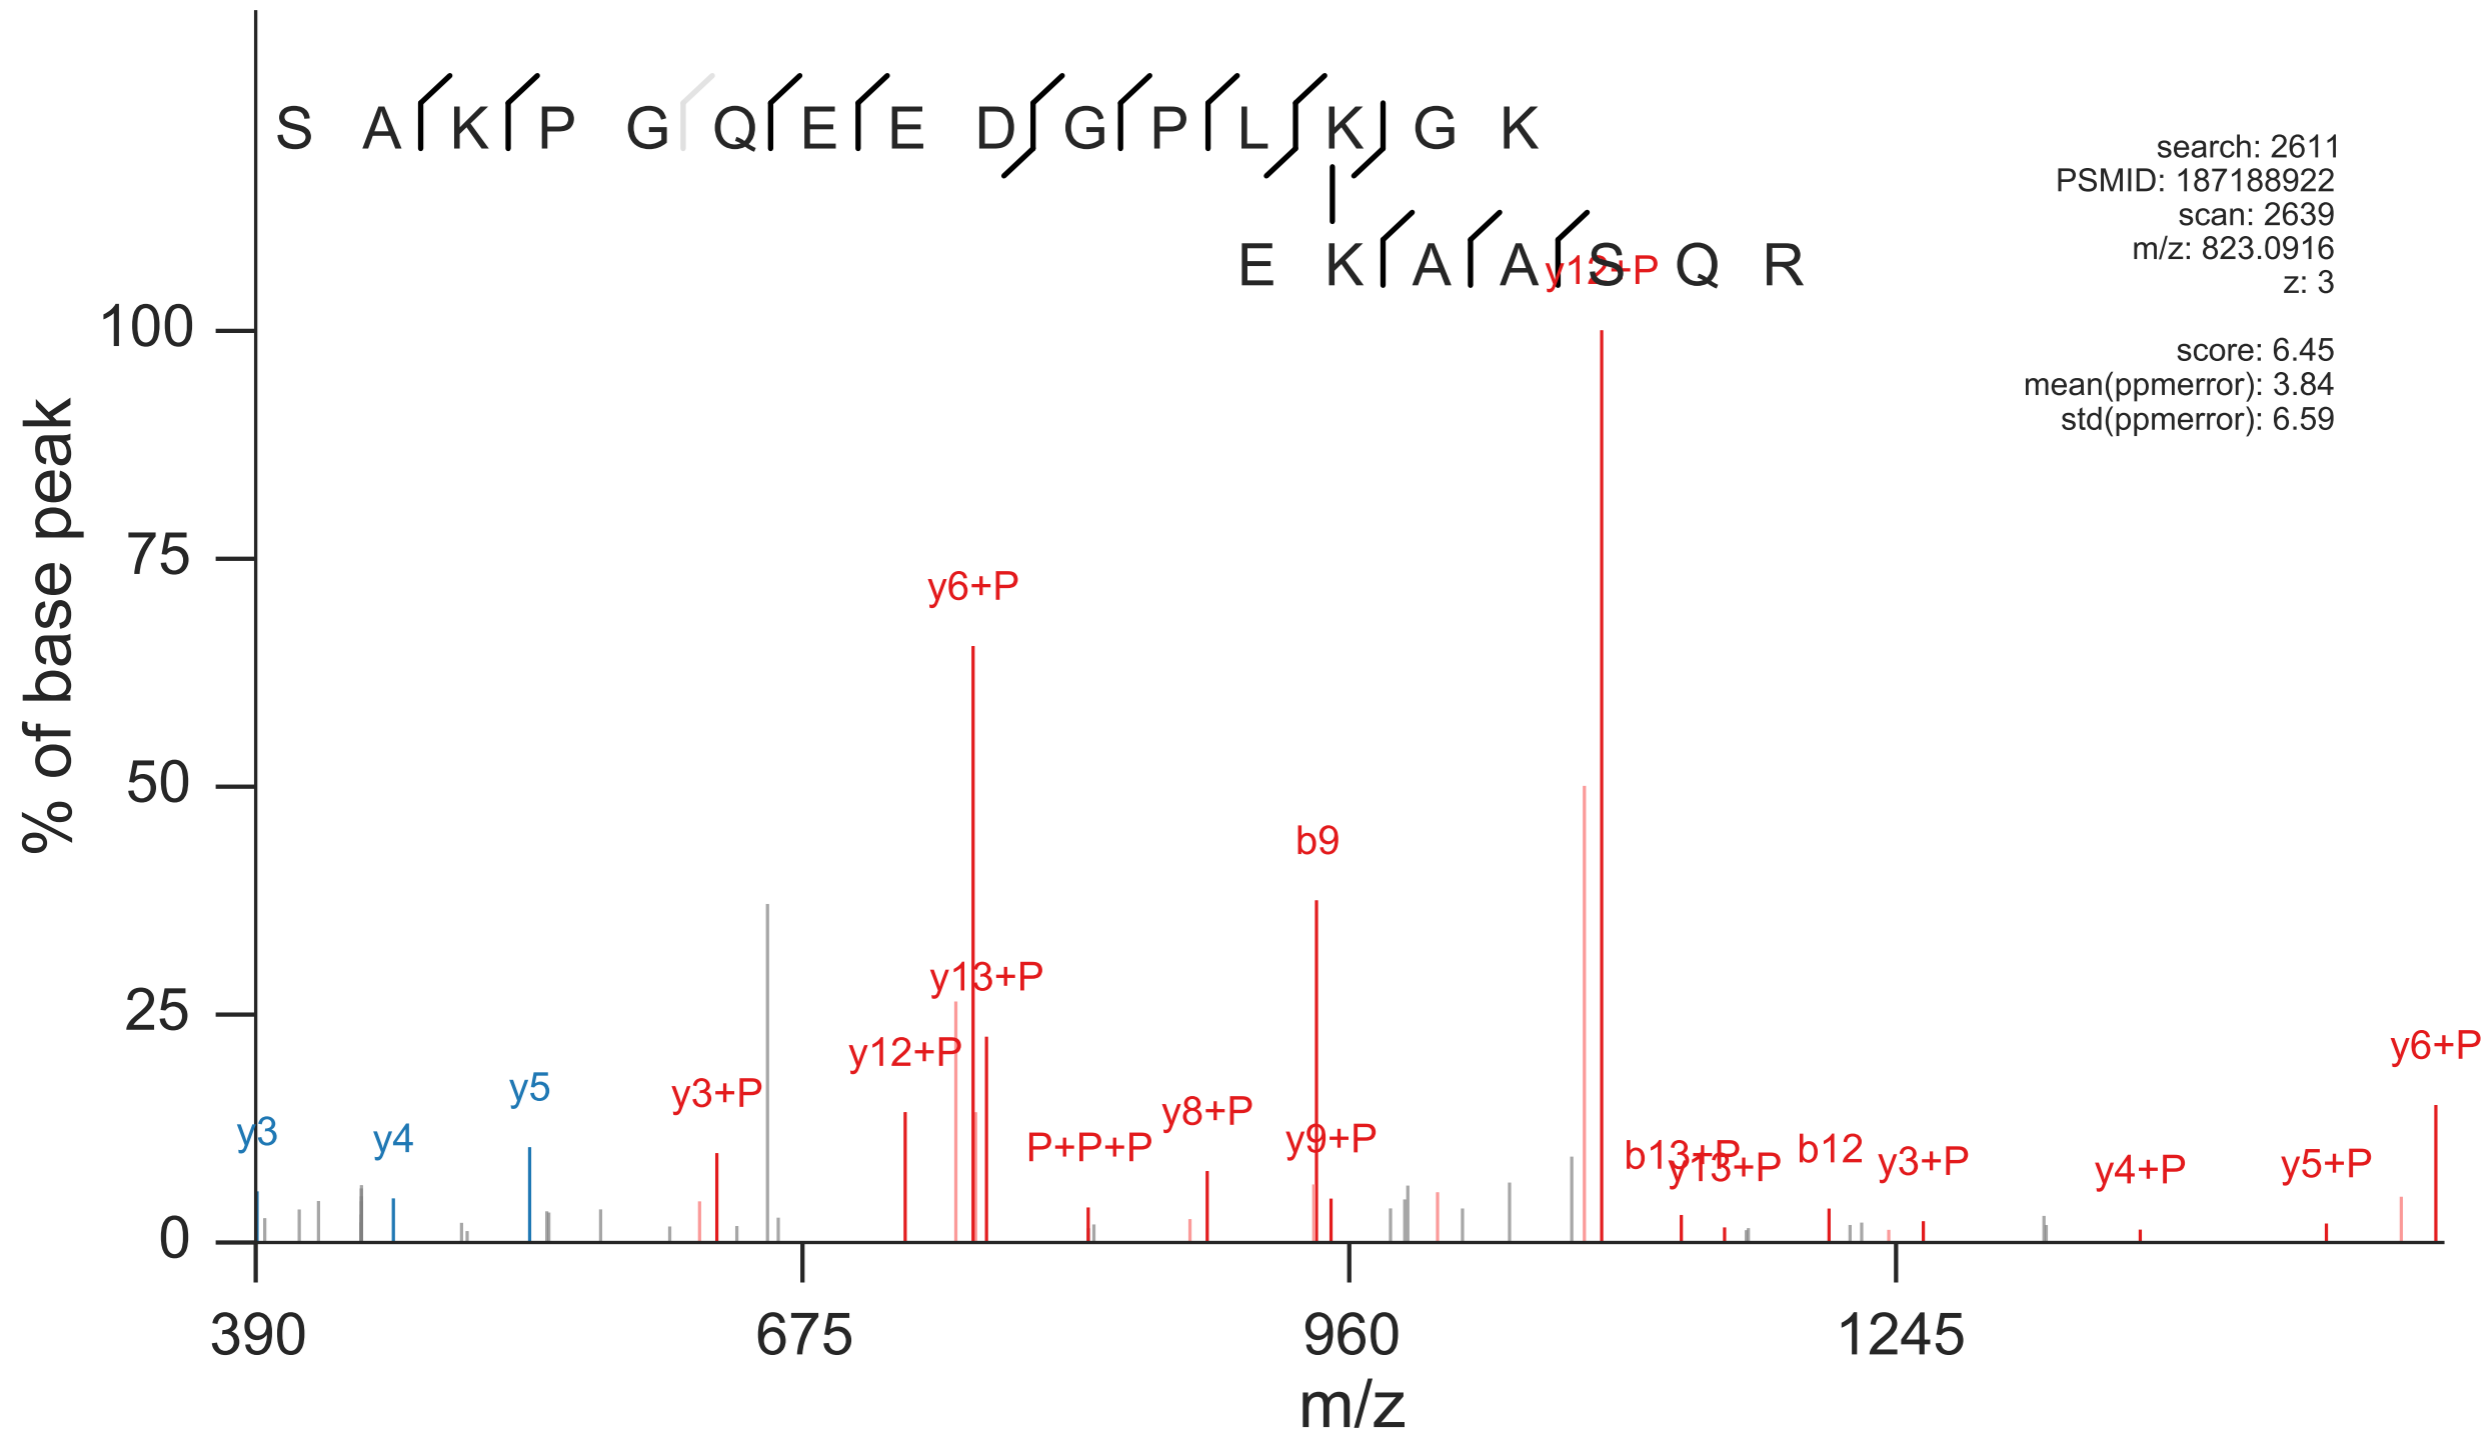

search: 2611  
 PSMID: 18718892  
 scan: 2639  
 m/z: 823.0916  
 z: 3

score: 6.45  
 mean(ppmerror): 3.84  
 std(ppmerror): 6.59

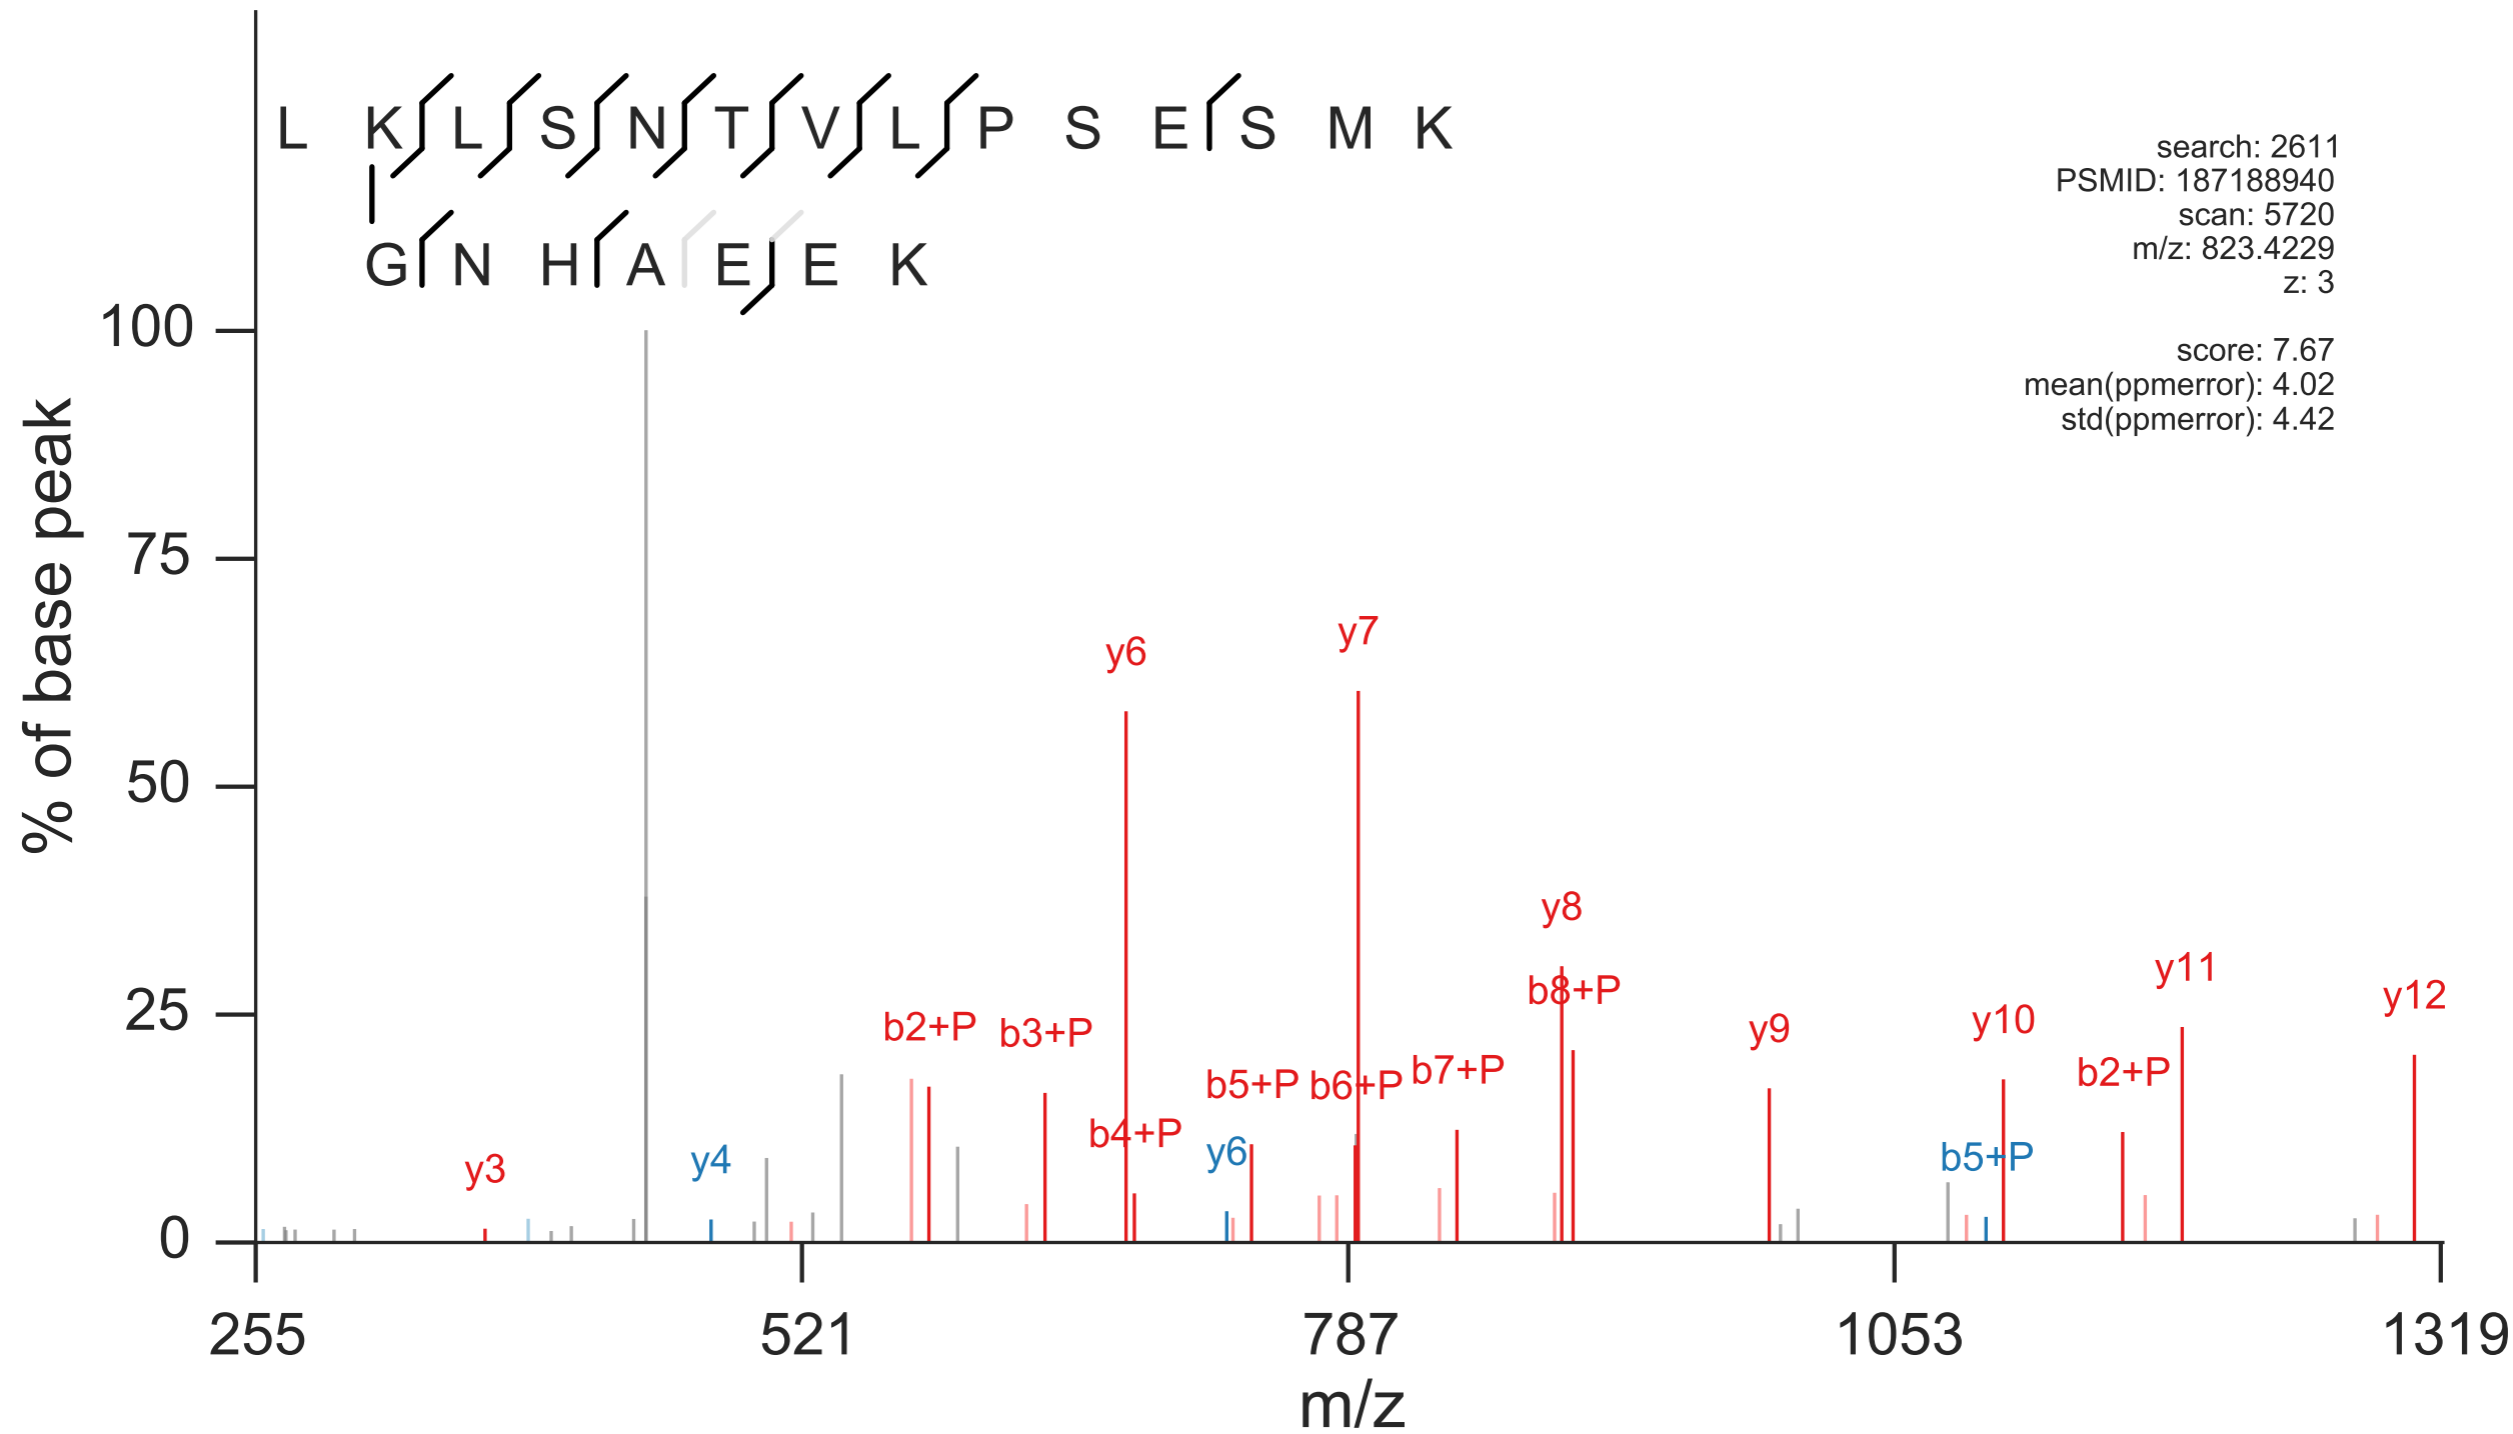

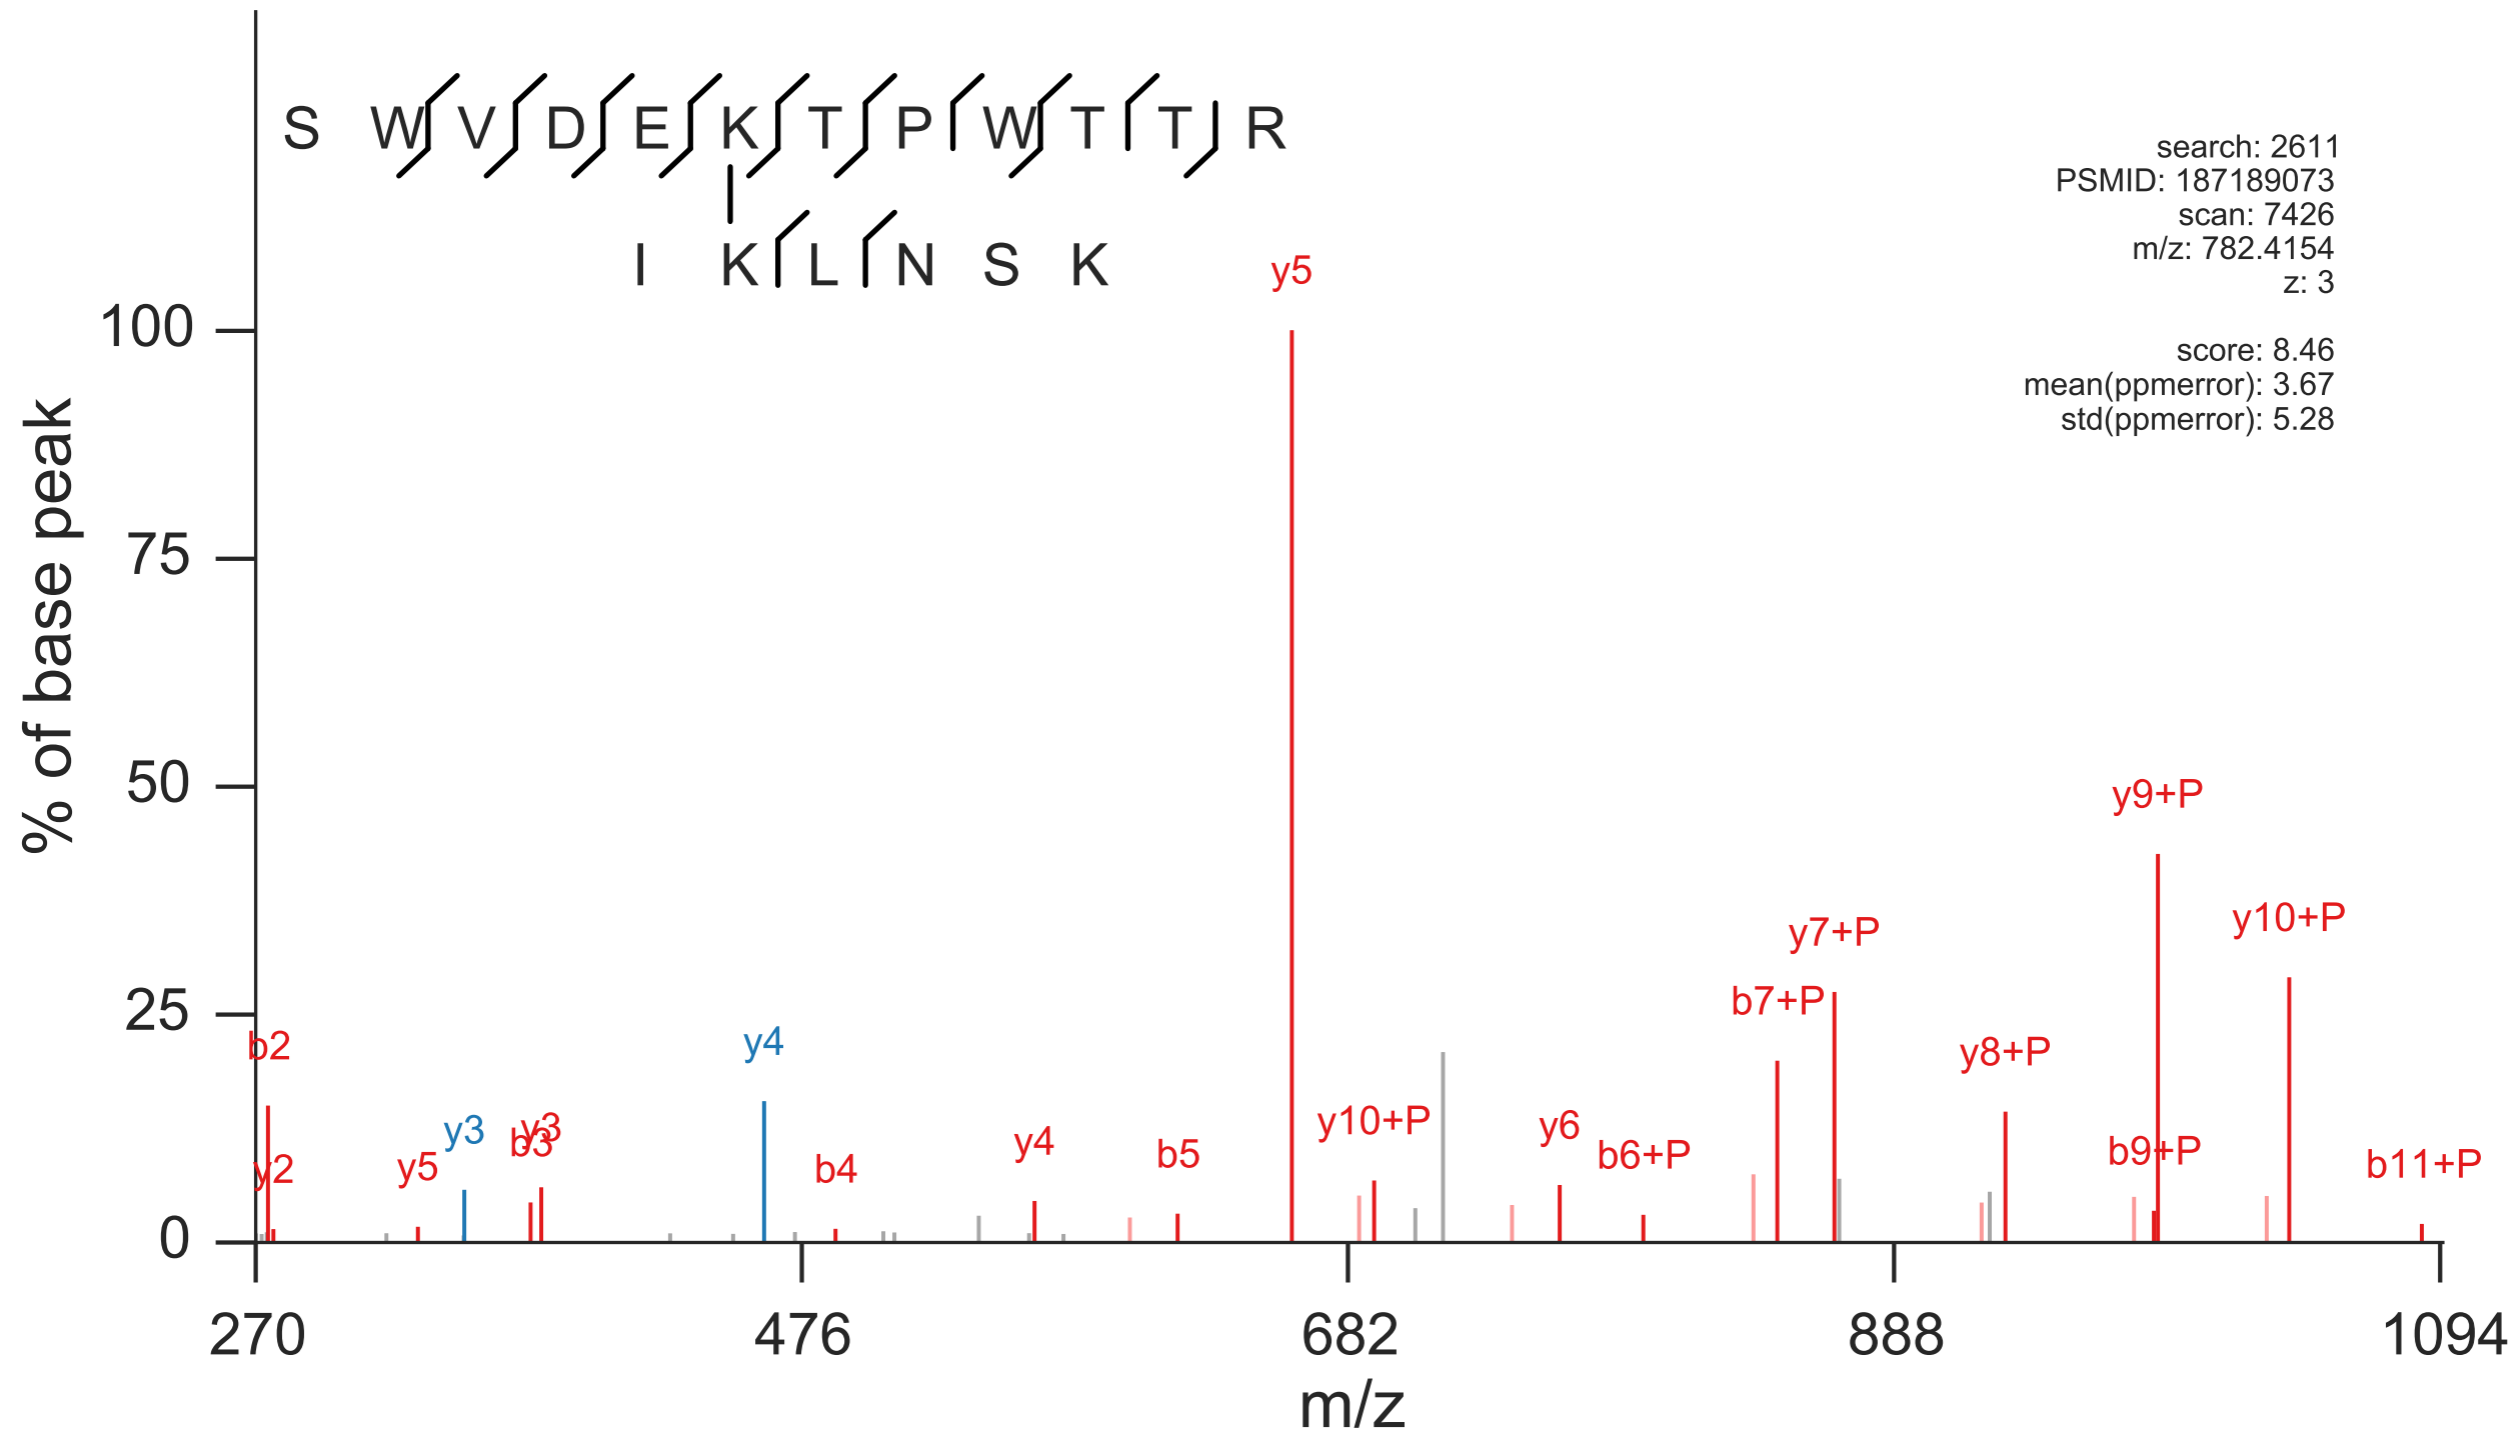

search: 2611  
 PSMID: 187189073  
 scan: 7426  
 m/z: 782.4154  
 z: 3

score: 8.46  
 mean(ppmerror): 3.67  
 std(ppmerror): 5.28

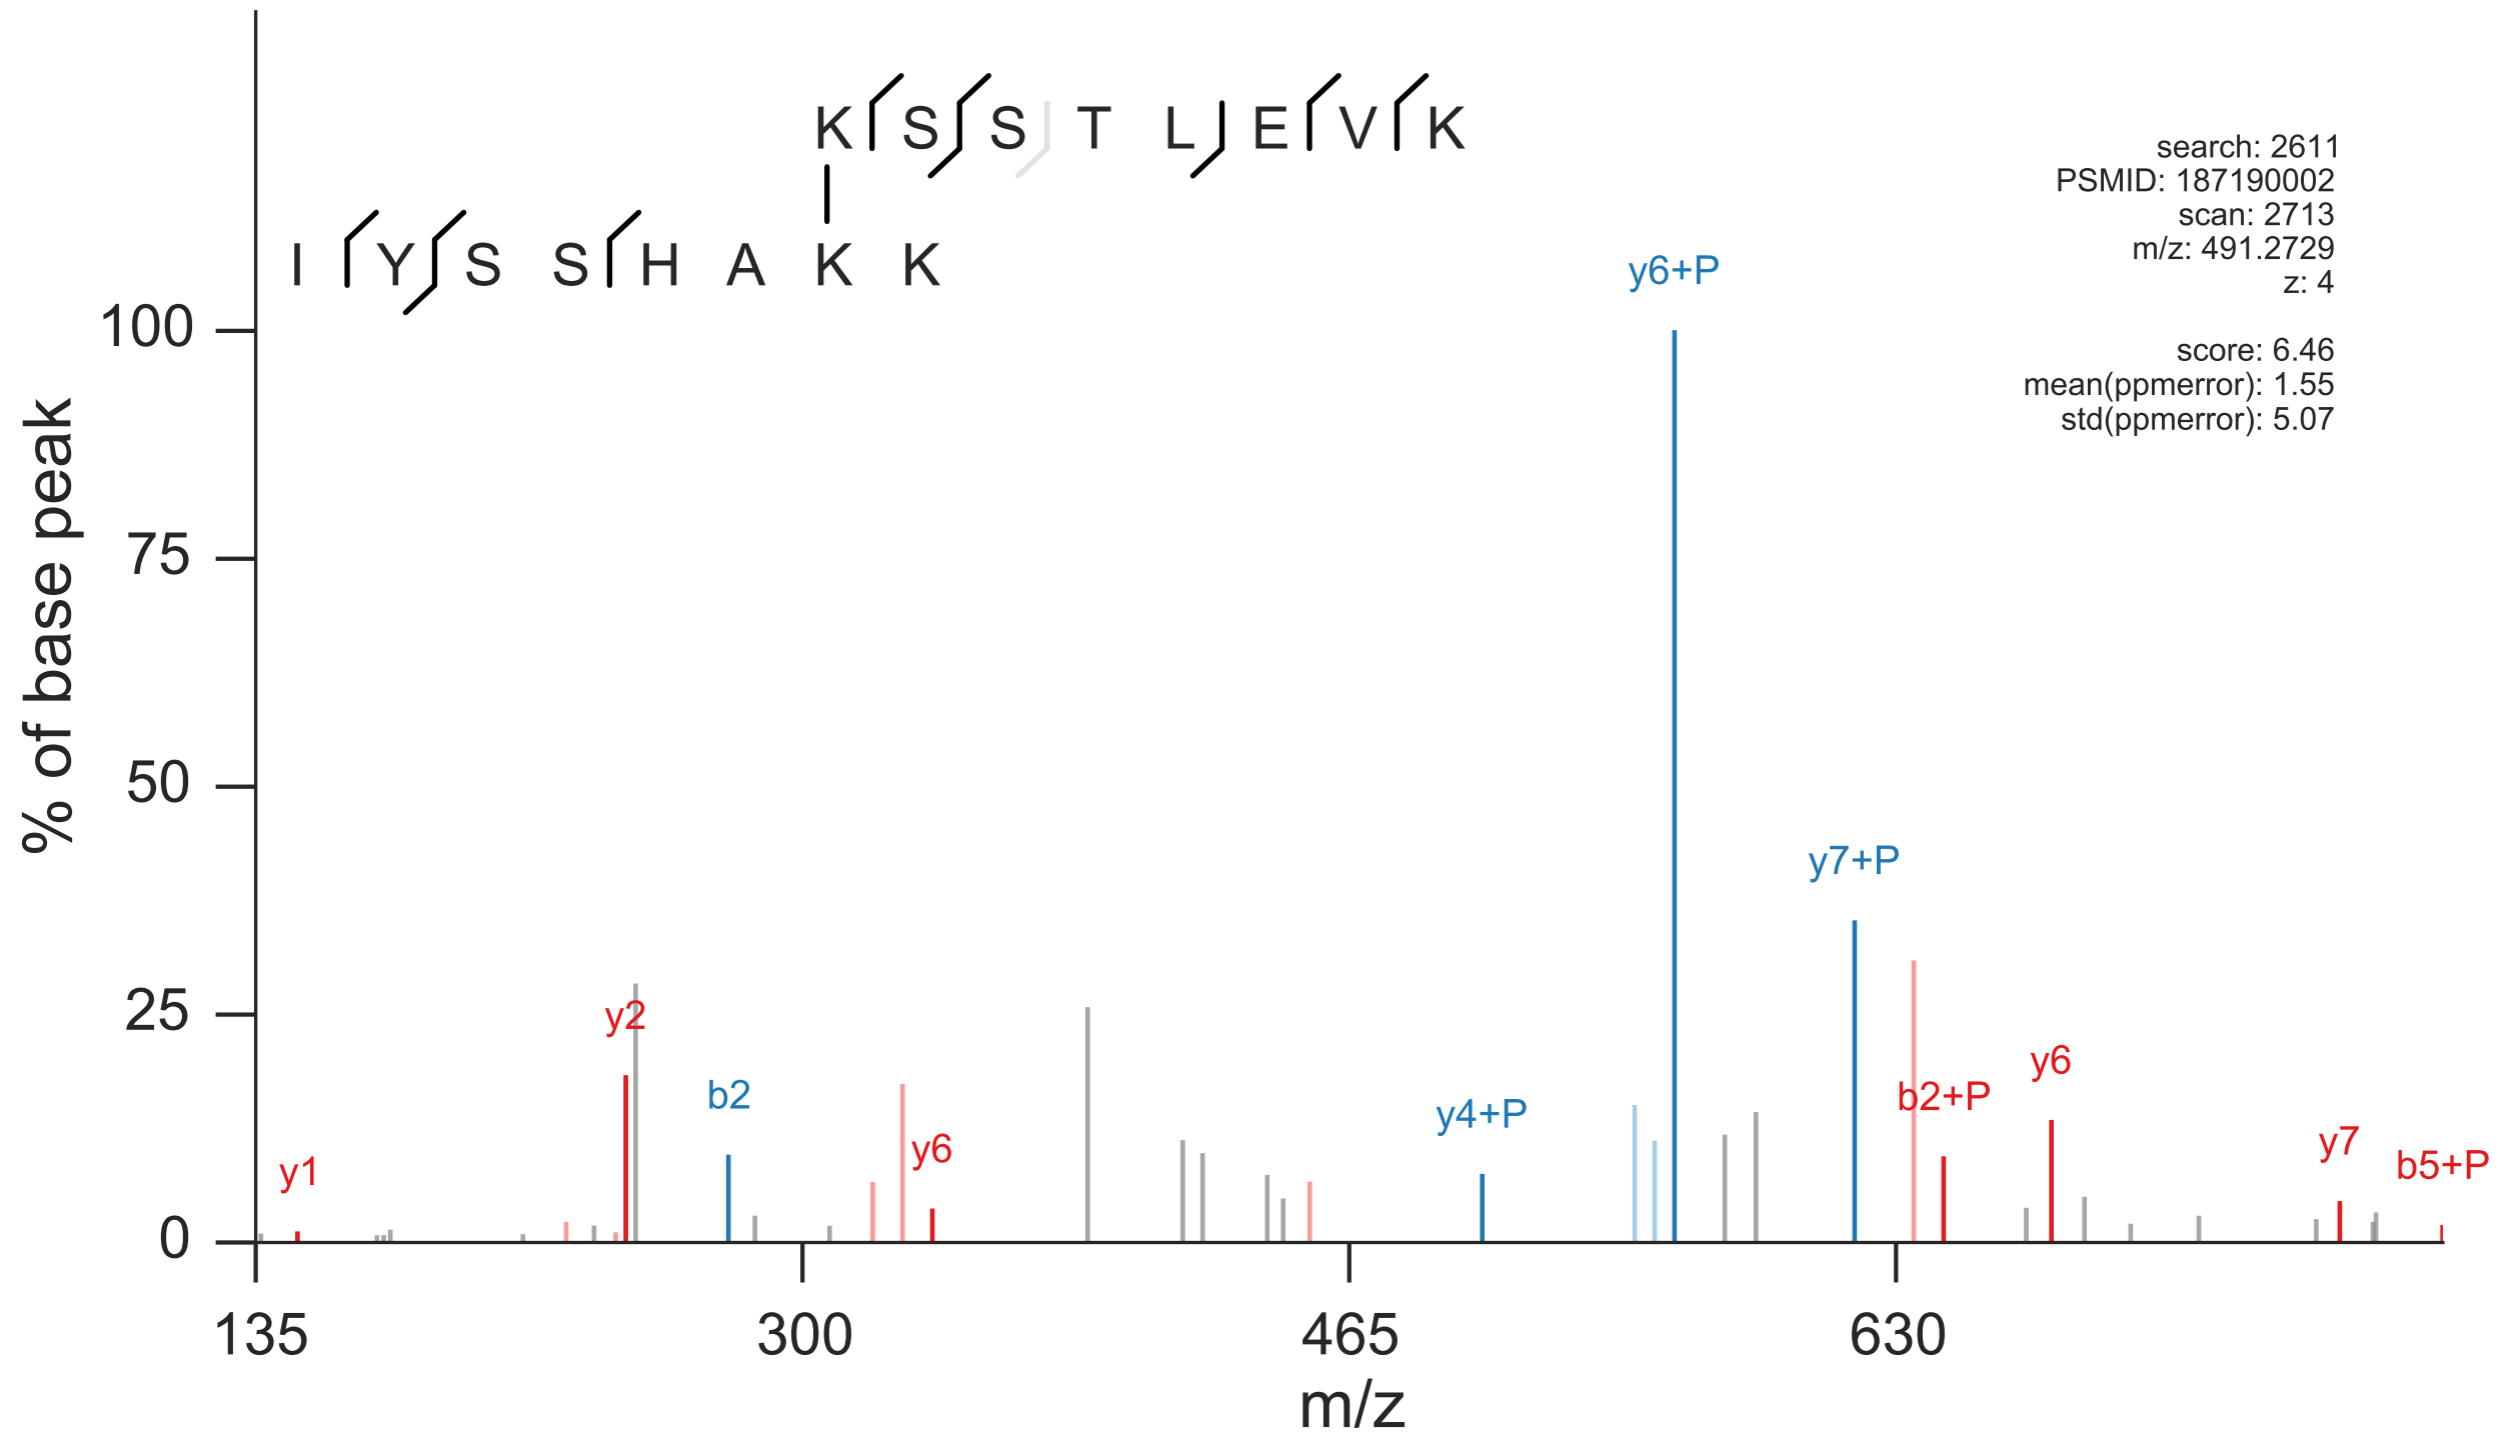

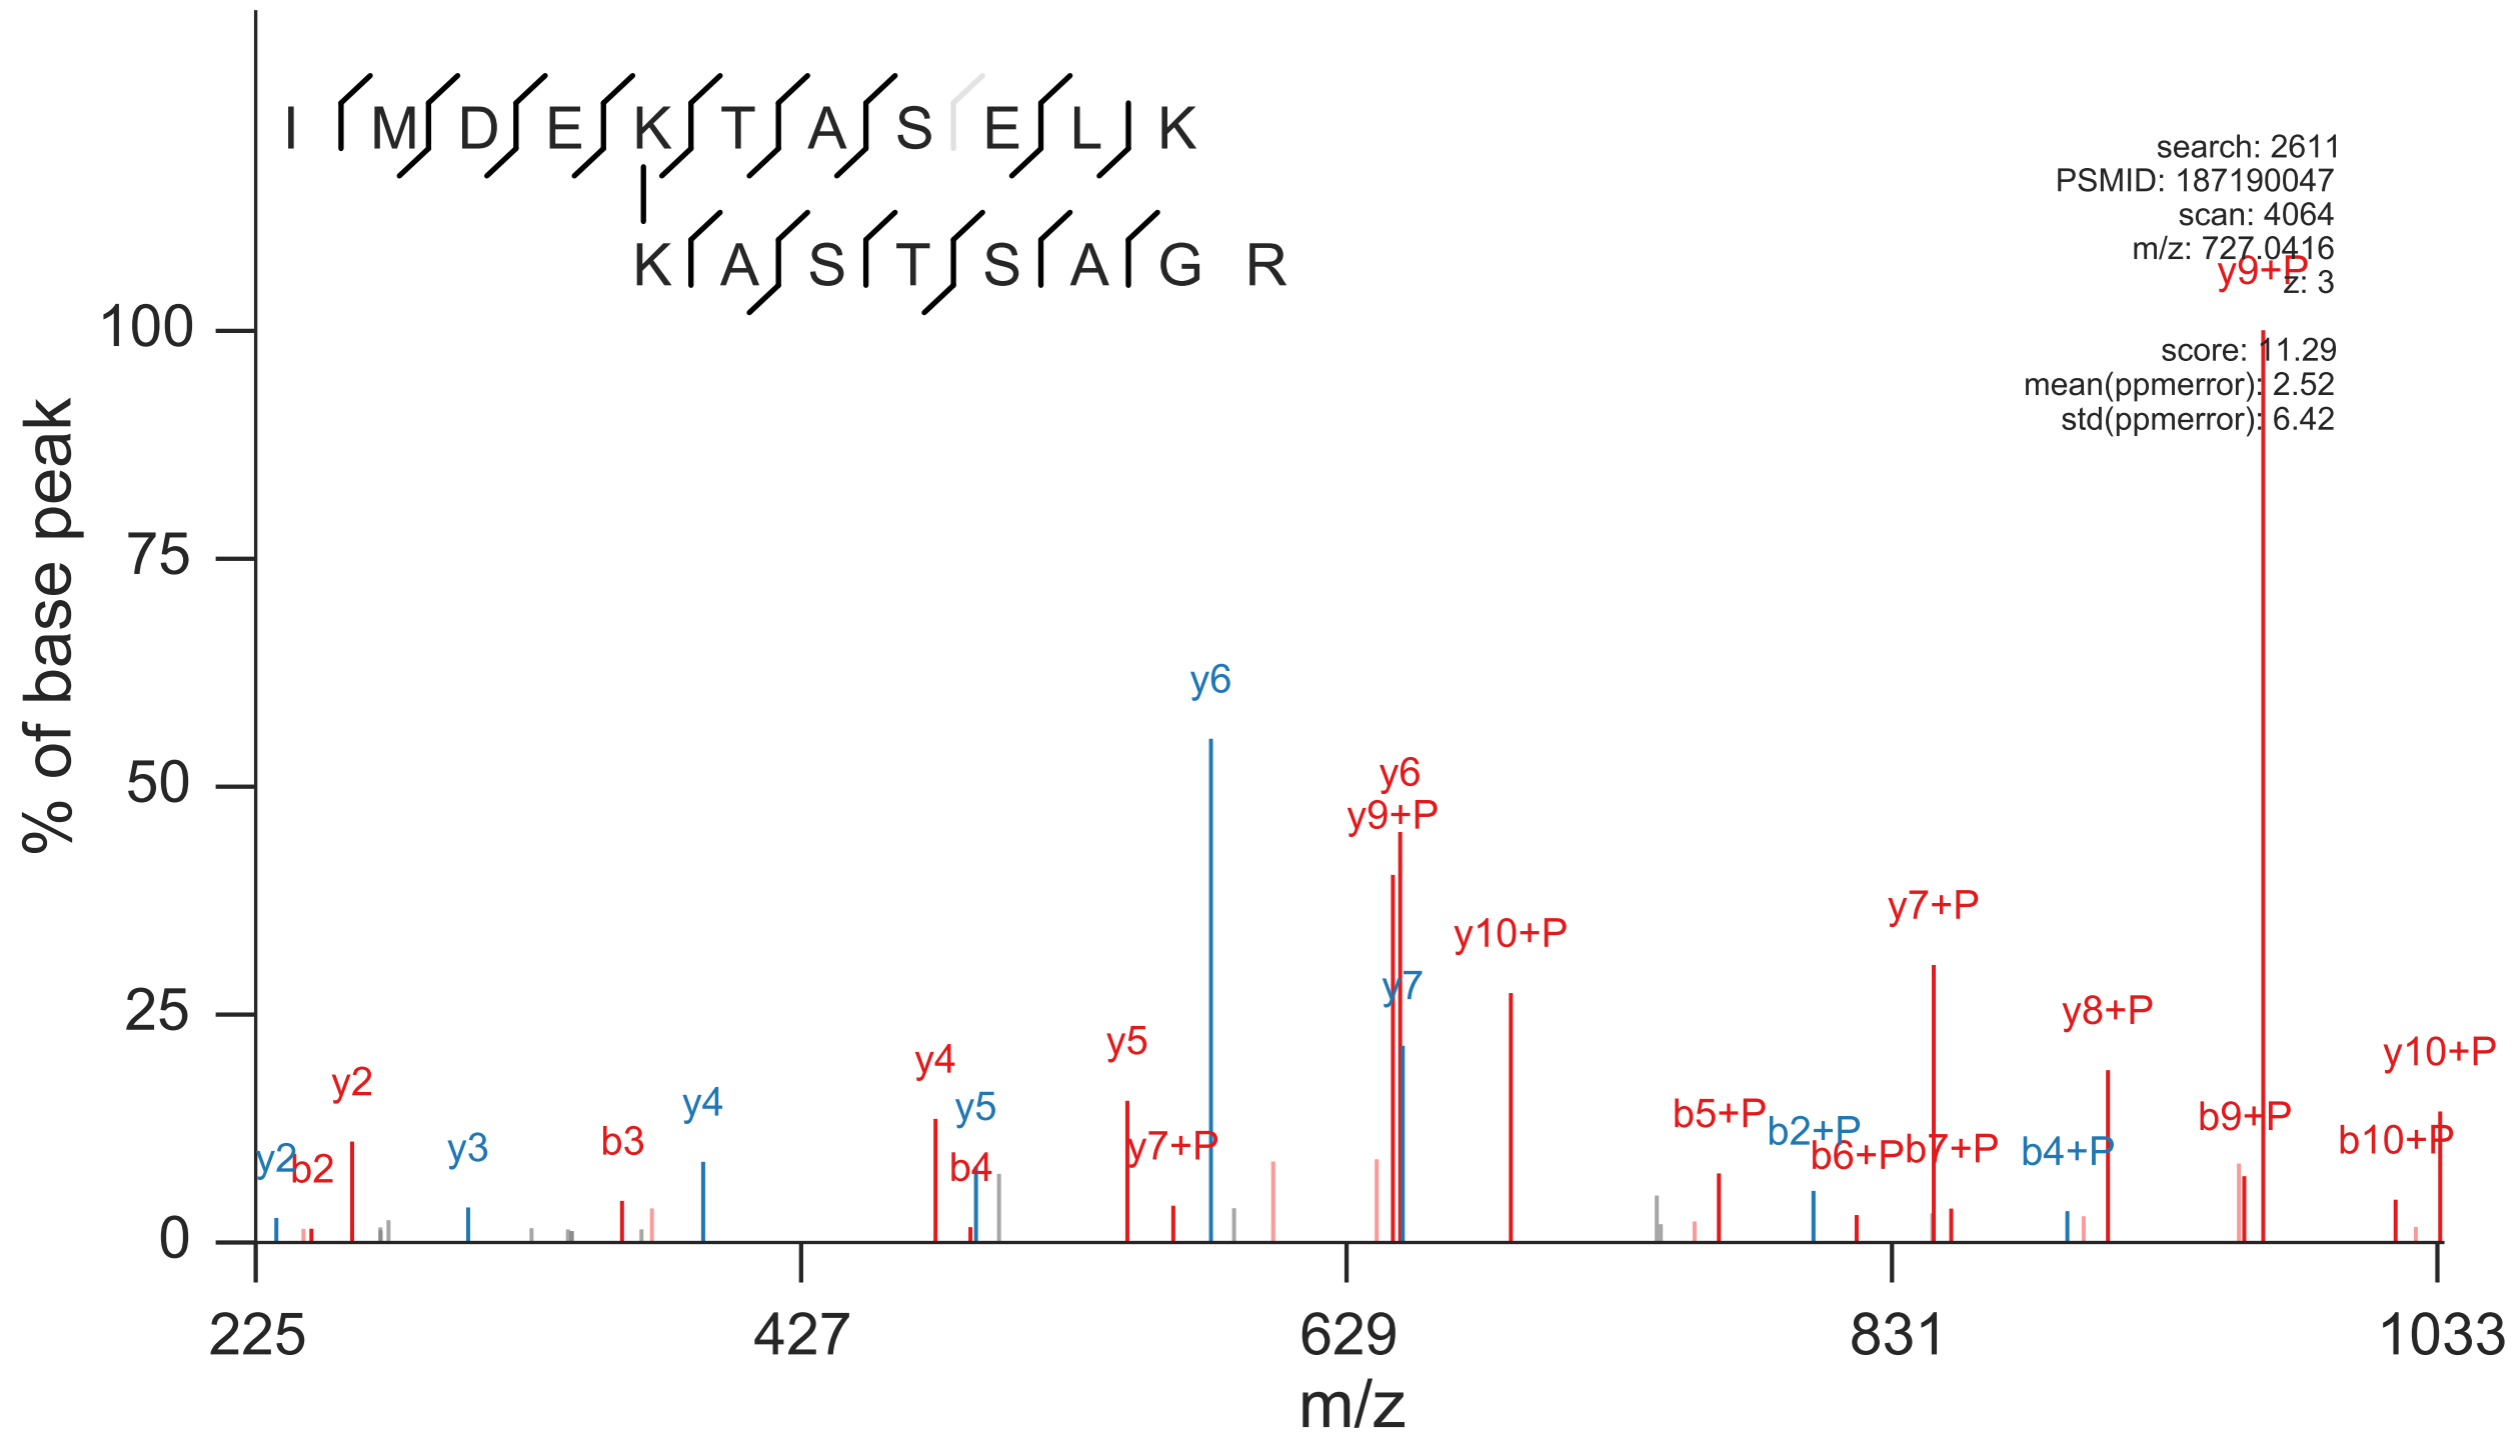



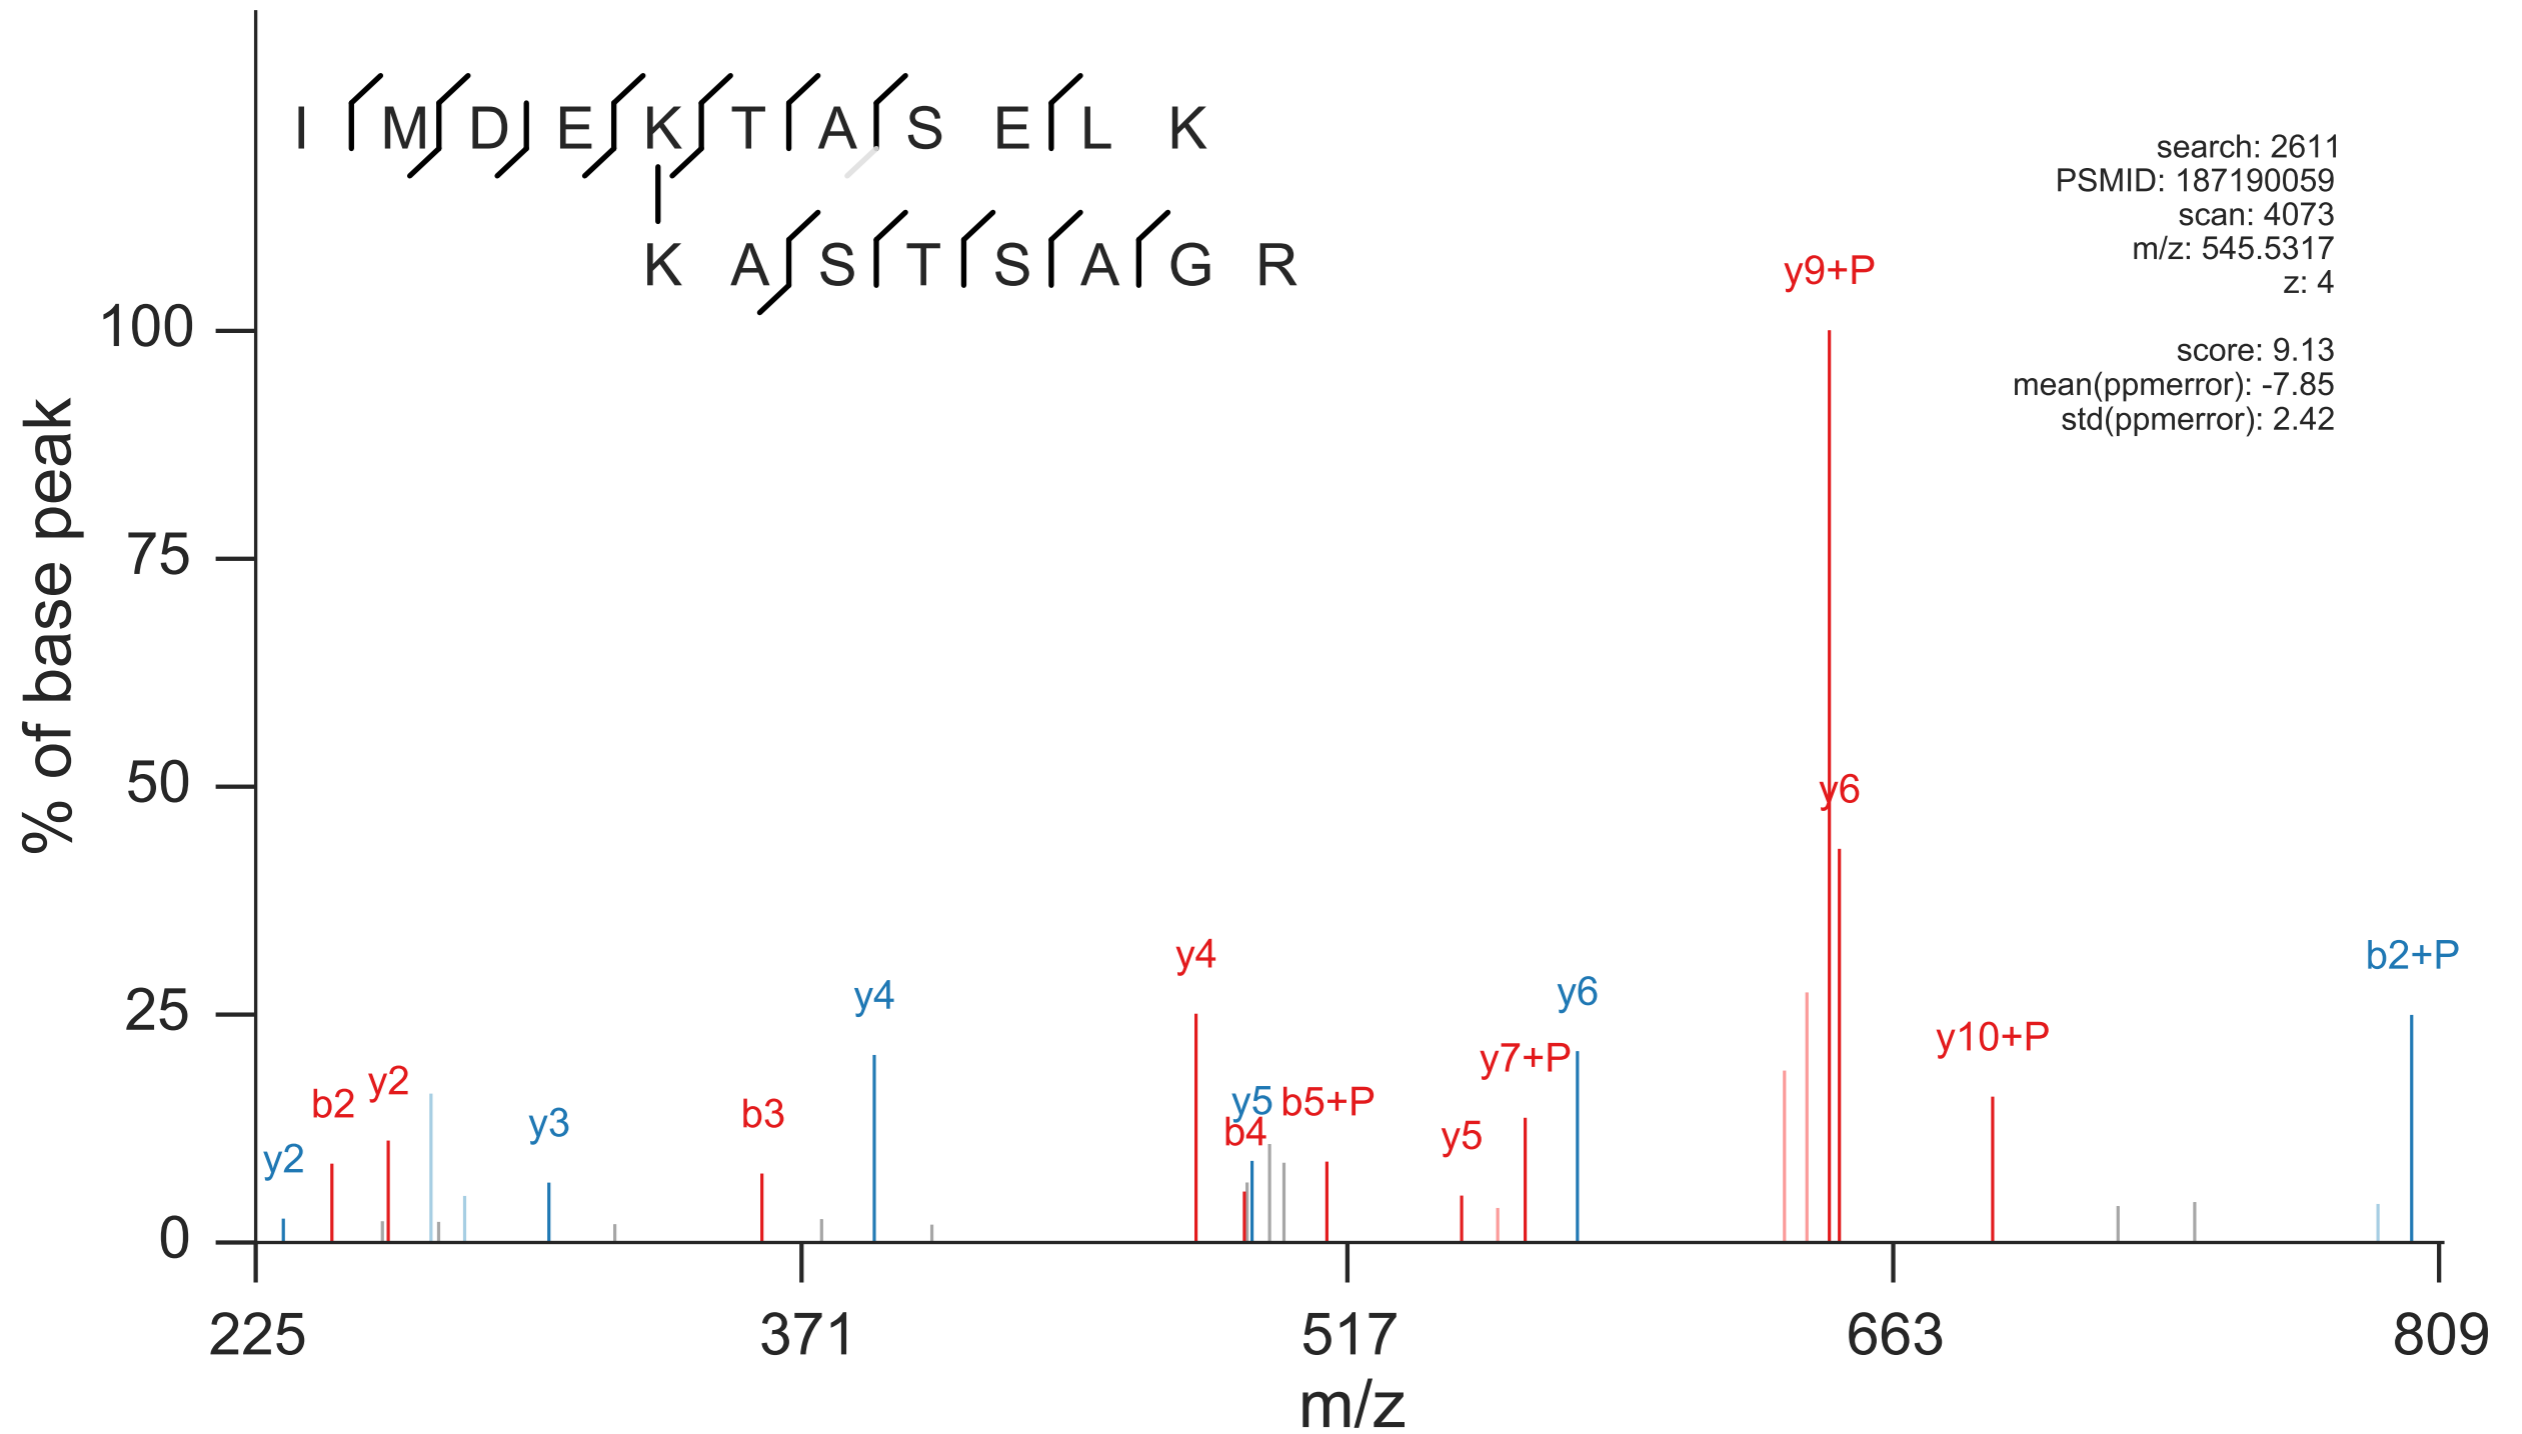

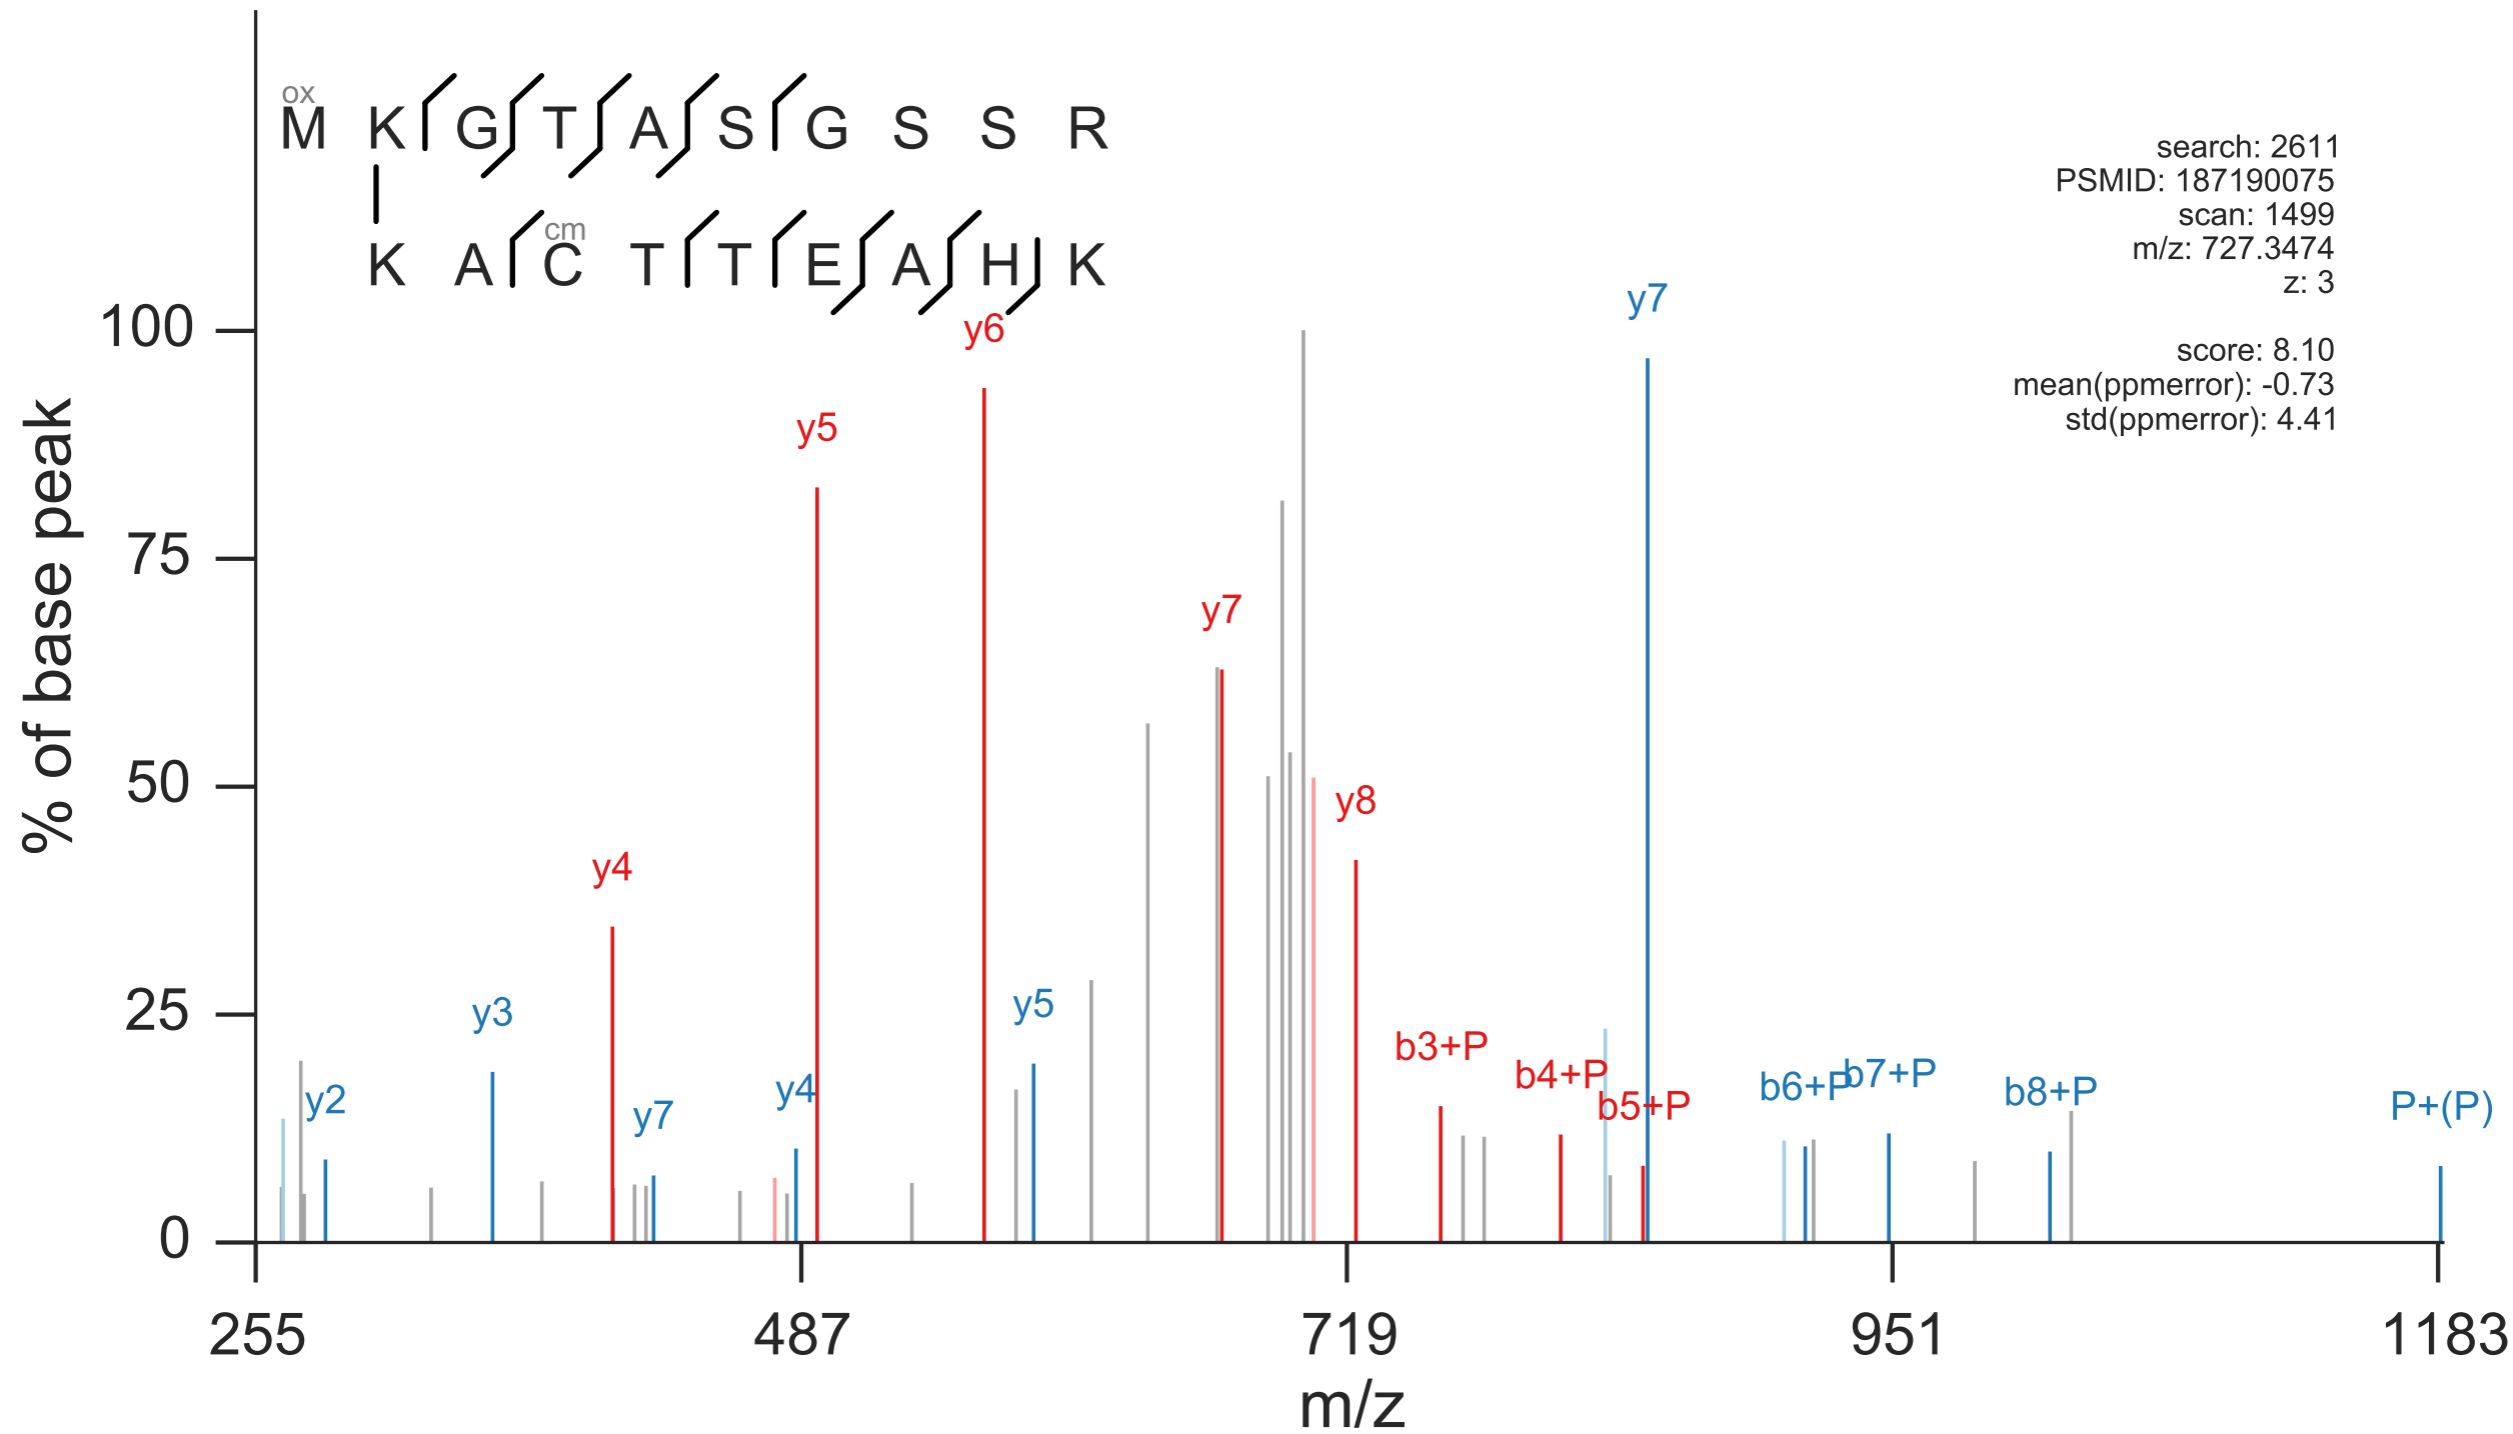

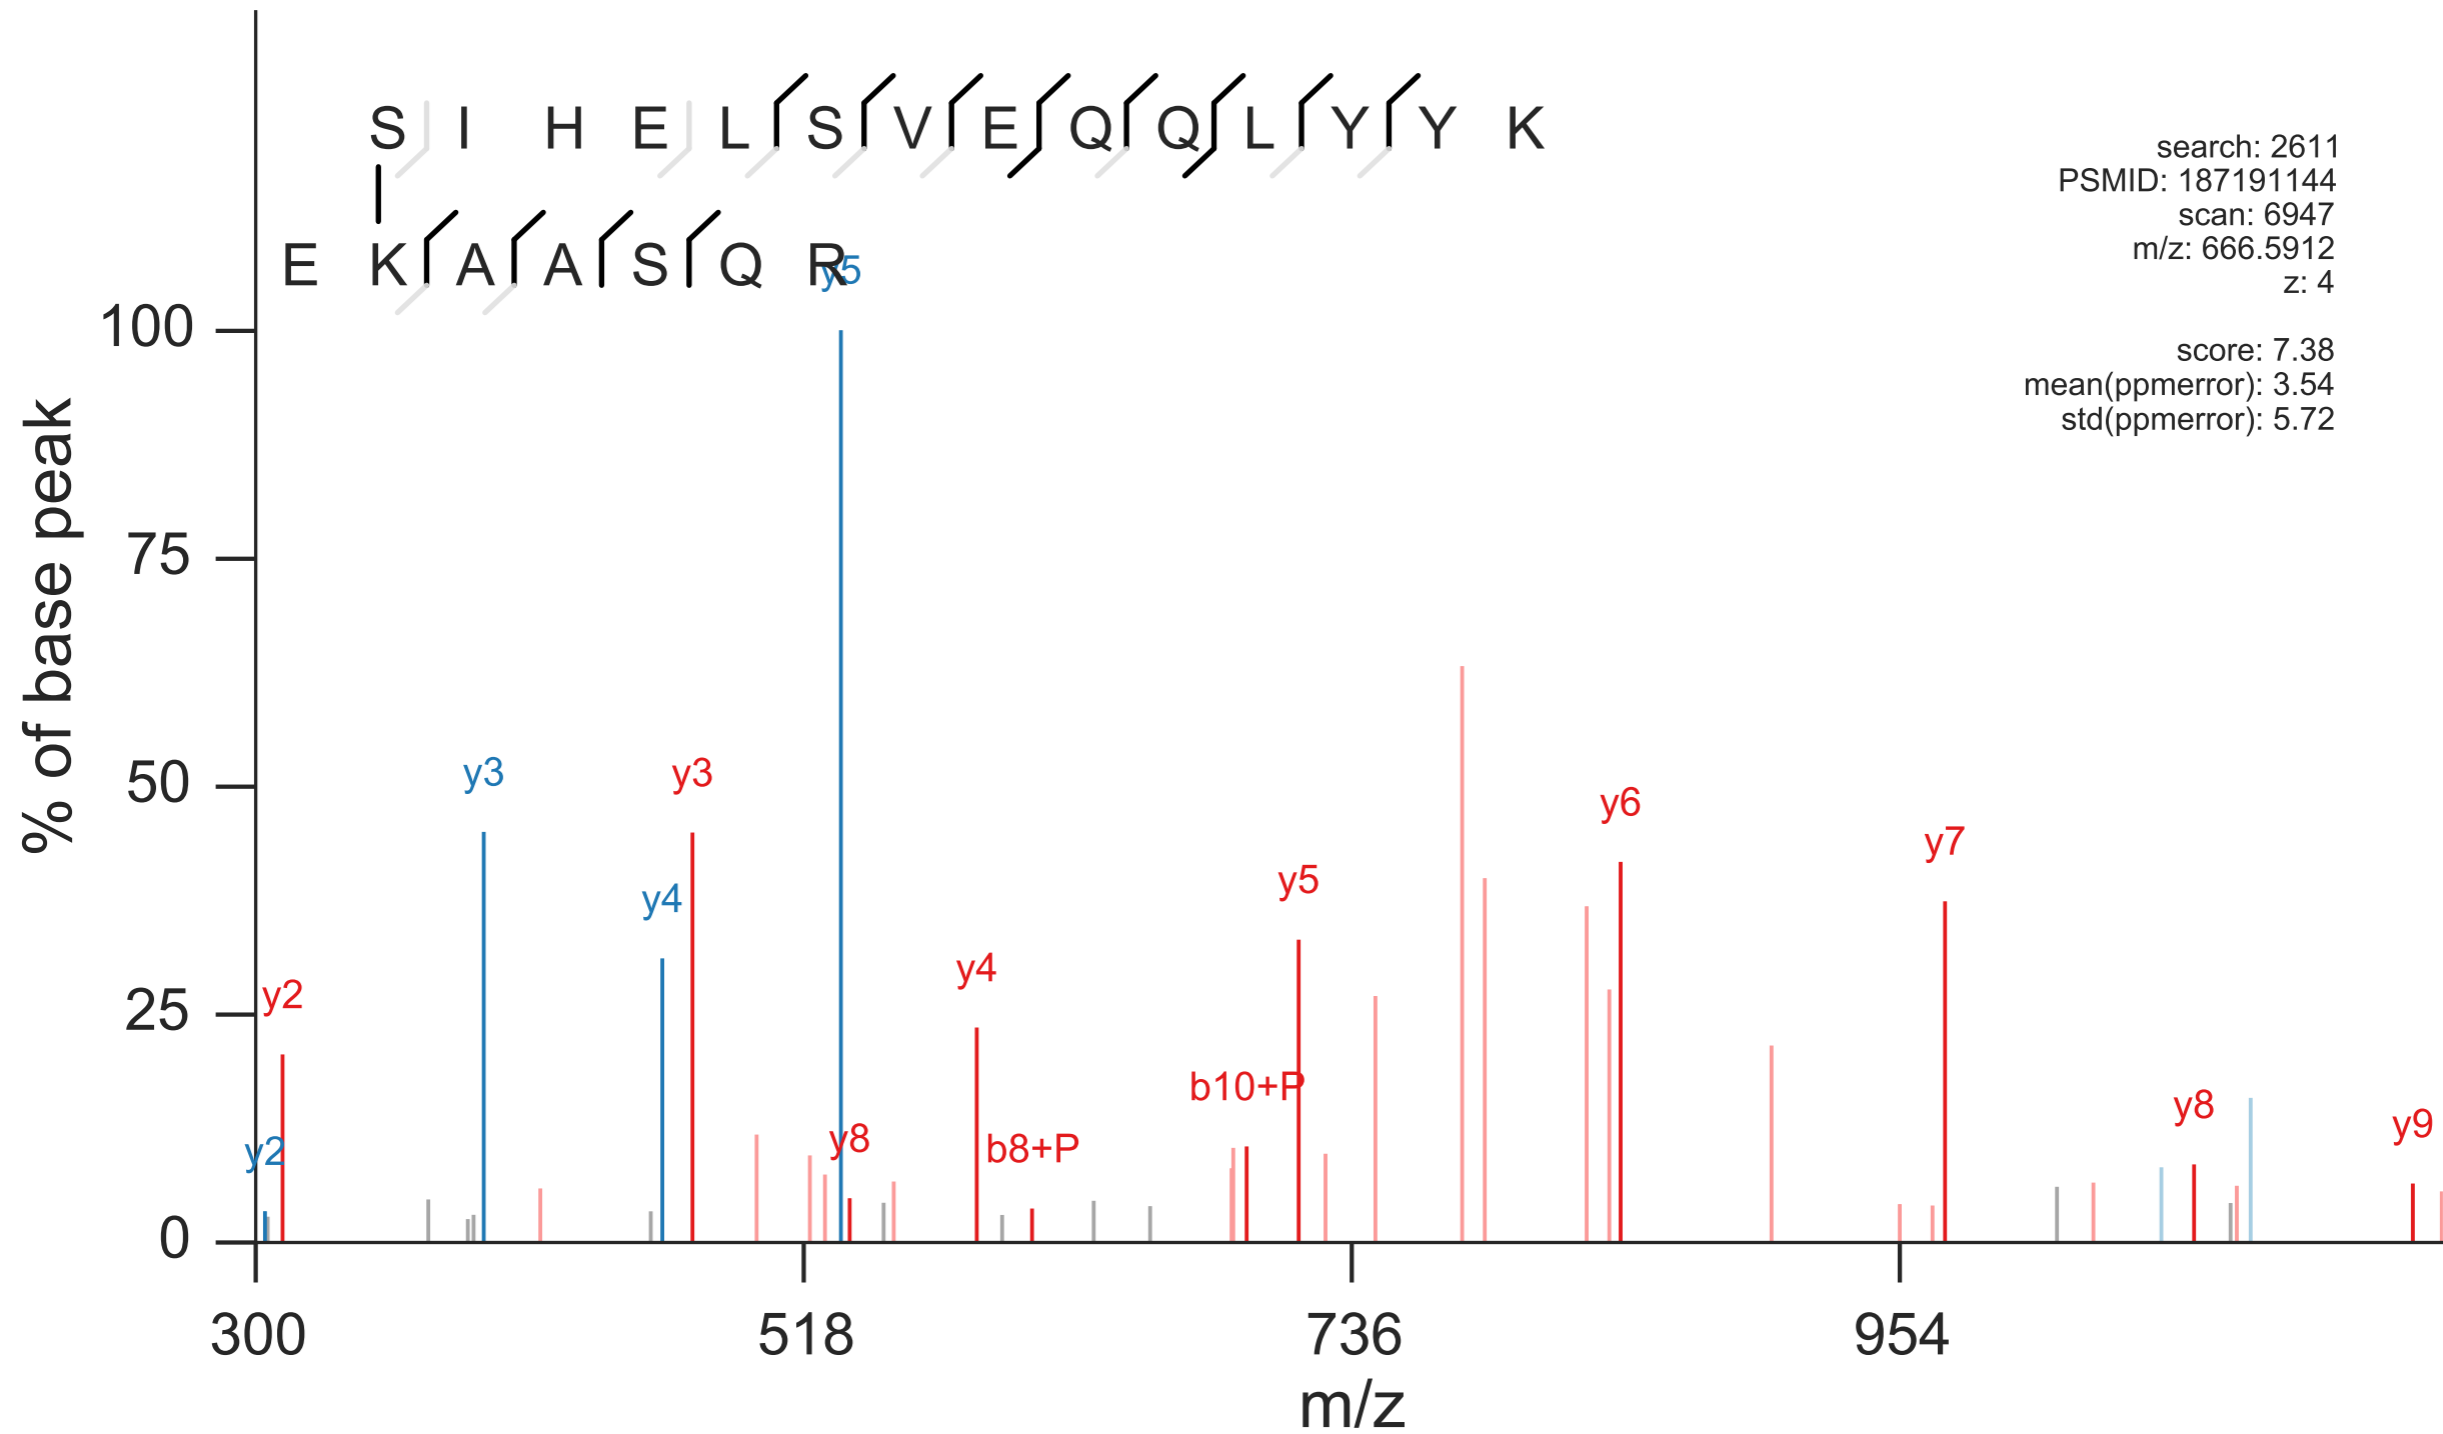

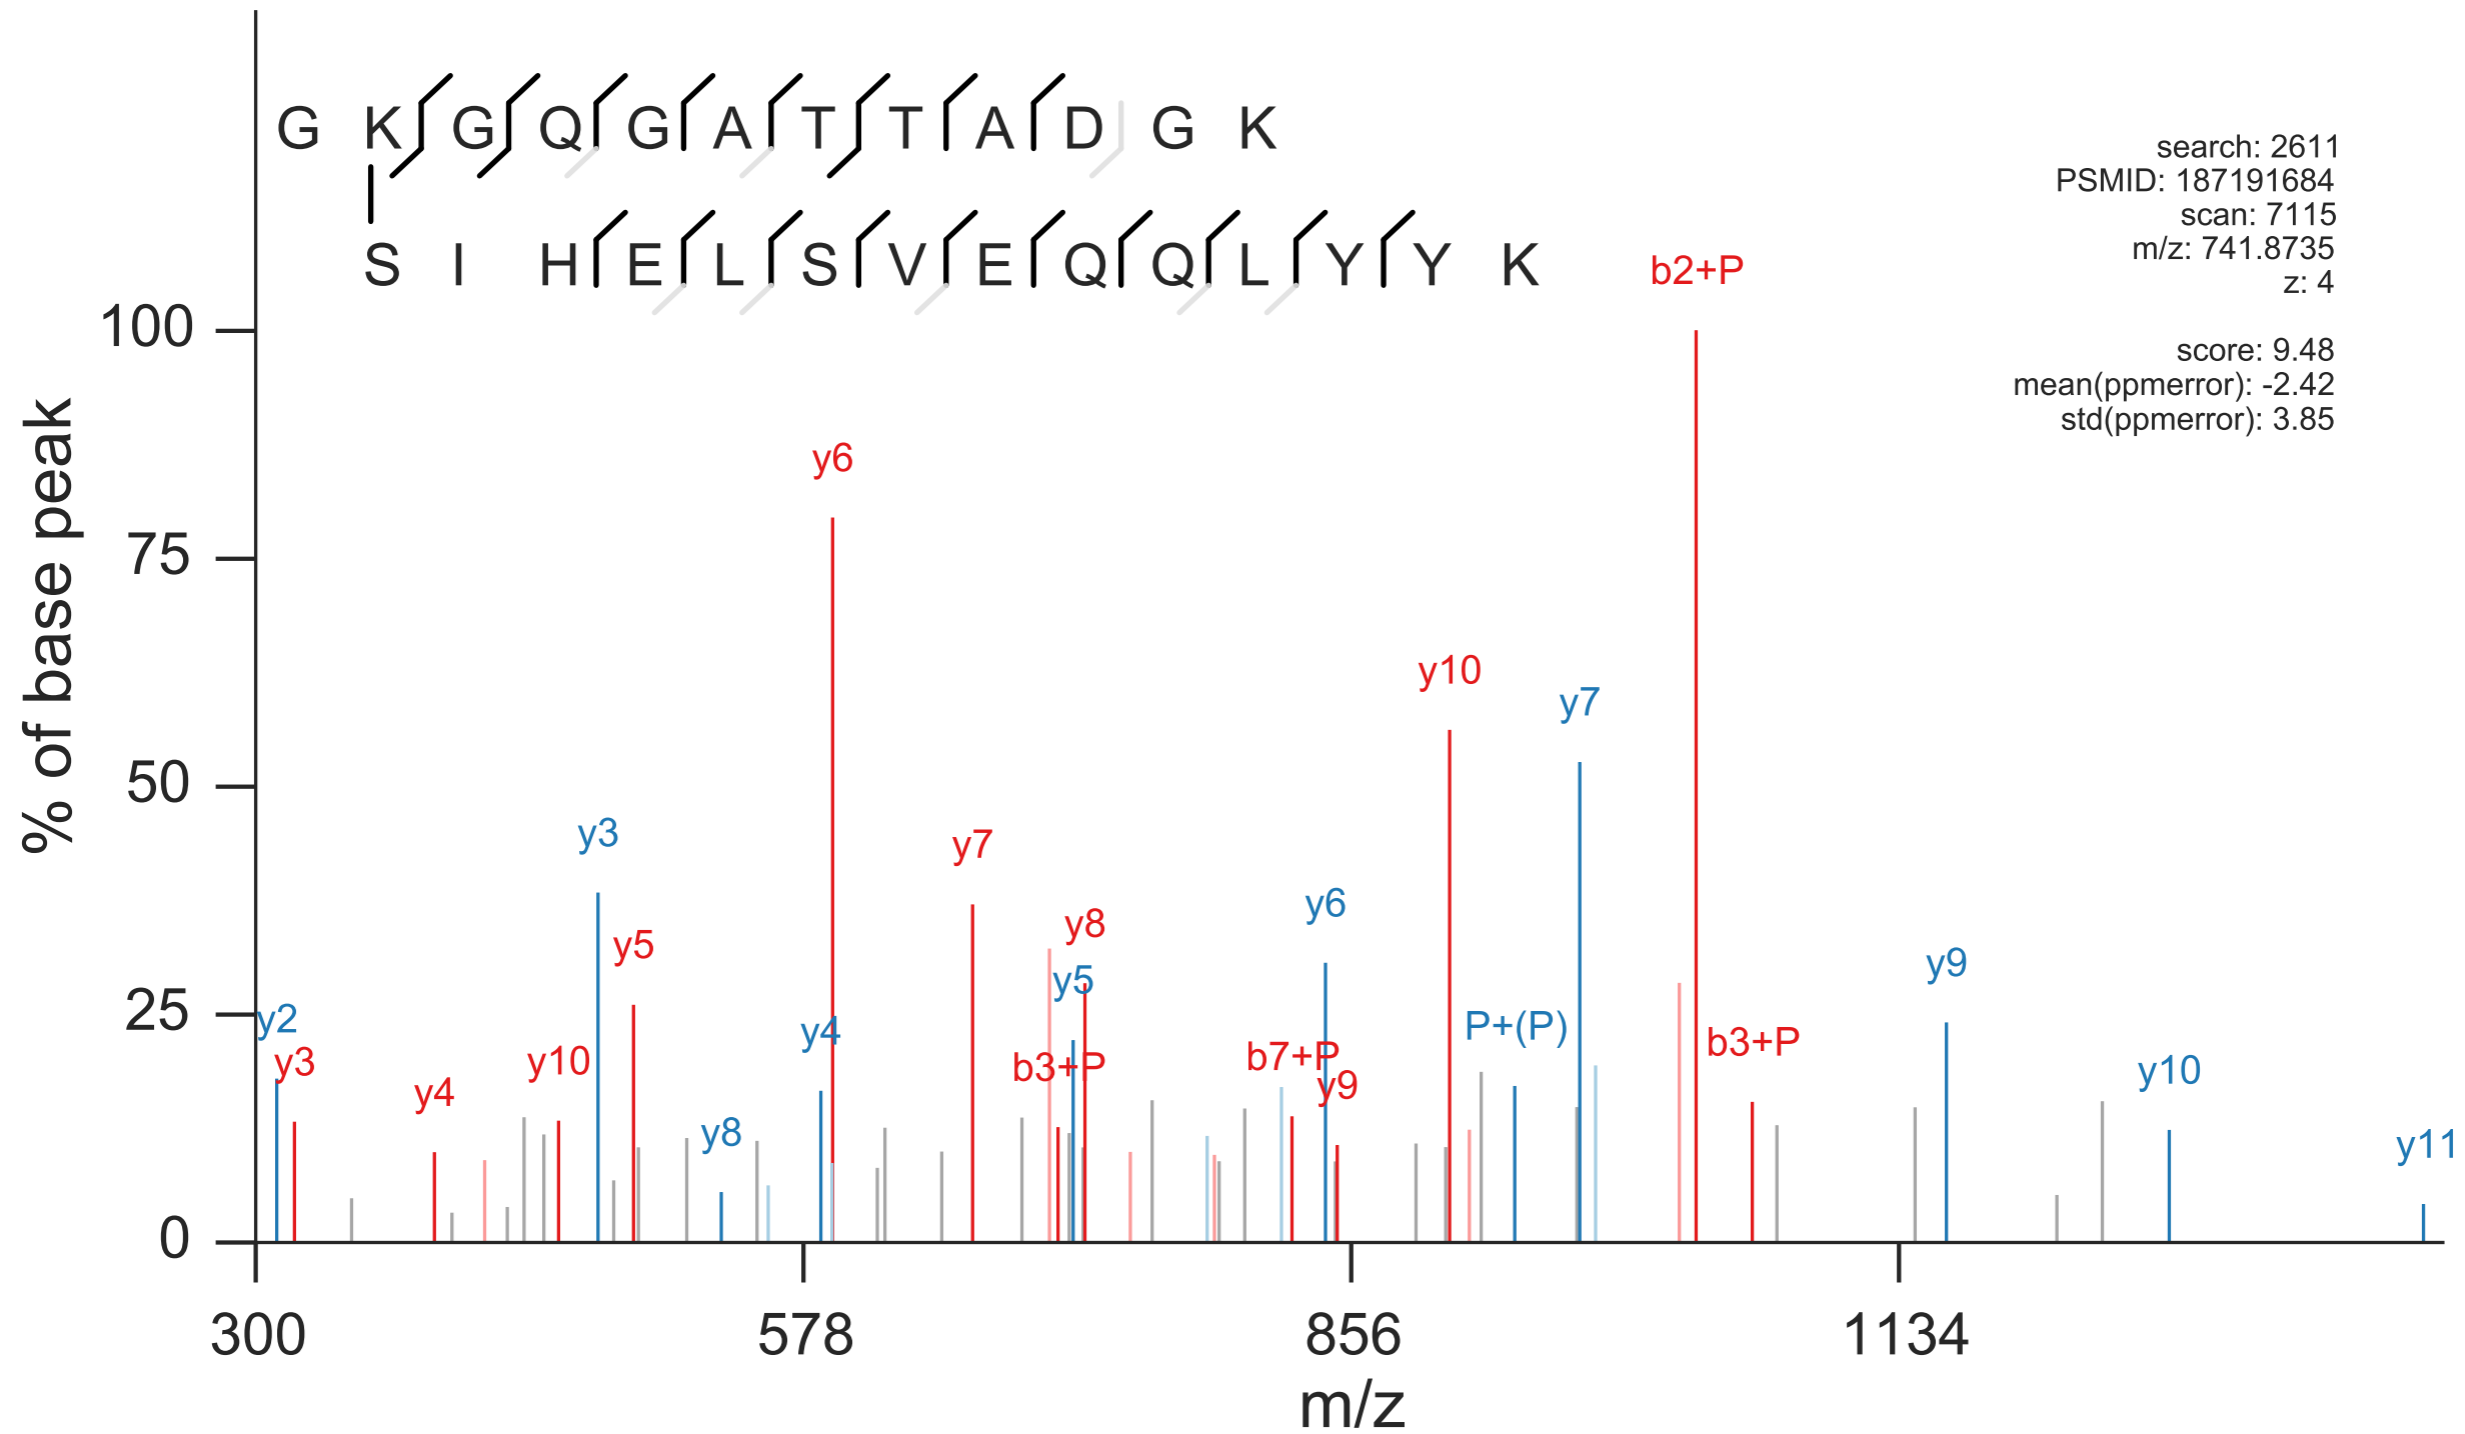

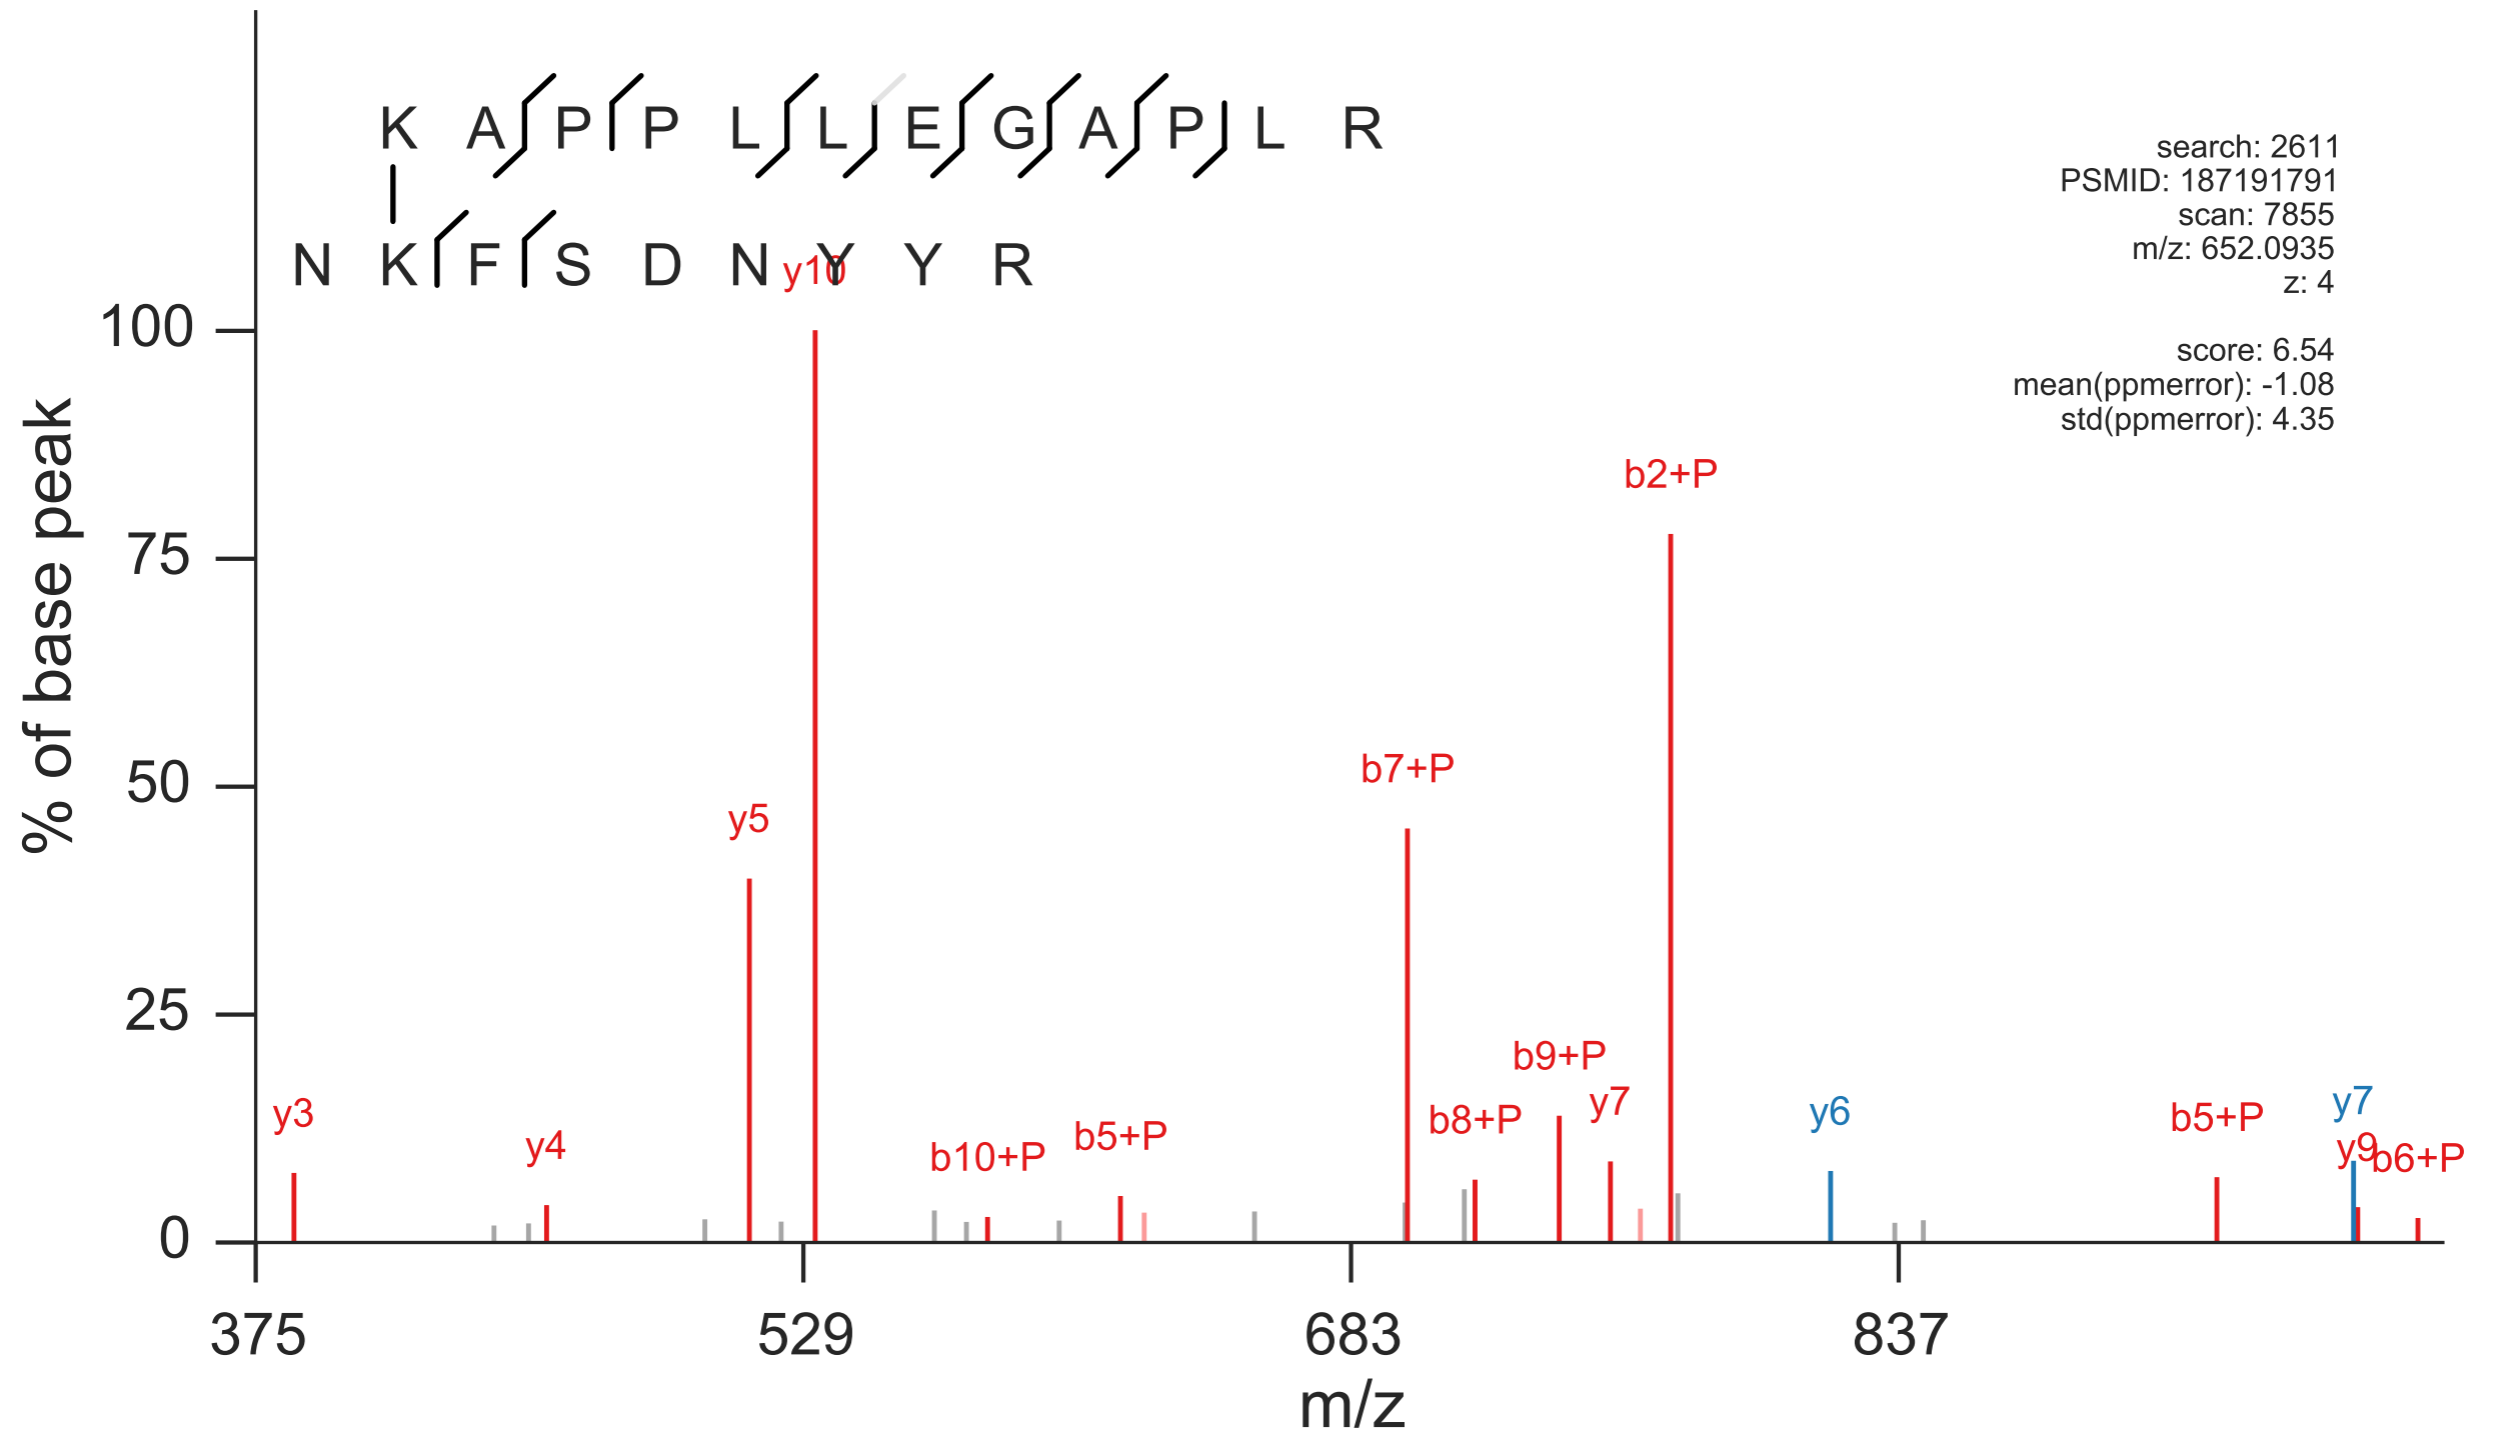

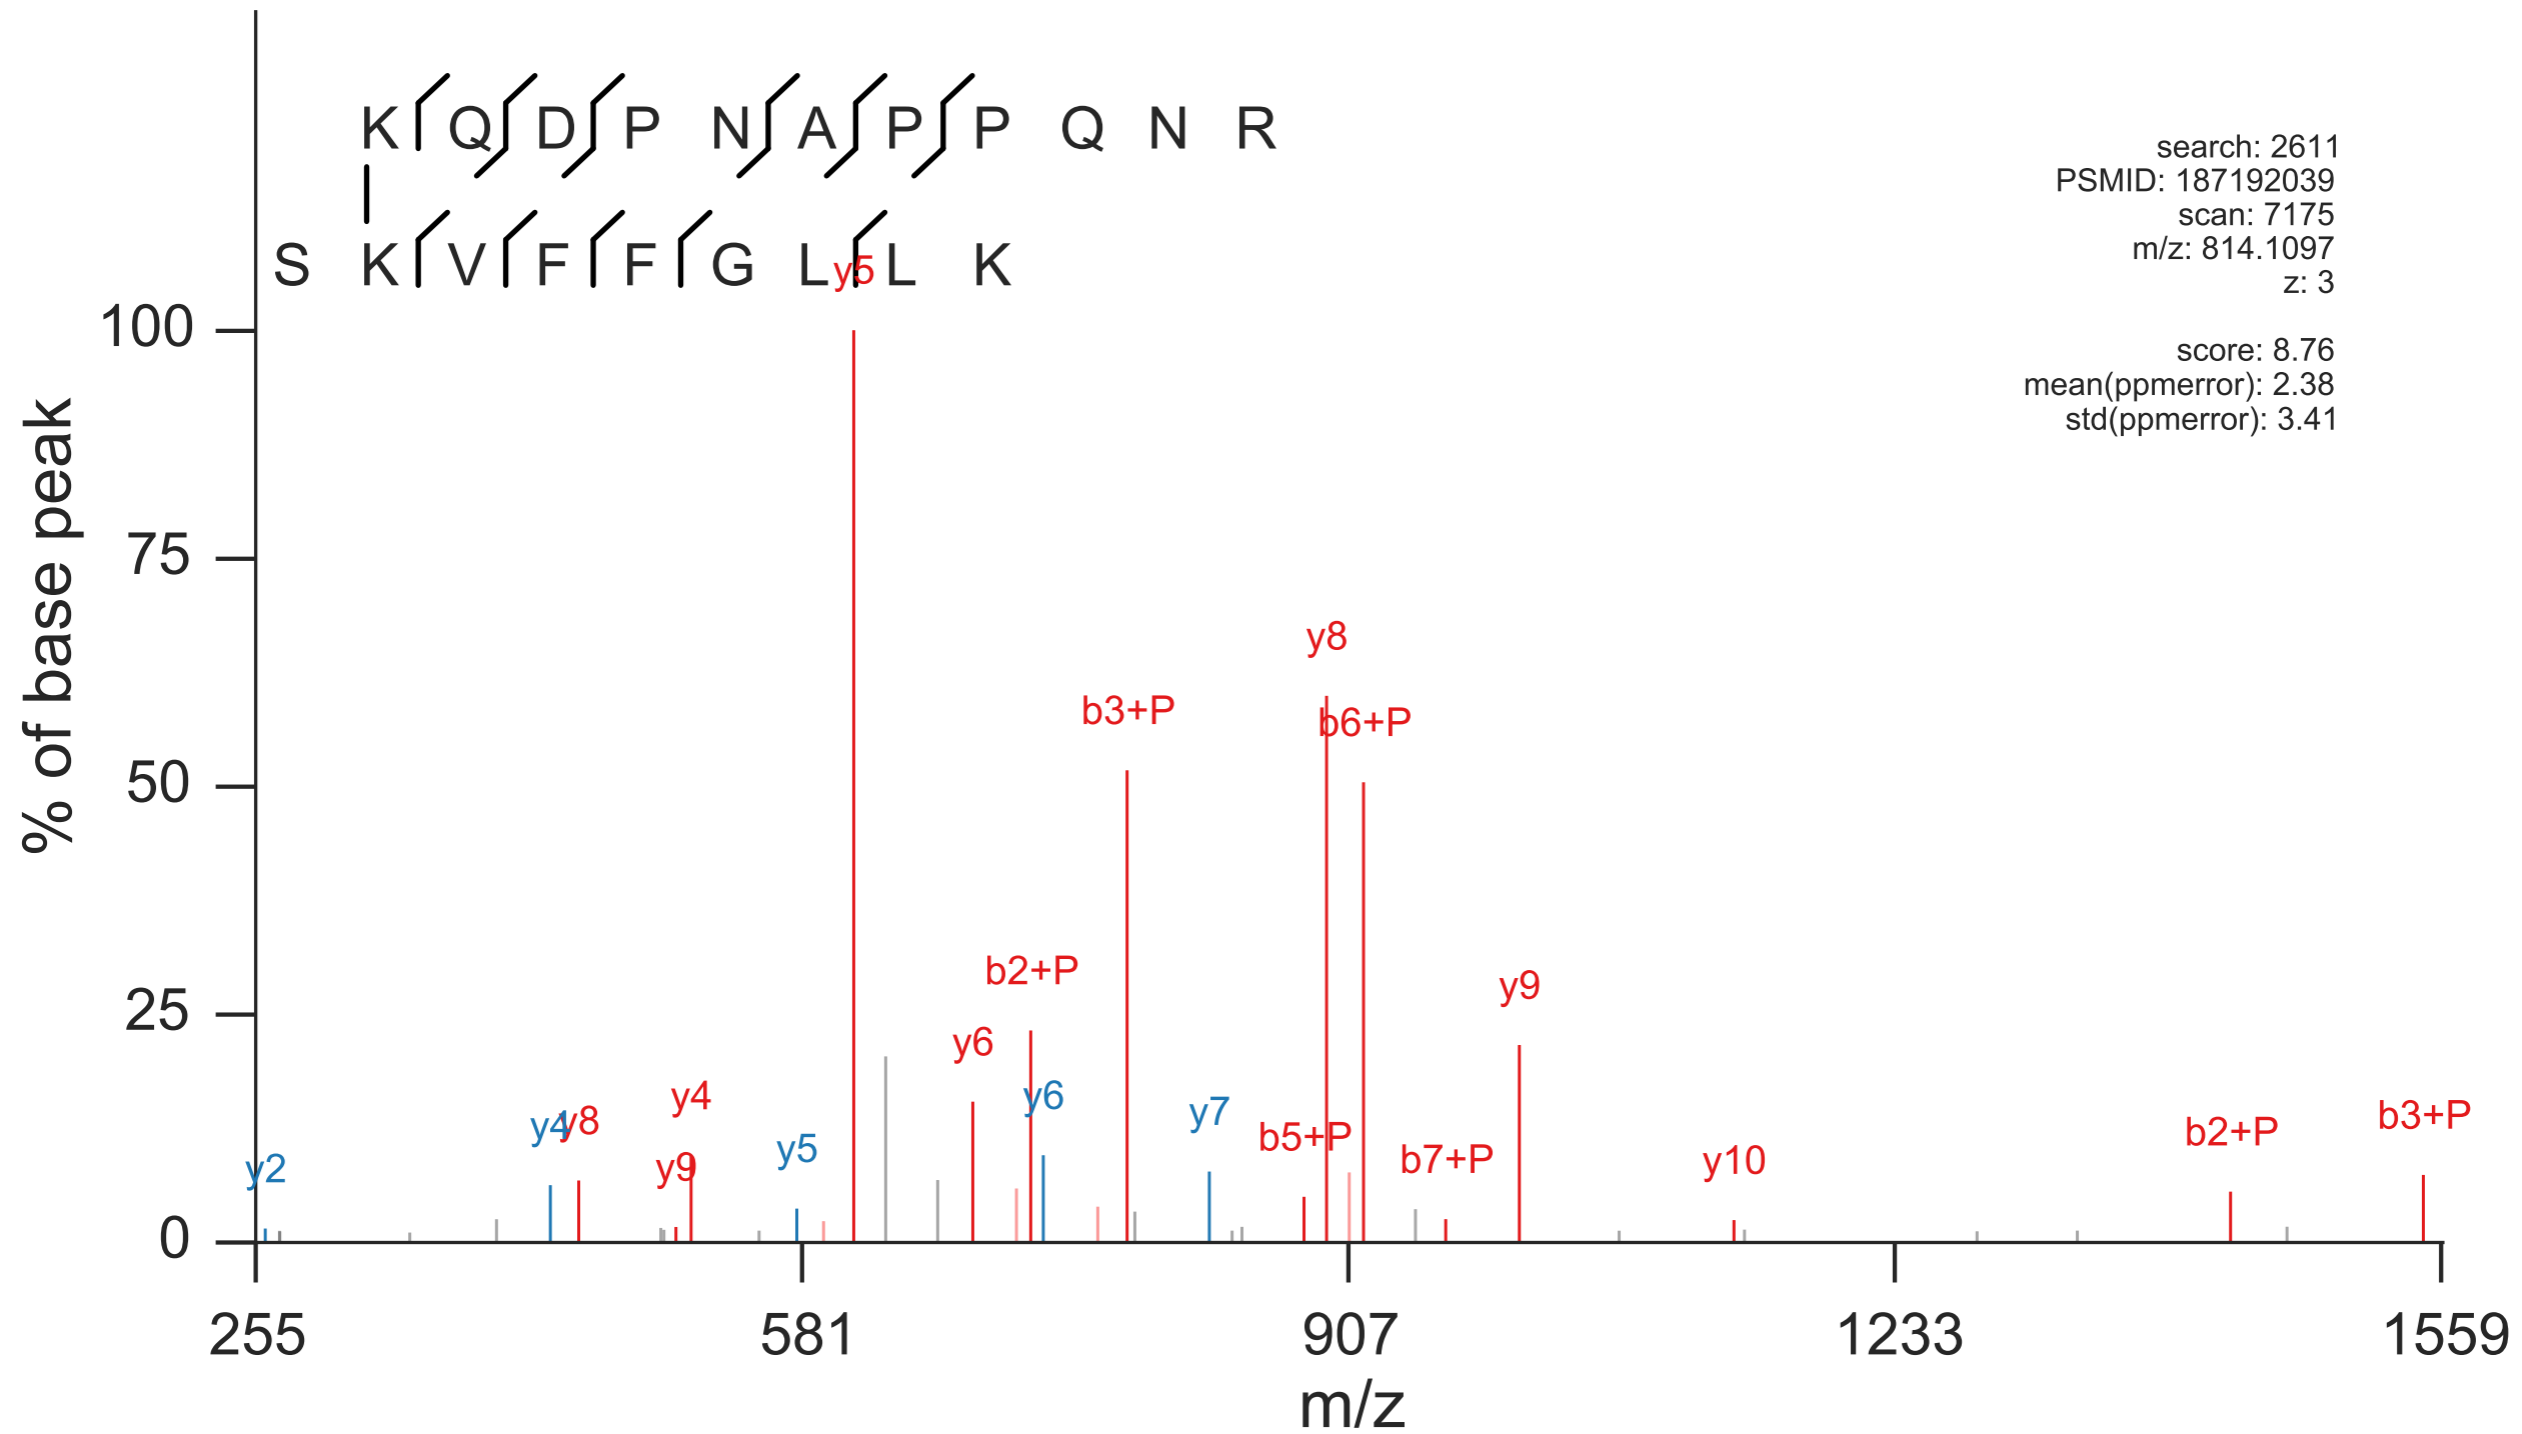

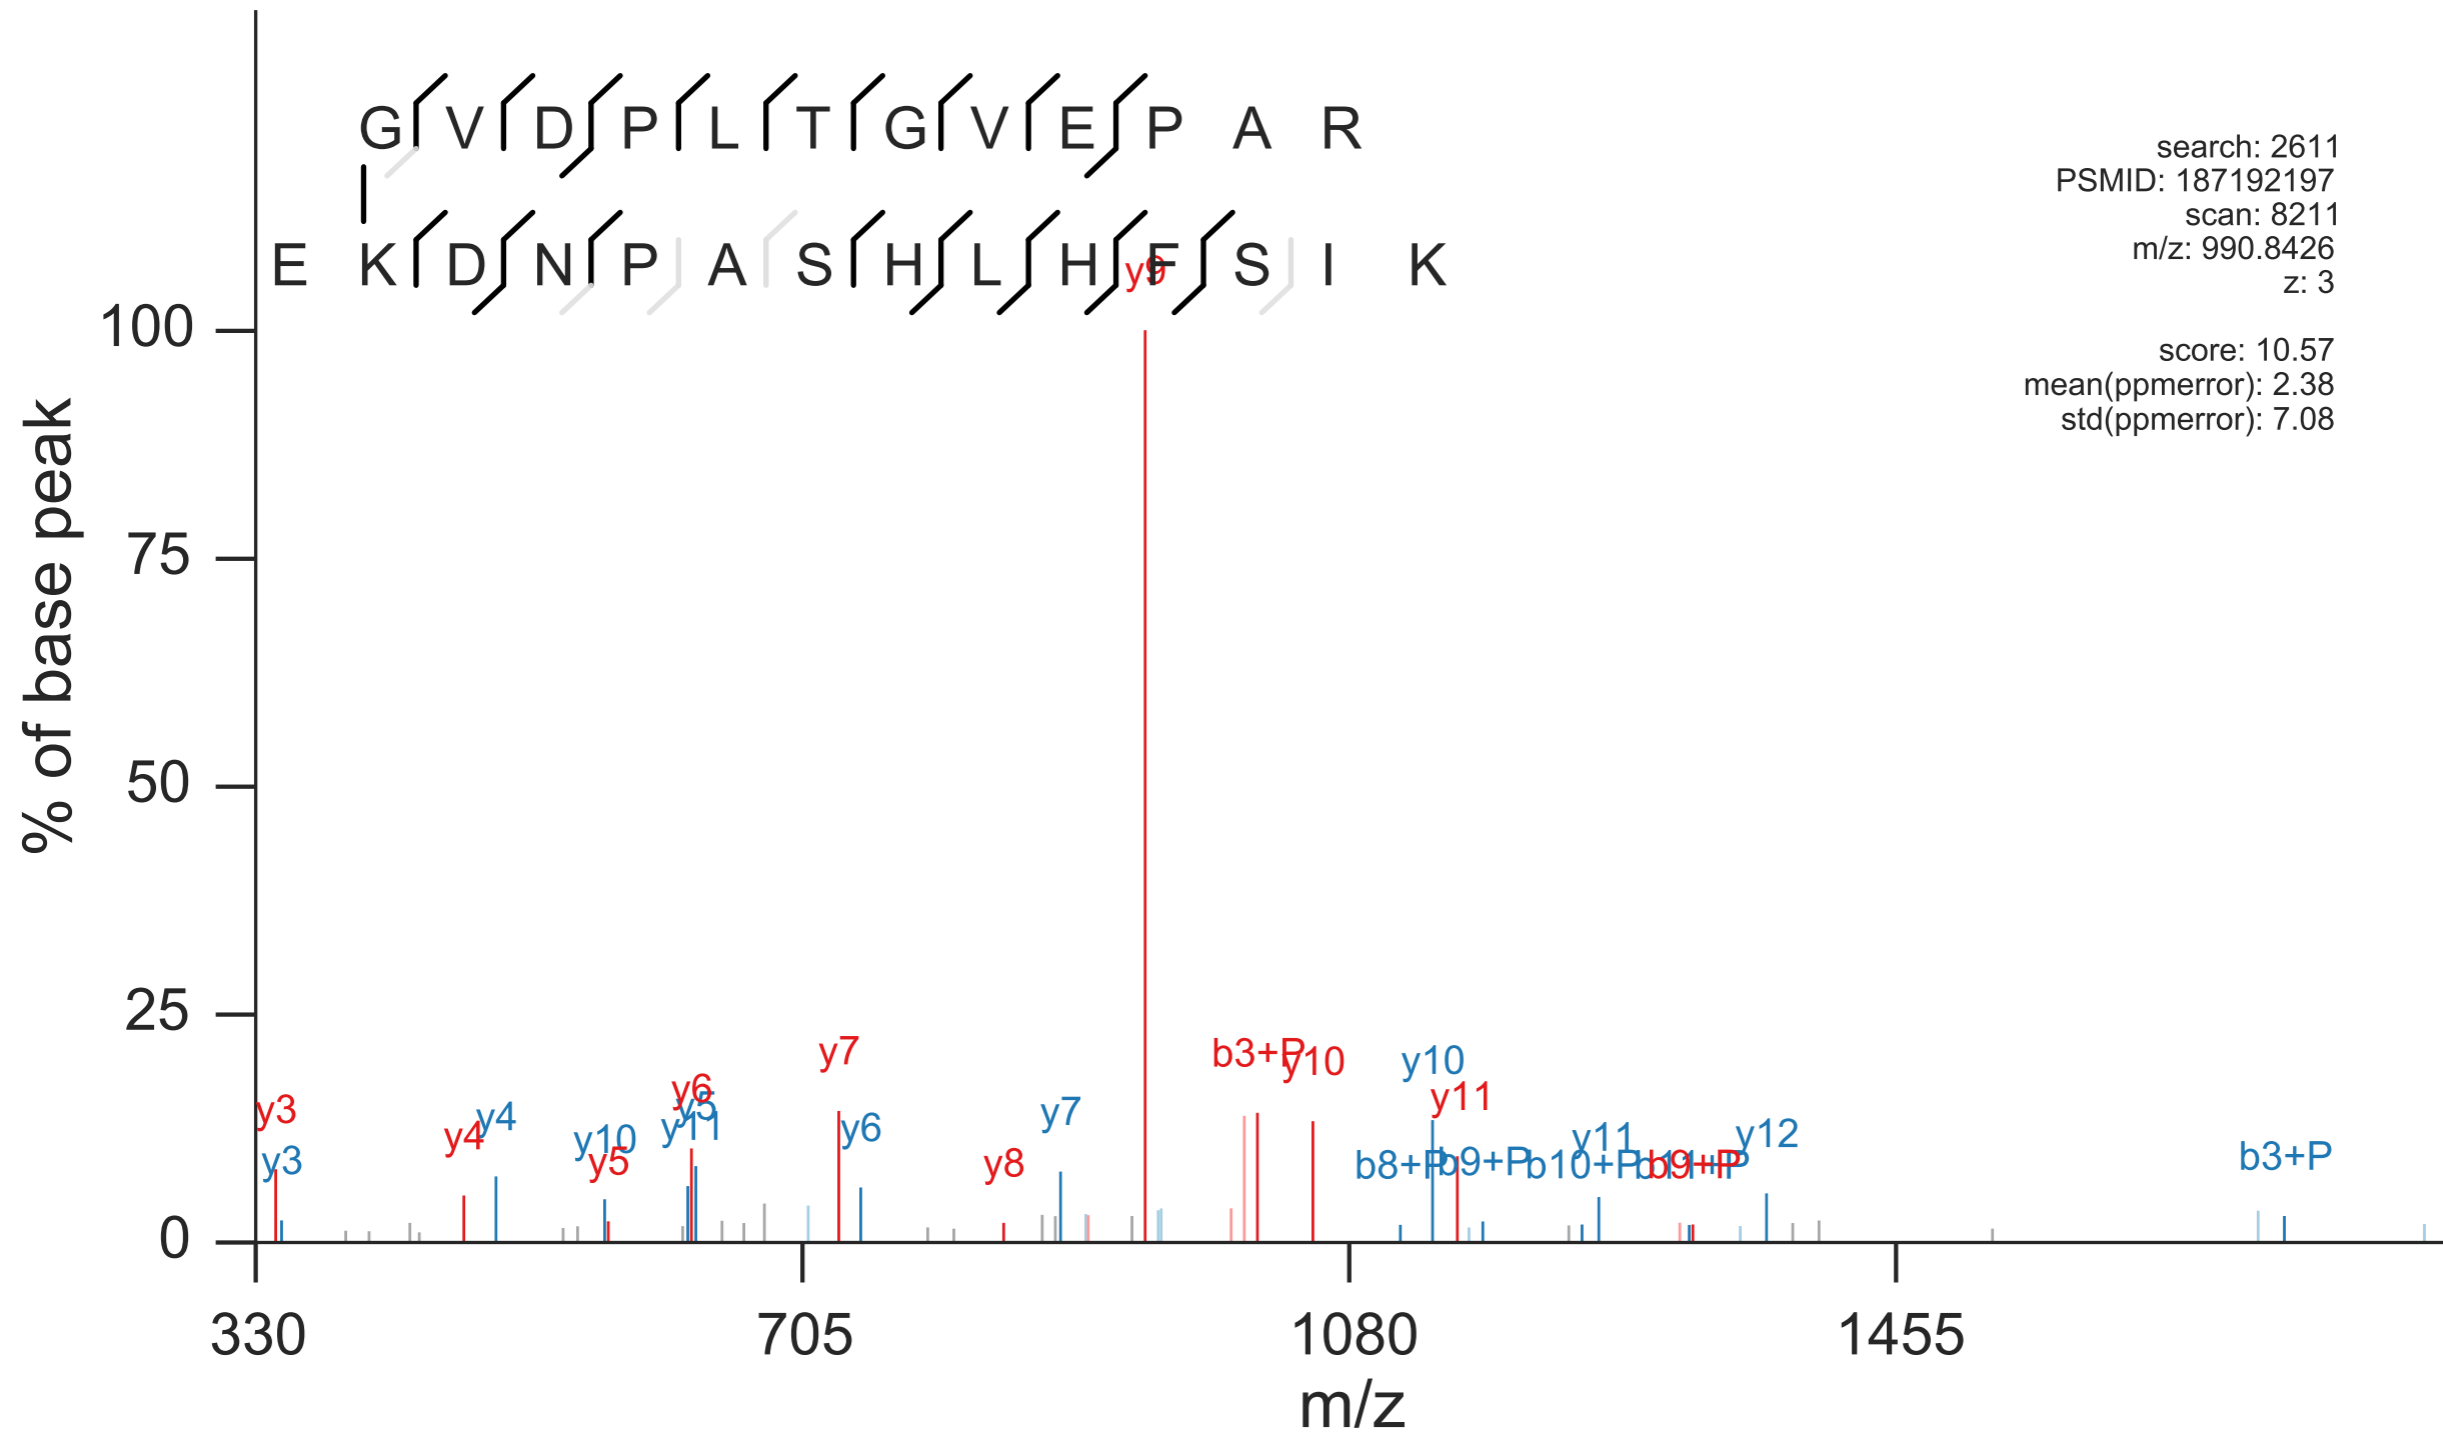

search: 2611  
 PSMID: 187192197  
 scan: 8211  
 m/z: 990.8426  
 z: 3

score: 10.57  
 mean(ppmerror): 2.38  
 std(ppmerror): 7.08

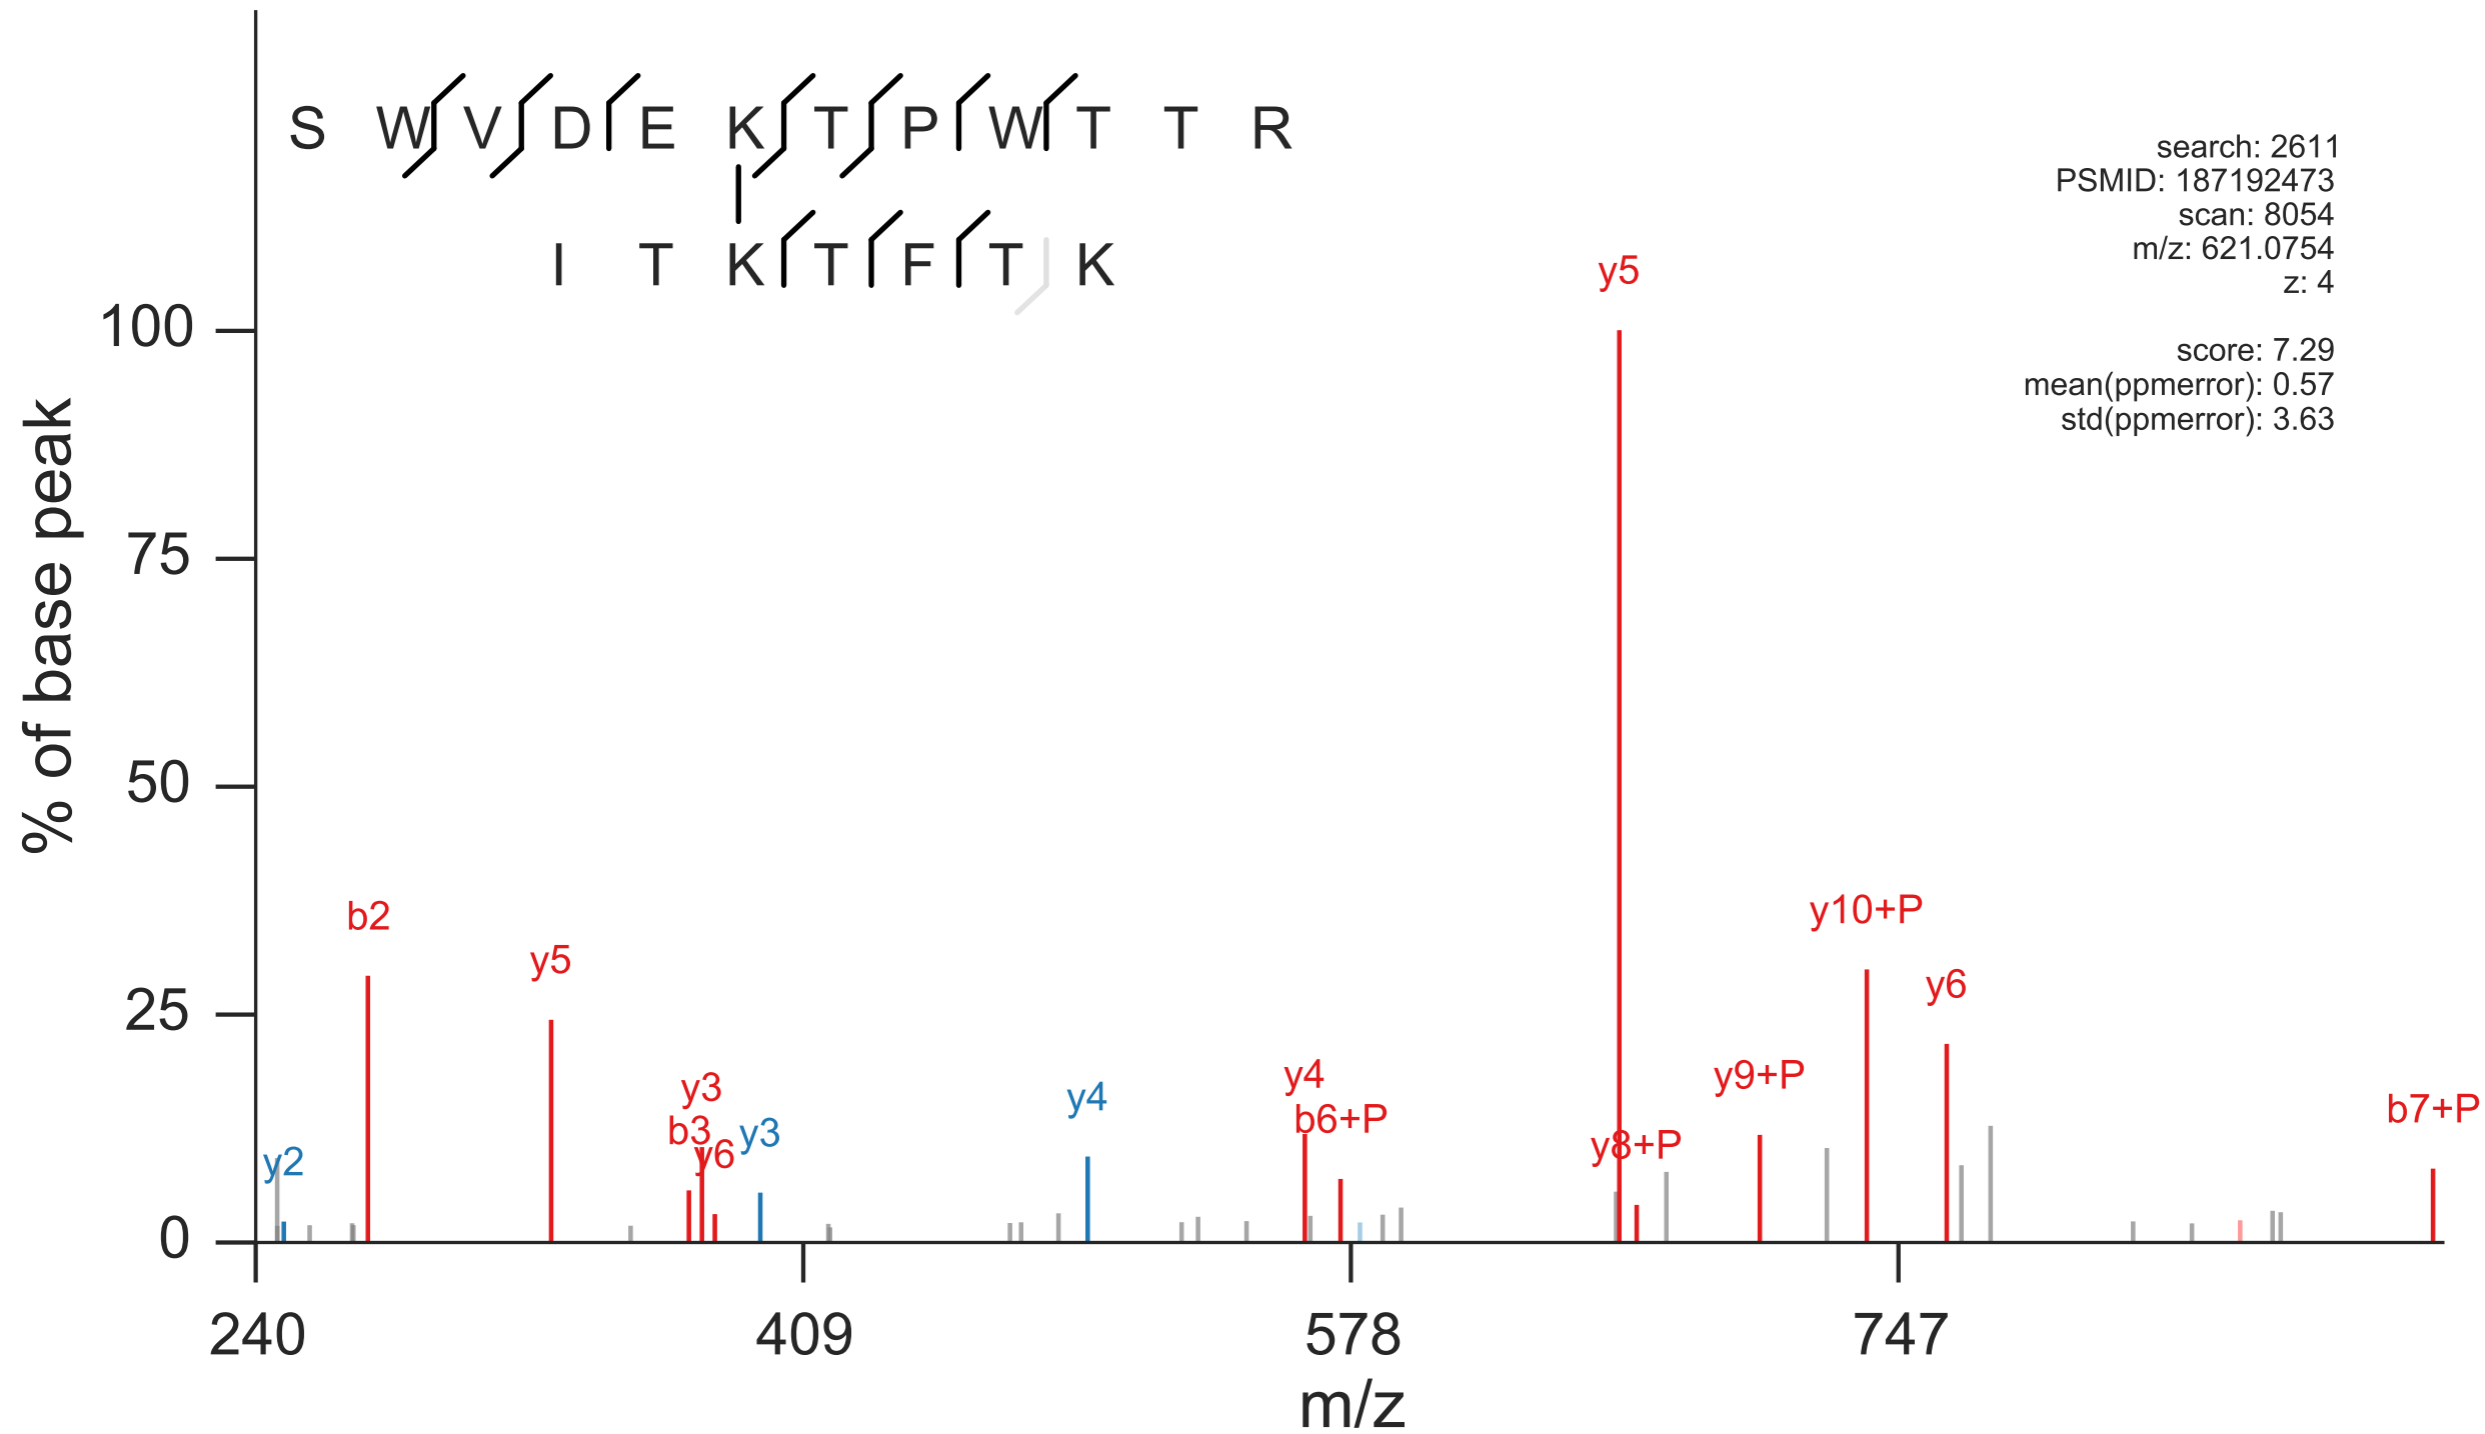



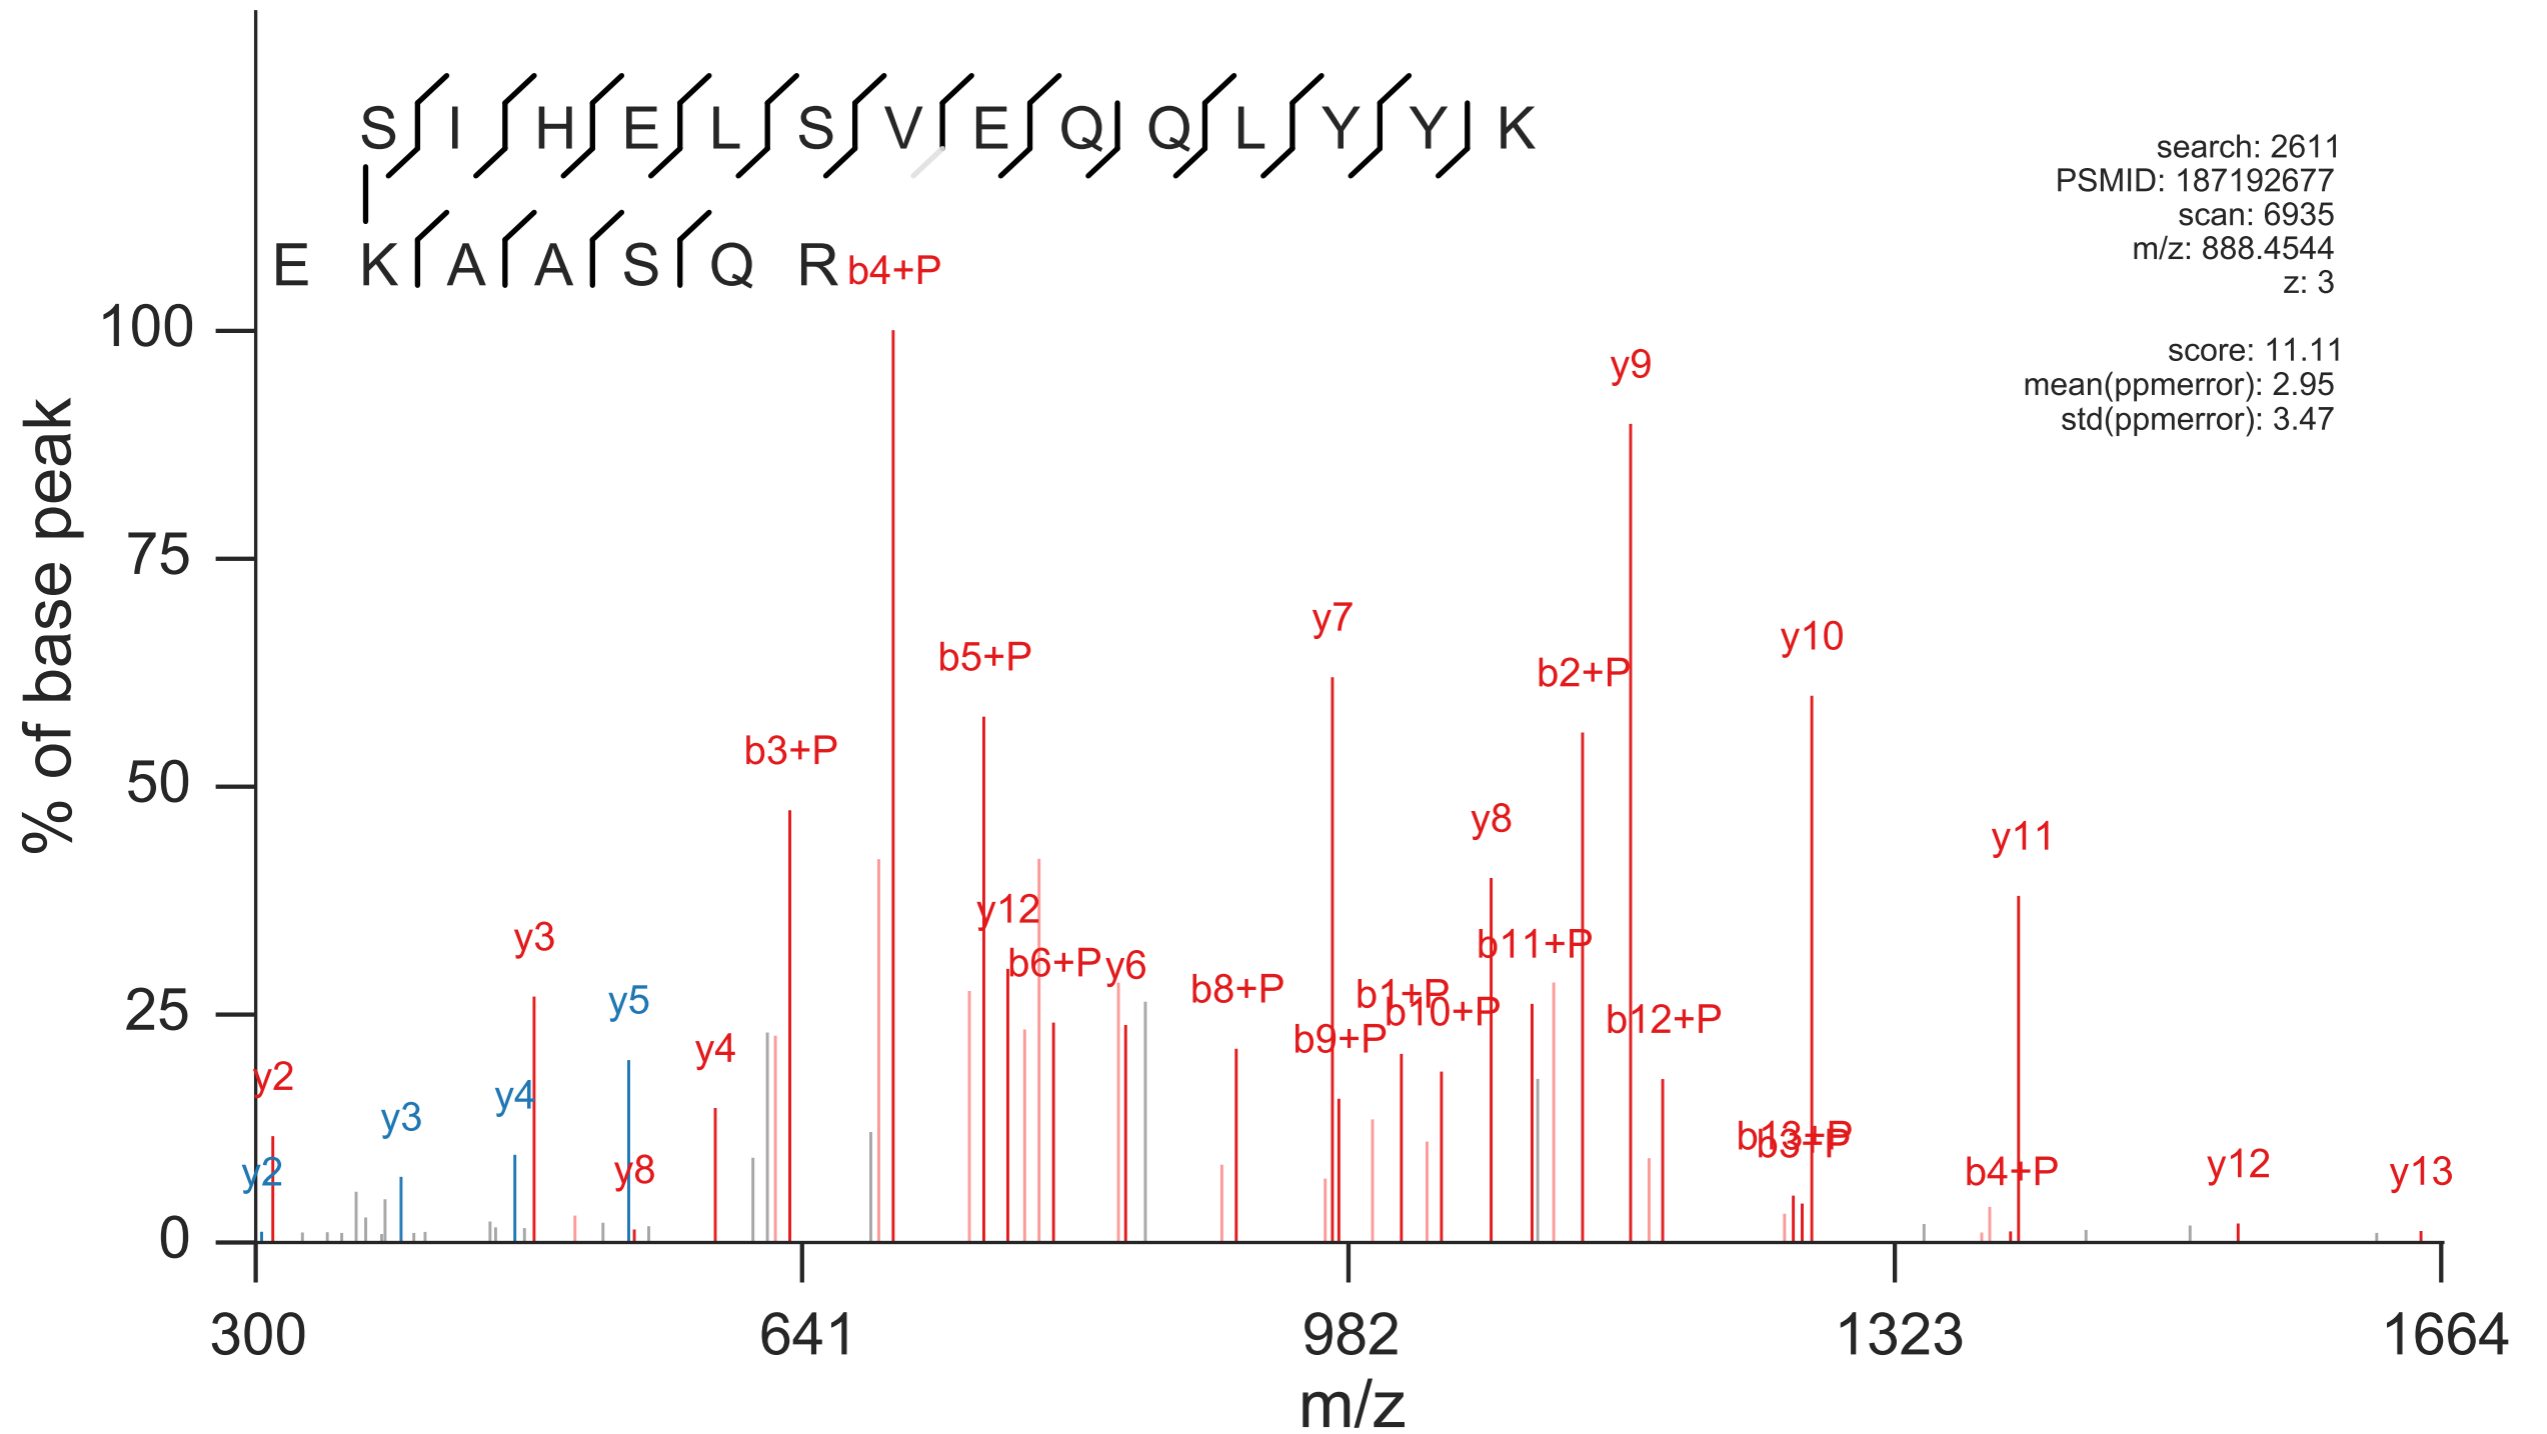

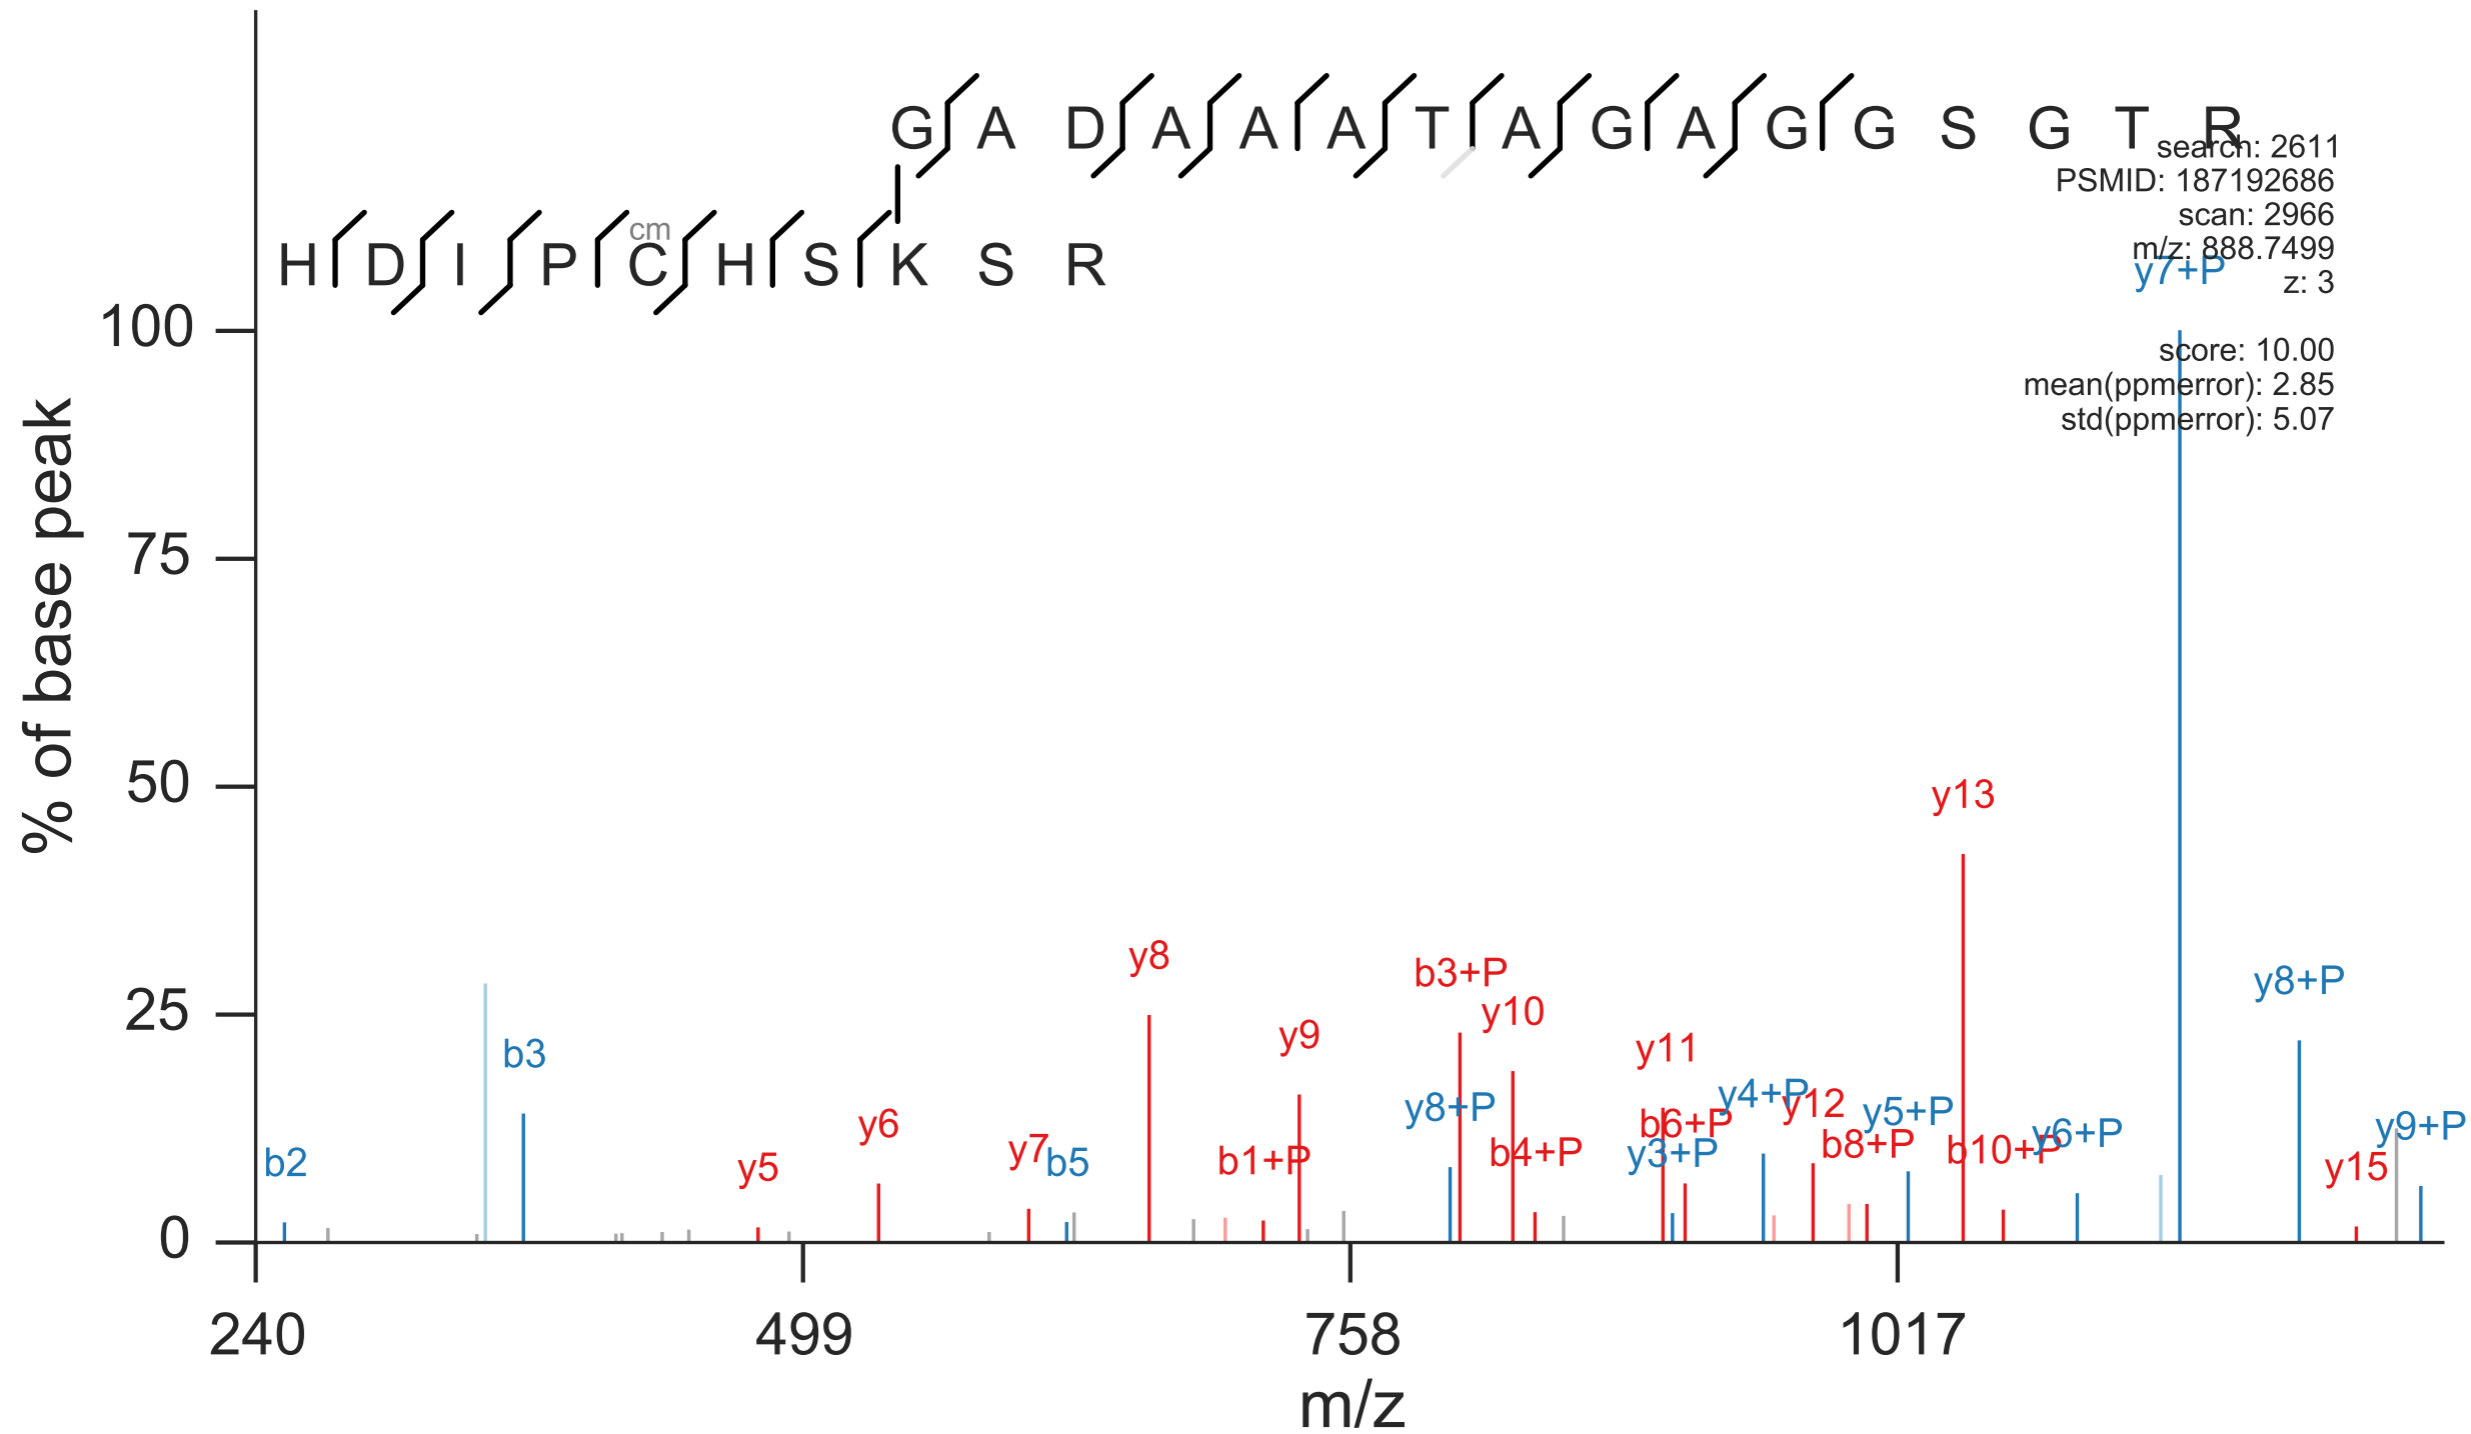

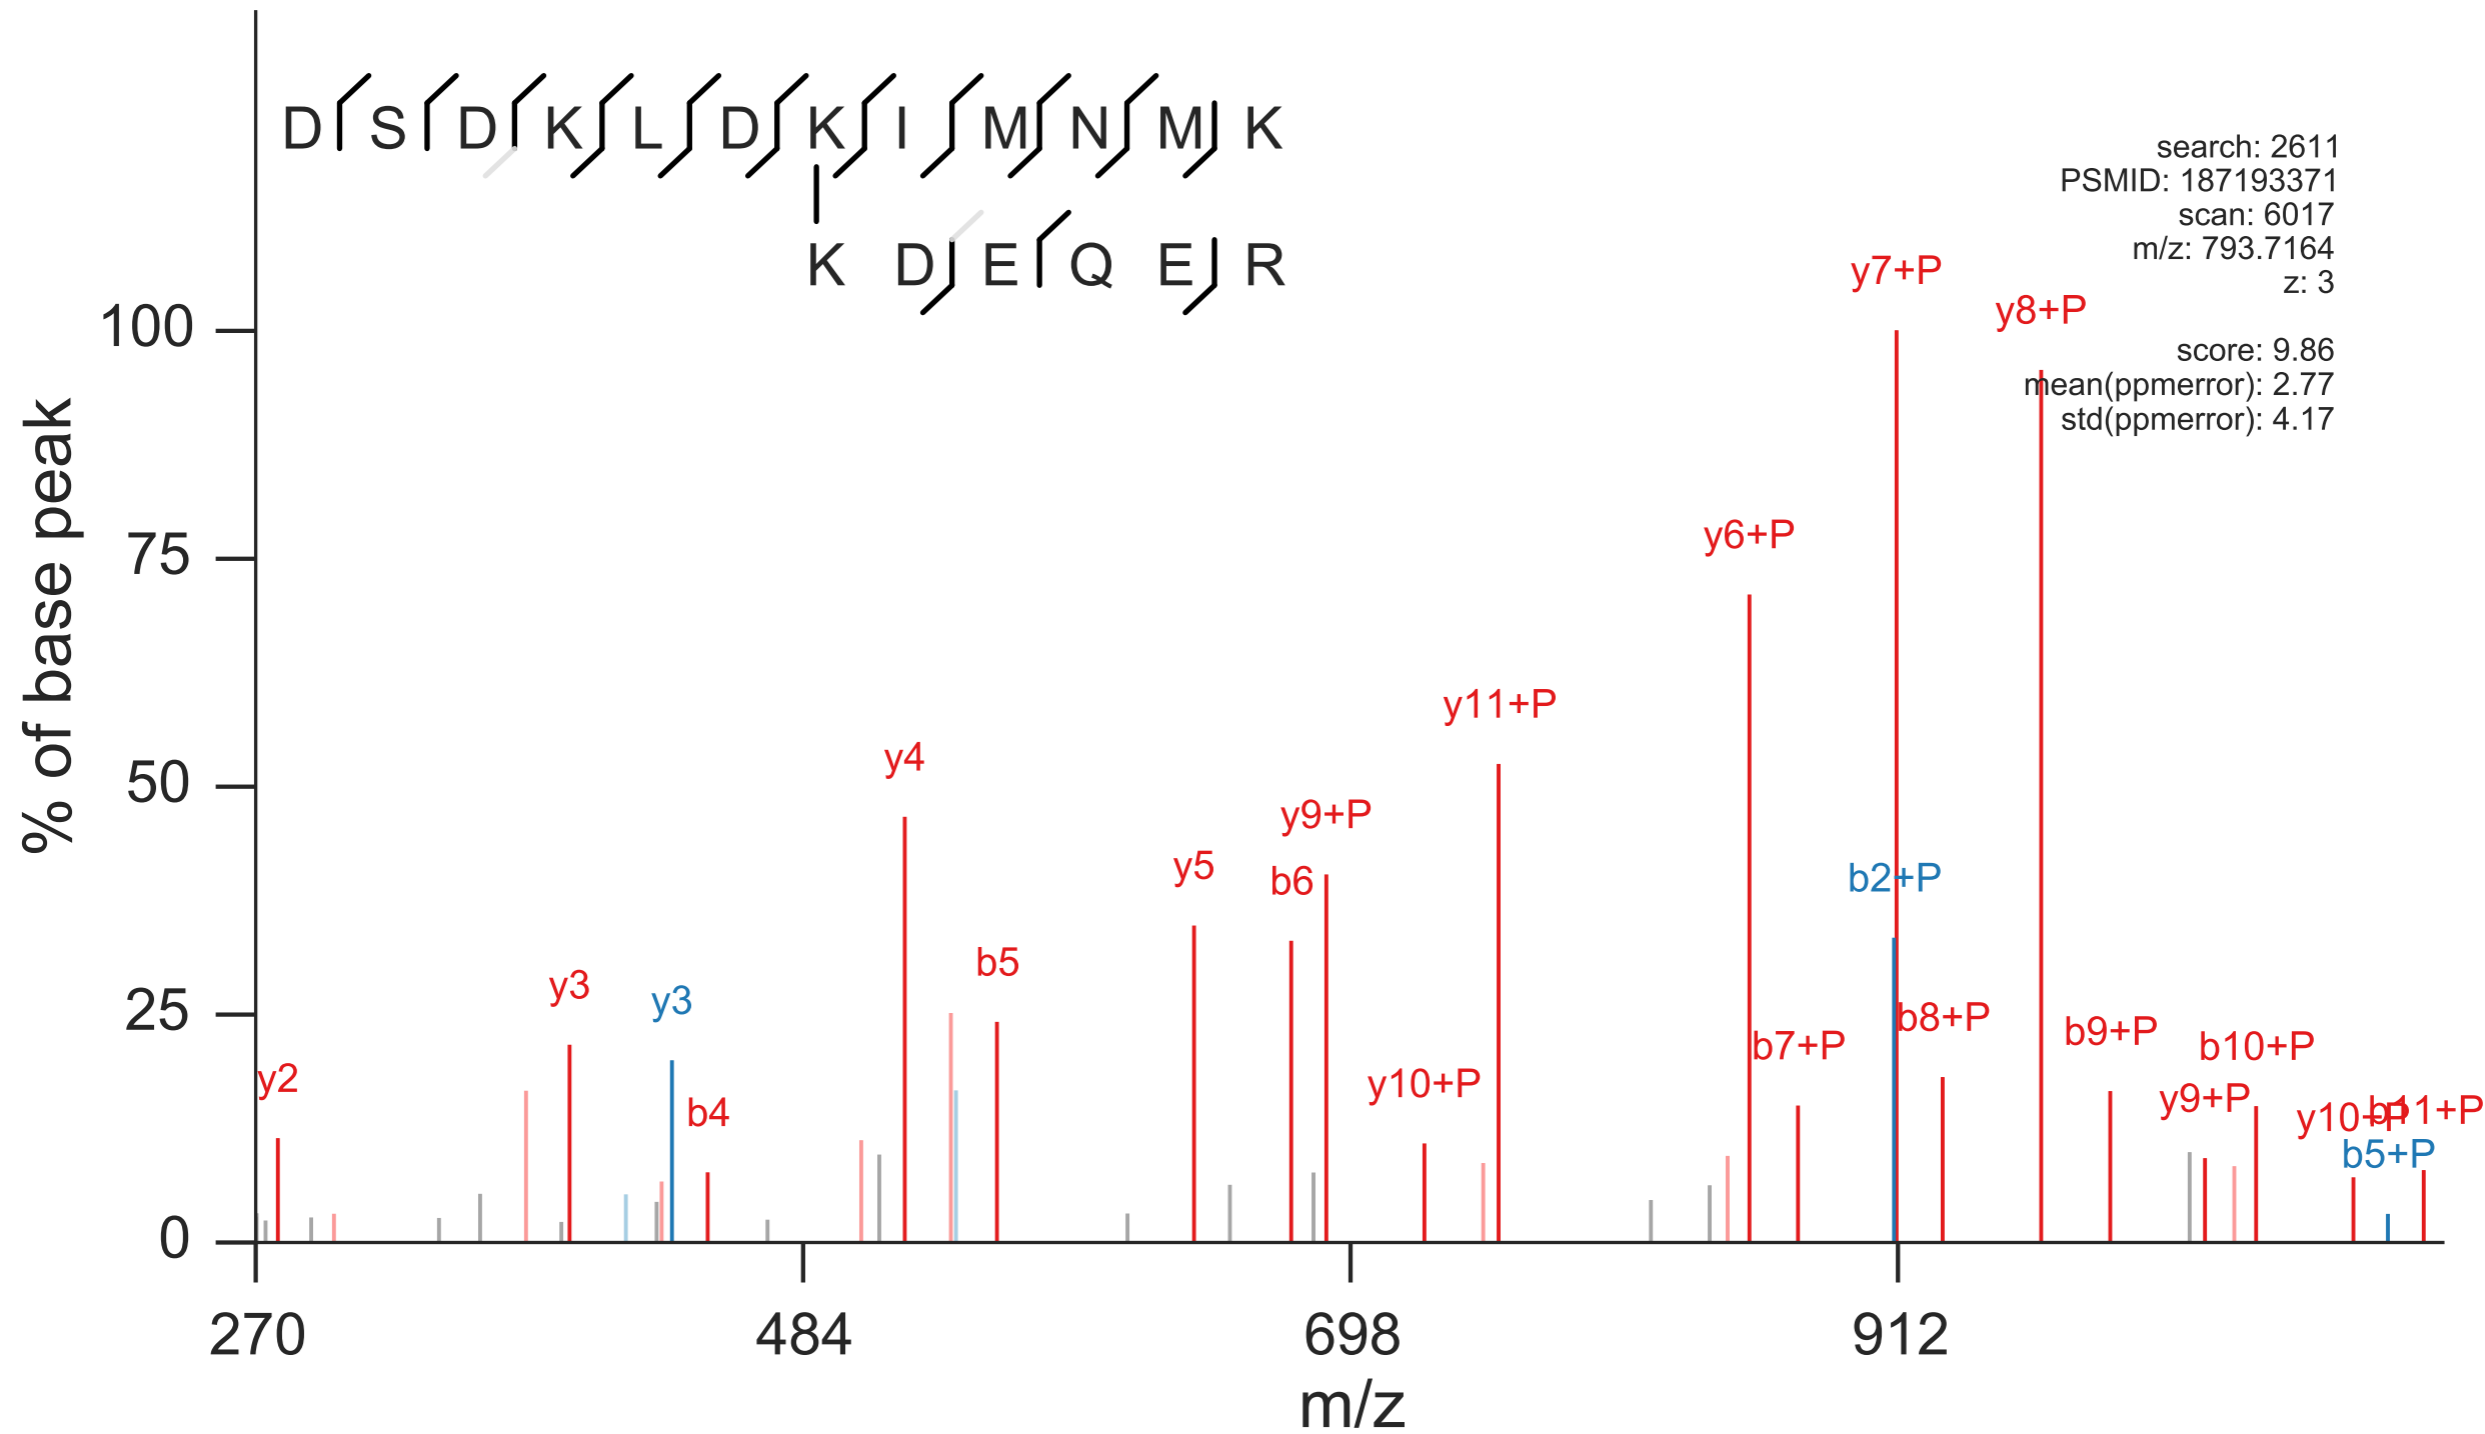

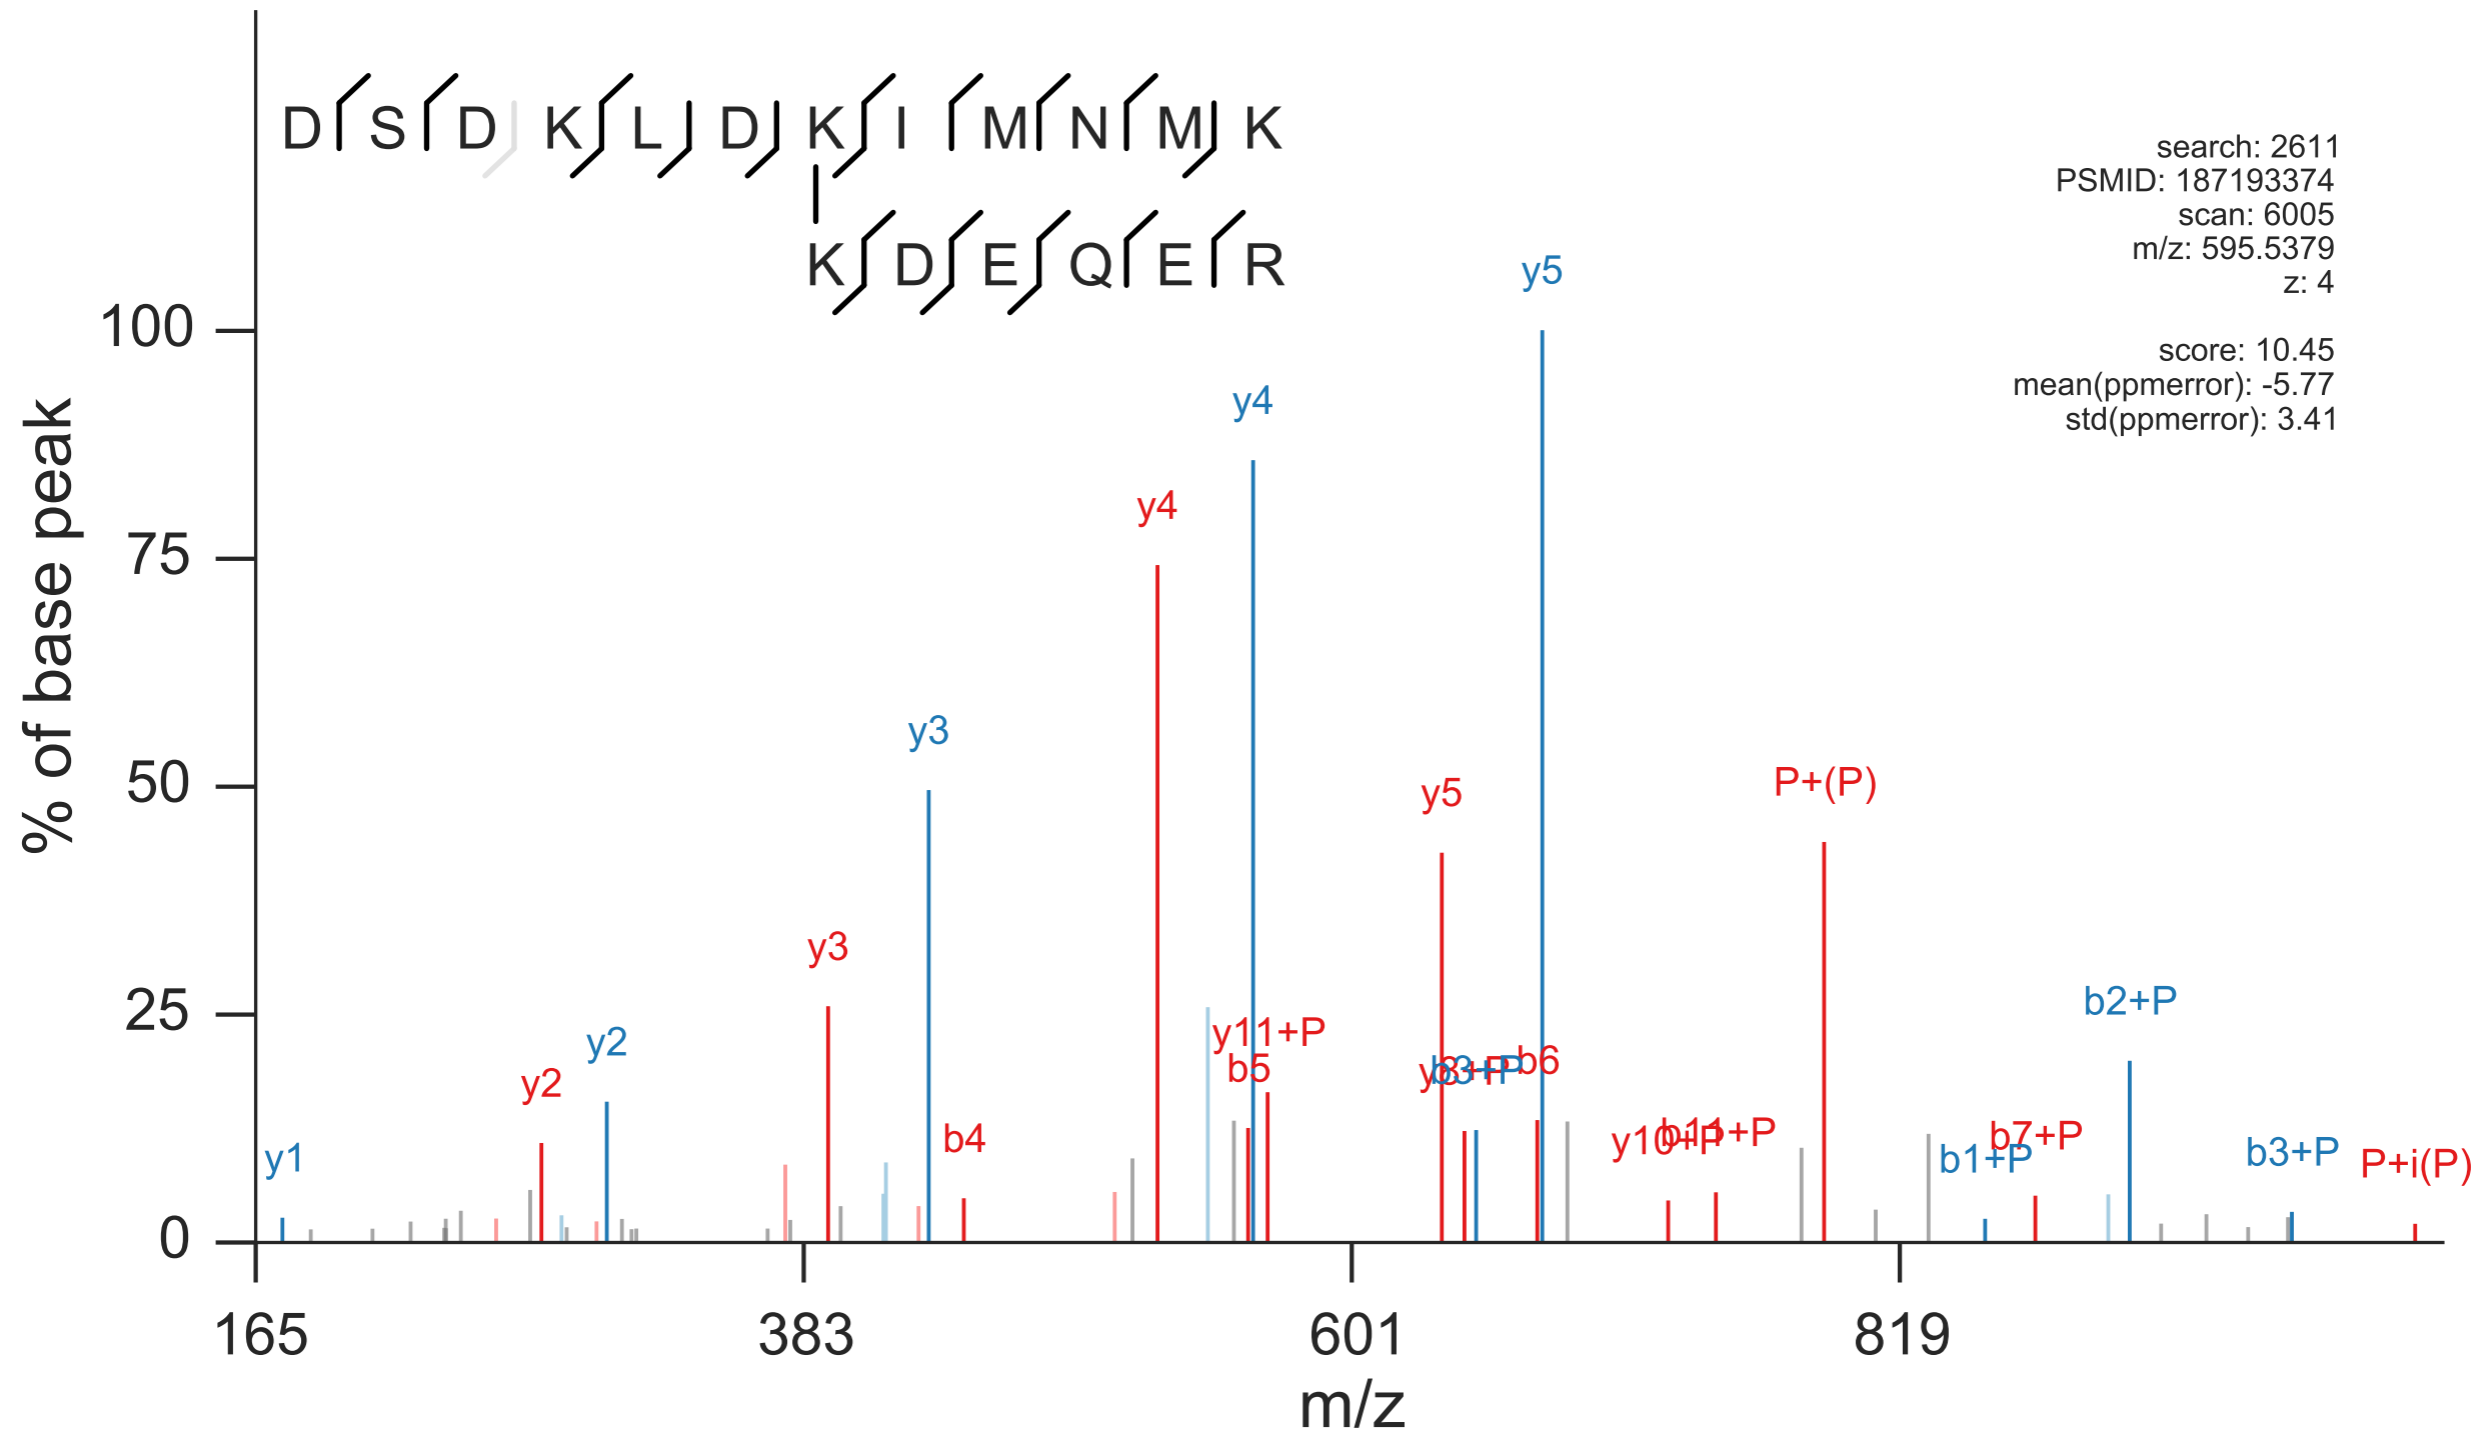

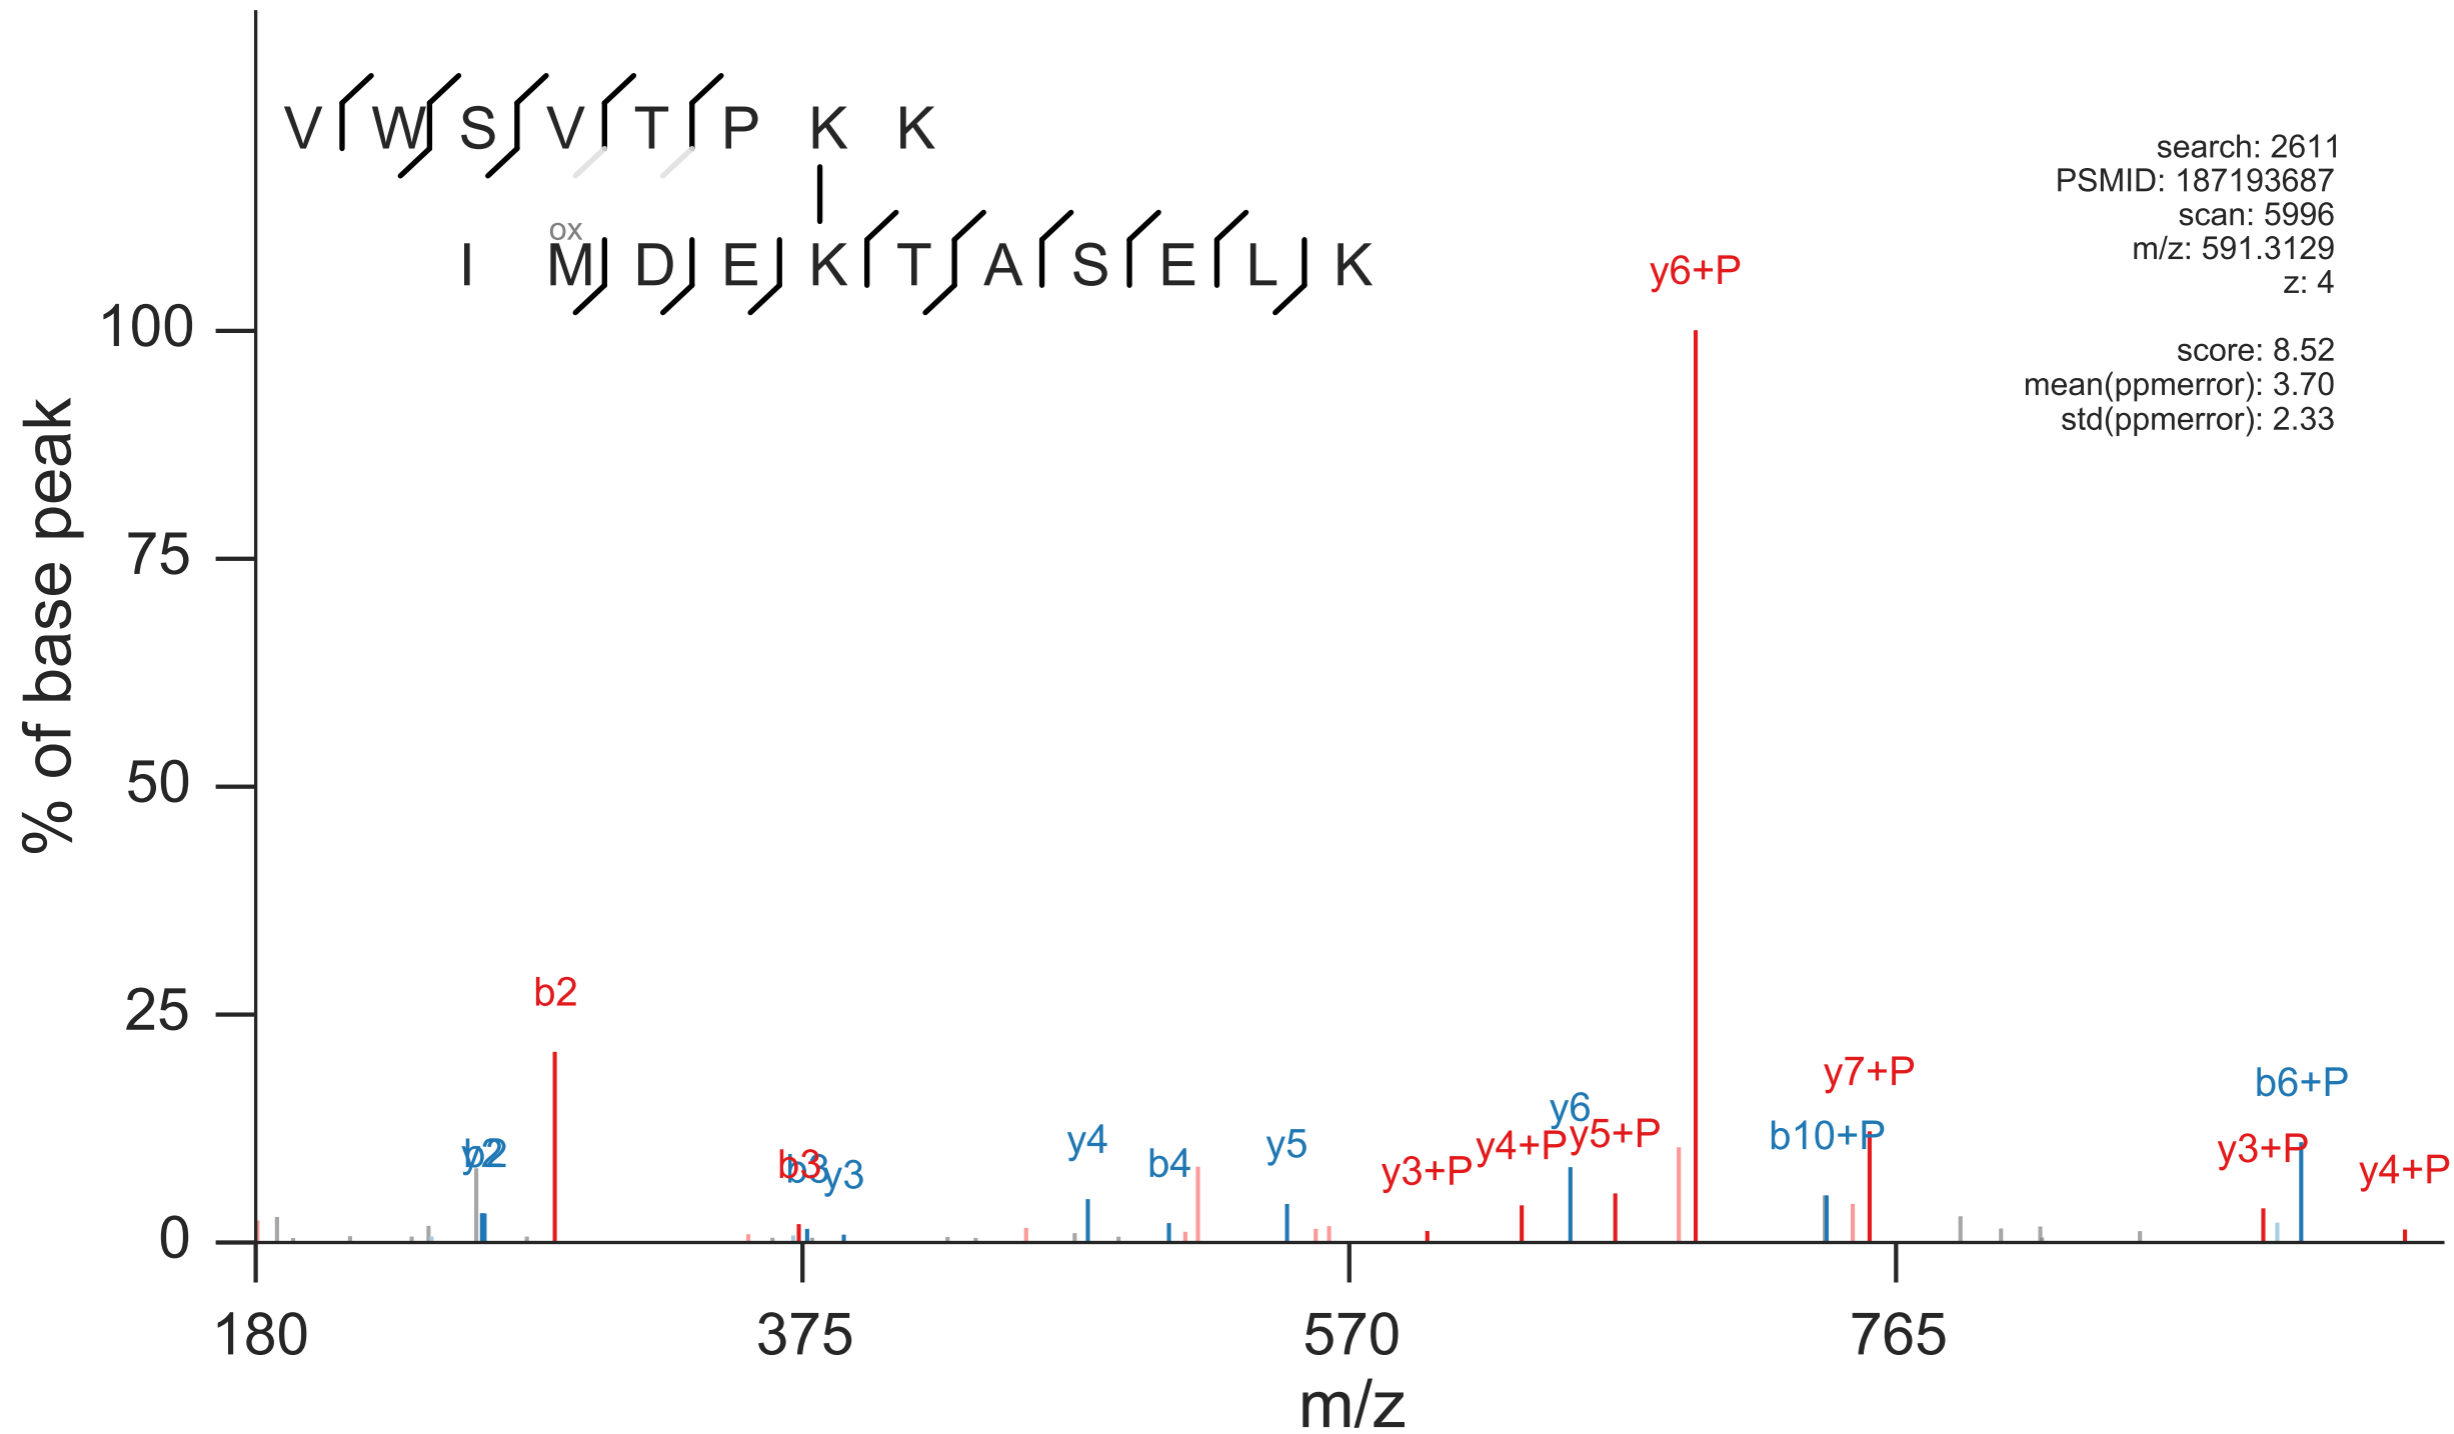

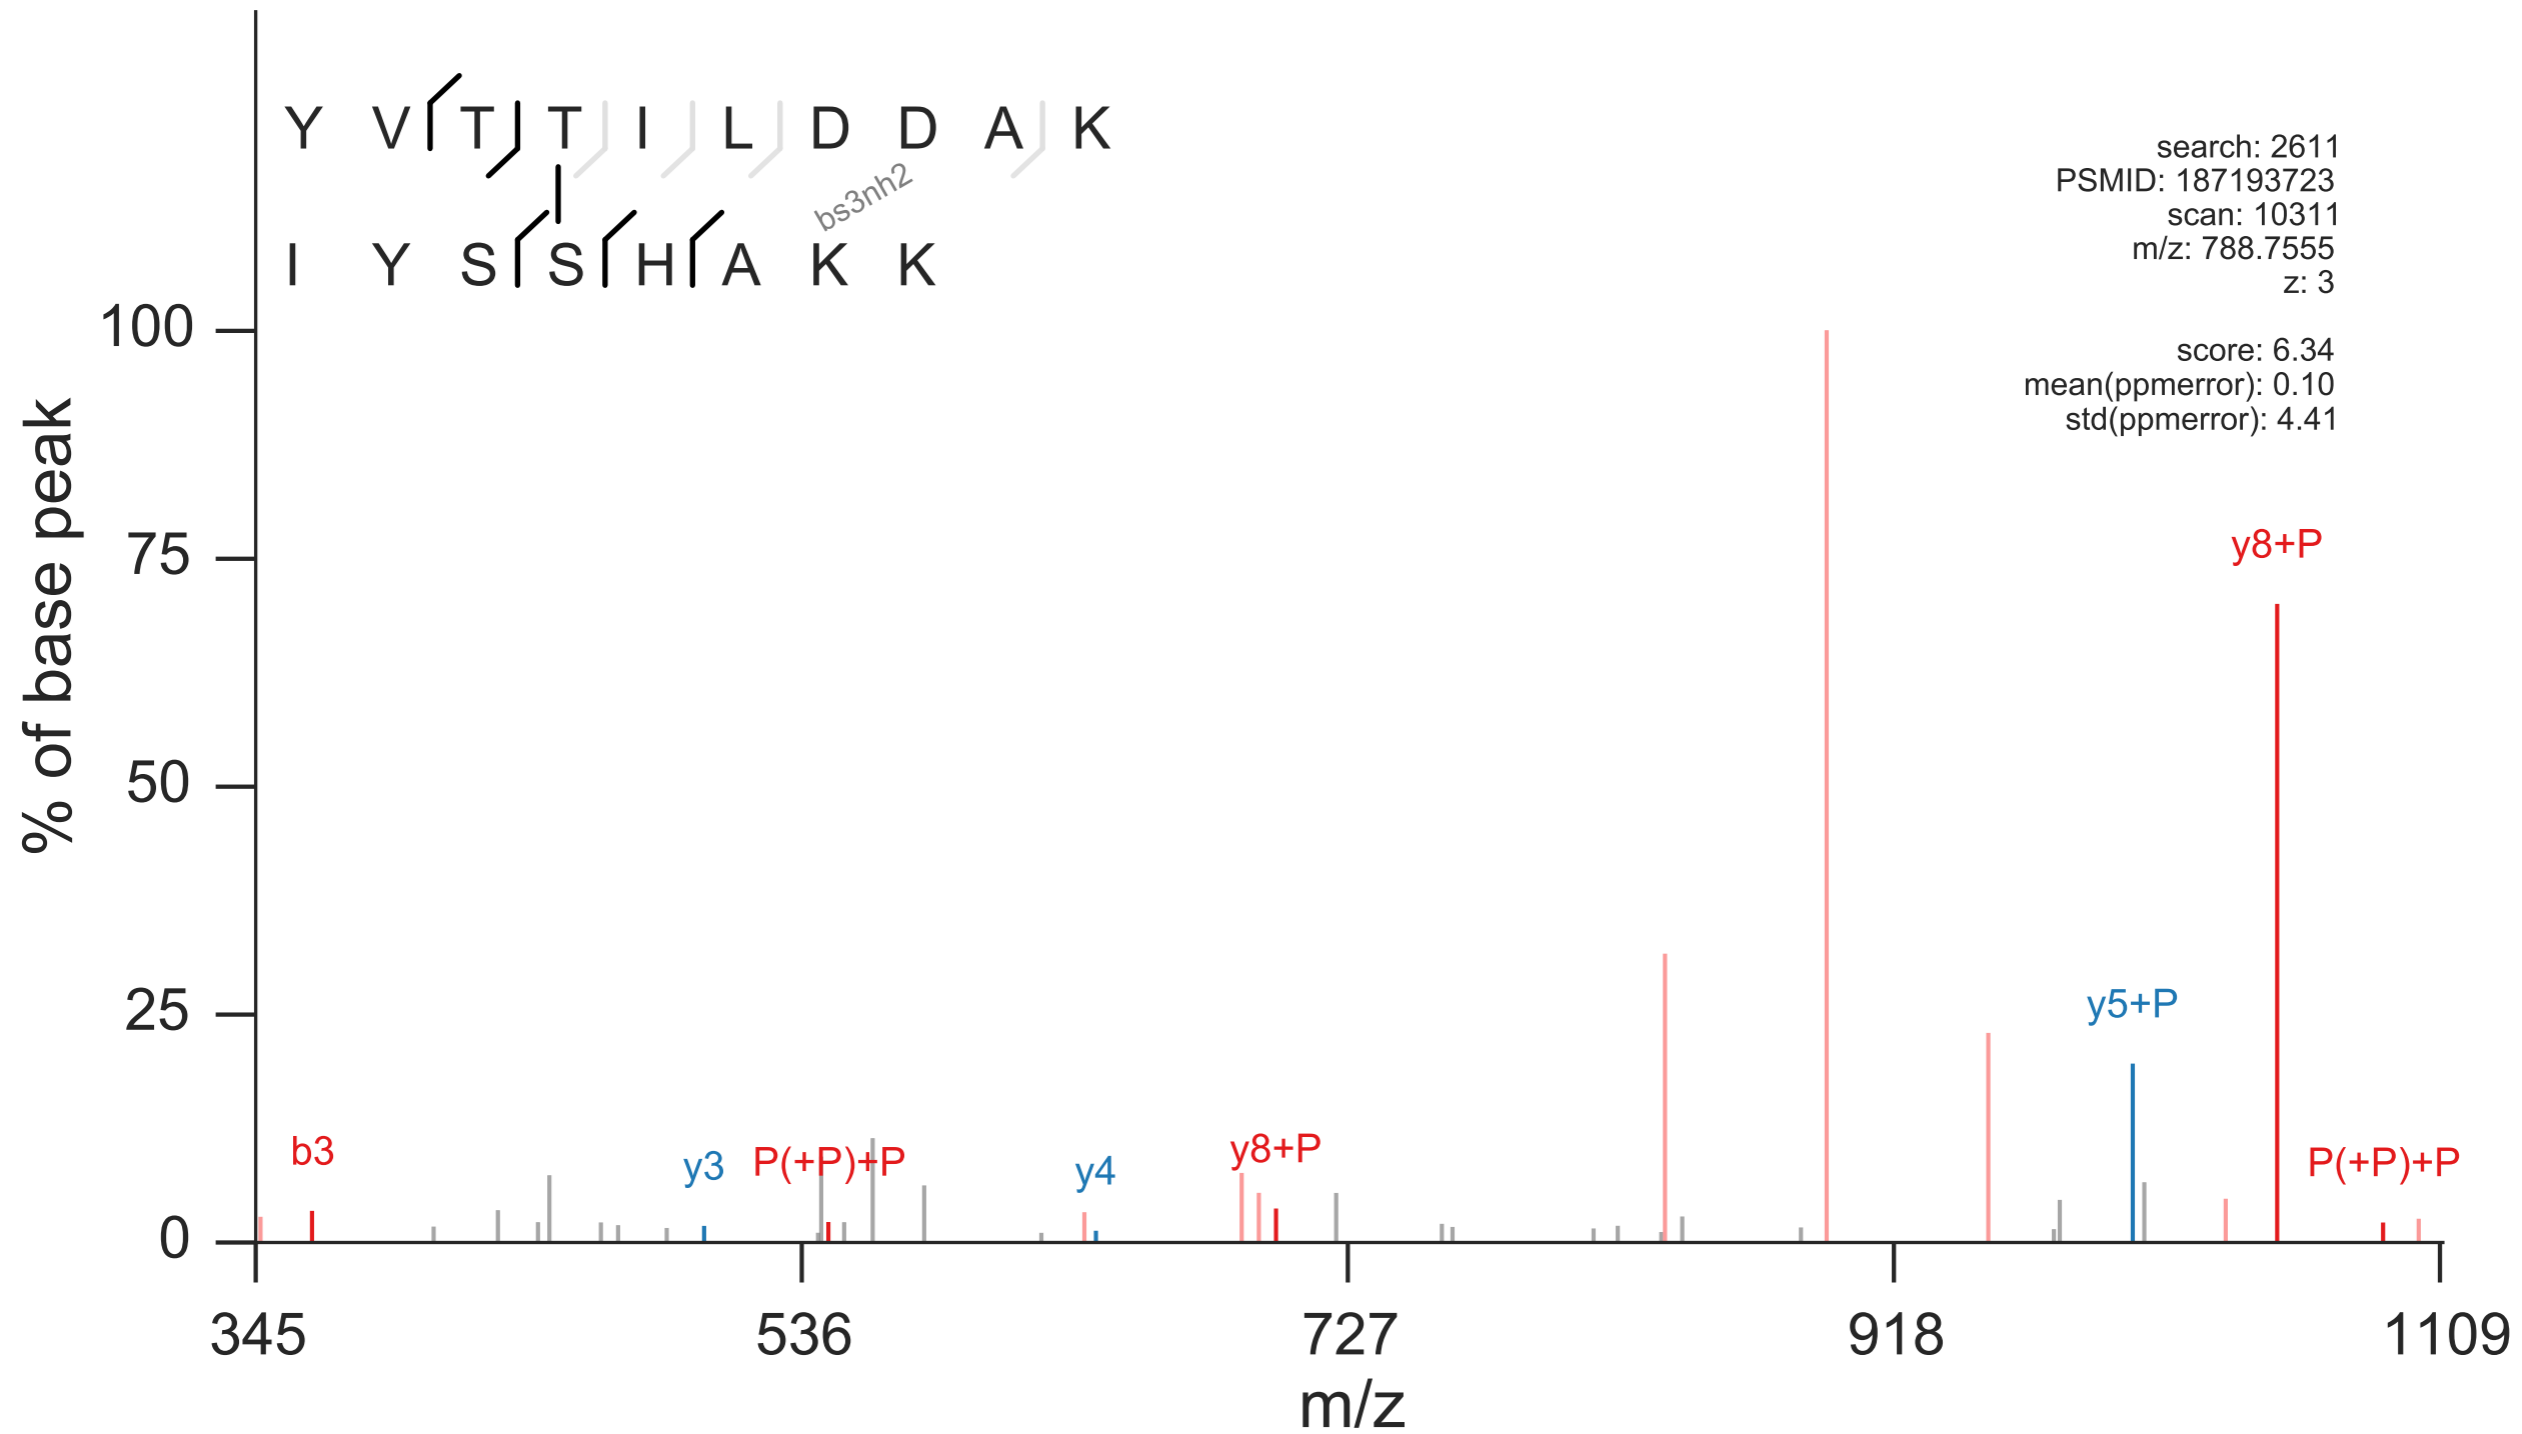

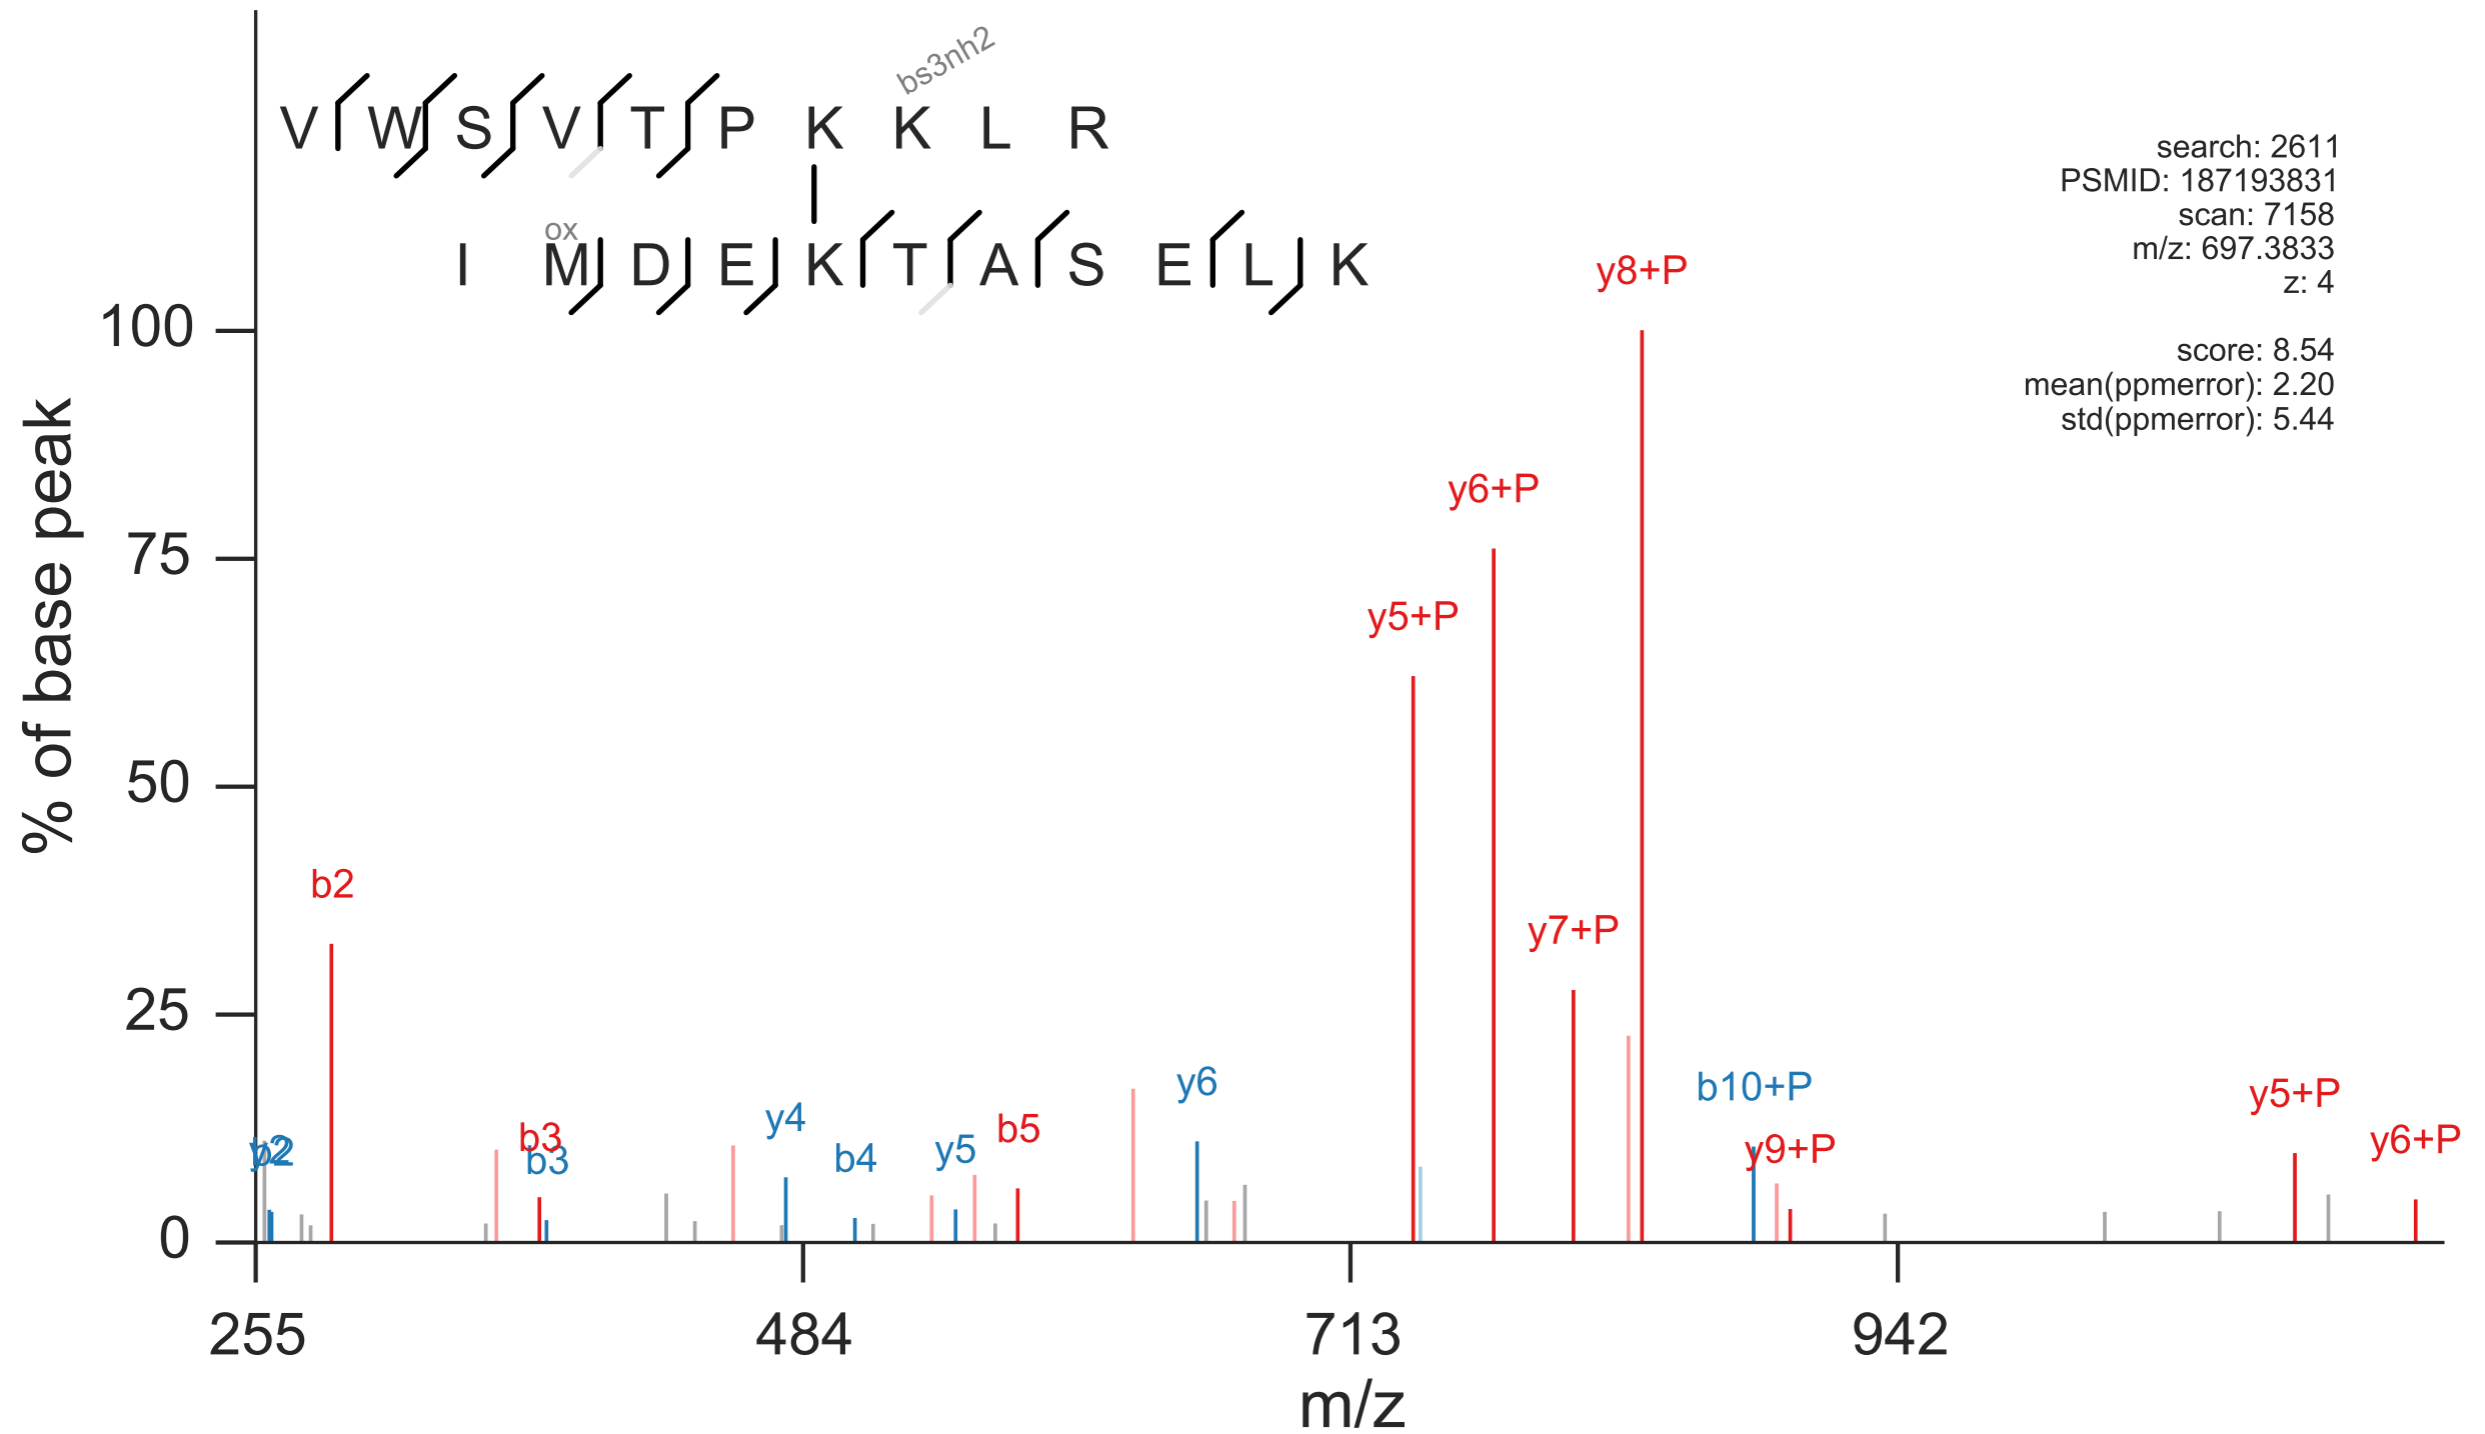

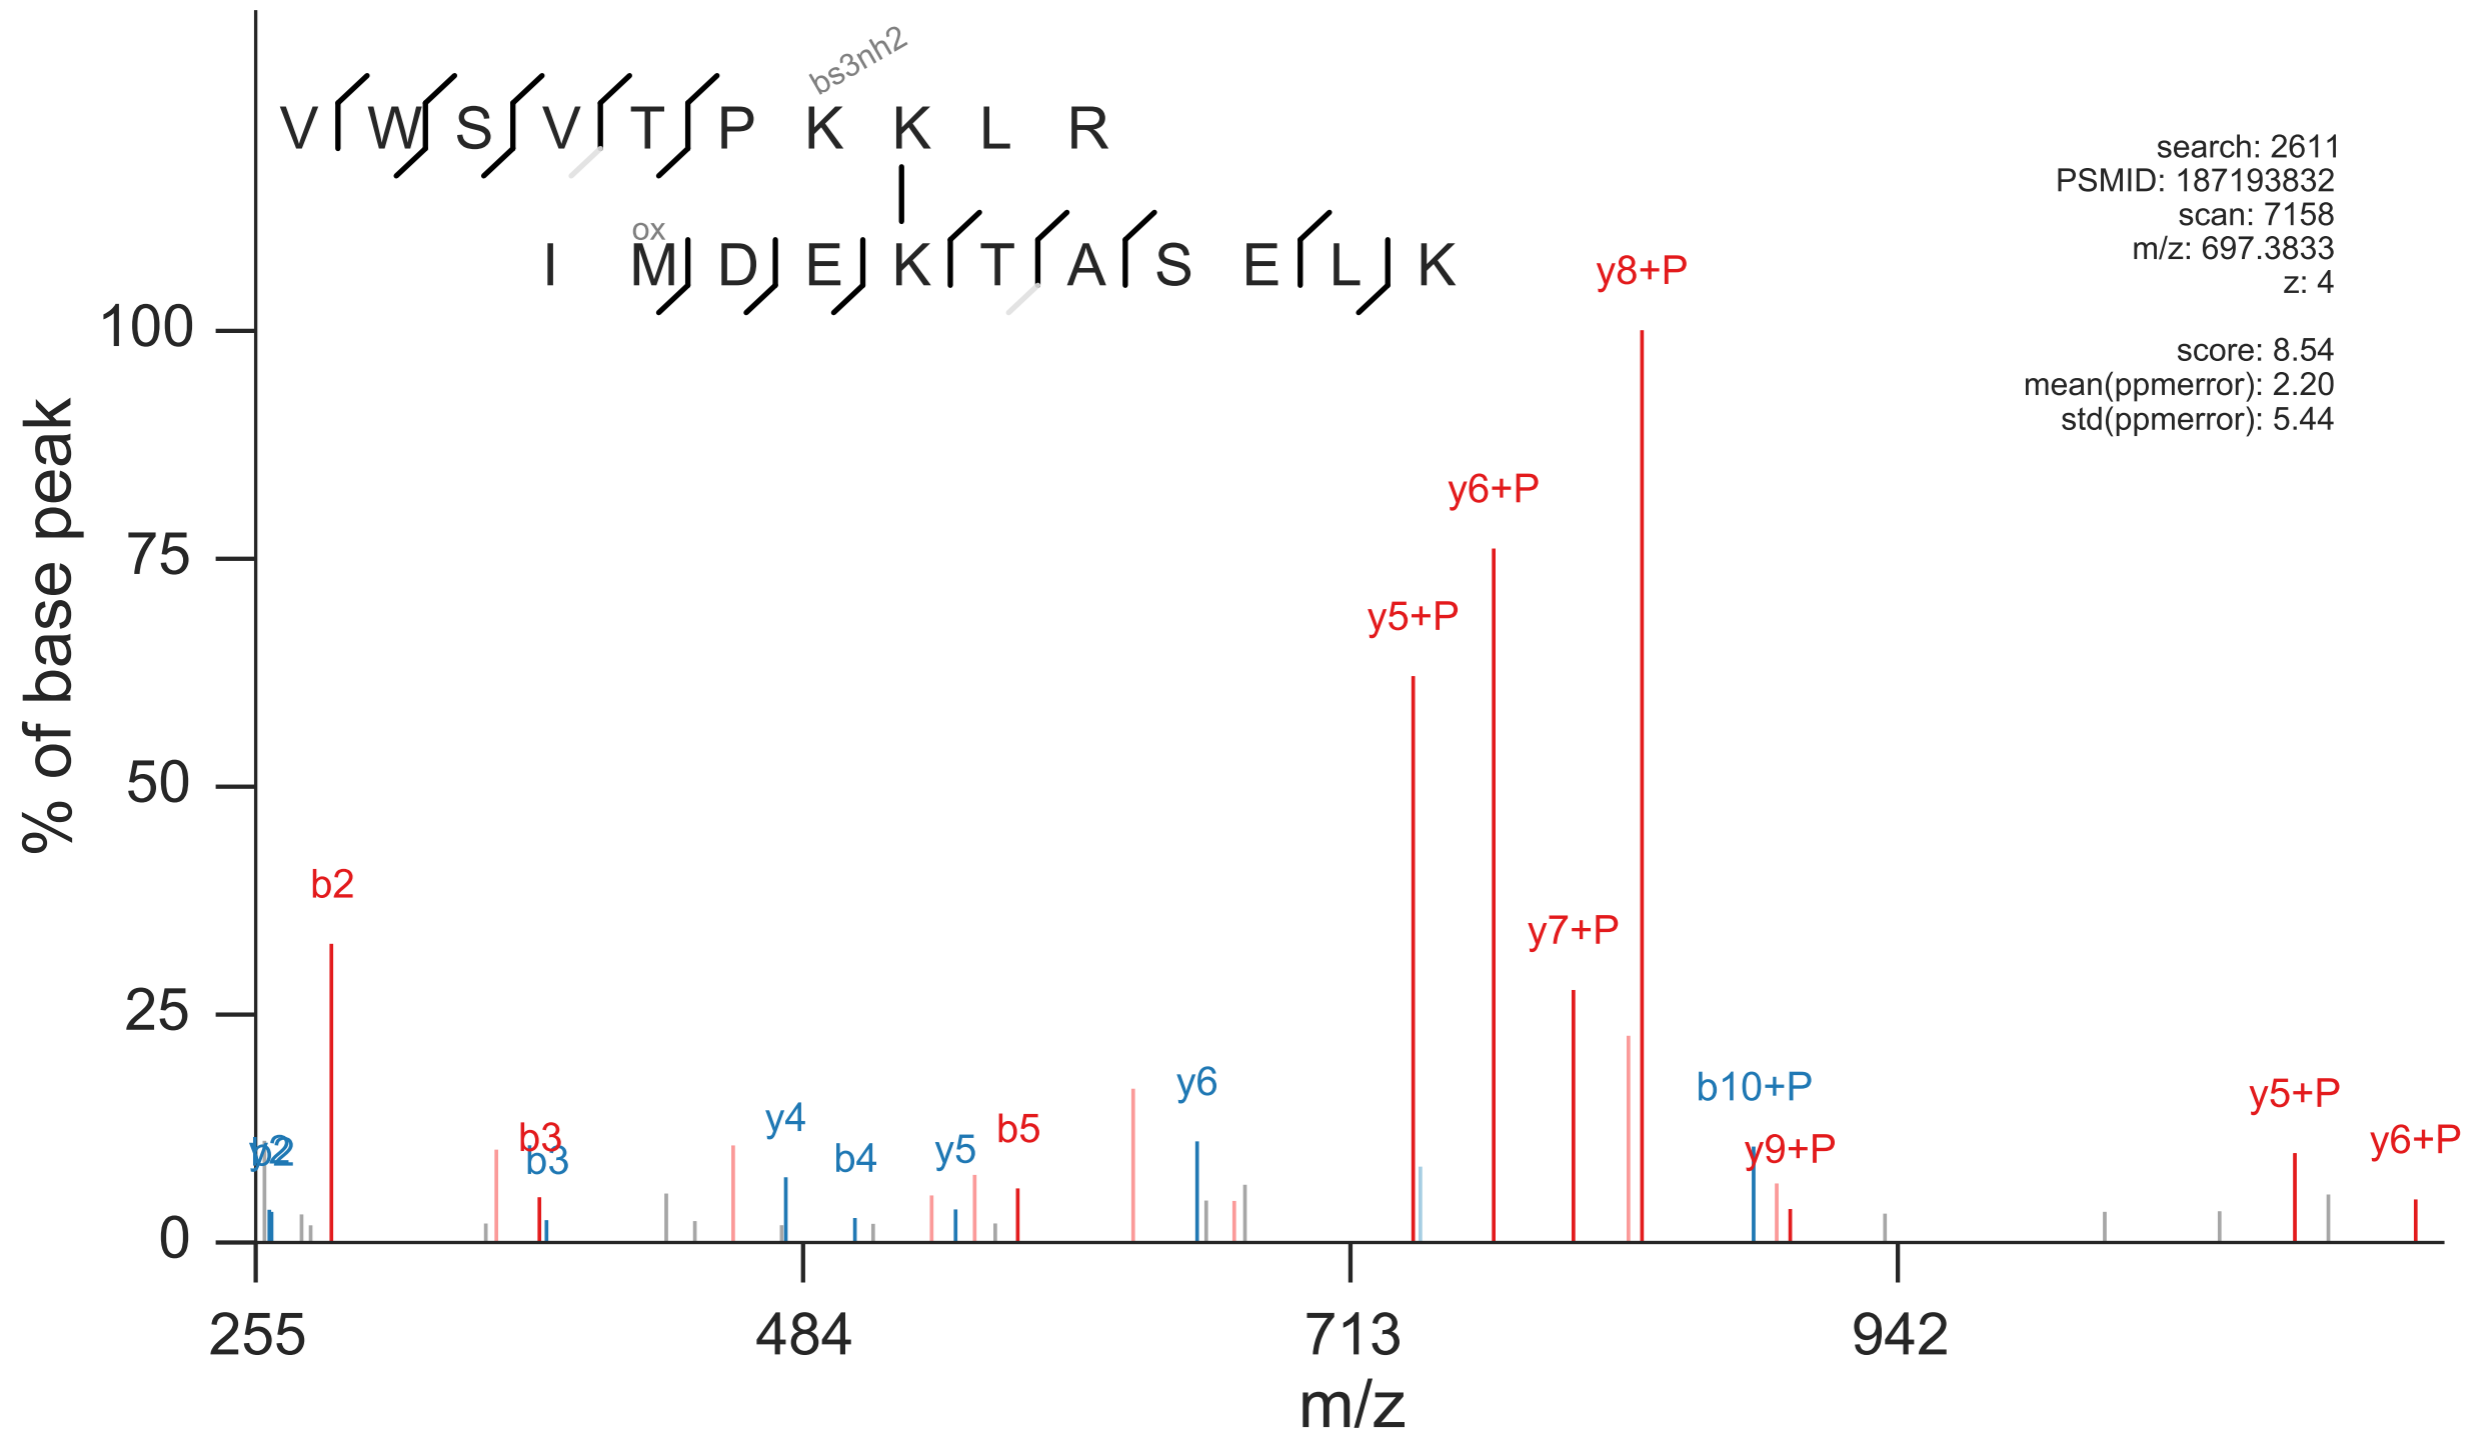



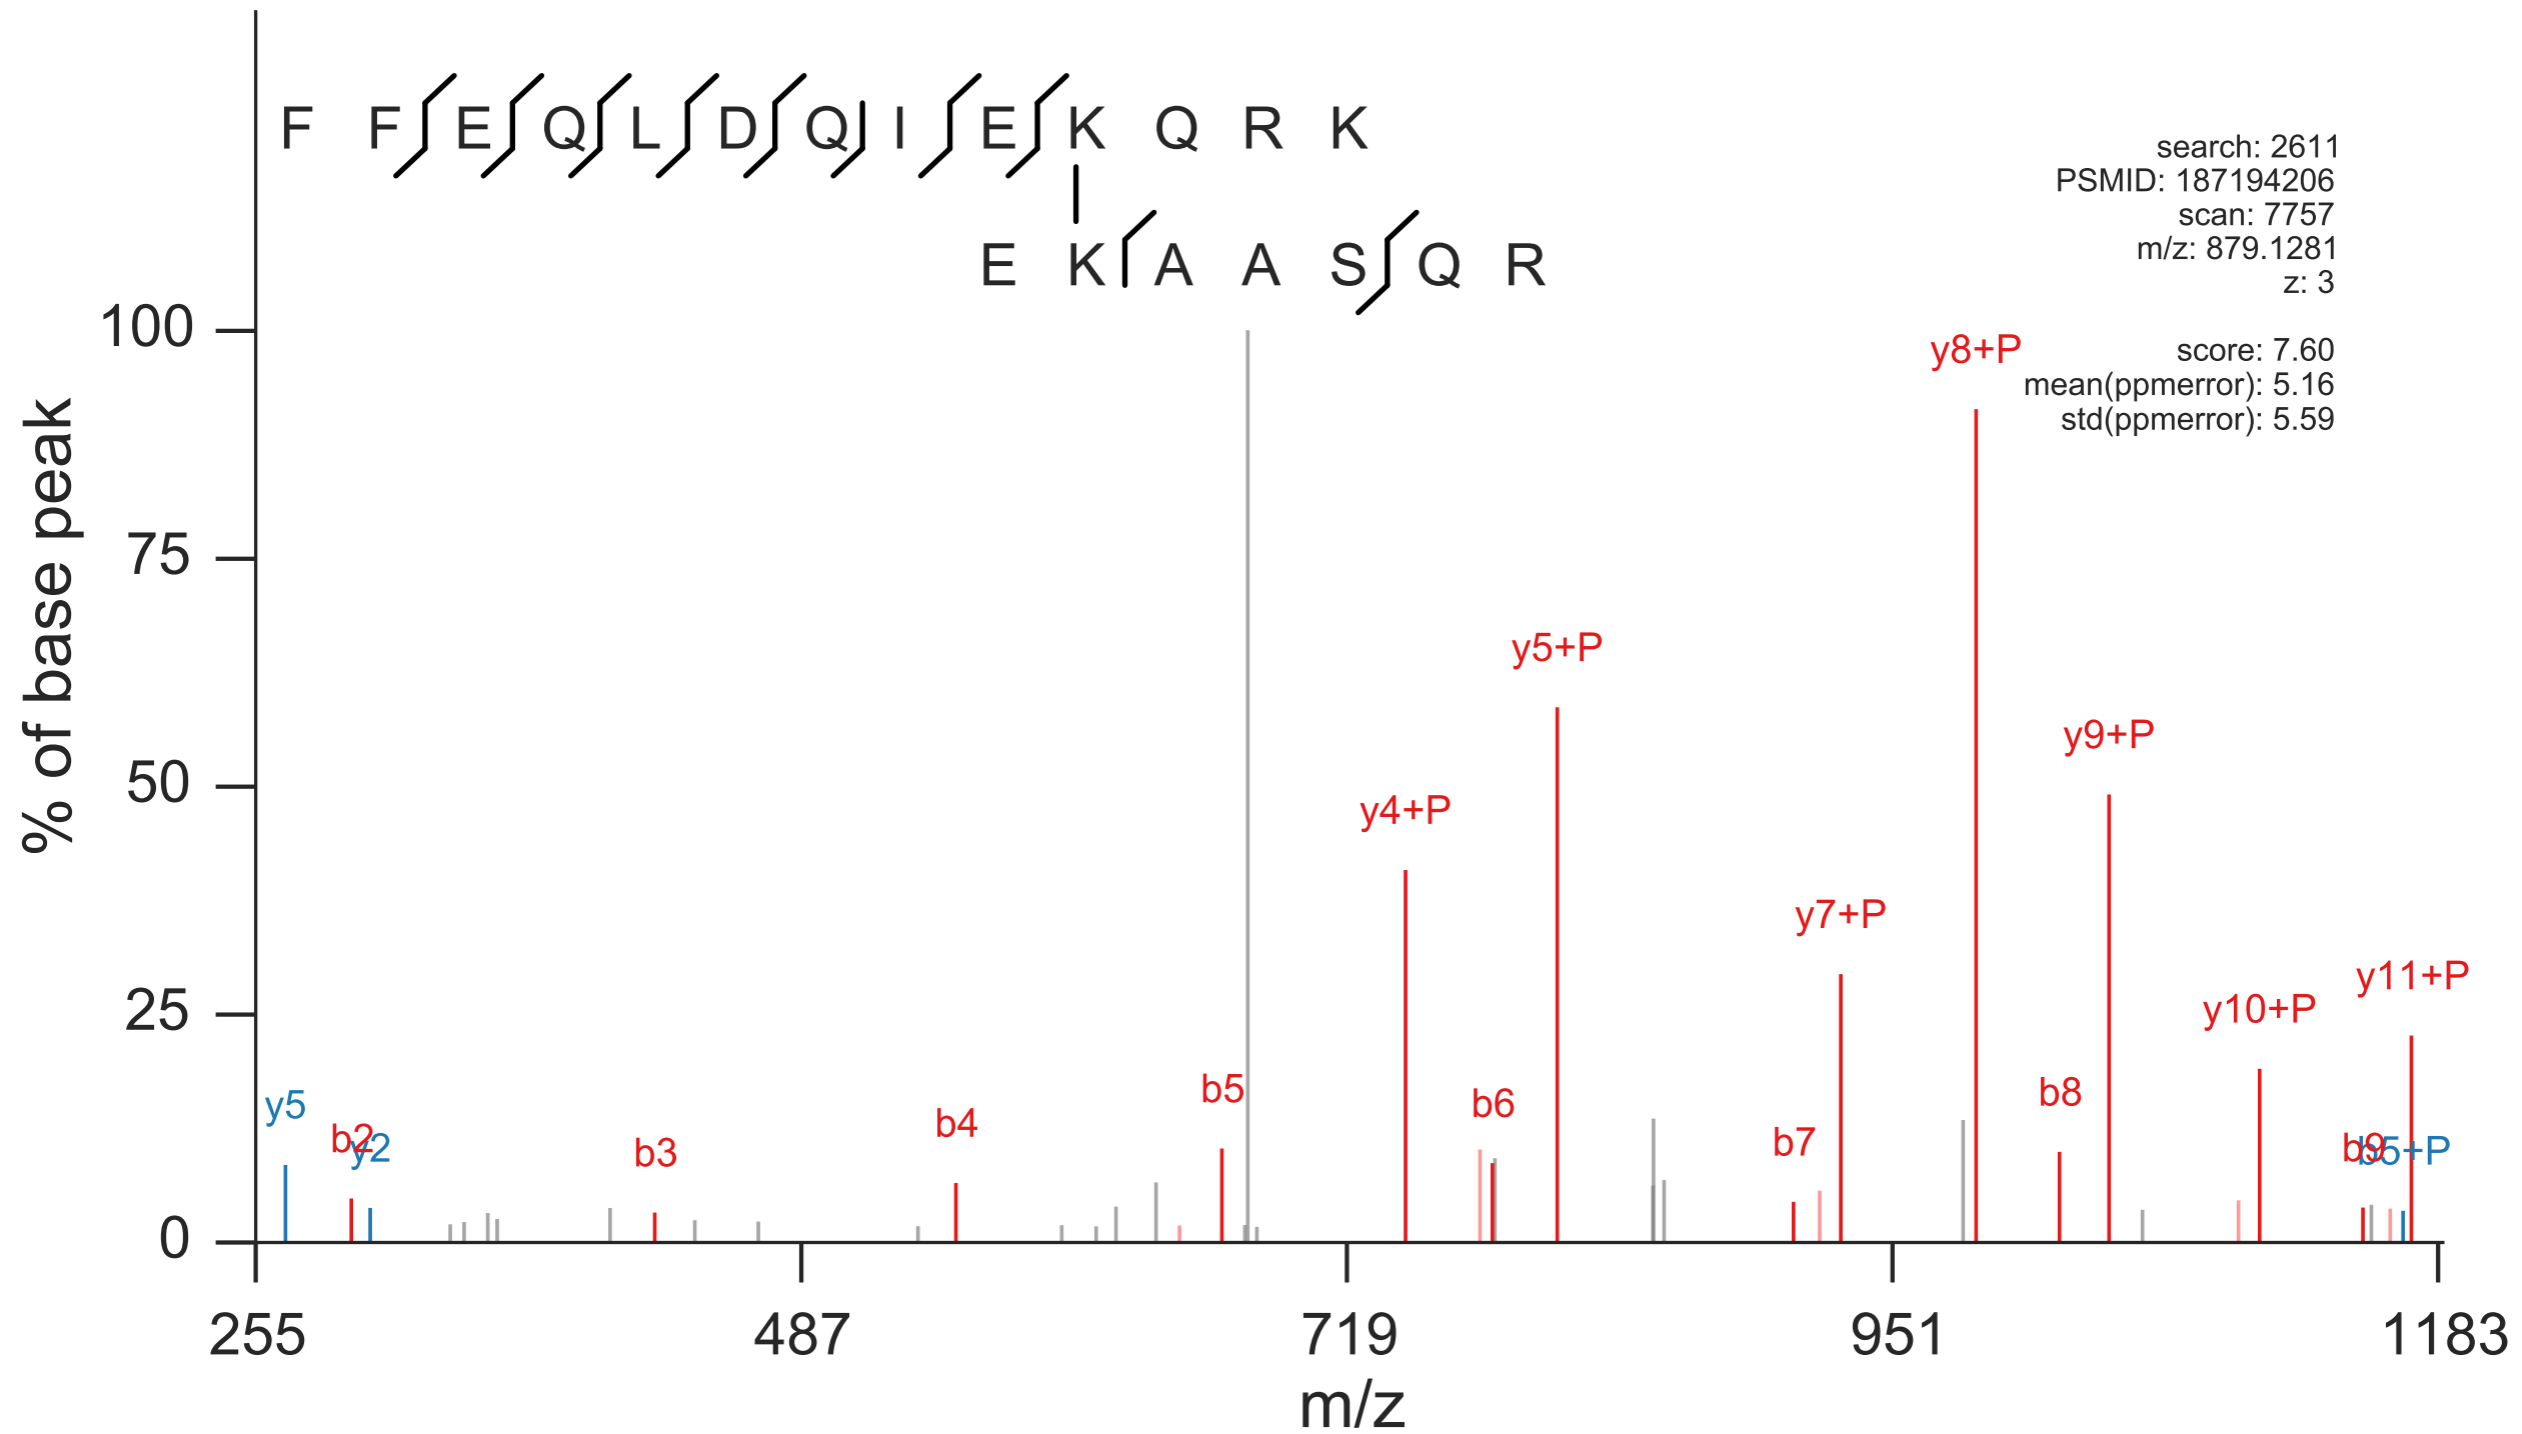

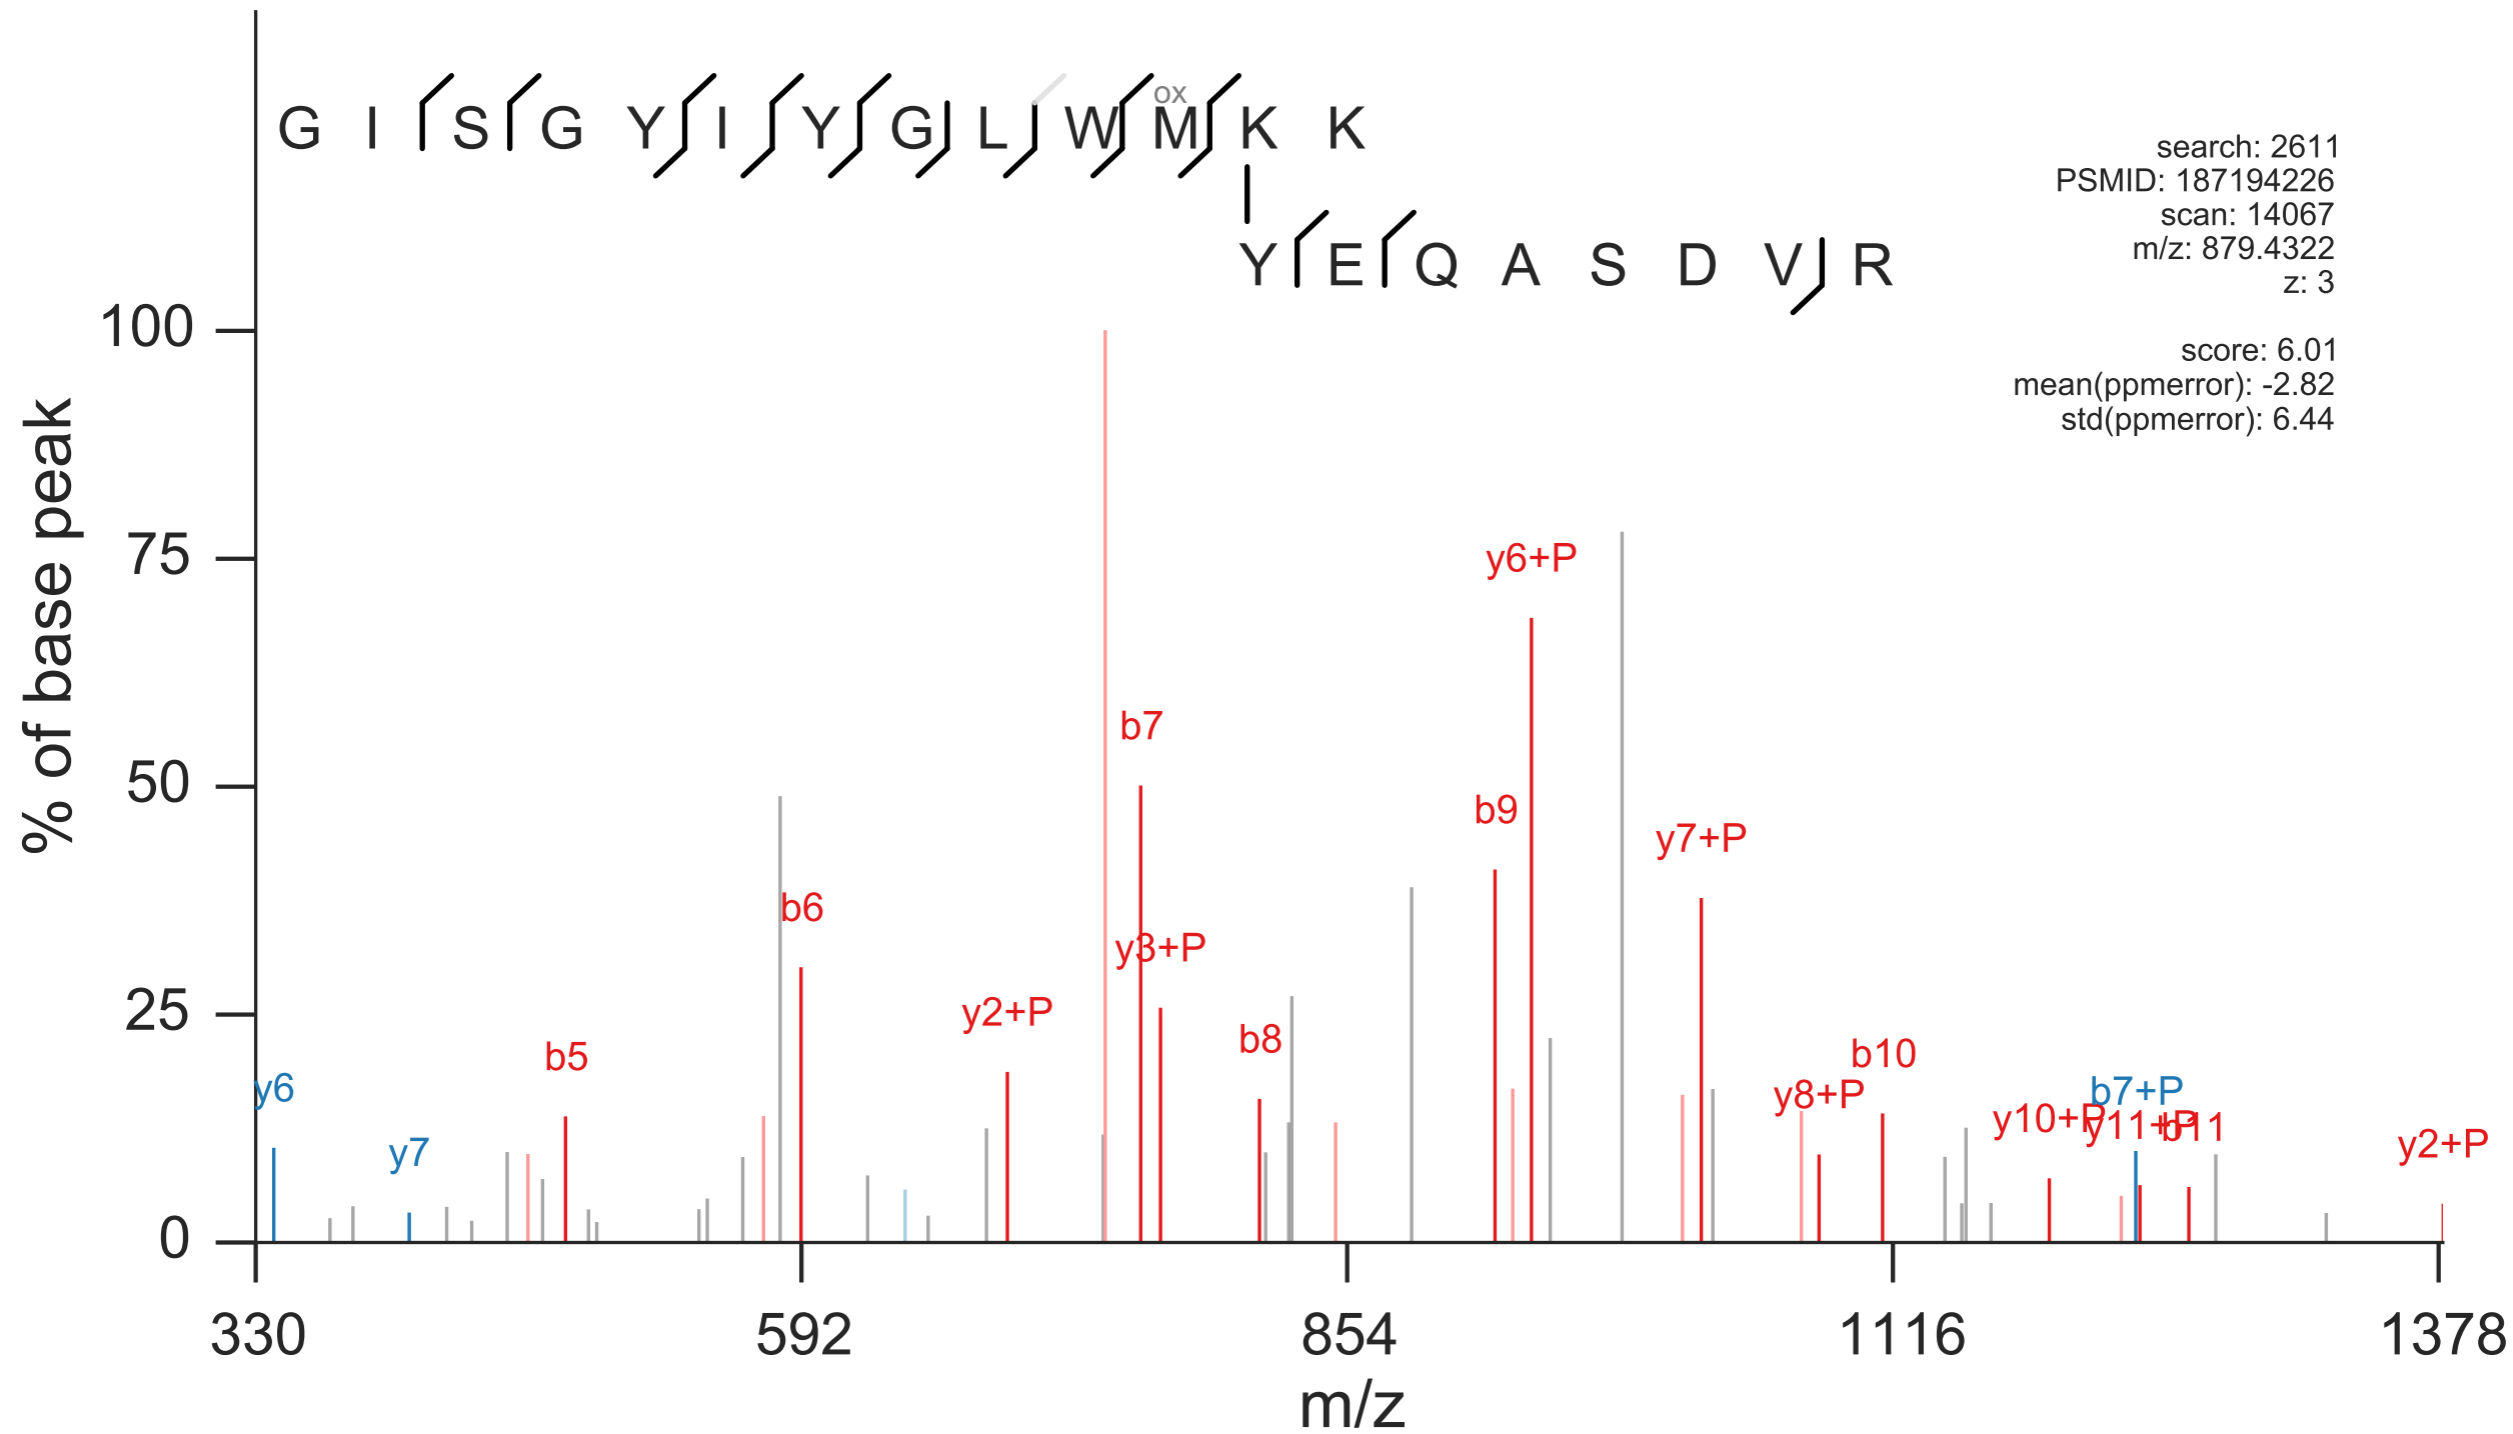

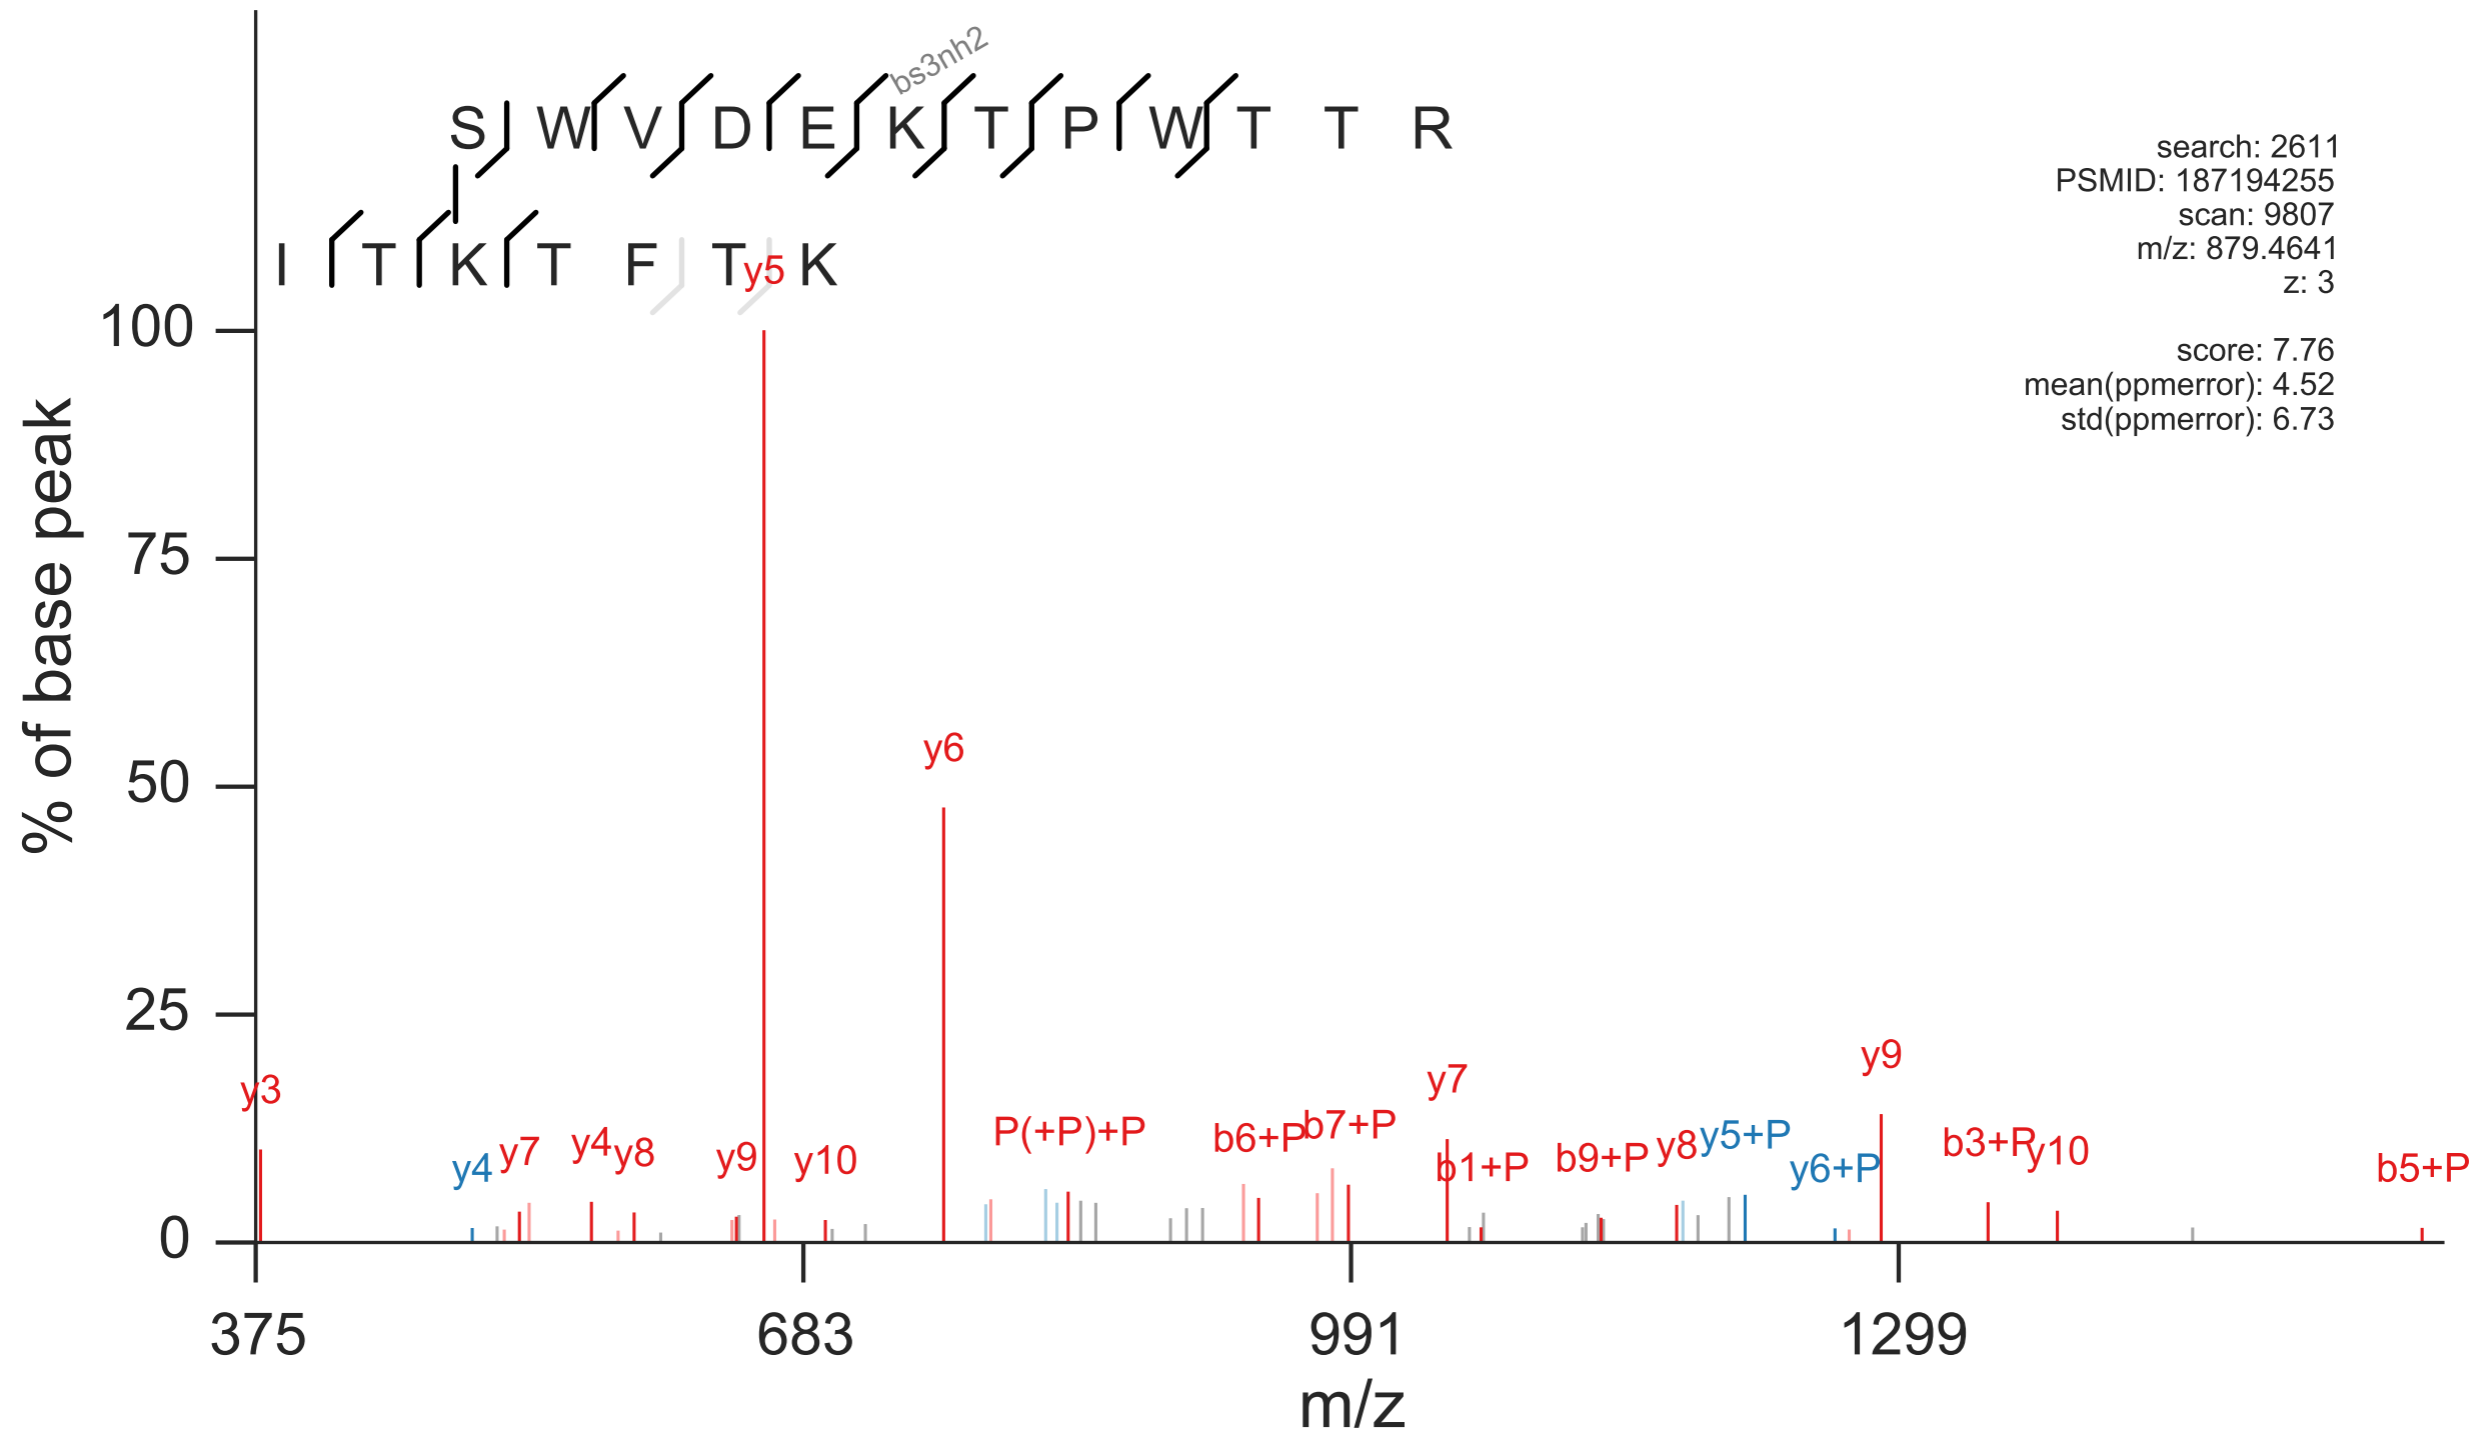

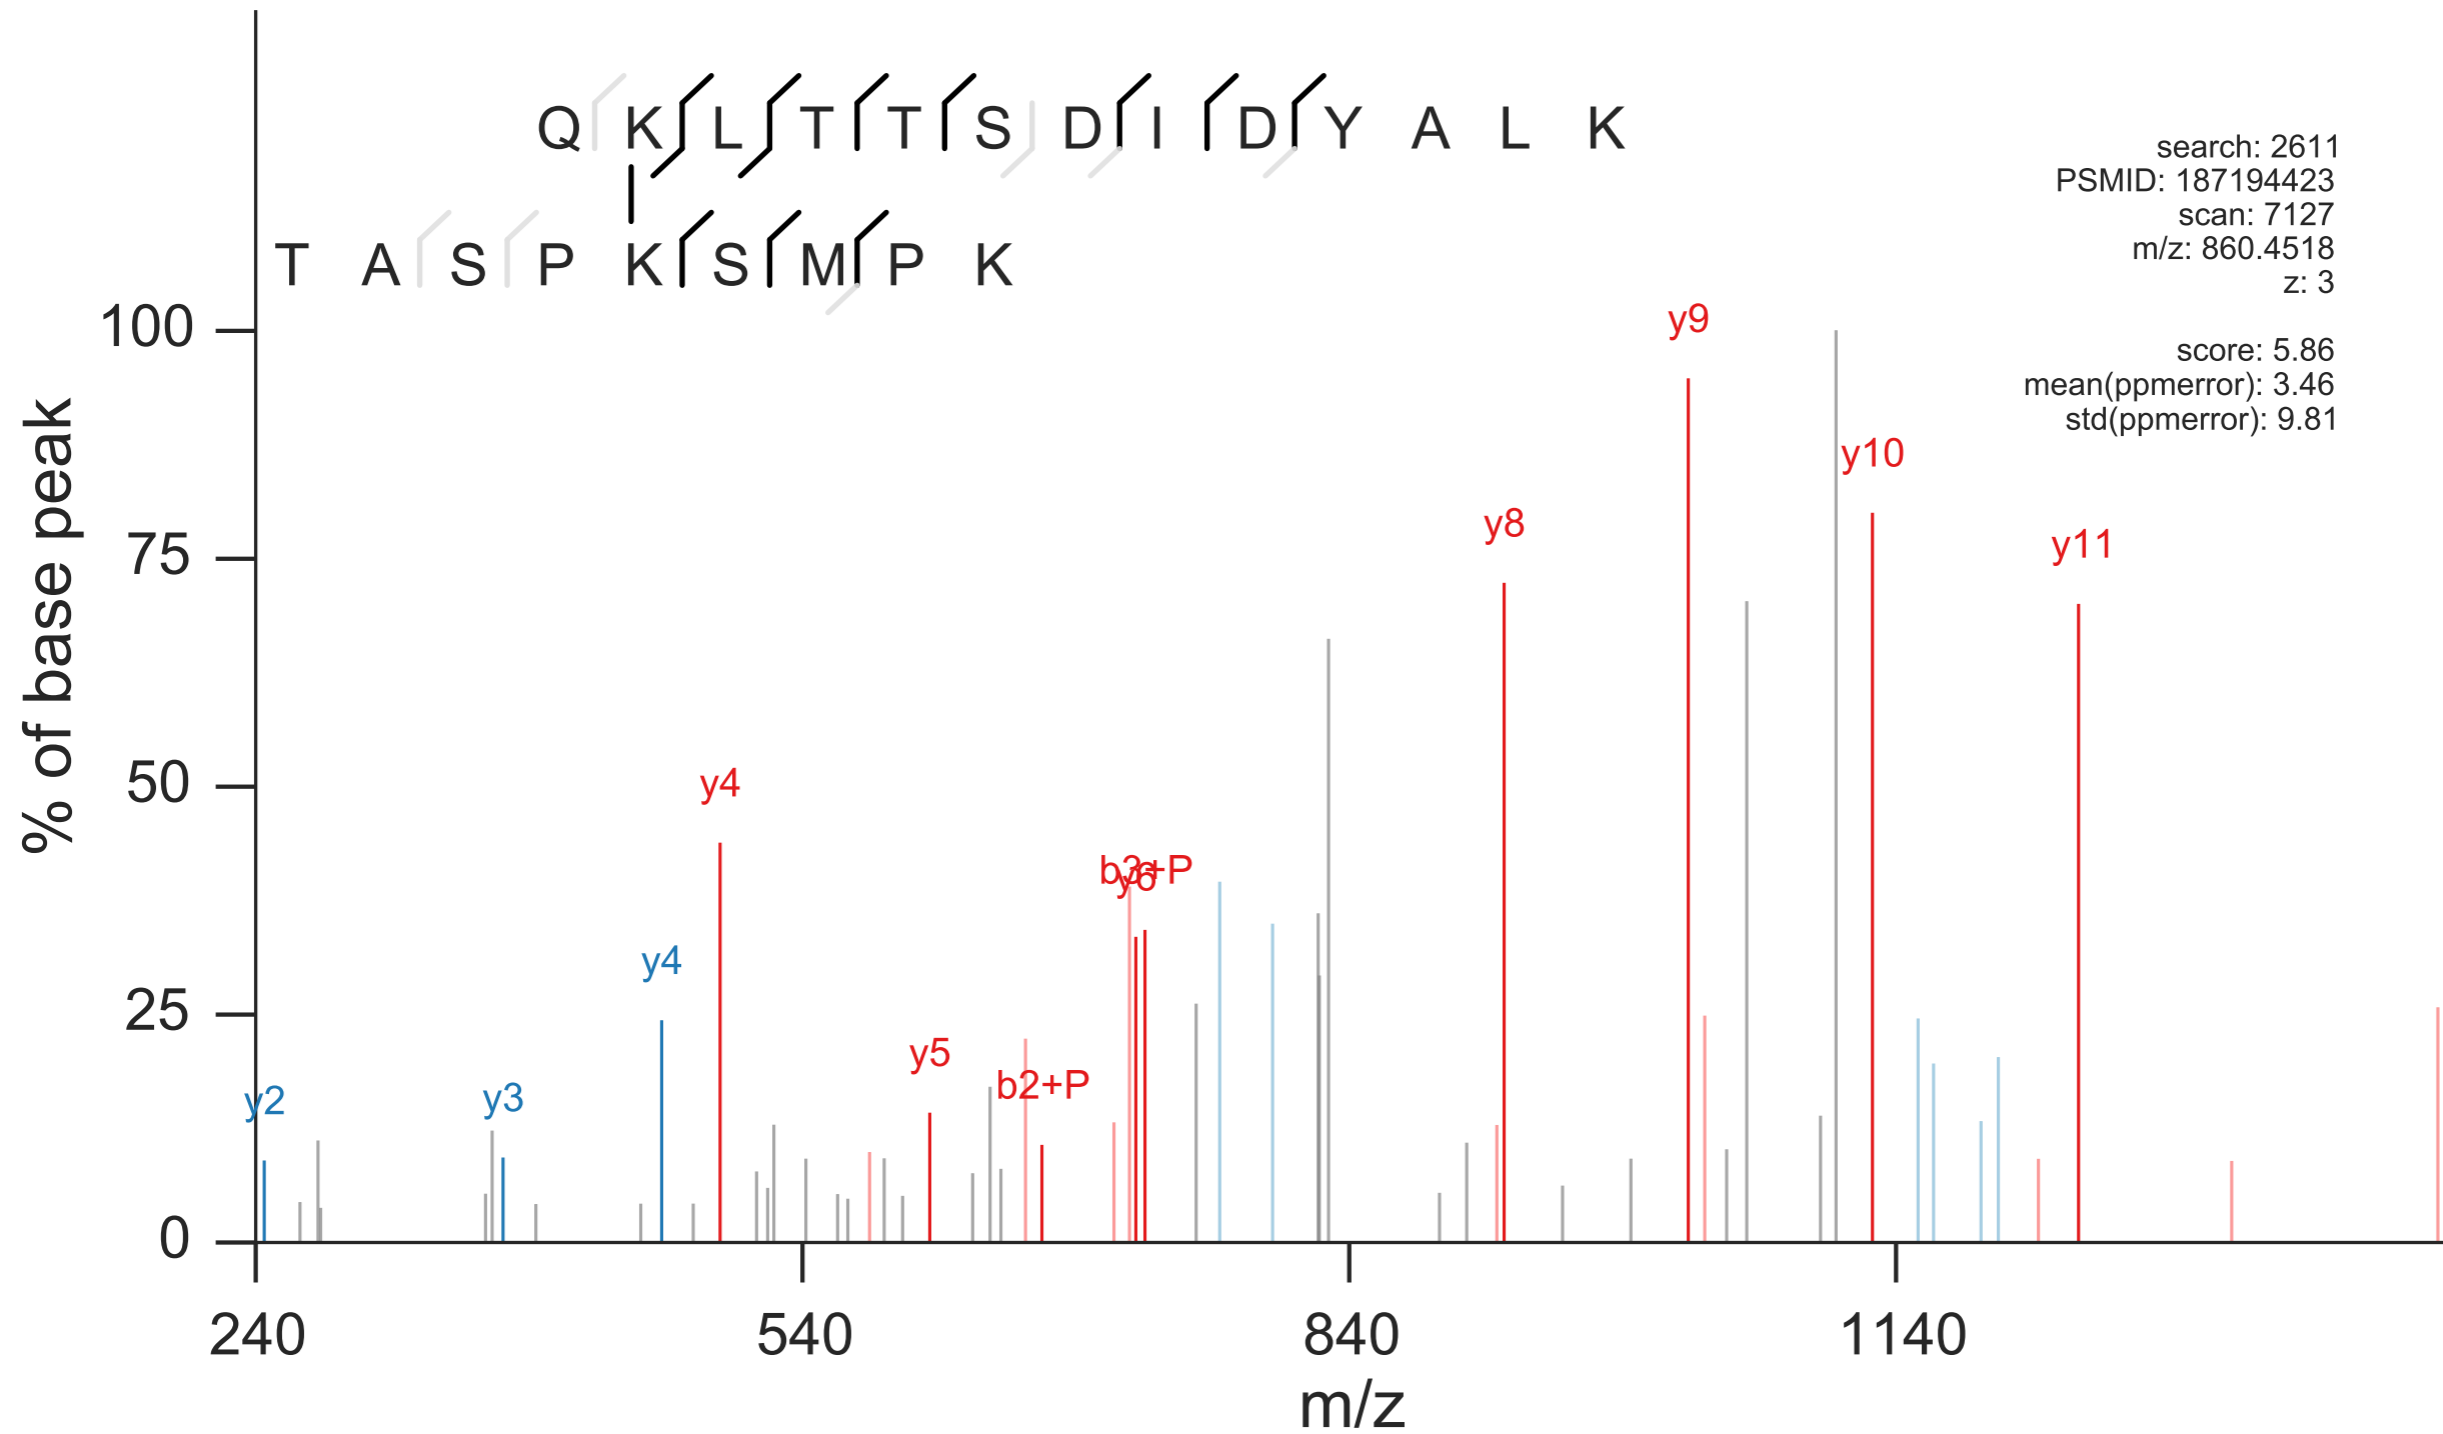

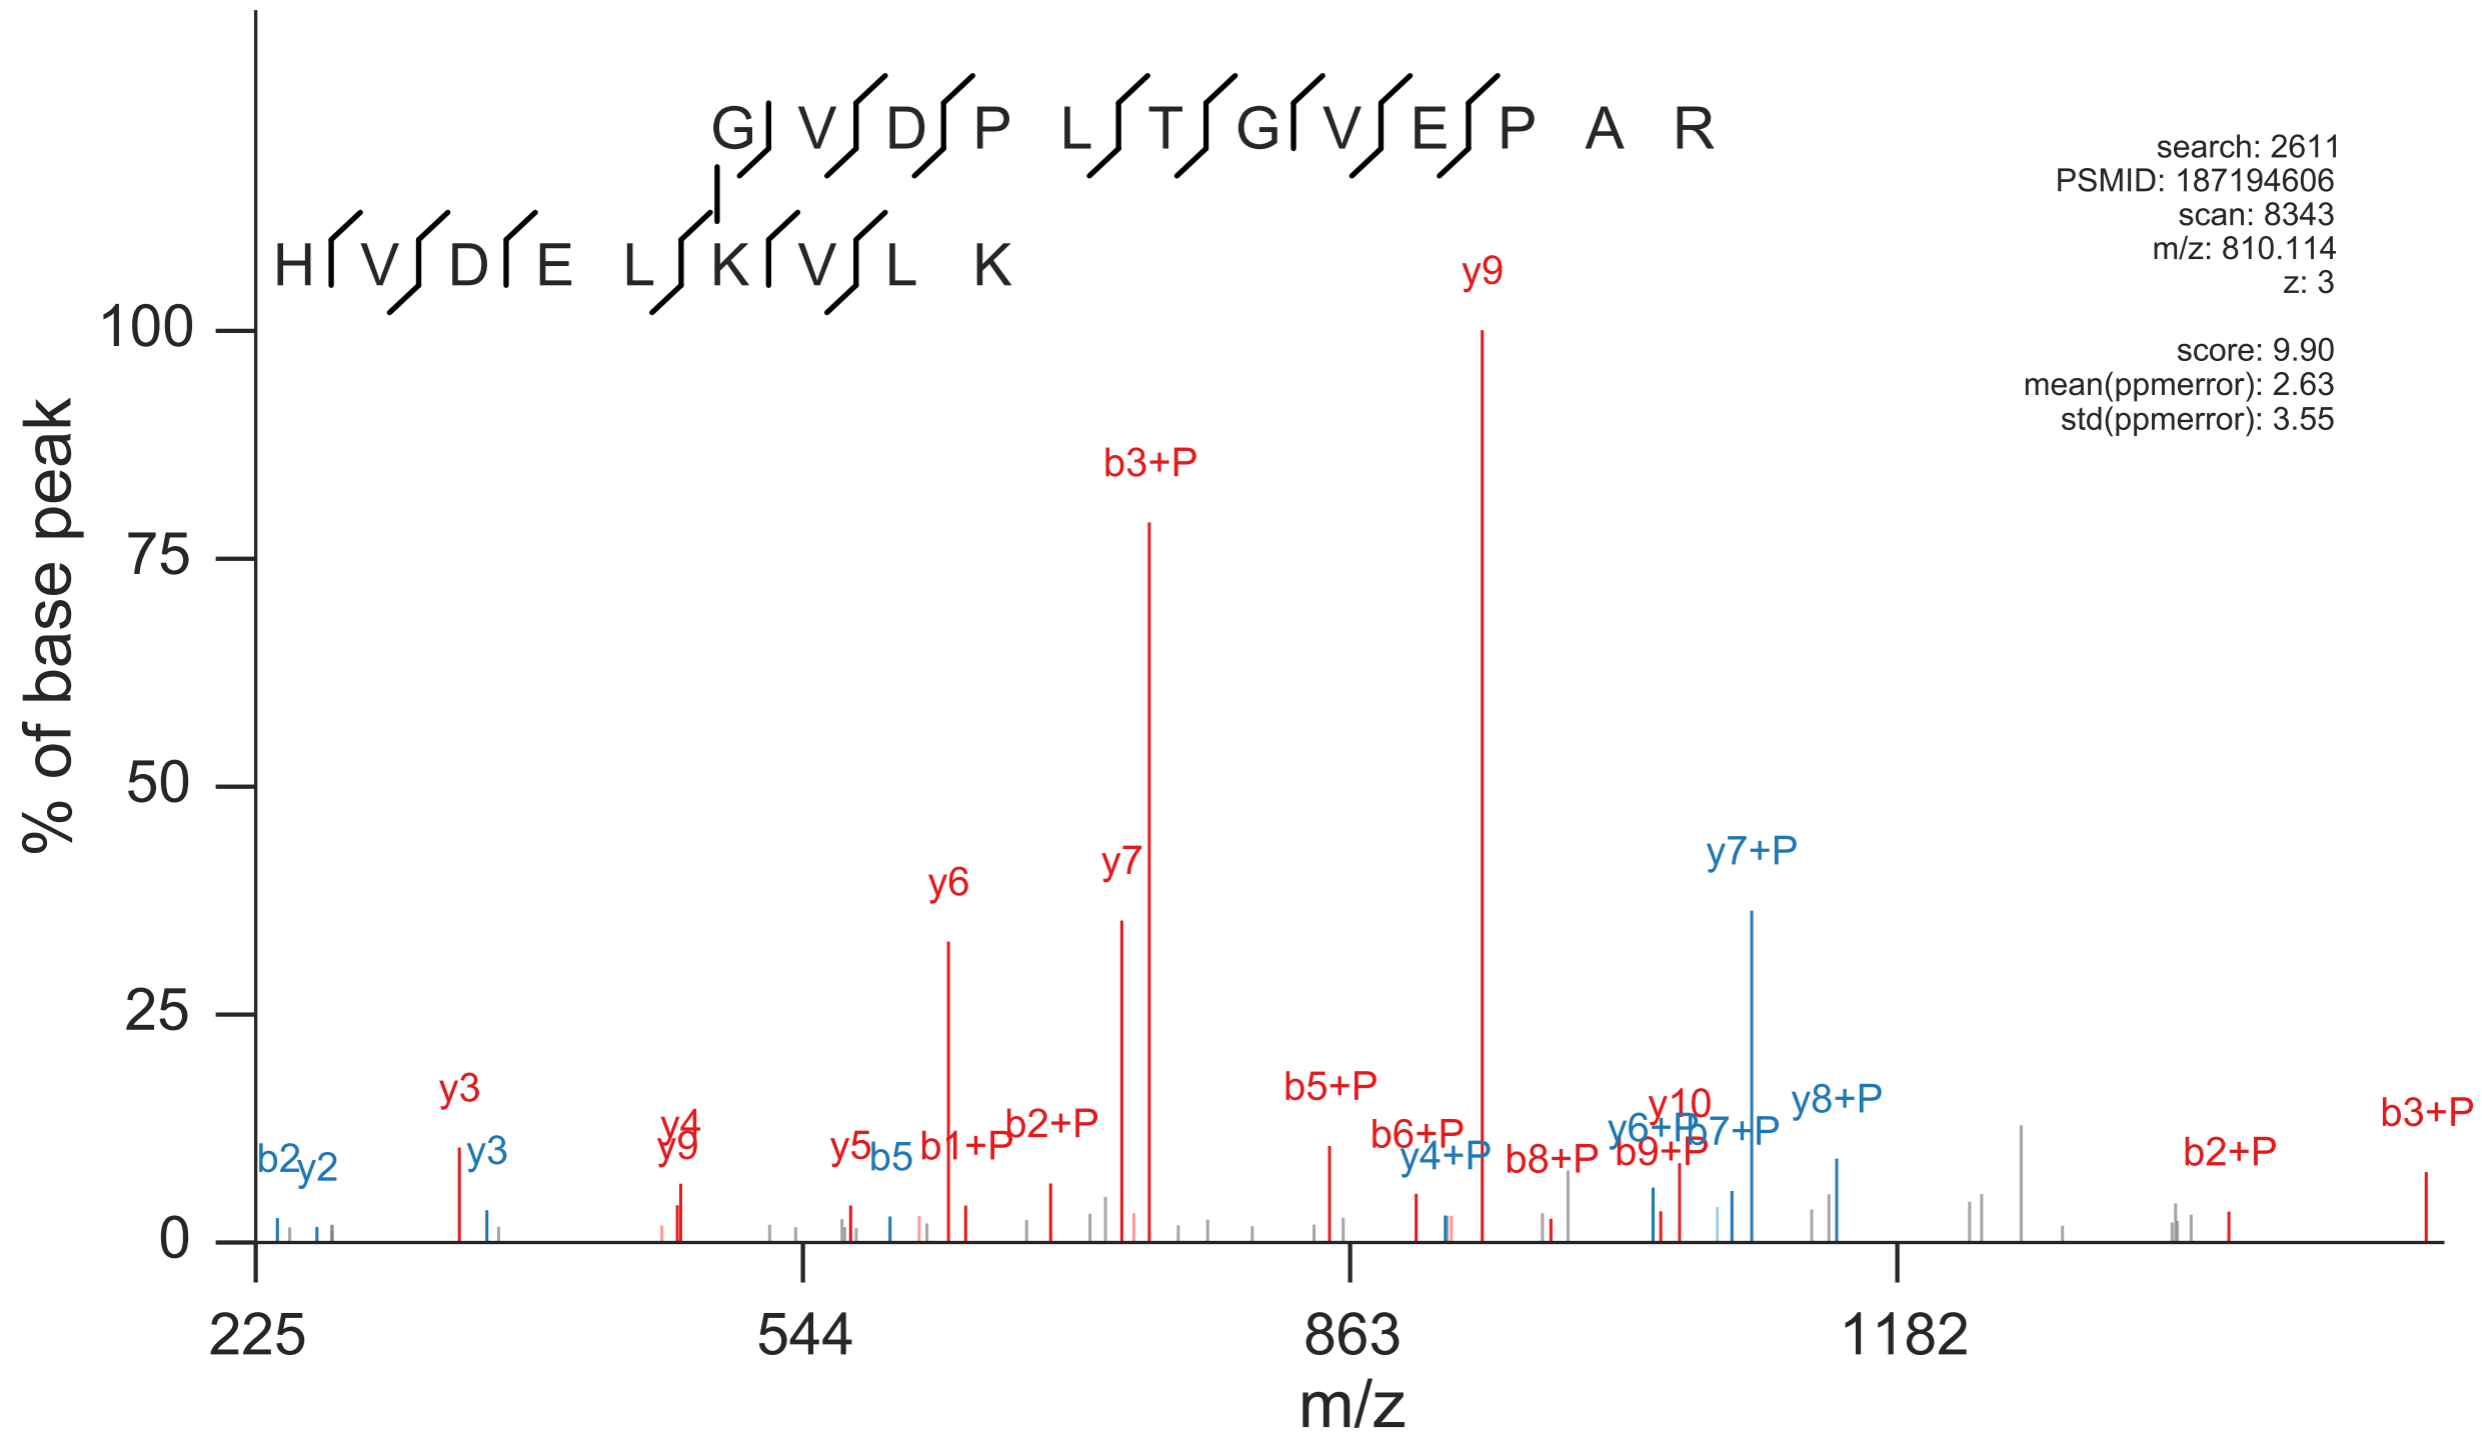

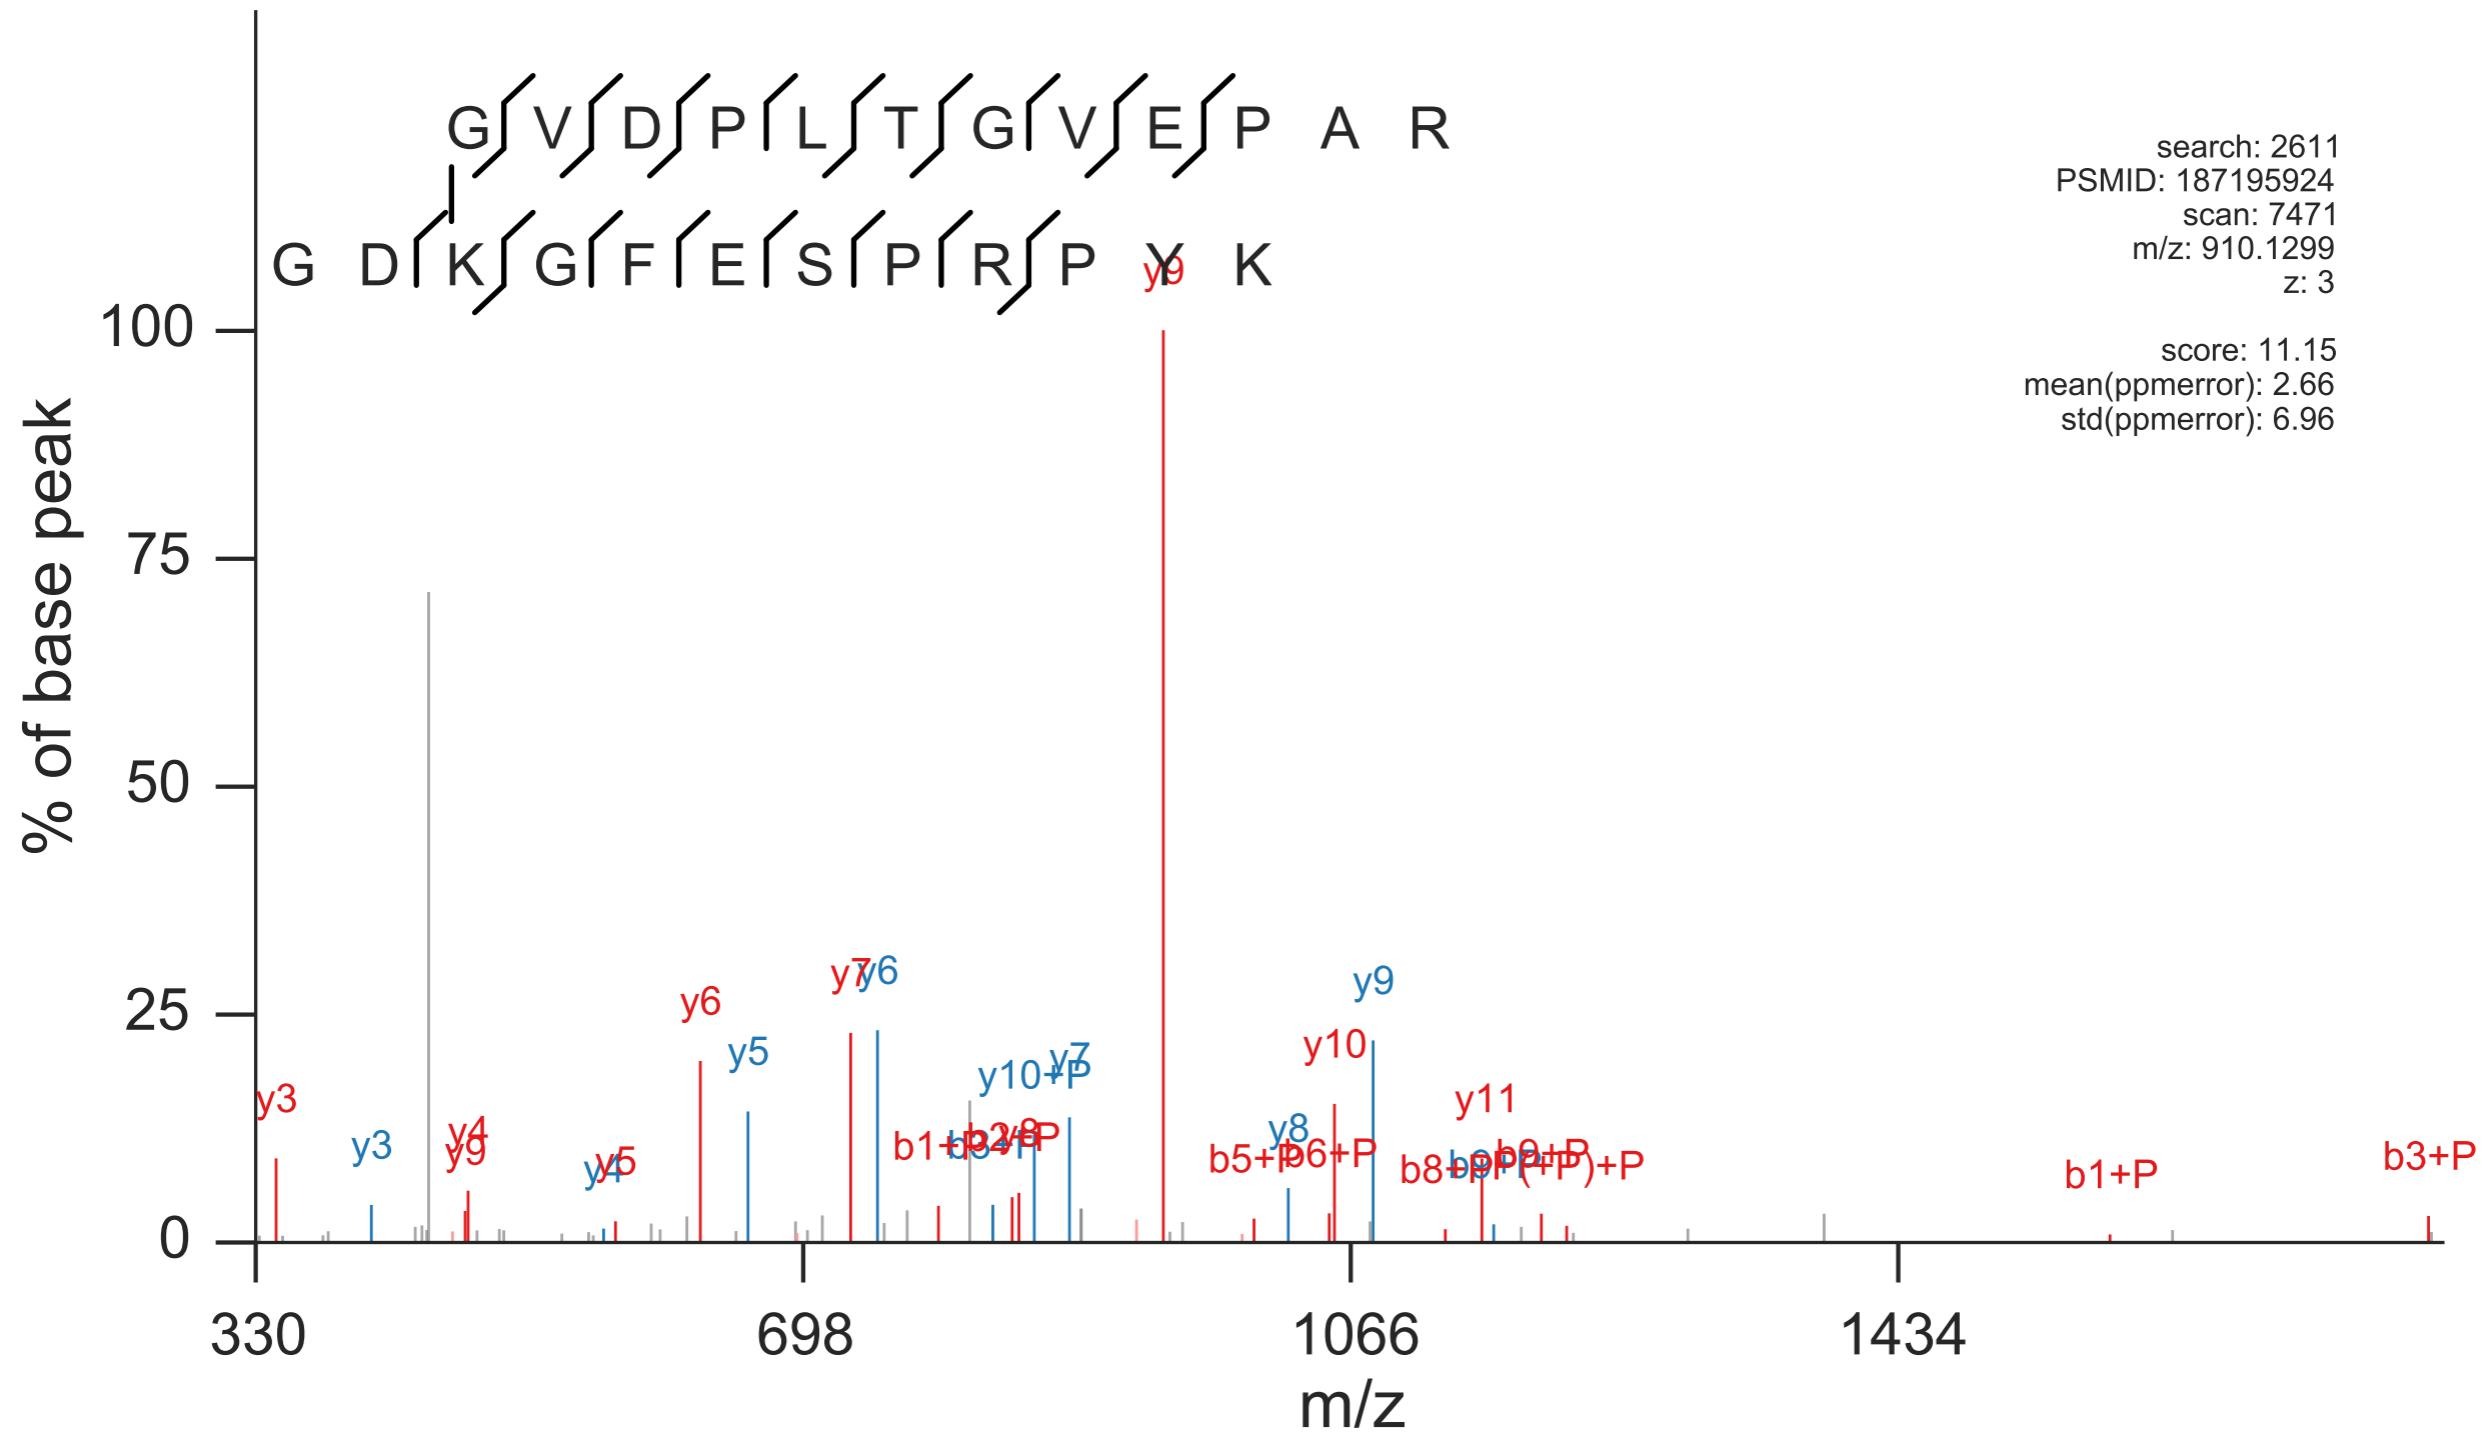

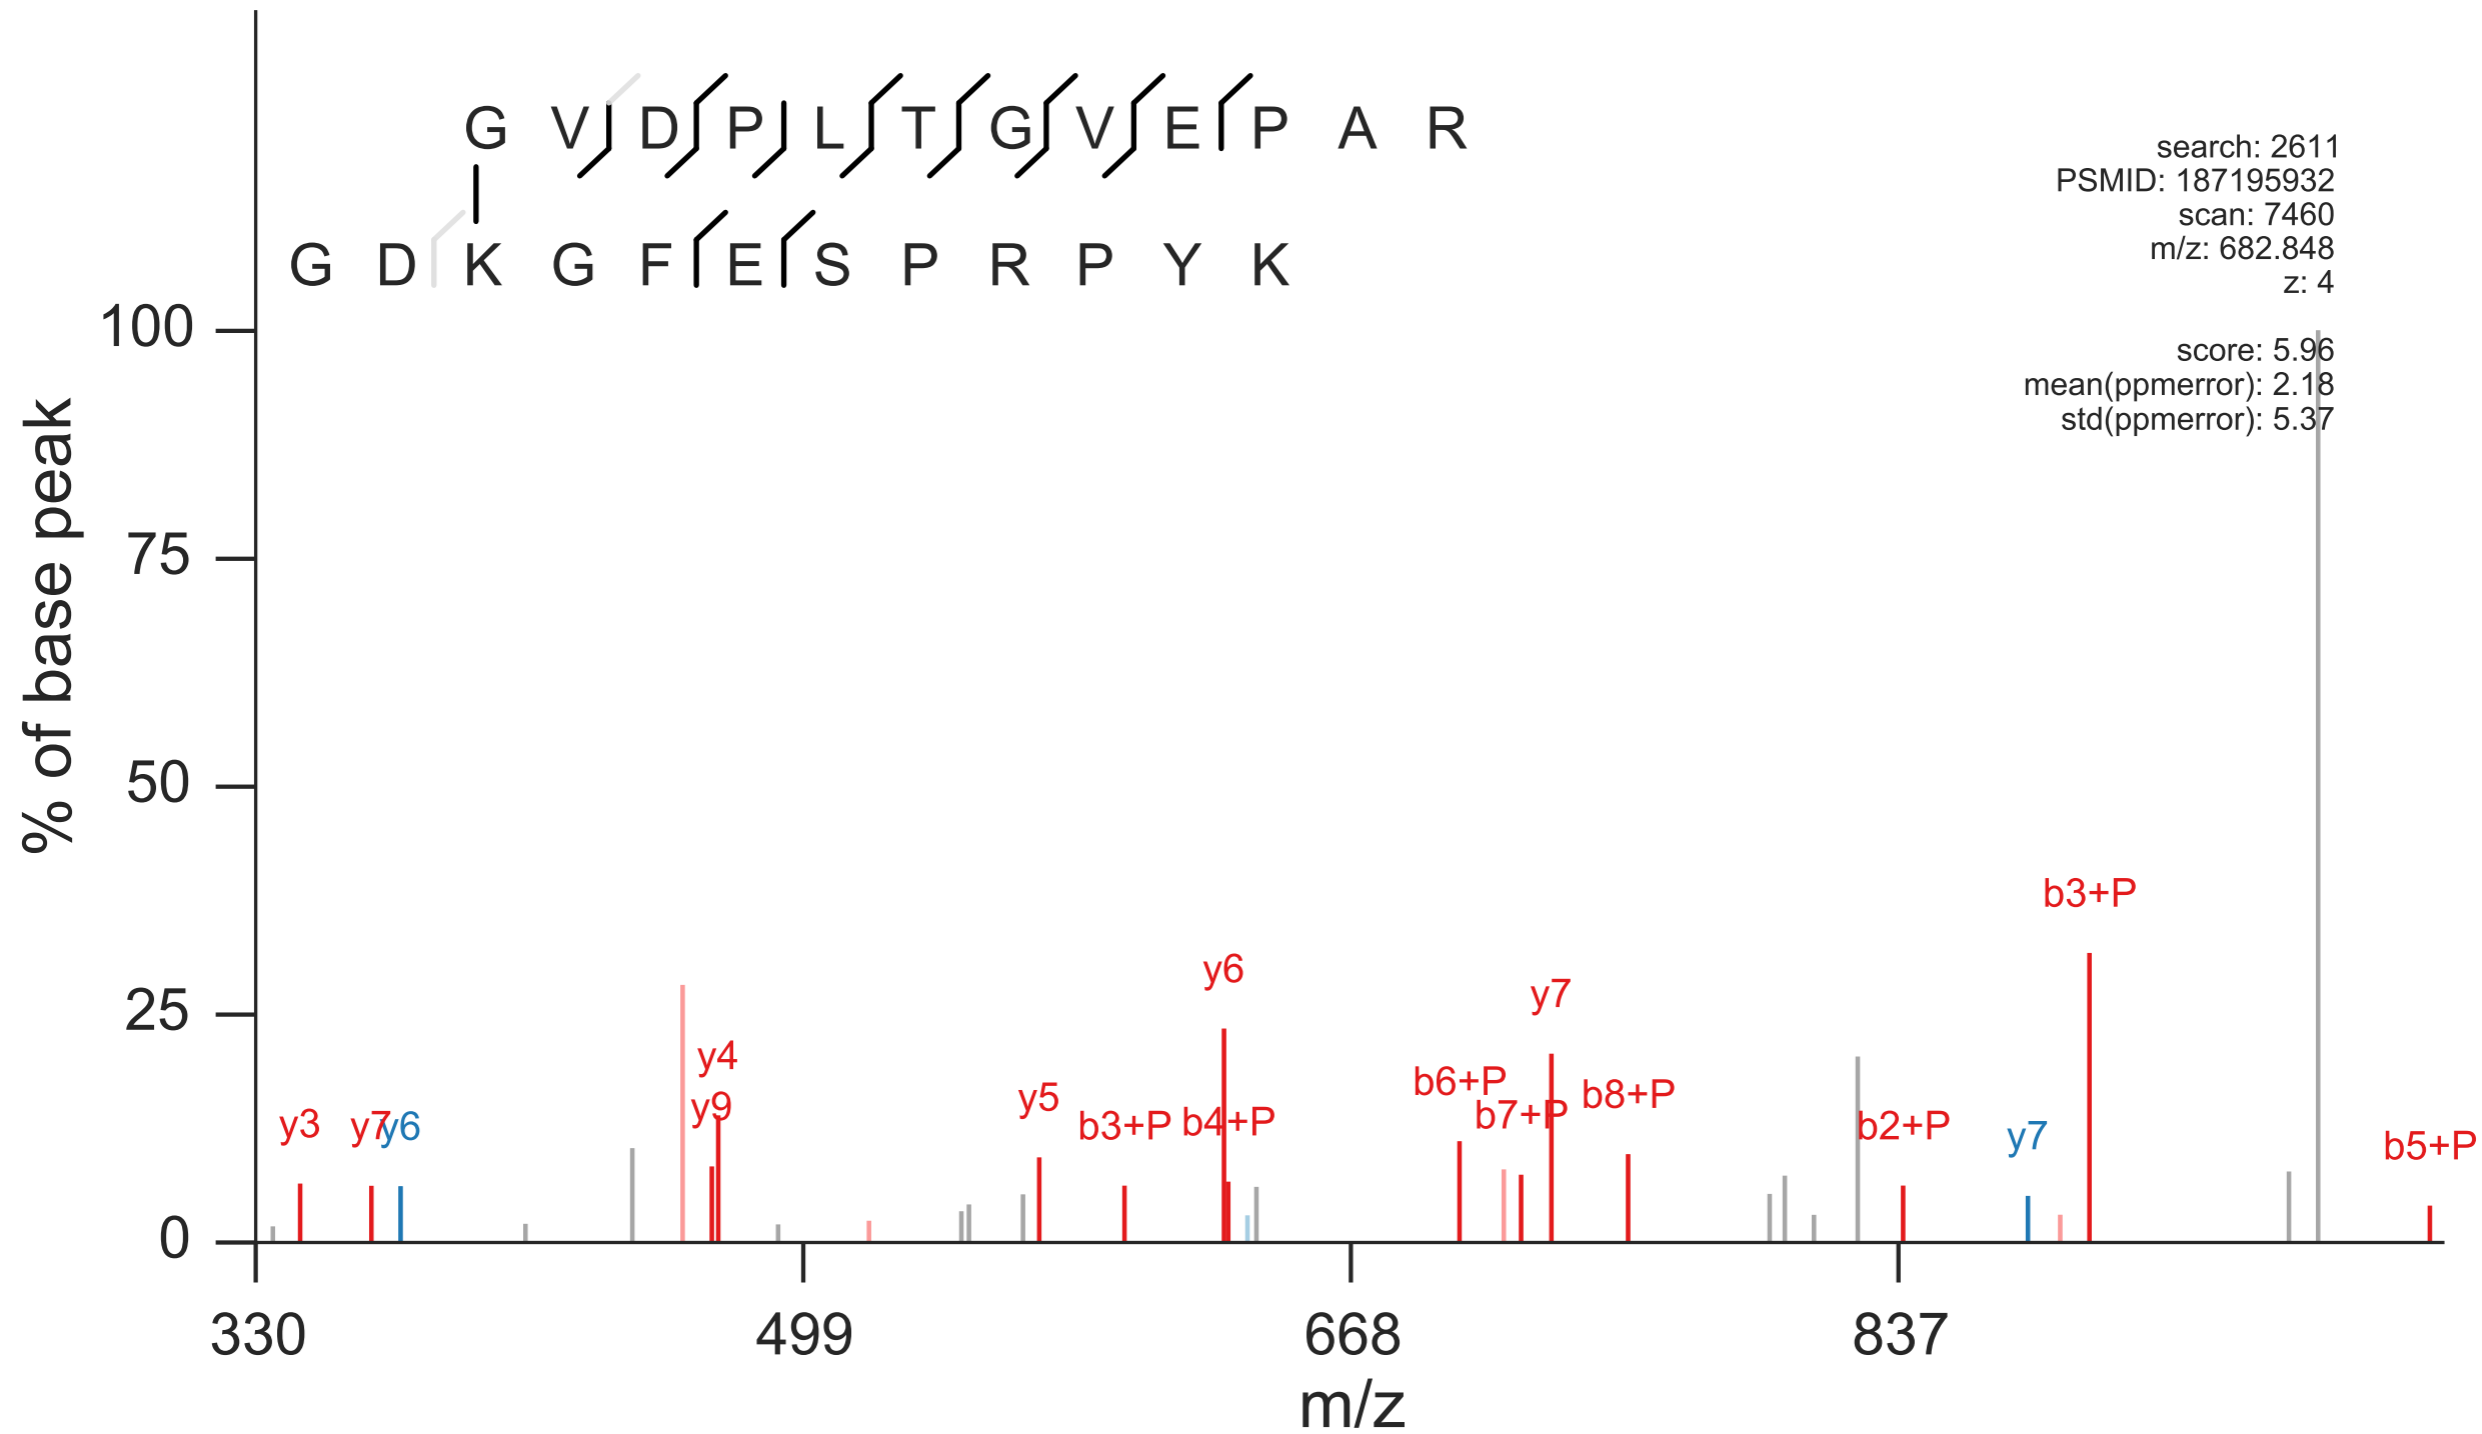

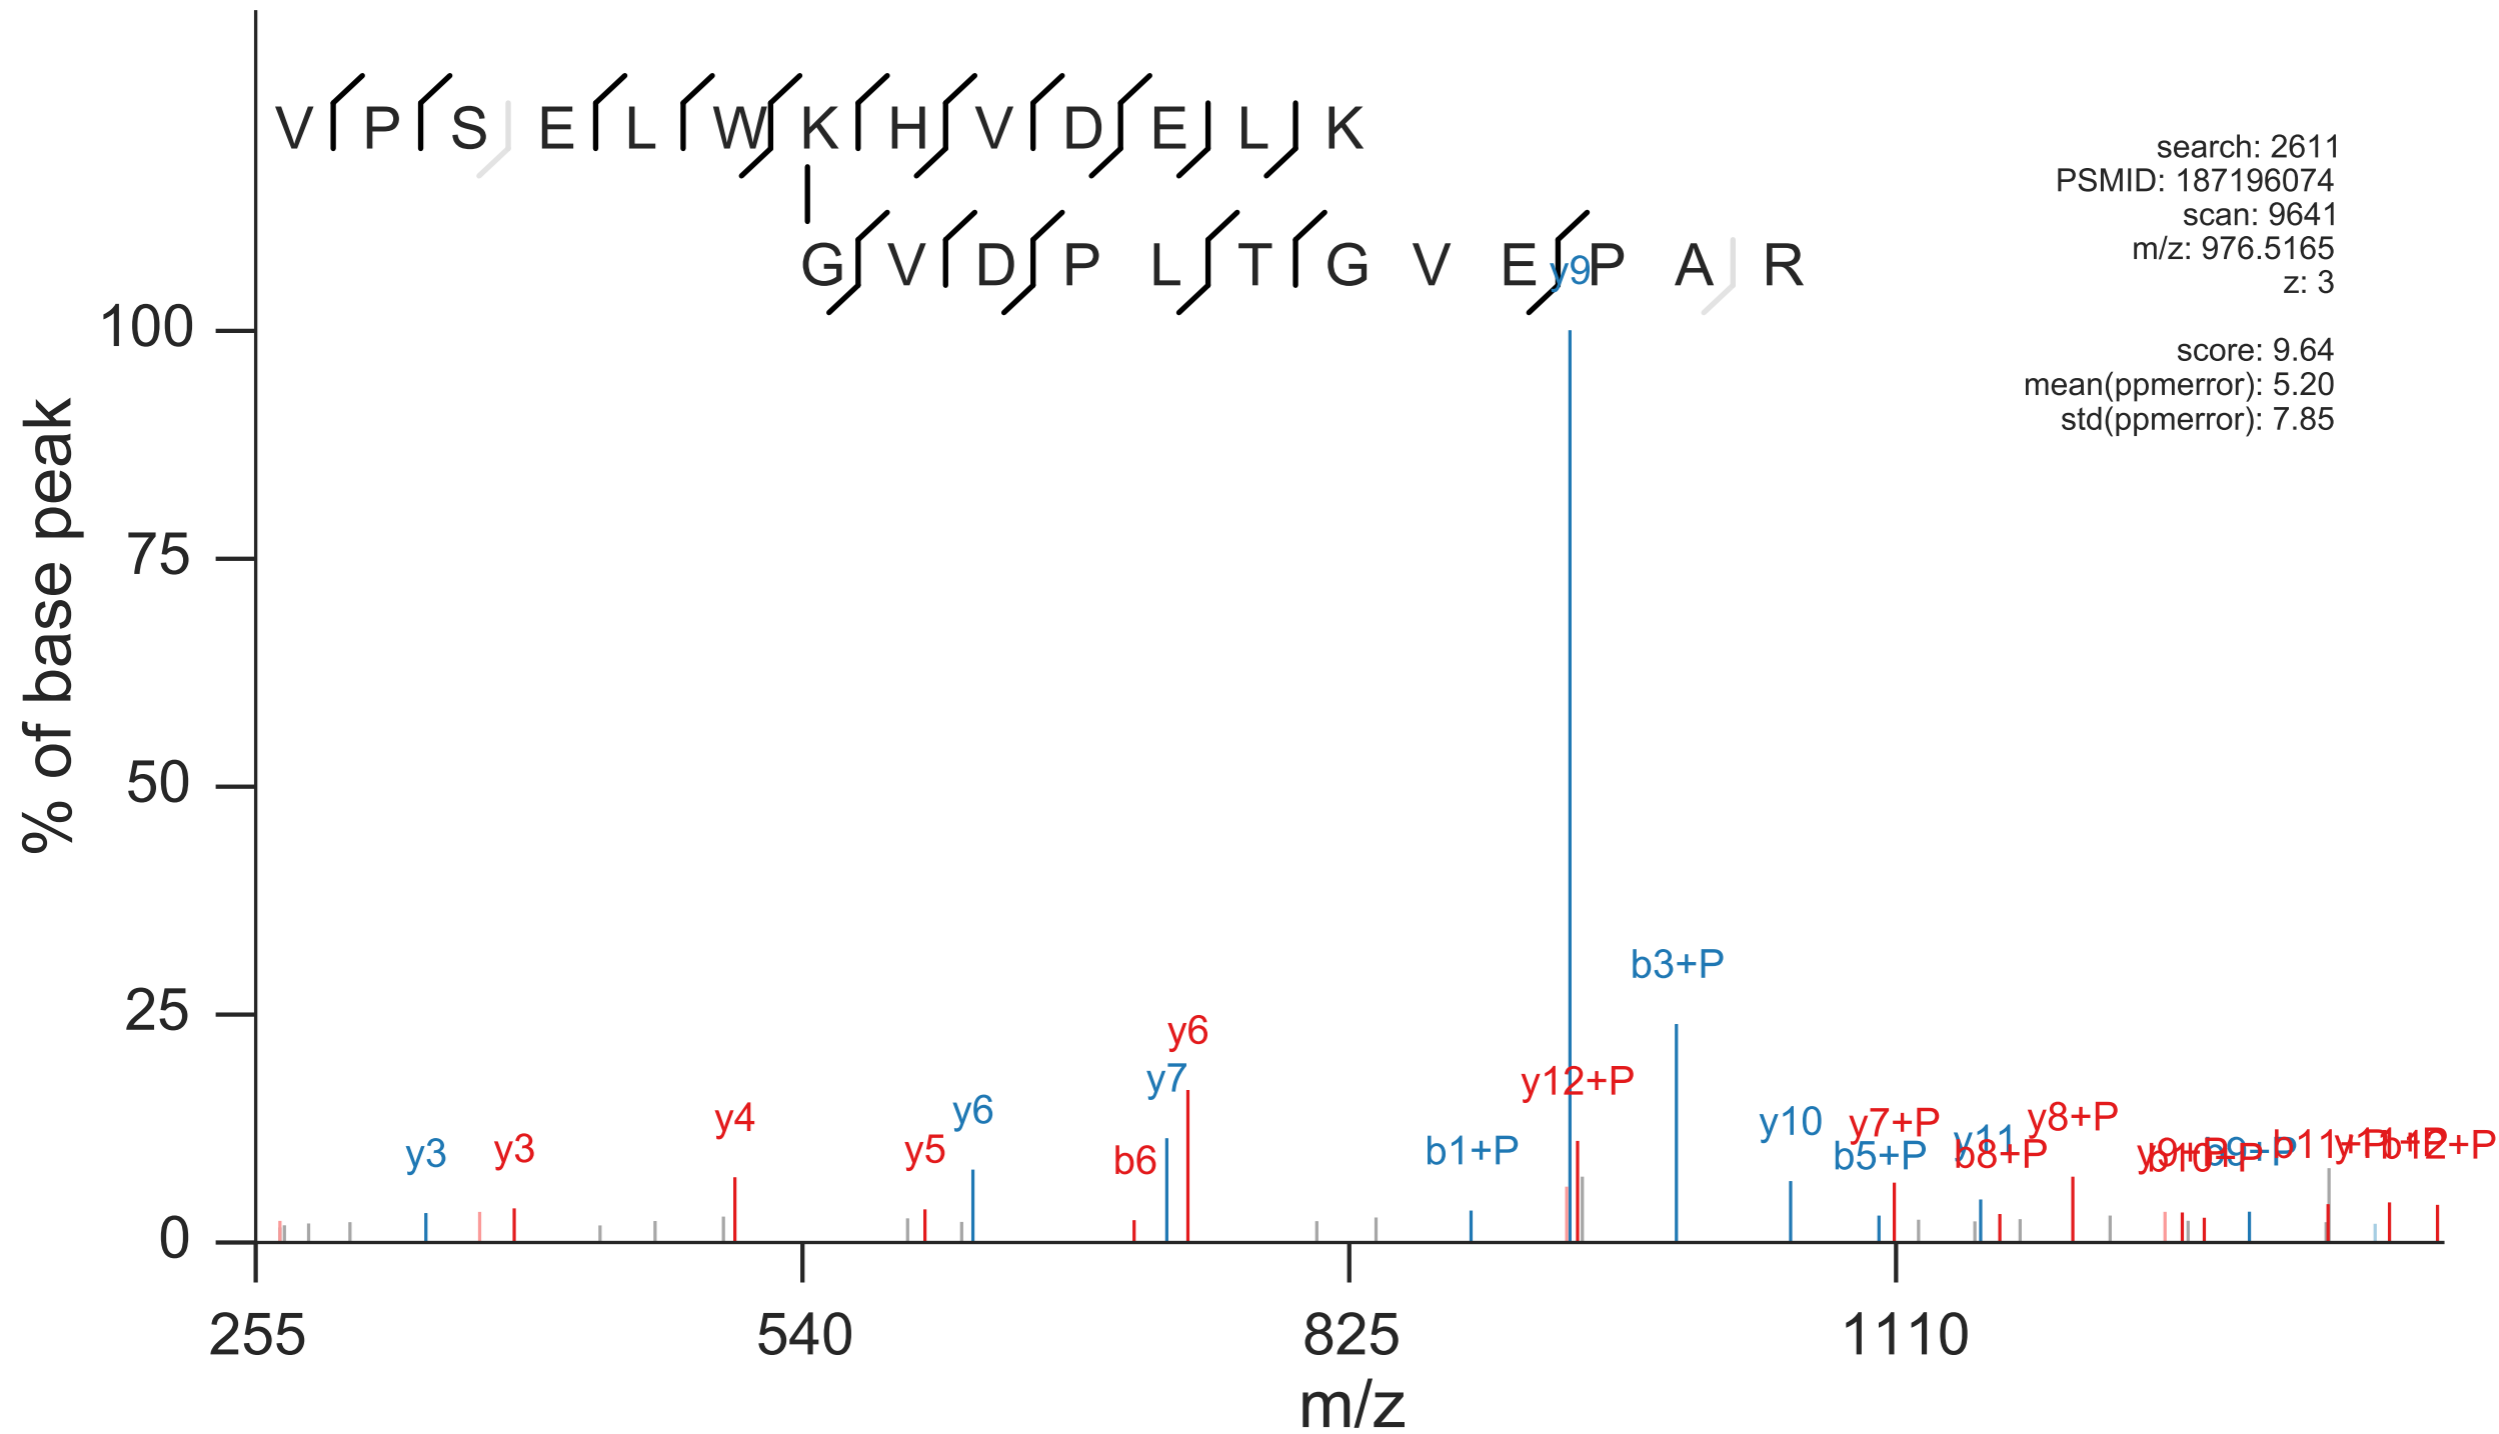



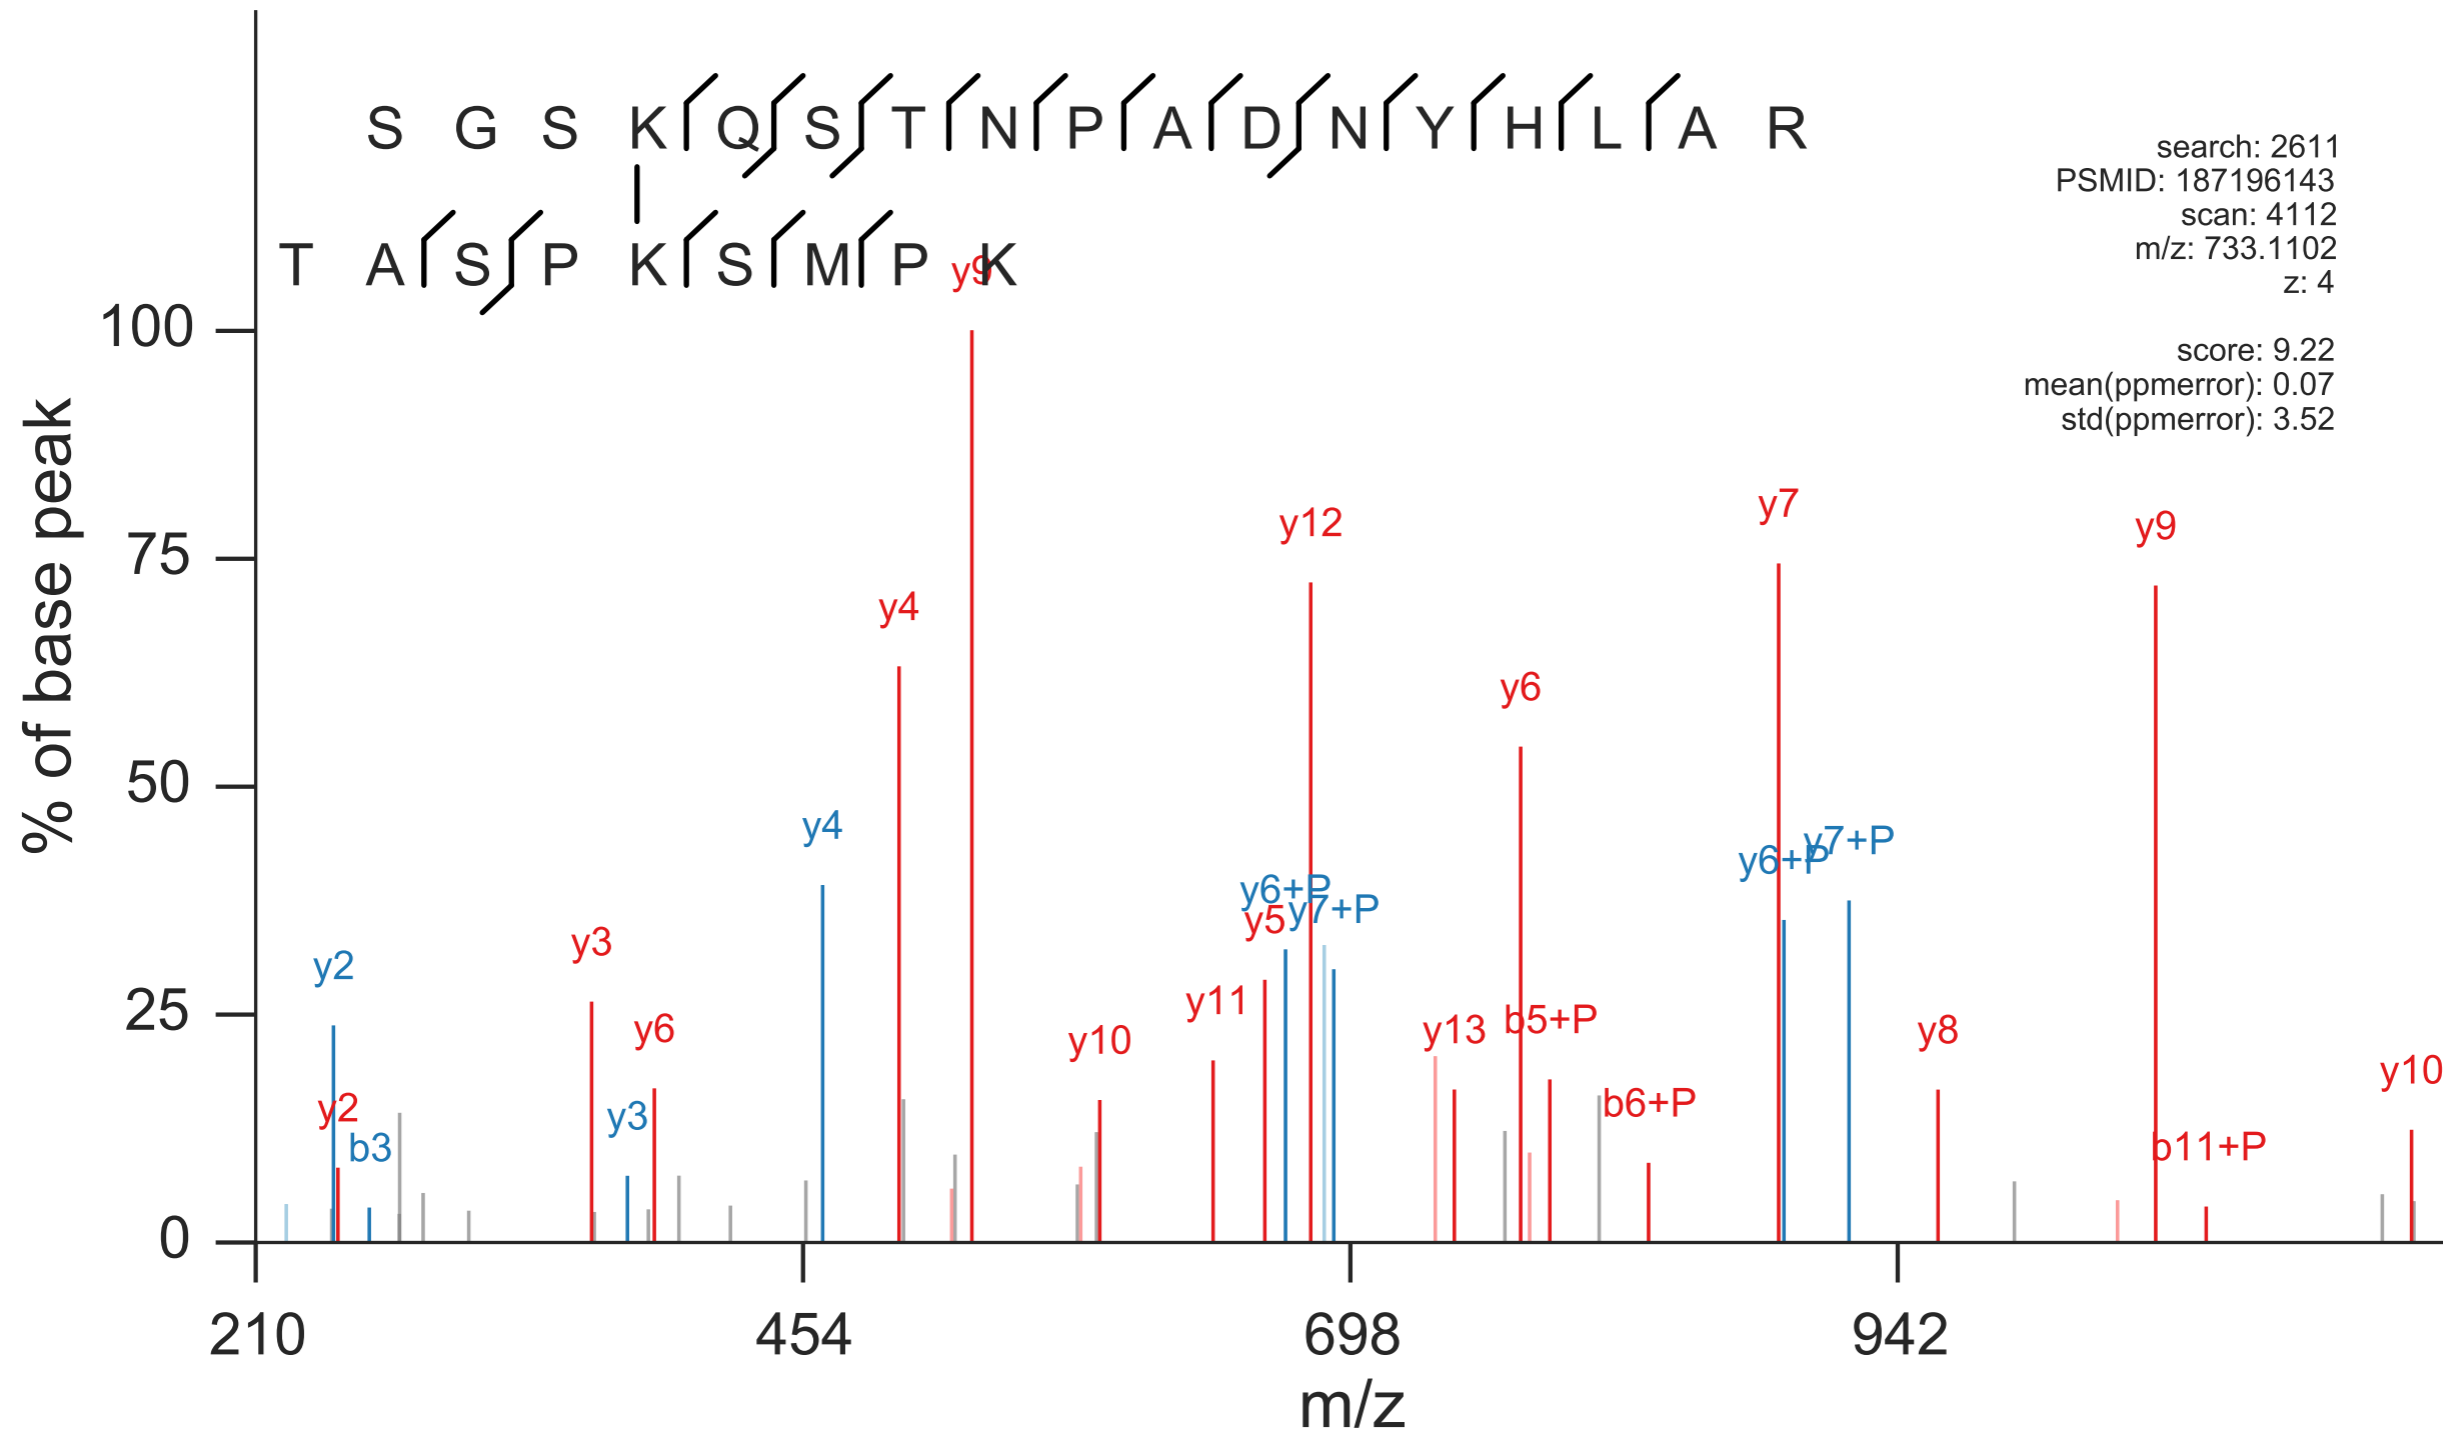

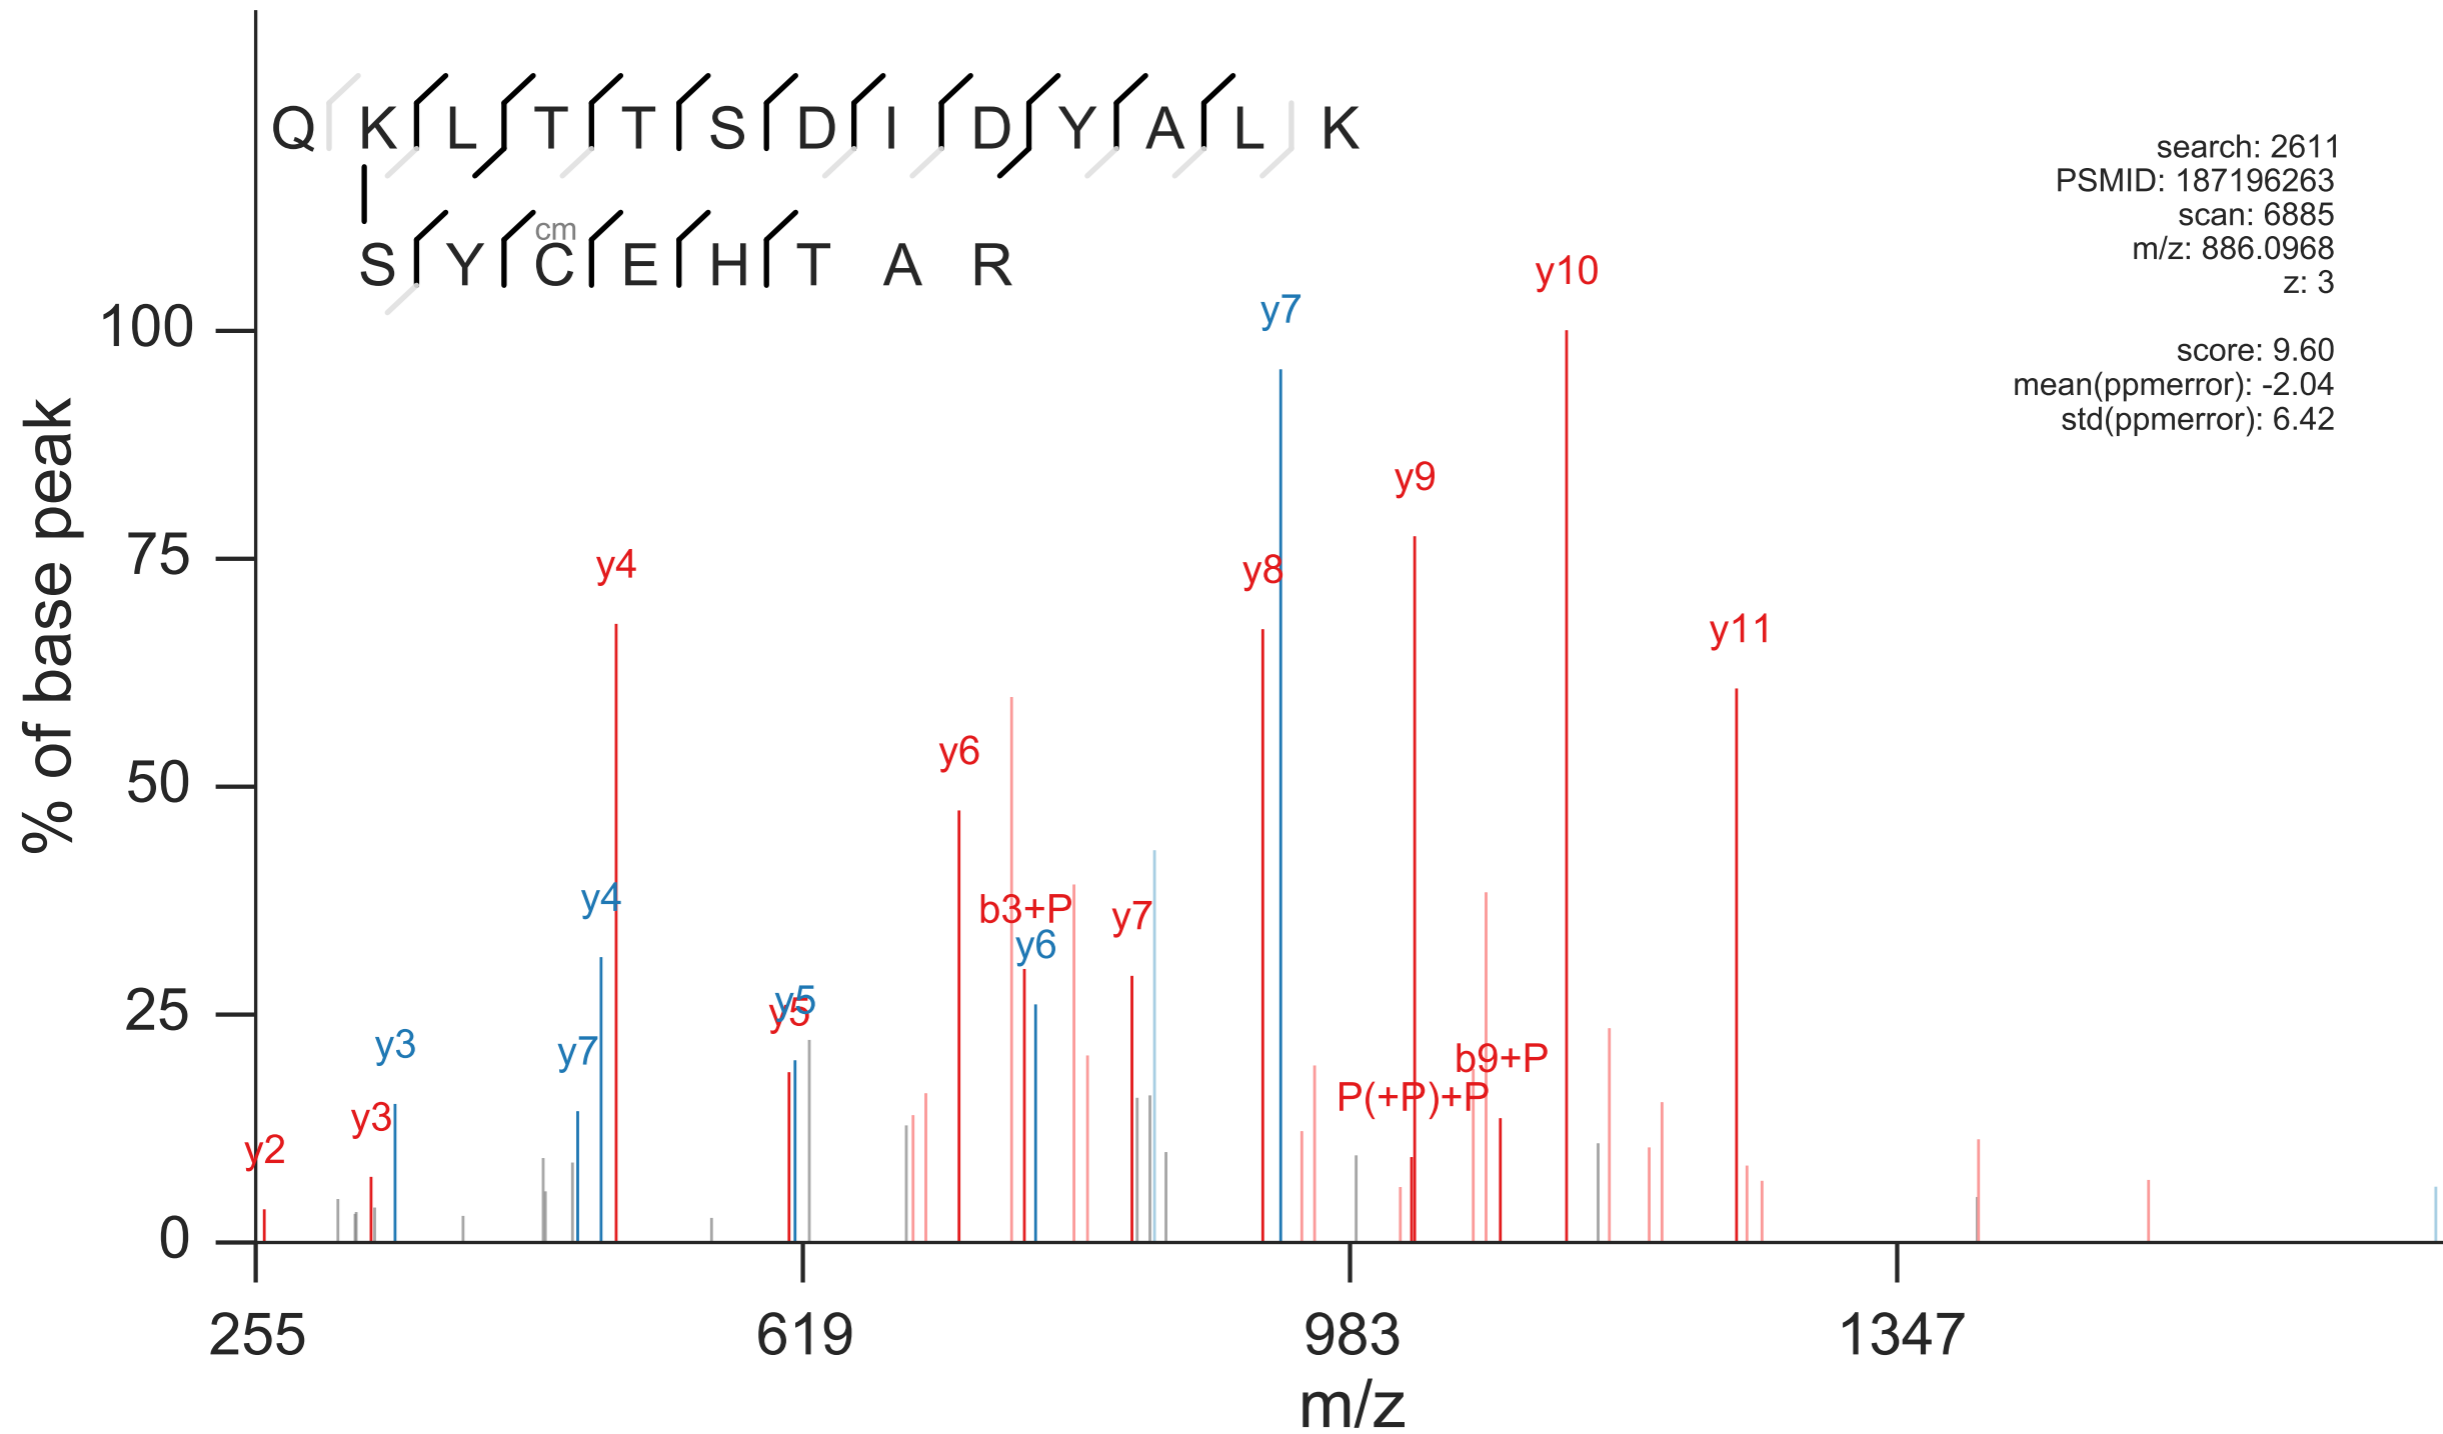

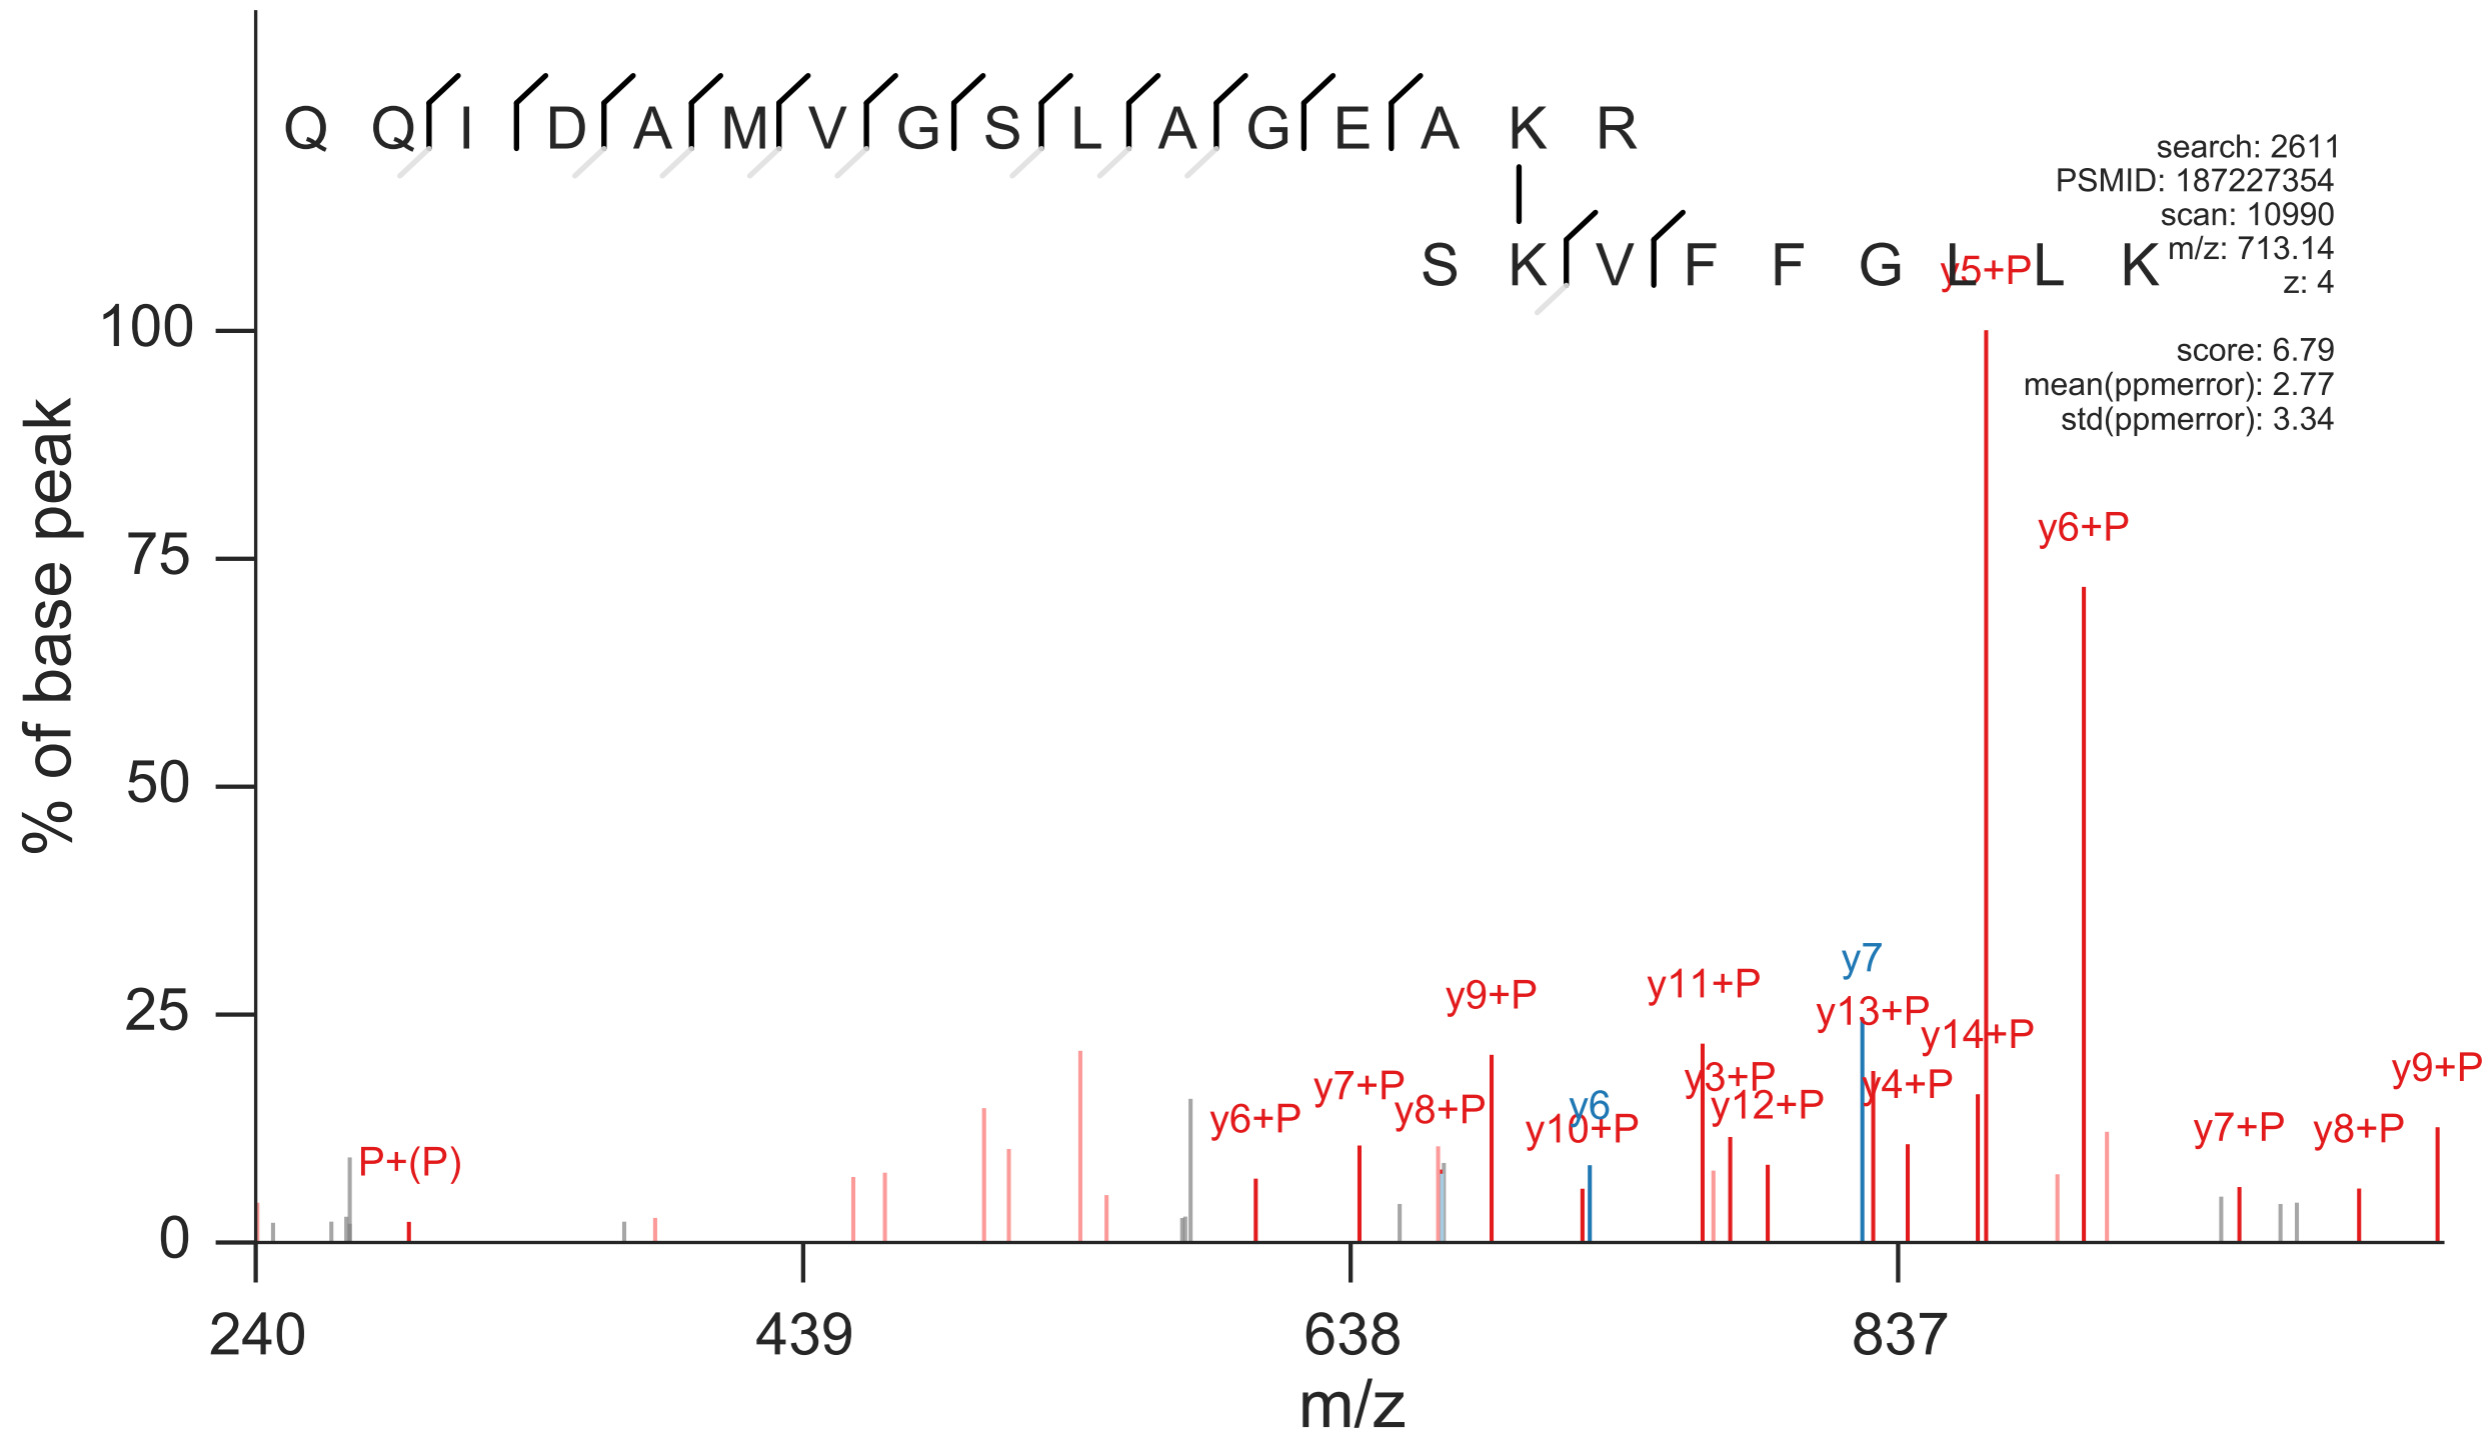

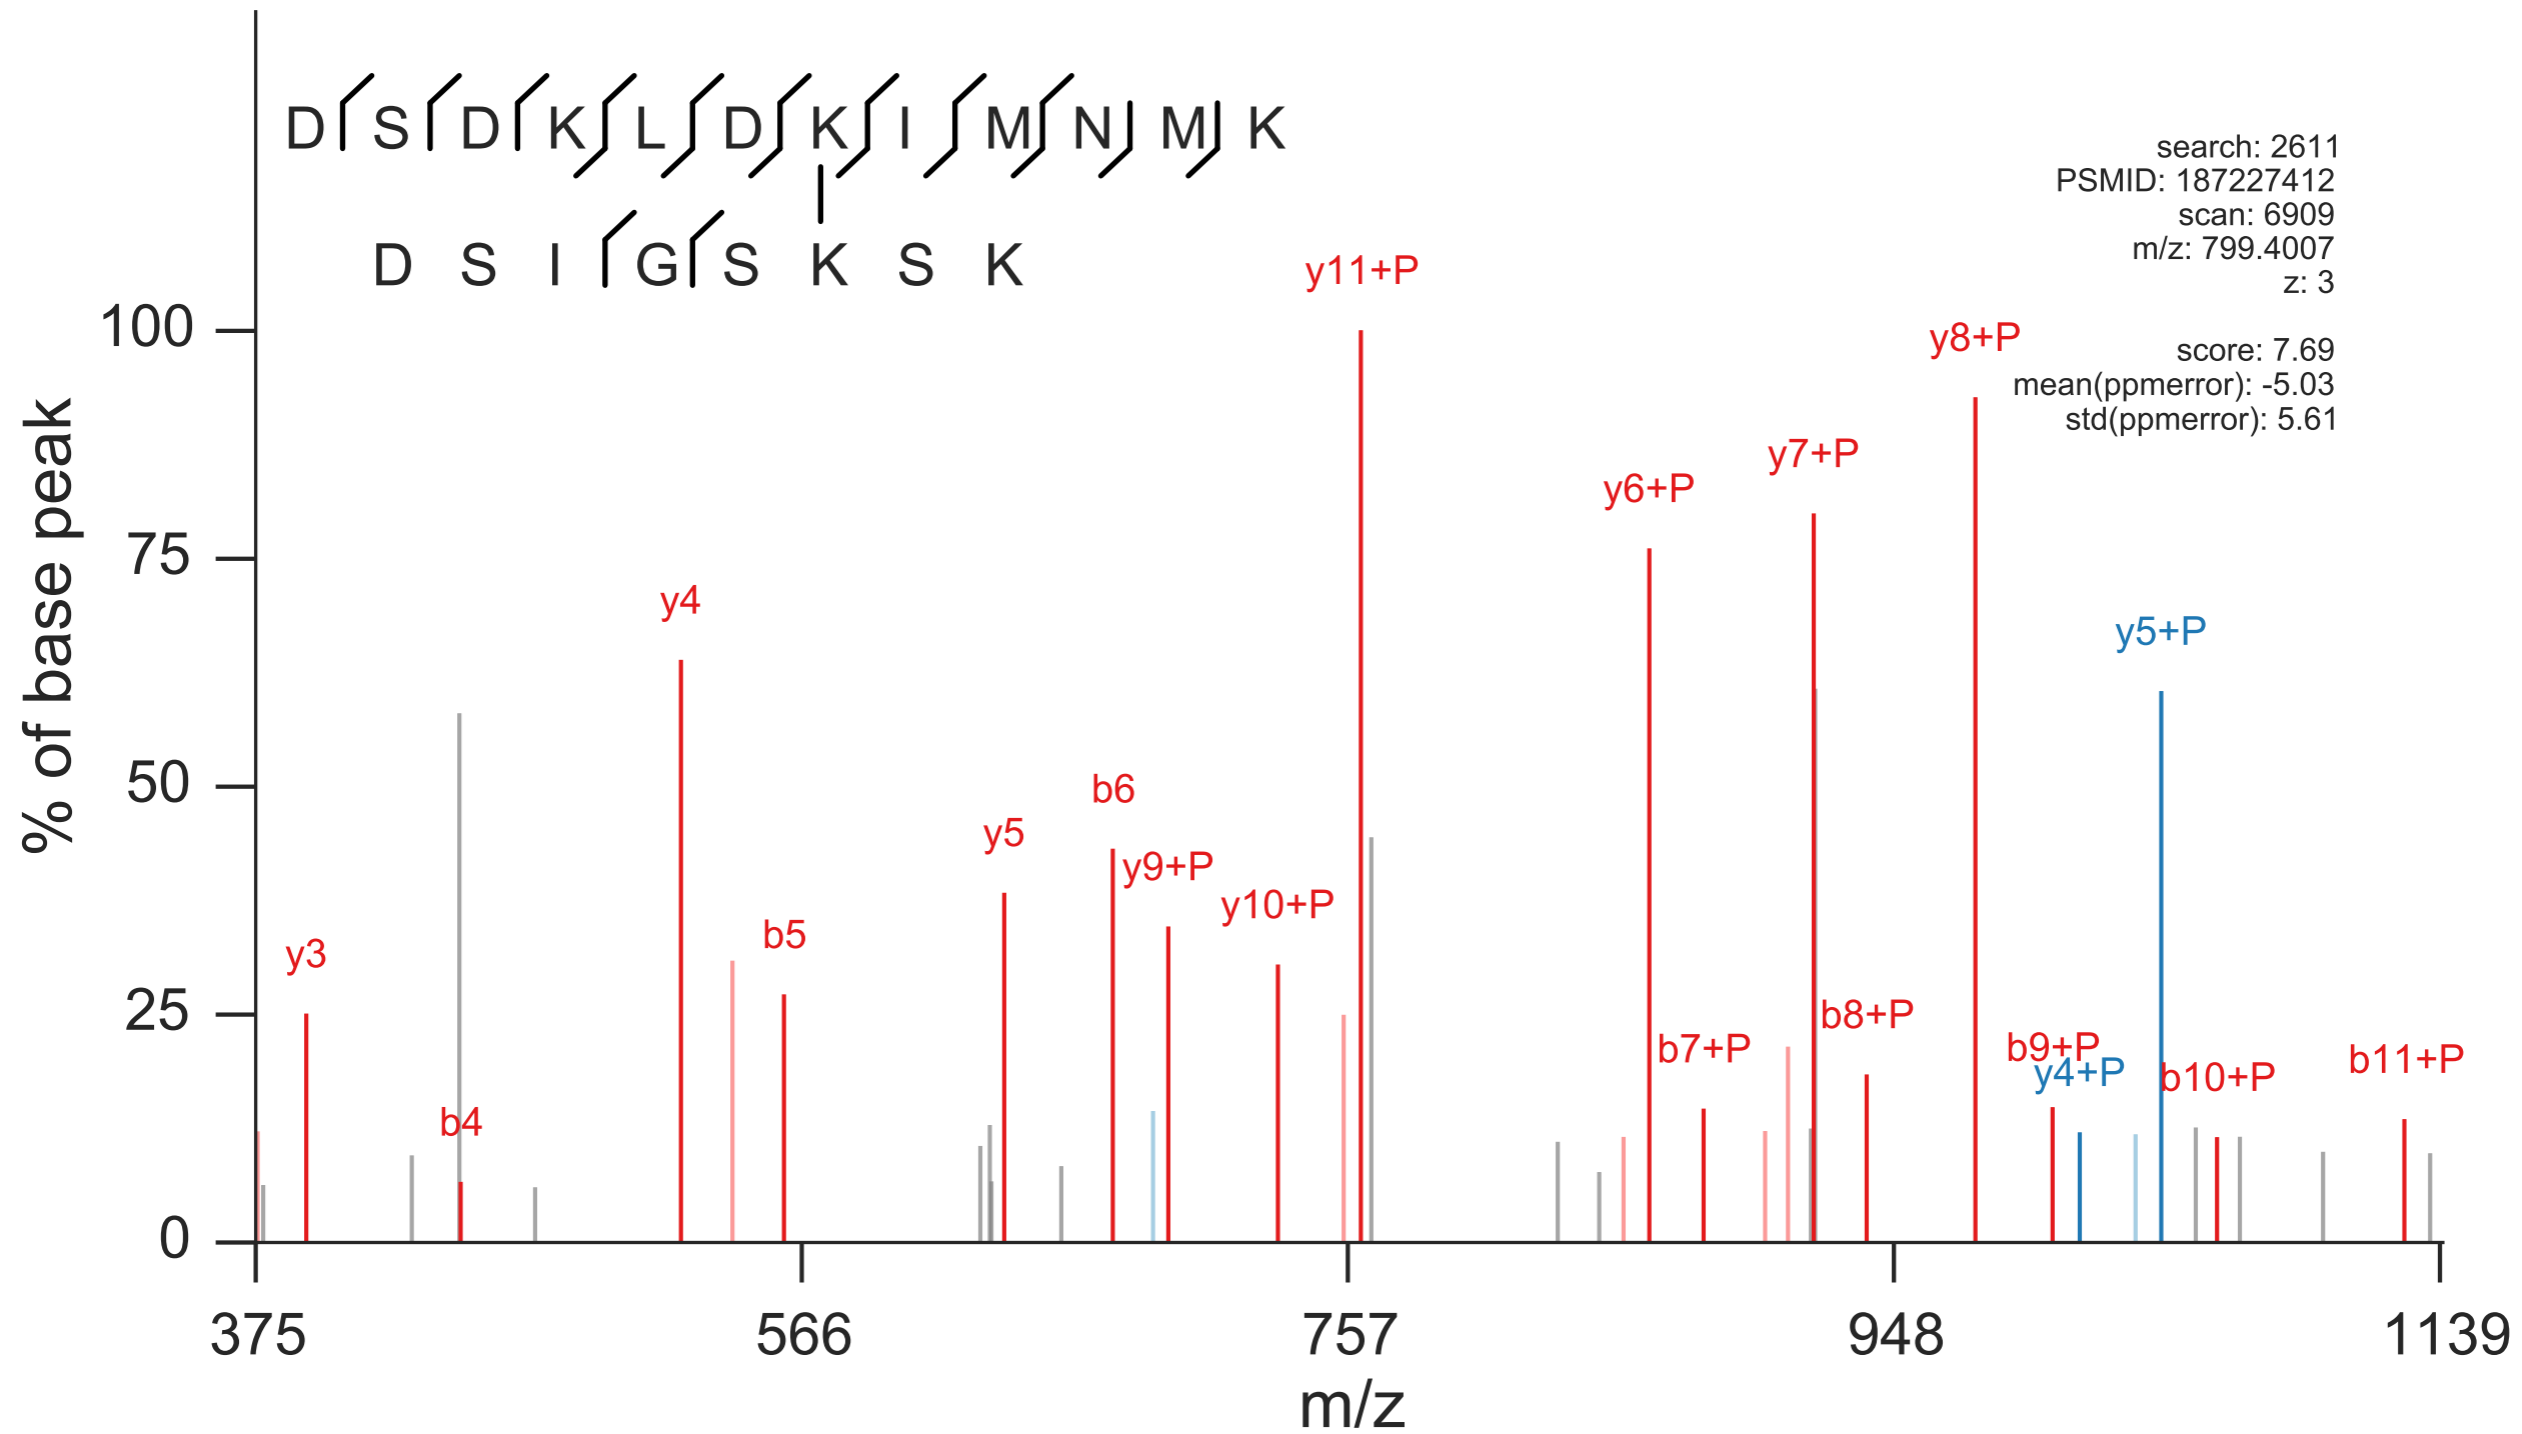

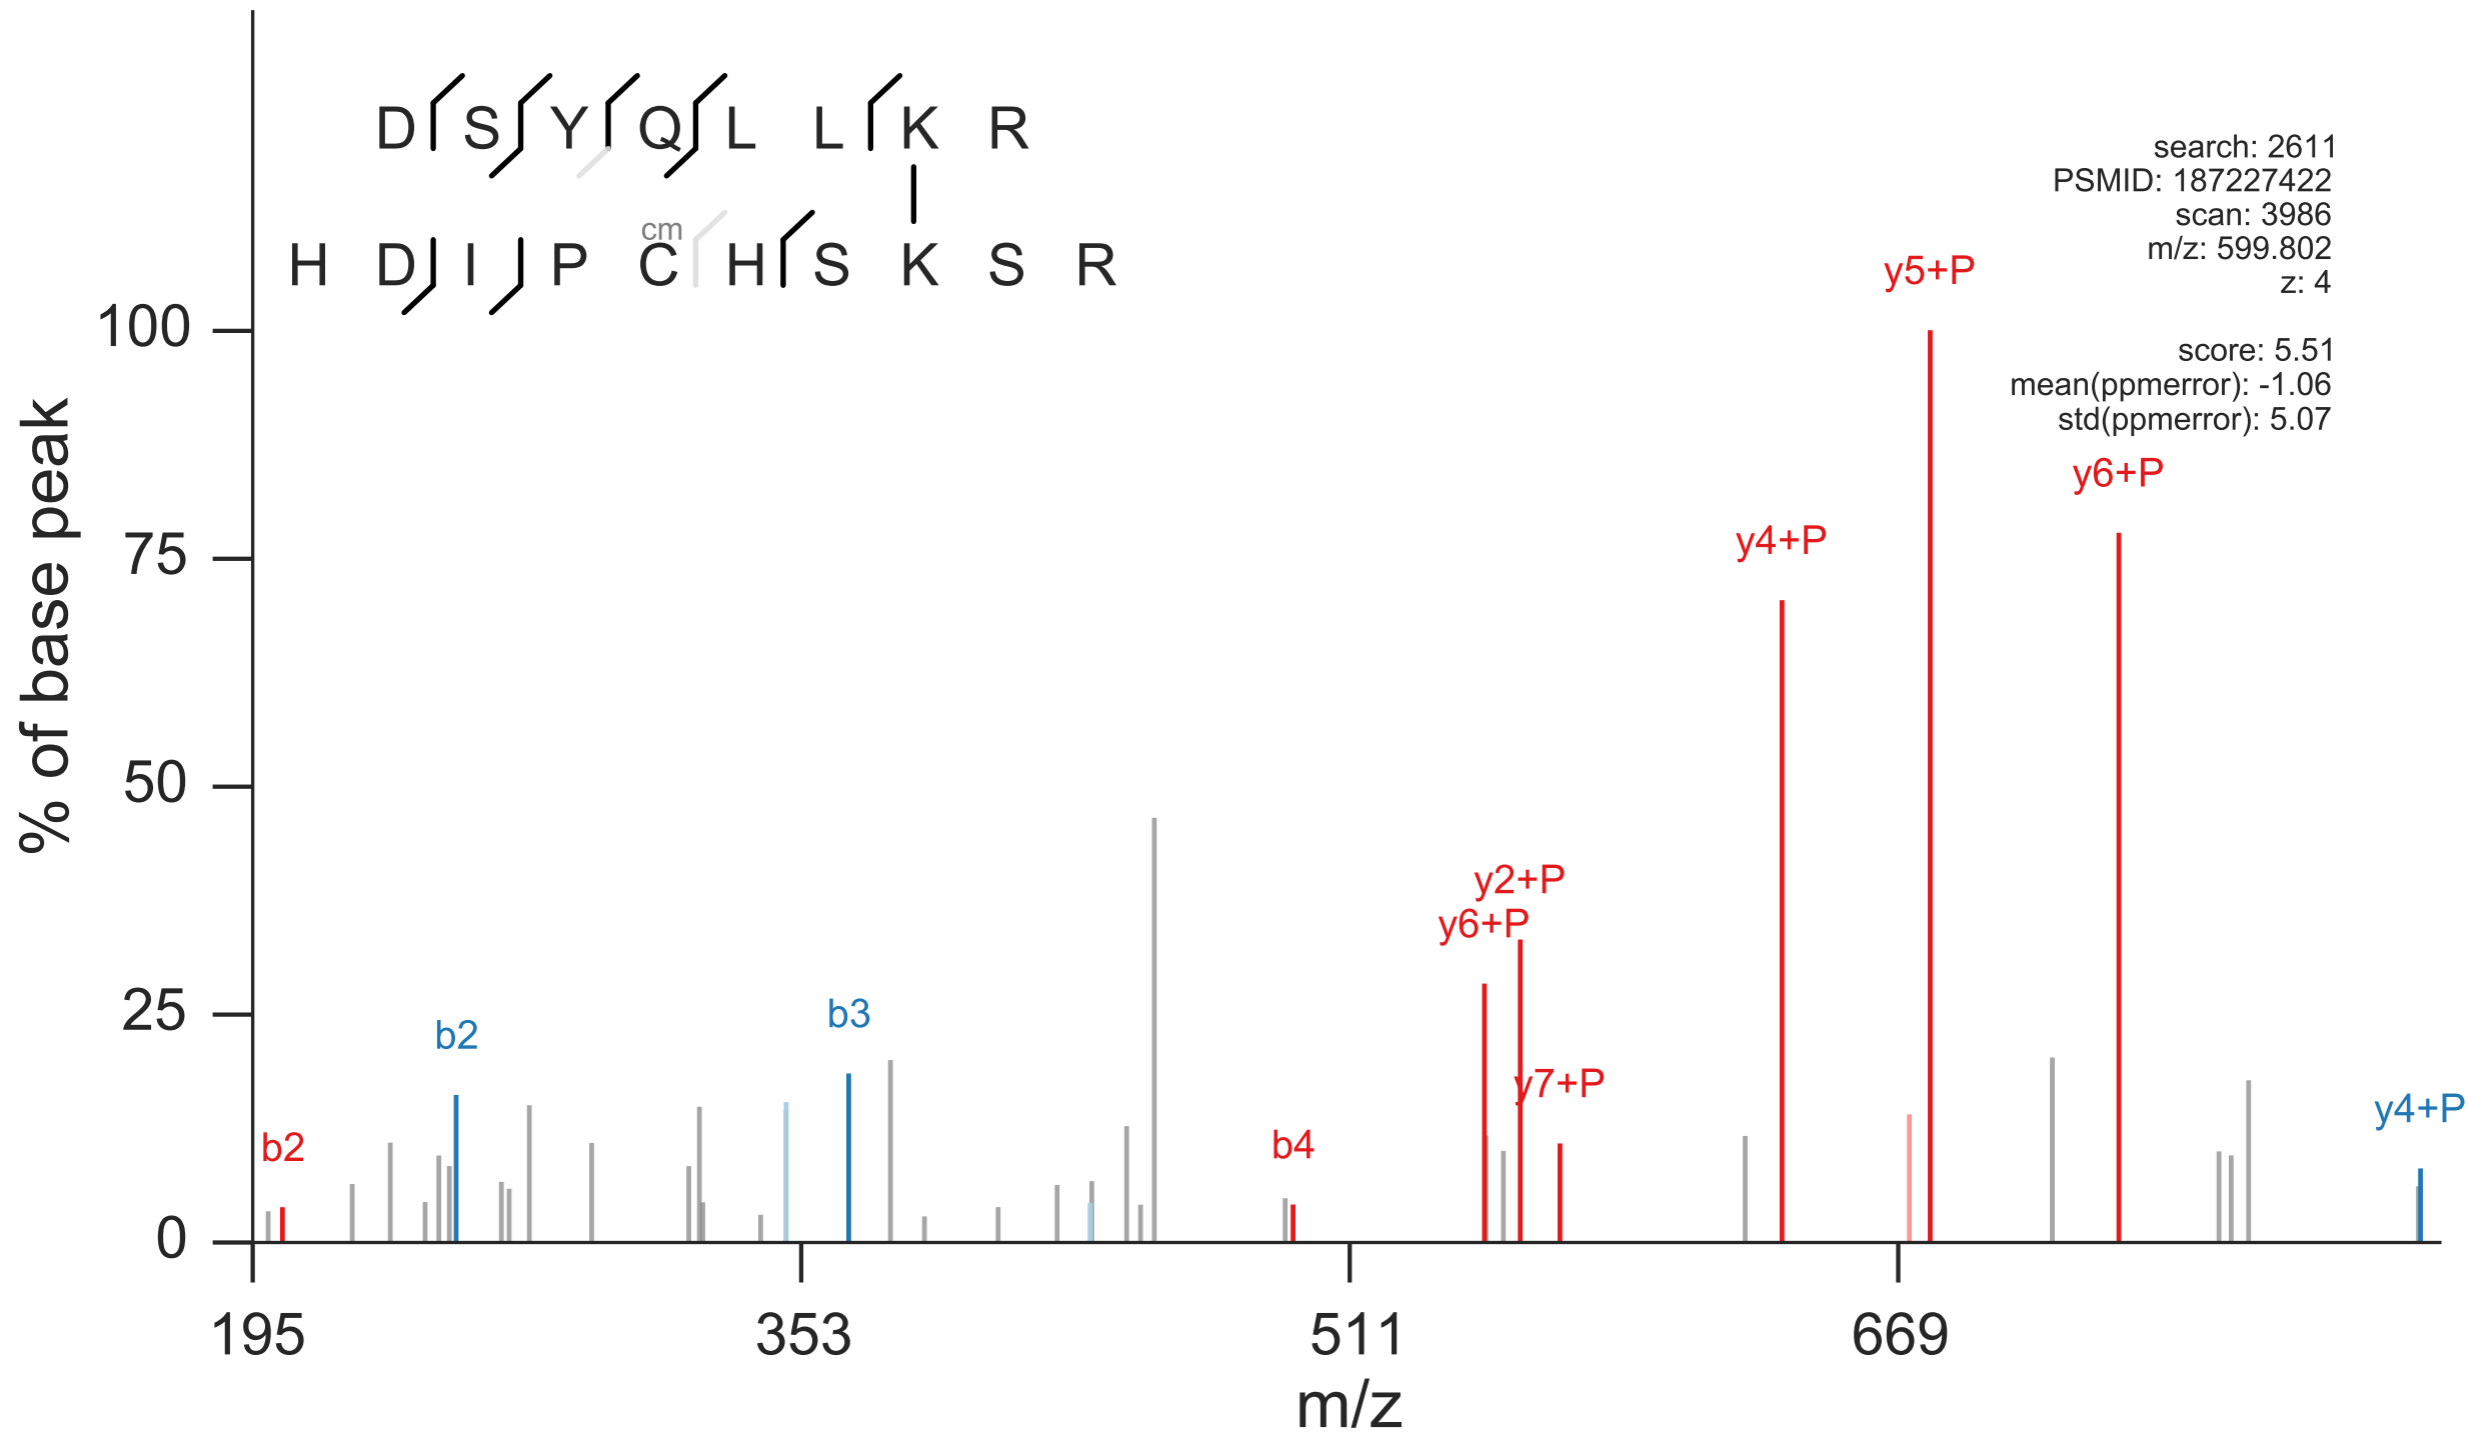

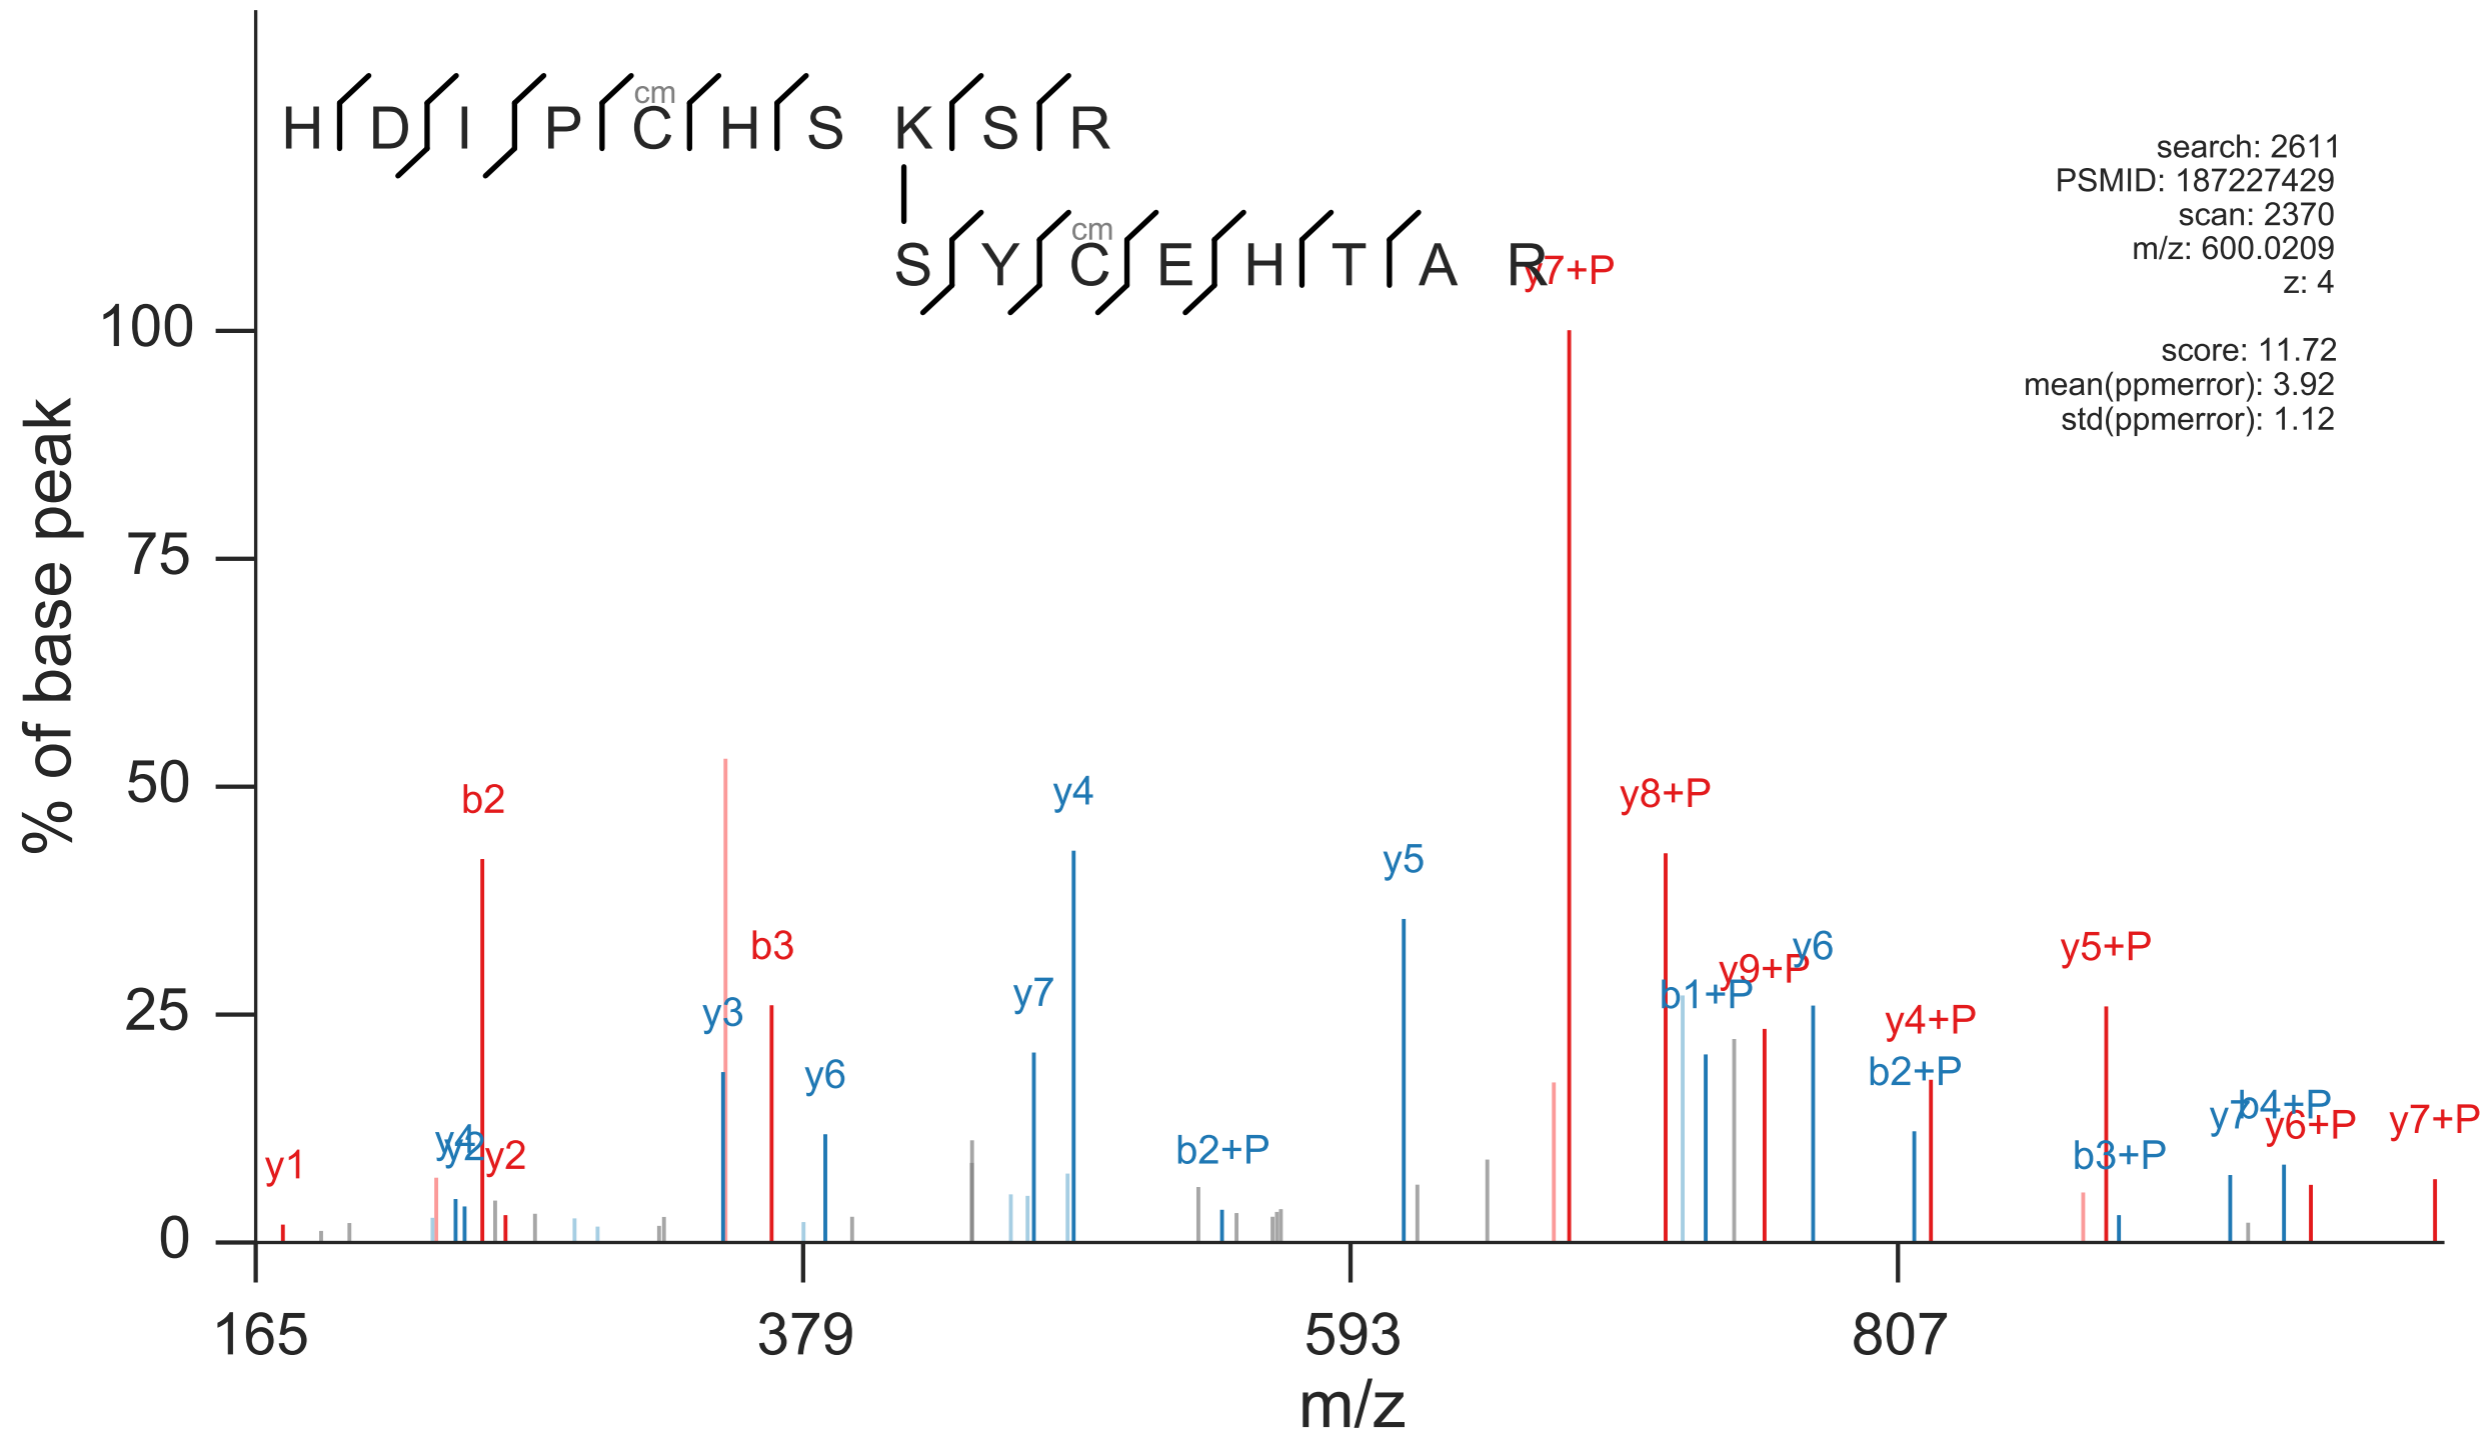

S G S K Q S T N P A D N Y H L A R  
 T A S P K S M P K

search: 2611  
 PSMID: 187227526  
 scan: 3932  
 m/z: 737.1095  
 z: 4

score: 6.77  
 mean(ppmerror): 4.79  
 std(ppmerror): 5.39

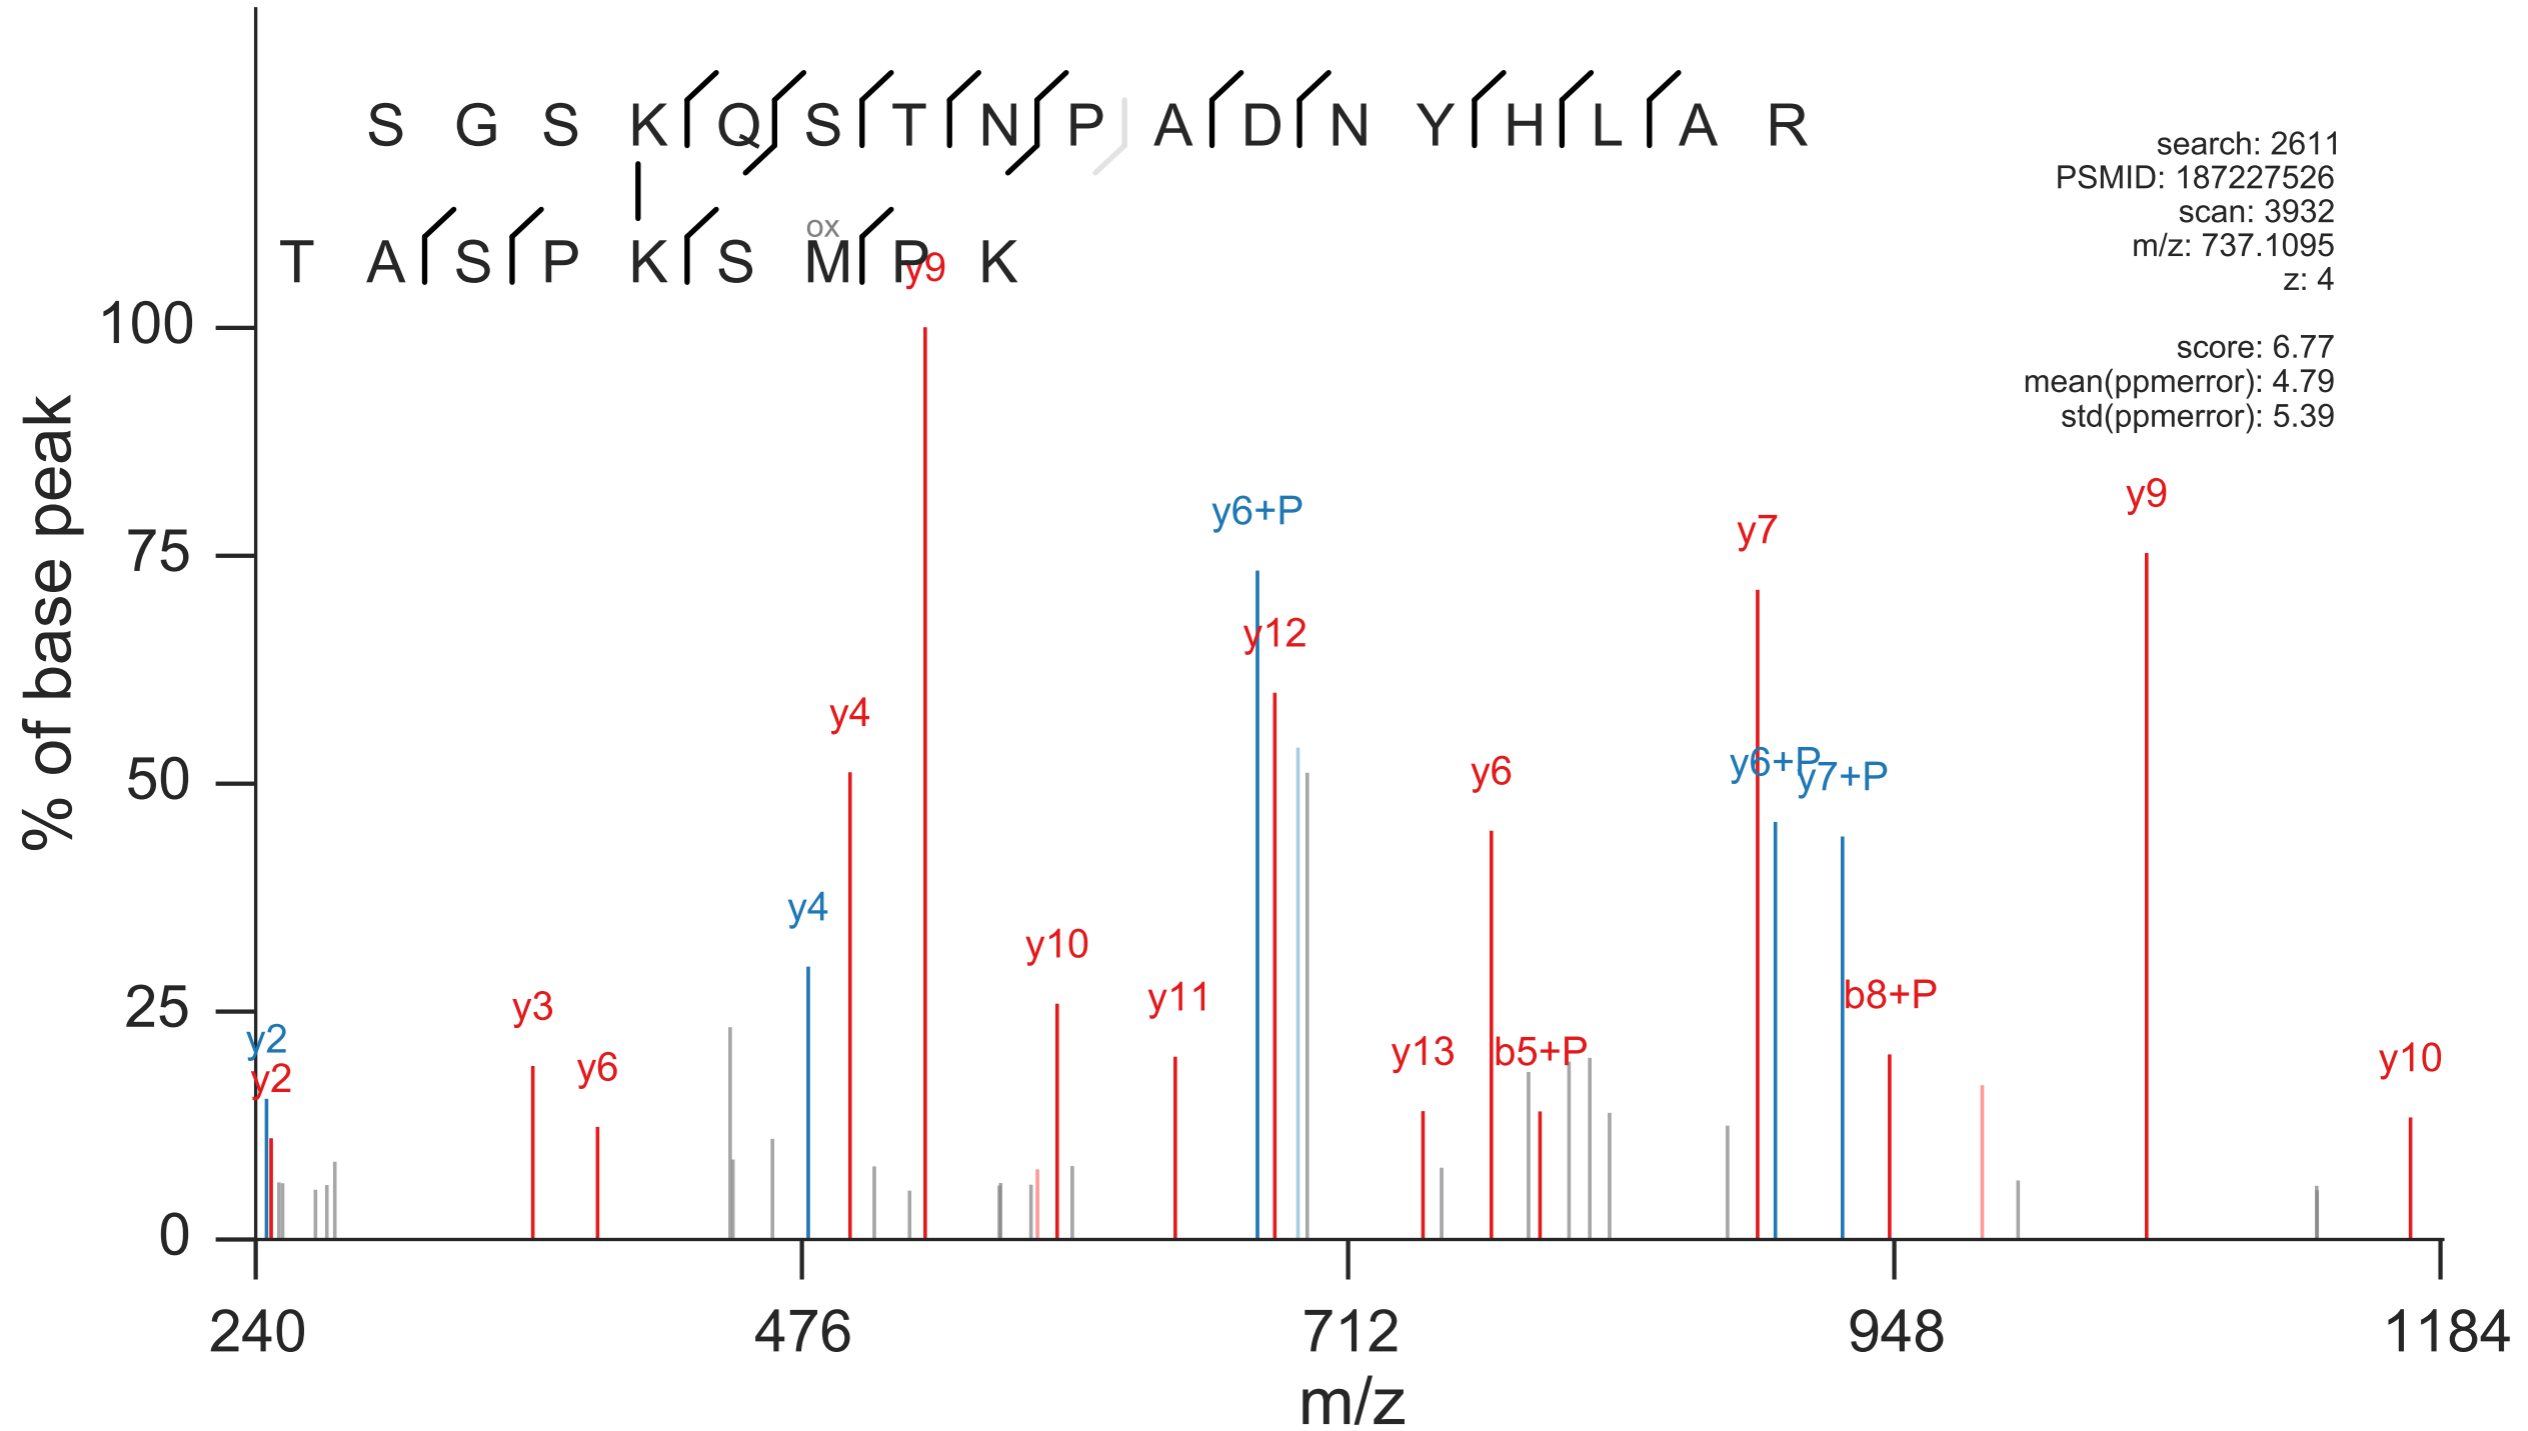

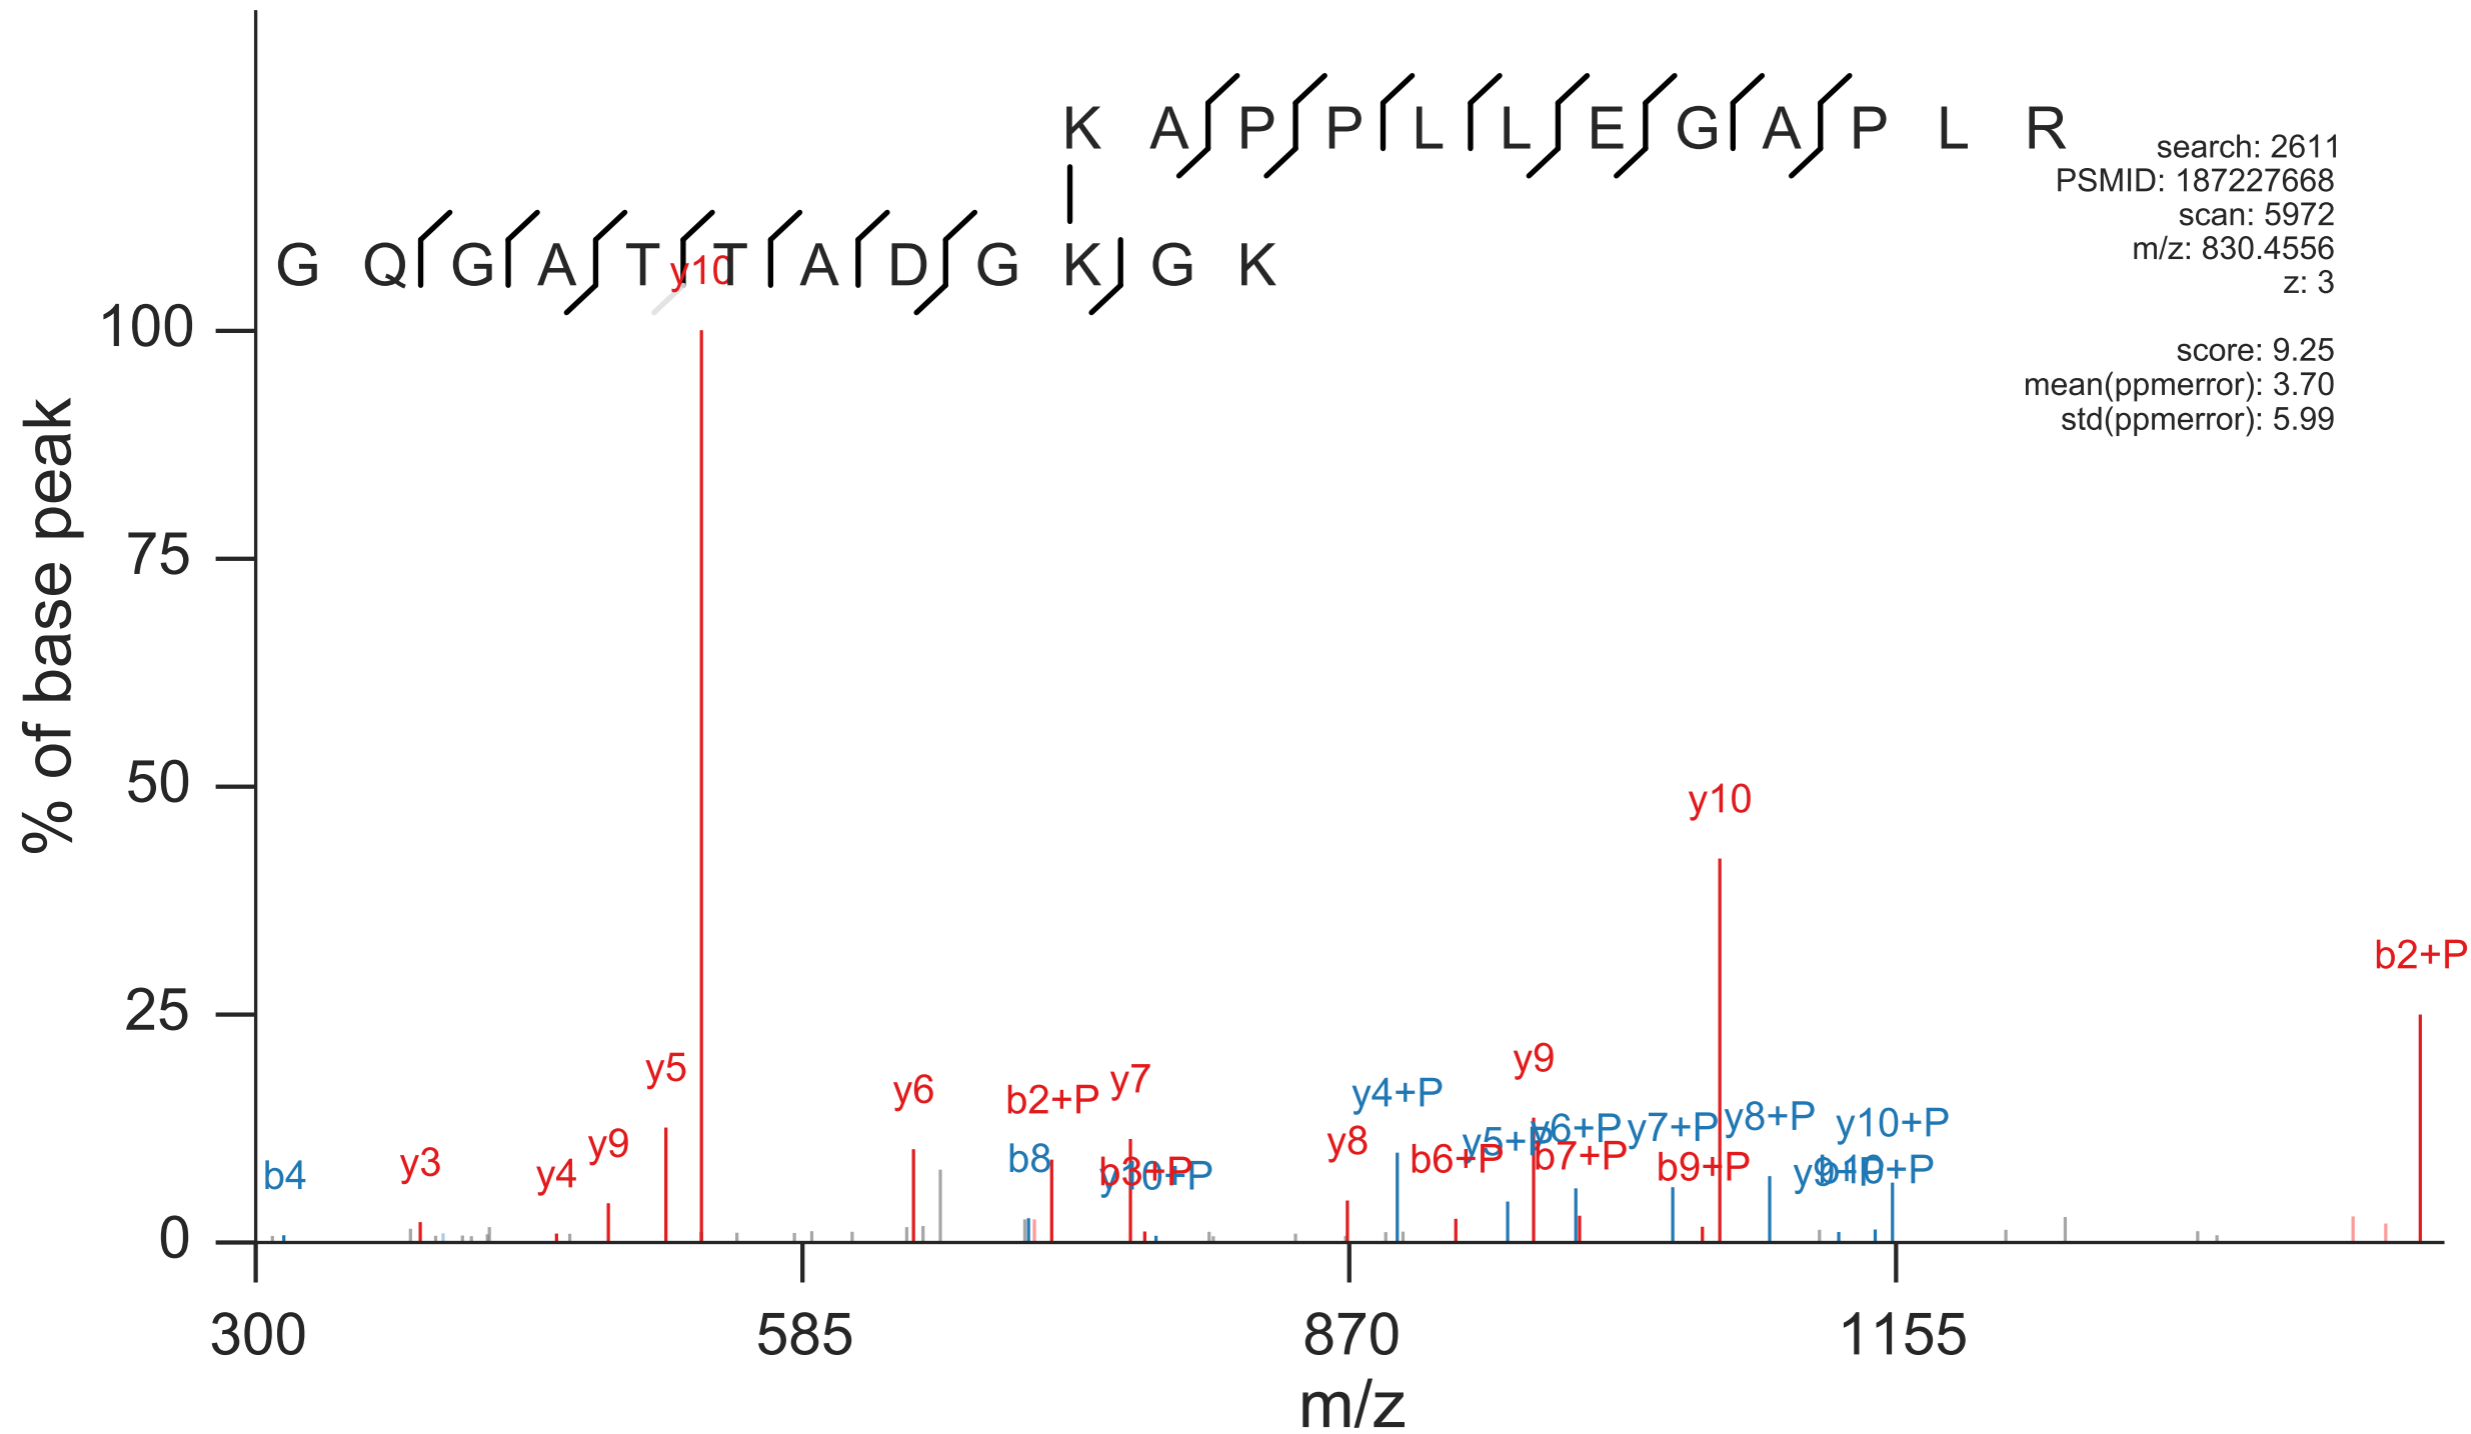



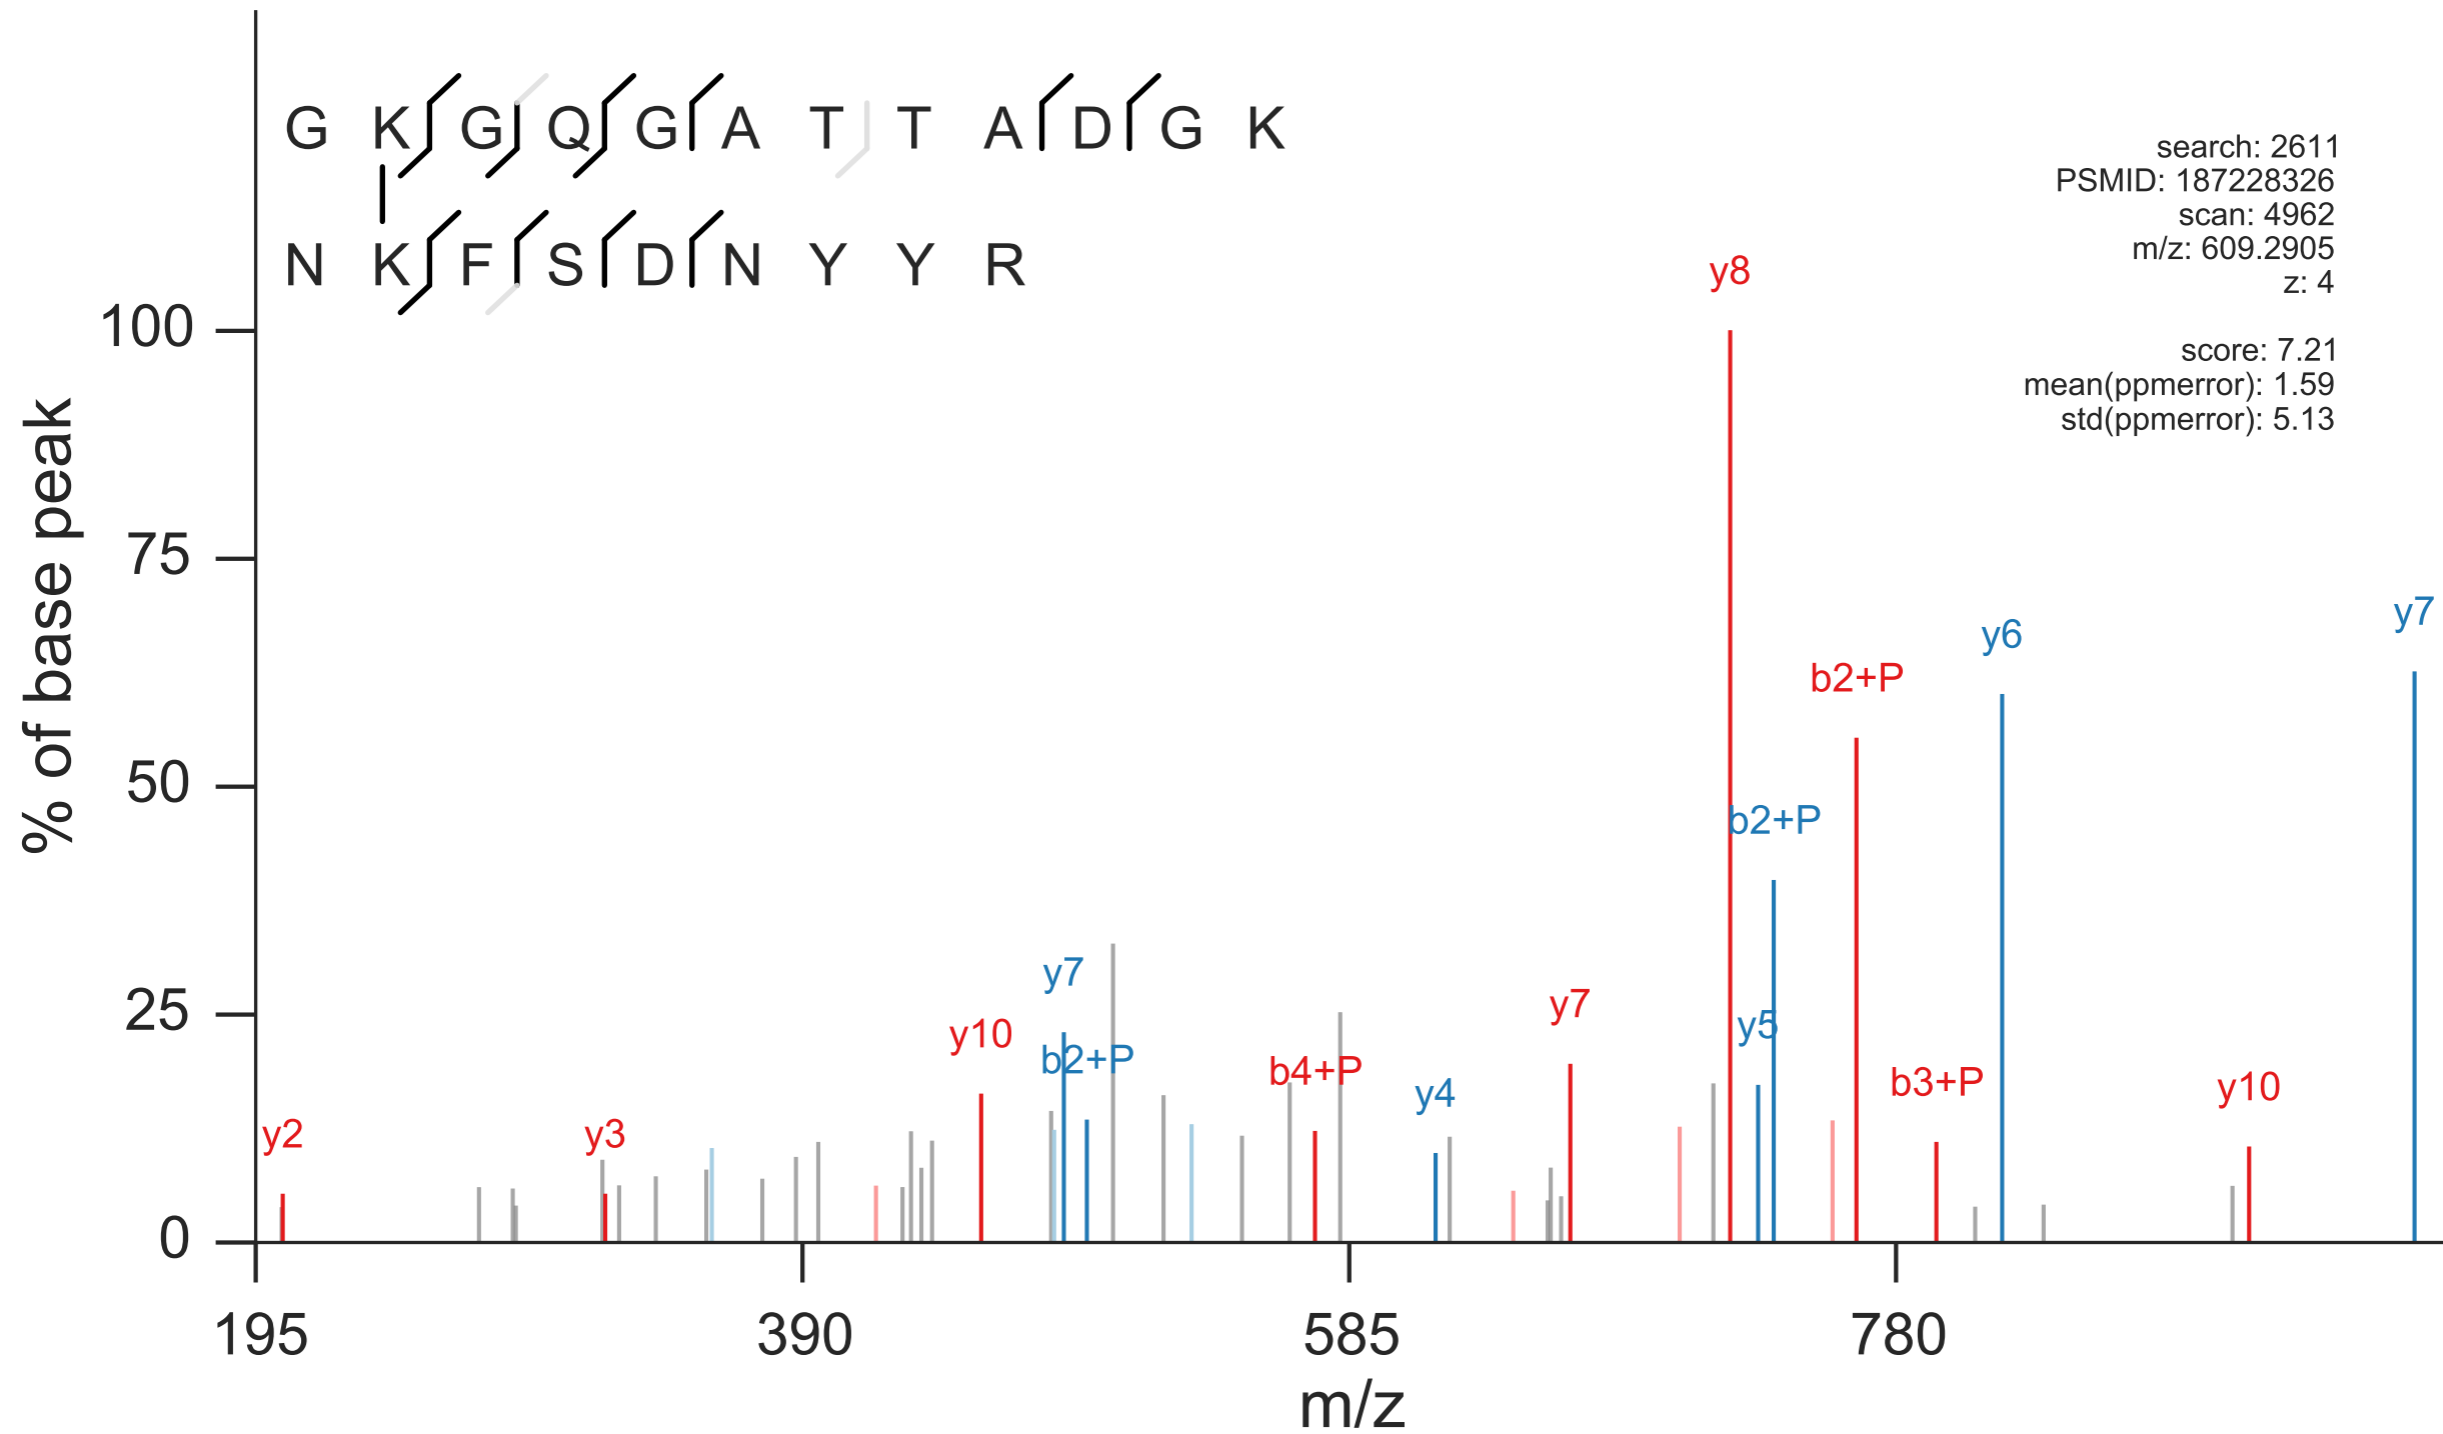

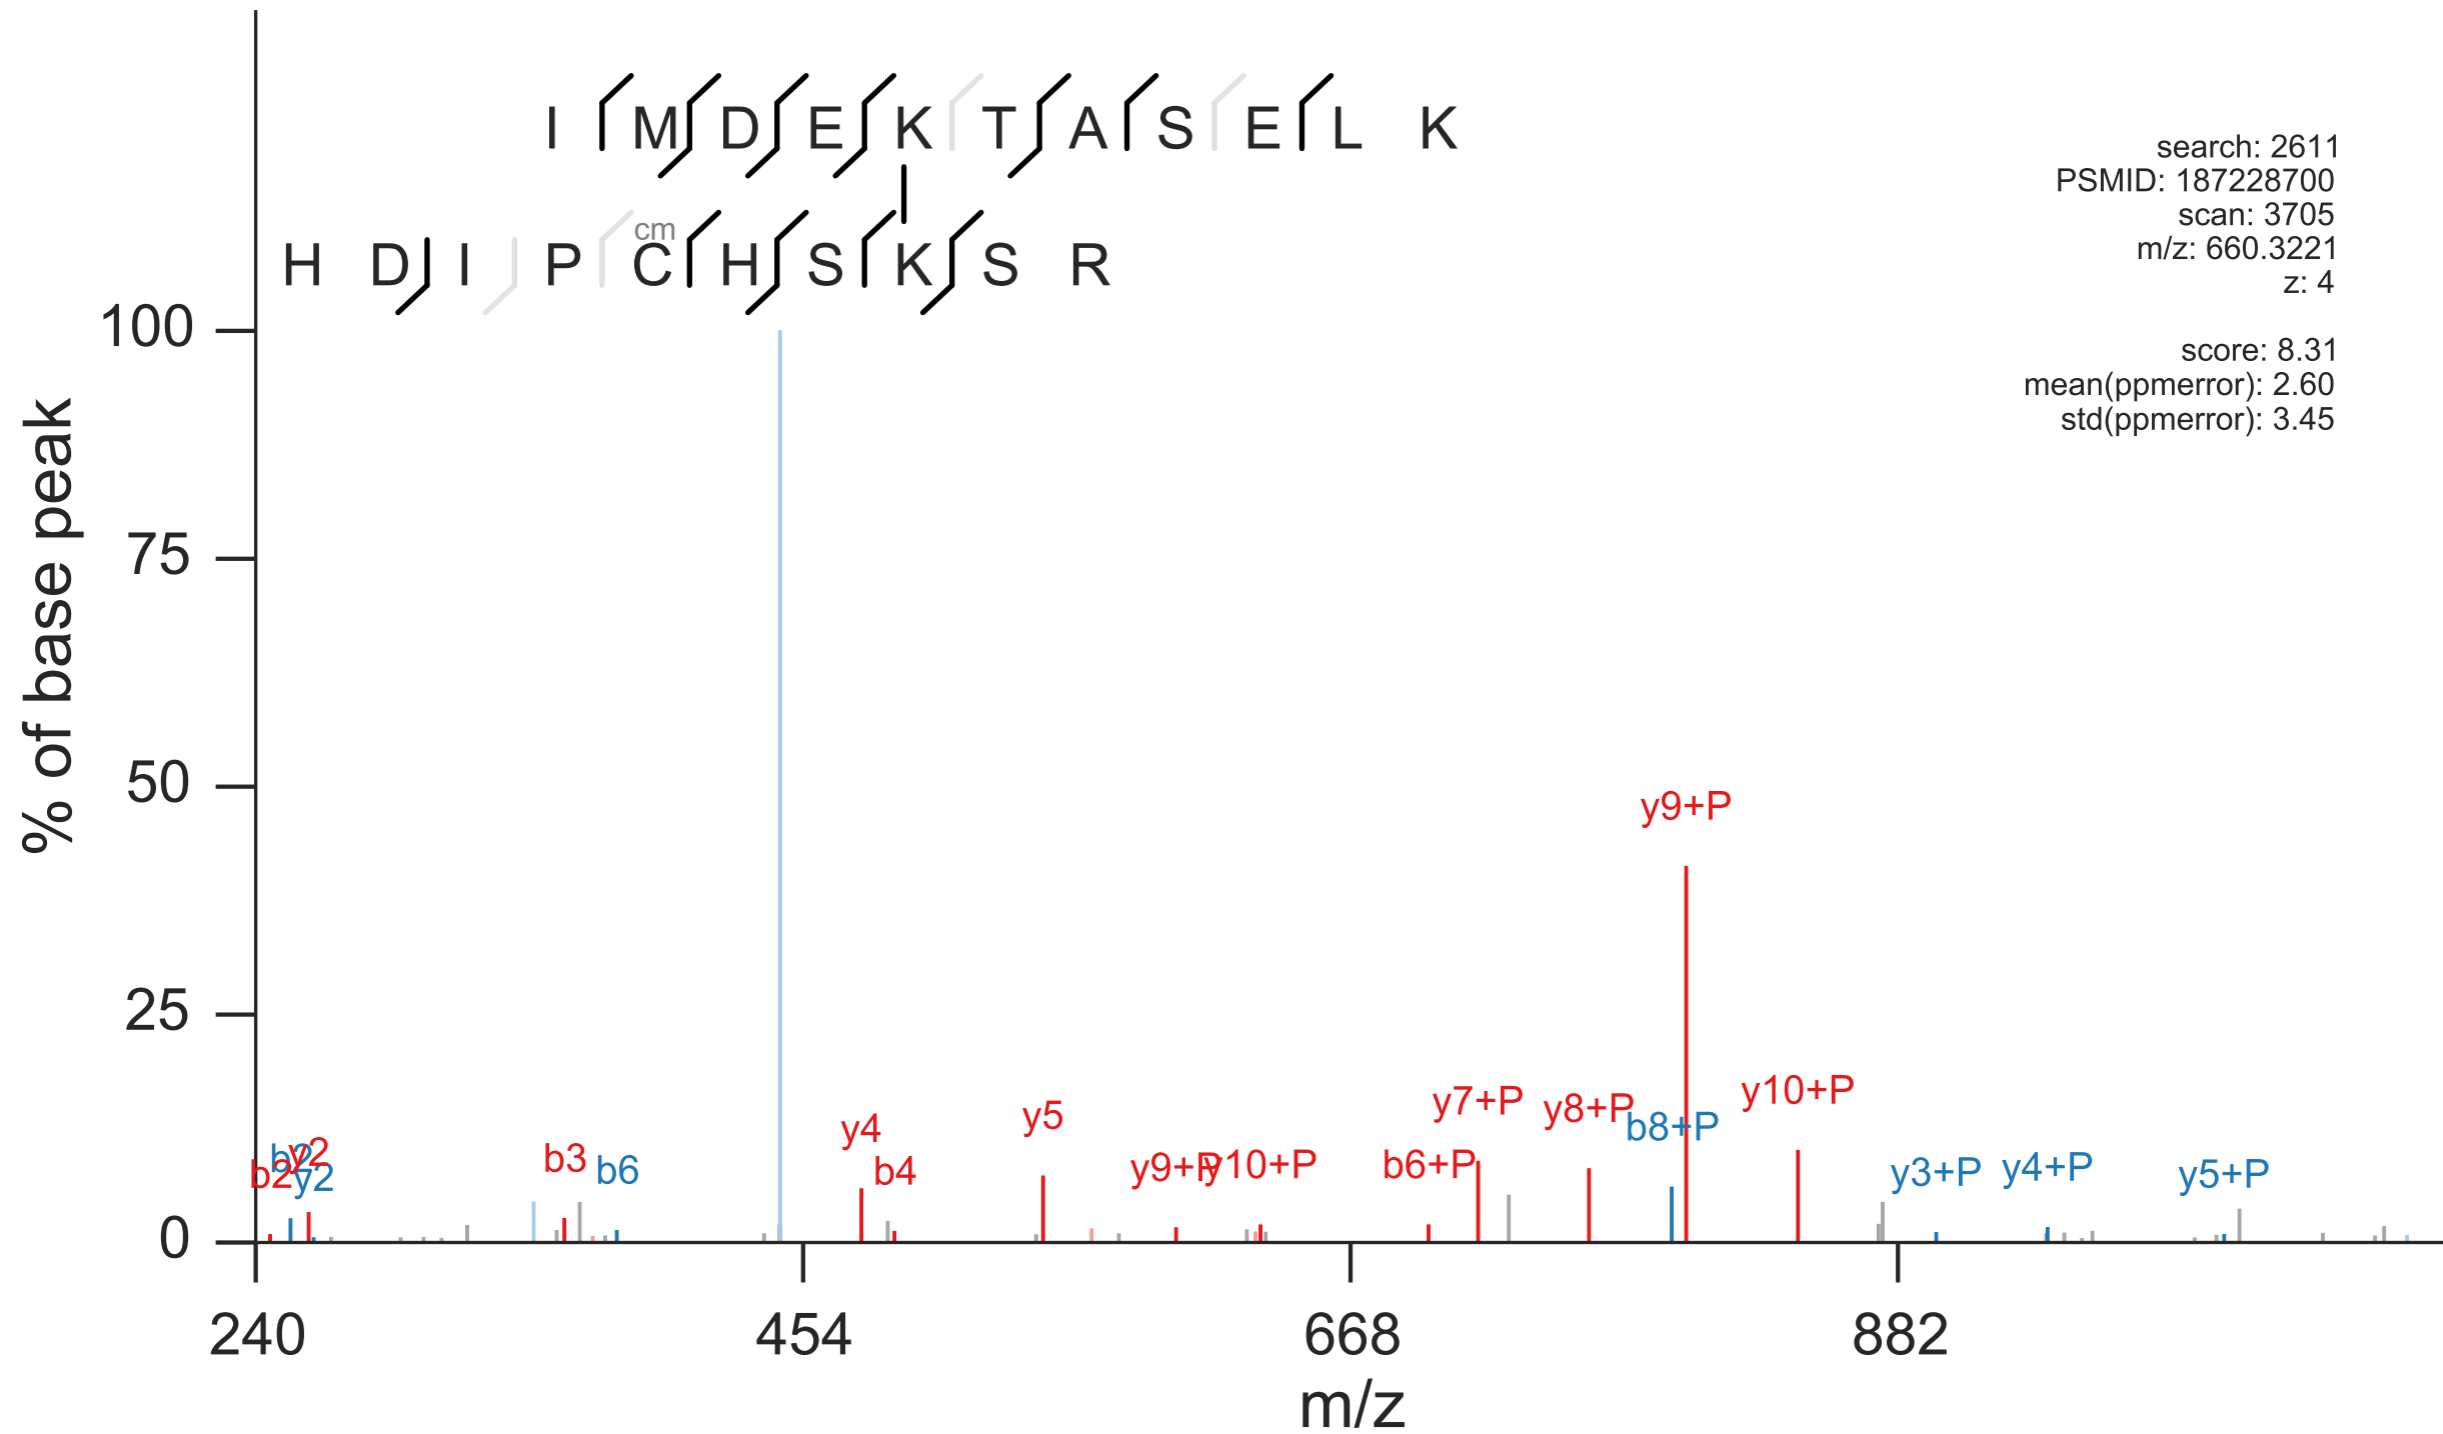

search: 2611  
 PSMID: 187228700  
 scan: 3705  
 m/z: 660.3221  
 z: 4

score: 8.31  
 mean(ppmerror): 2.60  
 std(ppmerror): 3.45

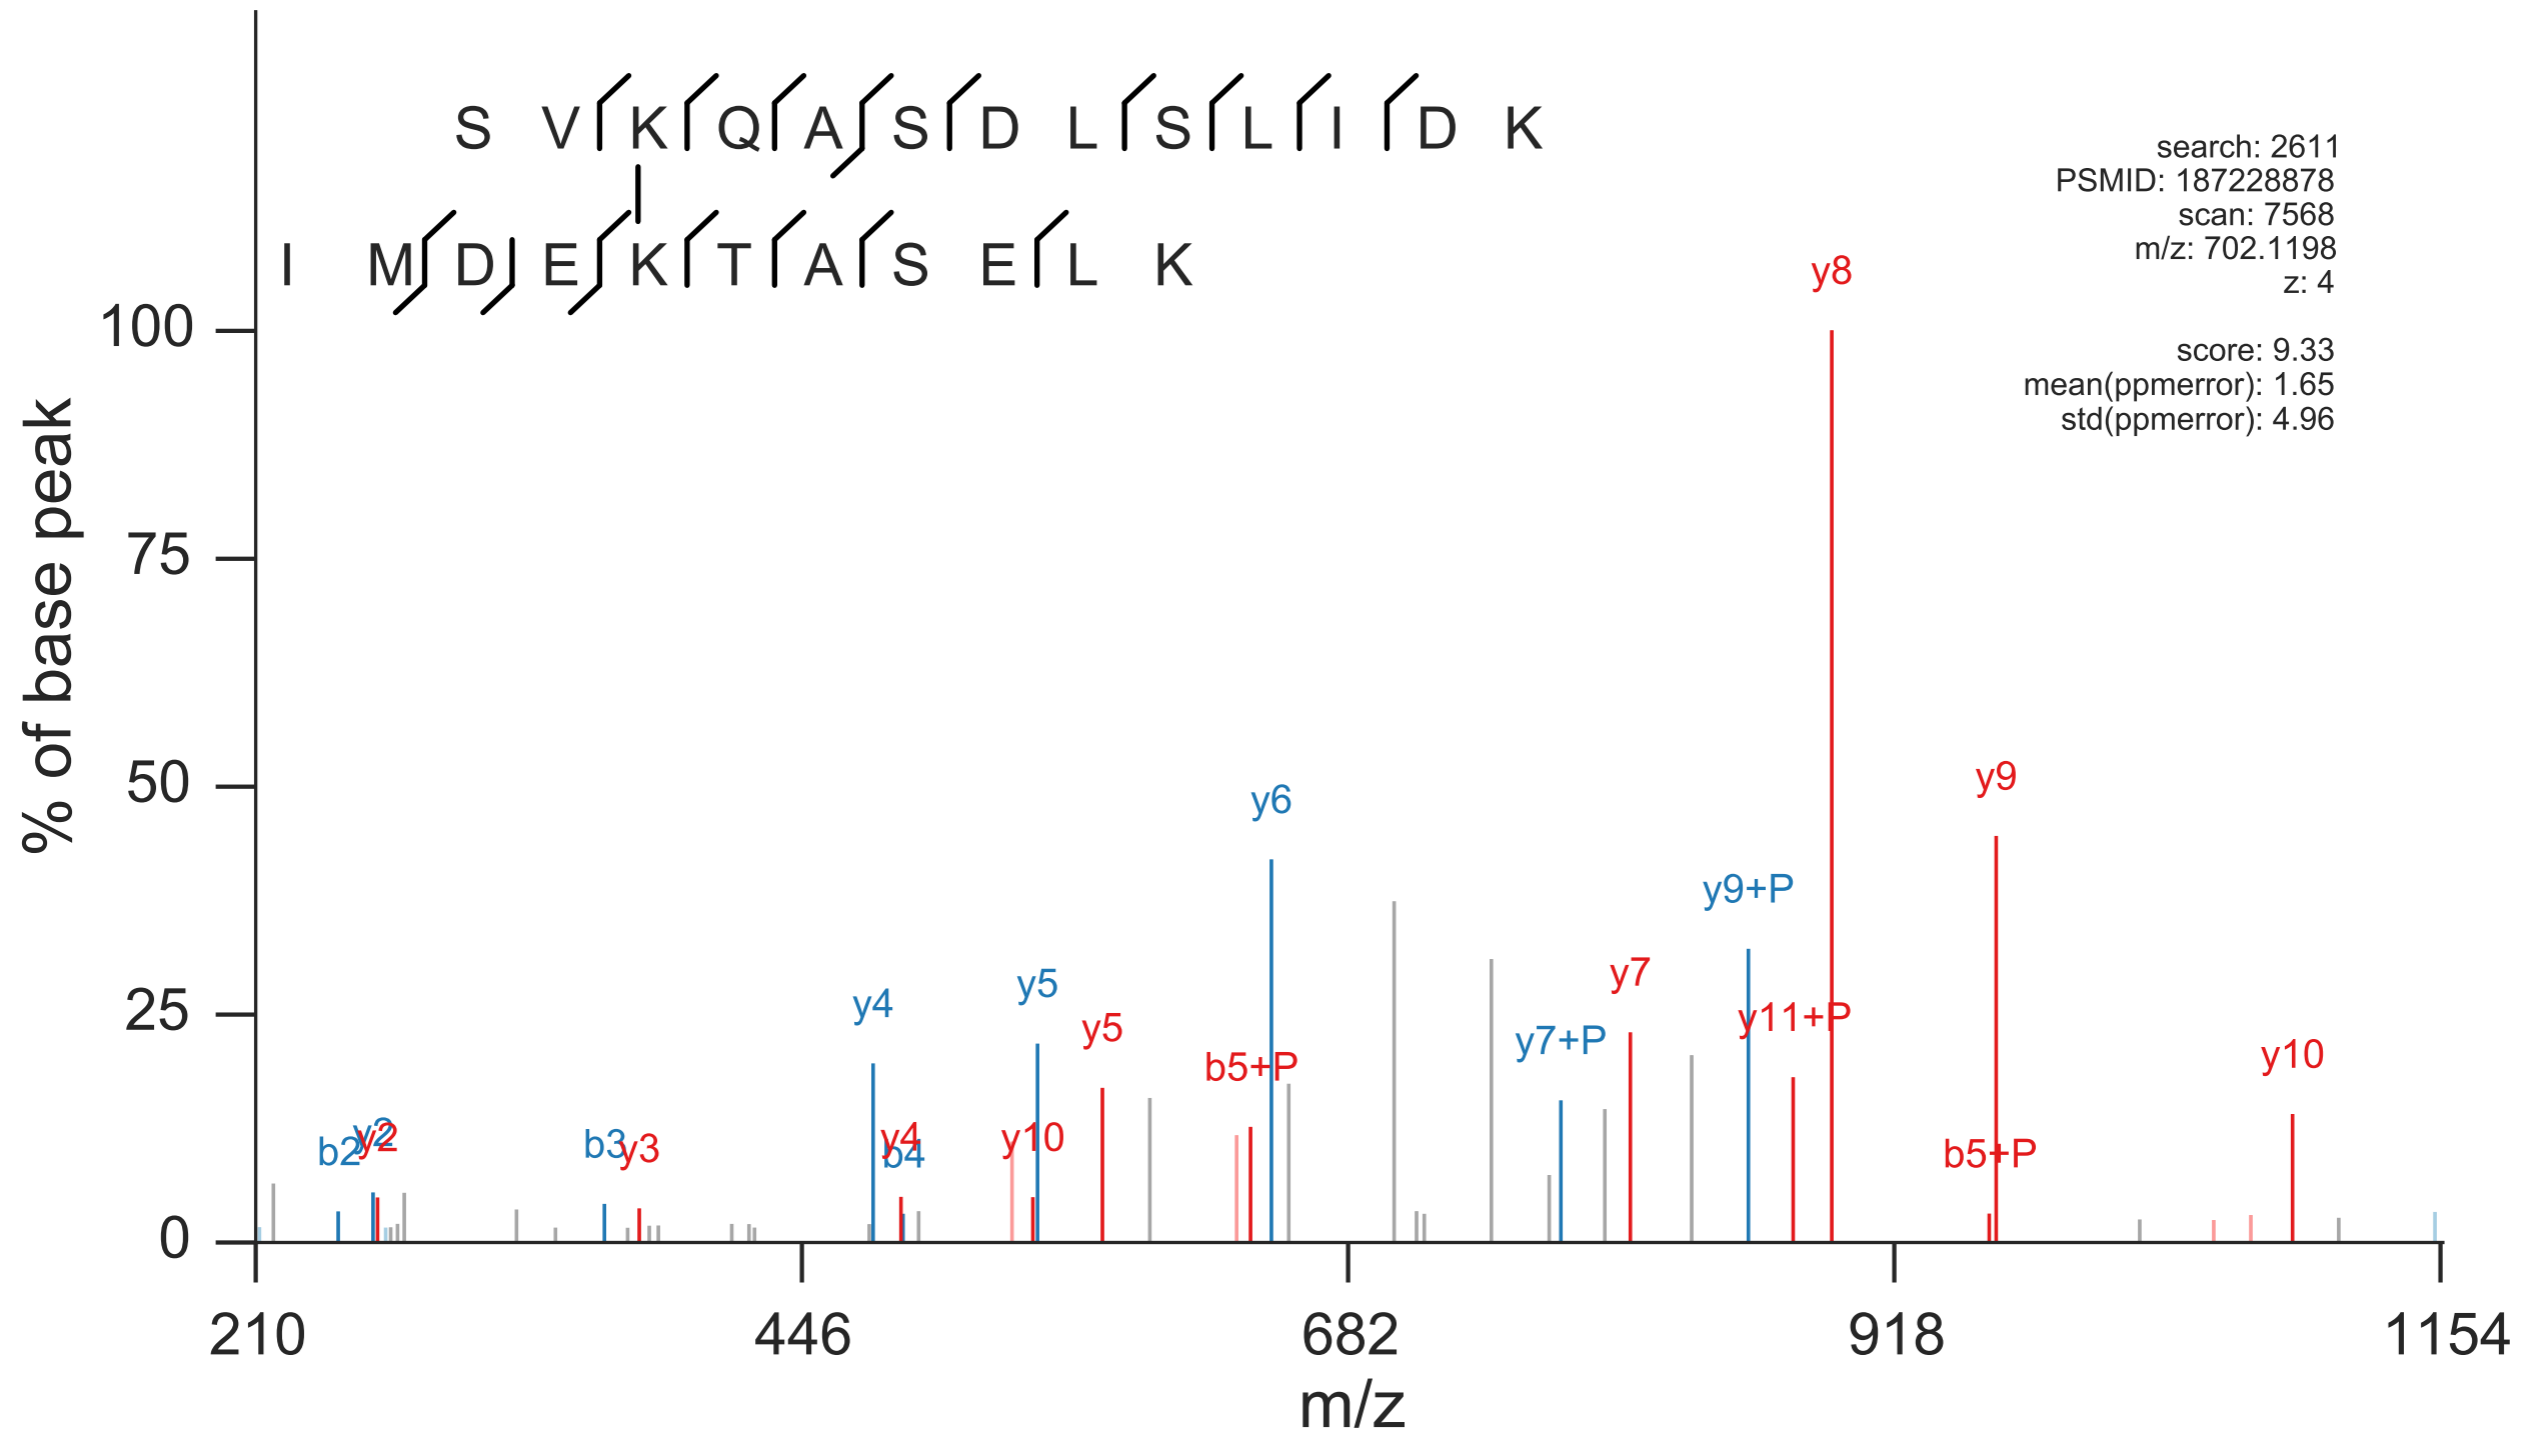

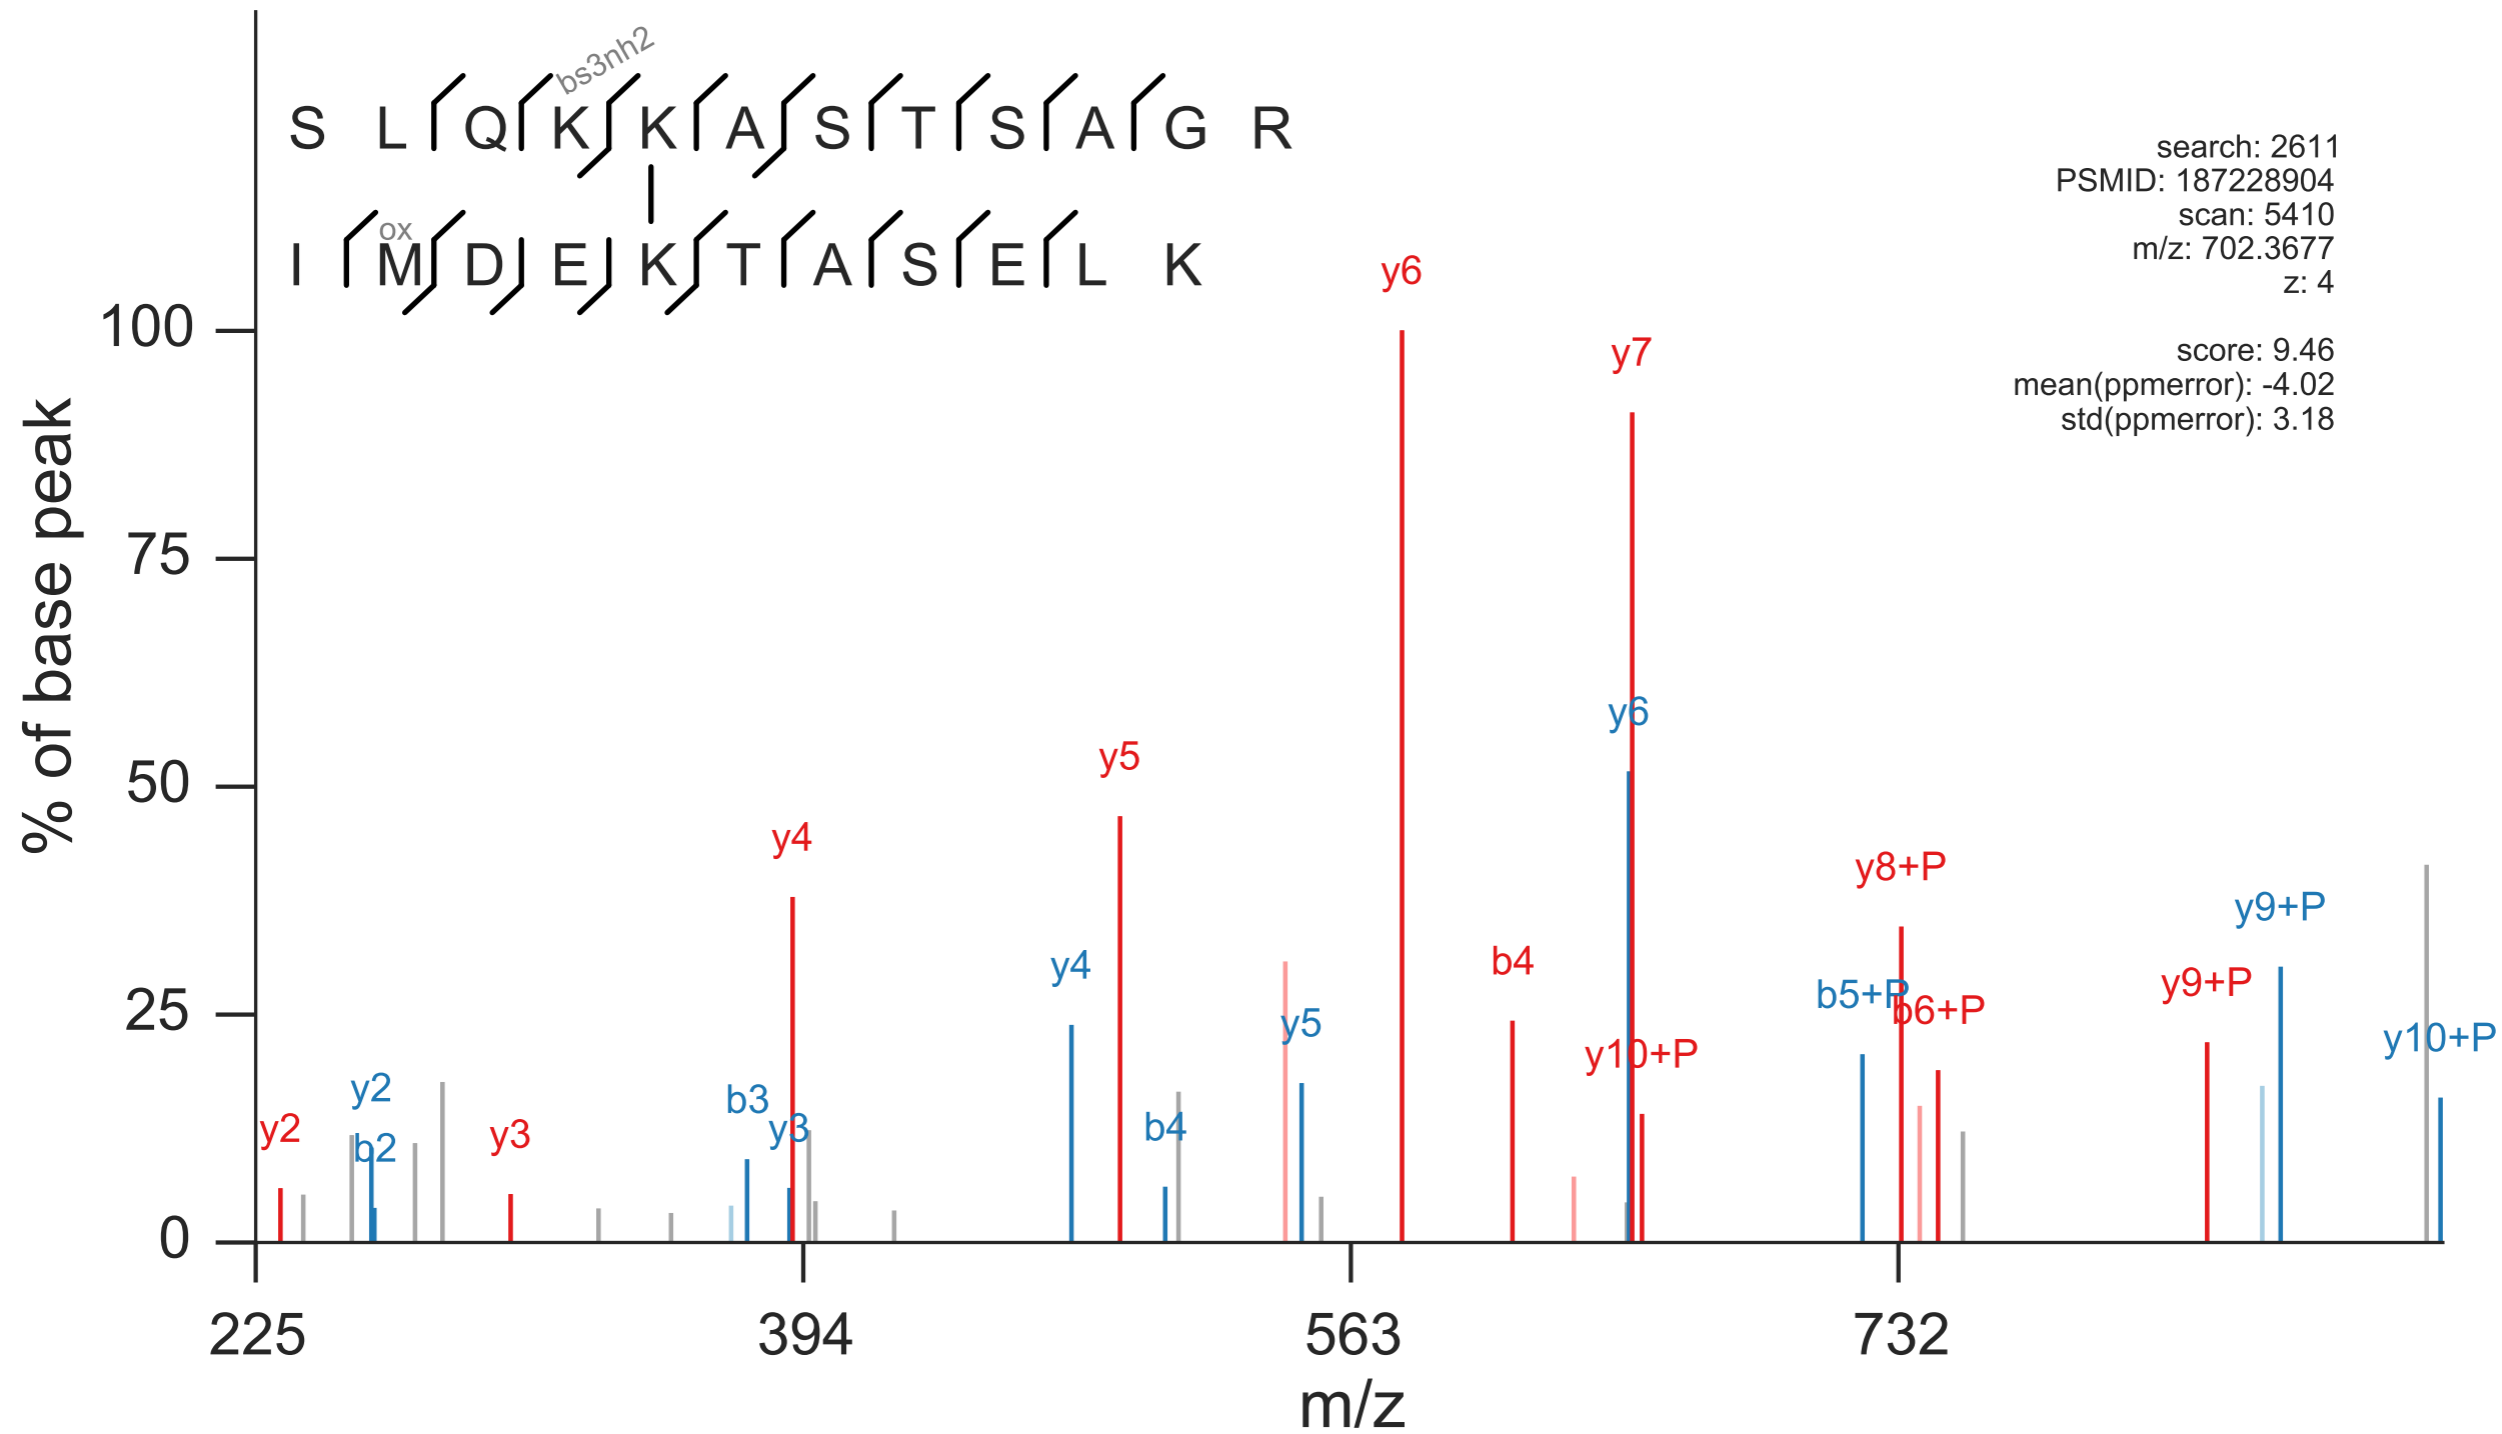

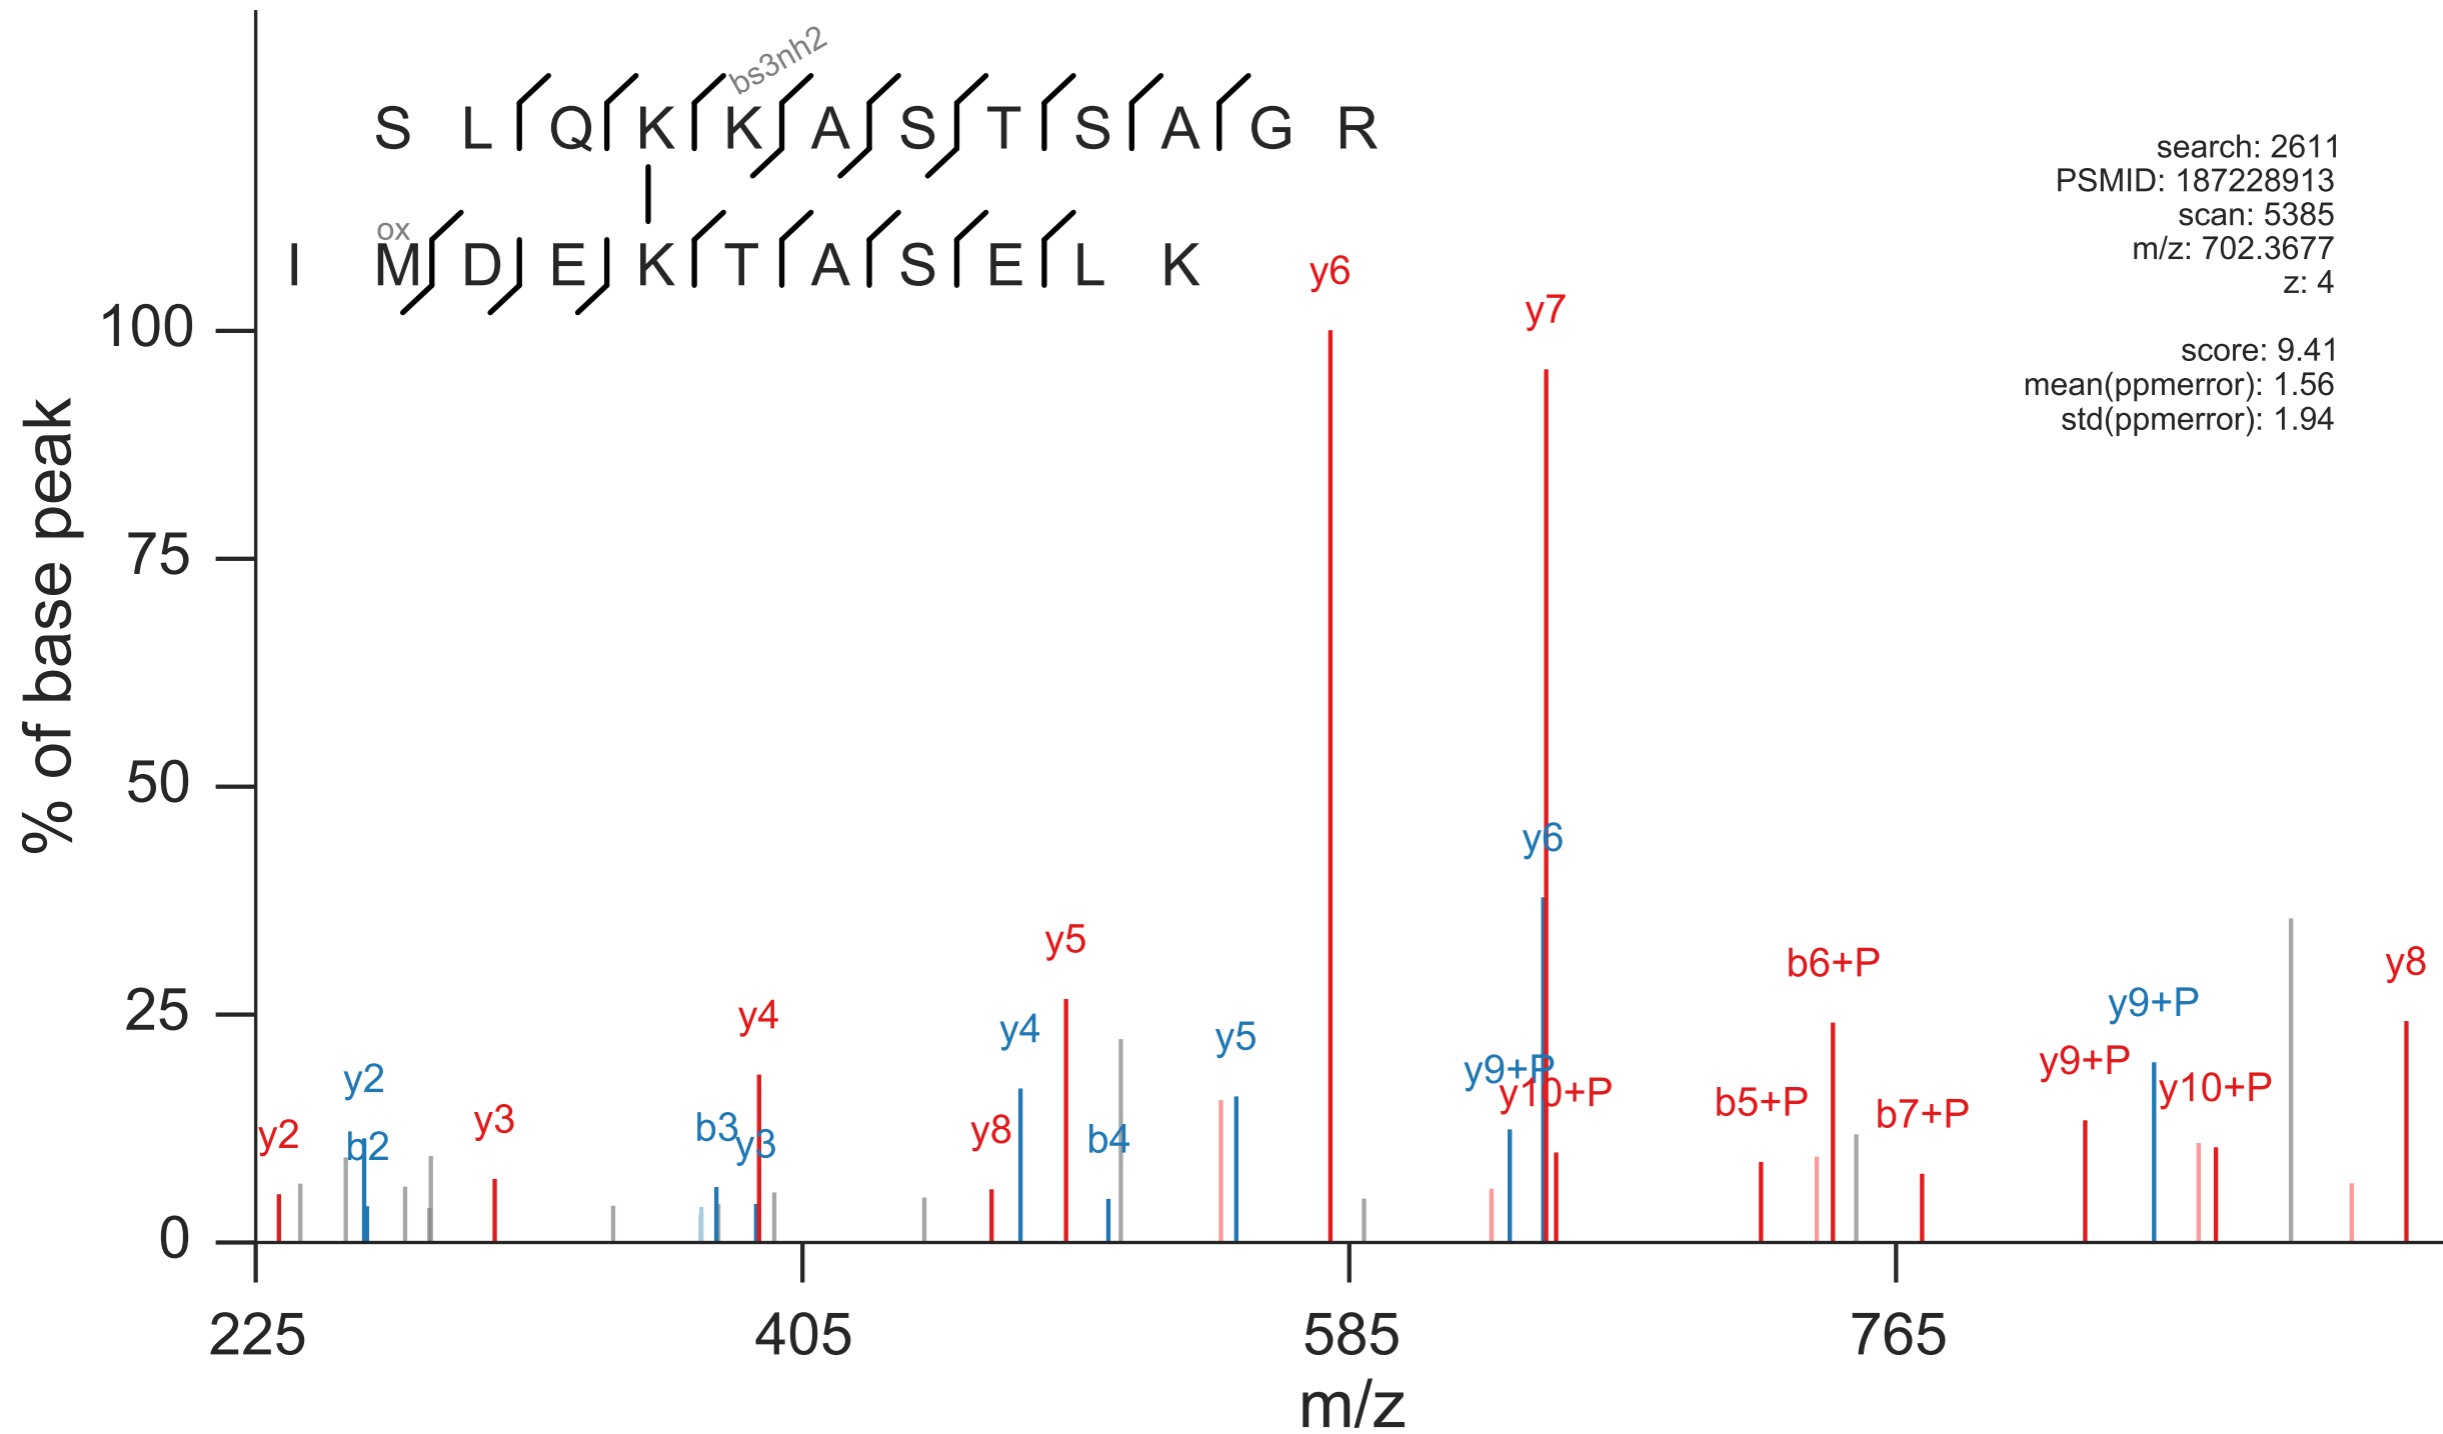

search: 2611  
 PSMID: 187228913  
 scan: 5385  
 m/z: 702.3677  
 z: 4

score: 9.41  
 mean(ppmerror): 1.56  
 std(ppmerror): 1.94

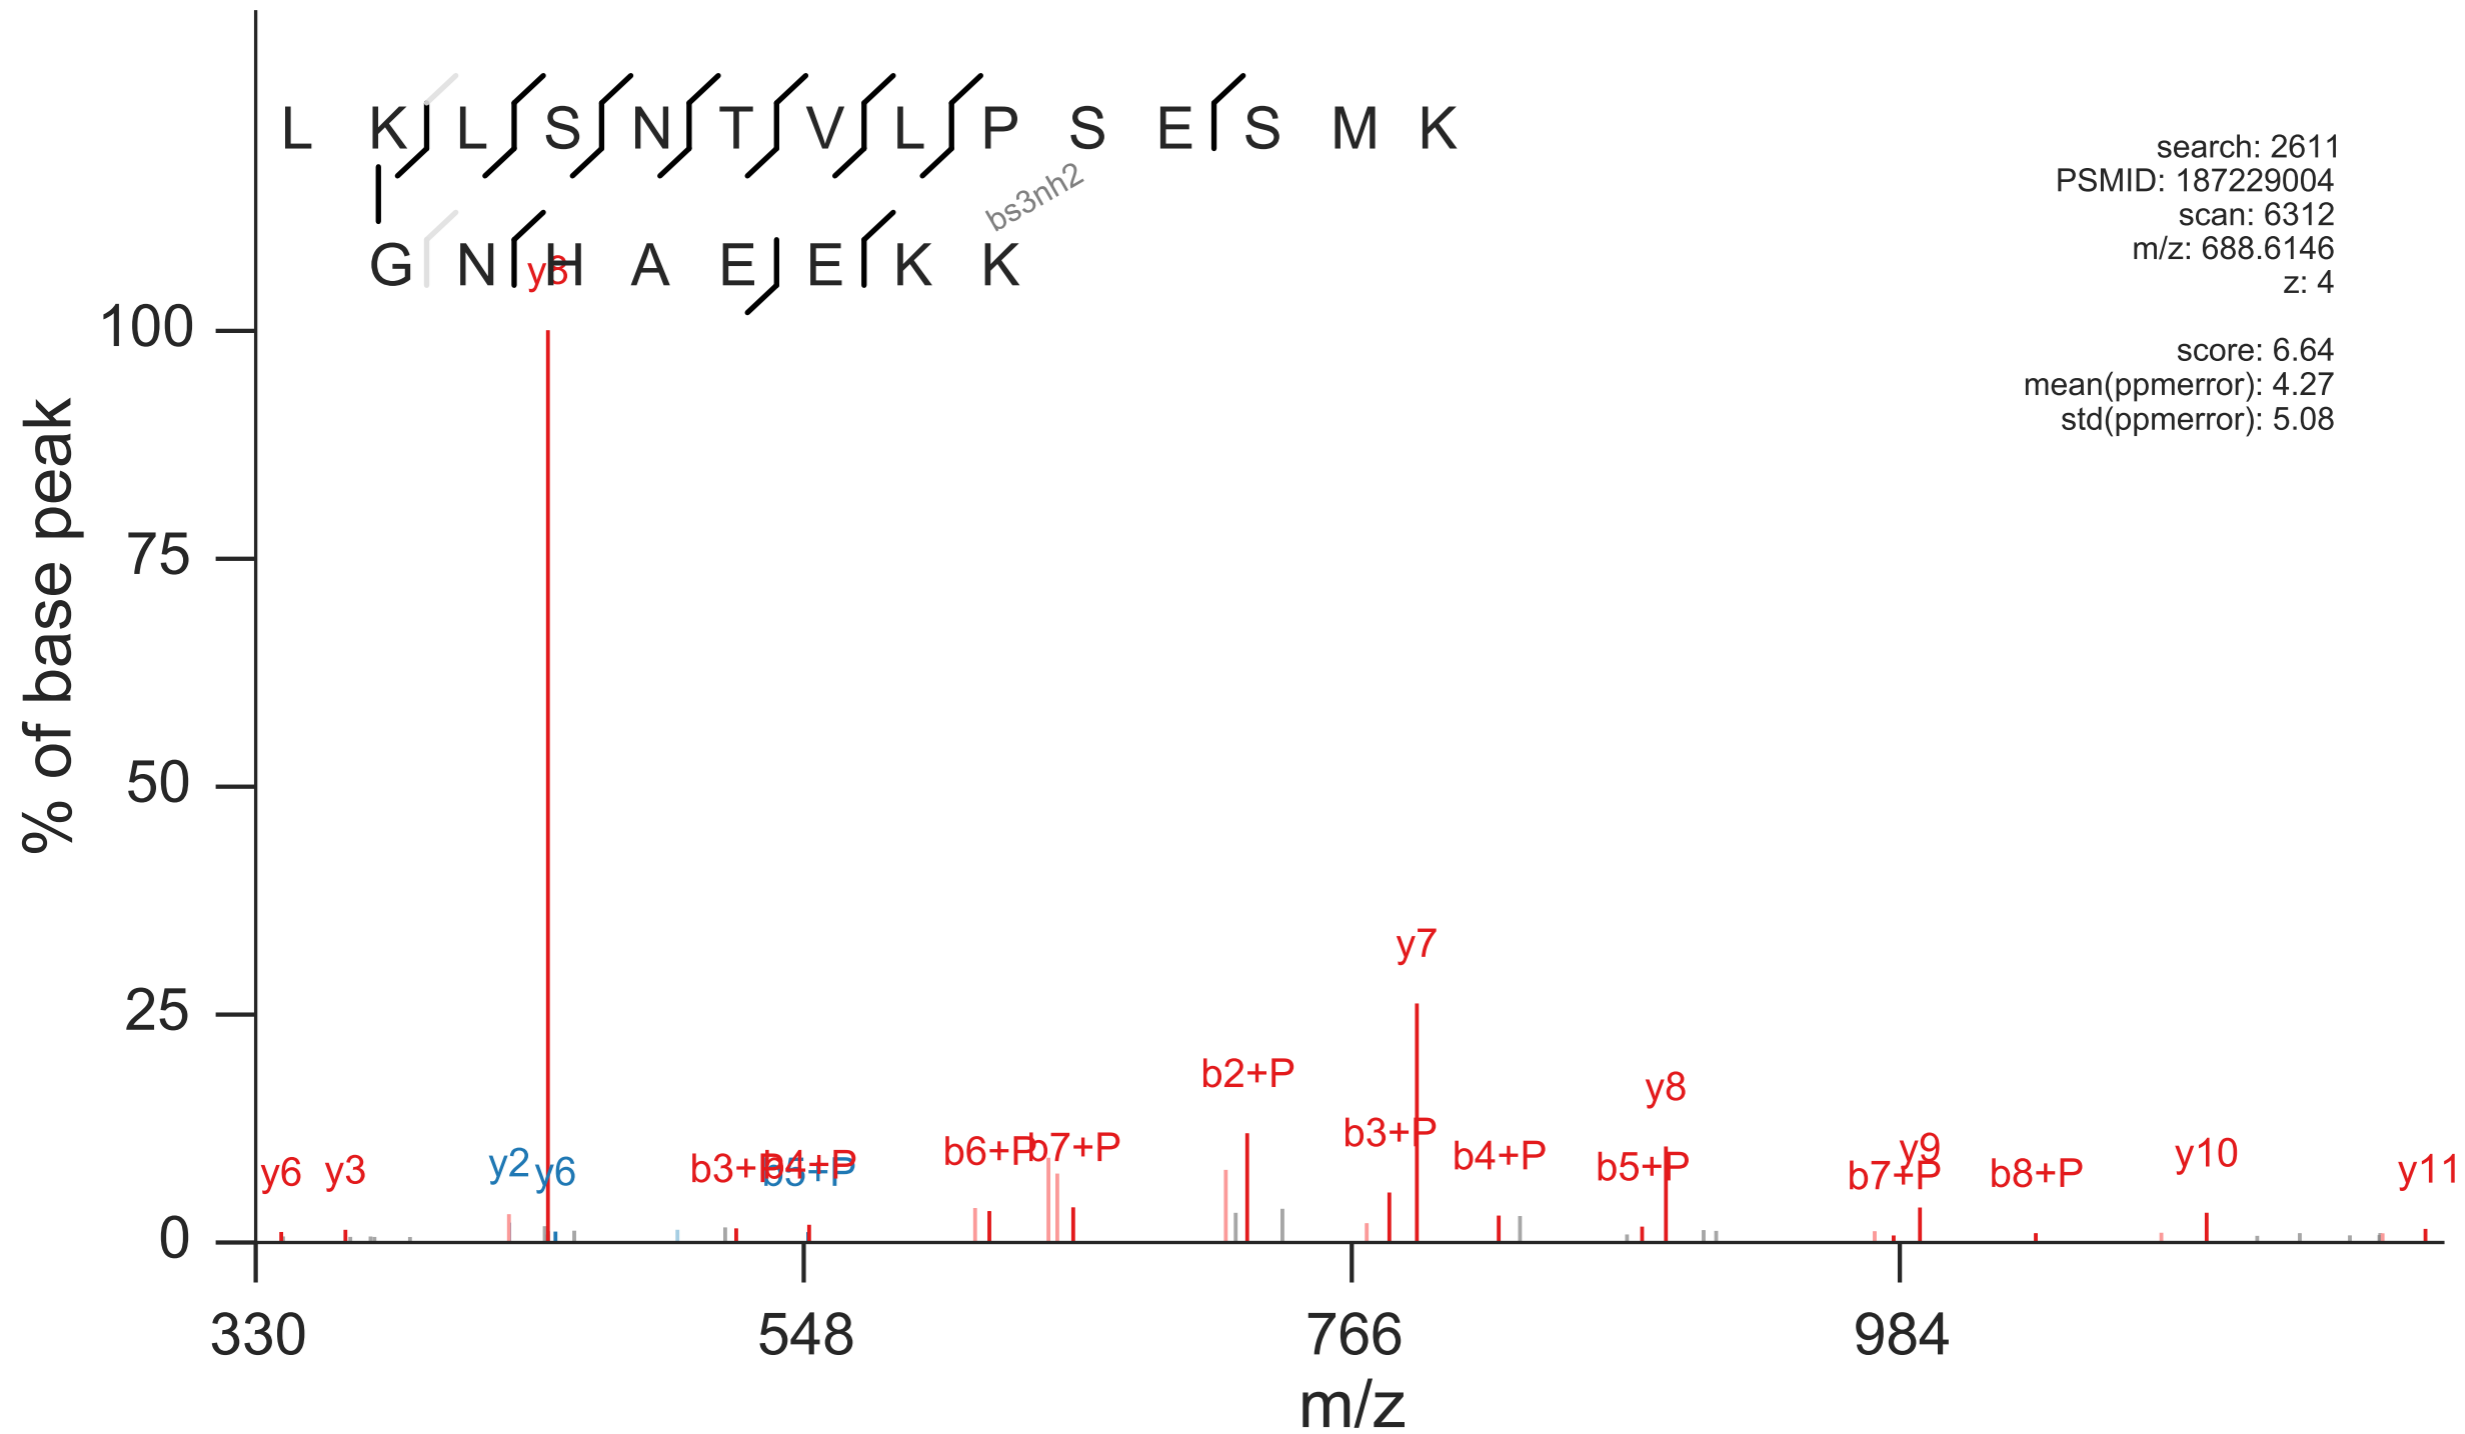

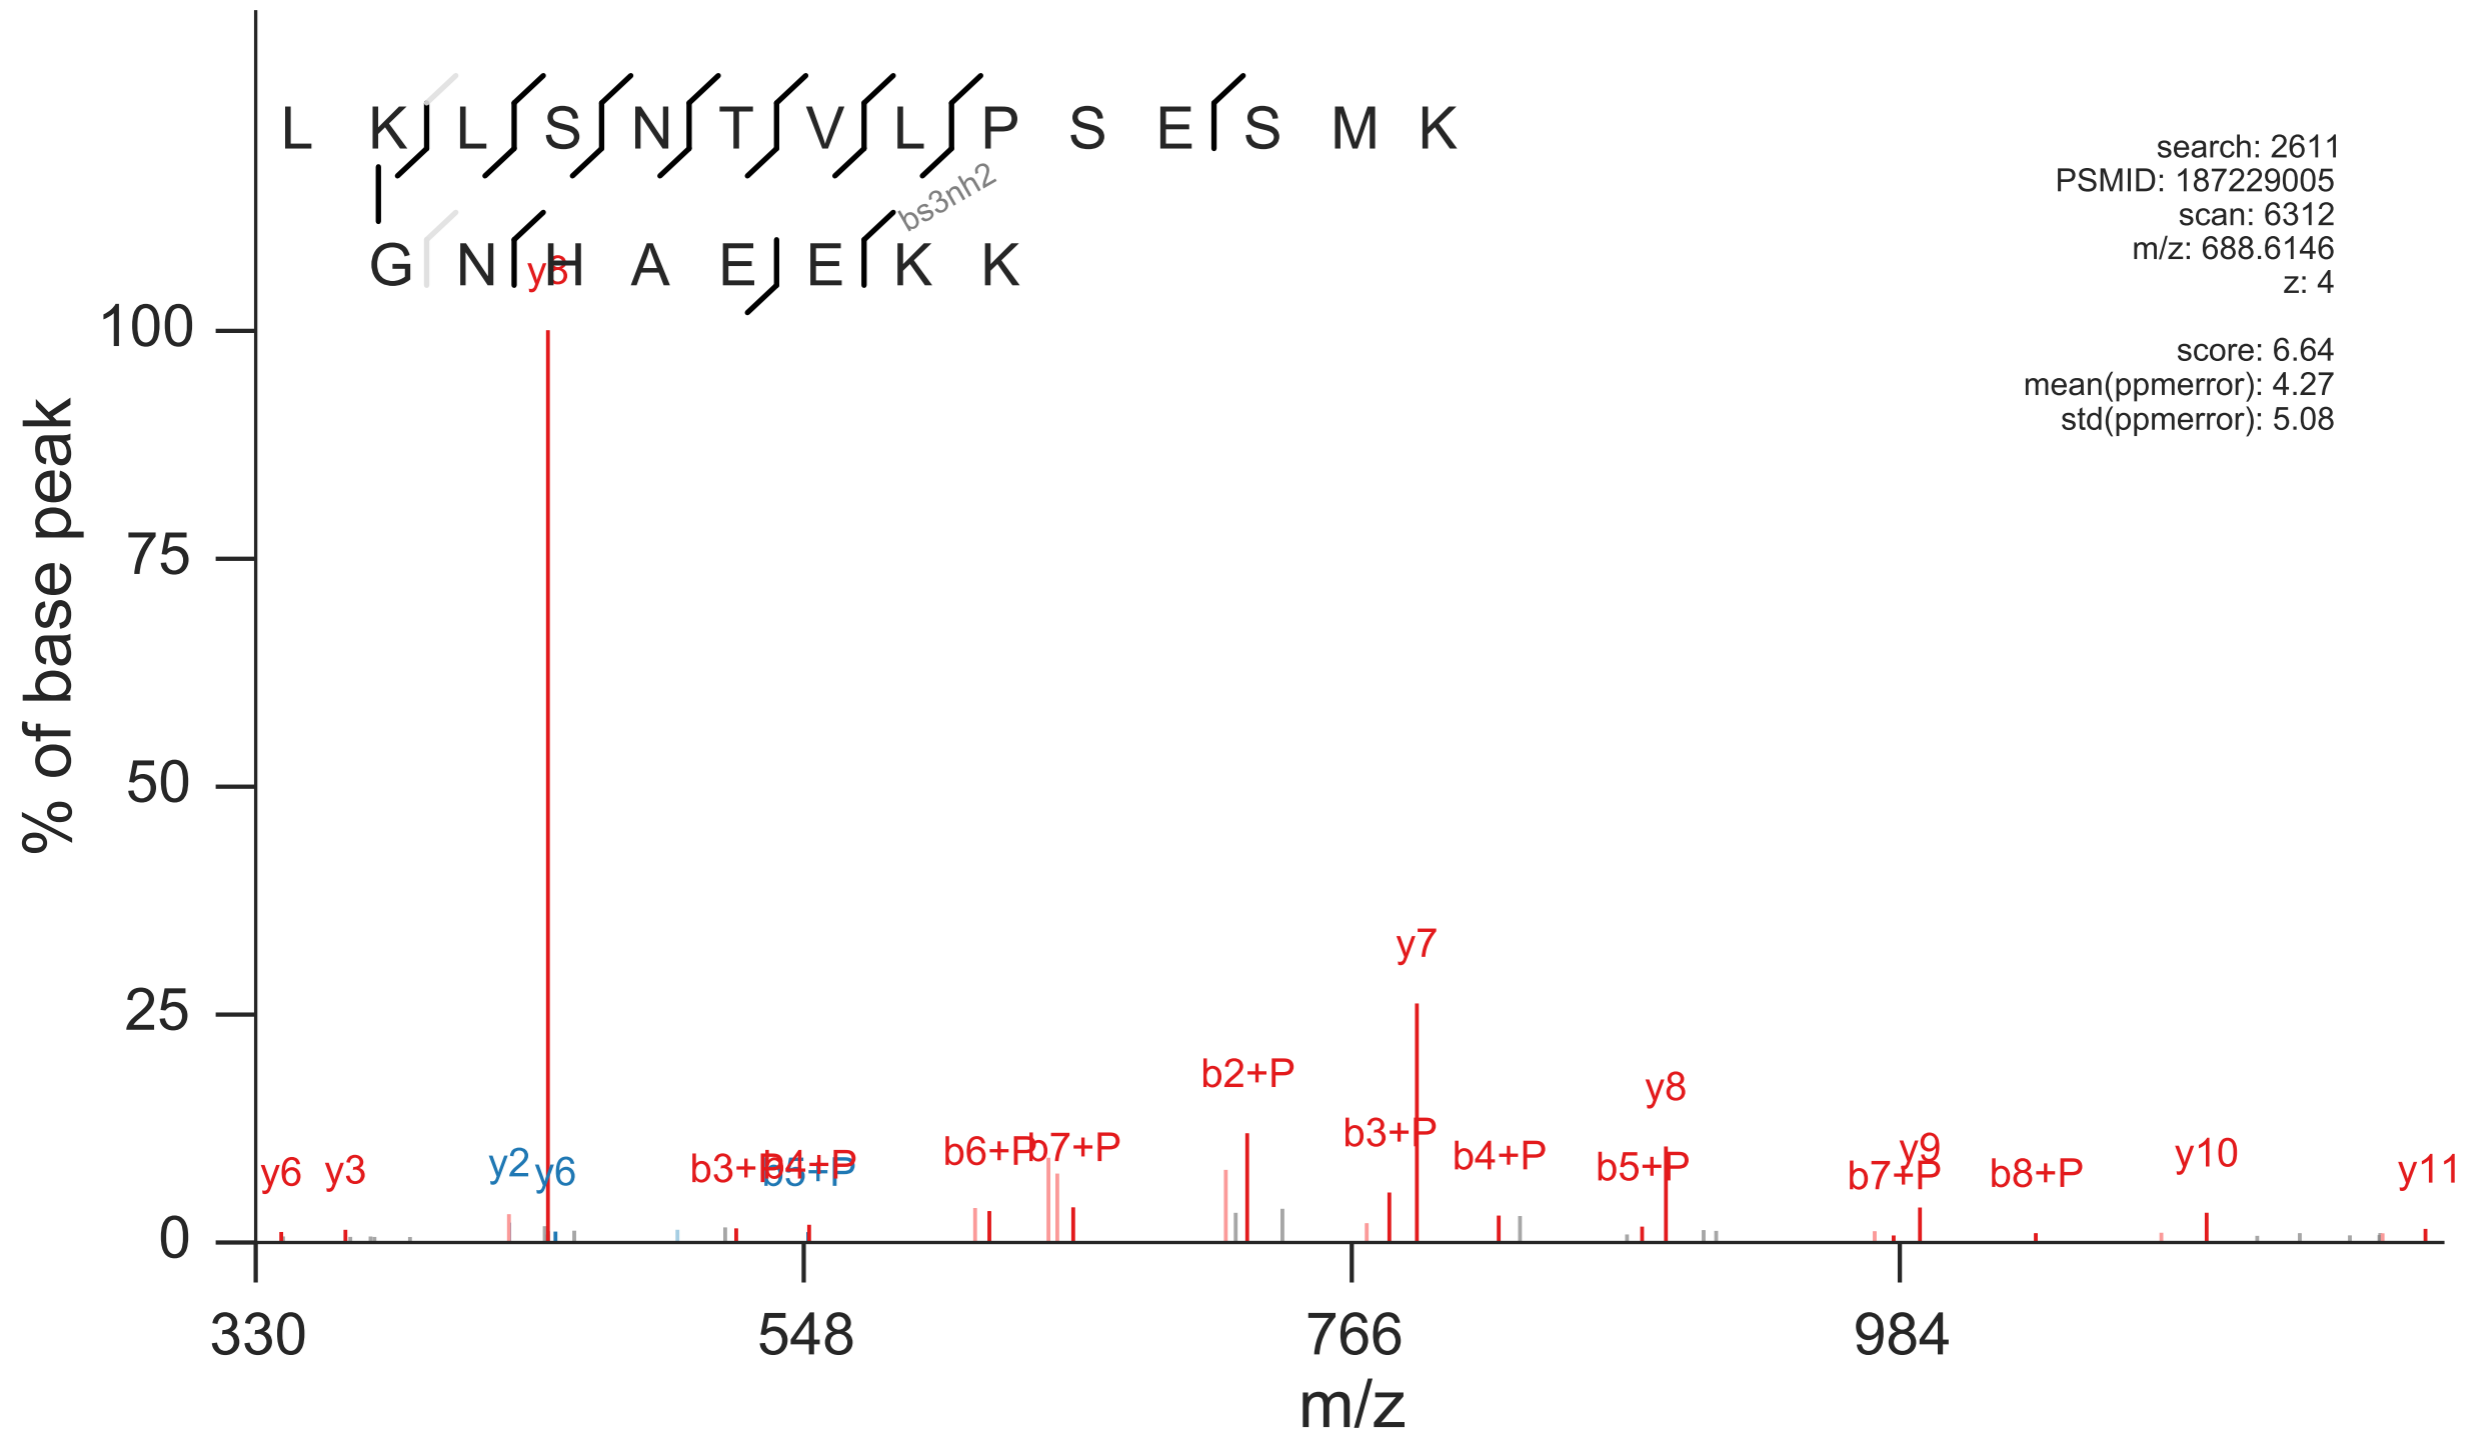

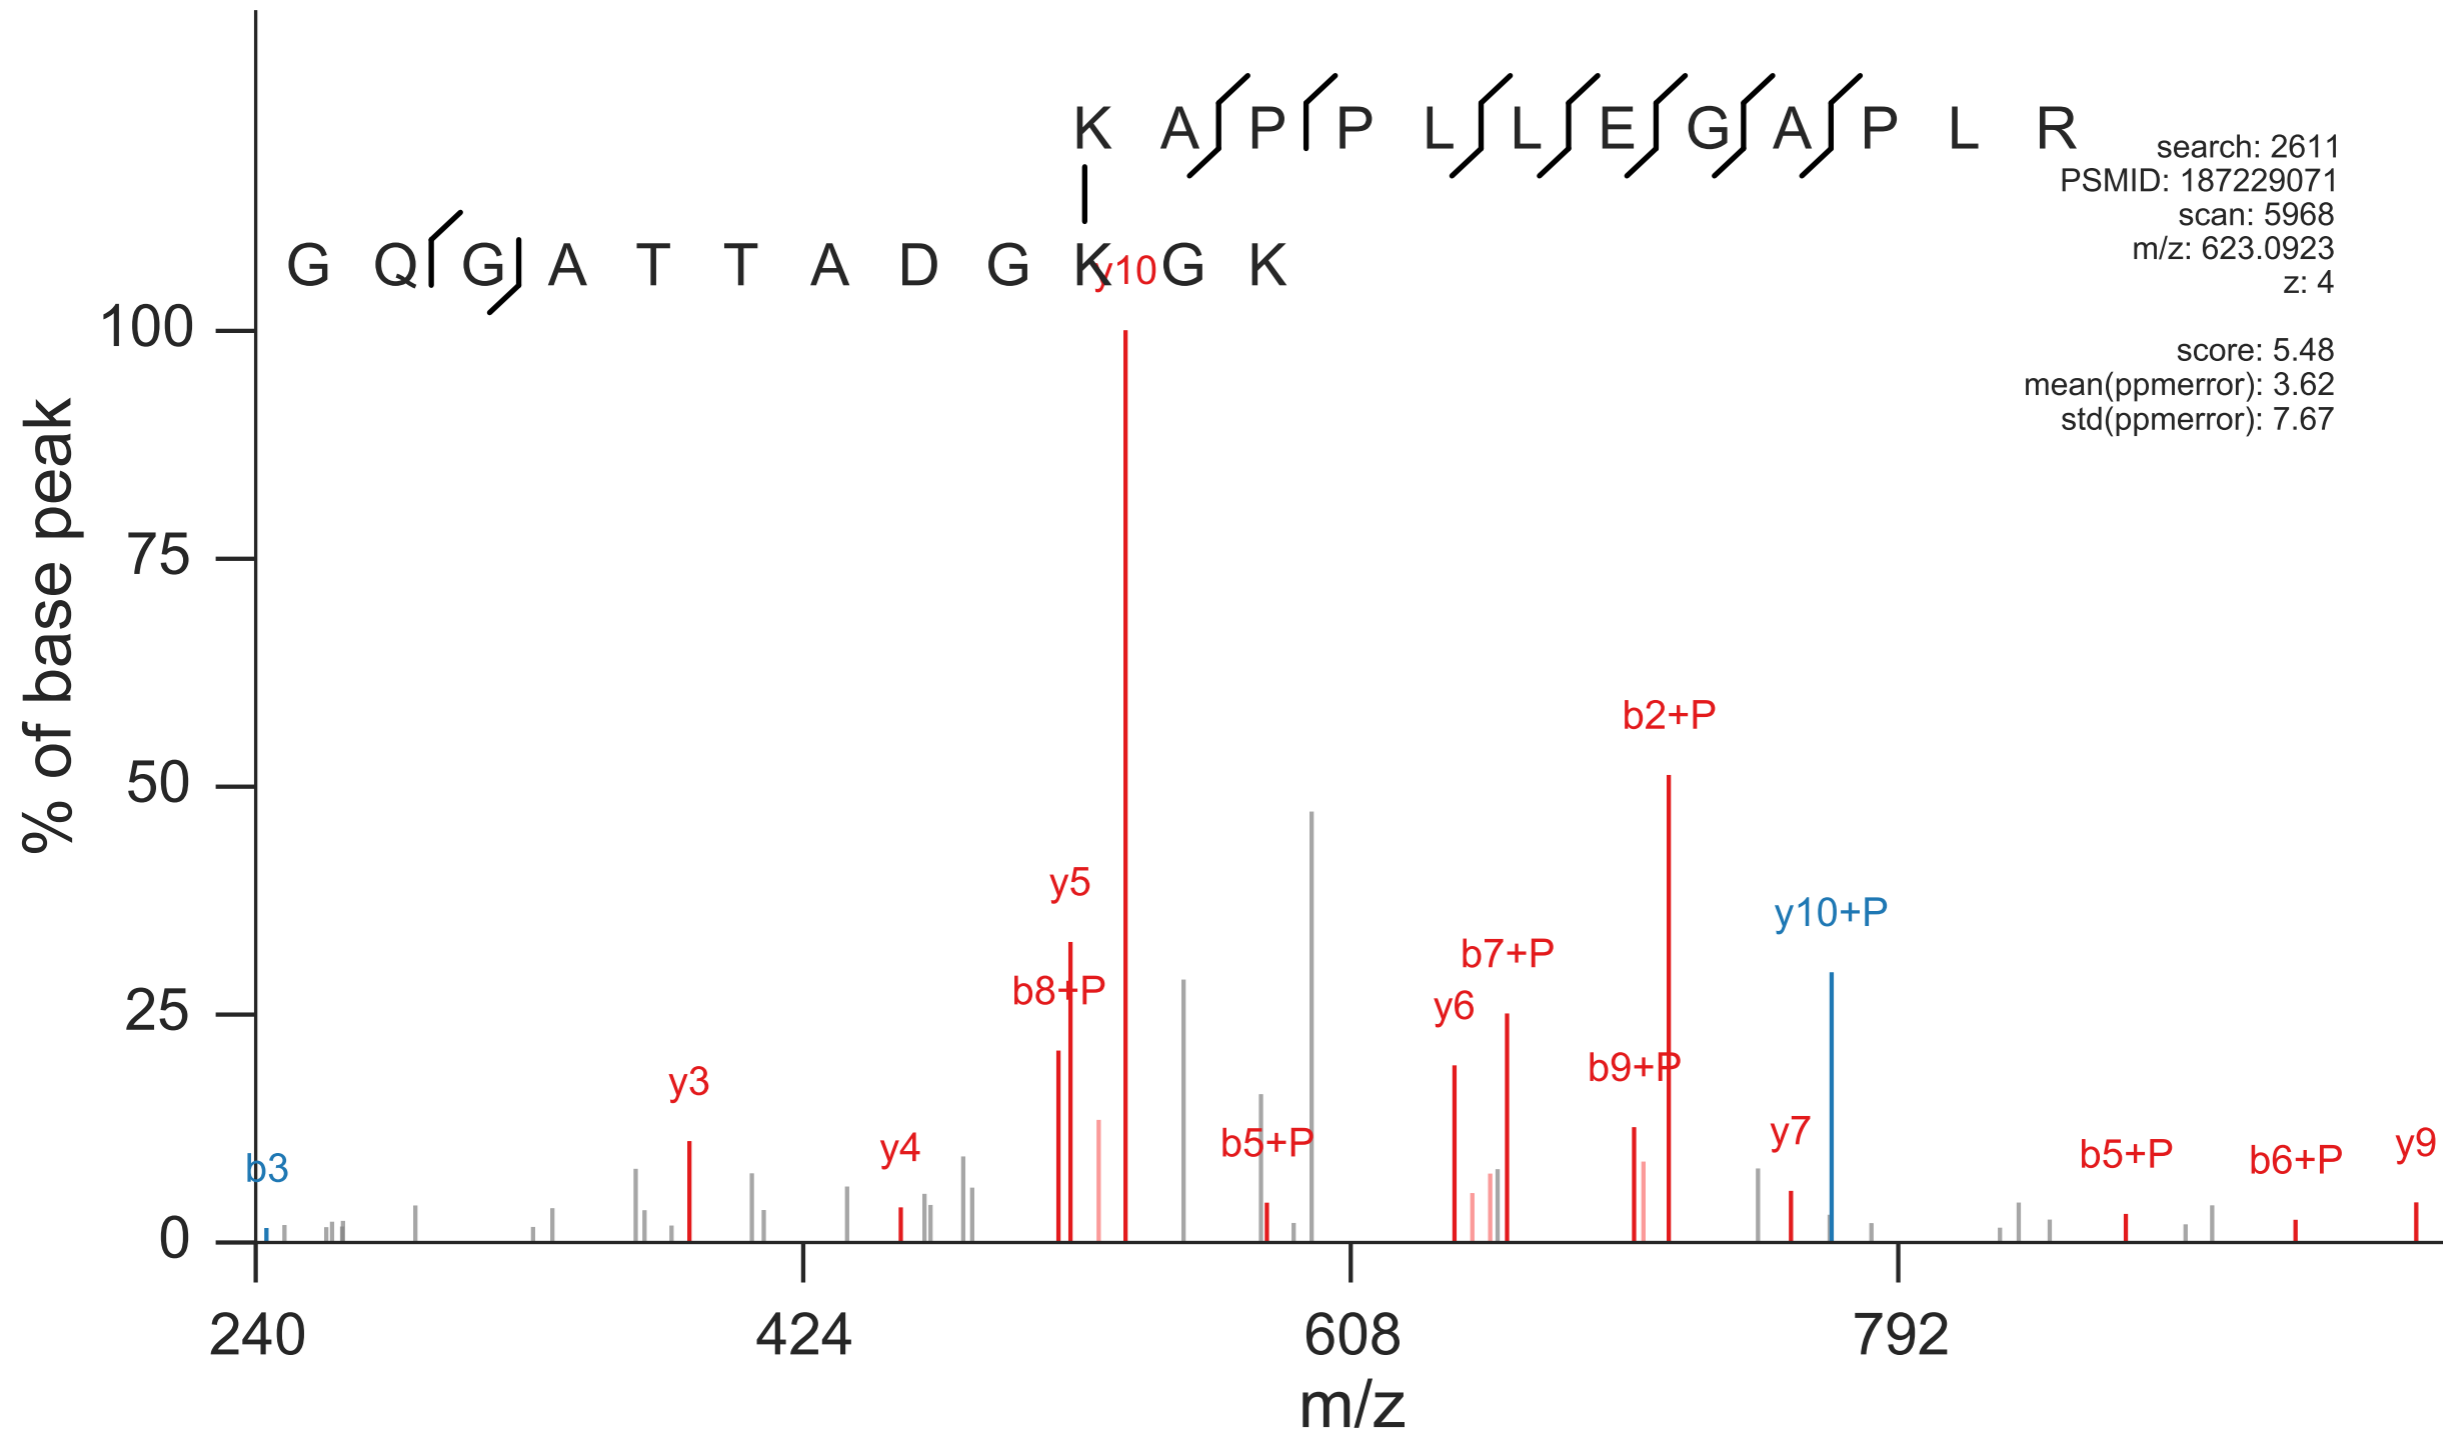



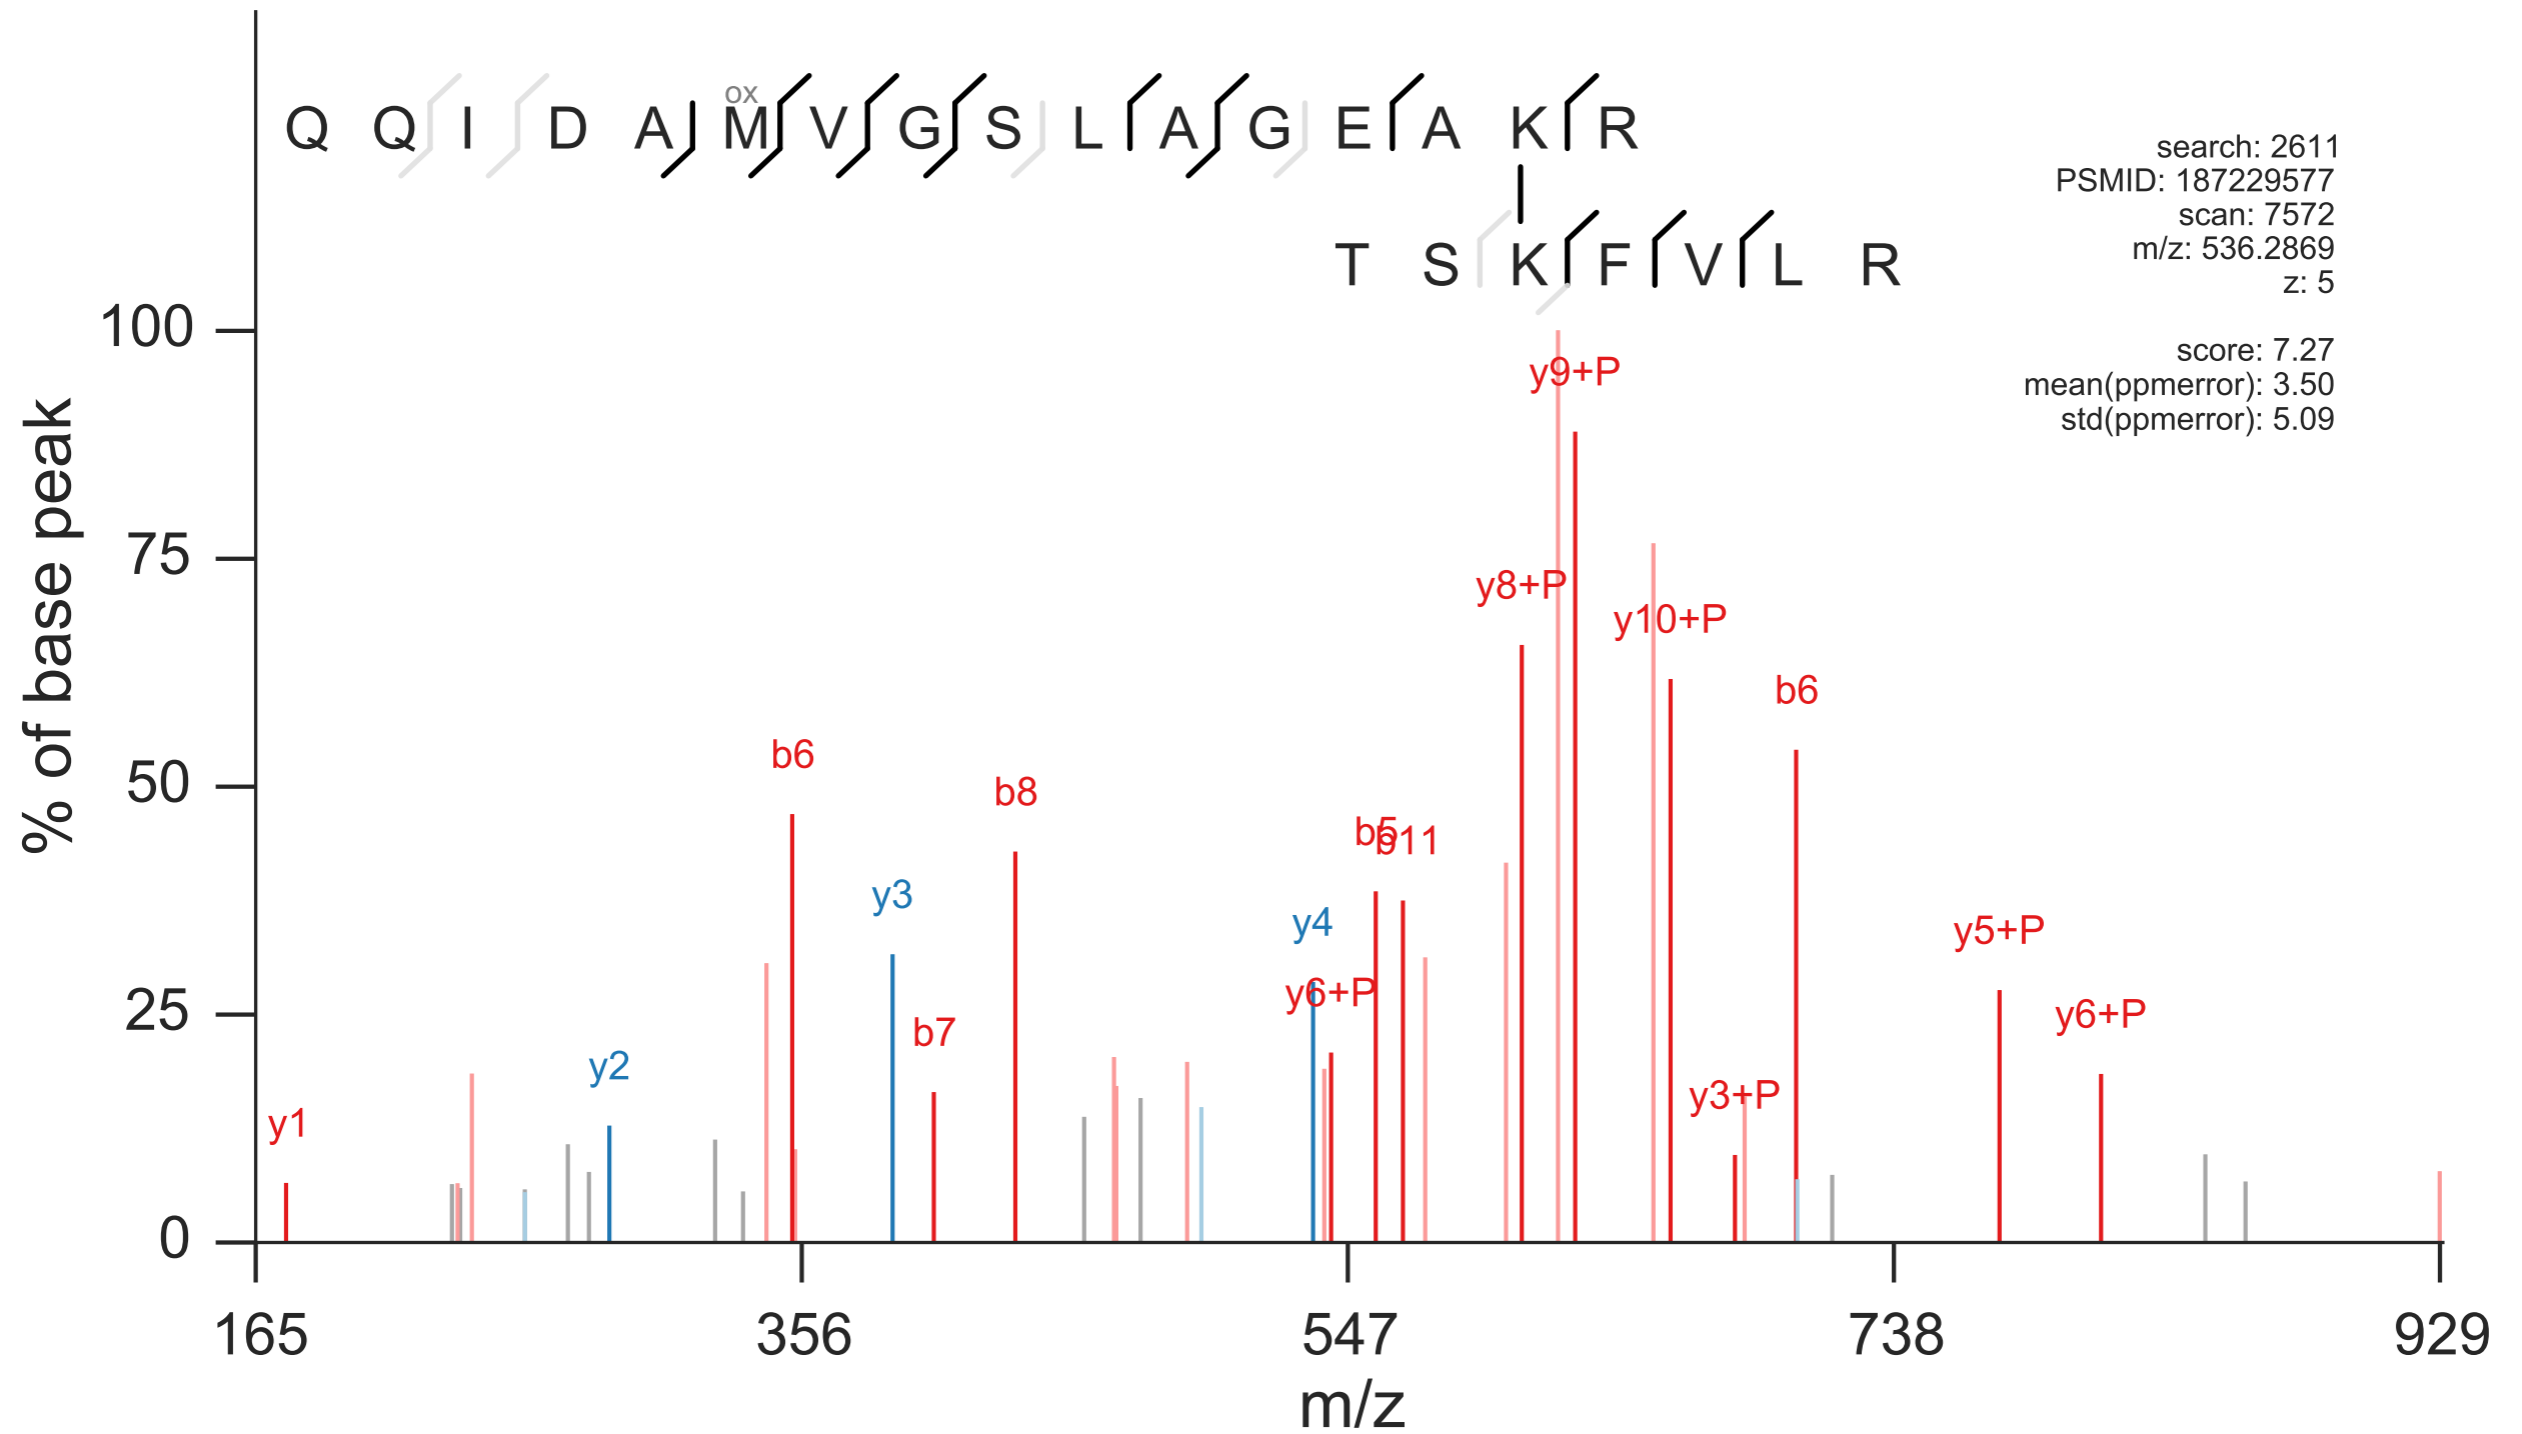

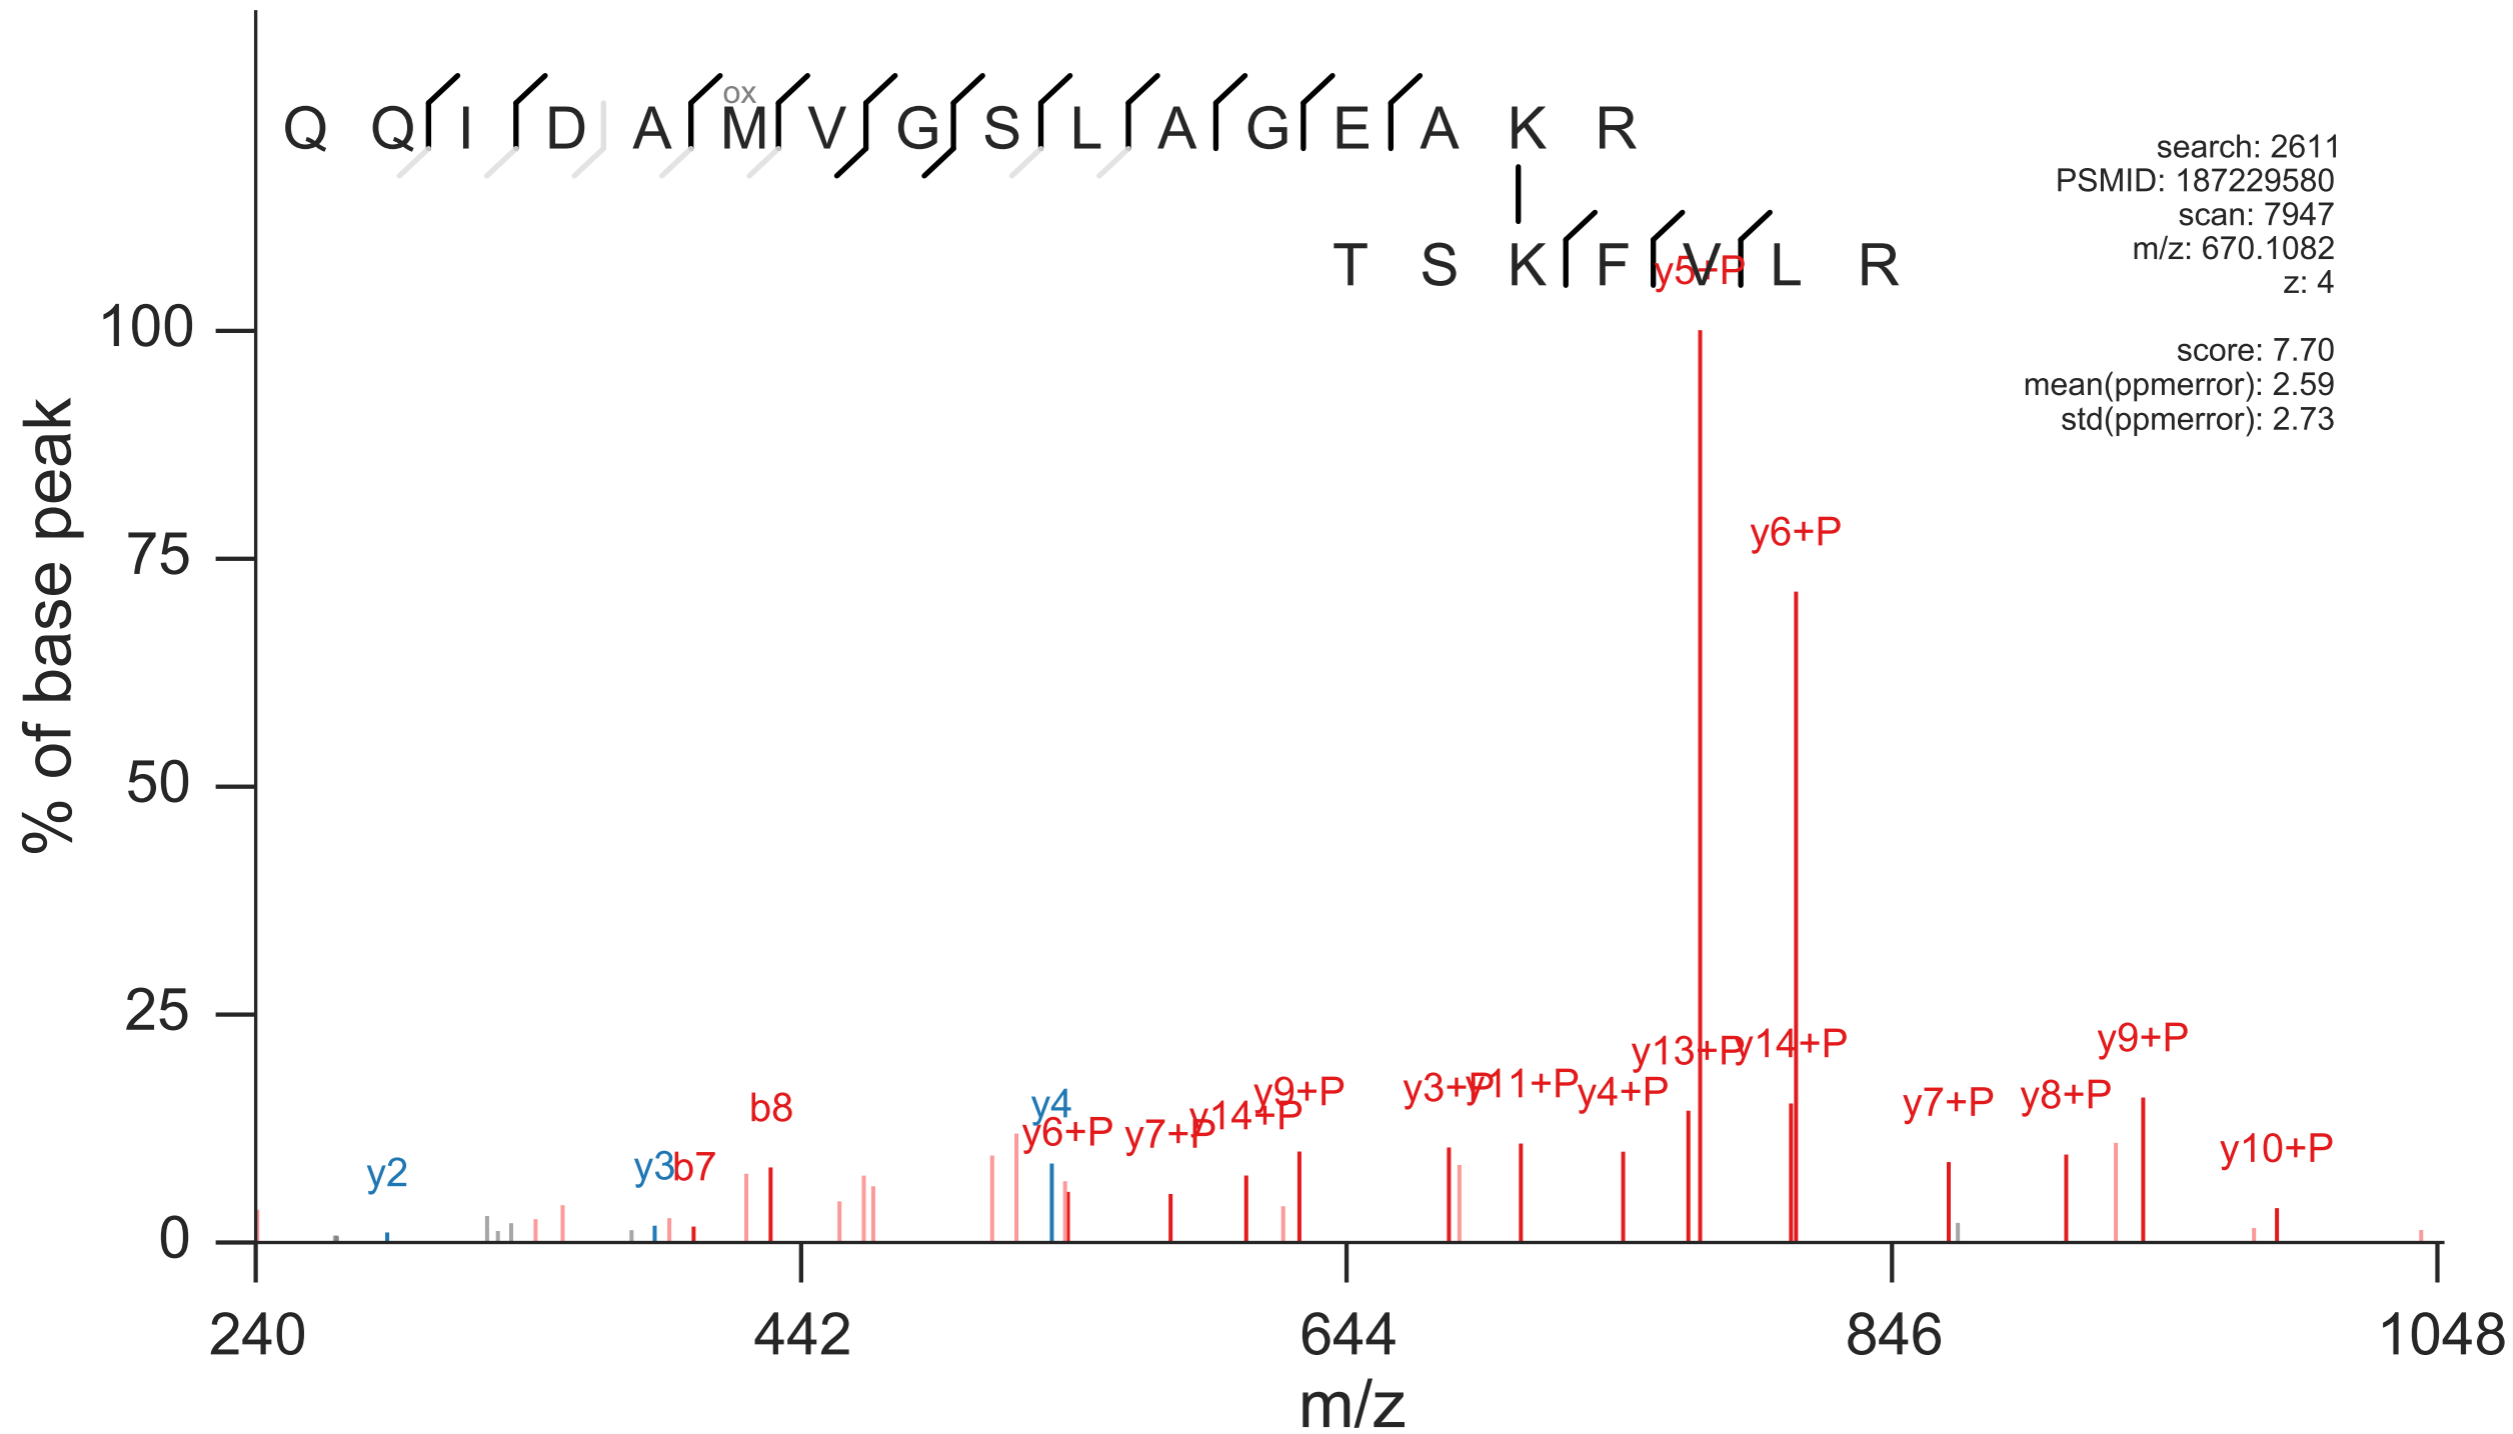

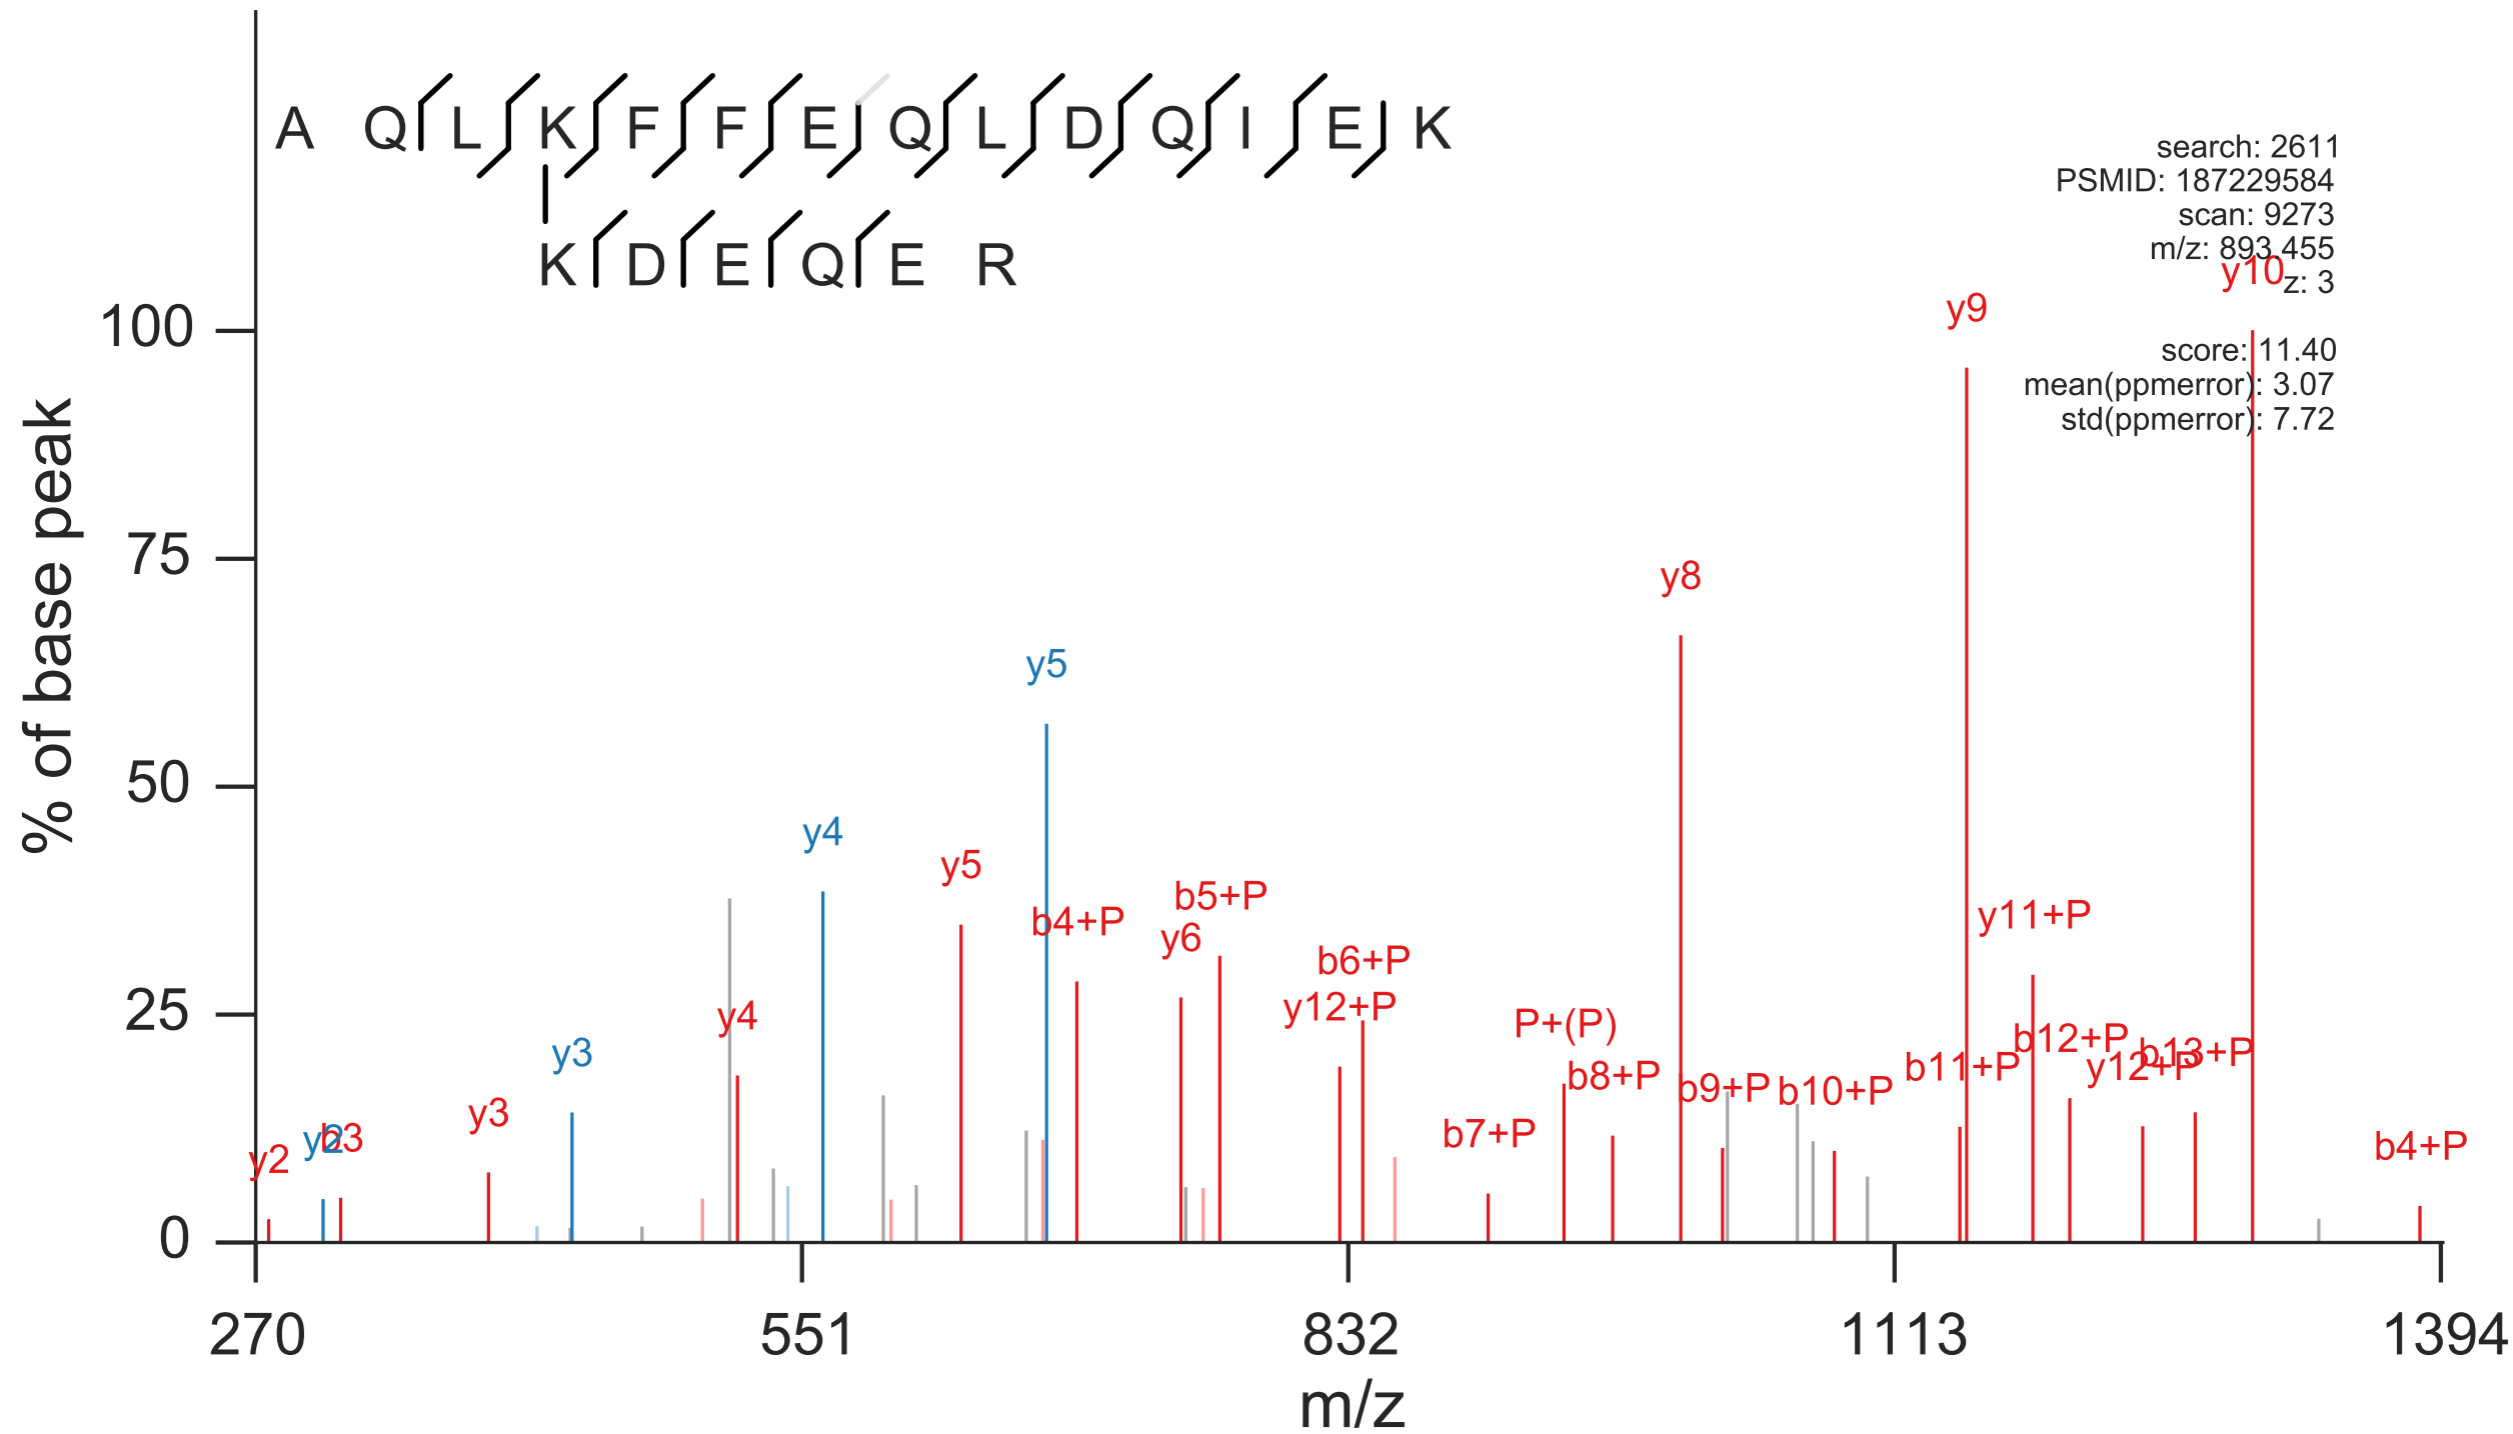

A Q L K F F E Q L D Q I E K  
 K D E Q E R

search: 2611  
 PSMID: 187229593  
 scan: 9271  
 m/z: 670.3417  
 z: 4  
 score: 10.44  
 mean(ppmerror): 3.79  
 std(ppmerror): 4.09

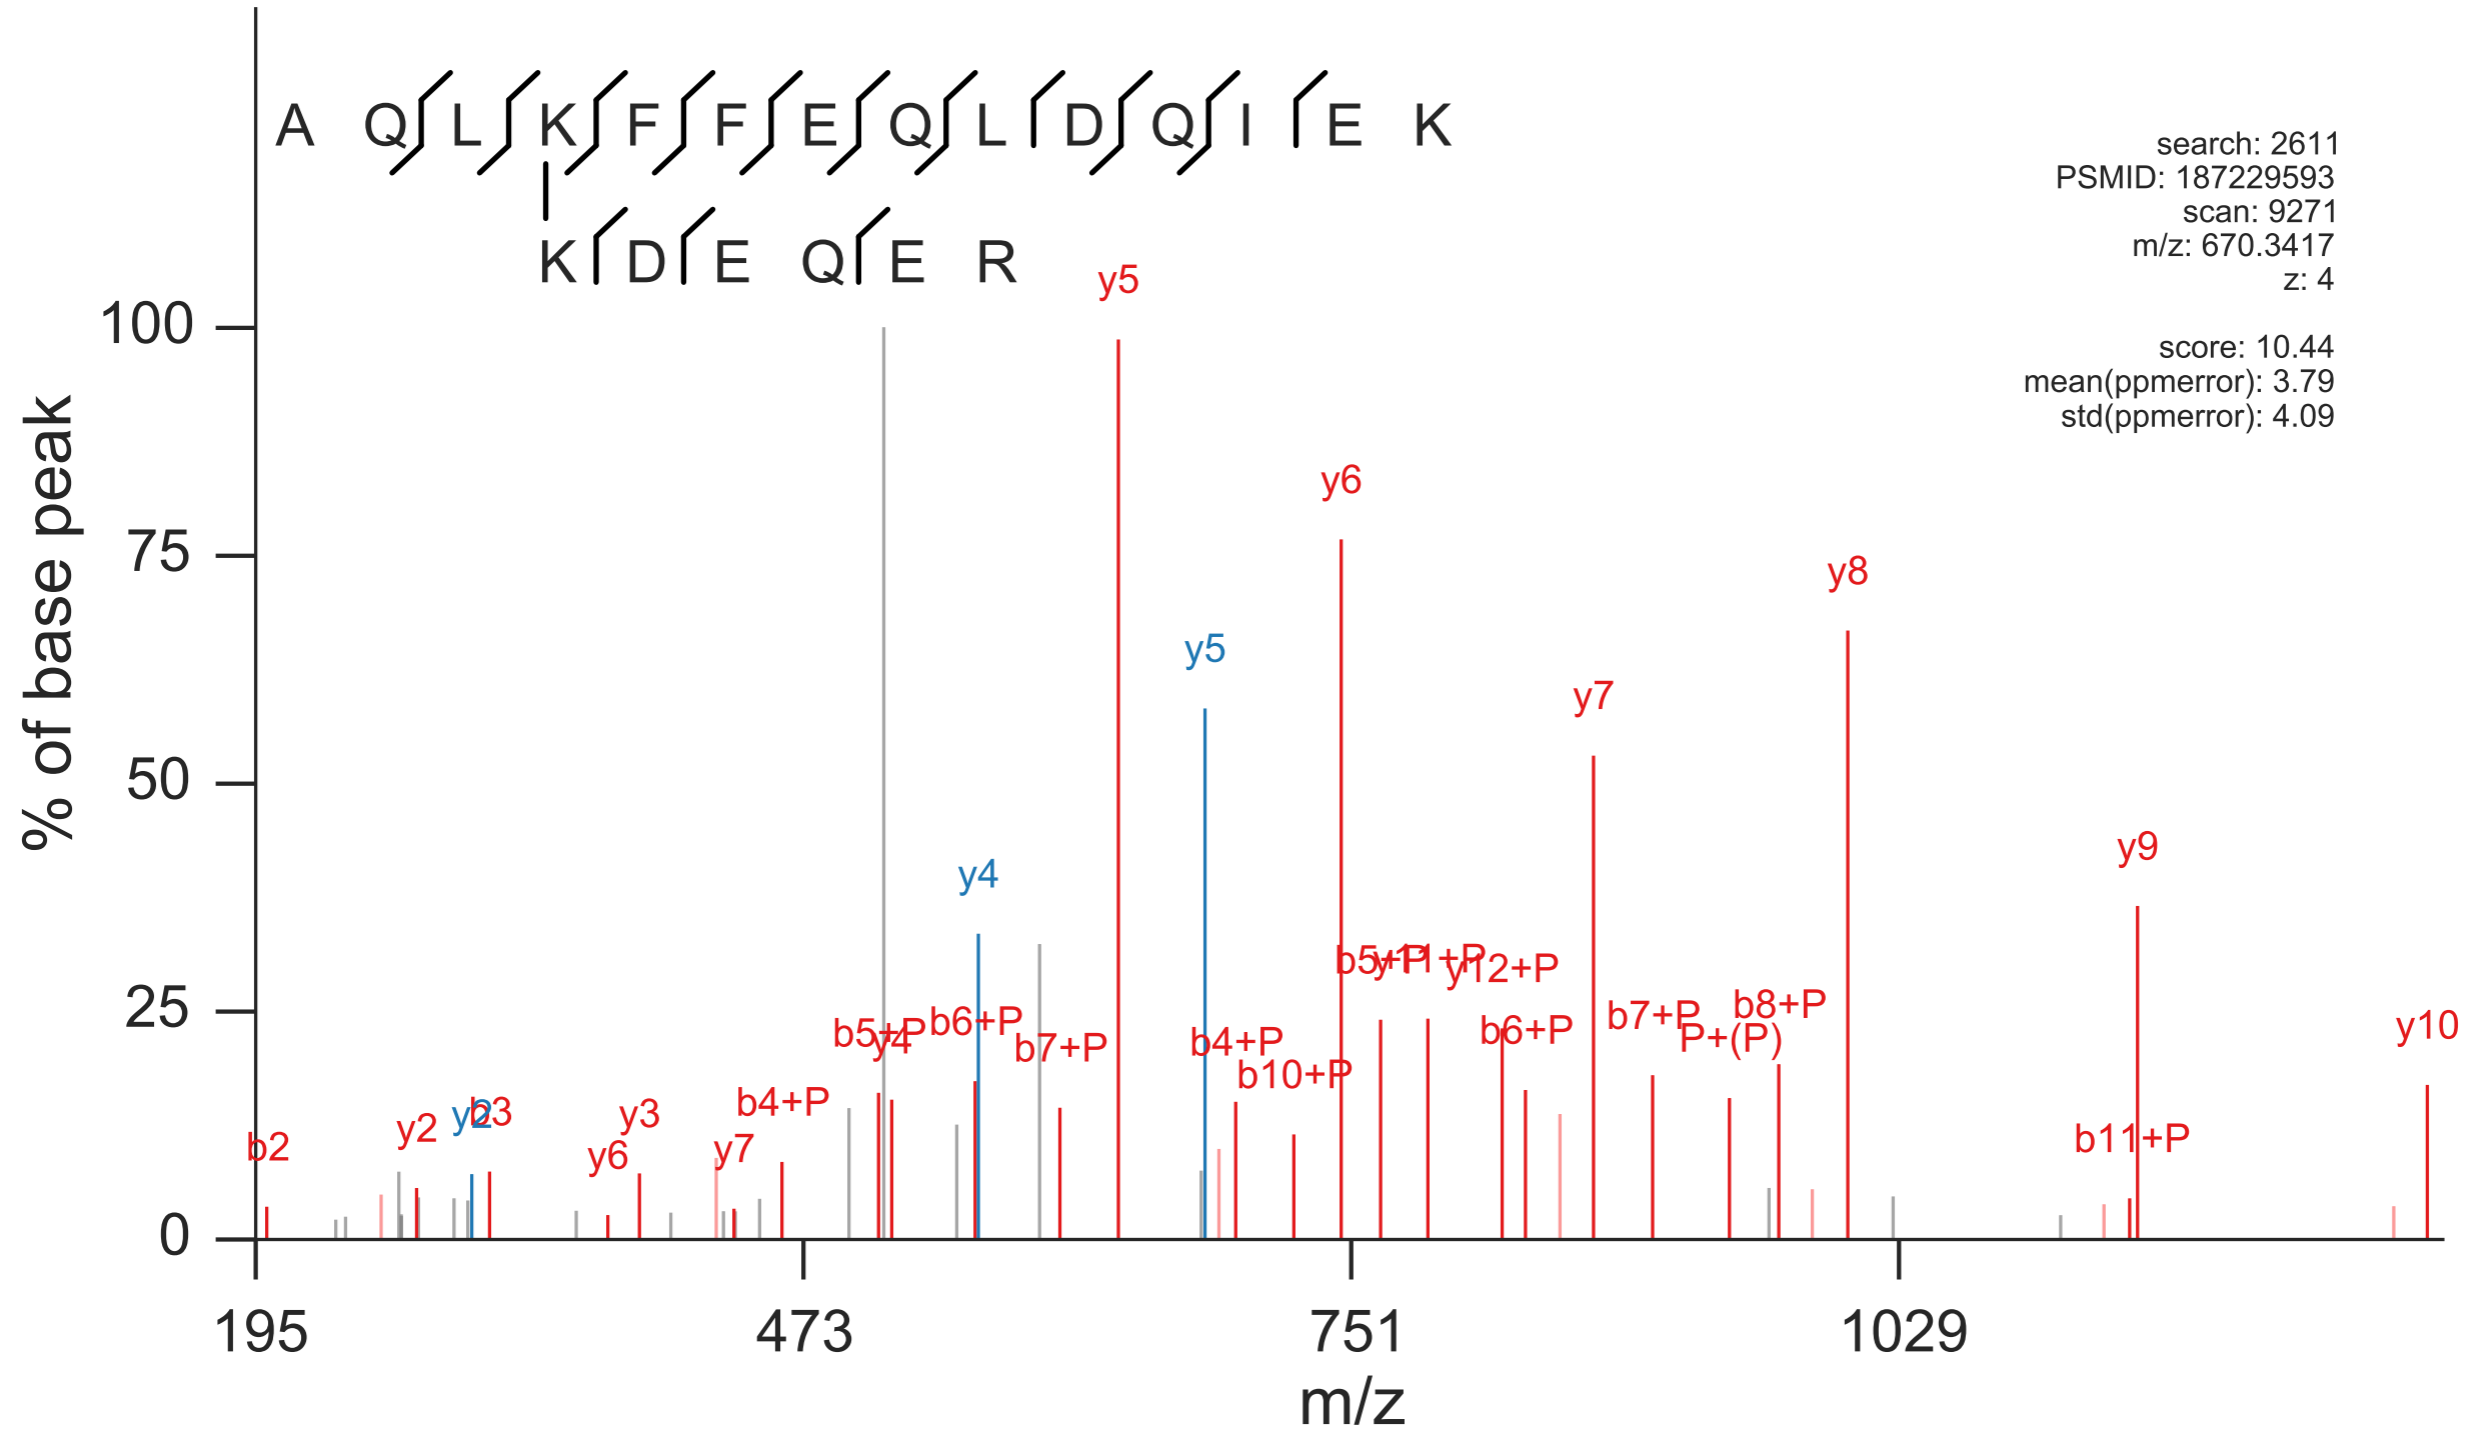

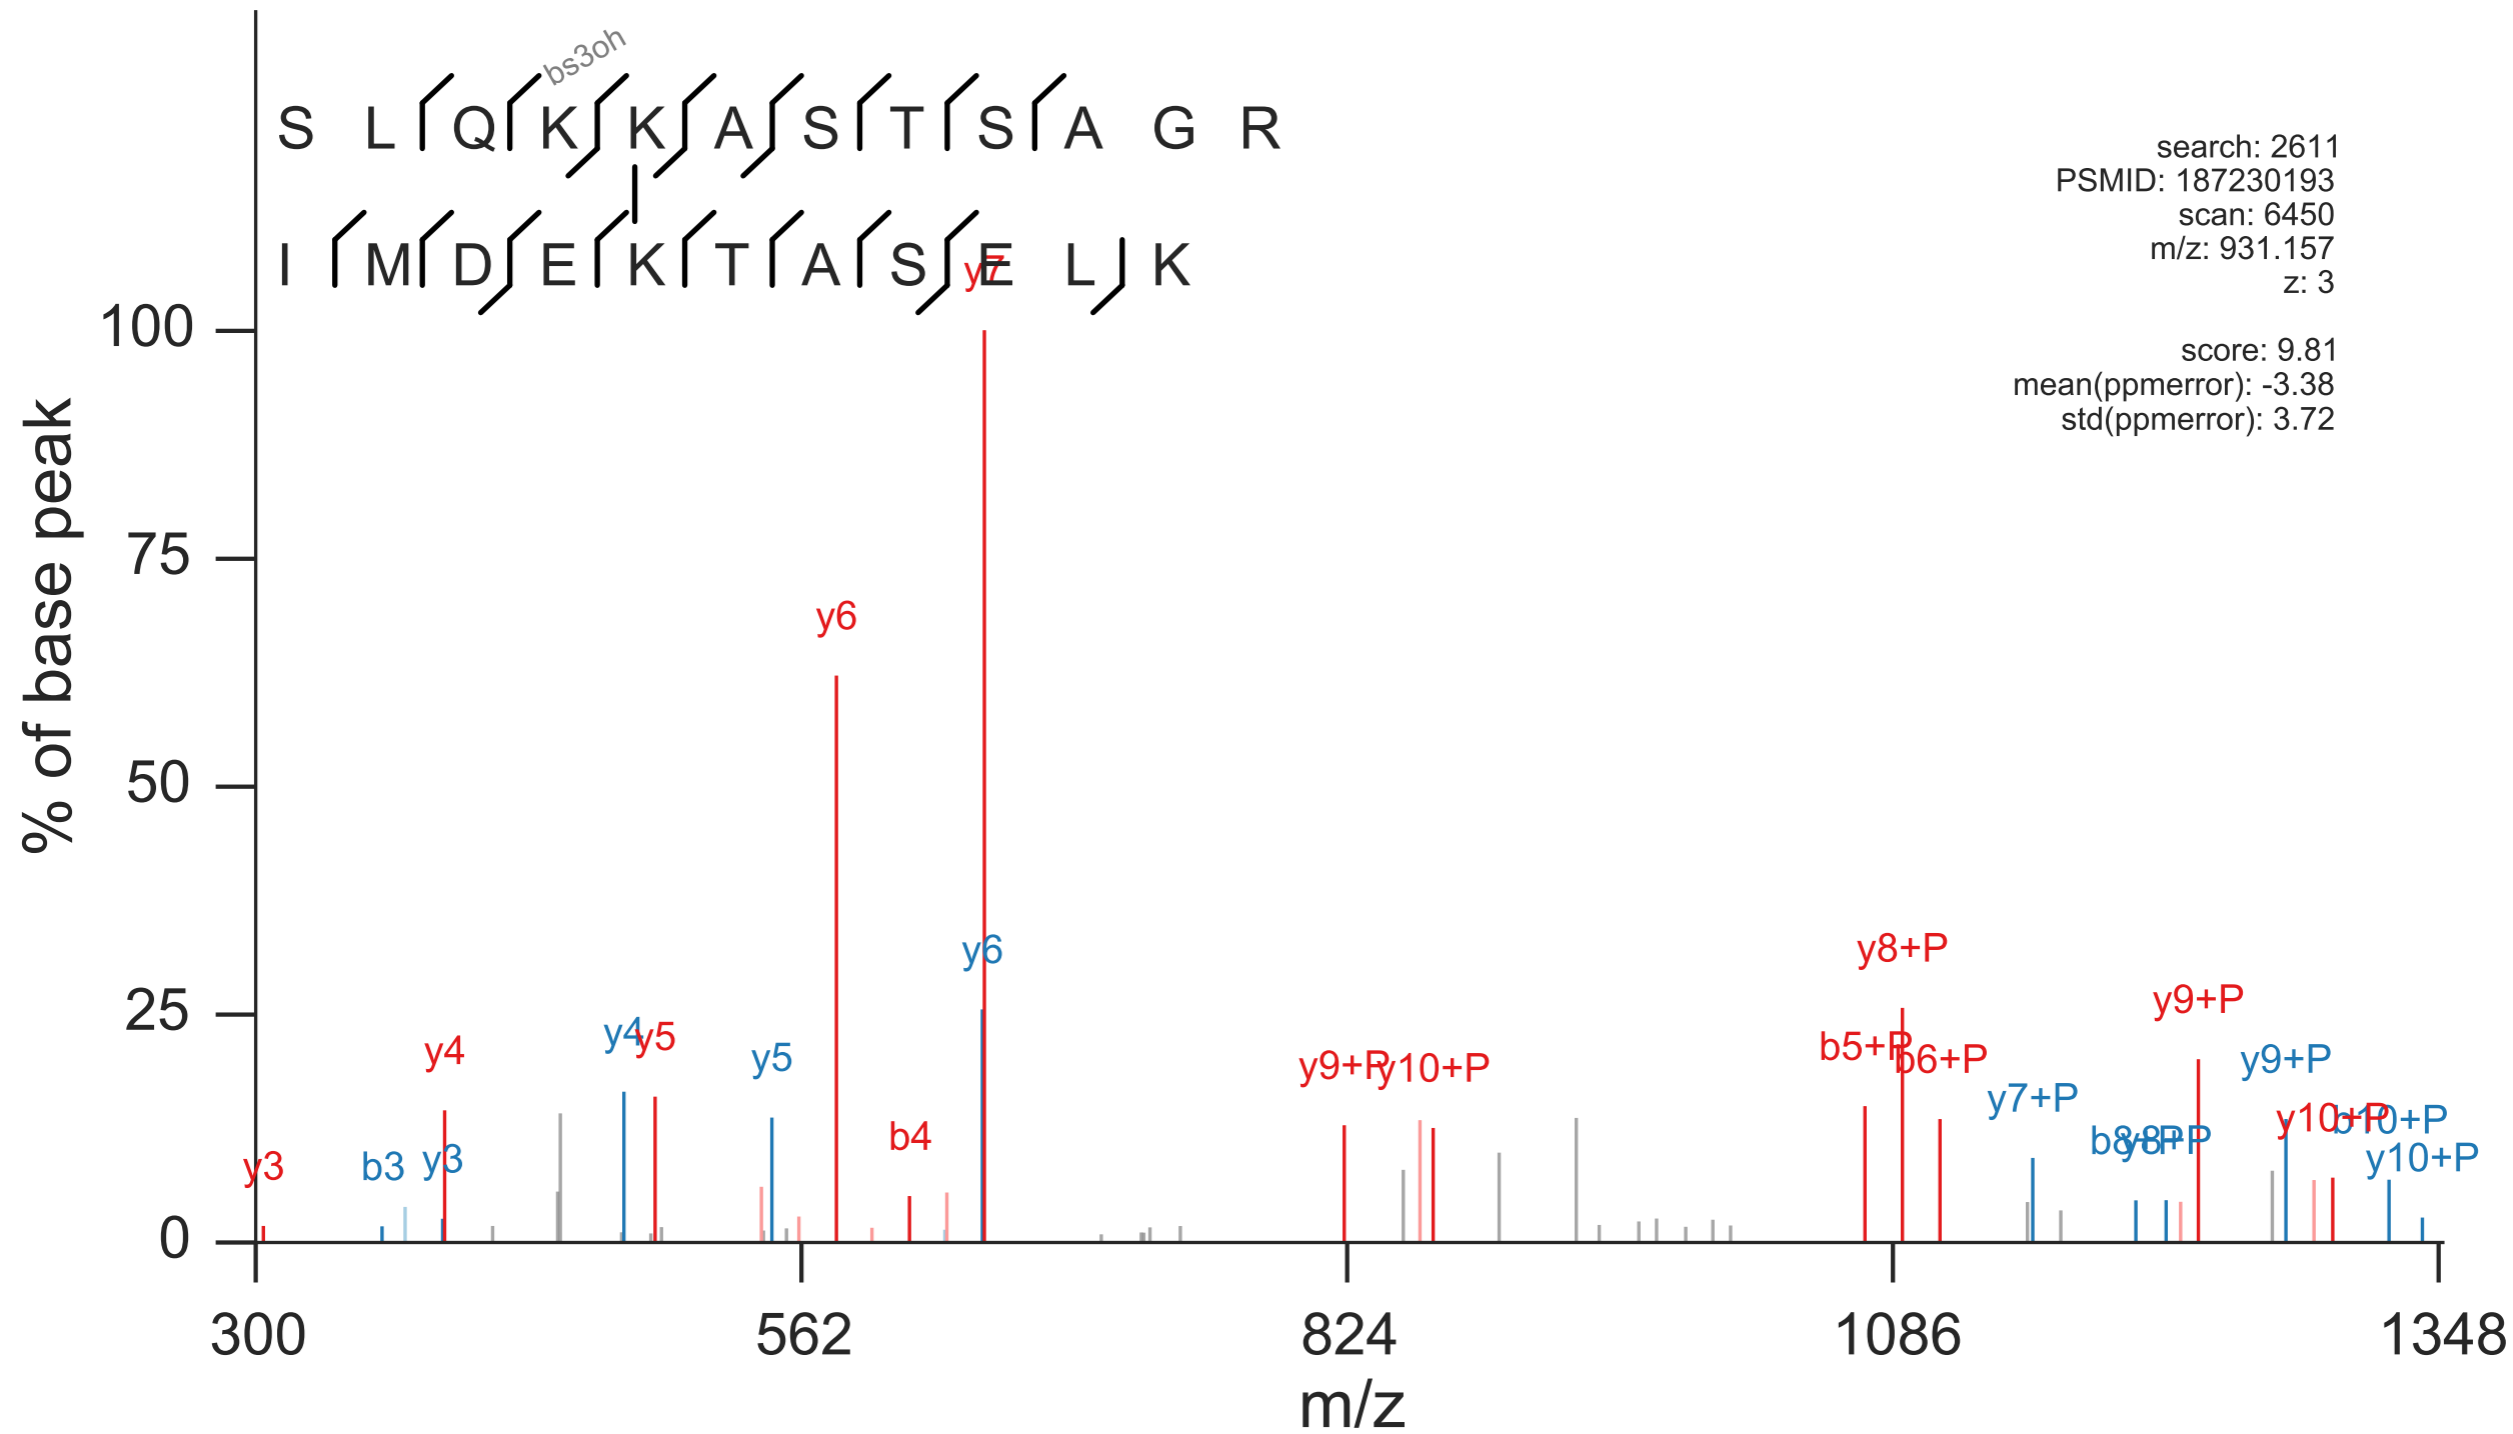

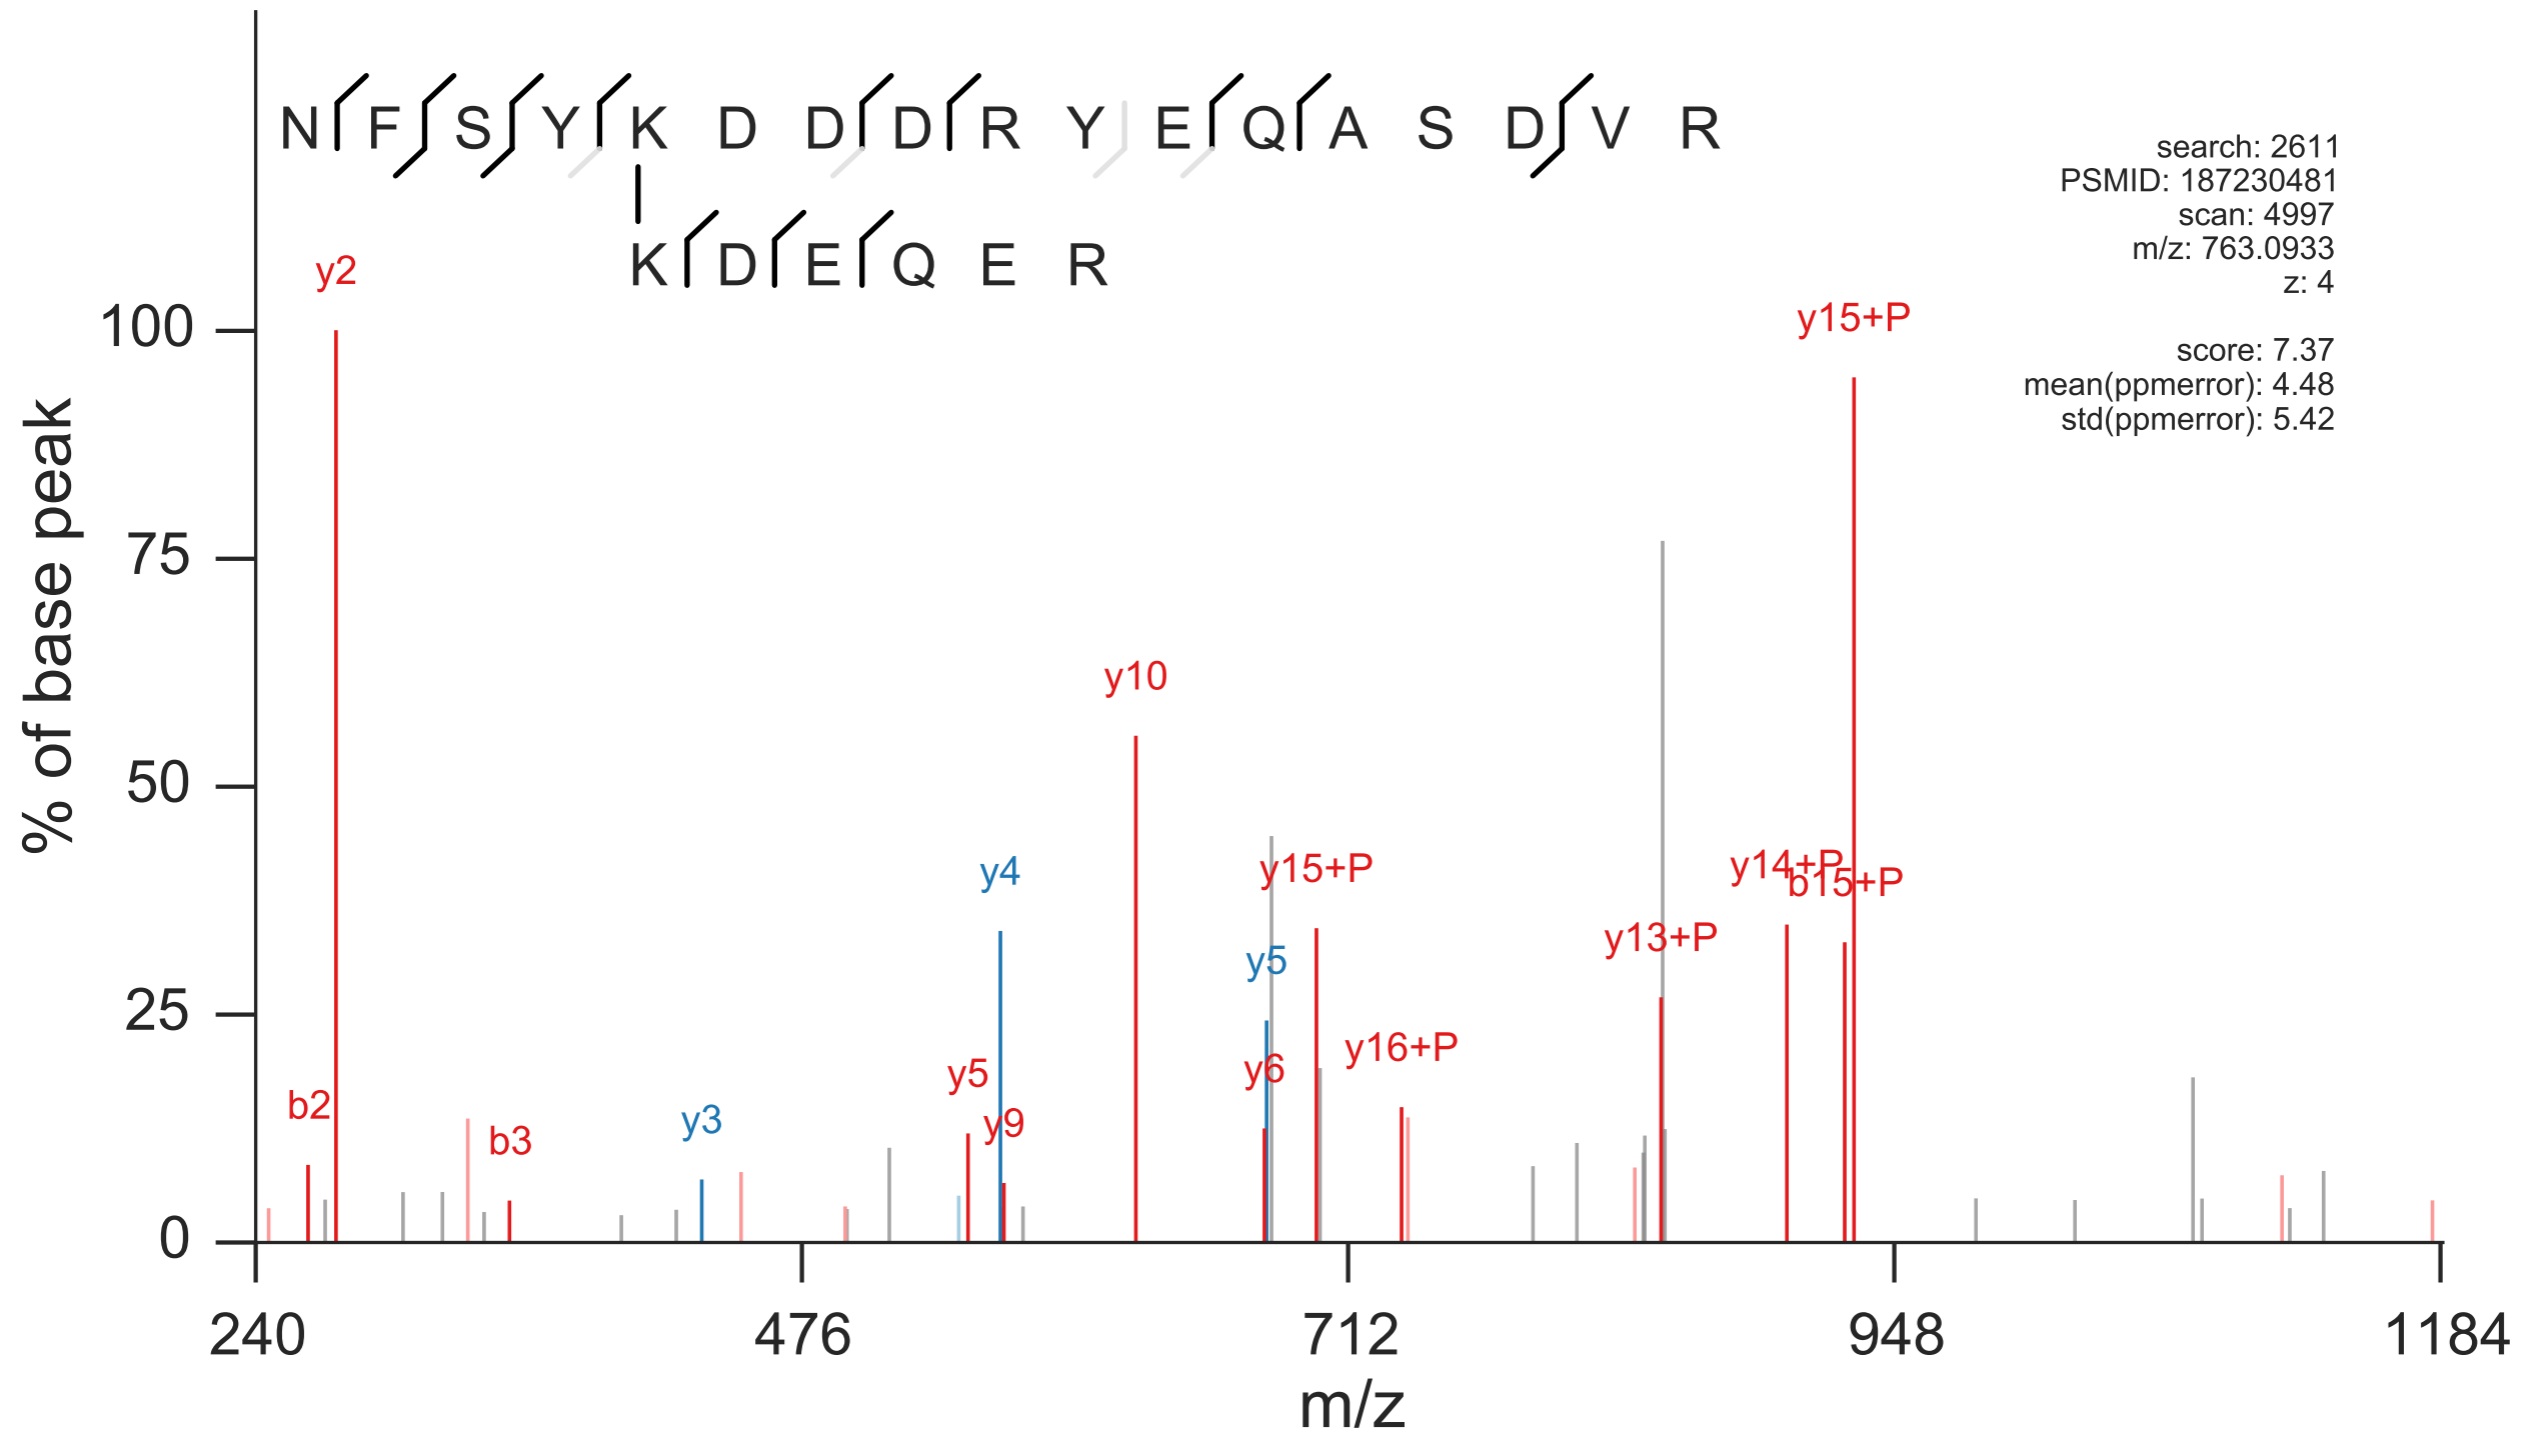

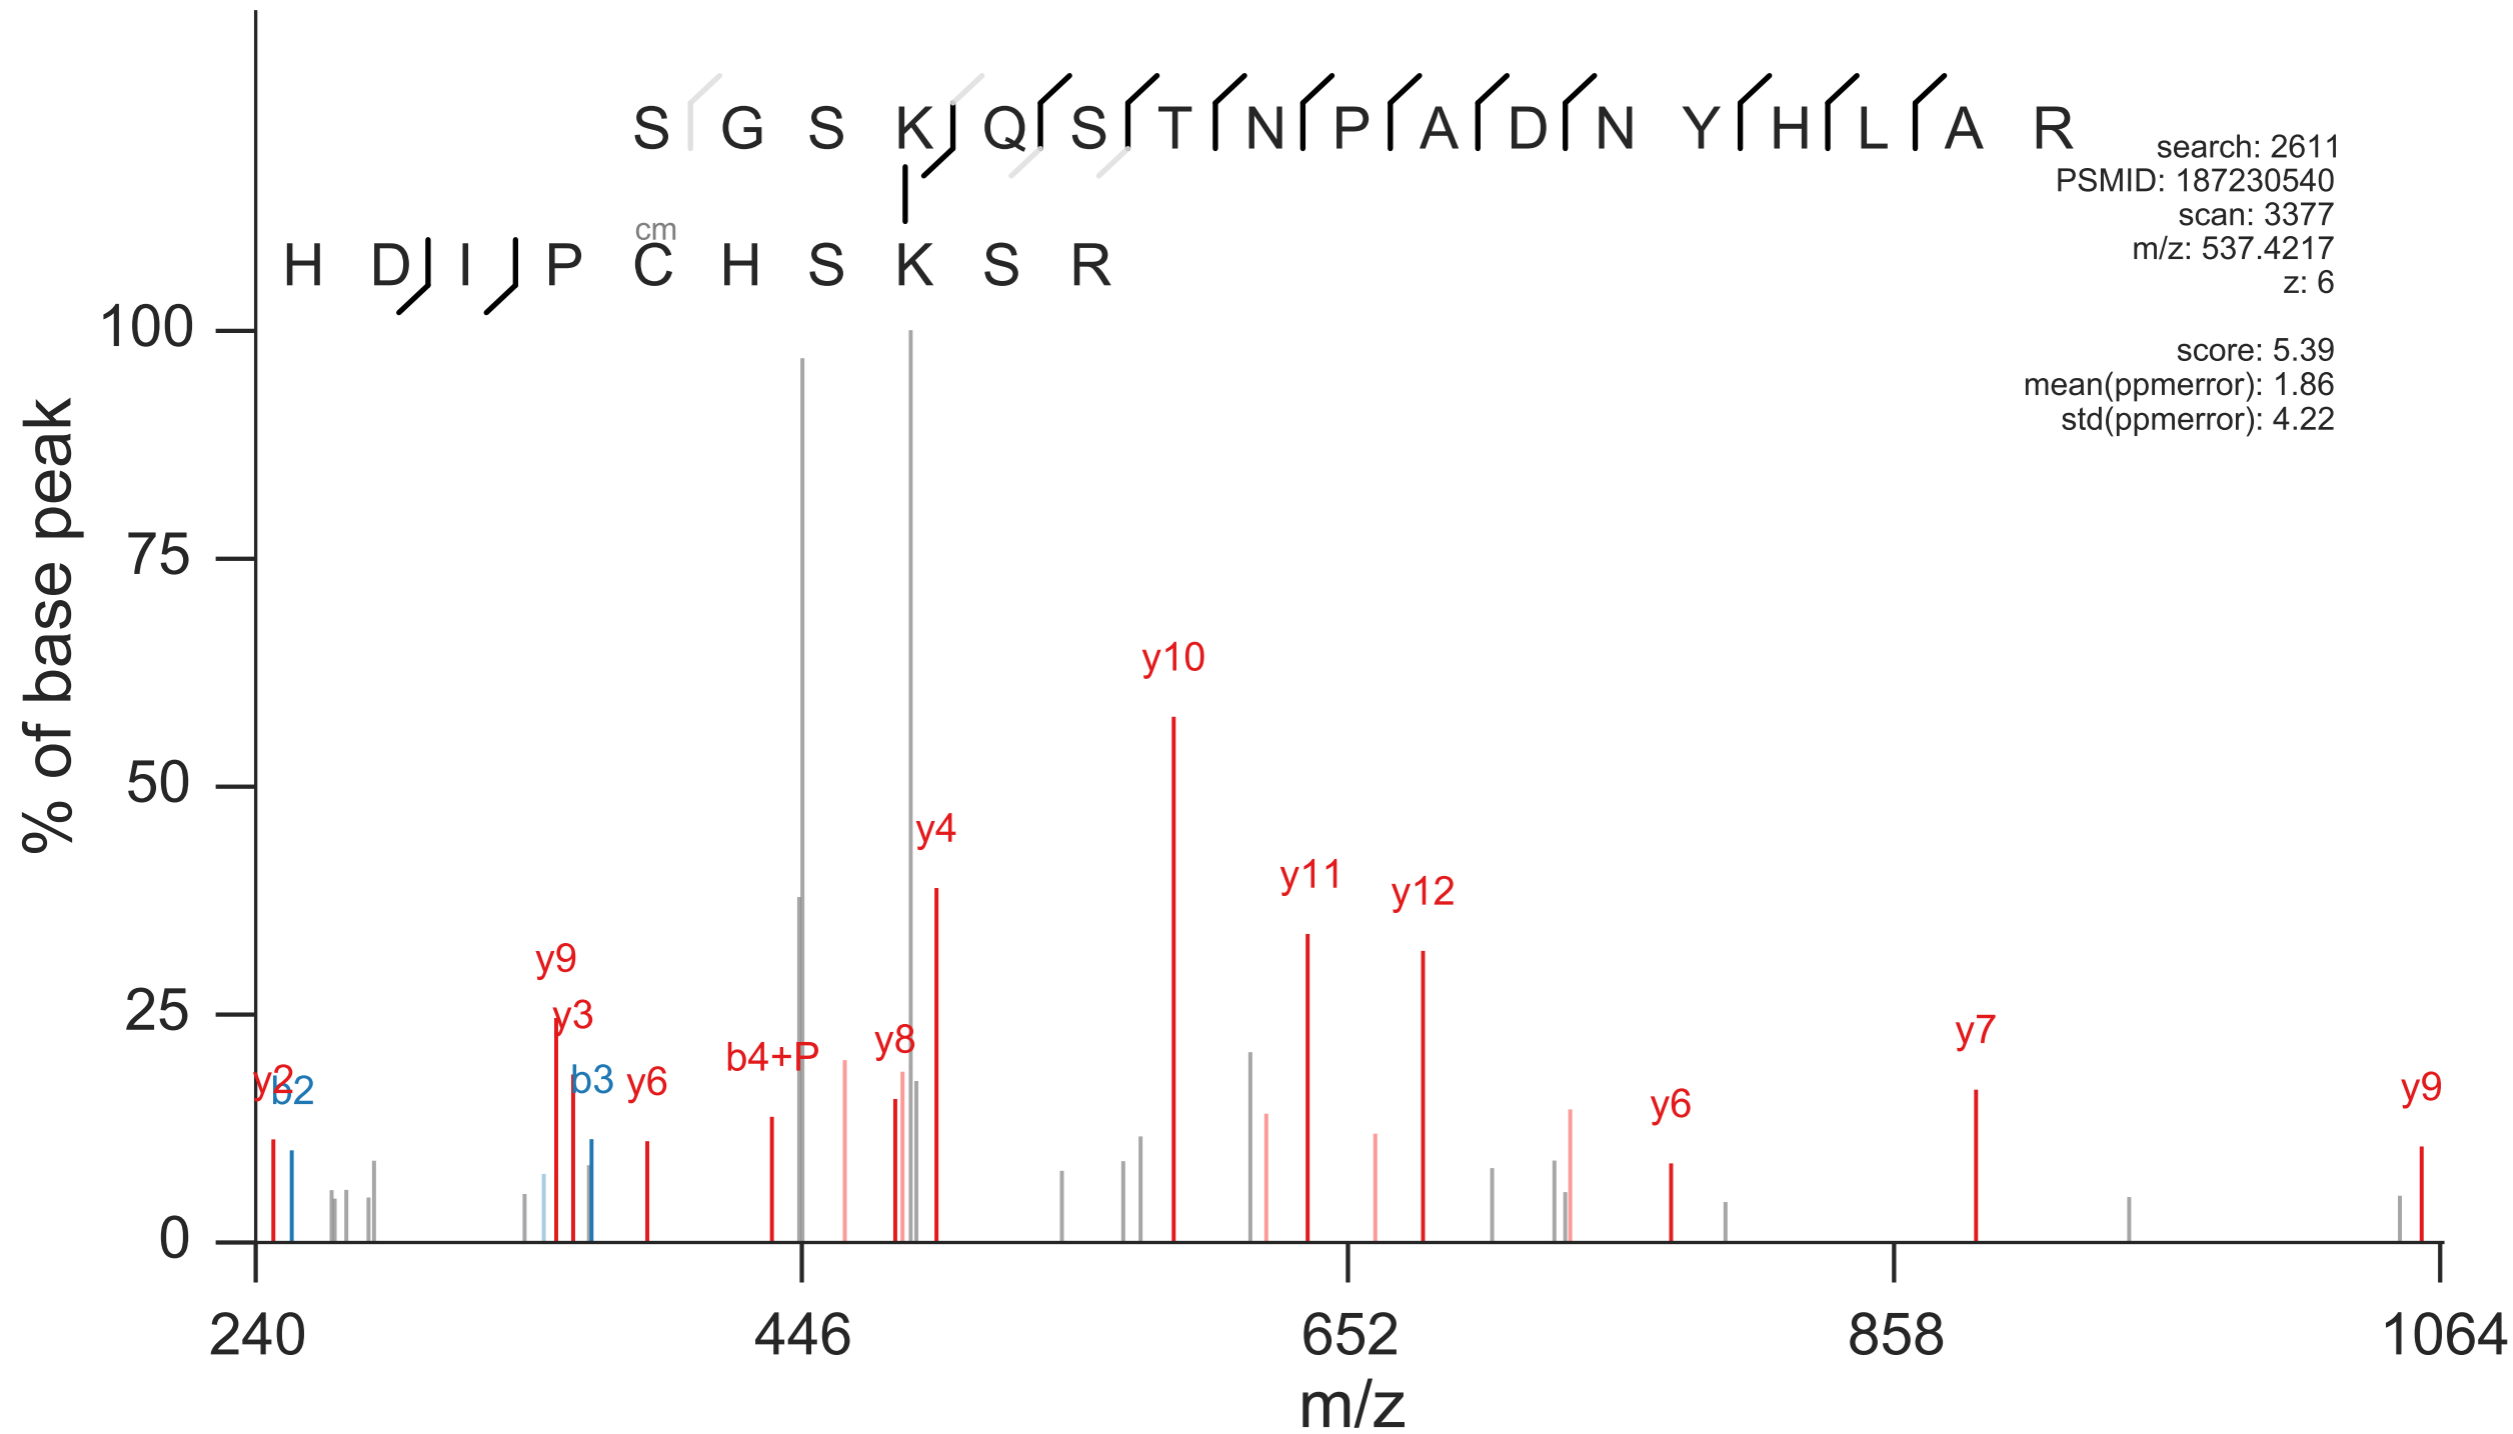

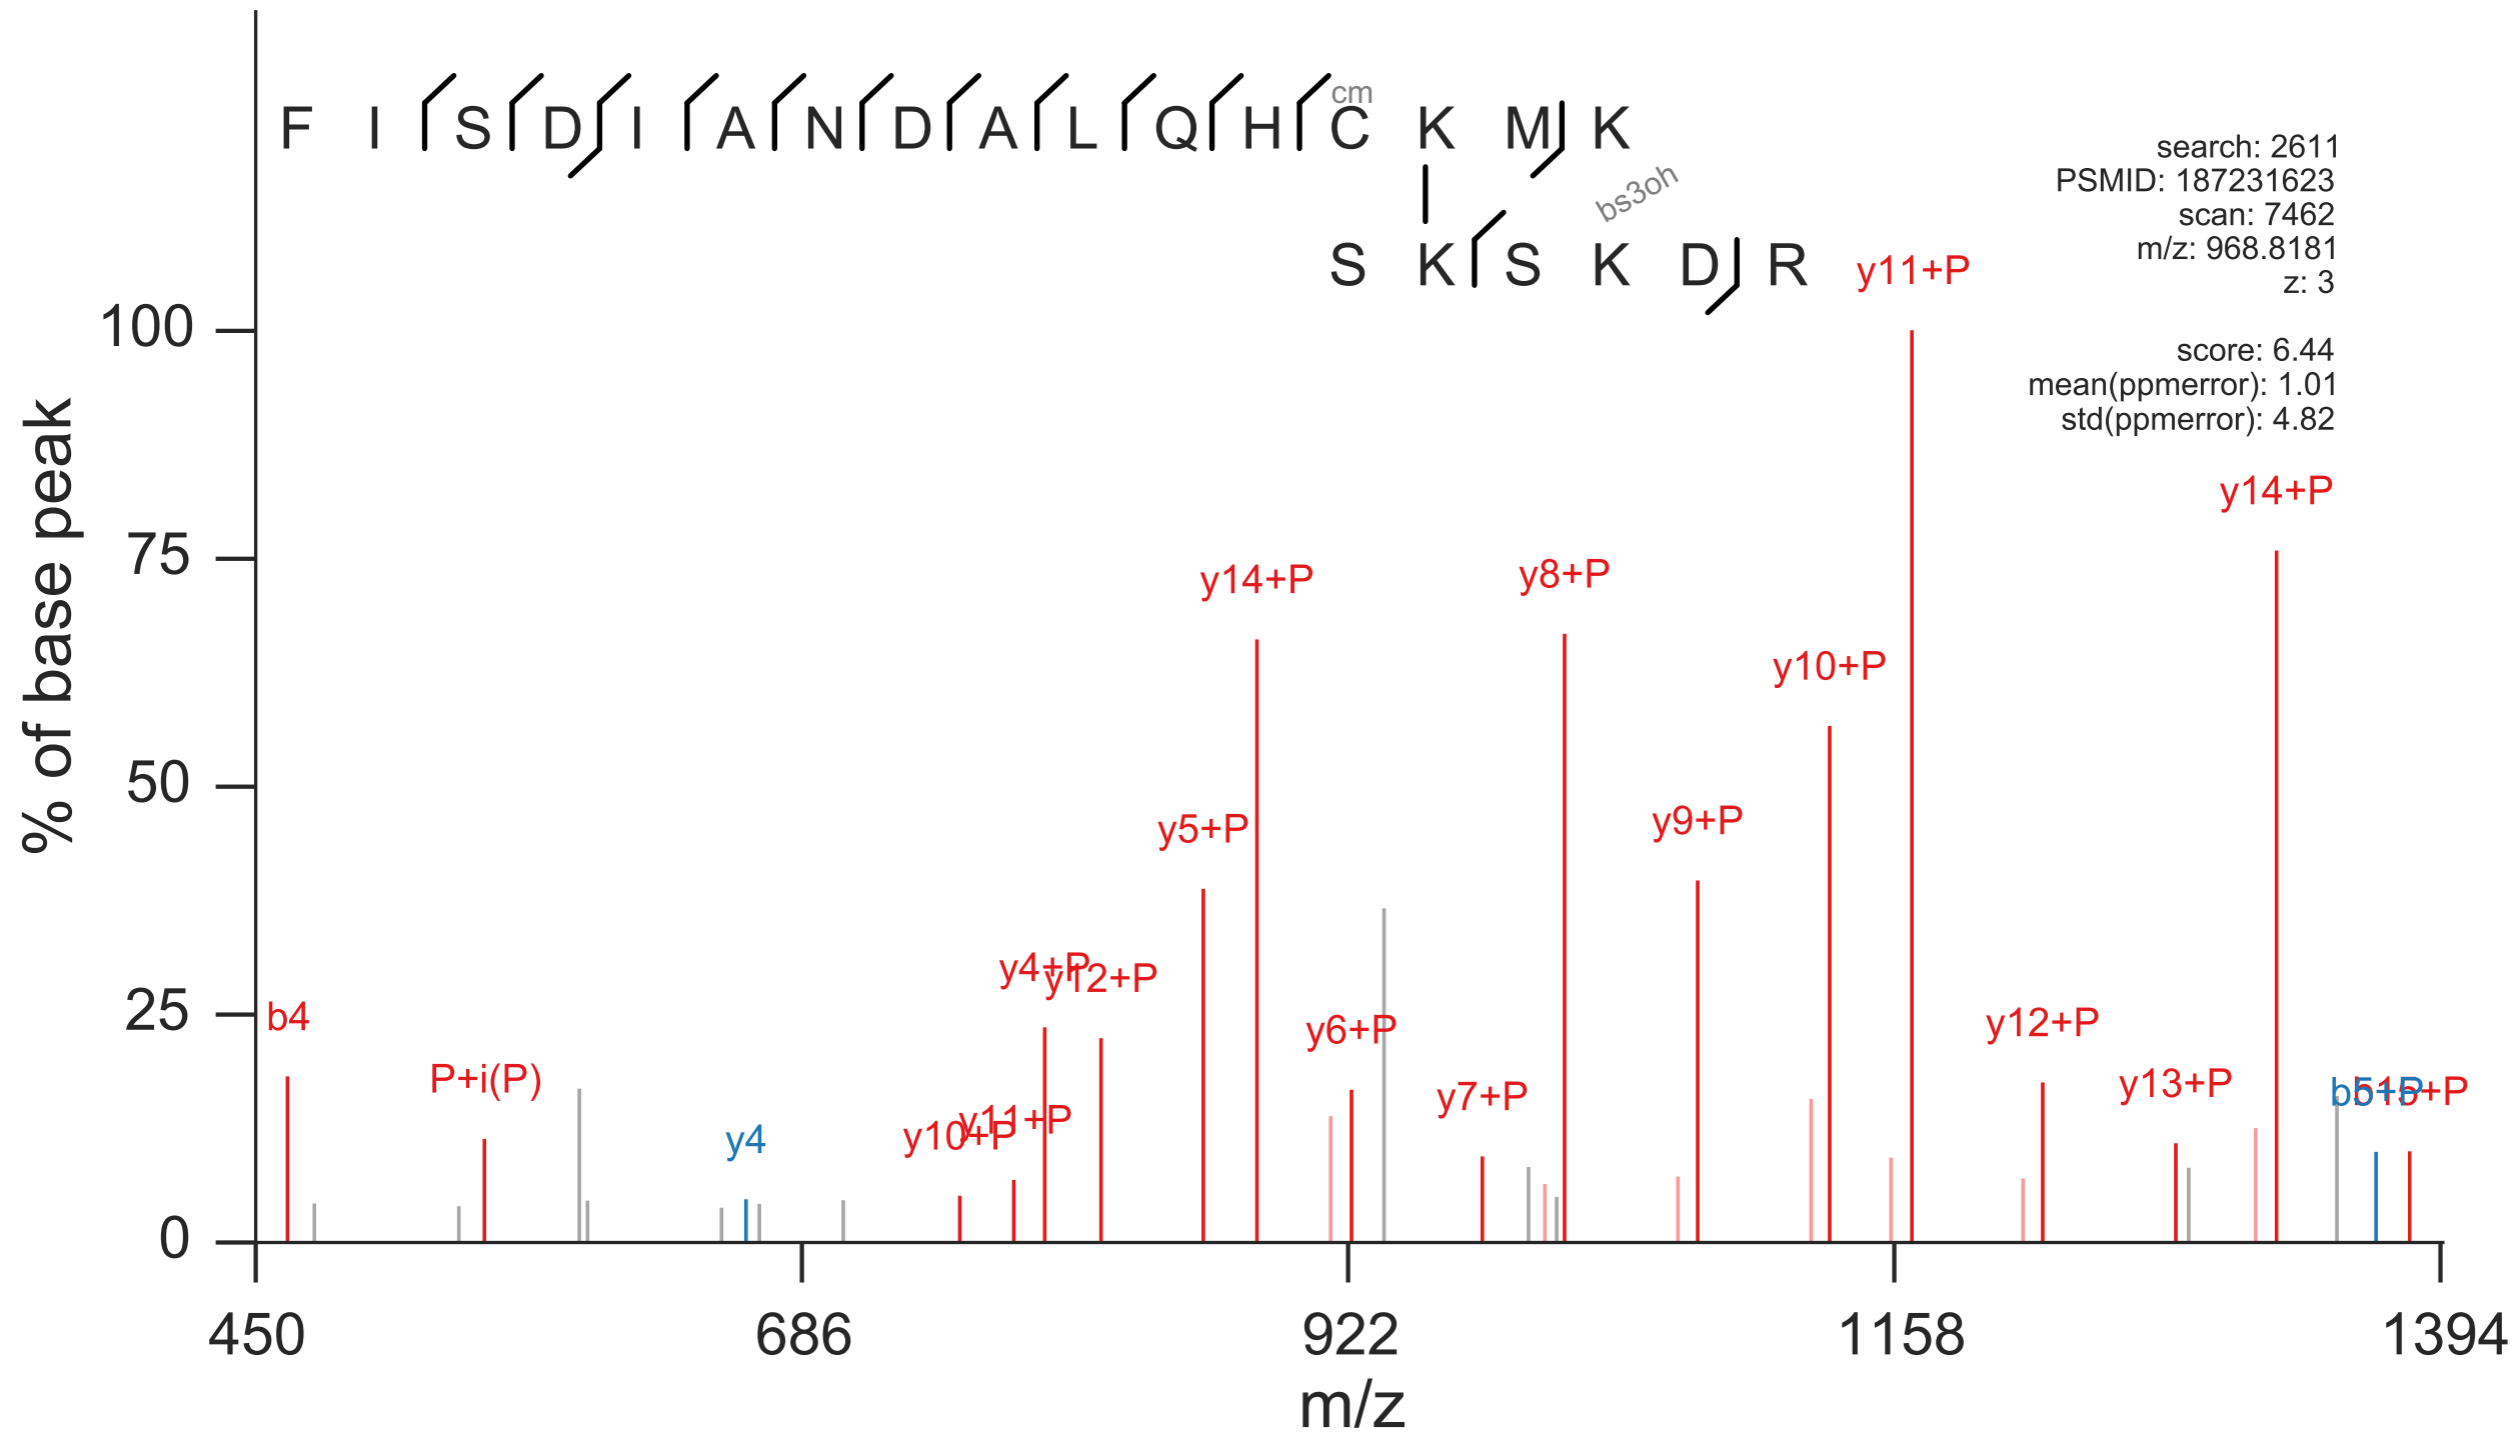



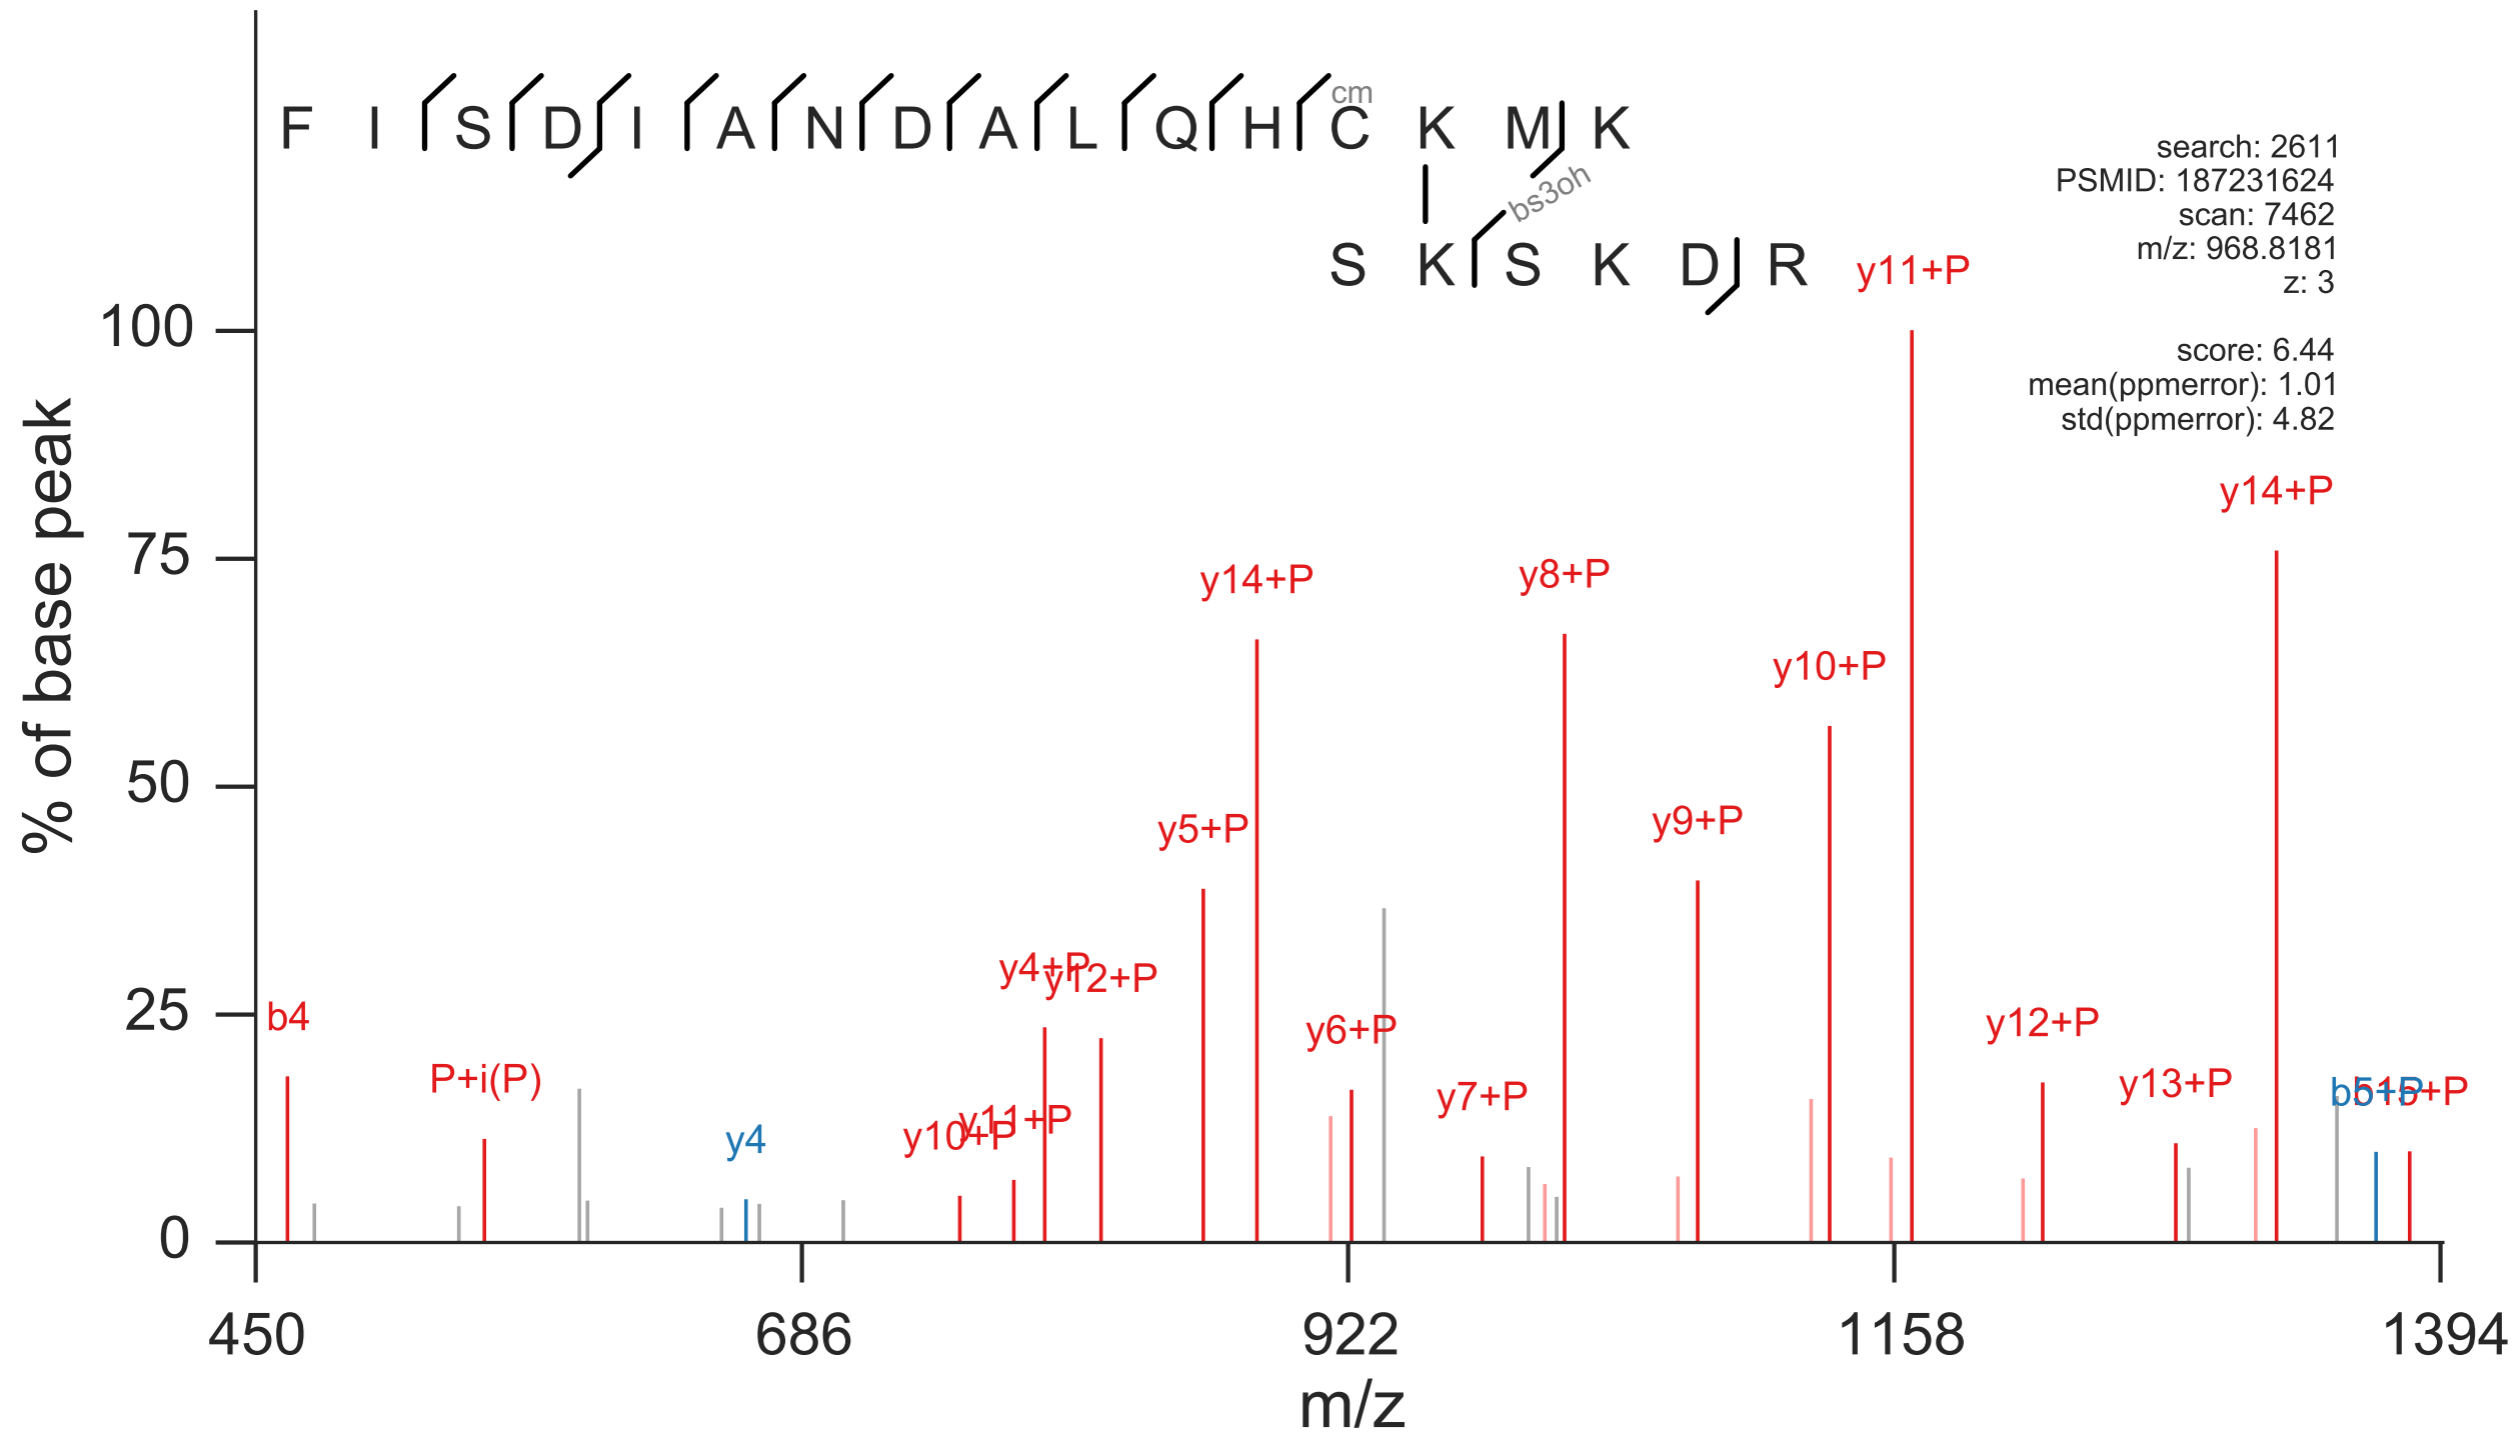

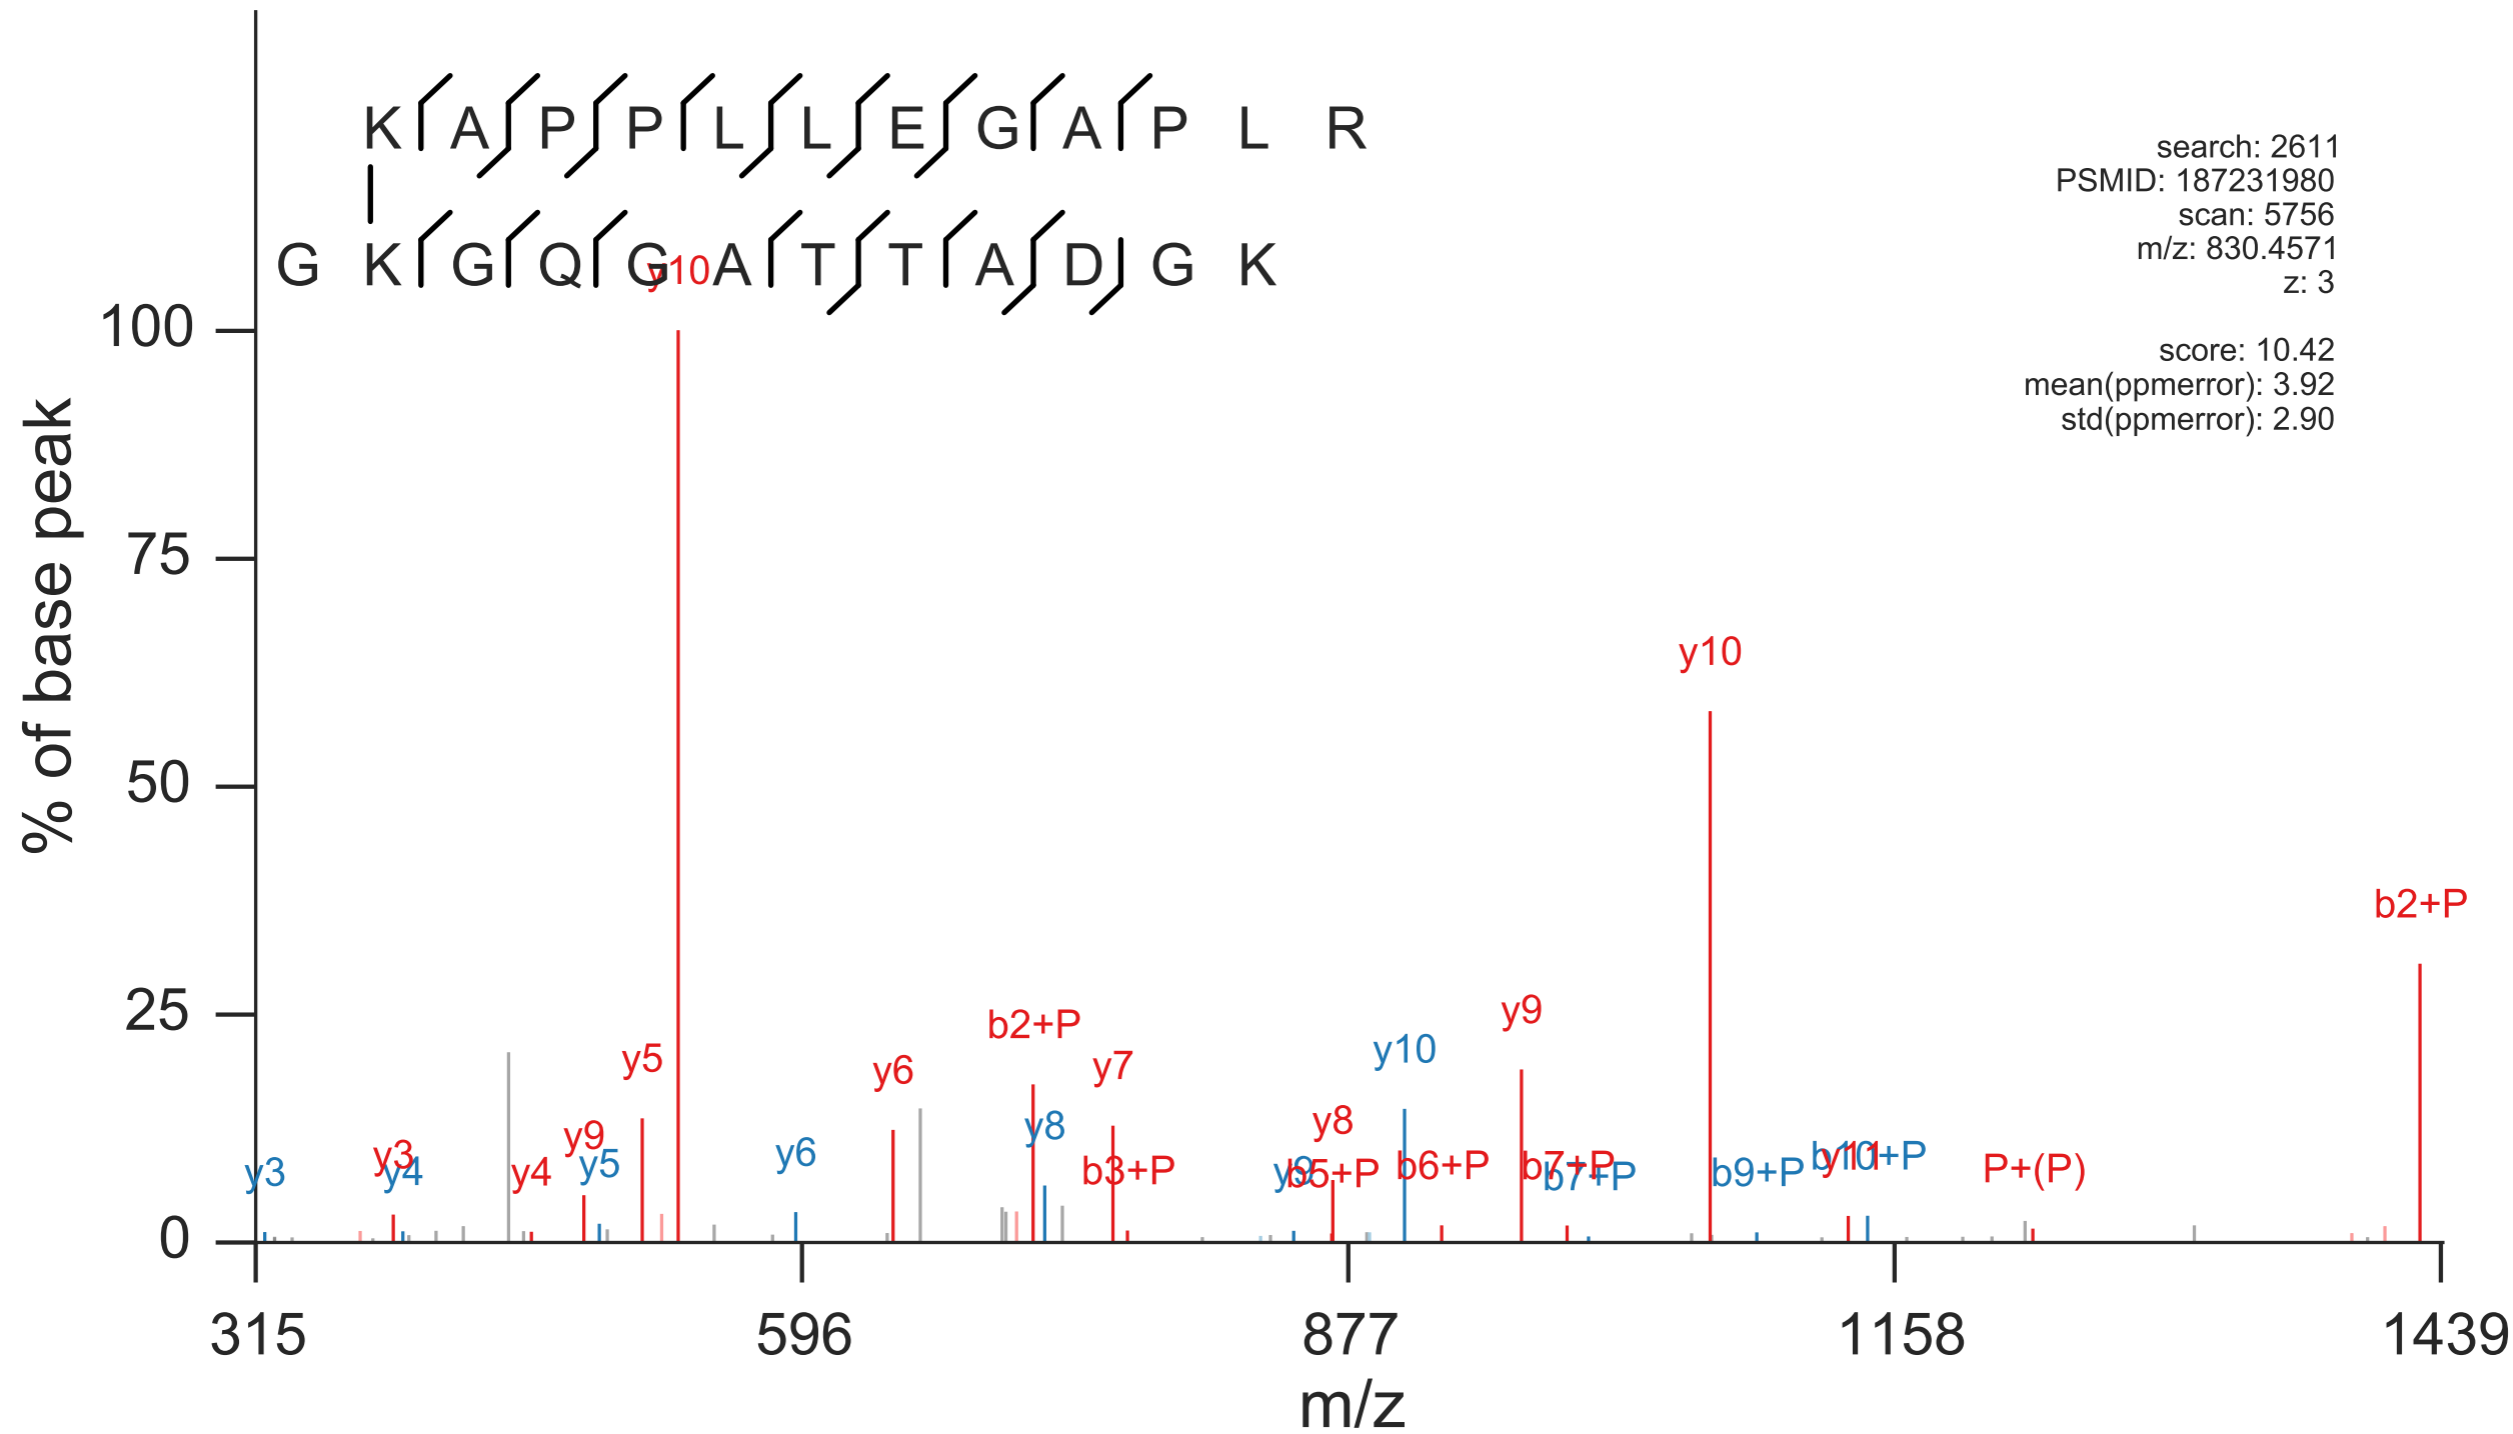

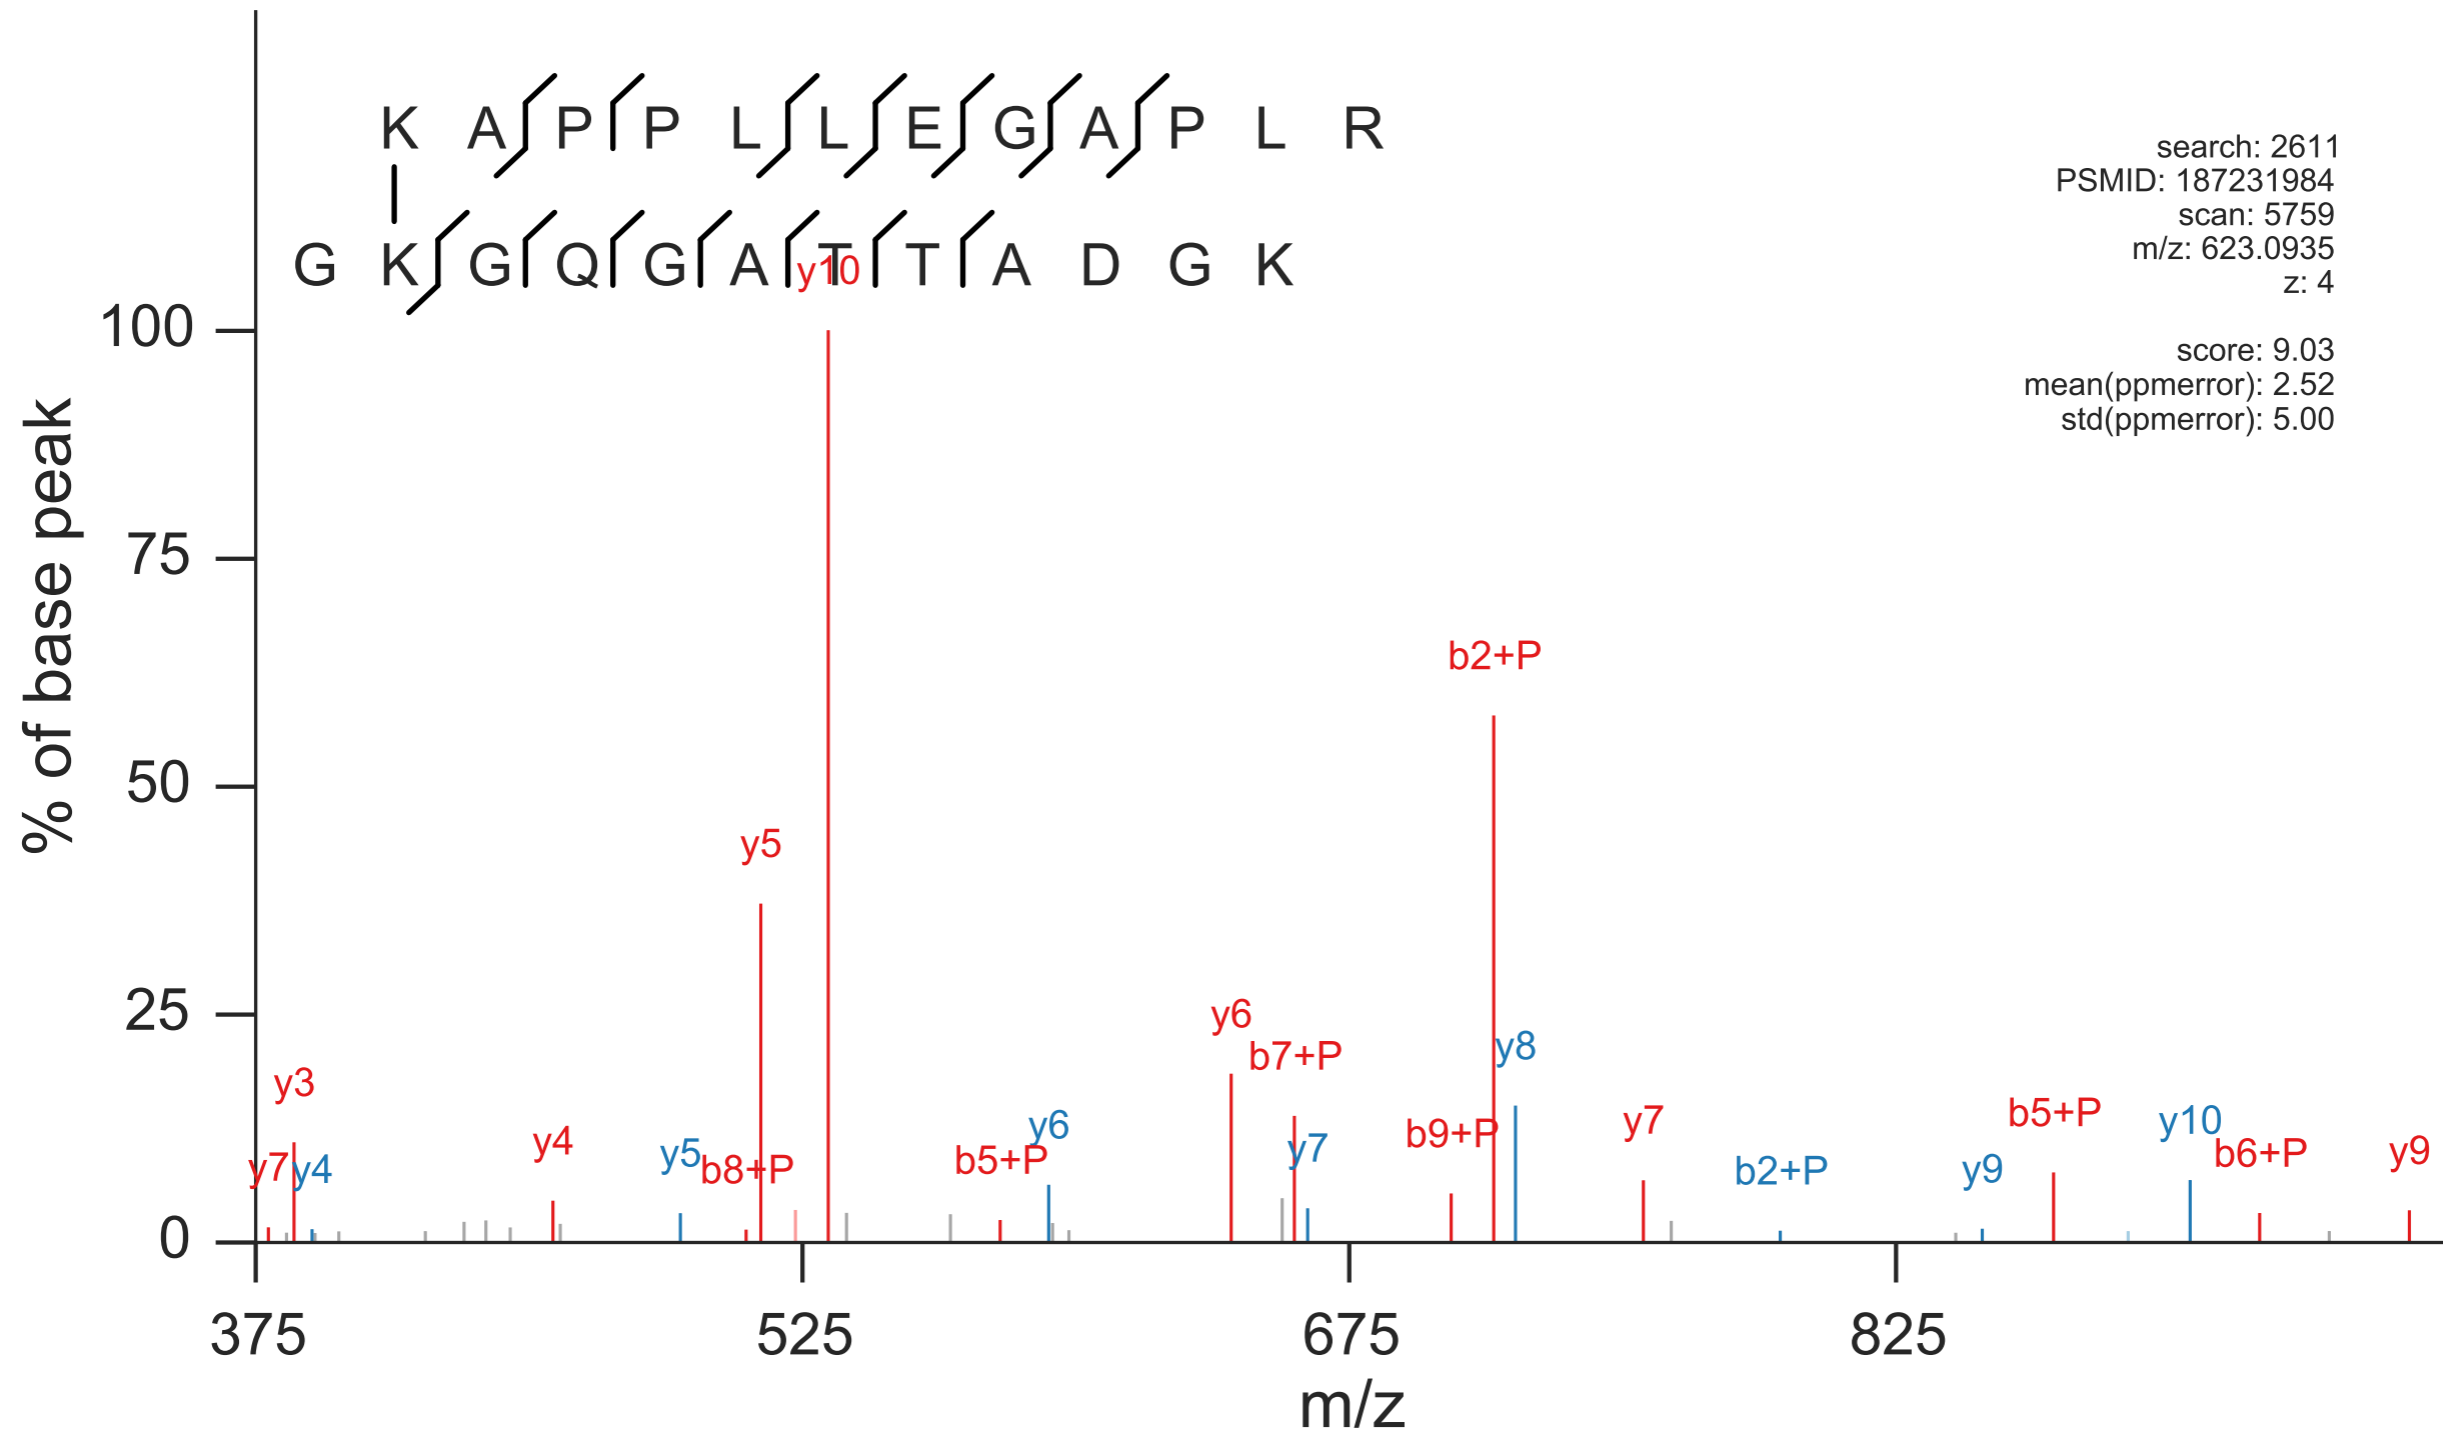

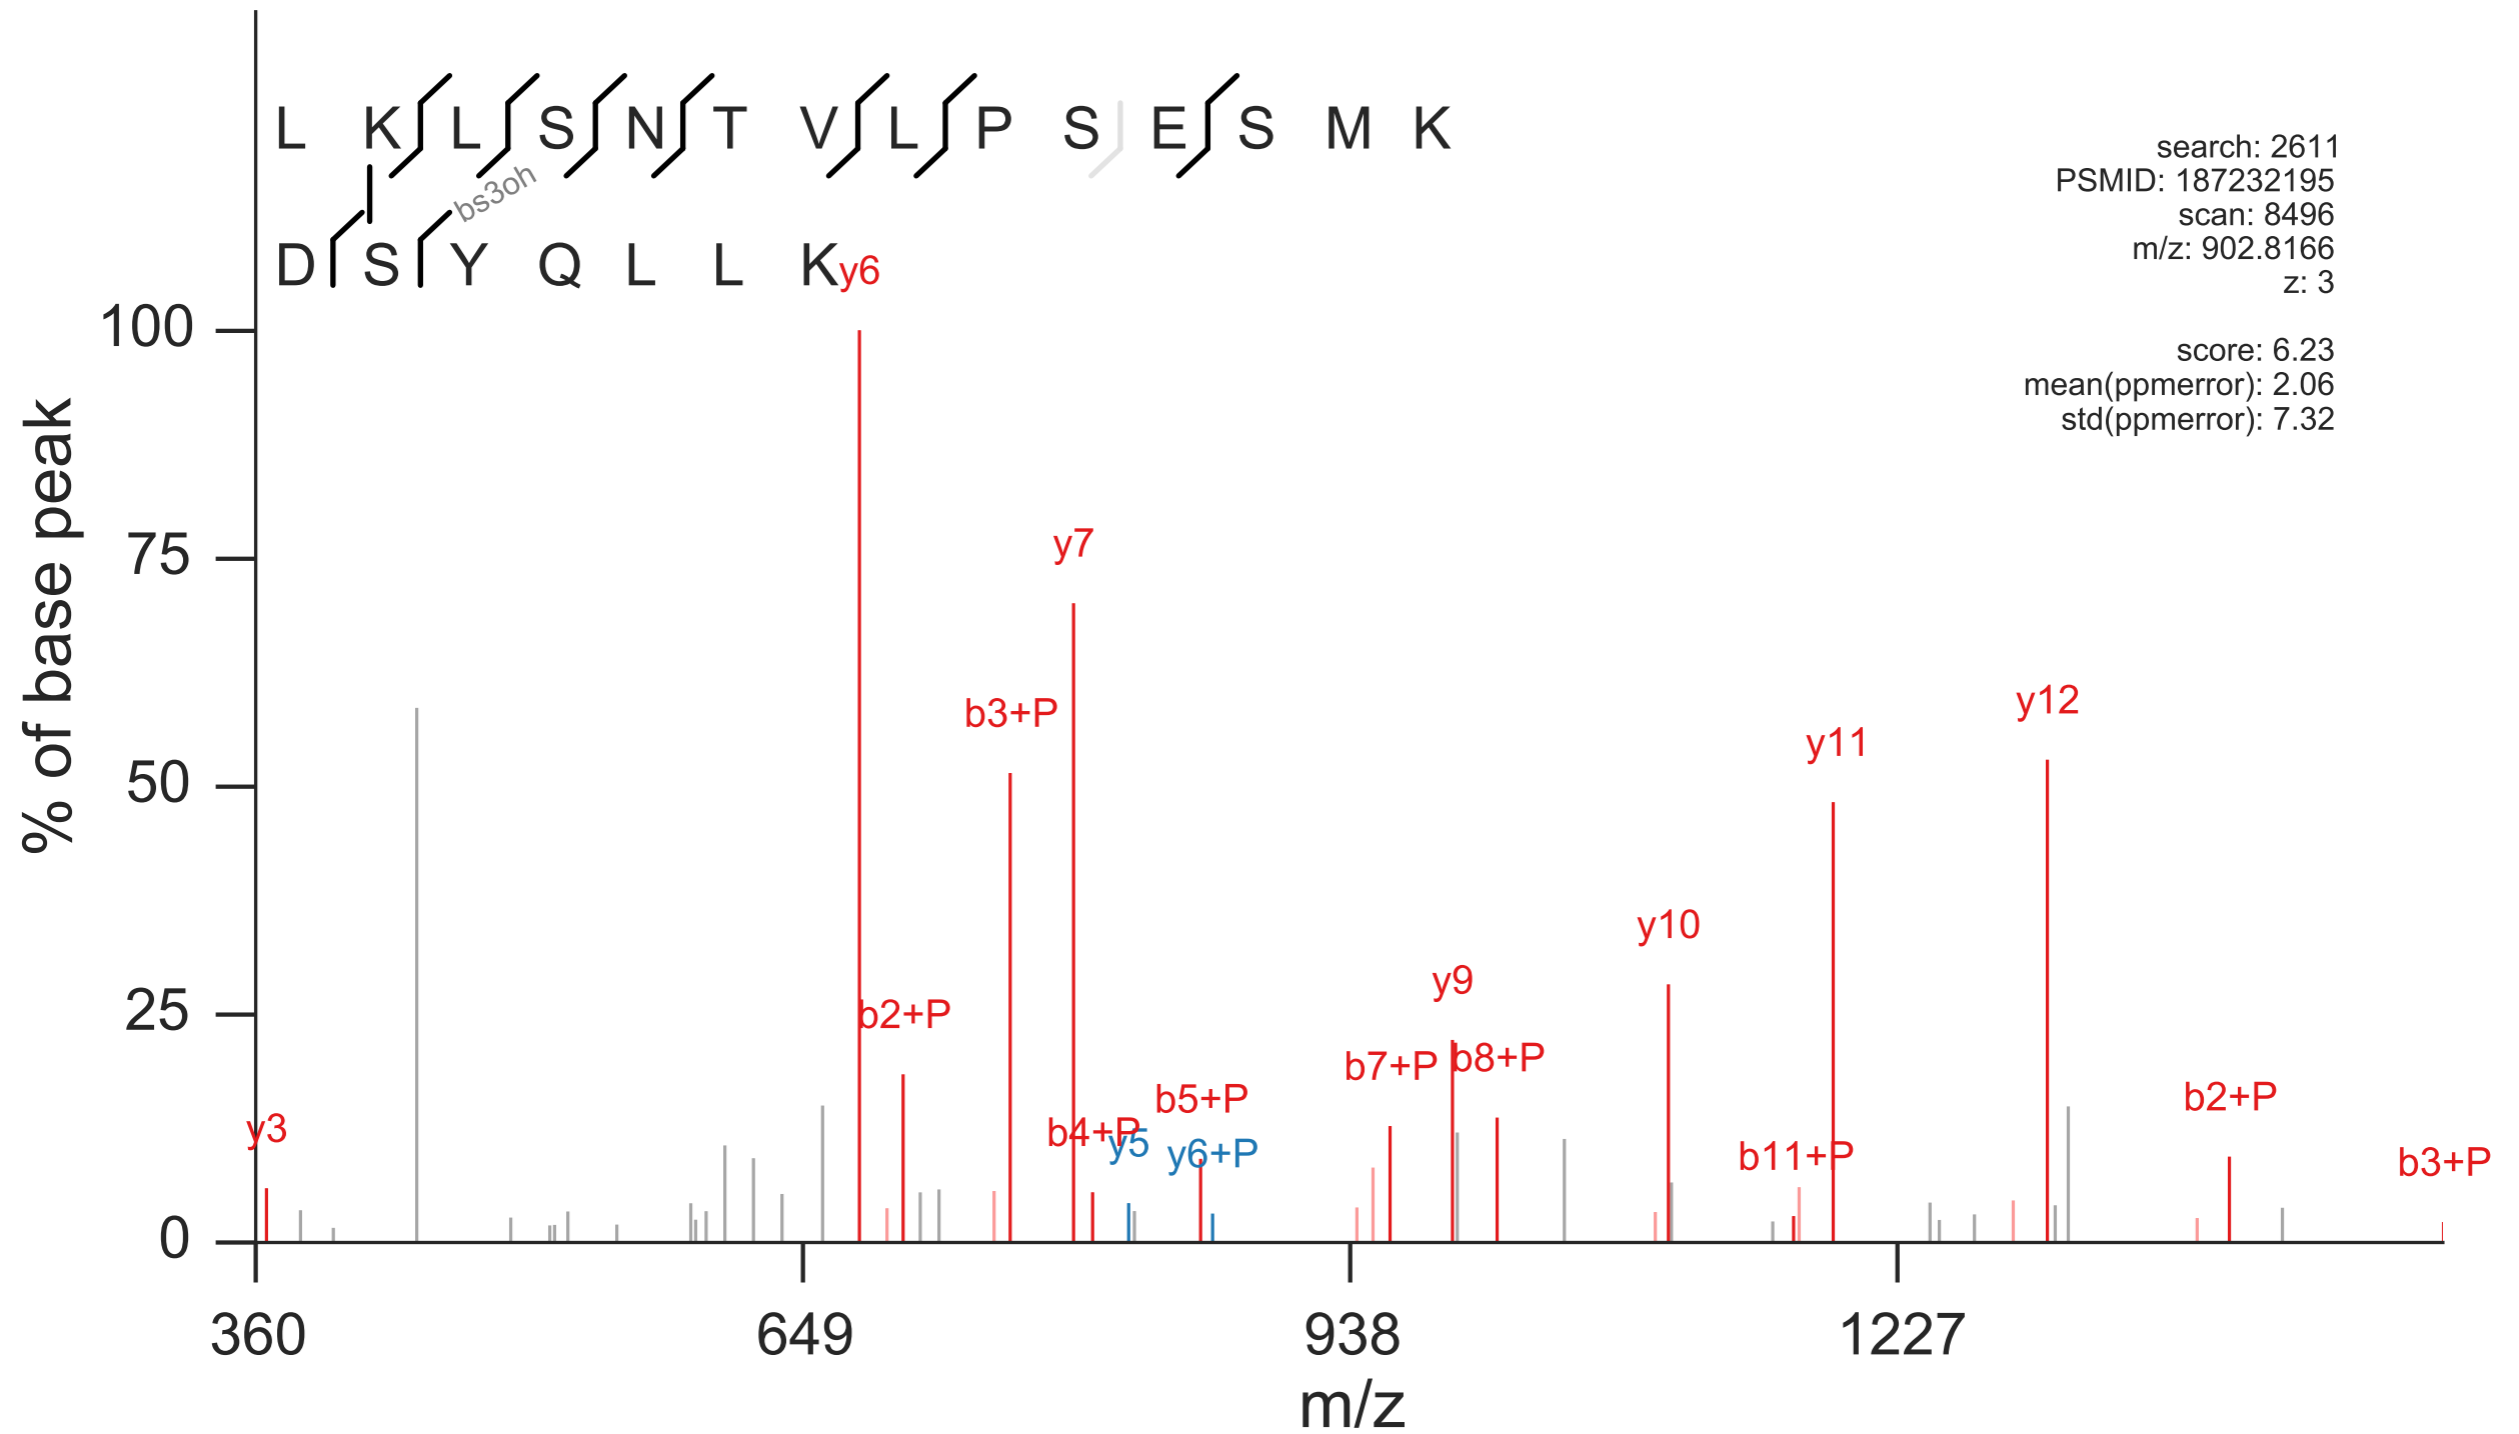

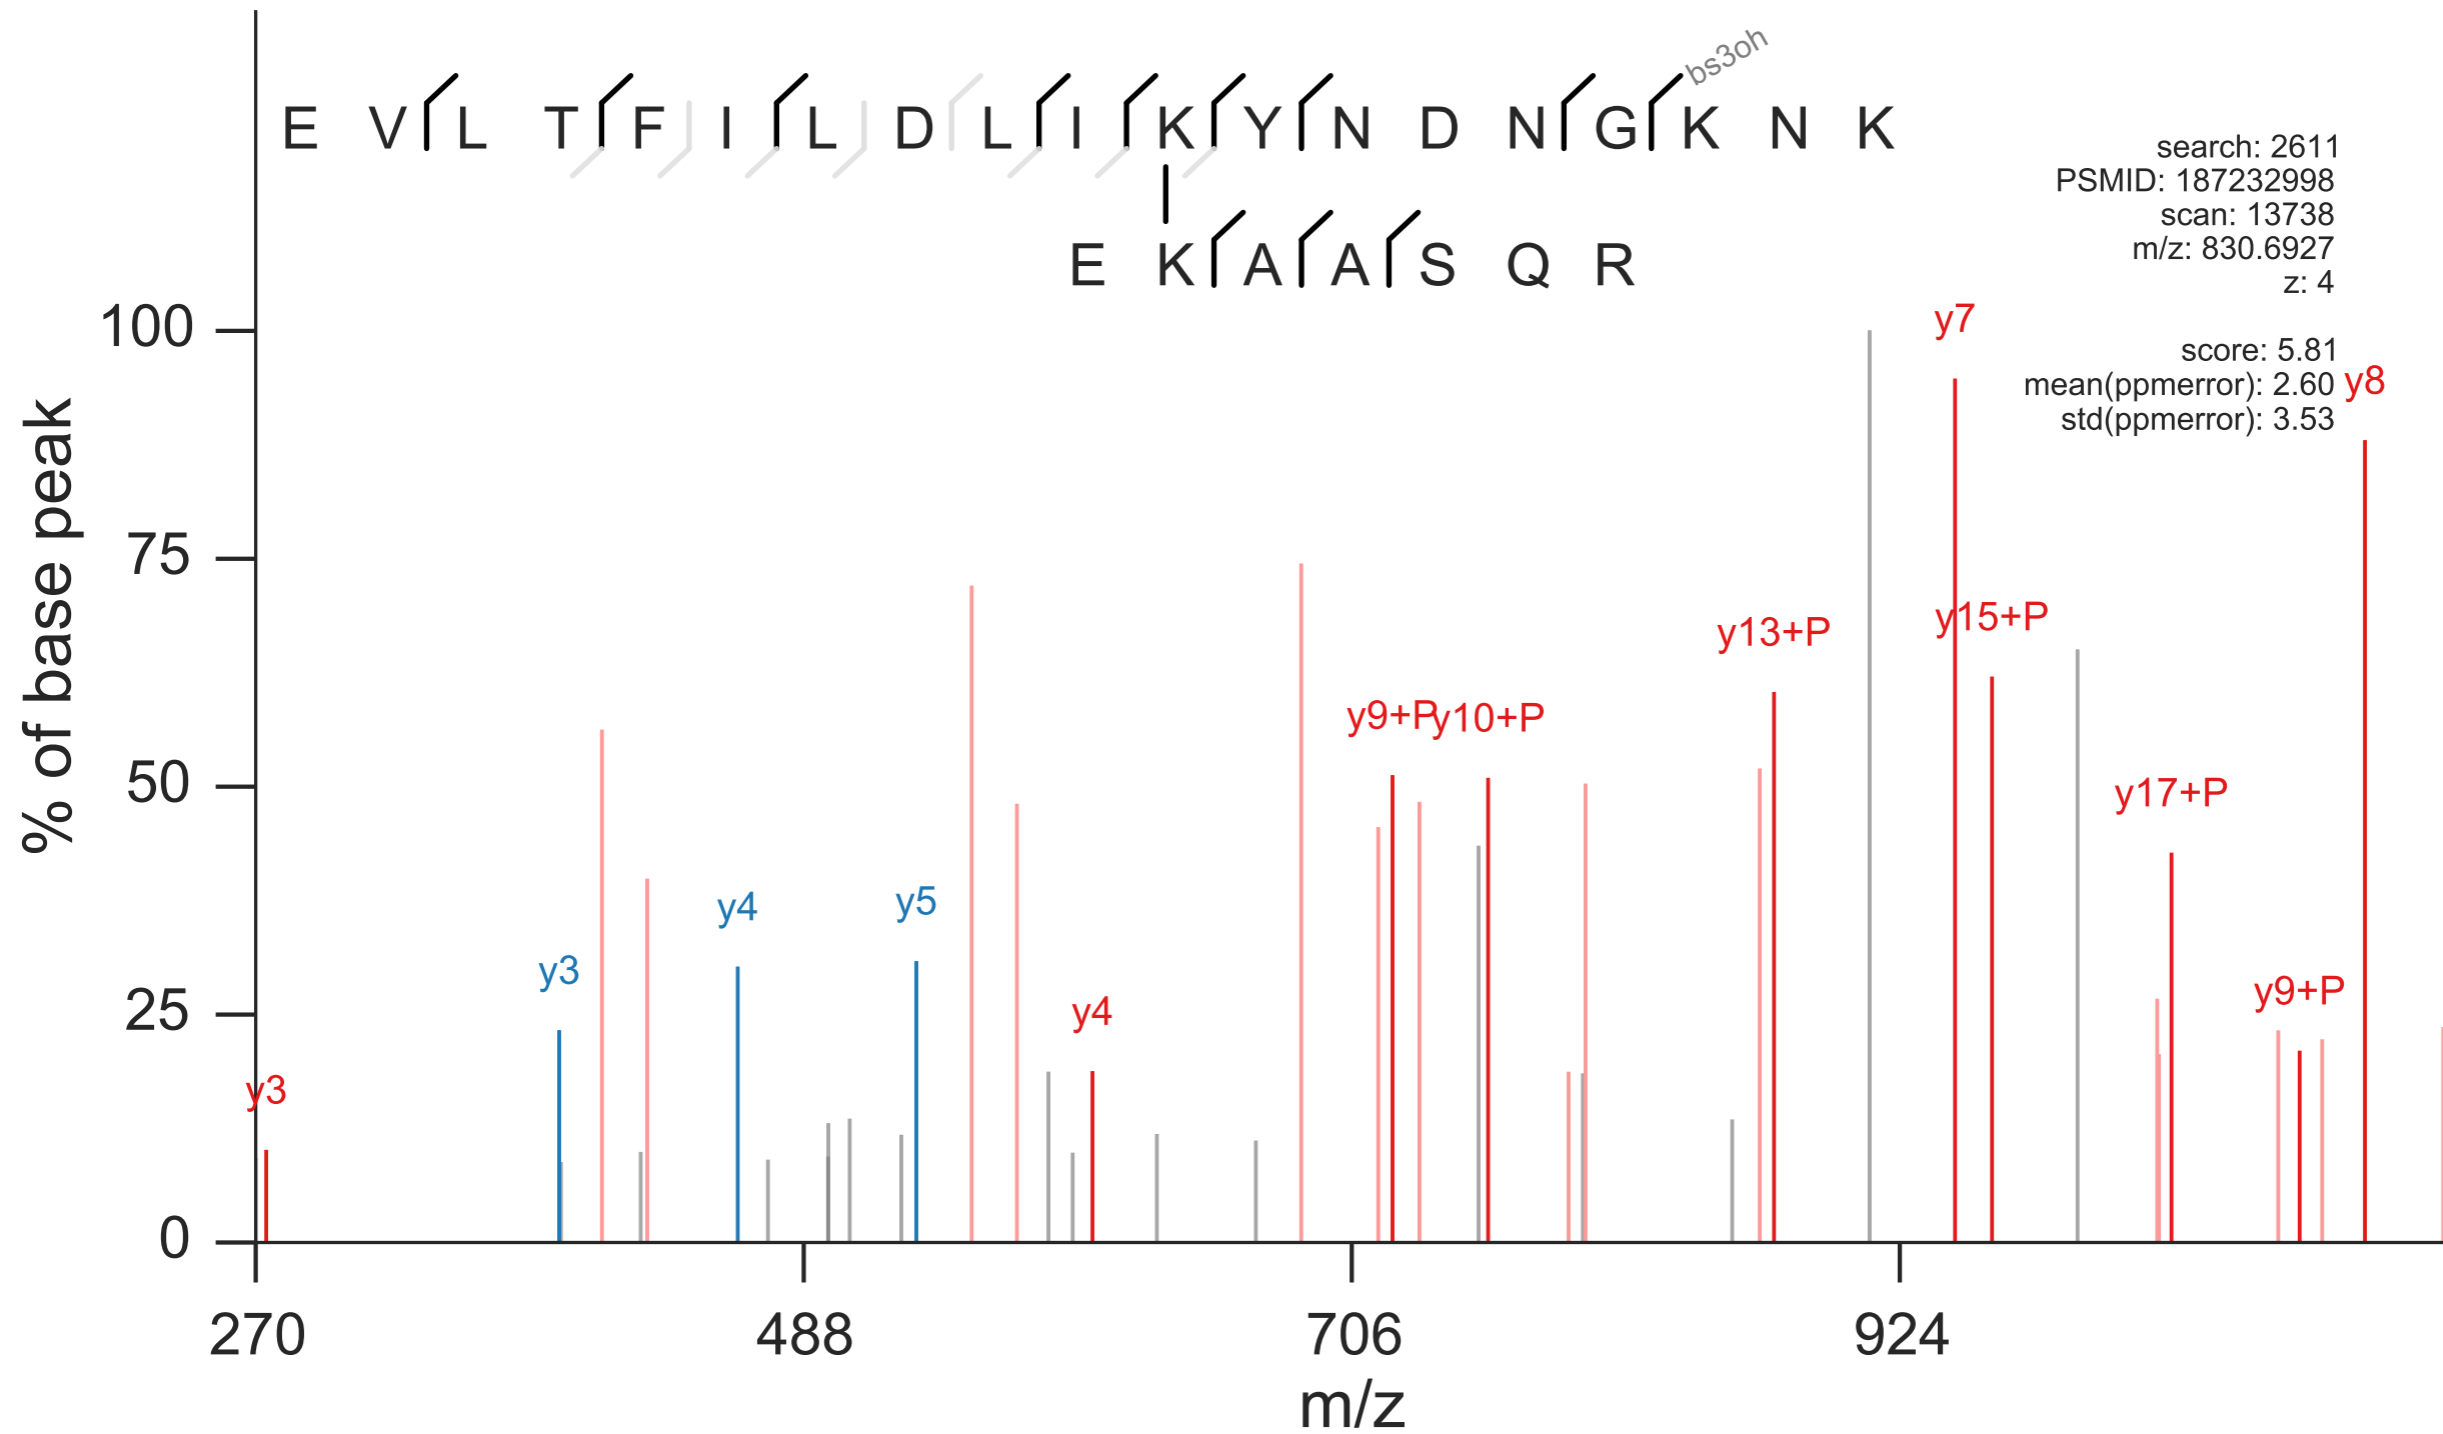

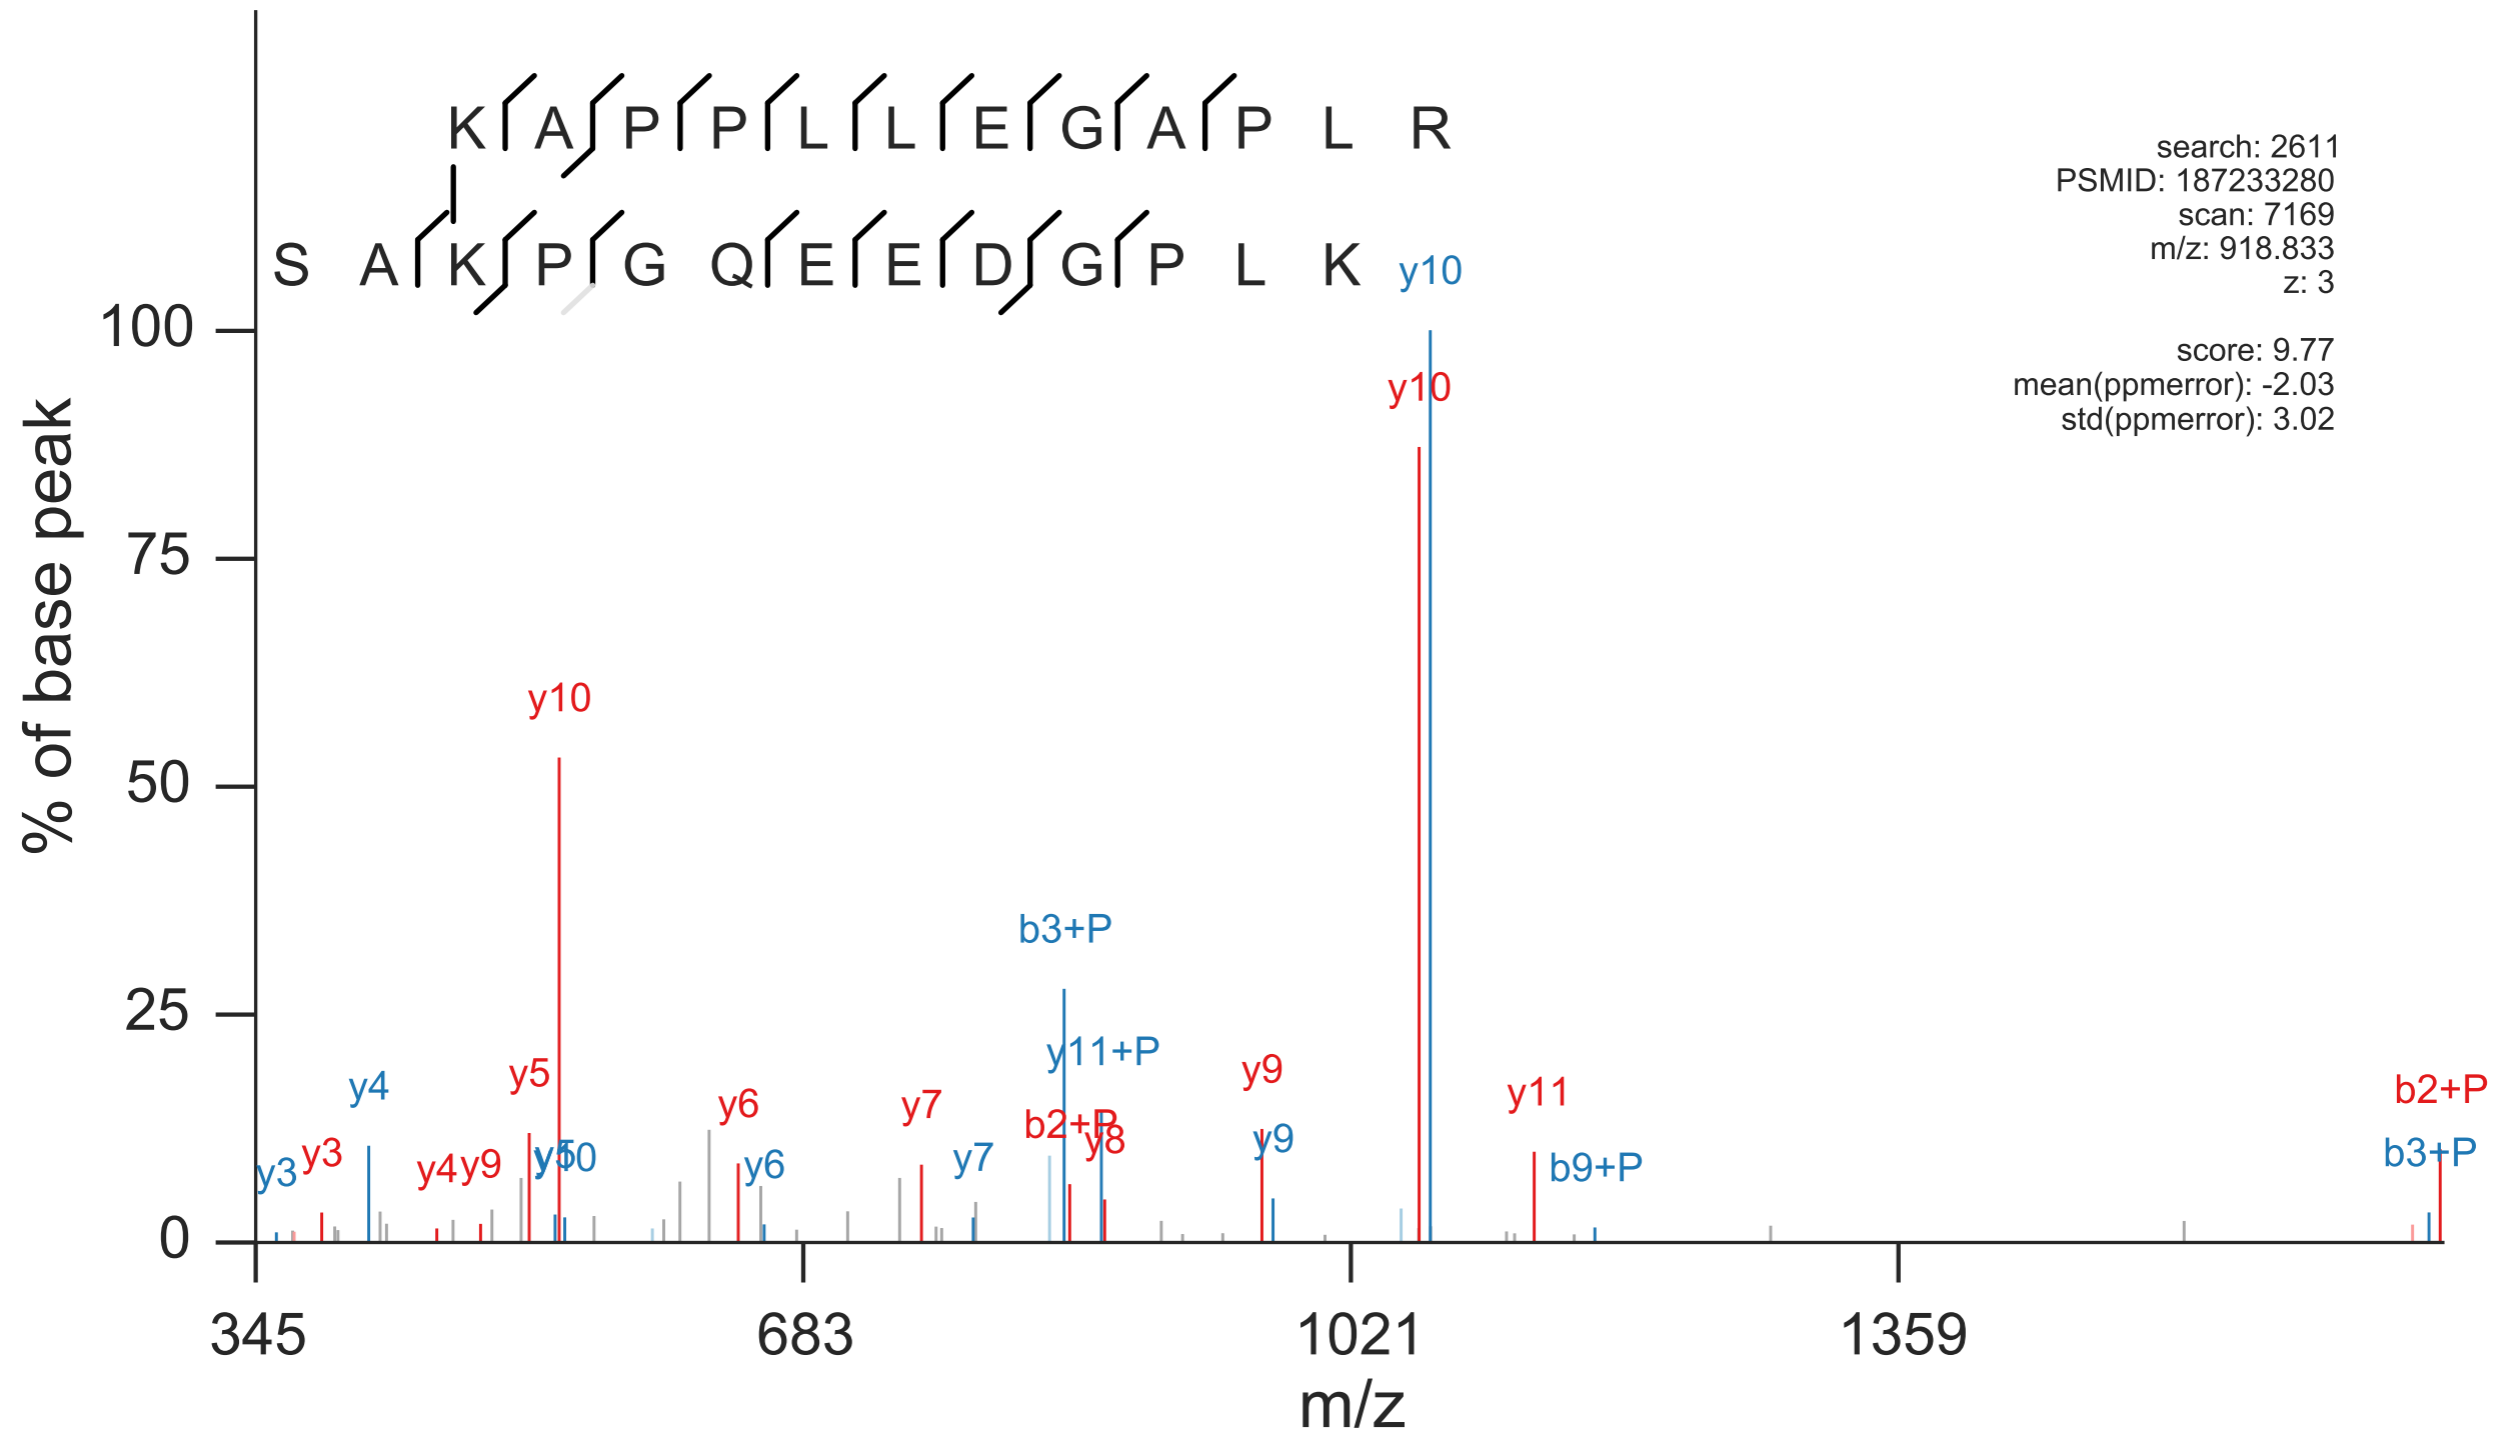

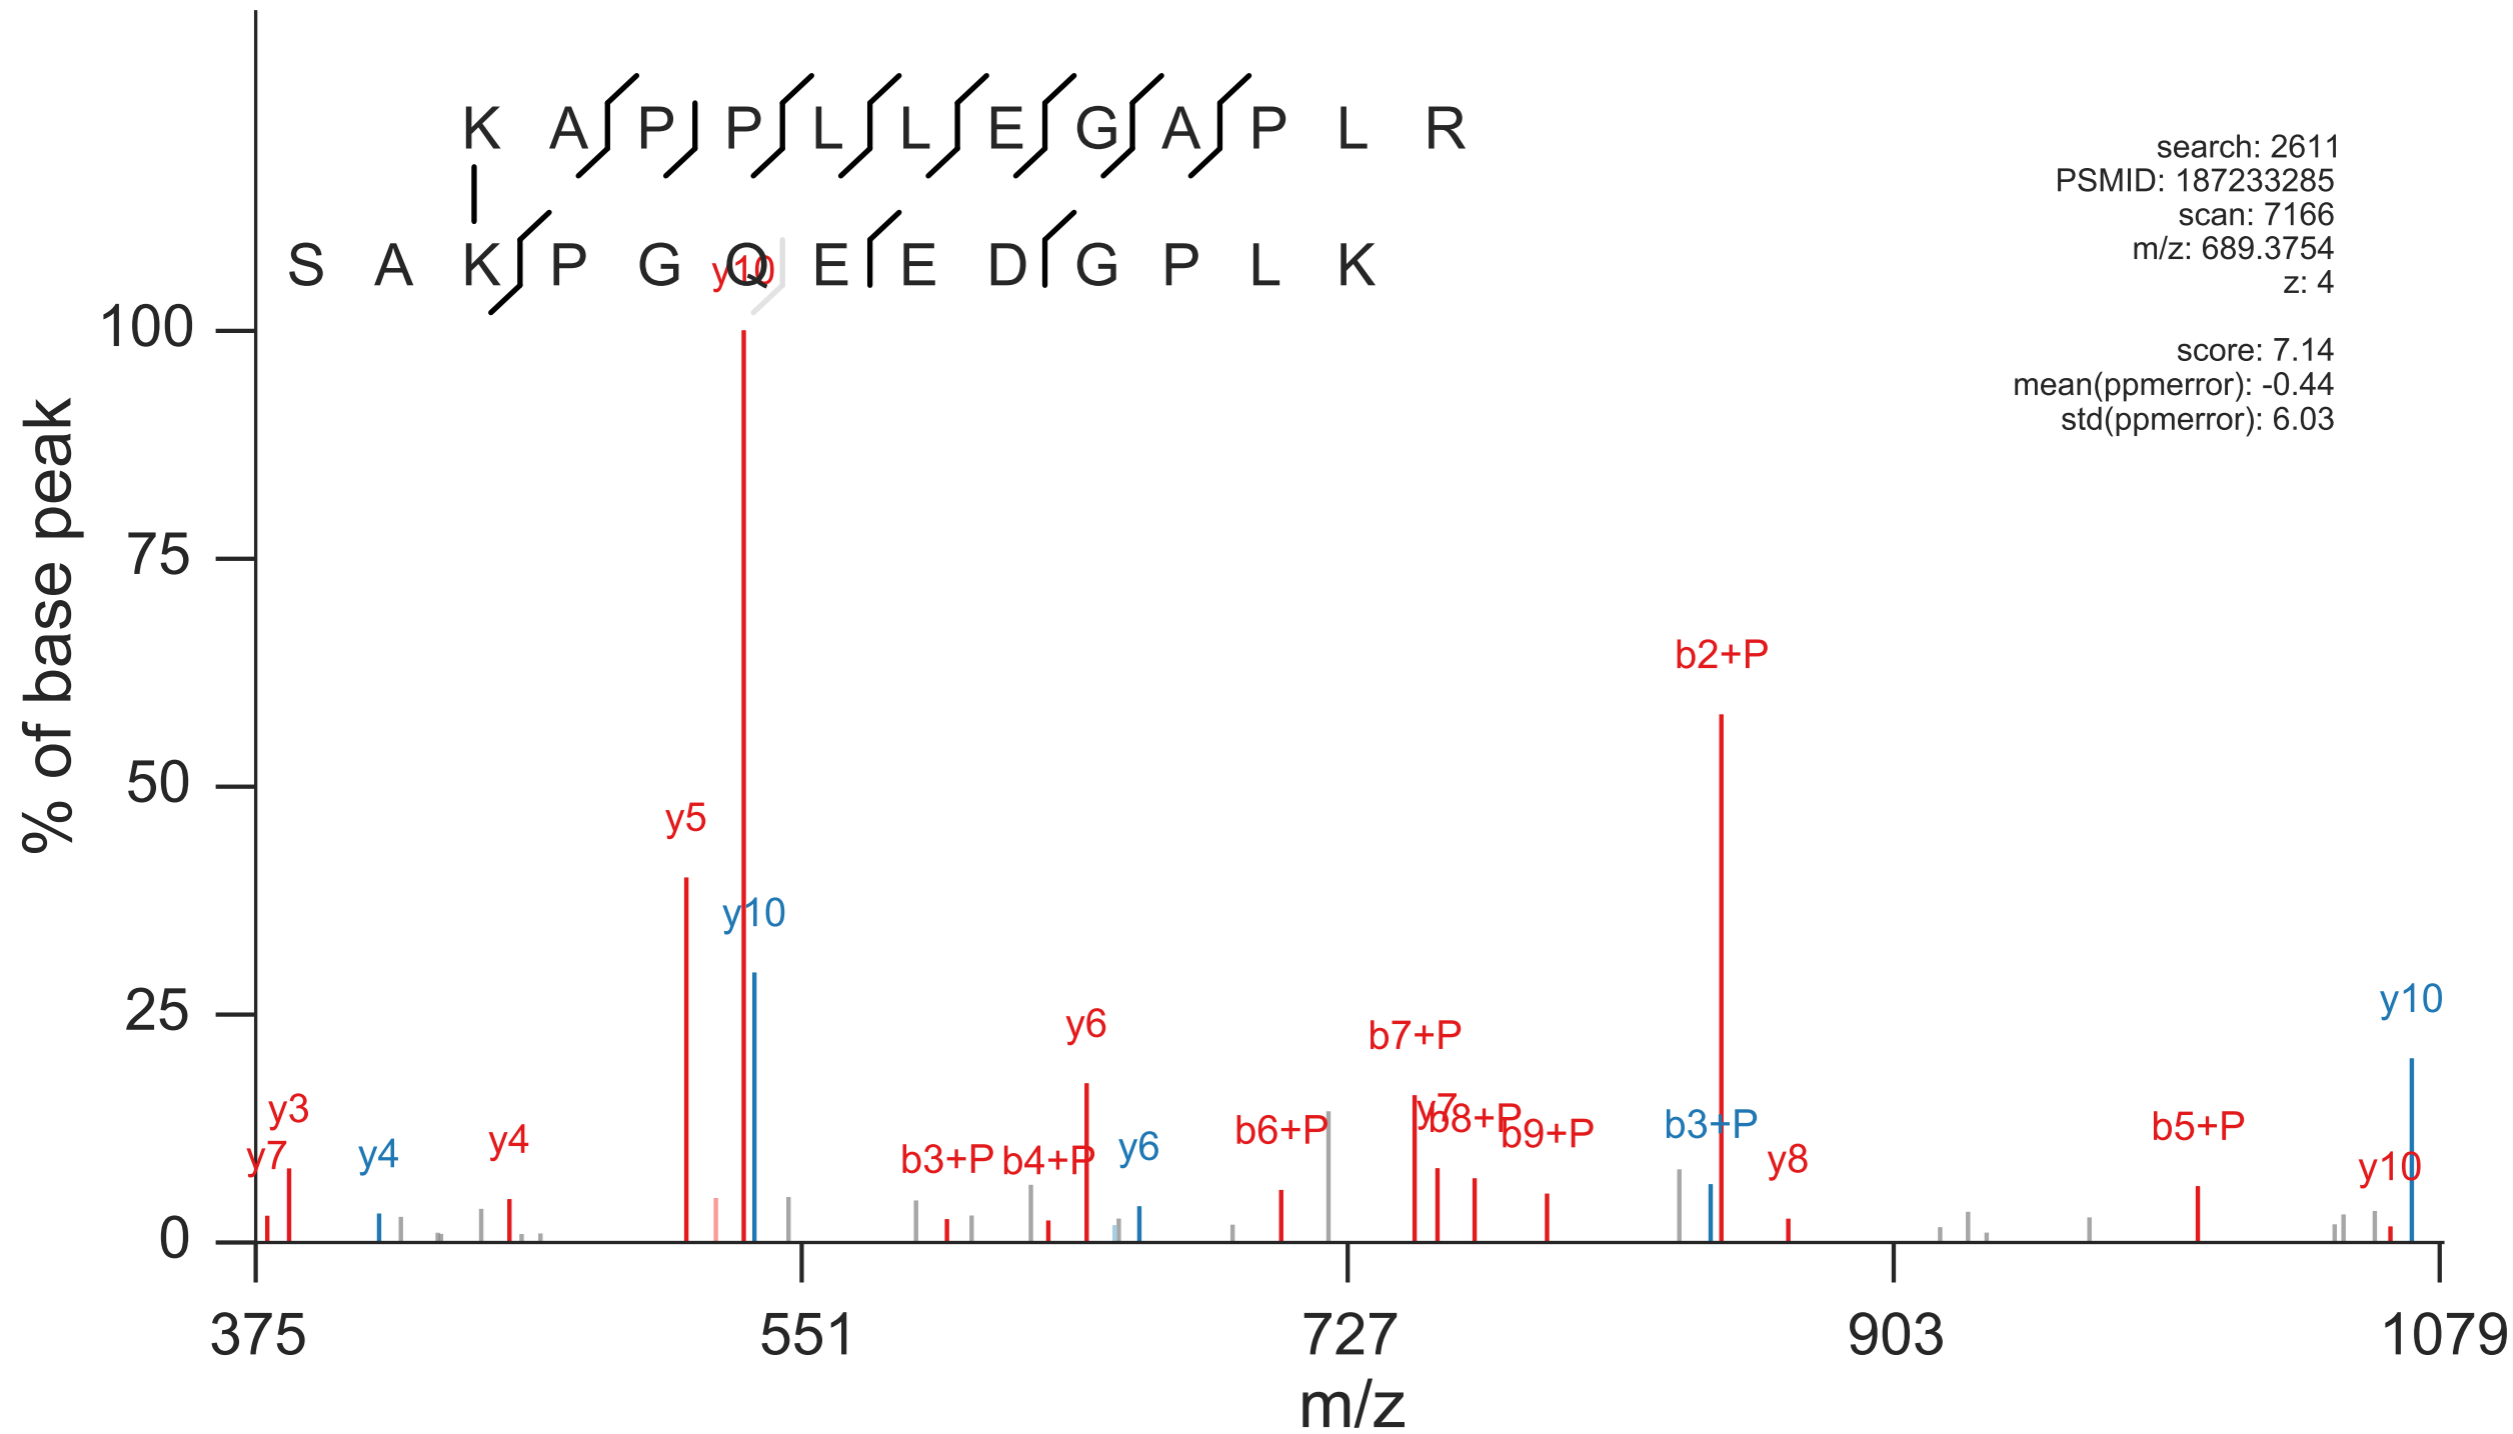

S G S K Q S T N P A D N Y H L A R  
 S Y C<sup>cm</sup> E H T A R

search: 2611  
 PSMID: 187233601  
 scan: 3855  
 m/z: 752.3423  
 z: 4  
 score: 9.64  
 mean(ppmerror): 1.78  
 std(ppmerror): 6.45

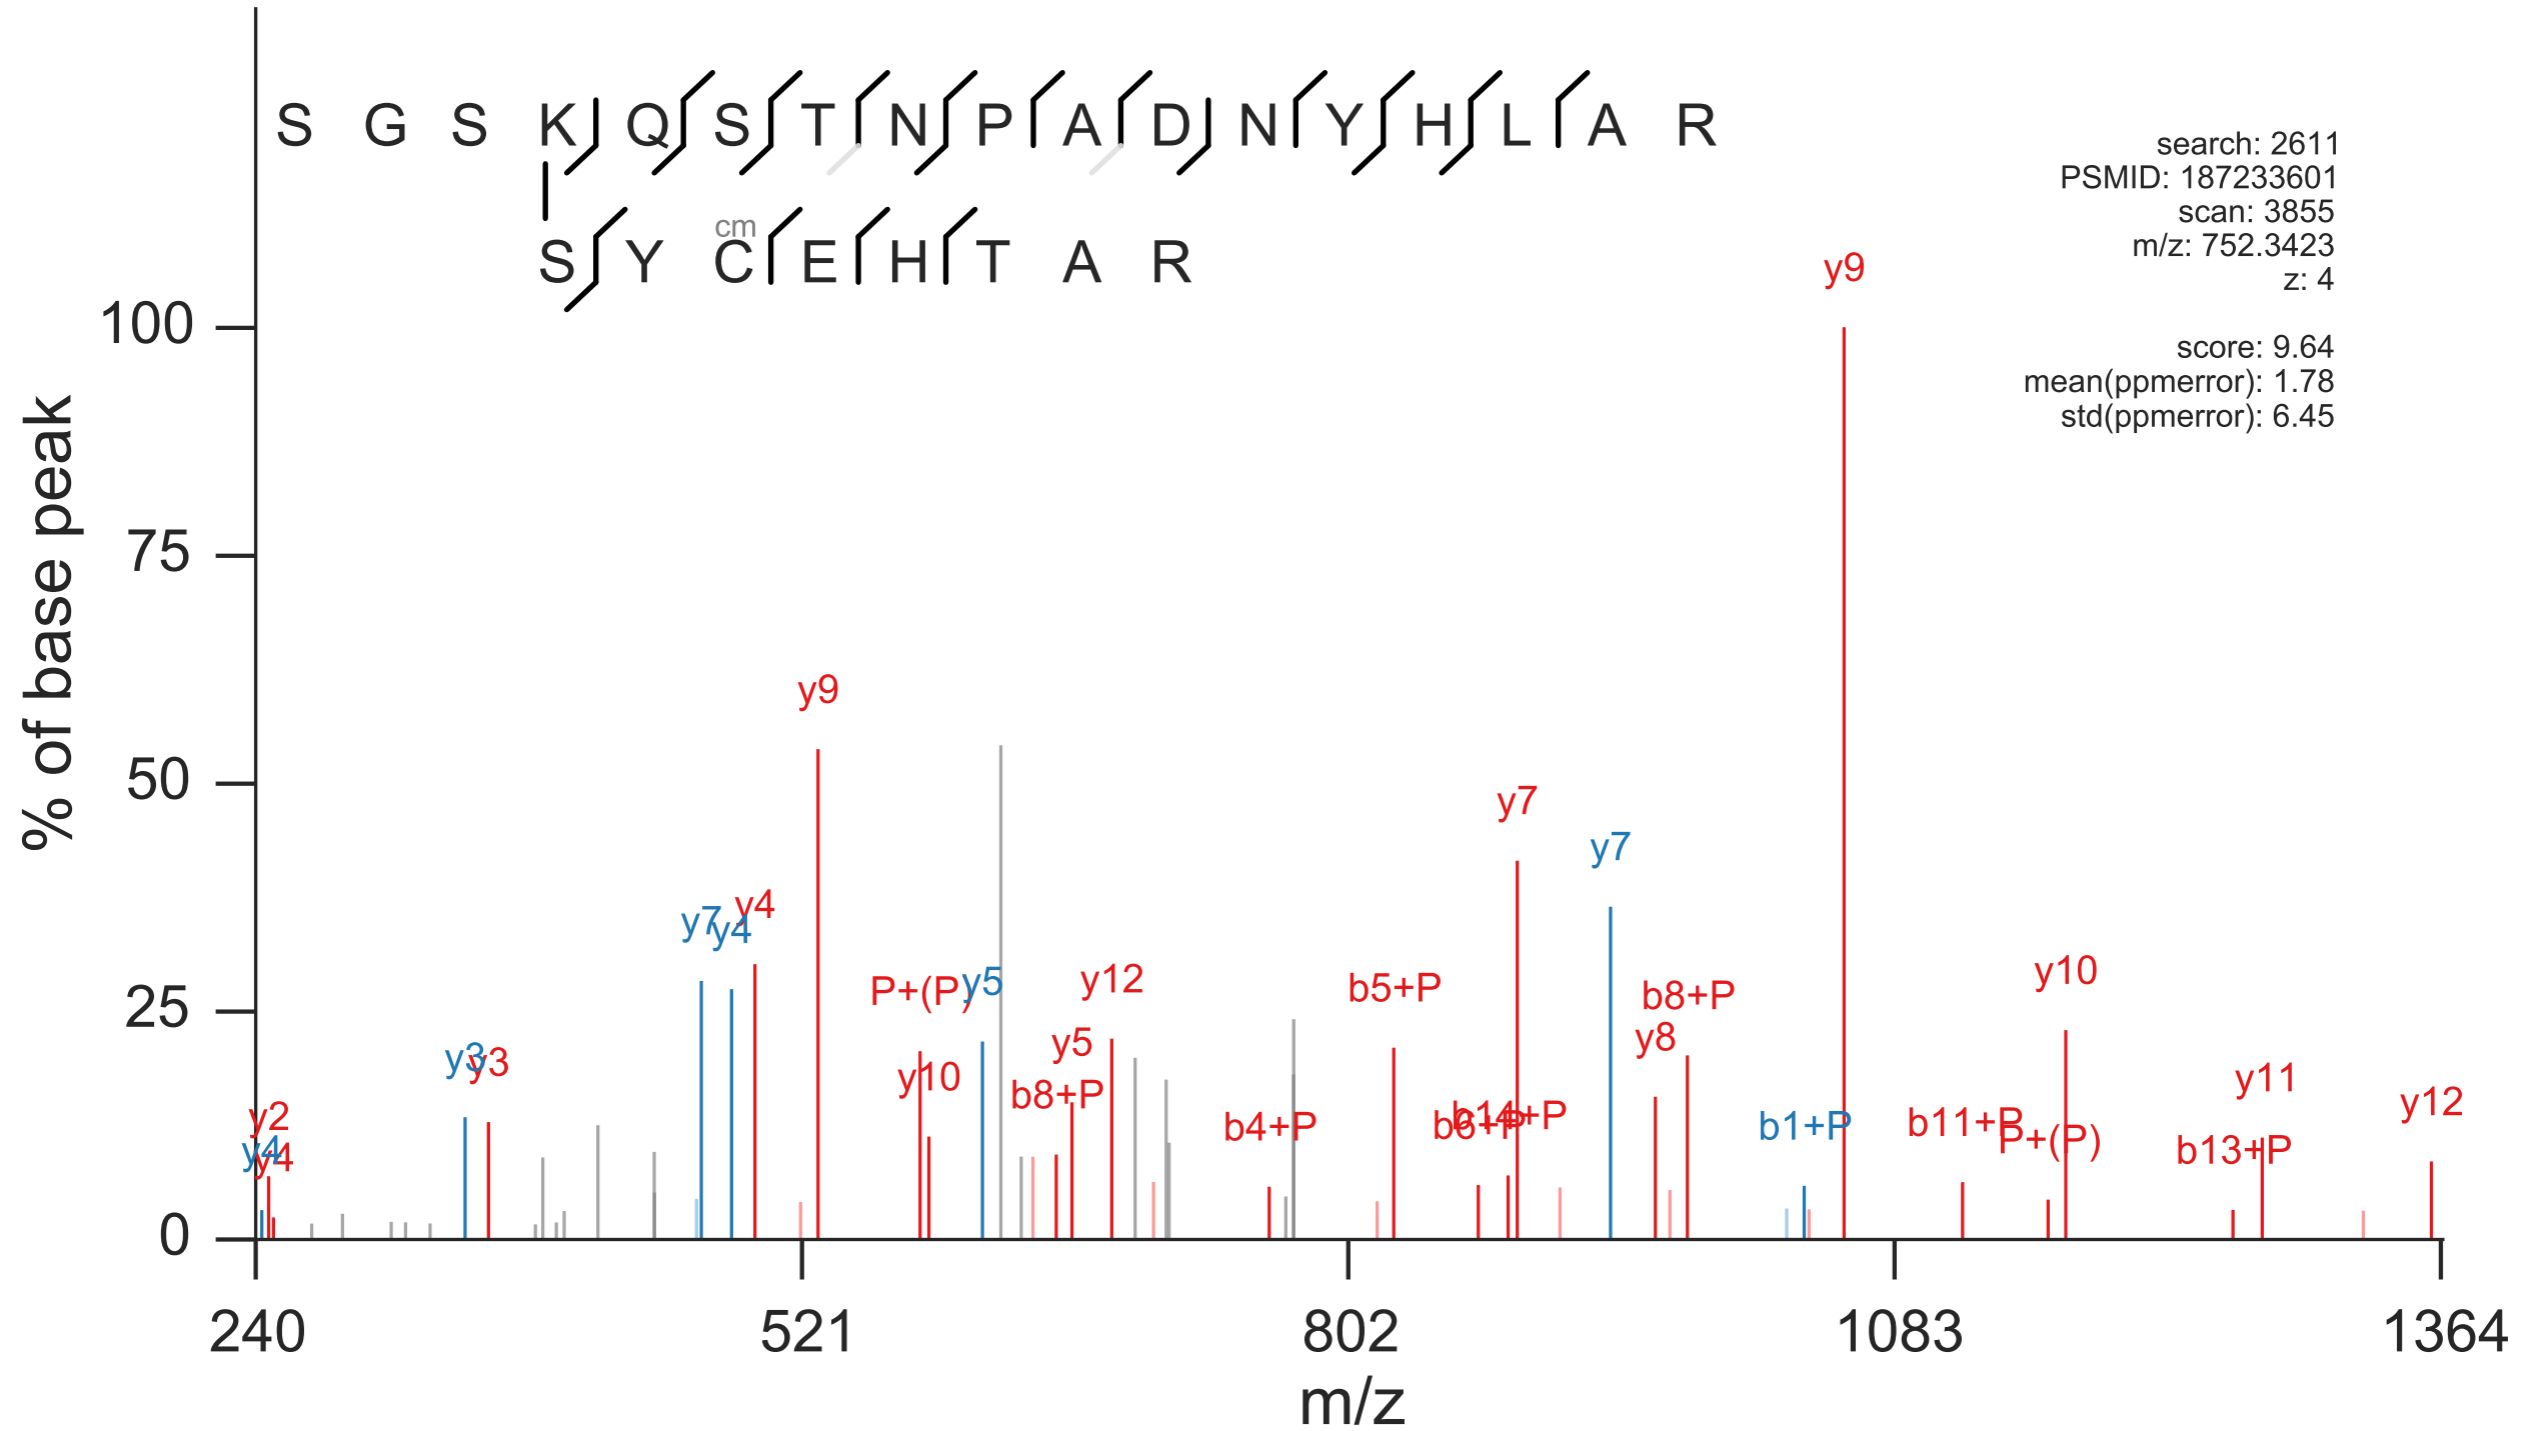



S G S K Q S T N P A D N Y H L A R  
 S Y C E H T A R

search: 2611  
 PSMID: 187233606  
 scan: 3845  
 m/z: 602.0743  
 z: 5

score: 8.76  
 mean(ppmerror): 2.19  
 std(ppmerror): 5.43

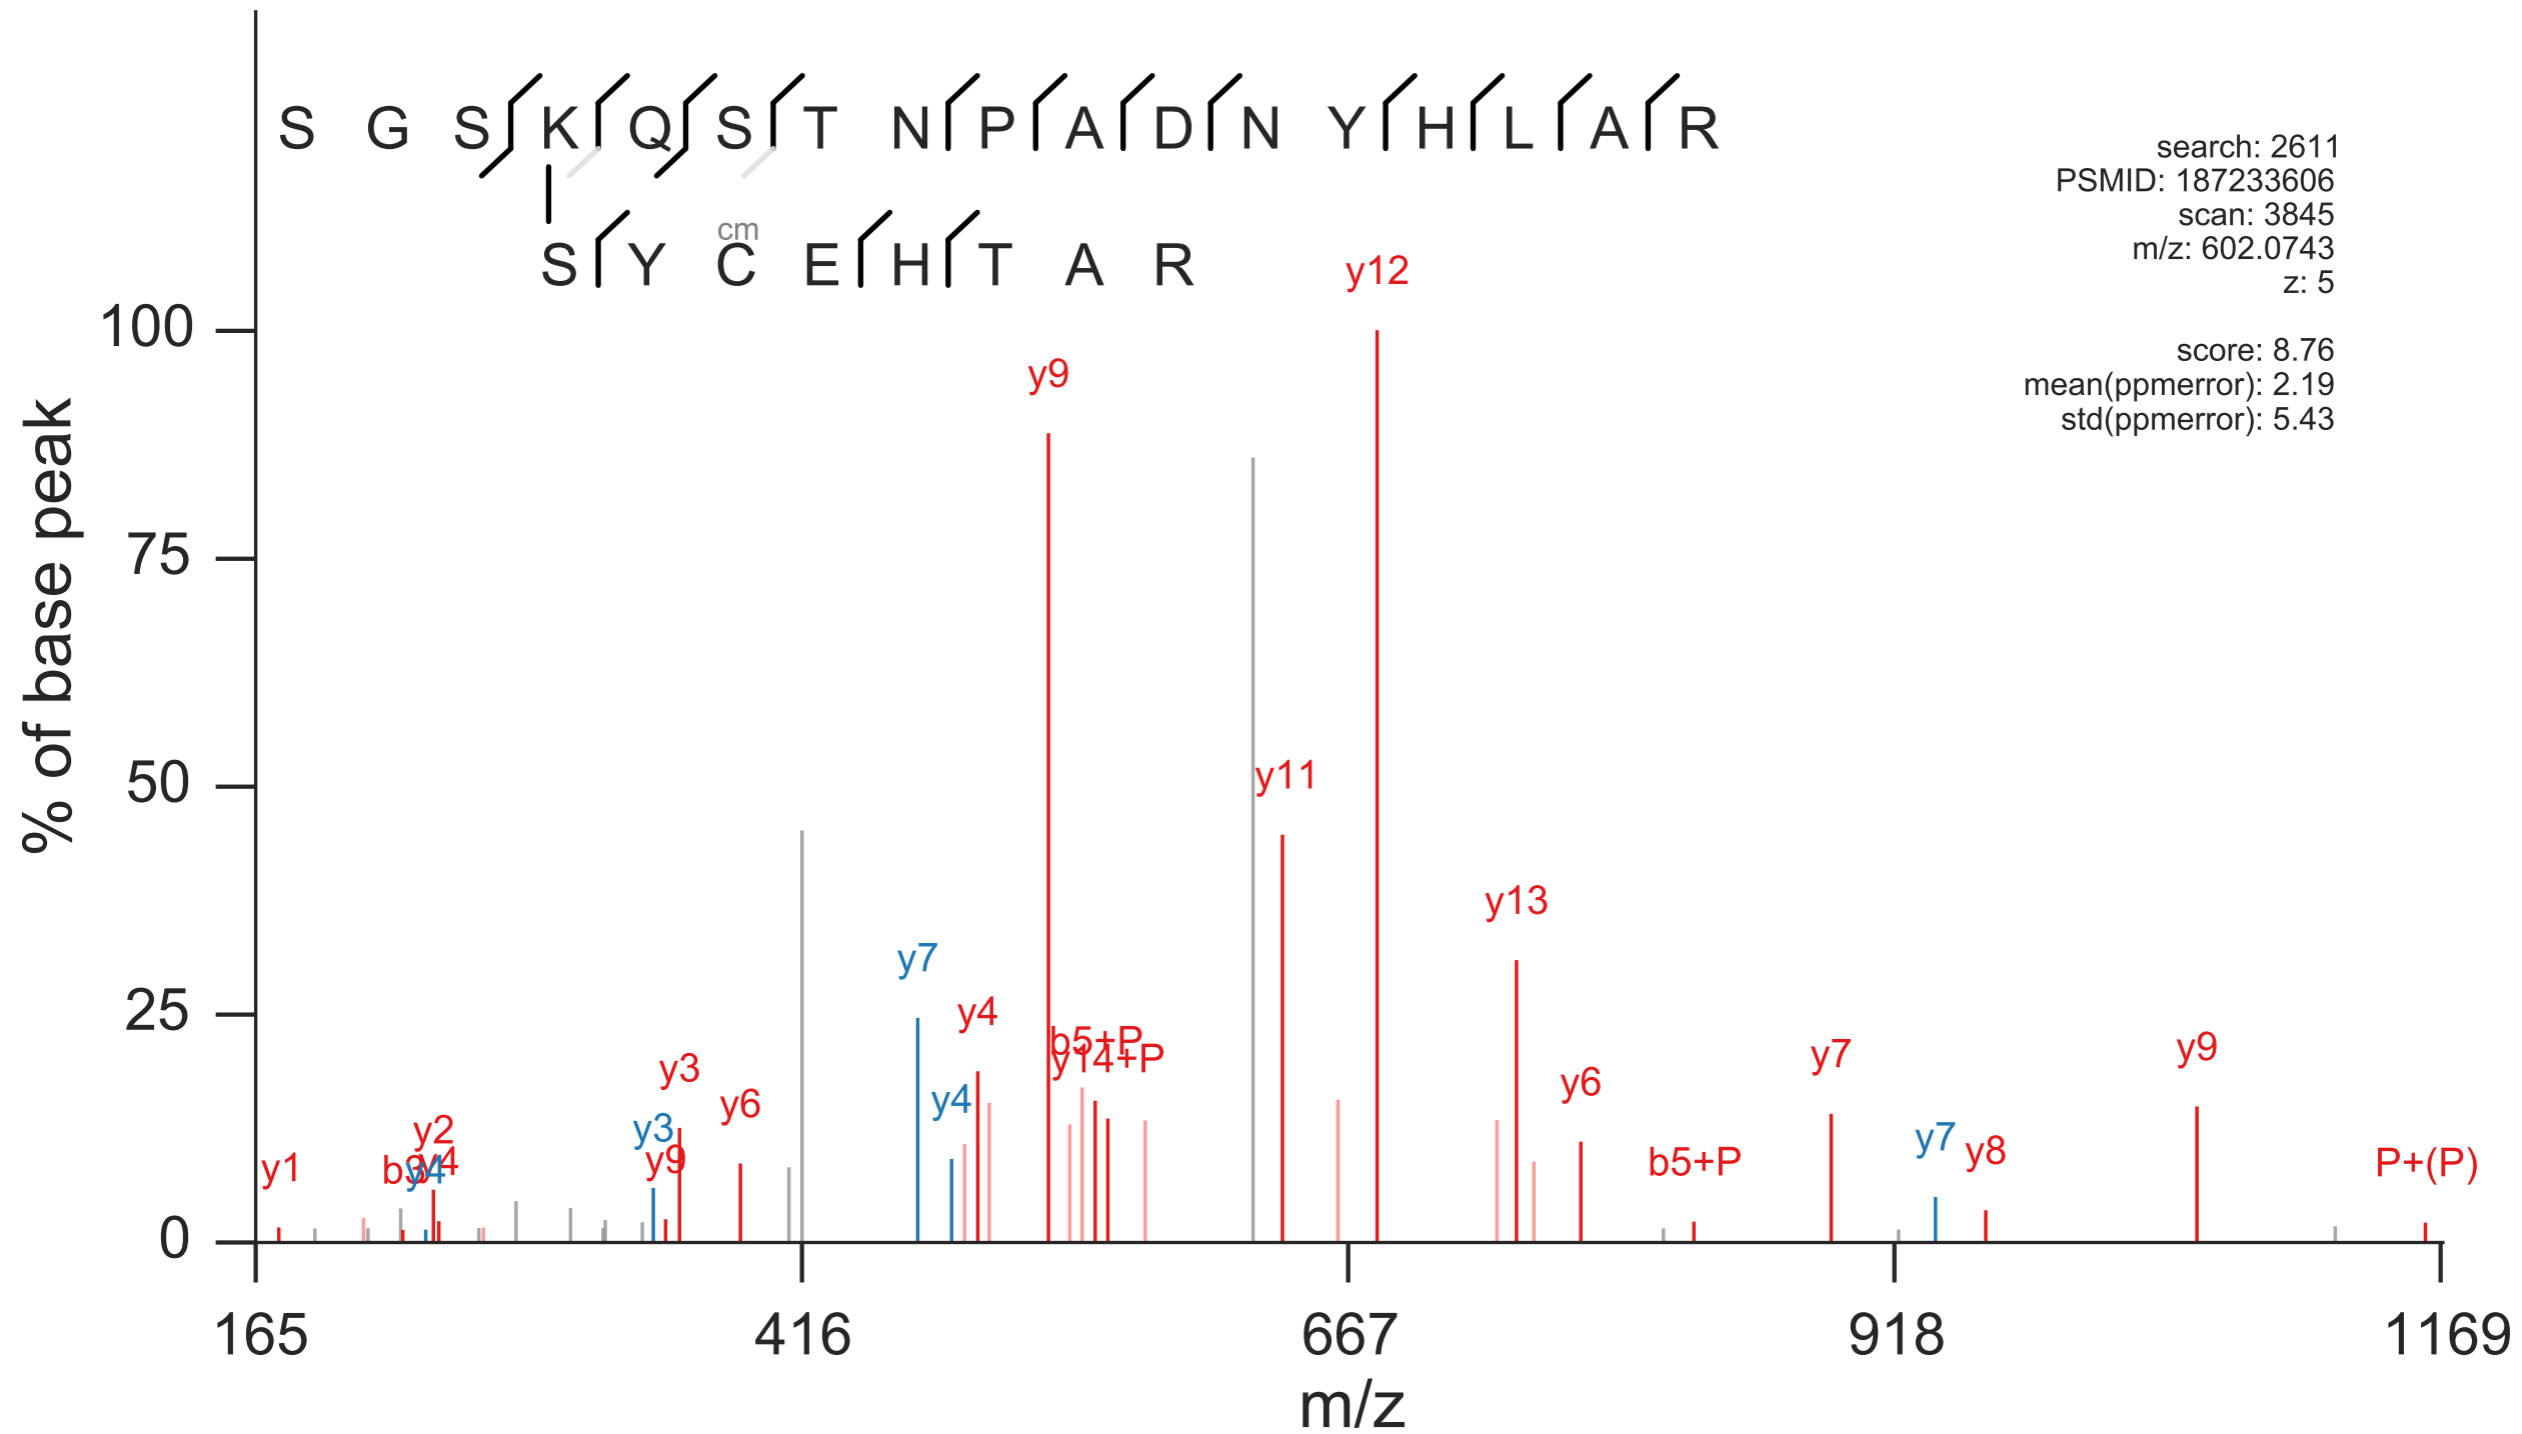

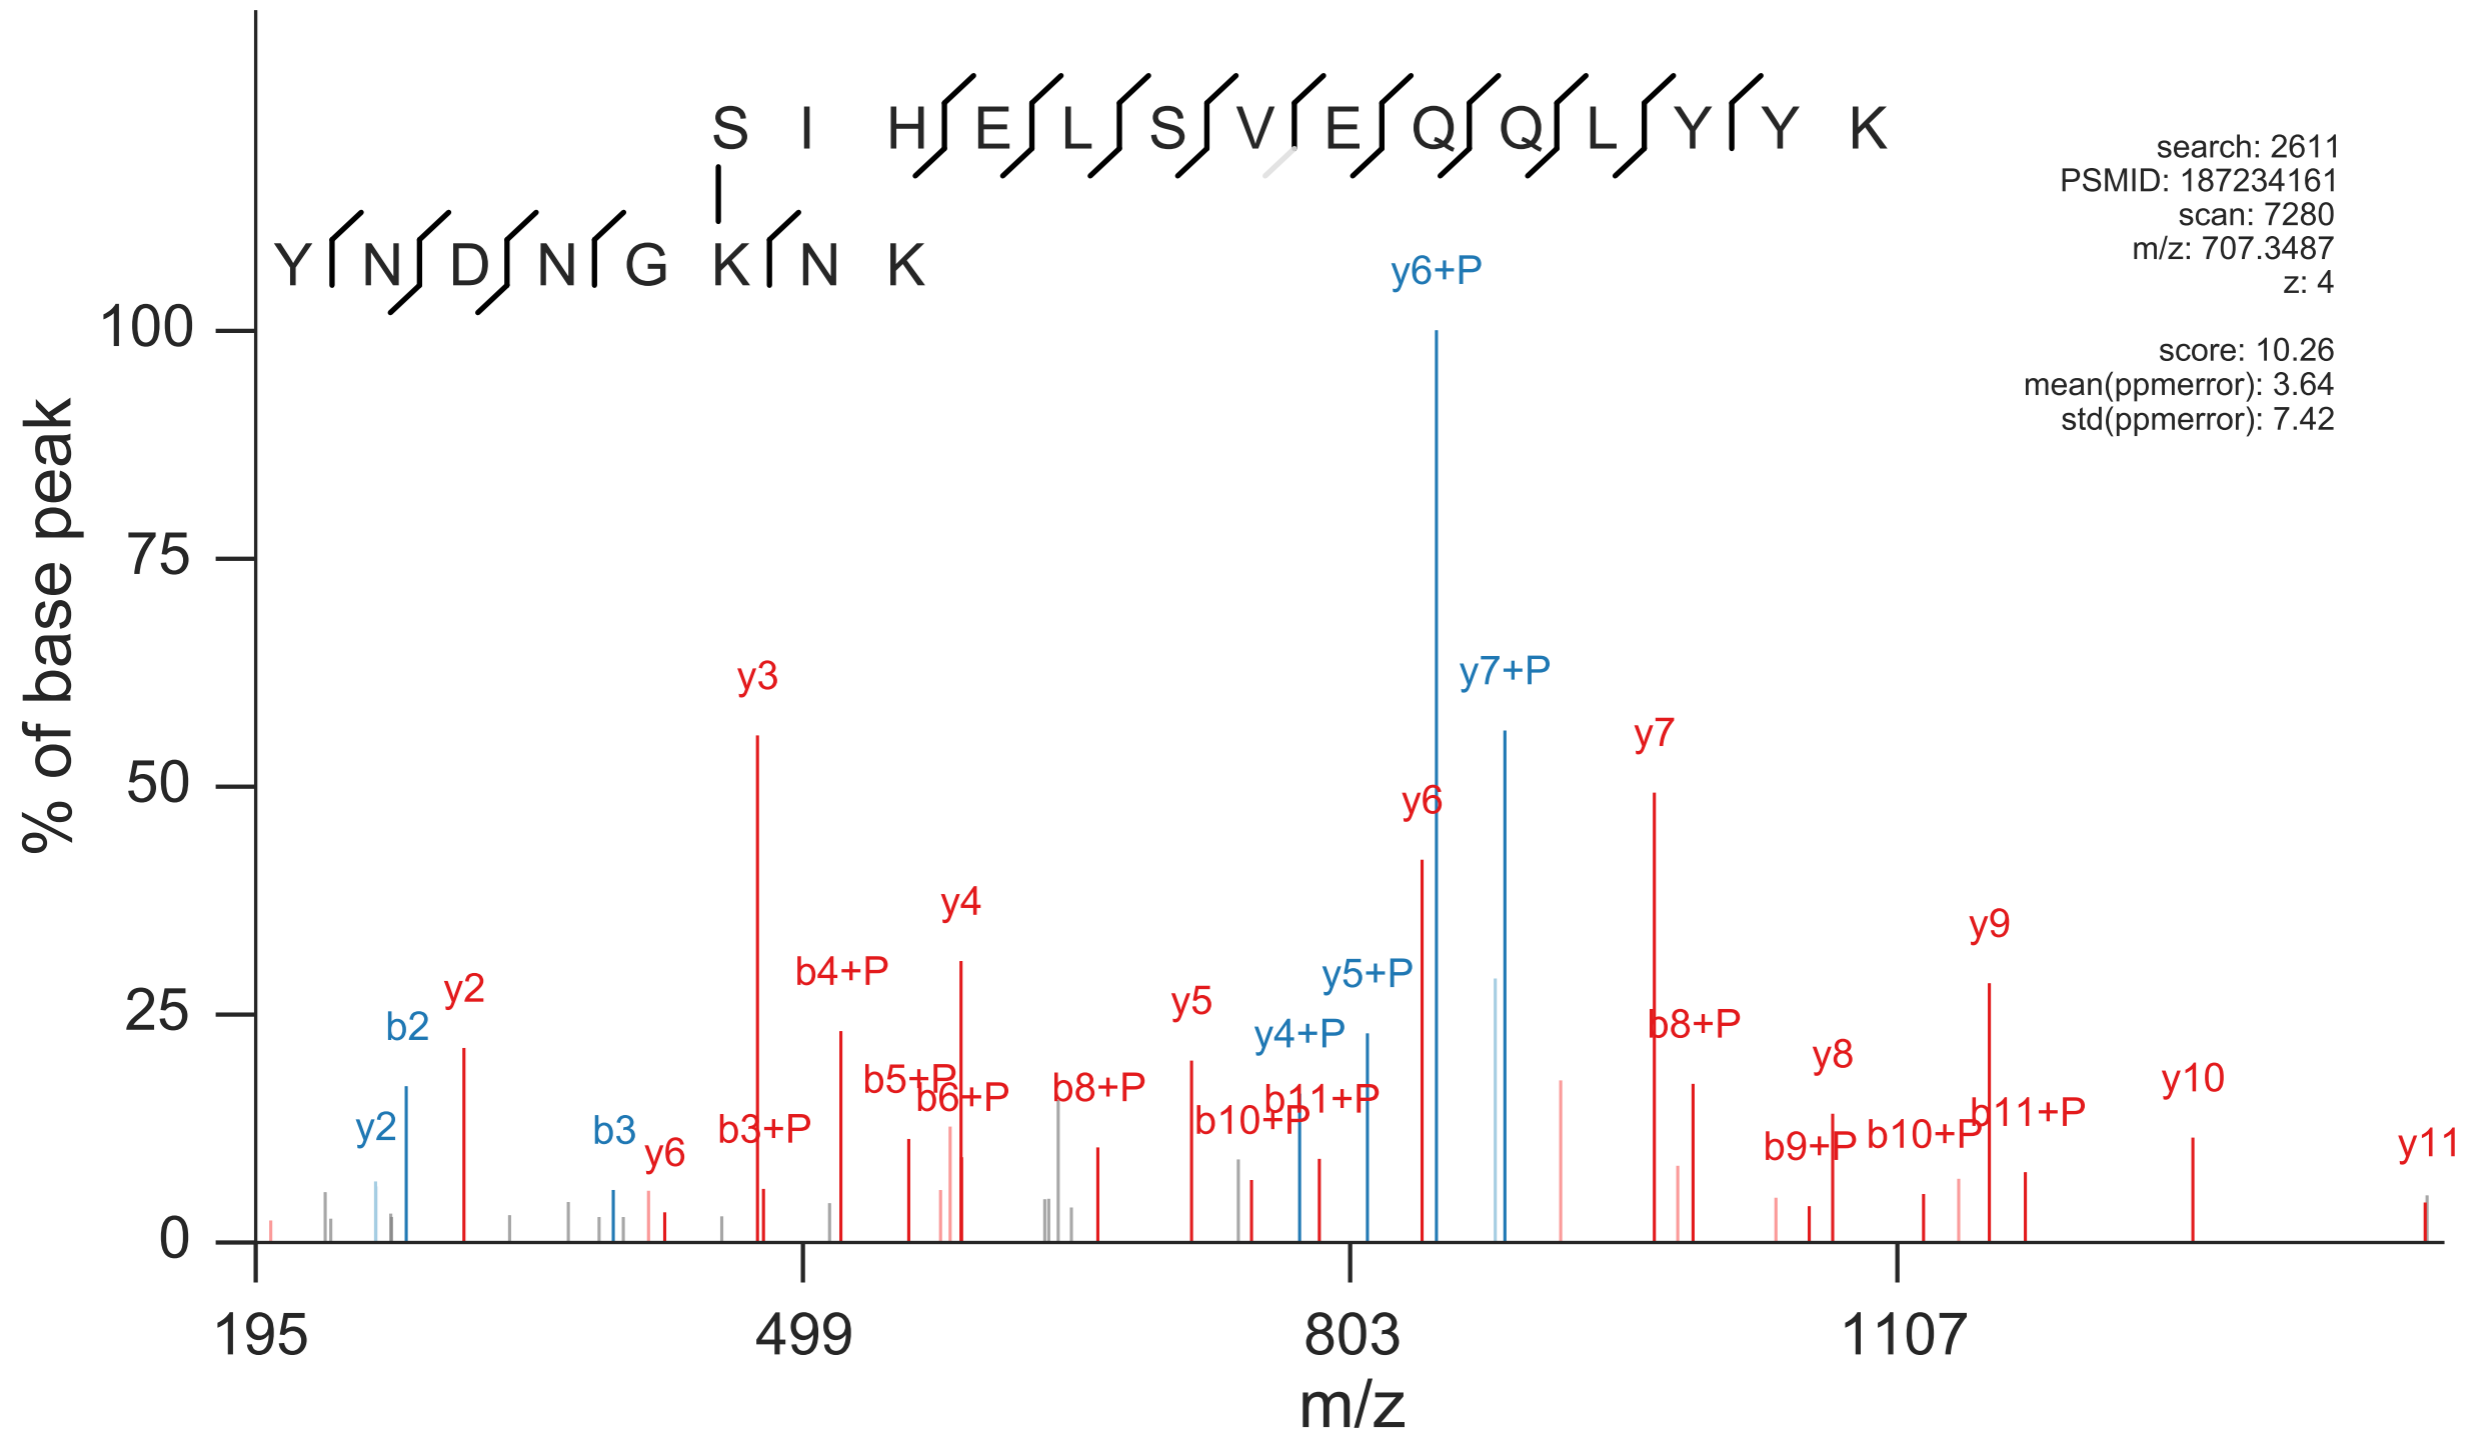

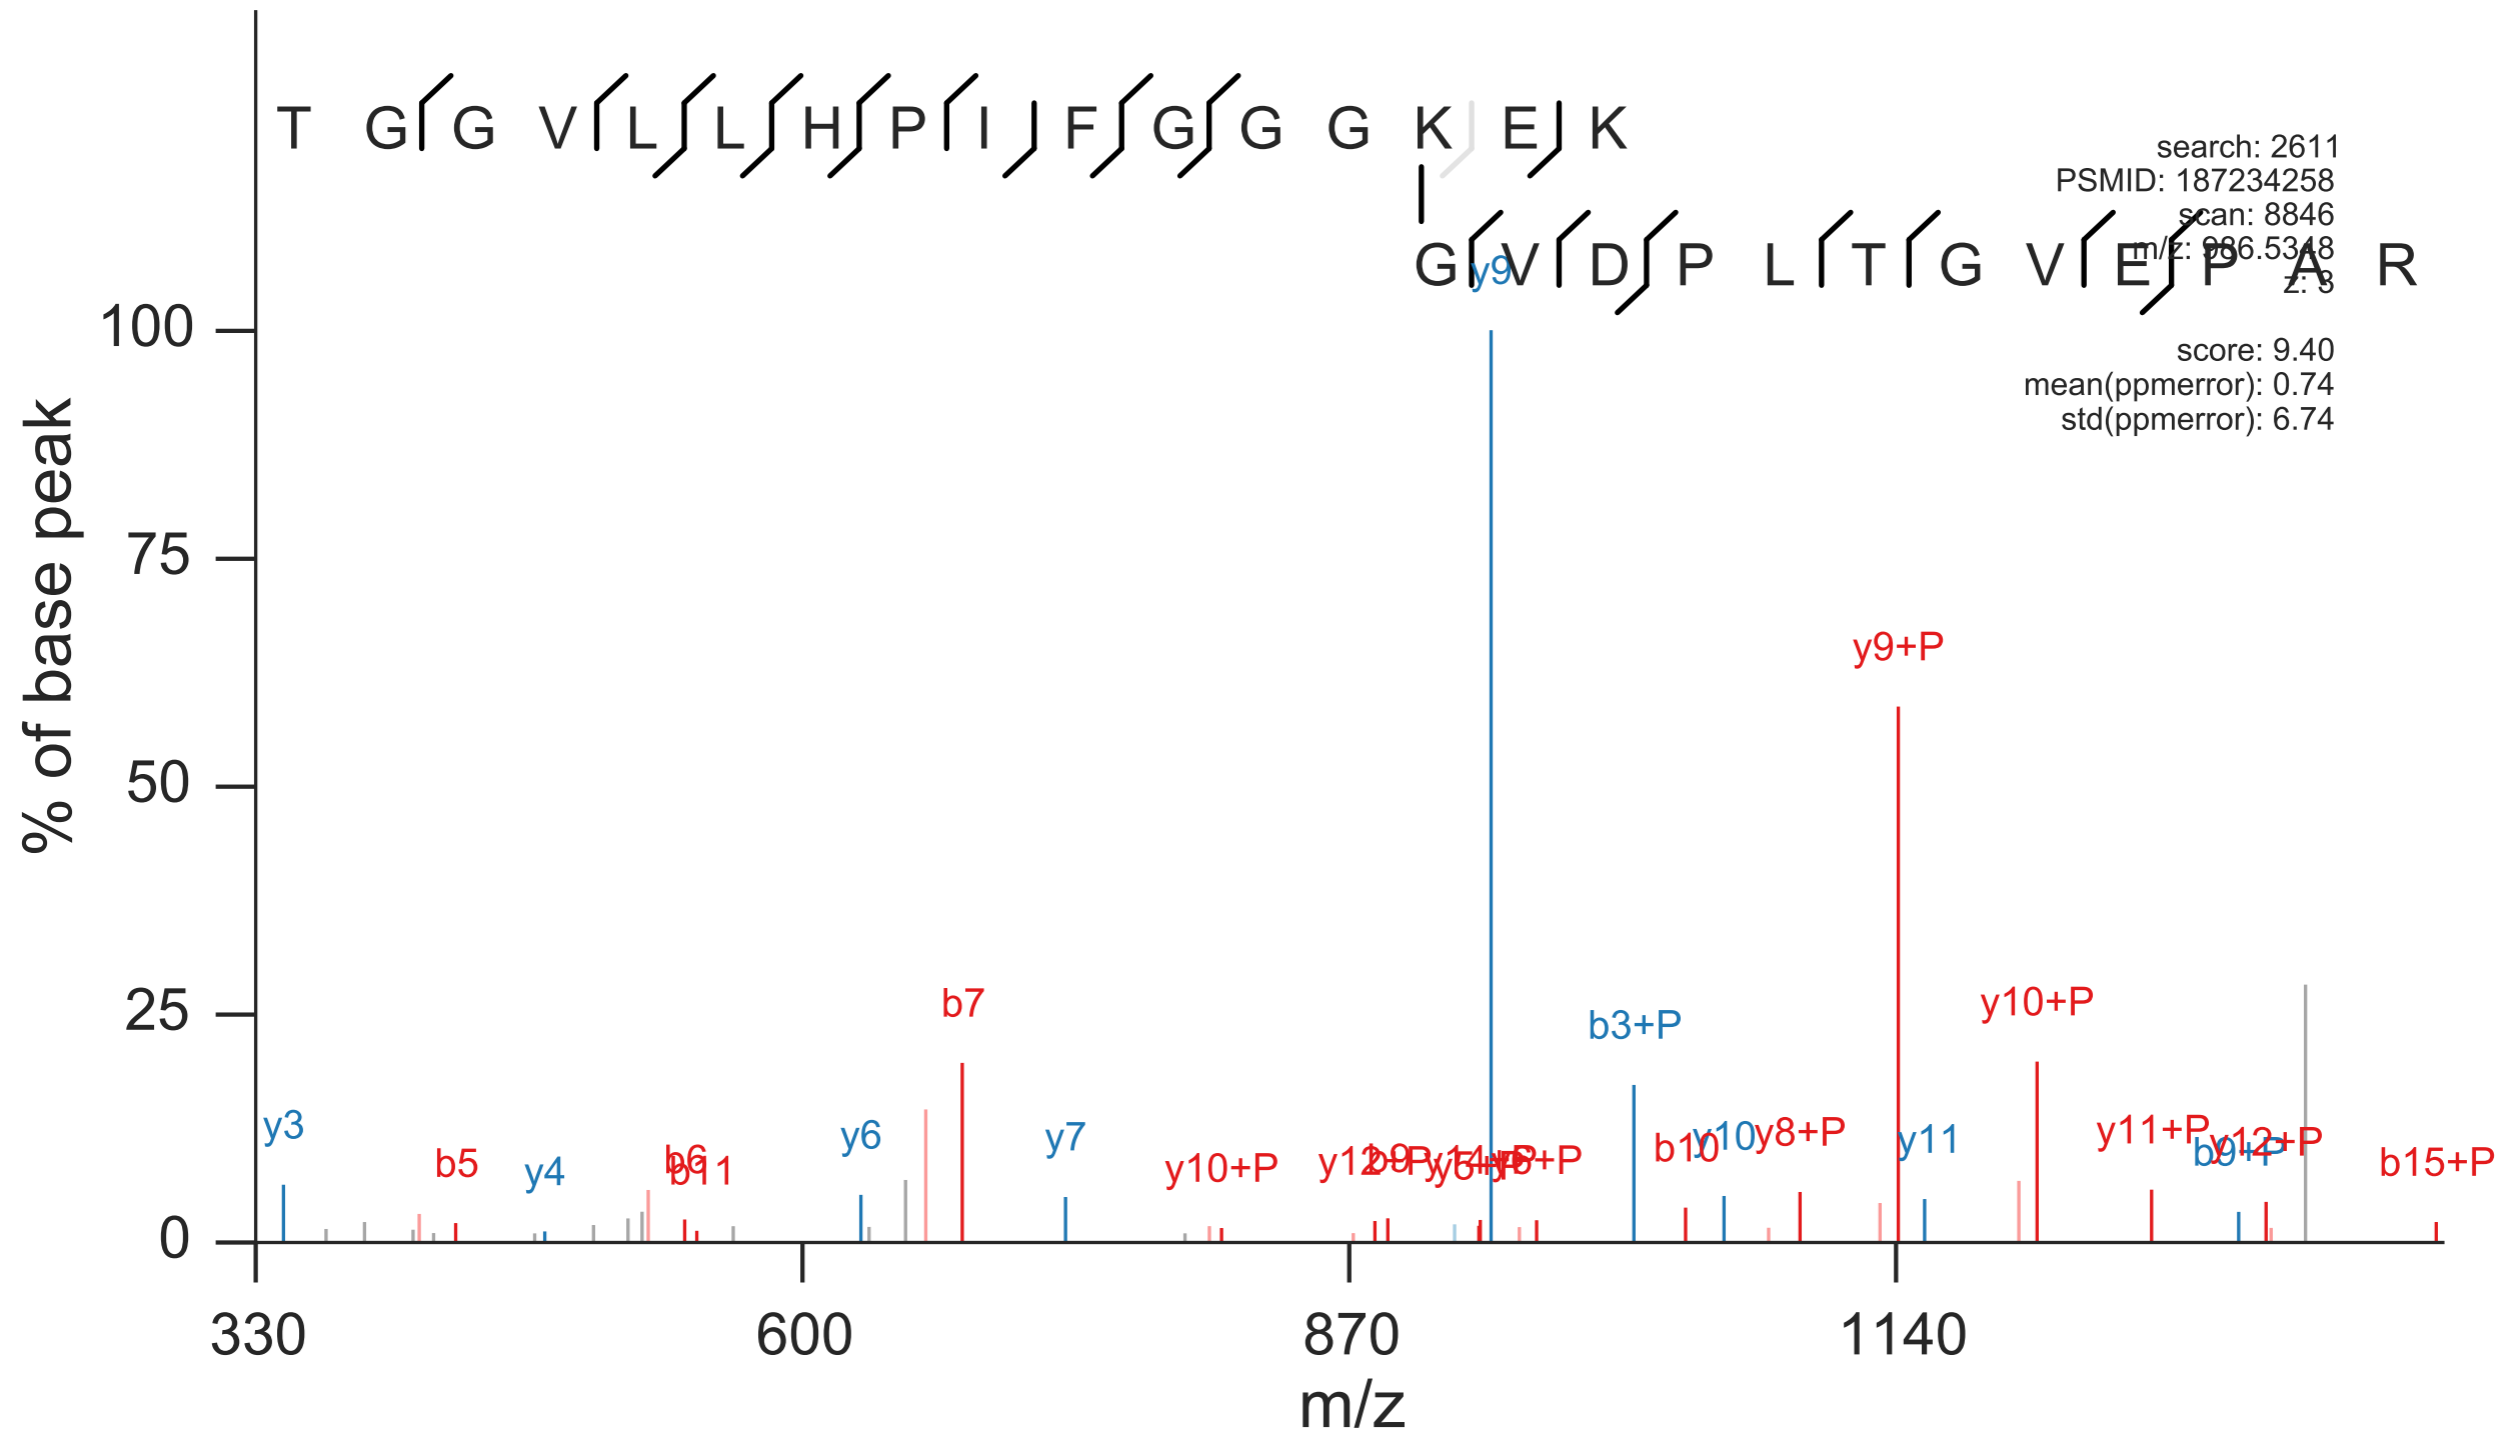

T G|G V|L|L|H|P|I|F|G|G G K|E|K

G|V|D|P L|T|G V|E|P A R

search: 2611  
 PSMID: 187234258  
 scan: 8846  
 m/z: 936.5318  
 z: 3  
 score: 9.40  
 mean(ppmerror): 0.74  
 std(ppmerror): 6.74

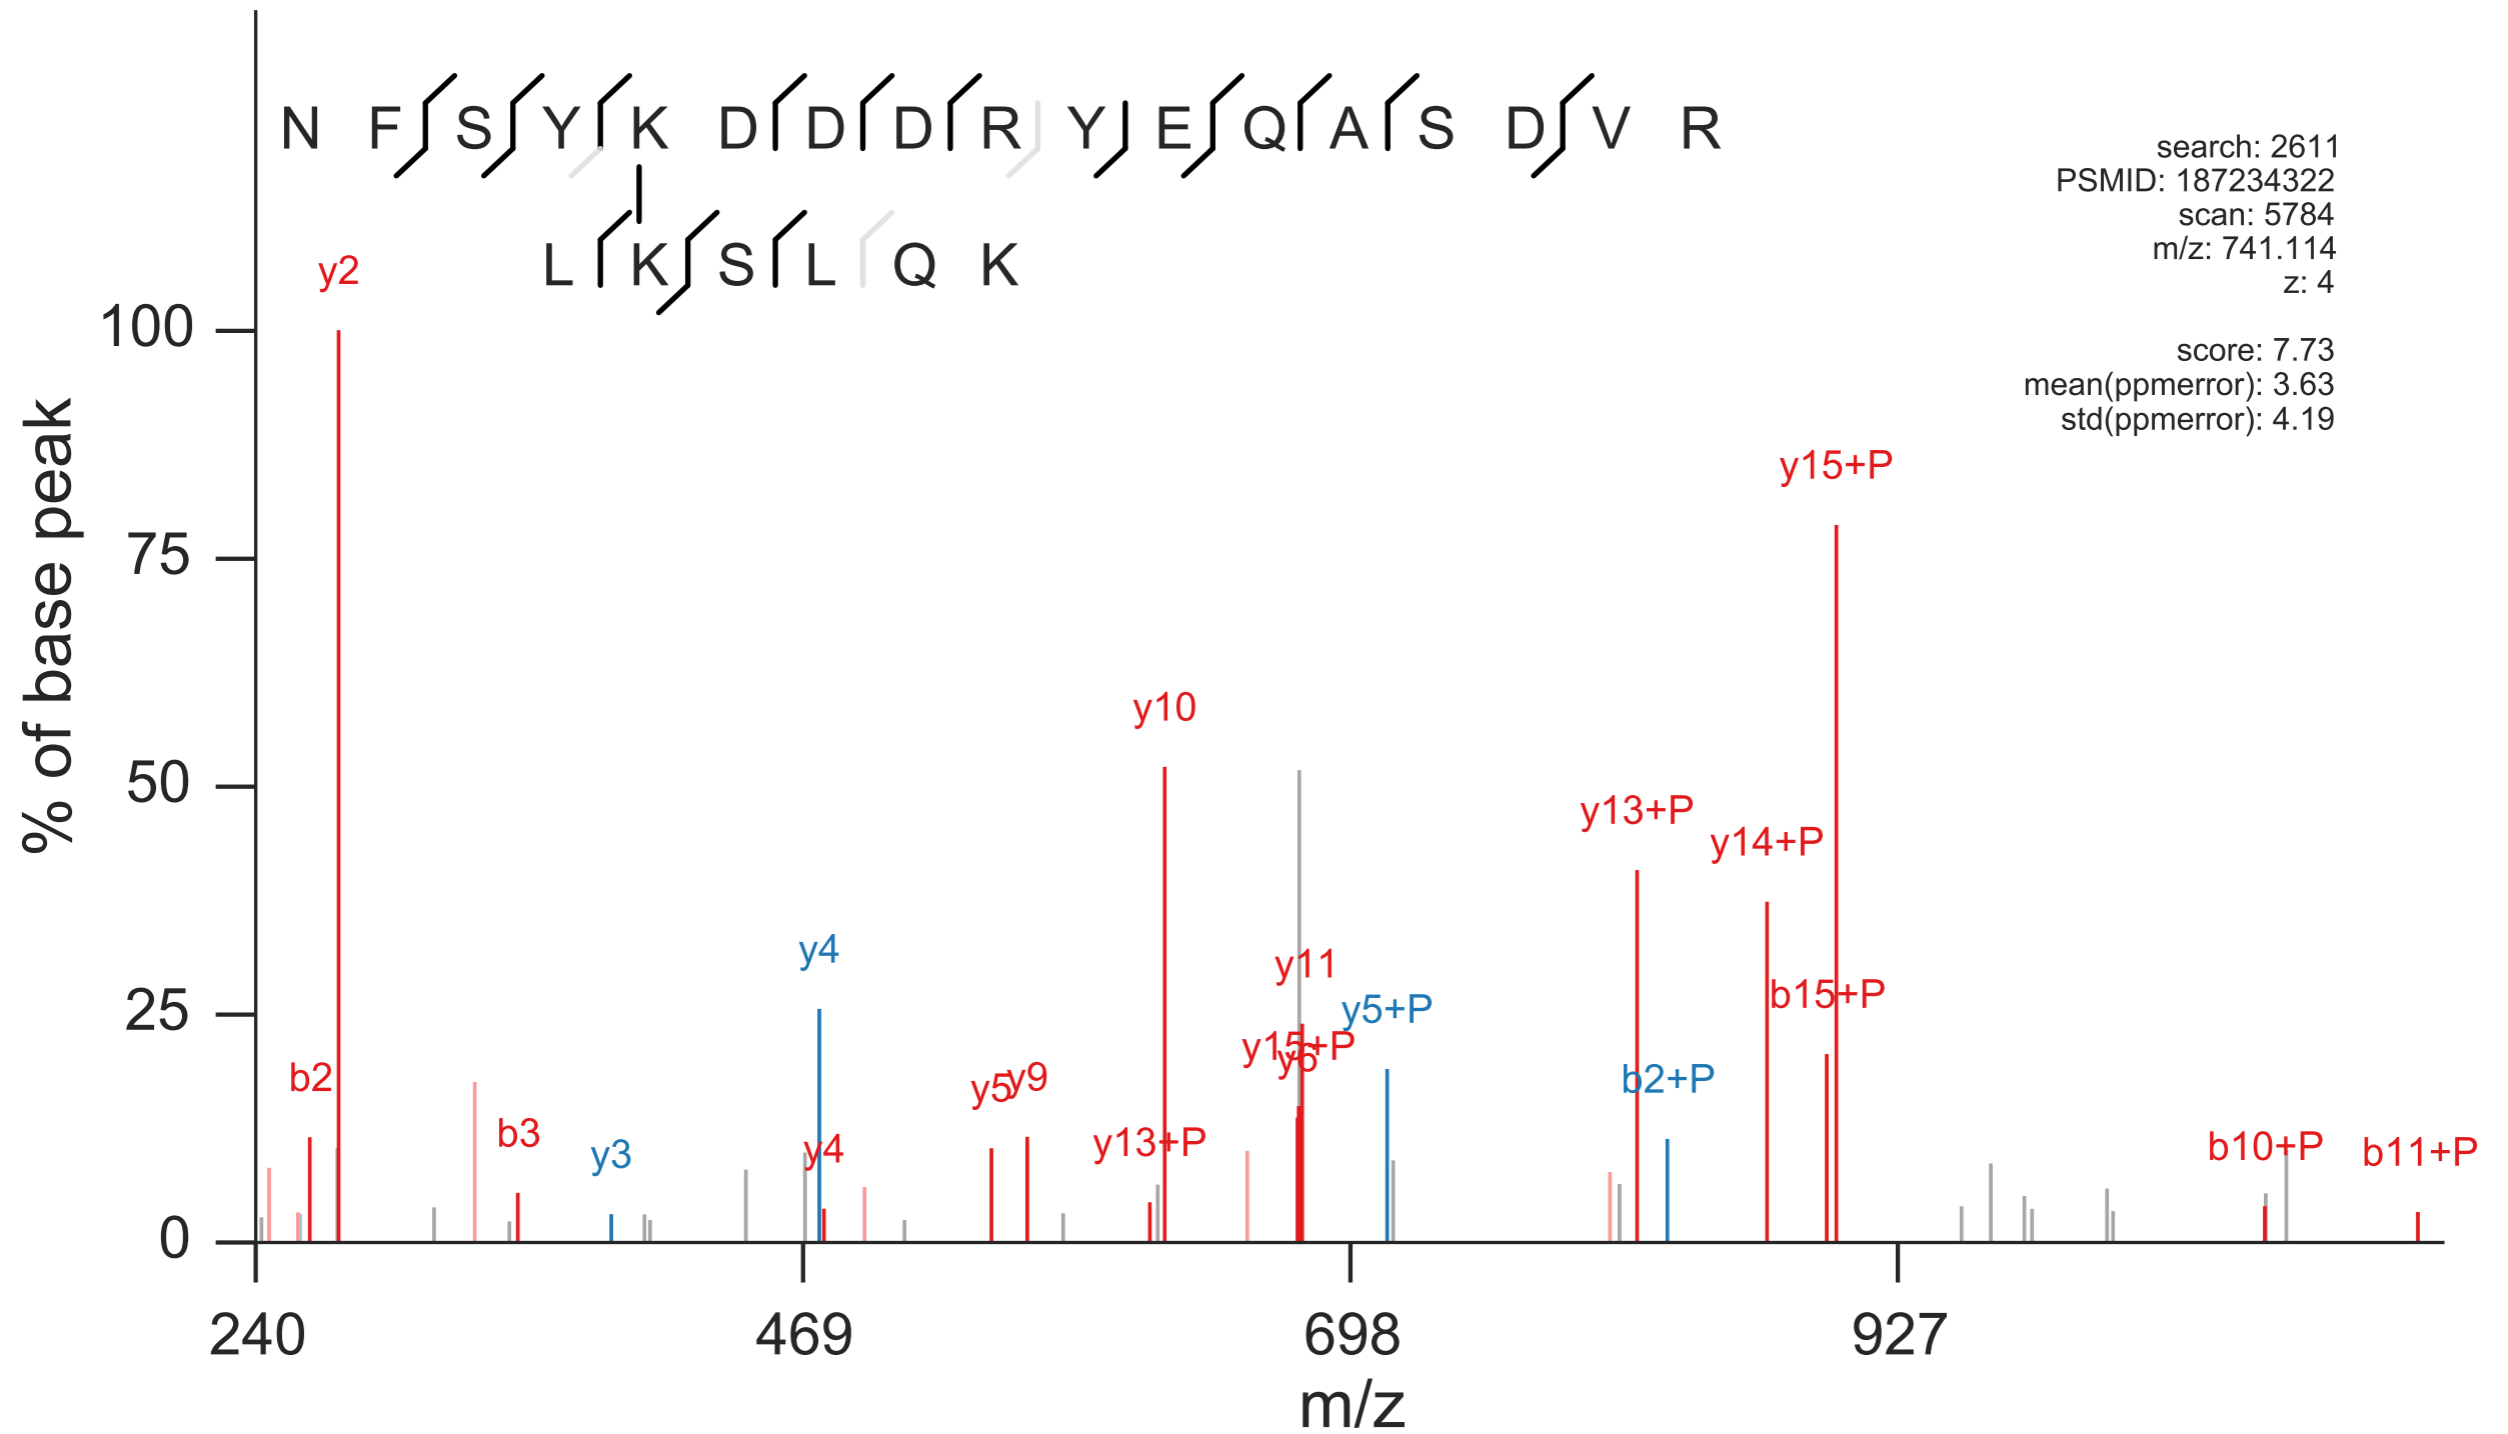

search: 2611  
 PSMID: 187234322  
 scan: 5784  
 m/z: 741.114  
 z: 4  
 score: 7.73  
 mean(ppmerror): 3.63  
 std(ppmerror): 4.19

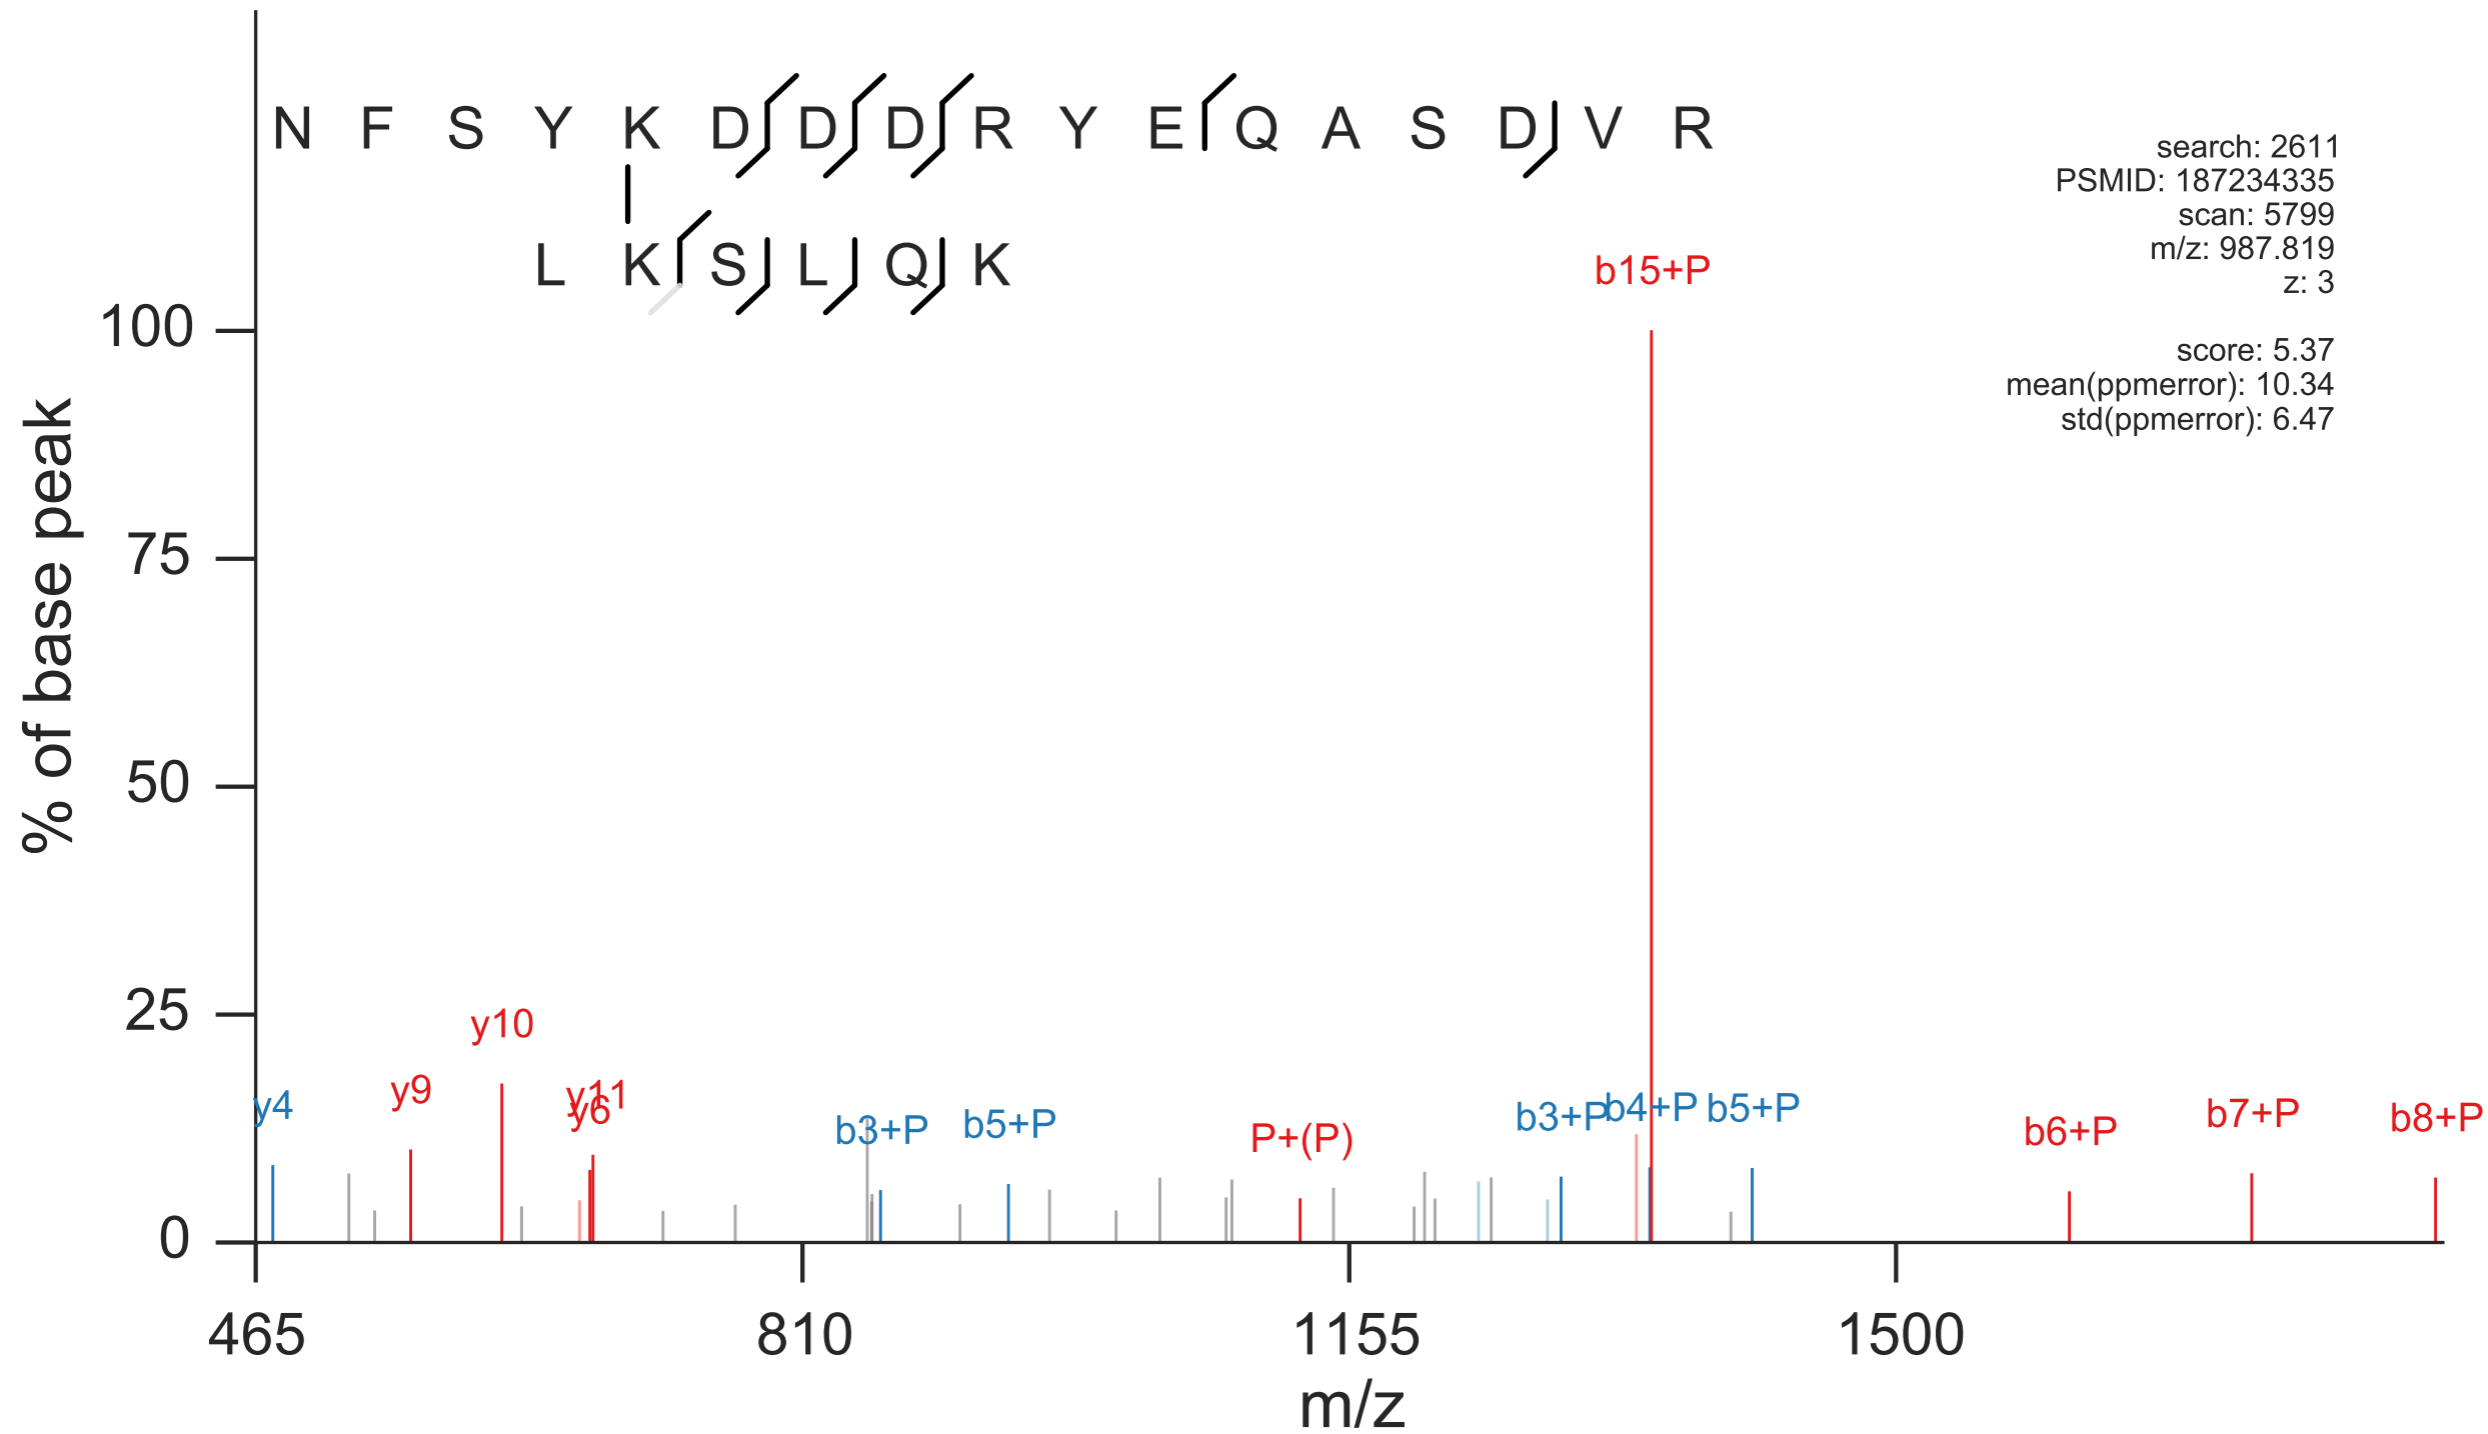

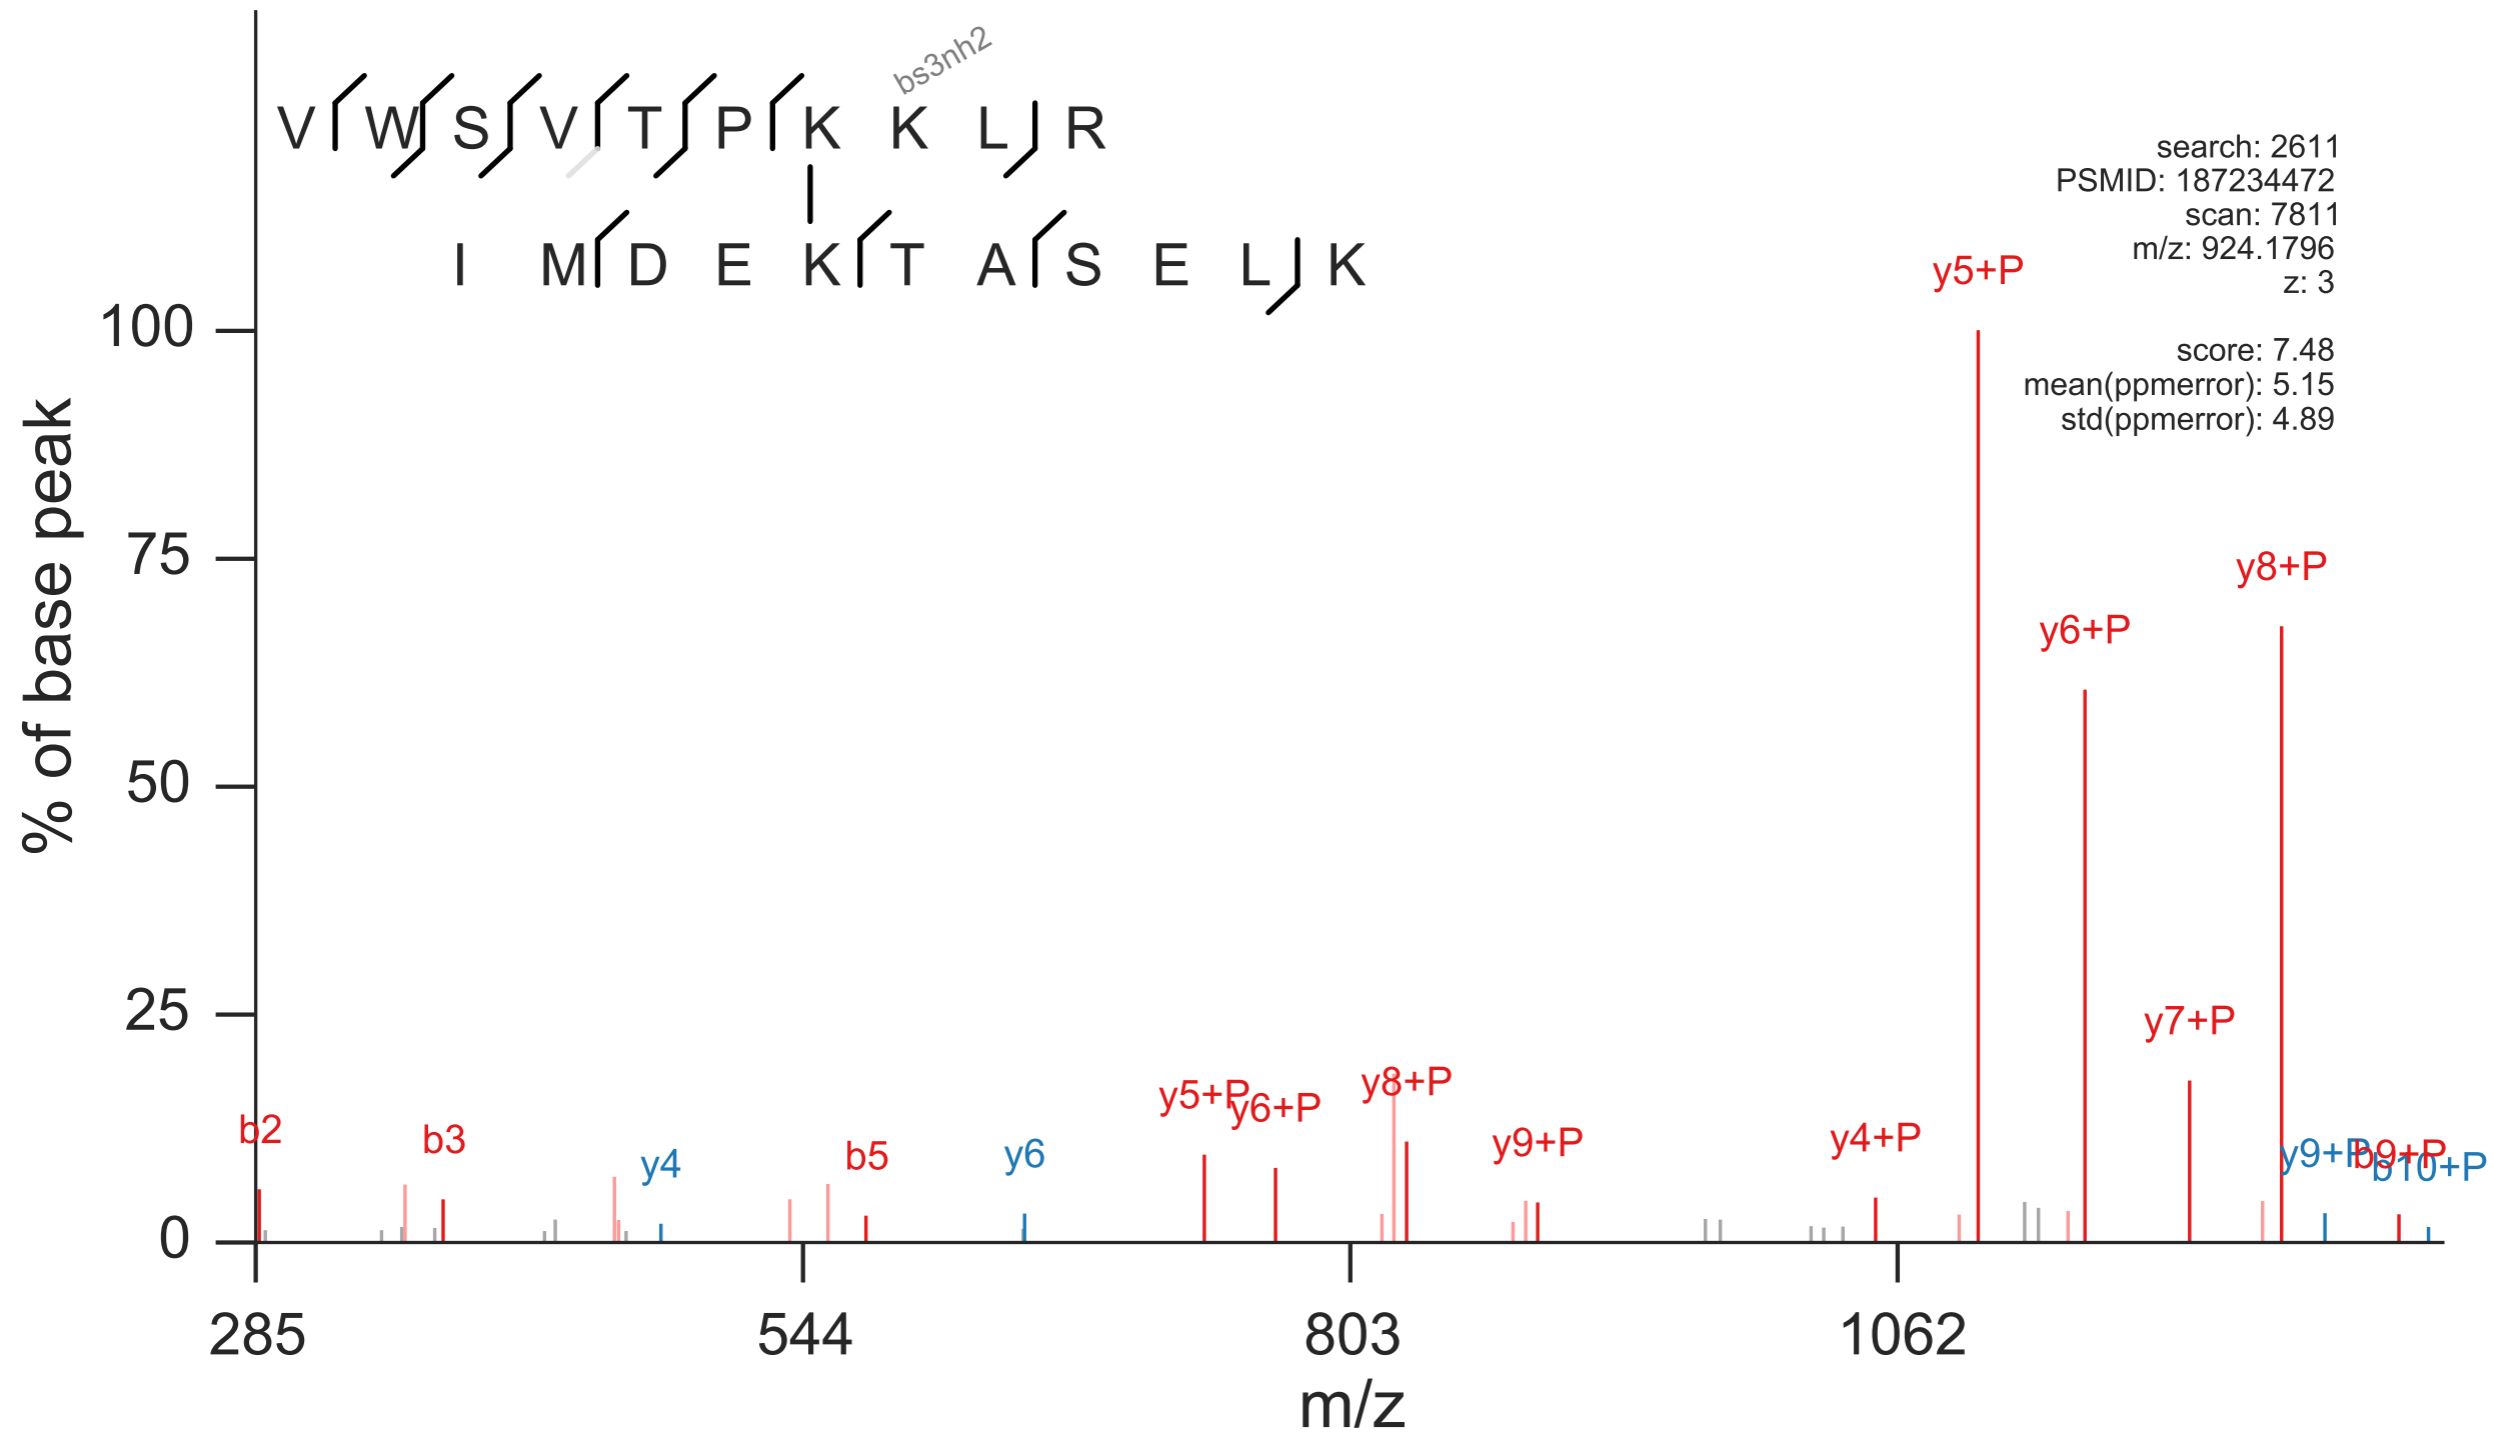

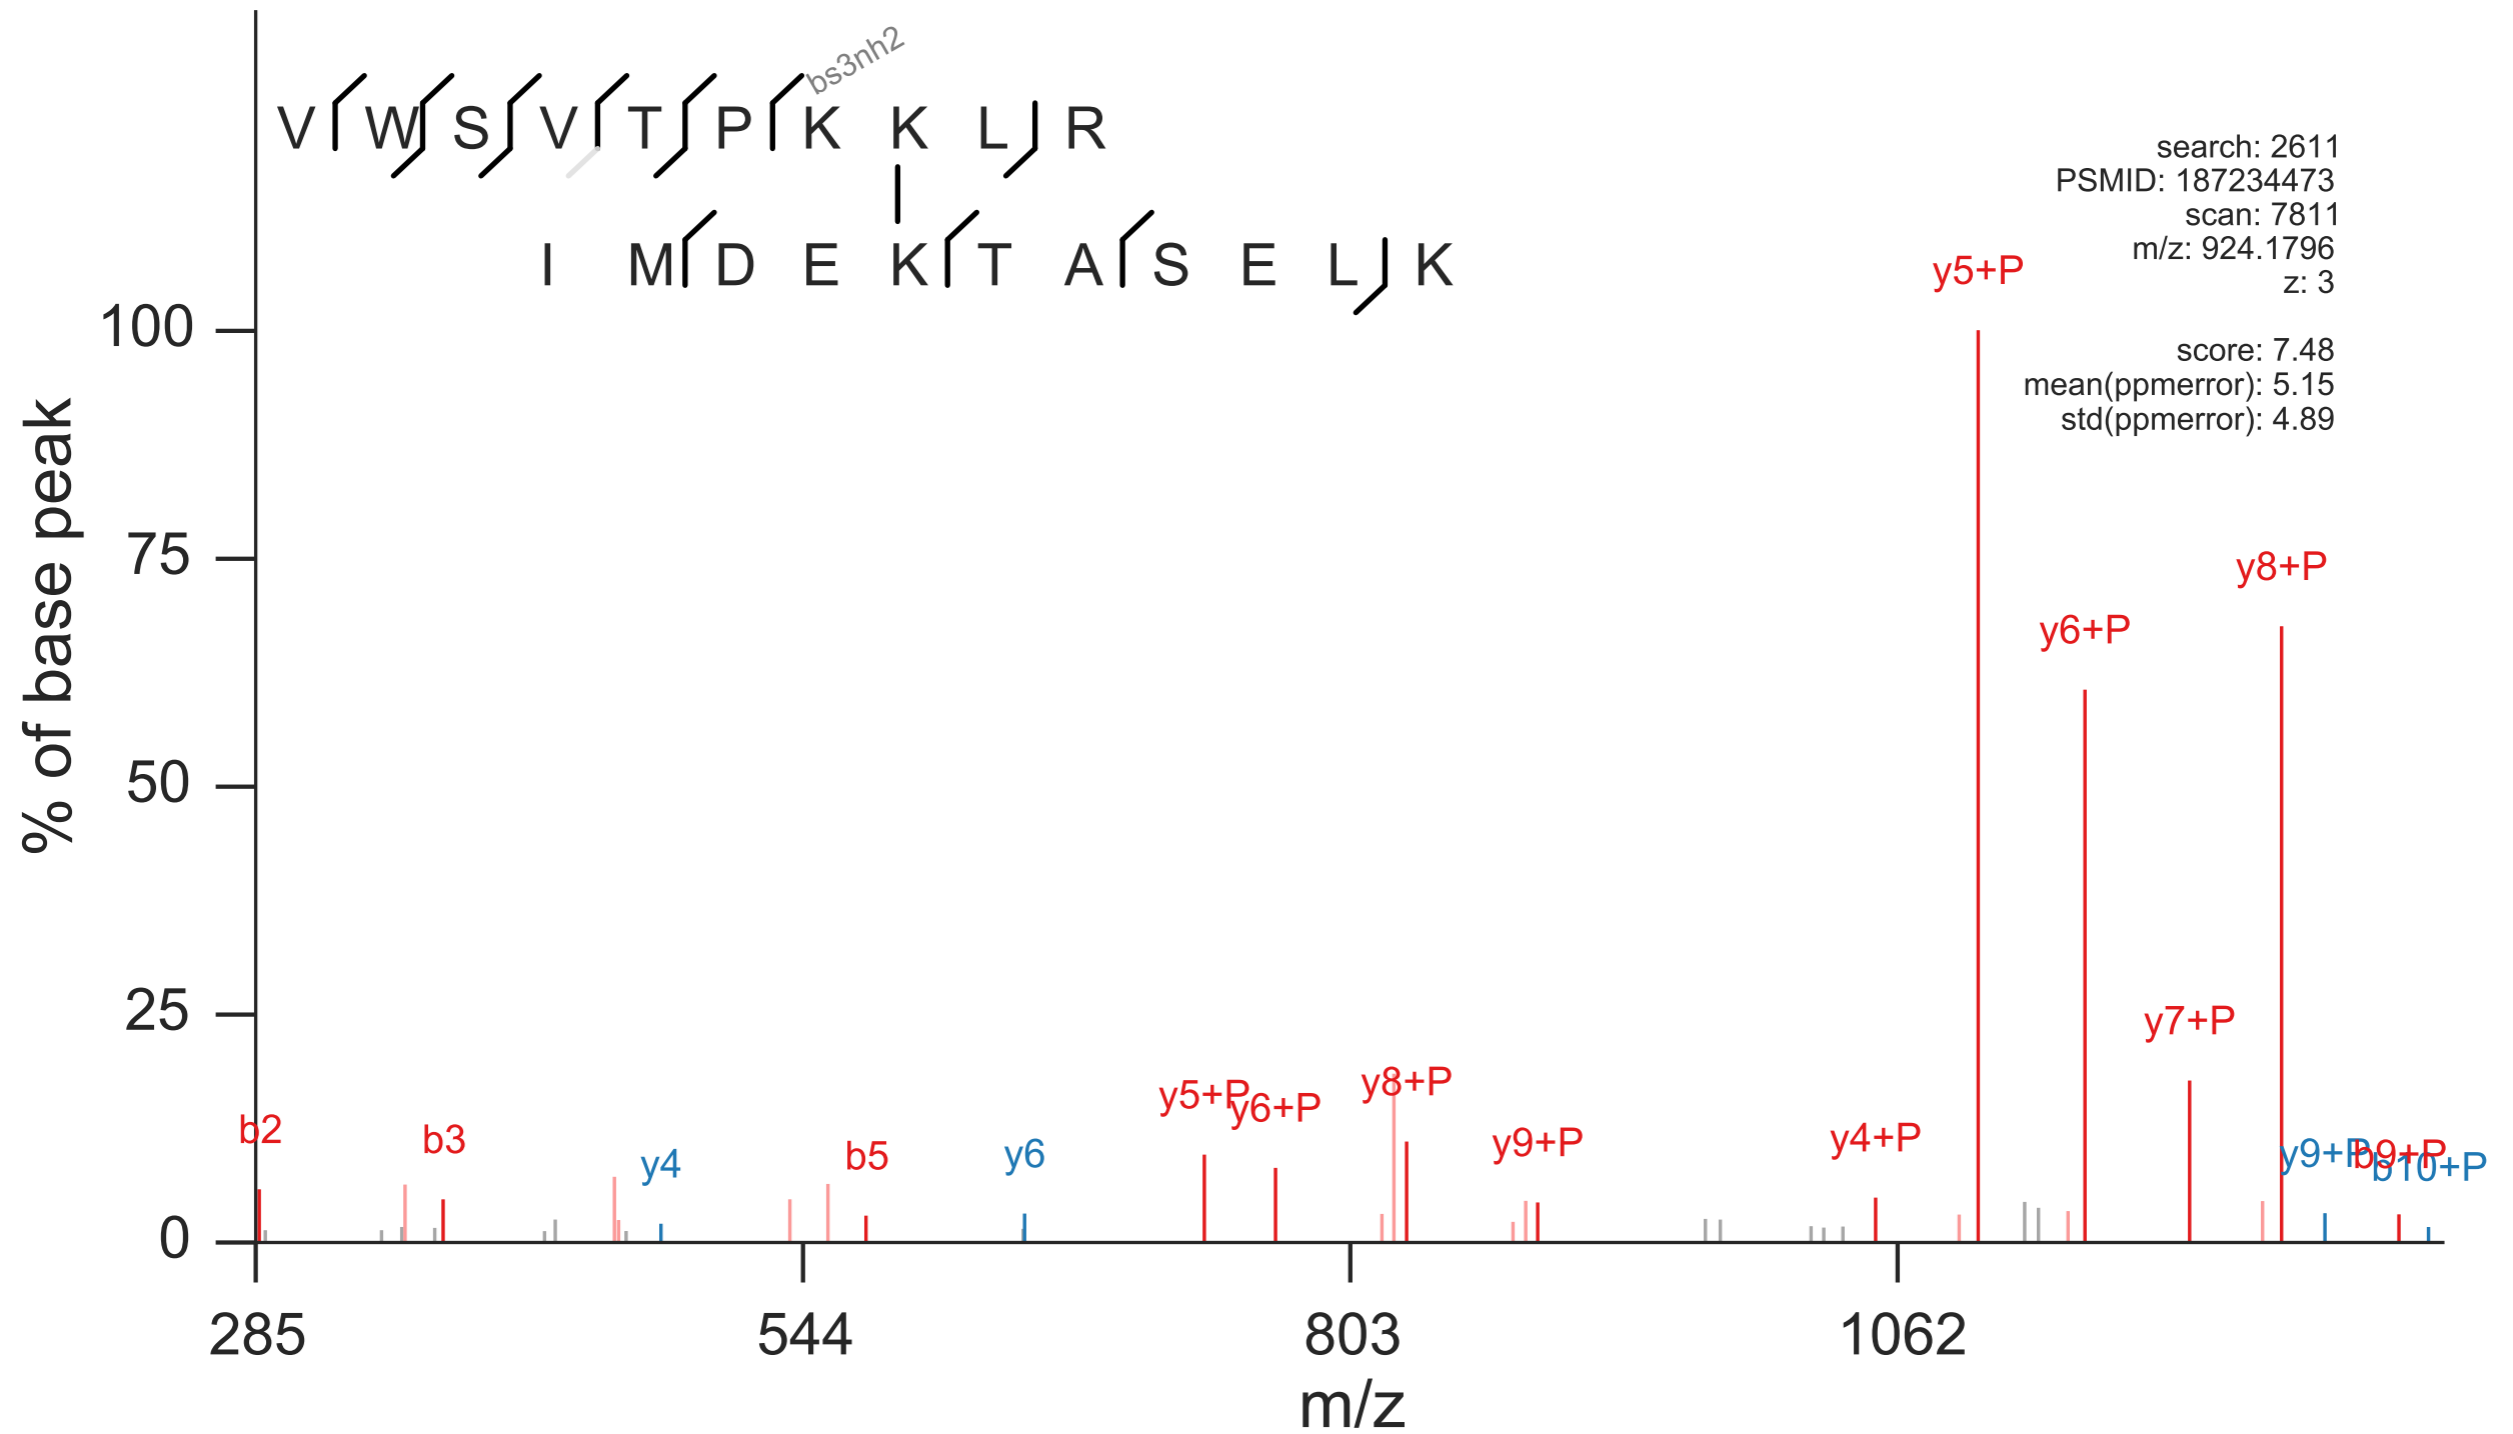

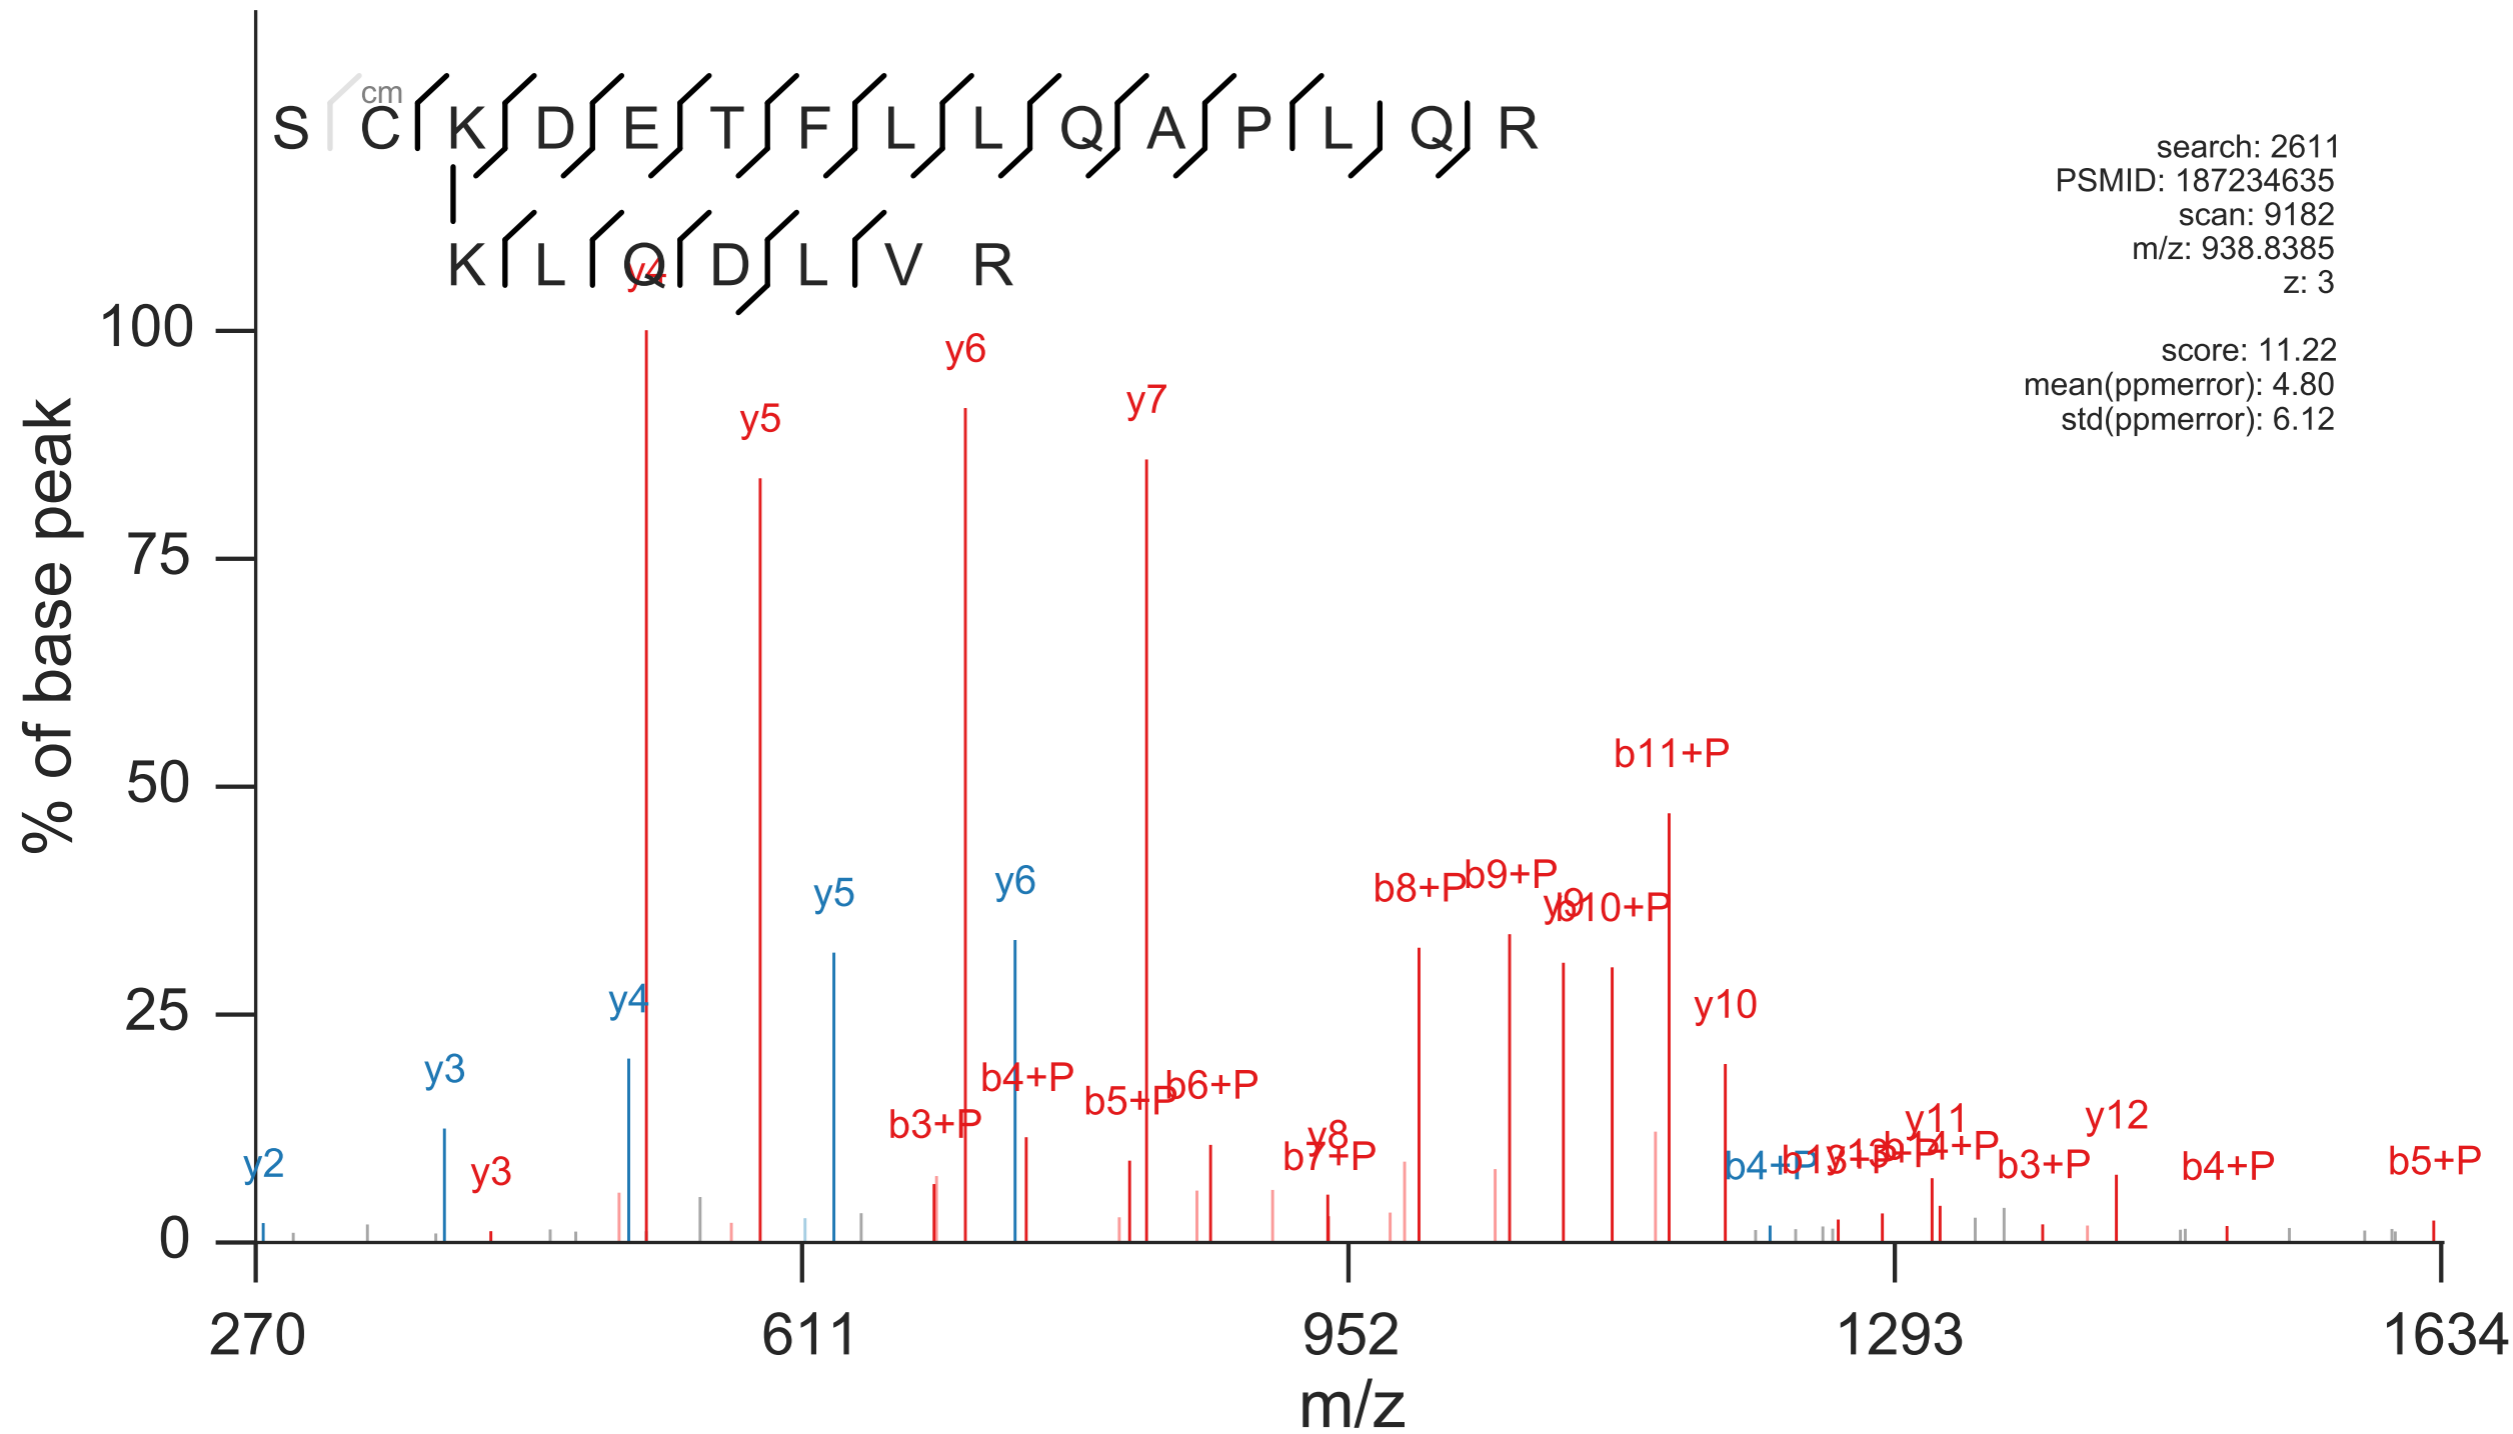



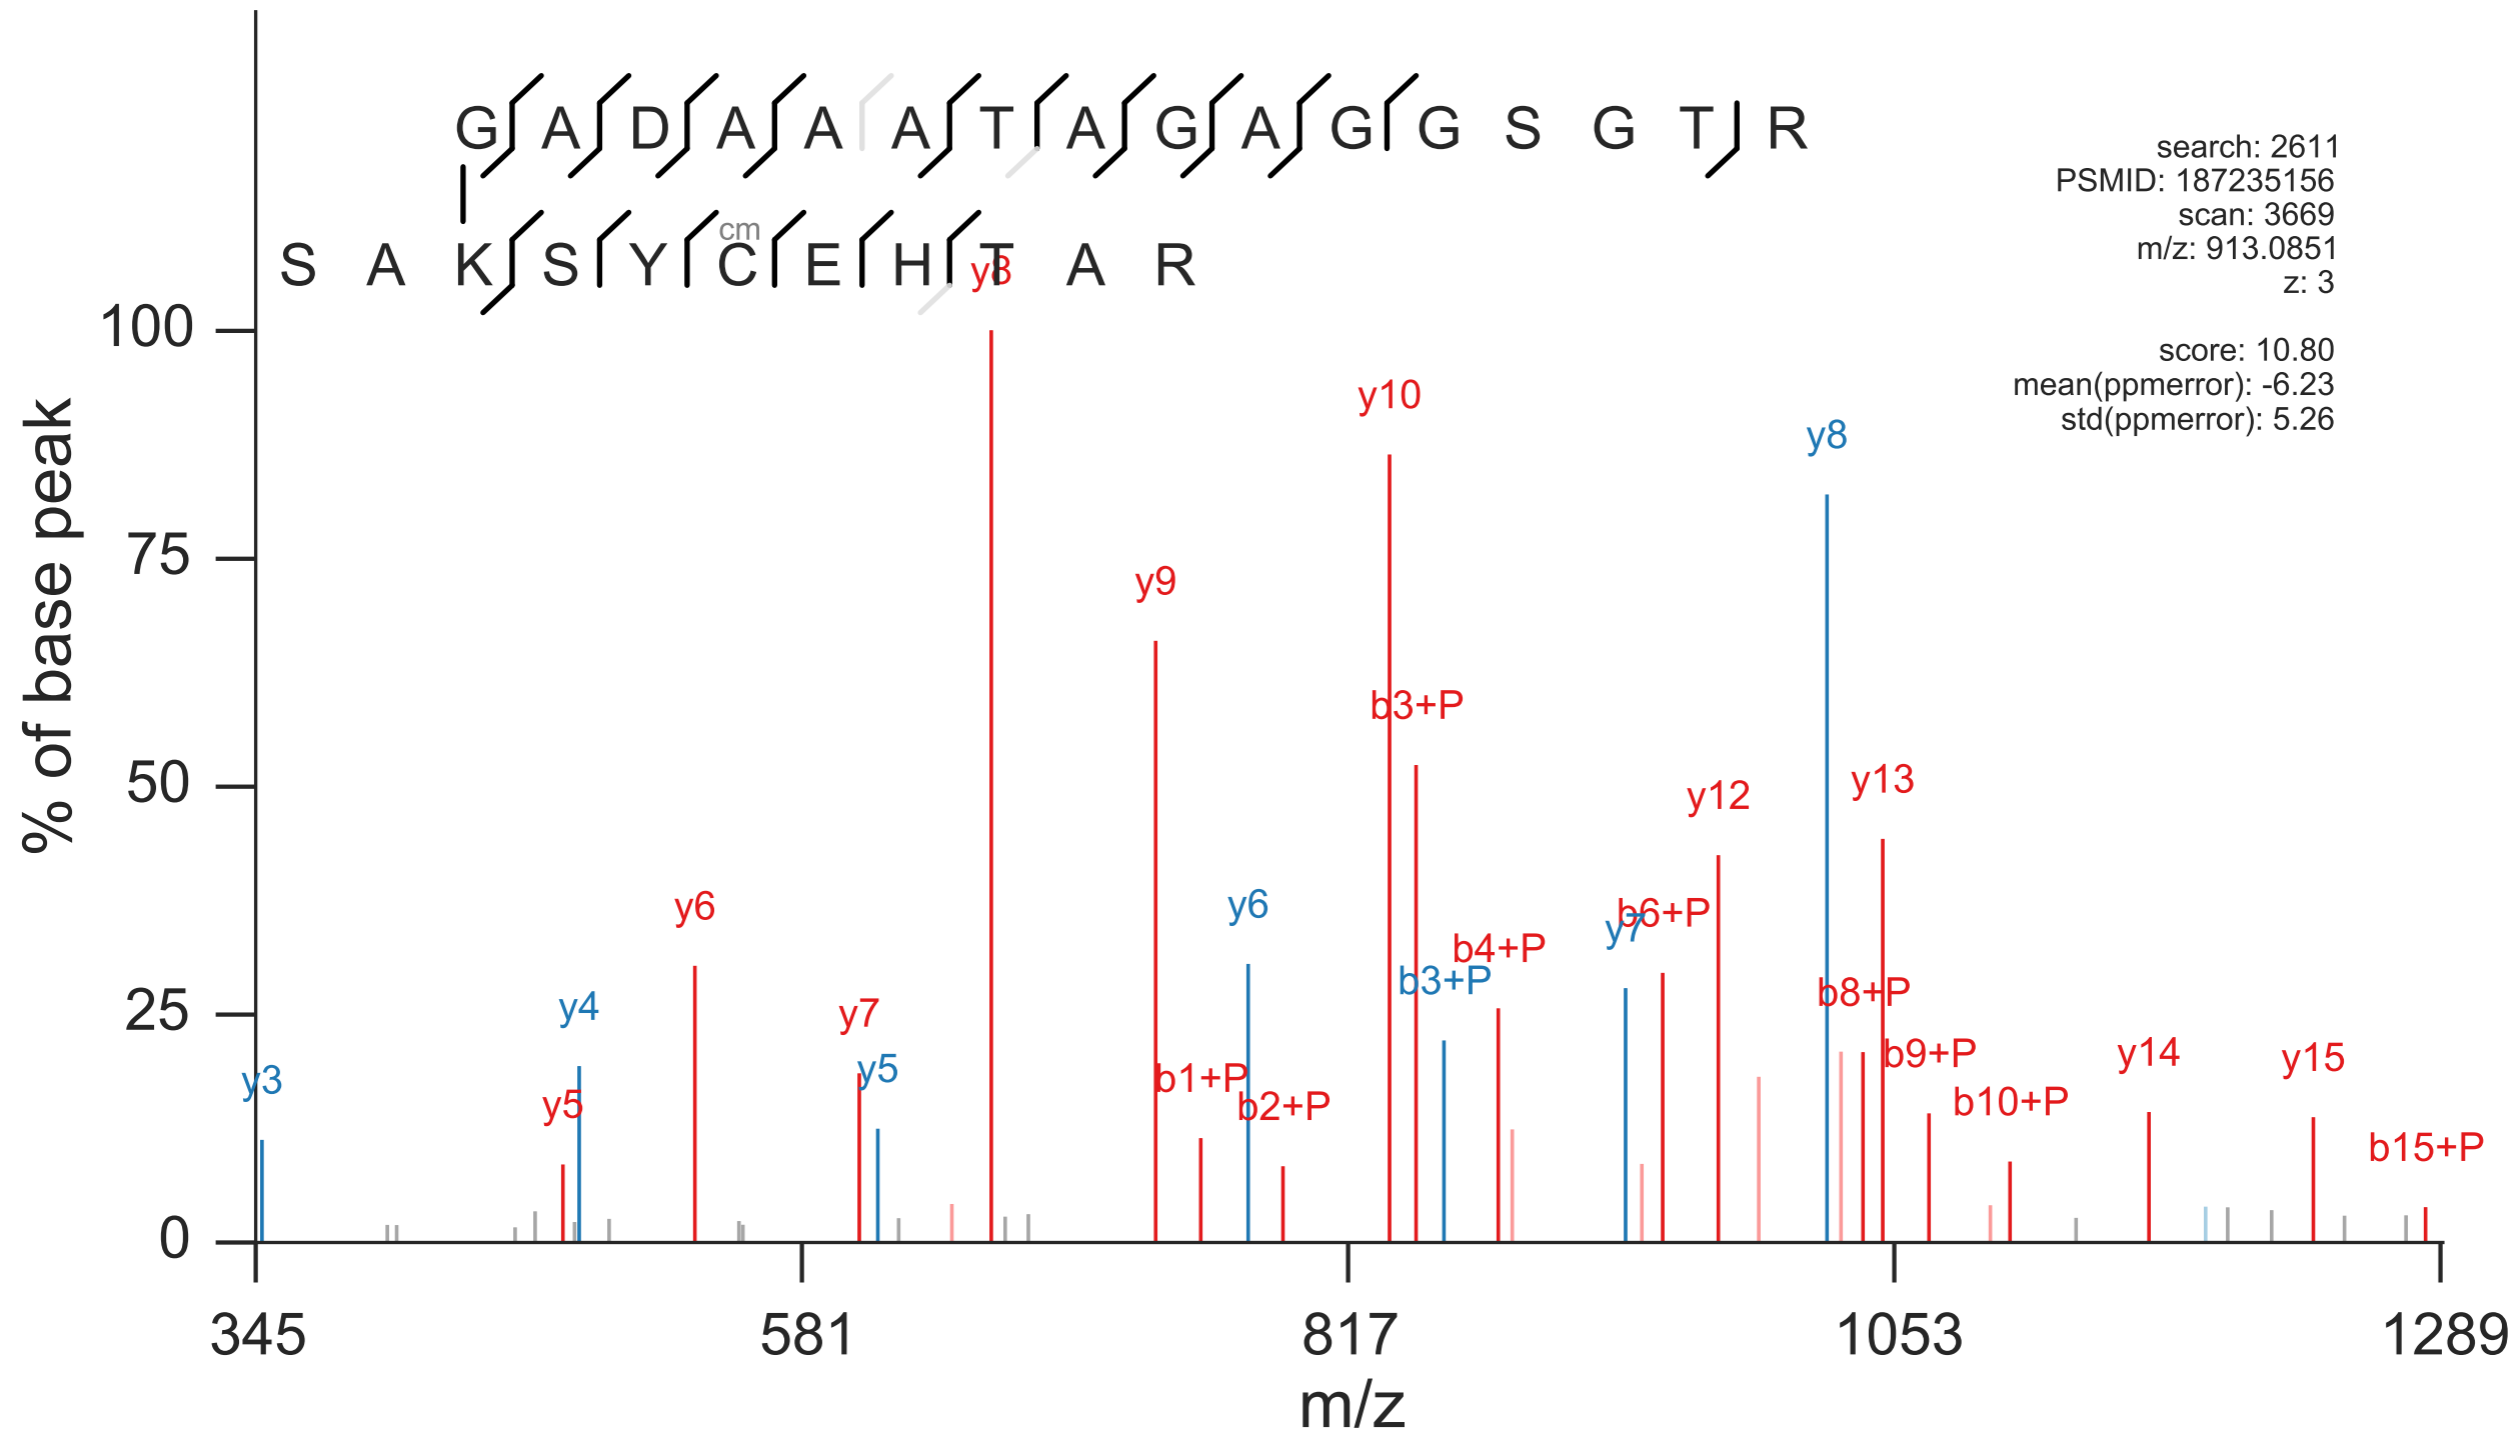

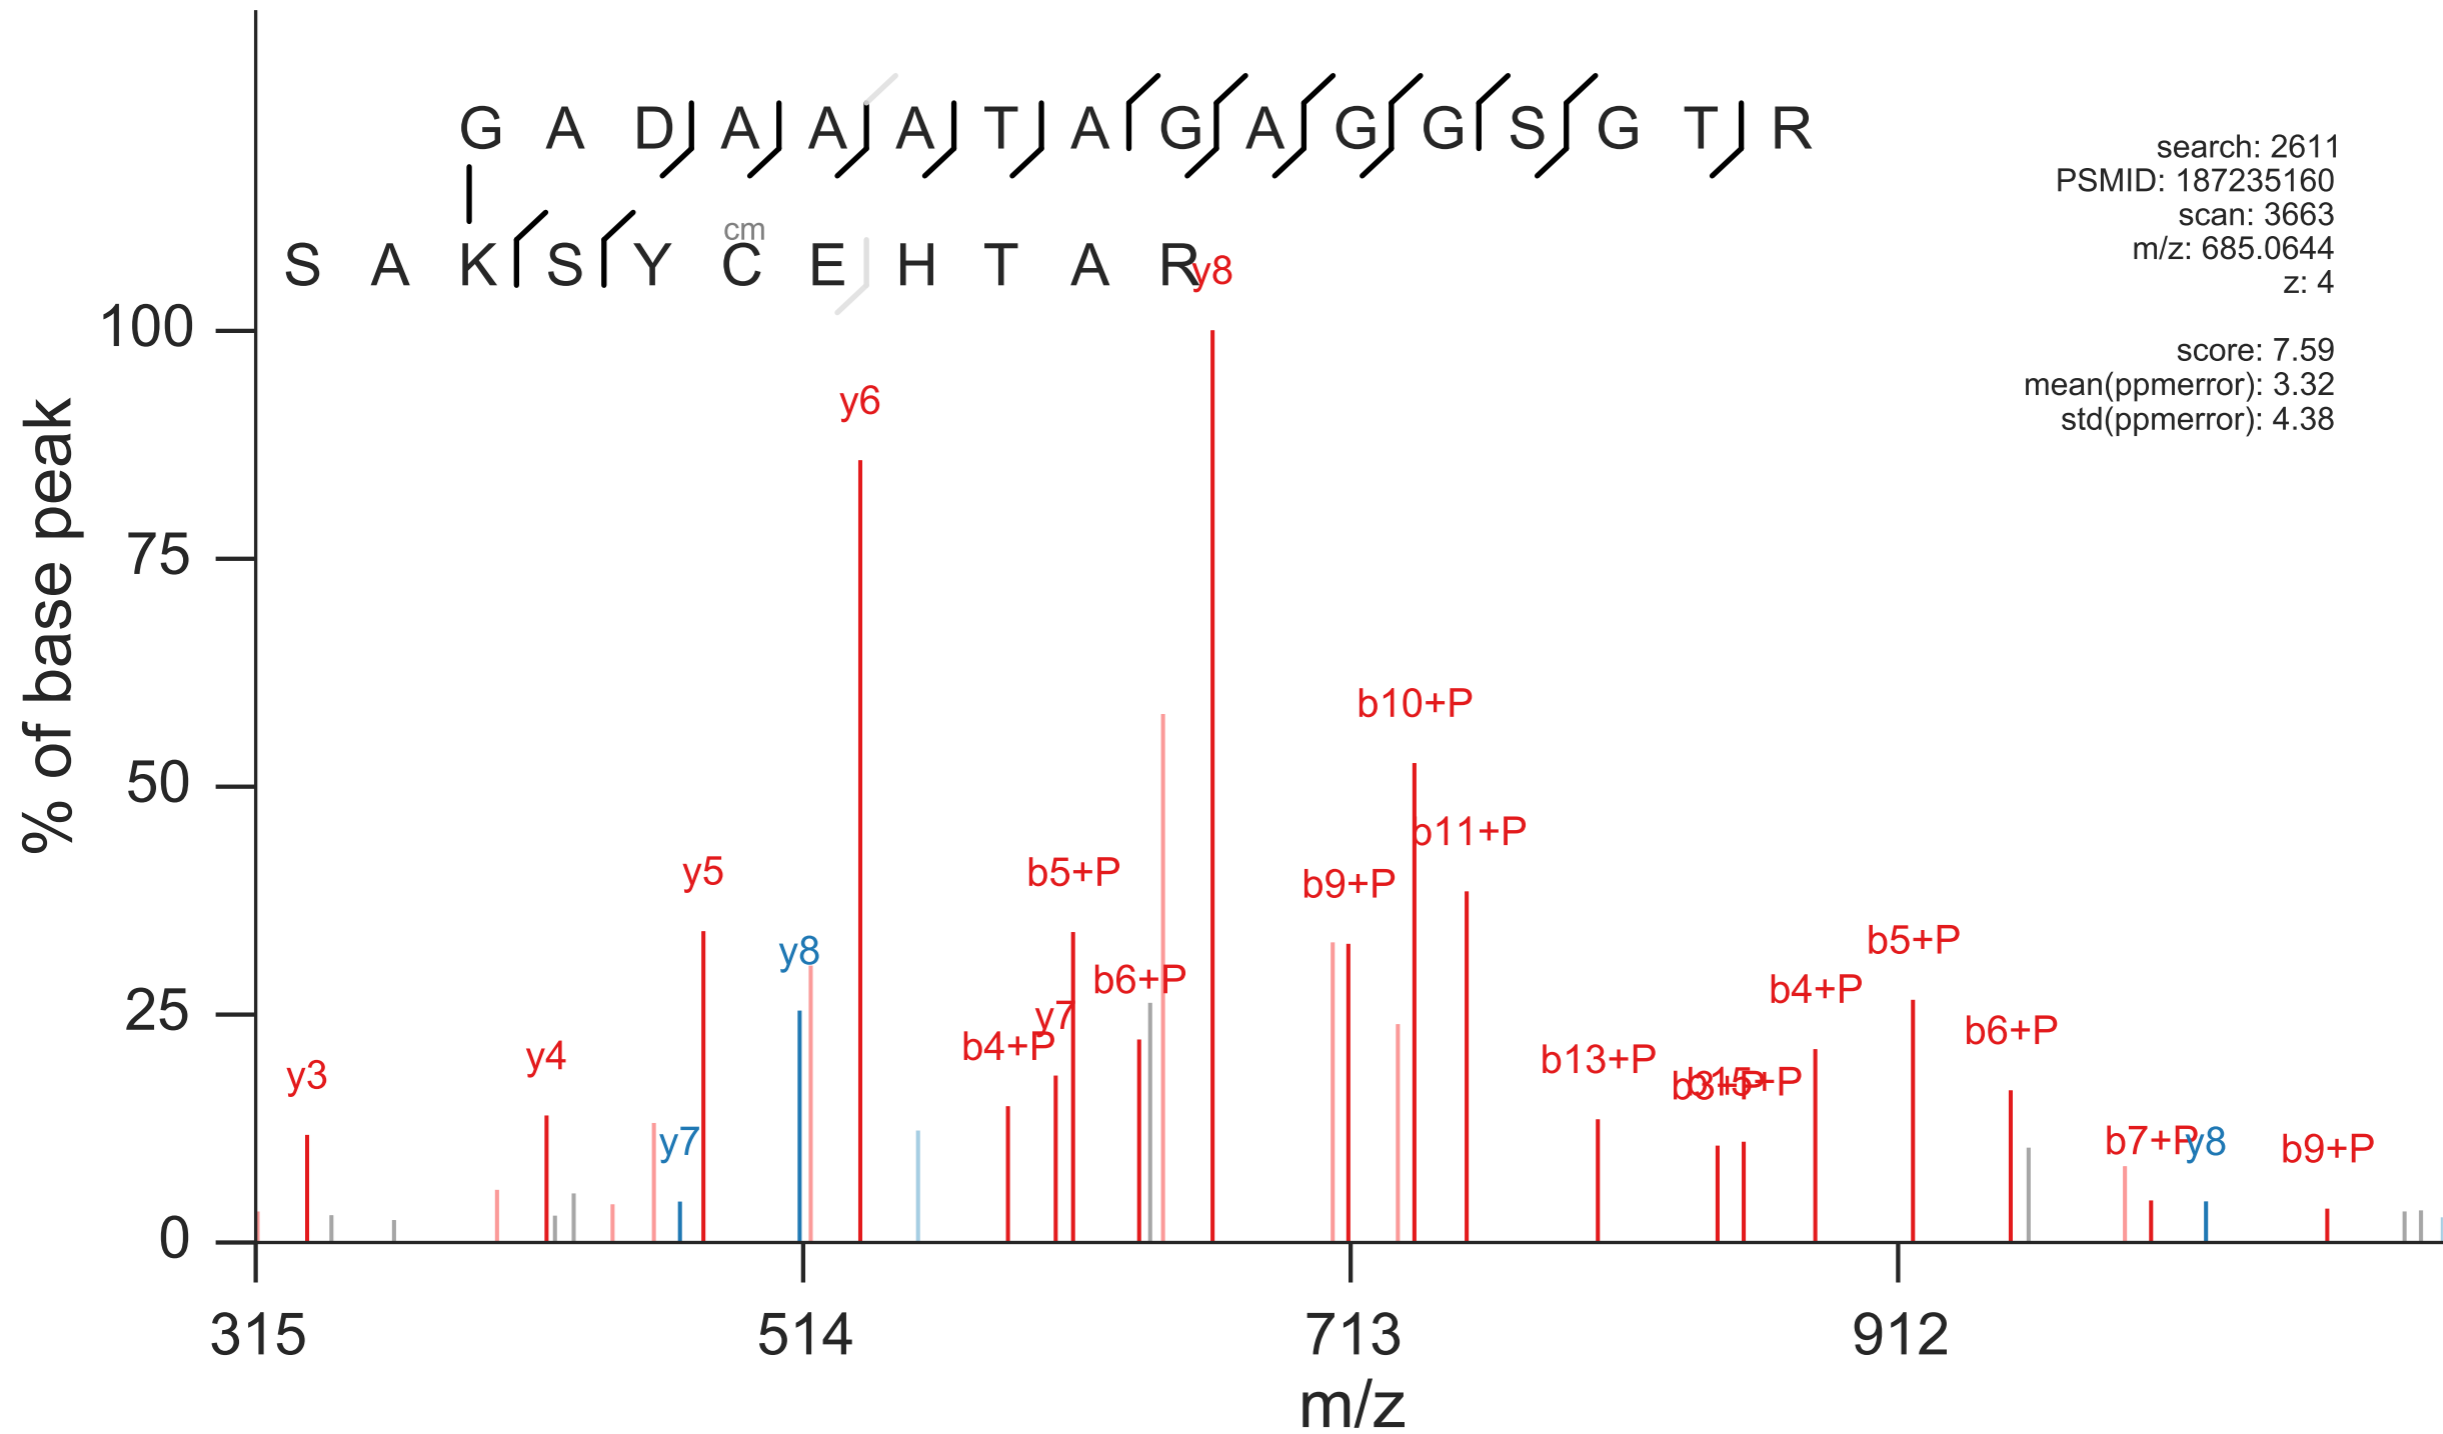

search: 2611  
 PSMID: 187235160  
 scan: 3663  
 m/z: 685.0644  
 z: 4  
  
 score: 7.59  
 mean(ppmerror): 3.32  
 std(ppmerror): 4.38

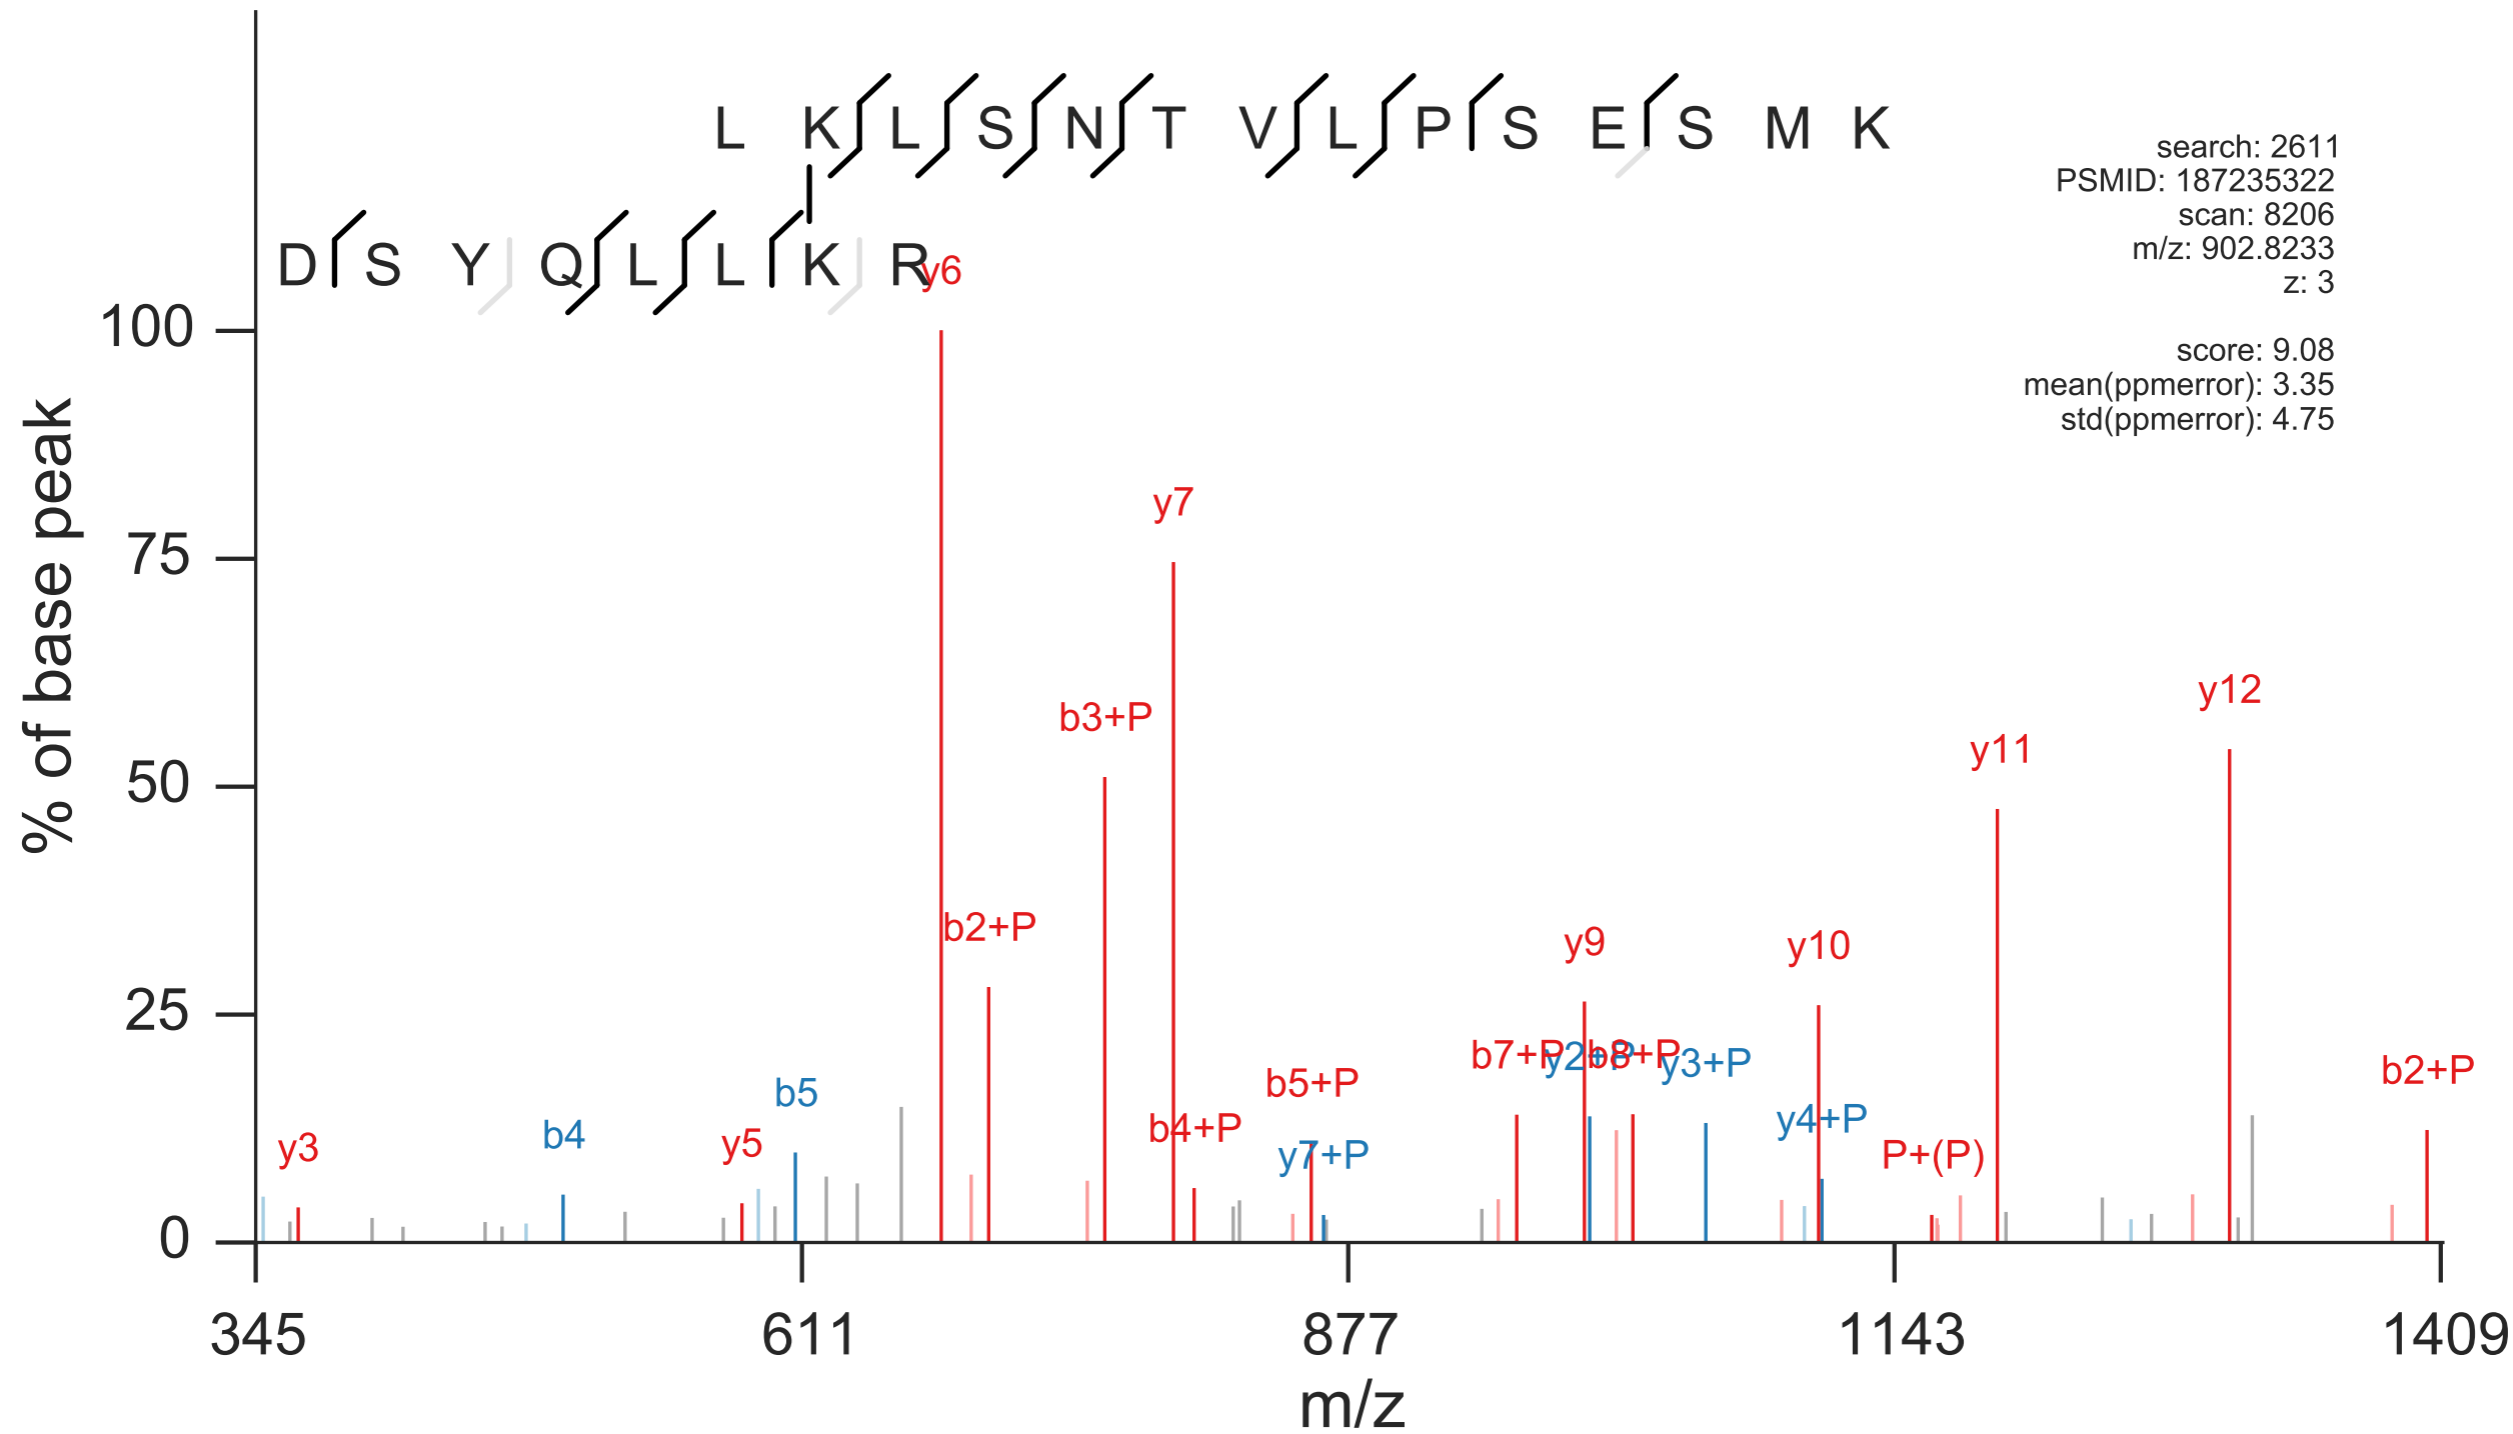

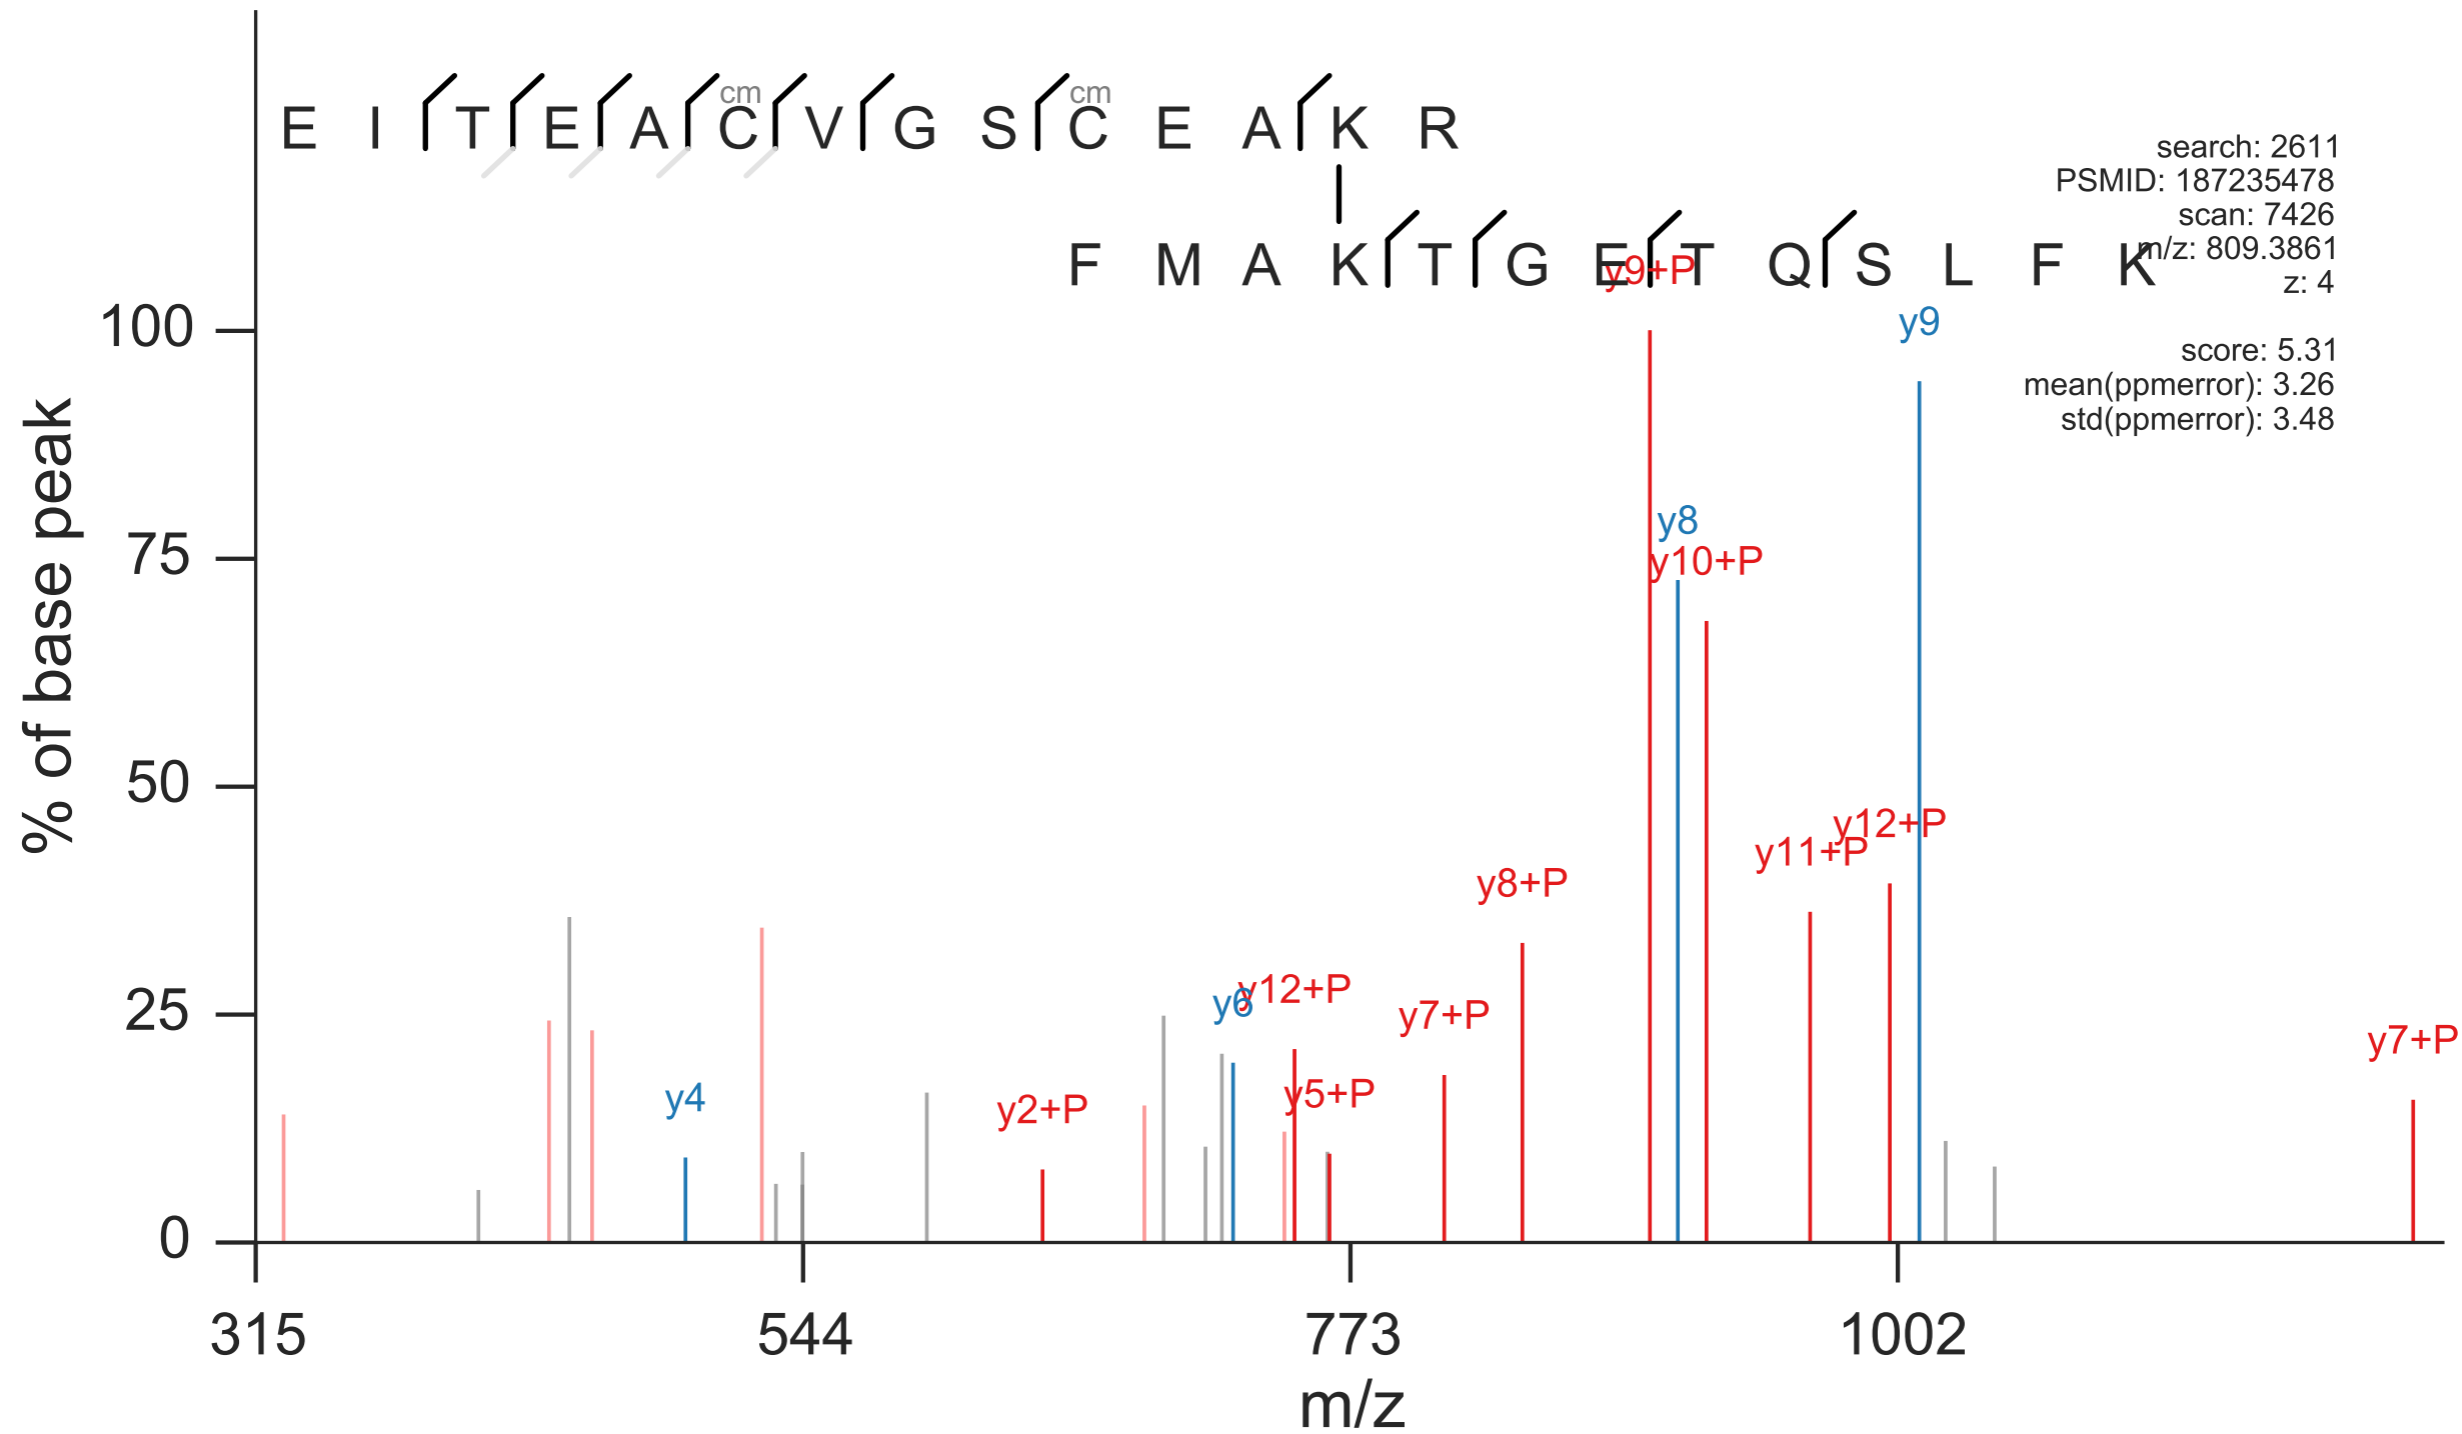

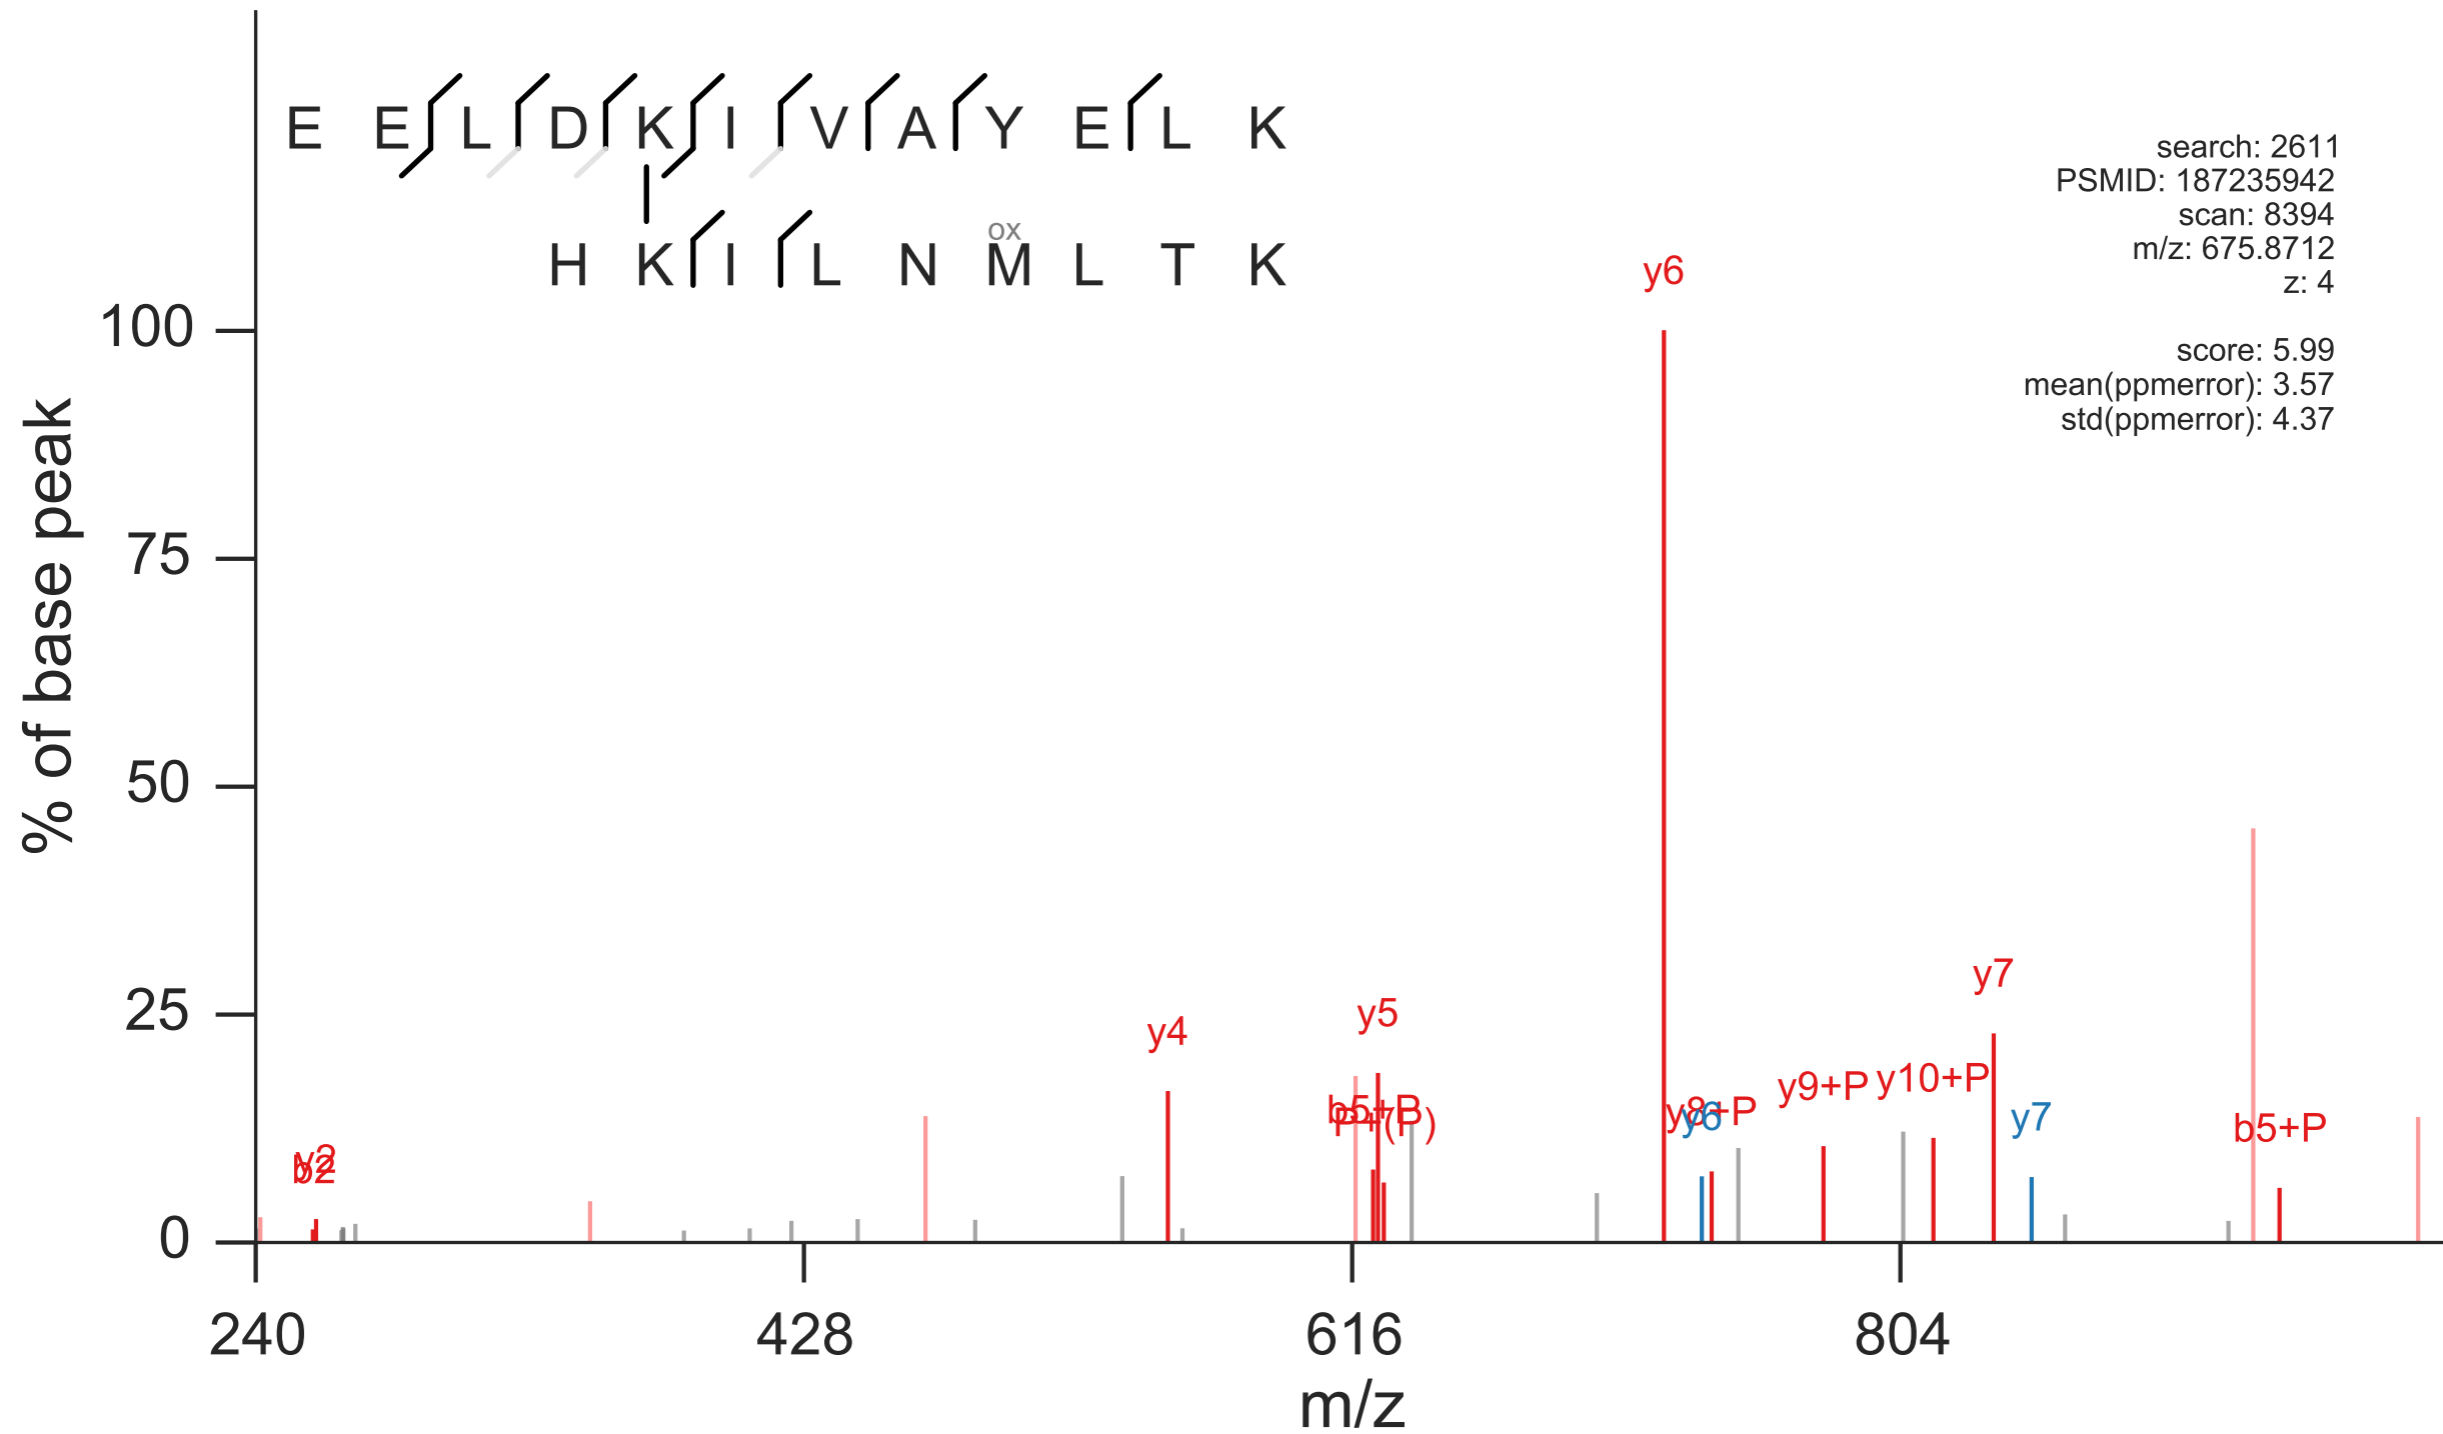

S G S K Q S T N P A D N Y H L A R  
 E K A A S Q R

search: 2611  
 PSMID: 187236024  
 scan: 3674  
 m/z: 693.8415  
 z: 4

score: 8.21  
 mean(ppmerror): 3.99  
 std(ppmerror): 4.93

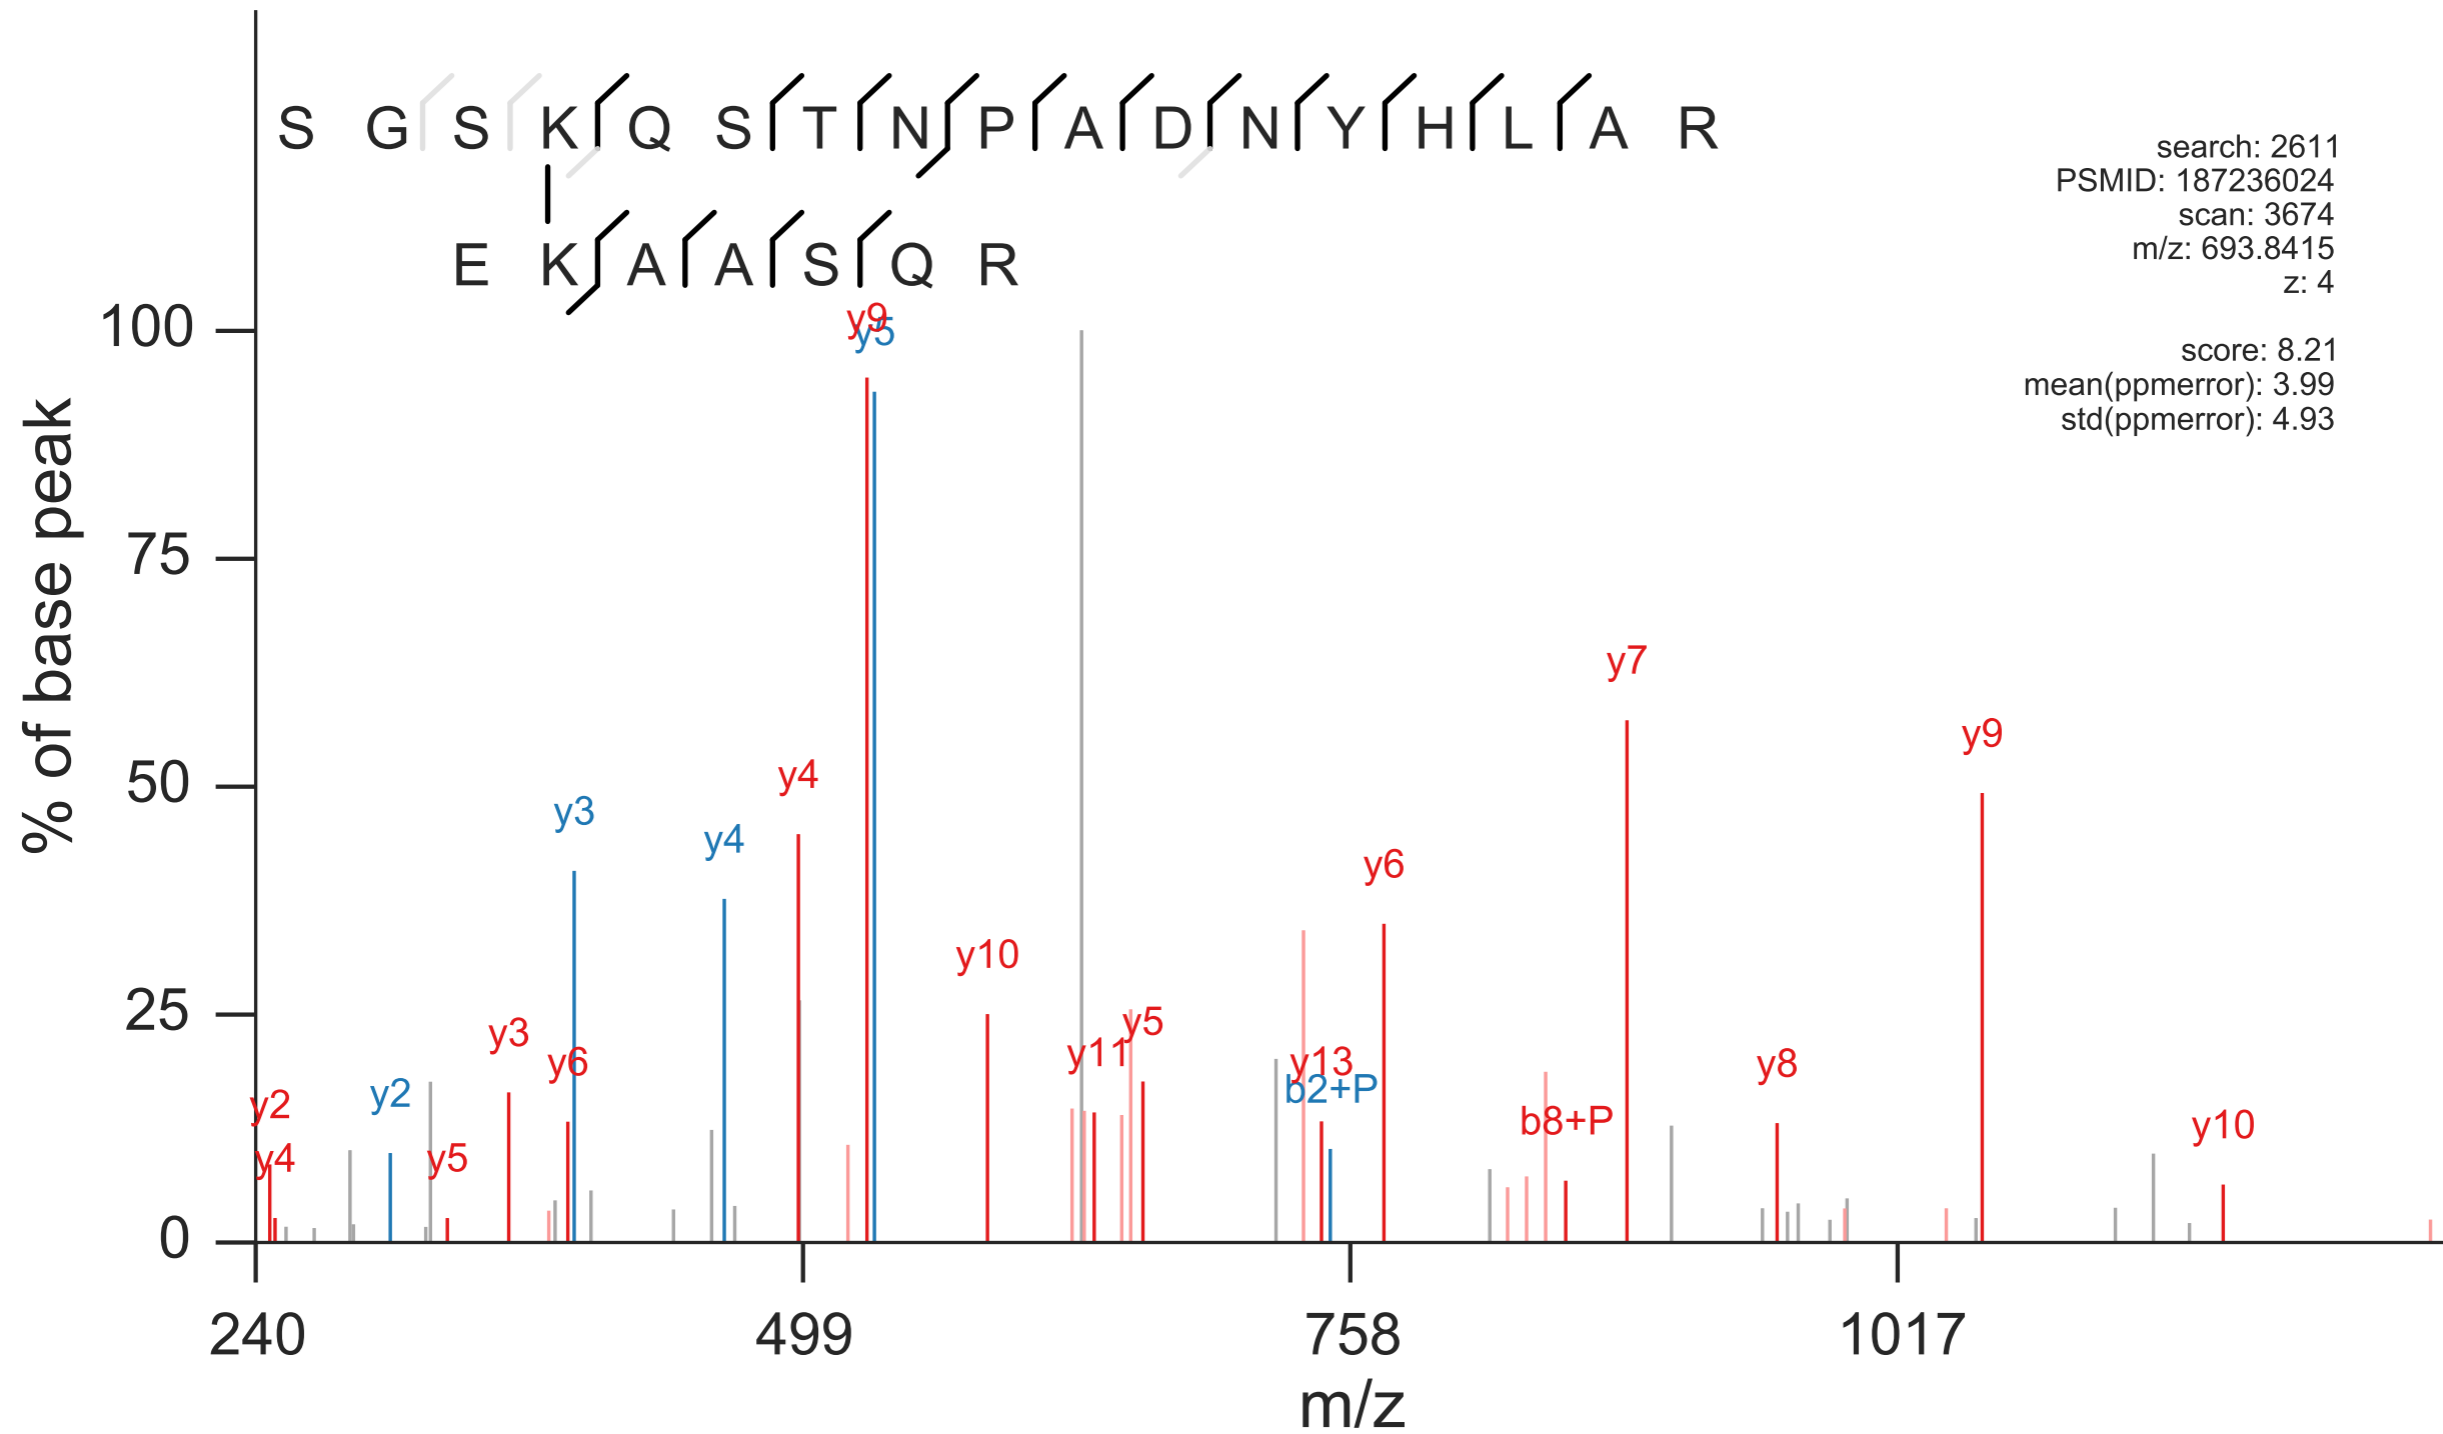

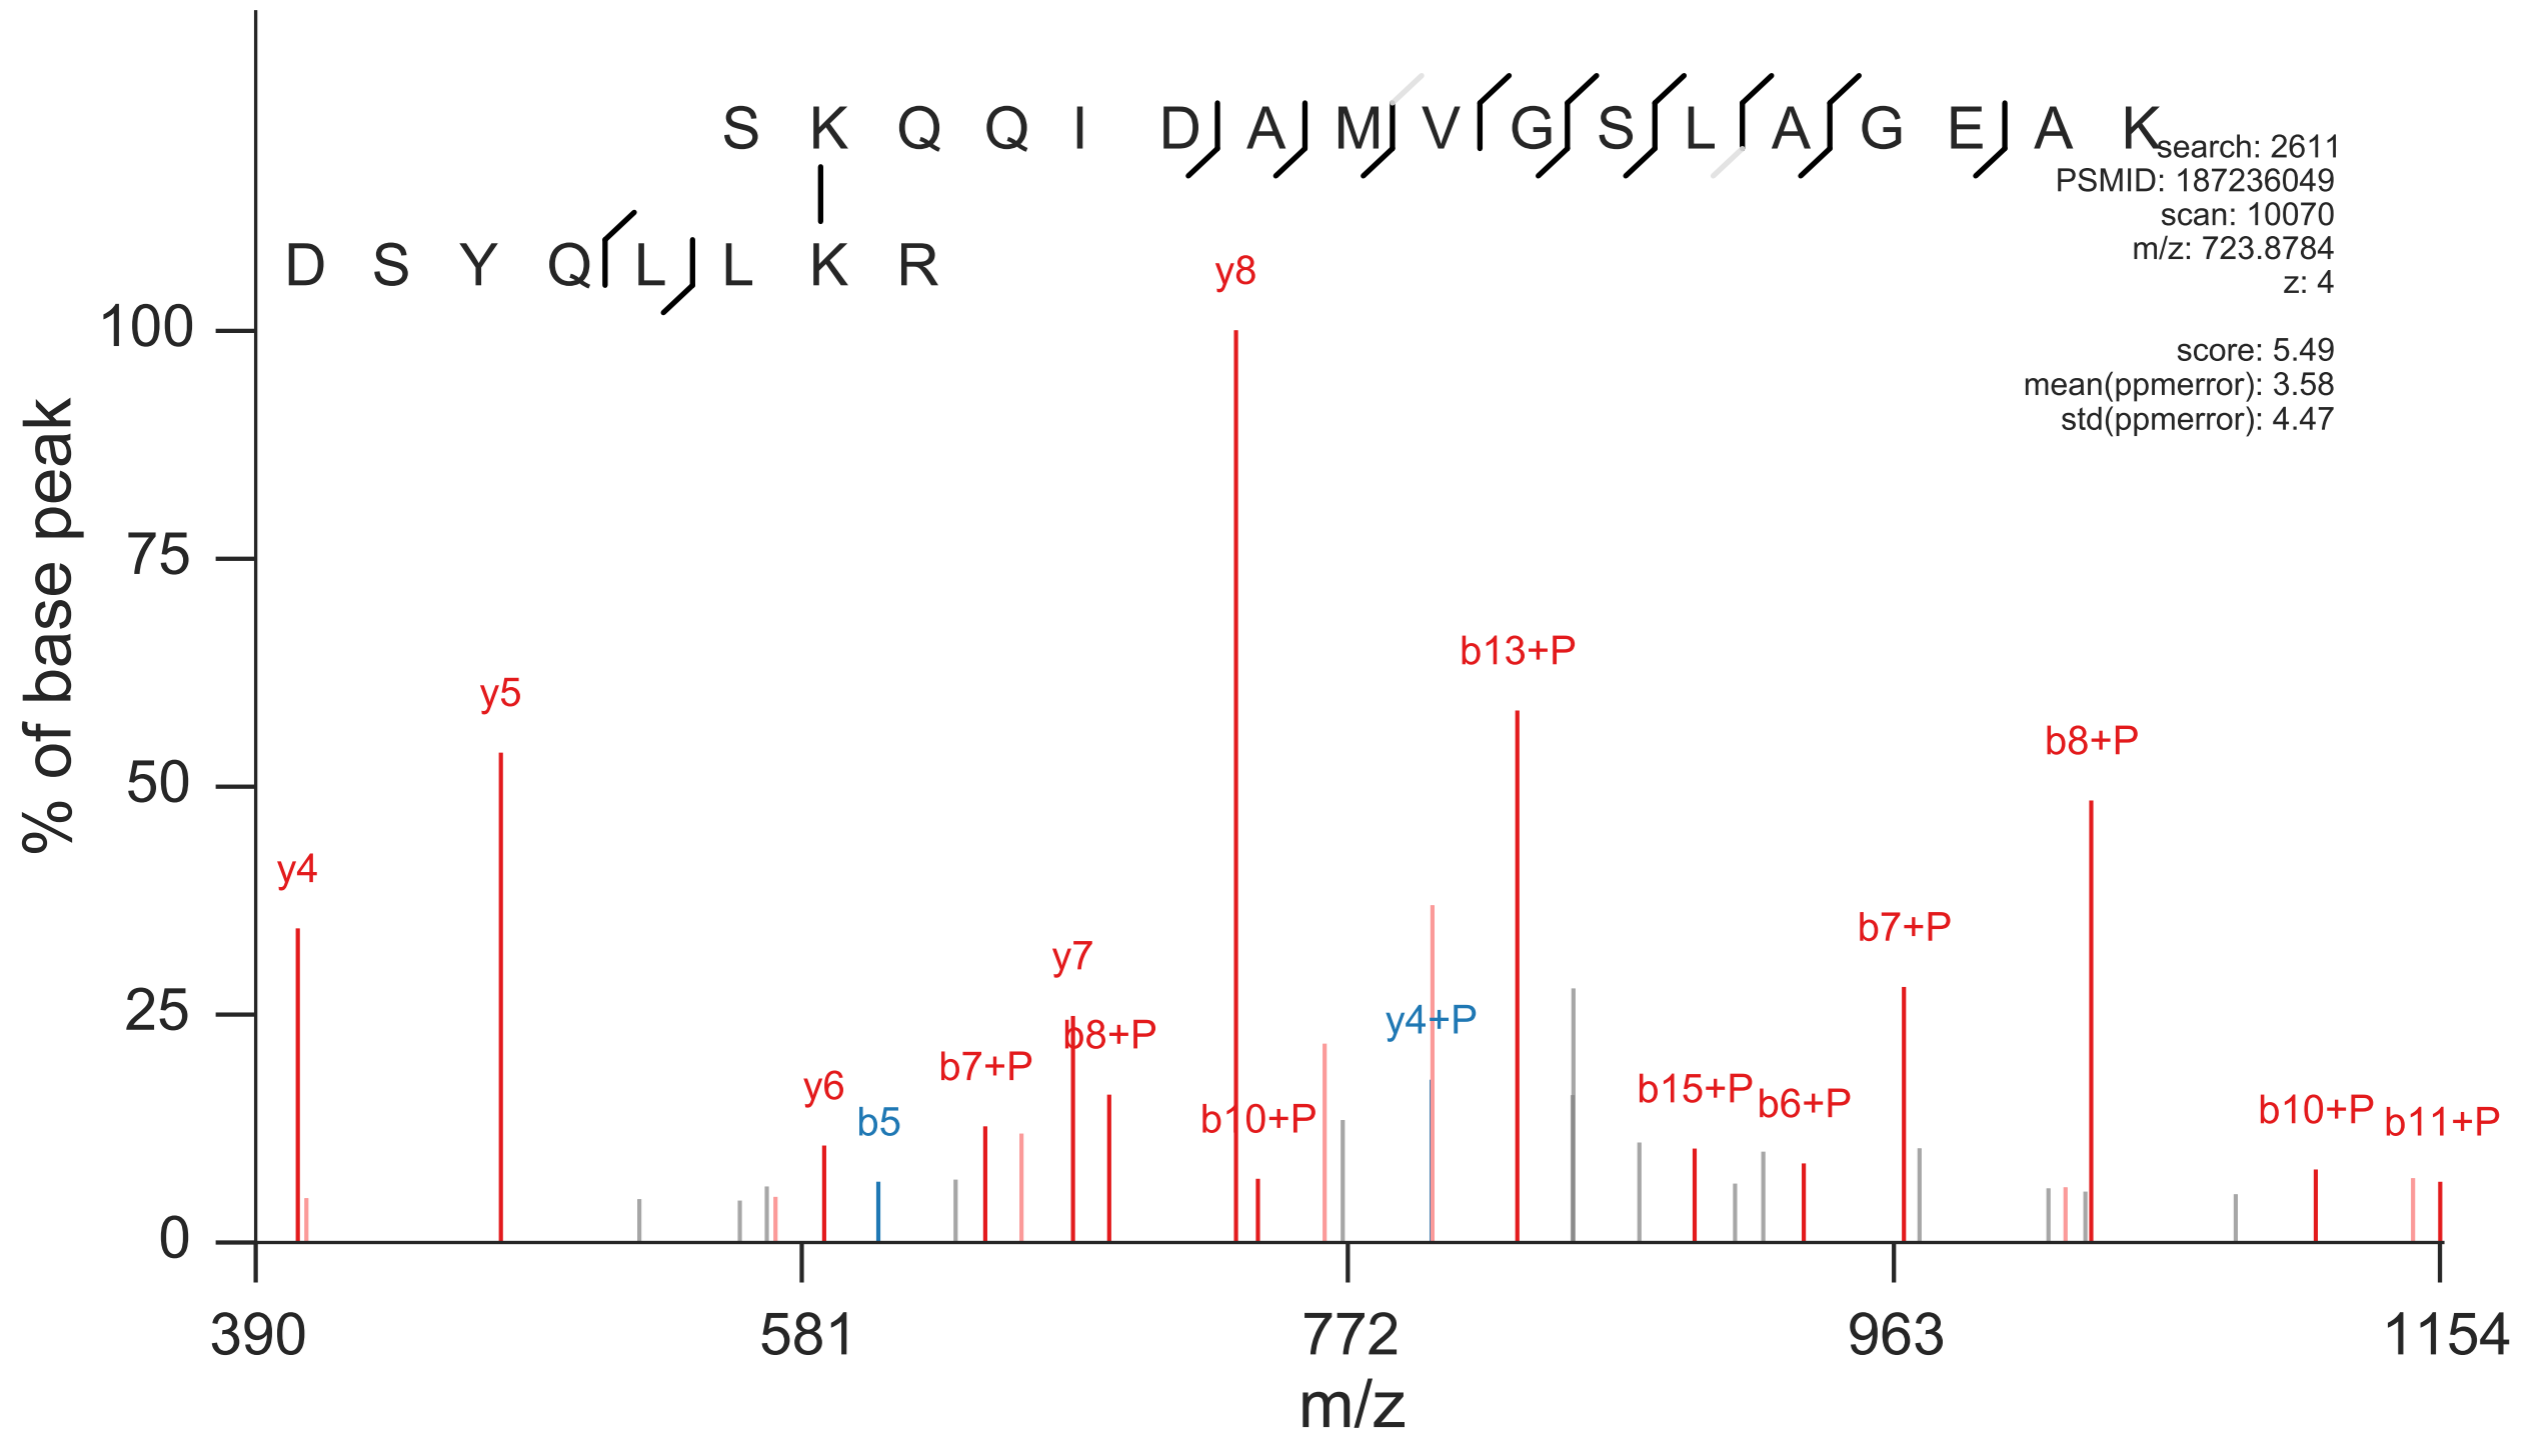

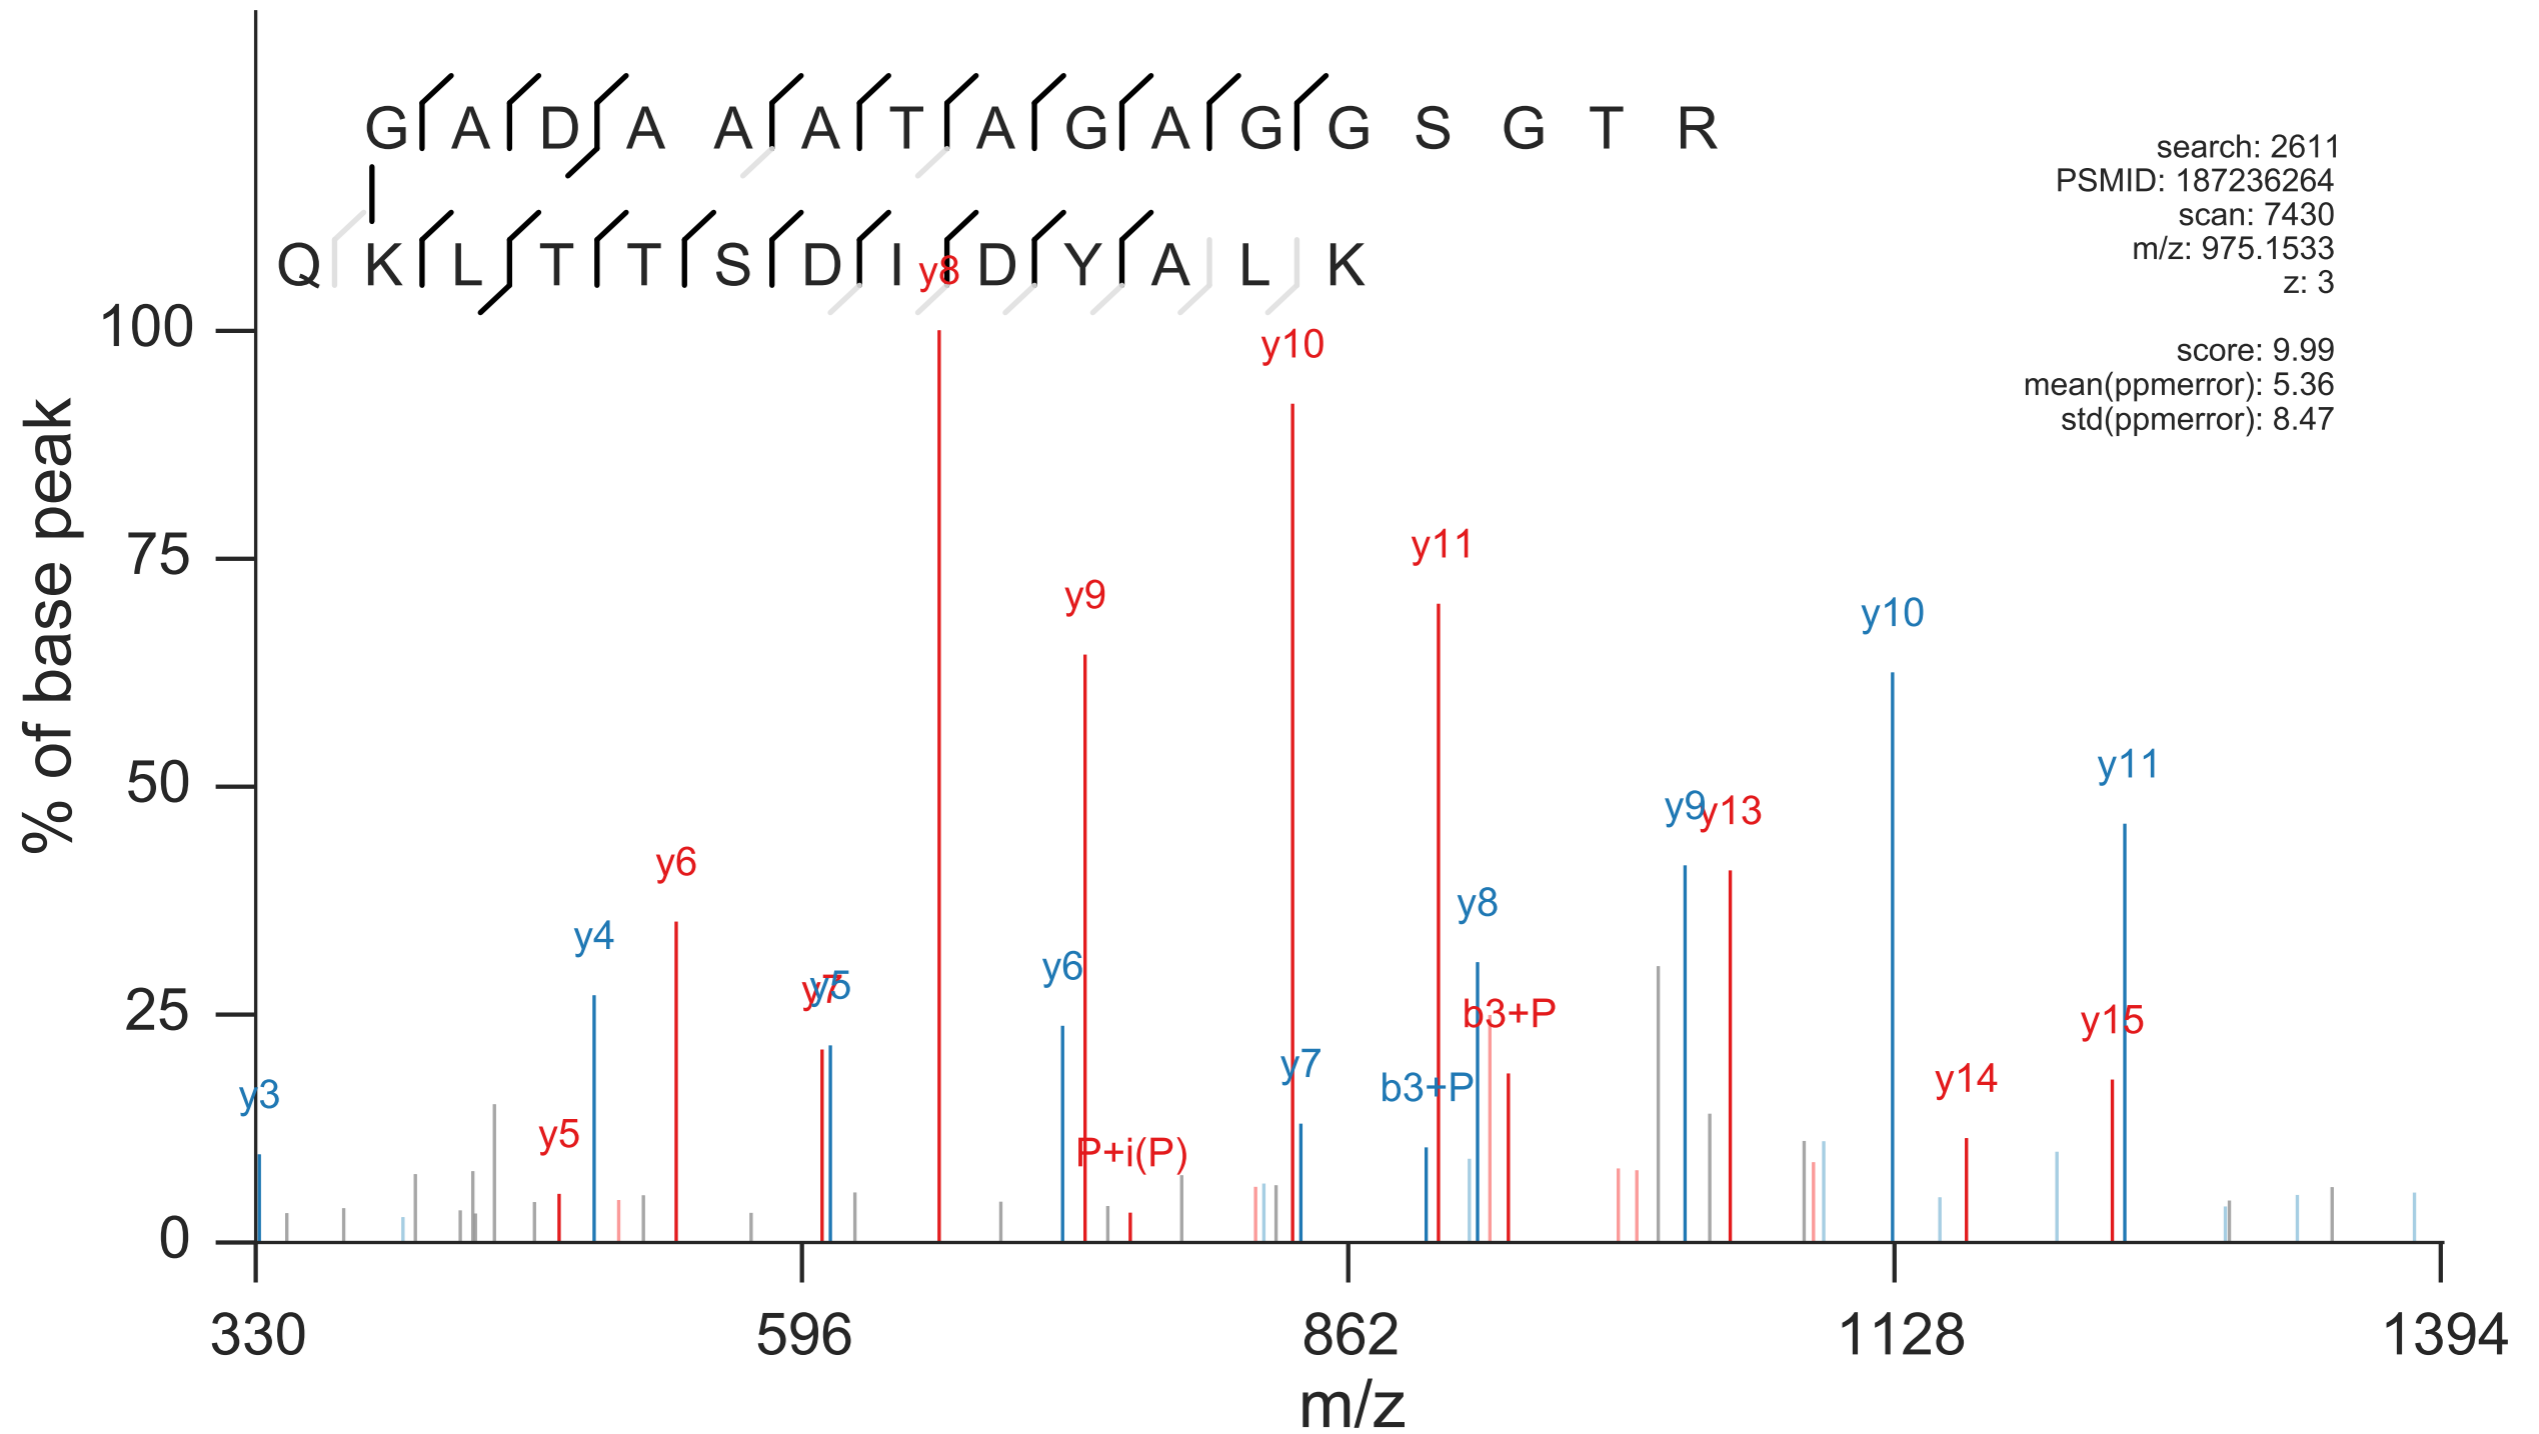



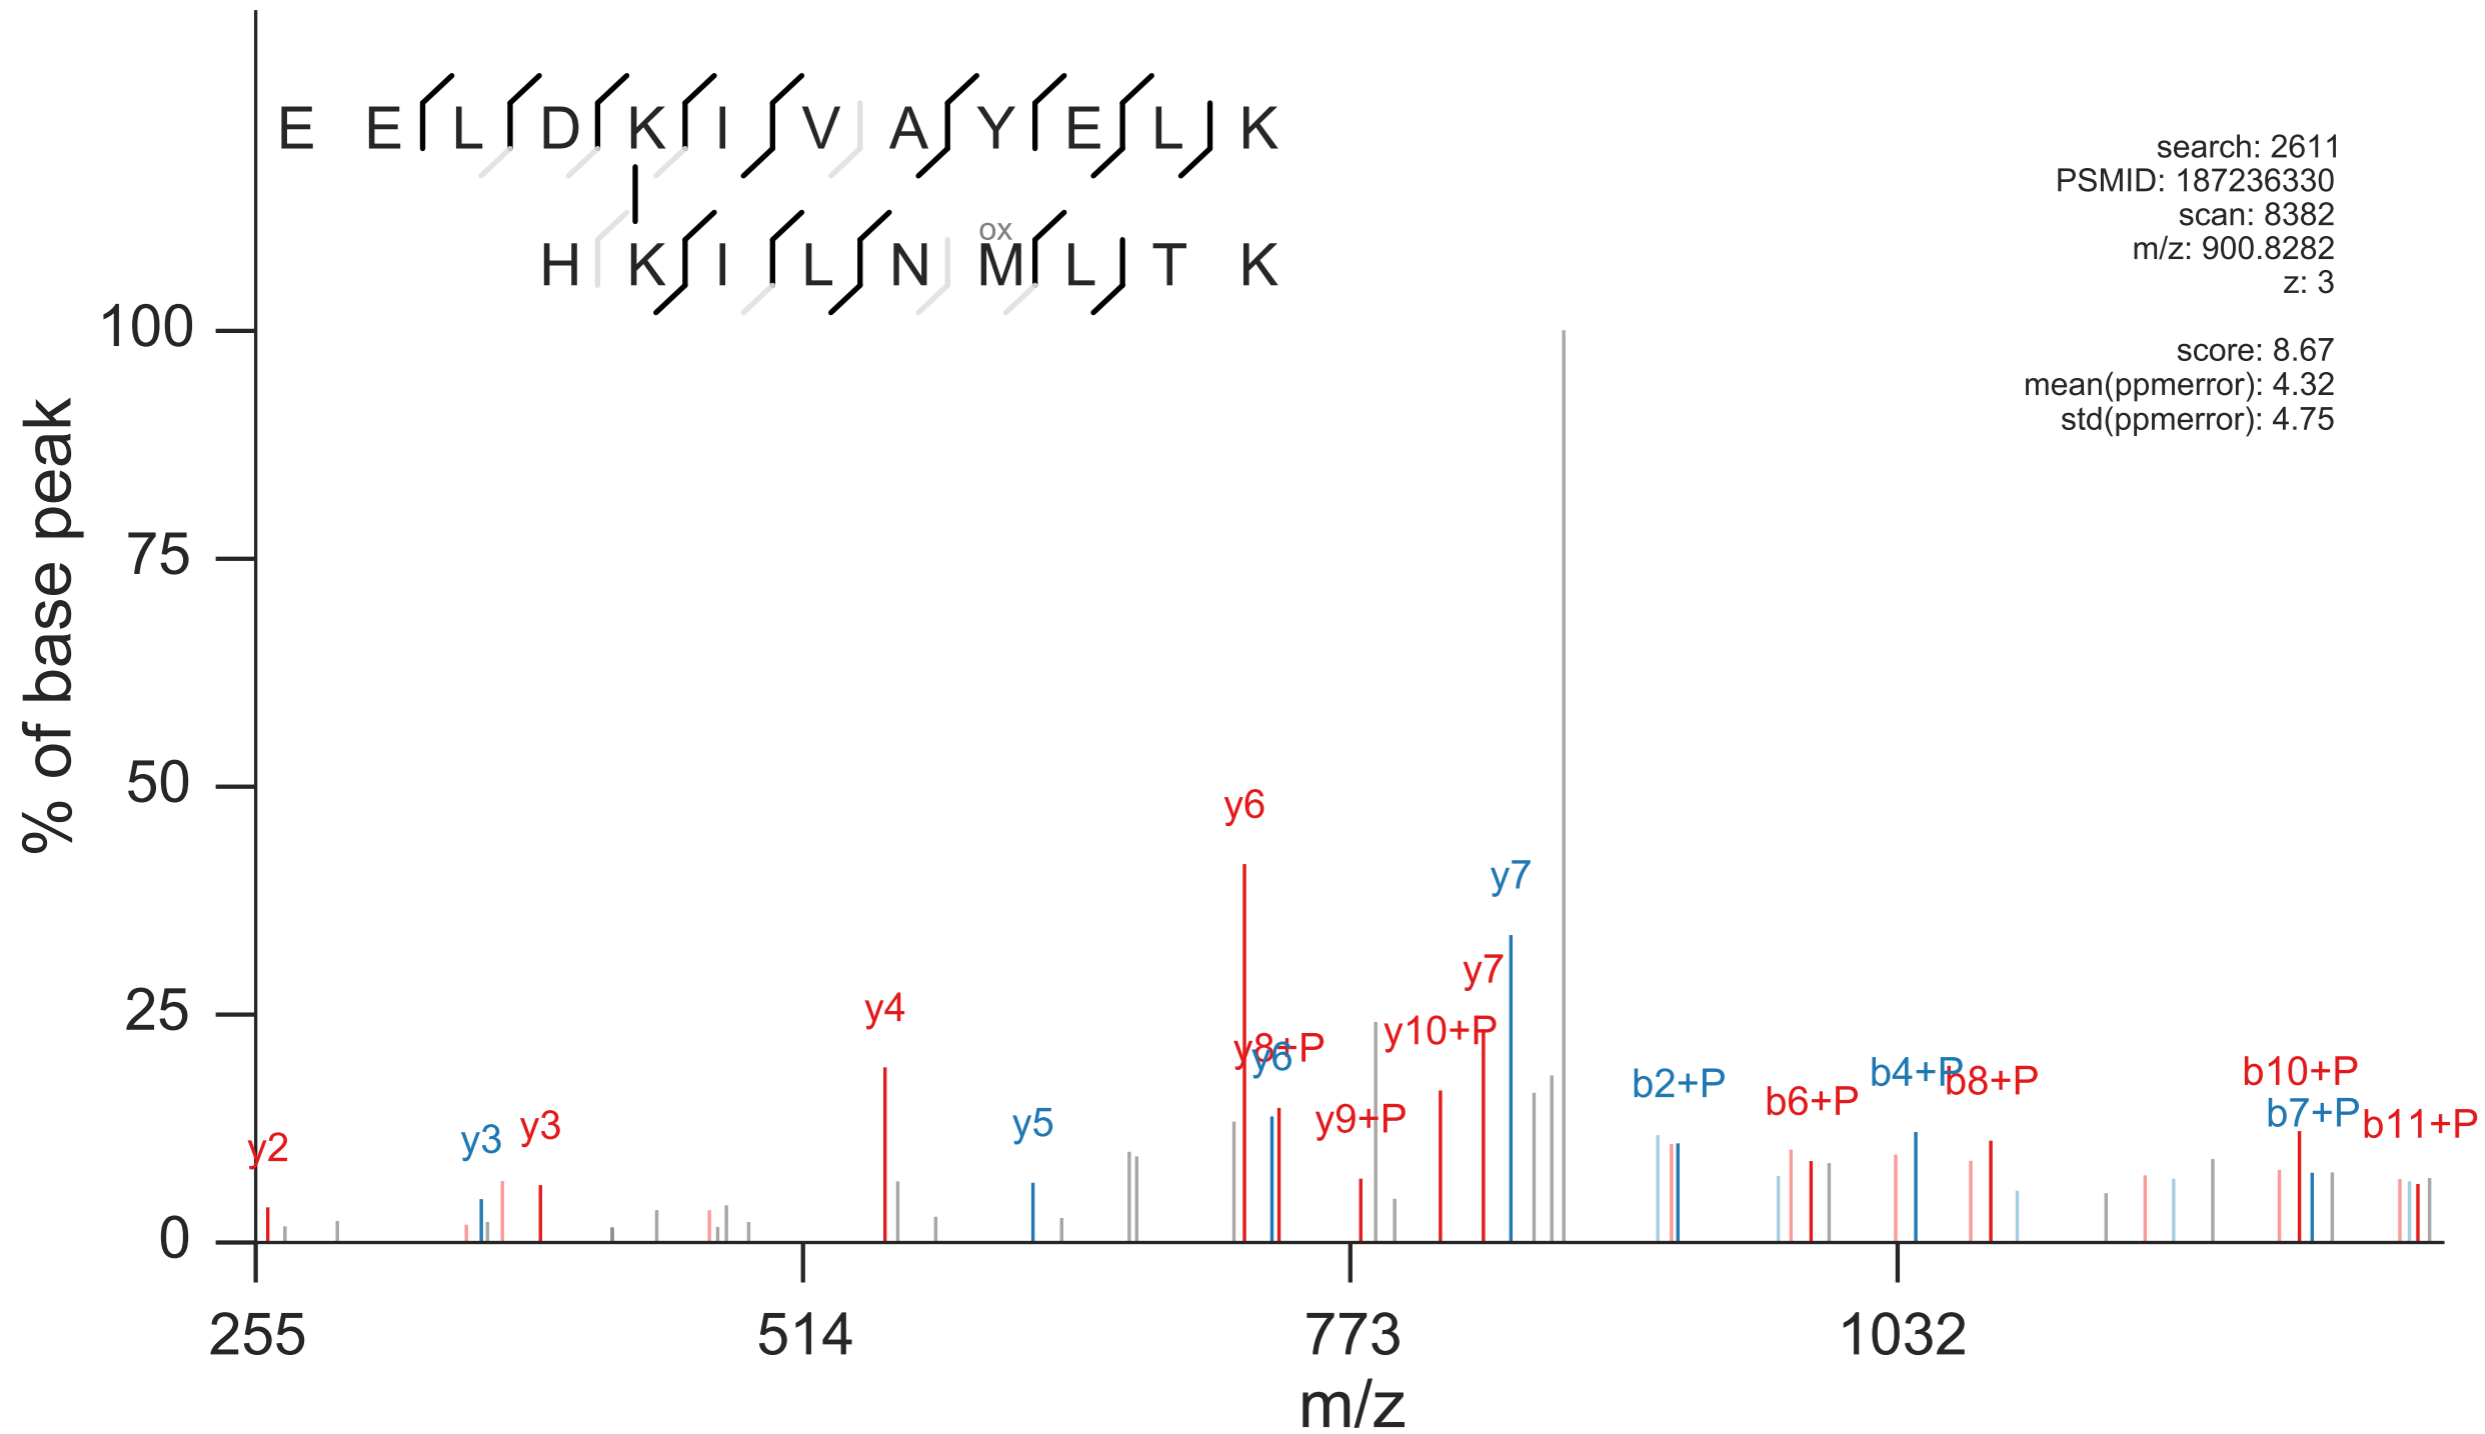

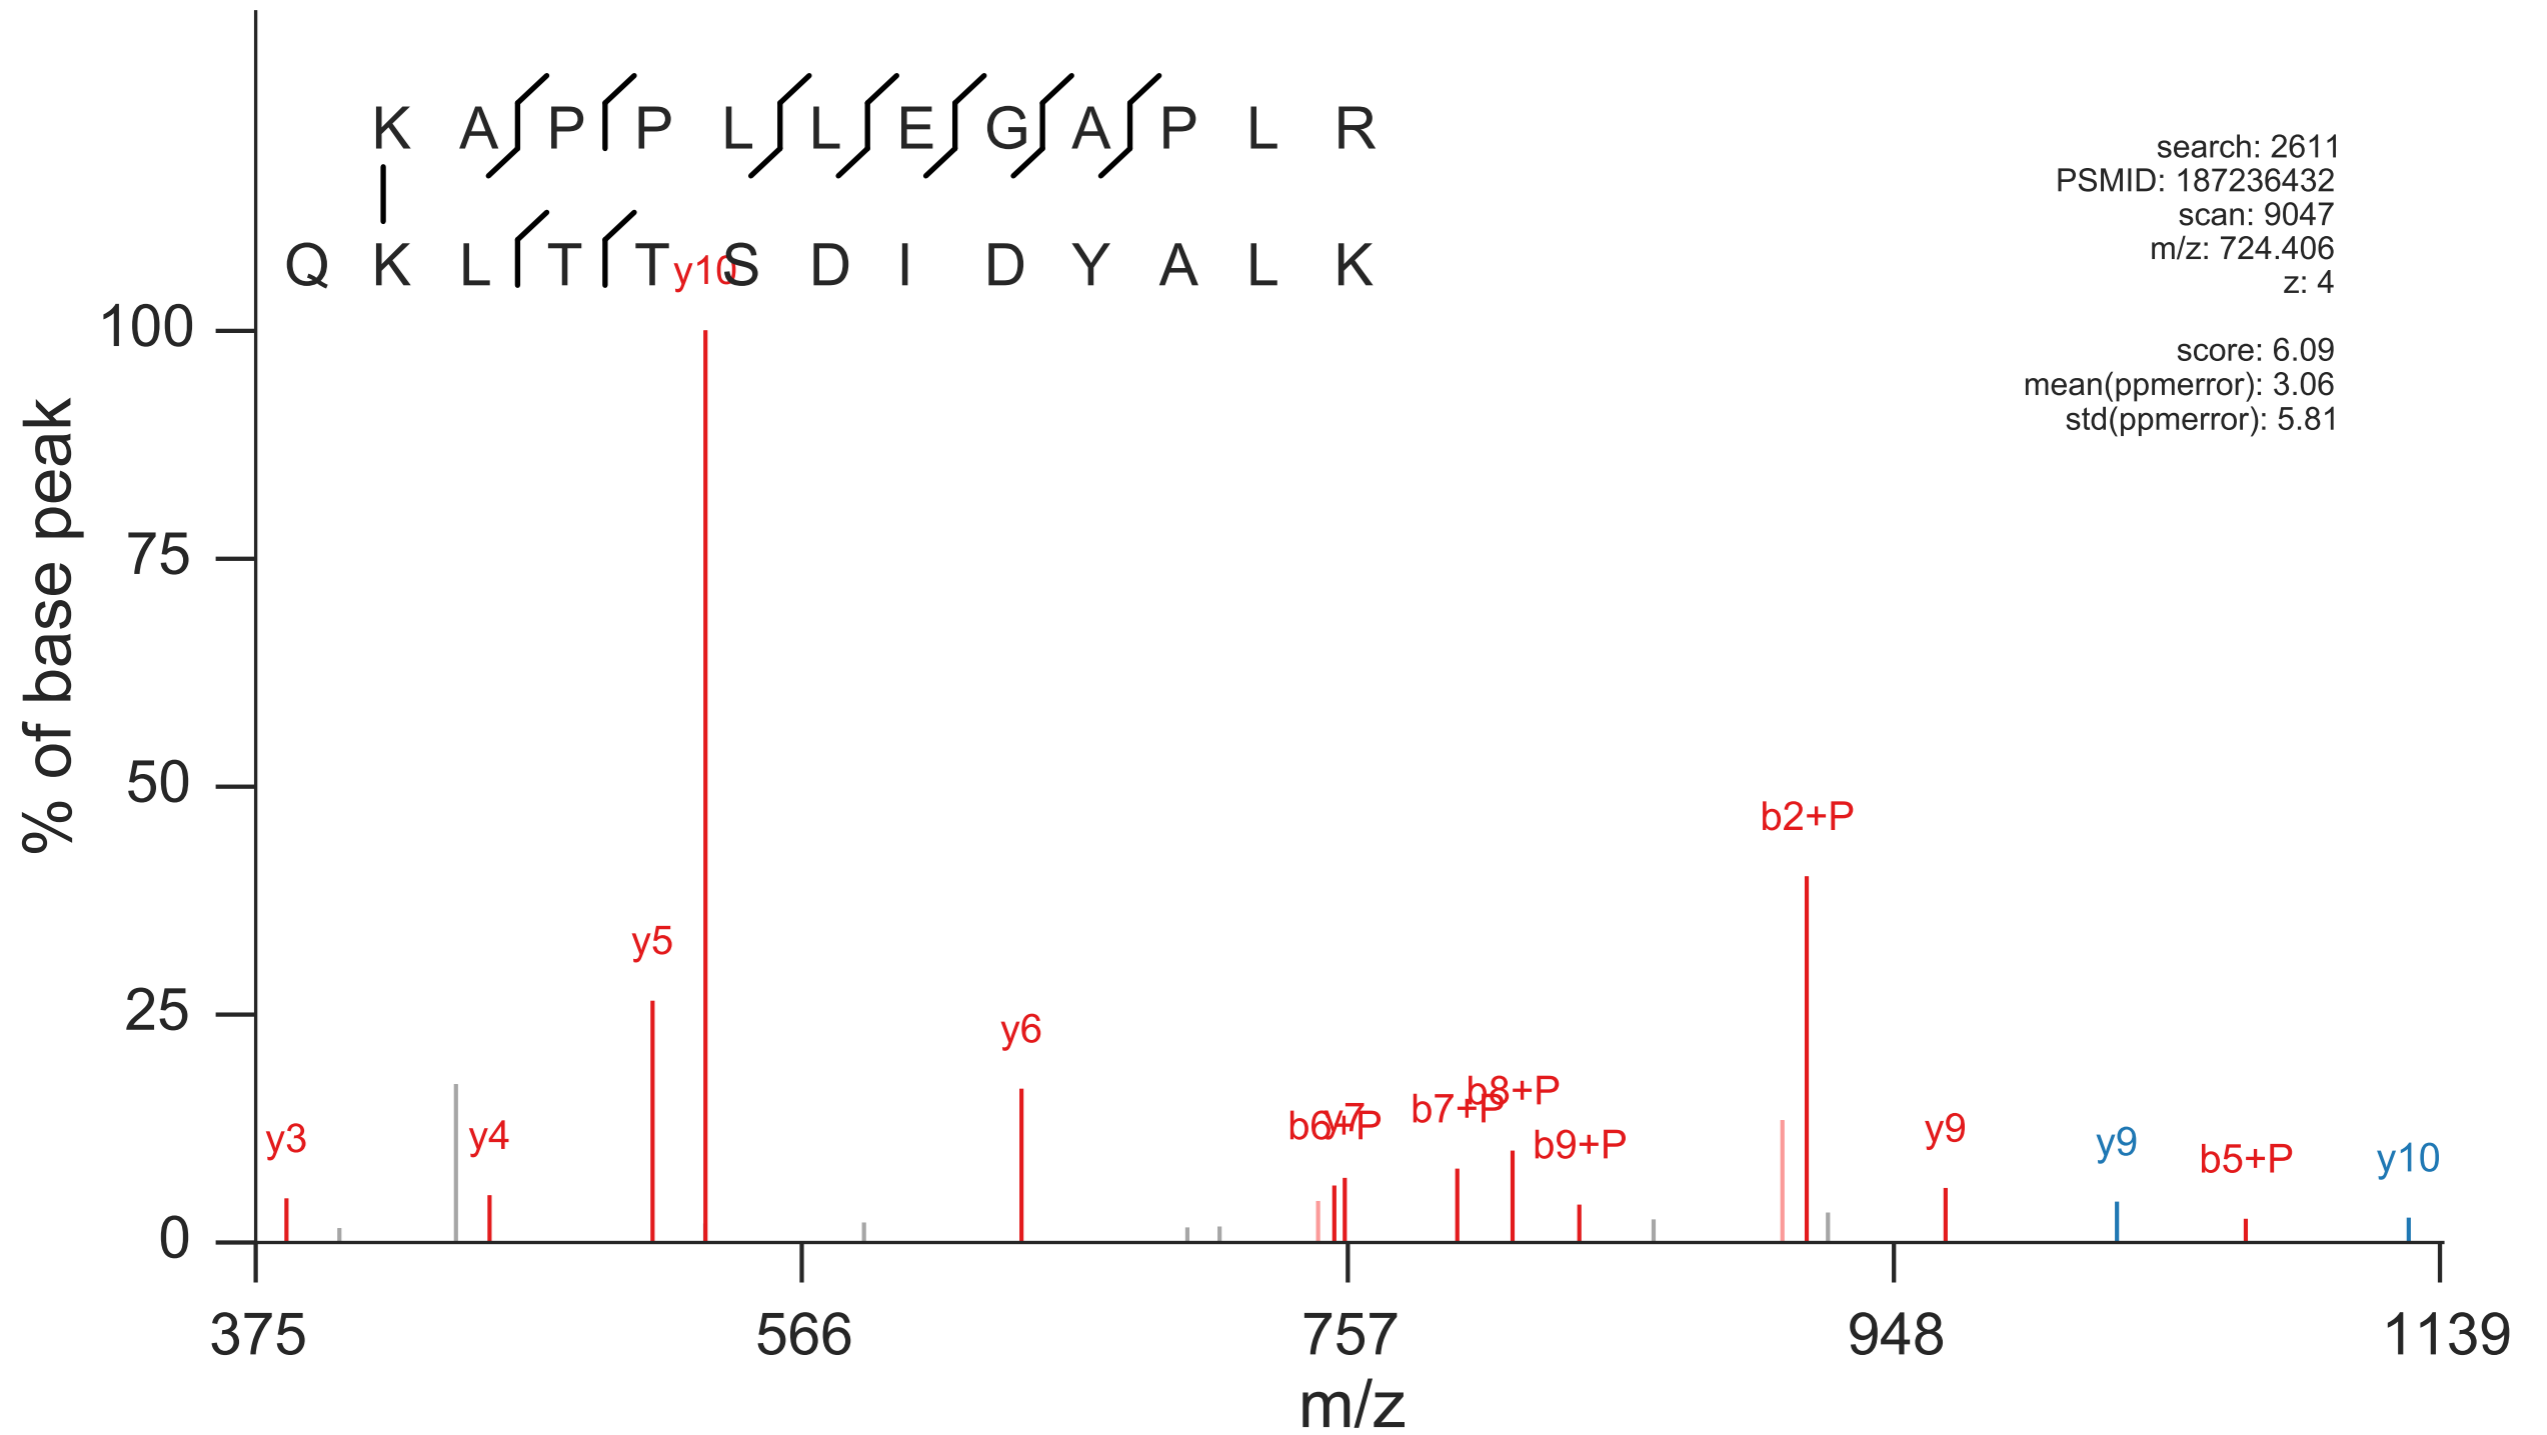

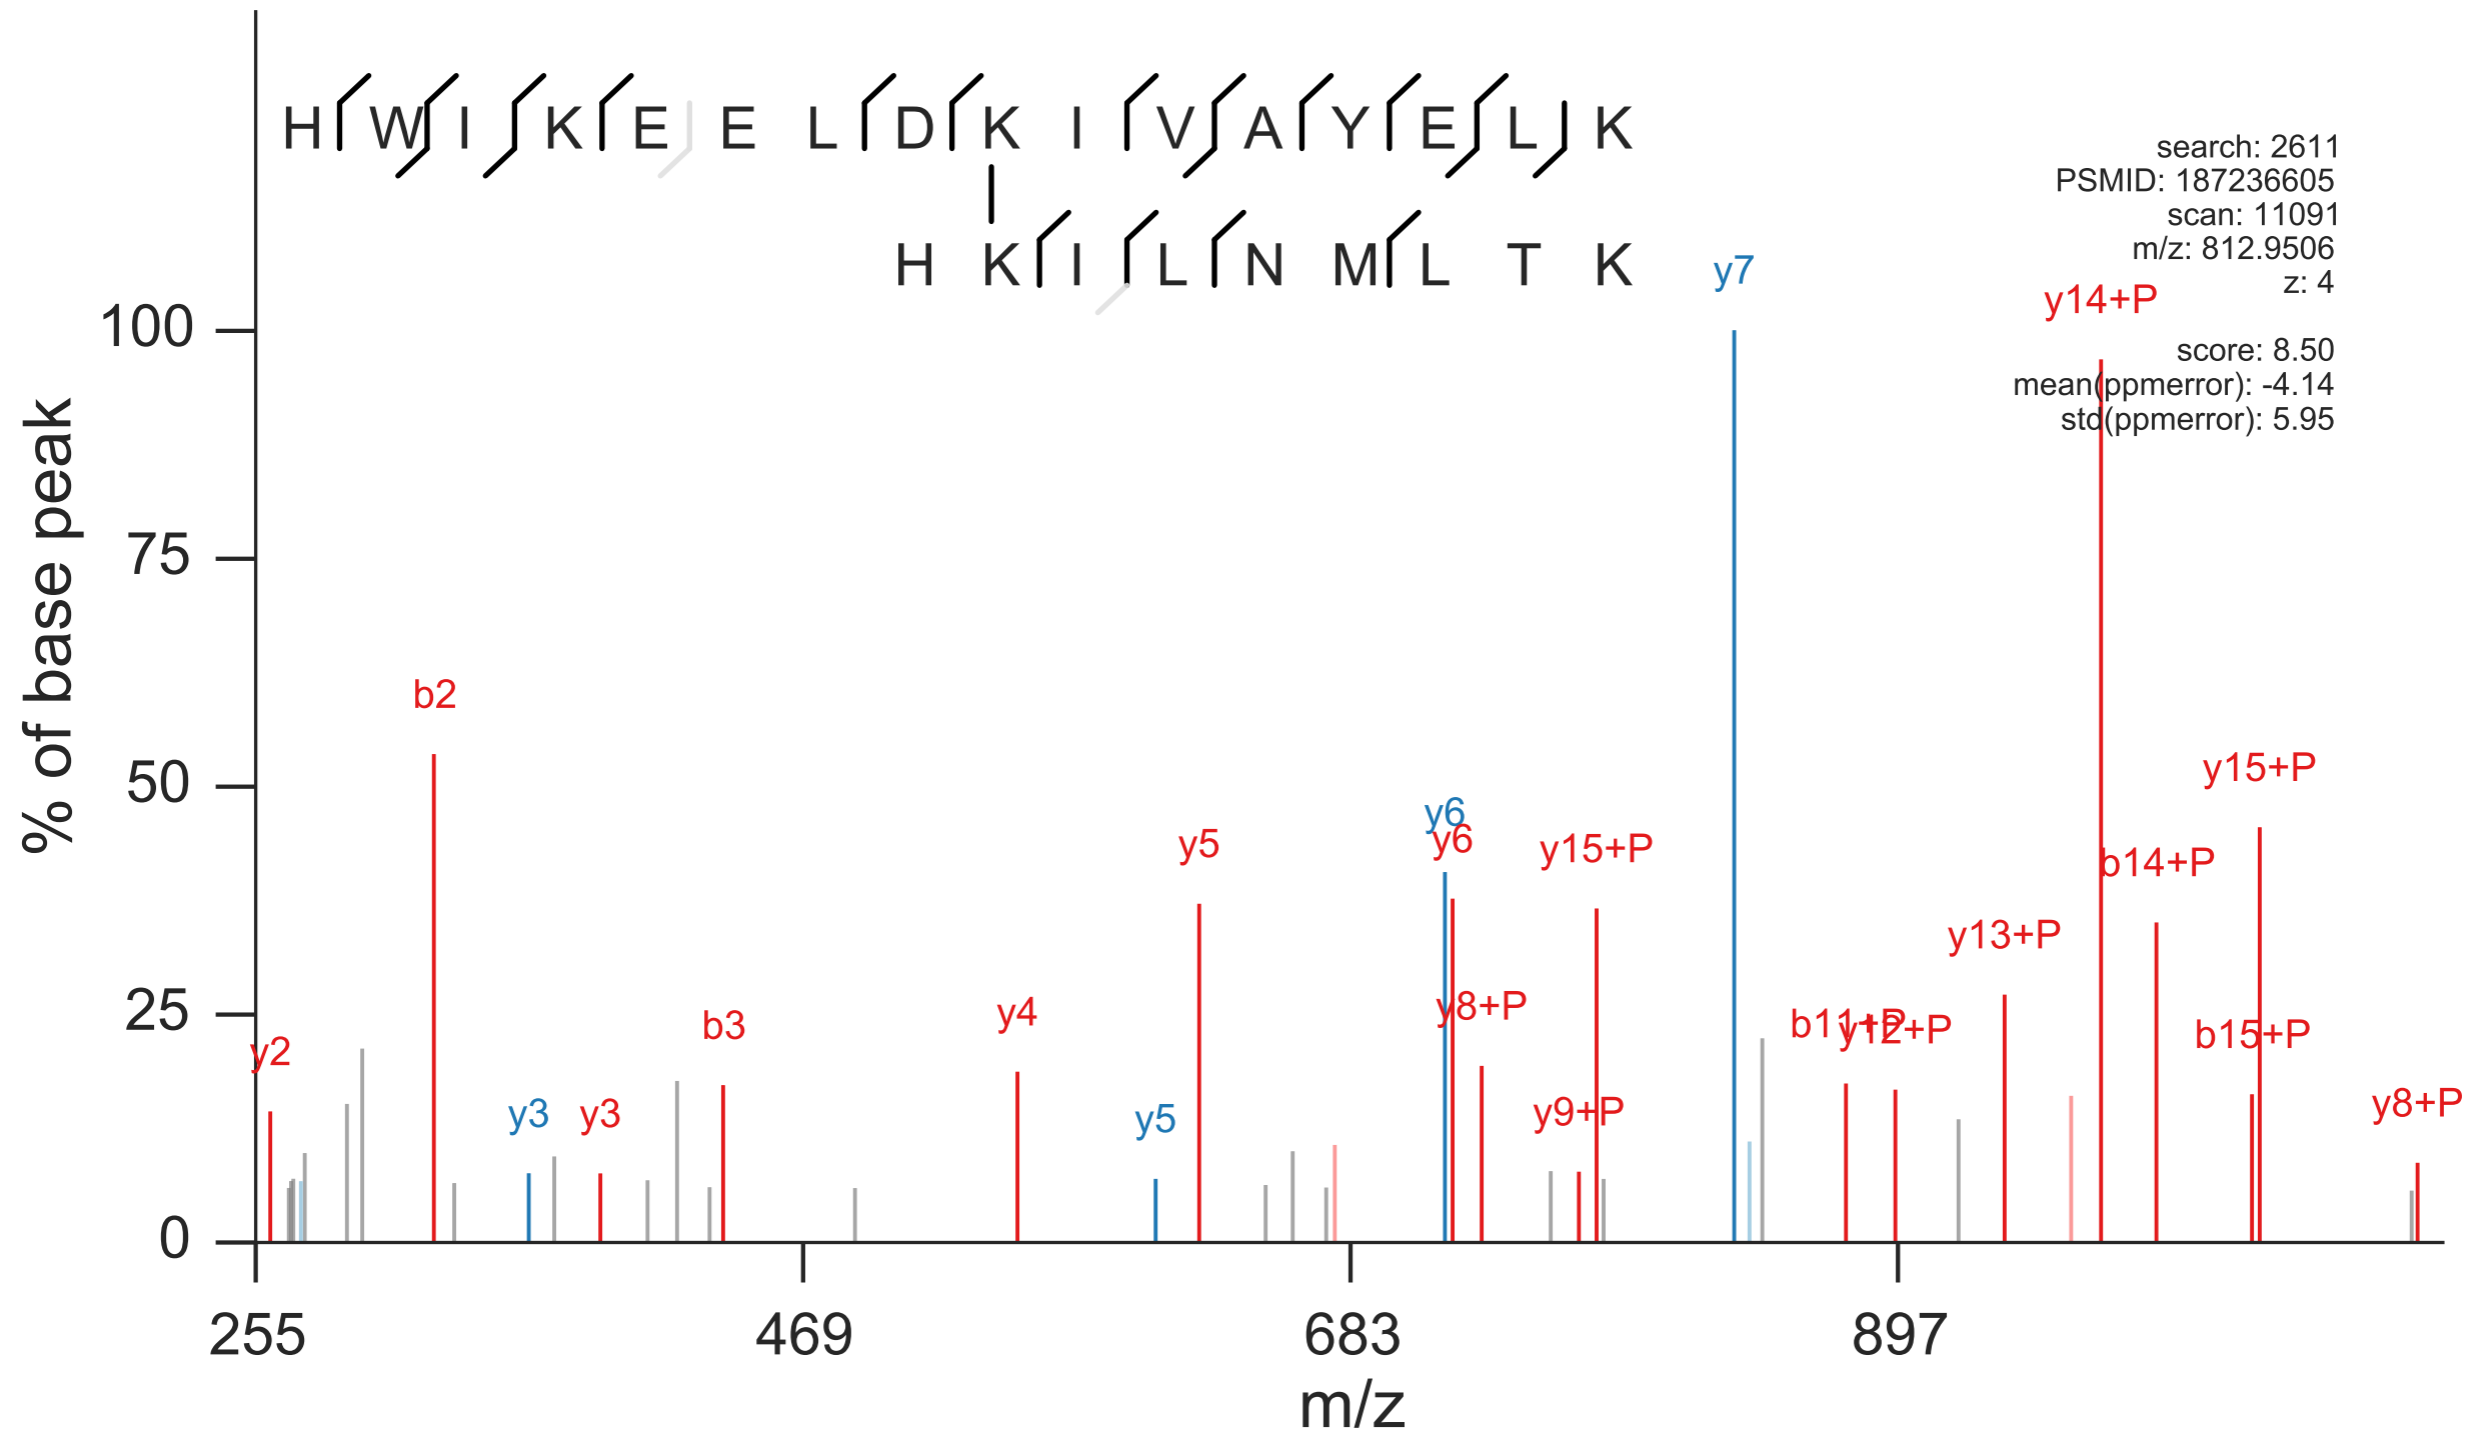

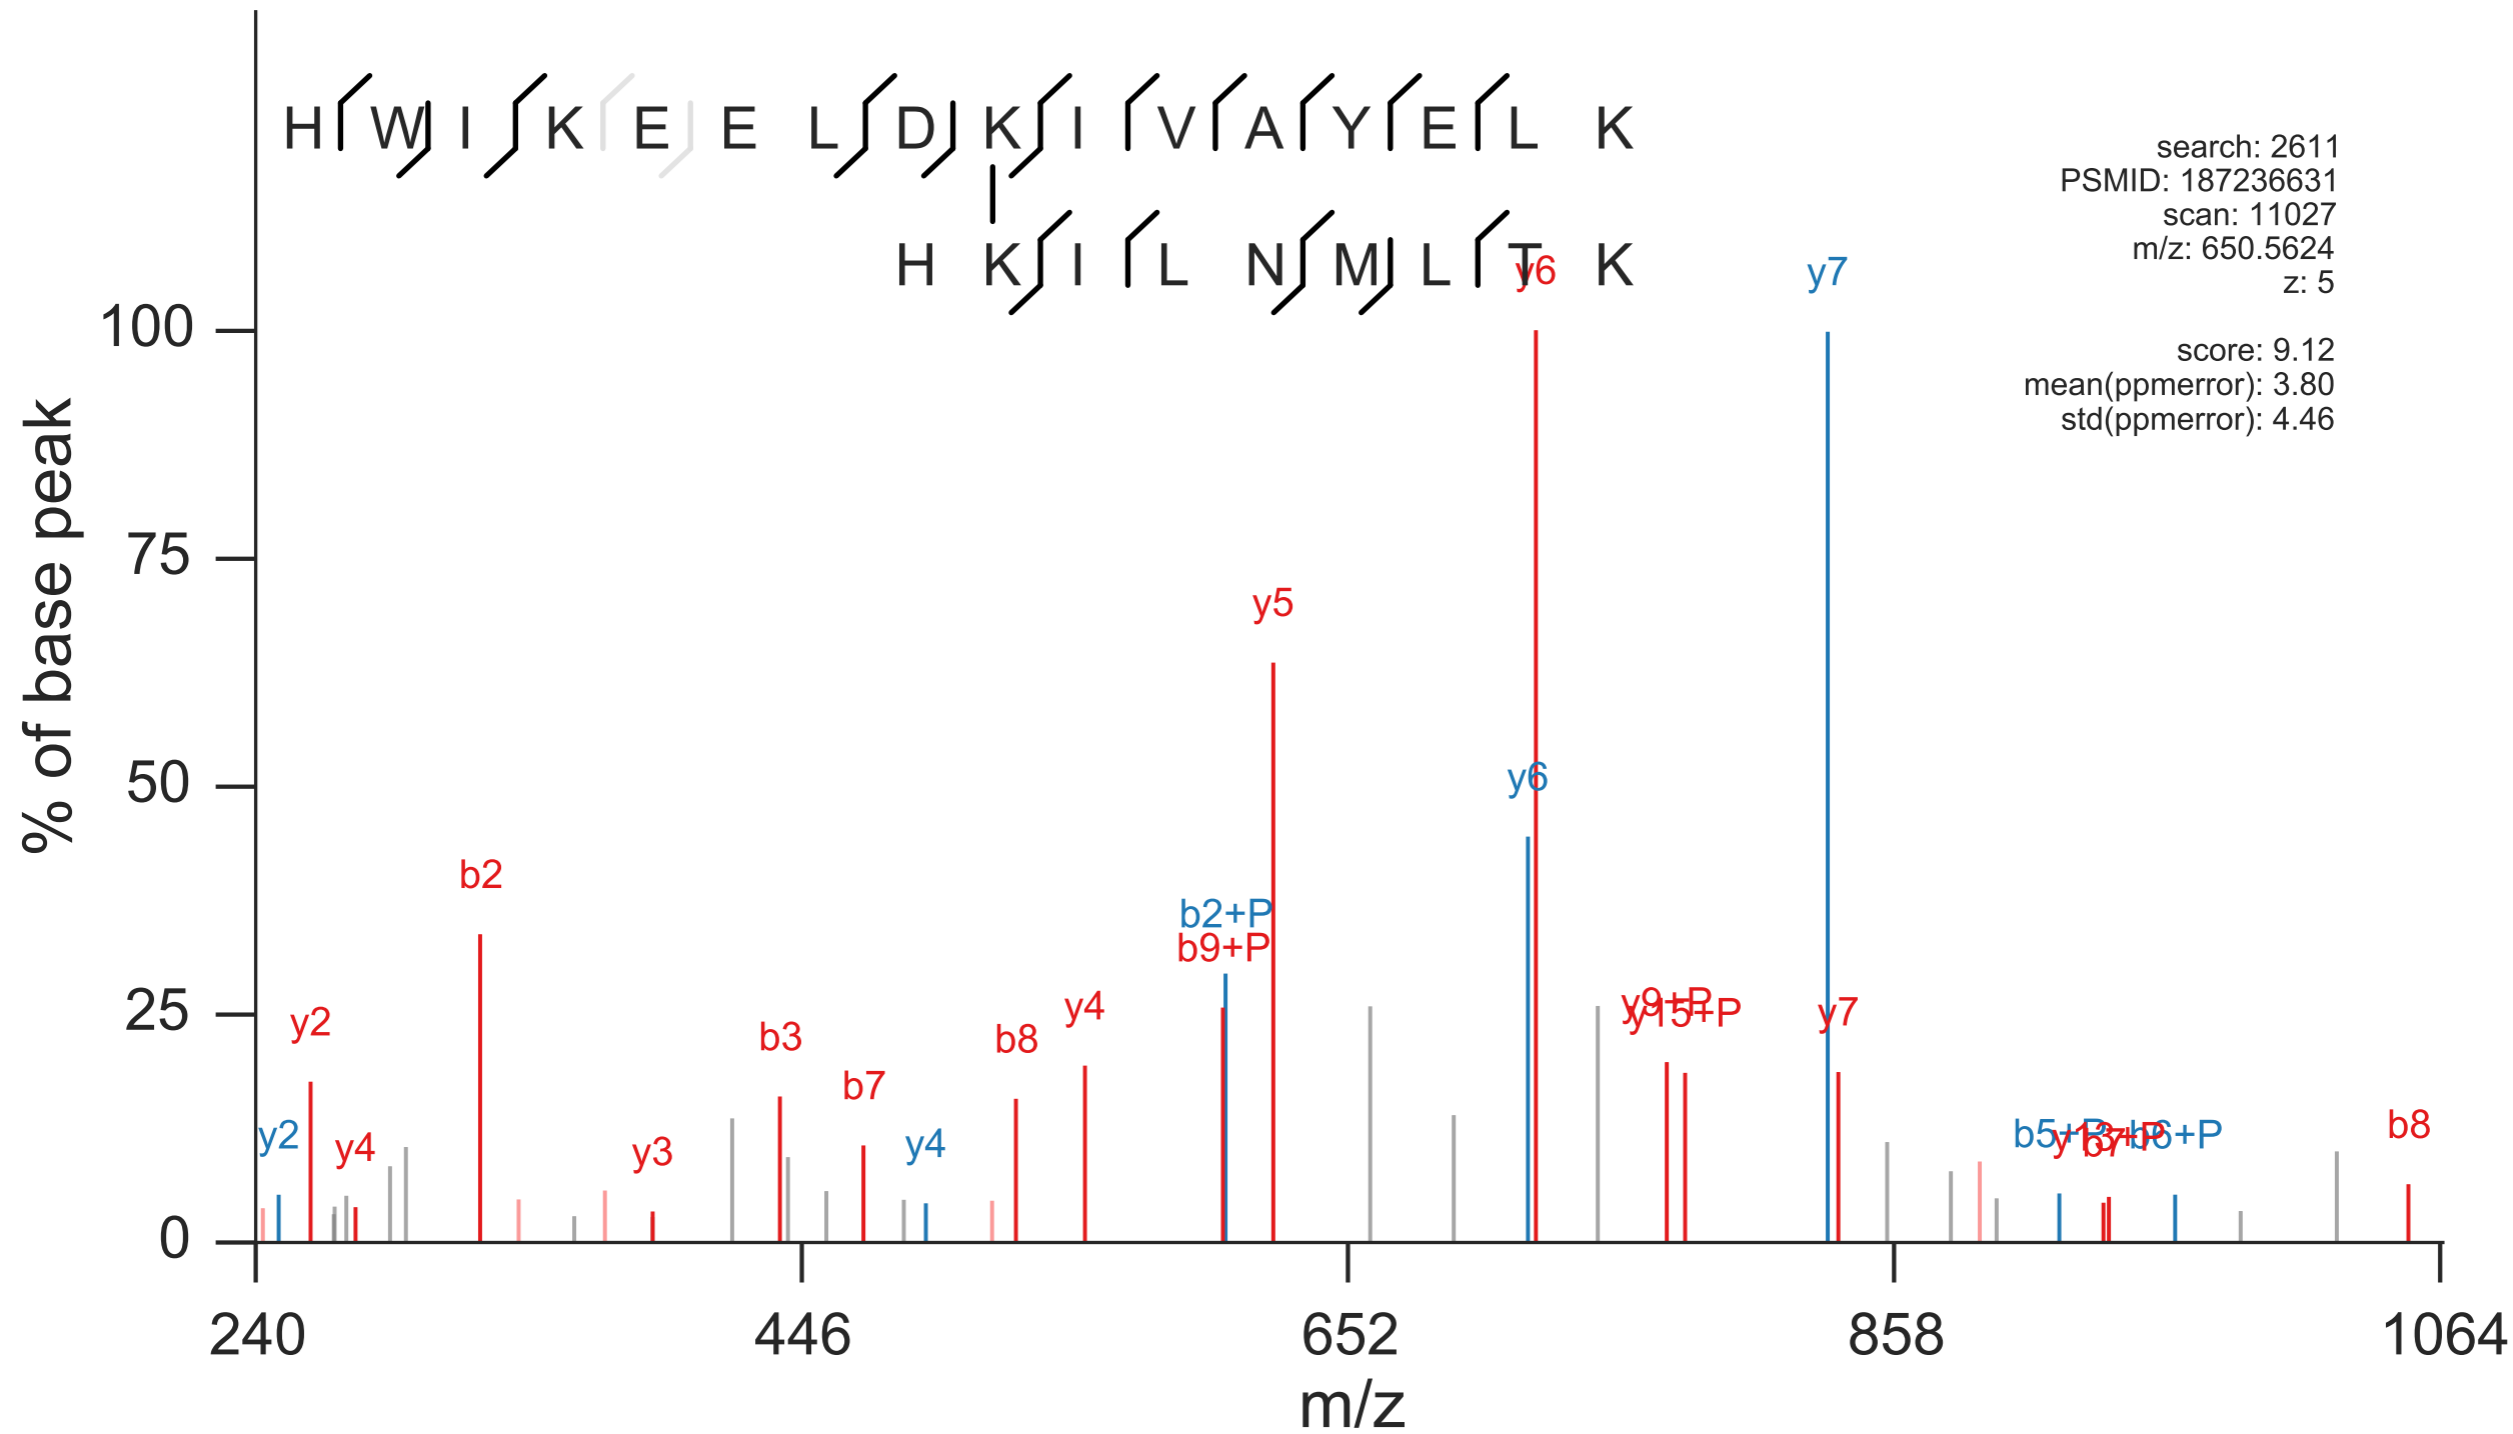

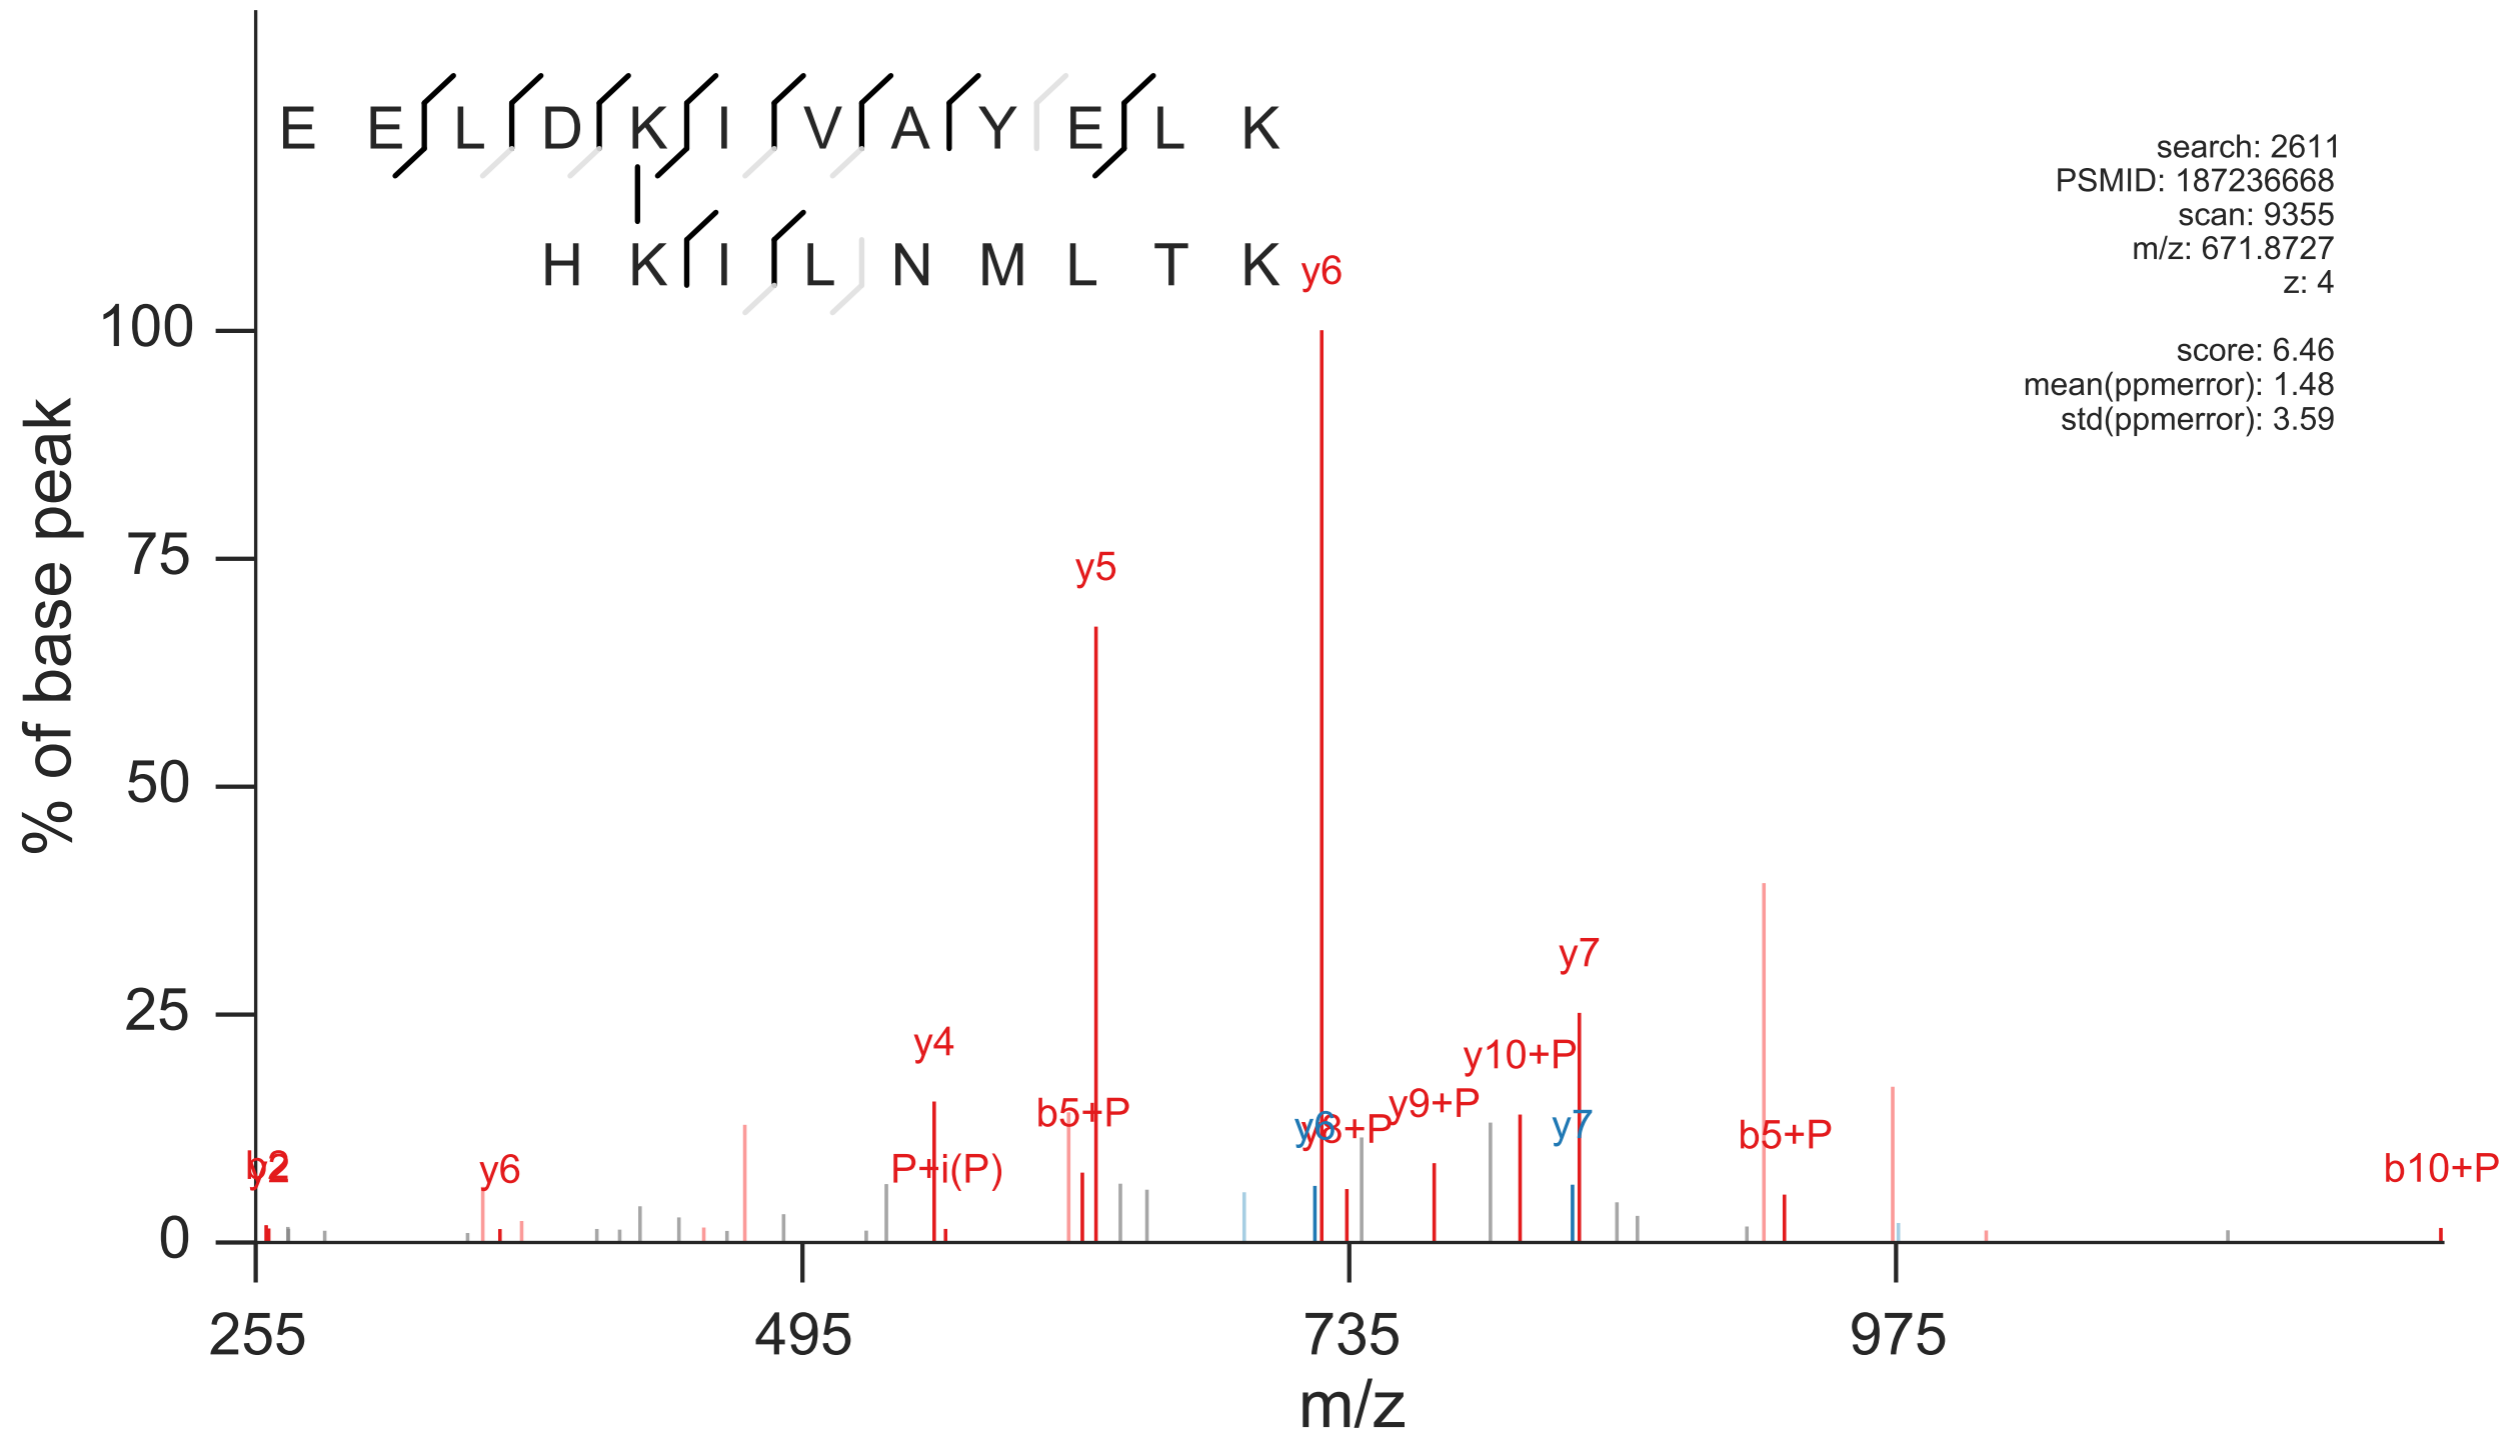

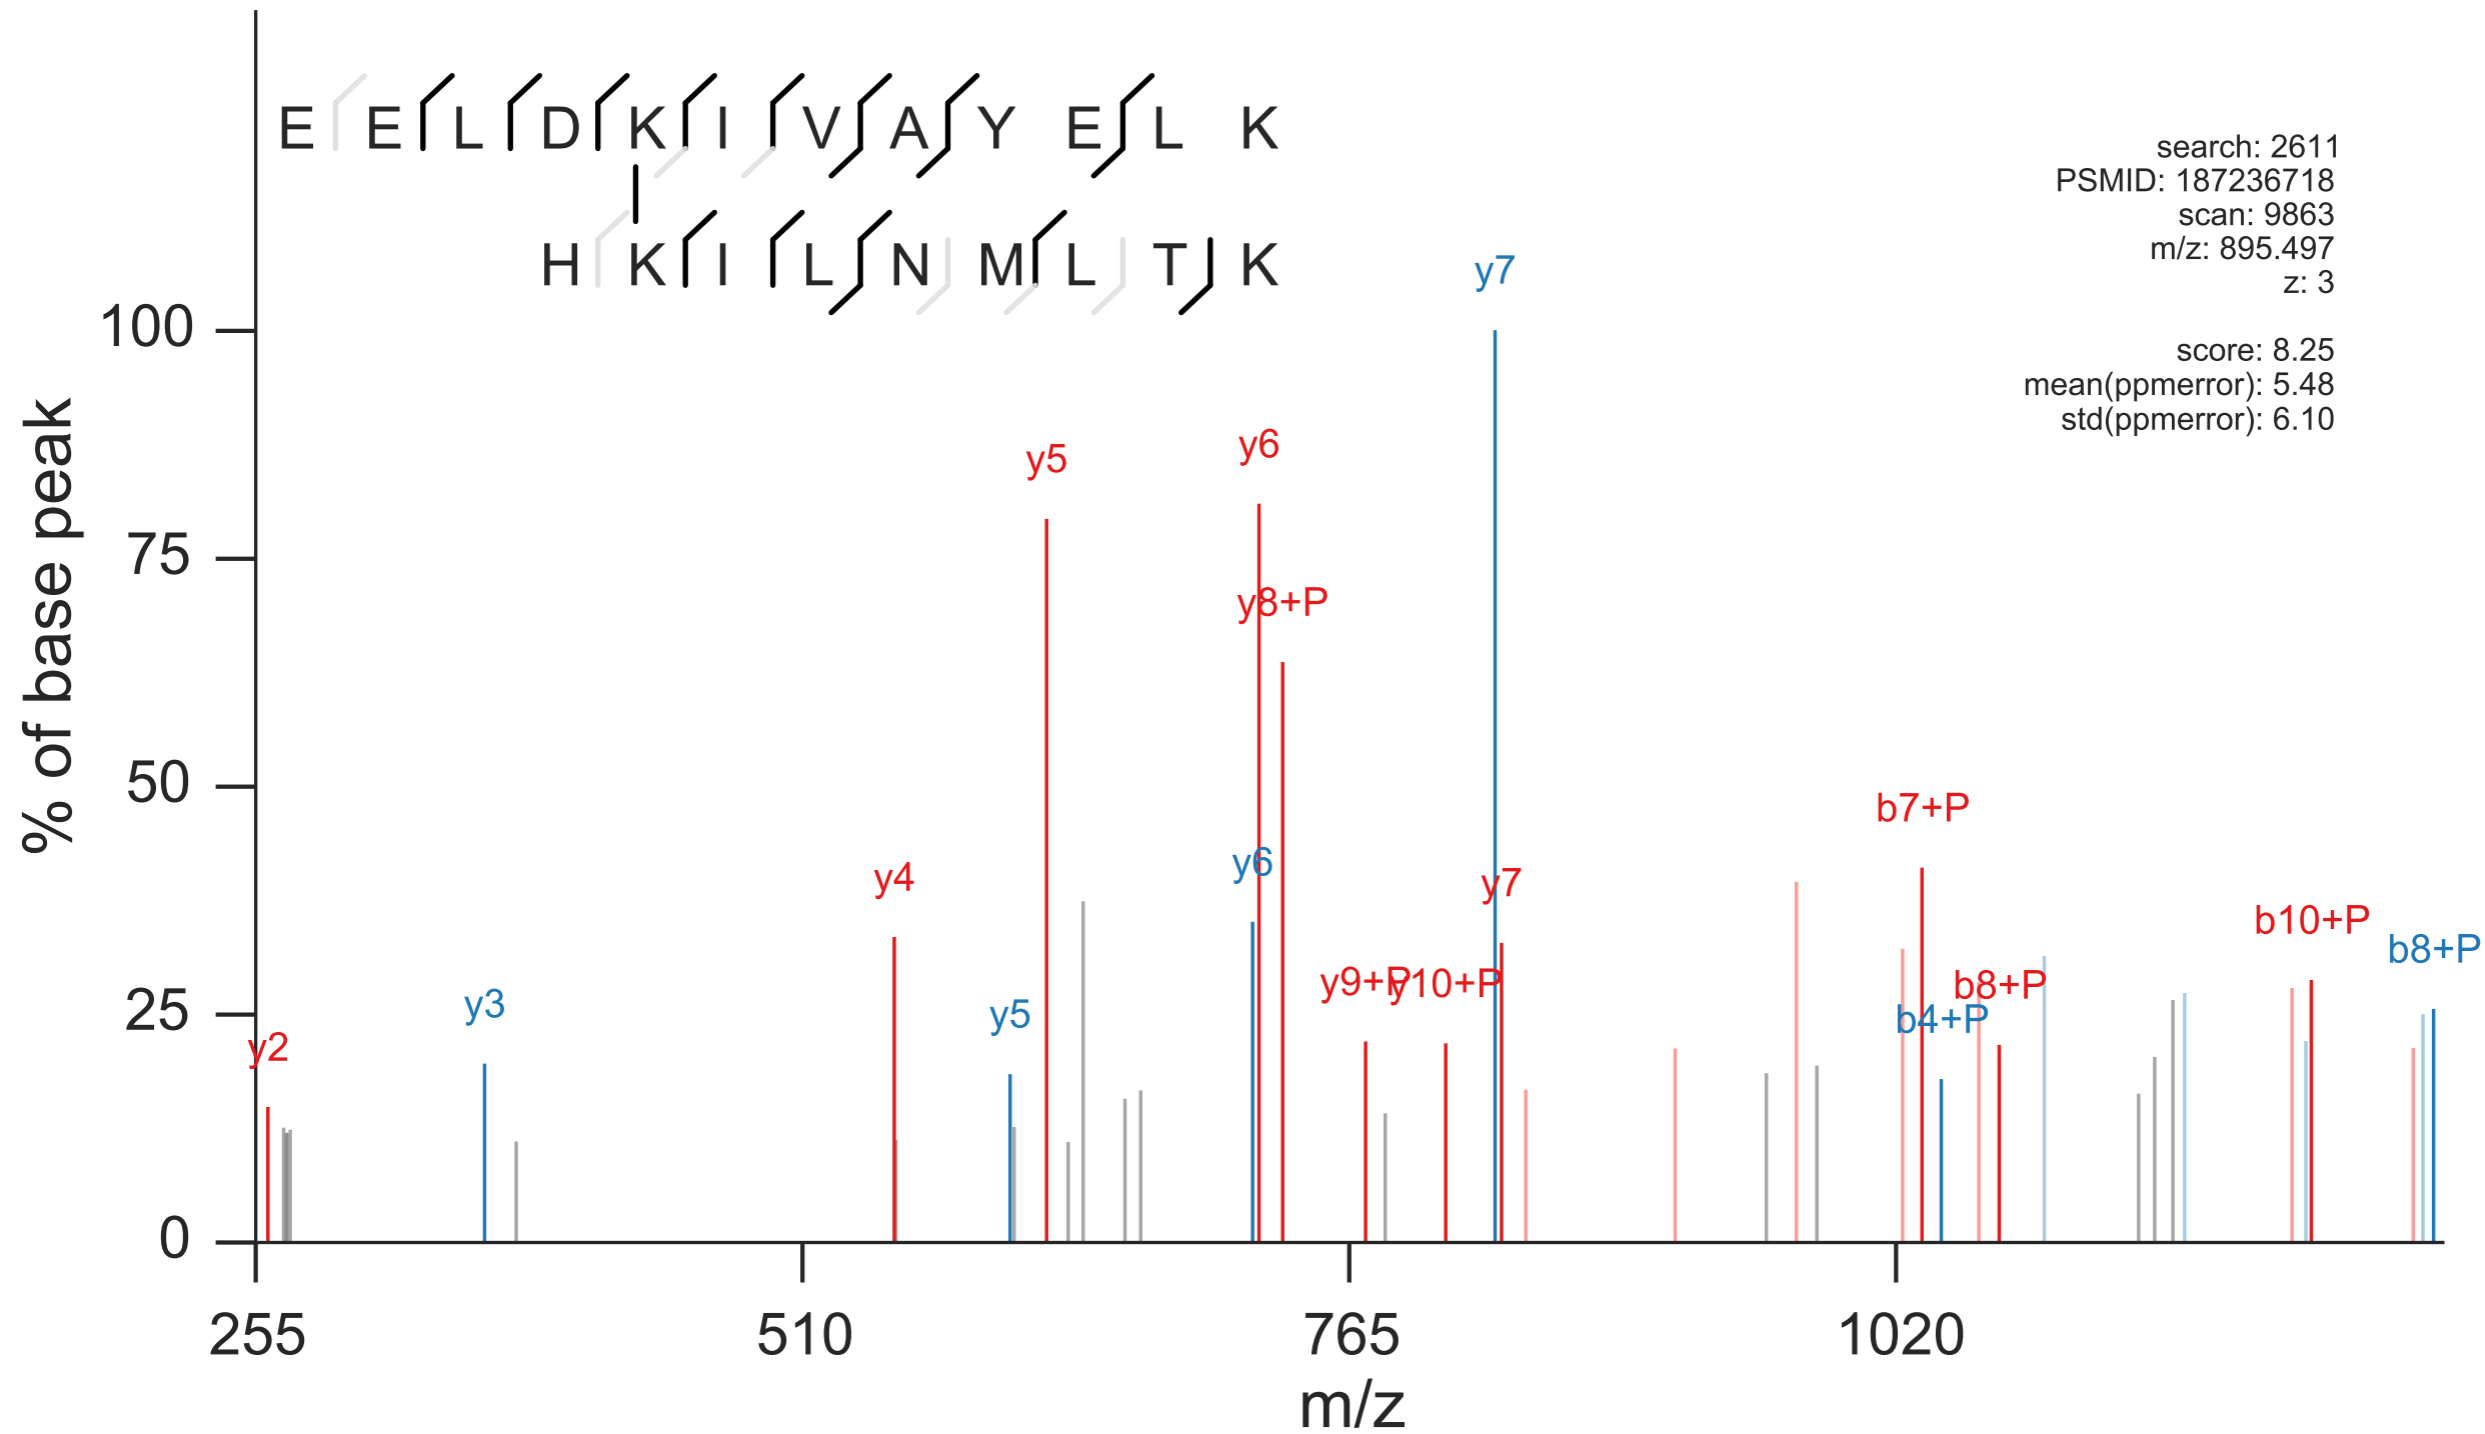

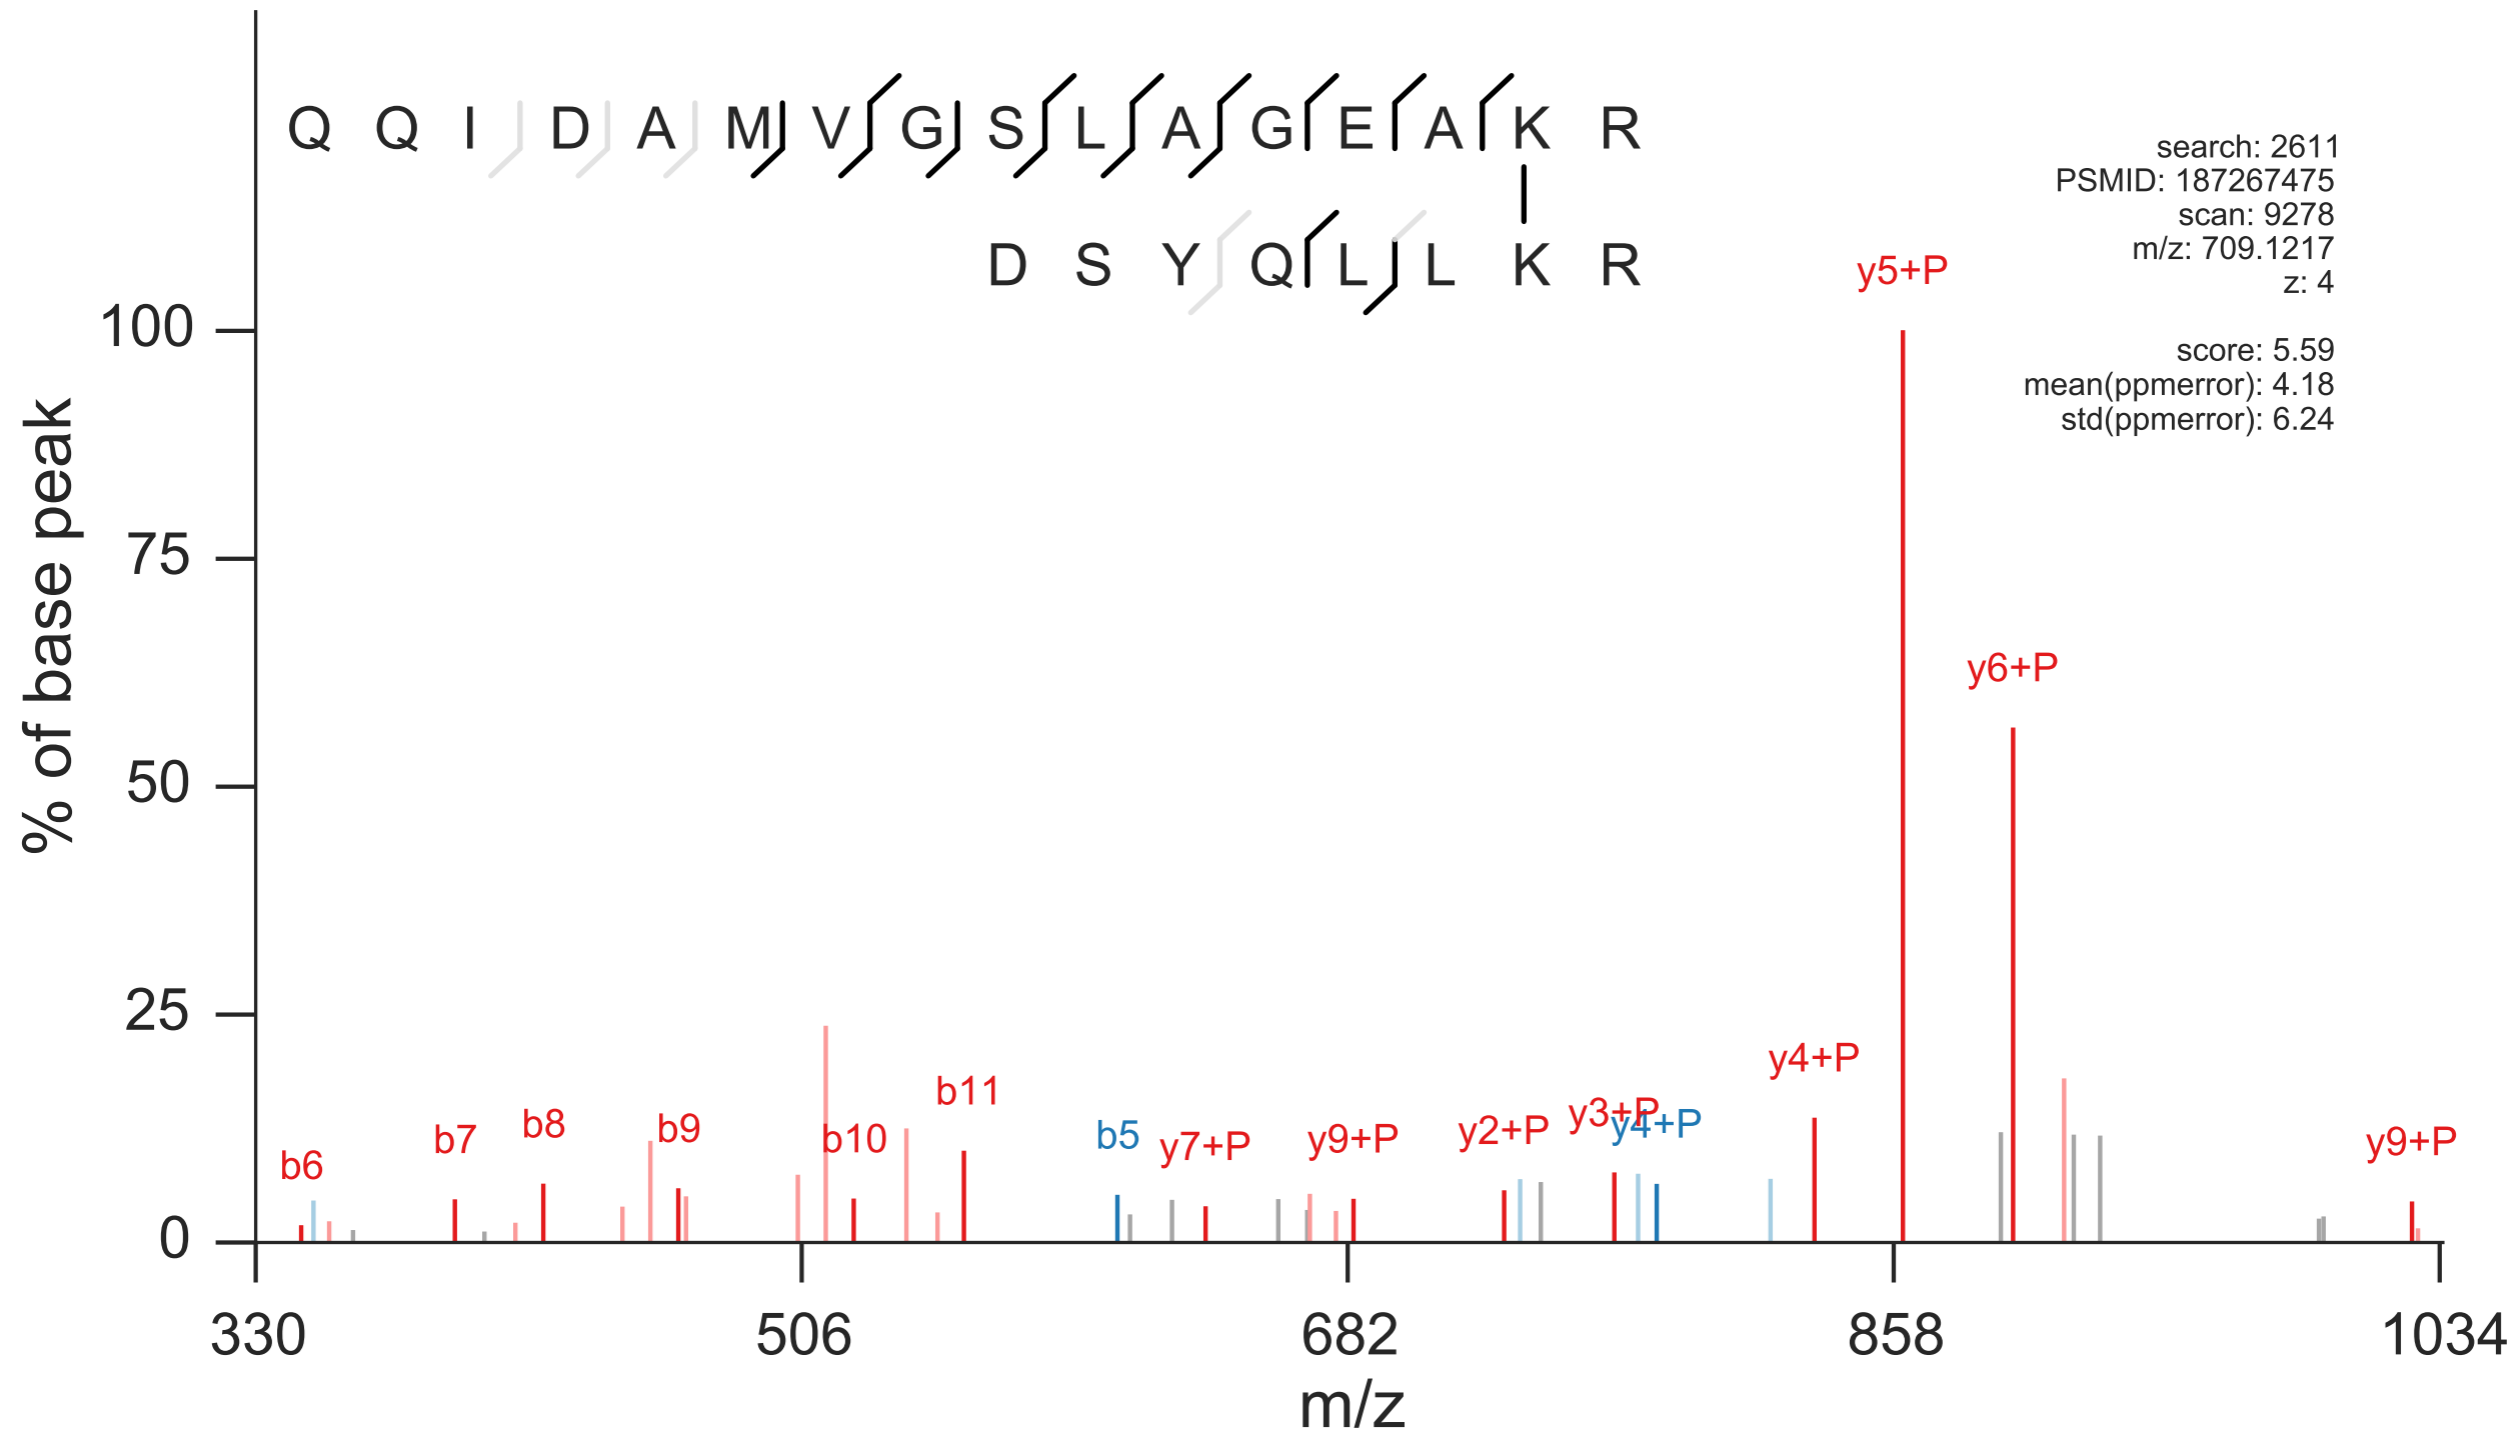

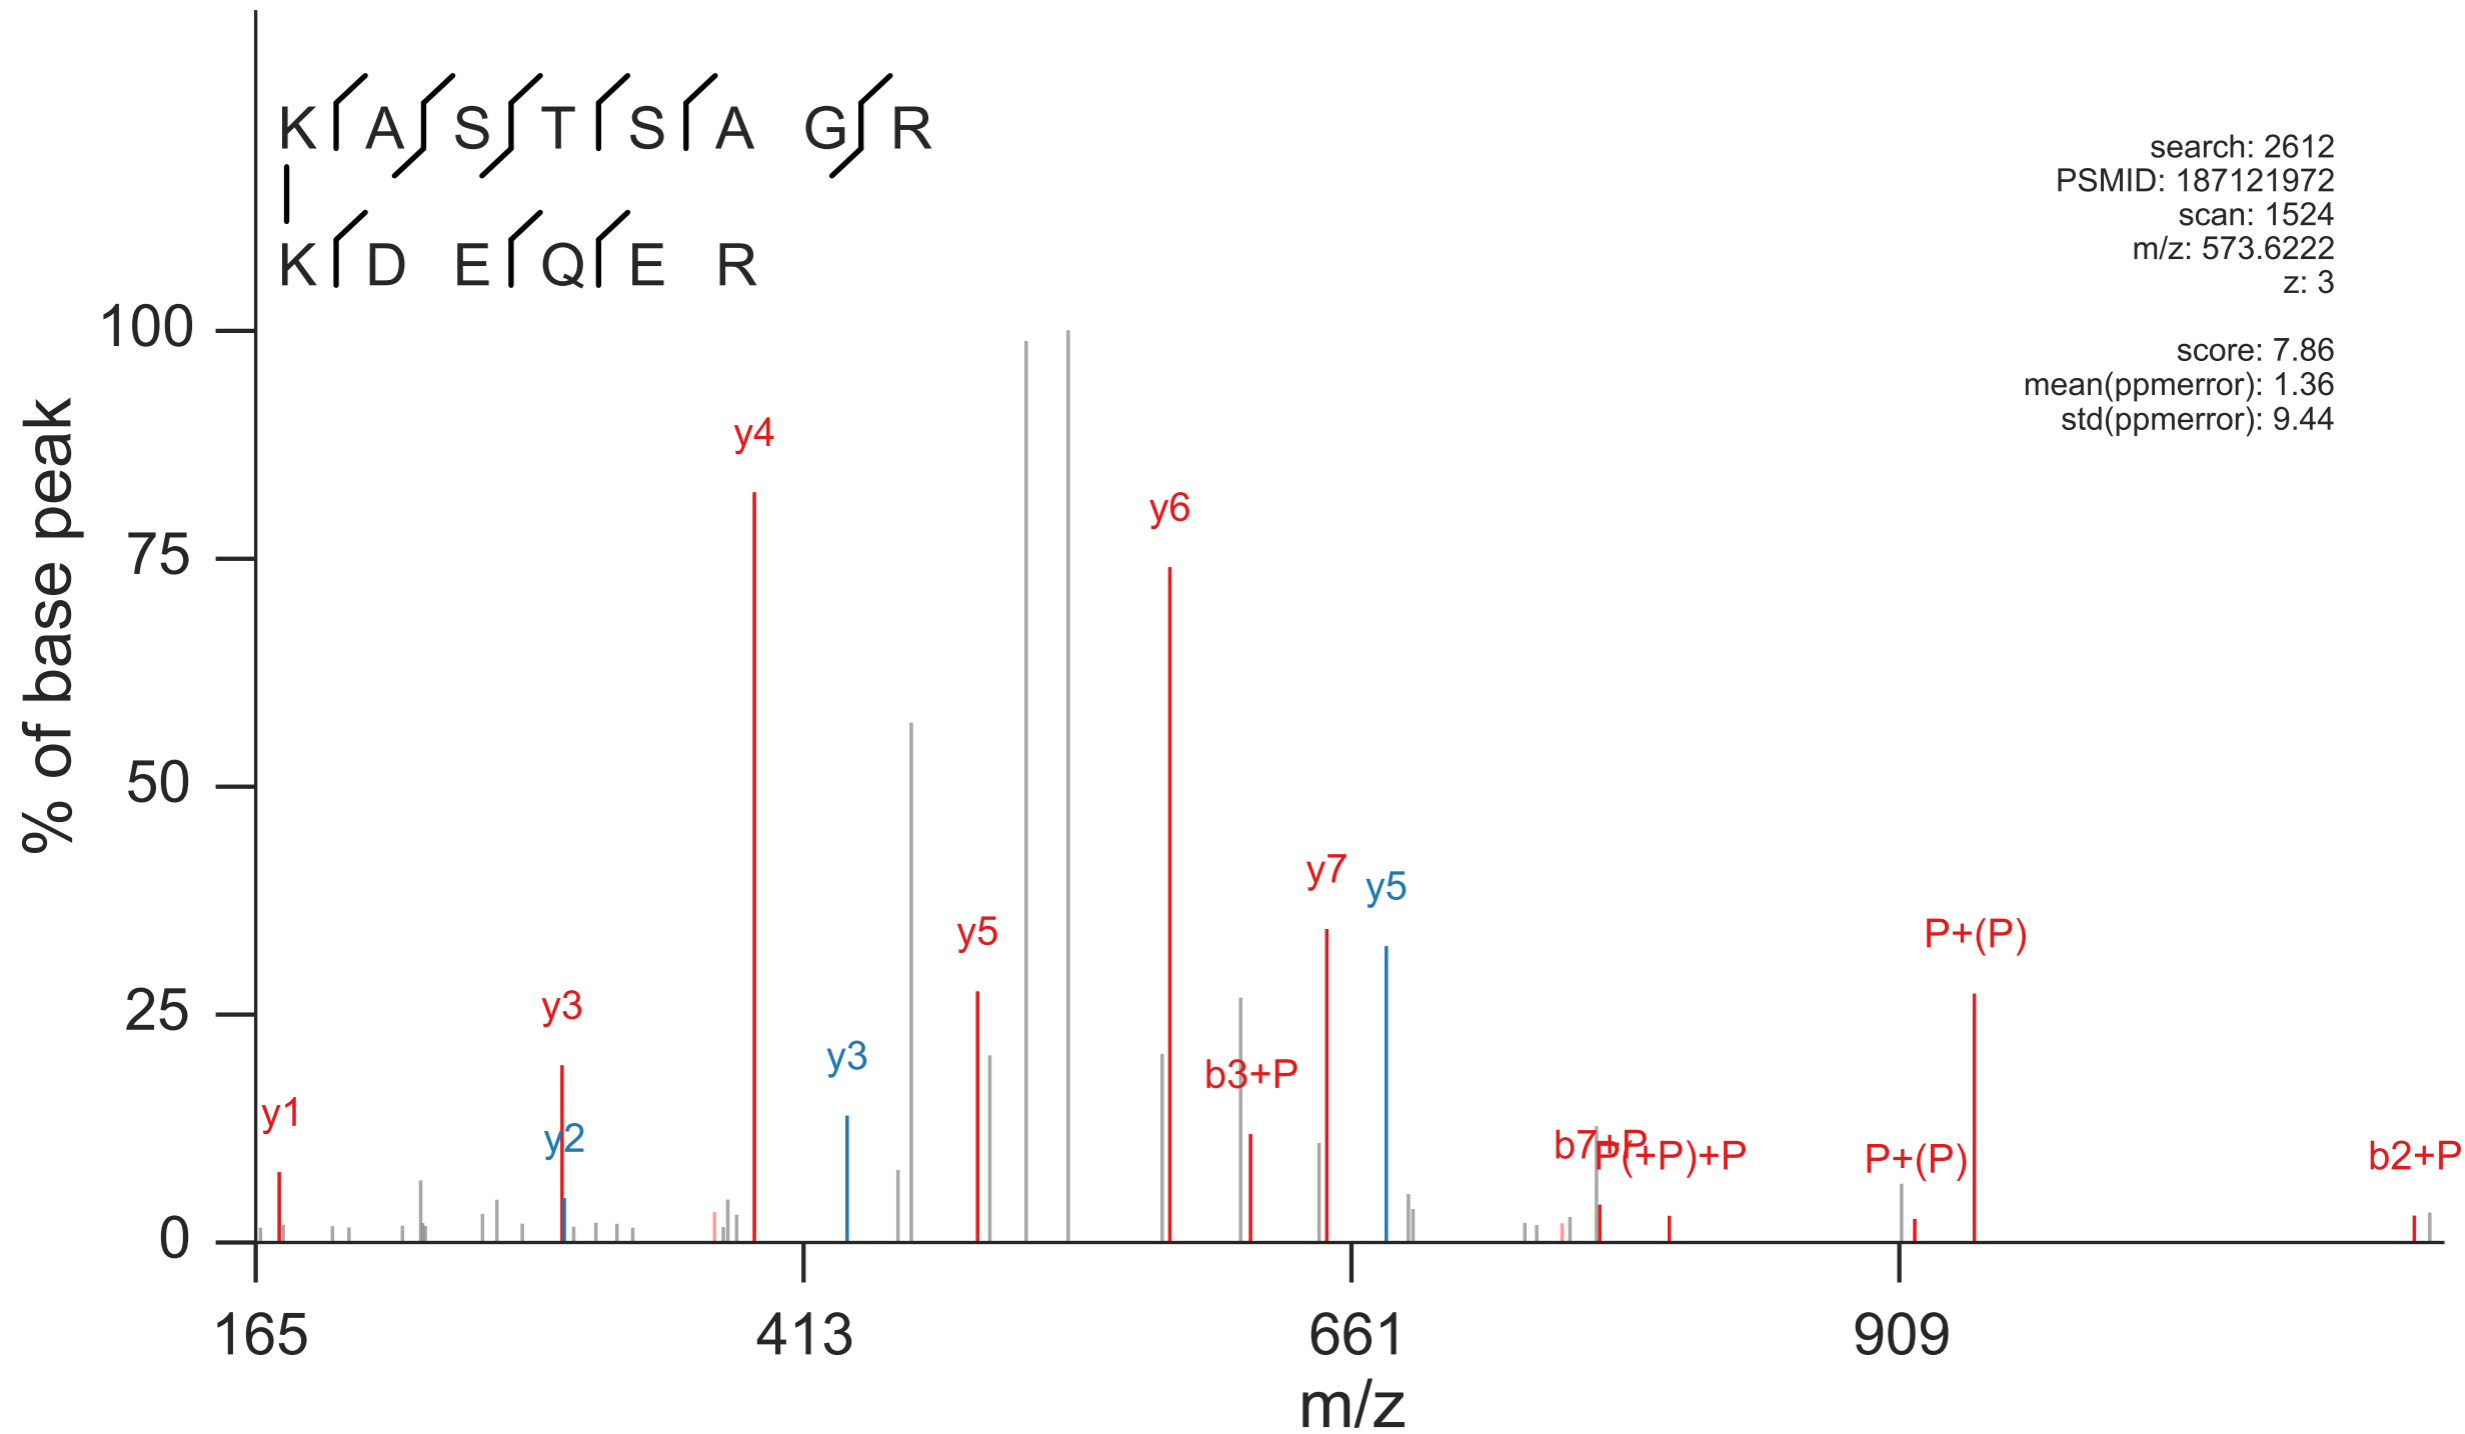



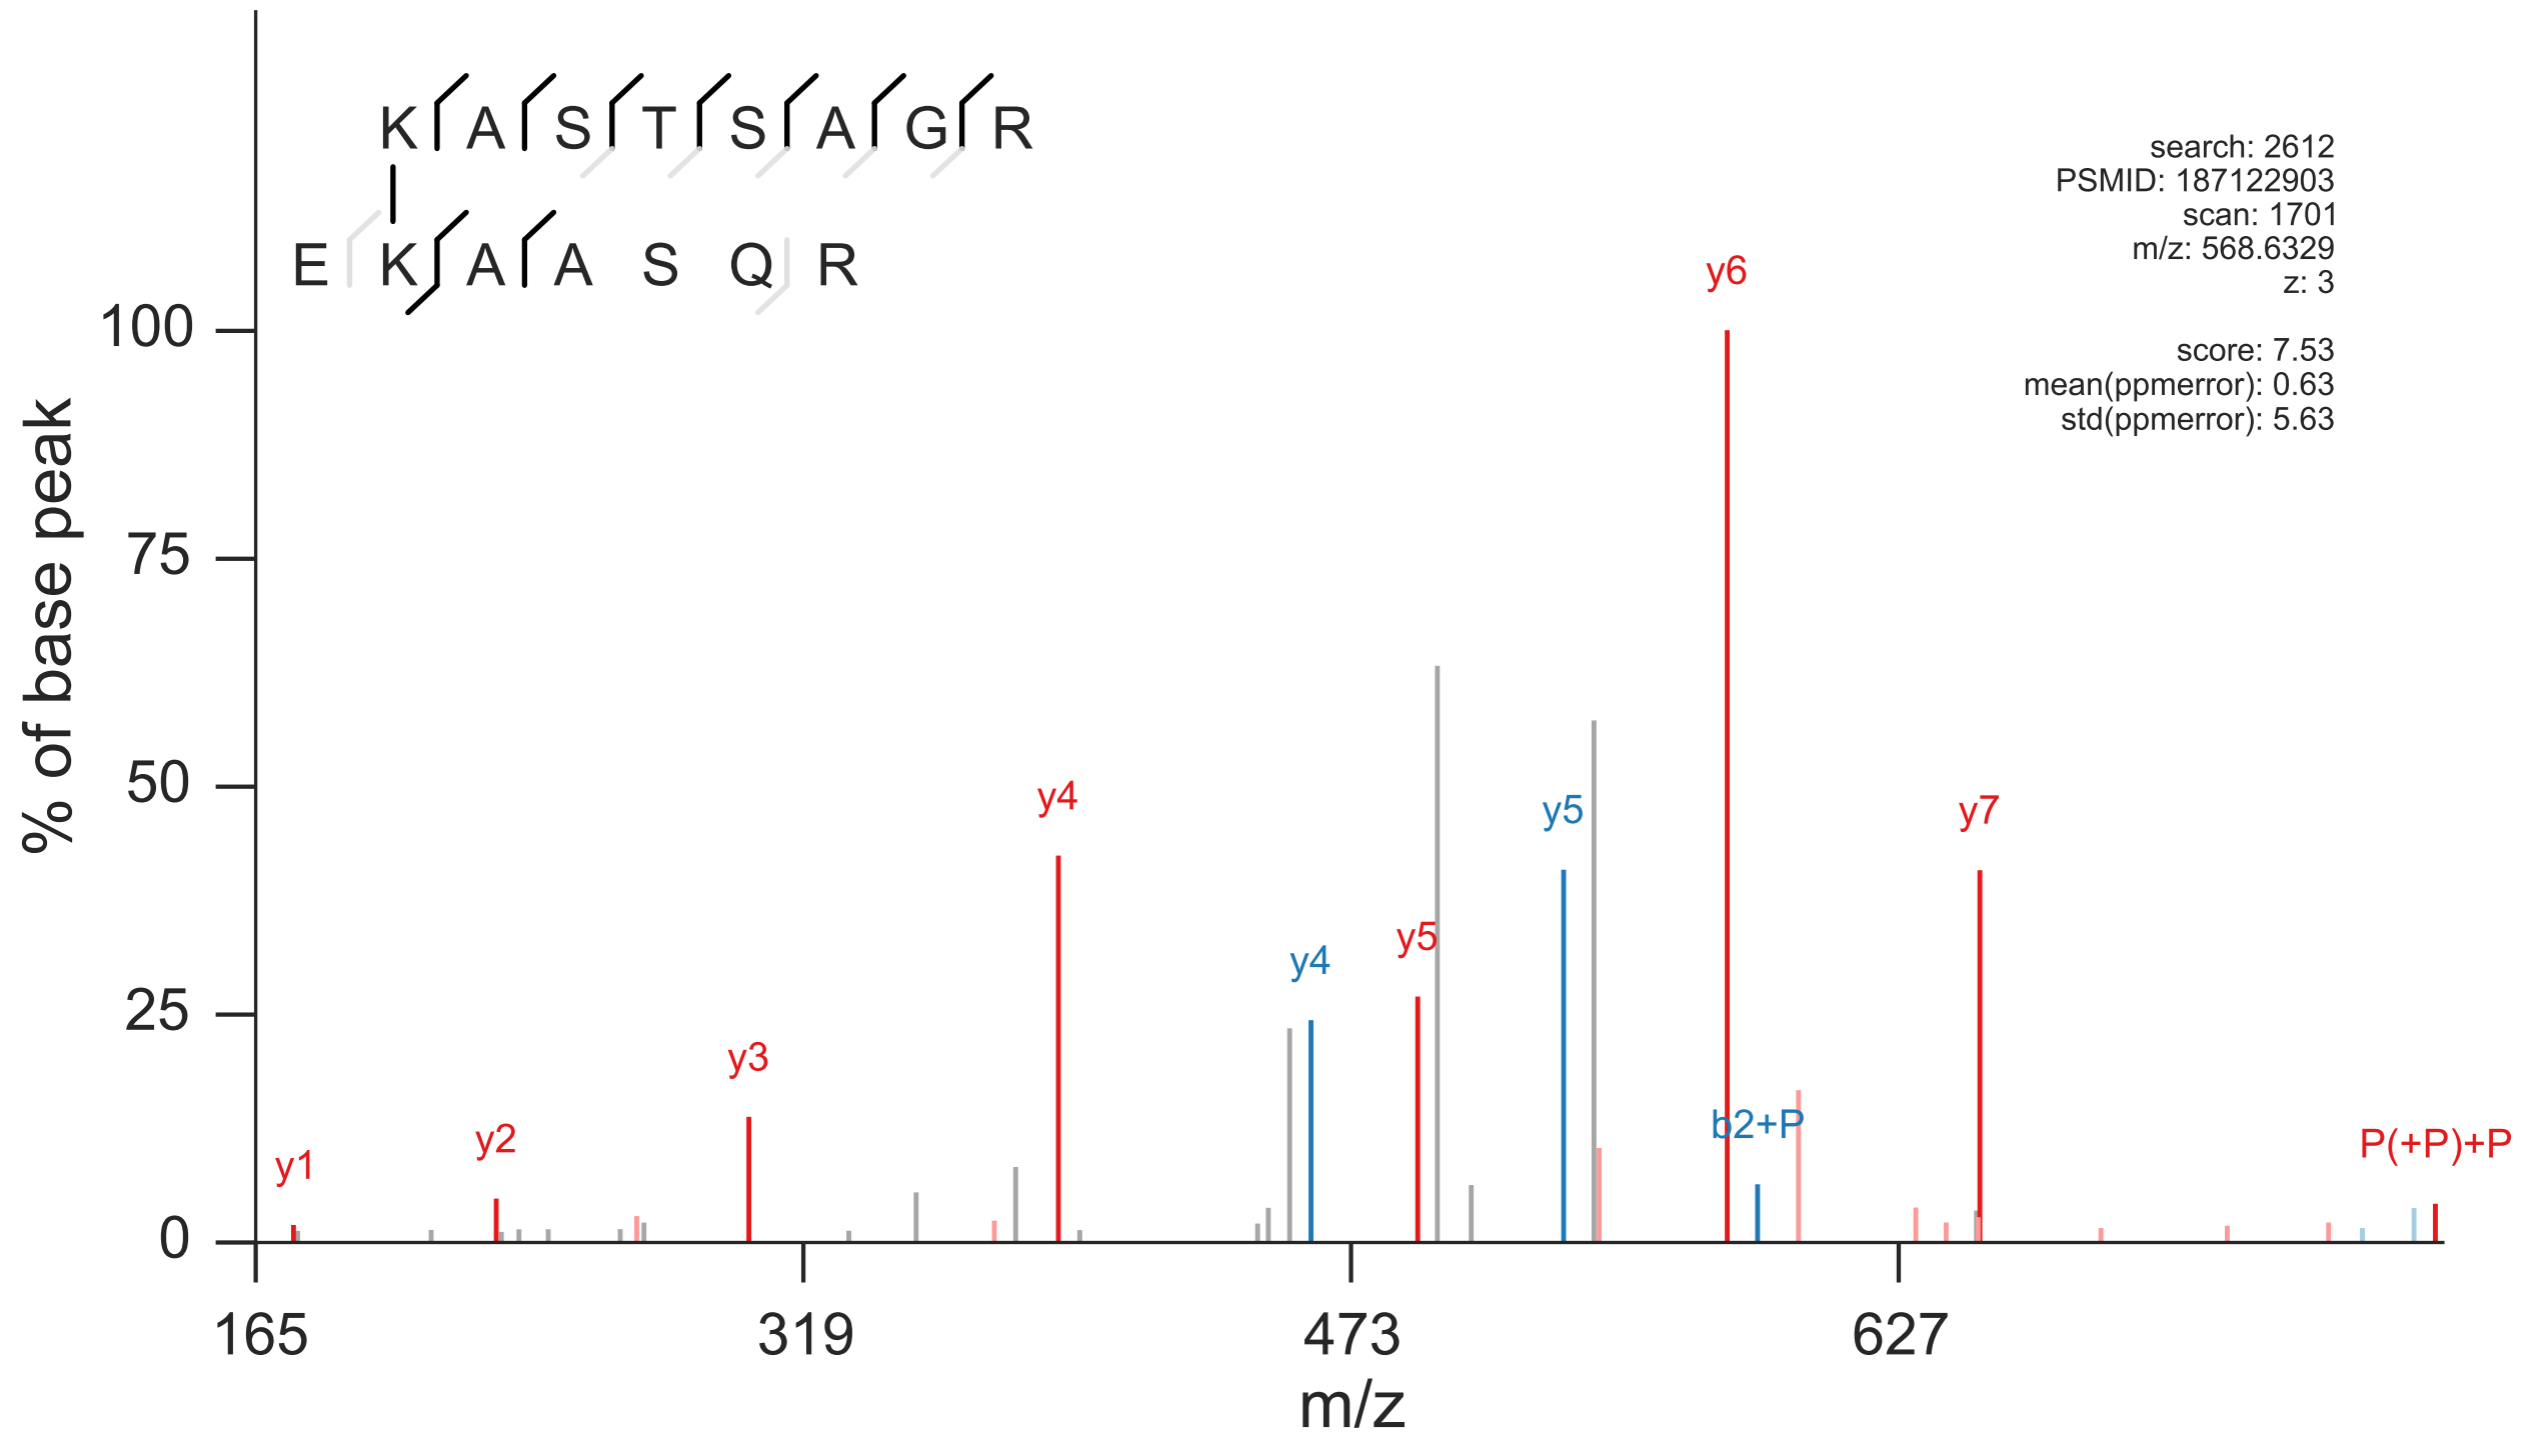

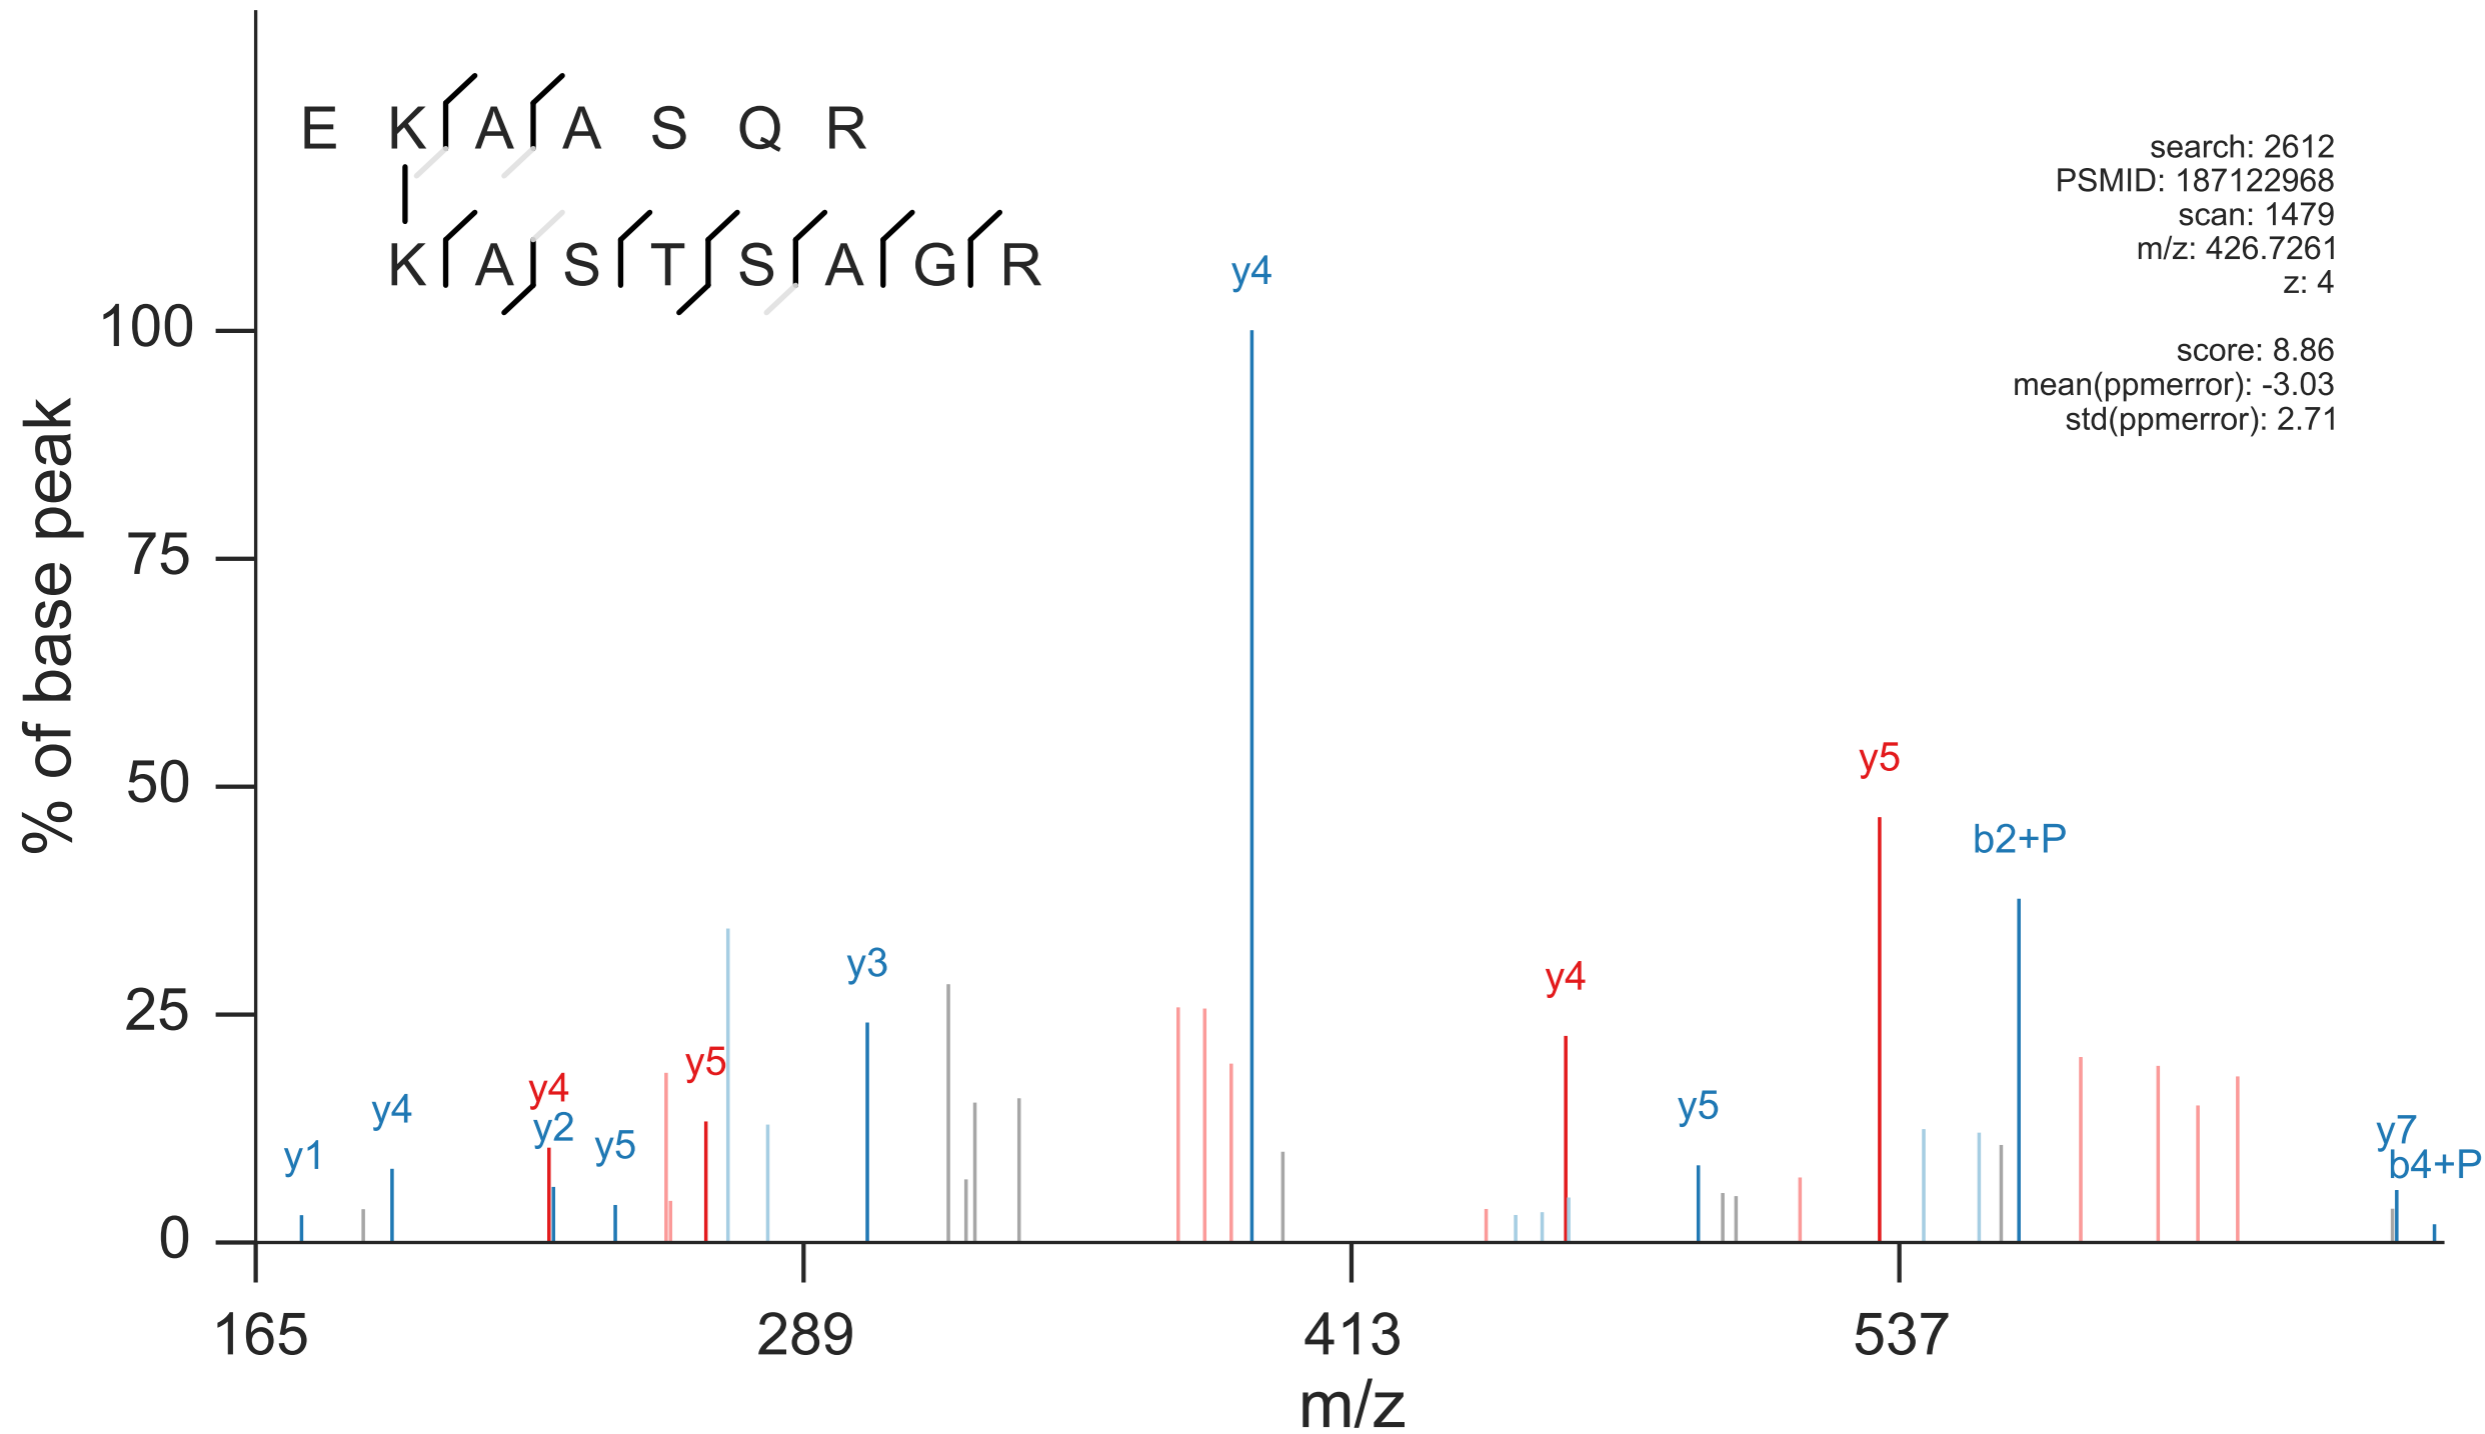

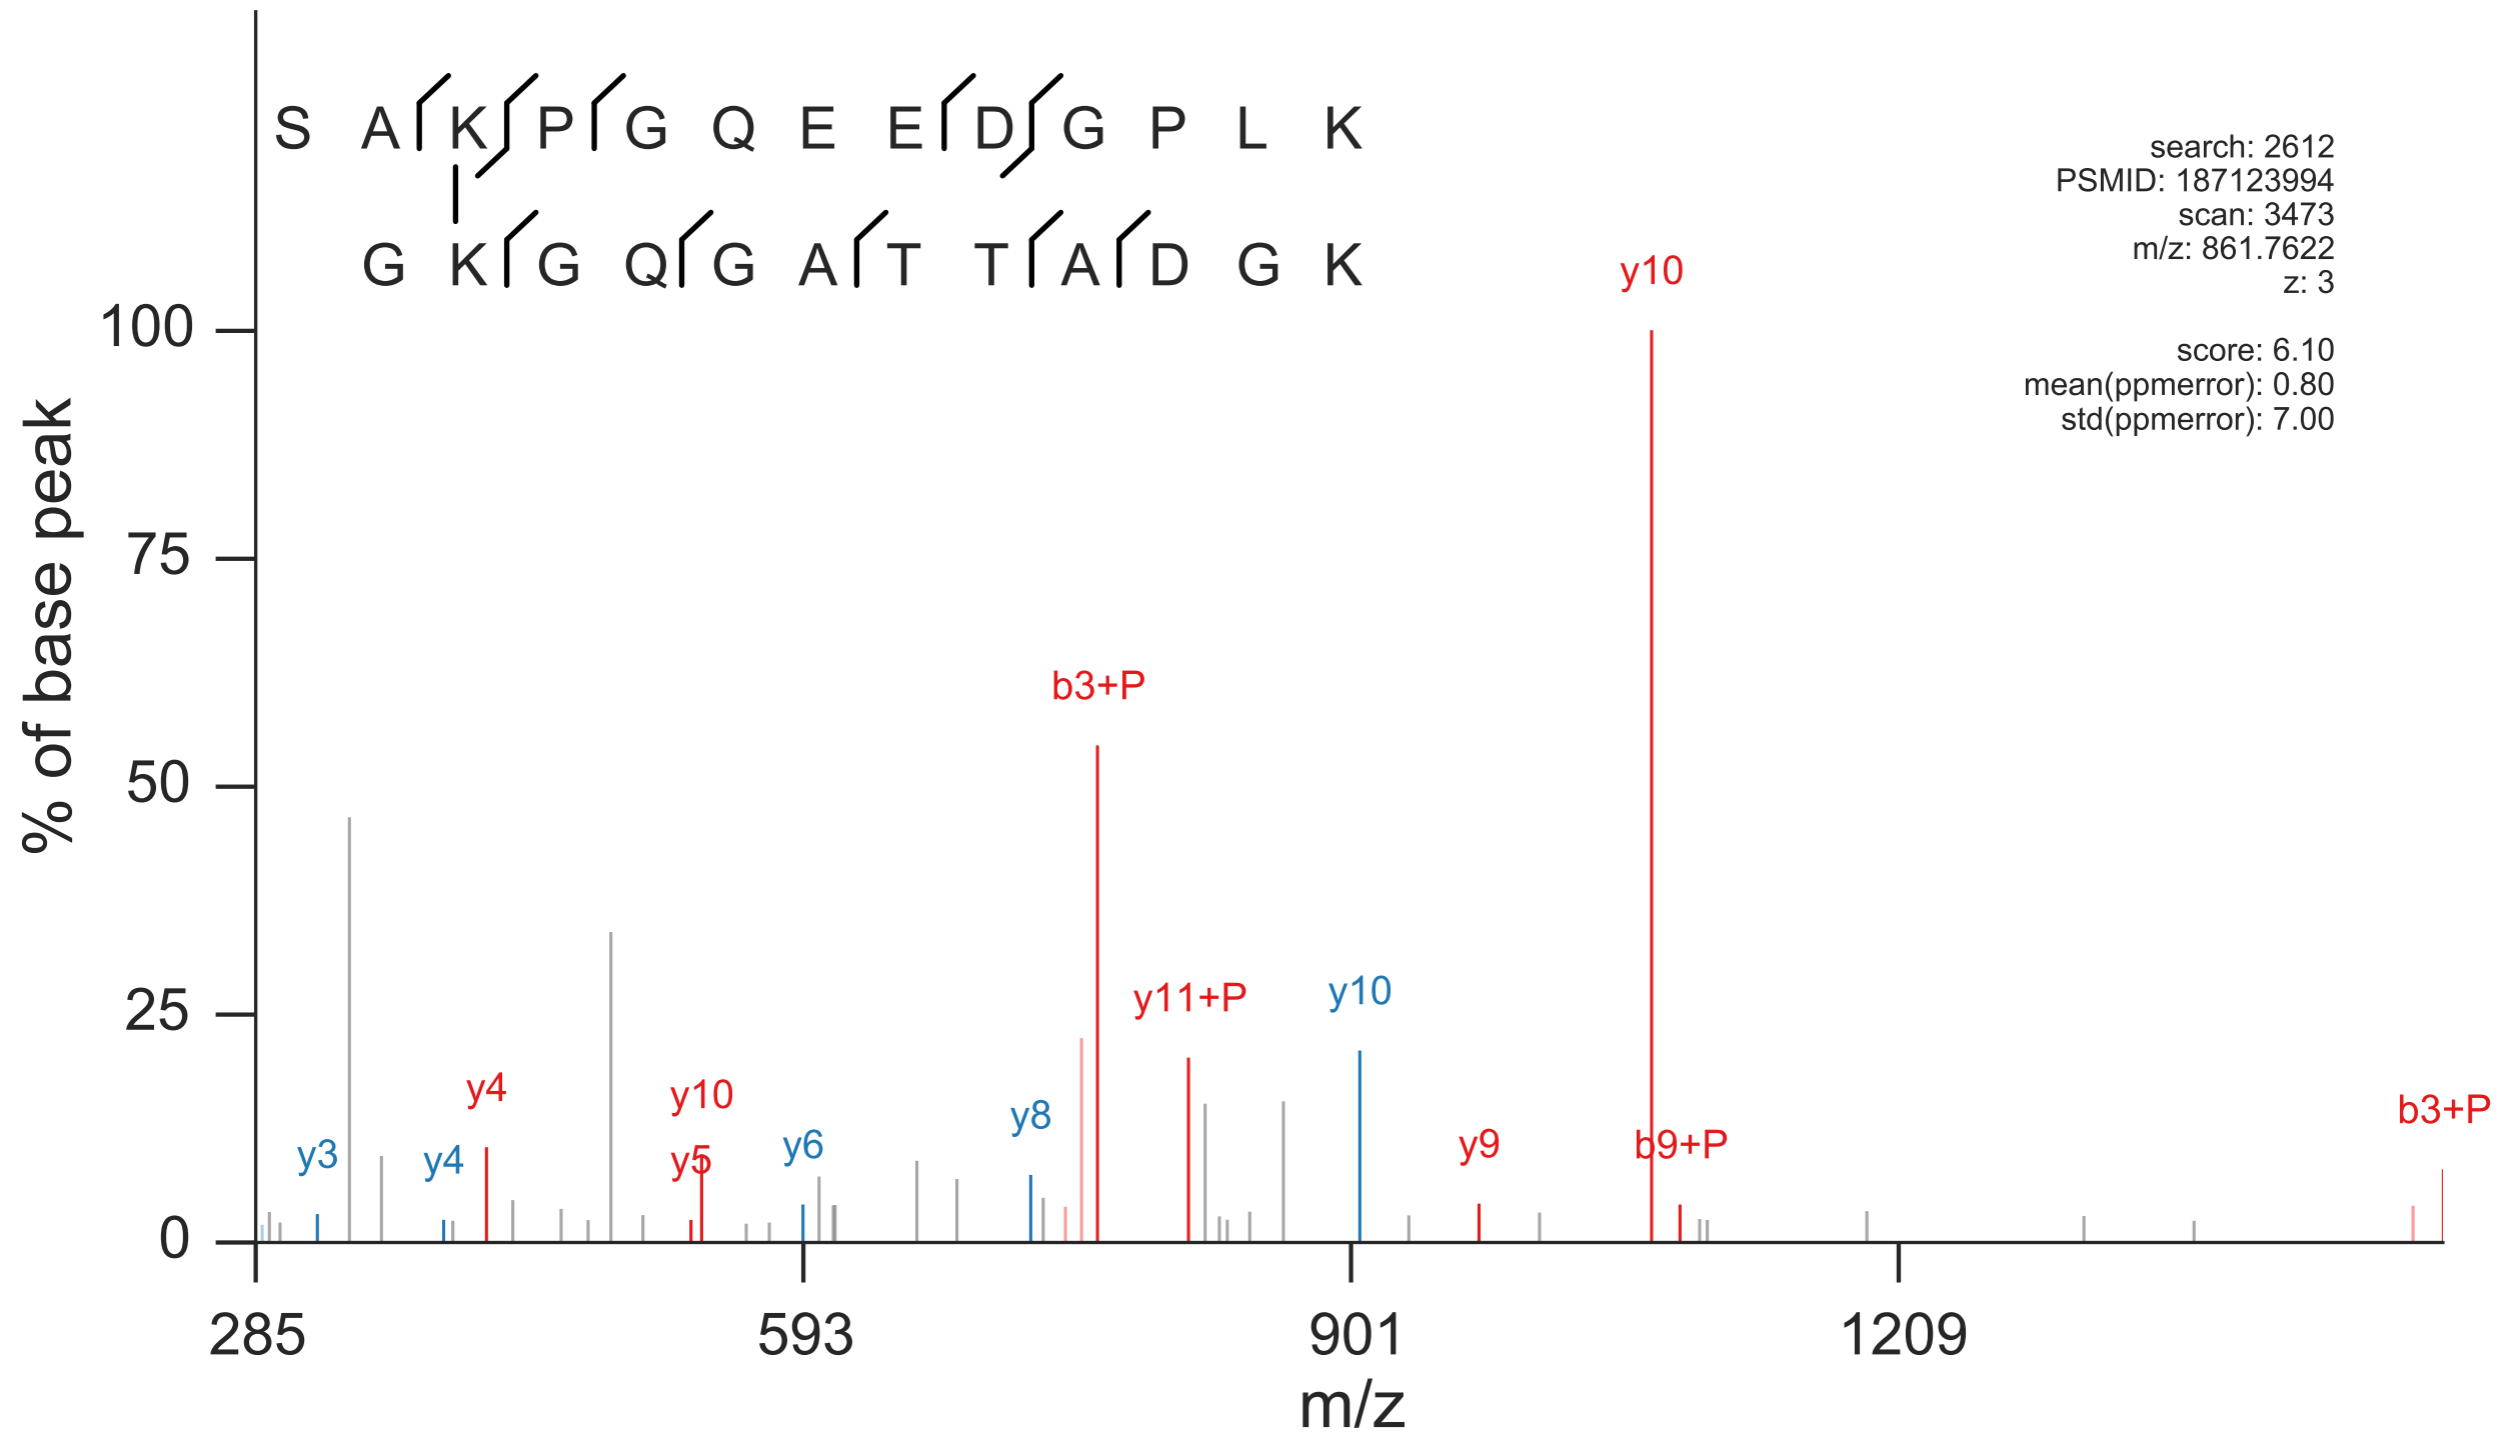

search: 2612  
 PSMID: 187123994  
 scan: 3473  
 m/z: 861.7622  
 z: 3

score: 6.10  
 mean(ppmerror): 0.80  
 std(ppmerror): 7.00

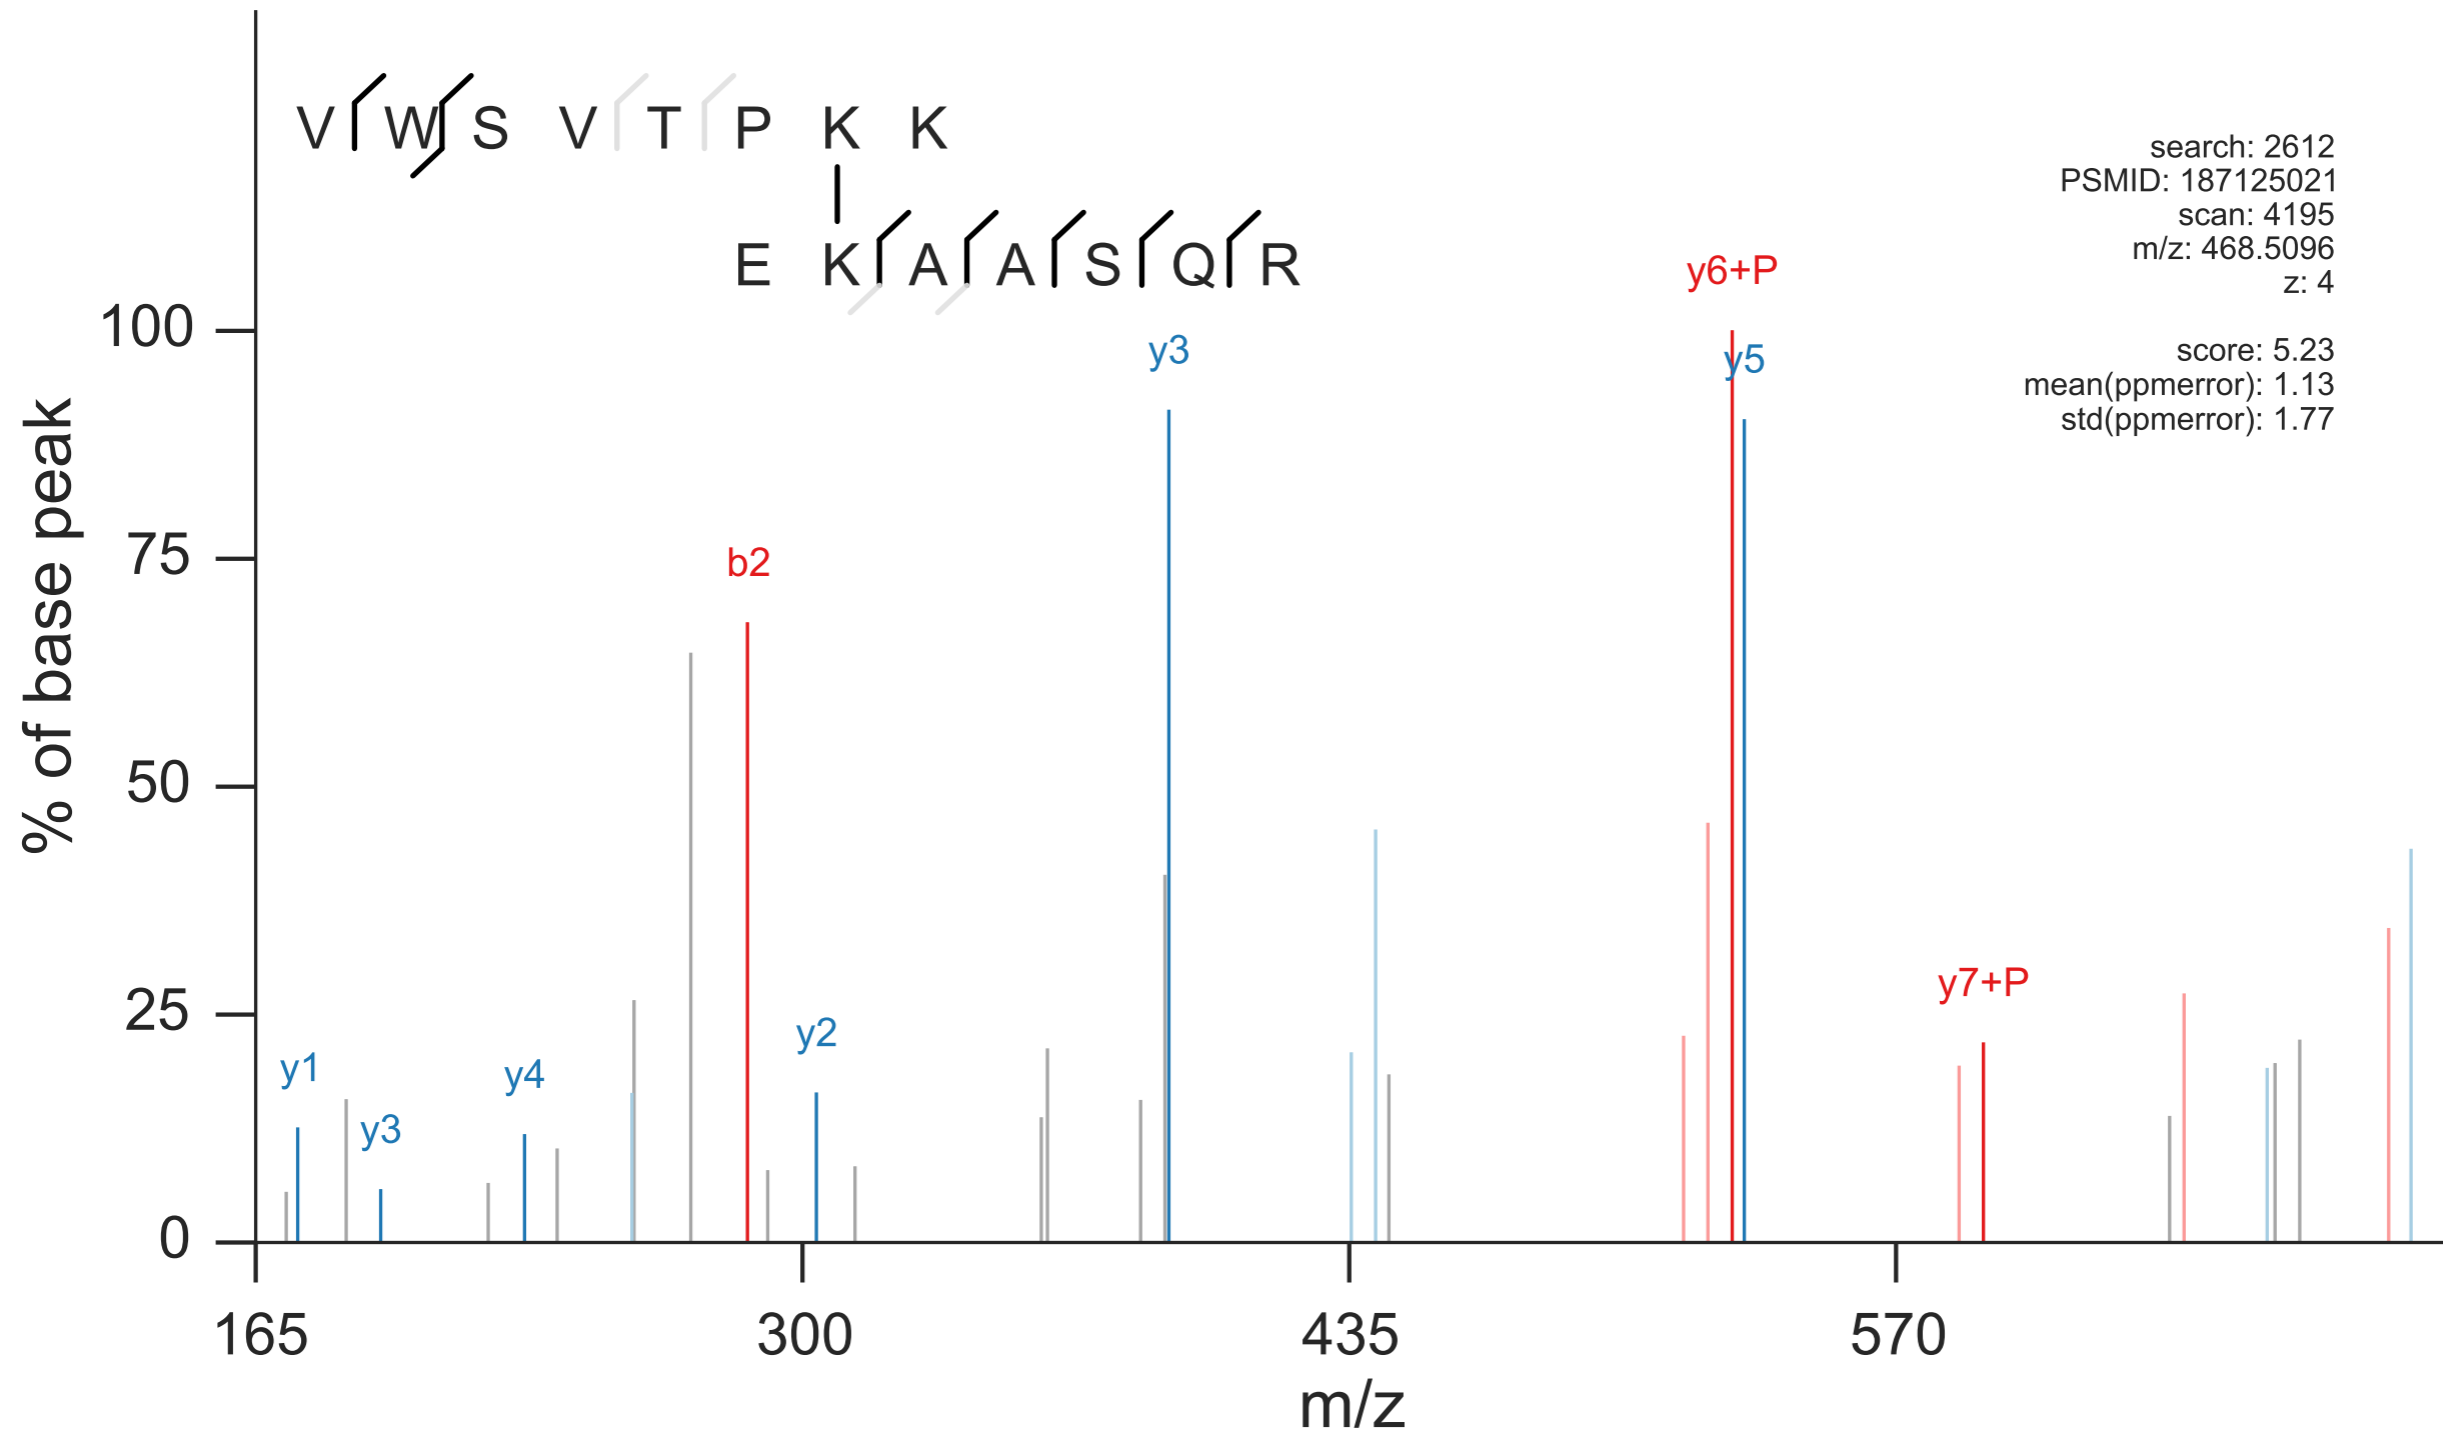

search: 2612  
 PSMID: 187125021  
 scan: 4195  
 m/z: 468.5096  
 z: 4

score: 5.23  
 mean(ppmerror): 1.13  
 std(ppmerror): 1.77

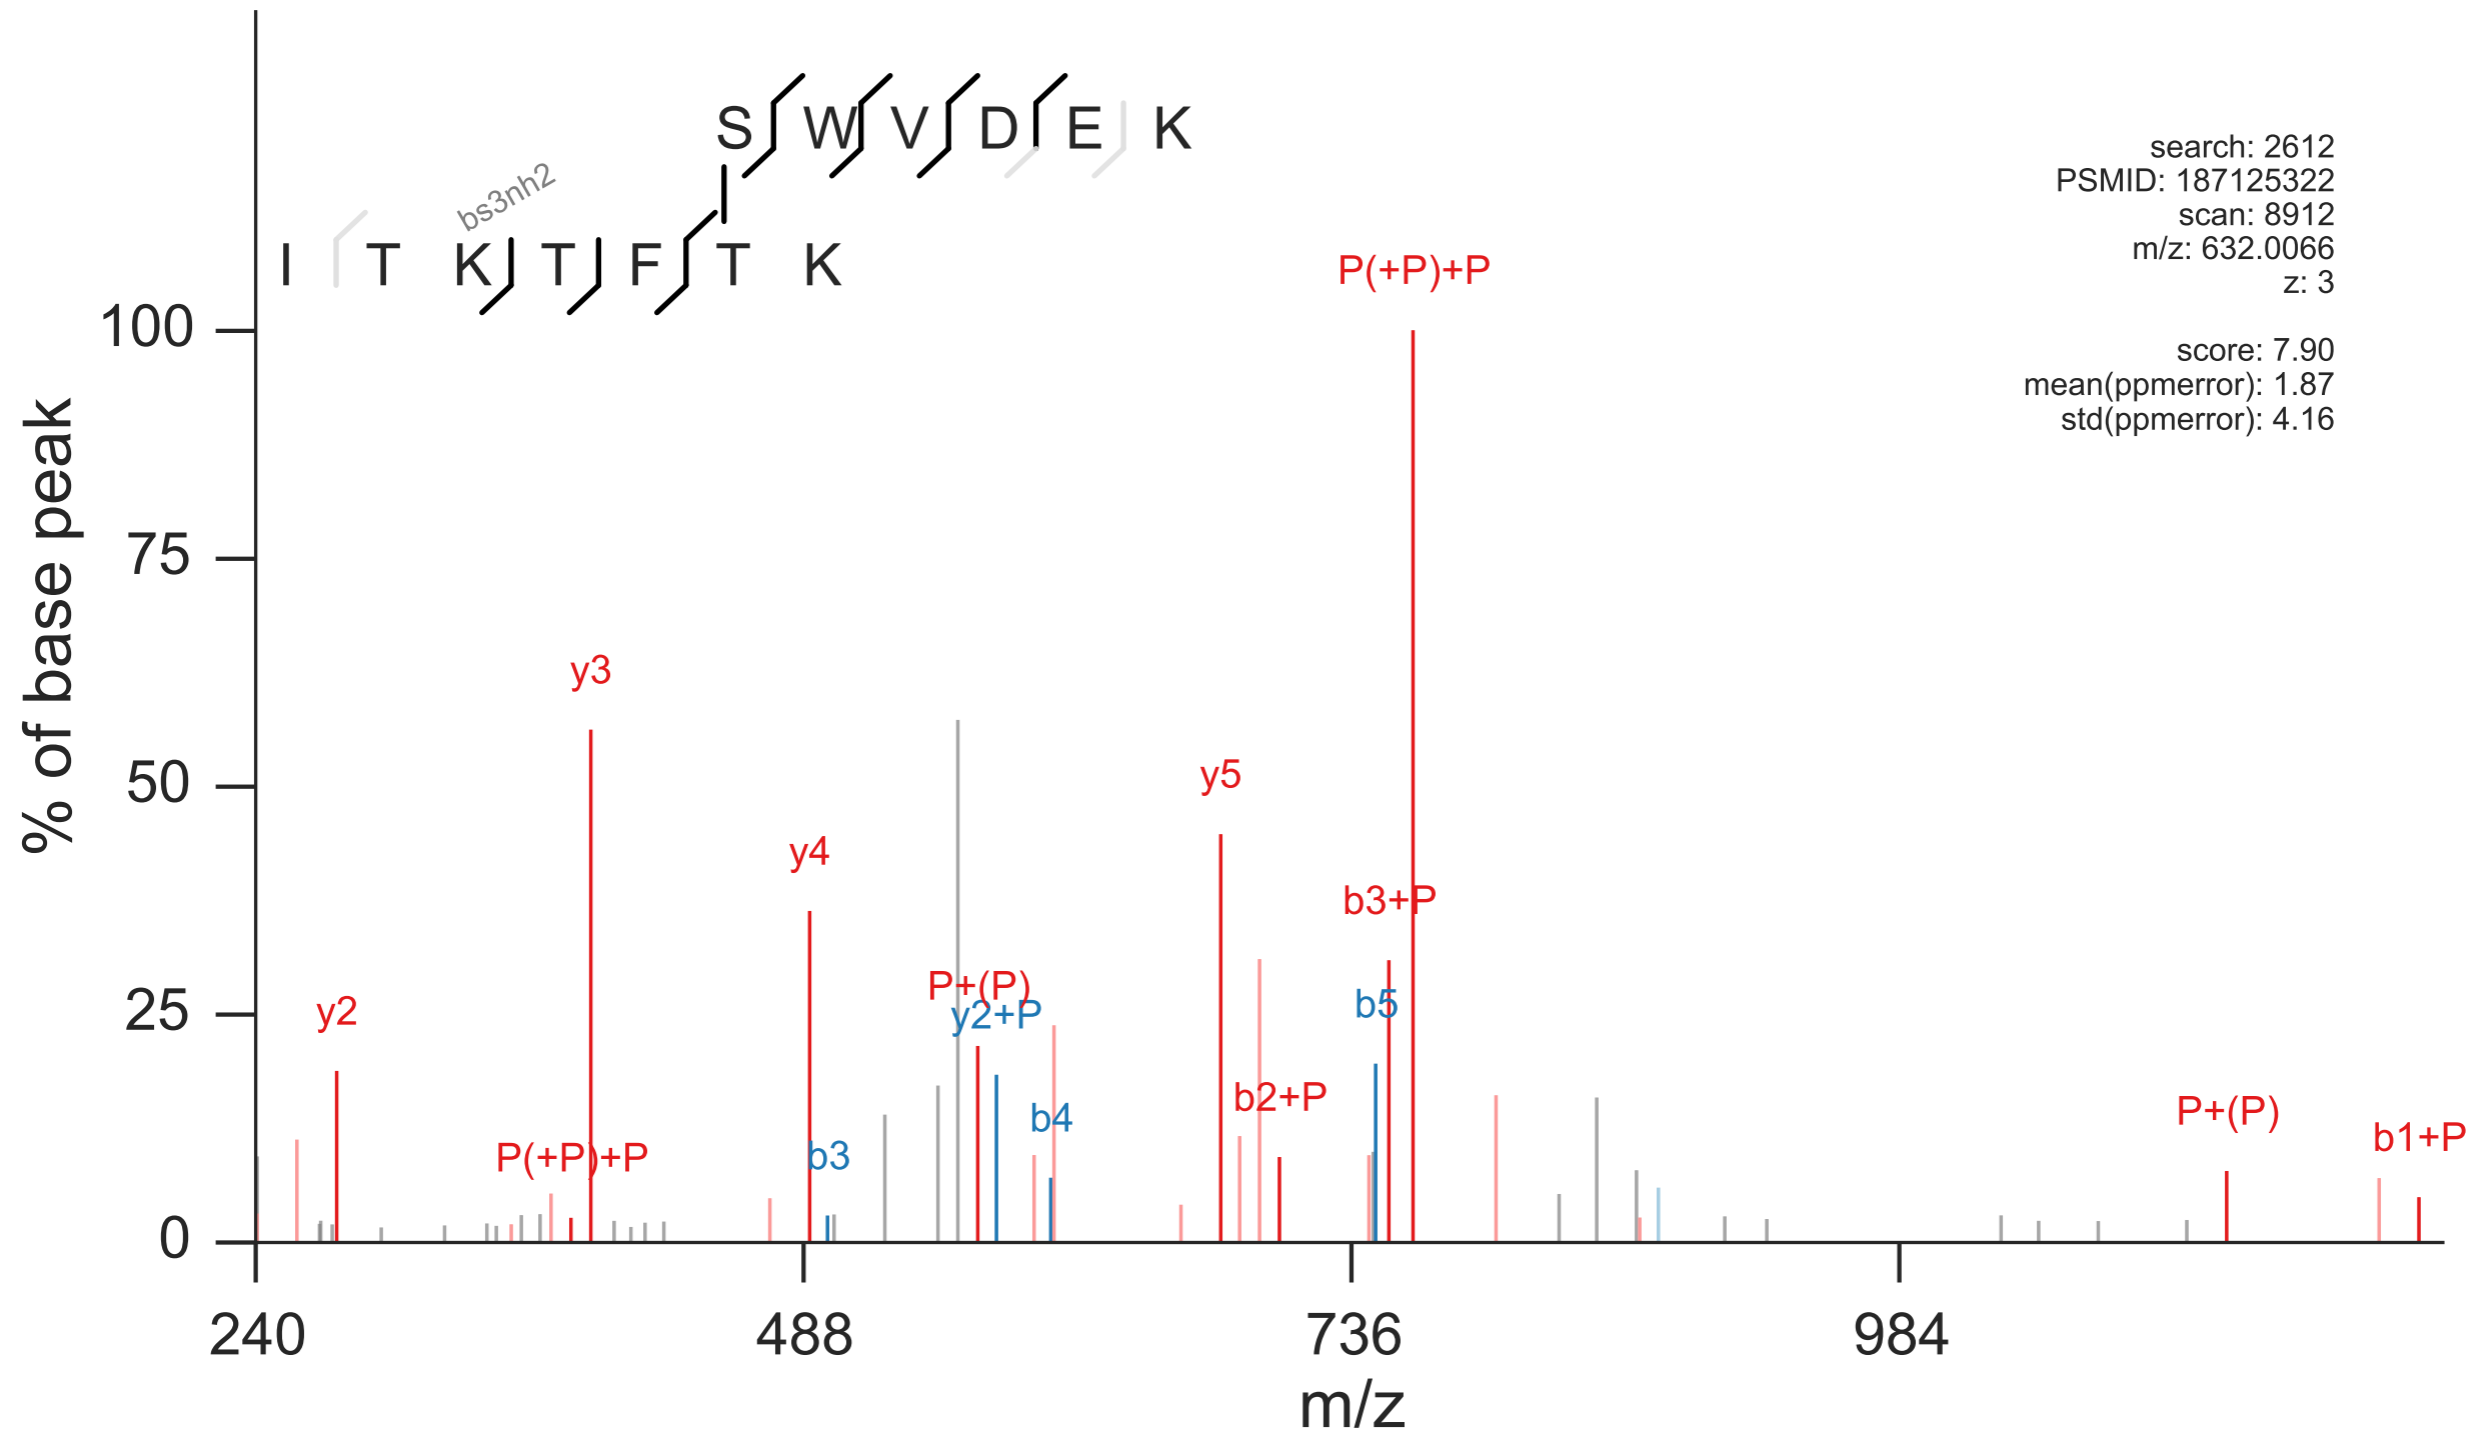

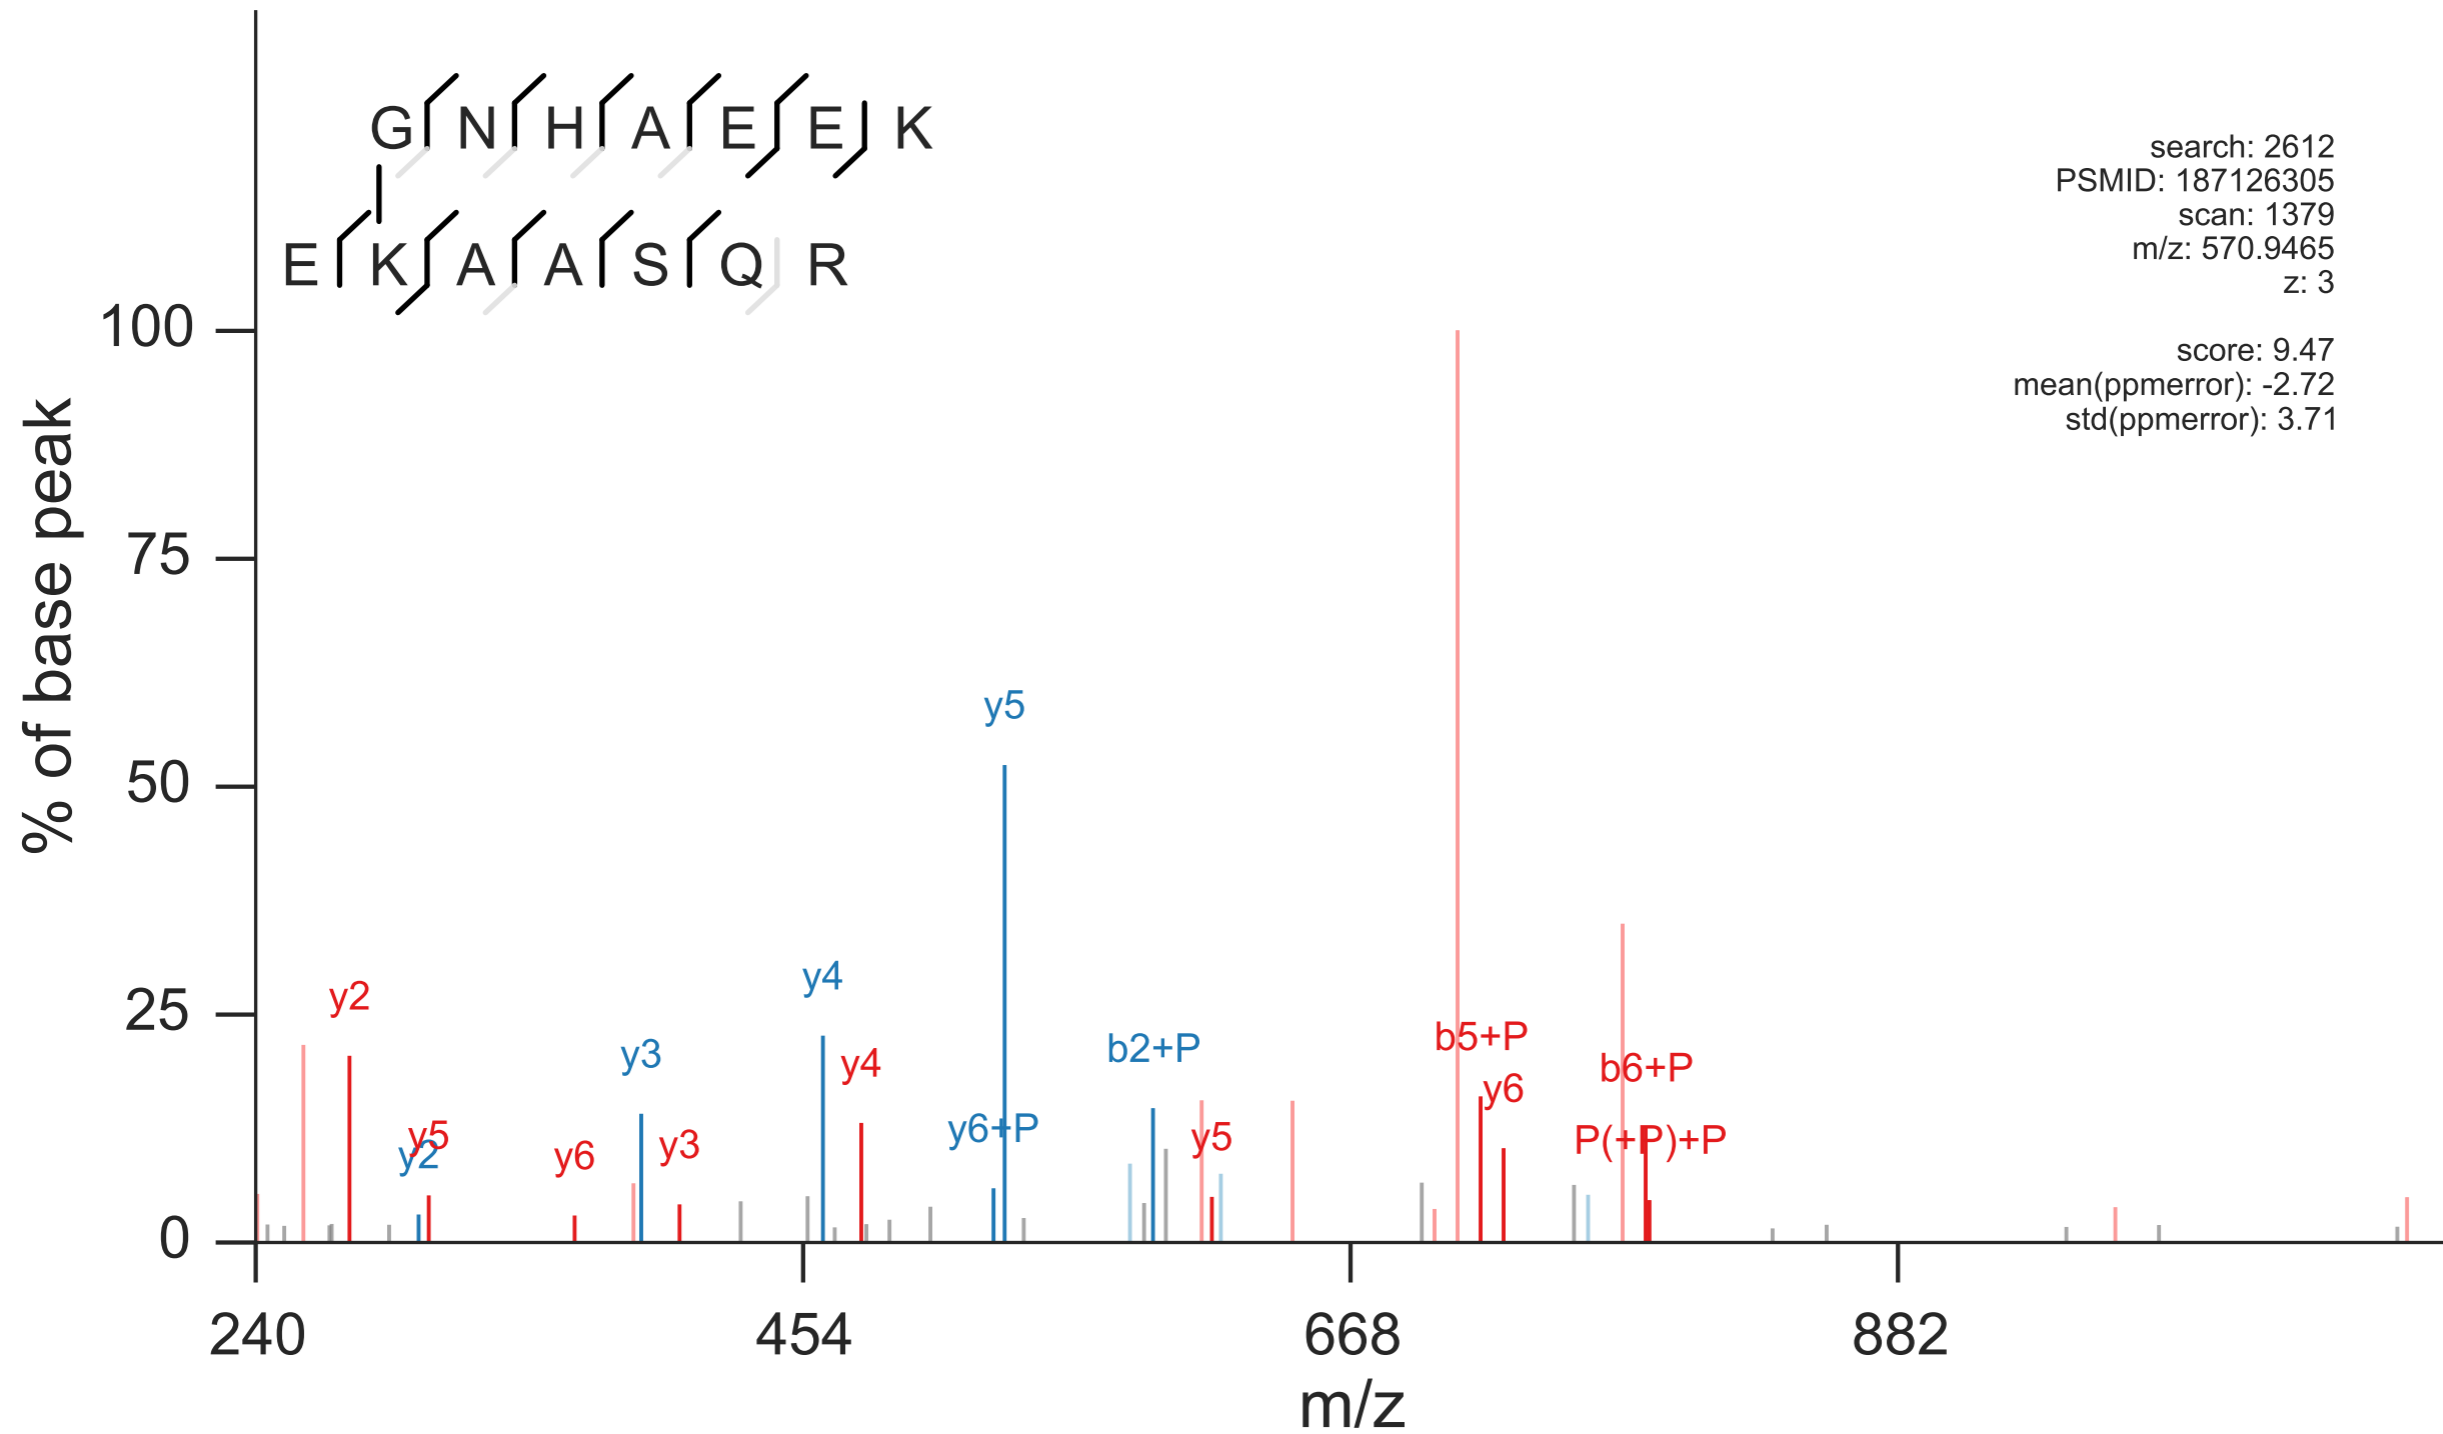

search: 2612  
 PSMID: 187126305  
 scan: 1379  
 m/z: 570.9465  
 z: 3  
  
 score: 9.47  
 mean(ppmerror): -2.72  
 std(ppmerror): 3.71

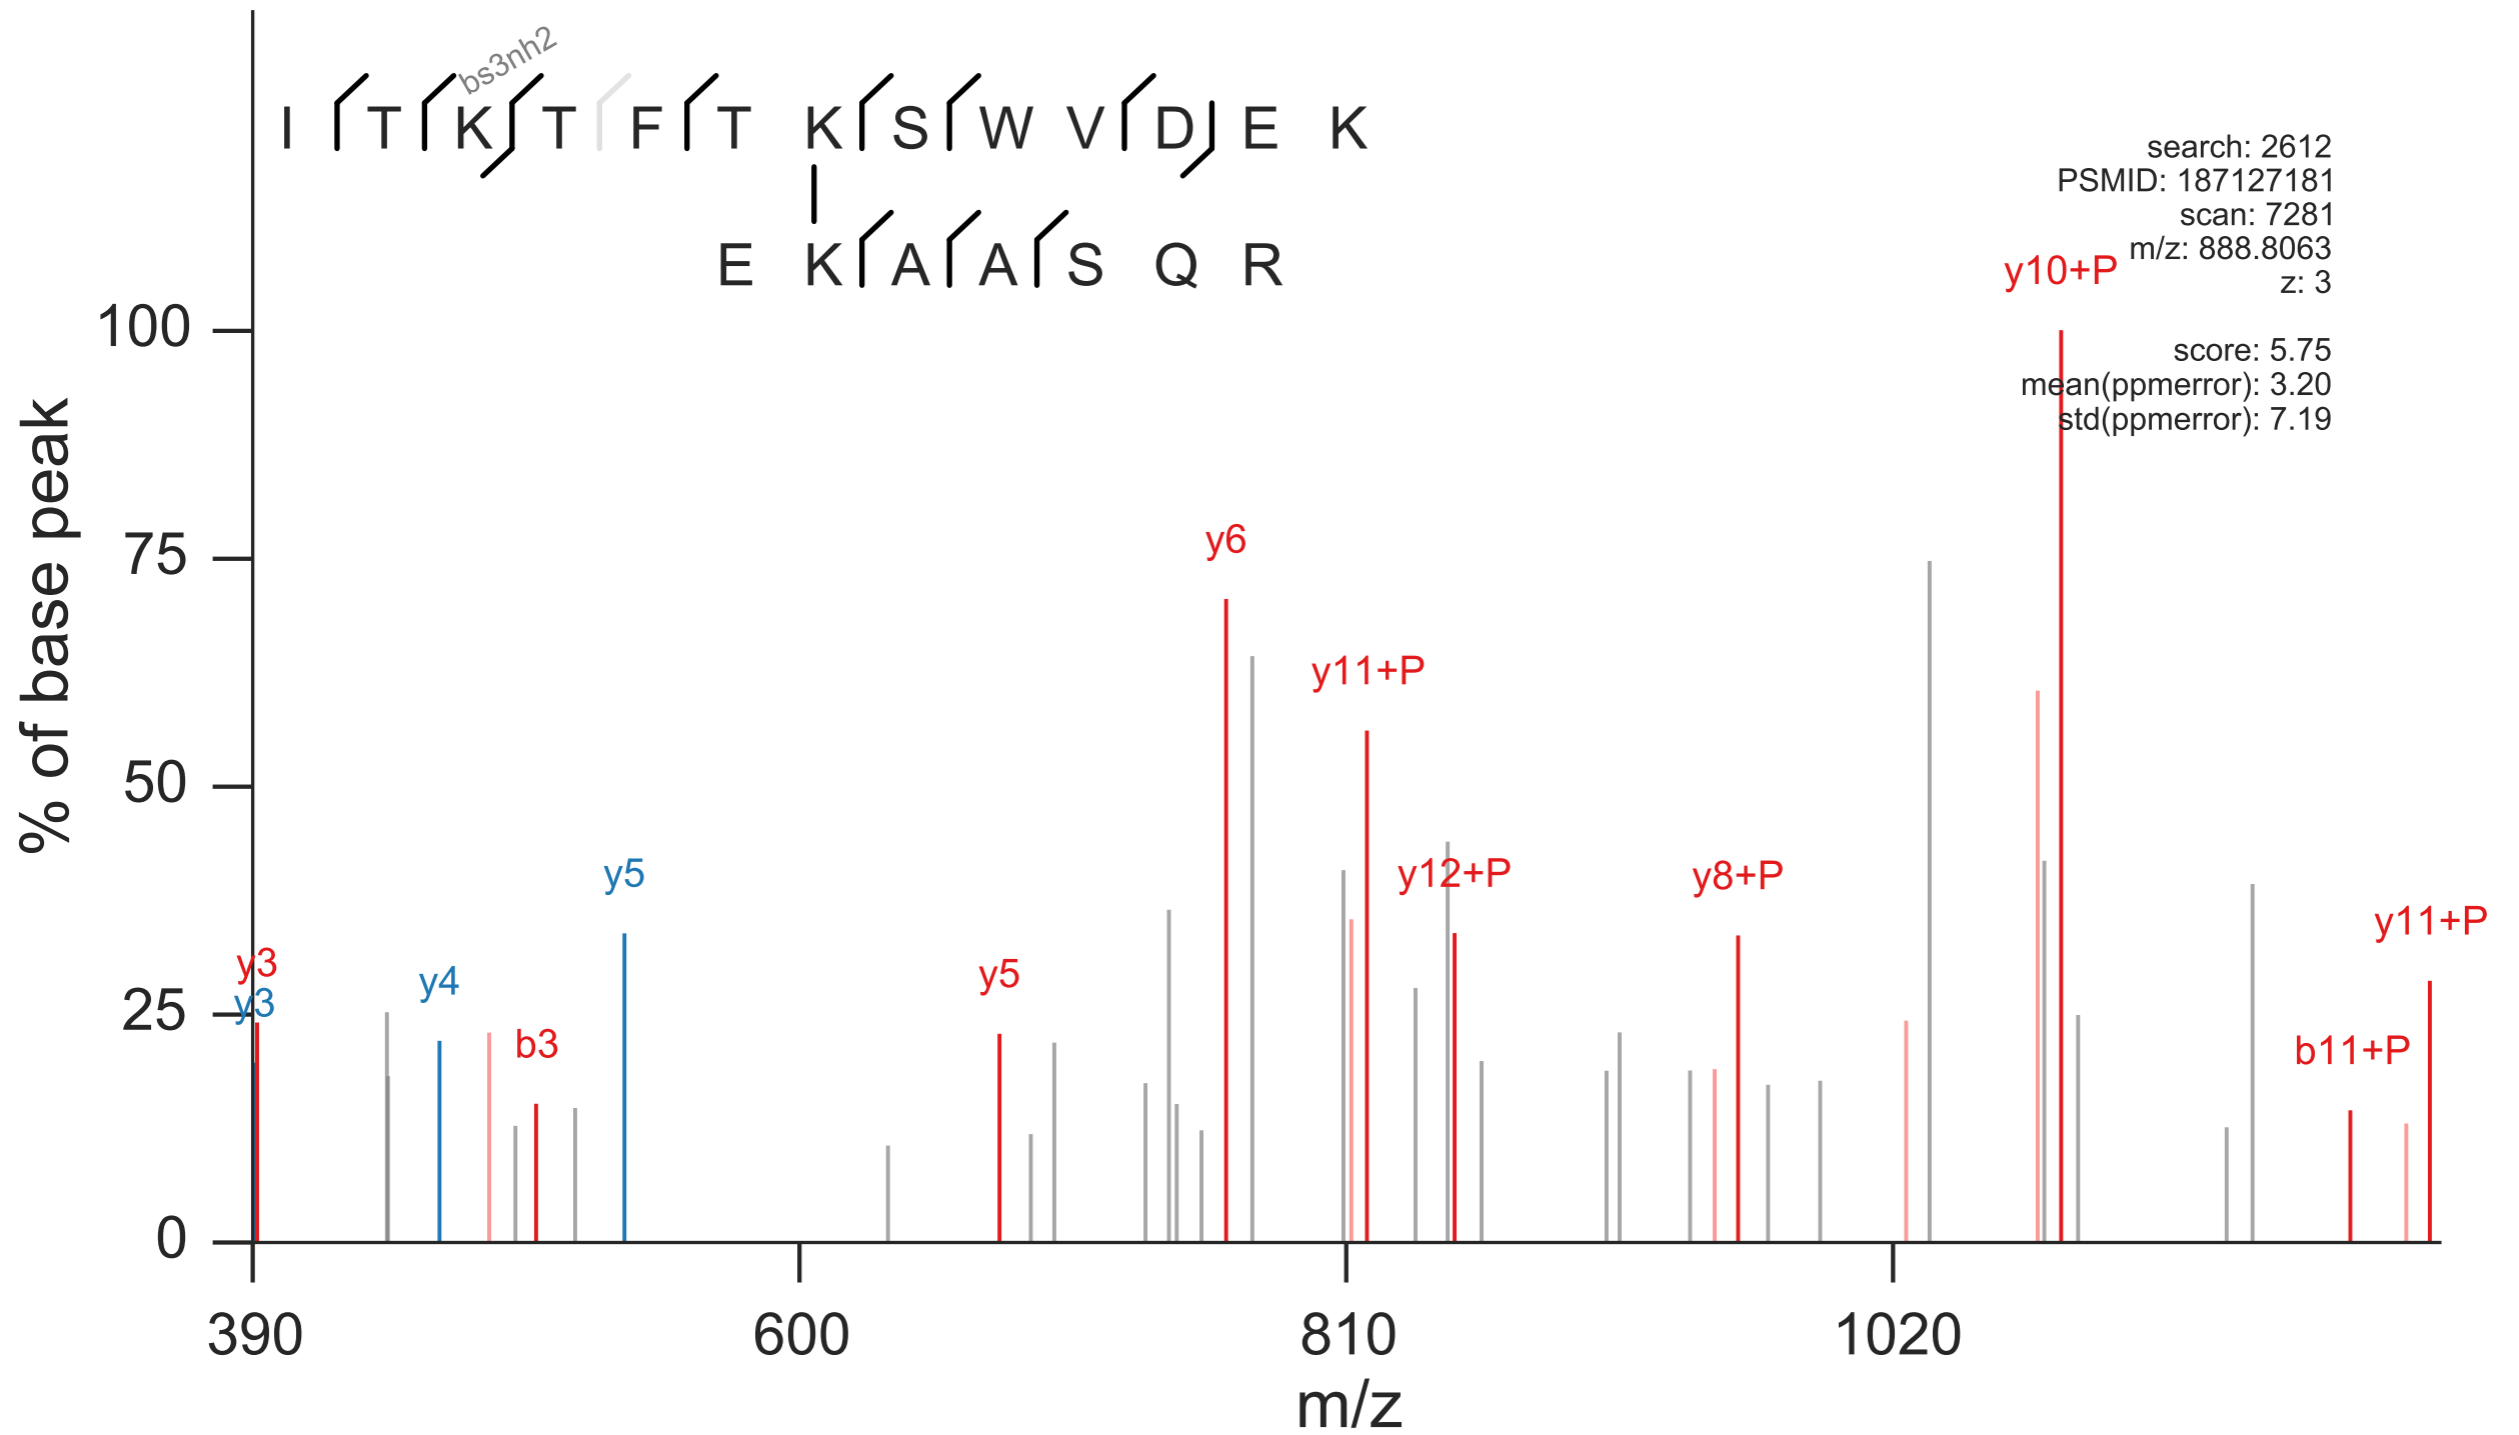

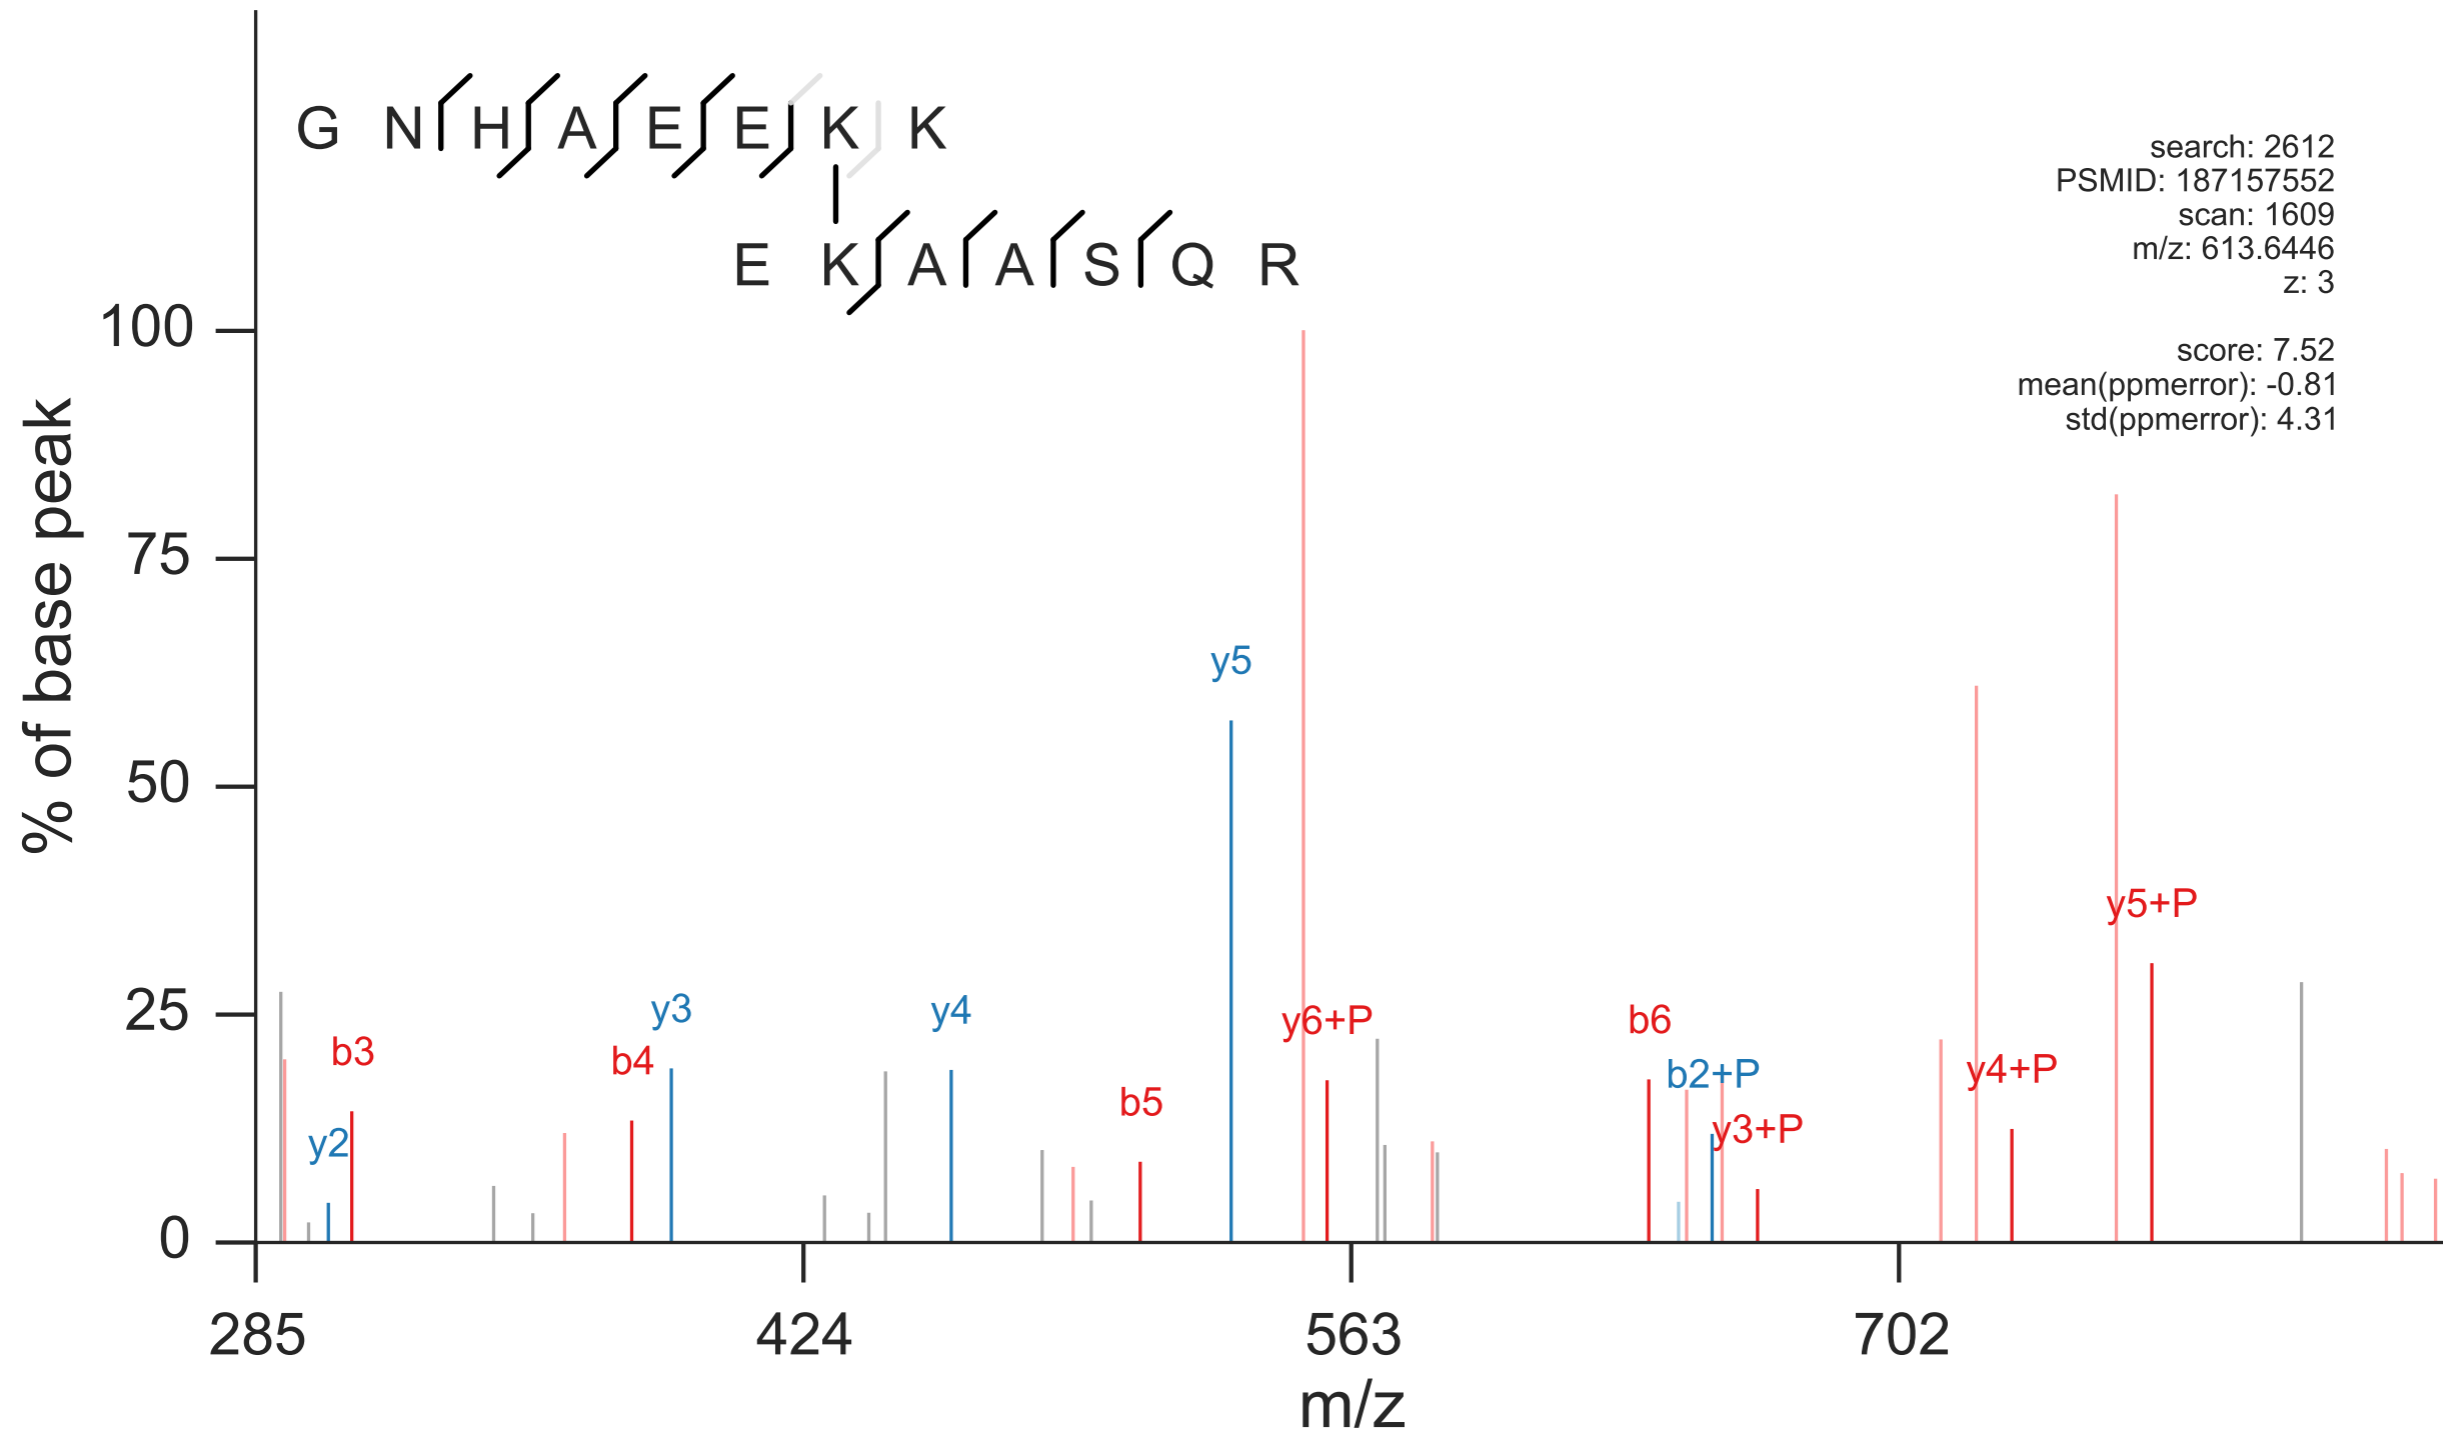



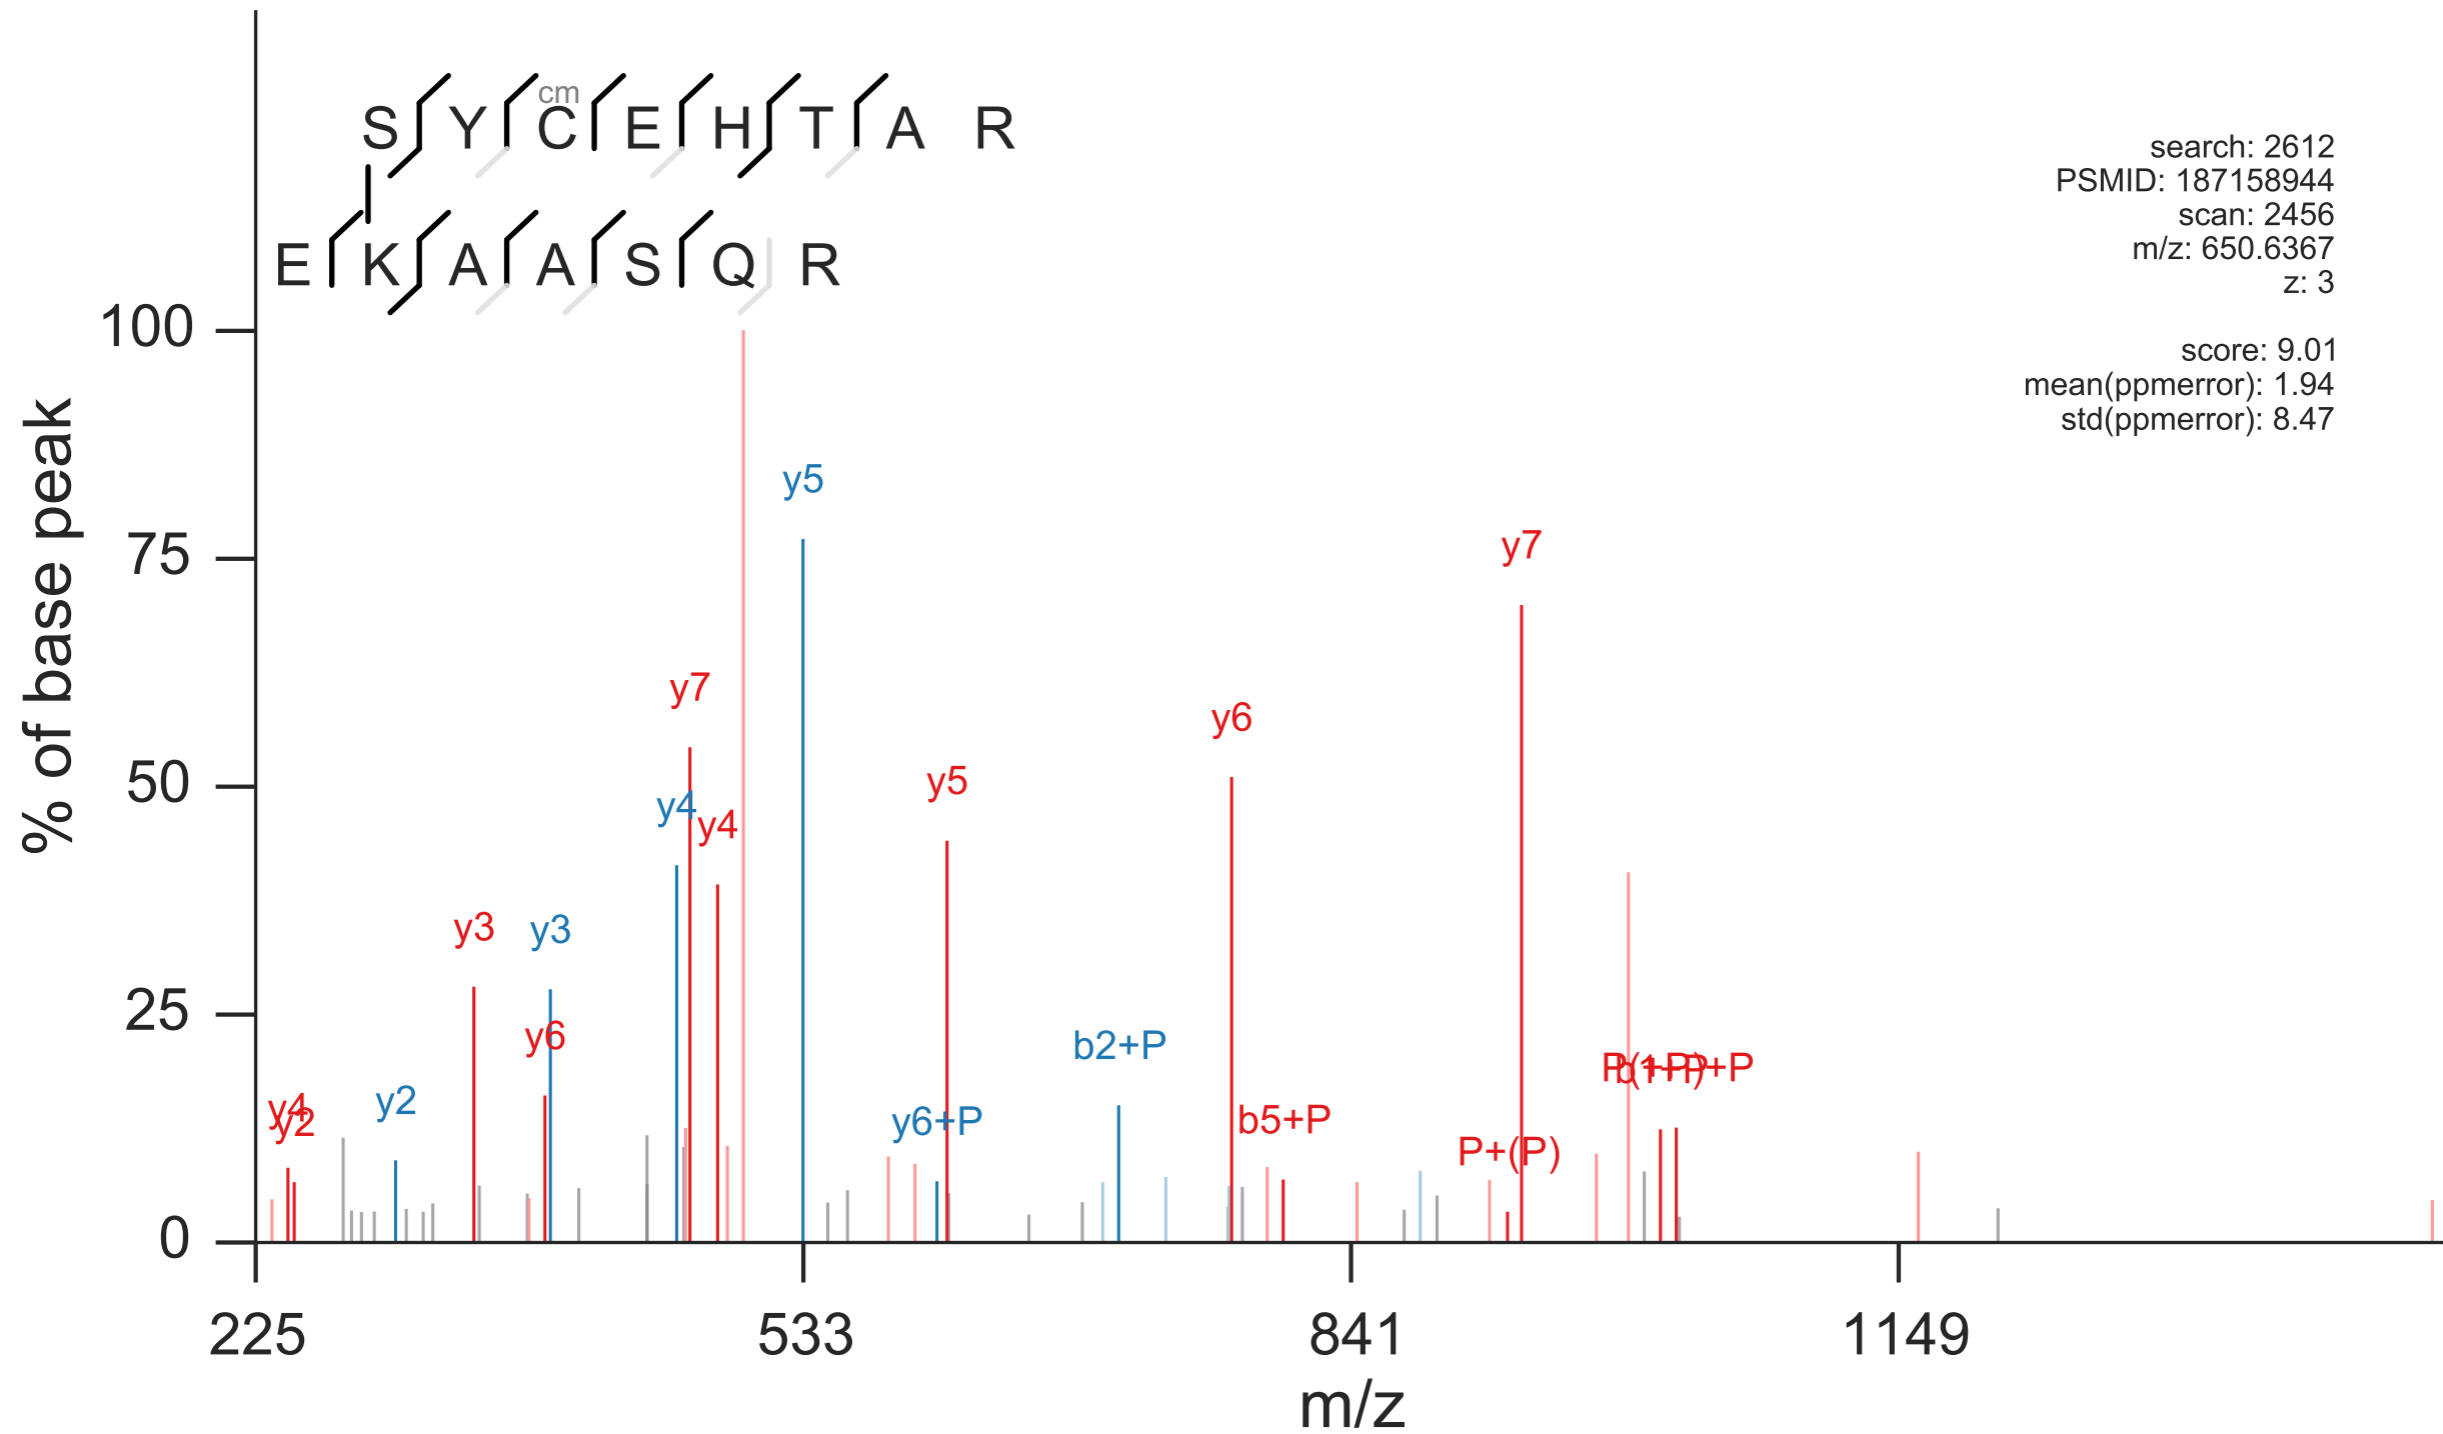

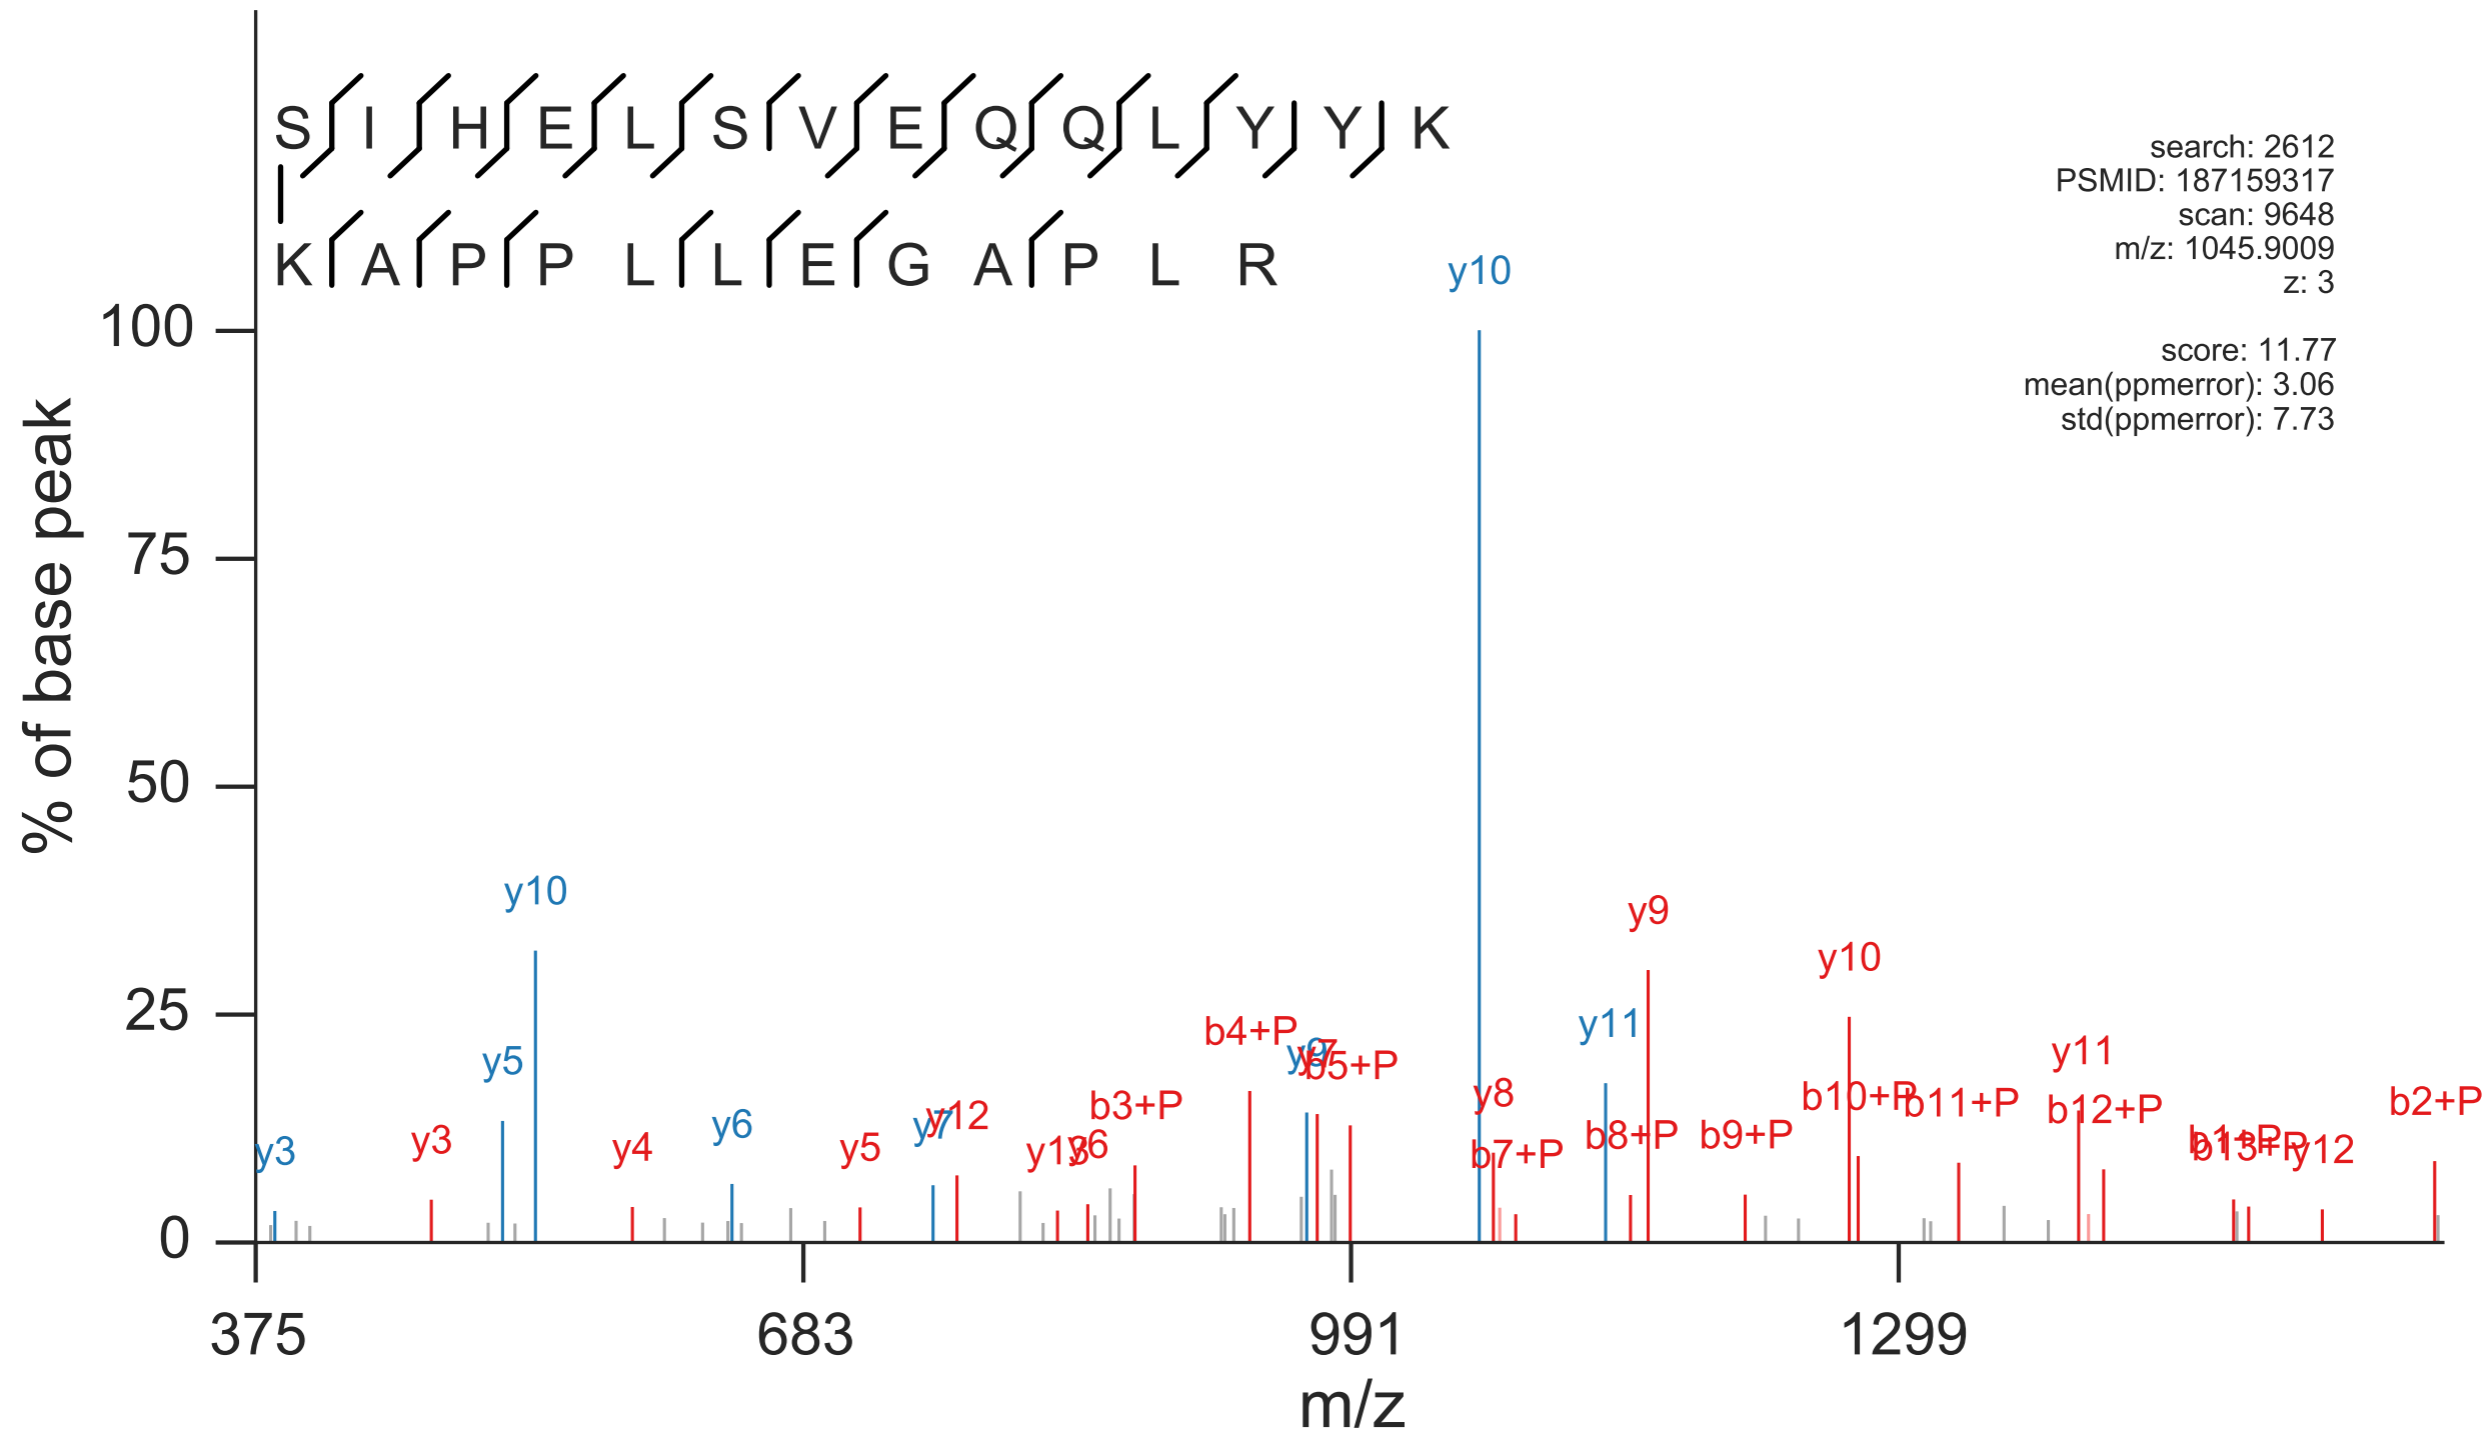

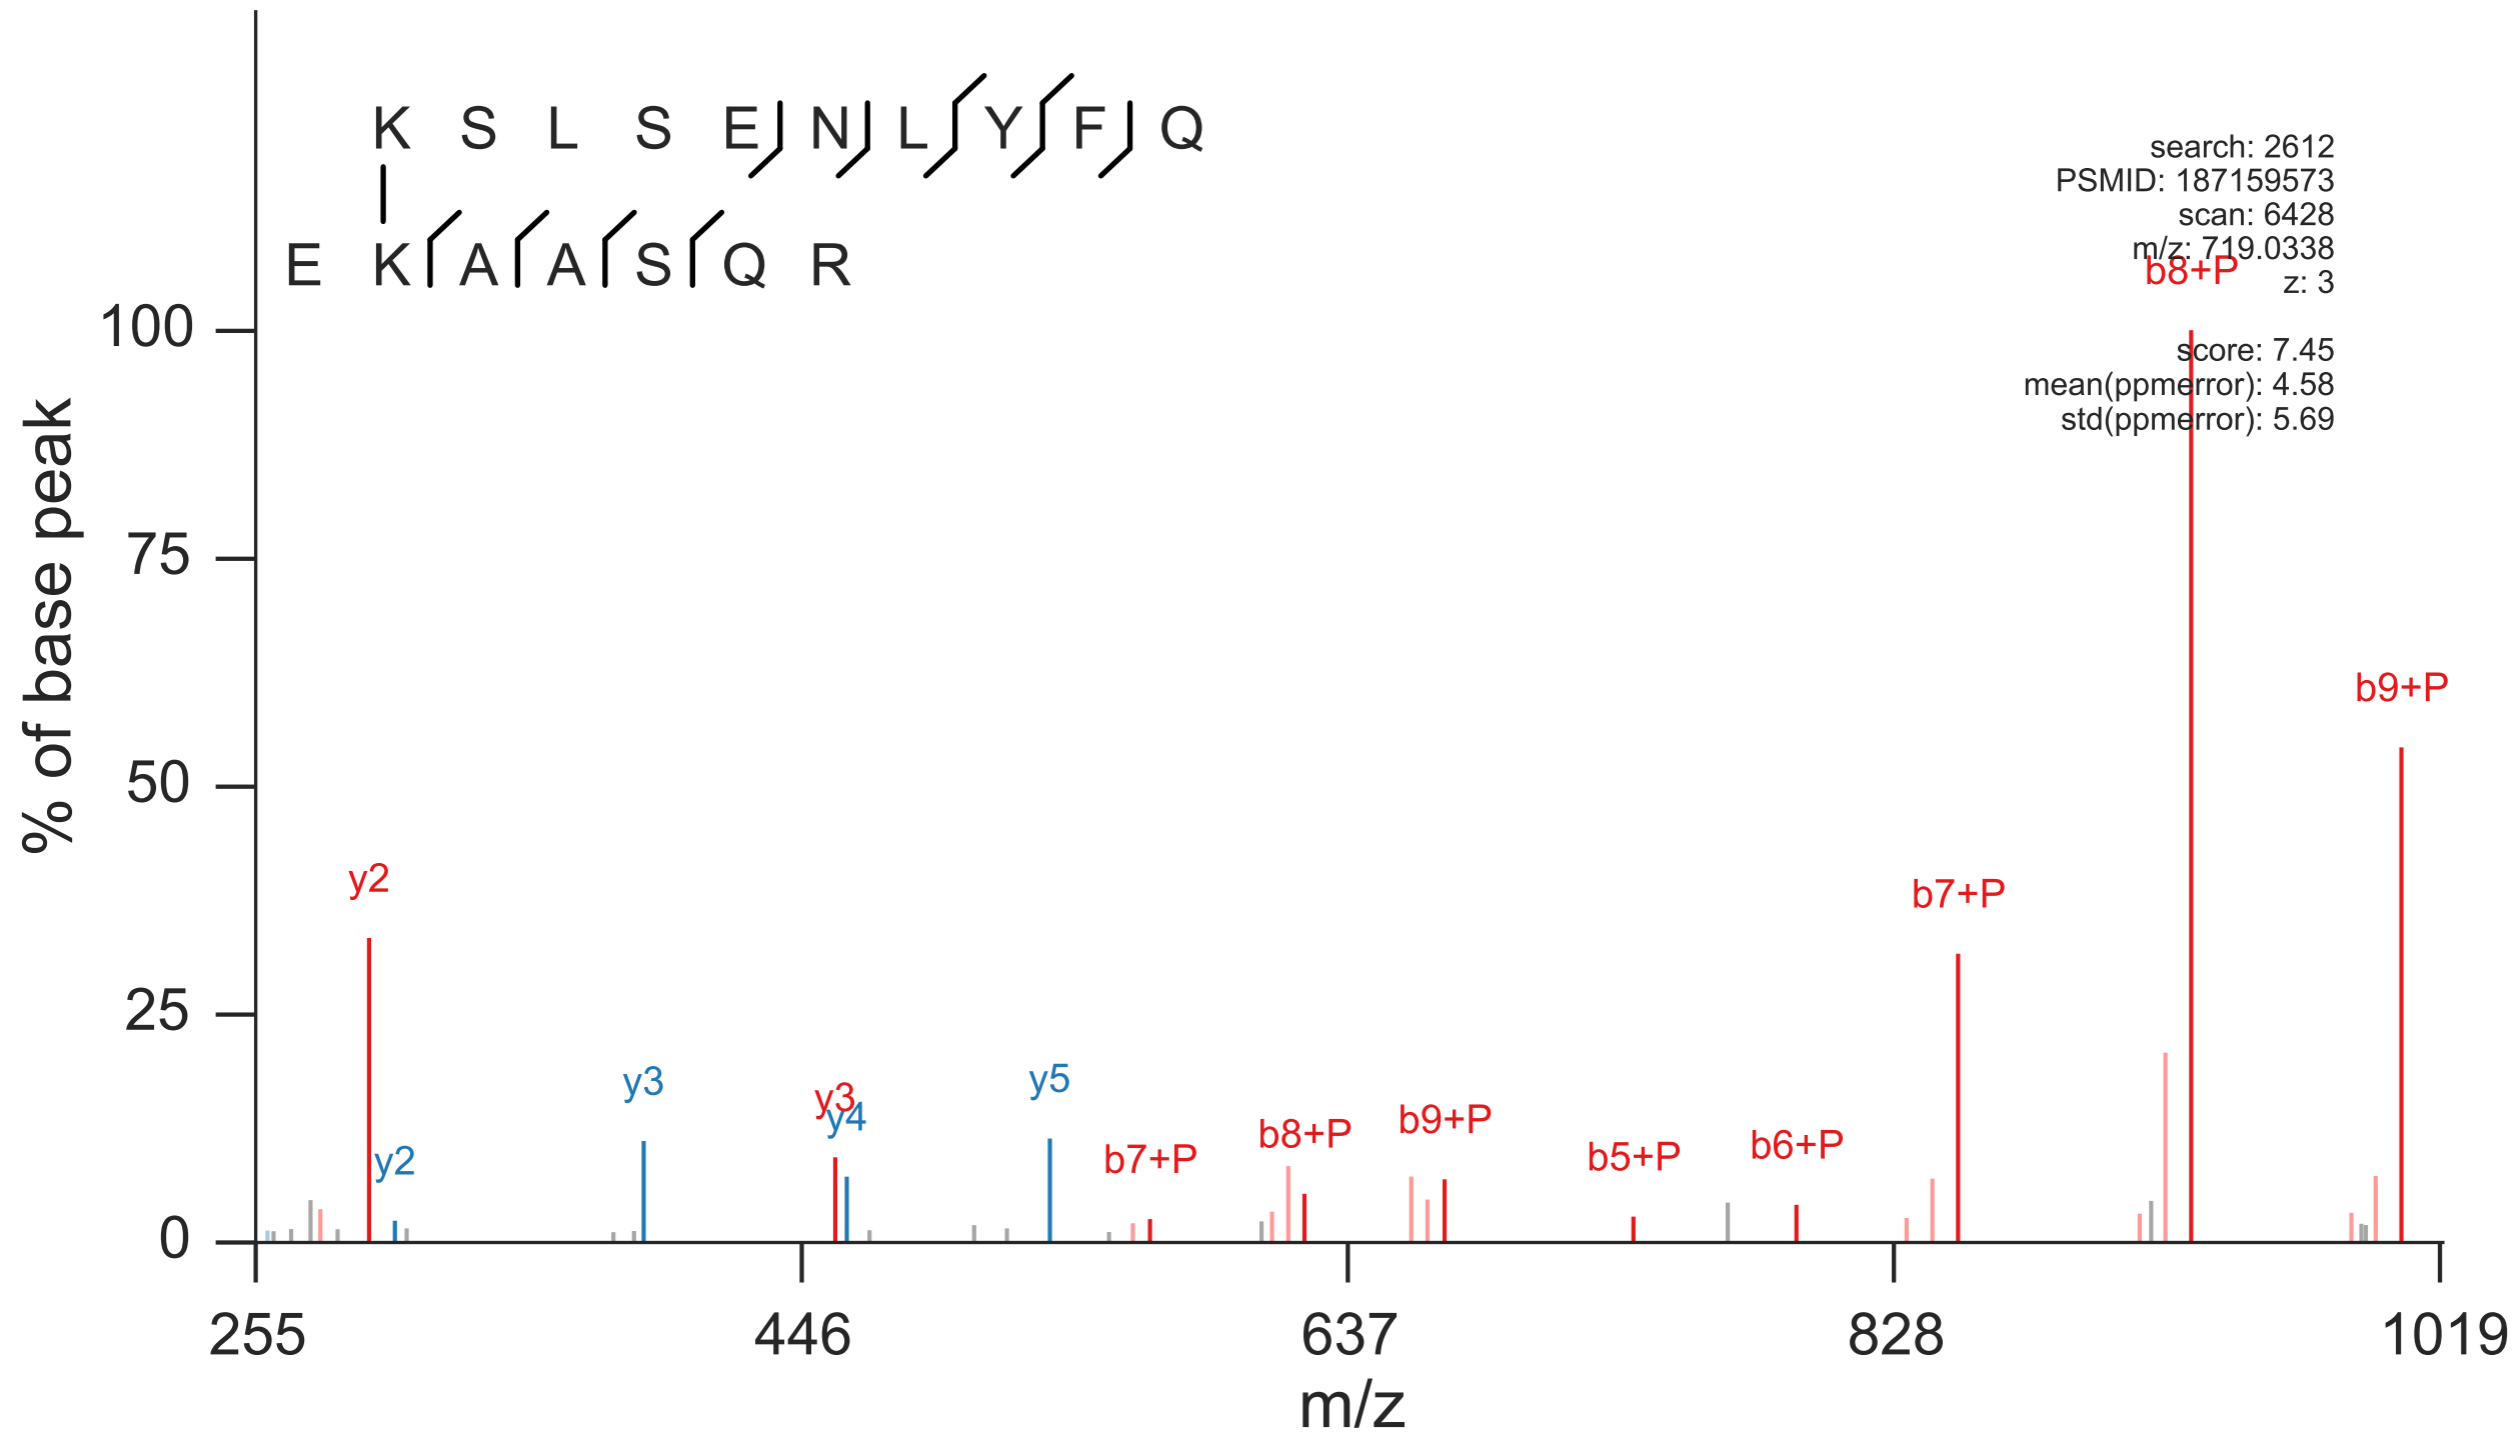

search: 2612  
 PSMID: 187159573  
 scan: 6428  
 m/z: 719.0338  
 z: 3  
 score: 7.45  
 mean(ppmerror): 4.58  
 std(ppmerror): 5.69

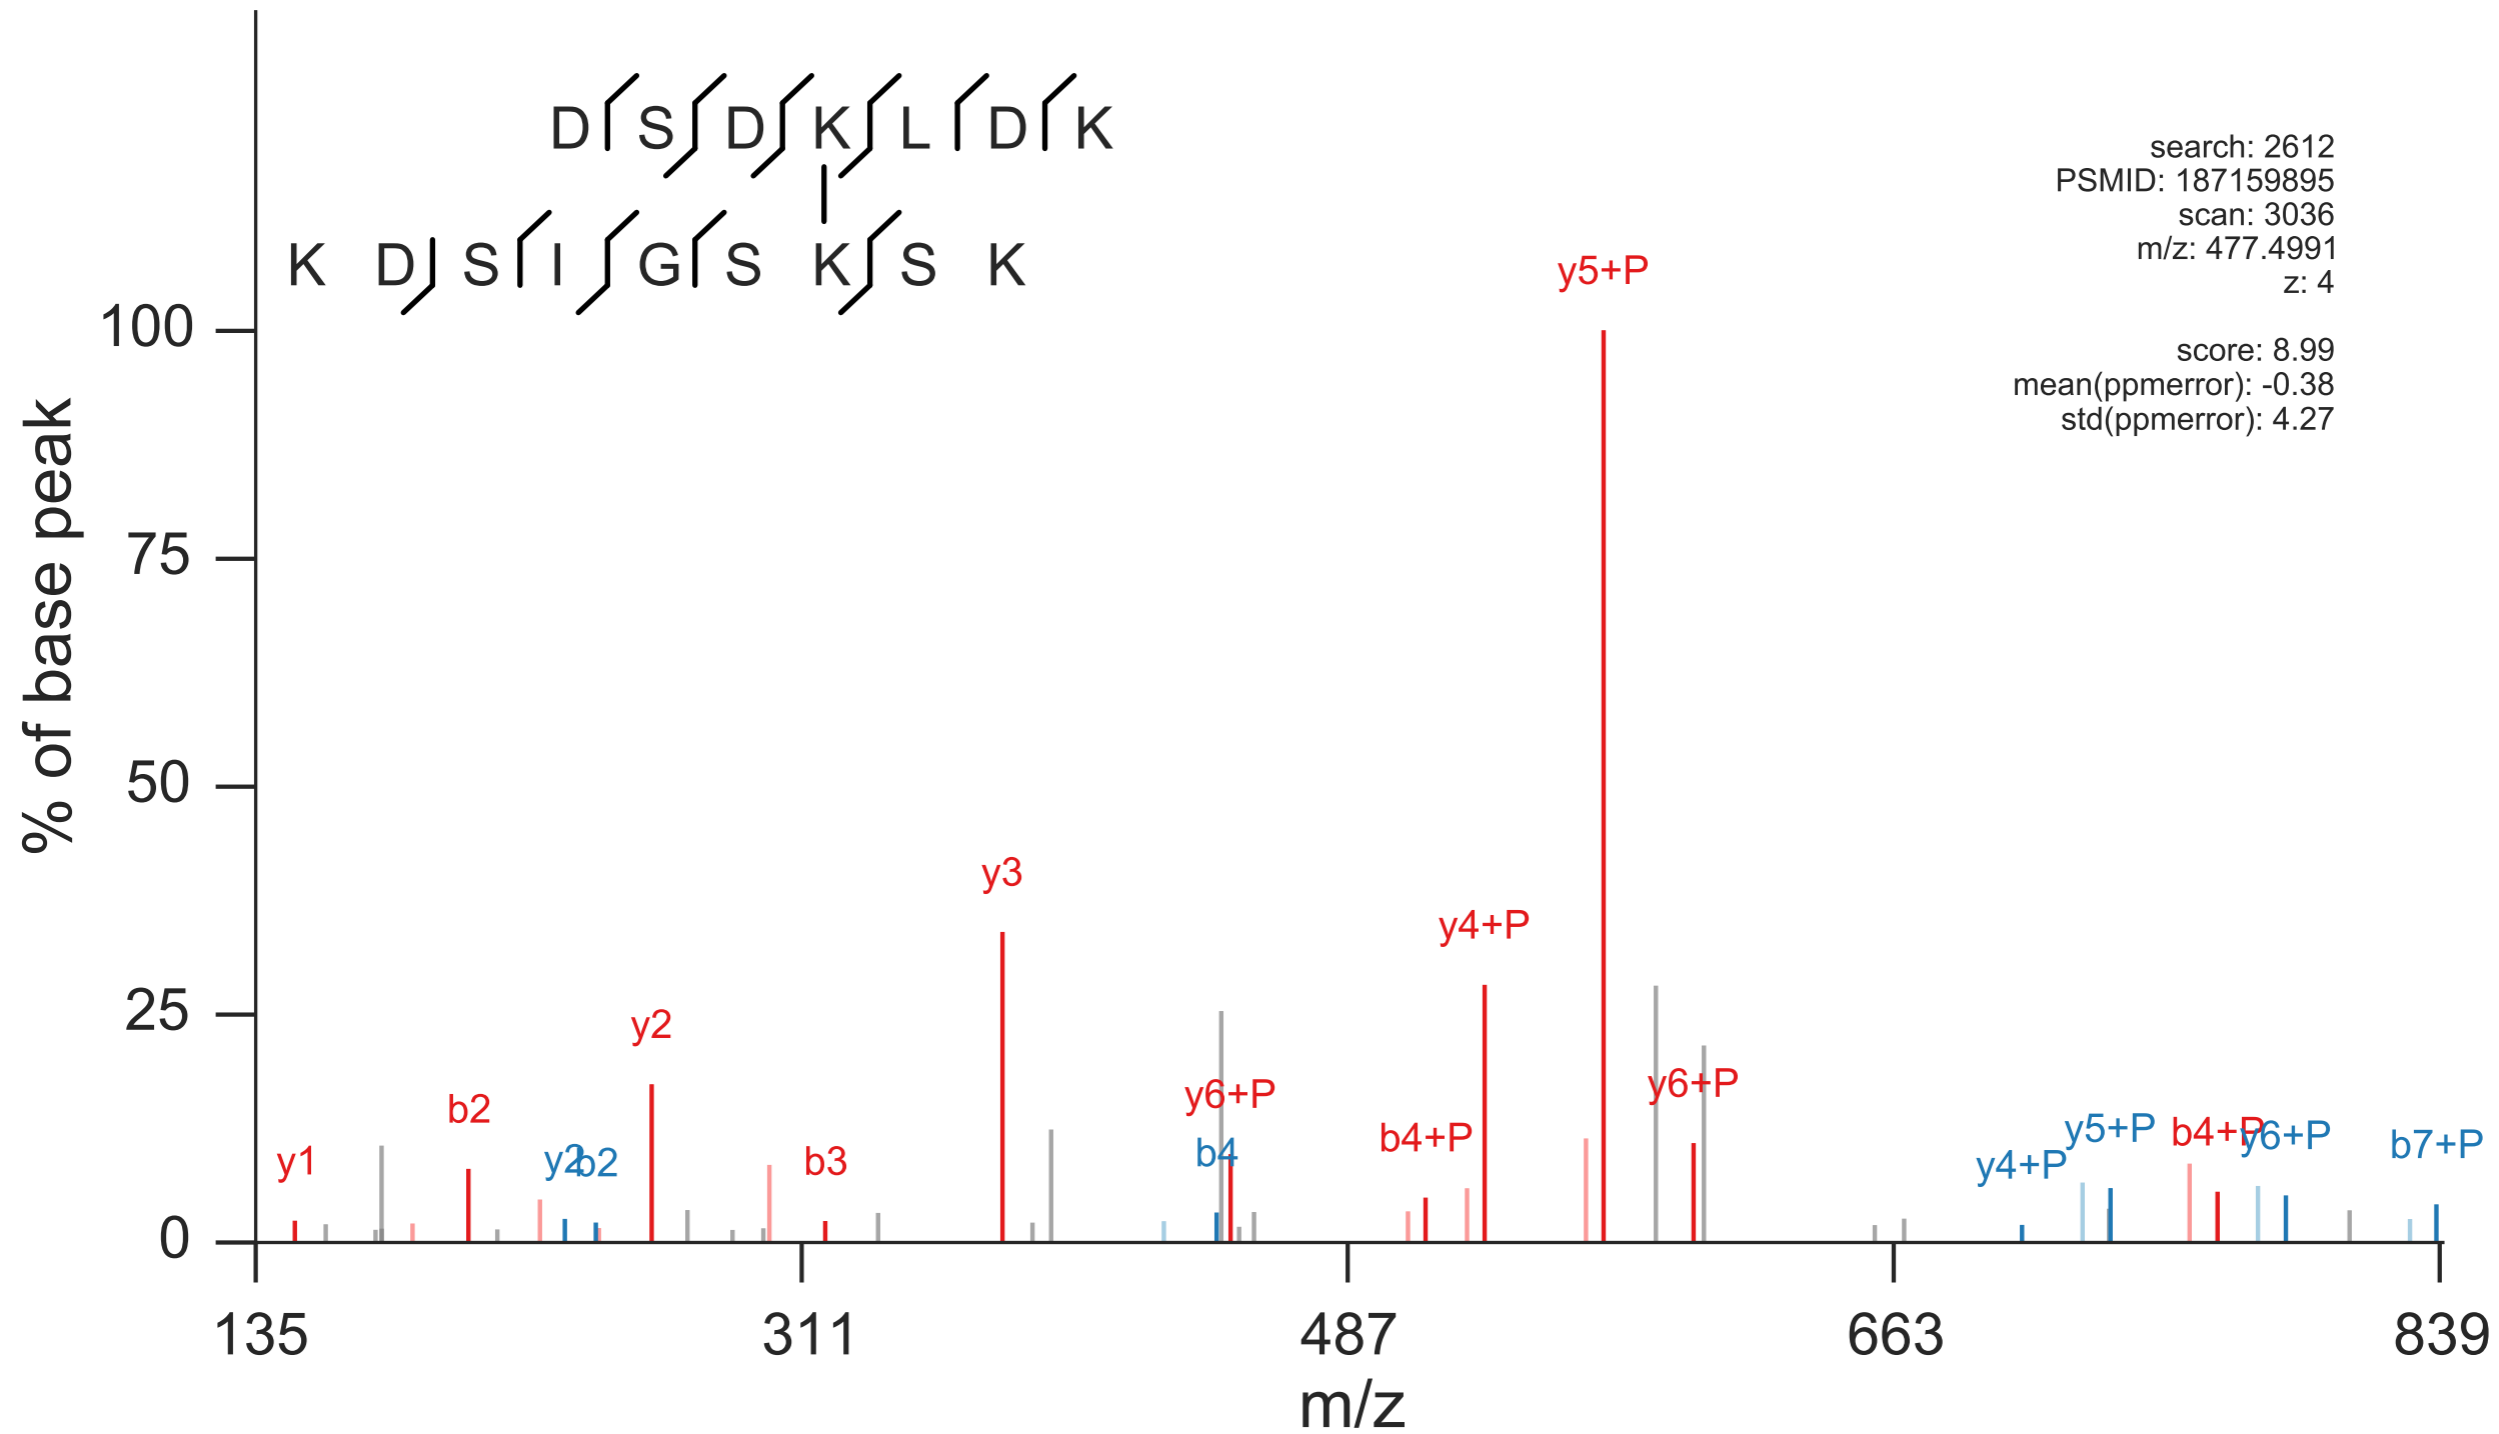

K D S I G S K S K  
 D S D K L D K

search: 2612  
 PSMID: 187159895  
 scan: 3036  
 m/z: 477.4991  
 z: 4  
  
 score: 8.99  
 mean(ppmerror): -0.38  
 std(ppmerror): 4.27

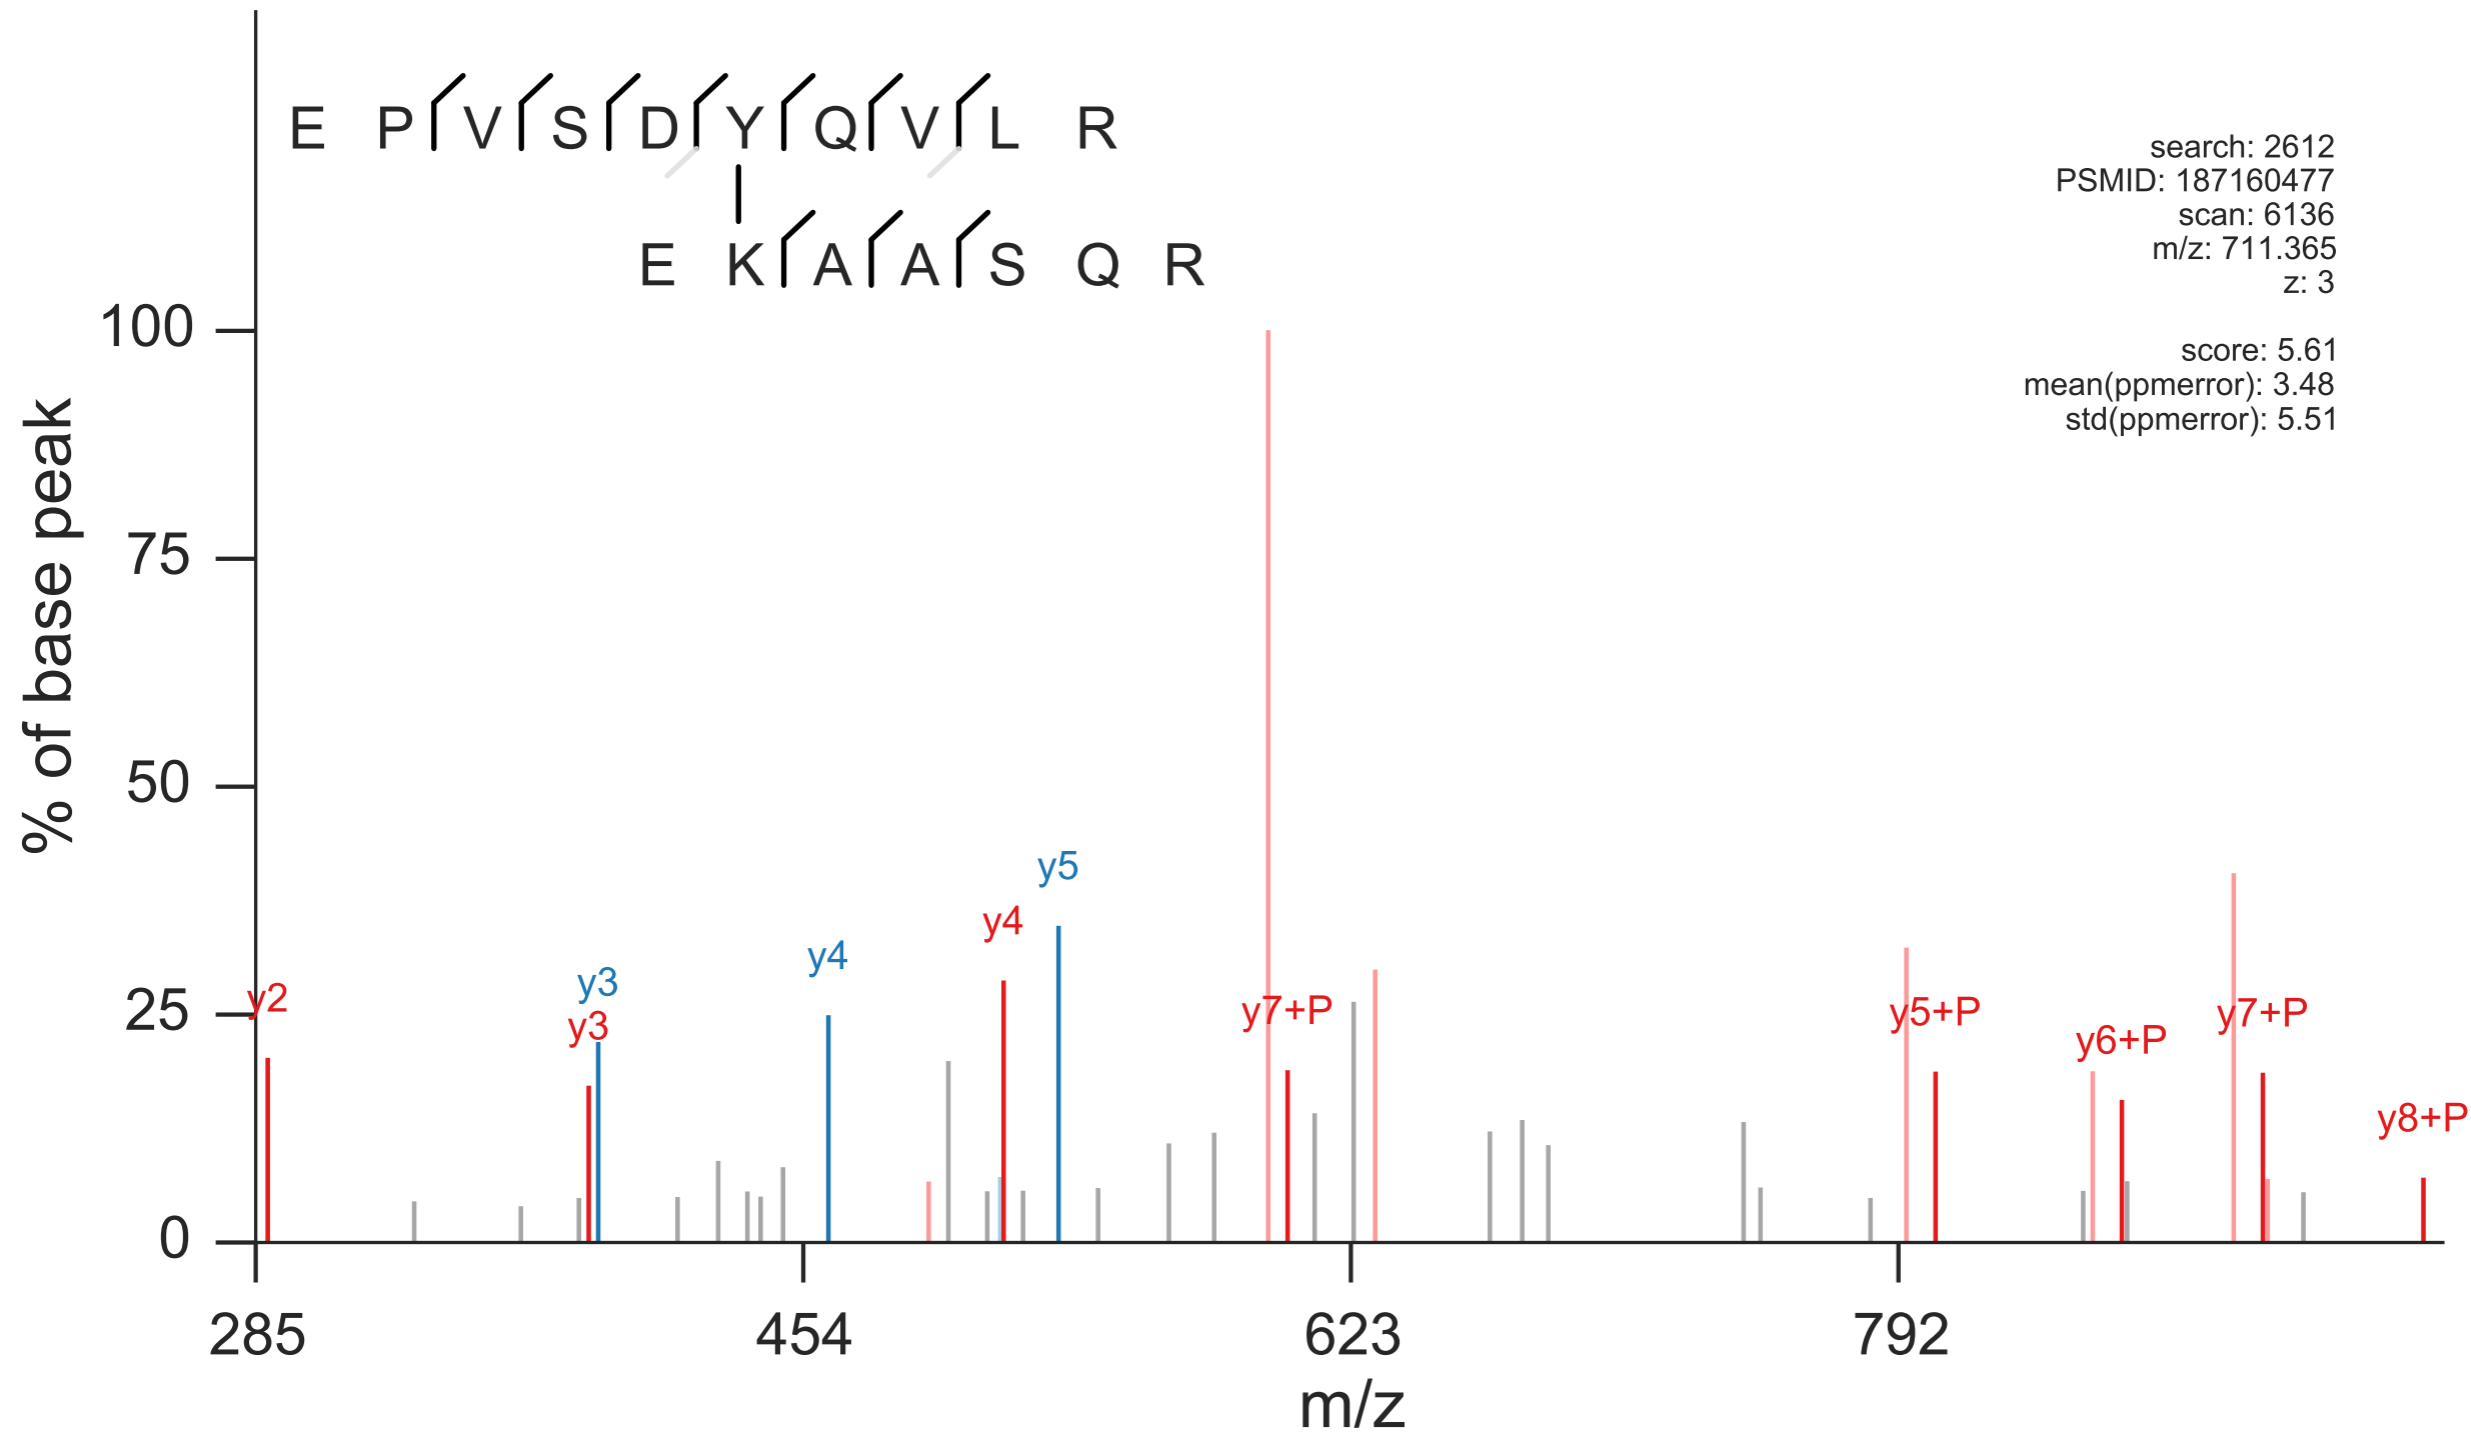

E P V S D Y Q V L R  
 E K A A S Q R

search: 2612  
 PSMID: 187160477  
 scan: 6136  
 m/z: 711.365  
 z: 3  
 score: 5.61  
 mean(ppmerror): 3.48  
 std(ppmerror): 5.51

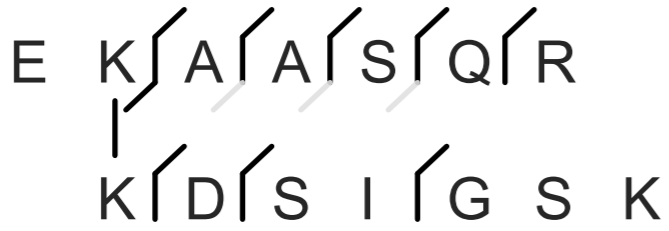

search: 2612  
 PSMID: 187160607  
 scan: 2077  
 m/z: 415.9717  
 z: 4  
  
 score: 7.25  
 mean(ppmerror): 2.81  
 std(ppmerror): 0.92

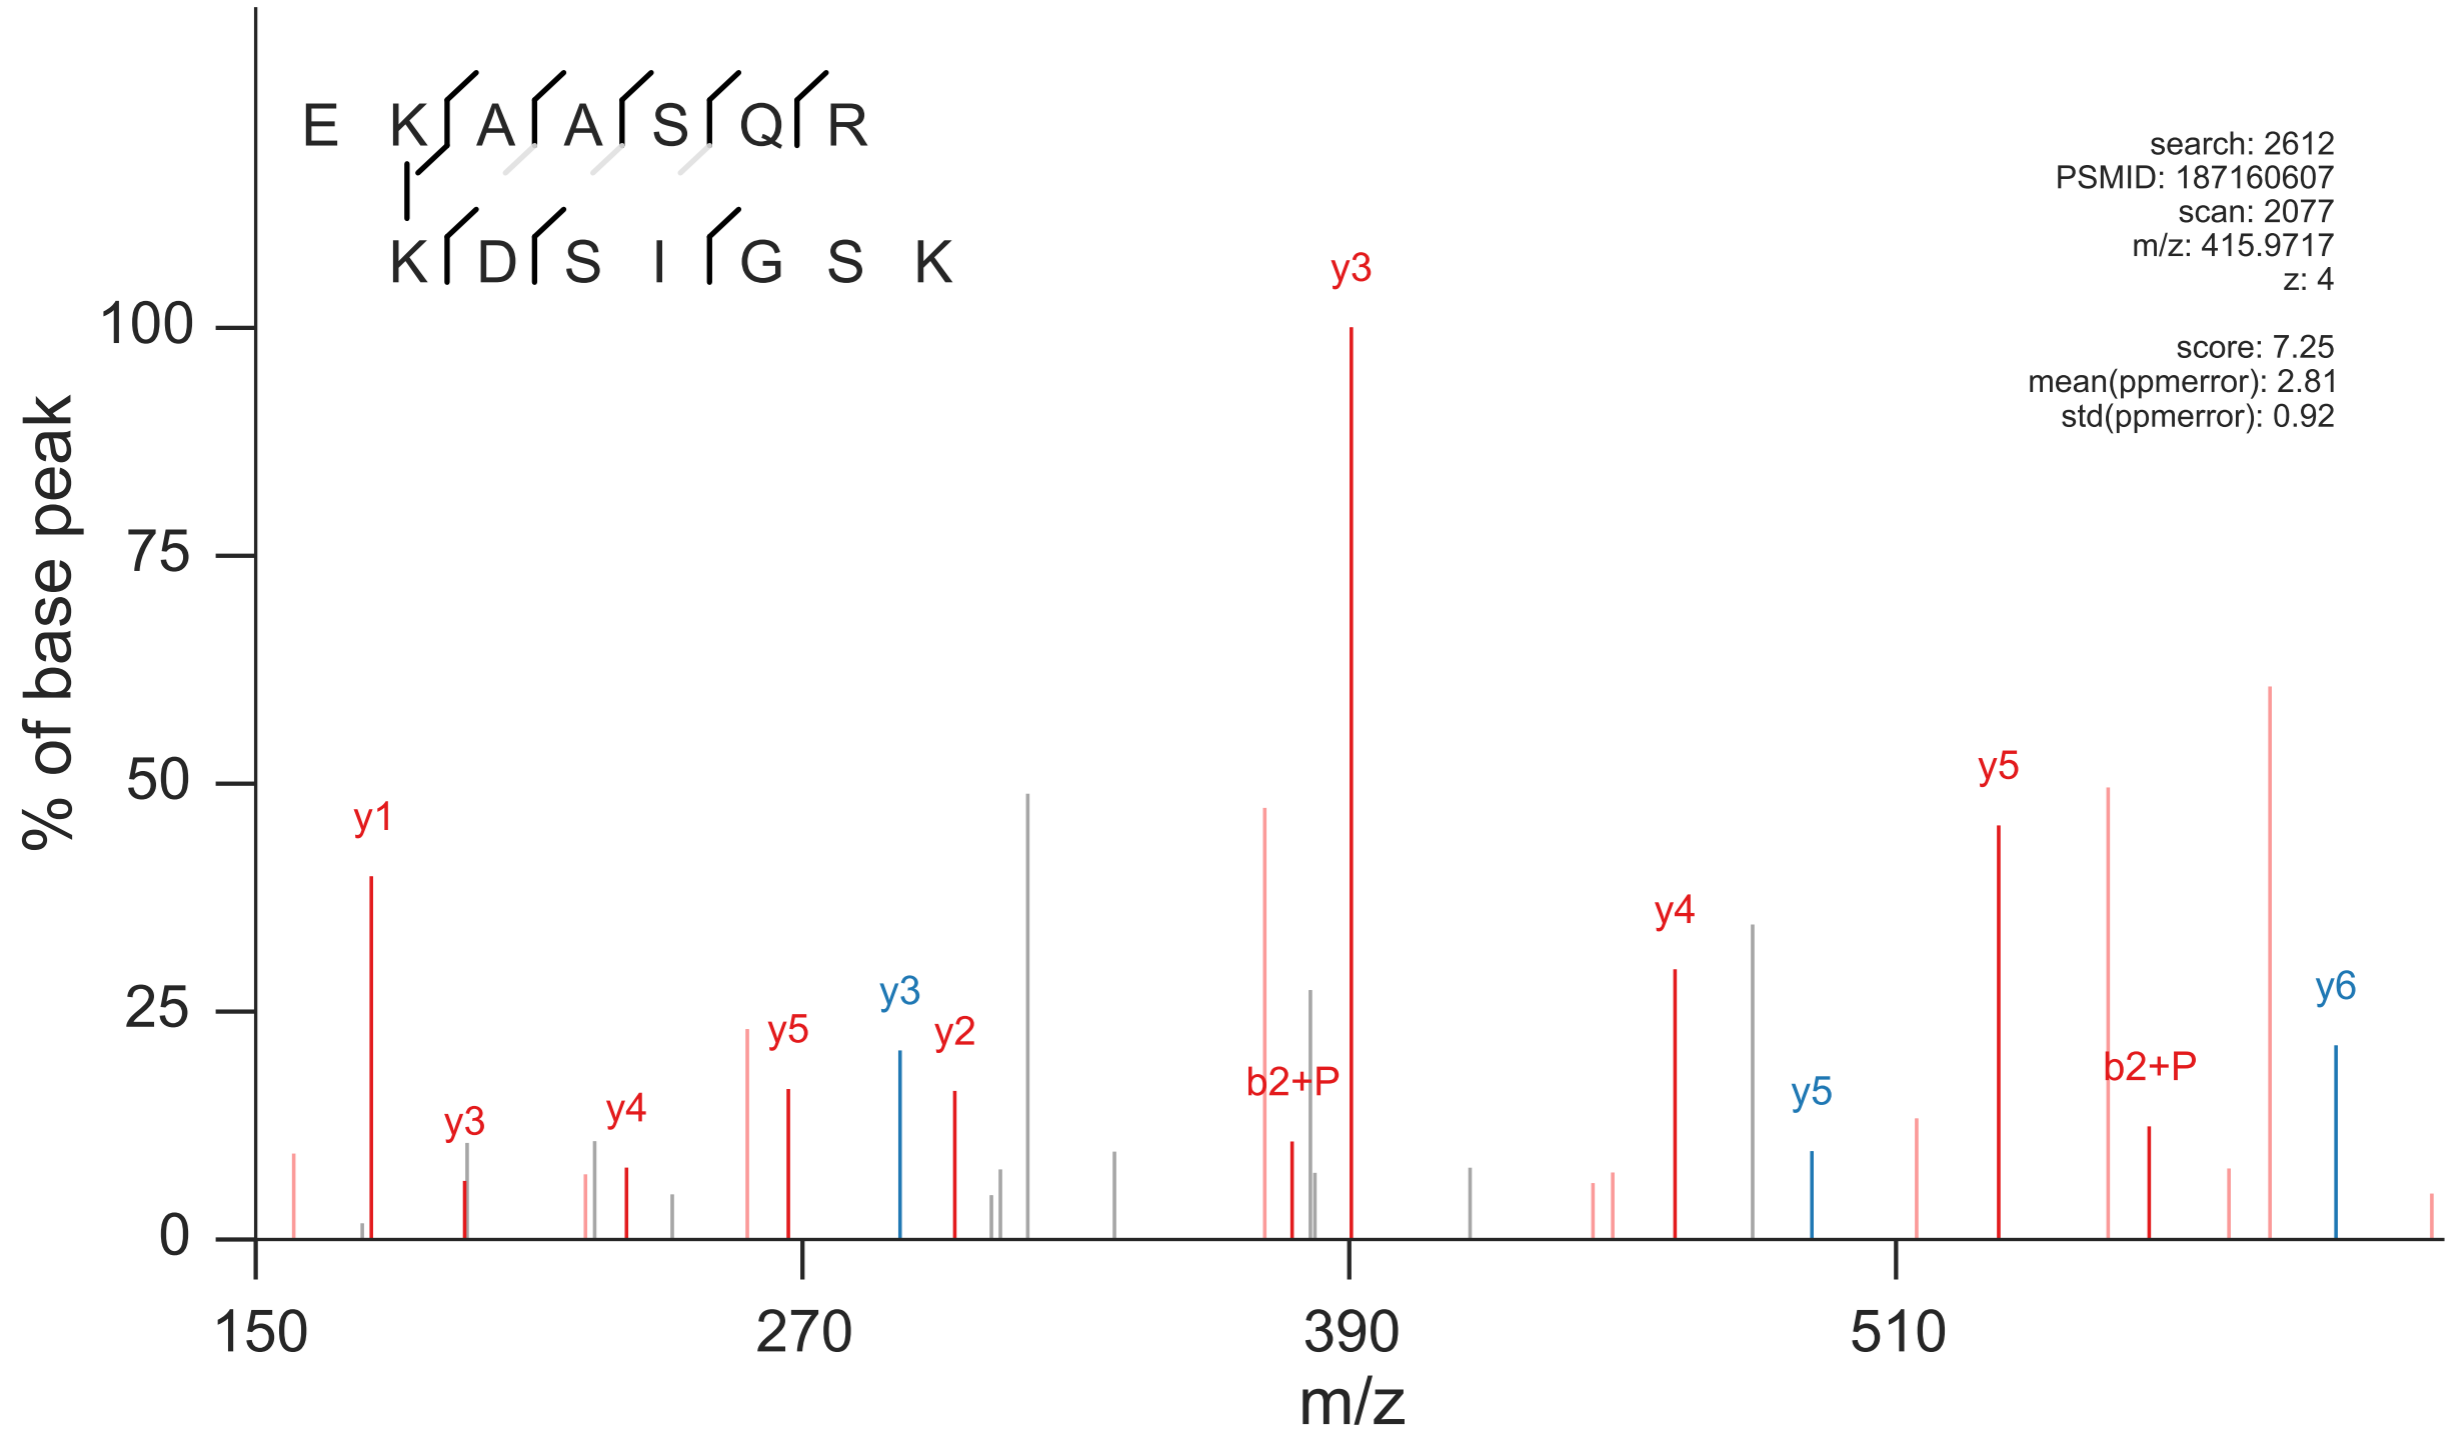

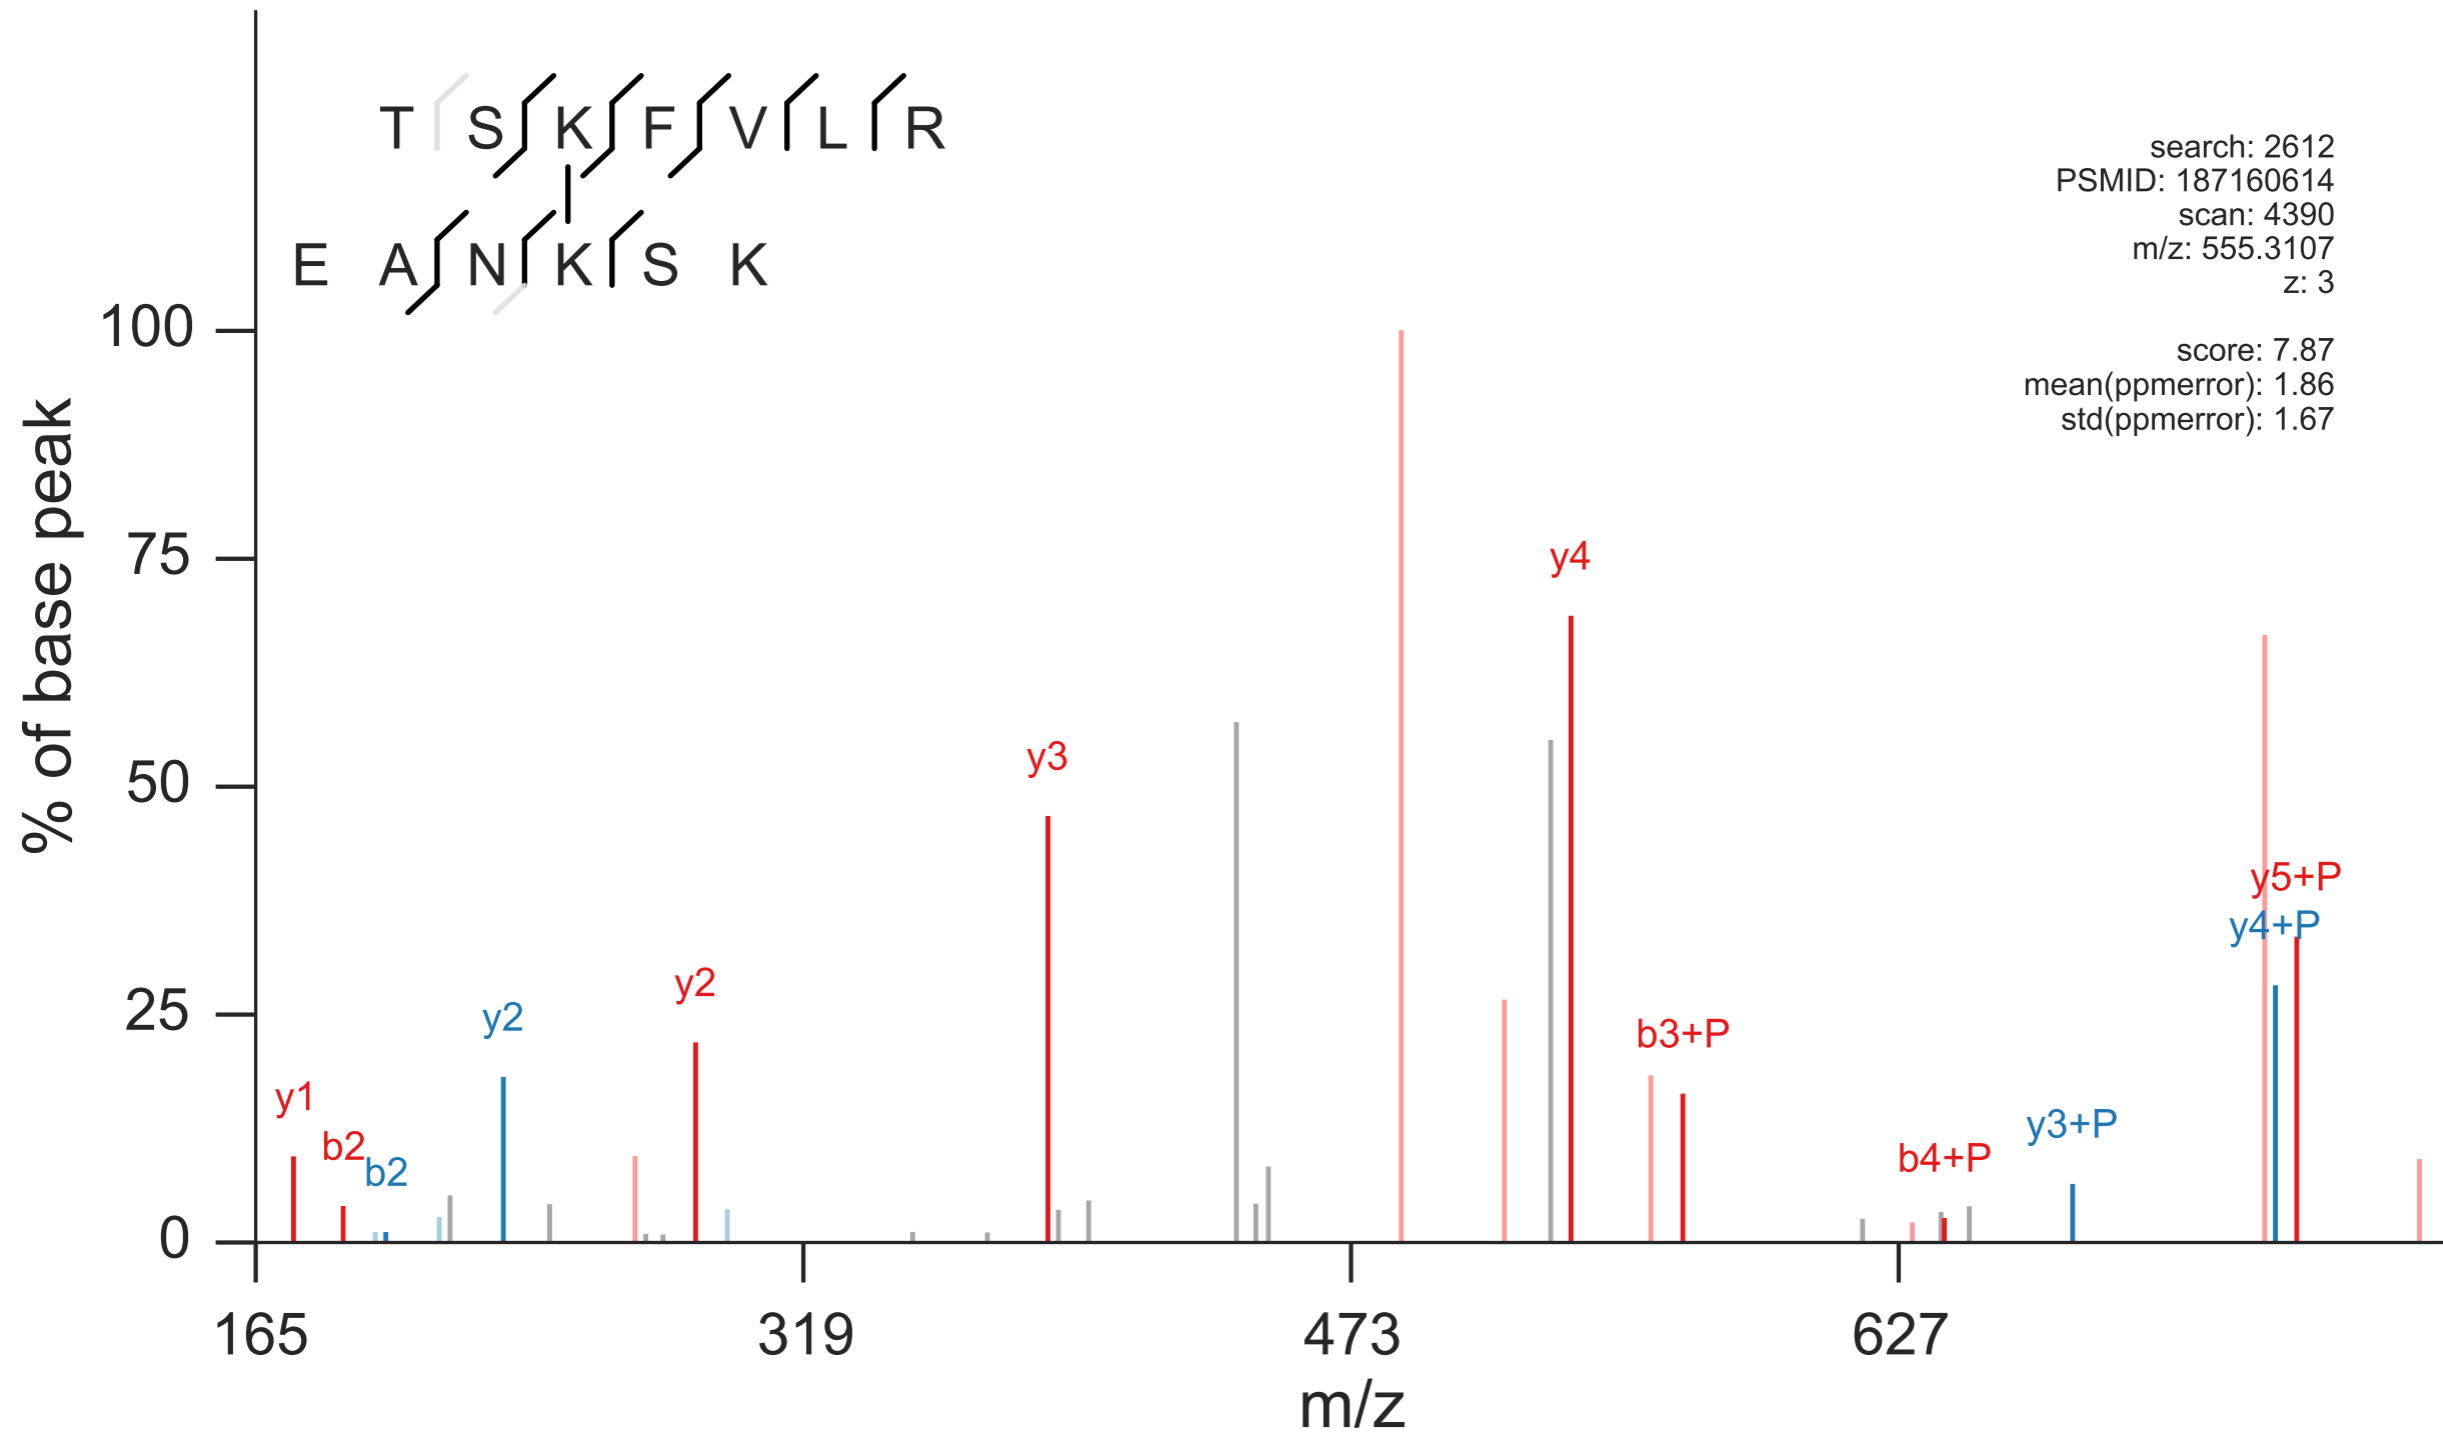

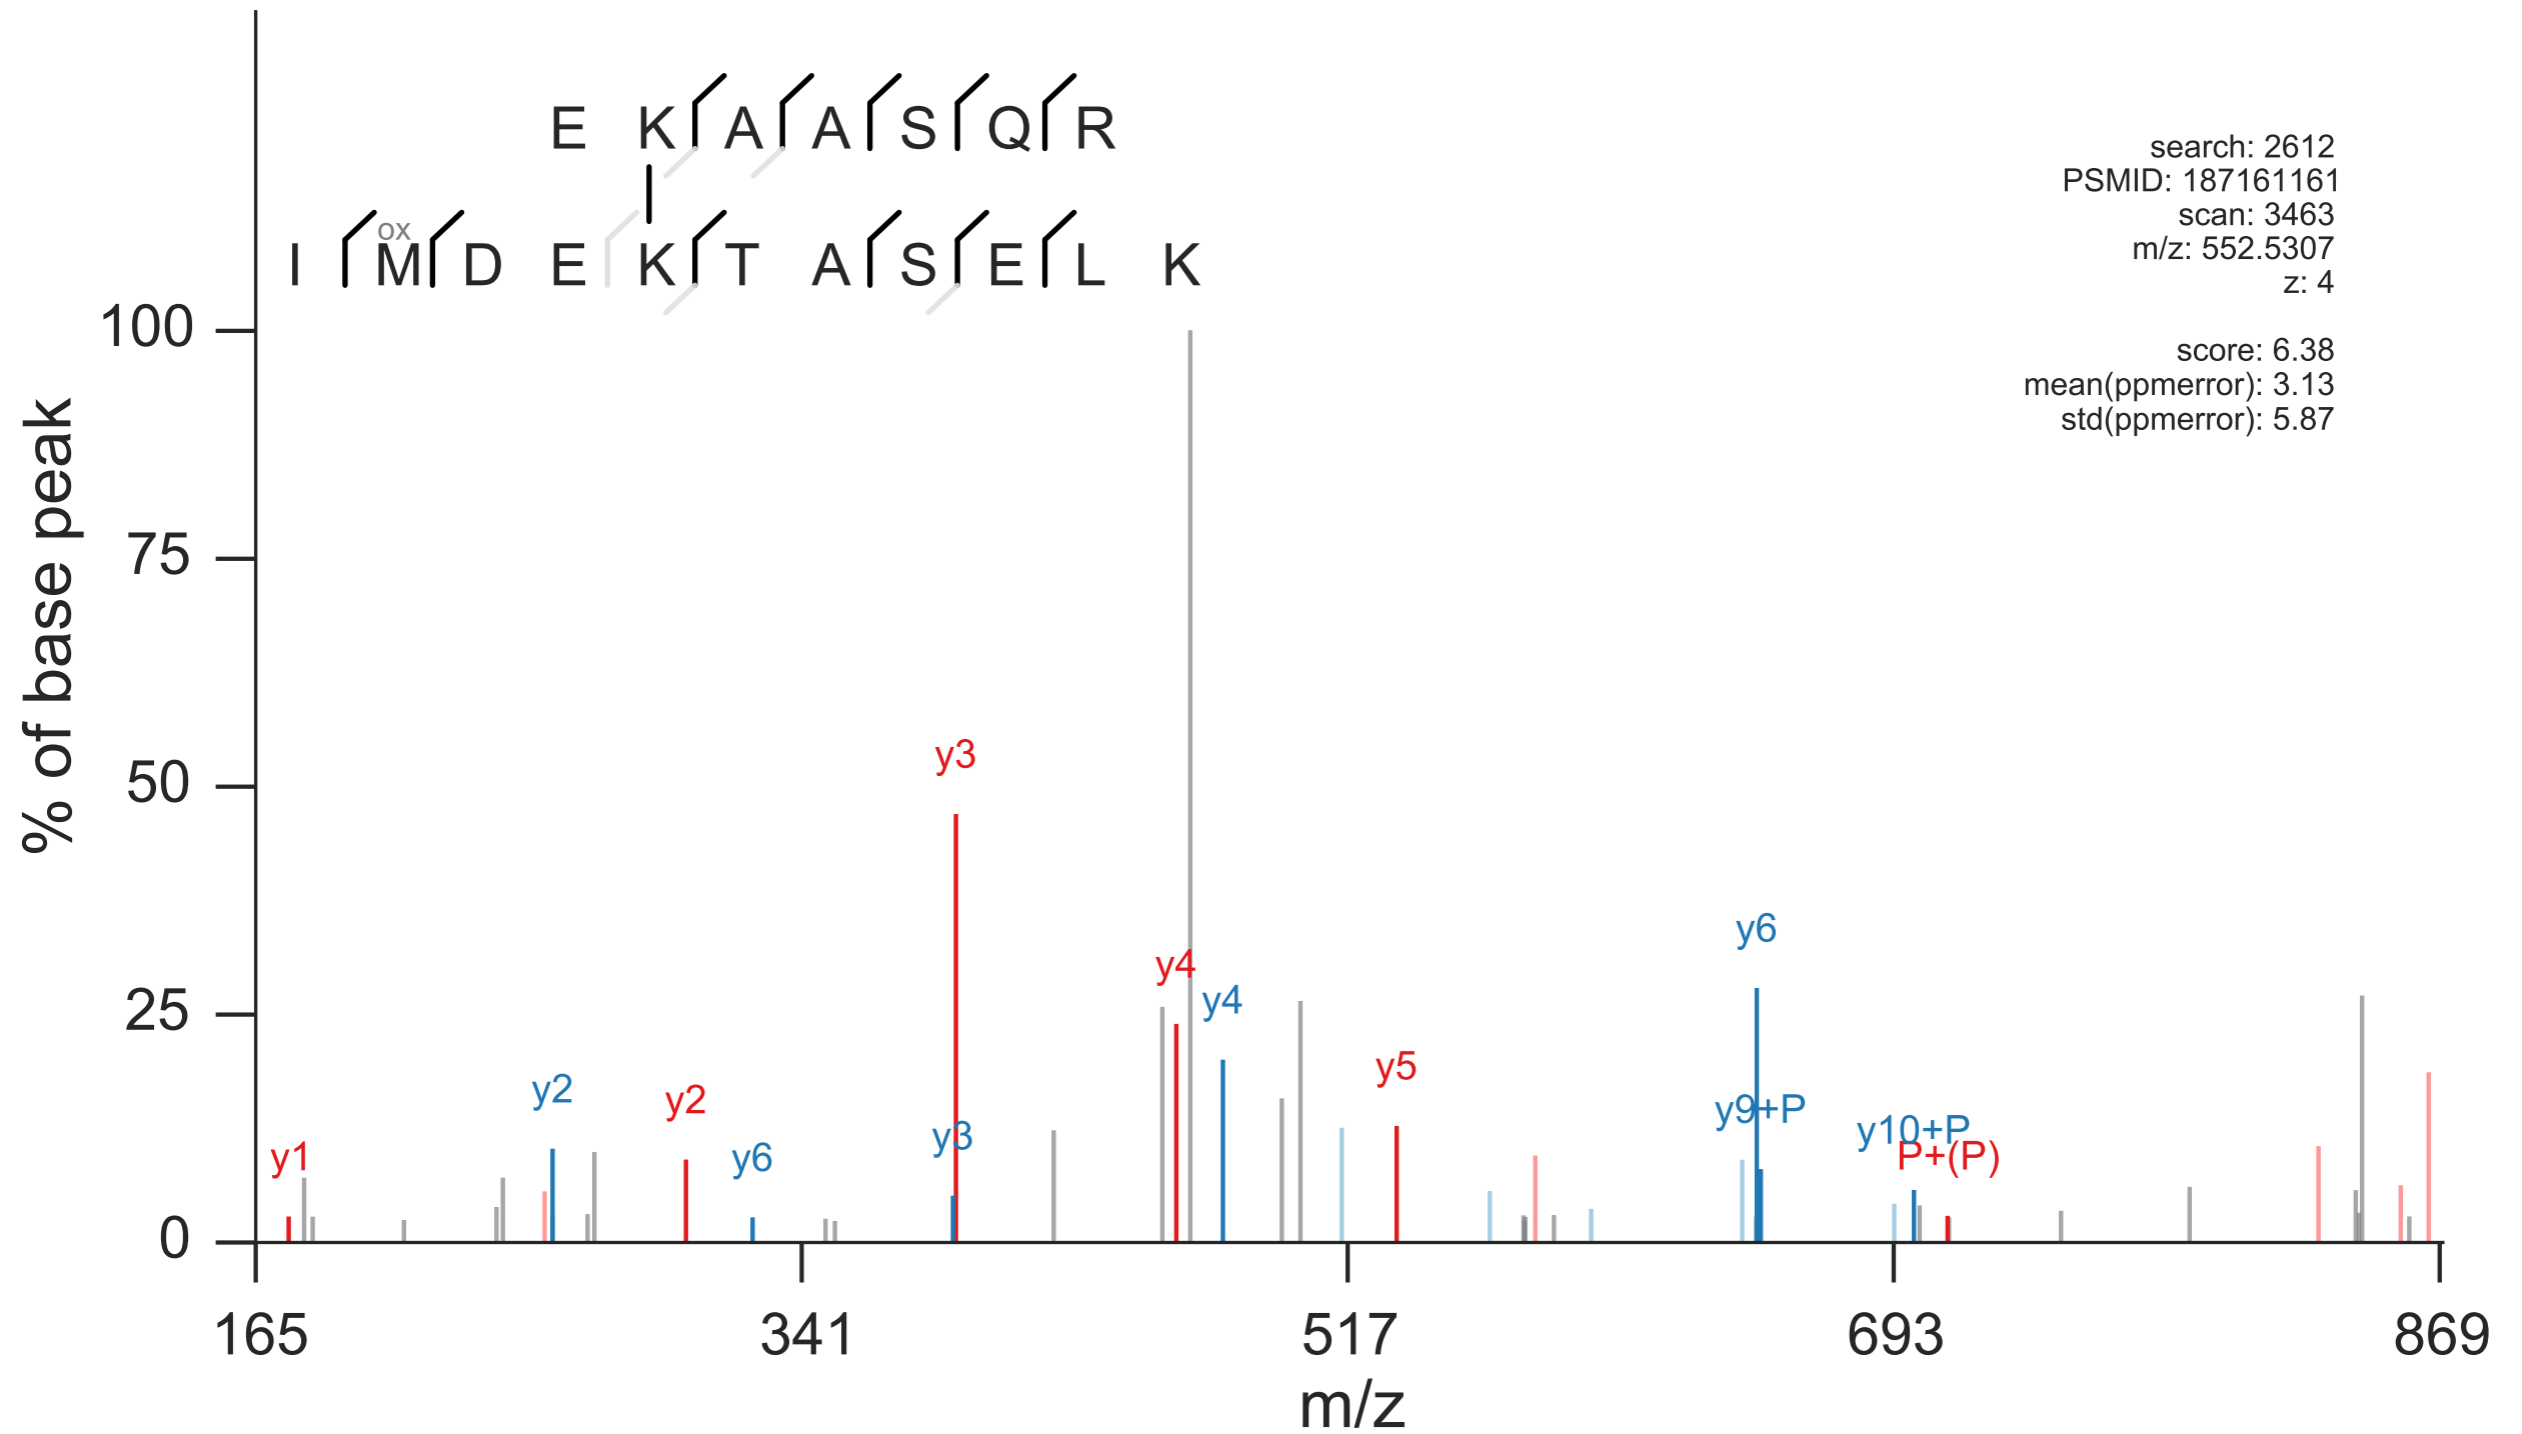



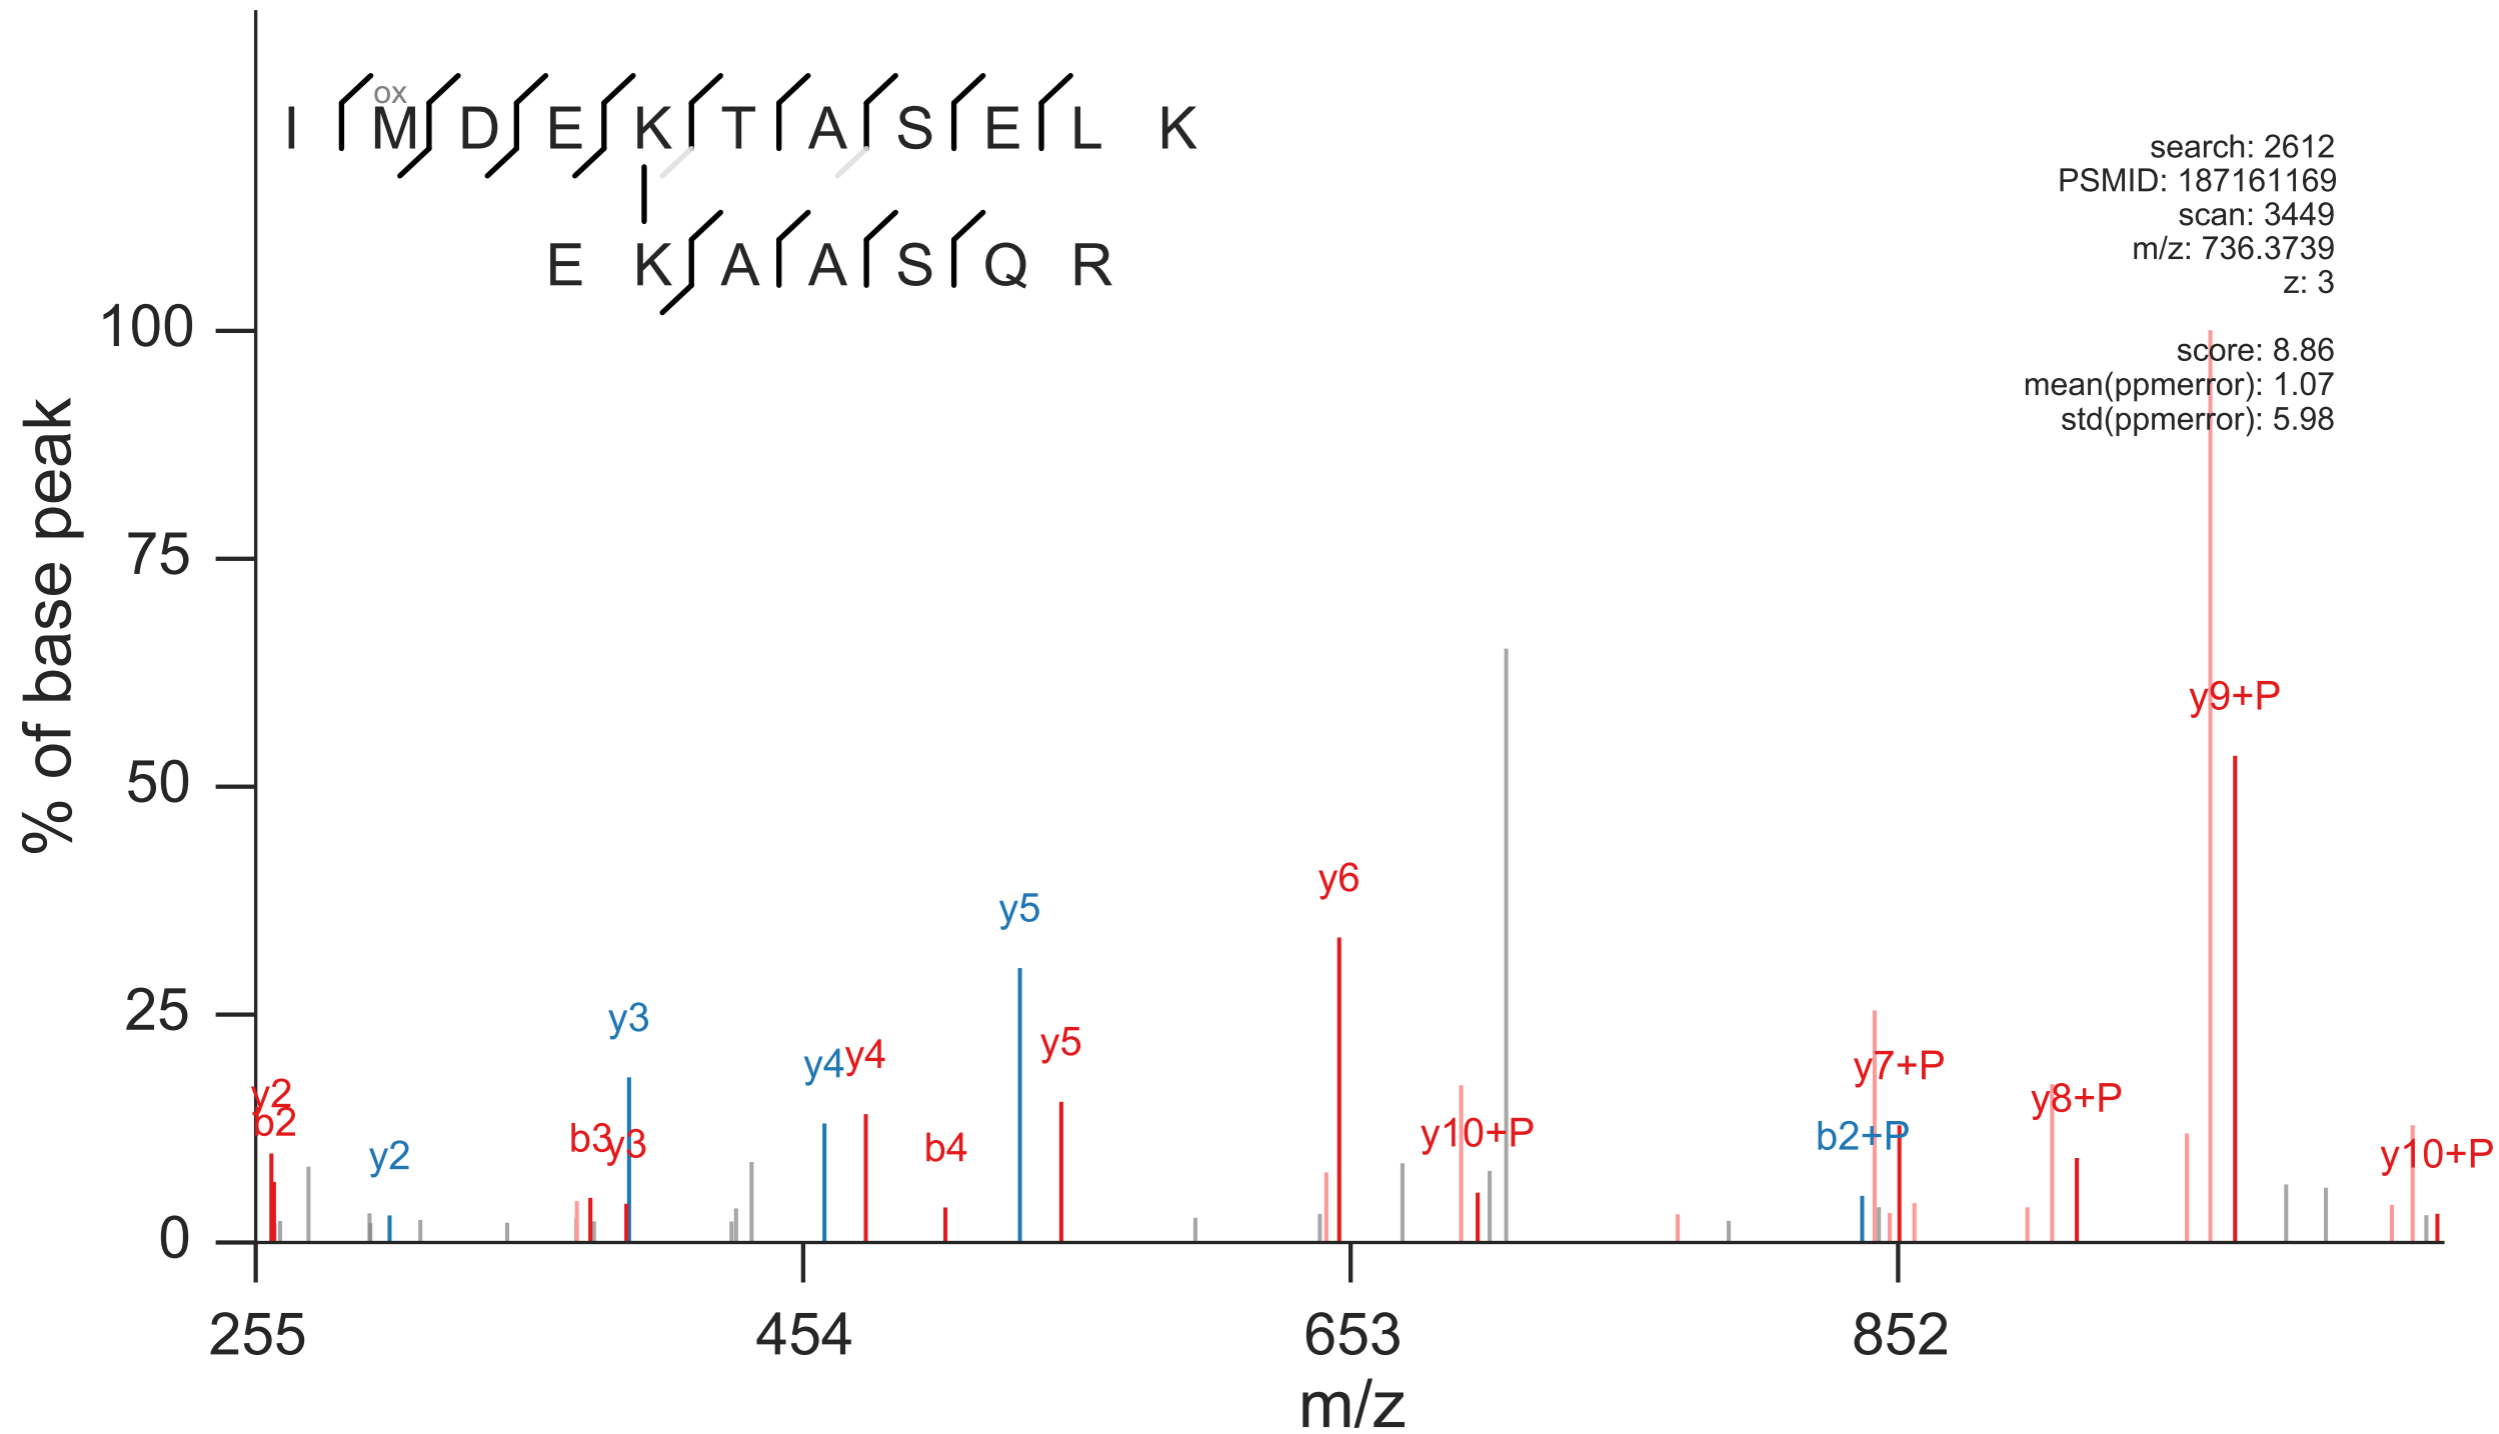

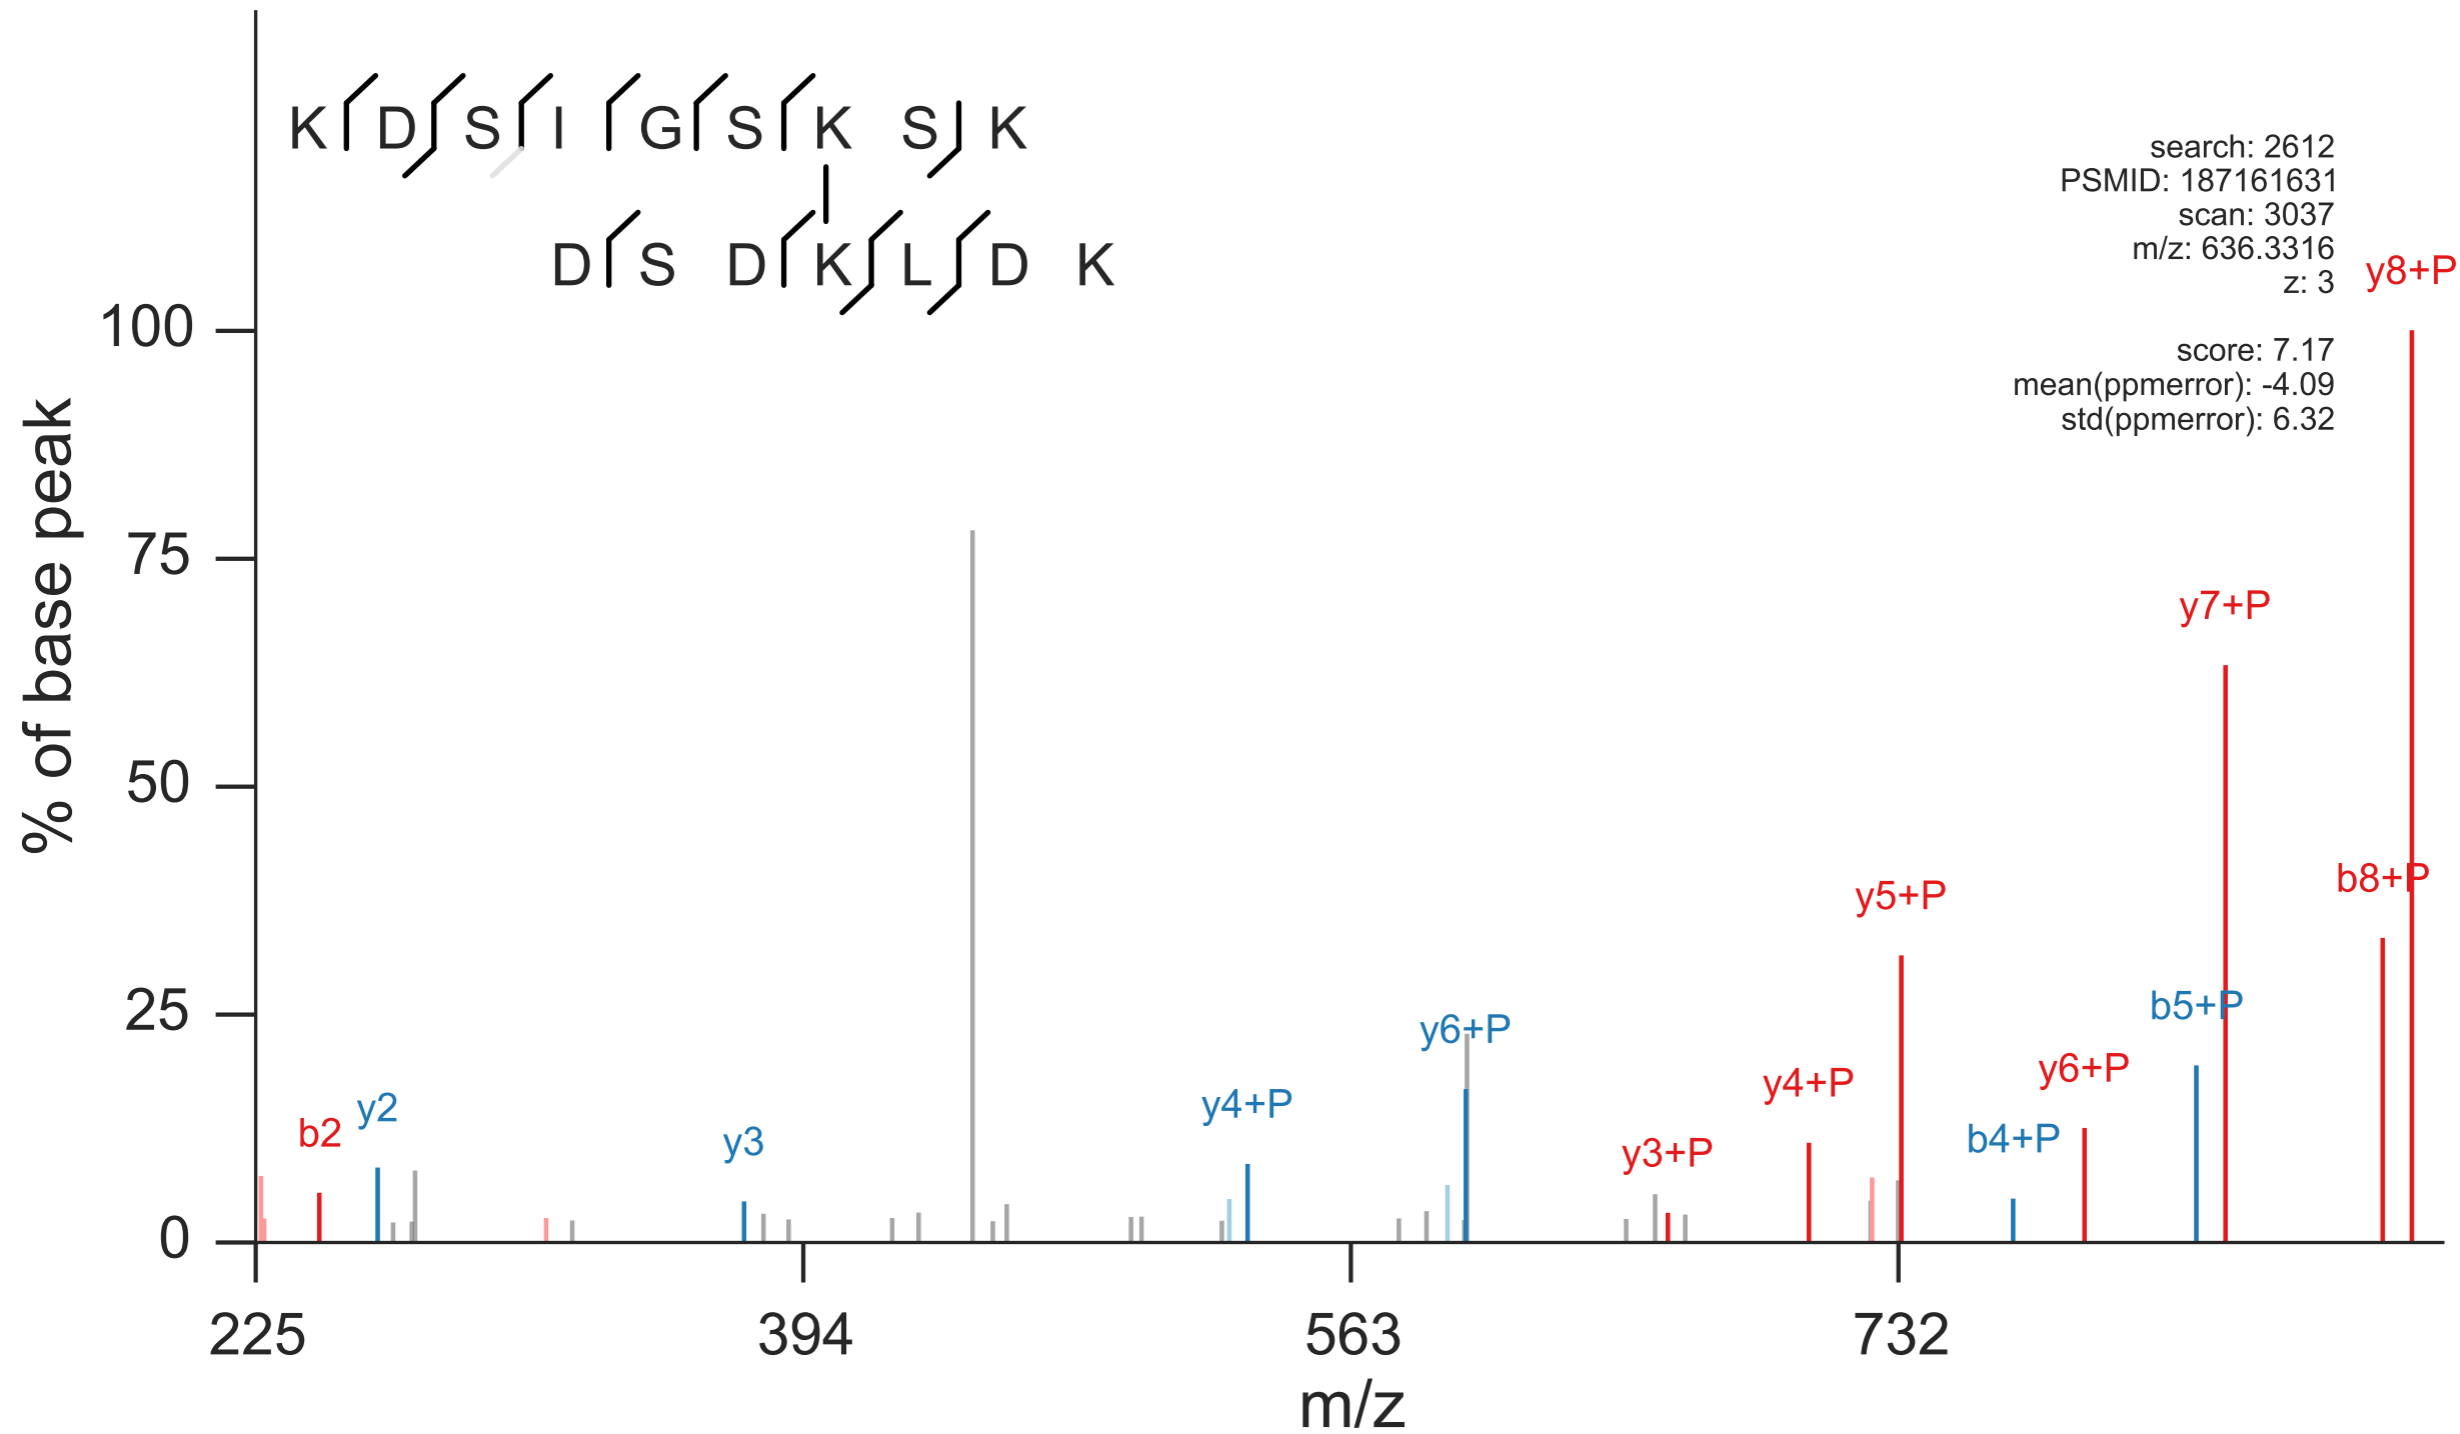

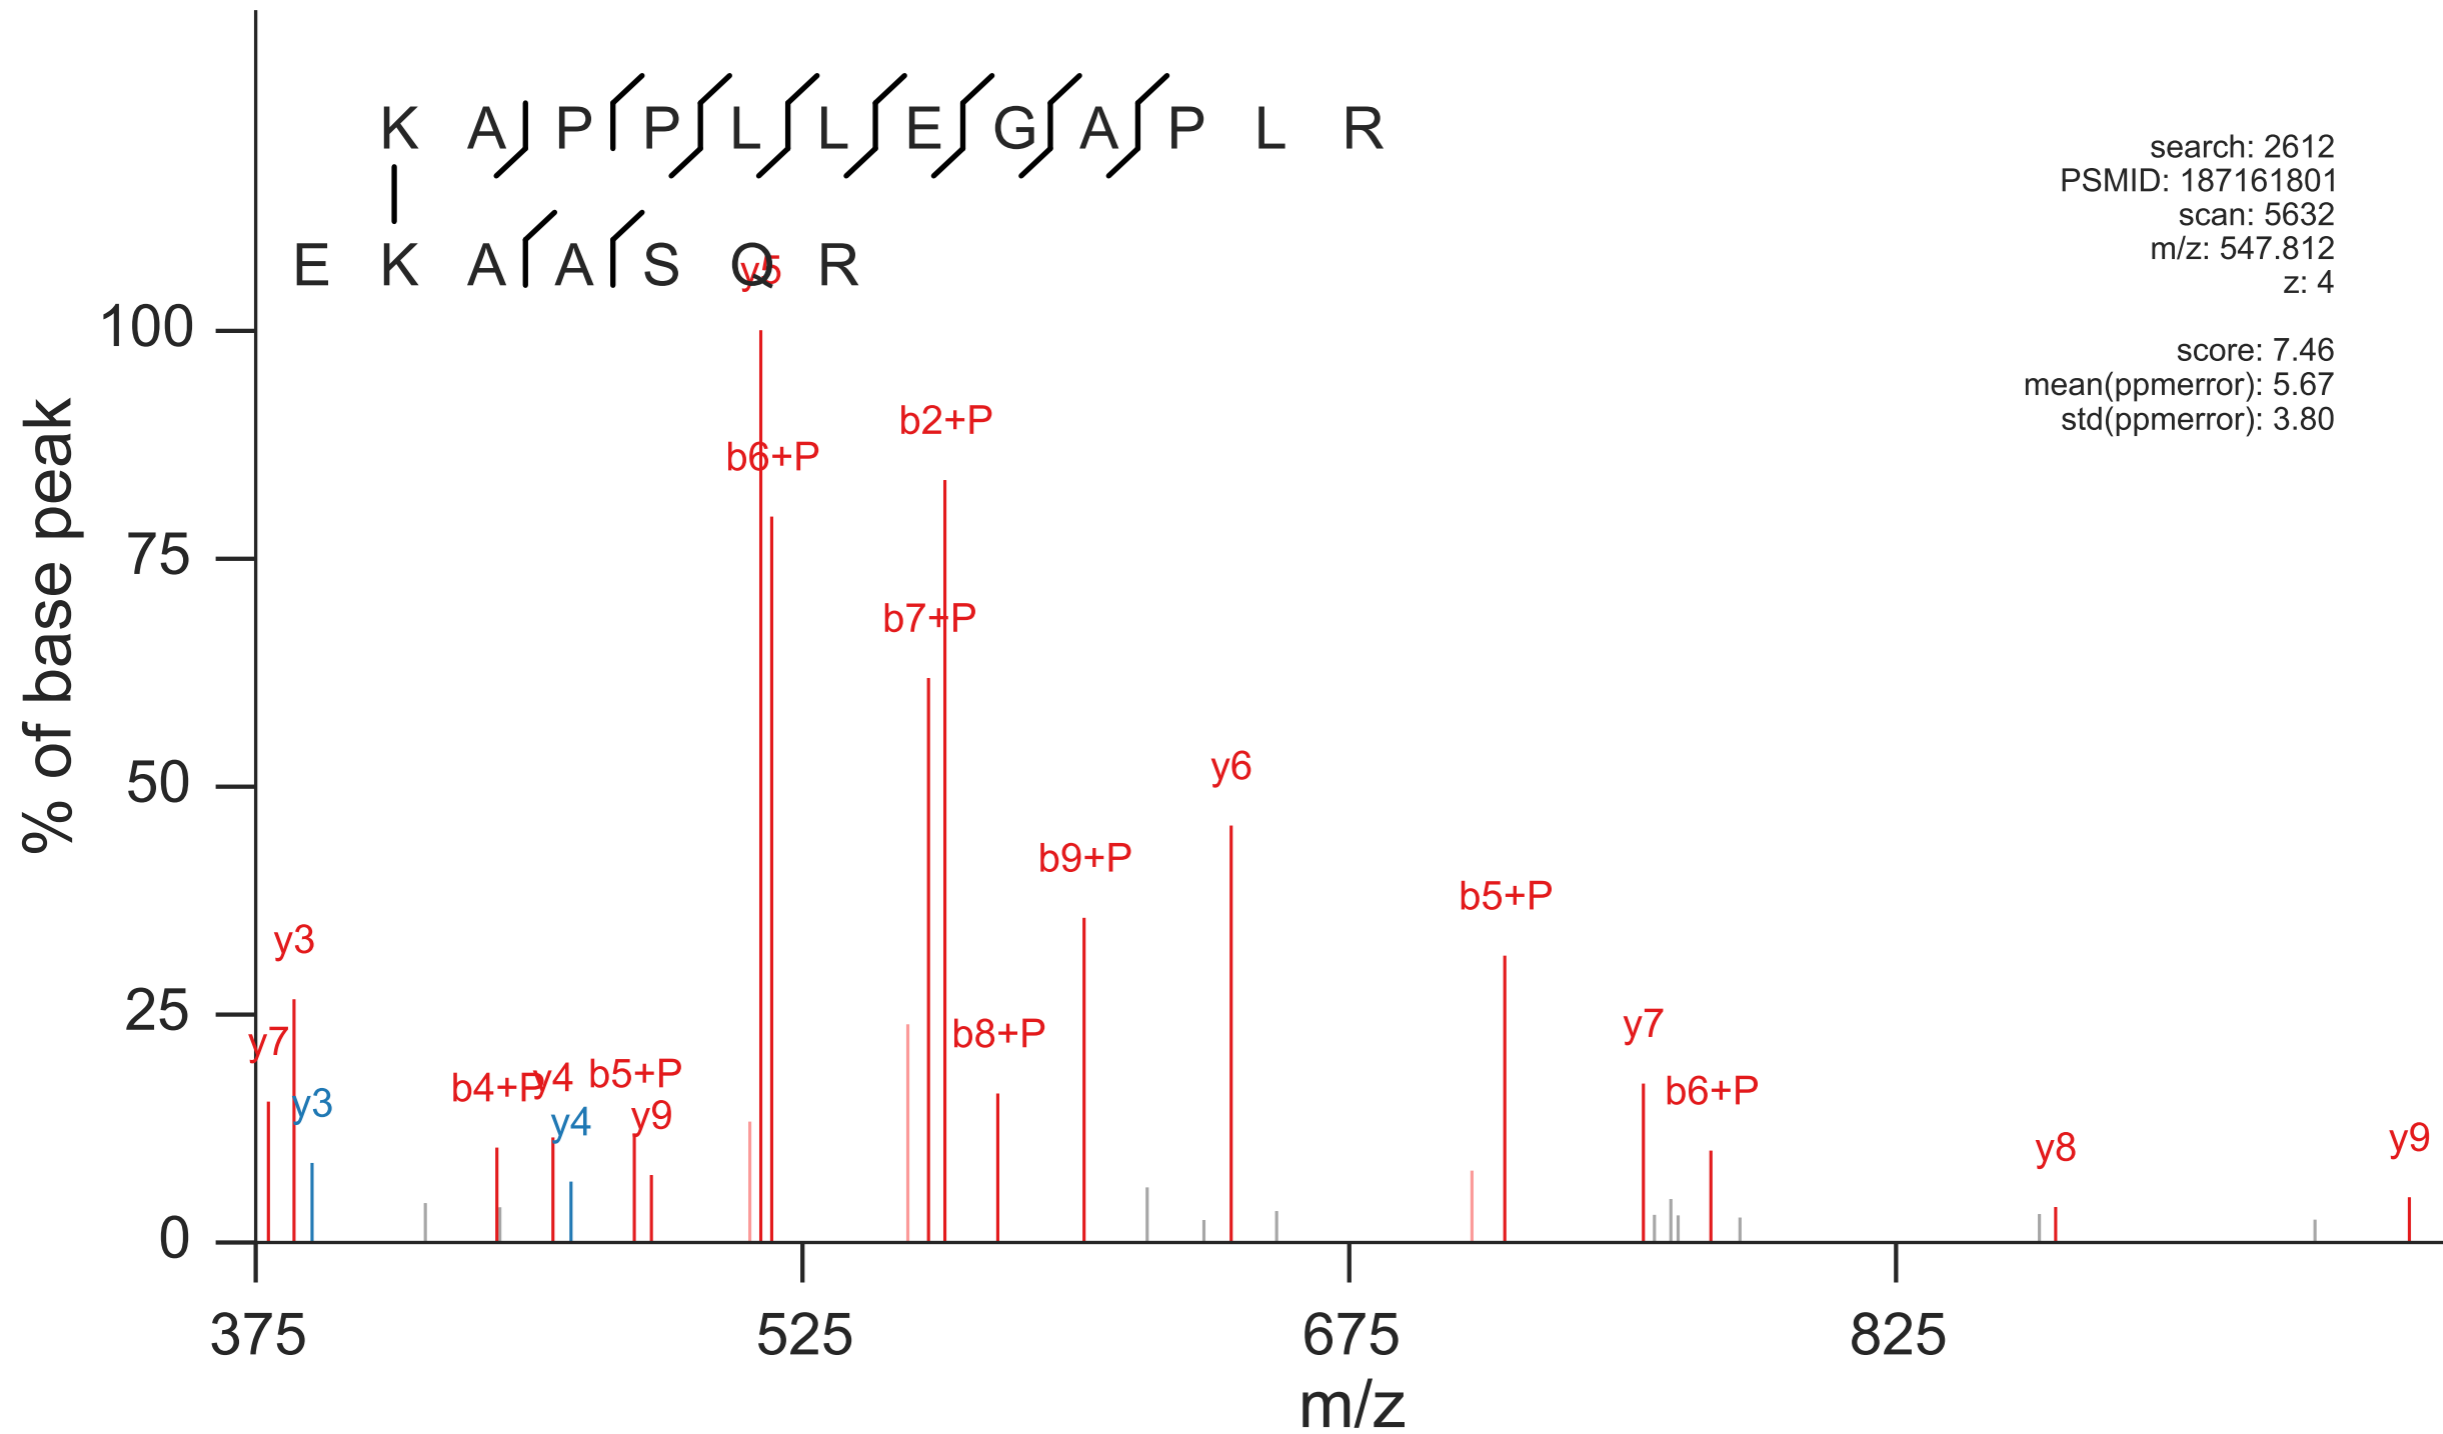

search: 2612  
 PSMID: 187161801  
 scan: 5632  
 m/z: 547.812  
 z: 4  
 score: 7.46  
 mean(ppmerror): 5.67  
 std(ppmerror): 3.80

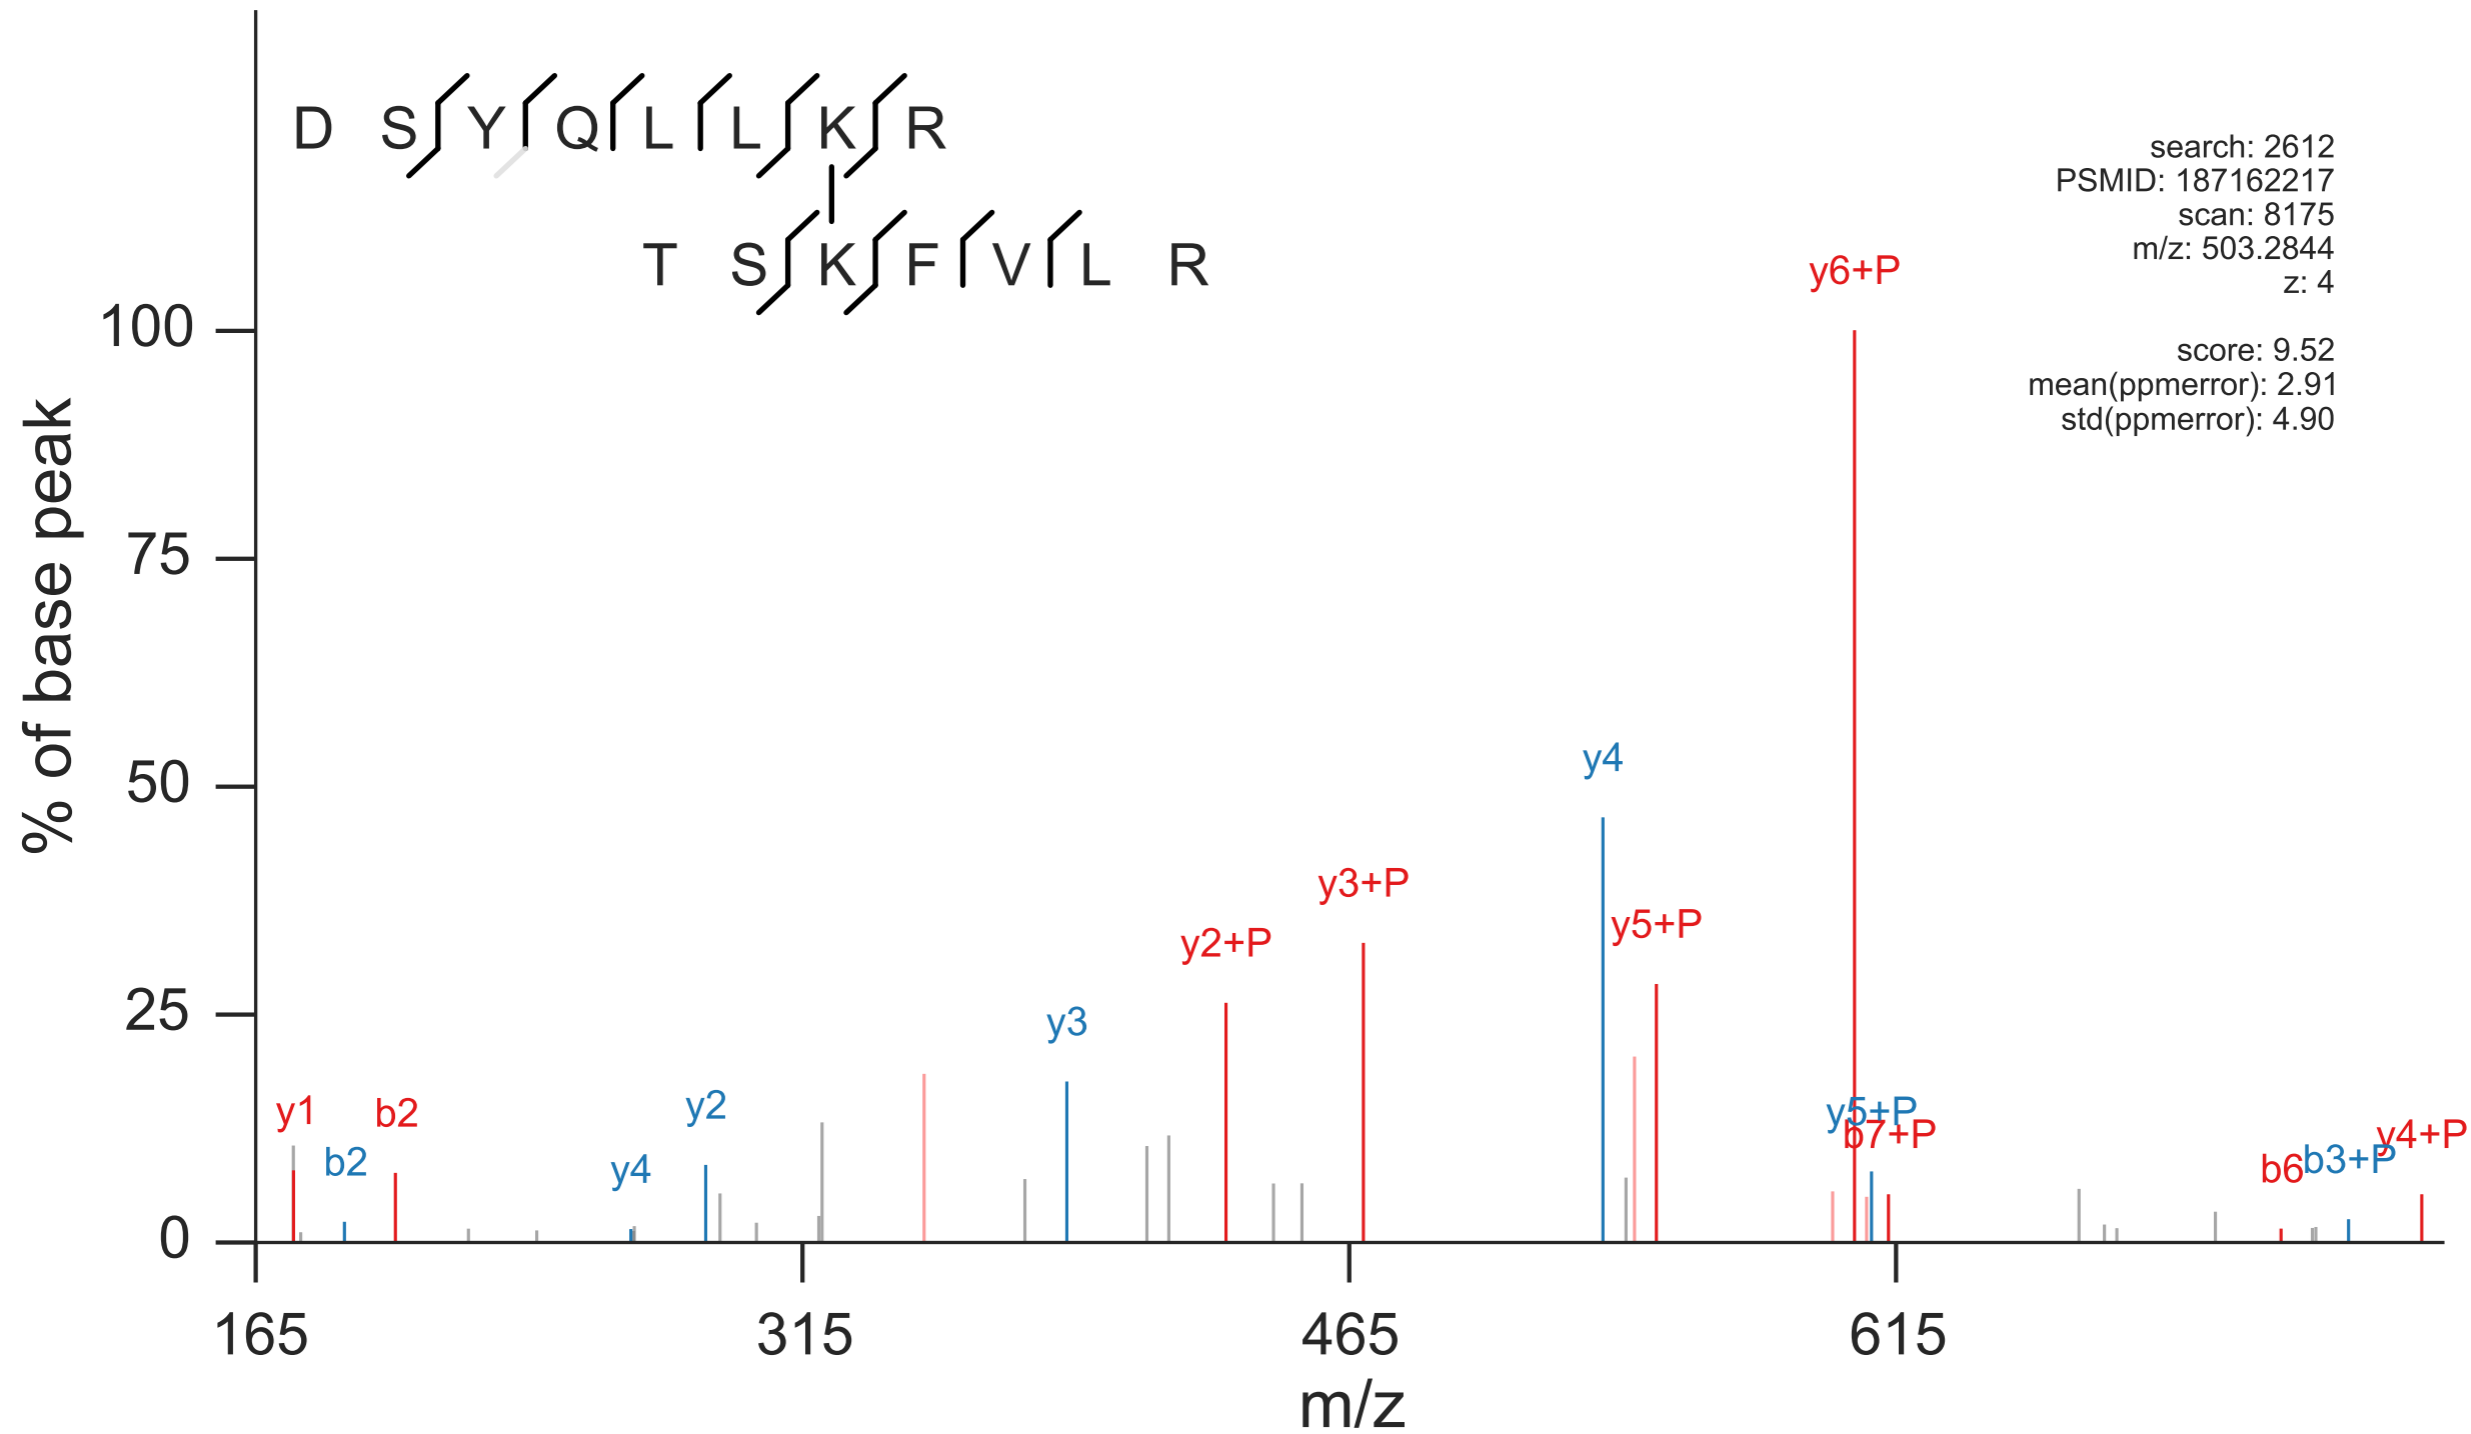

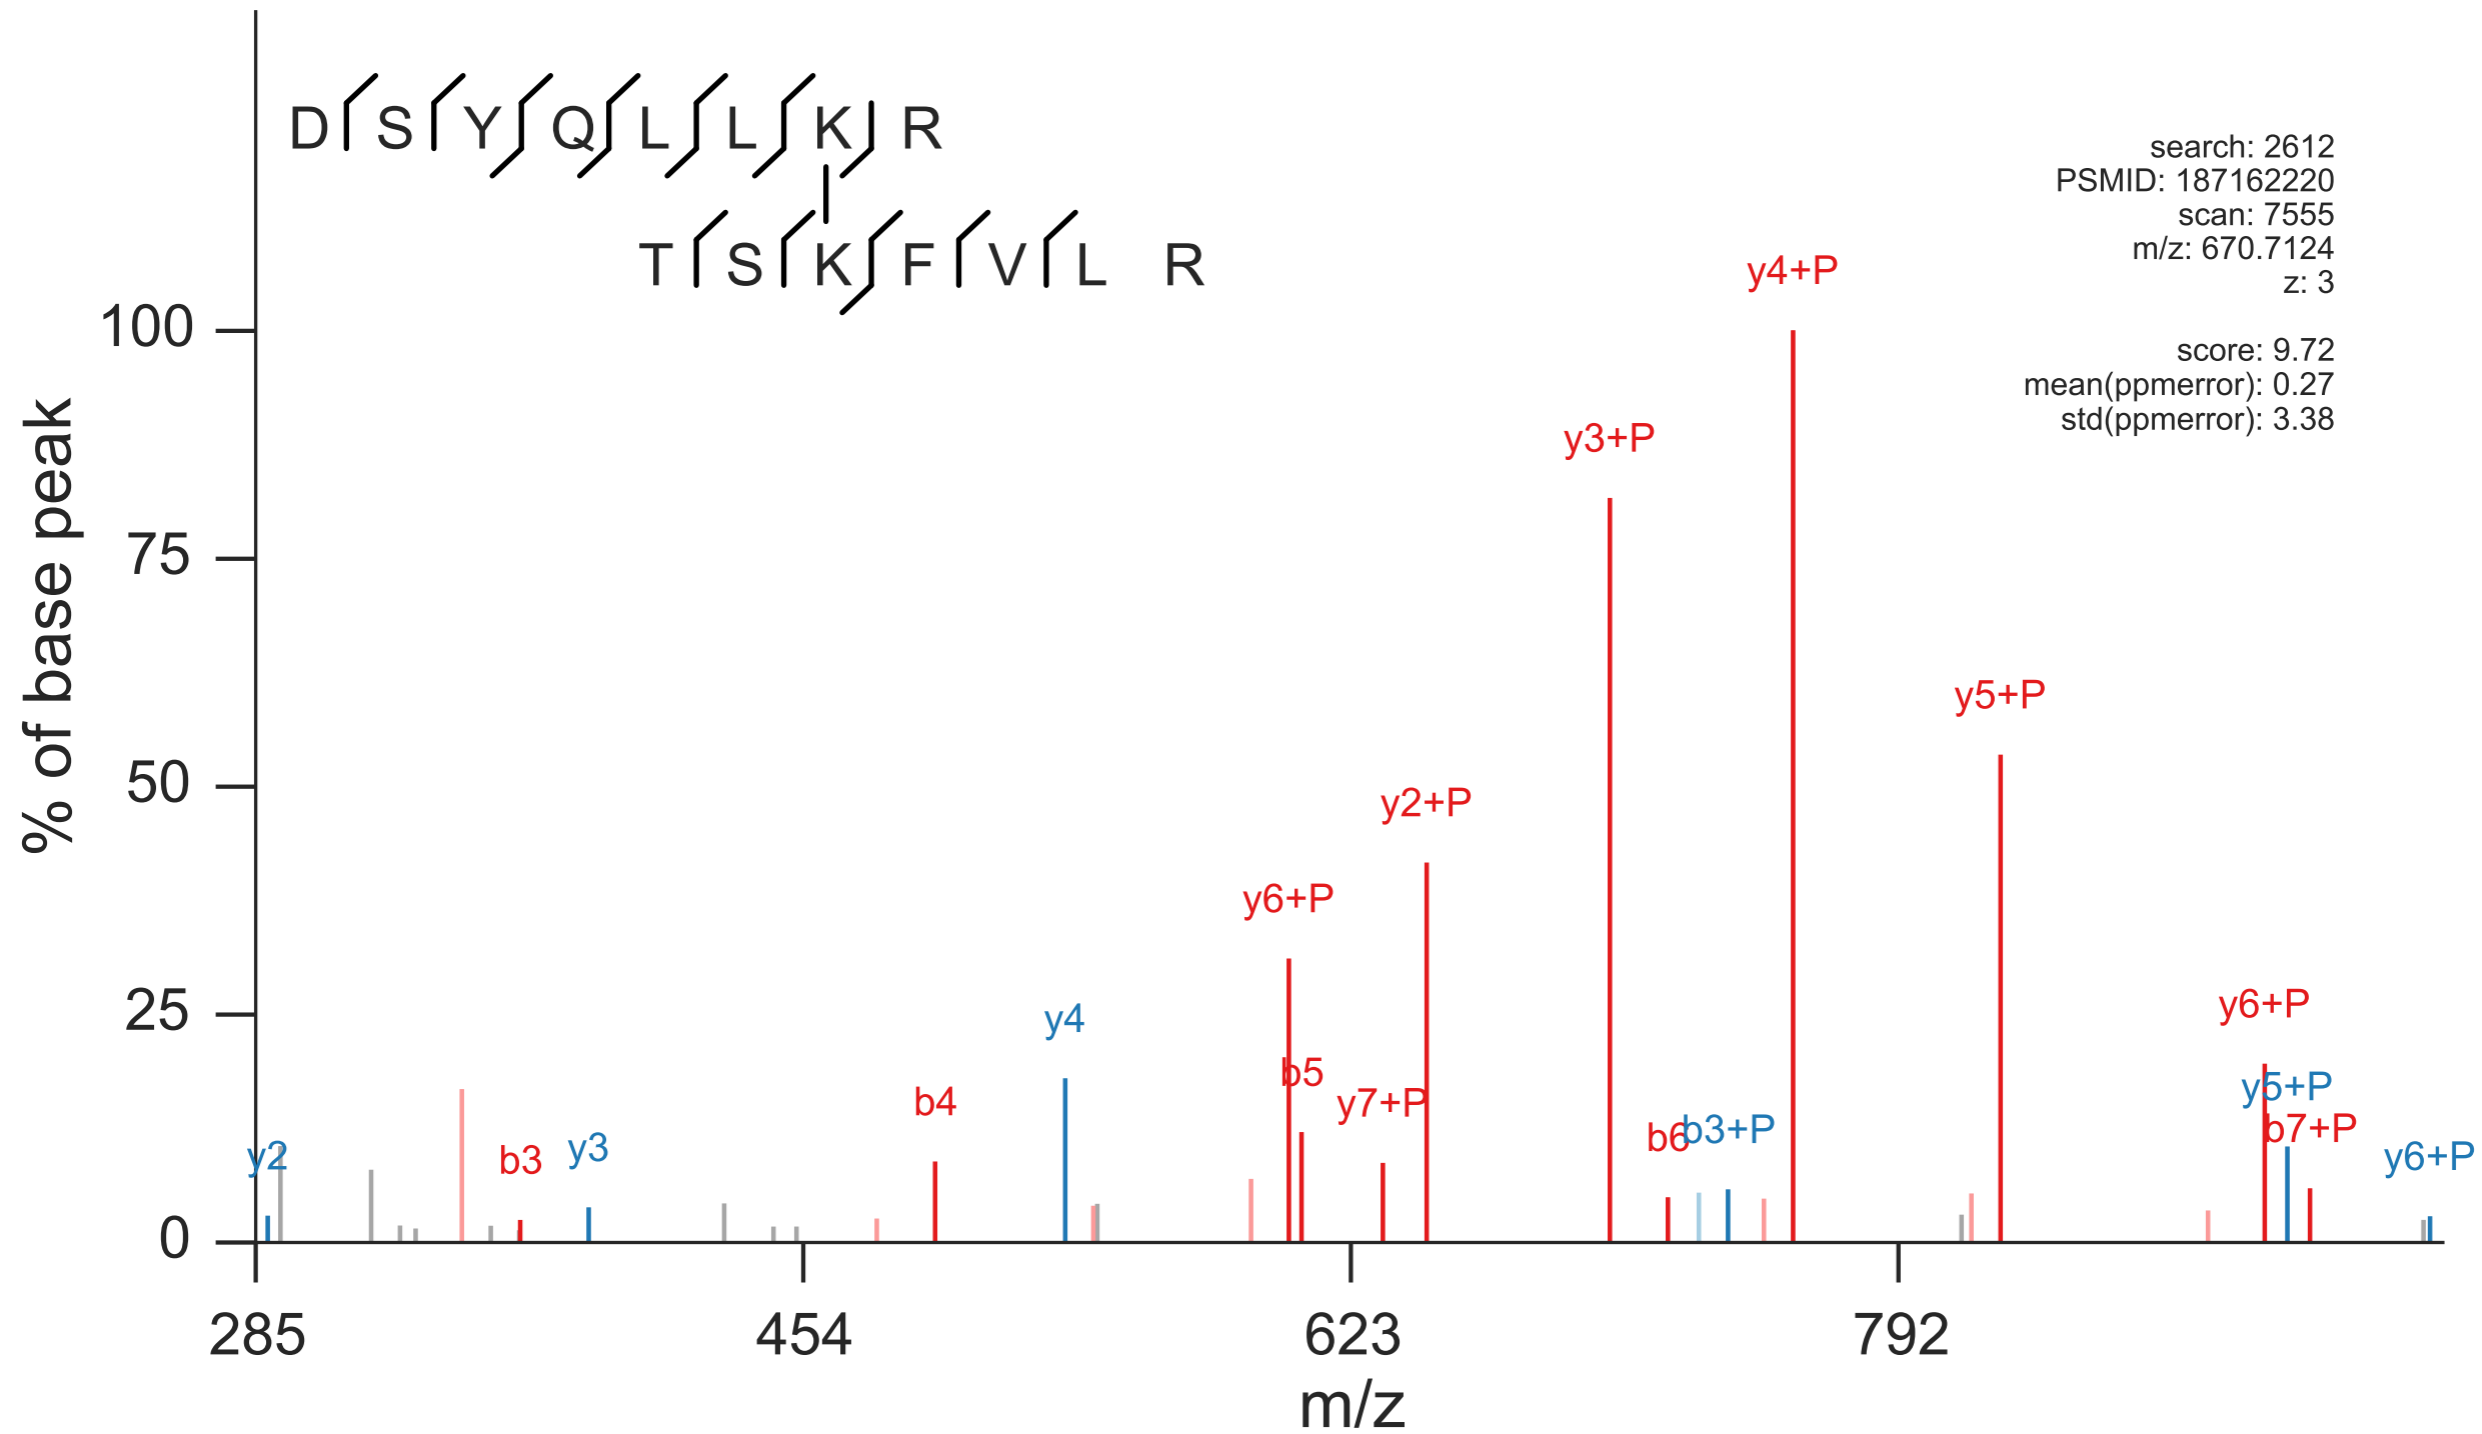

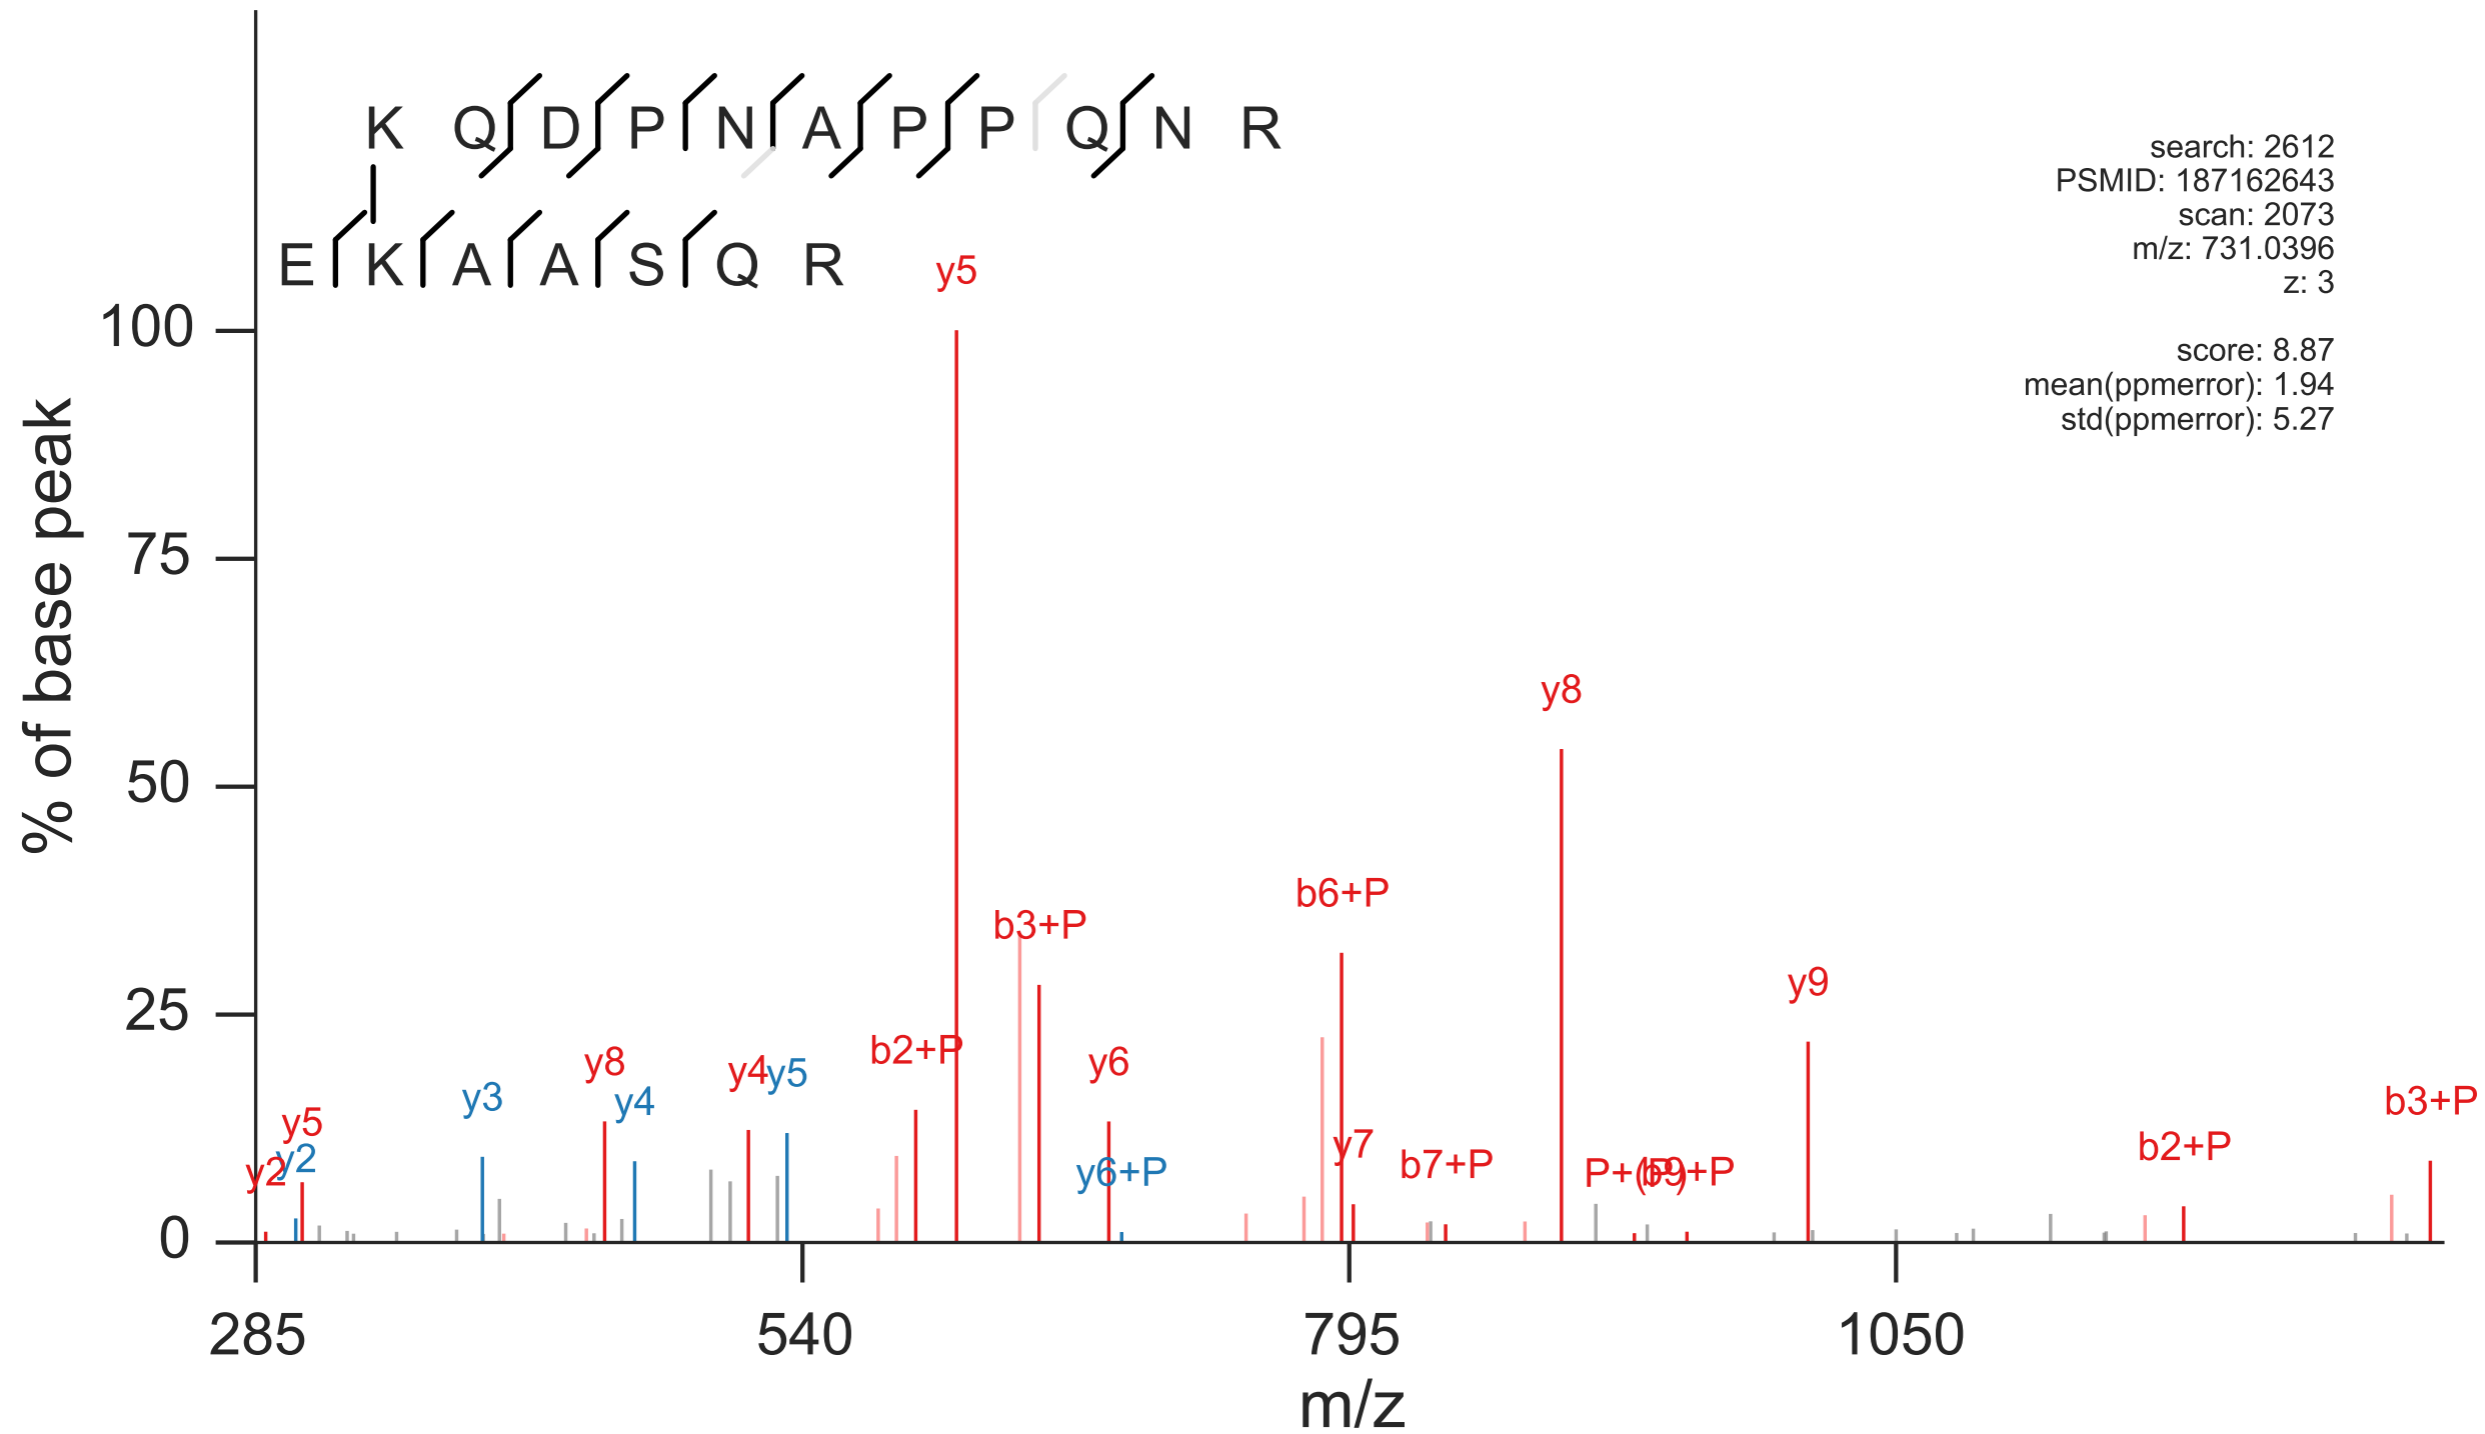

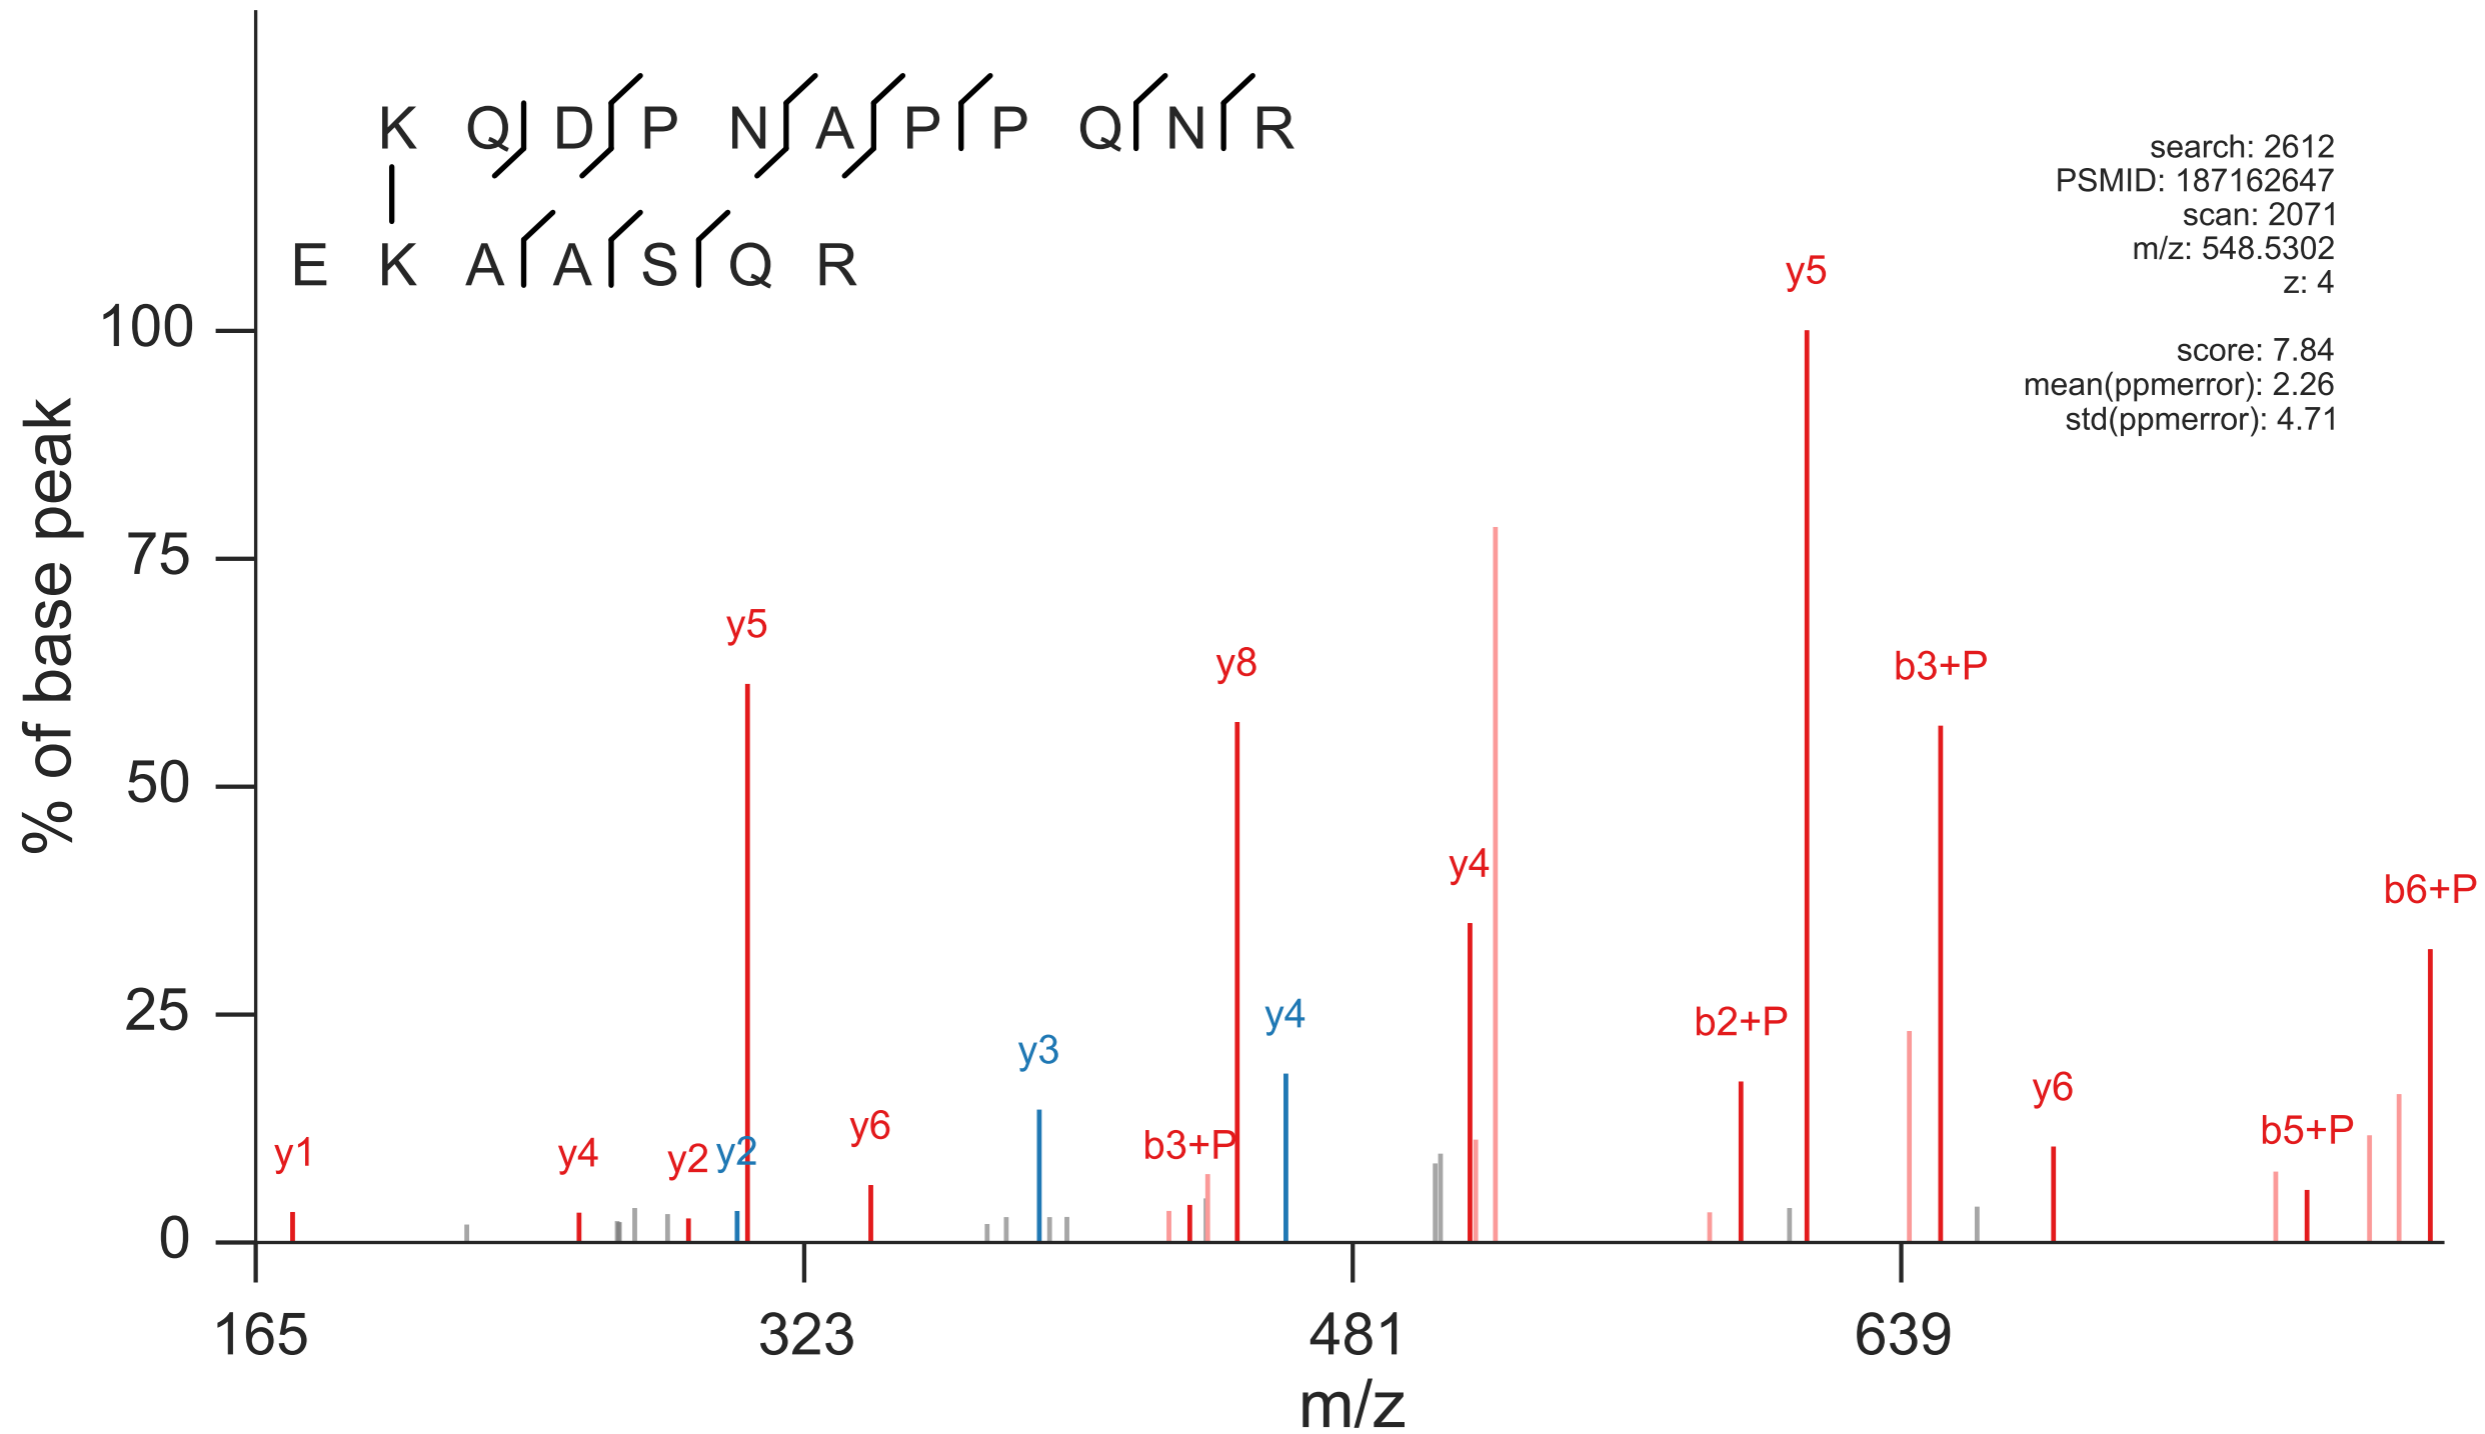

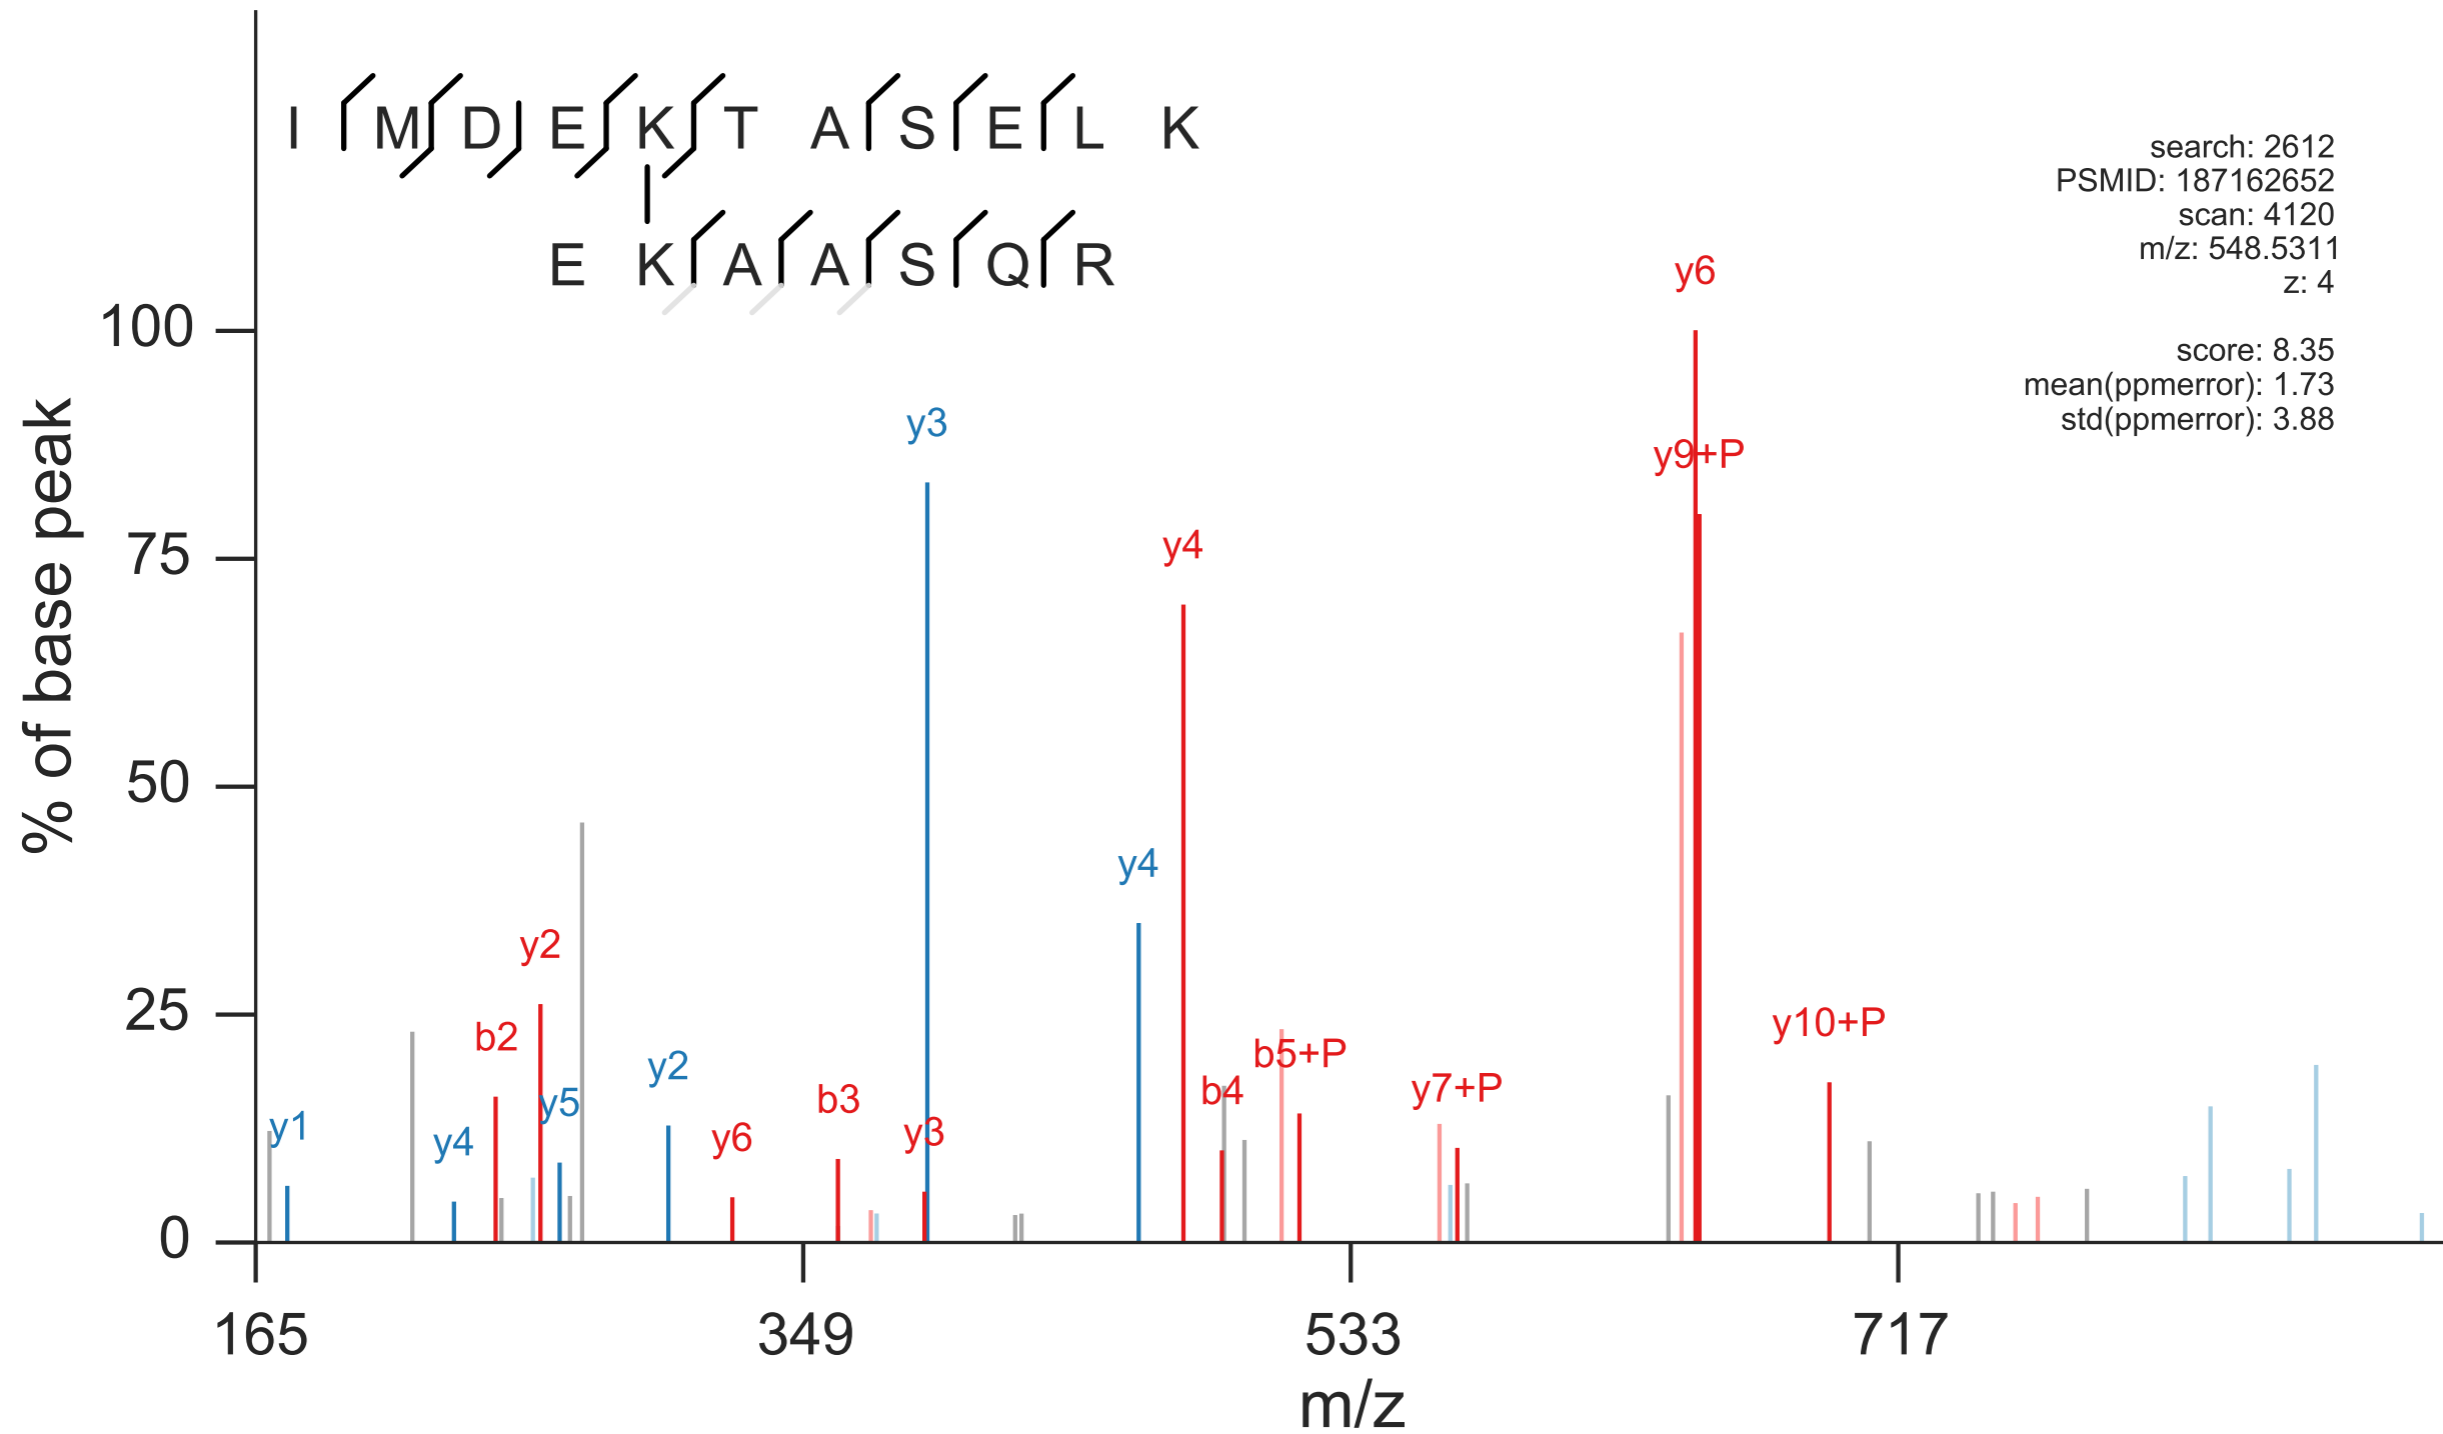



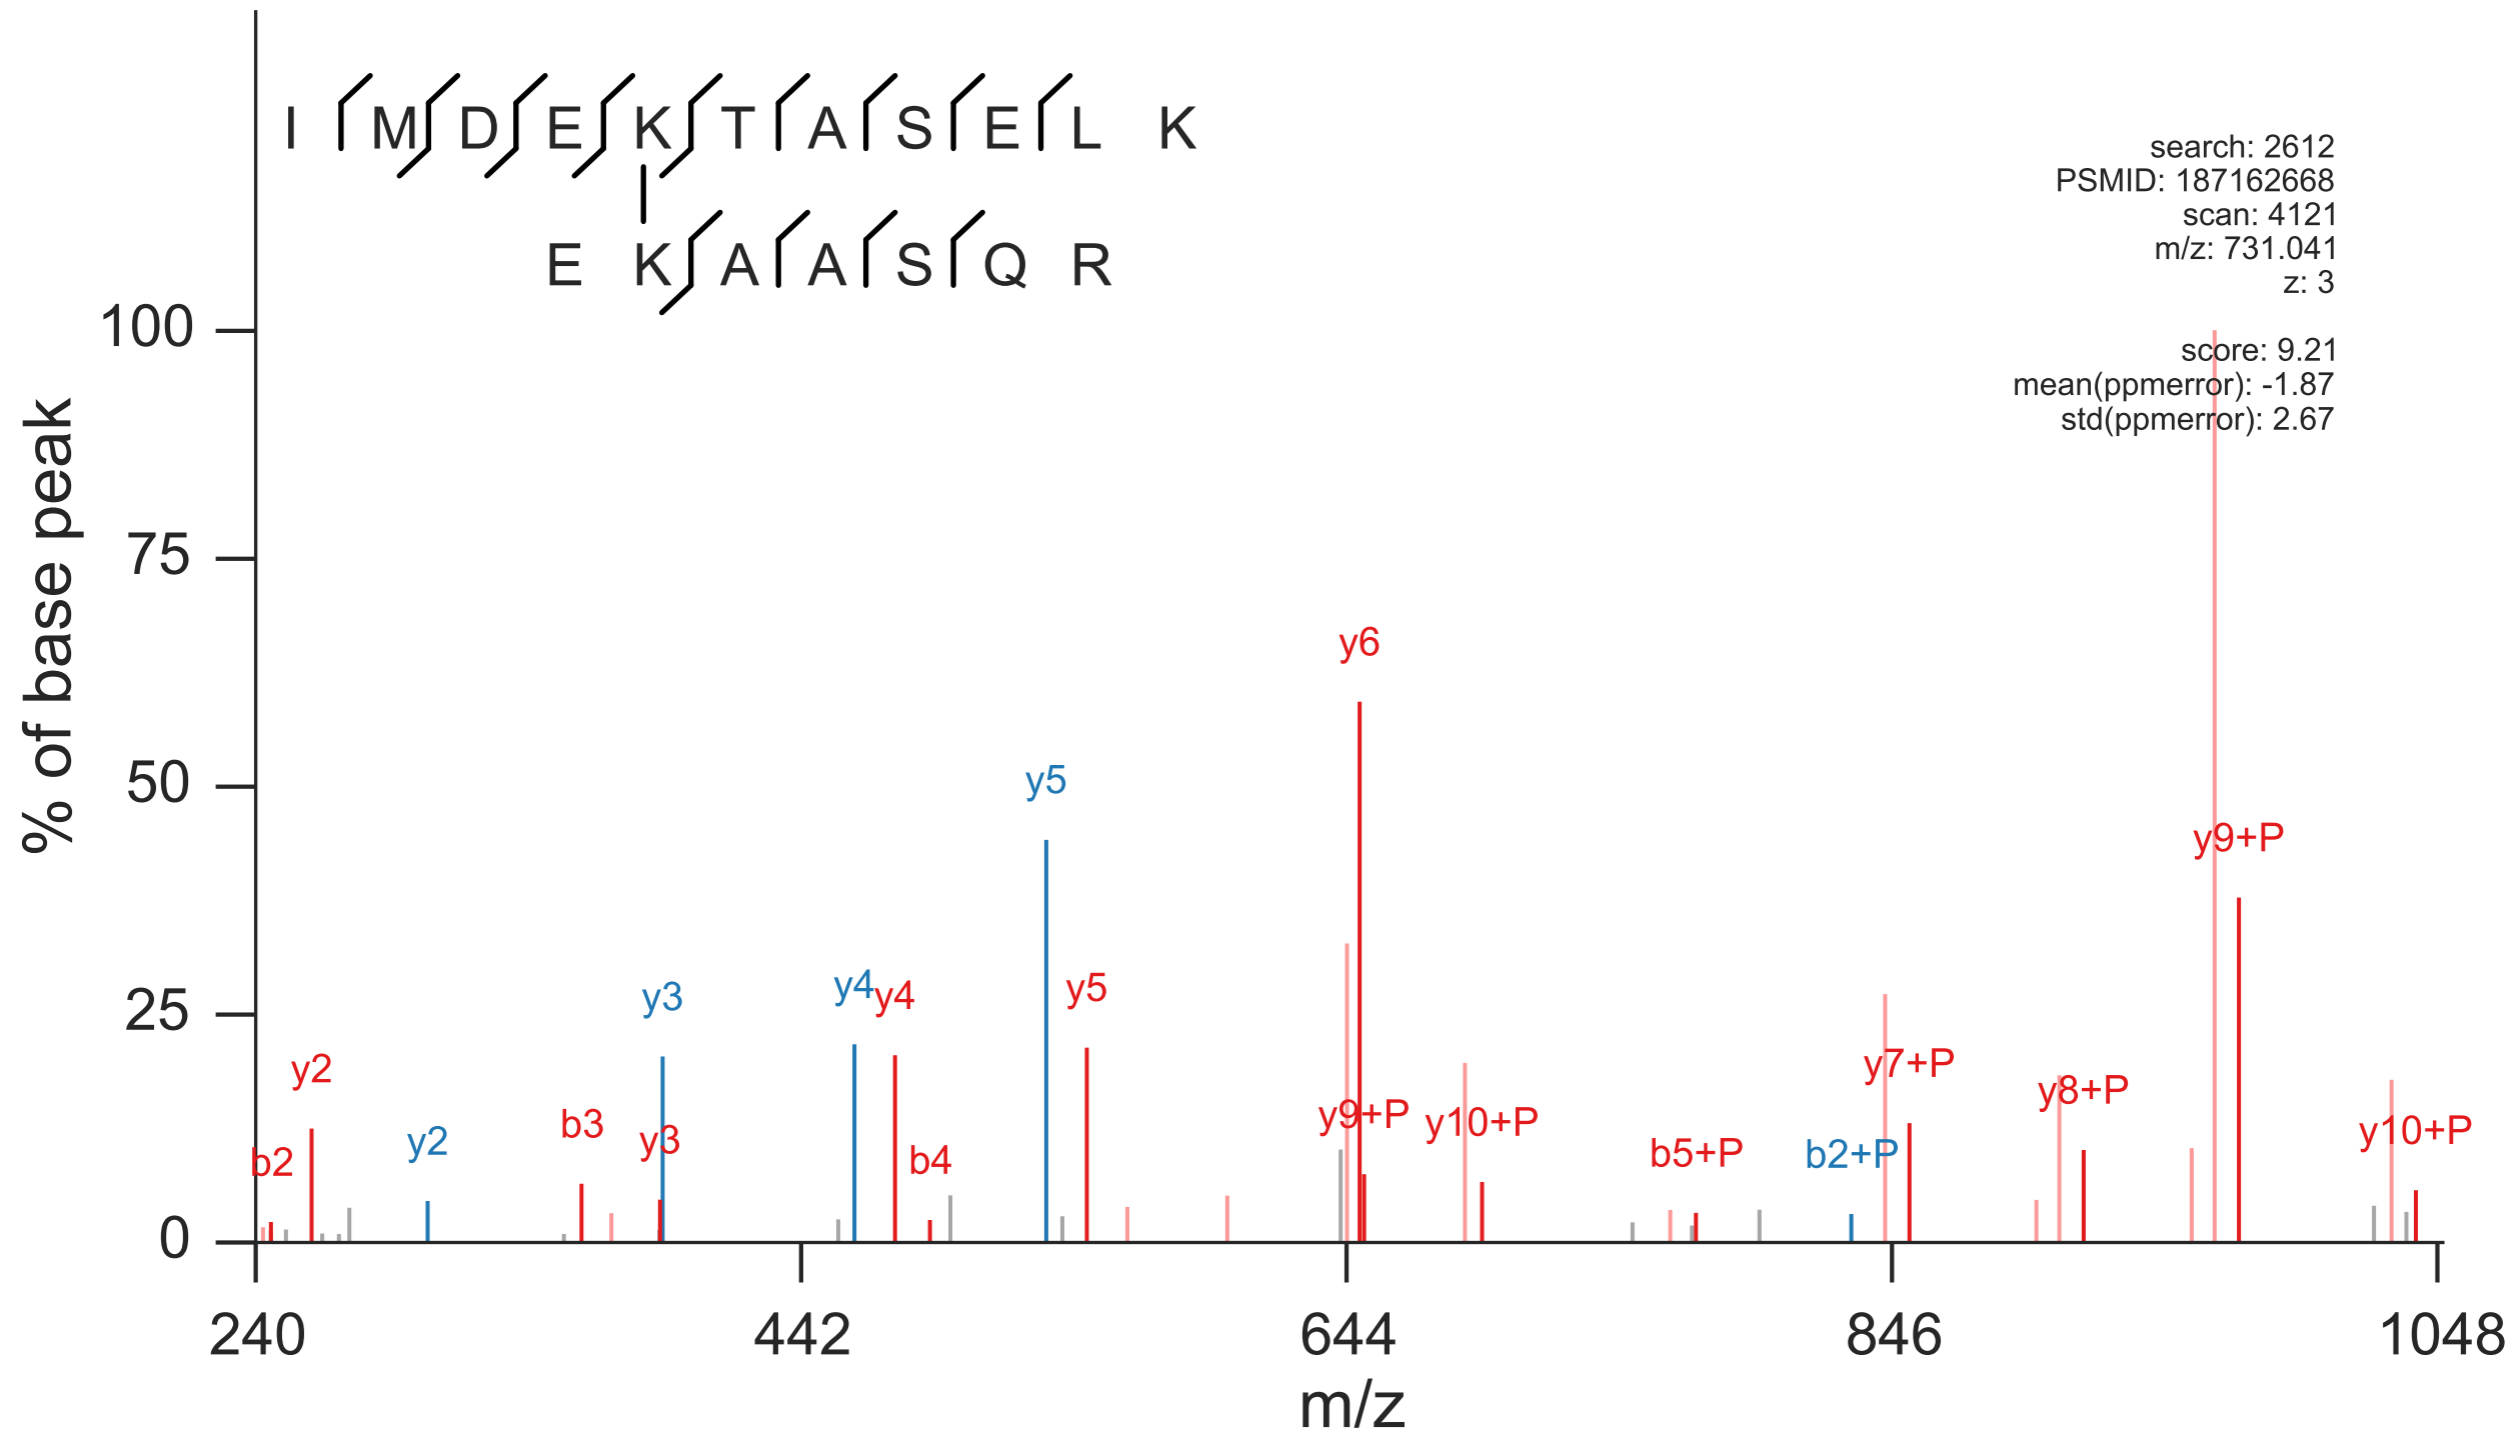

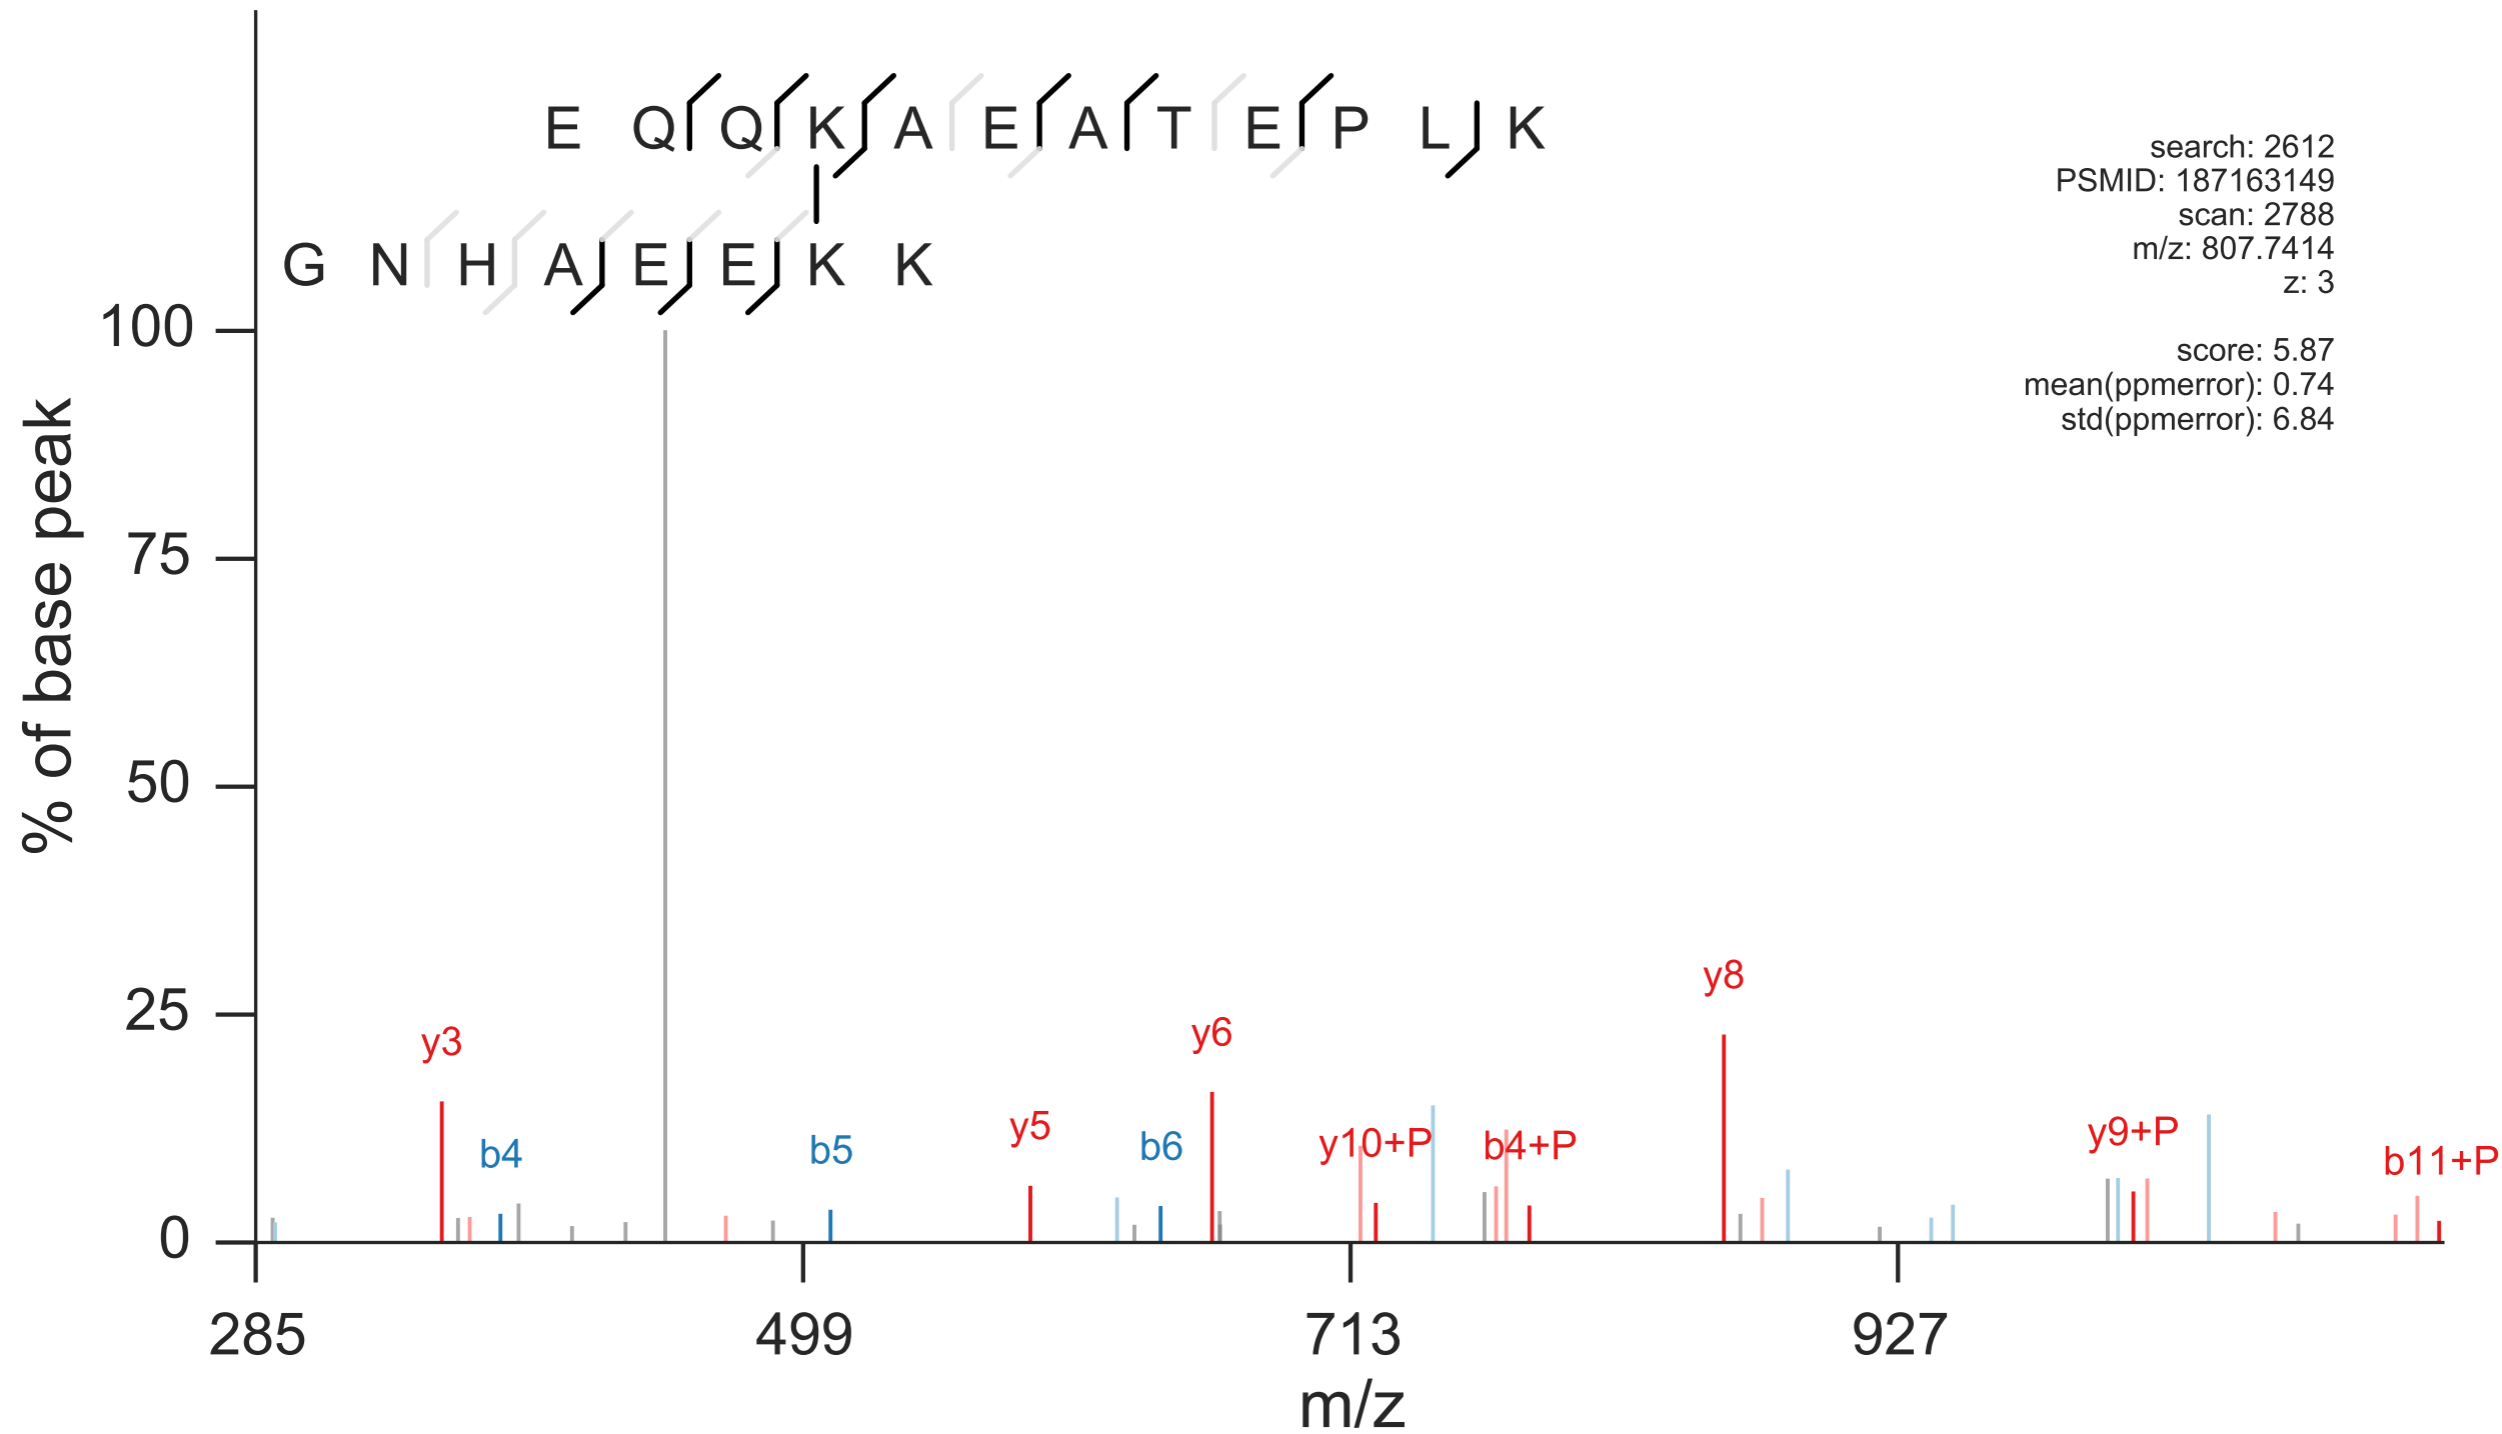

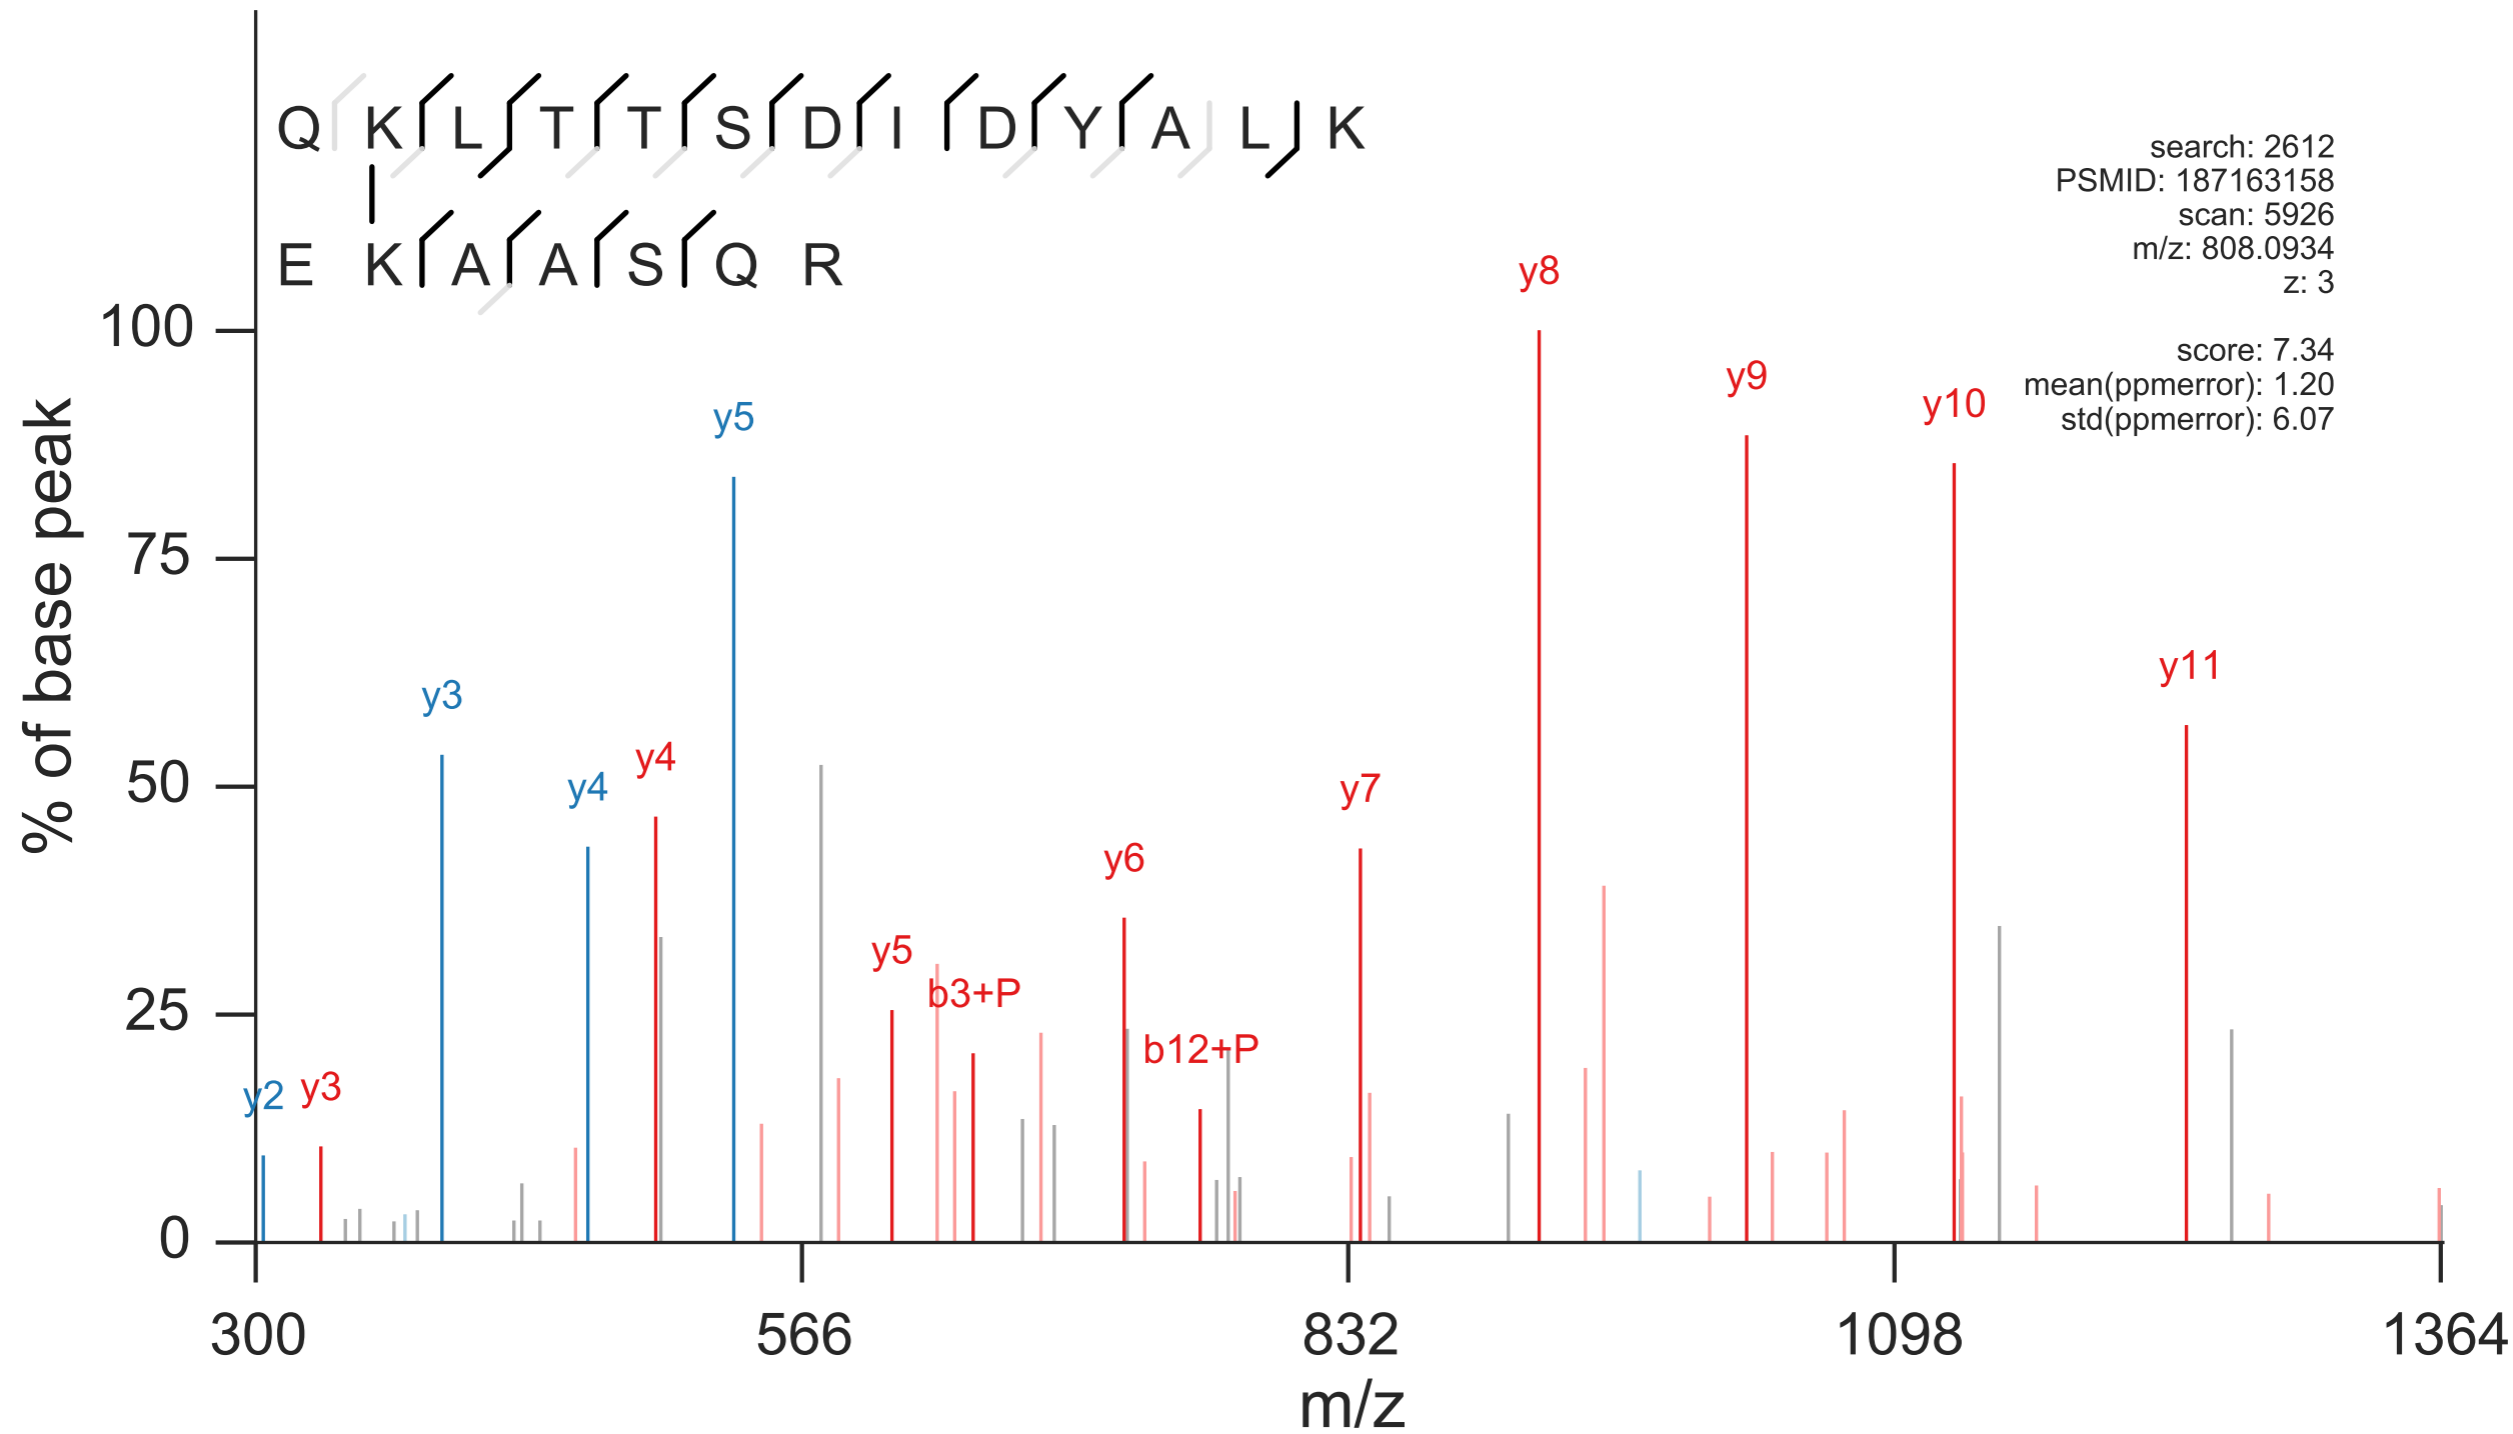

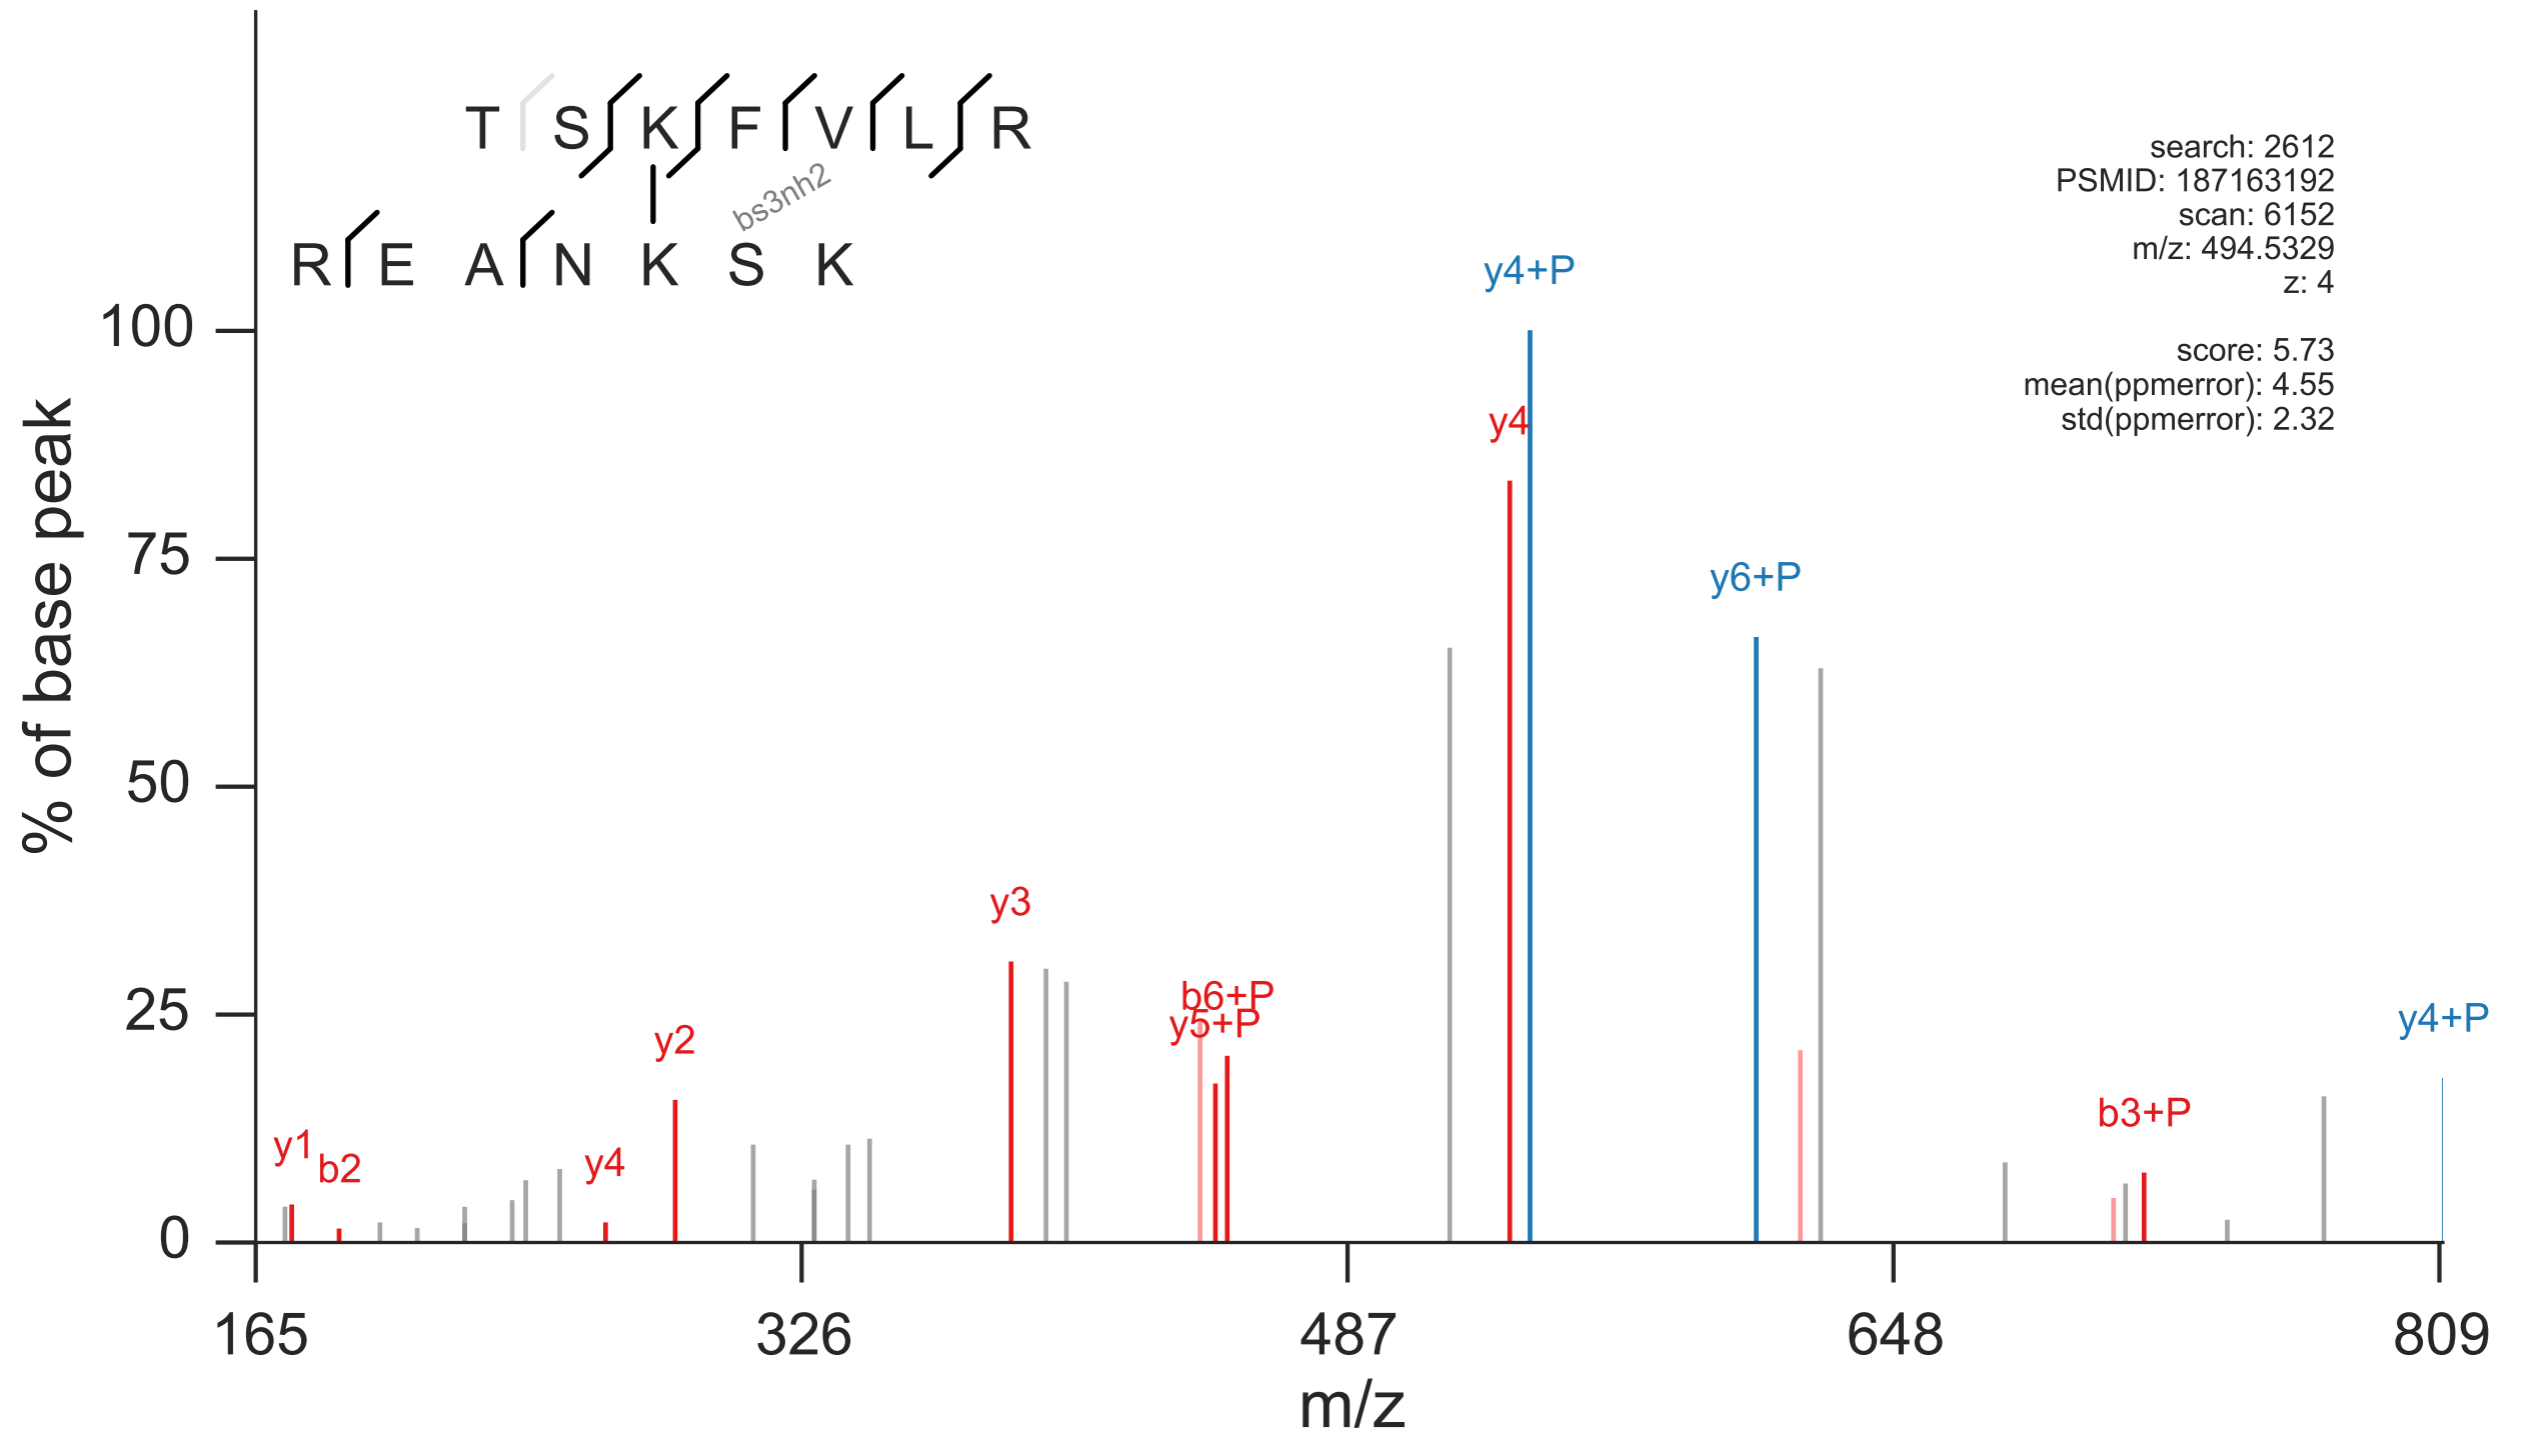

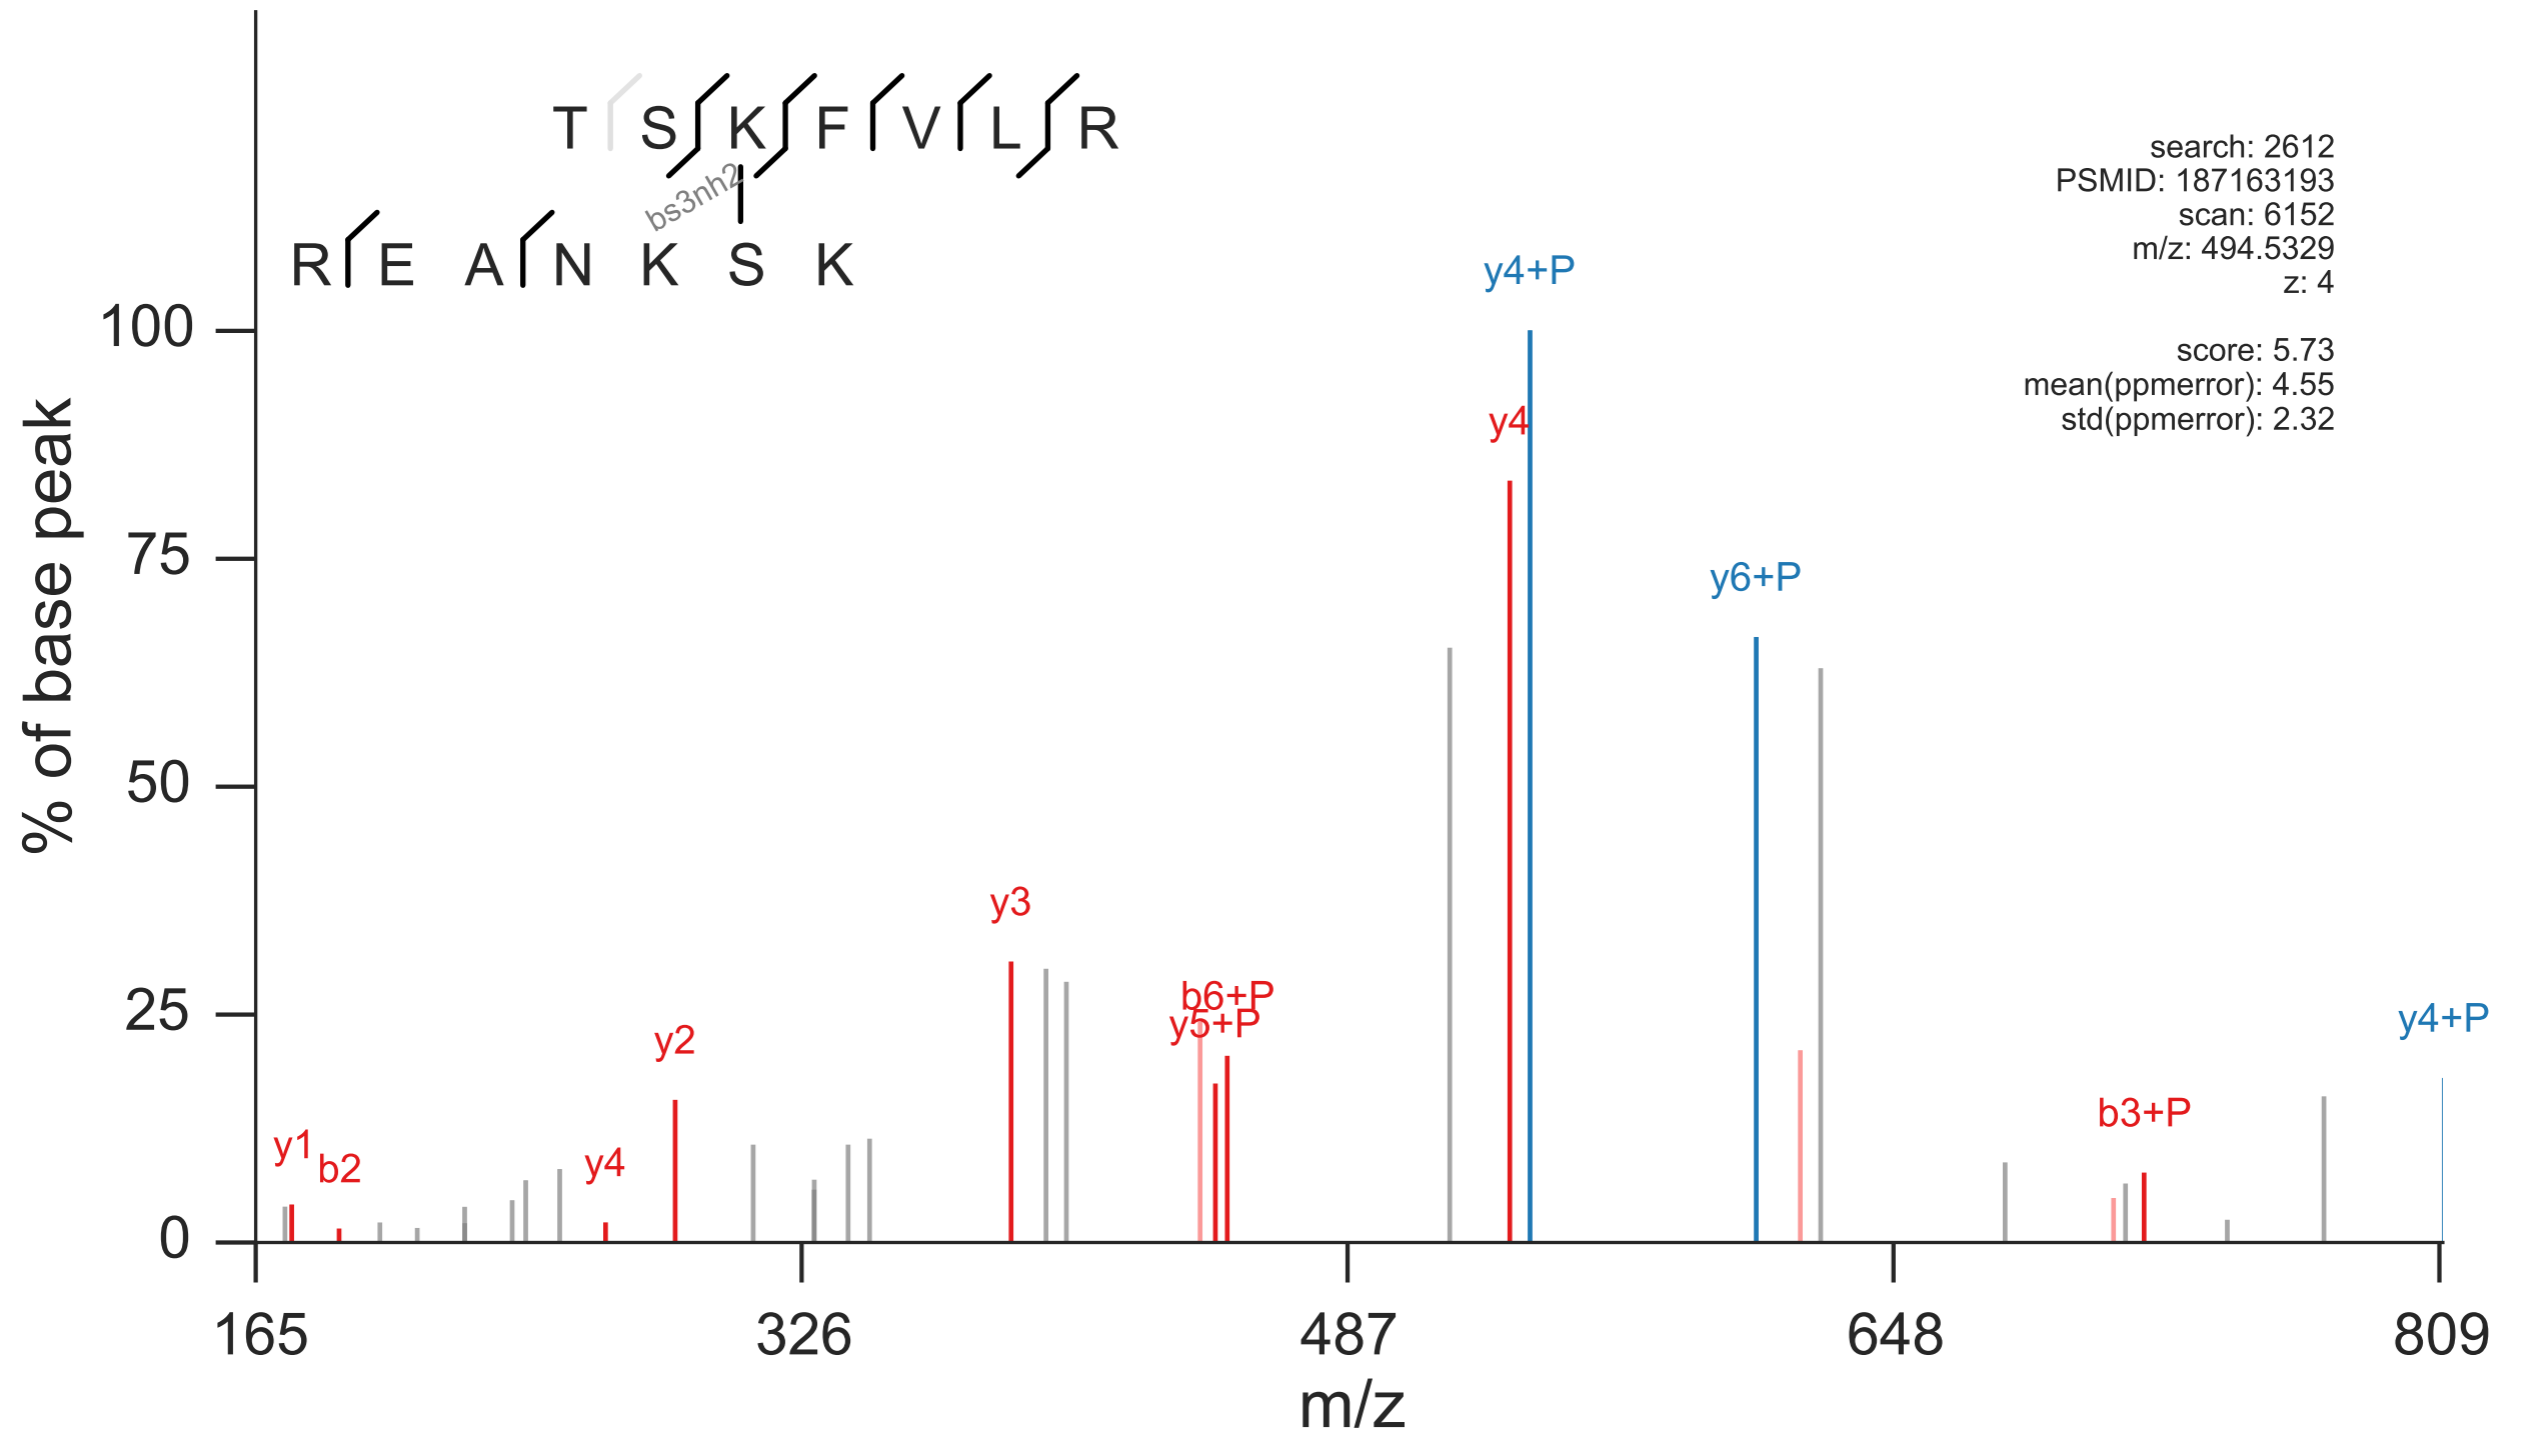

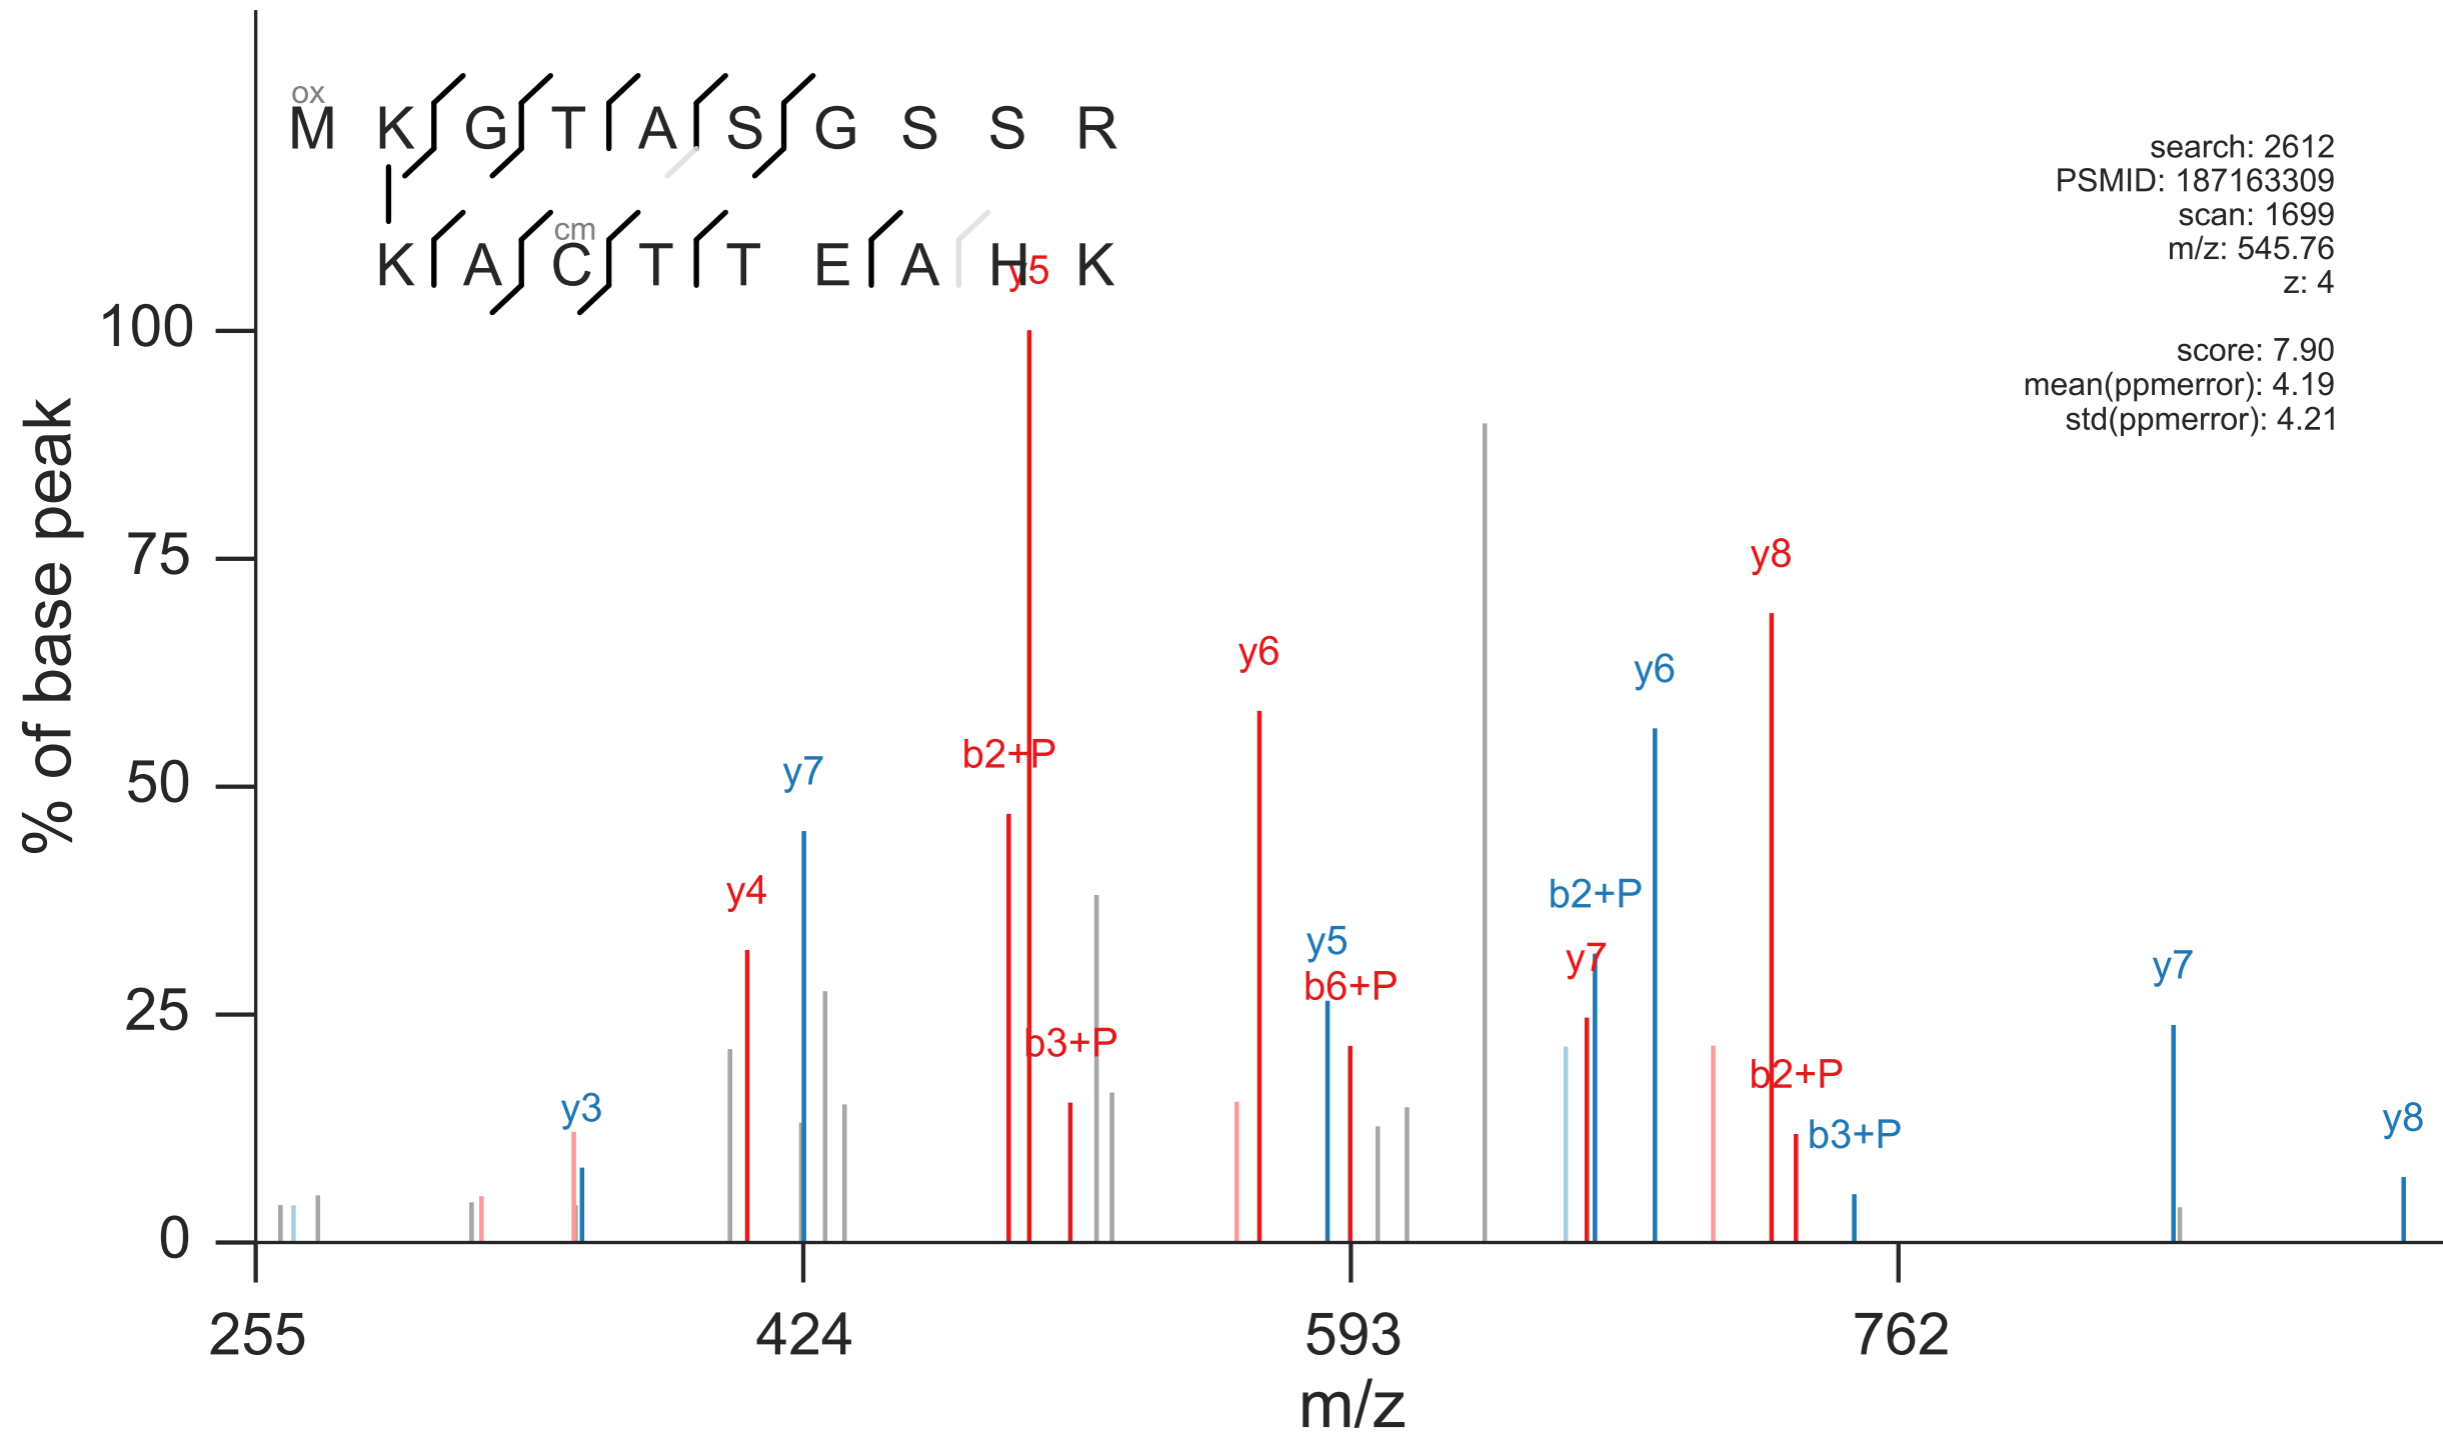

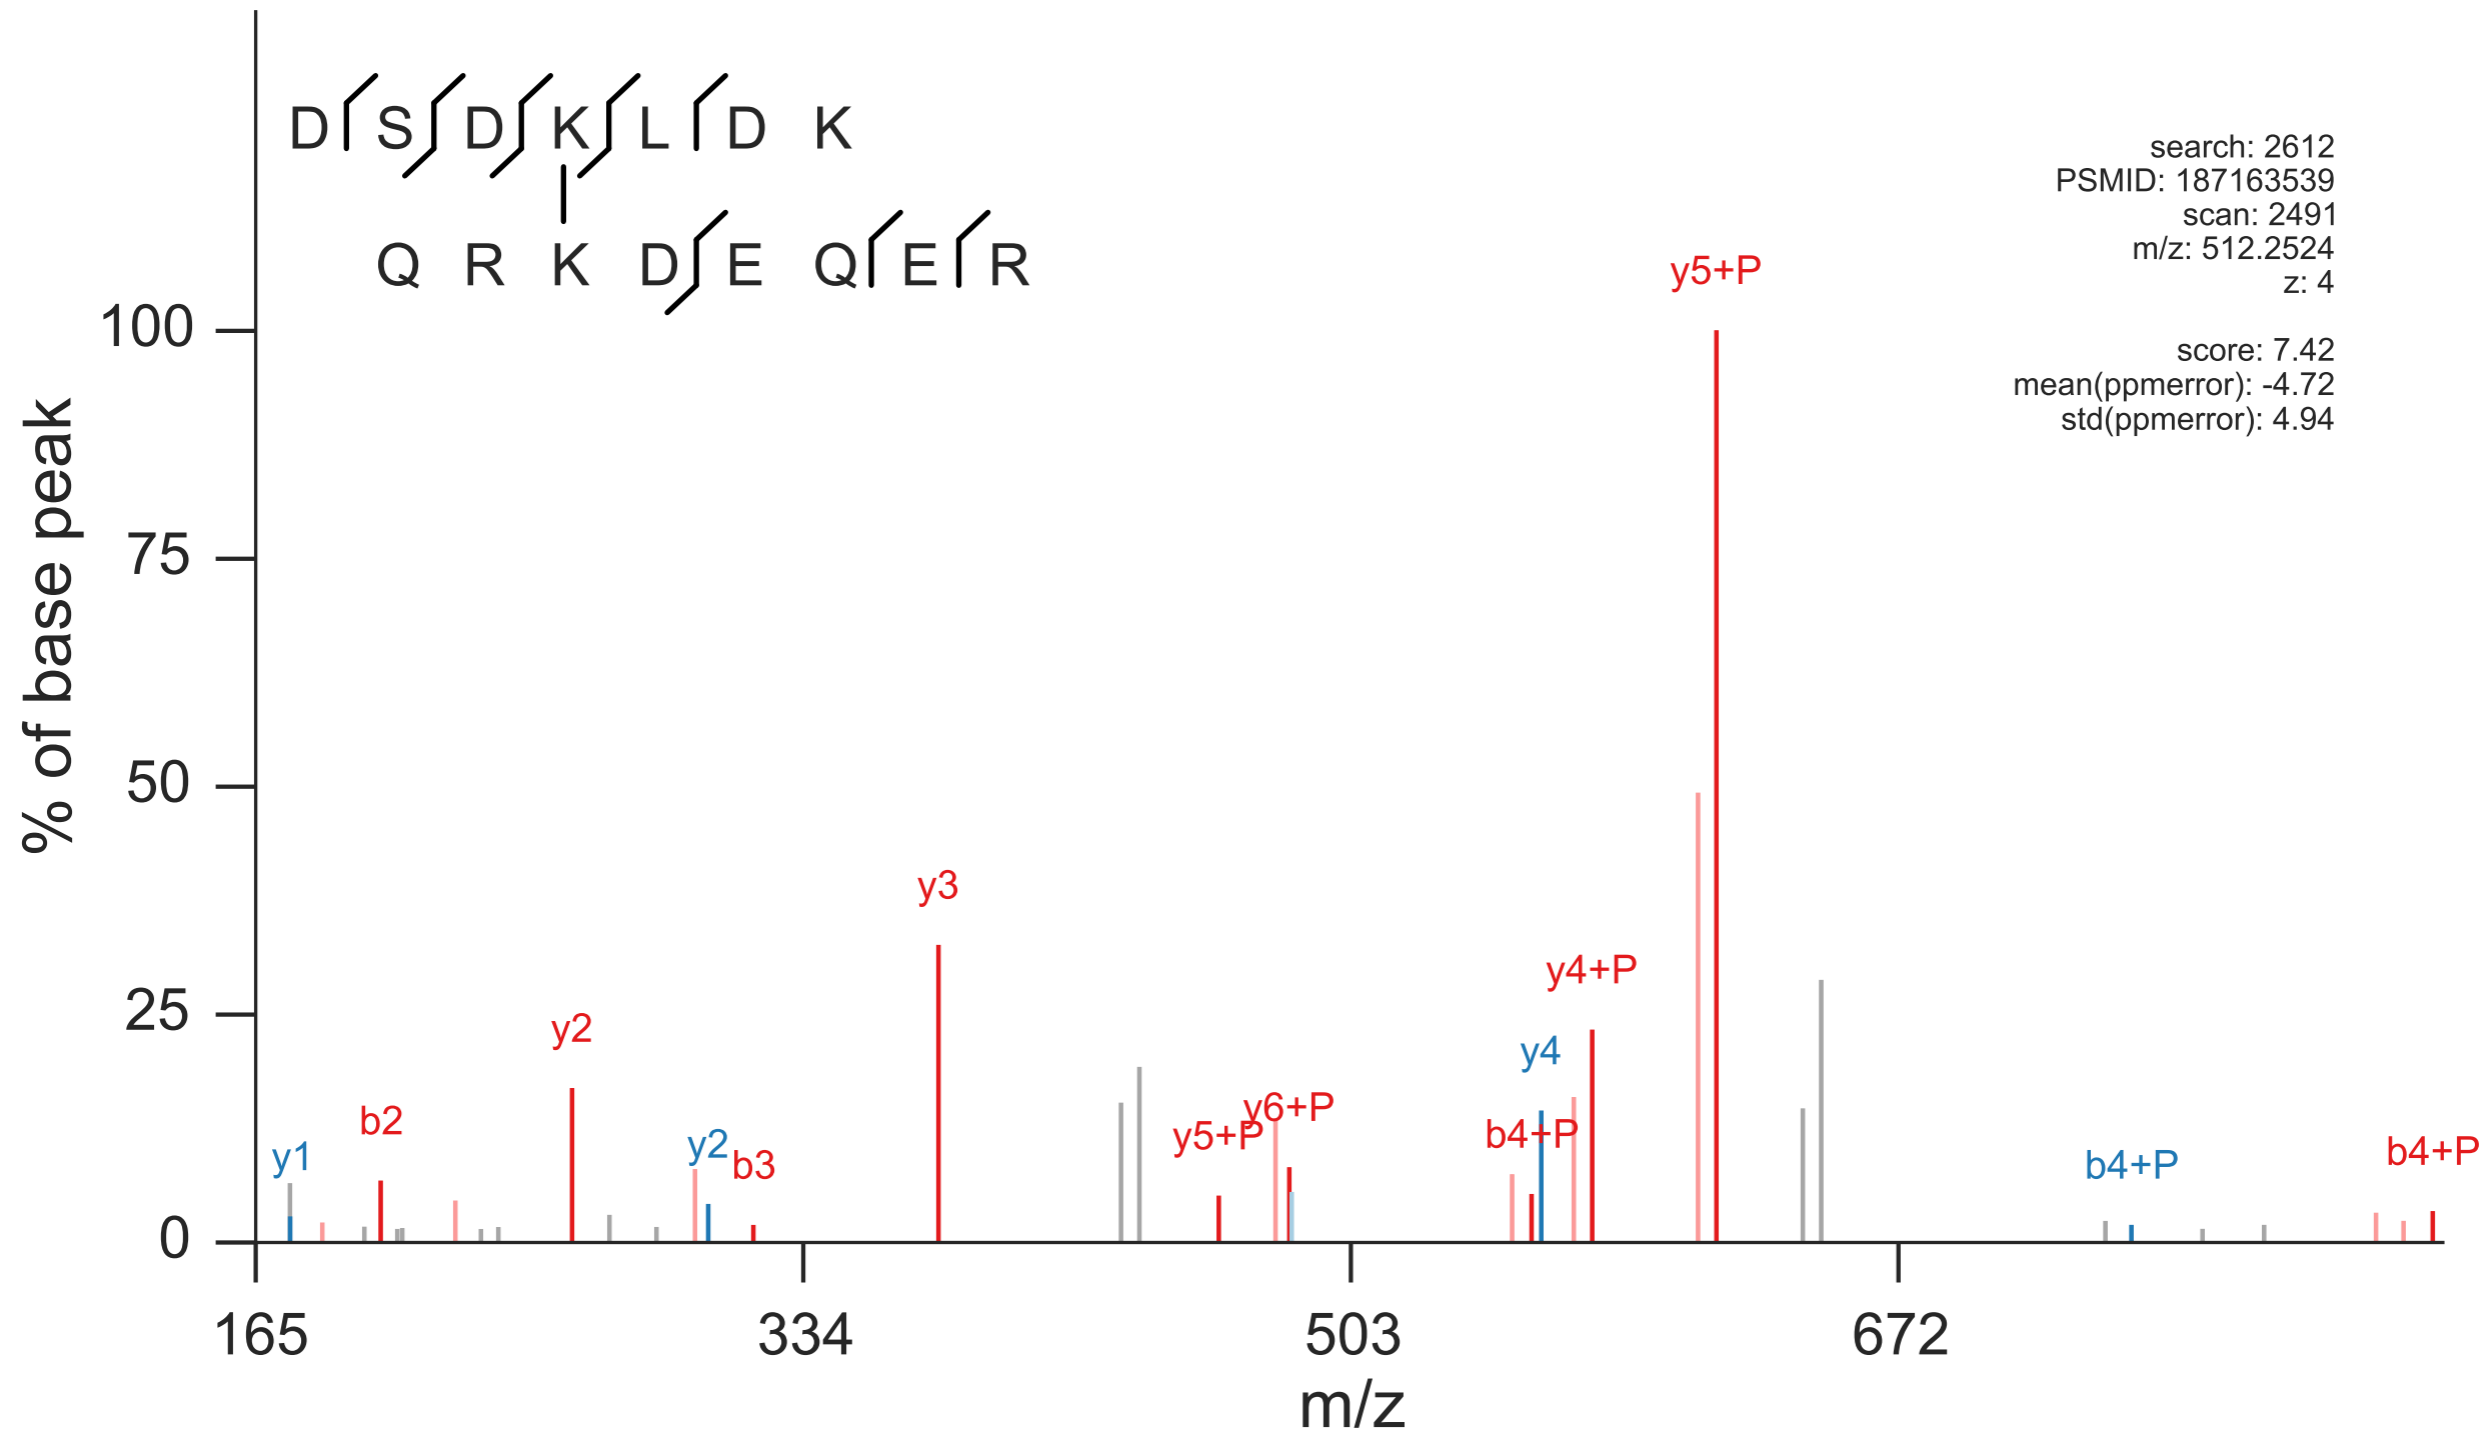

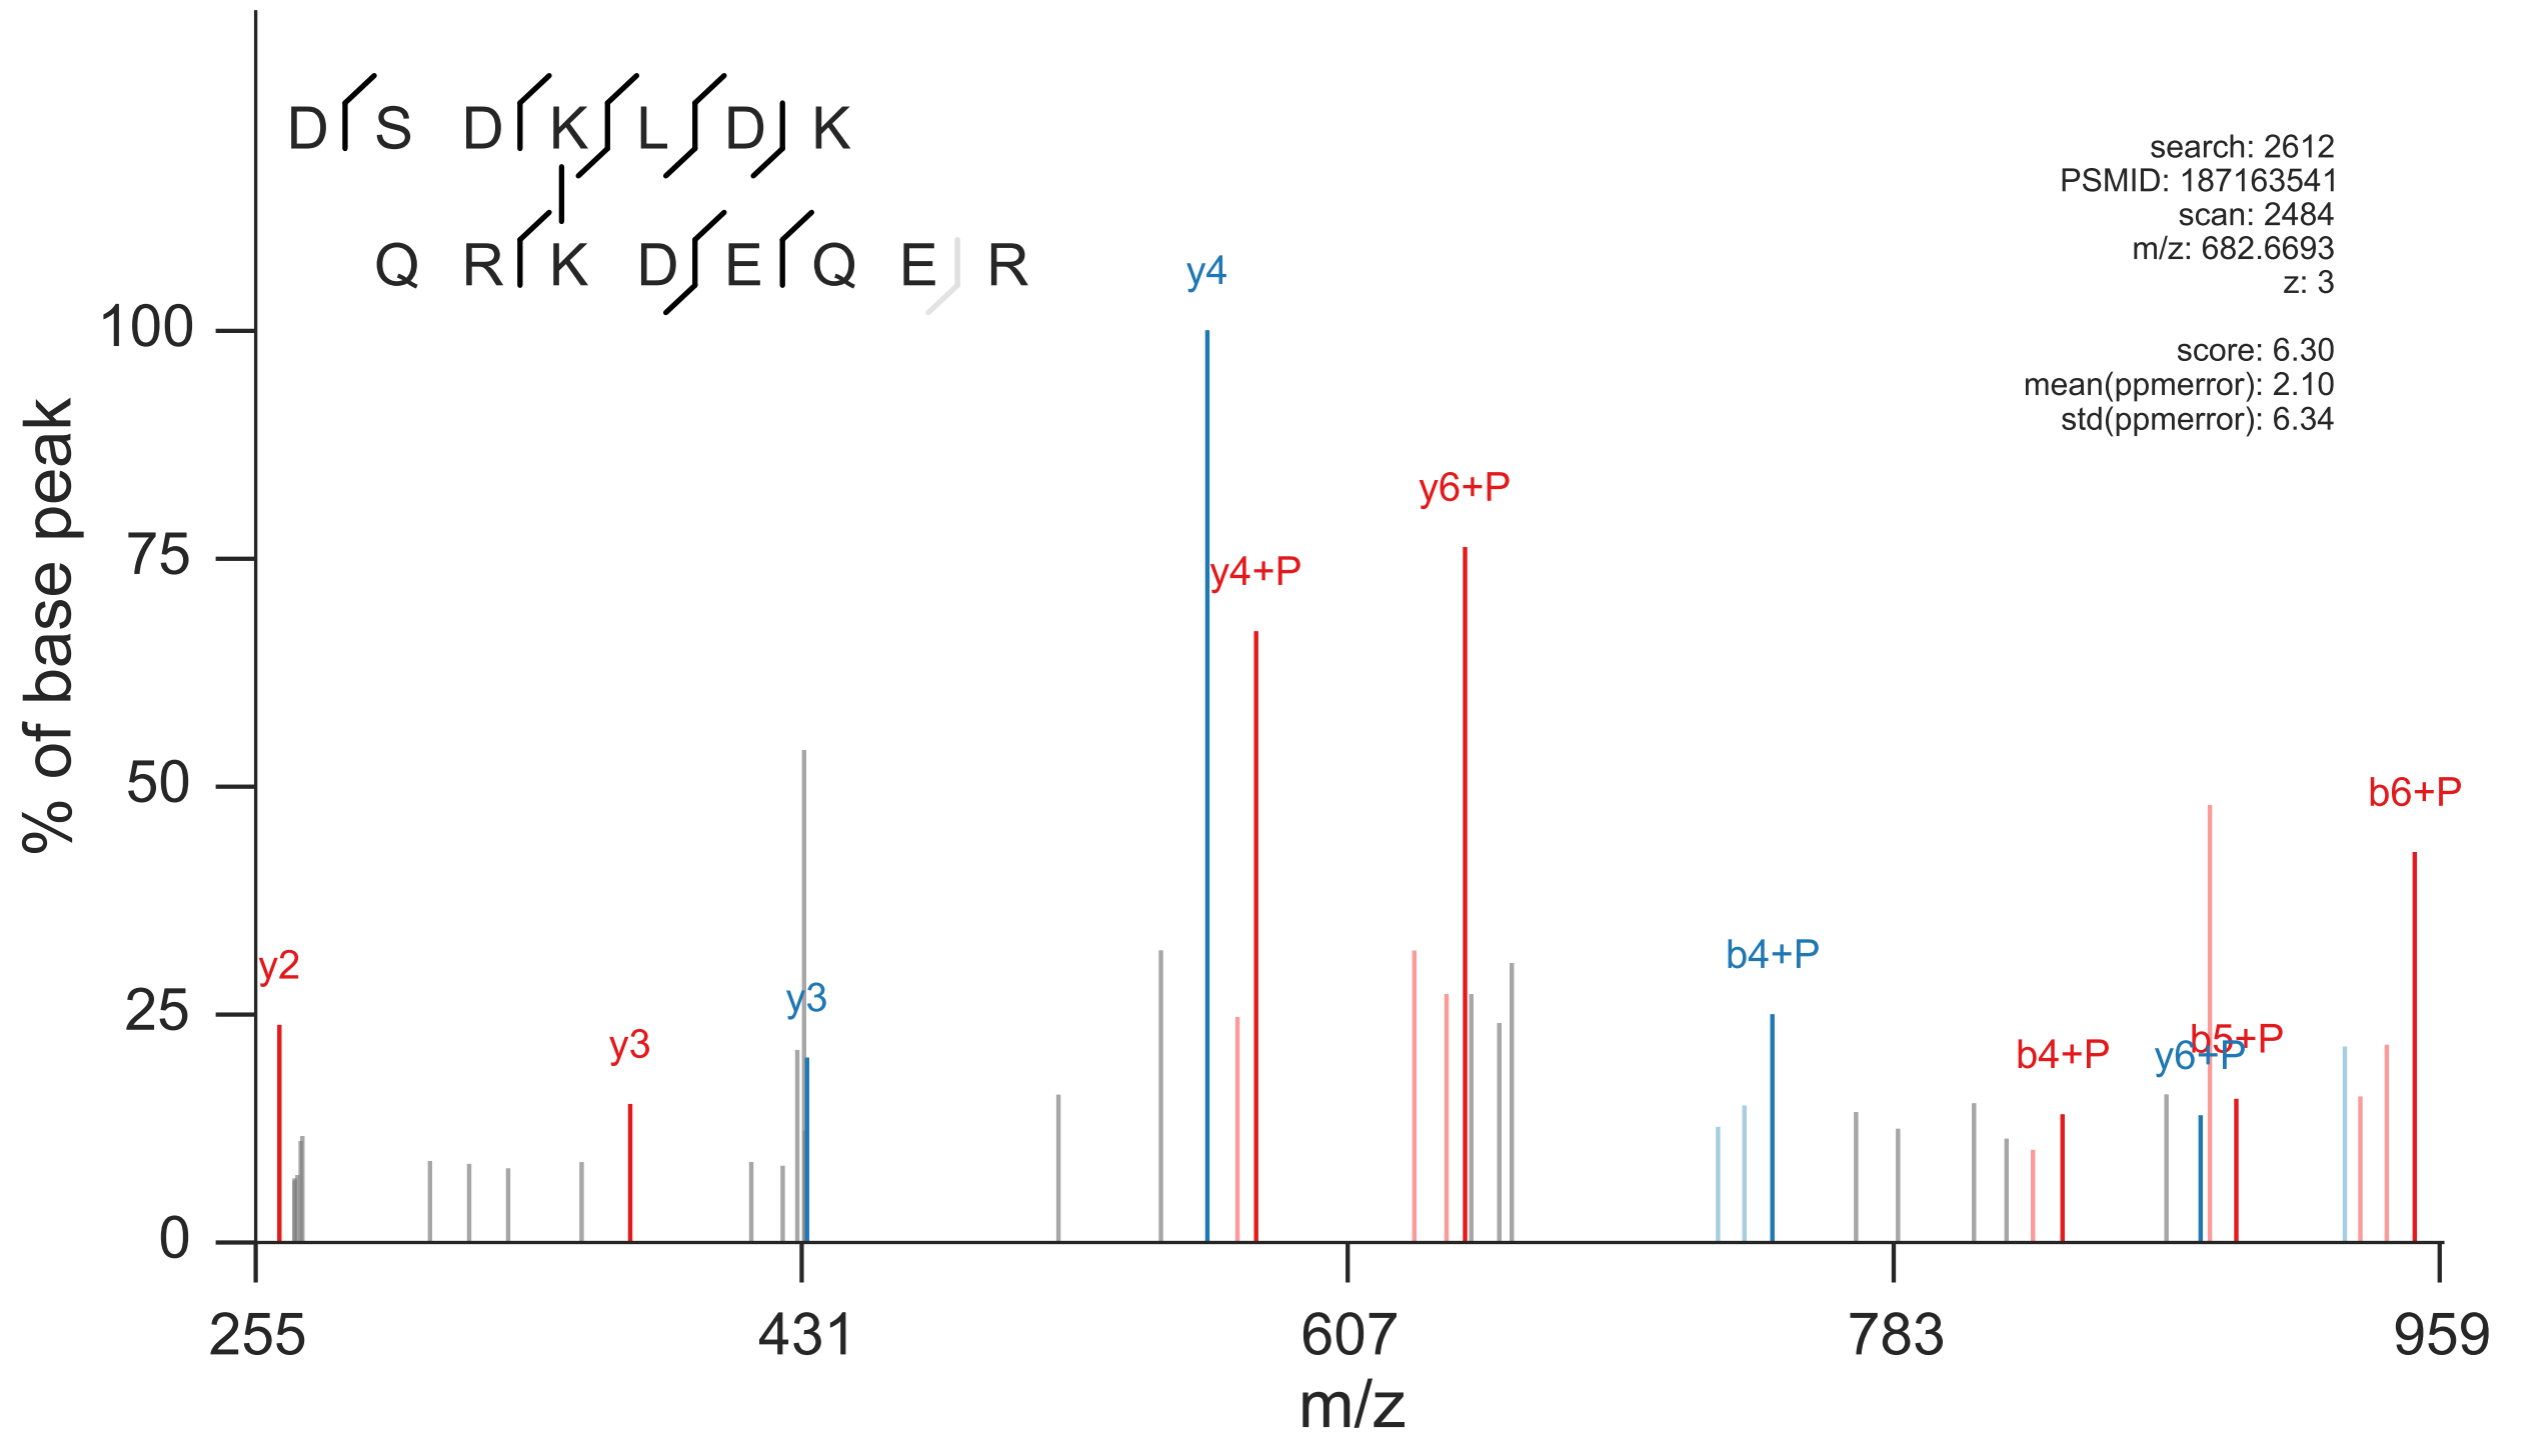



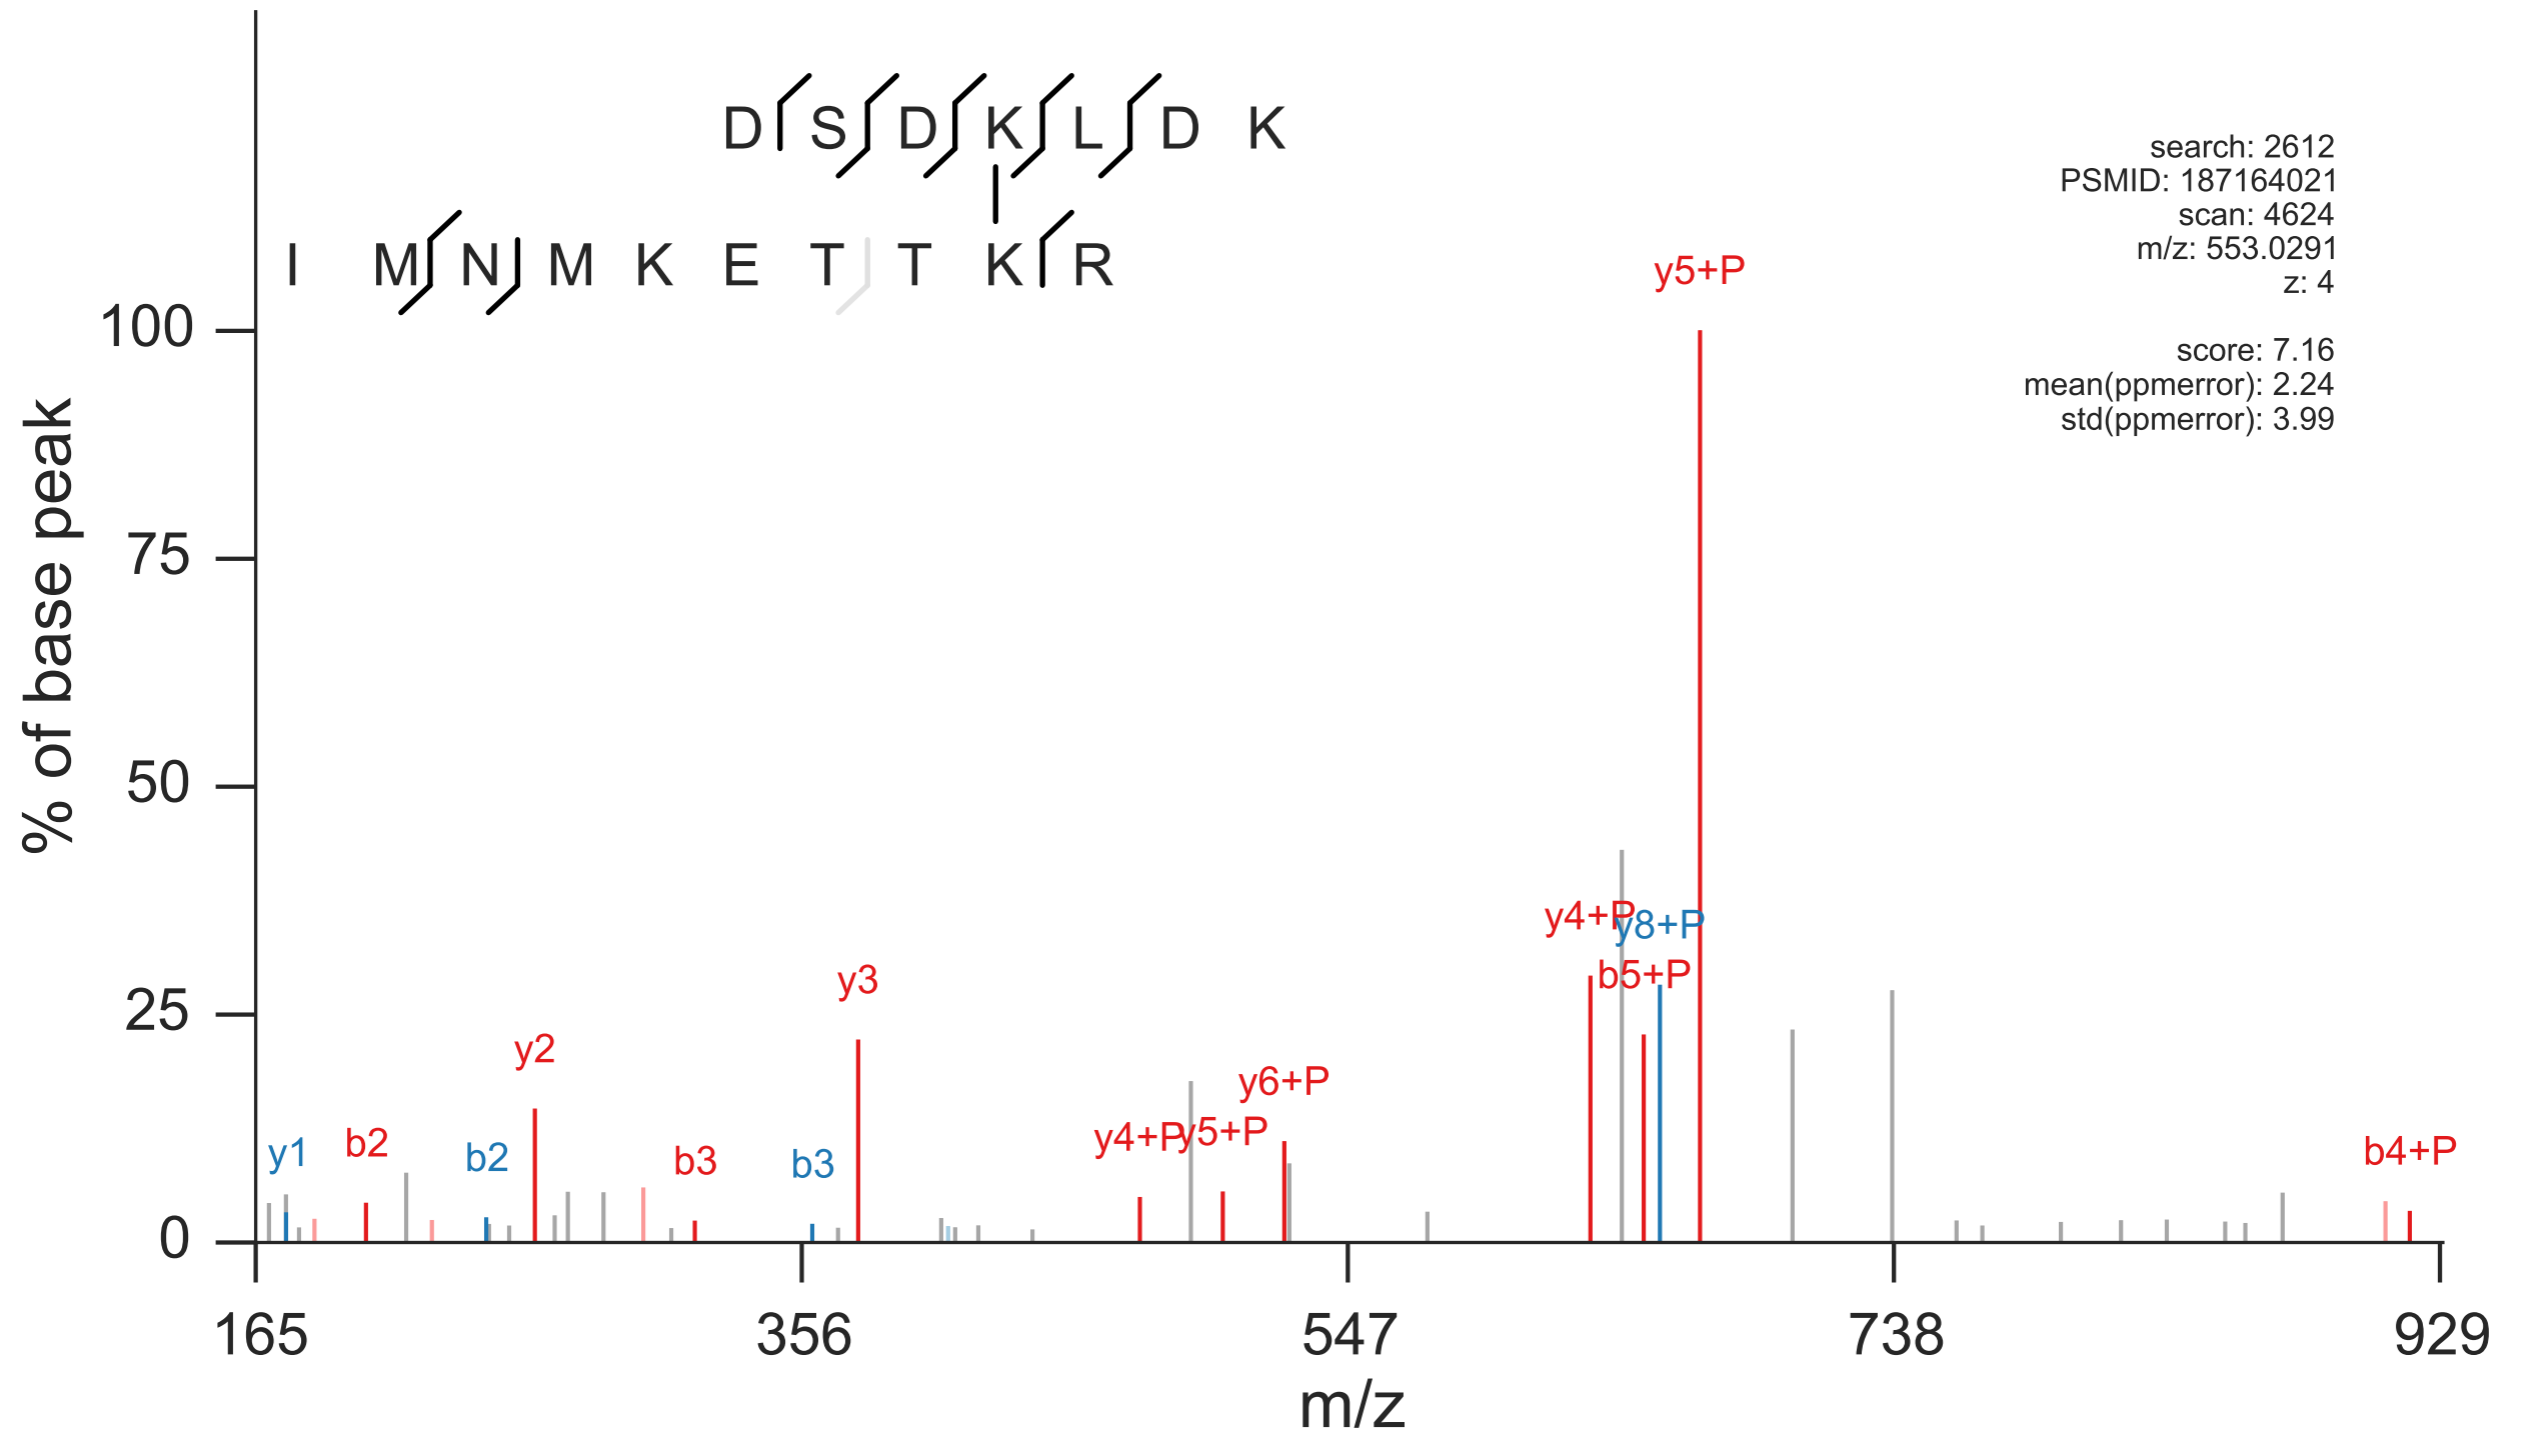

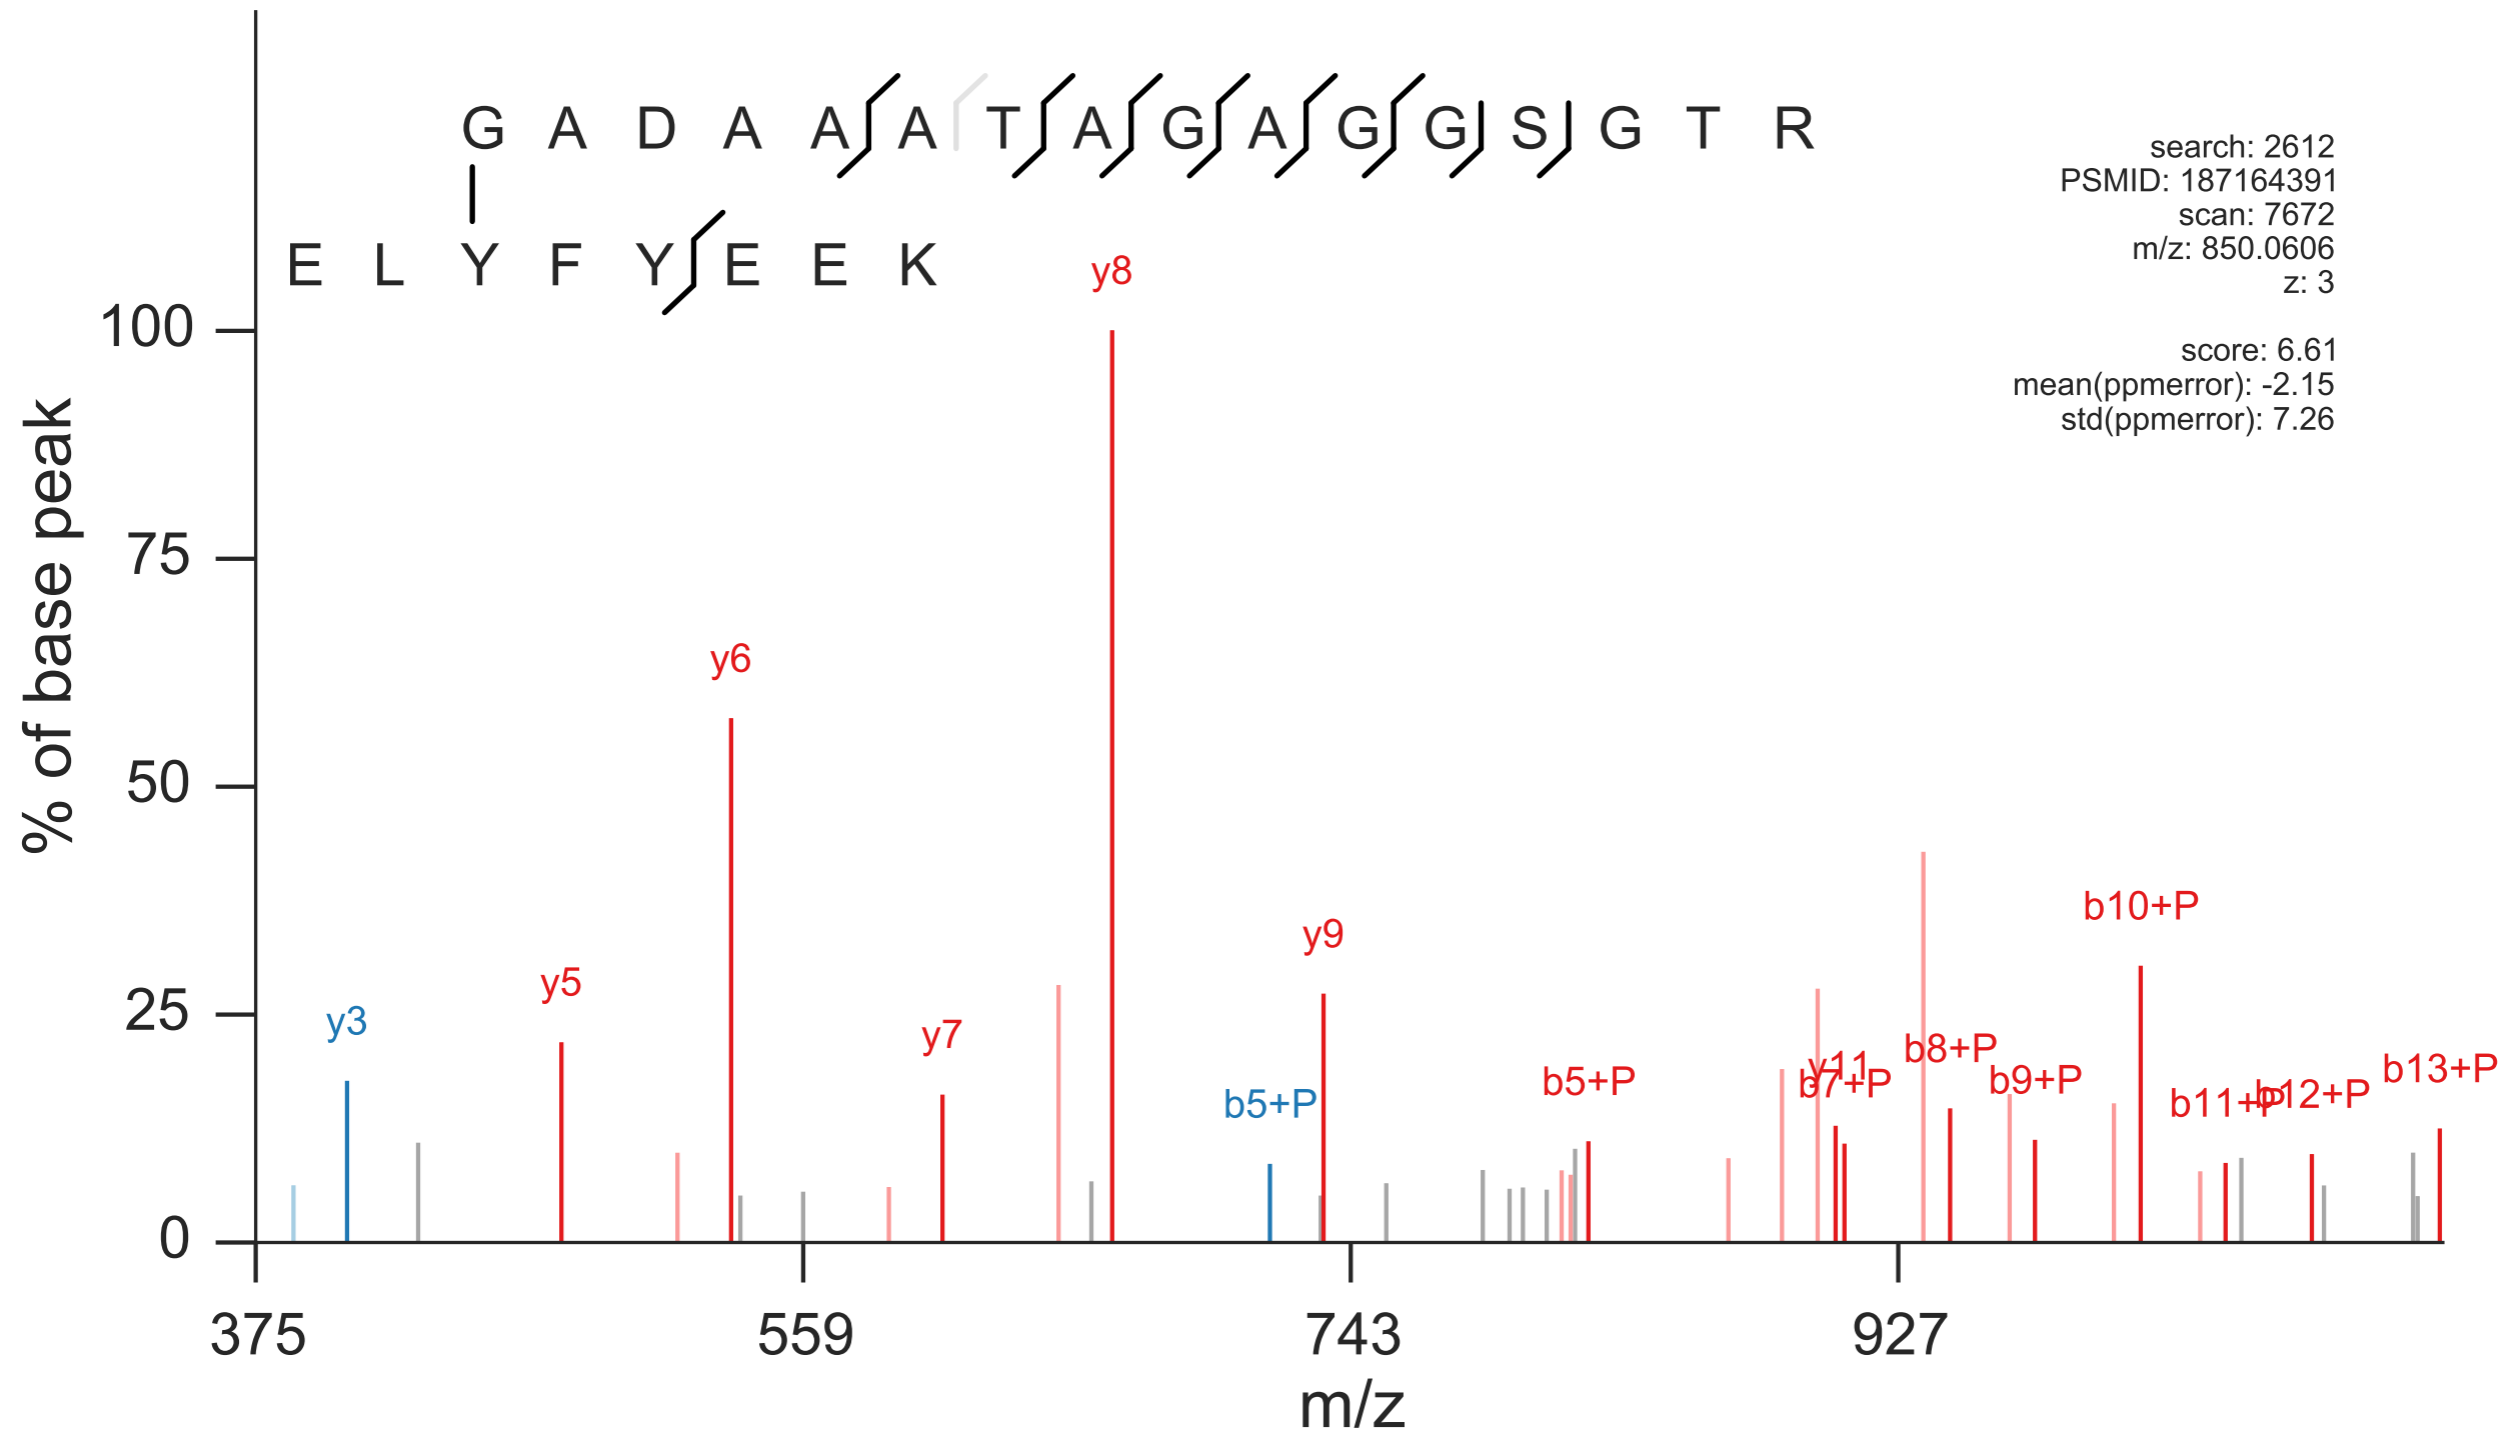

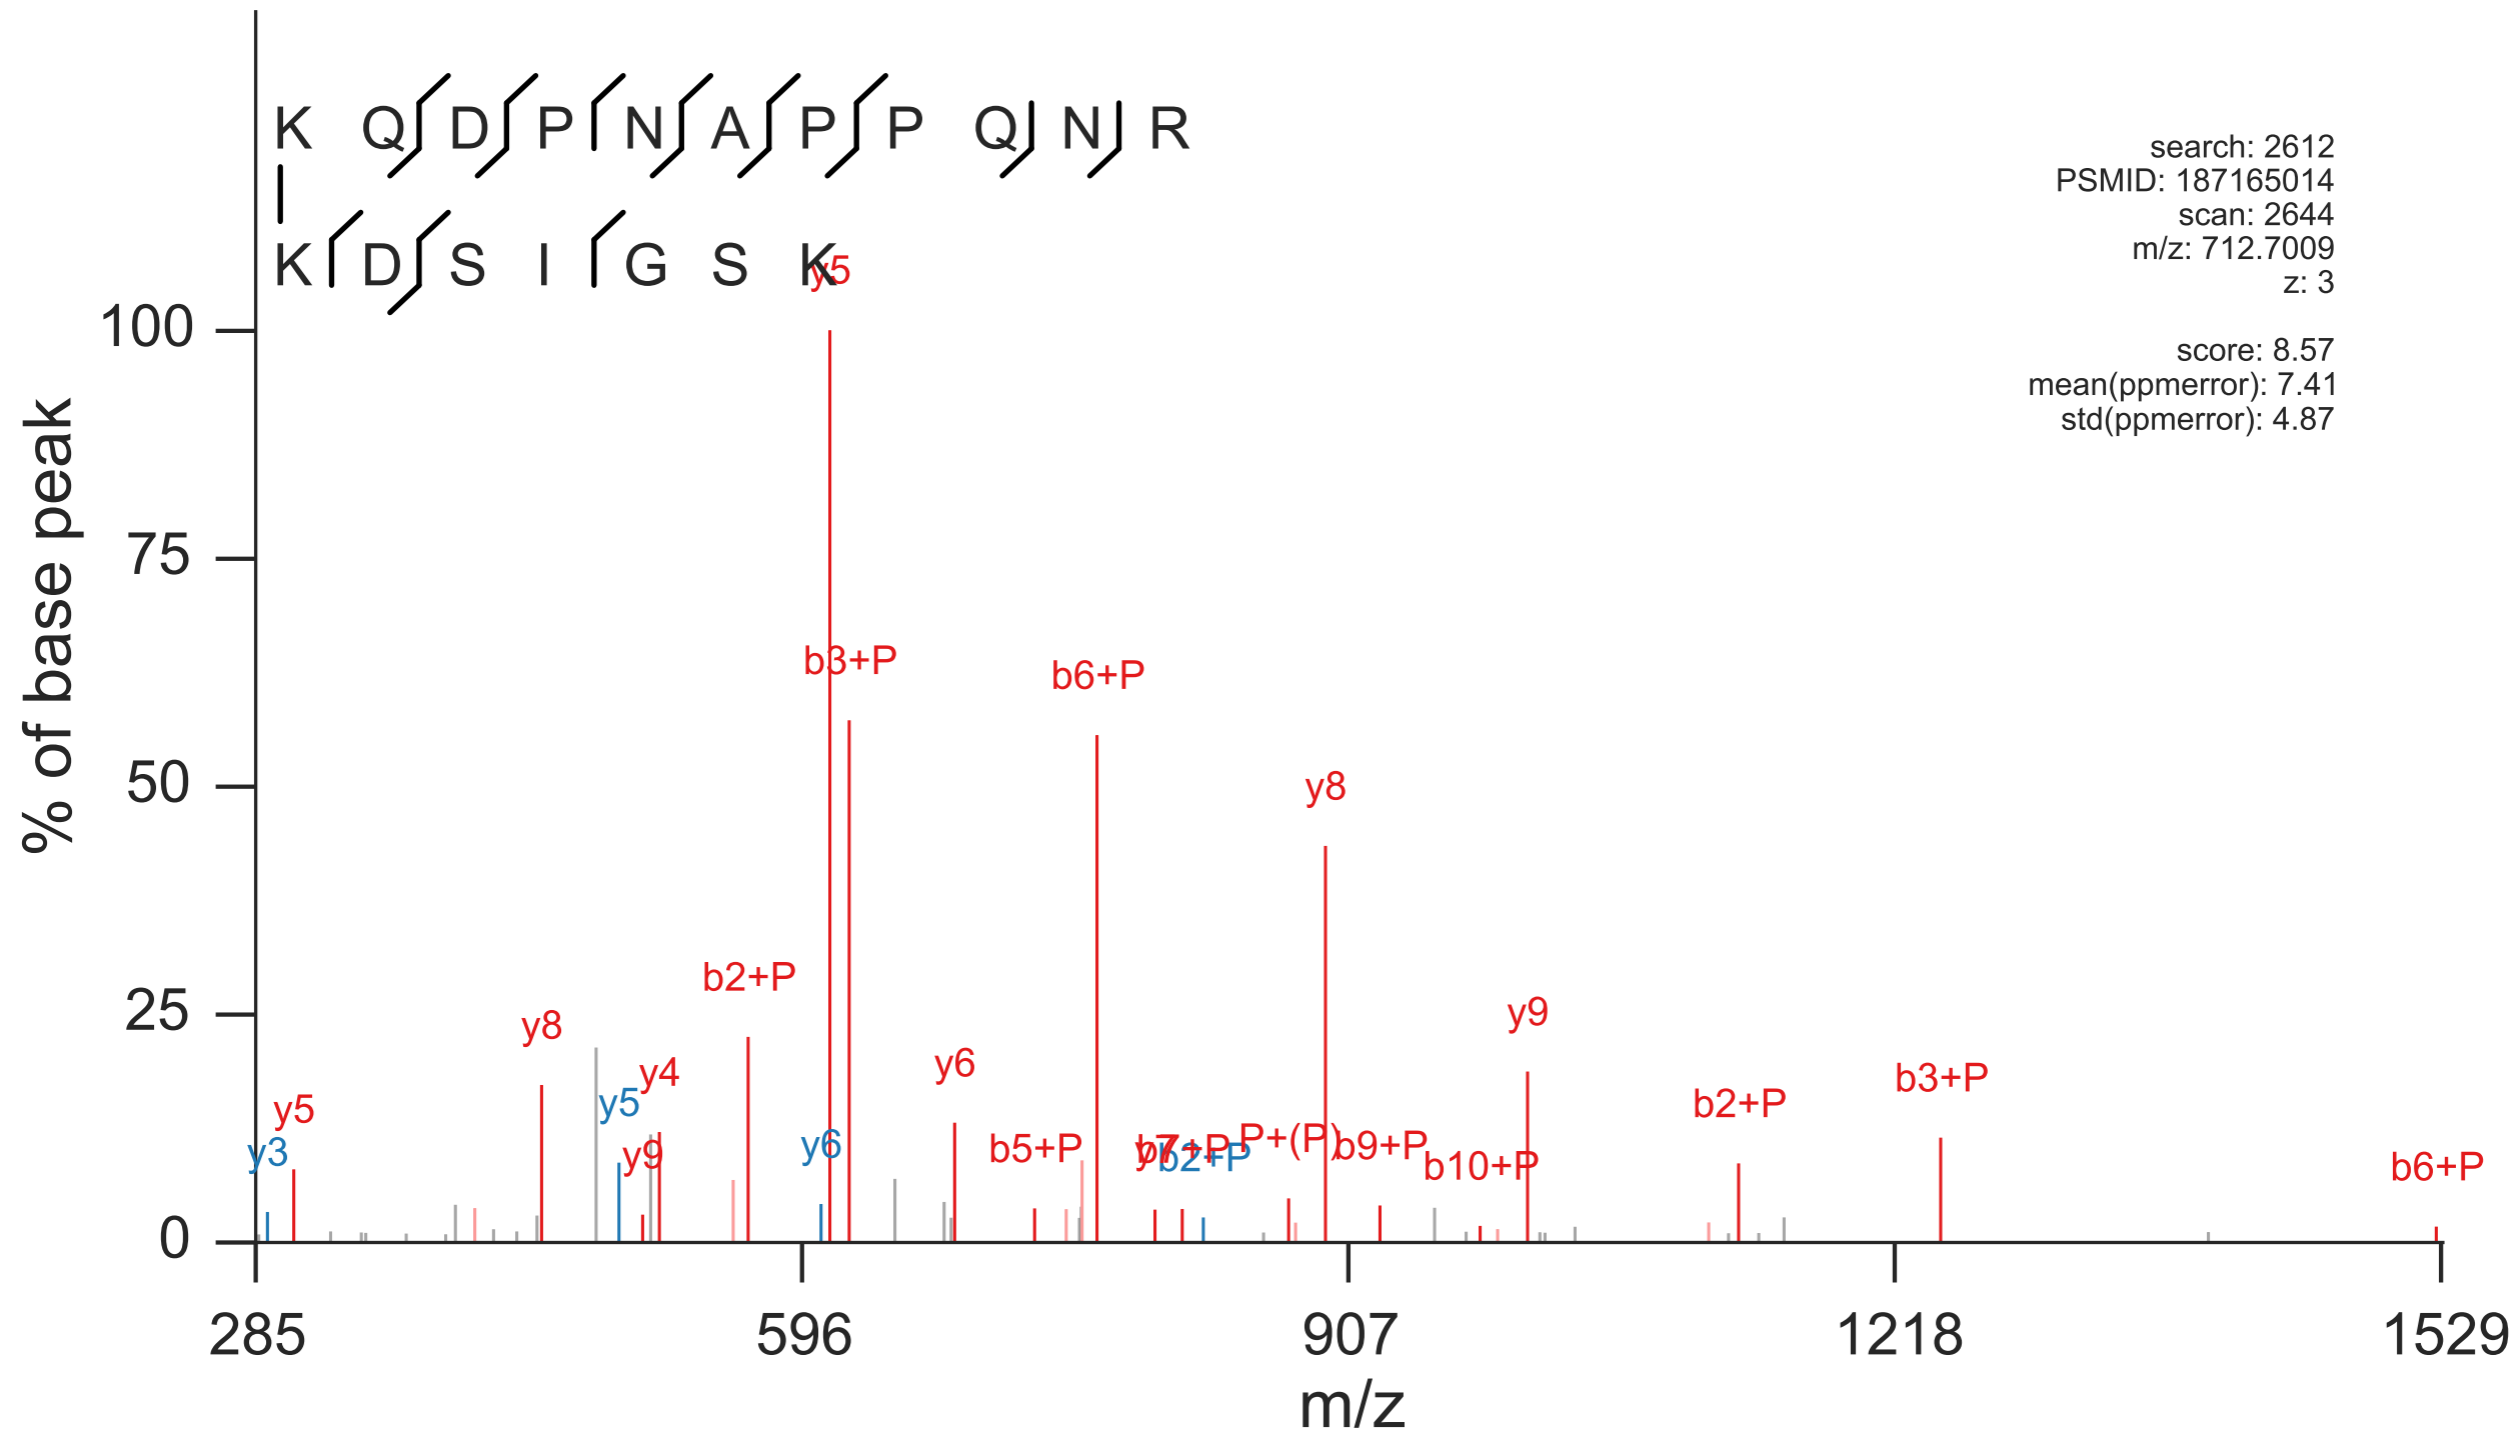

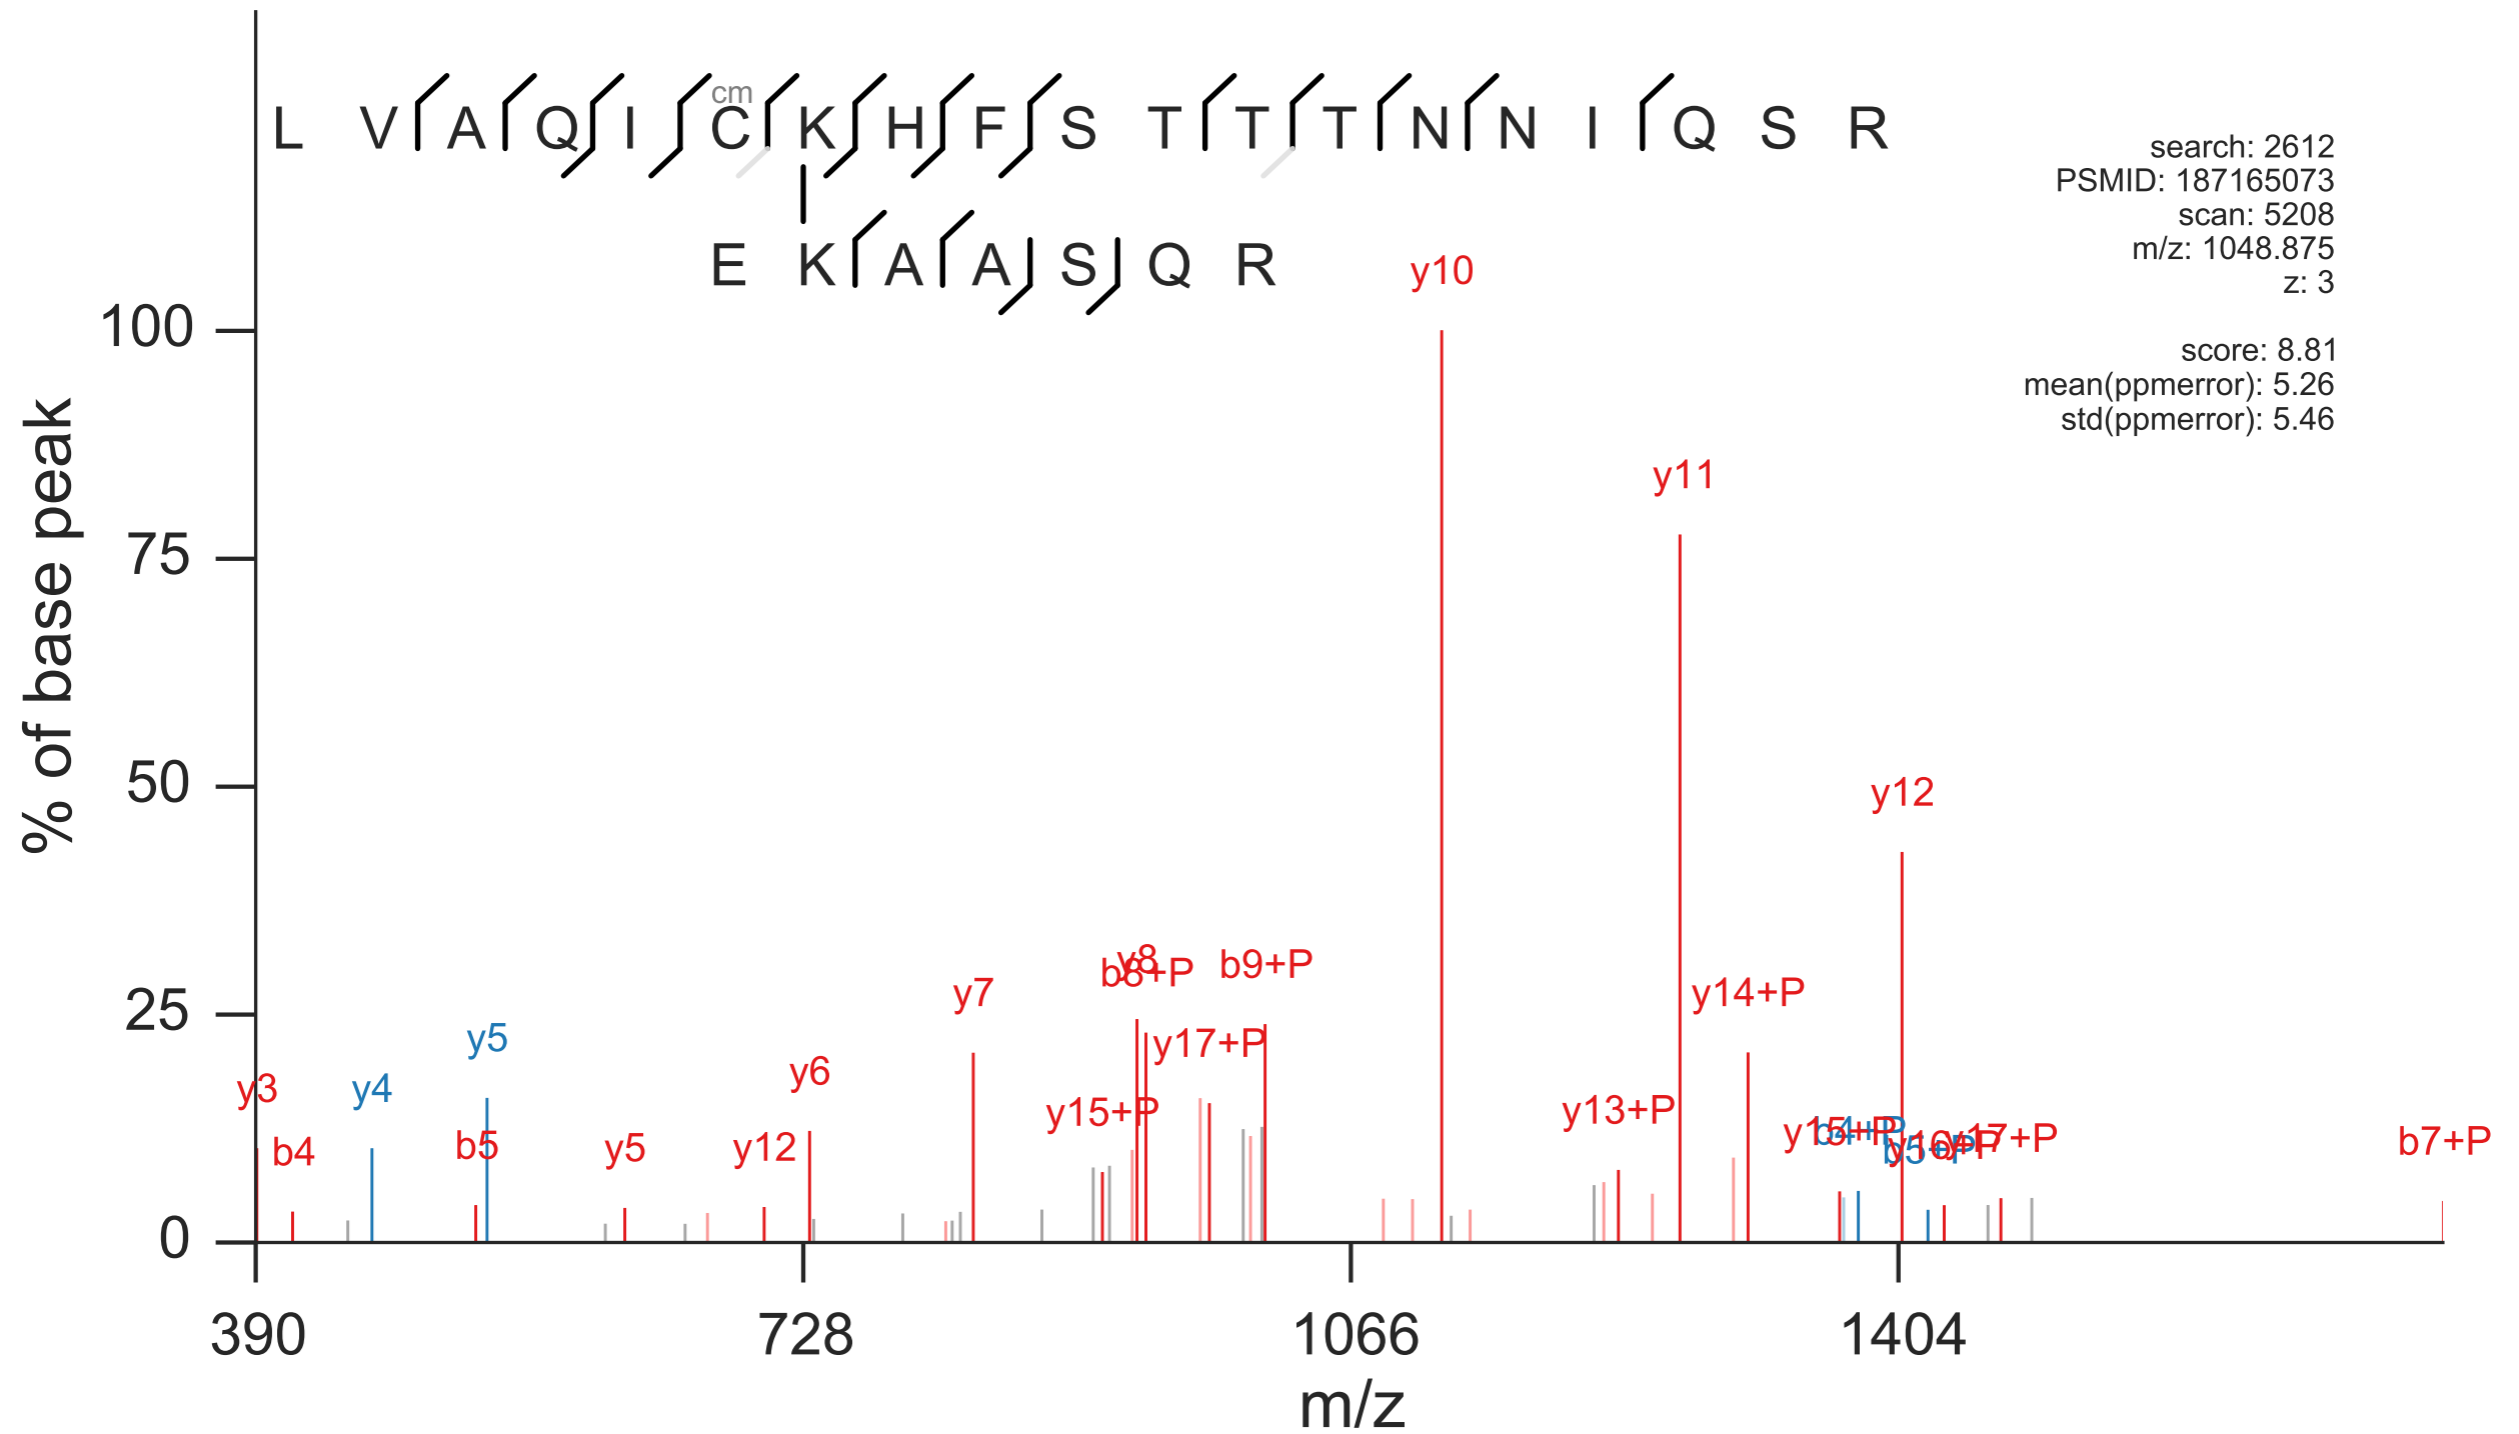

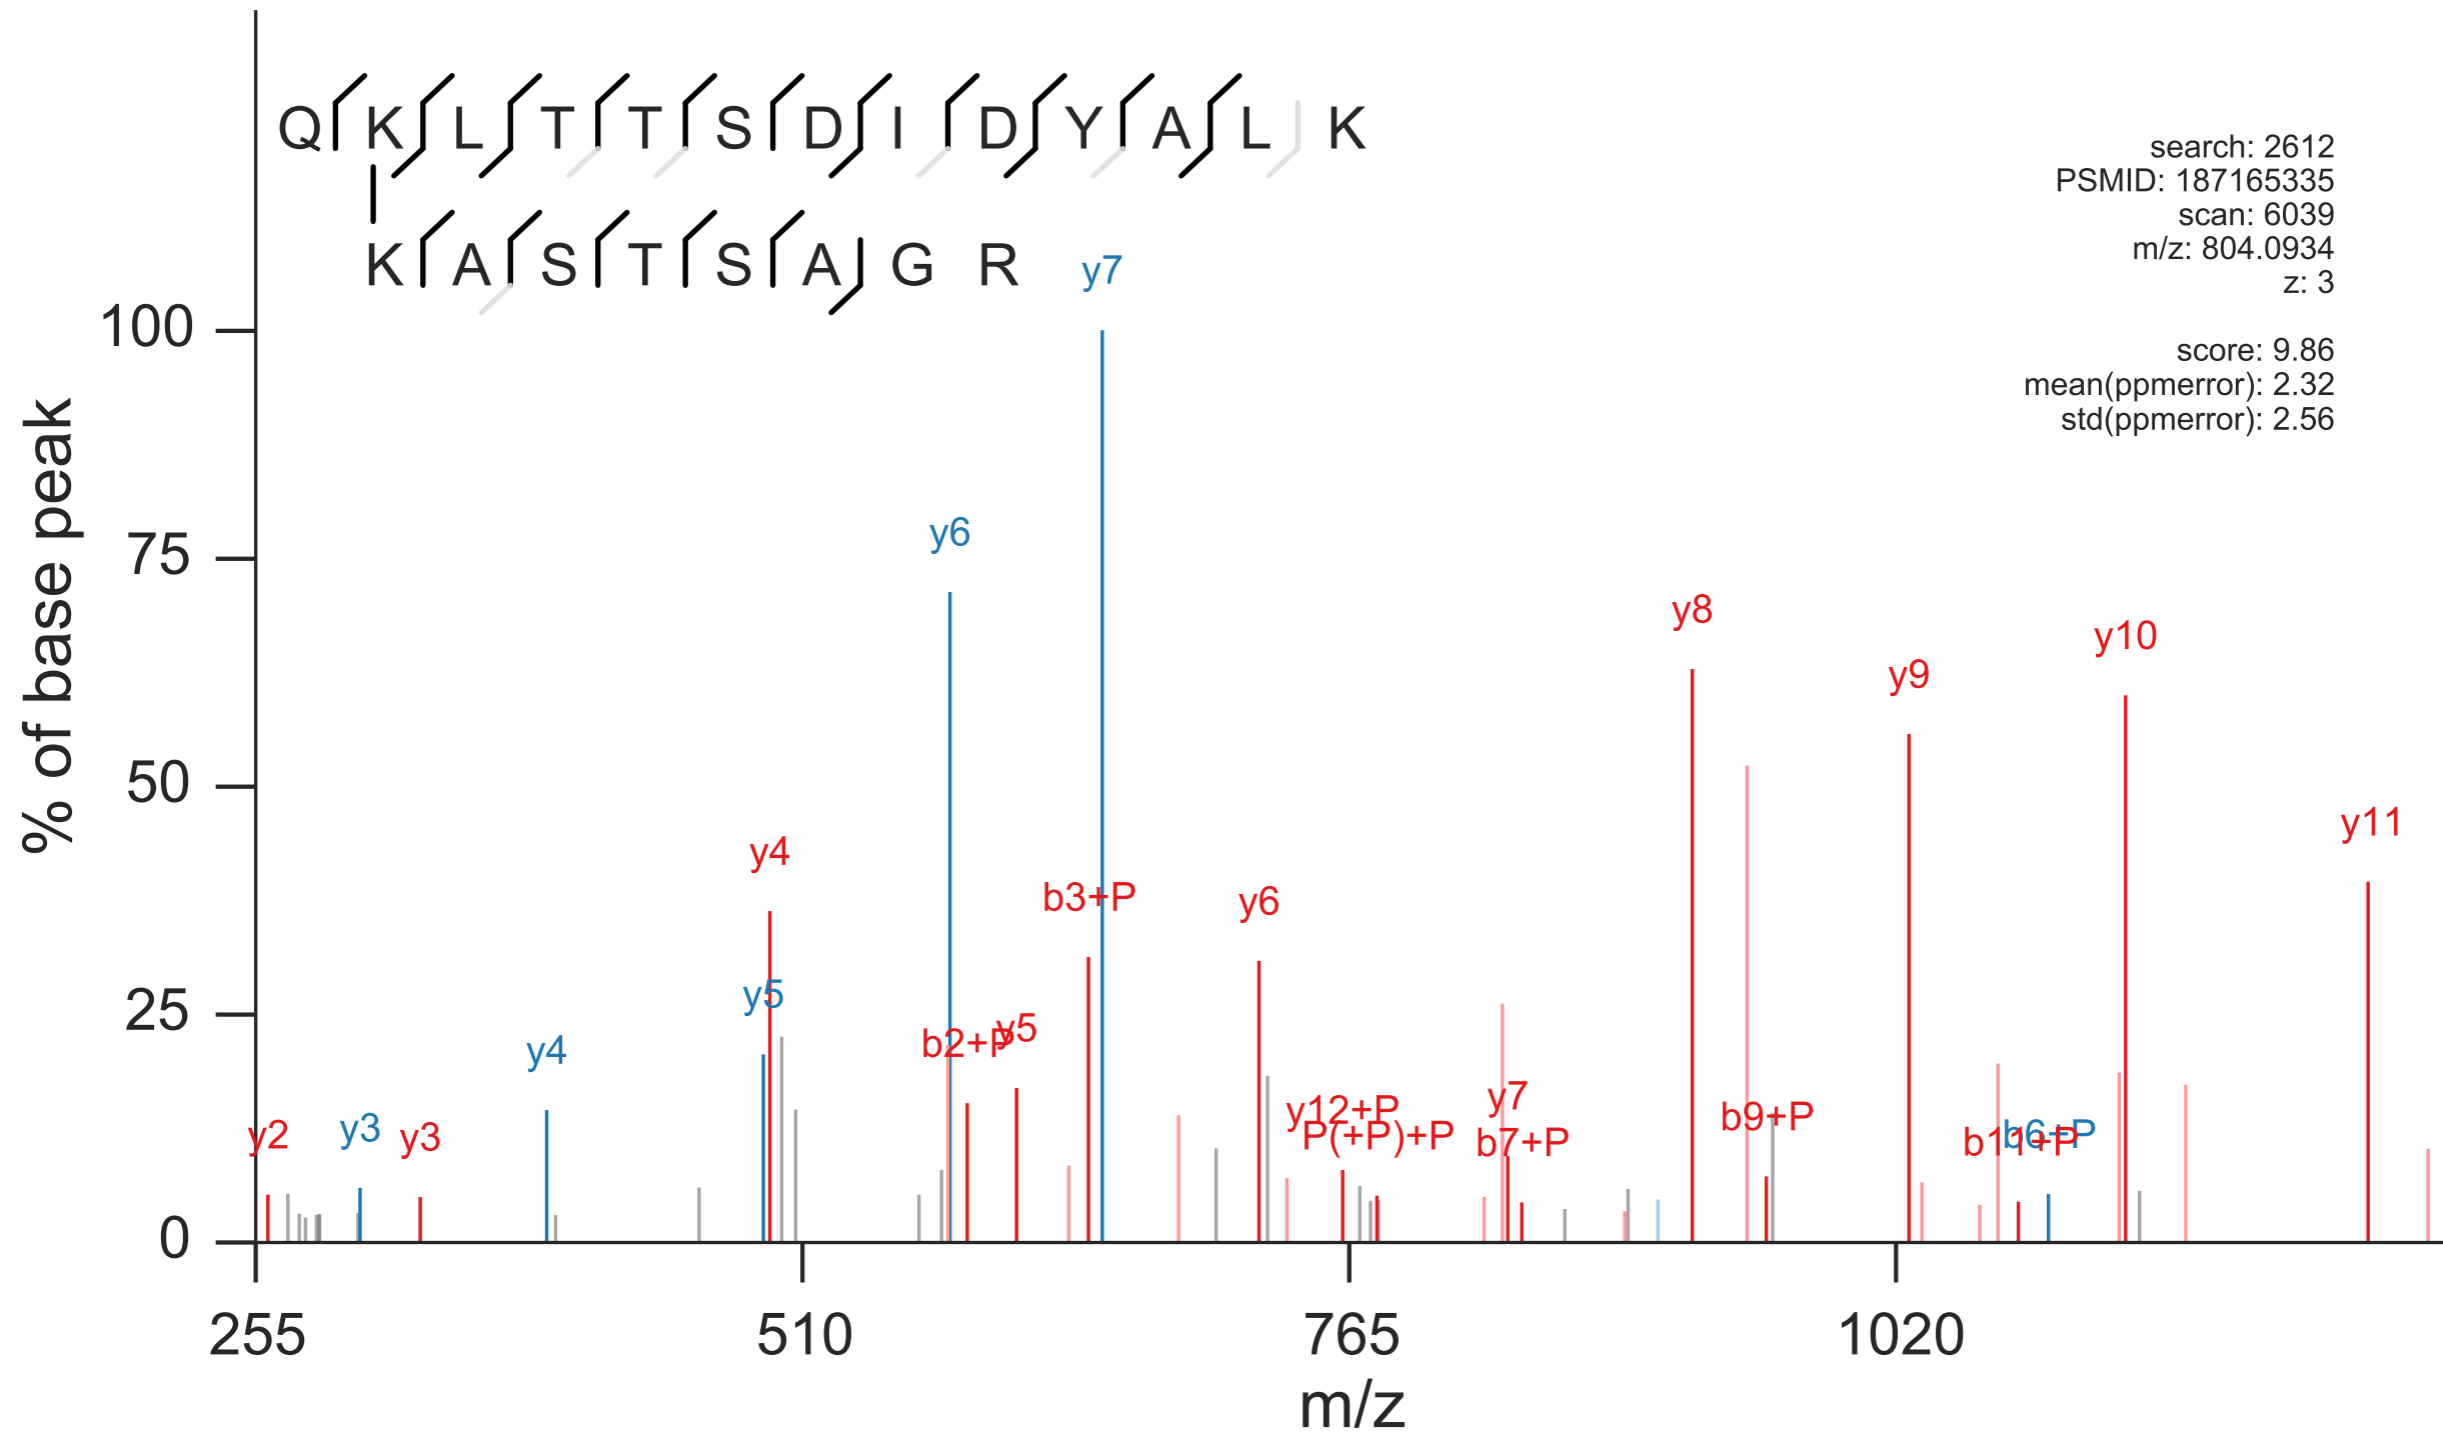

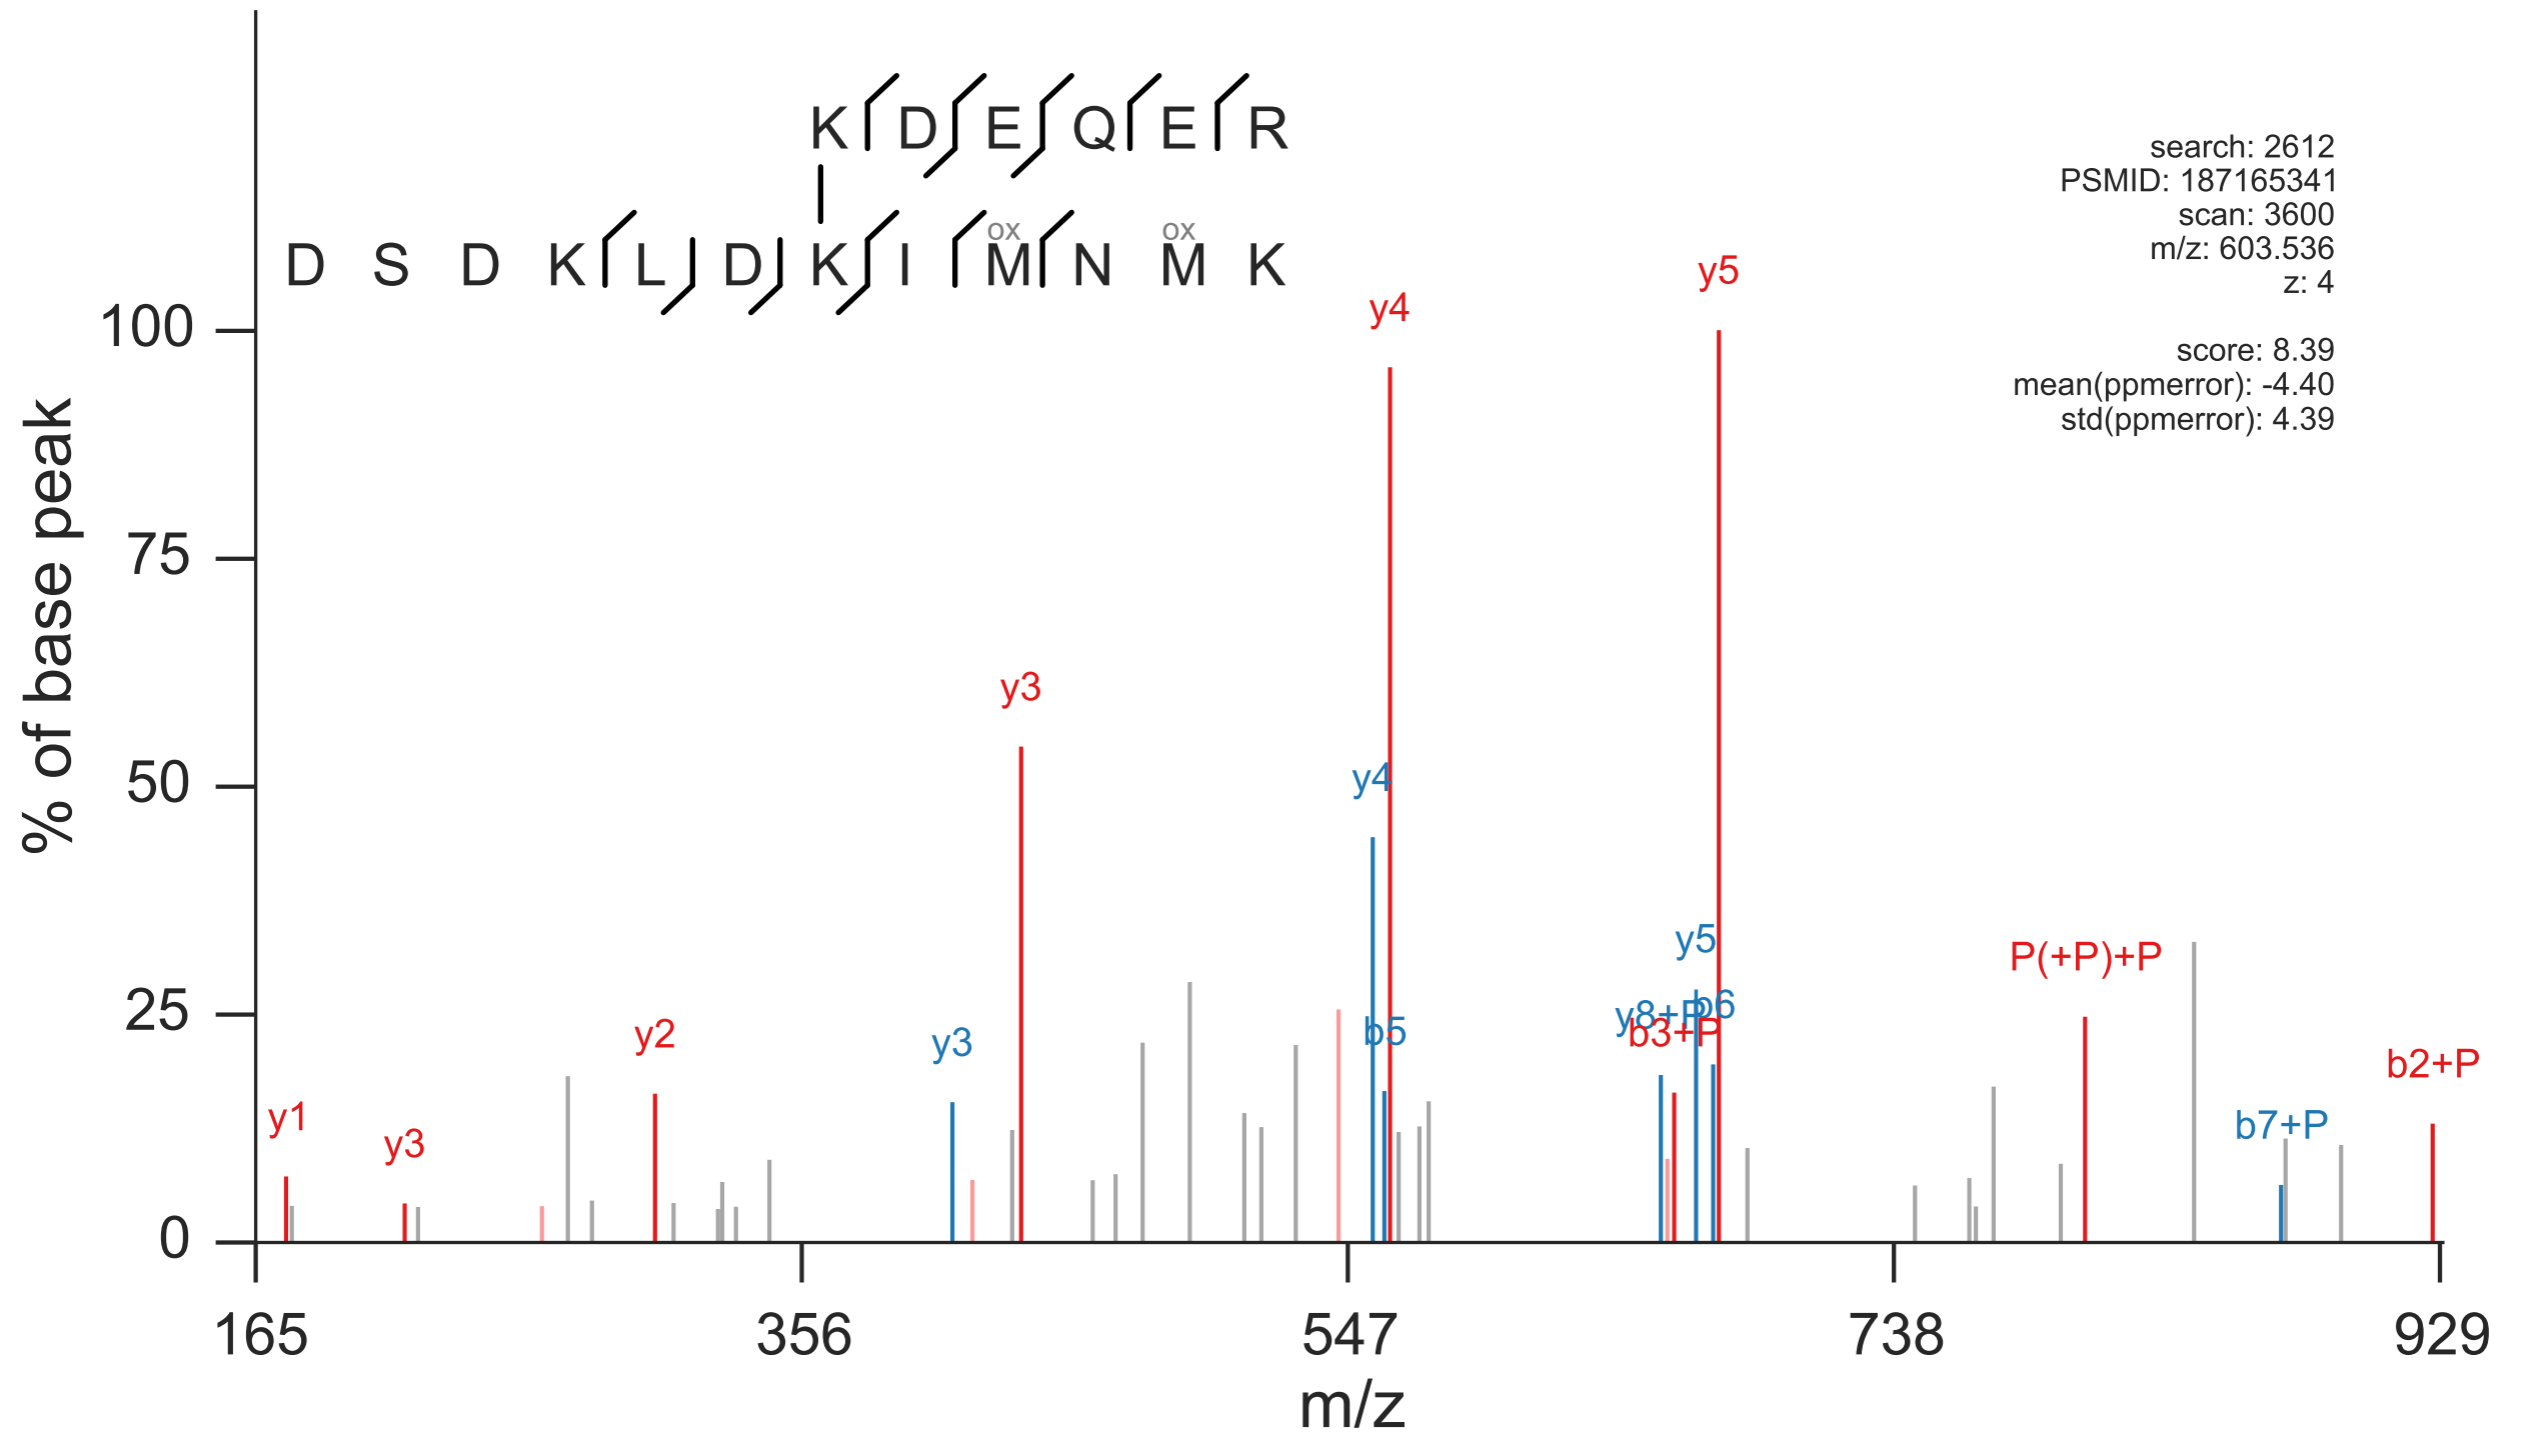

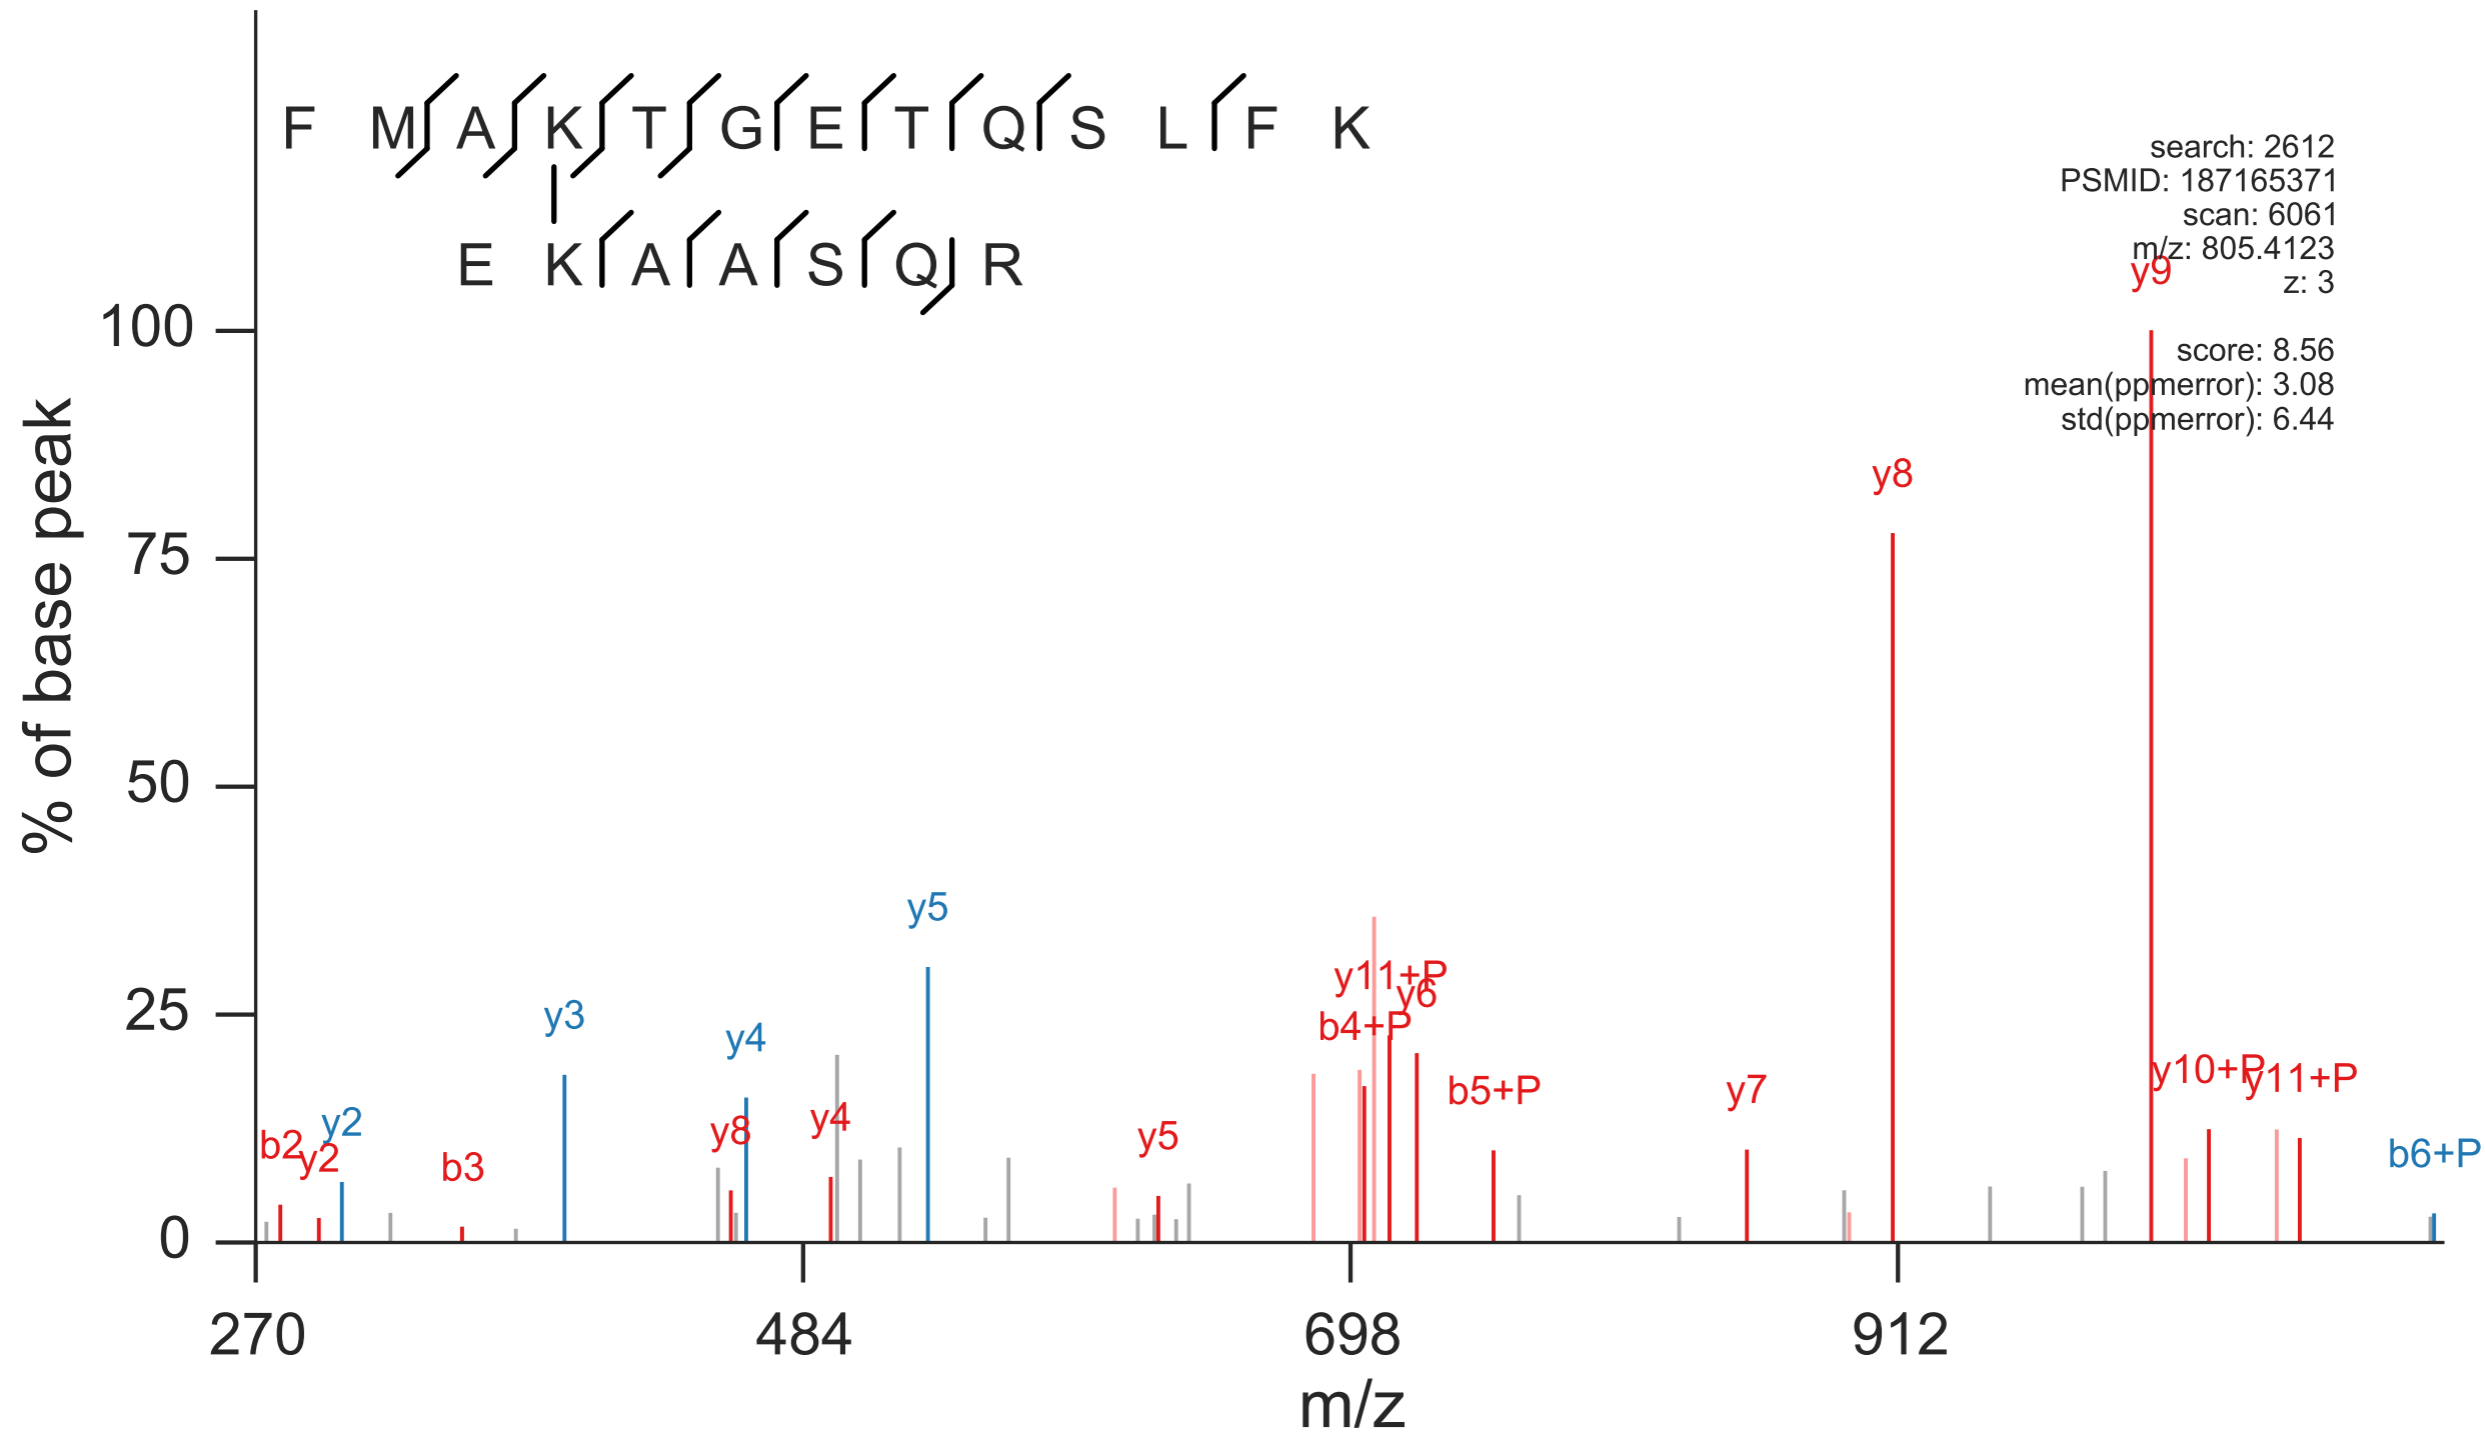

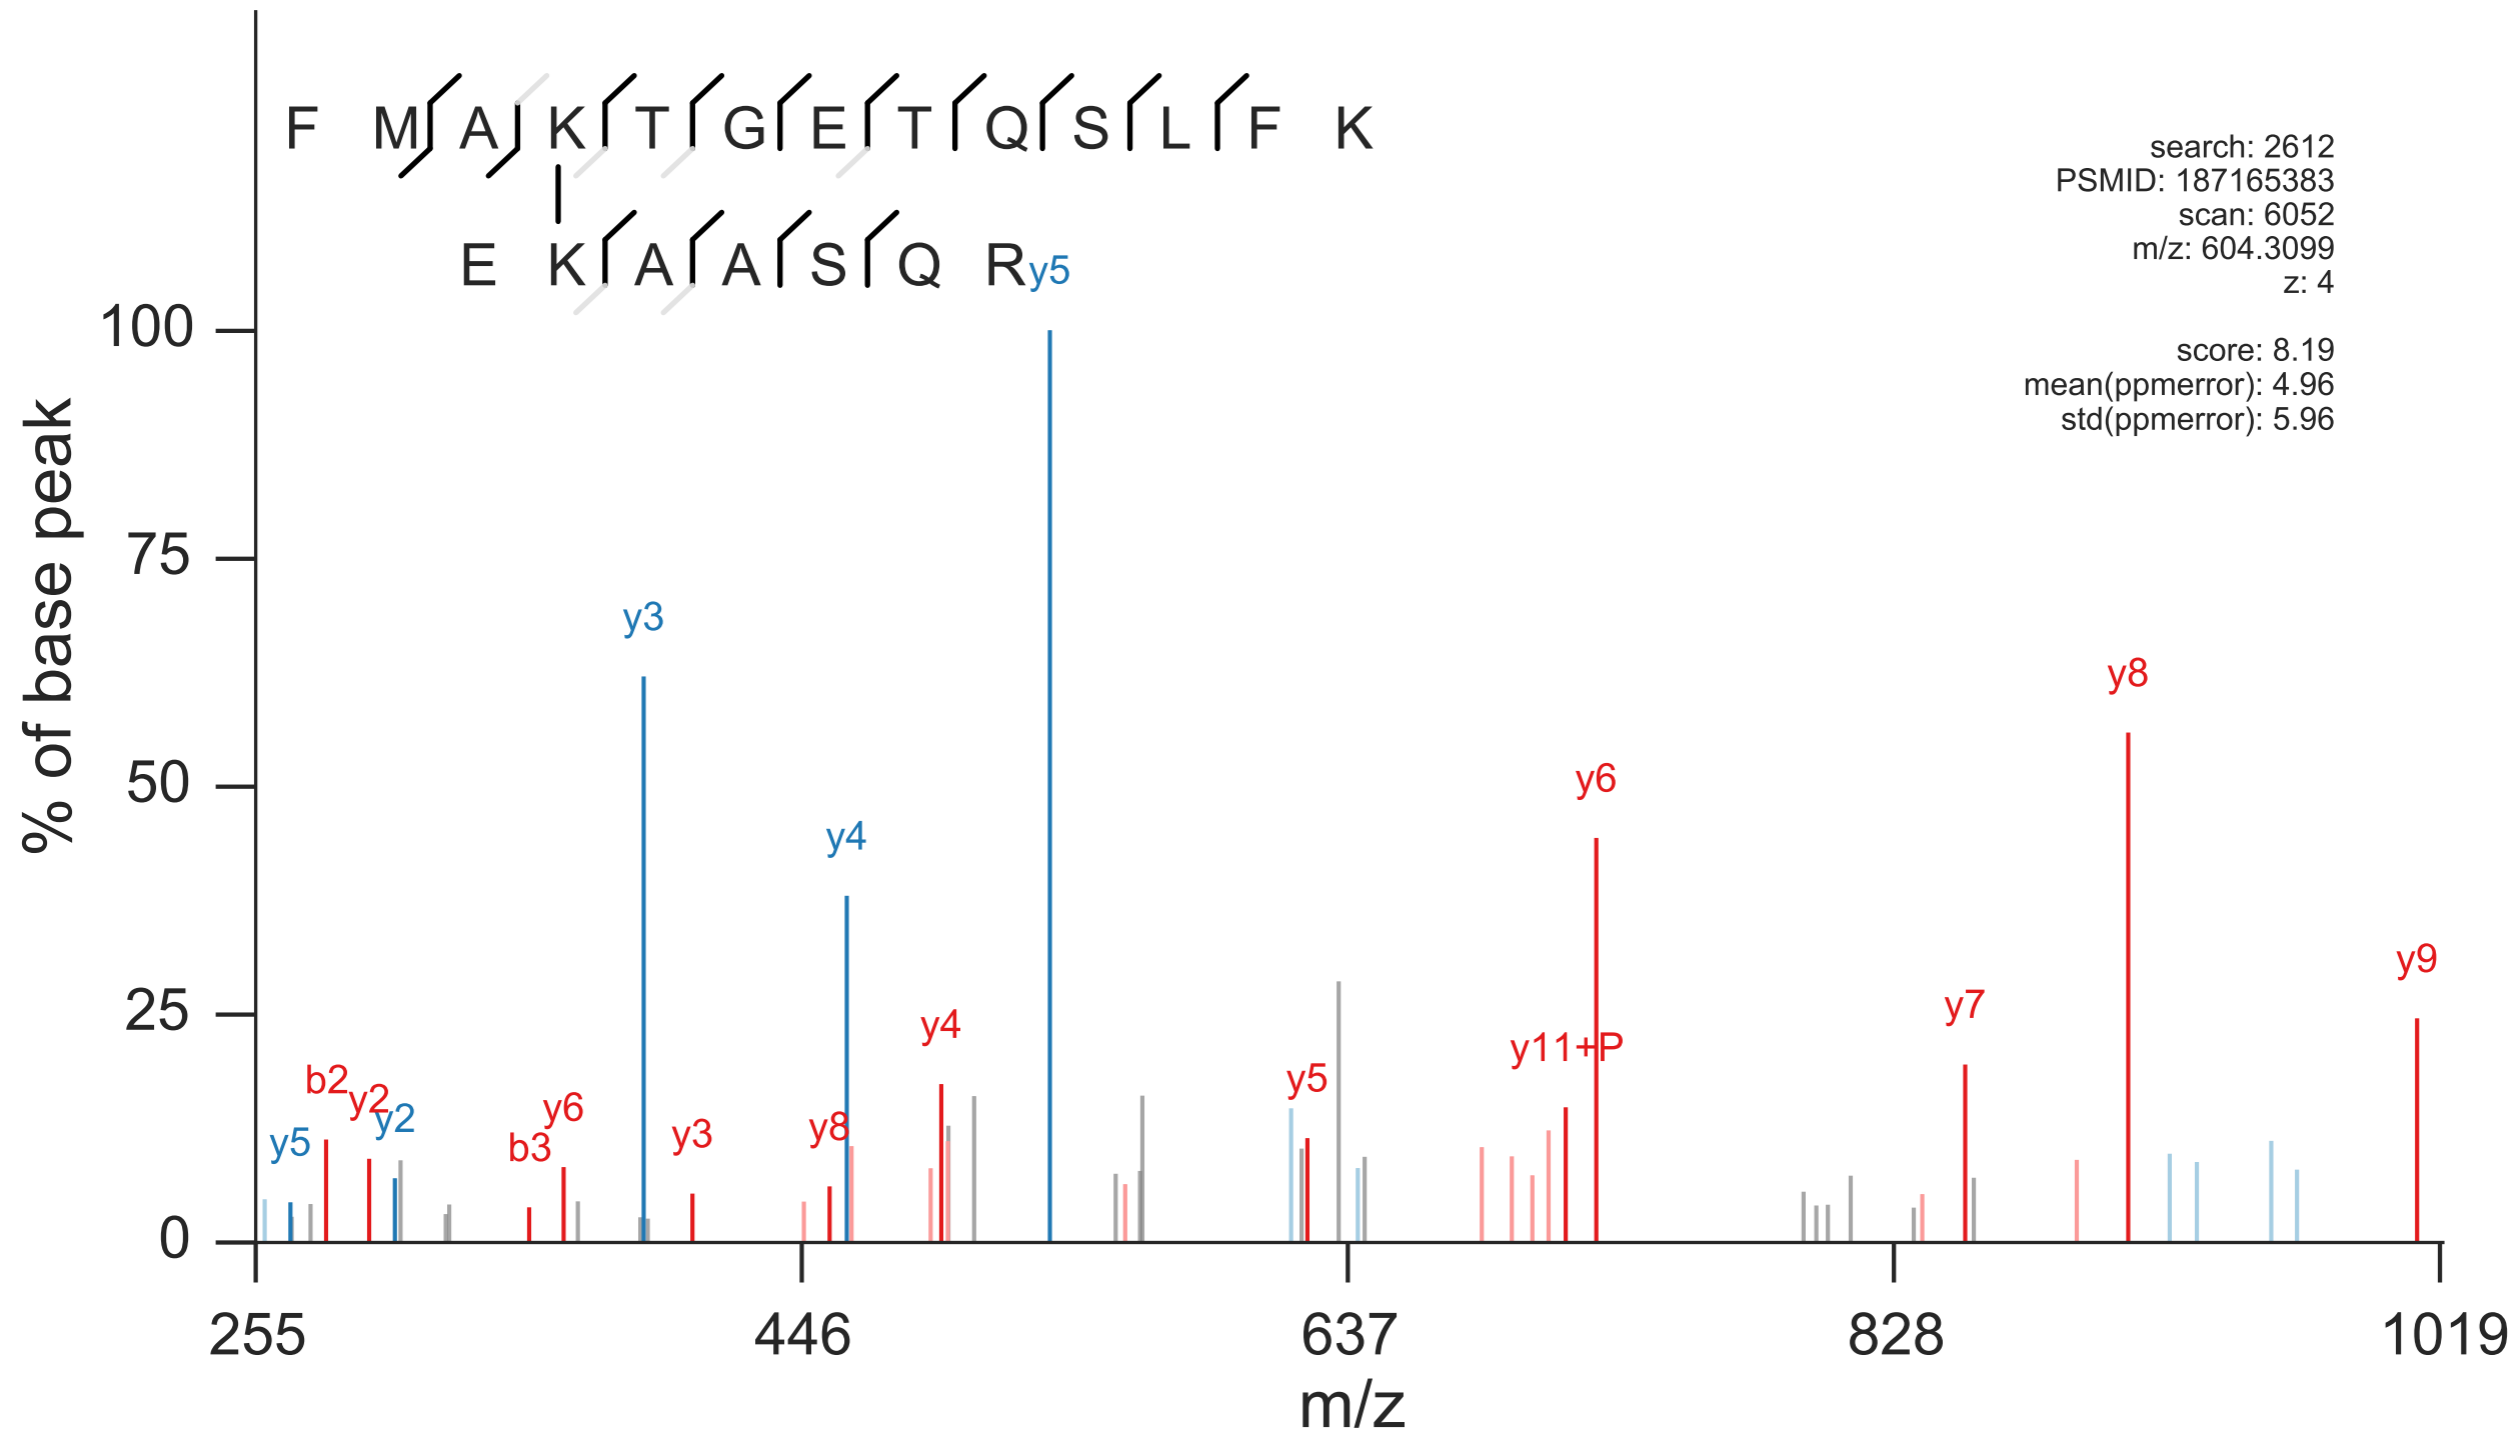



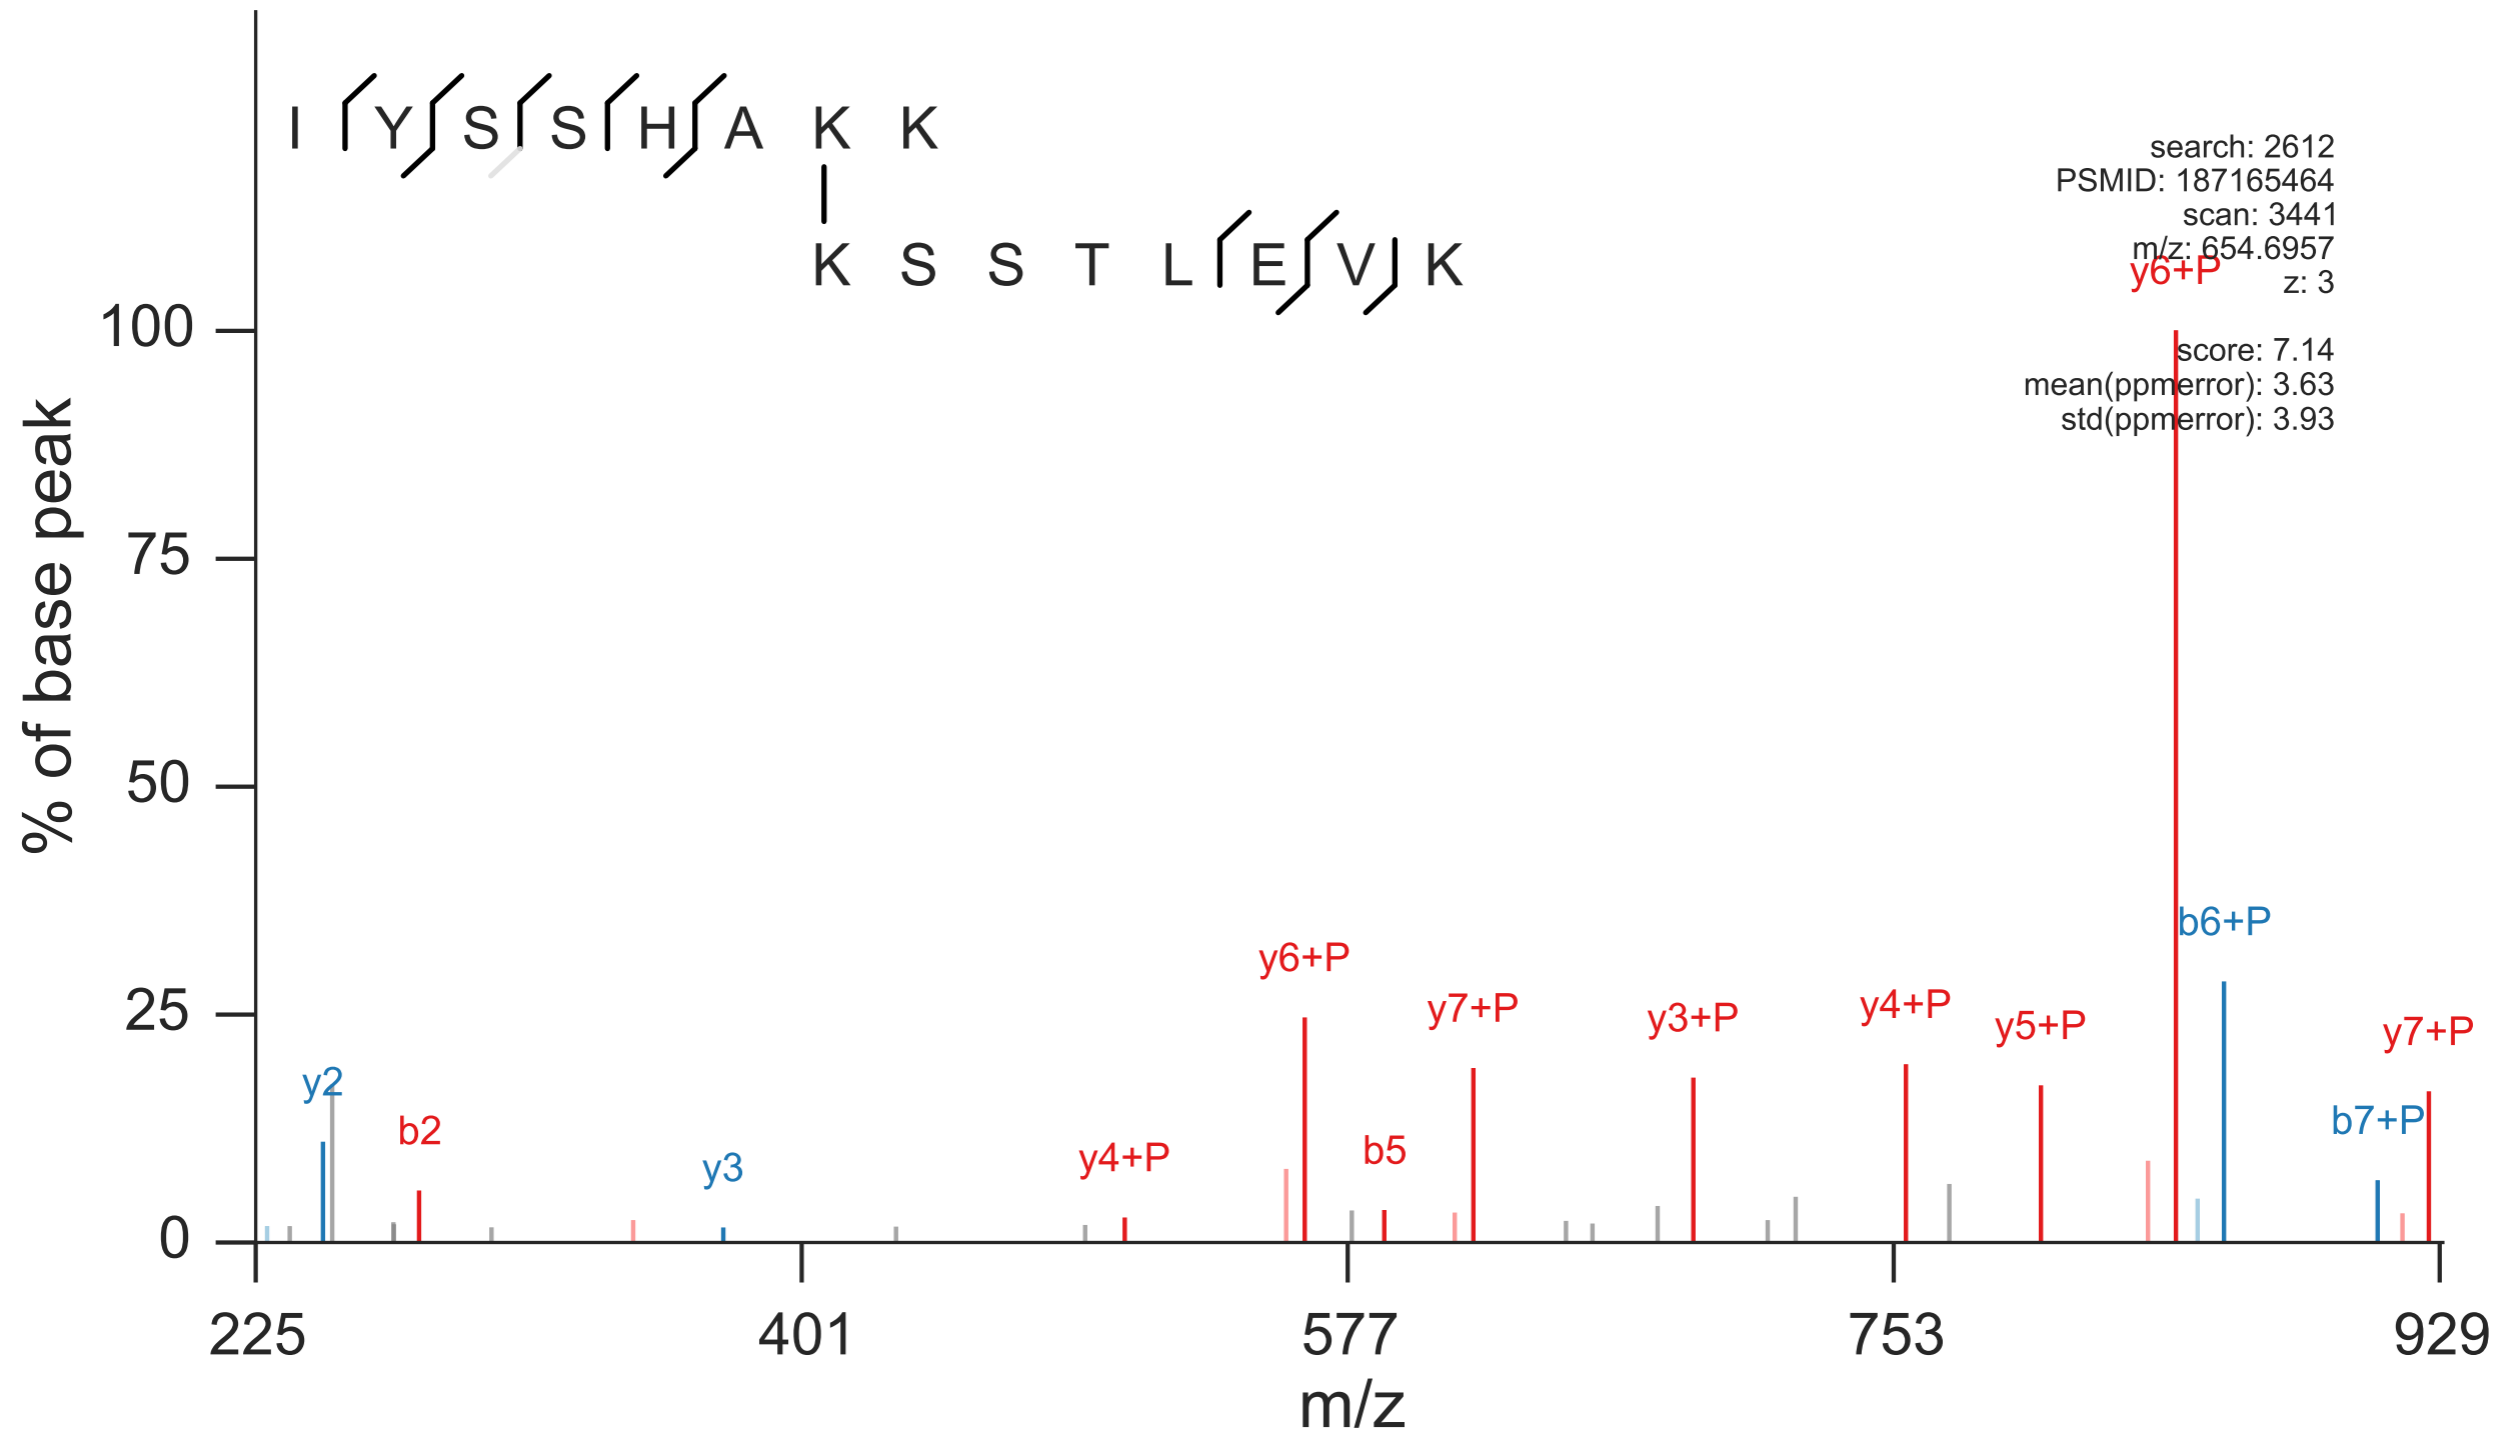

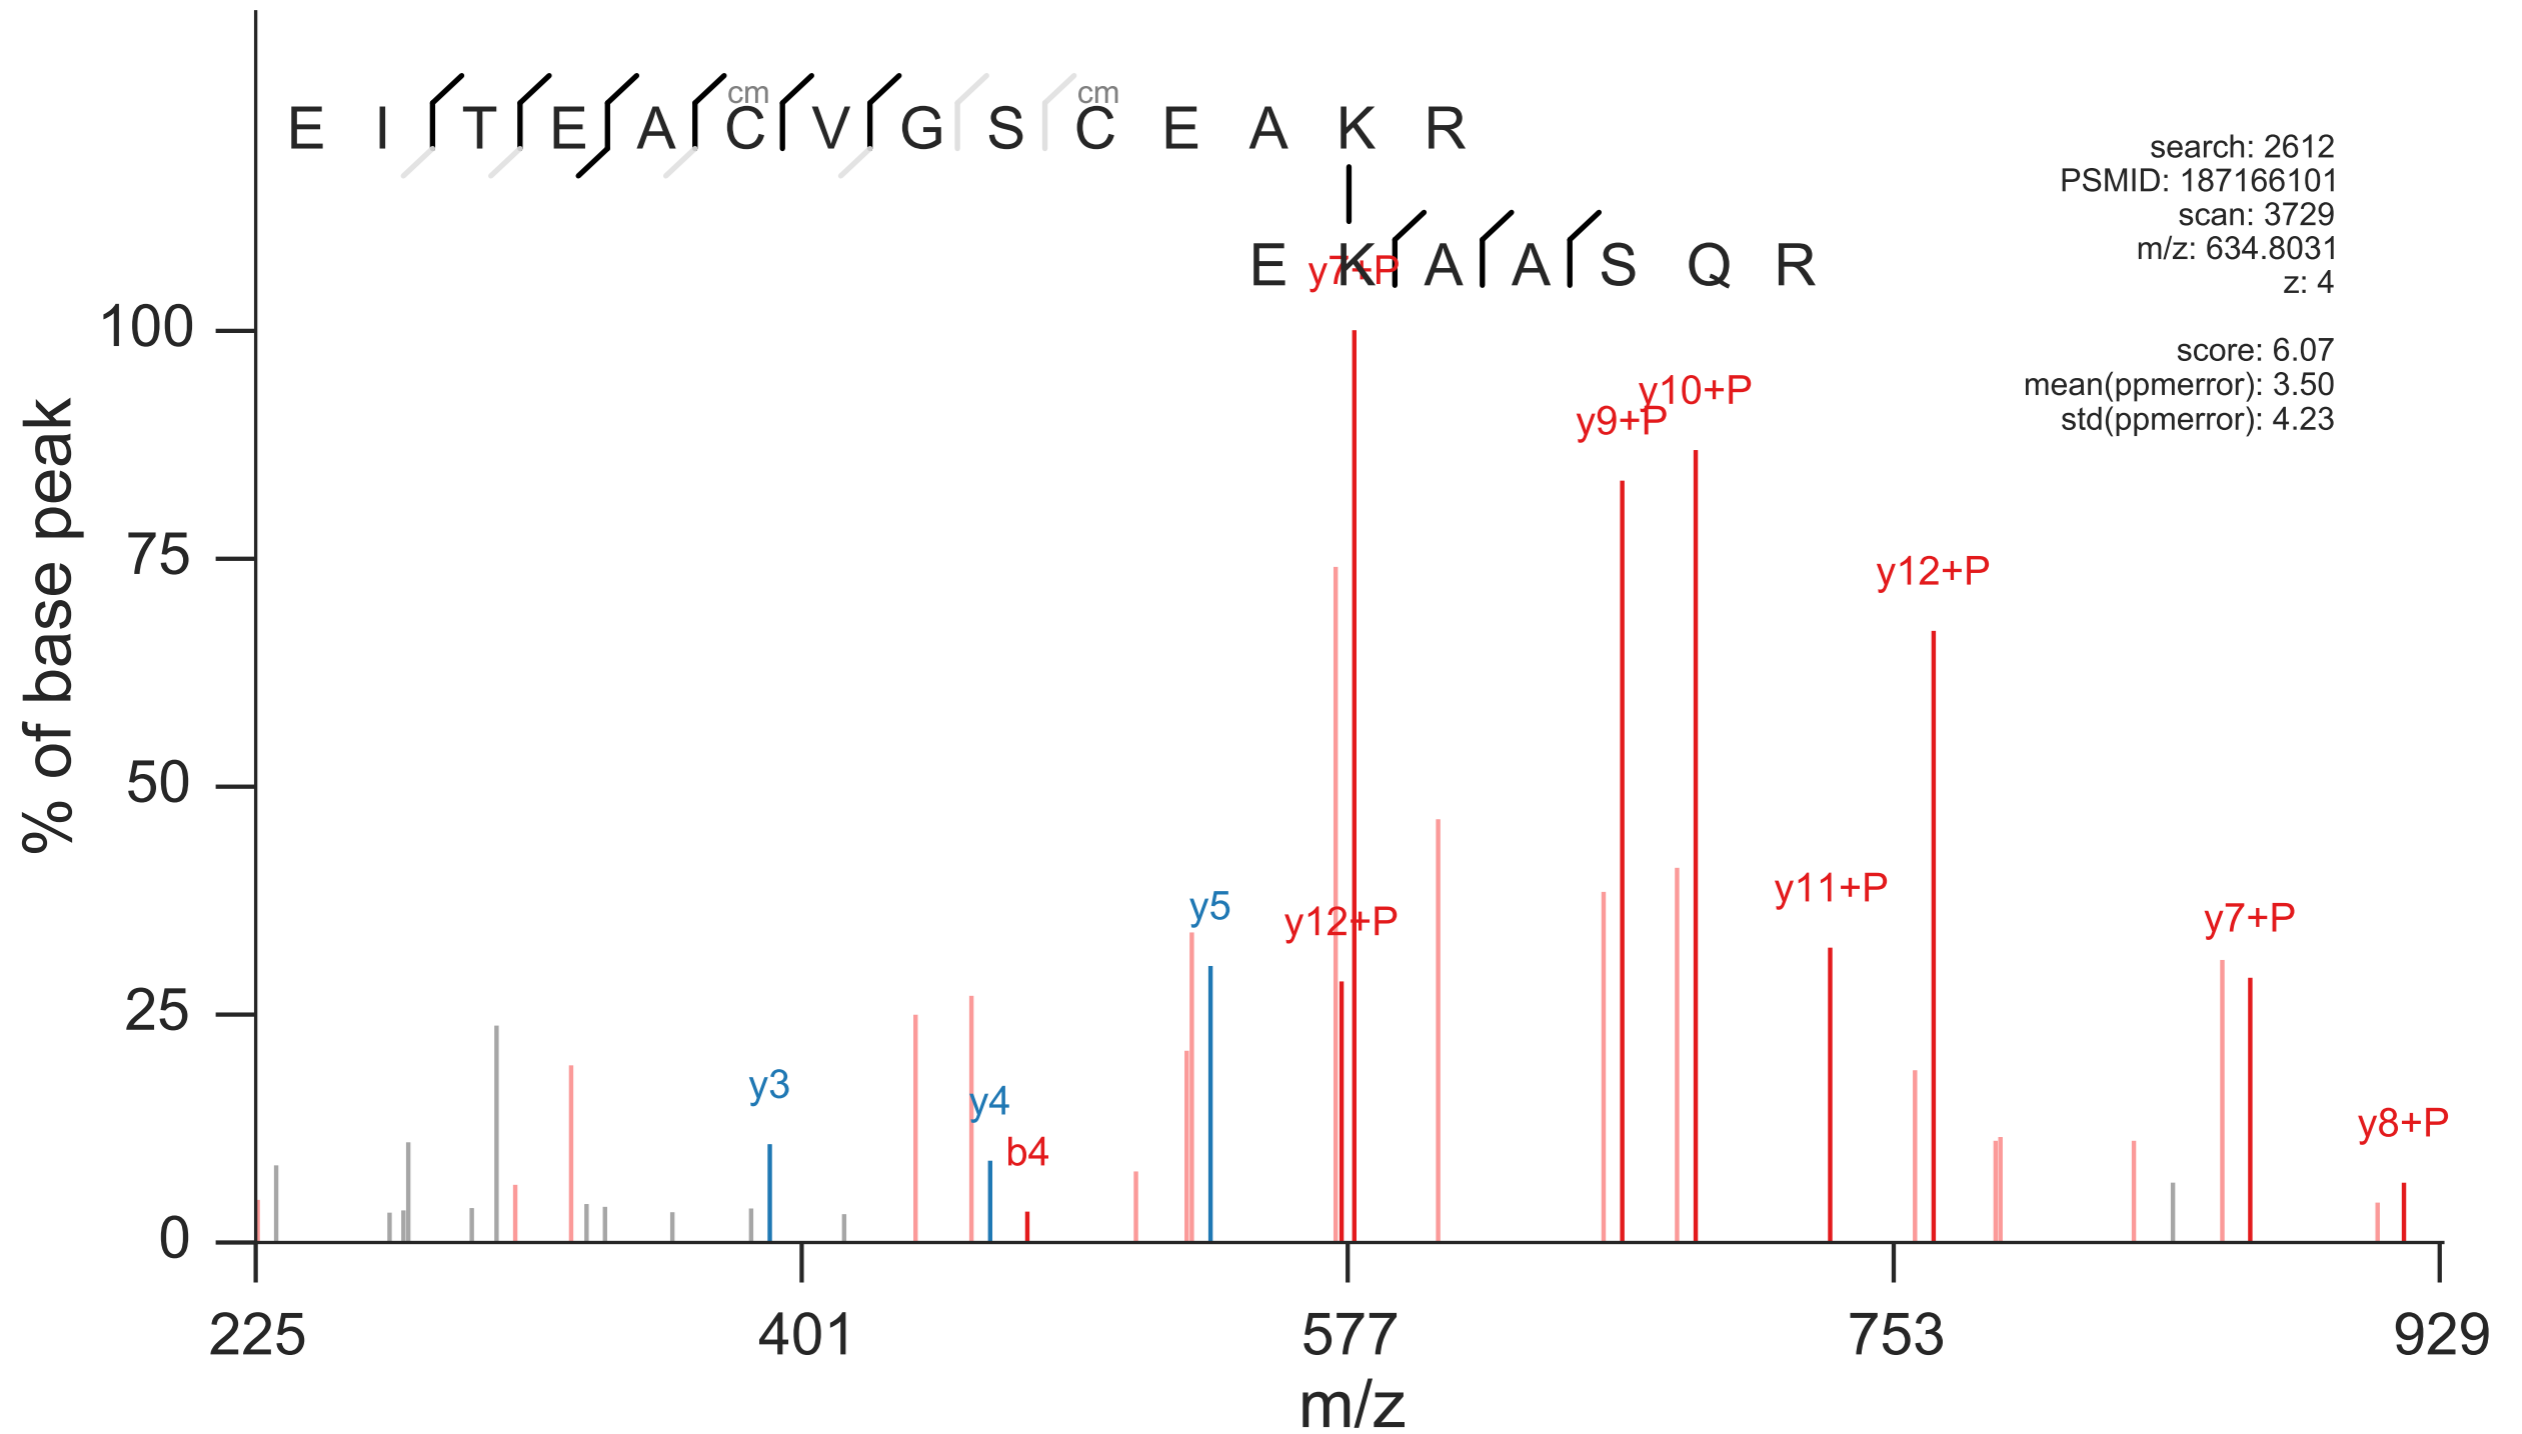

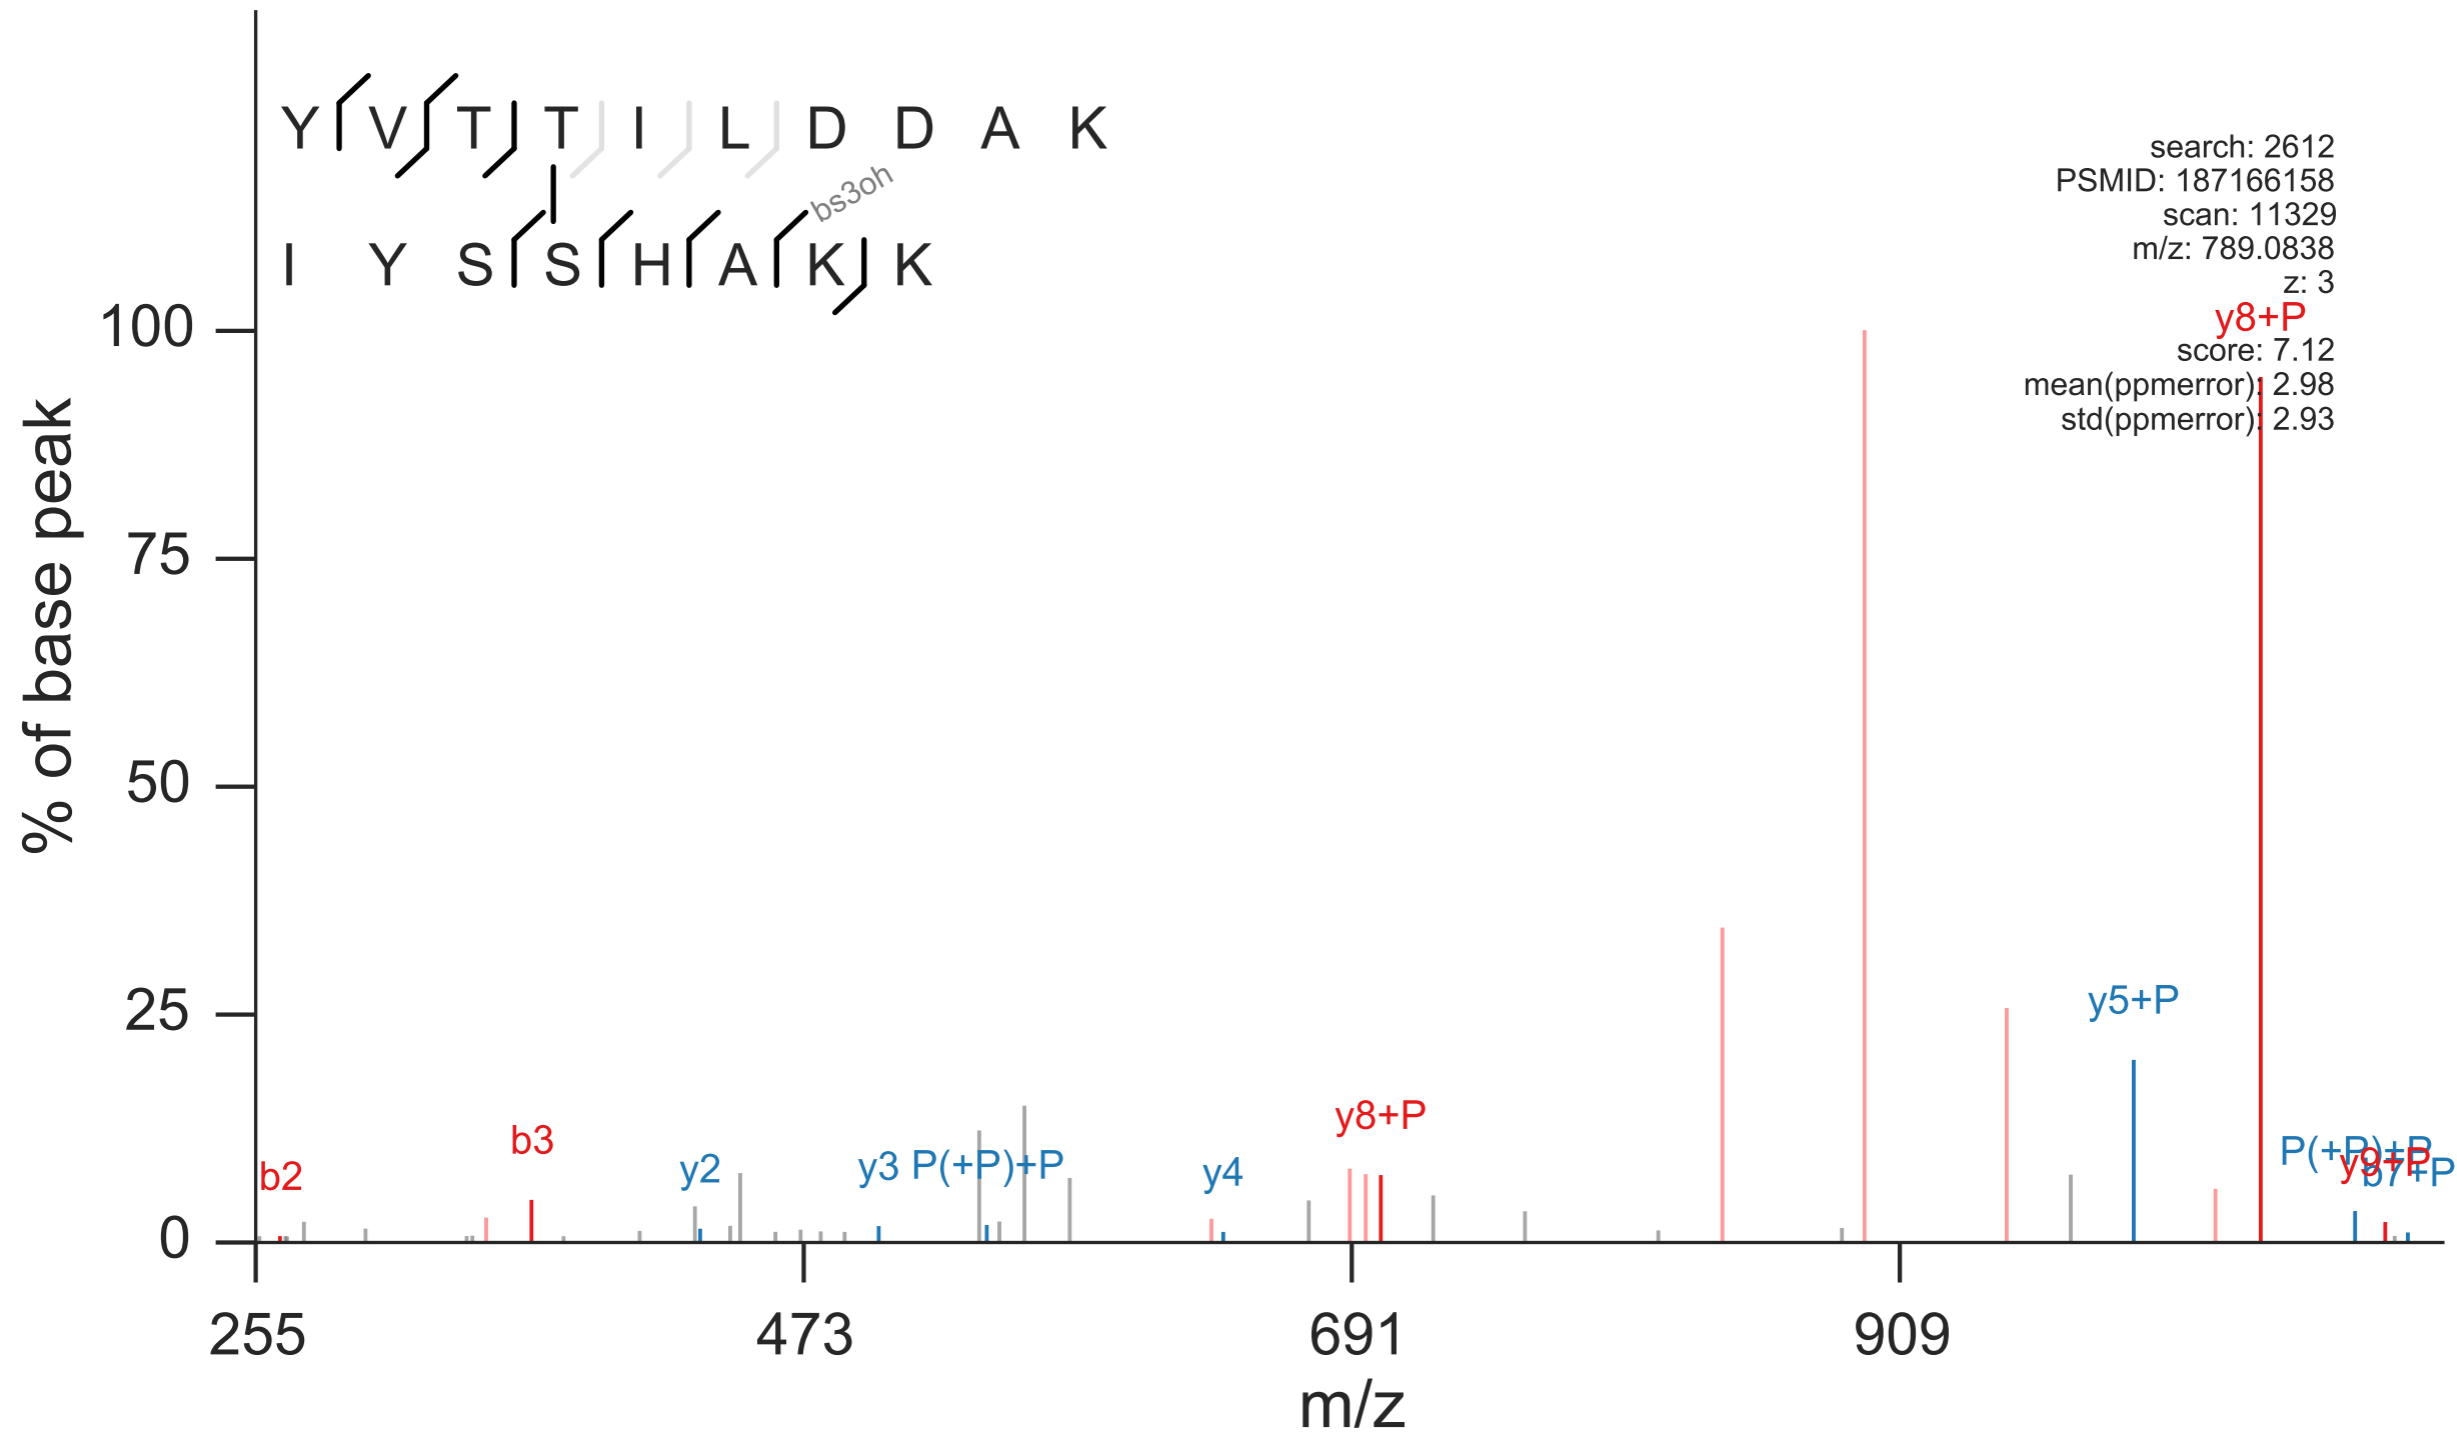

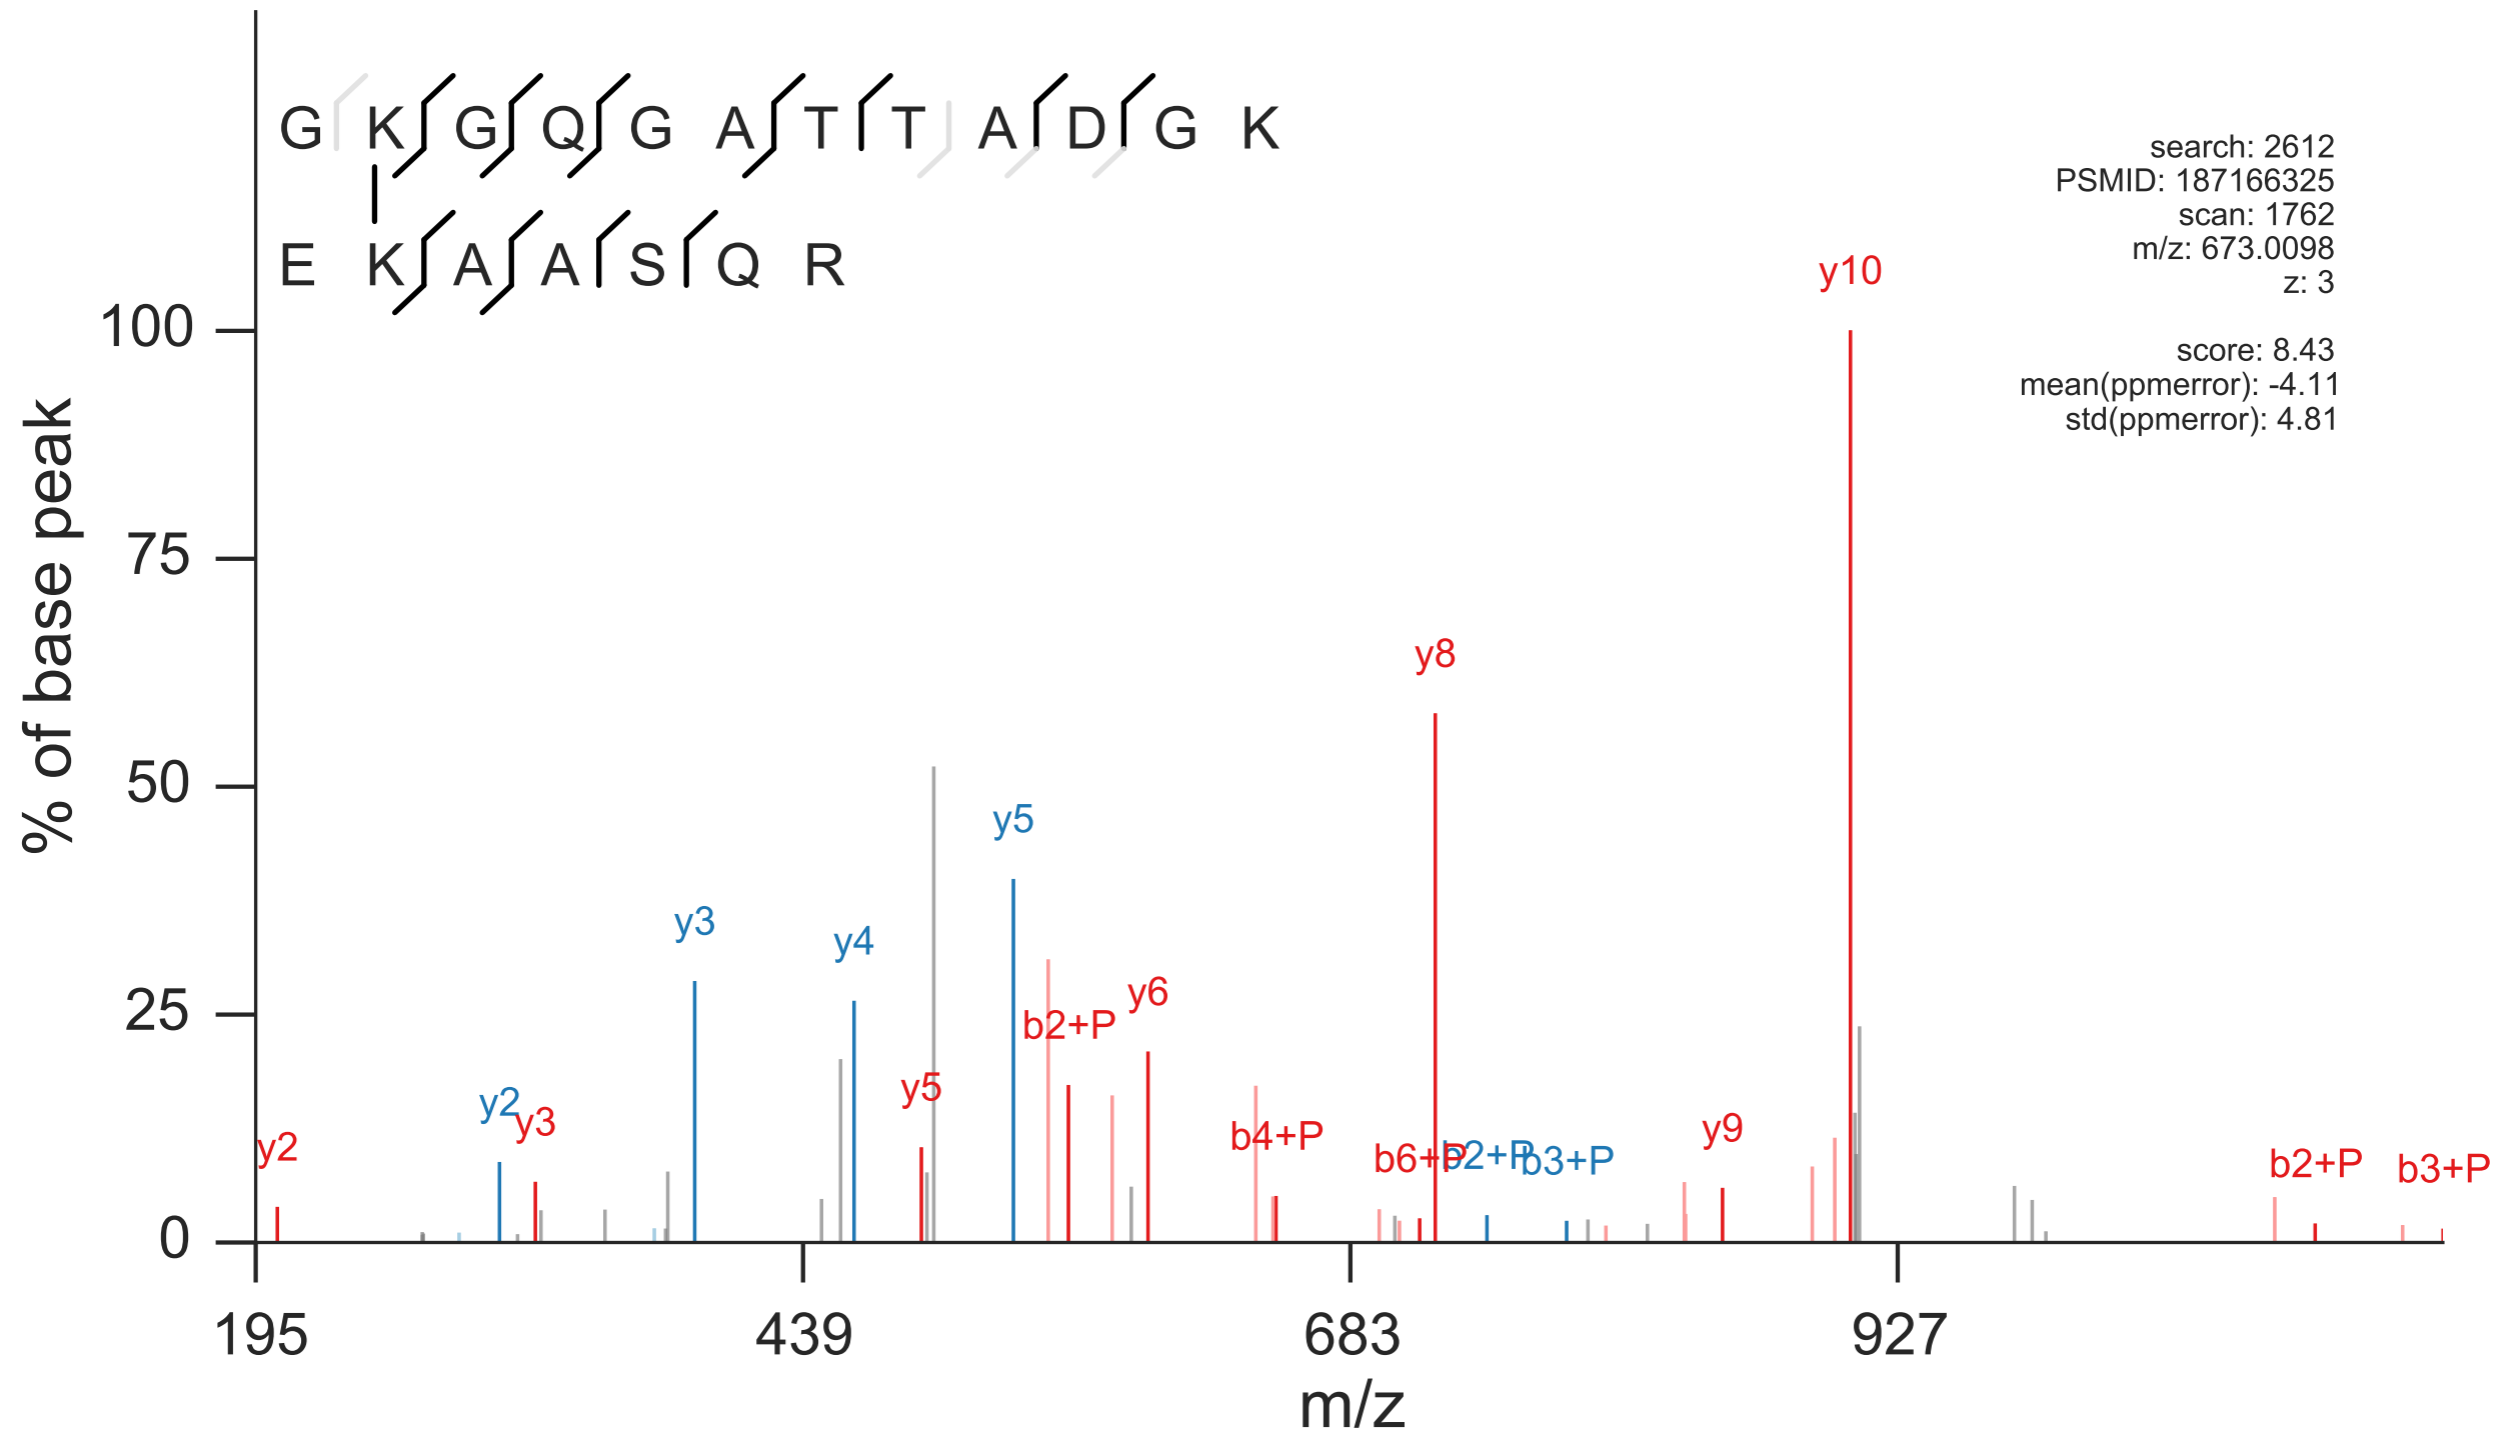

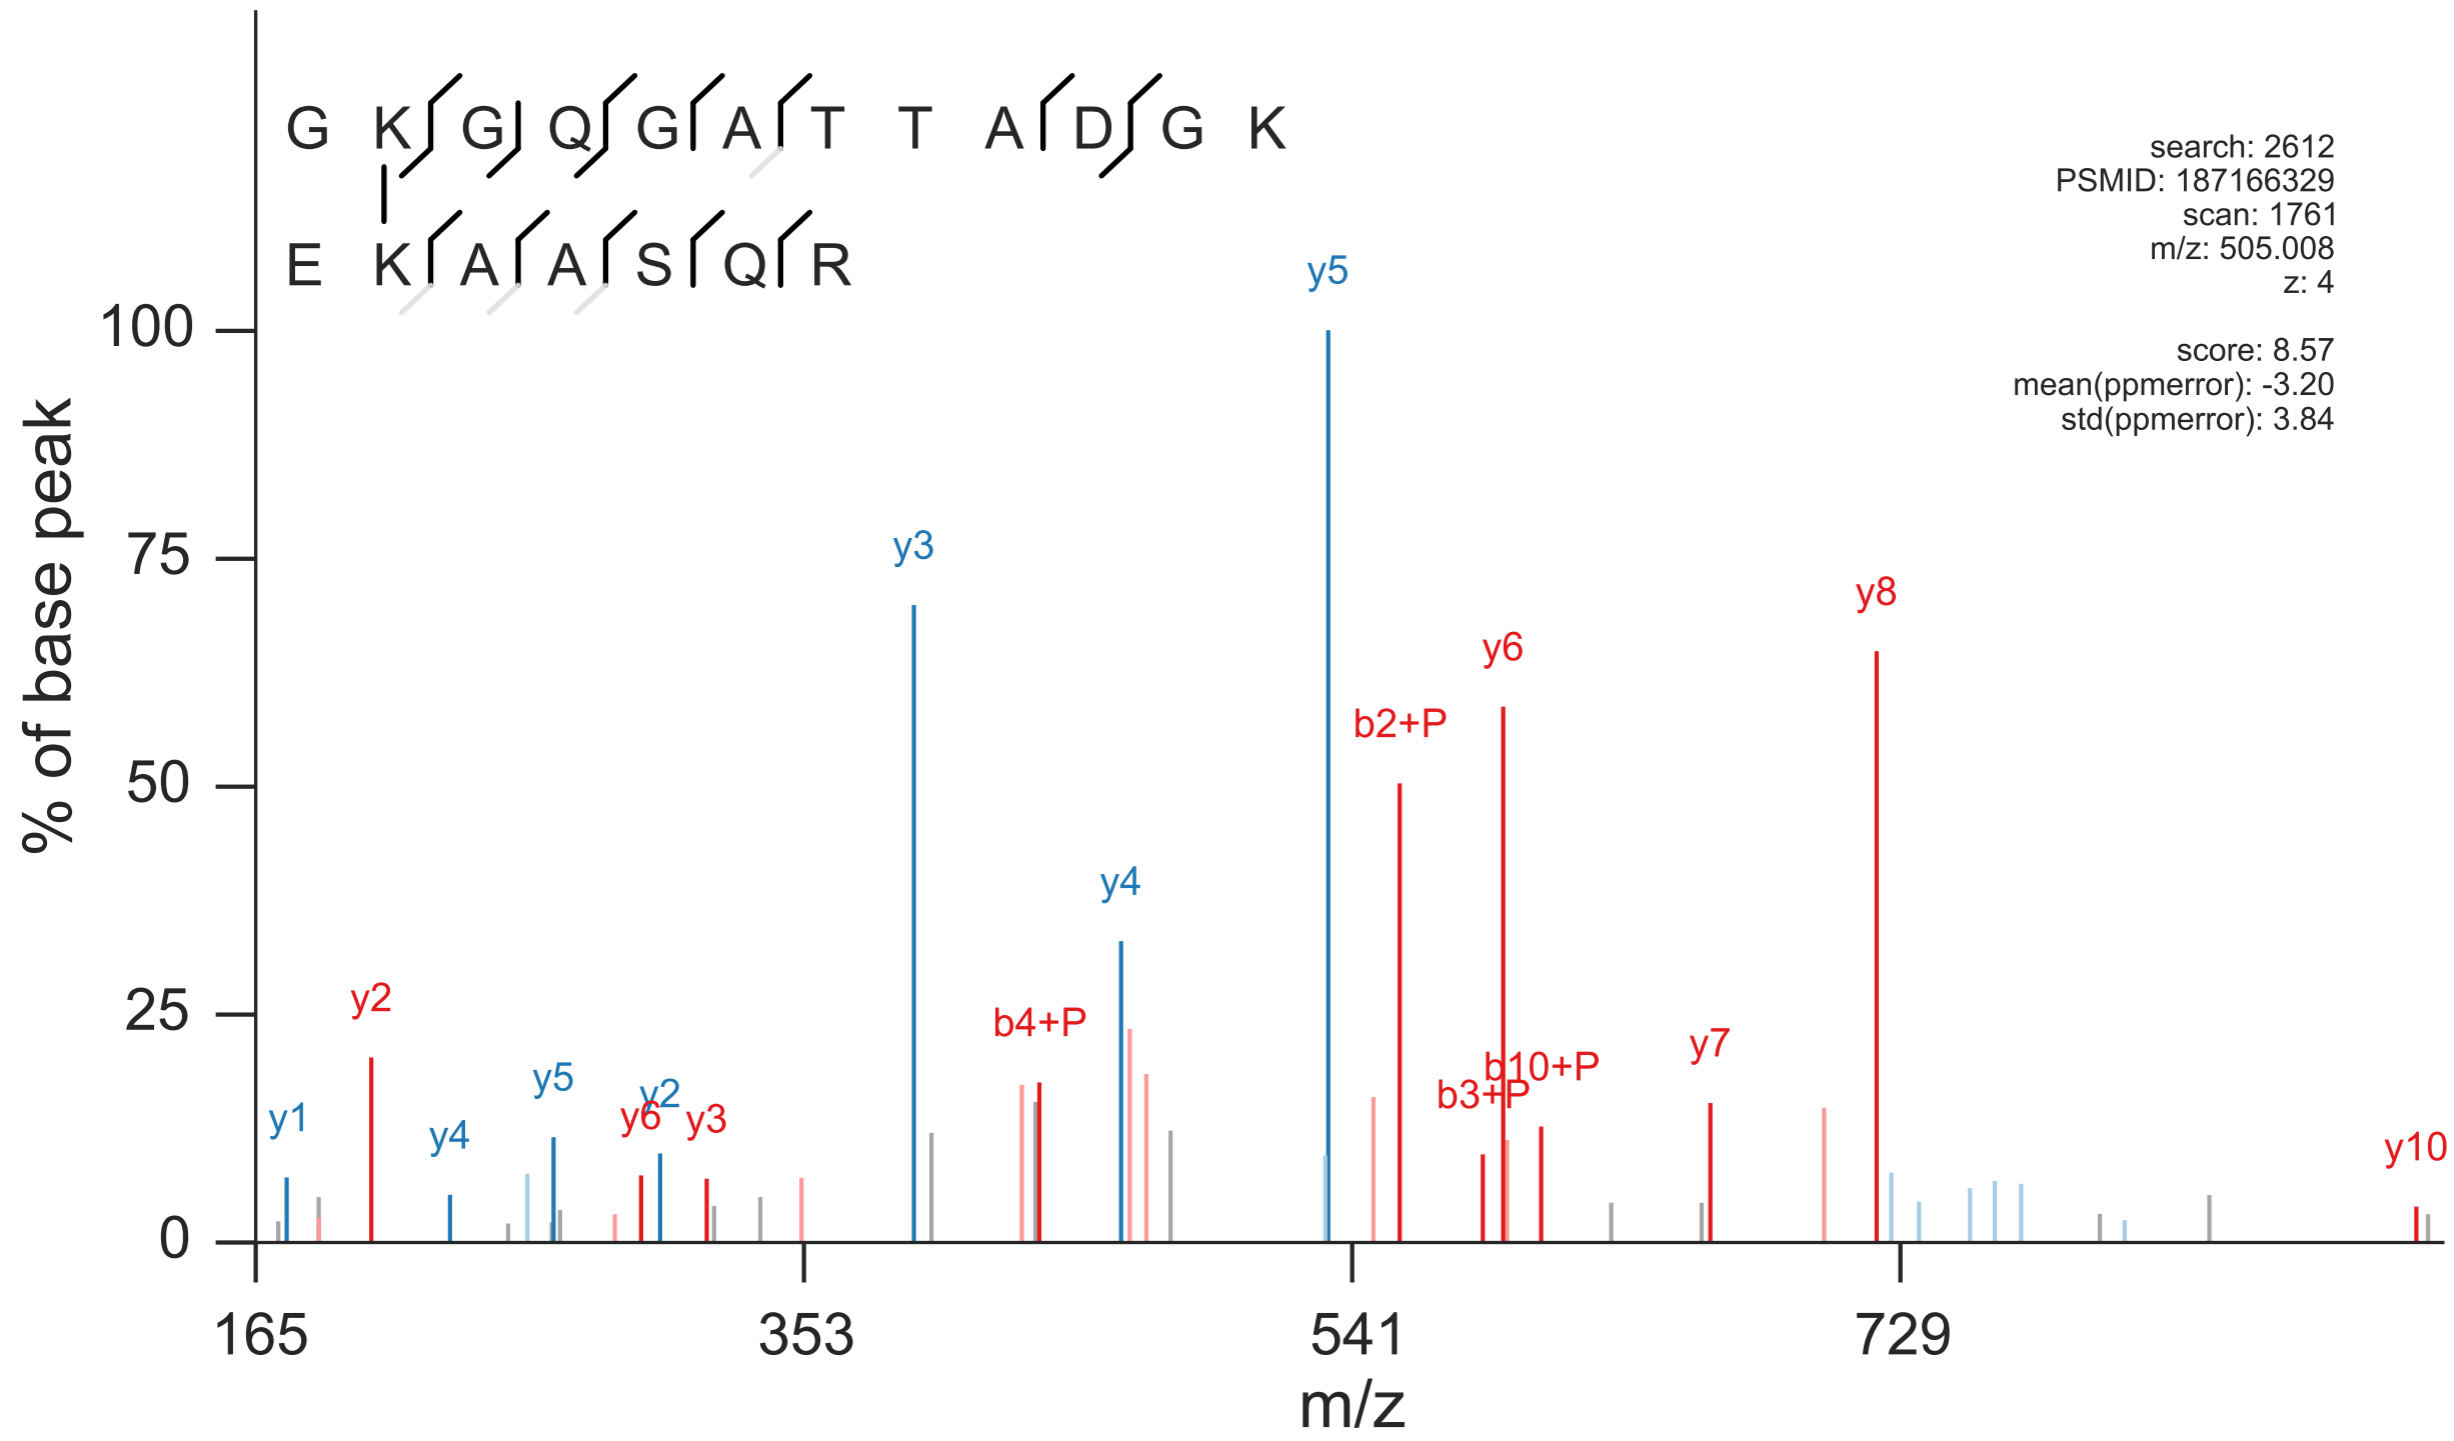

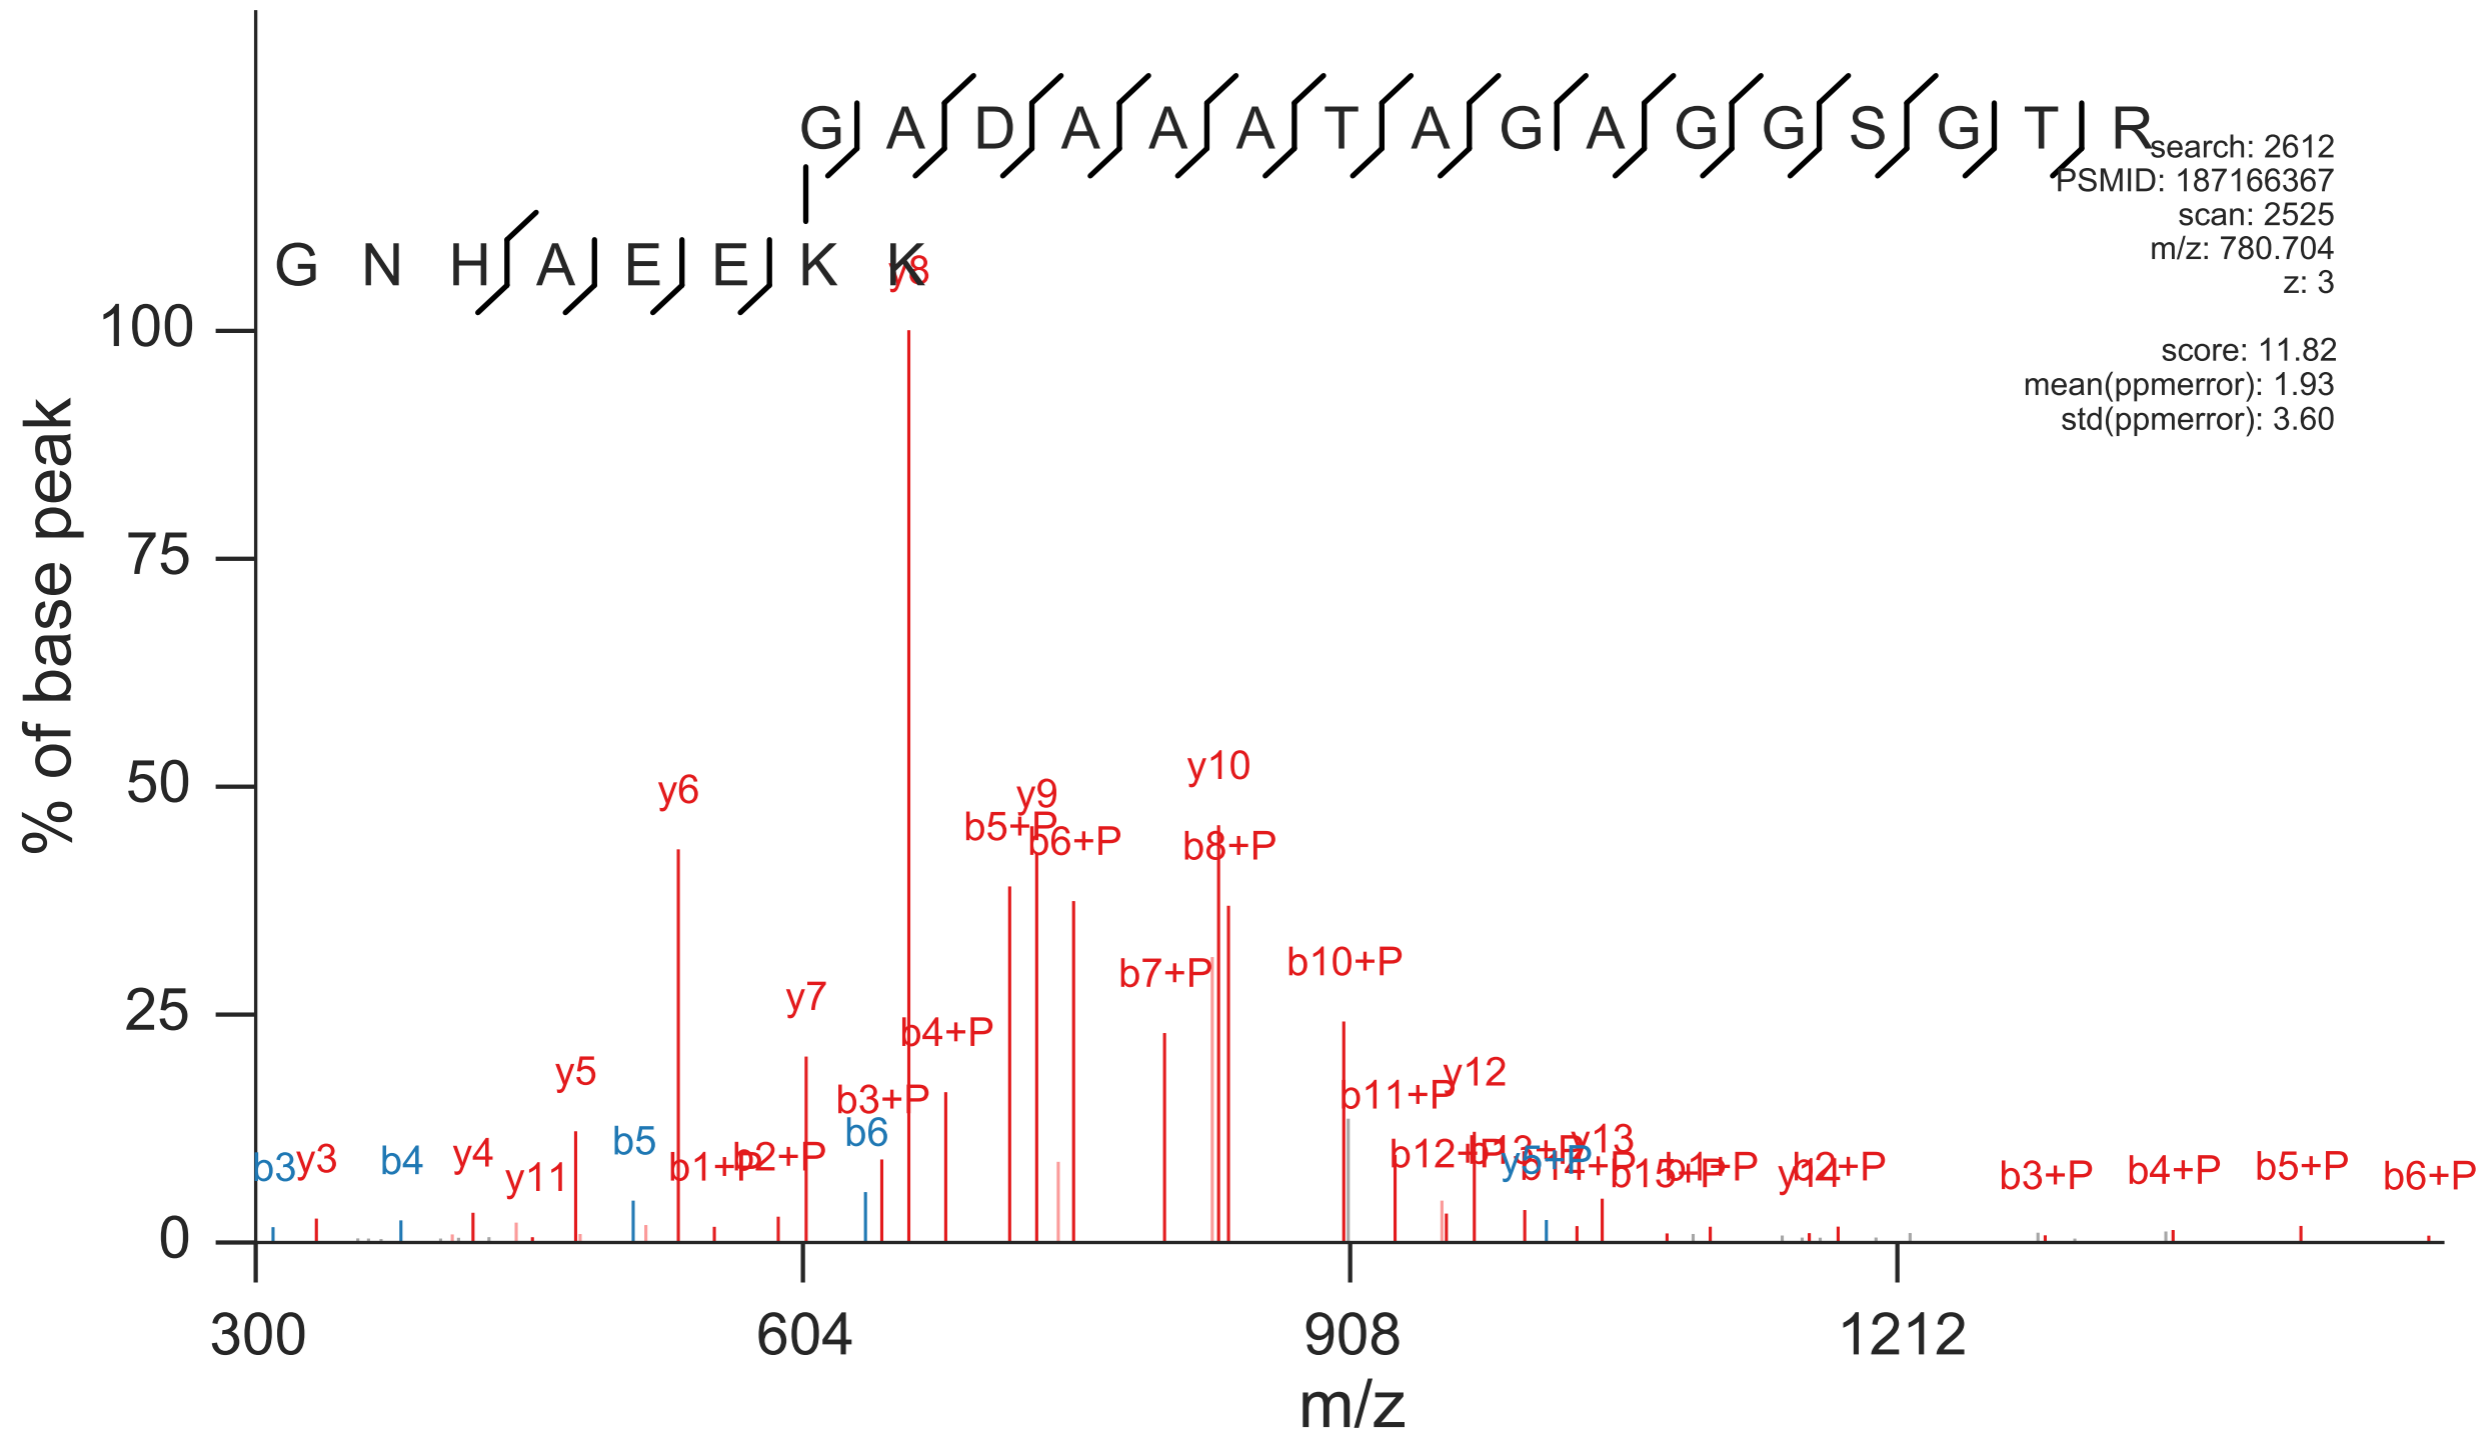

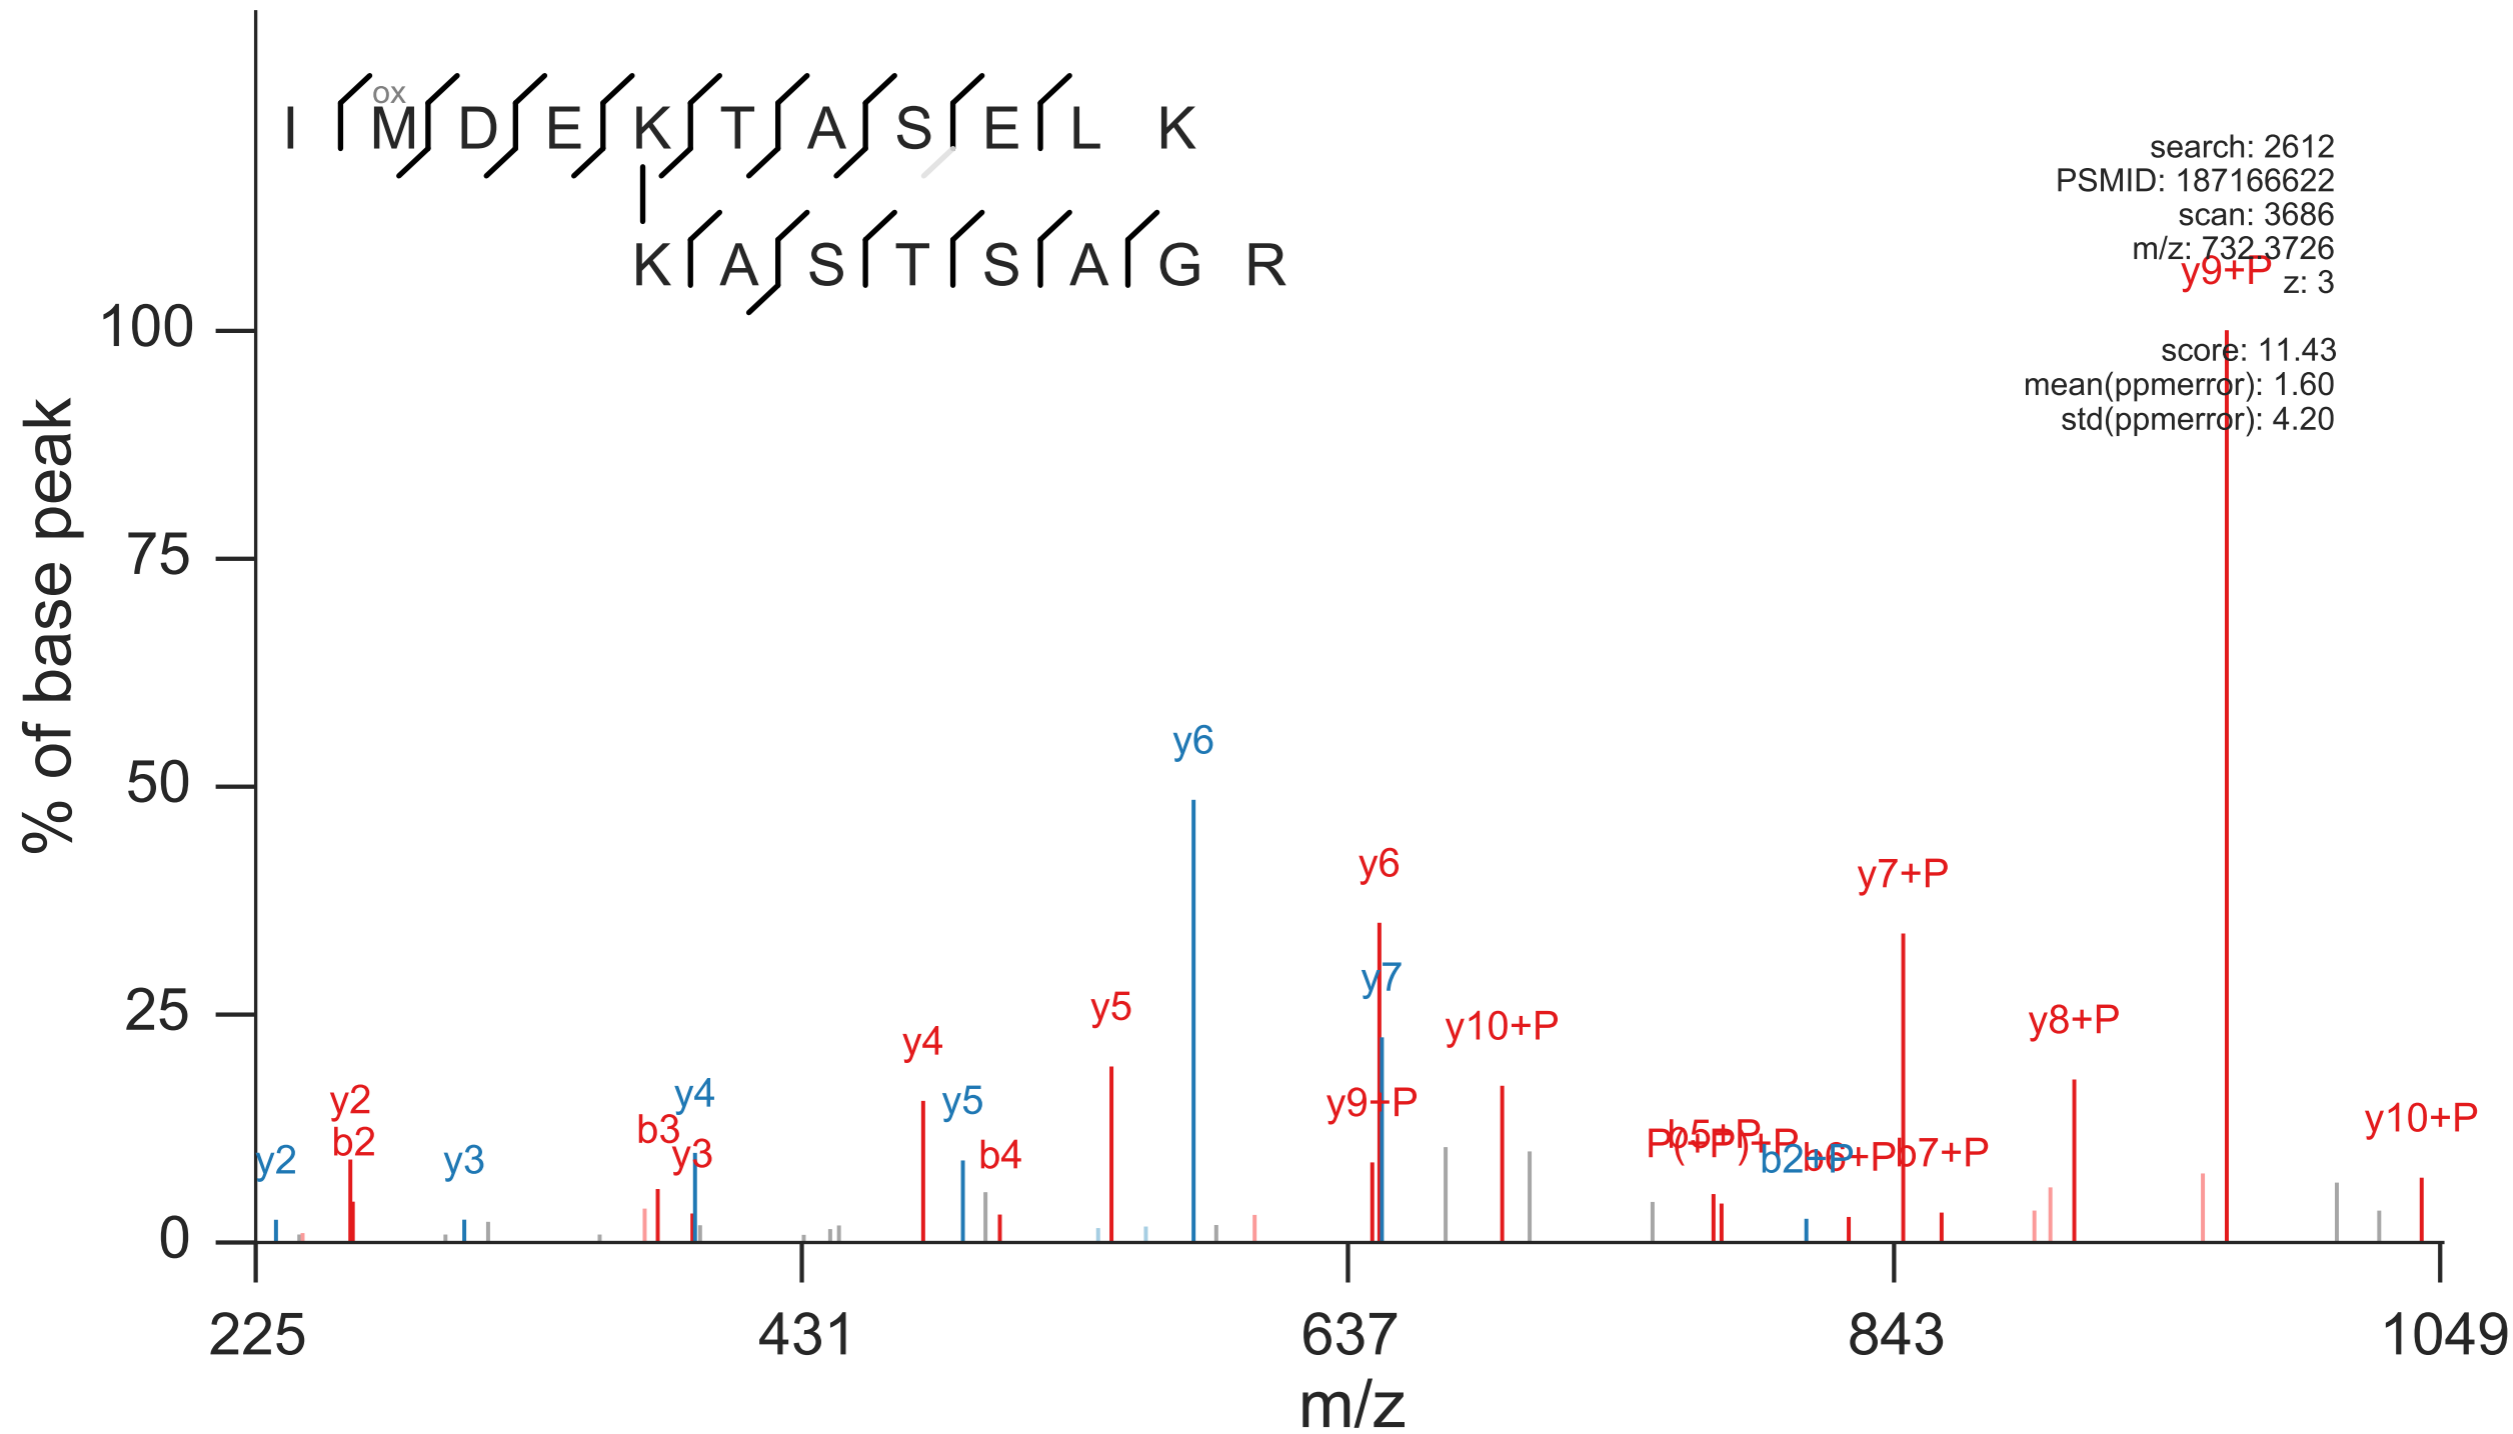

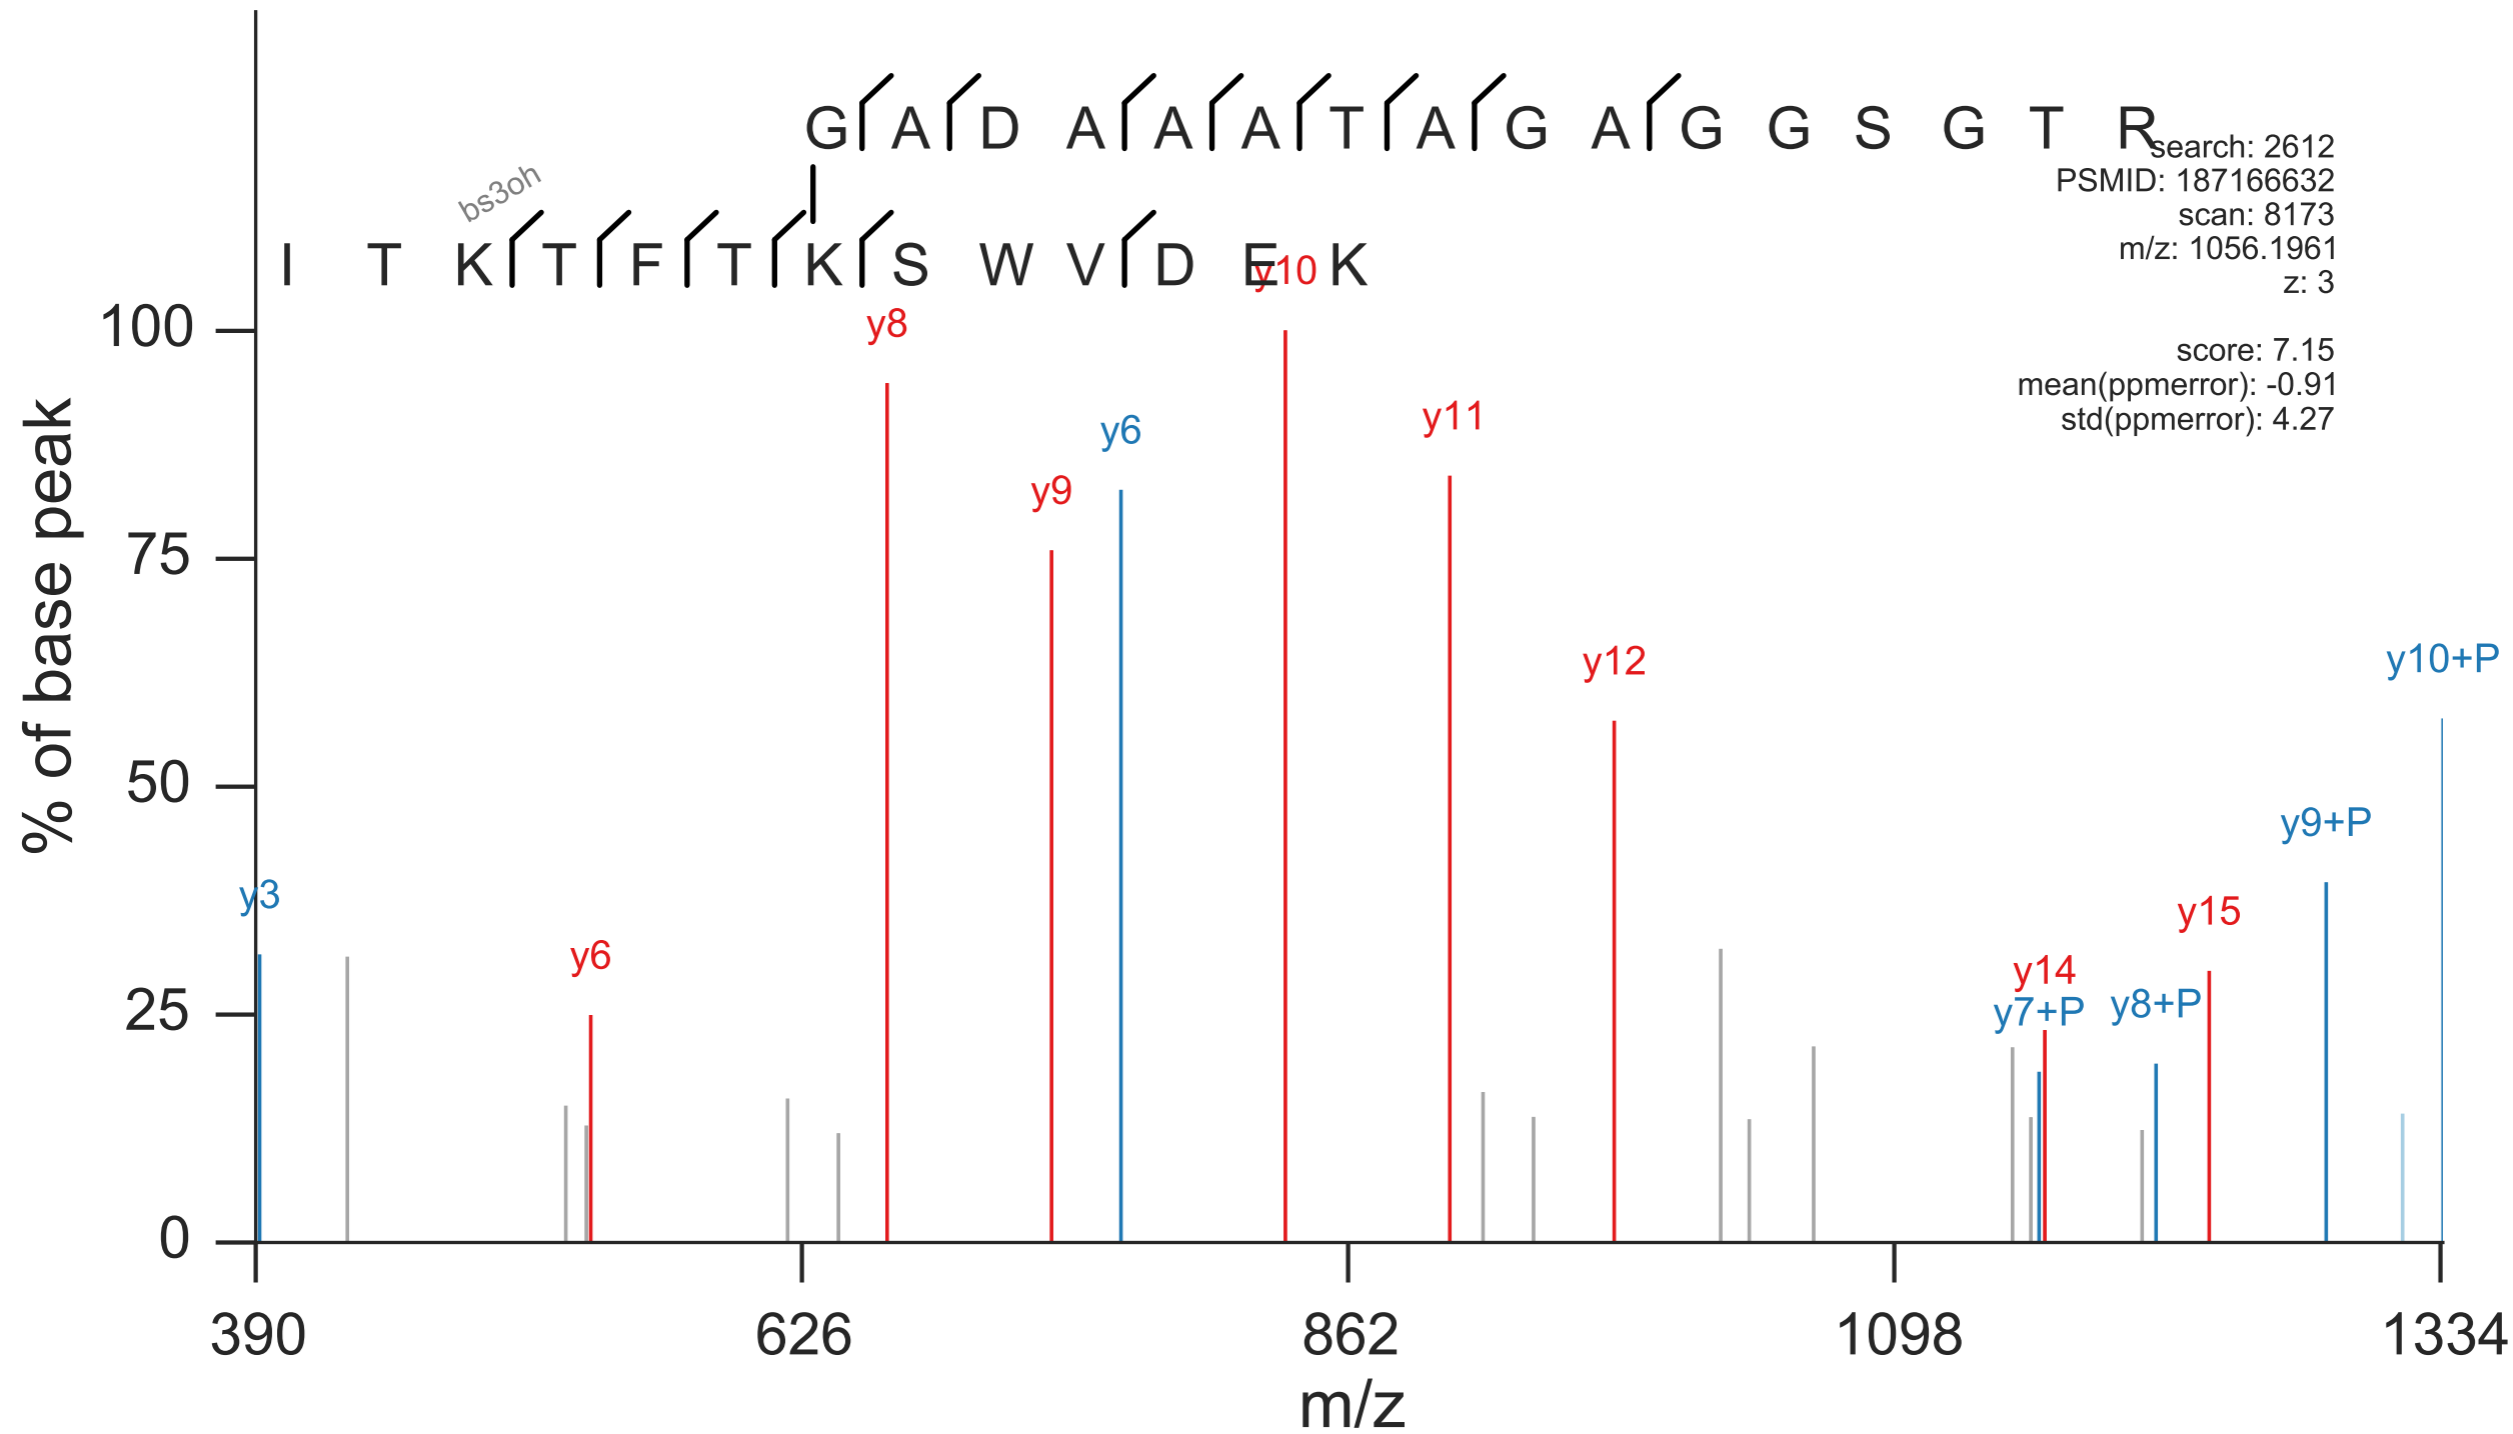



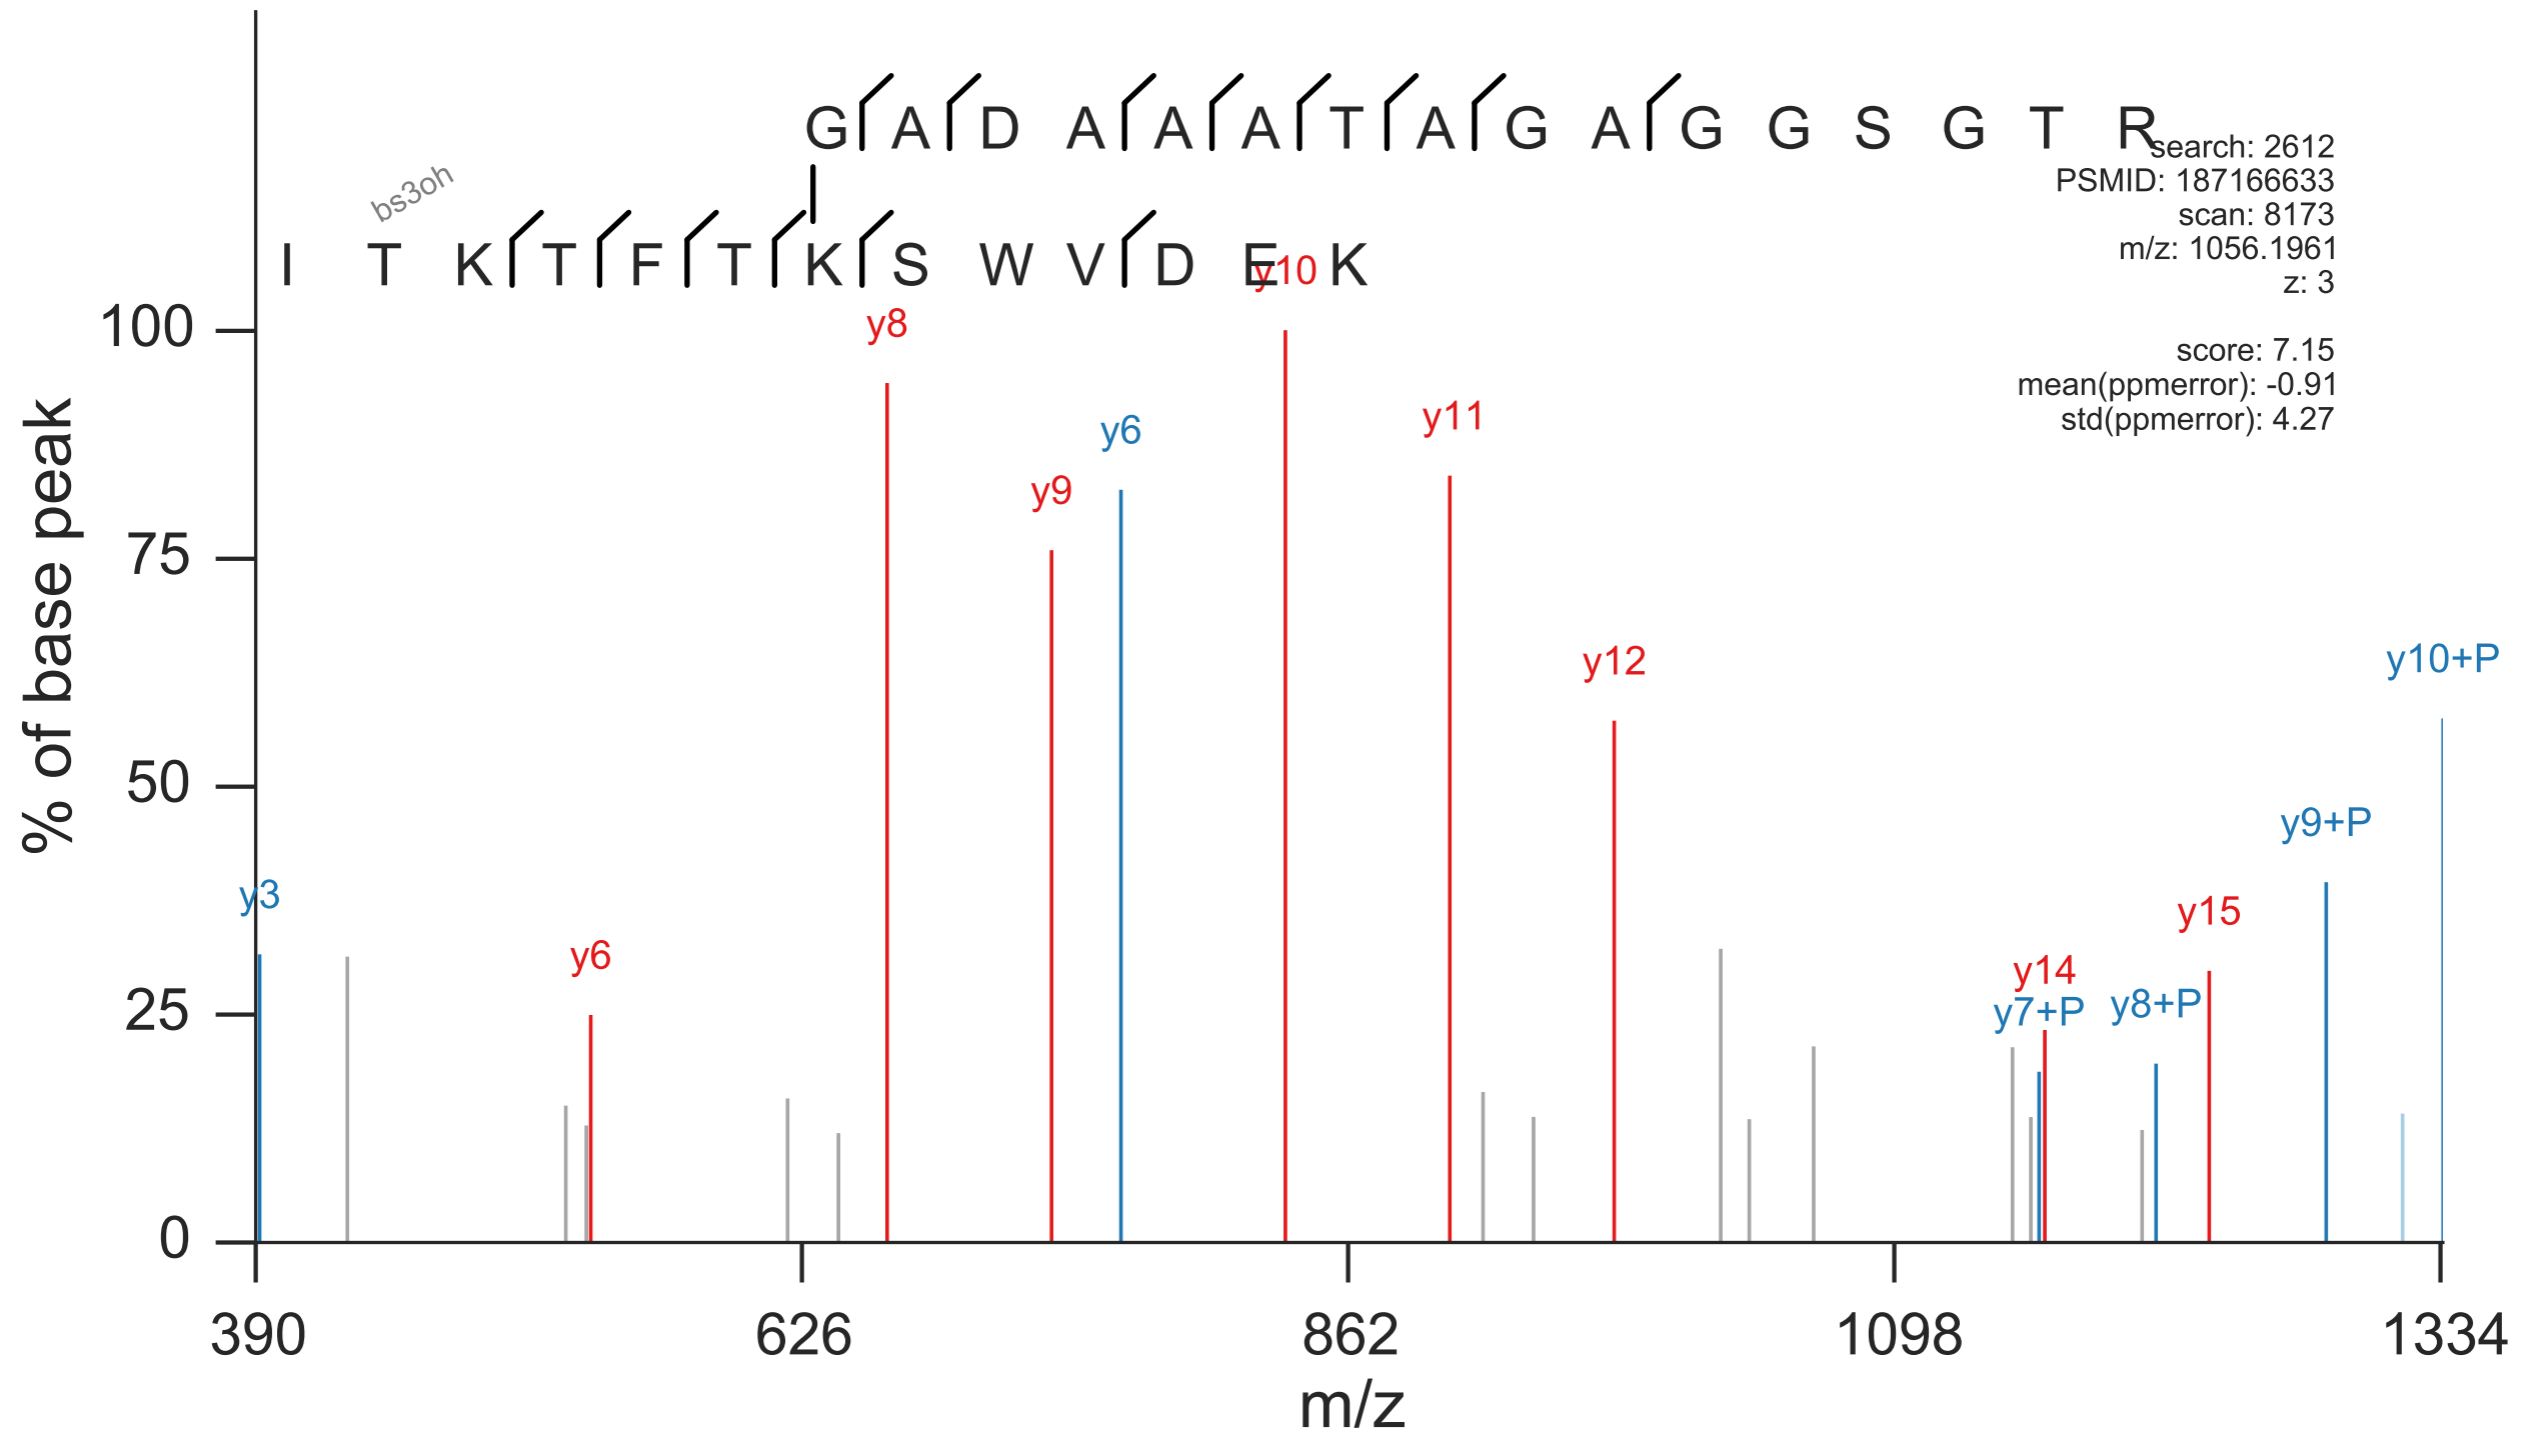

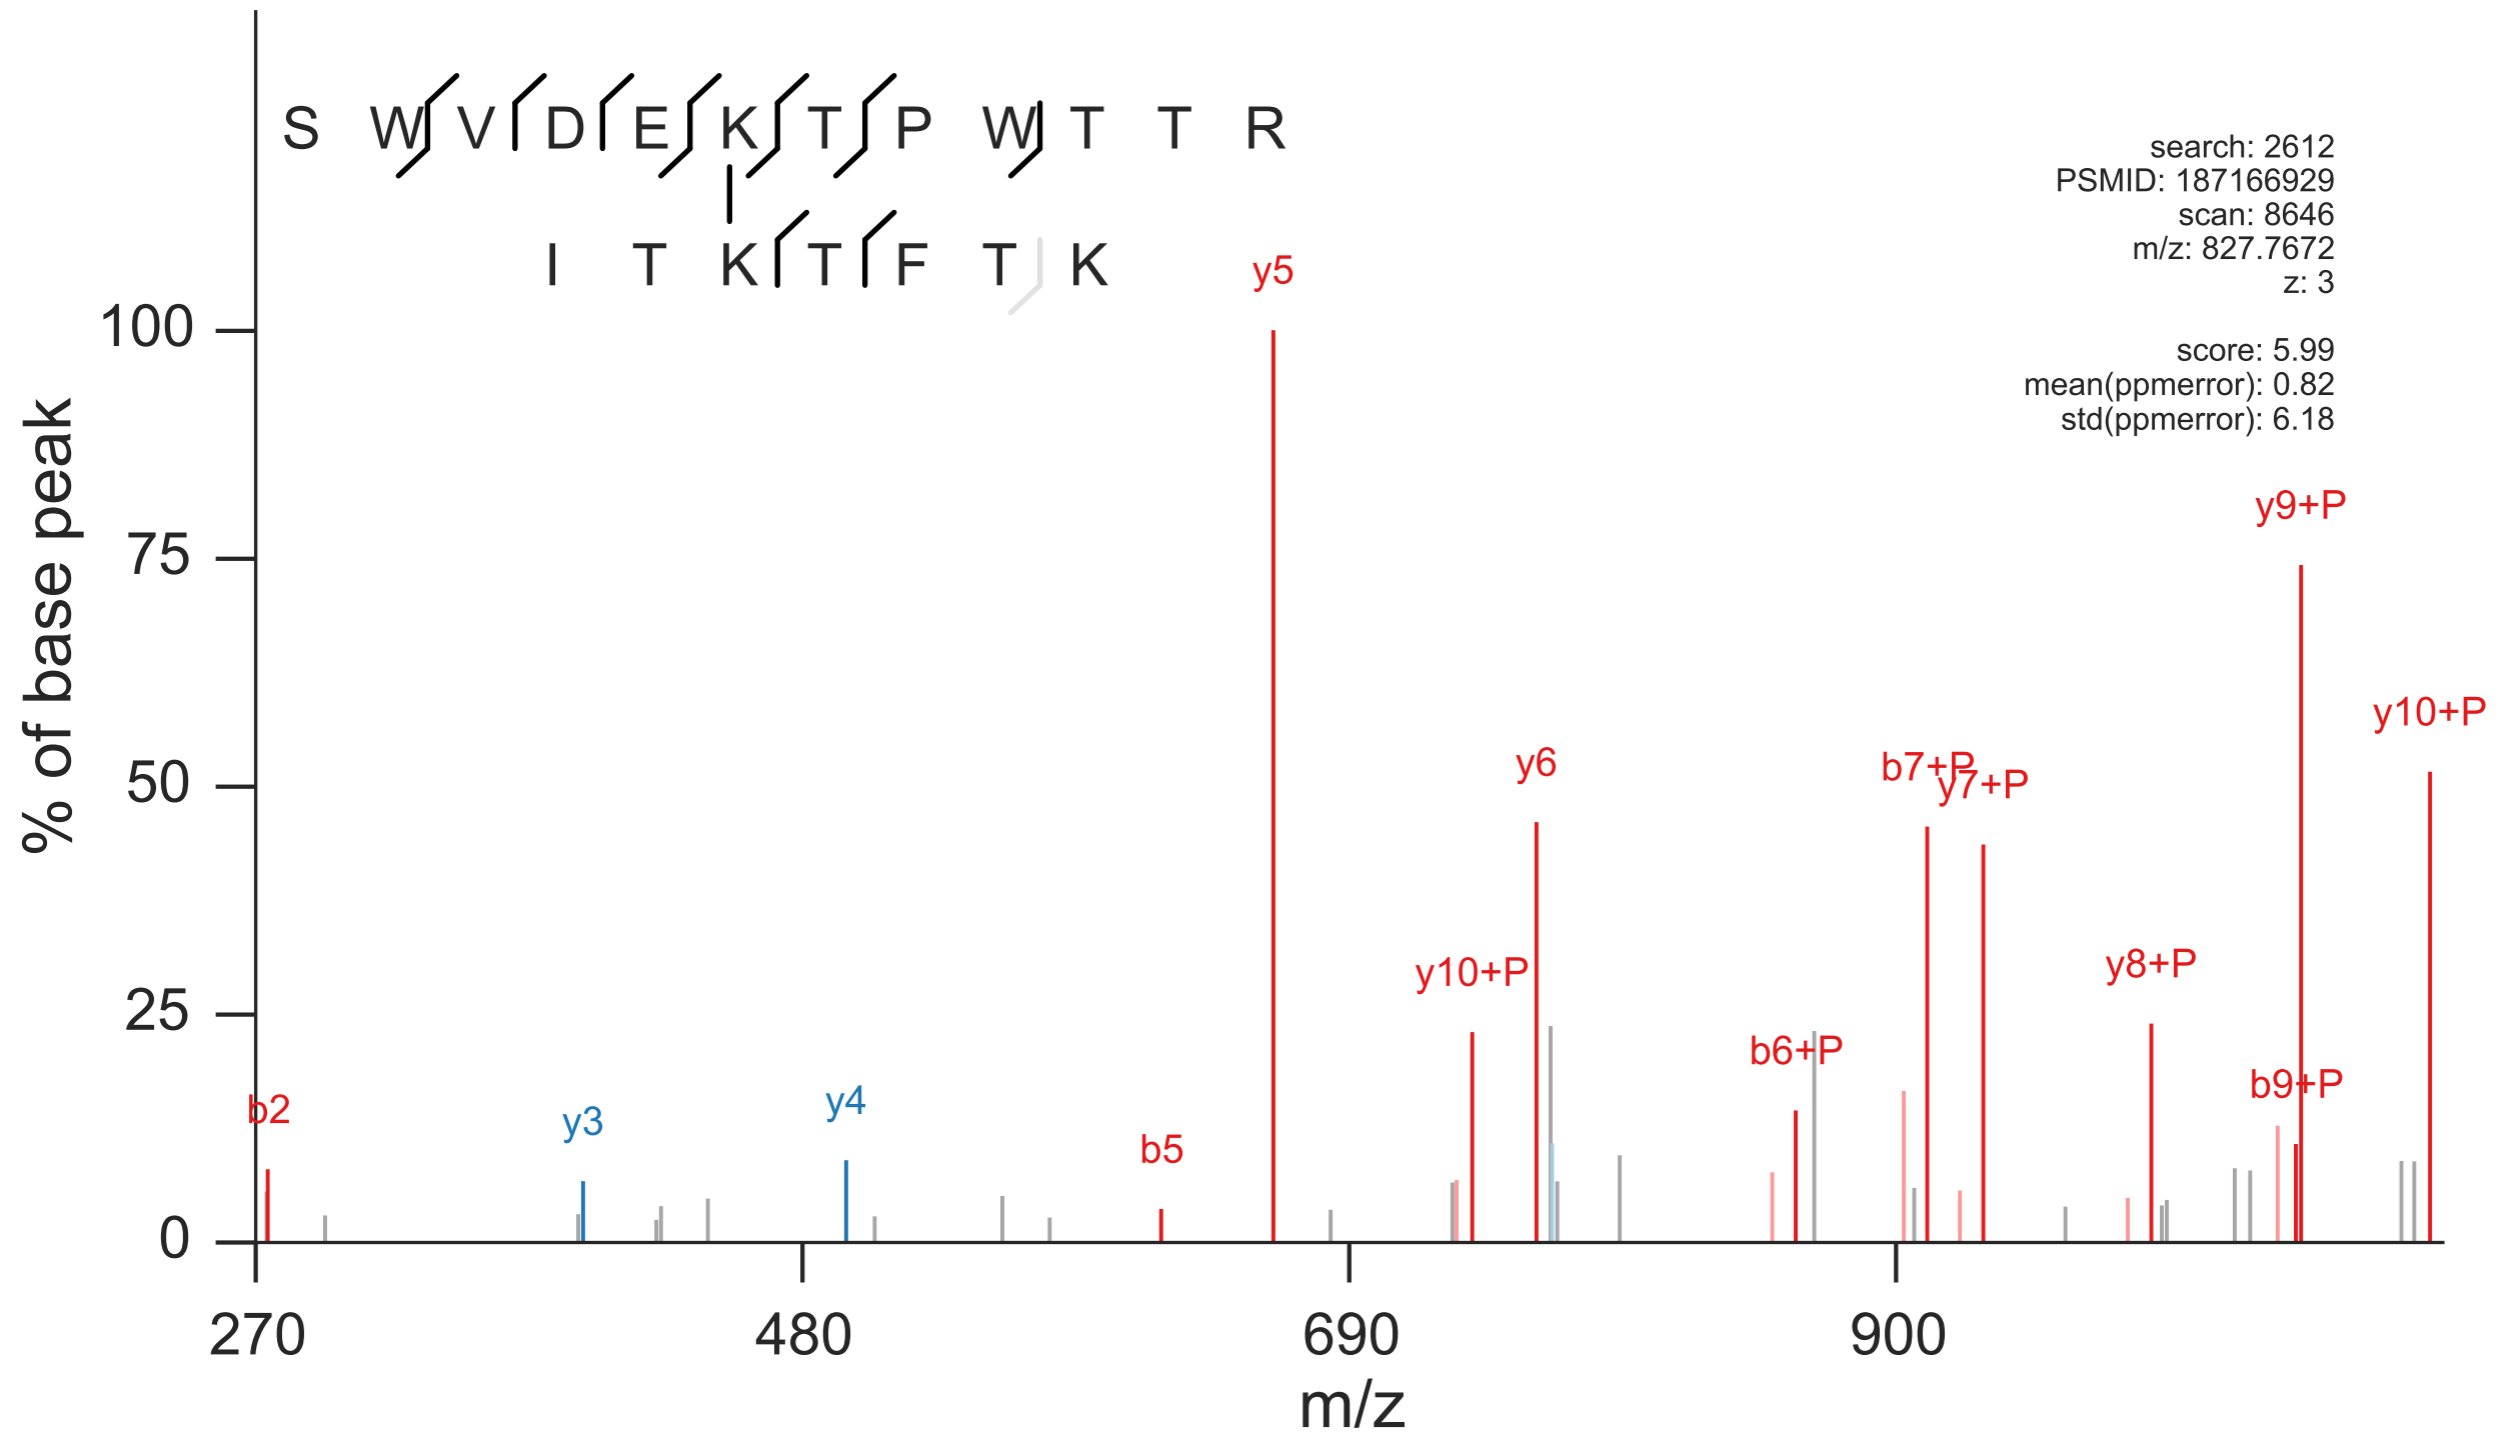

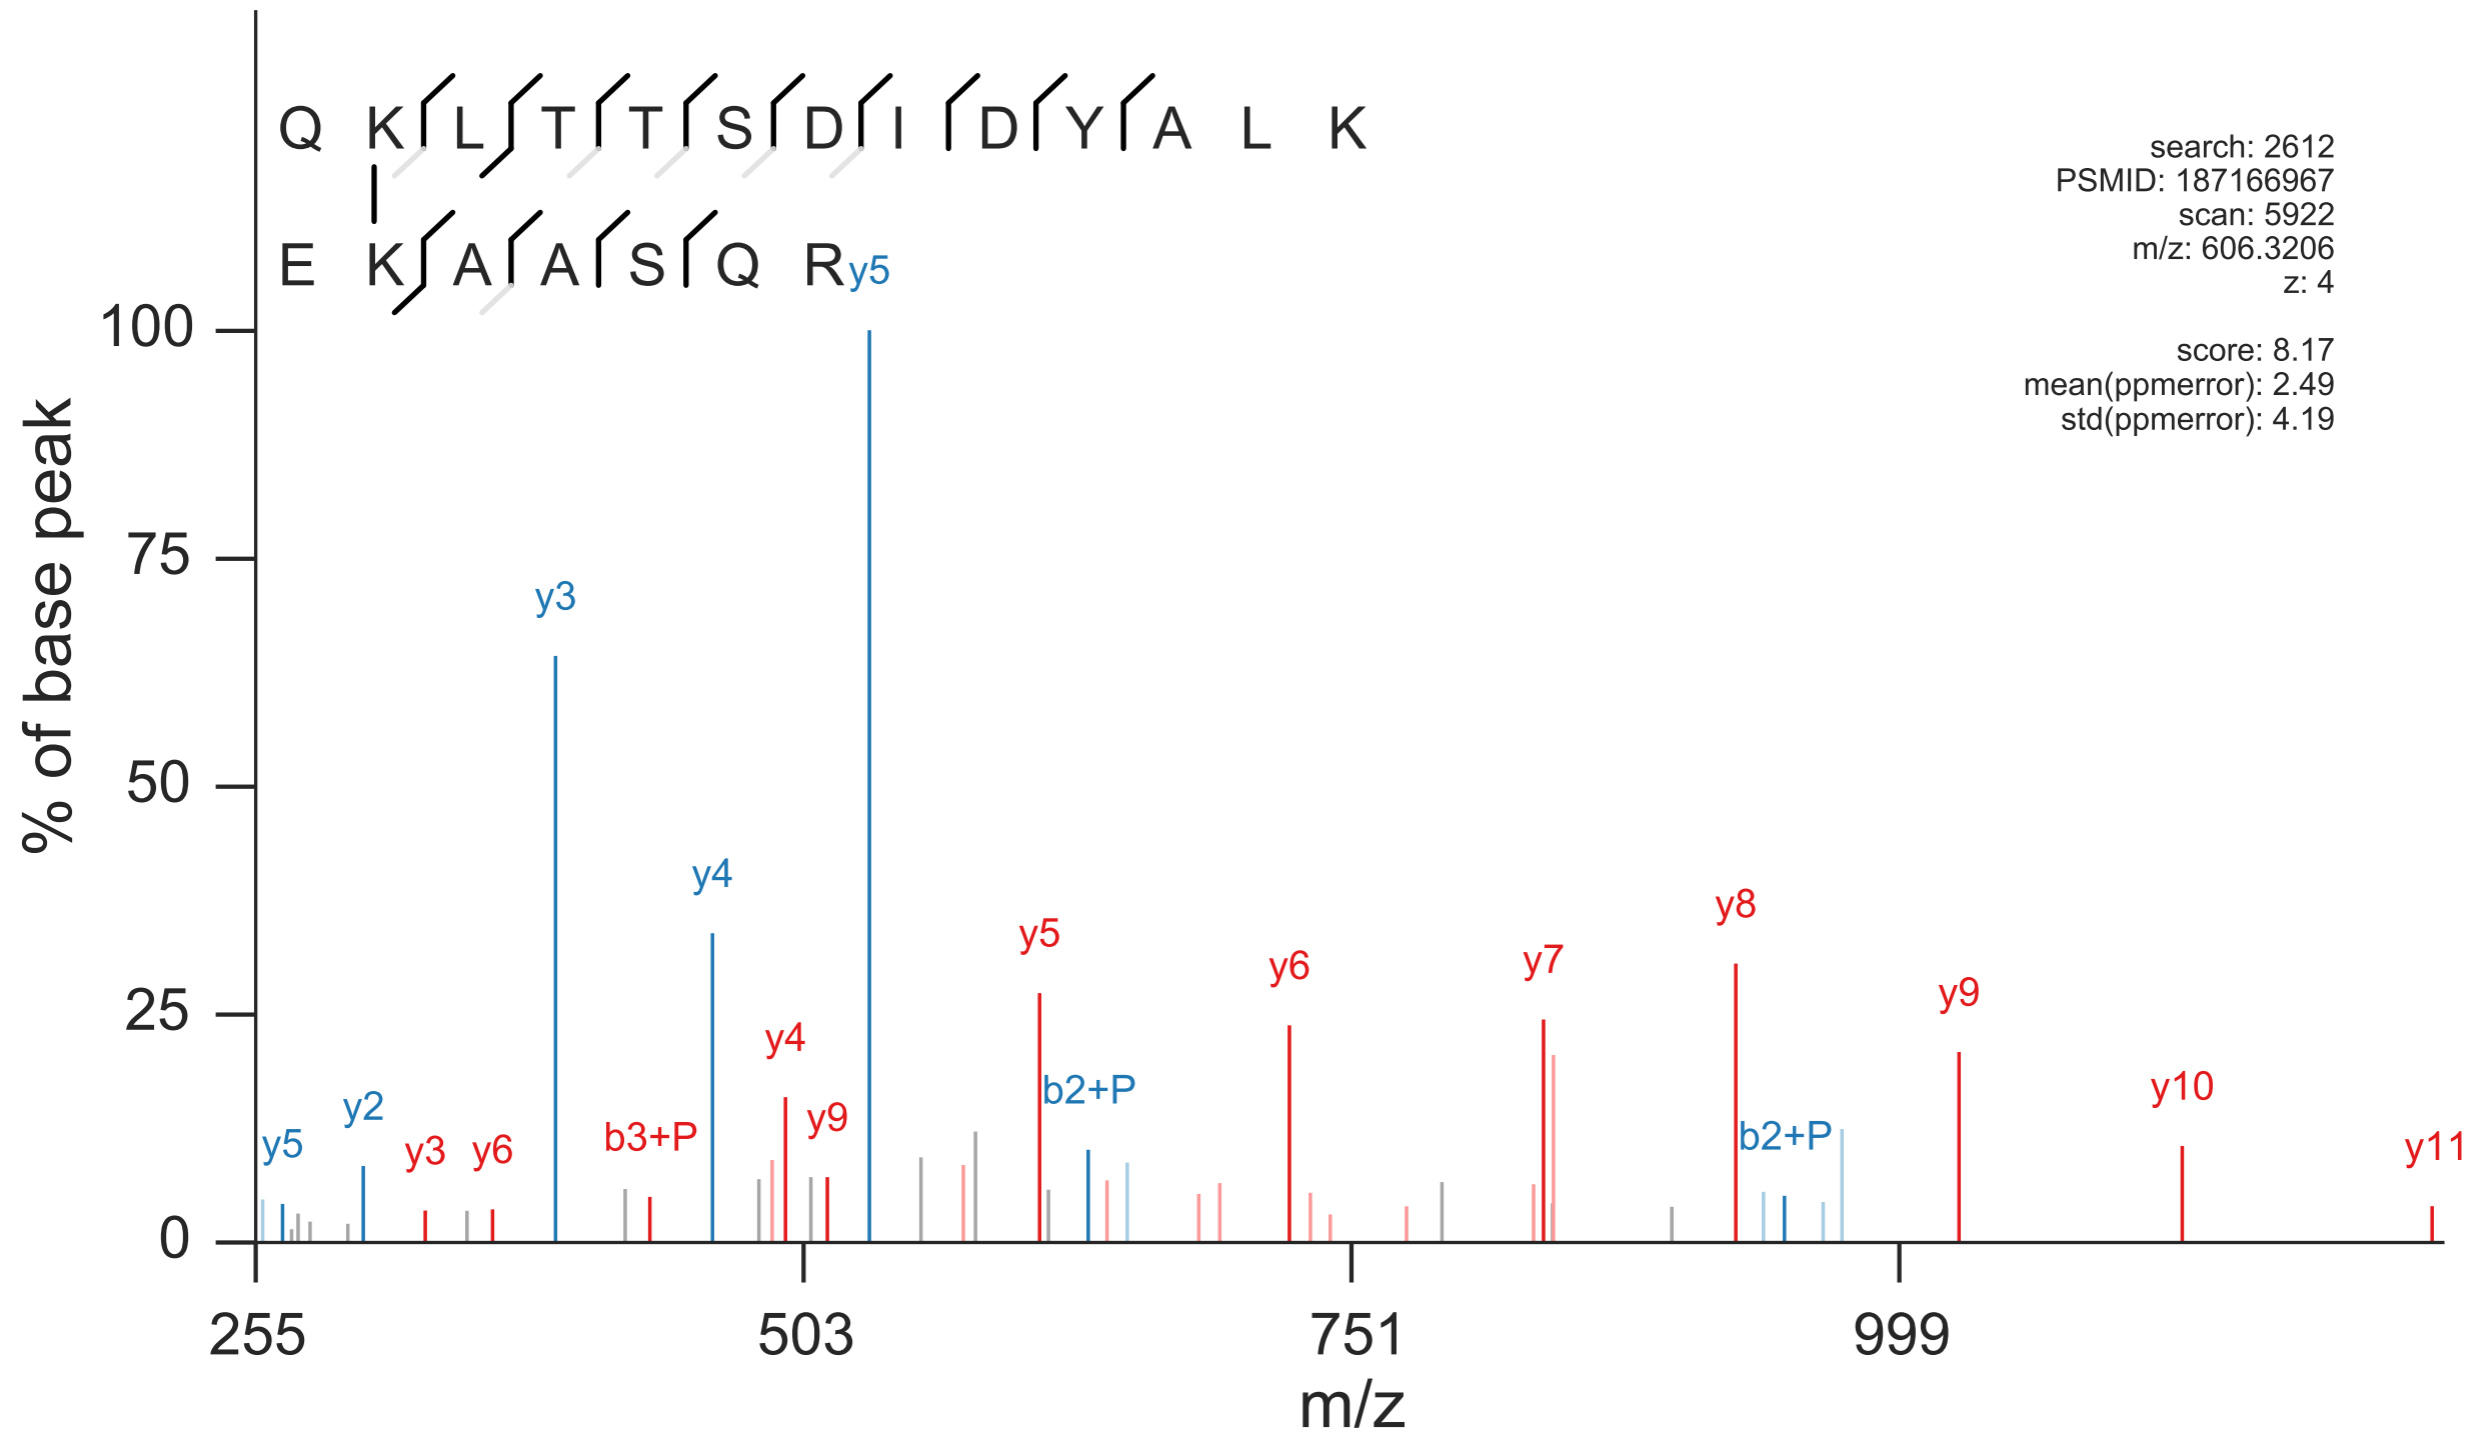

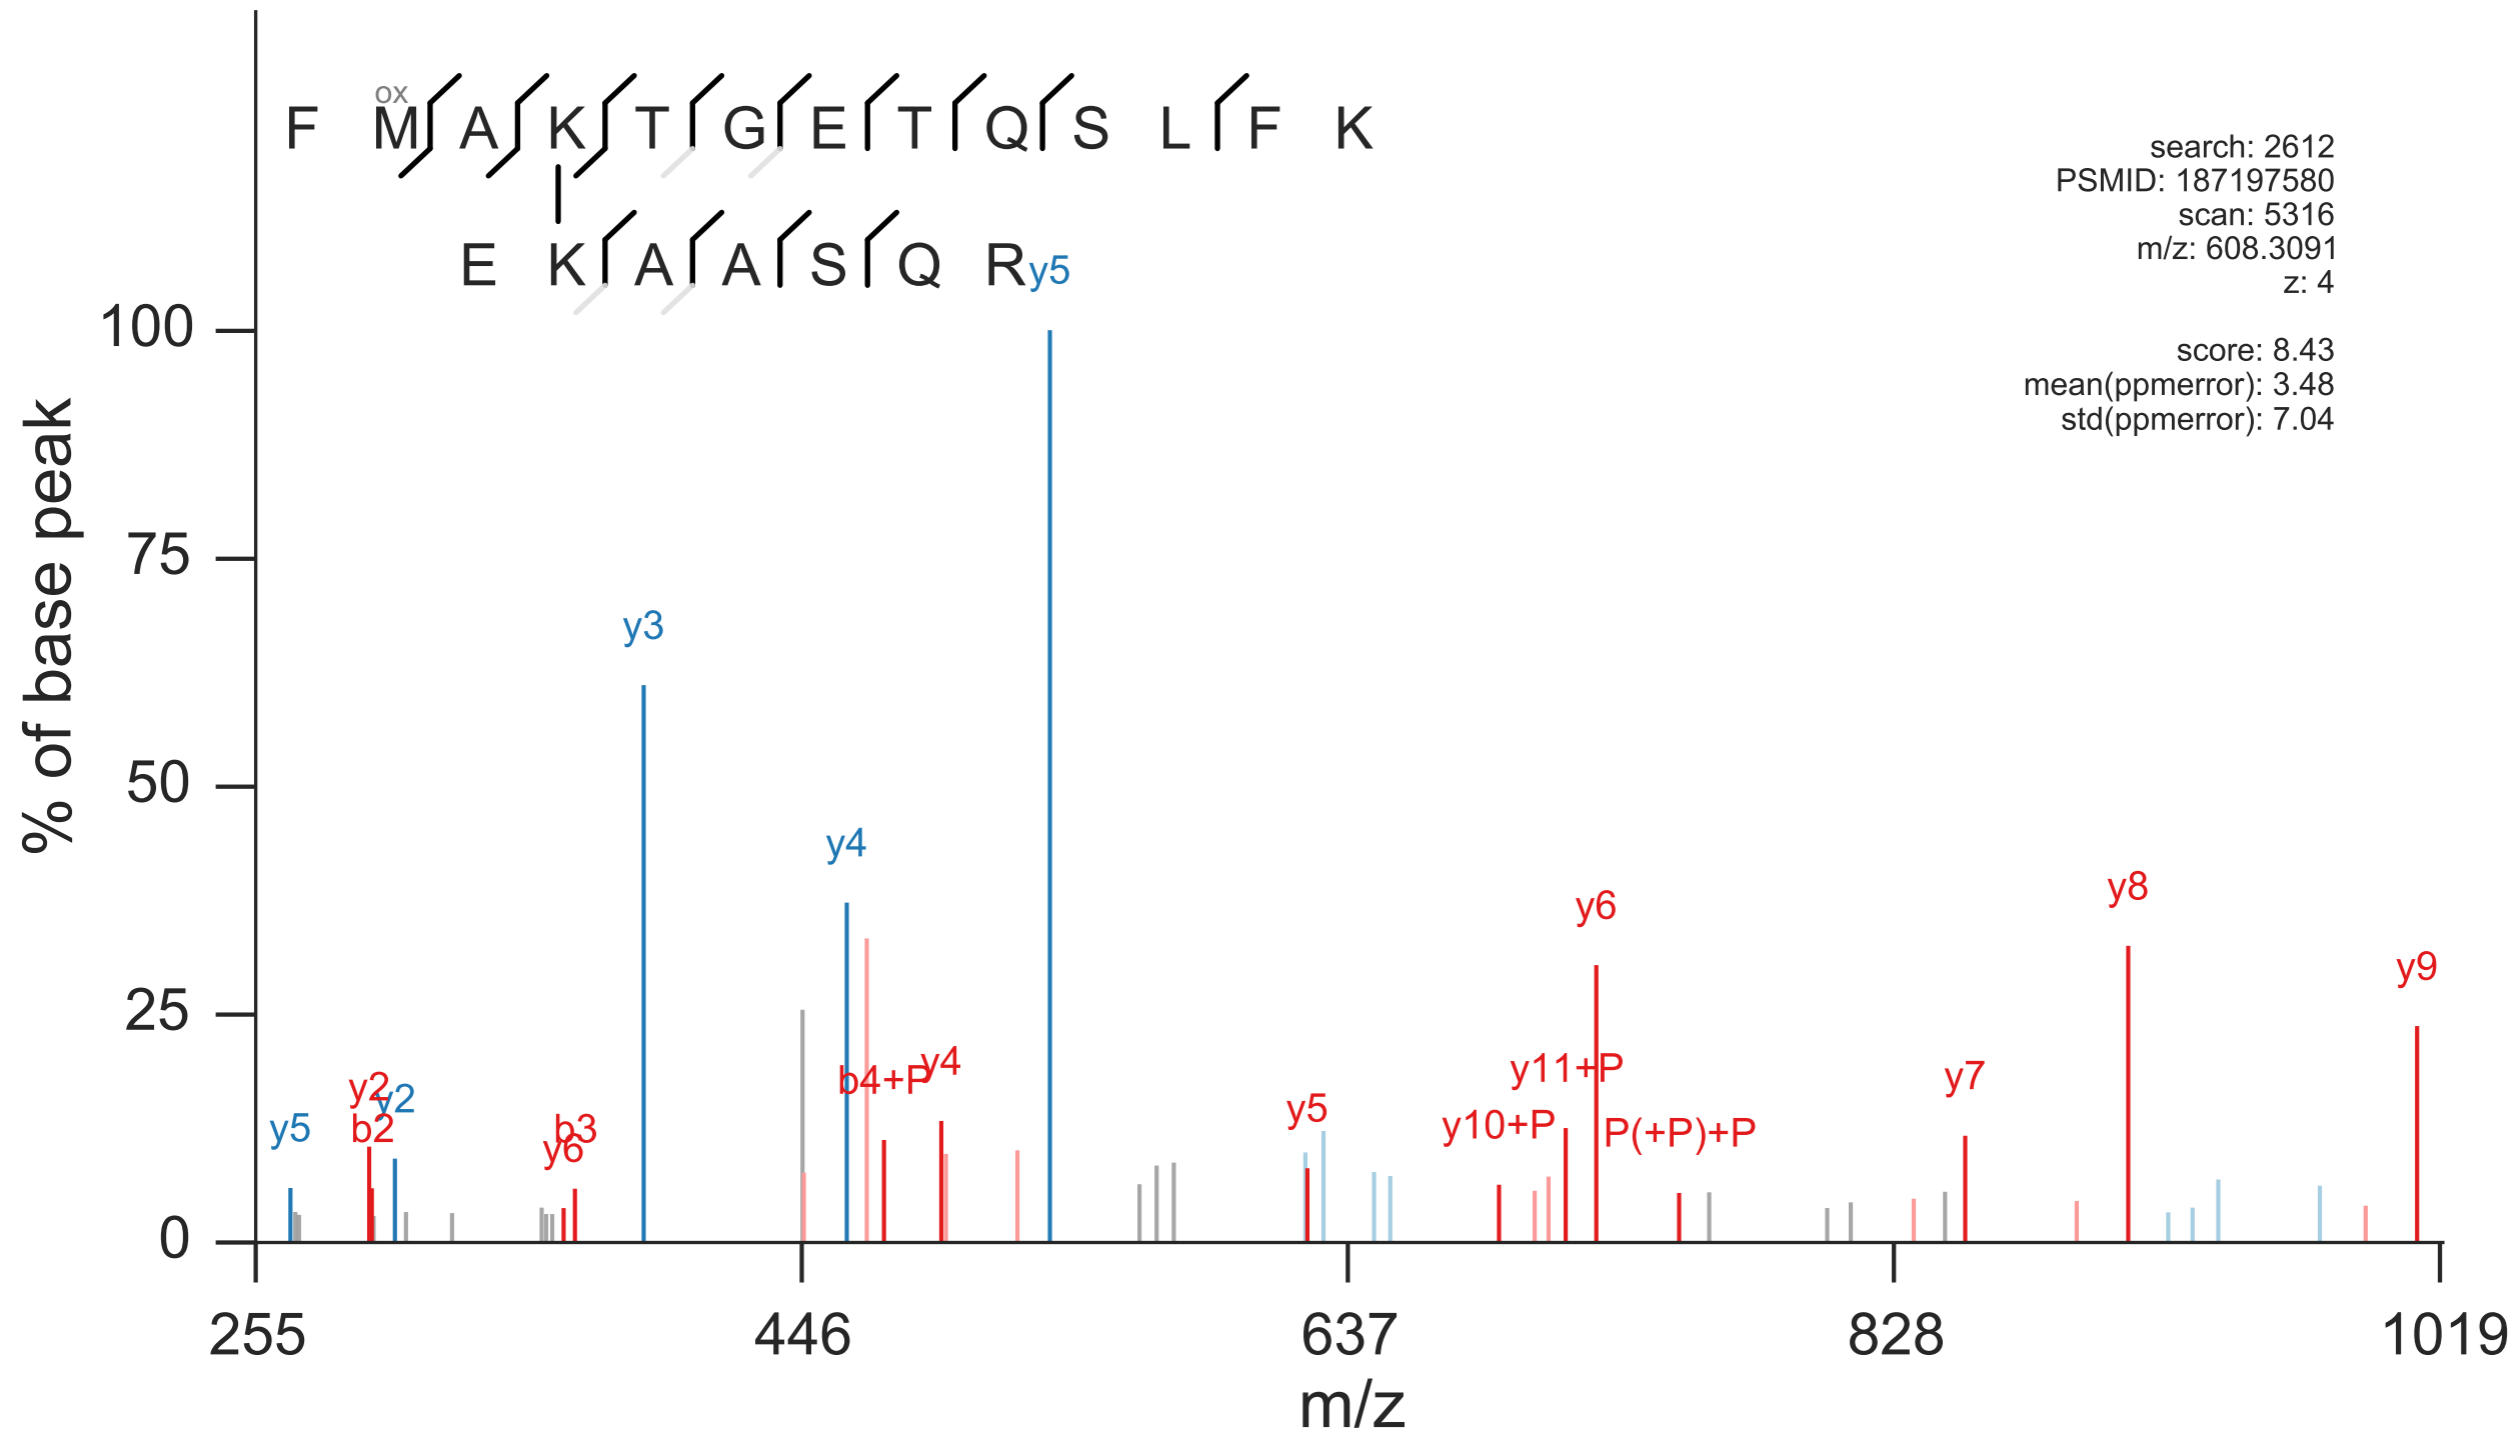

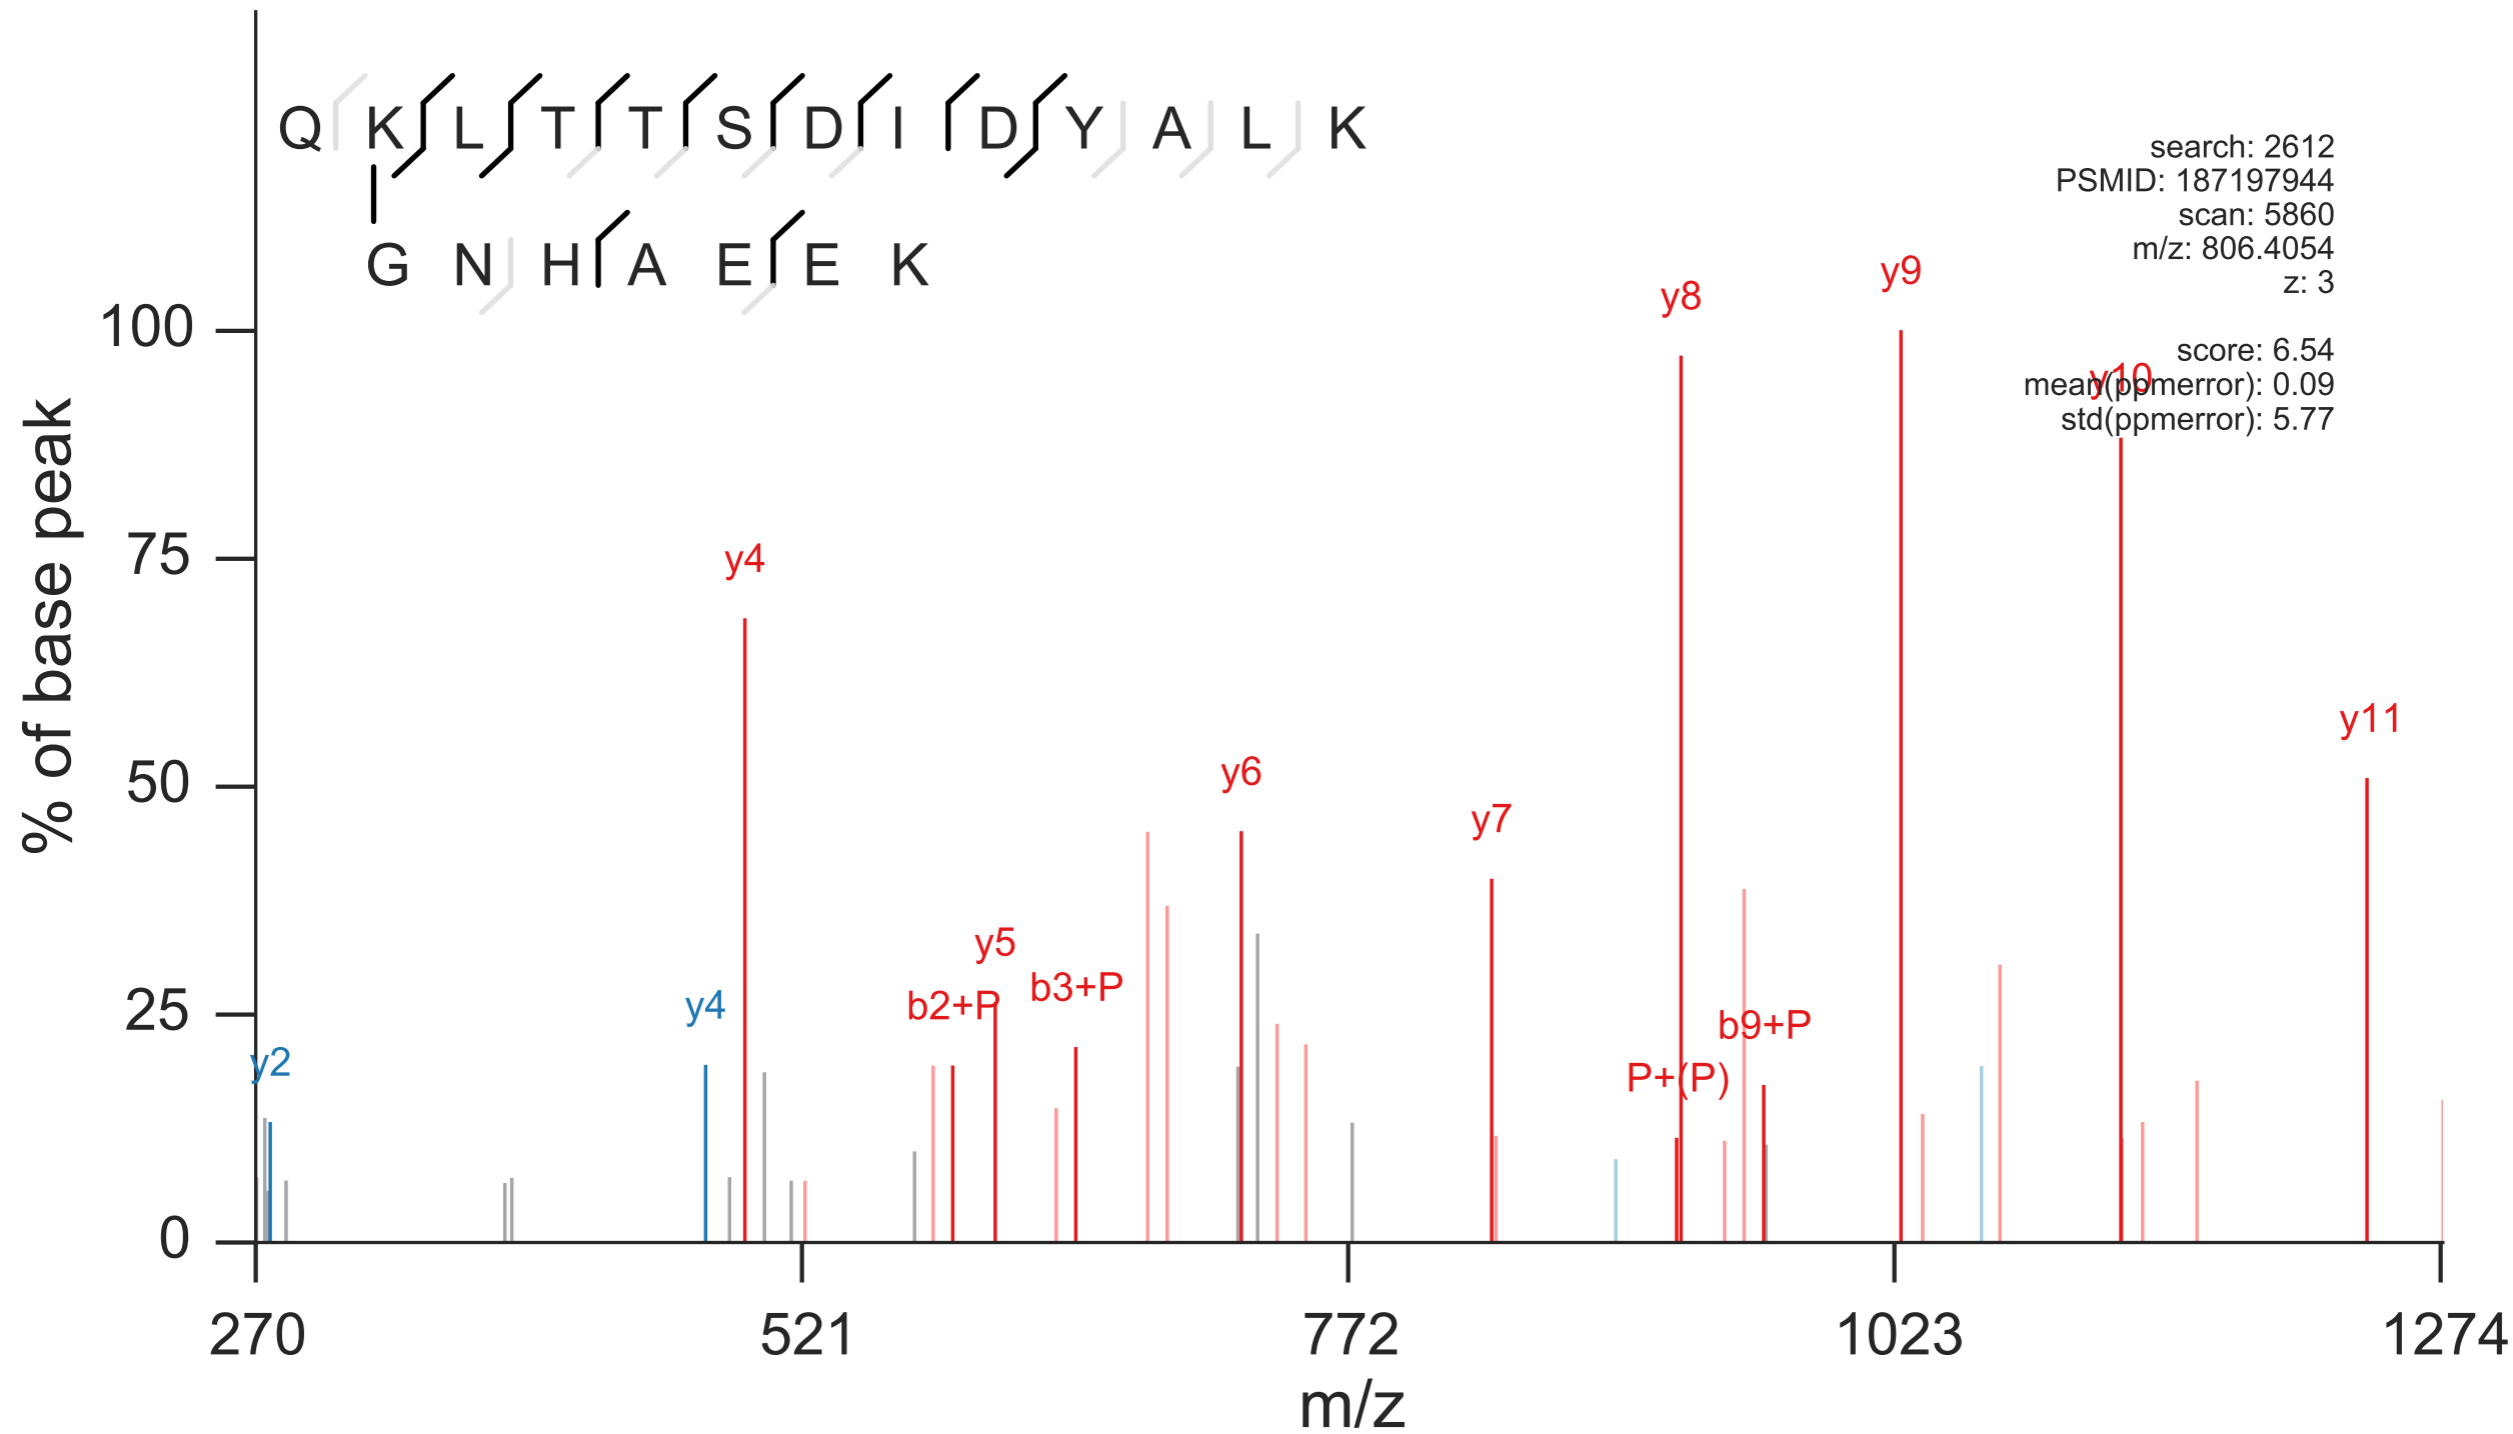

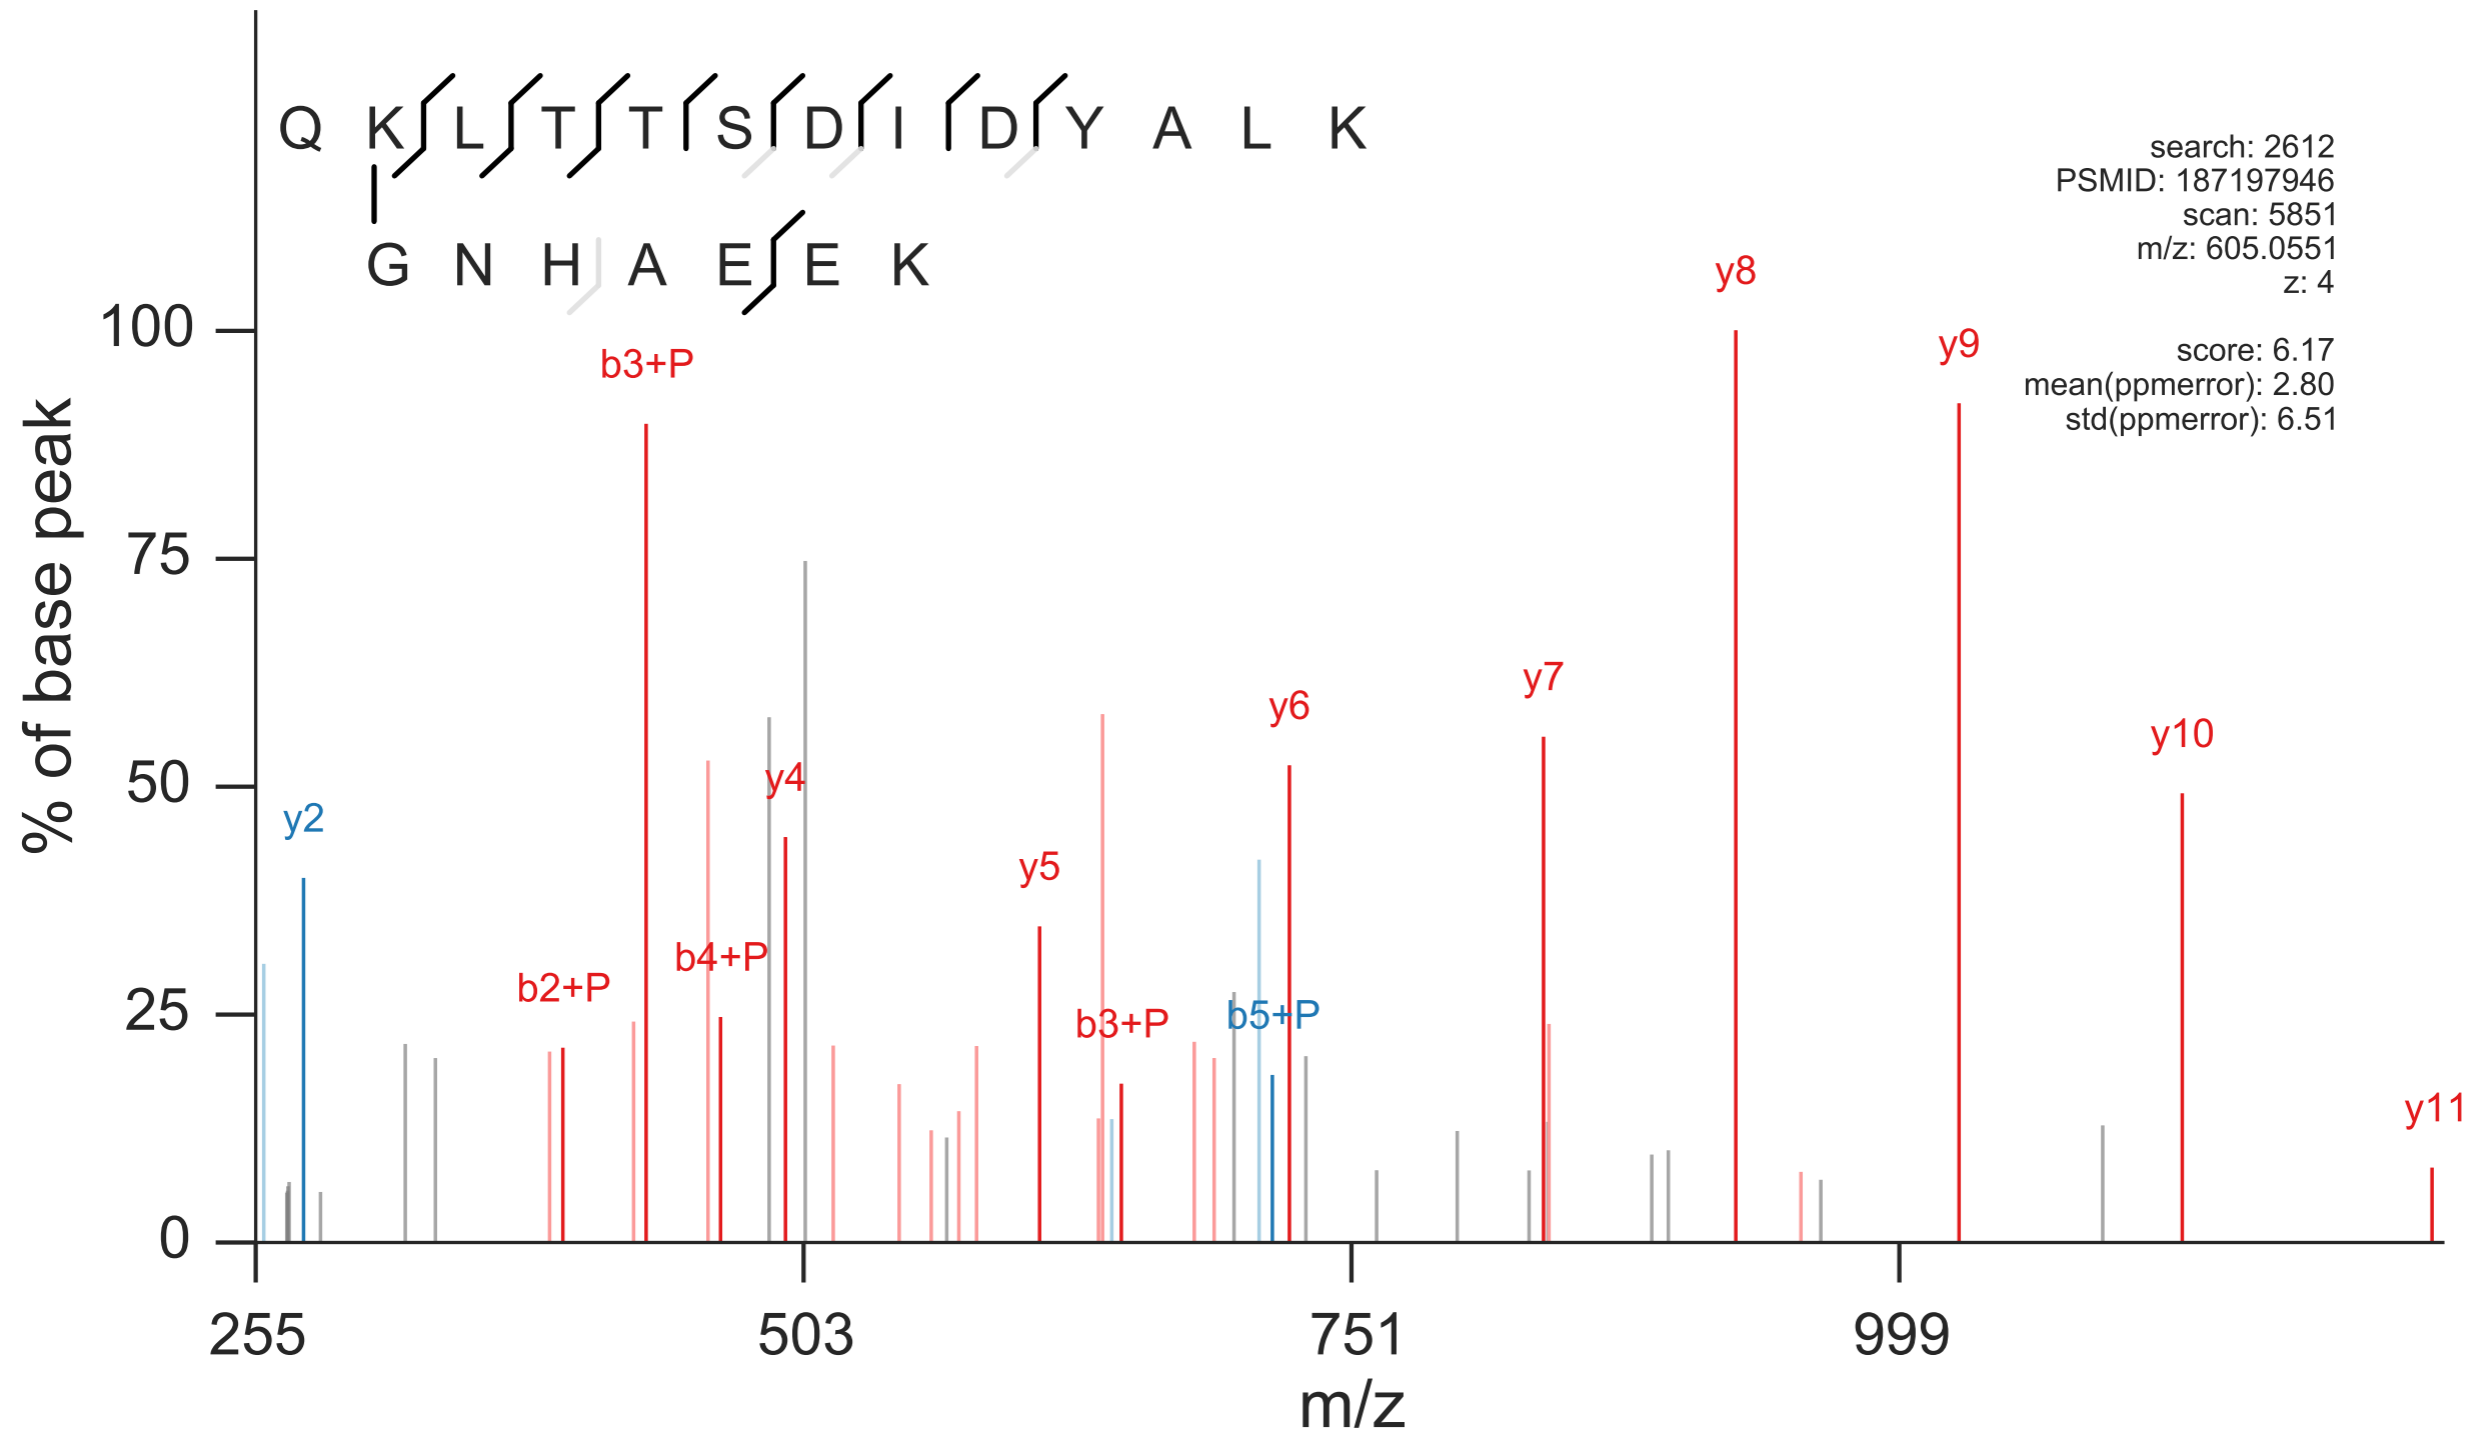

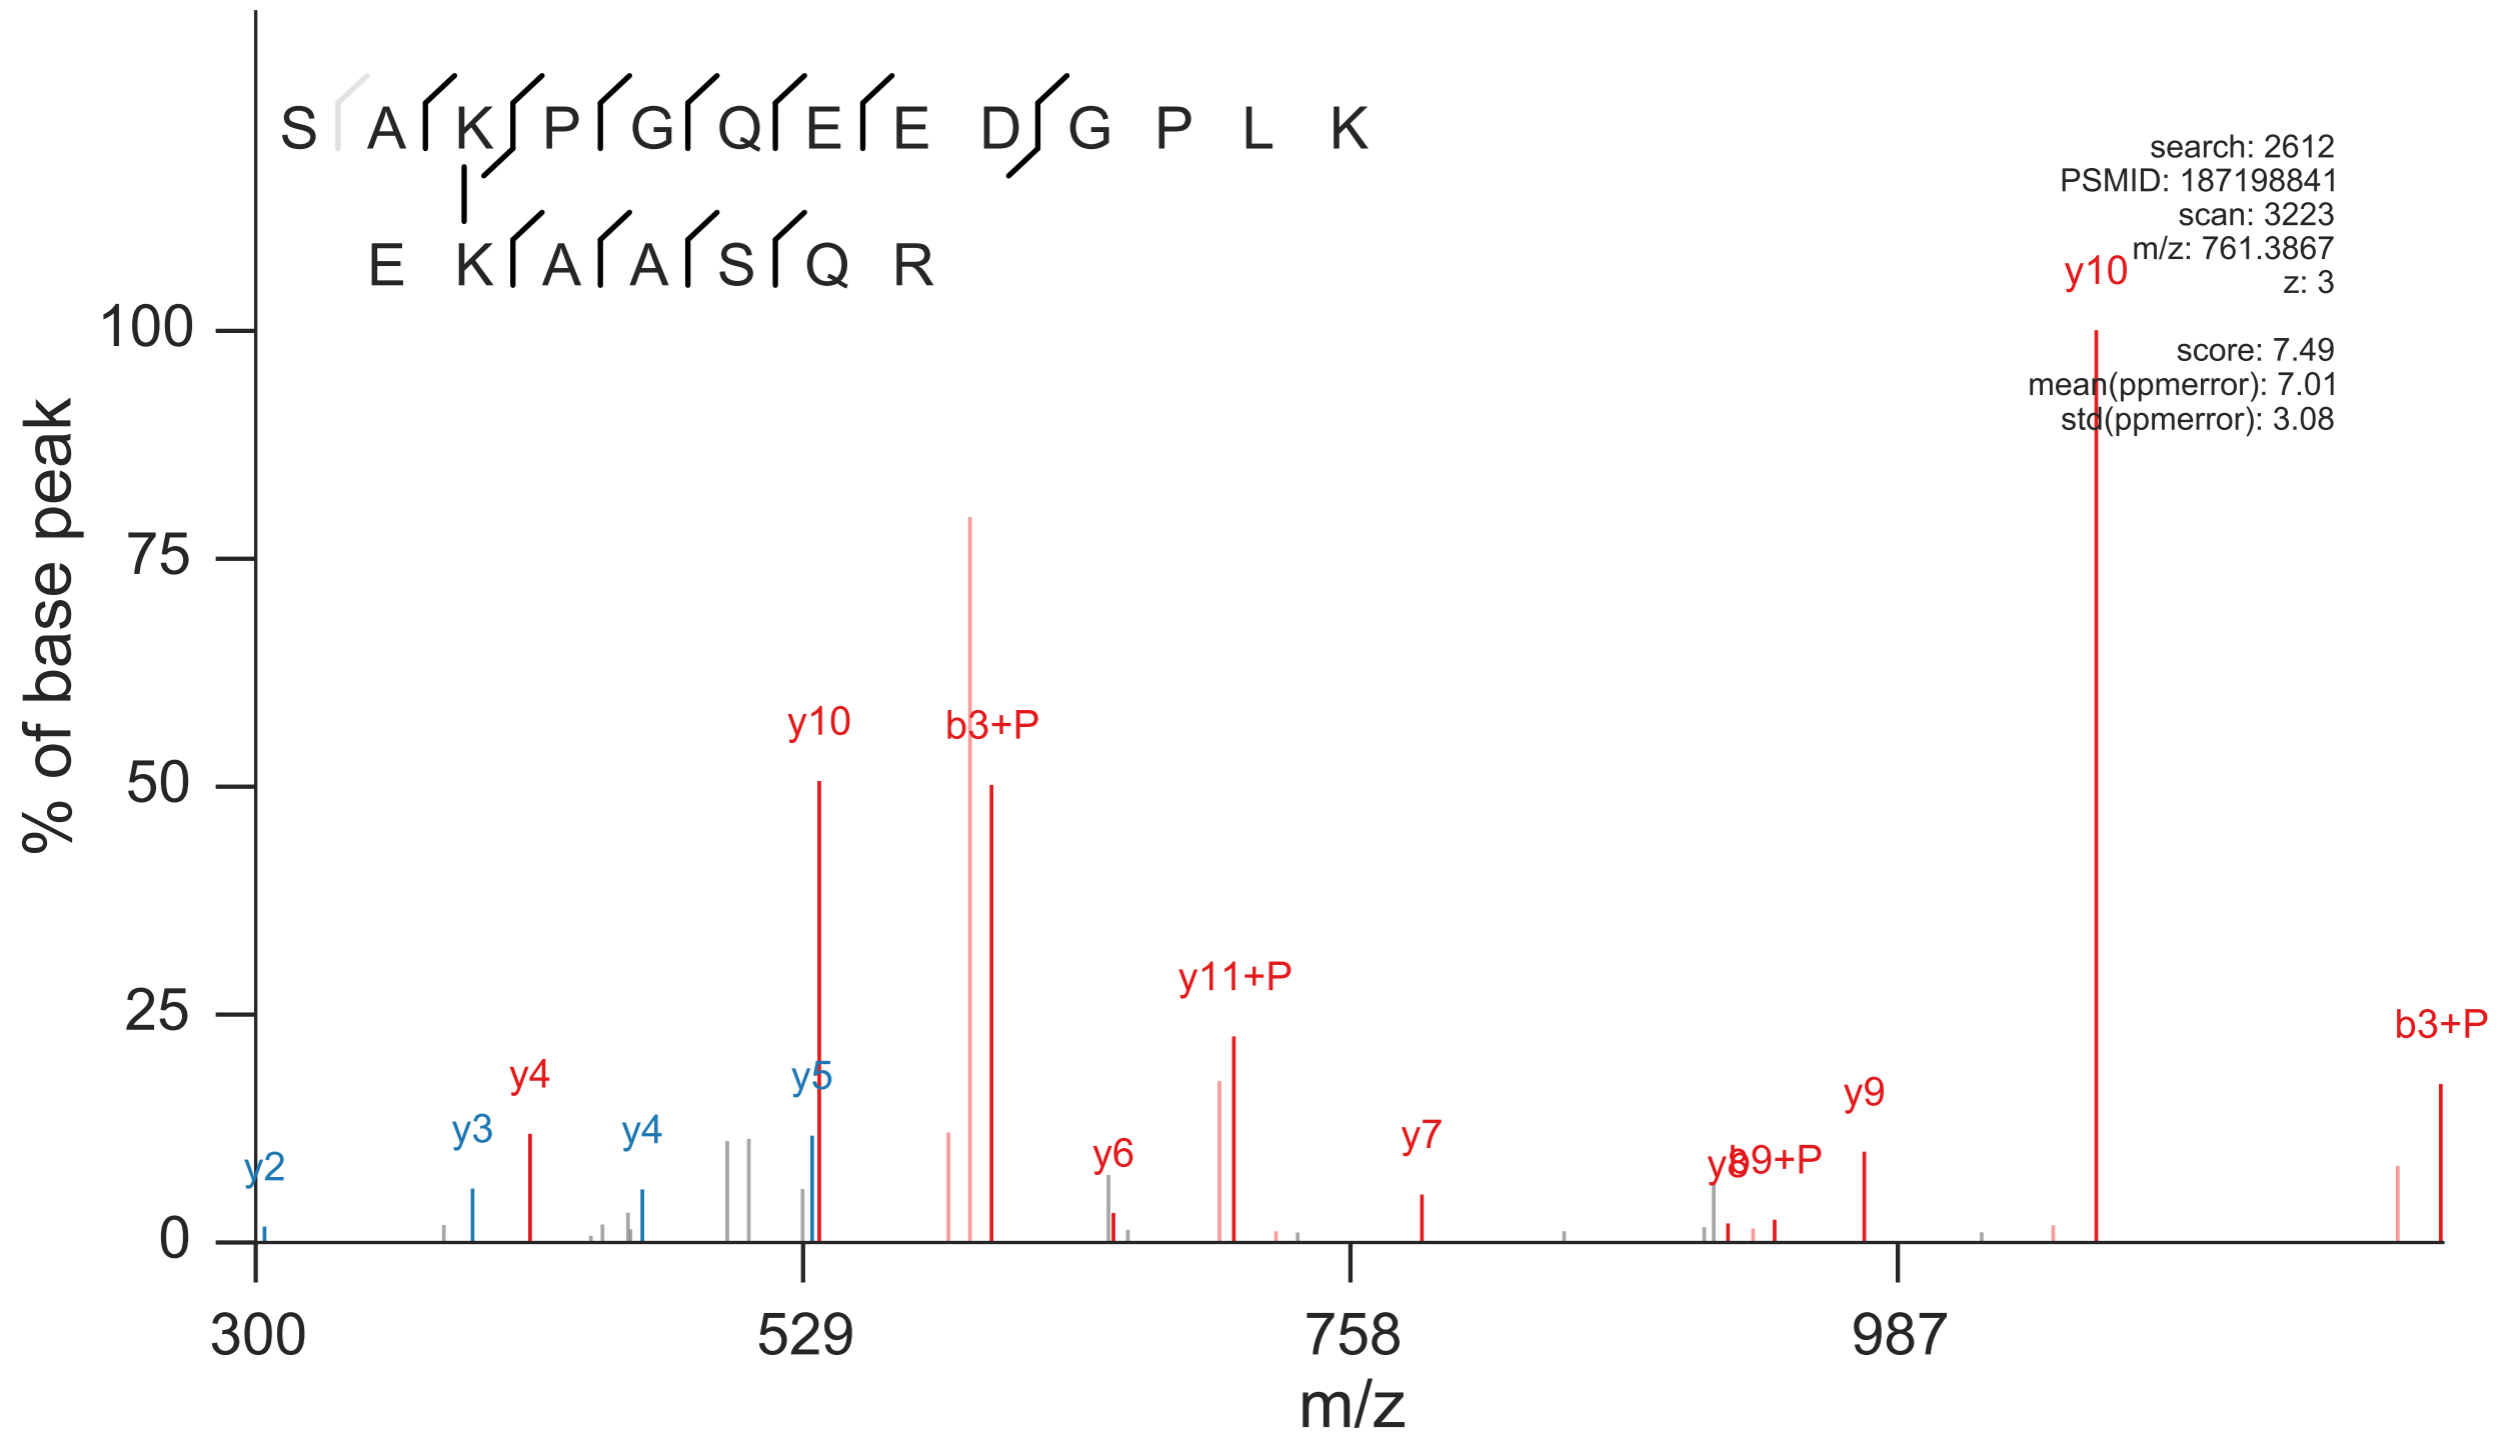

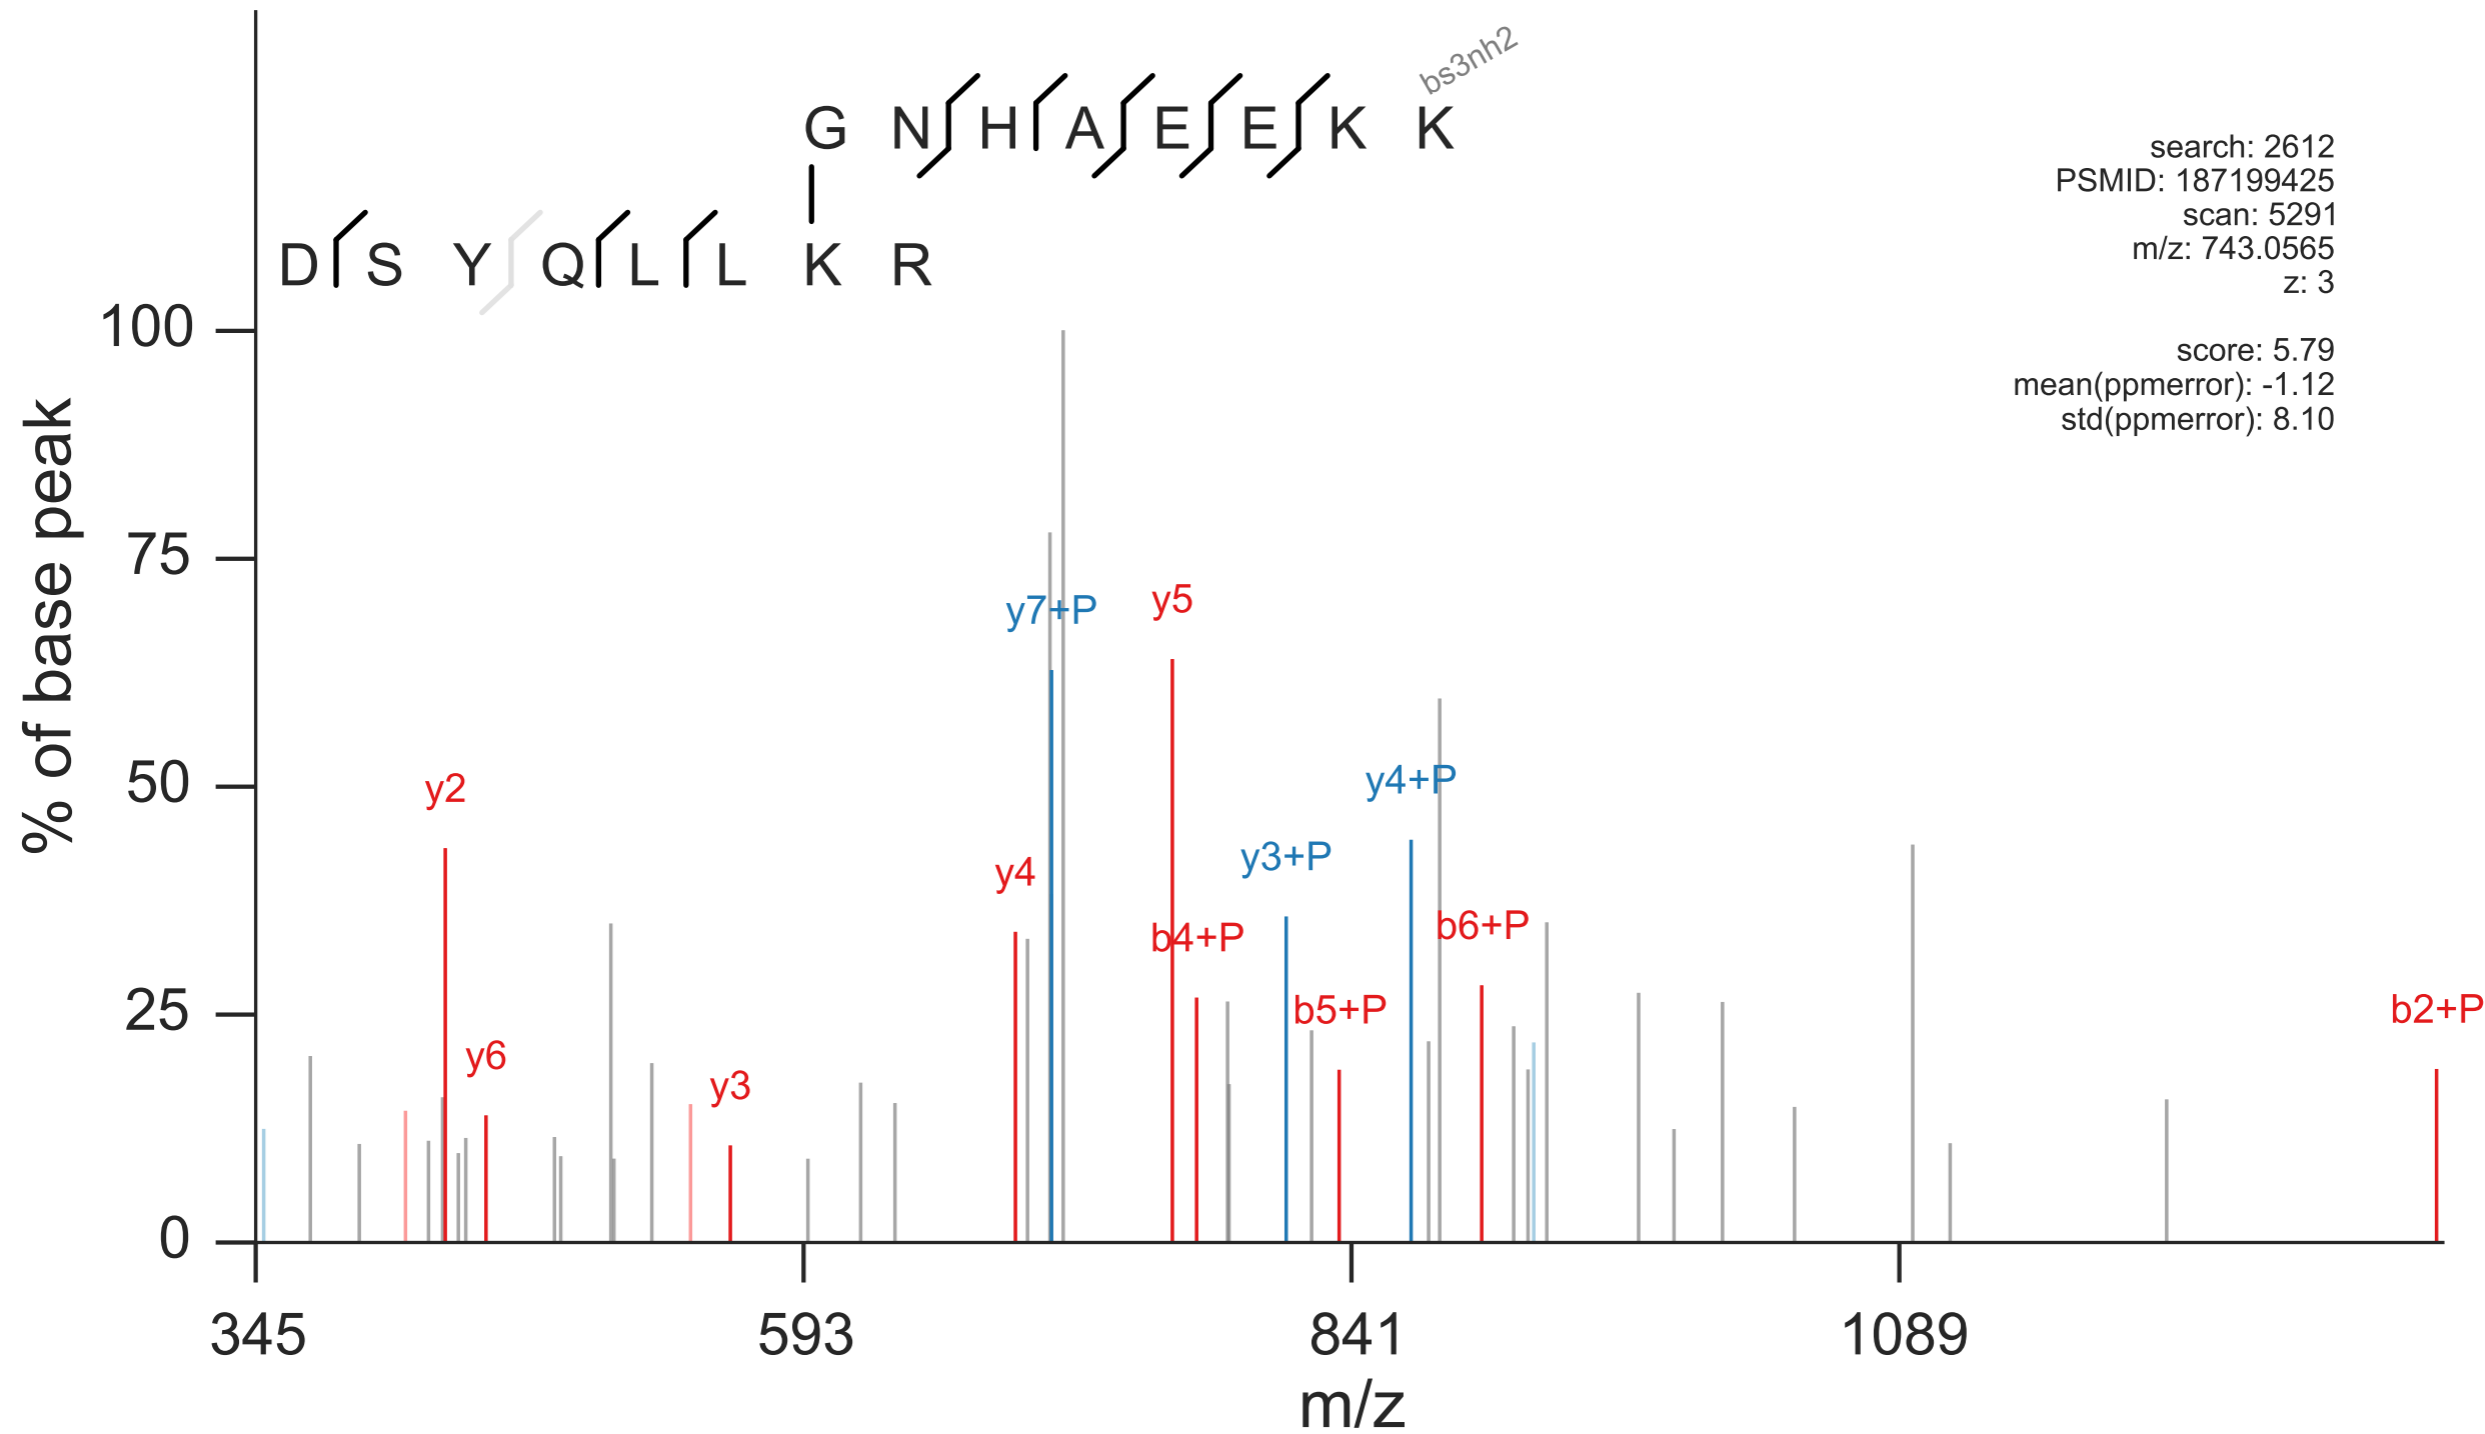



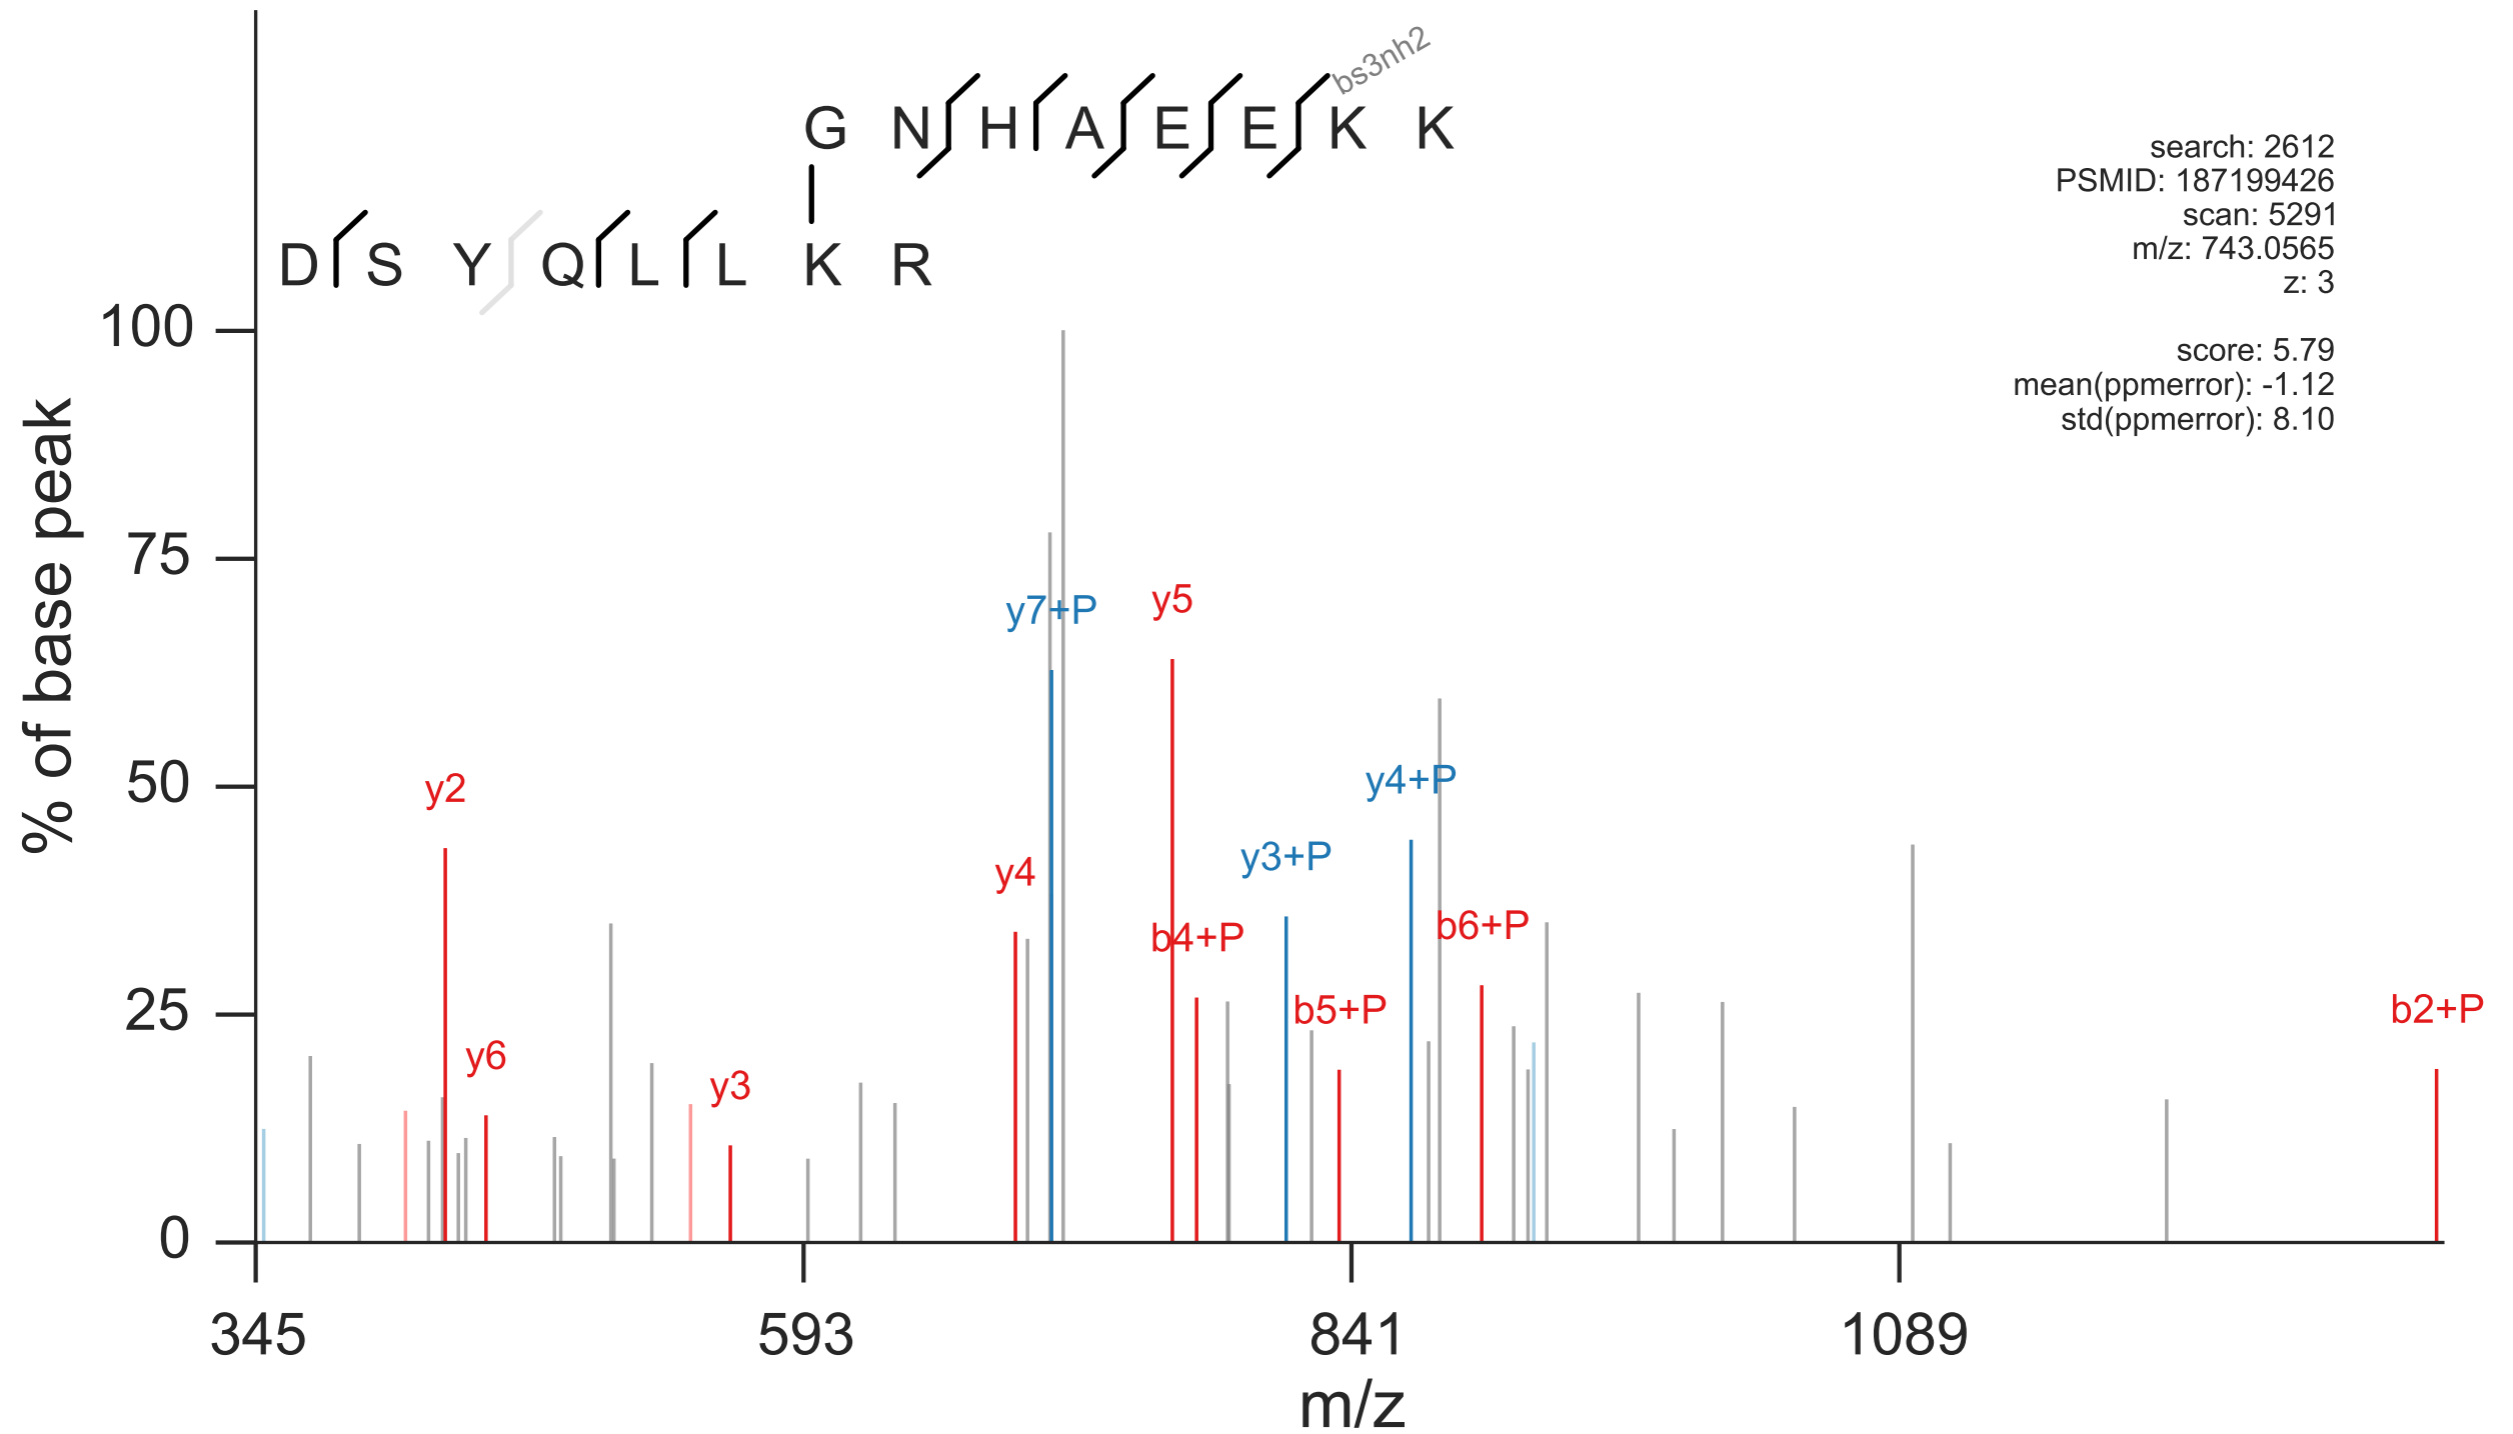

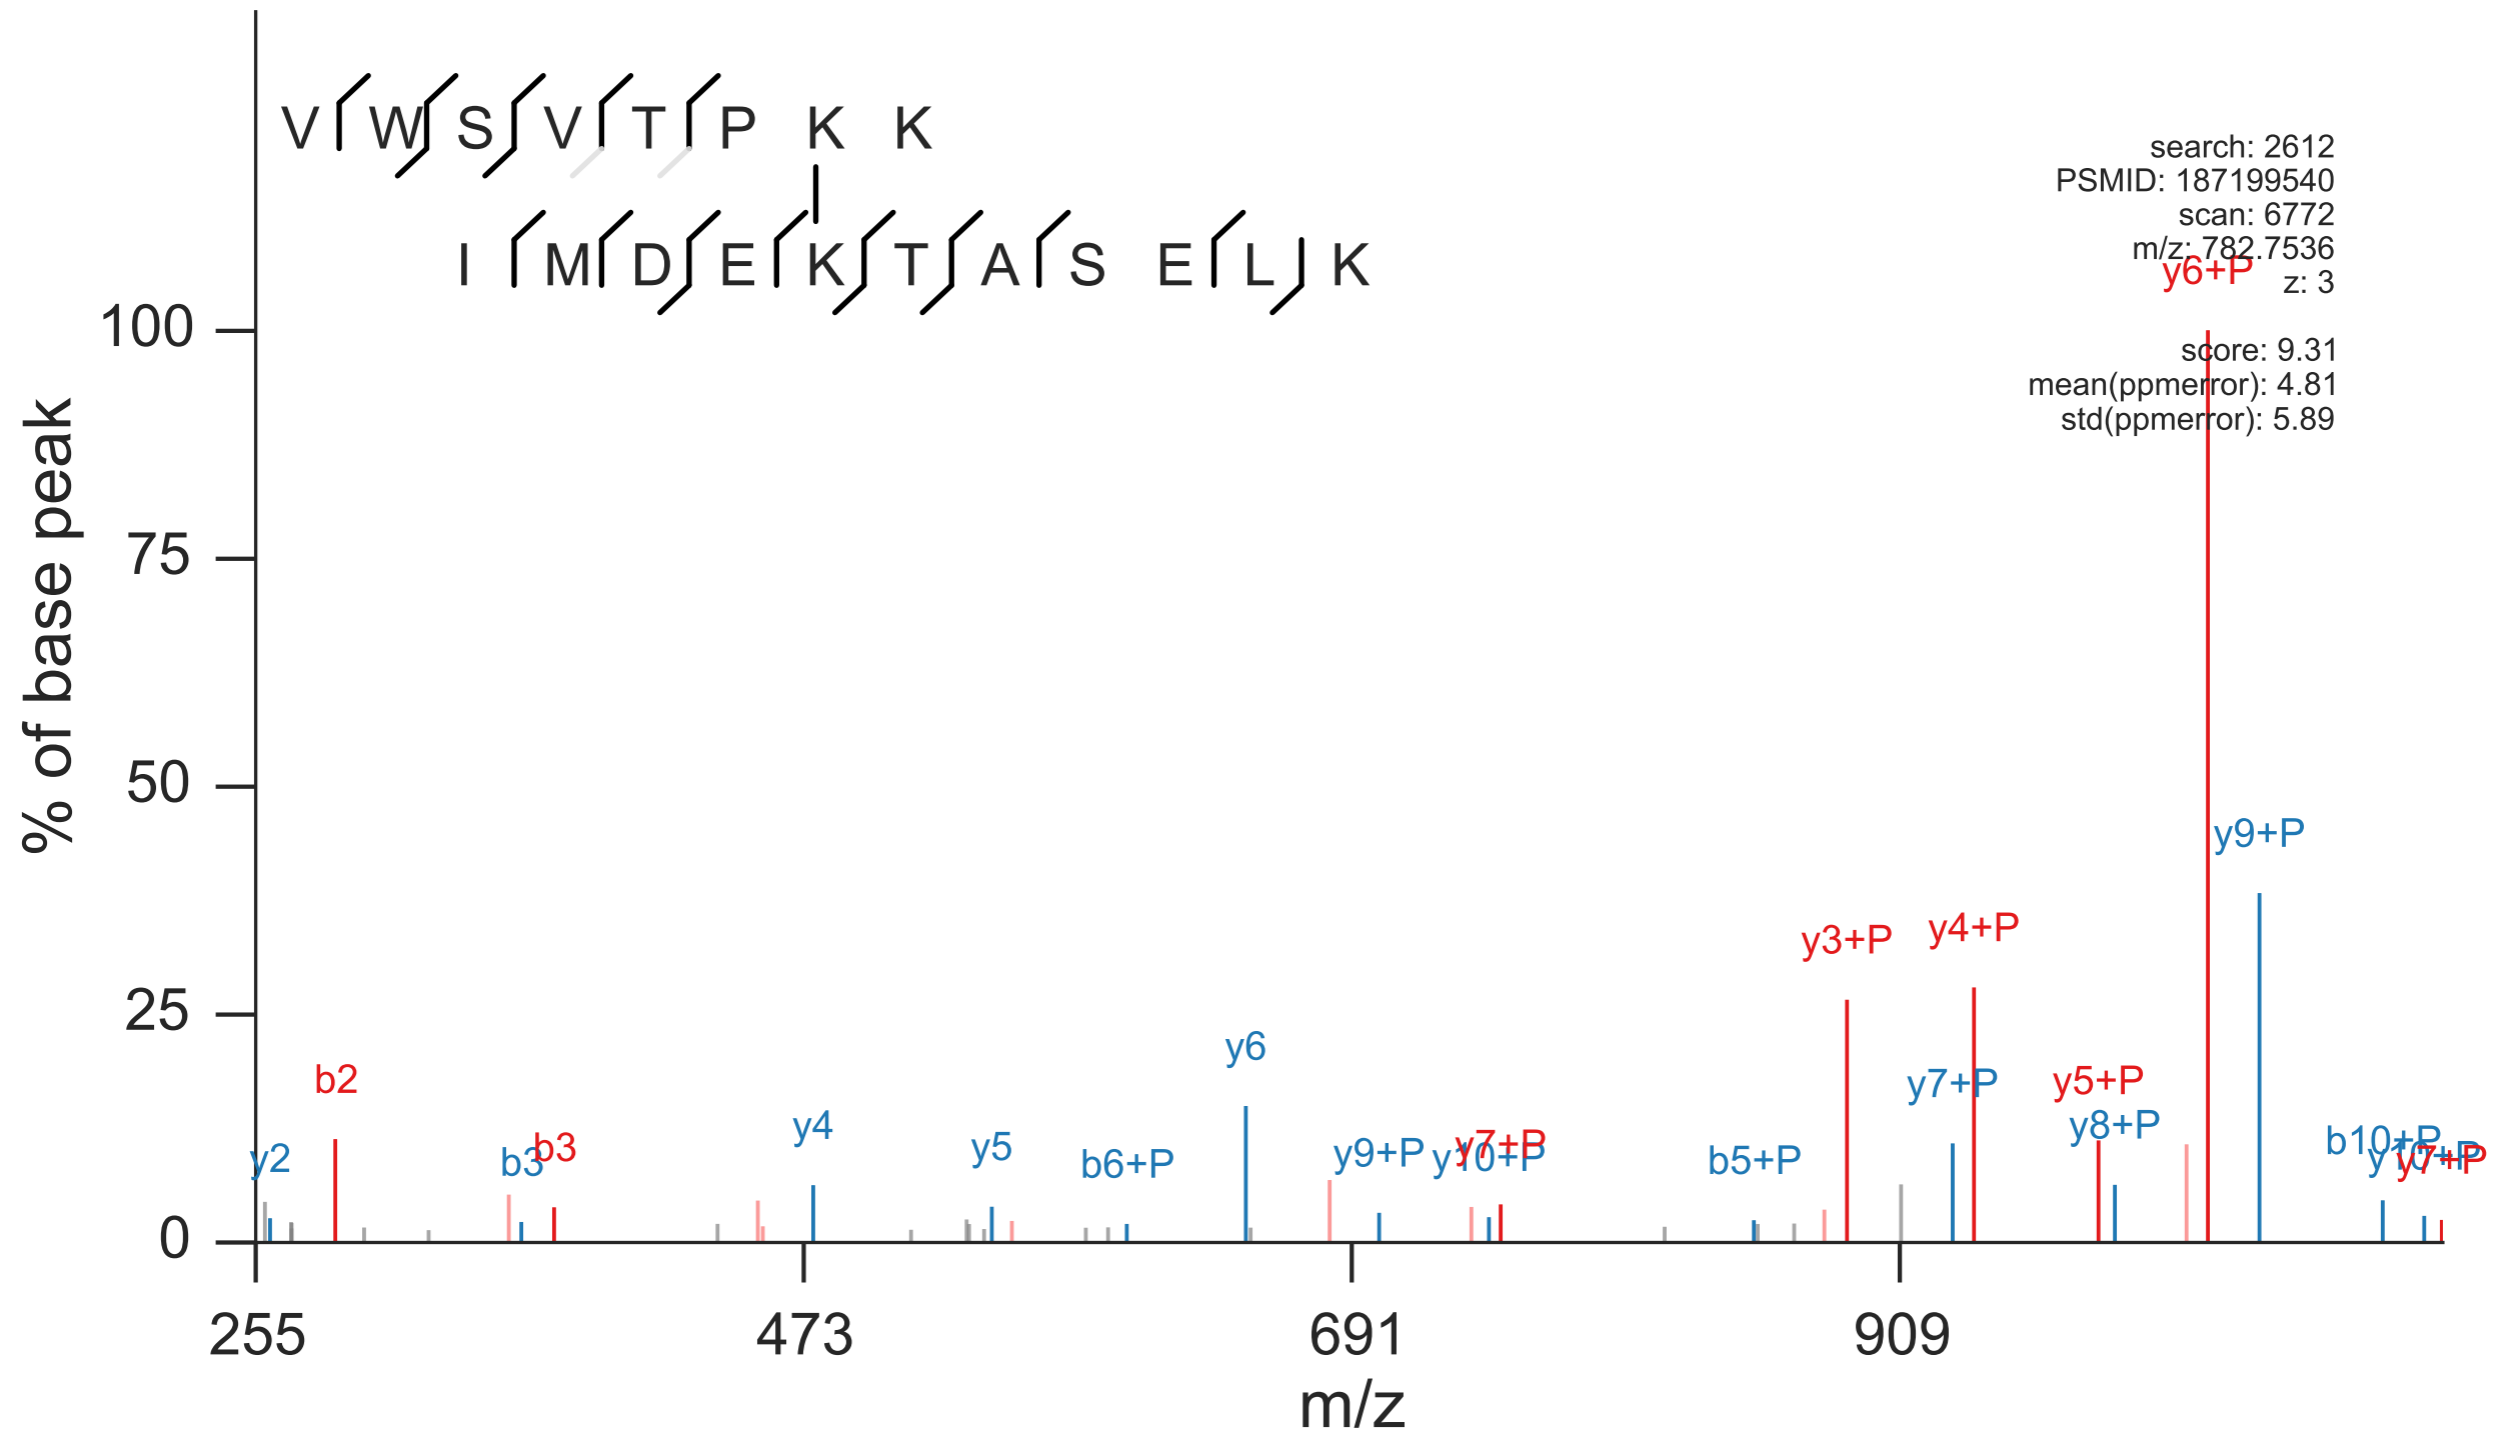

Q K L T T S D I I D Y A L K  
 S Y C<sup>cm</sup> E H T A R

search: 2612  
 PSMID: 187199662  
 scan: 6461  
 m/z: 664.8233  
 z: 4

score: 9.43  
 mean(ppmerror): 0.34  
 std(ppmerror): 4.79

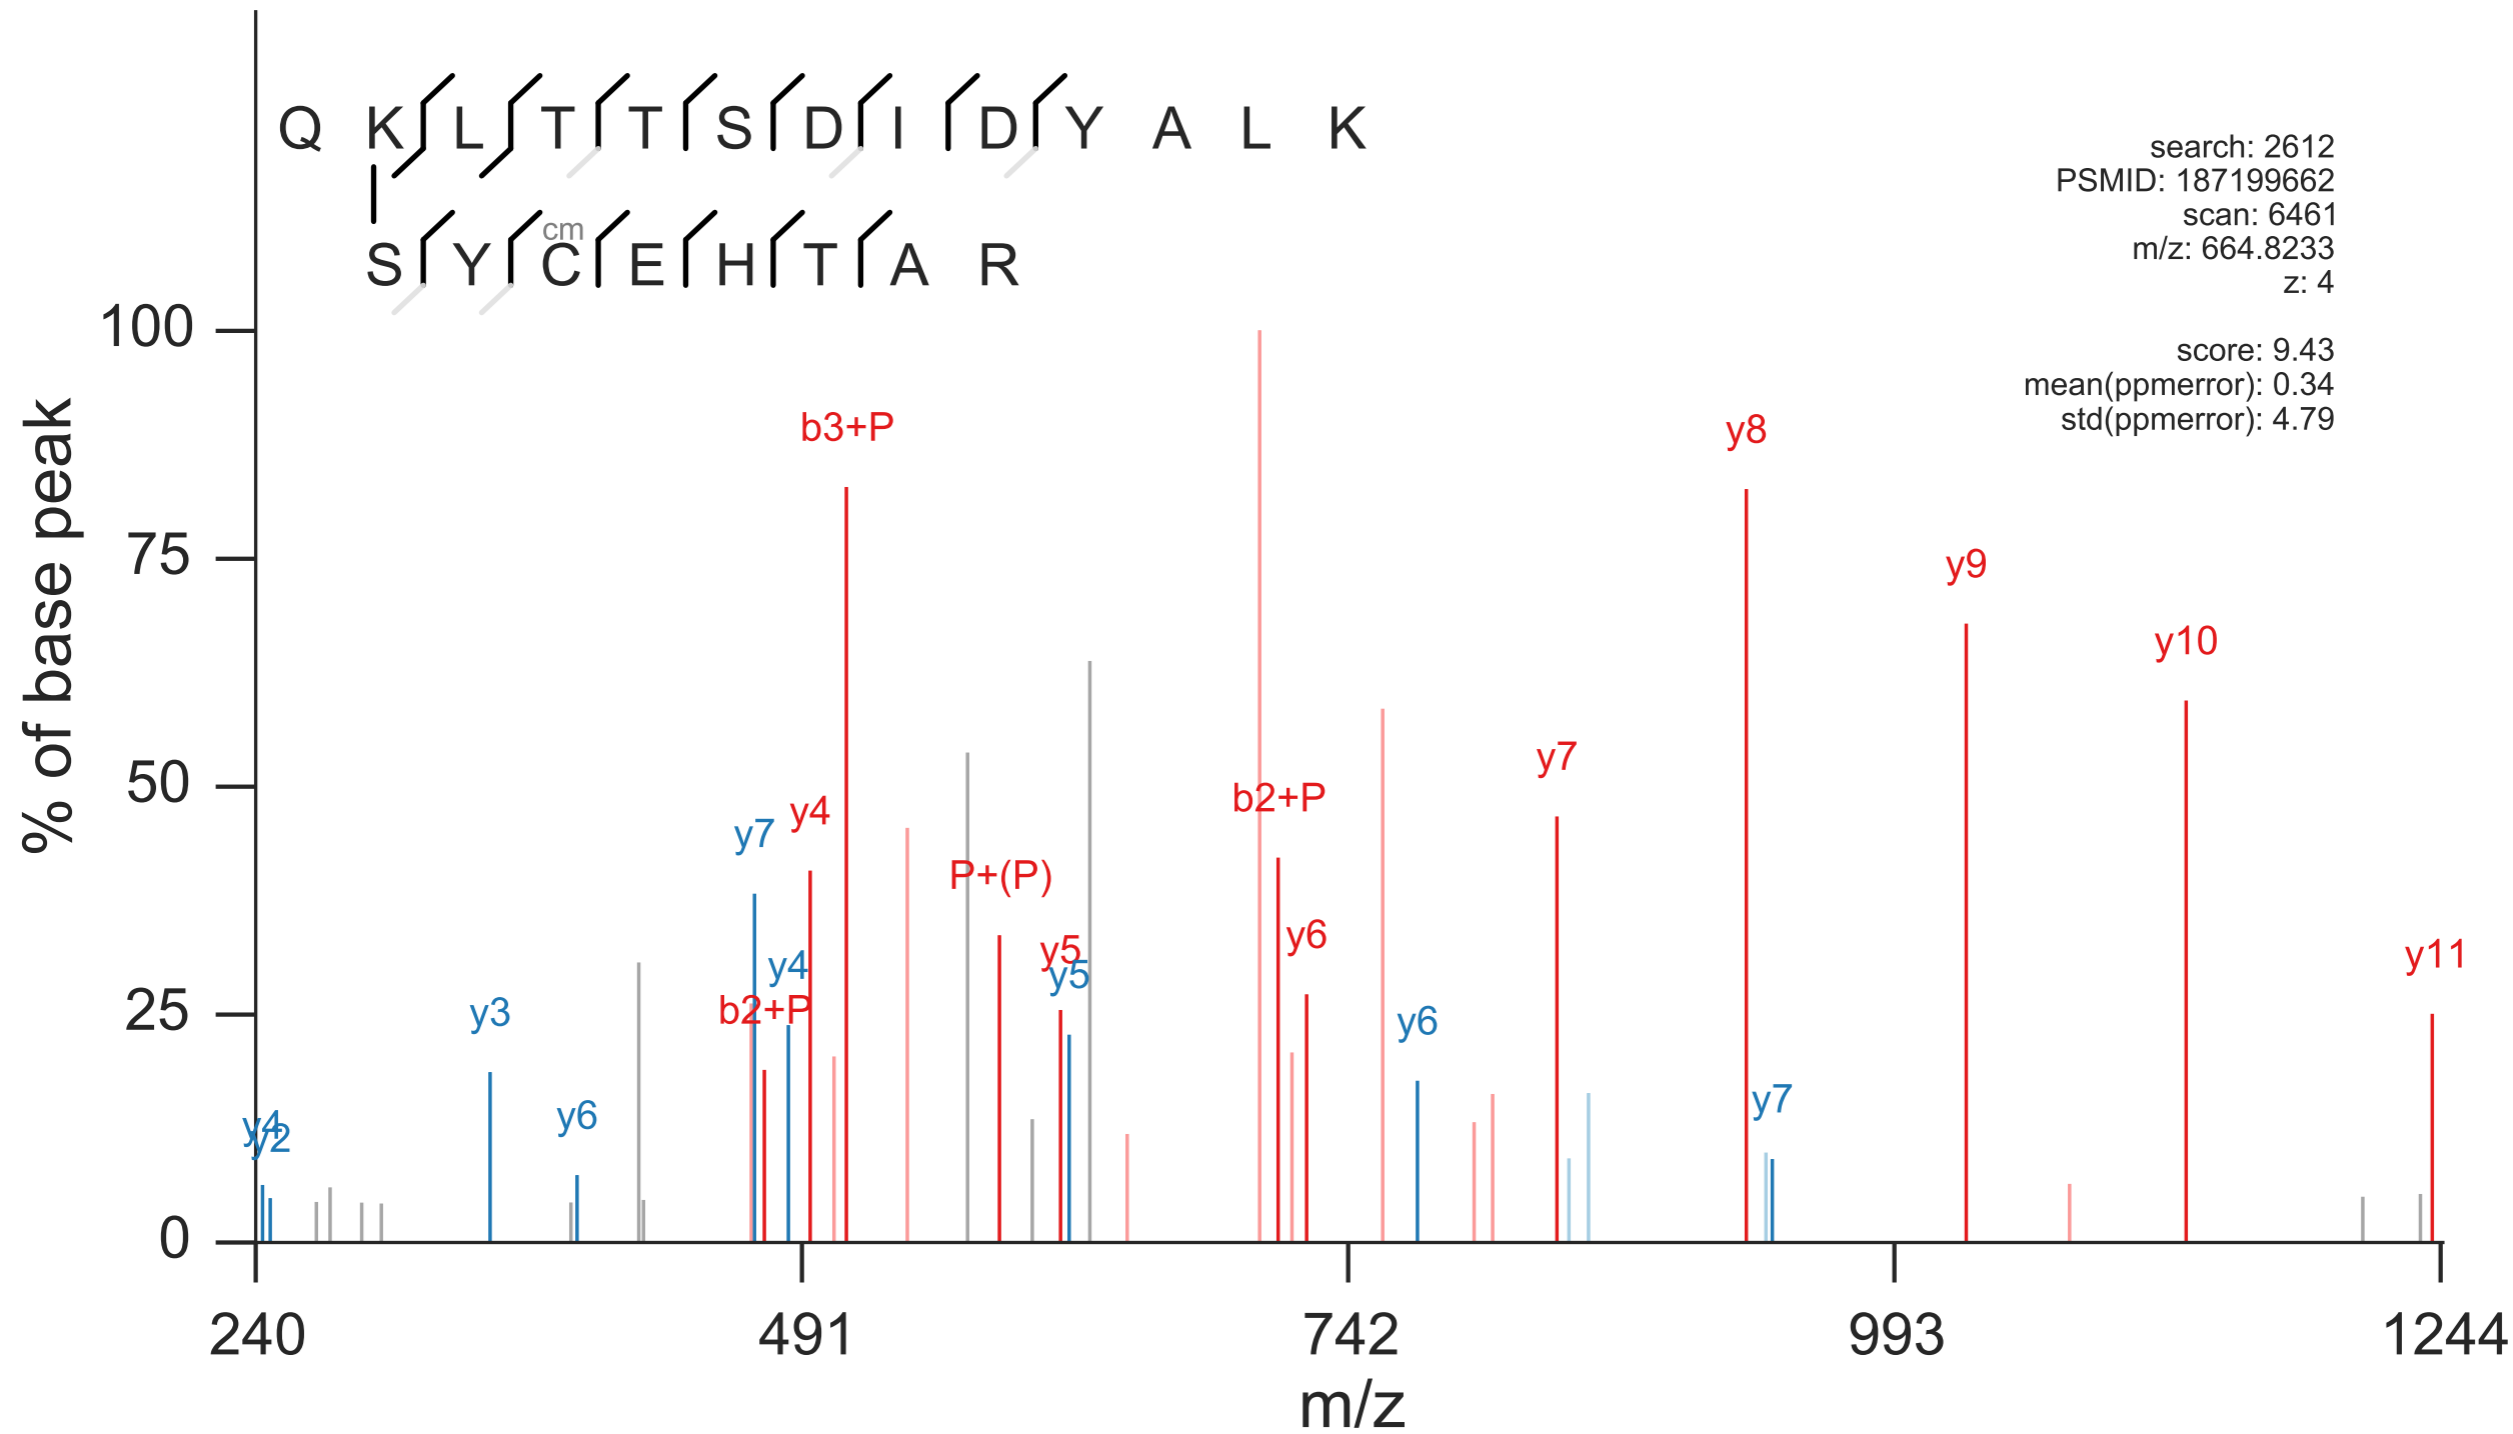

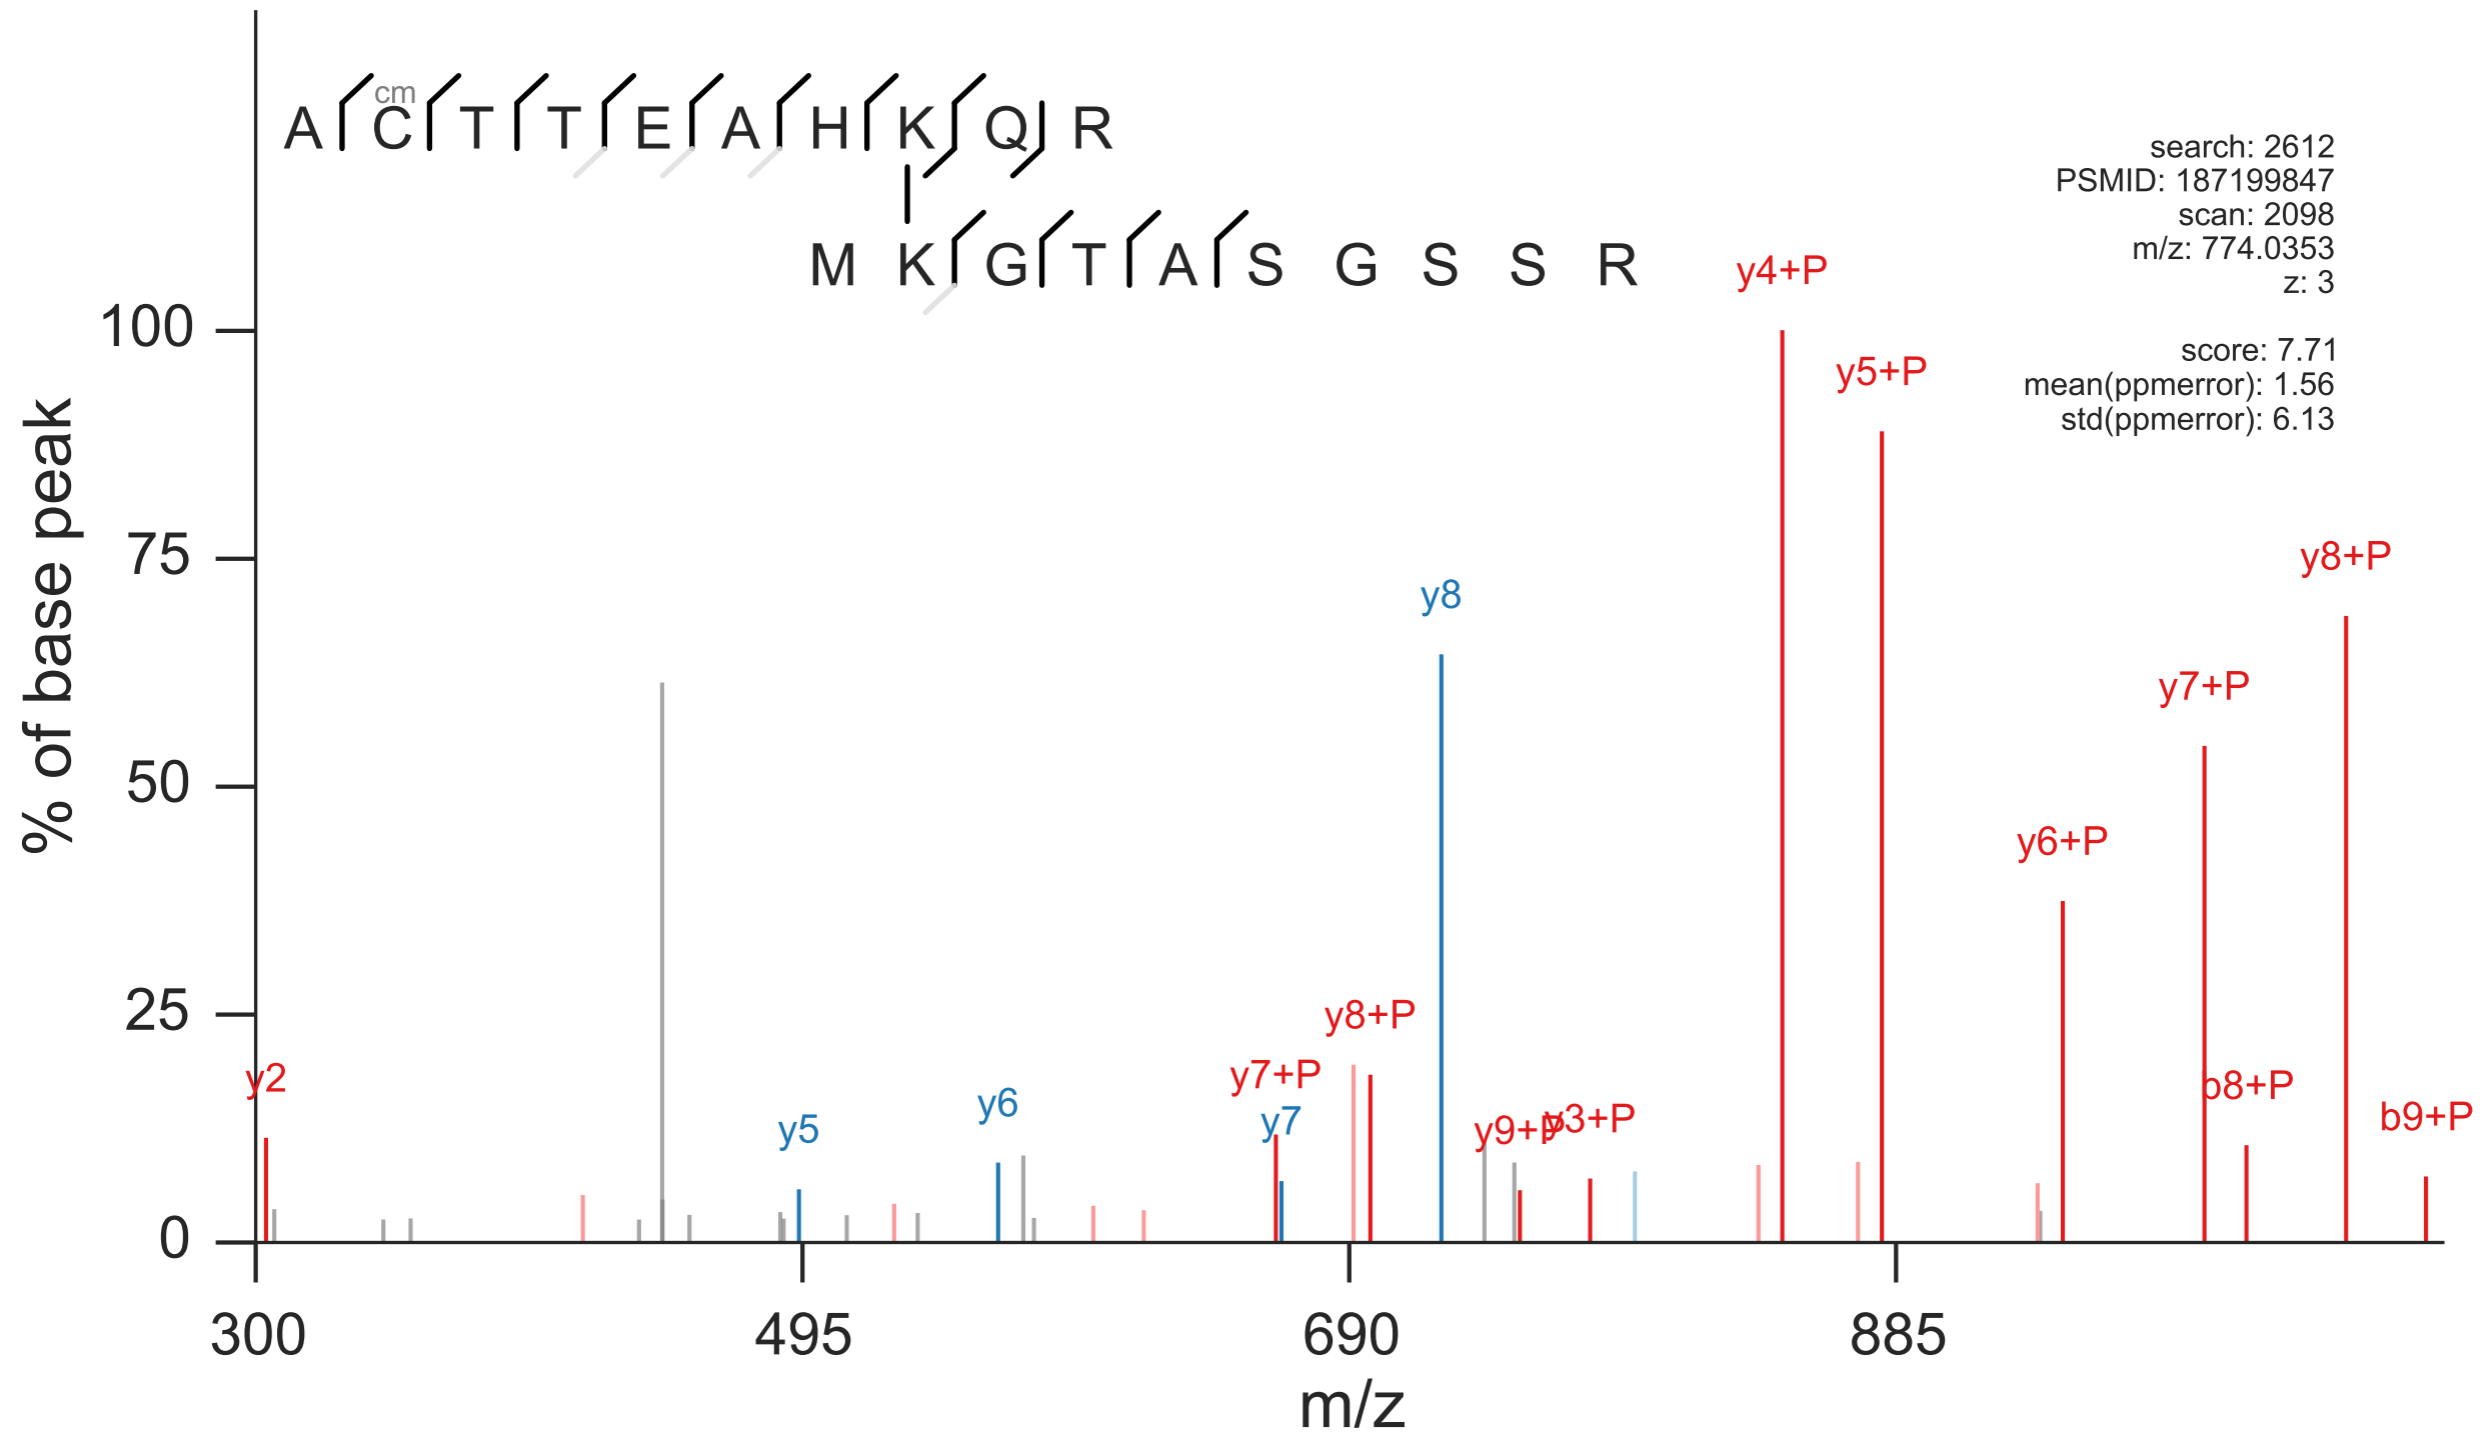

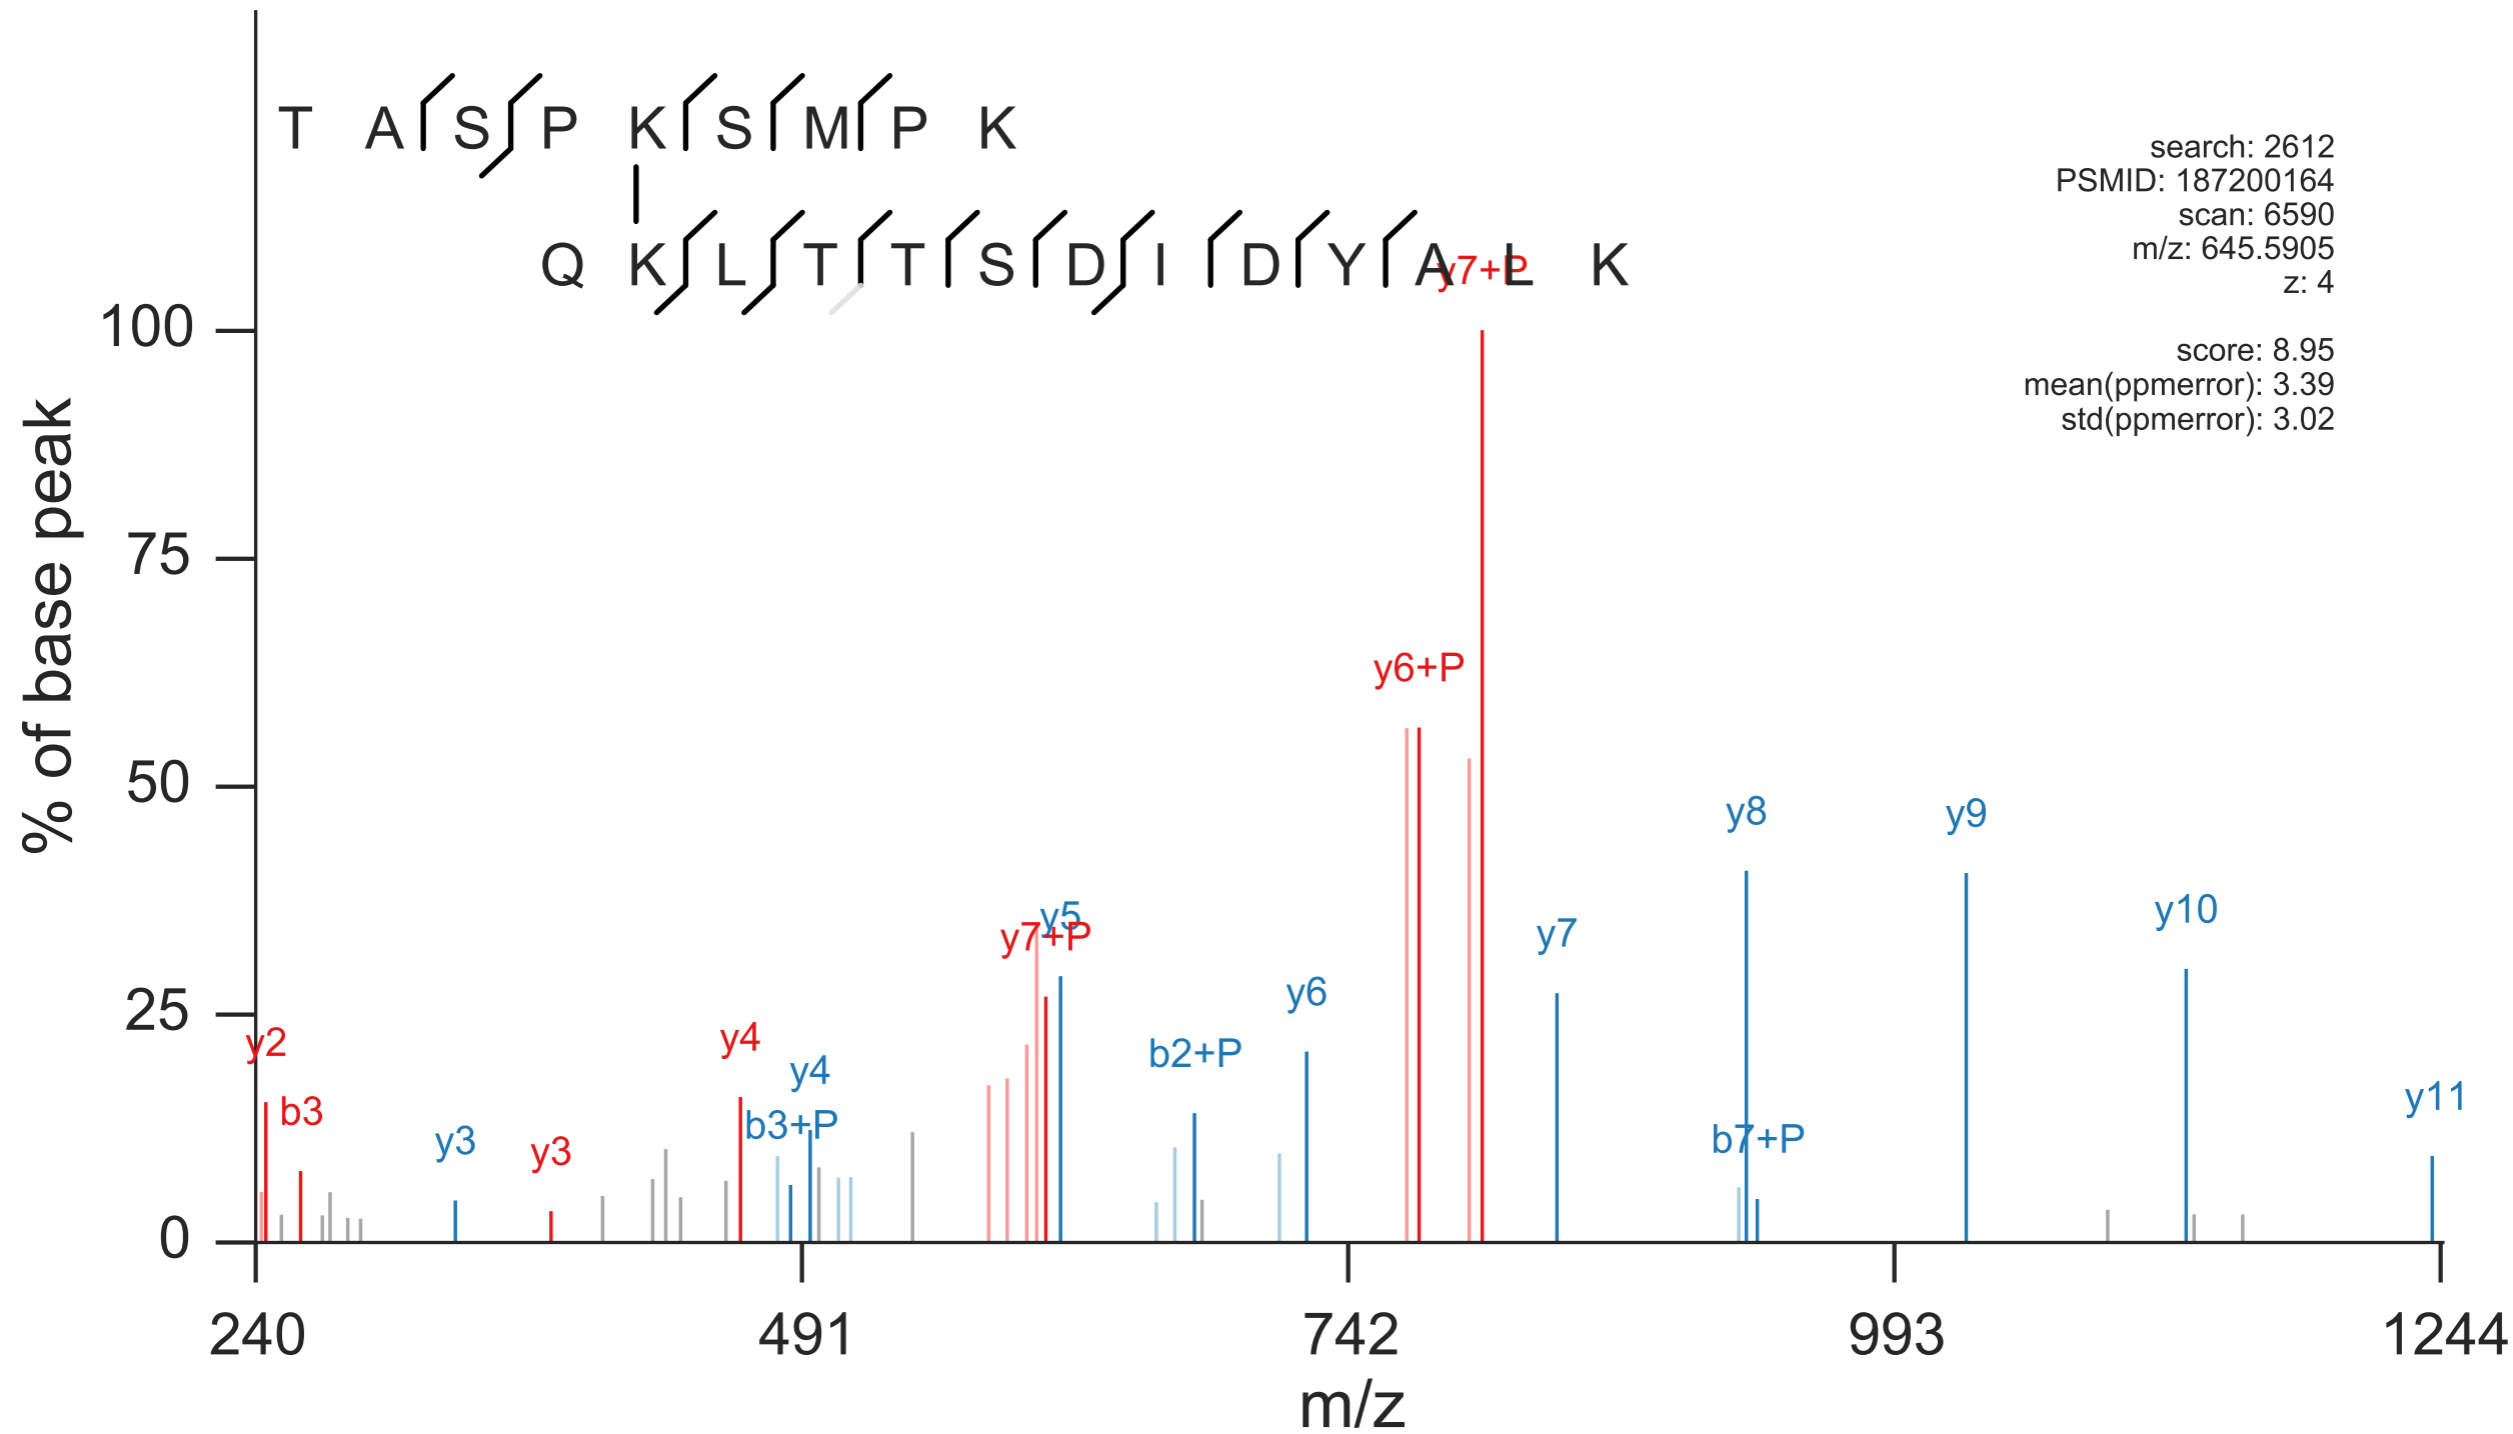

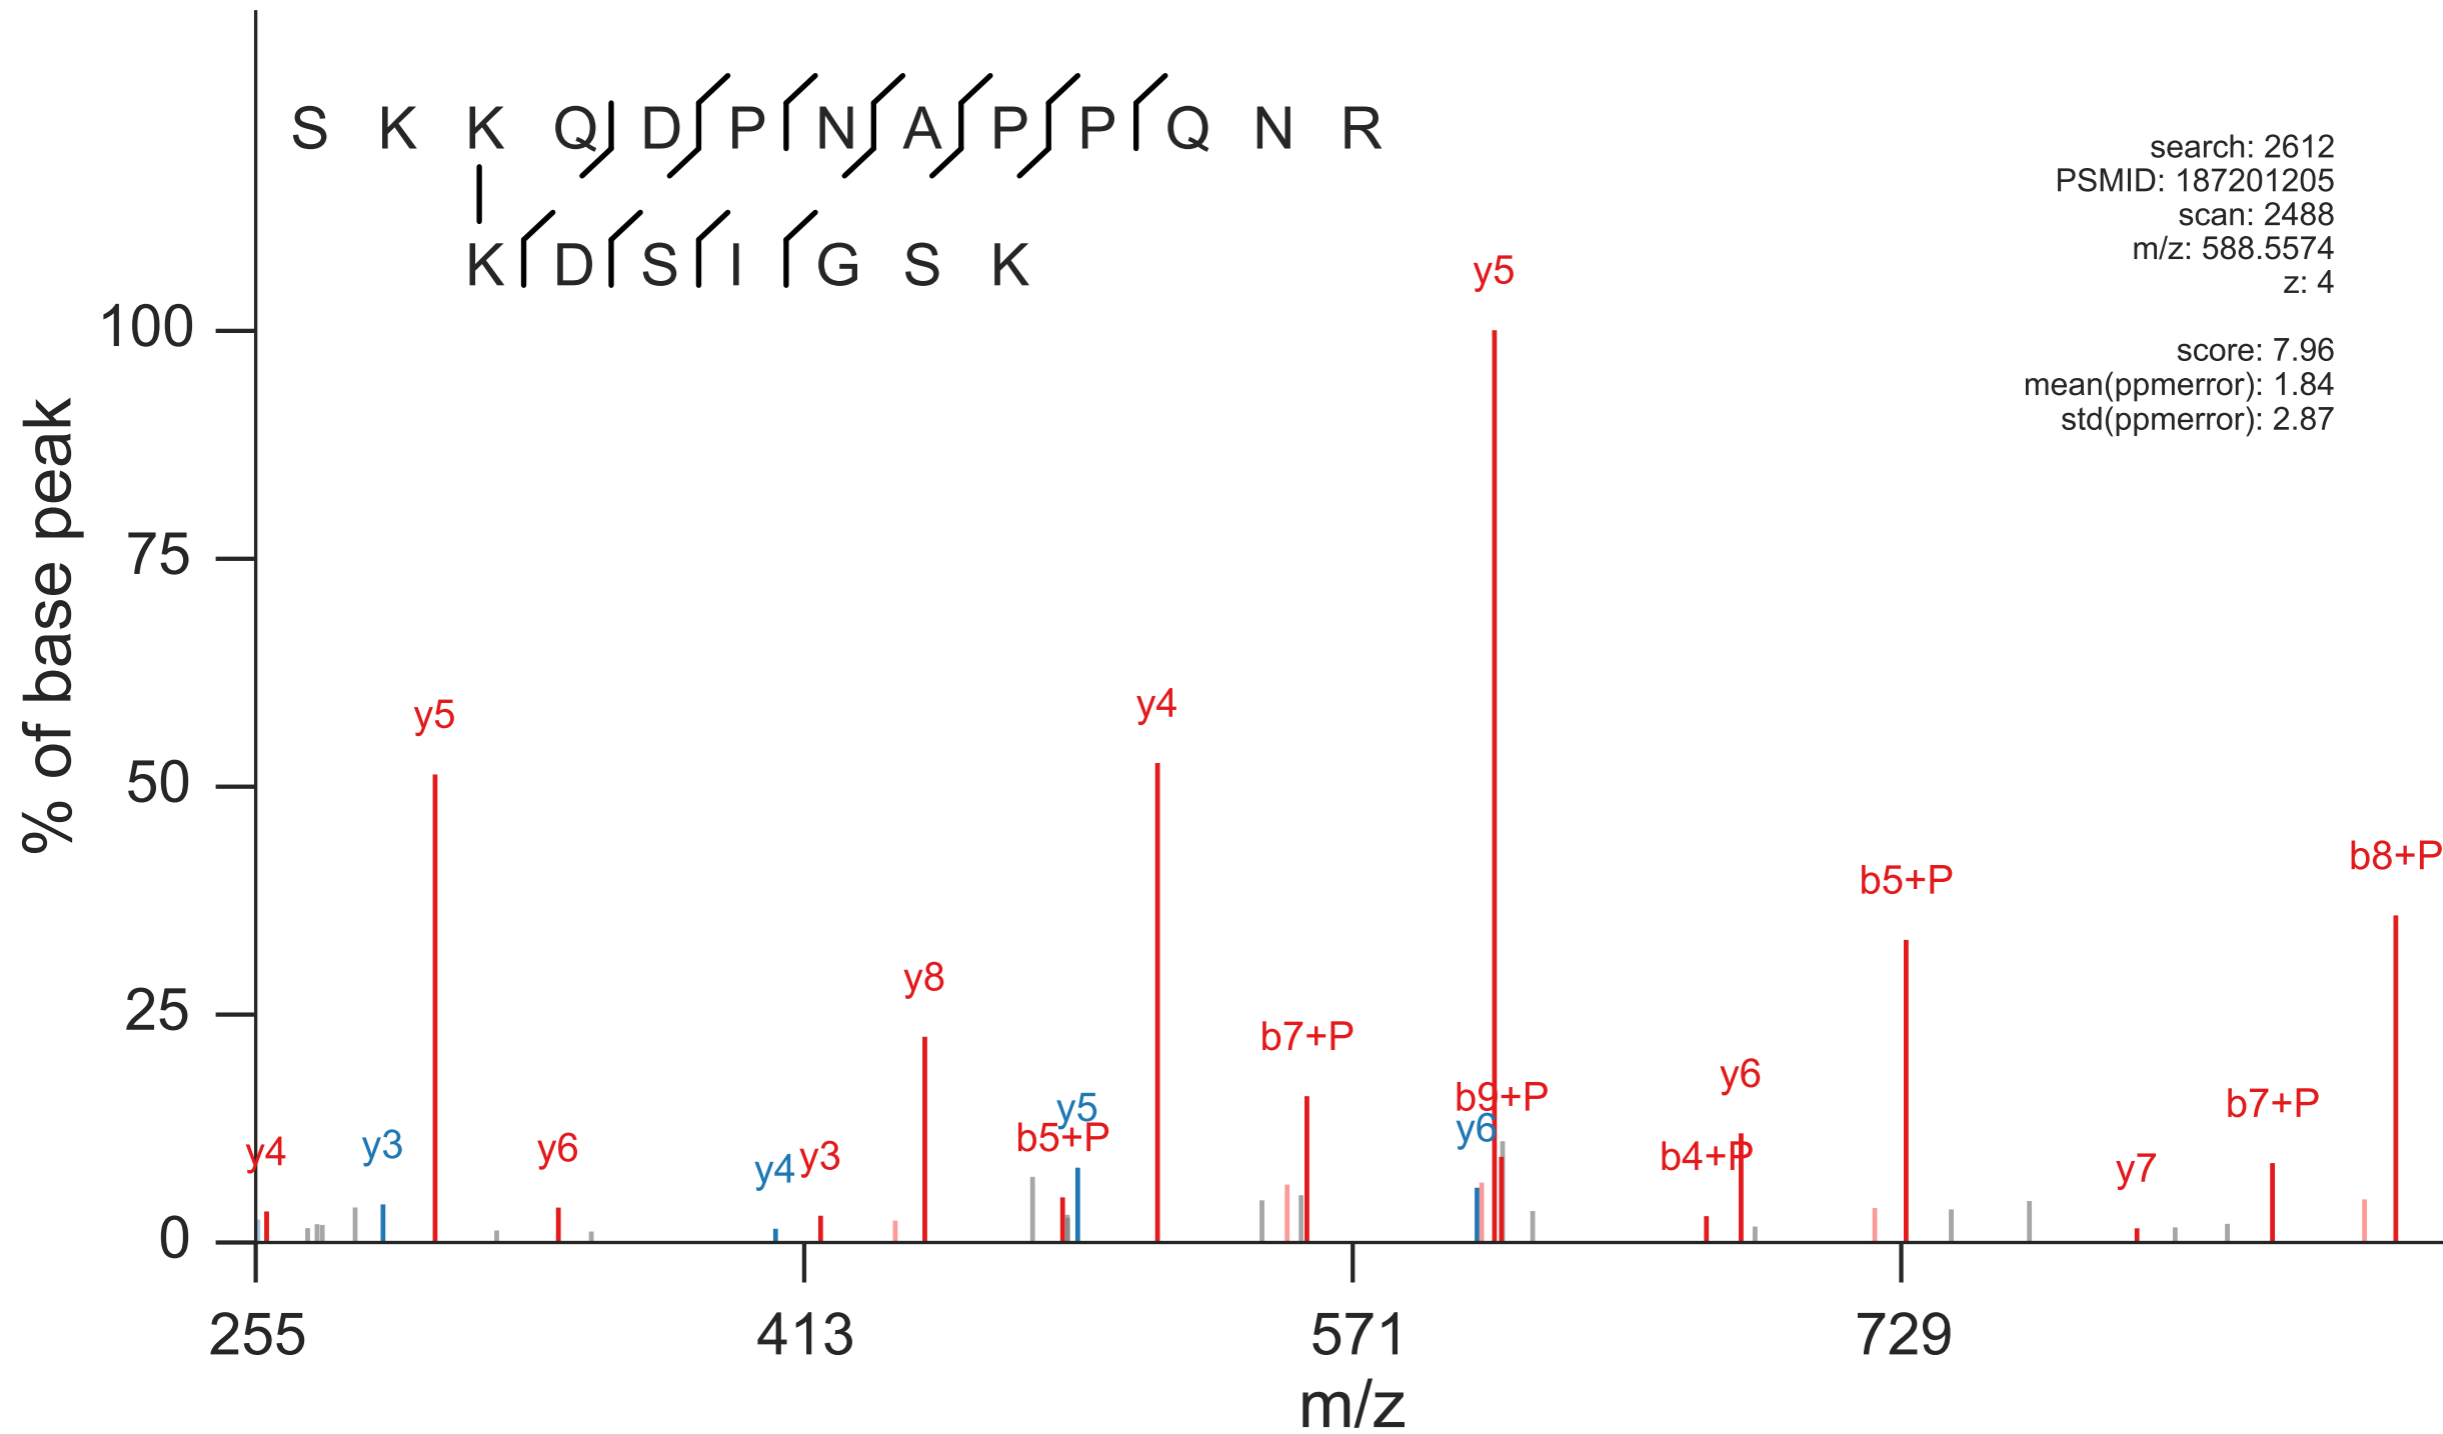

search: 2612  
 PSMID: 187201205  
 scan: 2488  
 m/z: 588.5574  
 z: 4

score: 7.96  
 mean(ppmerror): 1.84  
 std(ppmerror): 2.87

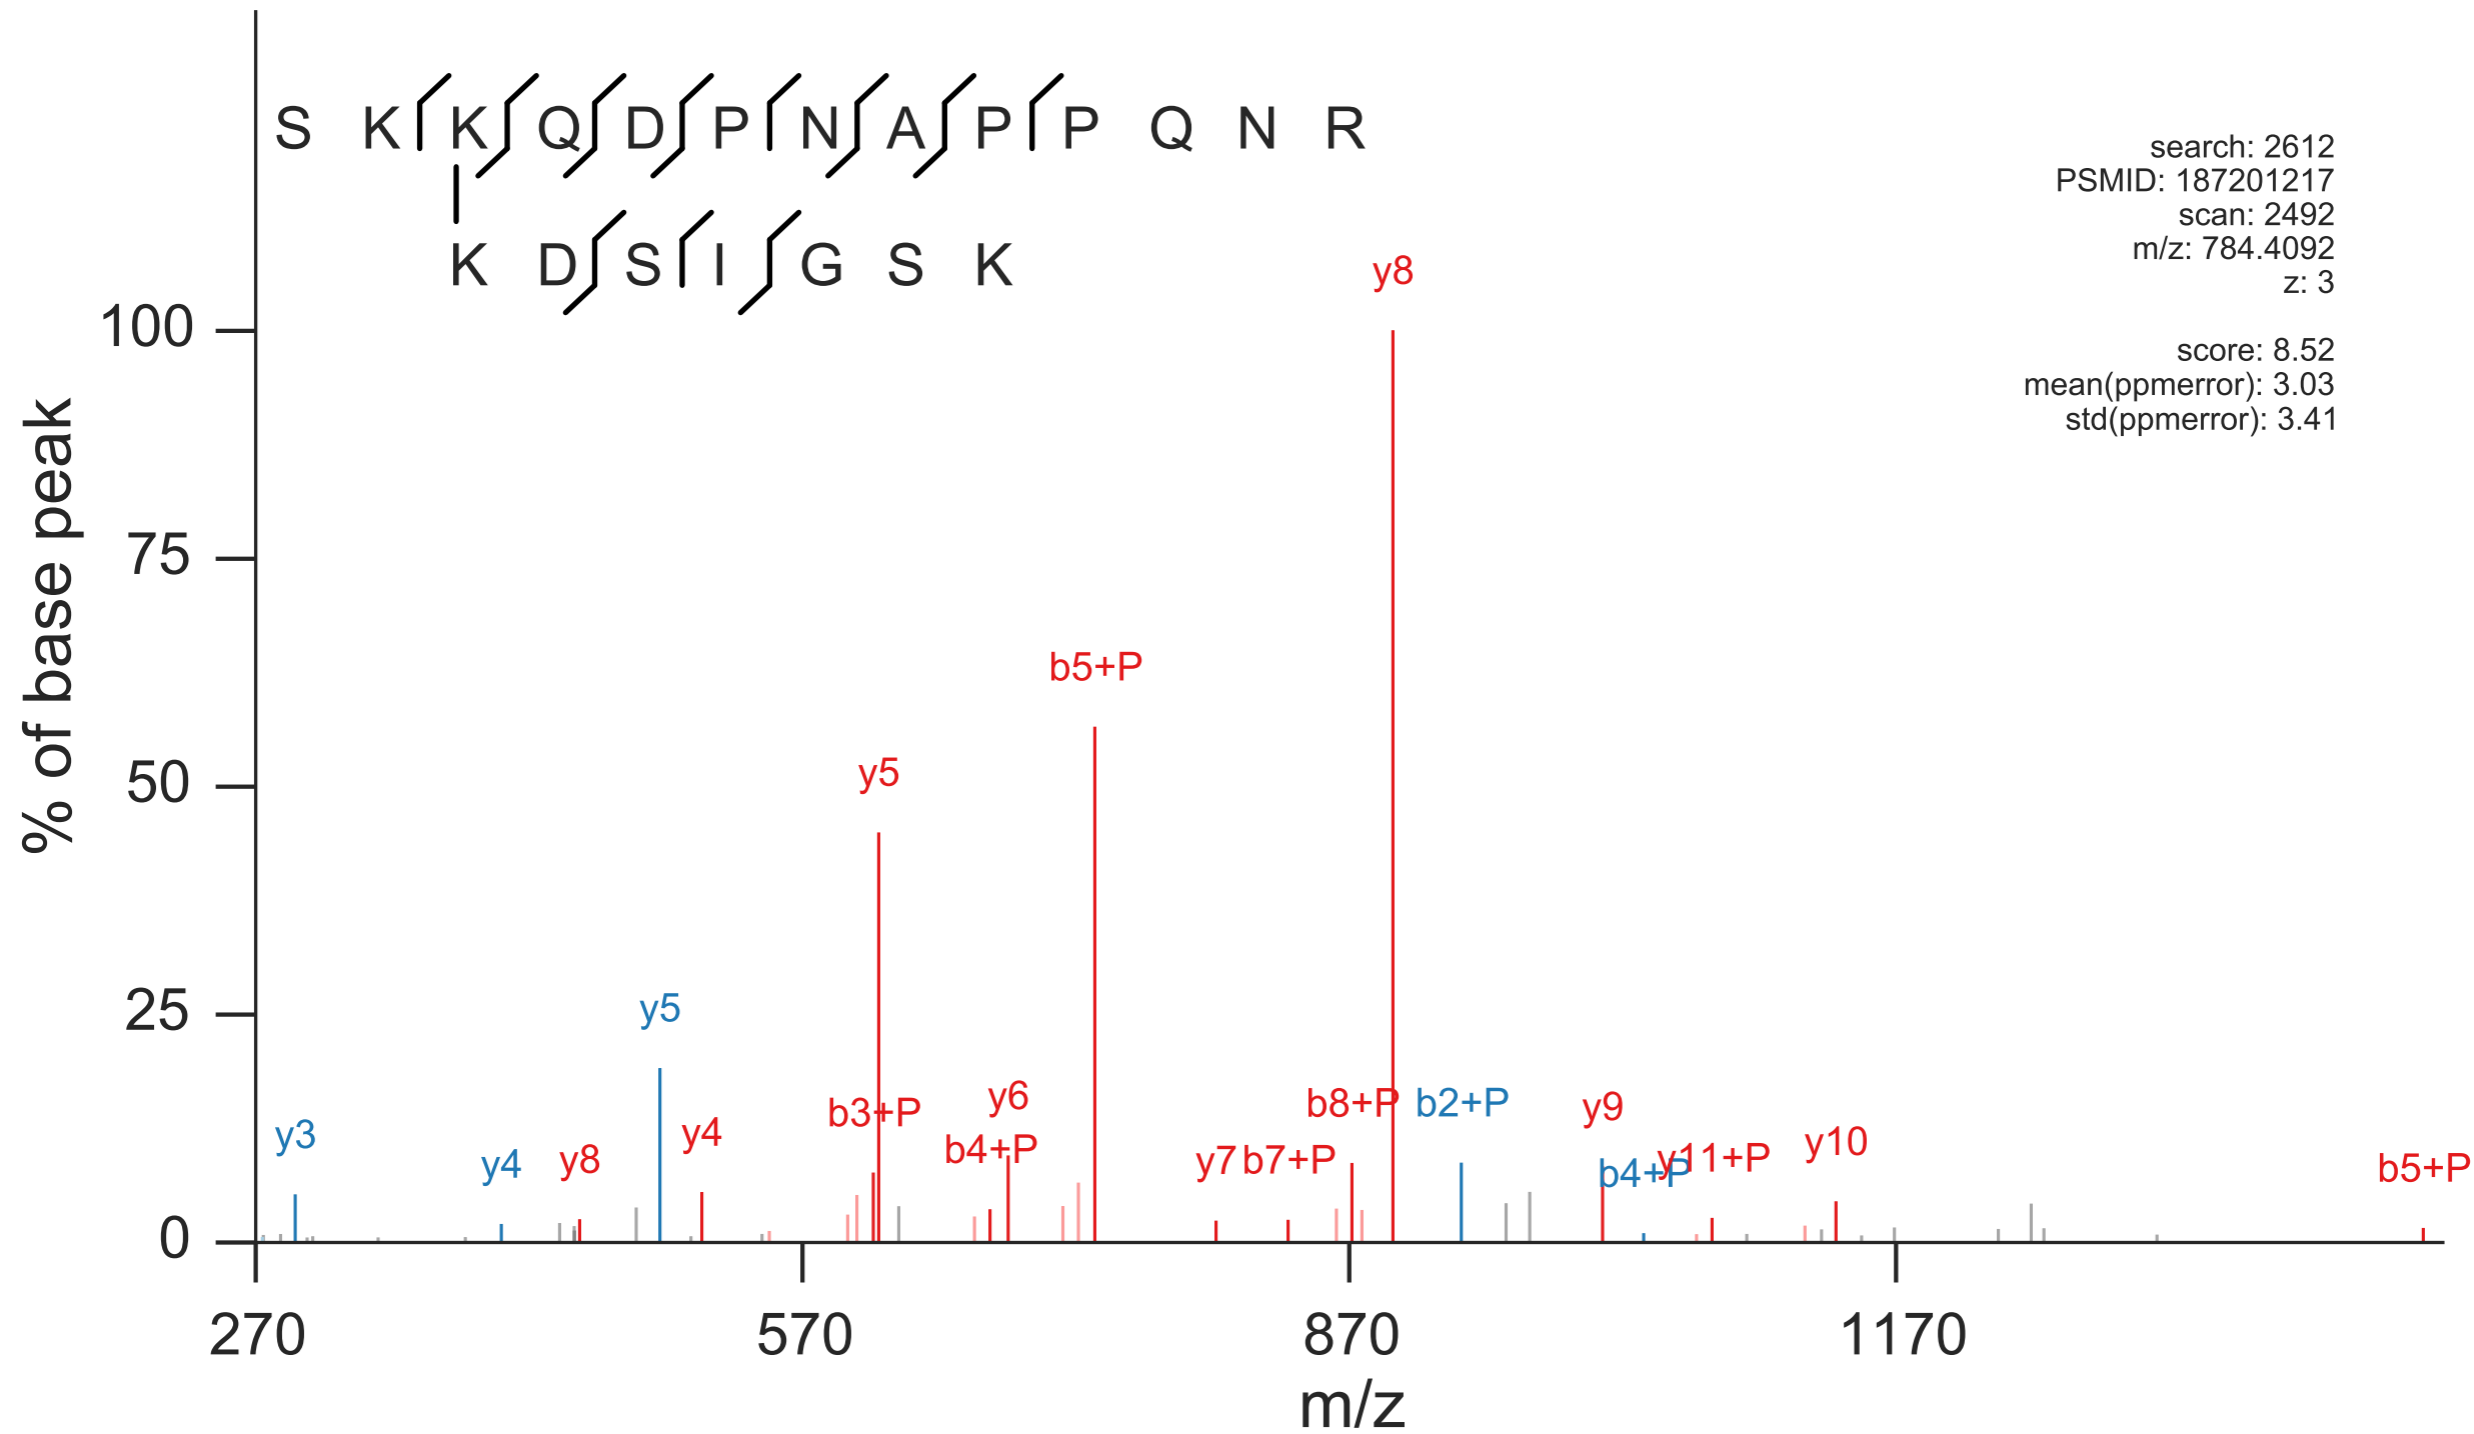

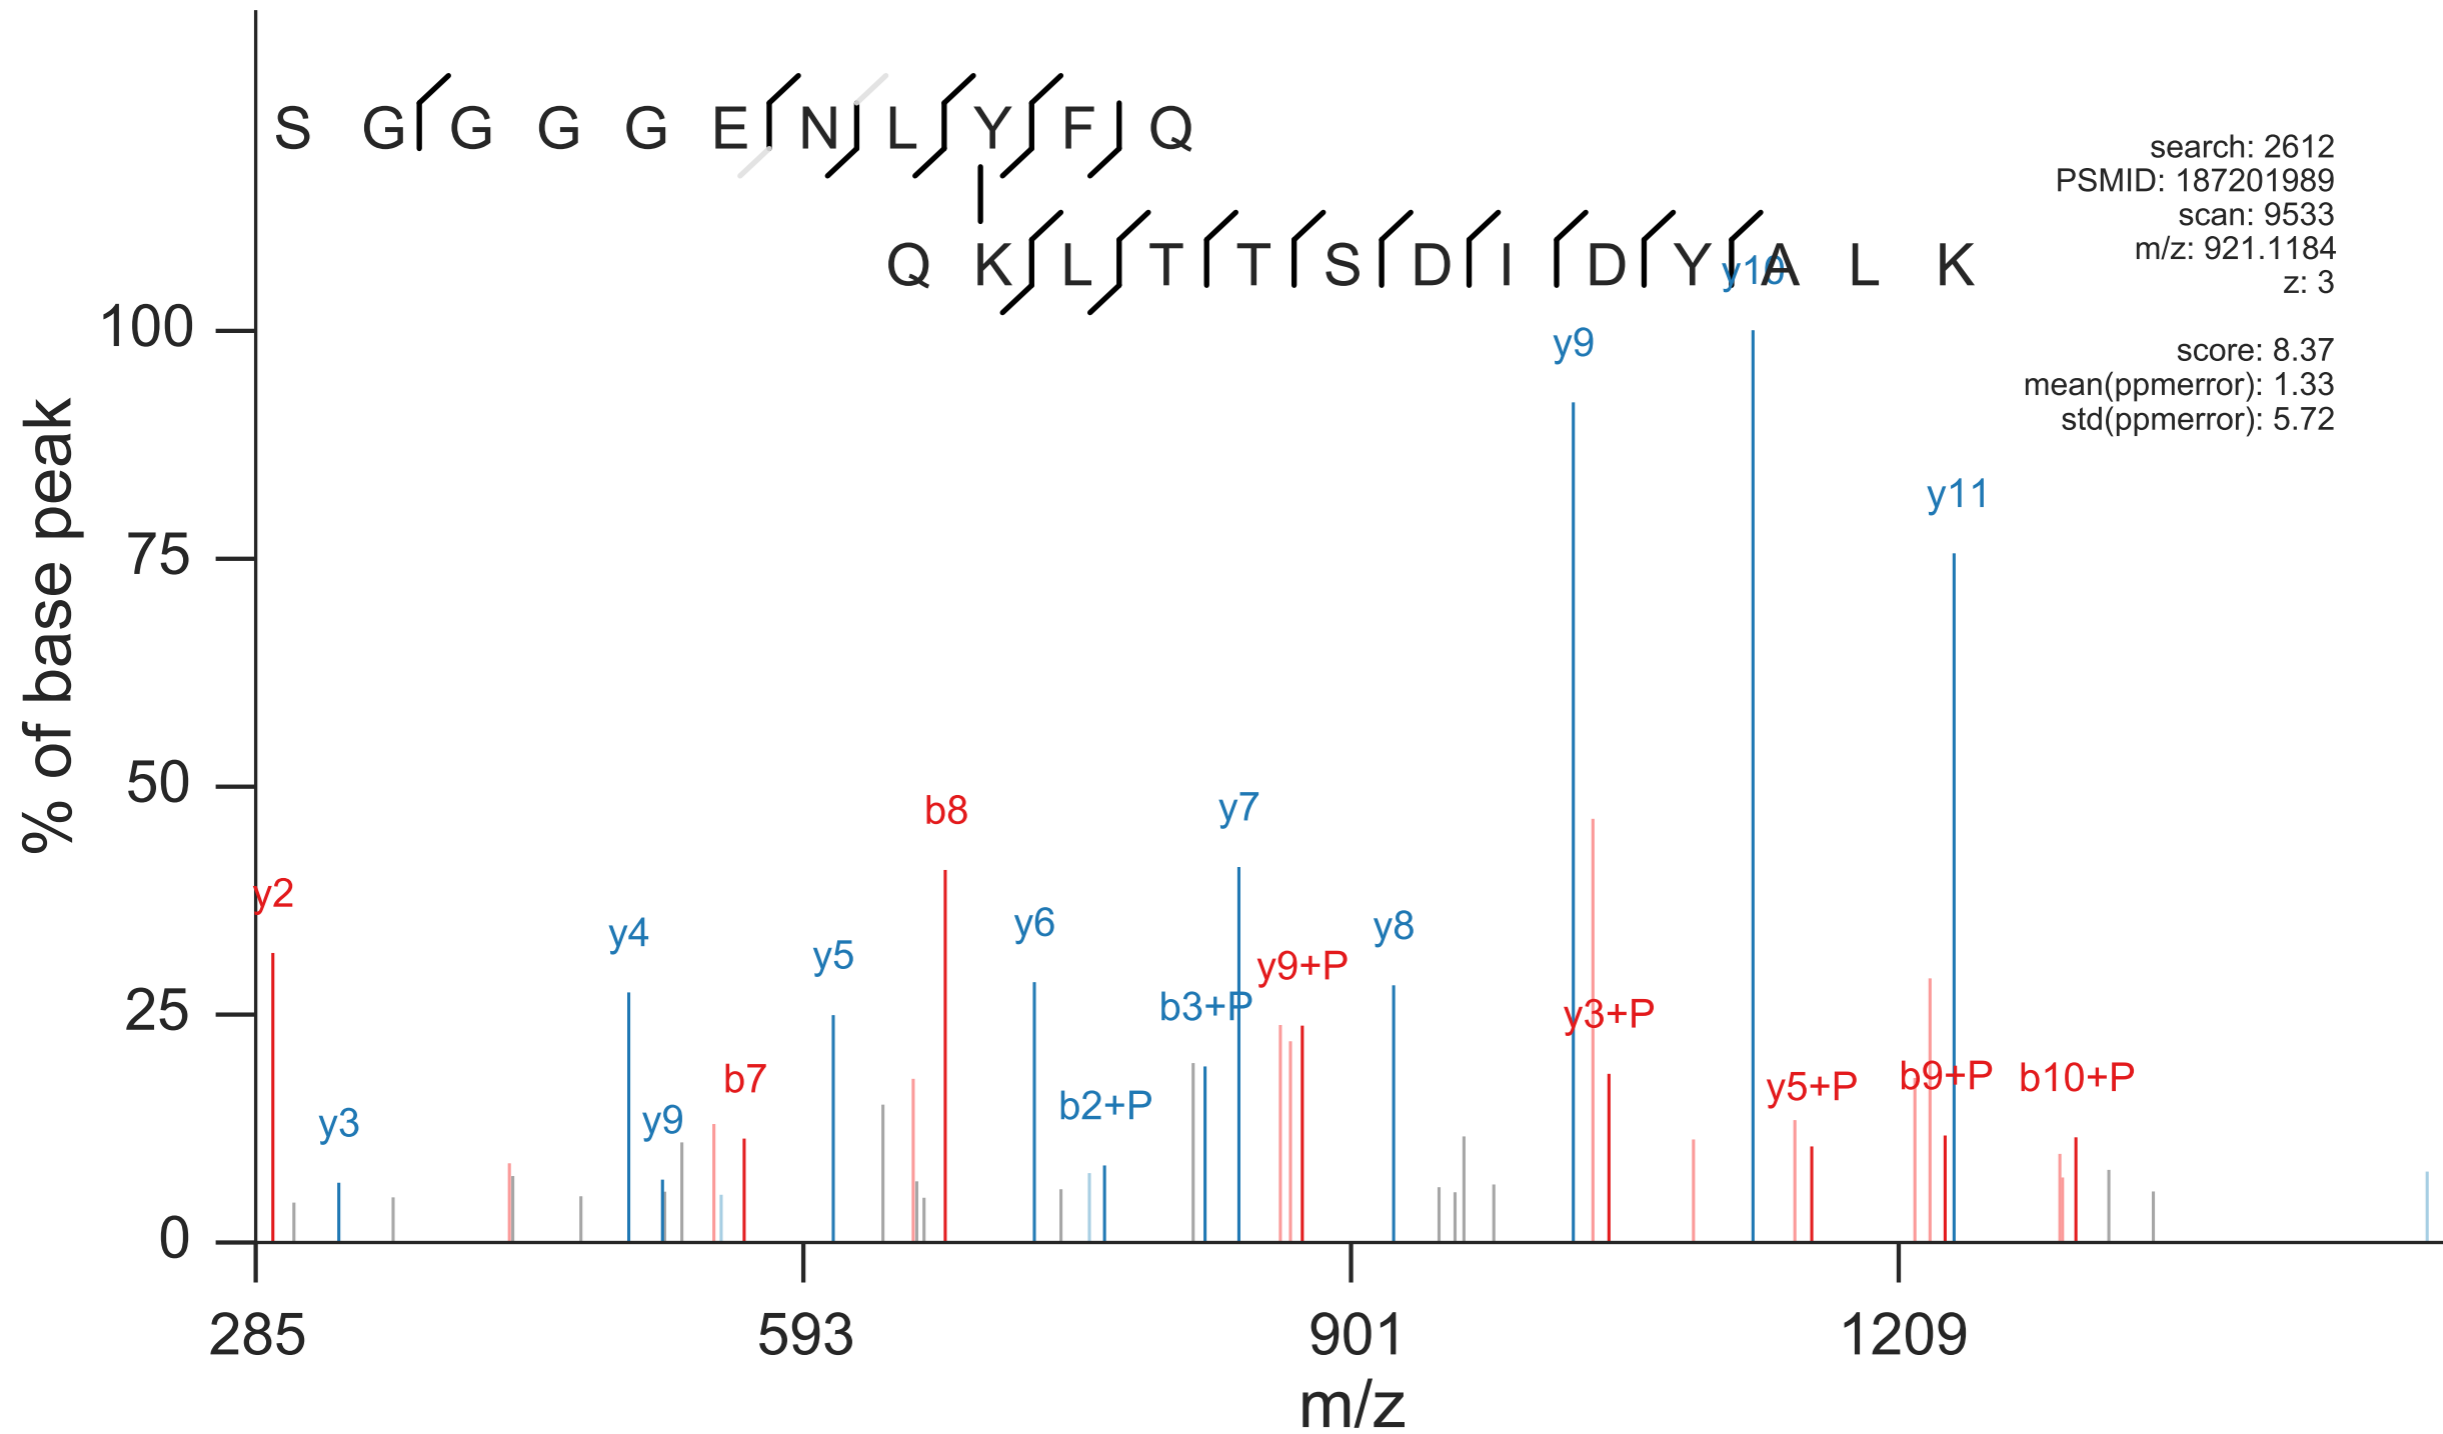



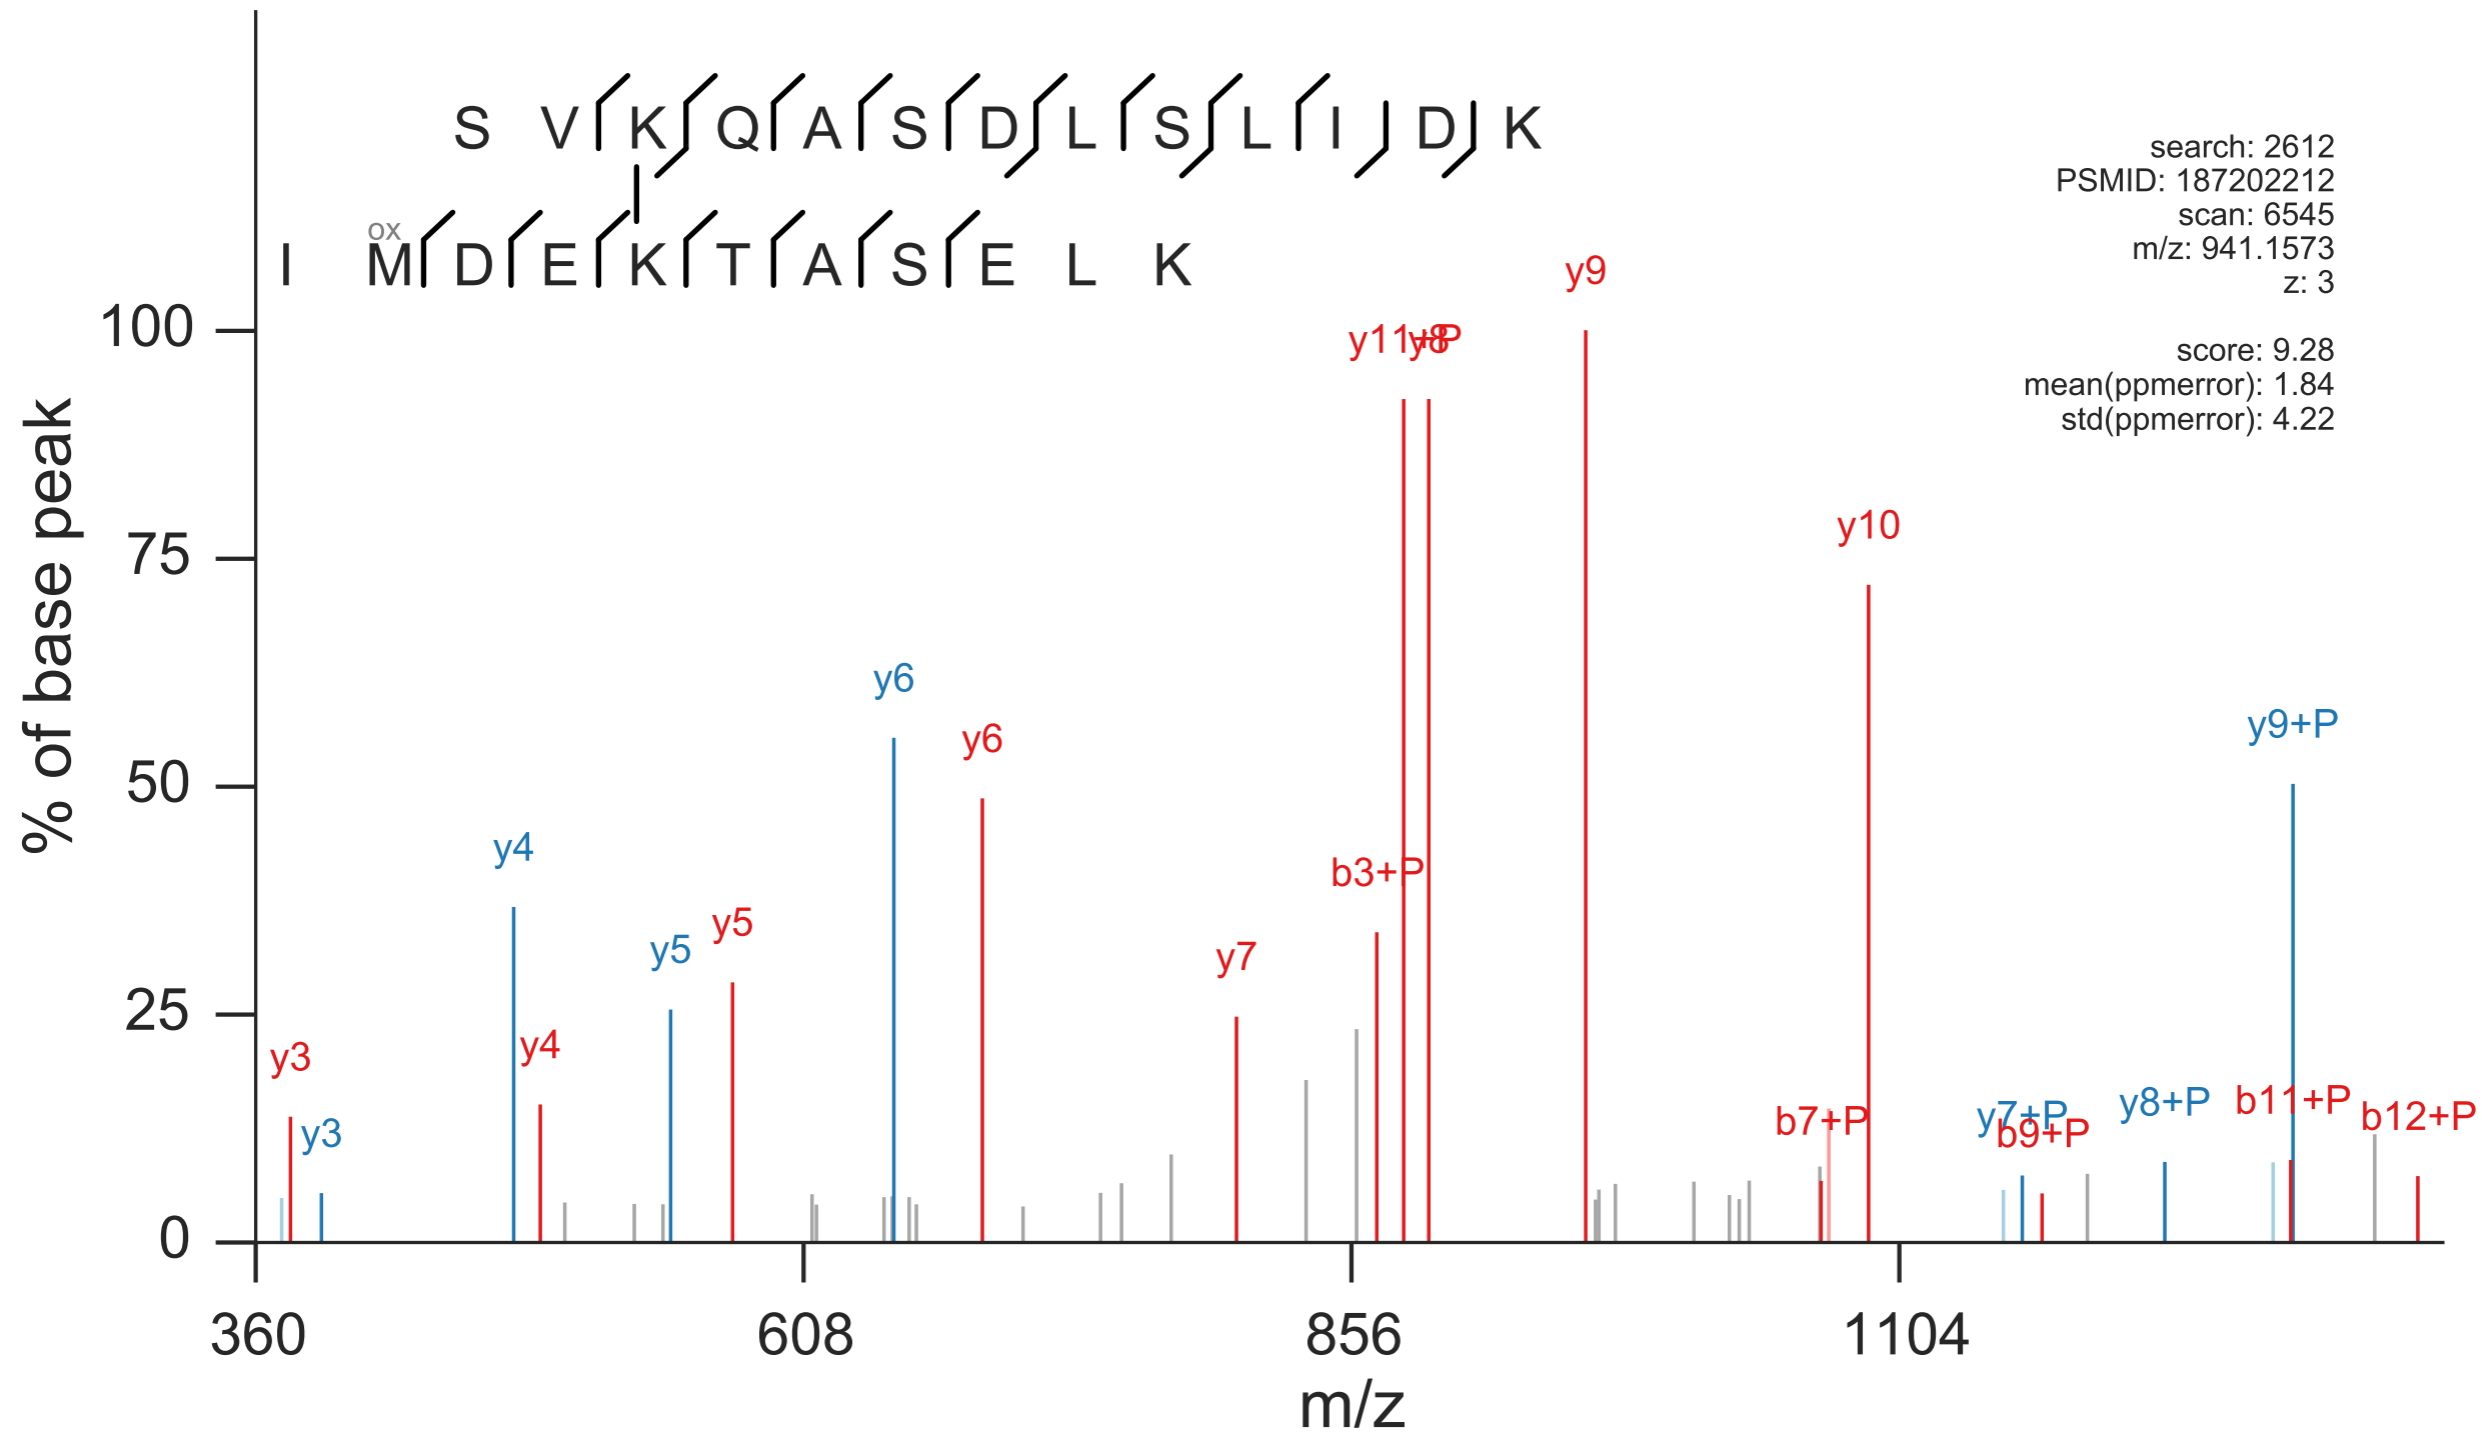

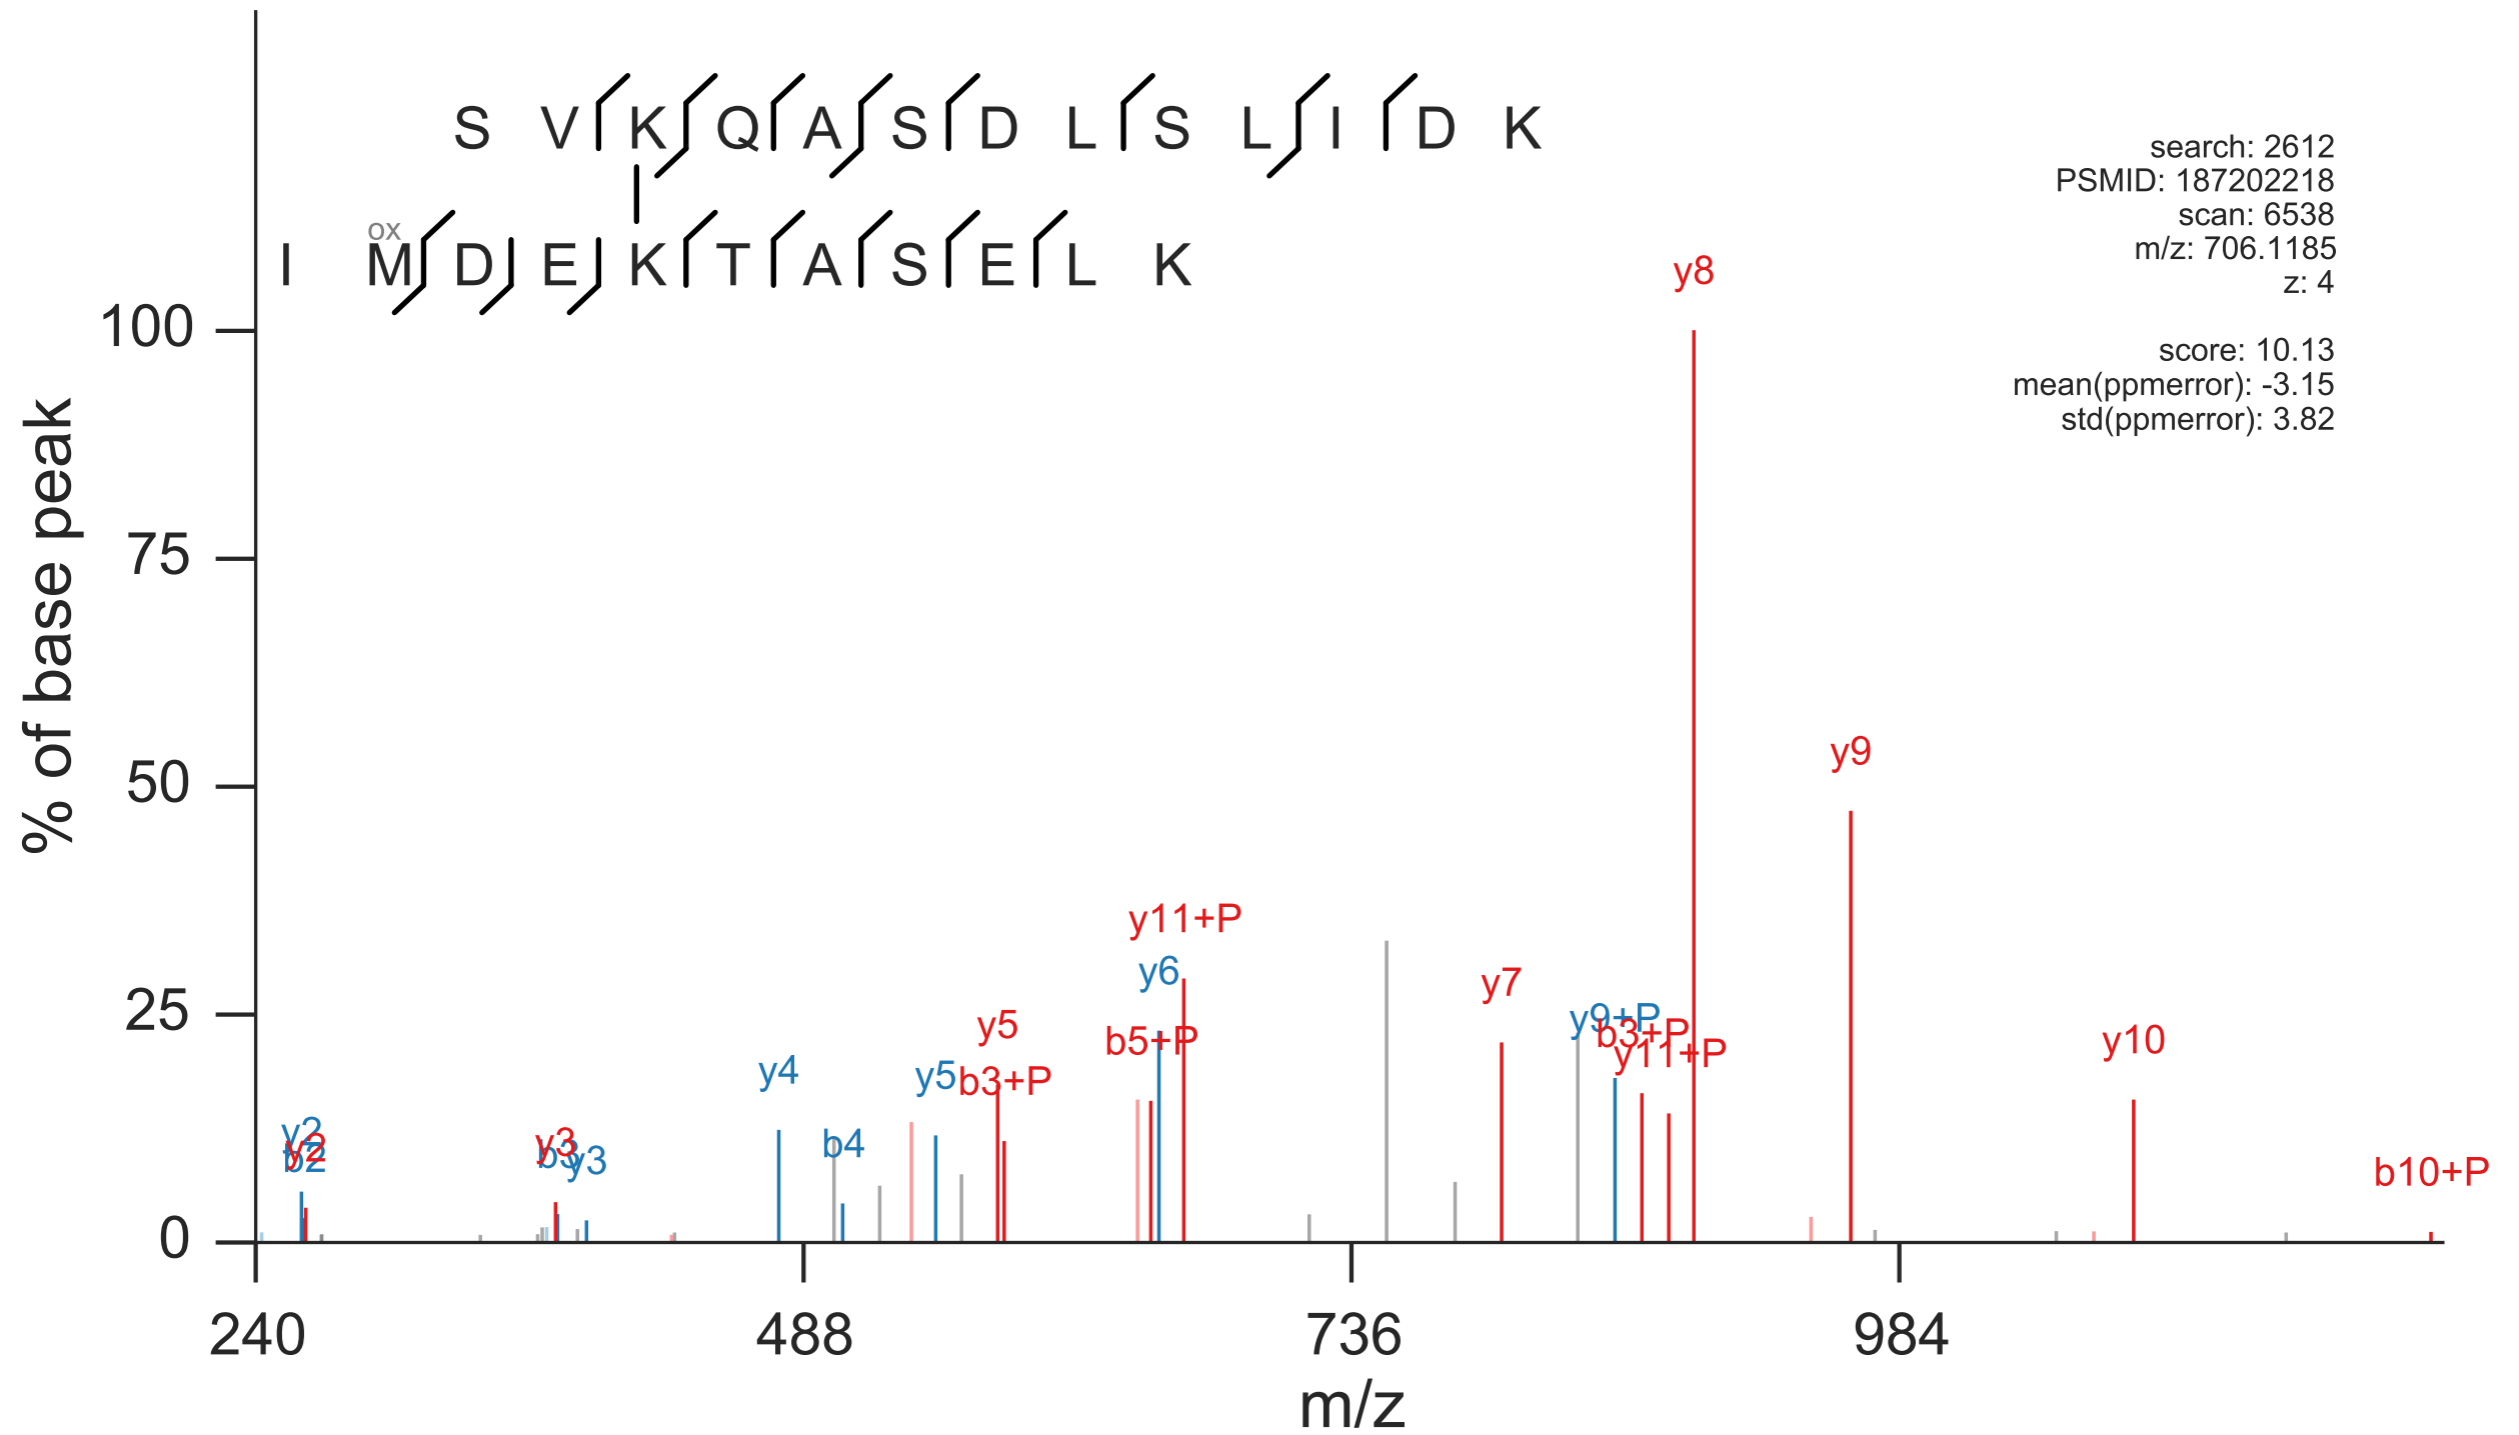

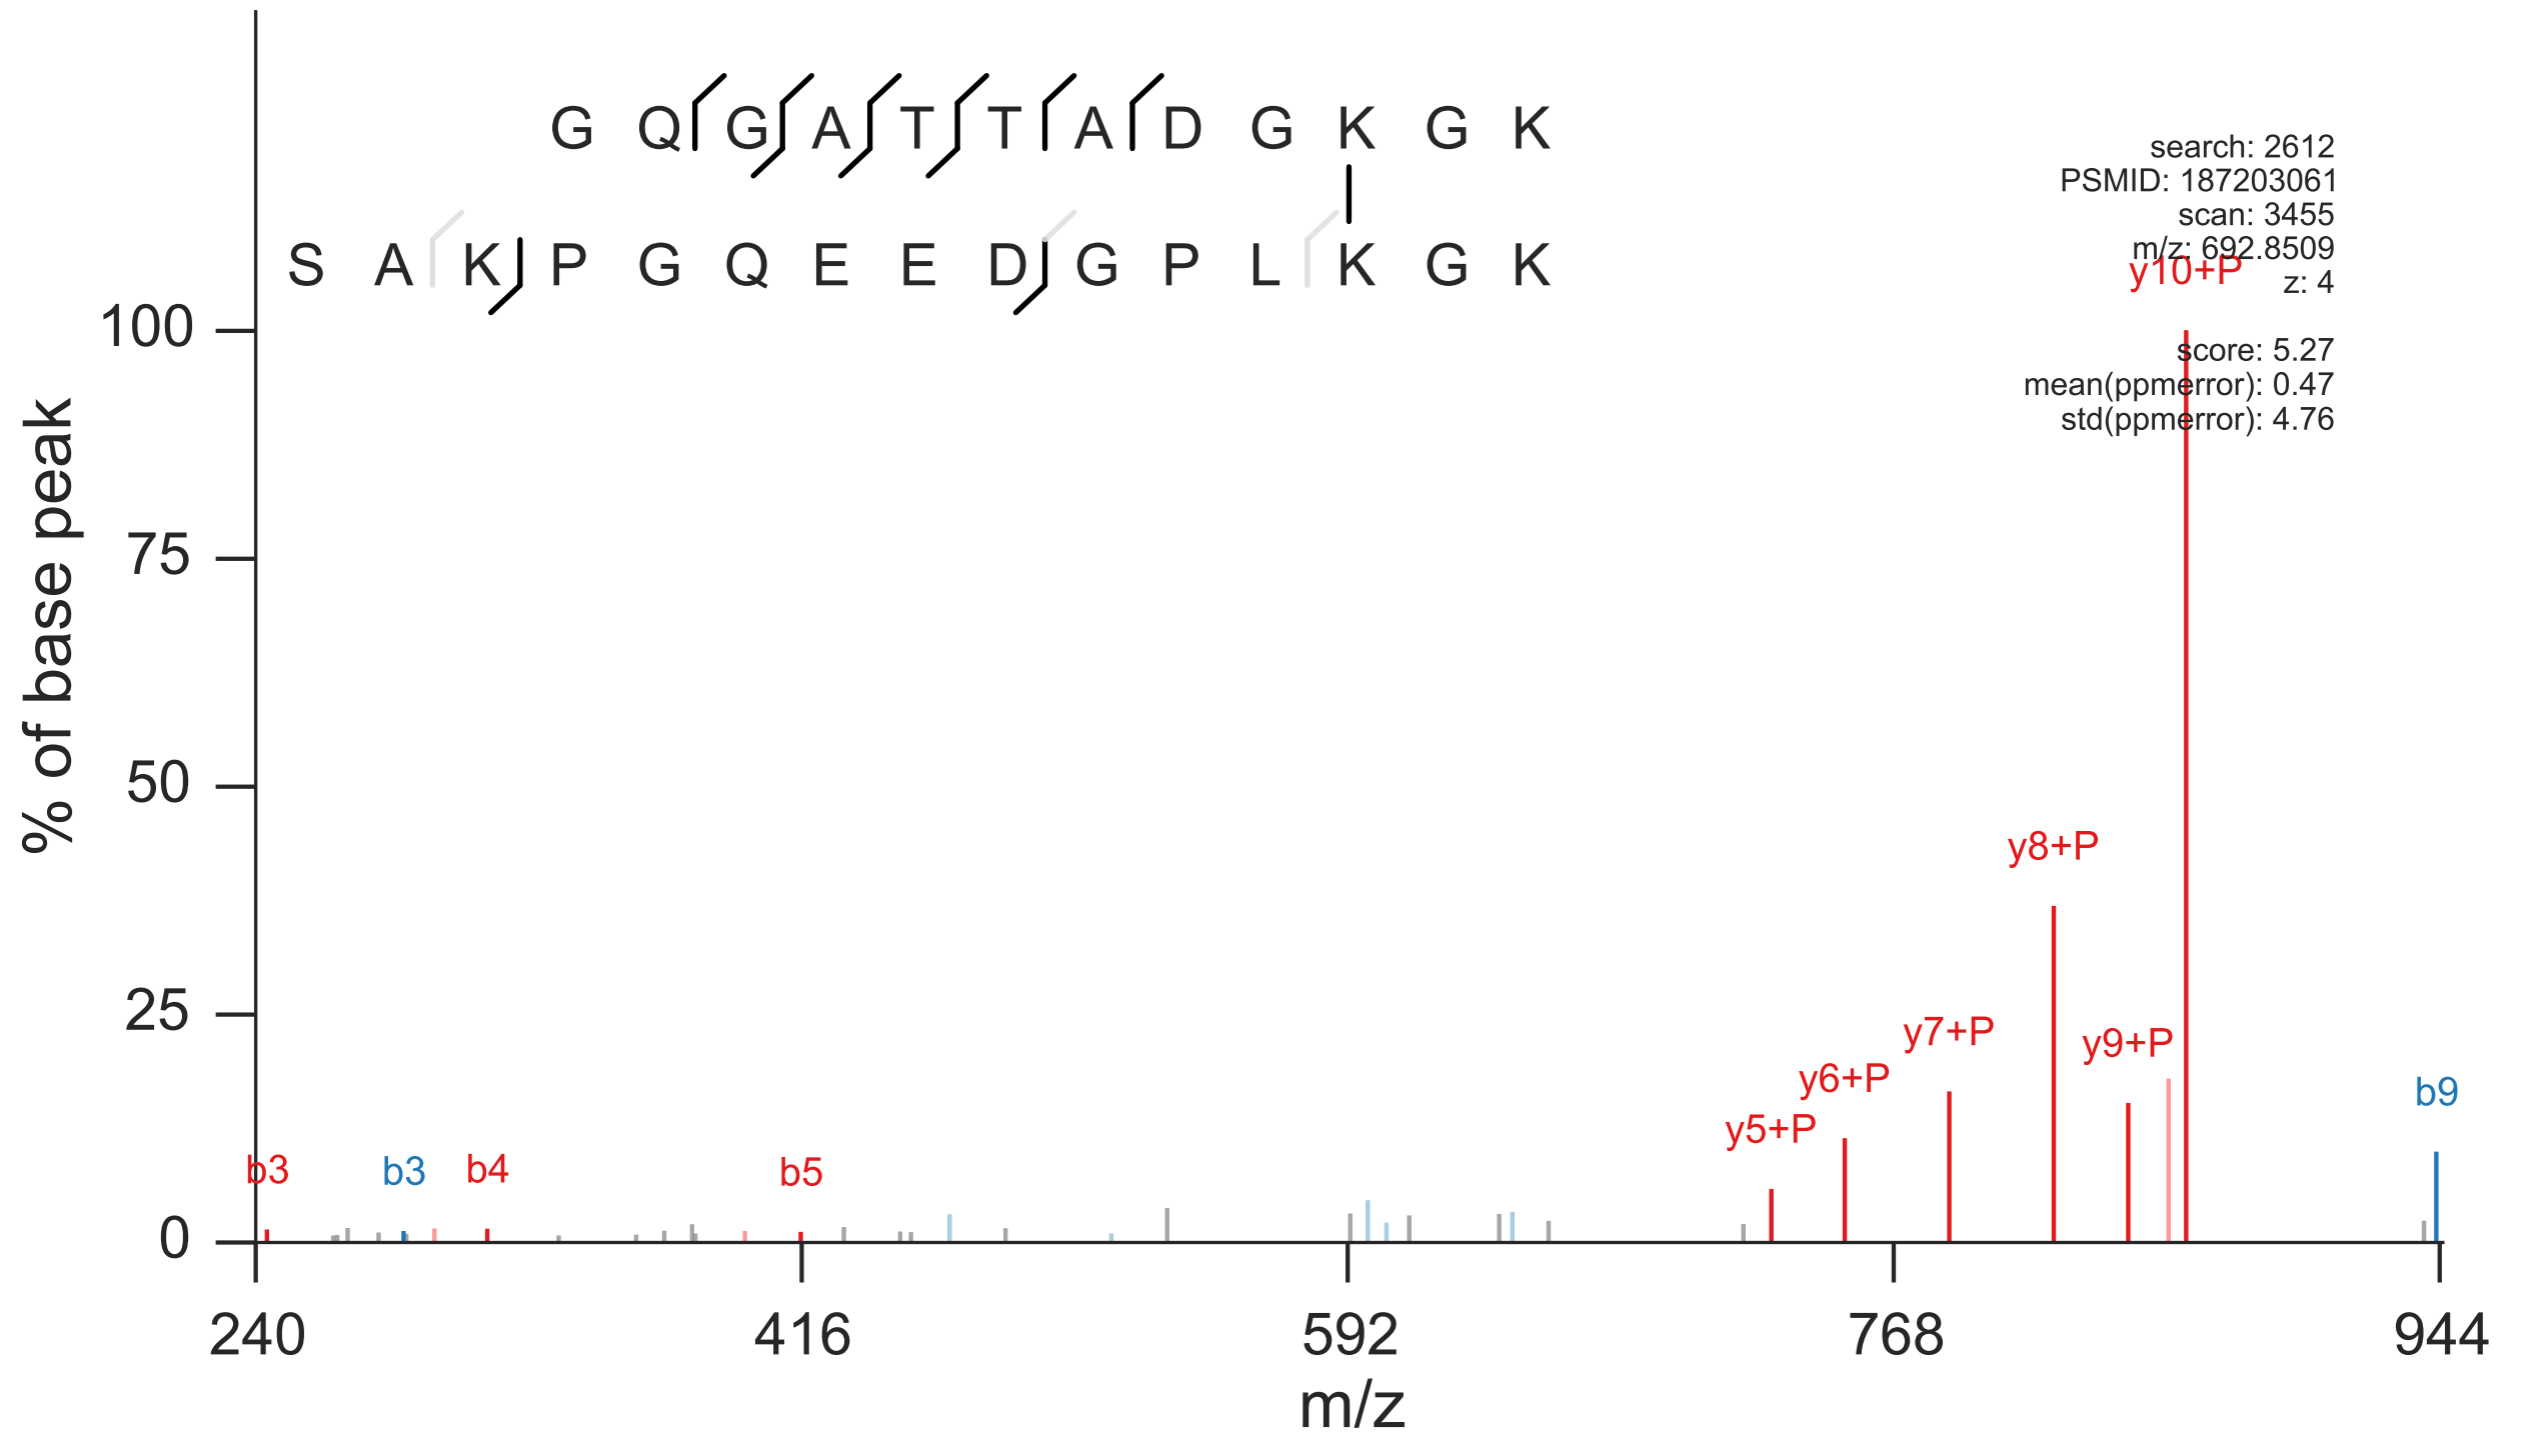

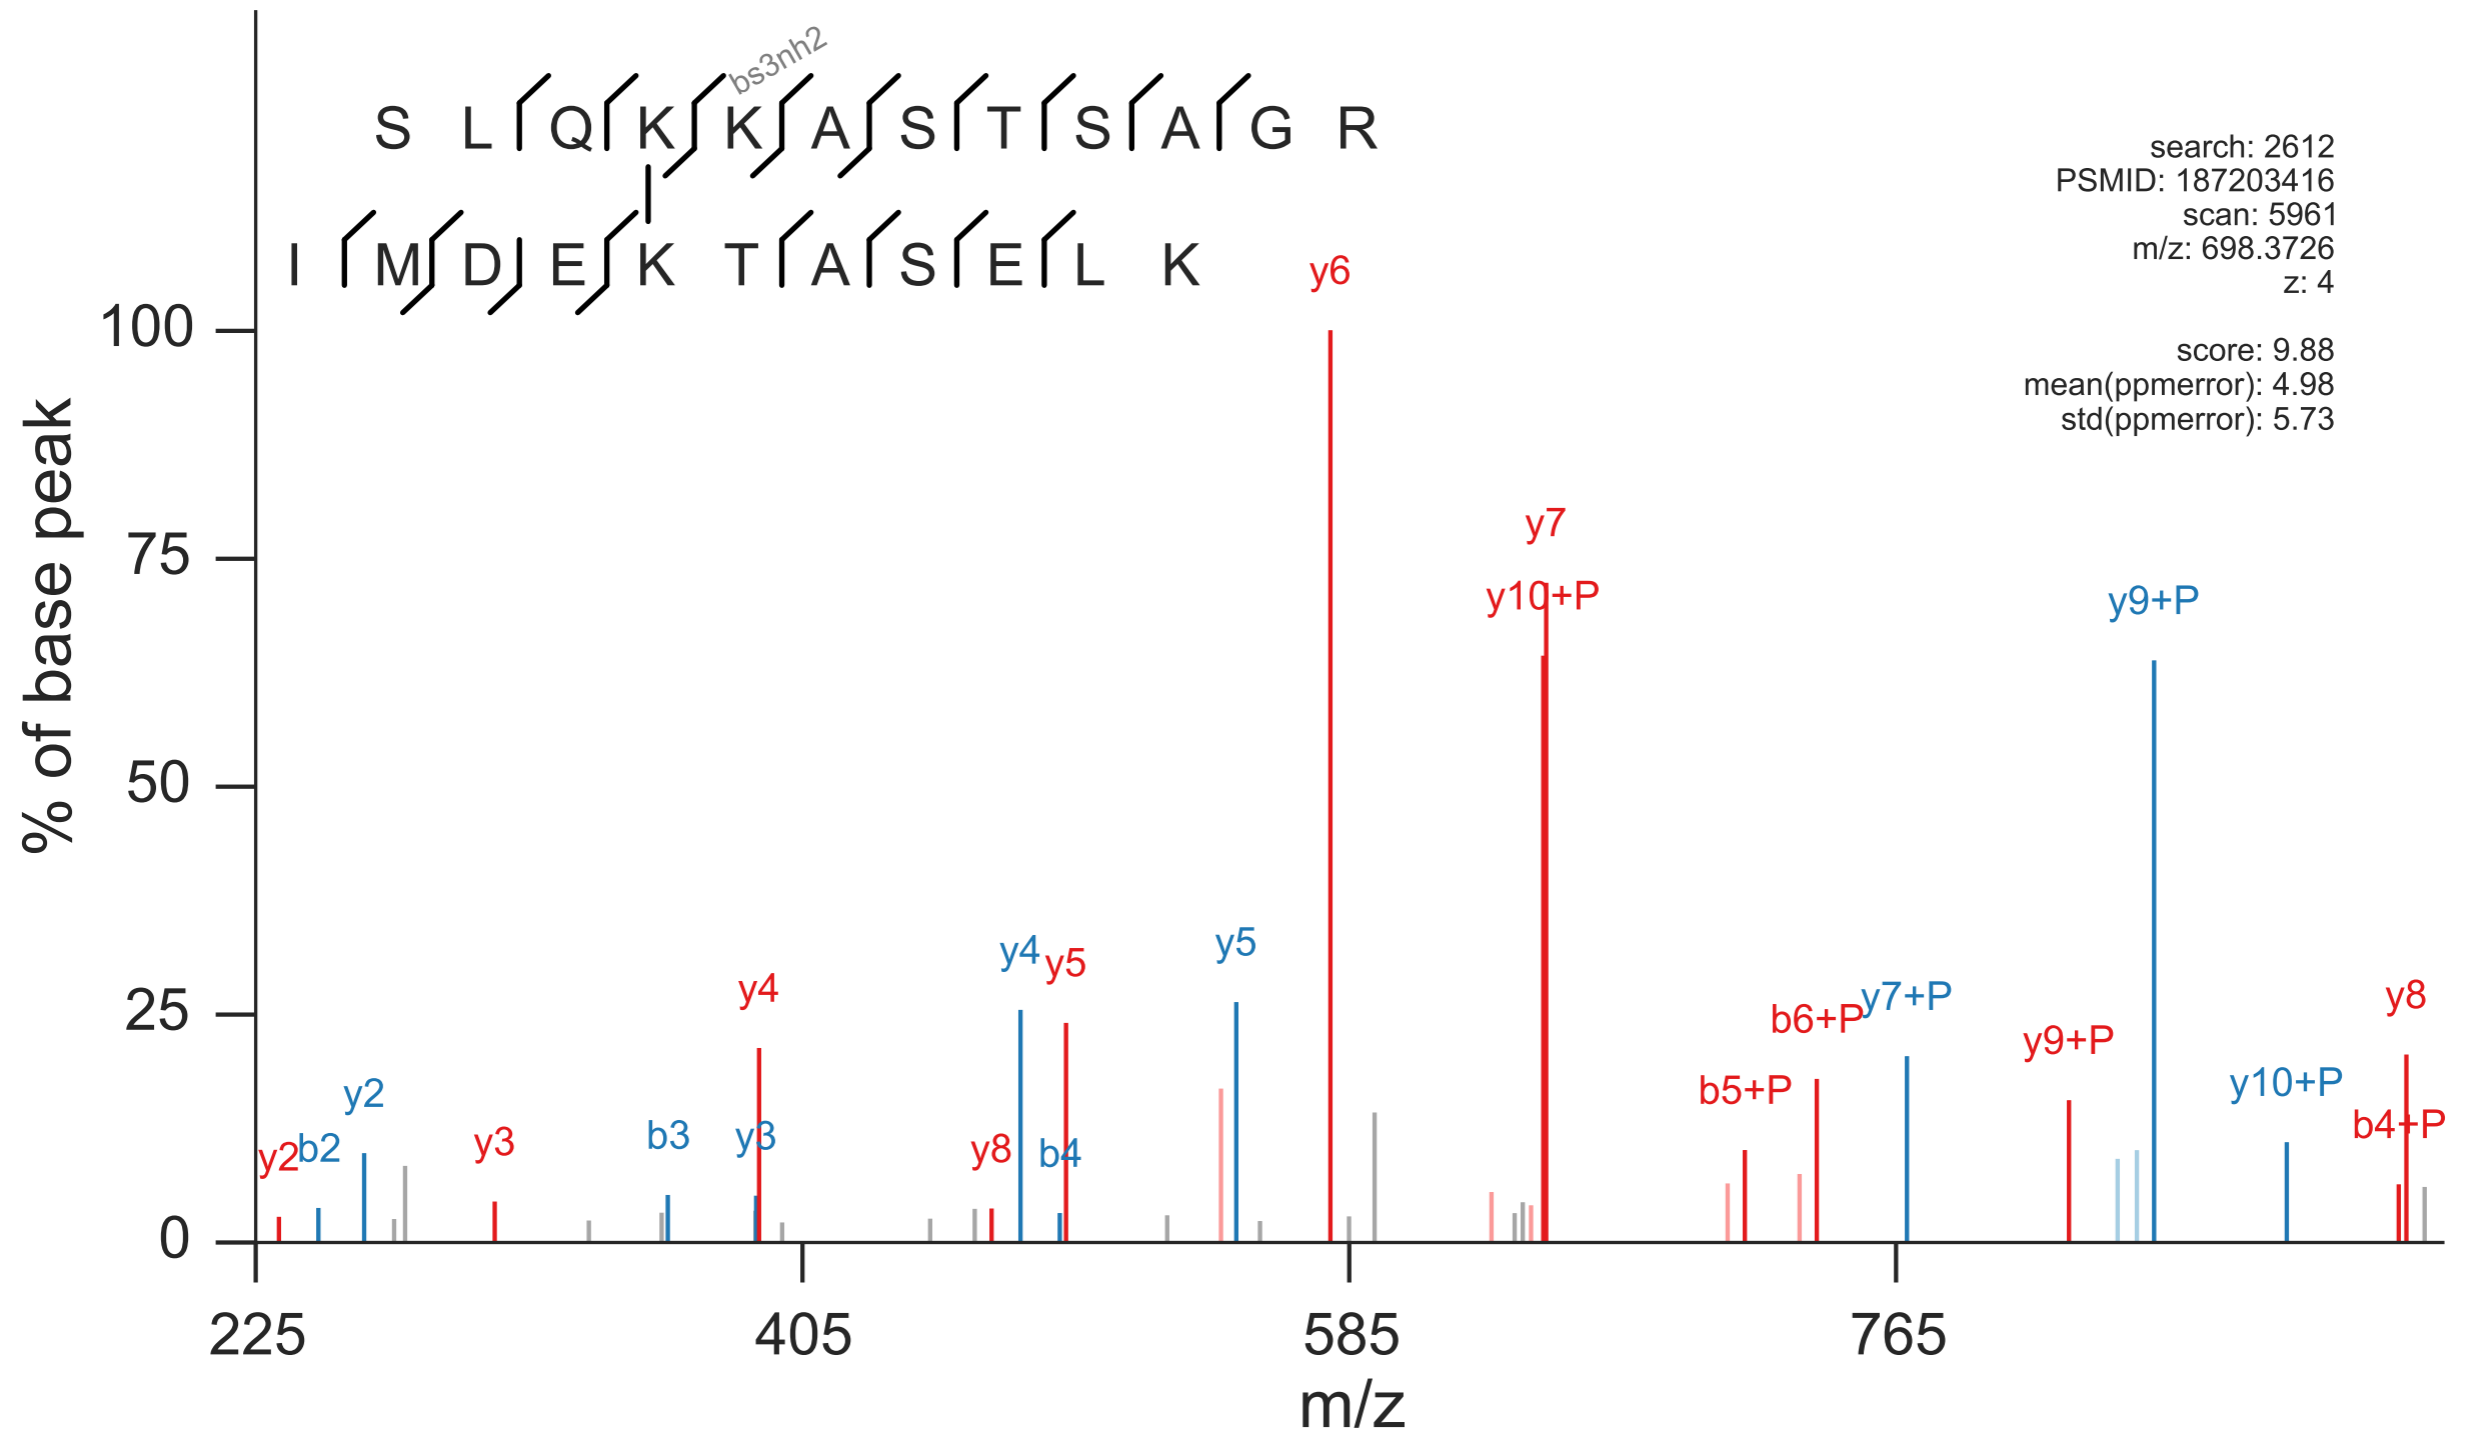

search: 2612  
 PSMID: 187203416  
 scan: 5961  
 m/z: 698.3726  
 z: 4

score: 9.88  
 mean(ppmerror): 4.98  
 std(ppmerror): 5.73

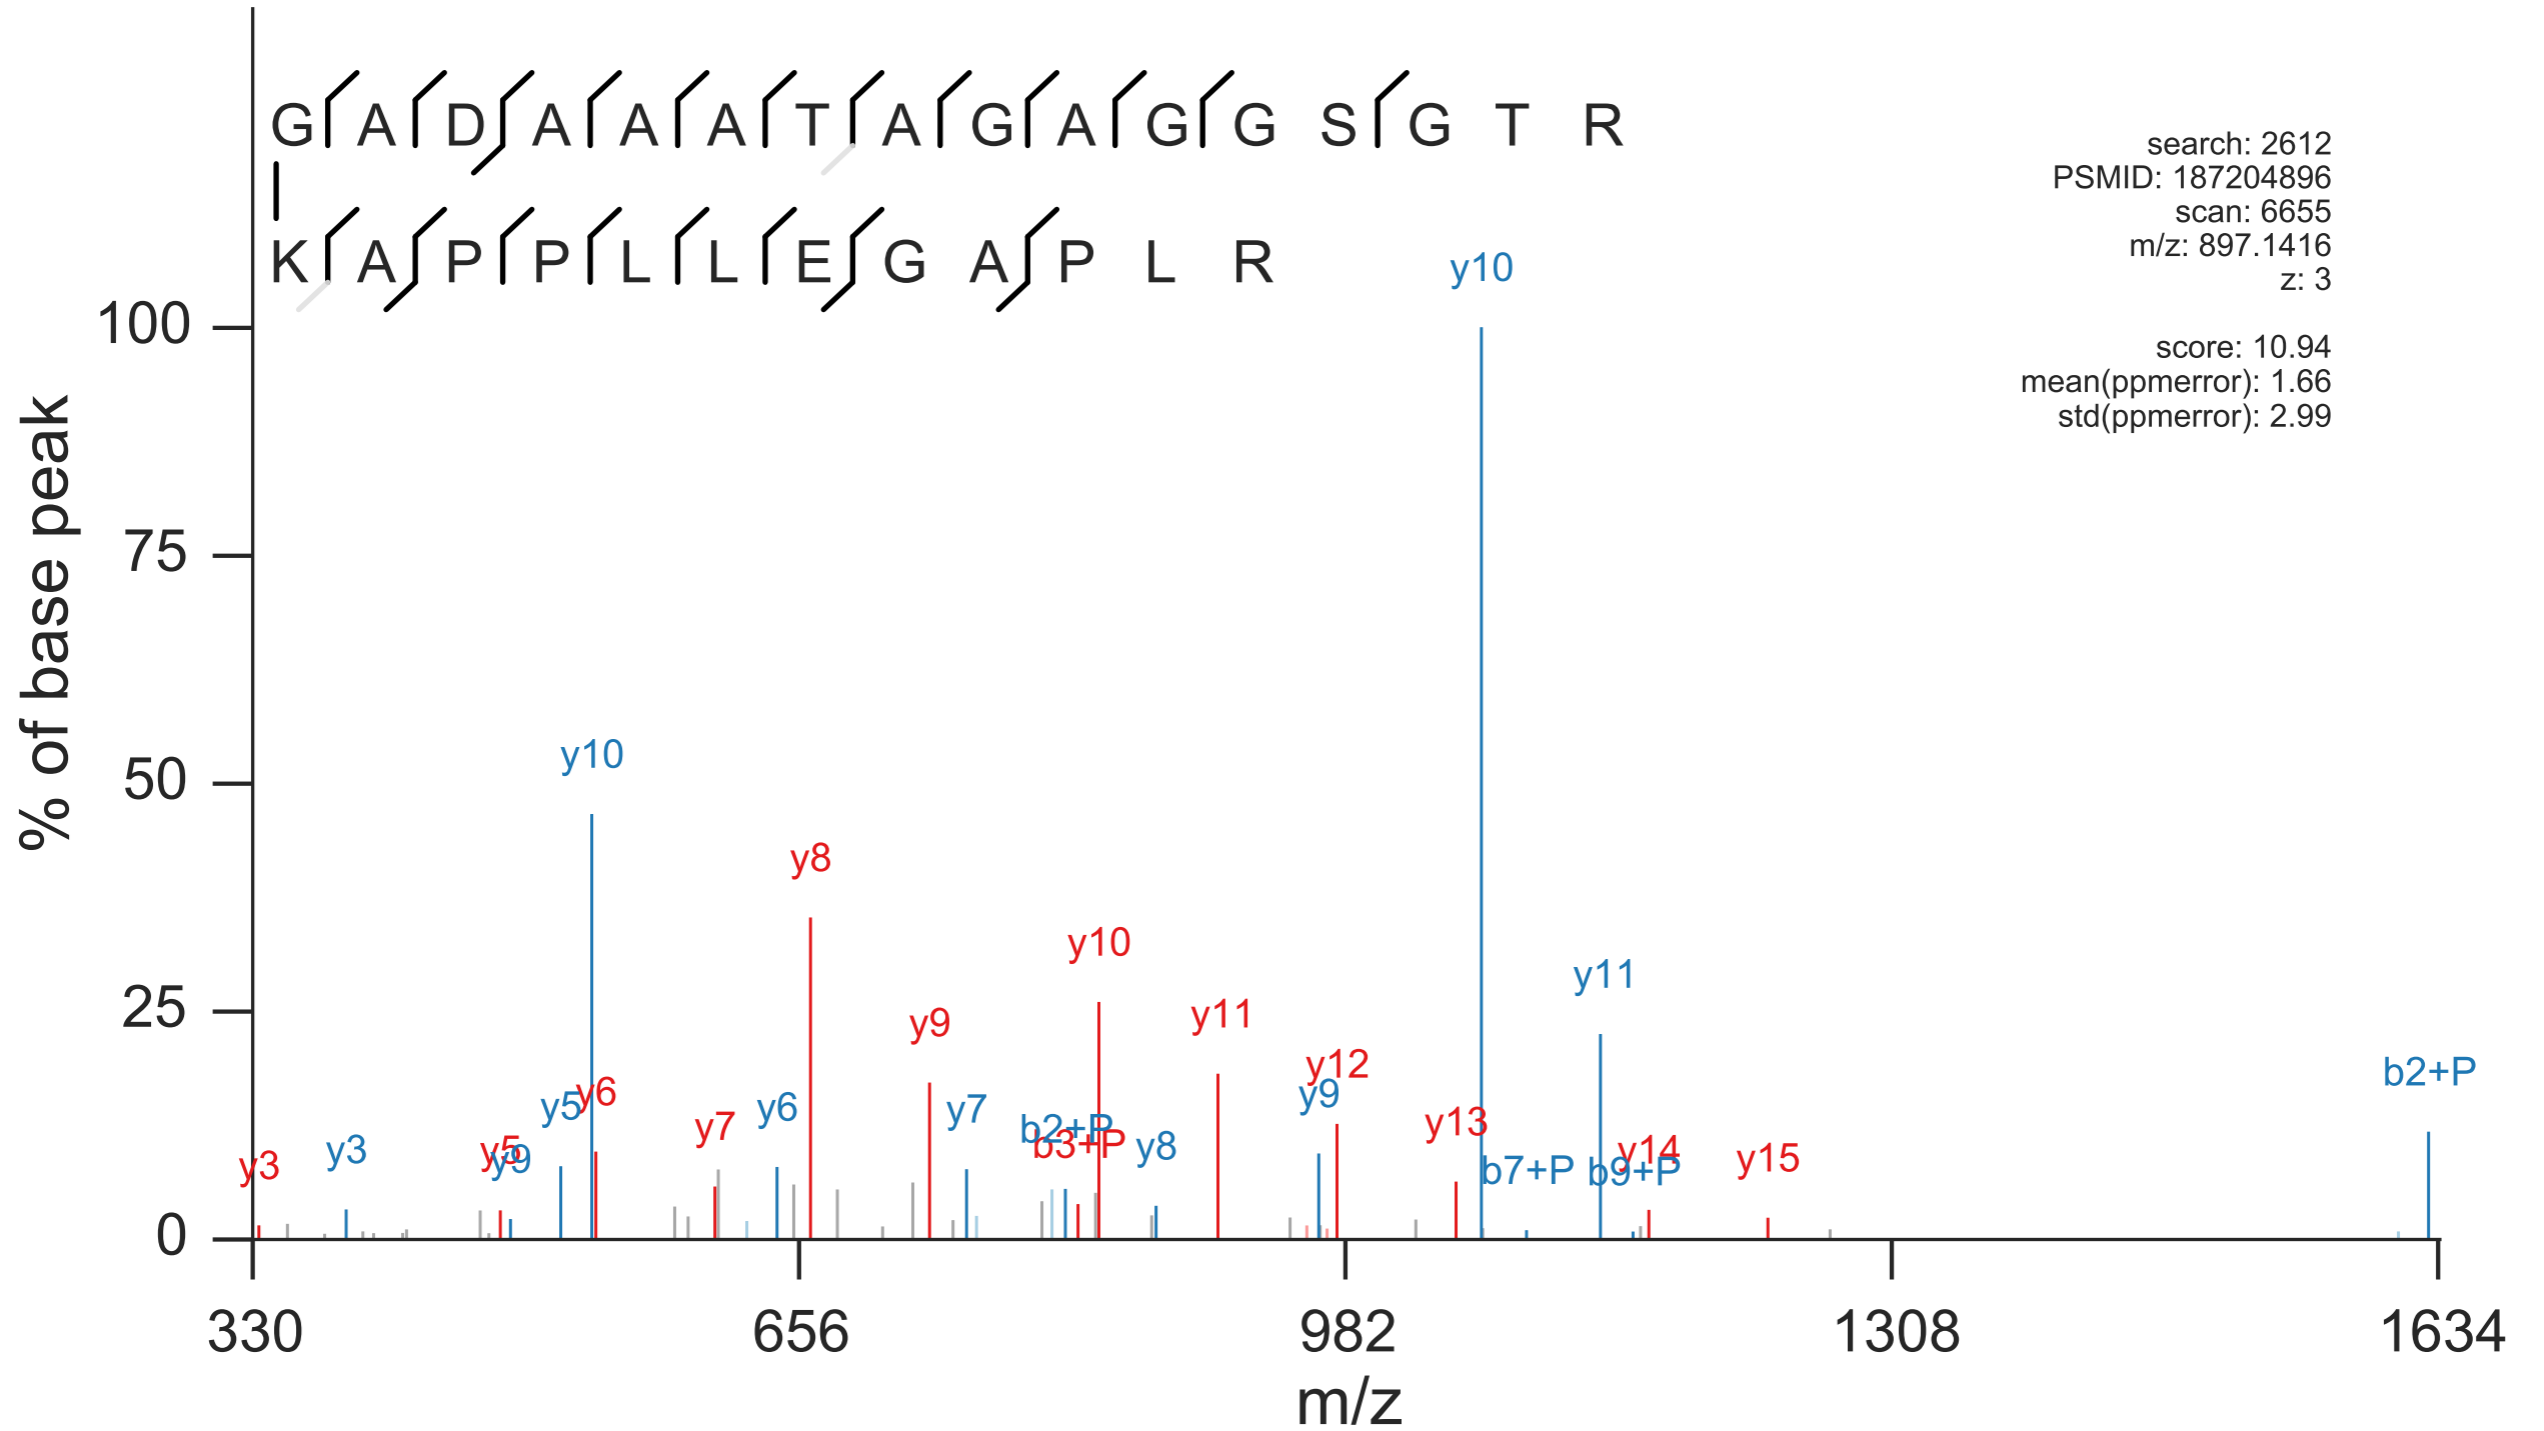

search: 2612  
PSMID: 187204896  
scan: 6655  
m/z: 897.1416  
z: 3  
  
score: 10.94  
mean(ppmerror): 1.66  
std(ppmerror): 2.99

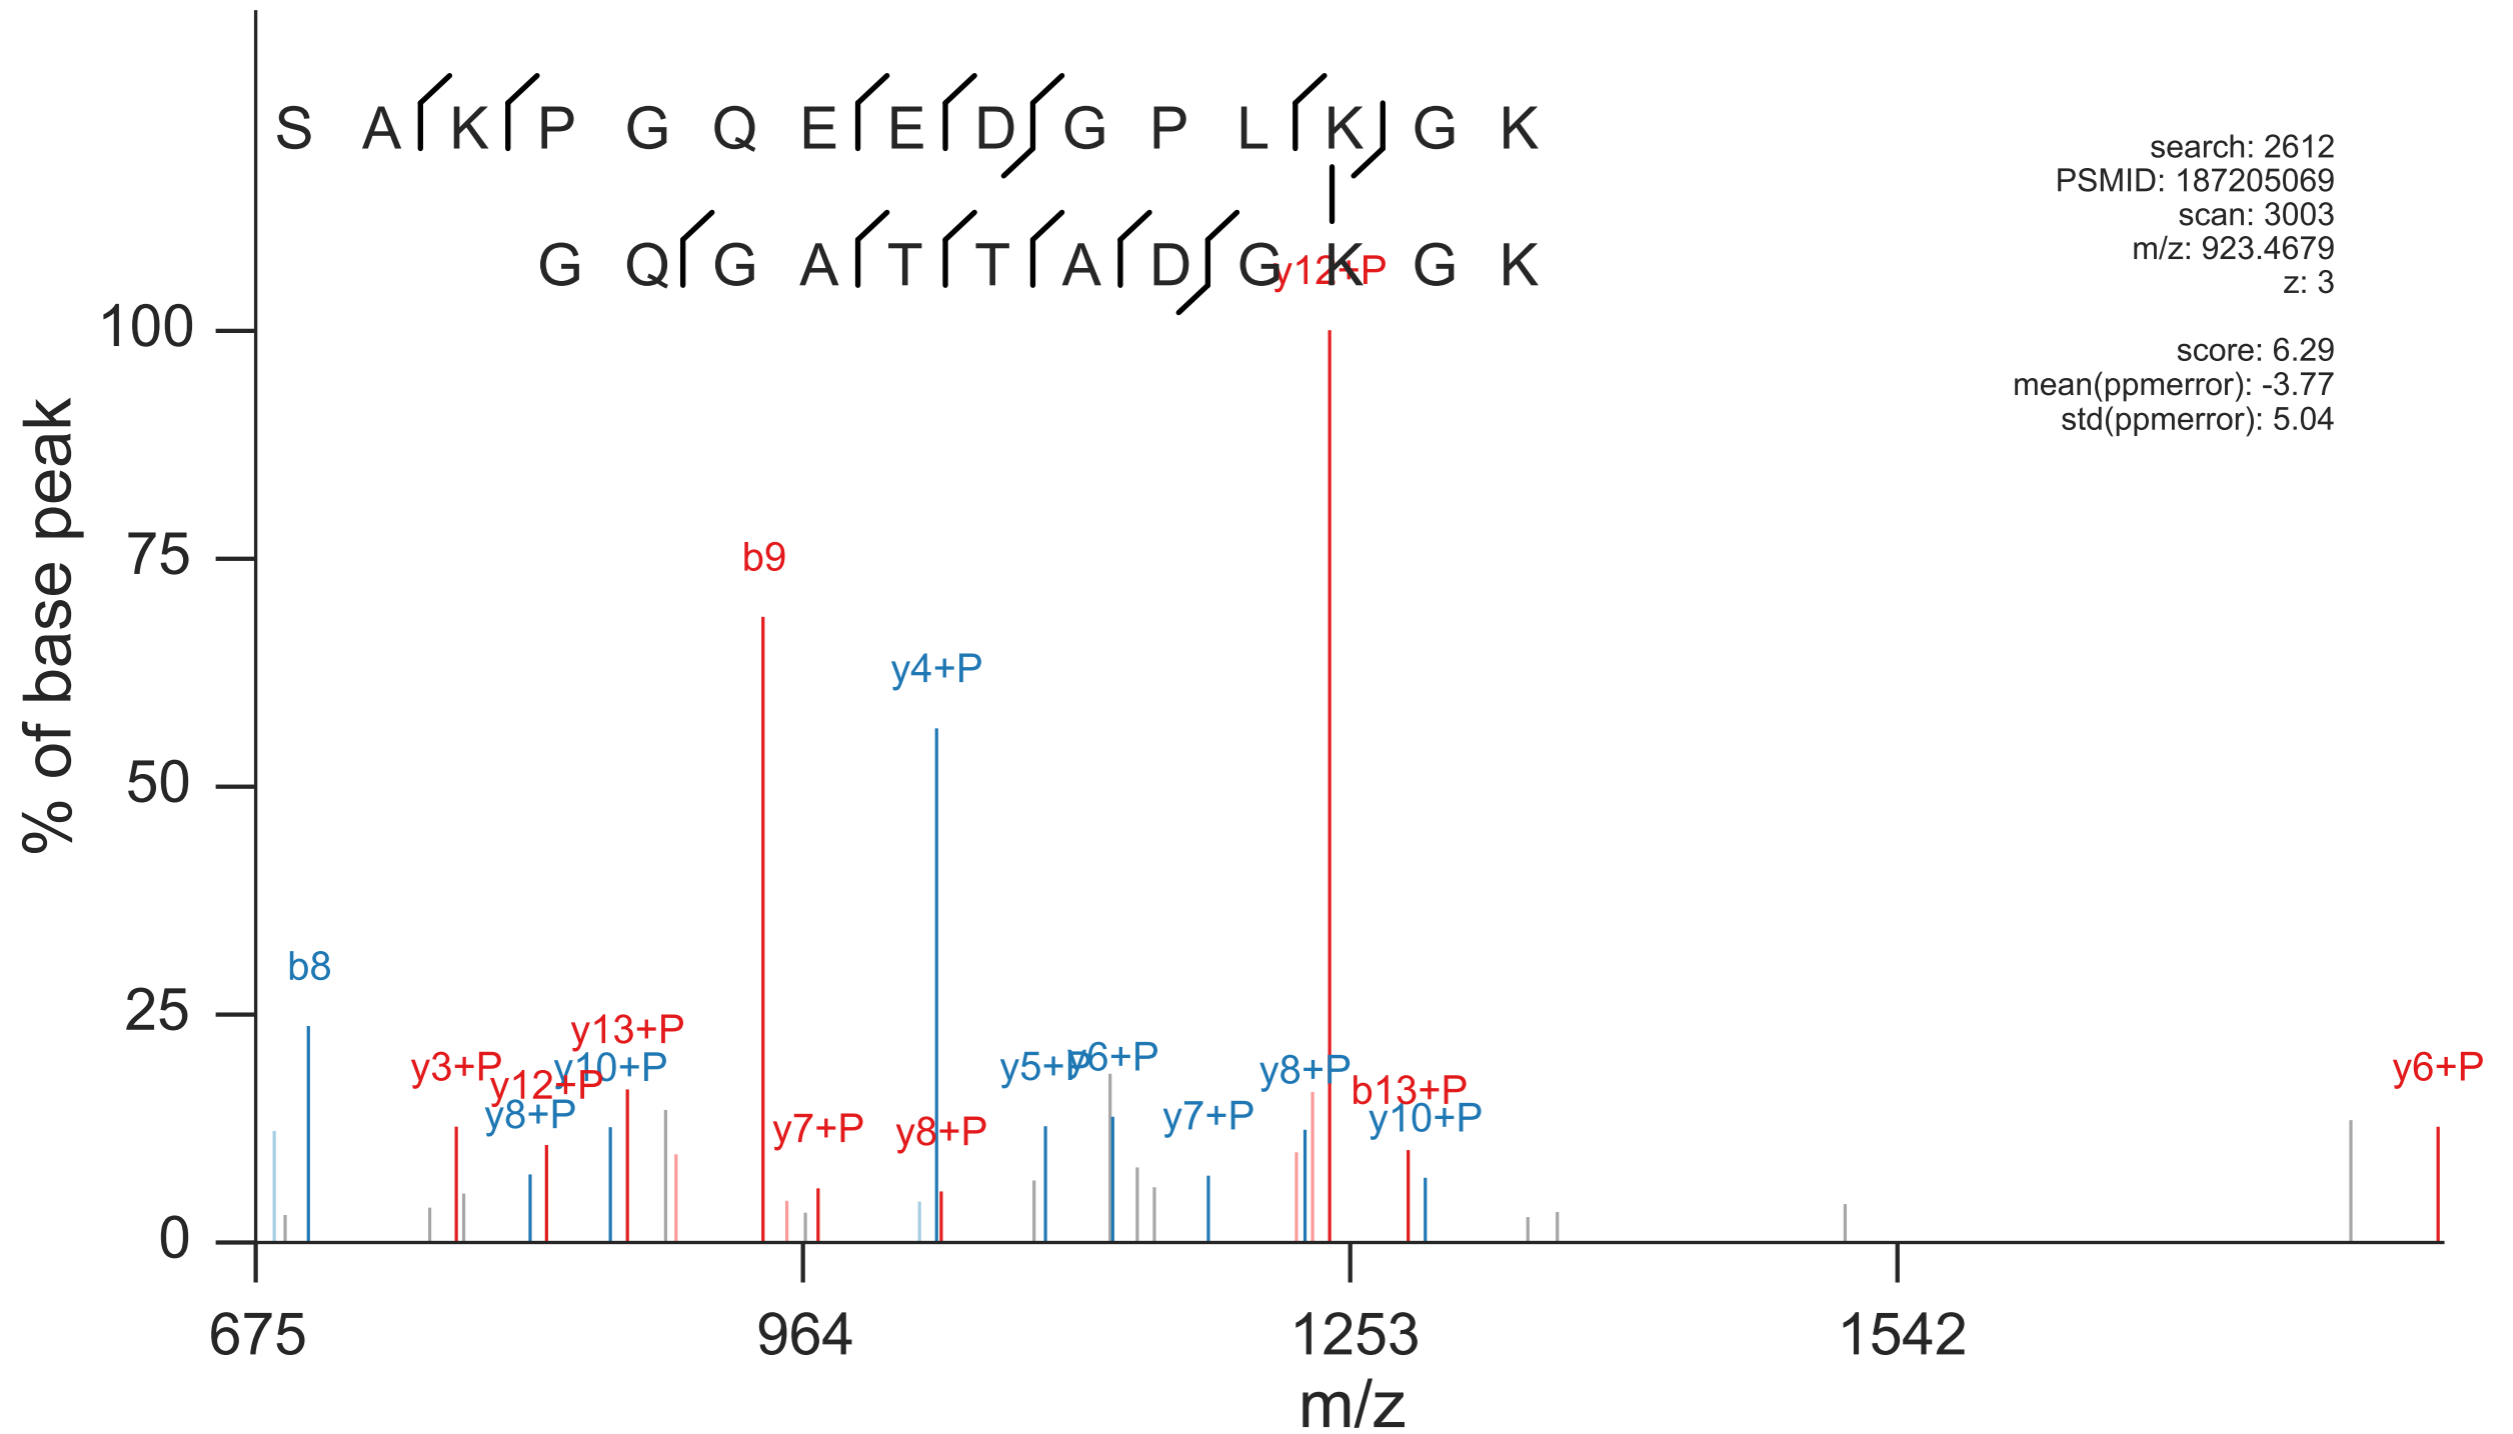

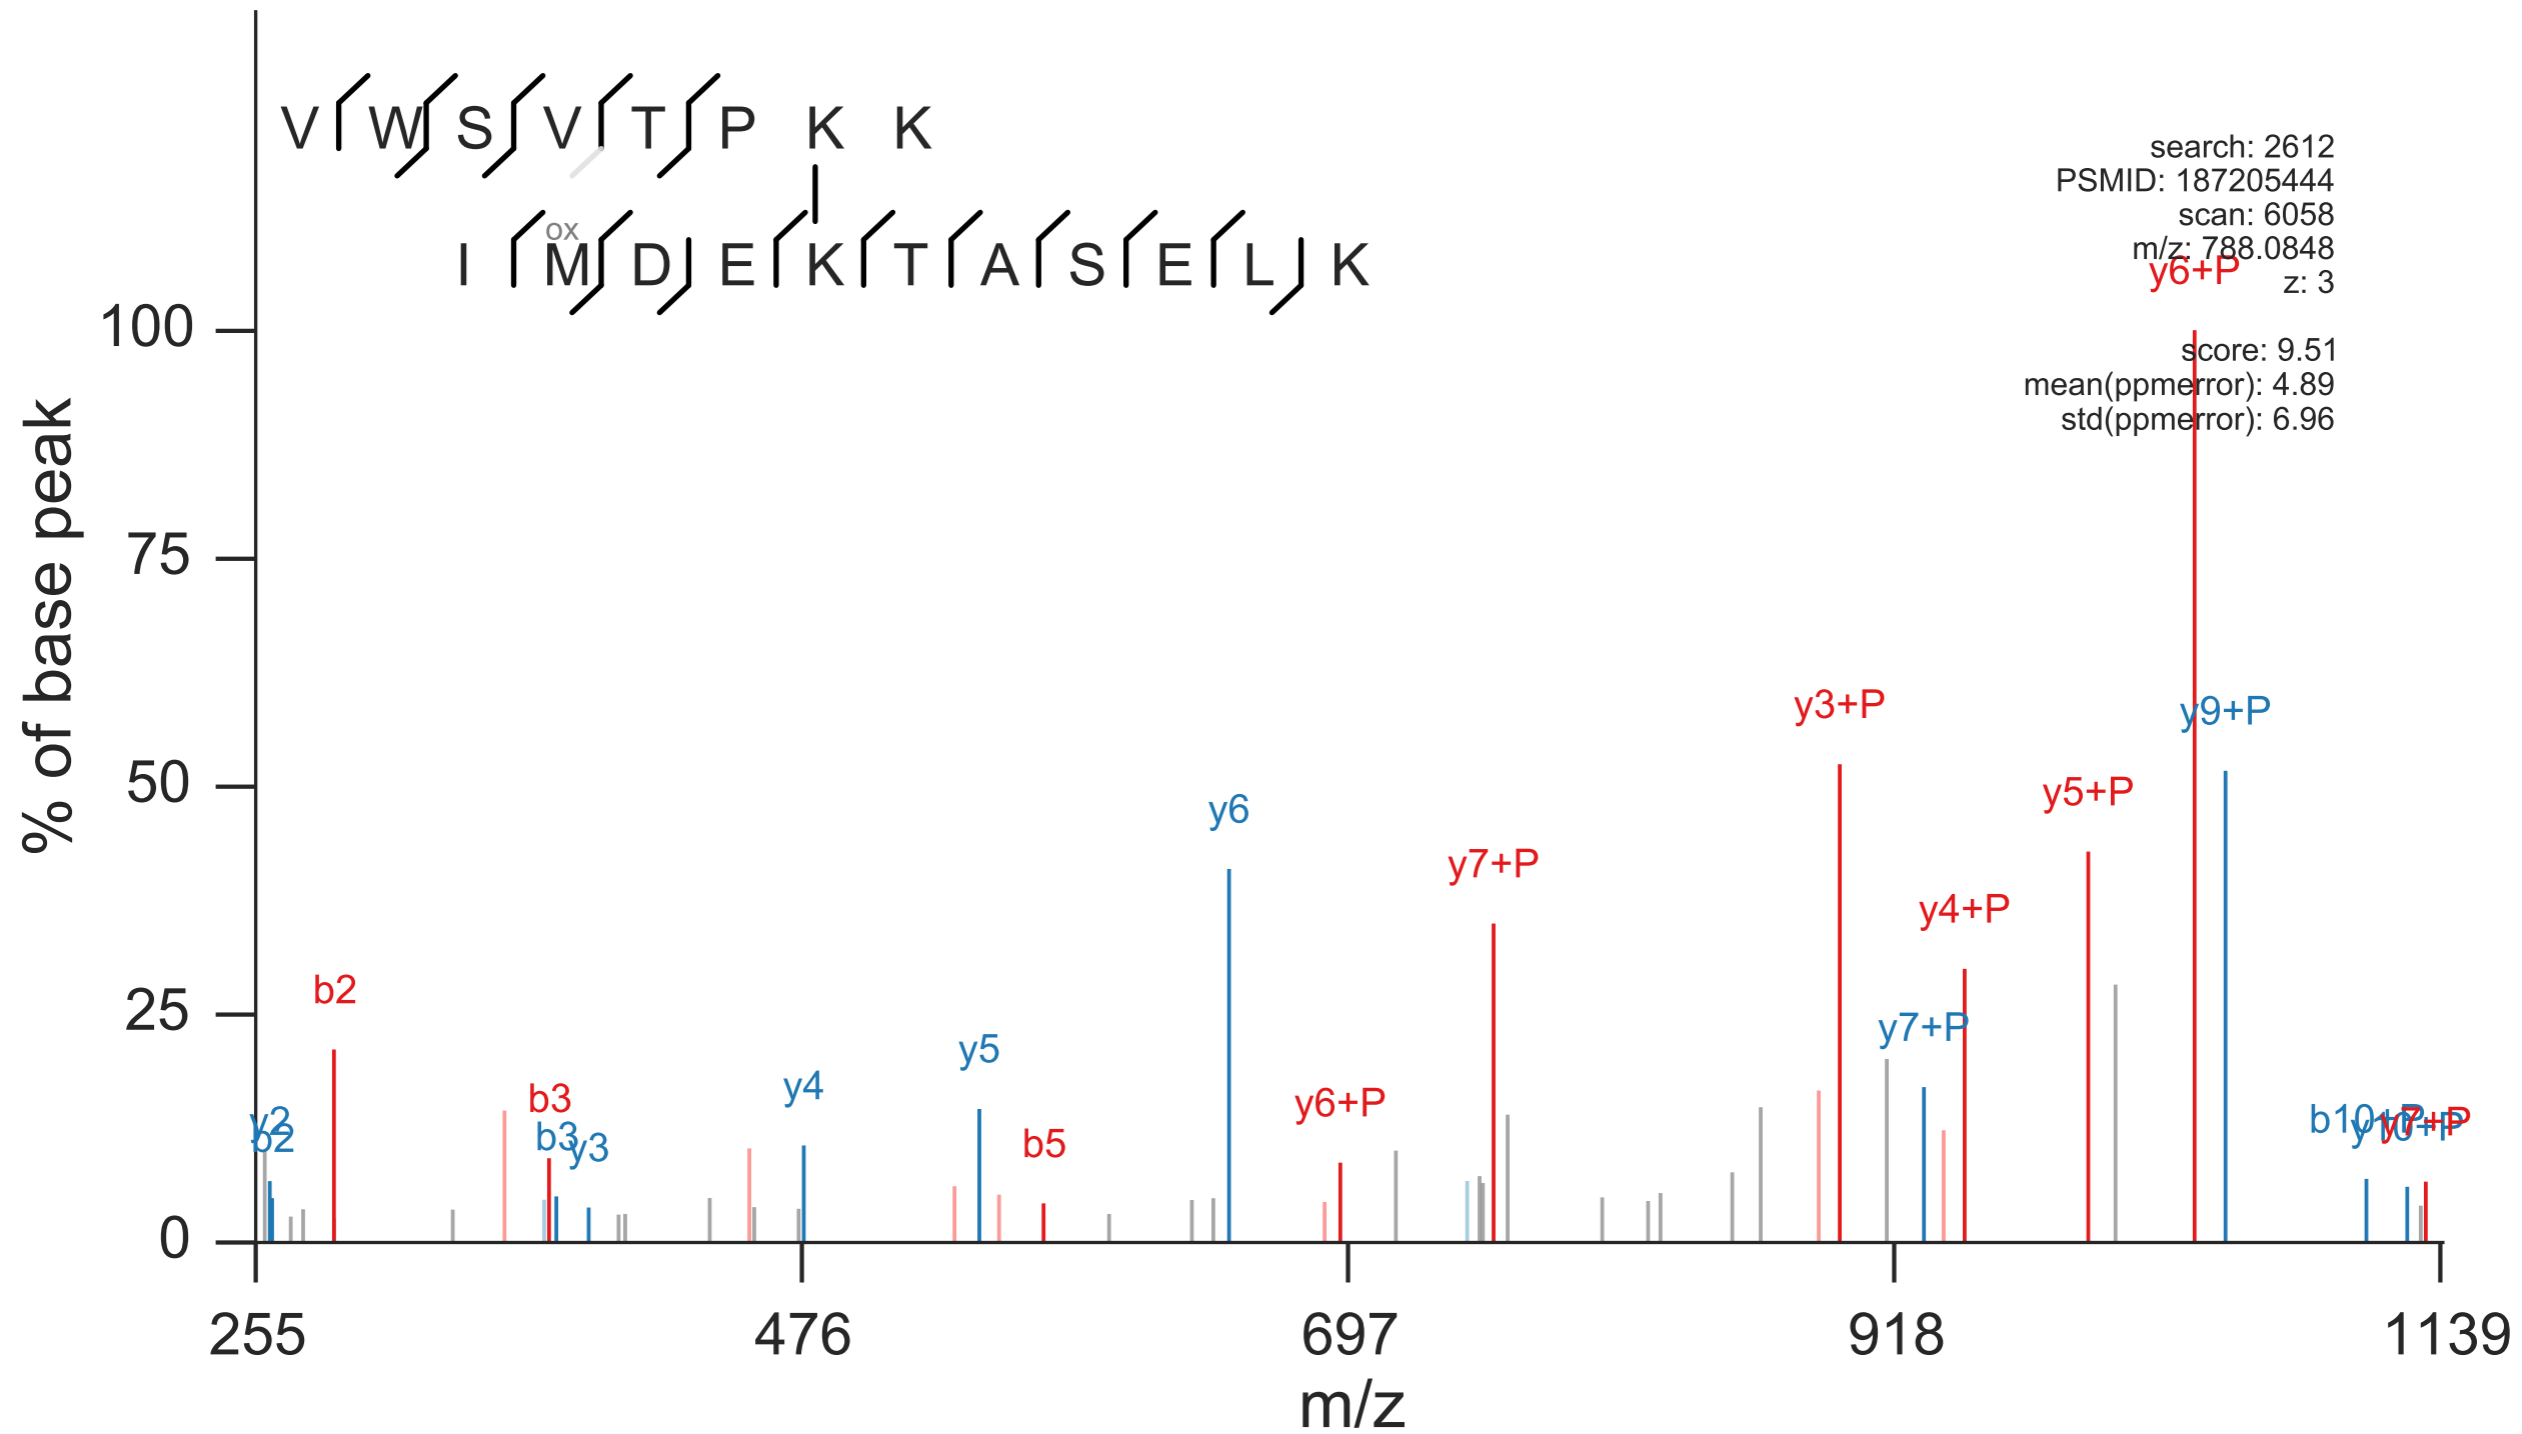

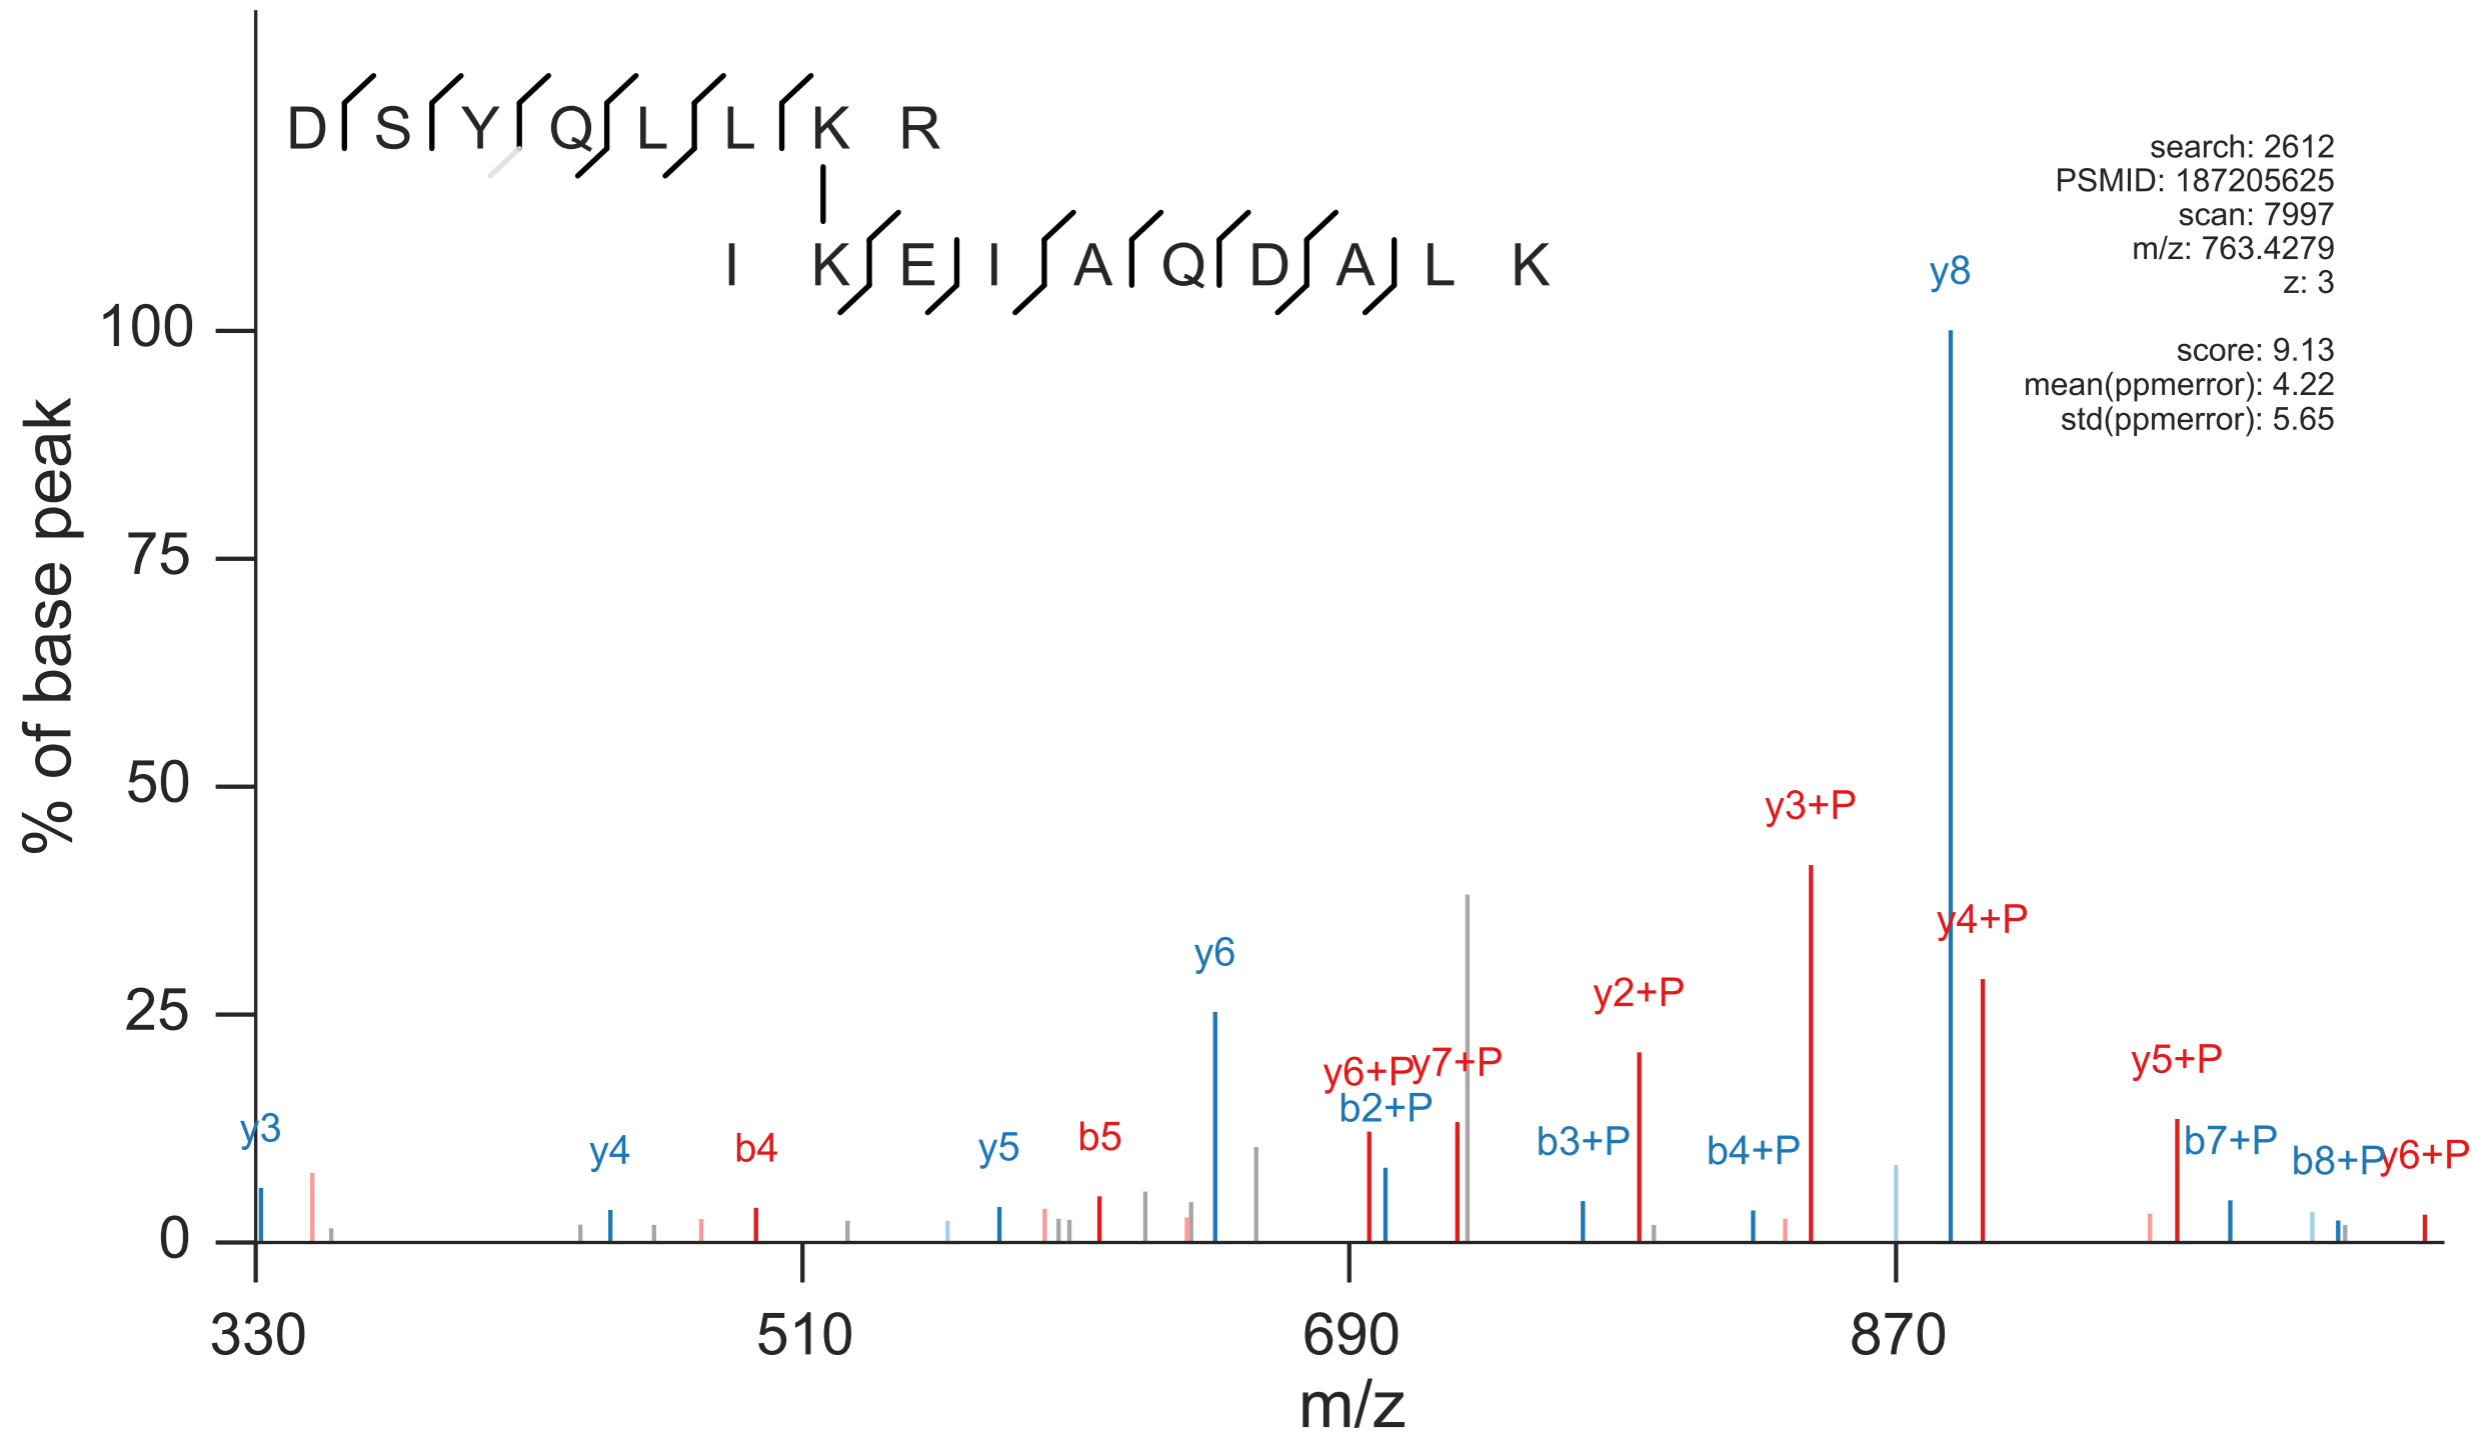



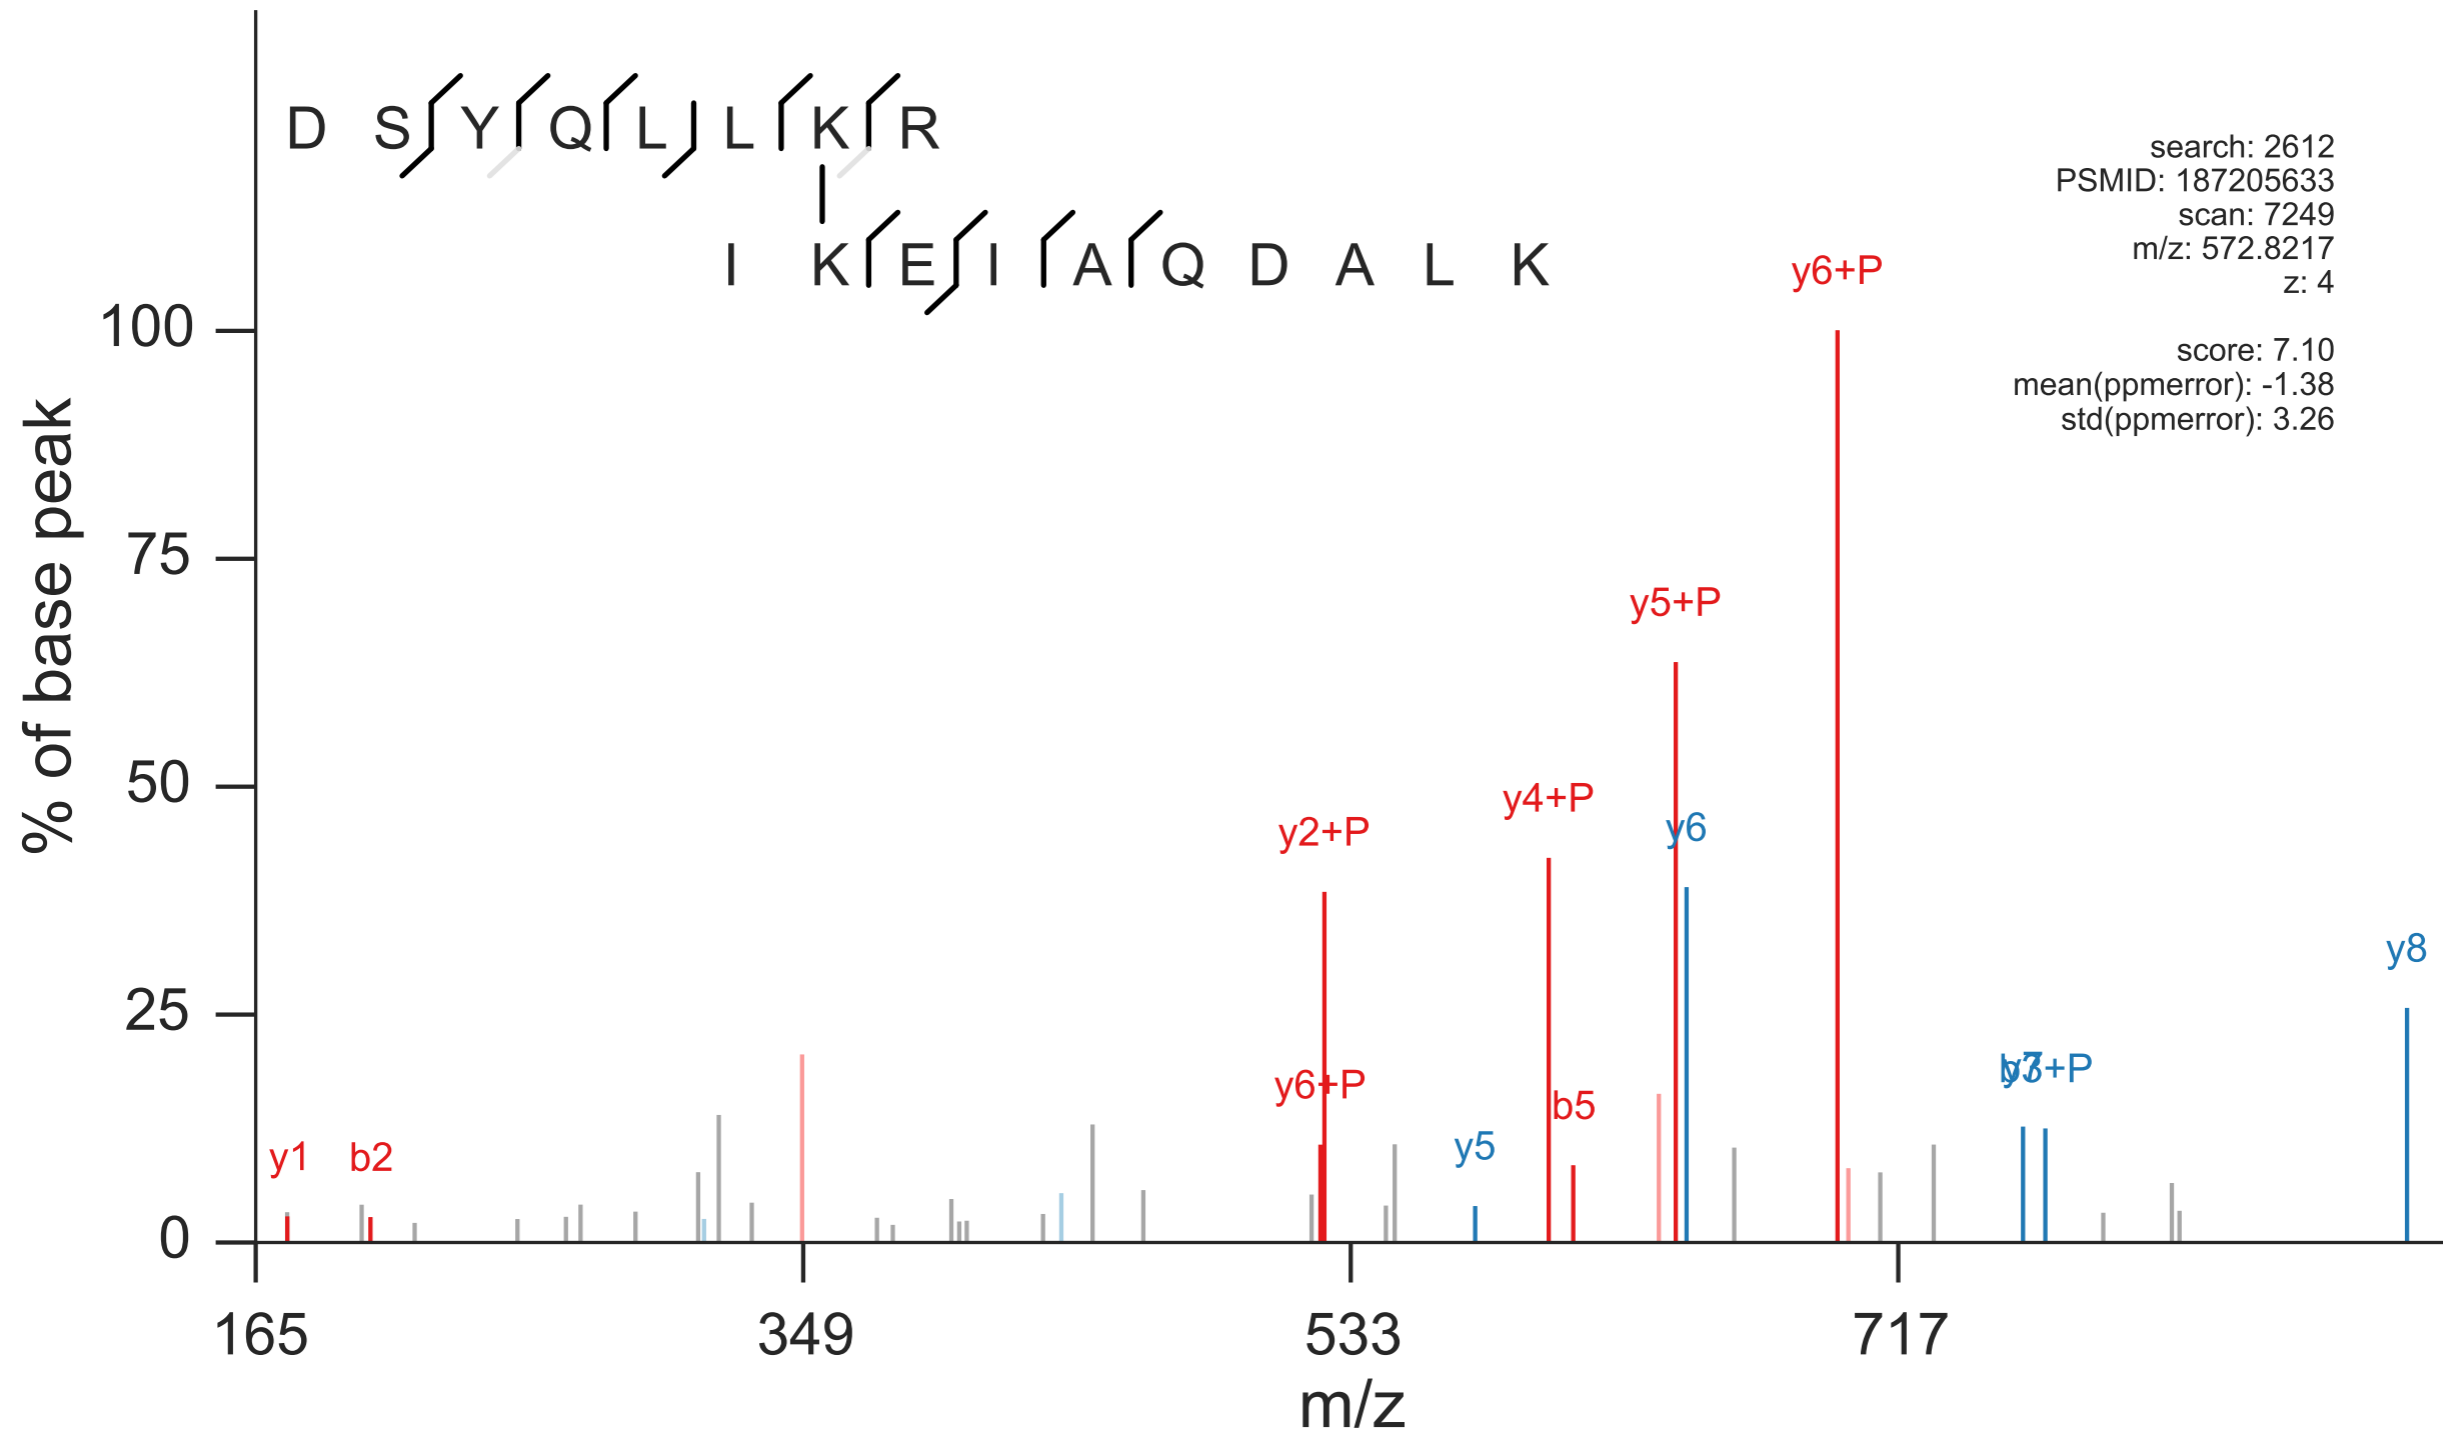

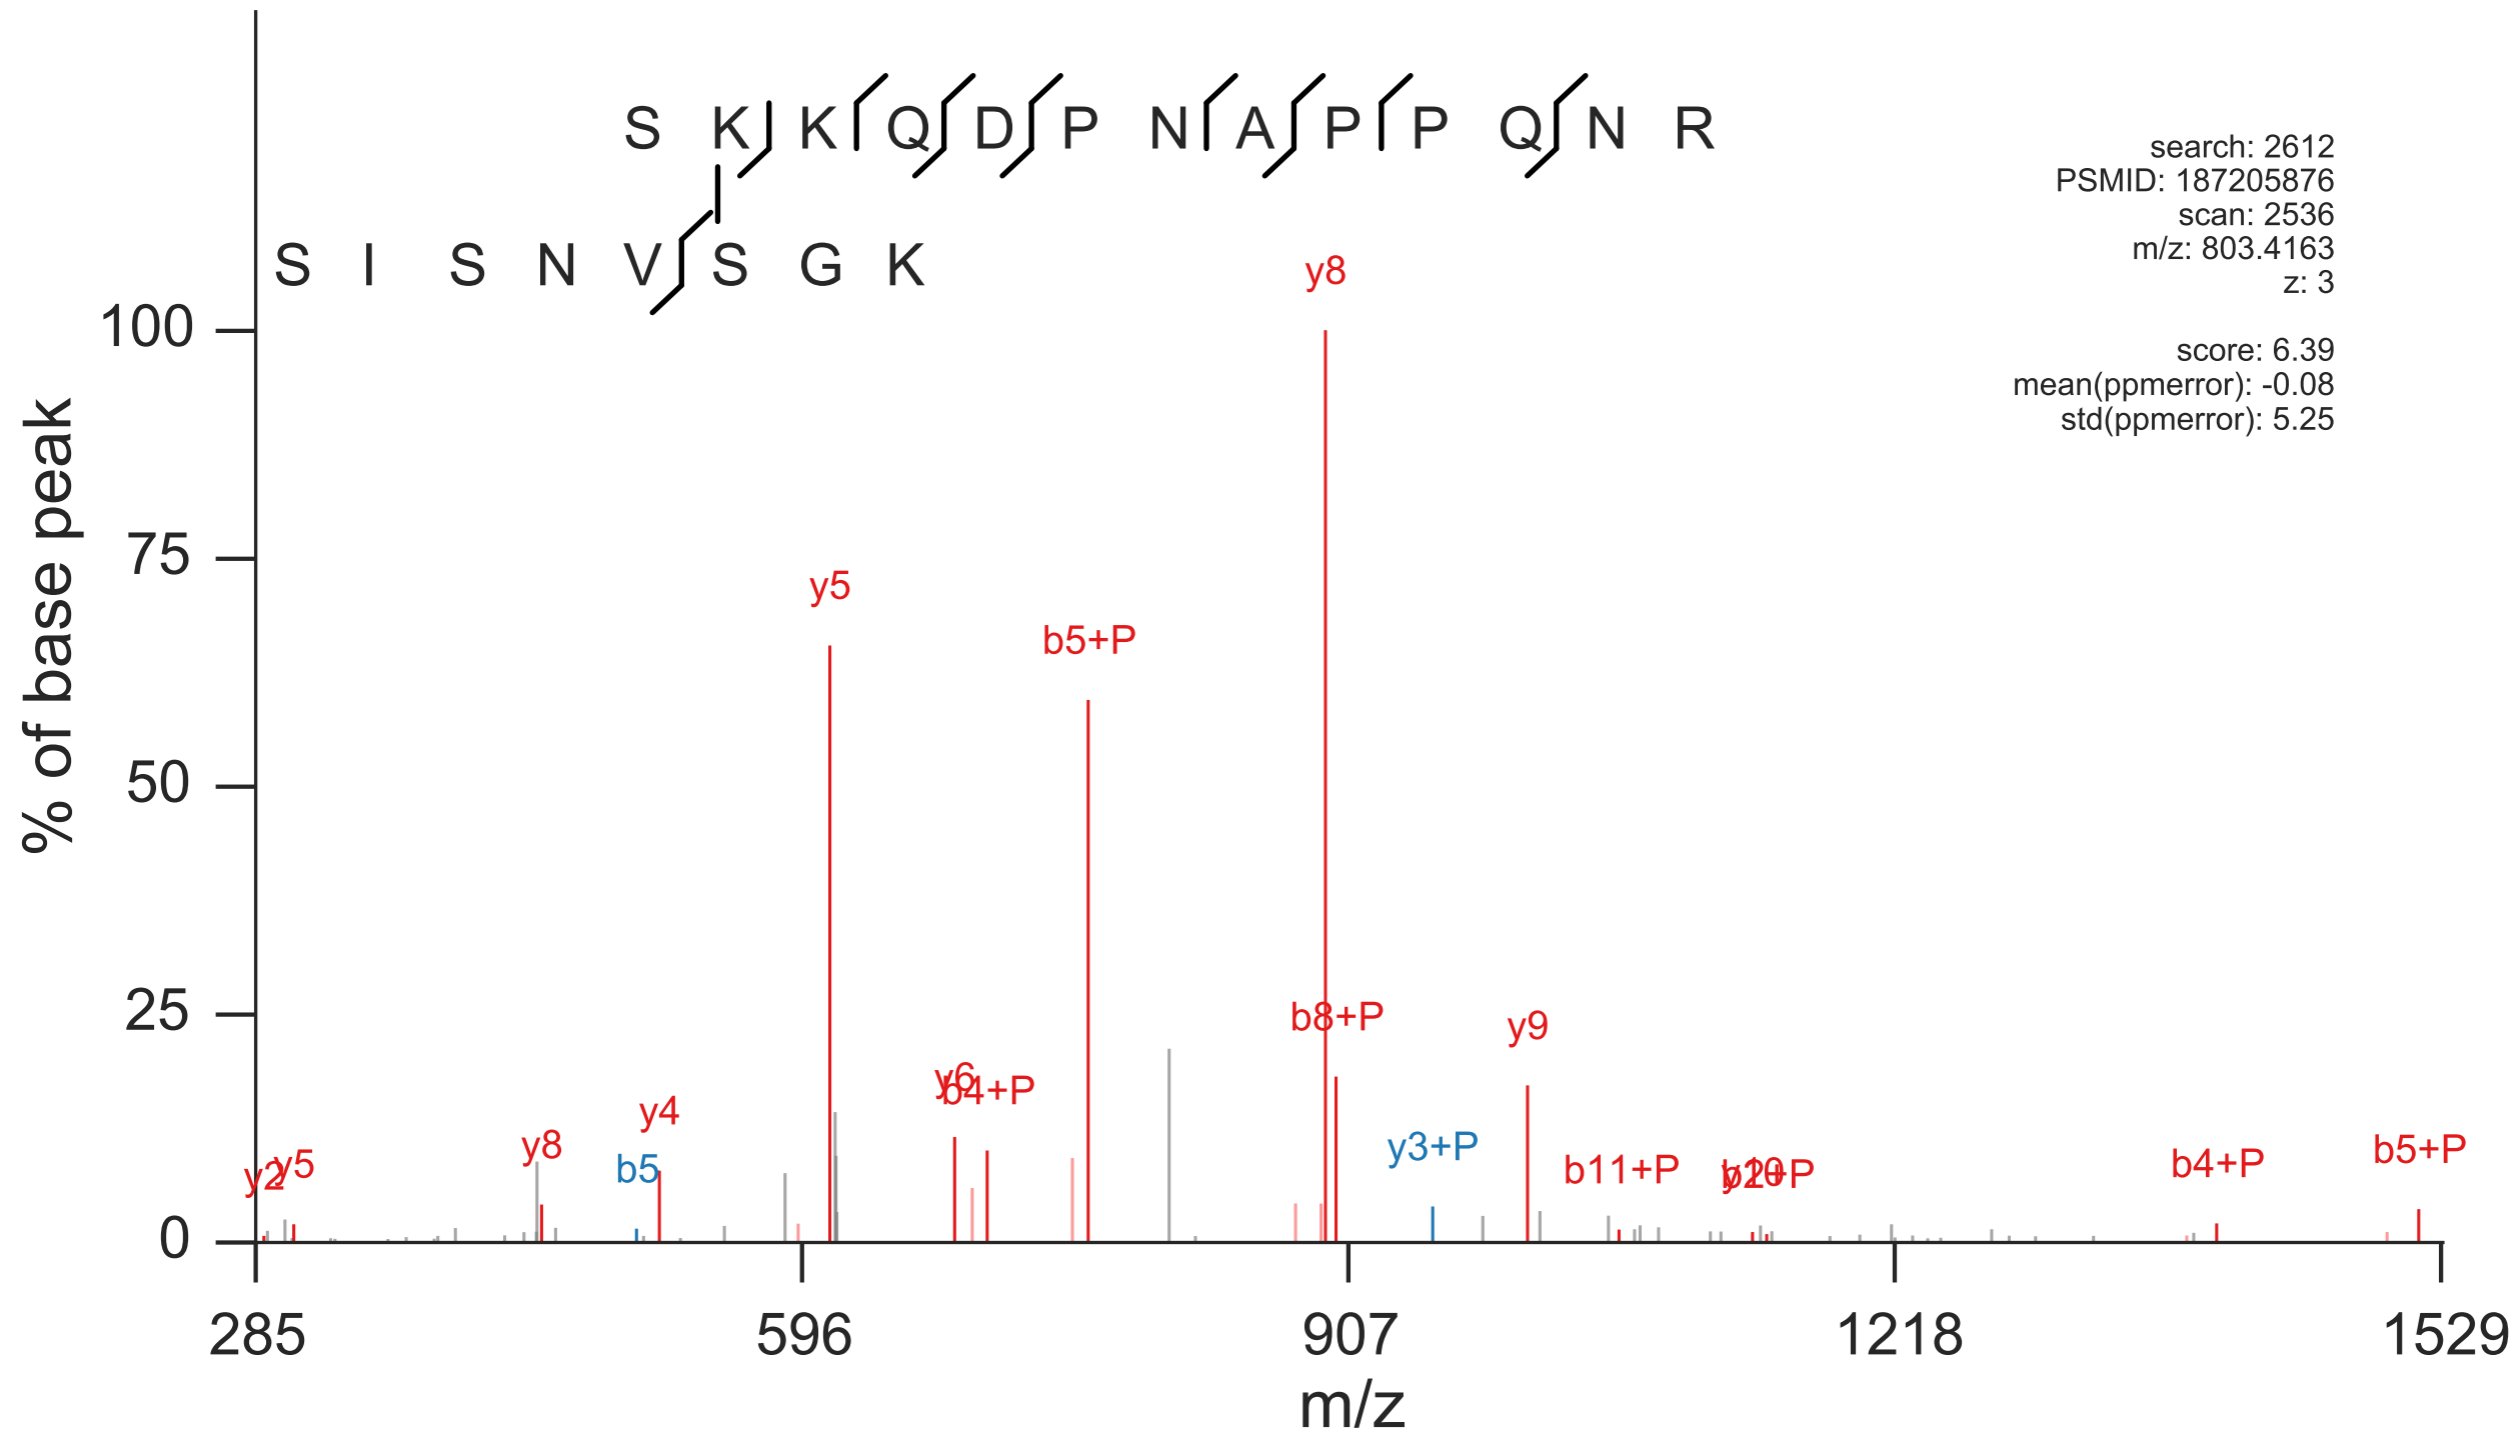

S G S K Q S T N P A D N Y H L A R  
 G E S G K T A S P K

search: 2612  
 PSMID: 187206187  
 scan: 4731  
 m/z: 775.6333  
 z: 4

score: 11.07  
 mean(ppmerror): -0.88  
 std(ppmerror): 3.81

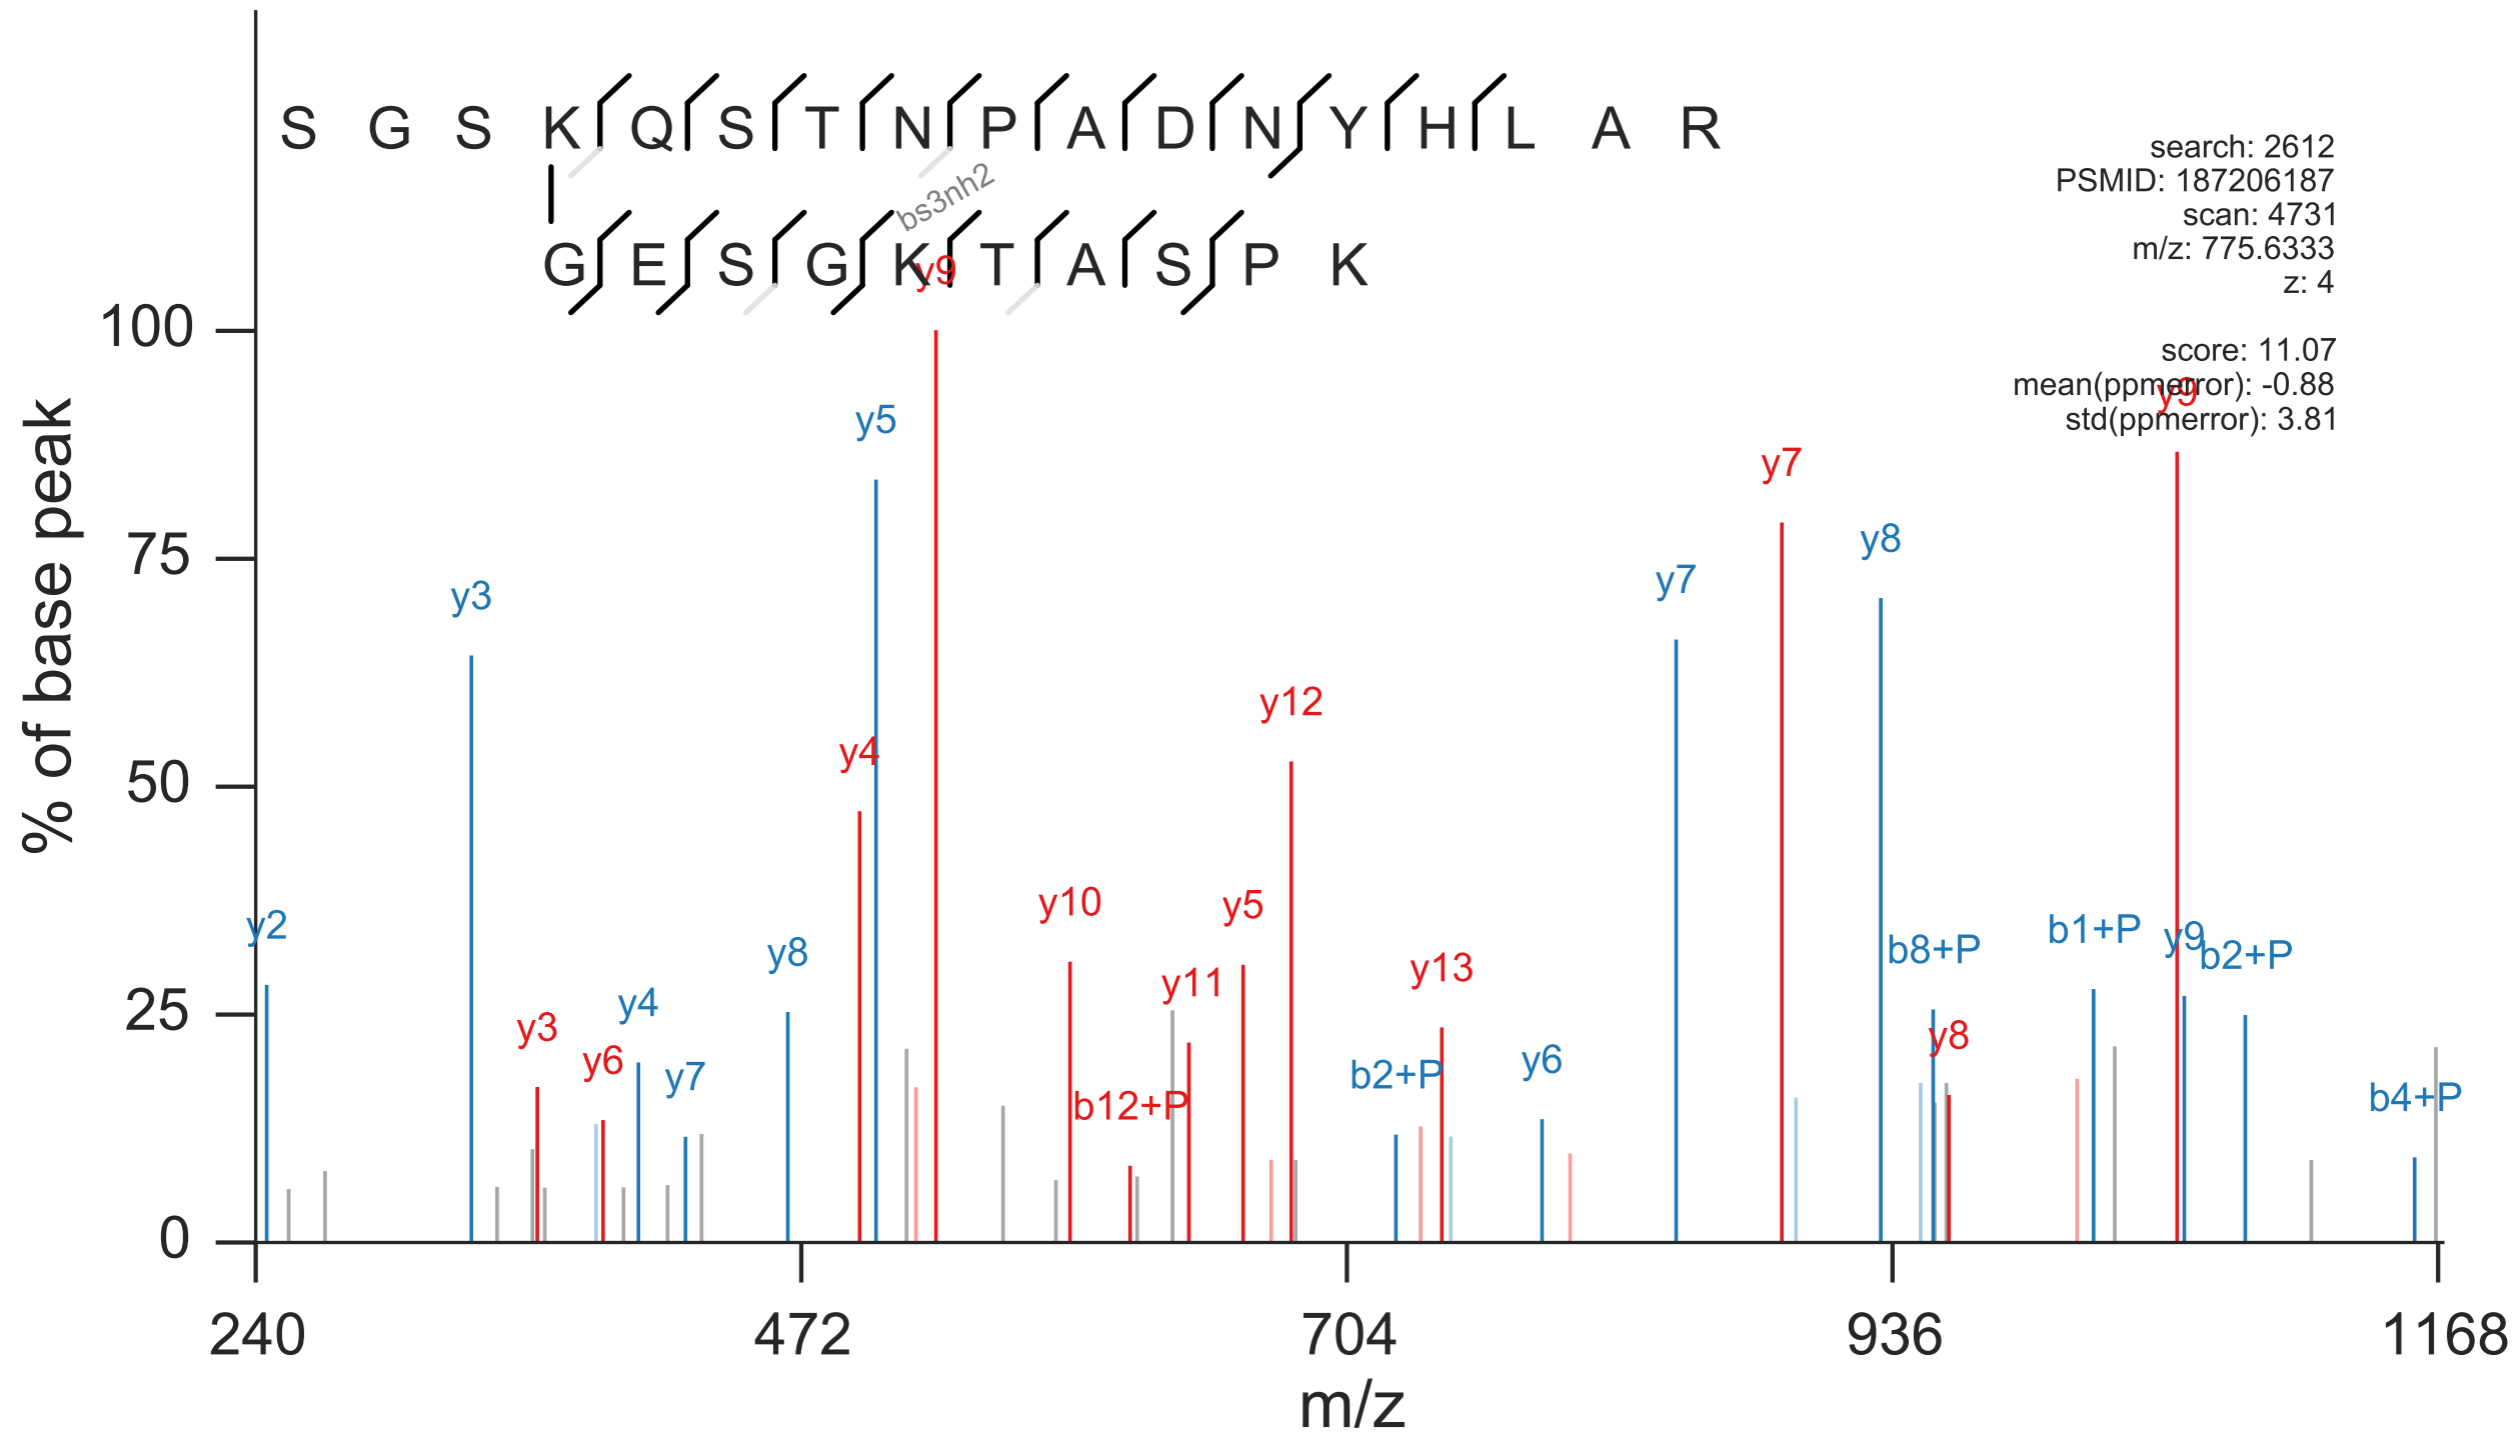

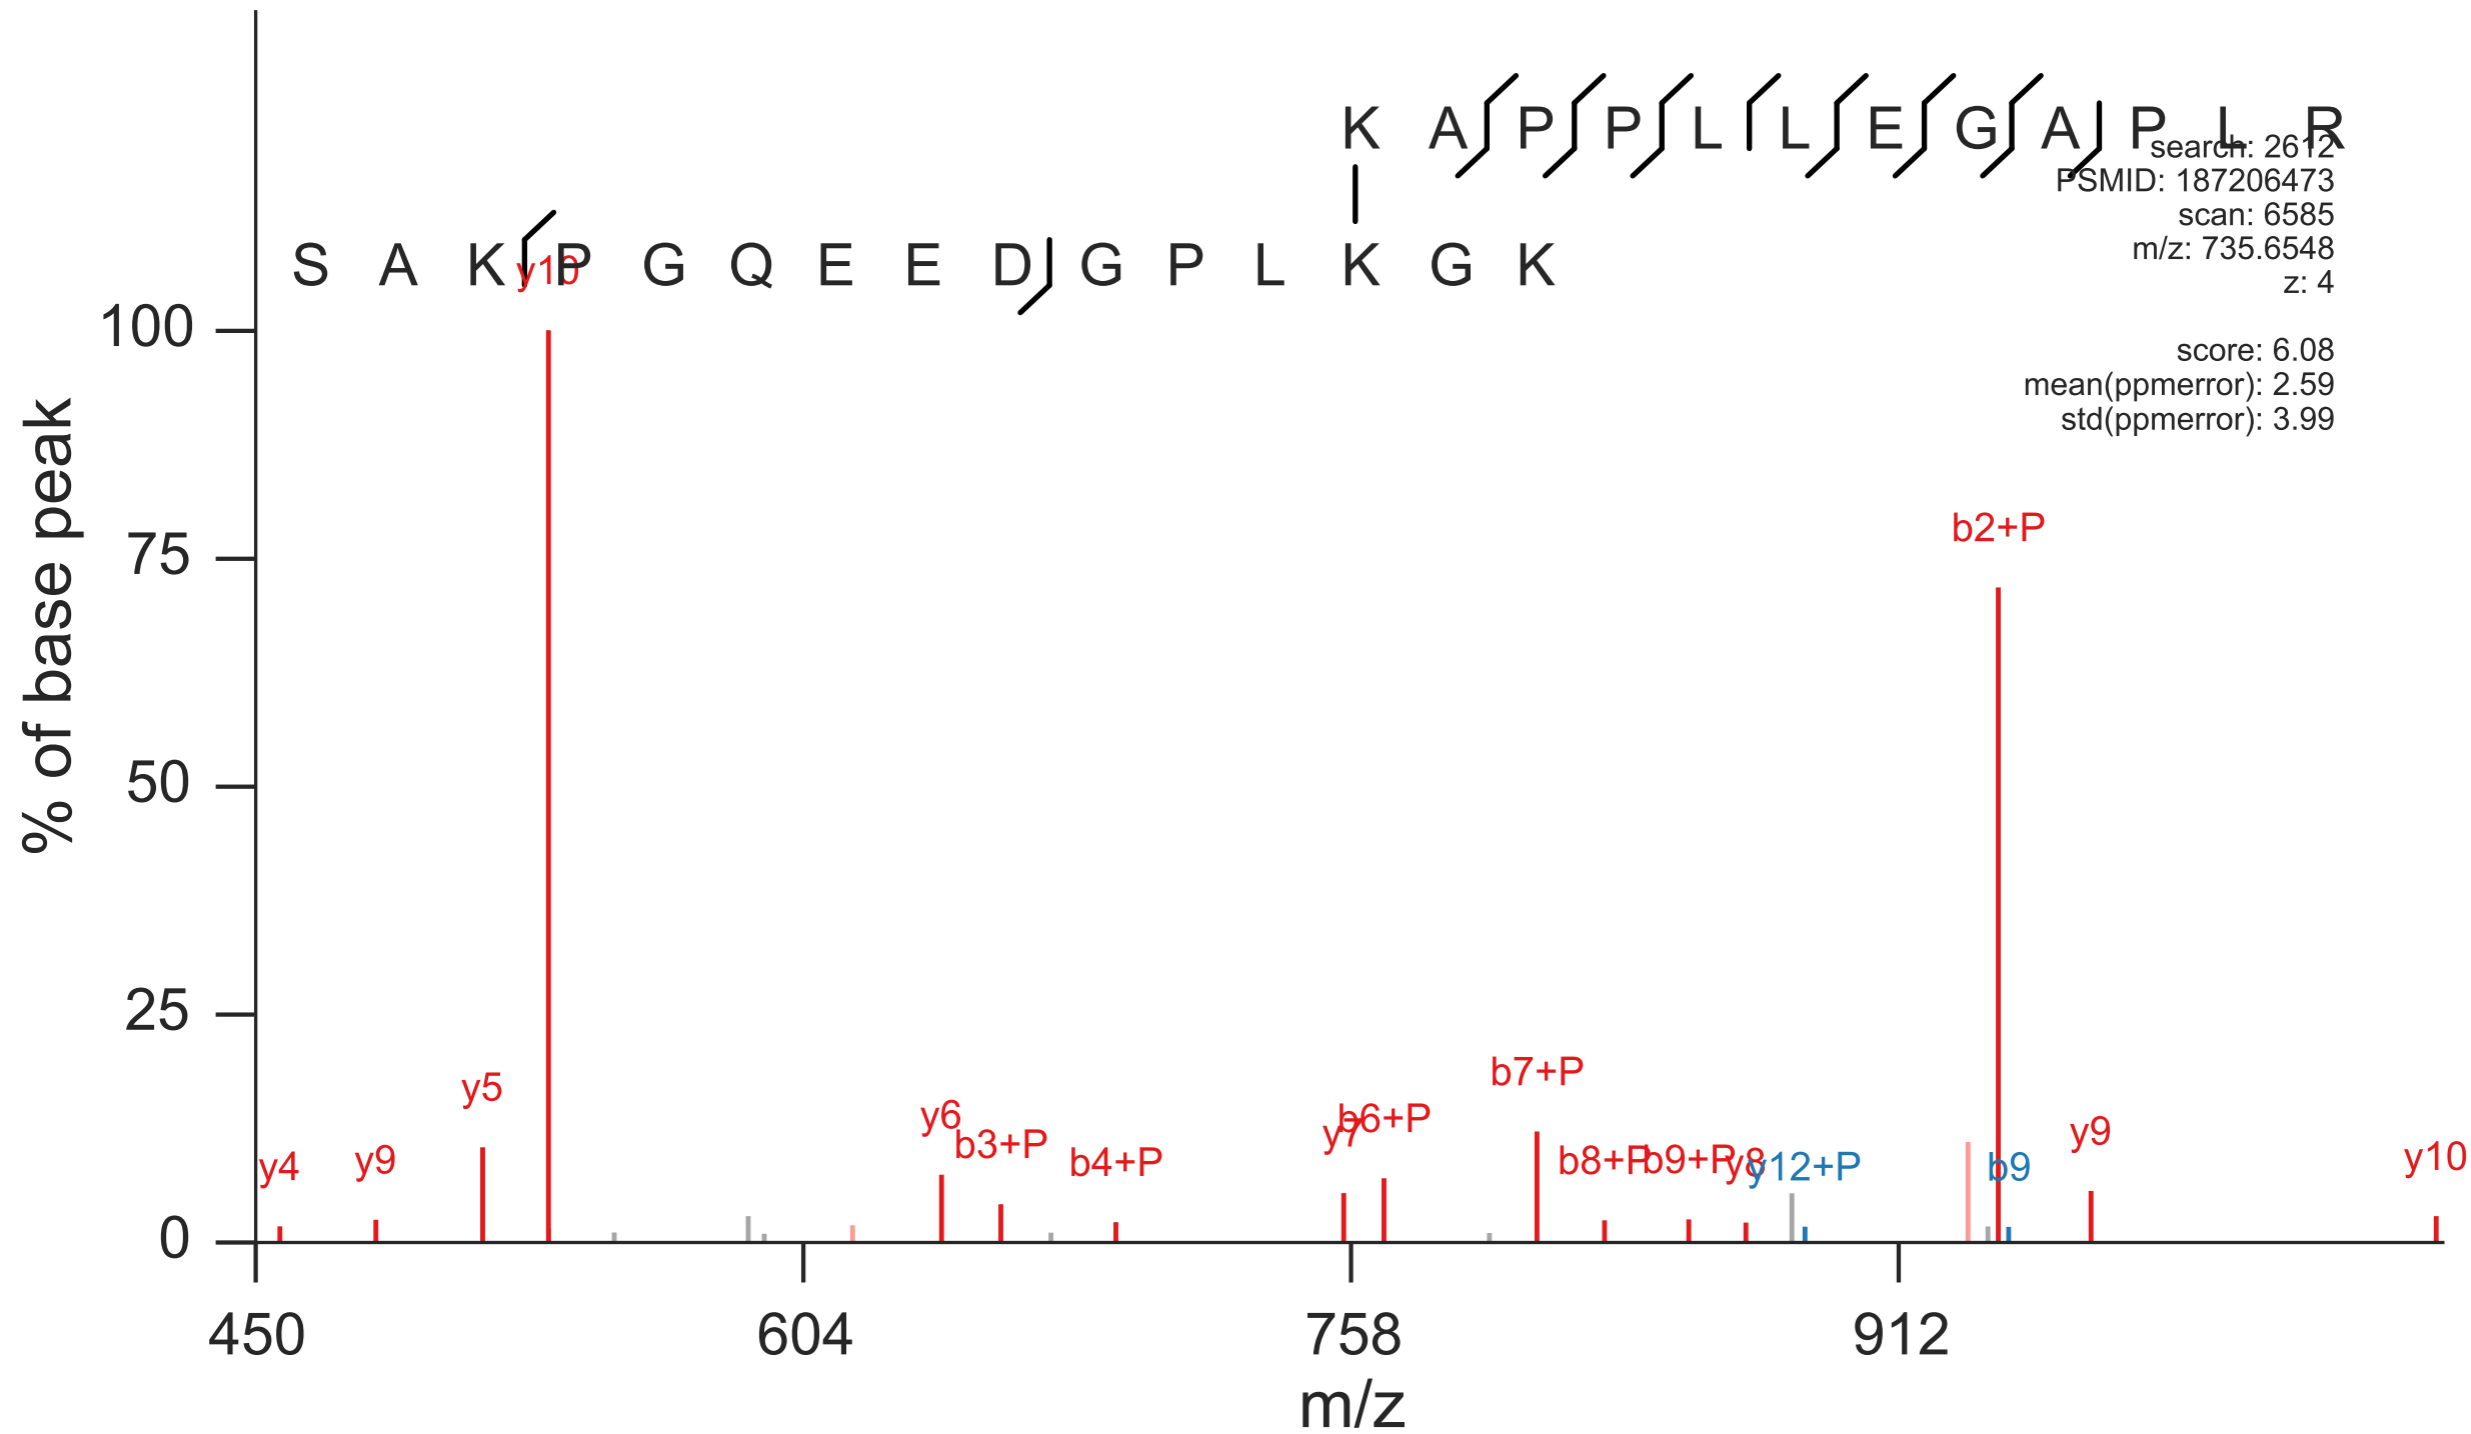

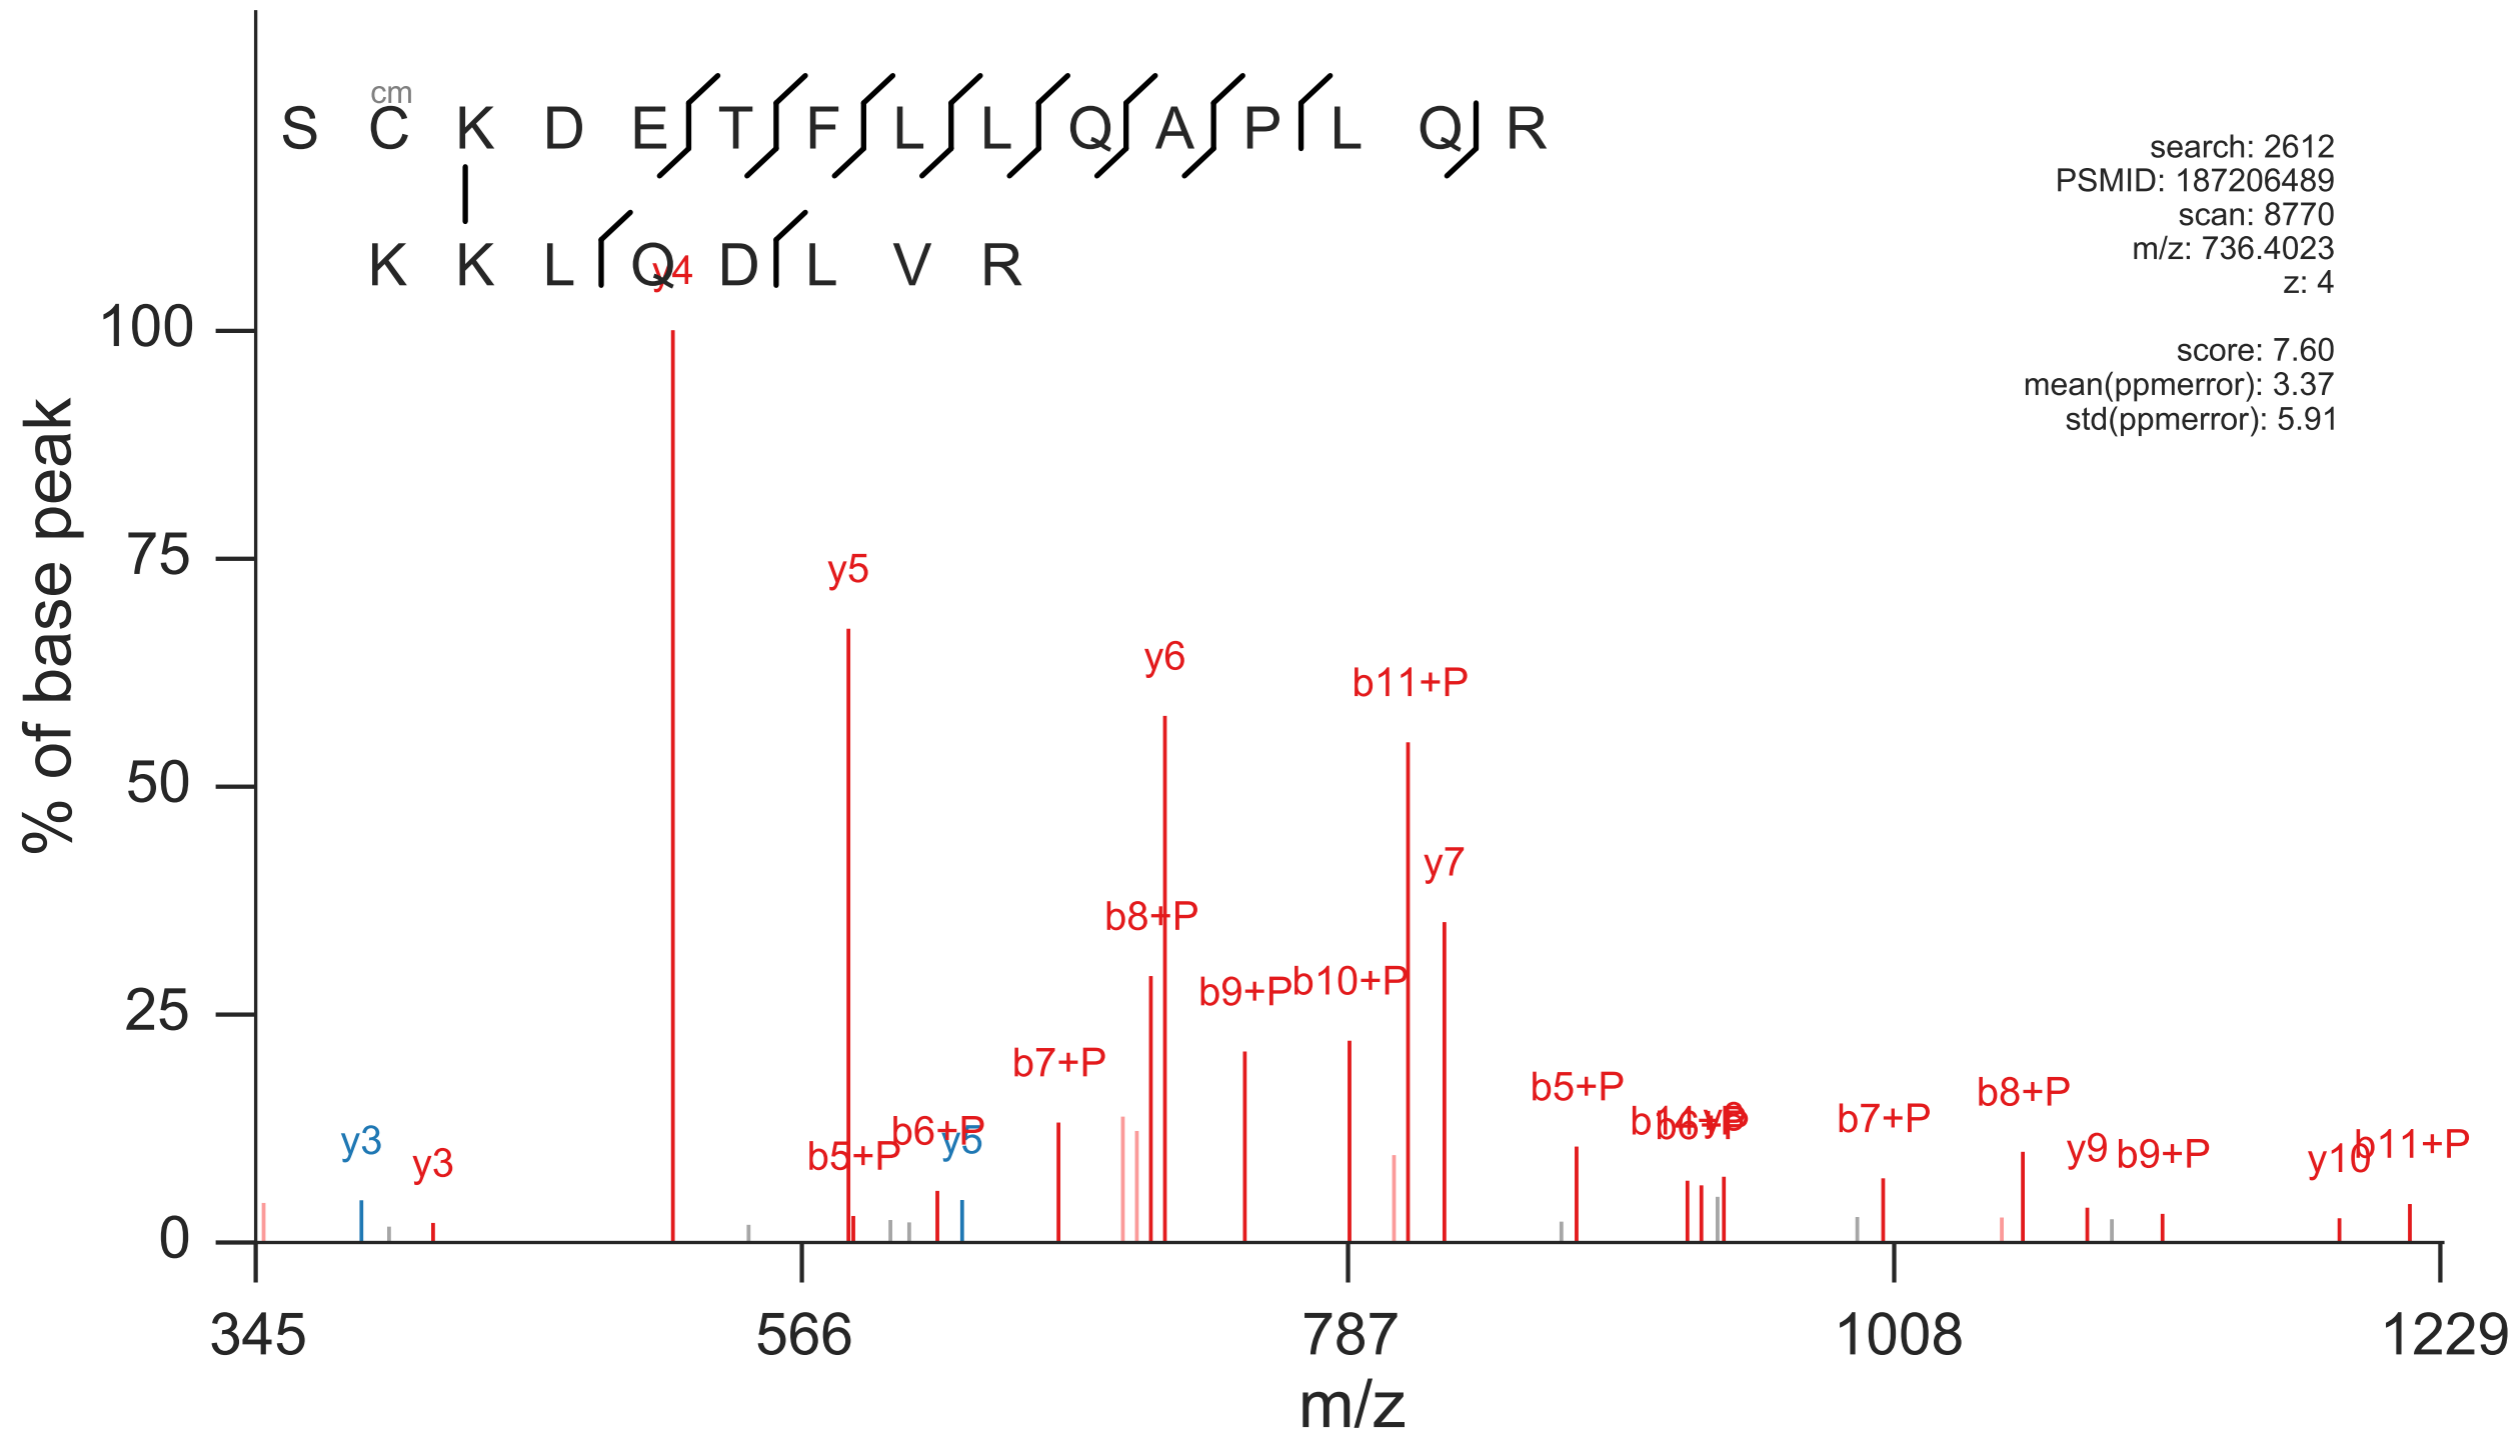

S C<sup>cm</sup> K D E T F L L Q A P L Q R  
 K K L Q D L V R

search: 2612  
 PSMID: 187206489  
 scan: 8770  
 m/z: 736.4023  
 z: 4  
 score: 7.60  
 mean(ppmerror): 3.37  
 std(ppmerror): 5.91

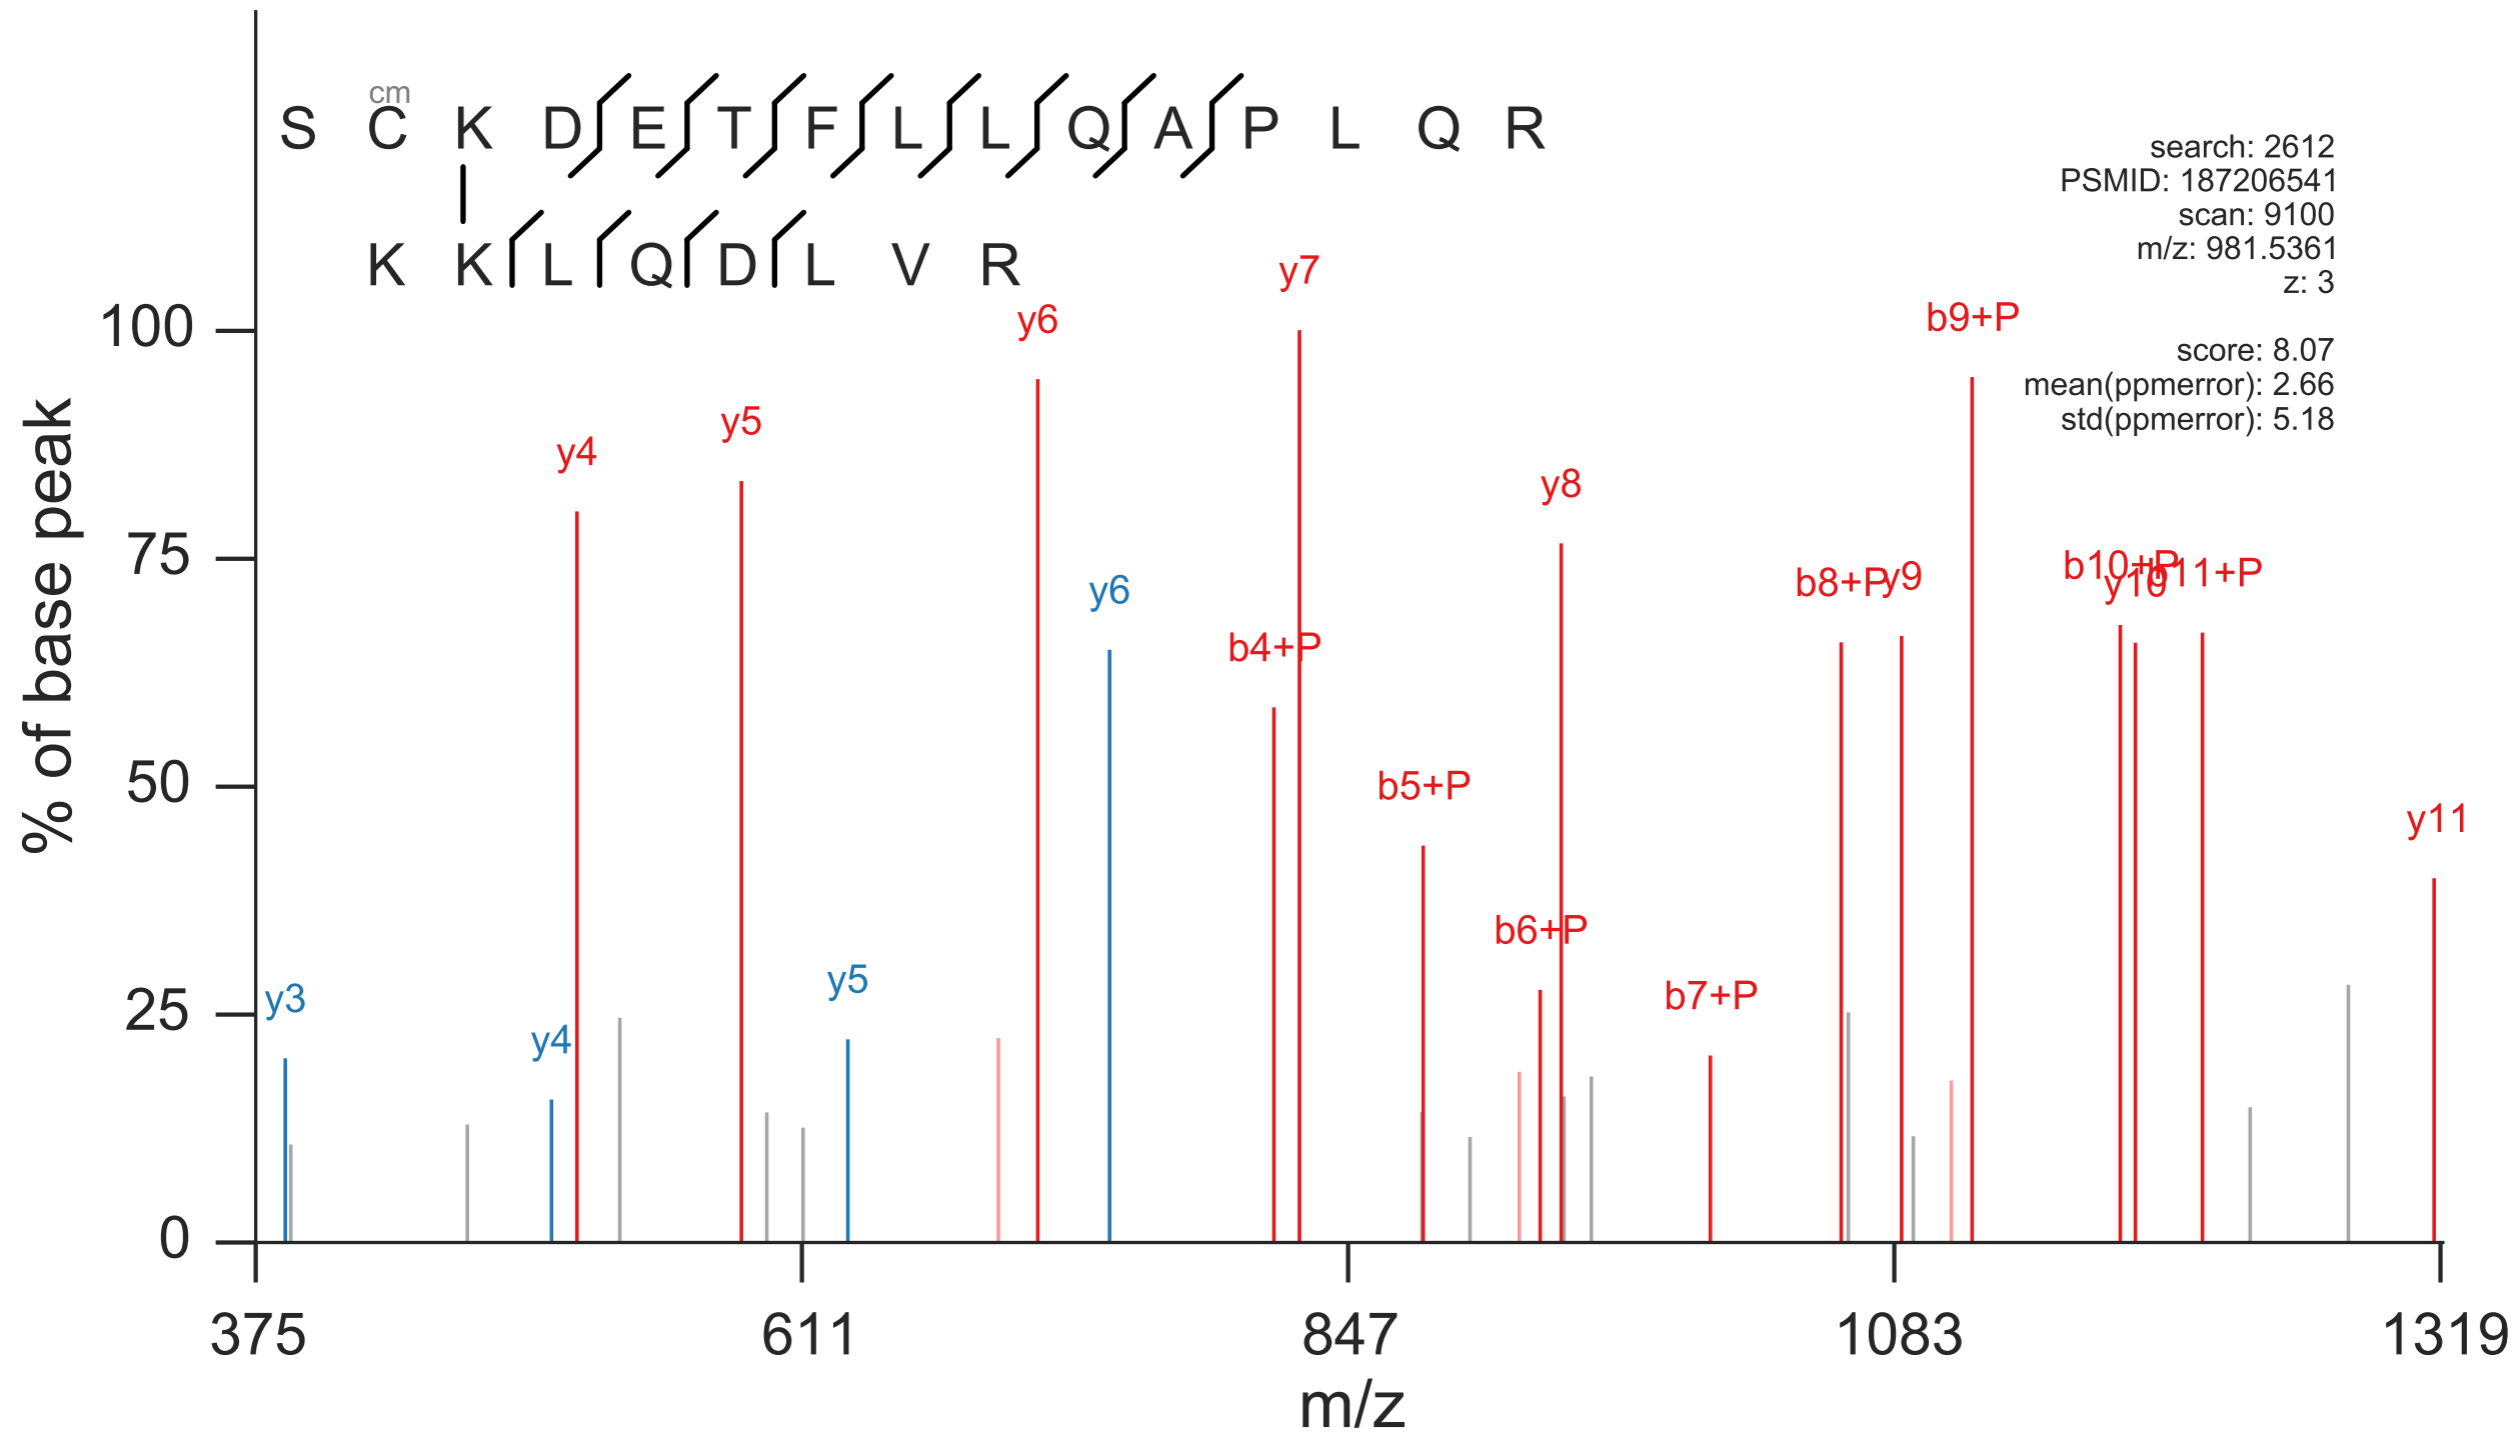

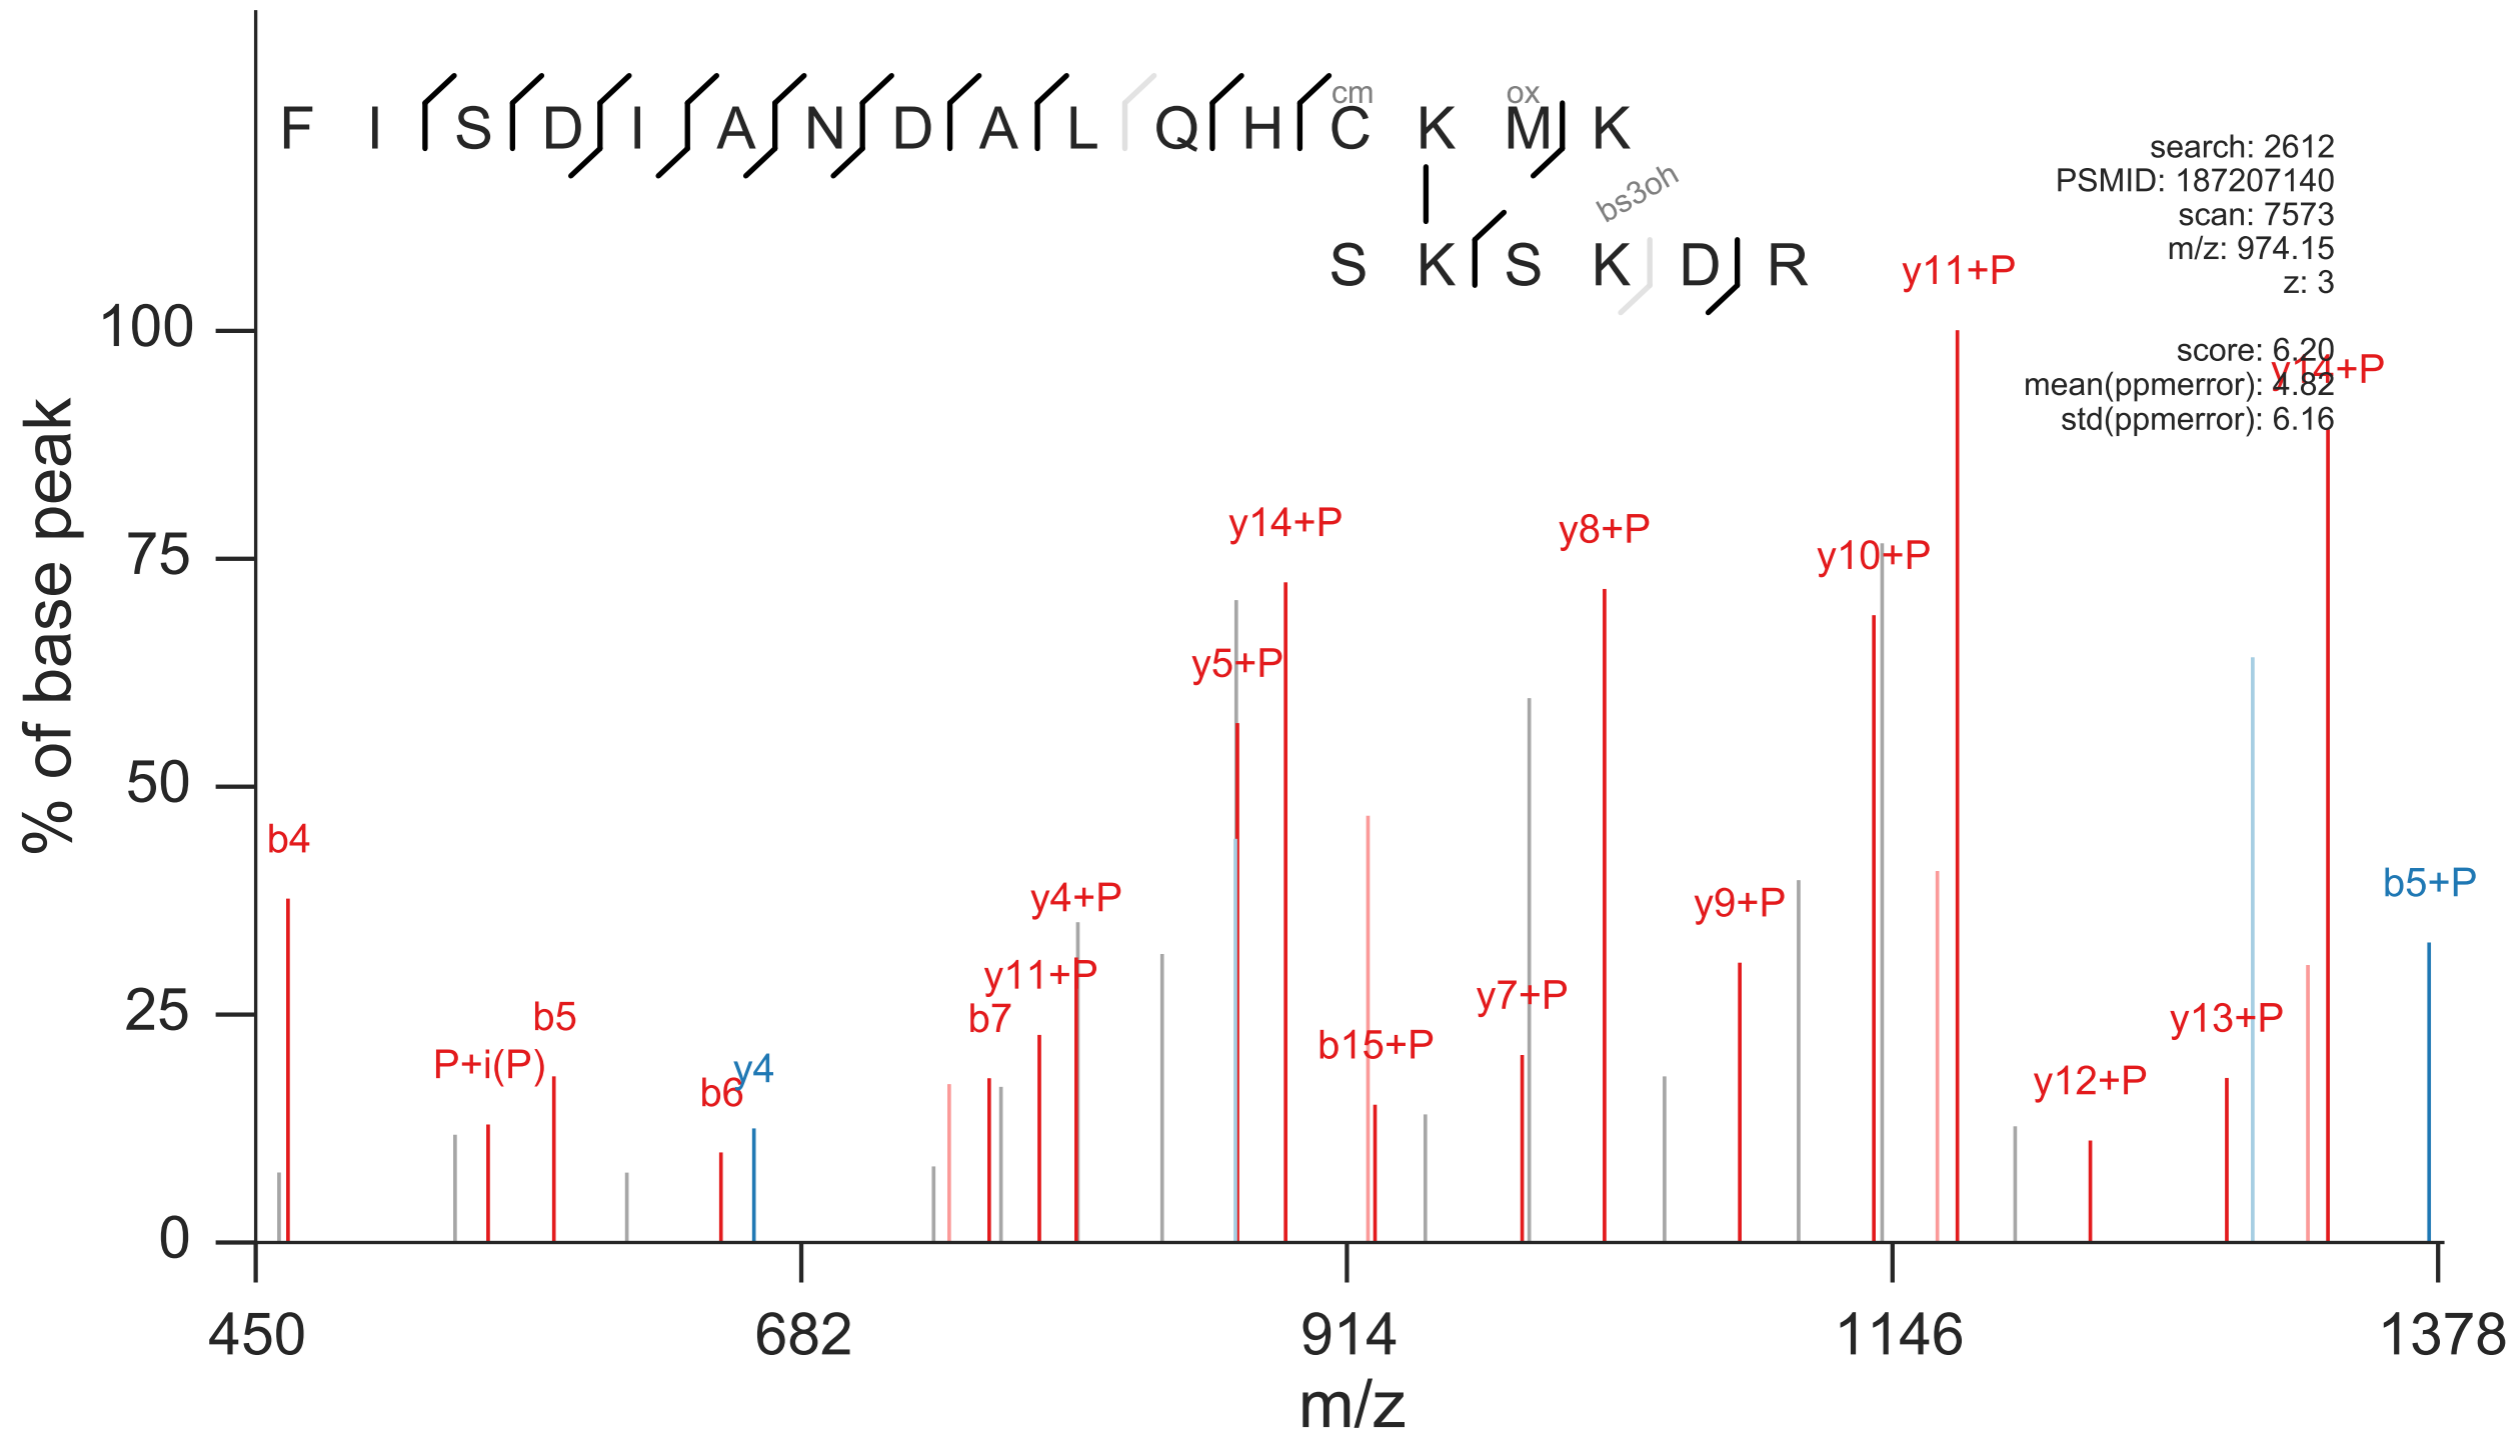

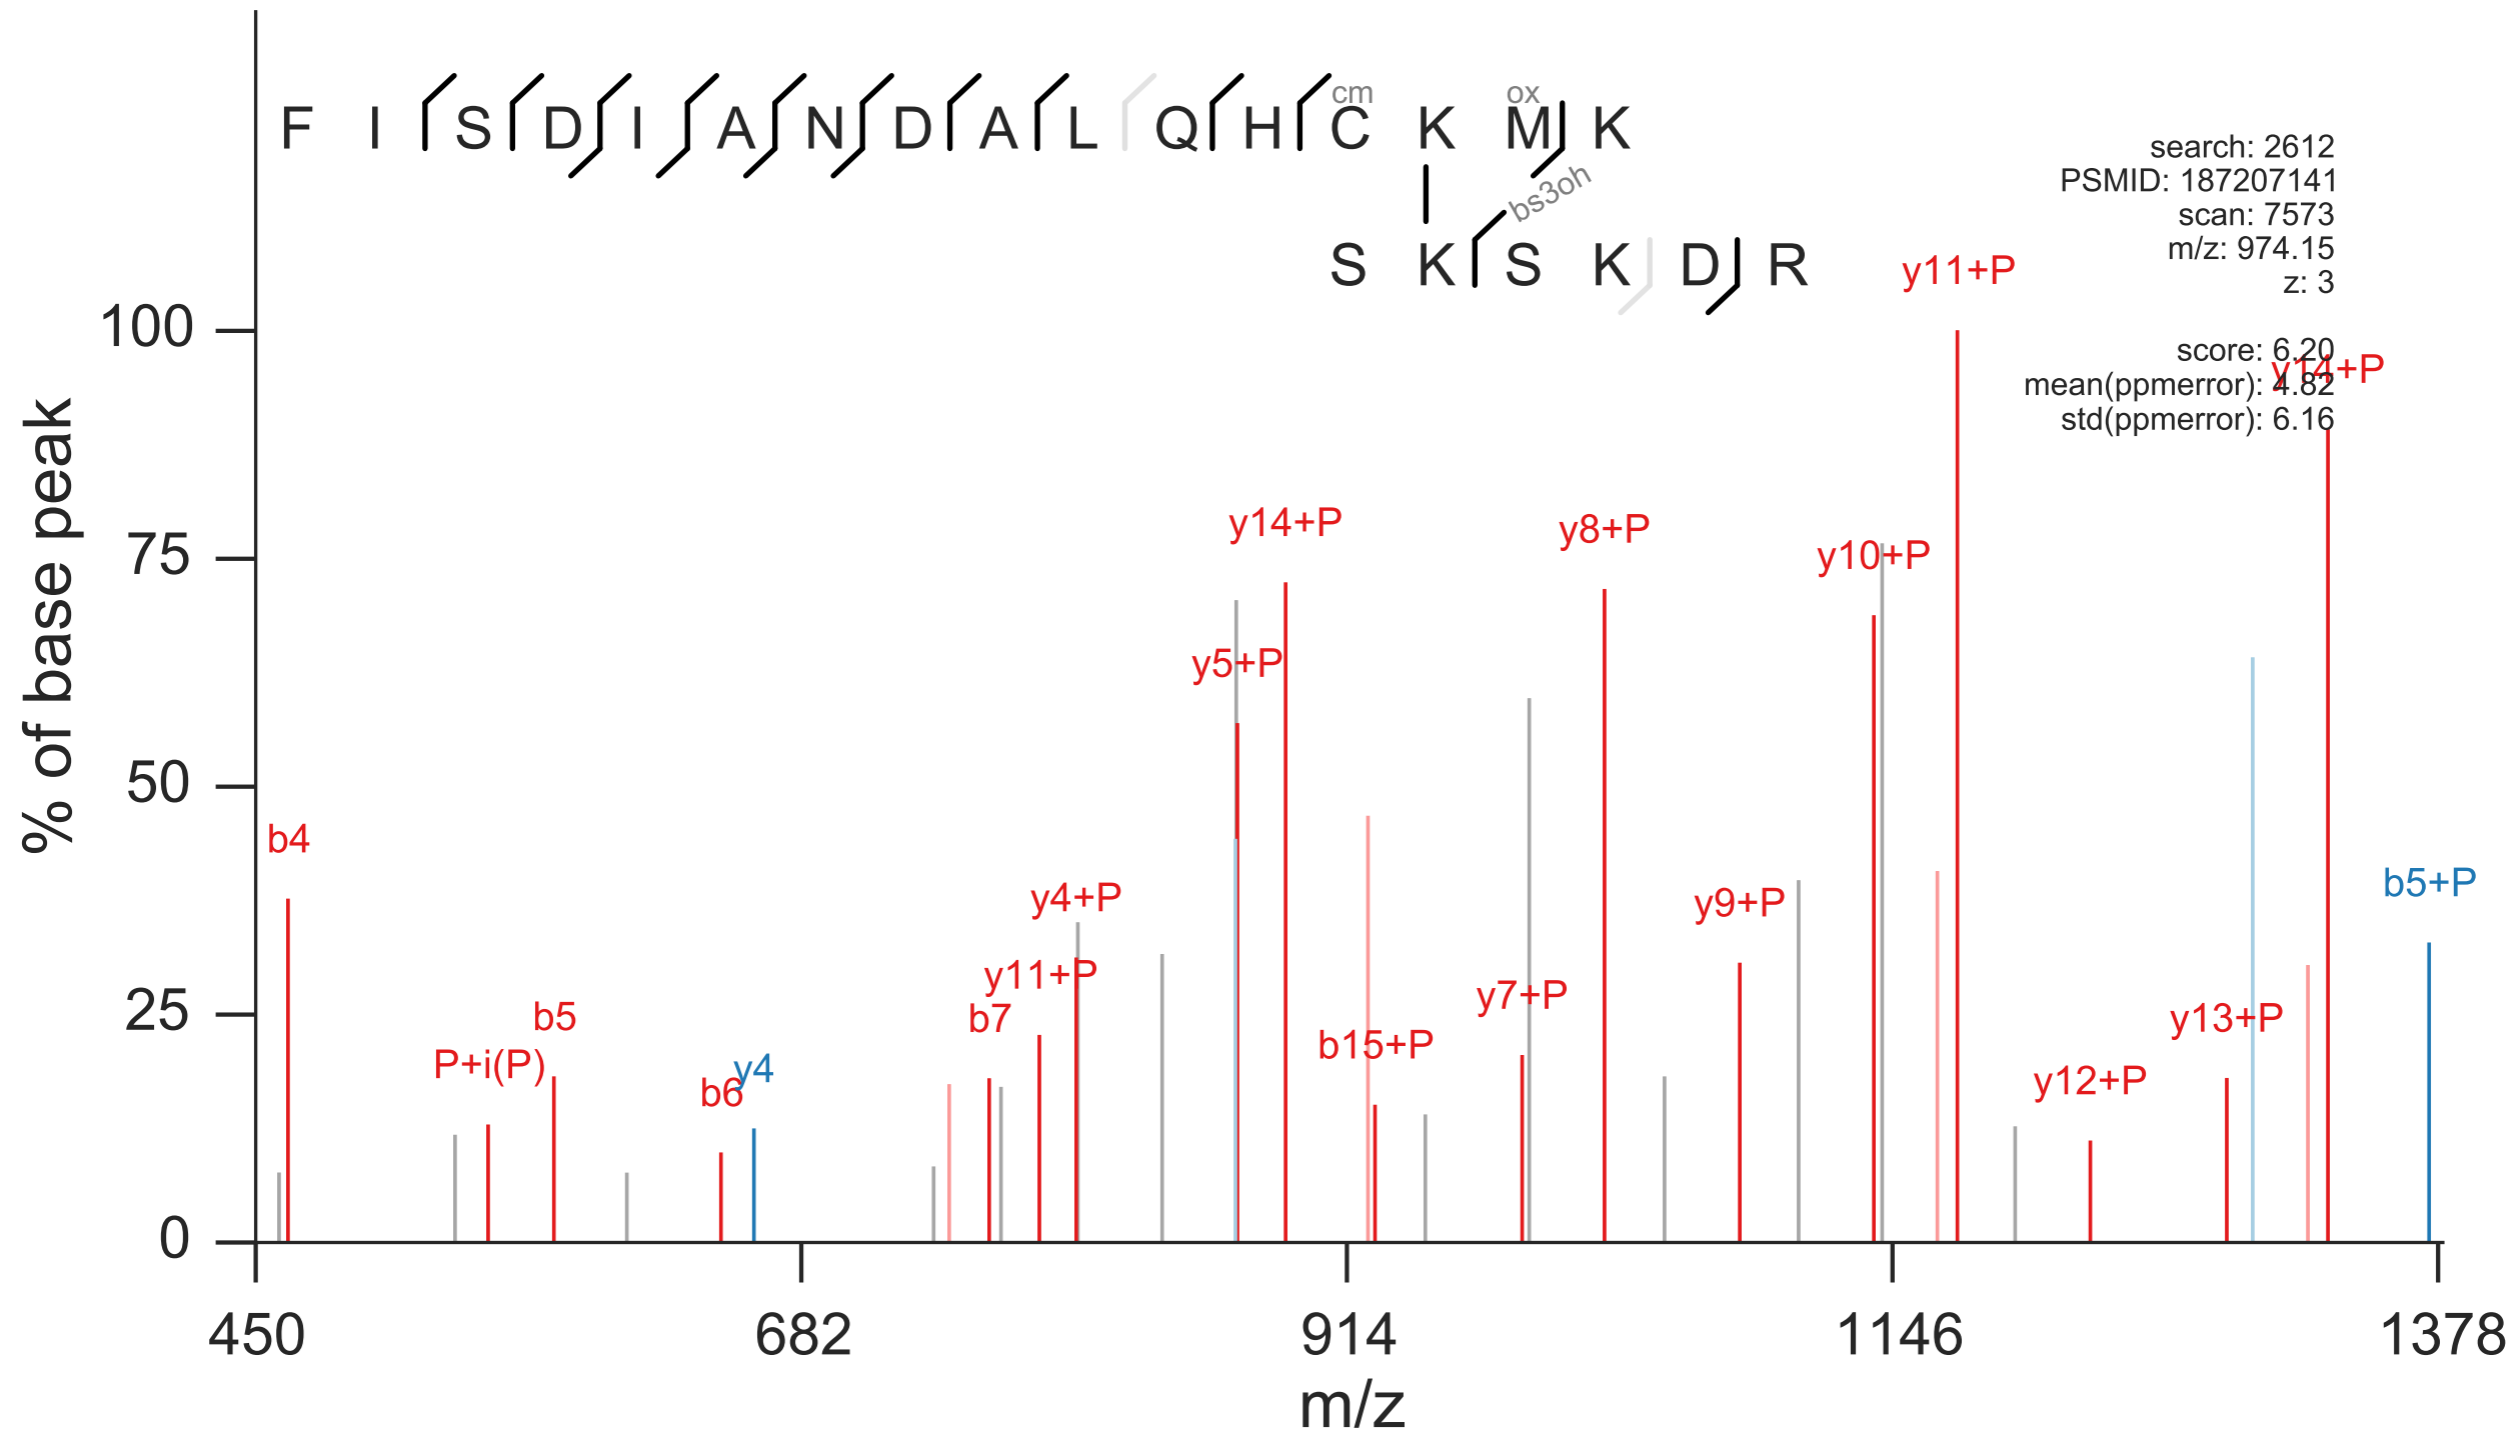



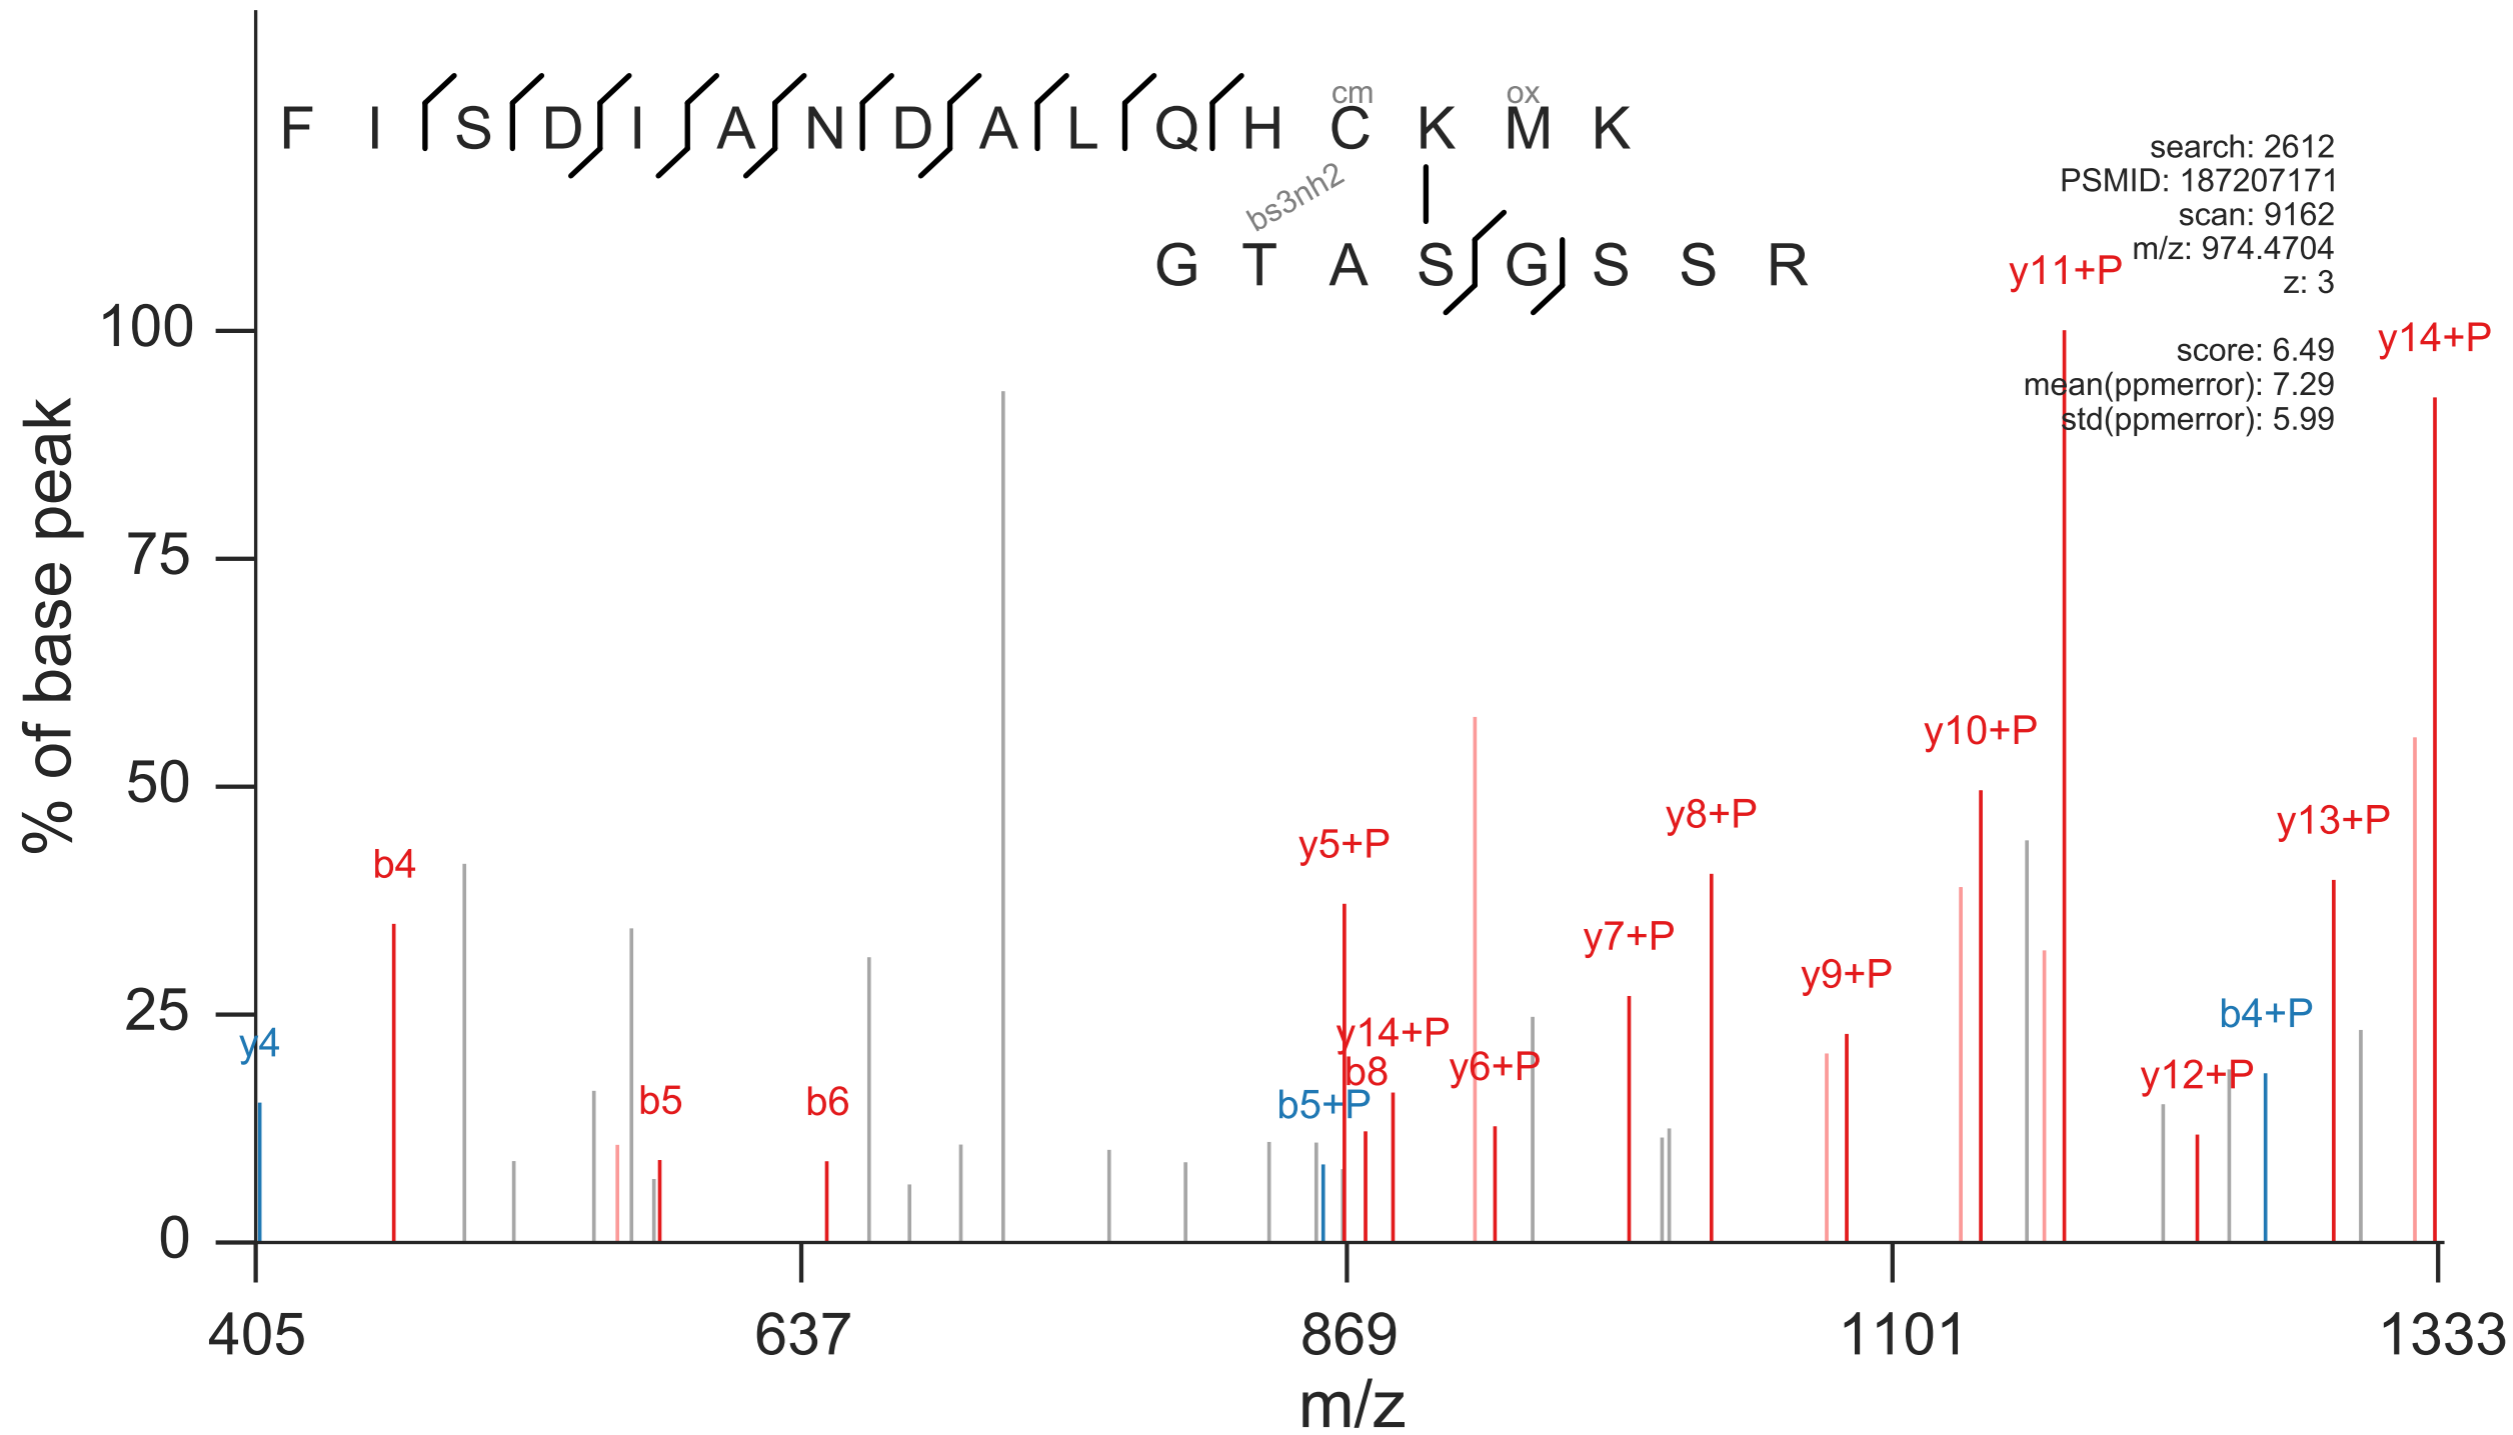

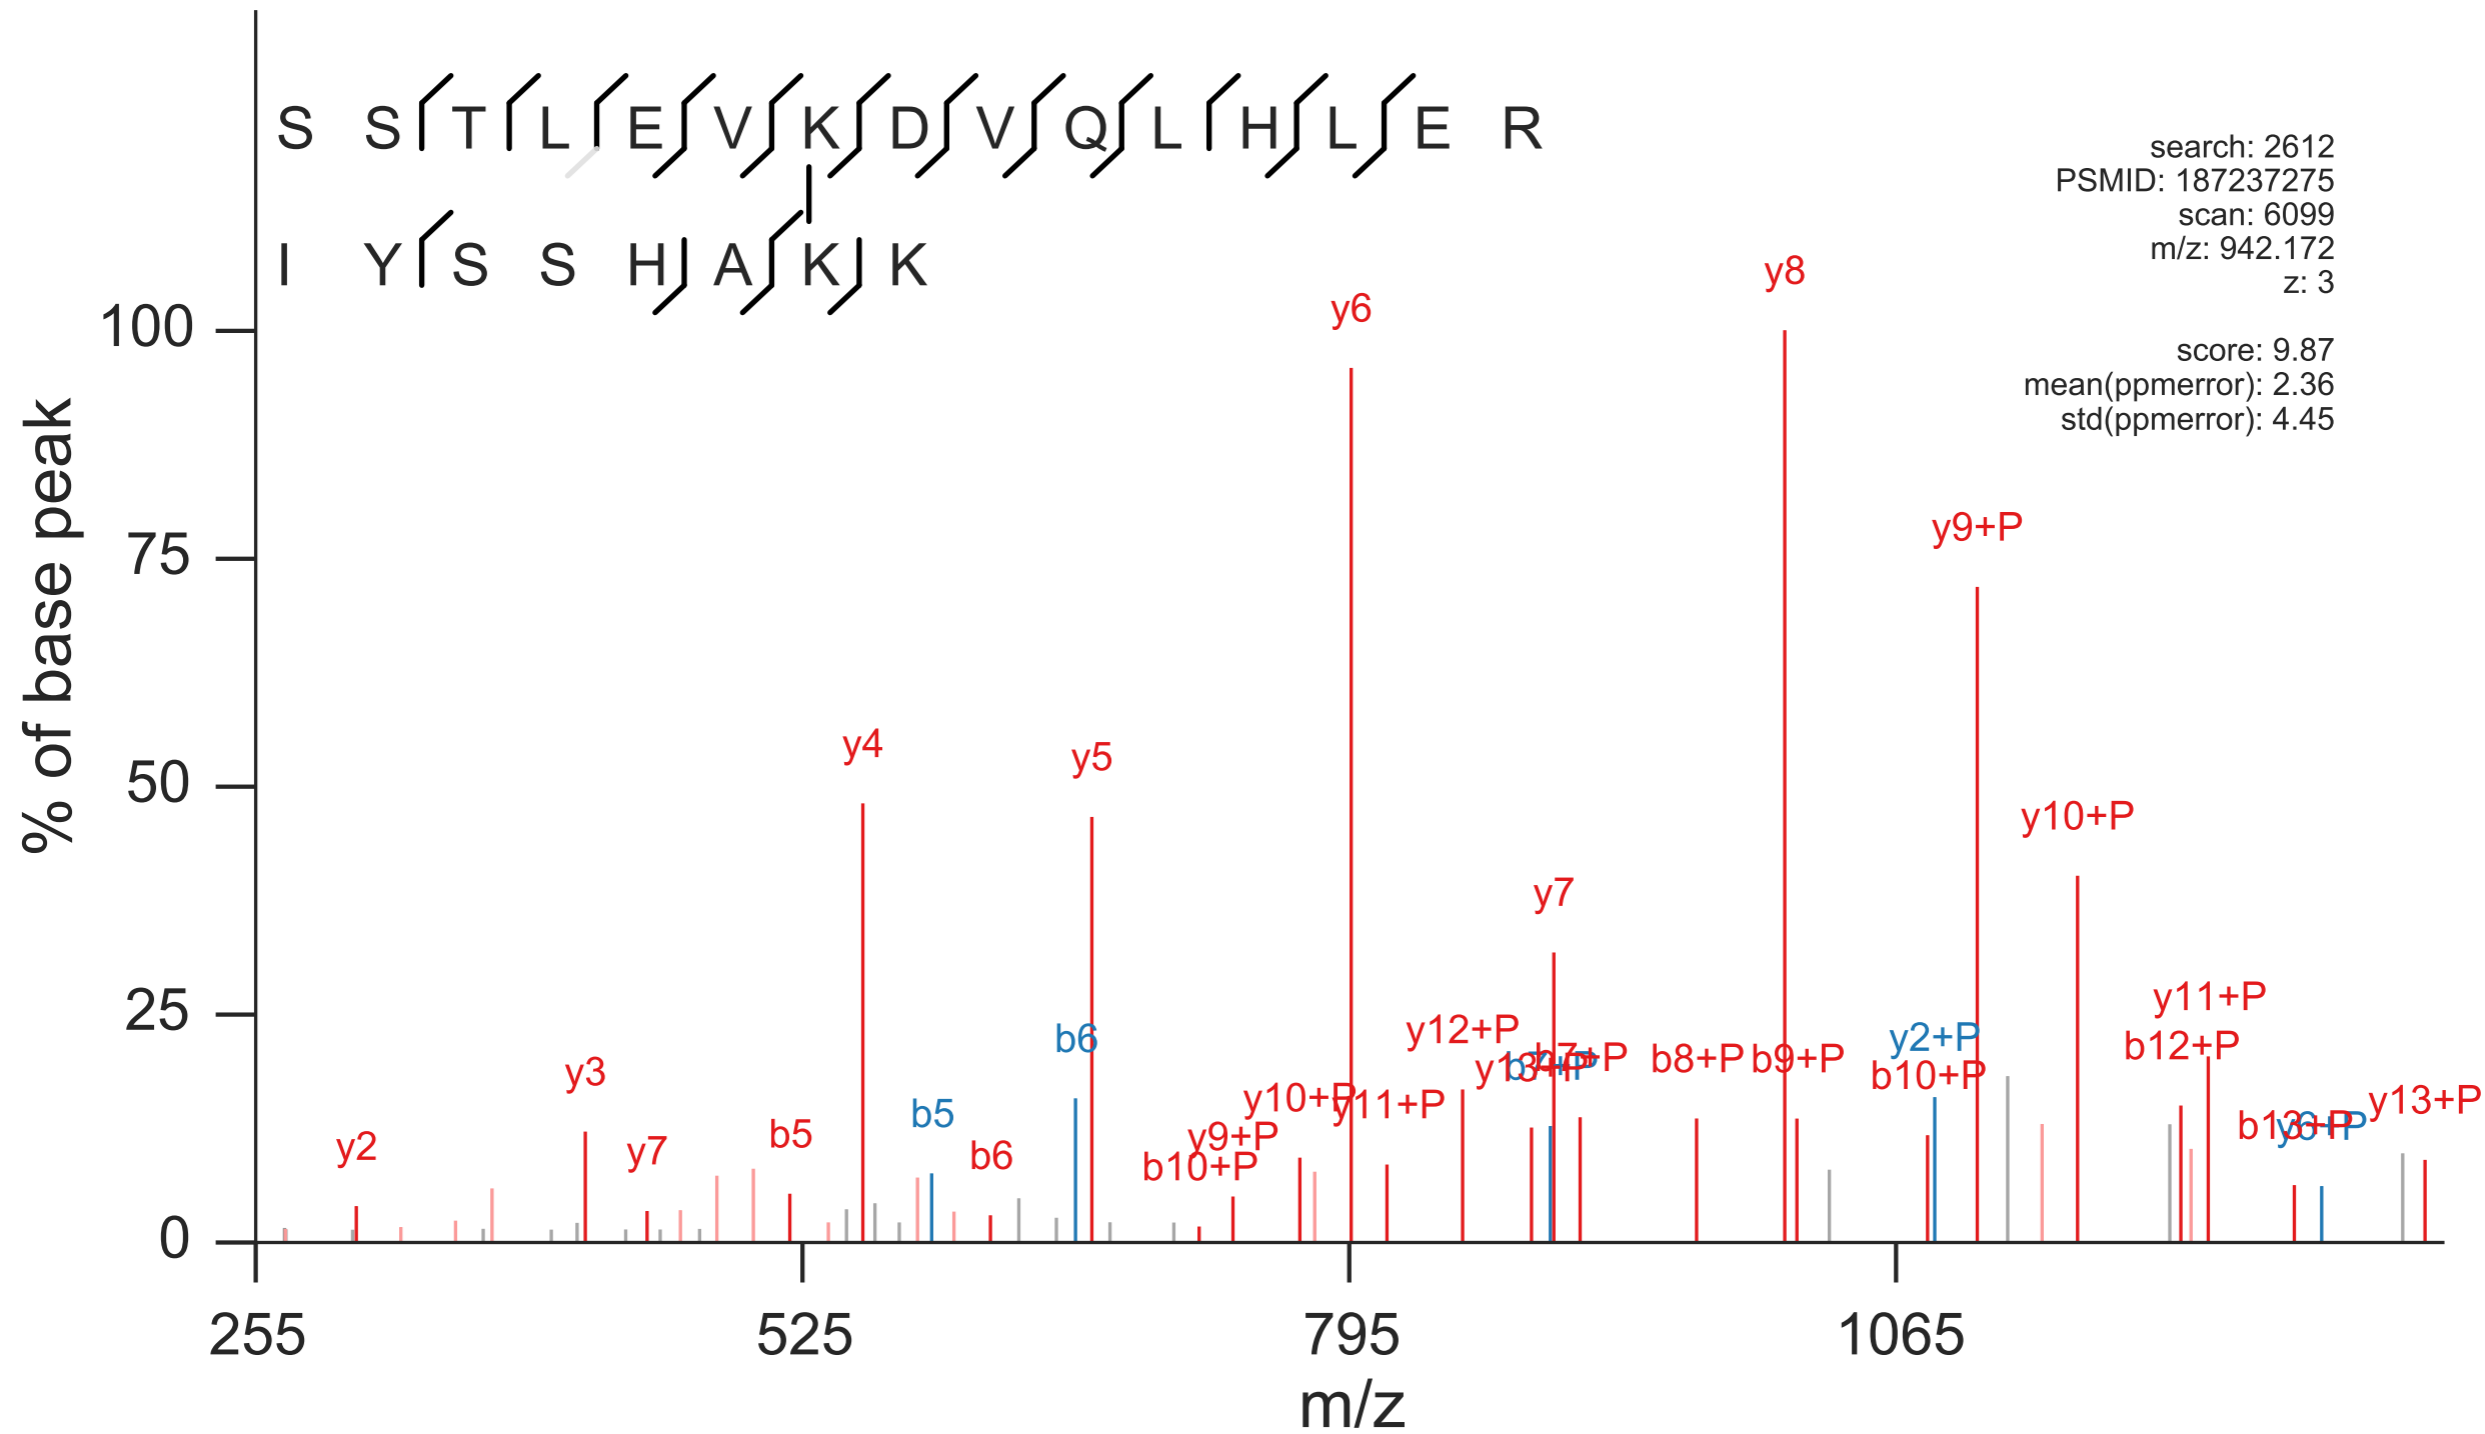

search: 2612  
 PSMID: 187237275  
 scan: 6099  
 m/z: 942.172  
 z: 3  
 score: 9.87  
 mean(ppmerror): 2.36  
 std(ppmerror): 4.45

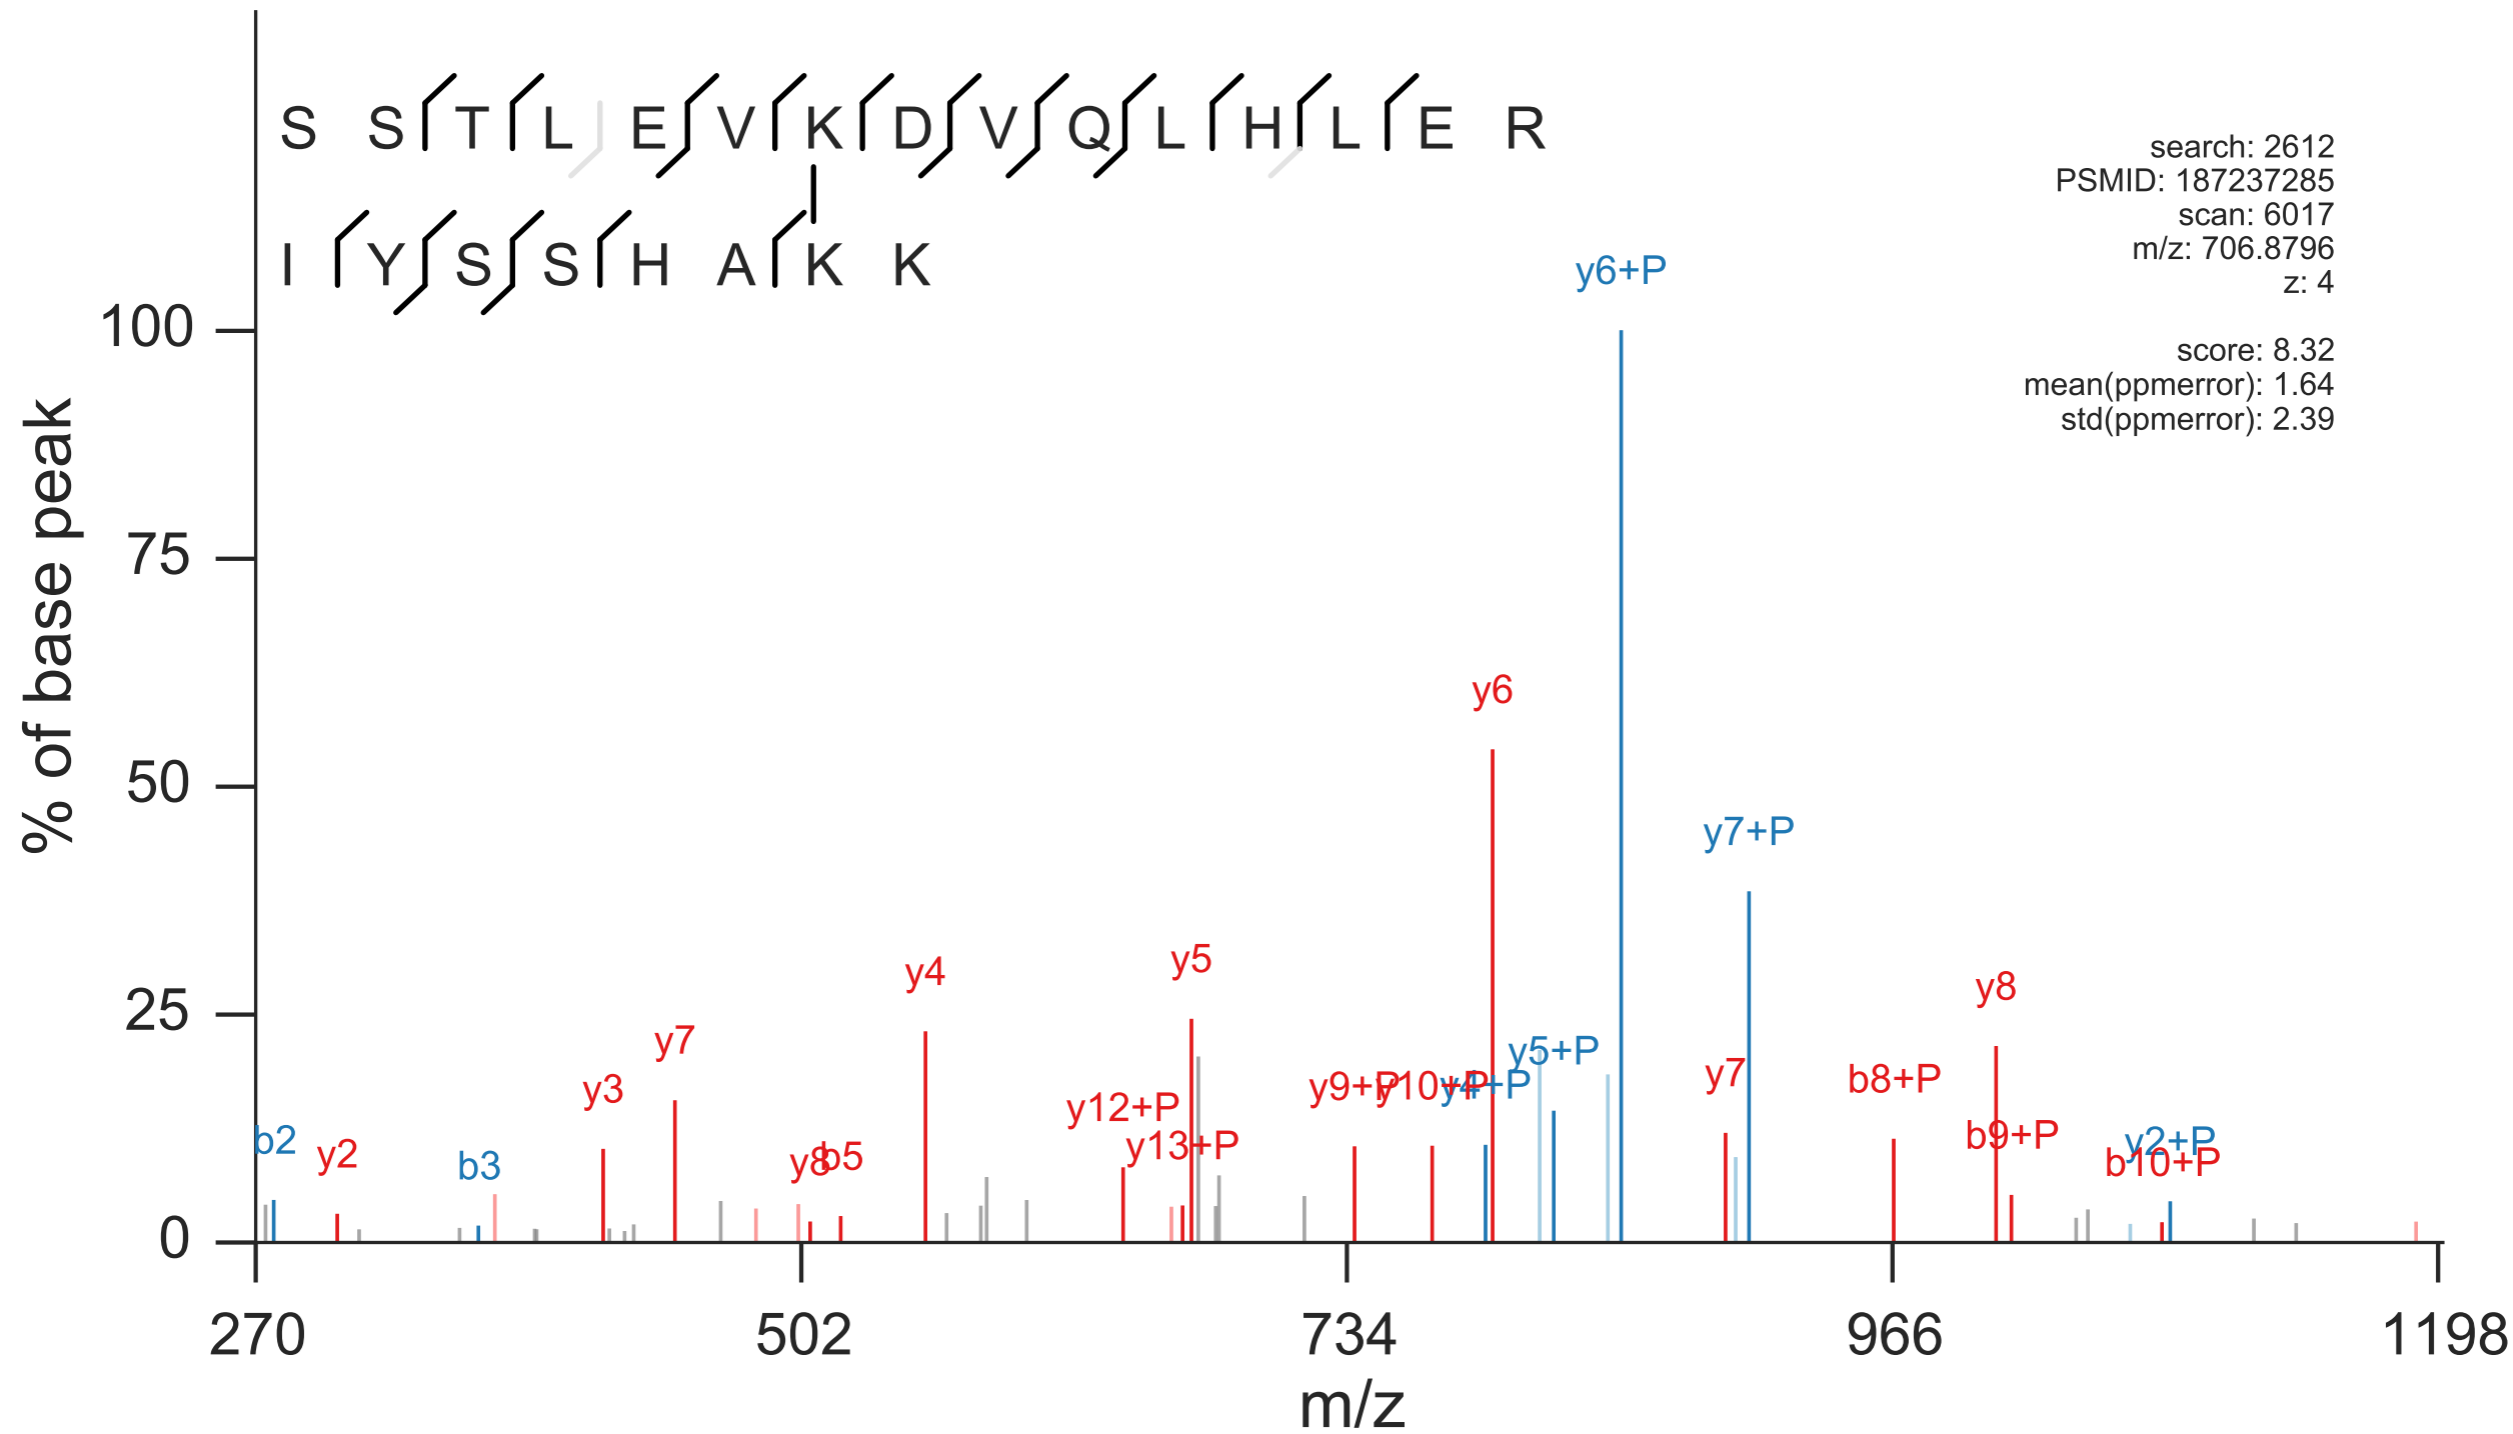

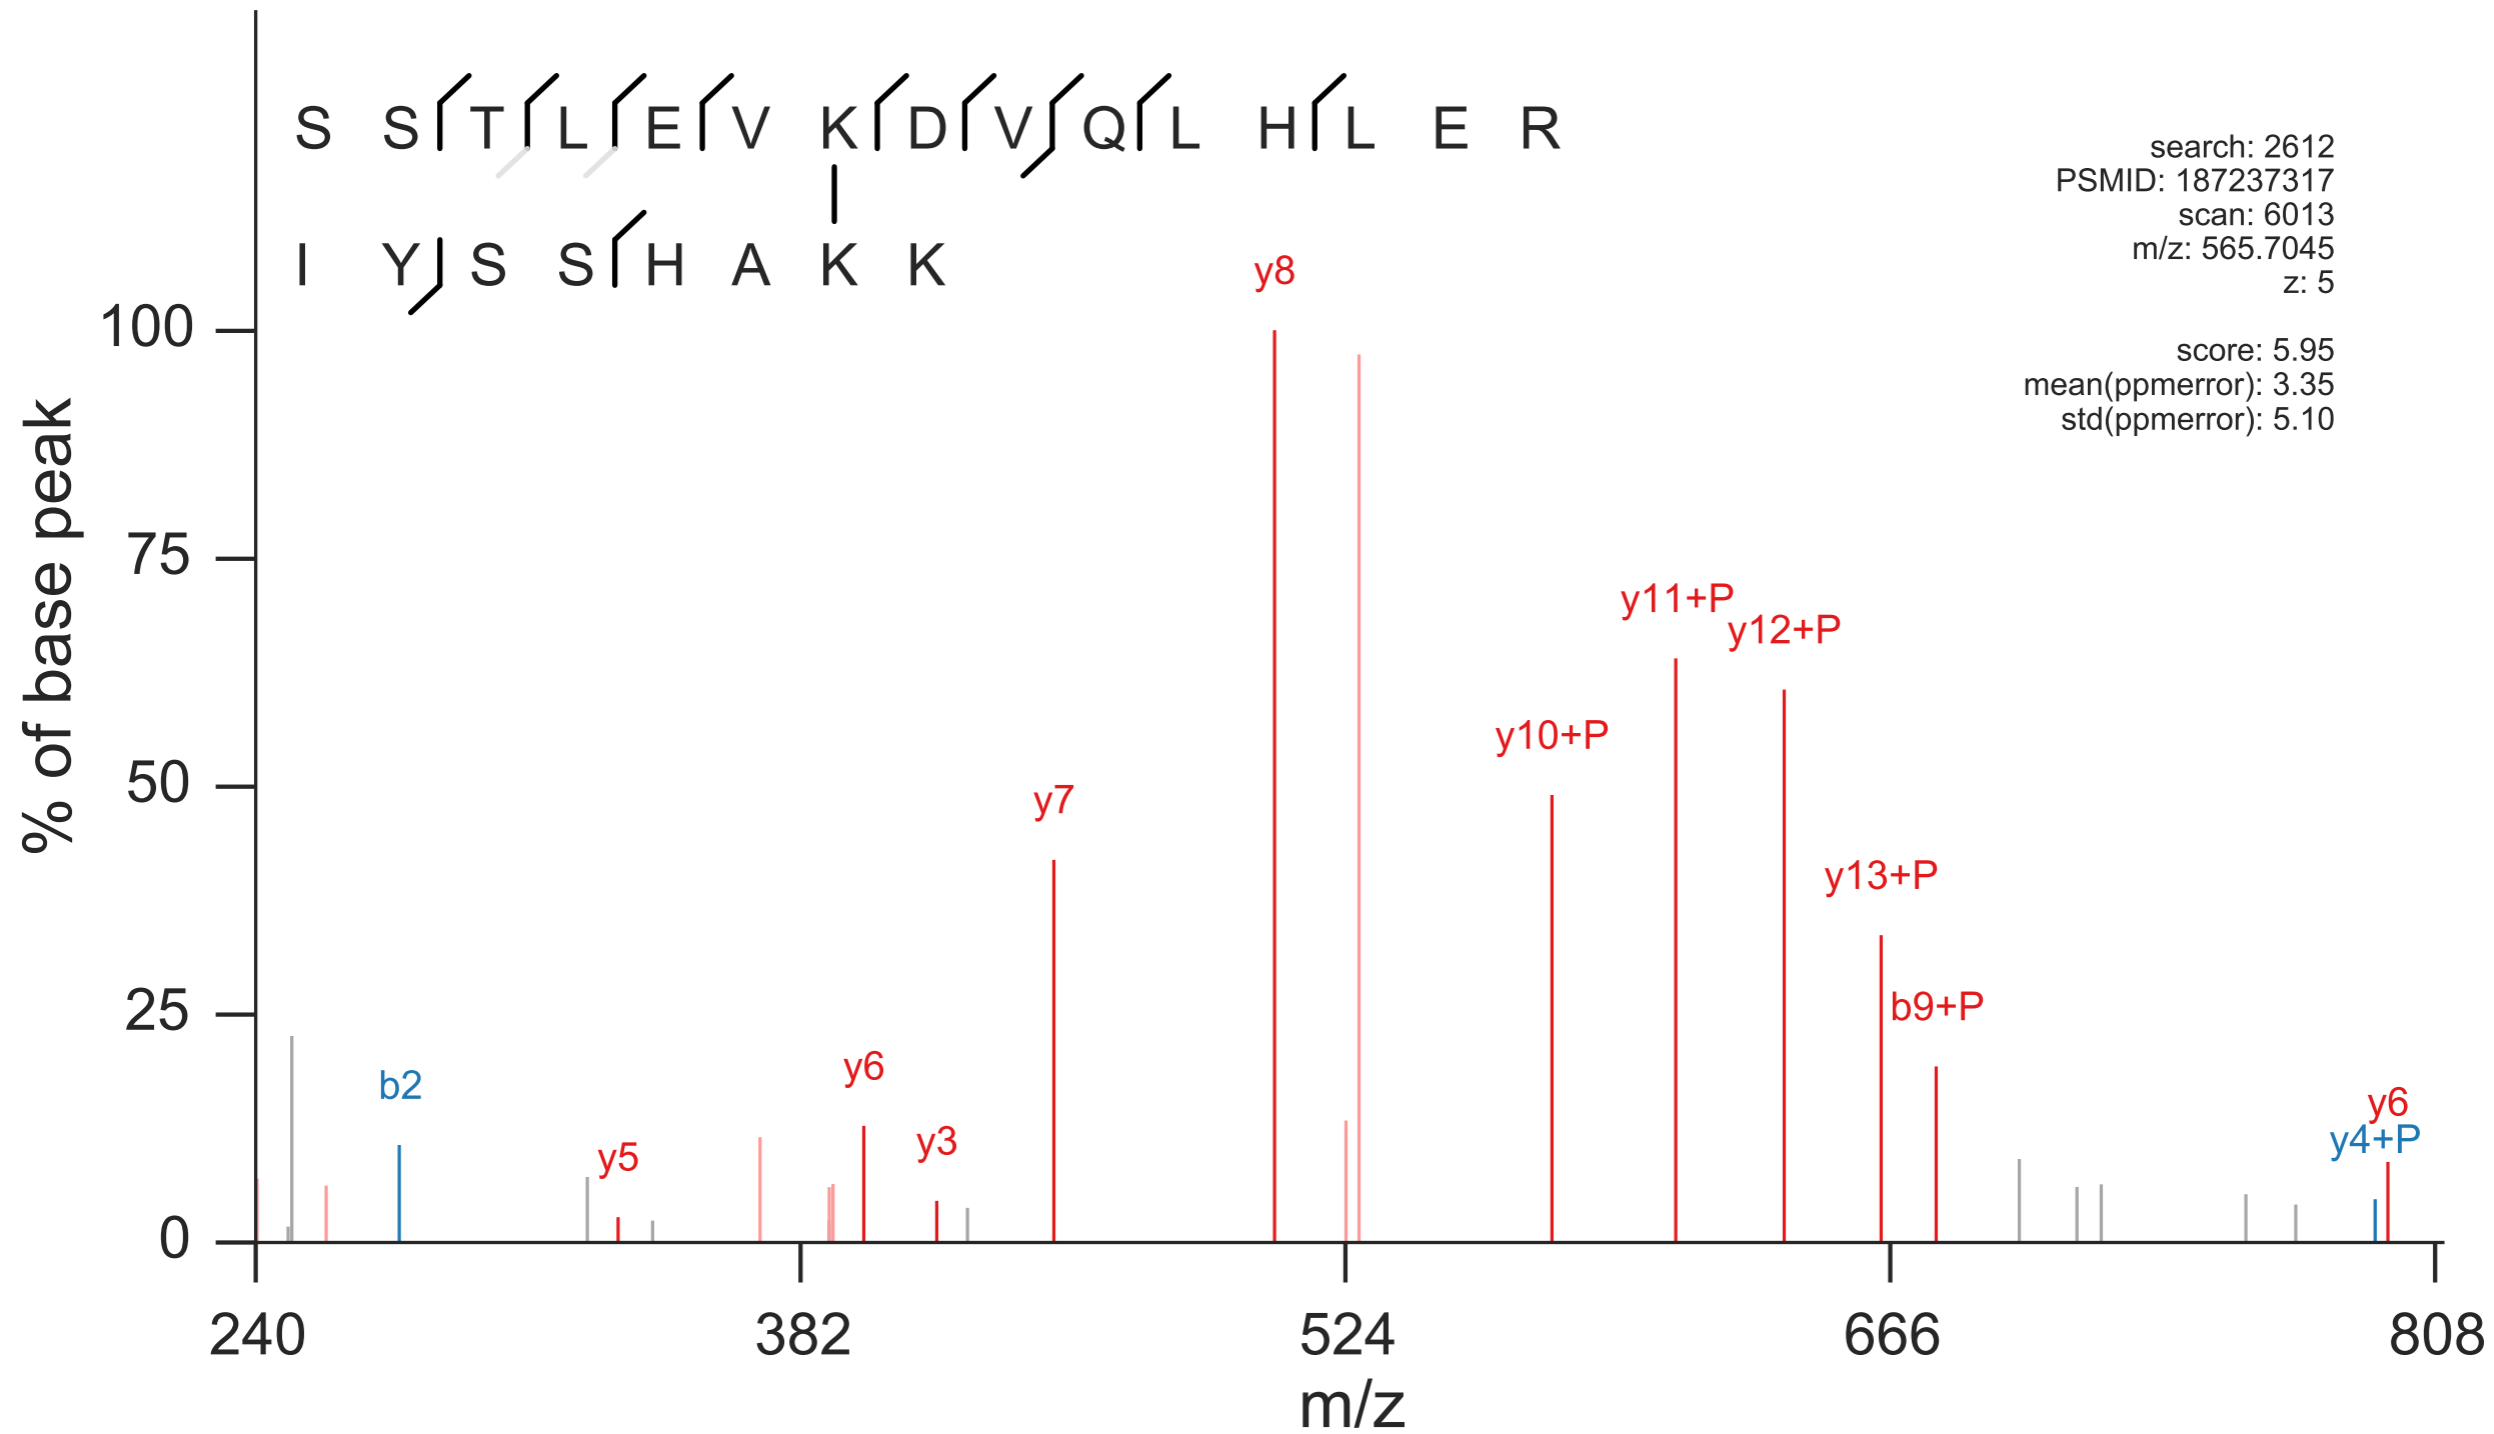

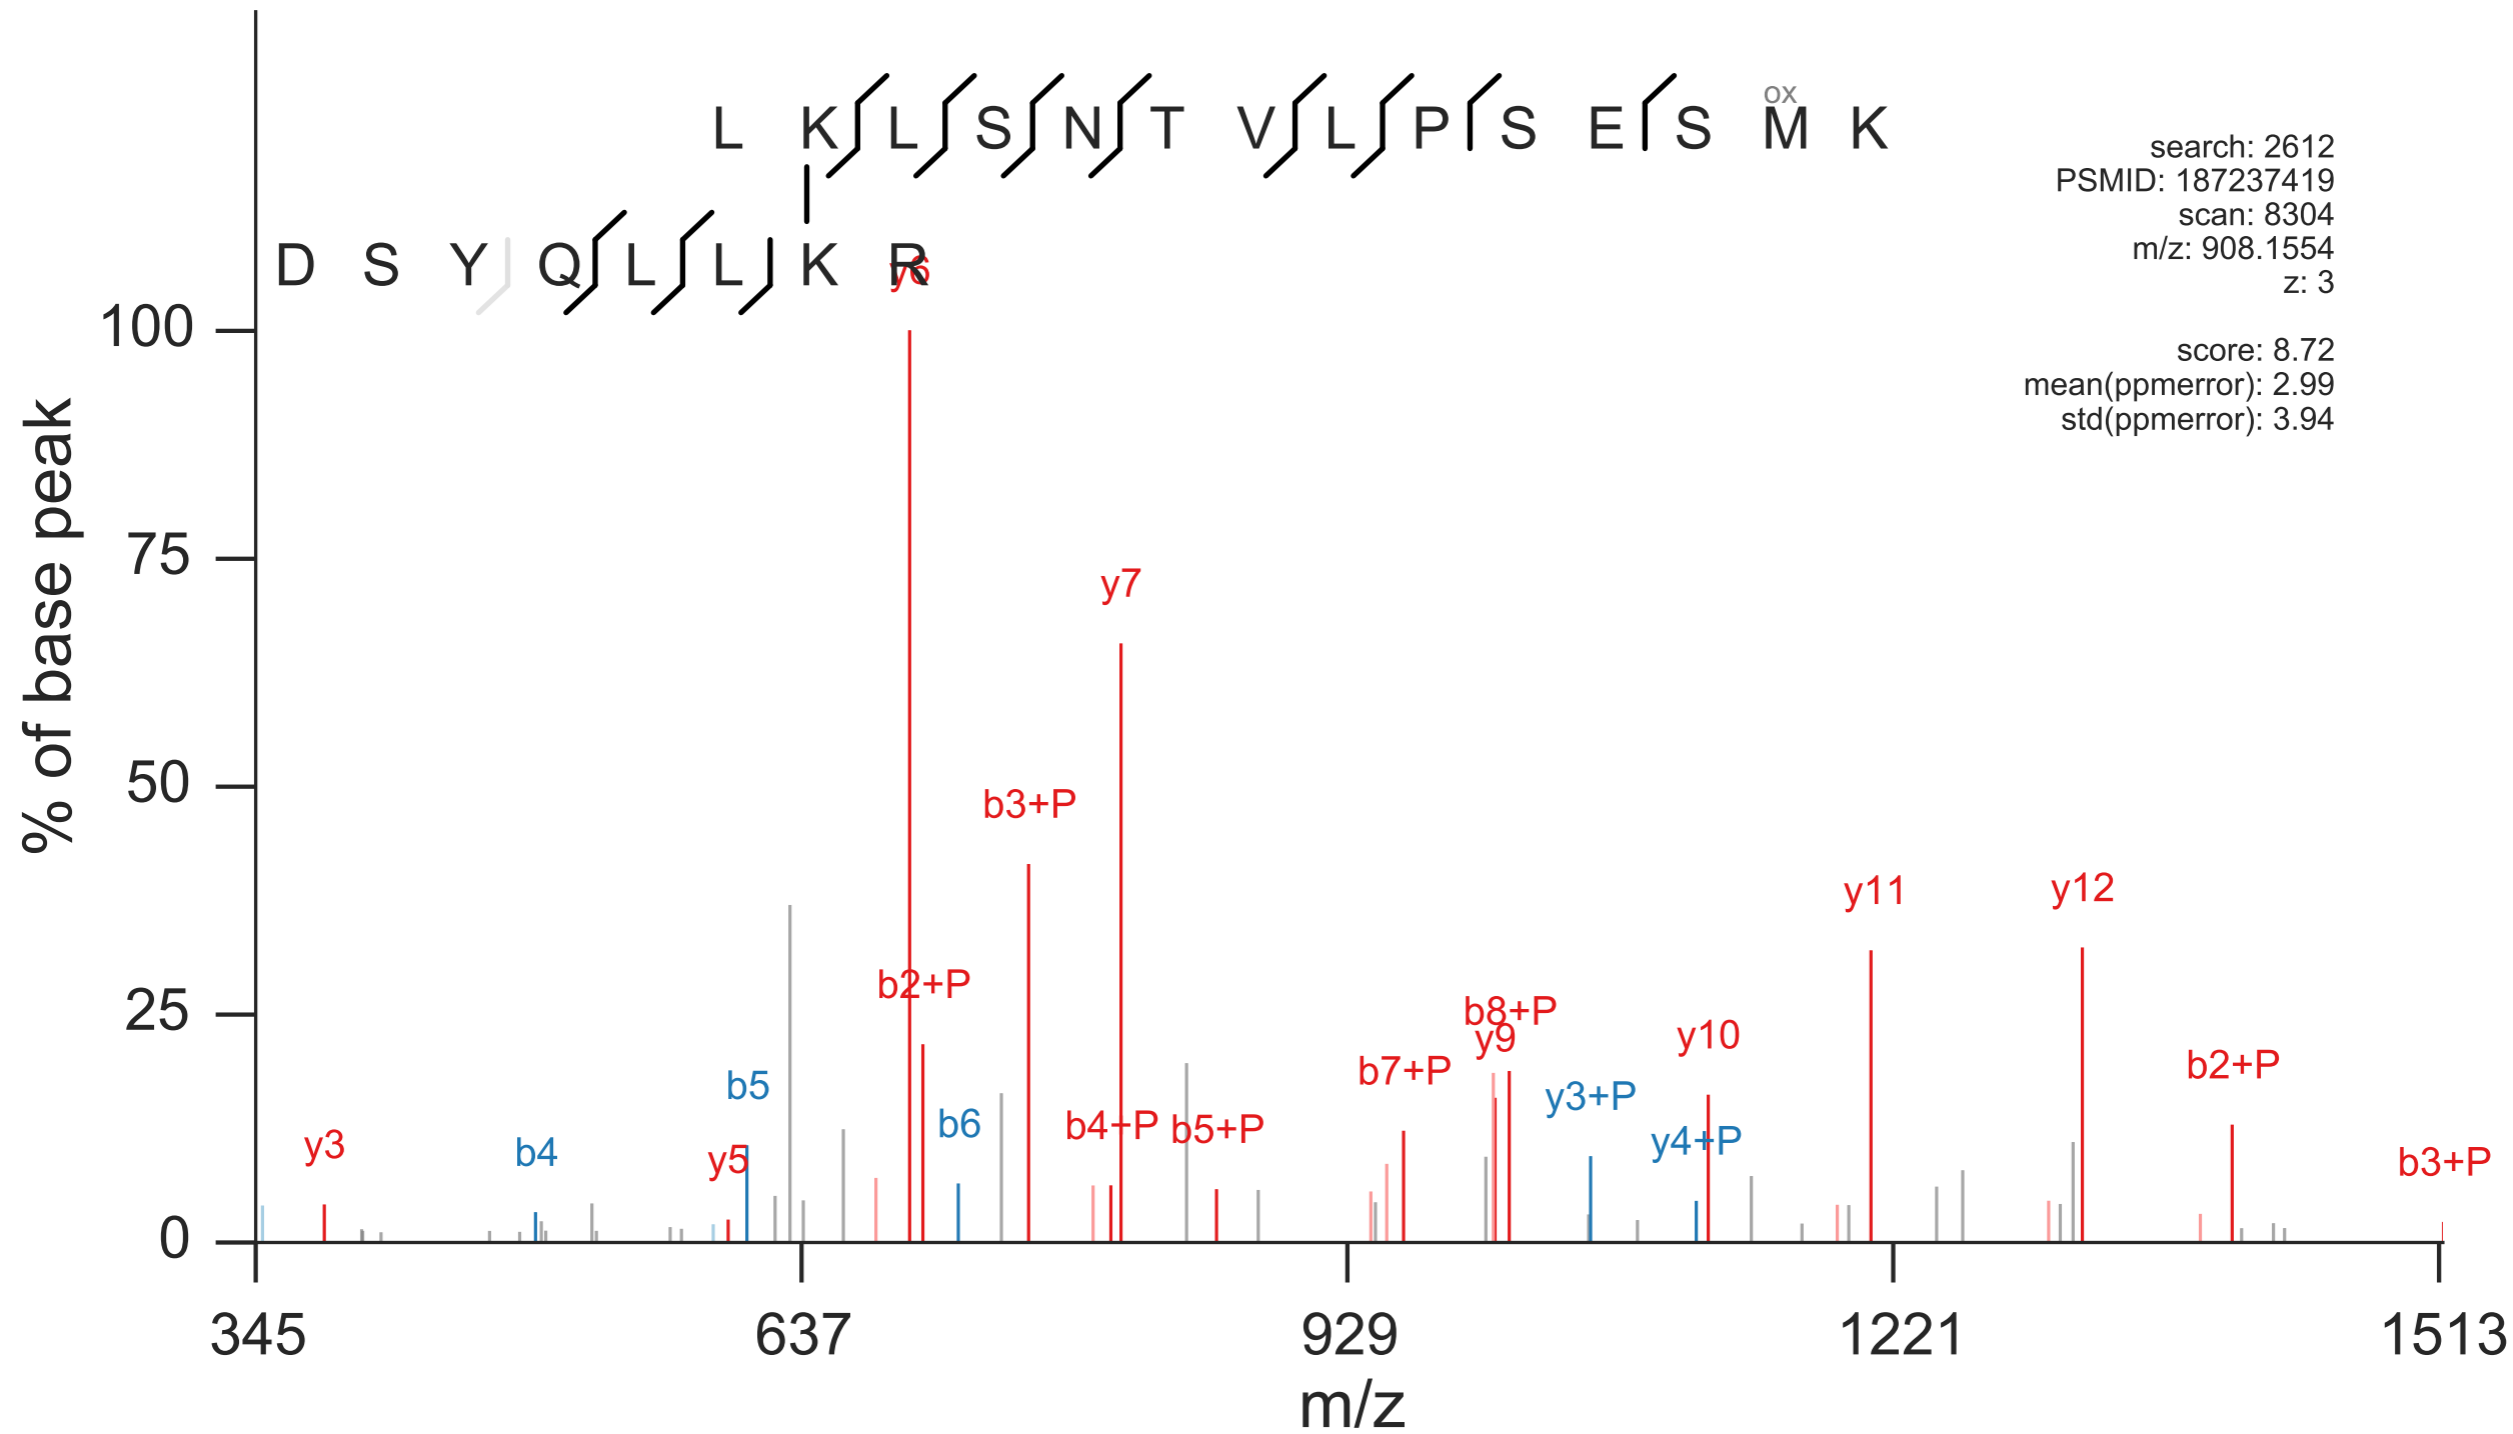

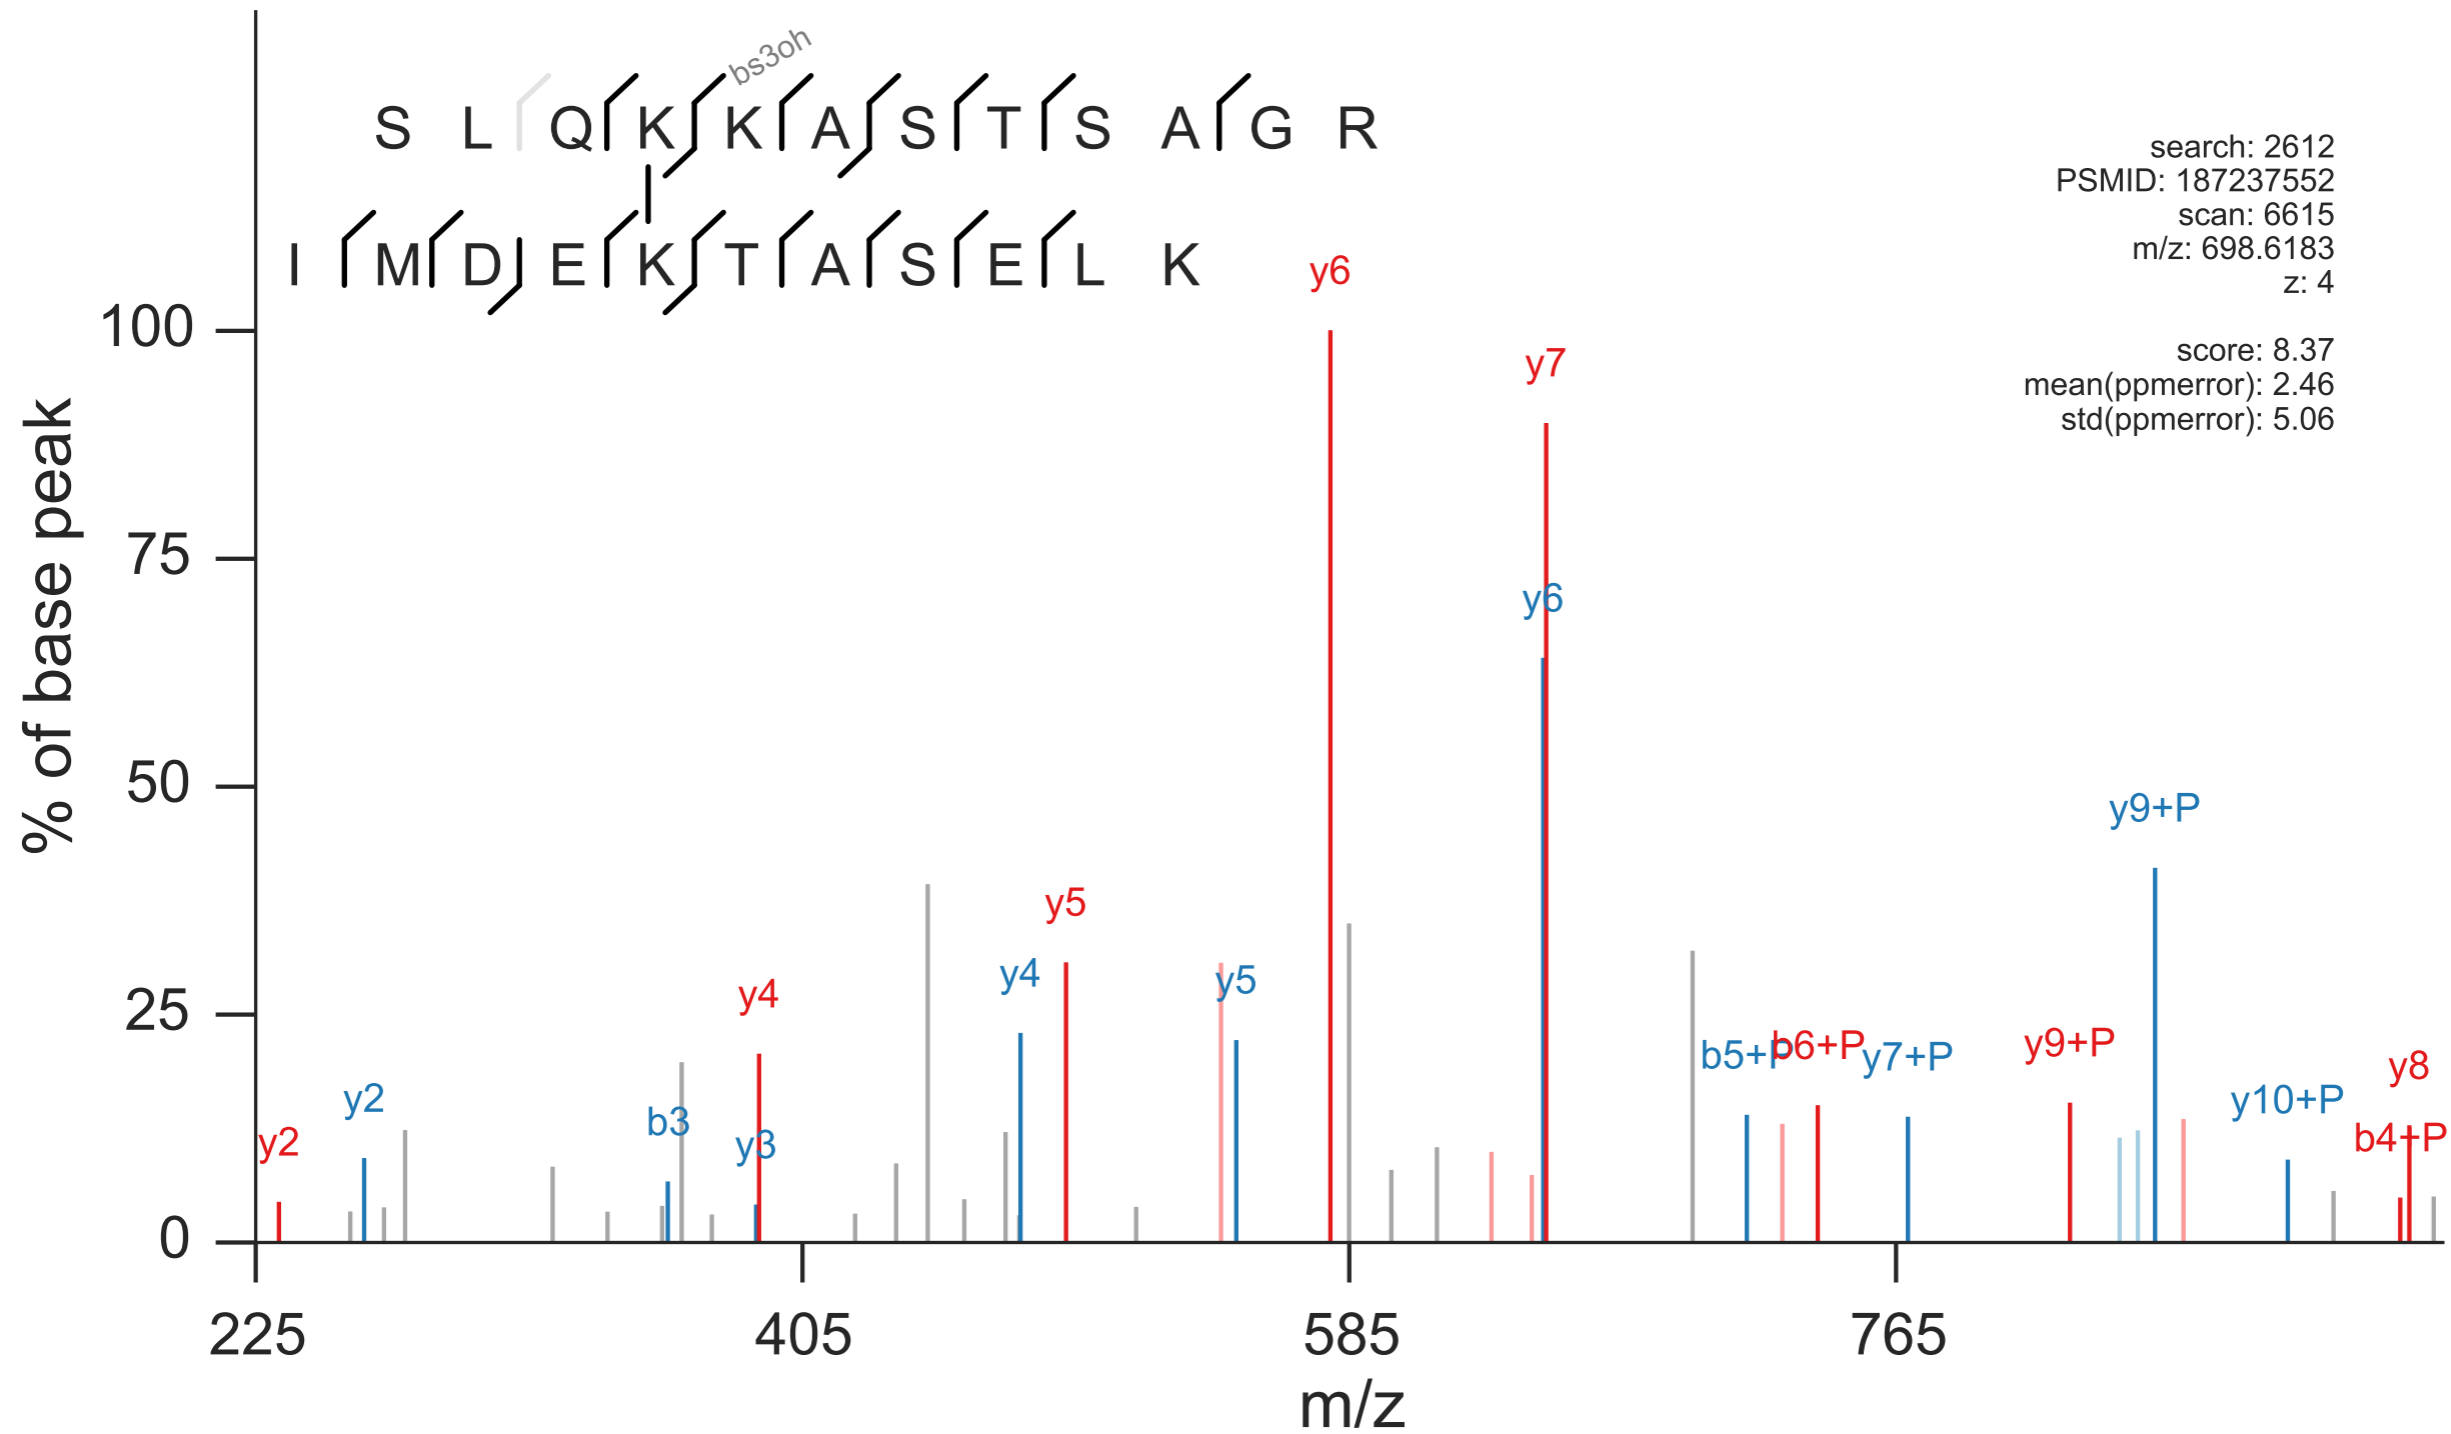

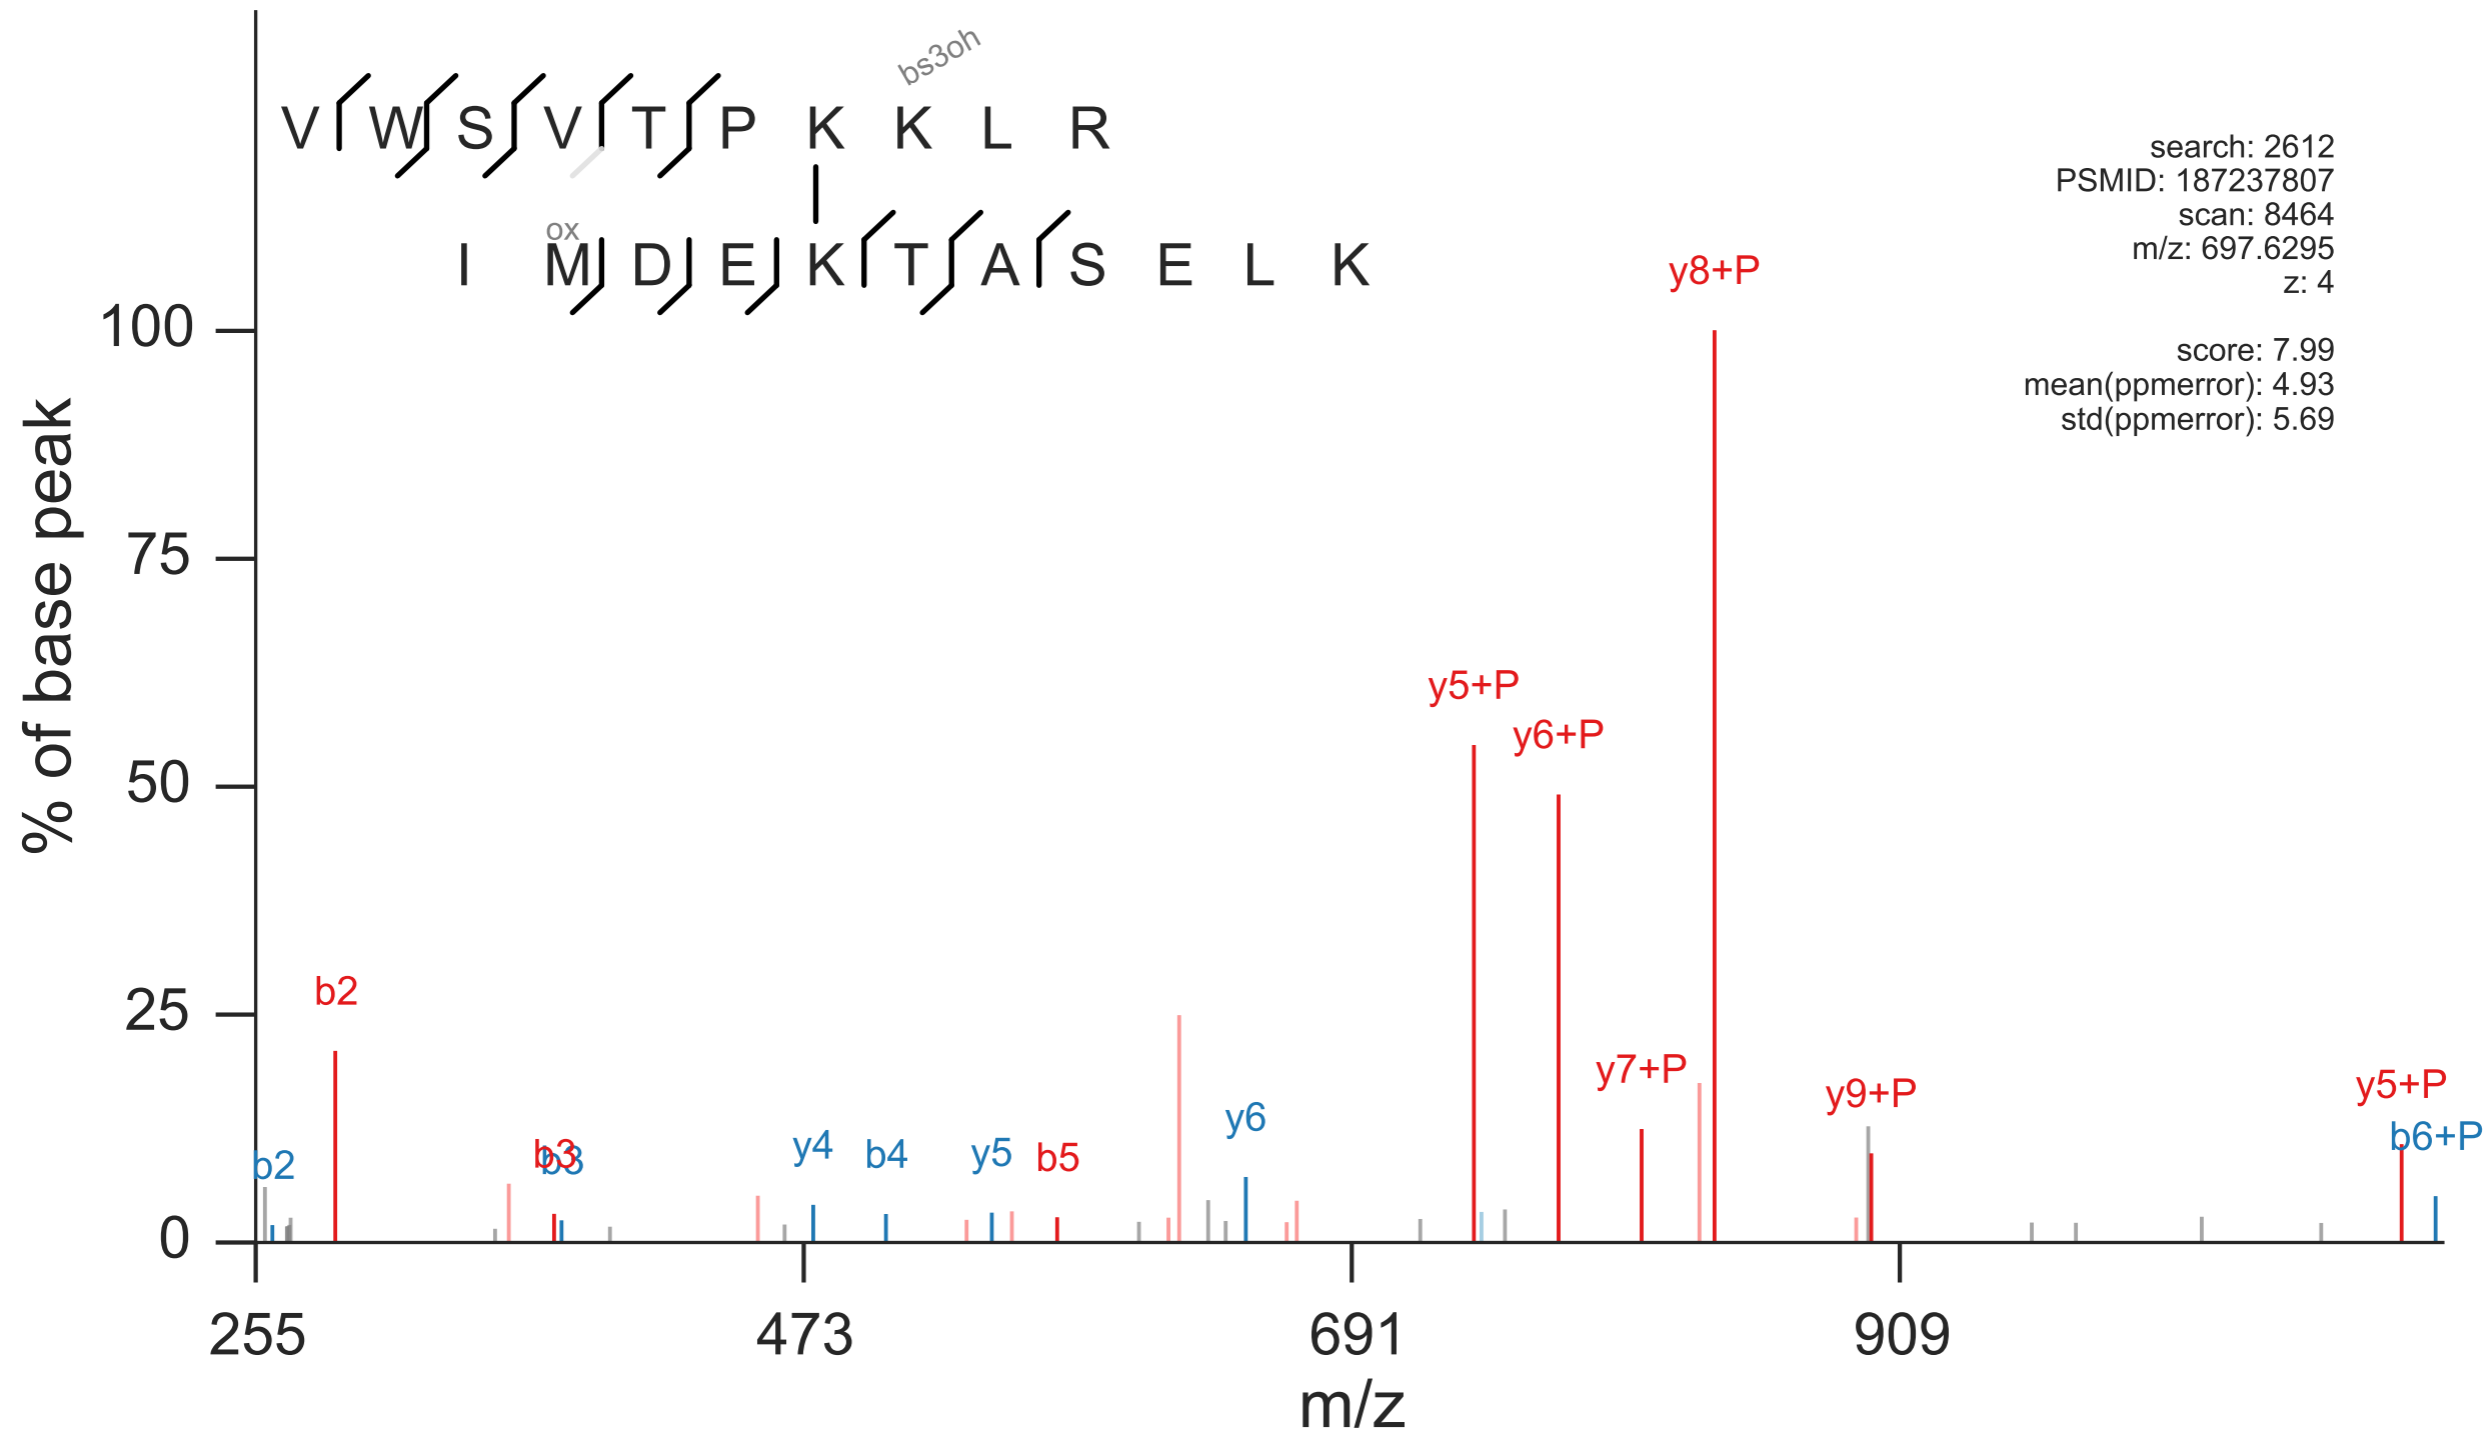

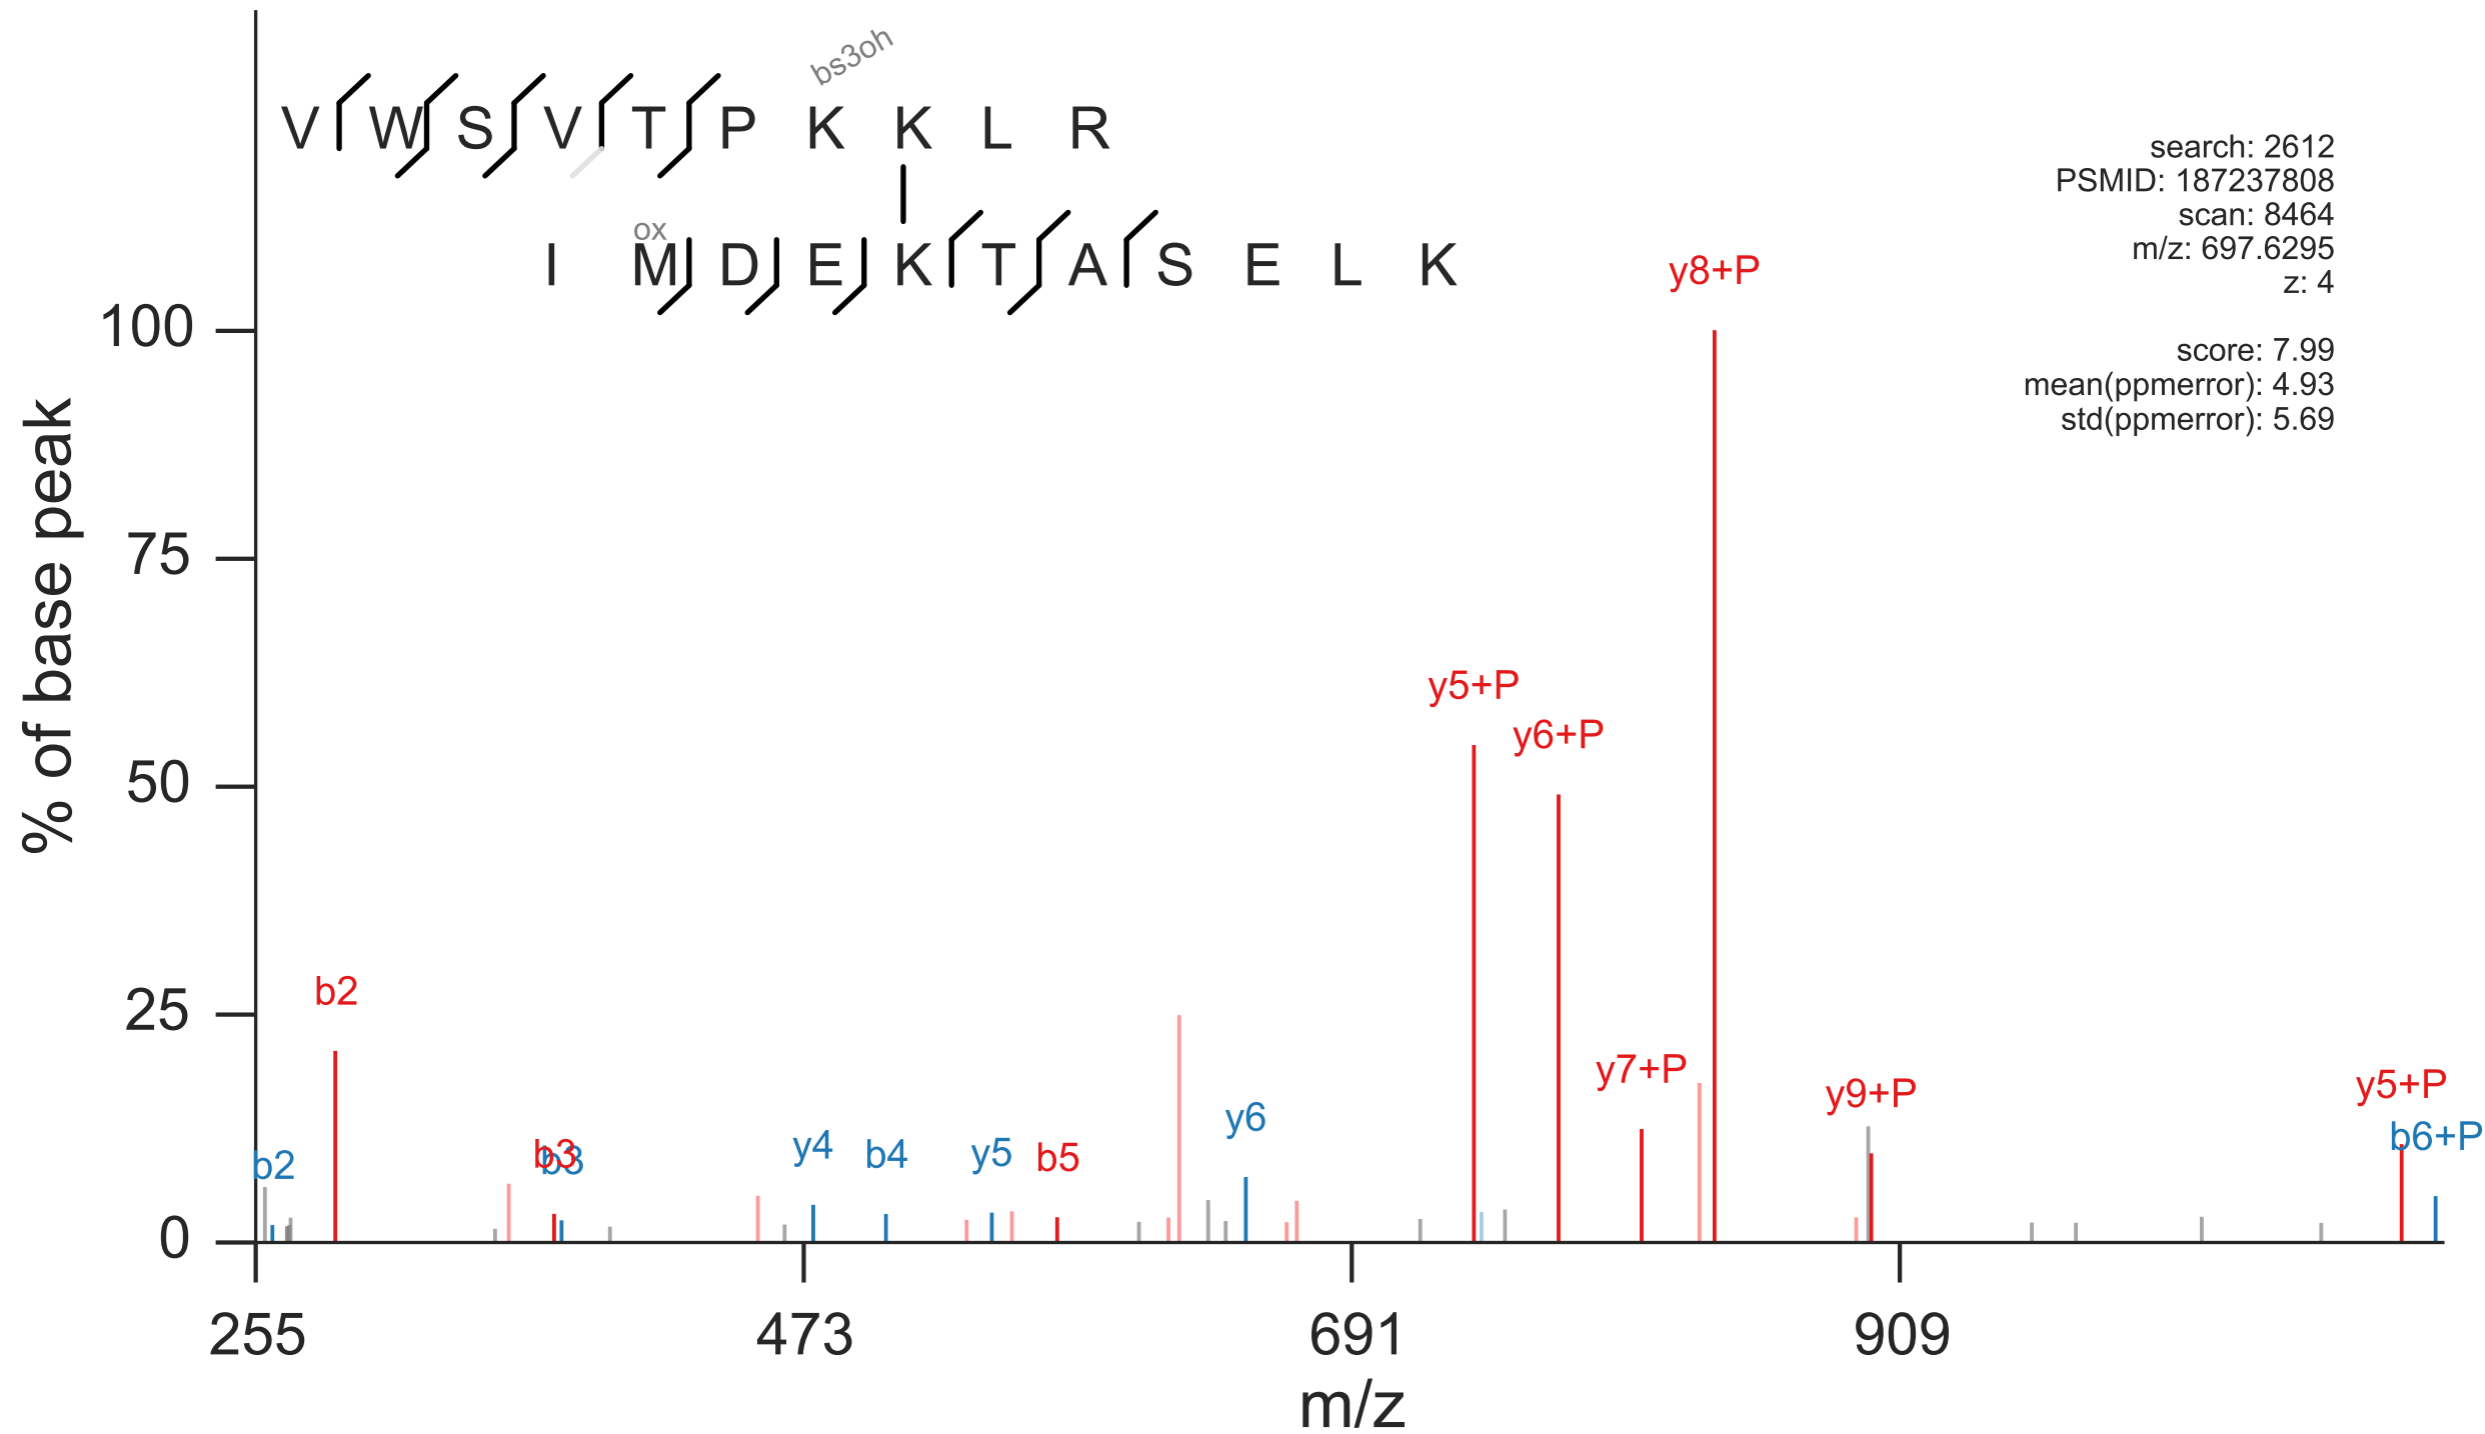



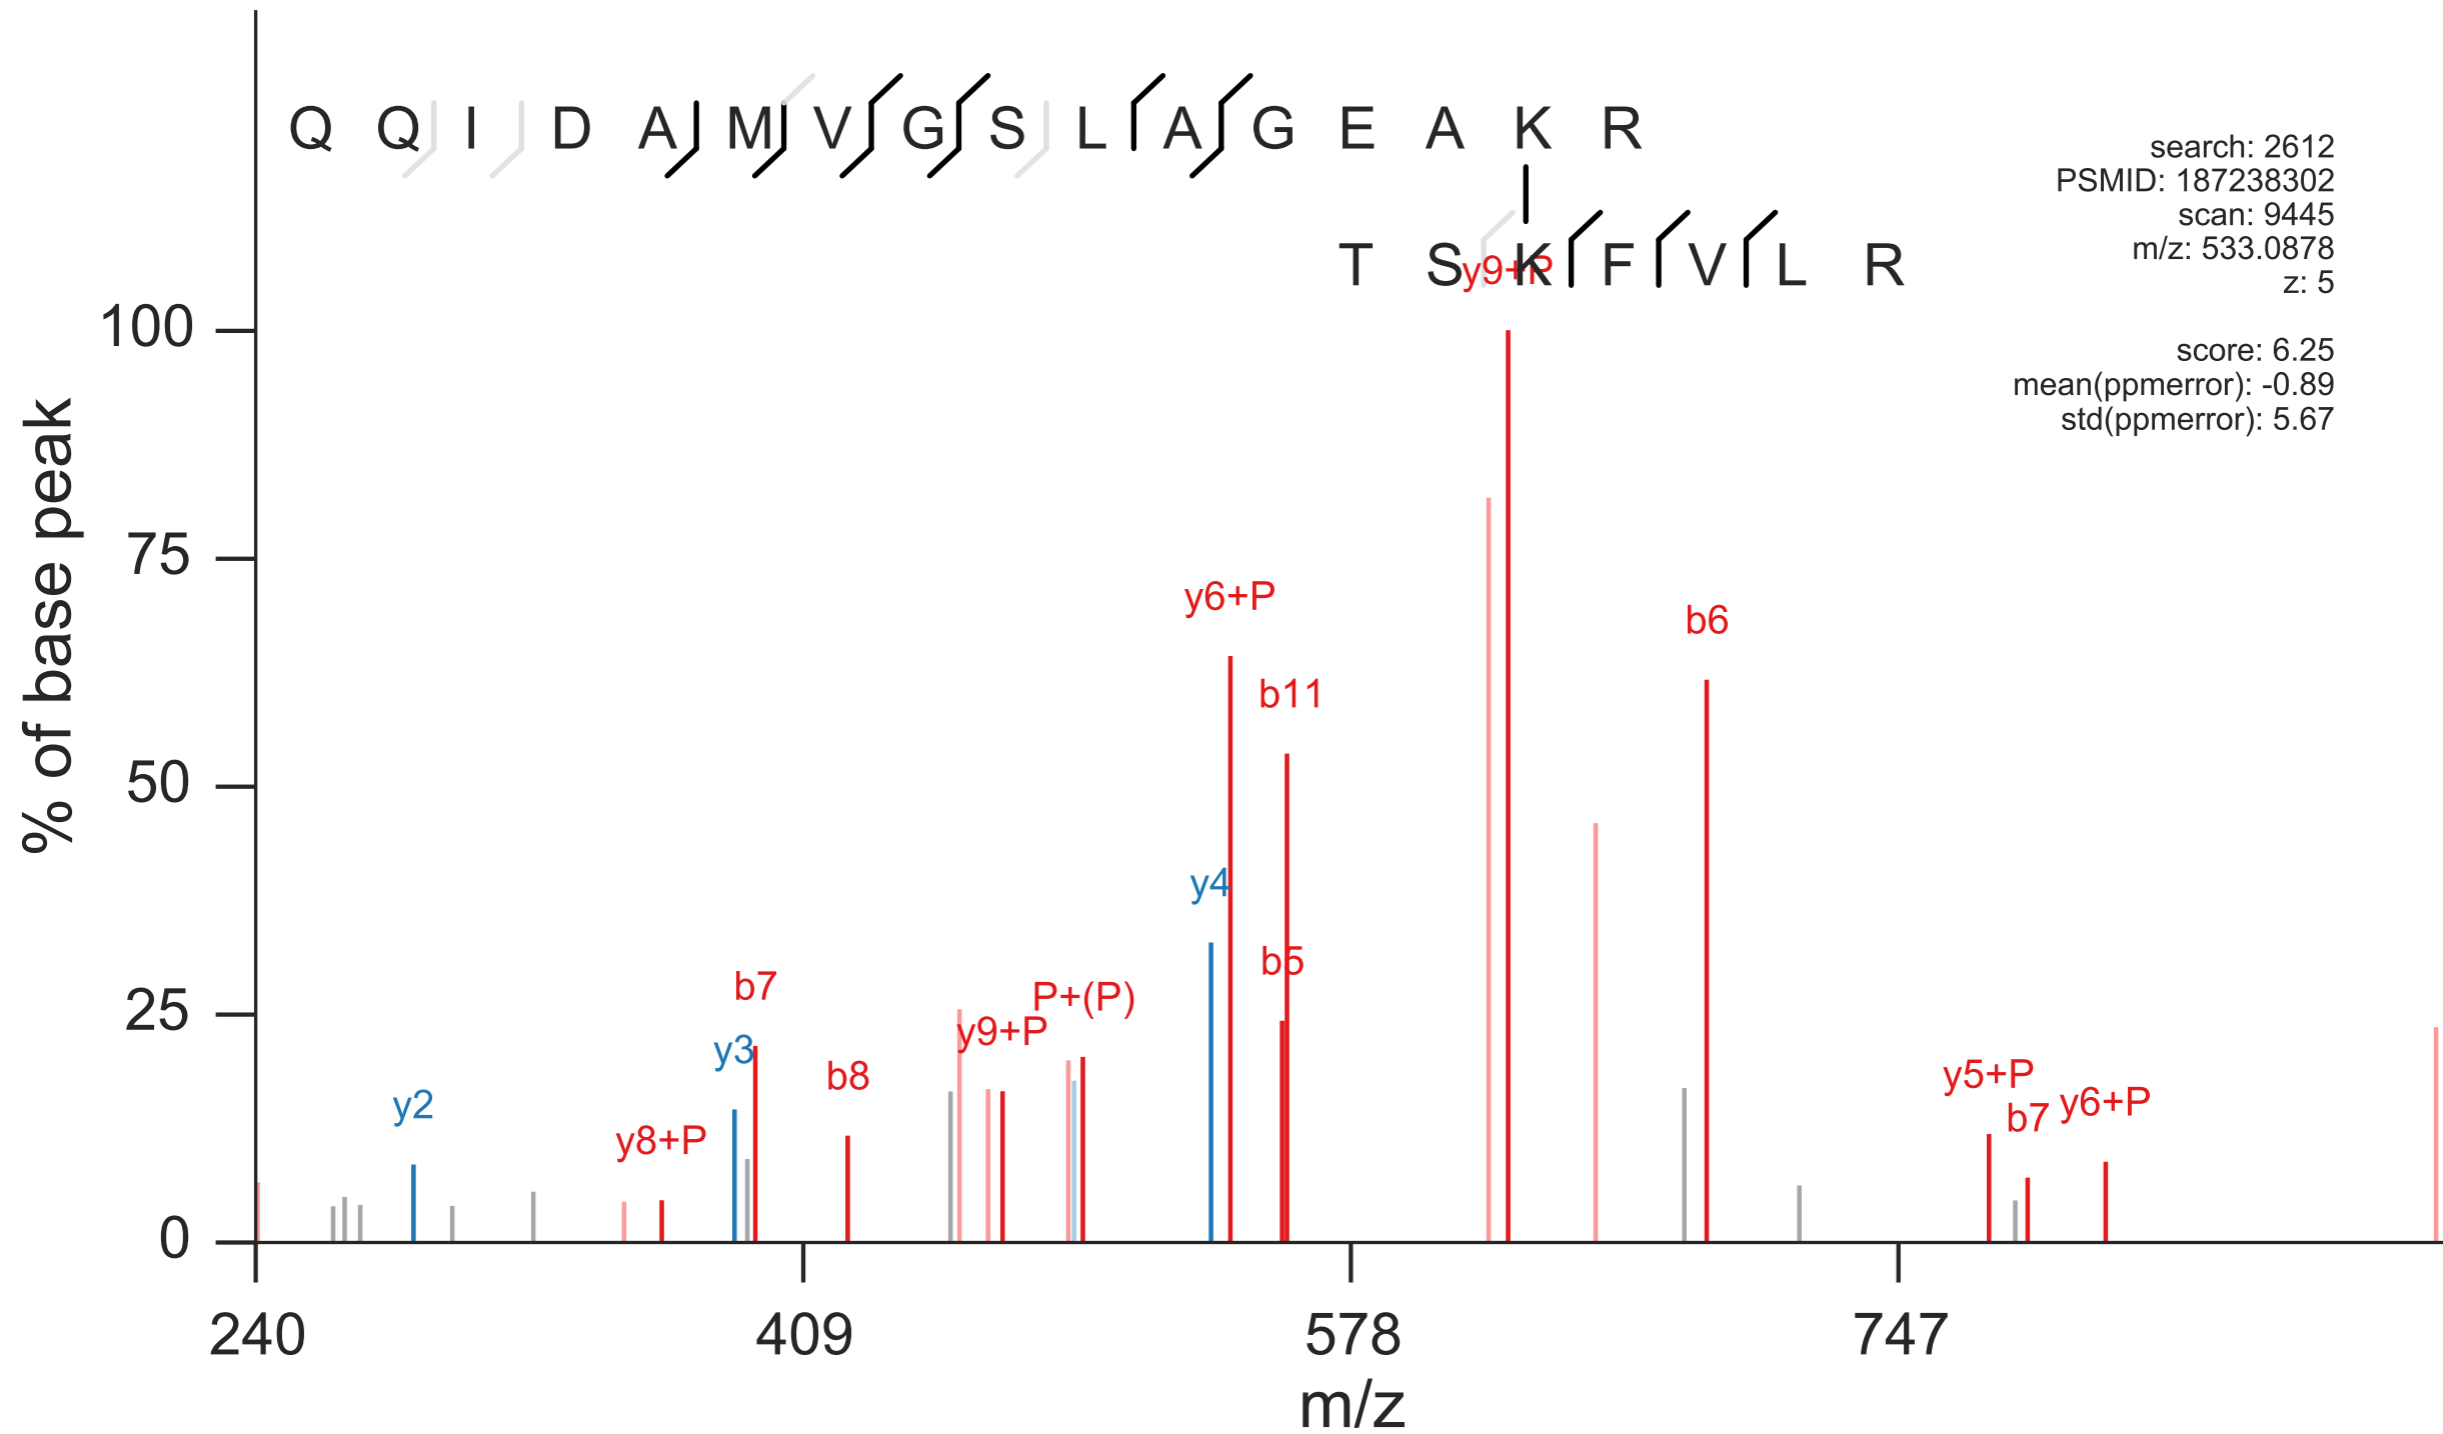

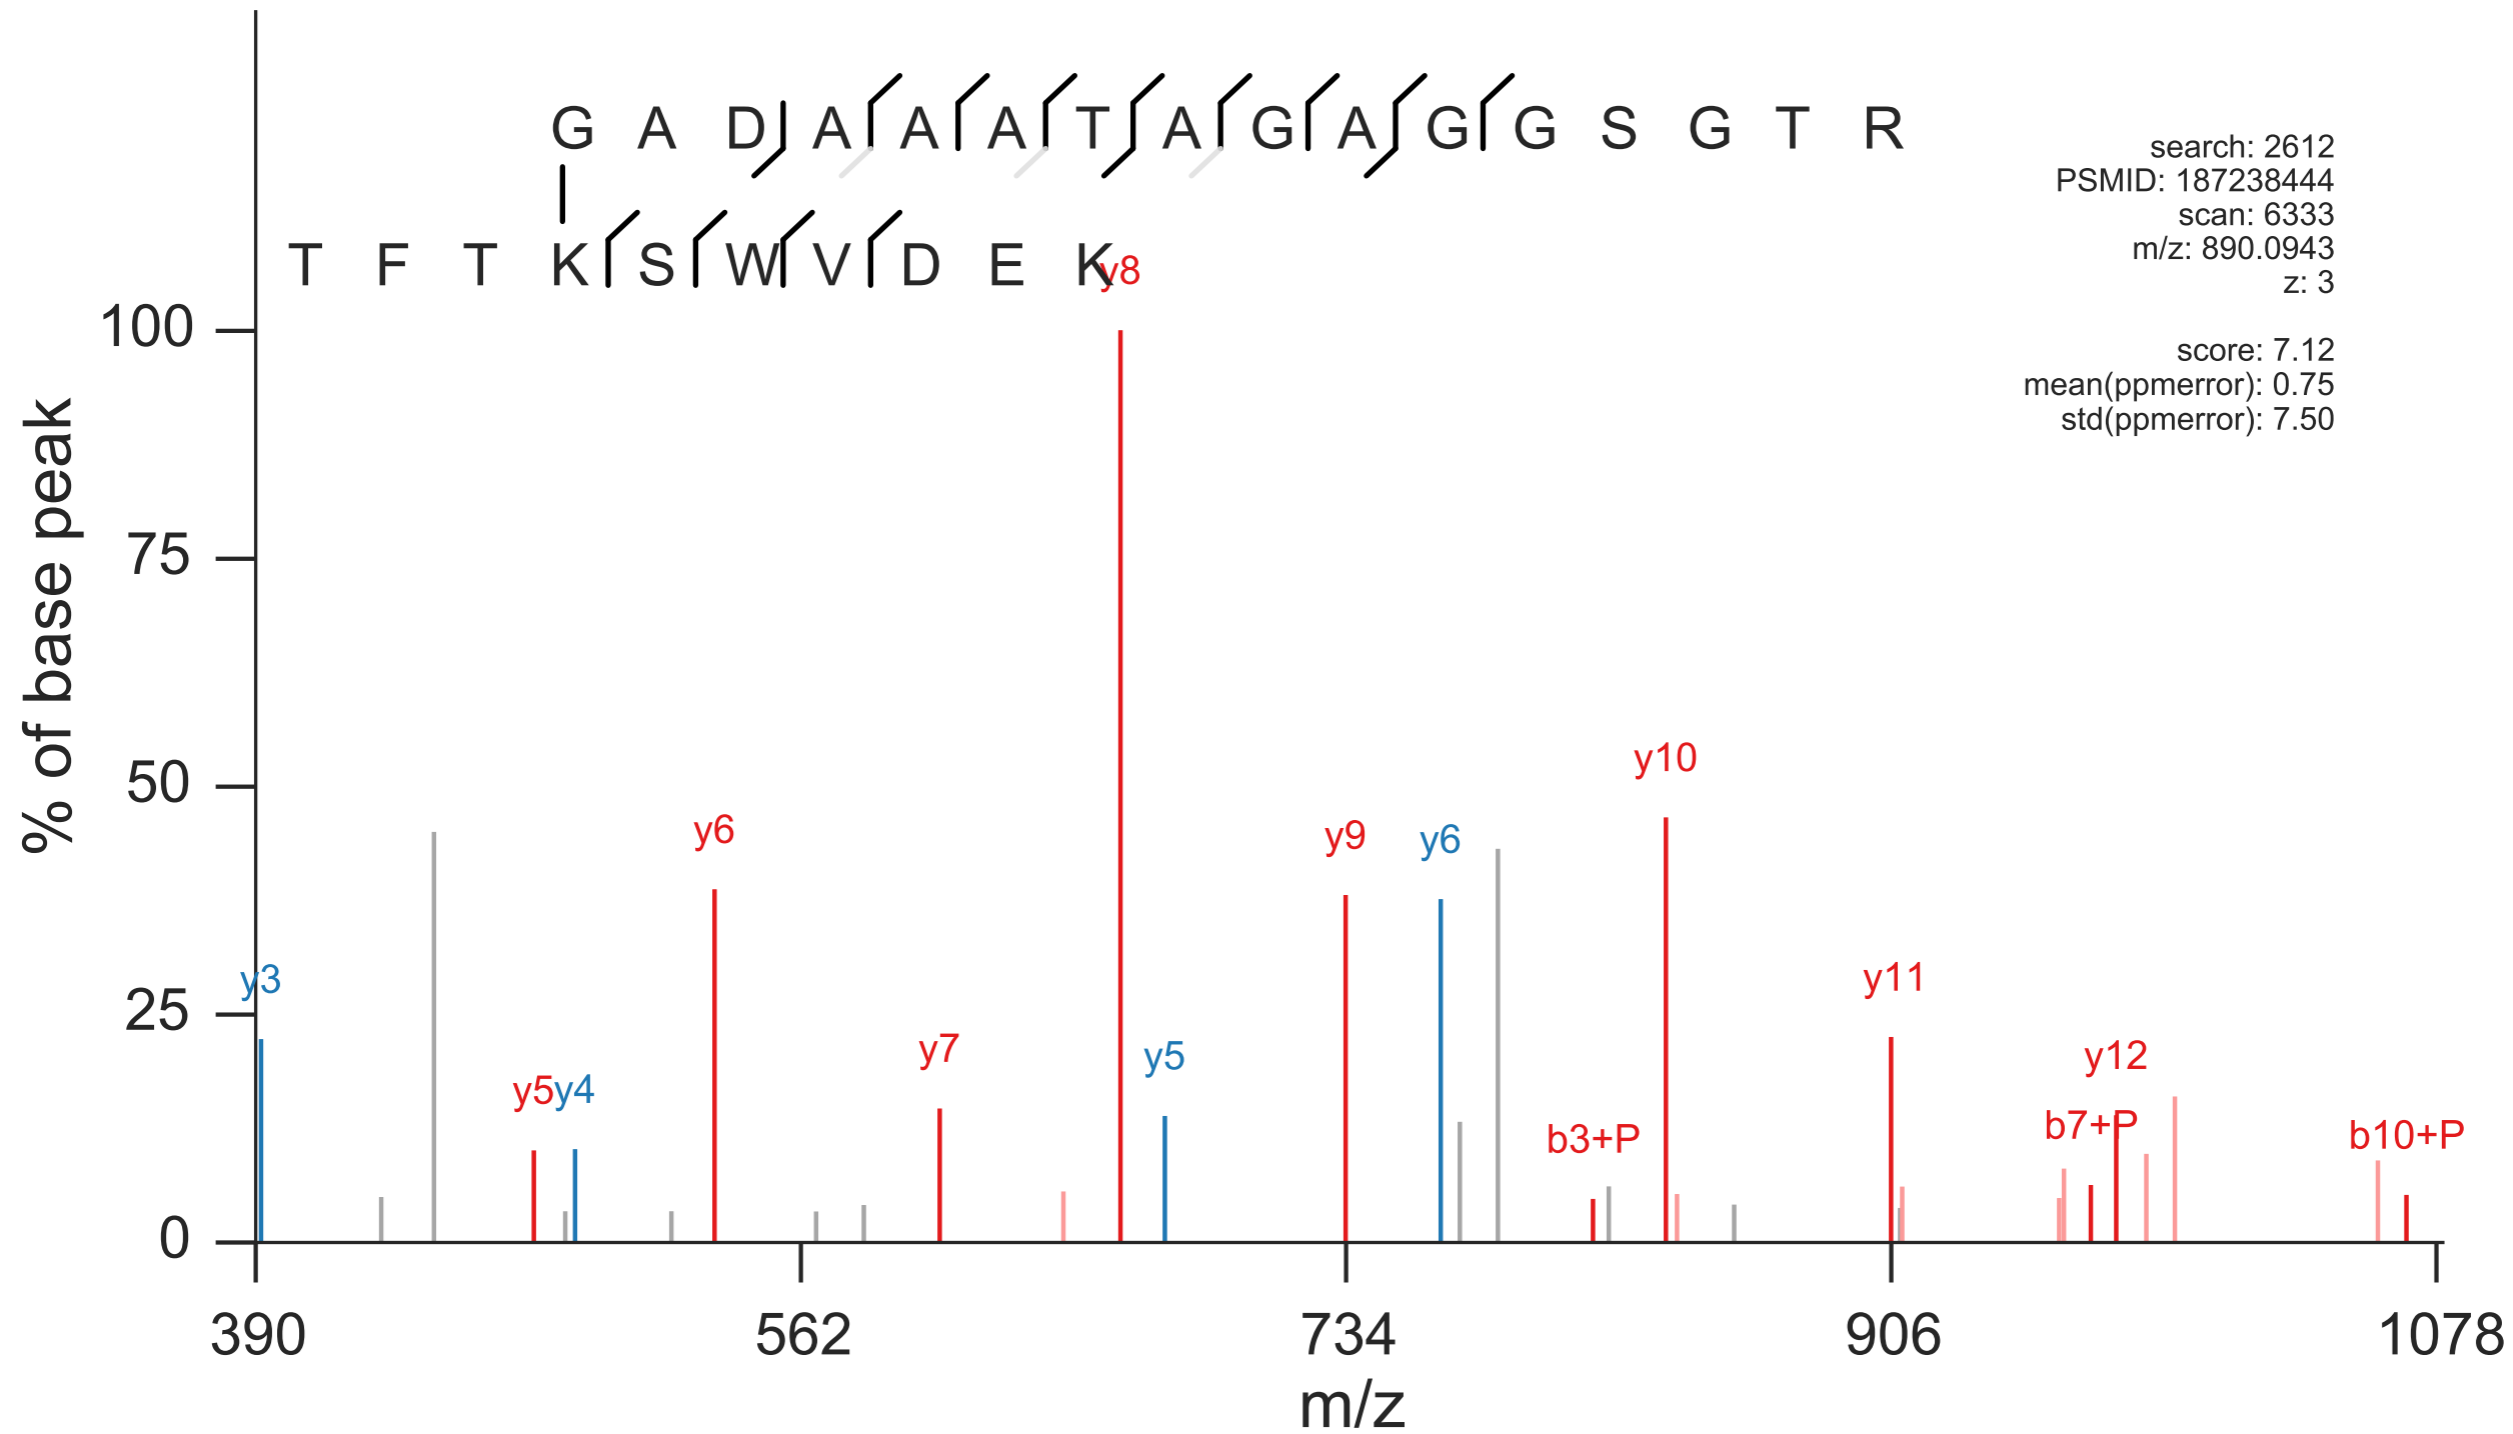

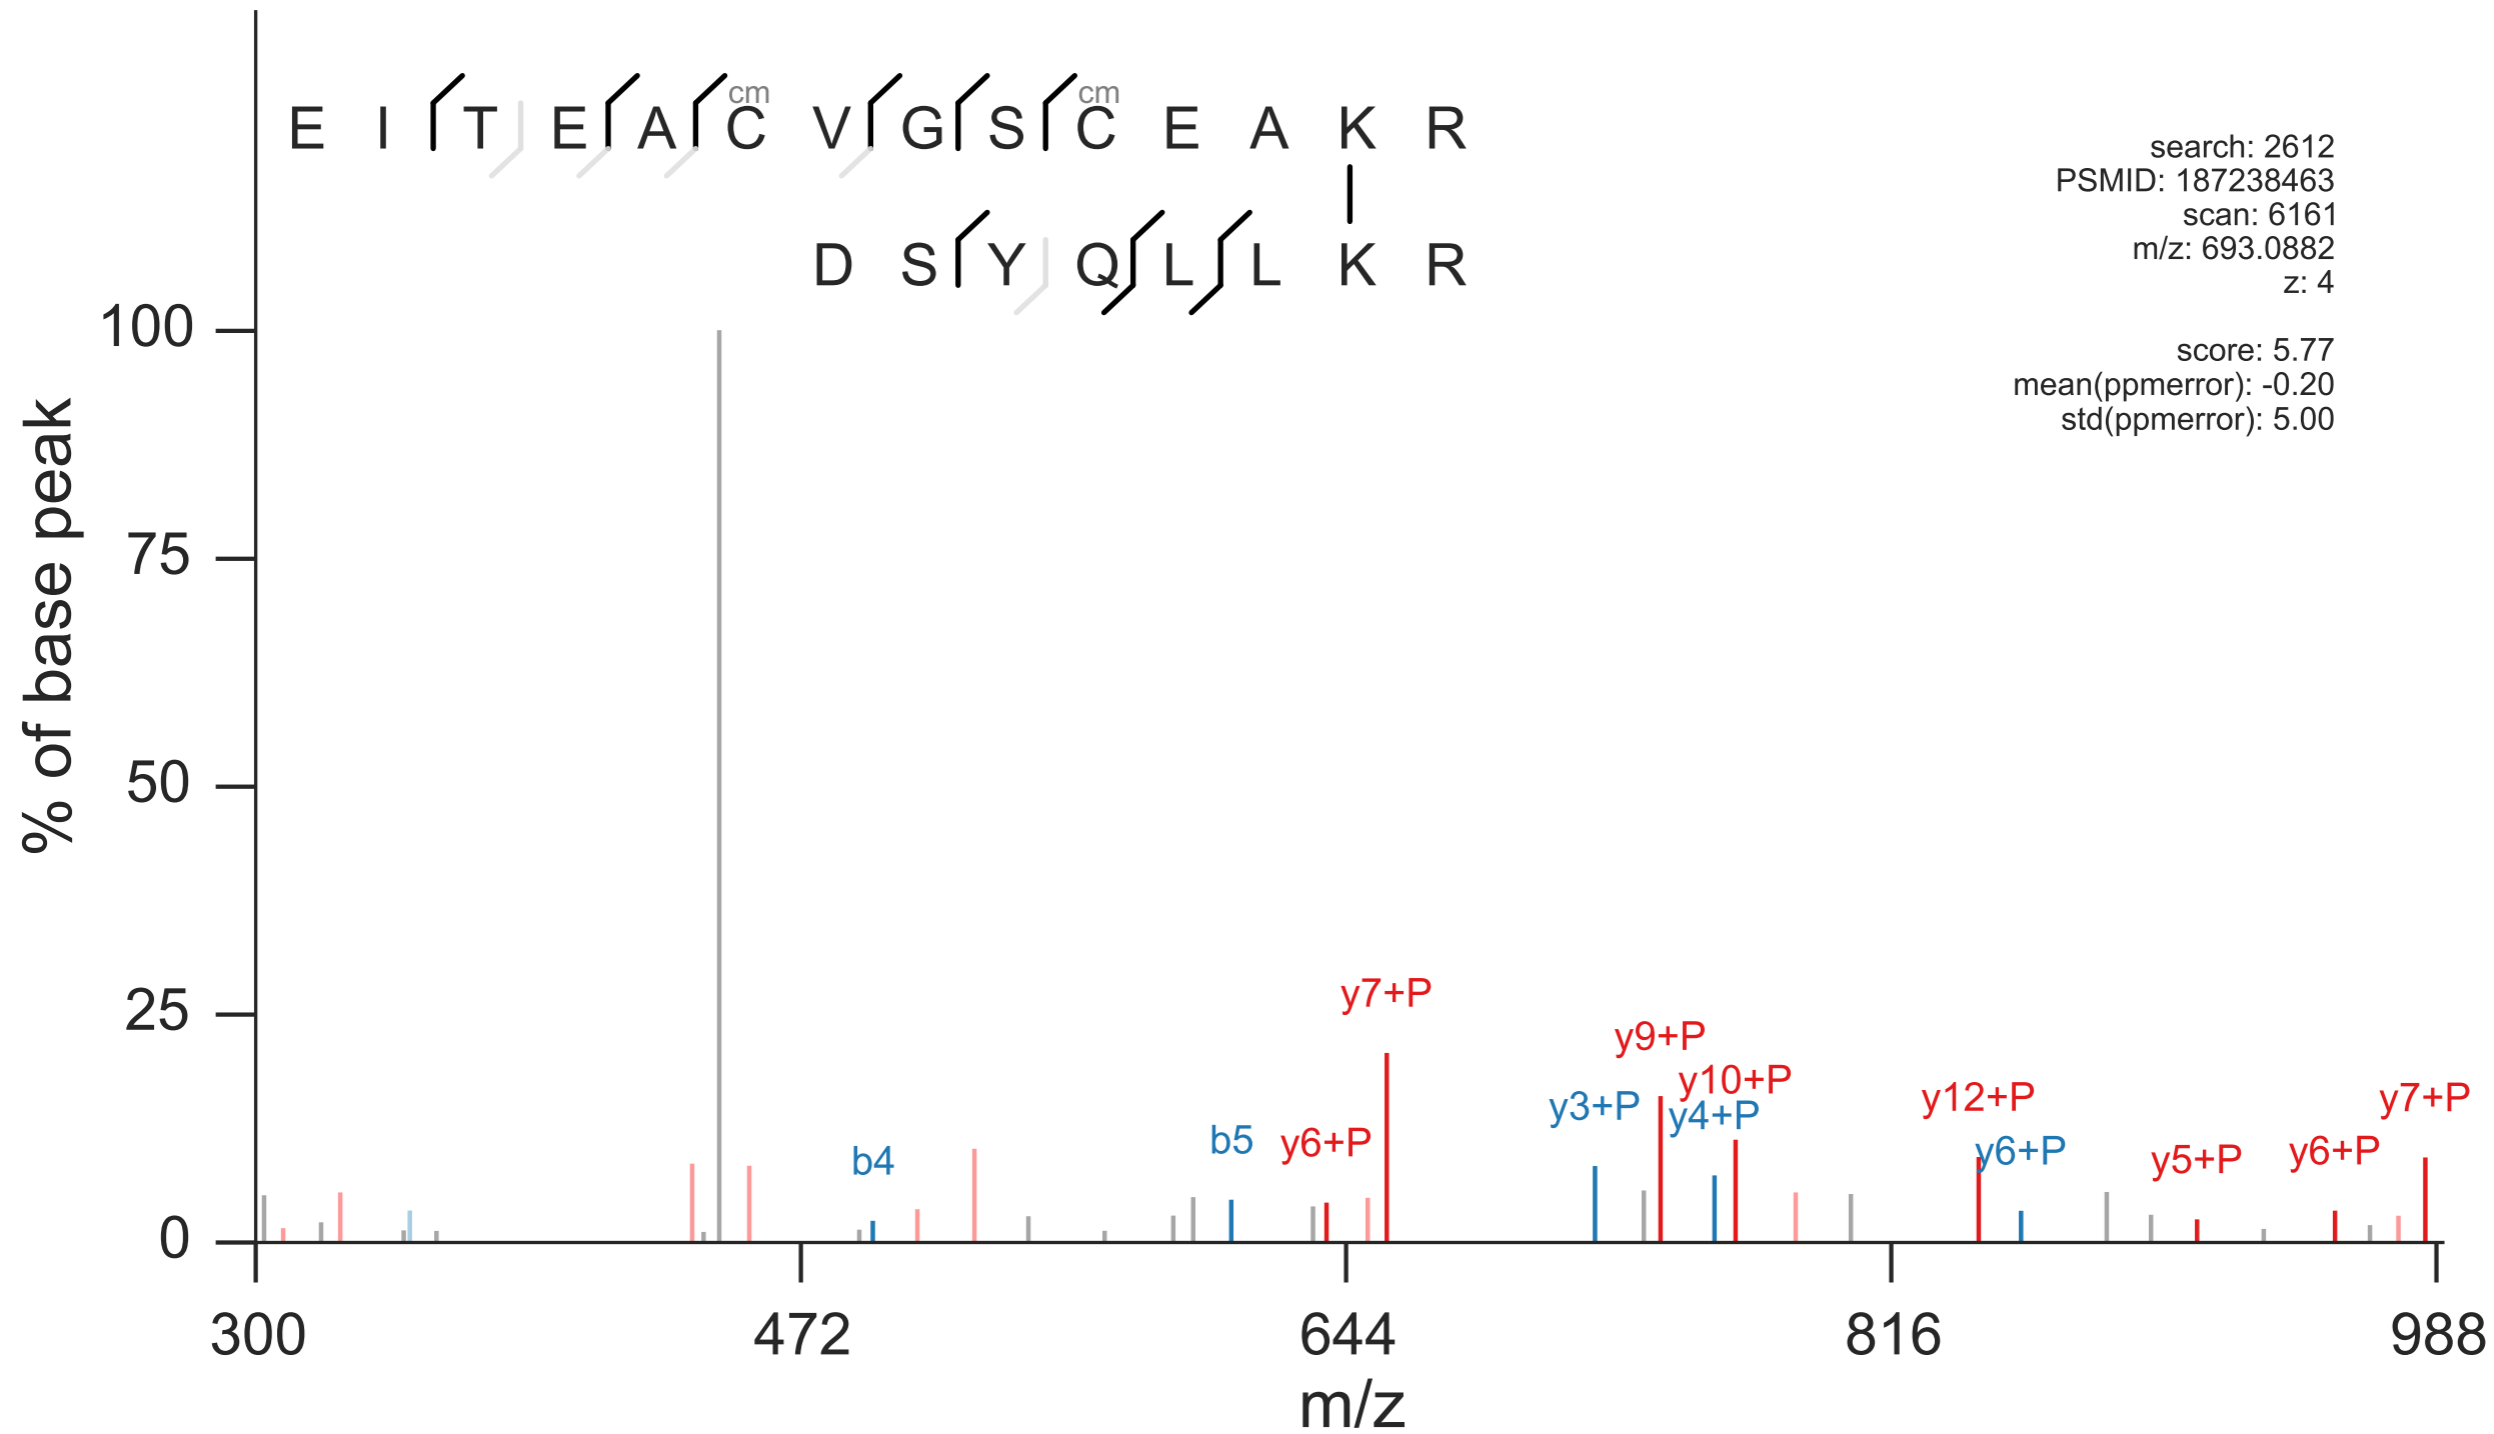

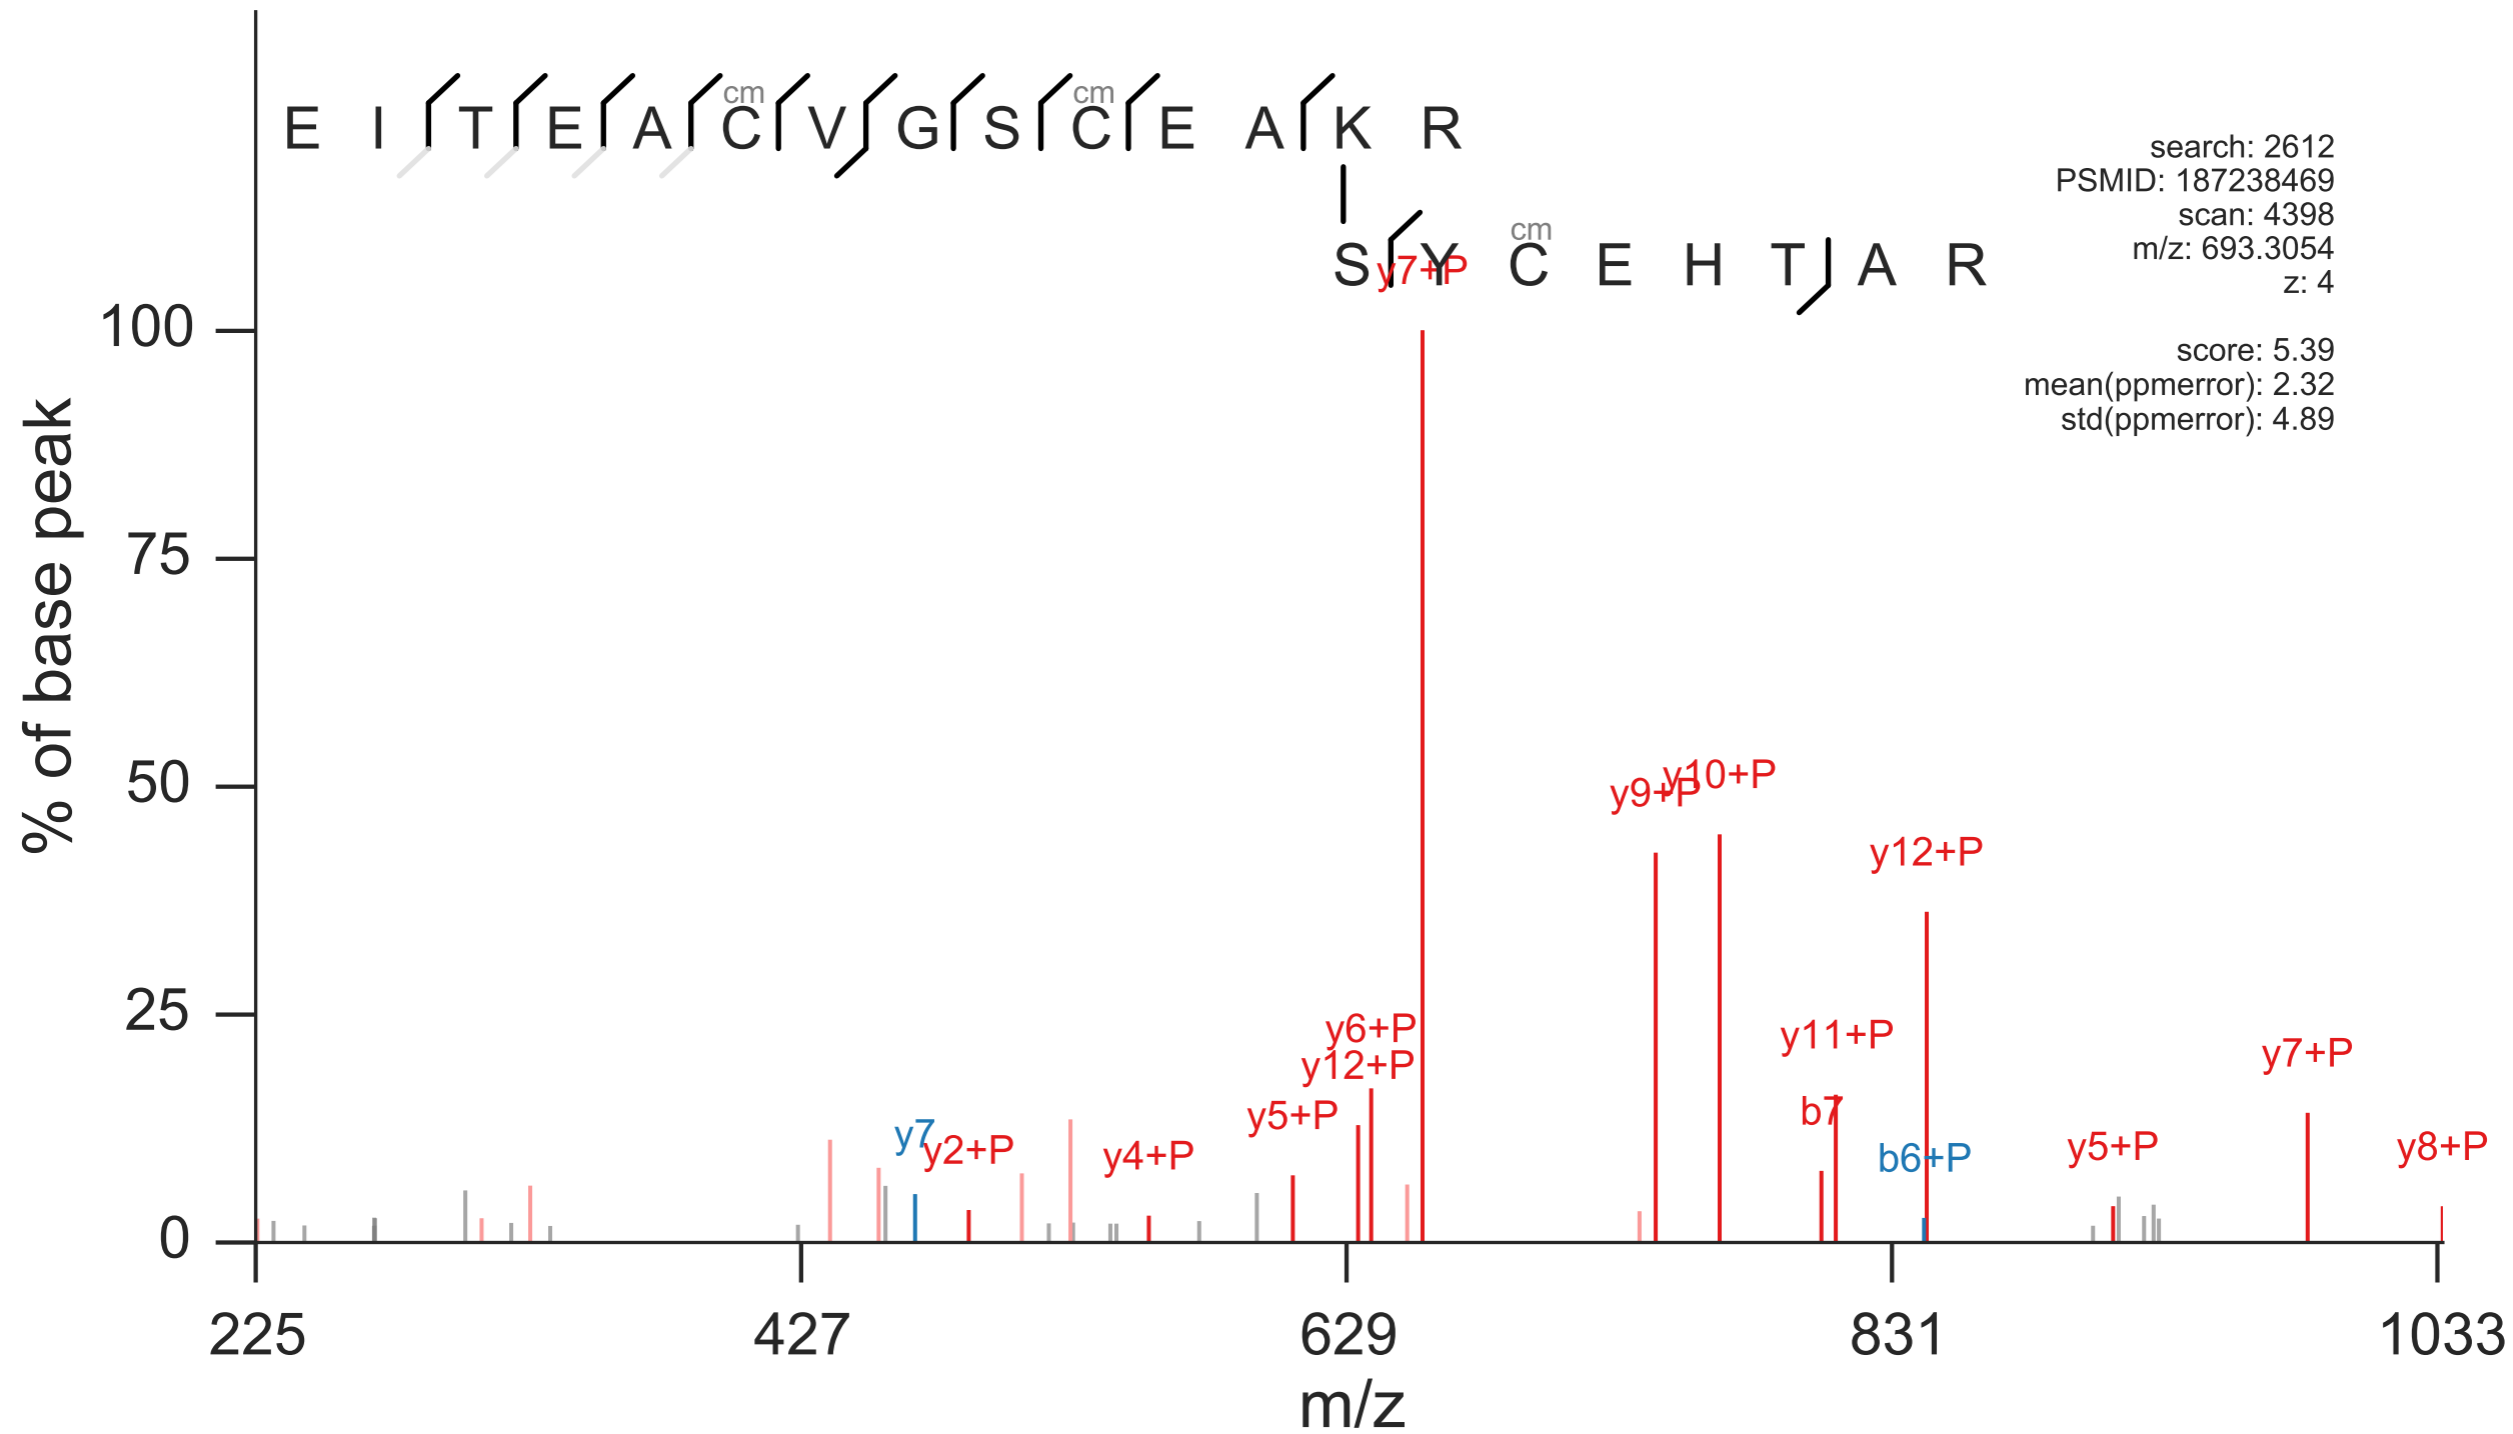

search: 2612  
 PSMID: 187238469  
 scan: 4398  
 m/z: 693.3054  
 z: 4

score: 5.39  
 mean(ppmerror): 2.32  
 std(ppmerror): 4.89

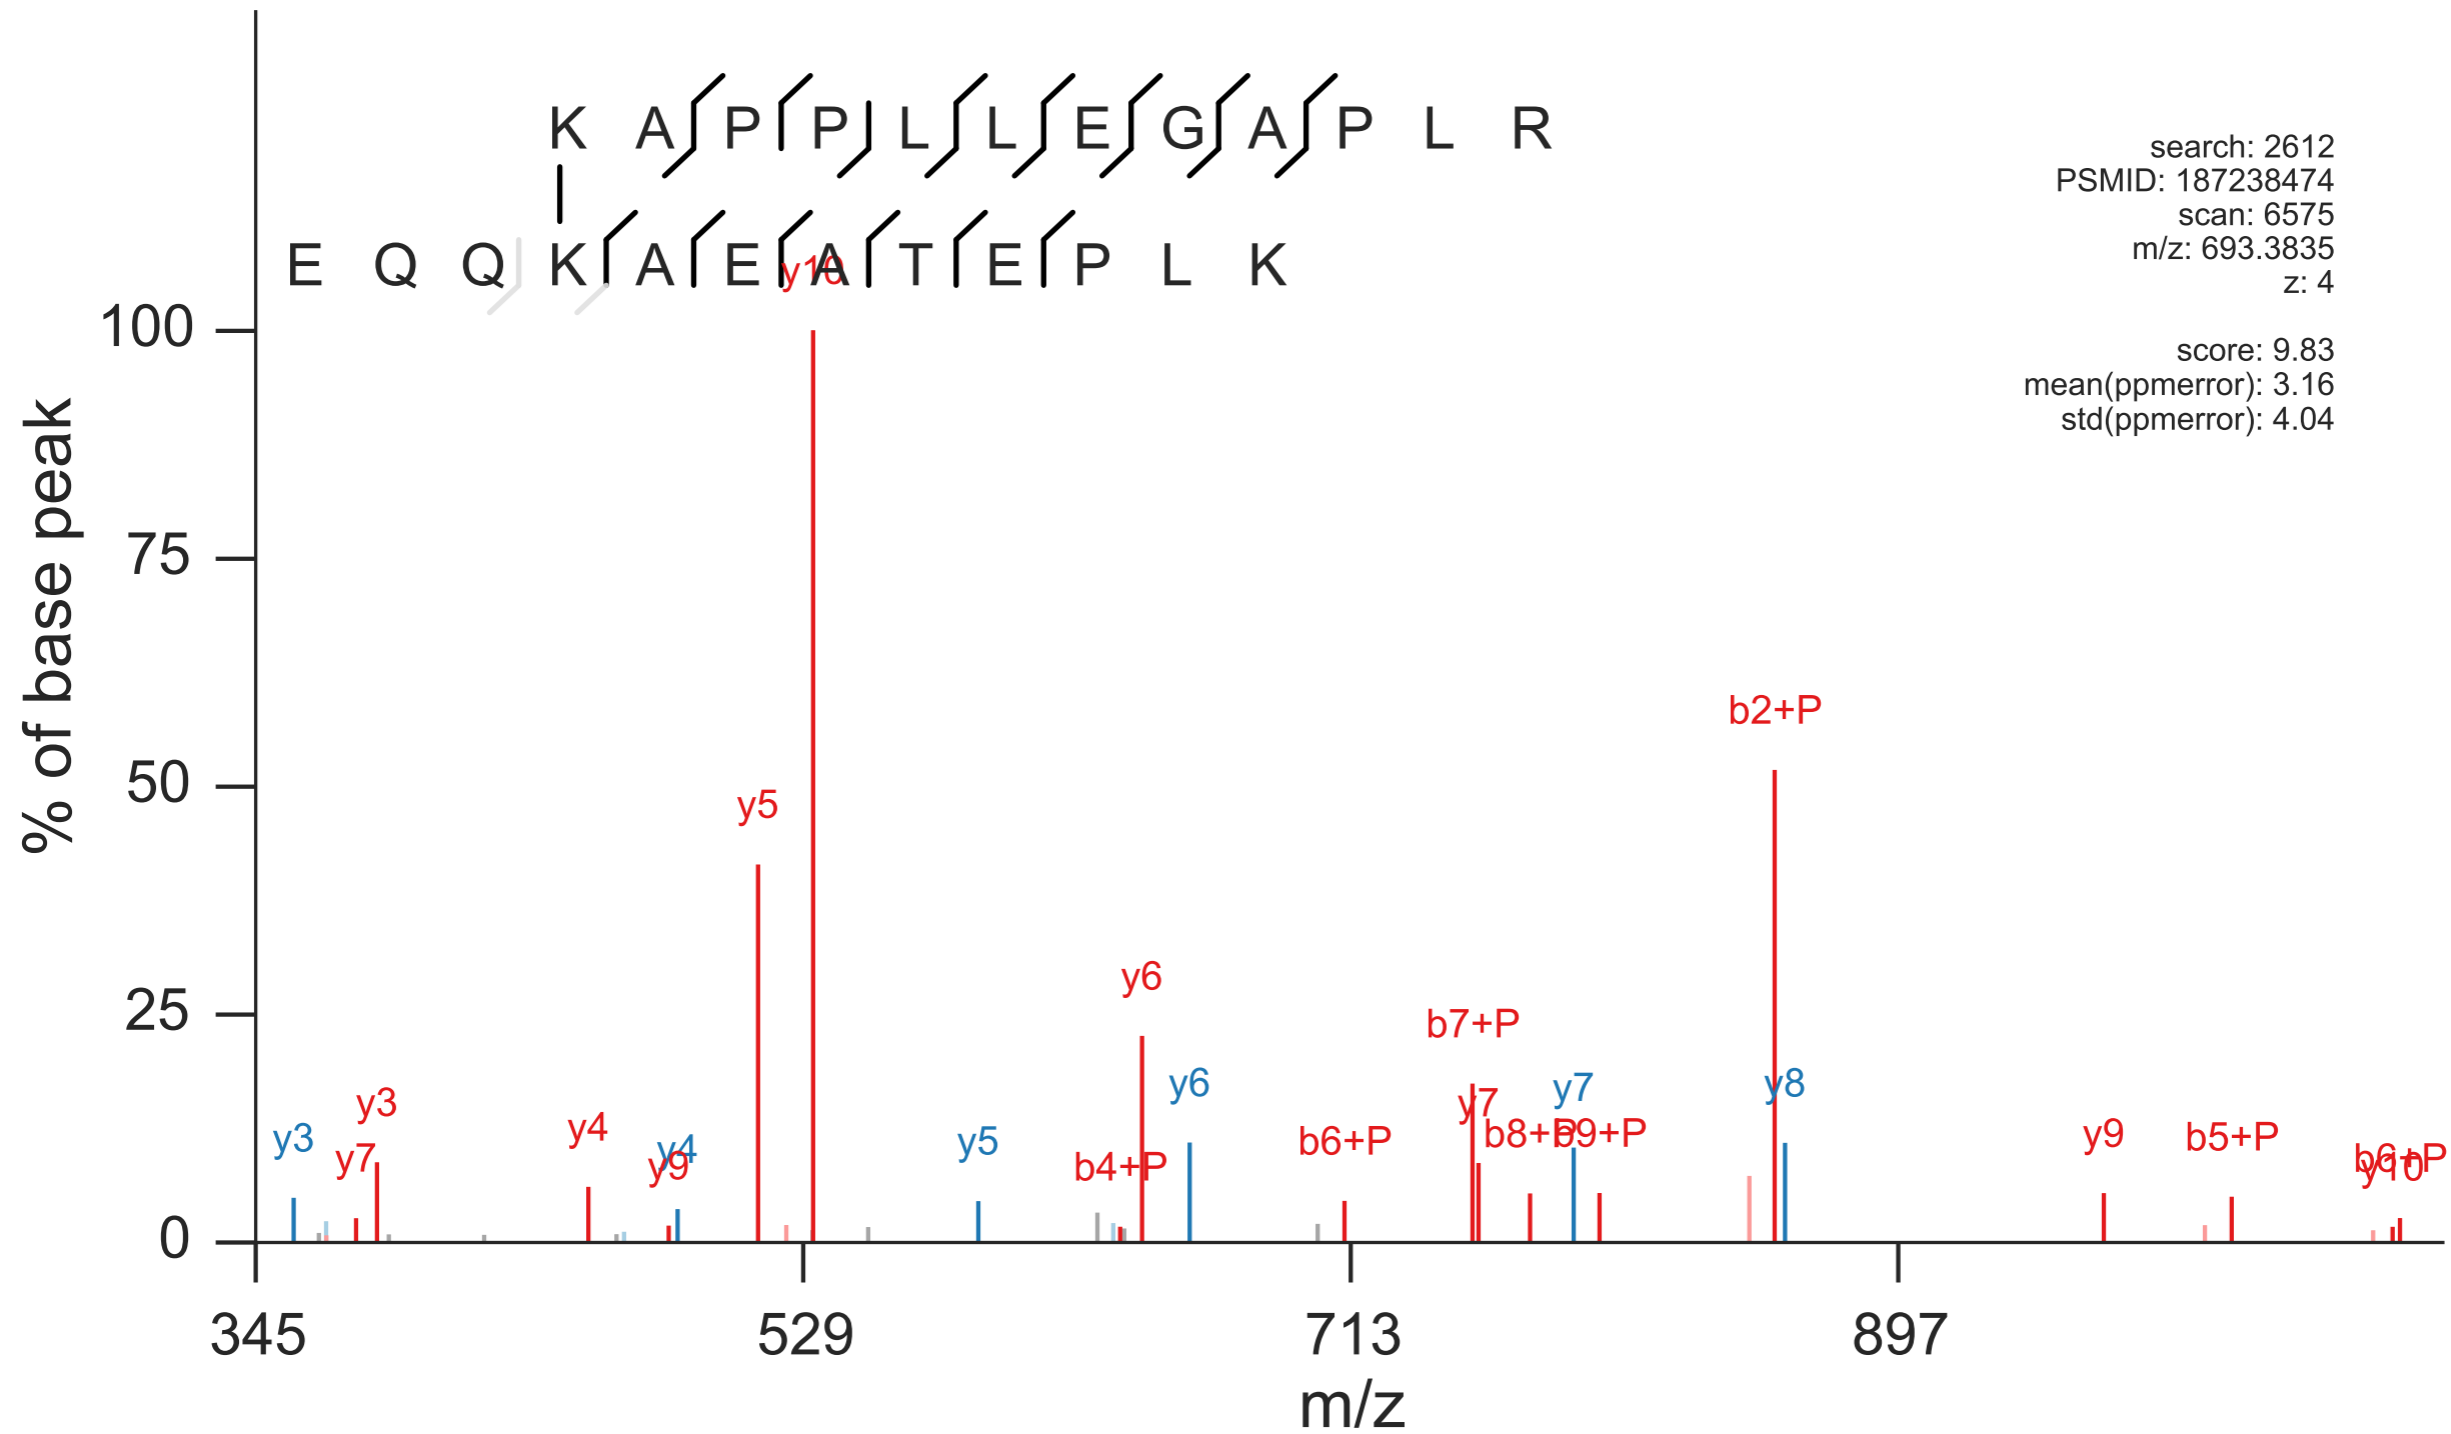

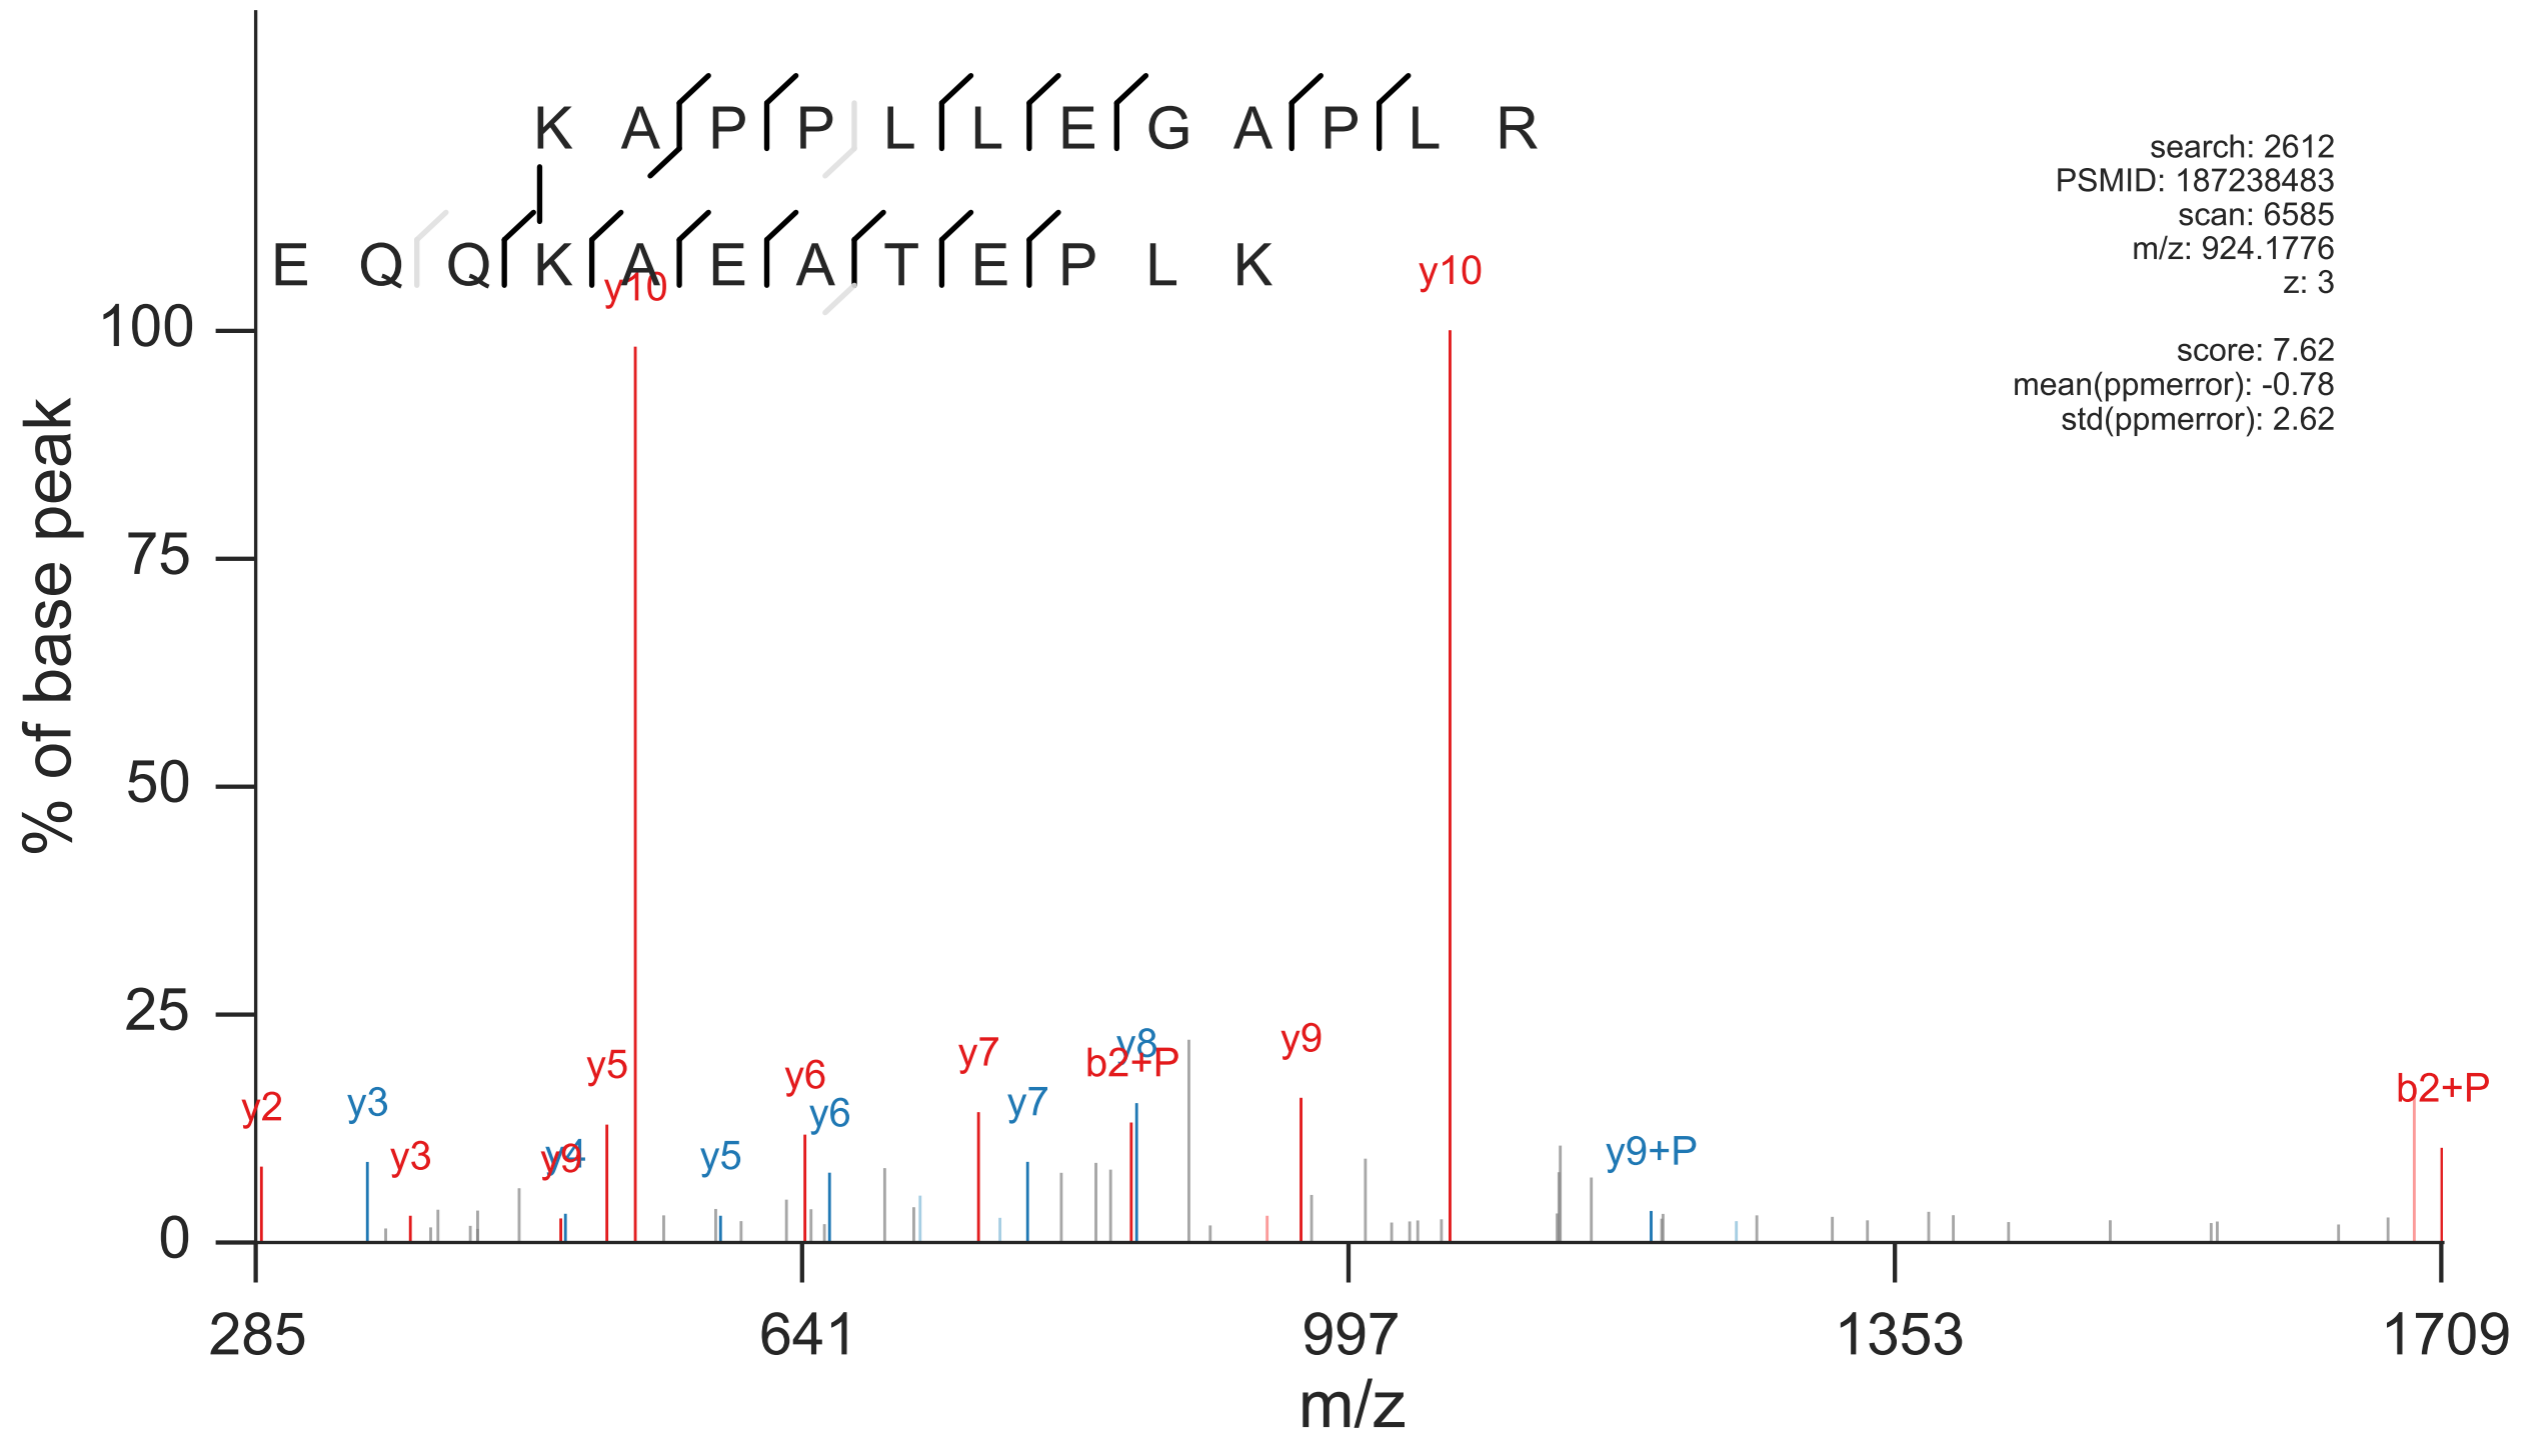

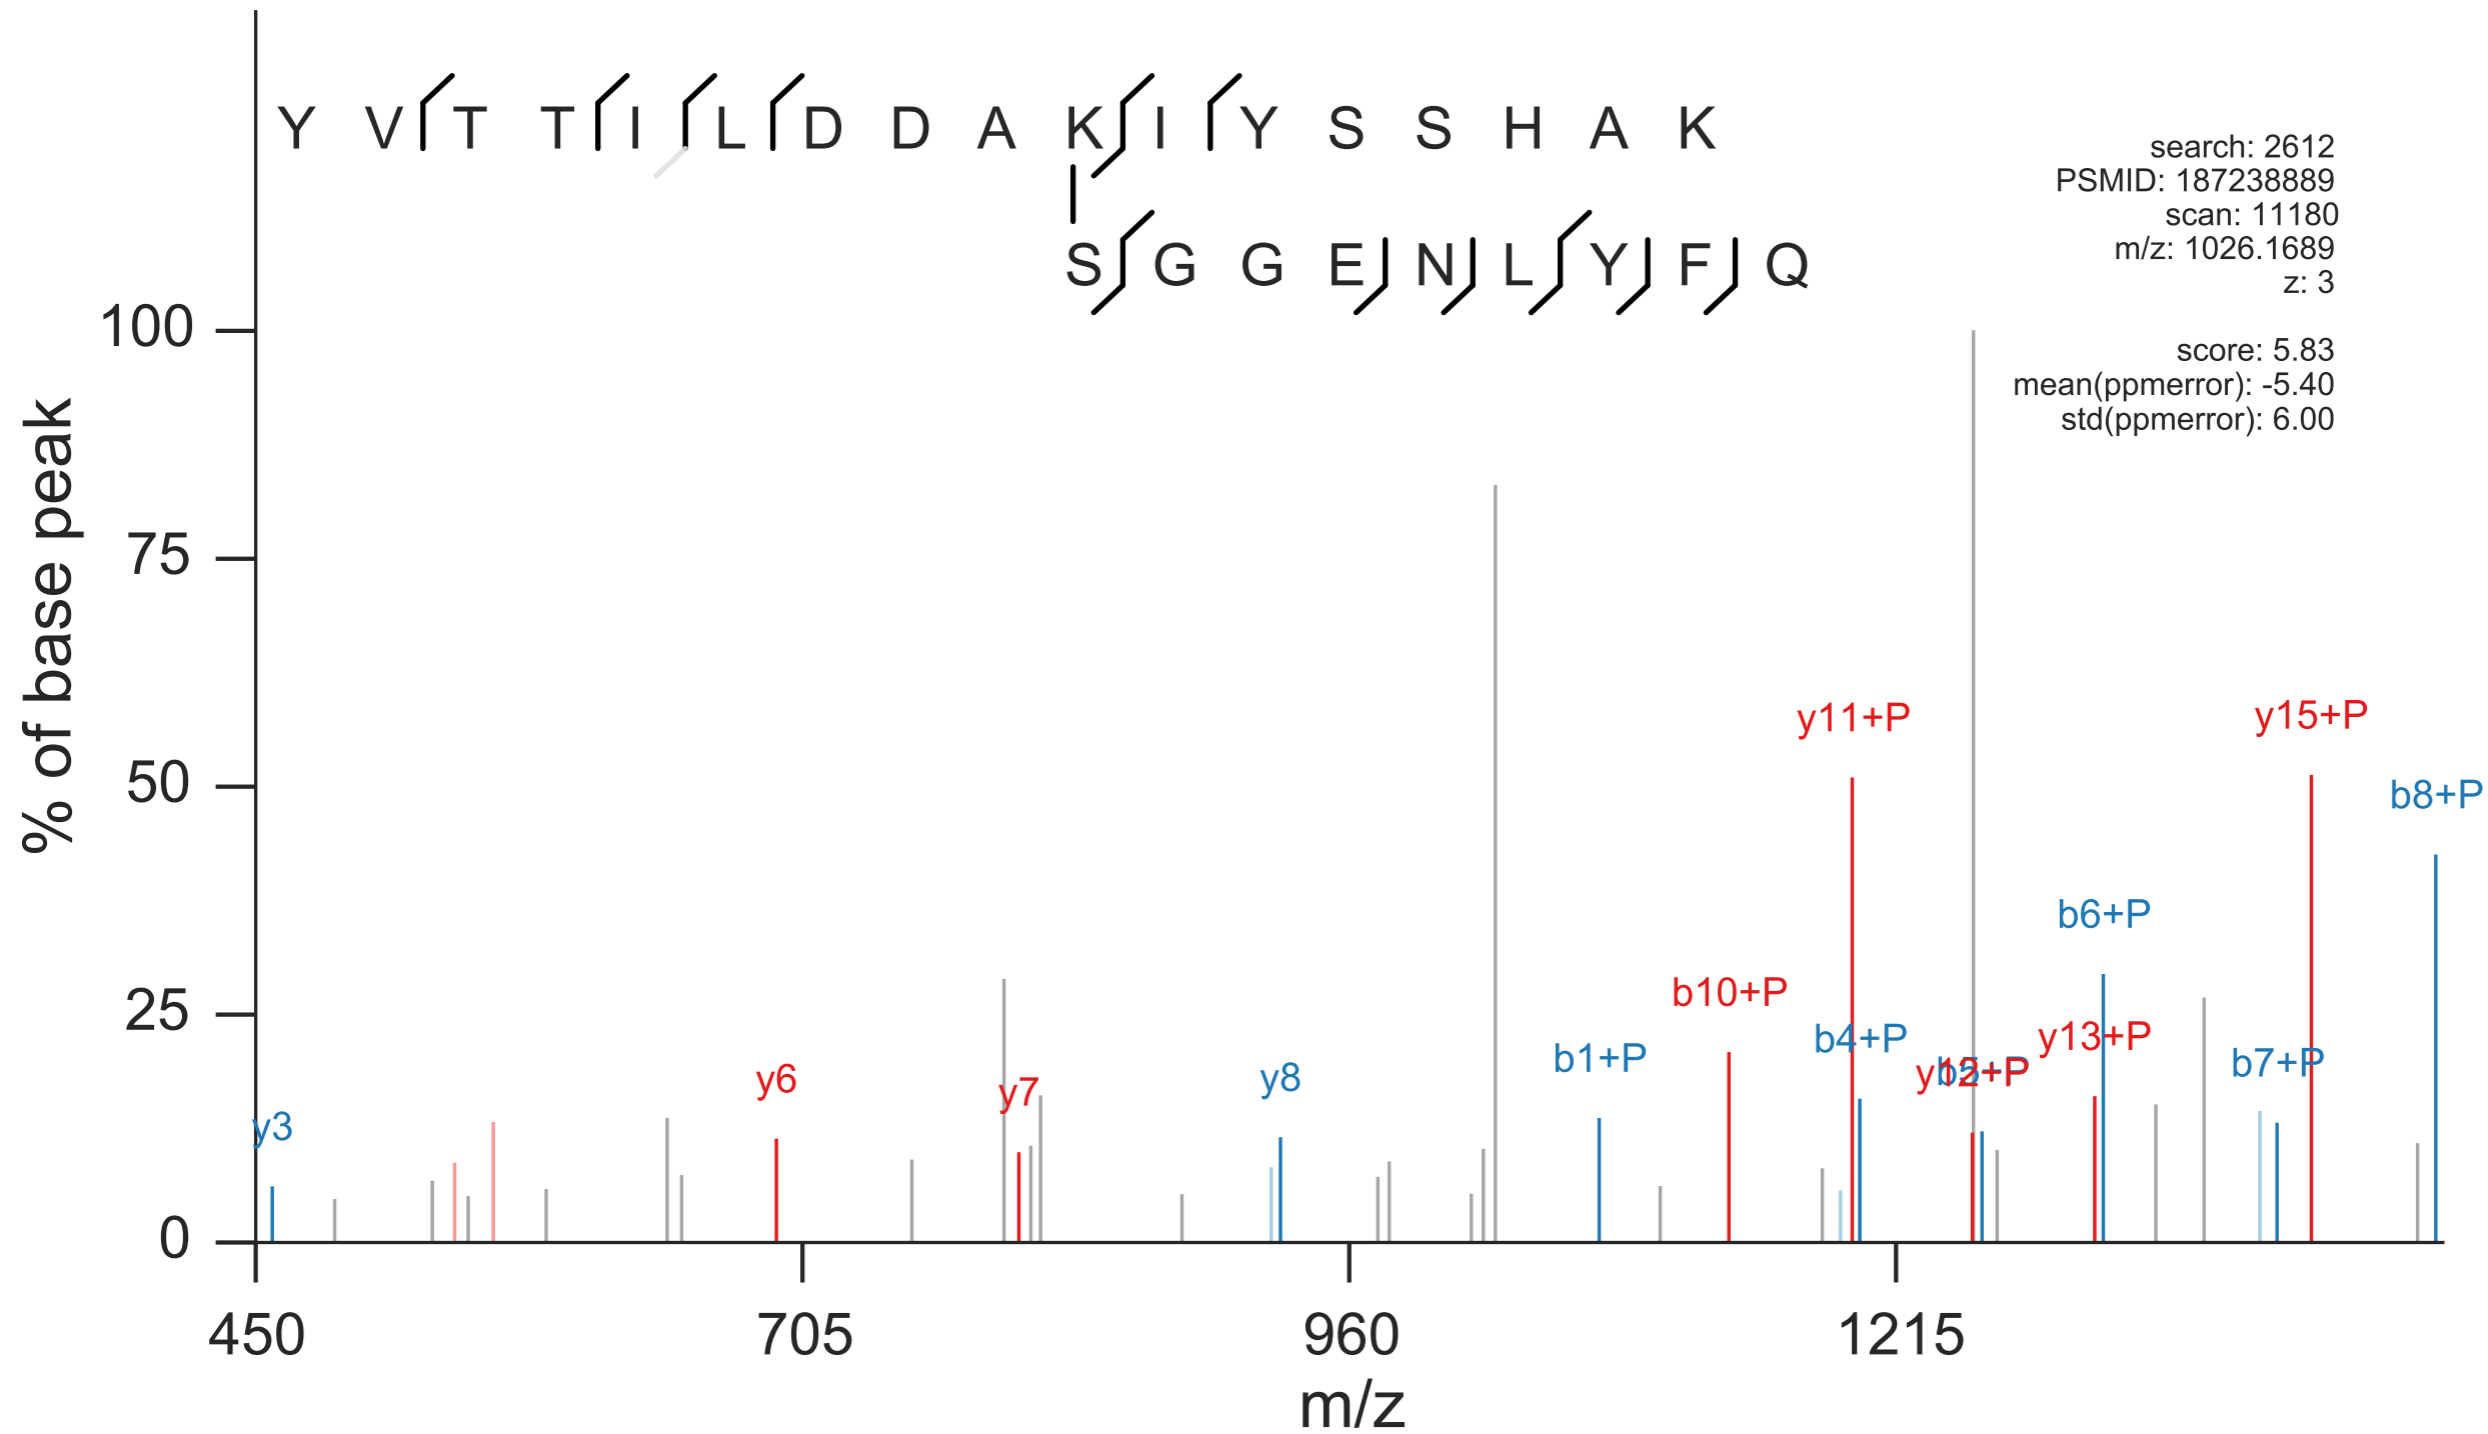

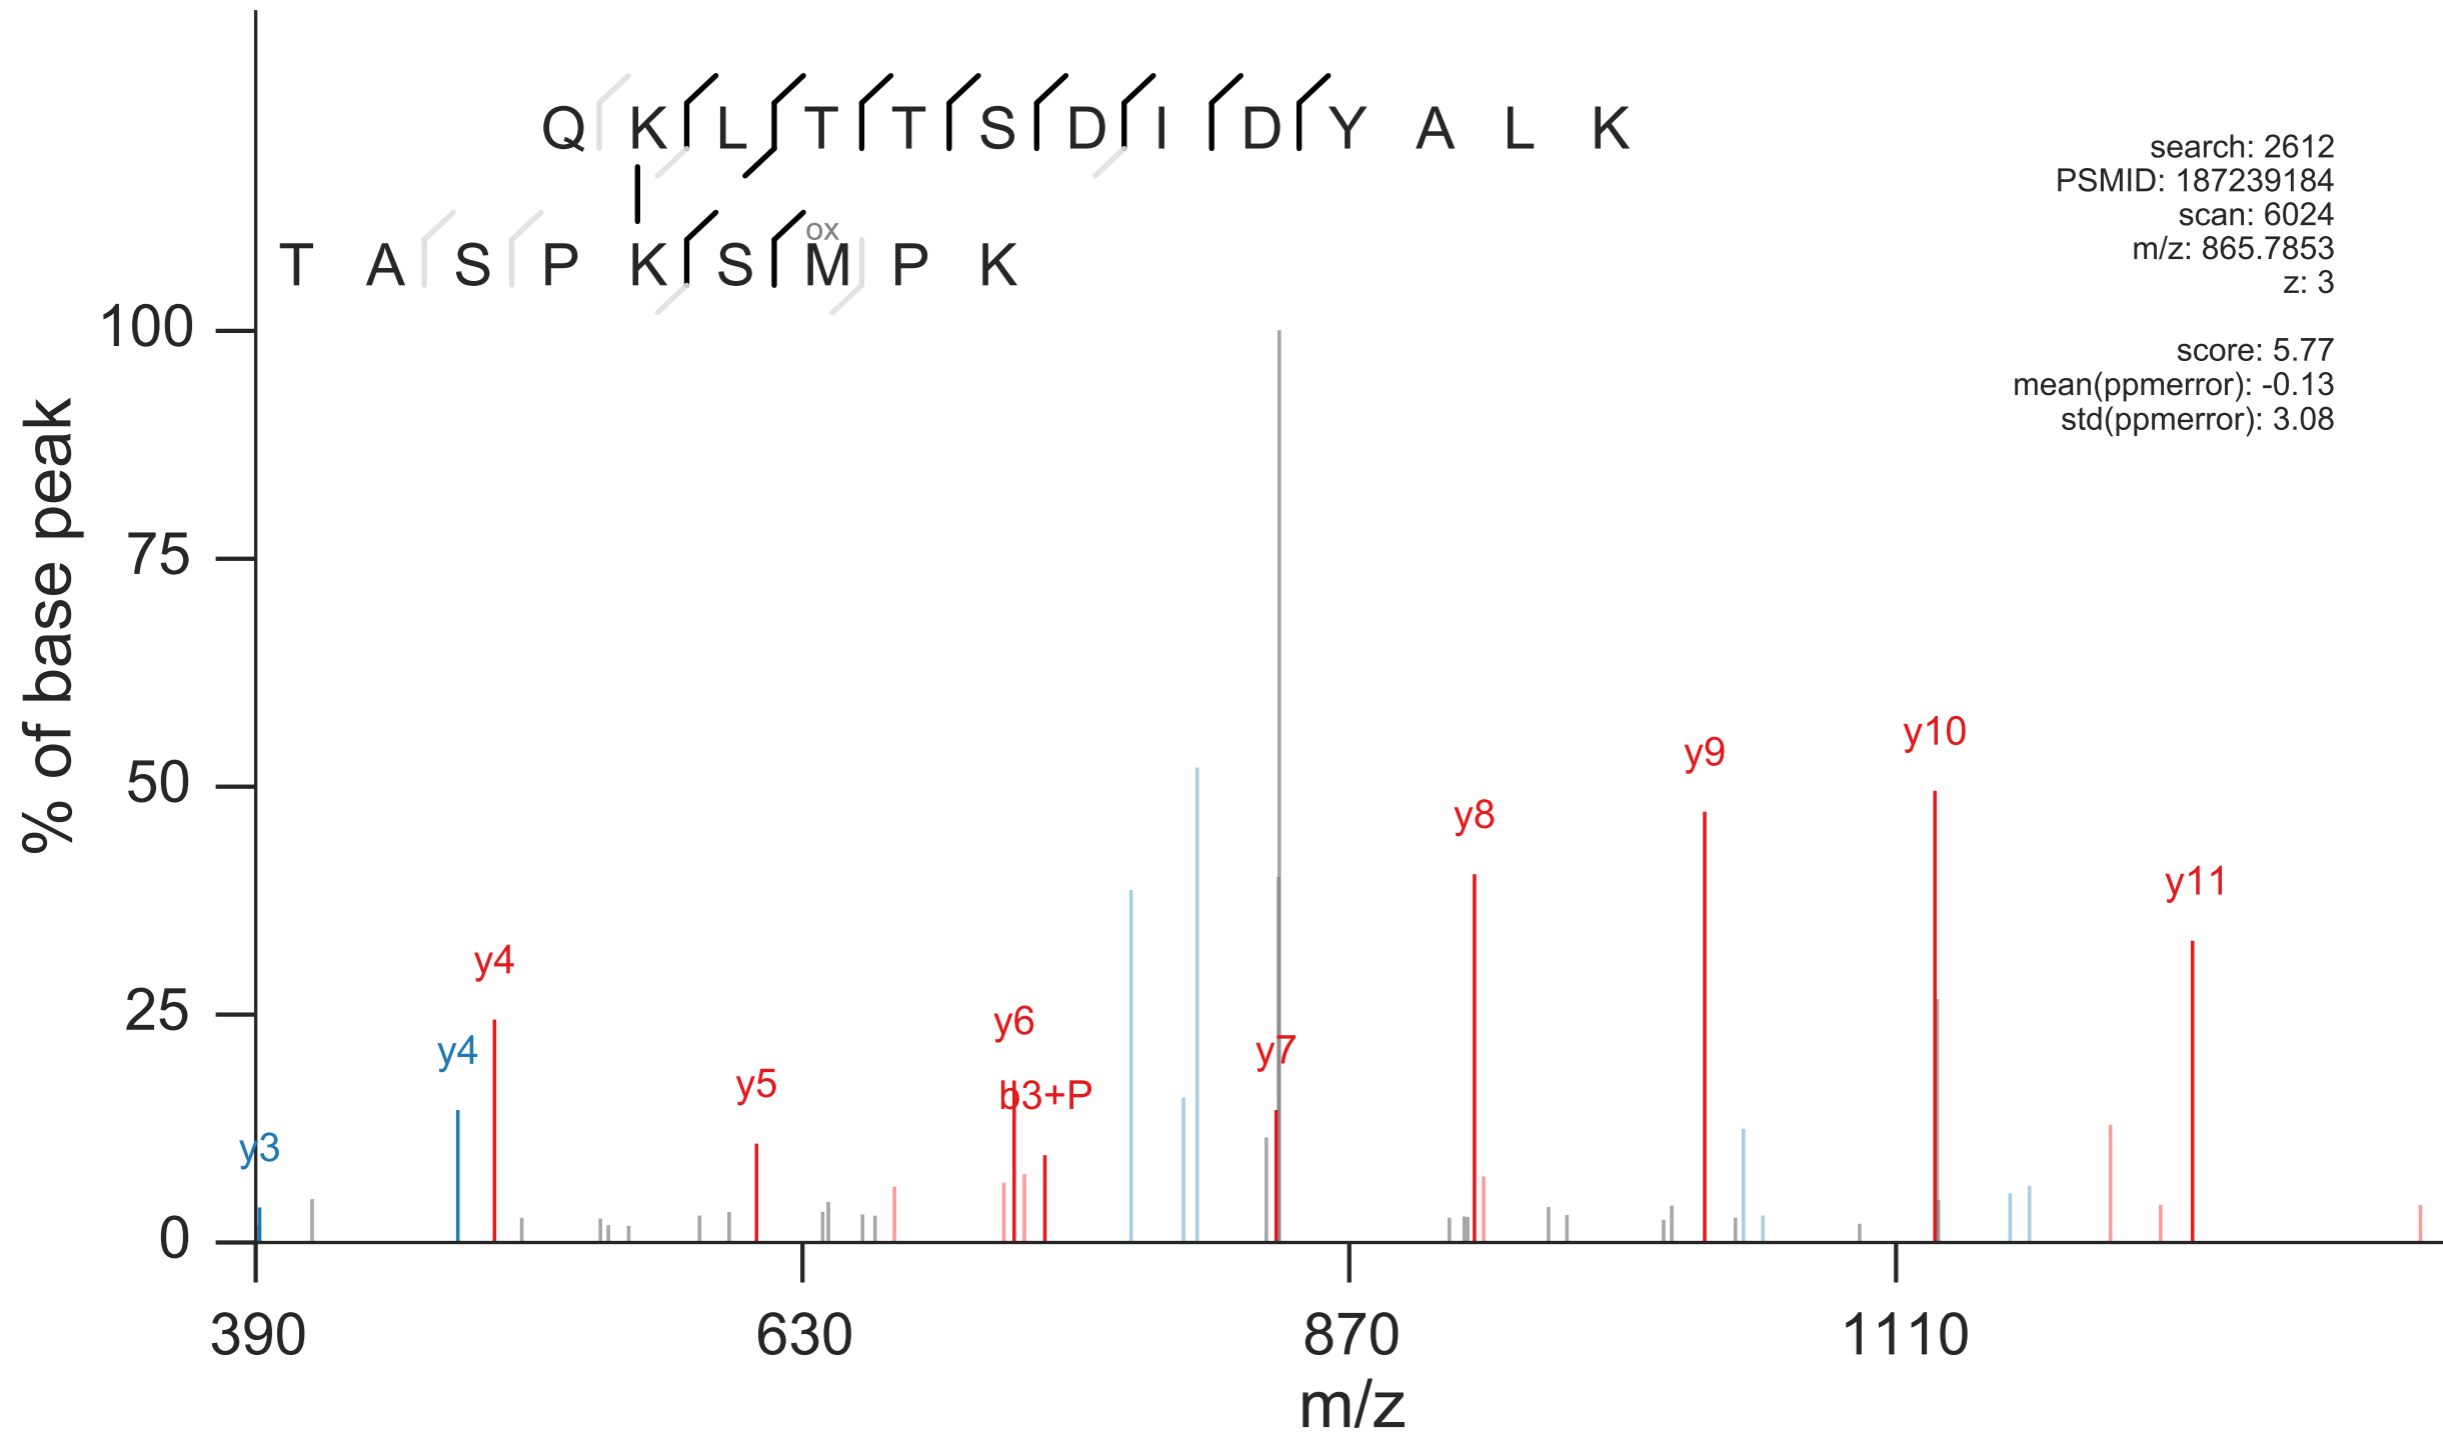



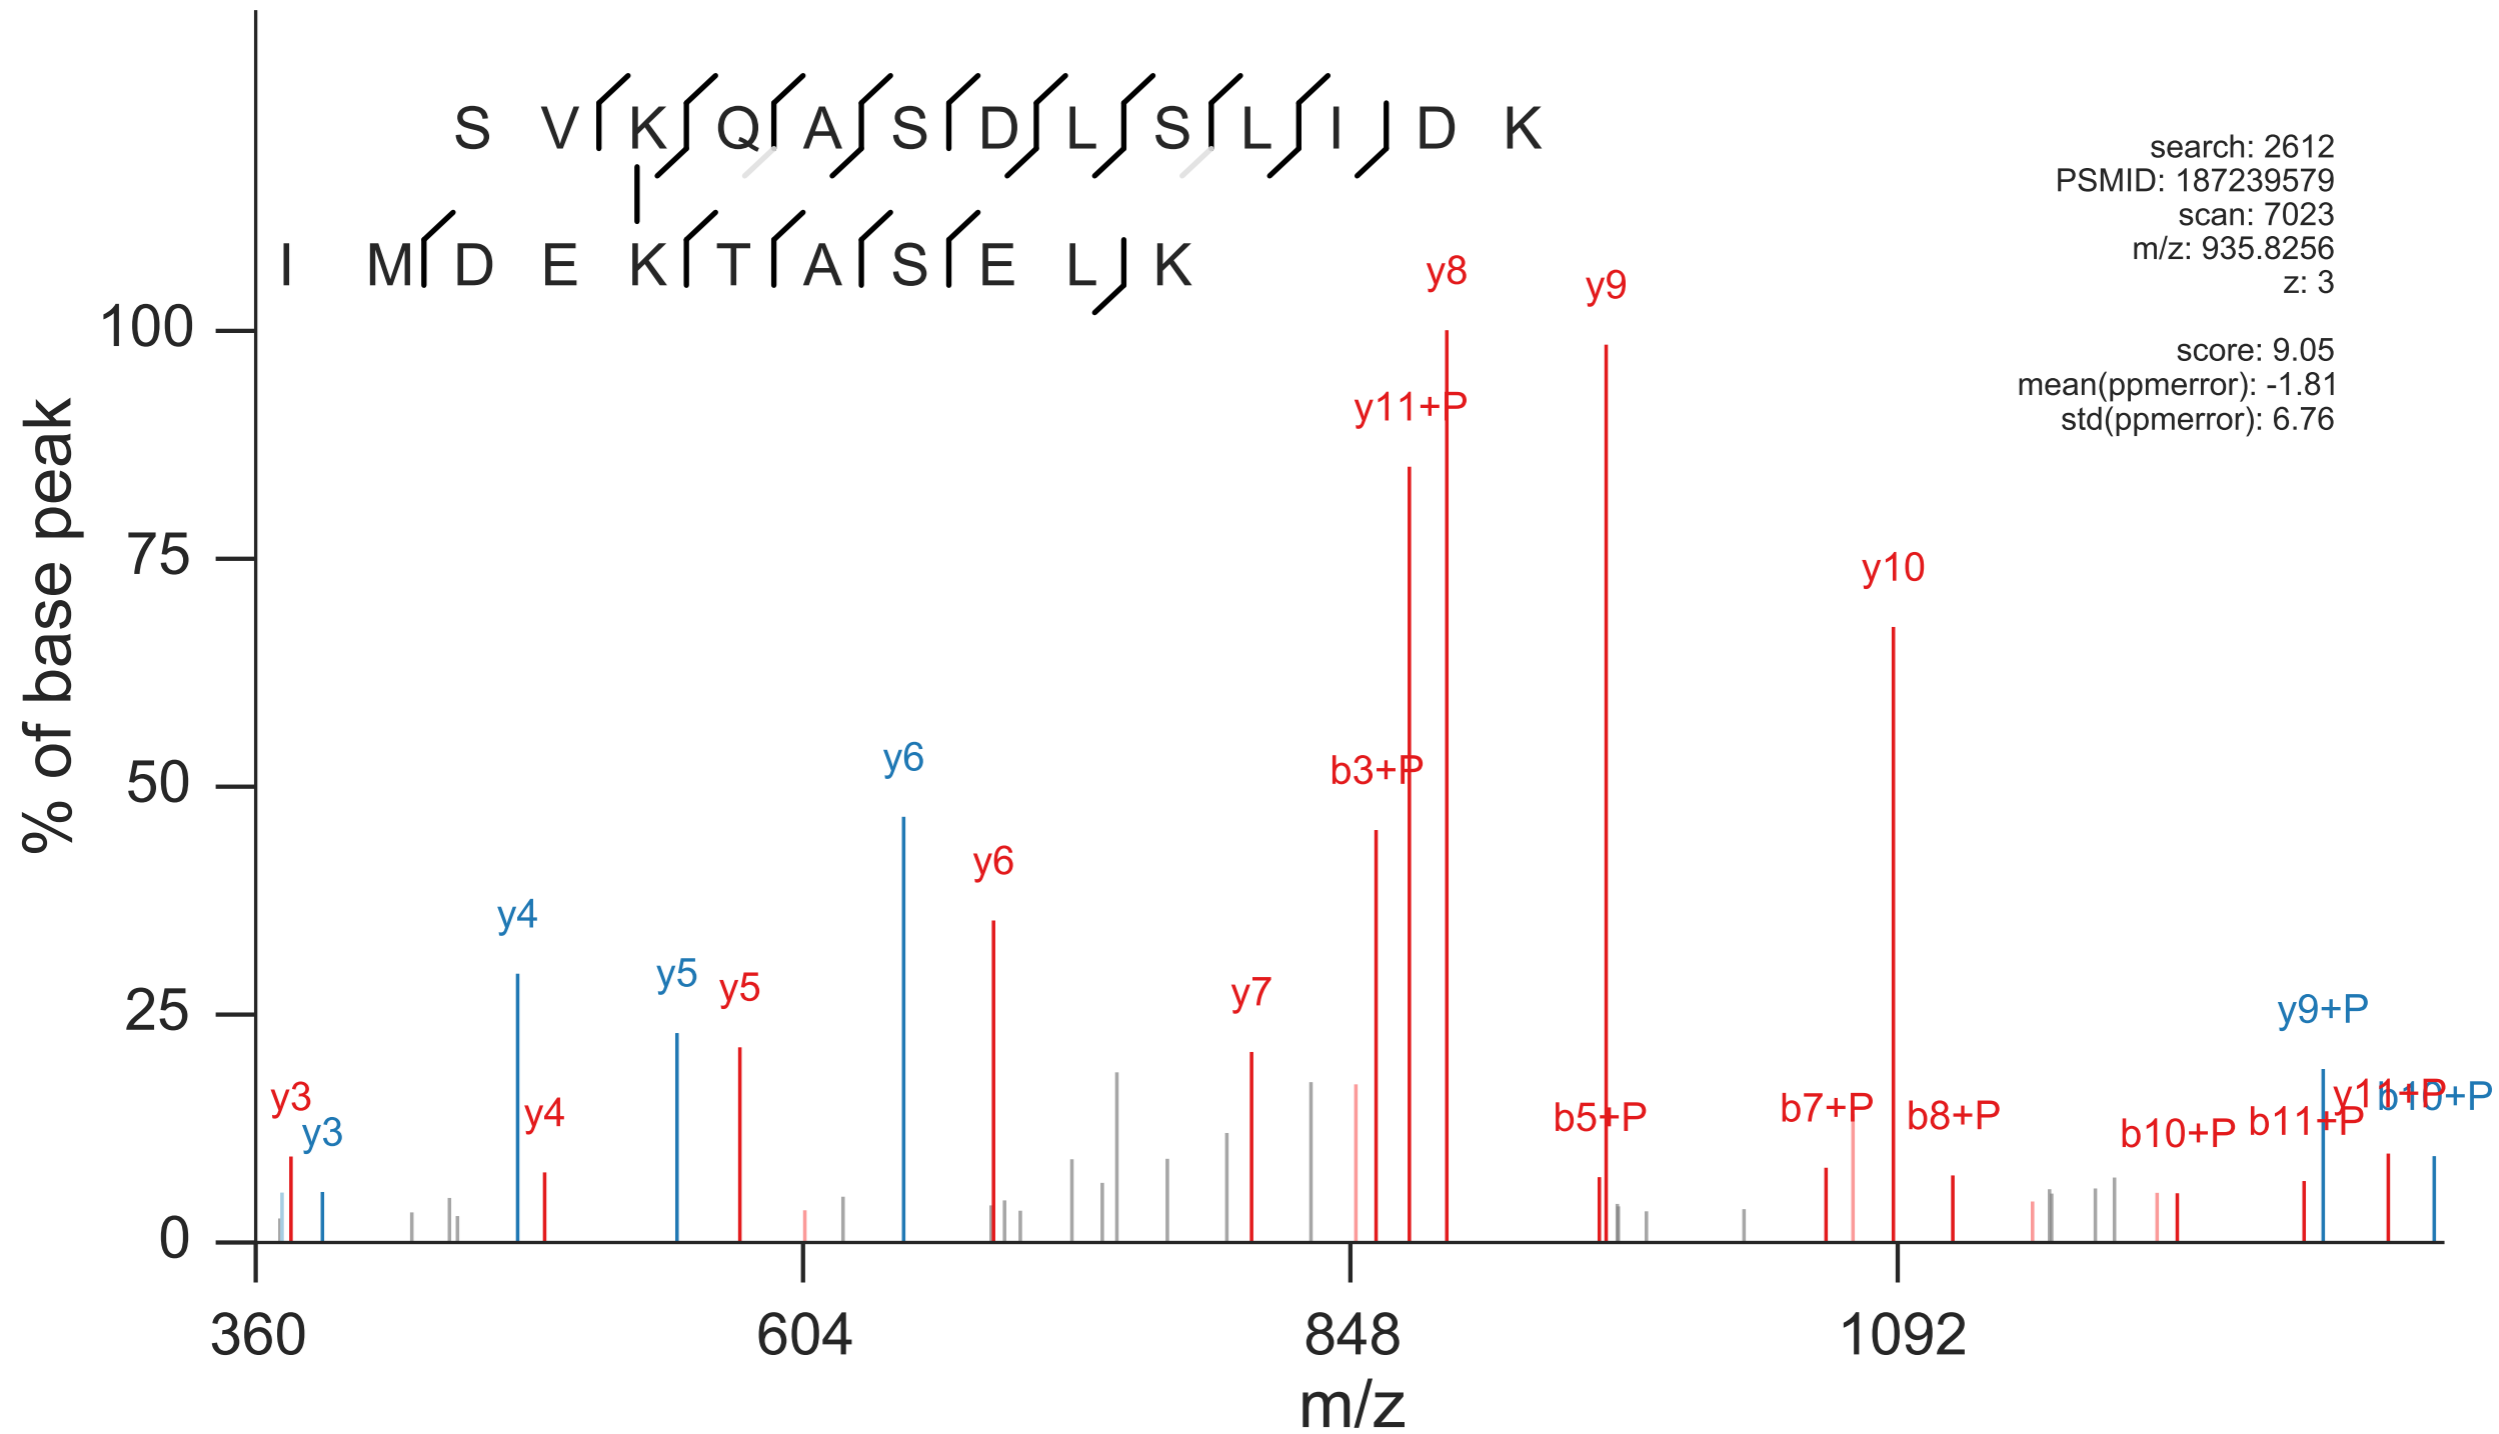

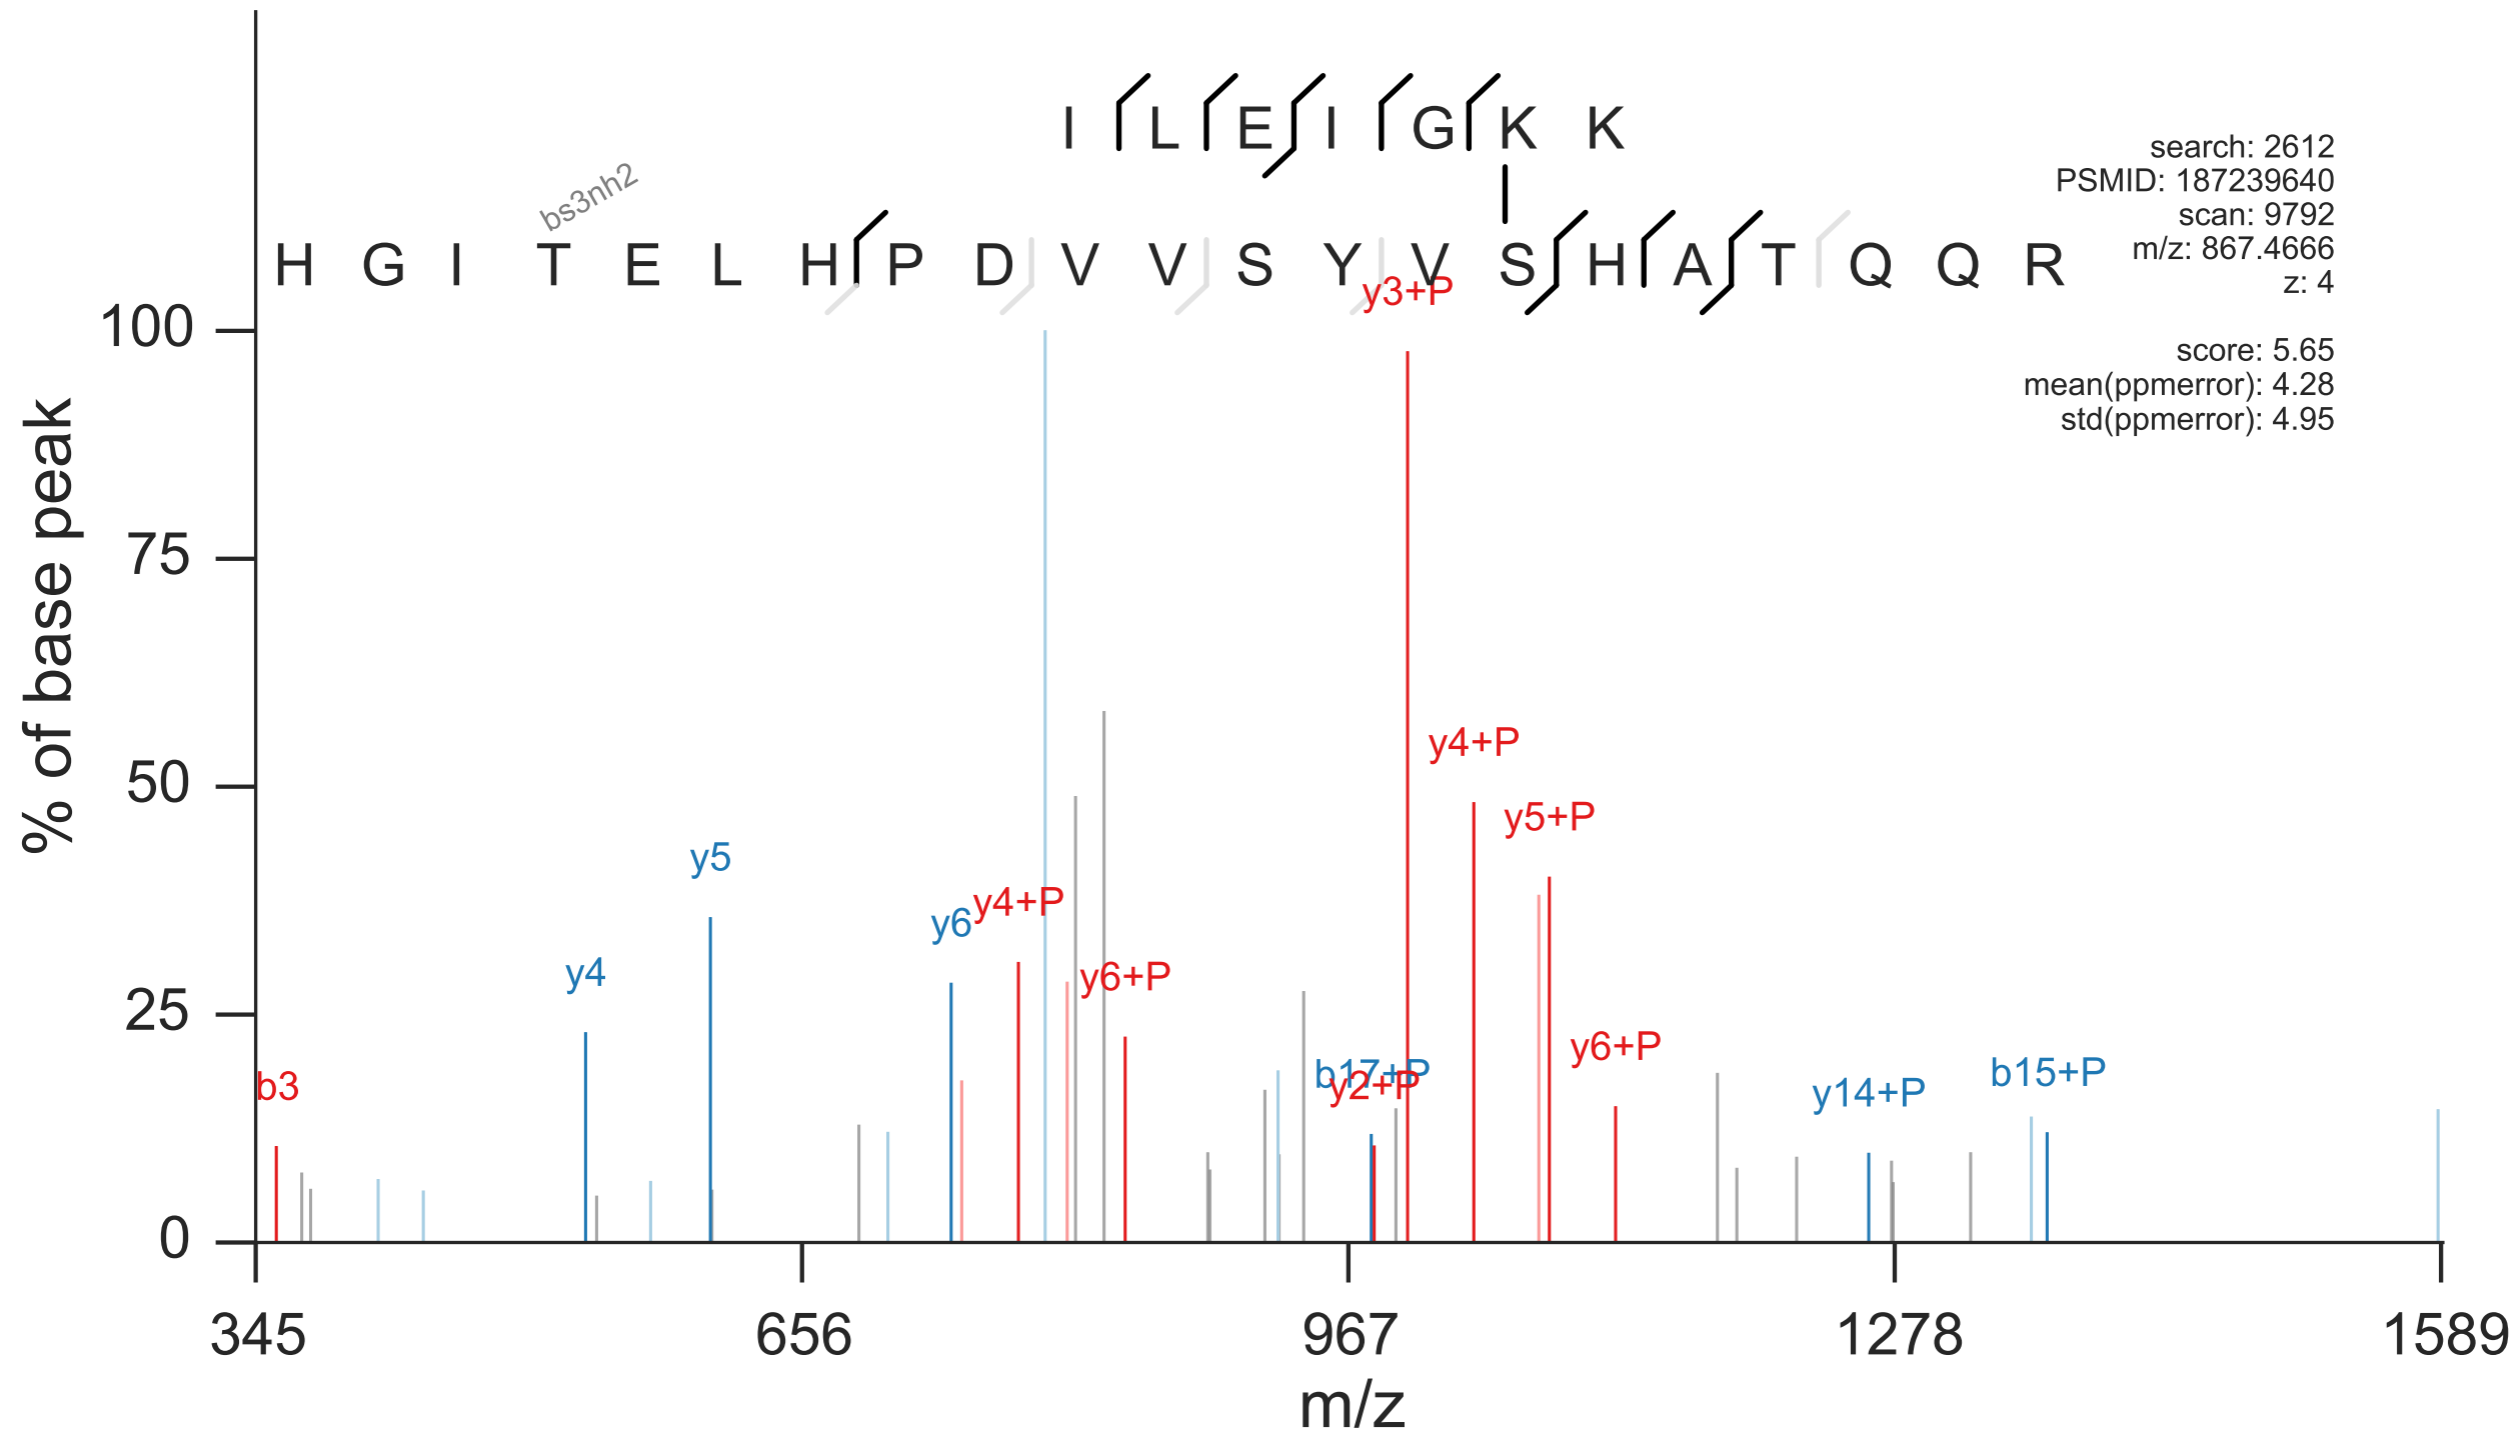

search: 2612  
 PSMID: 187239640  
 scan: 9792  
 m/z: 867.4666  
 z: 4  
  
 score: 5.65  
 mean(ppmerror): 4.28  
 std(ppmerror): 4.95

bs3nh2

I L E I G K K

H G I T E L H P D V V S Y V S H A T Q Q R

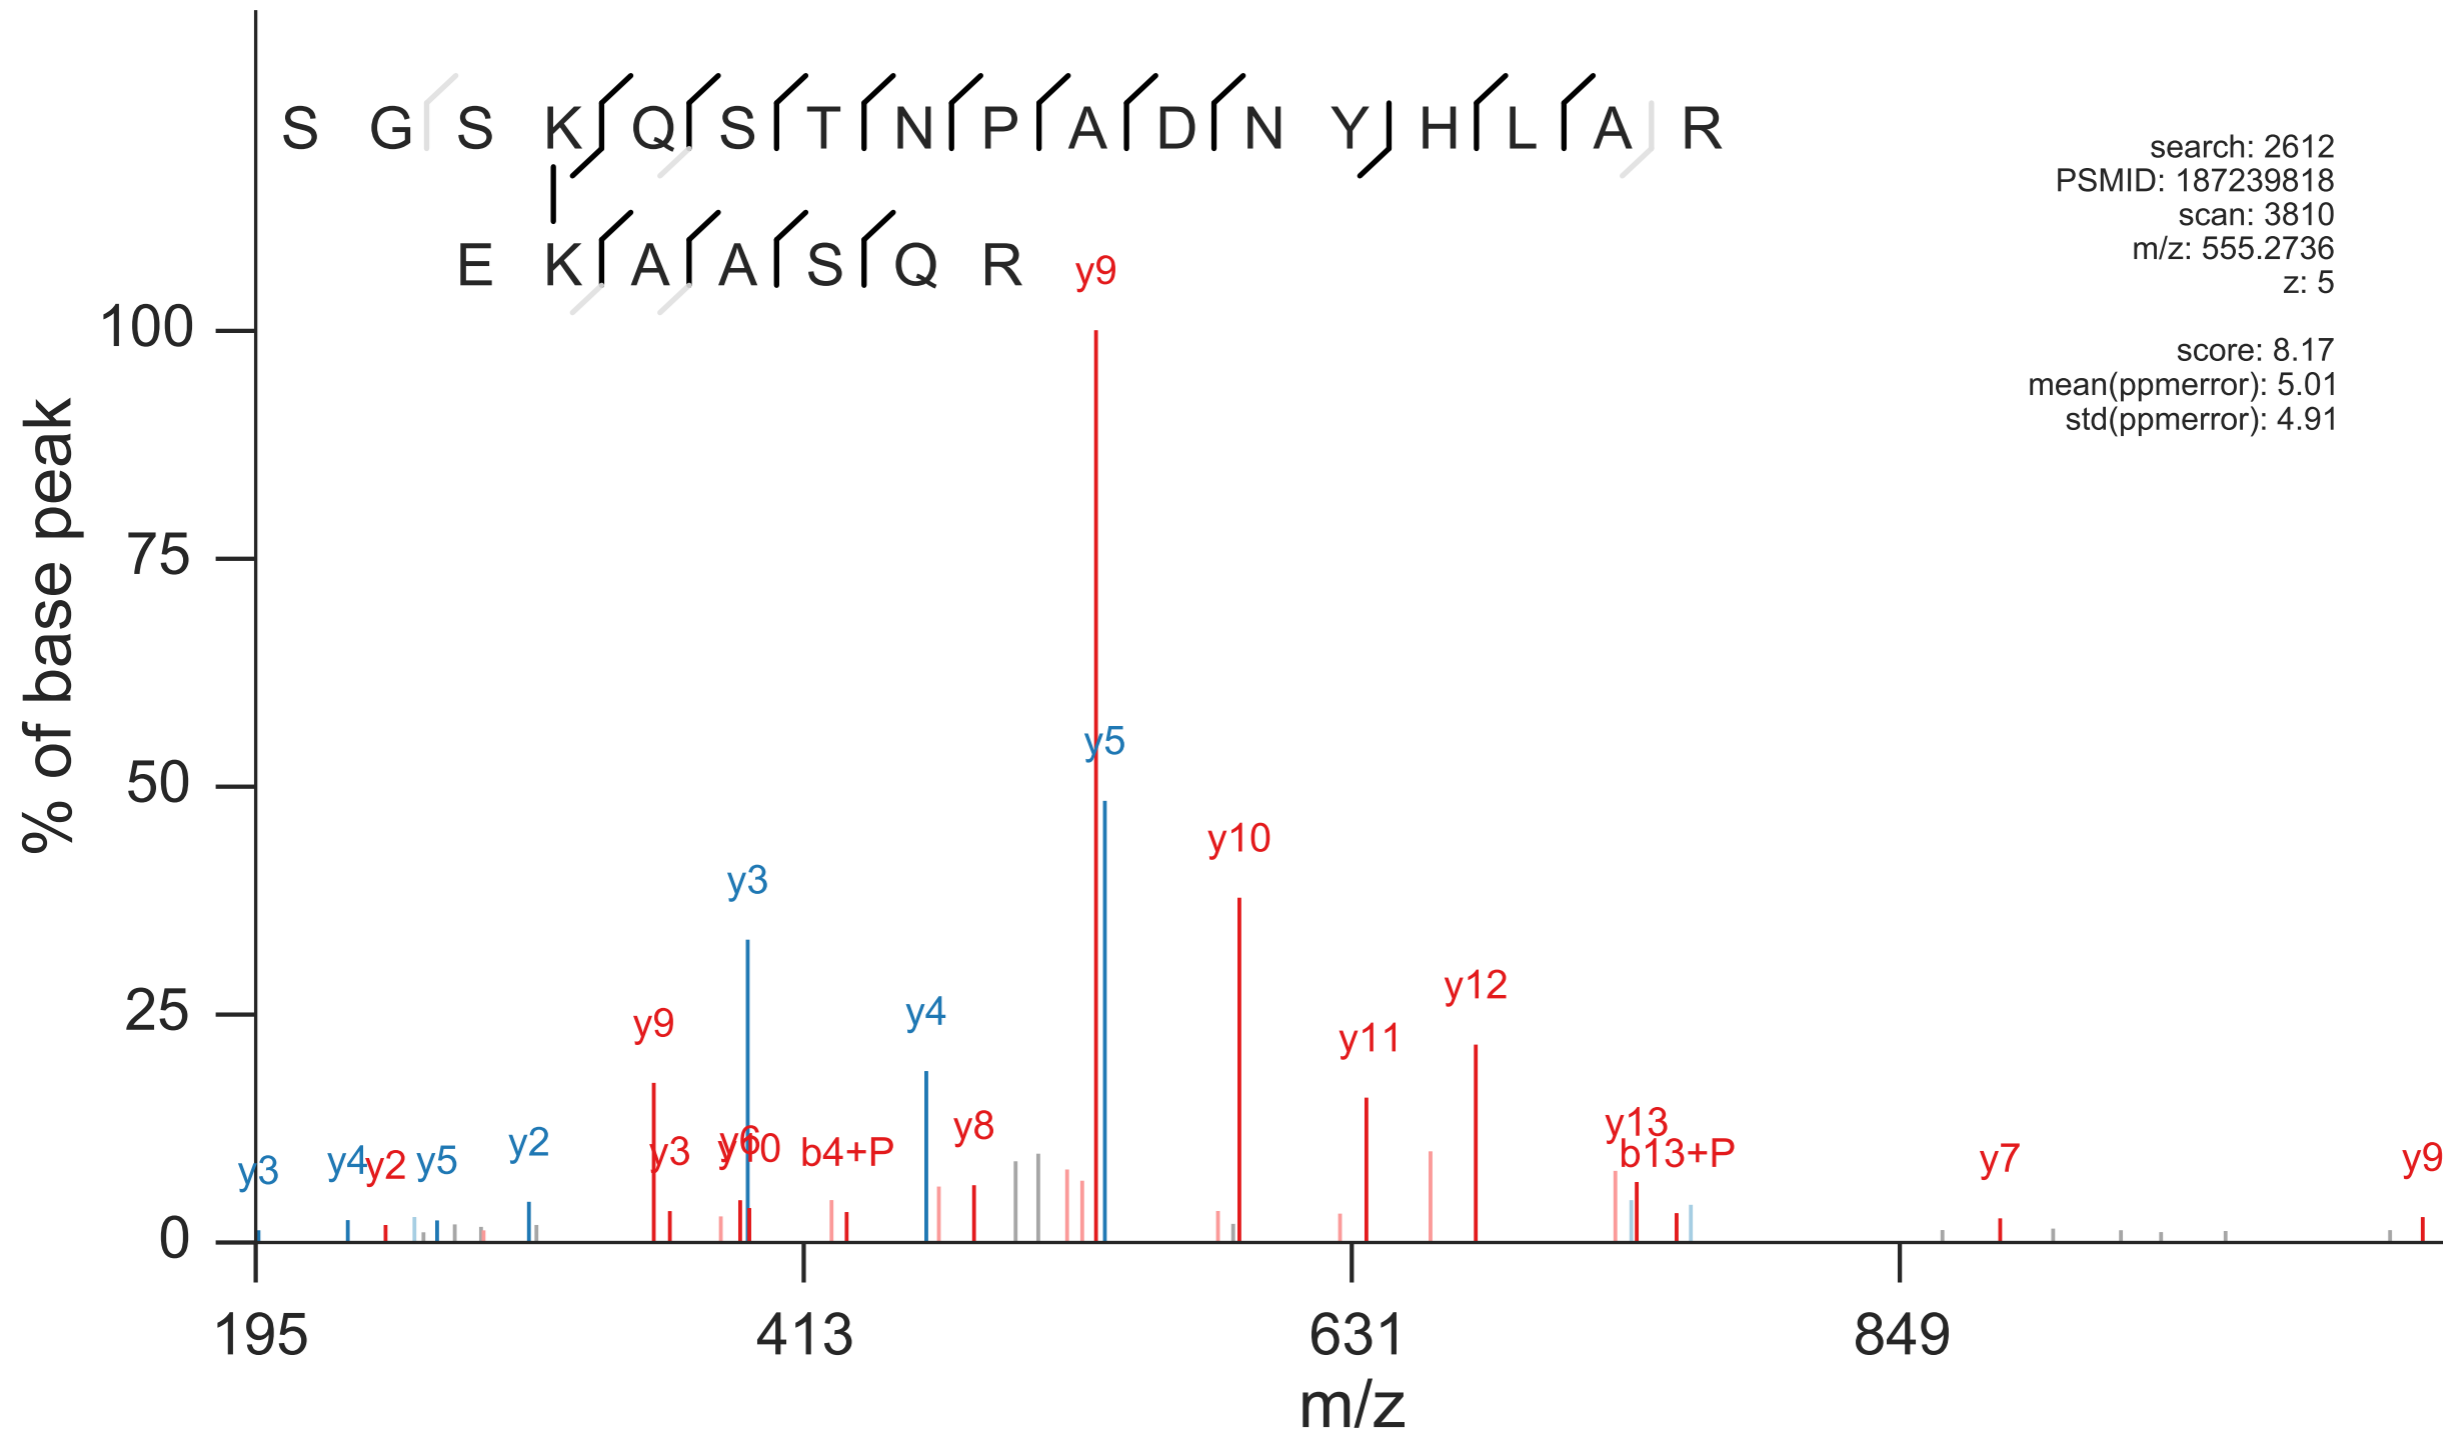

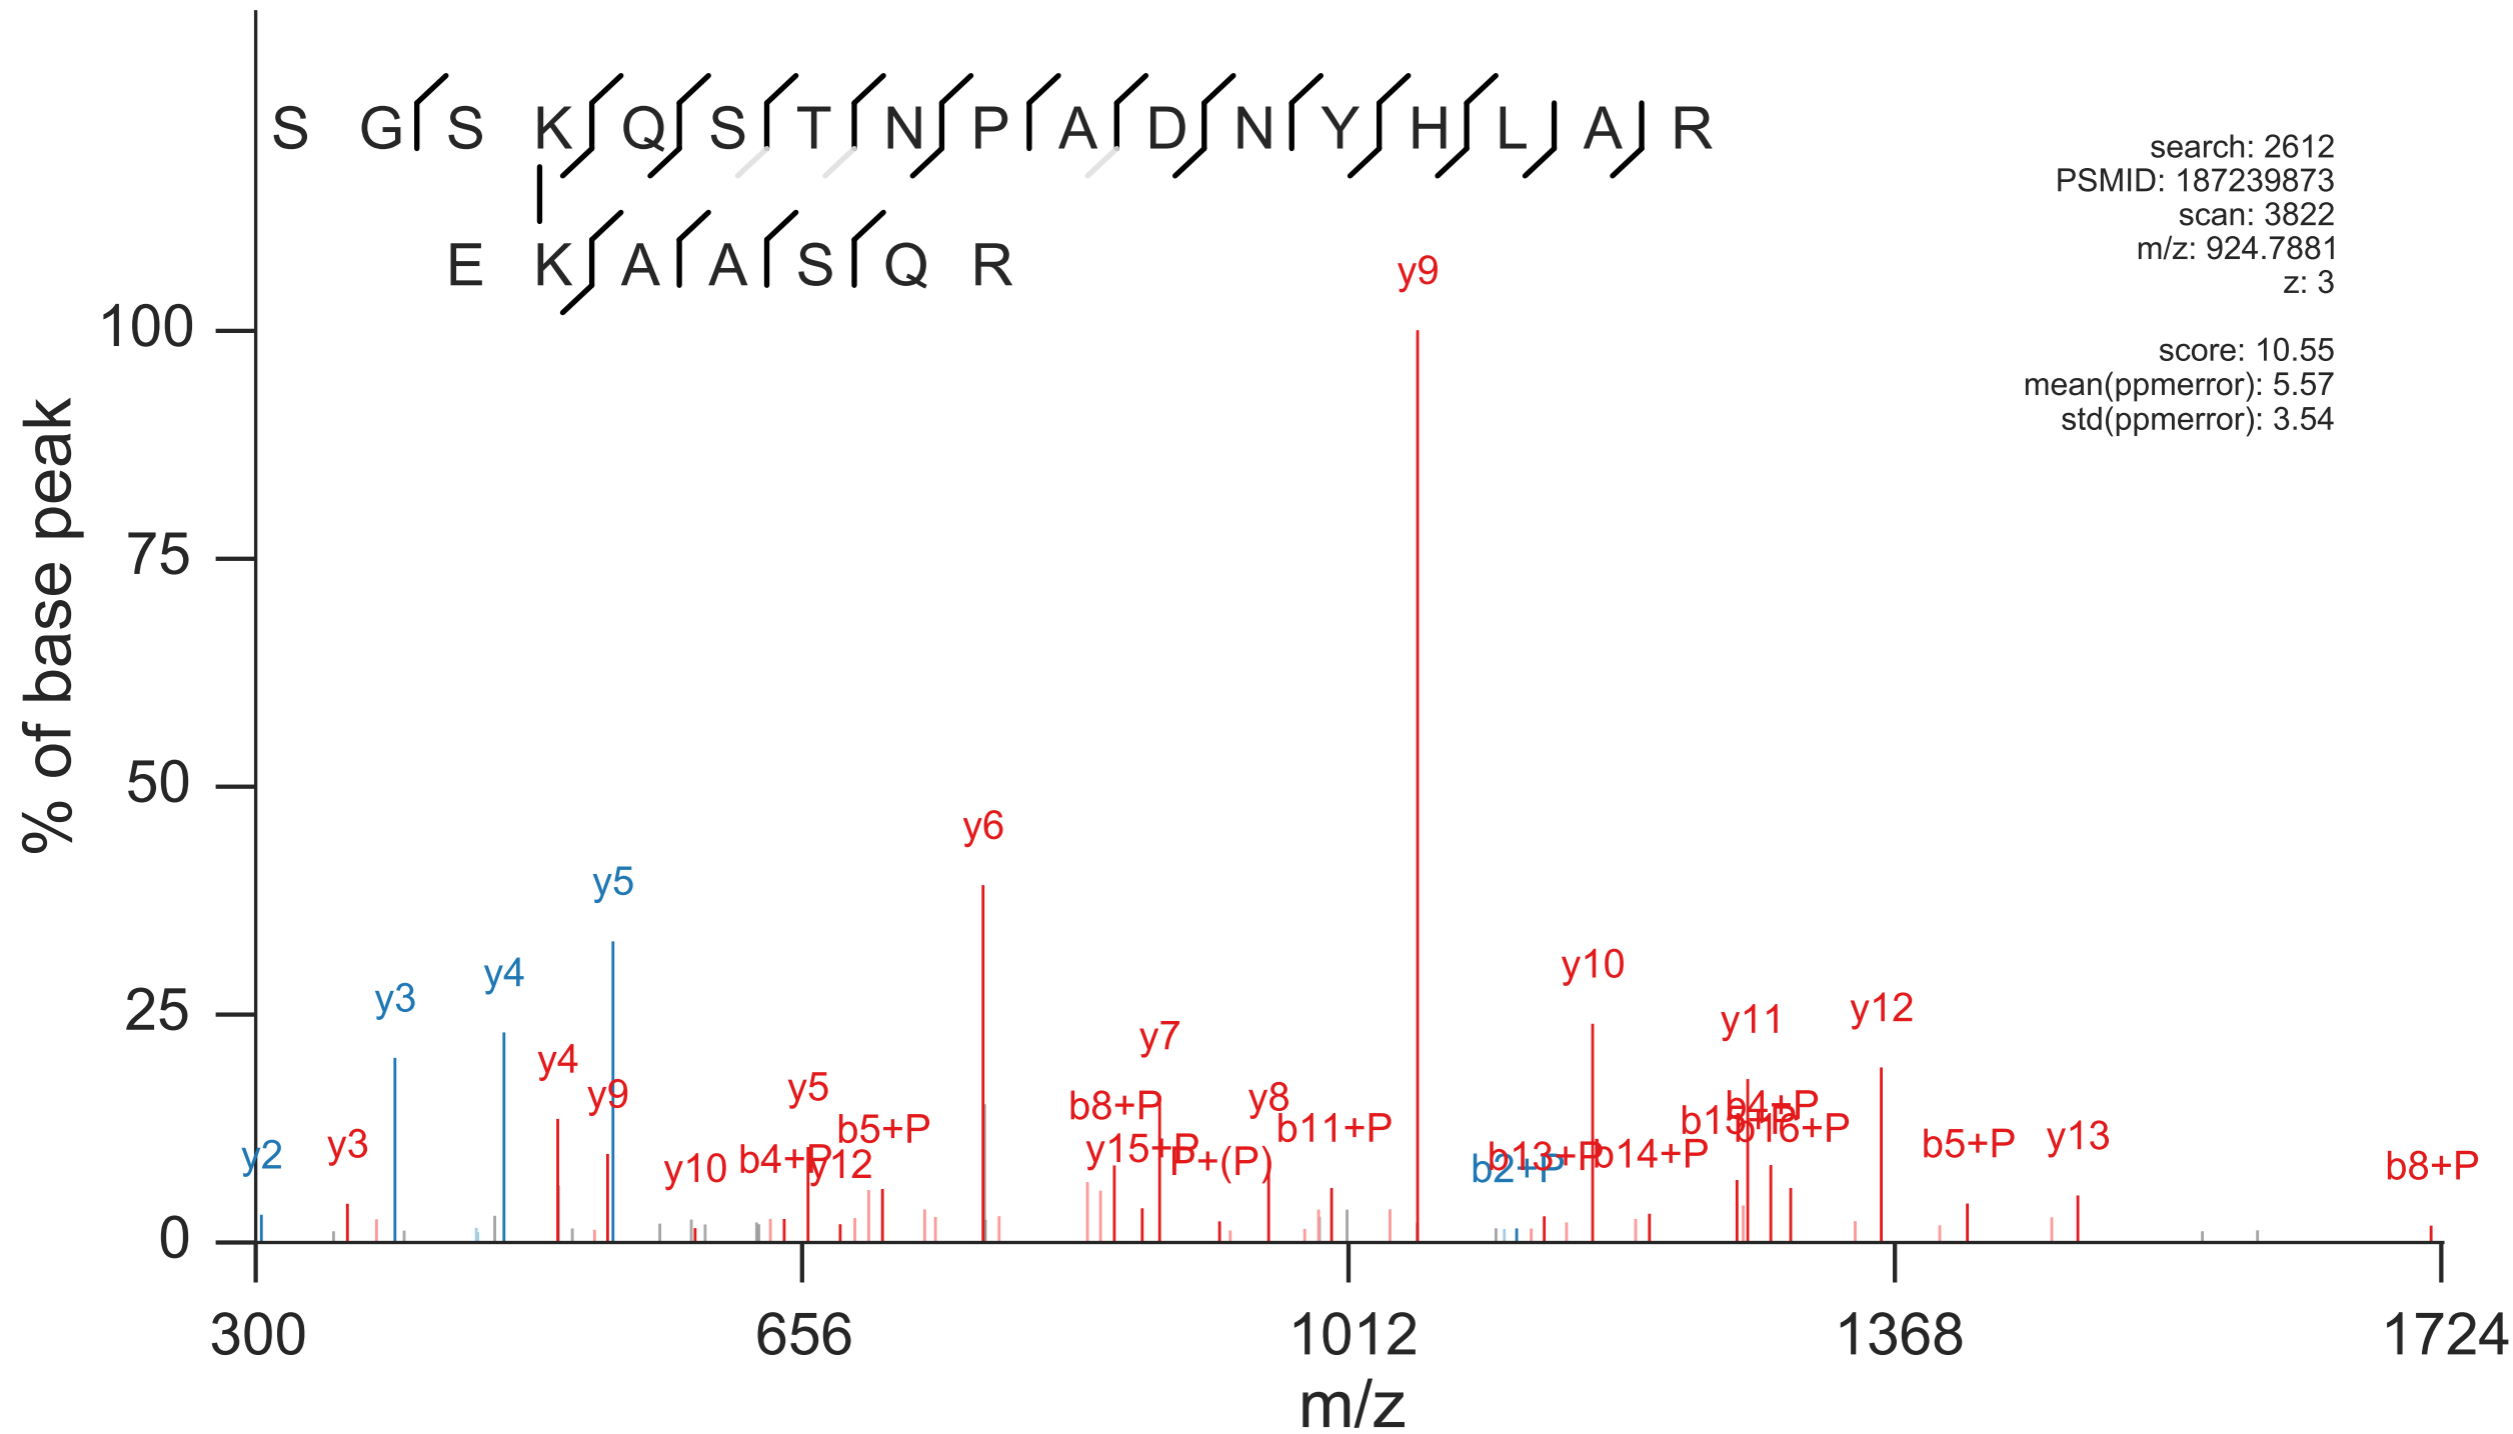

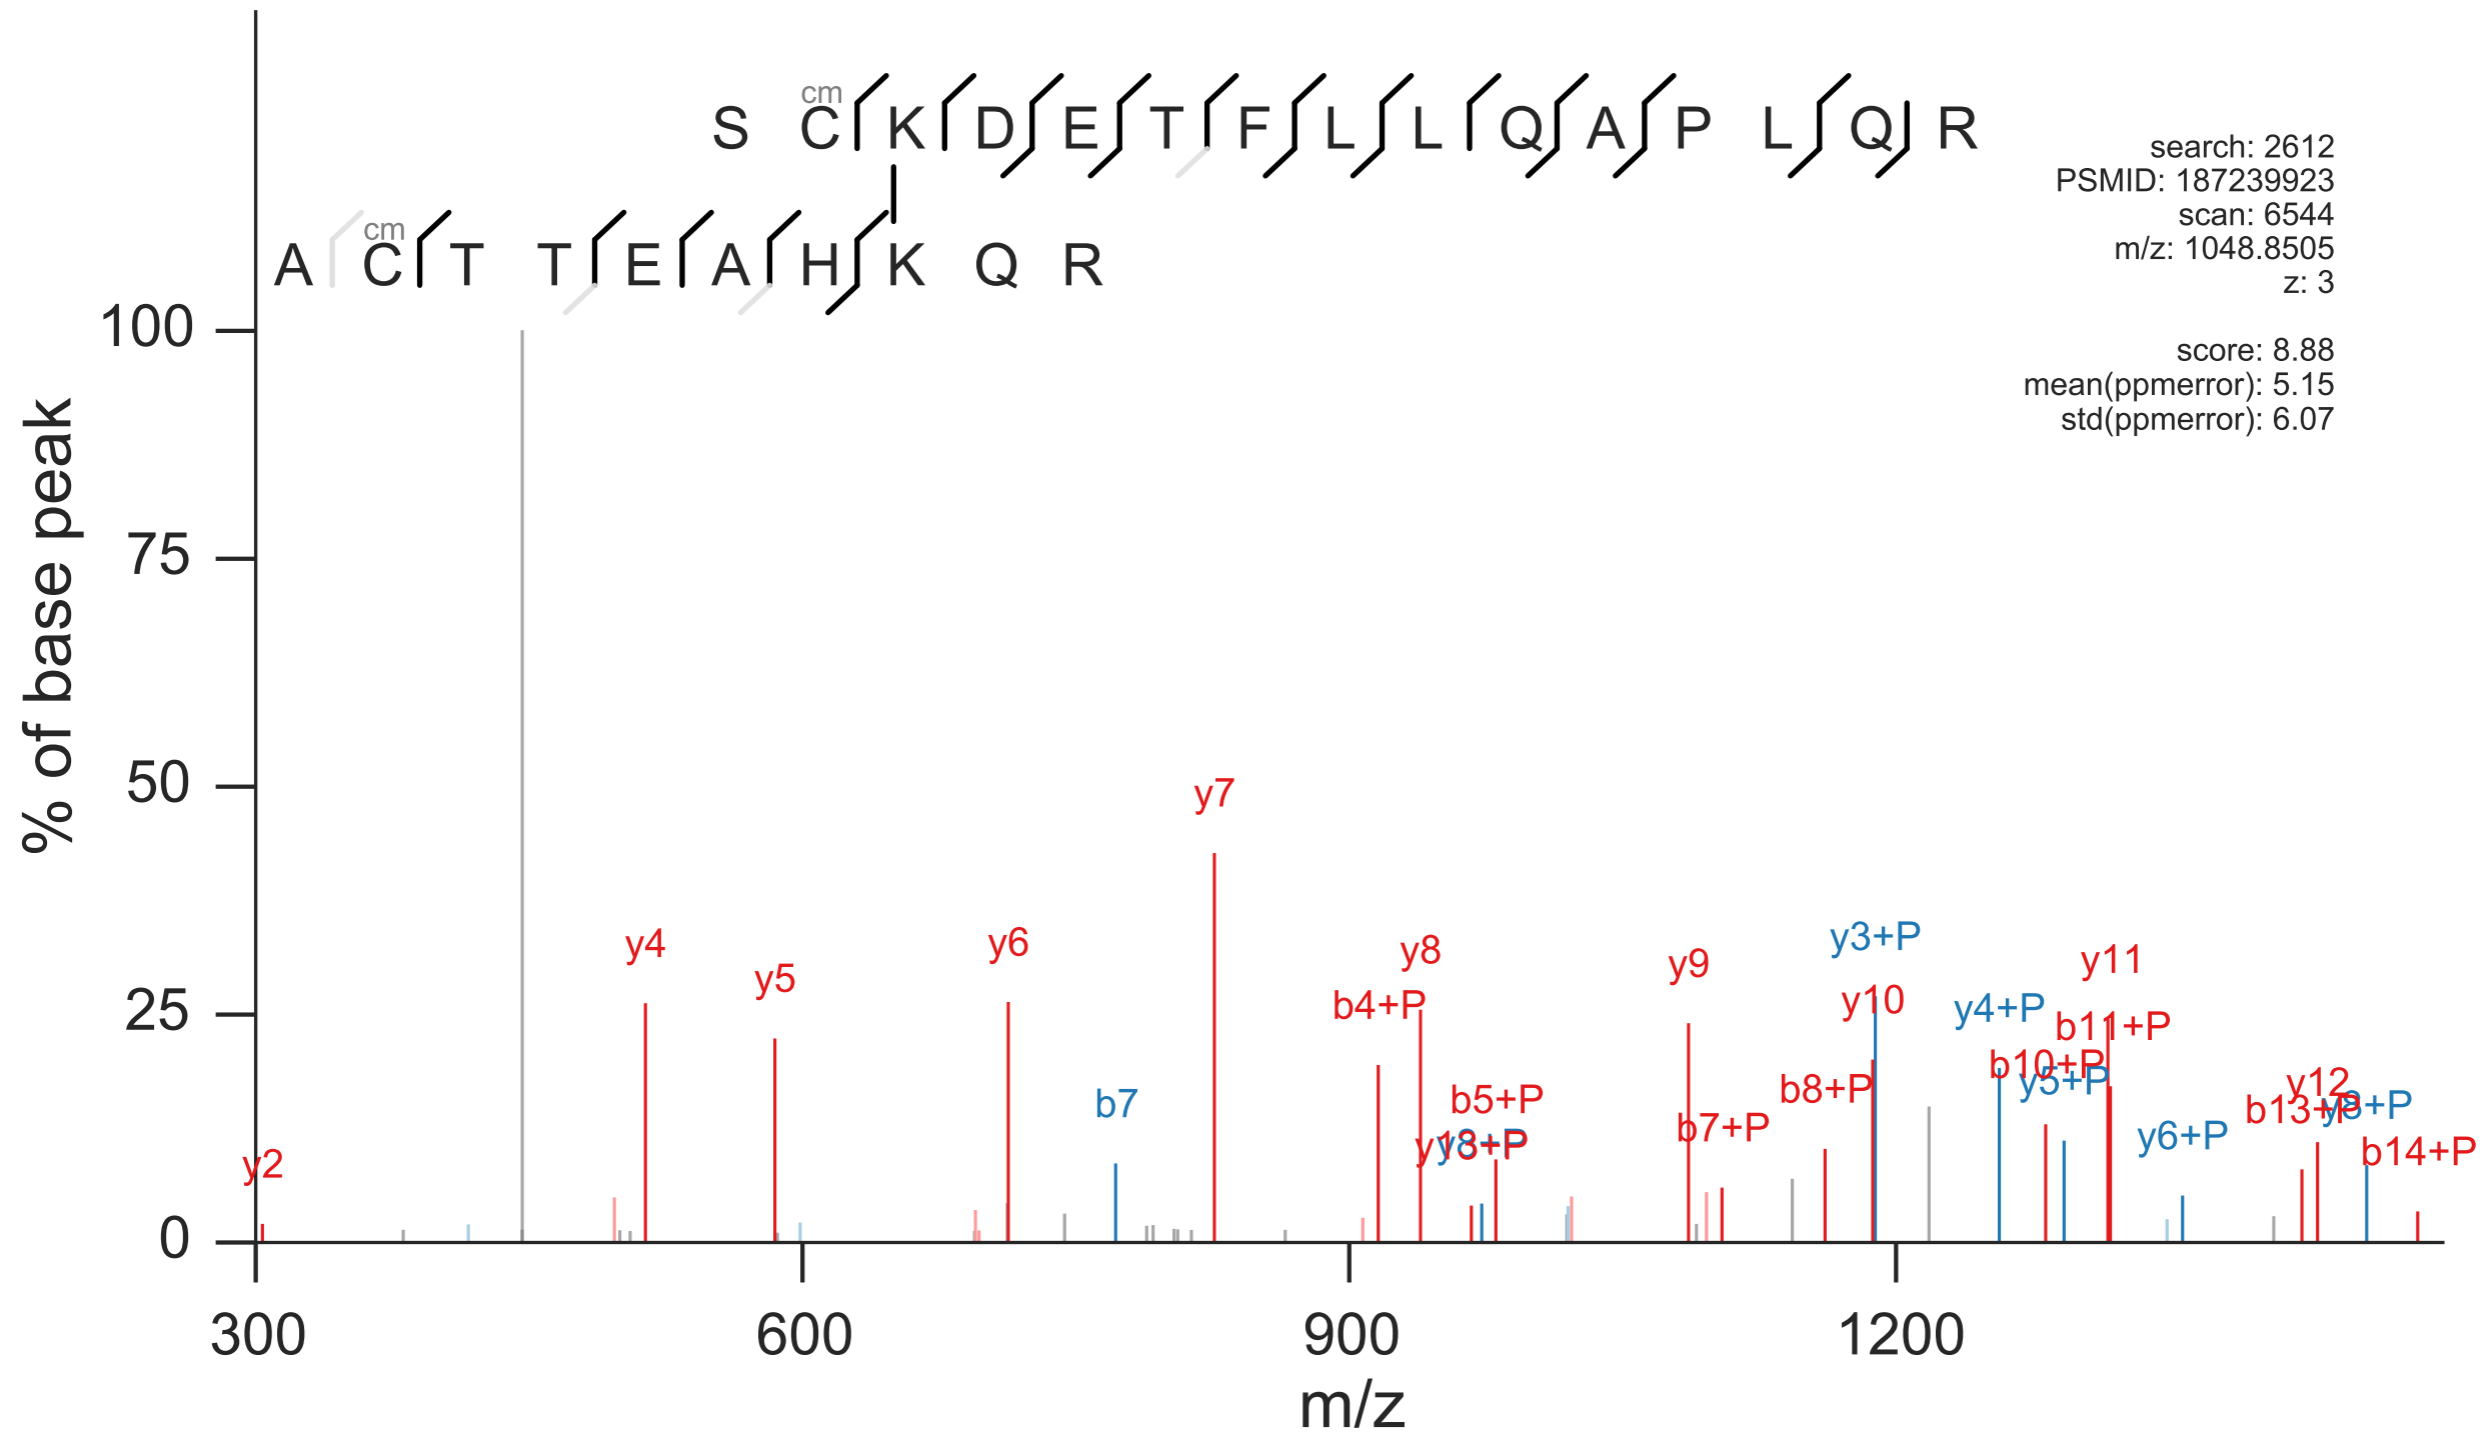

search: 2612  
 PSMID: 187239923  
 scan: 6544  
 m/z: 1048.8505  
 z: 3

score: 8.88  
 mean(ppmerror): 5.15  
 std(ppmerror): 6.07

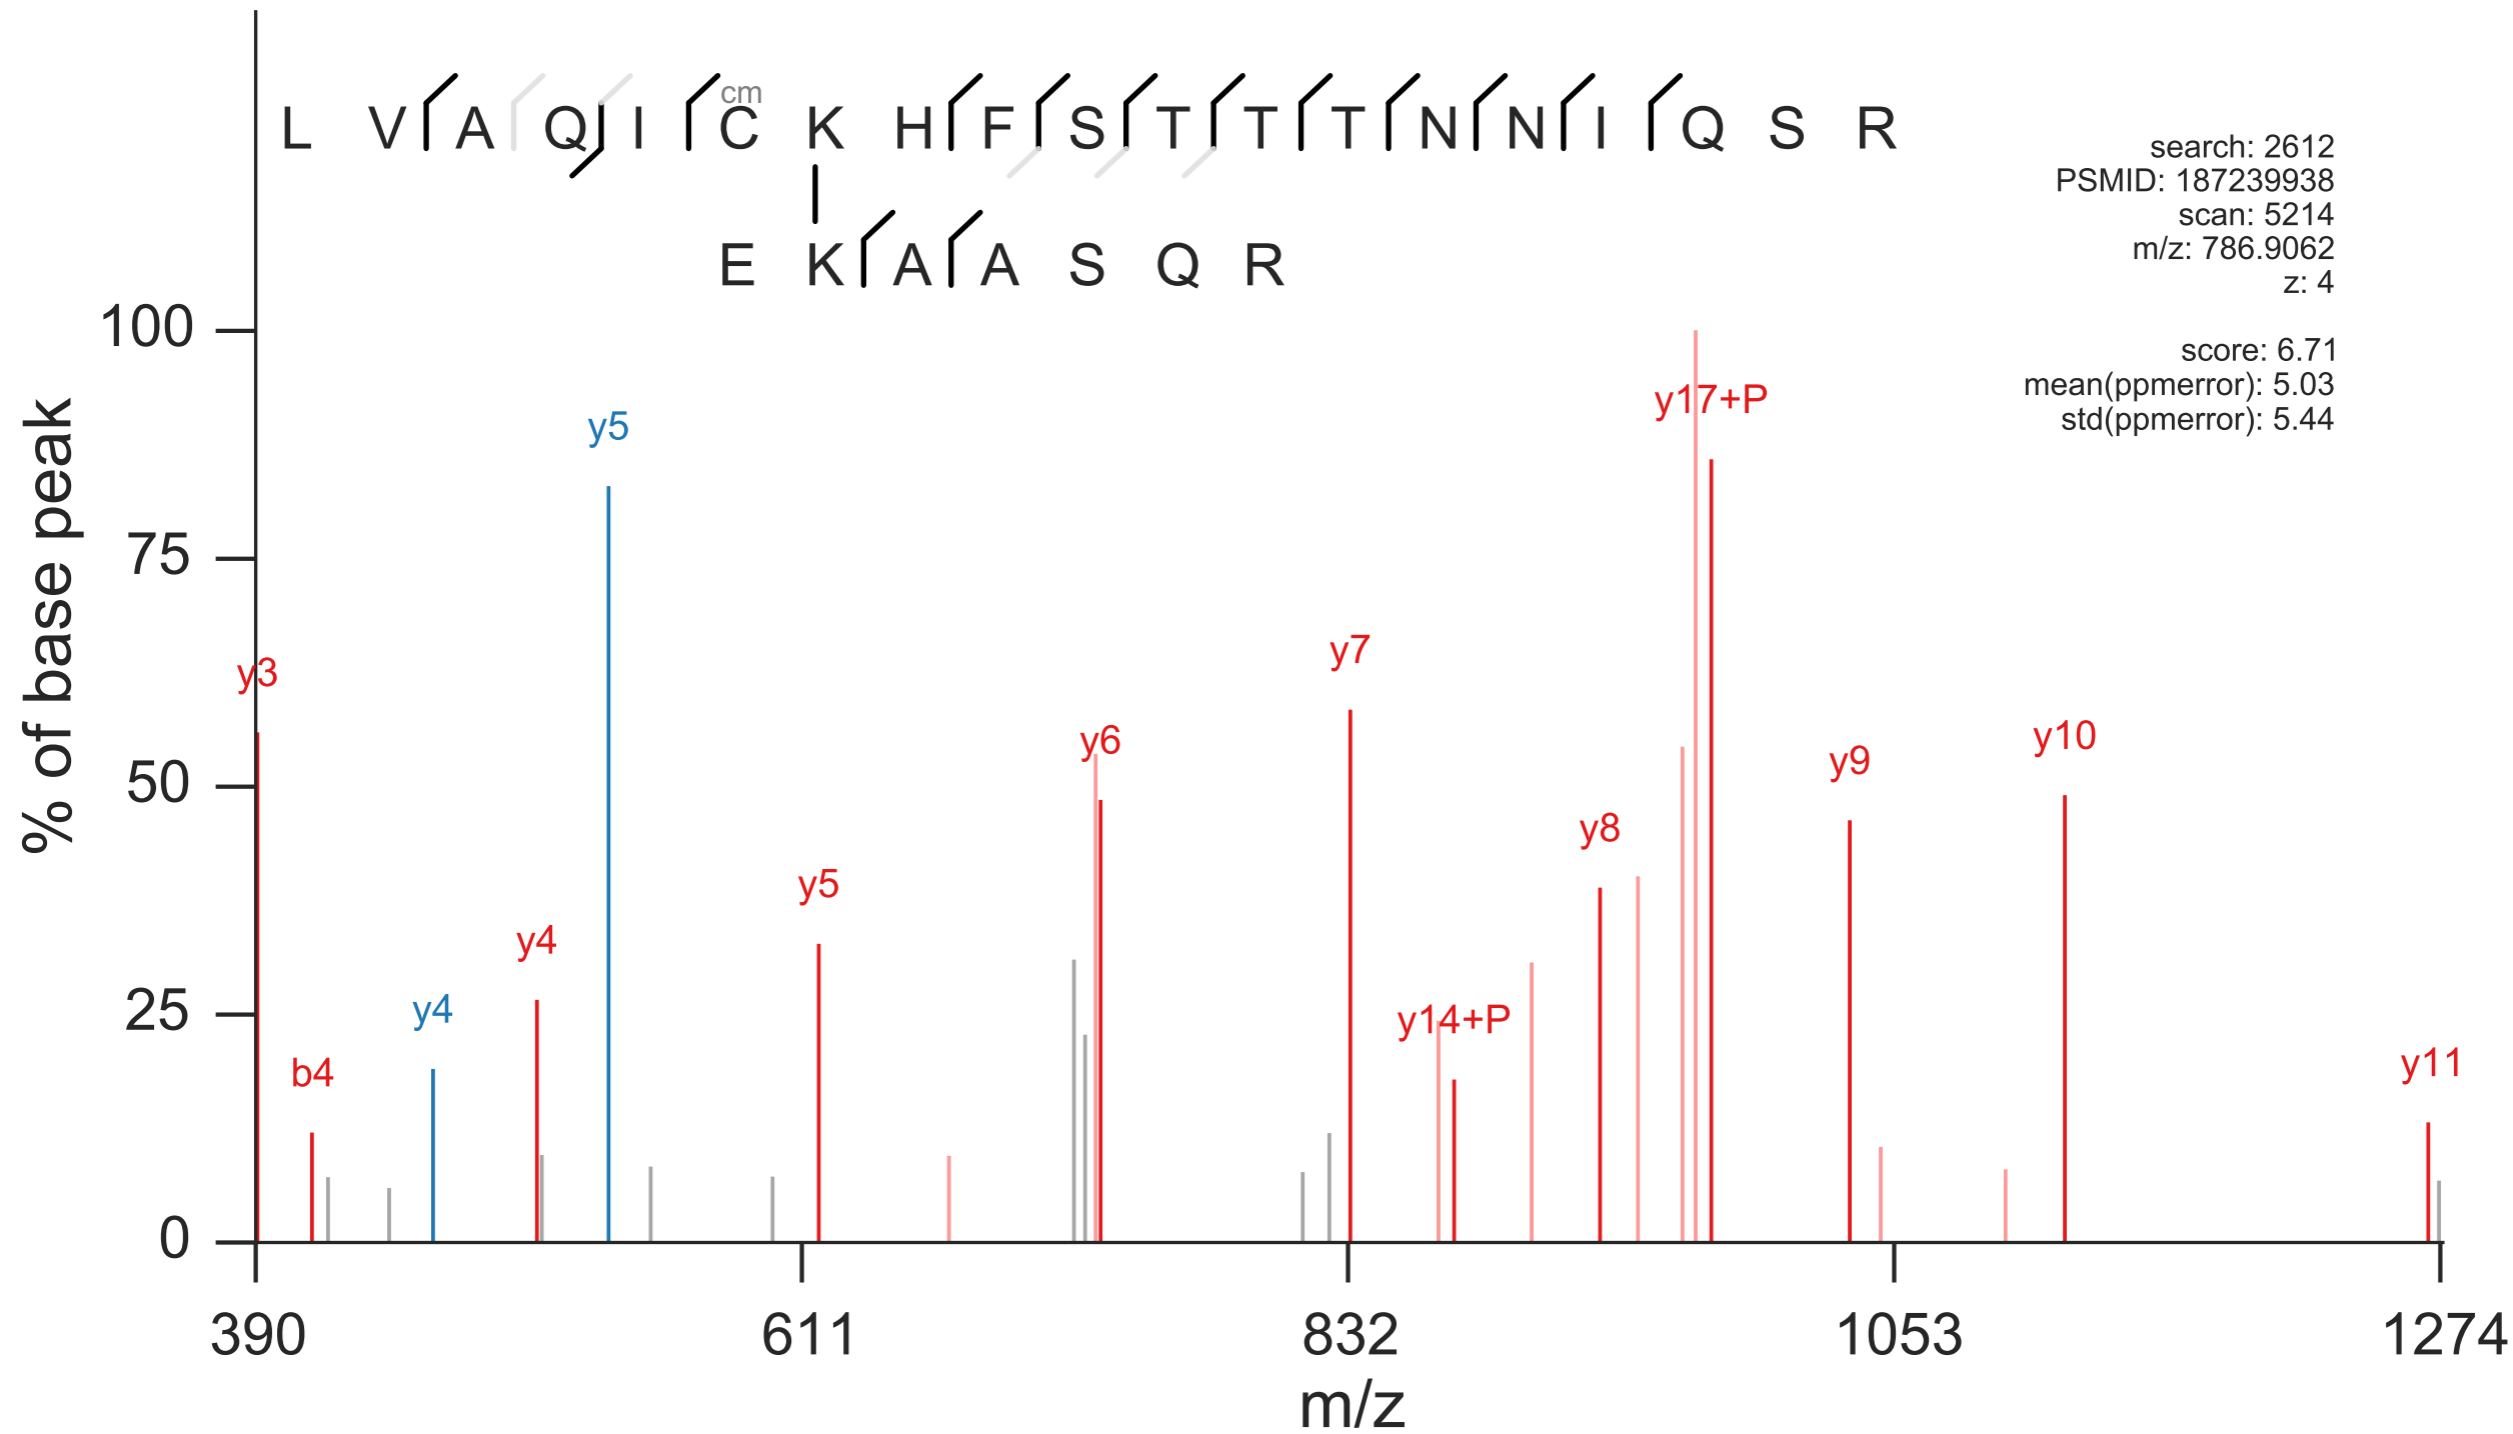

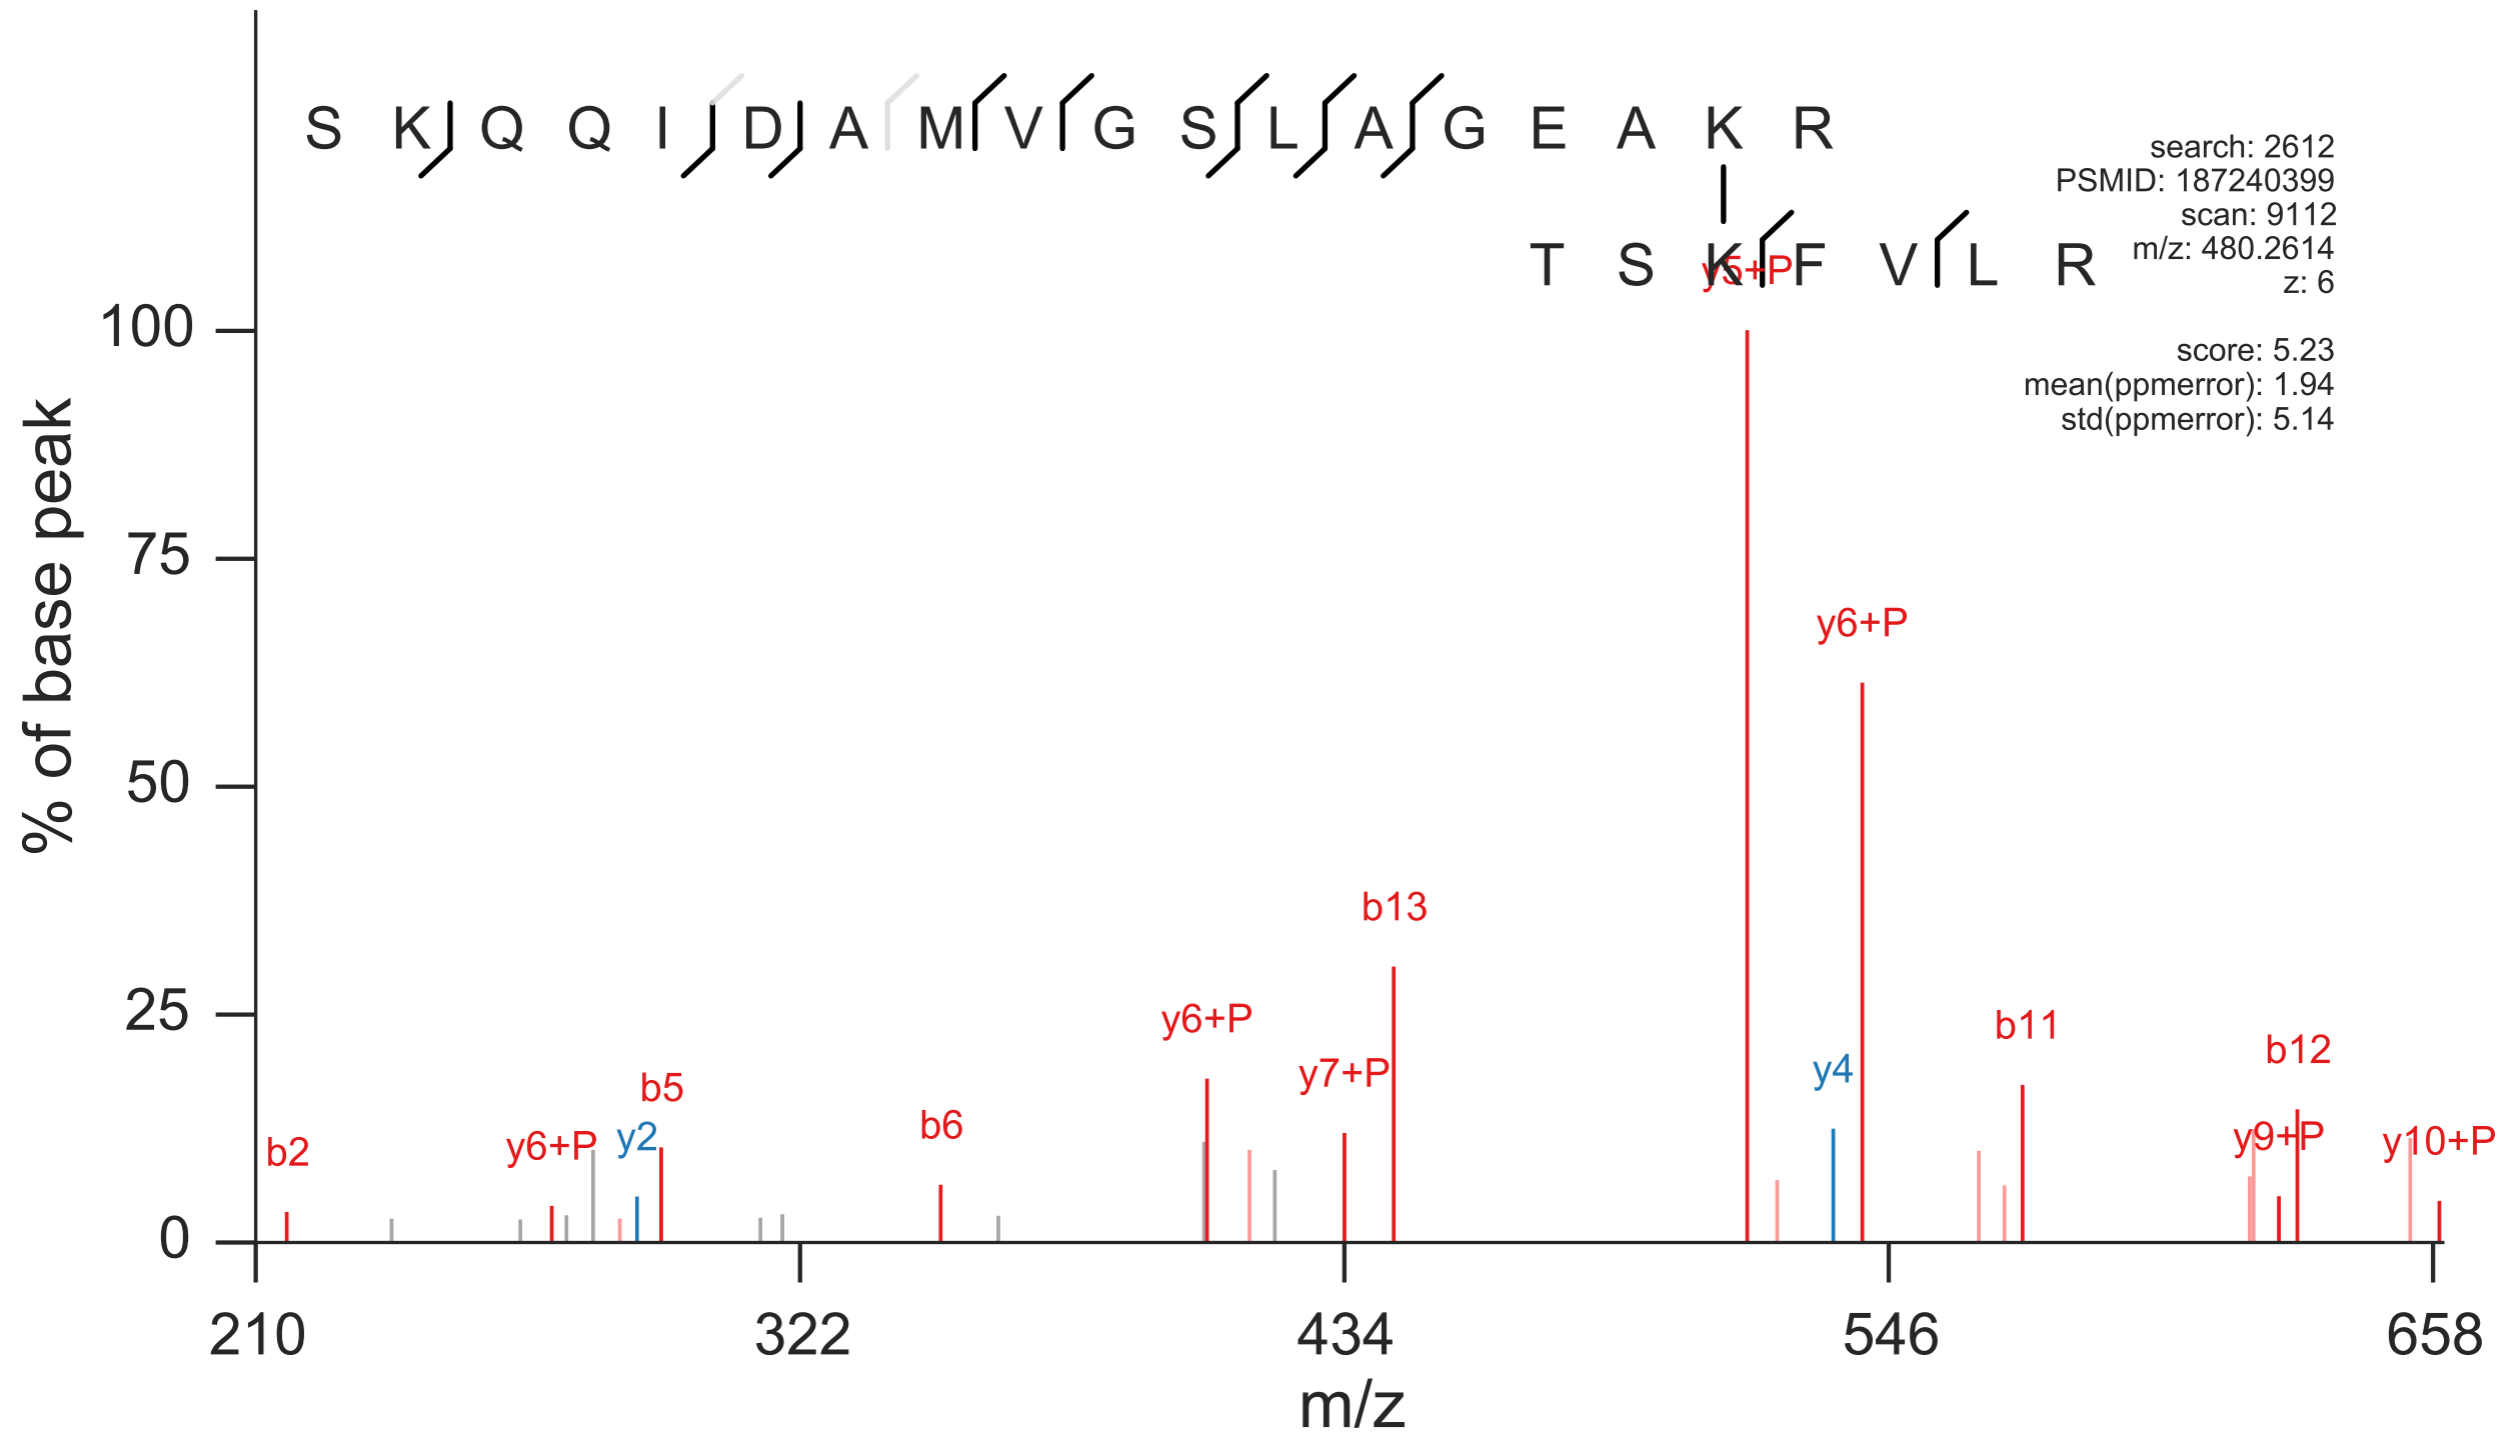

search: 2612  
 PSMID: 187240399  
 scan: 9112  
 m/z: 480.2614  
 z: 6  
 score: 5.23  
 mean(ppmerror): 1.94  
 std(ppmerror): 5.14

S K Q Q I D A M V G S L A G E A K R  
 T S K F V L R

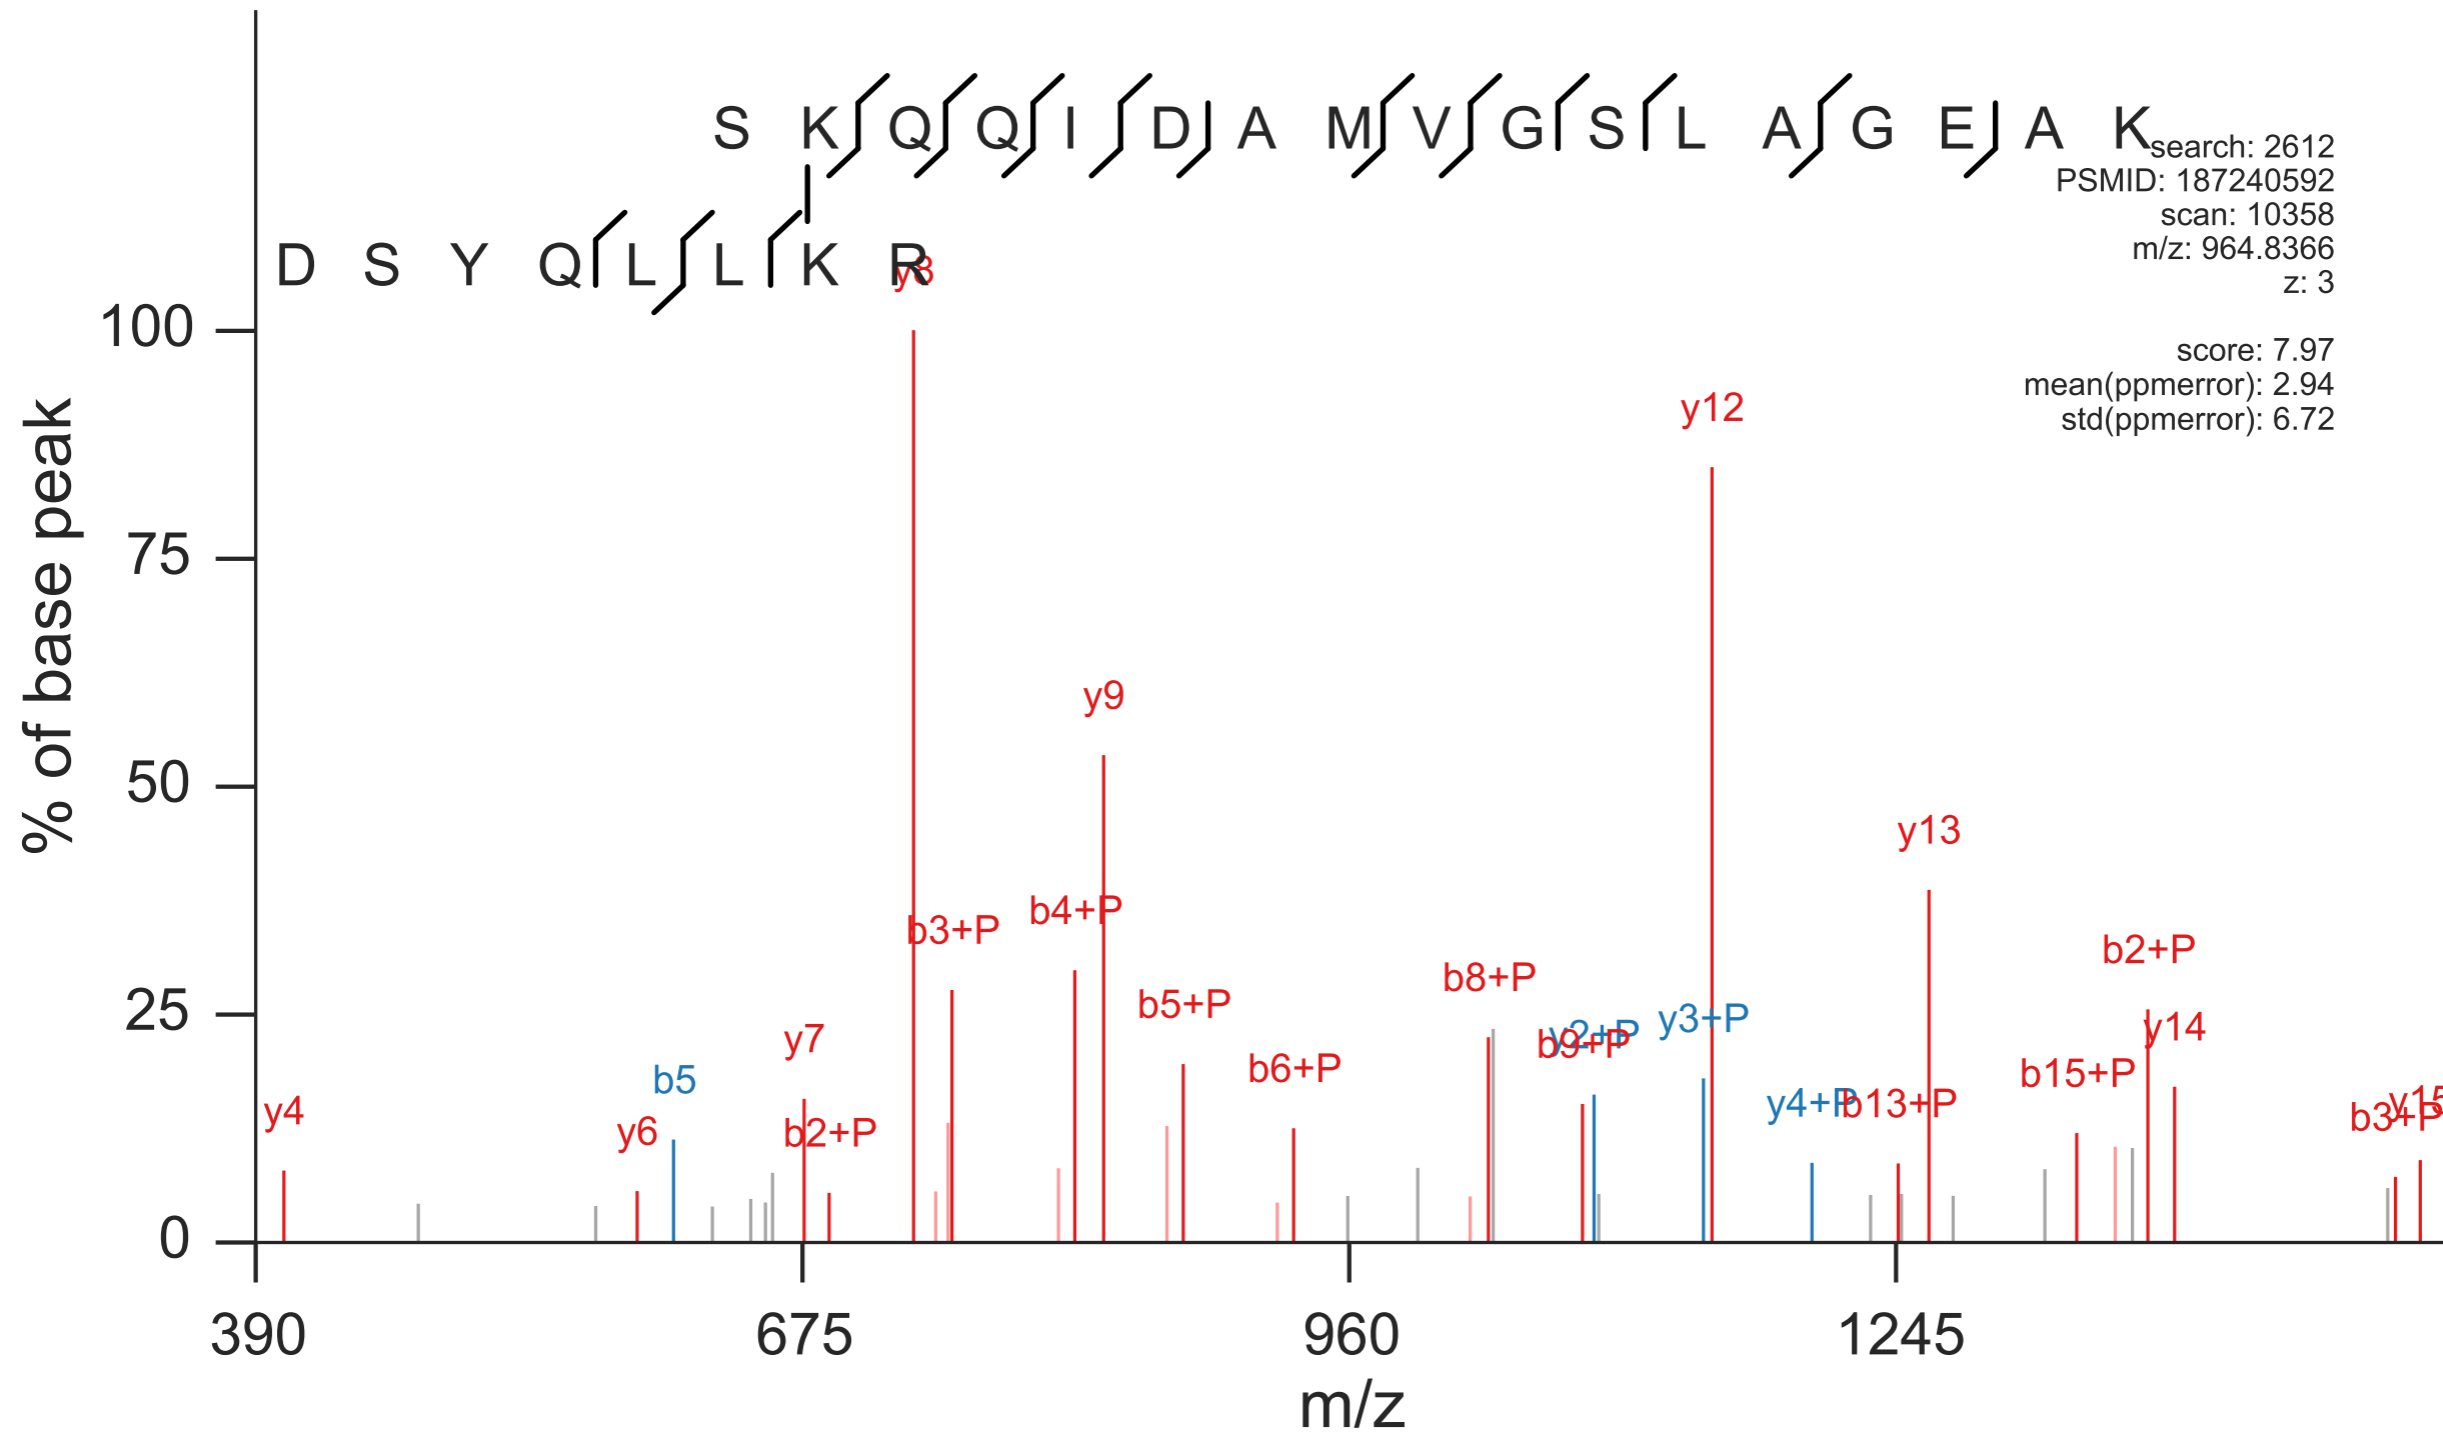



S K Q Q I D A M<sup>ox</sup> V G S L A G E A K R

search: 2612  
PSMID: 187240594  
scan: 7527  
m/z: 579.3126  
z: 5

score: 7.02  
mean(ppmerror): 1.59  
std(ppmerror): 3.52

y9+P S K F V L R

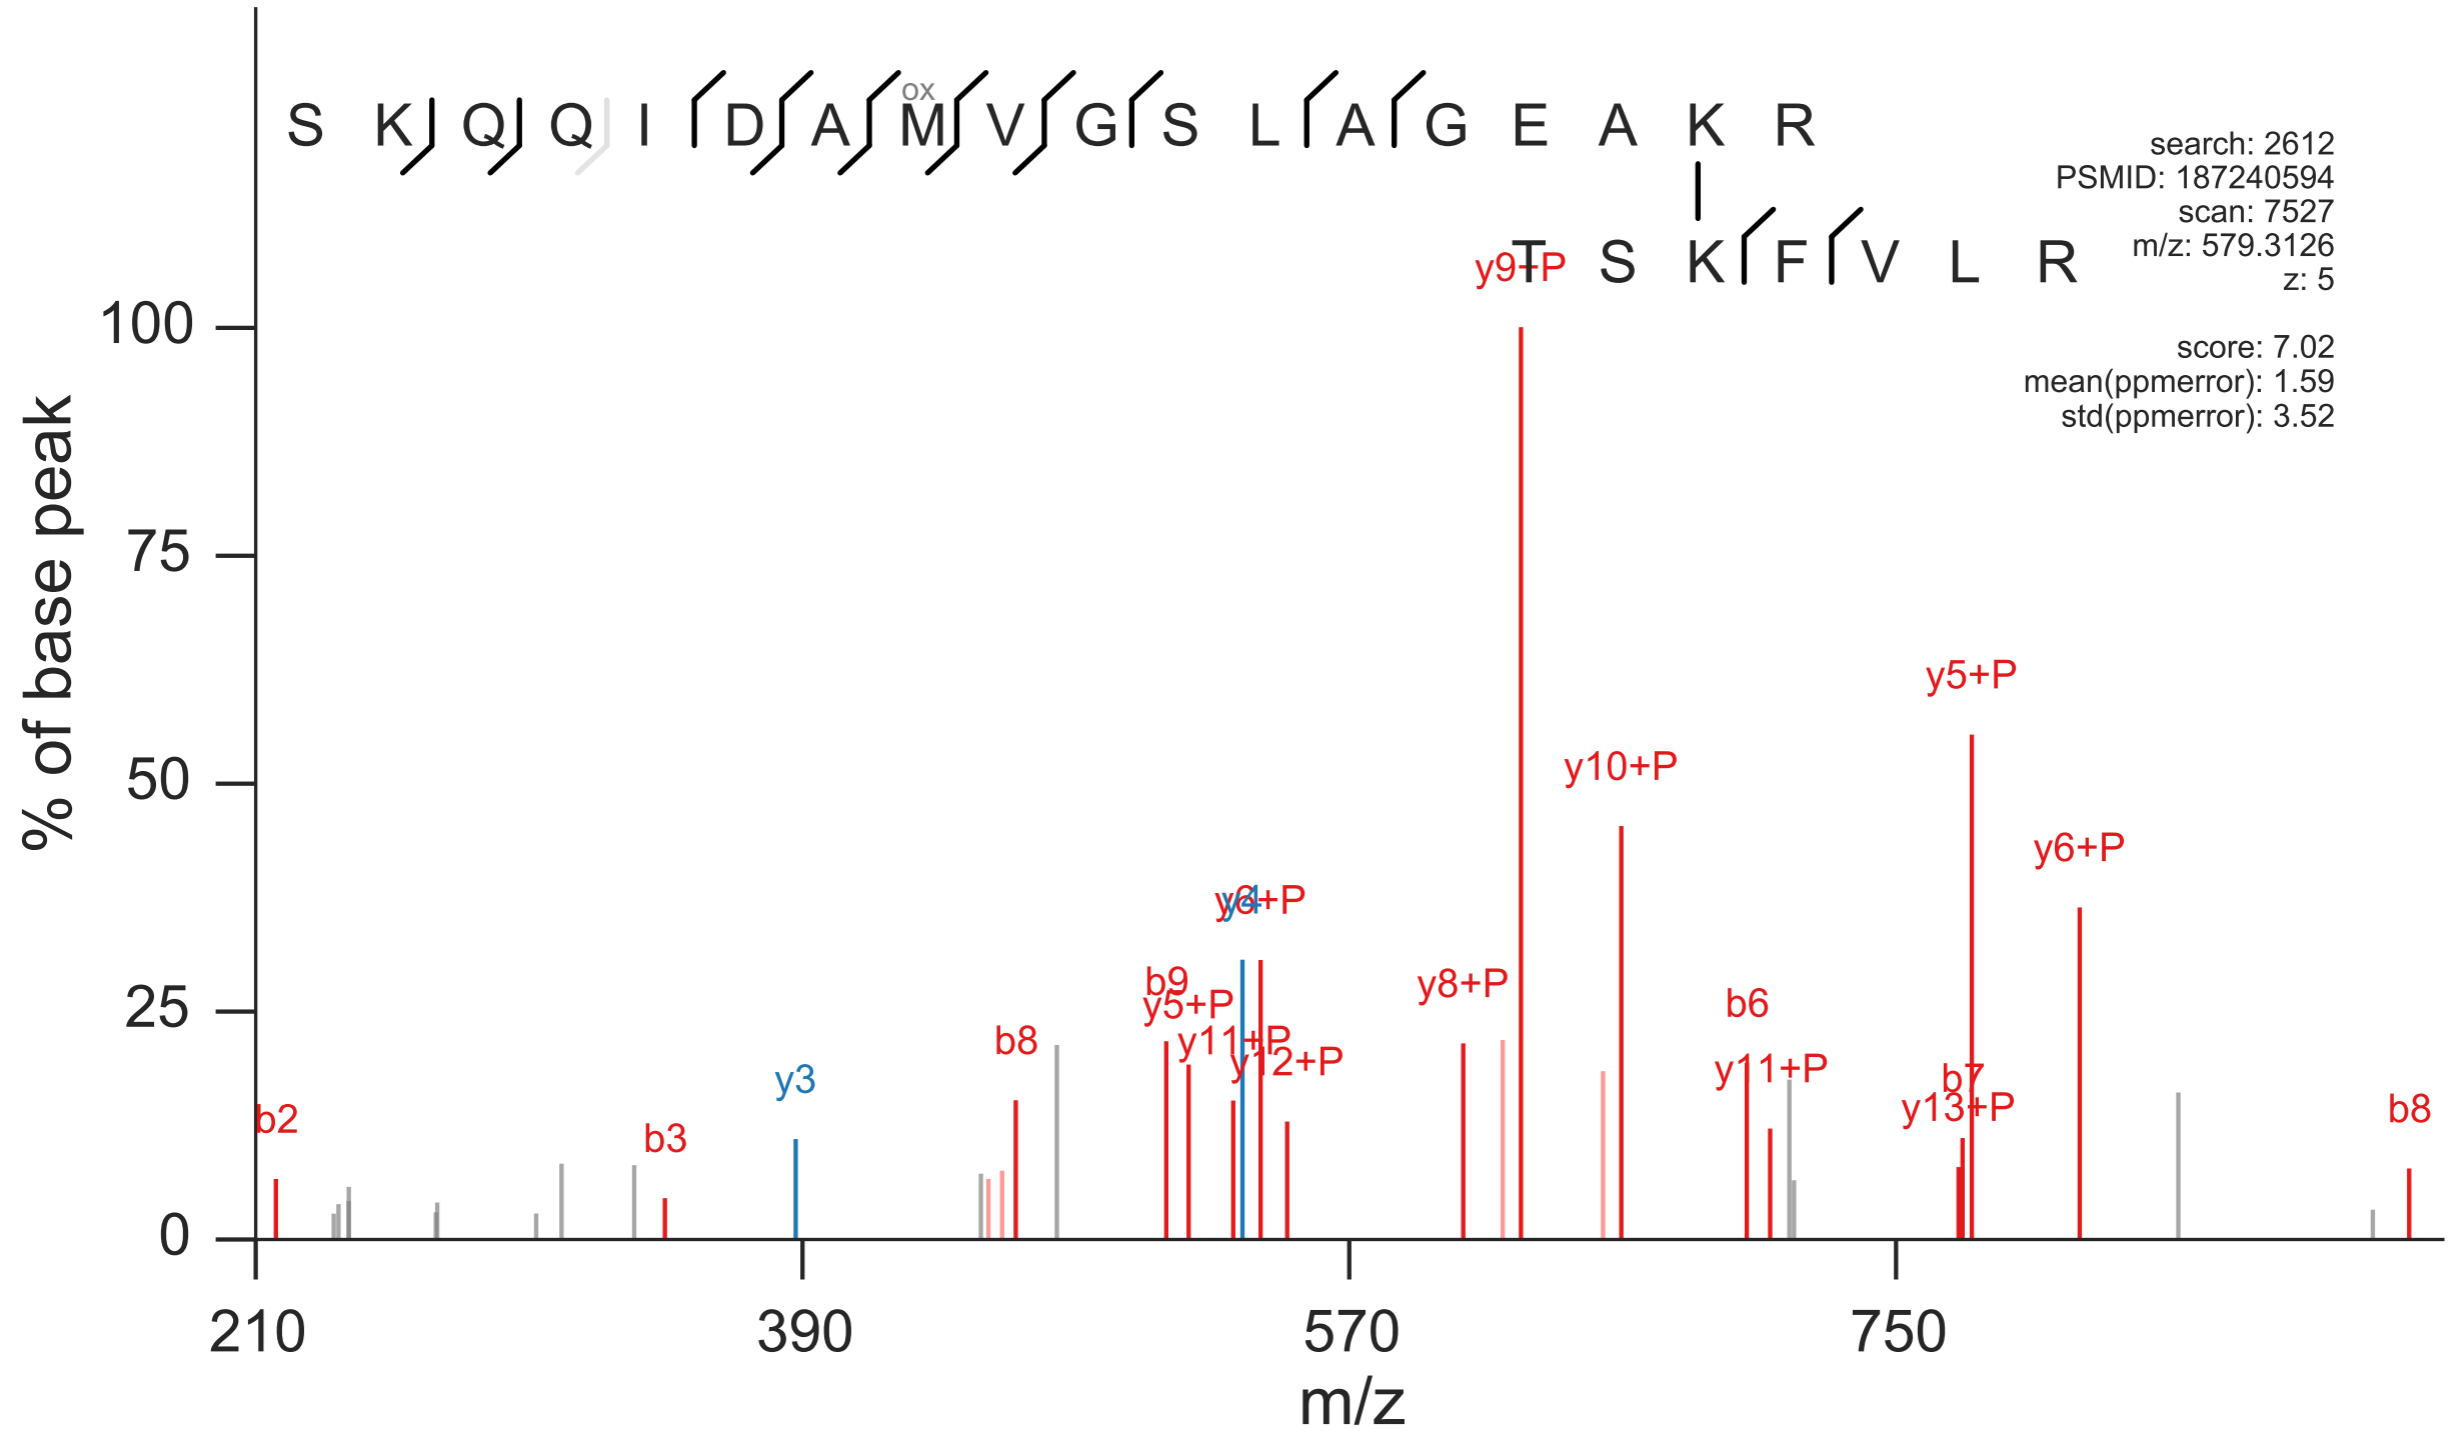

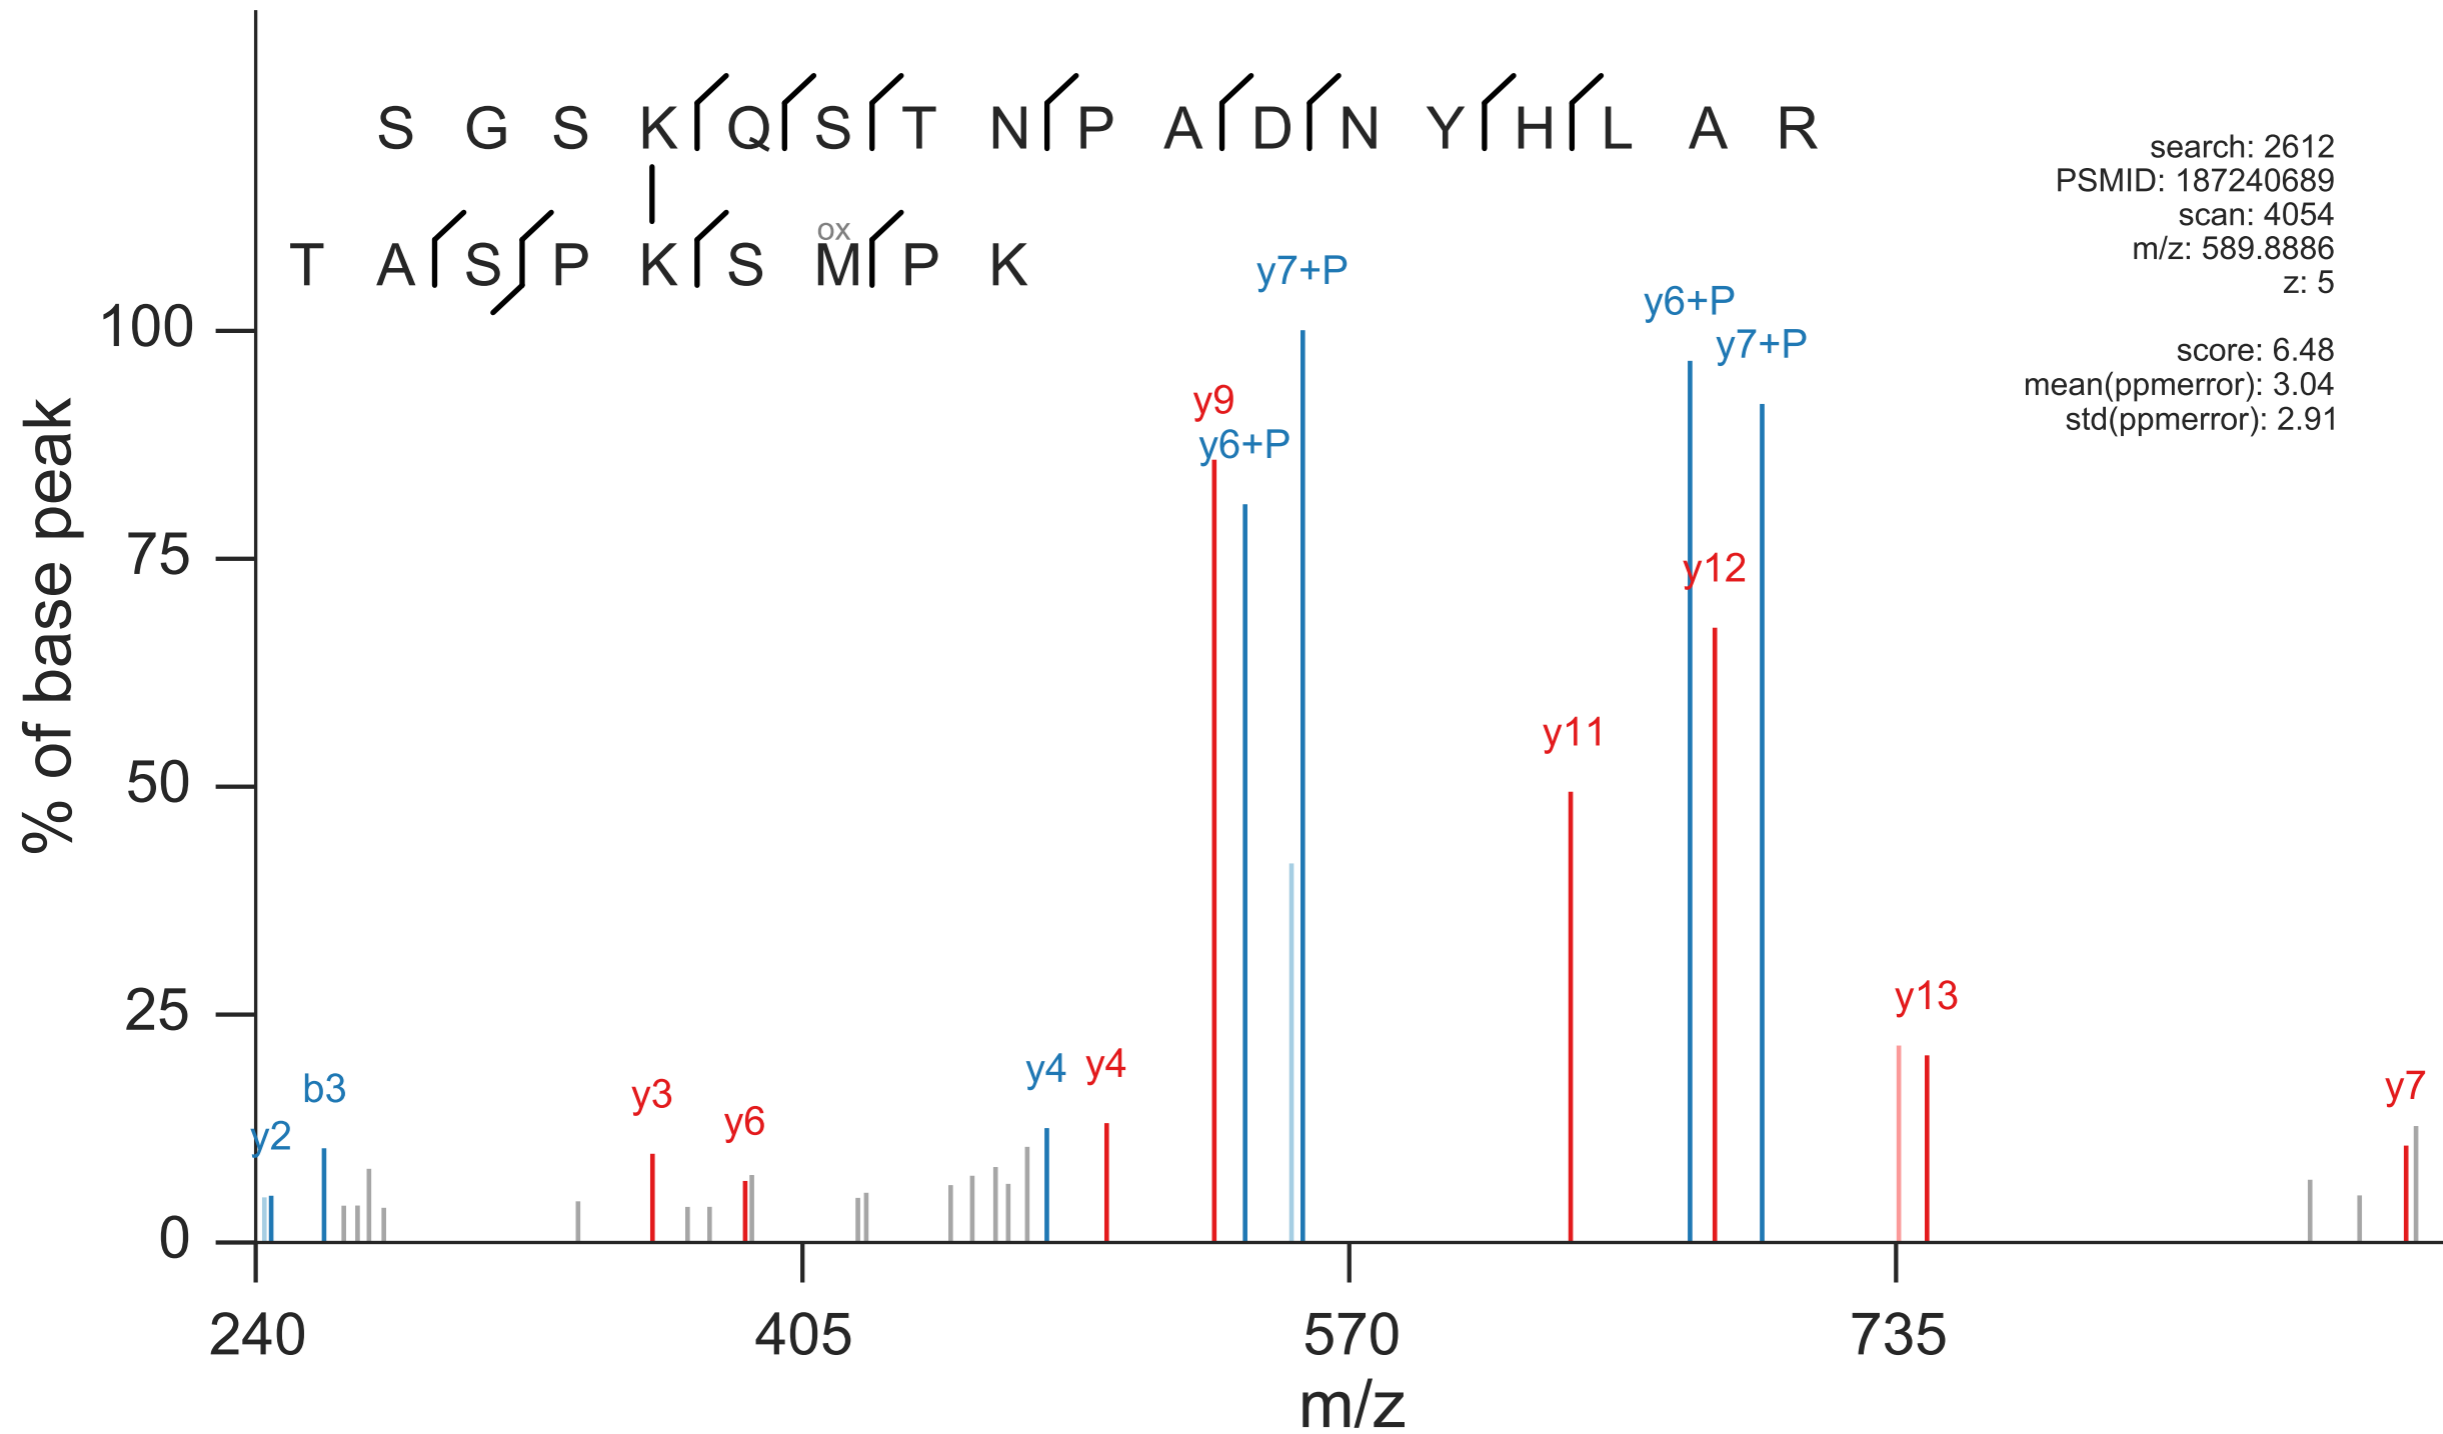

search: 2612  
 PSMID: 187240689  
 scan: 4054  
 m/z: 589.8886  
 z: 5

score: 6.48  
 mean(ppmerror): 3.04  
 std(ppmerror): 2.91

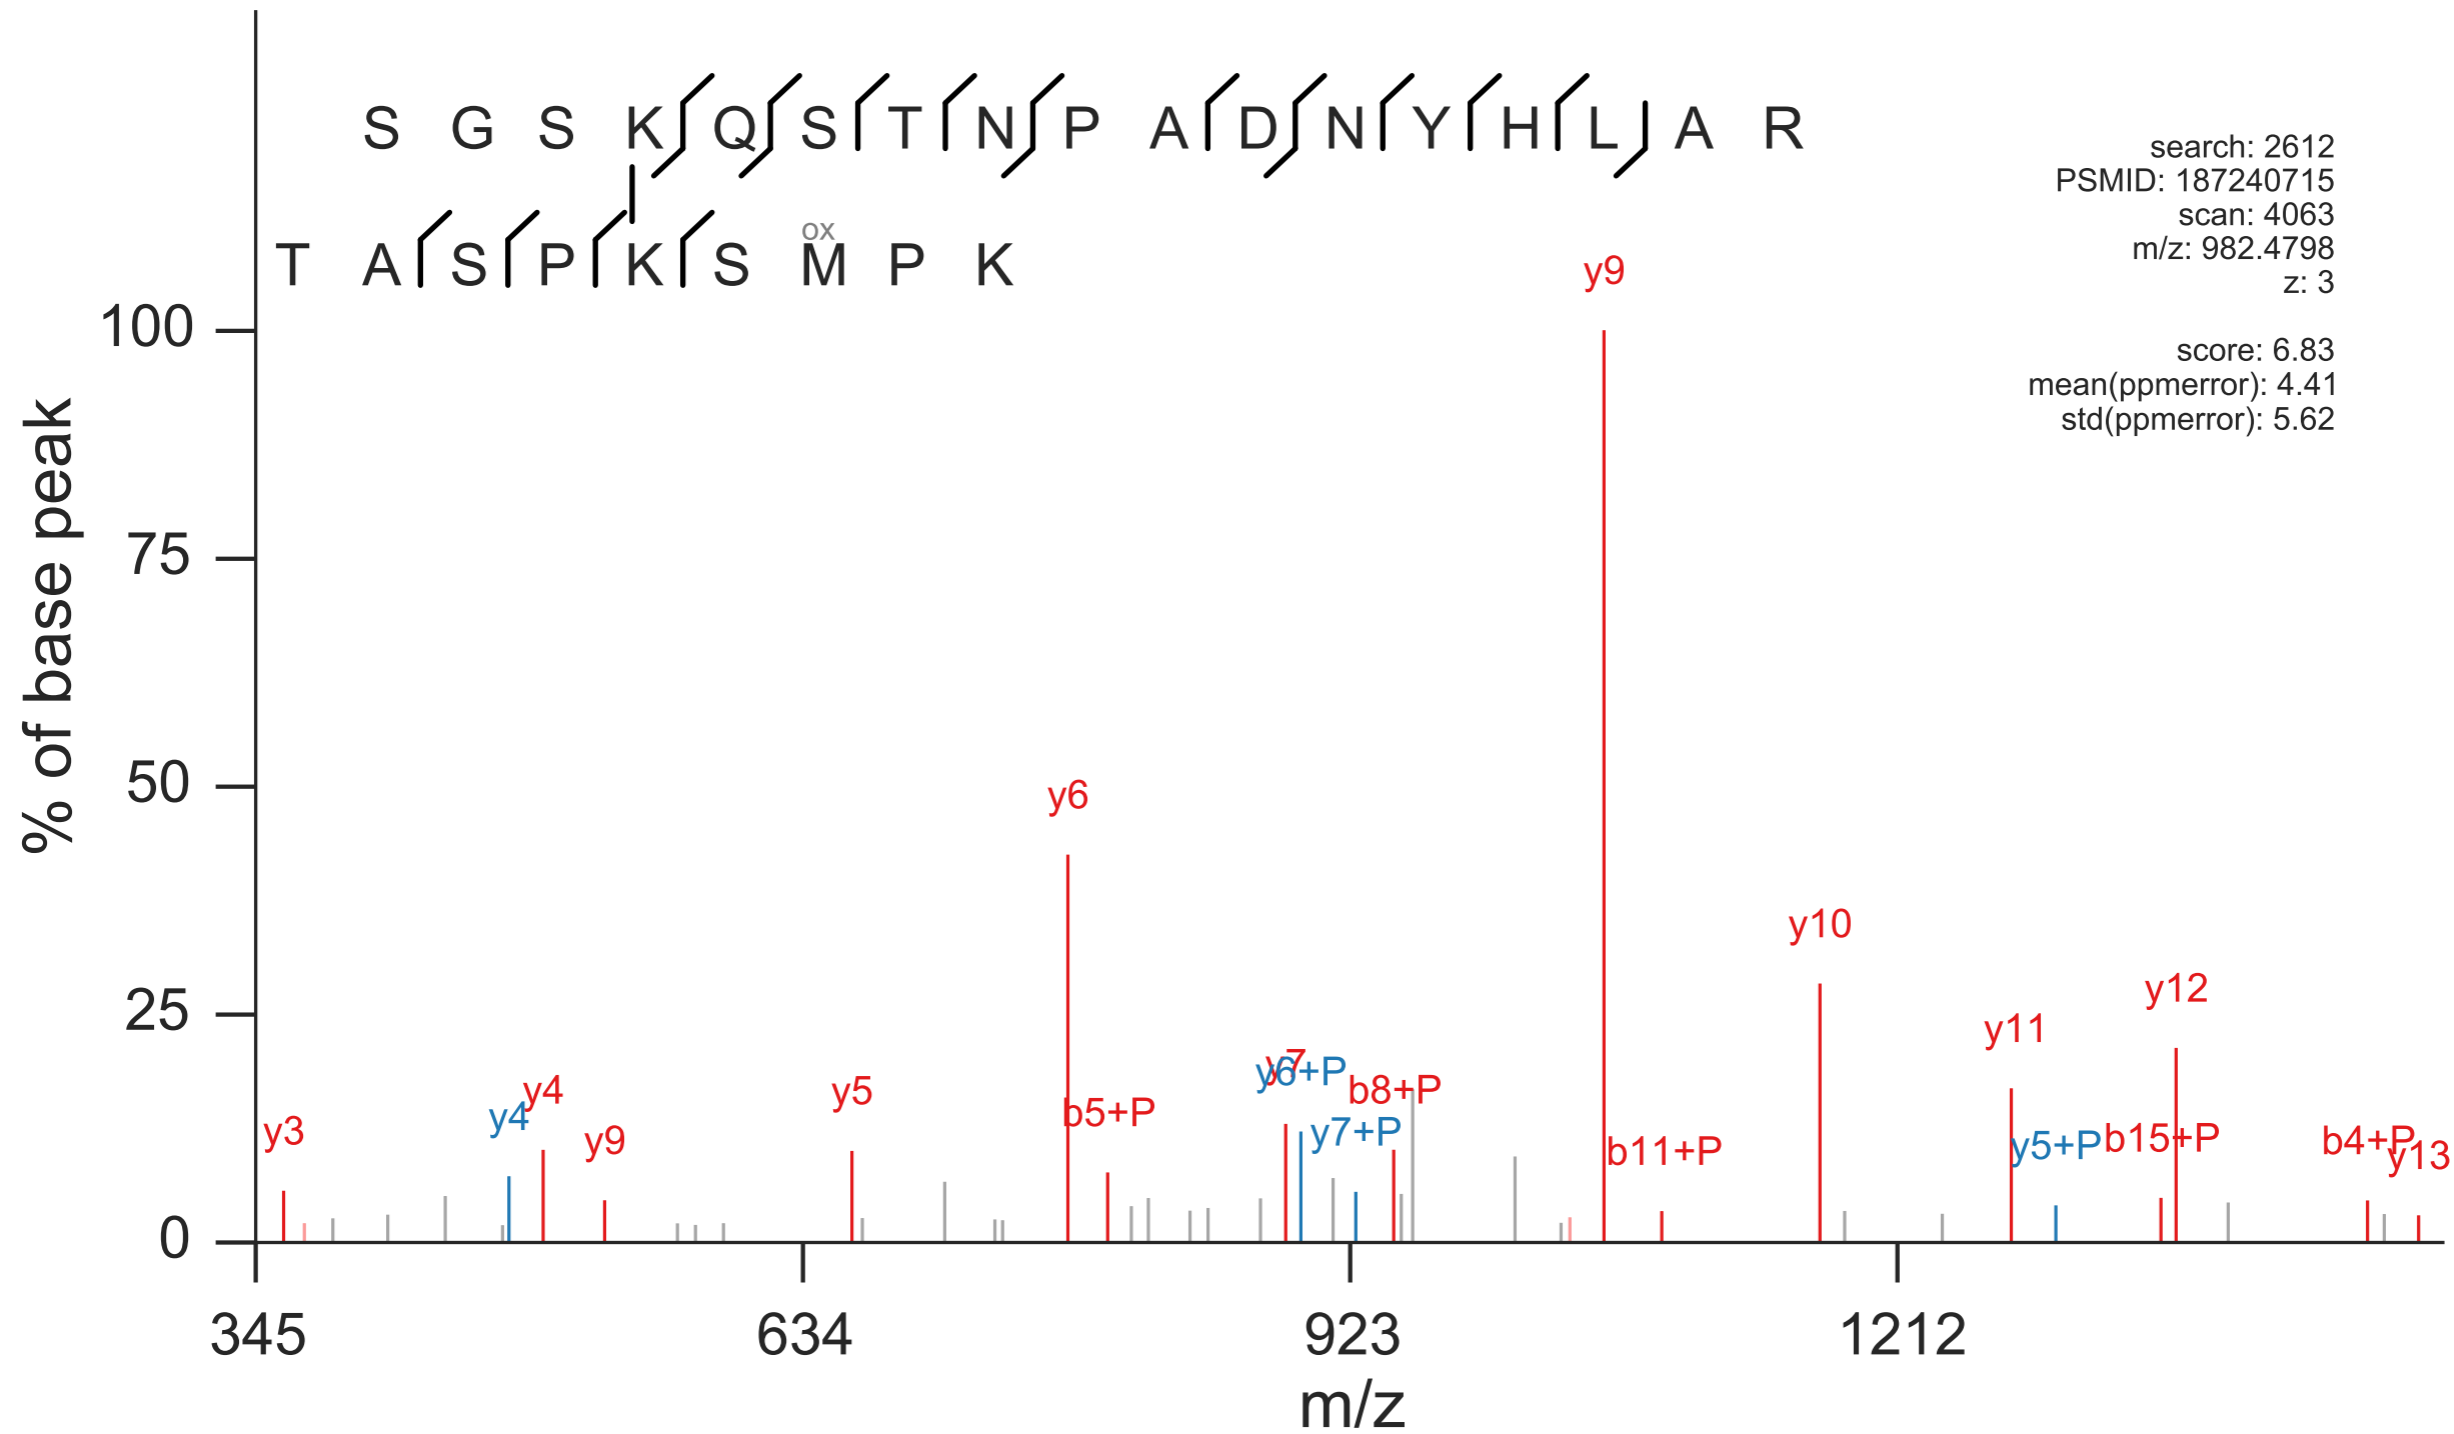

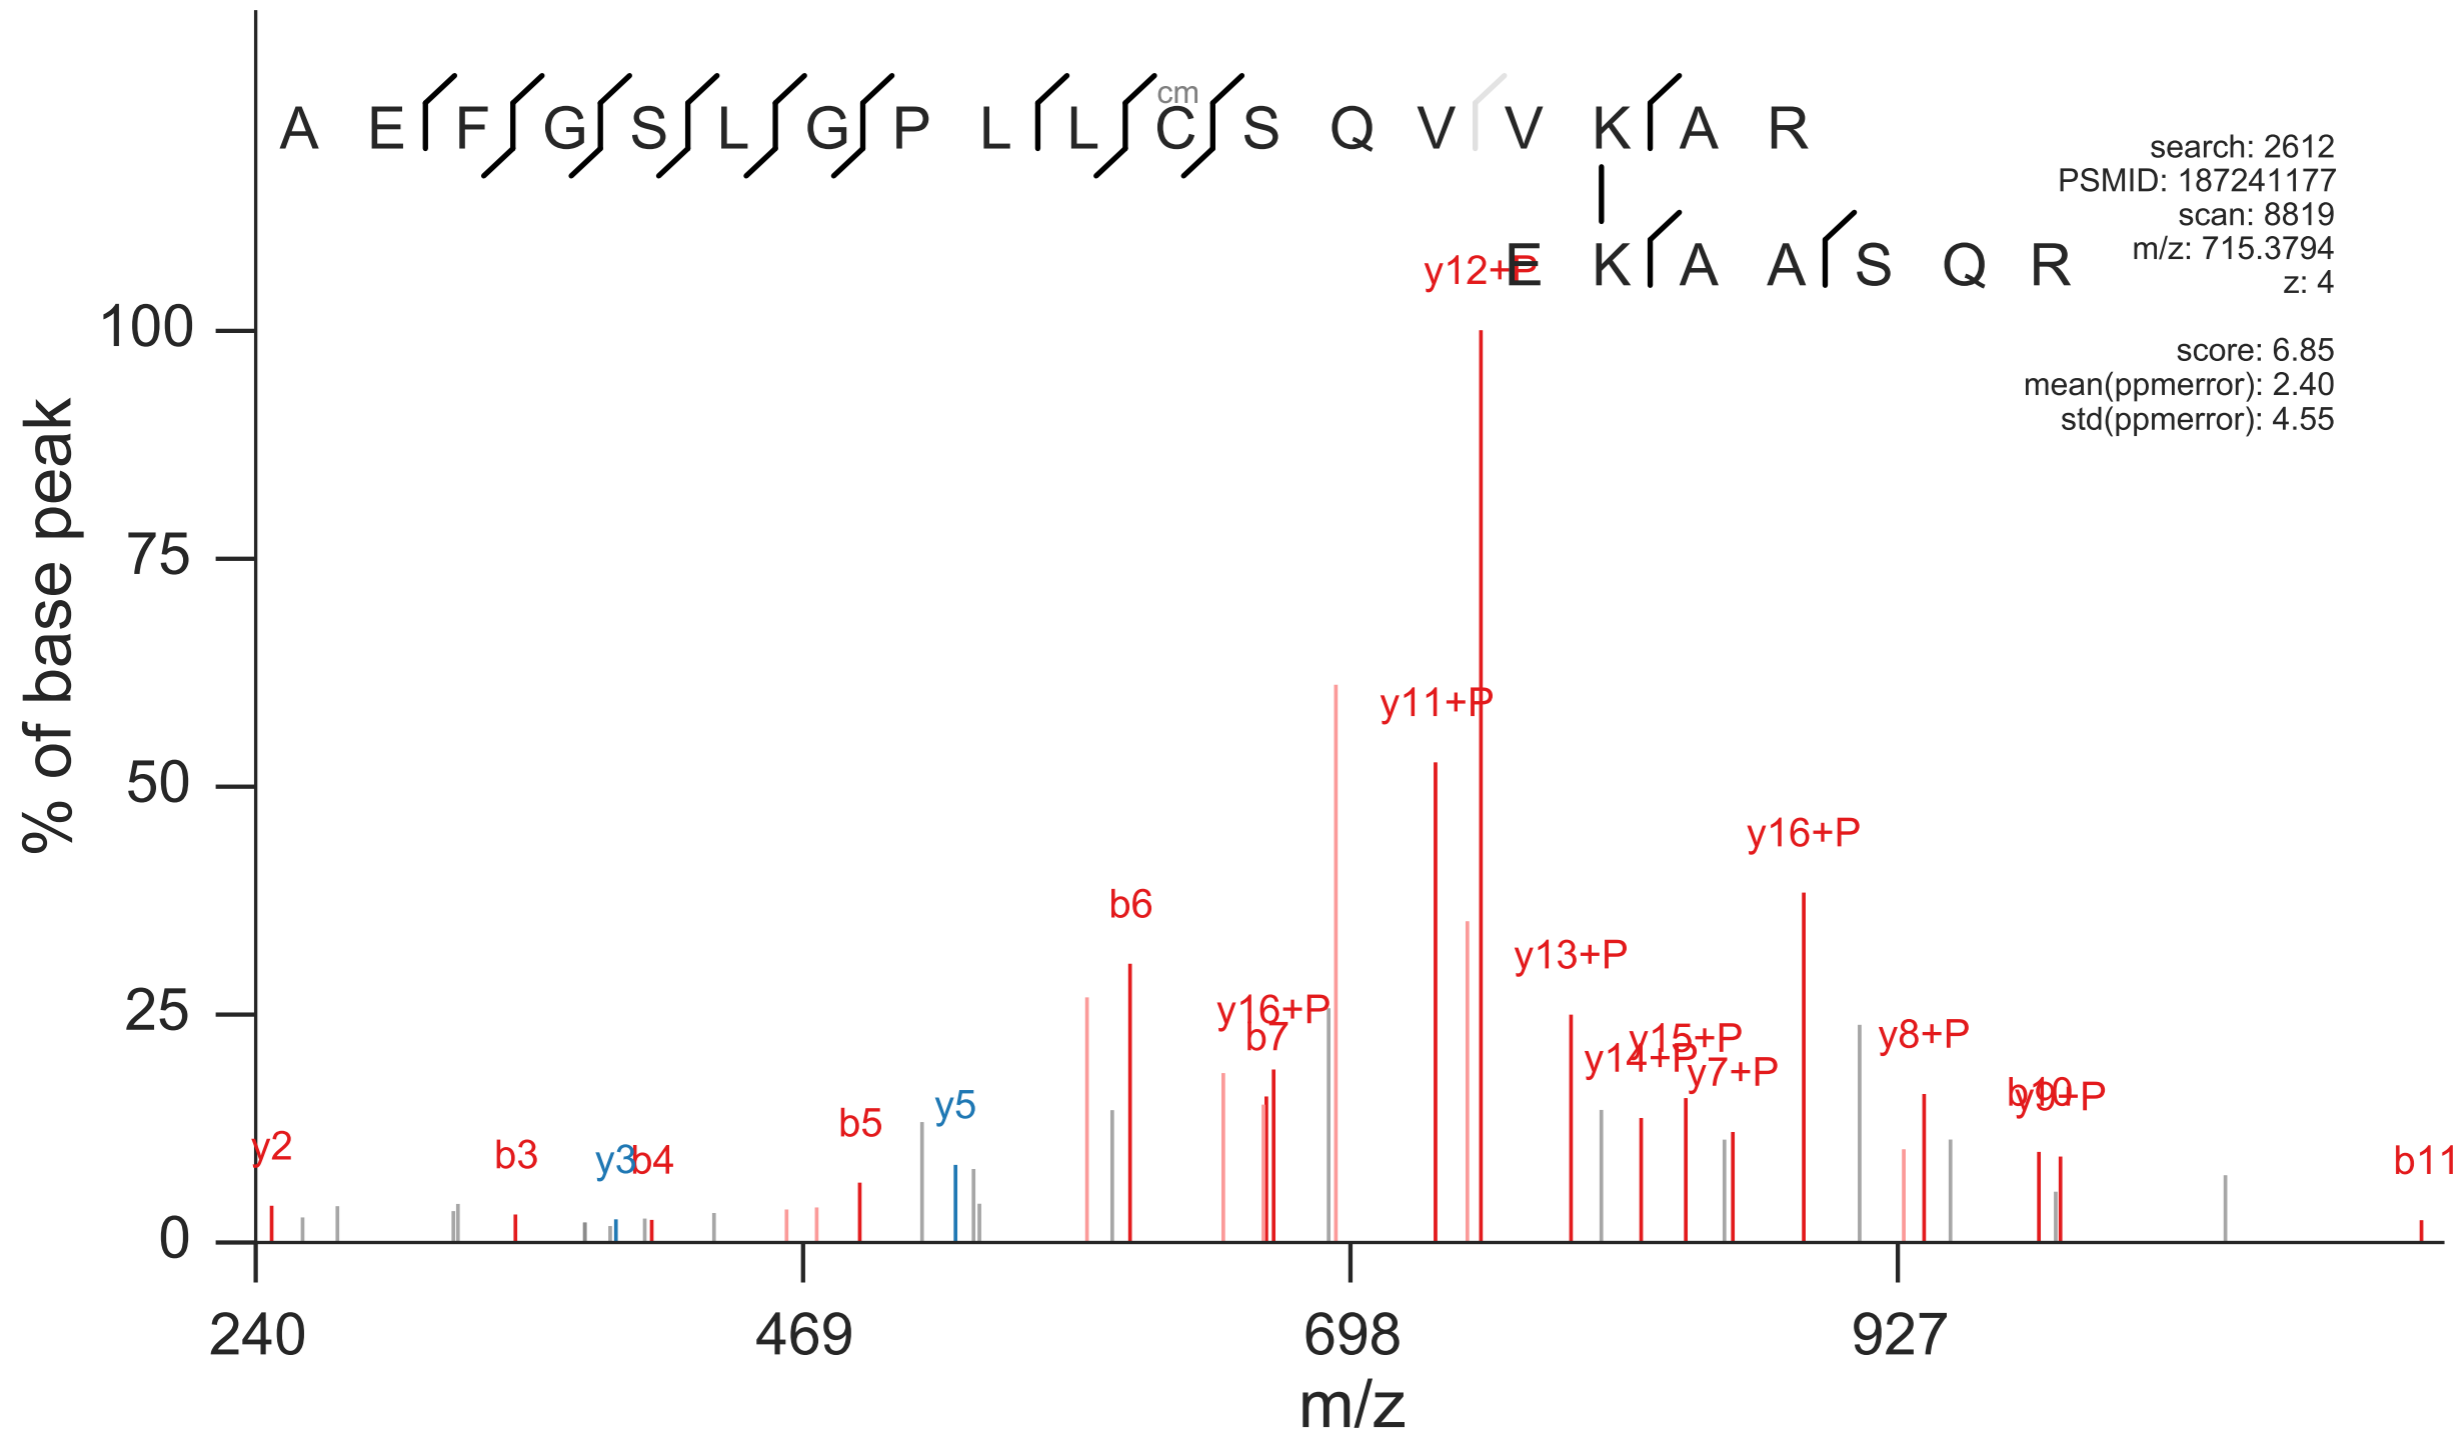

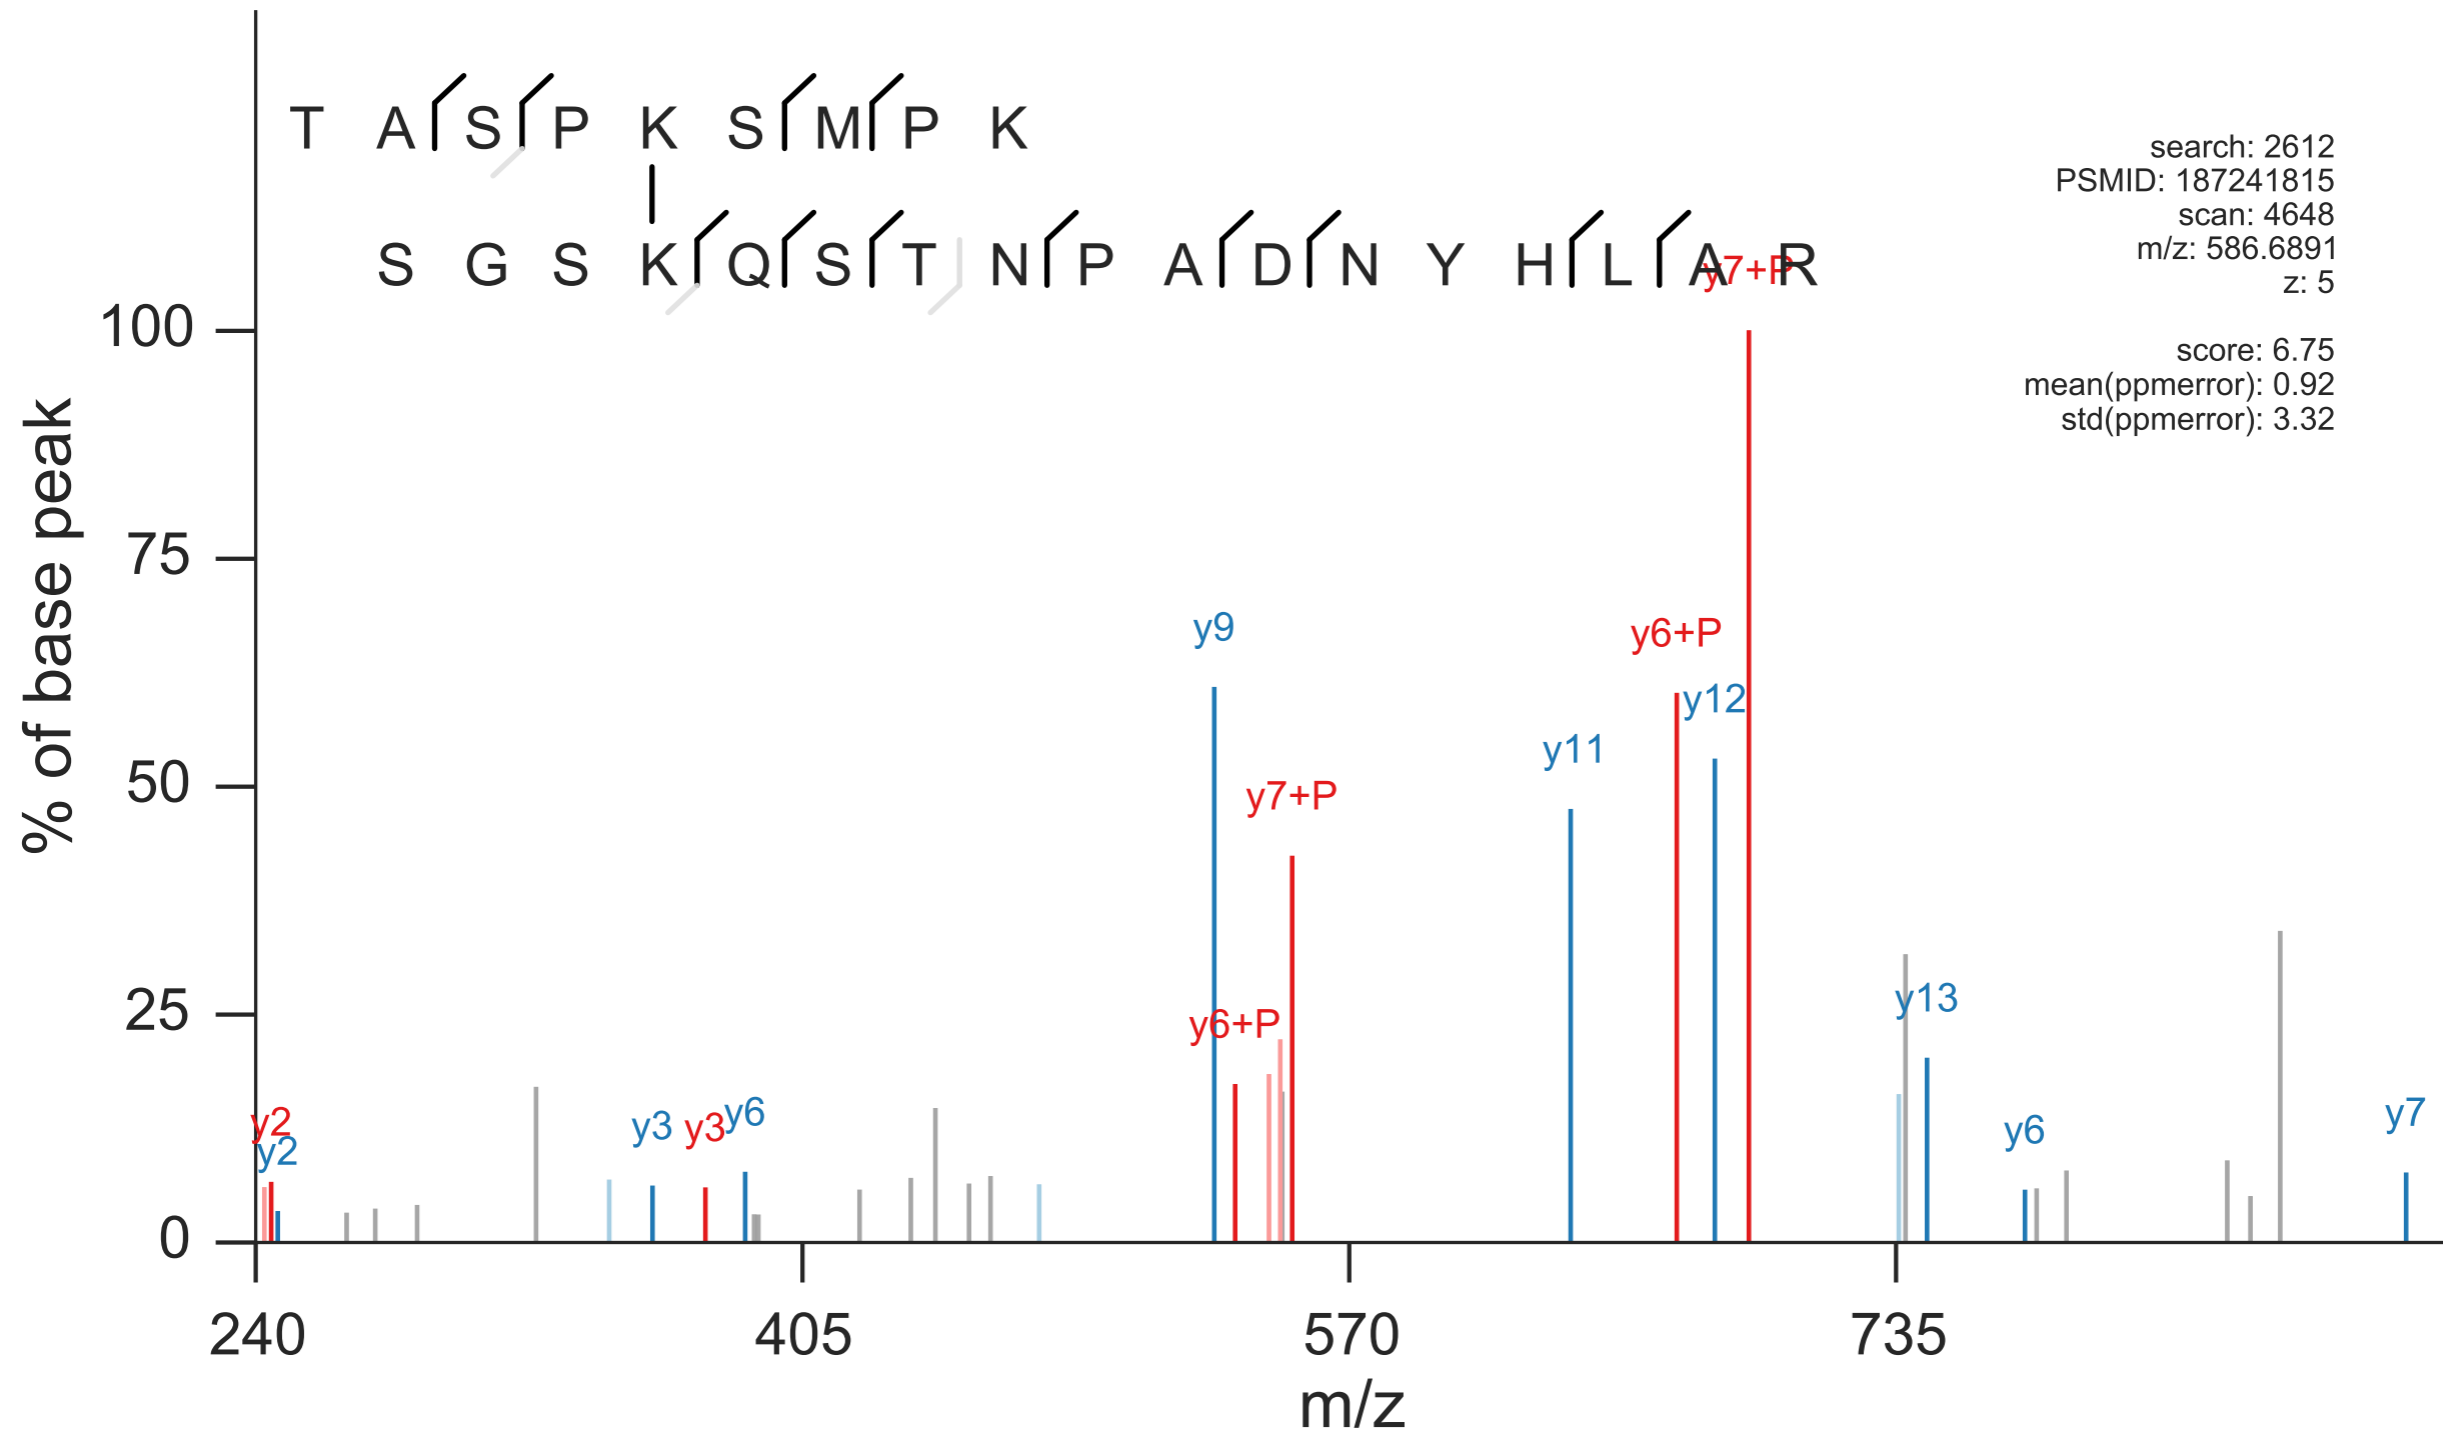

search: 2612  
 PSMID: 187241815  
 scan: 4648  
 m/z: 586.6891  
 z: 5

score: 6.75  
 mean(ppmerror): 0.92  
 std(ppmerror): 3.32

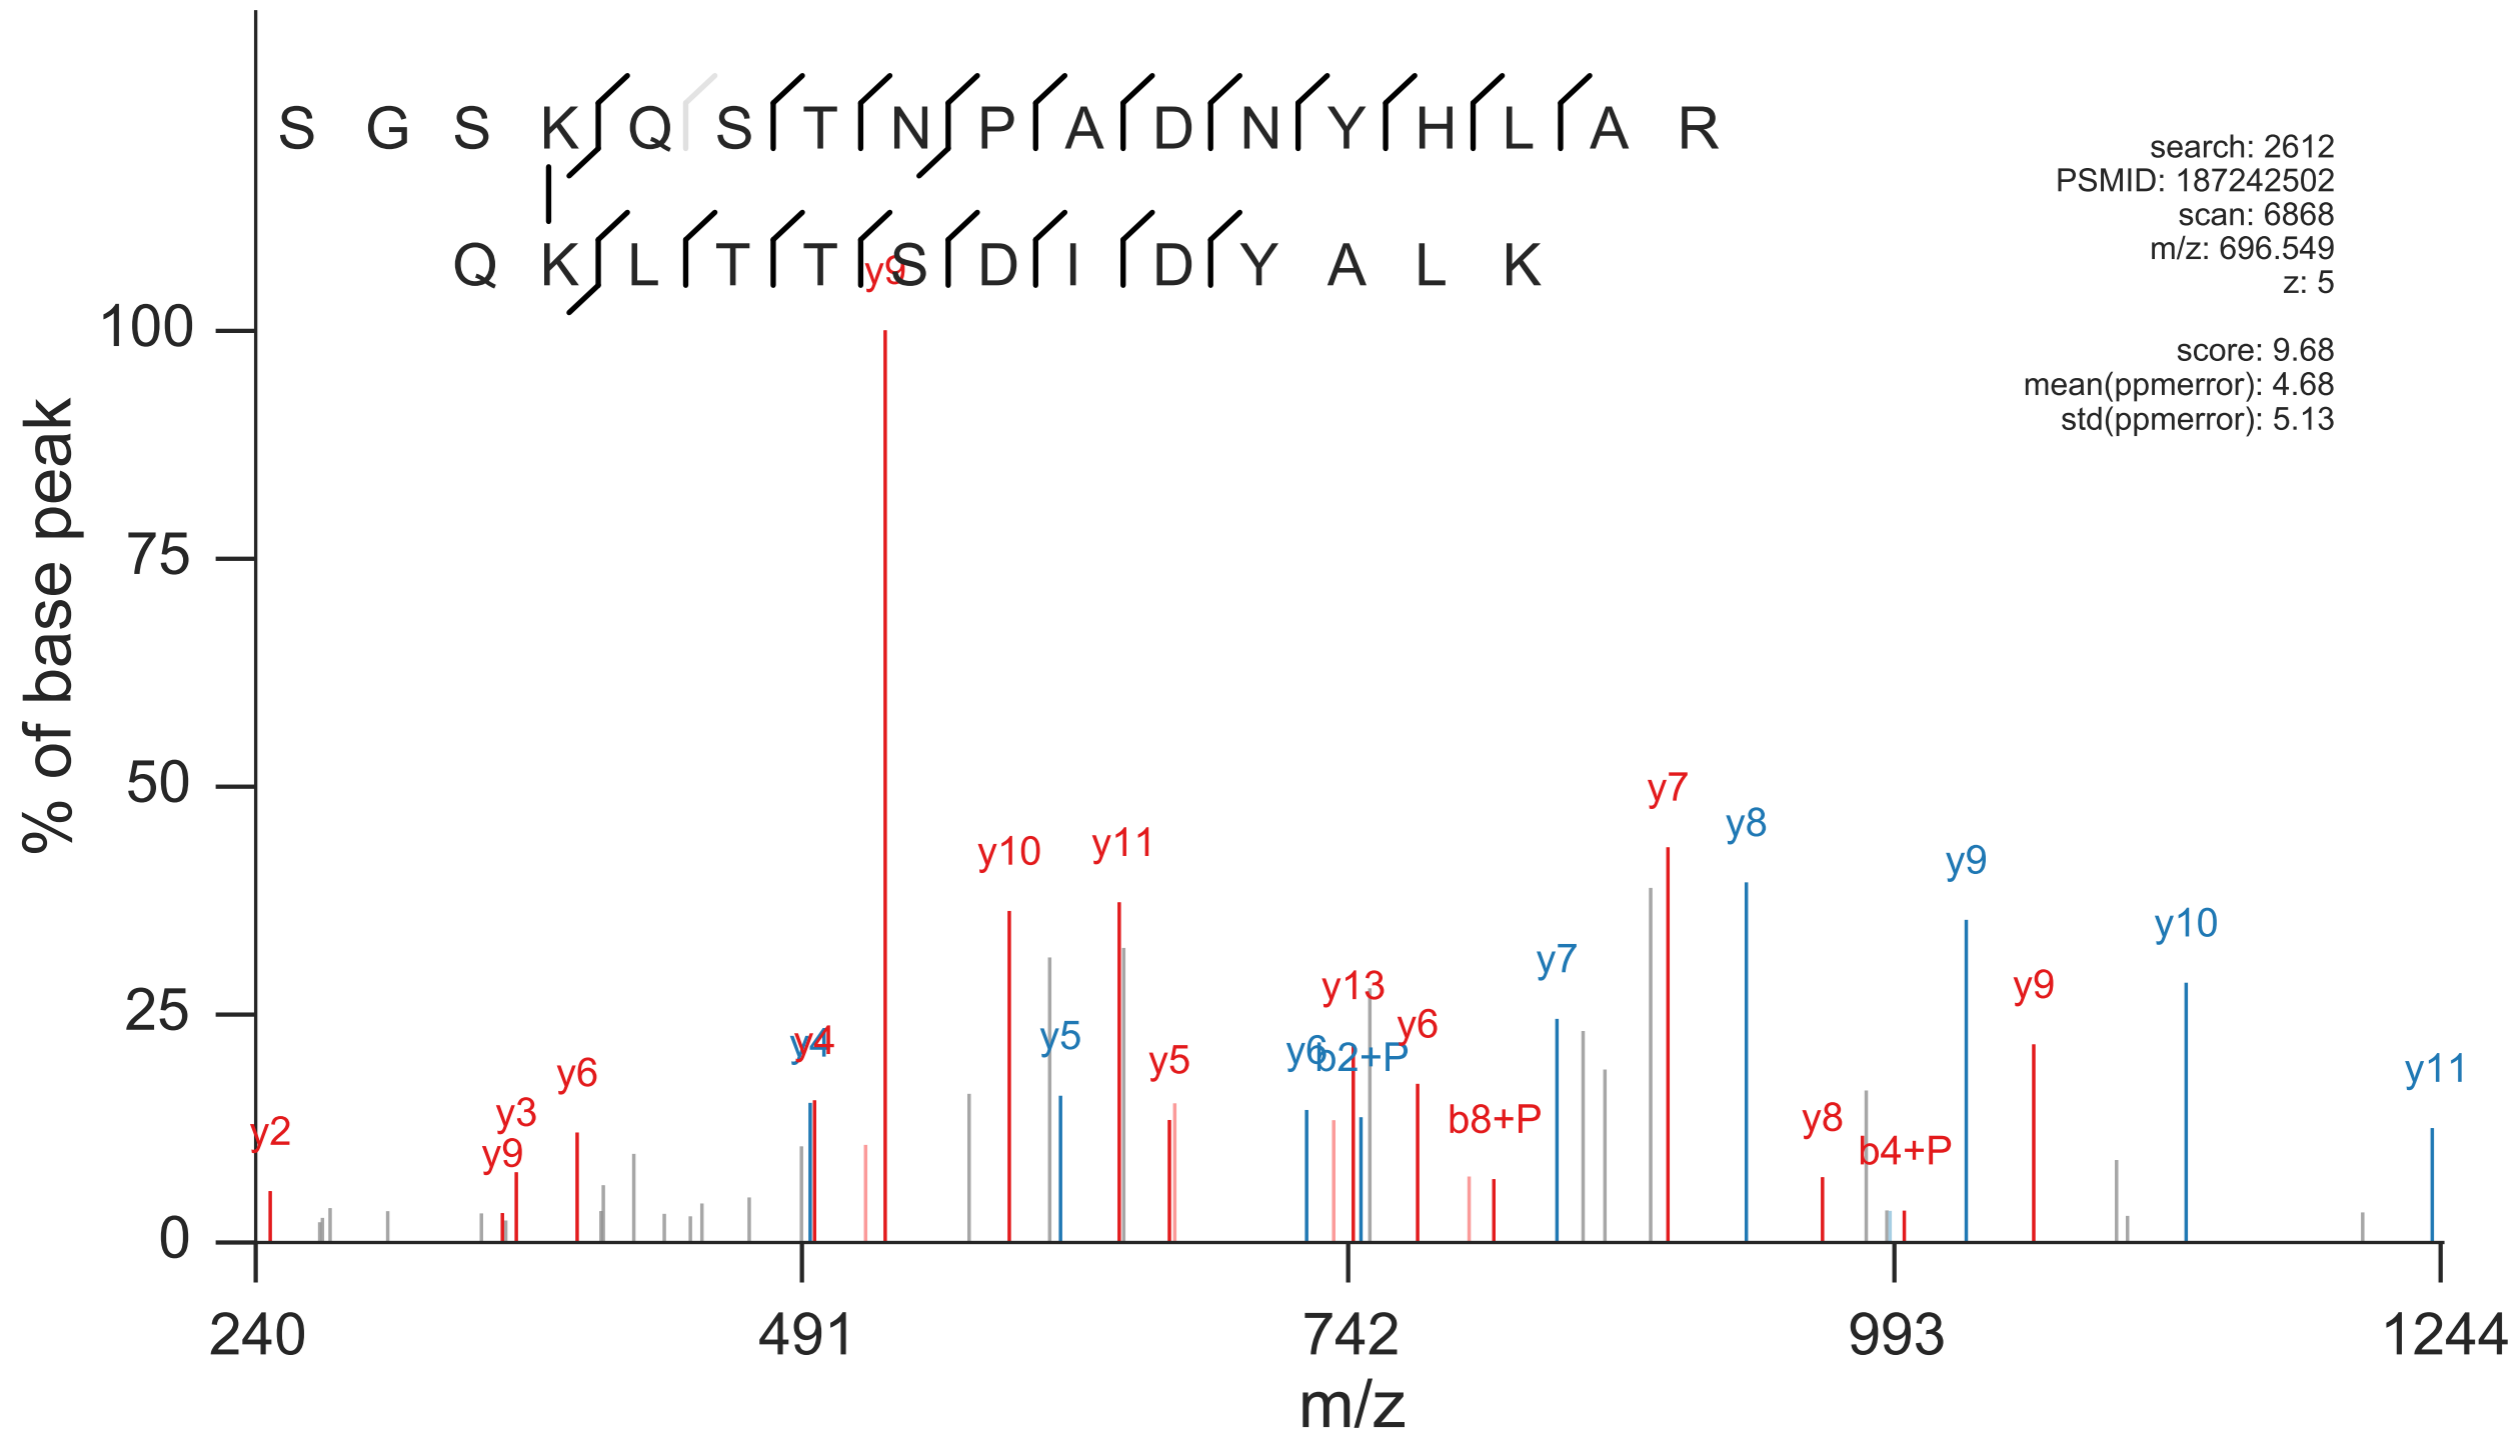

search: 2612  
 PSMID: 187242502  
 scan: 6868  
 m/z: 696.549  
 z: 5

score: 9.68  
 mean(ppmerror): 4.68  
 std(ppmerror): 5.13

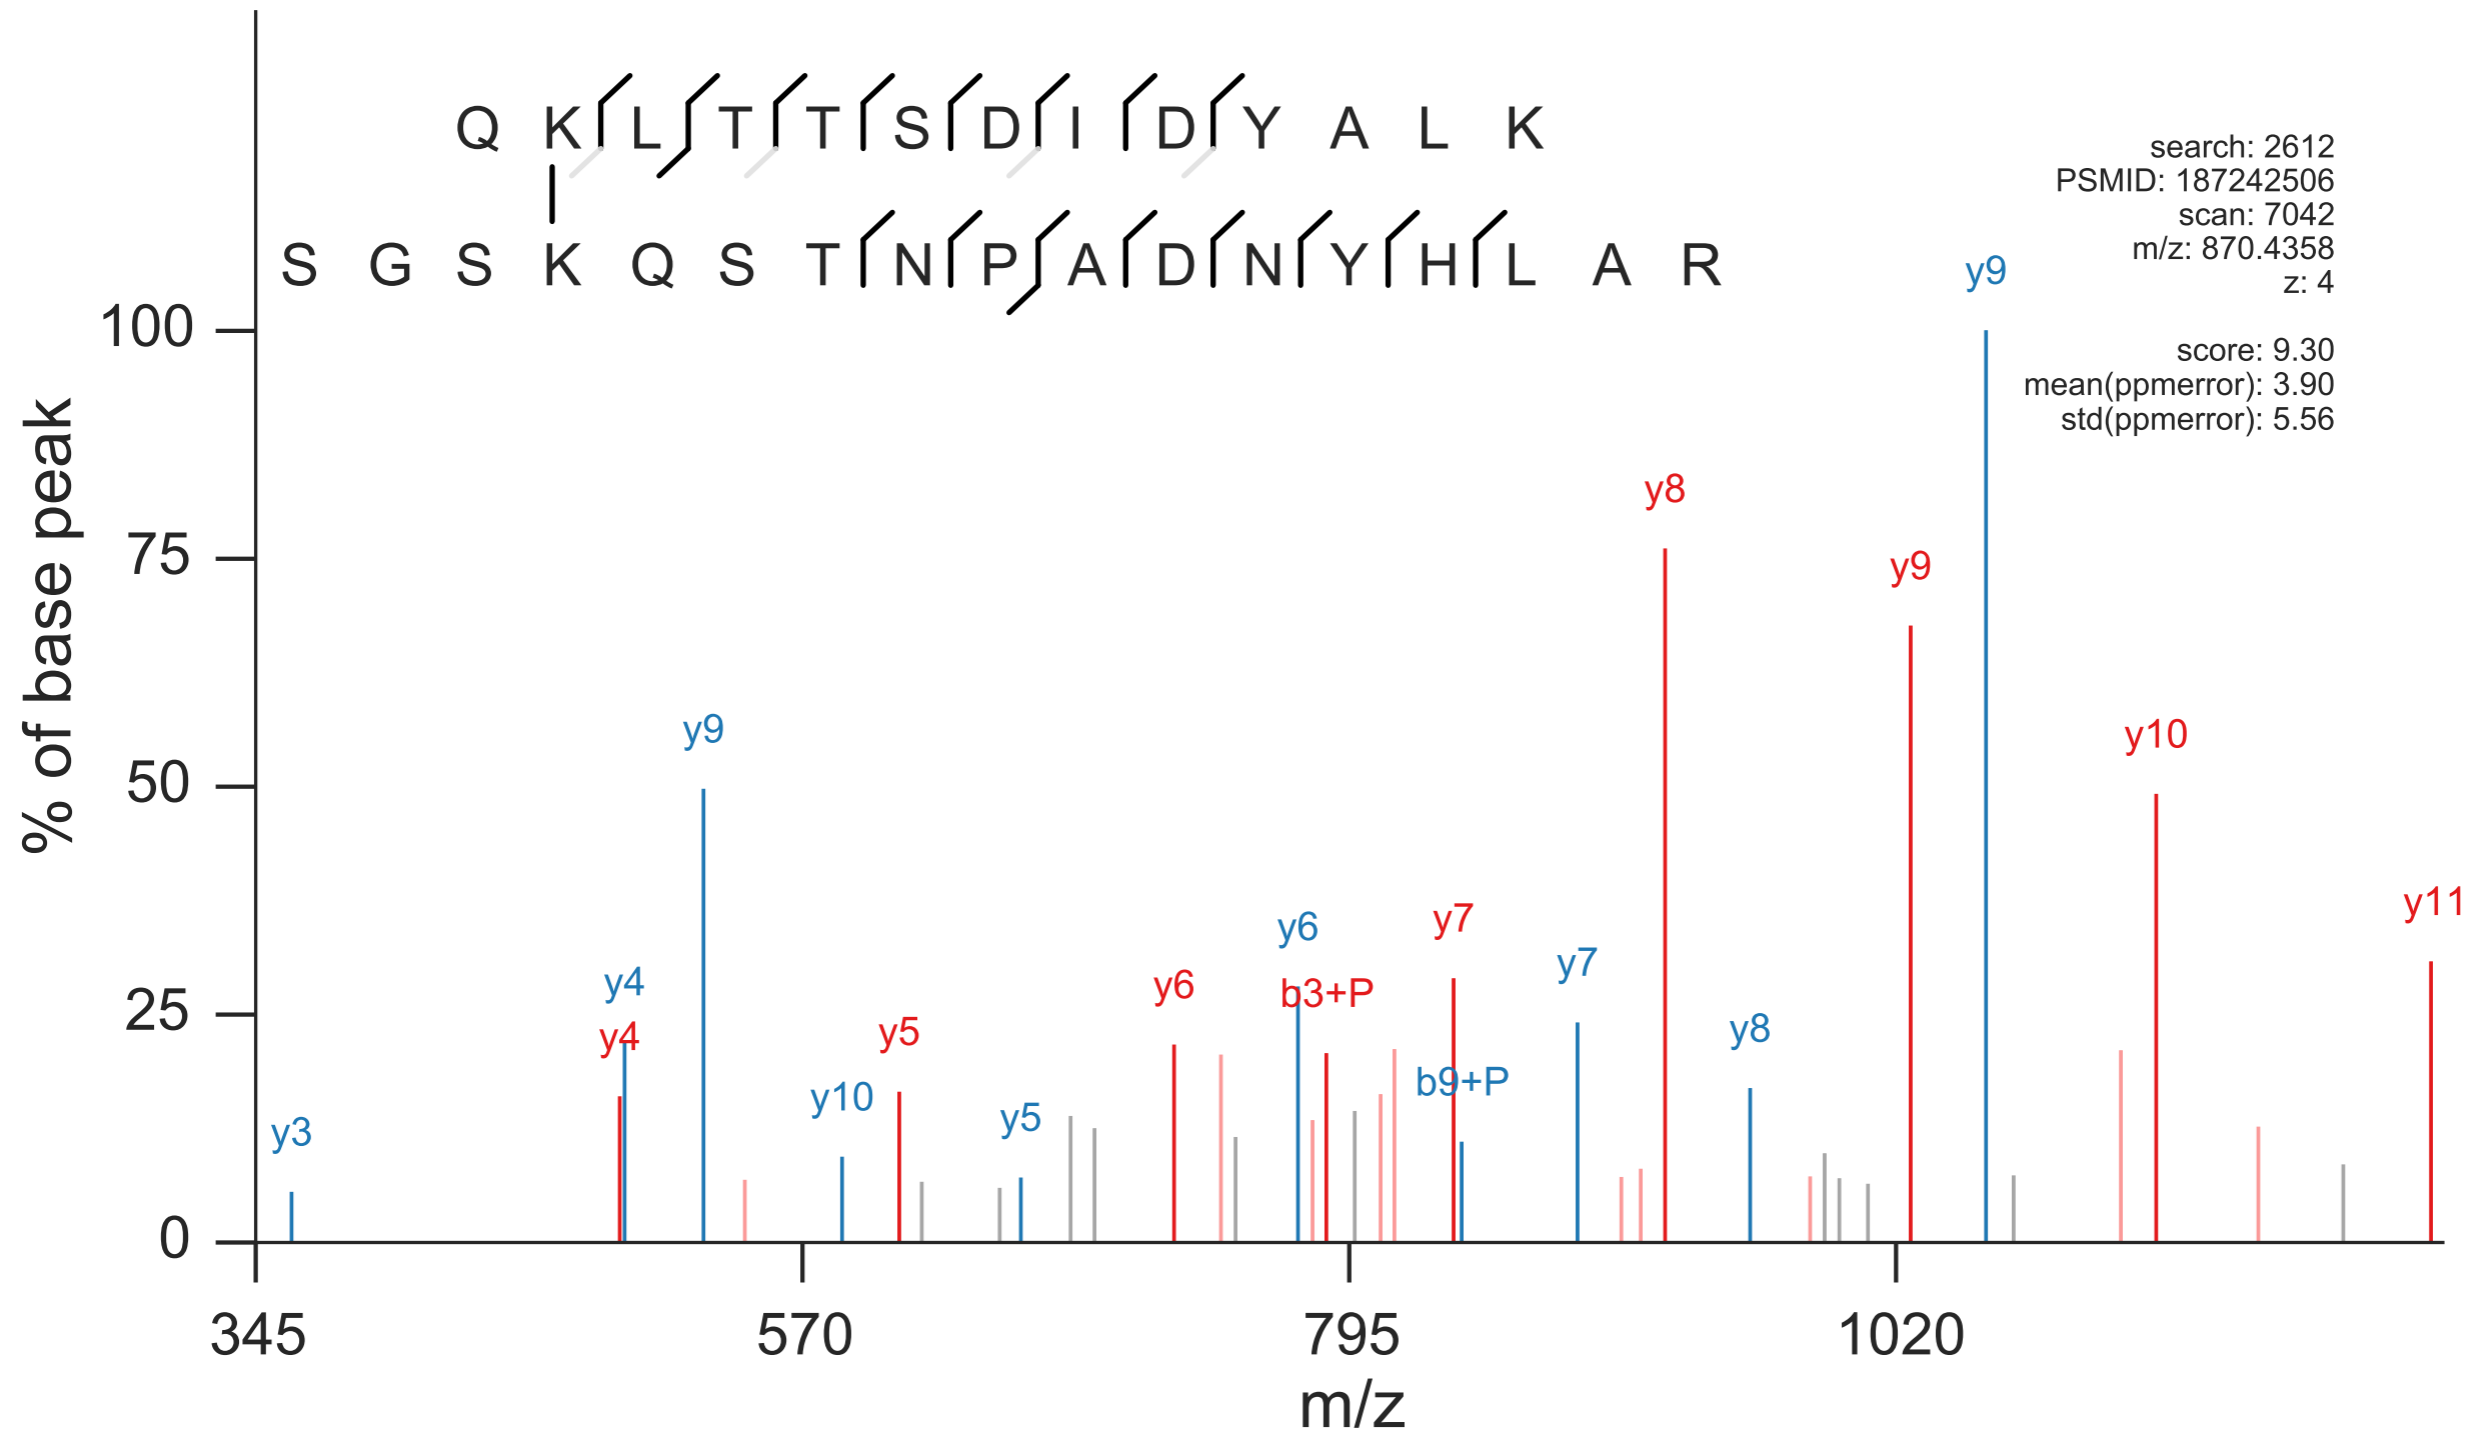

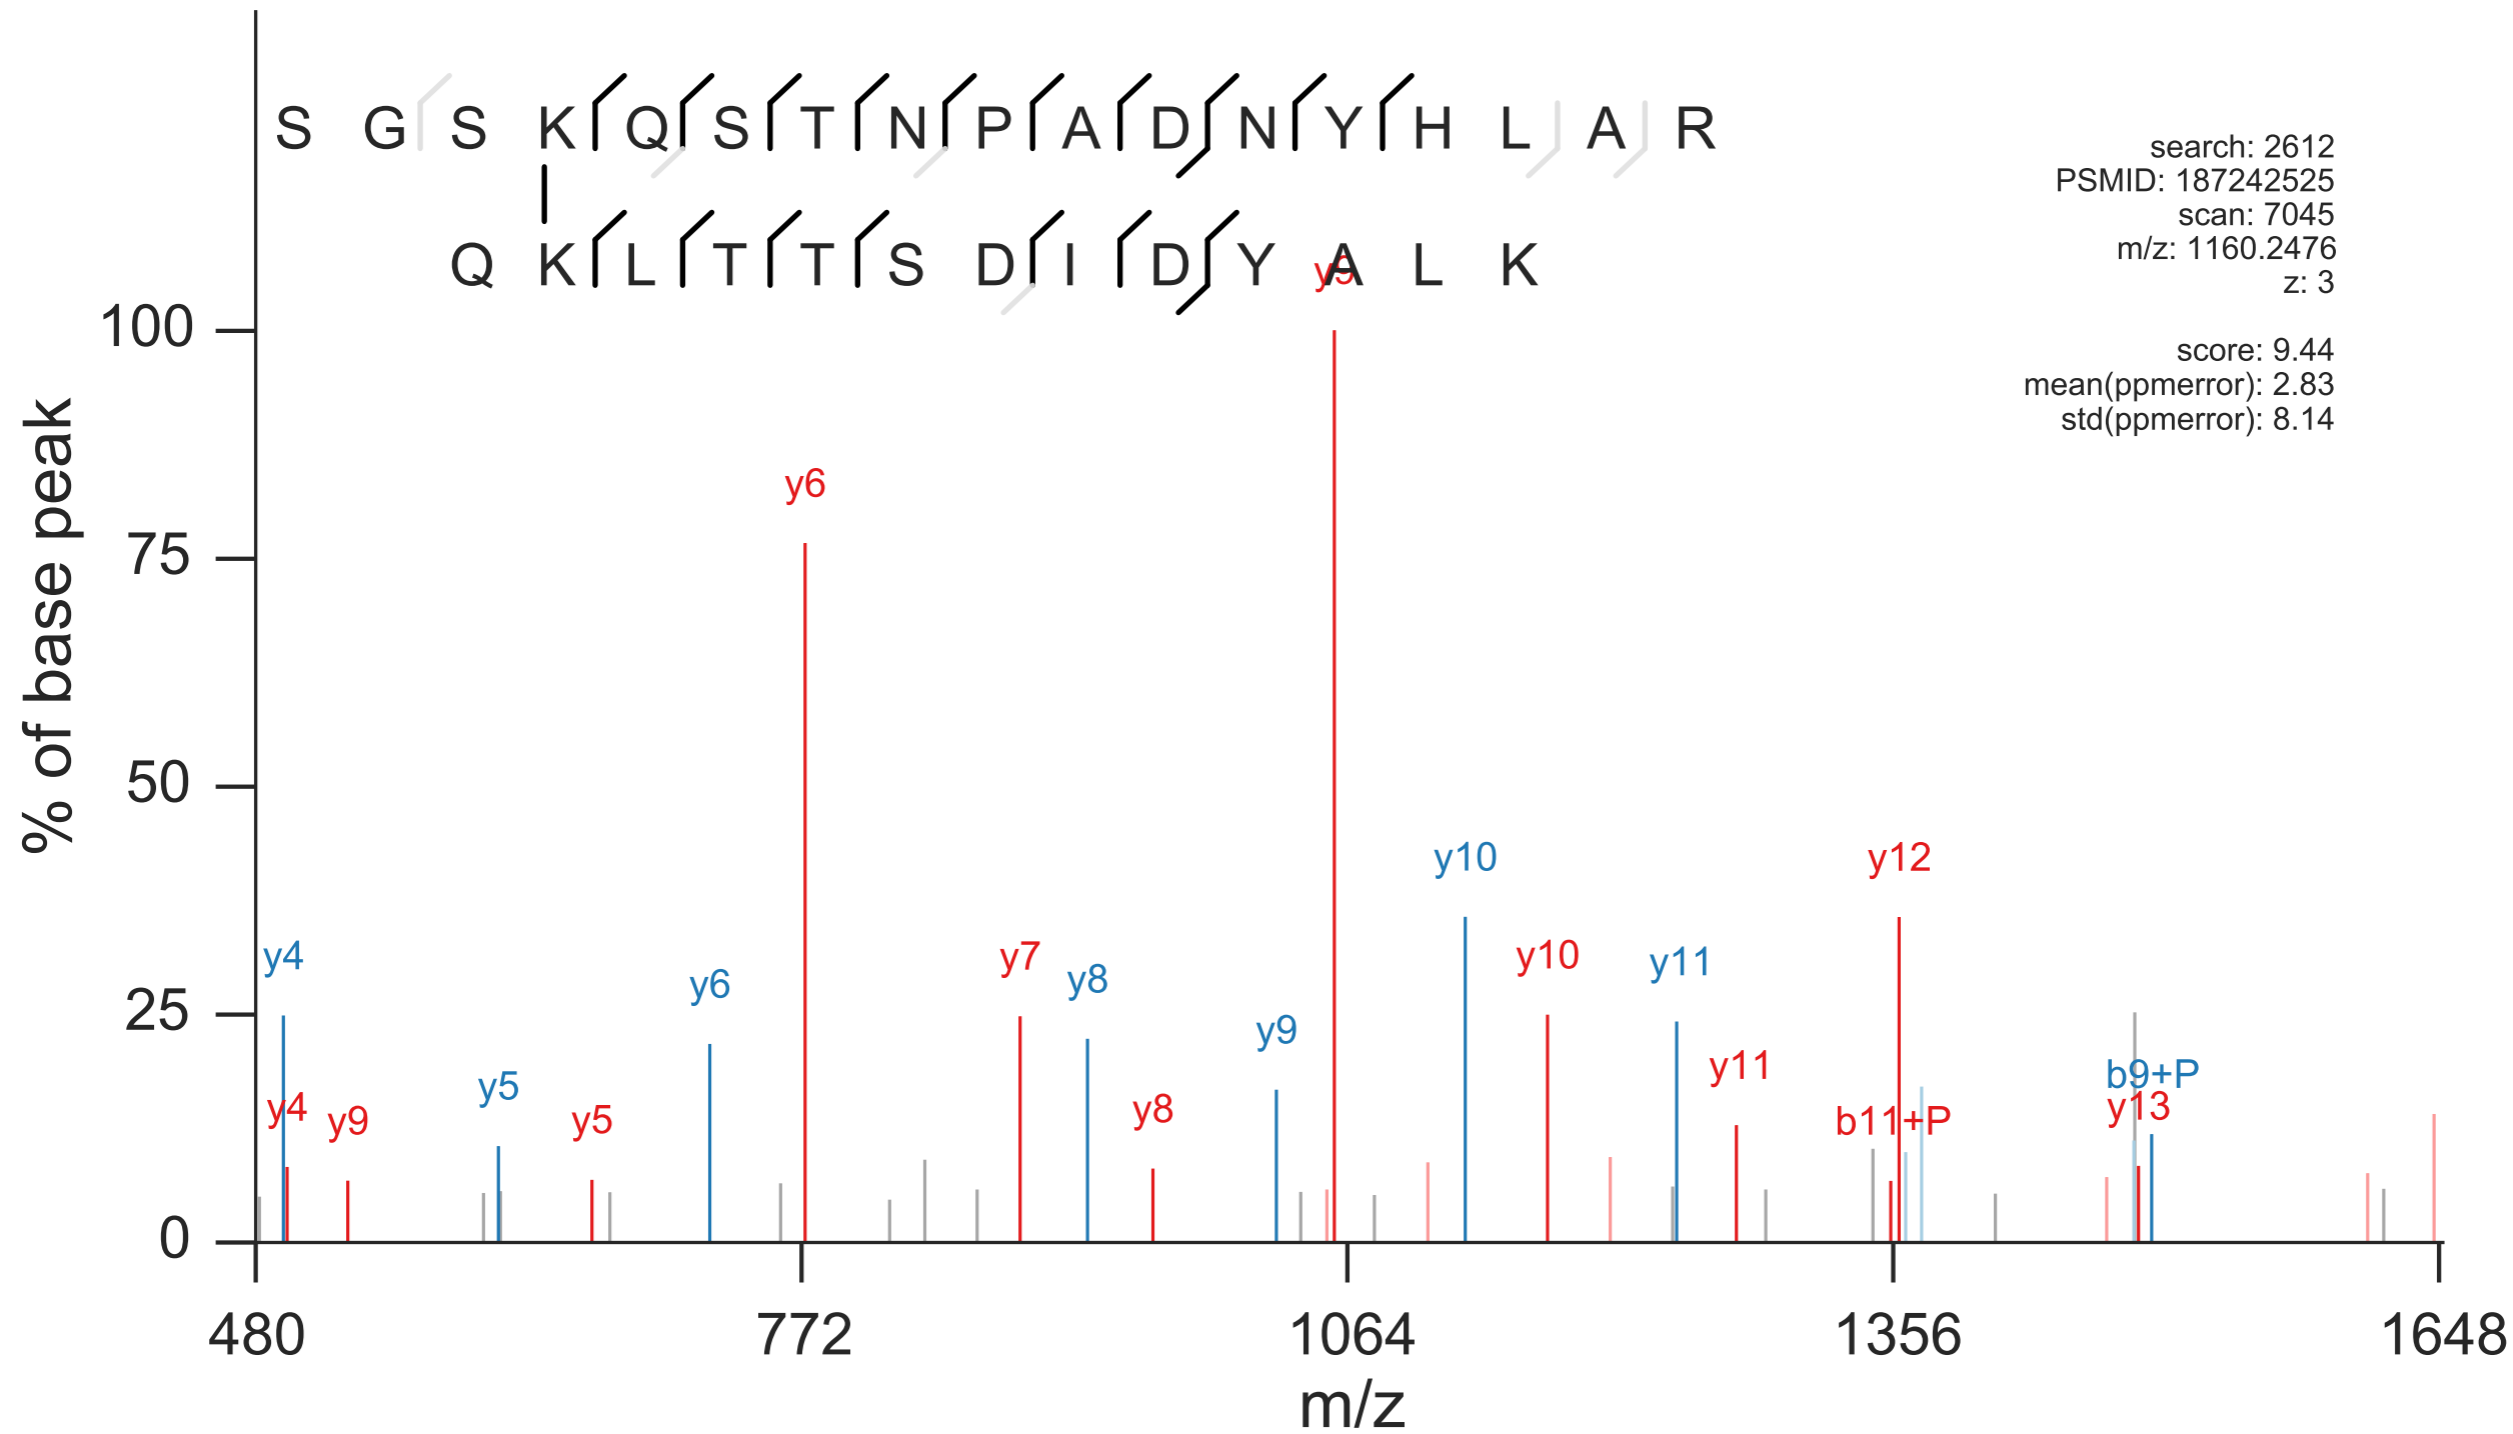



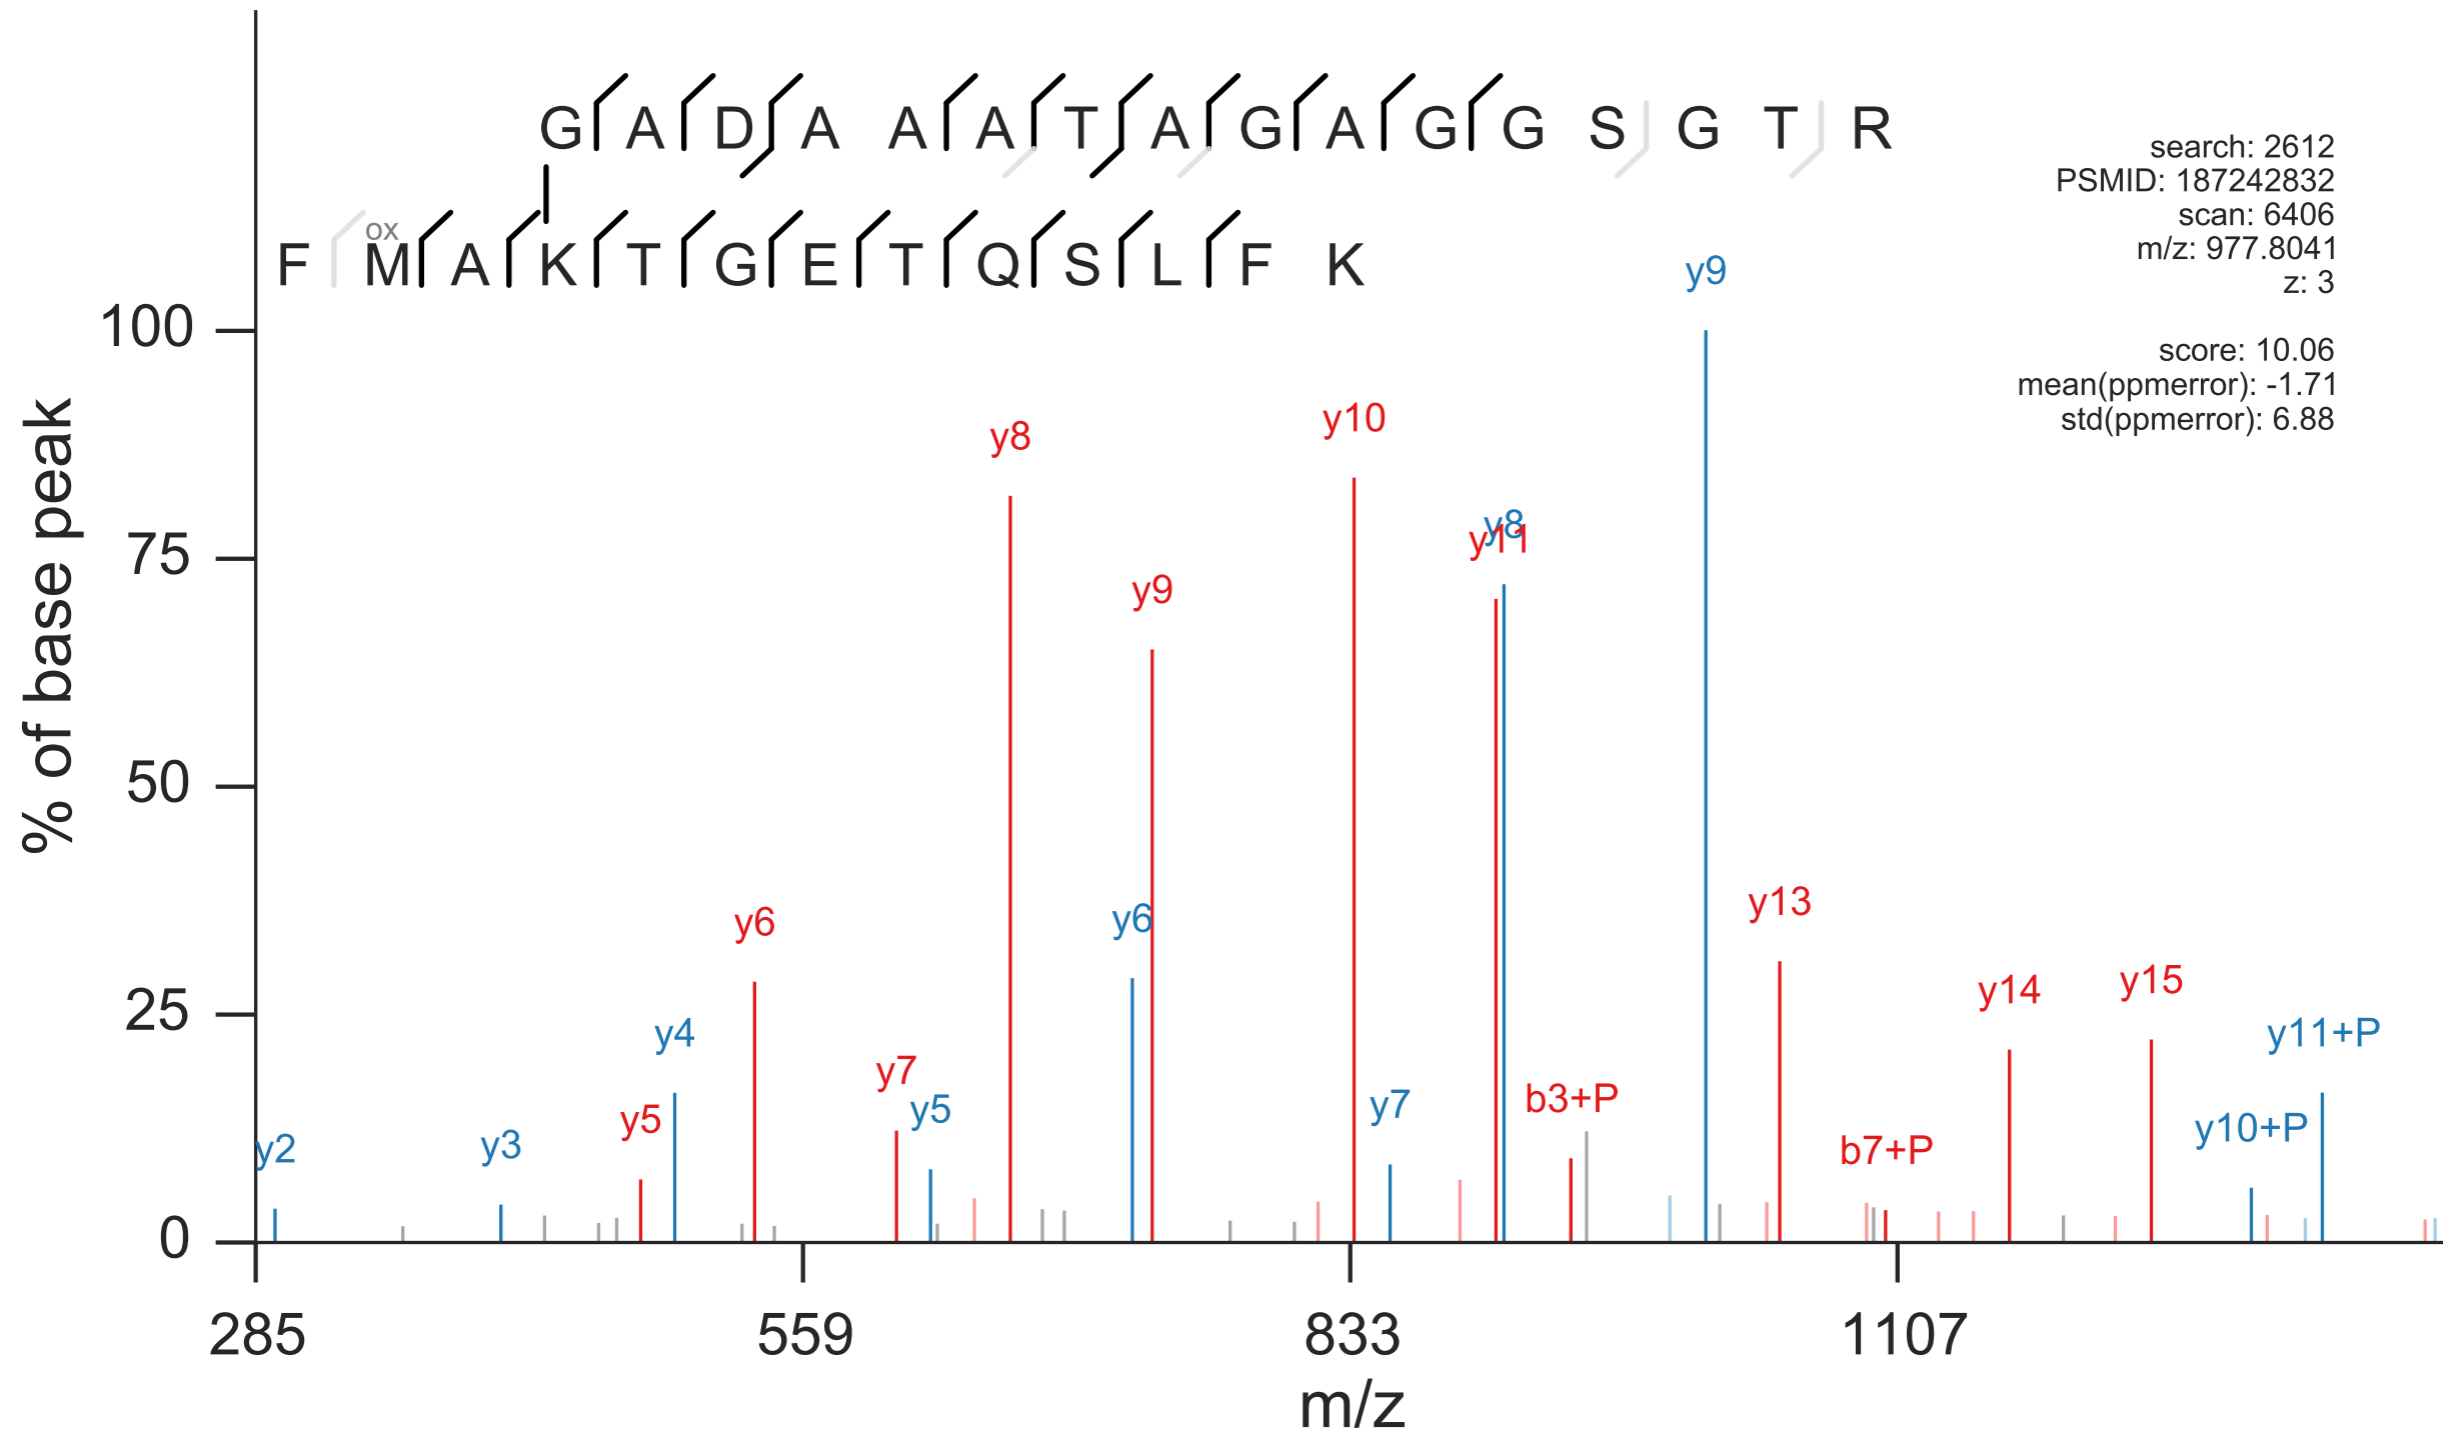

search: 2612  
 PSMID: 187242832  
 scan: 6406  
 m/z: 977.8041  
 z: 3

score: 10.06  
 mean(ppmerror): -1.71  
 std(ppmerror): 6.88

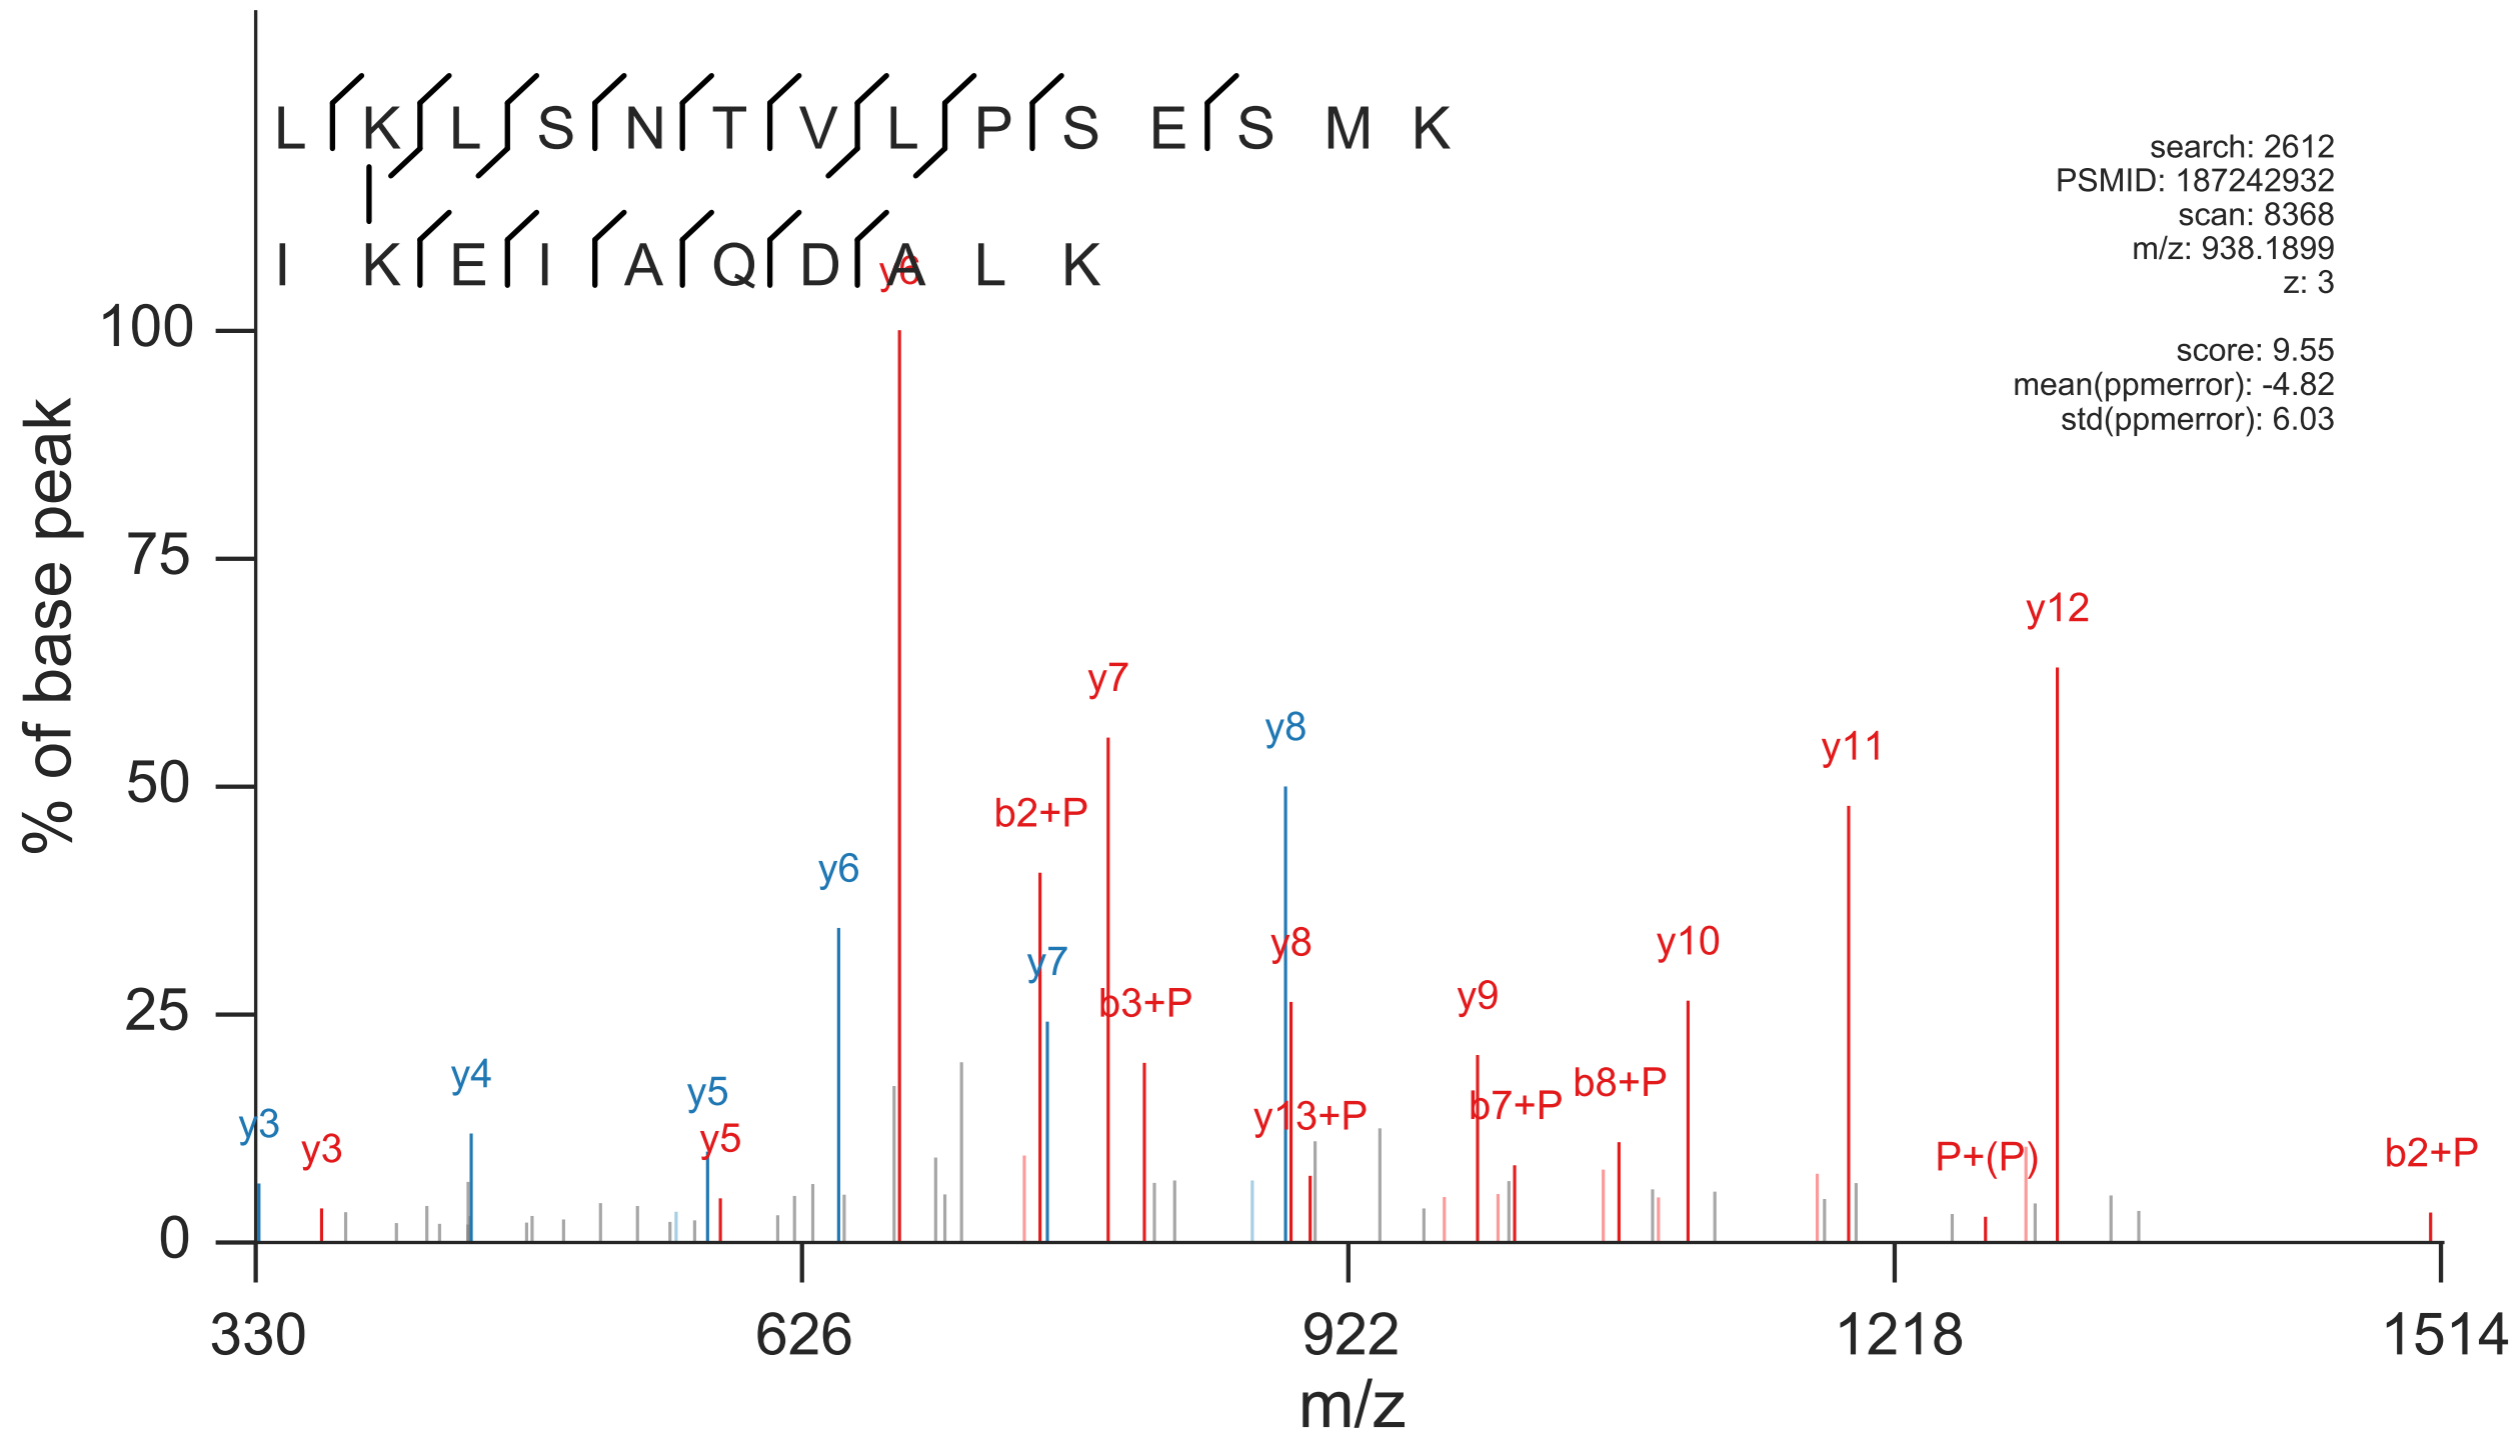

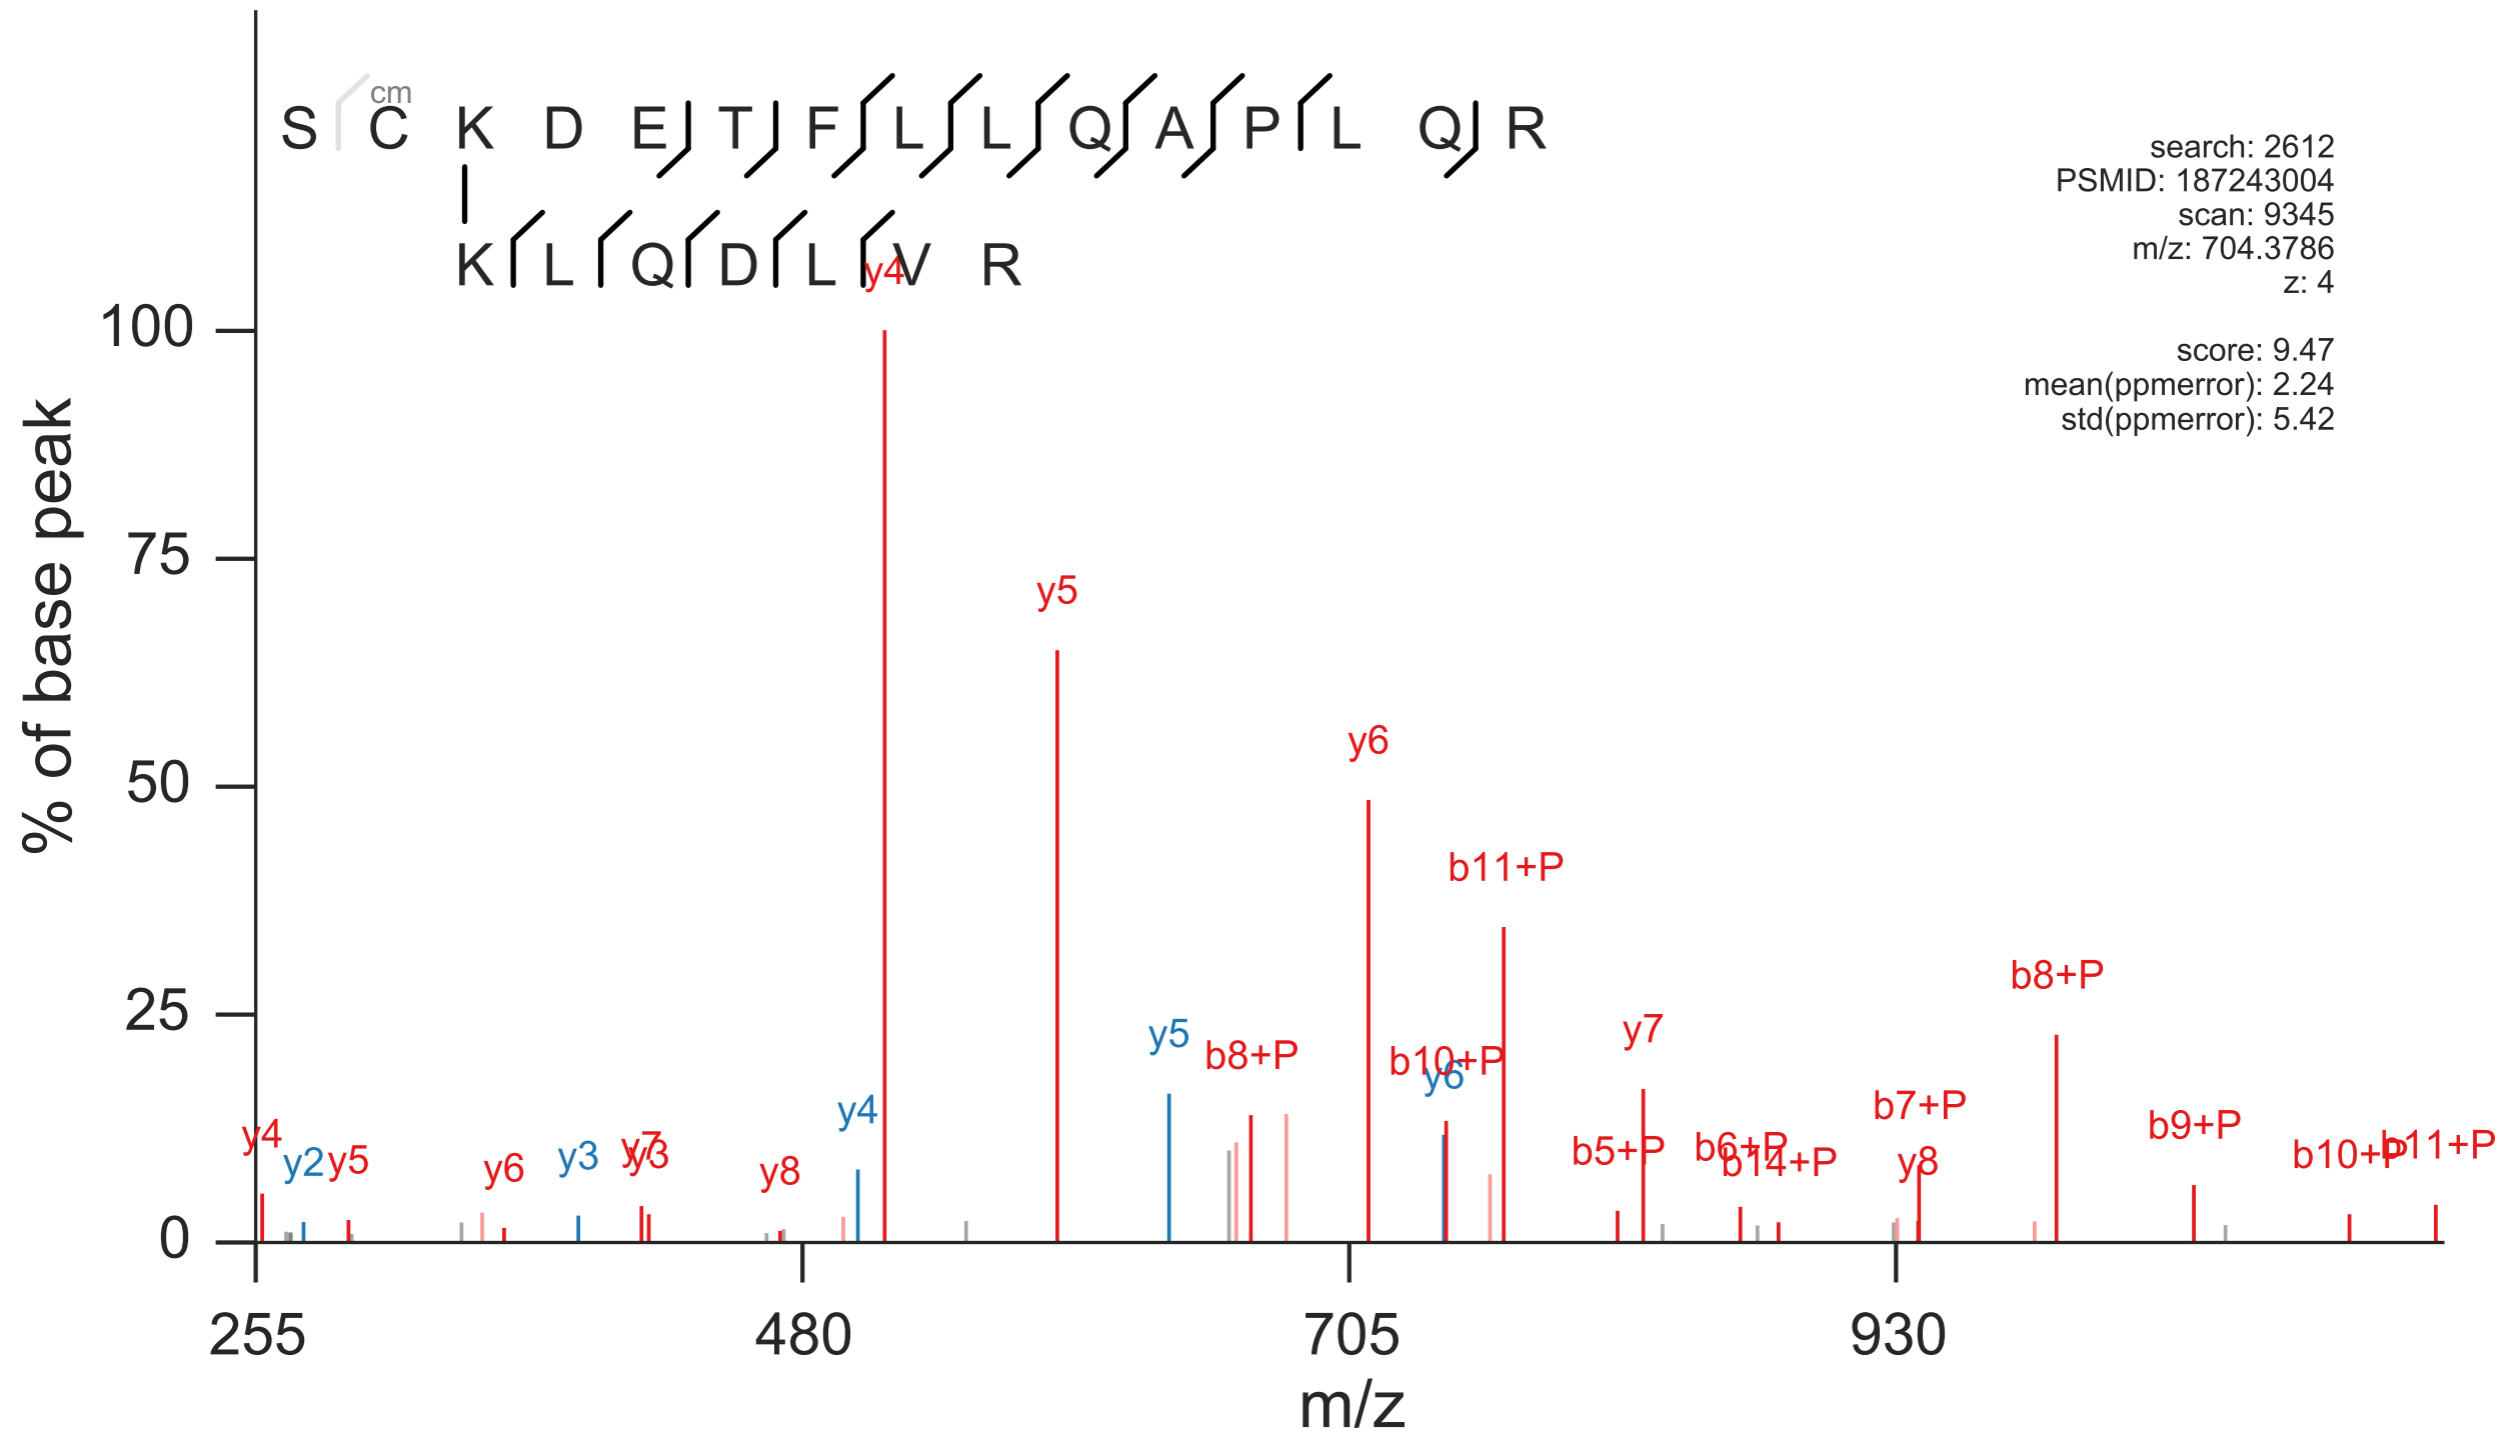

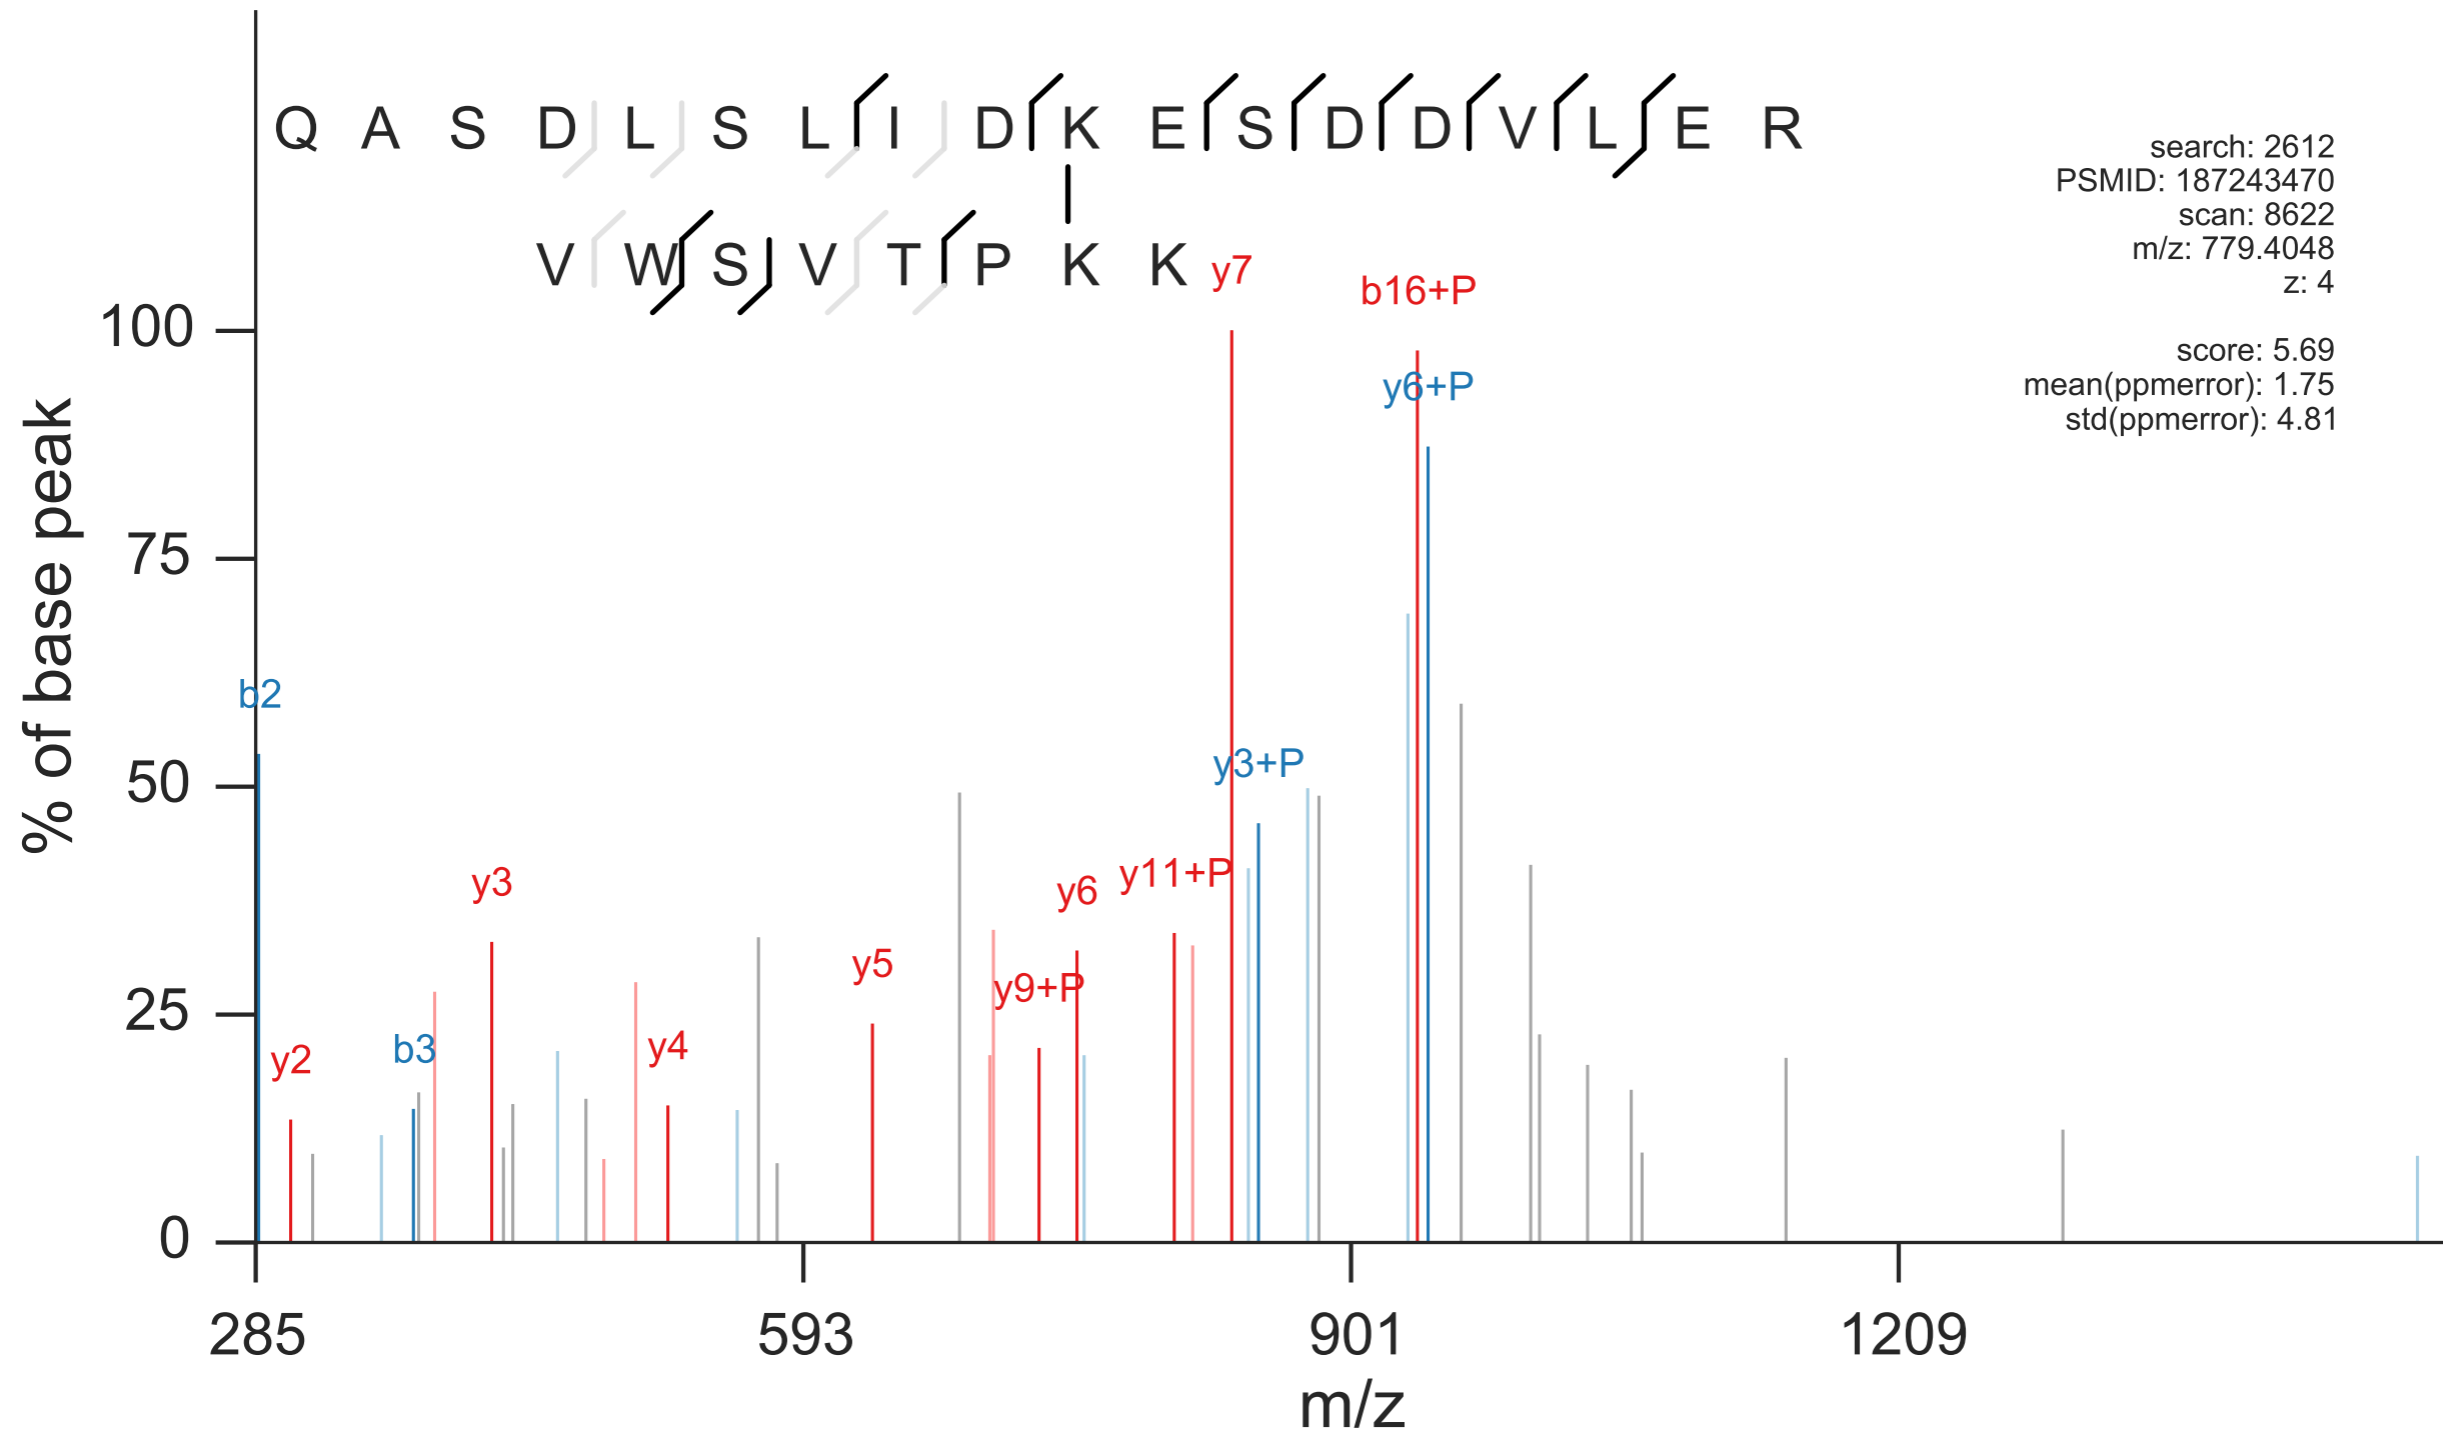

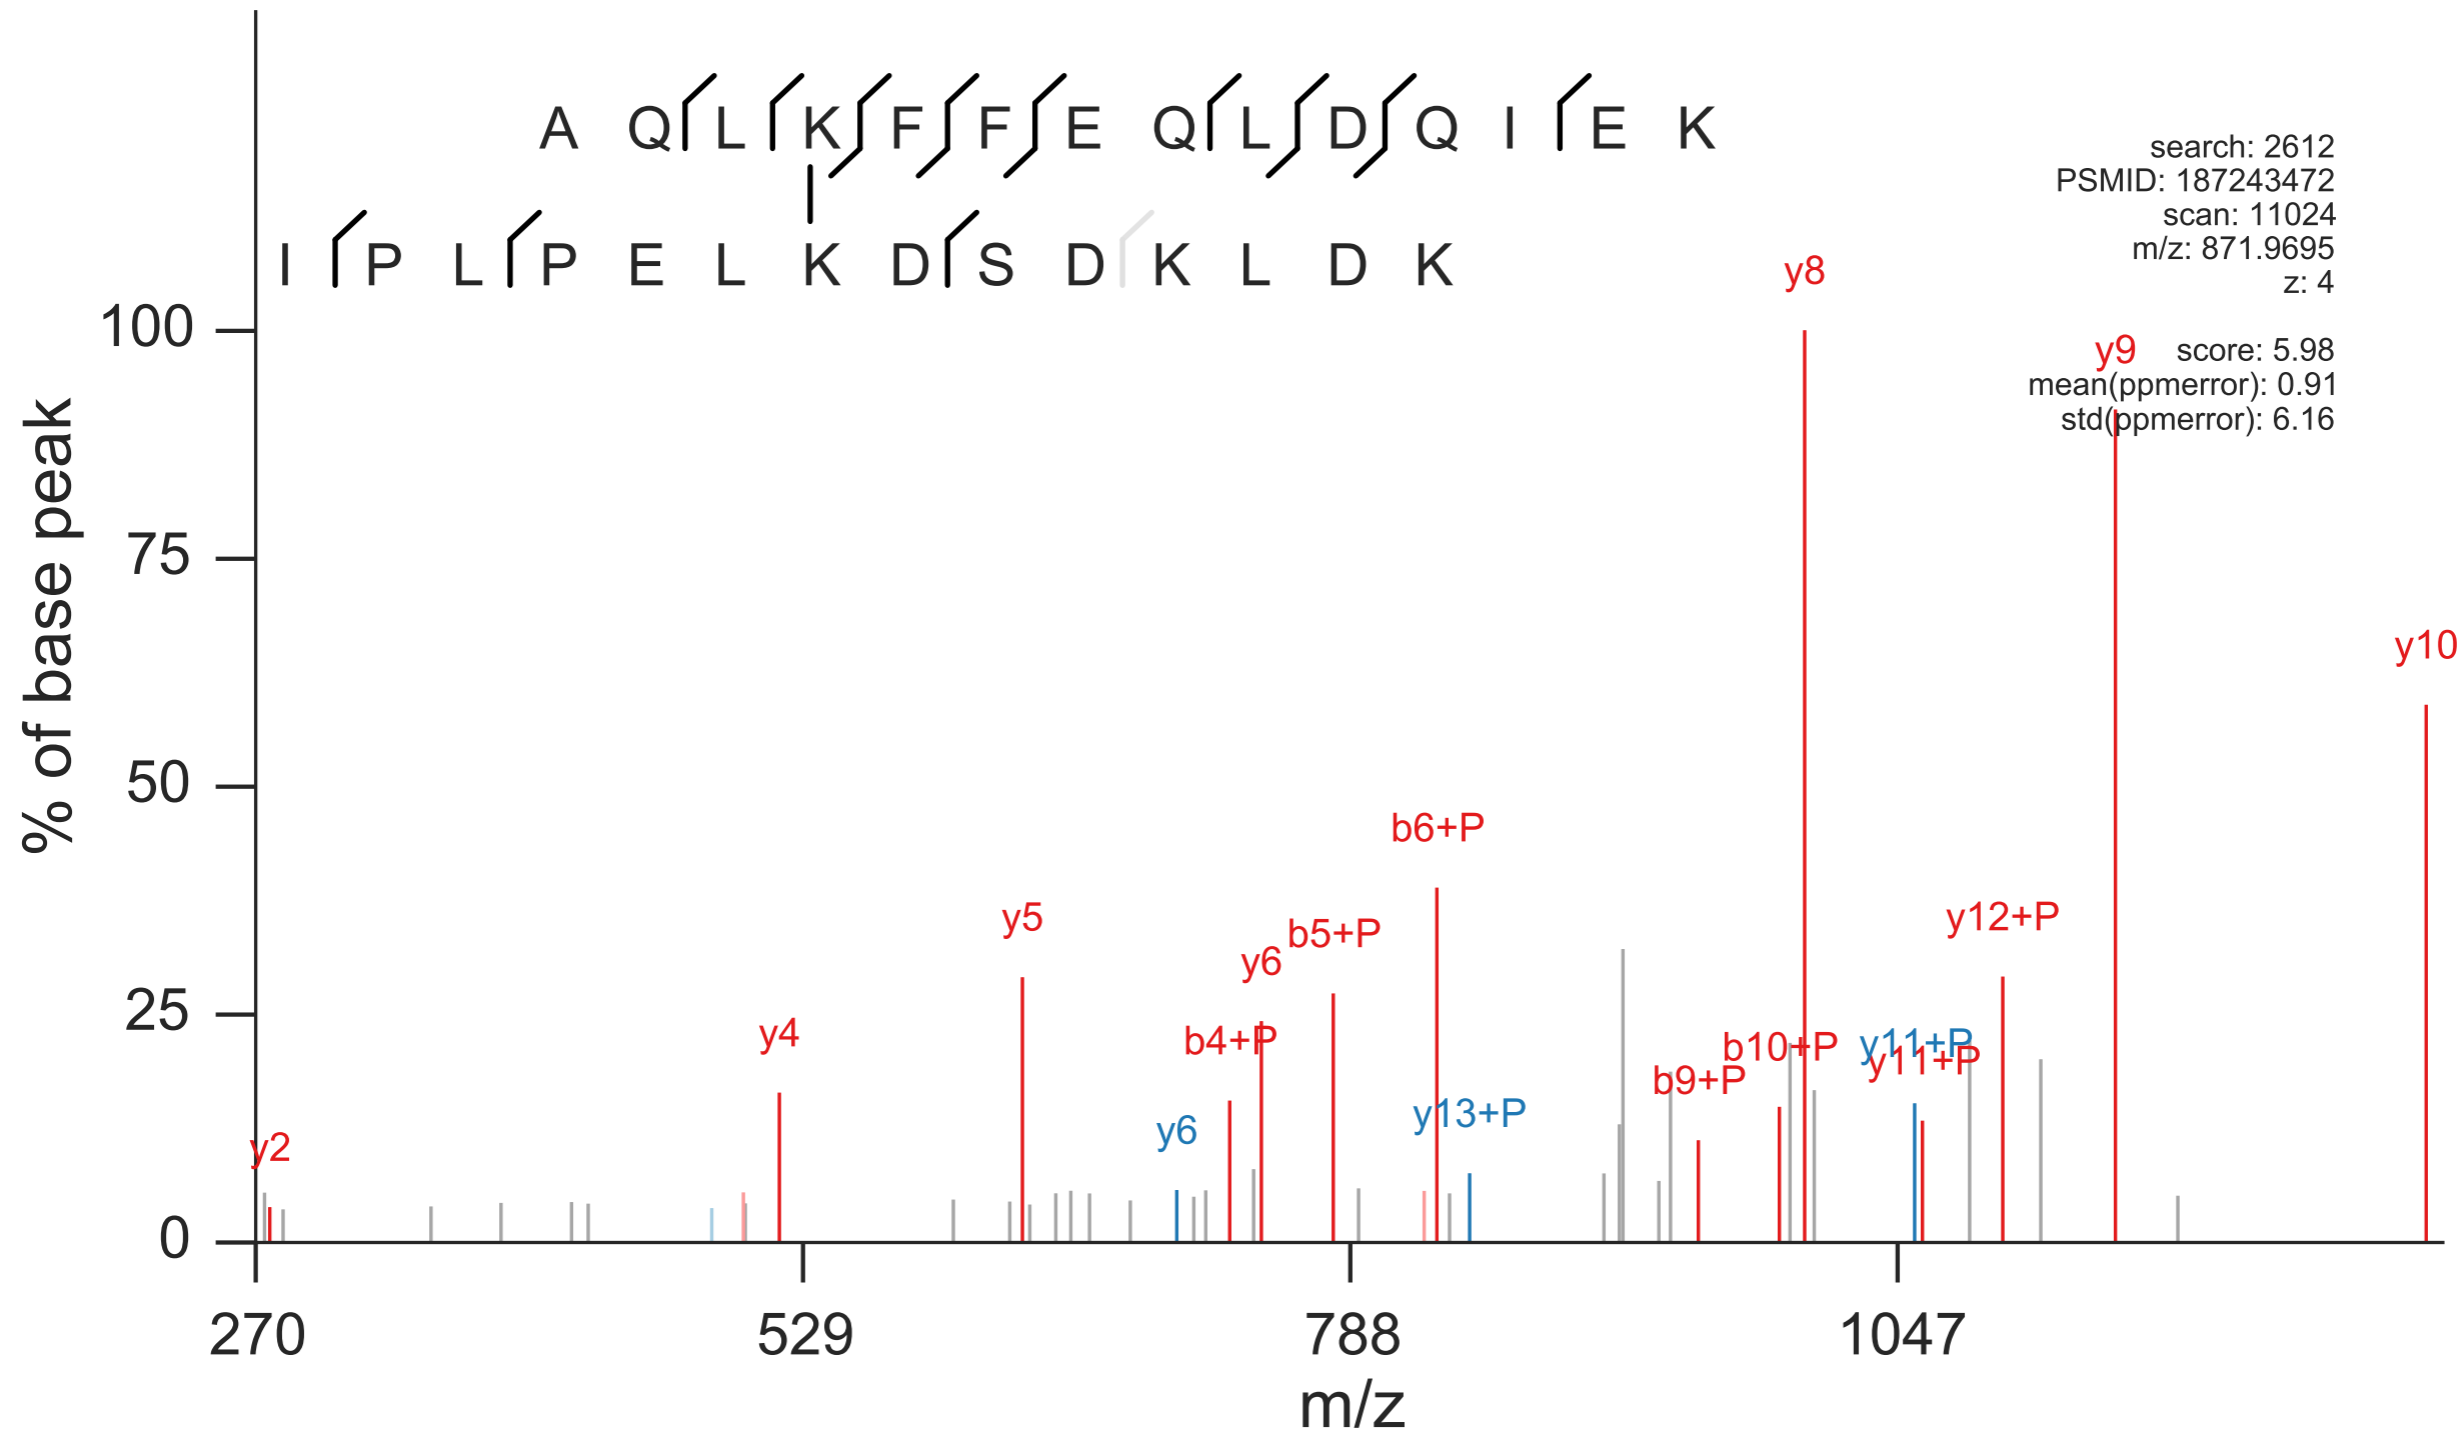

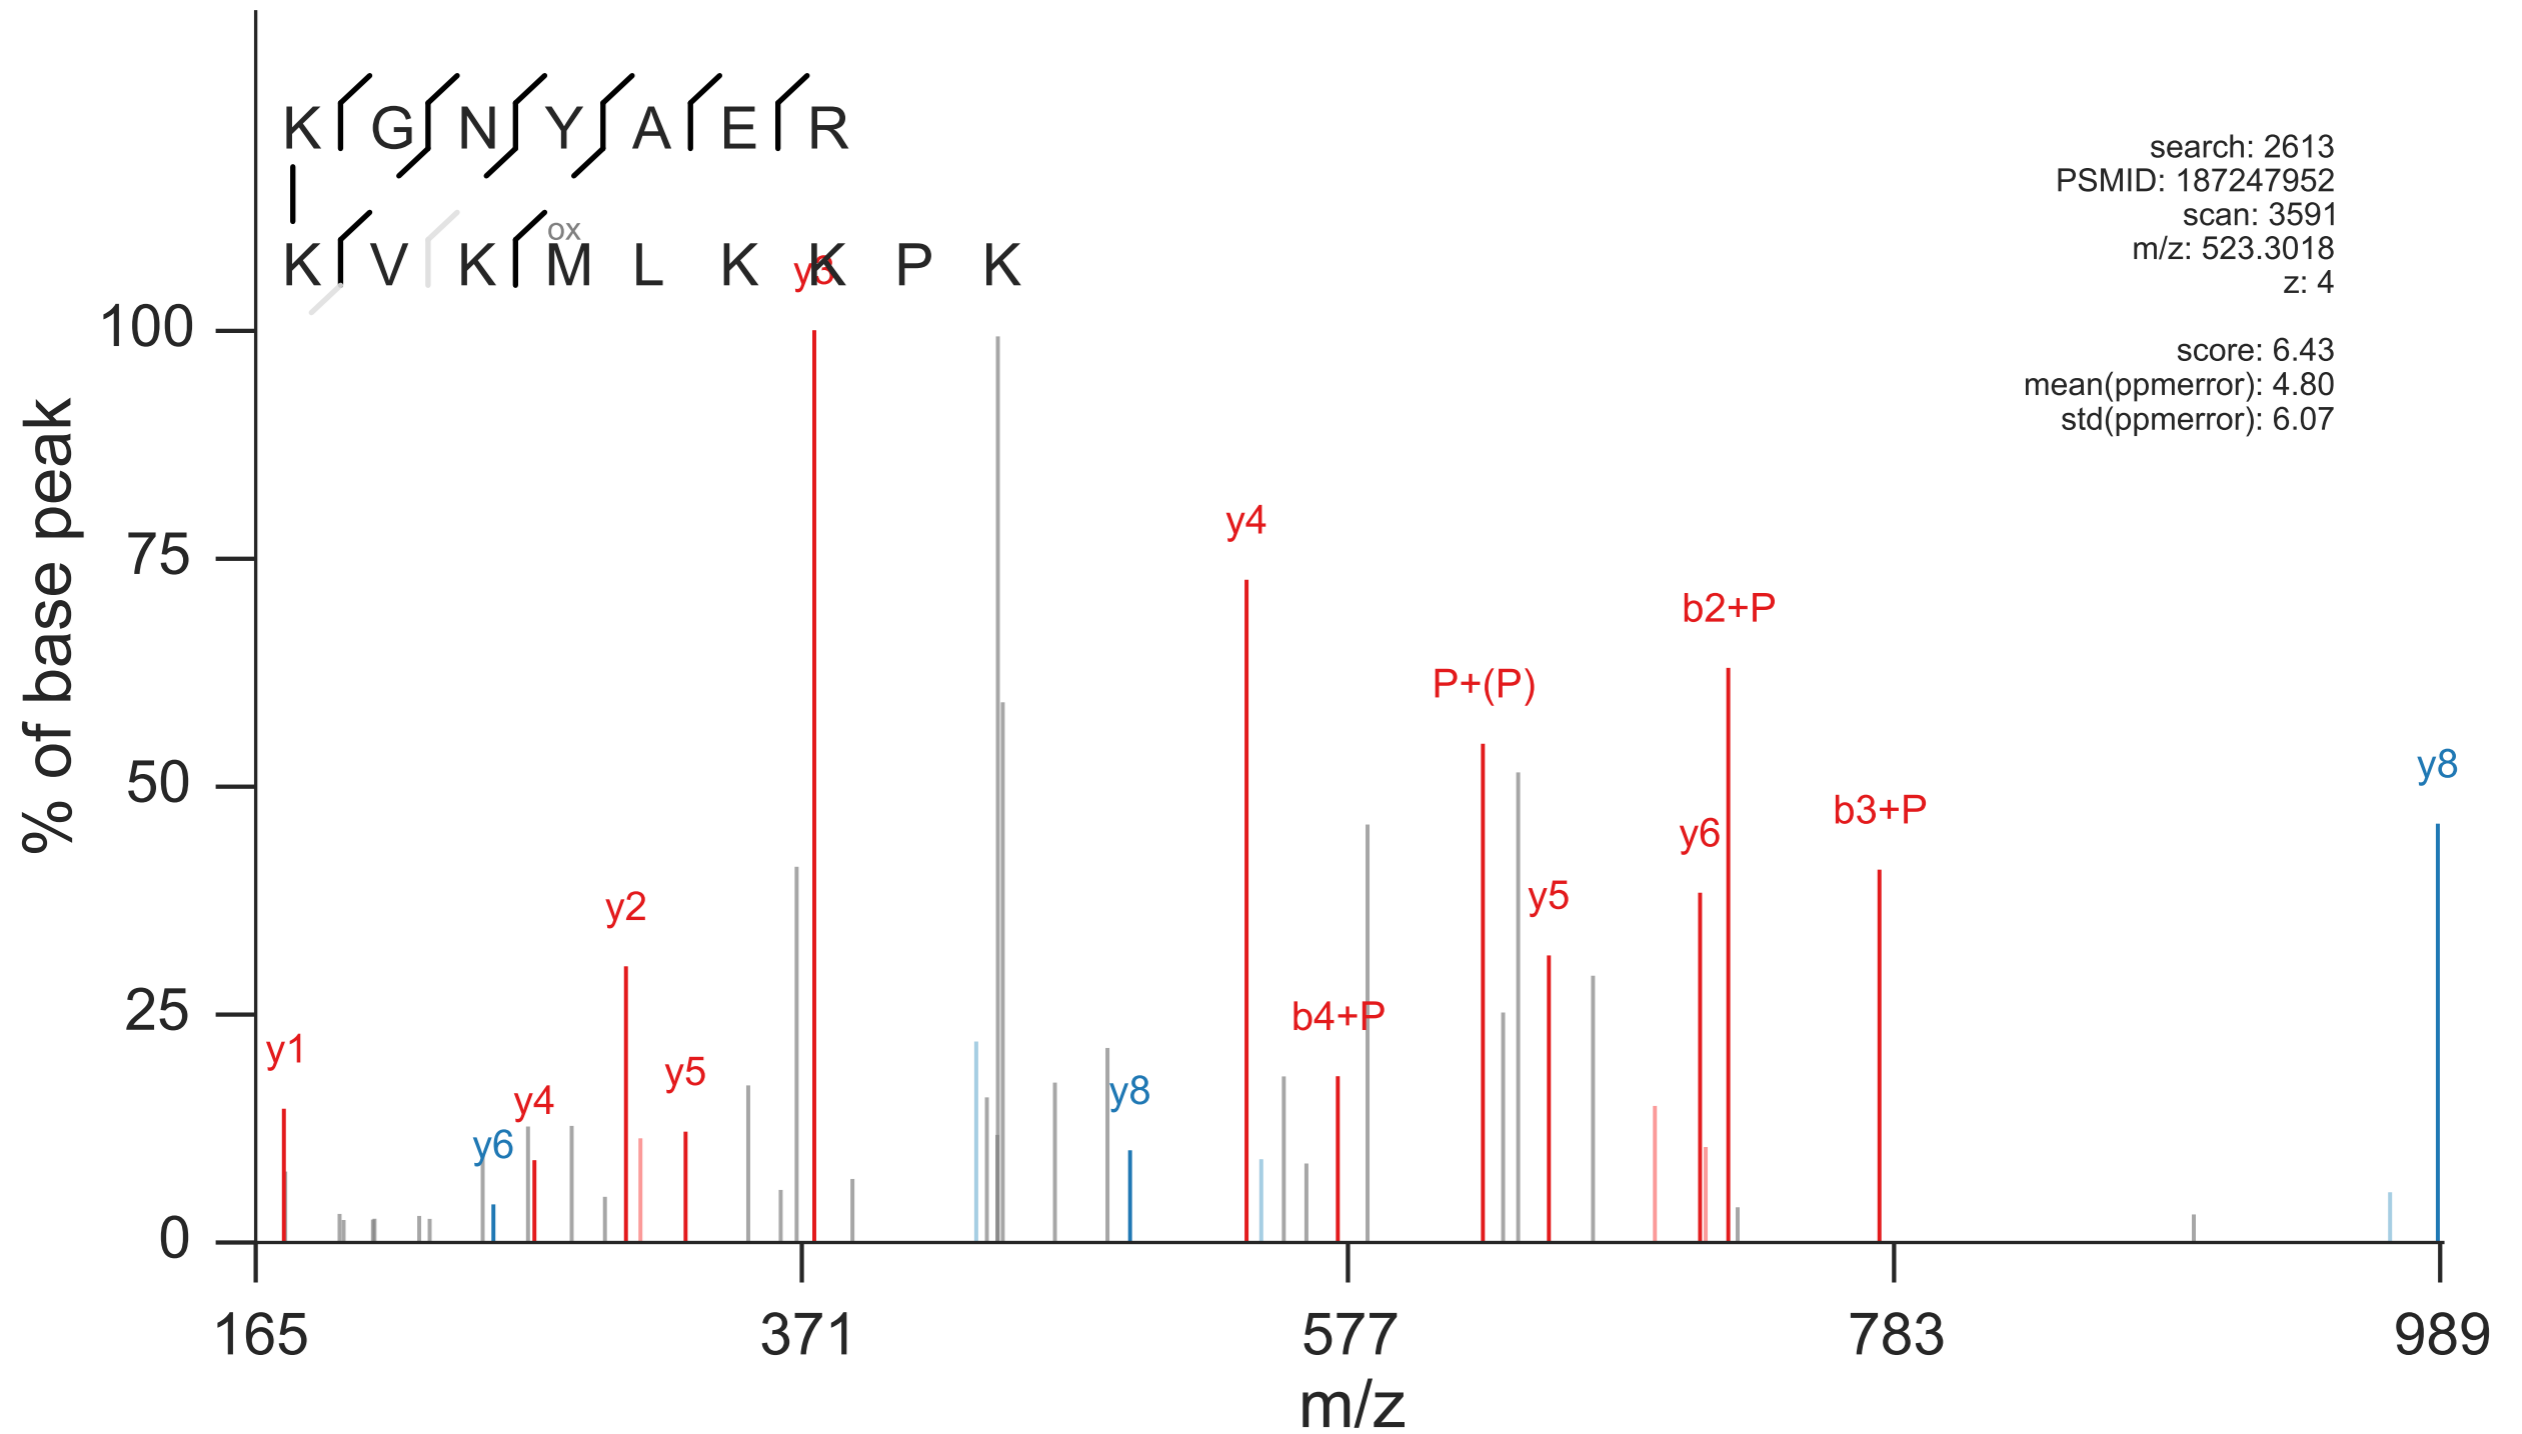

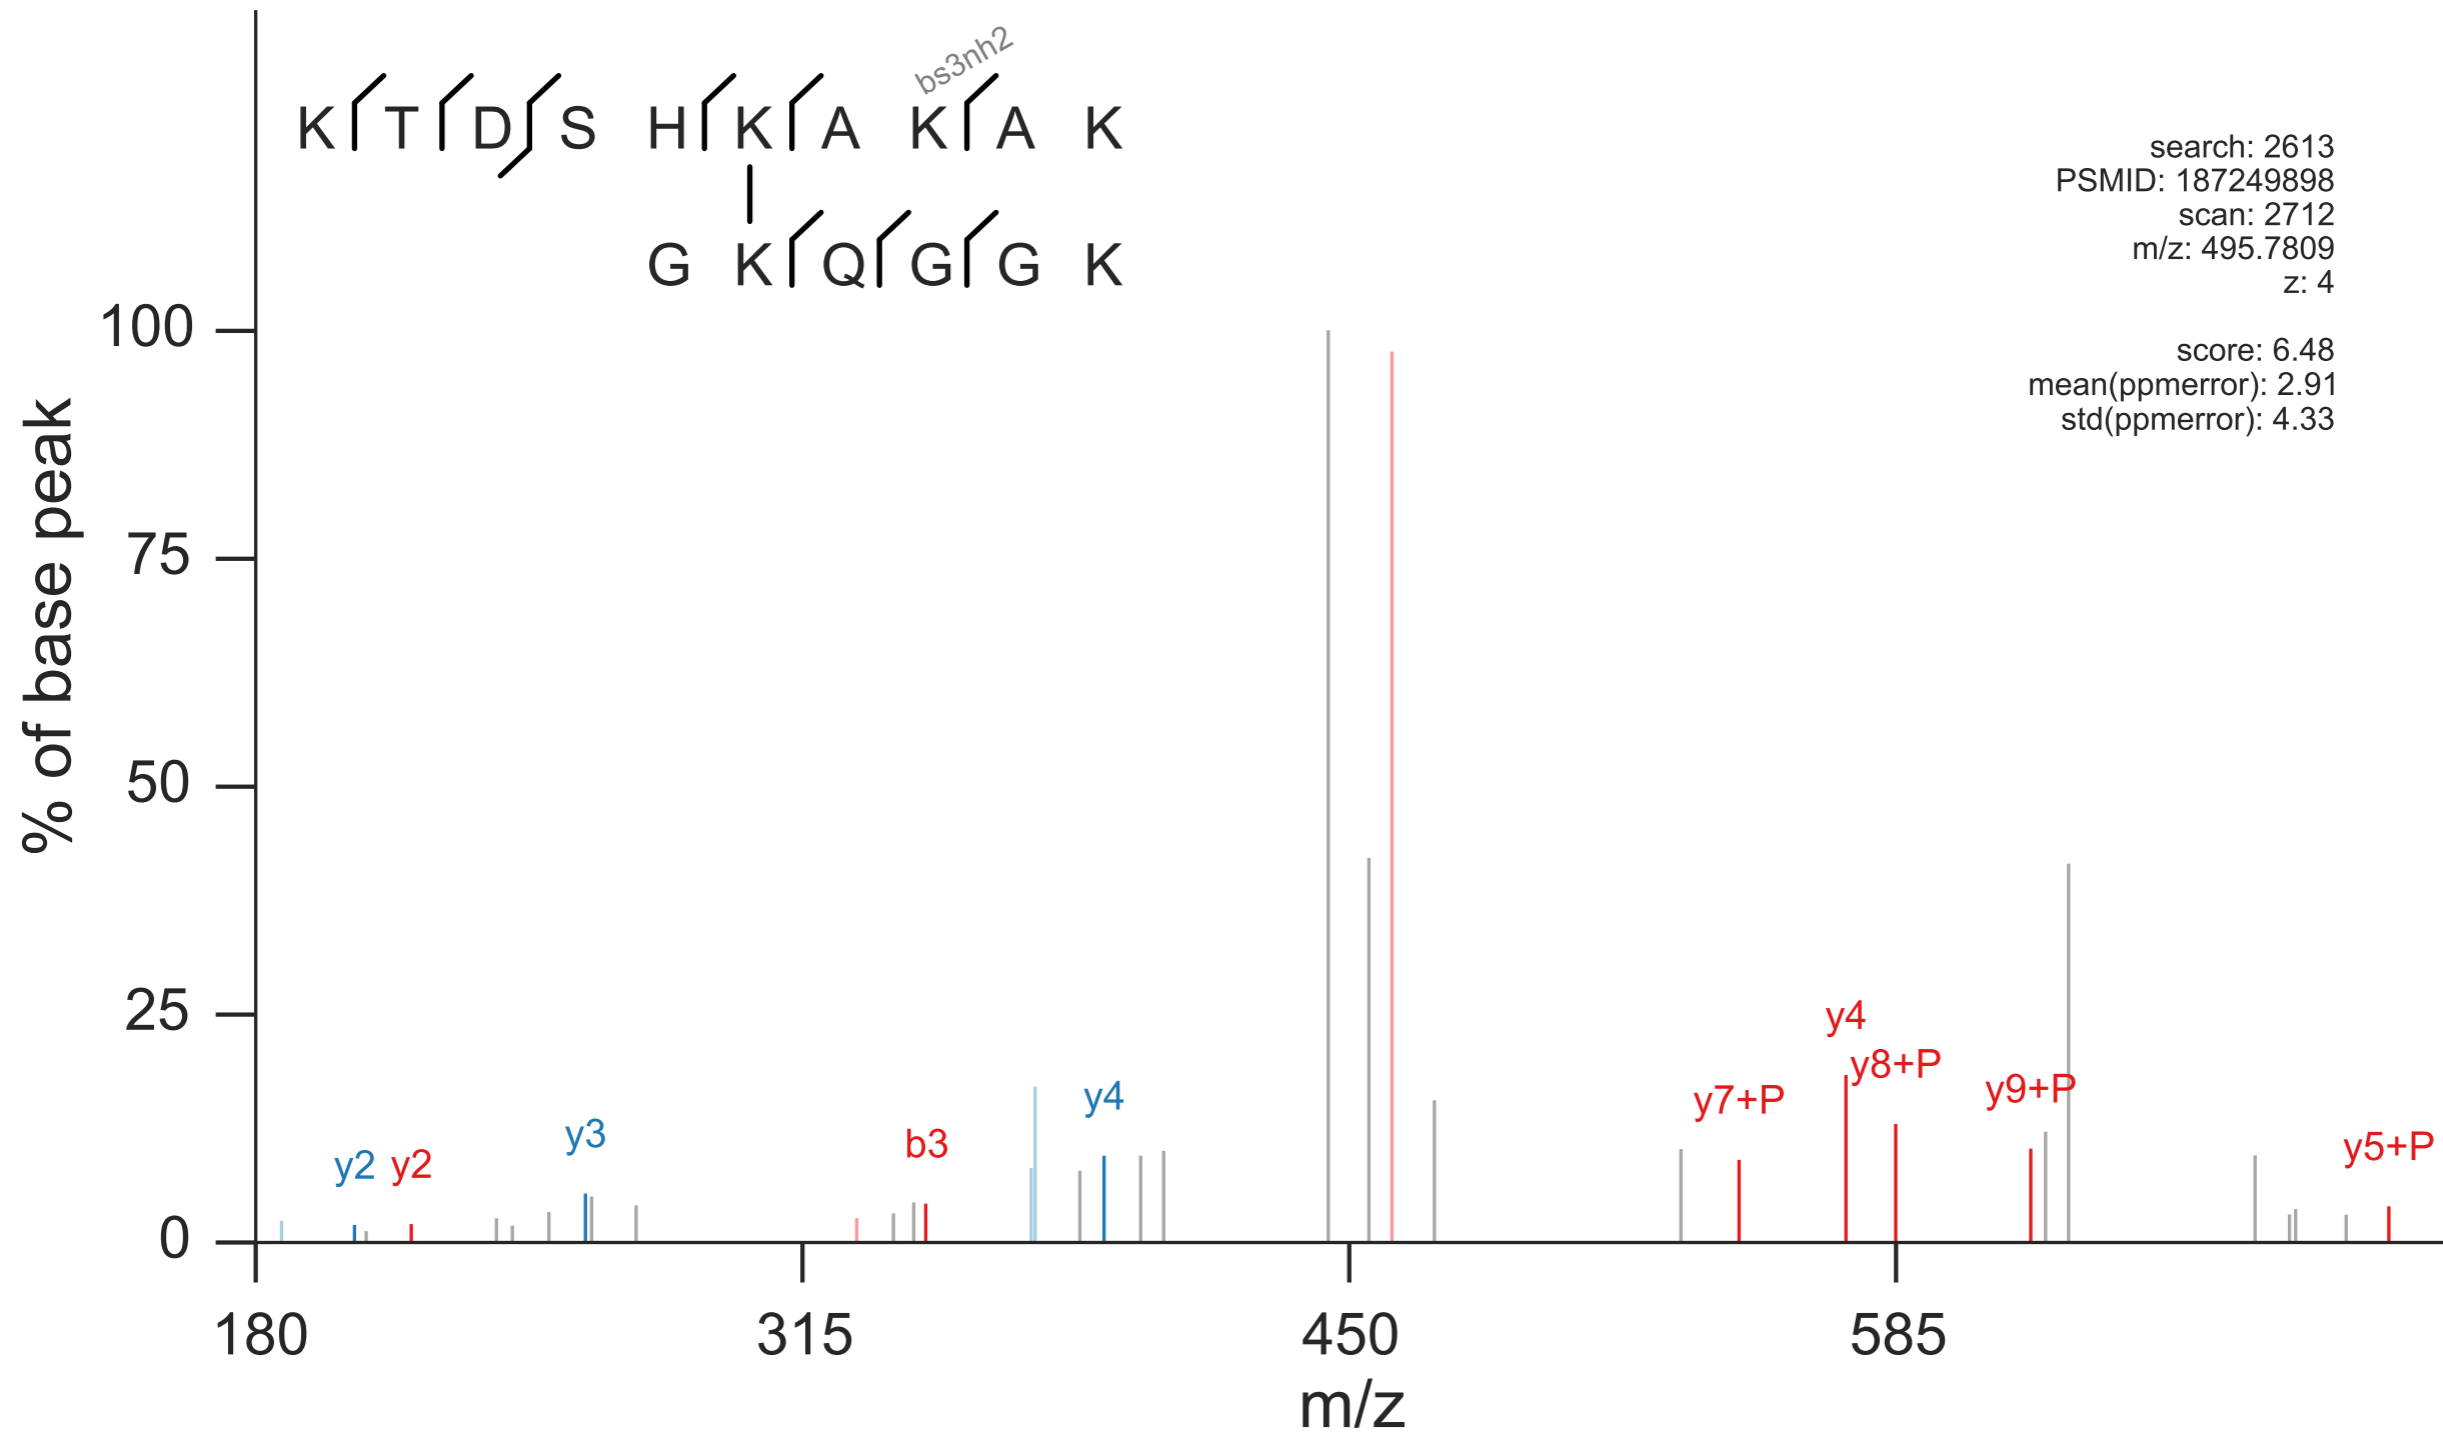

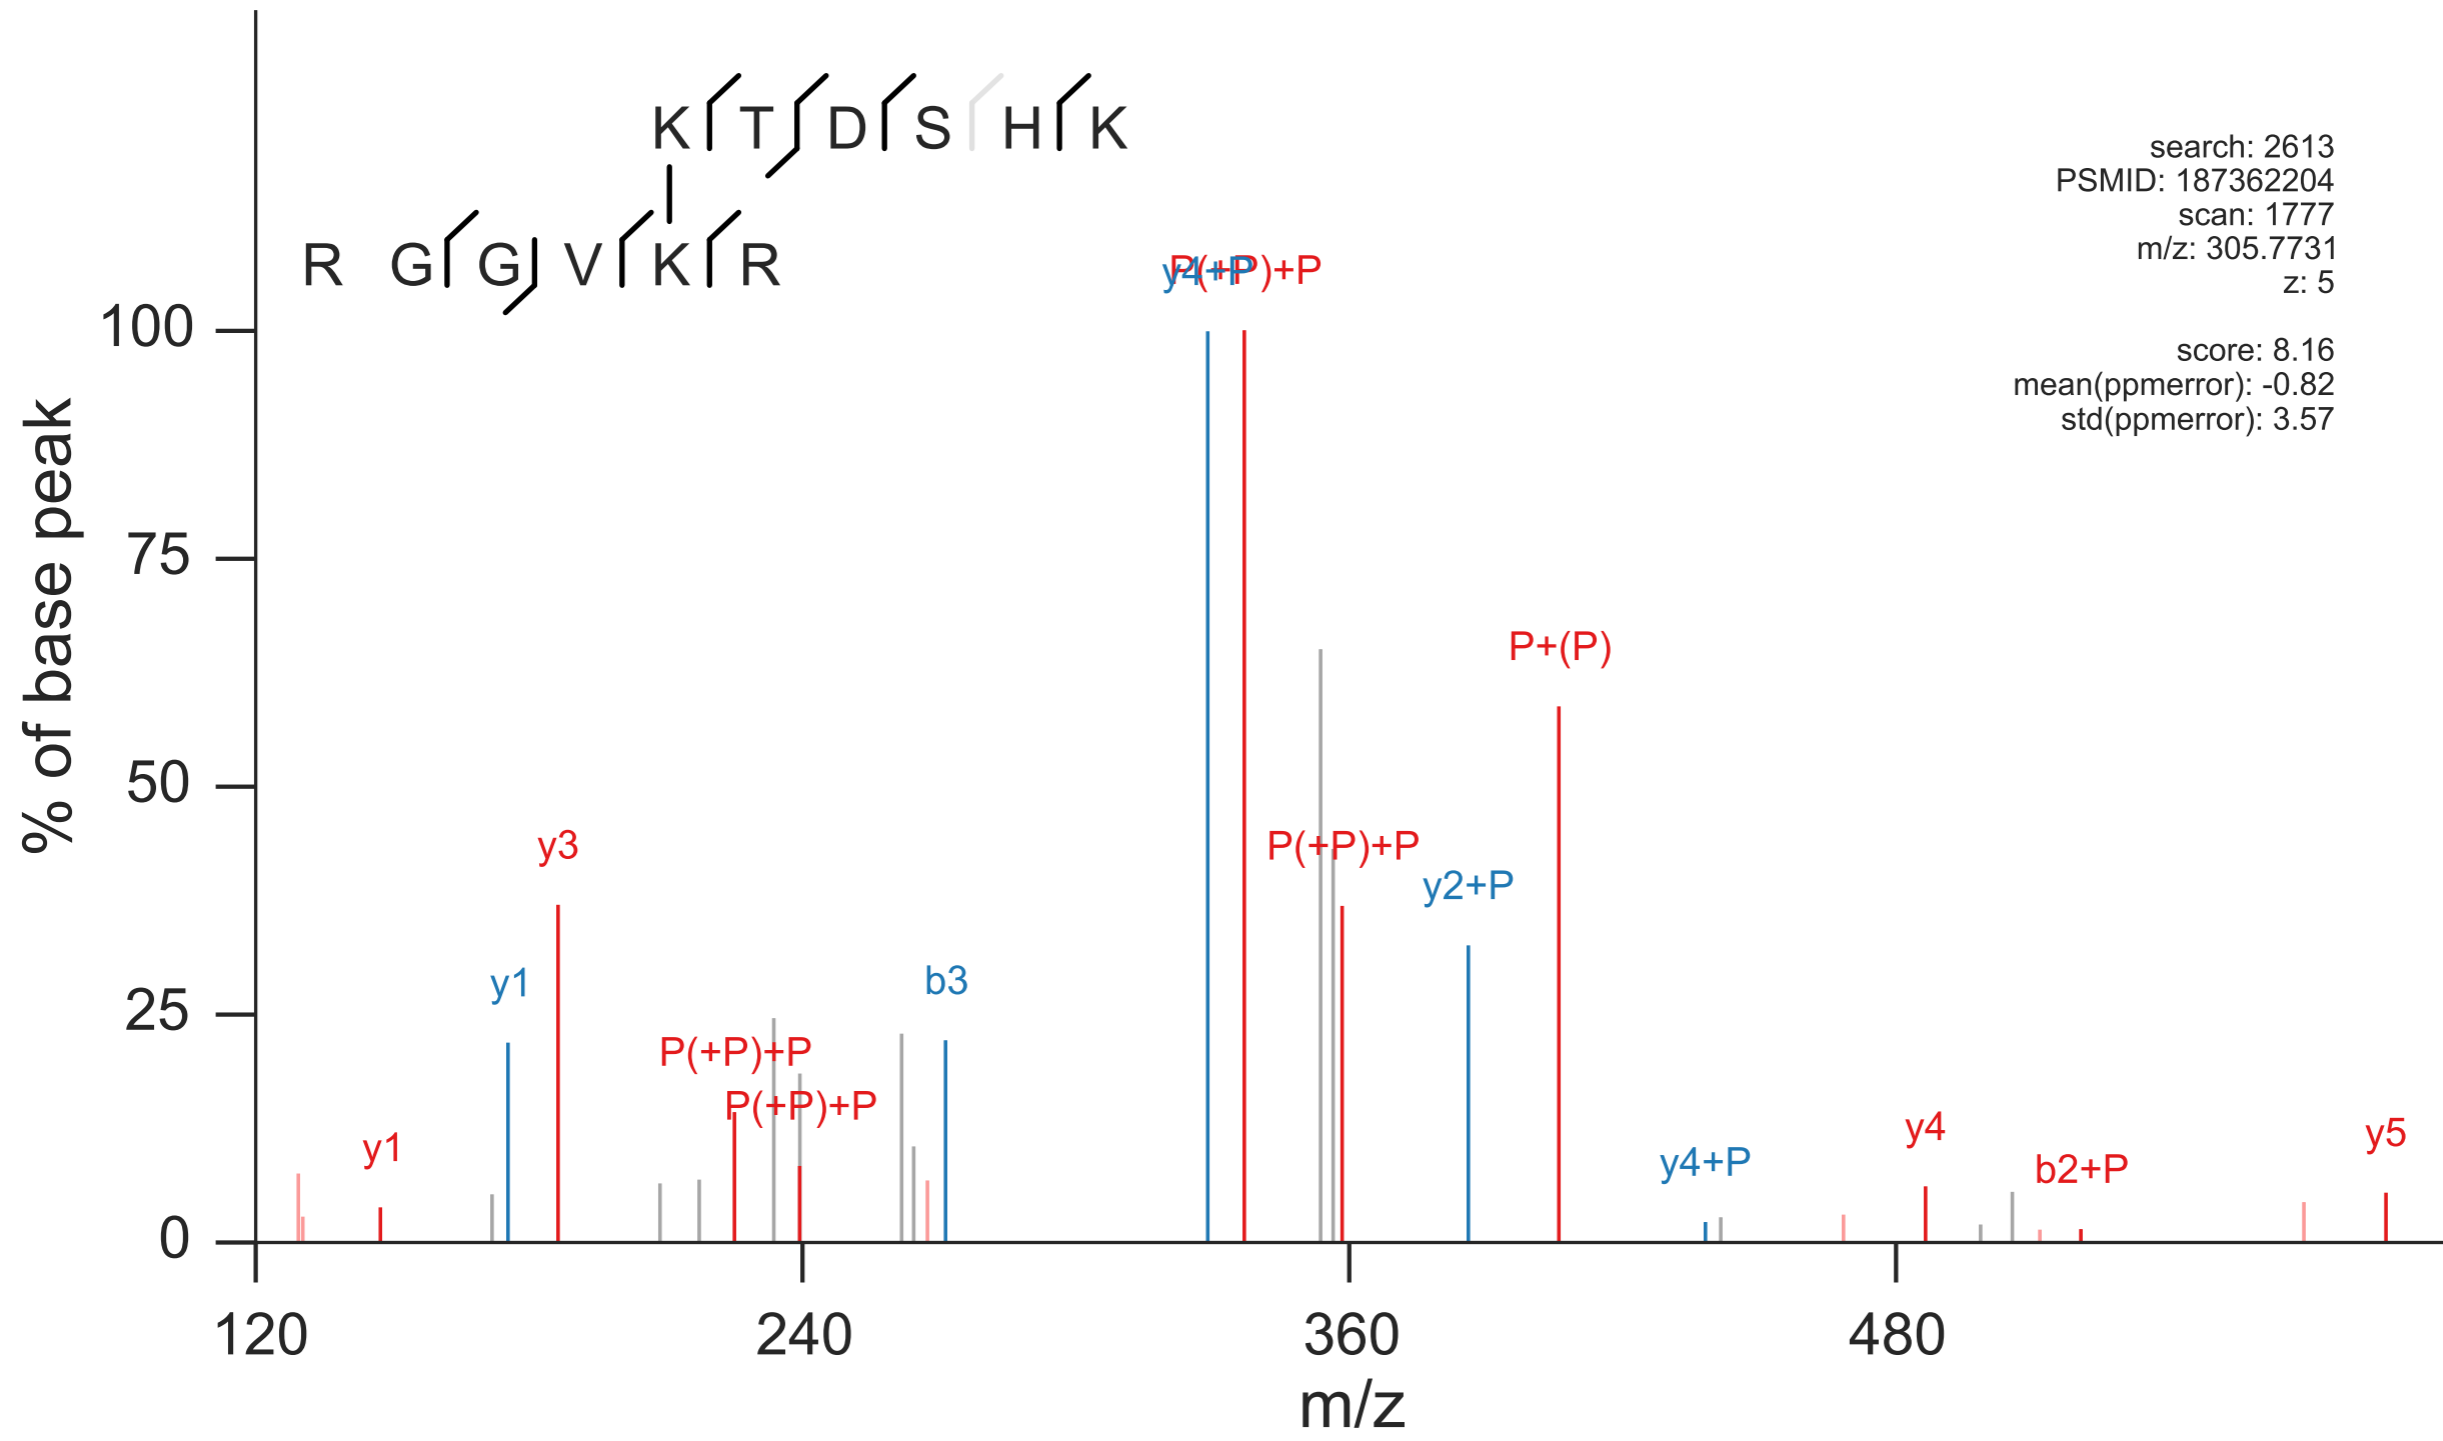



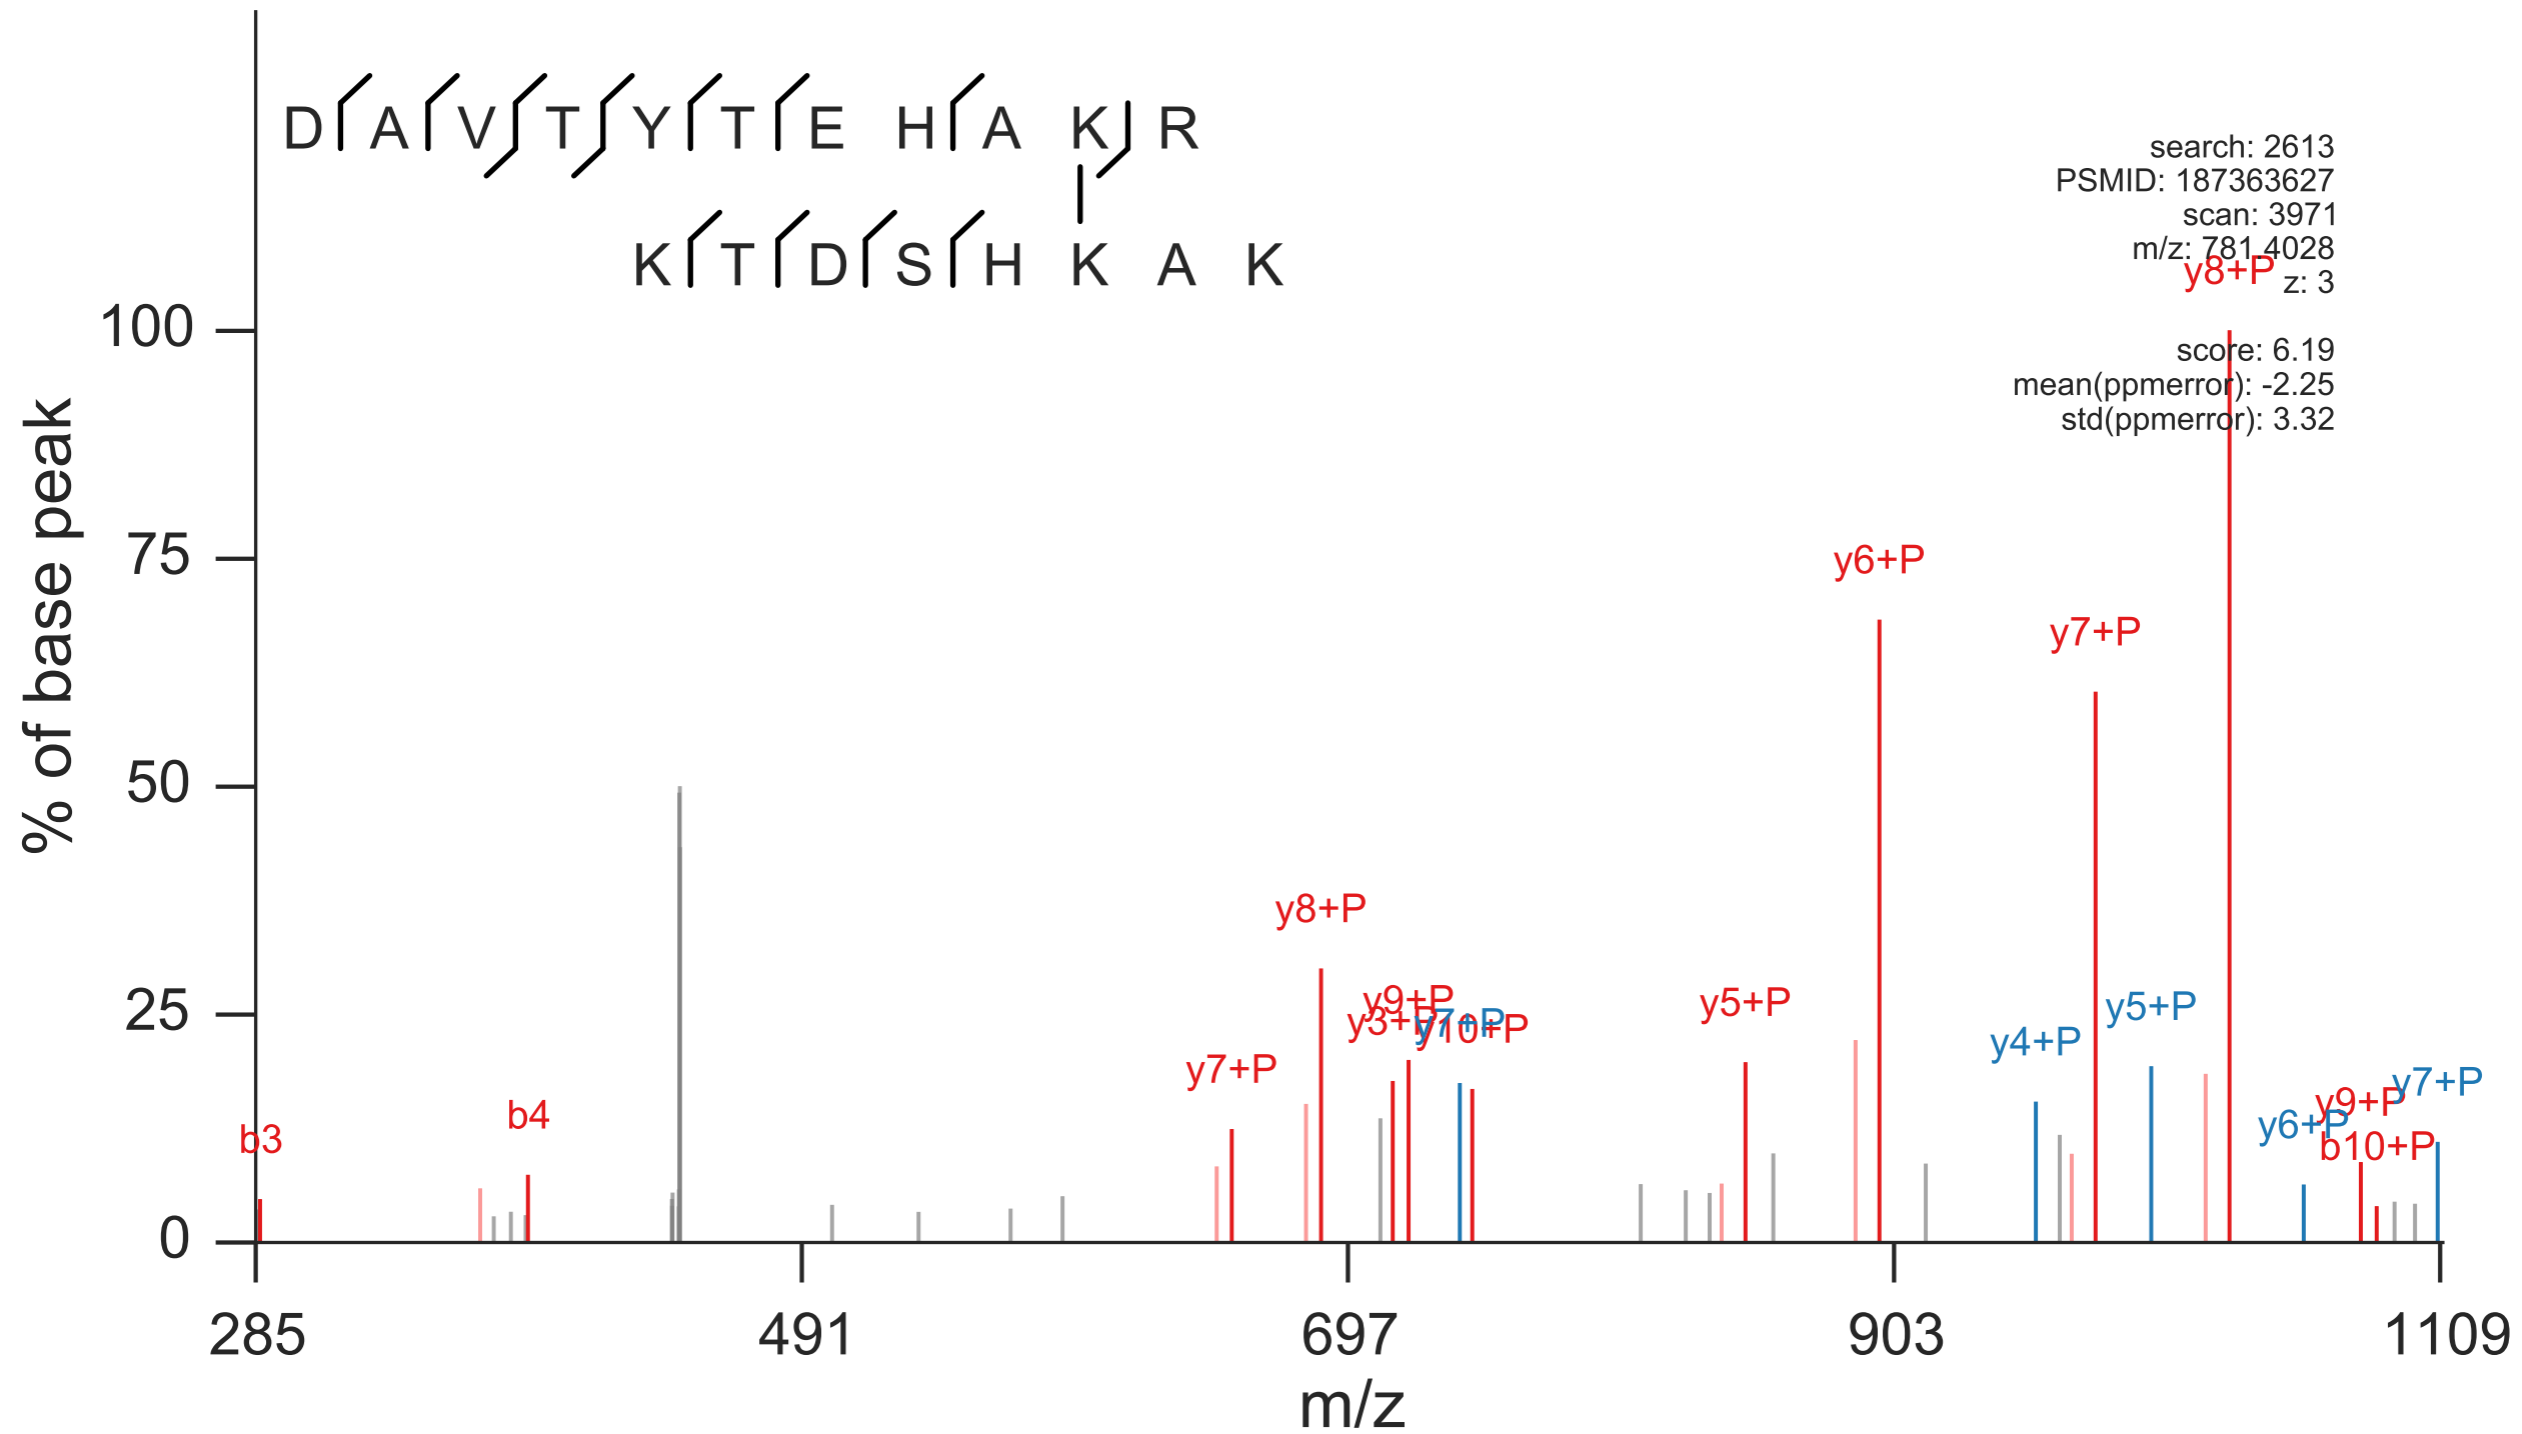

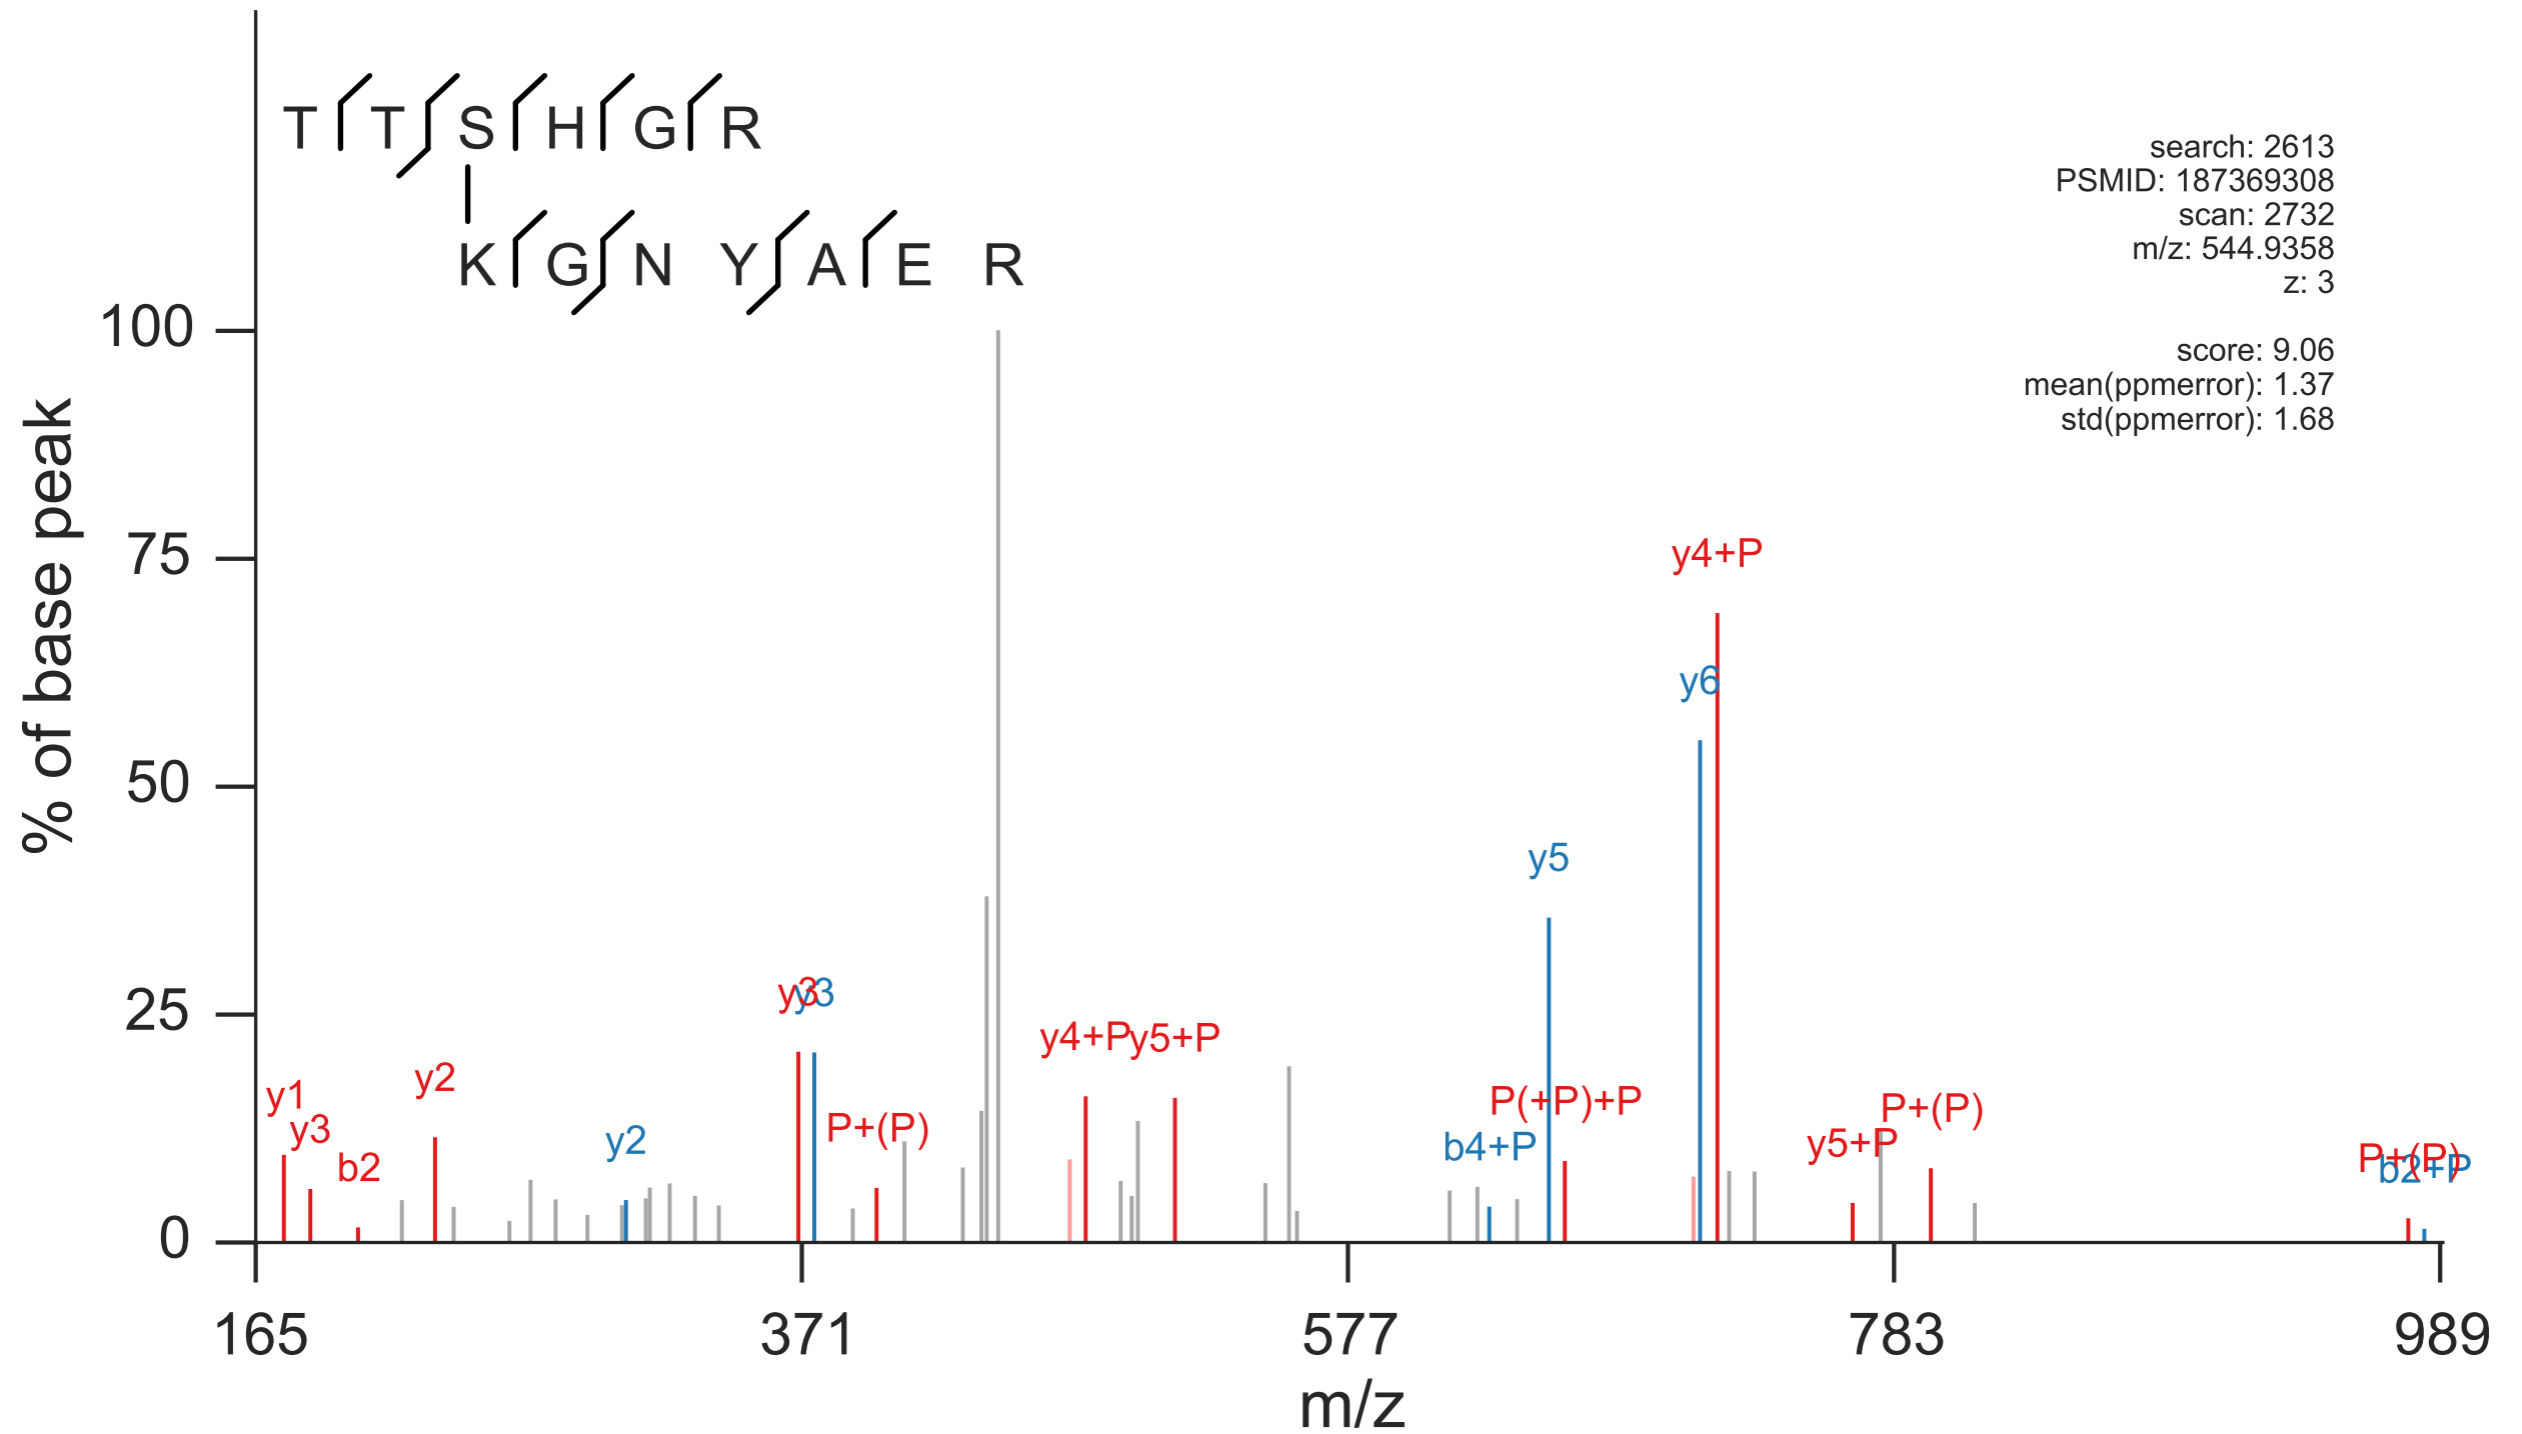

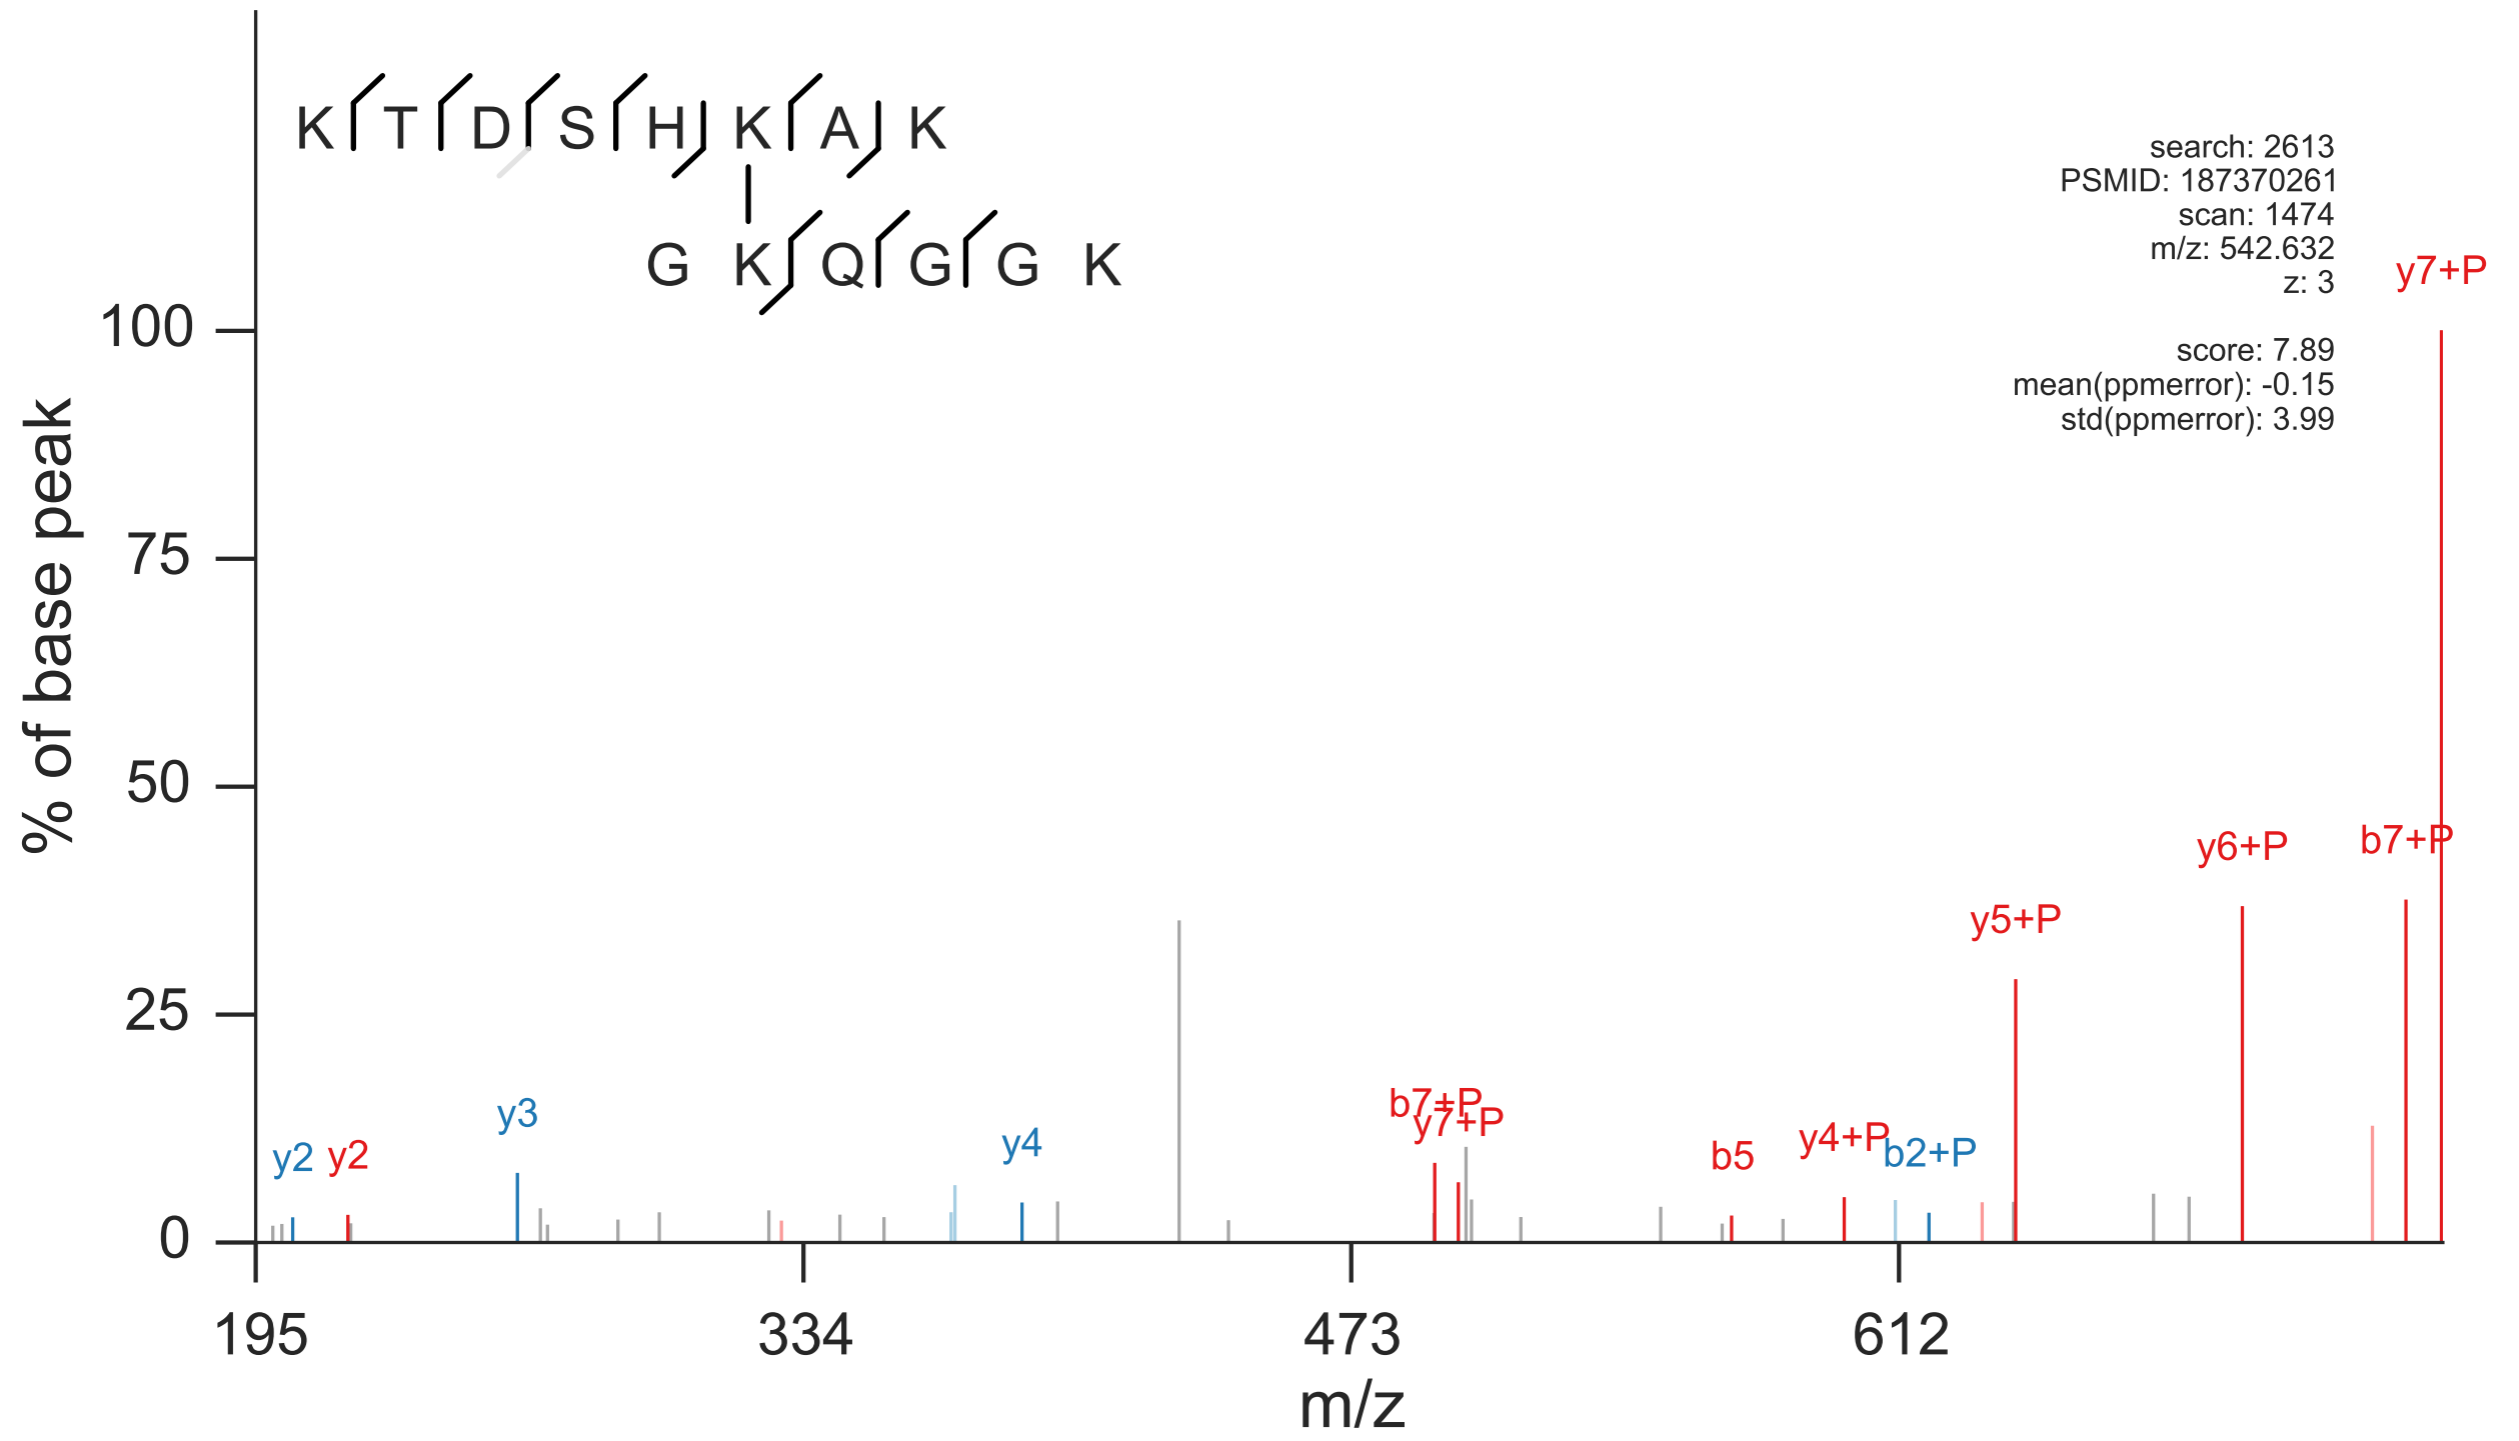

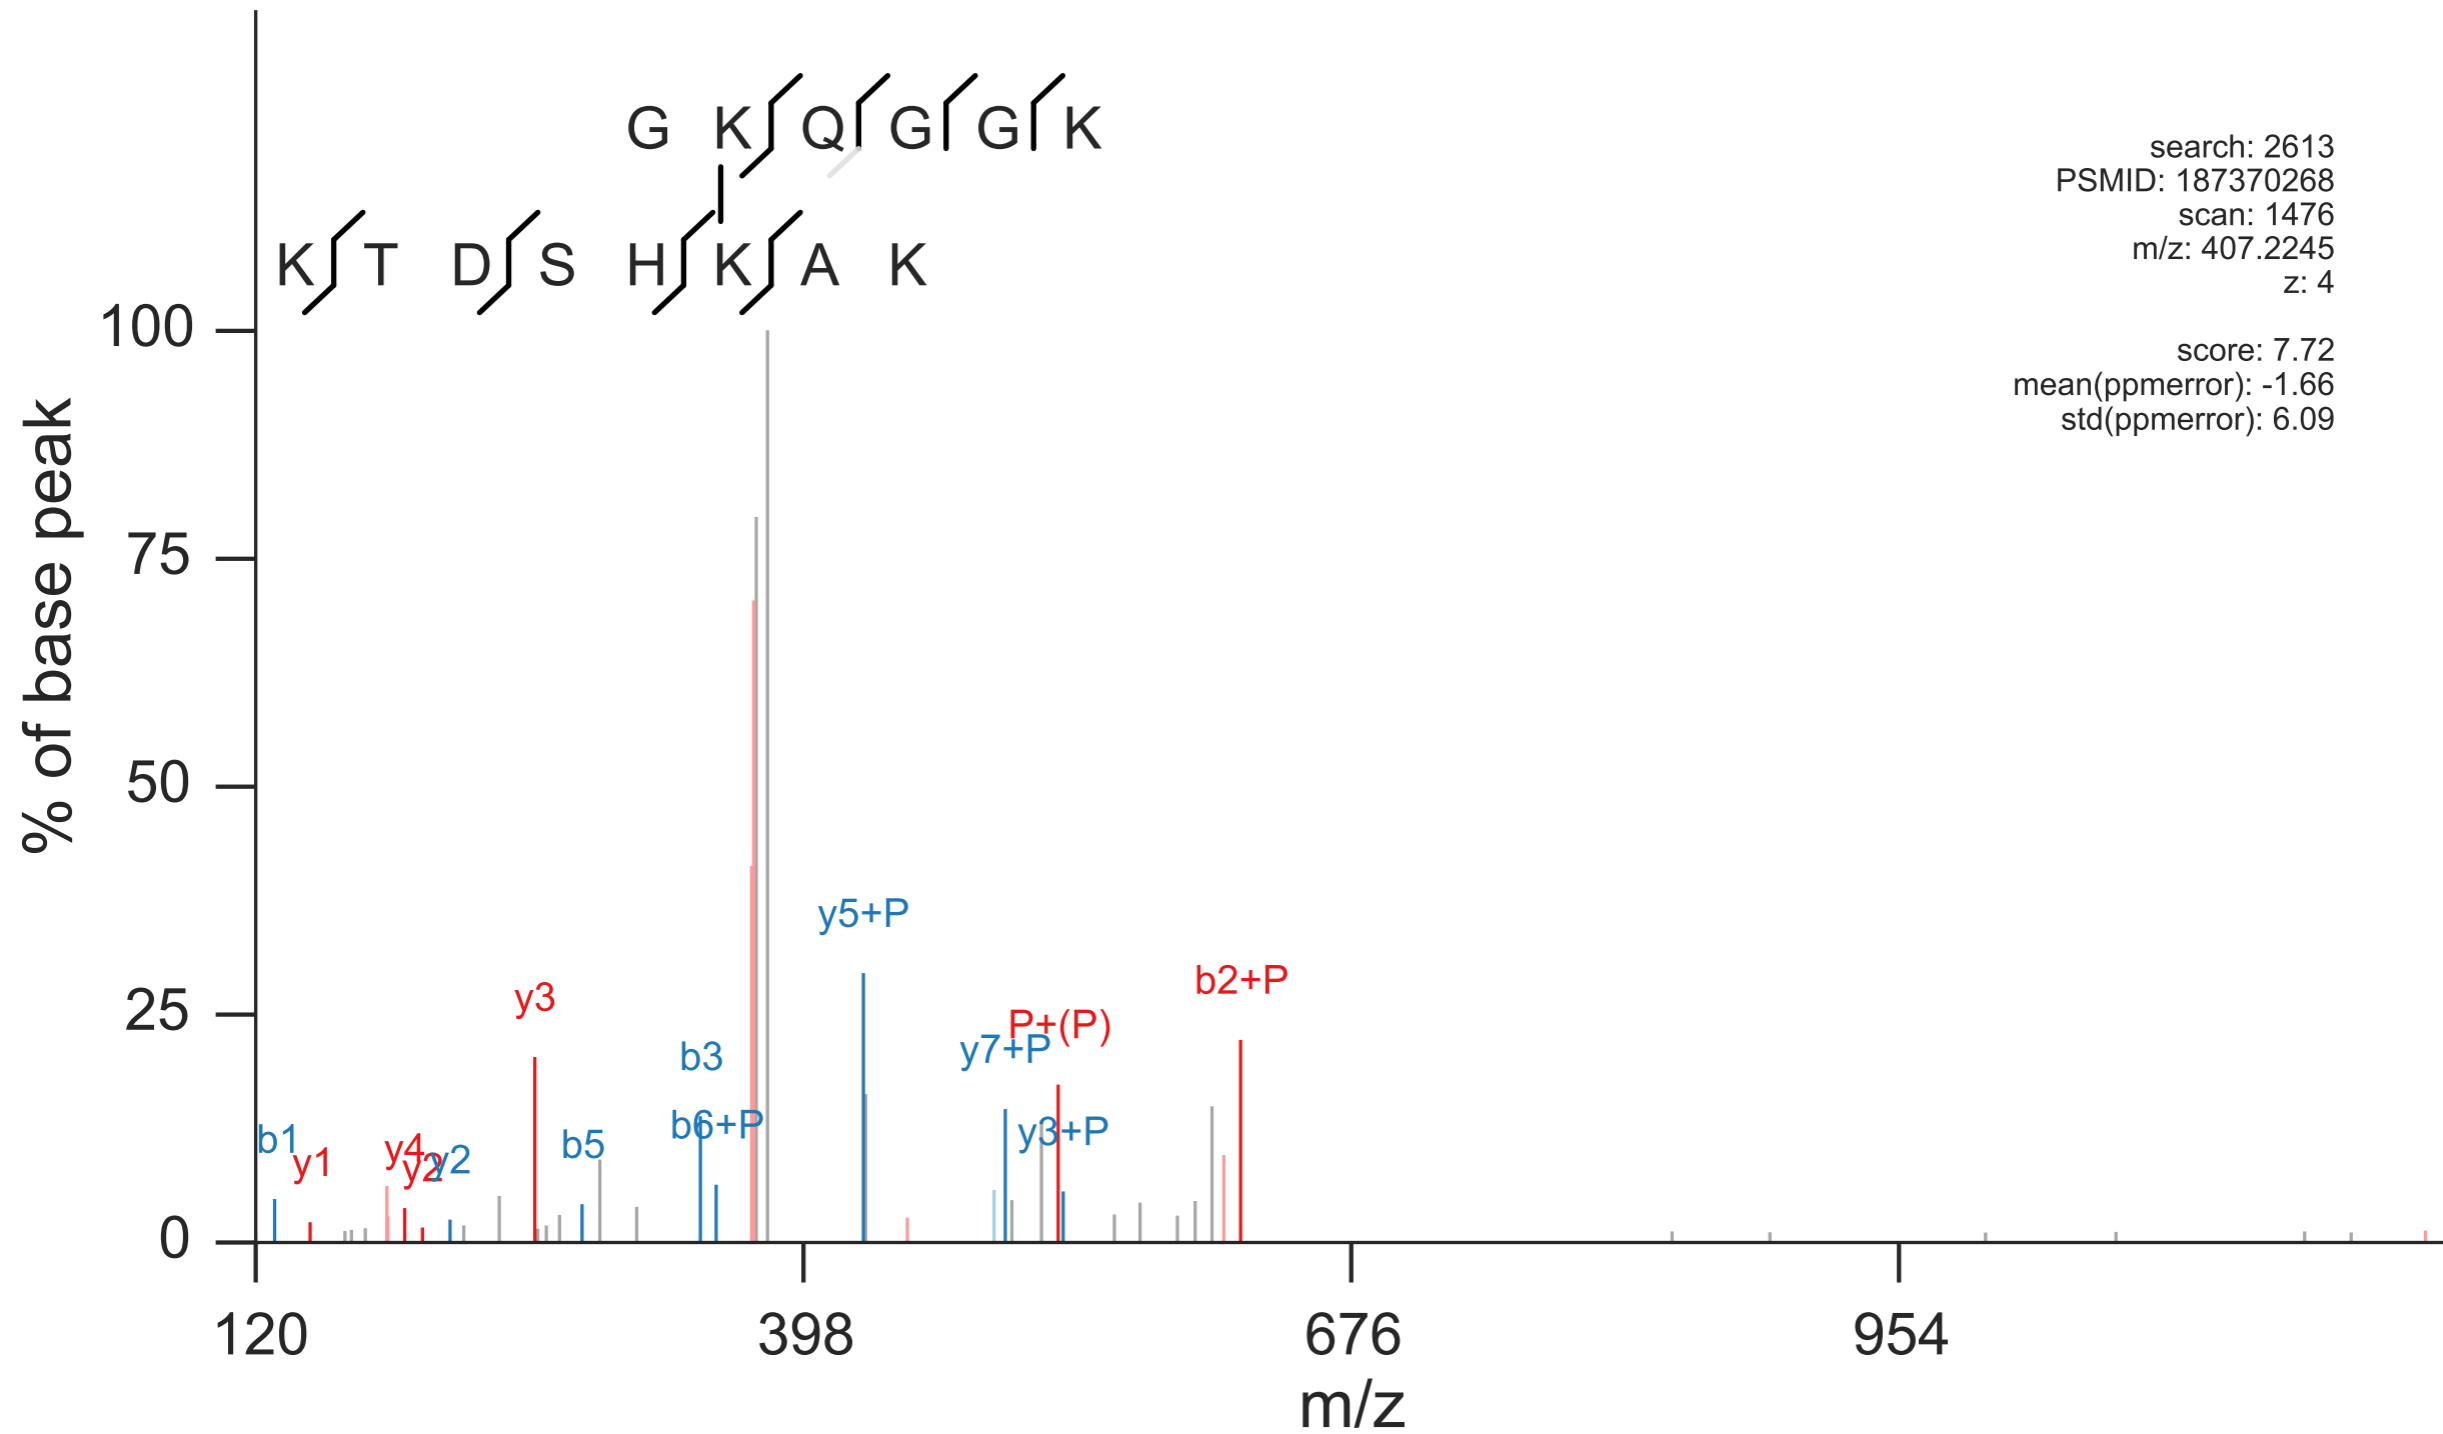

search: 2613  
 PSMID: 187370268  
 scan: 1476  
 m/z: 407.2245  
 z: 4

score: 7.72  
 mean(ppmerror): -1.66  
 std(ppmerror): 6.09

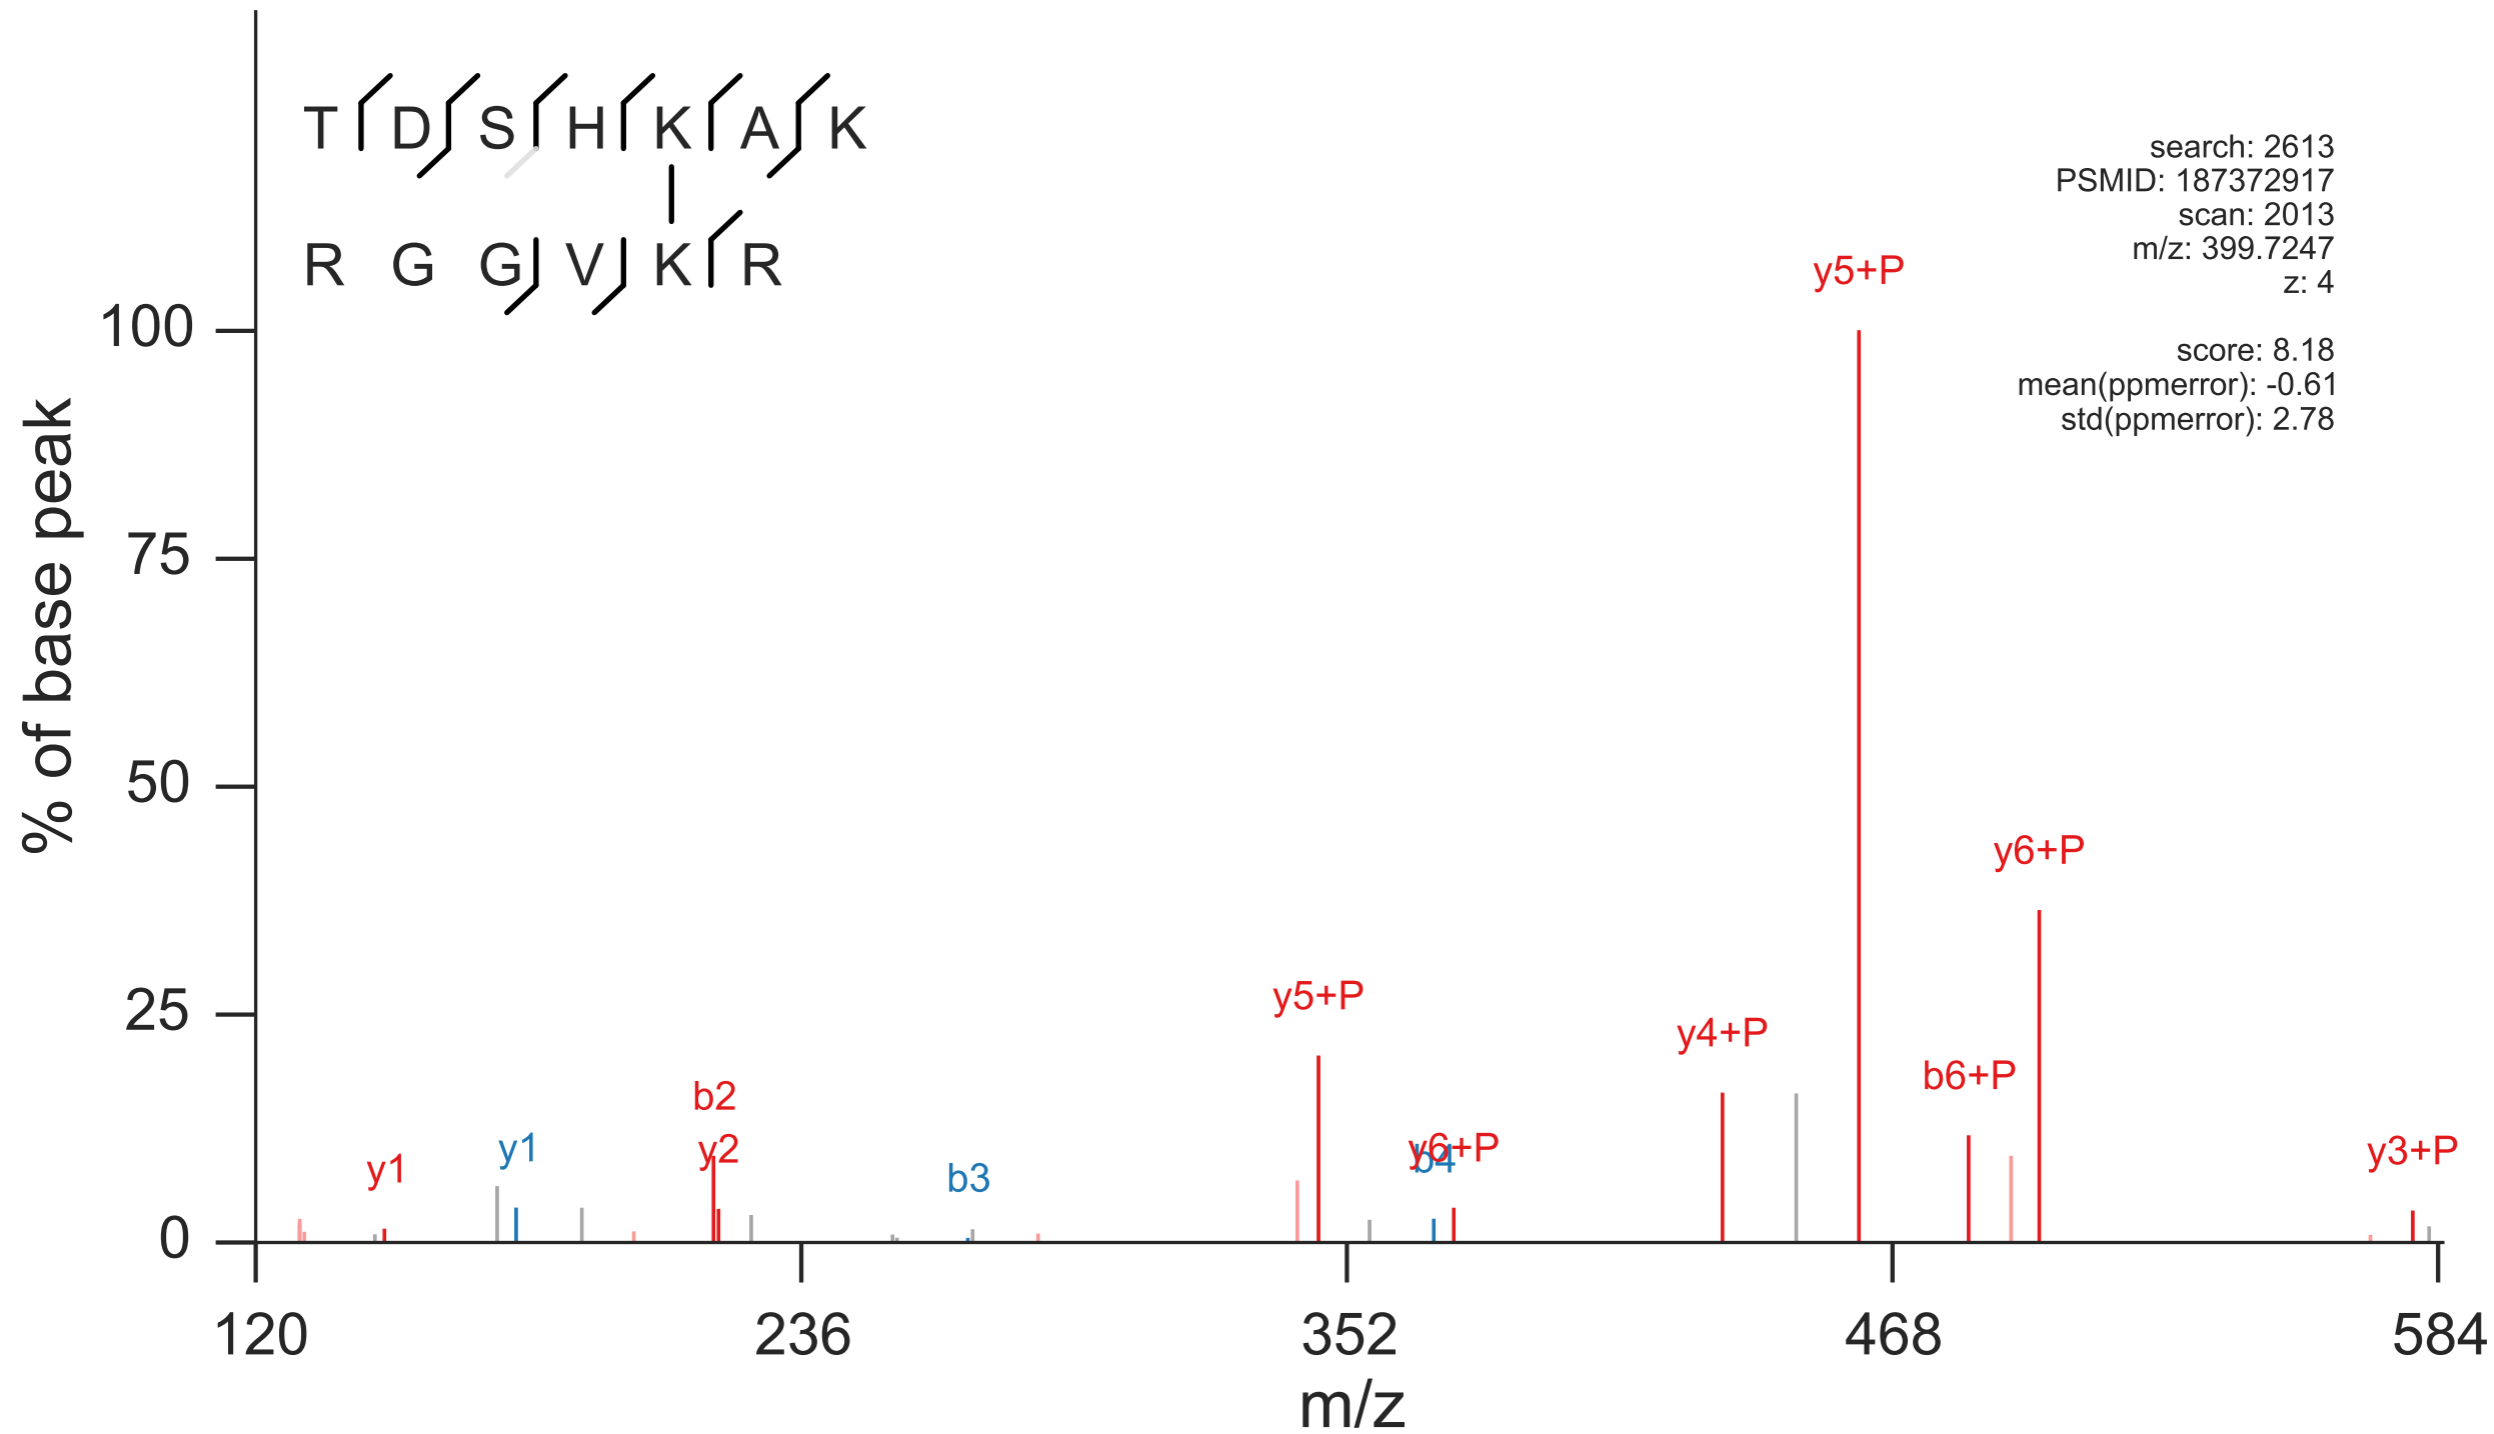

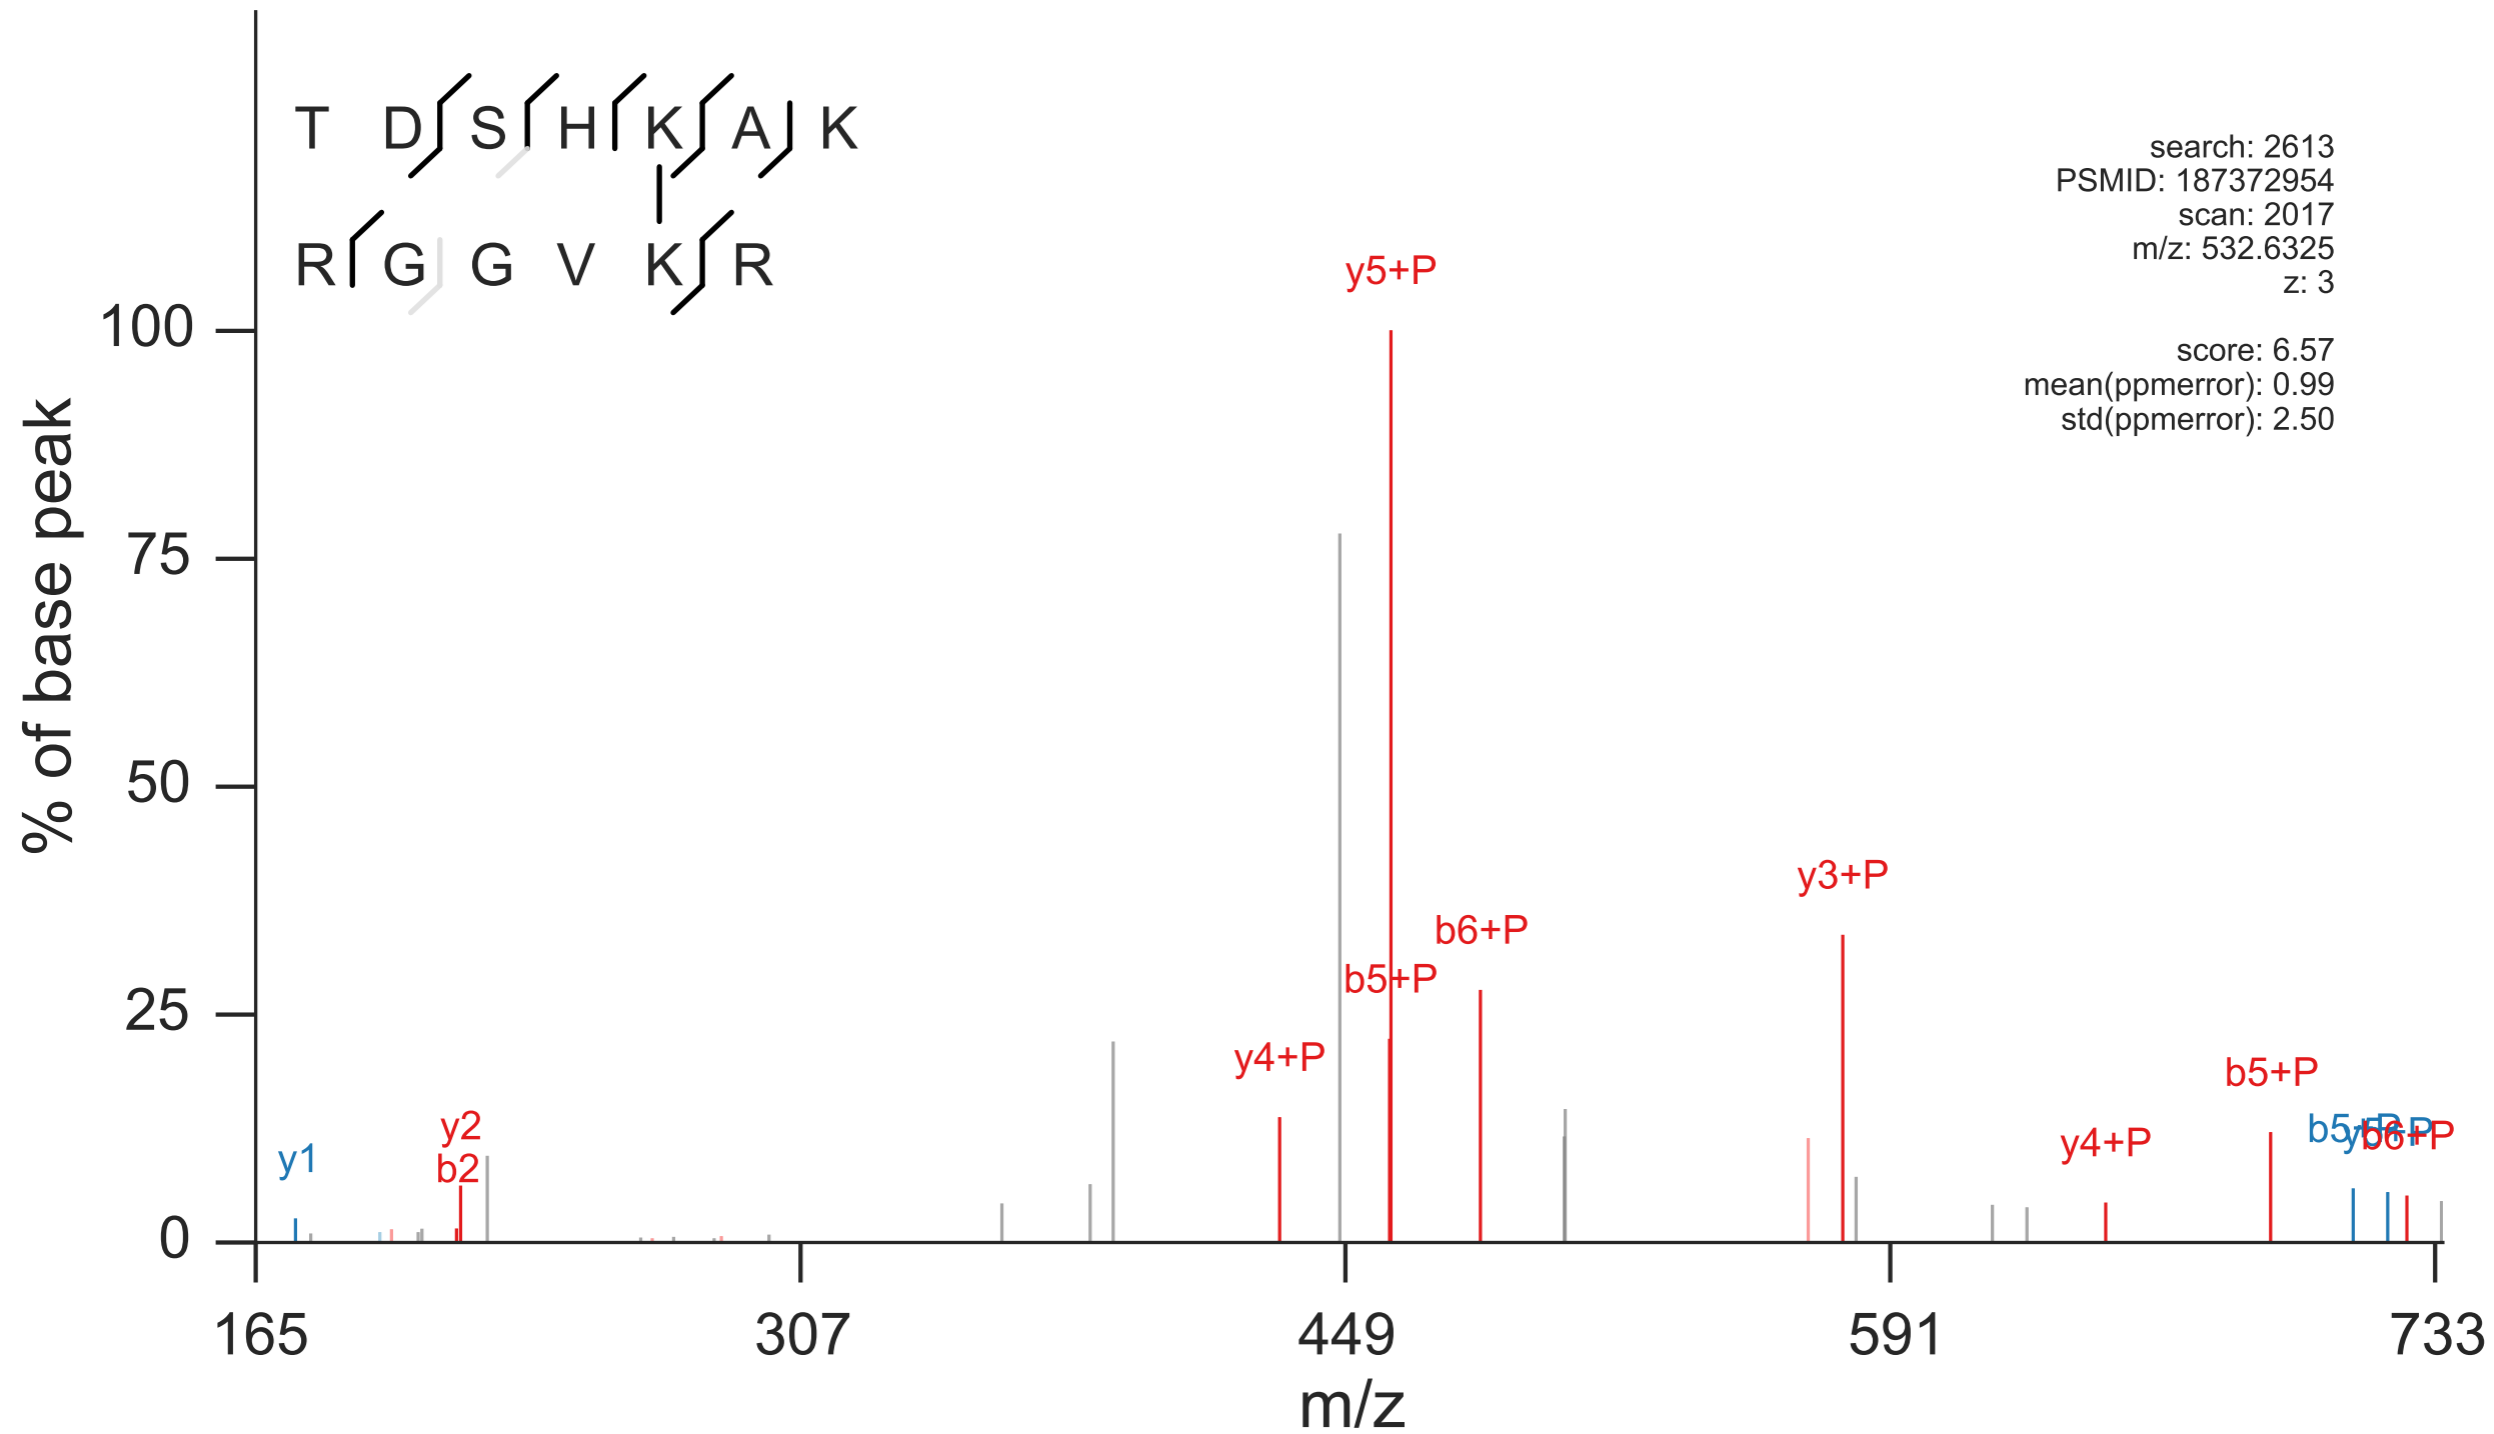

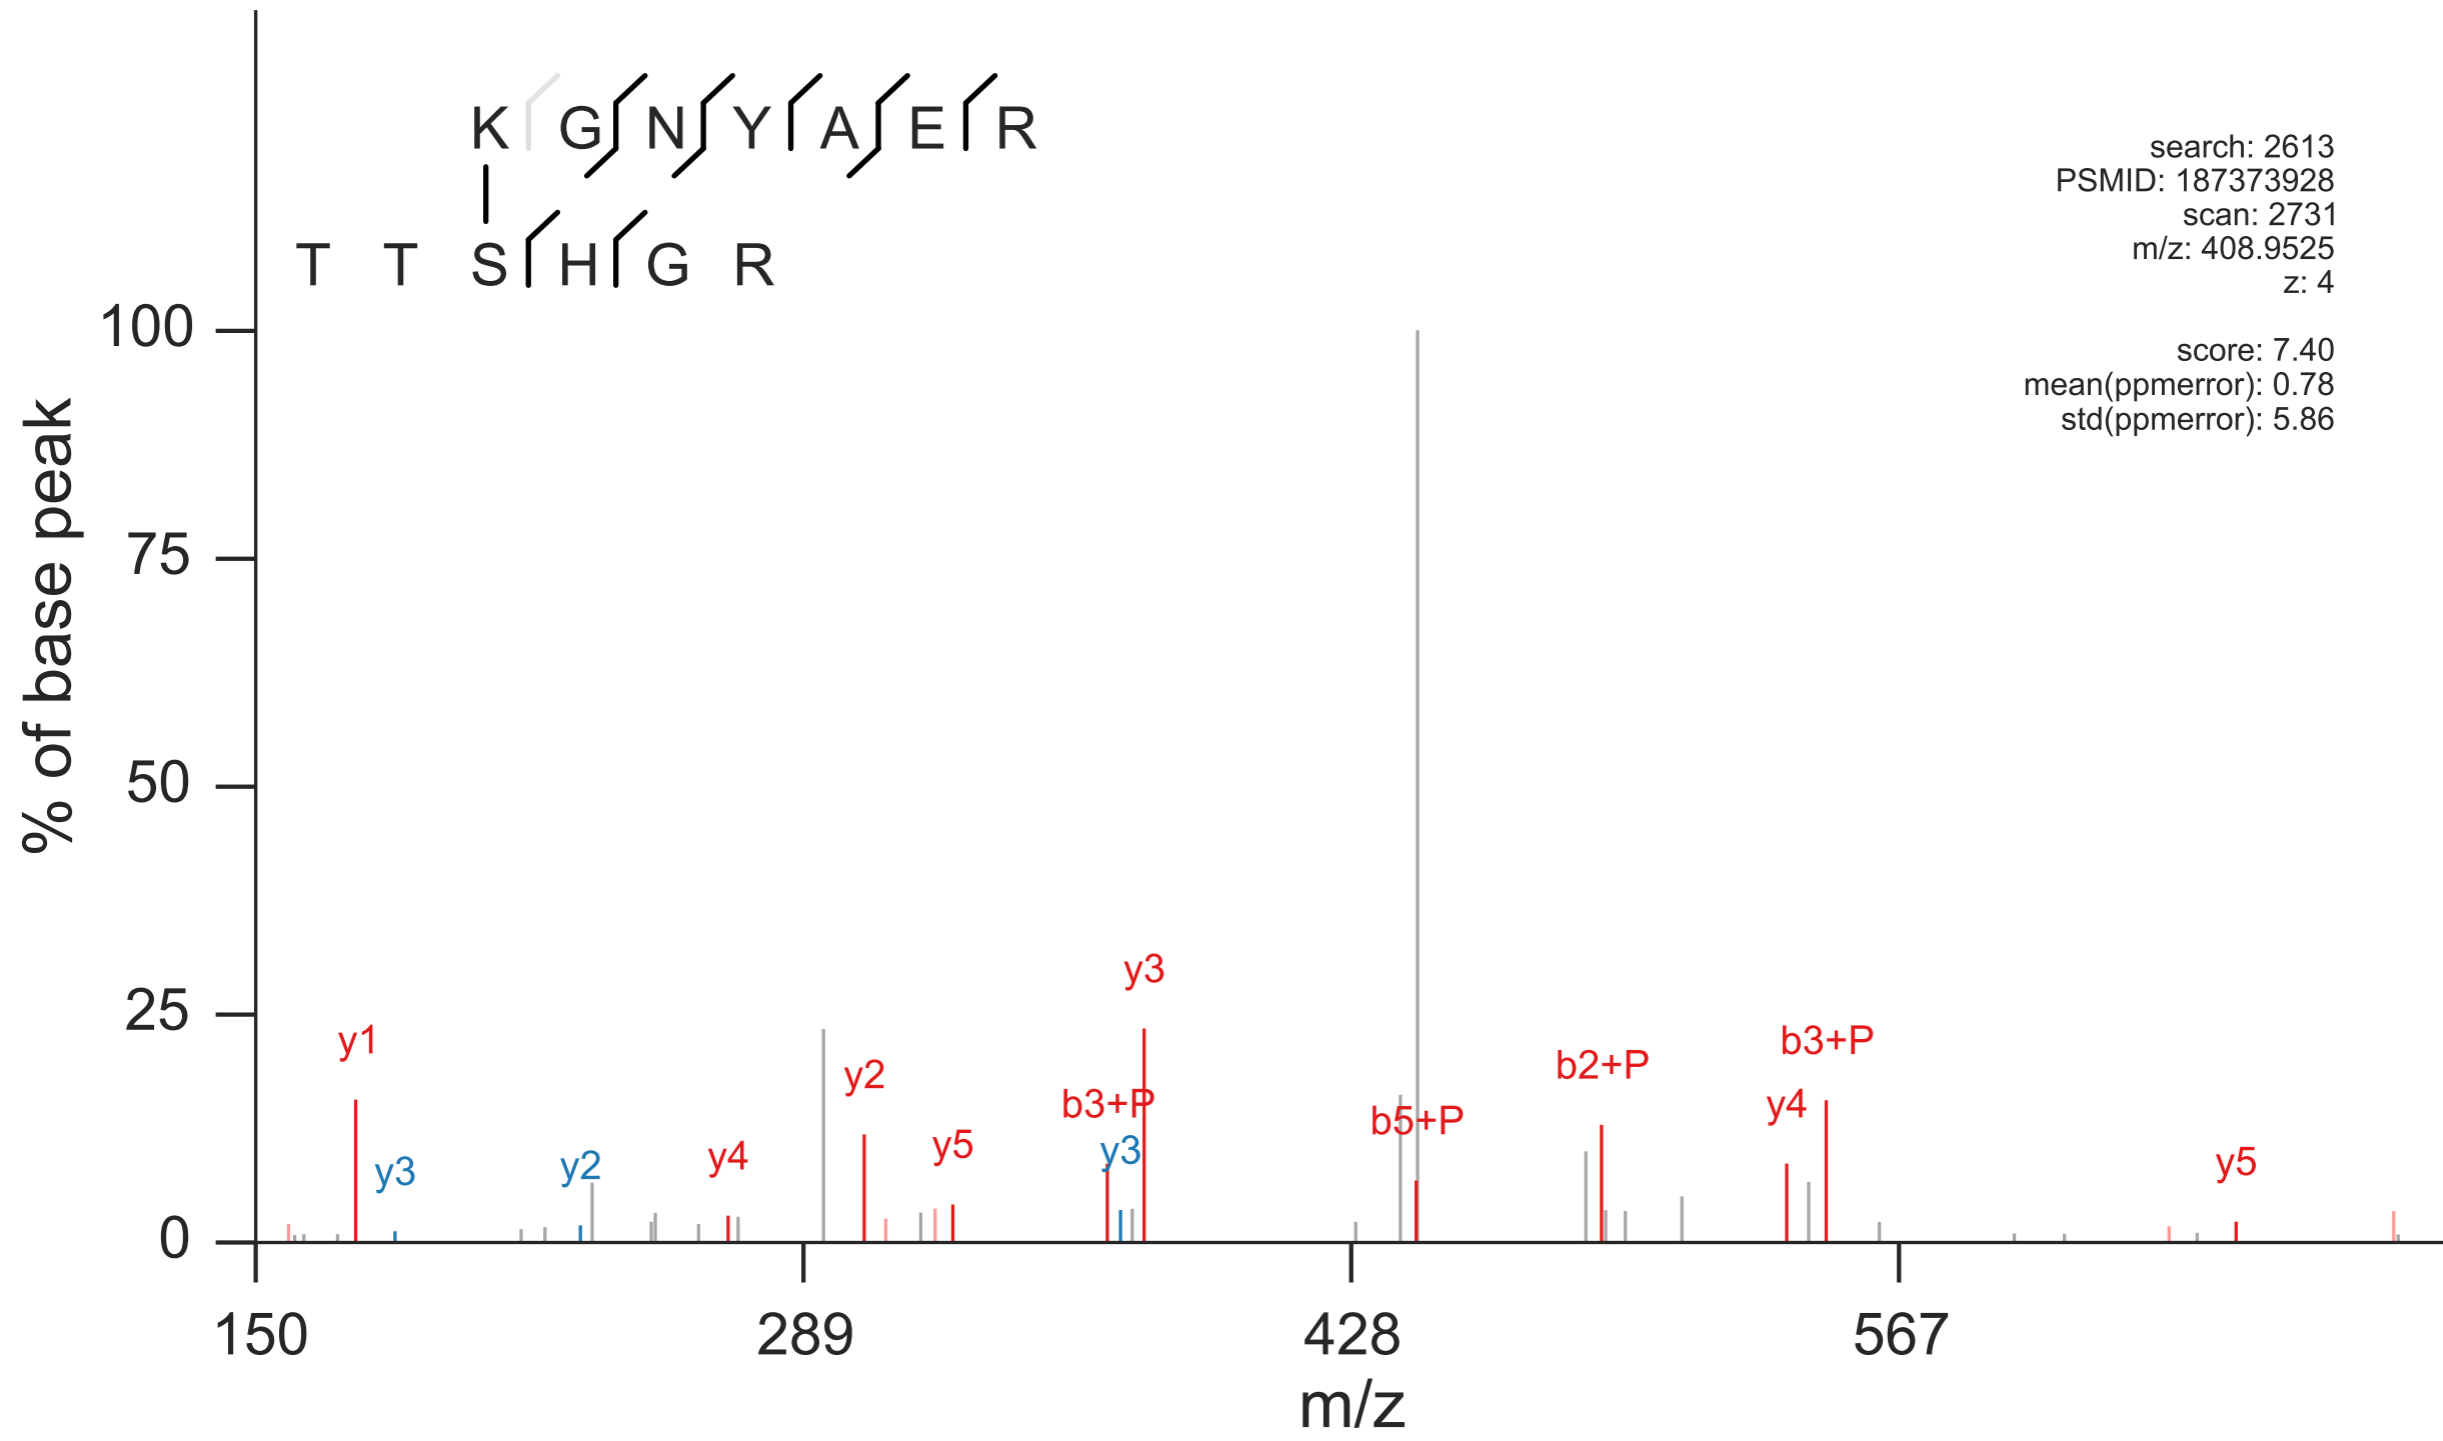

search: 2613  
PSMID: 187373928  
scan: 2731  
m/z: 408.9525  
z: 4  
score: 7.40  
mean(ppmerror): 0.78  
std(ppmerror): 5.86

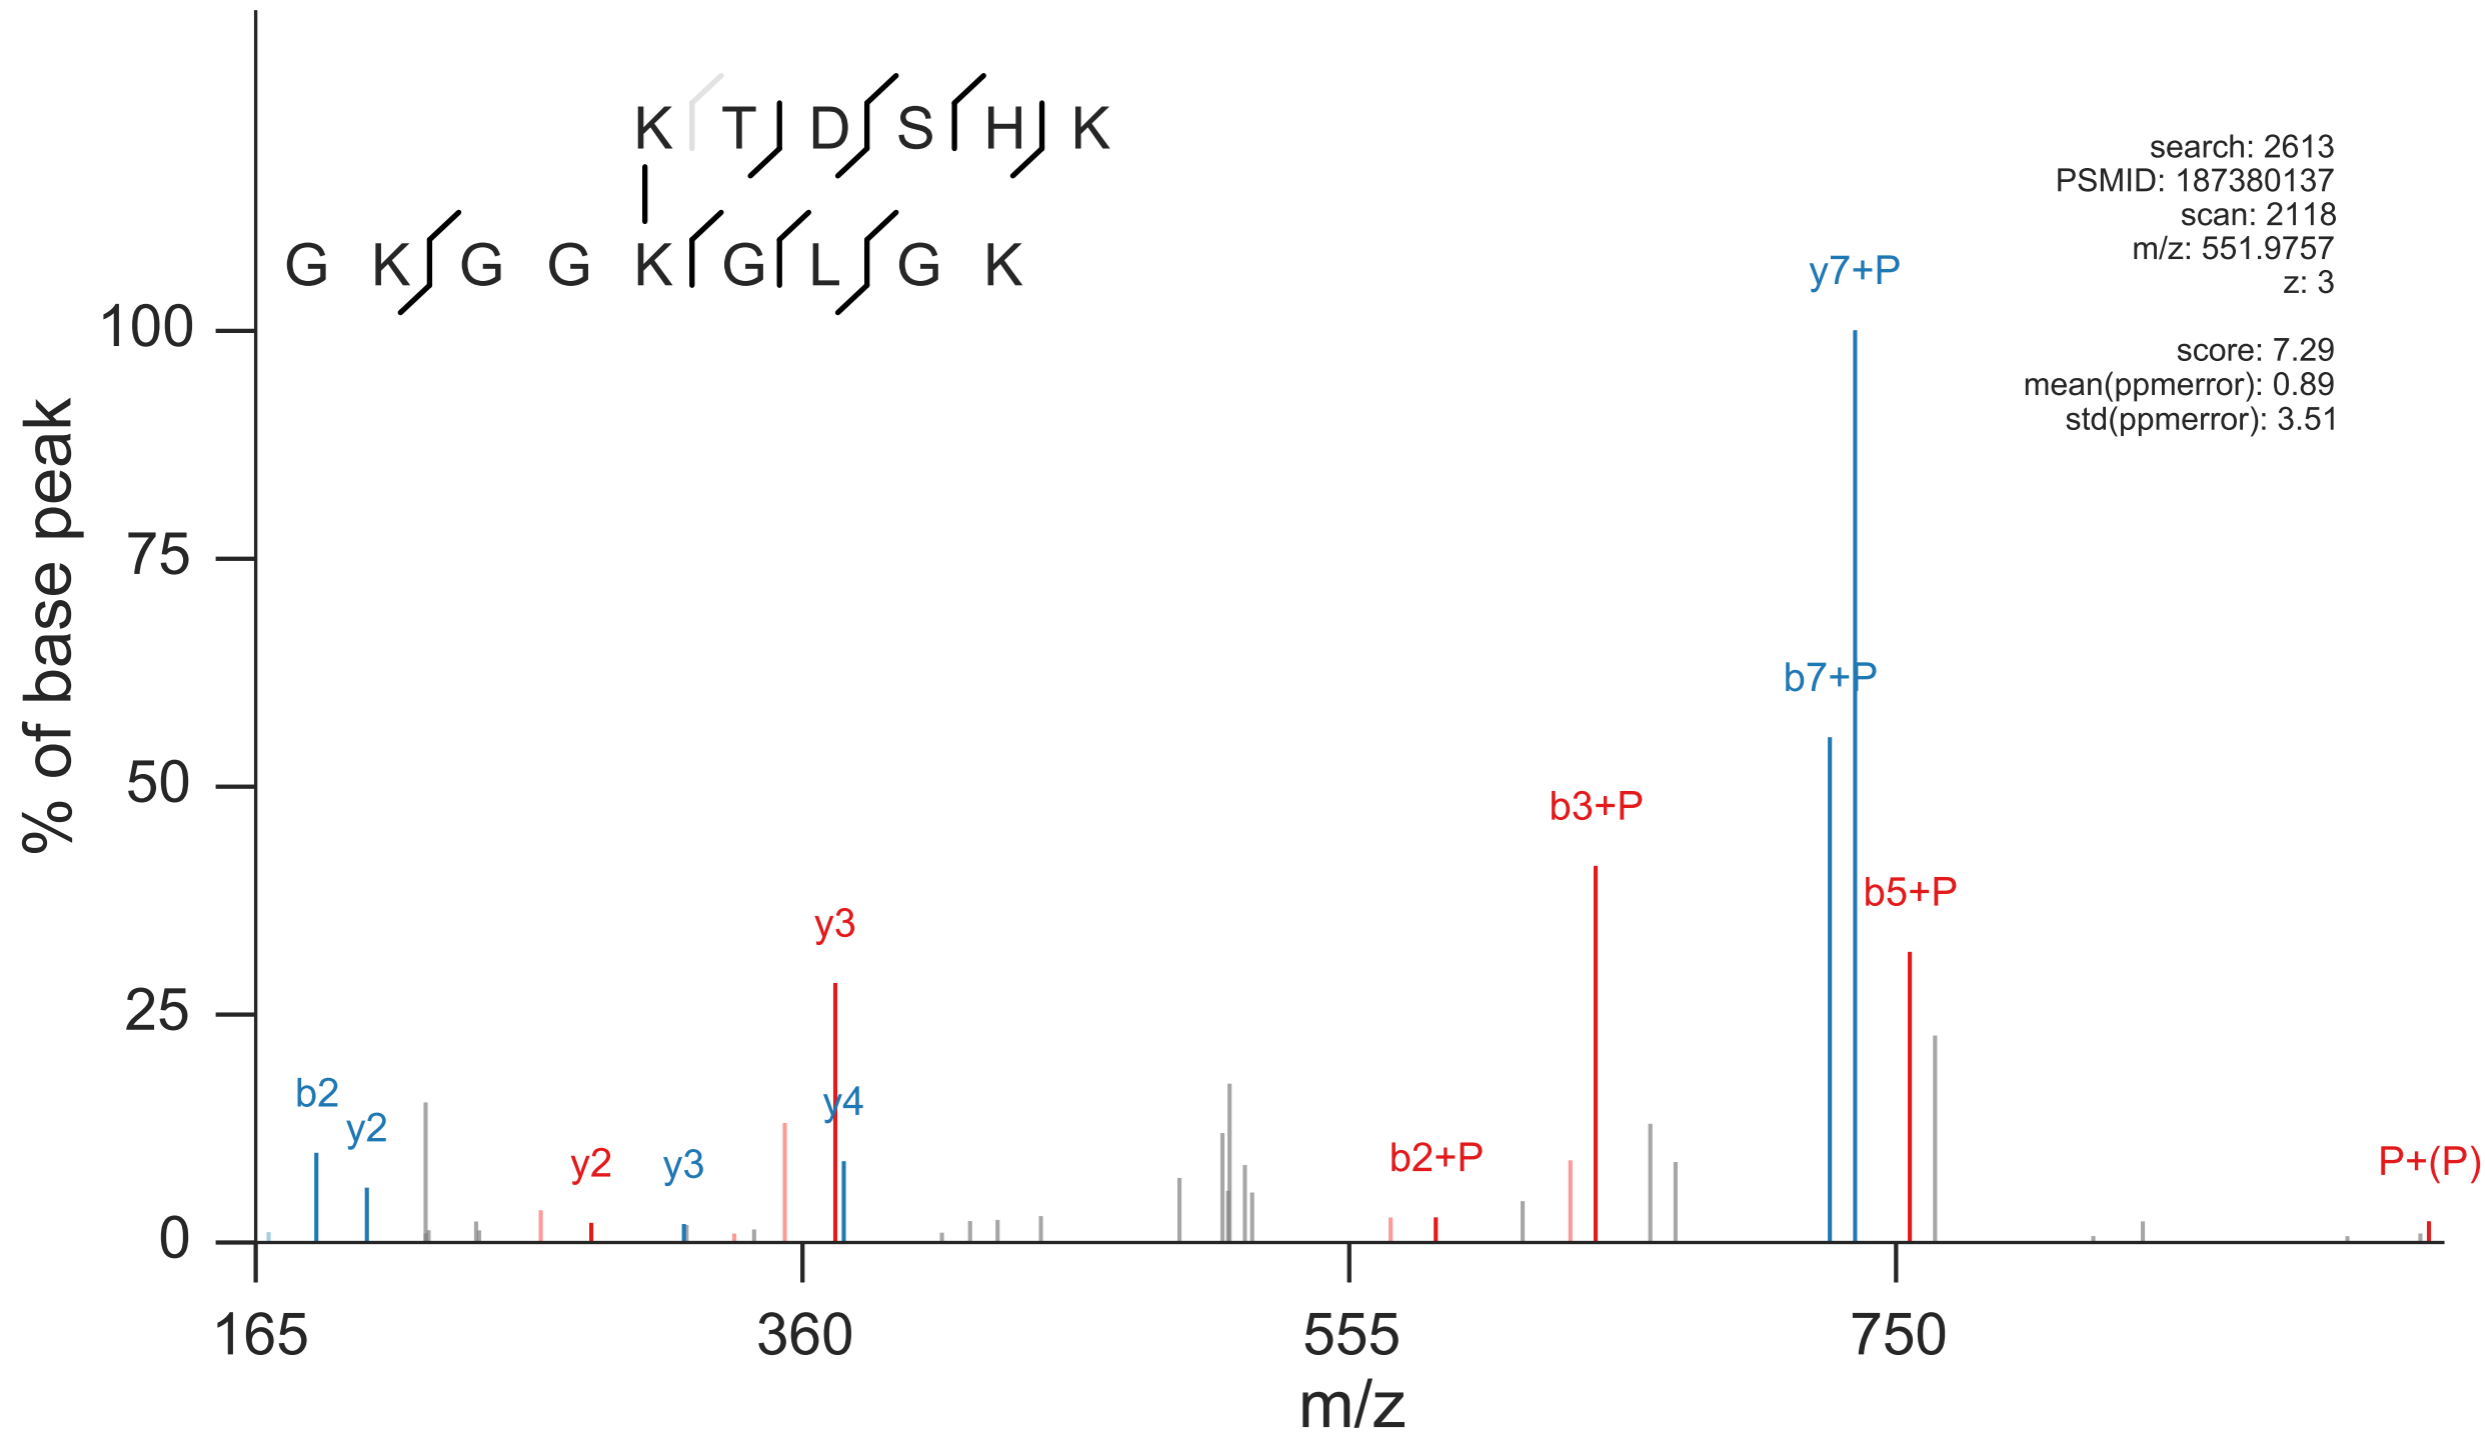



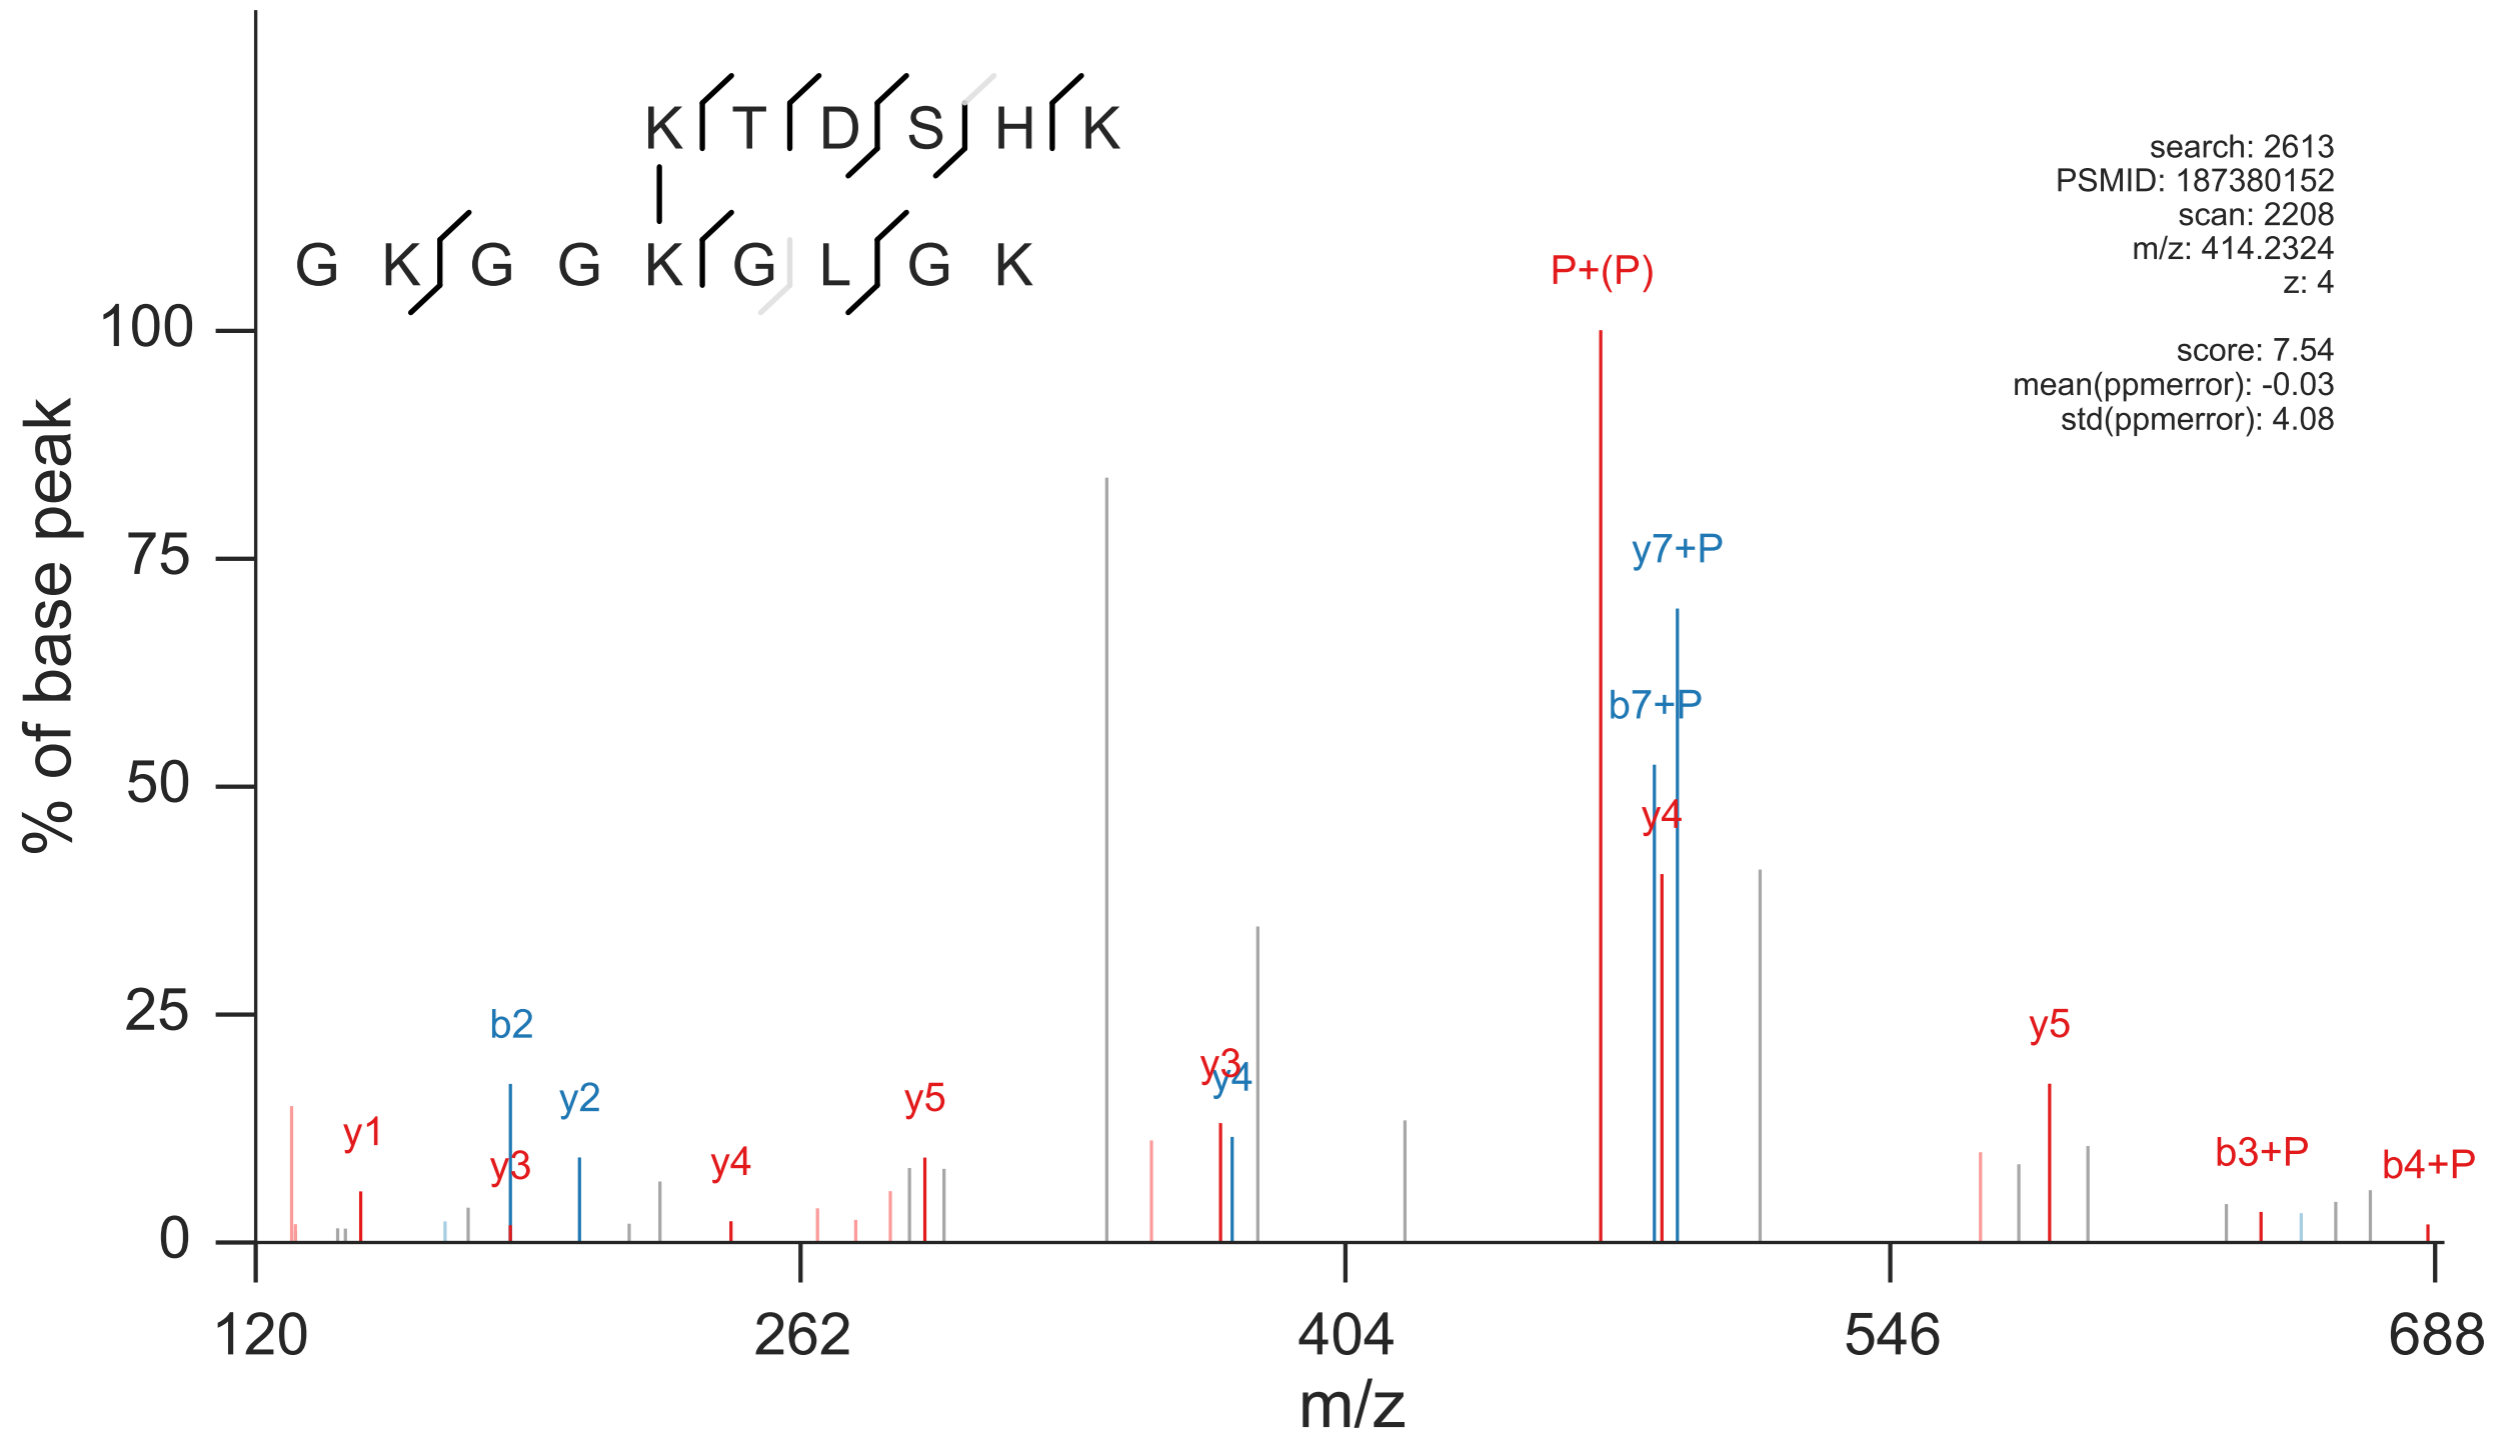

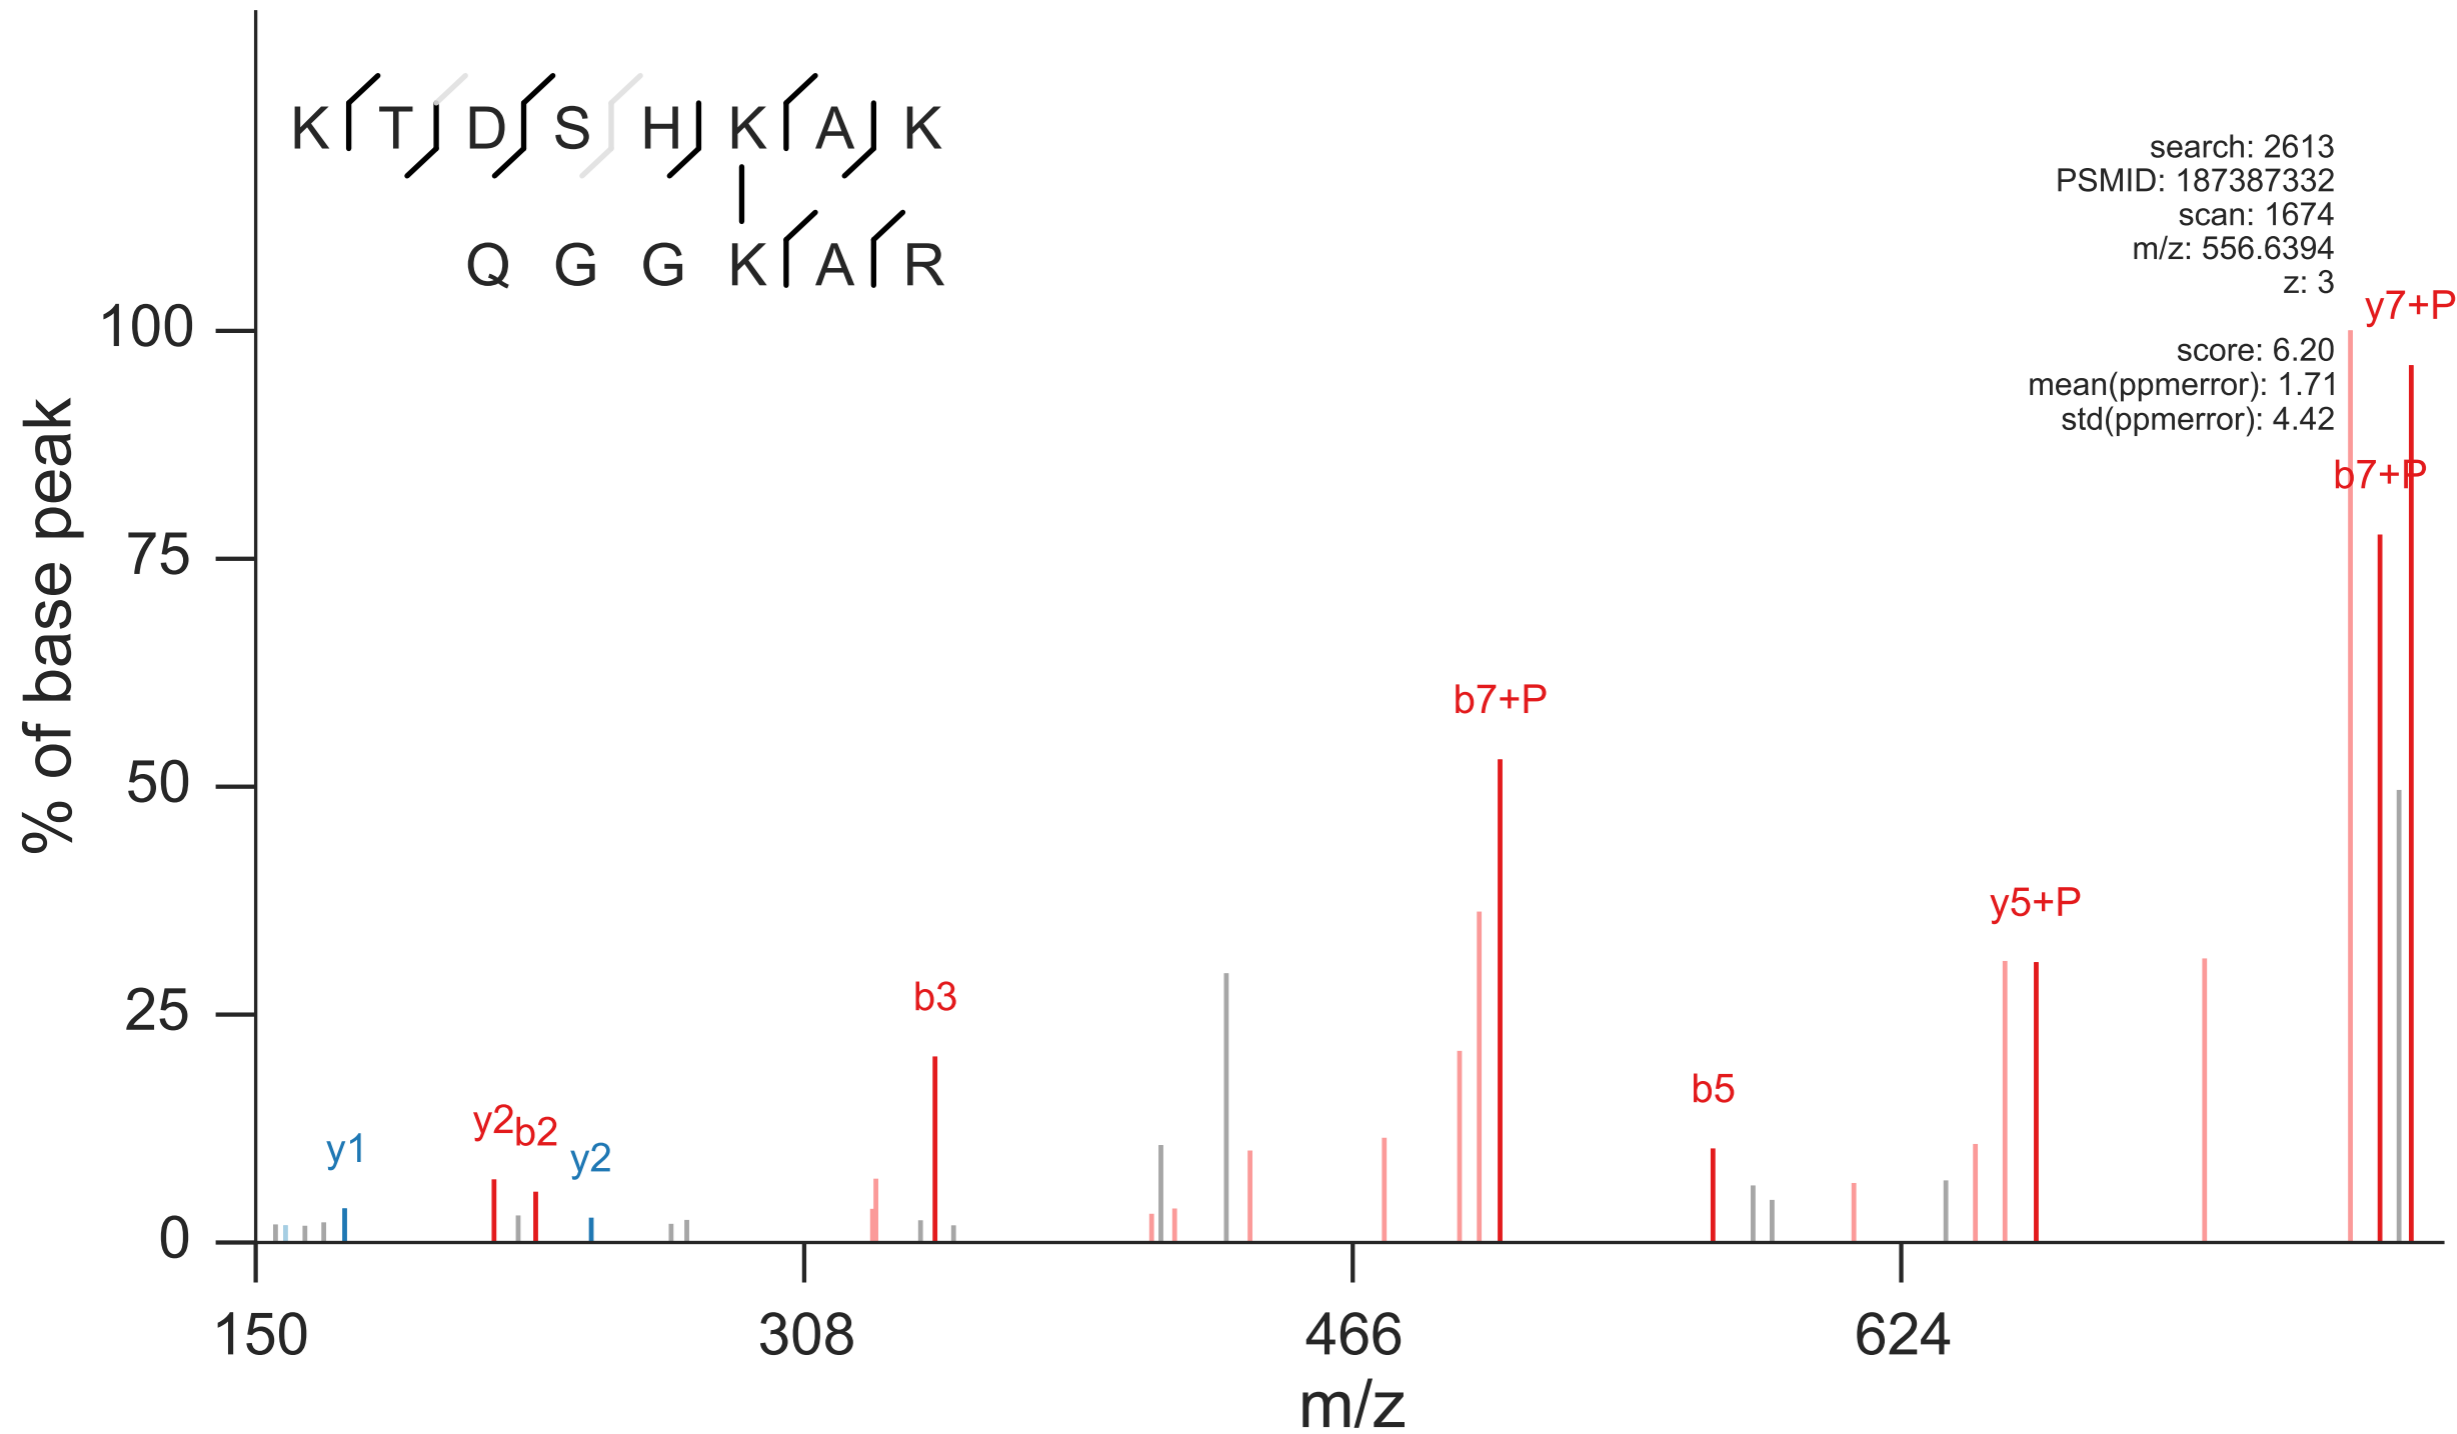

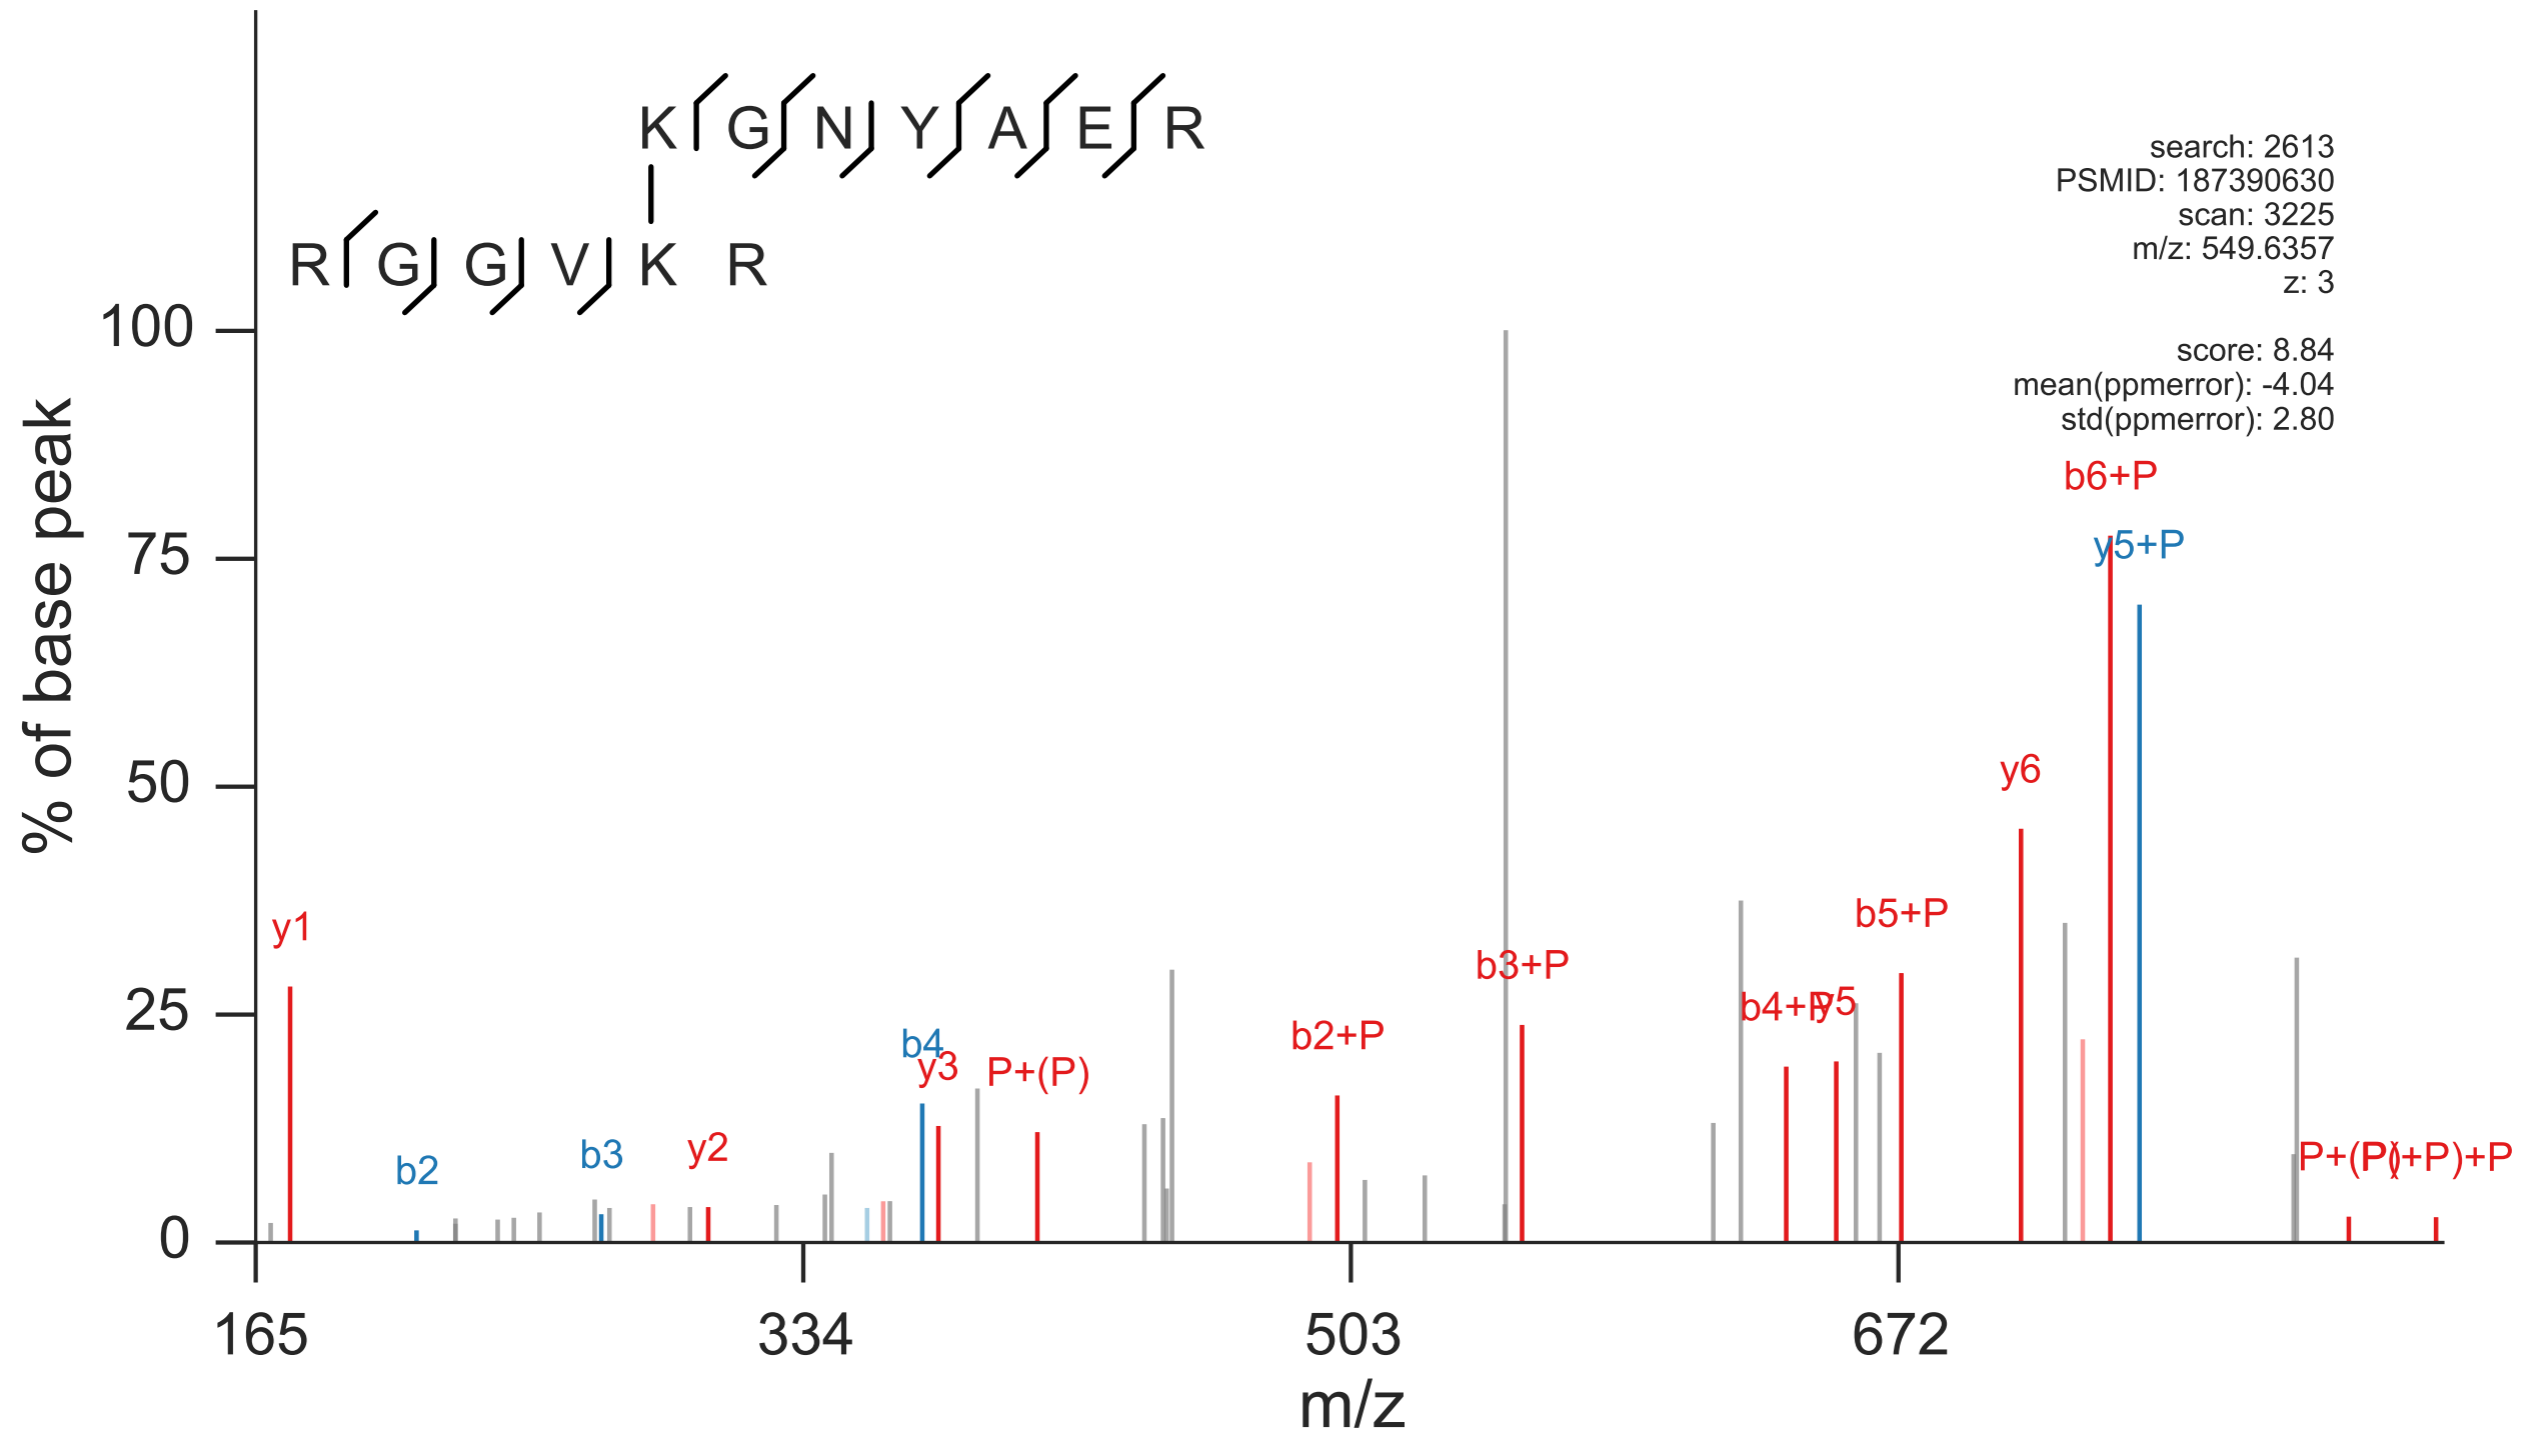

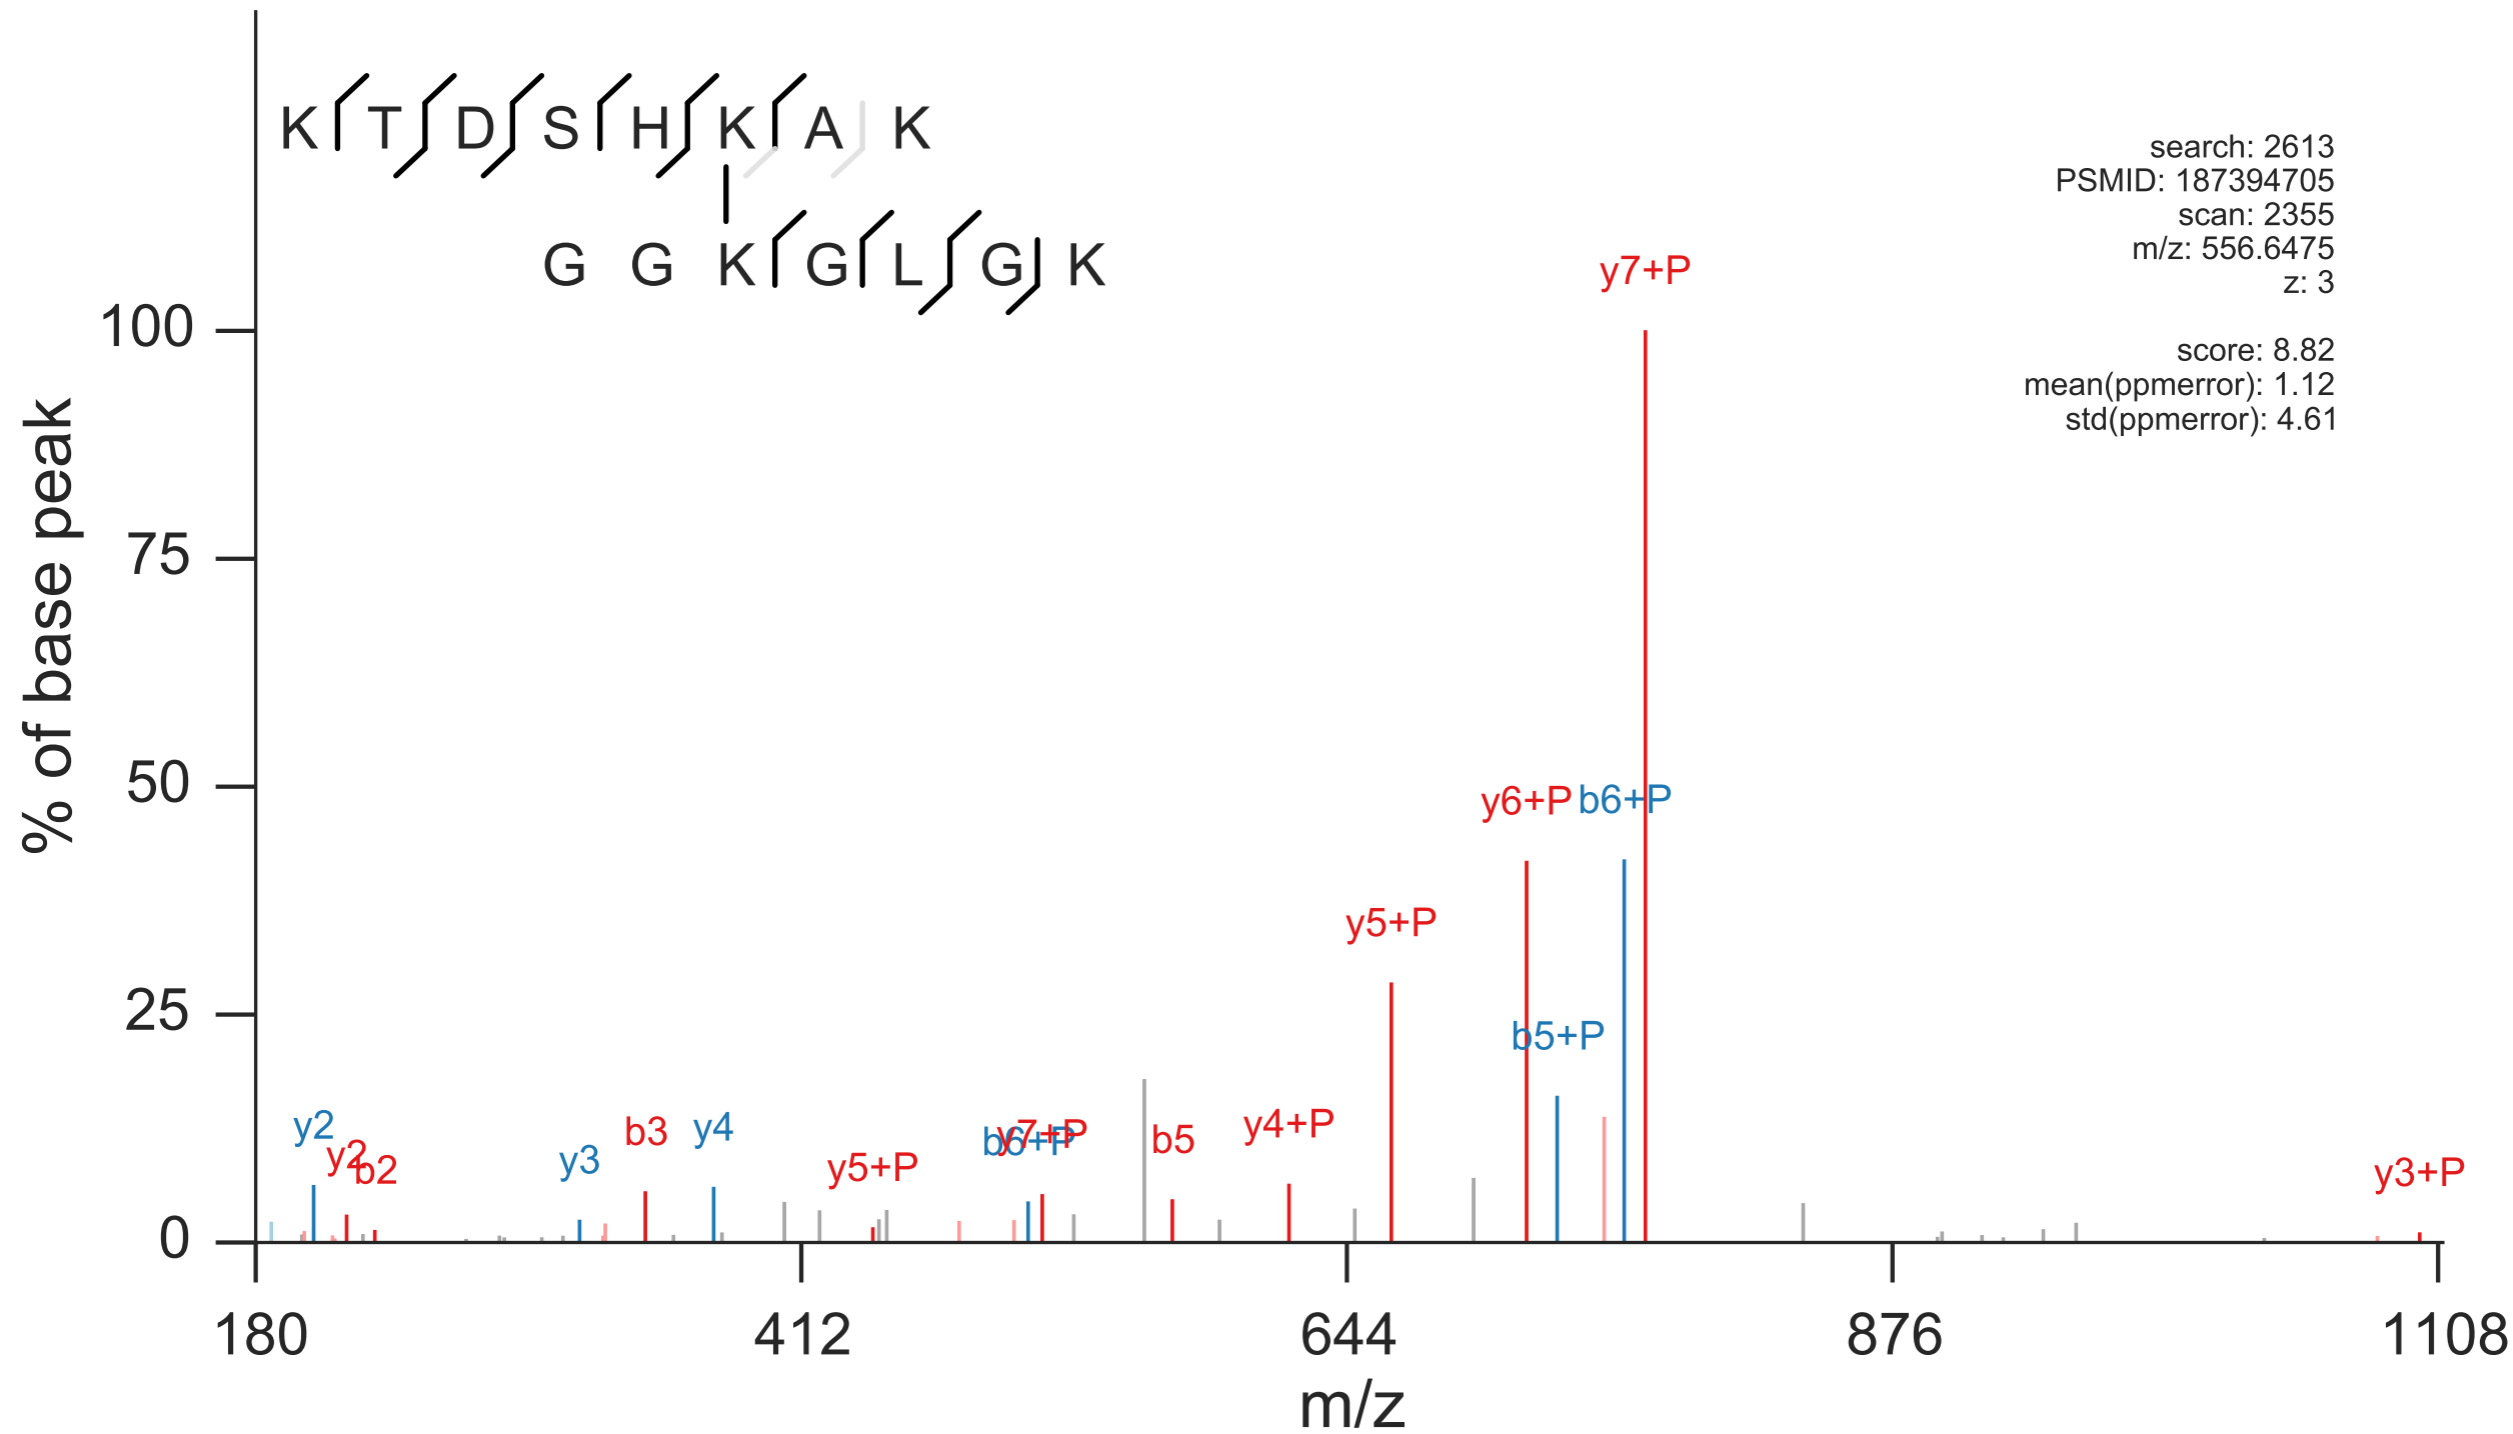

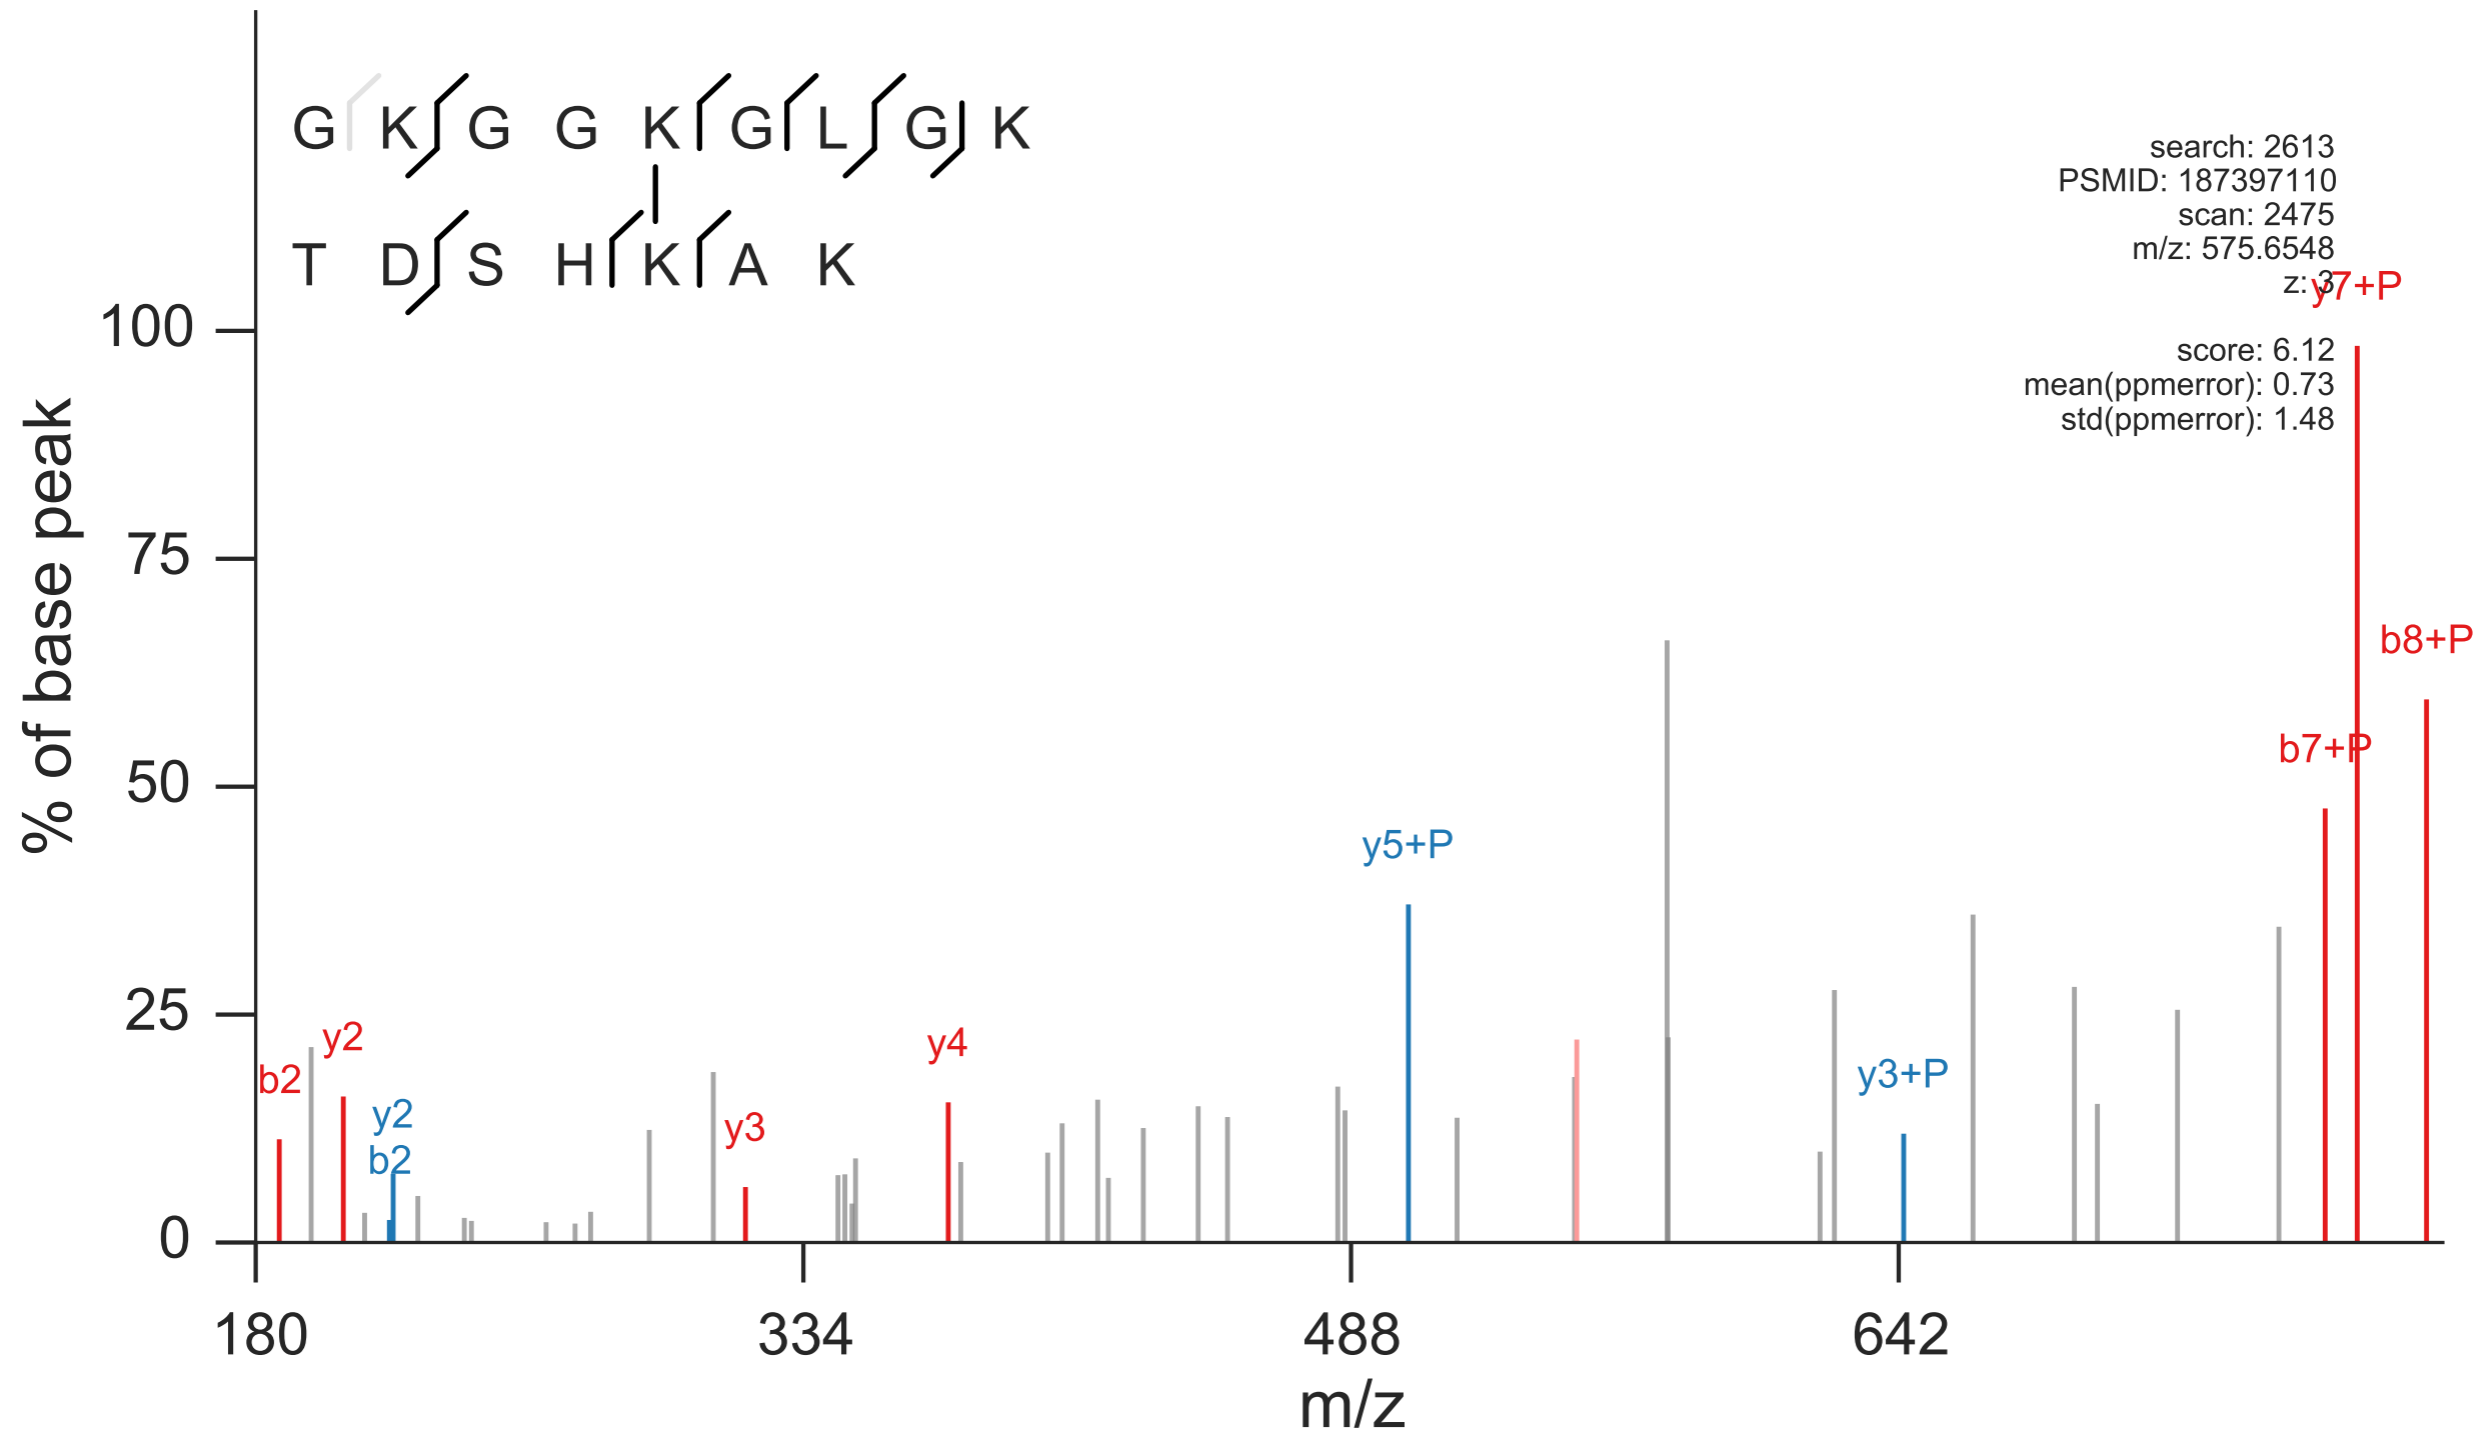

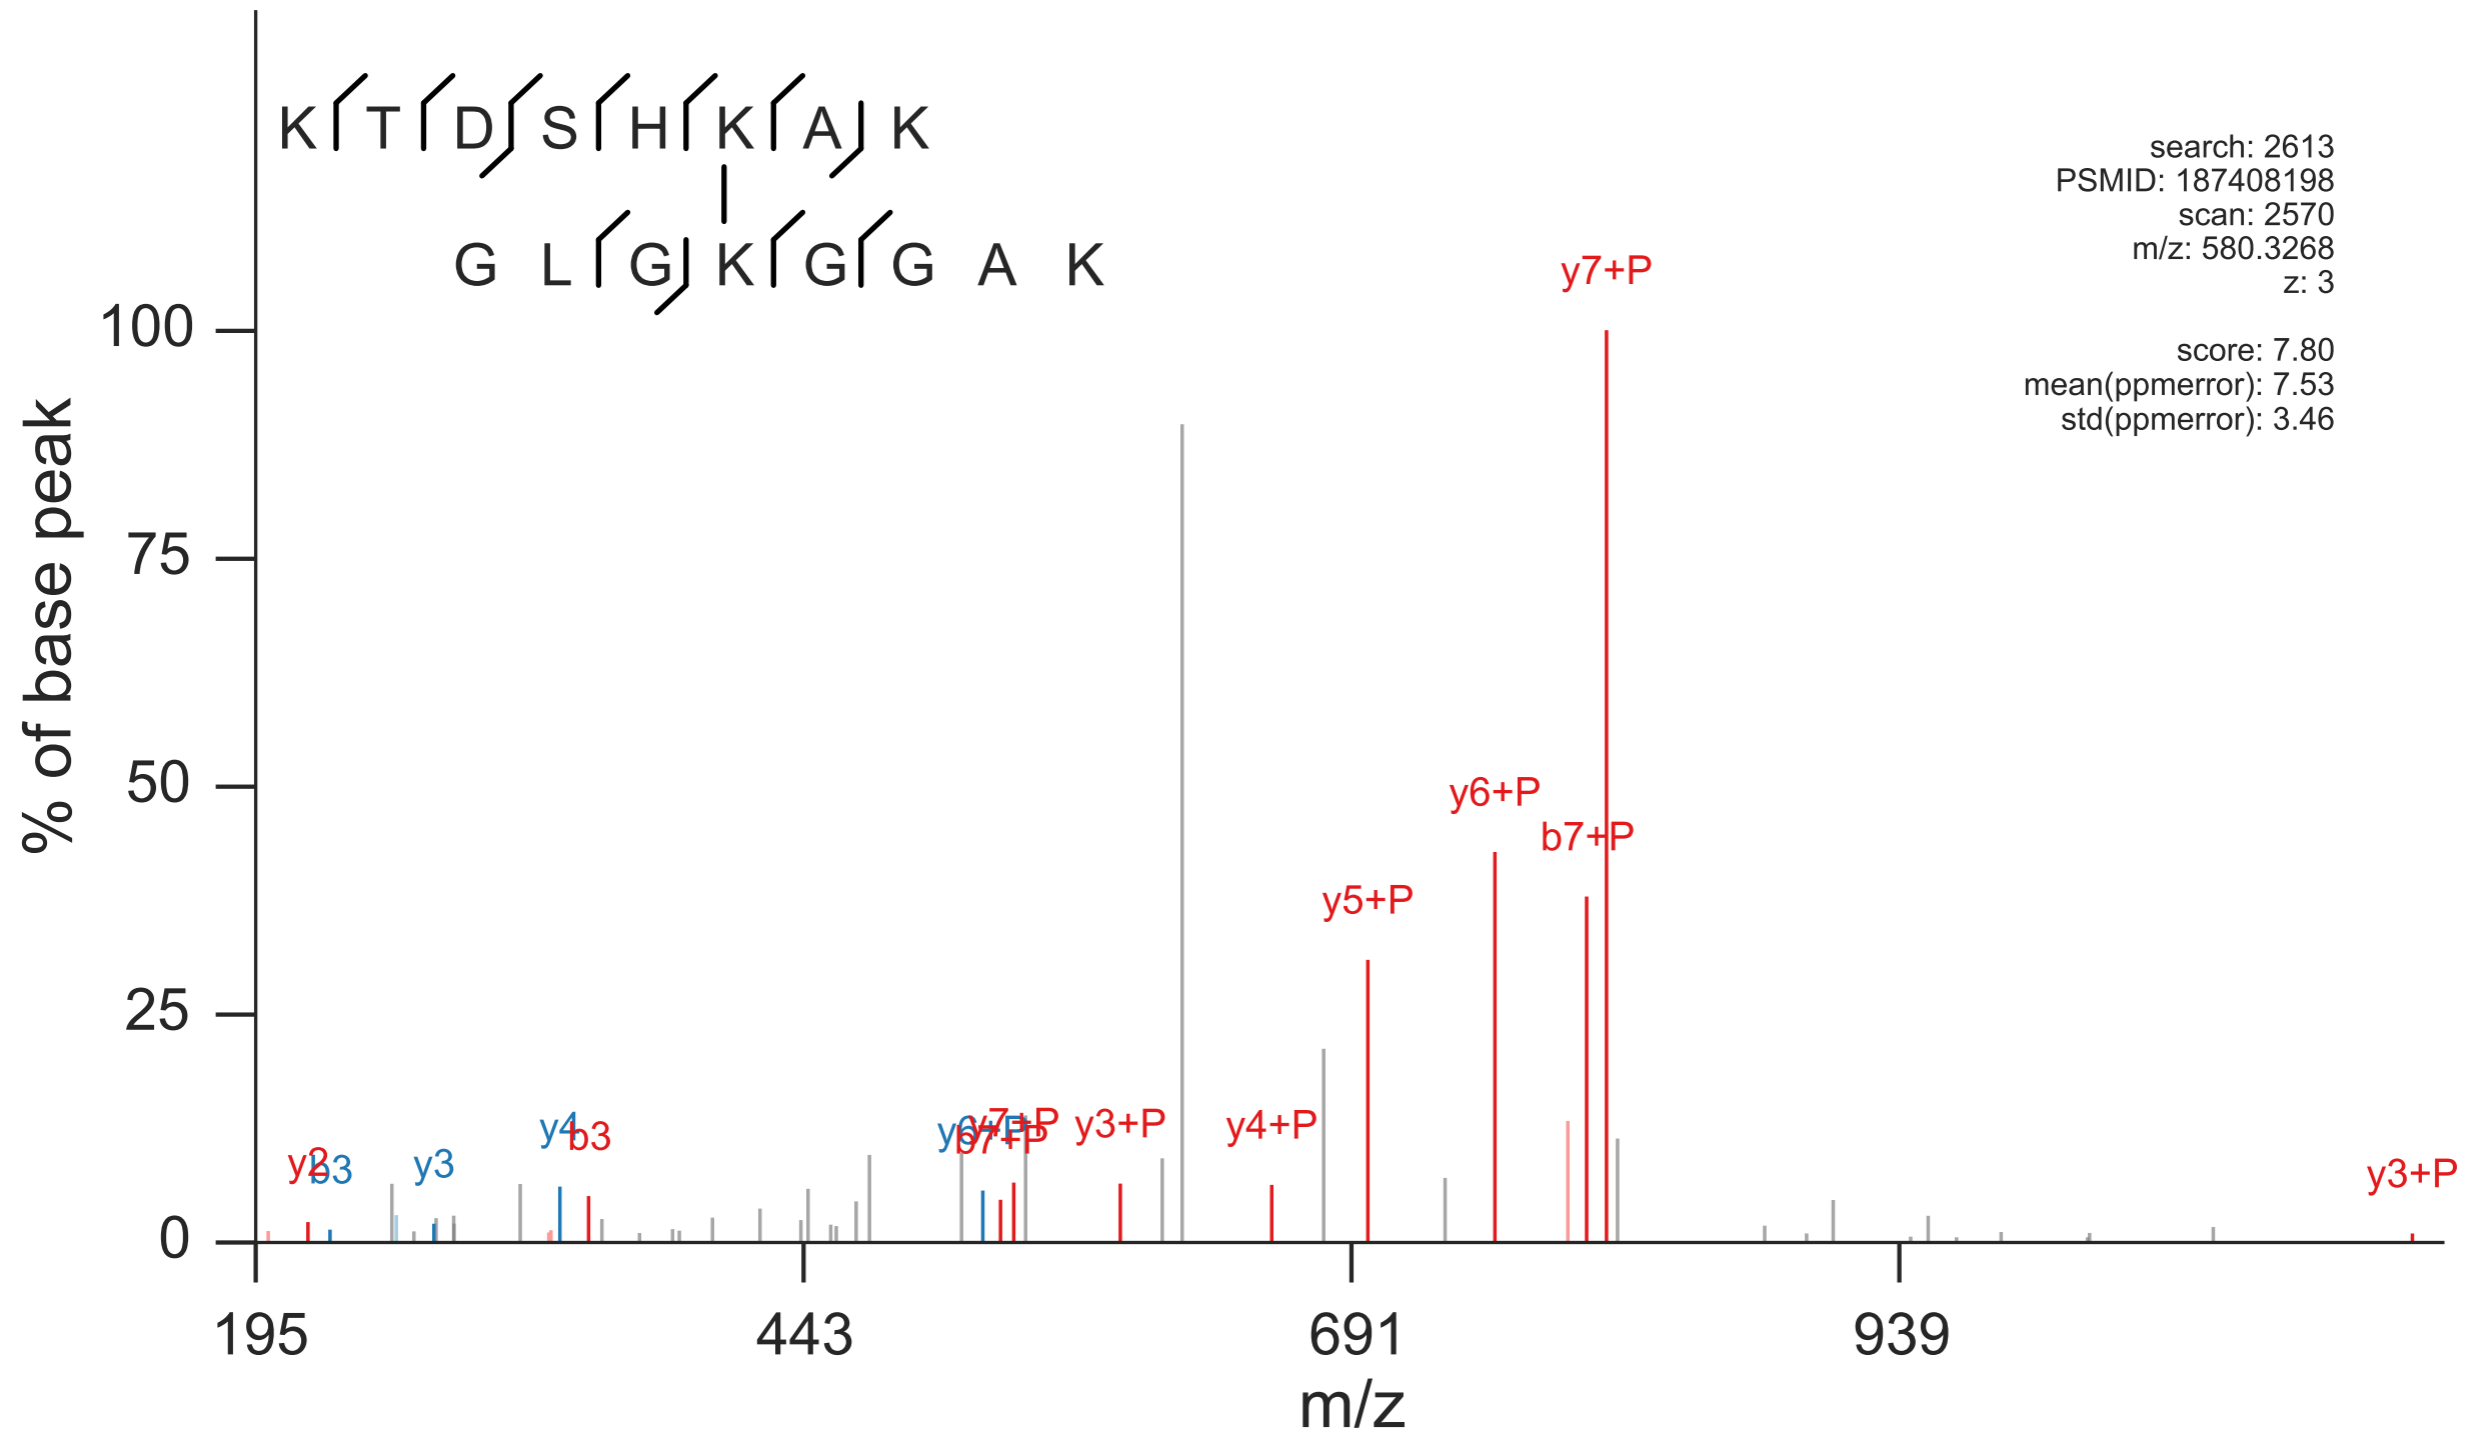

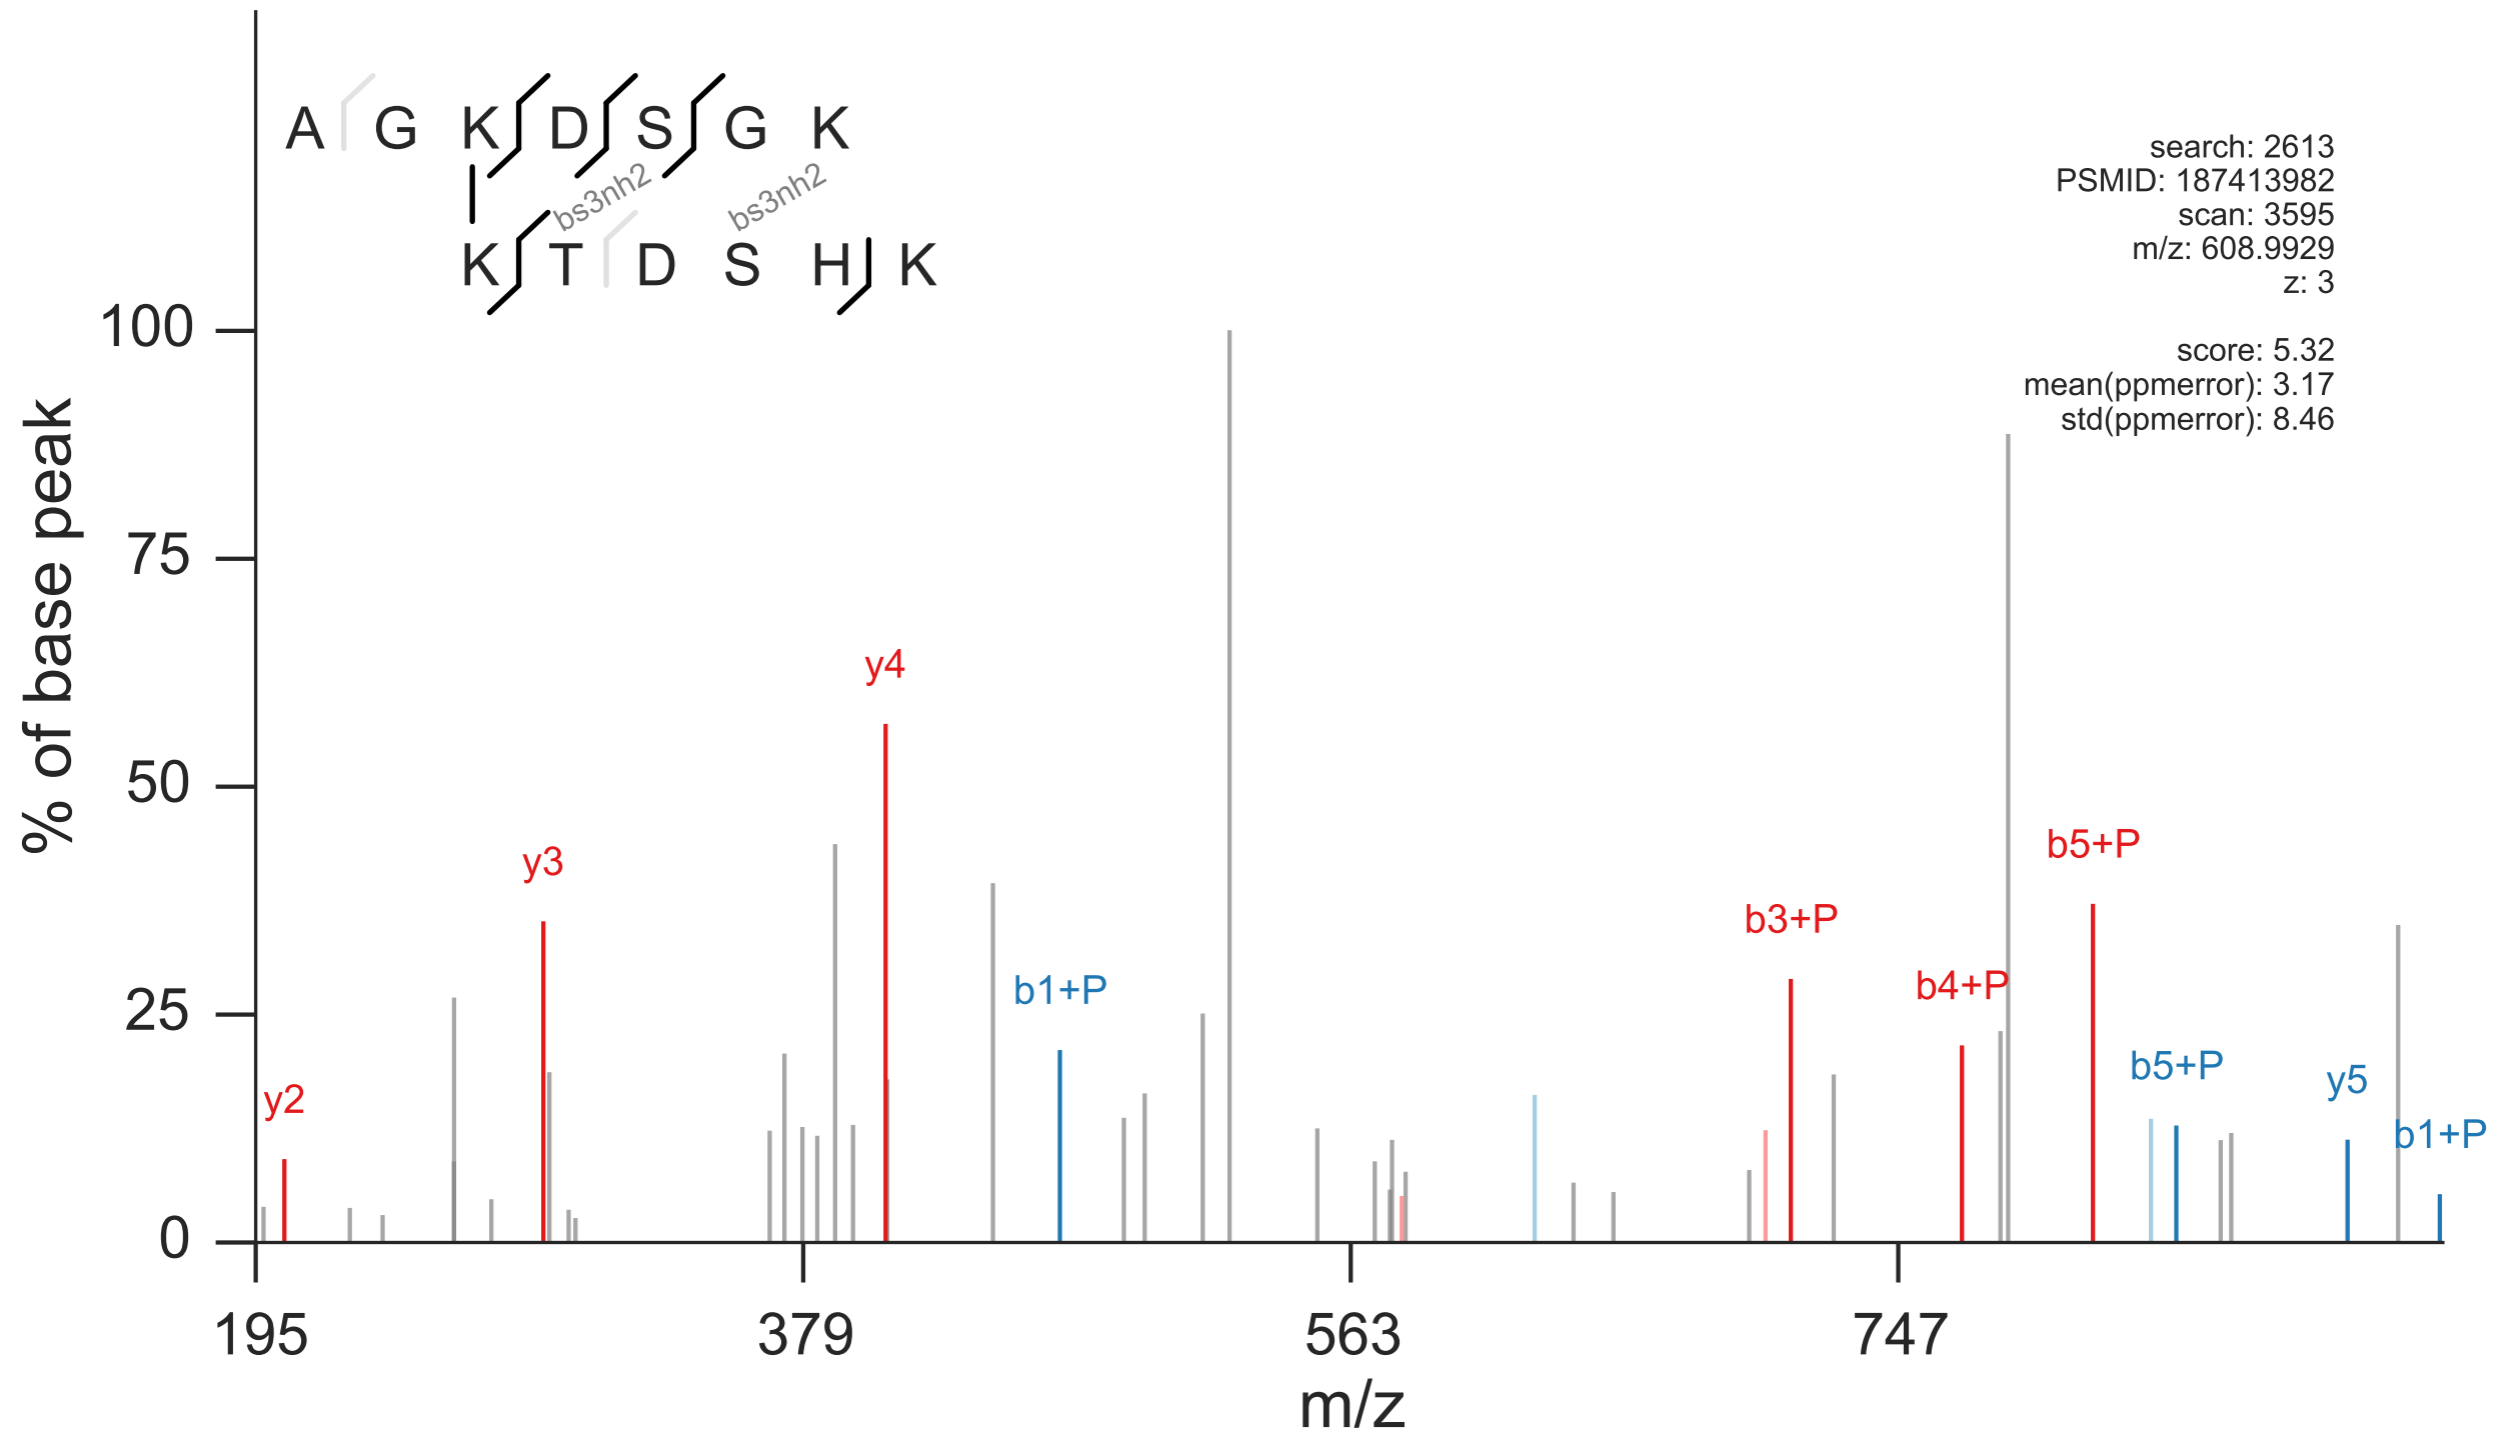

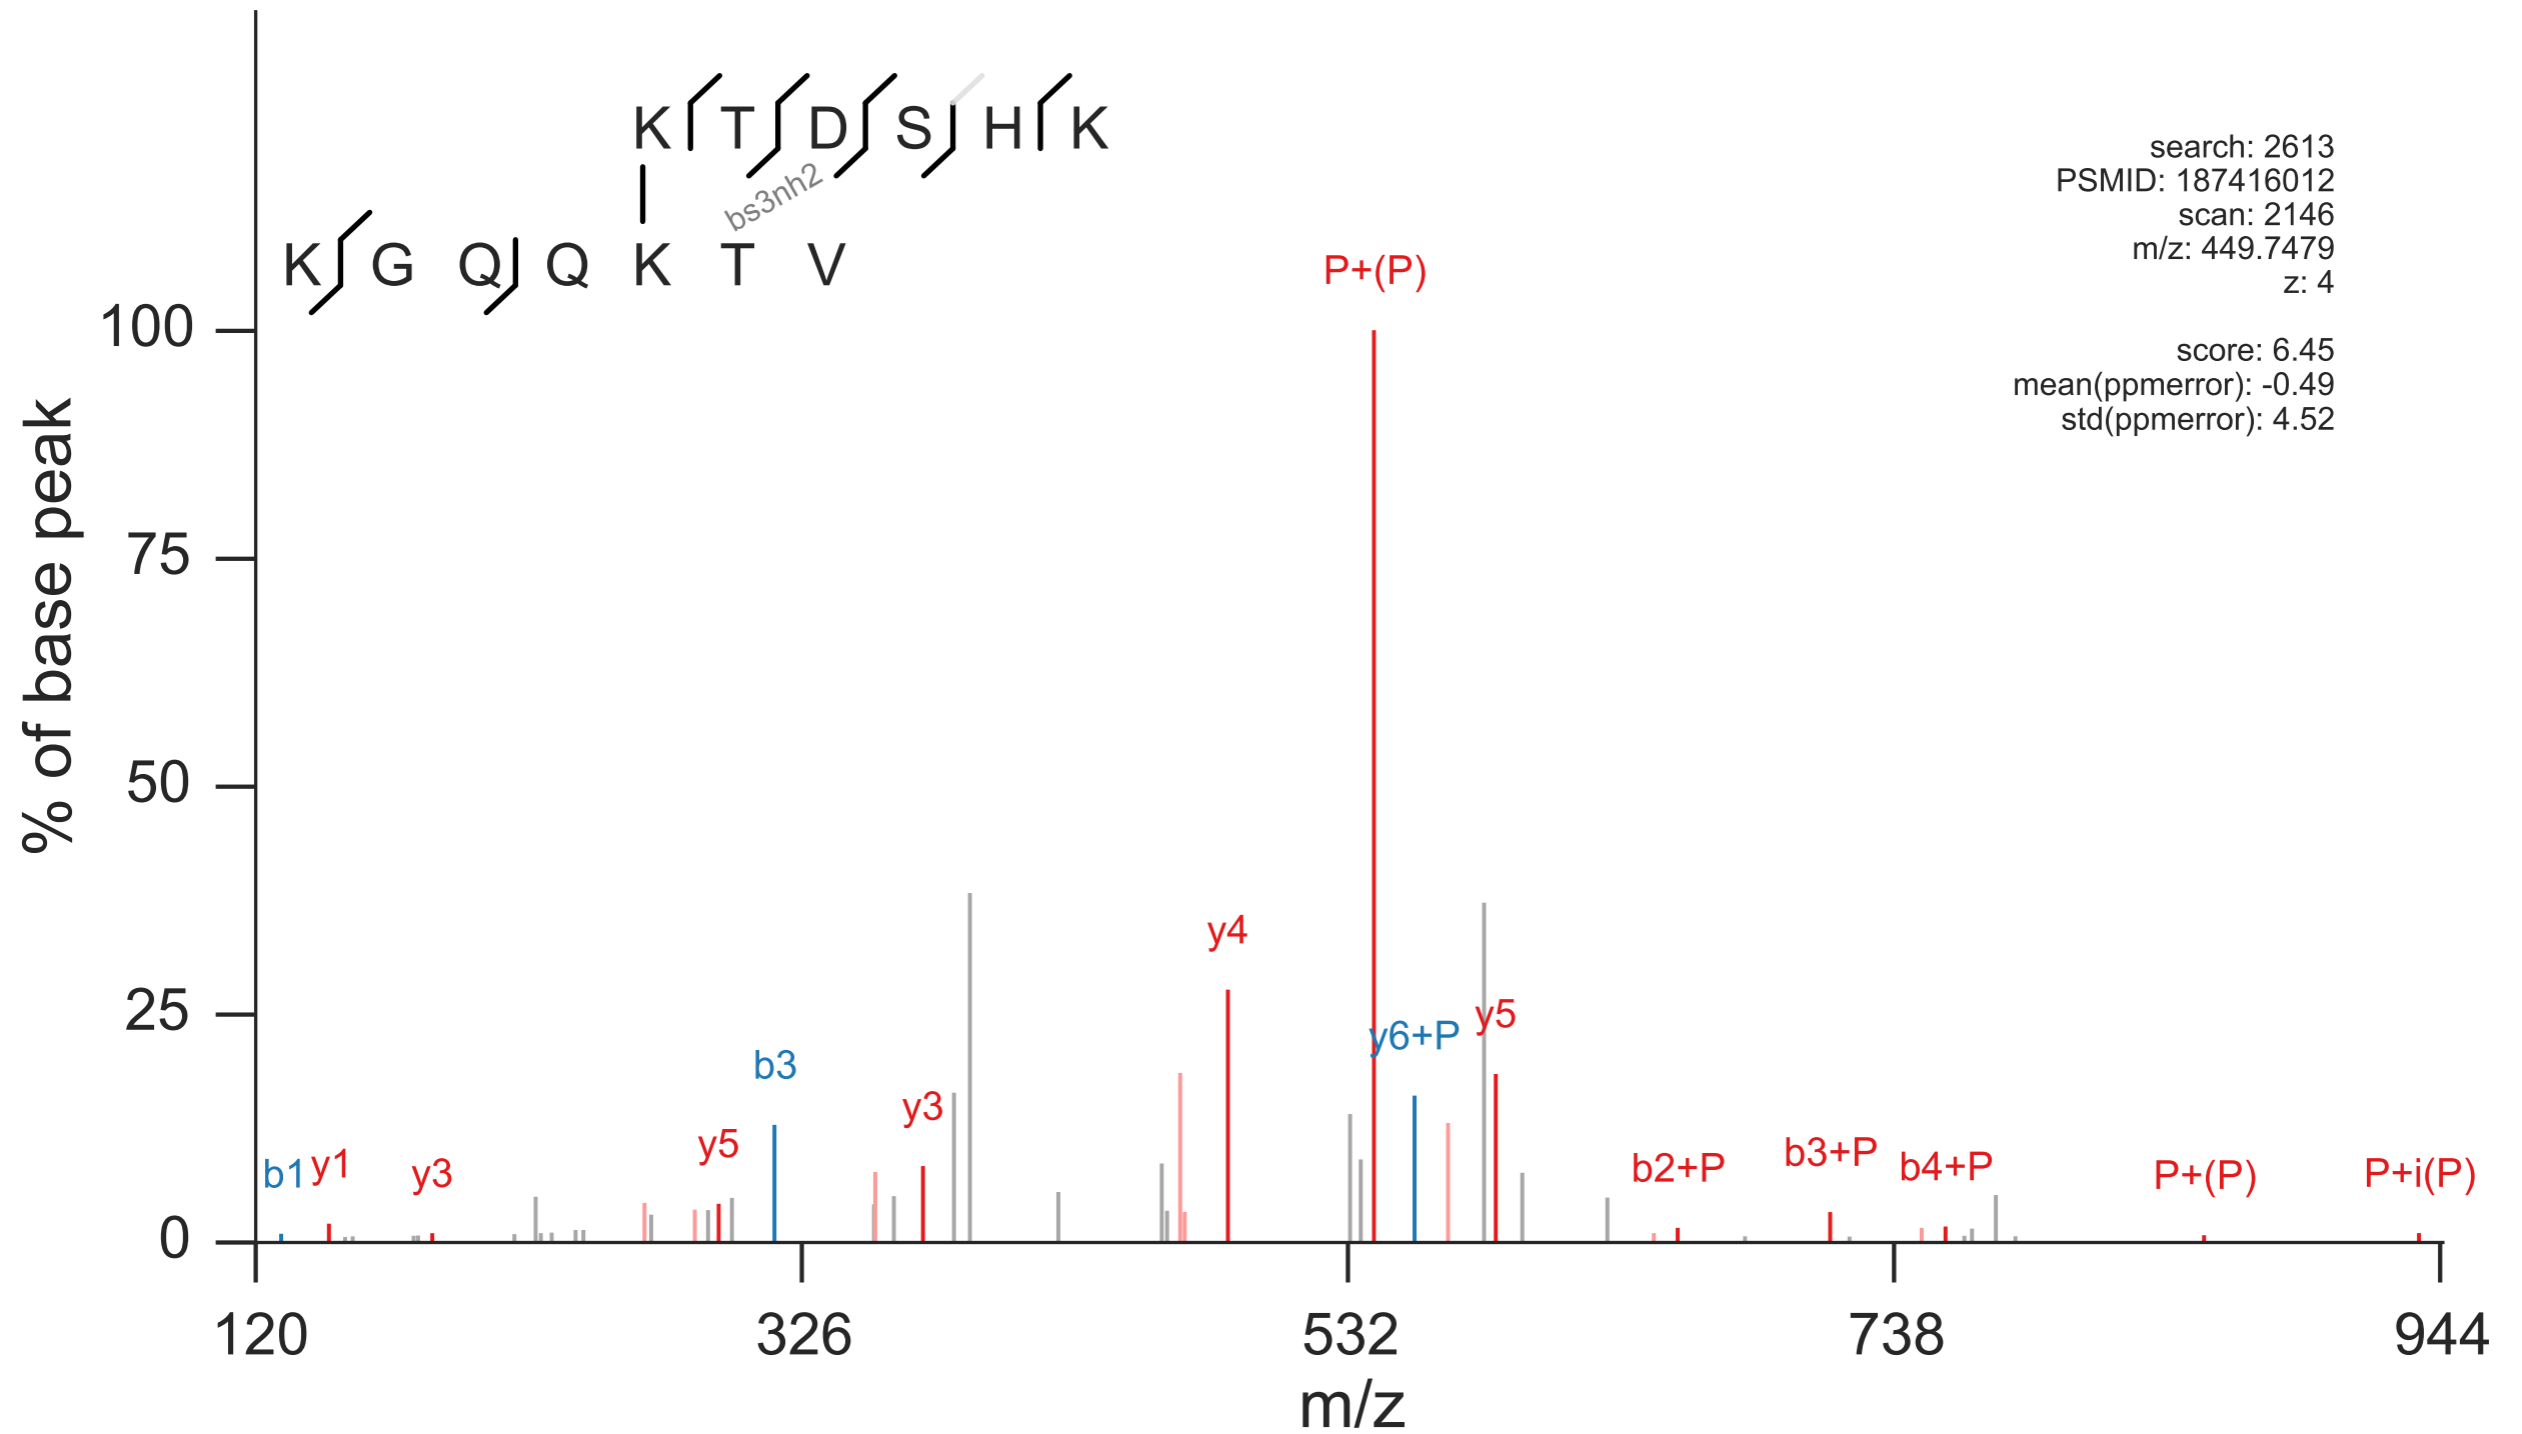



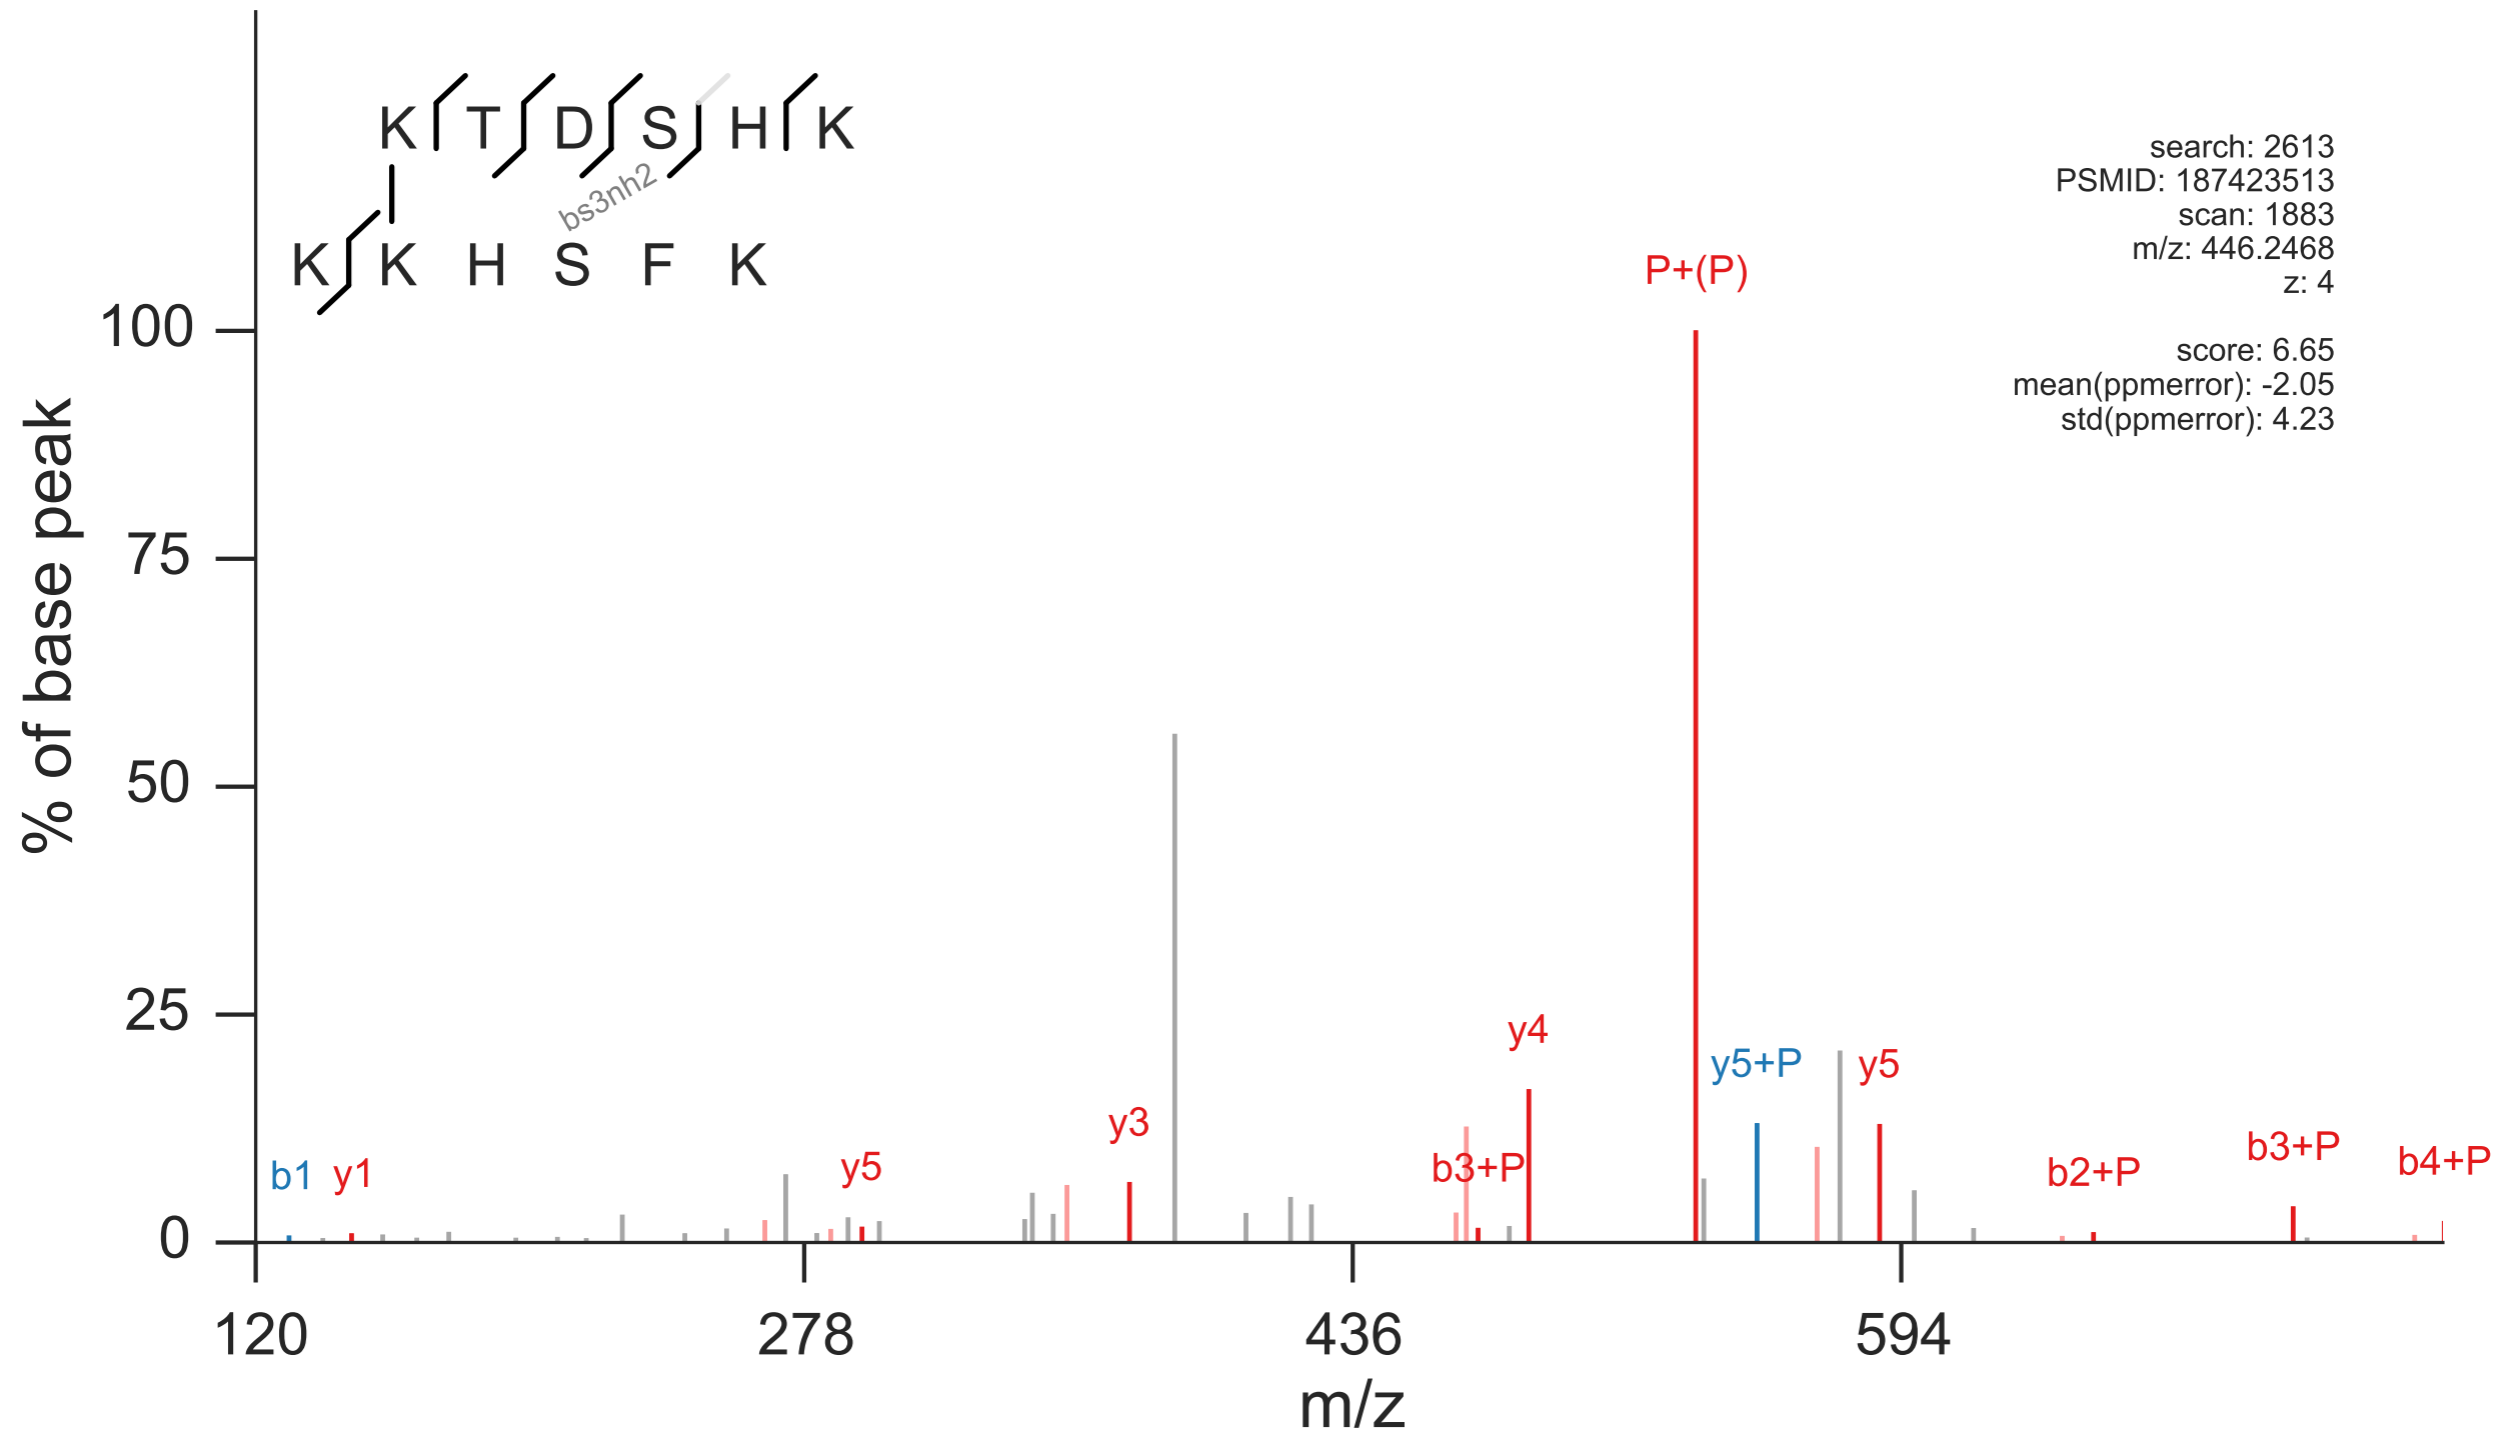

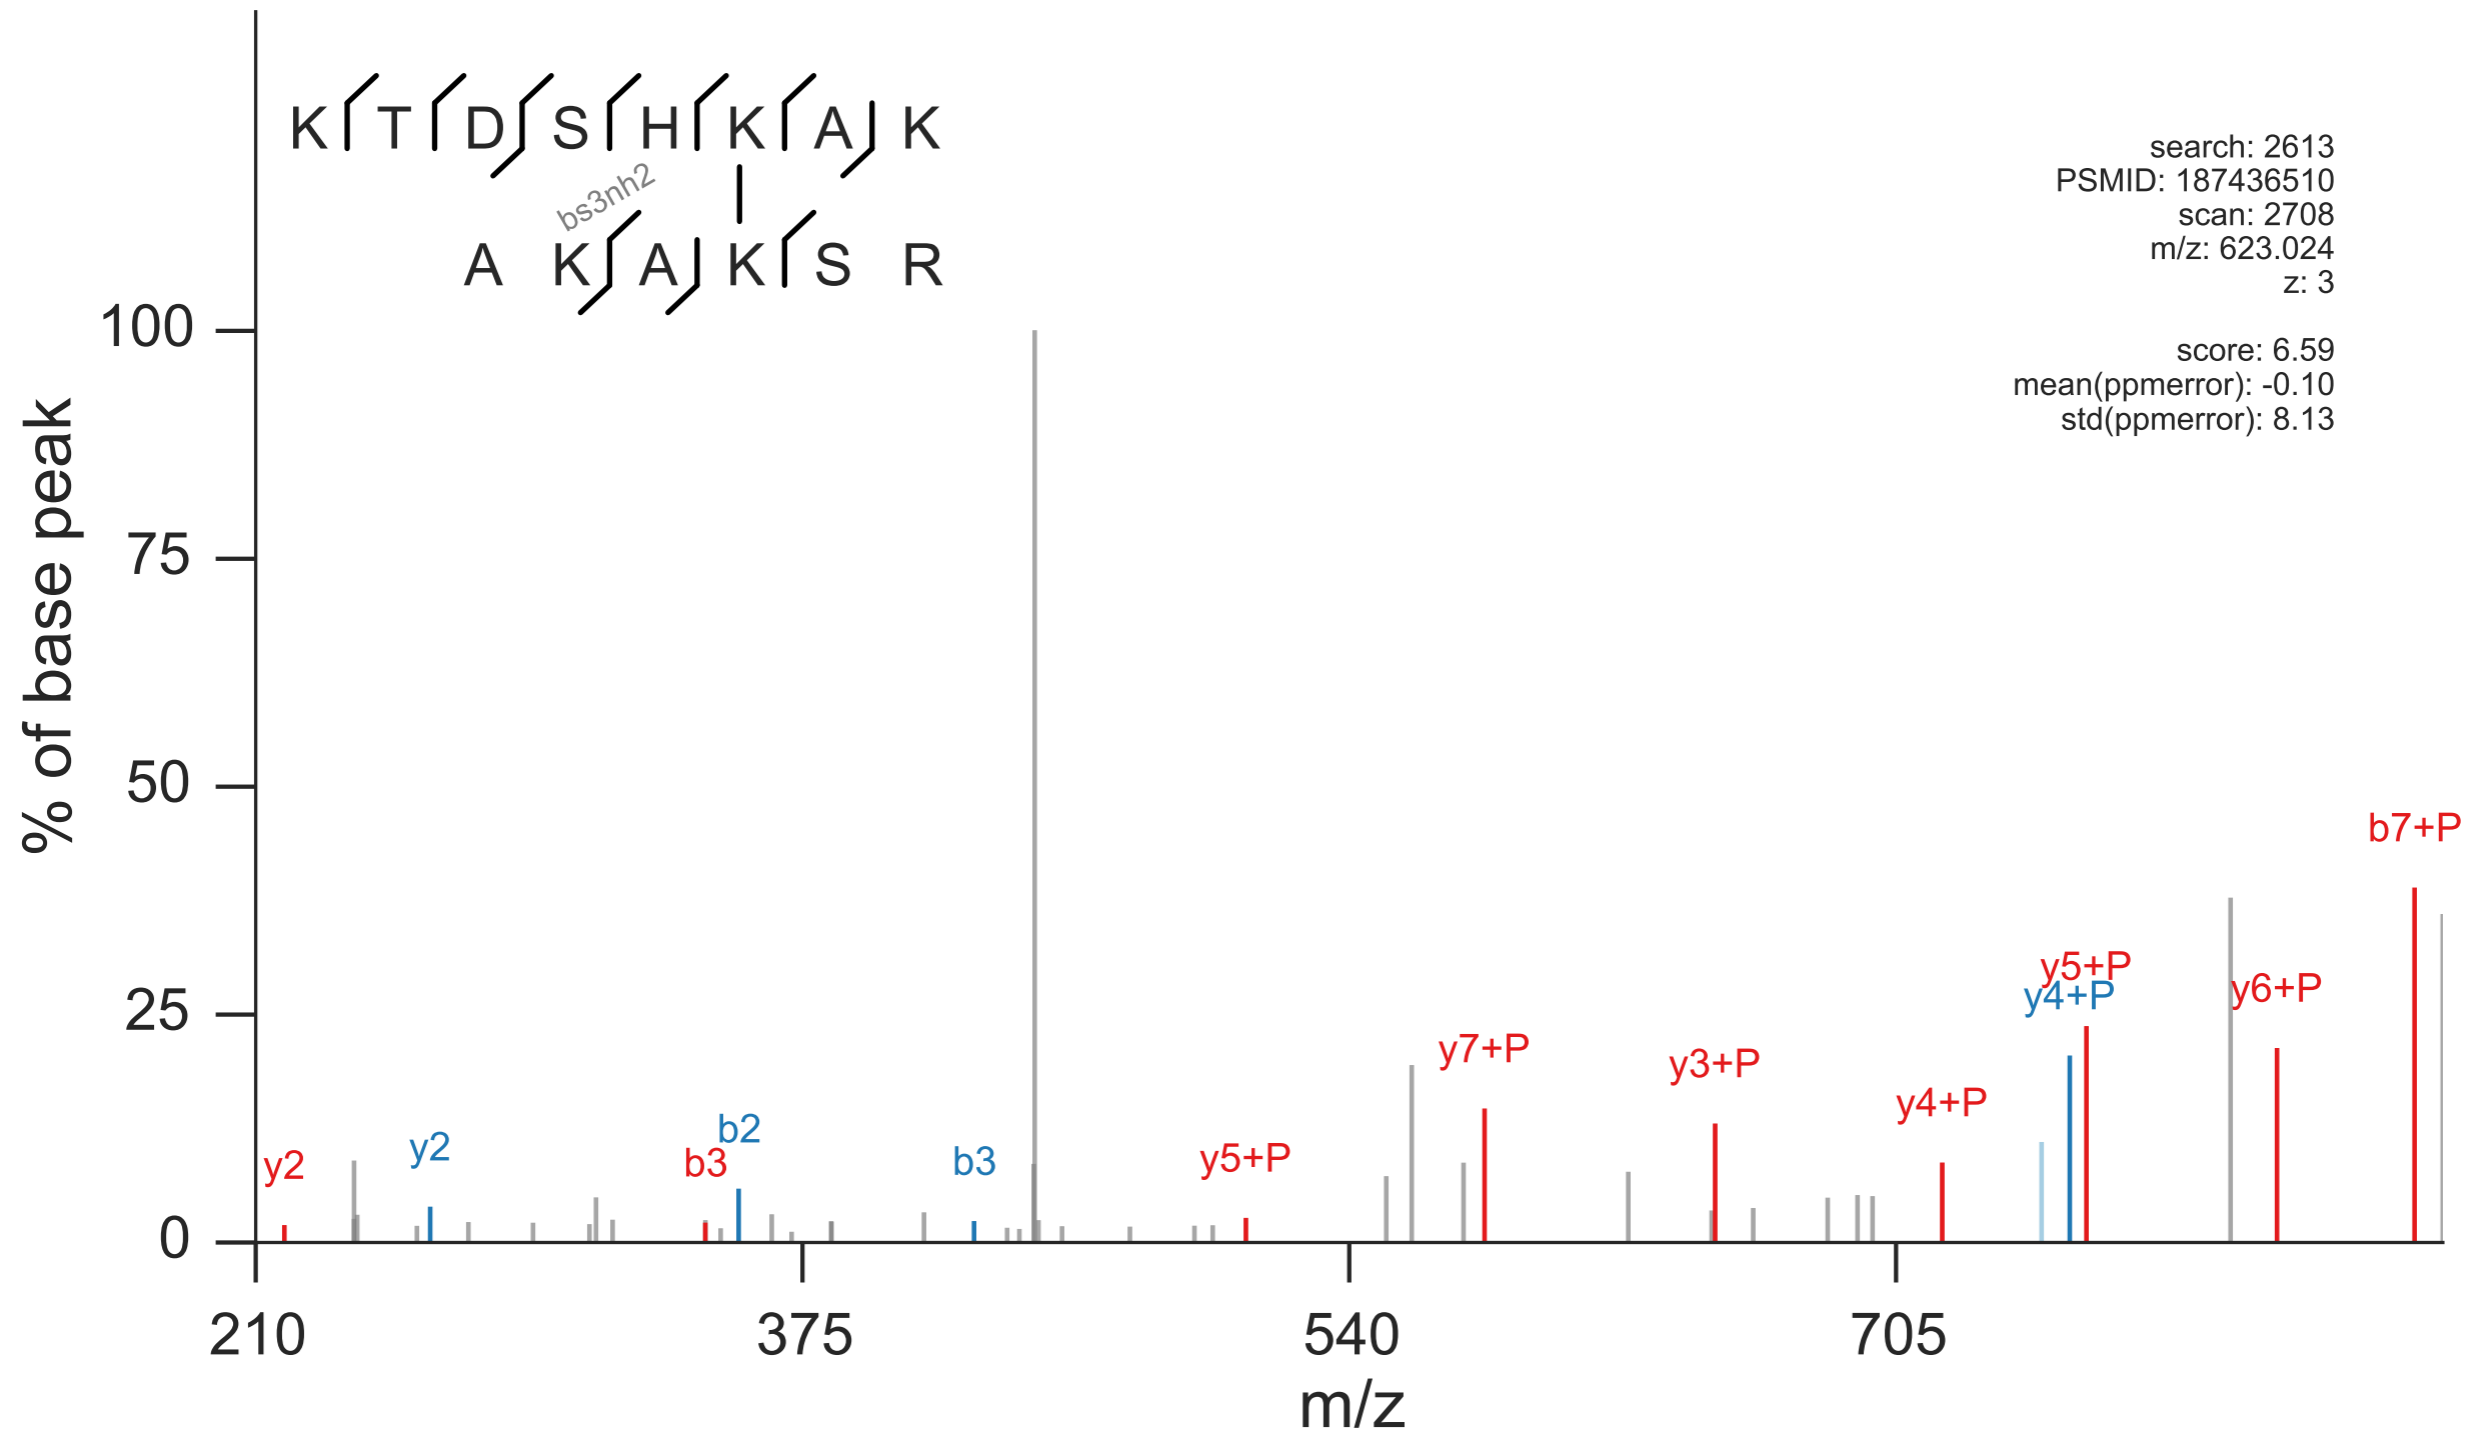

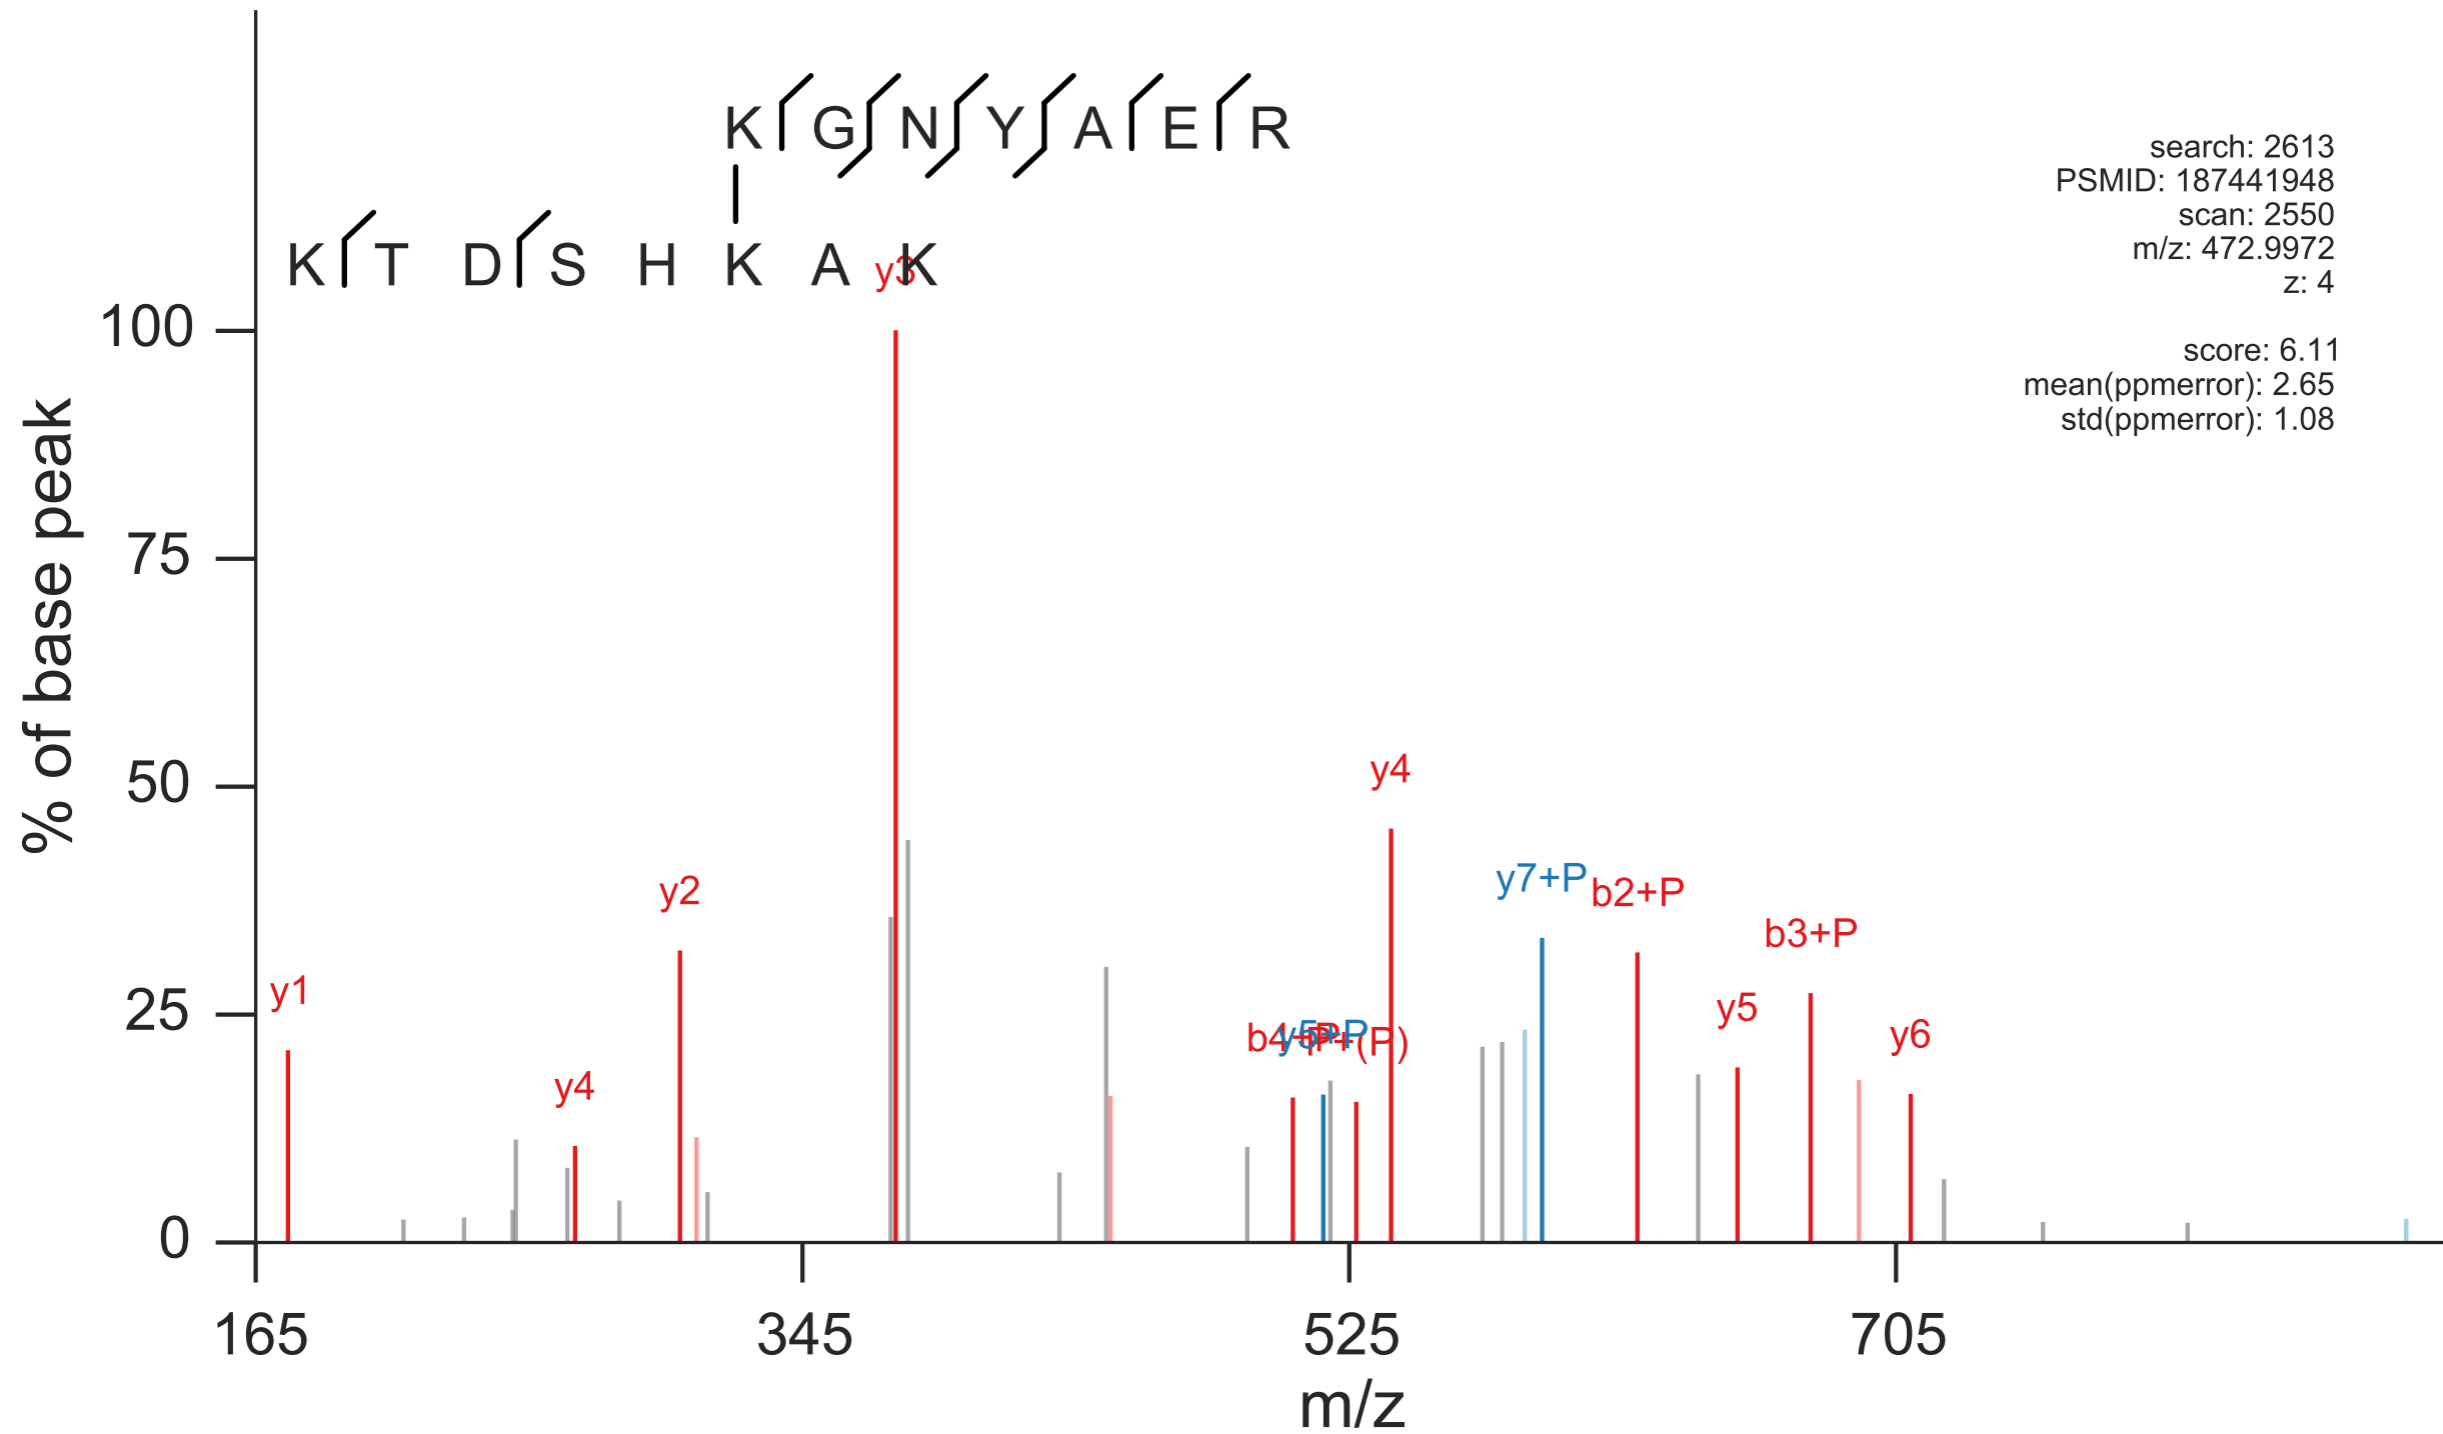

search: 2613  
 PSMID: 187441948  
 scan: 2550  
 m/z: 472.9972  
 z: 4

score: 6.11  
 mean(ppmerror): 2.65  
 std(ppmerror): 1.08

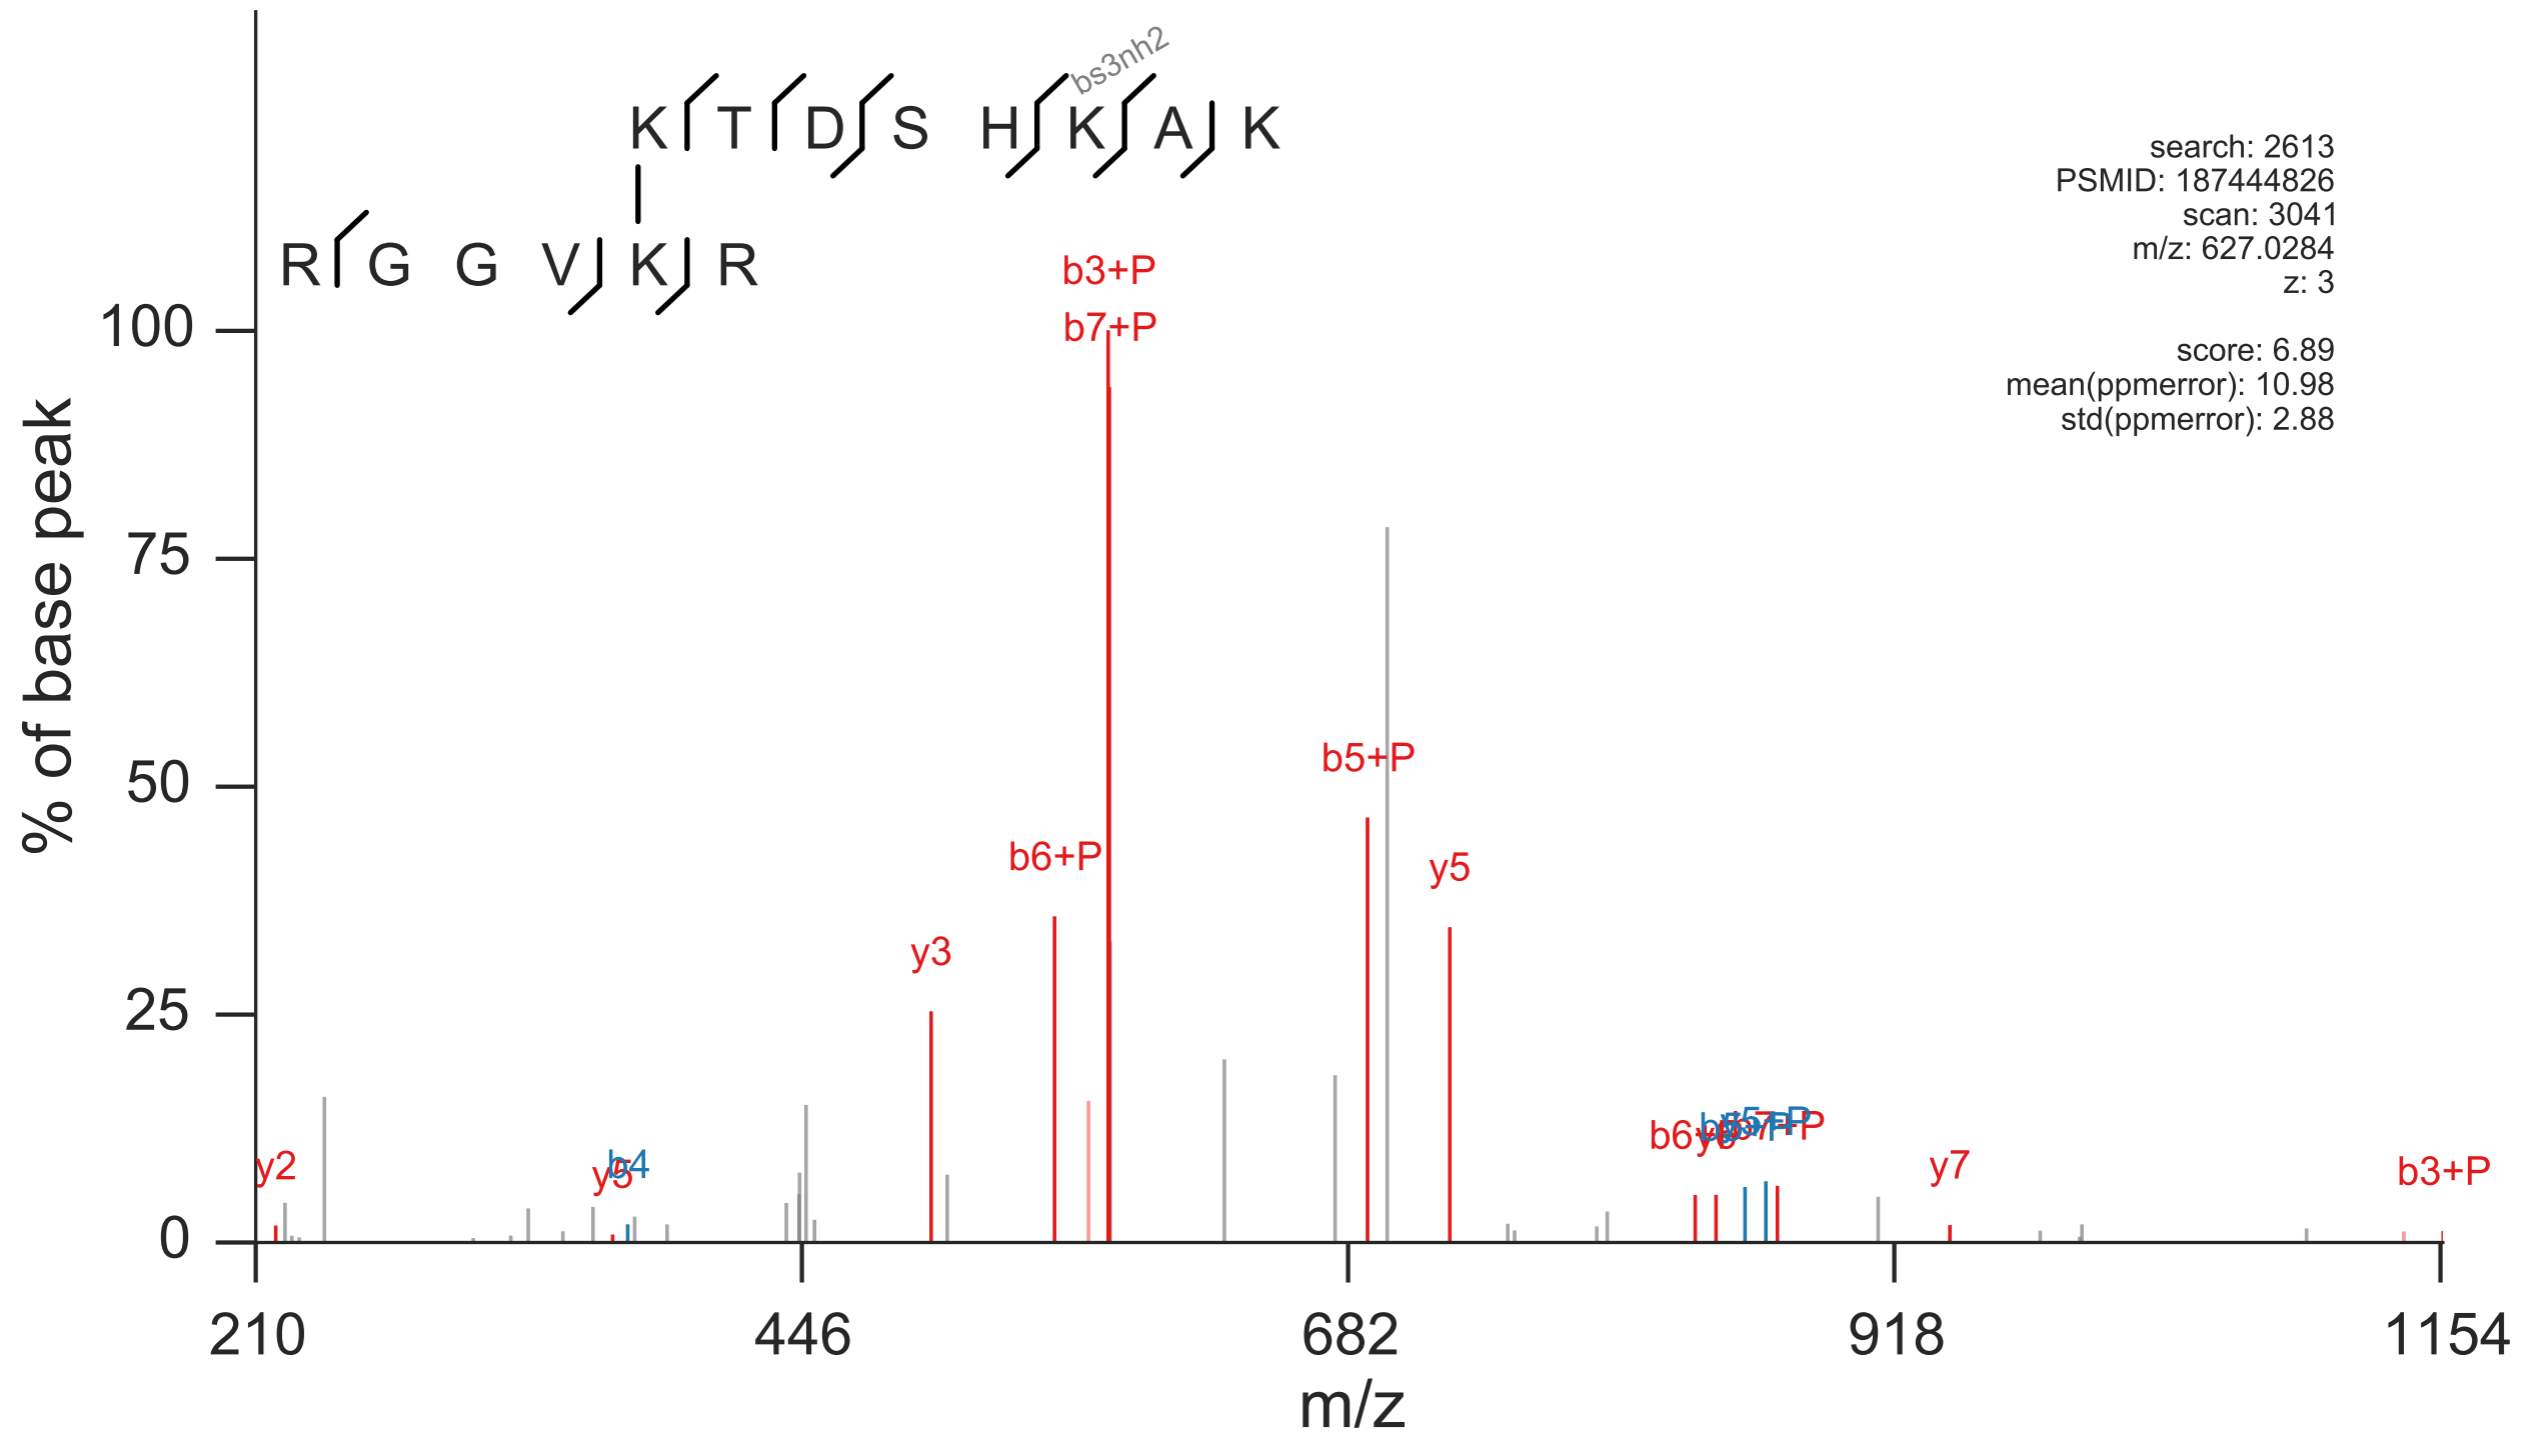

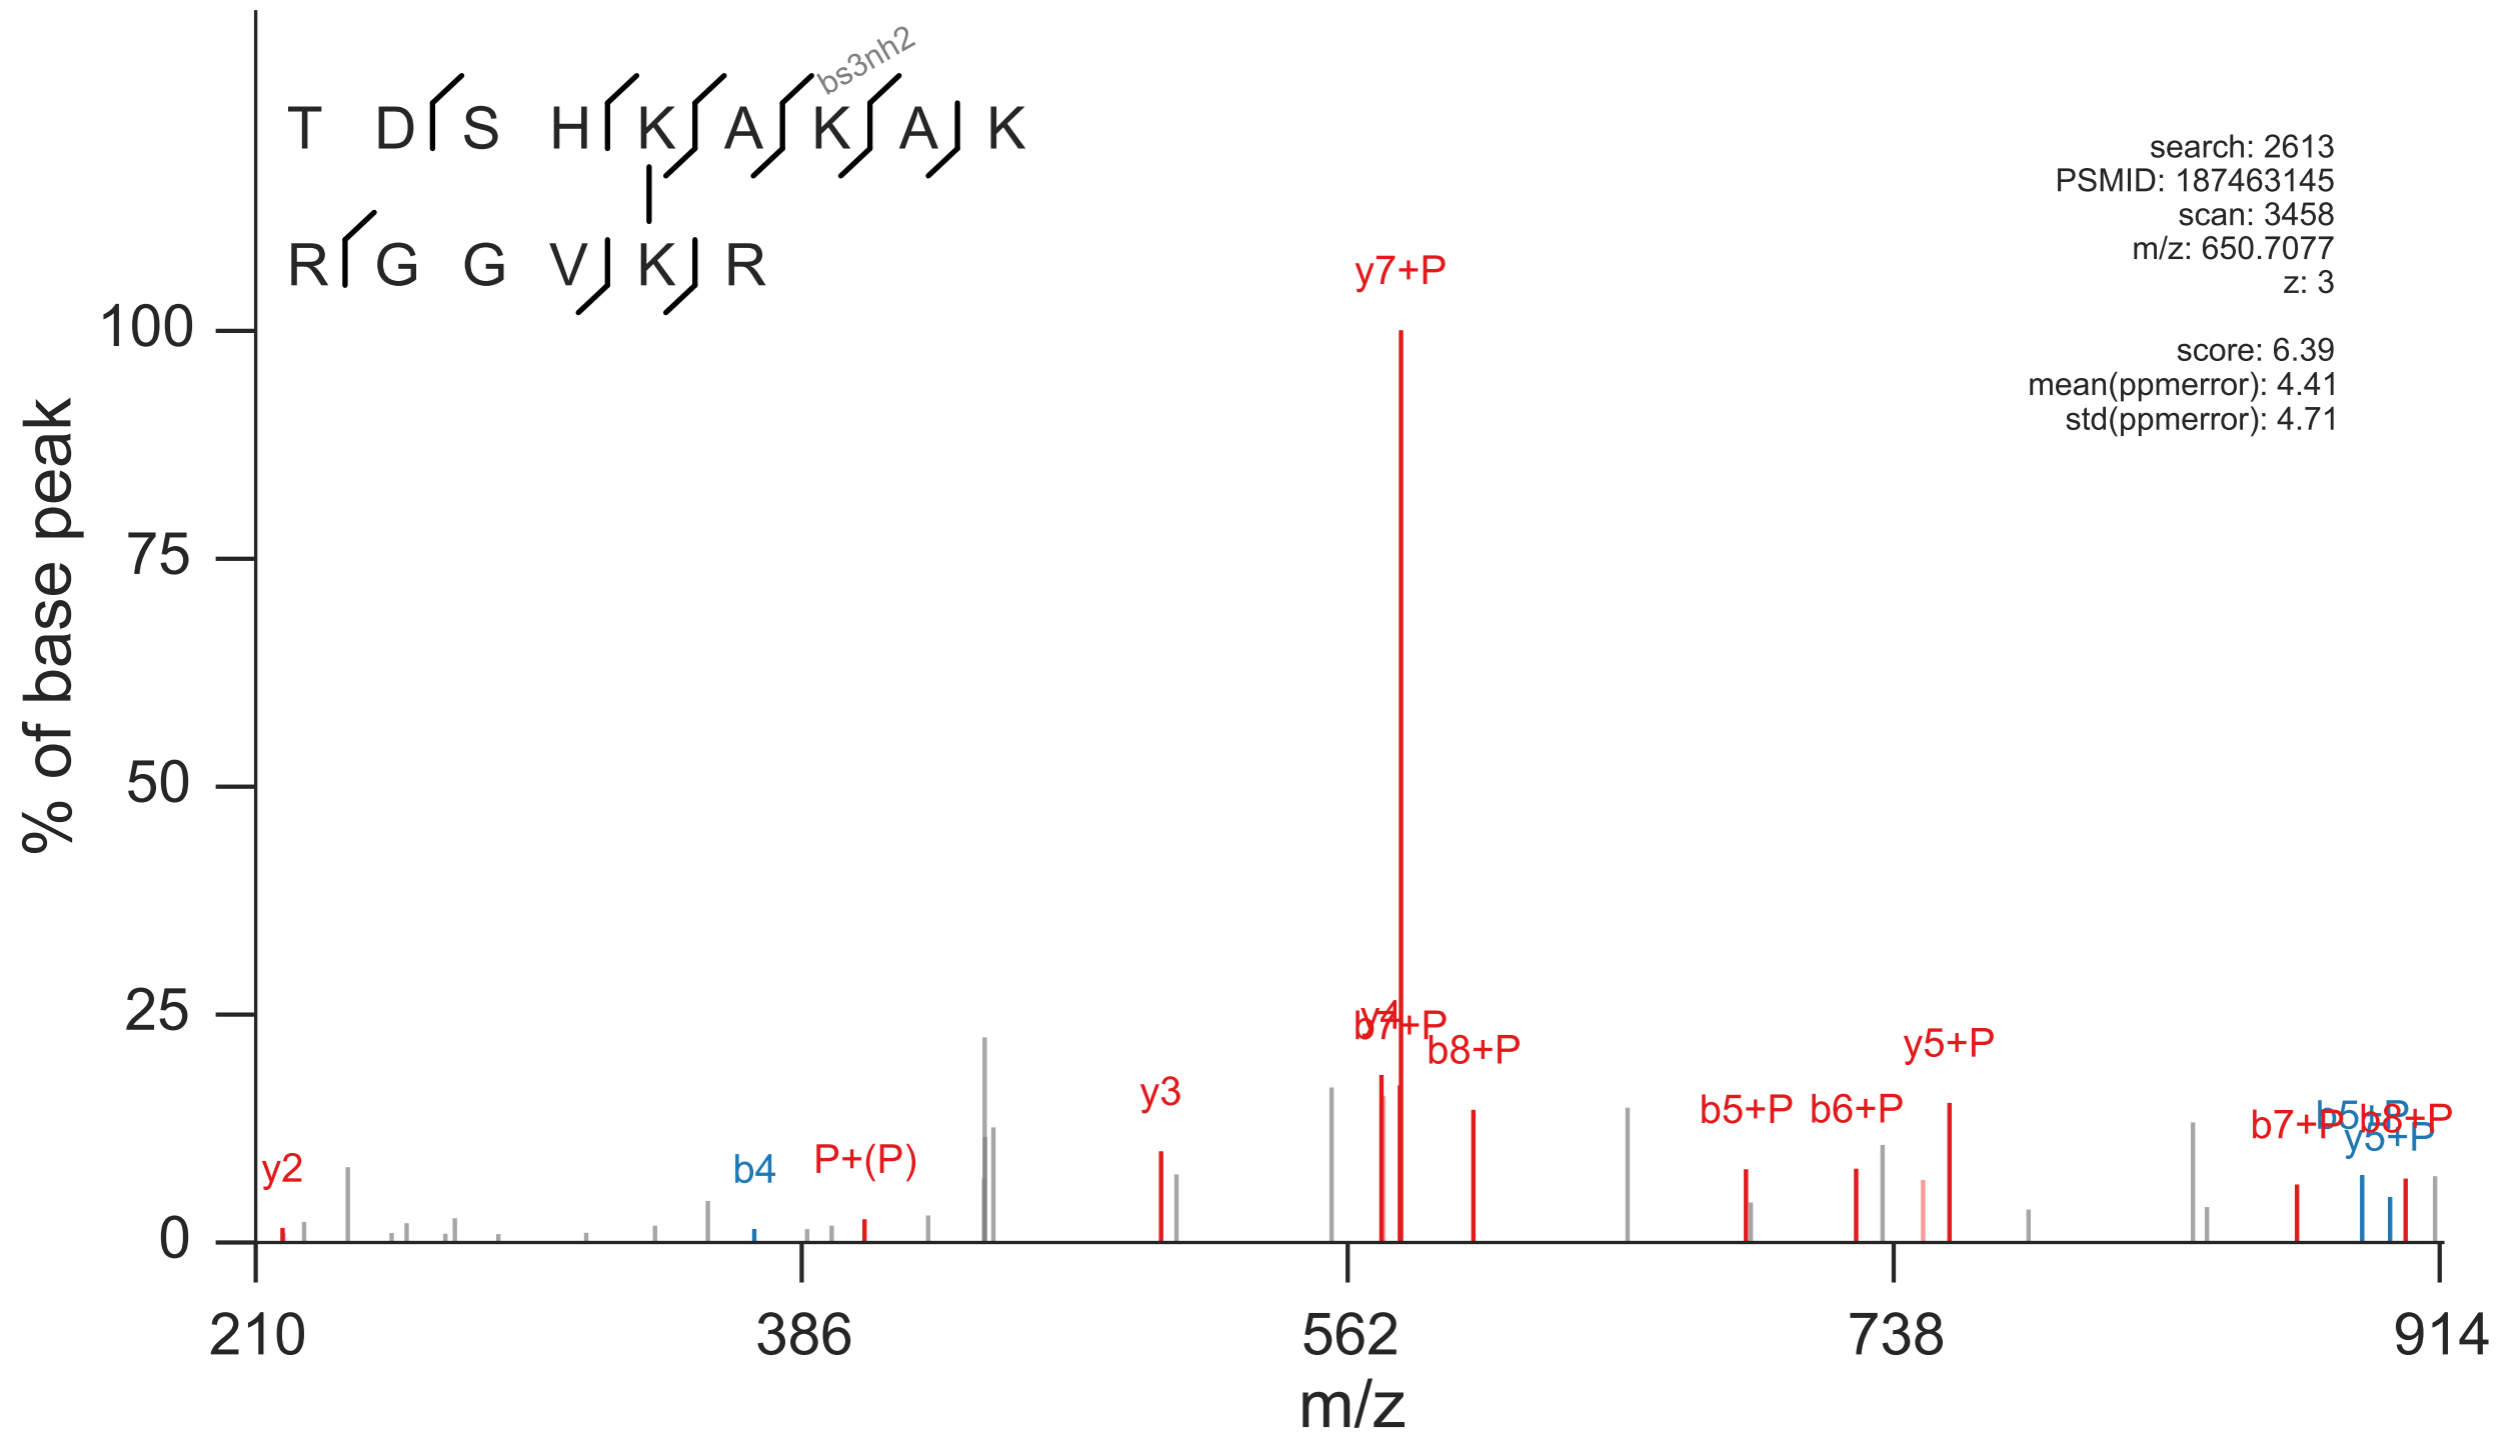

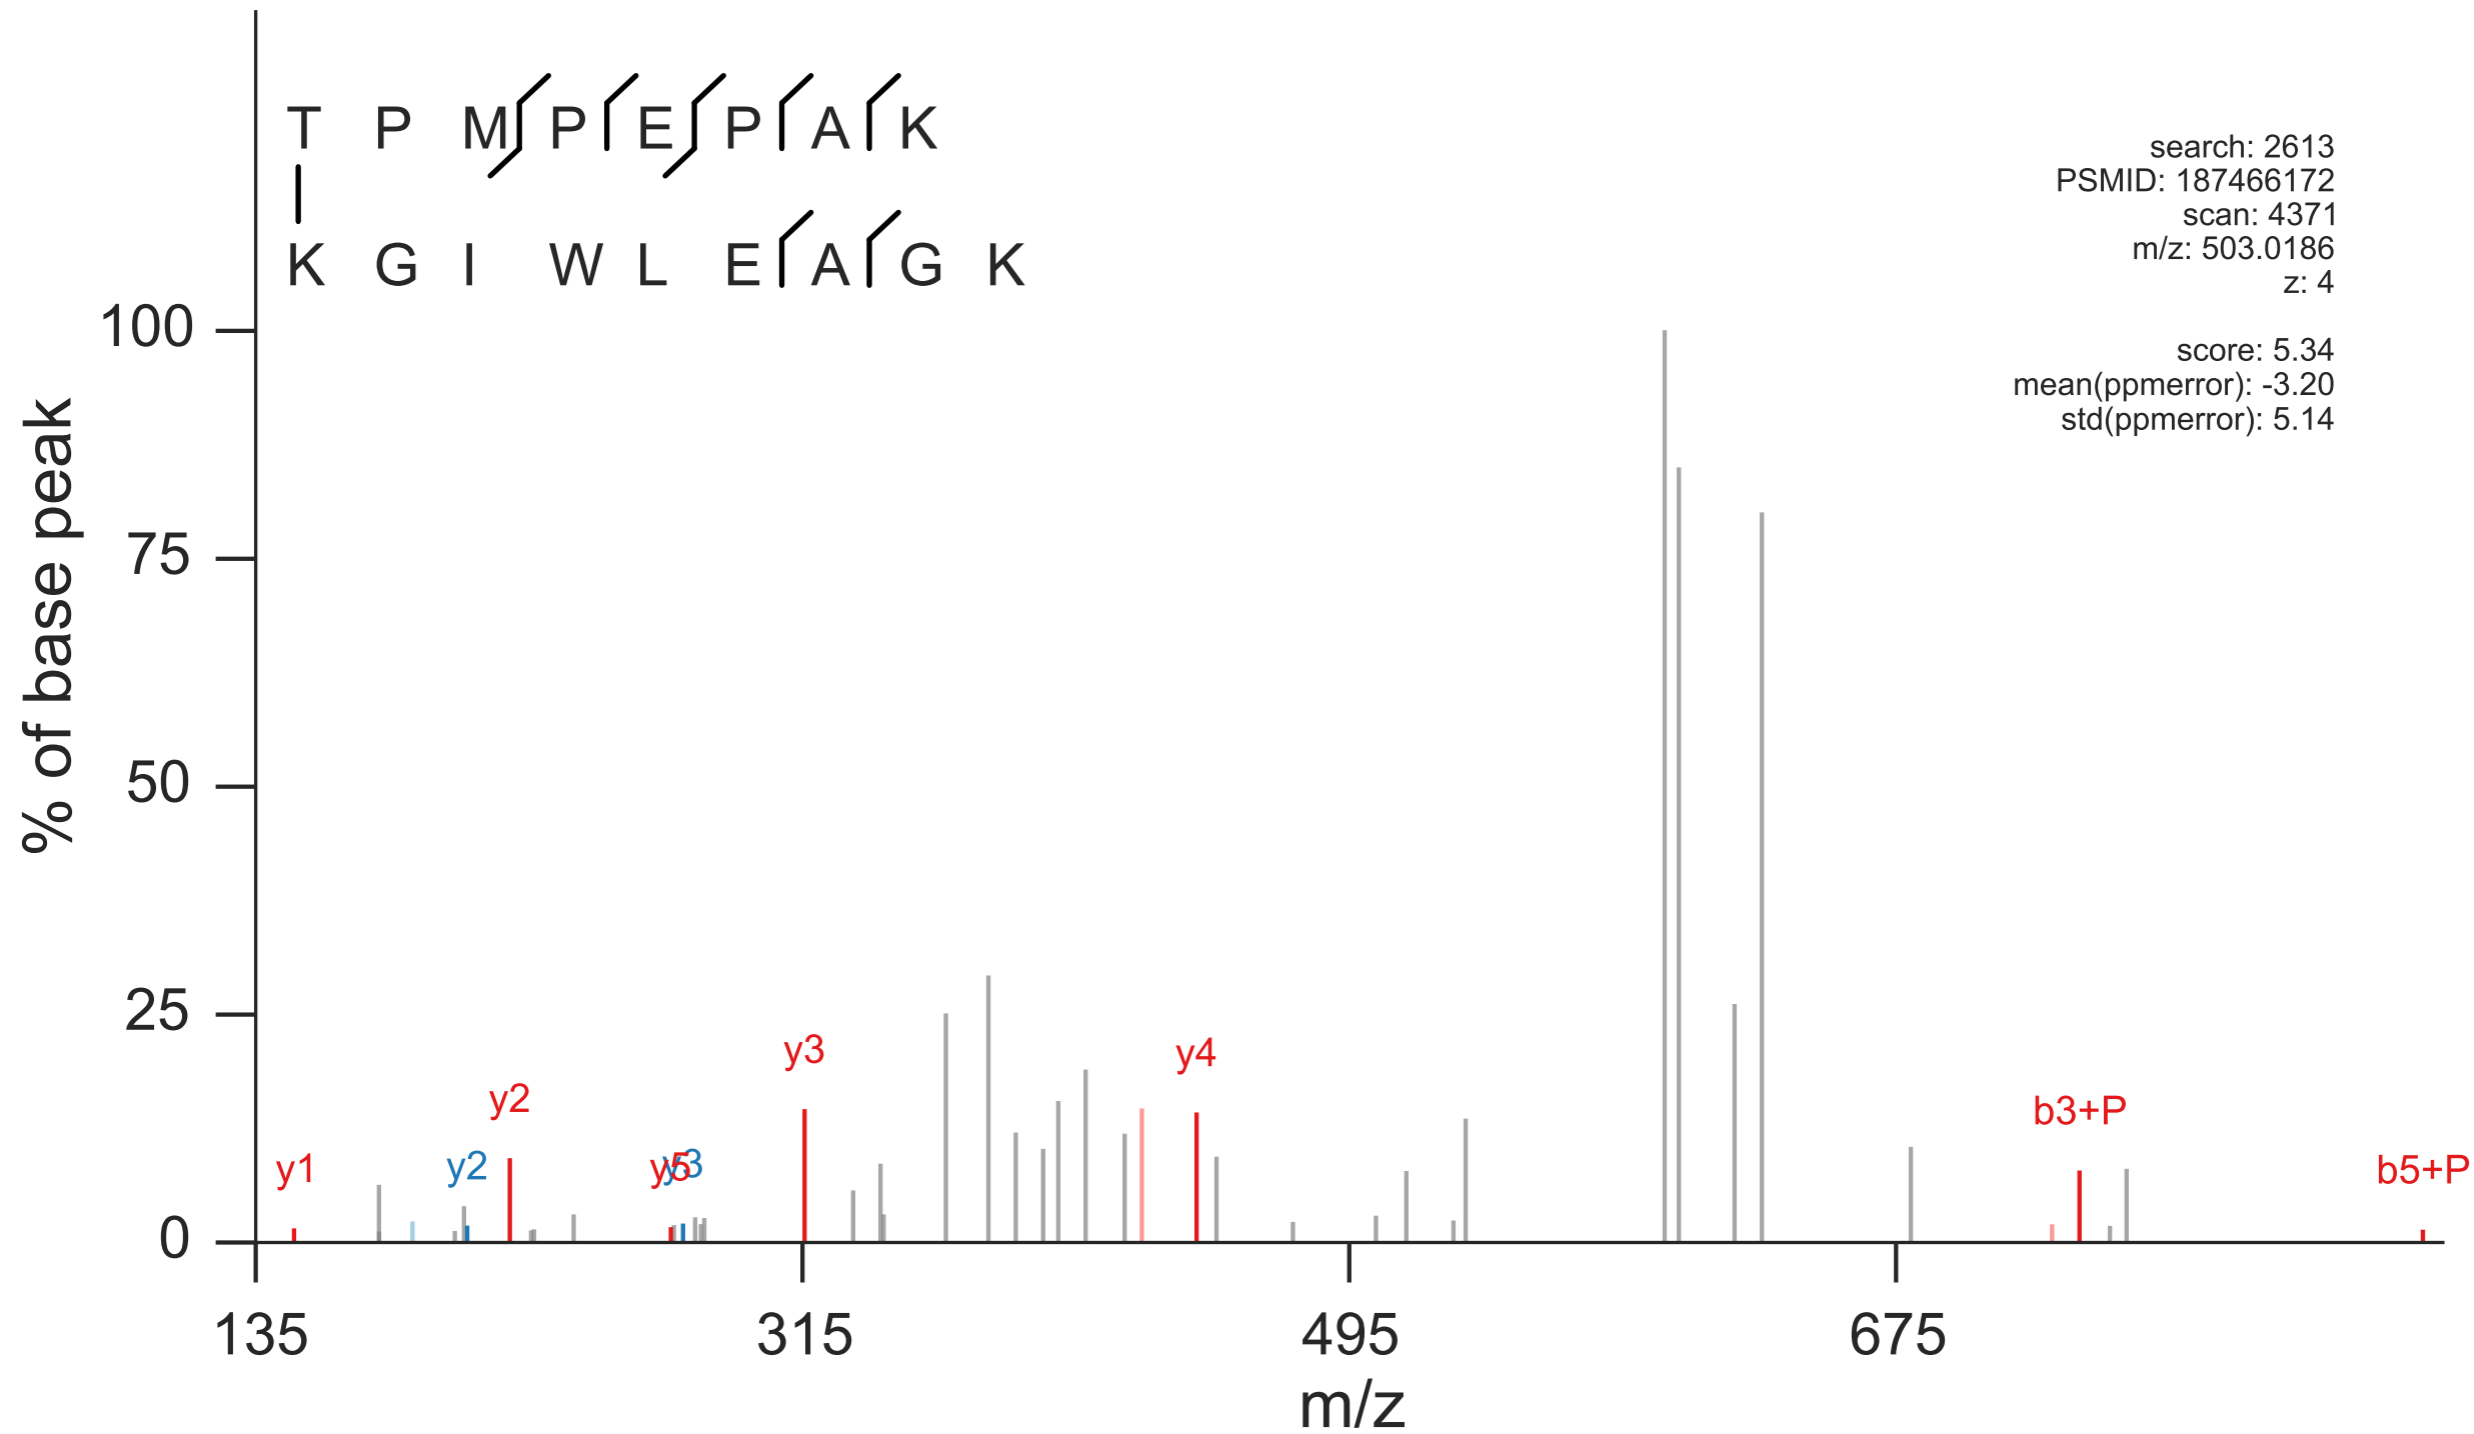

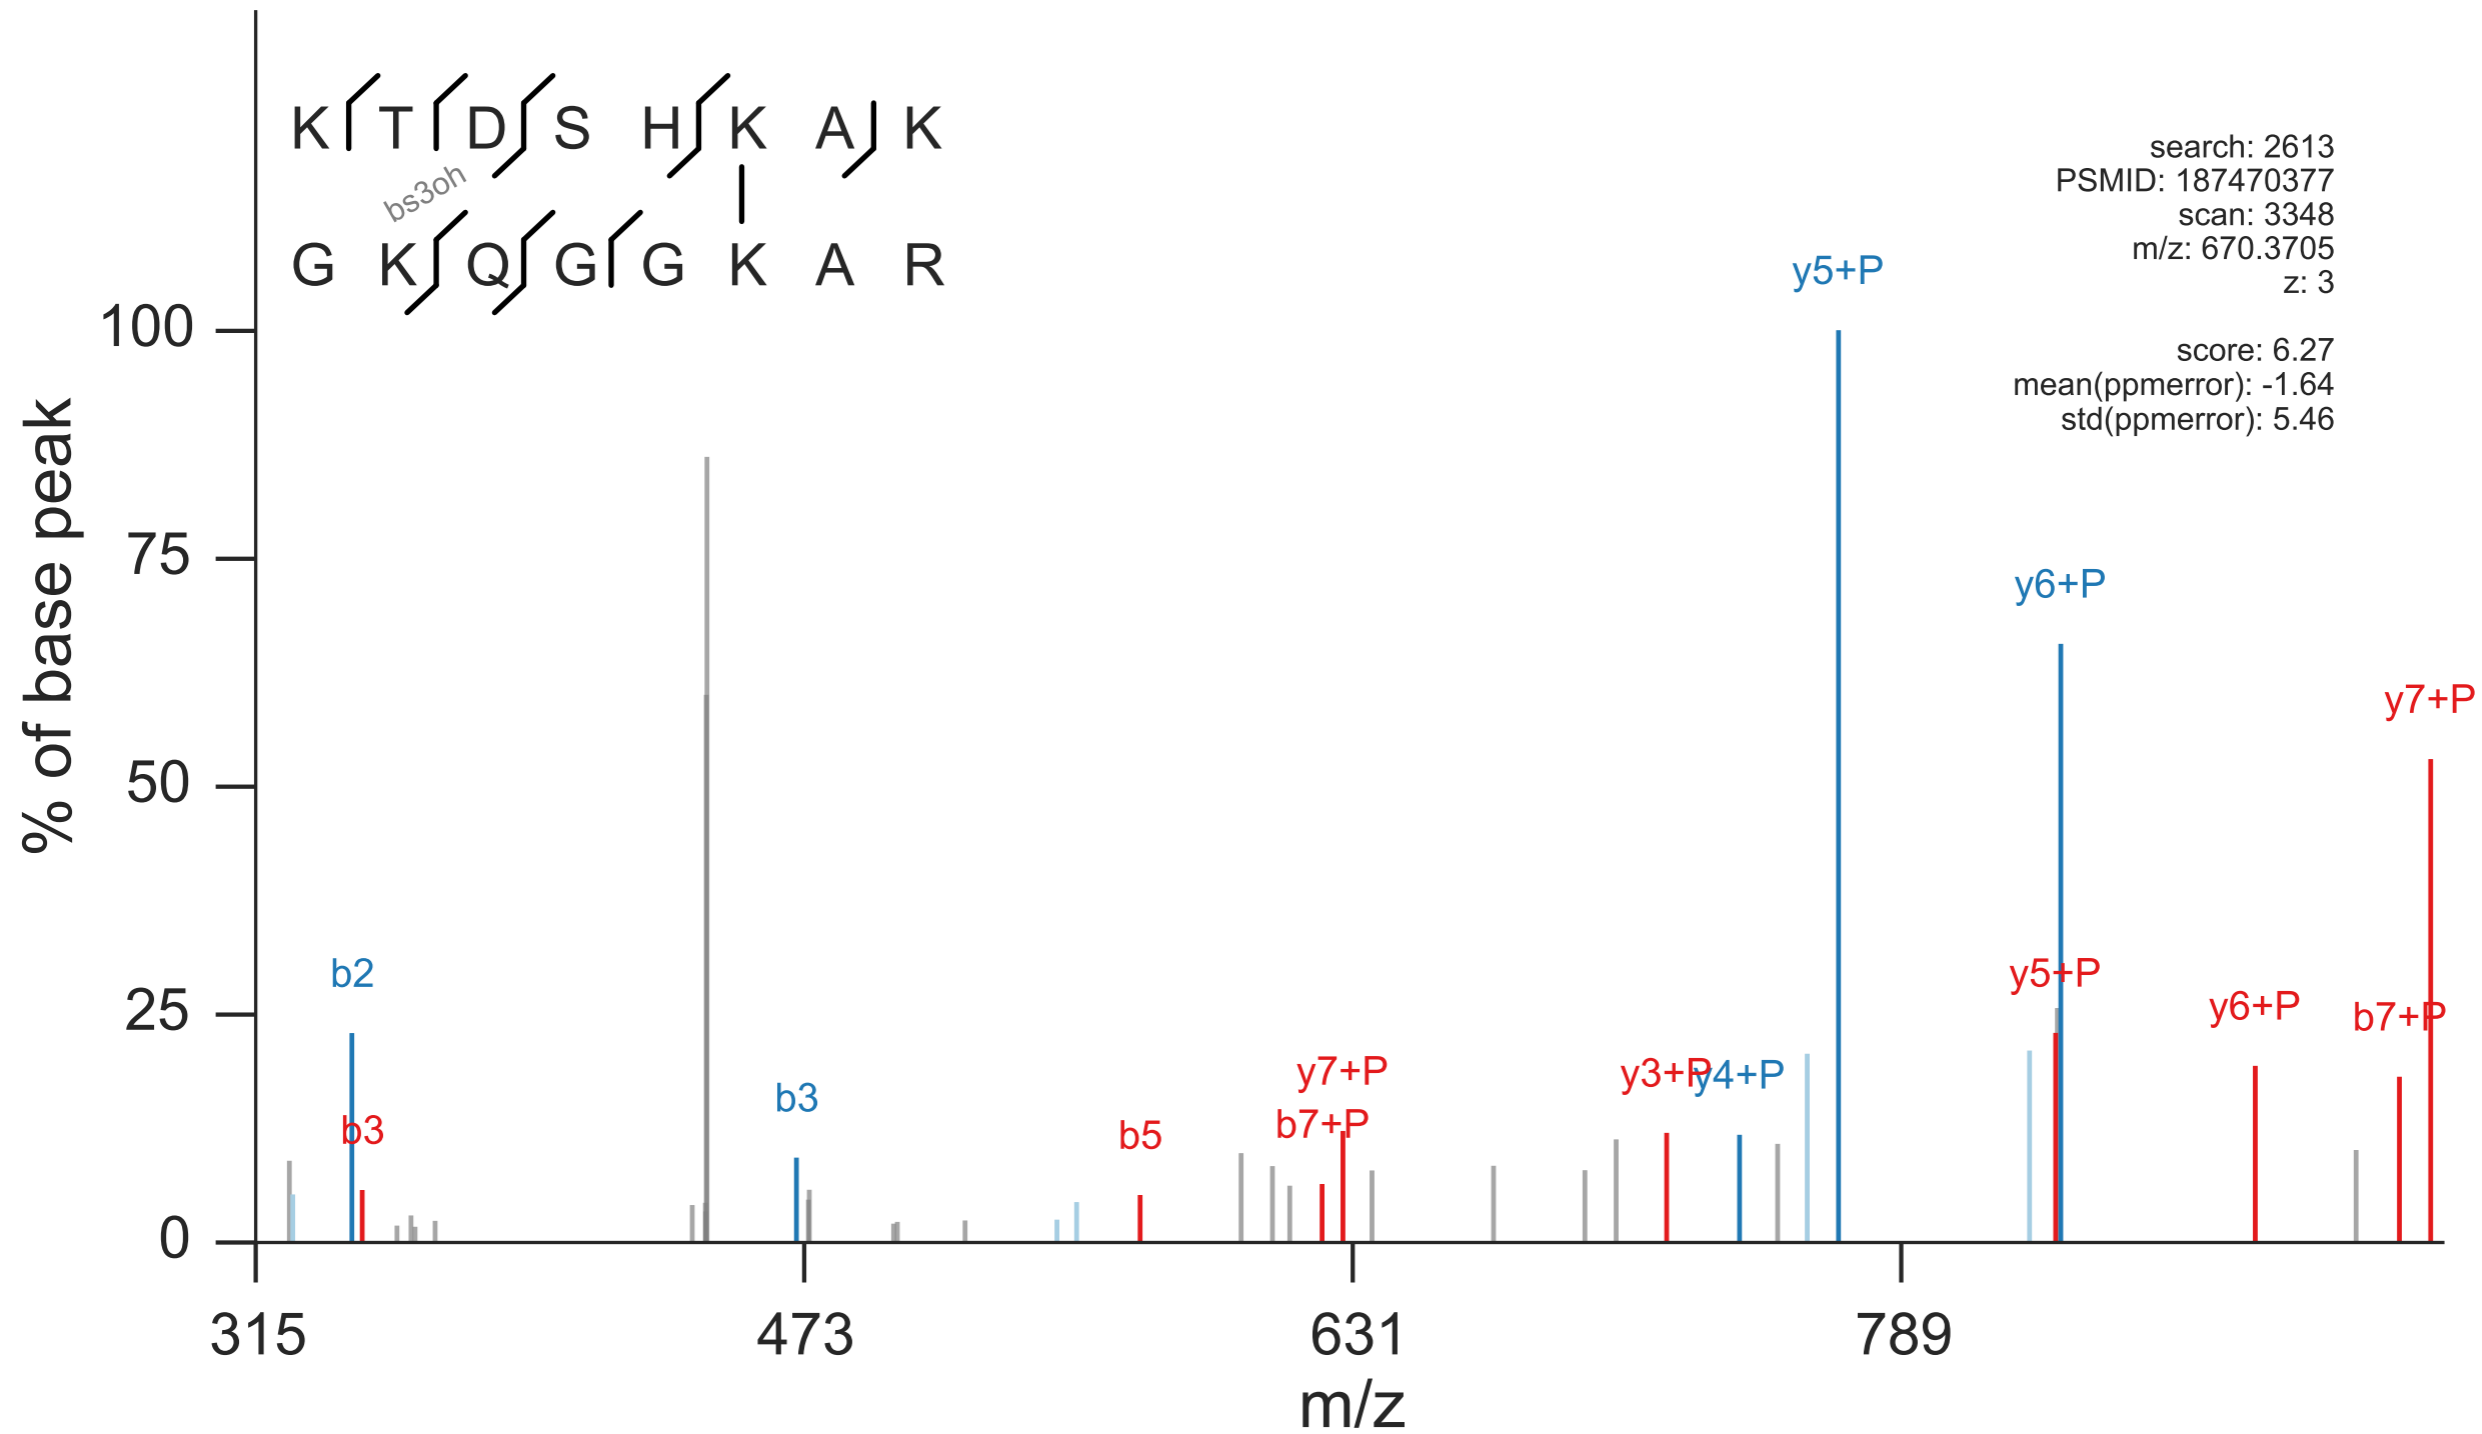

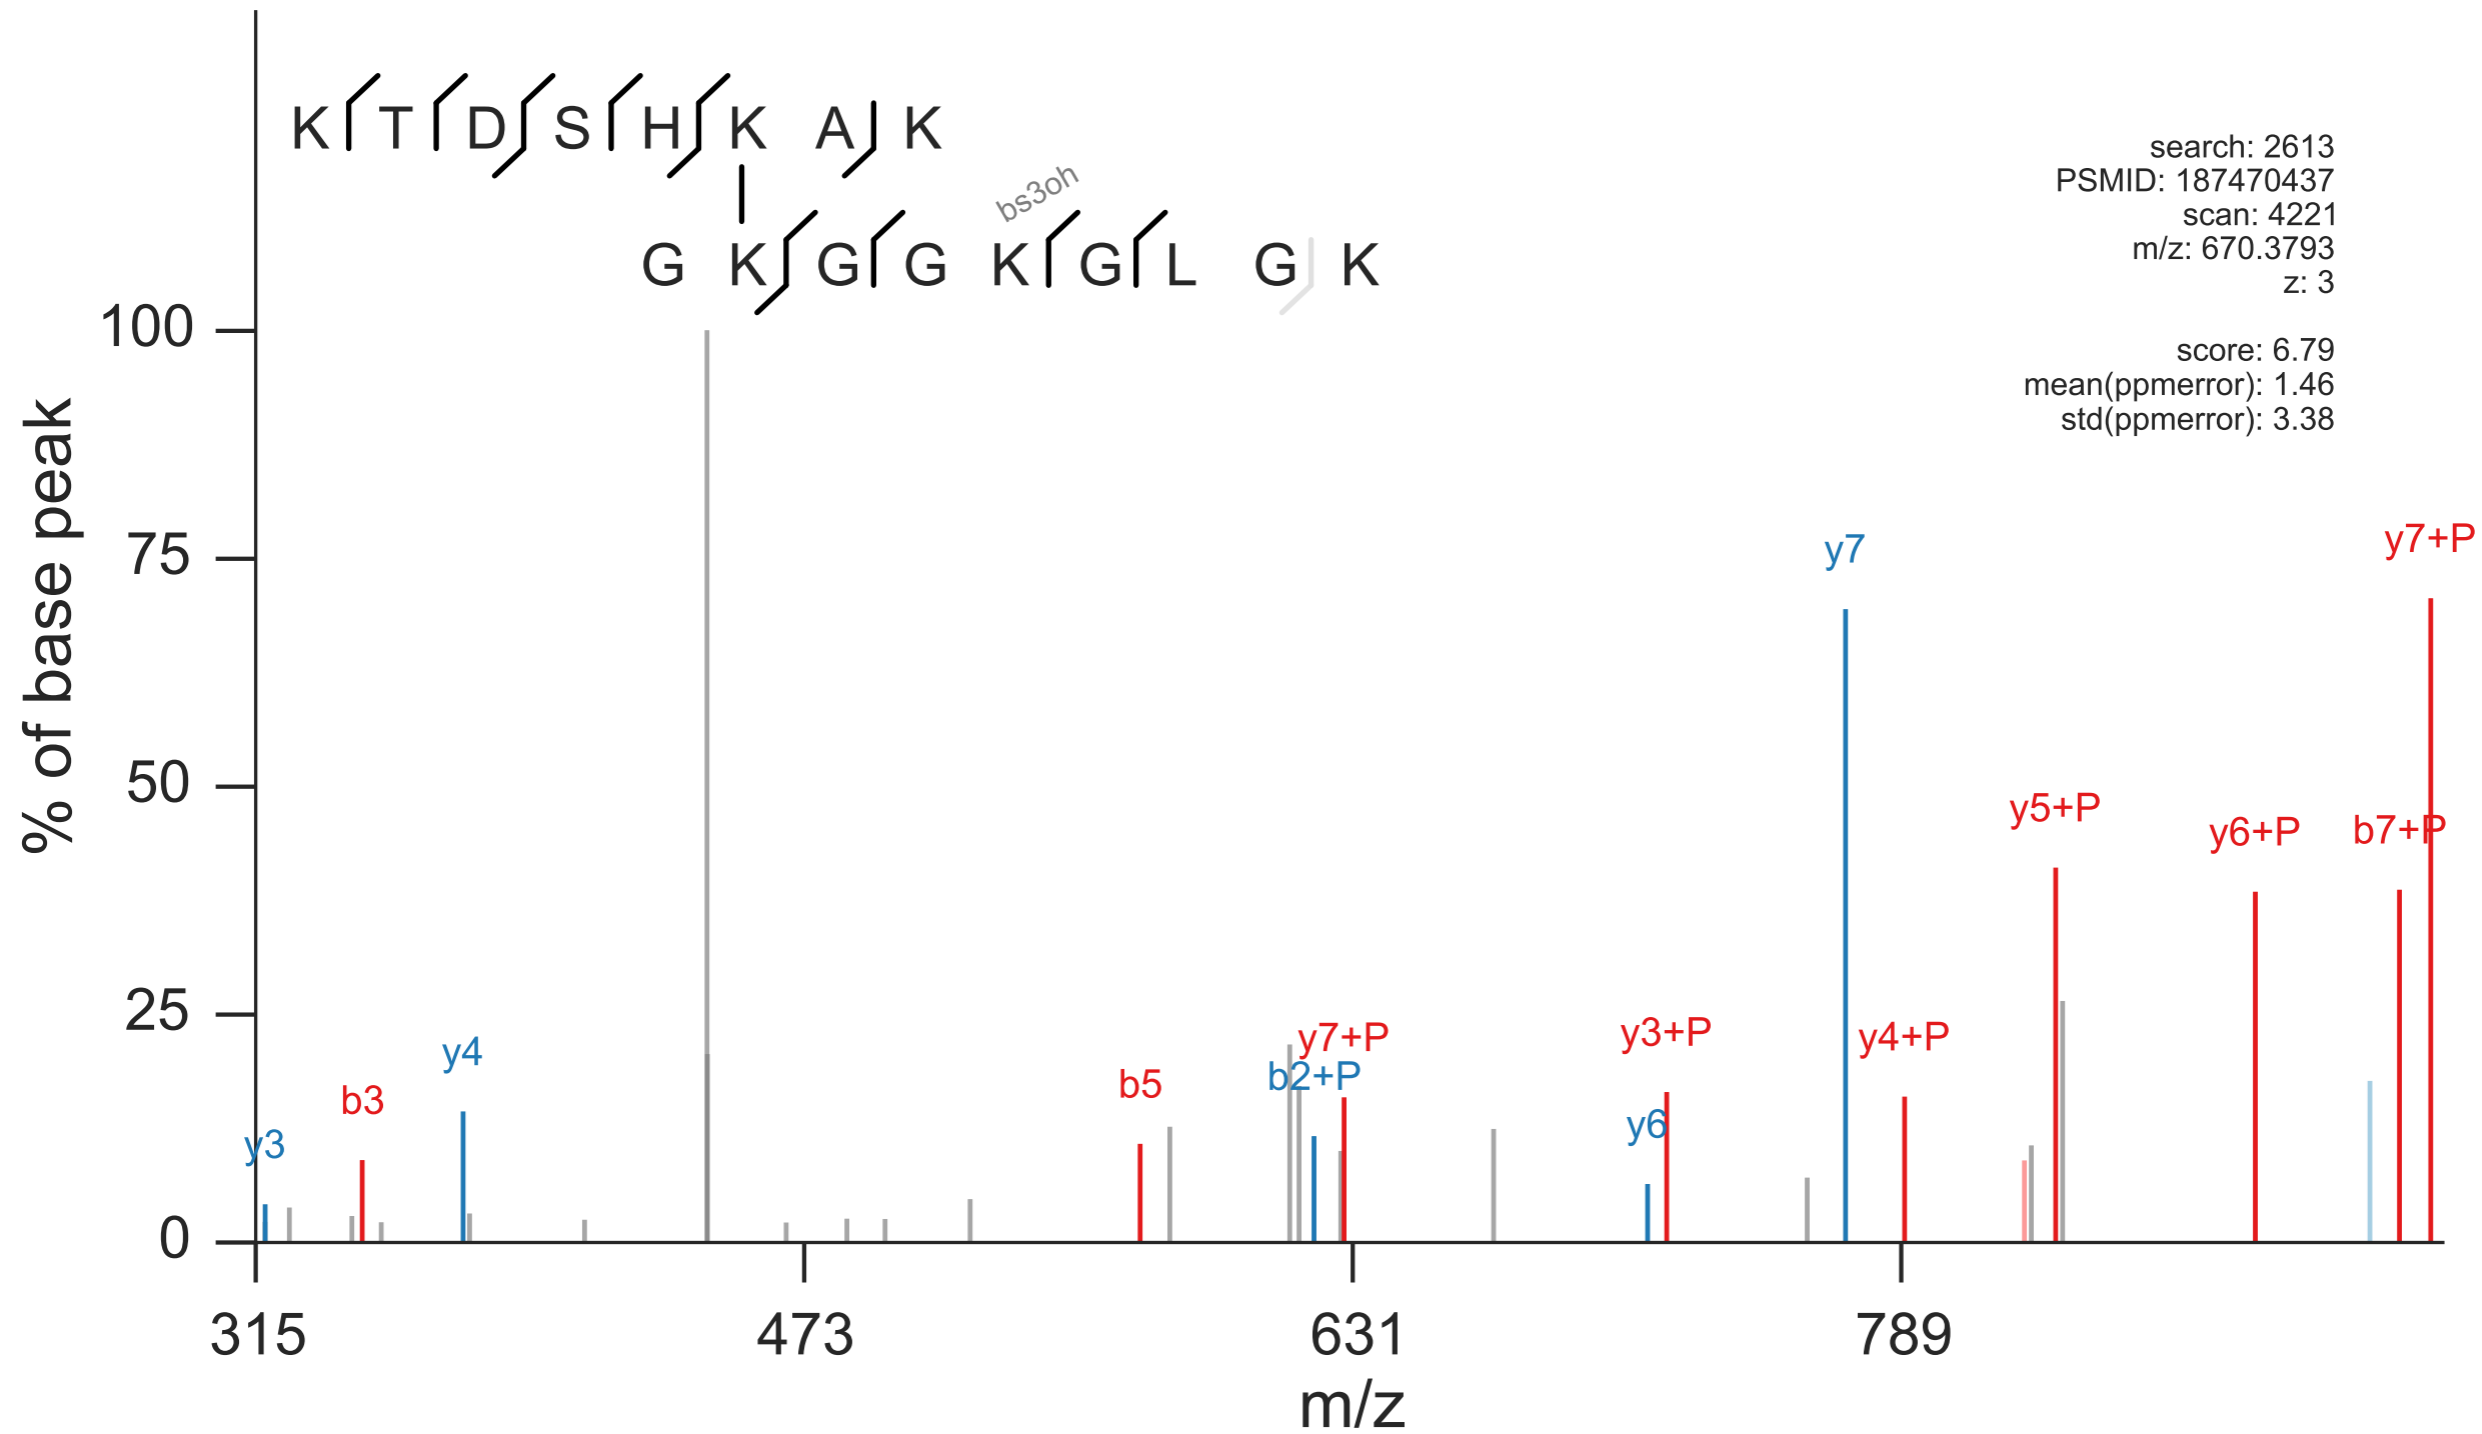



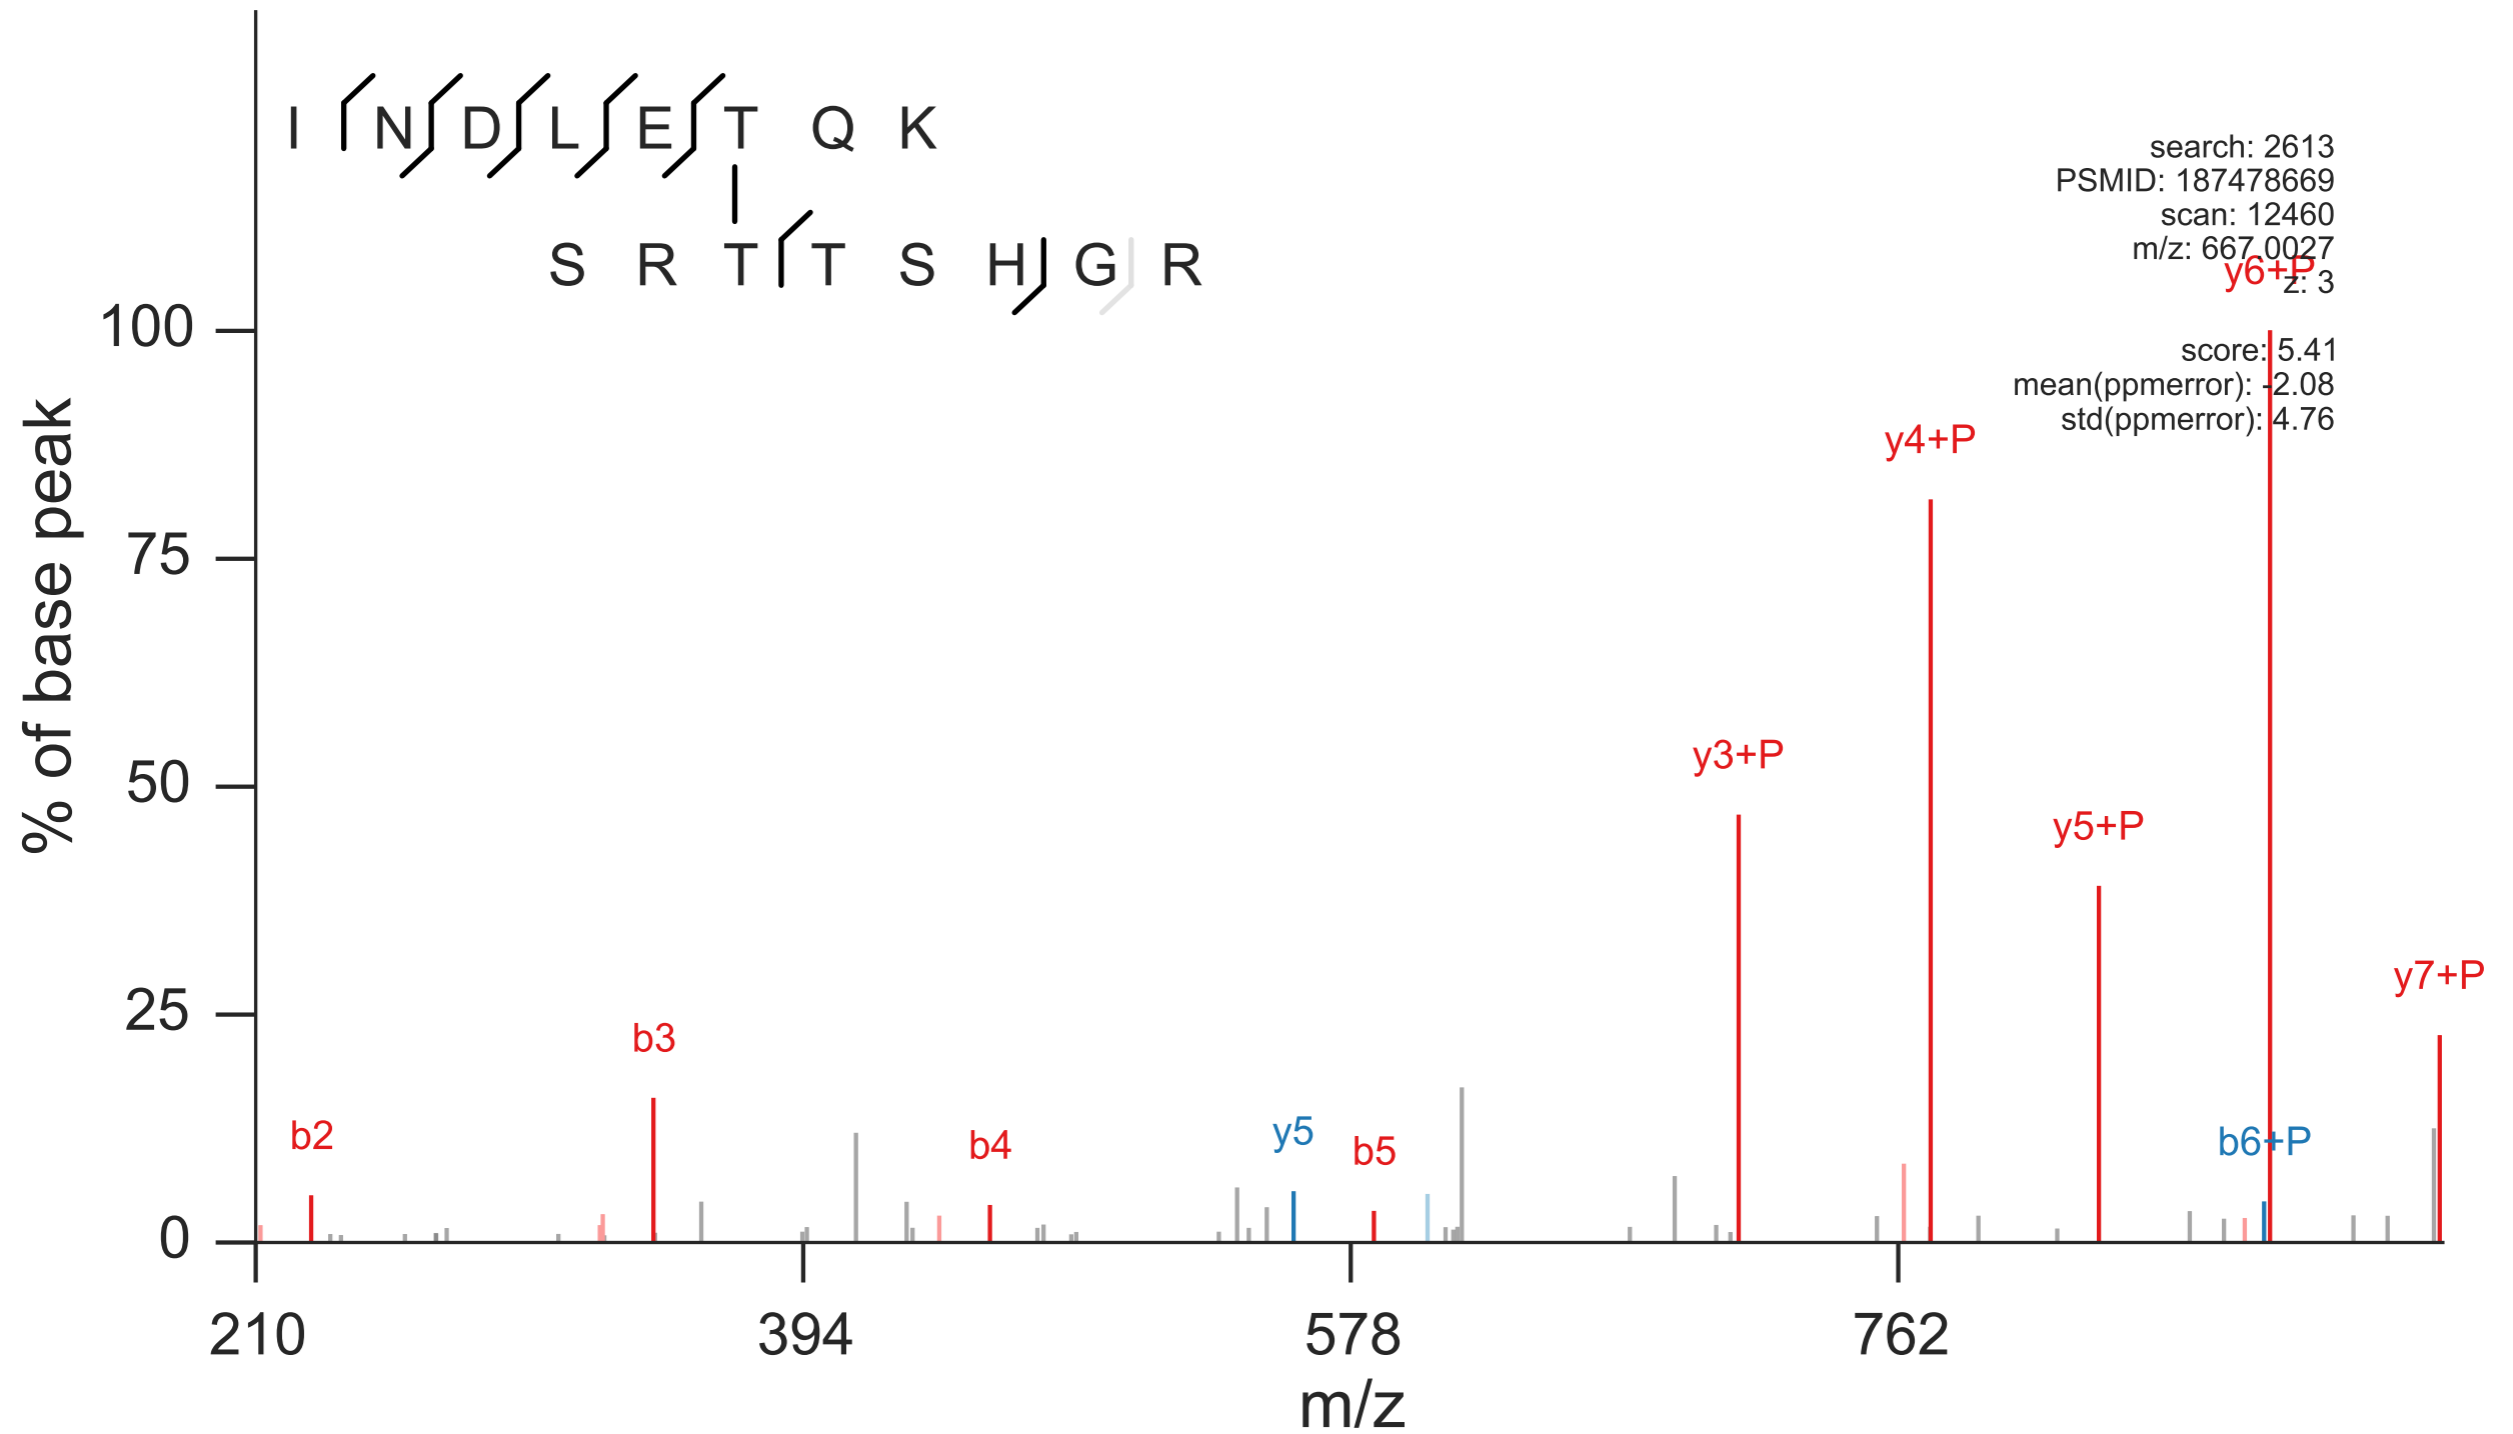

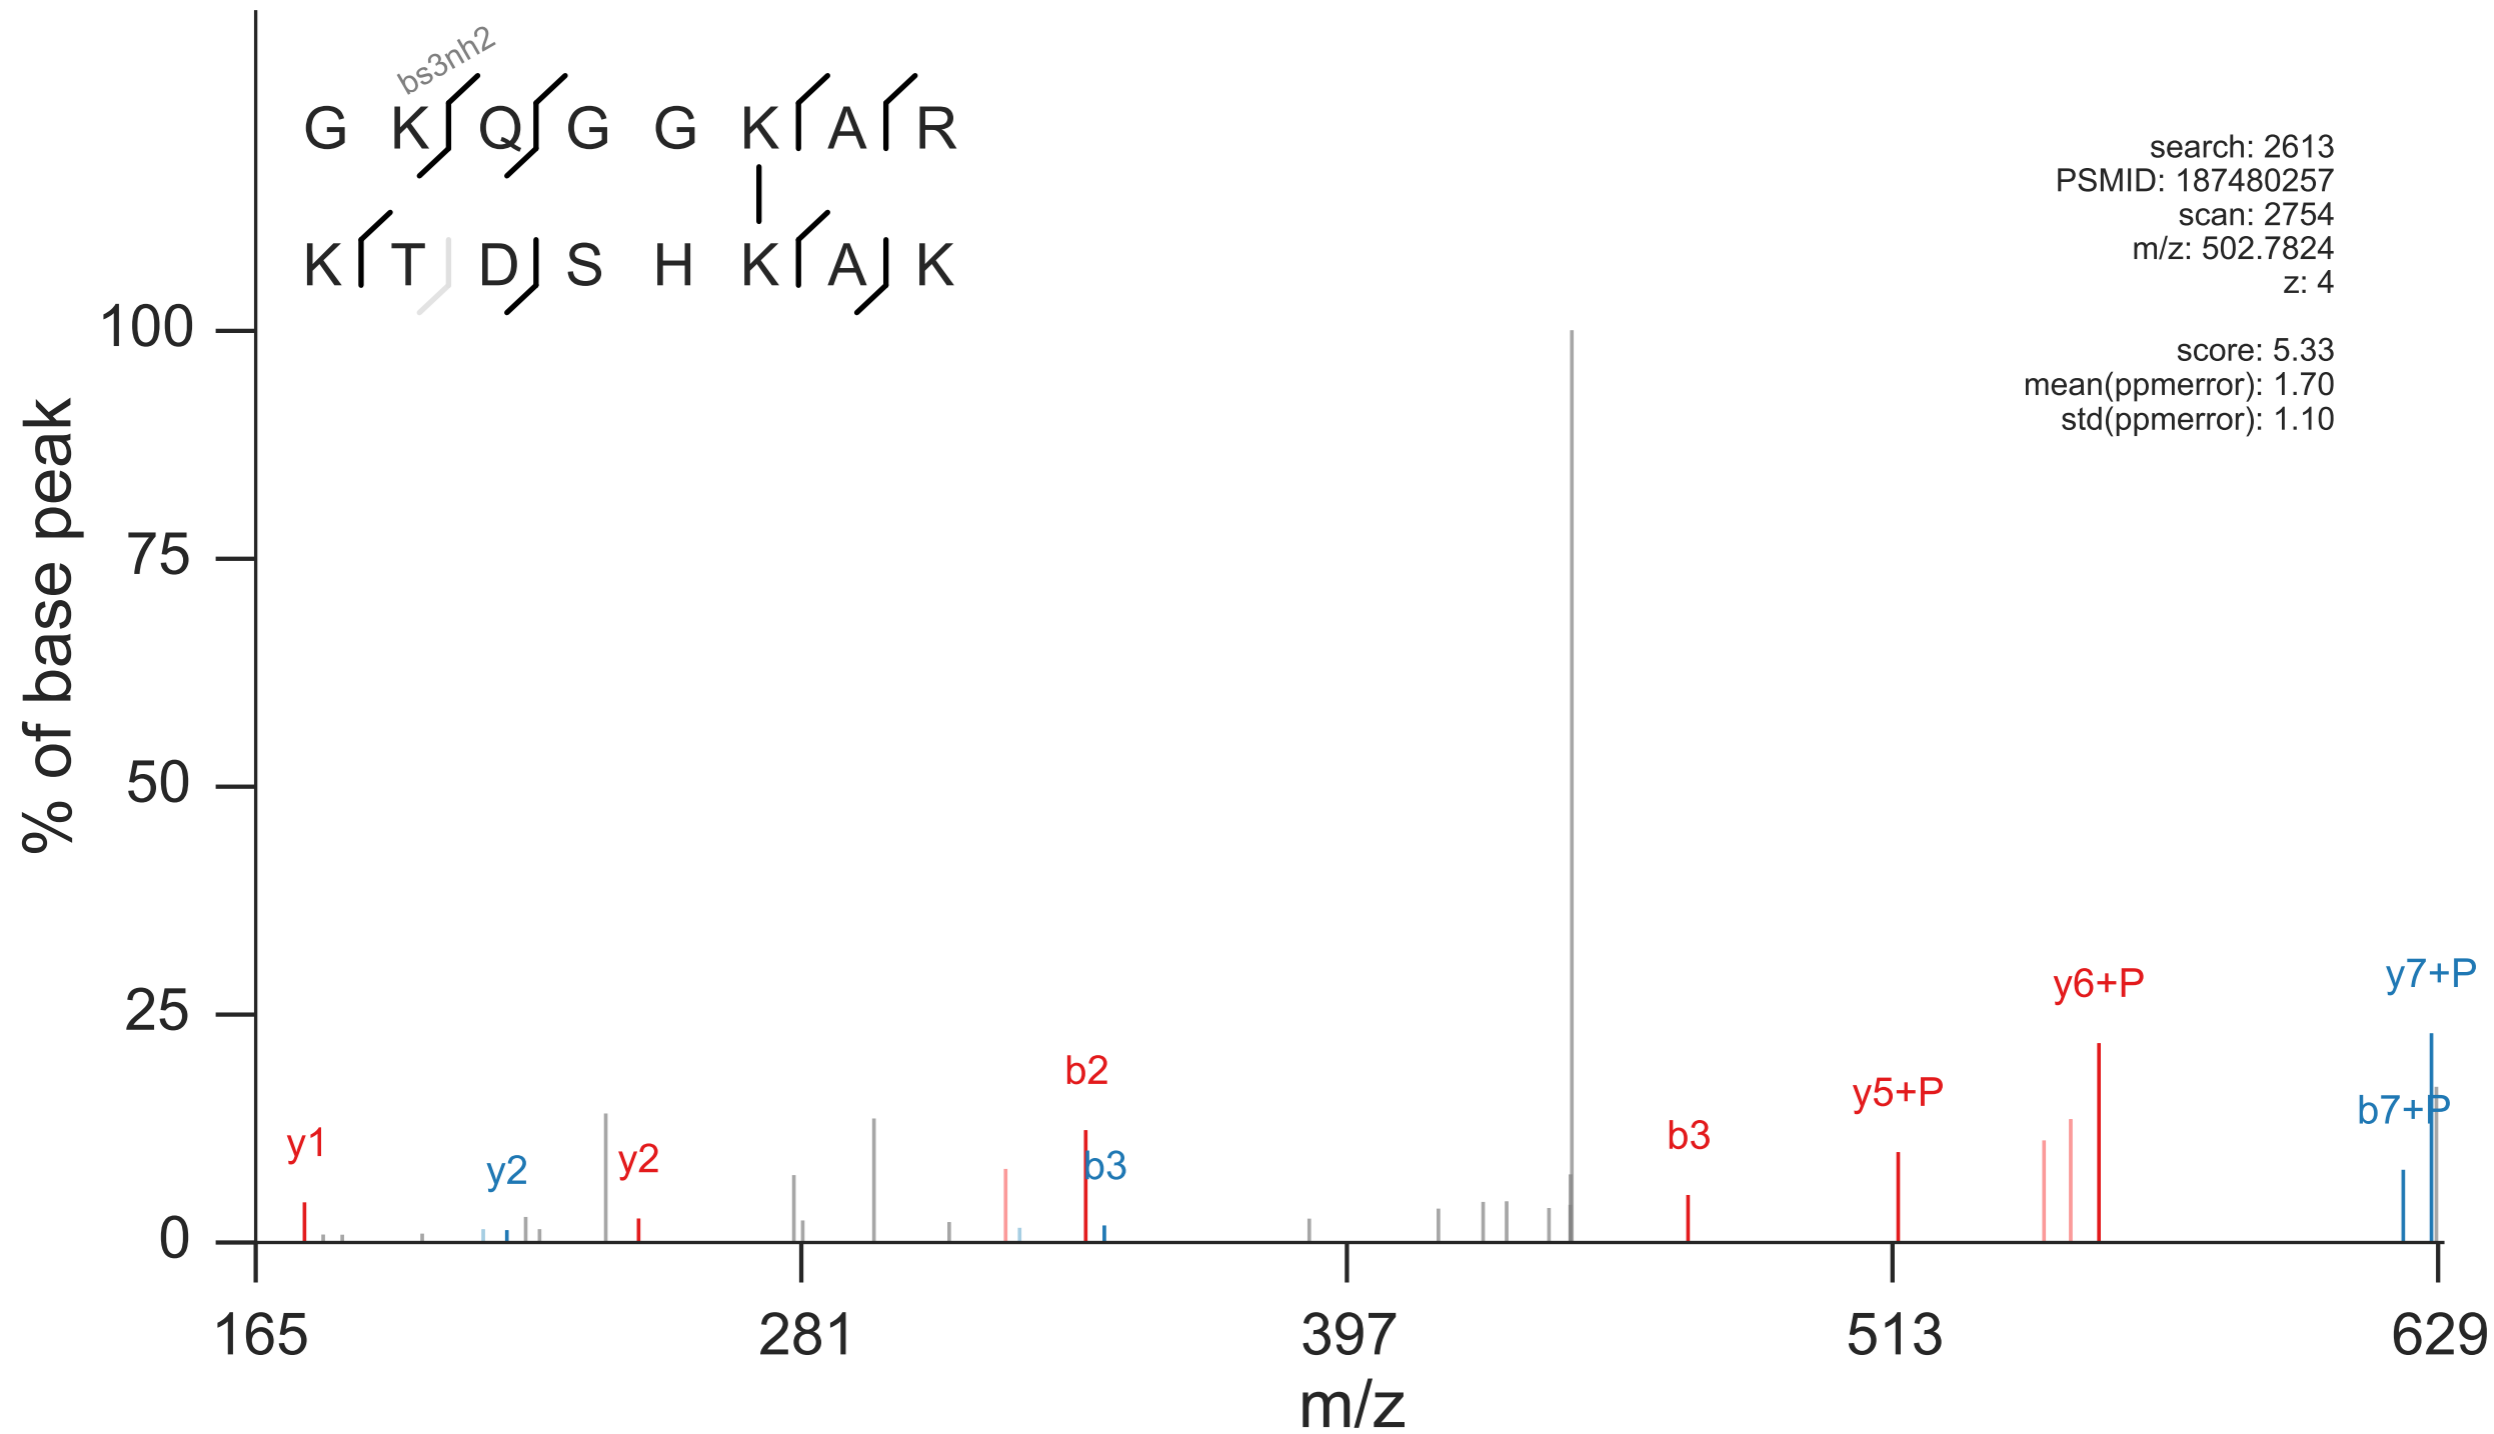

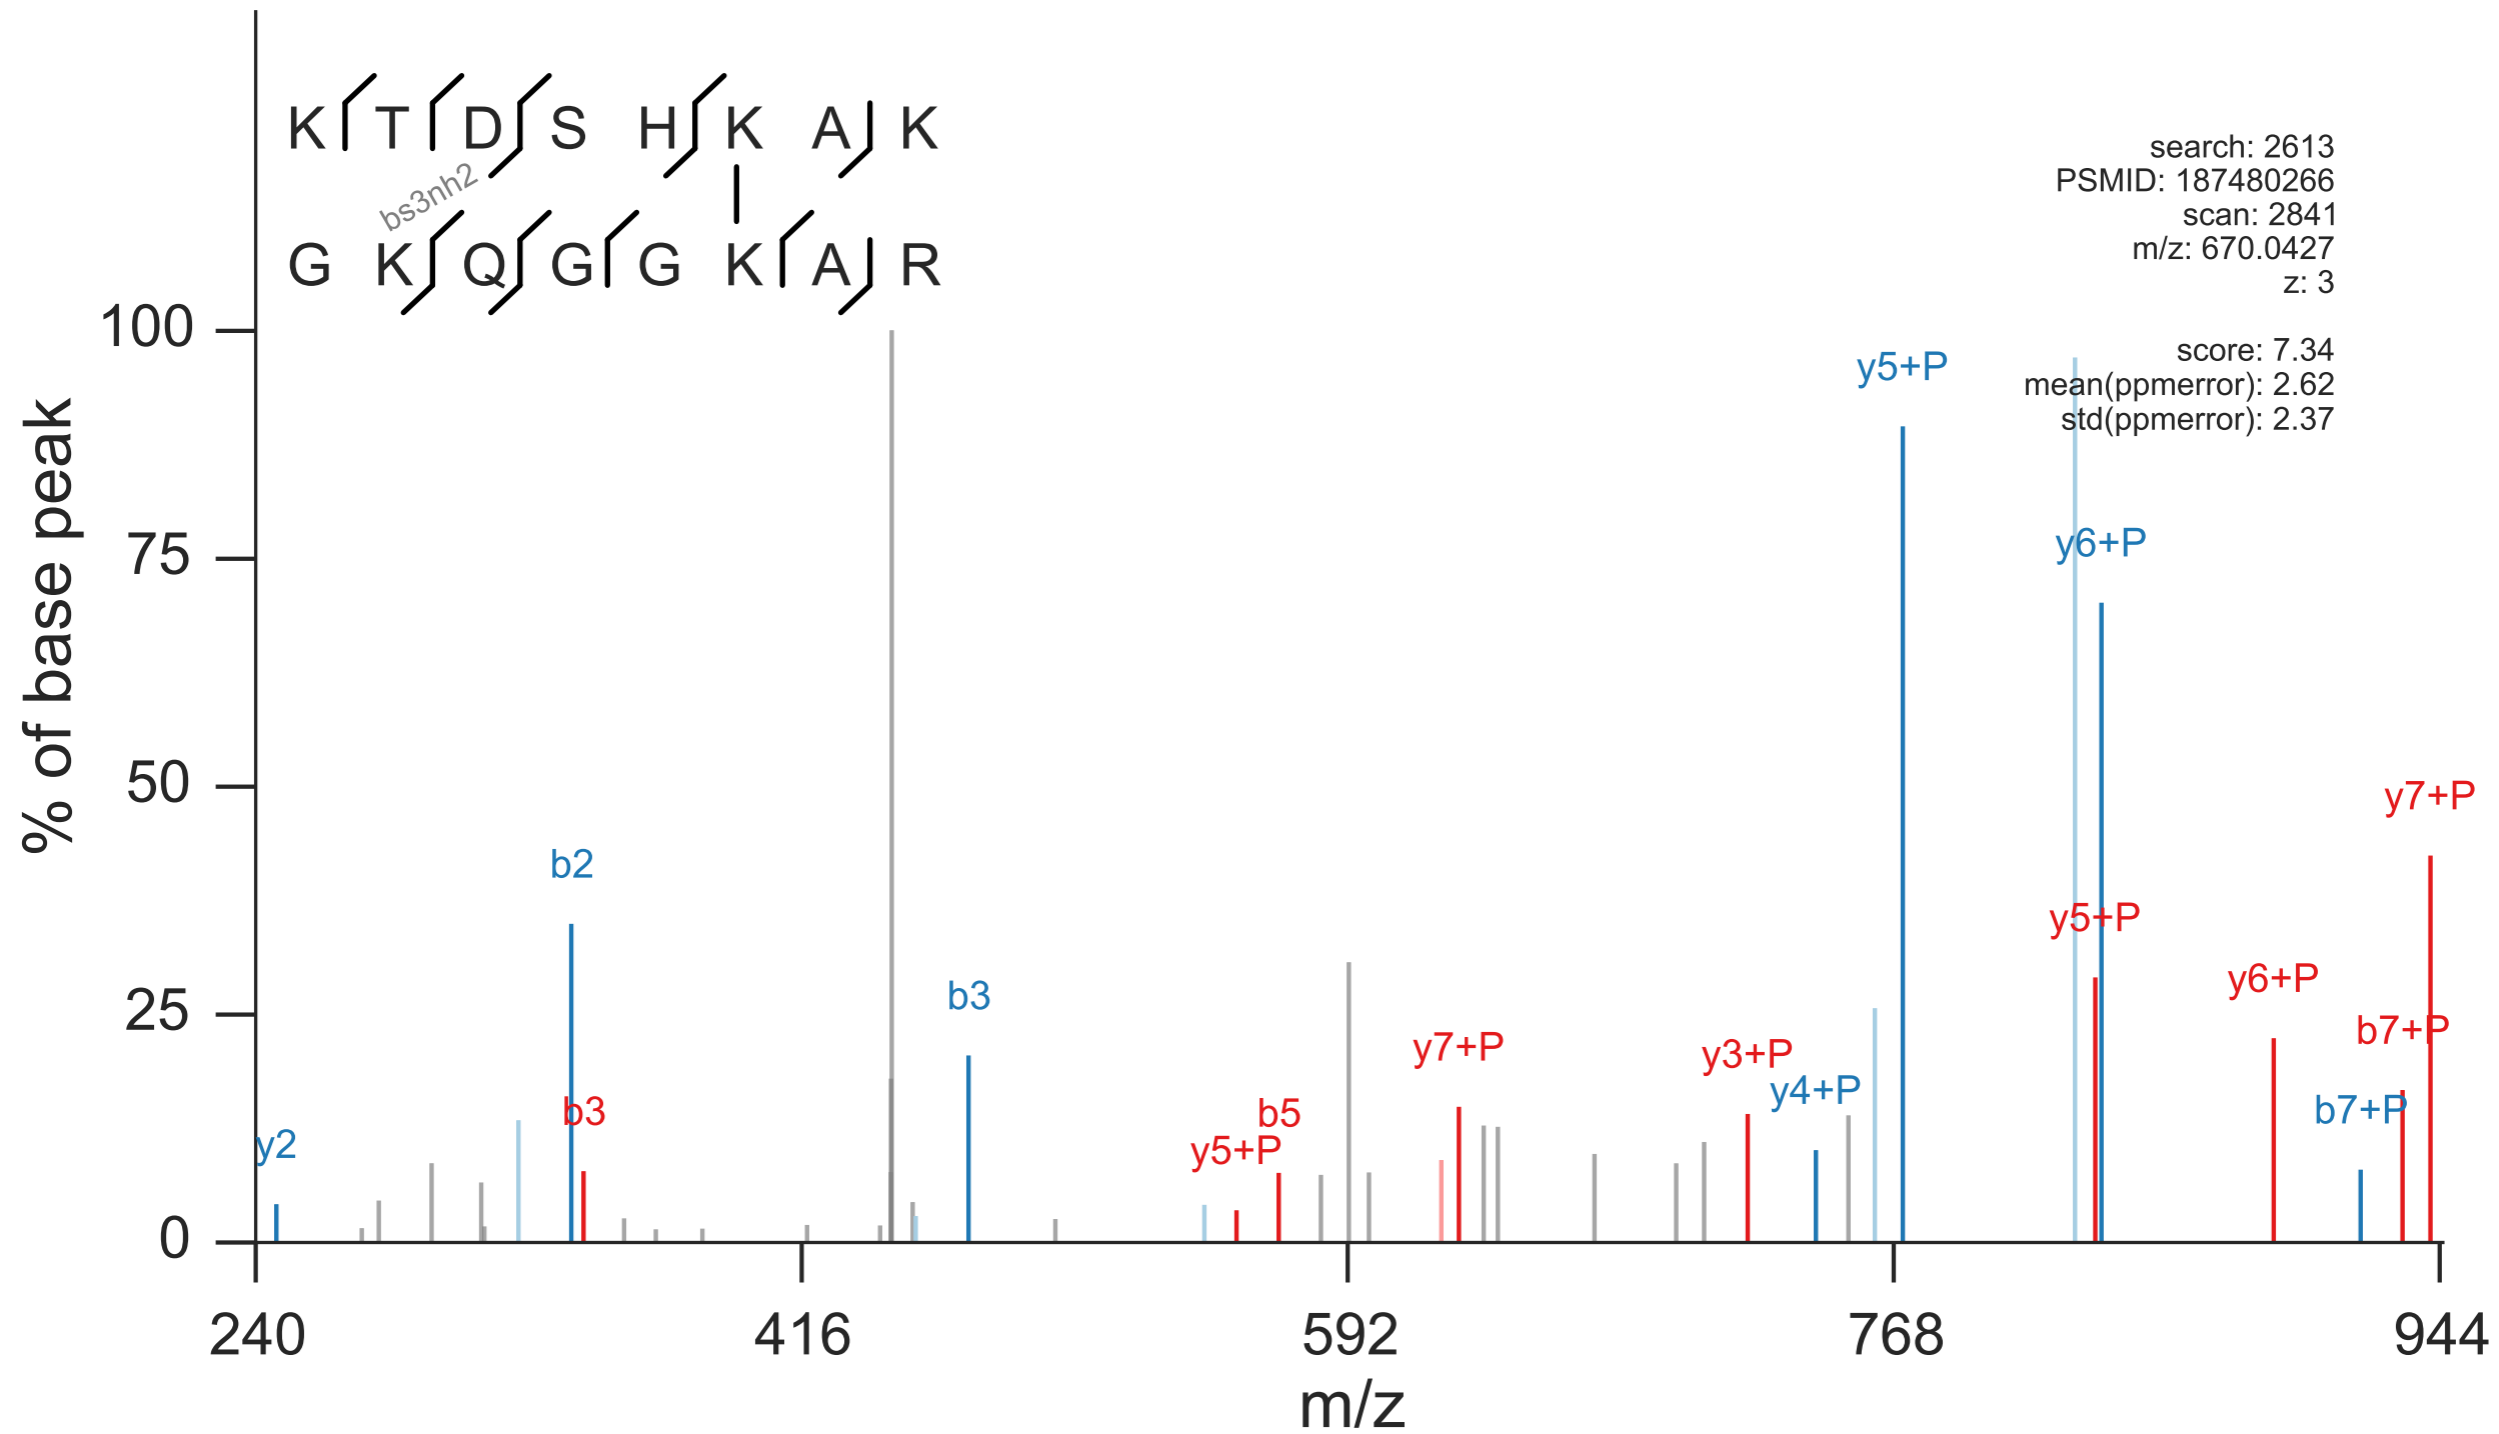

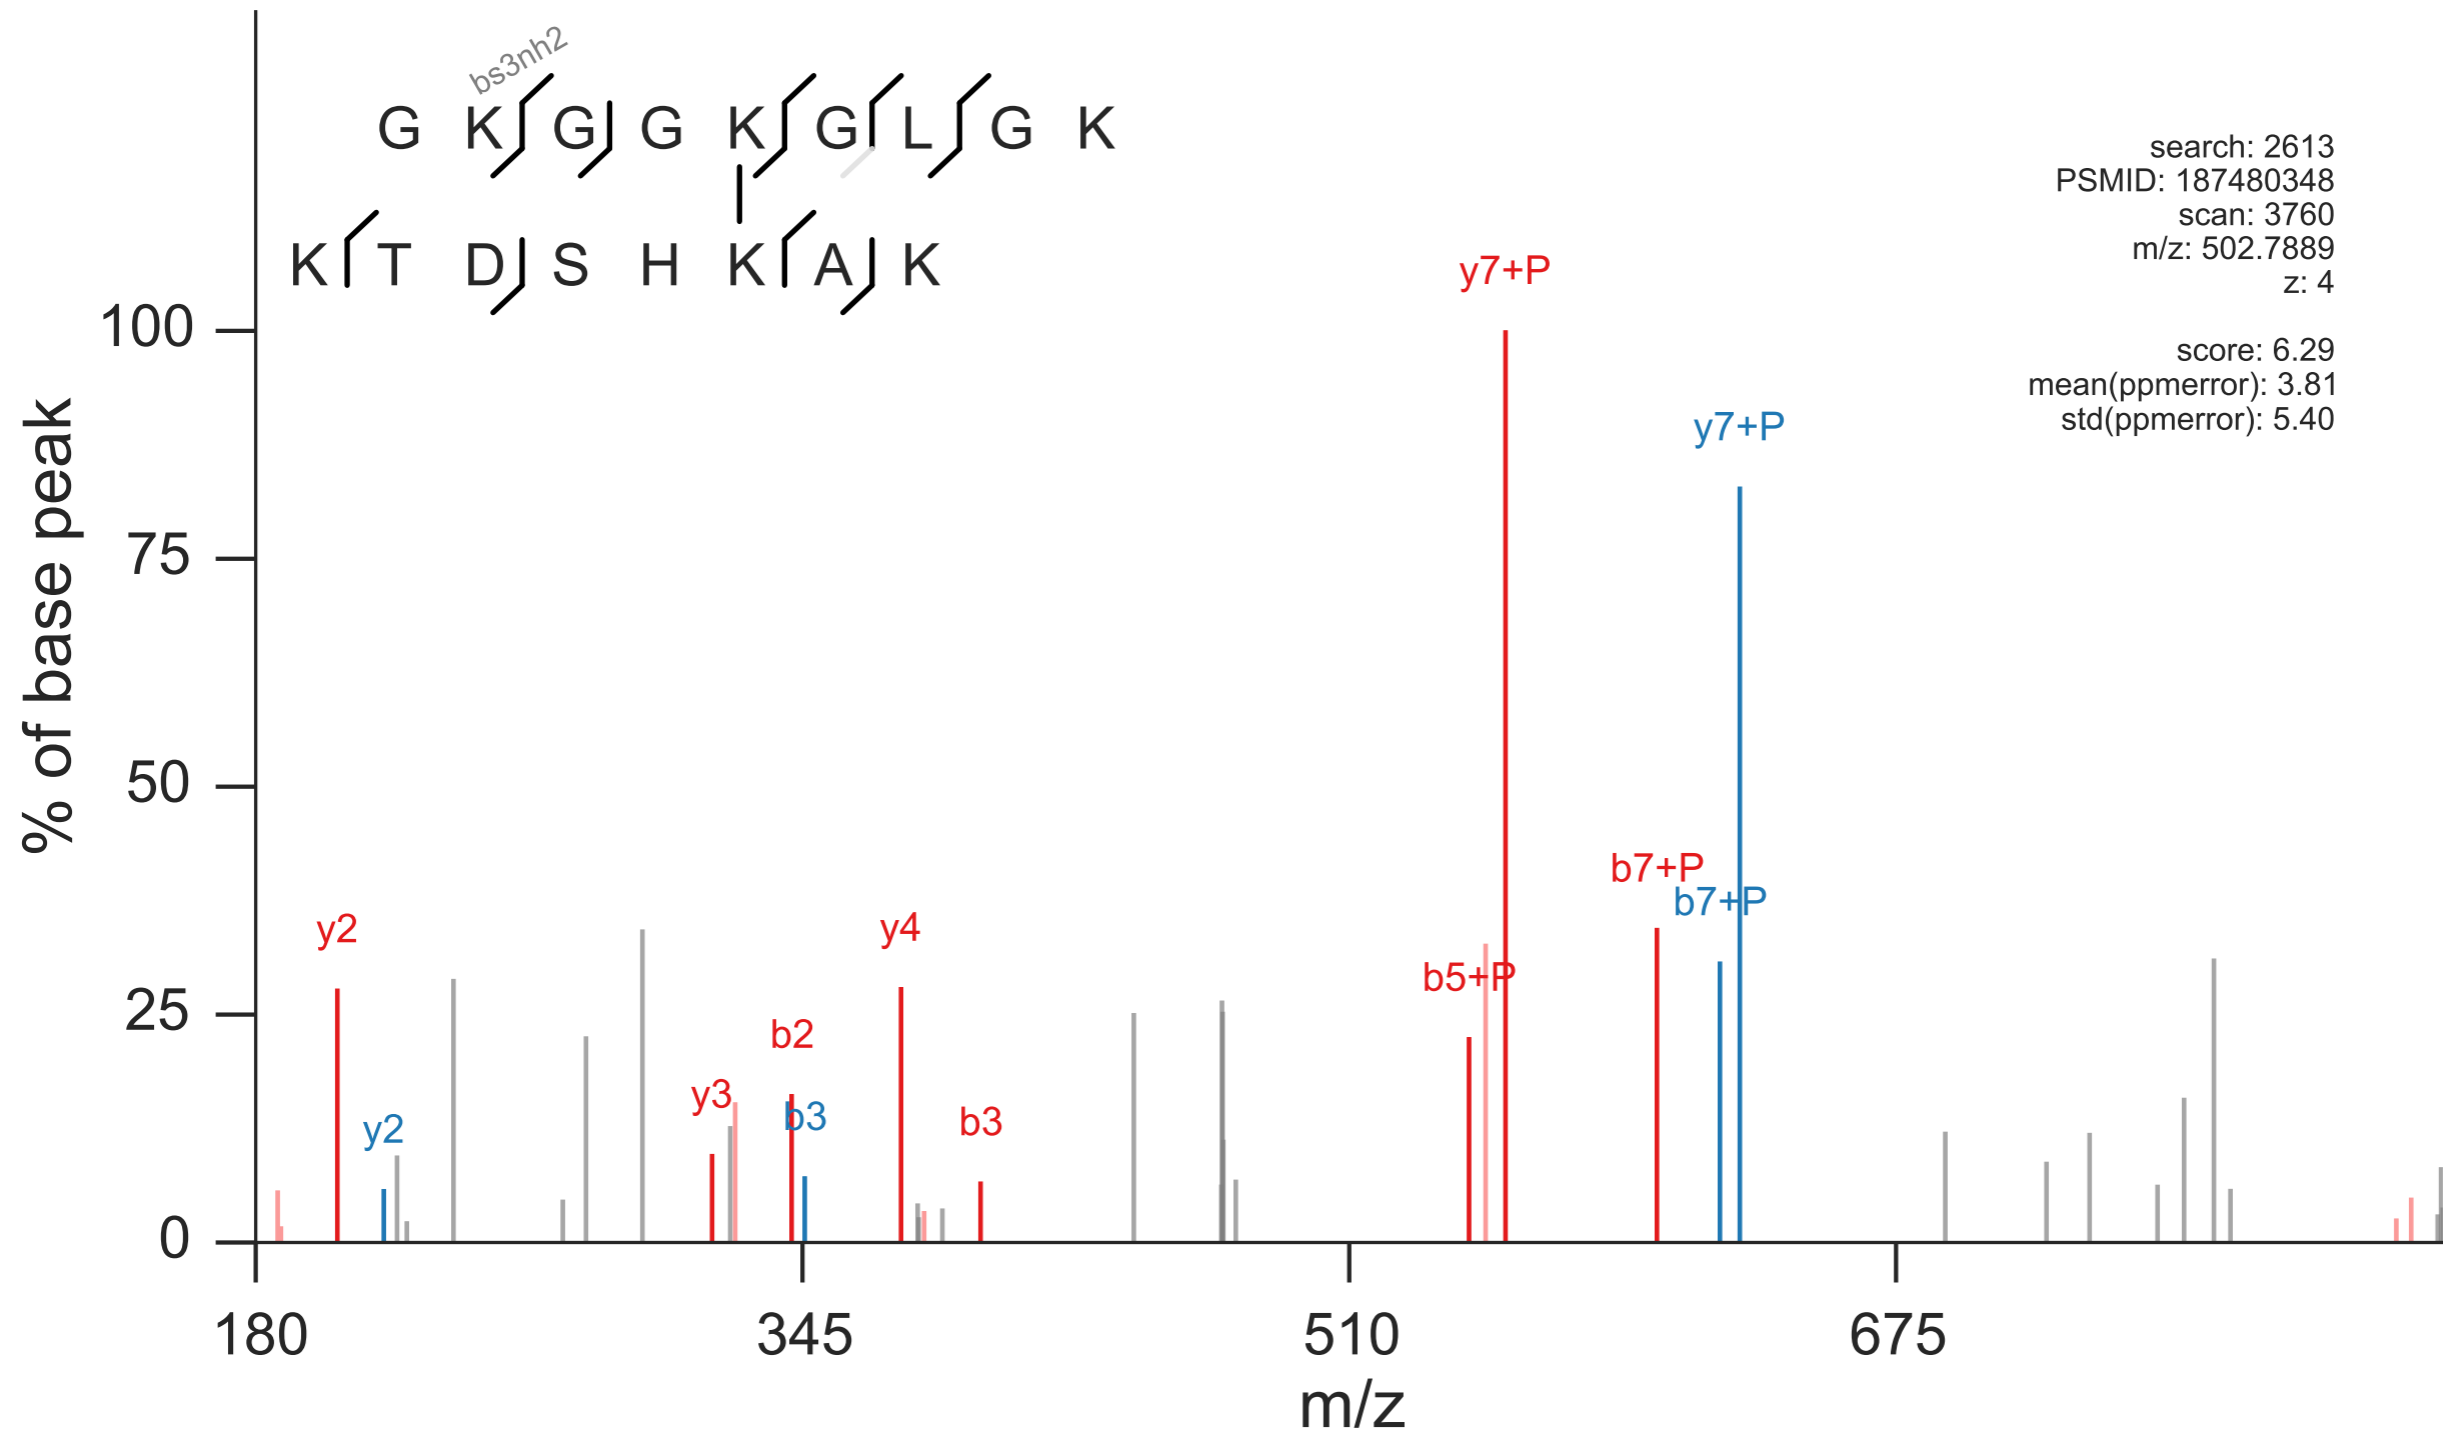

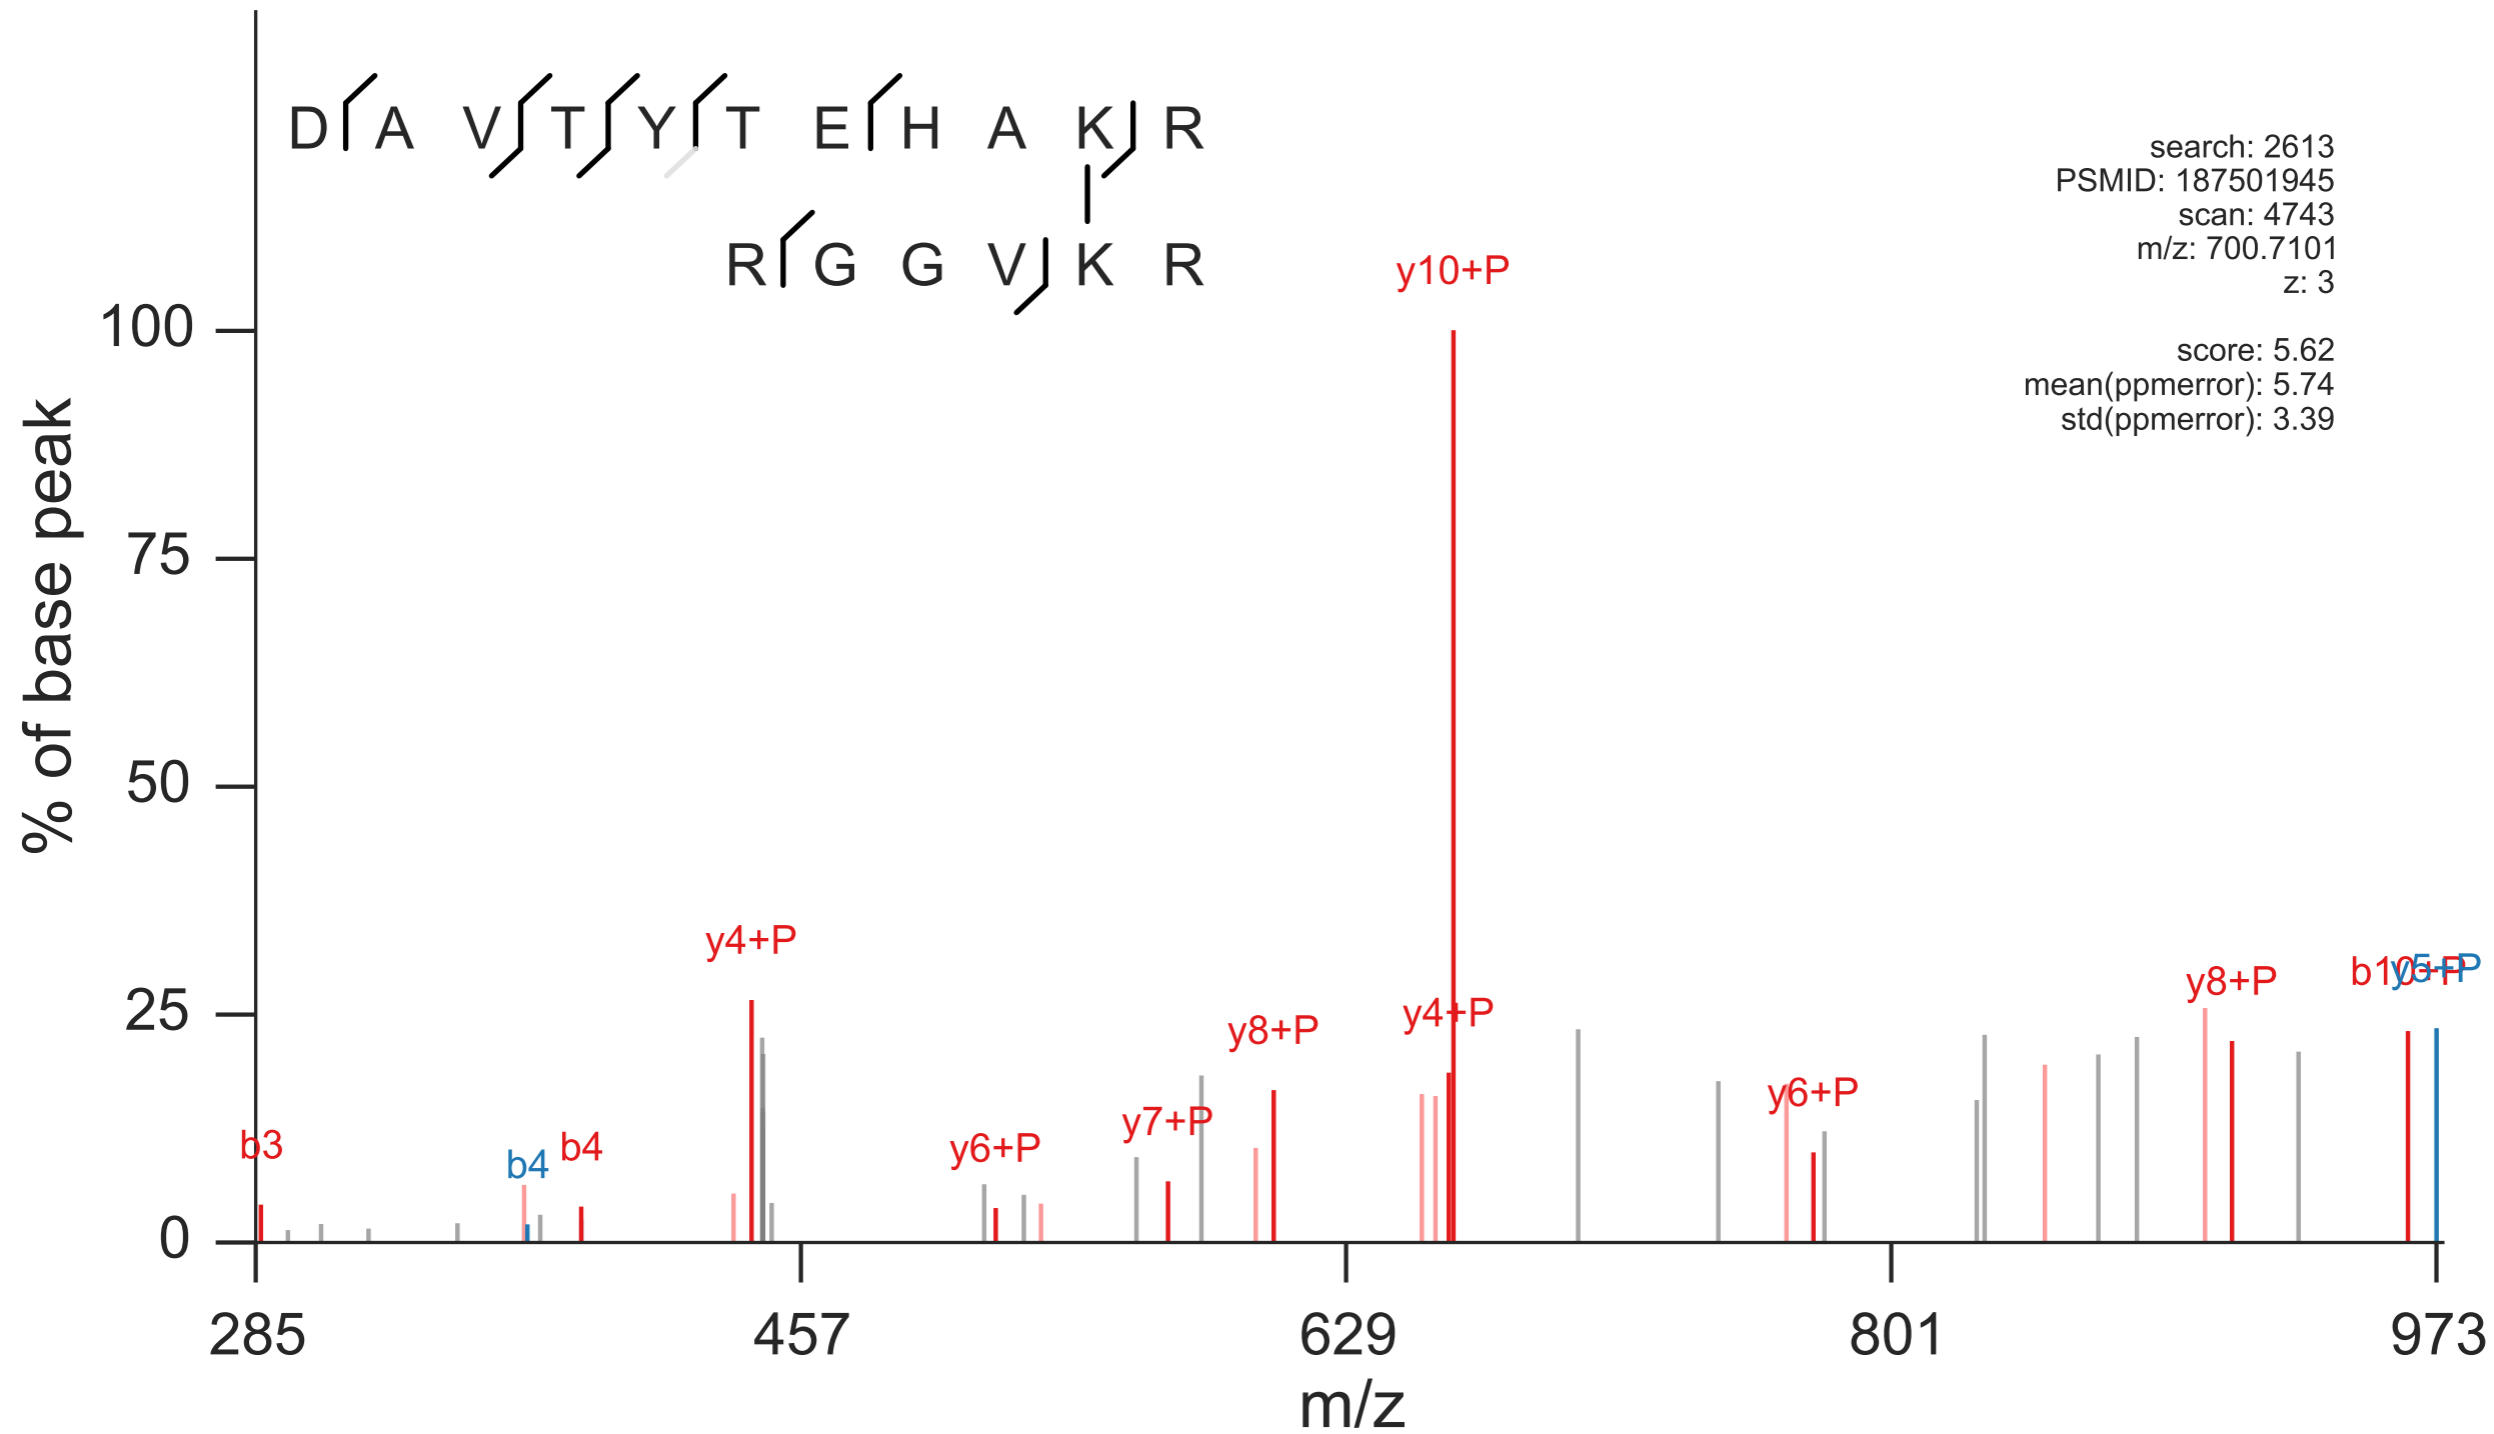

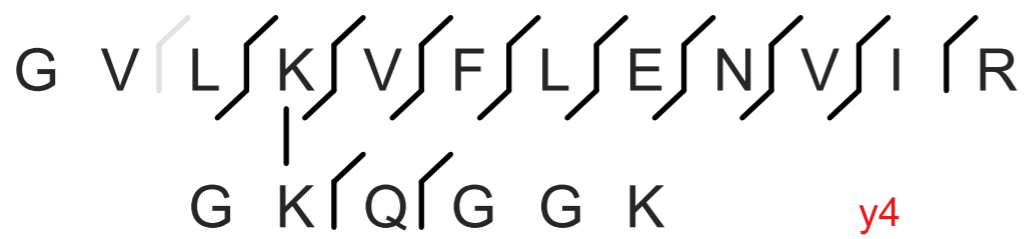

search: 2613  
 PSMID: 187506553  
 scan: 11458  
 m/z: 525.3098  
 z: 4  
  
 score: 8.59  
 mean(ppmerror): 0.32  
 std(ppmerror): 3.51

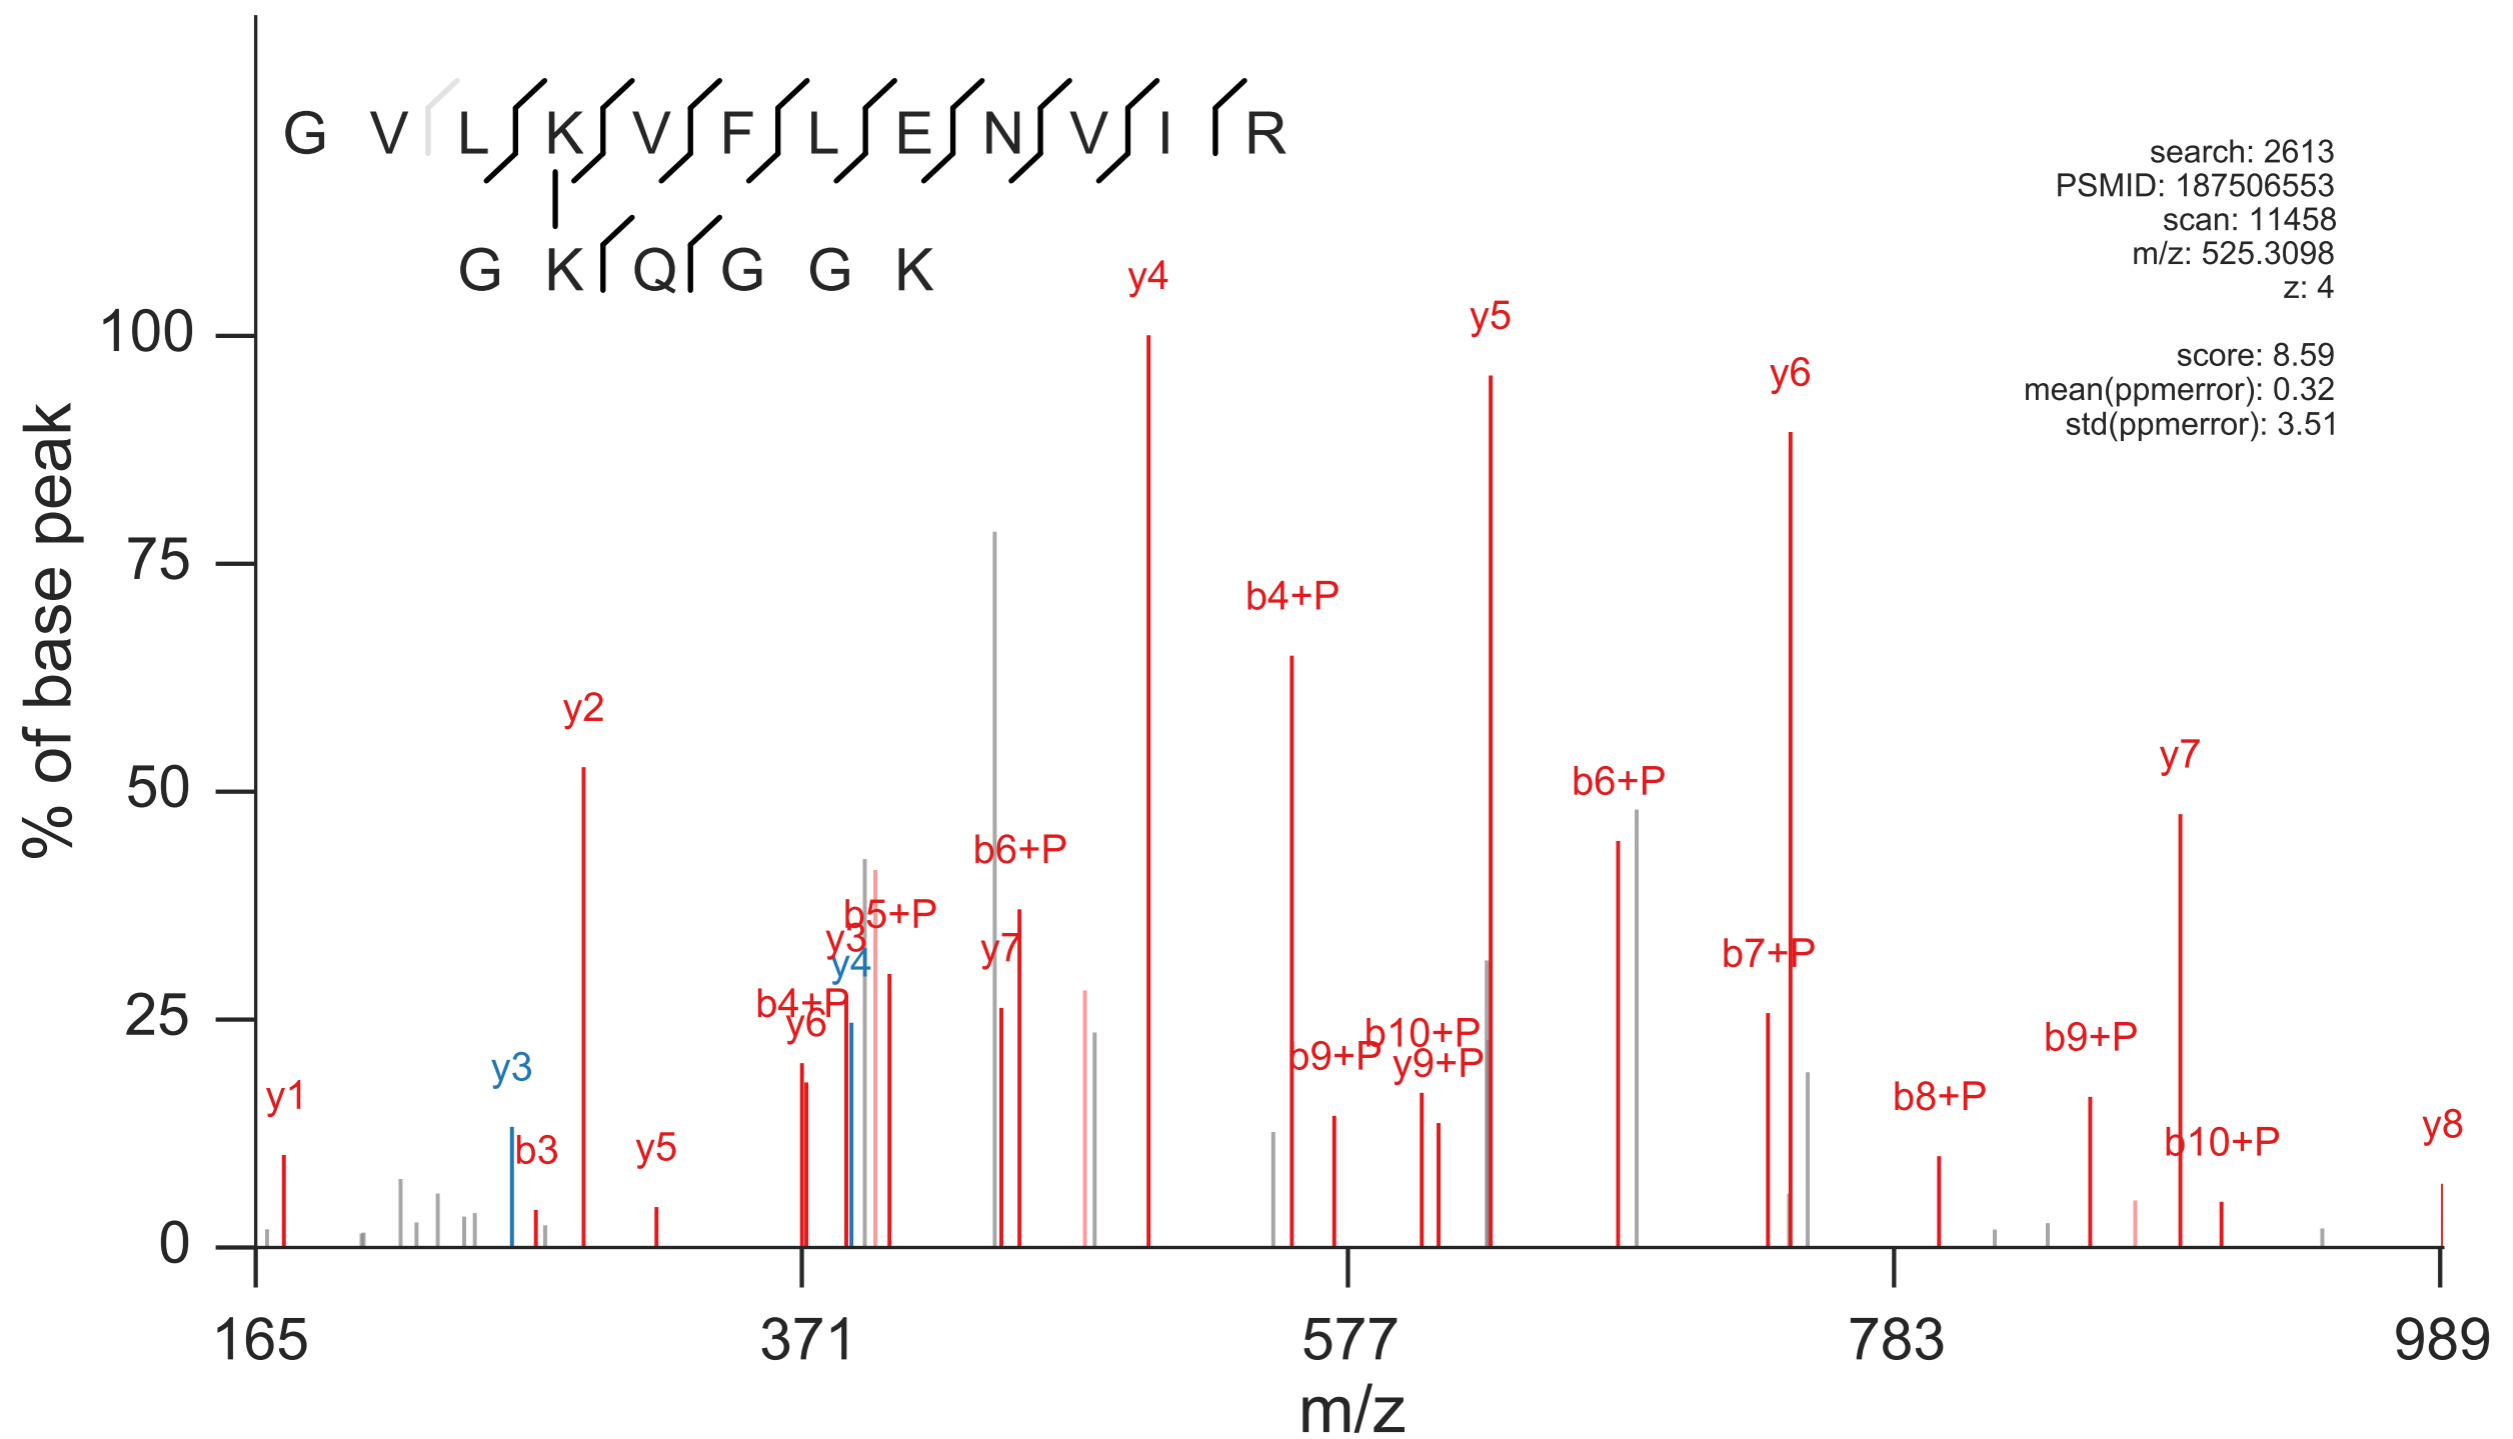

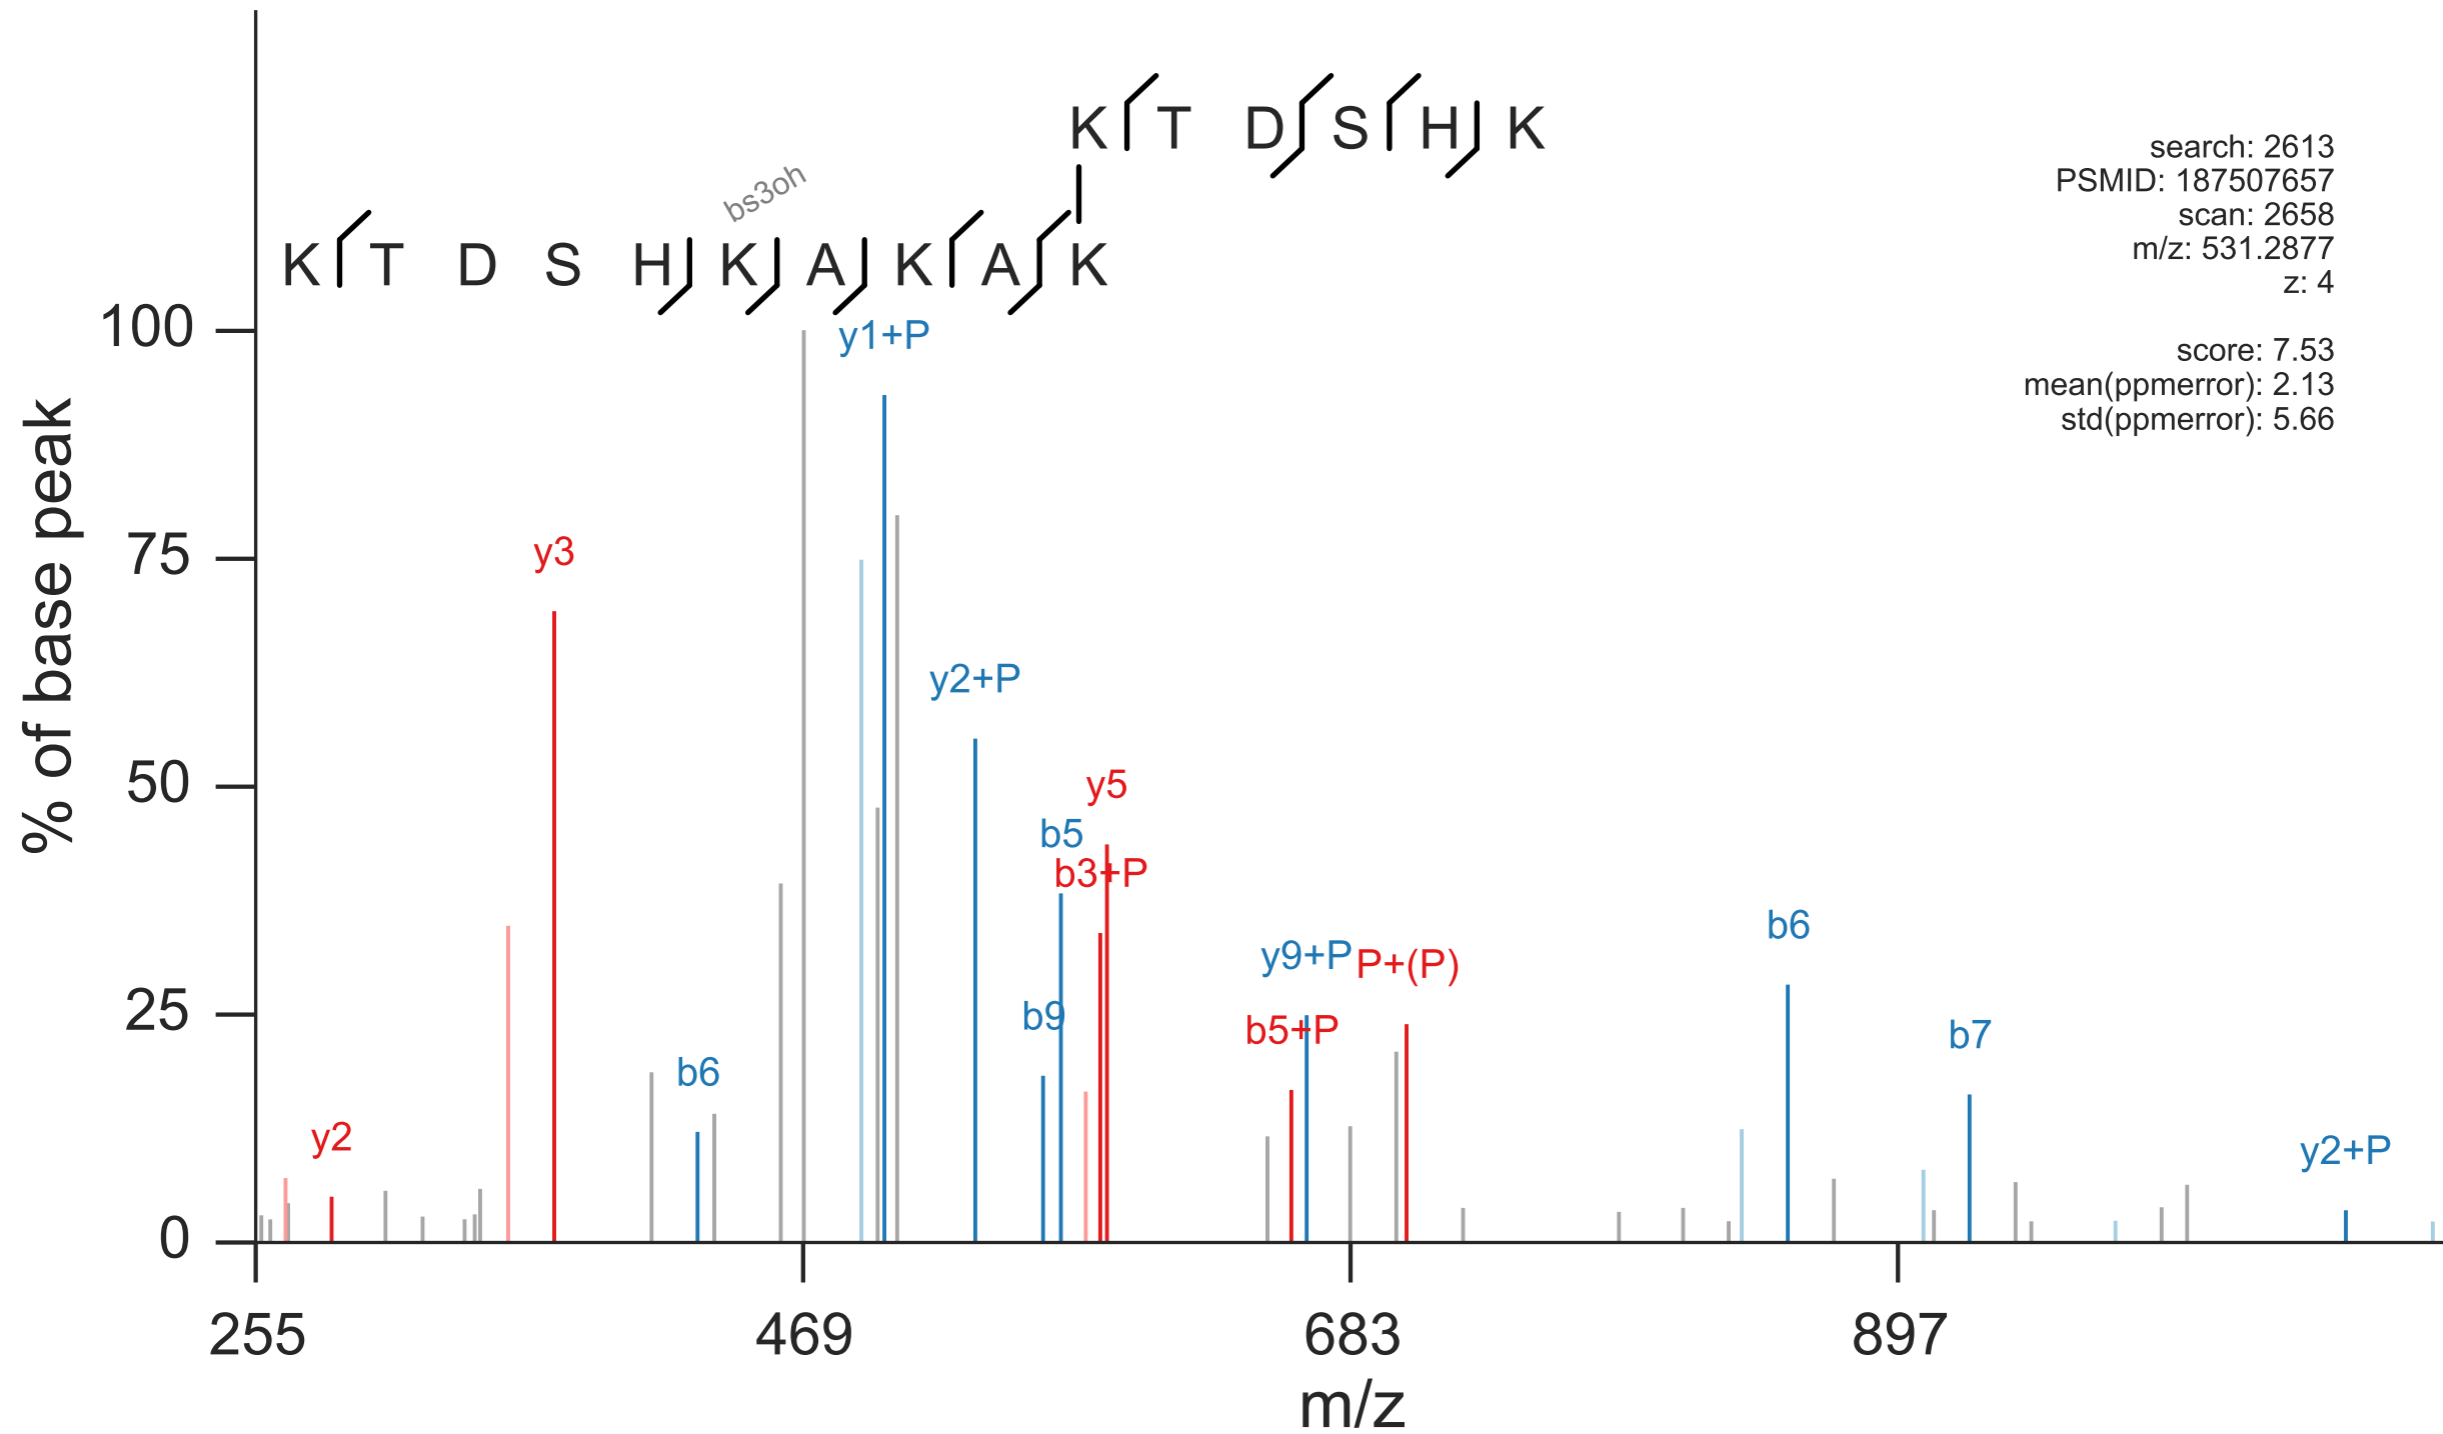

search: 2613  
 PSMID: 187507657  
 scan: 2658  
 m/z: 531.2877  
 z: 4

score: 7.53  
 mean(ppmerror): 2.13  
 std(ppmerror): 5.66

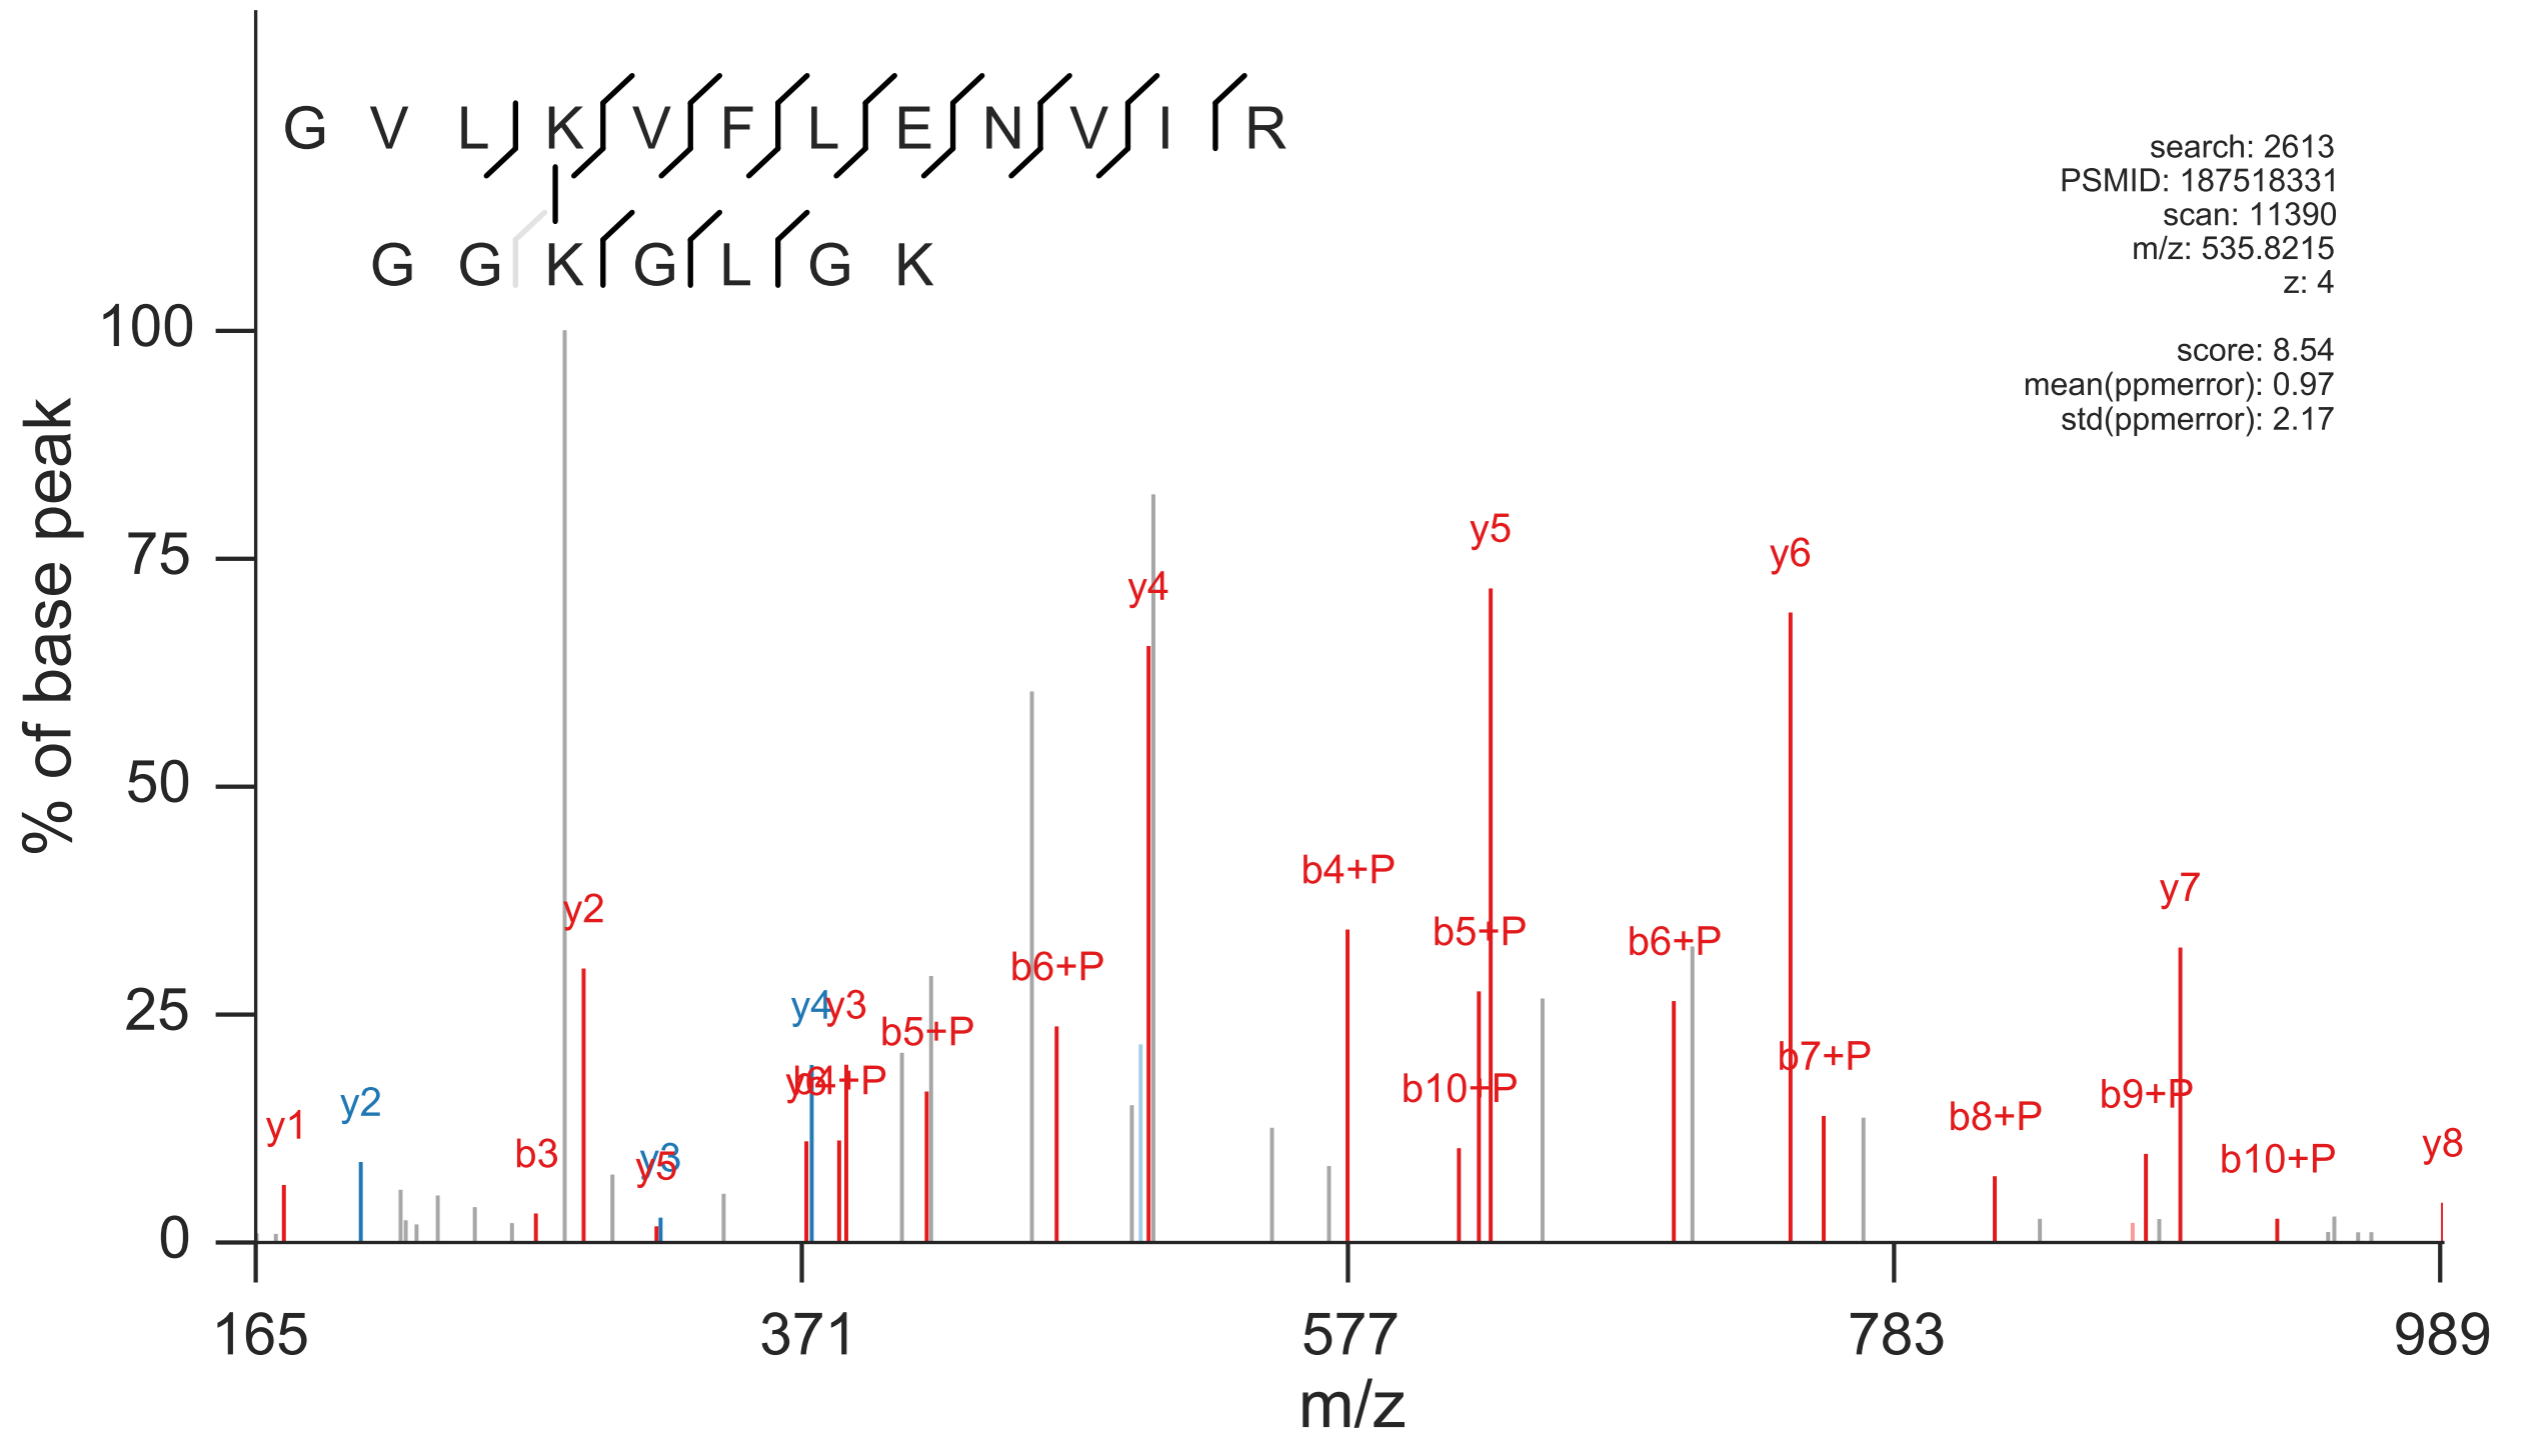



G V L K V F L E N V I R  
 G L G K G G A K

search: 2613  
 PSMID: 187530214  
 scan: 11380  
 m/z: 553.5811  
 z: 4  
 score: 9.15  
 mean(ppmerror): -0.01  
 std(ppmerror): 1.56

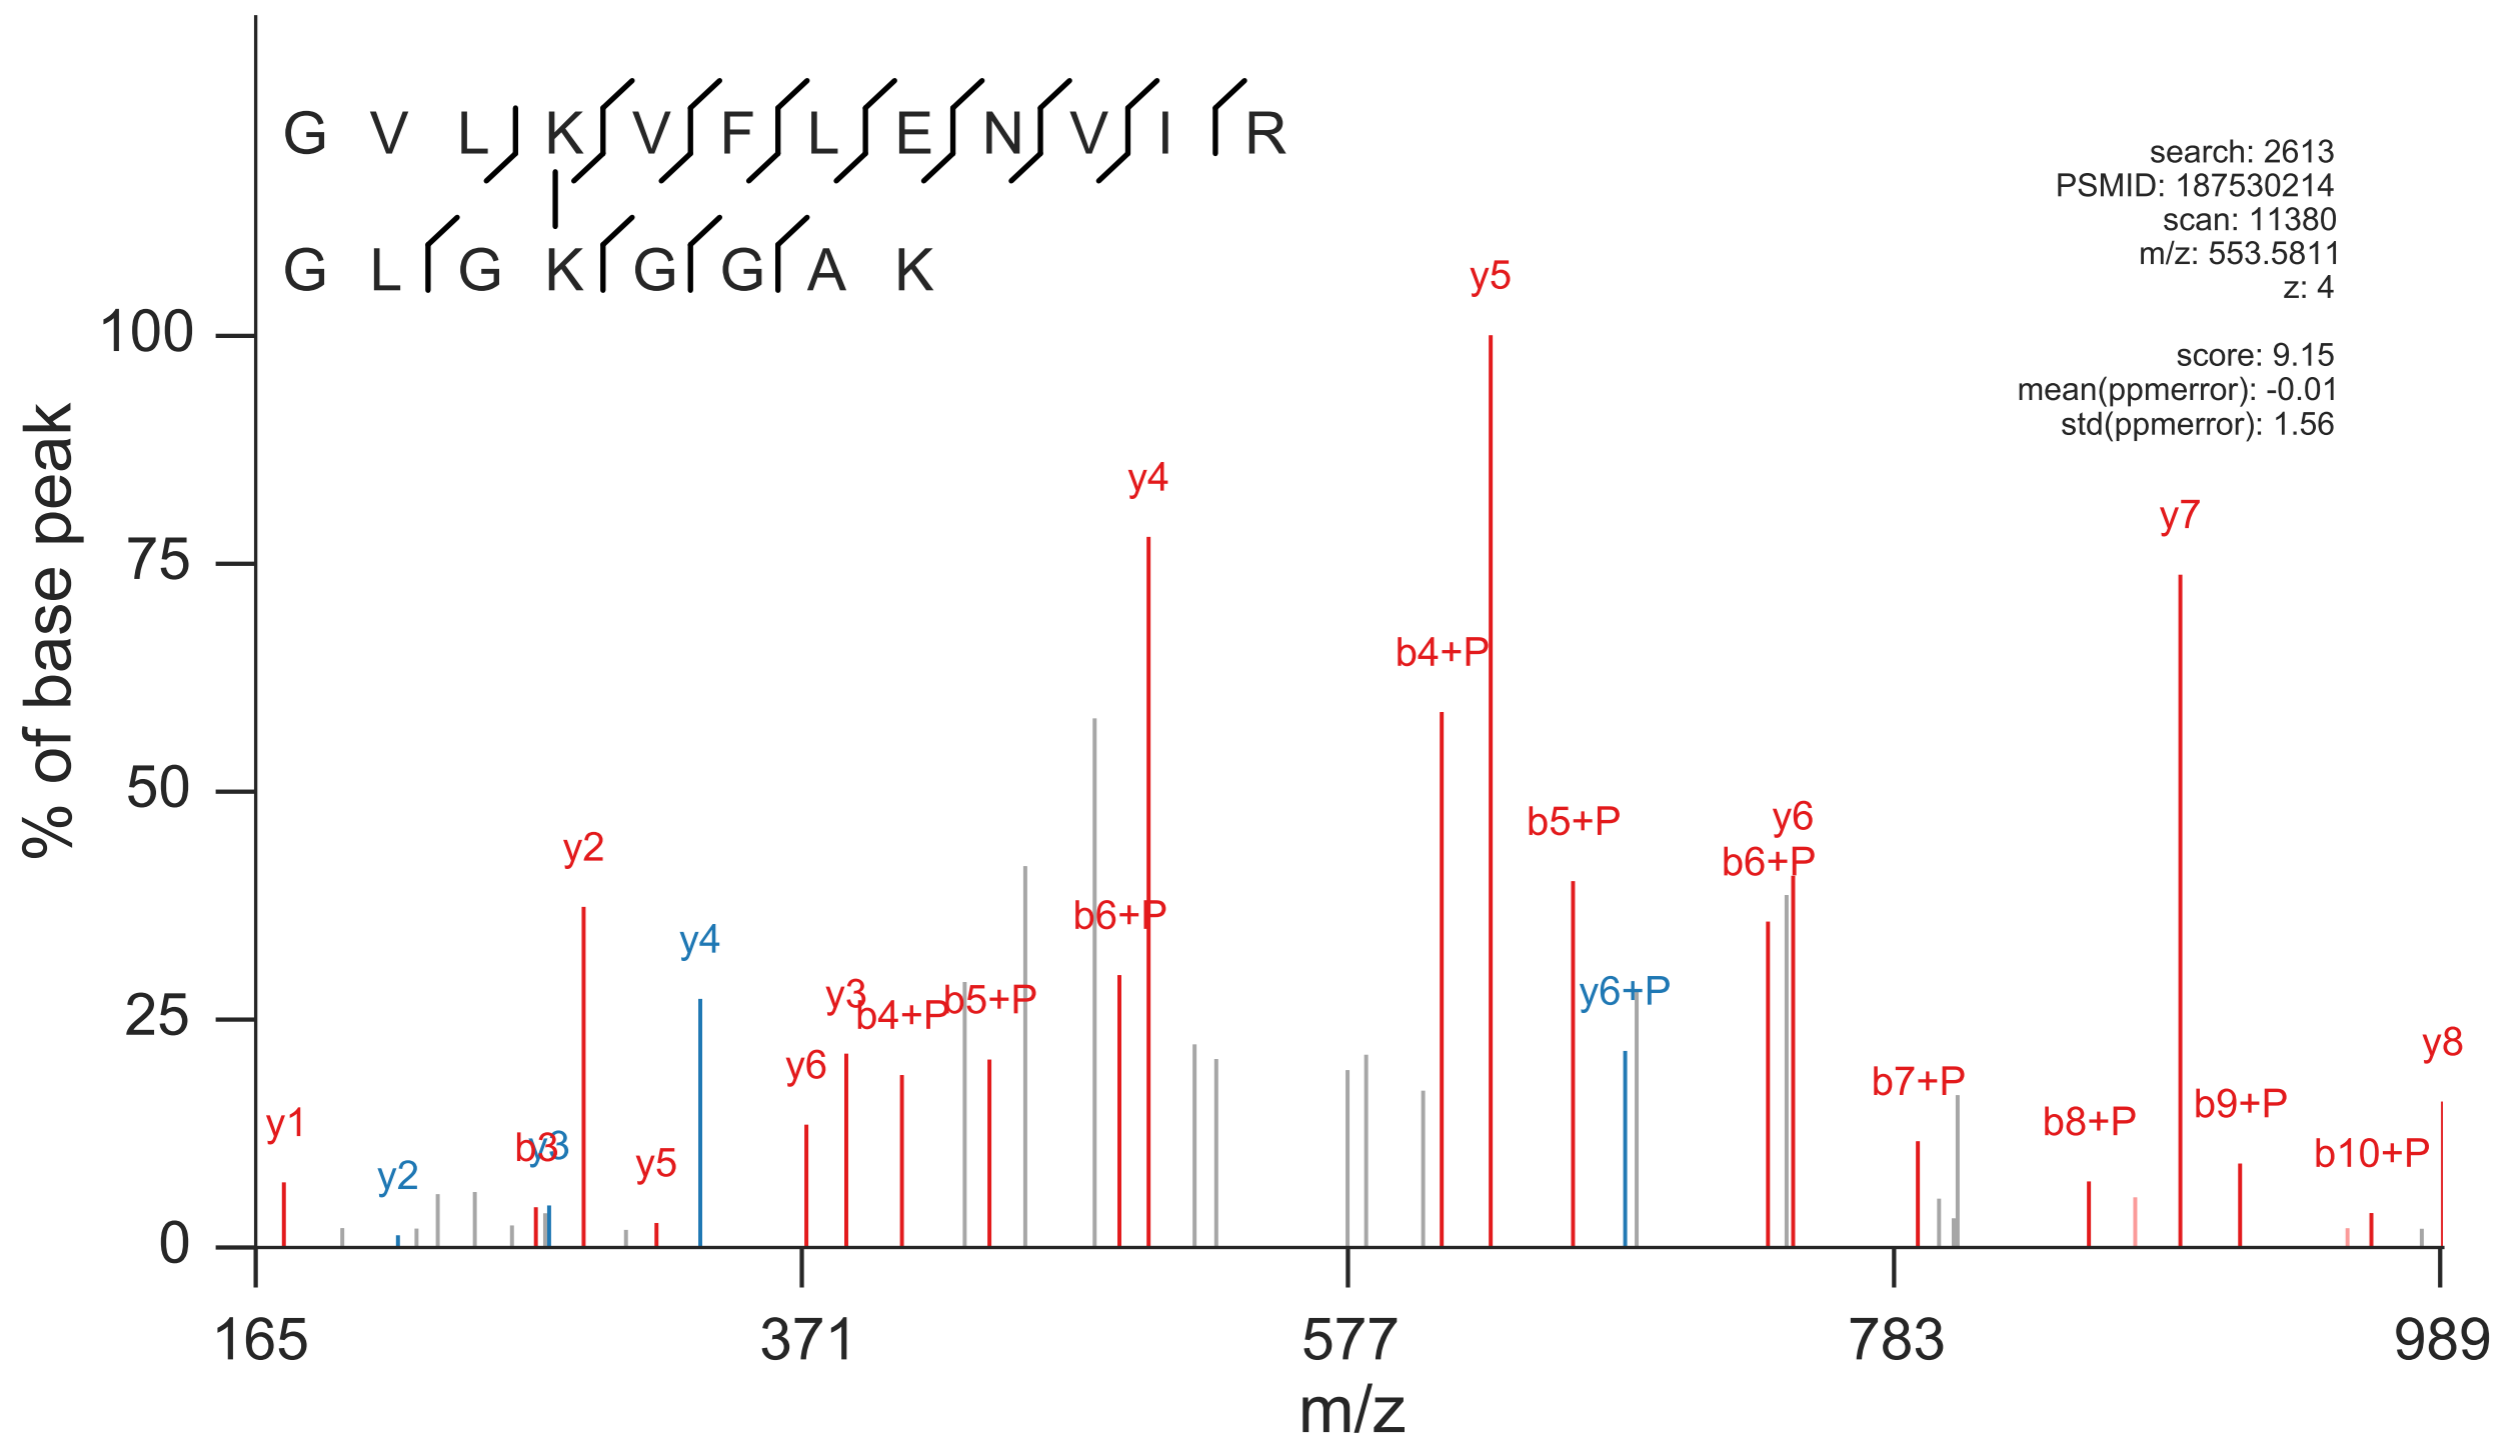

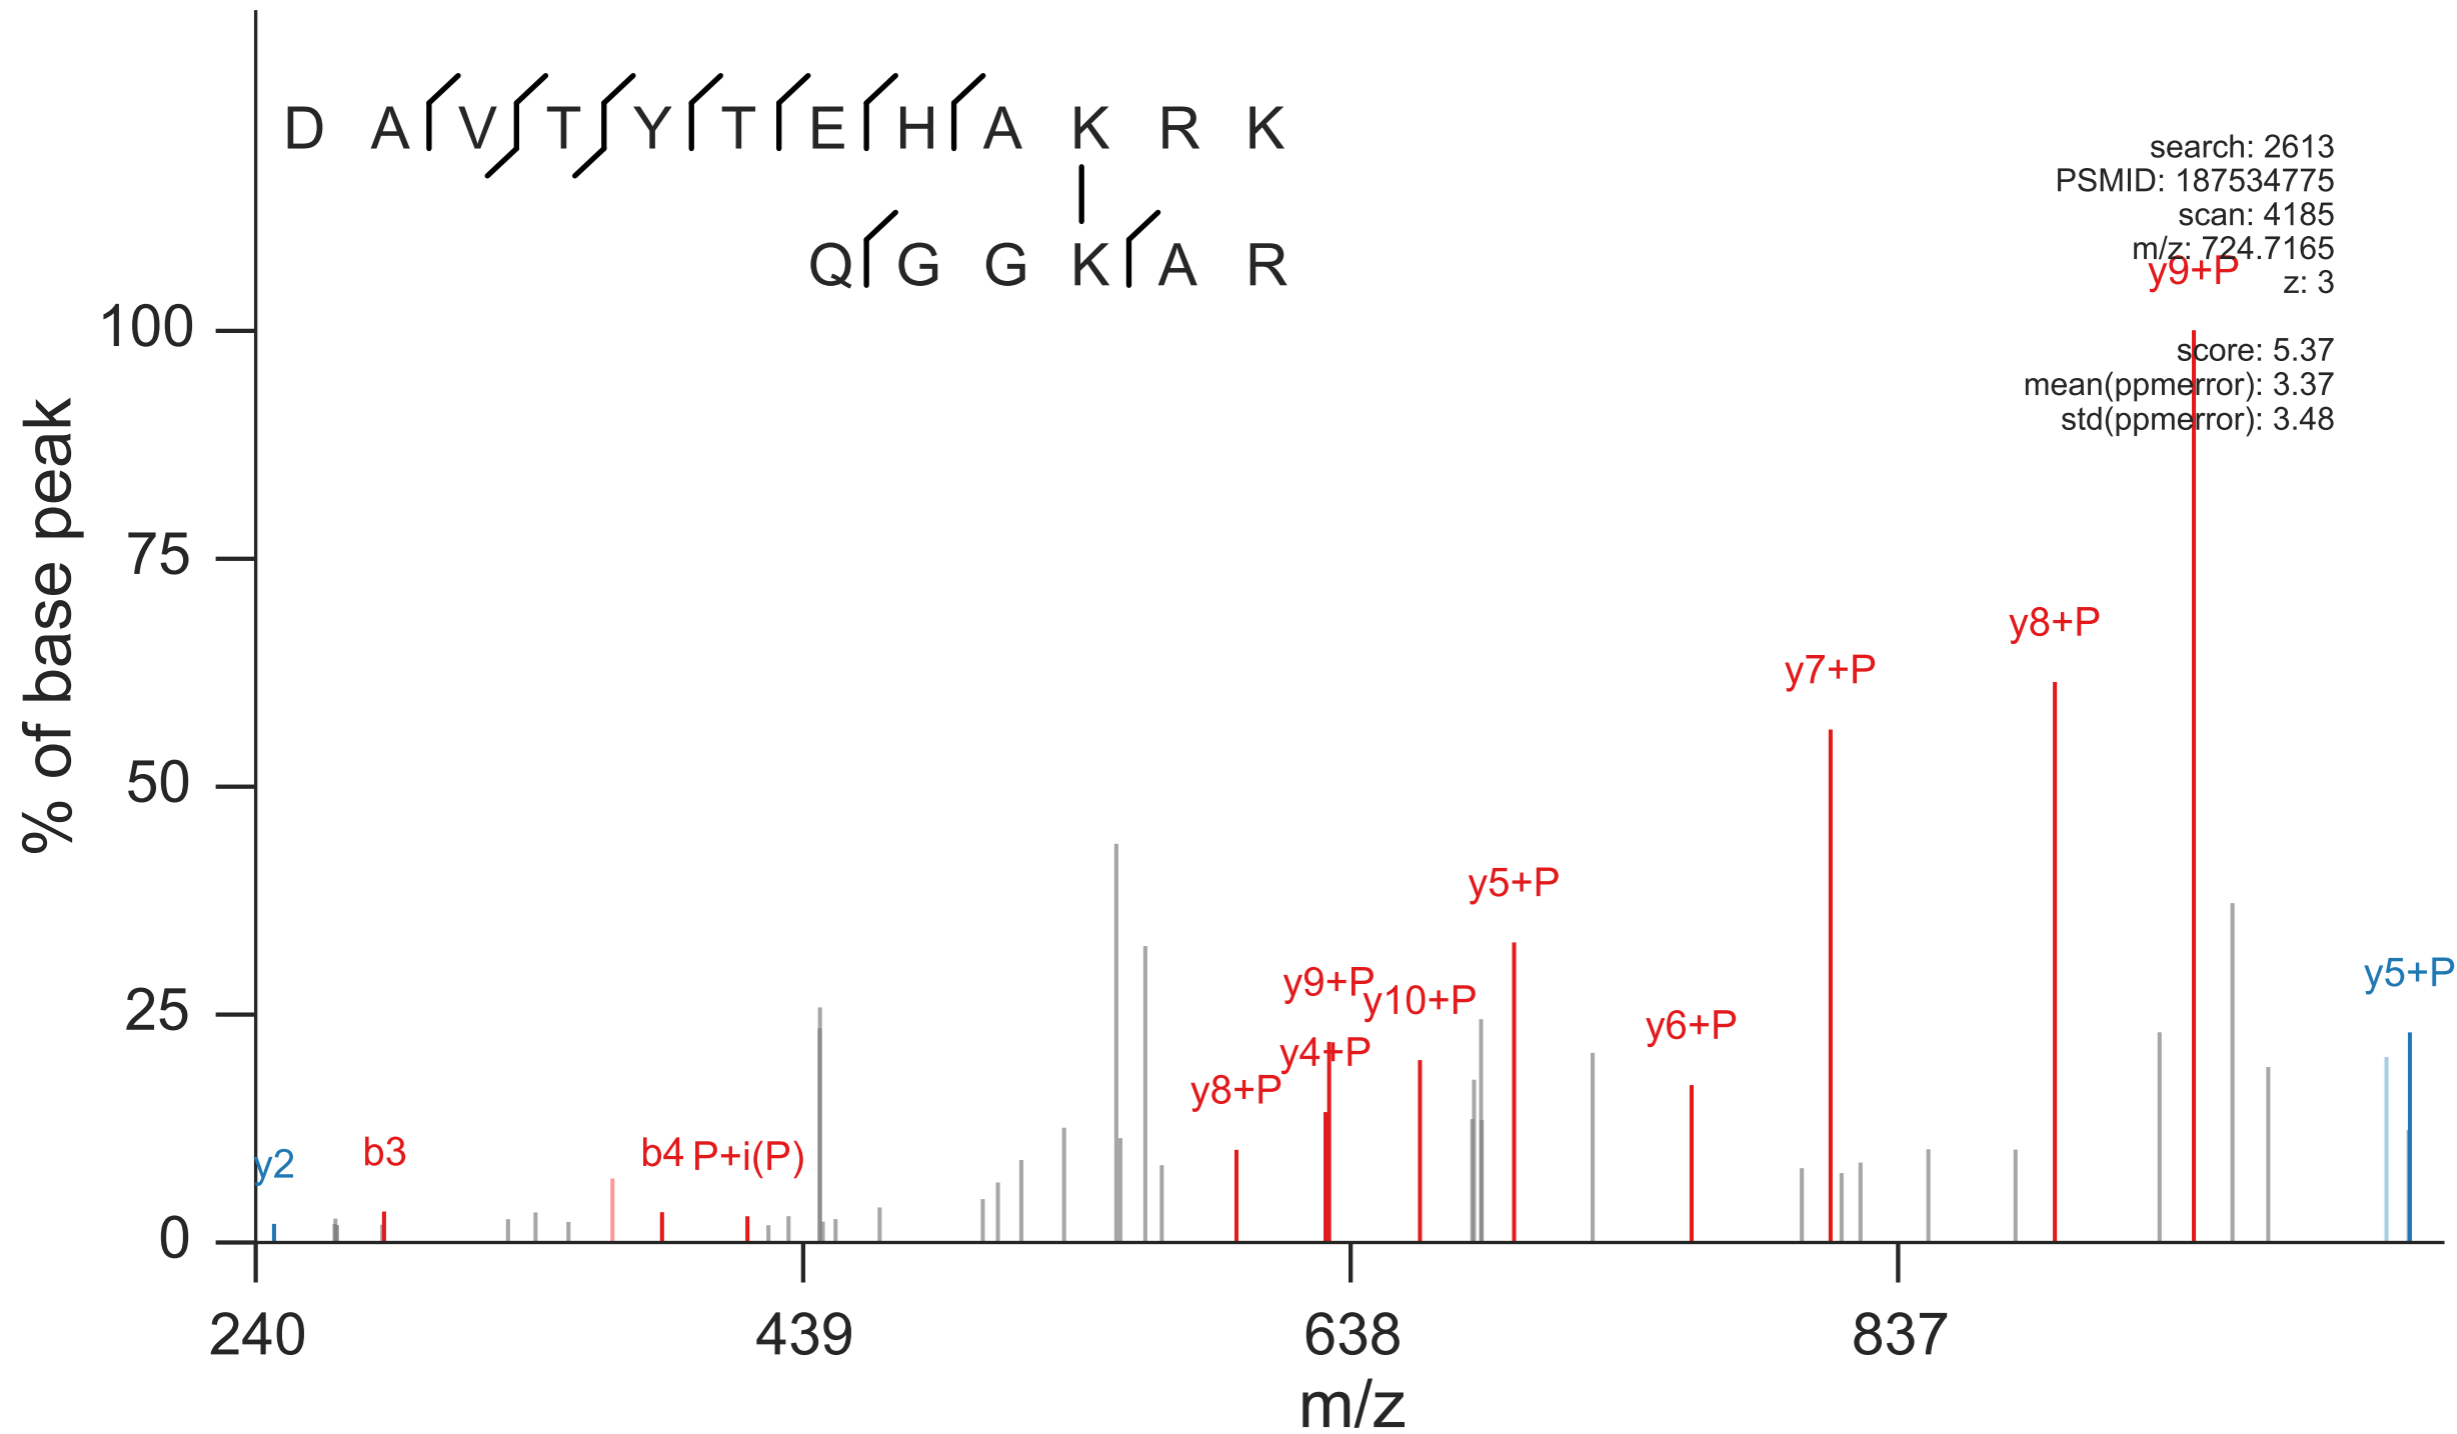

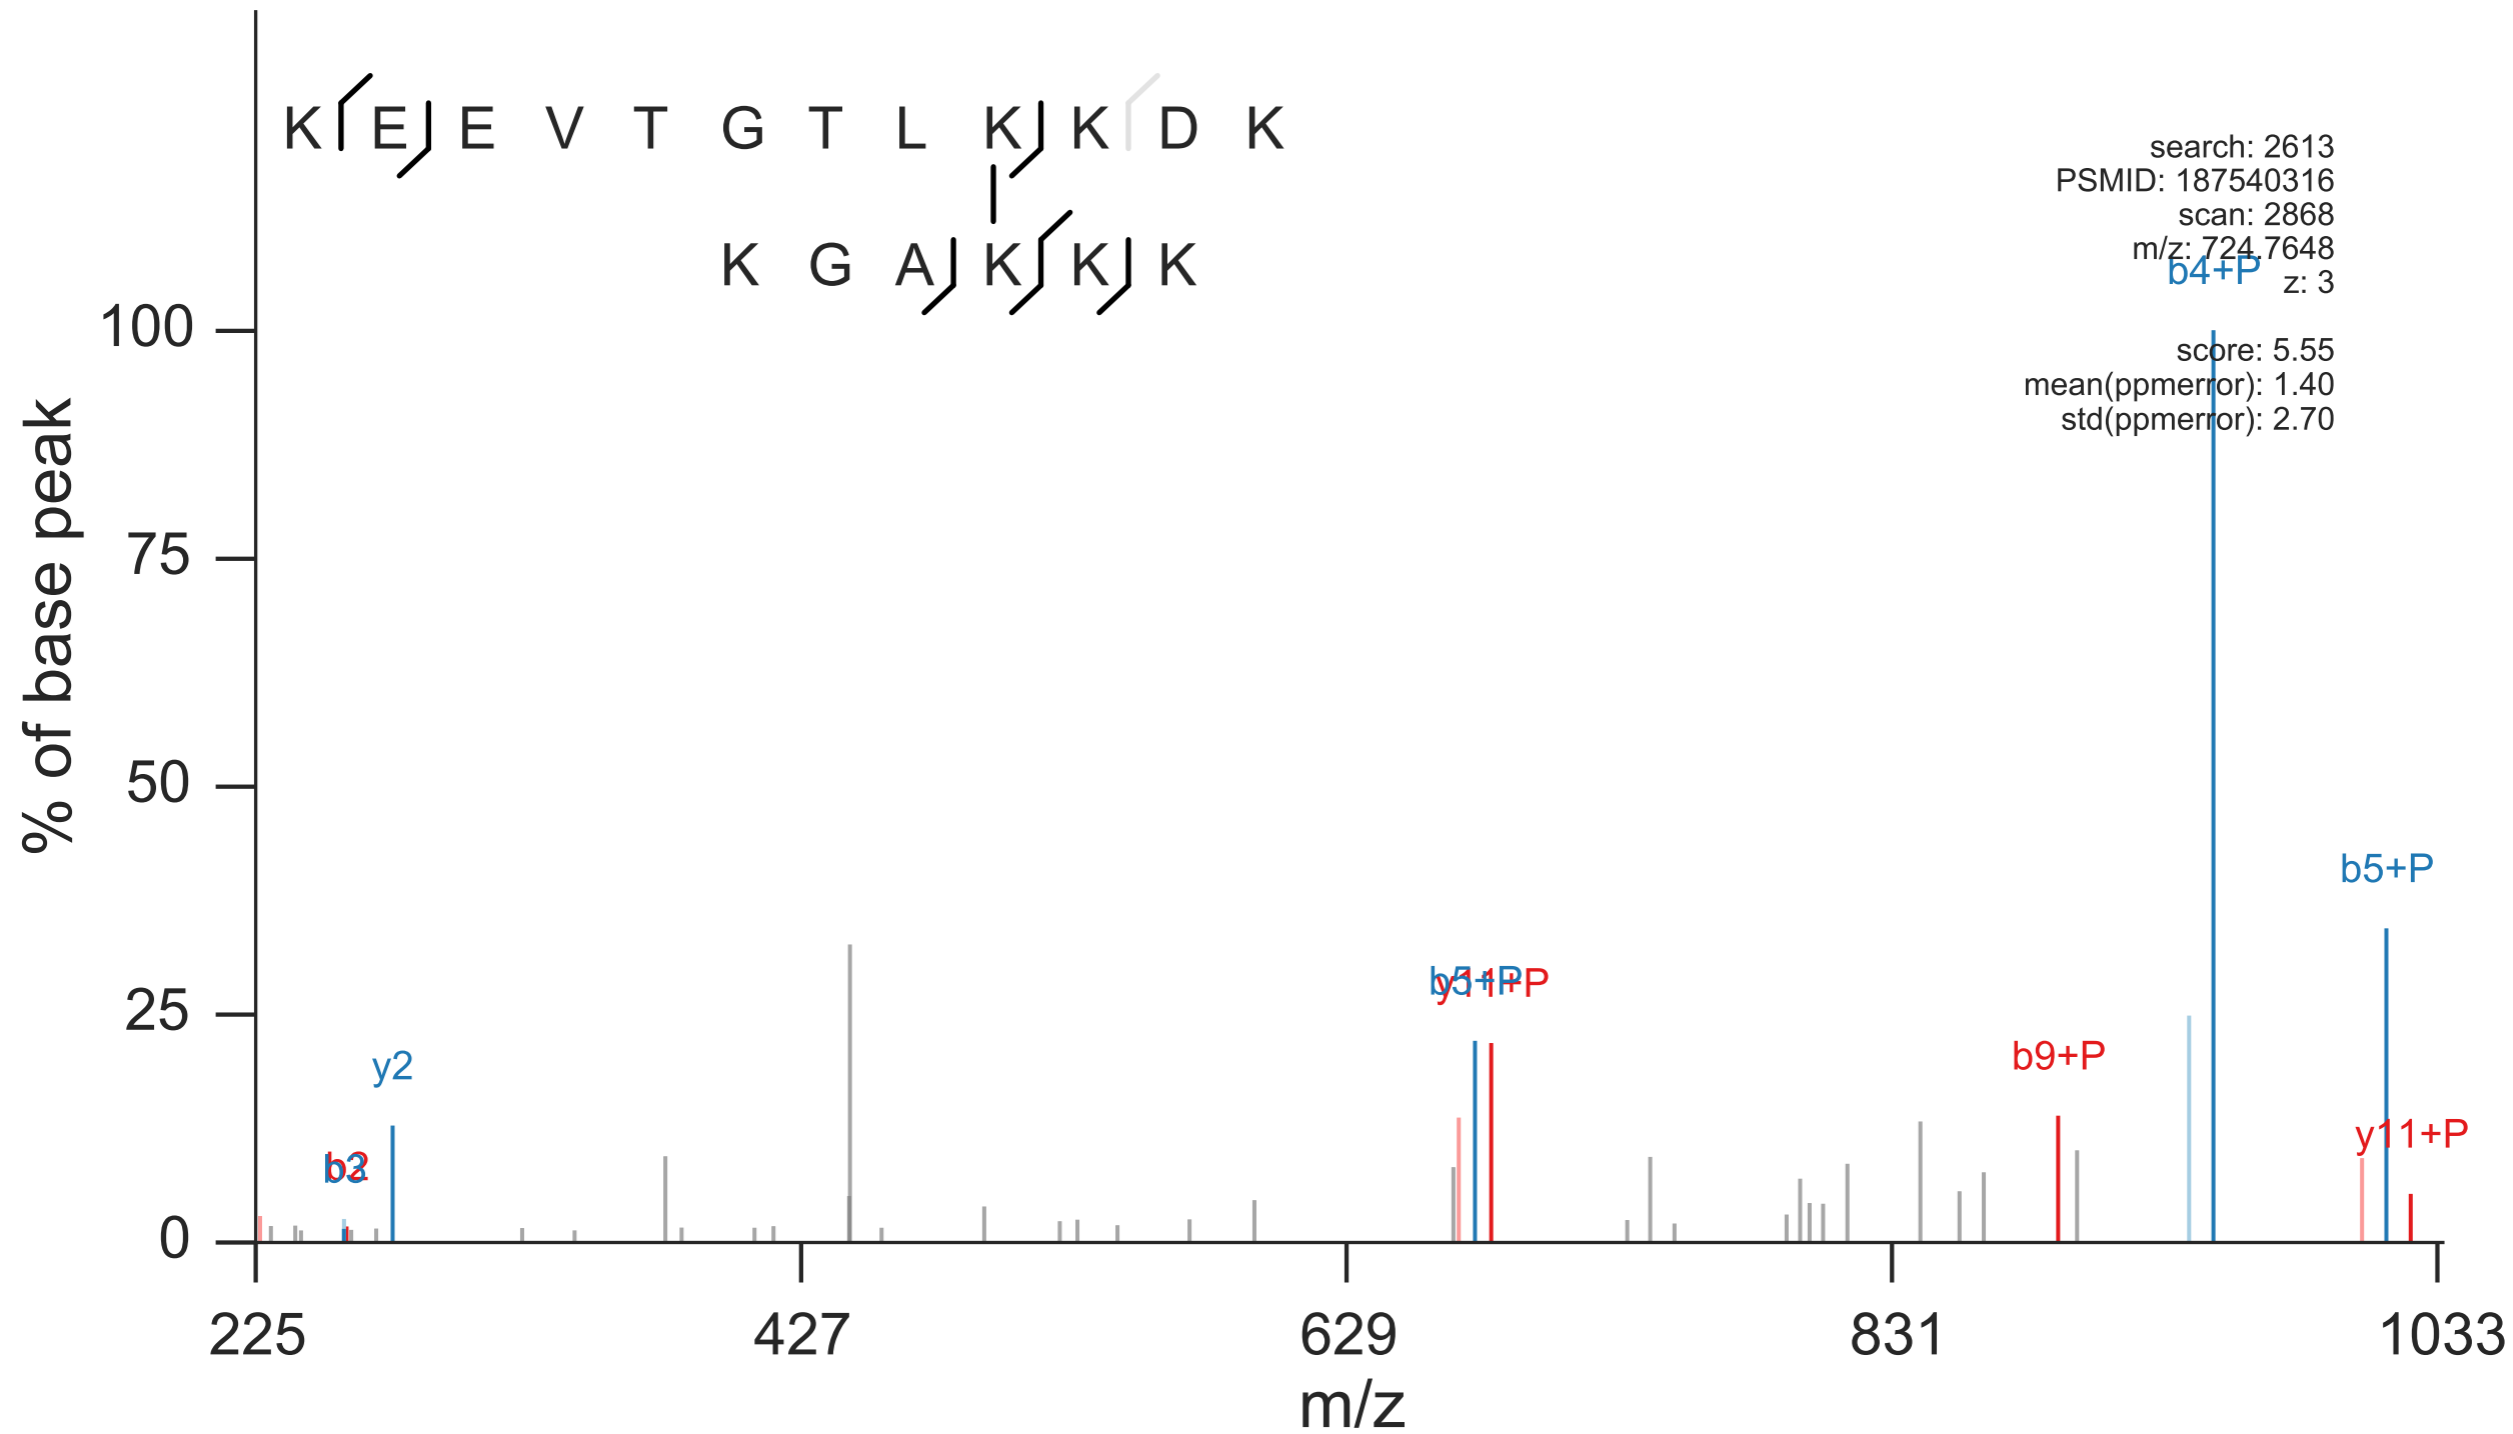

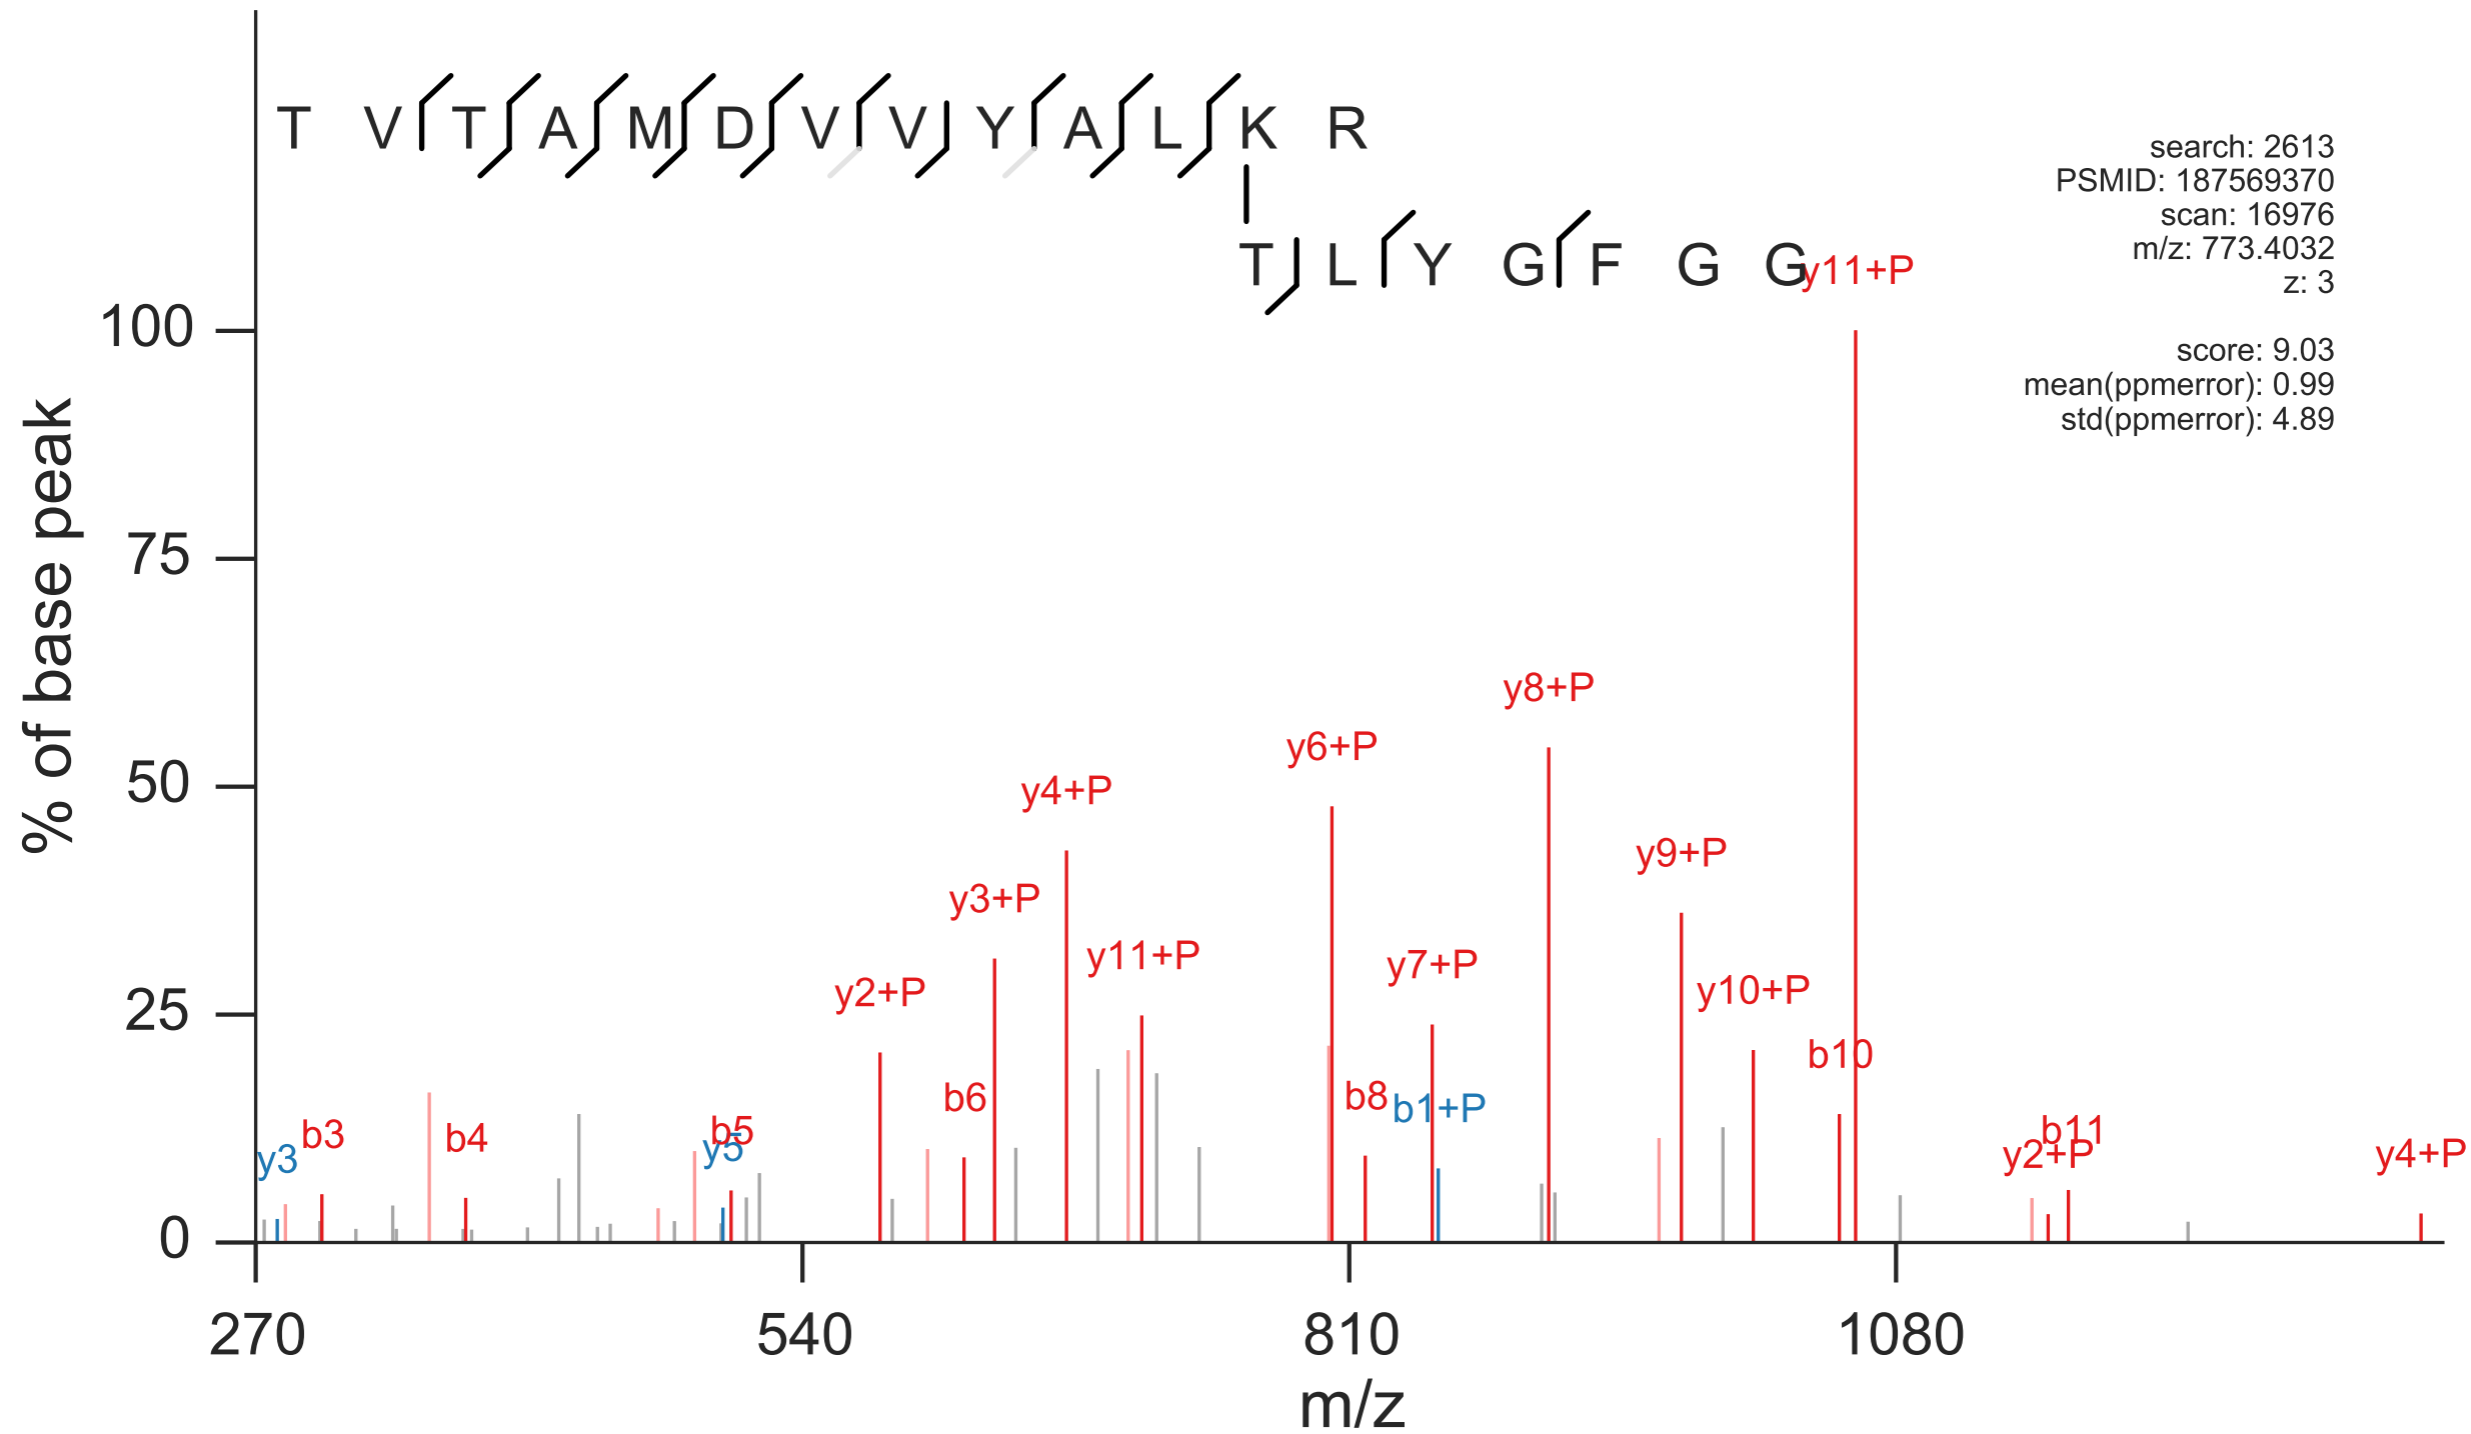

D|A|V|T|Y|T|E H A K R|K  
 T D|S H|K|A K

search: 2613  
 PSMID: 187577935  
 scan: 4062  
 m/z: 781.4025  
 z: 3  
 score: 6.58  
 mean(ppmerror): -1.76  
 std(ppmerror): 5.93

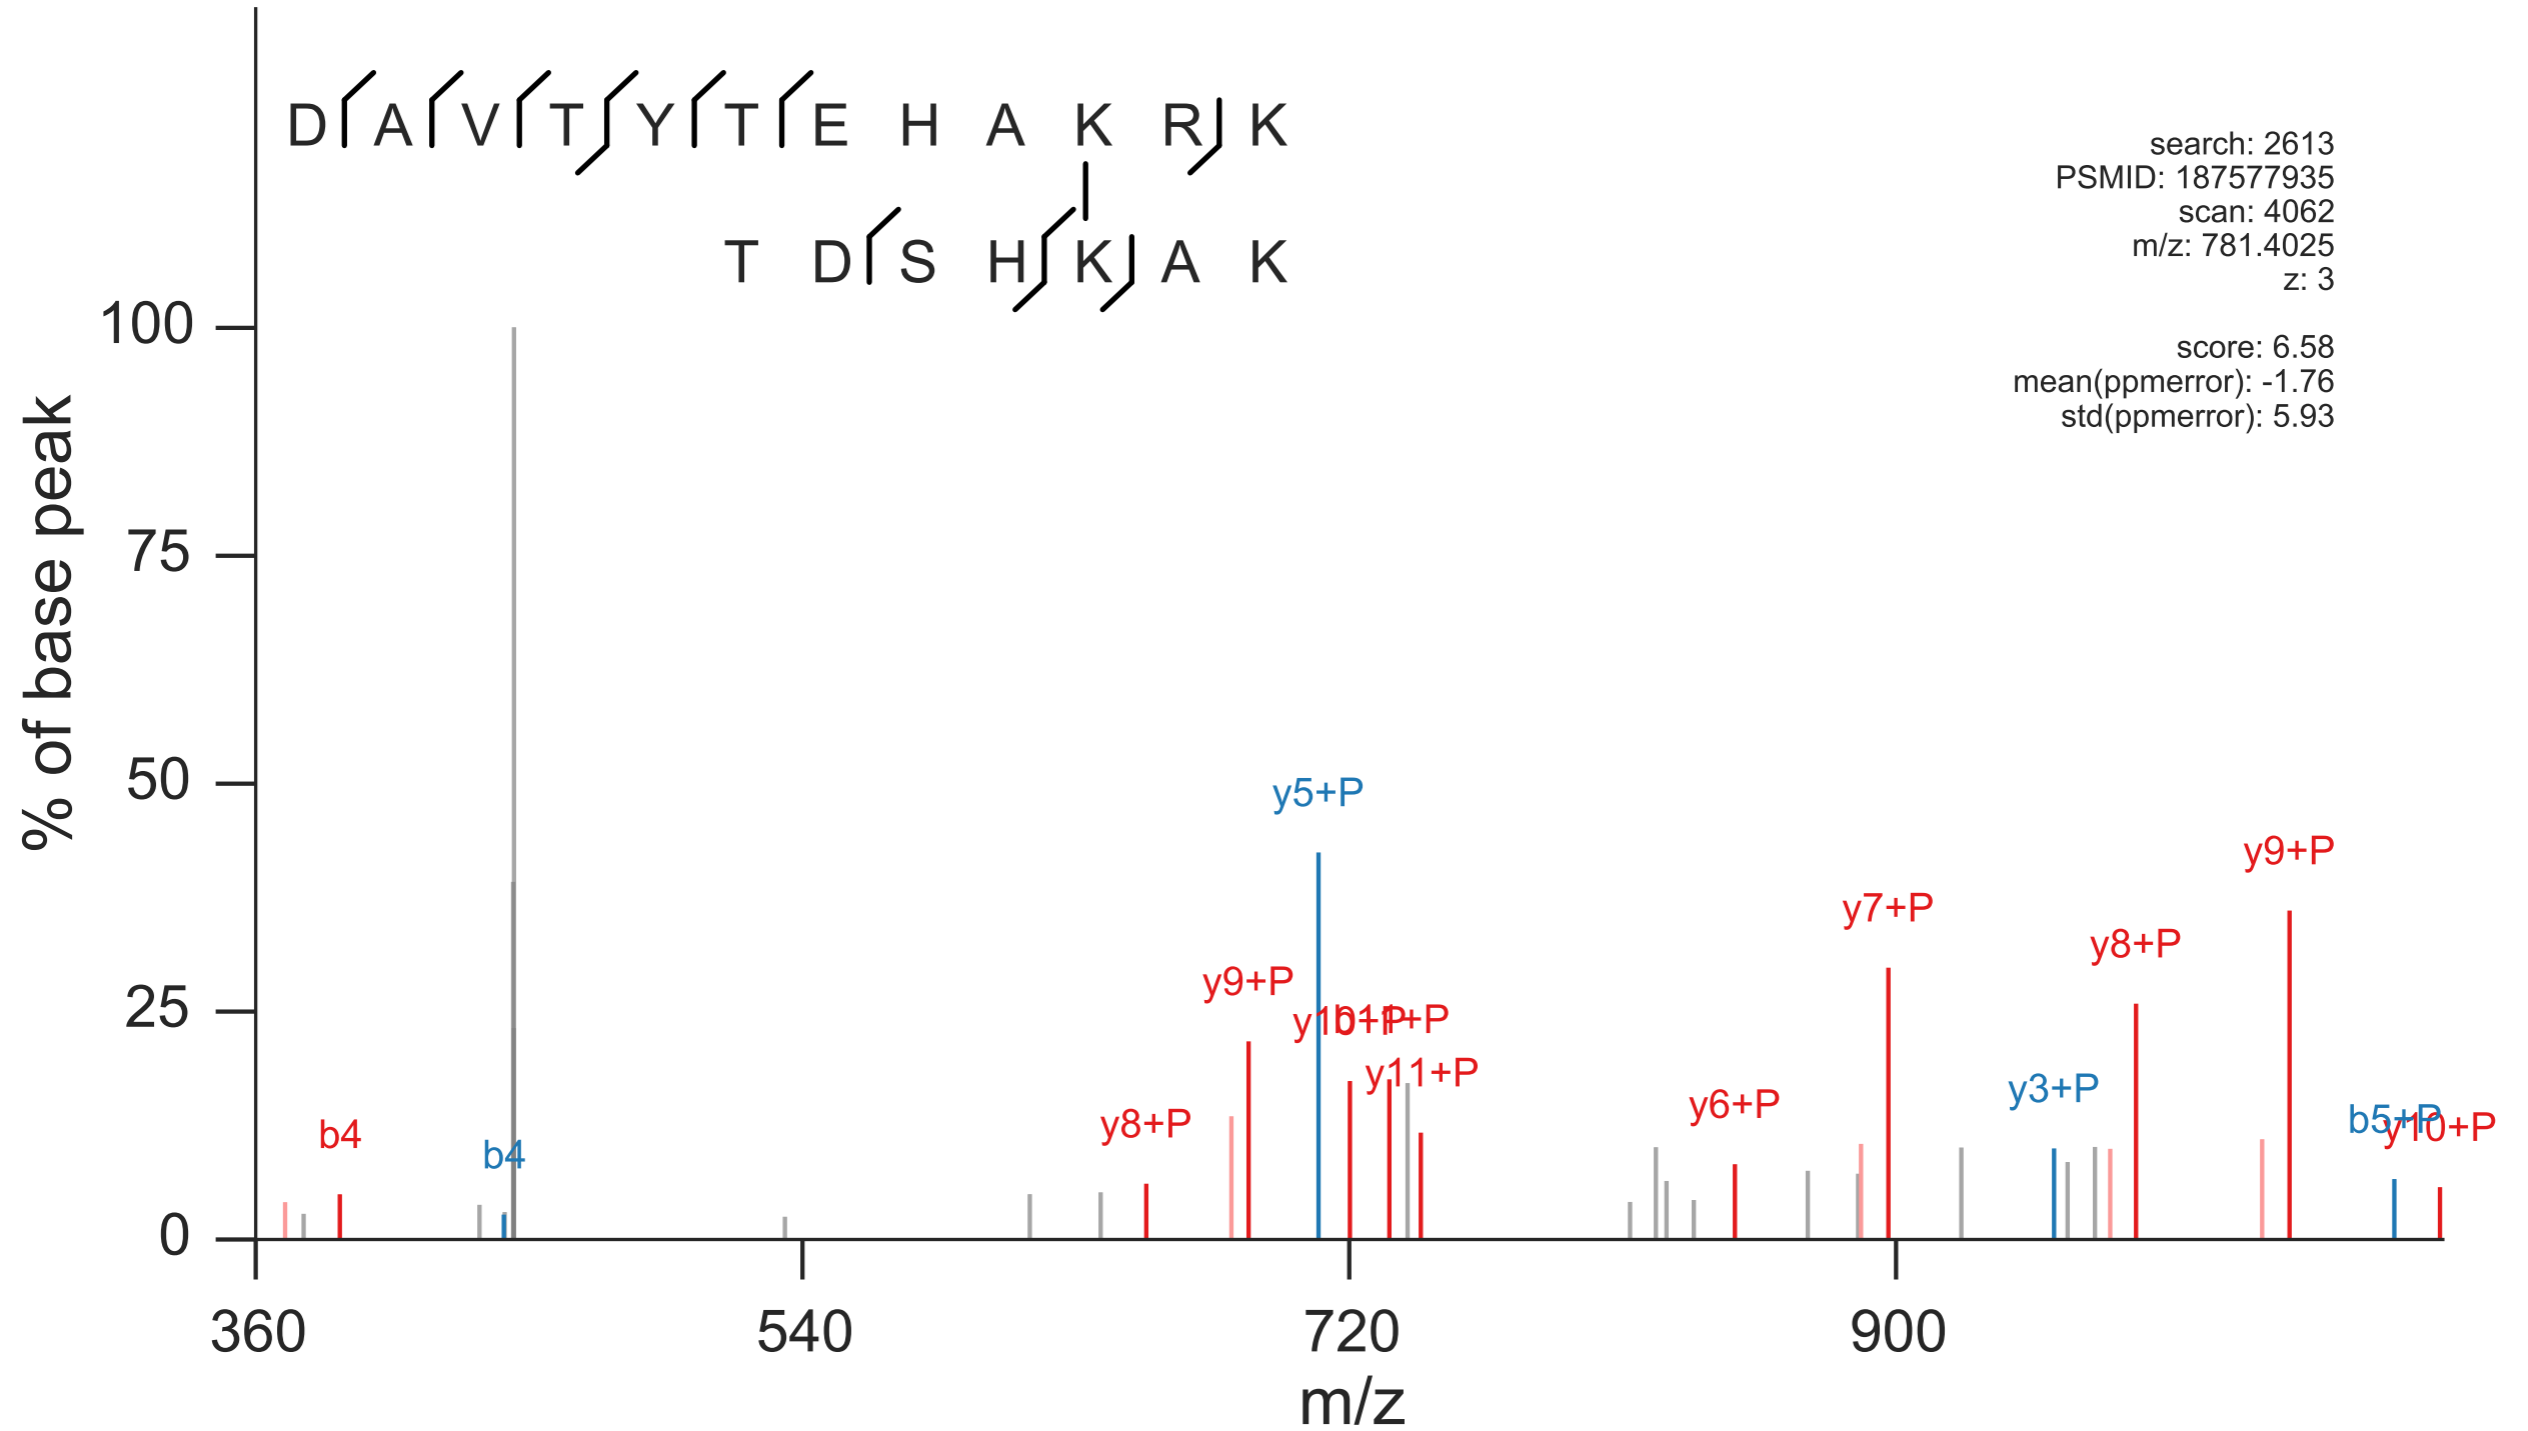

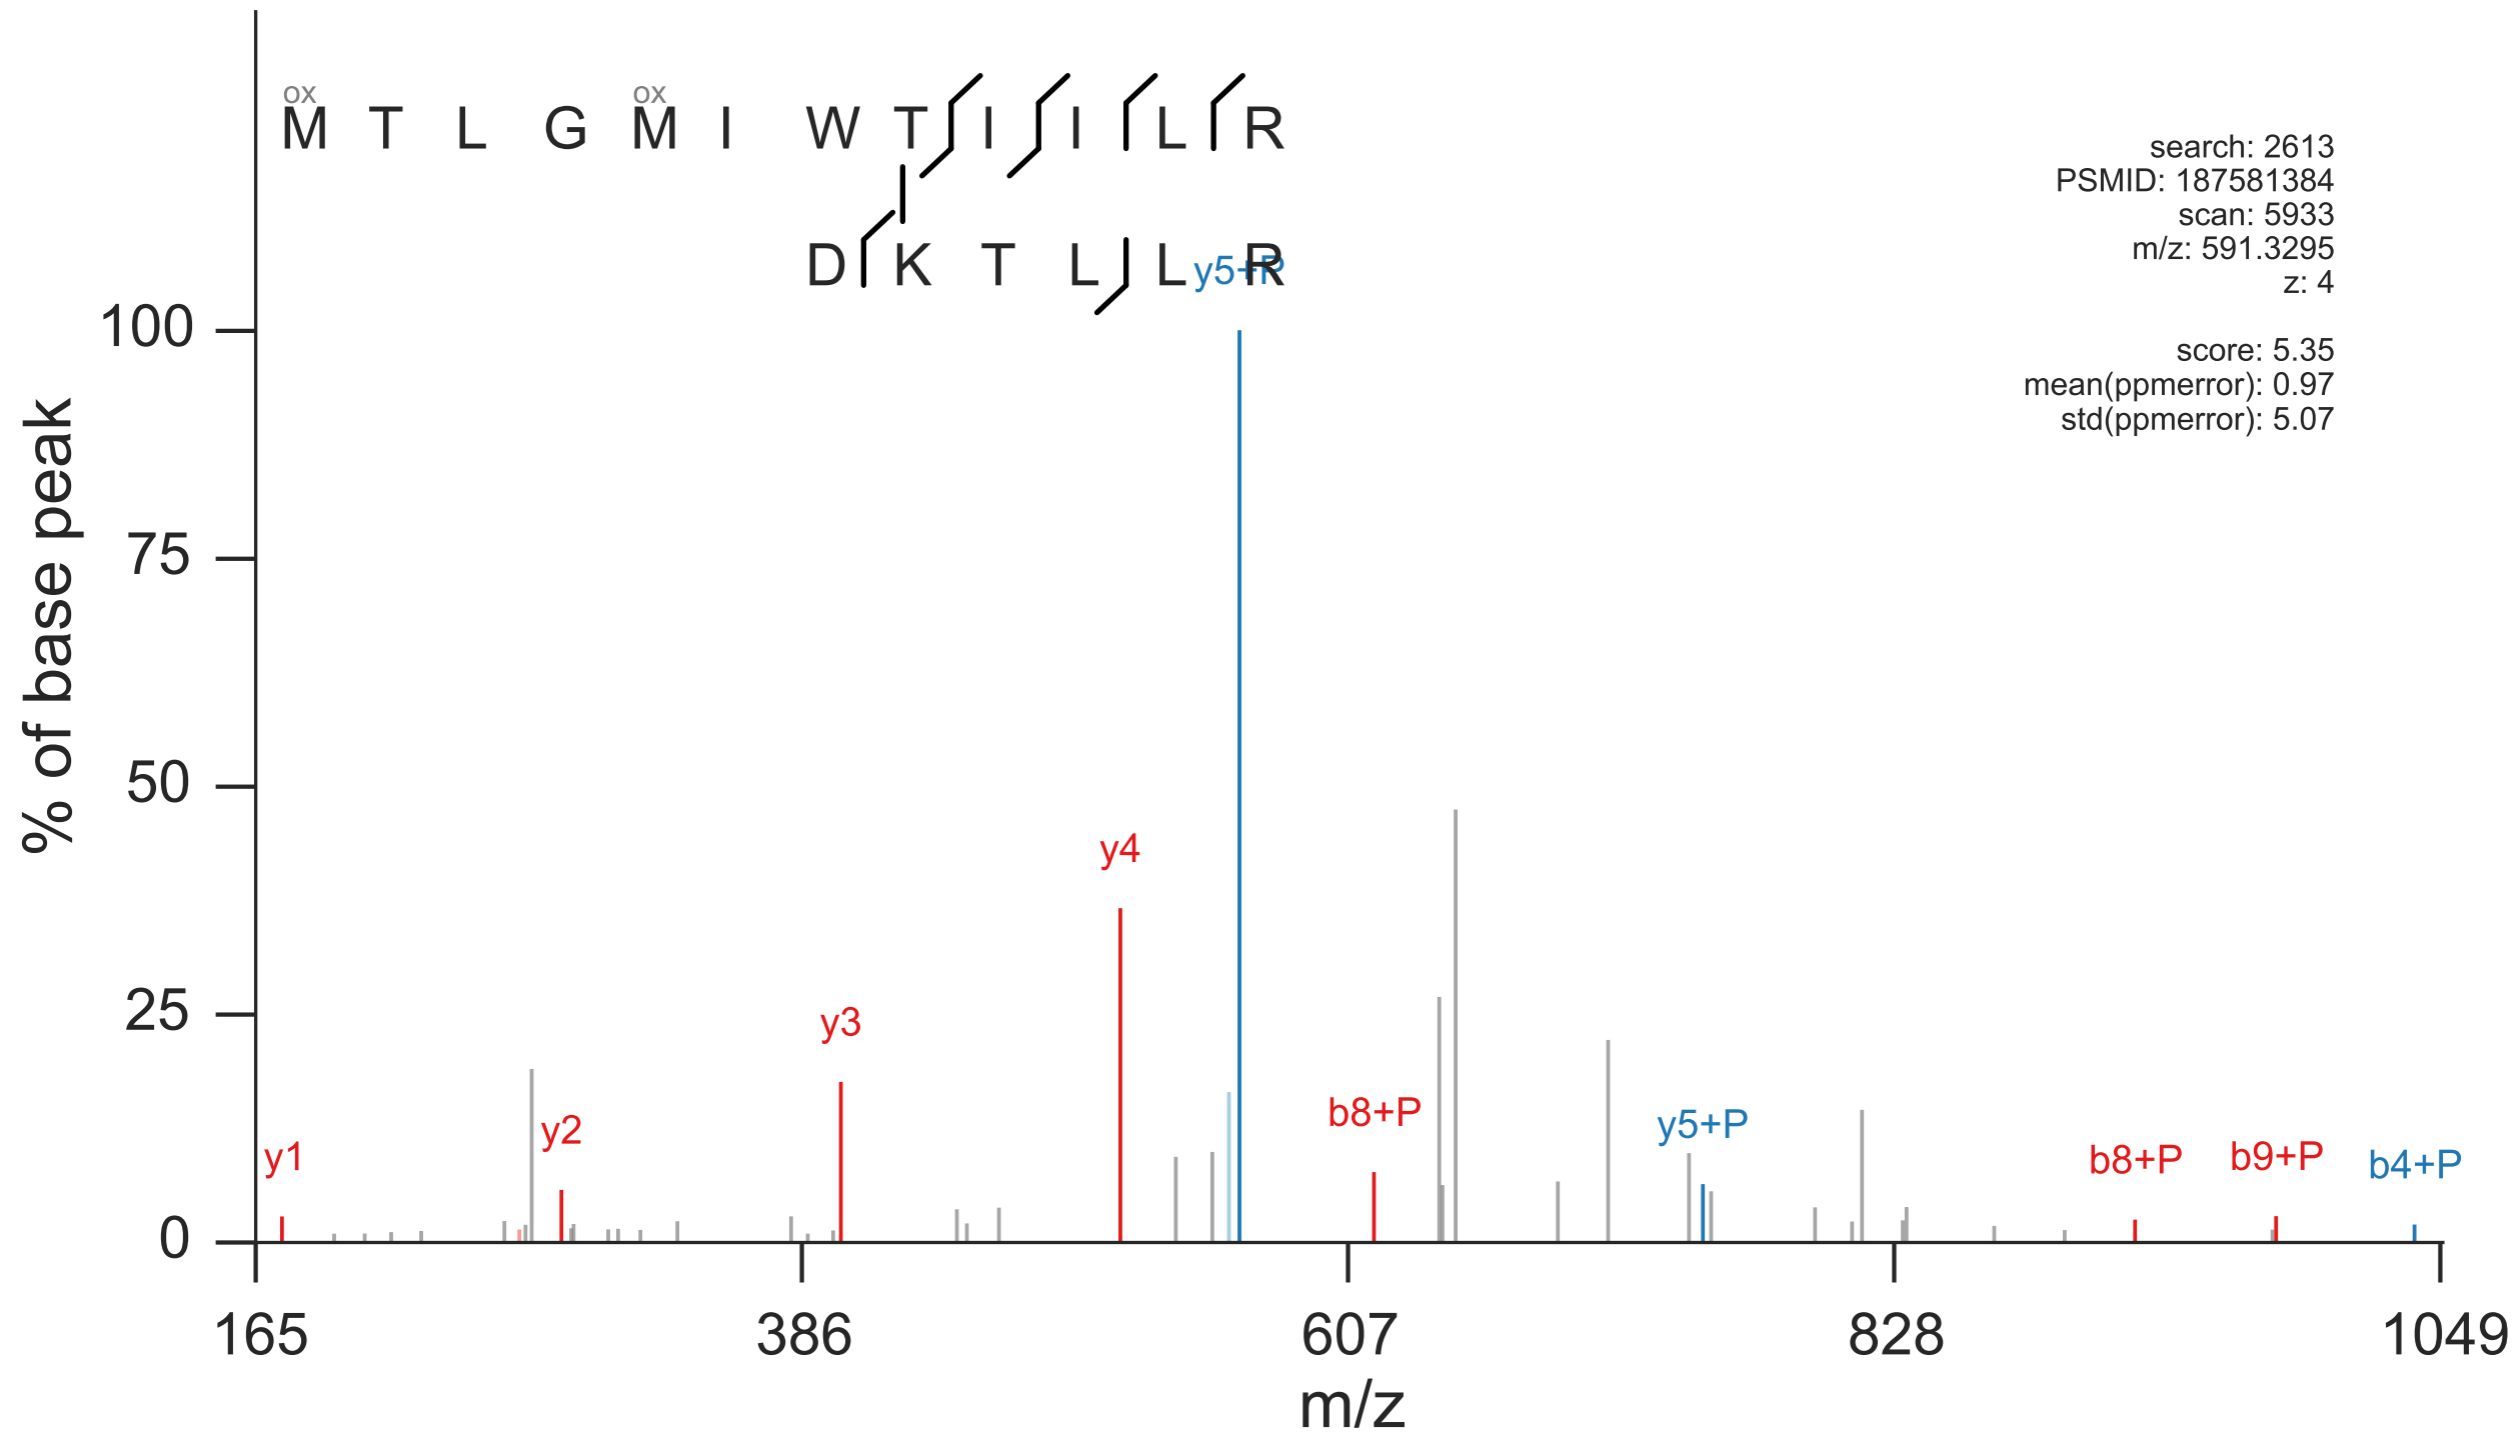

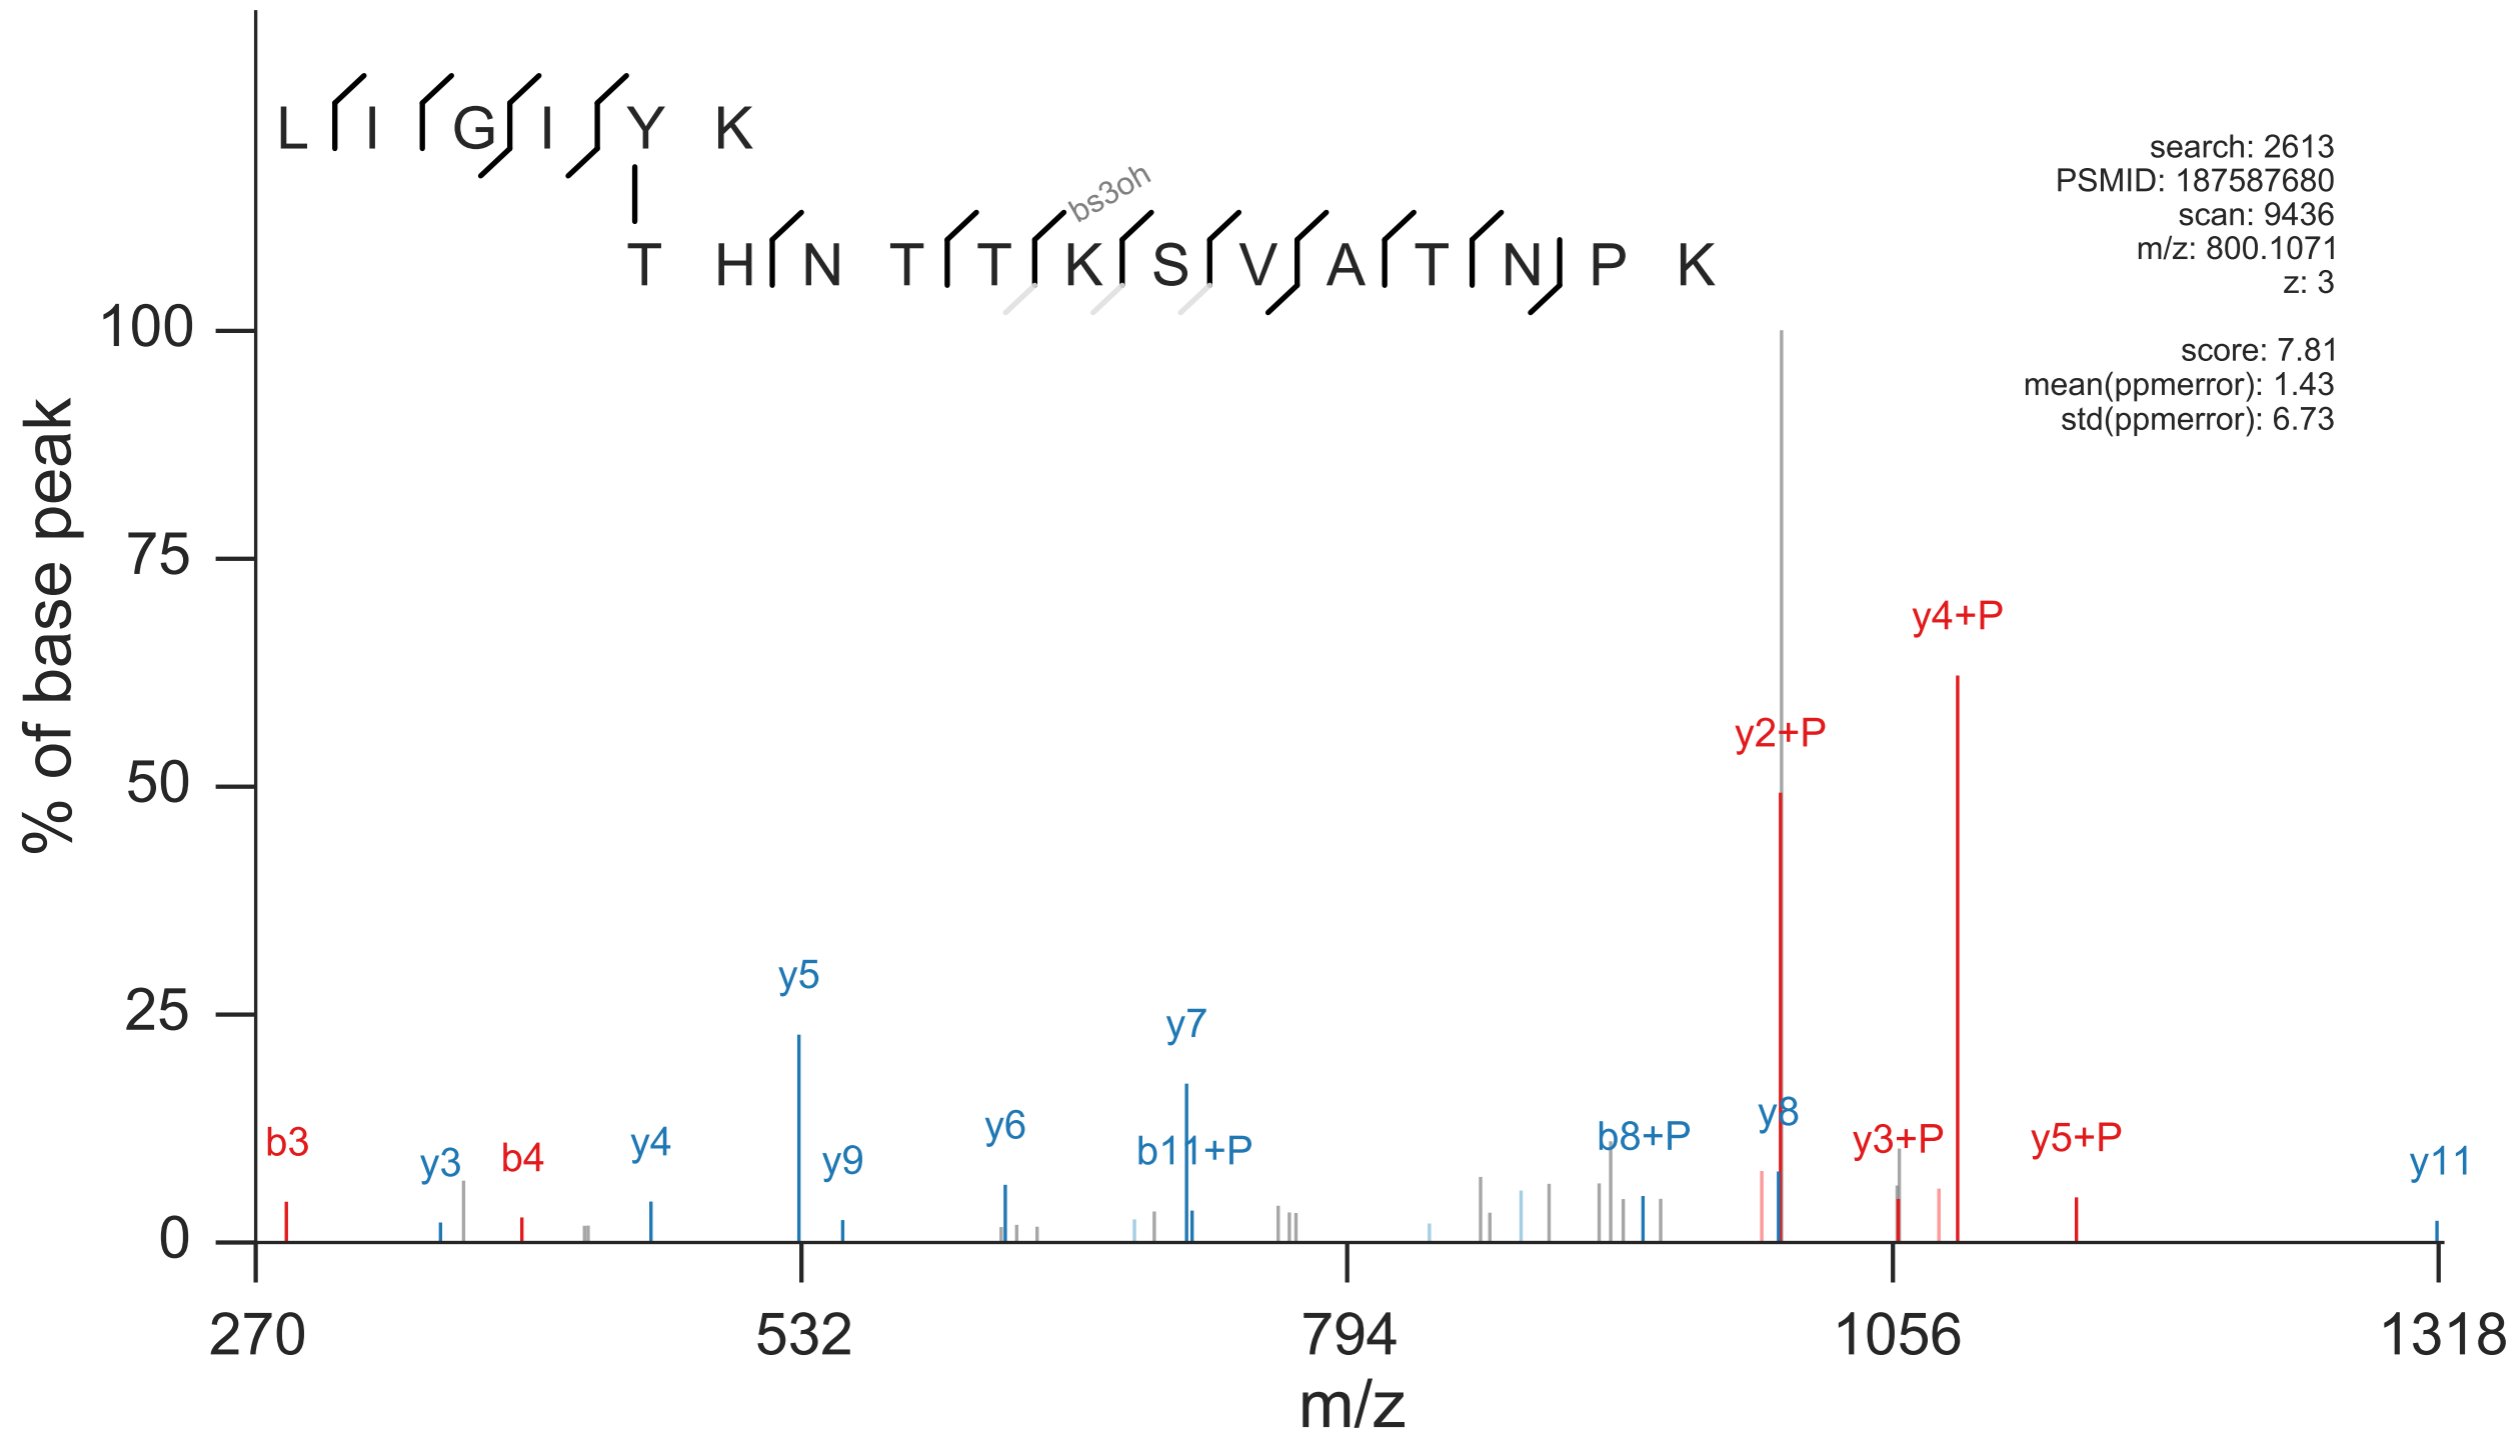

search: 2613  
 PSMID: 187587680  
 scan: 9436  
 m/z: 800.1071  
 z: 3

score: 7.81  
 mean(ppmerror): 1.43  
 std(ppmerror): 6.73

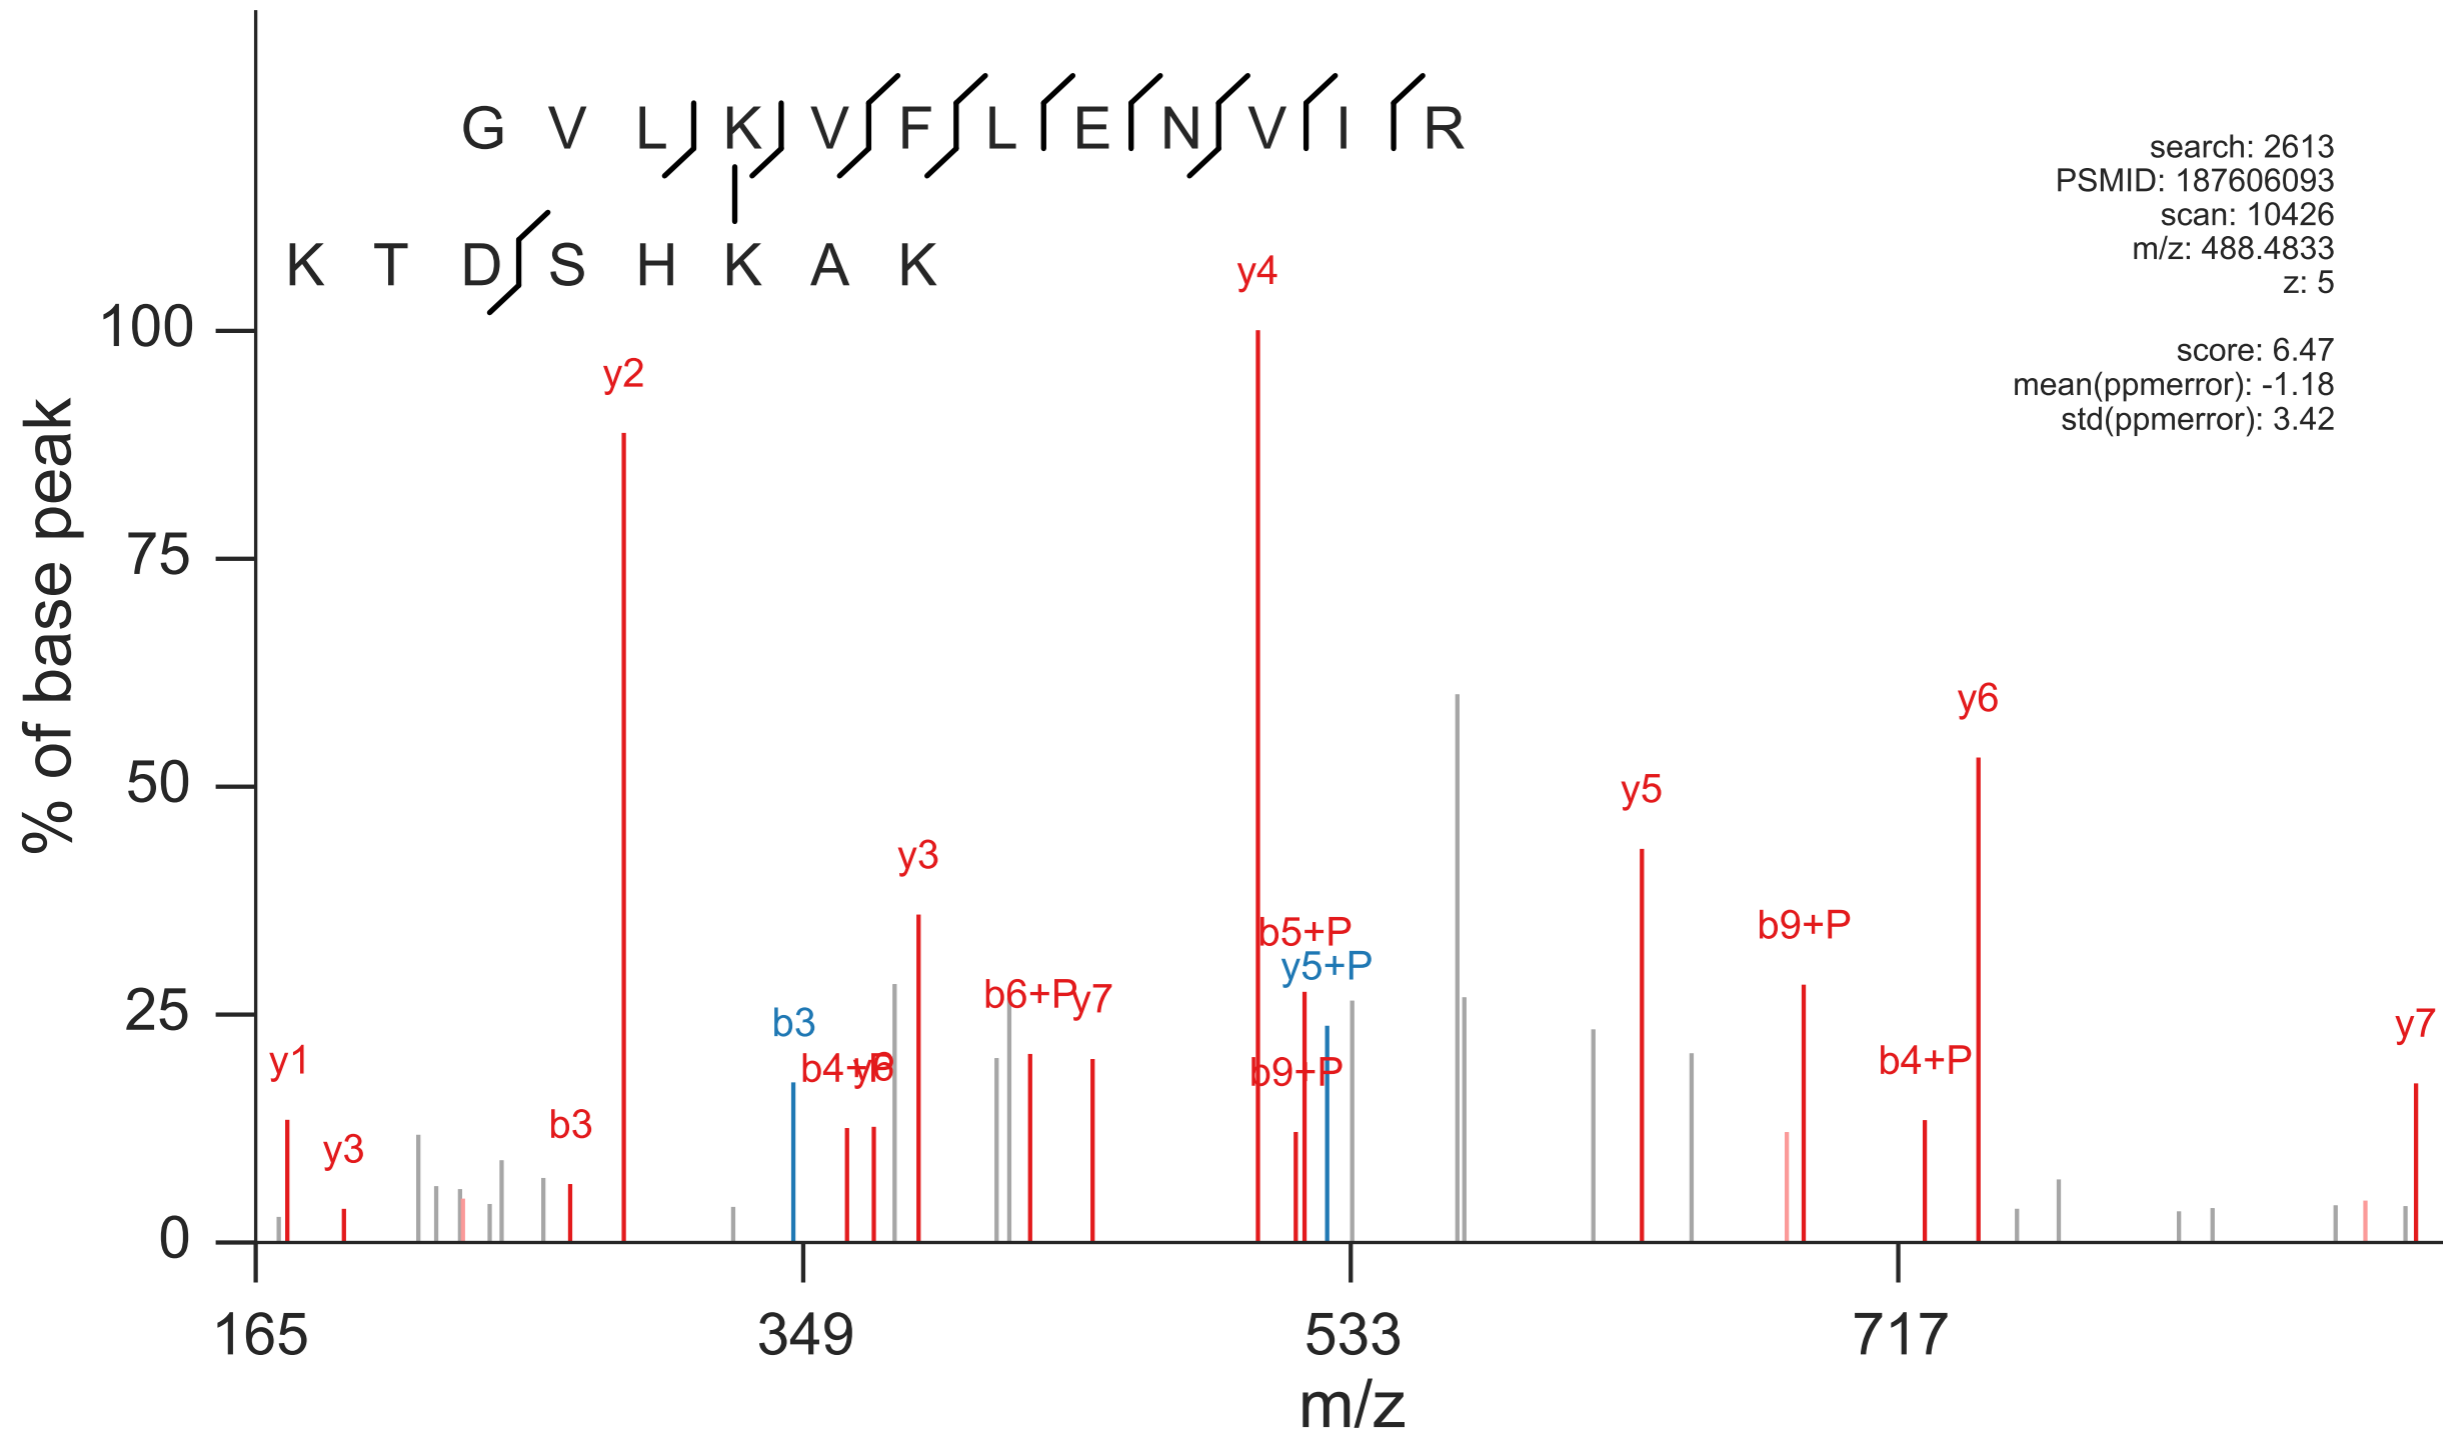

search: 2613  
 PSMID: 187606093  
 scan: 10426  
 m/z: 488.4833  
 z: 5

score: 6.47  
 mean(ppmerror): -1.18  
 std(ppmerror): 3.42



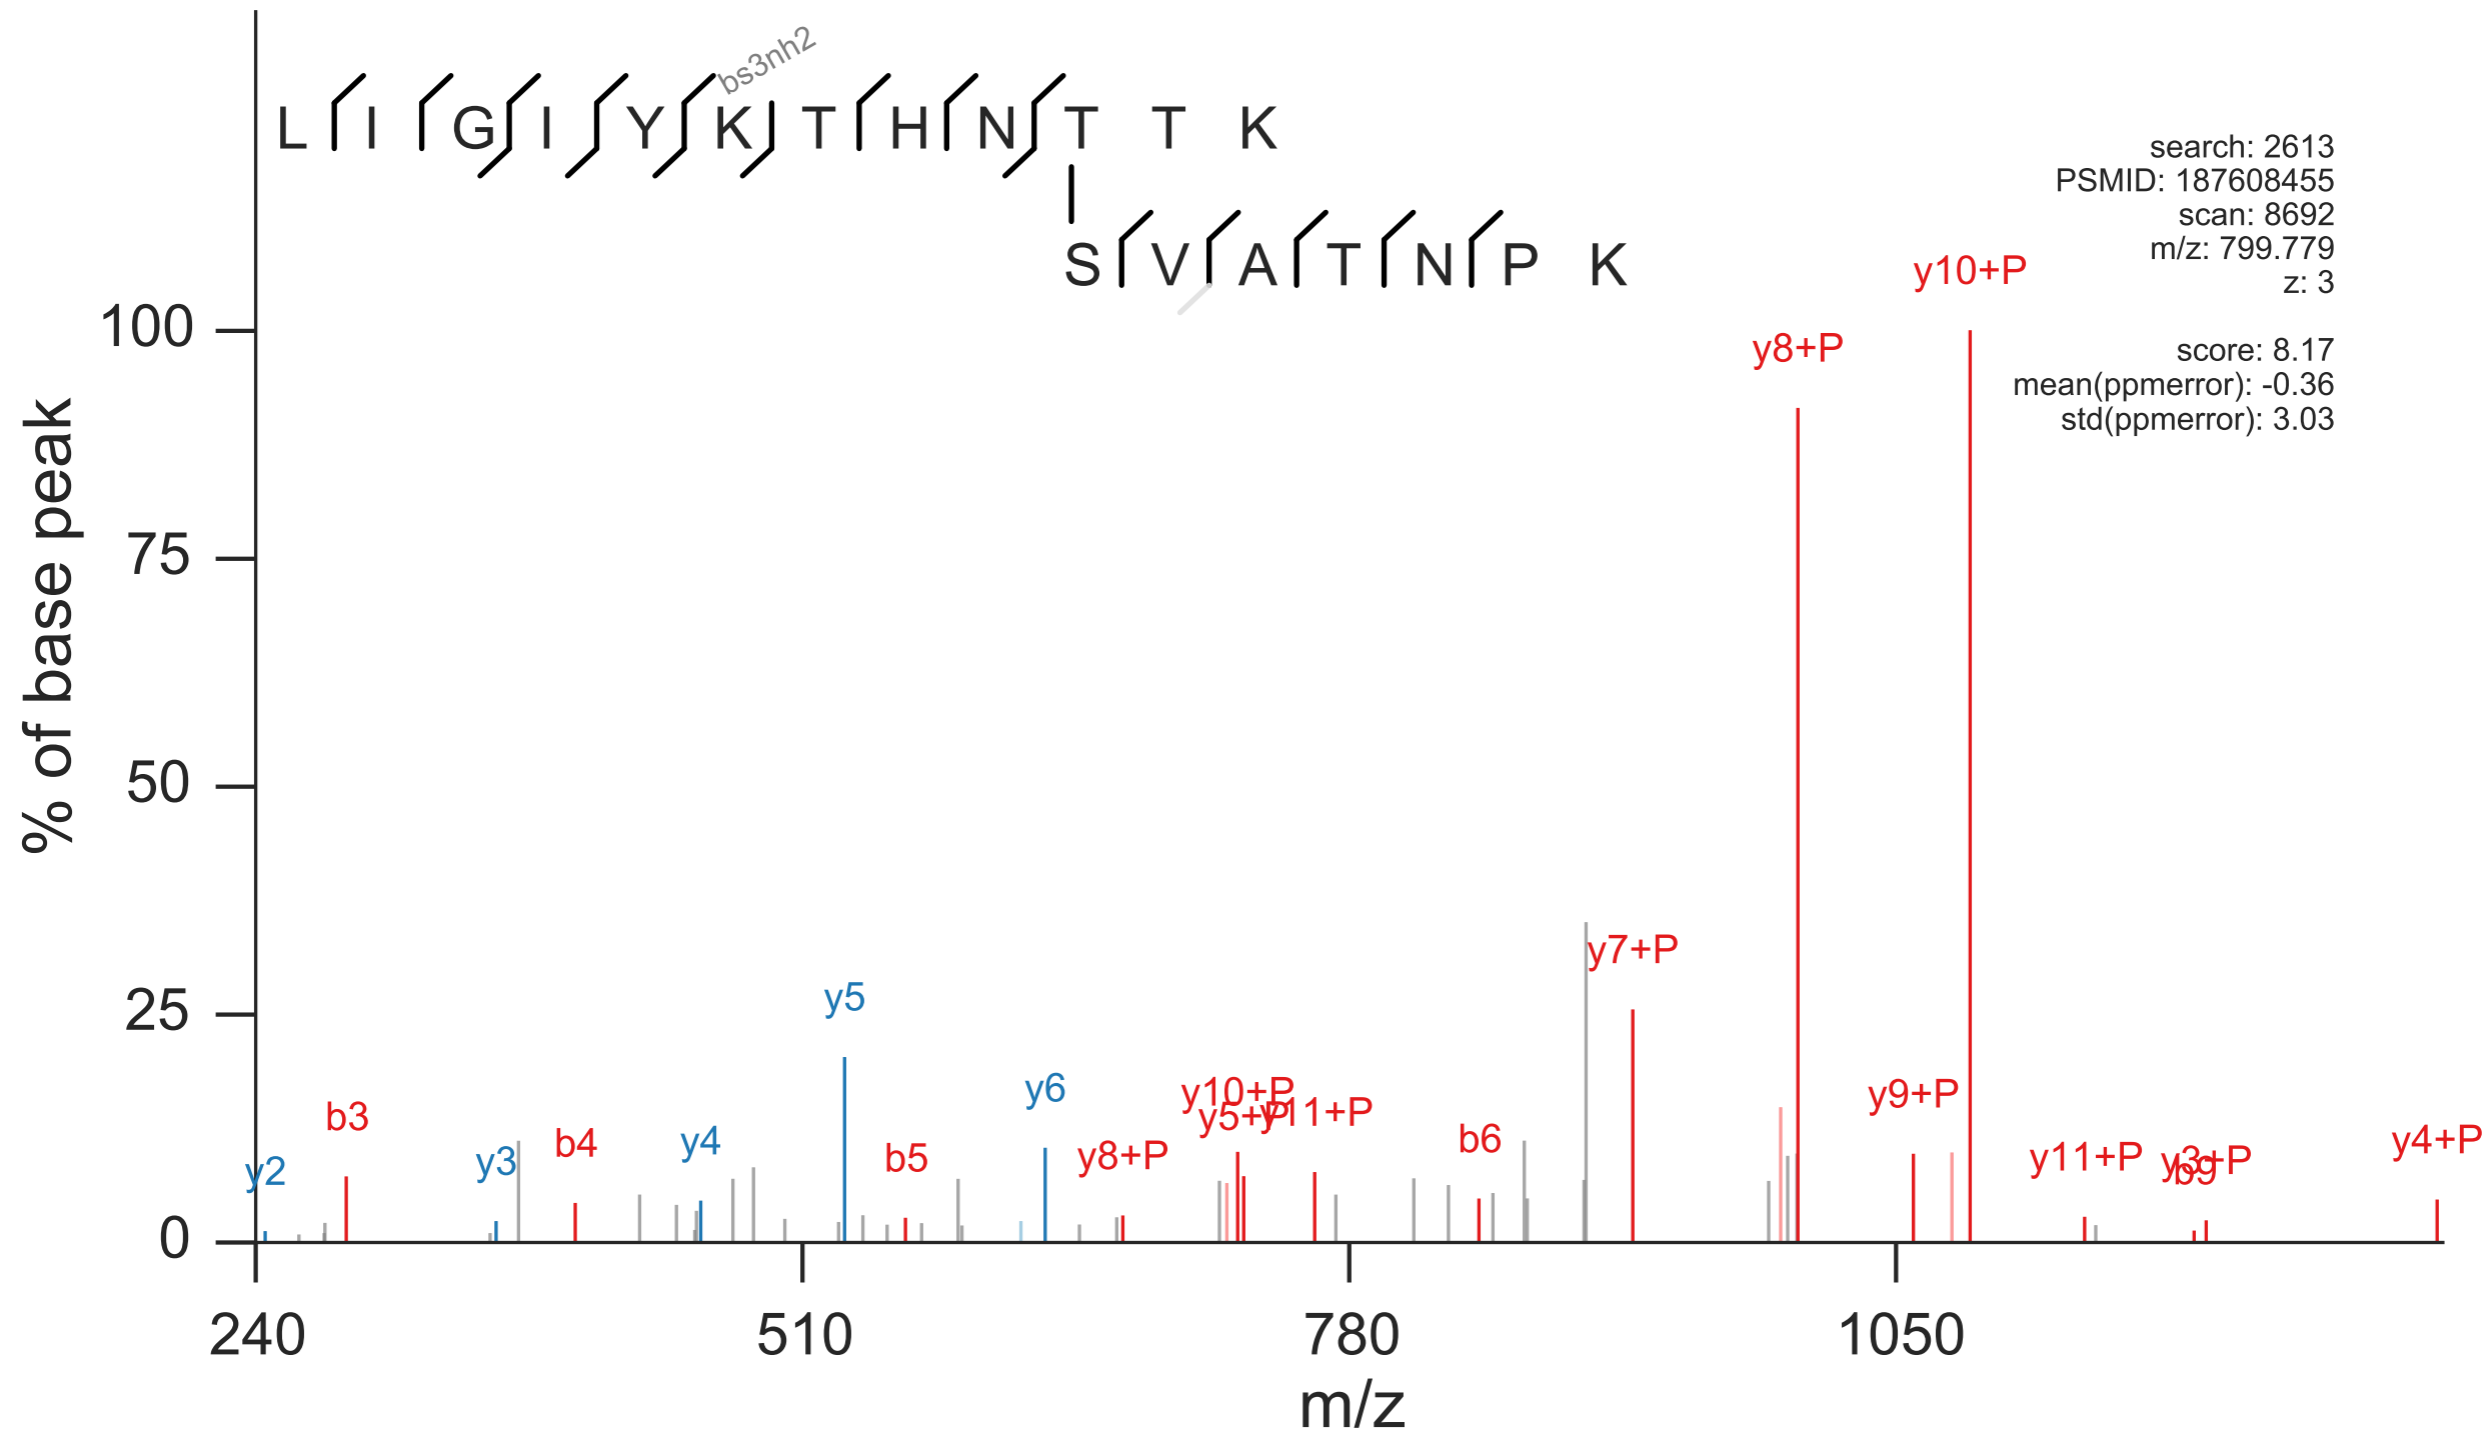

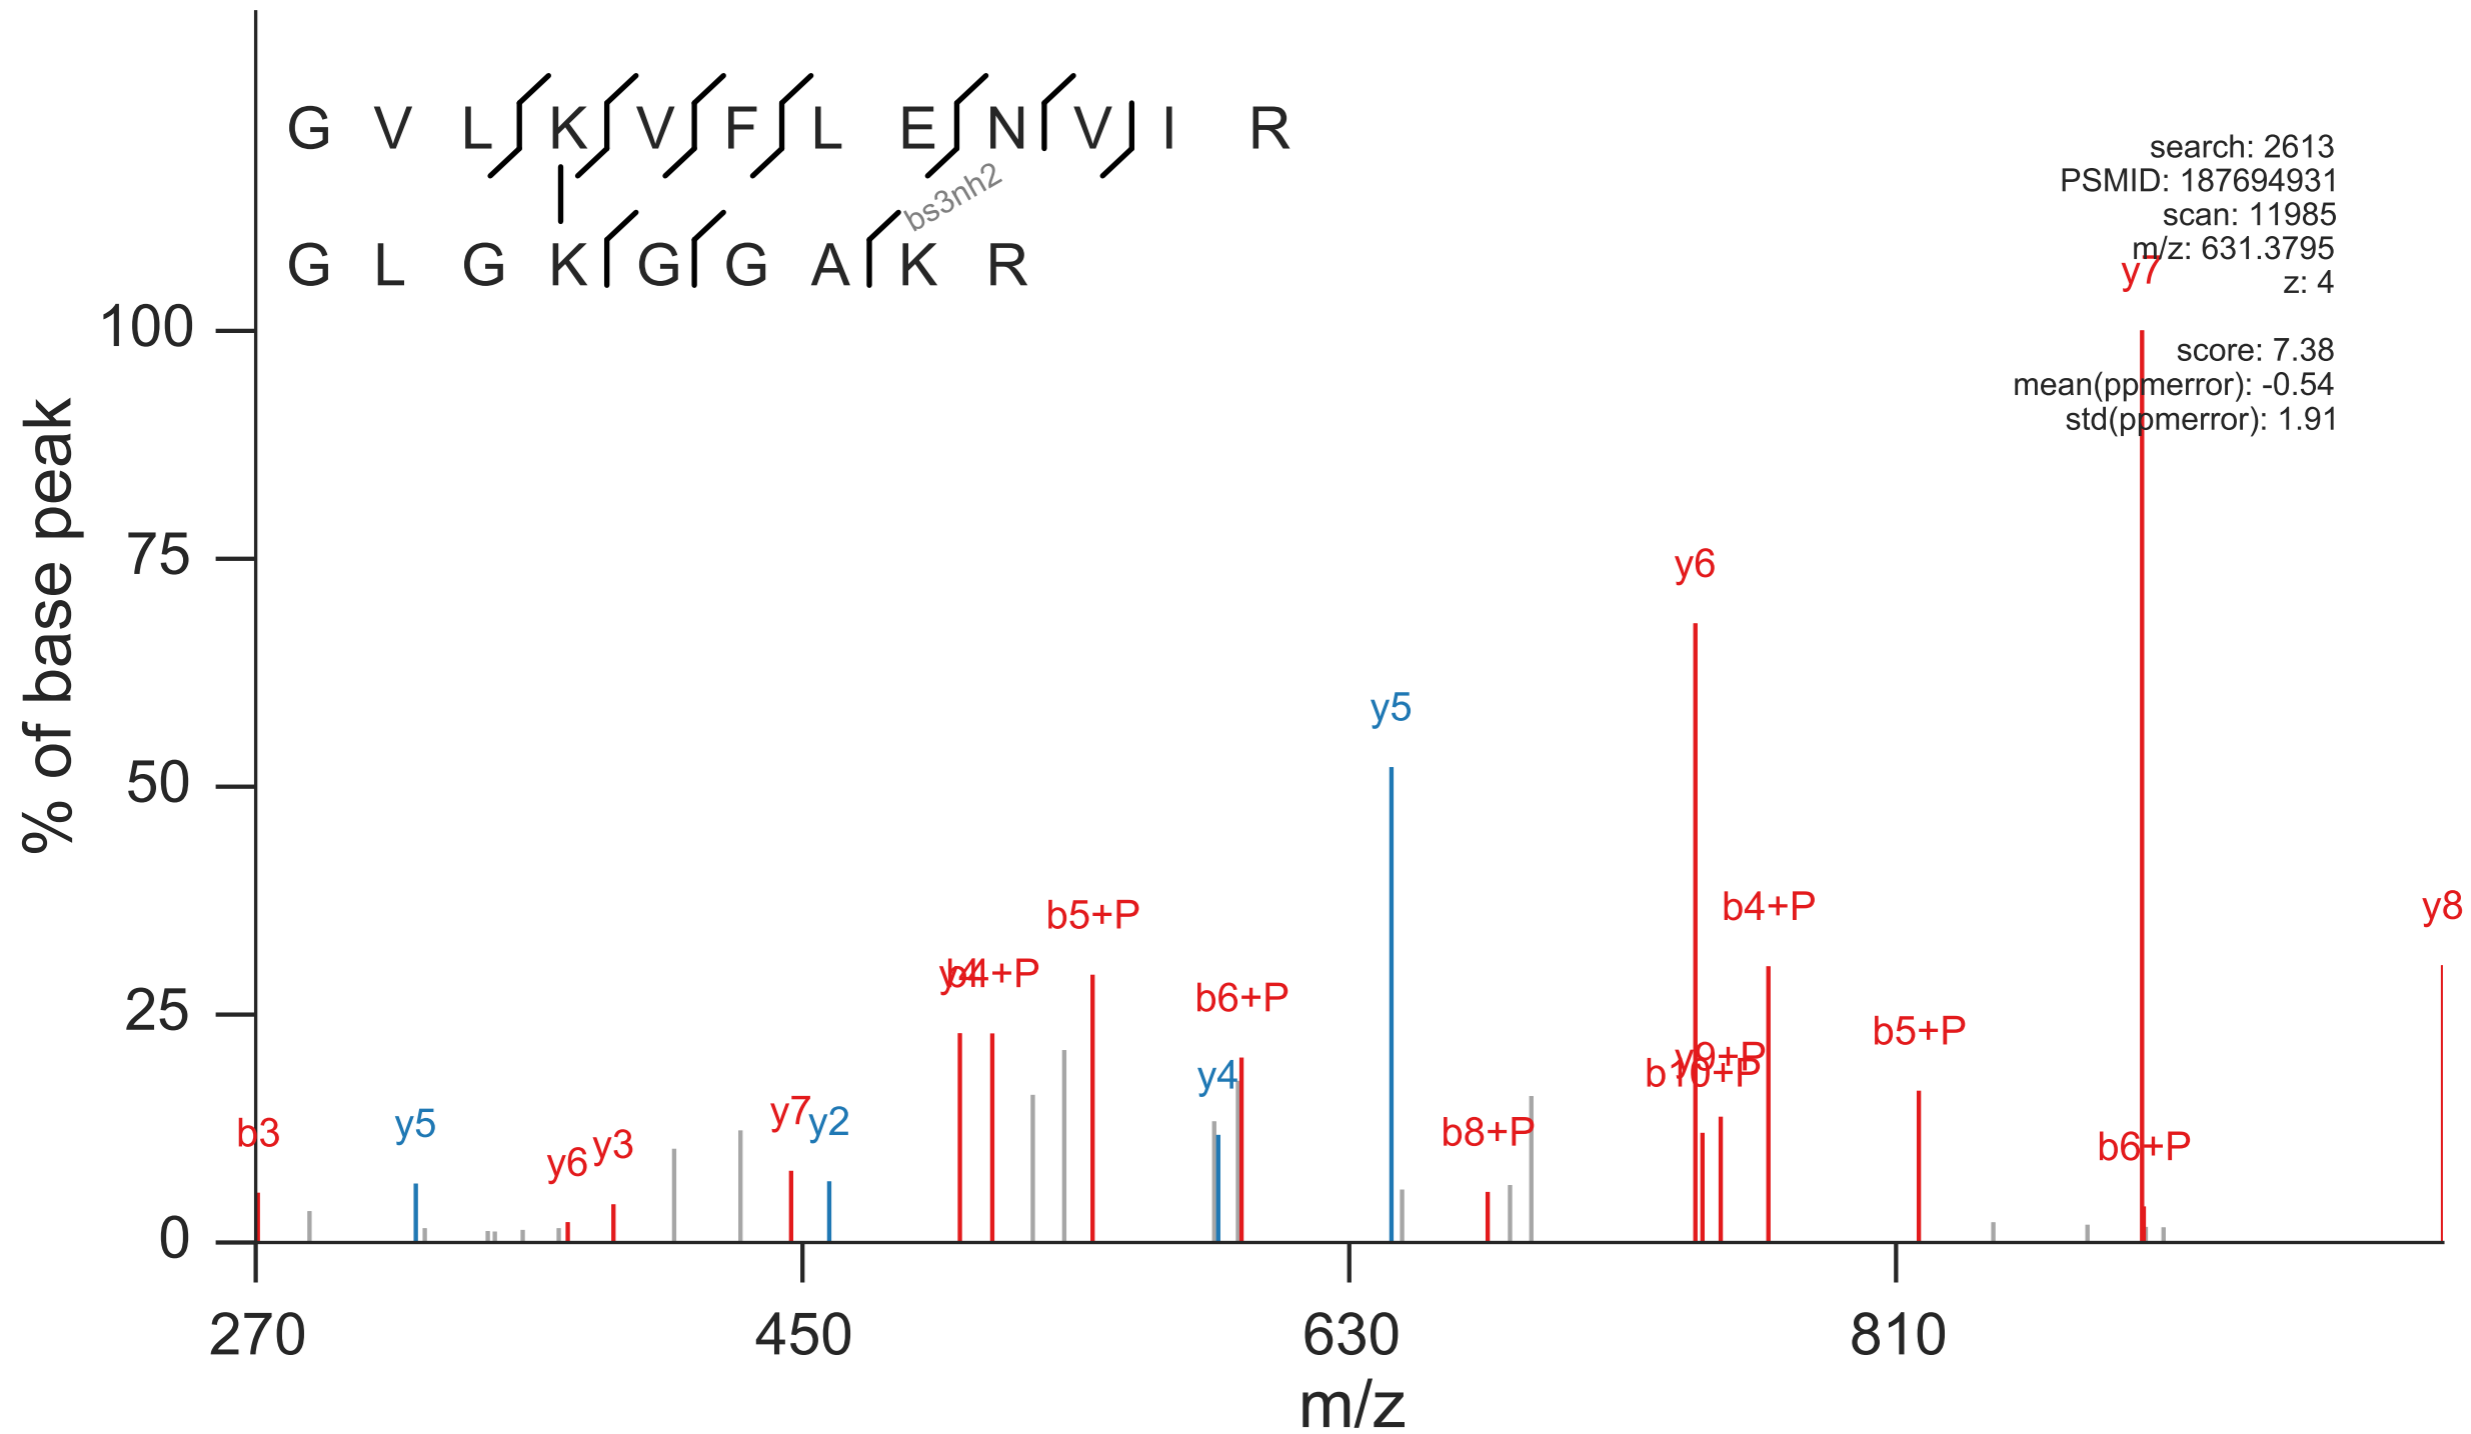

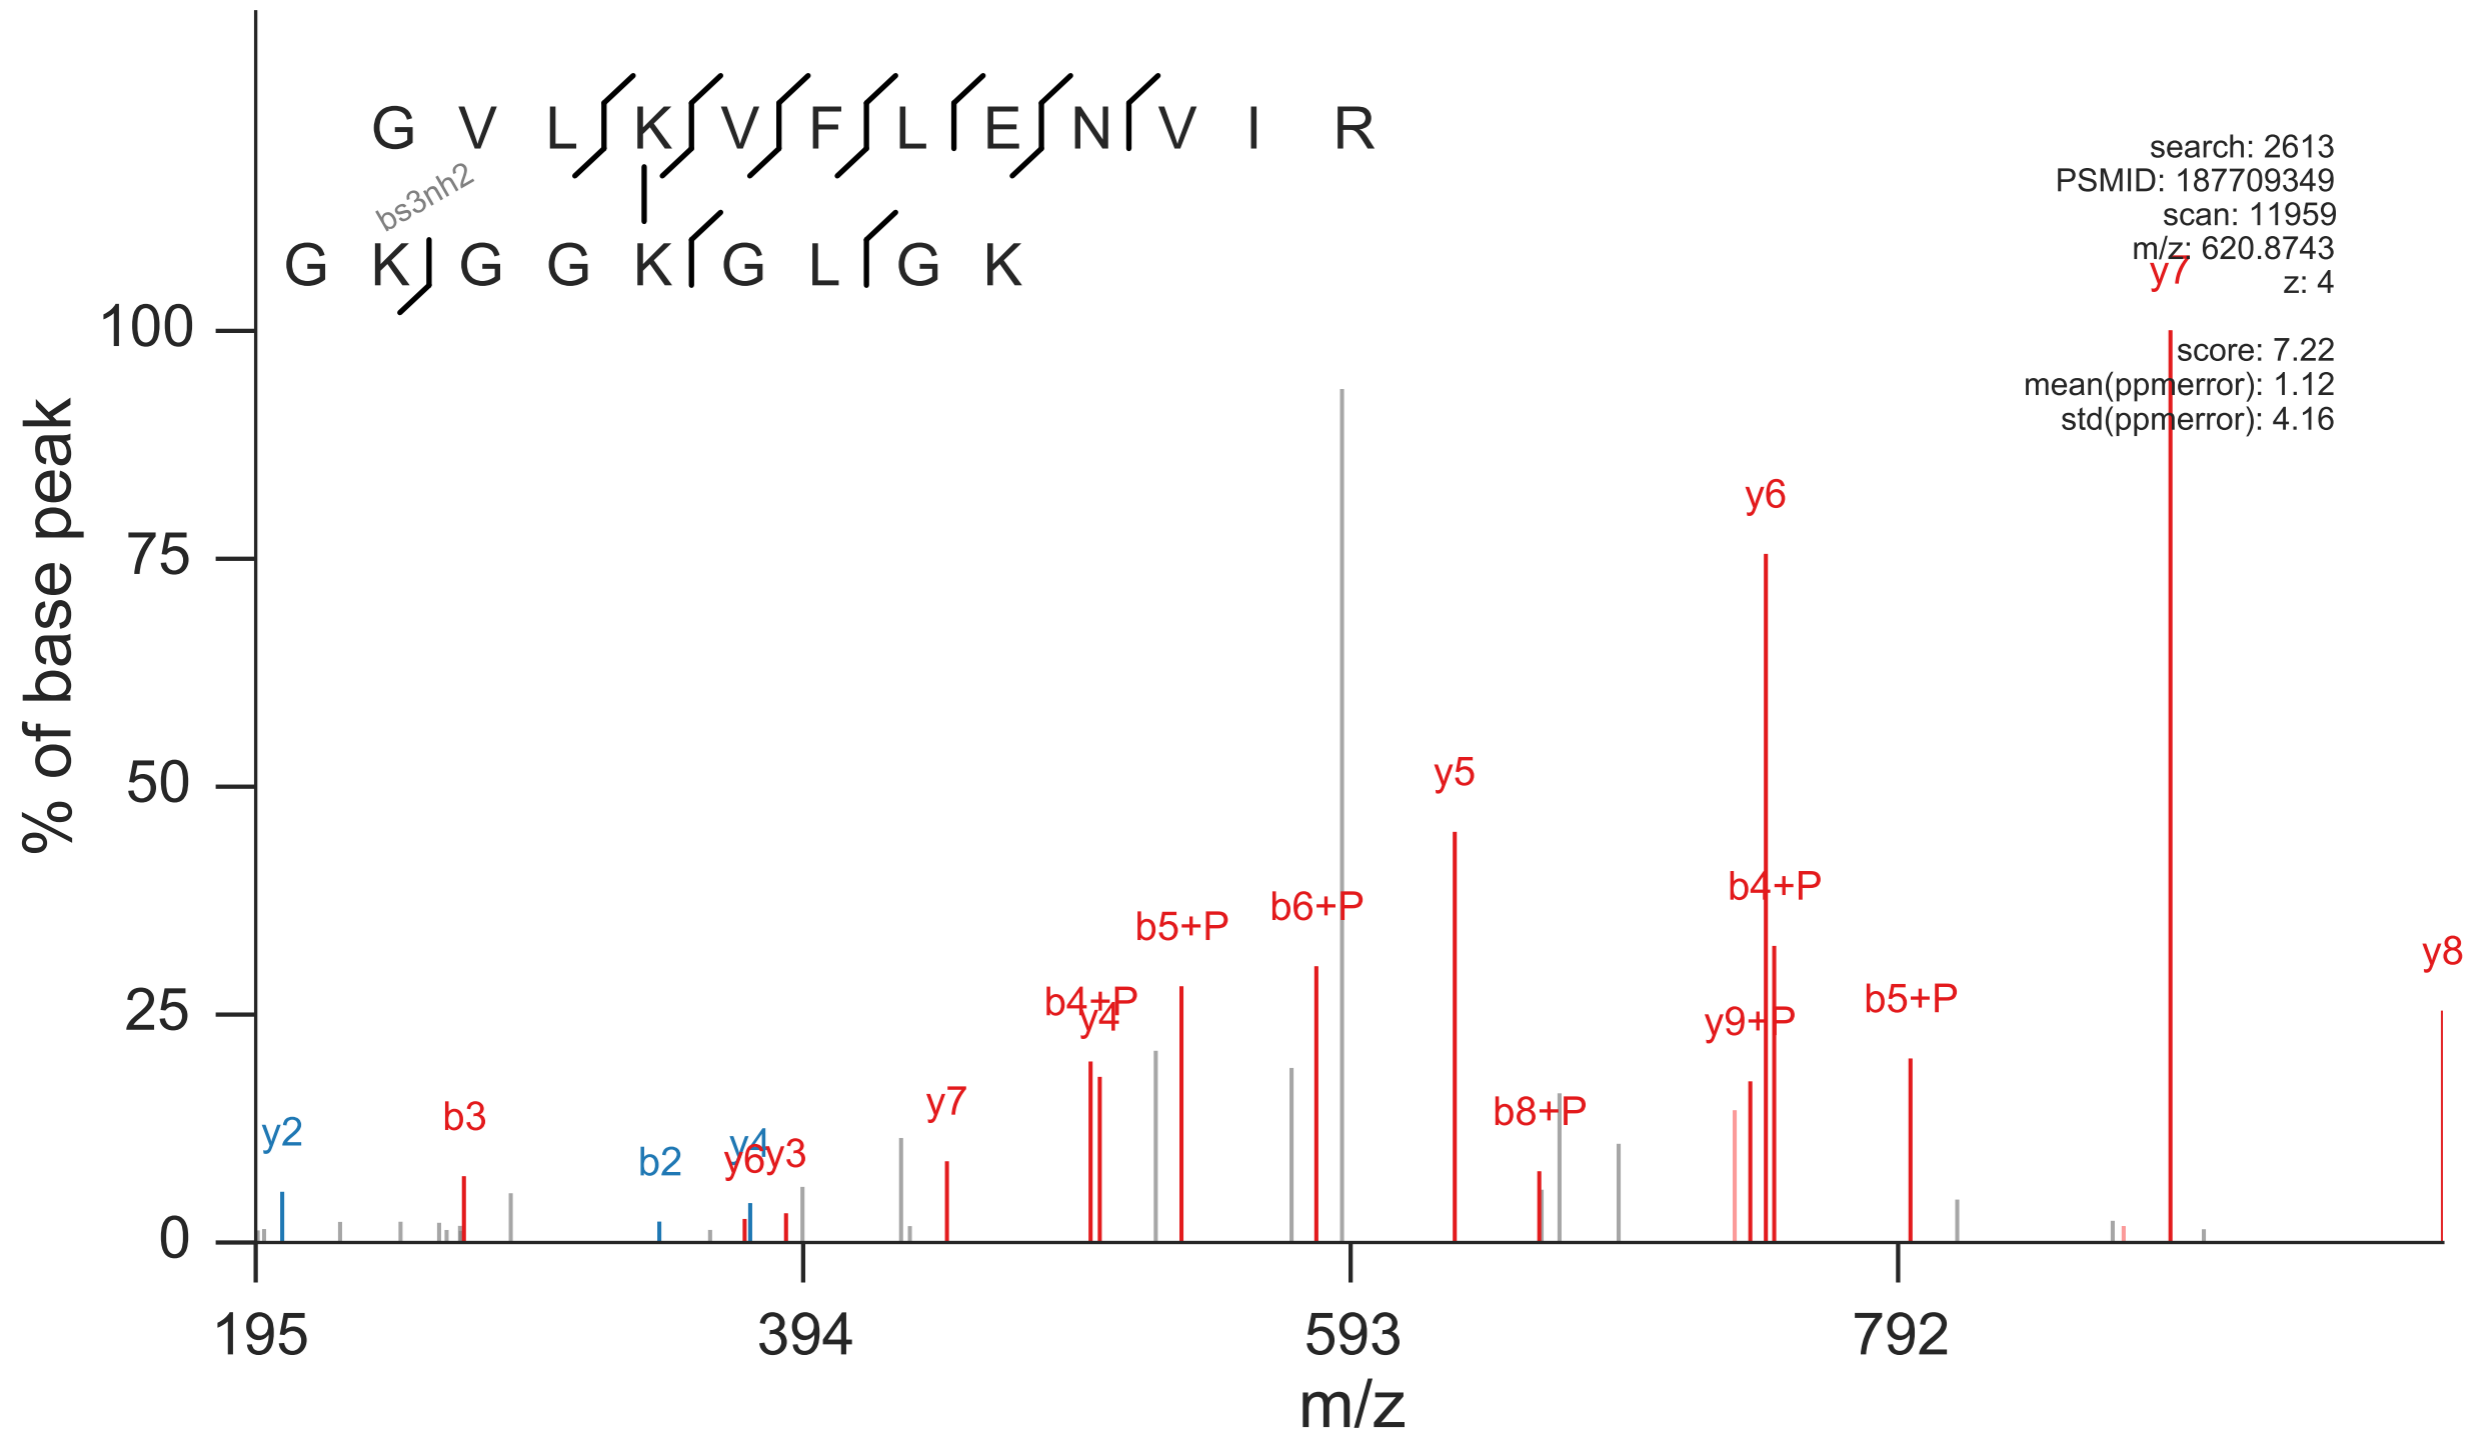

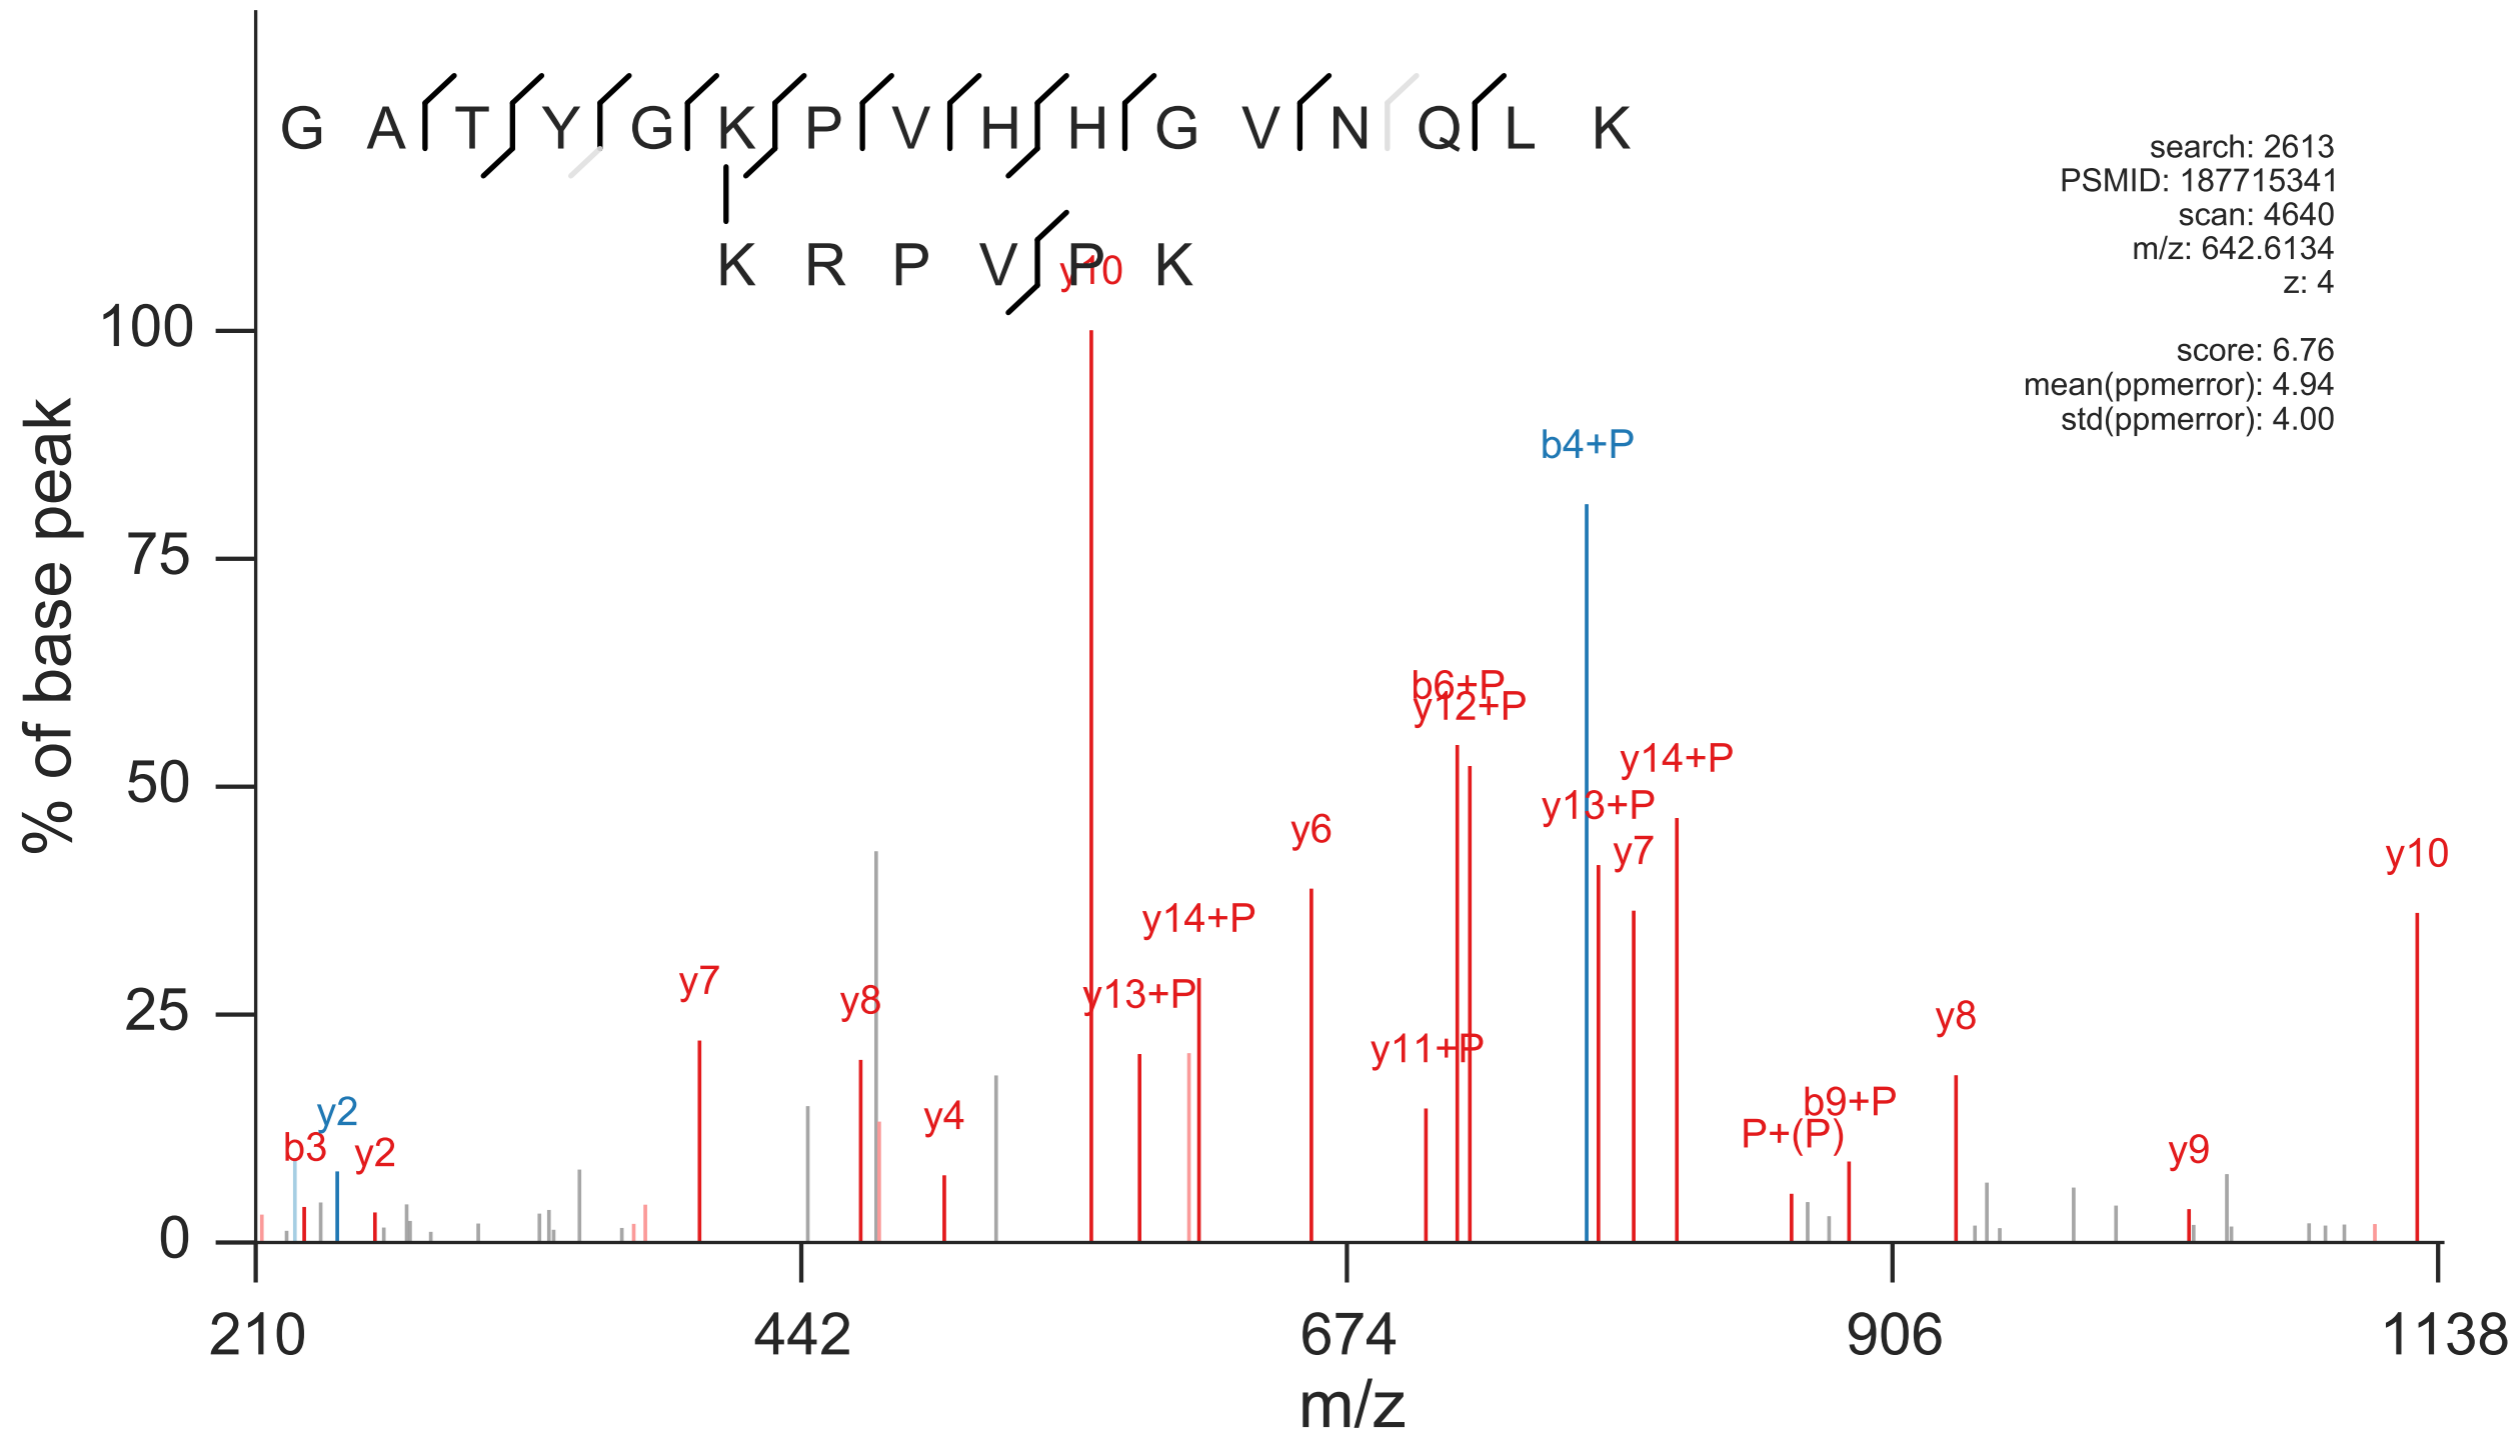

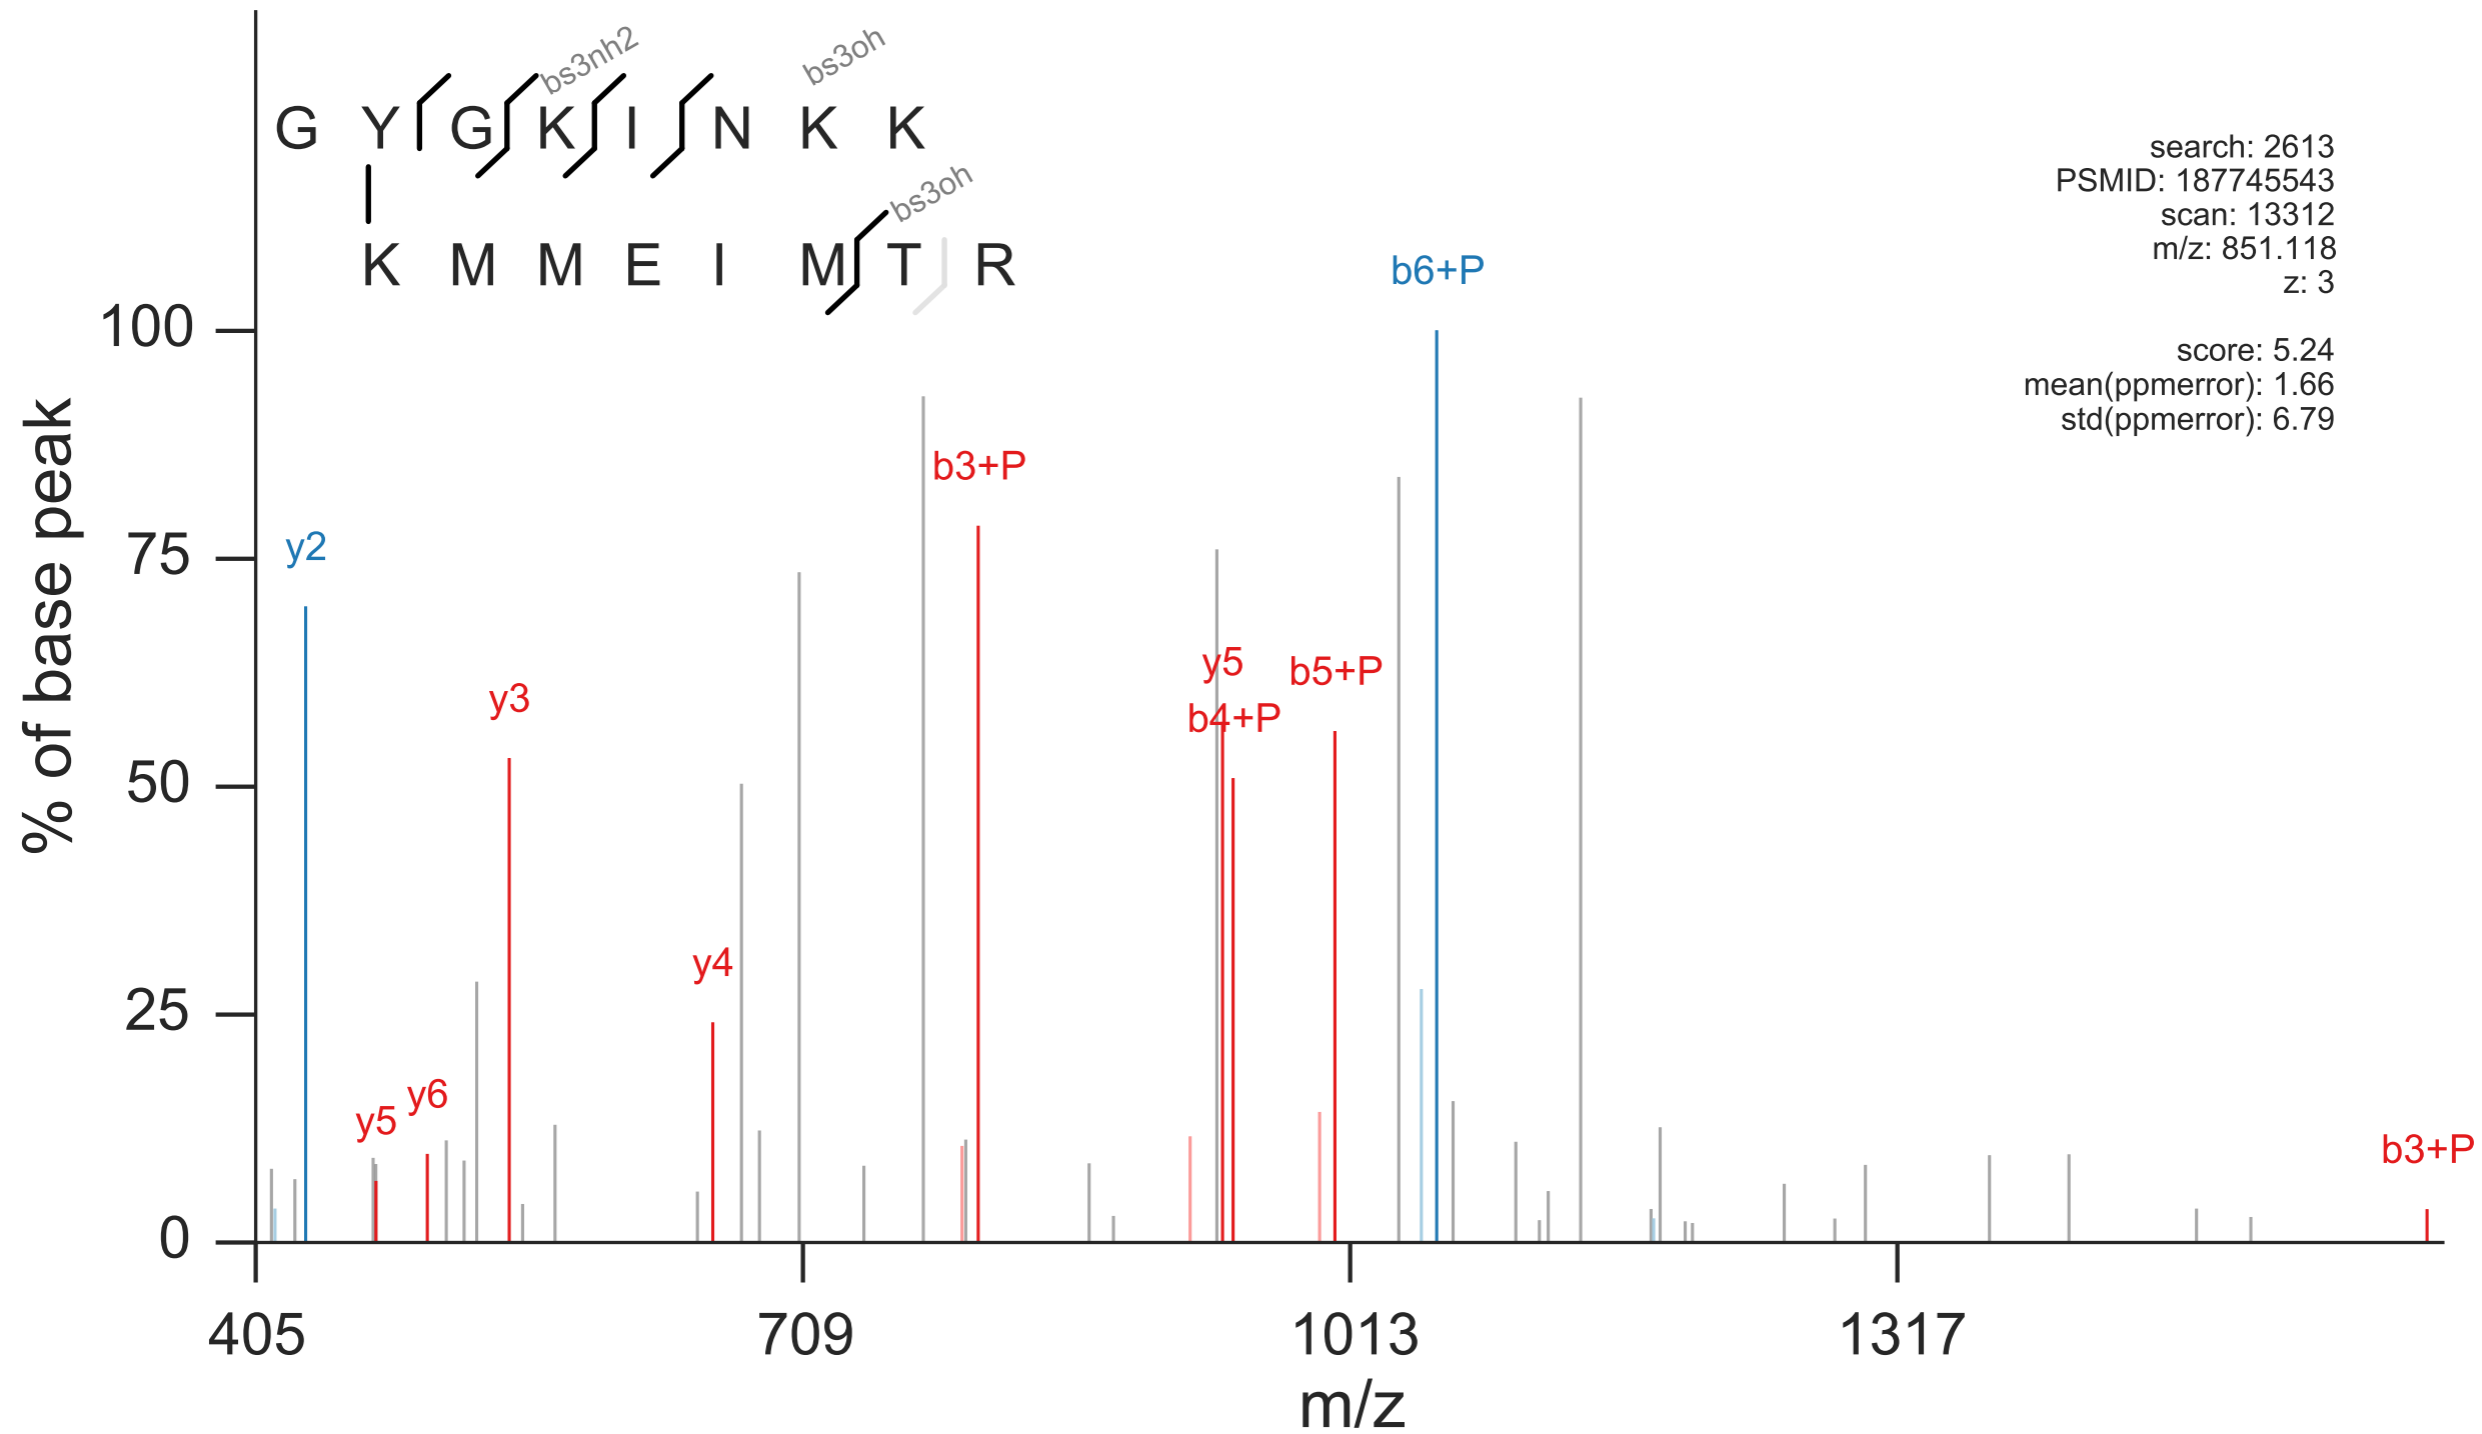

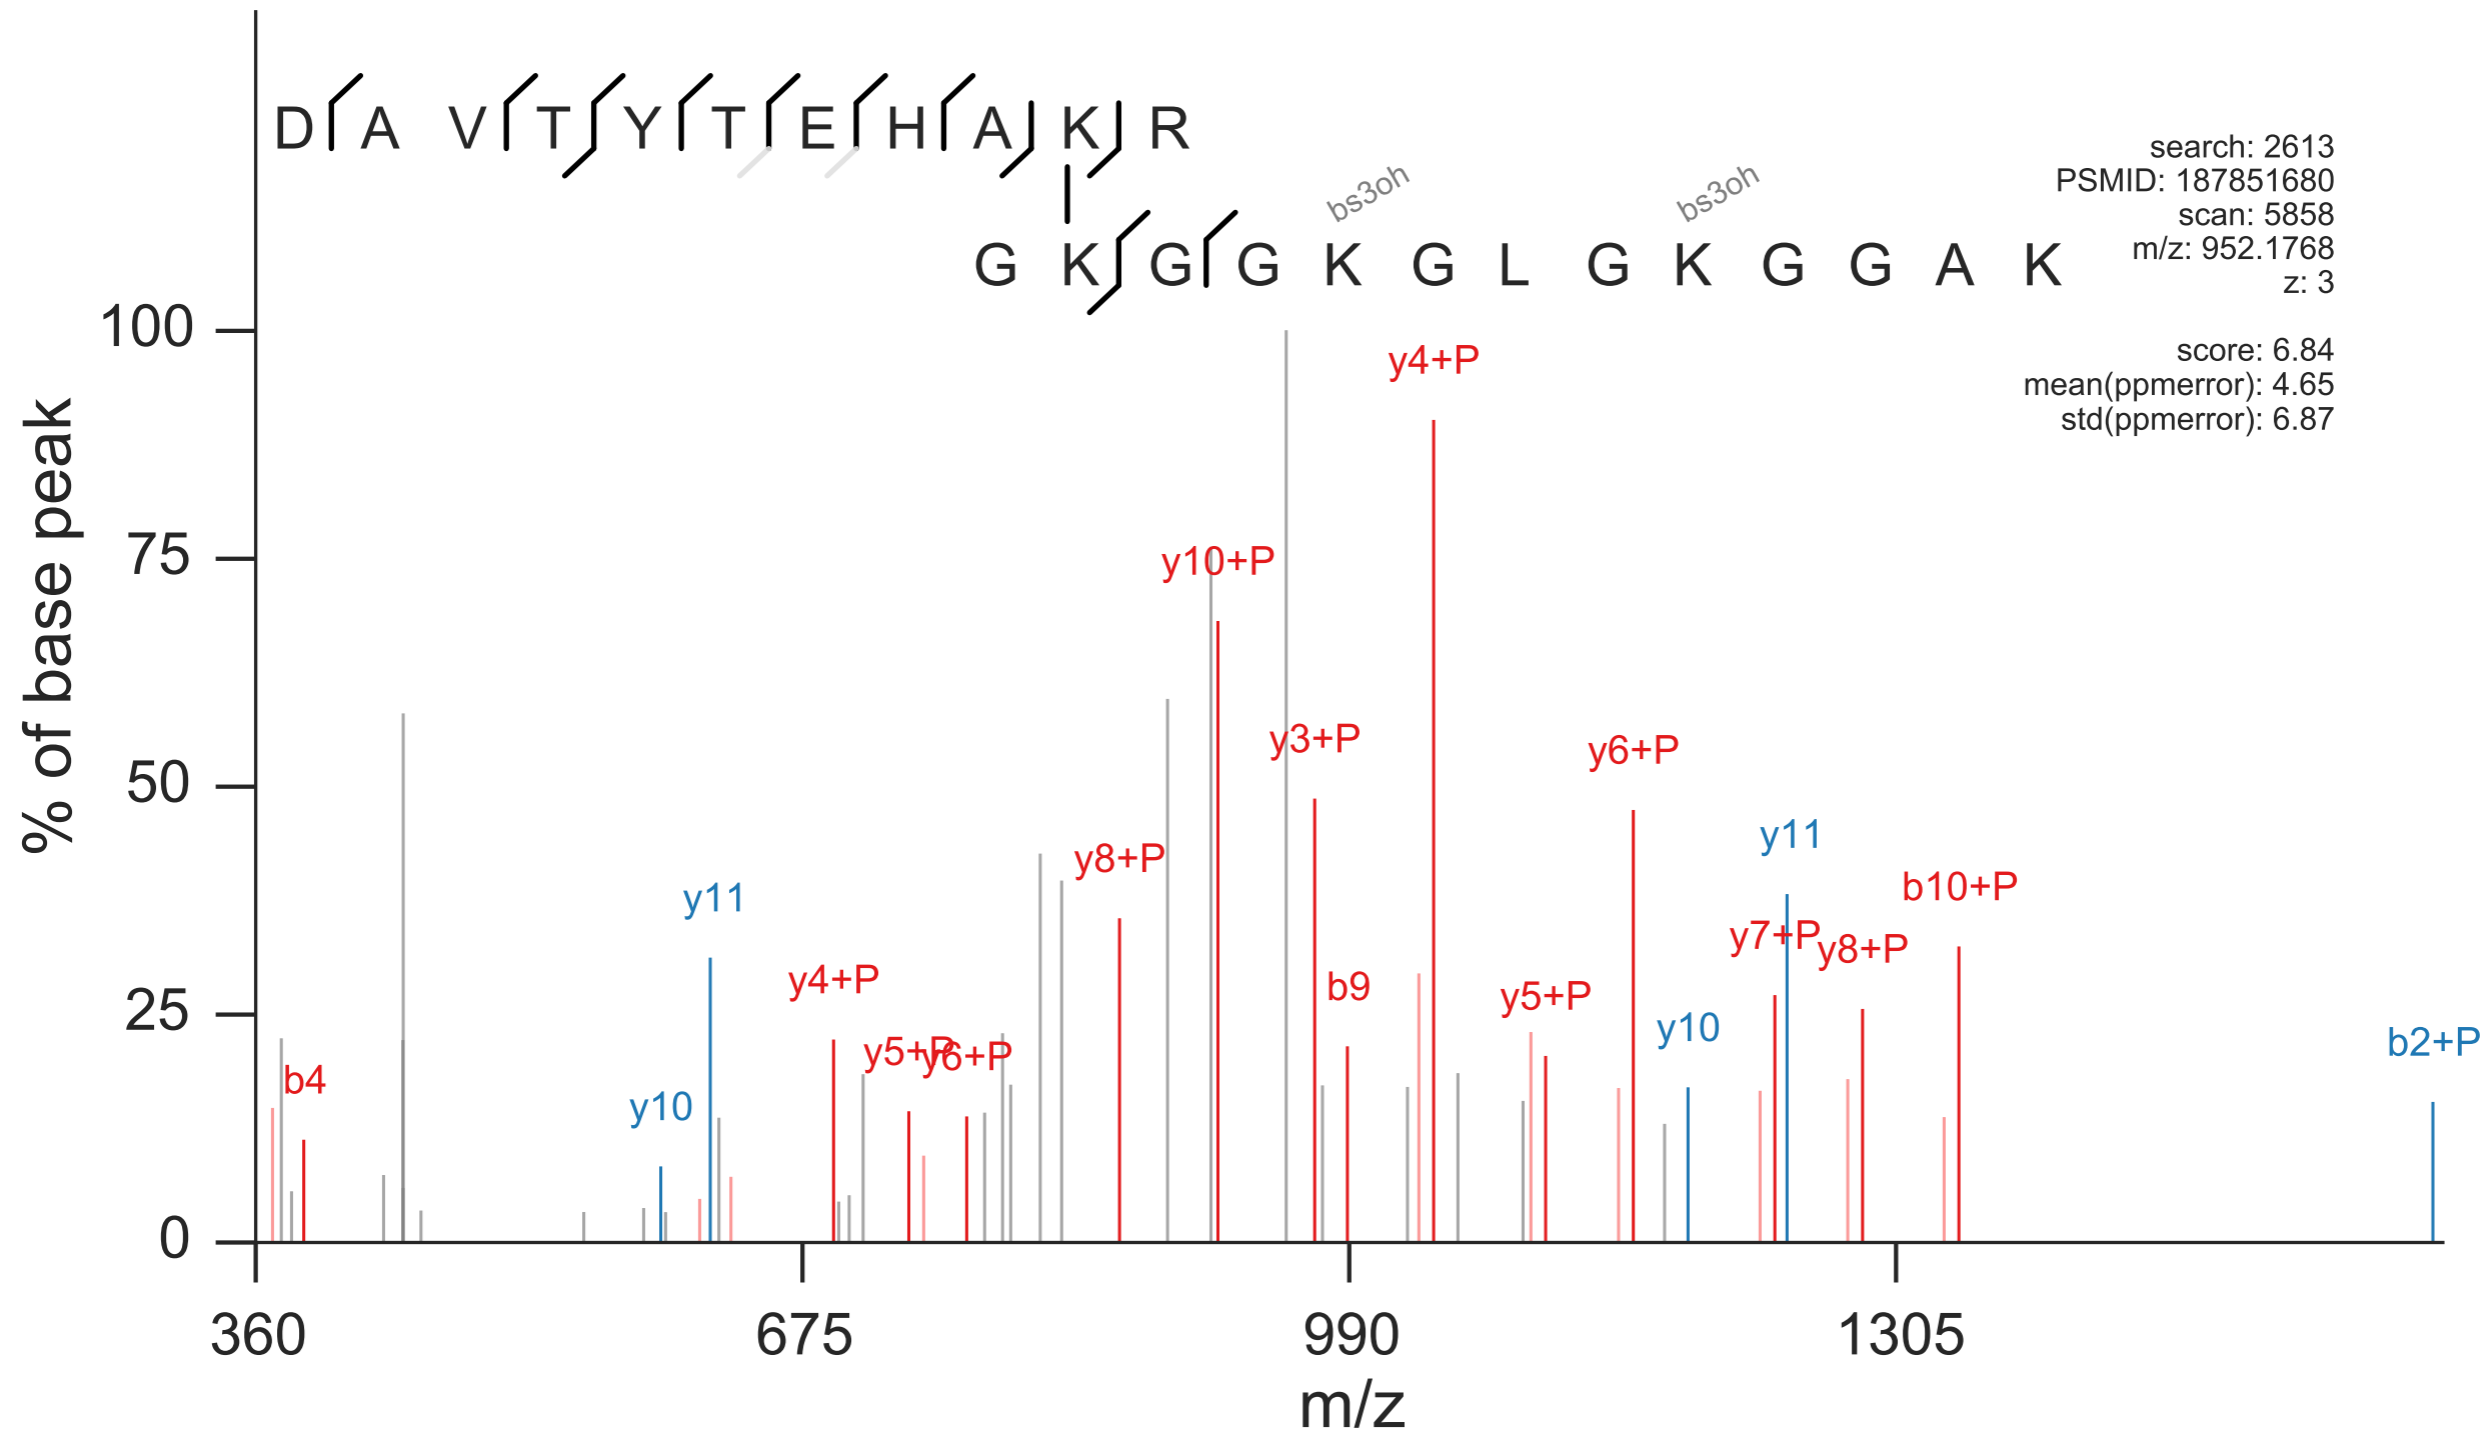

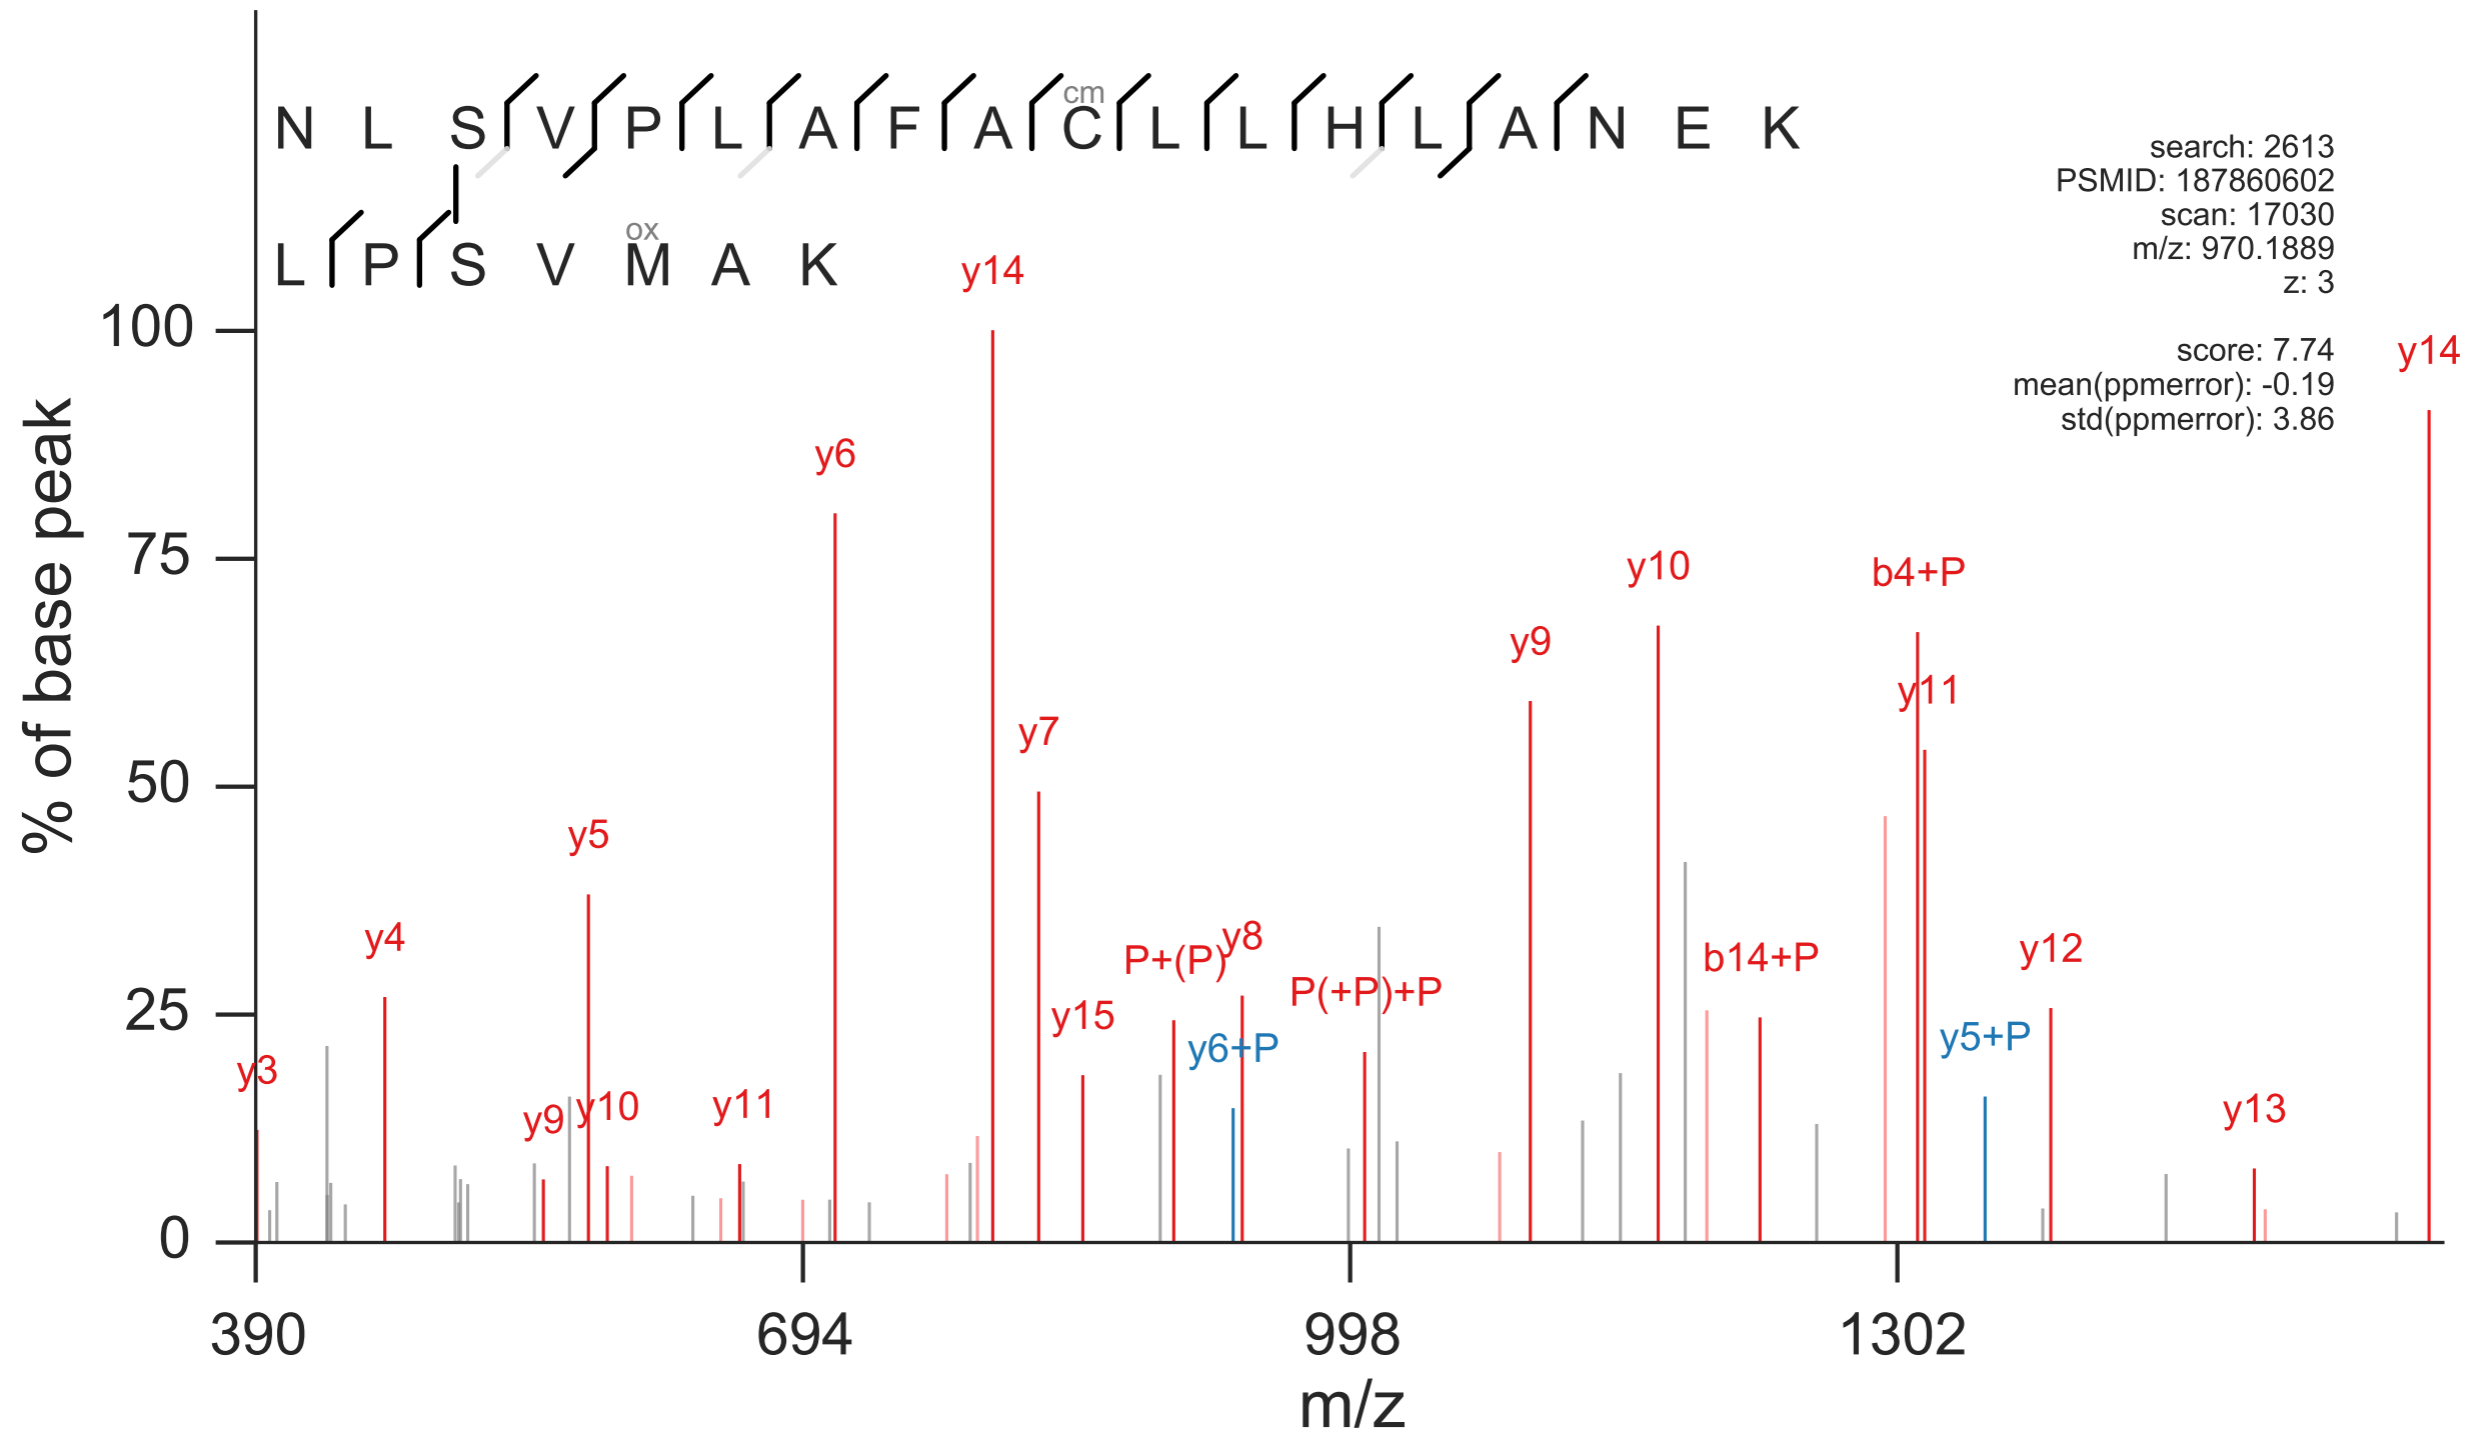

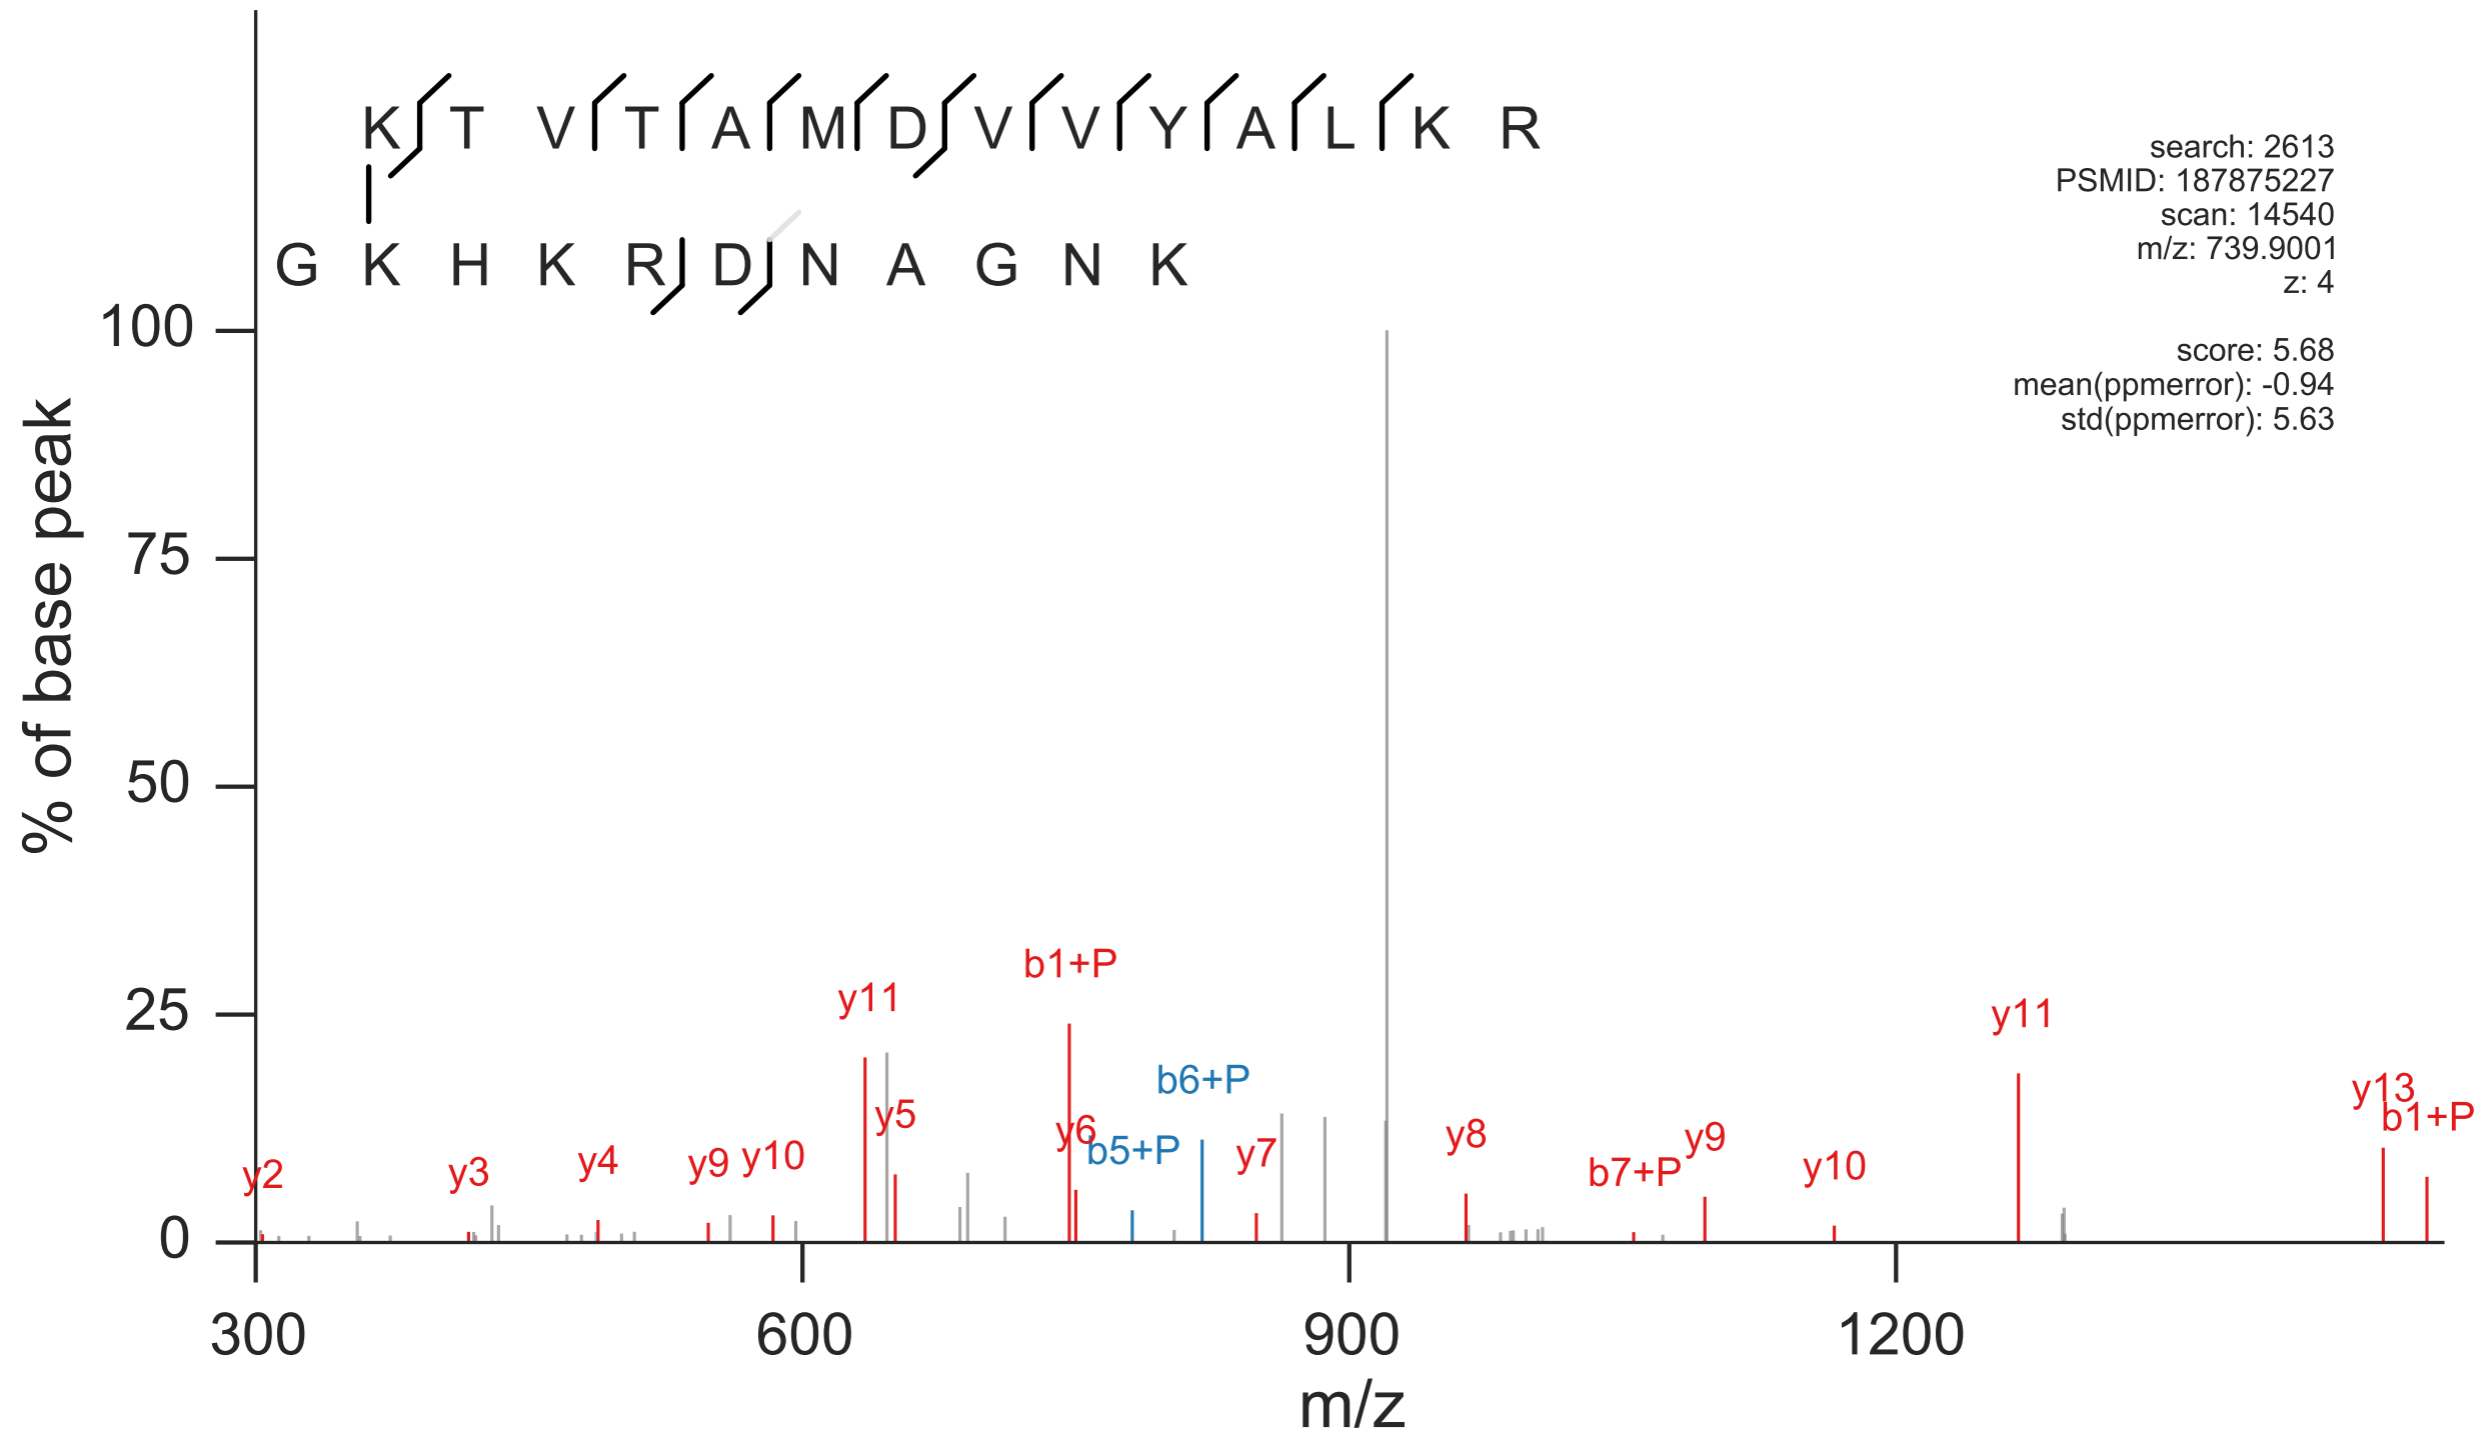



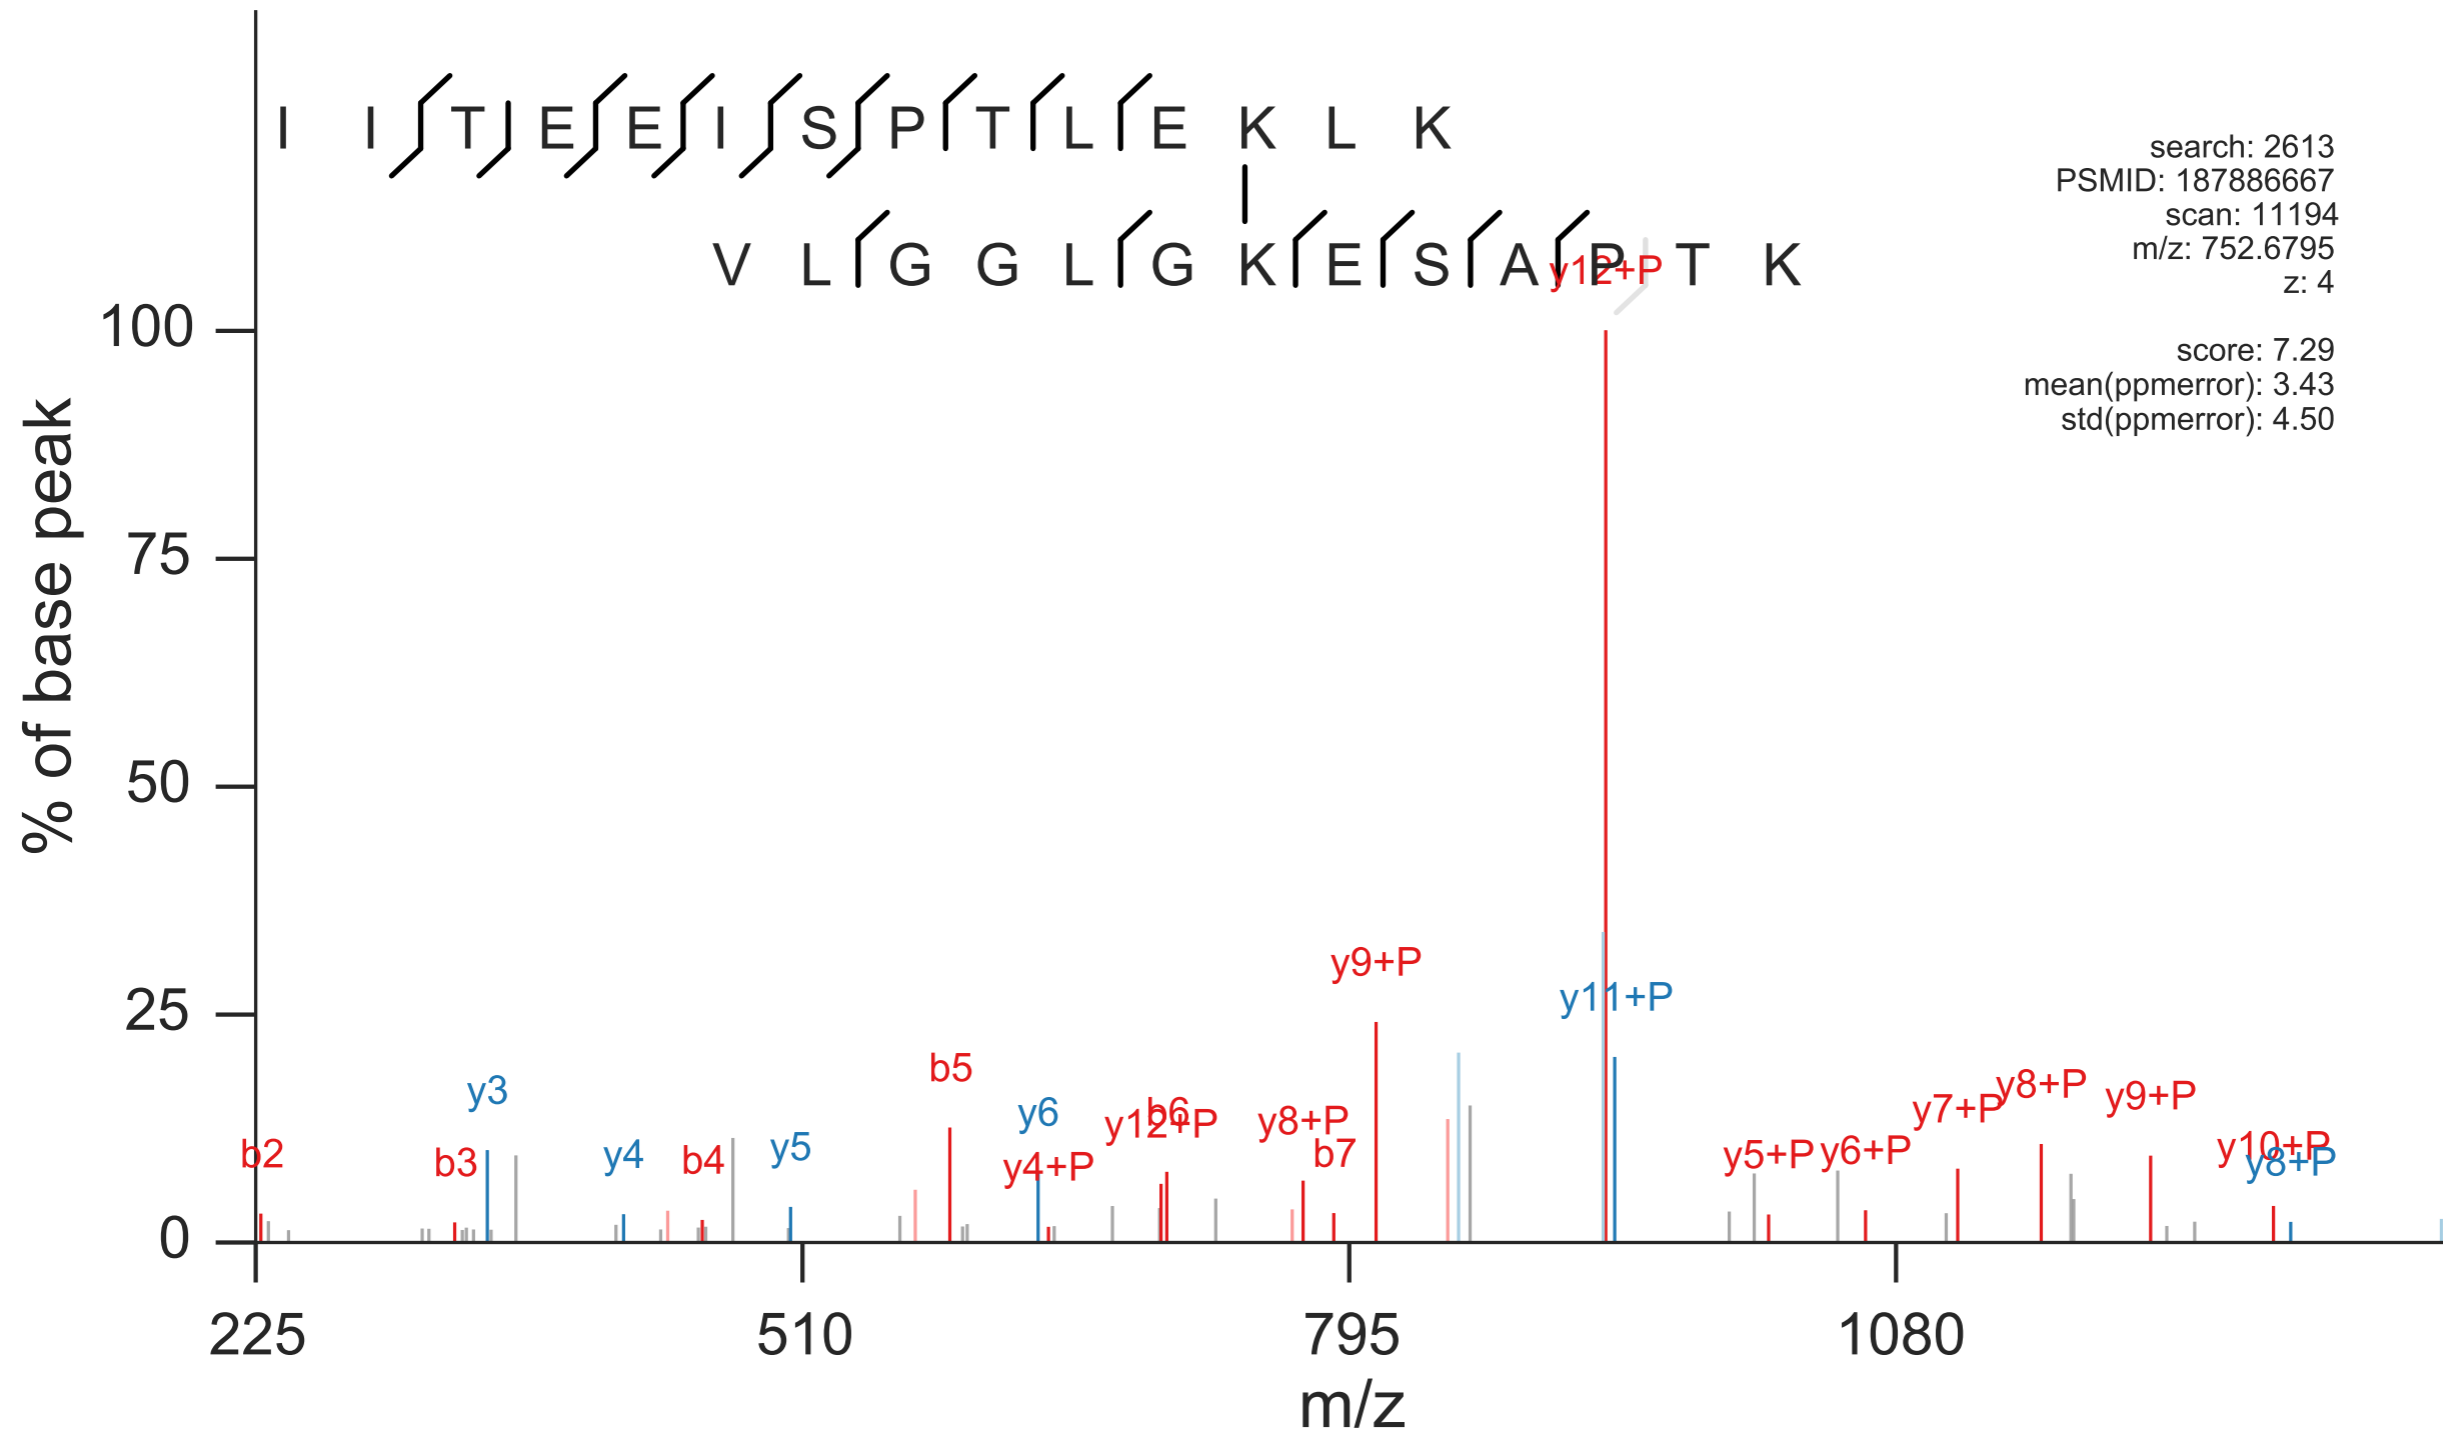

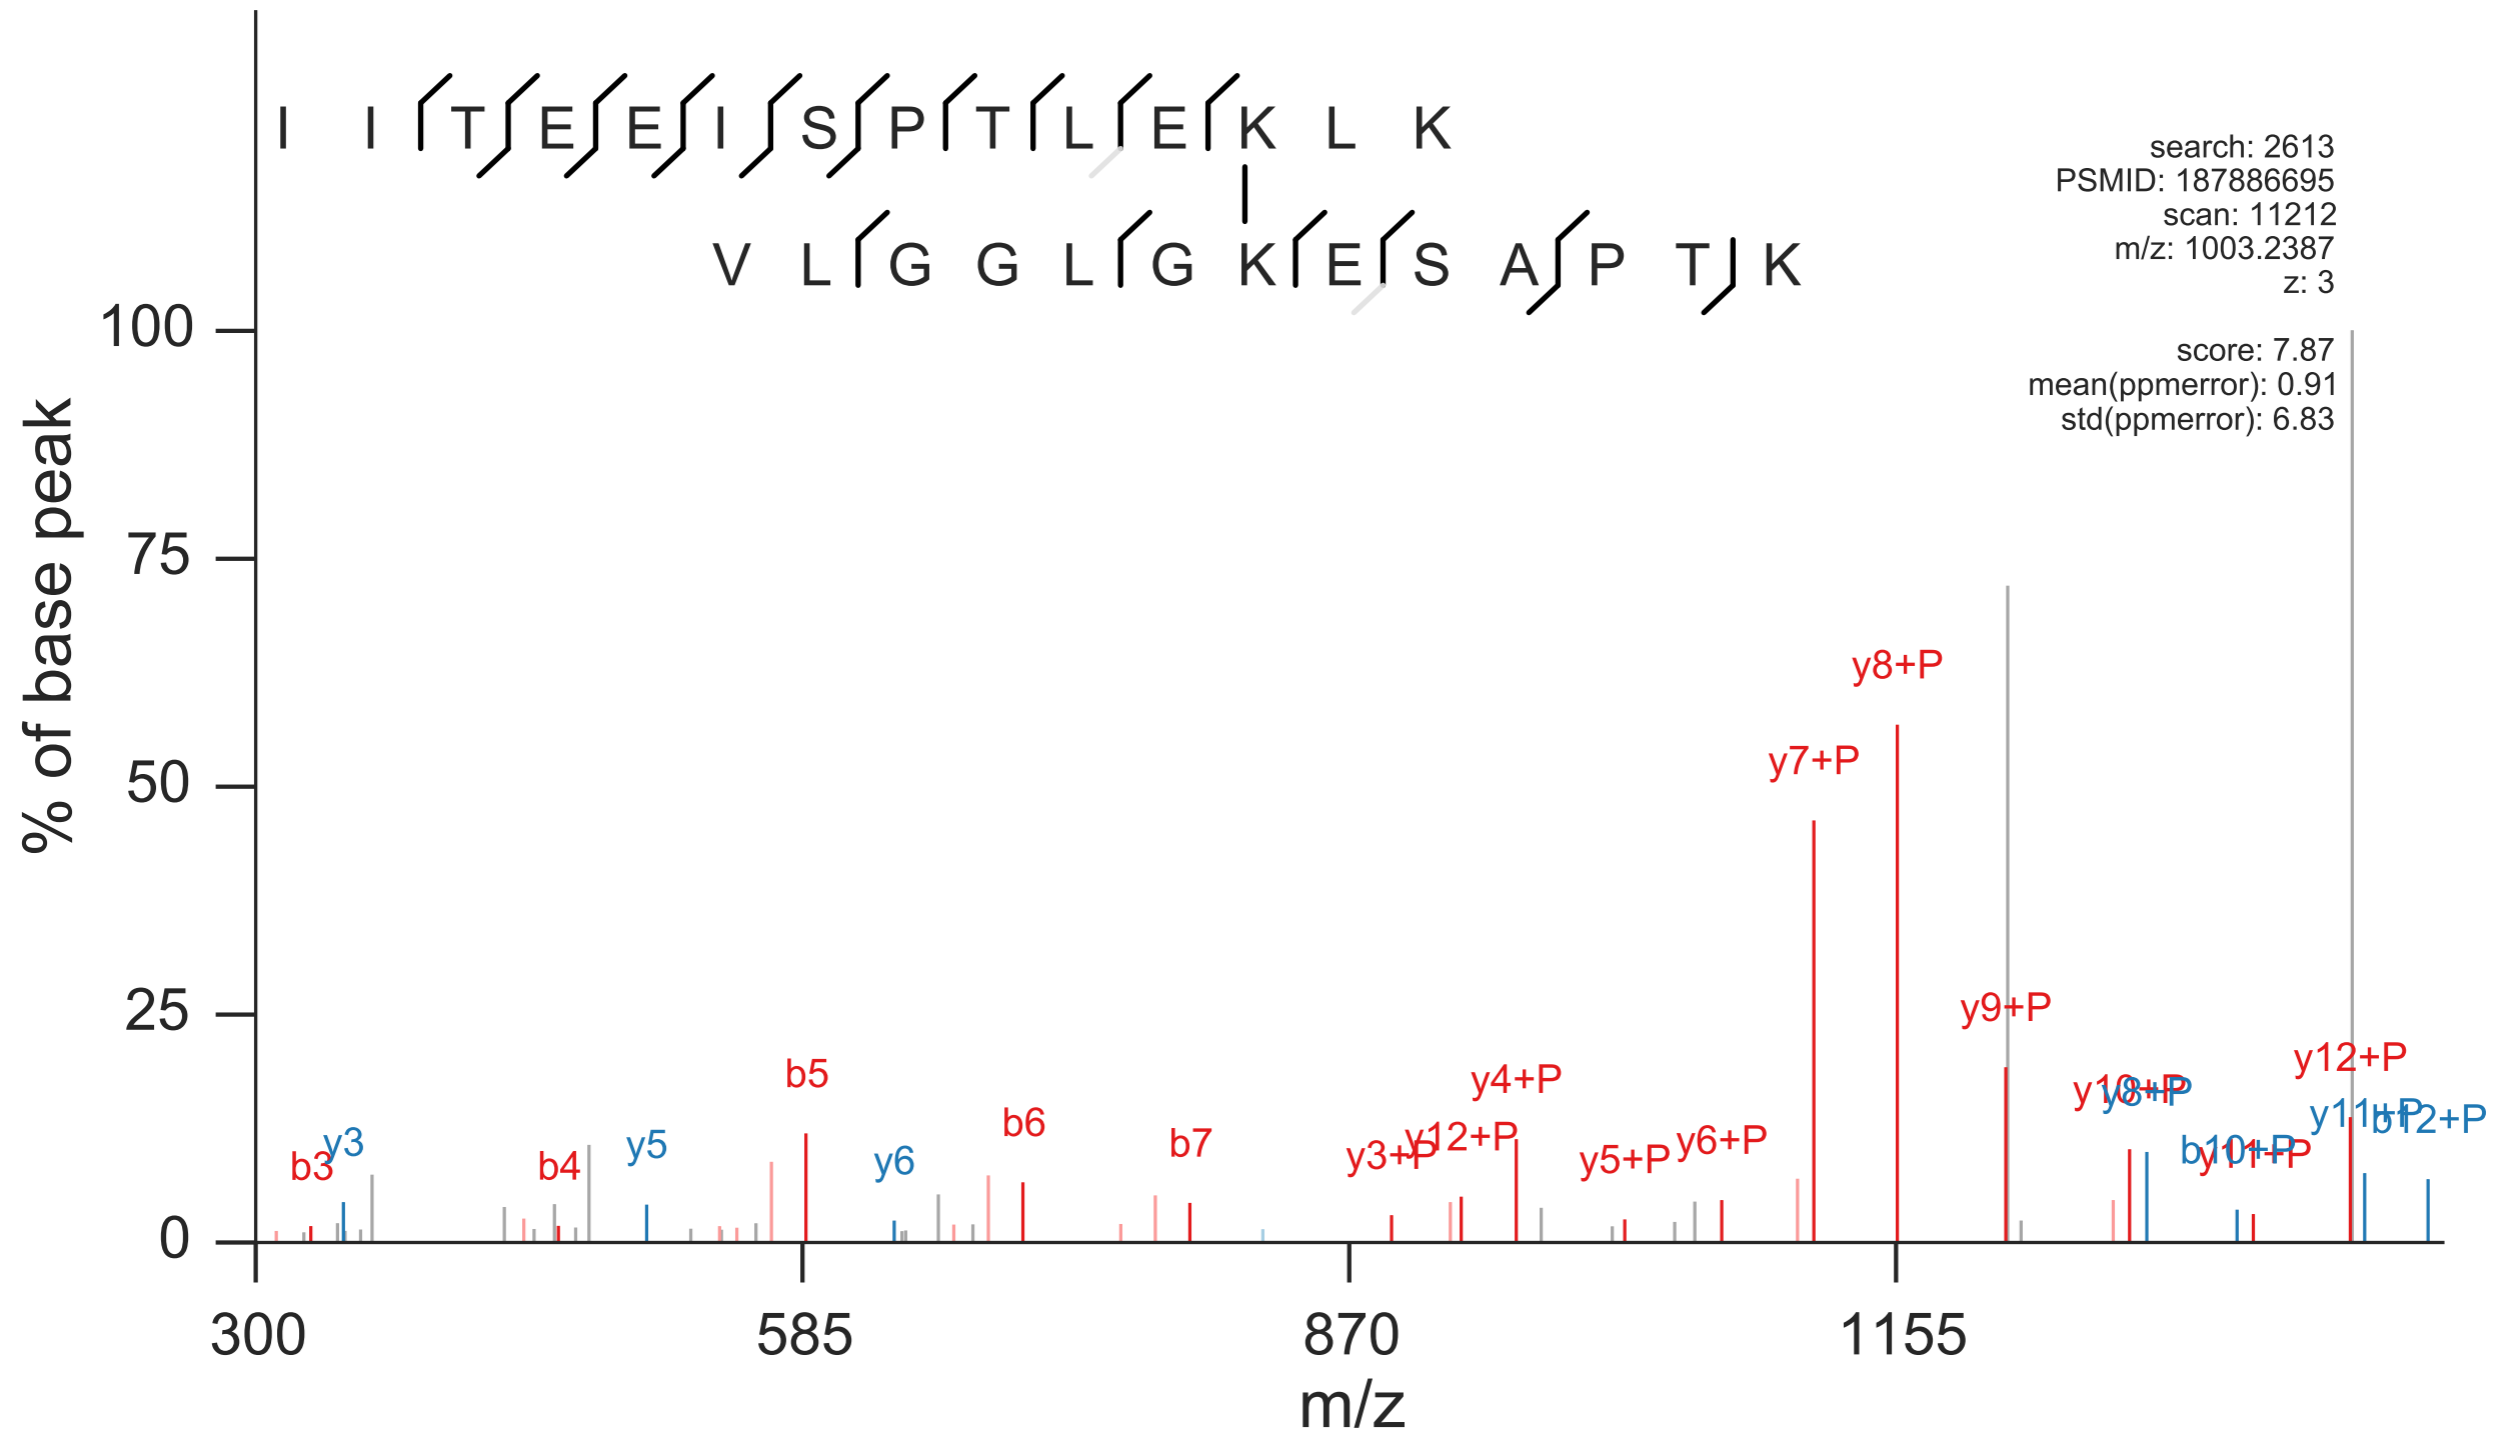

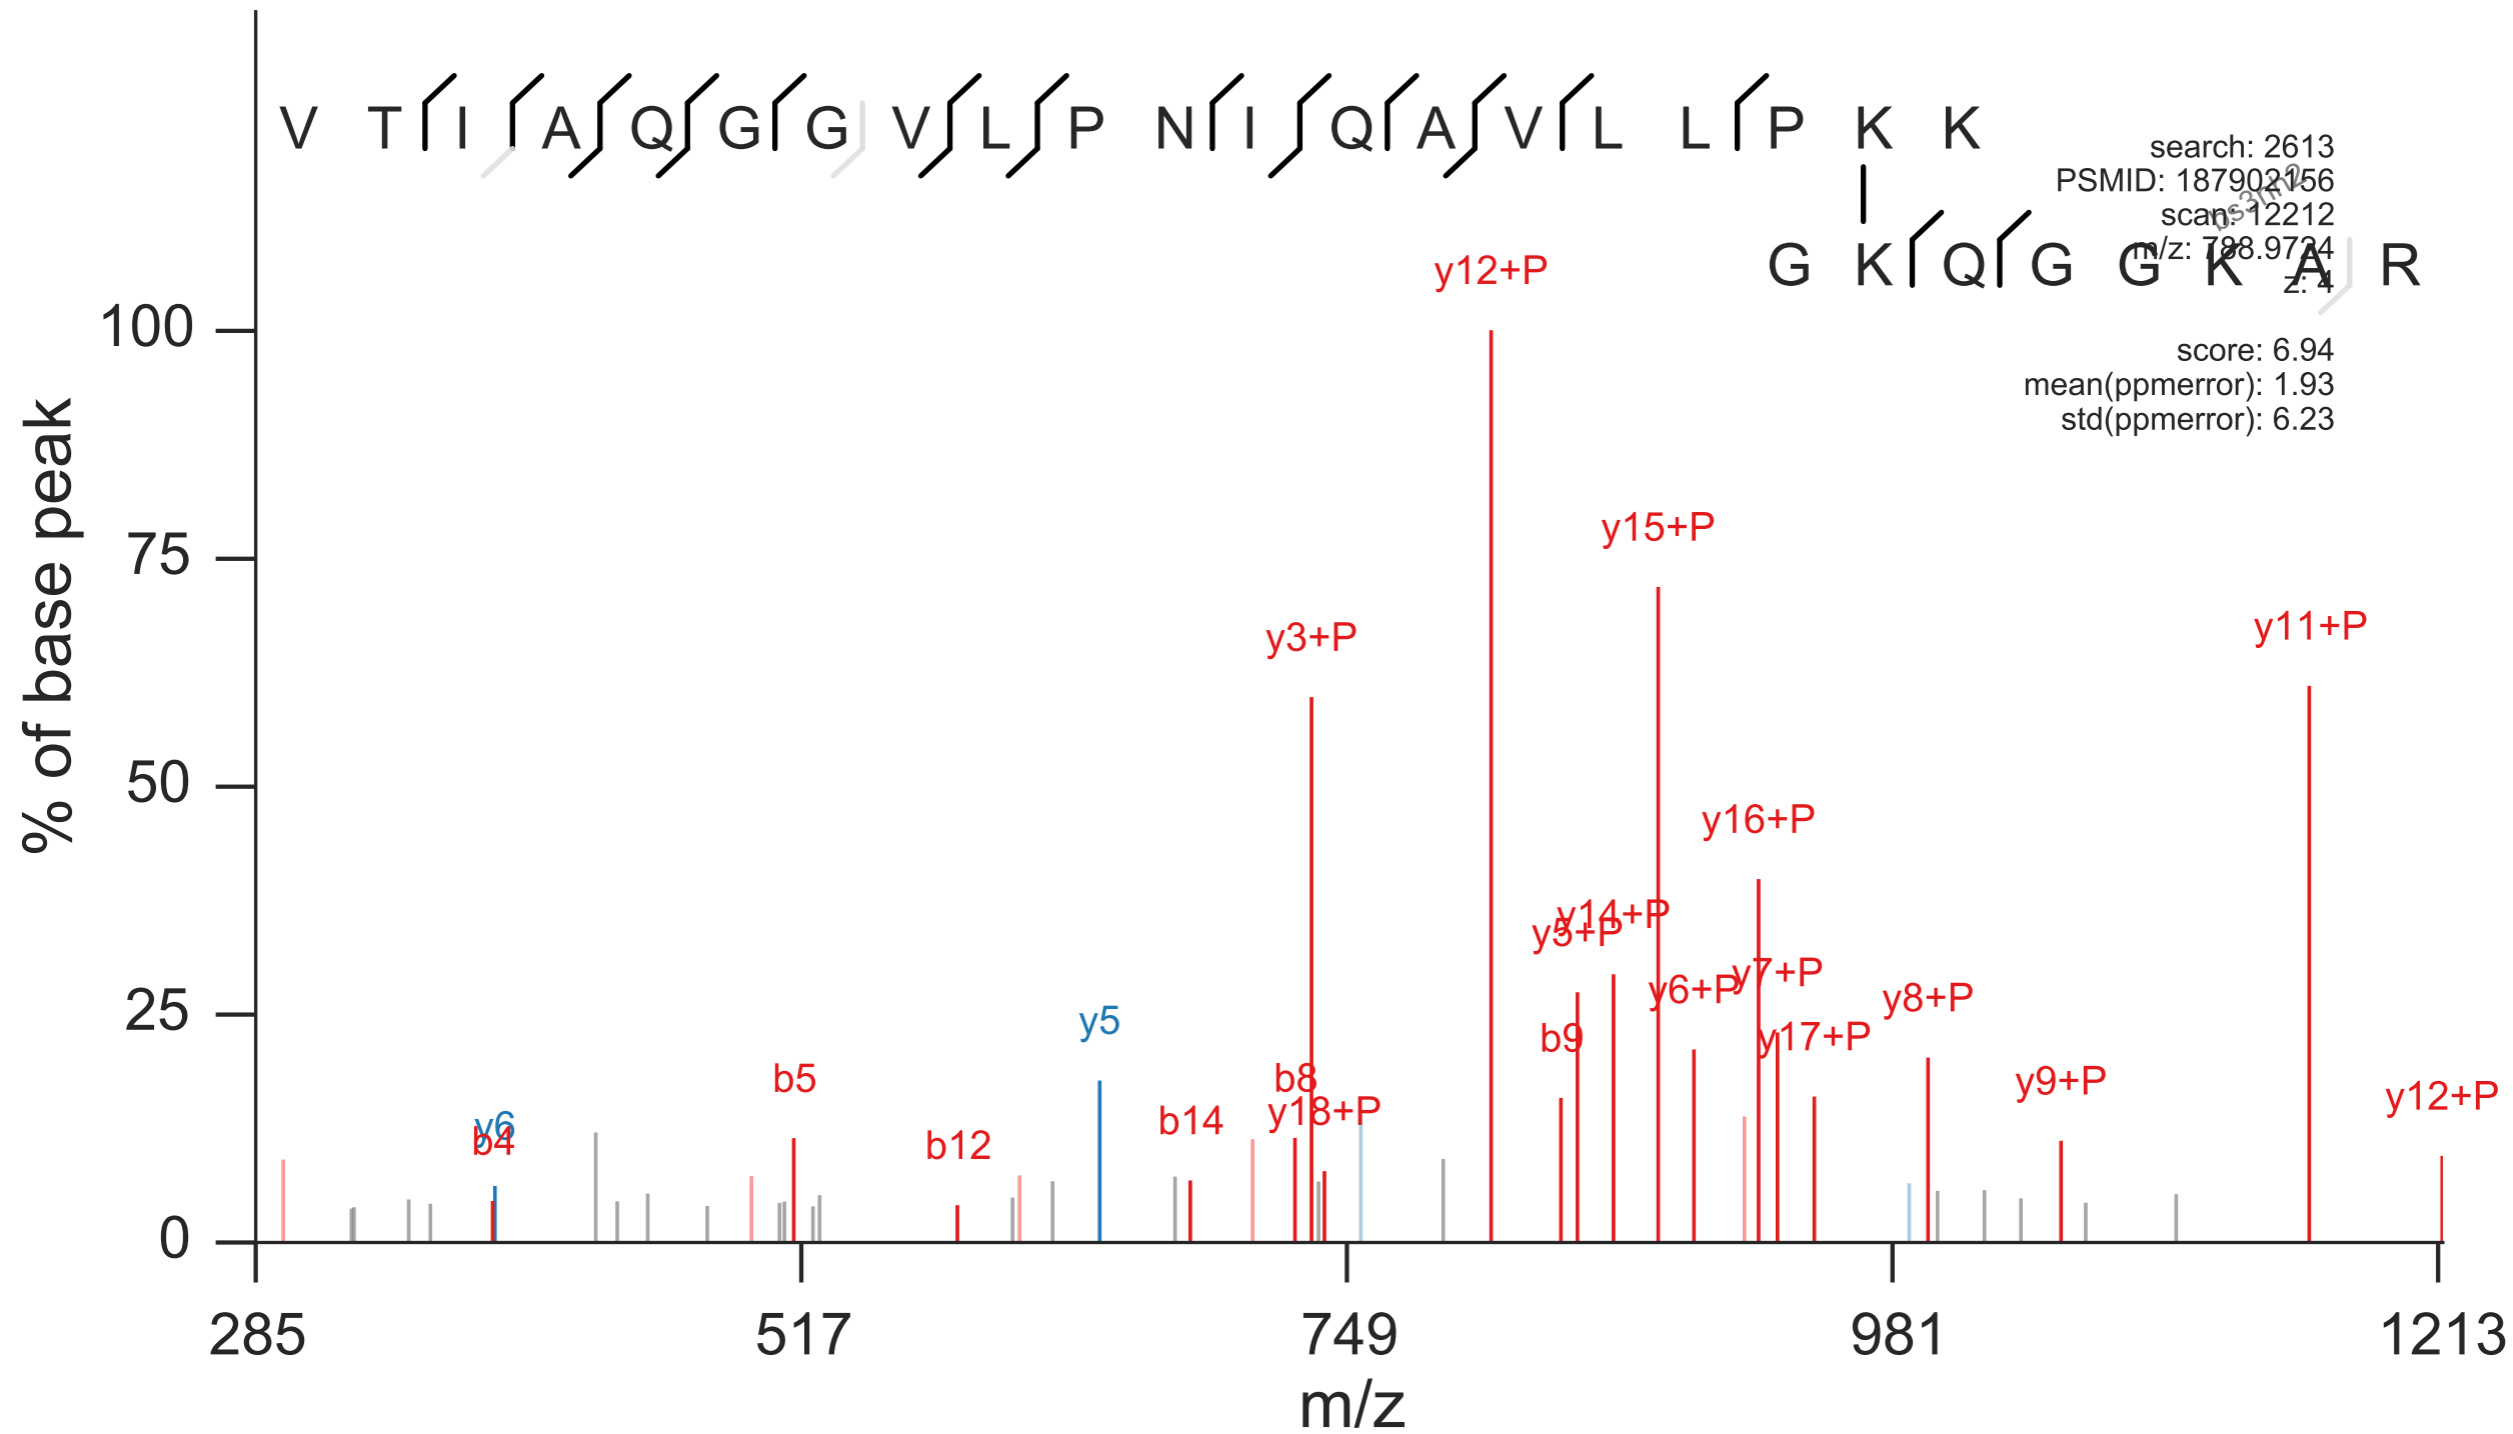

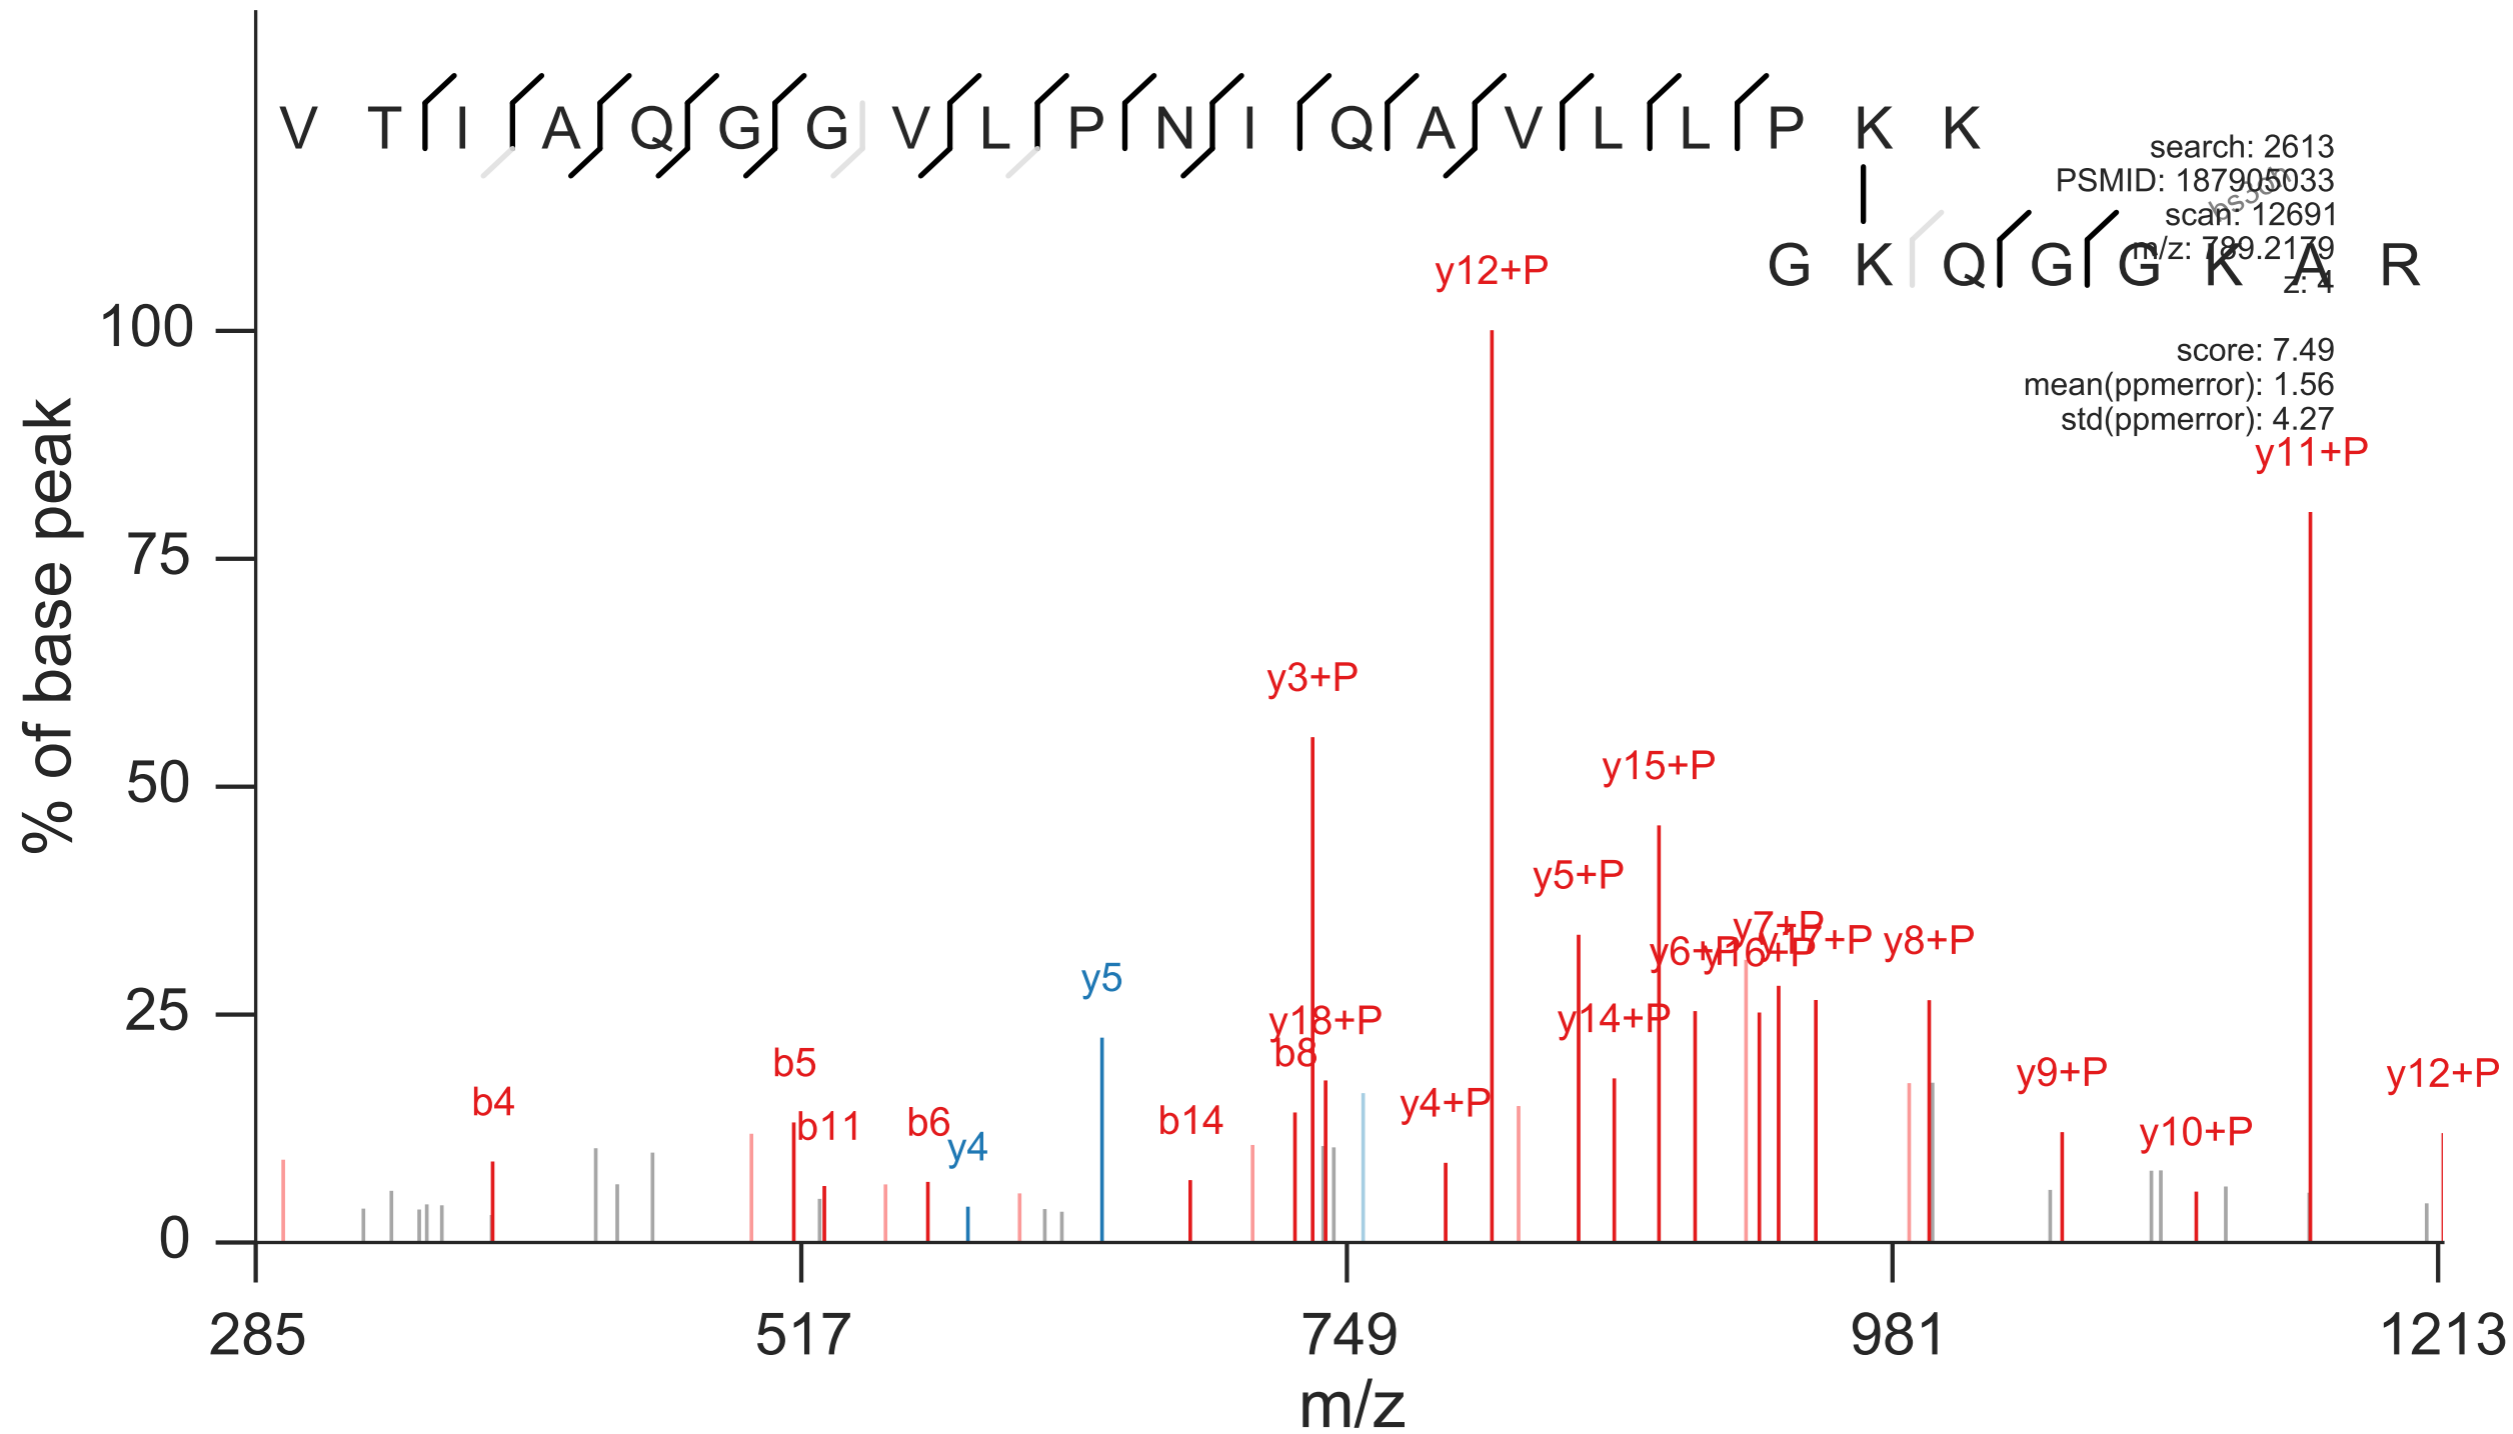

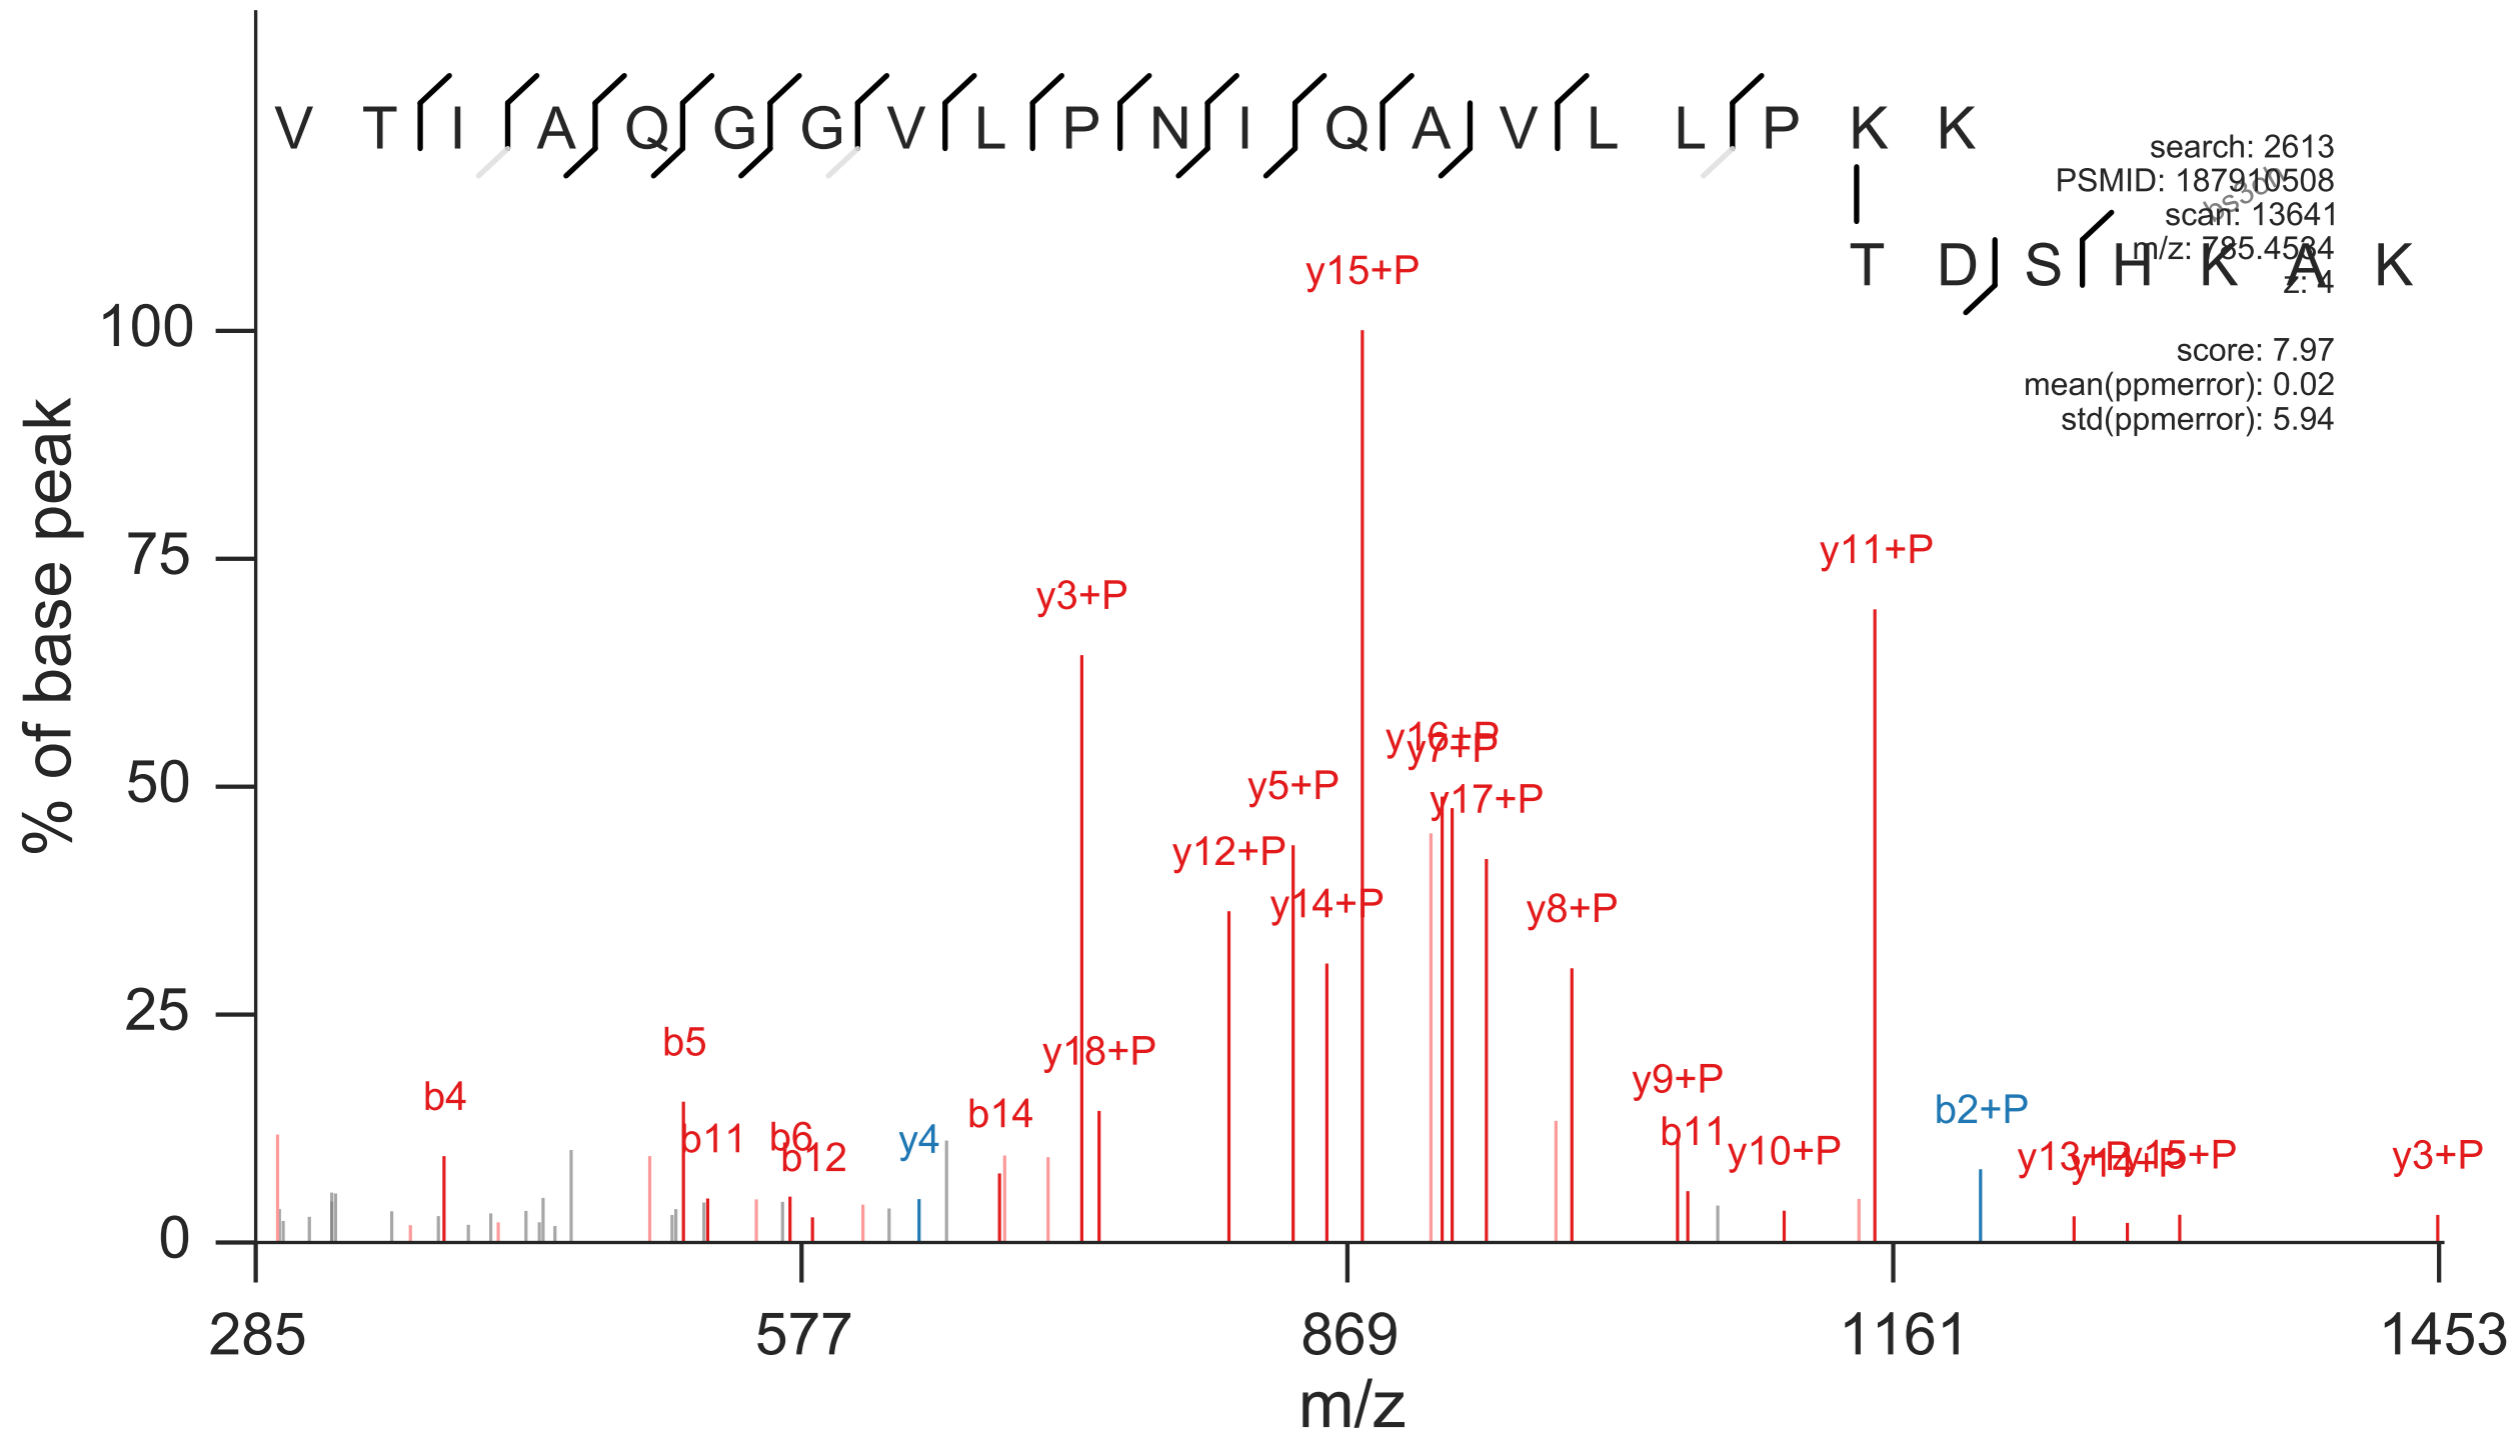

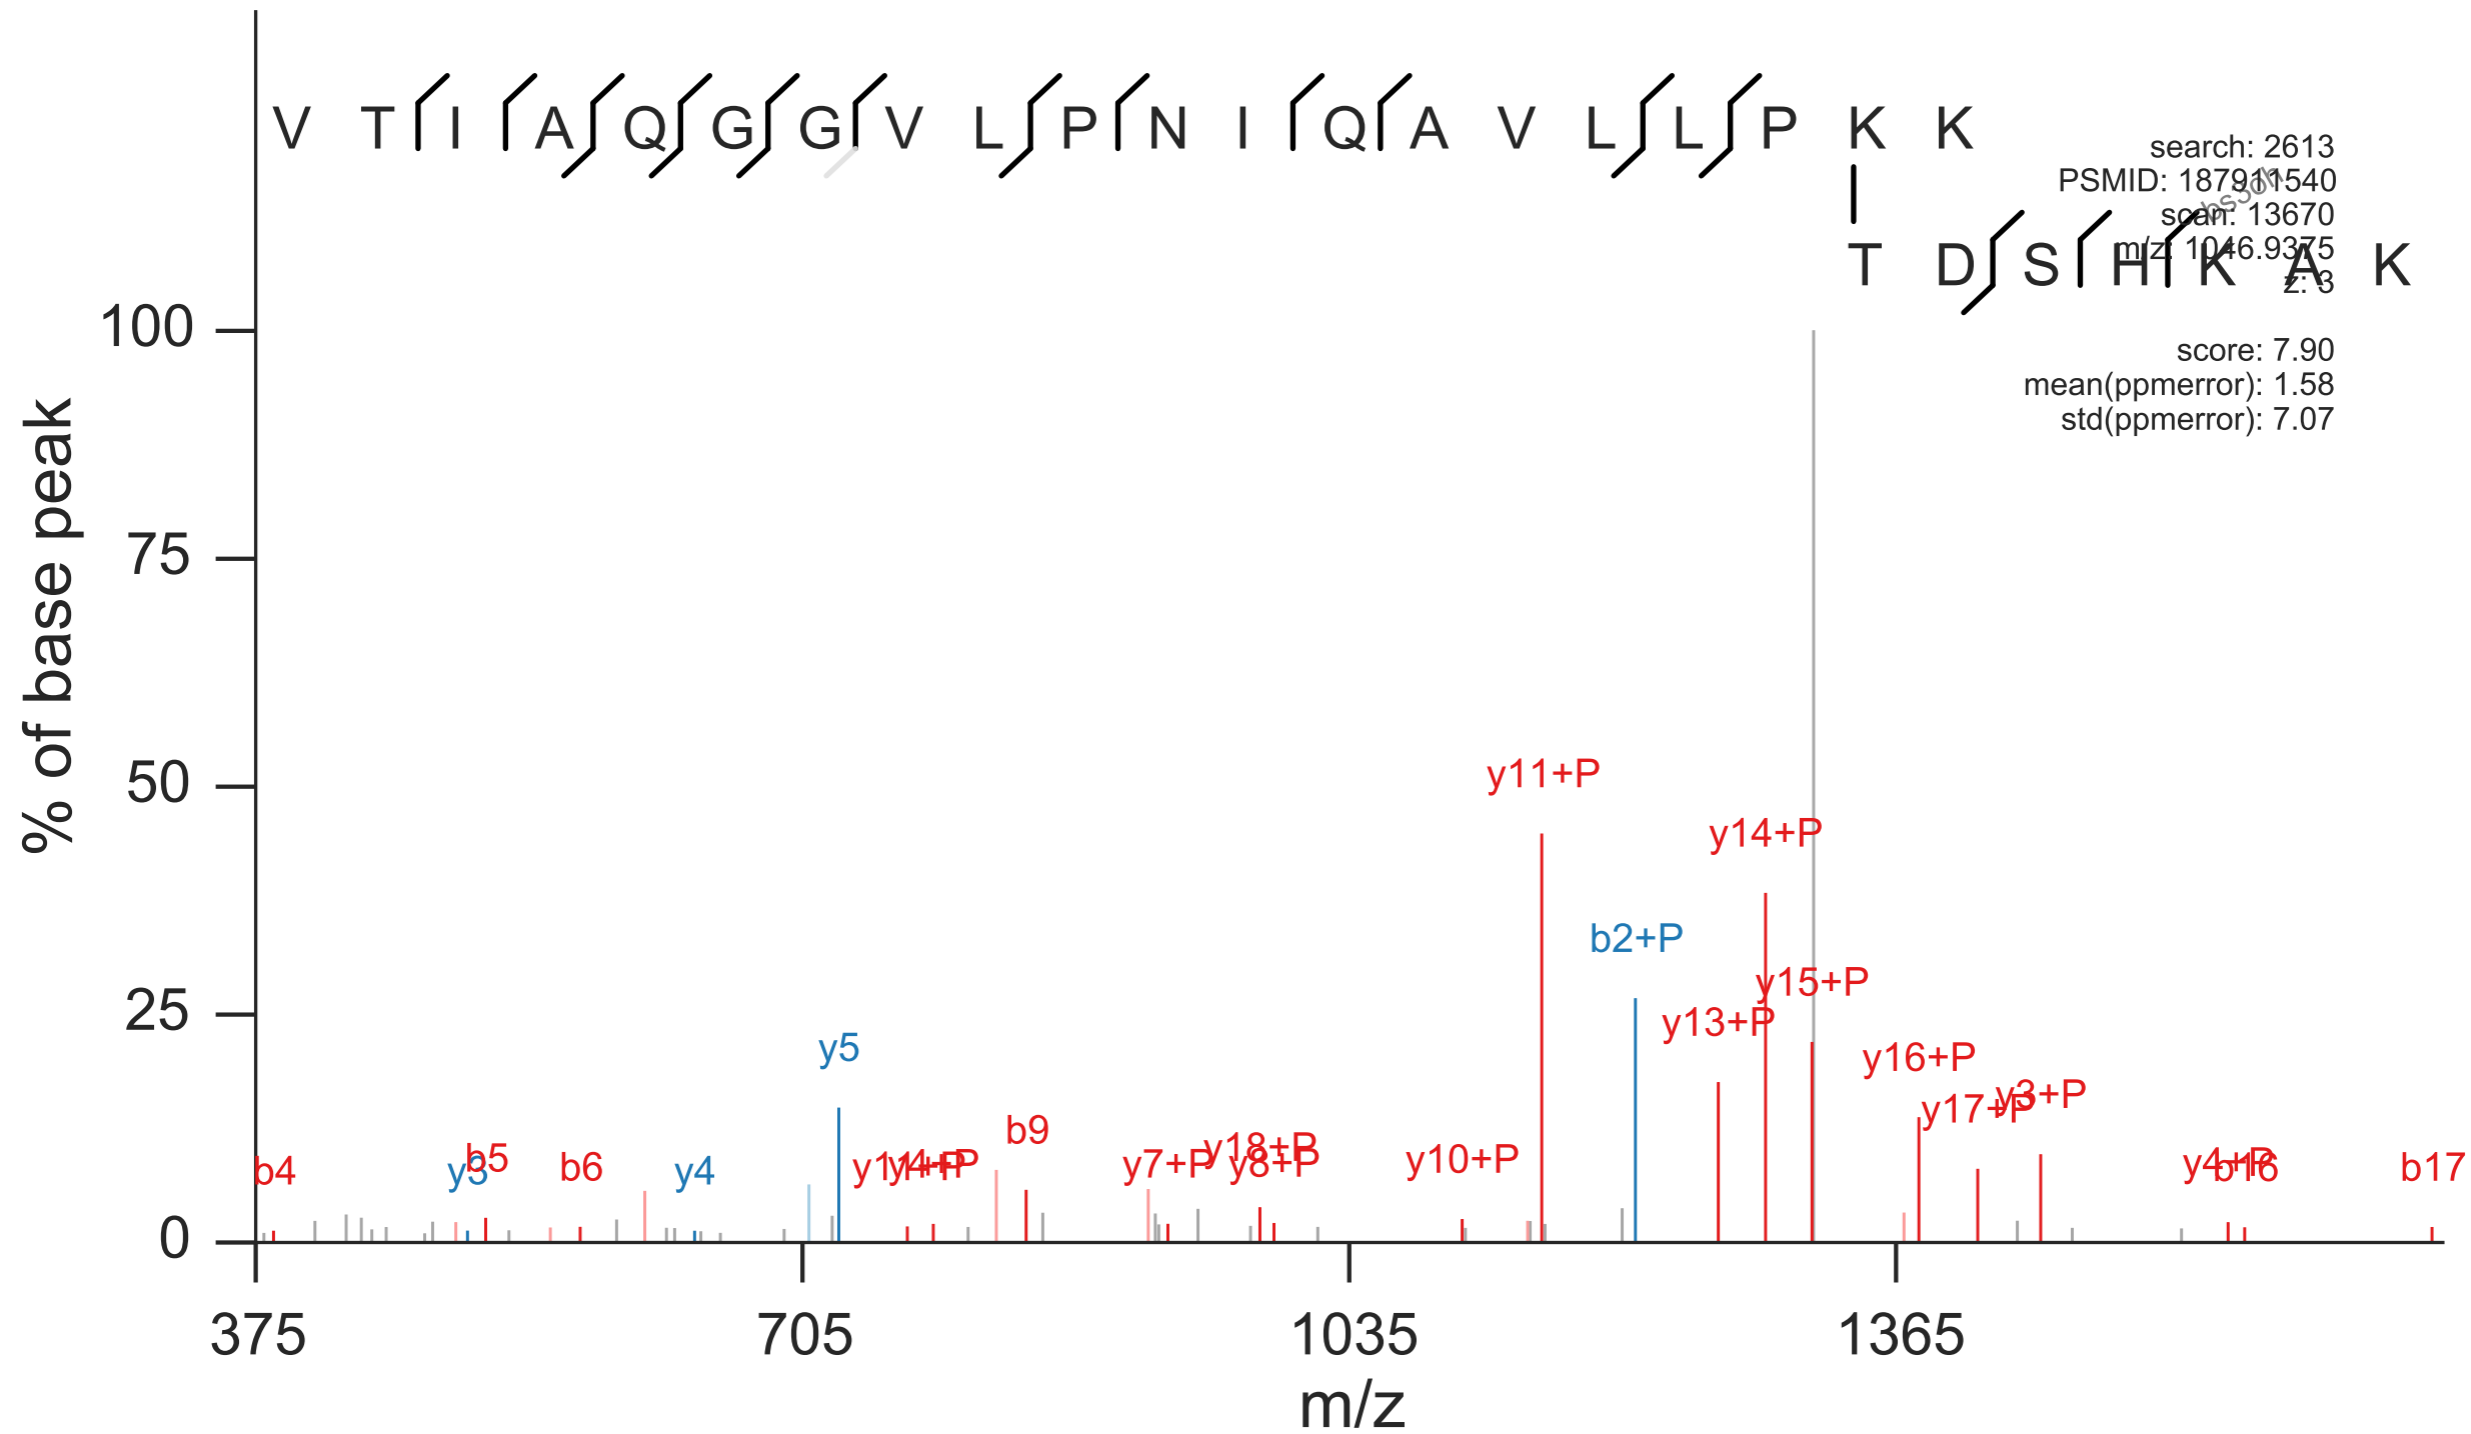

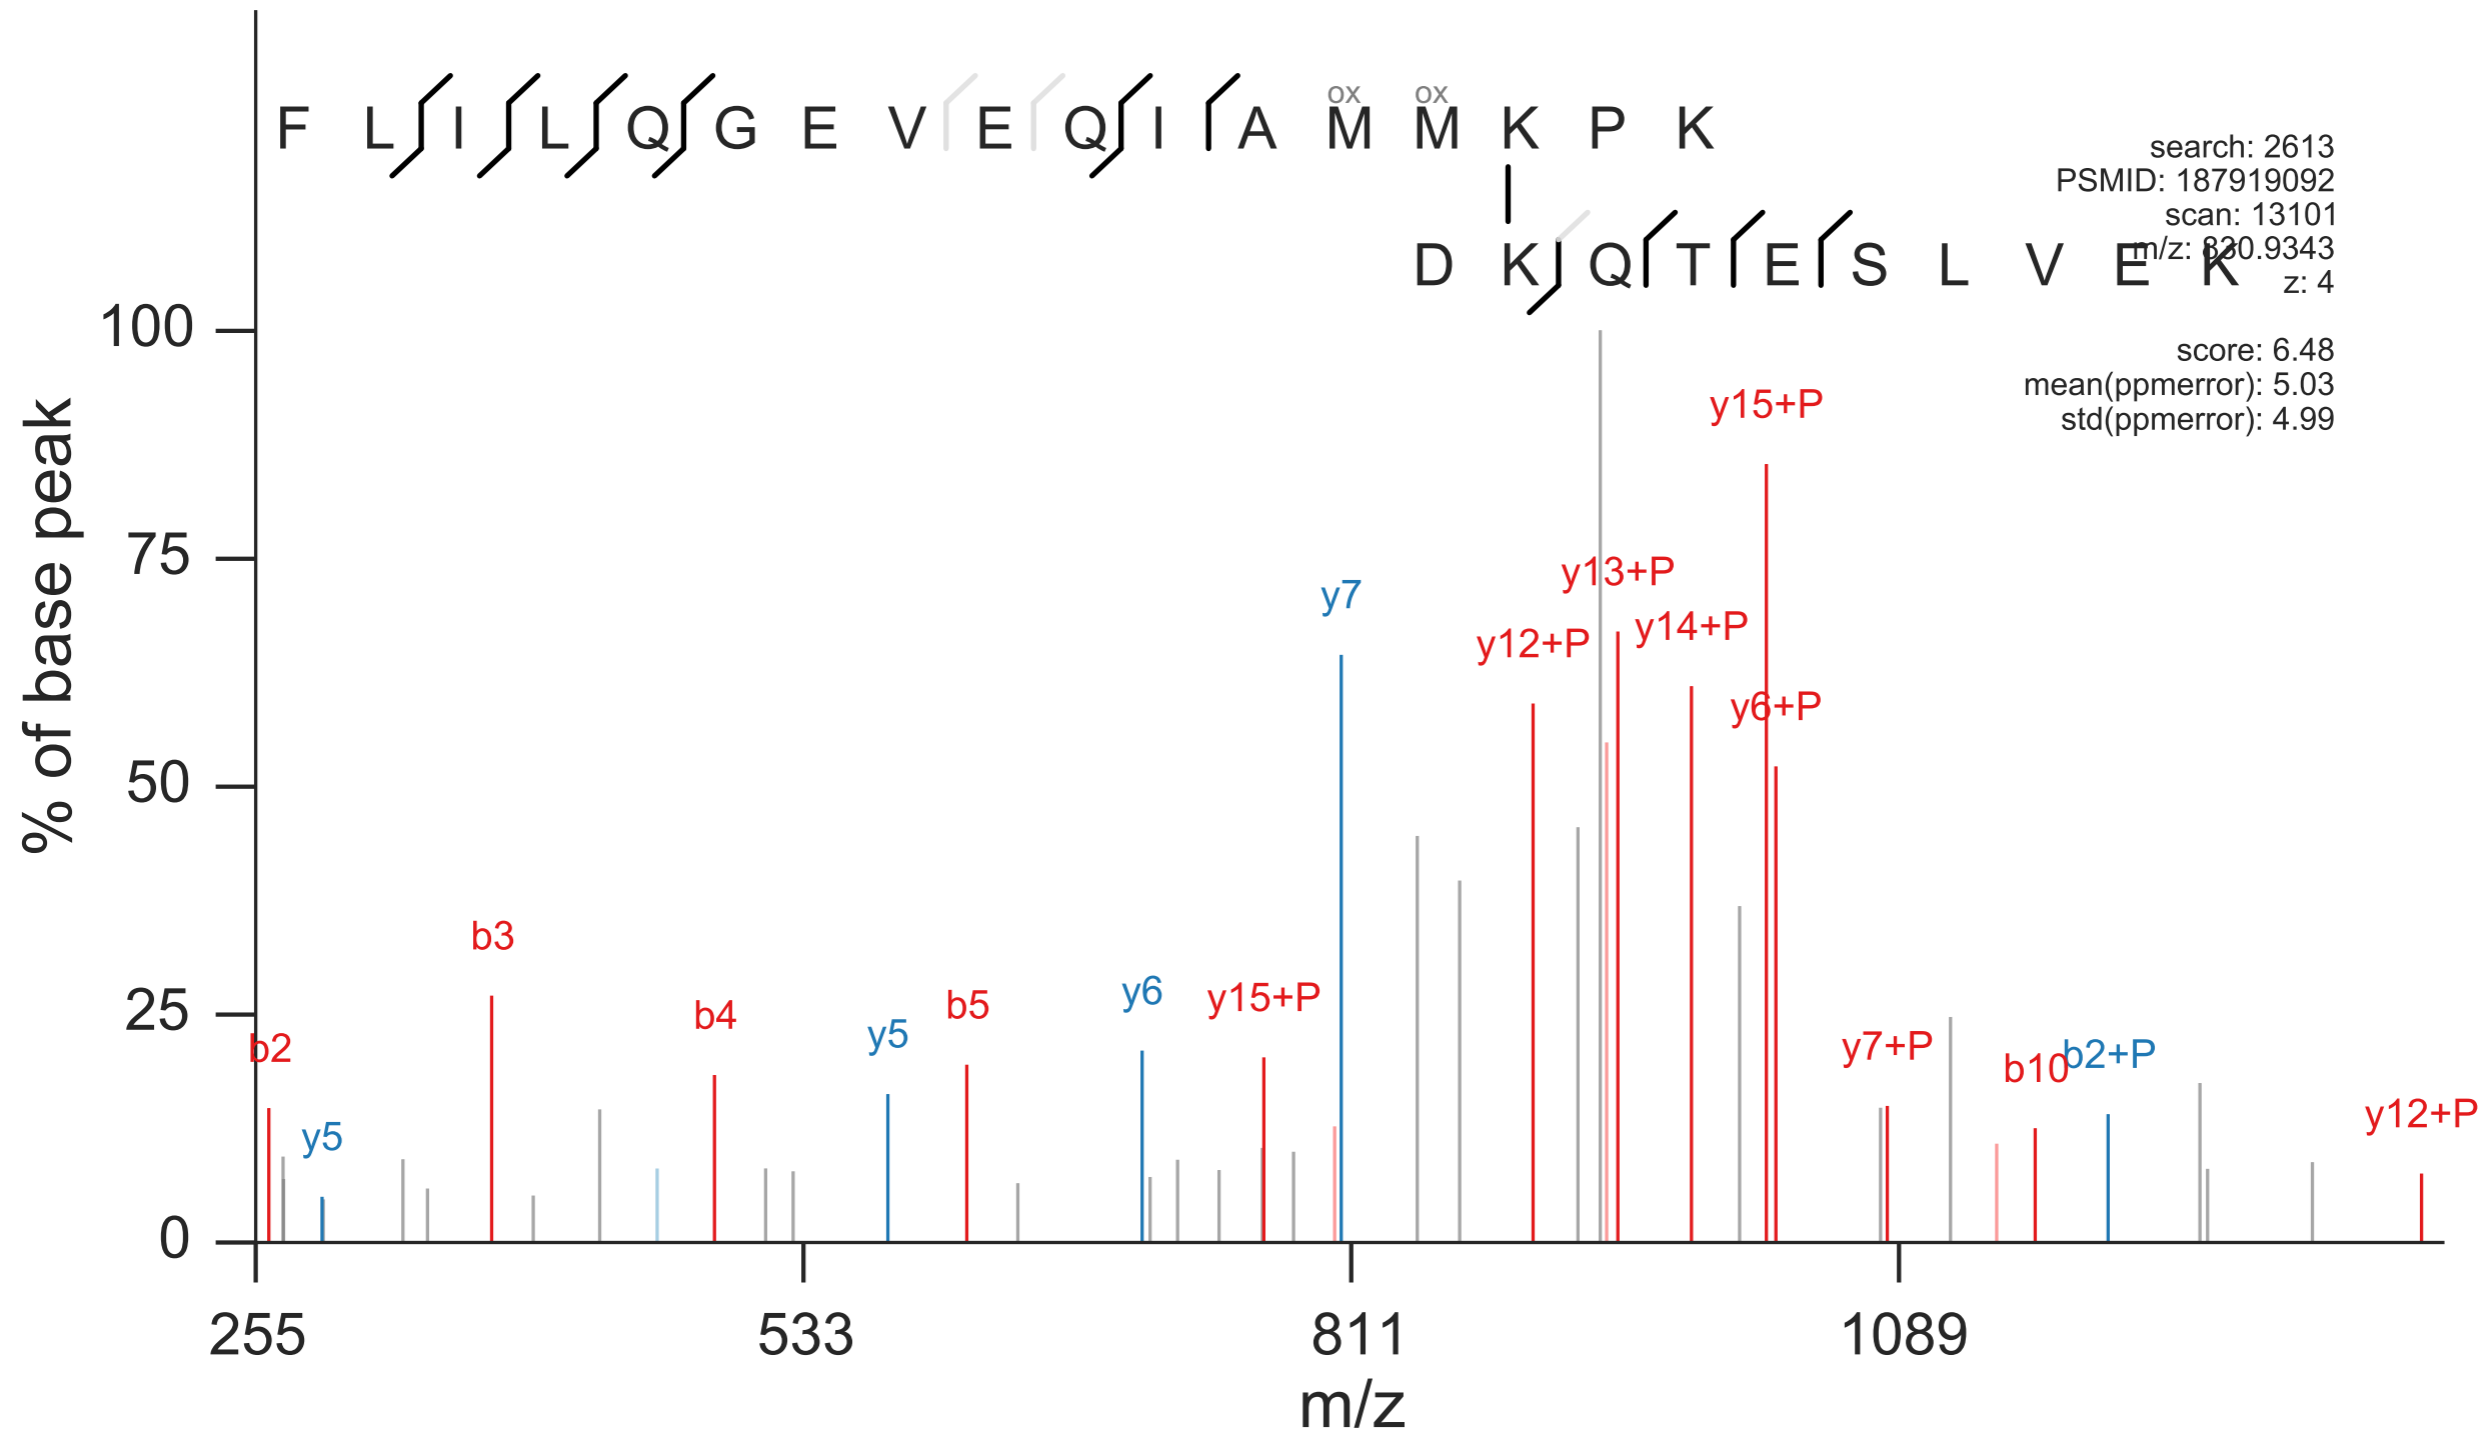

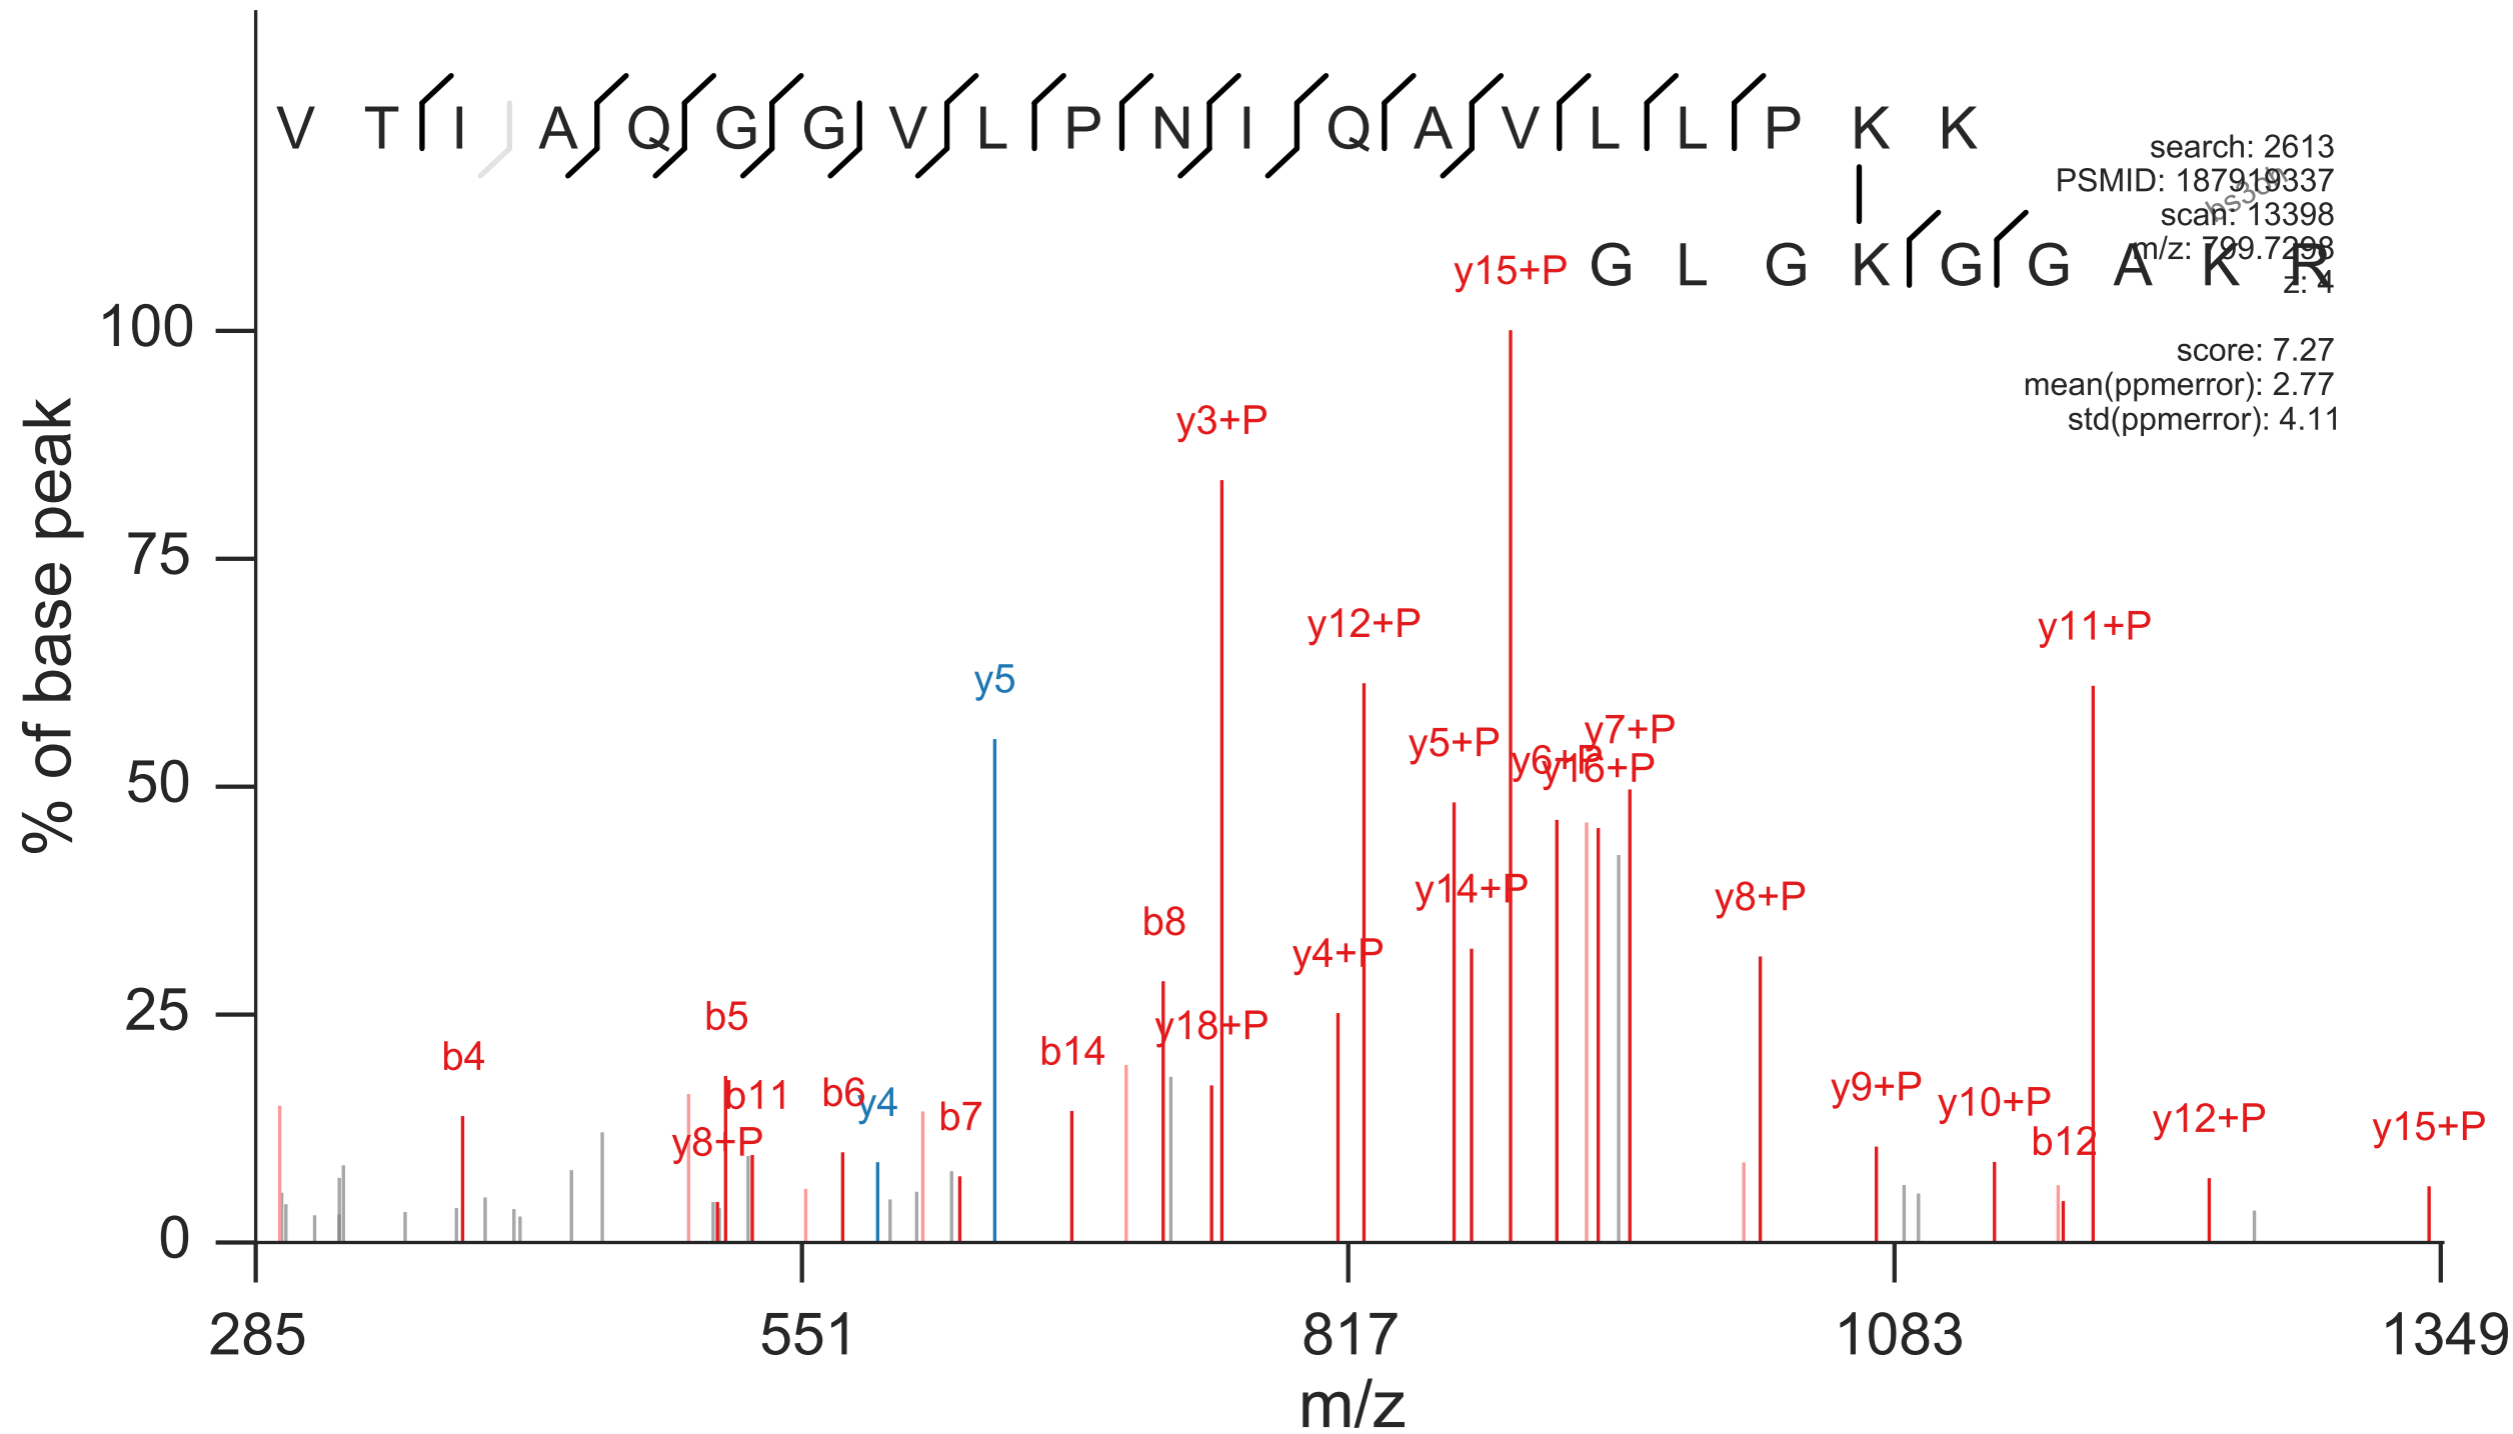



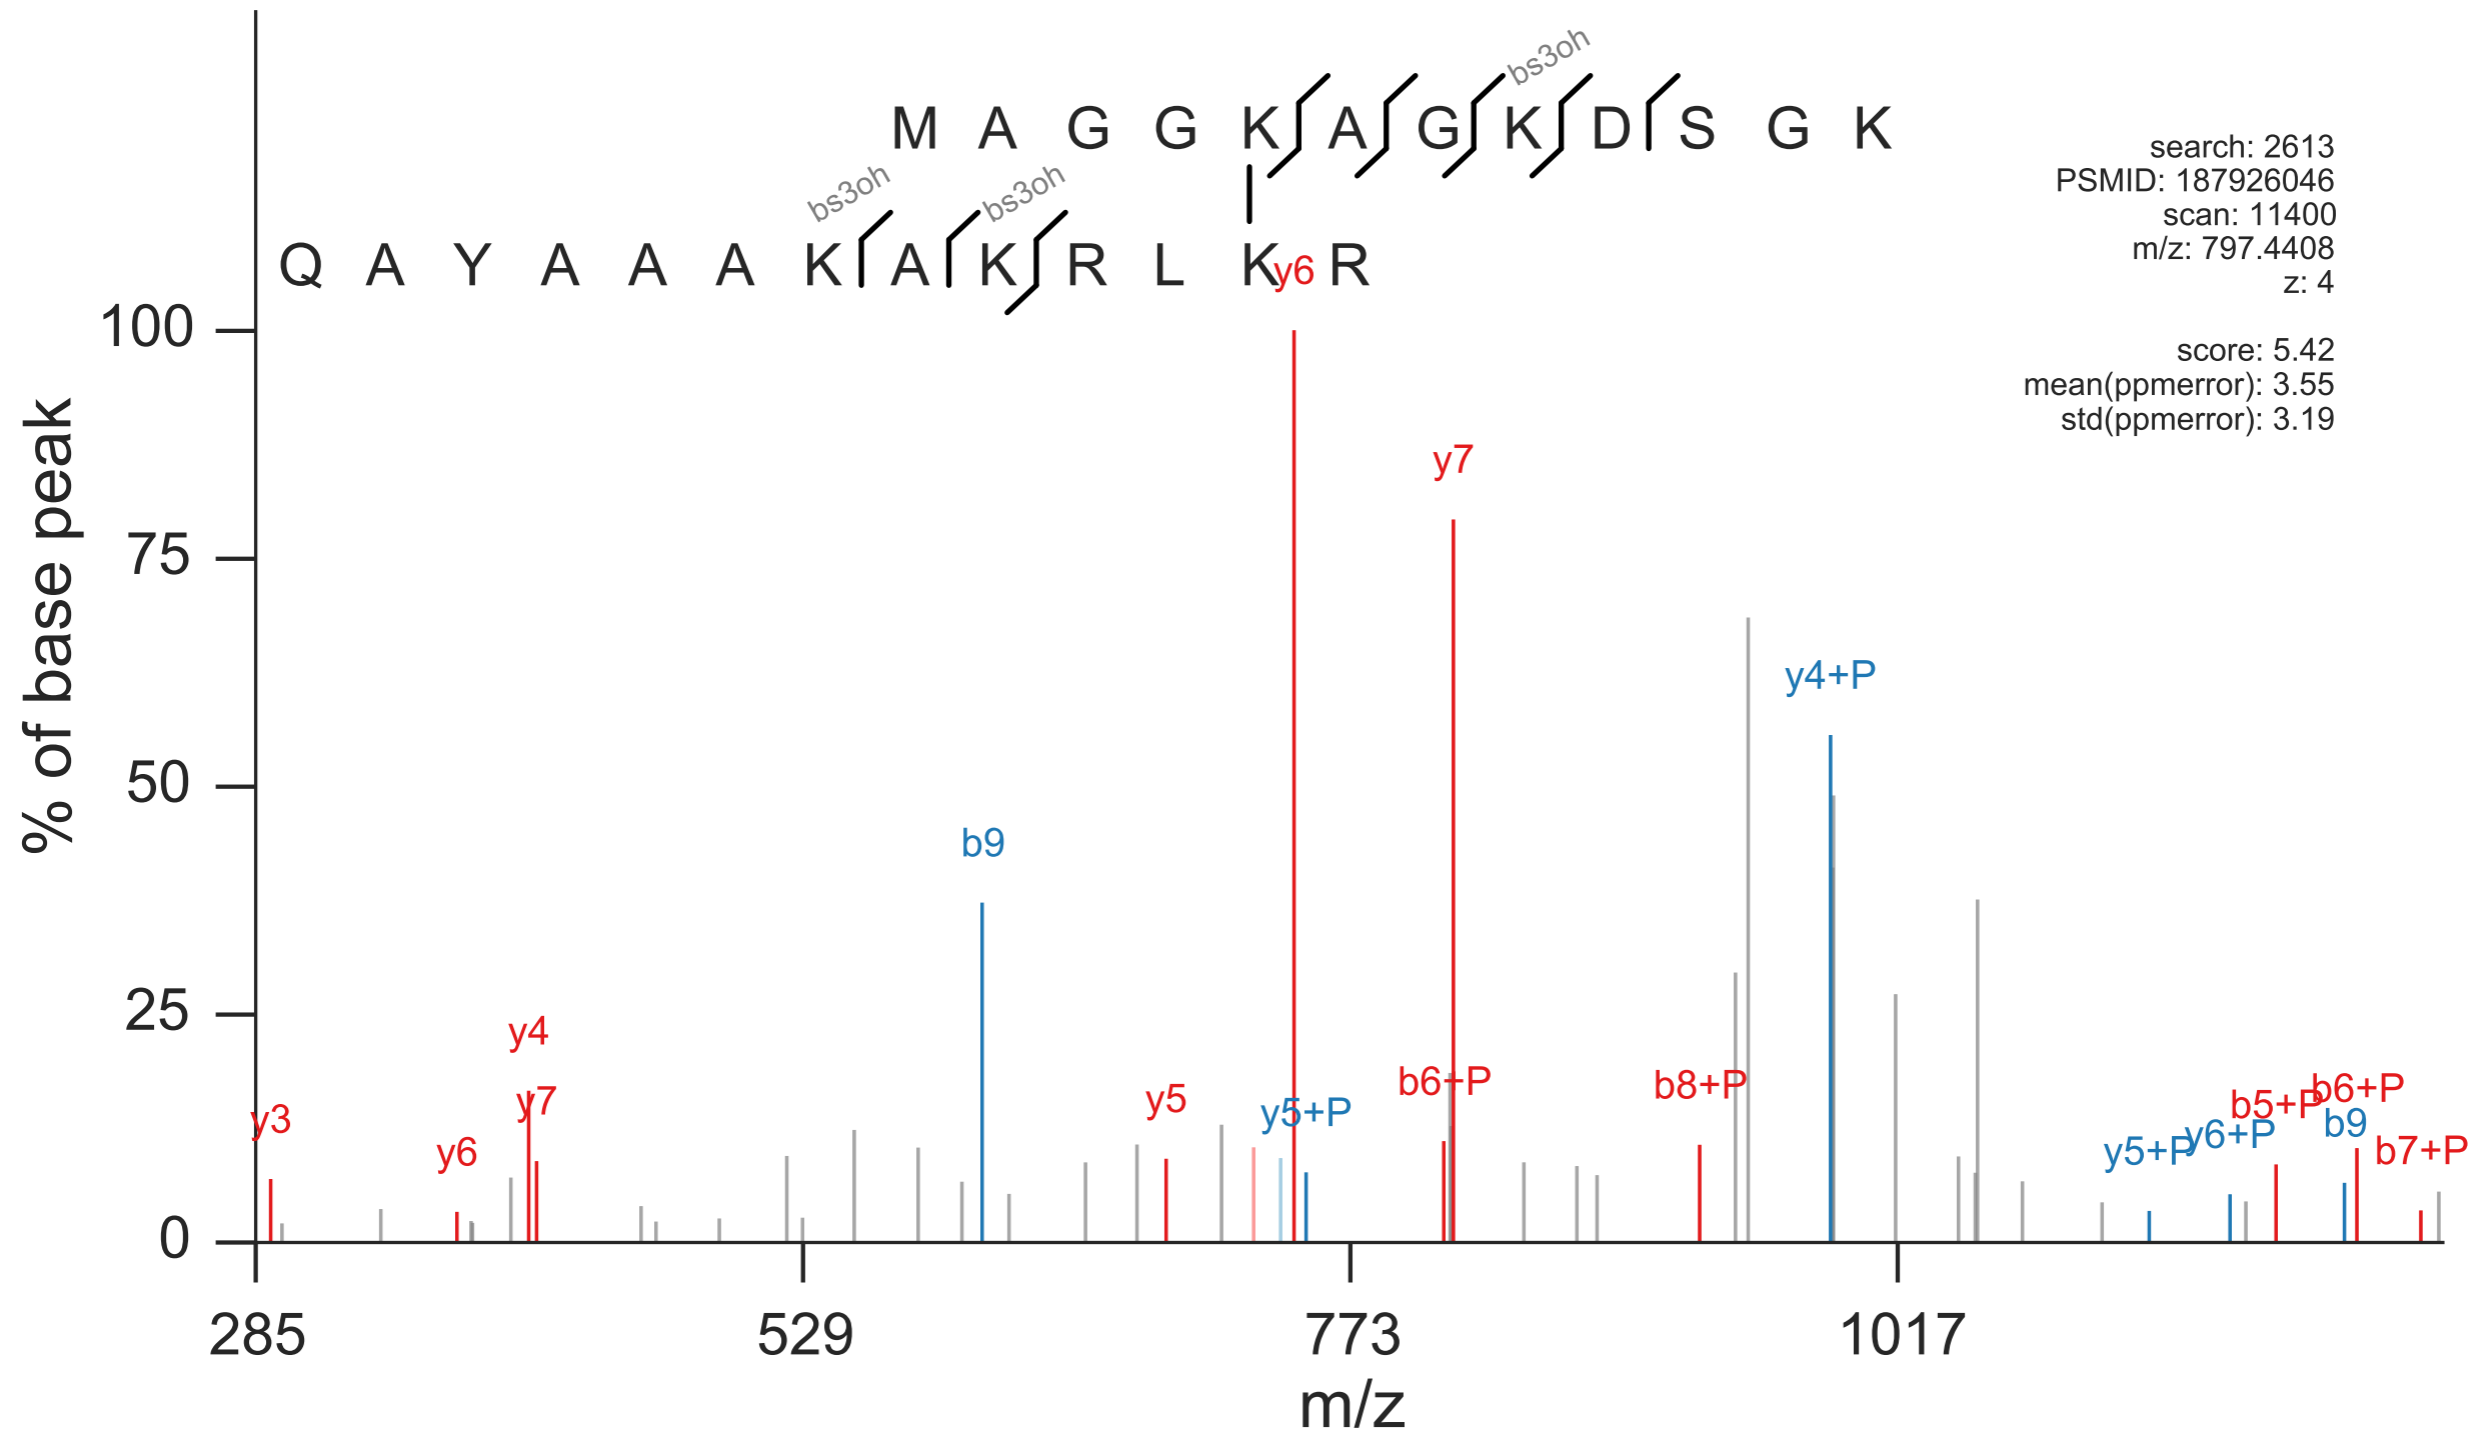

Q A Y A A A K A K R L K A G K D S G K

M A G G K A G K D S G K

bs30h bs30h bs30h bs30h

search: 2613  
 PSMID: 187926046  
 scan: 11400  
 m/z: 797.4408  
 z: 4

score: 5.42  
 mean(ppmerror): 3.55  
 std(ppmerror): 3.19

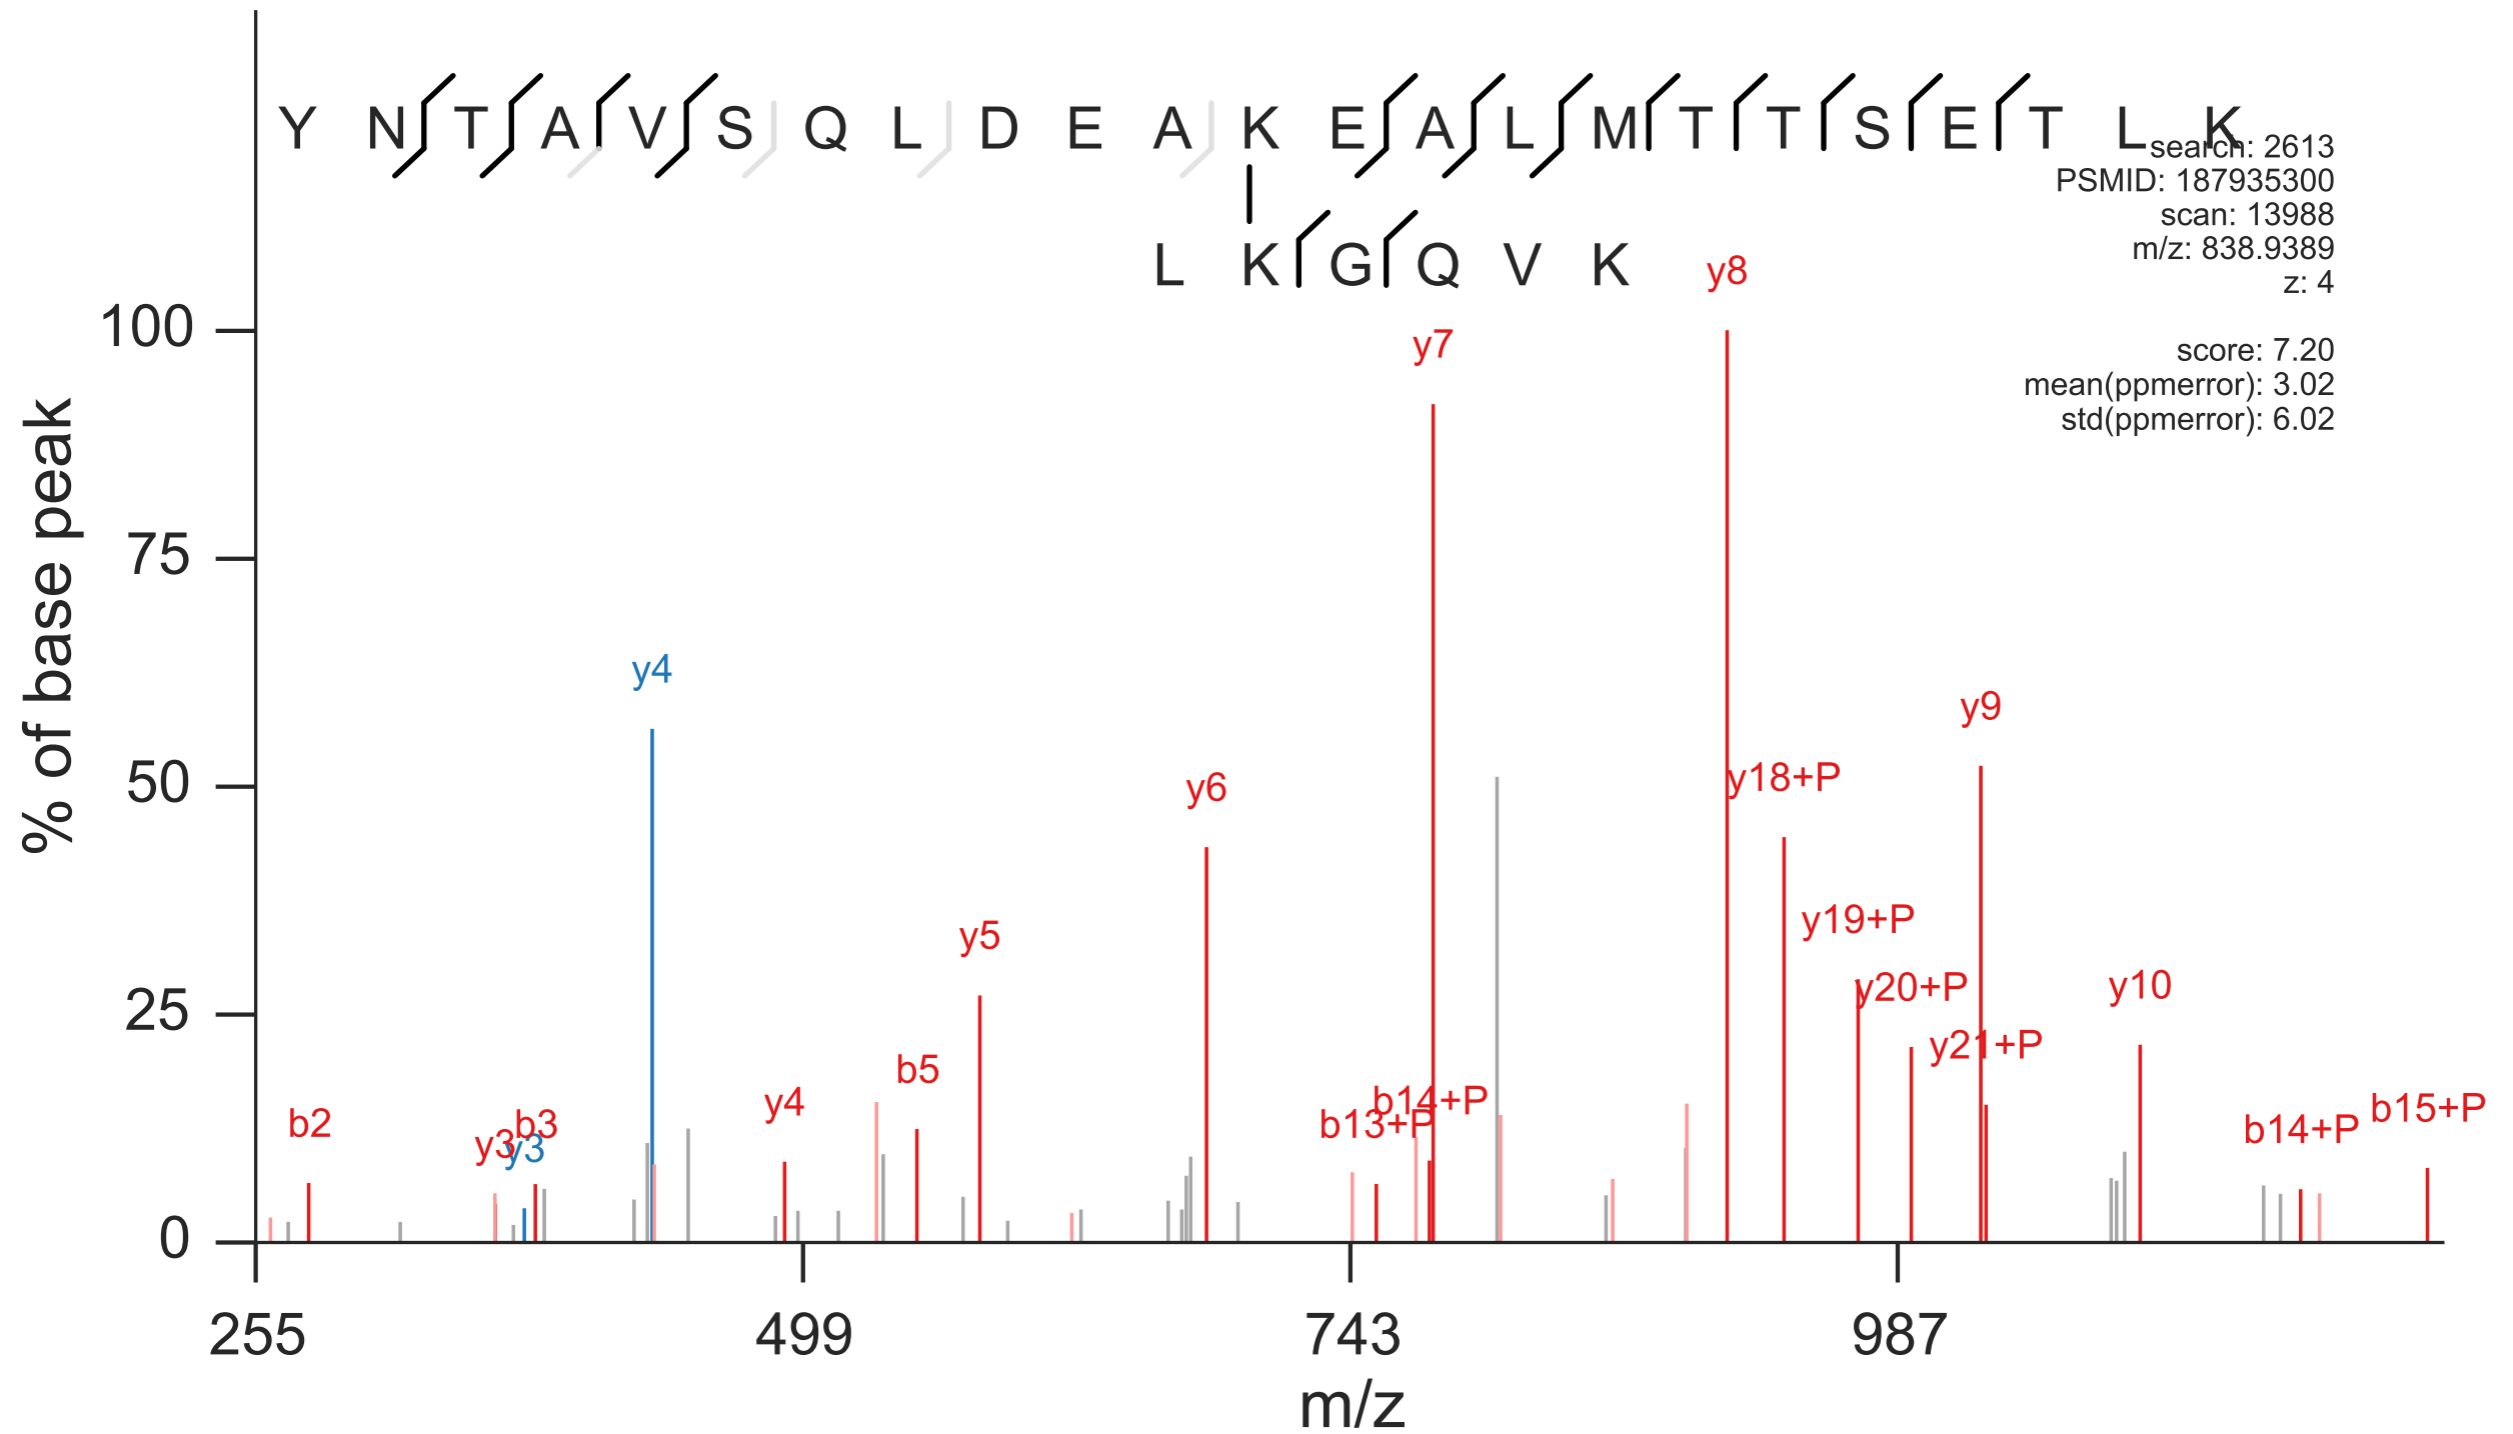

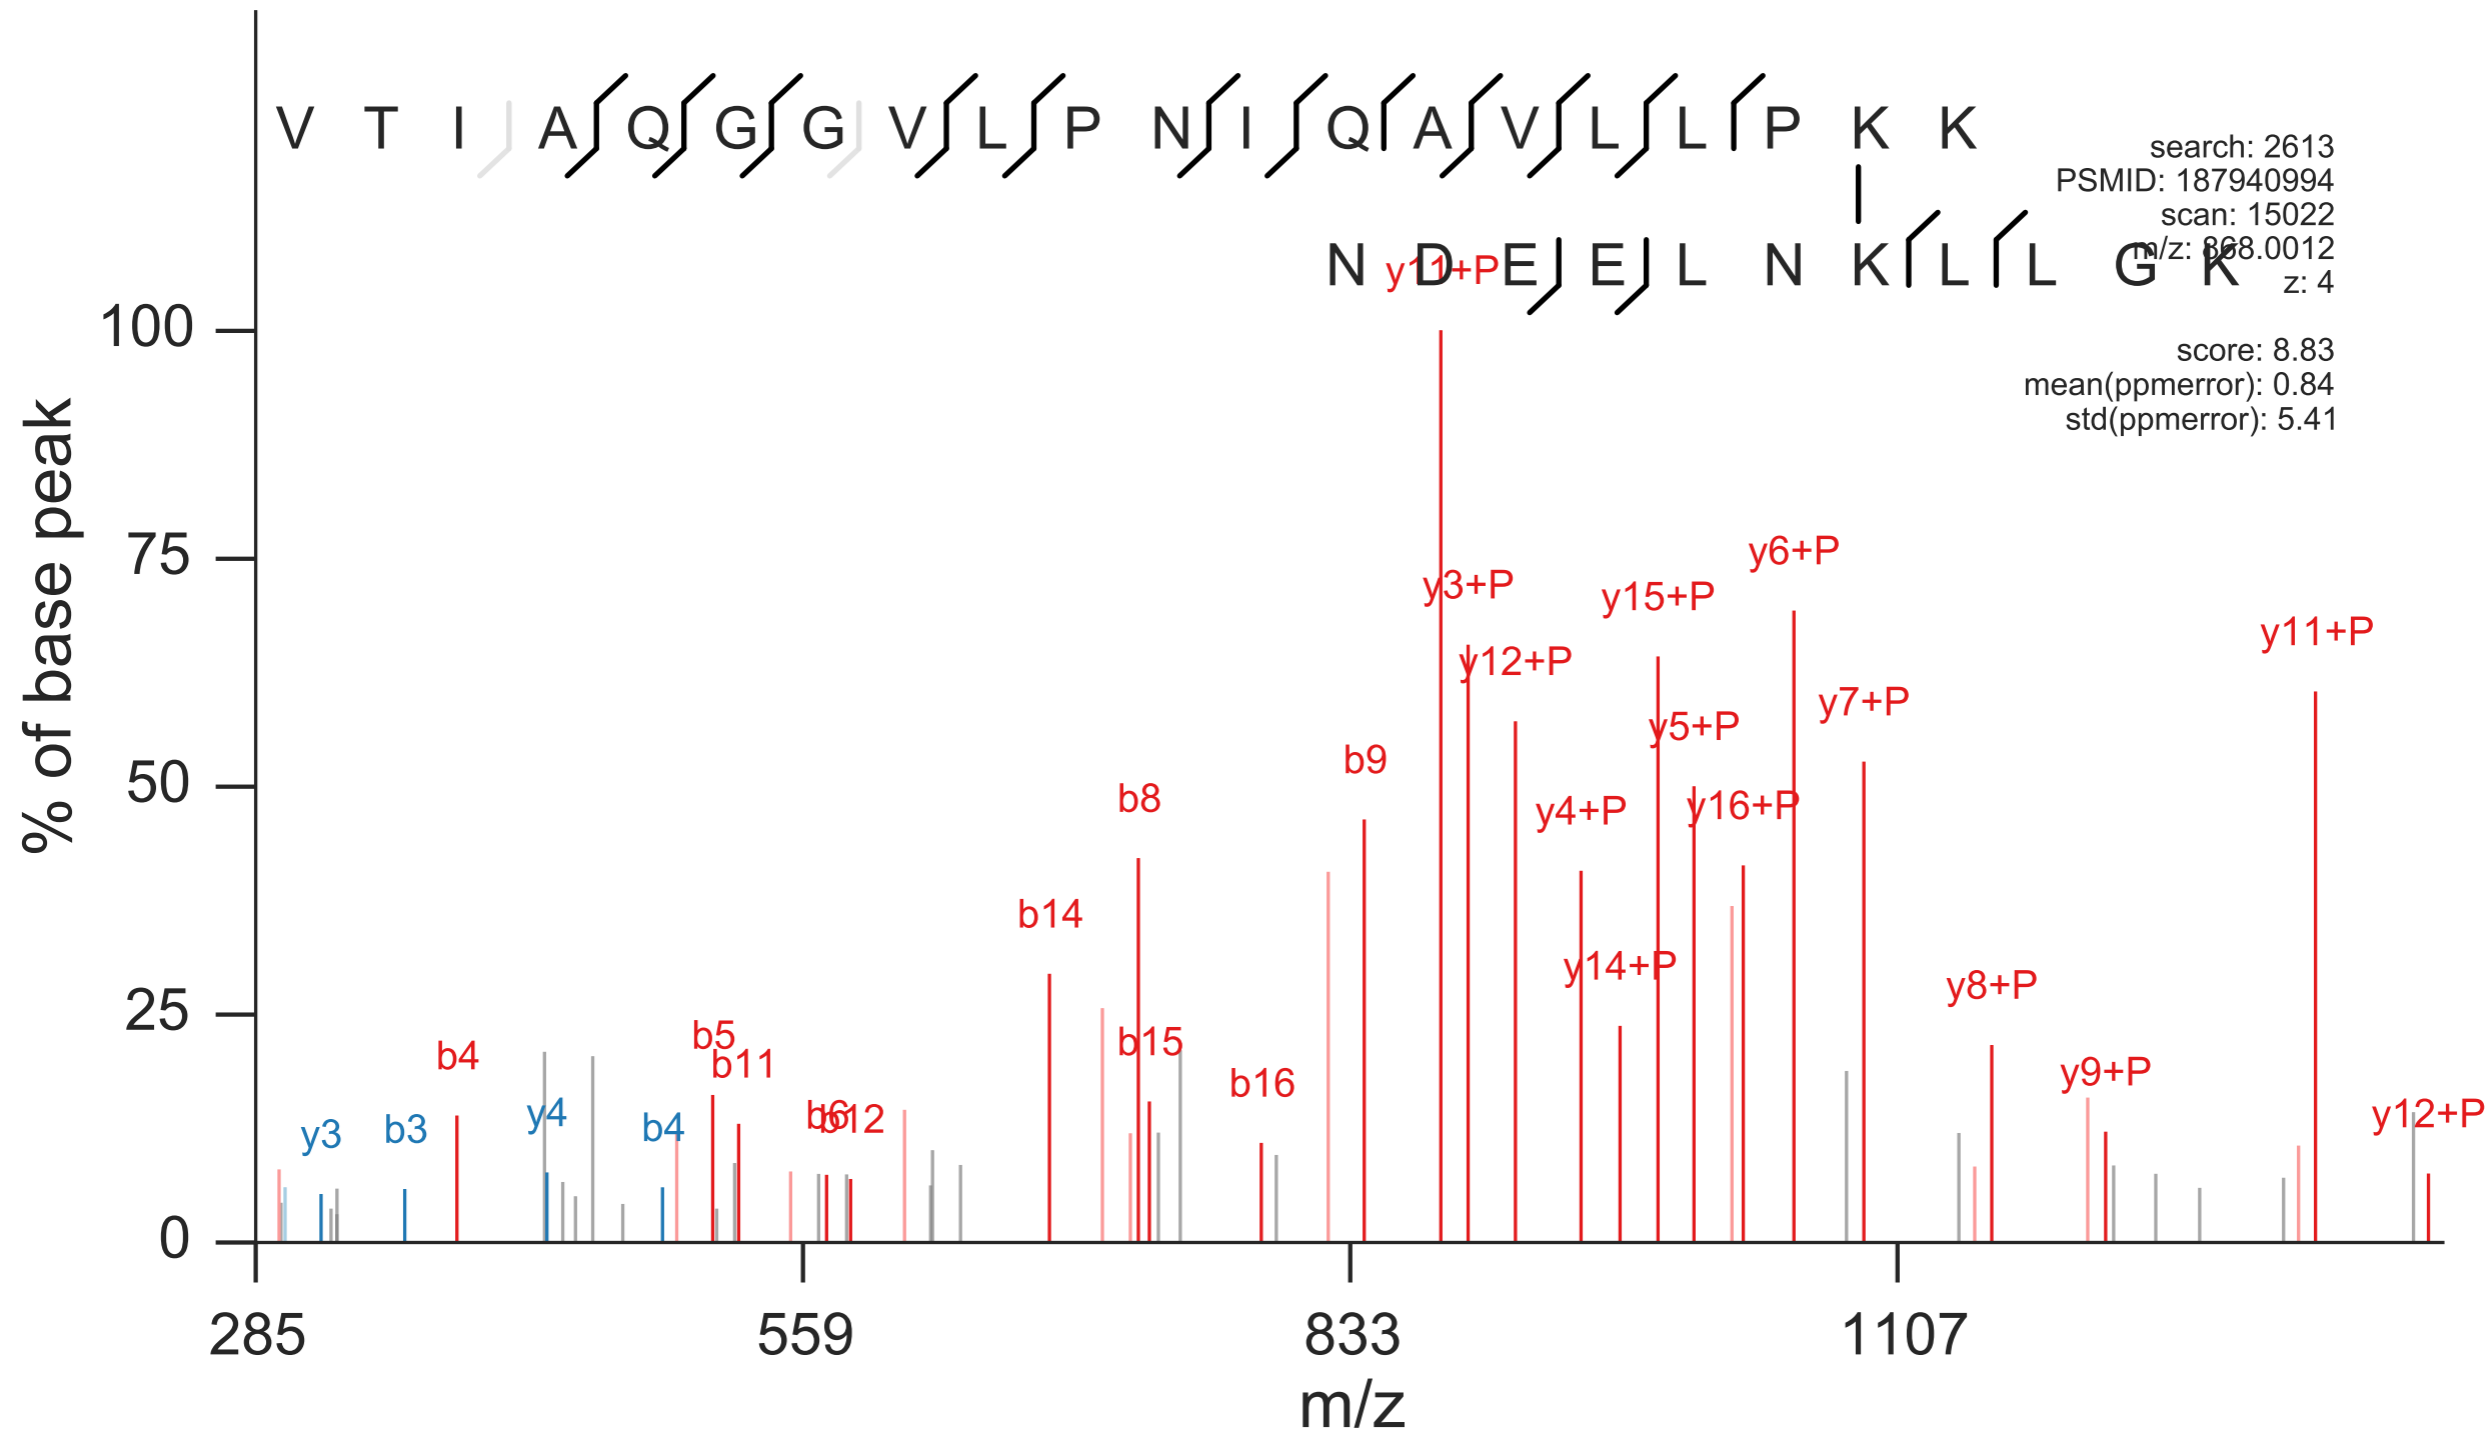

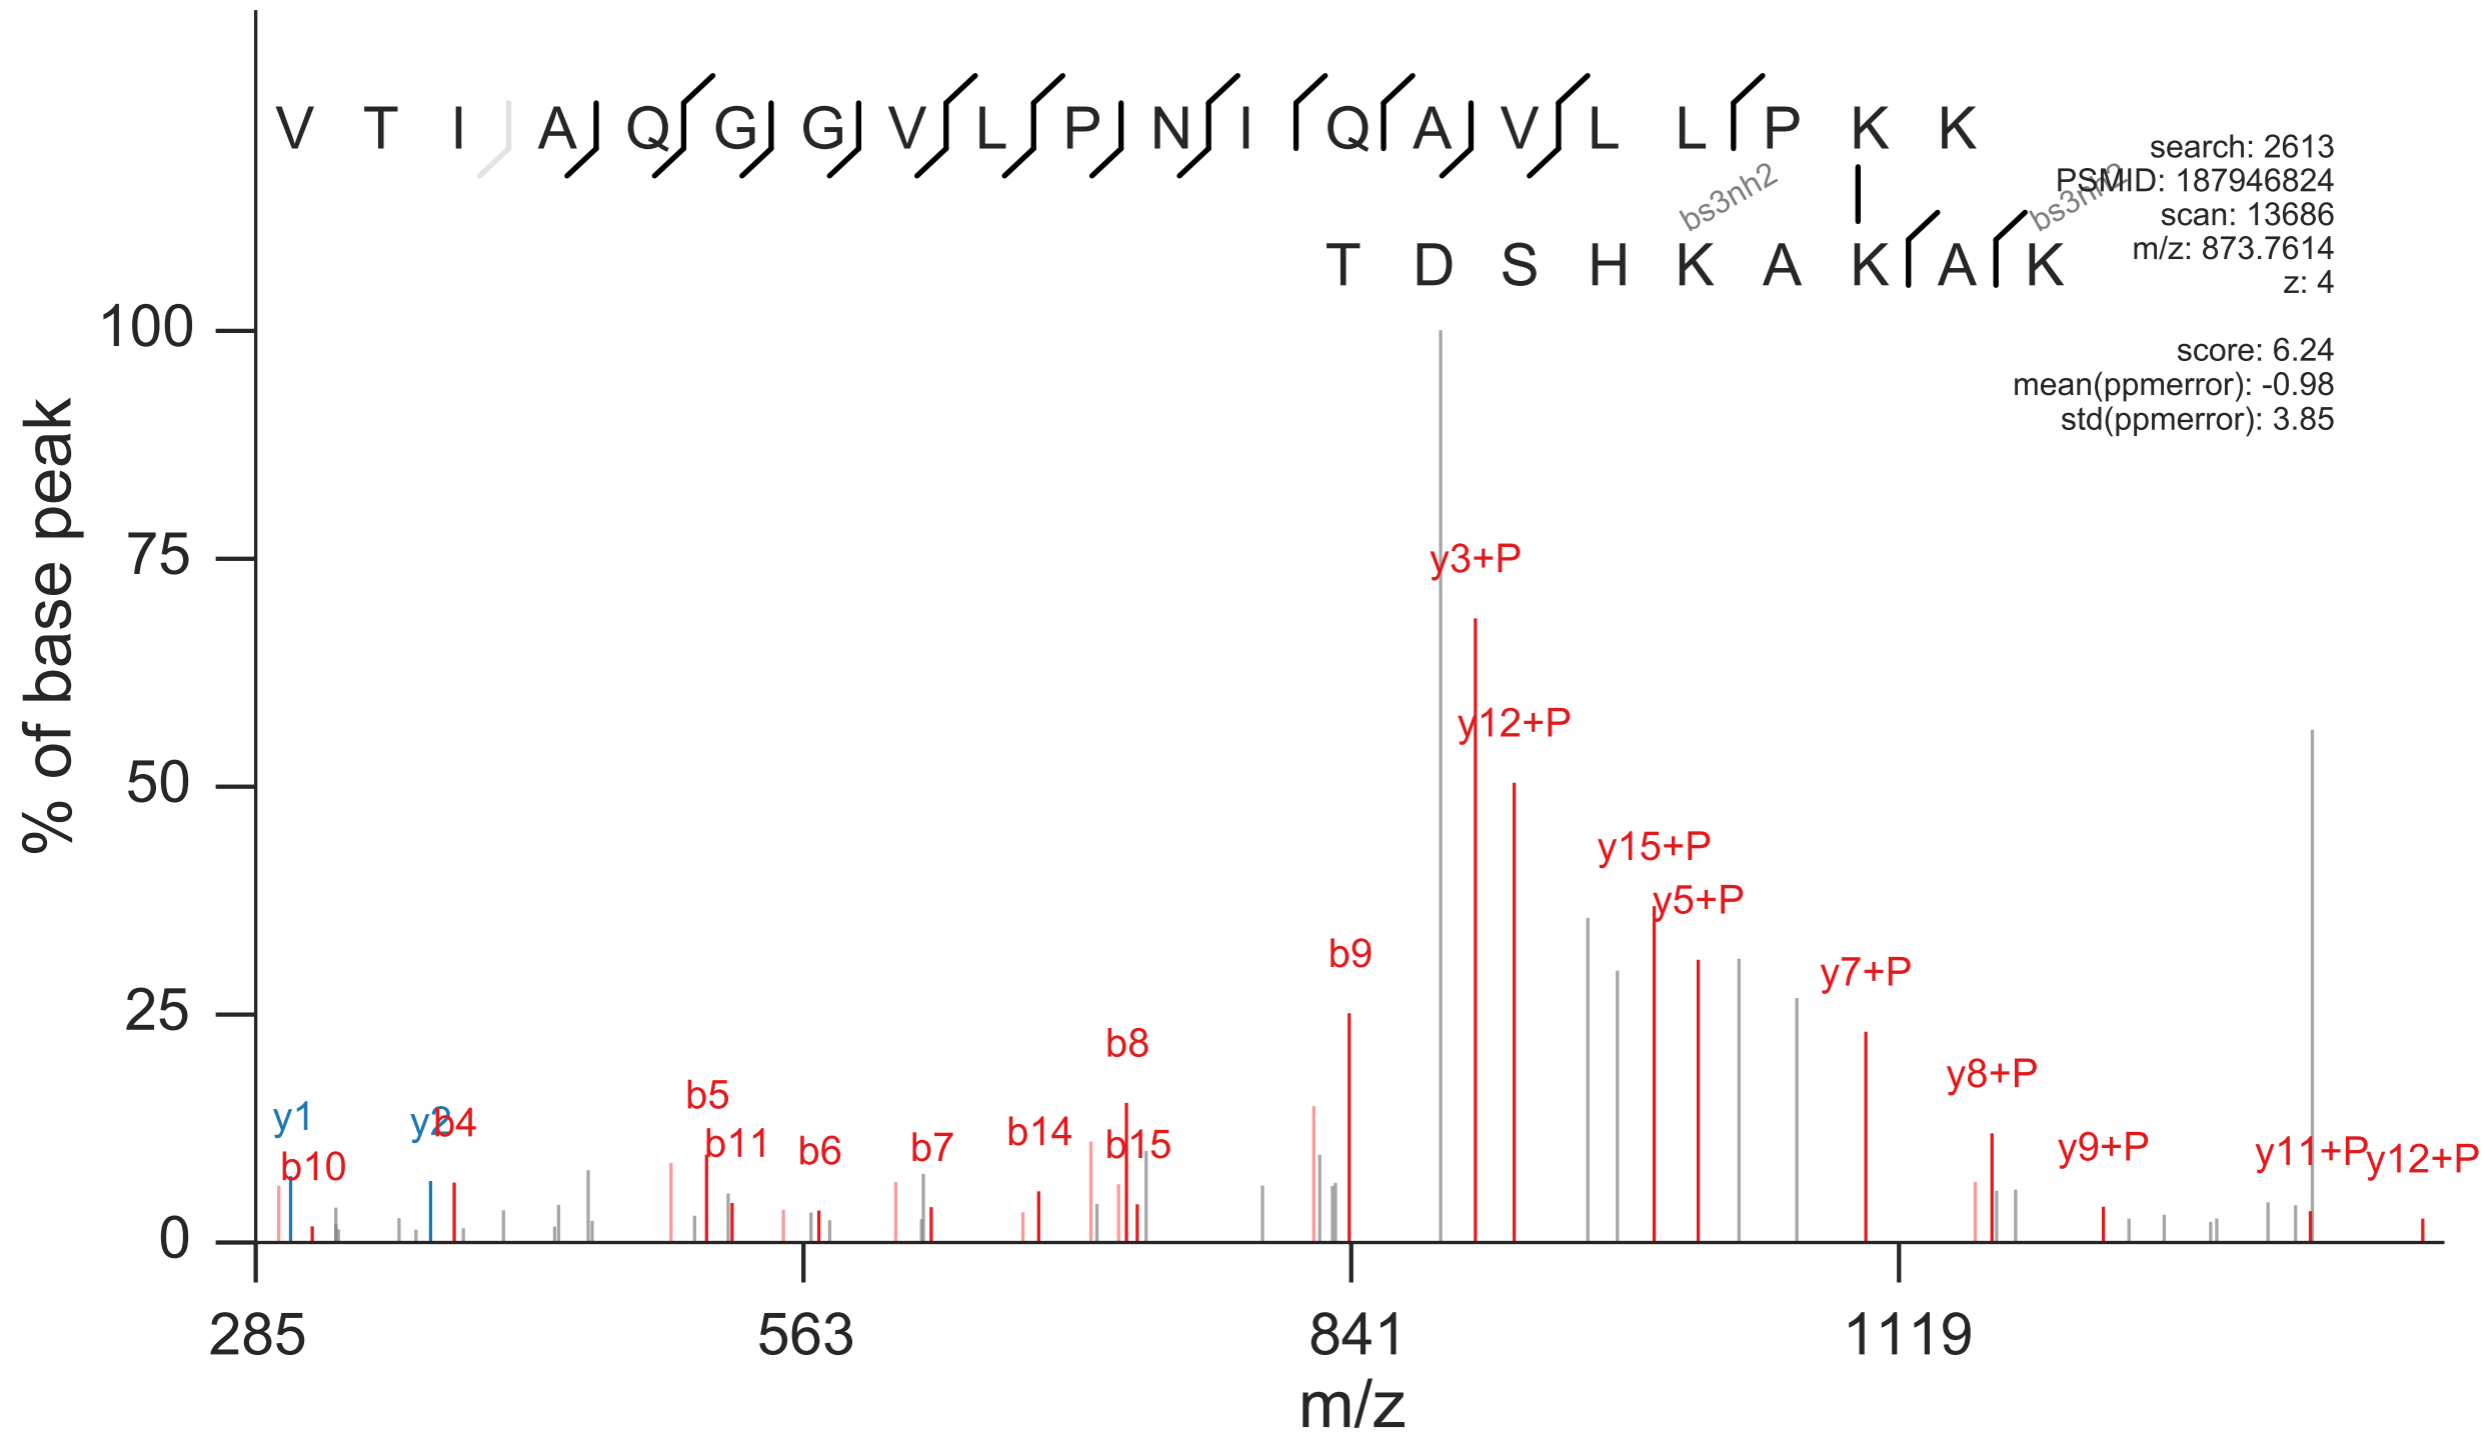

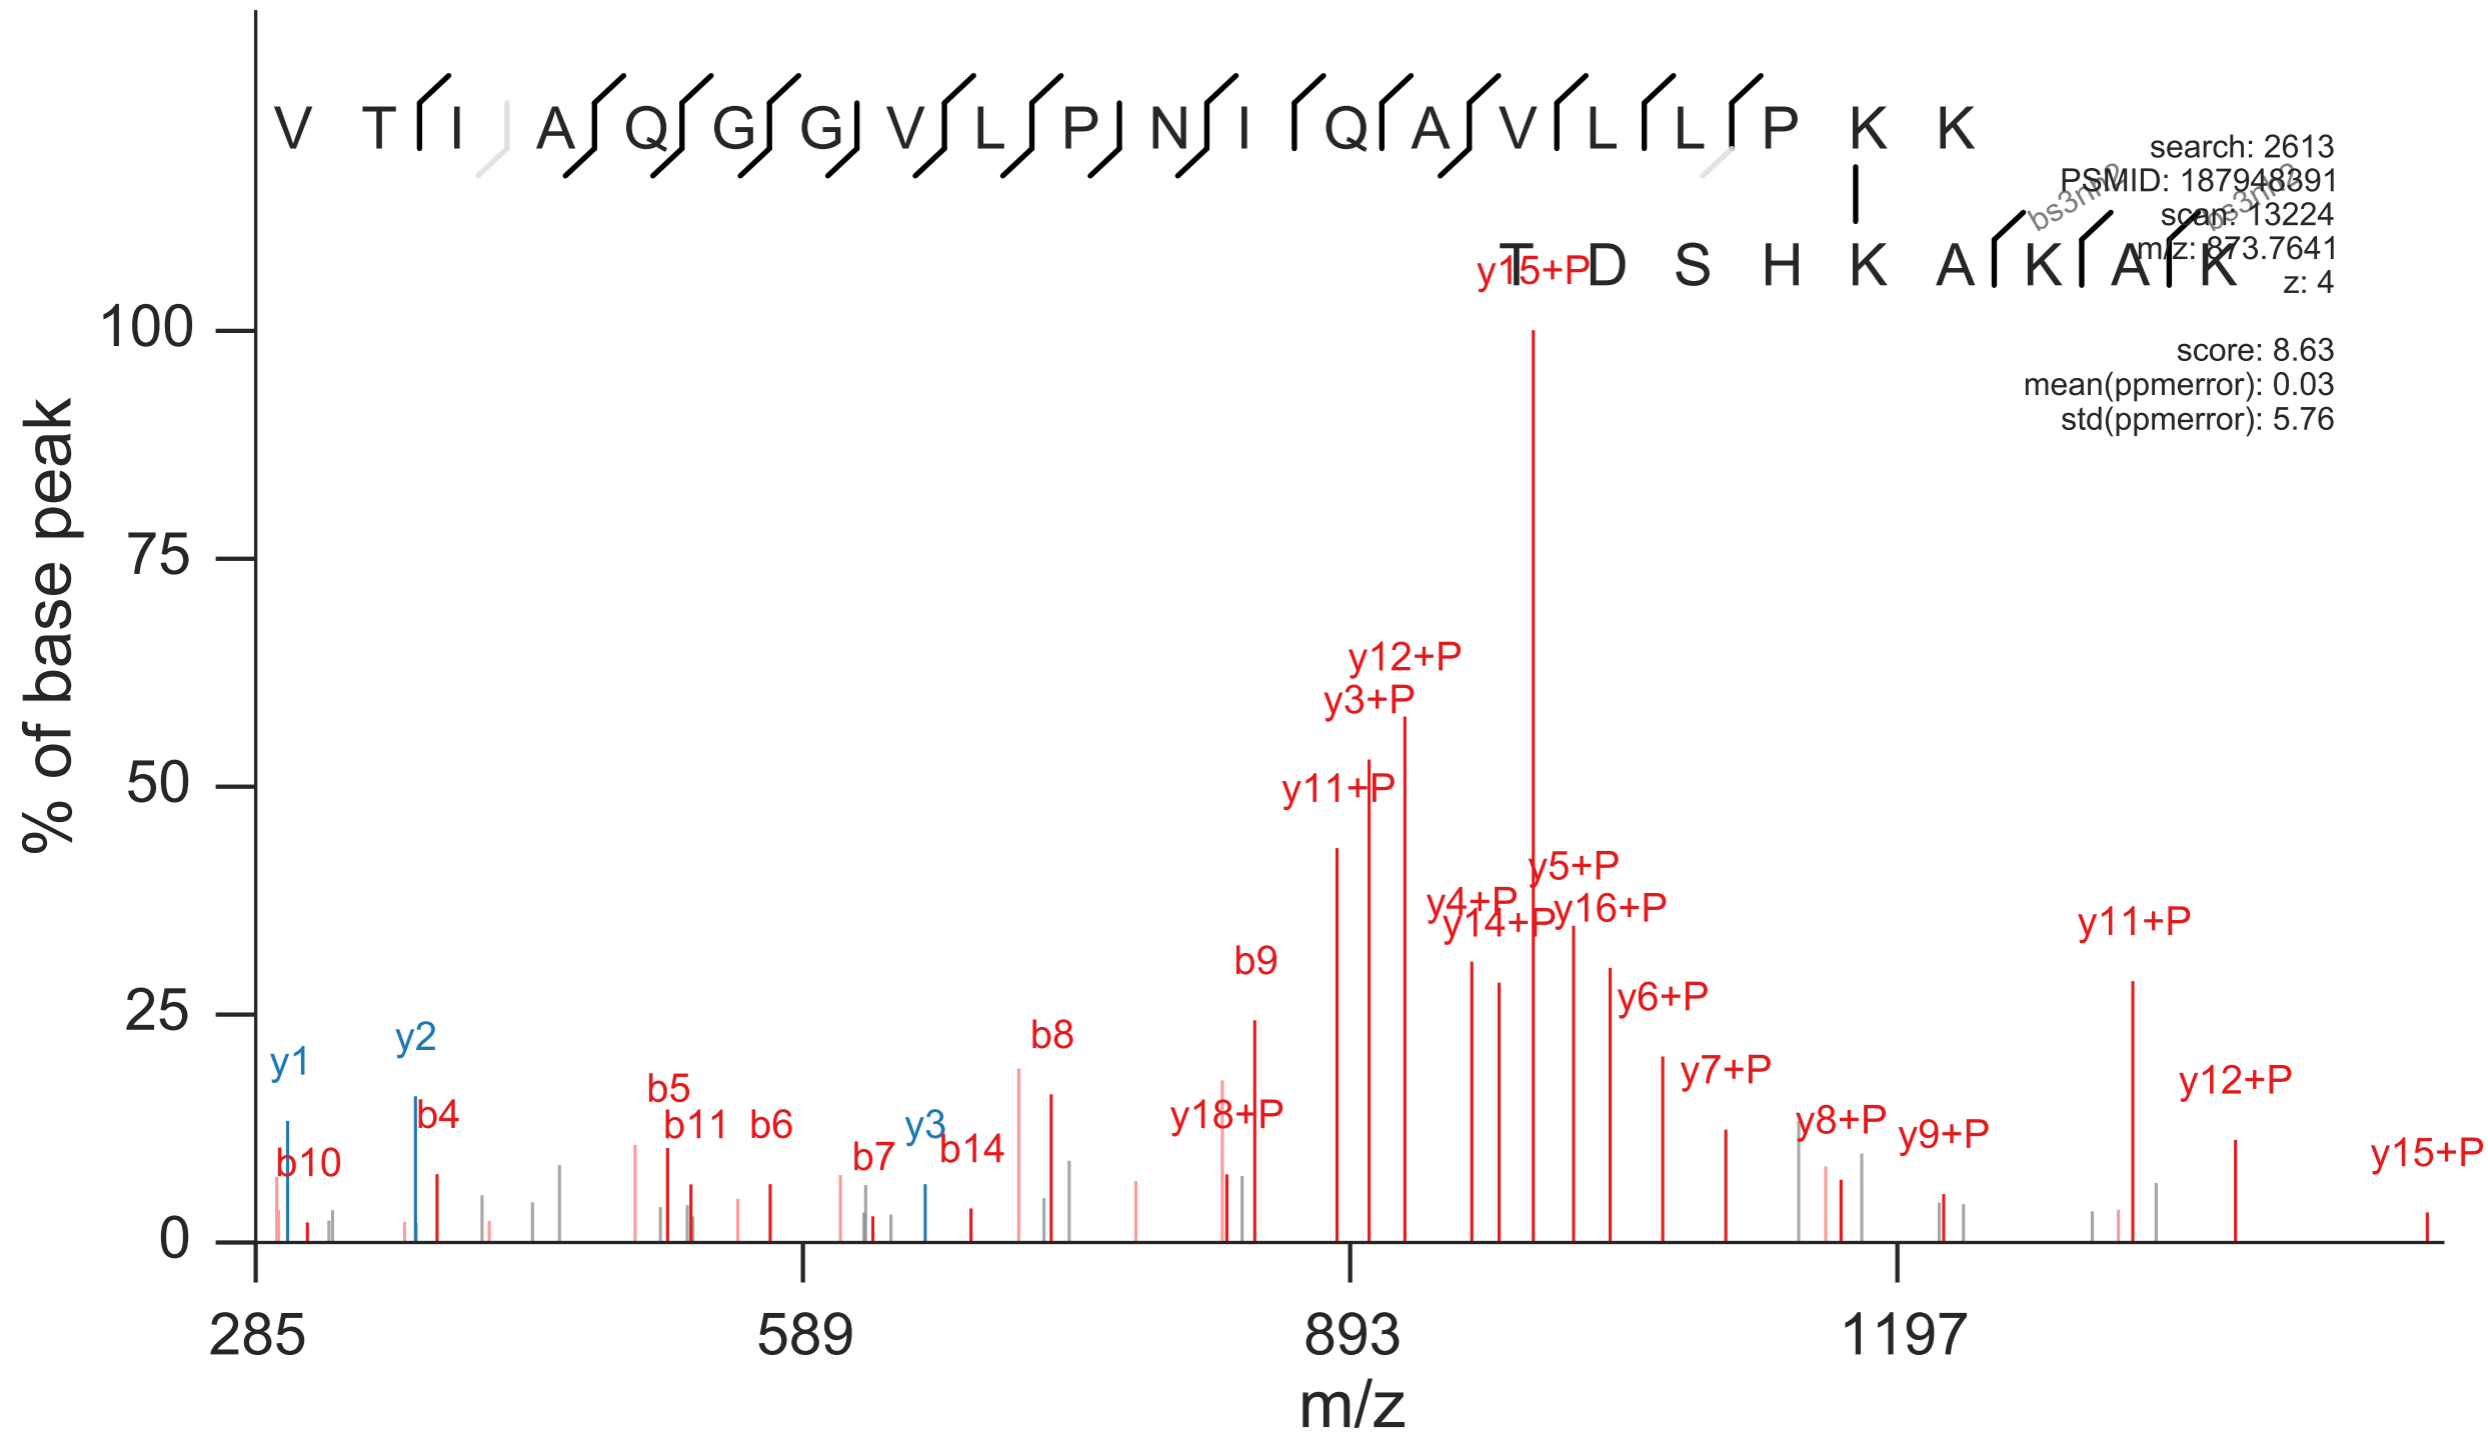

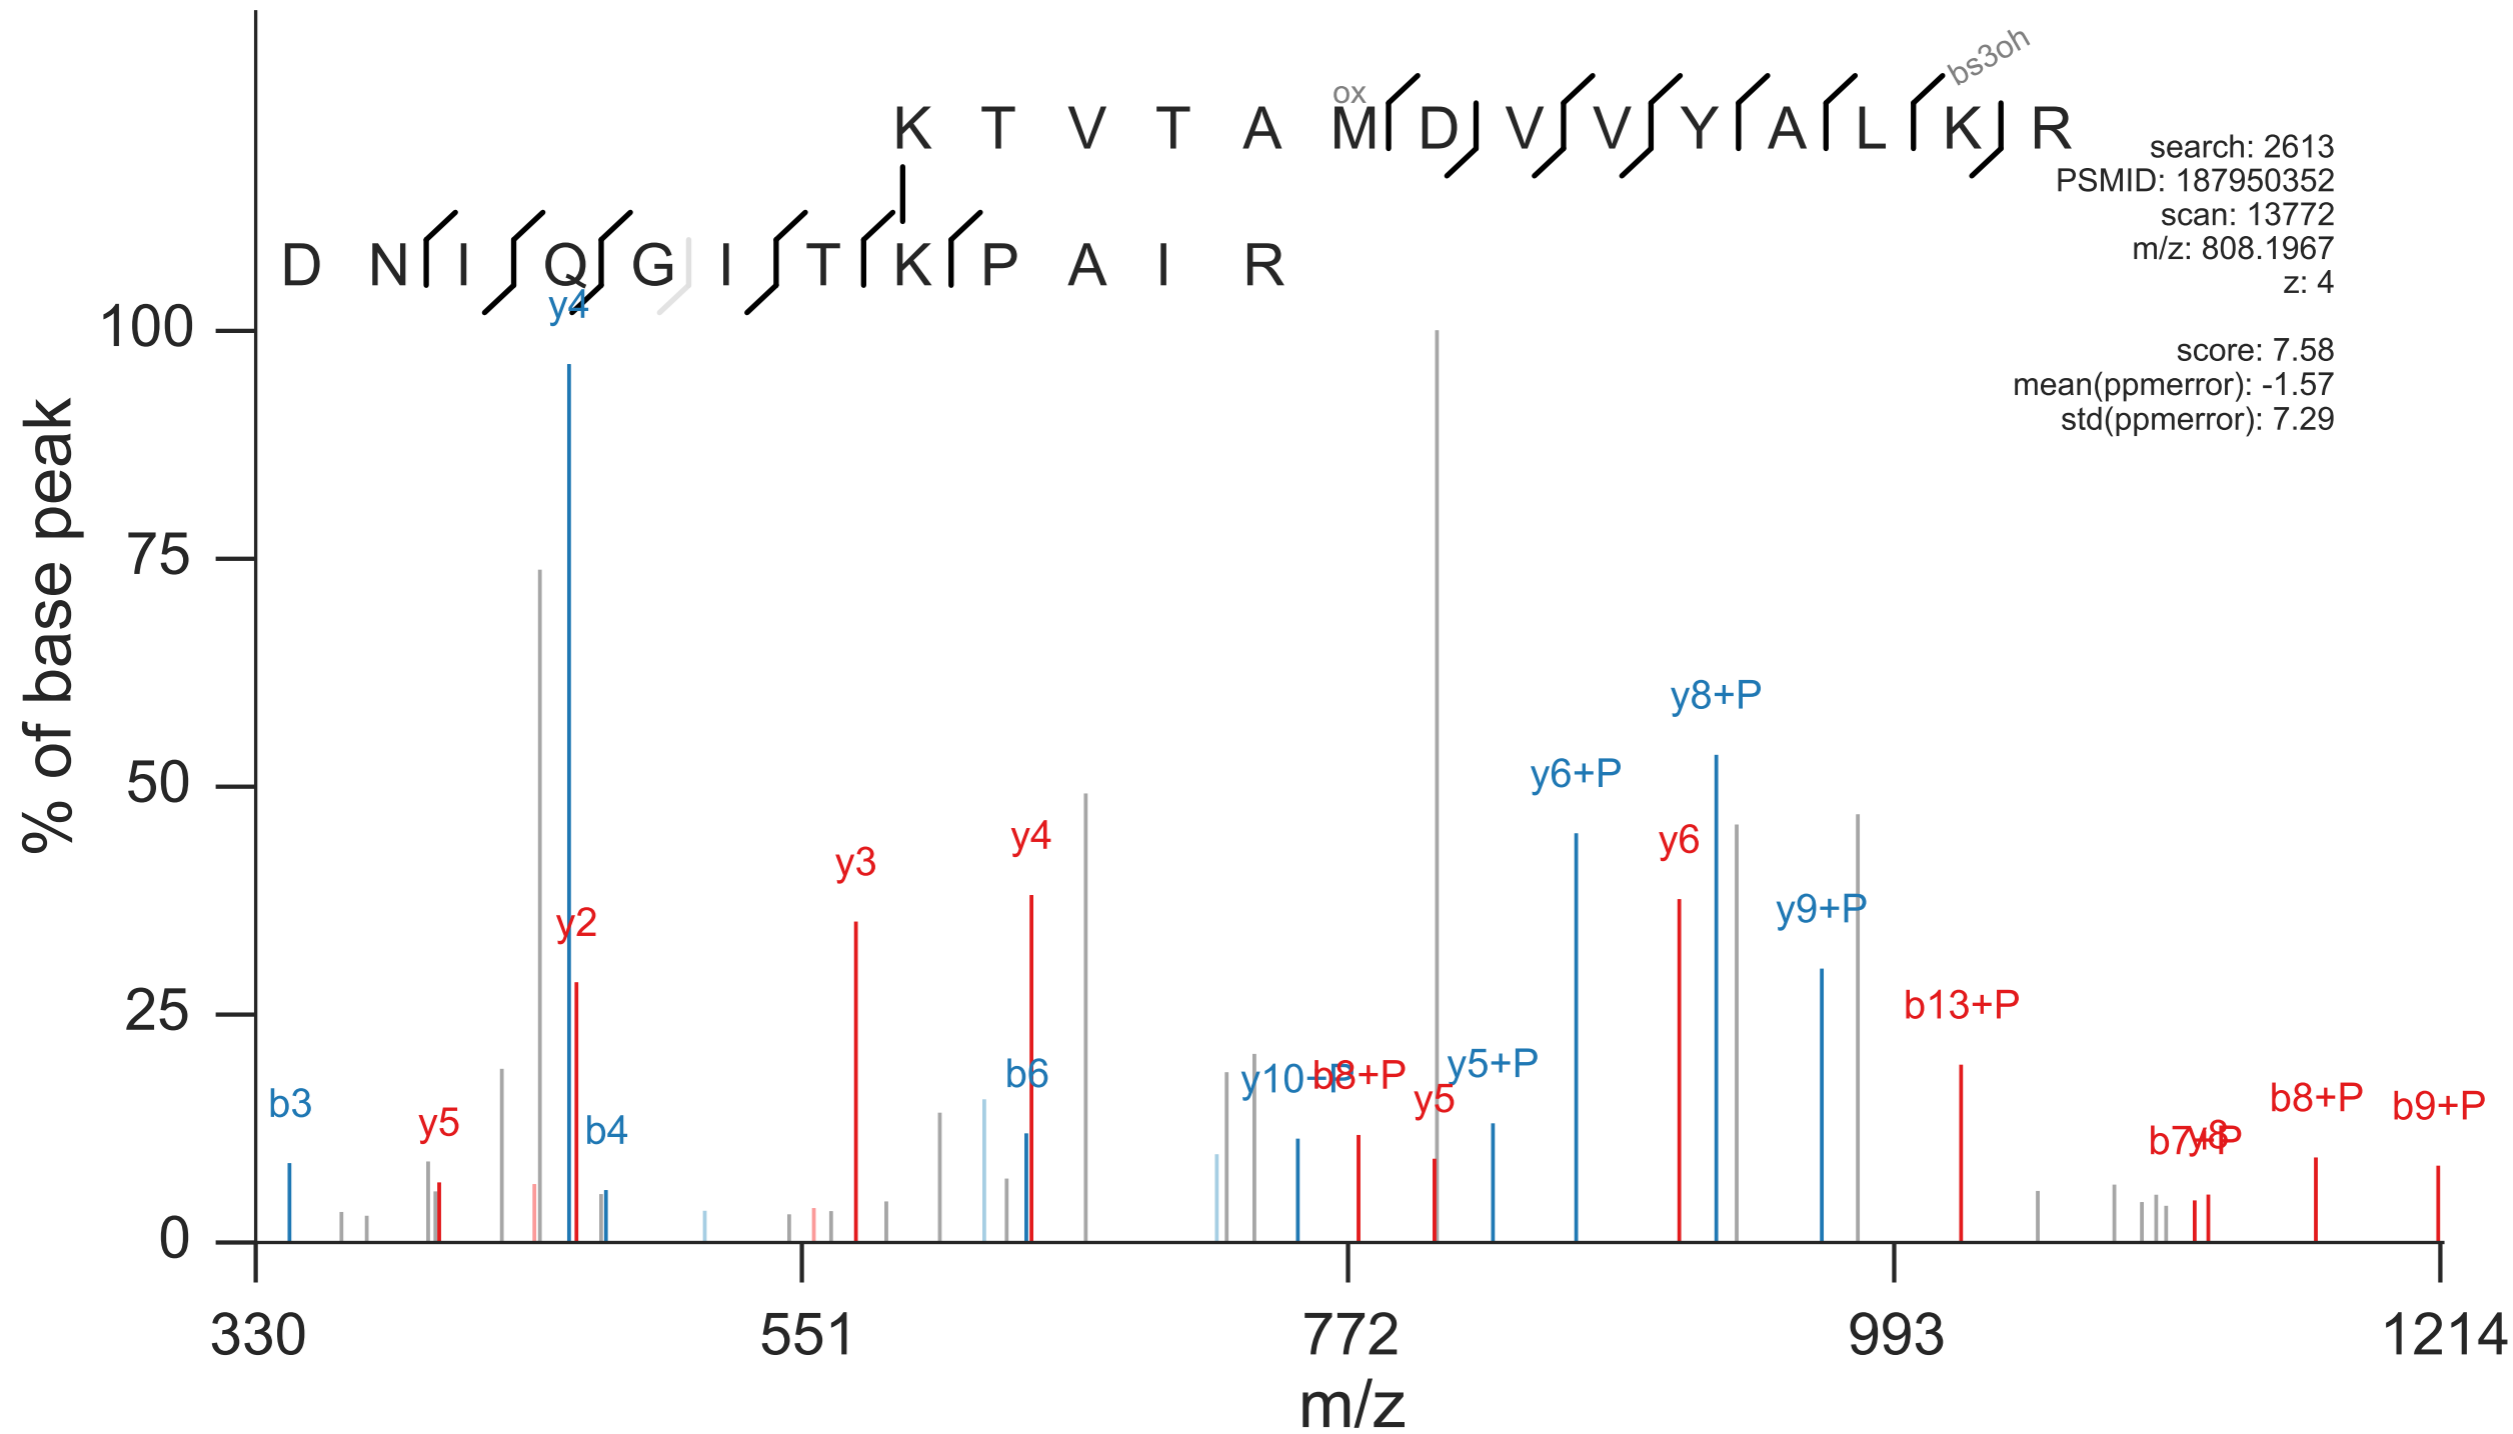

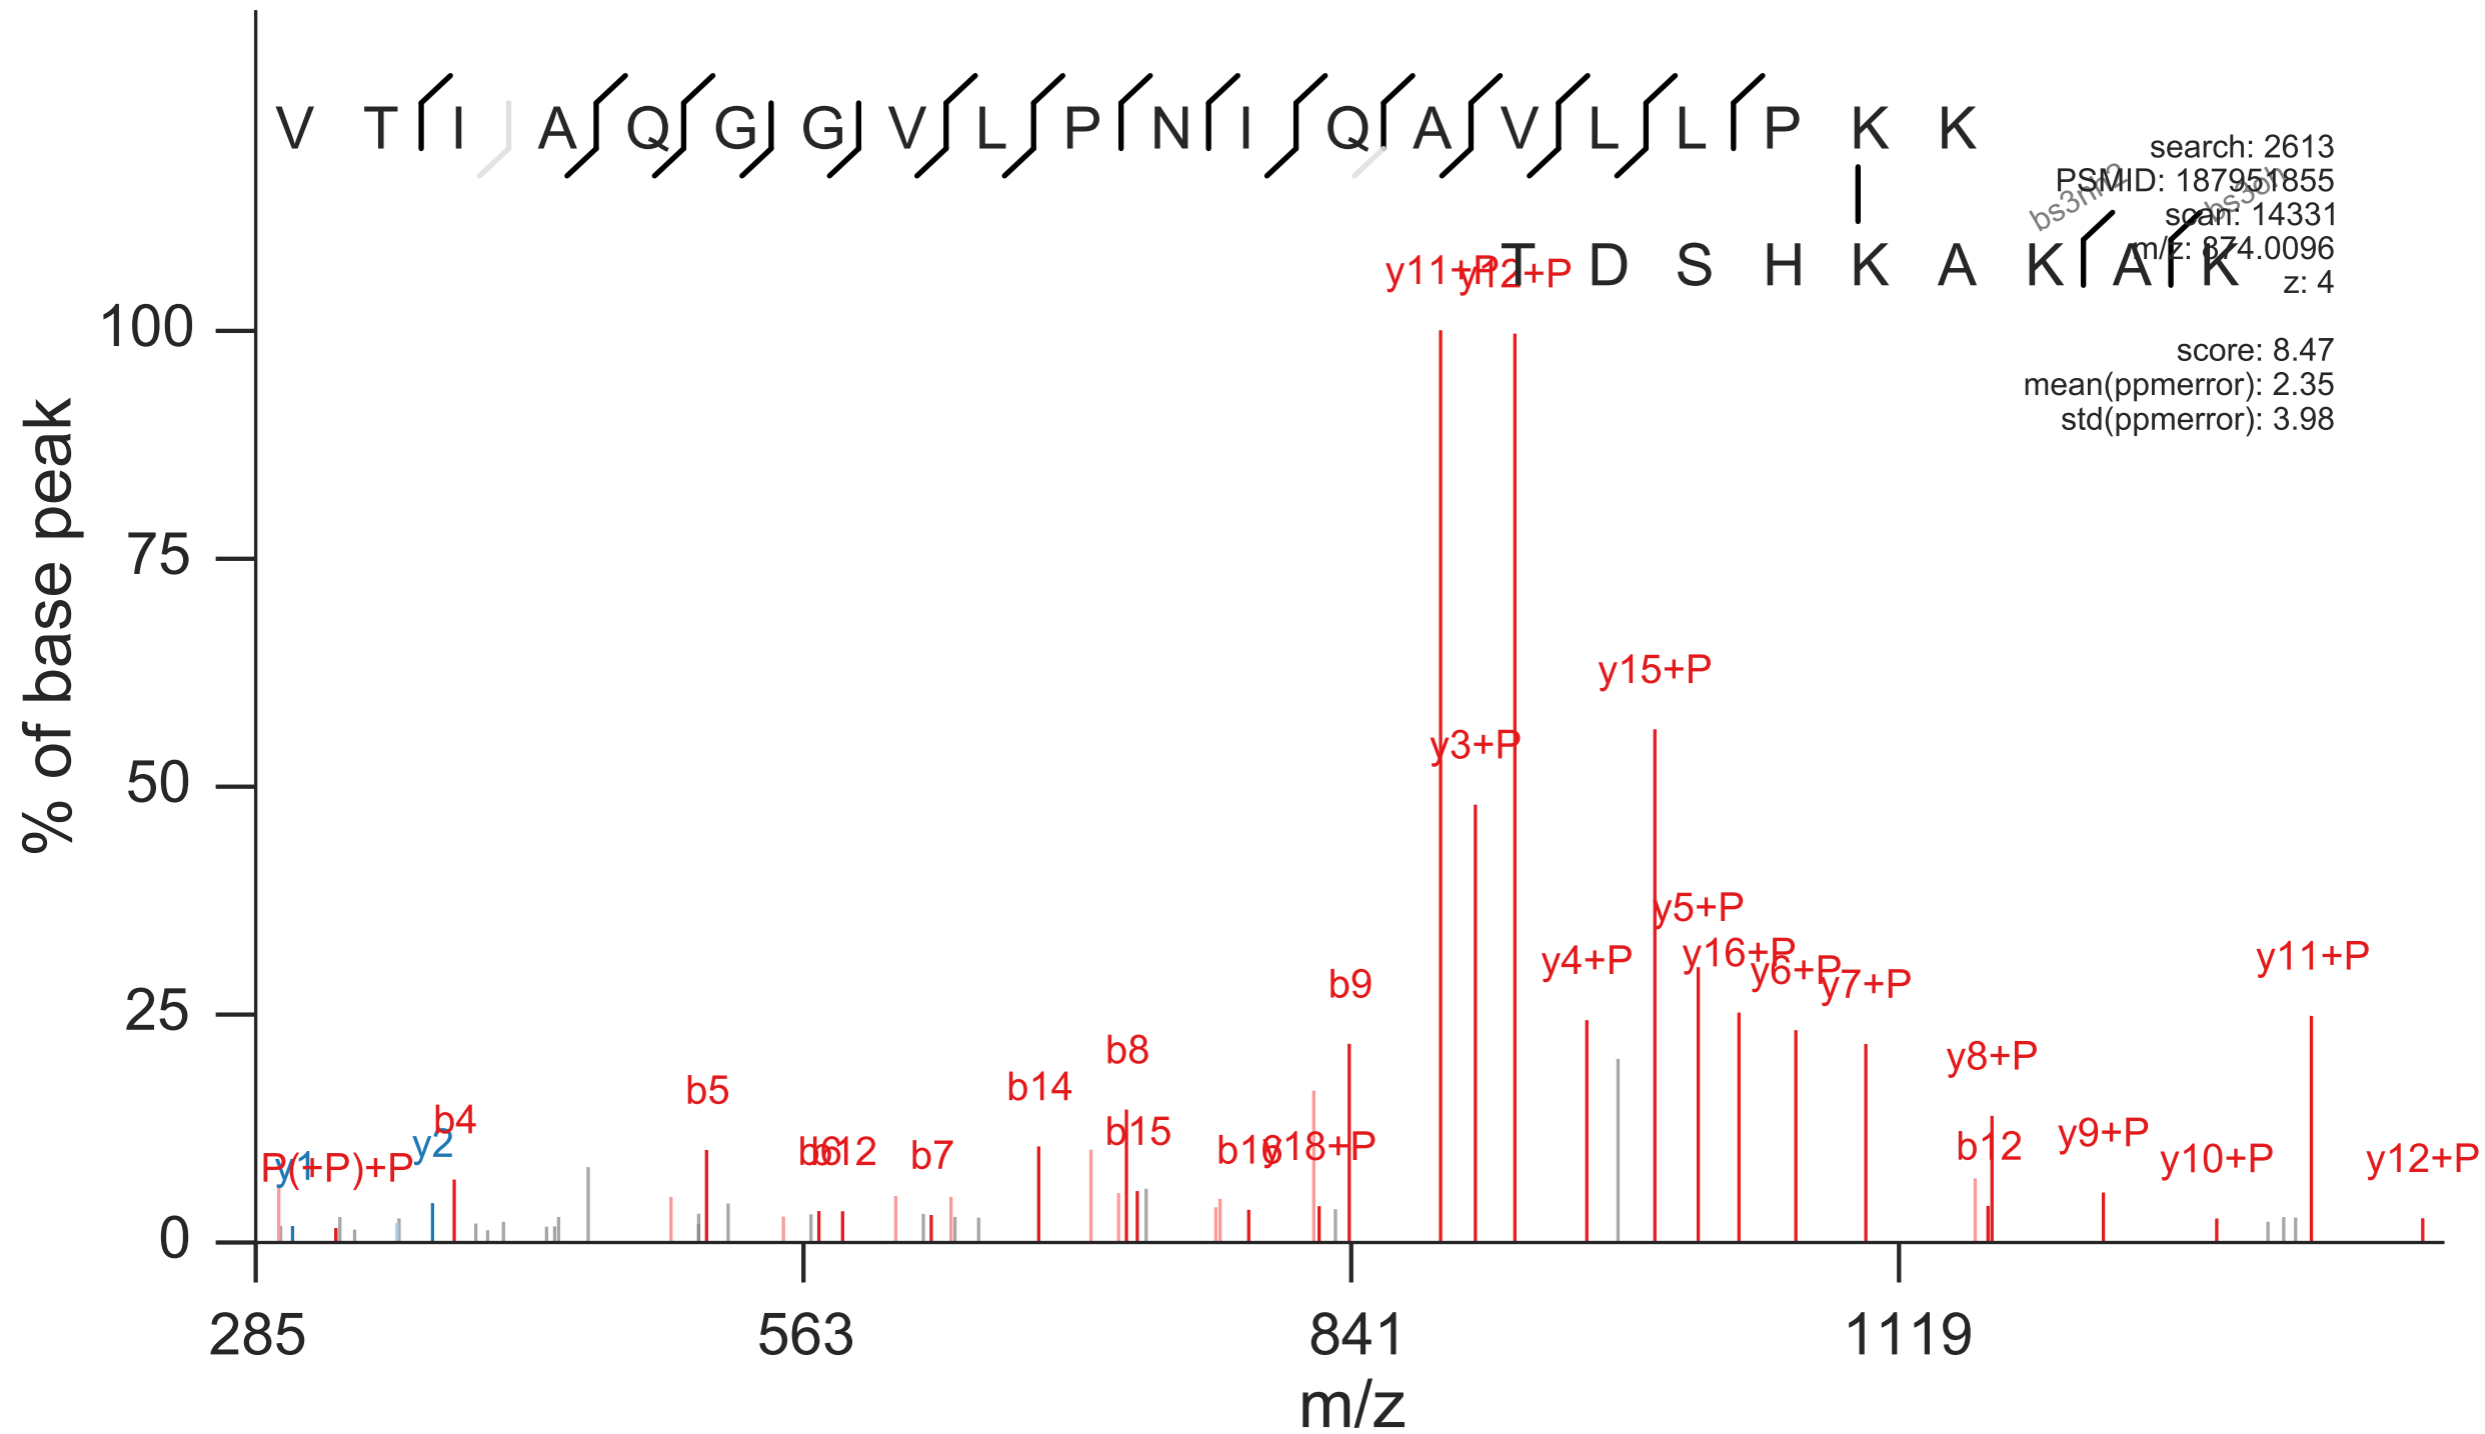

V T I A Q G G V L P N I Q A V L L P K K

y11+P y2+P T D S H K A K I A K

search: 2613  
 PSMID: 187951855  
 scan: 14331  
 m/z: 874.0096  
 z: 4  
 score: 8.47  
 mean(ppmerror): 2.35  
 std(ppmerror): 3.98

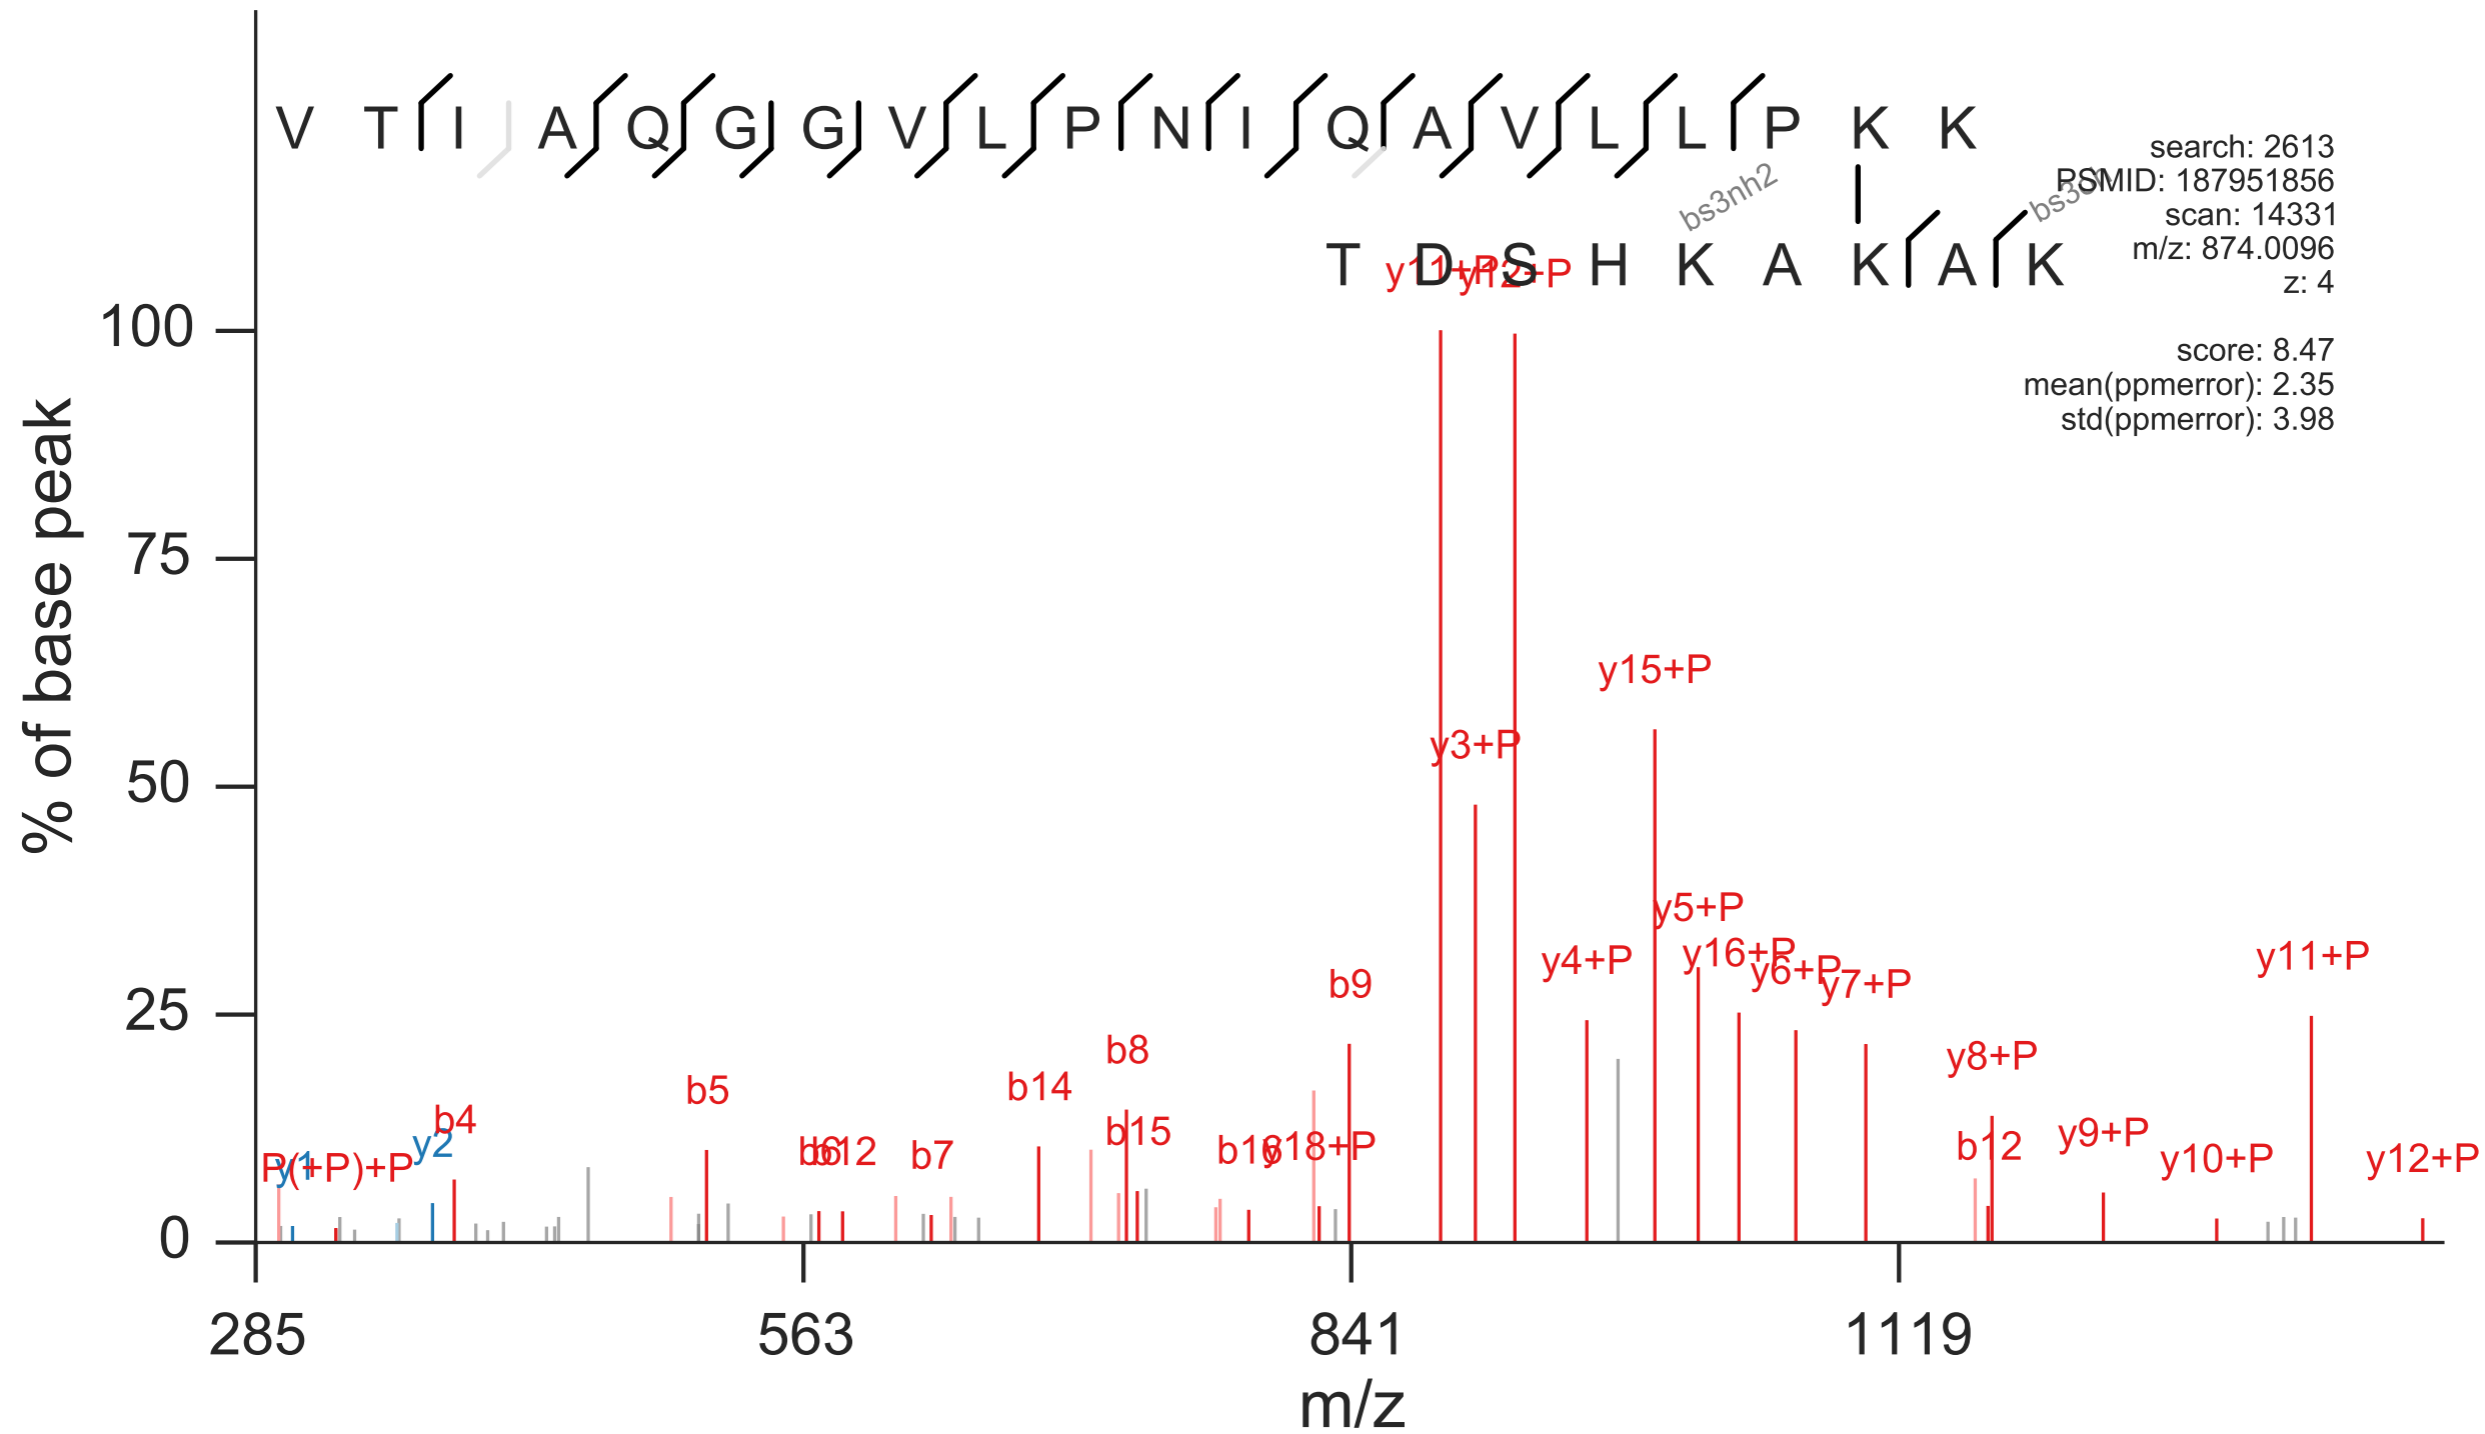



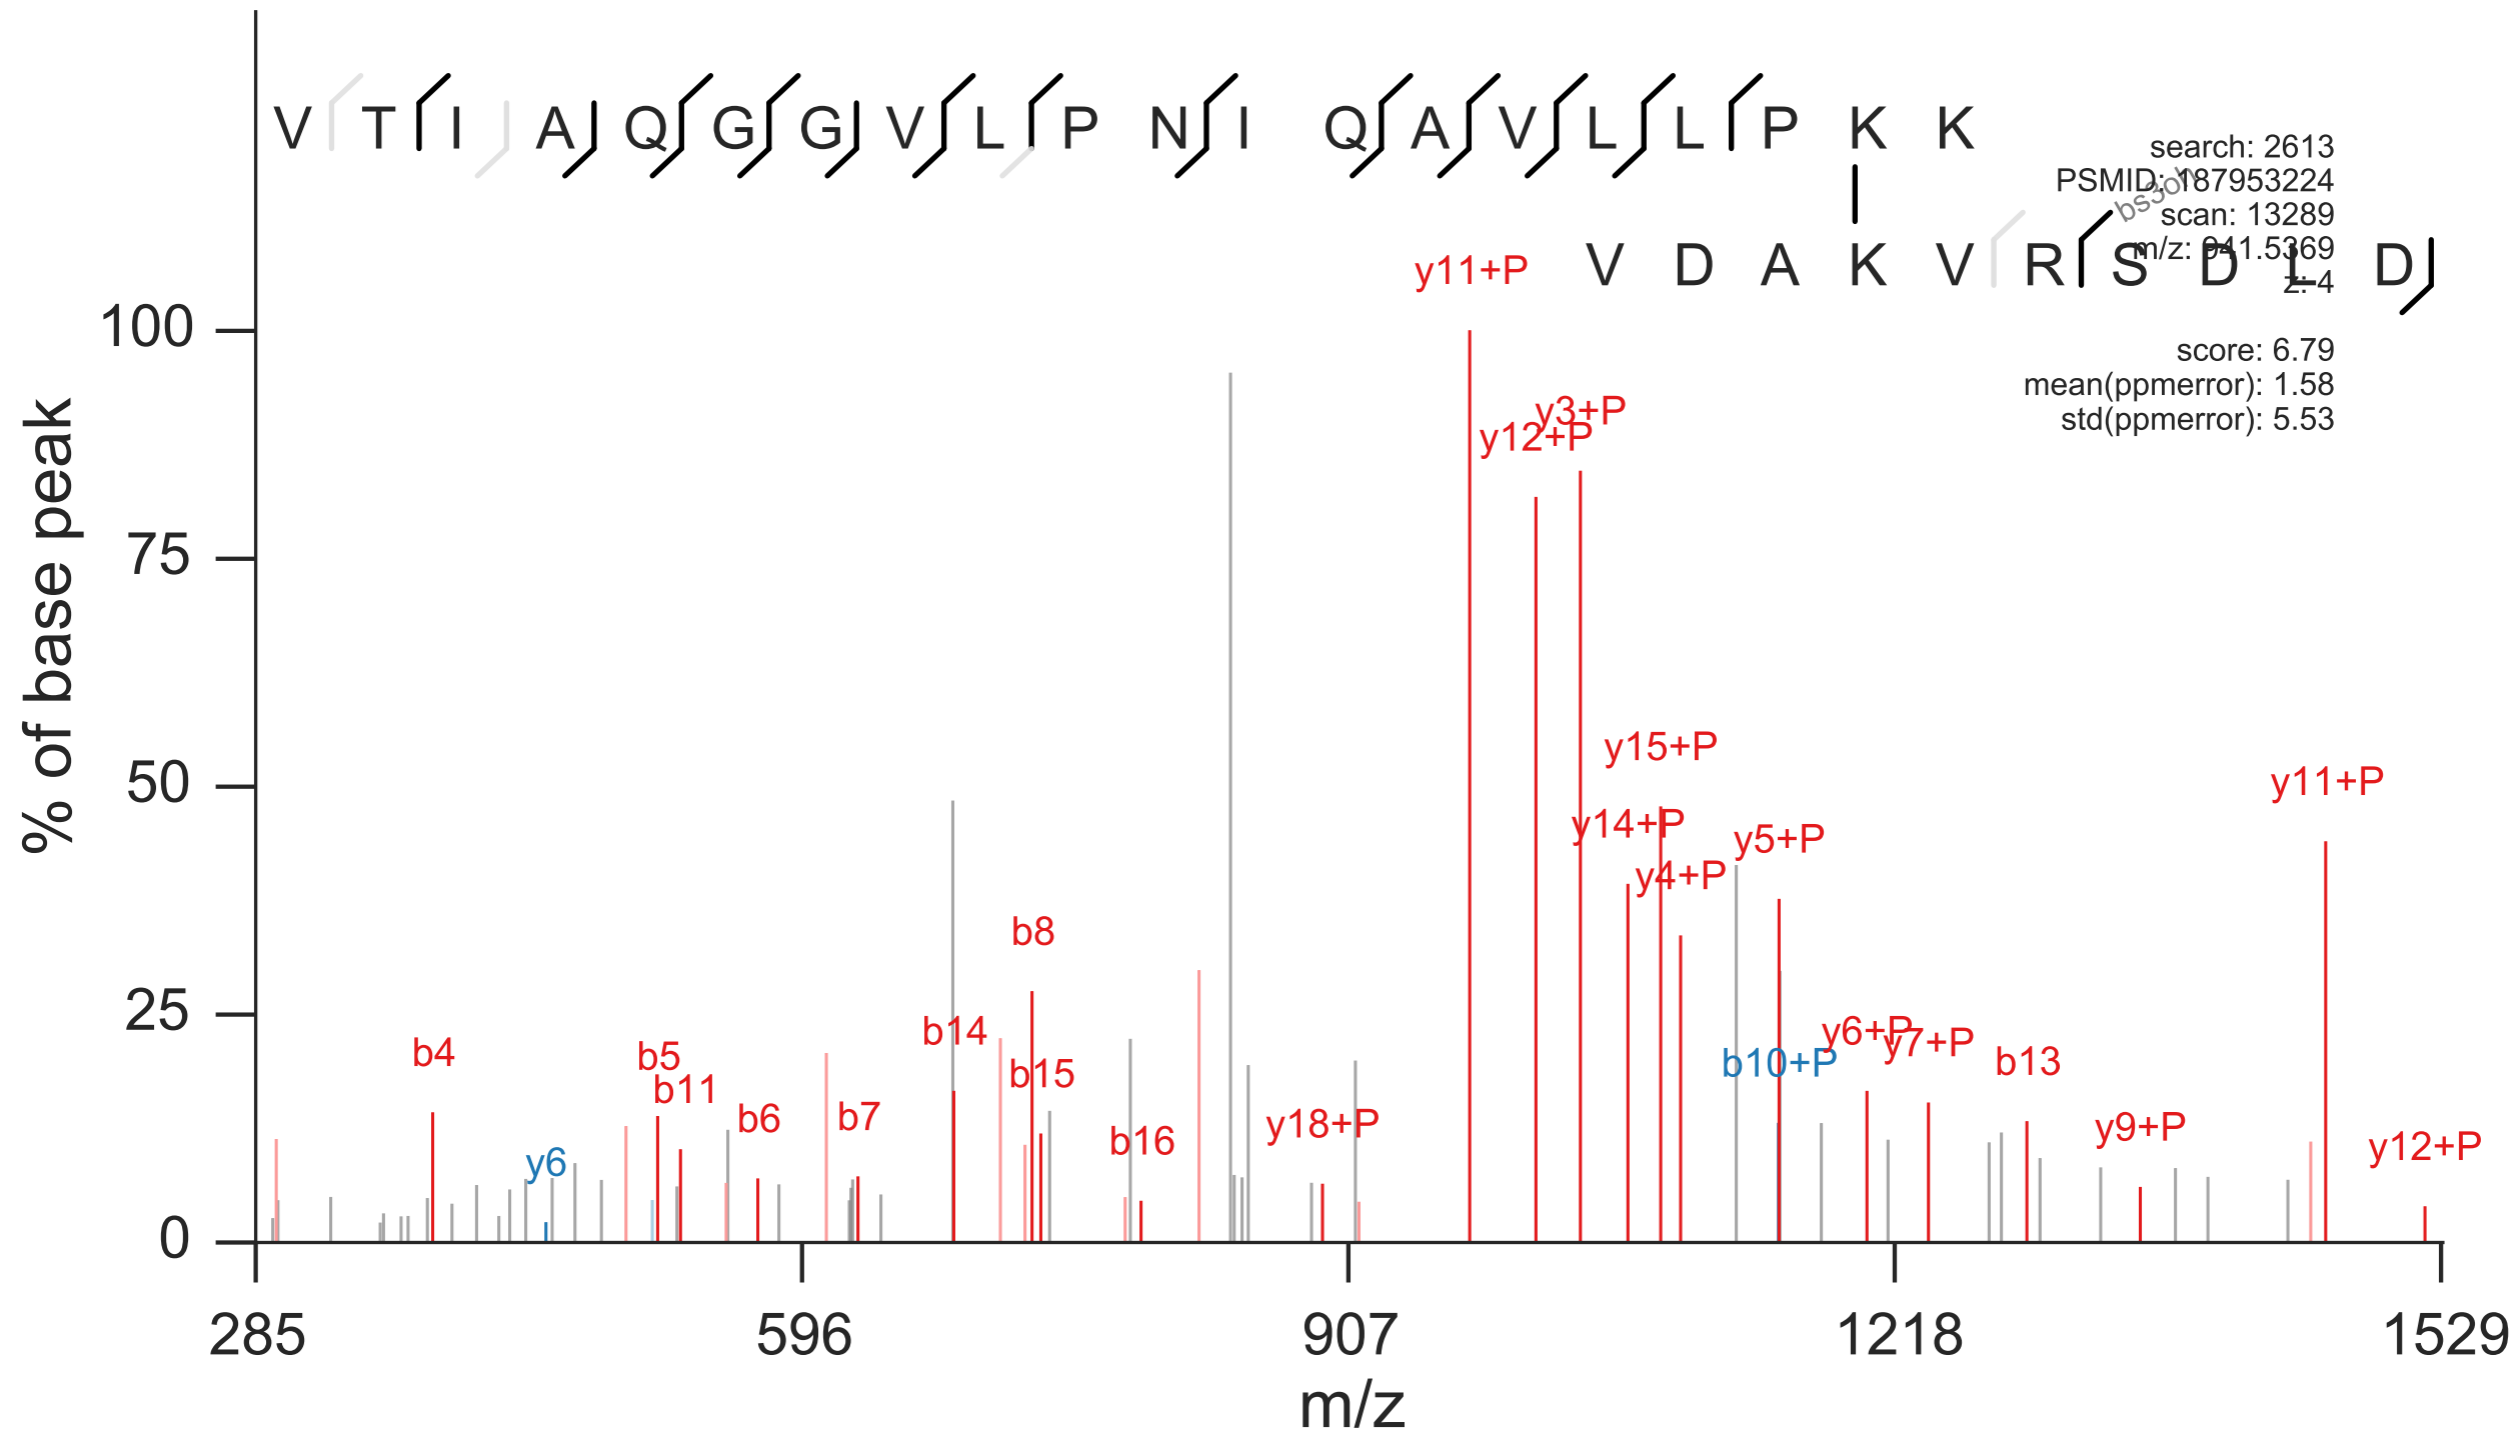

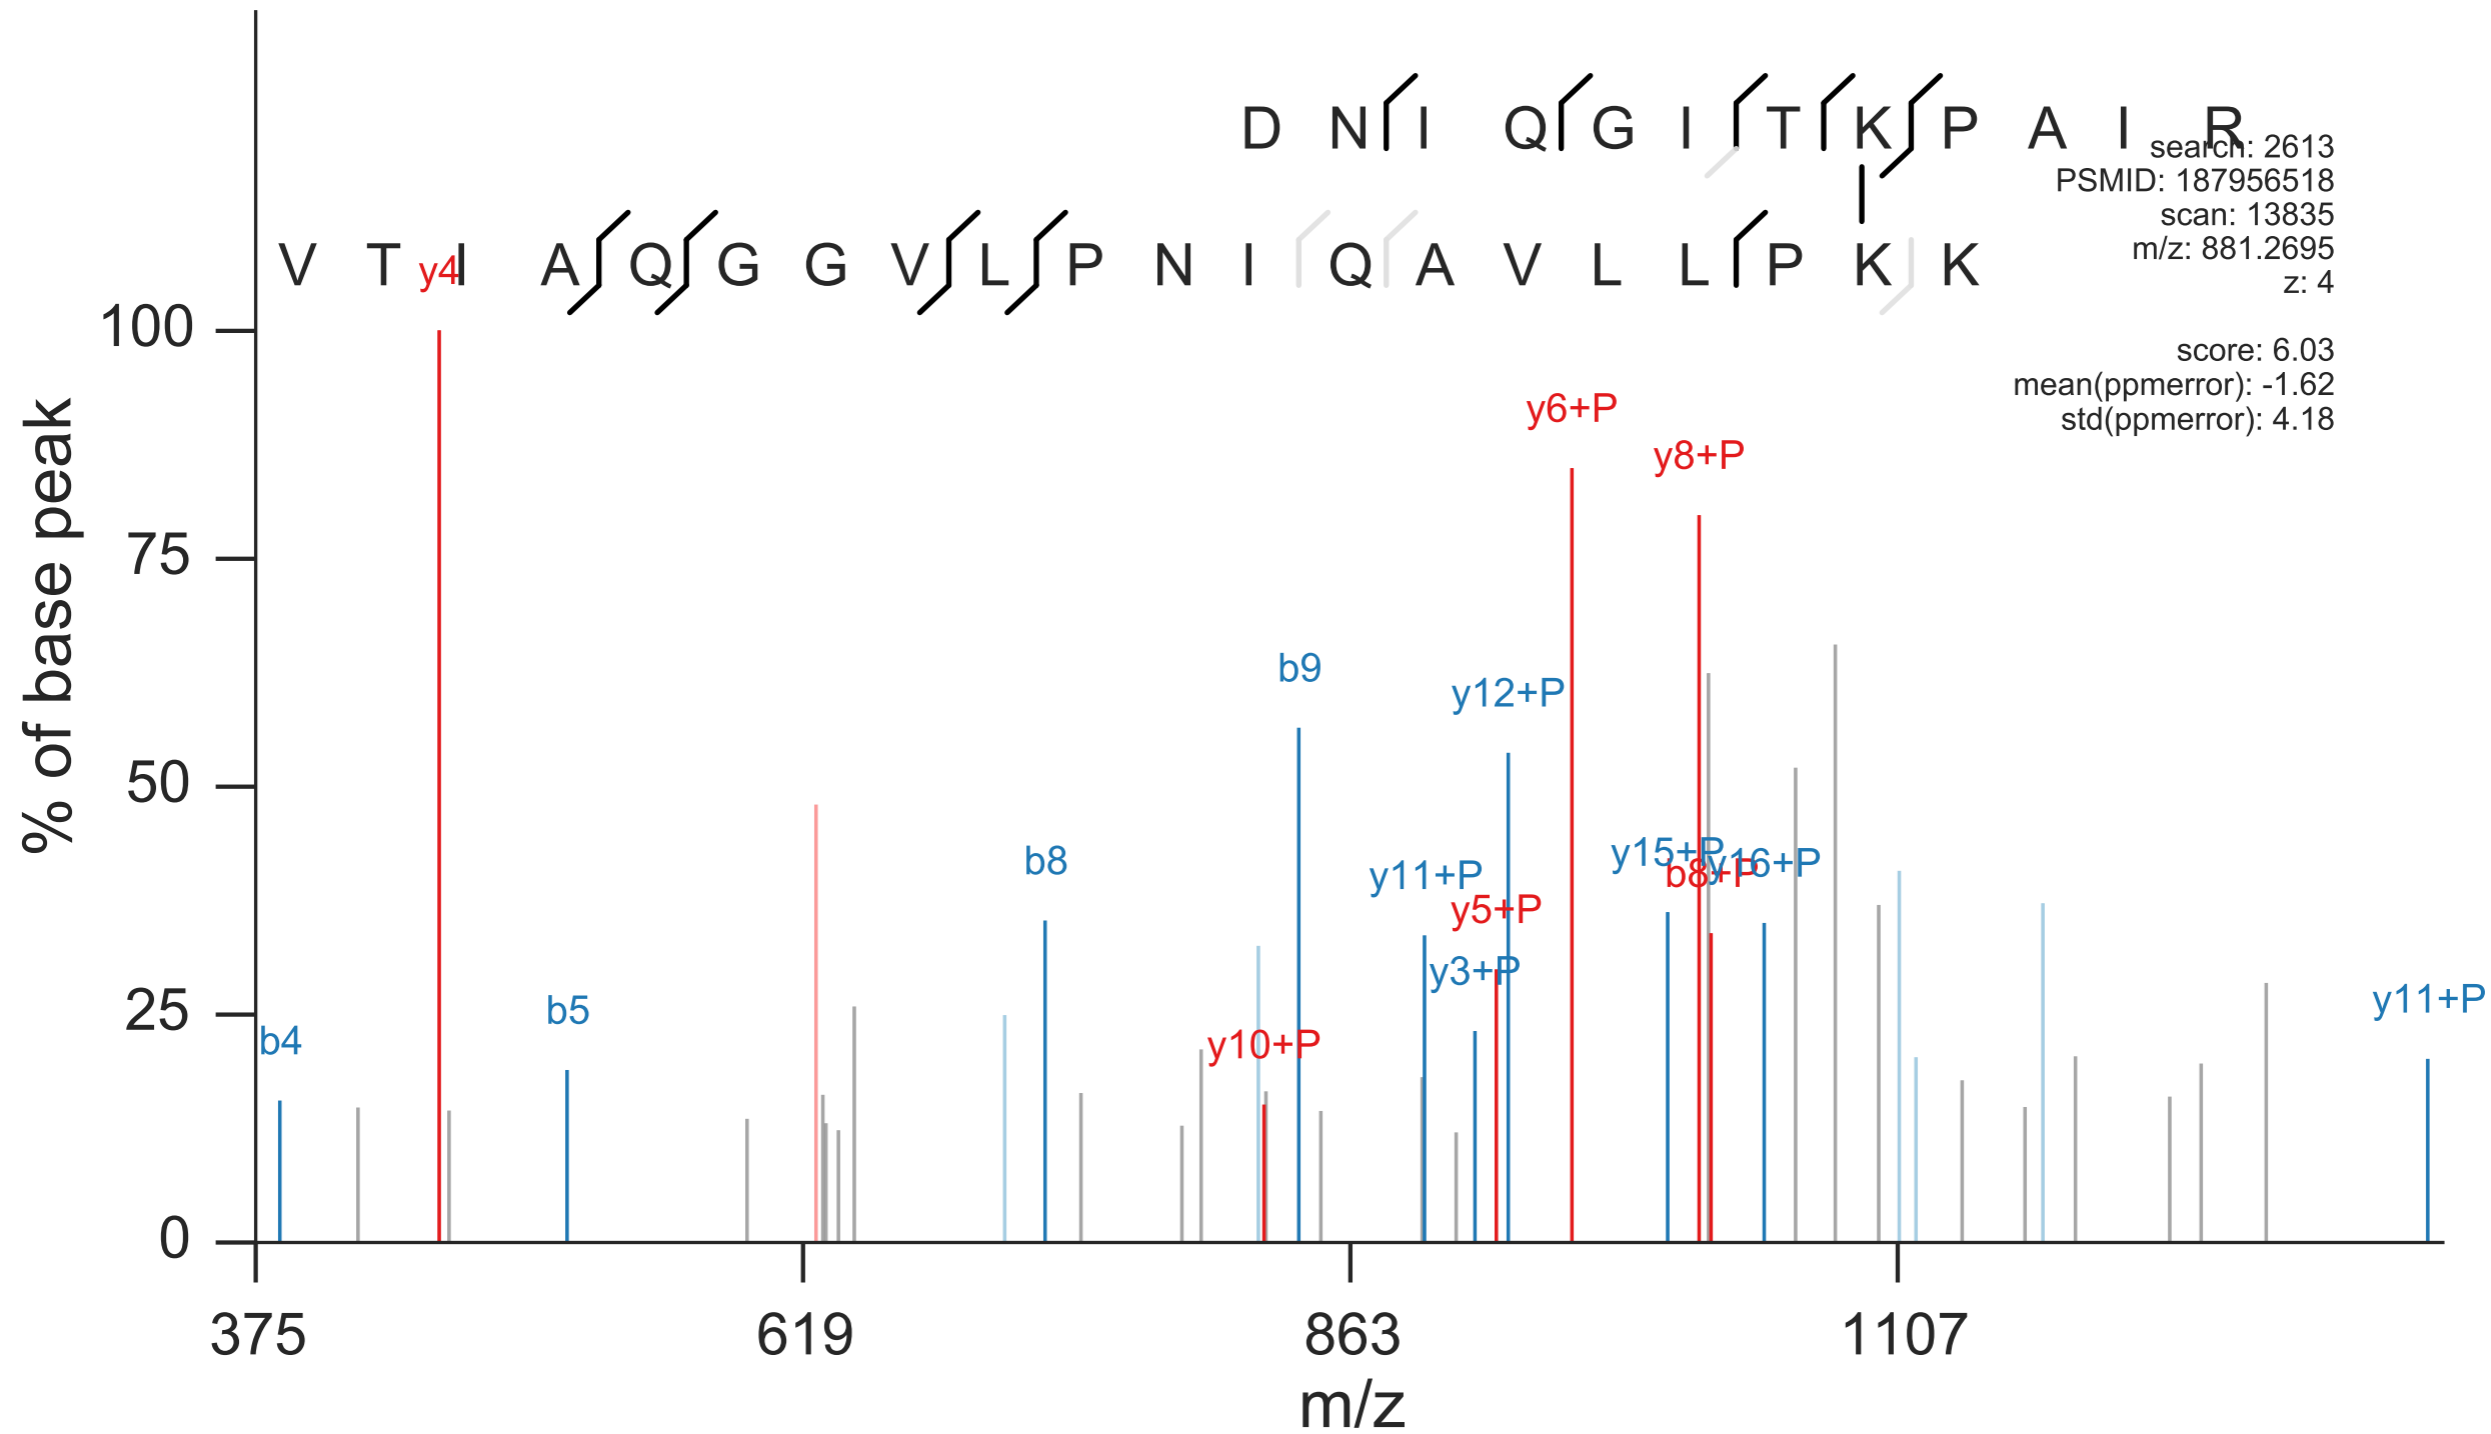

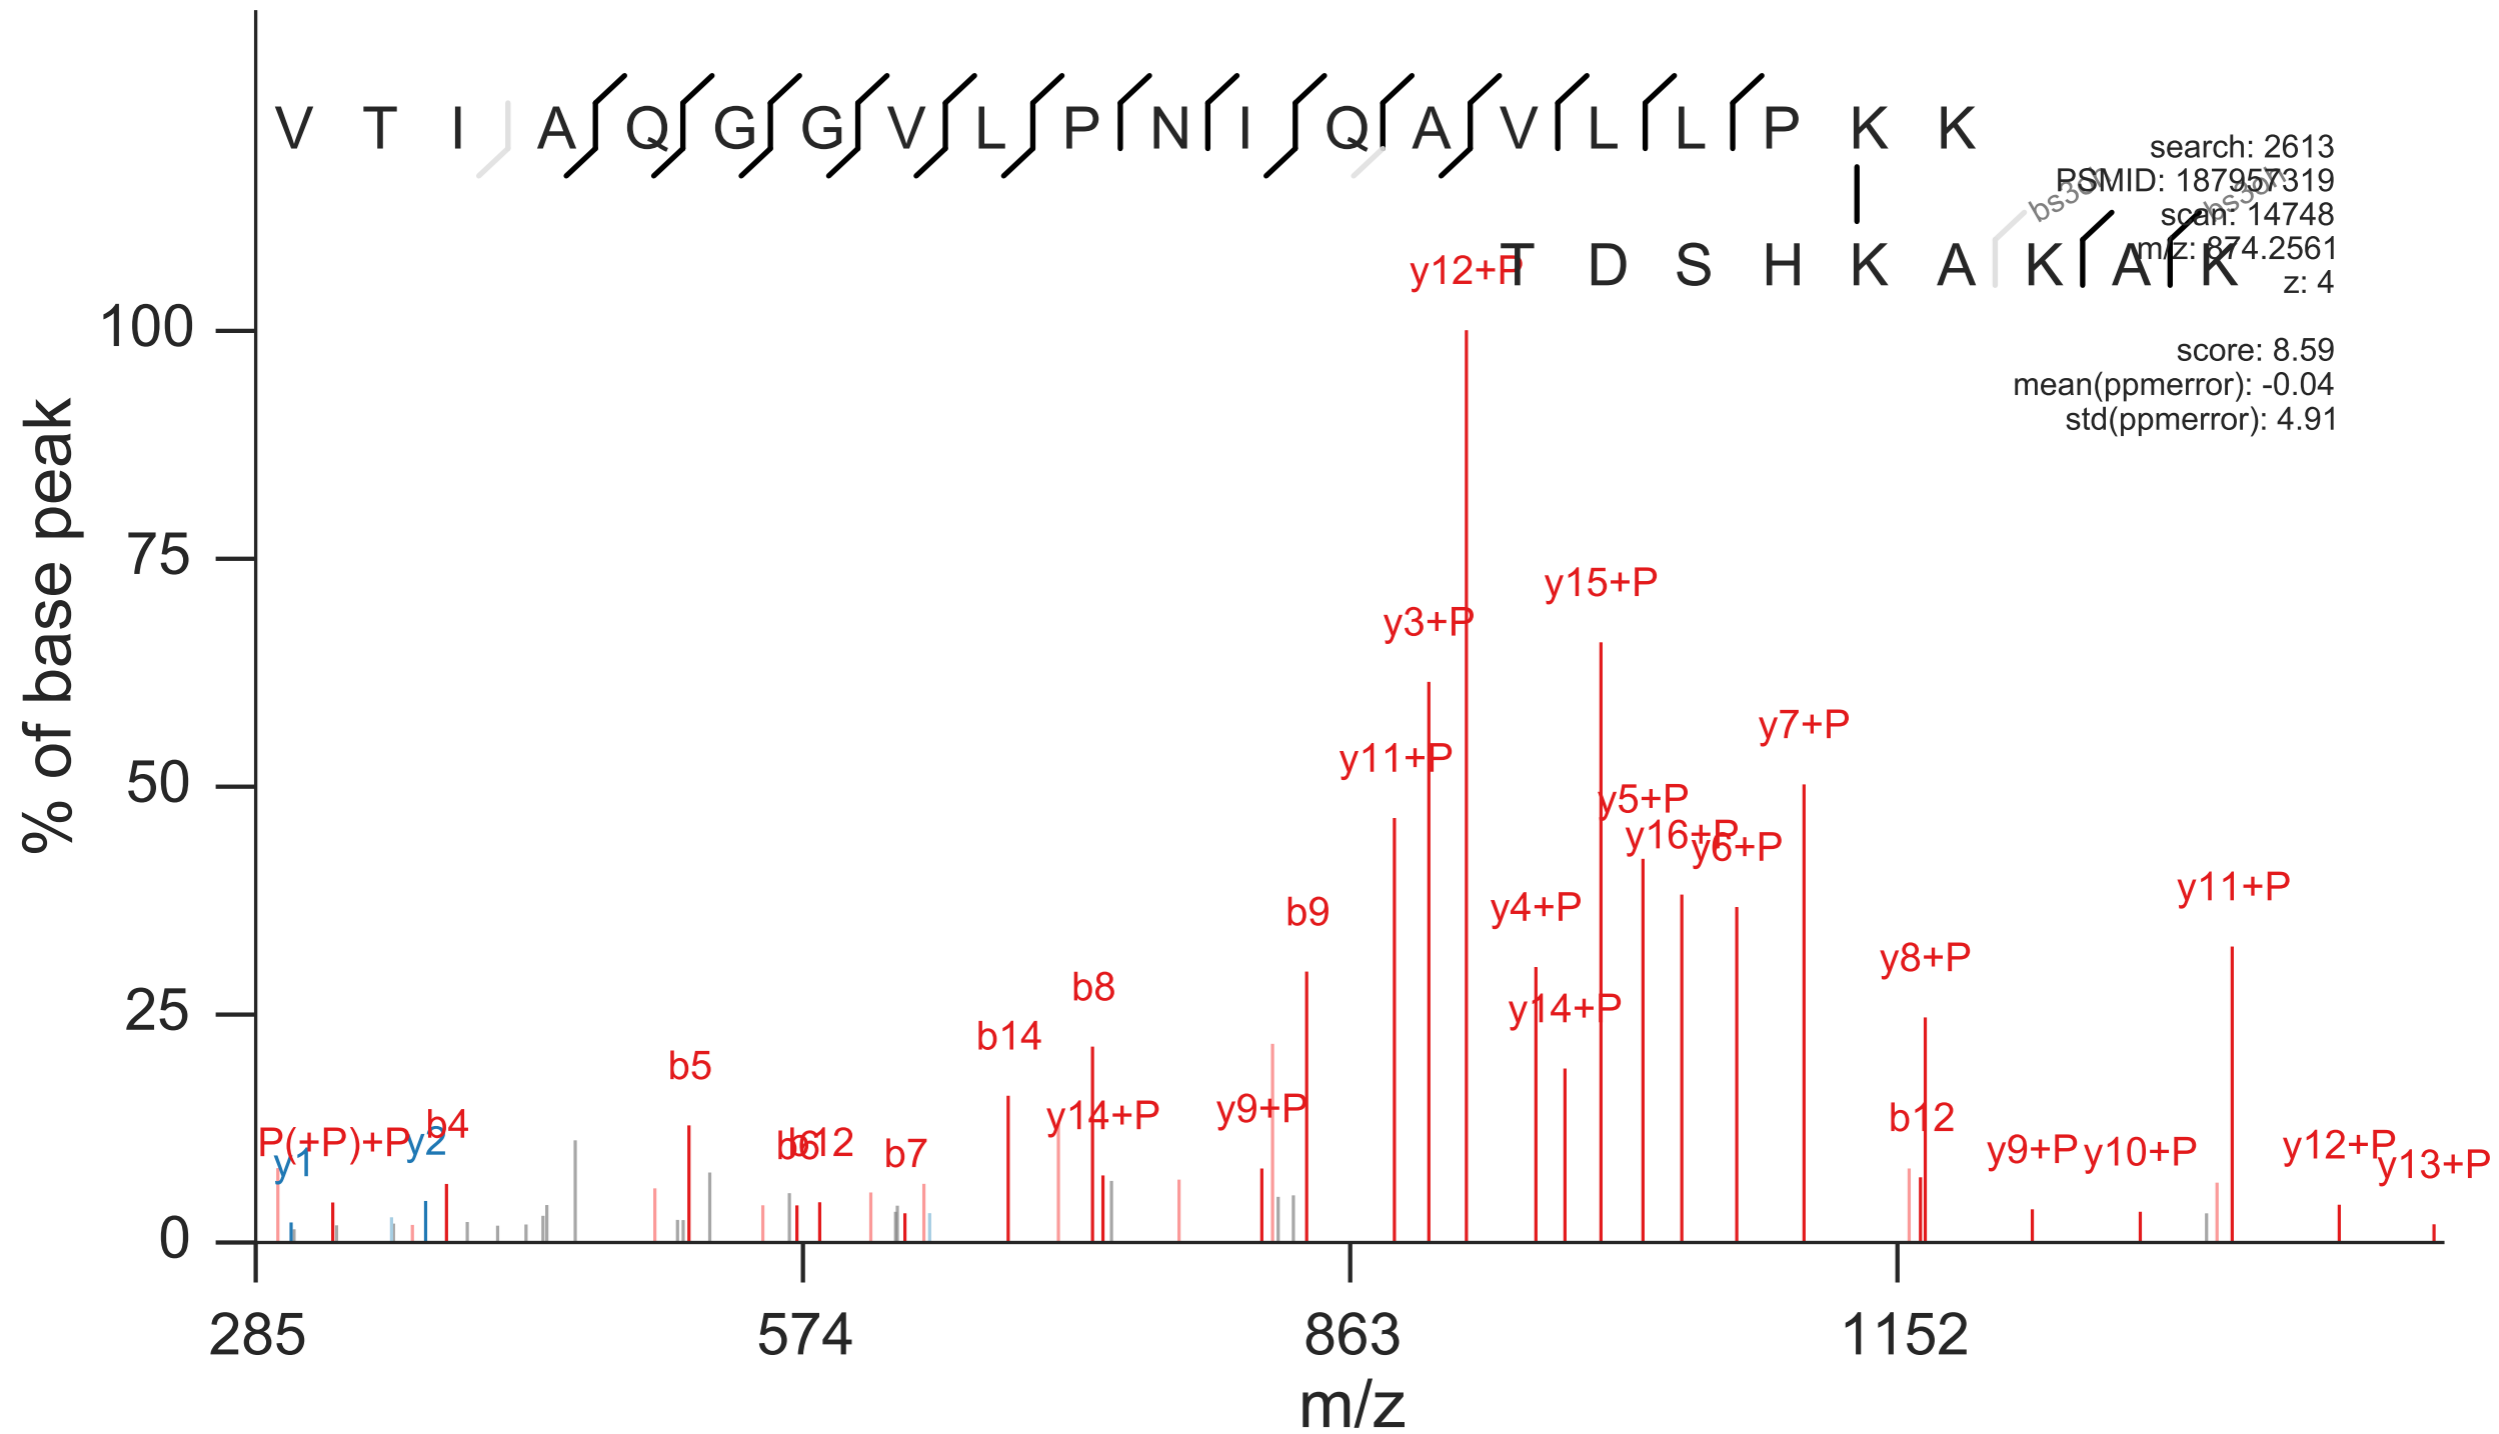

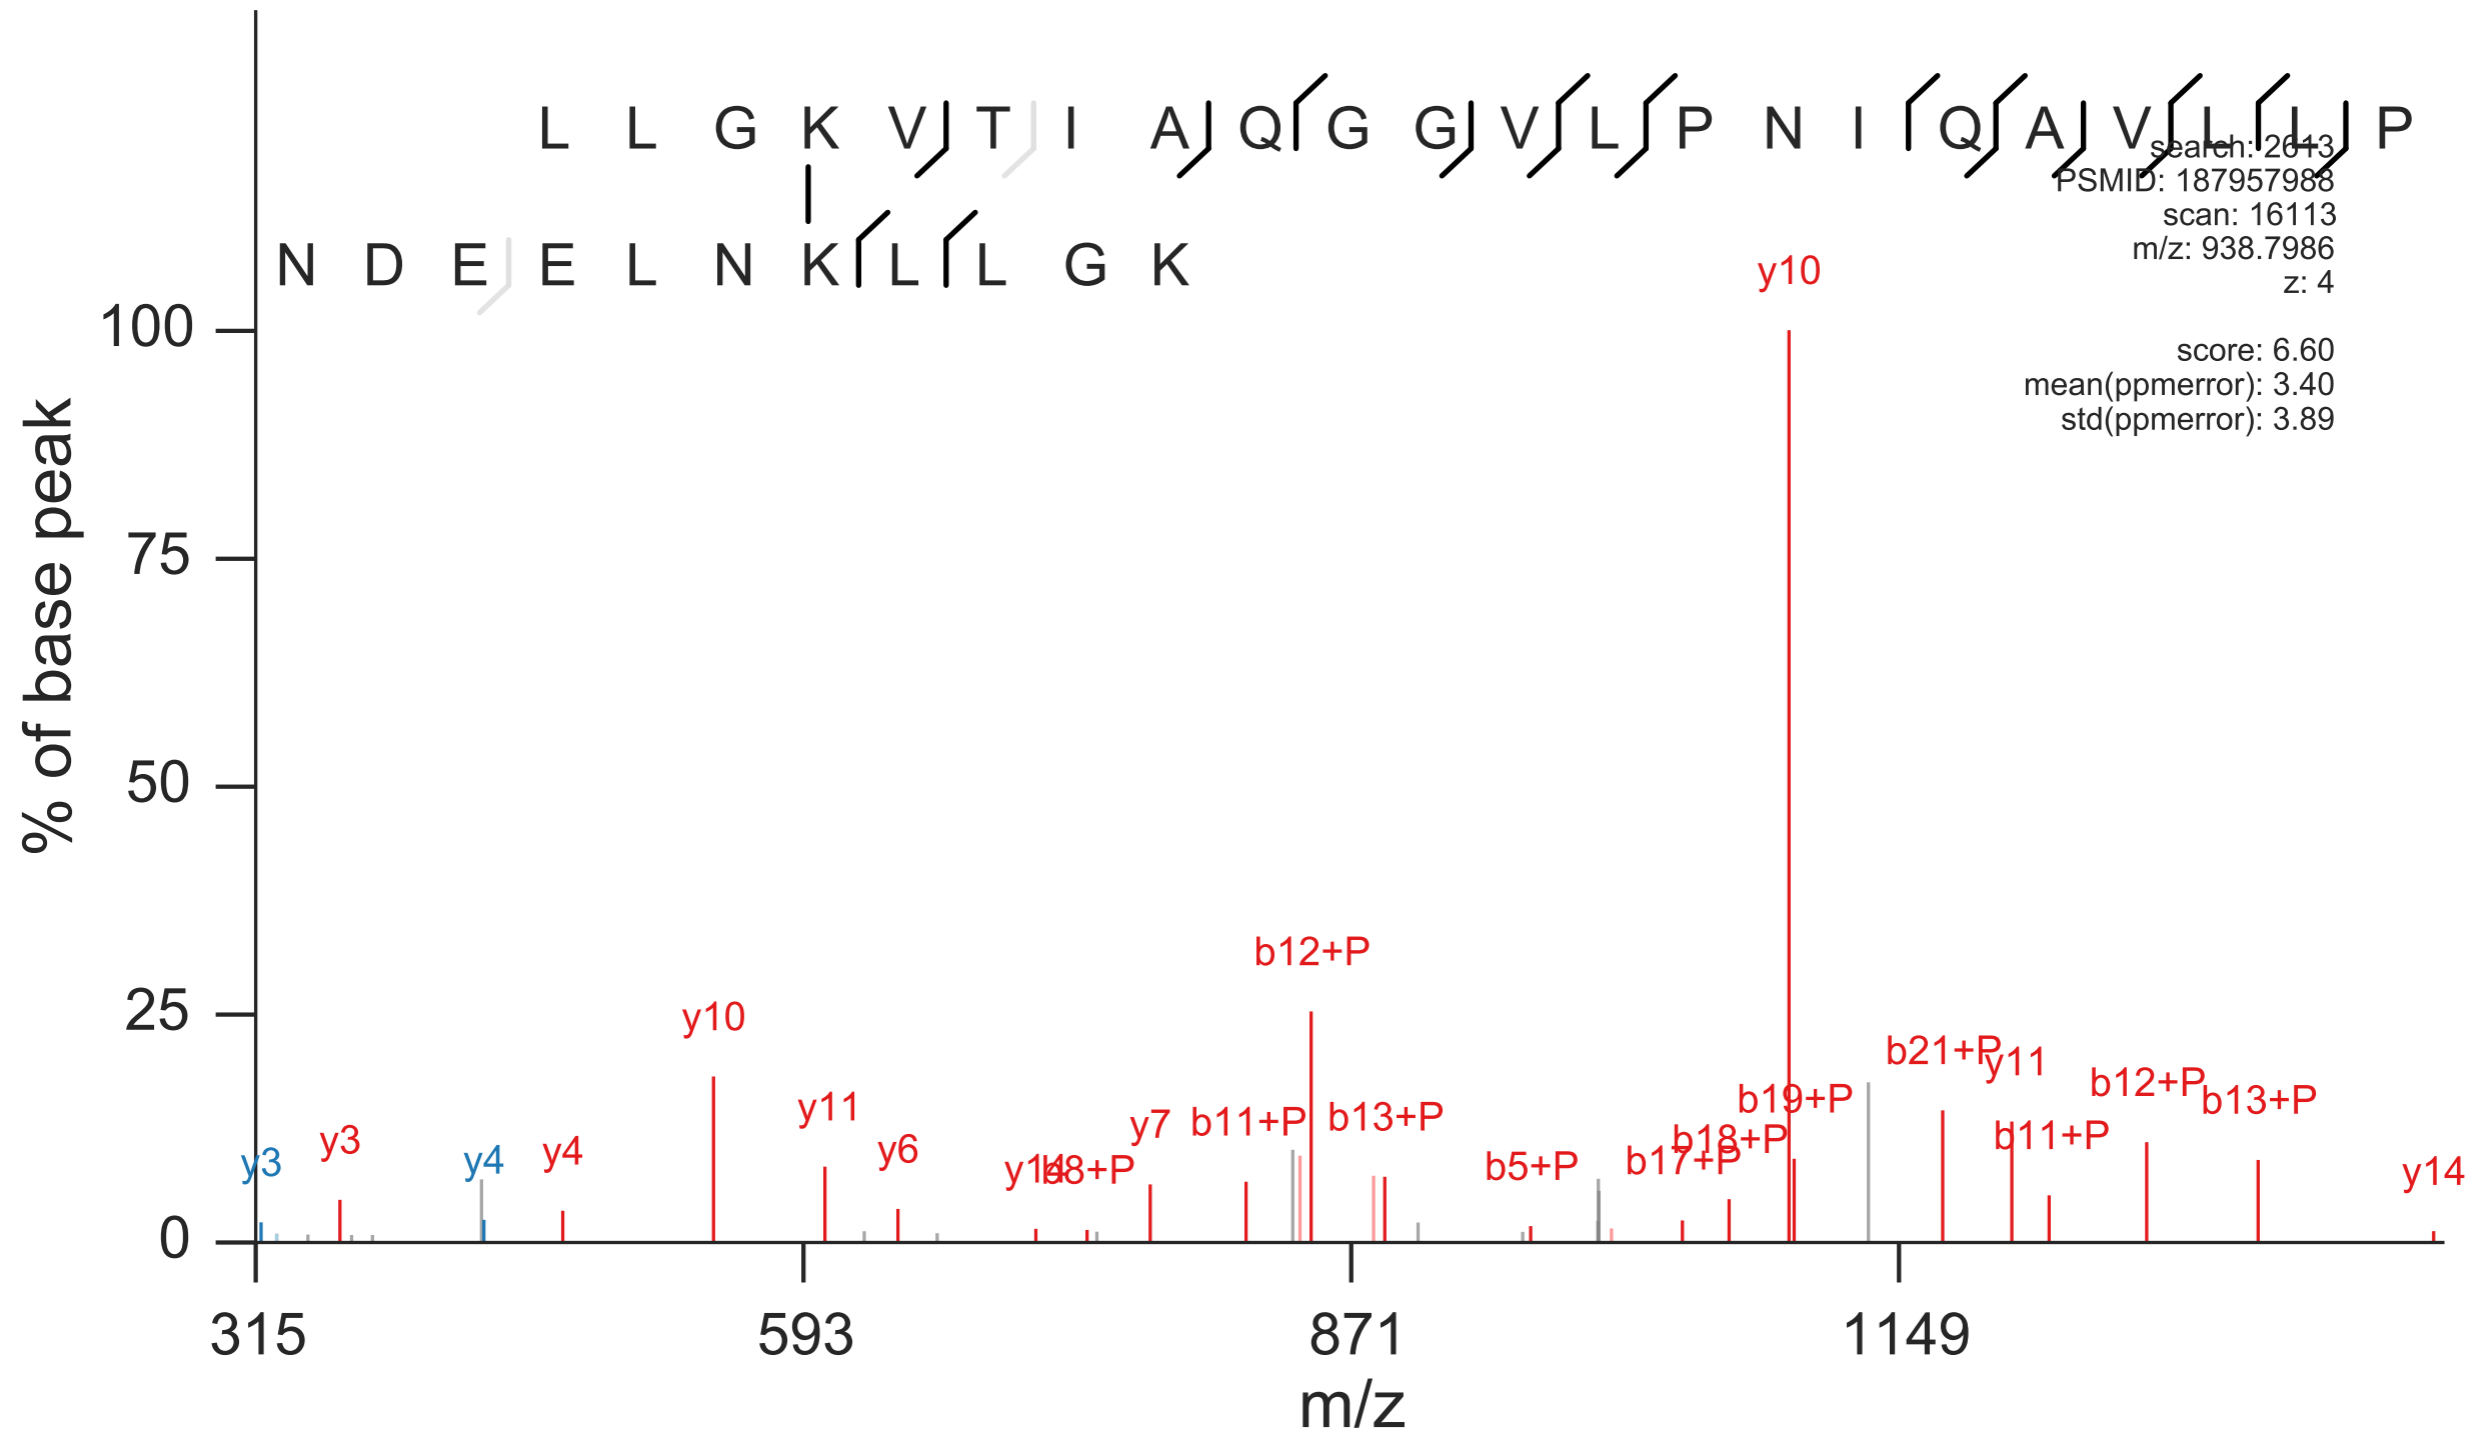

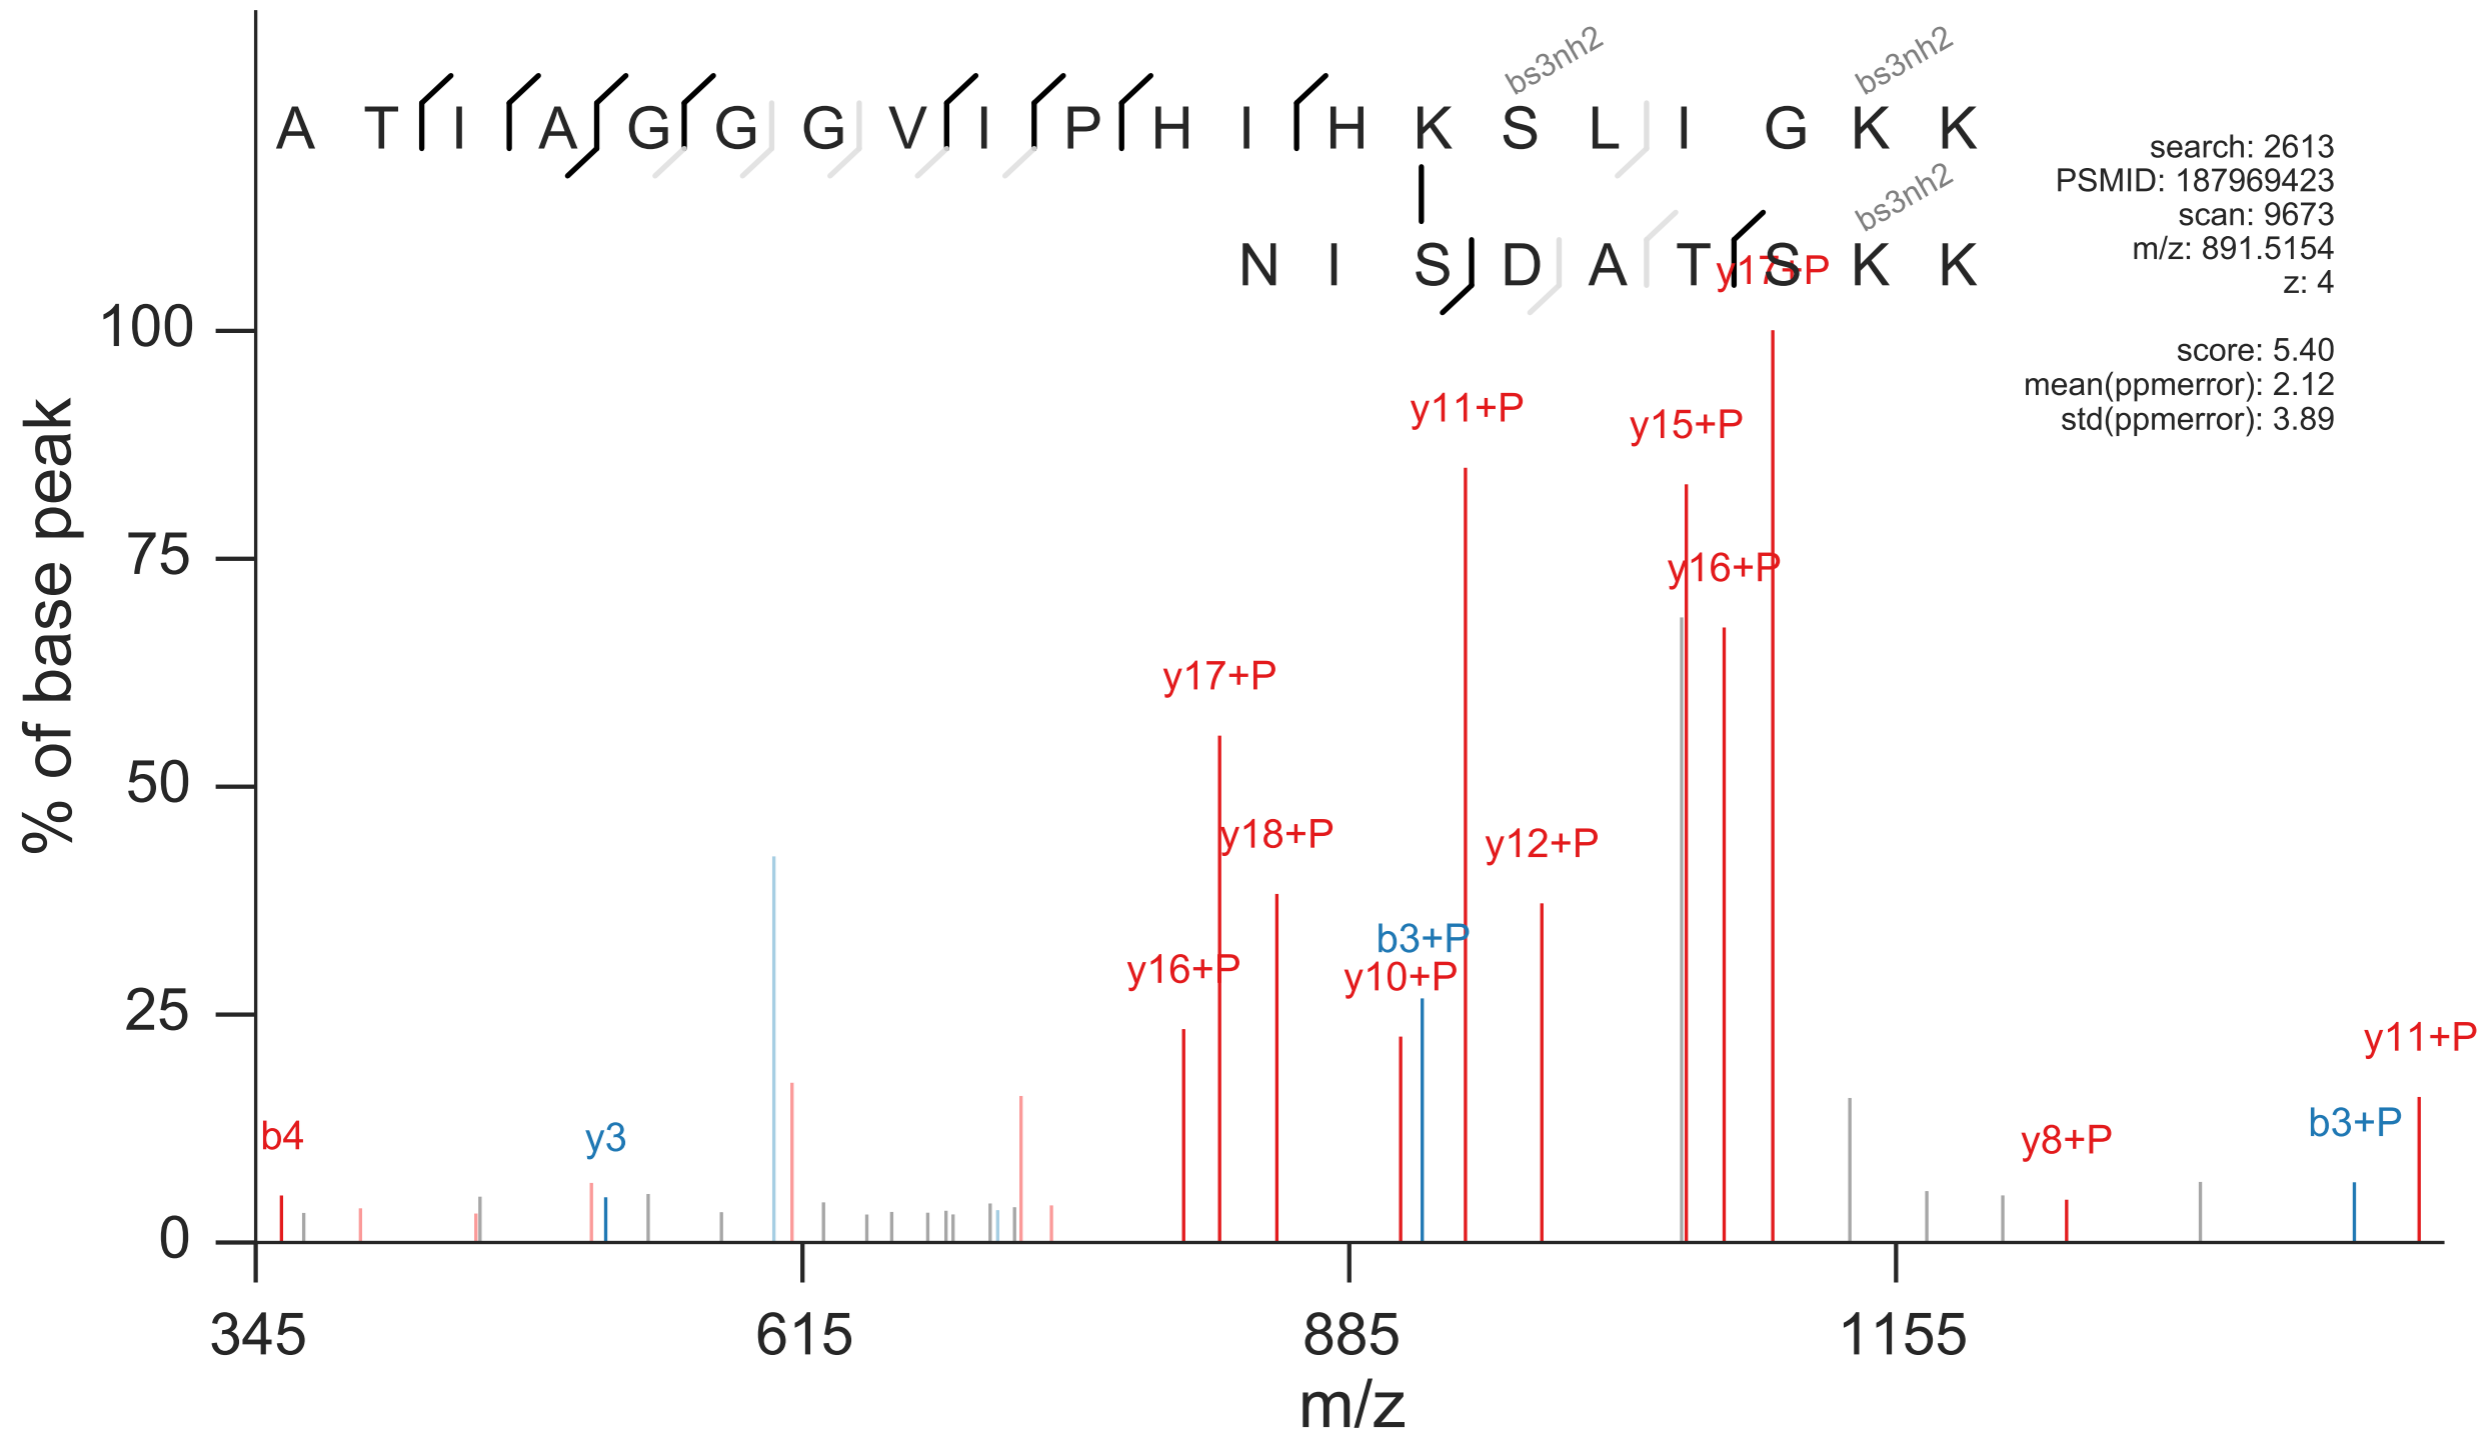

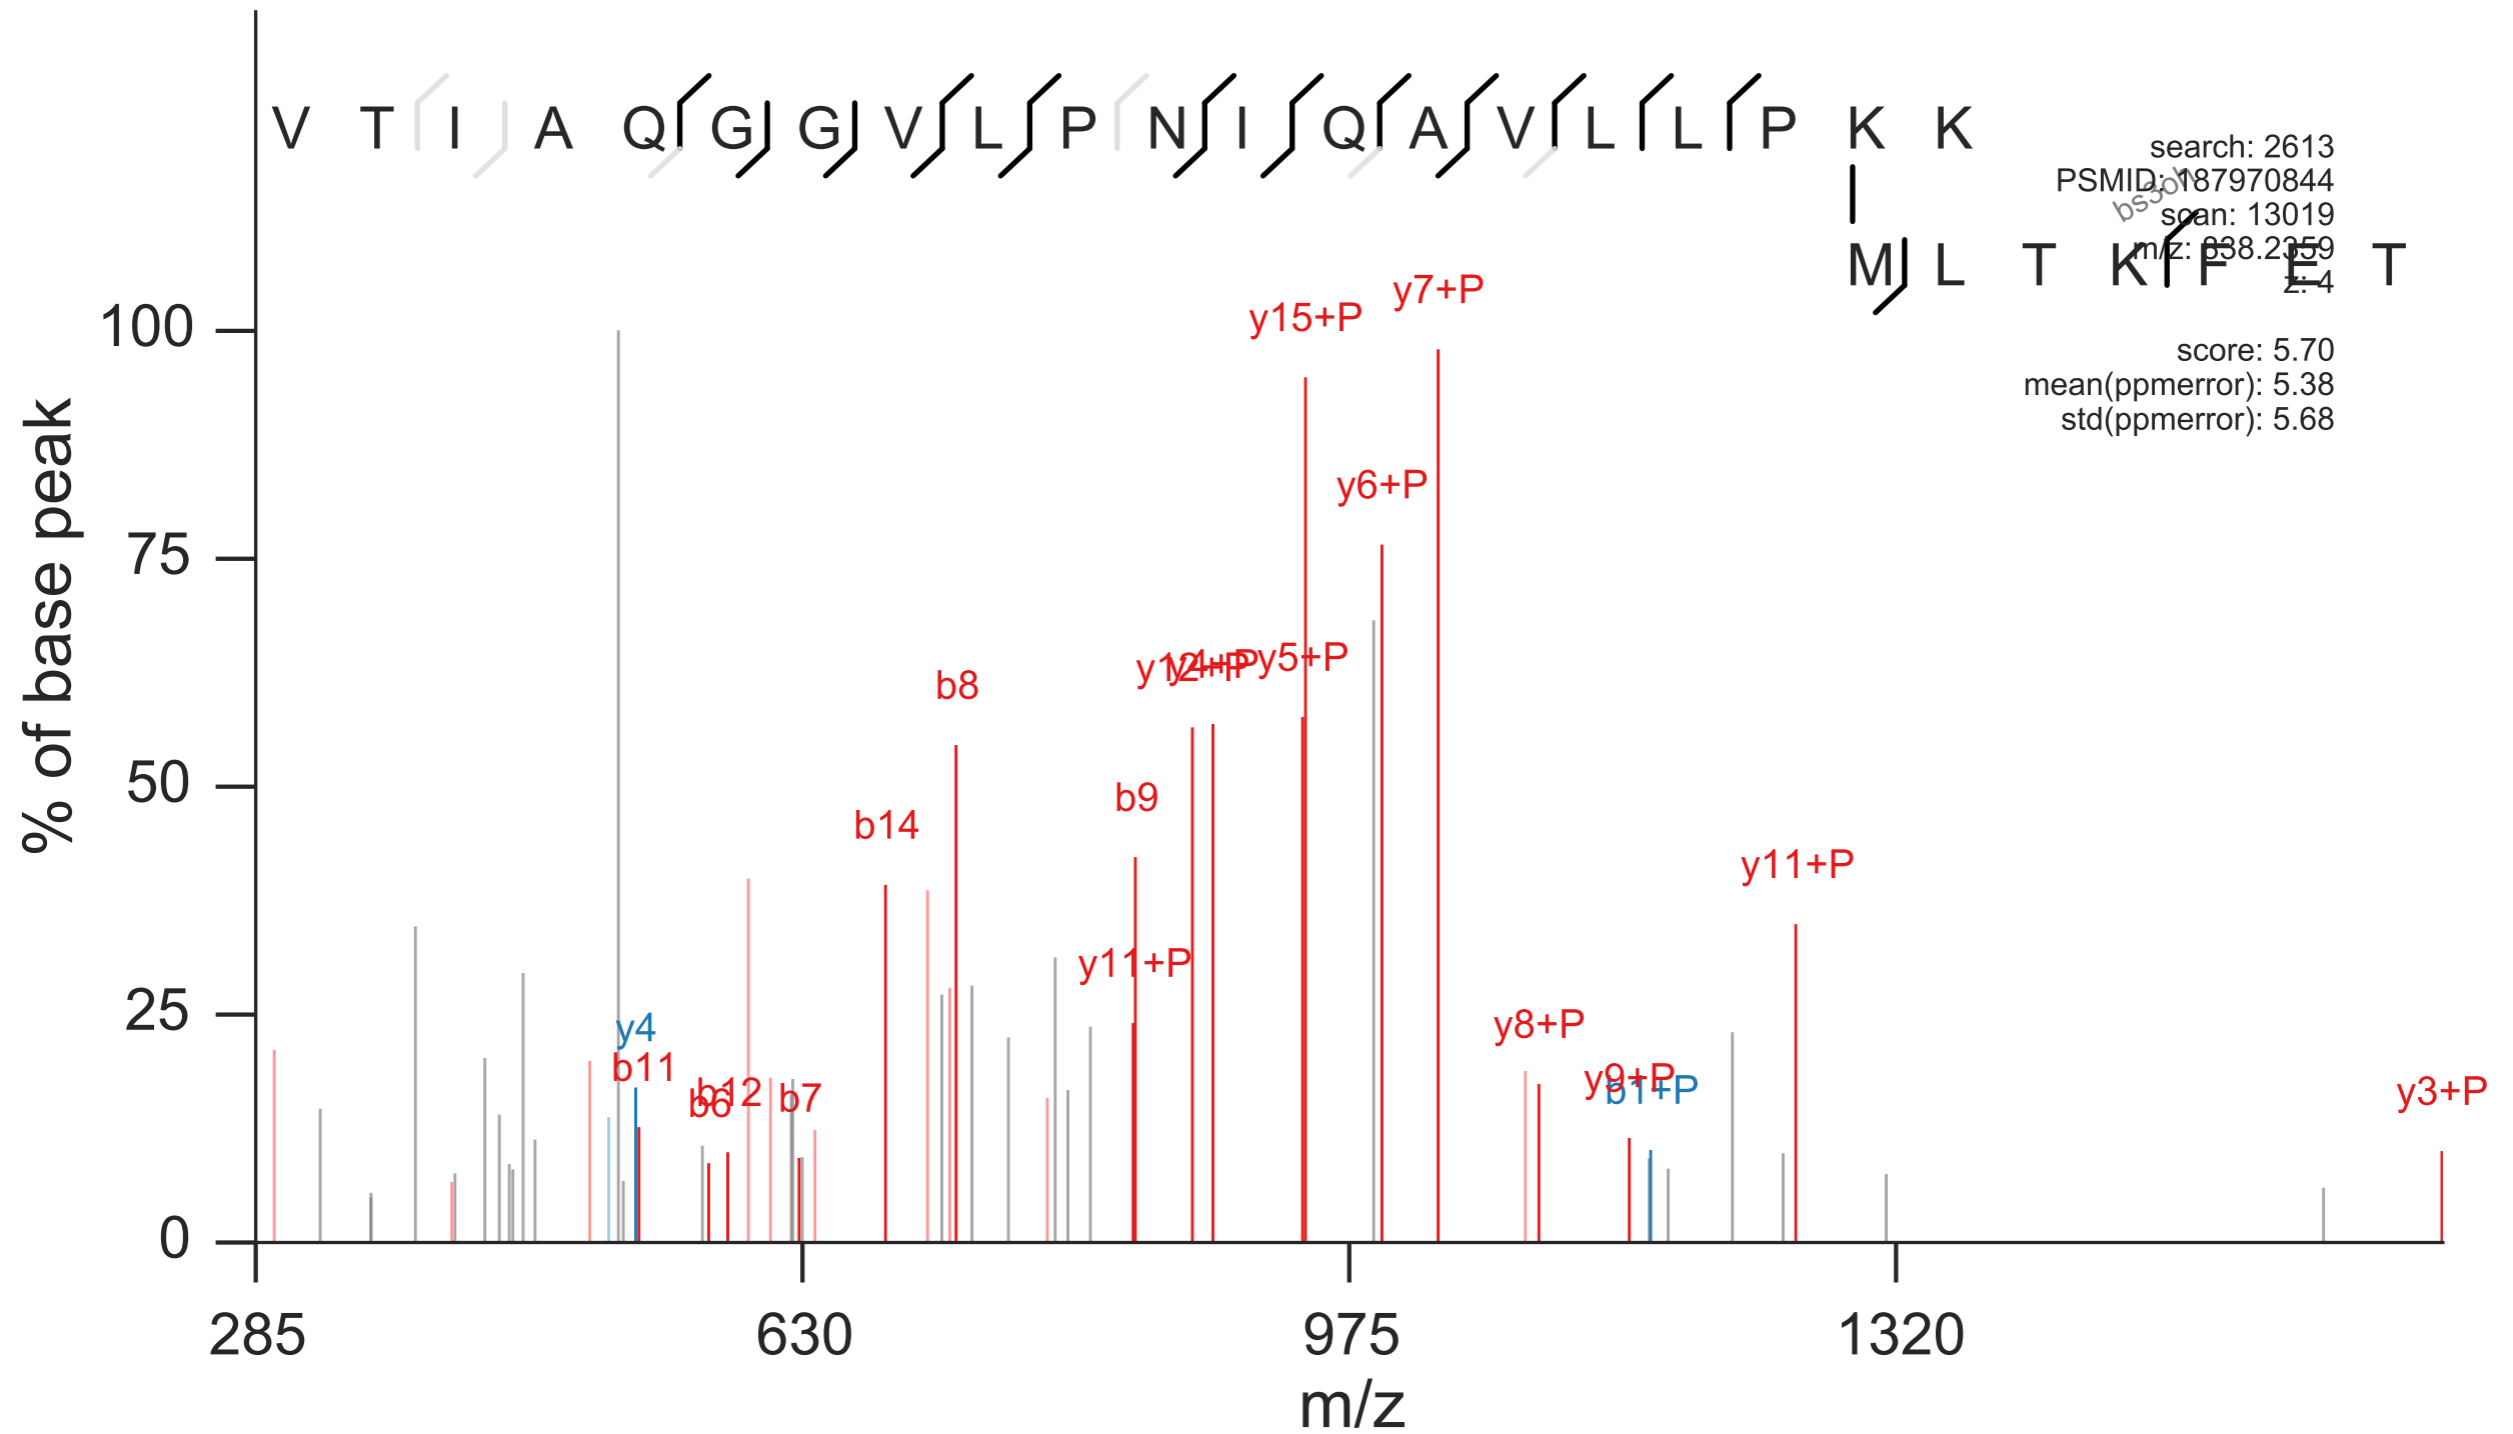

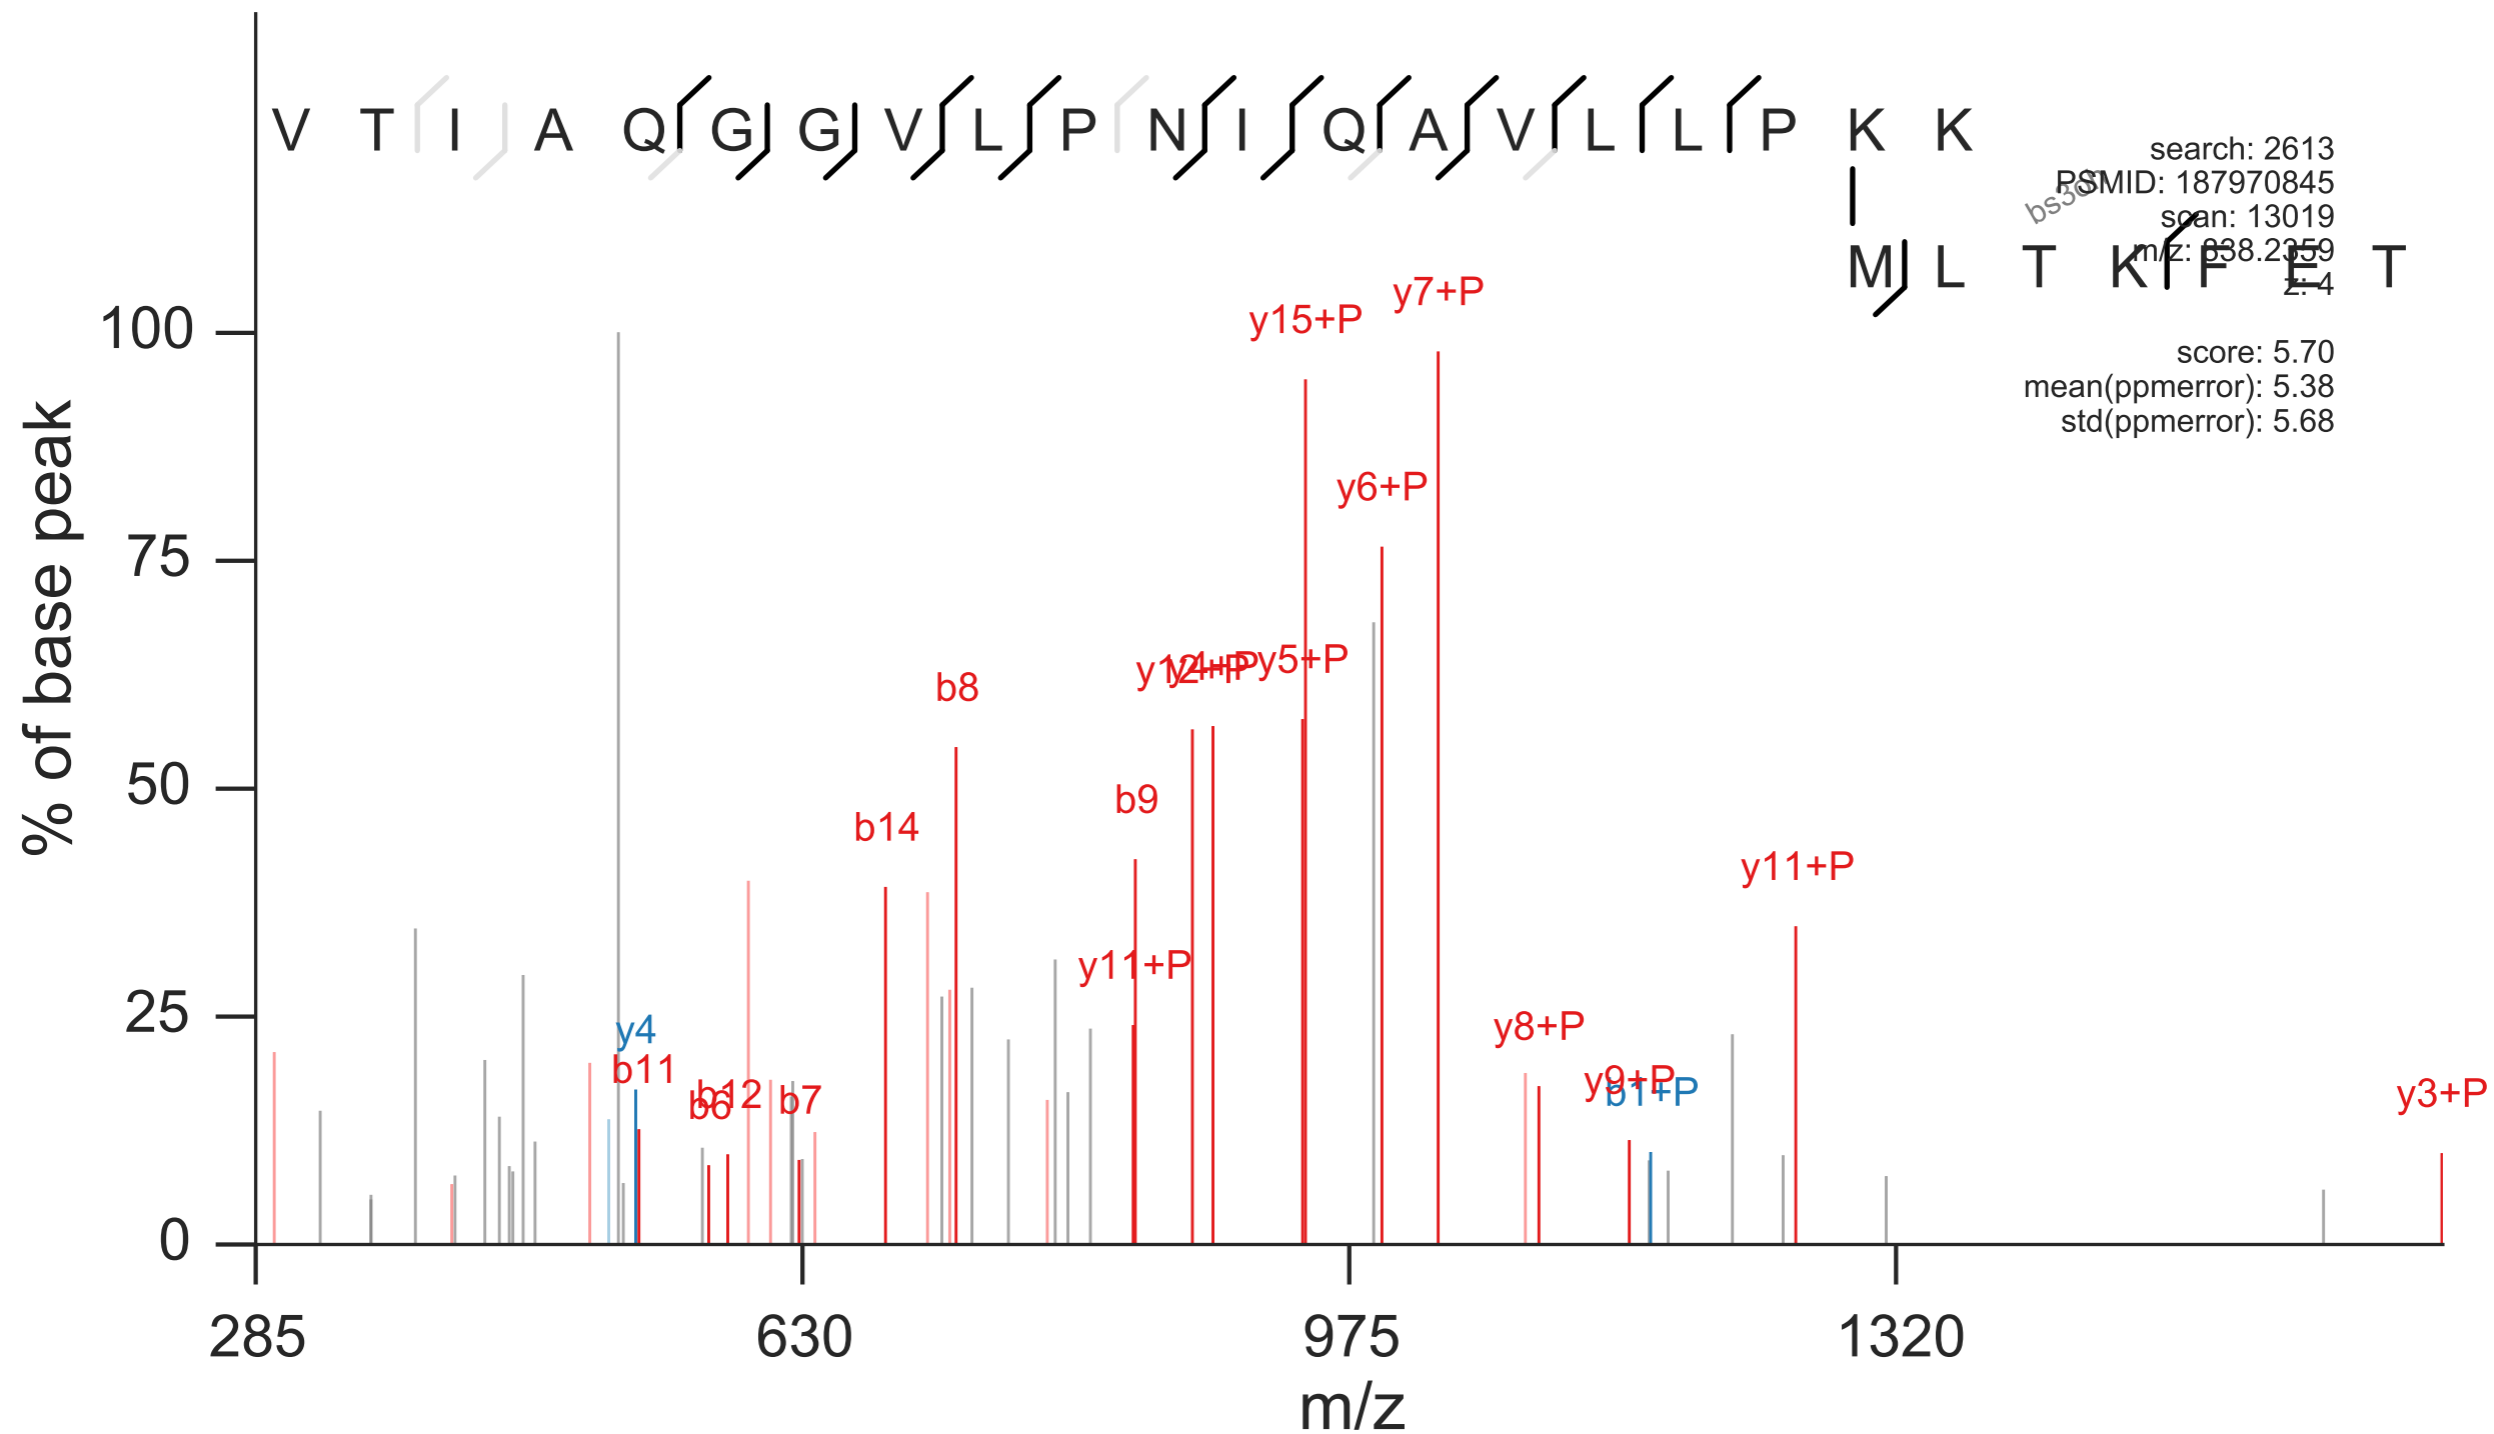

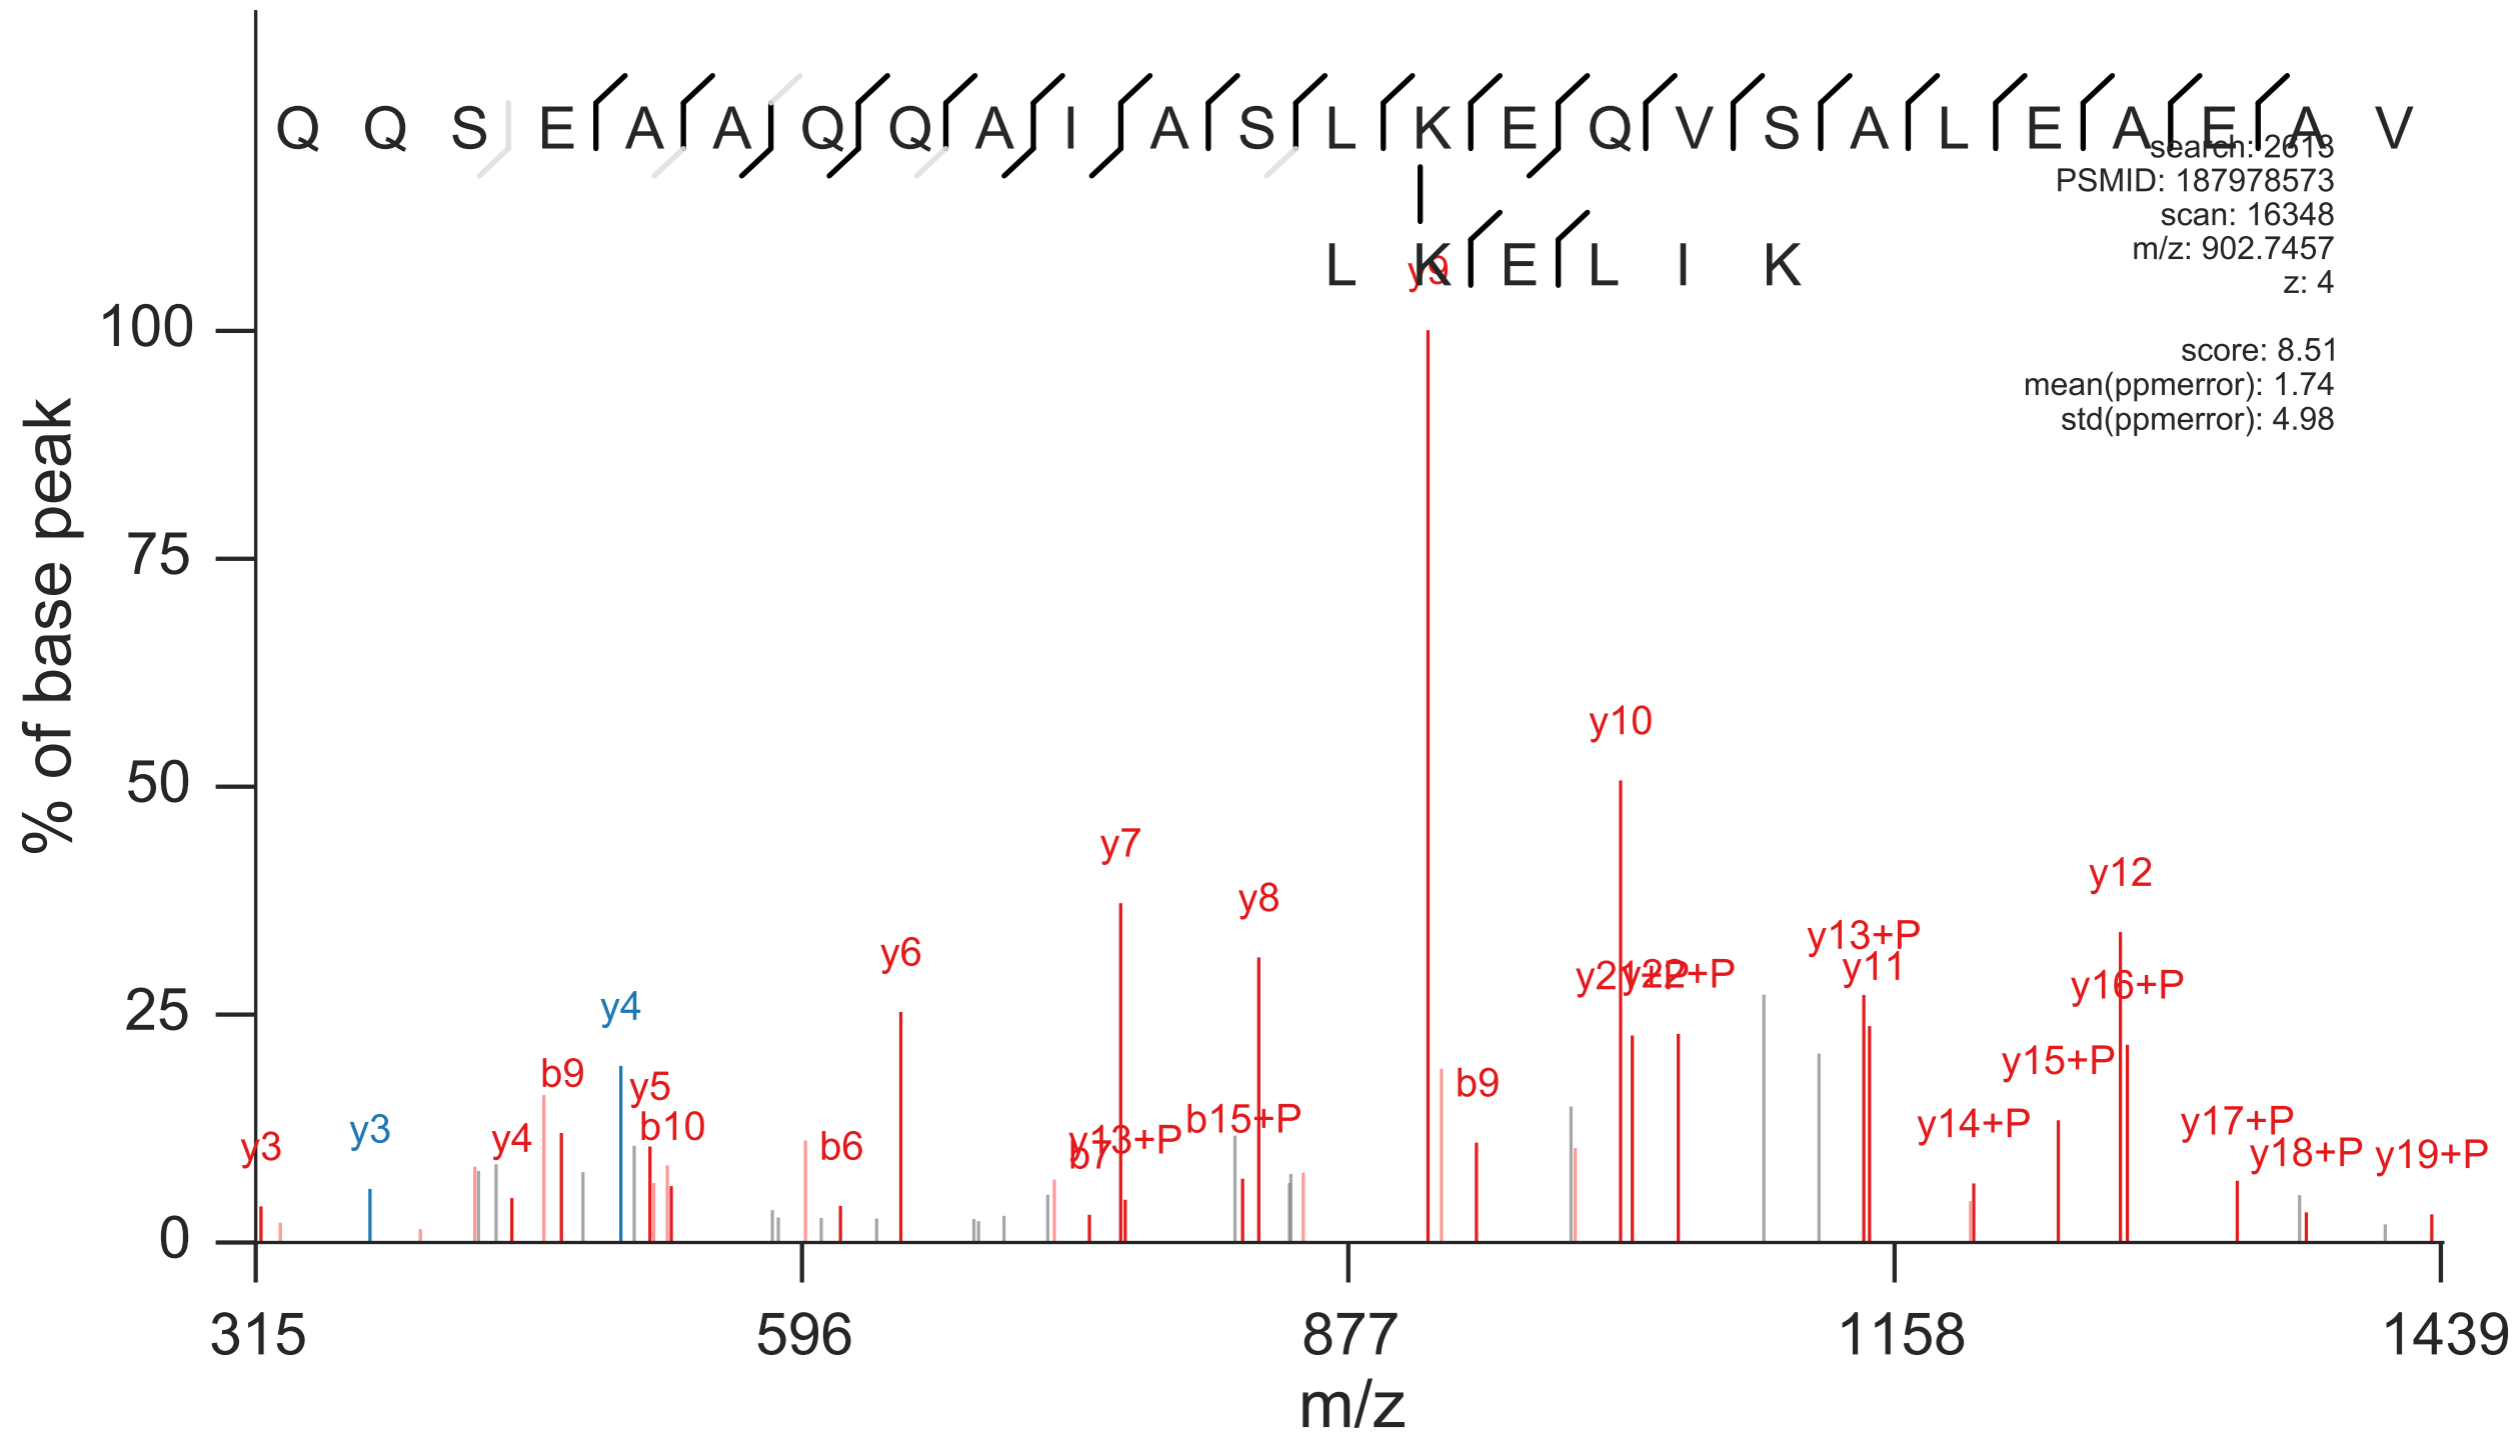



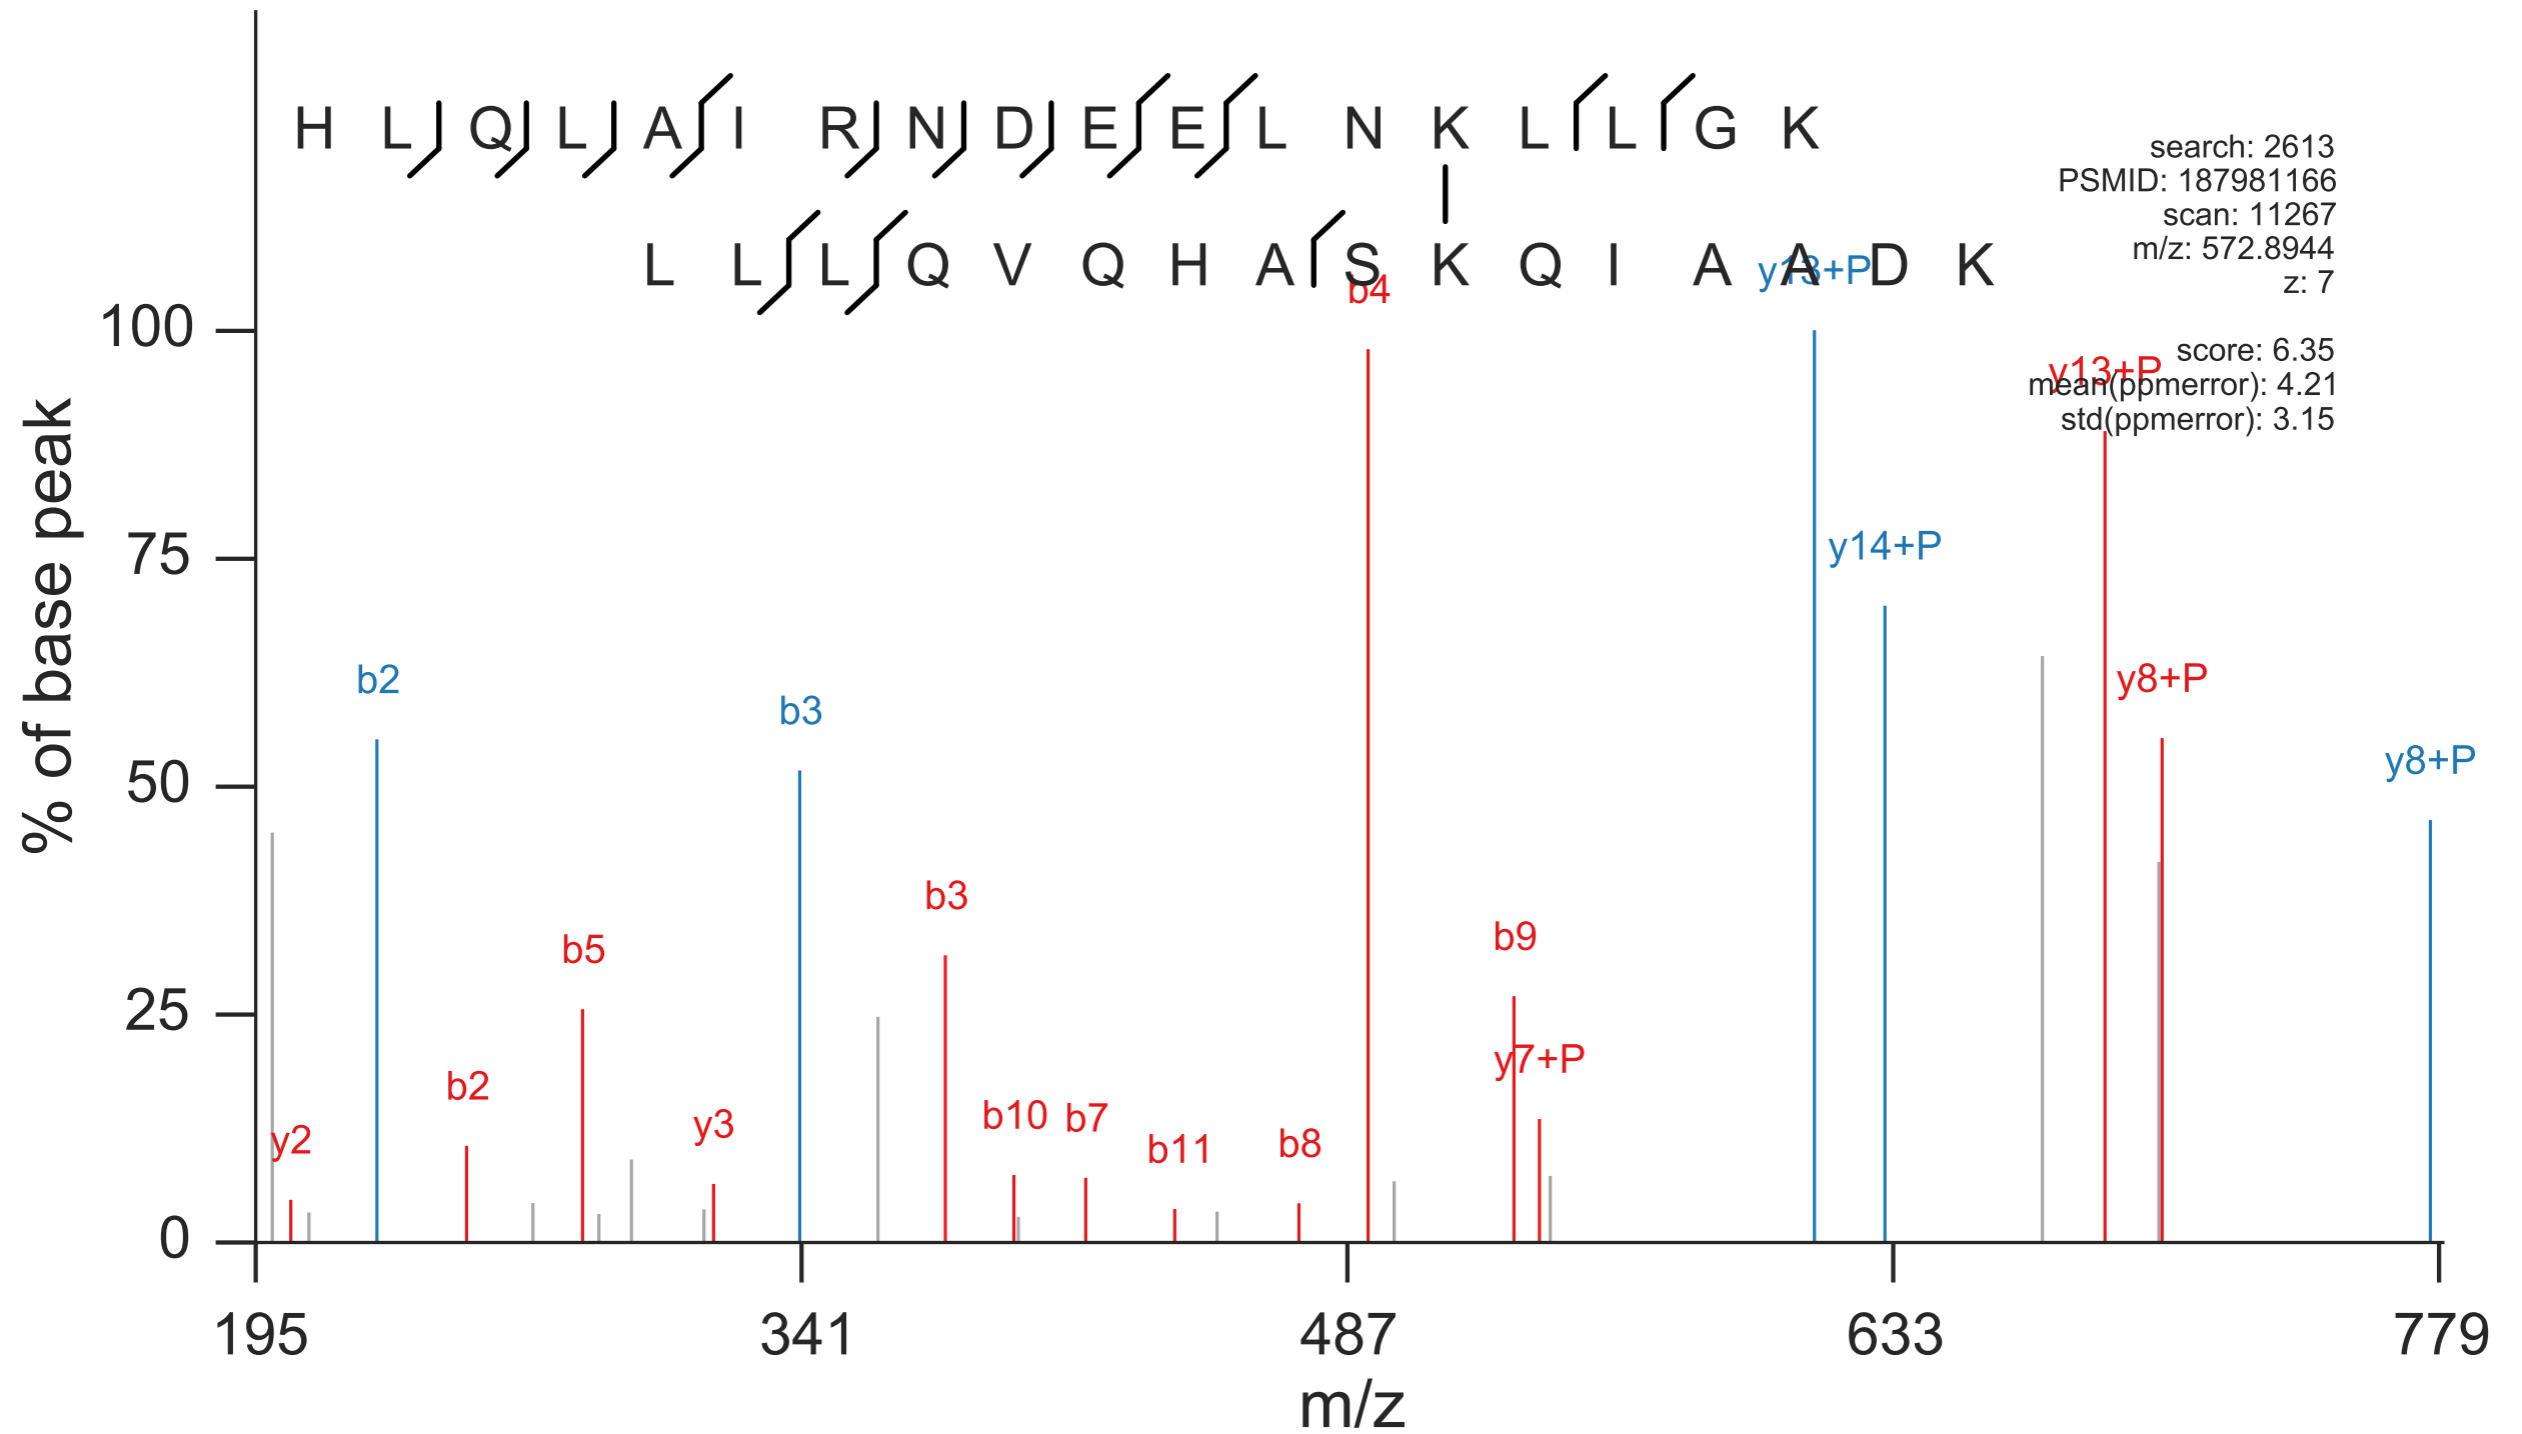

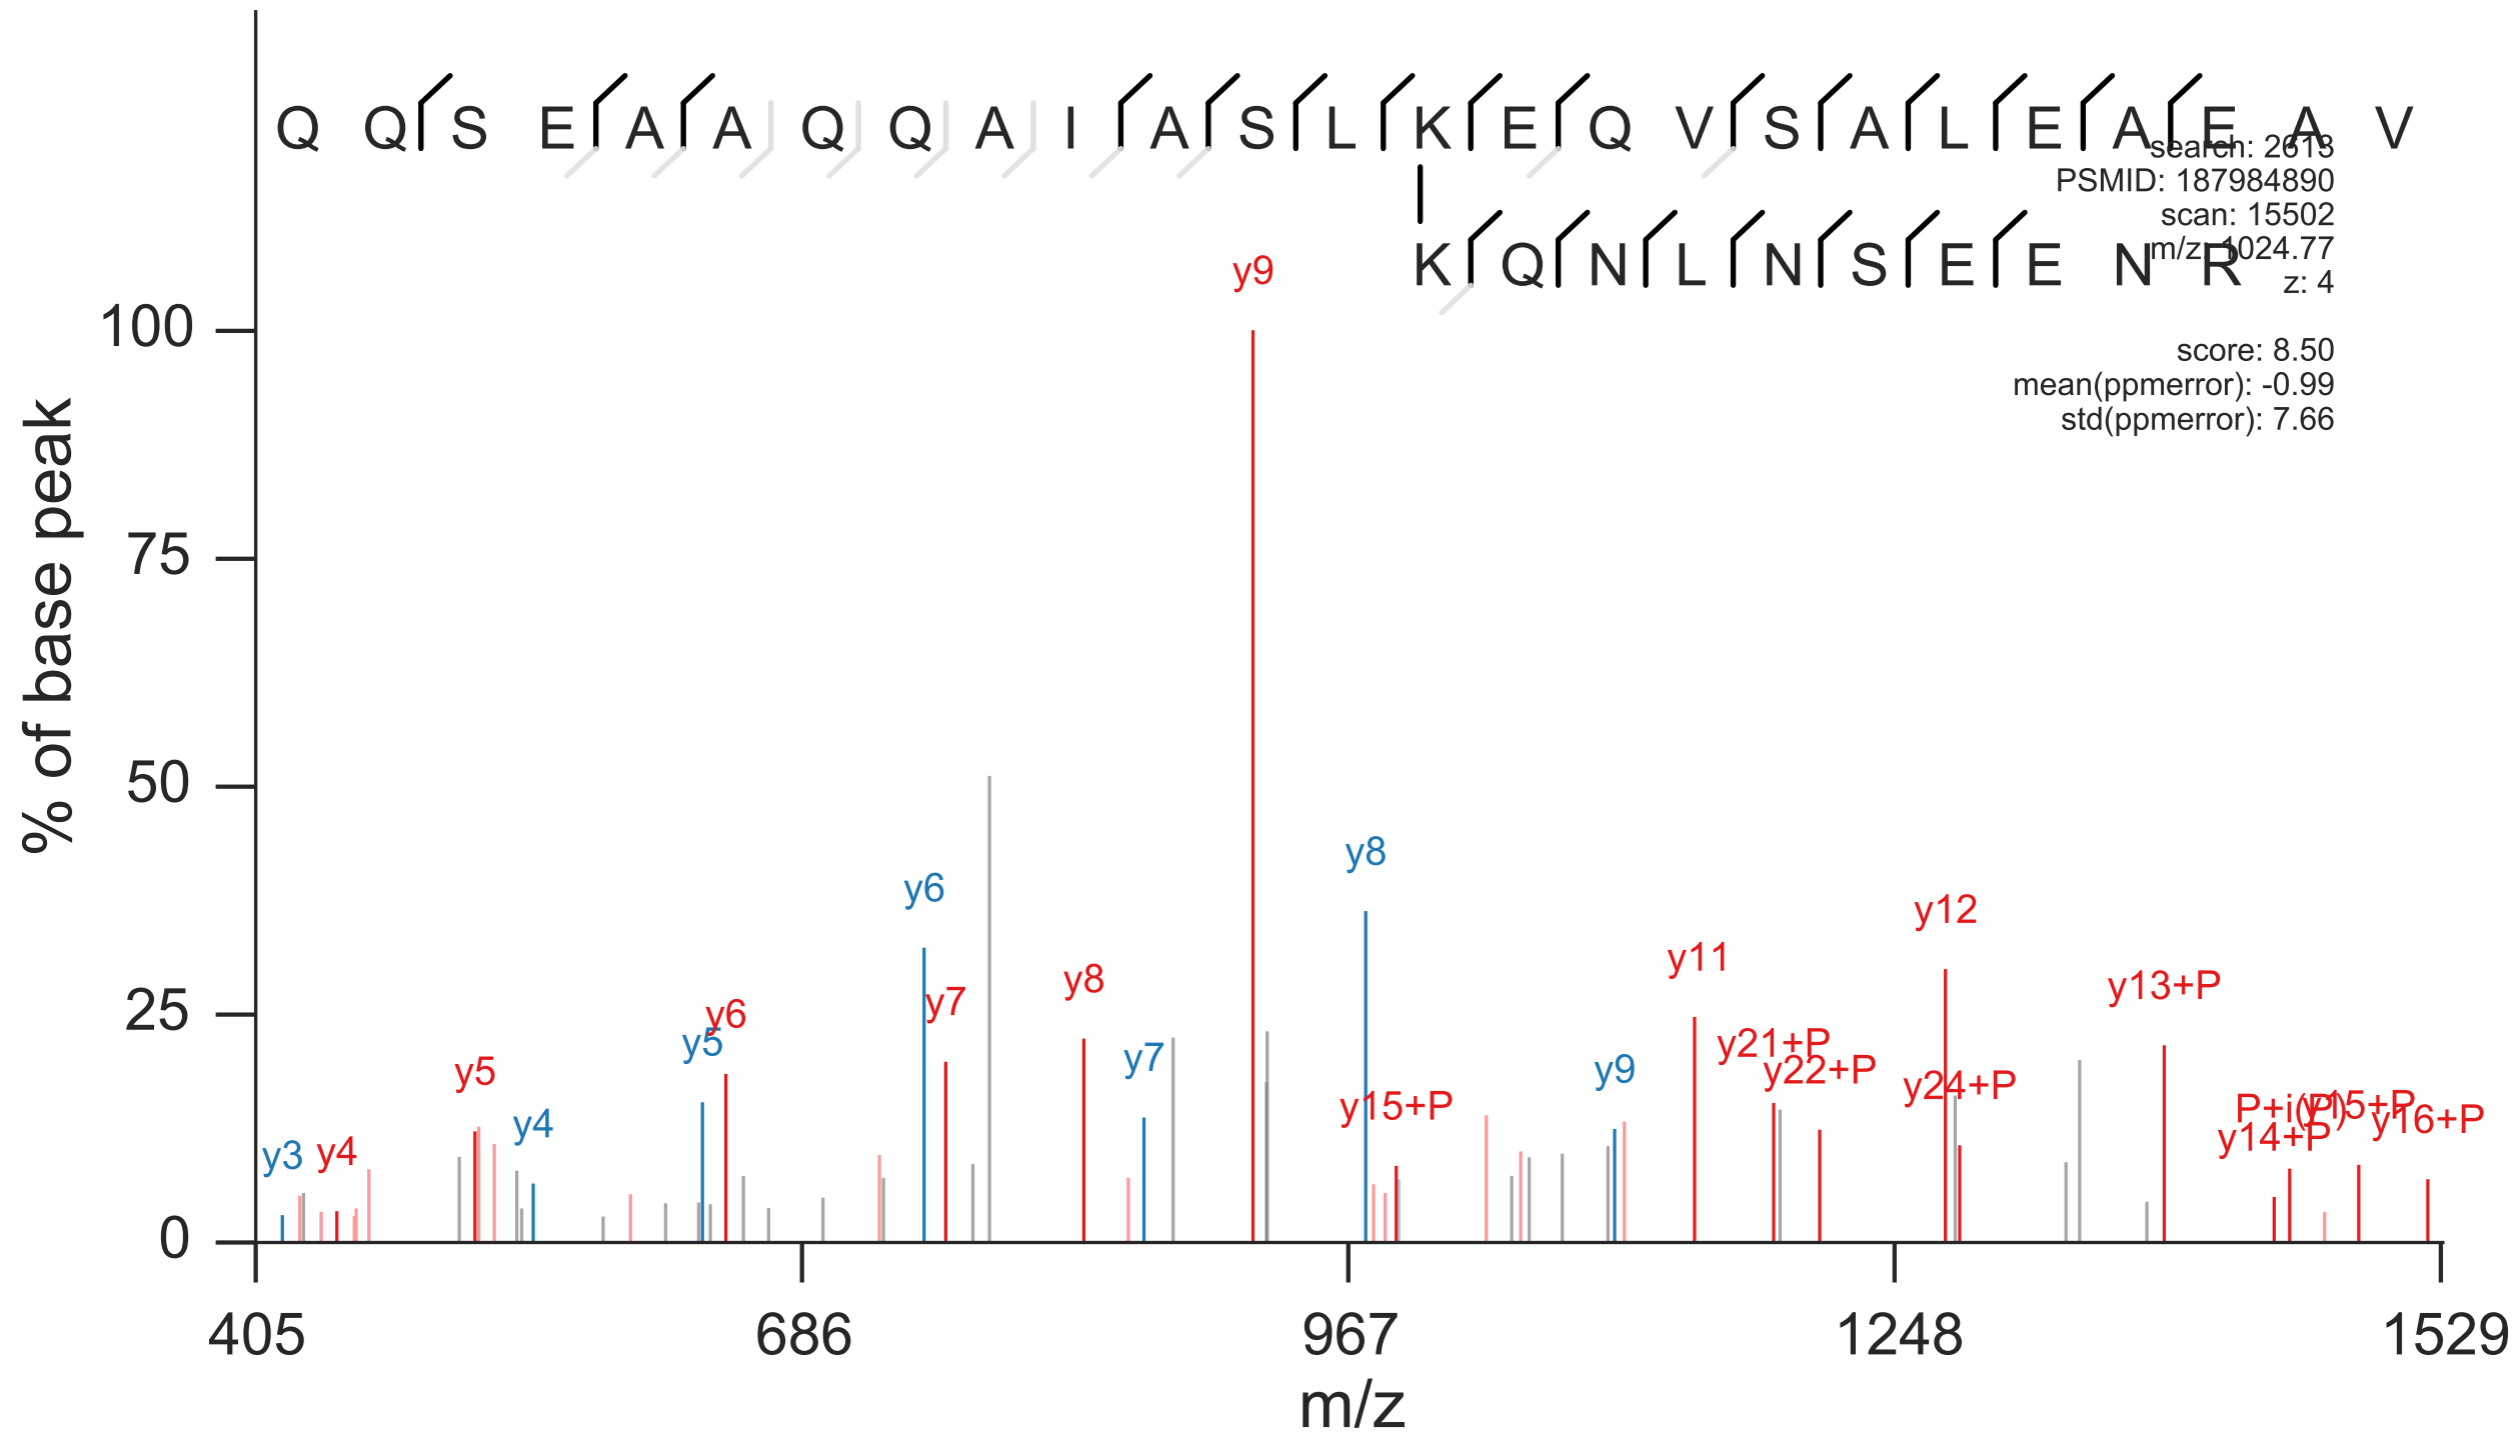

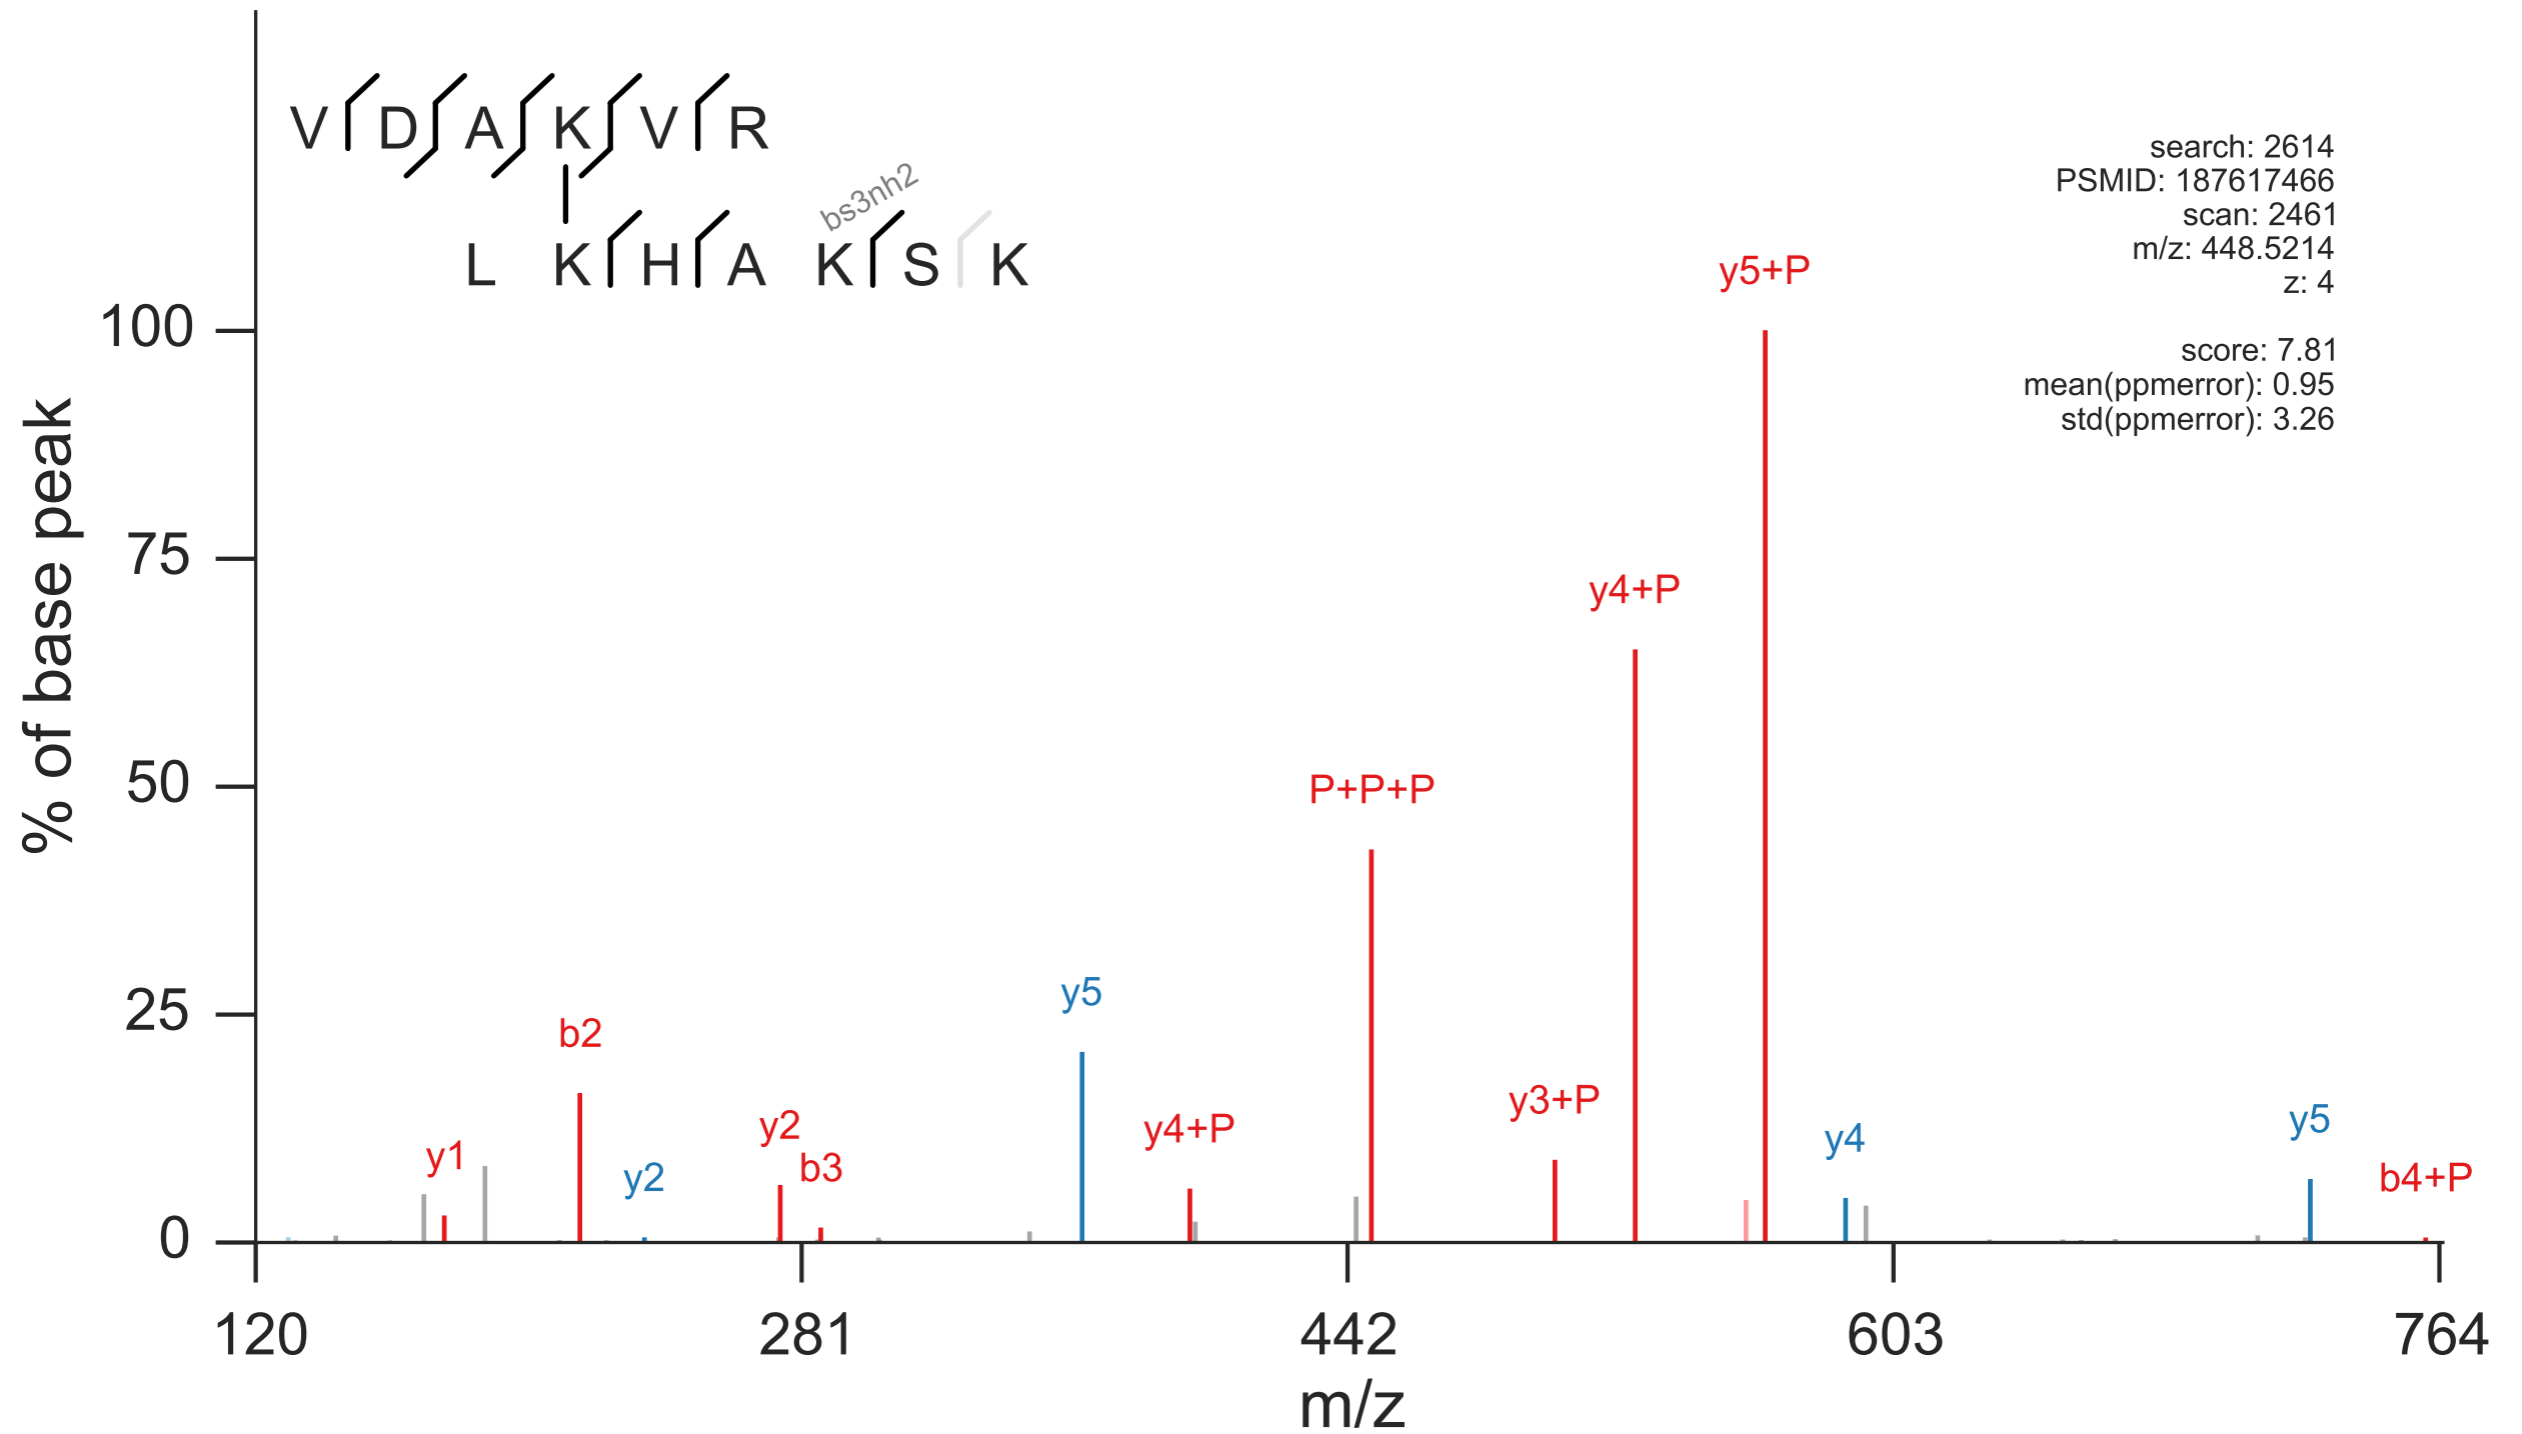

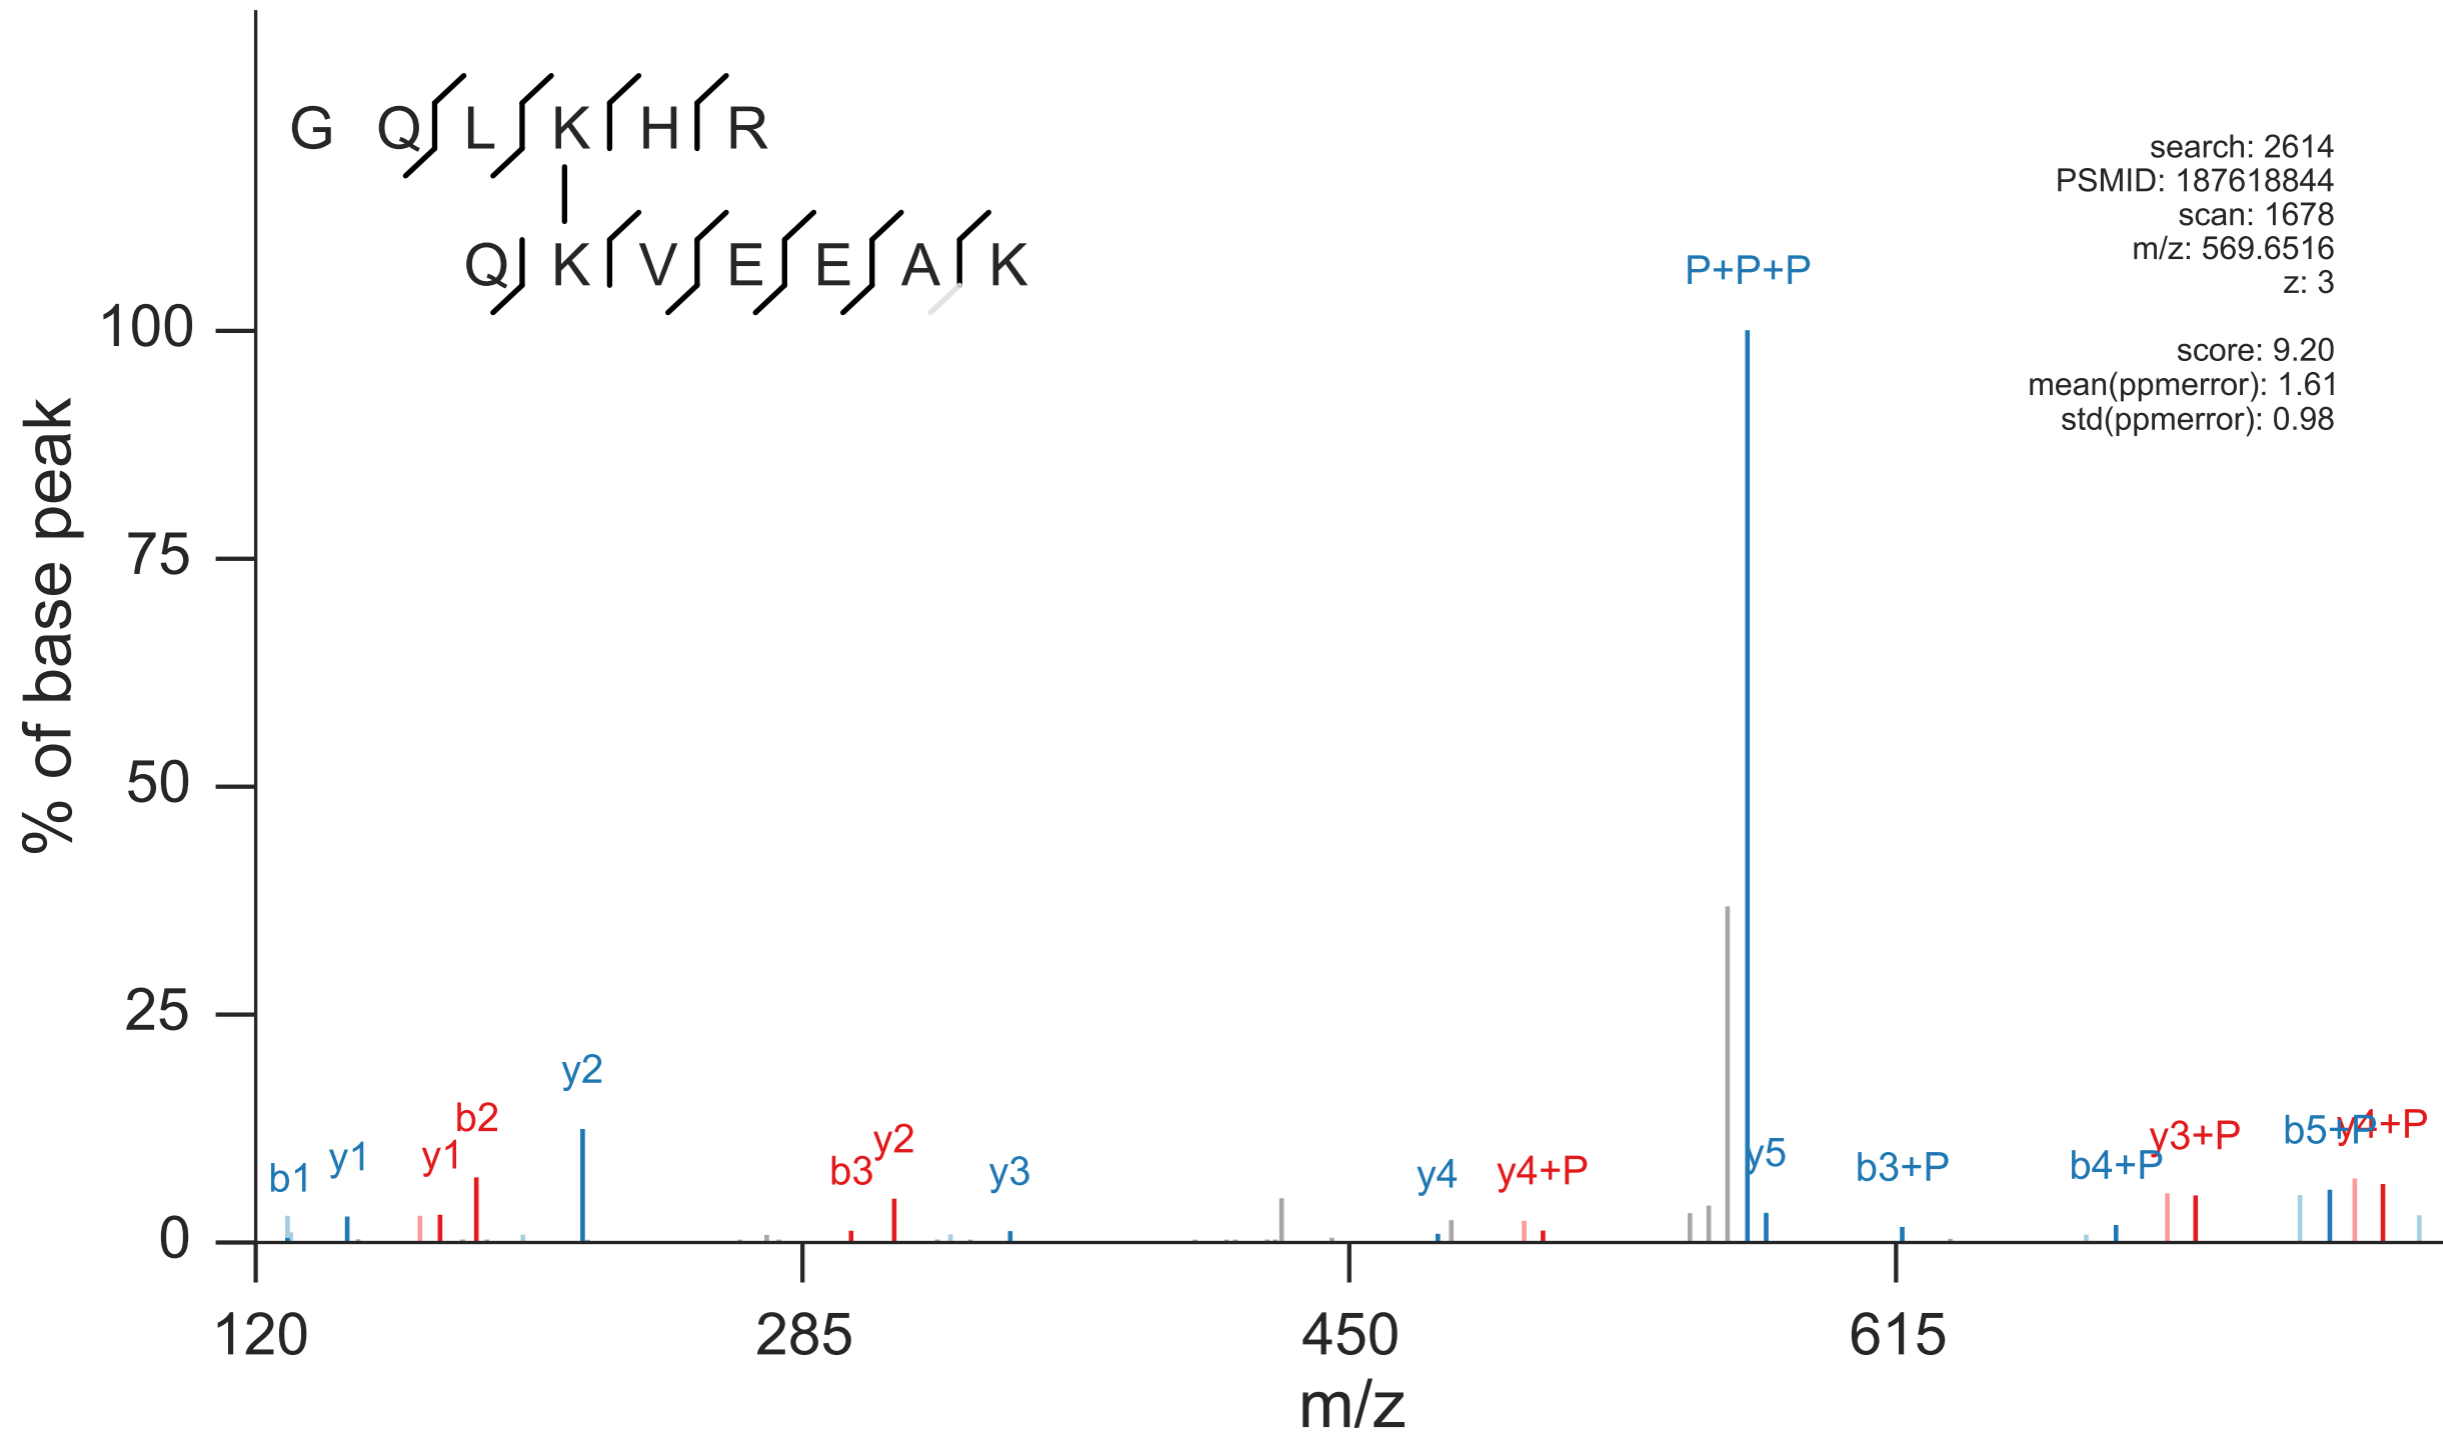

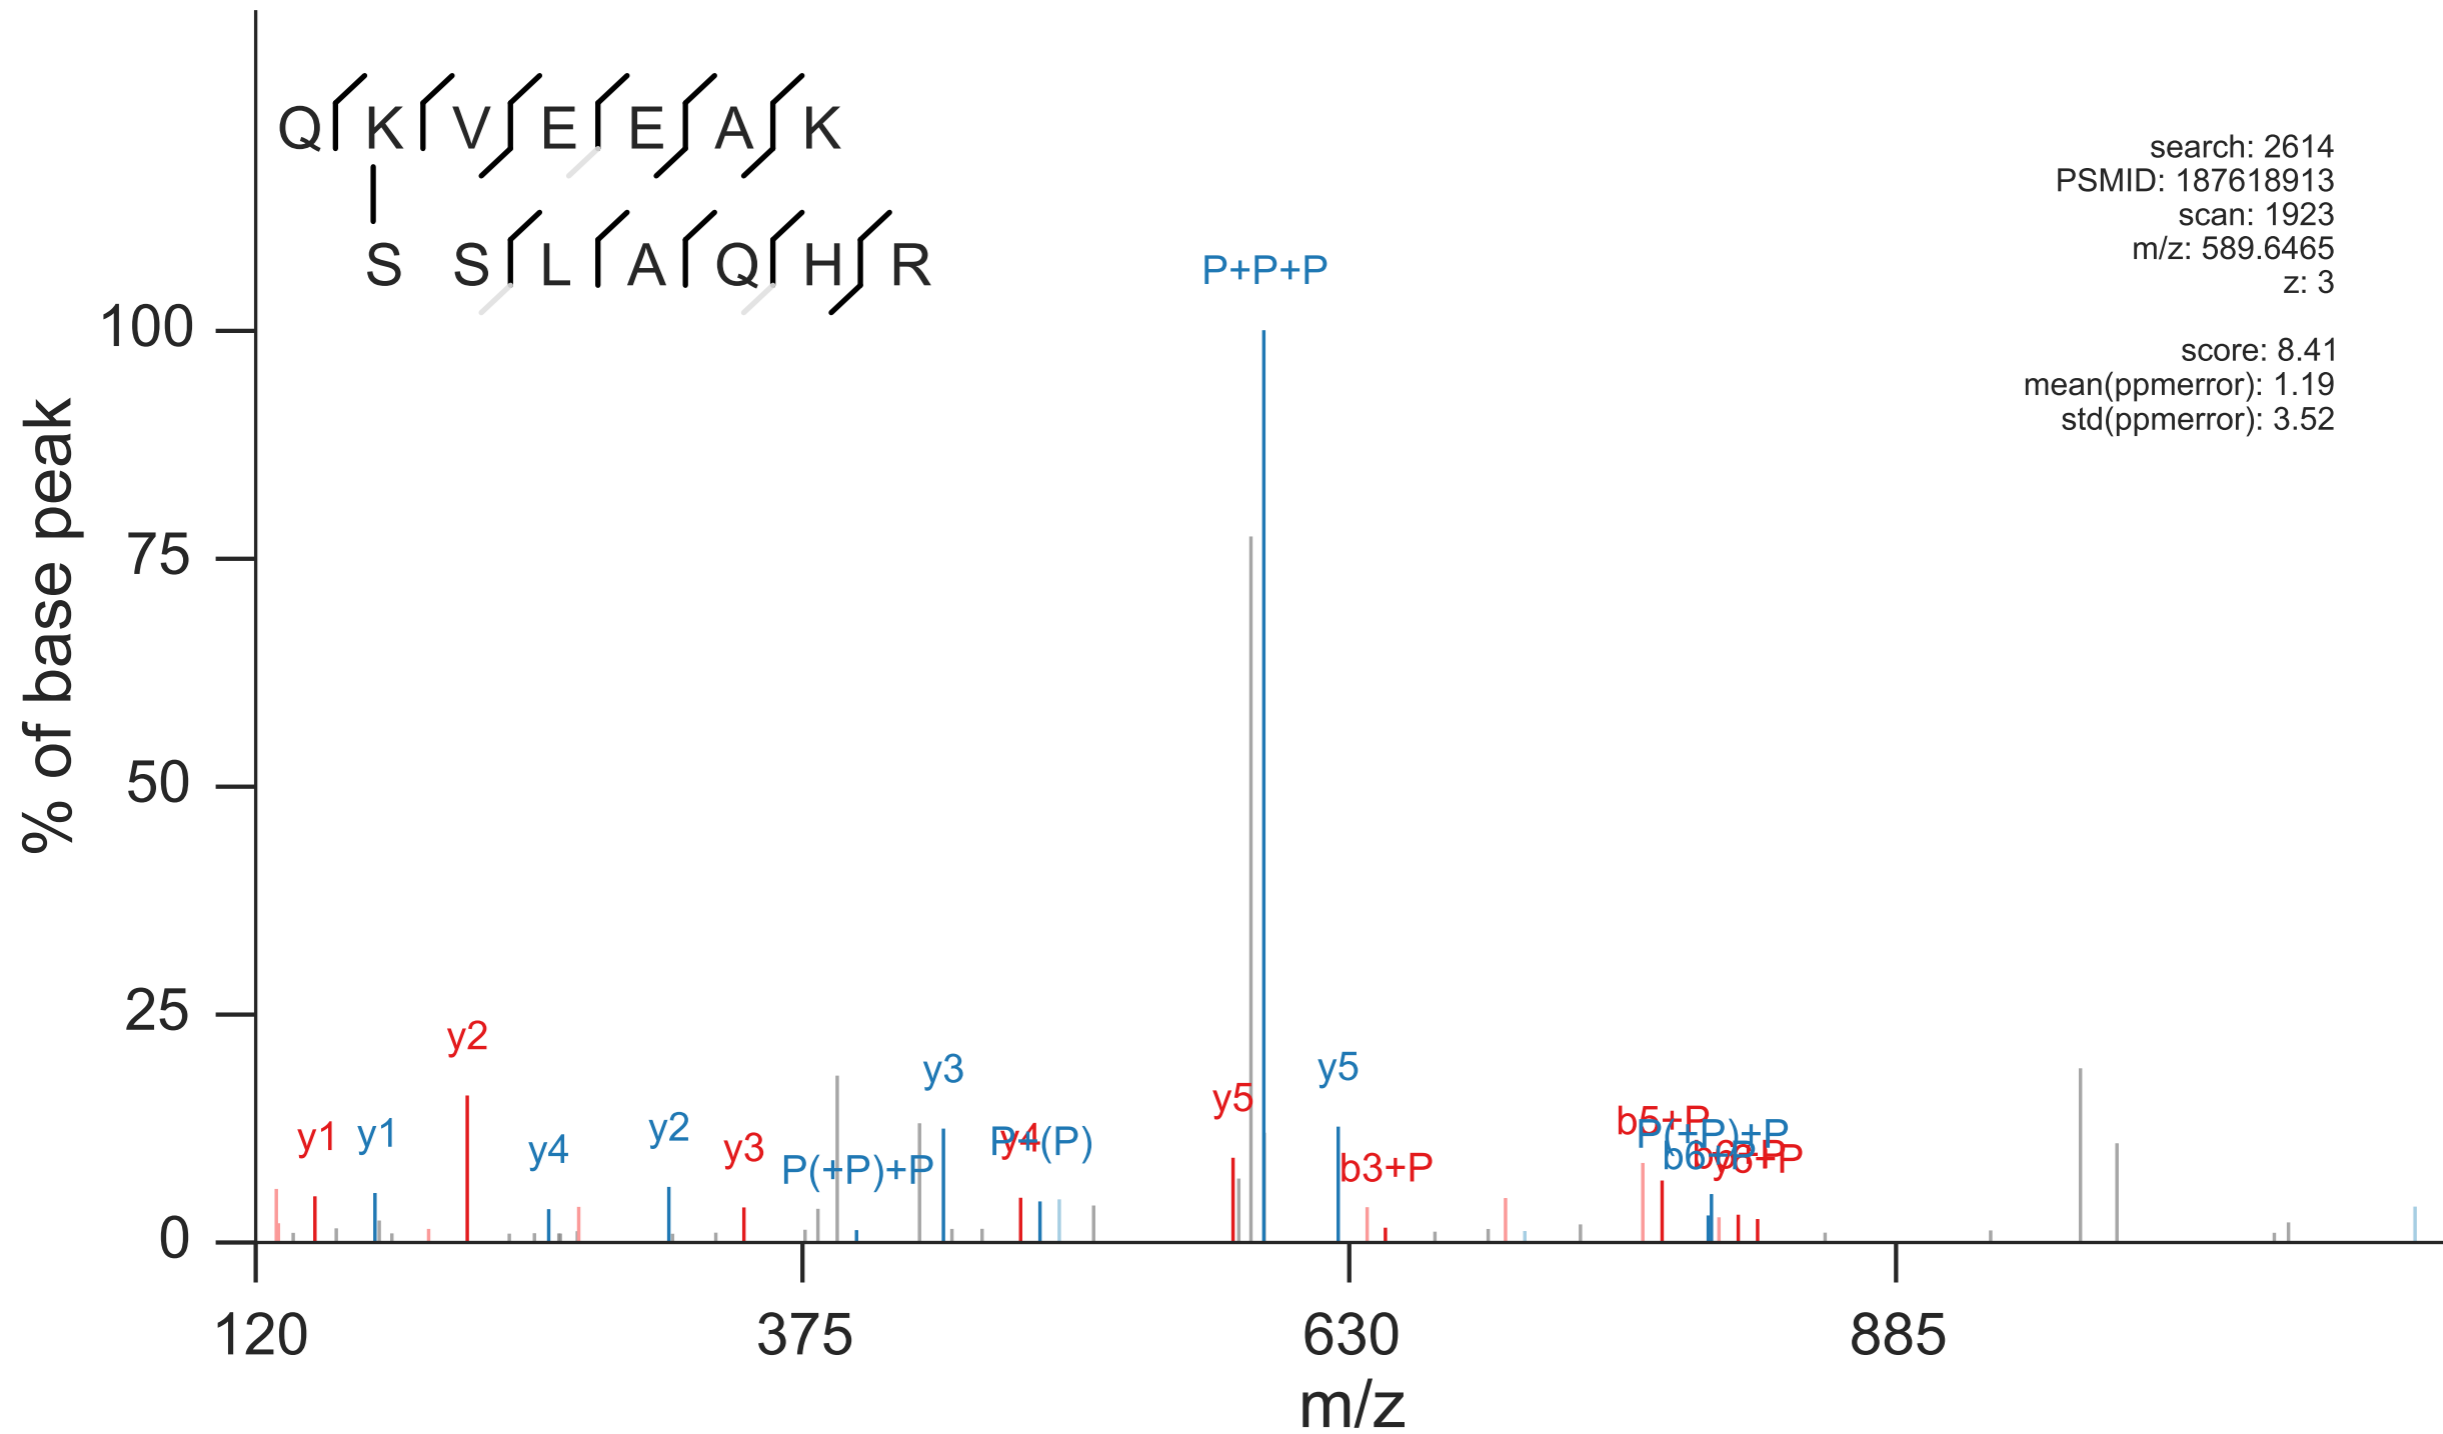

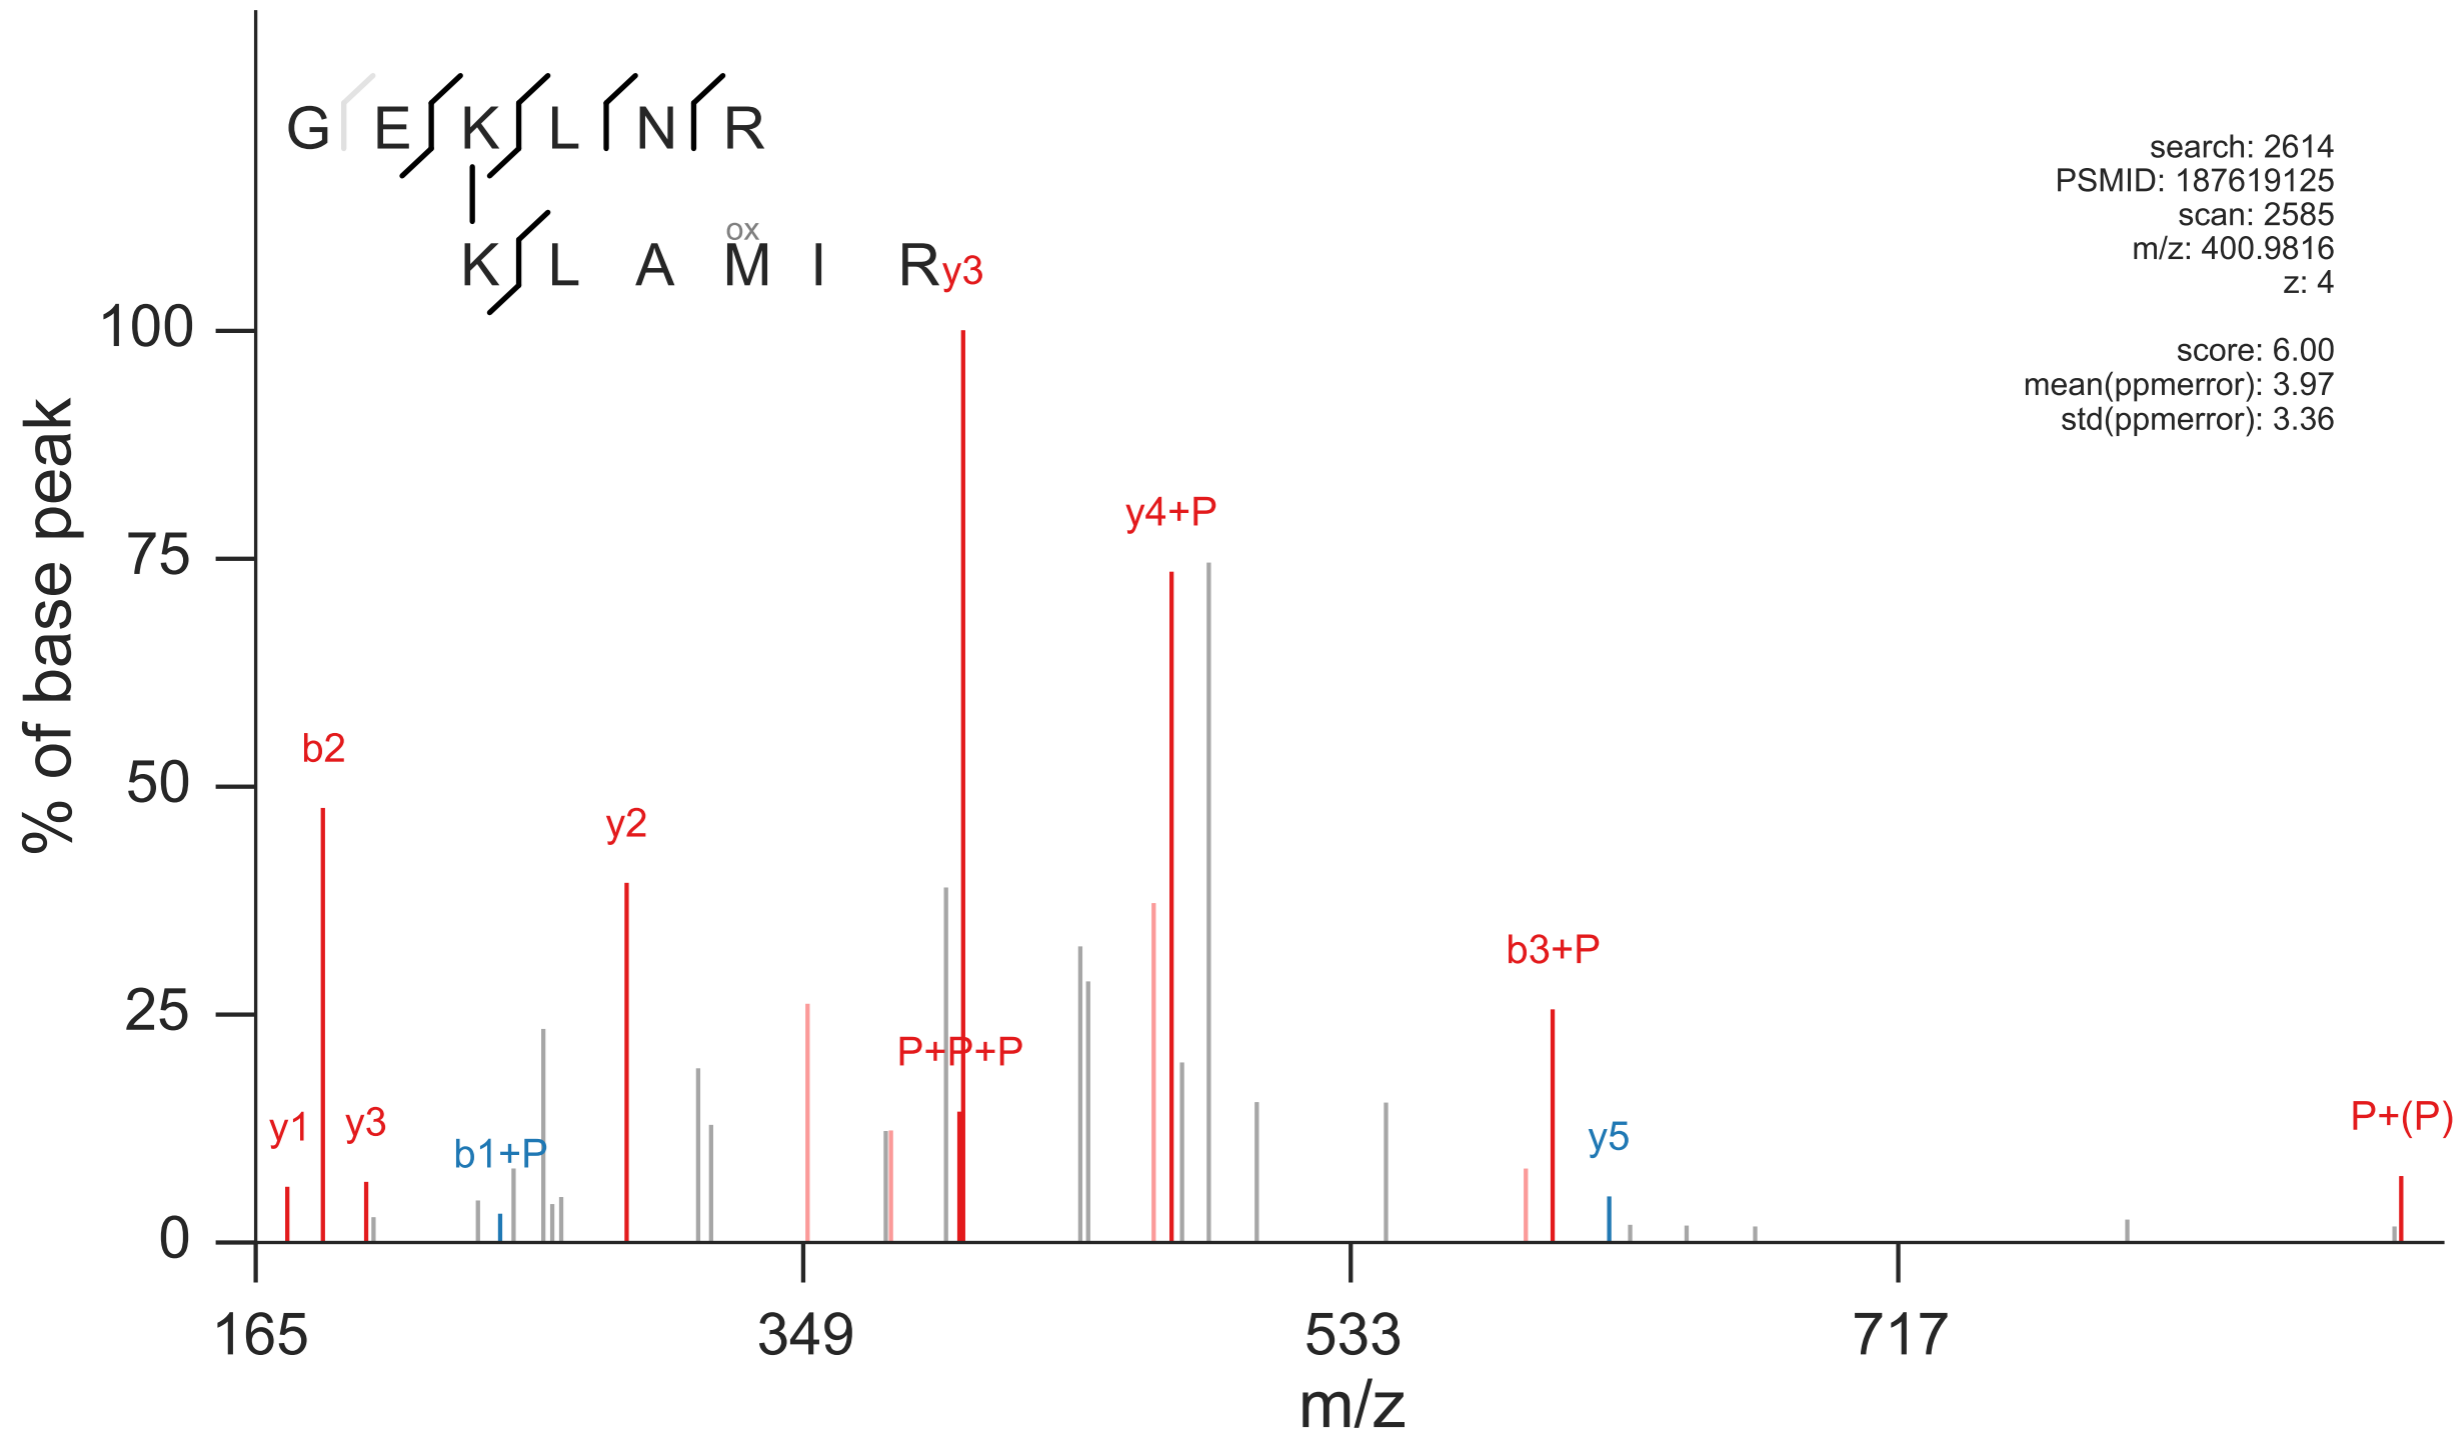

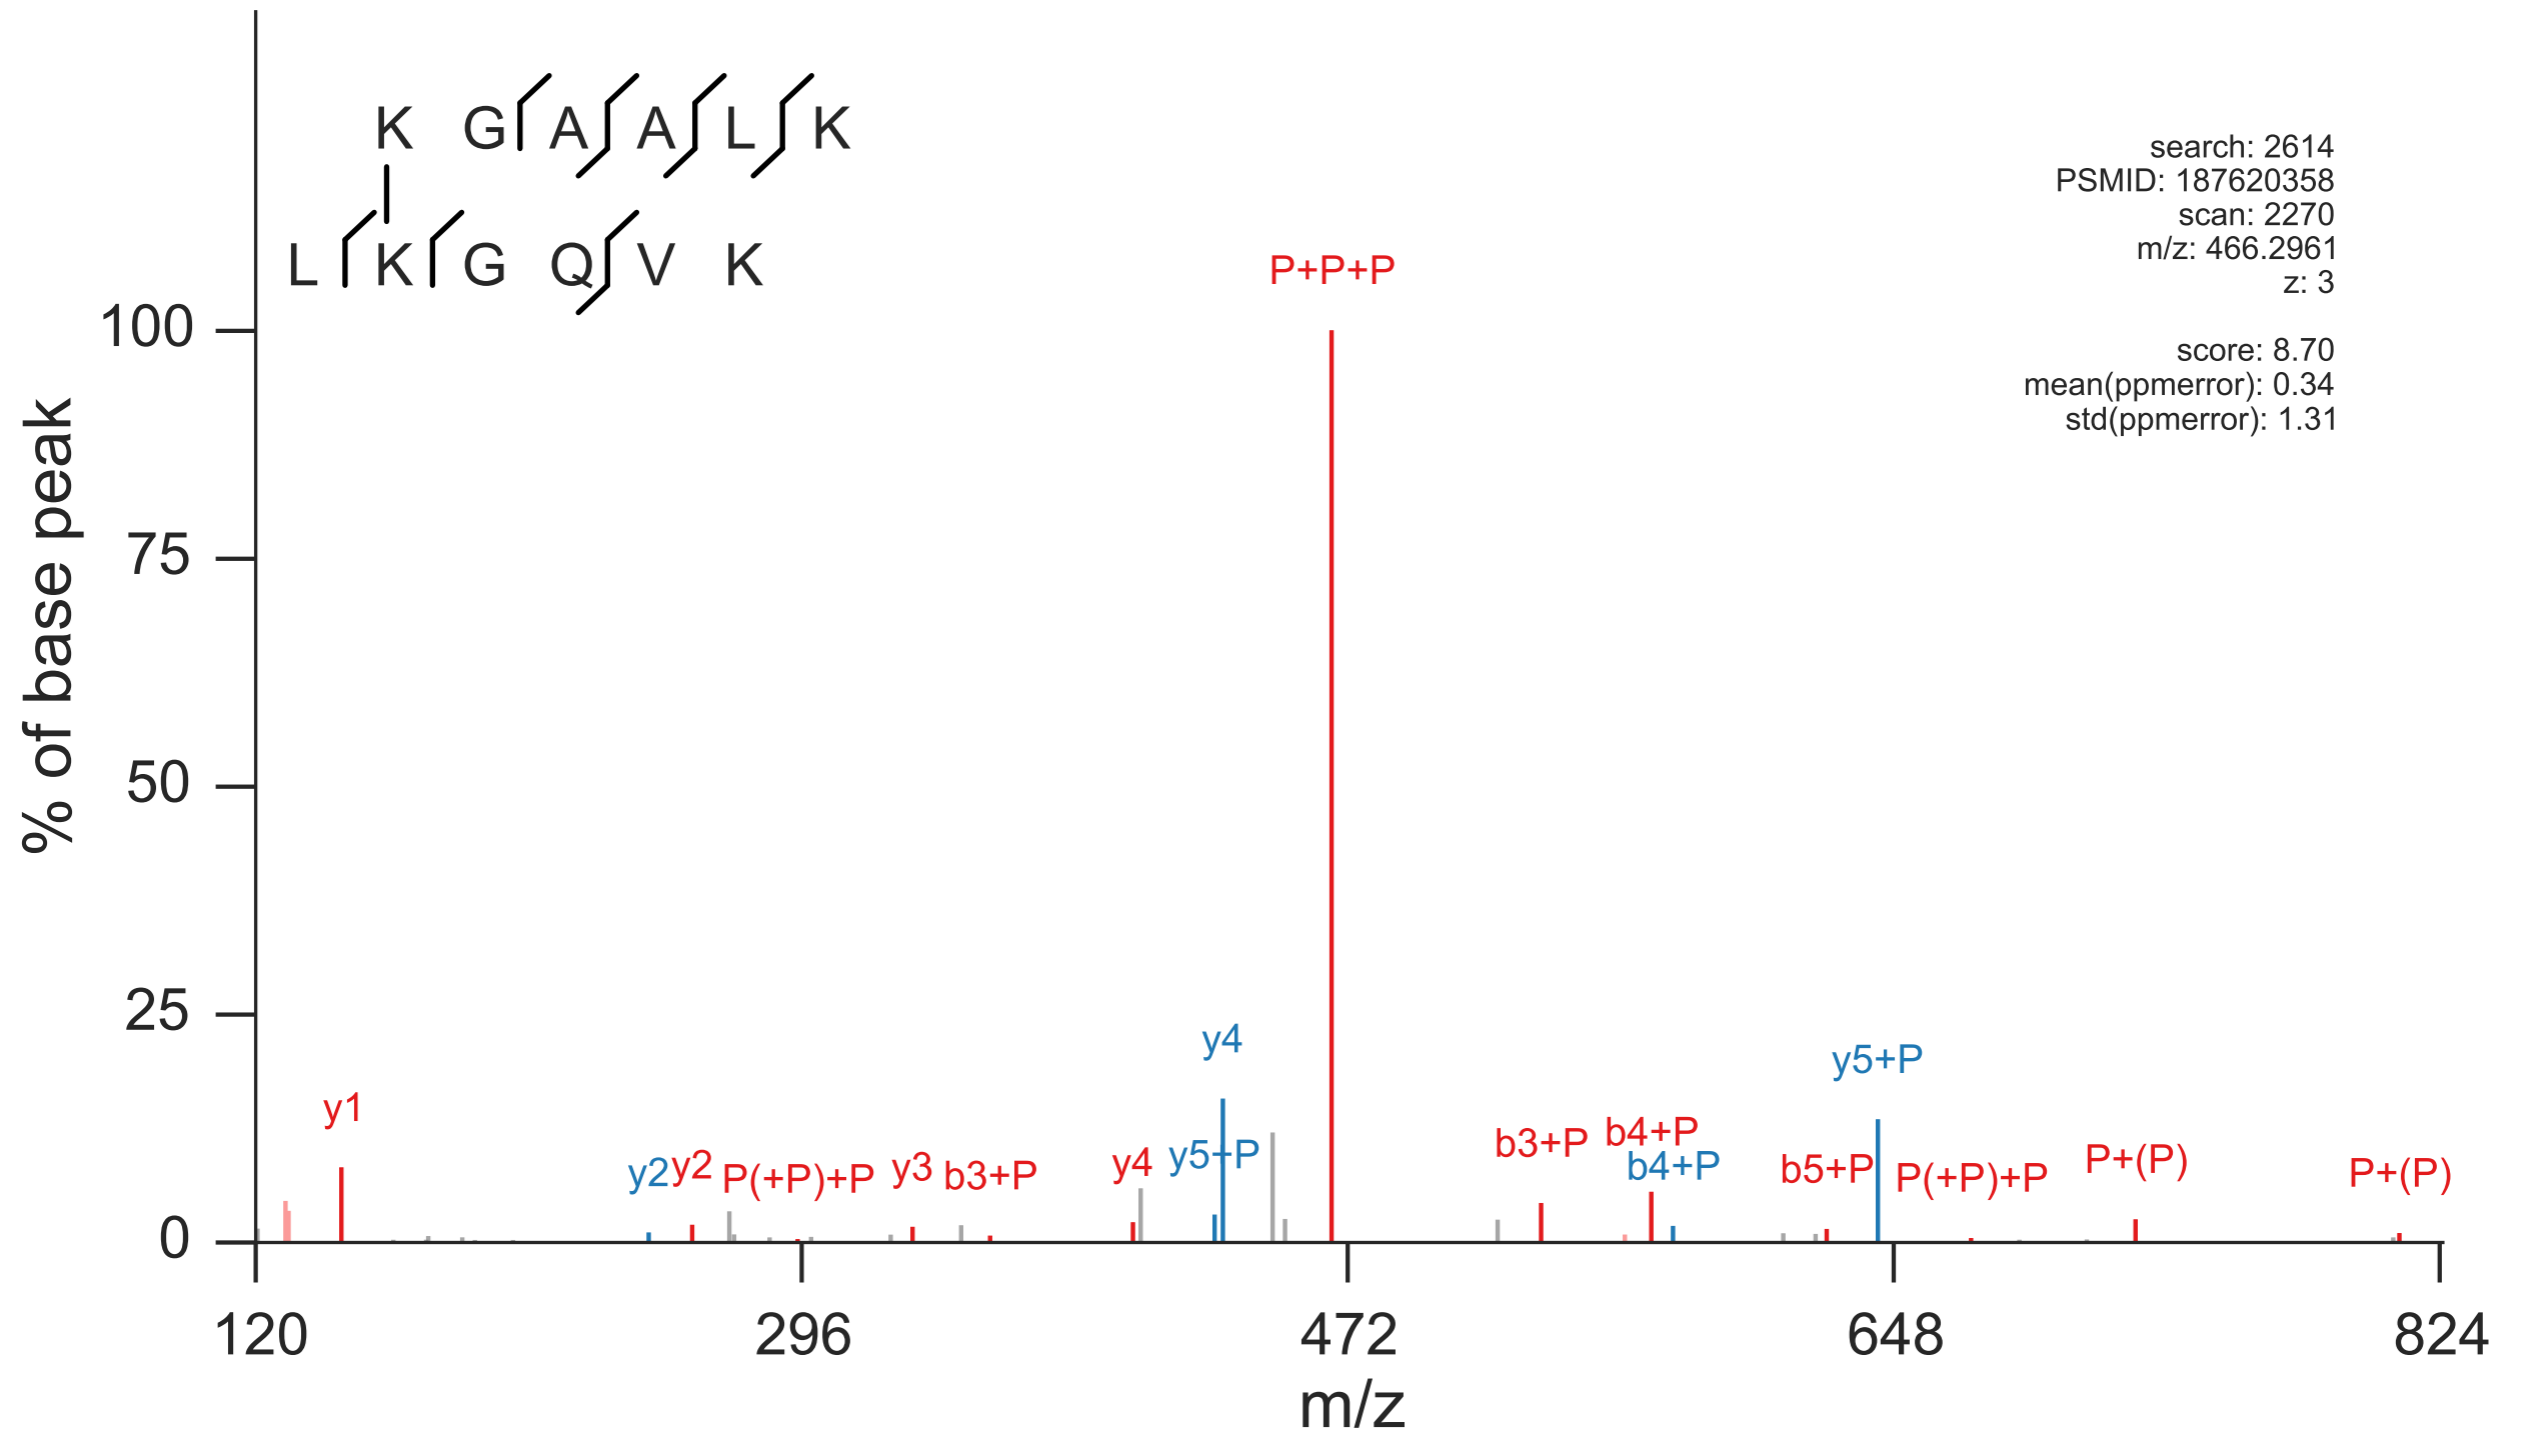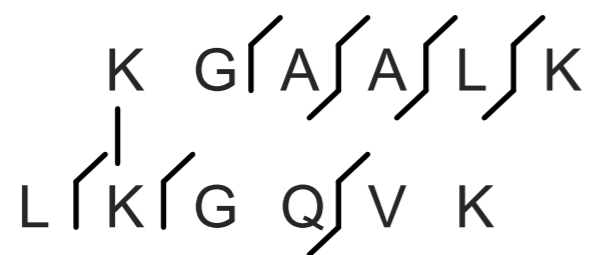

search: 2614  
 PSMID: 187620358  
 scan: 2270  
 m/z: 466.2961  
 z: 3  
  
 score: 8.70  
 mean(ppmerror): 0.34  
 std(ppmerror): 1.31

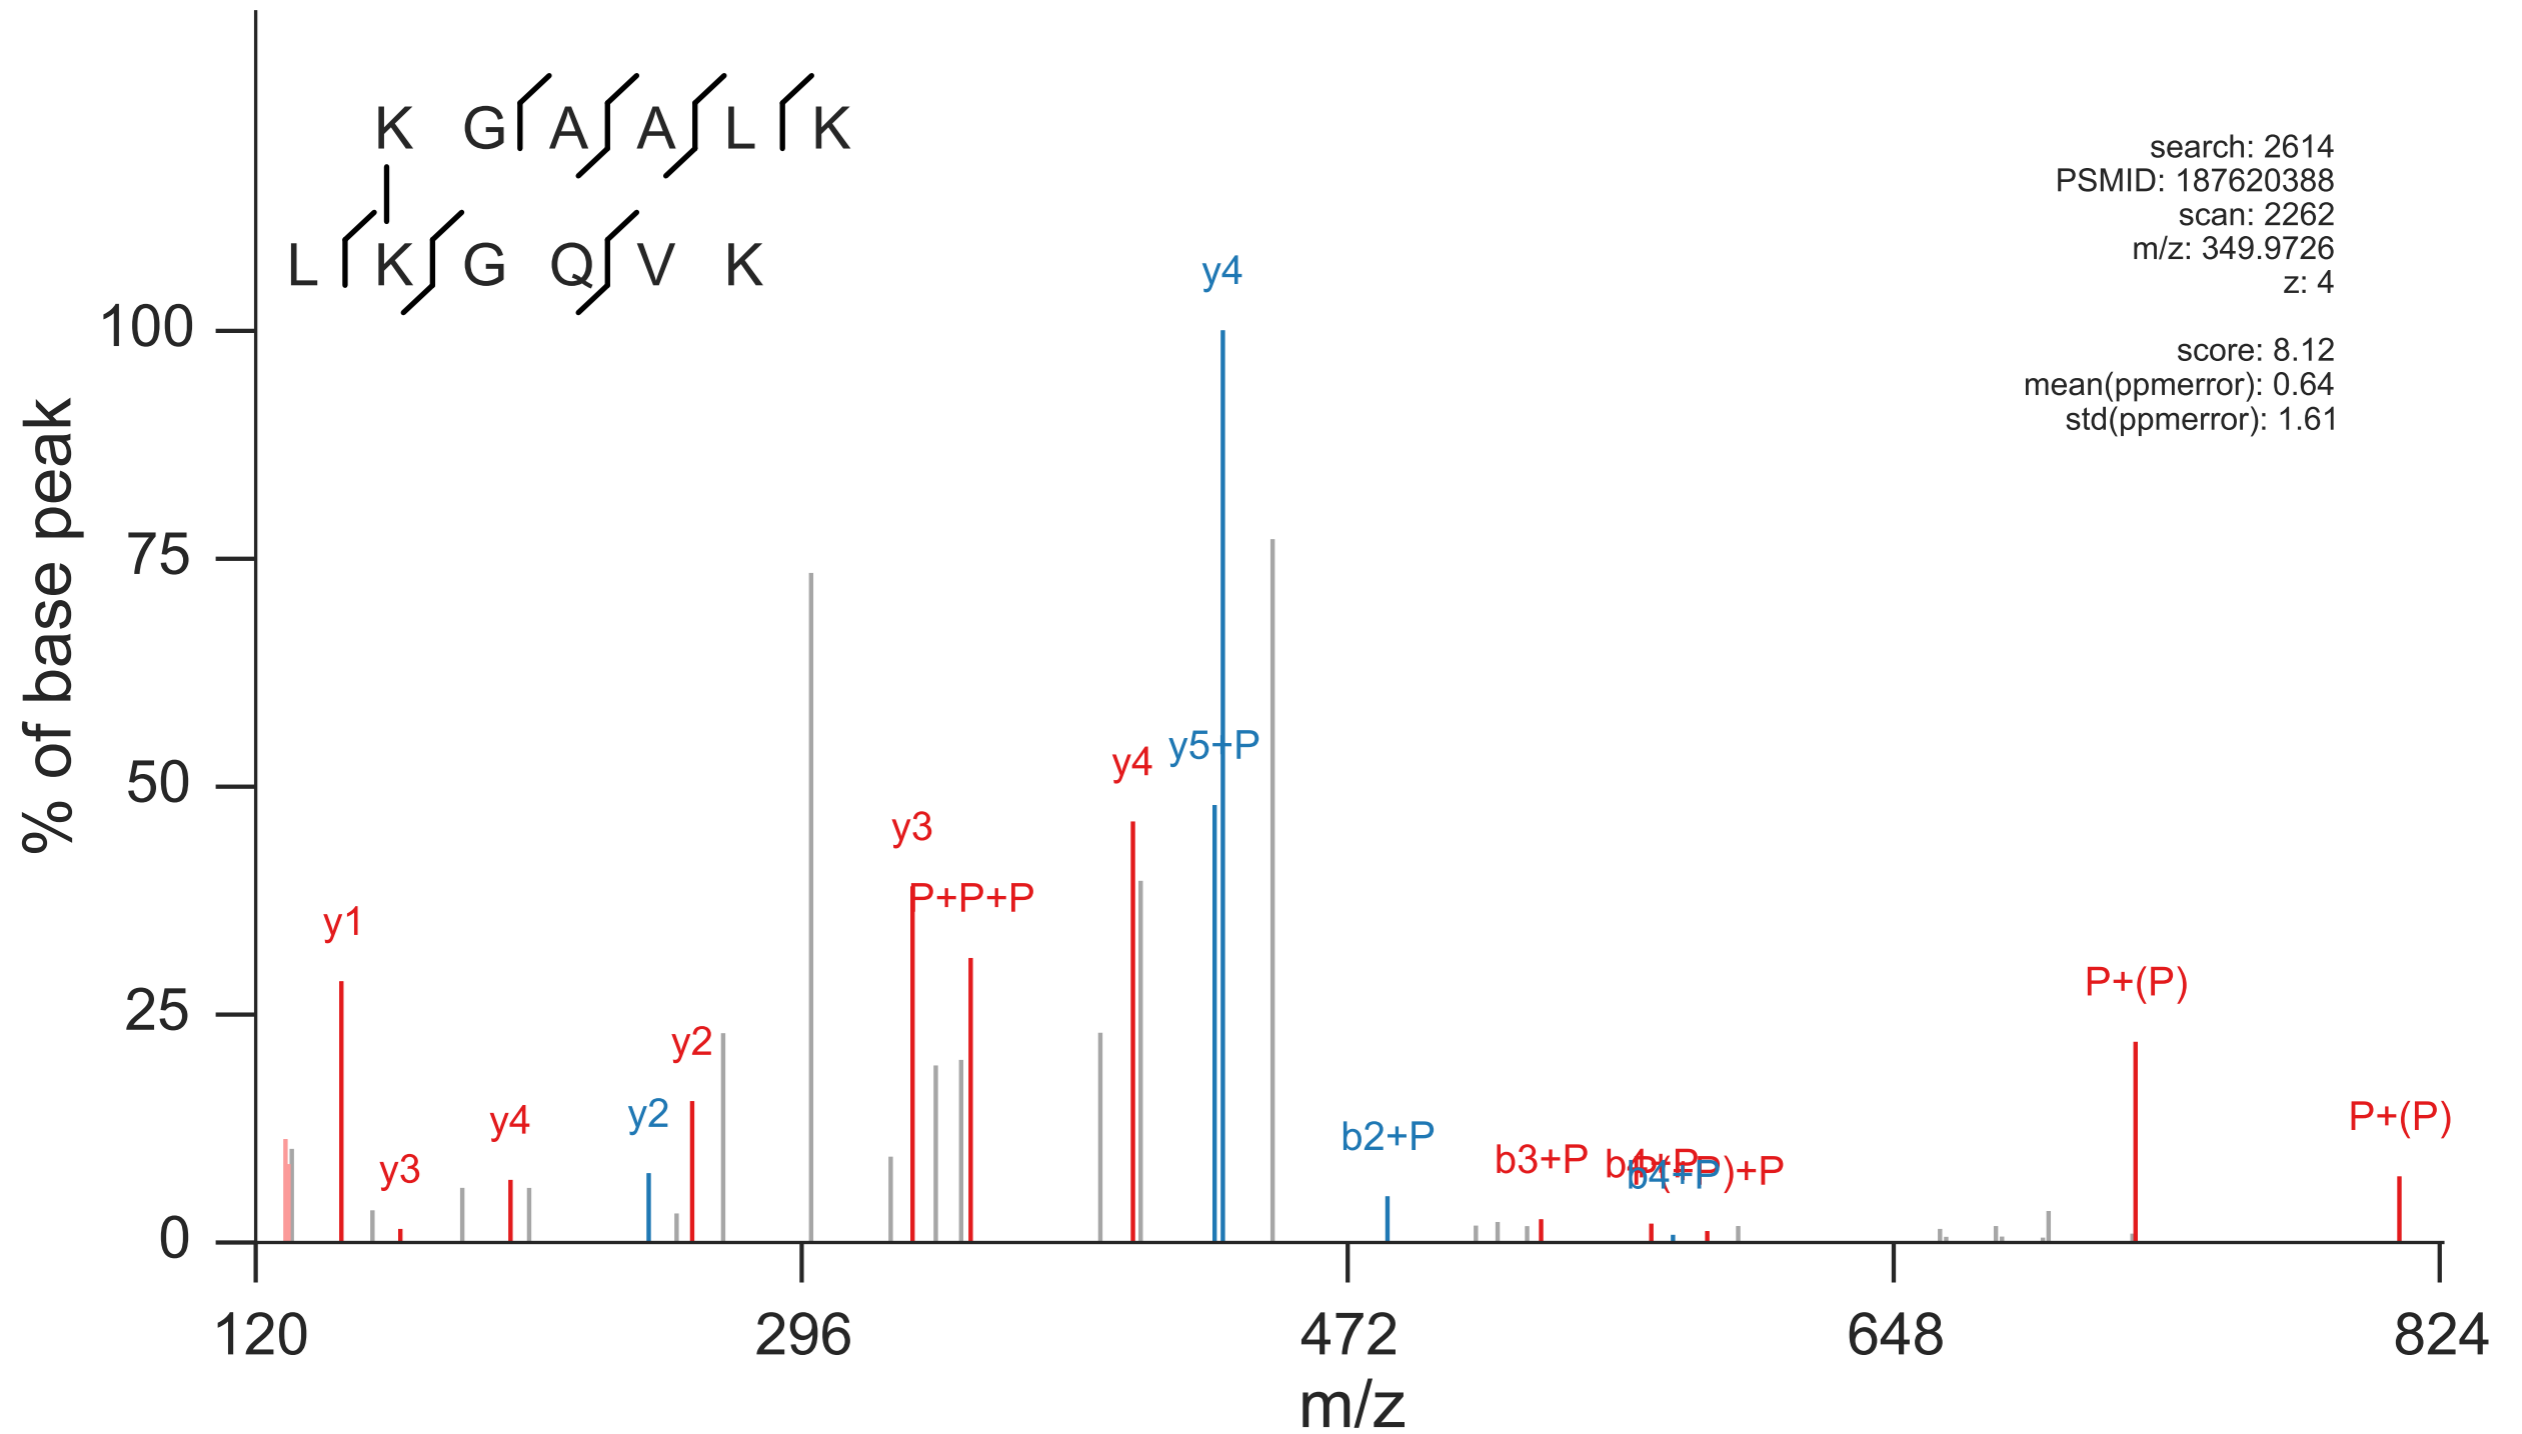



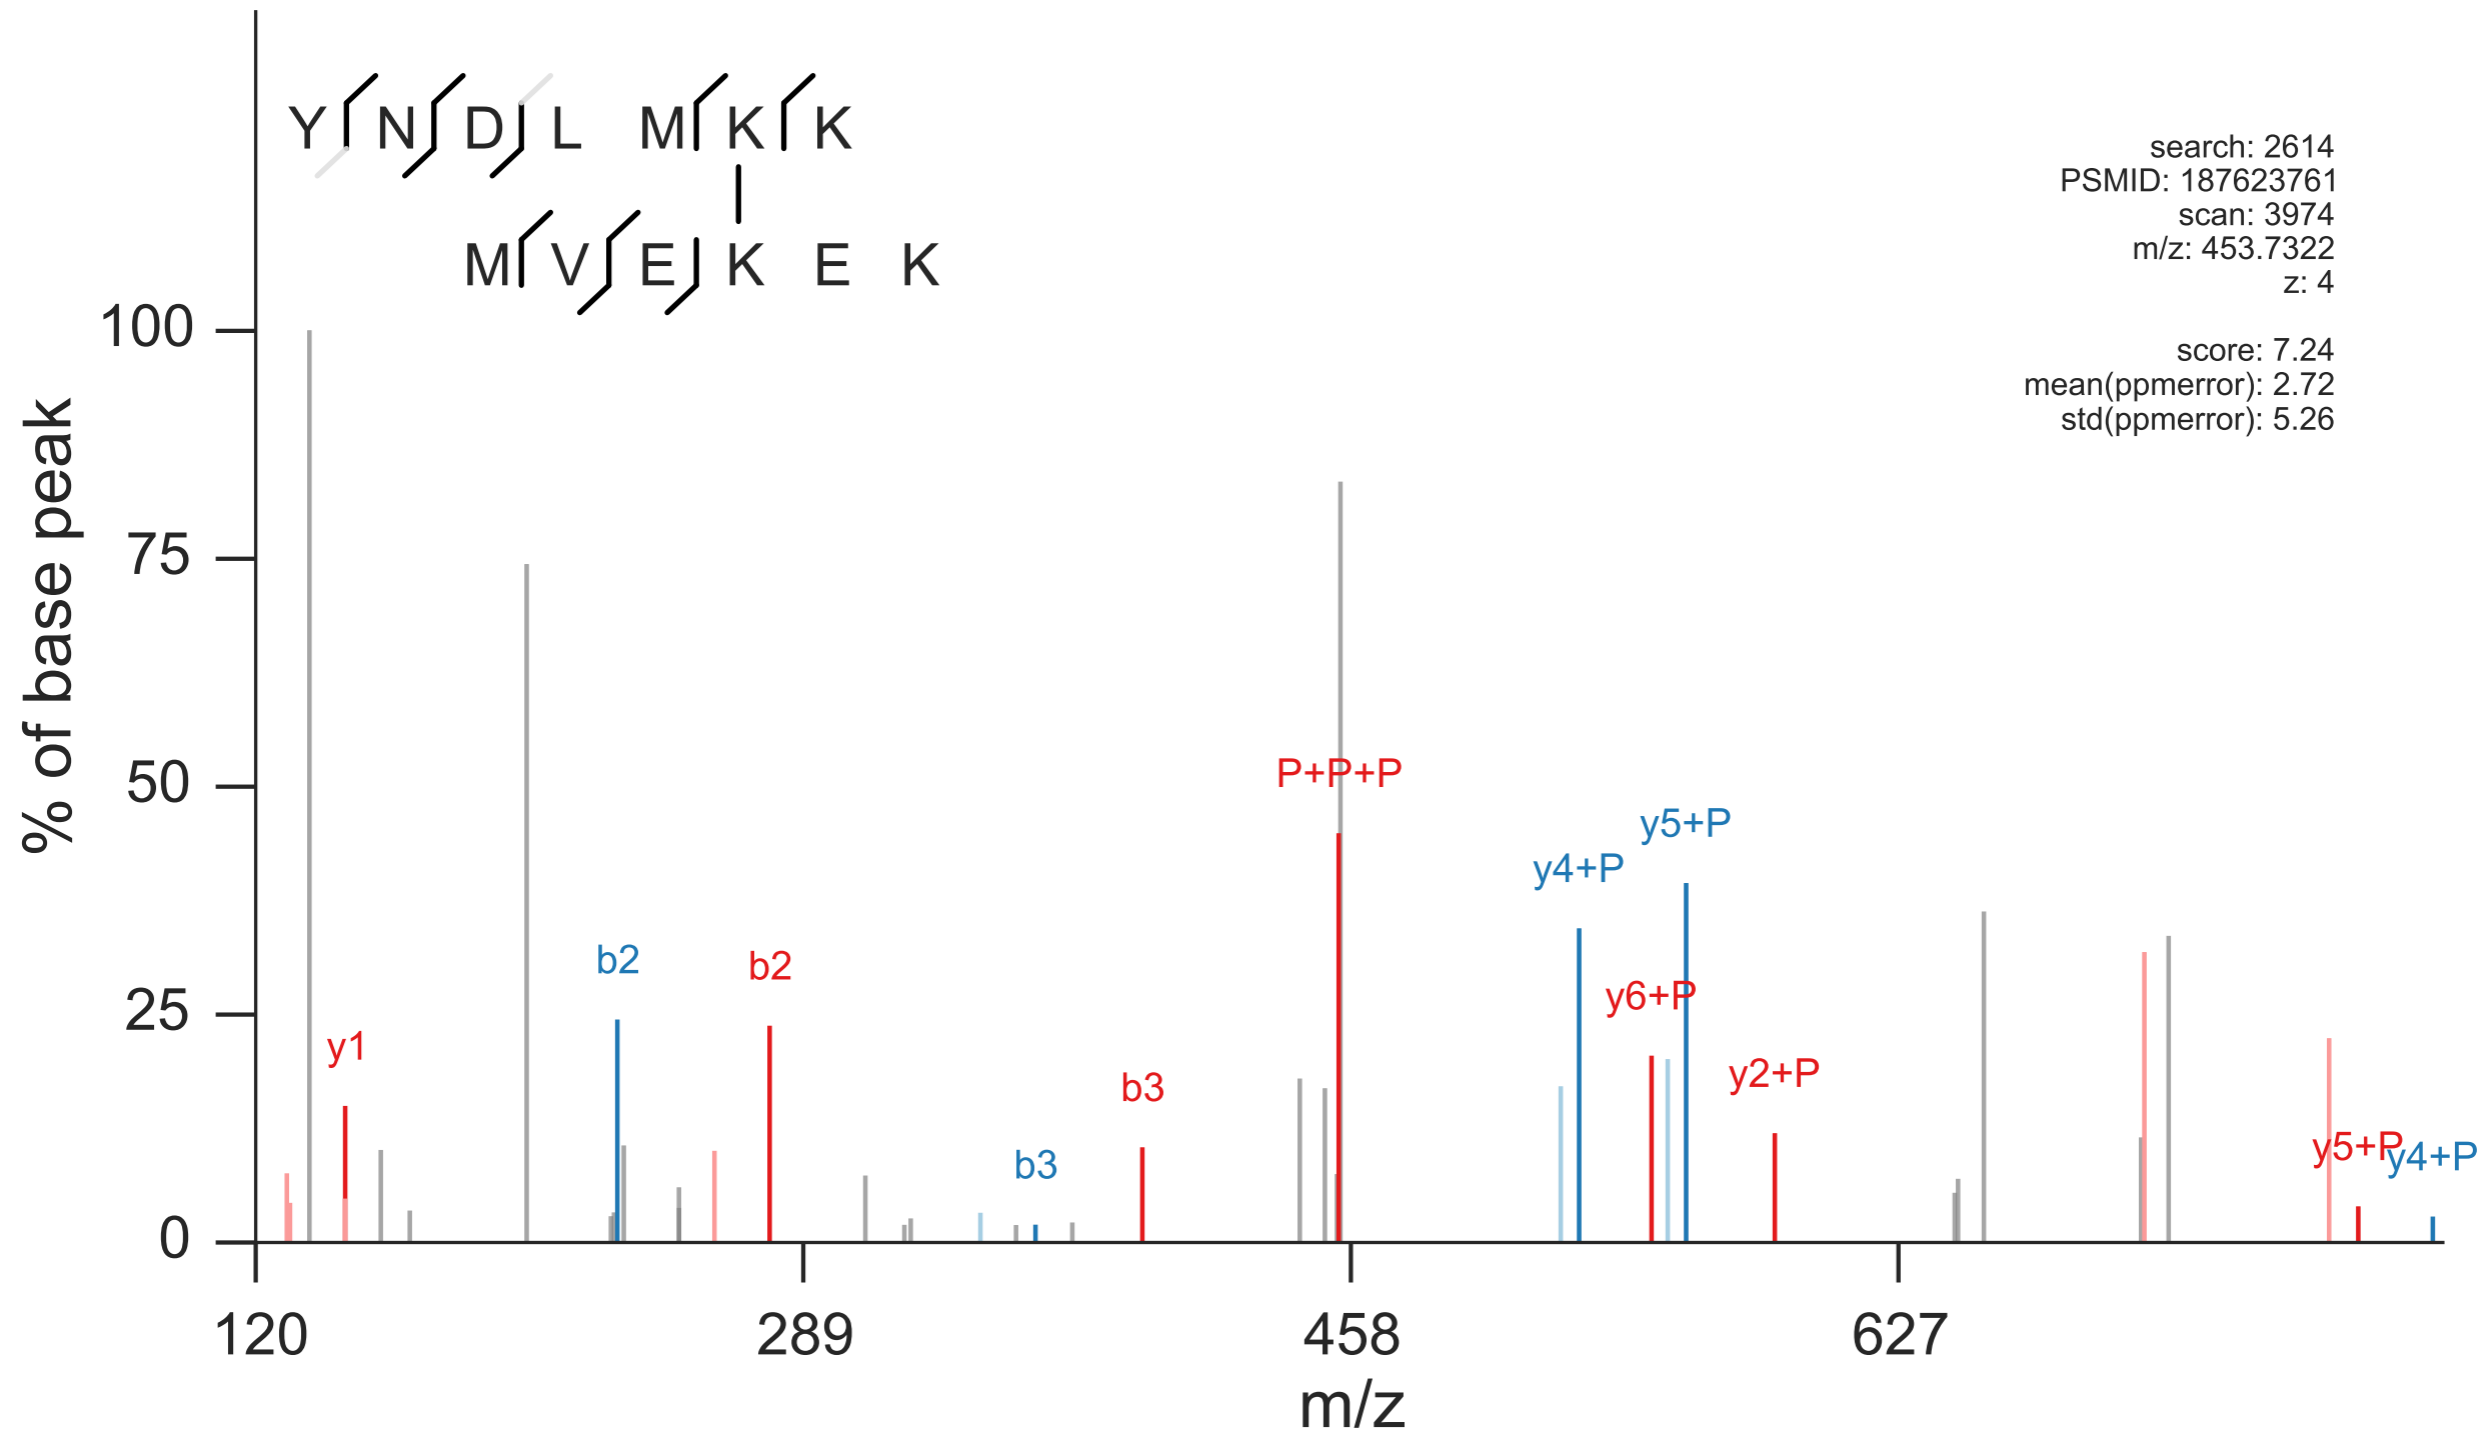

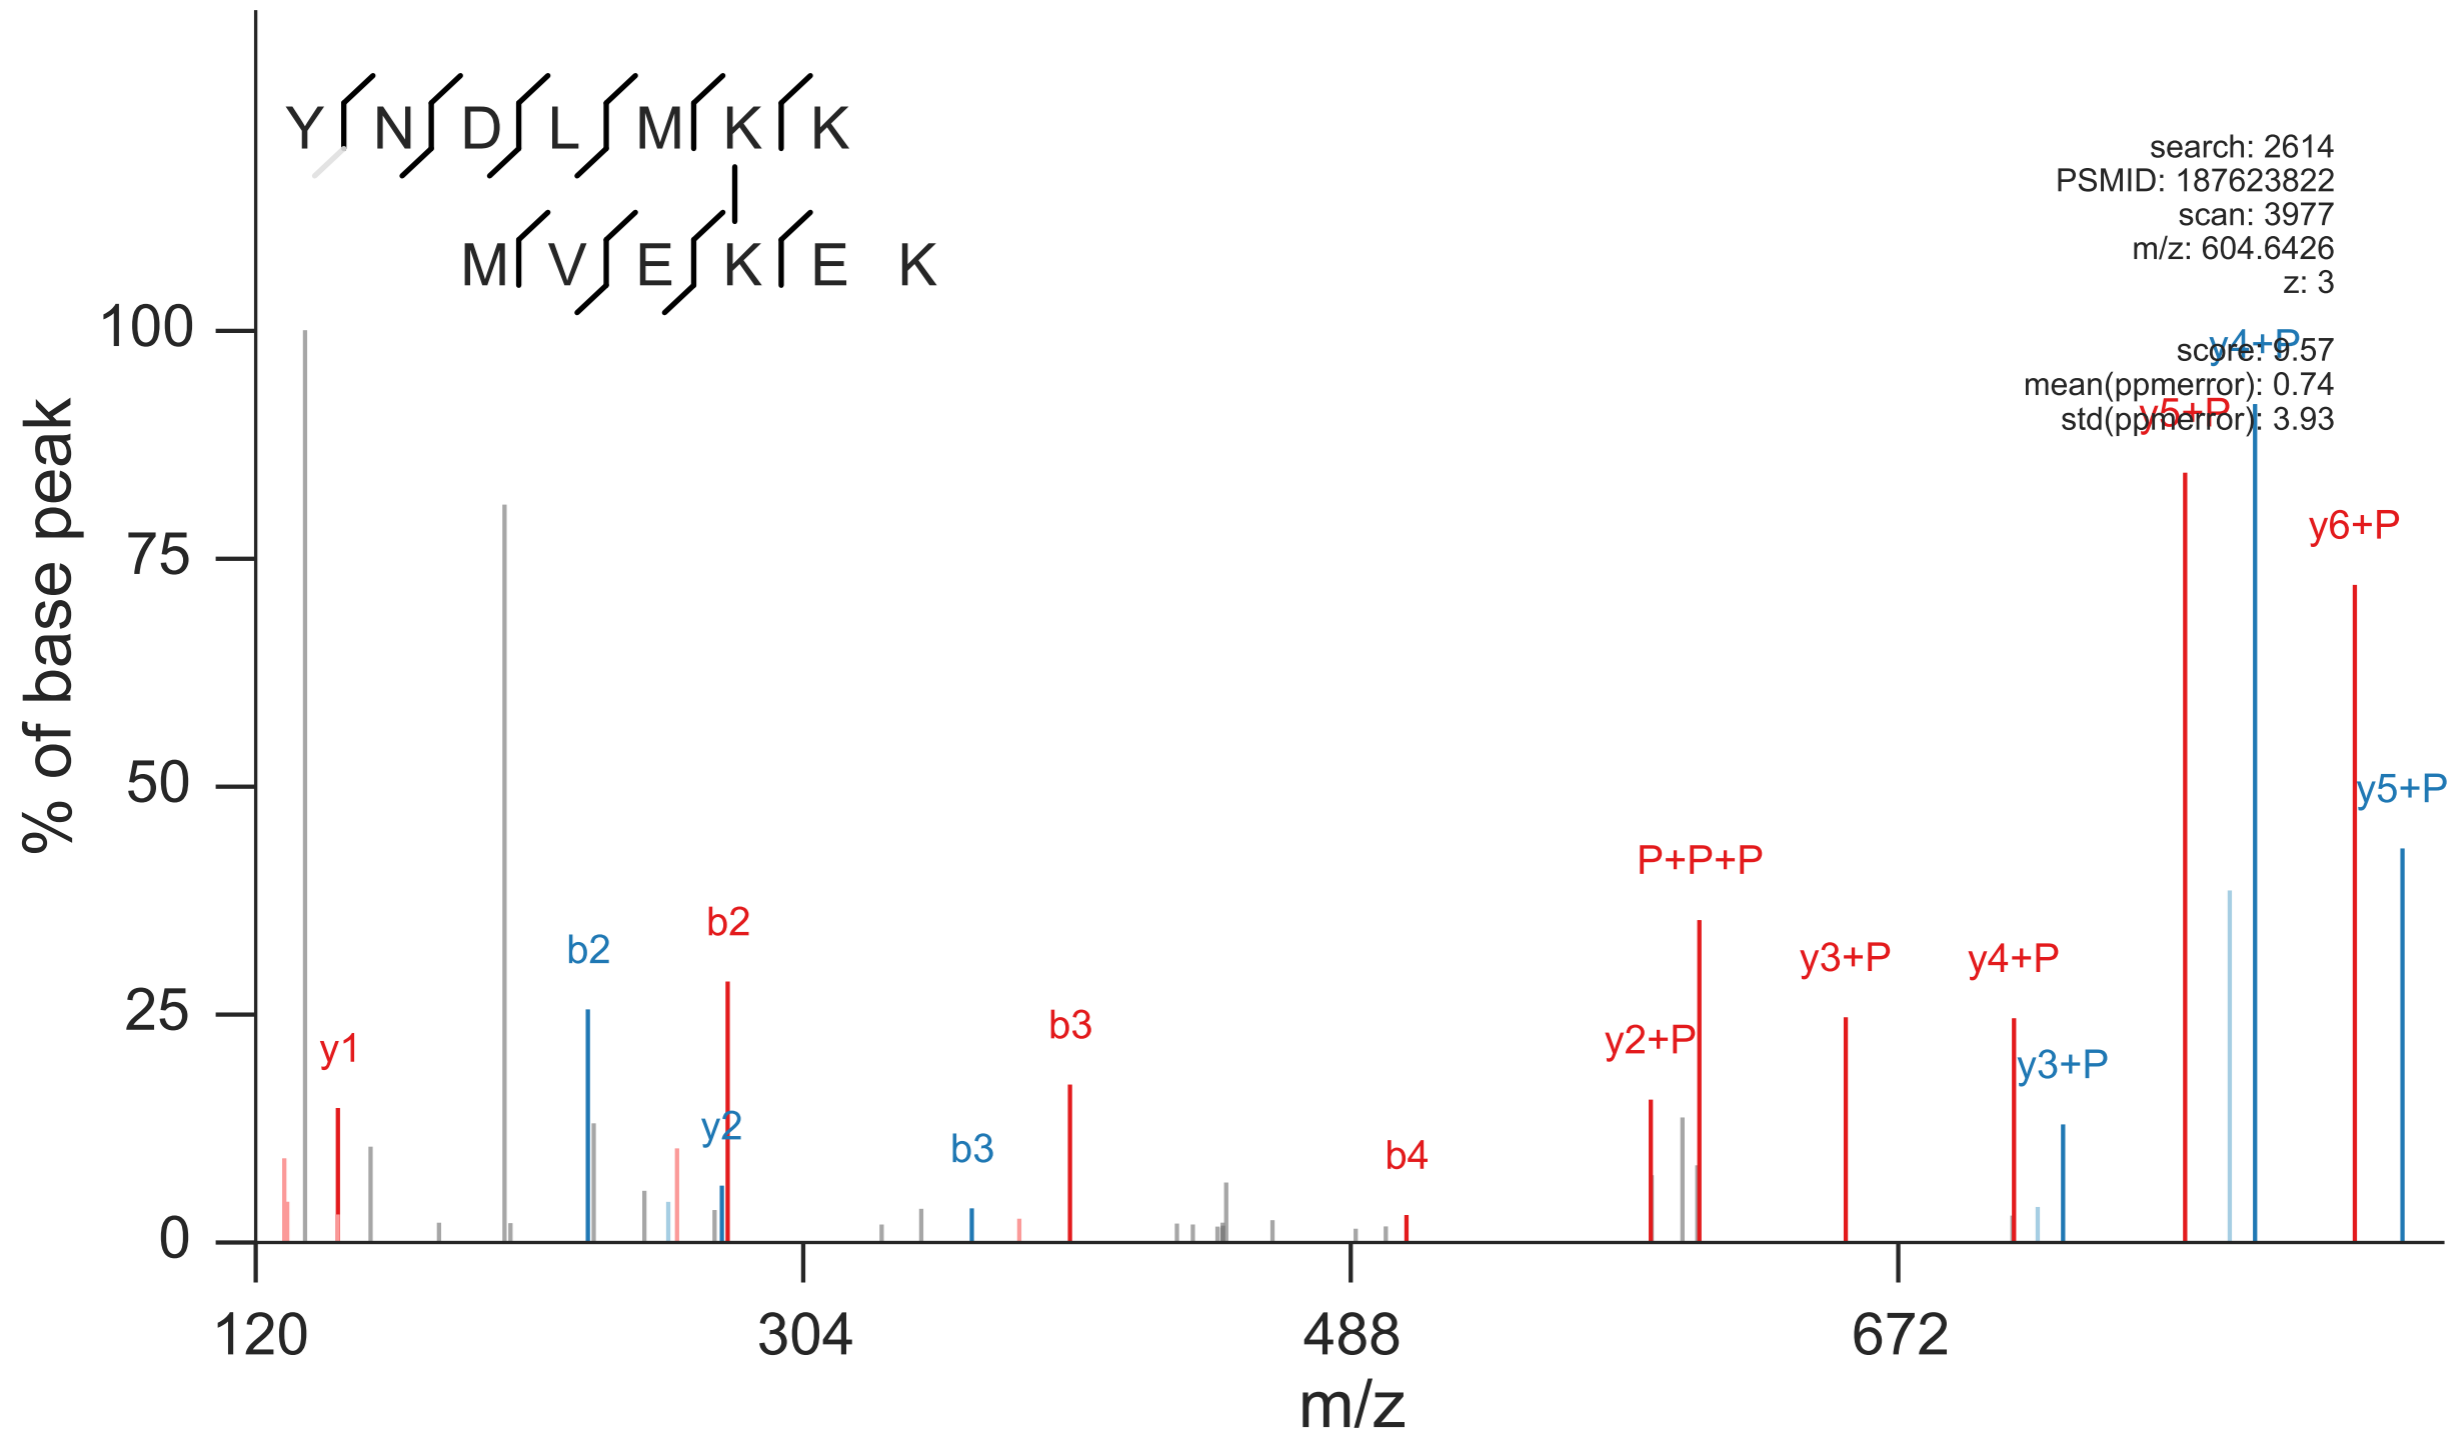

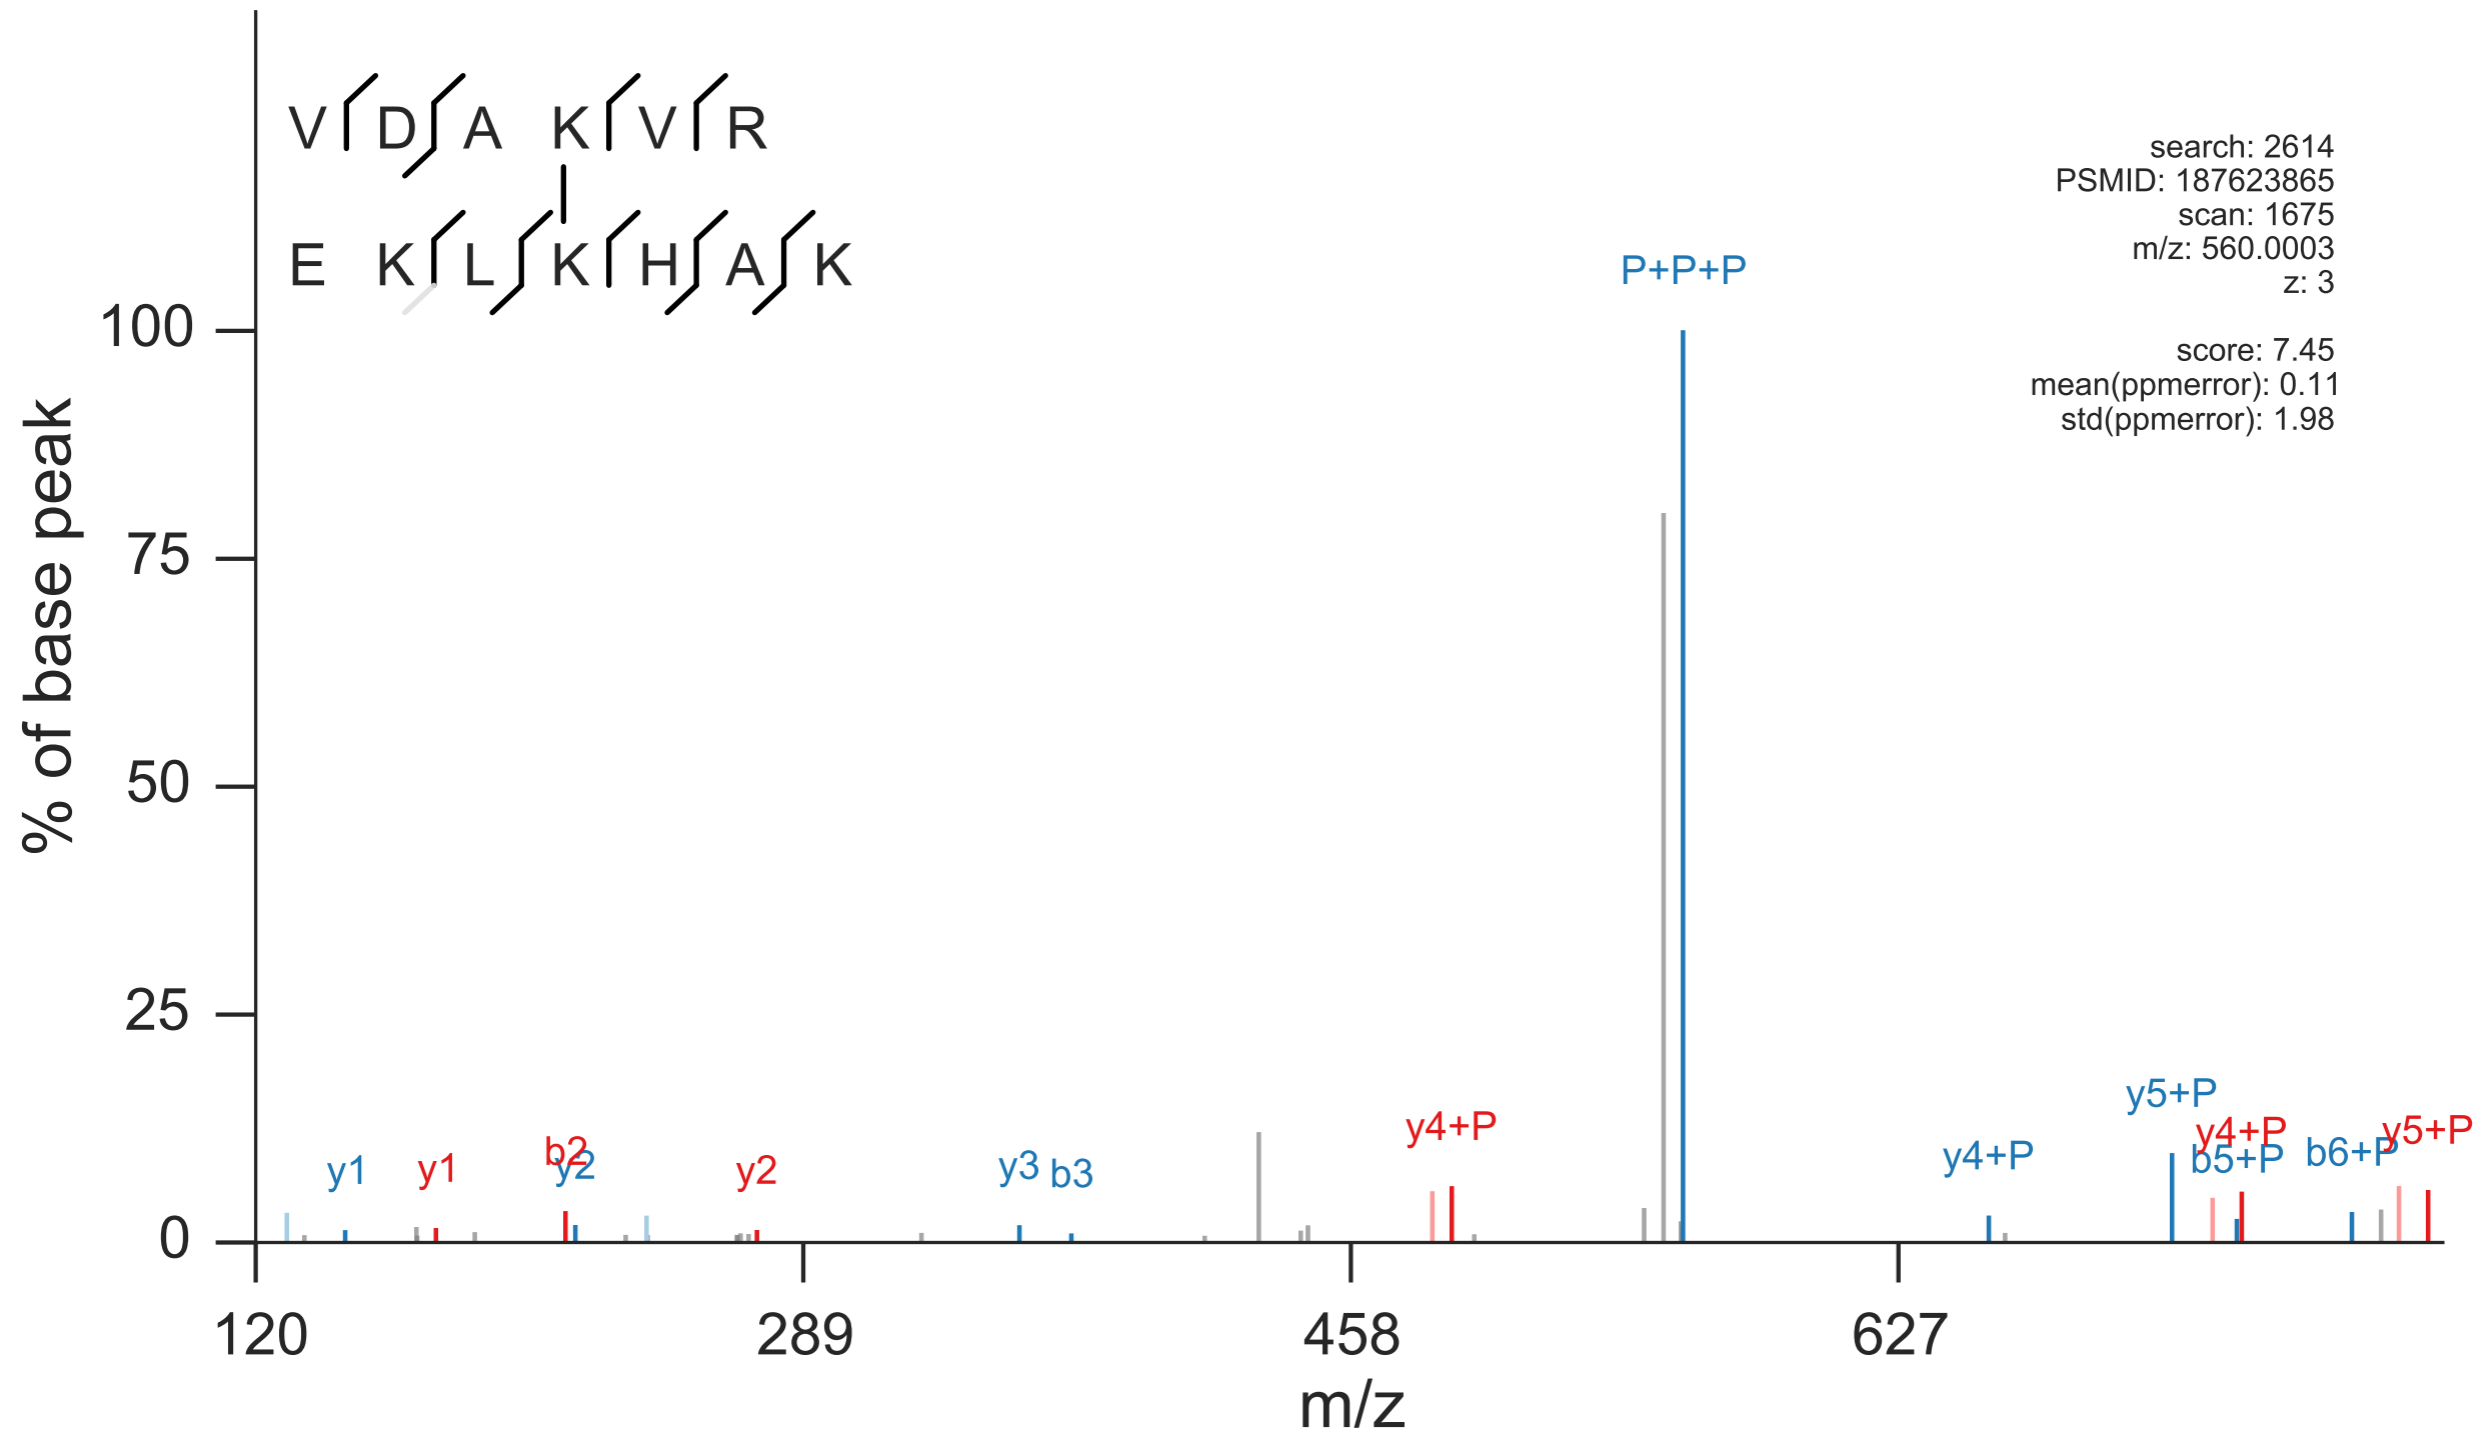

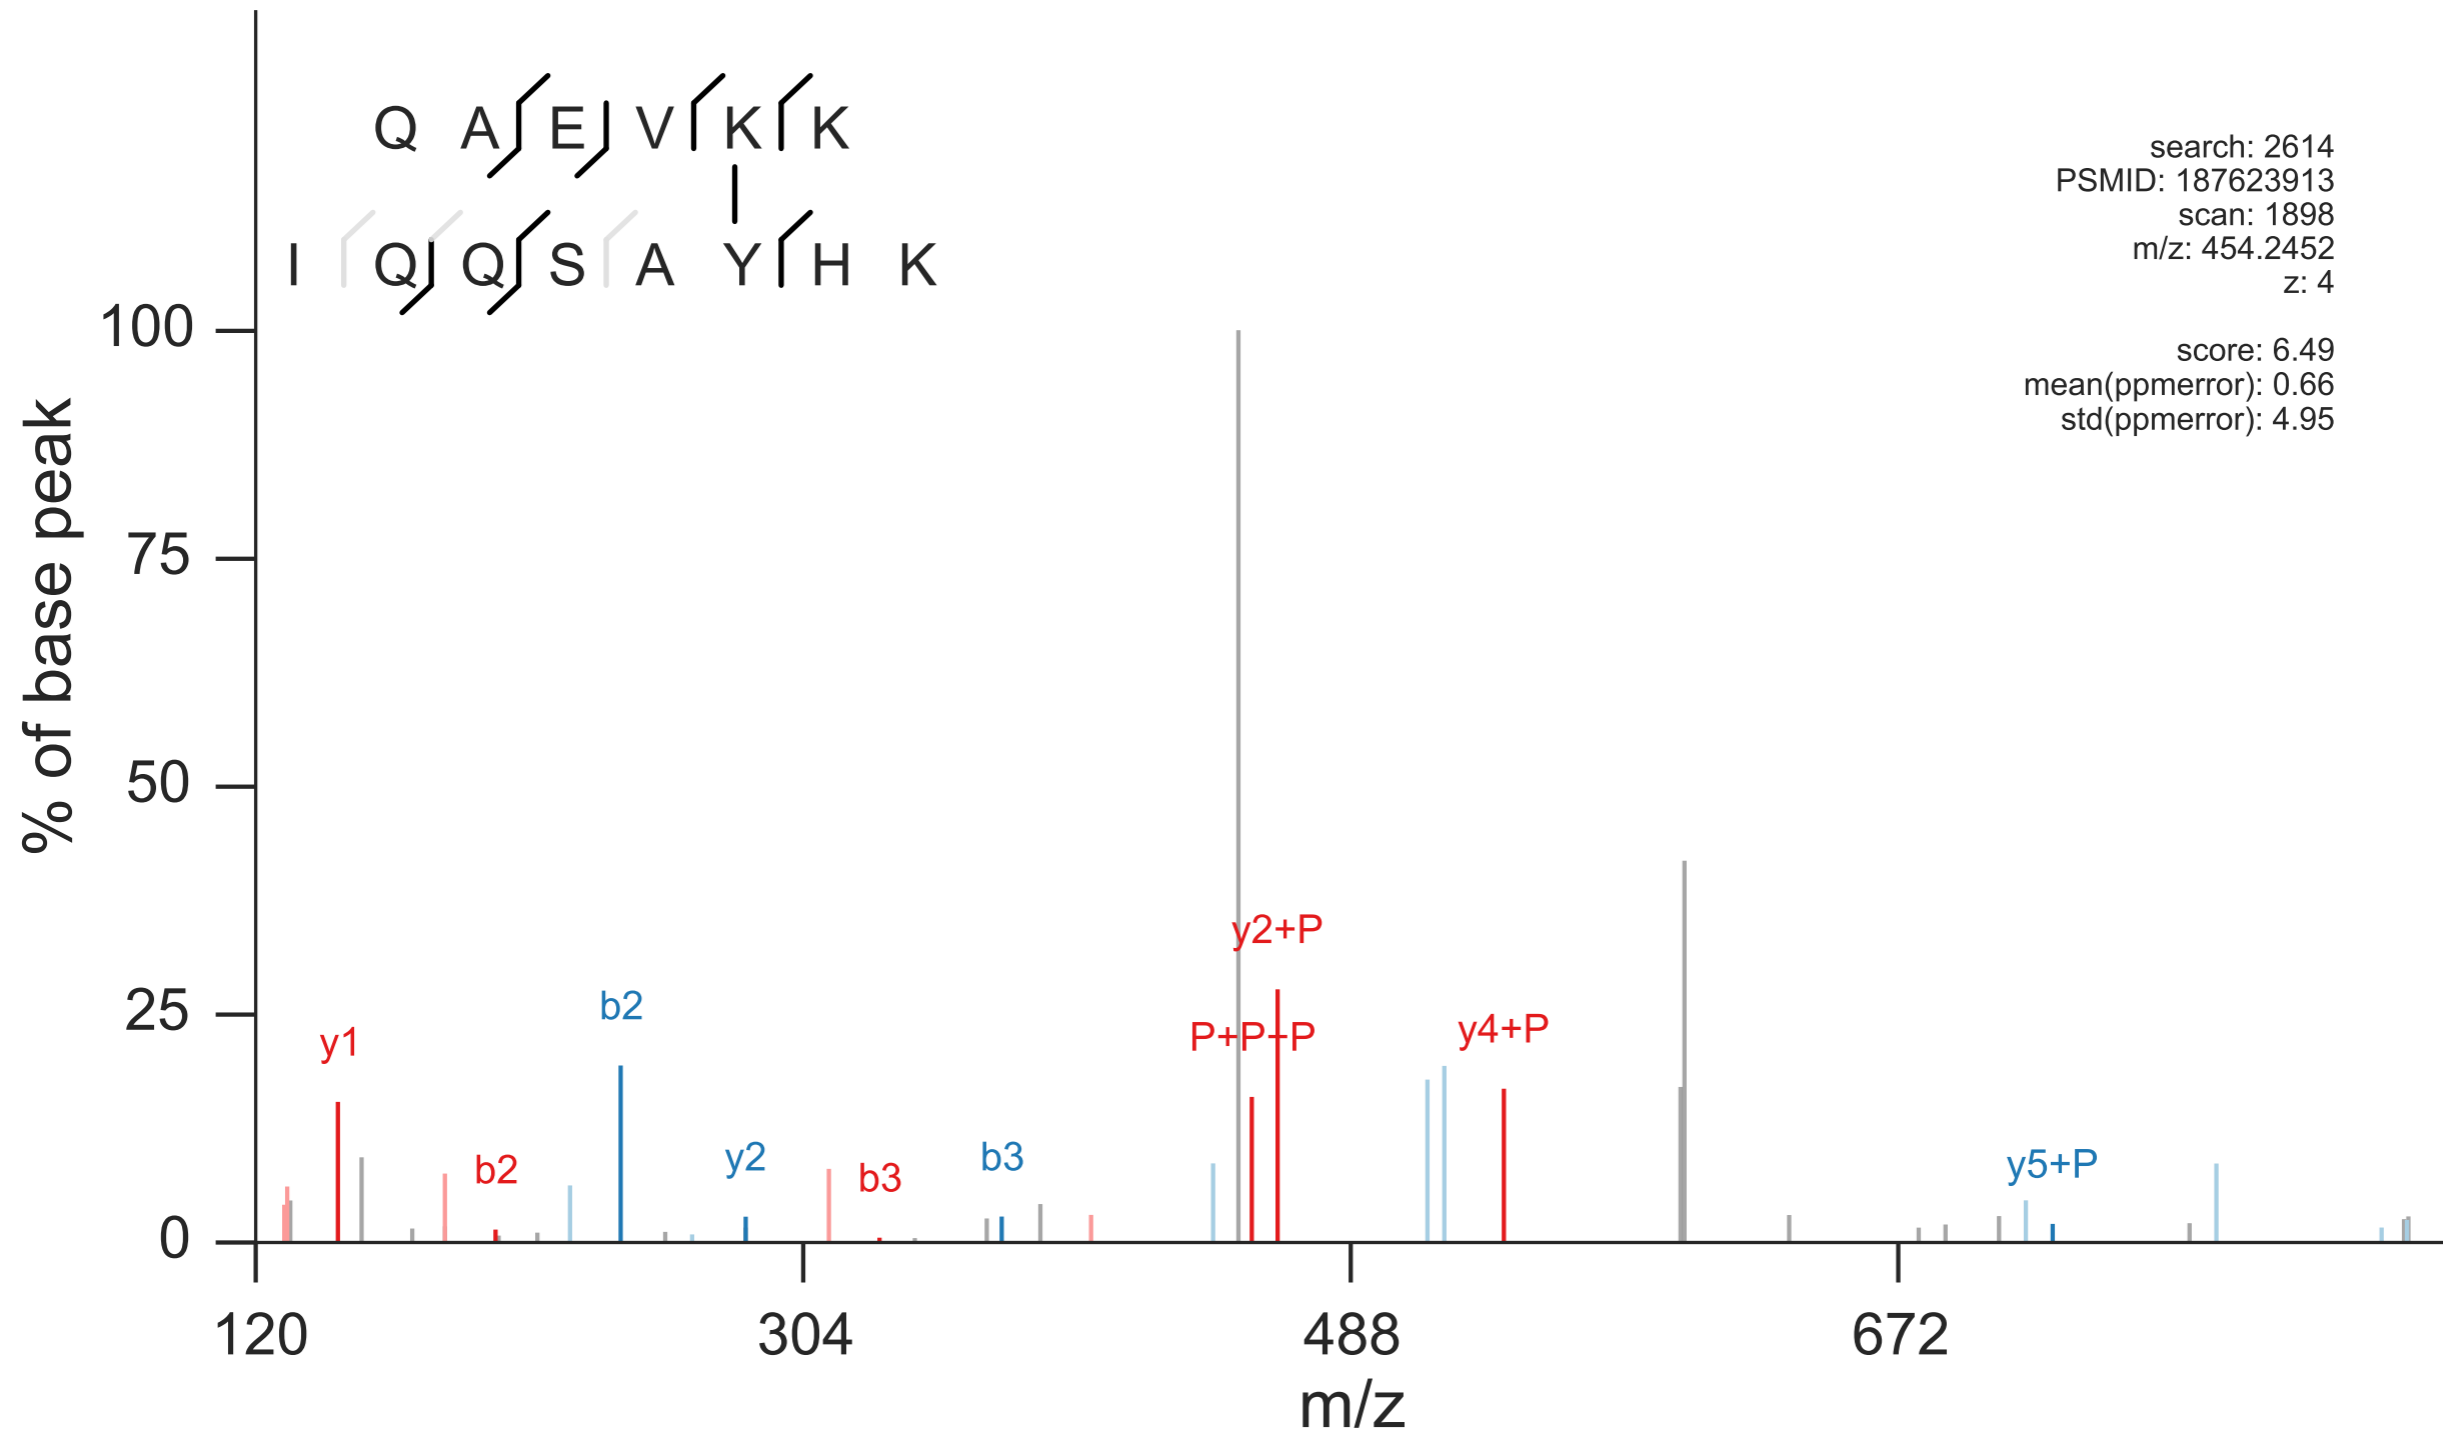

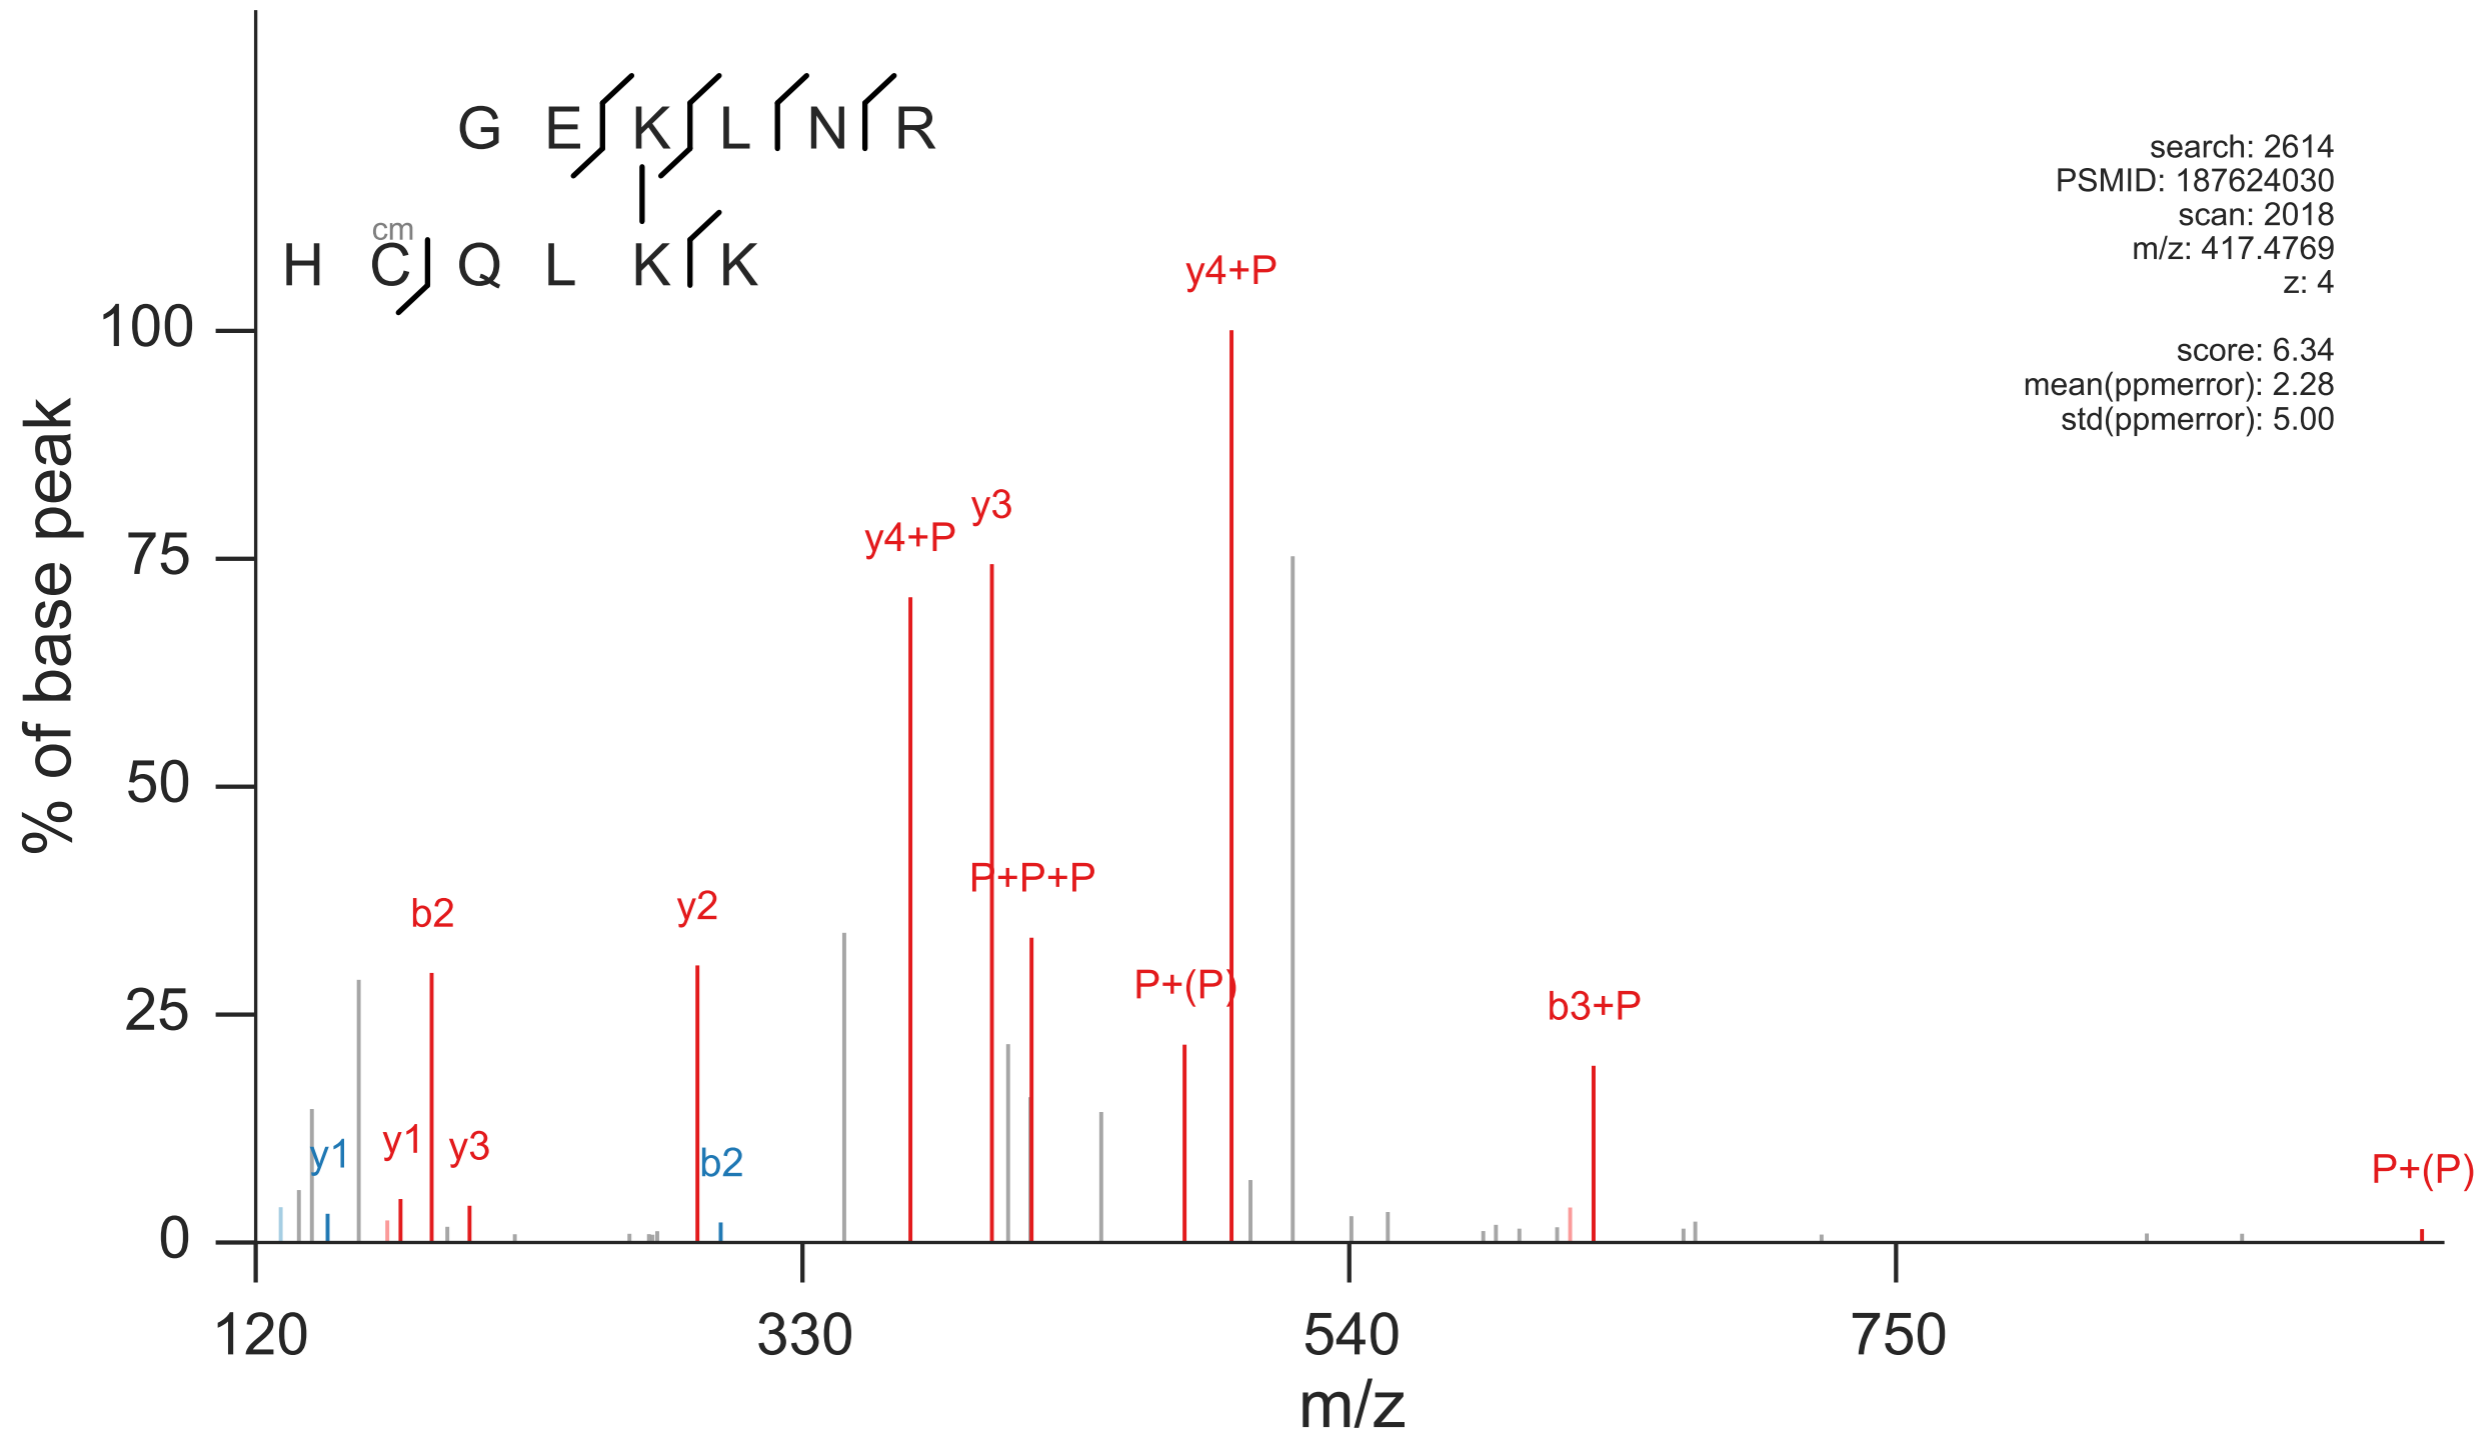

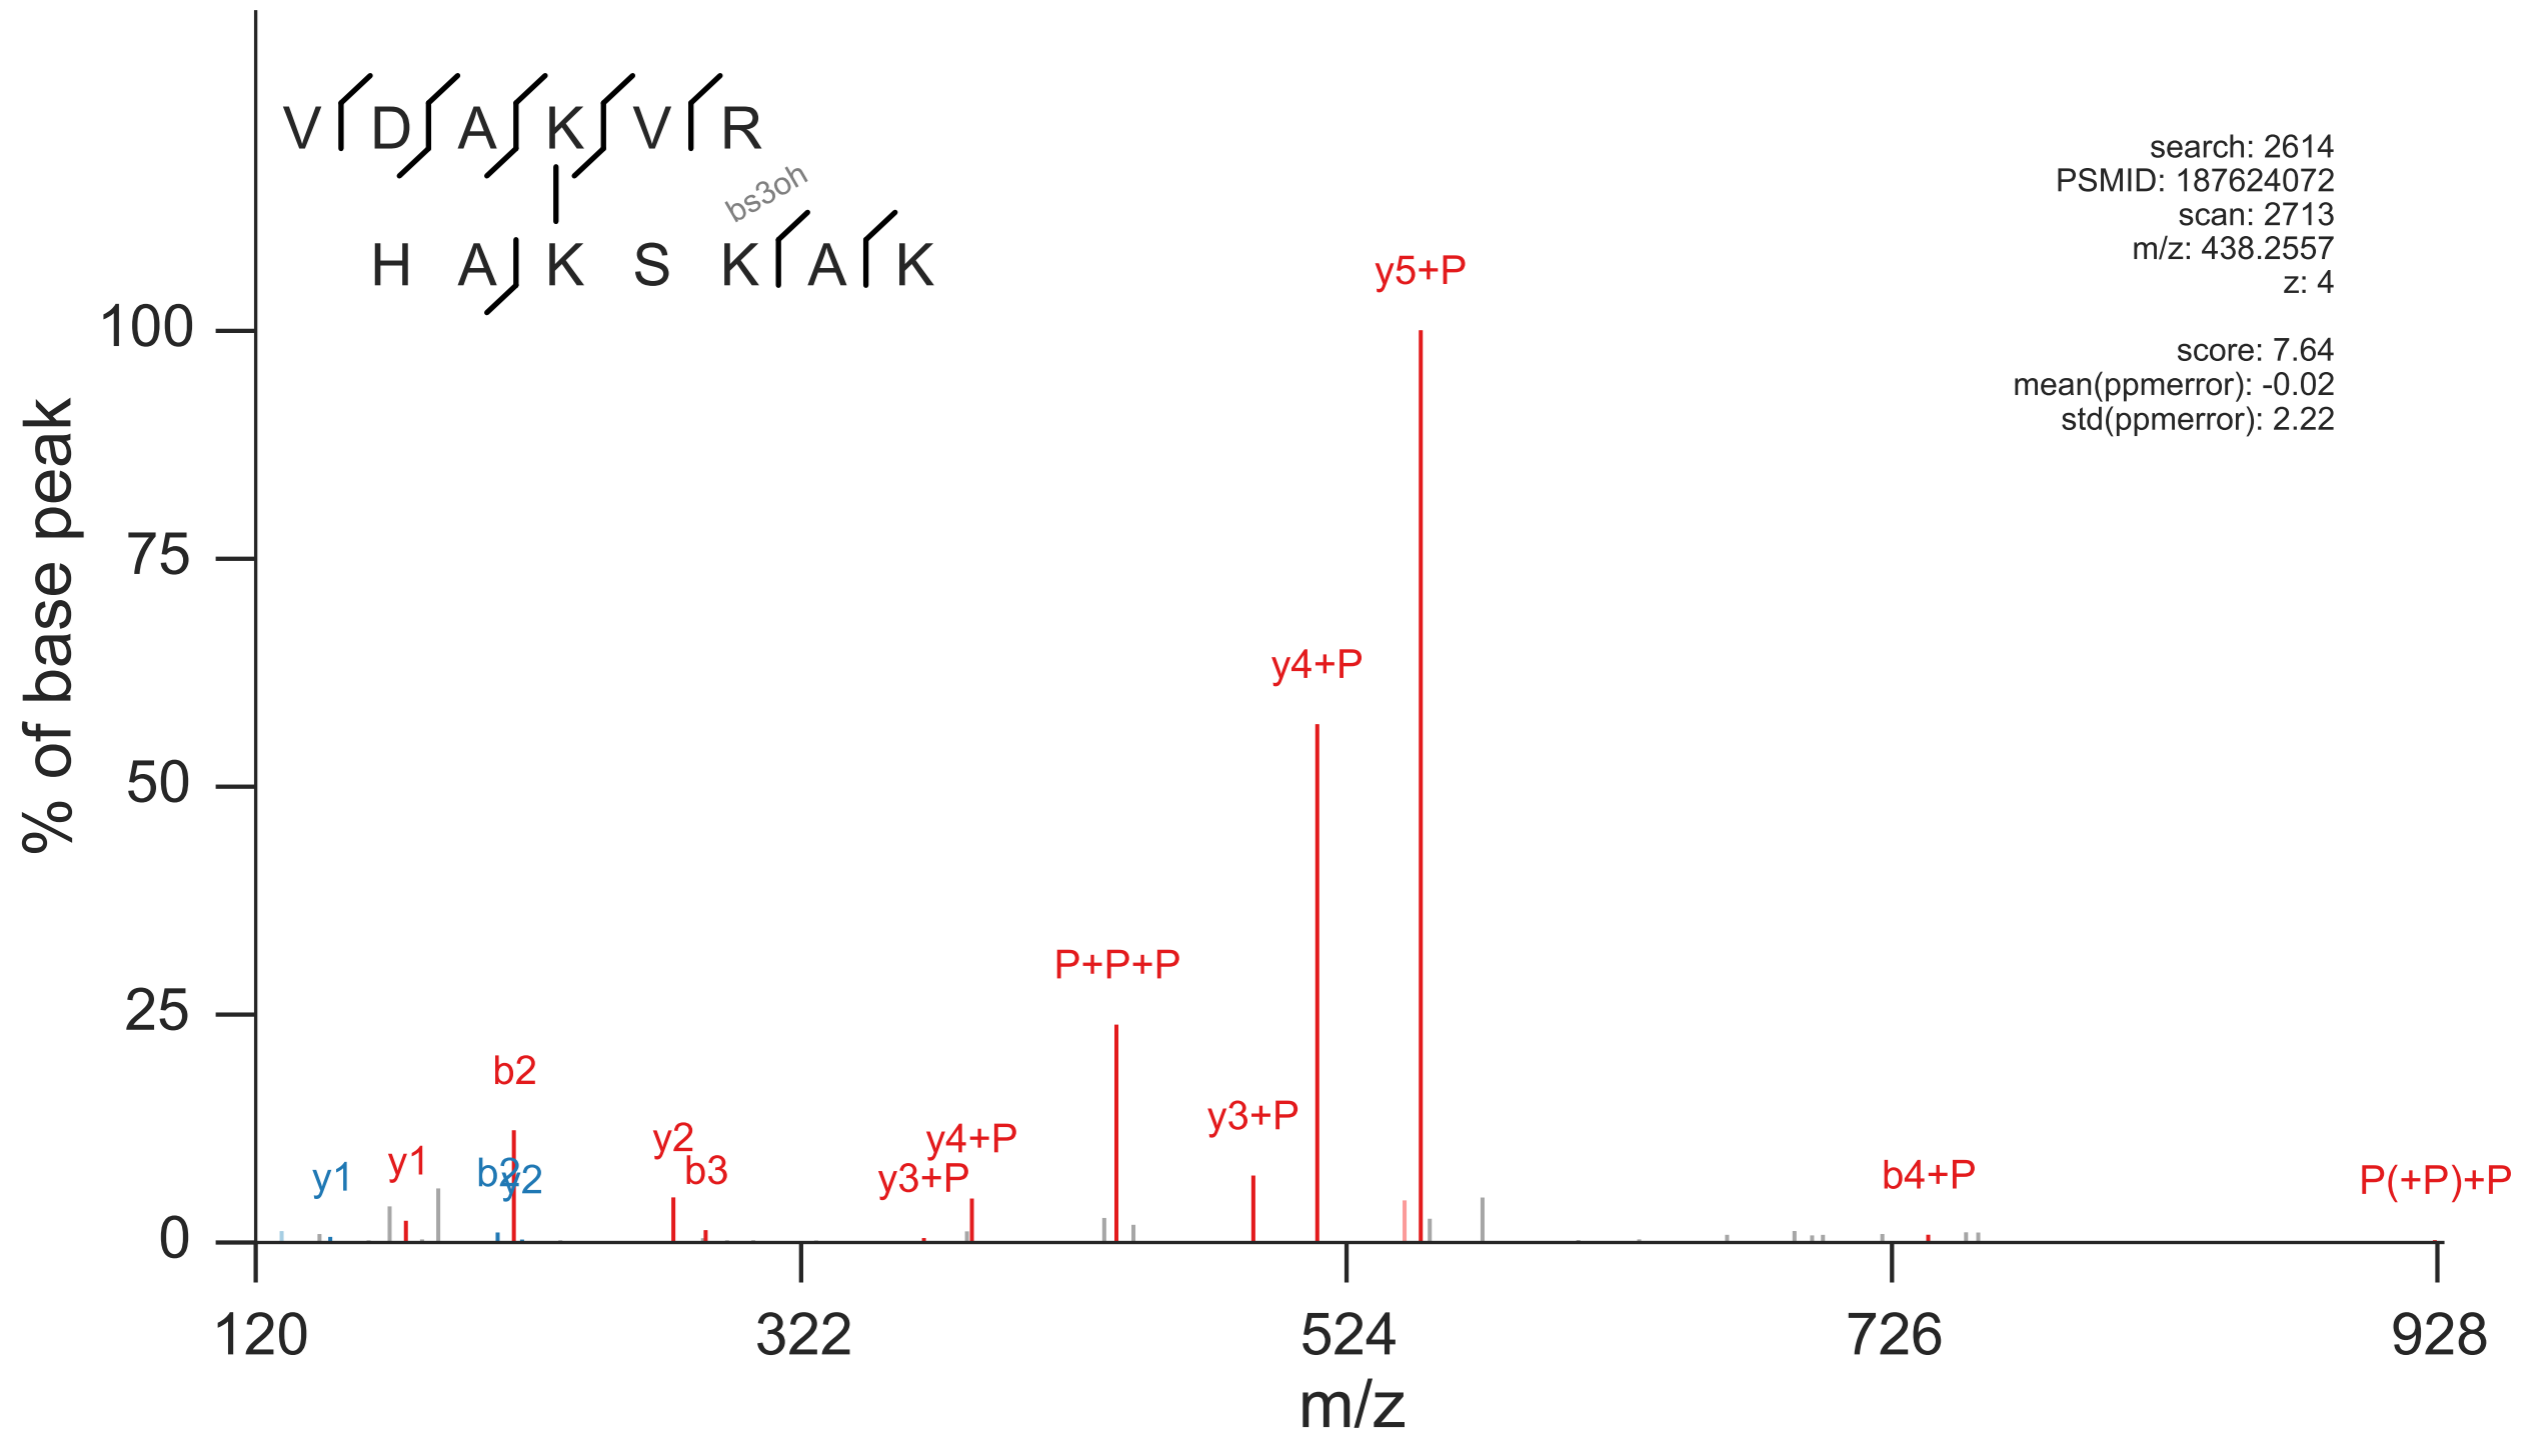

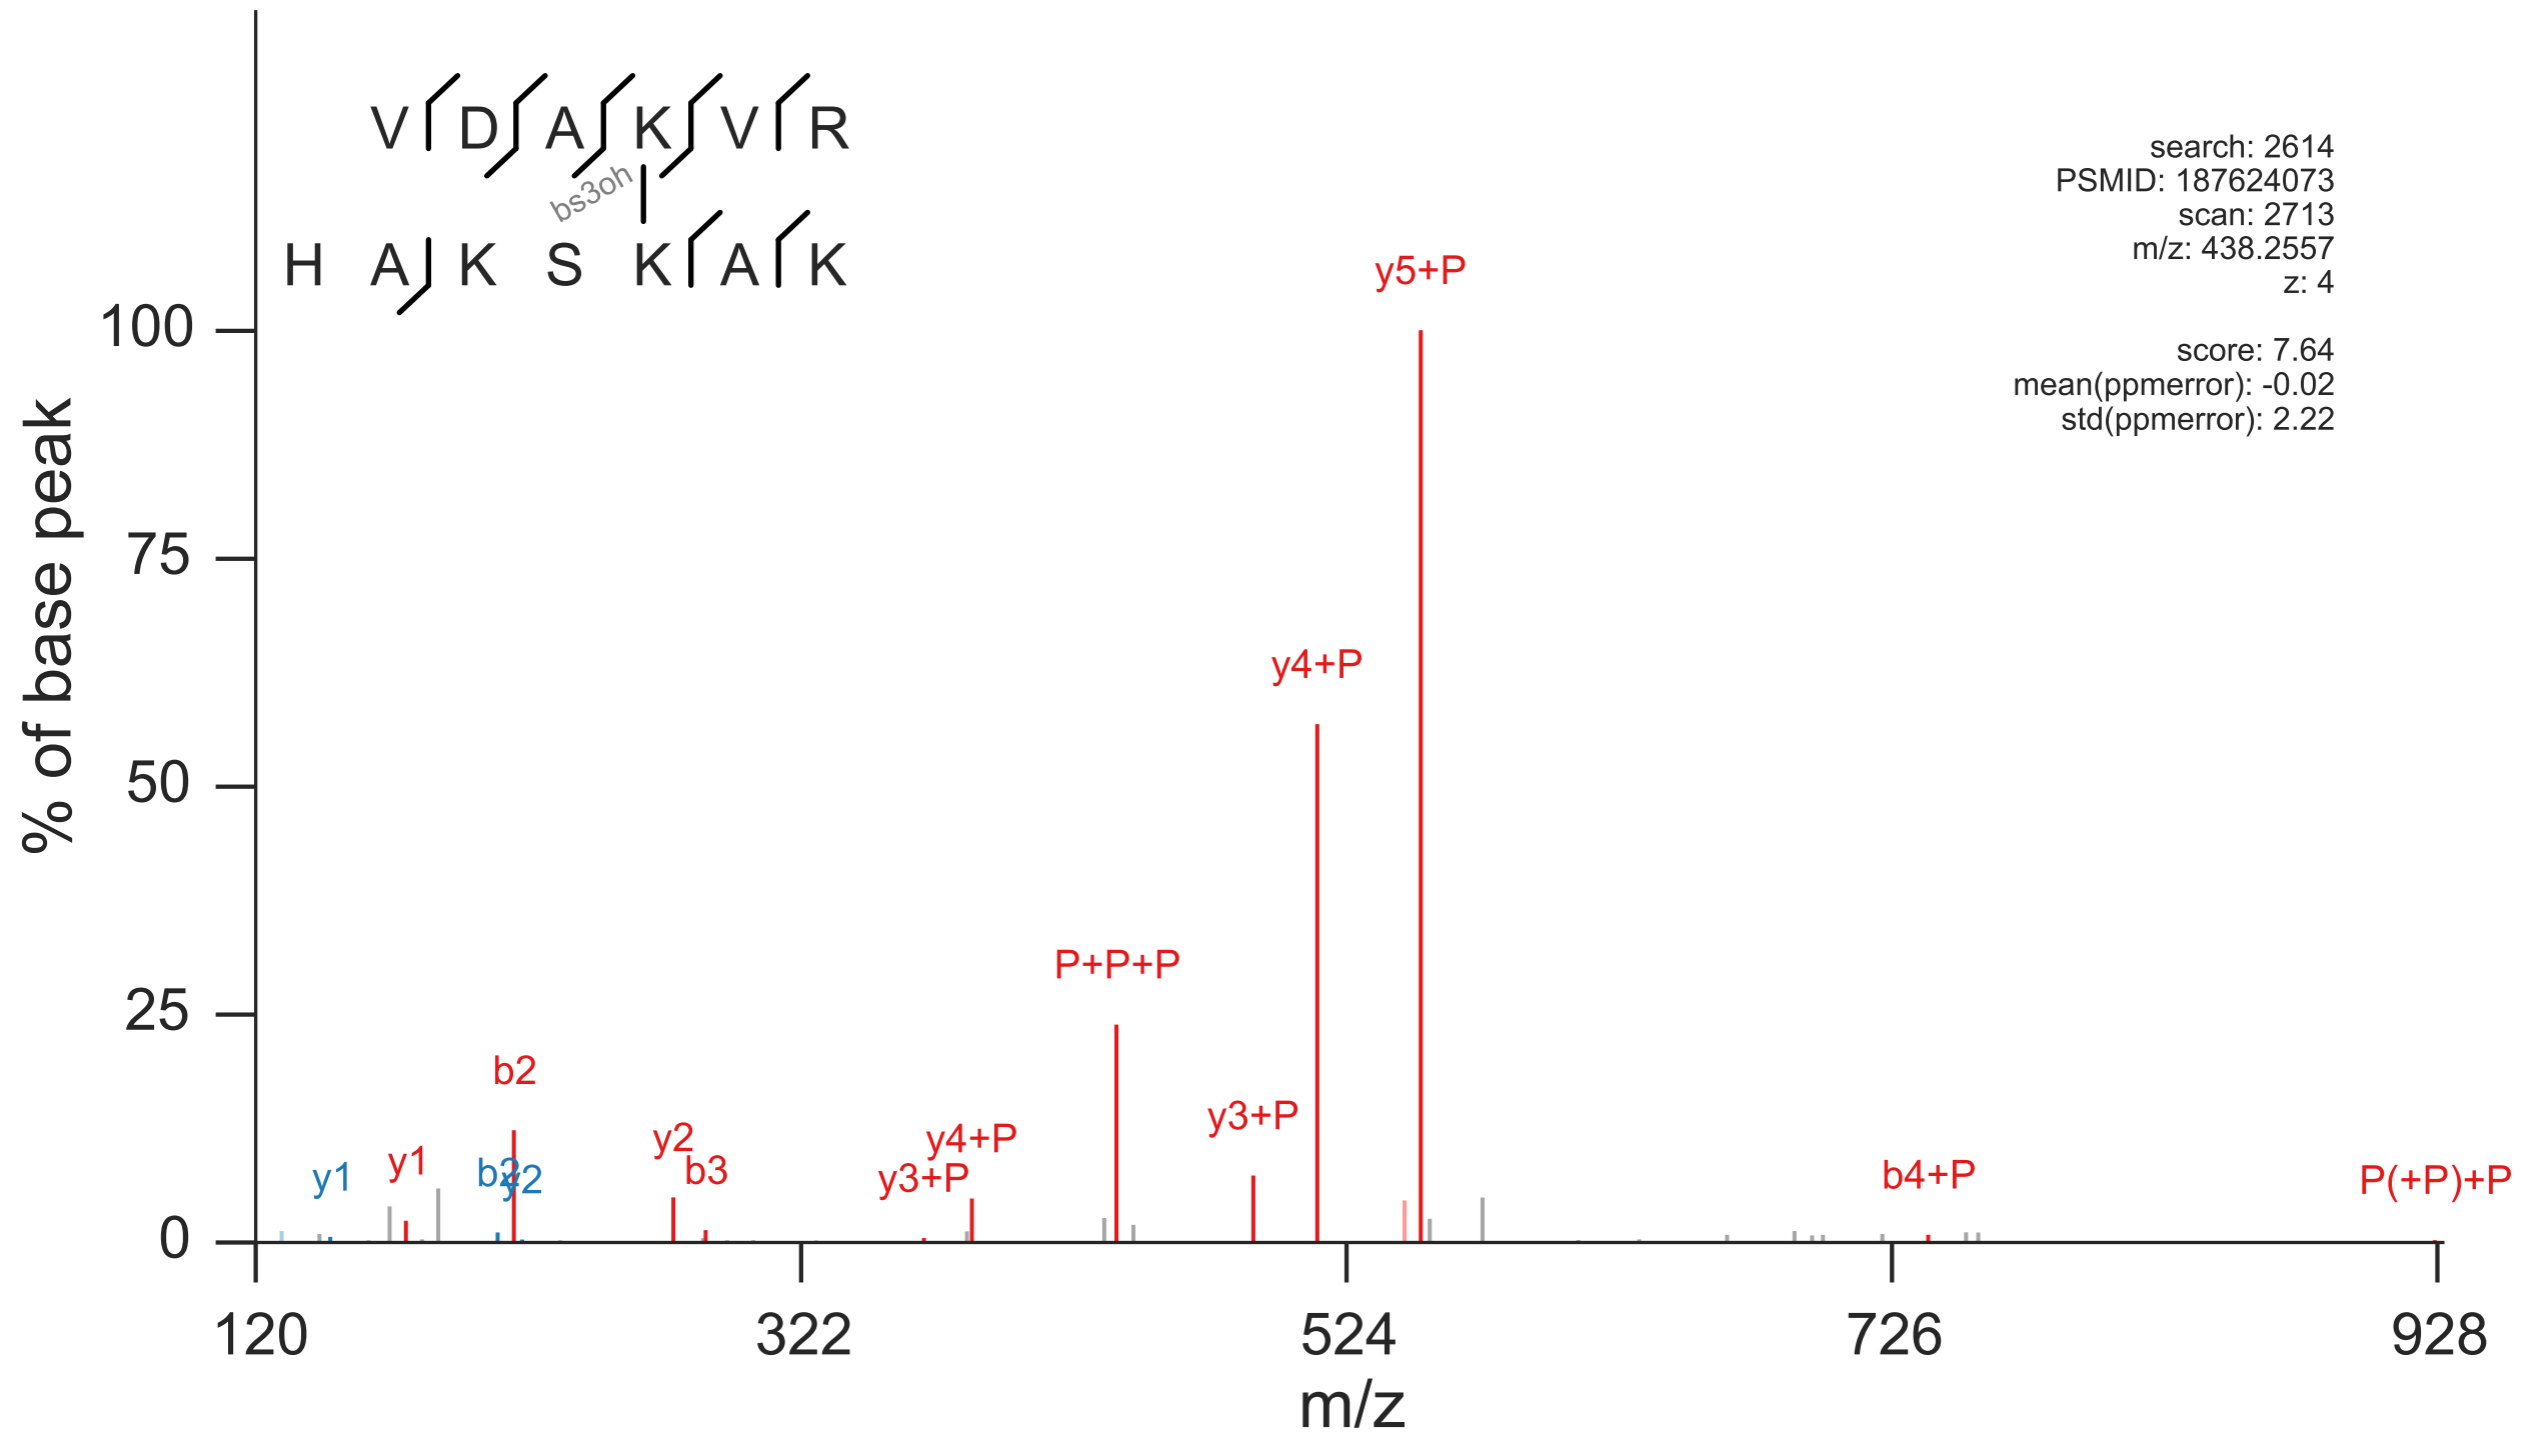

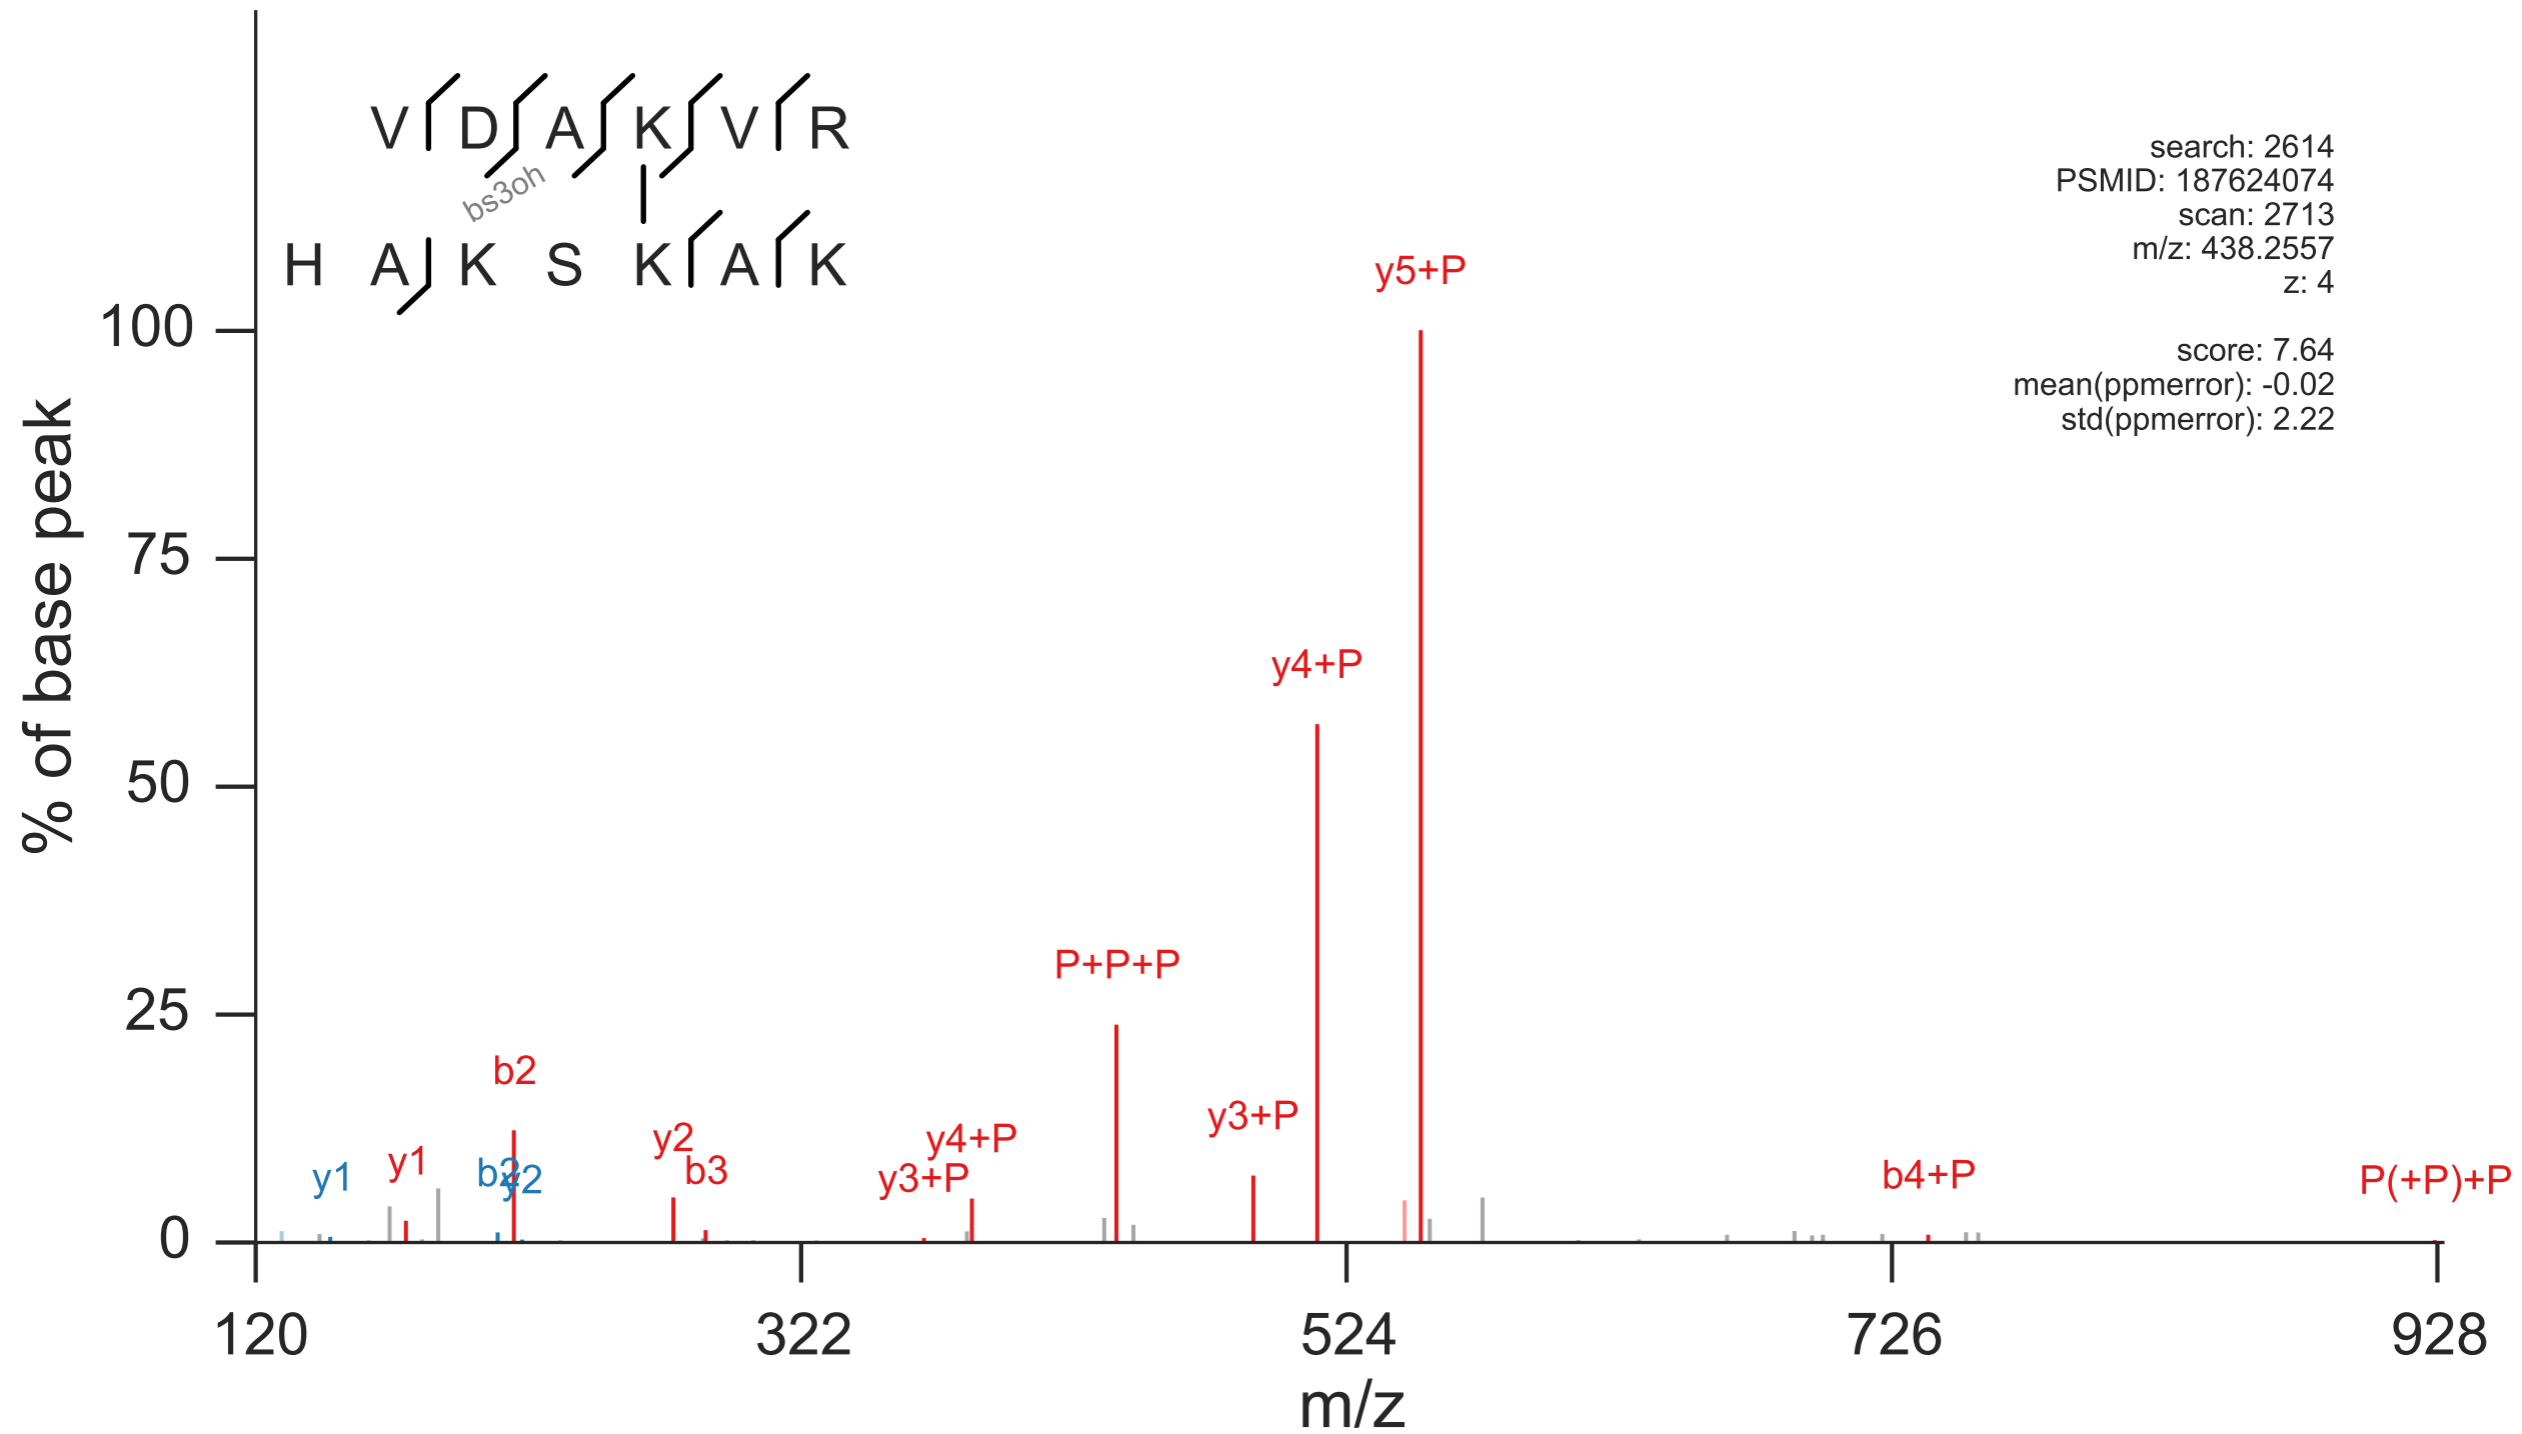



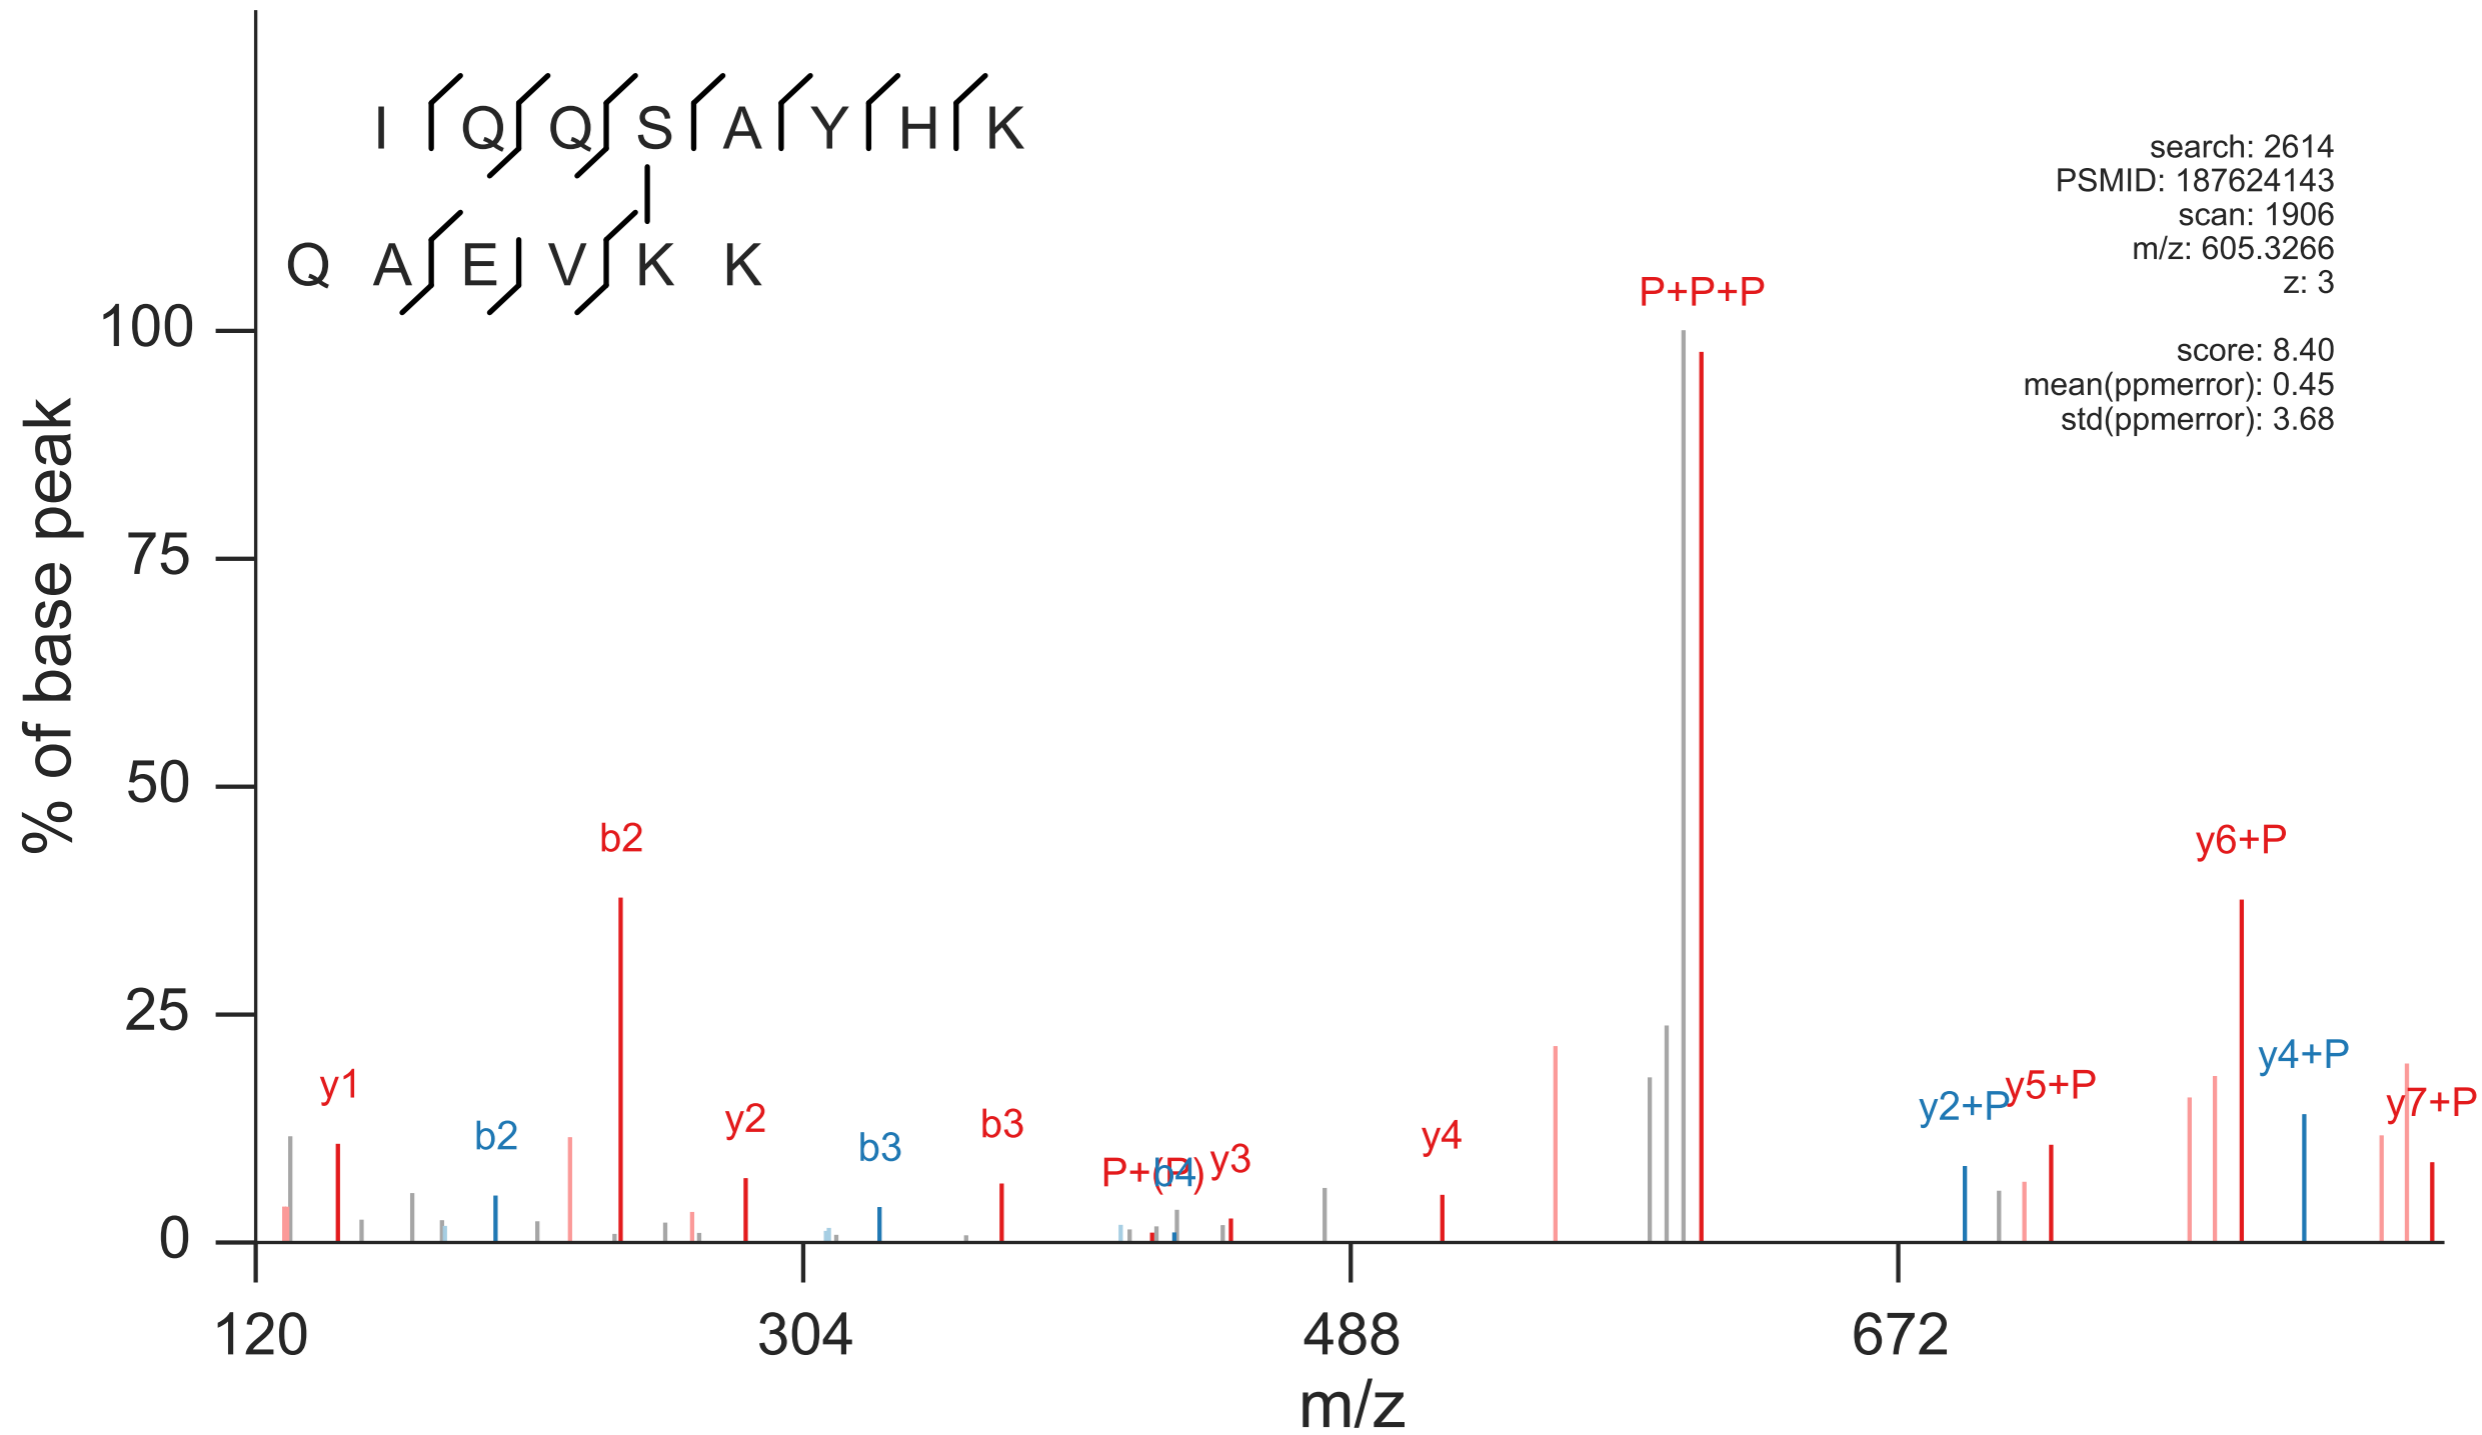

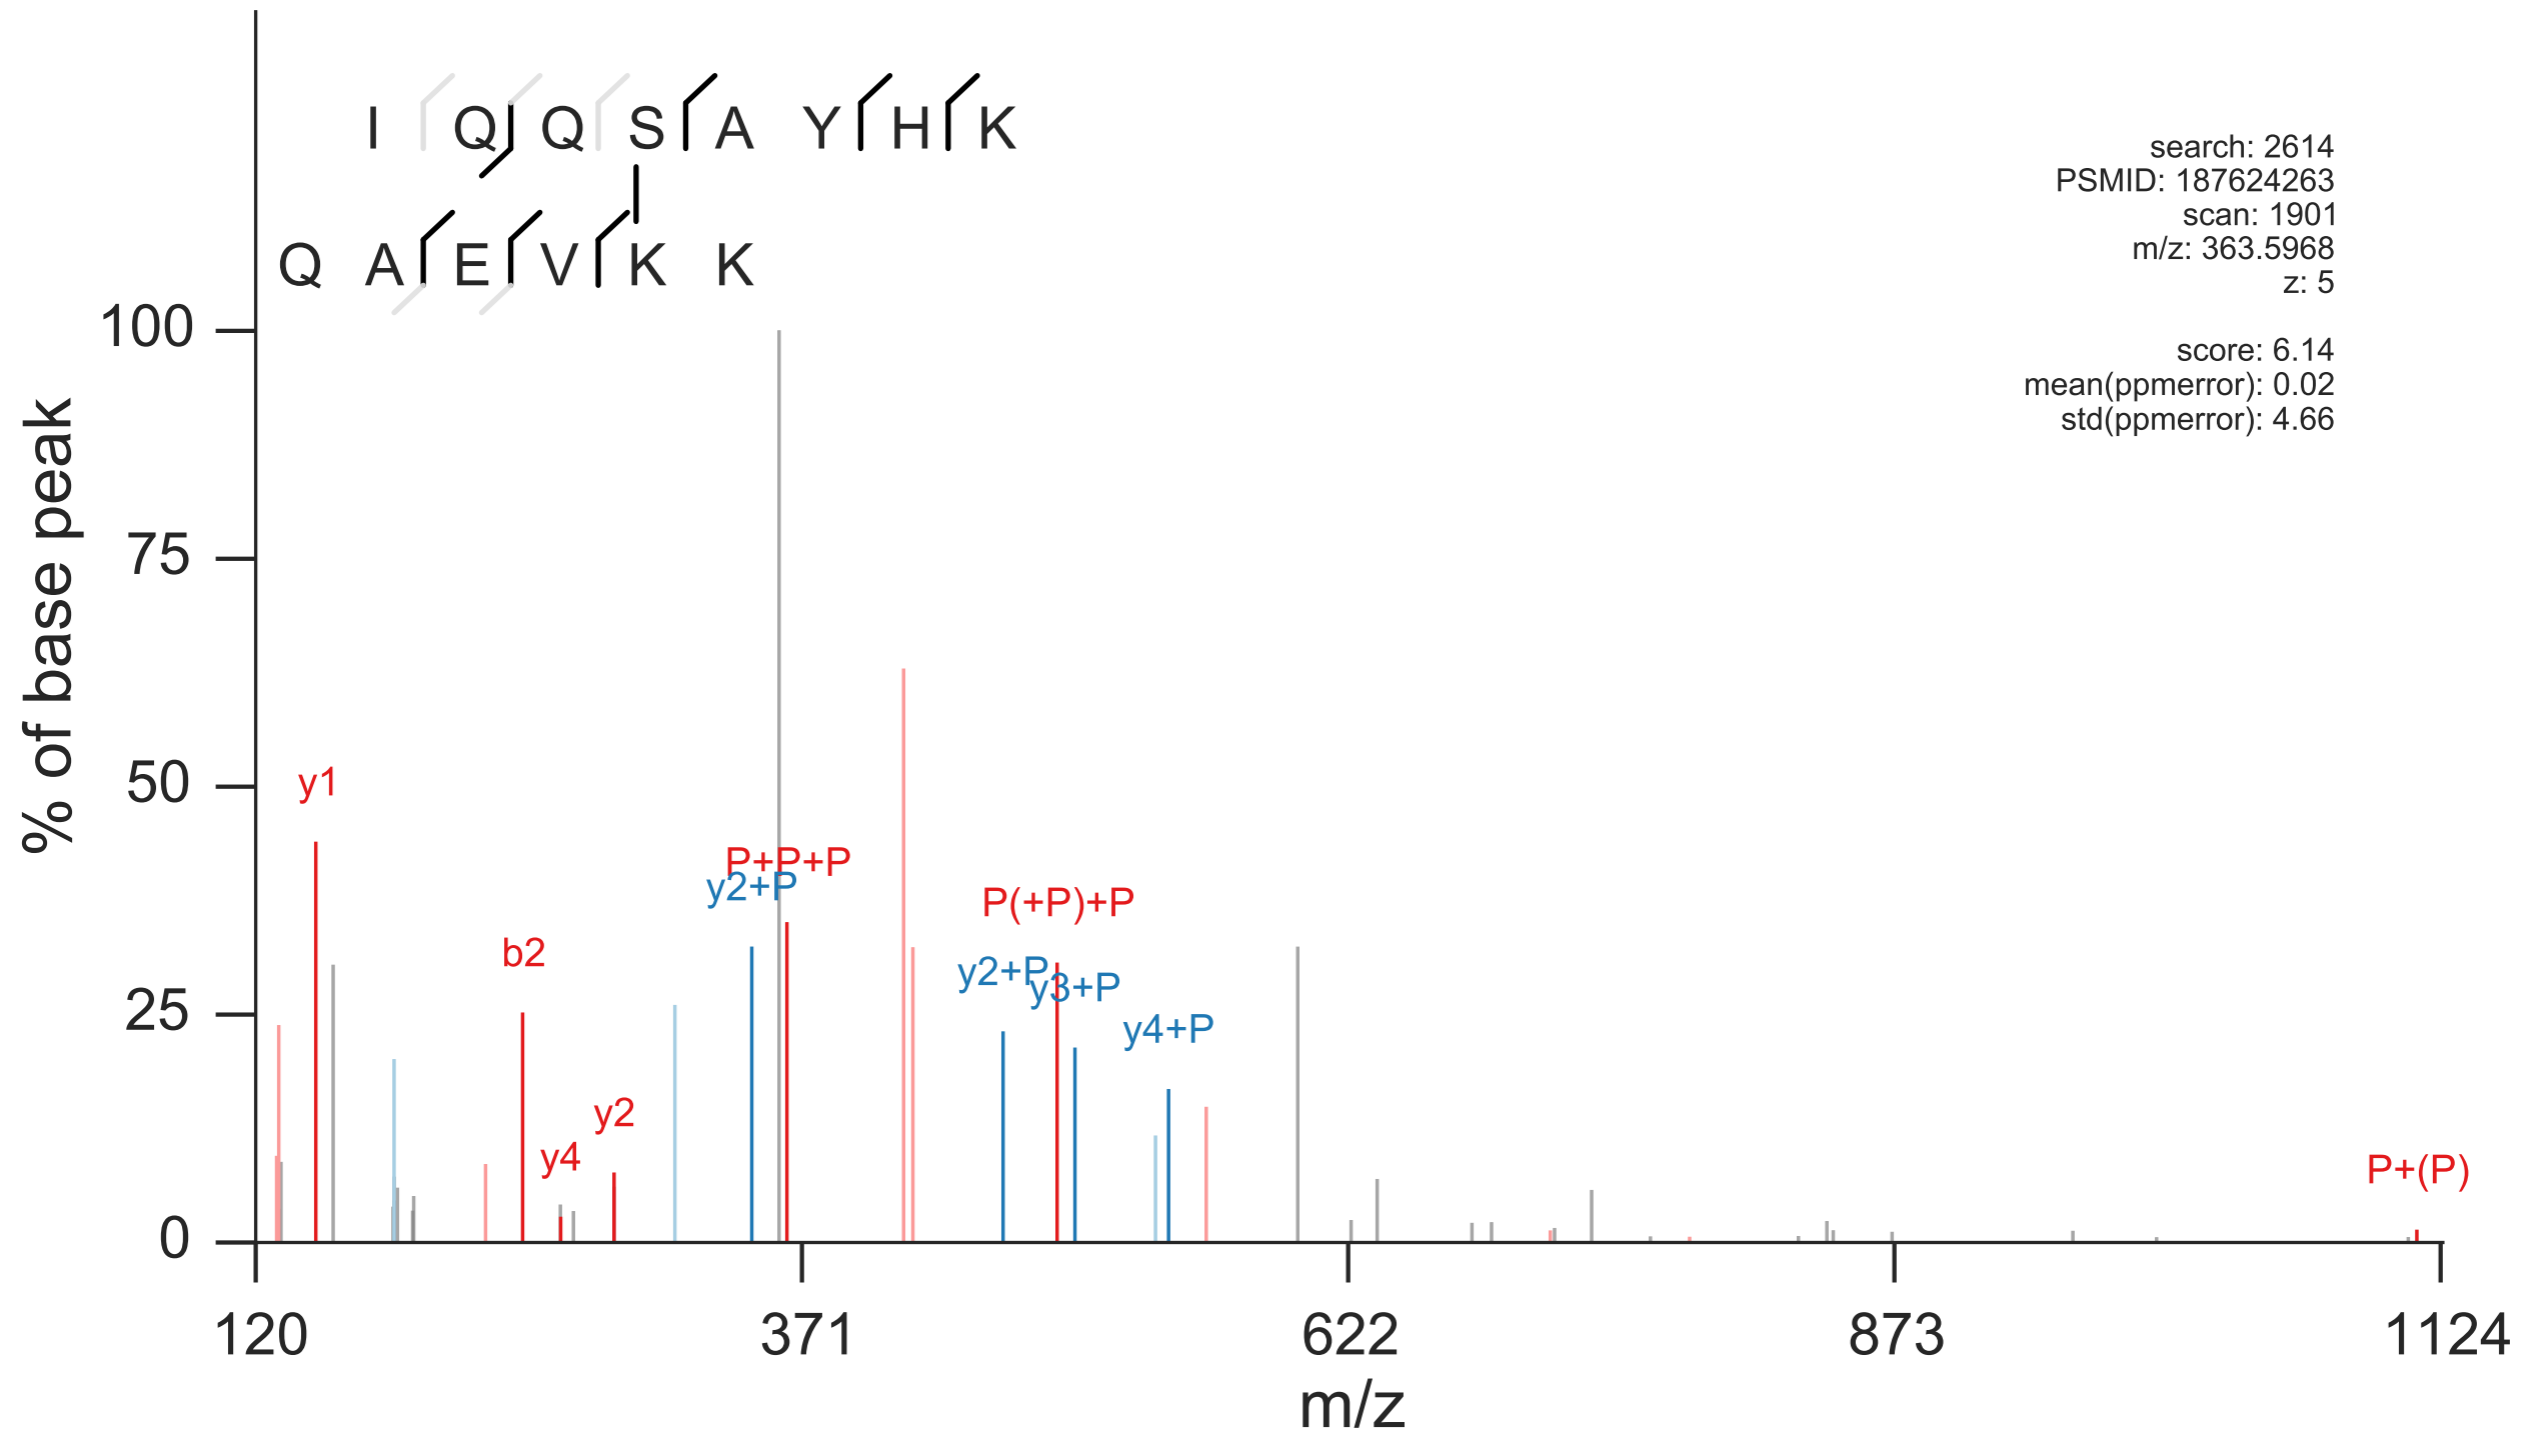

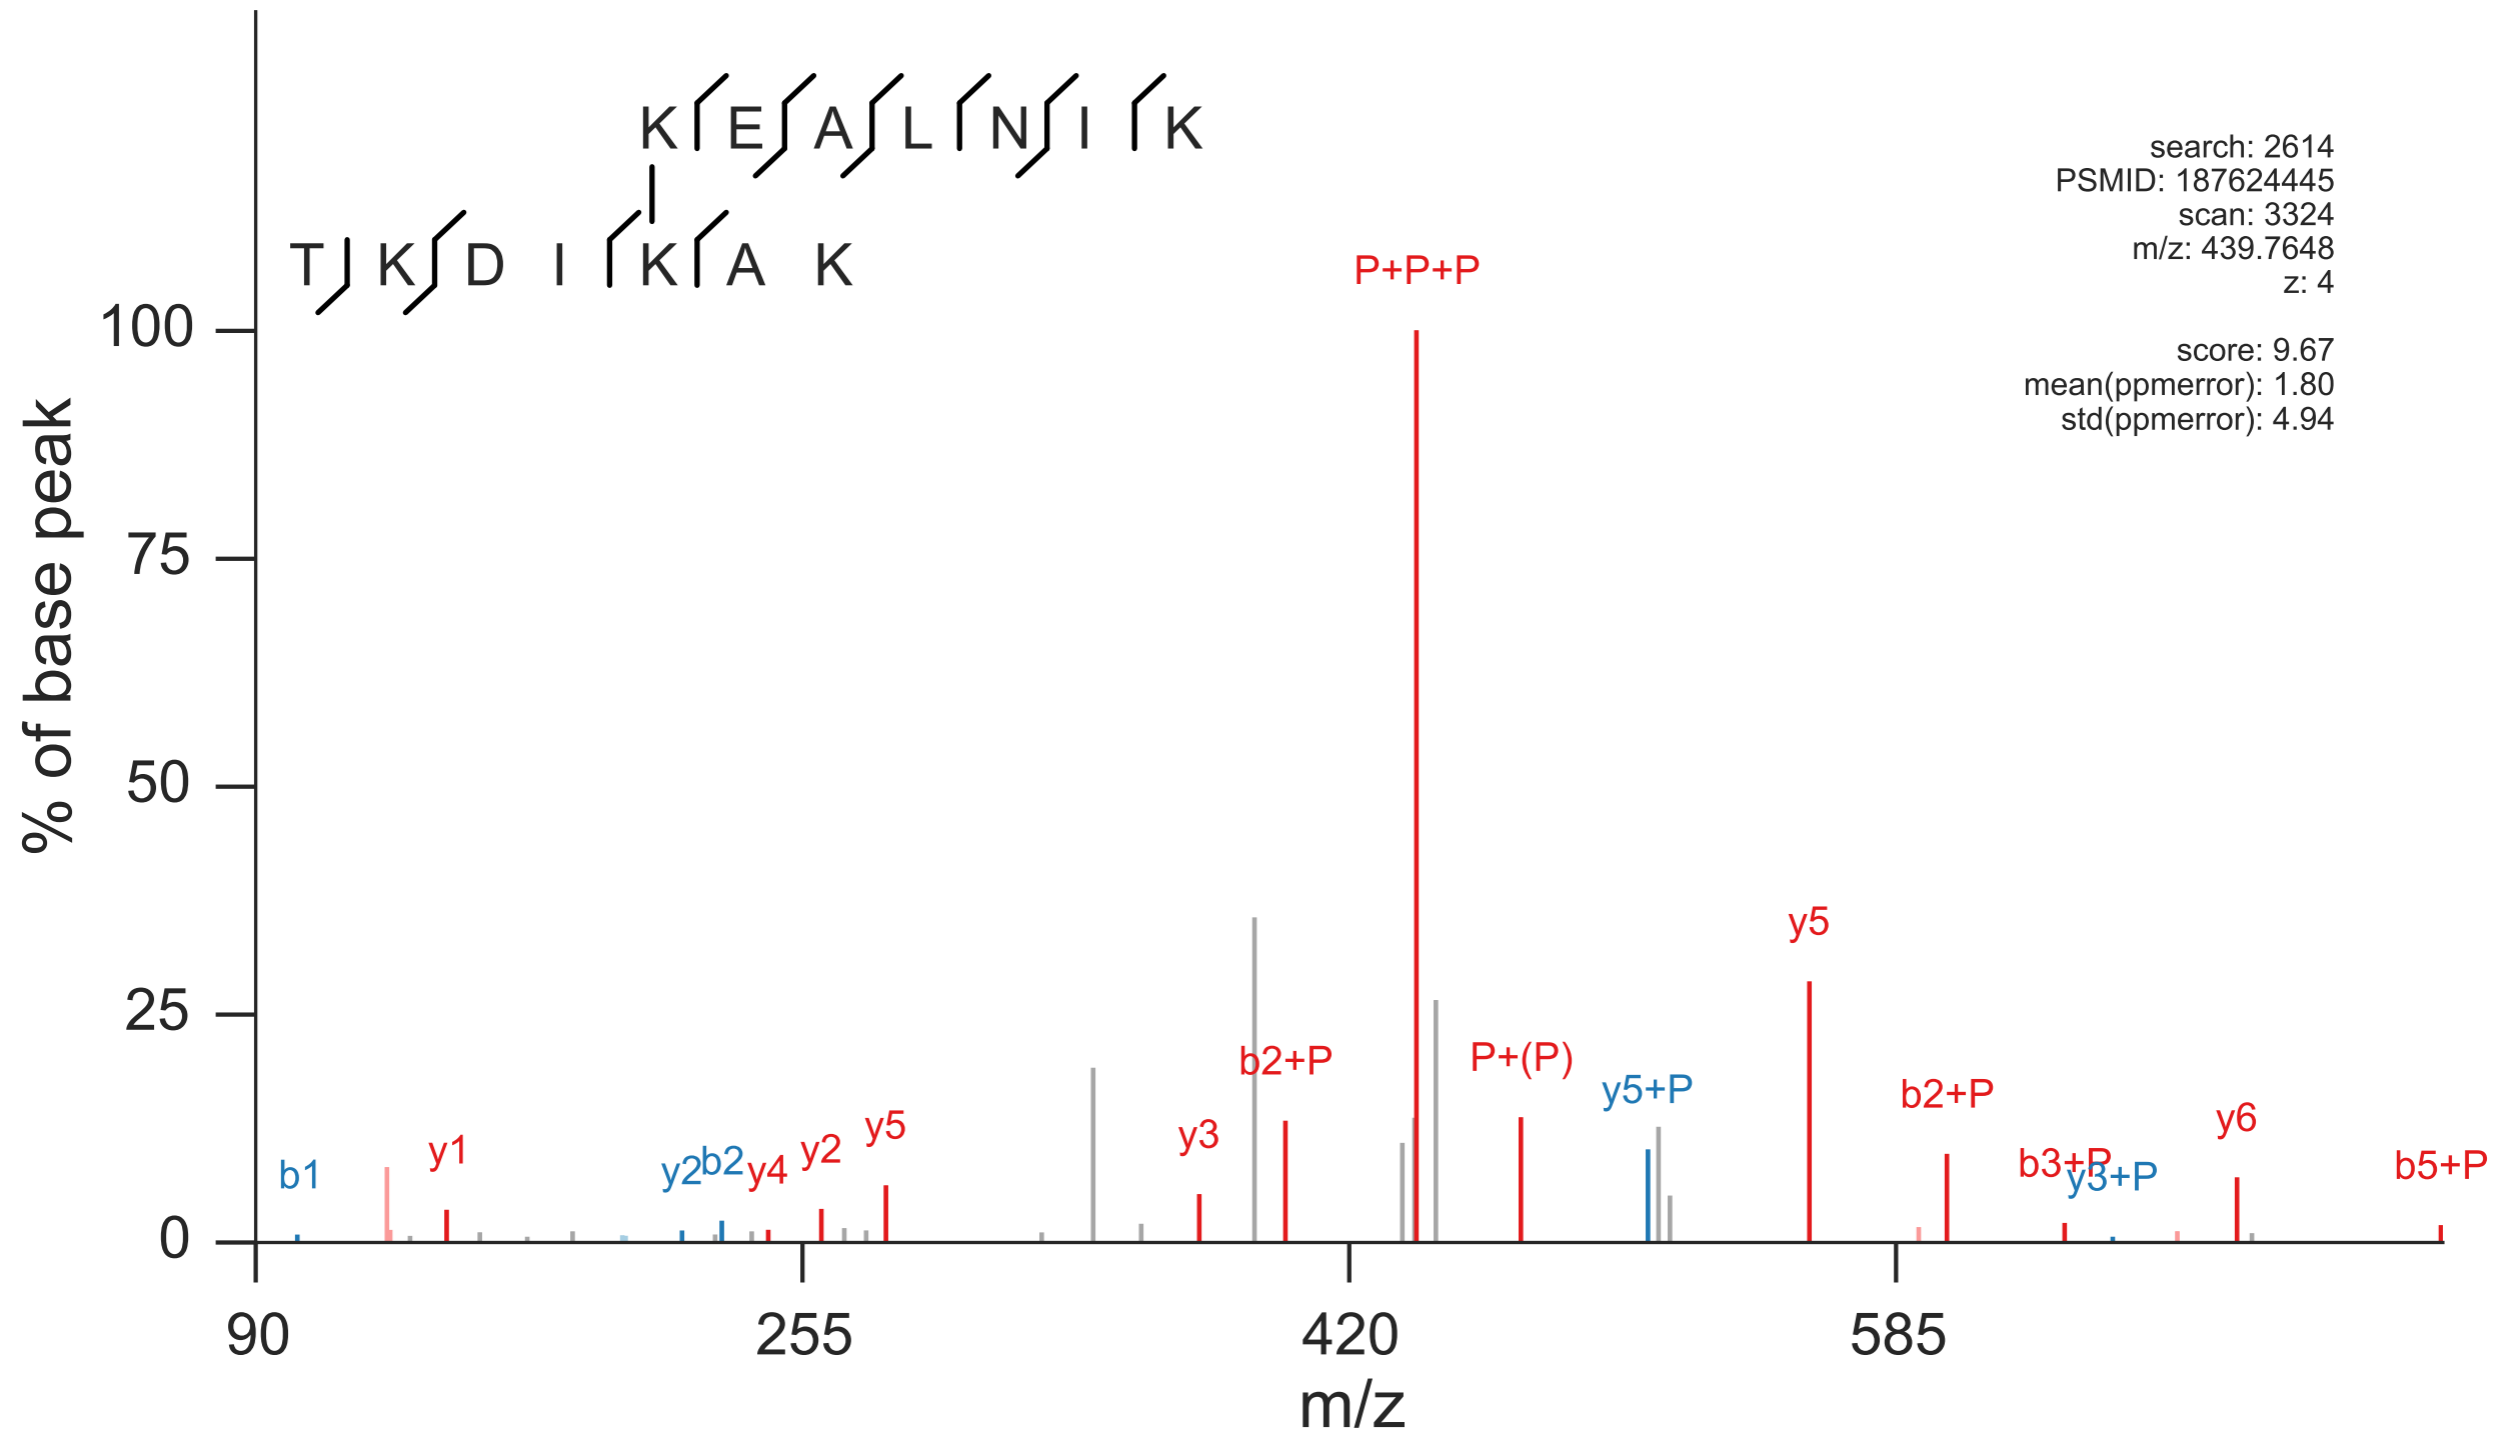

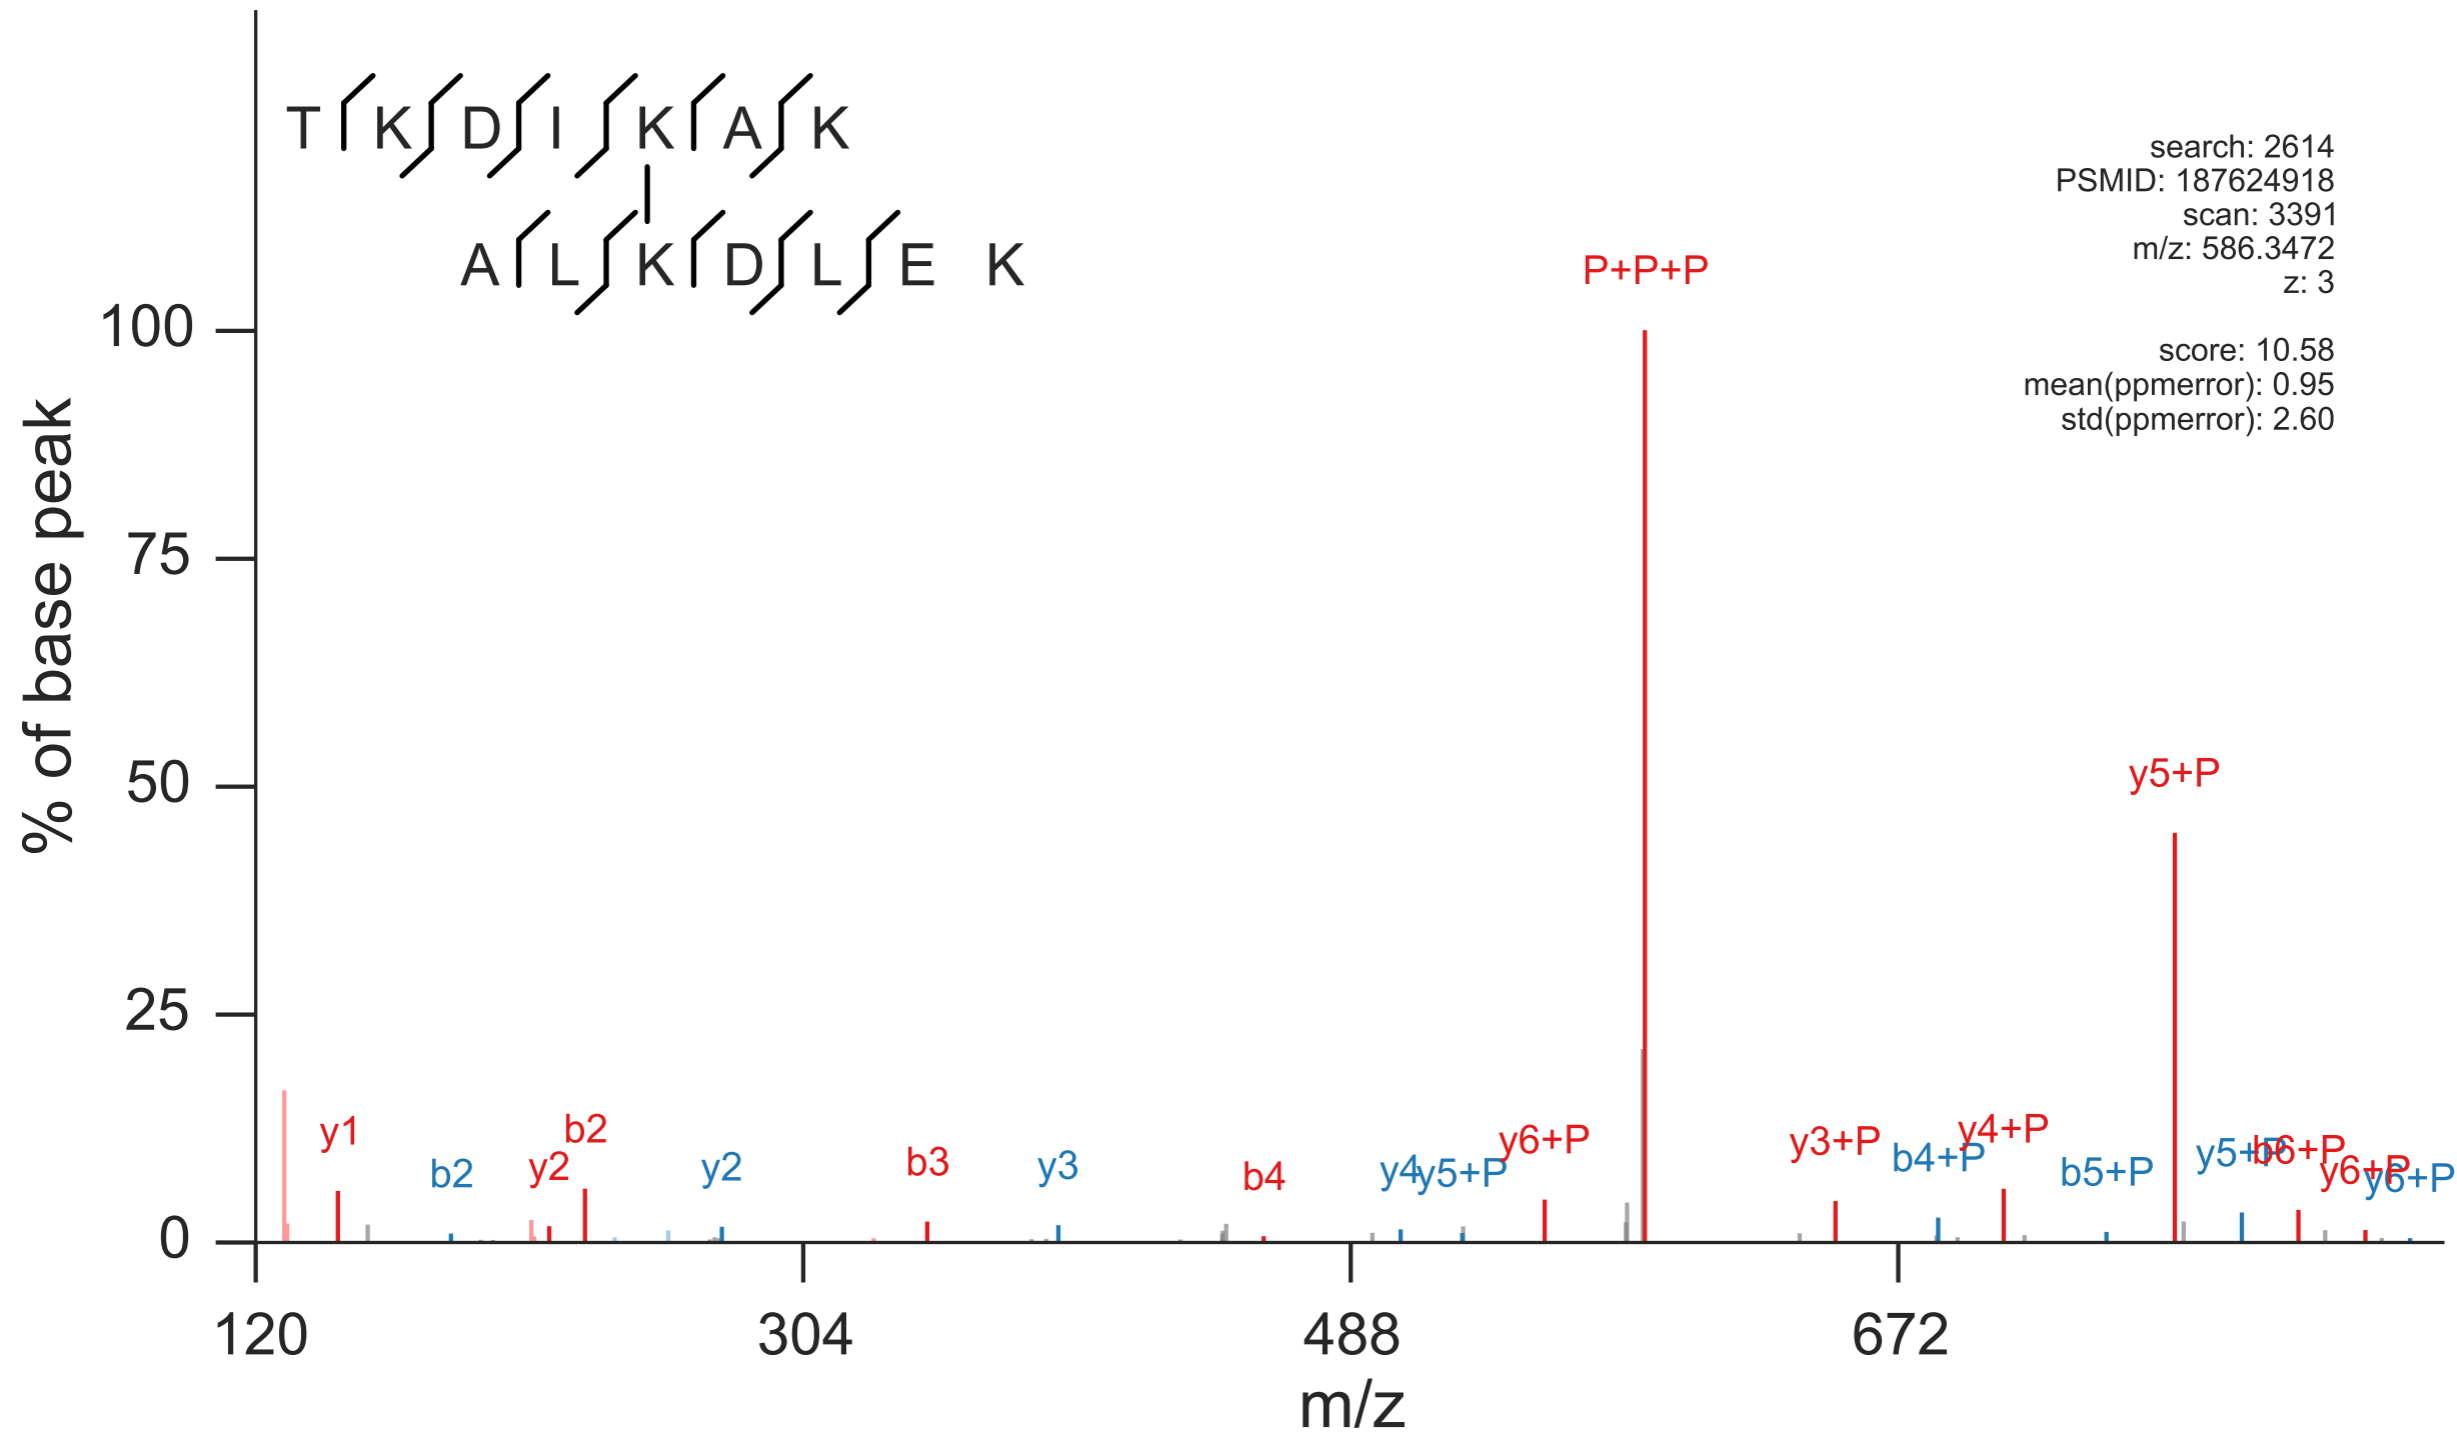

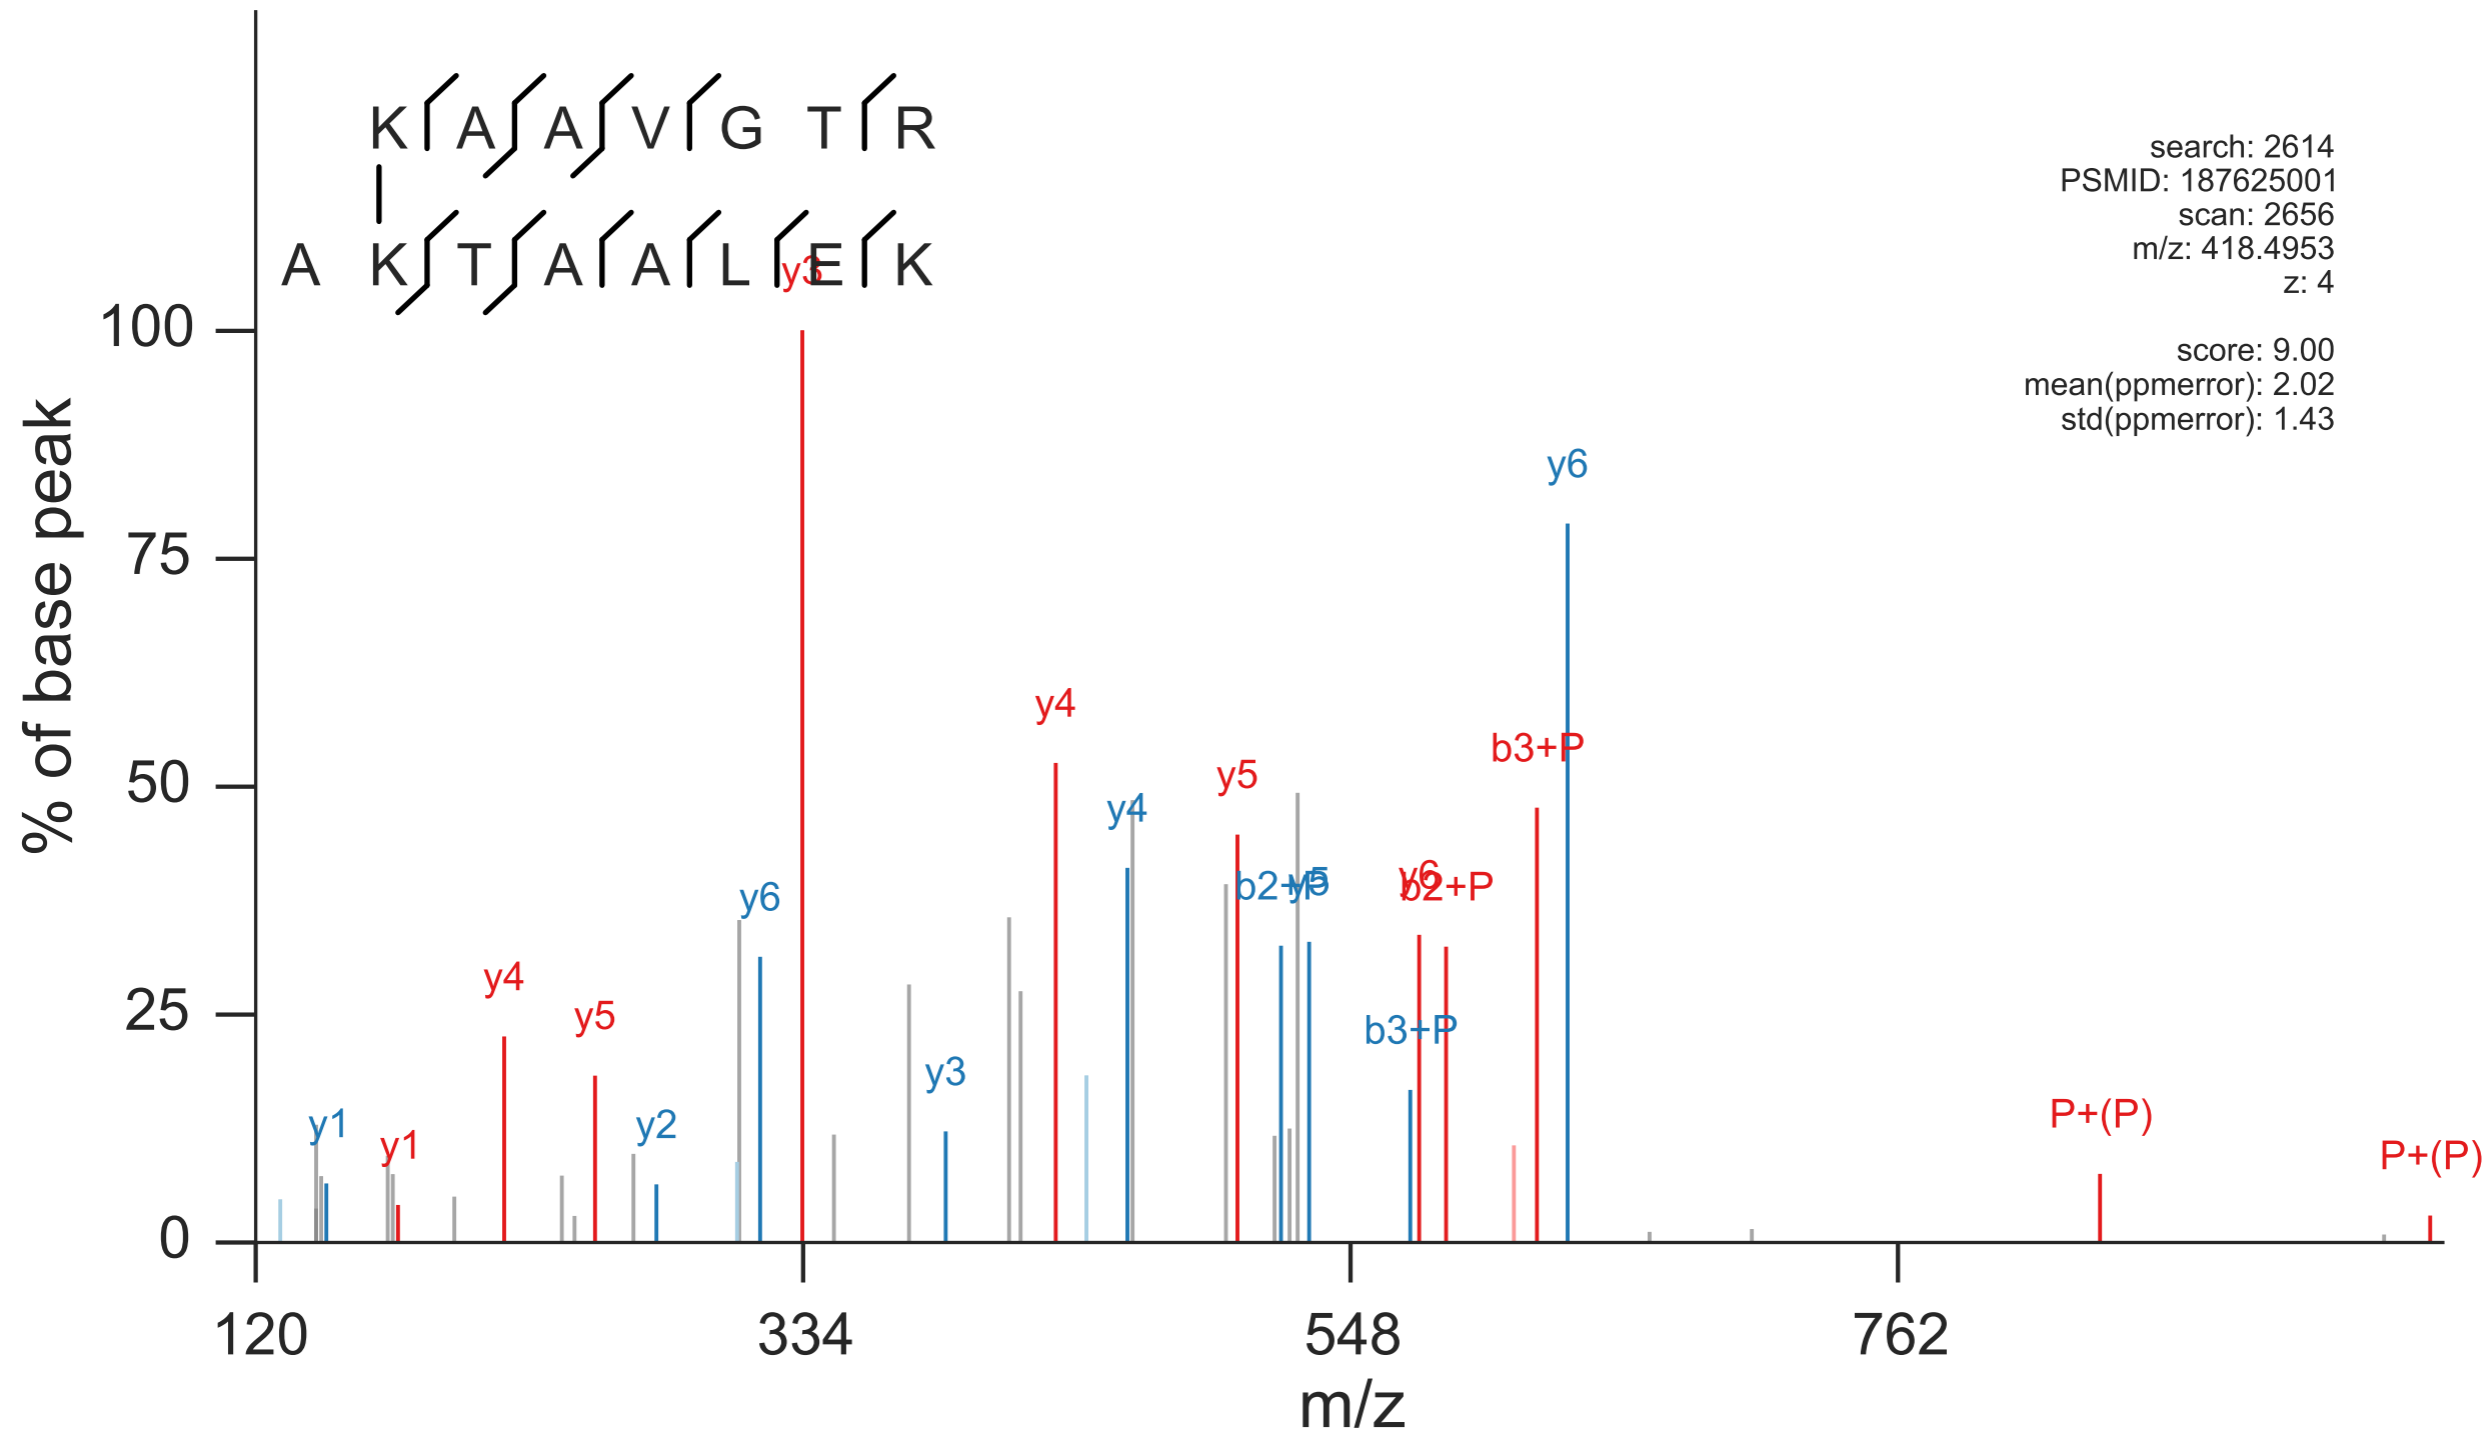

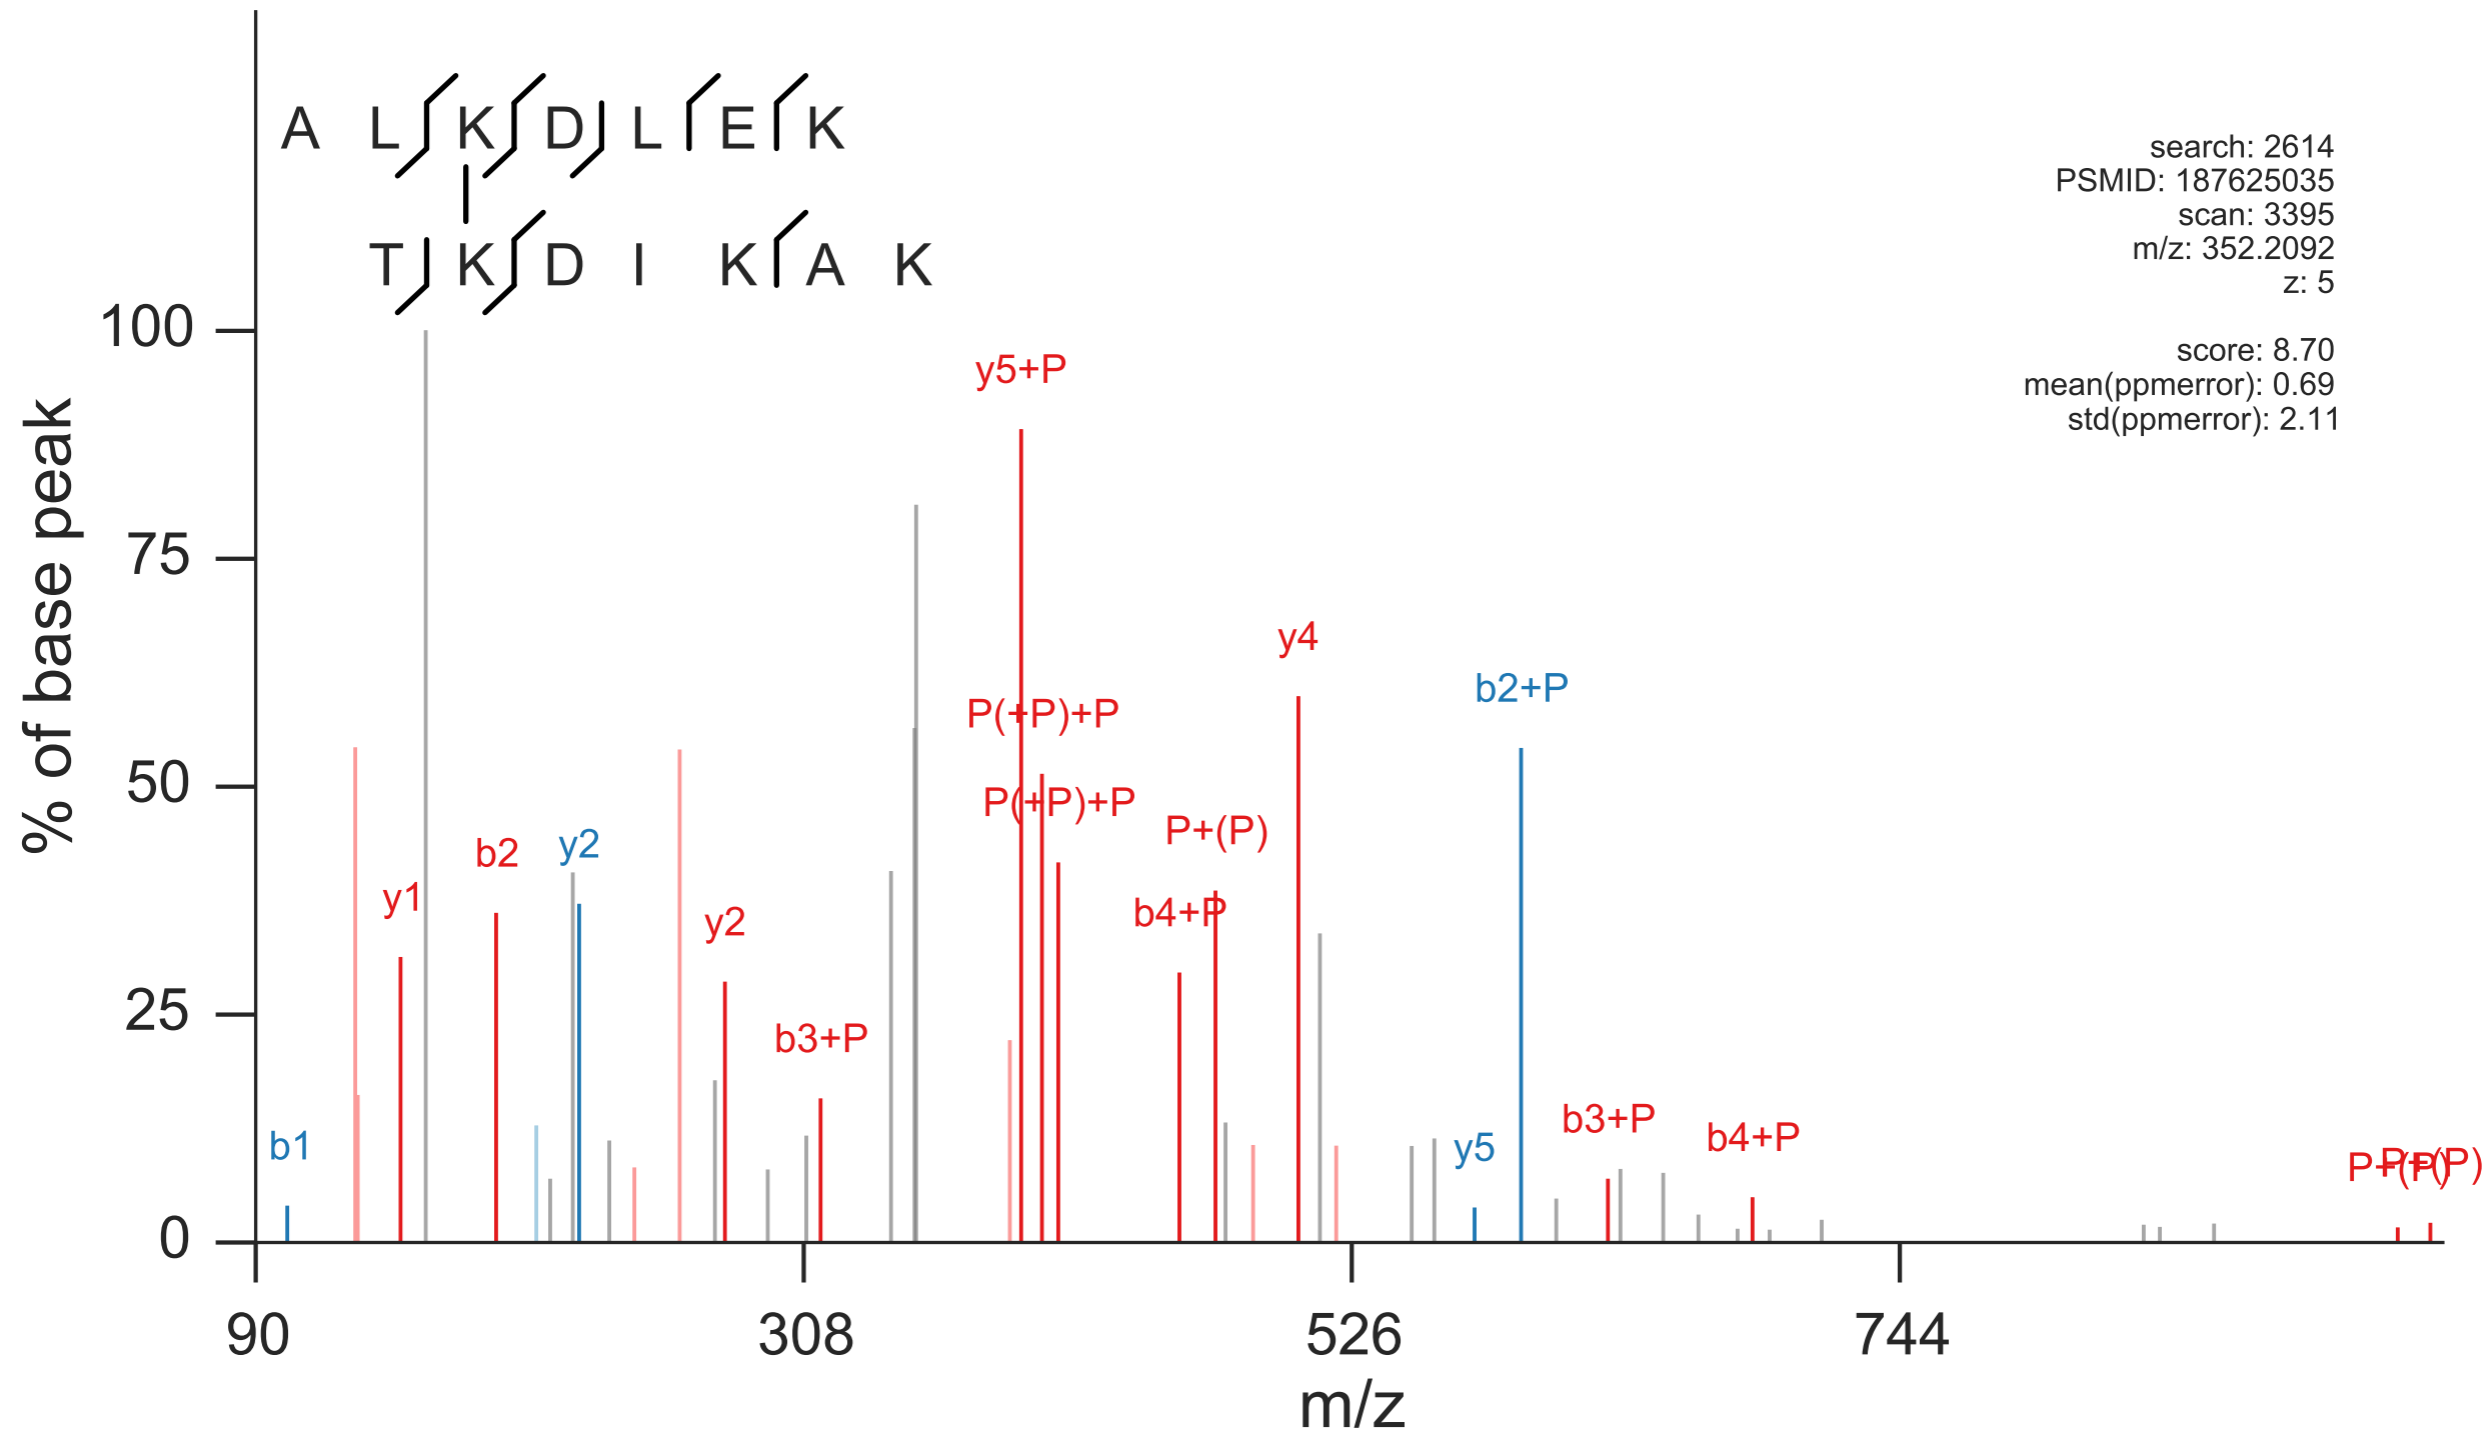

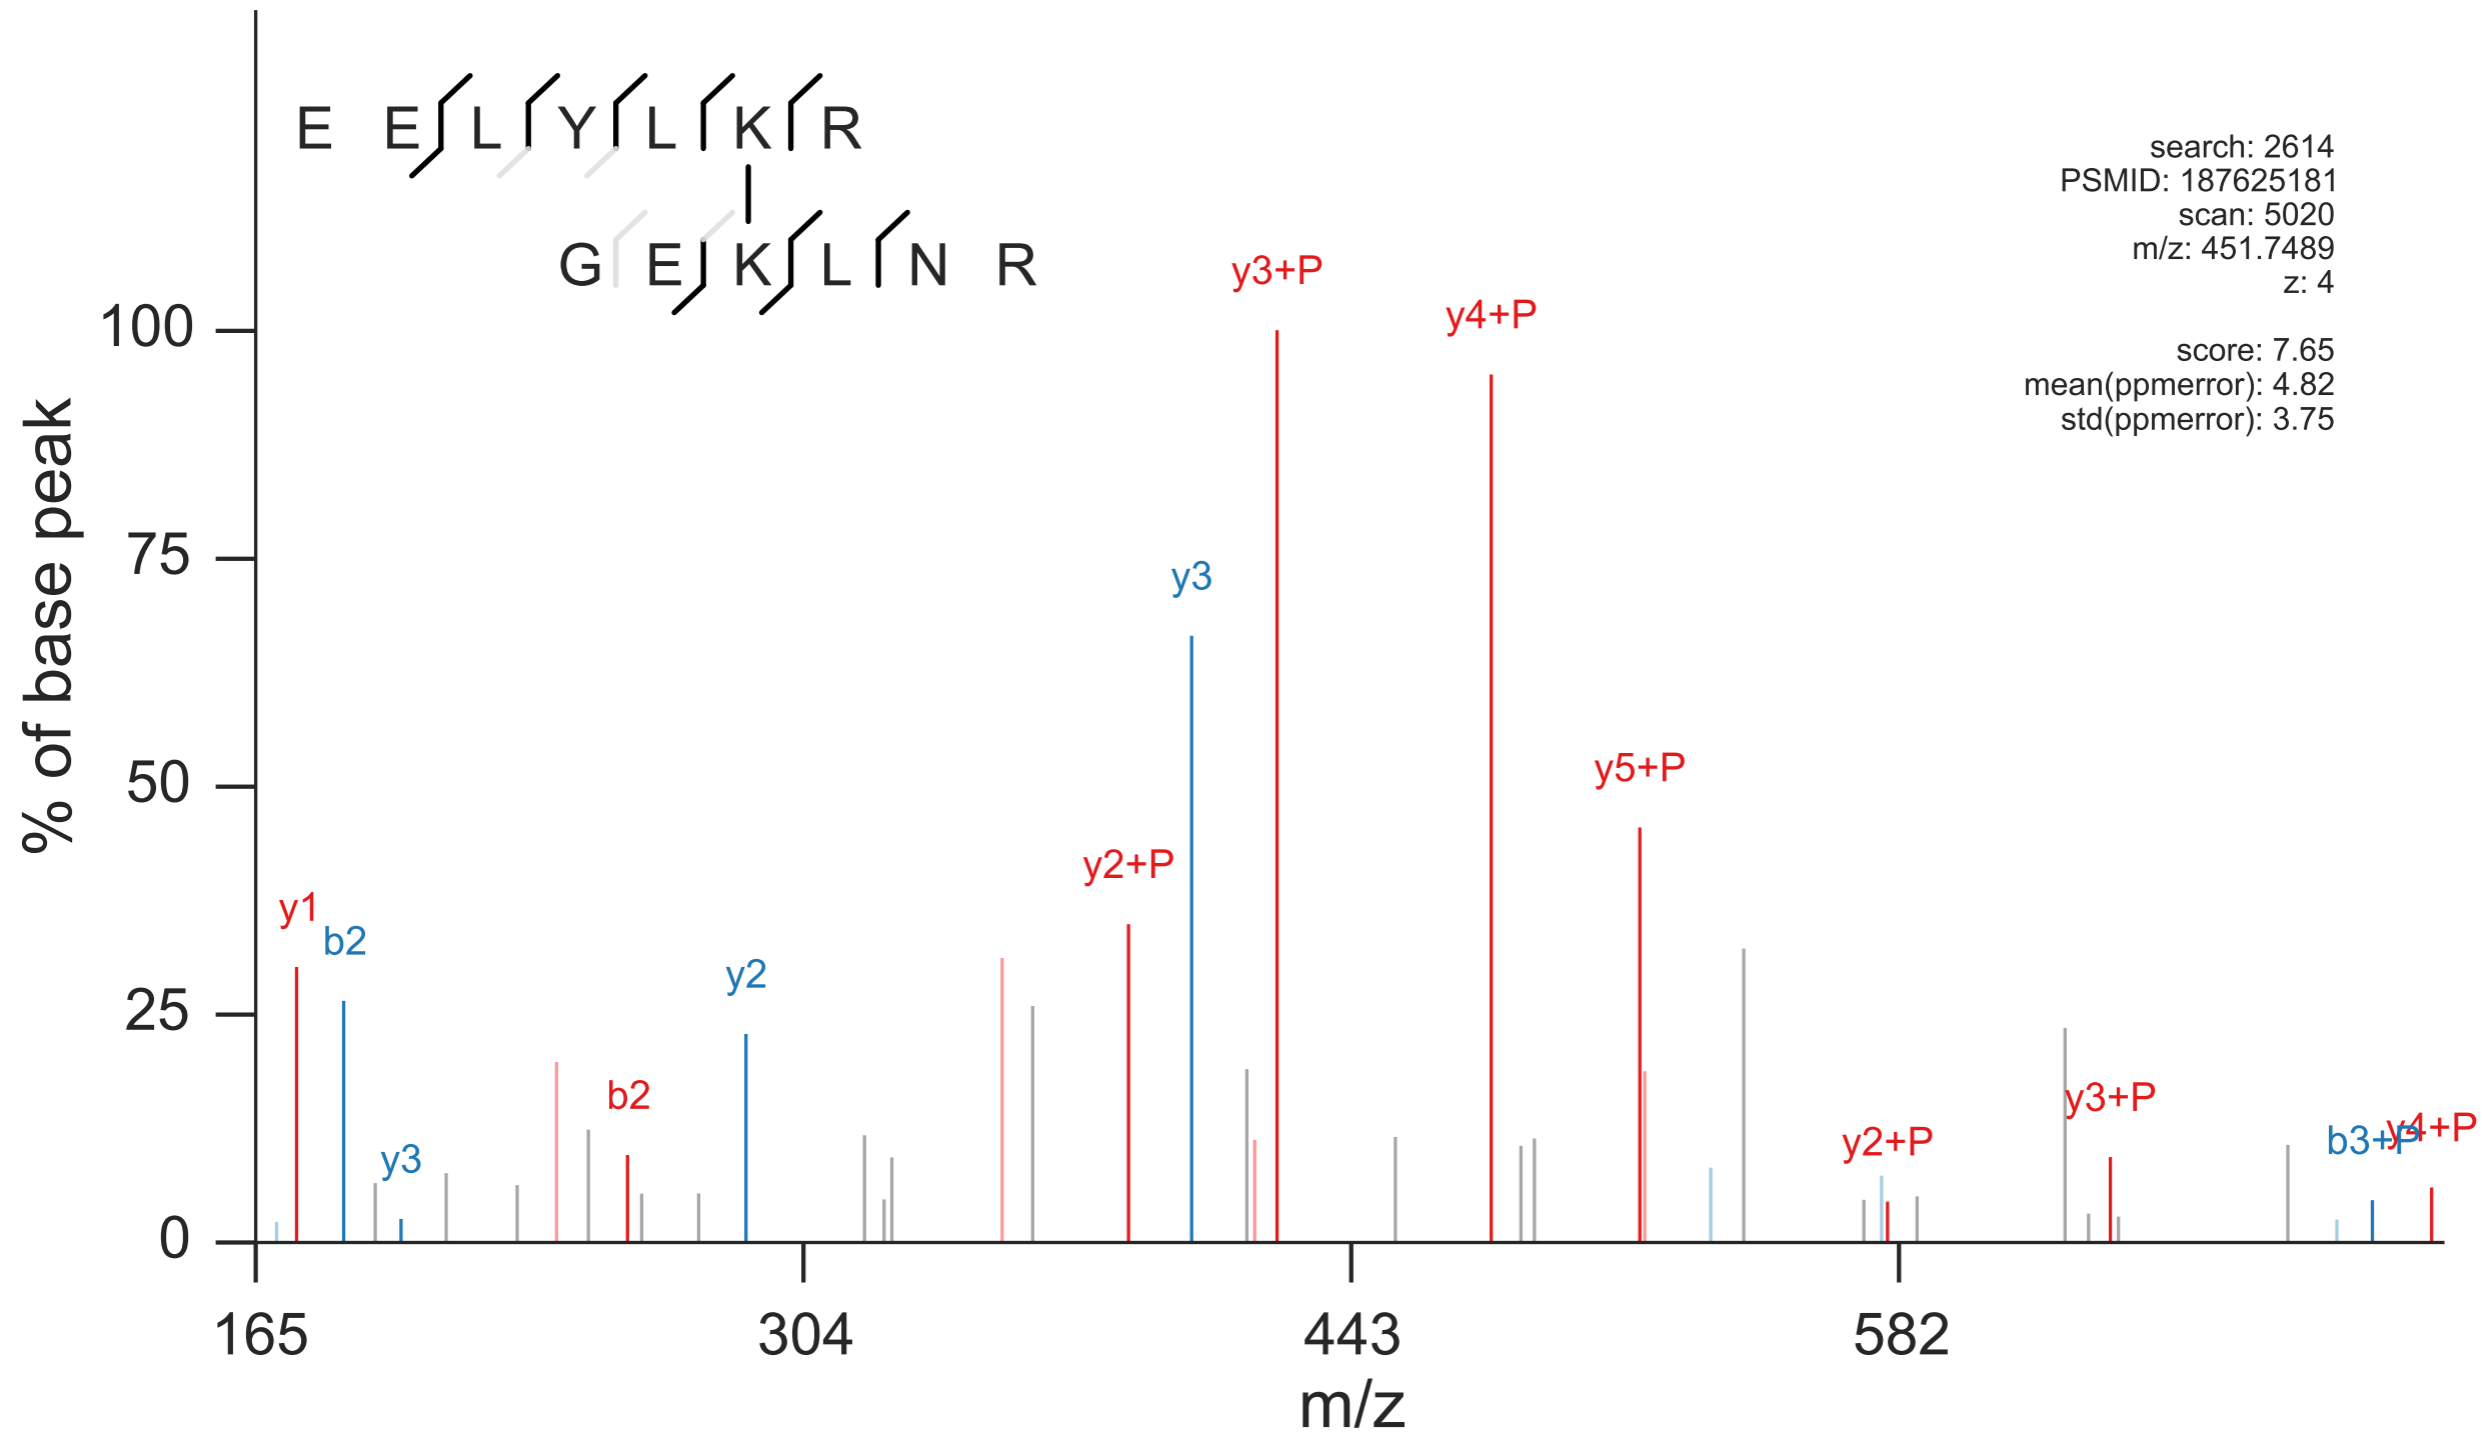

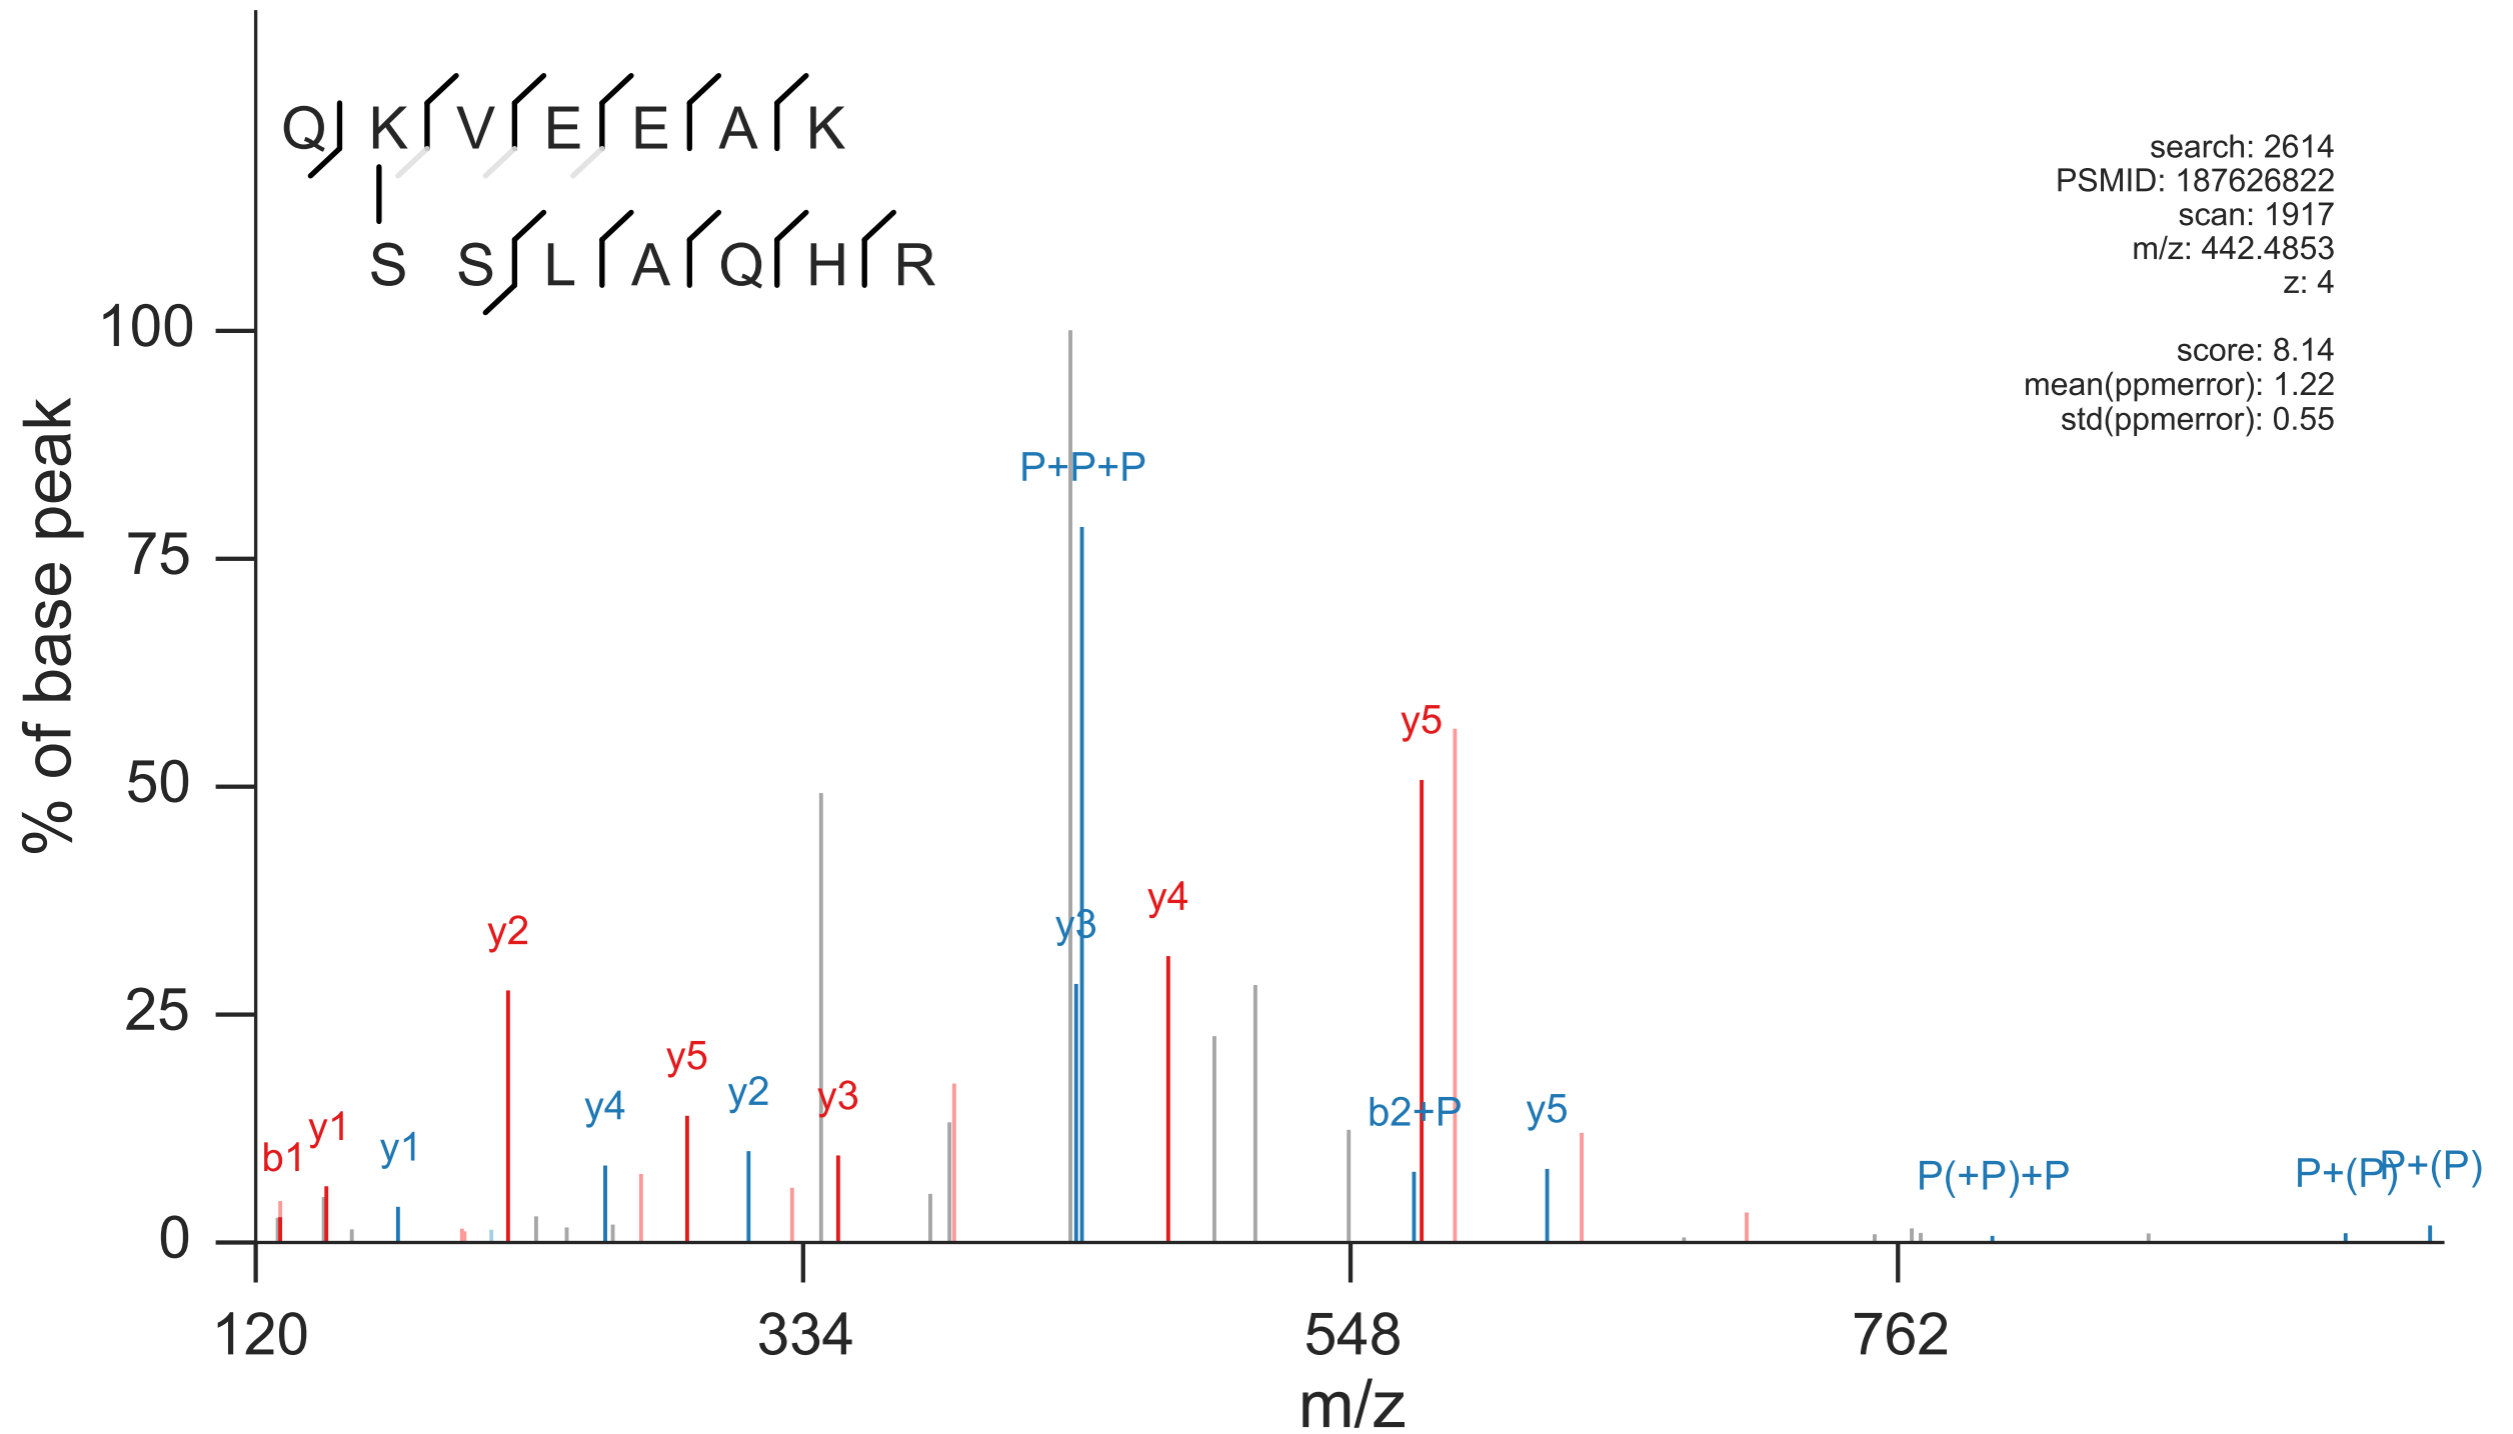



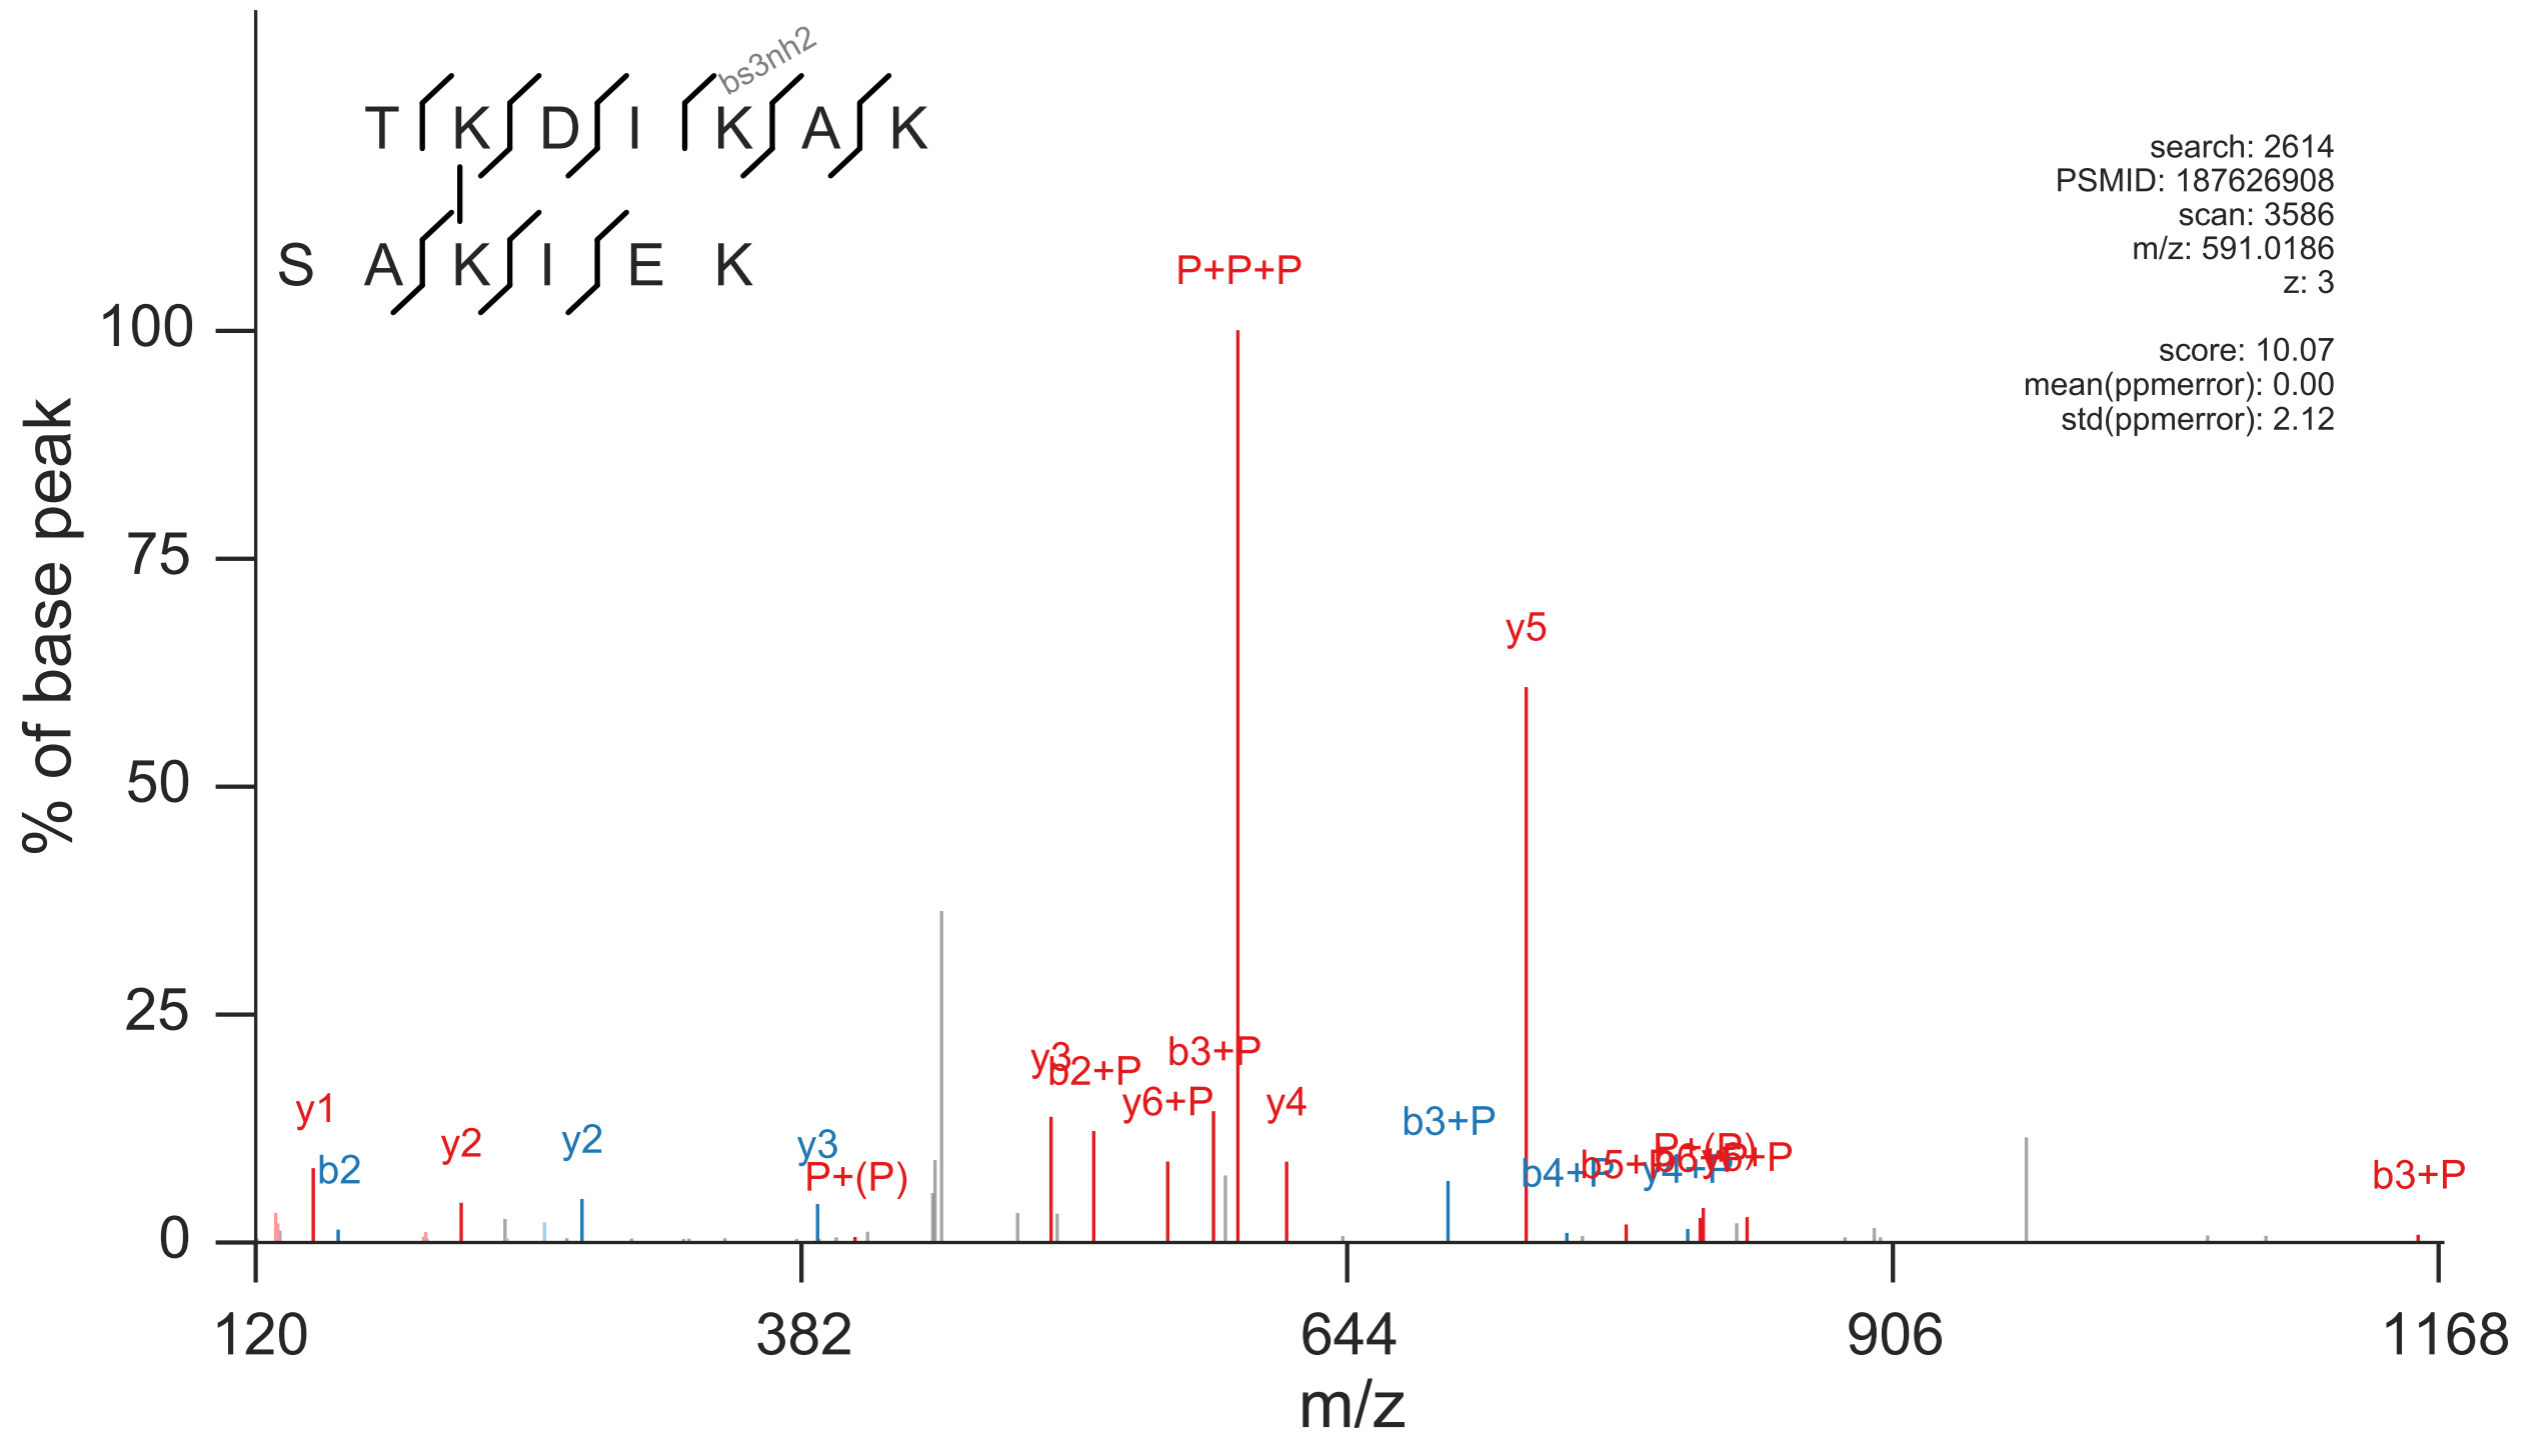

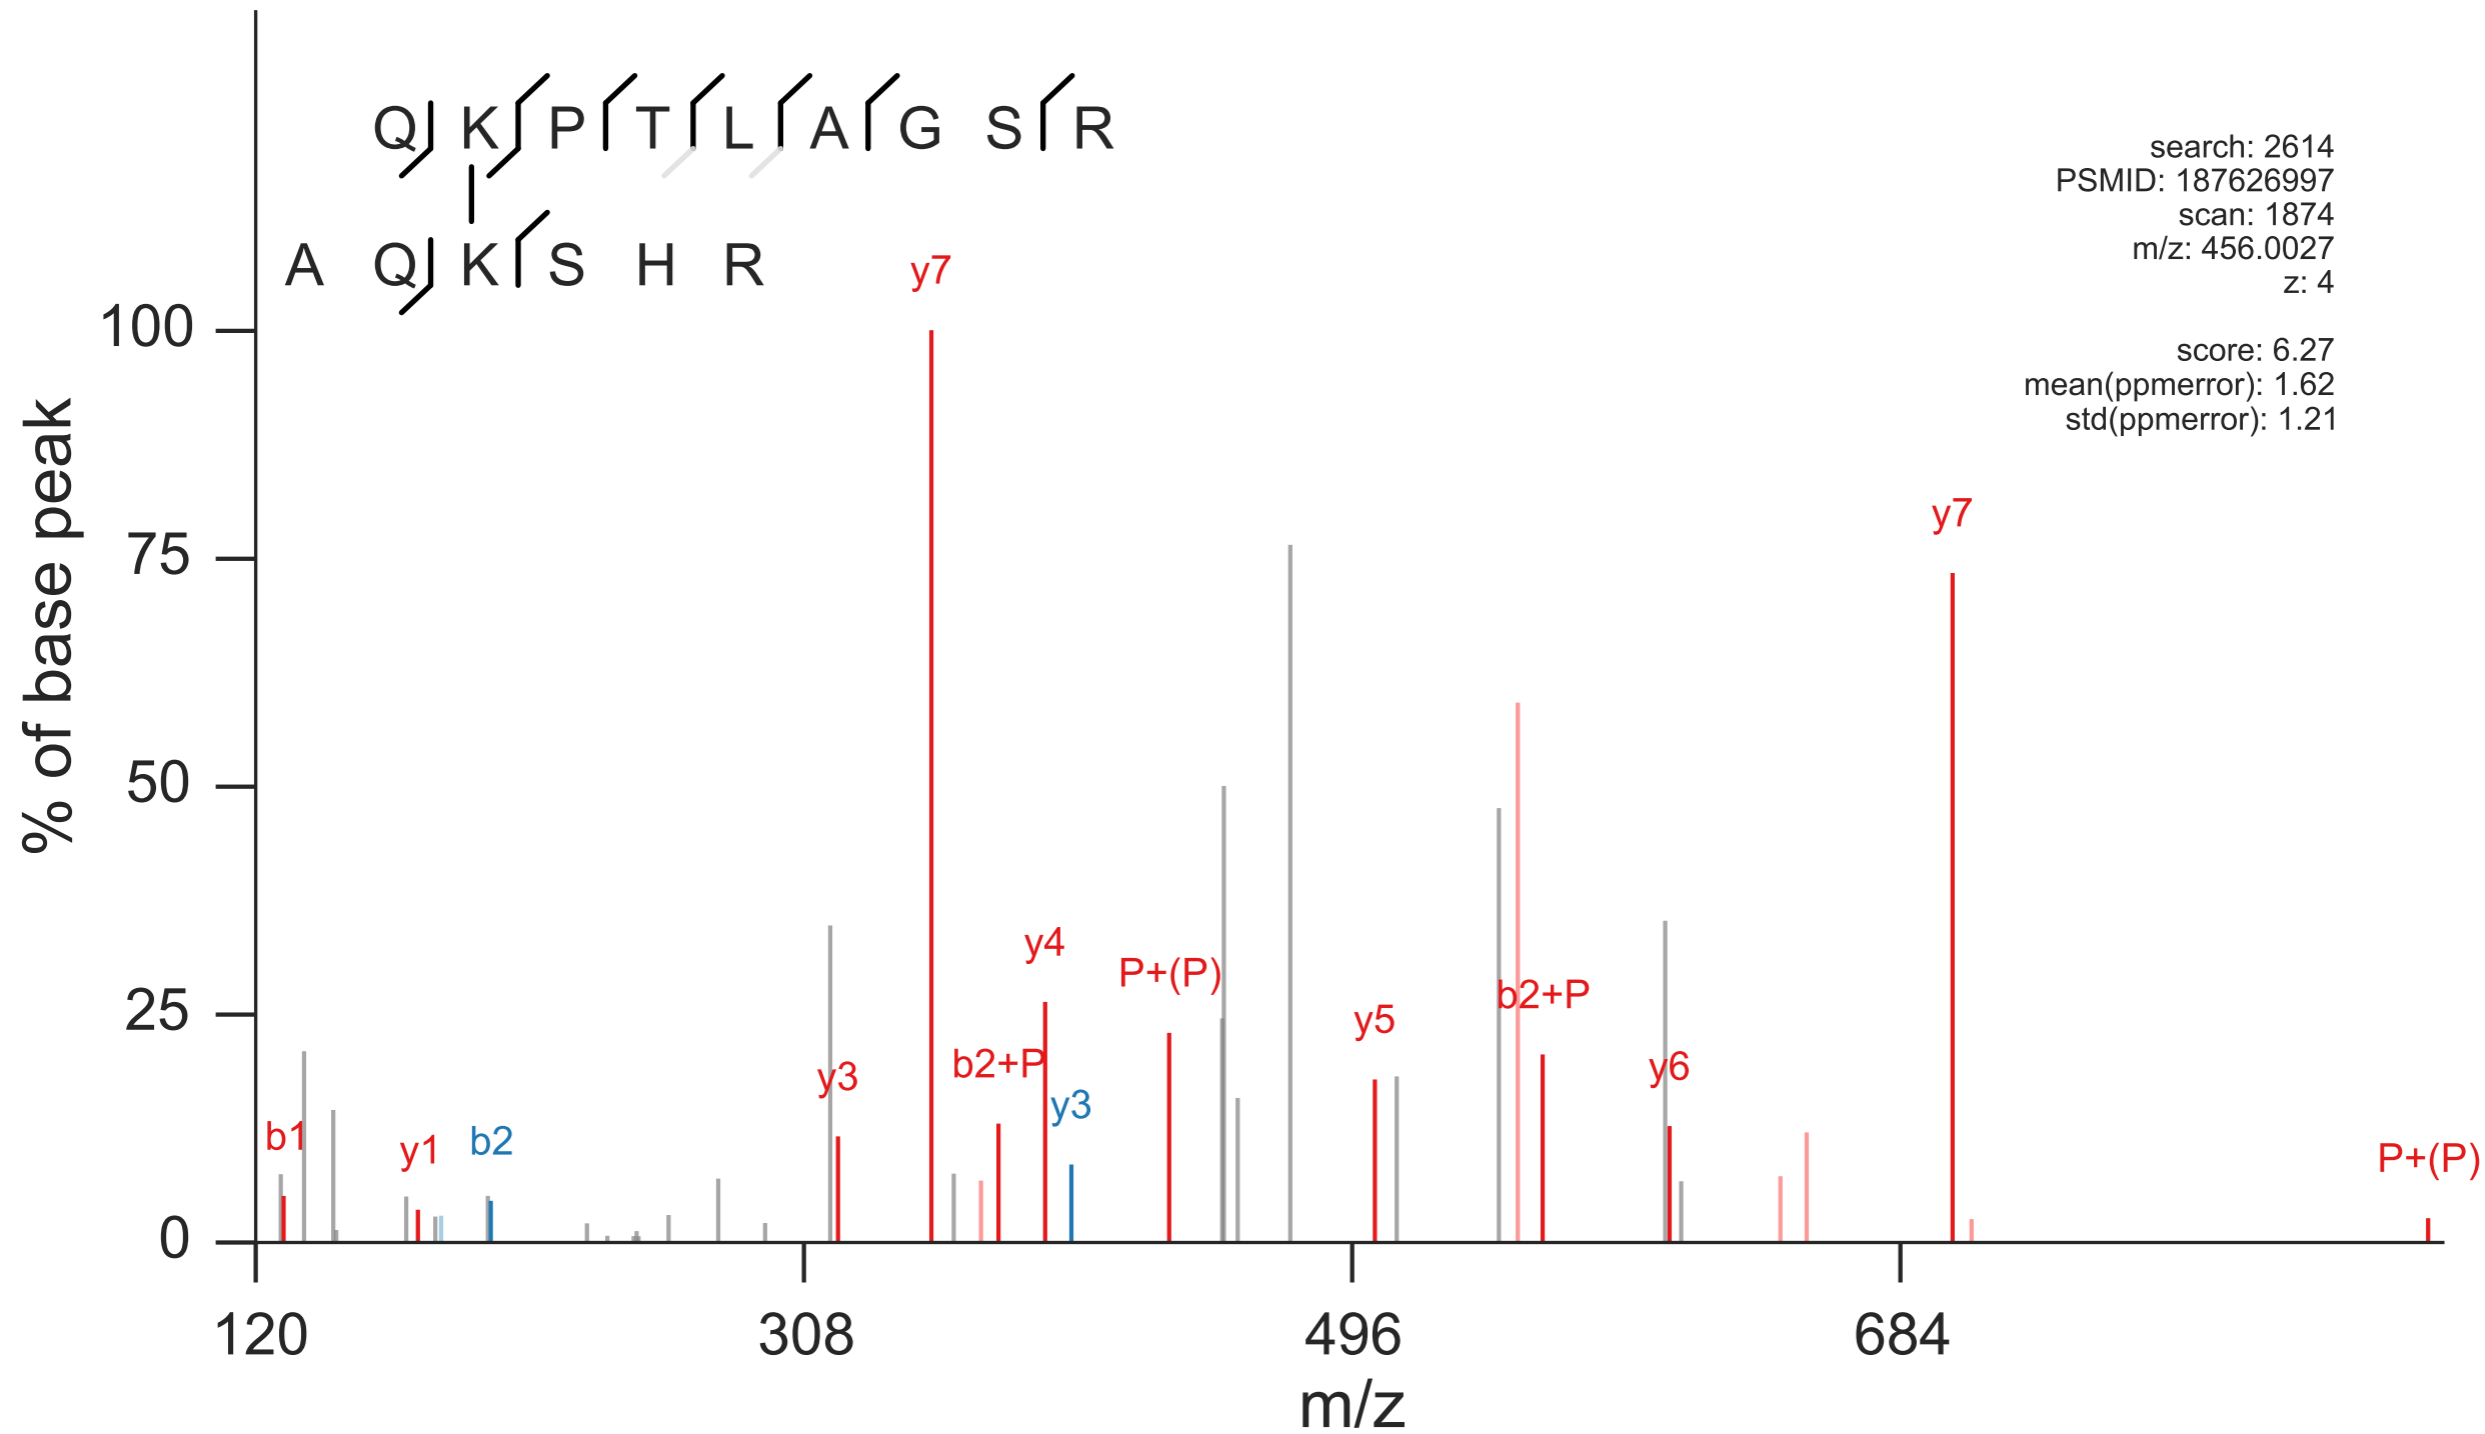

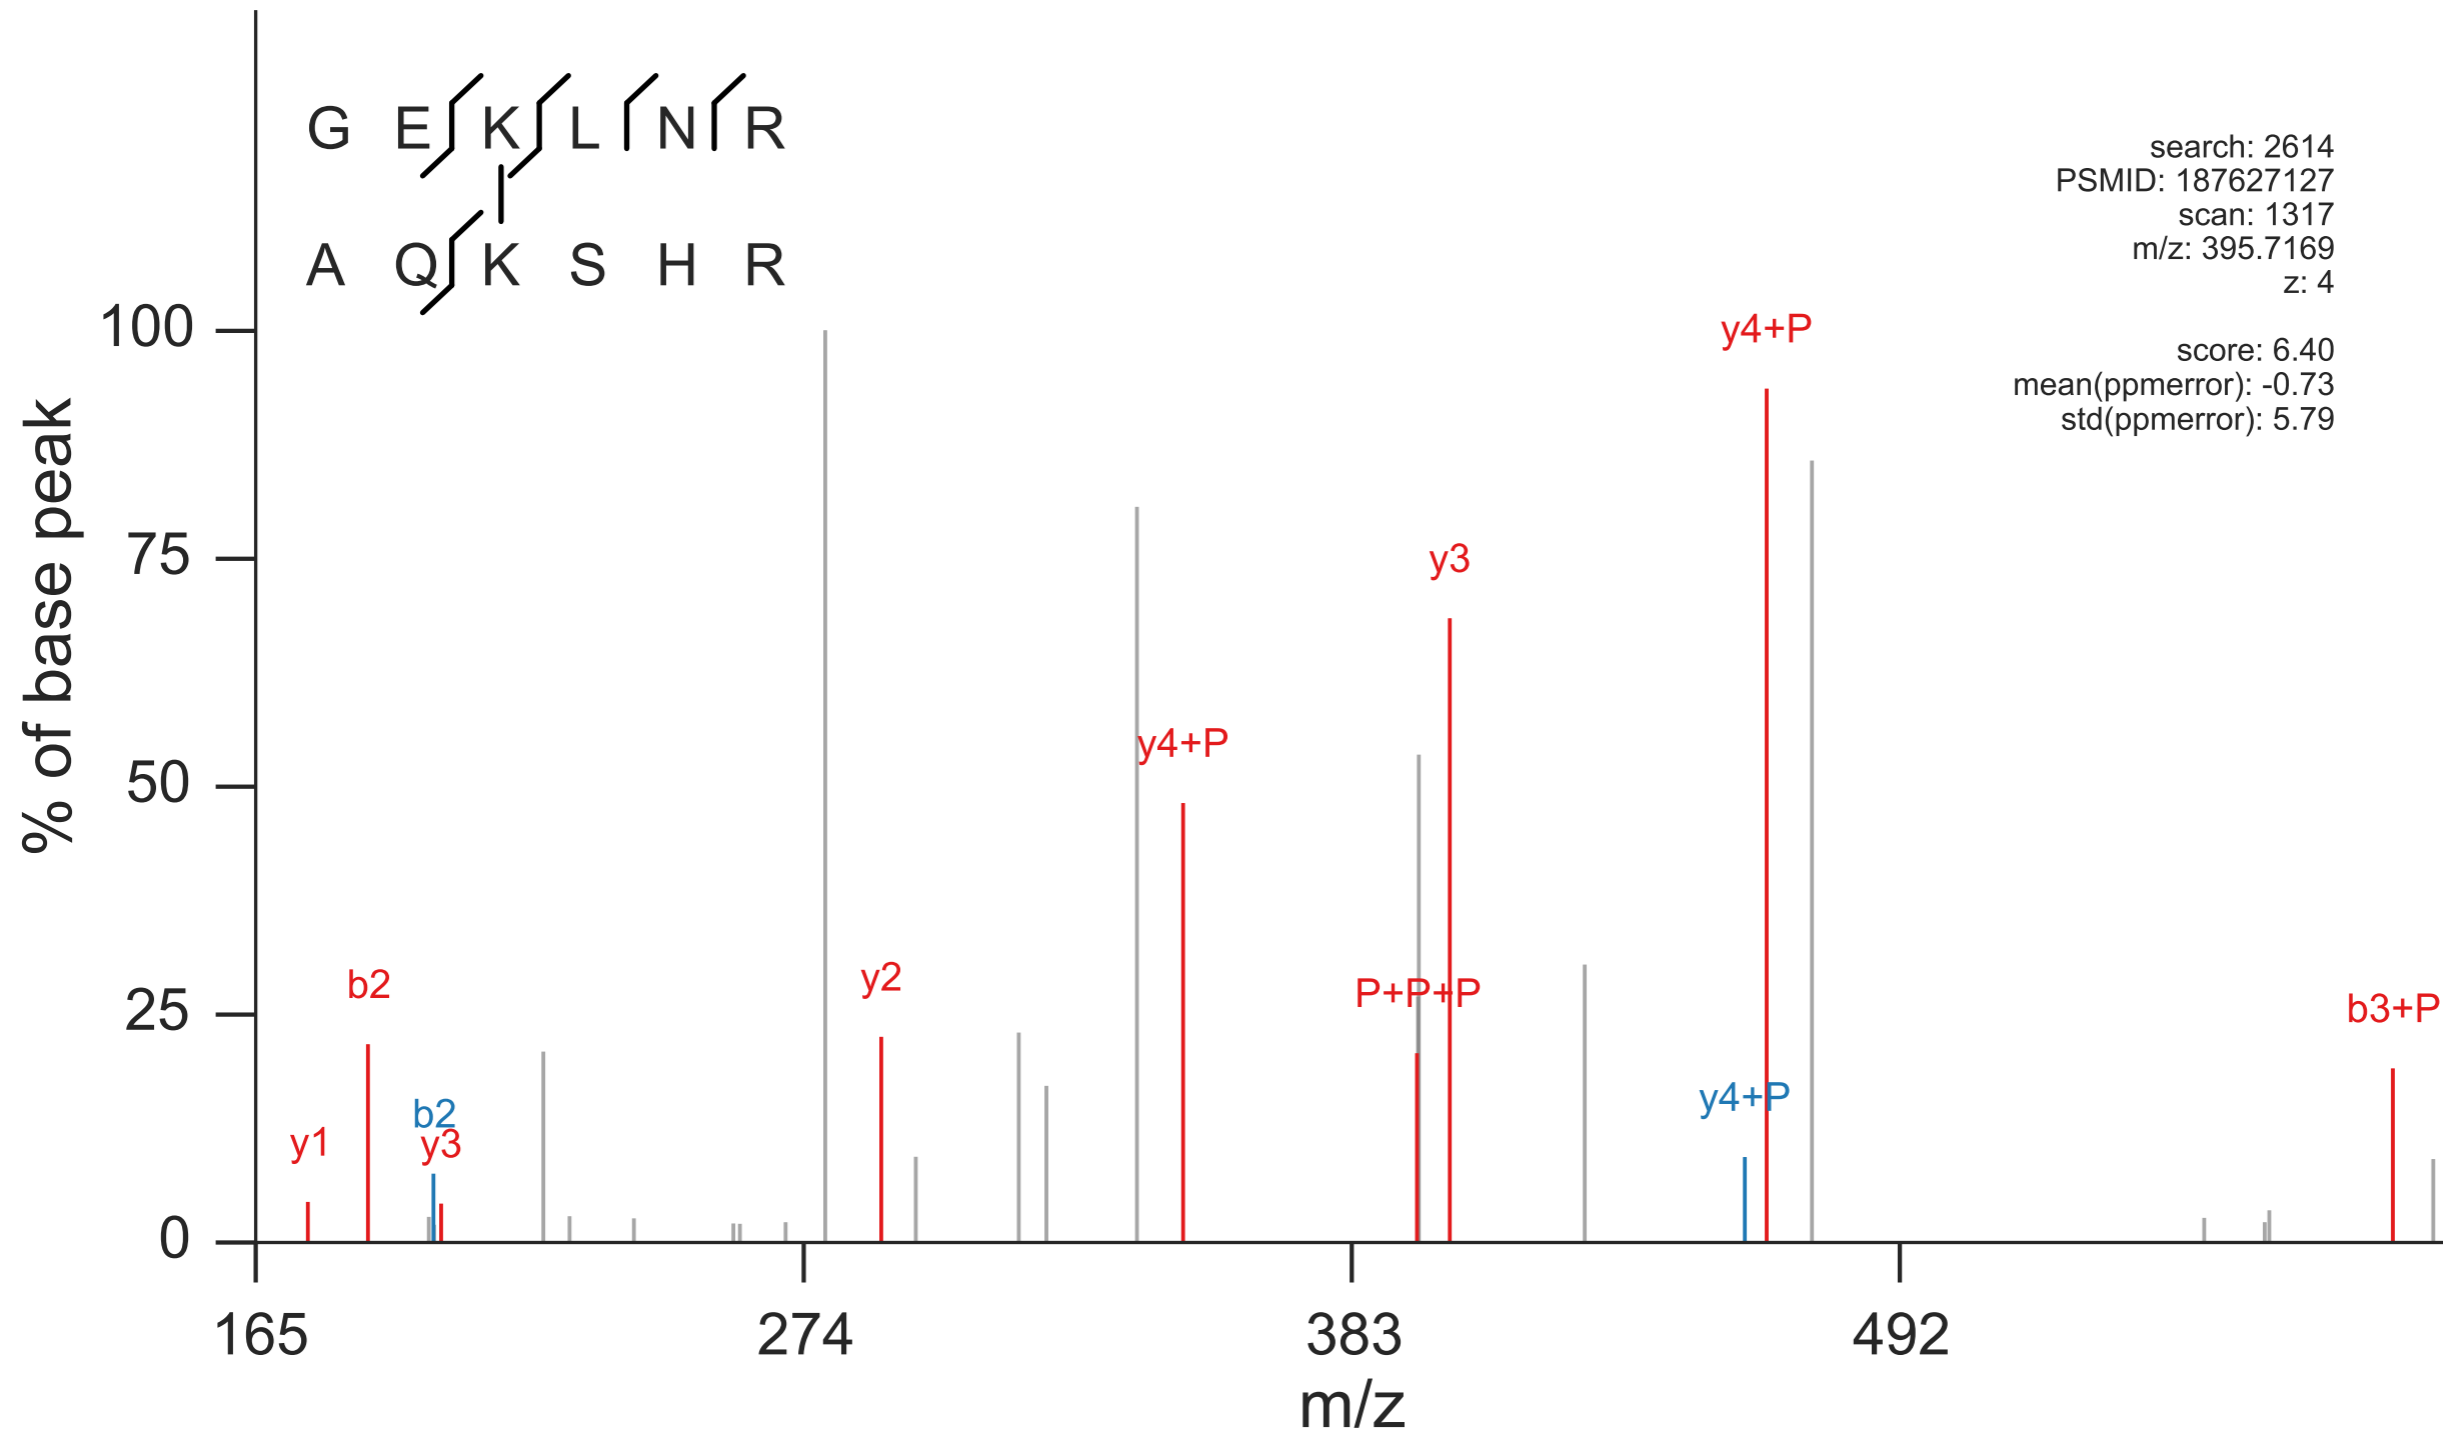

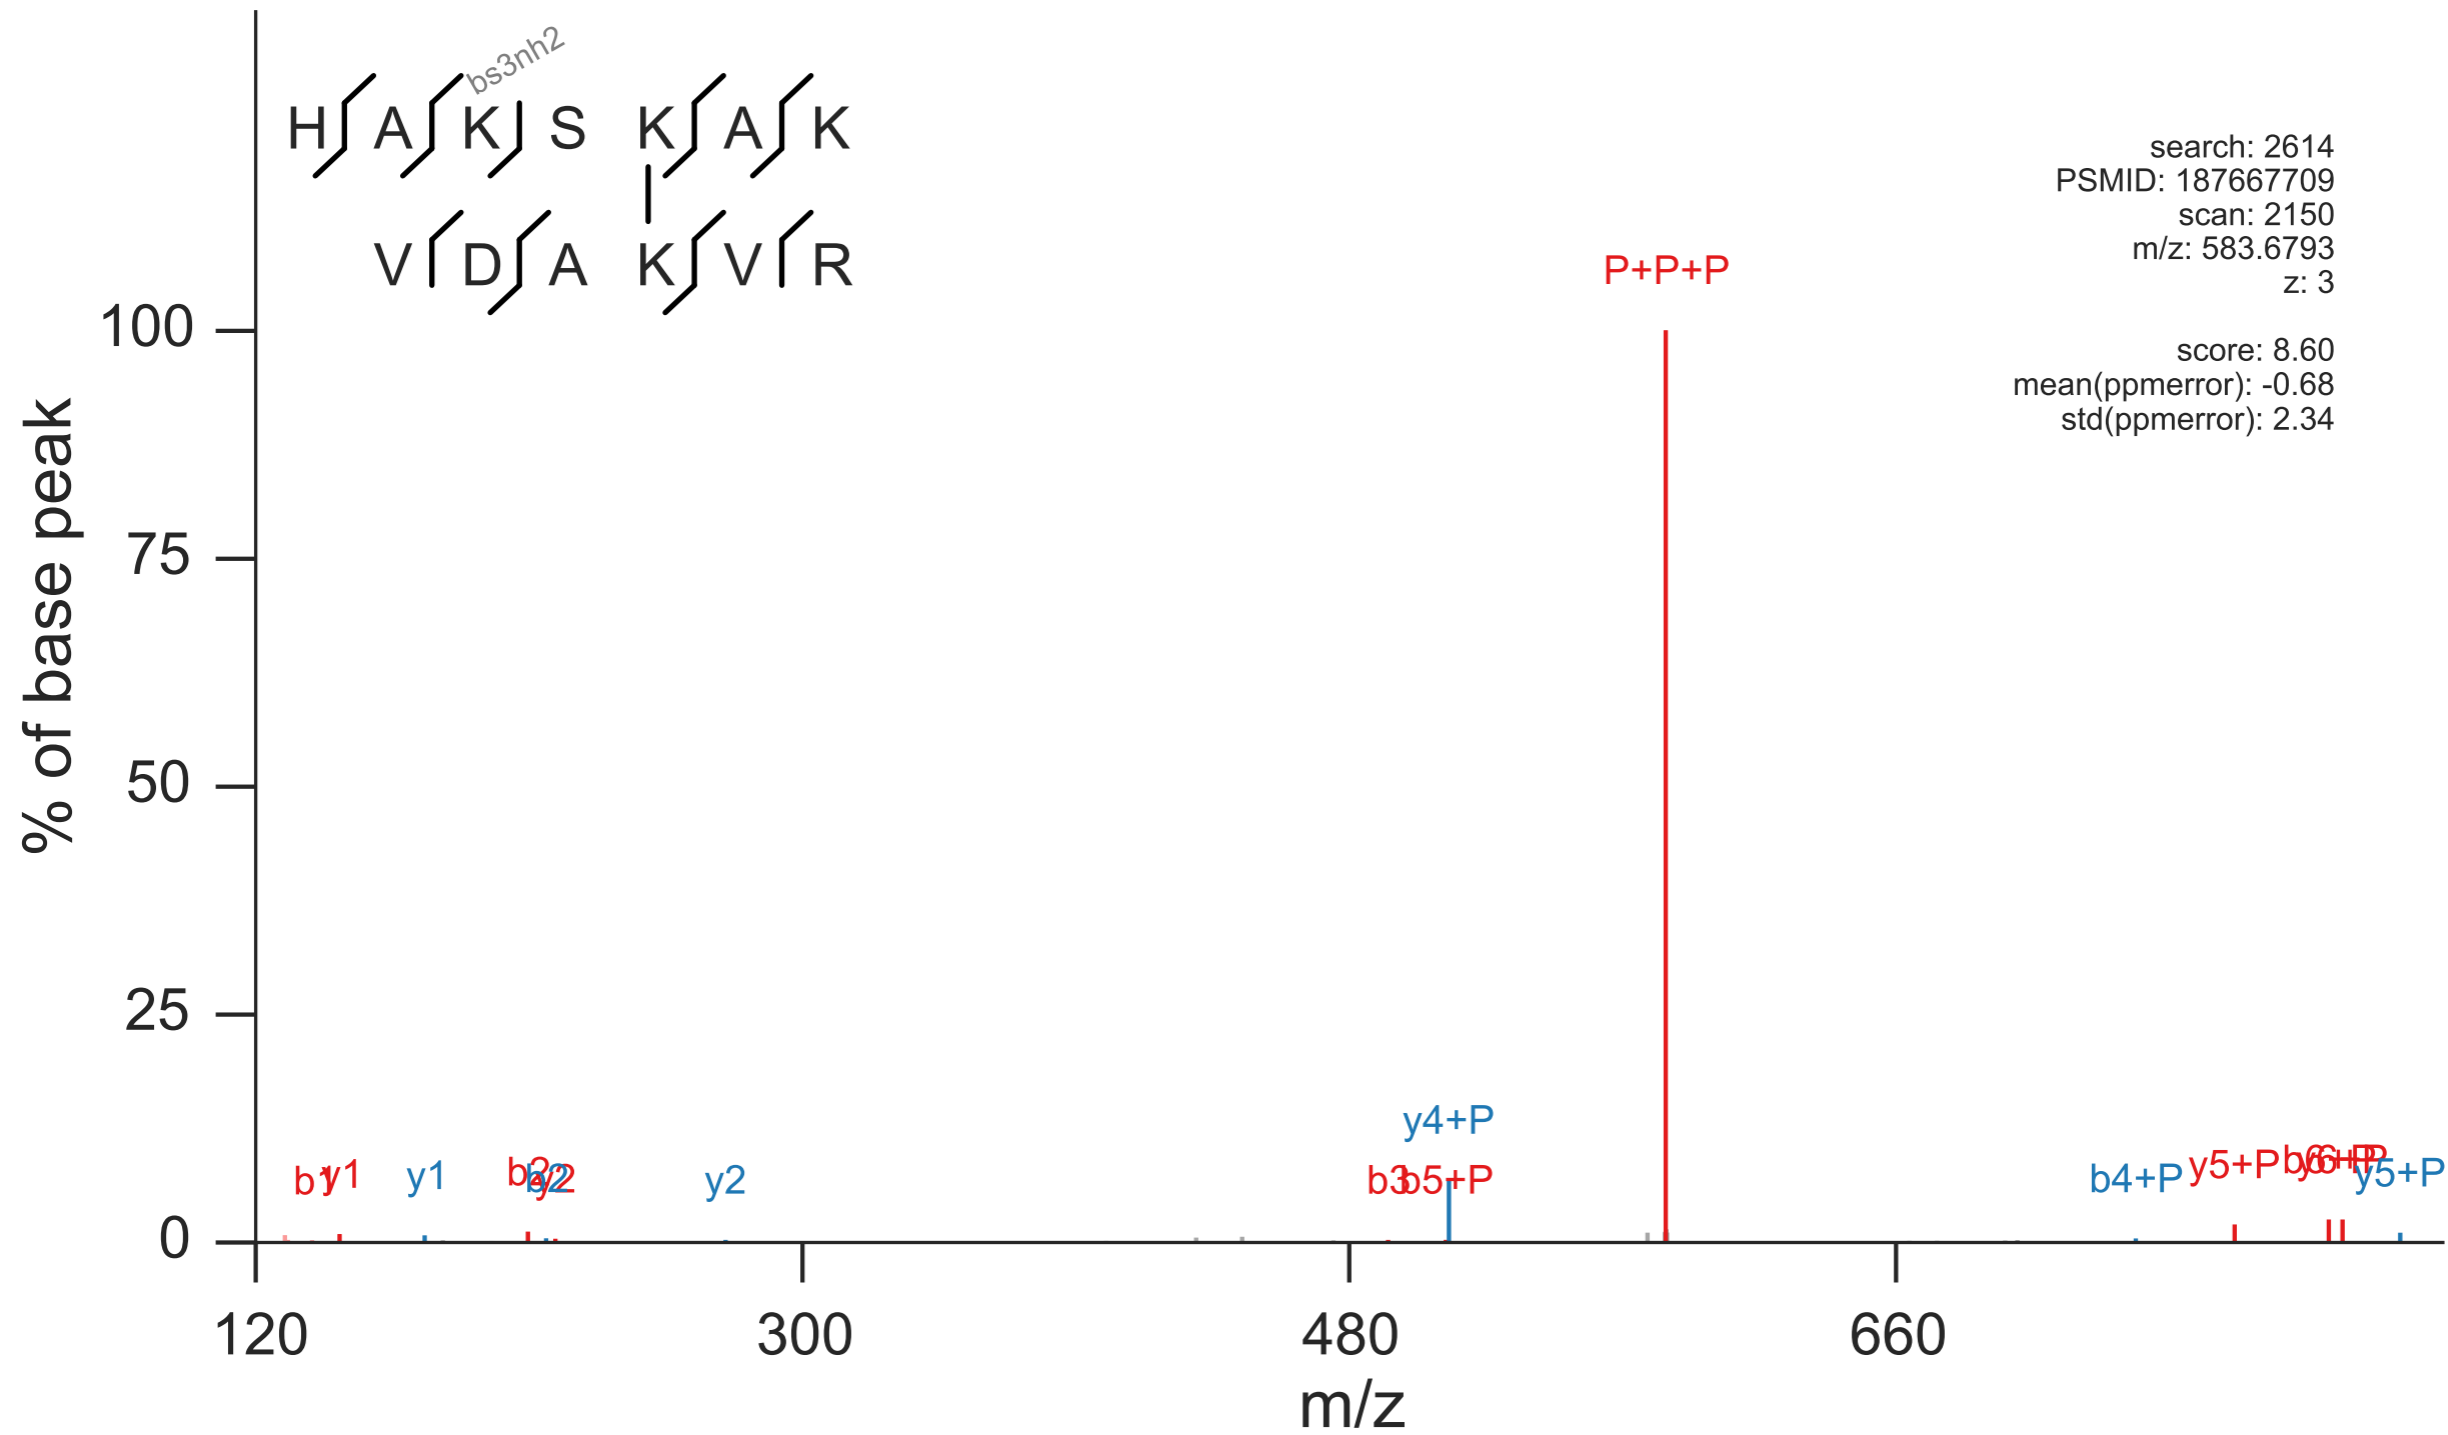

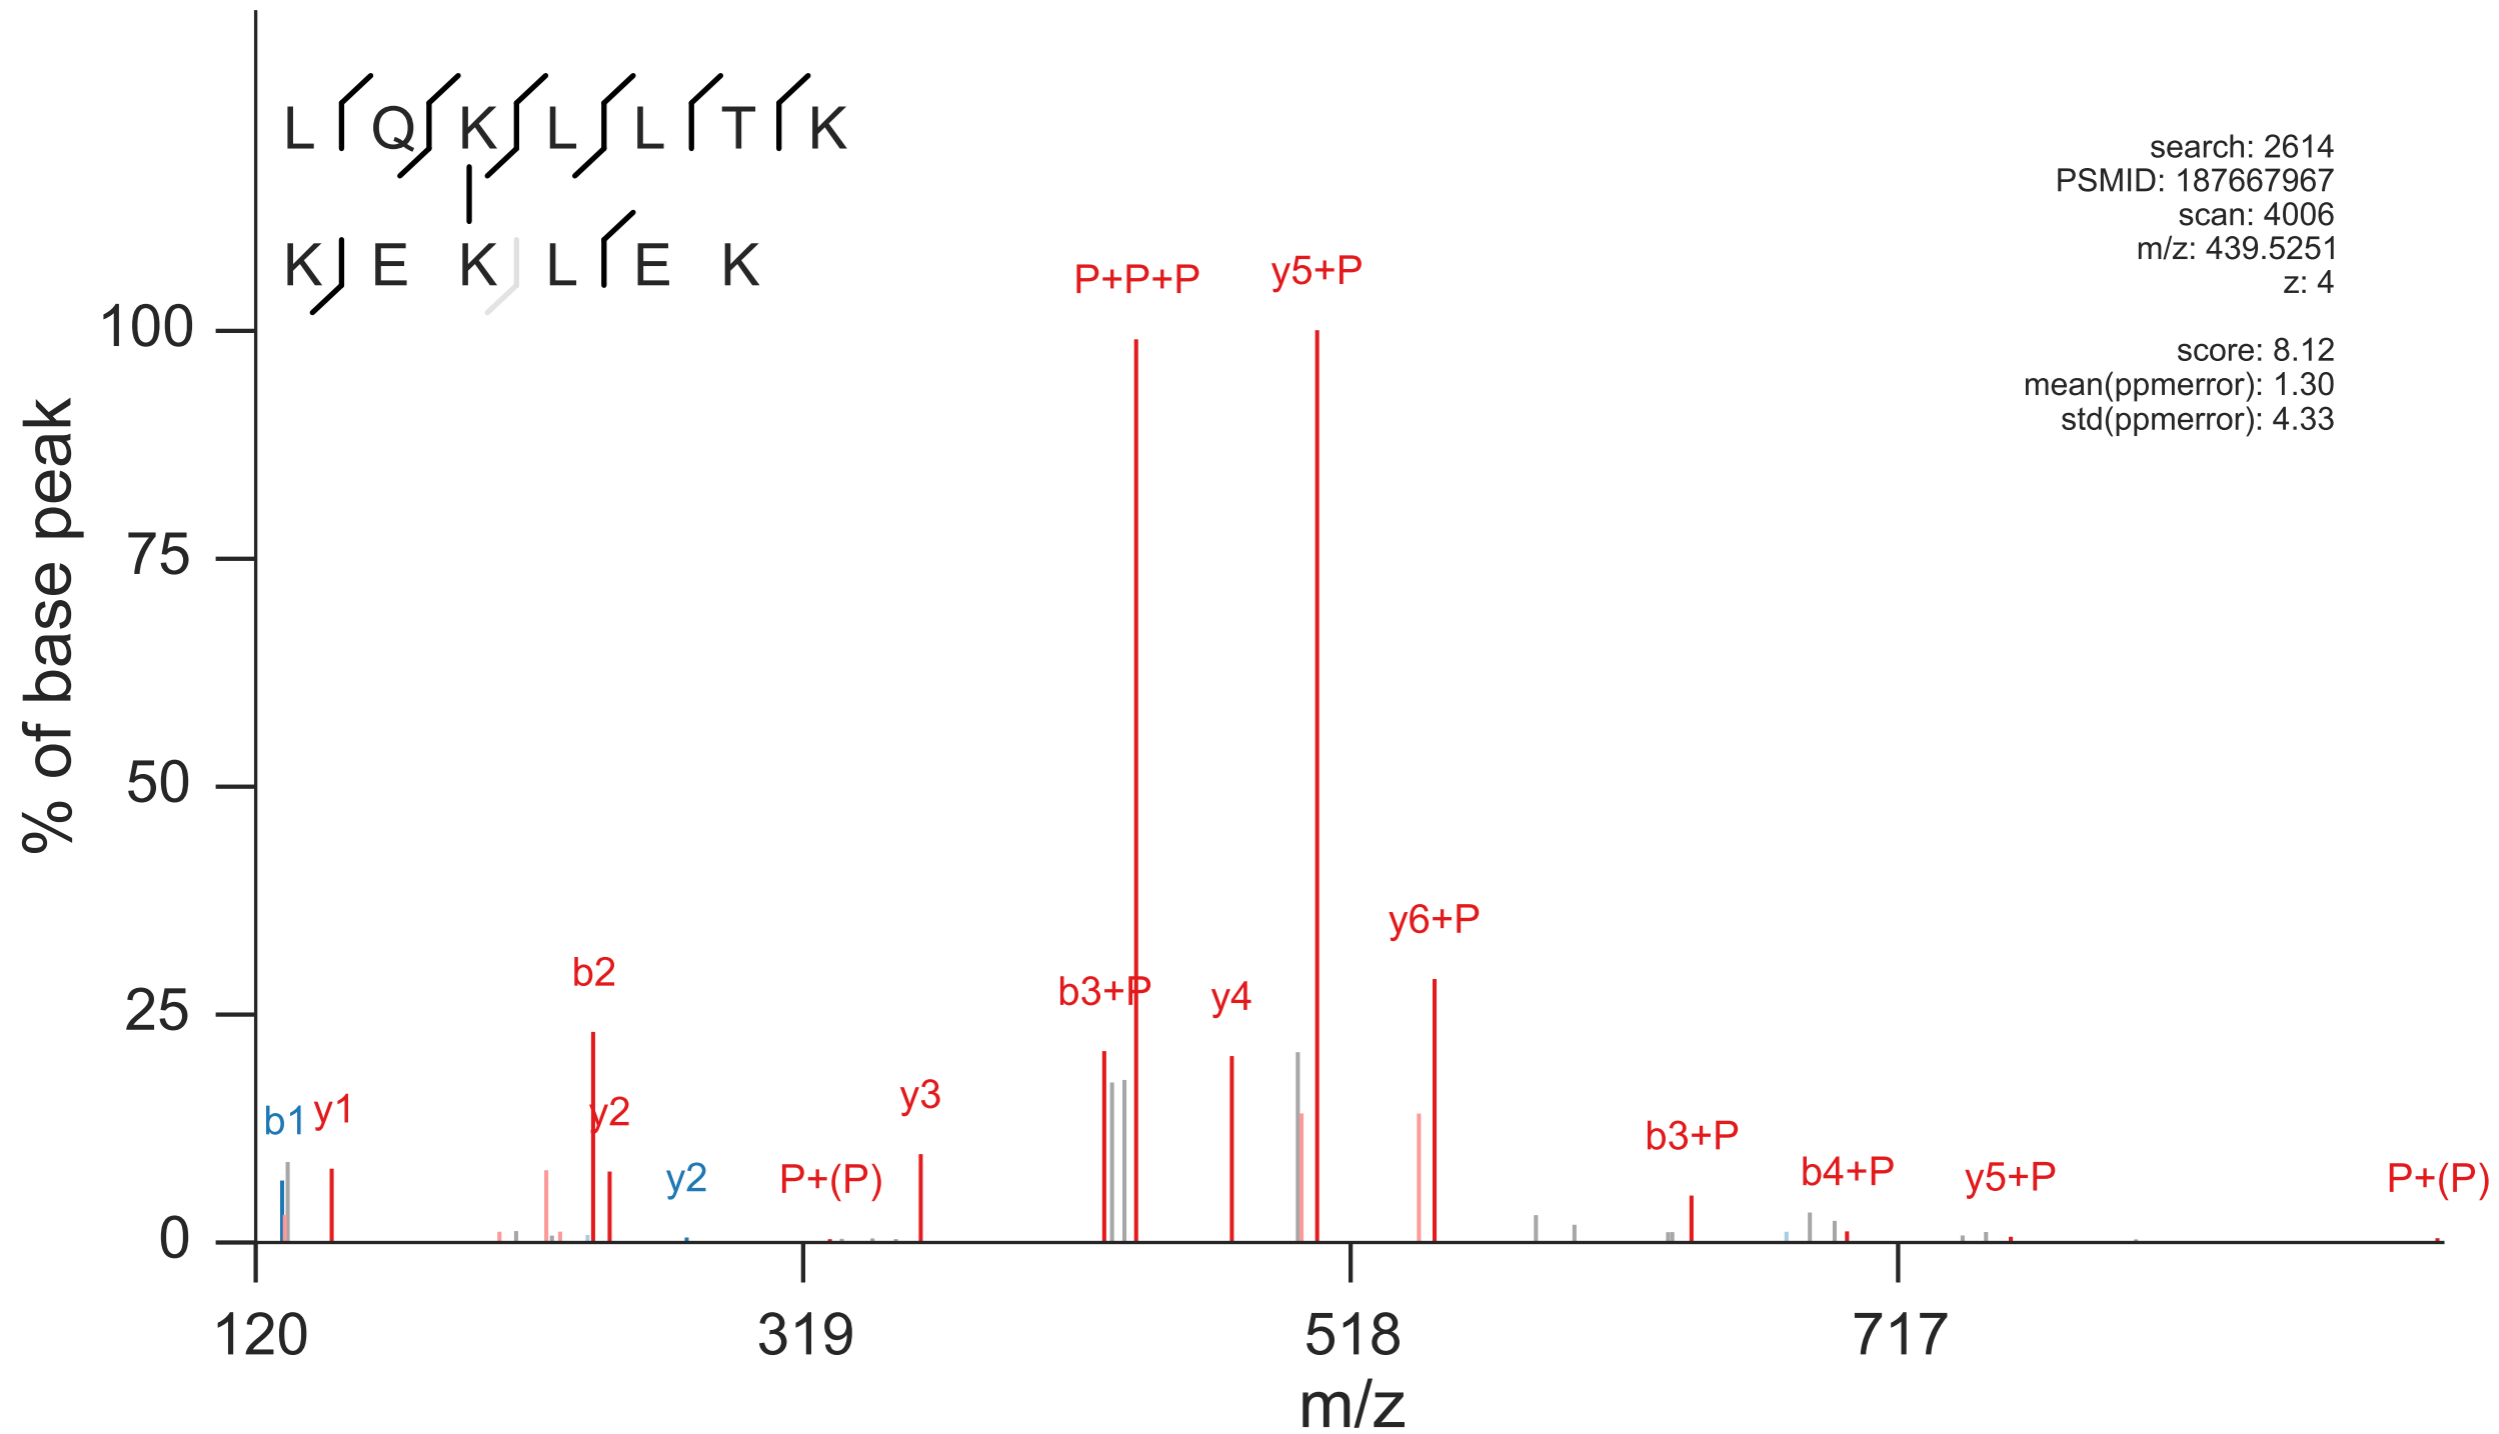

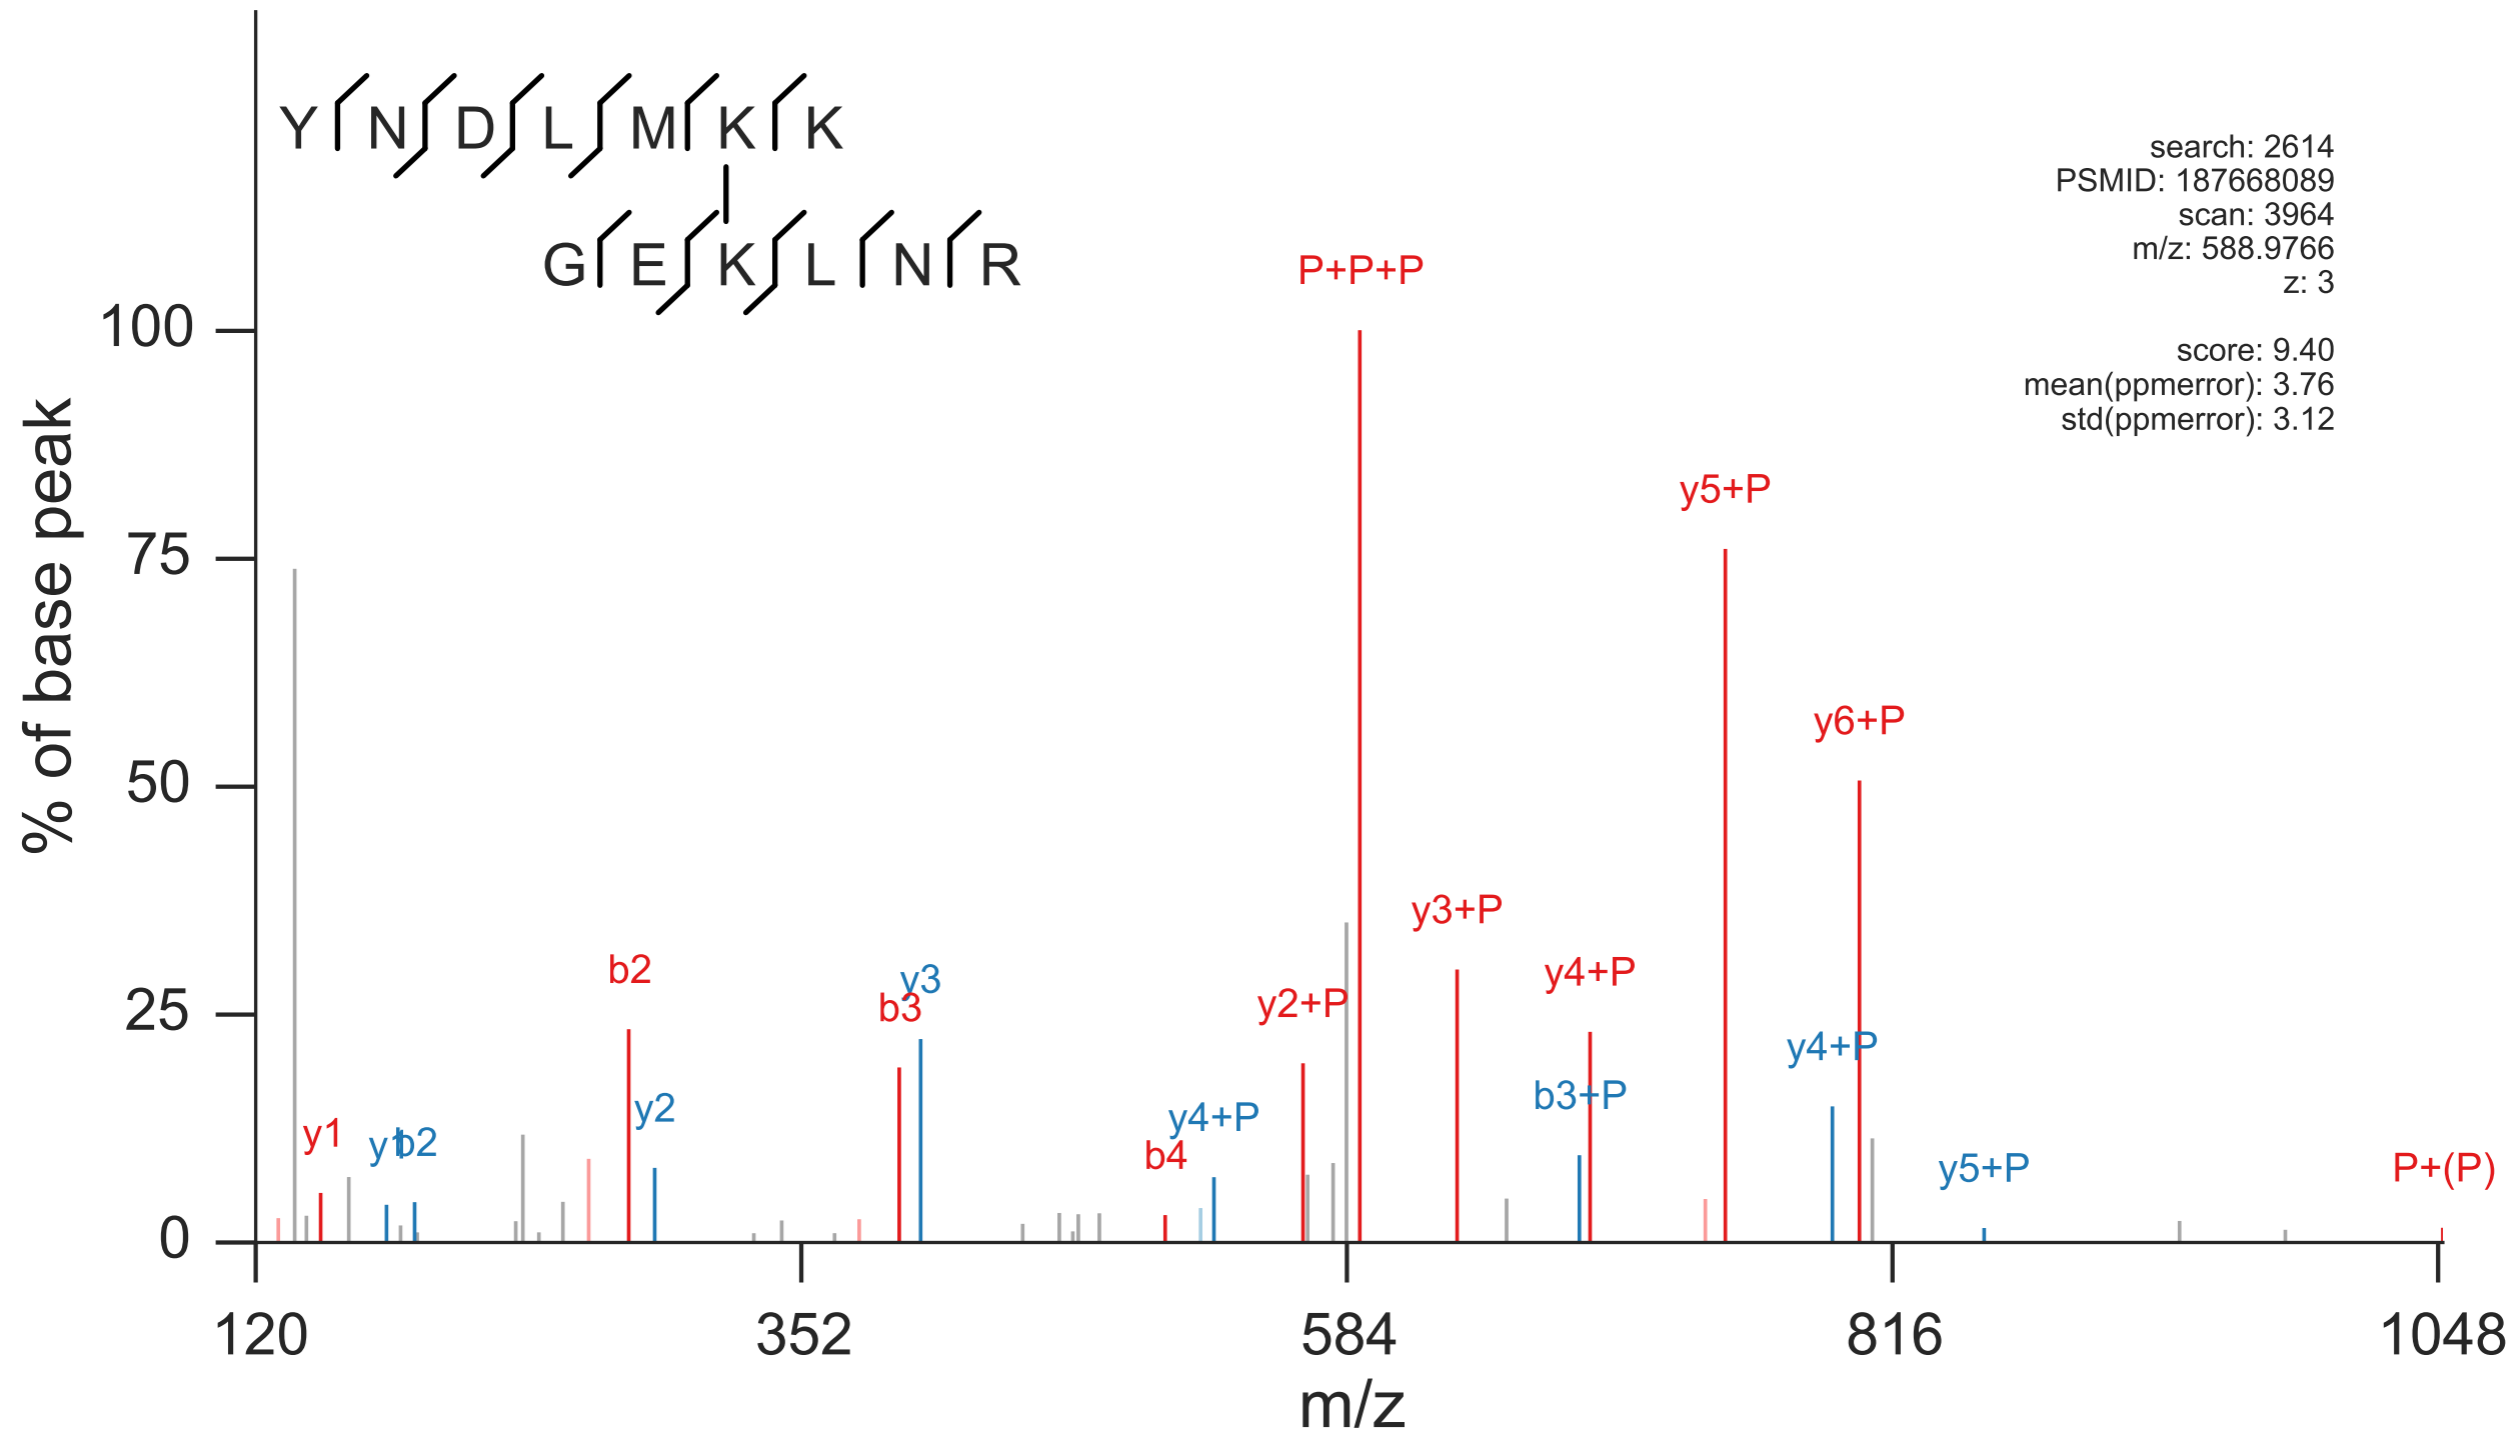

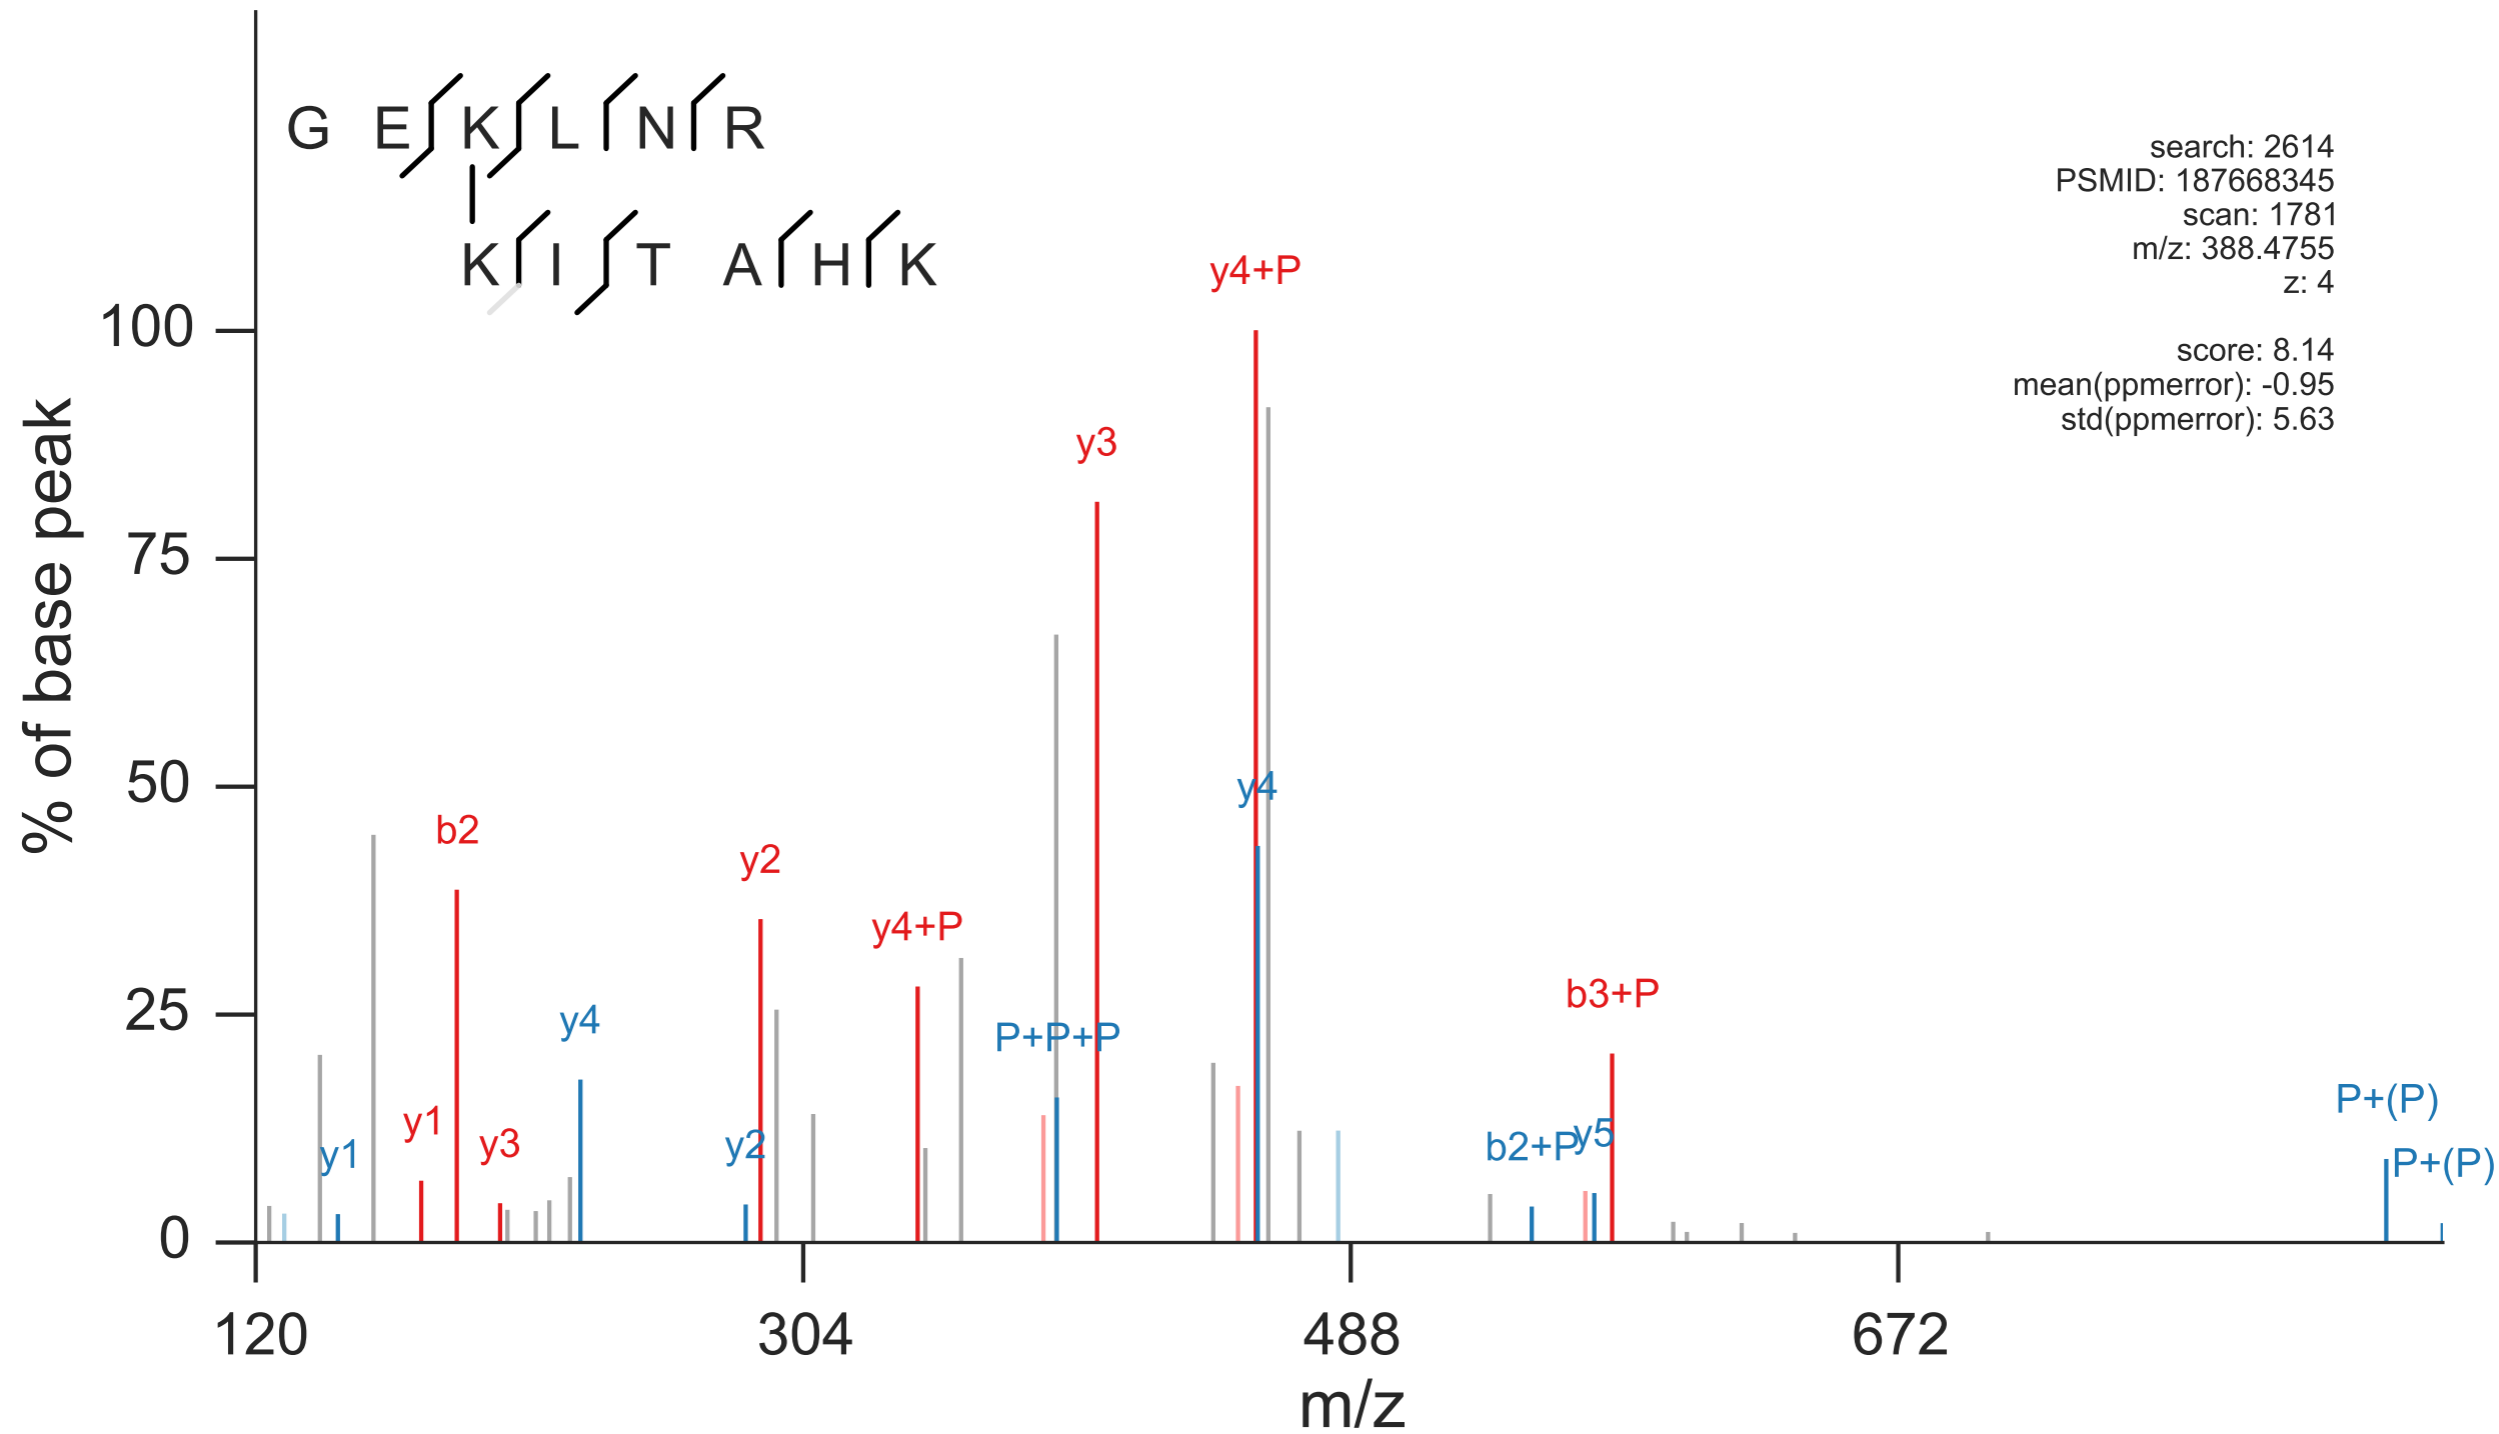

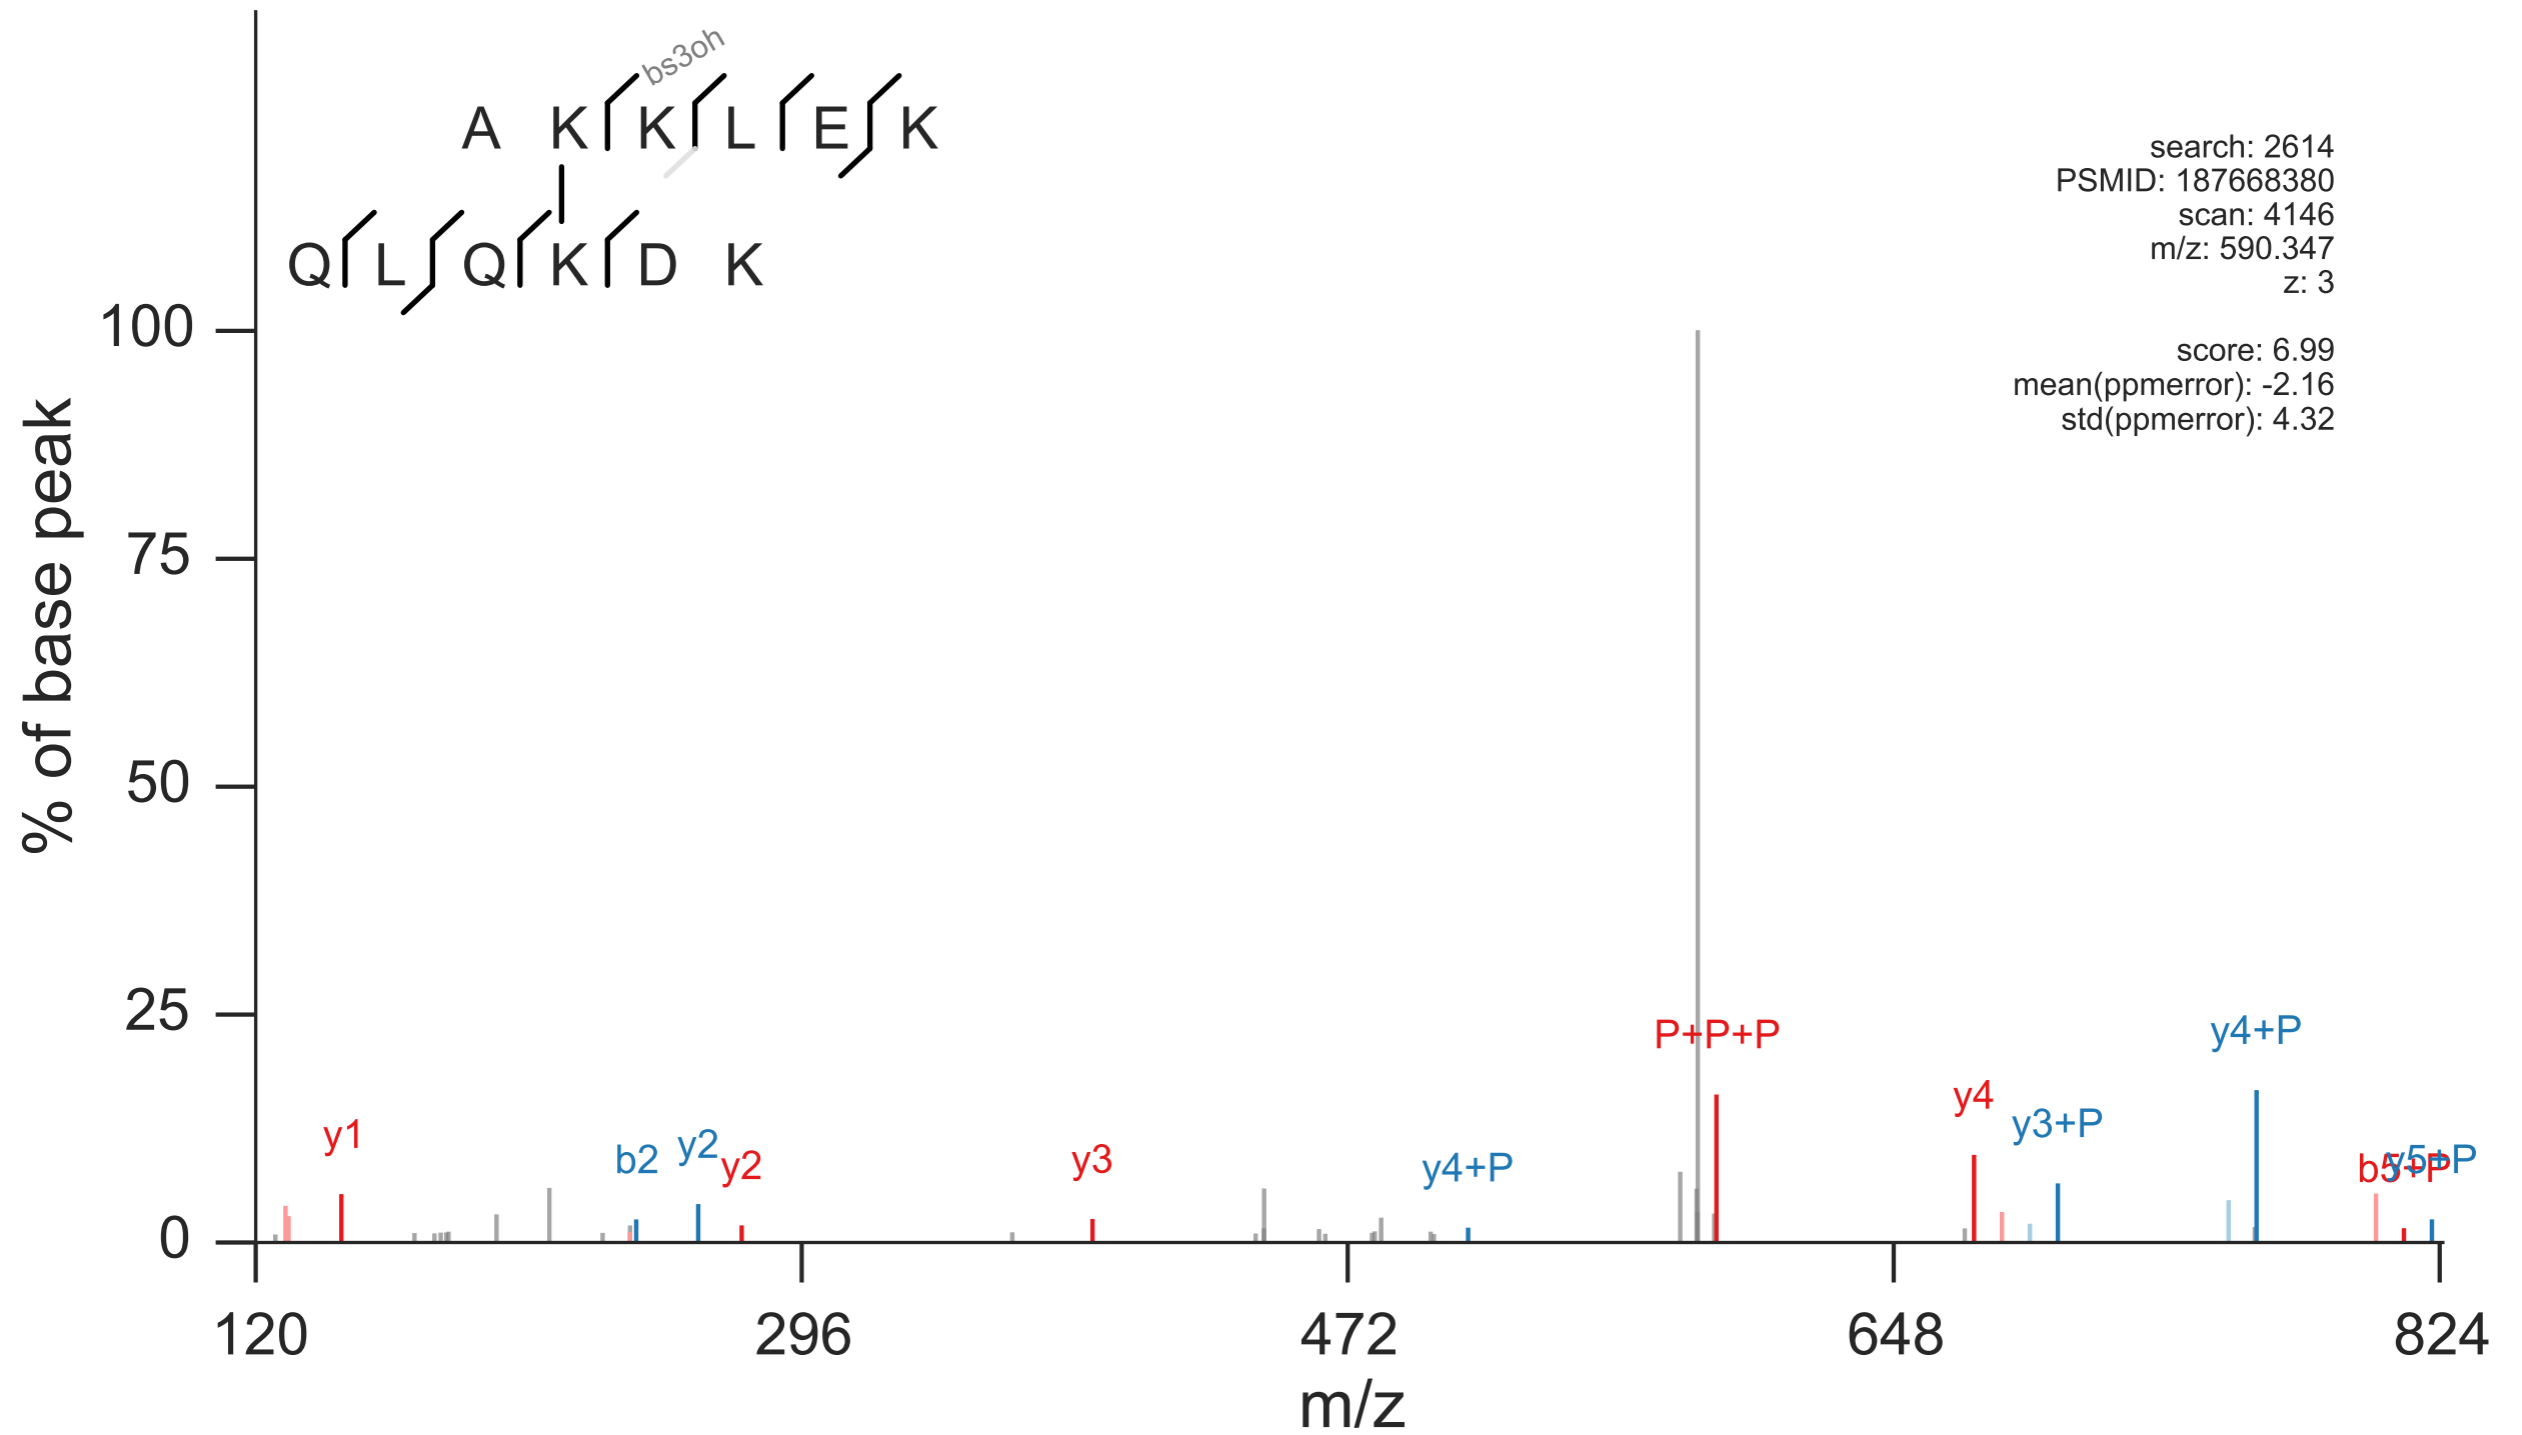



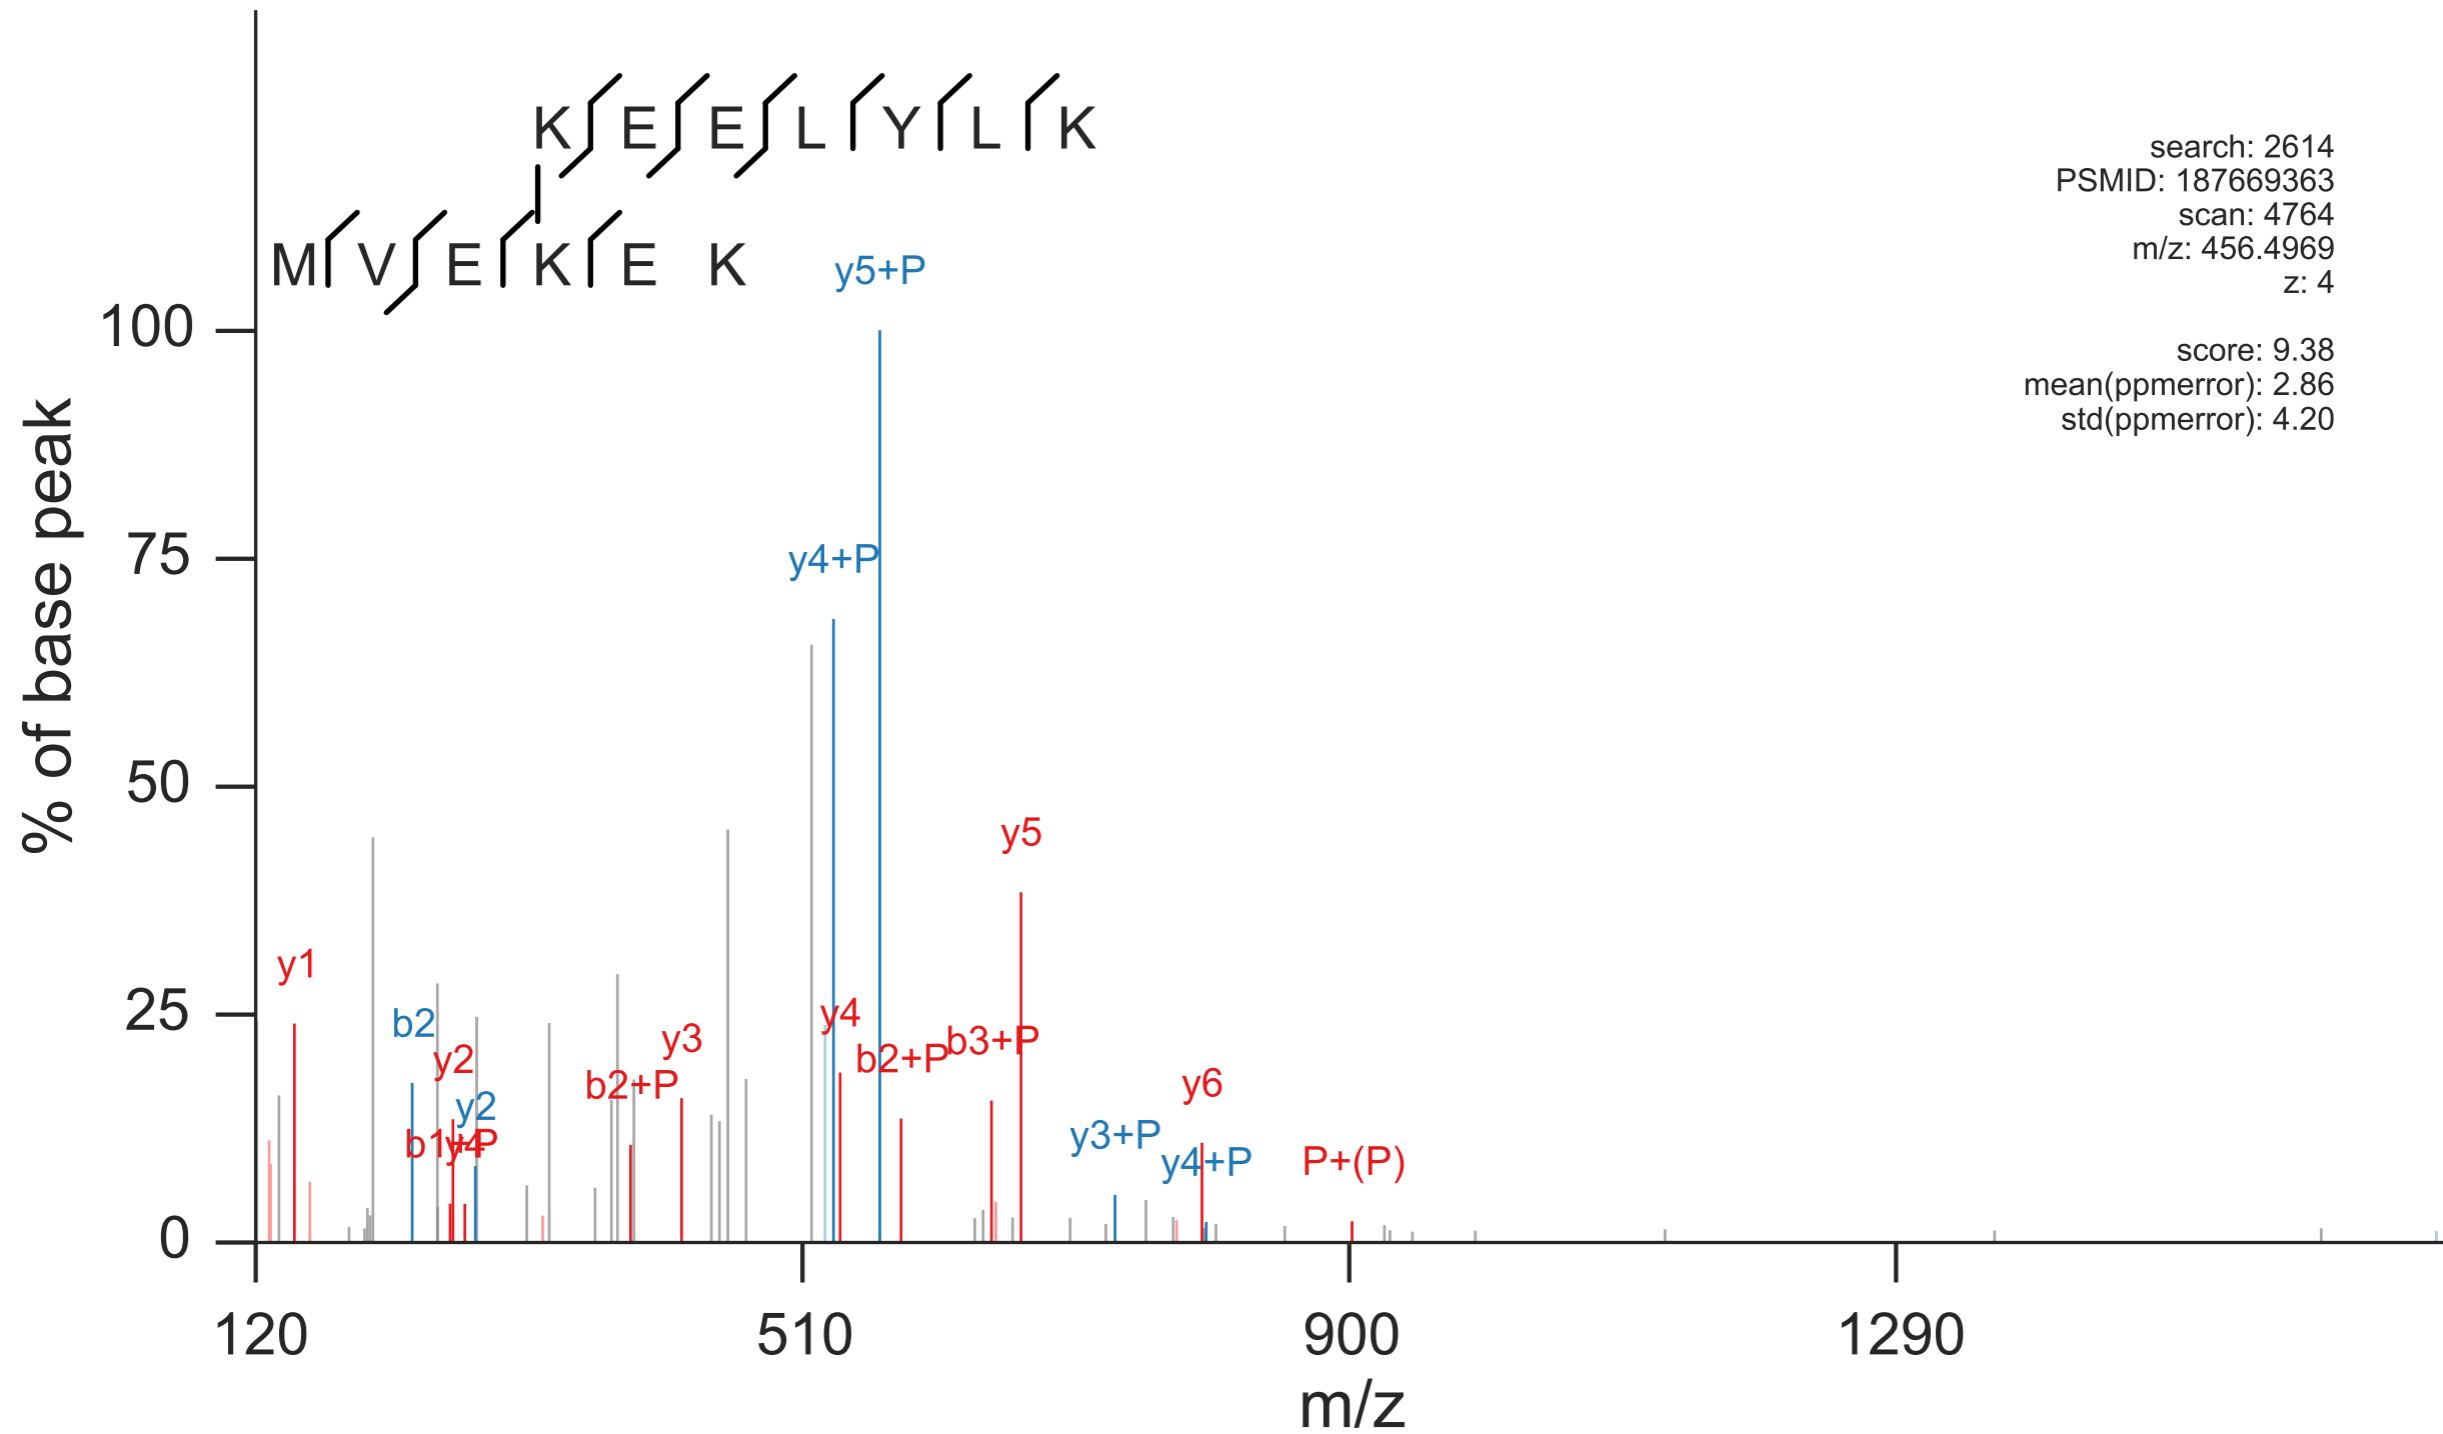

search: 2614  
 PSMID: 187669363  
 scan: 4764  
 m/z: 456.4969  
 z: 4

score: 9.38  
 mean(ppmerror): 2.86  
 std(ppmerror): 4.20

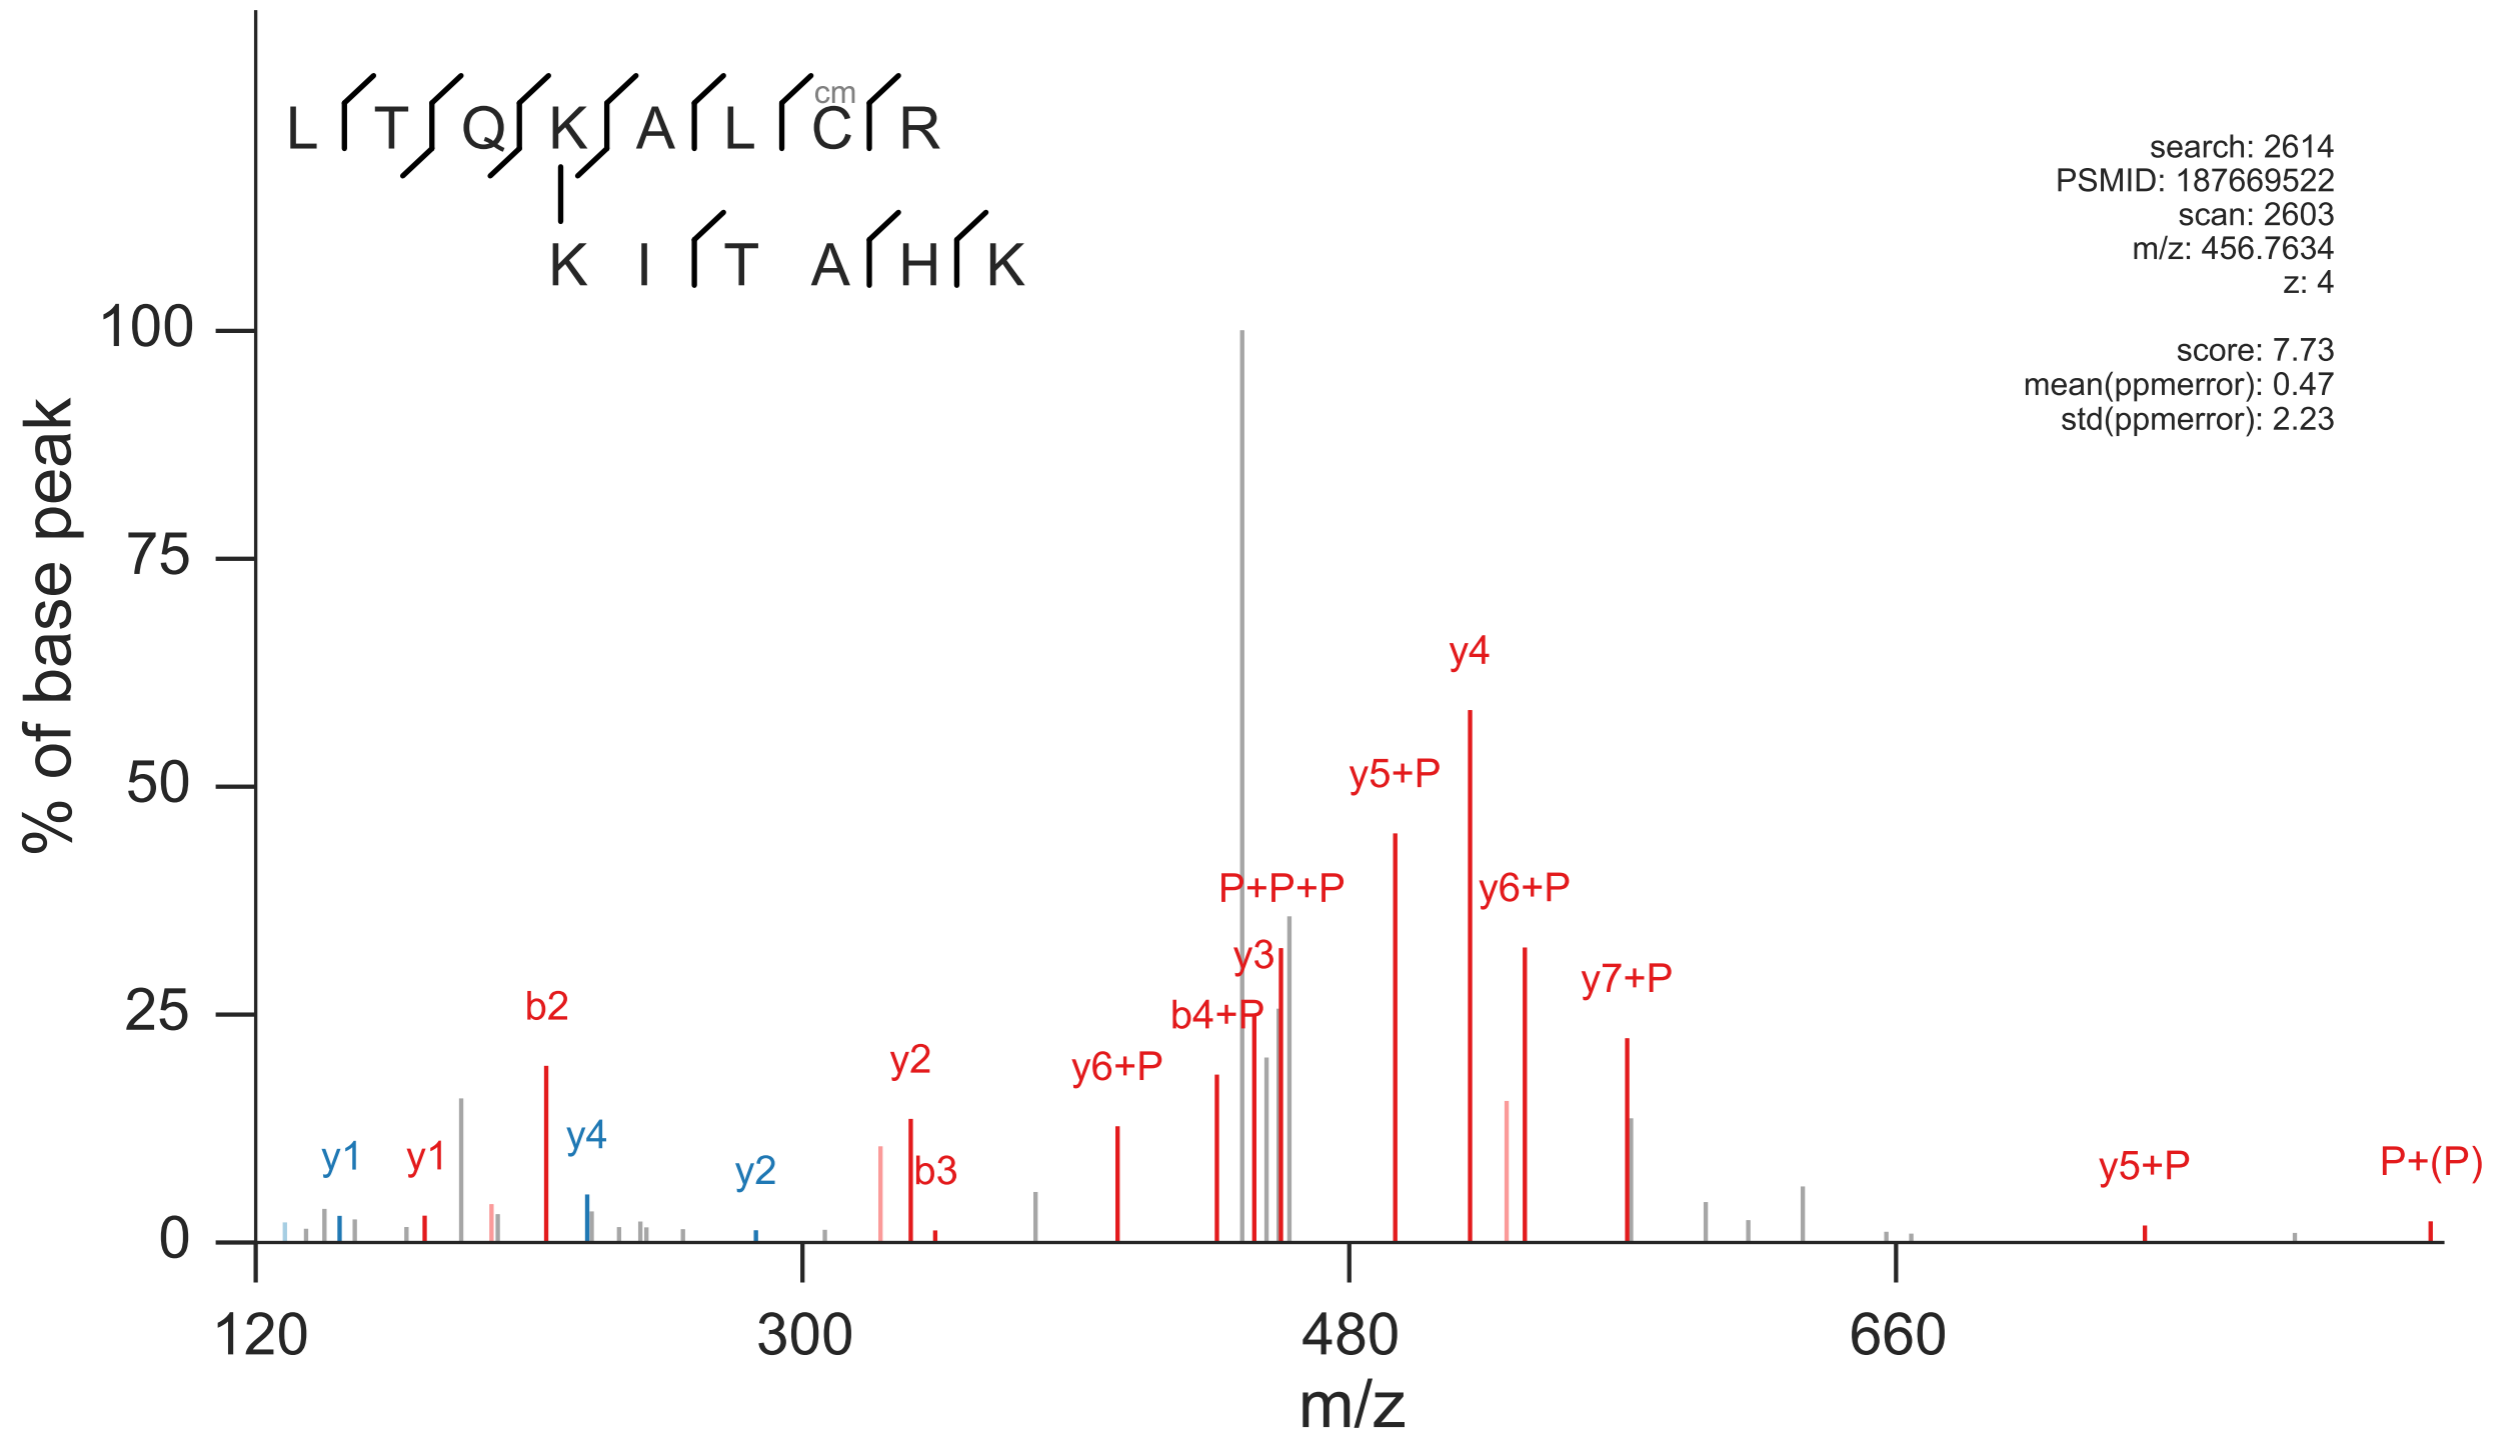

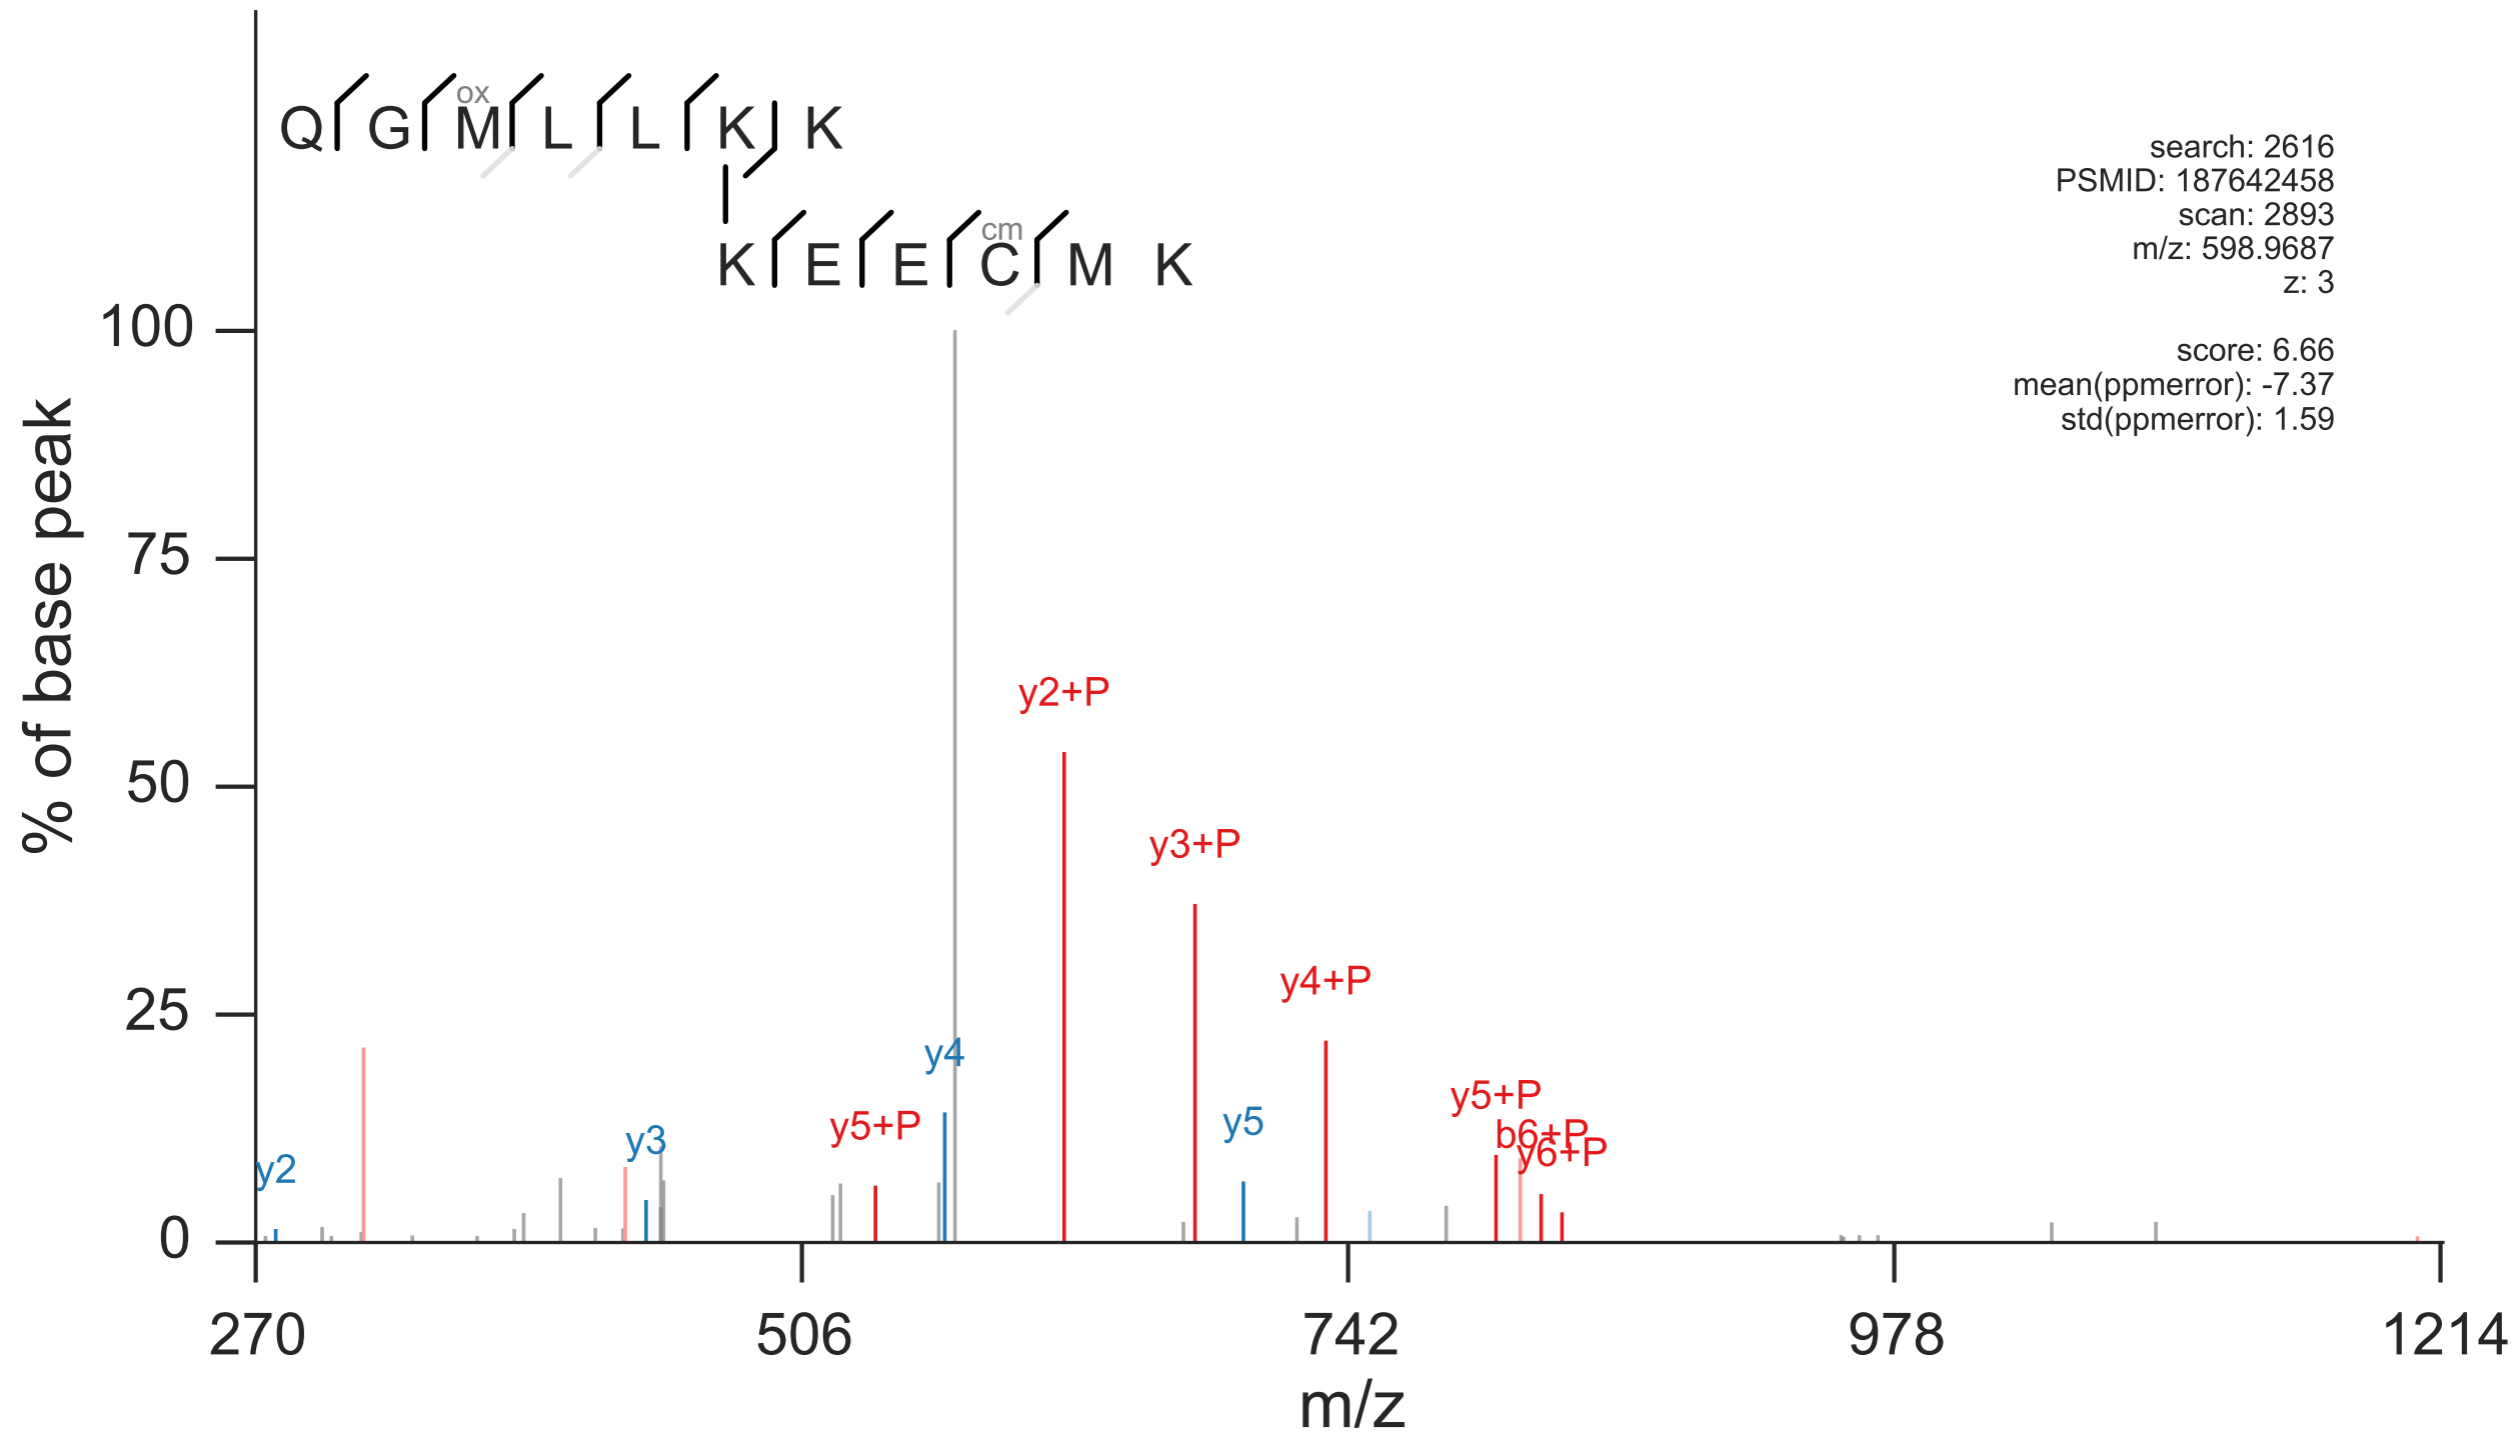

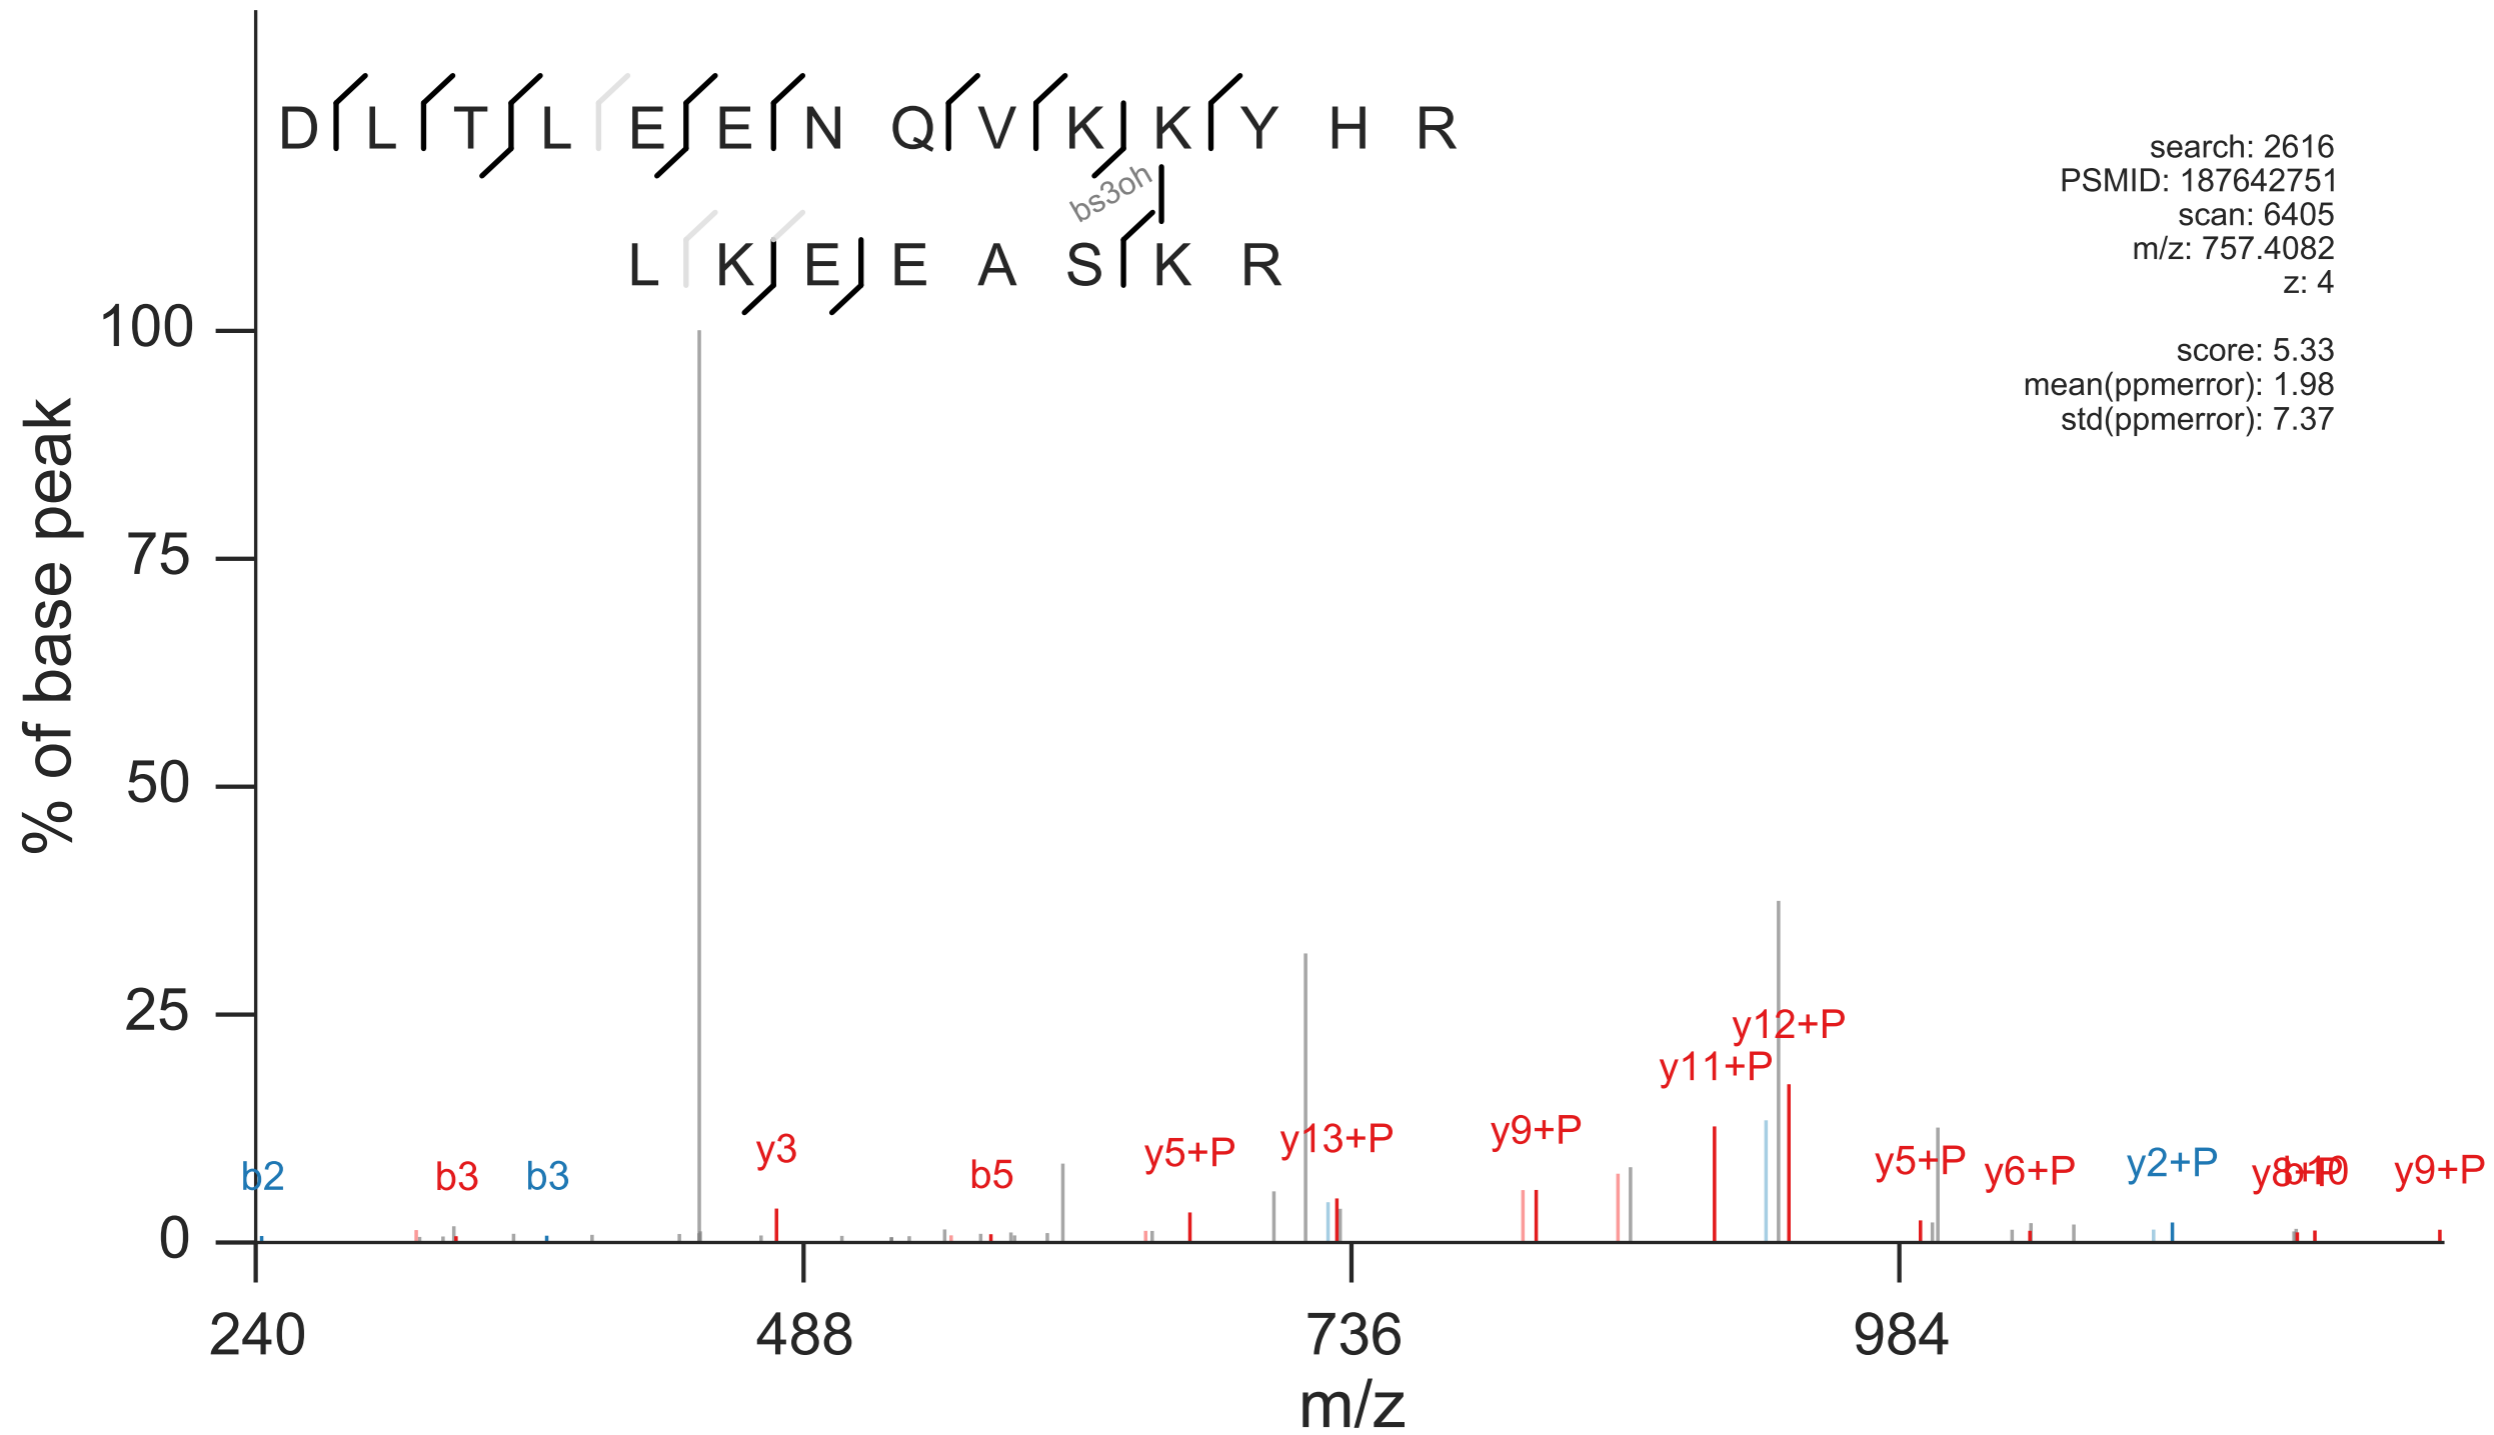

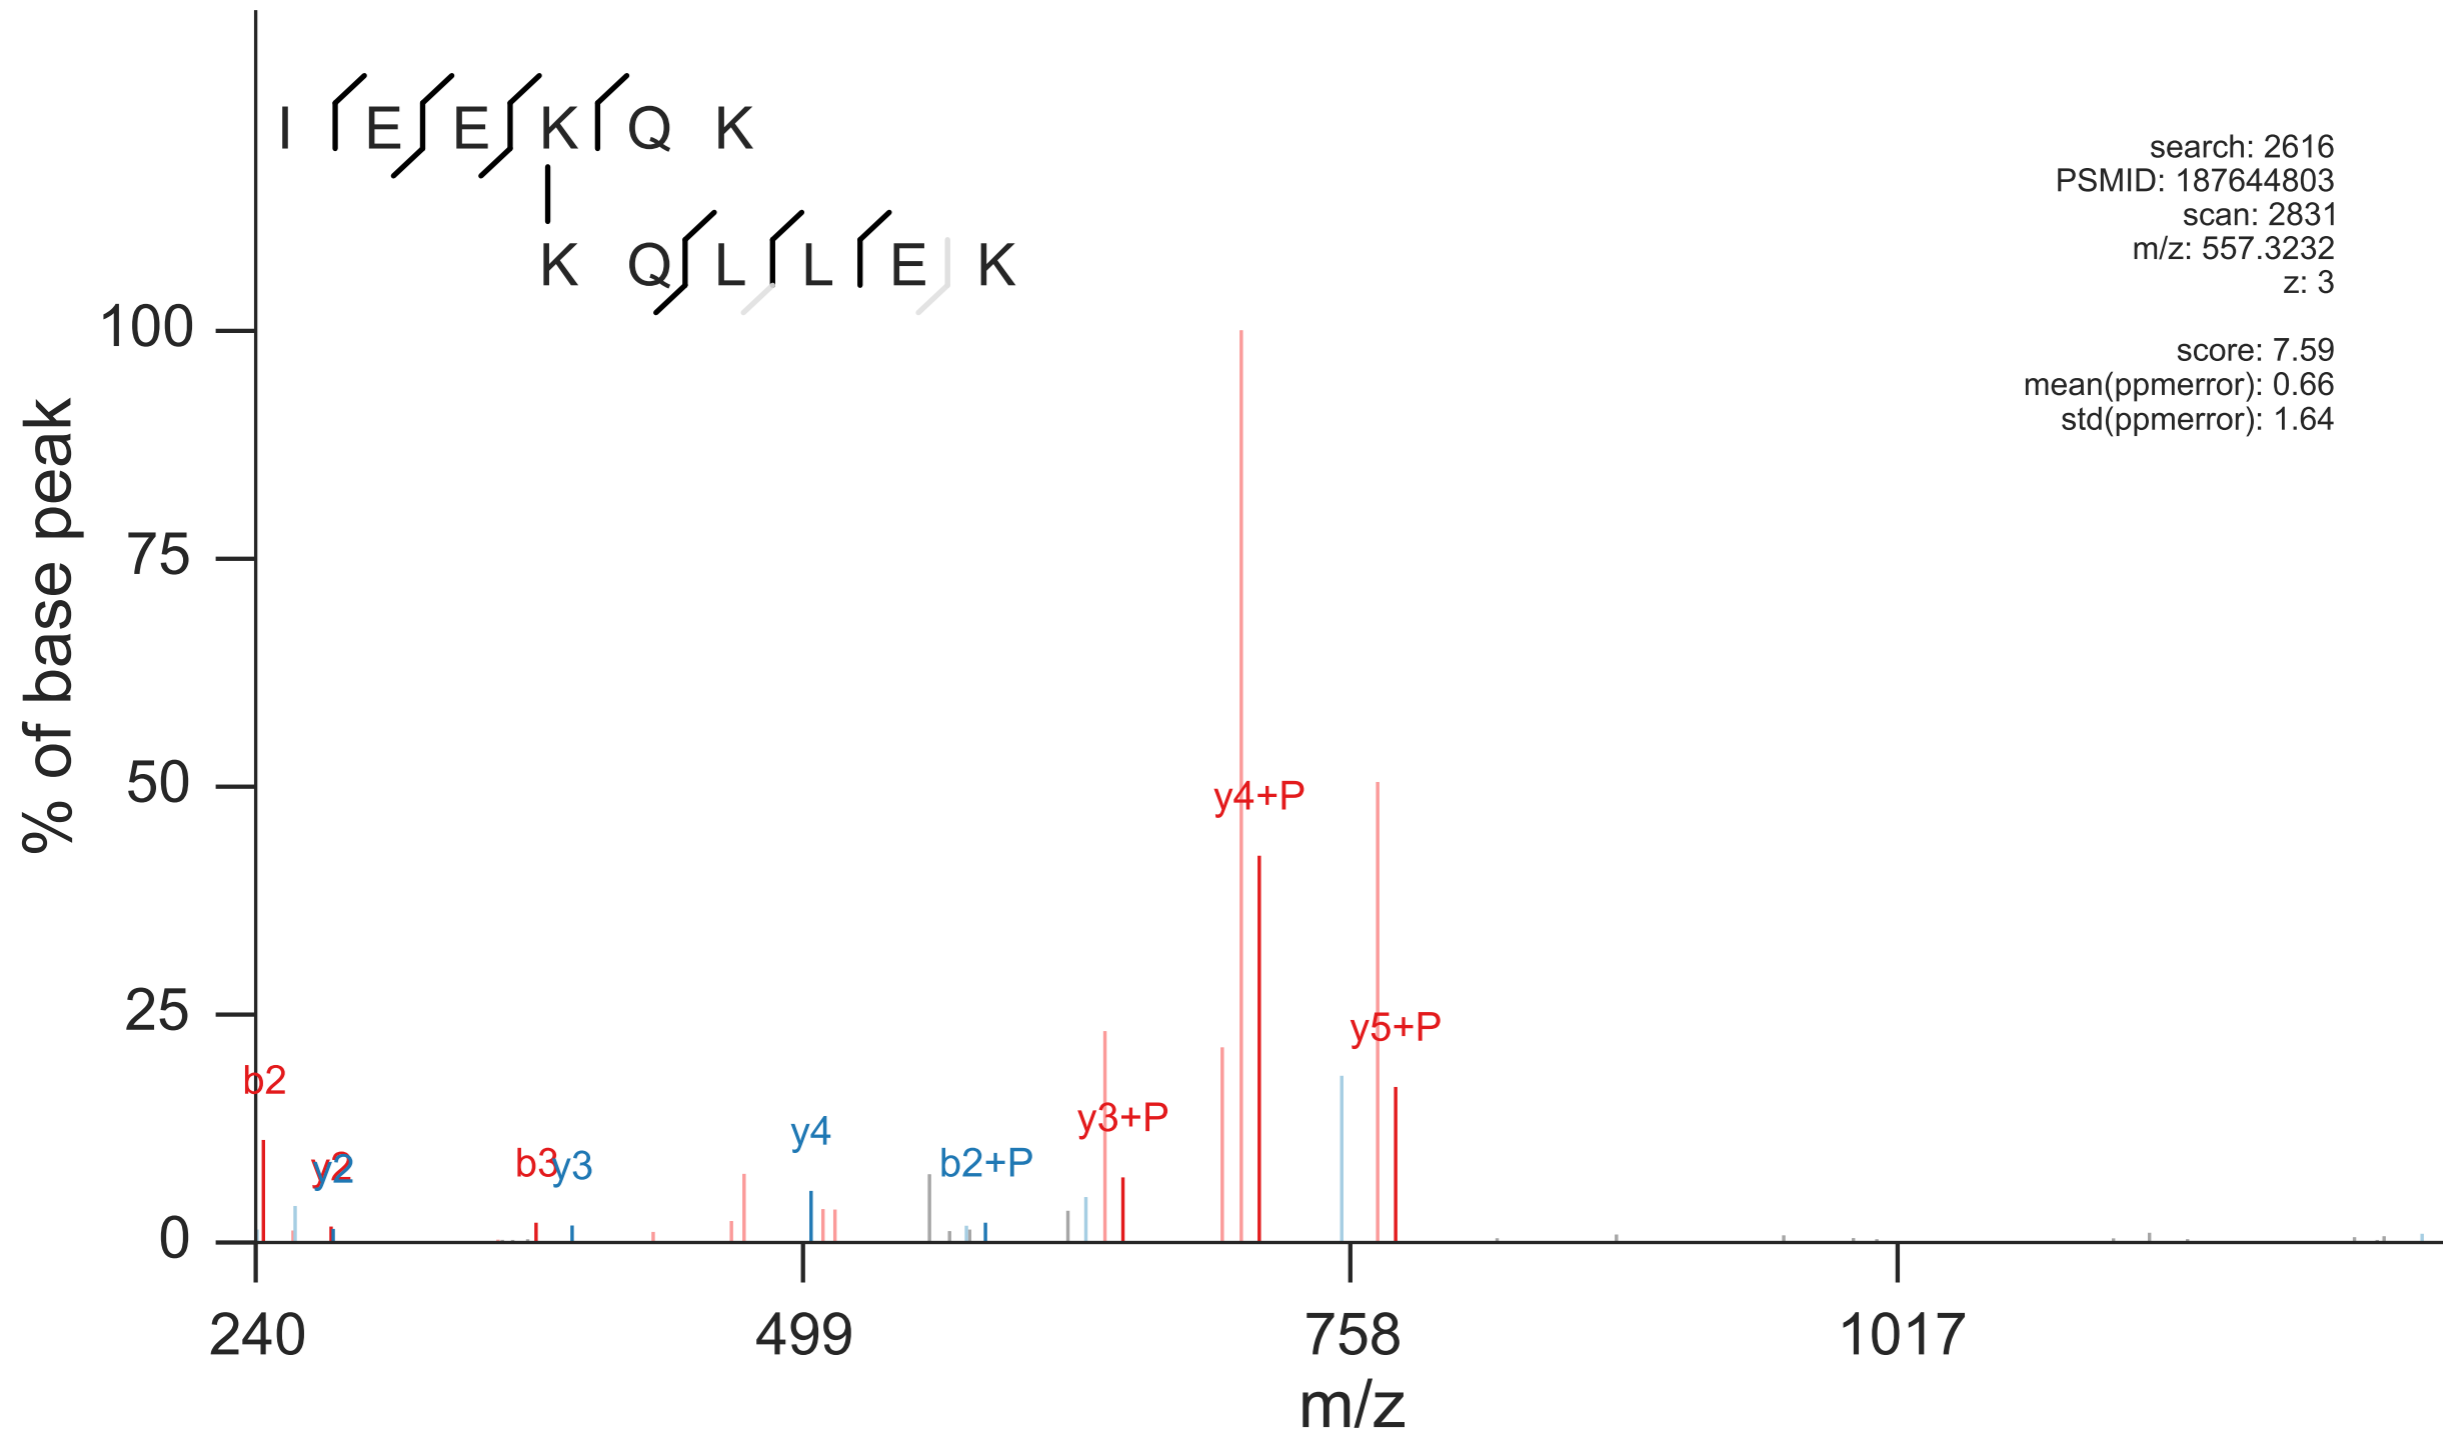

search: 2616  
PSMID: 187644803  
scan: 2831  
m/z: 557.3232  
z: 3  
  
score: 7.59  
mean(ppmerror): 0.66  
std(ppmerror): 1.64

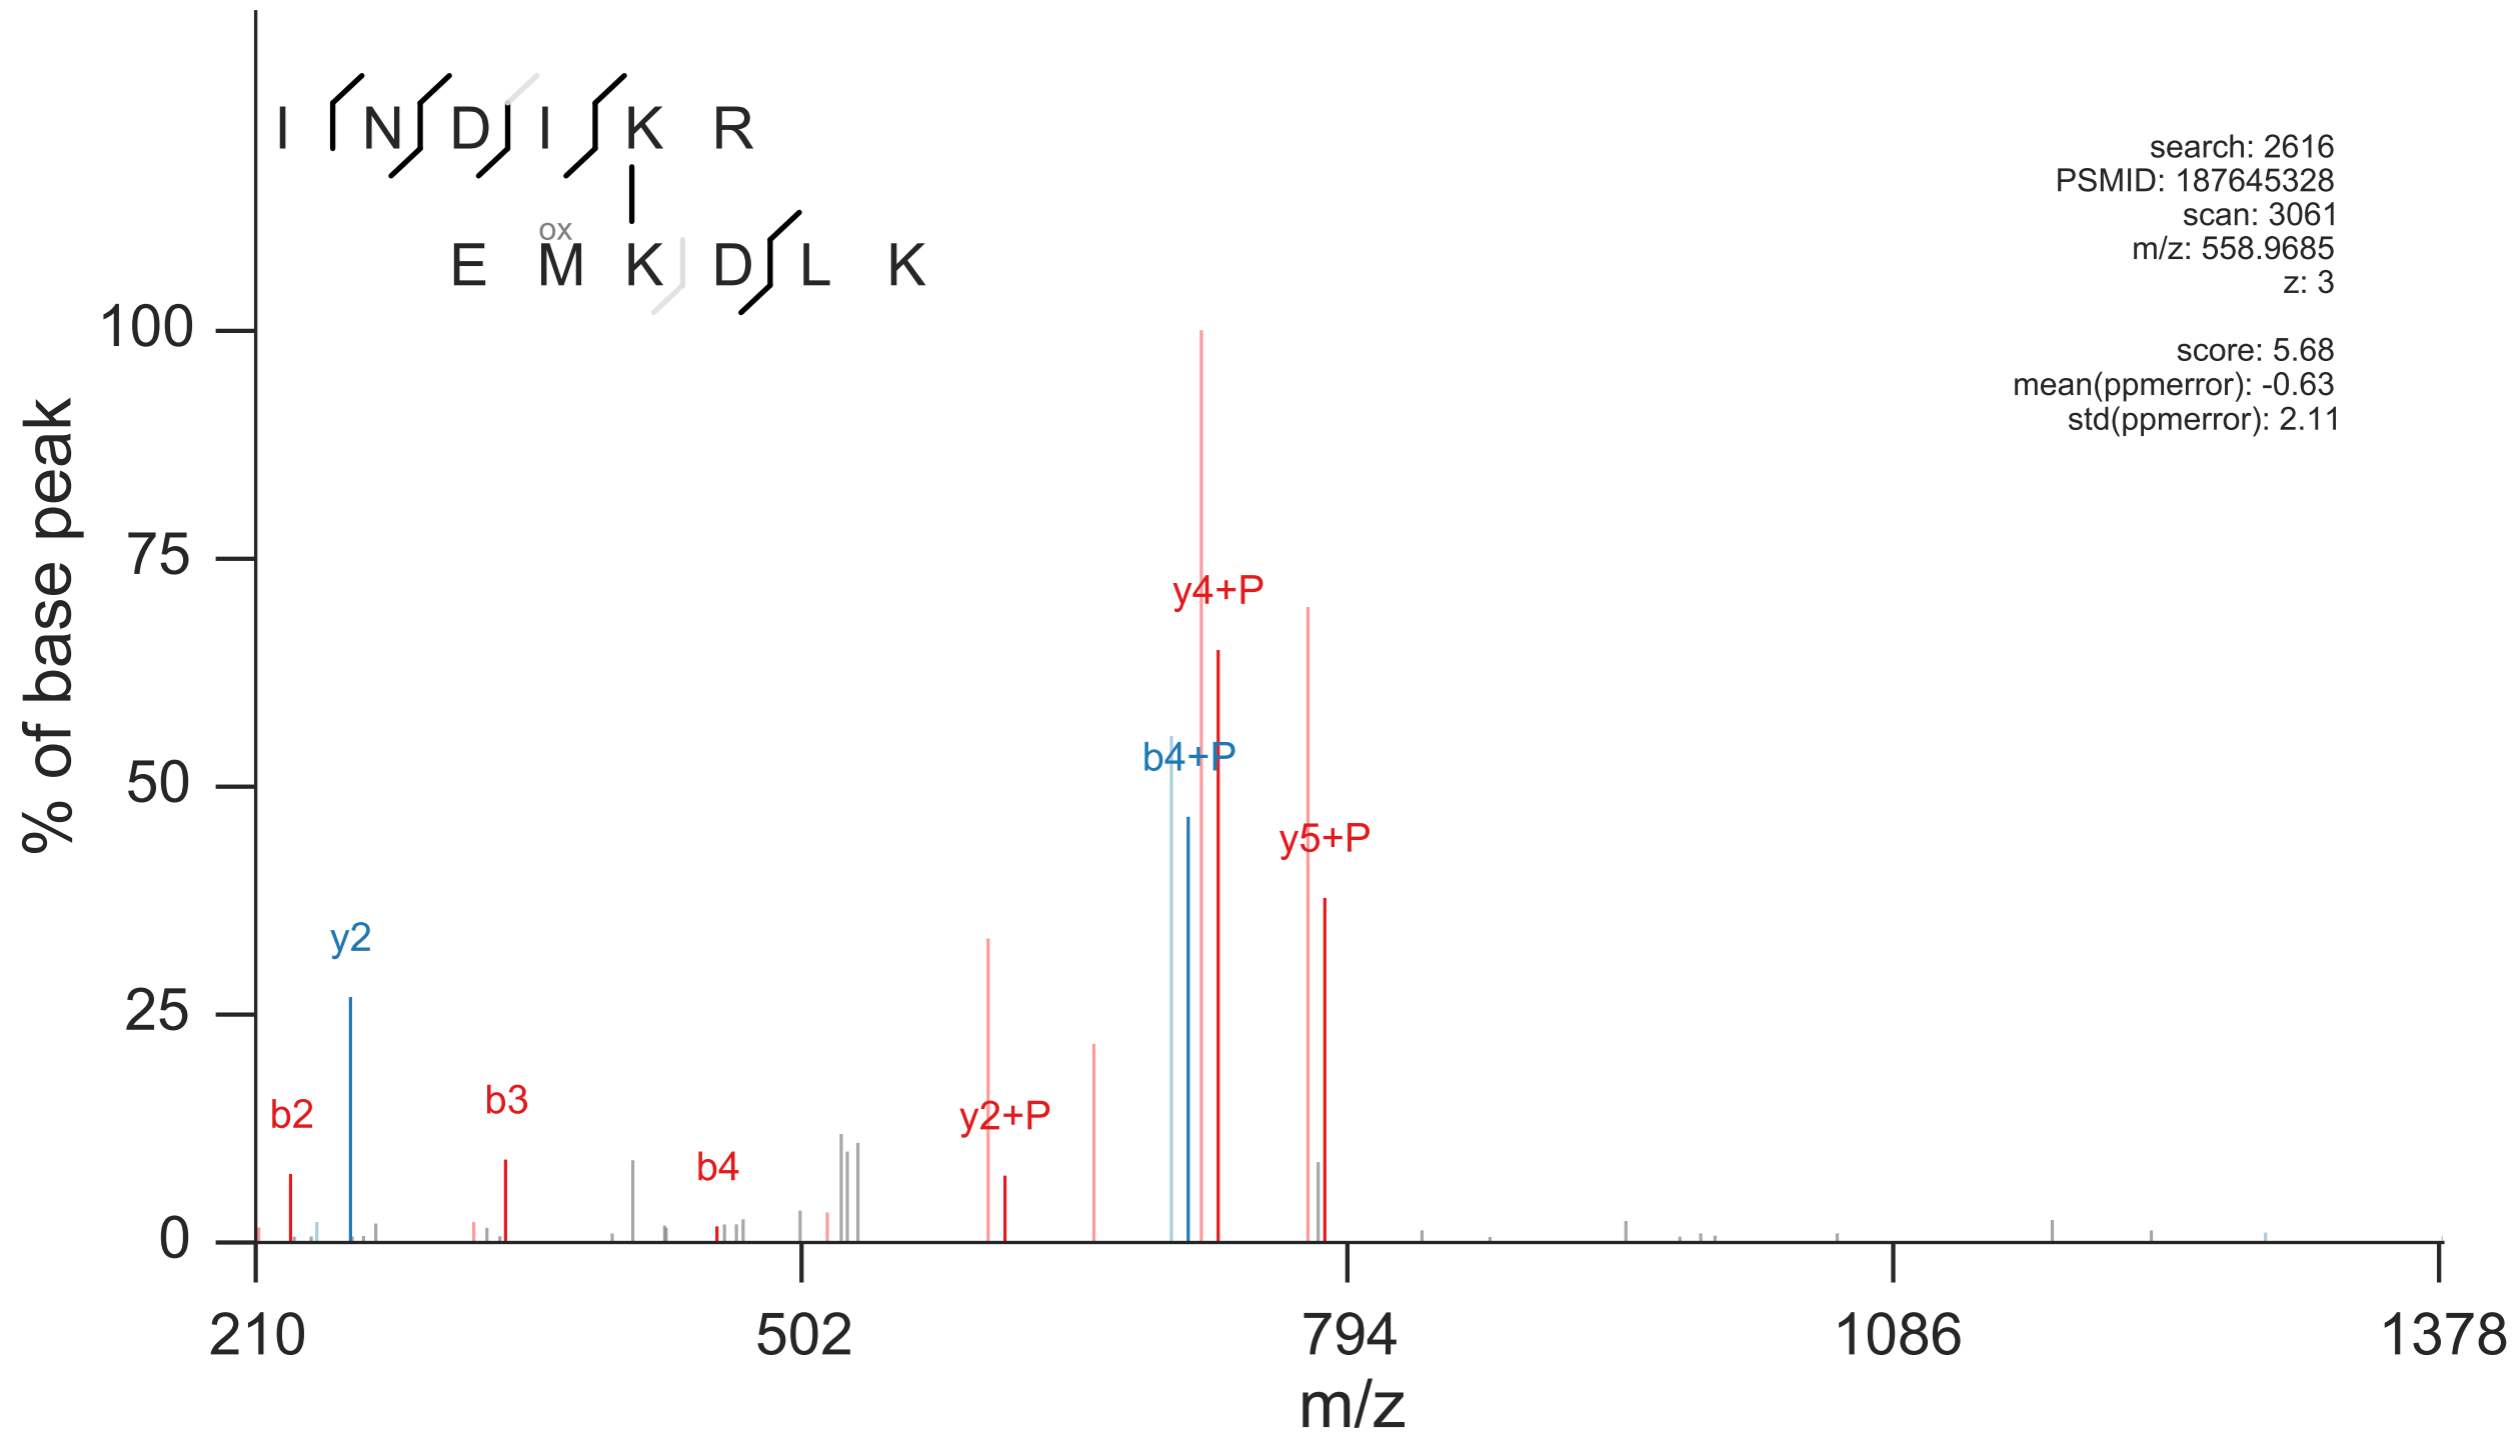

search: 2616  
PSMID: 187645328  
scan: 3061  
m/z: 558.9685  
z: 3  
score: 5.68  
mean(ppmerror): -0.63  
std(ppmerror): 2.11

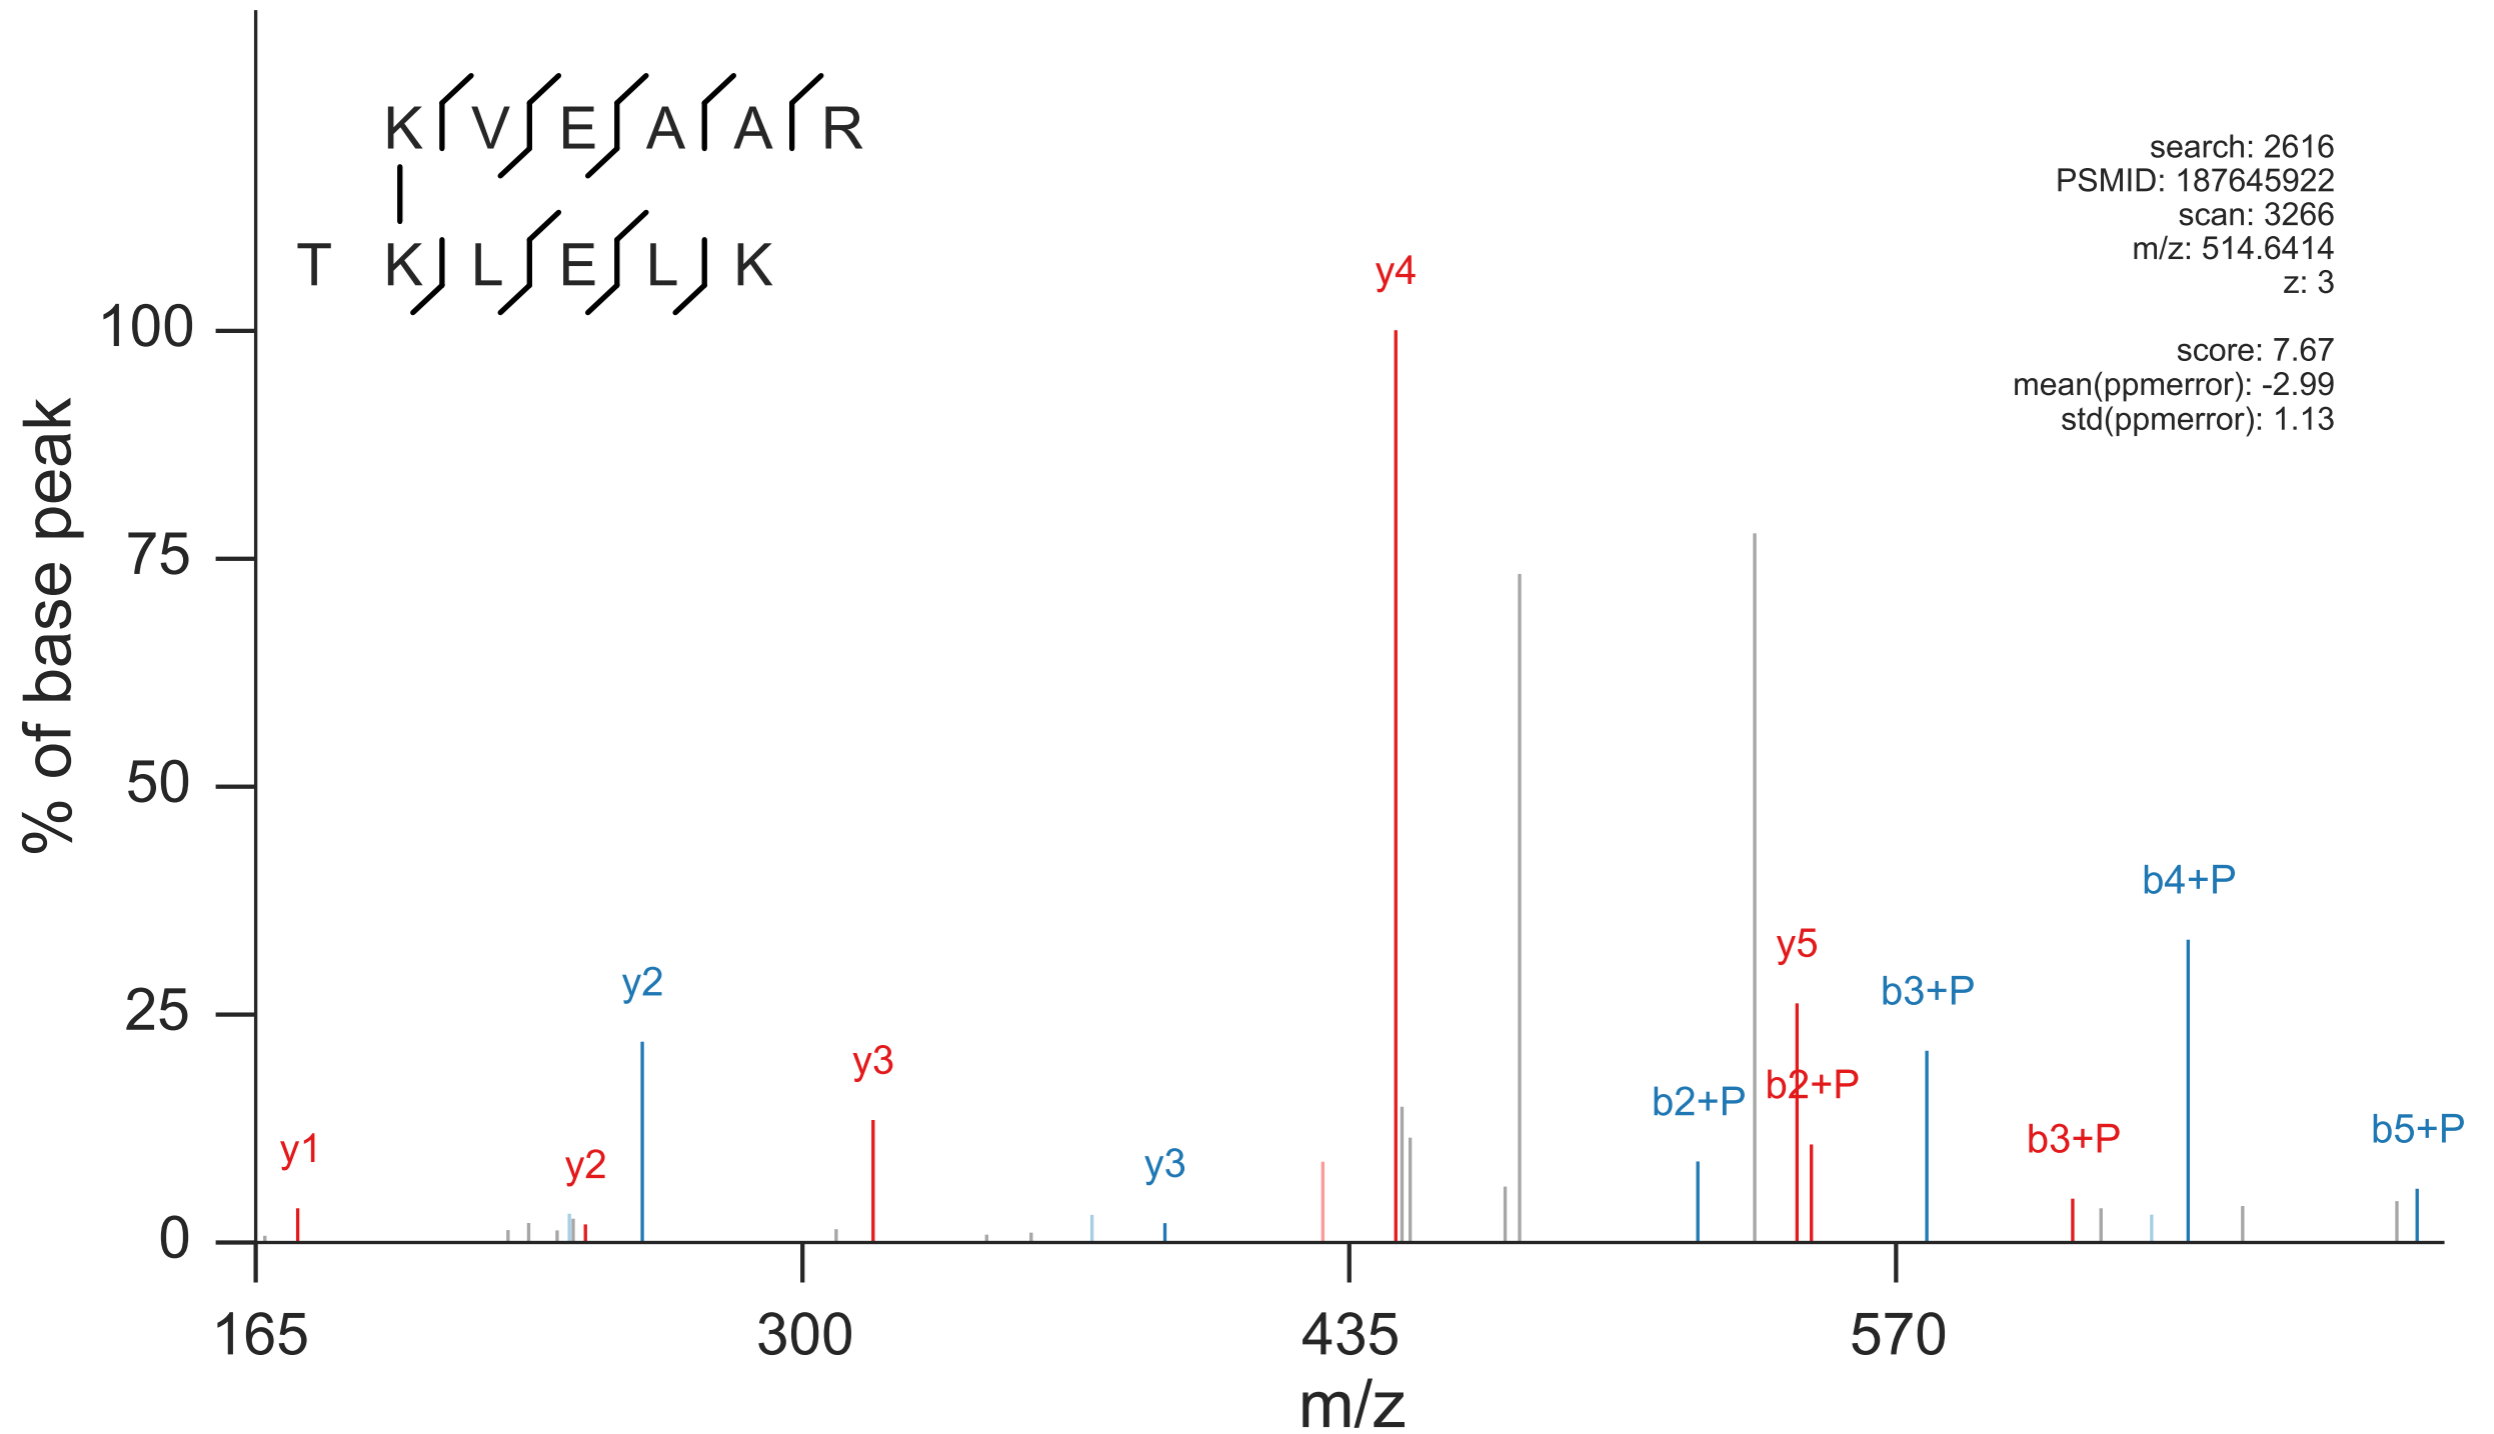

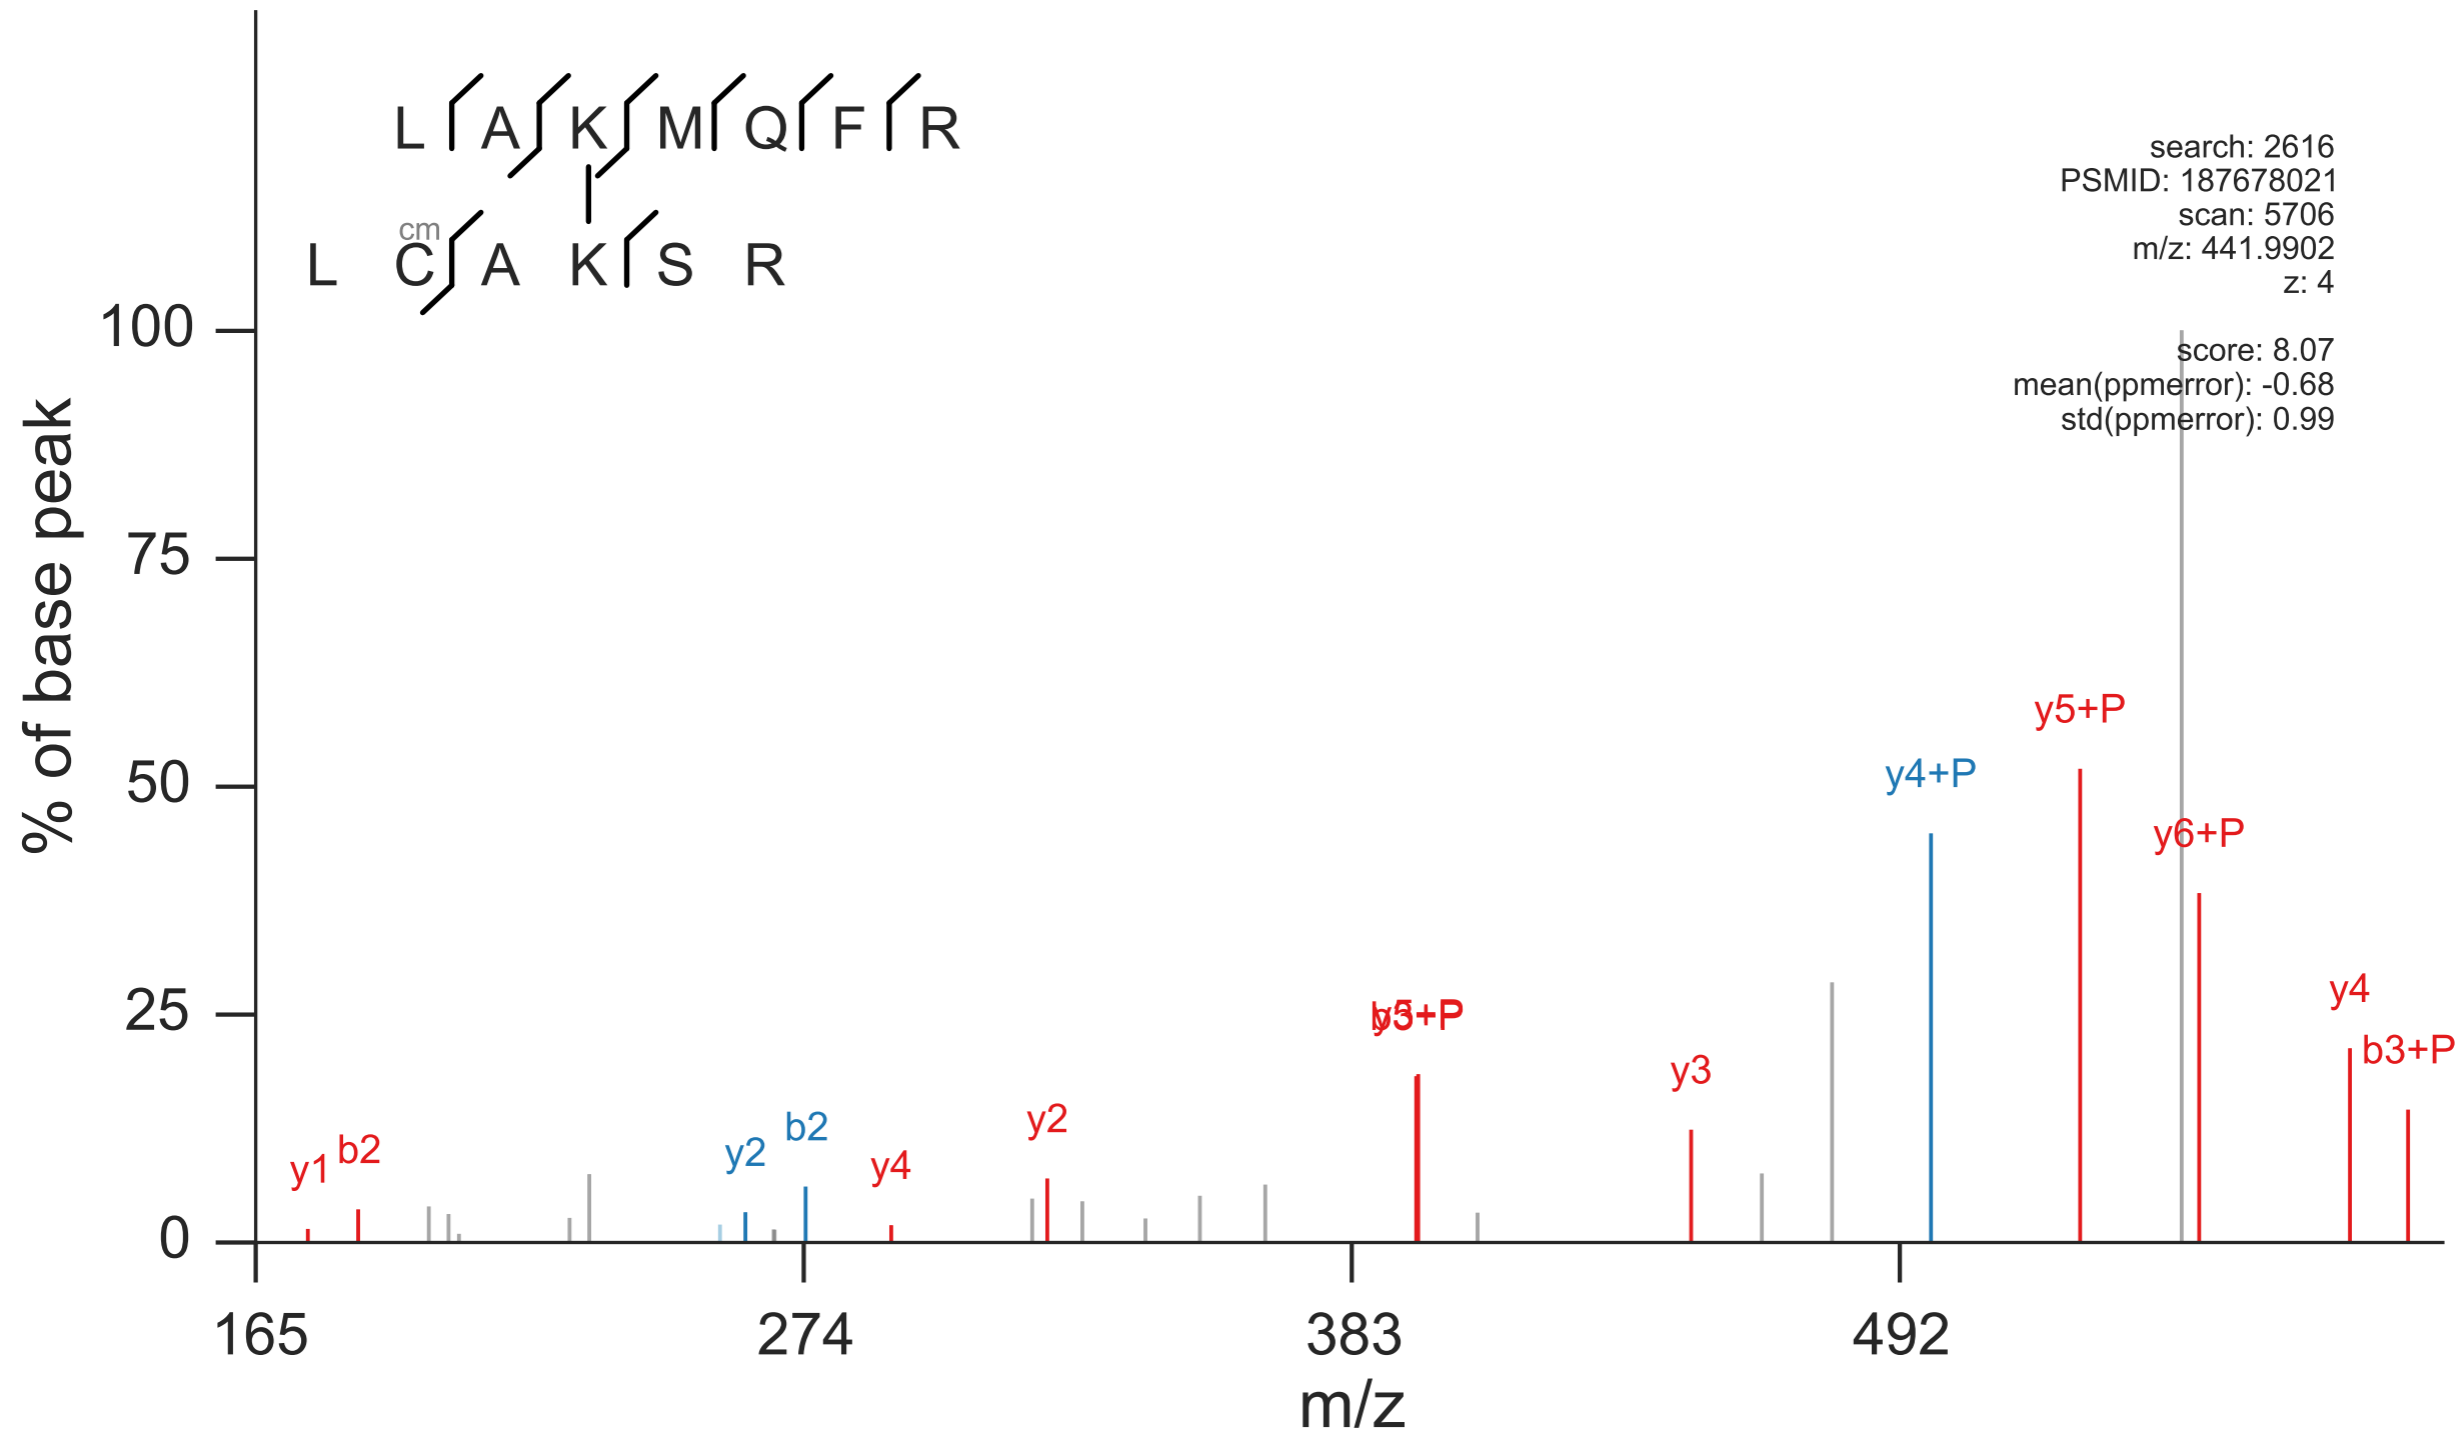



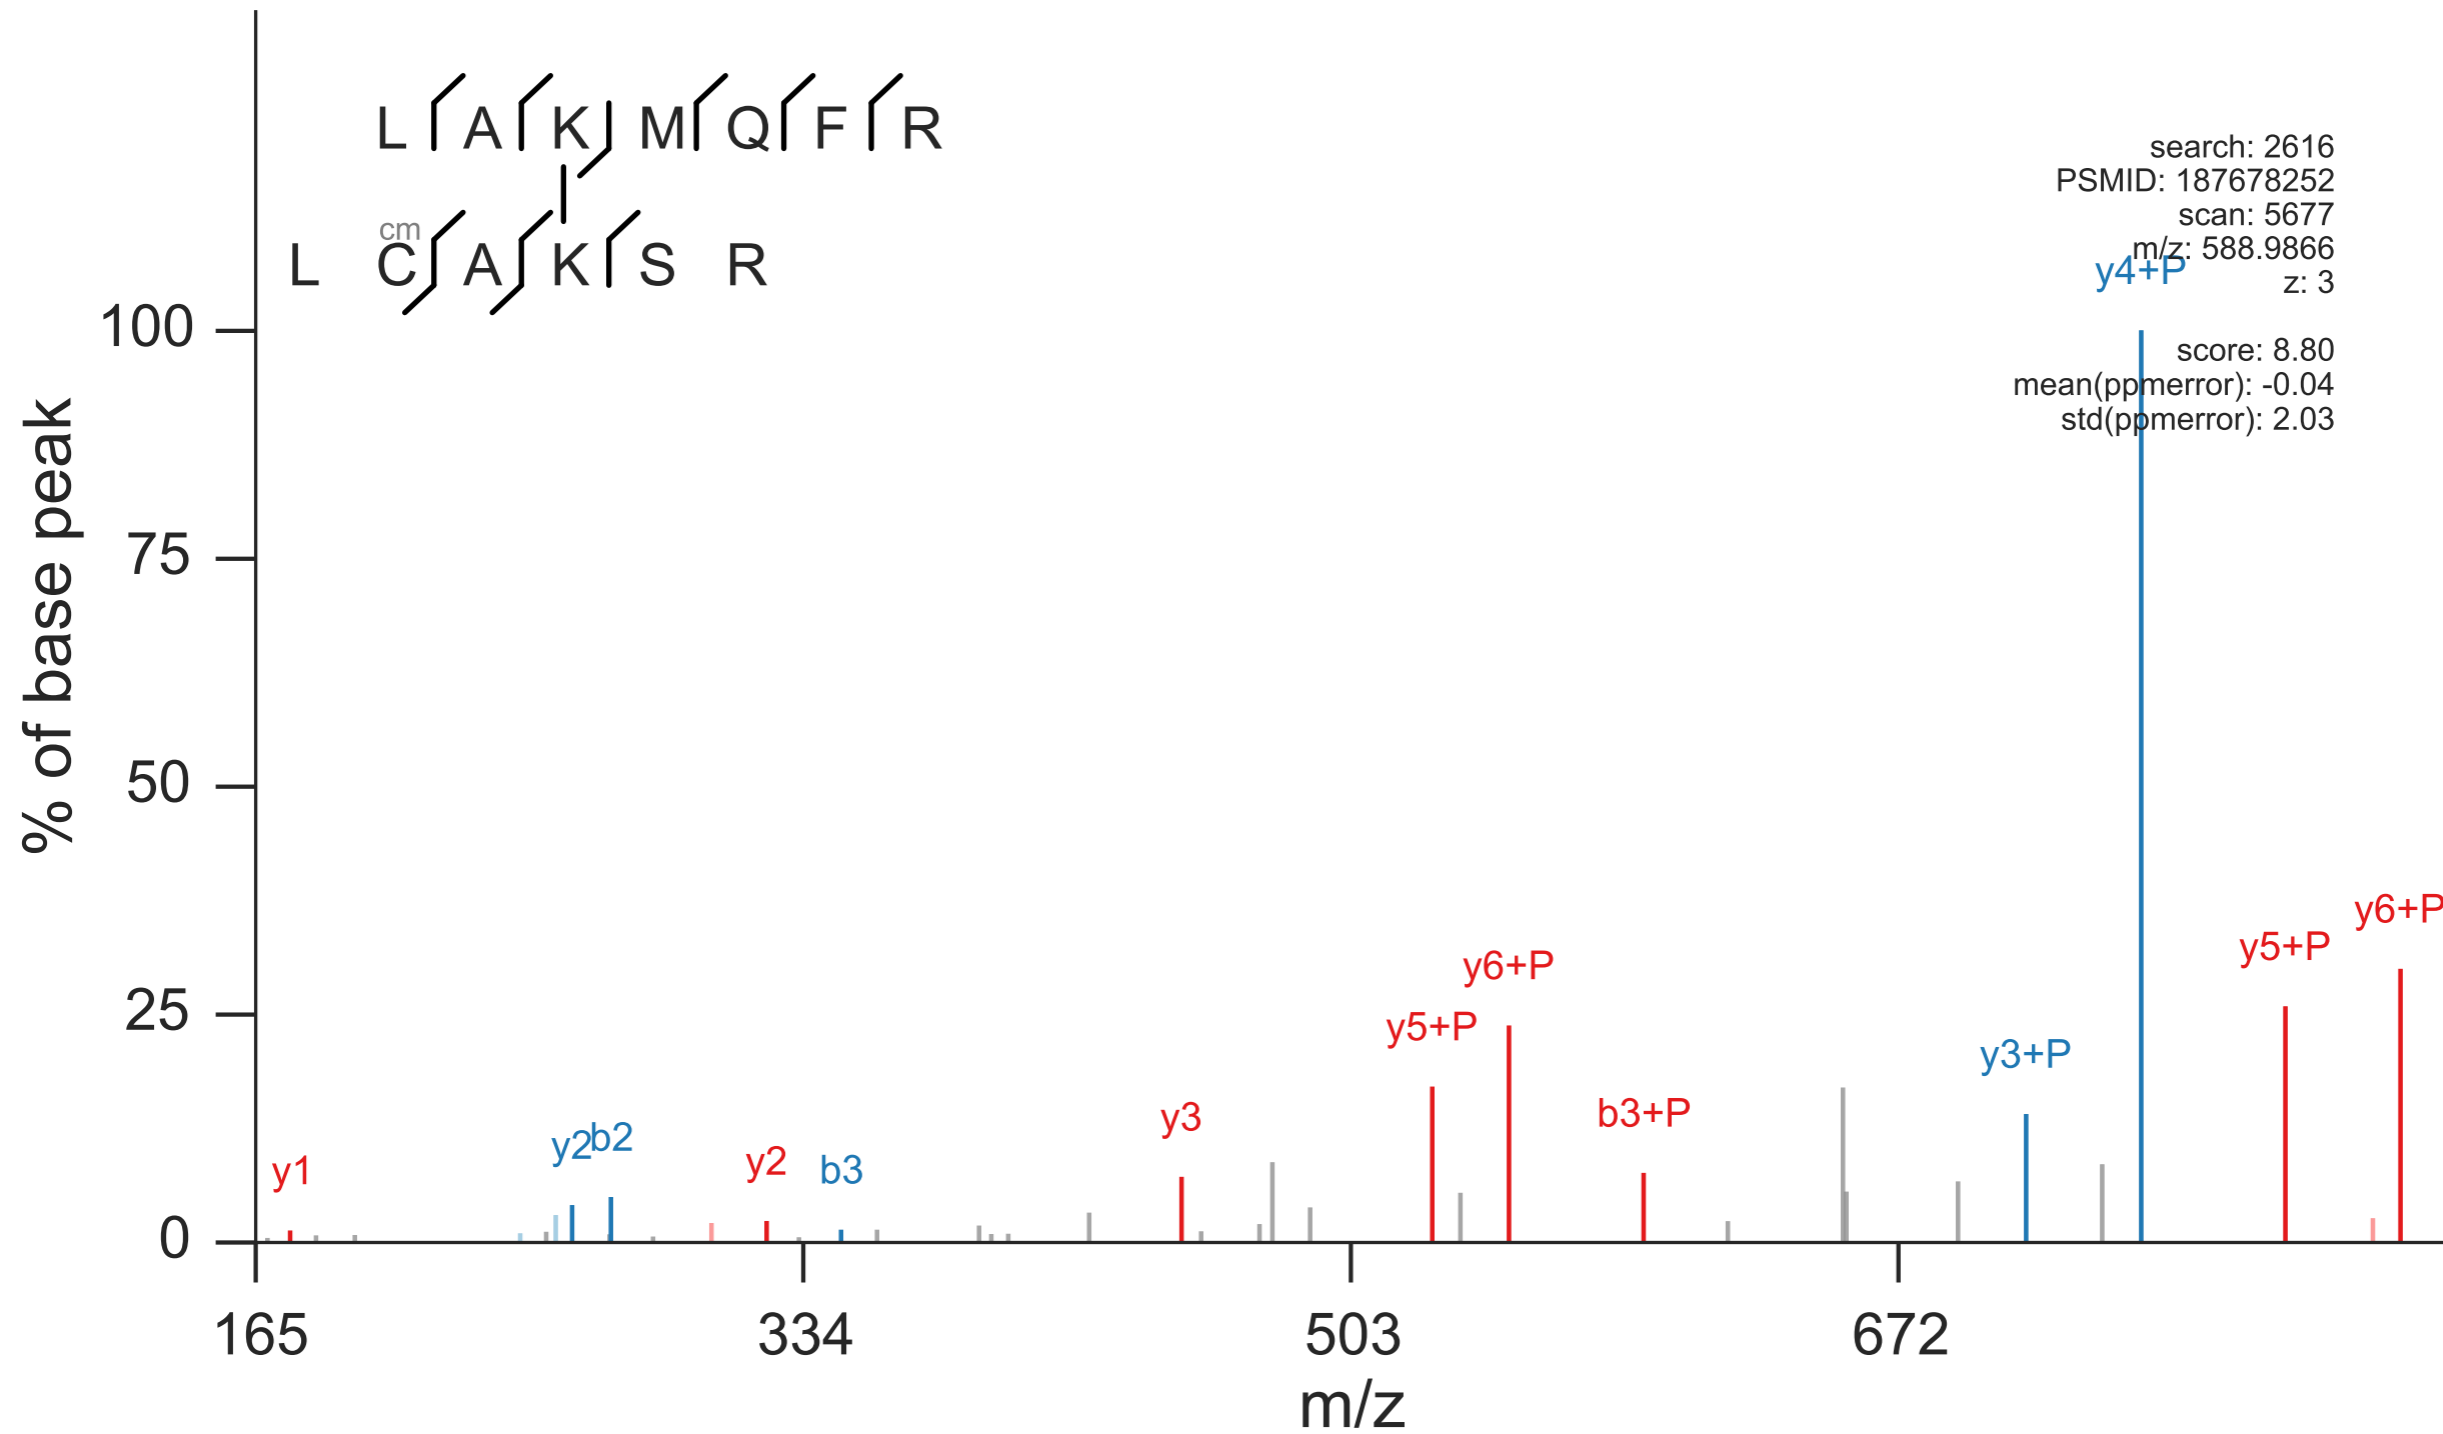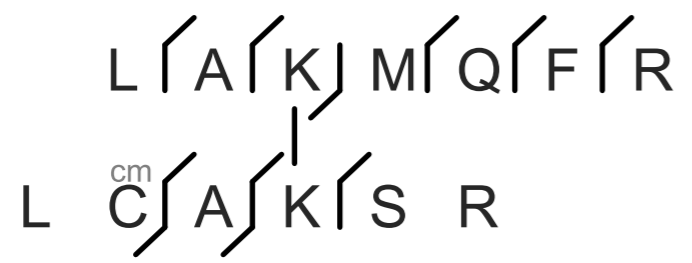

search: 2616  
 PSMID: 187678252  
 scan: 5677  
 m/z: 588.9866  
 z: 3  
 score: 8.80  
 mean(ppmerror): -0.04  
 std(ppmerror): 2.03

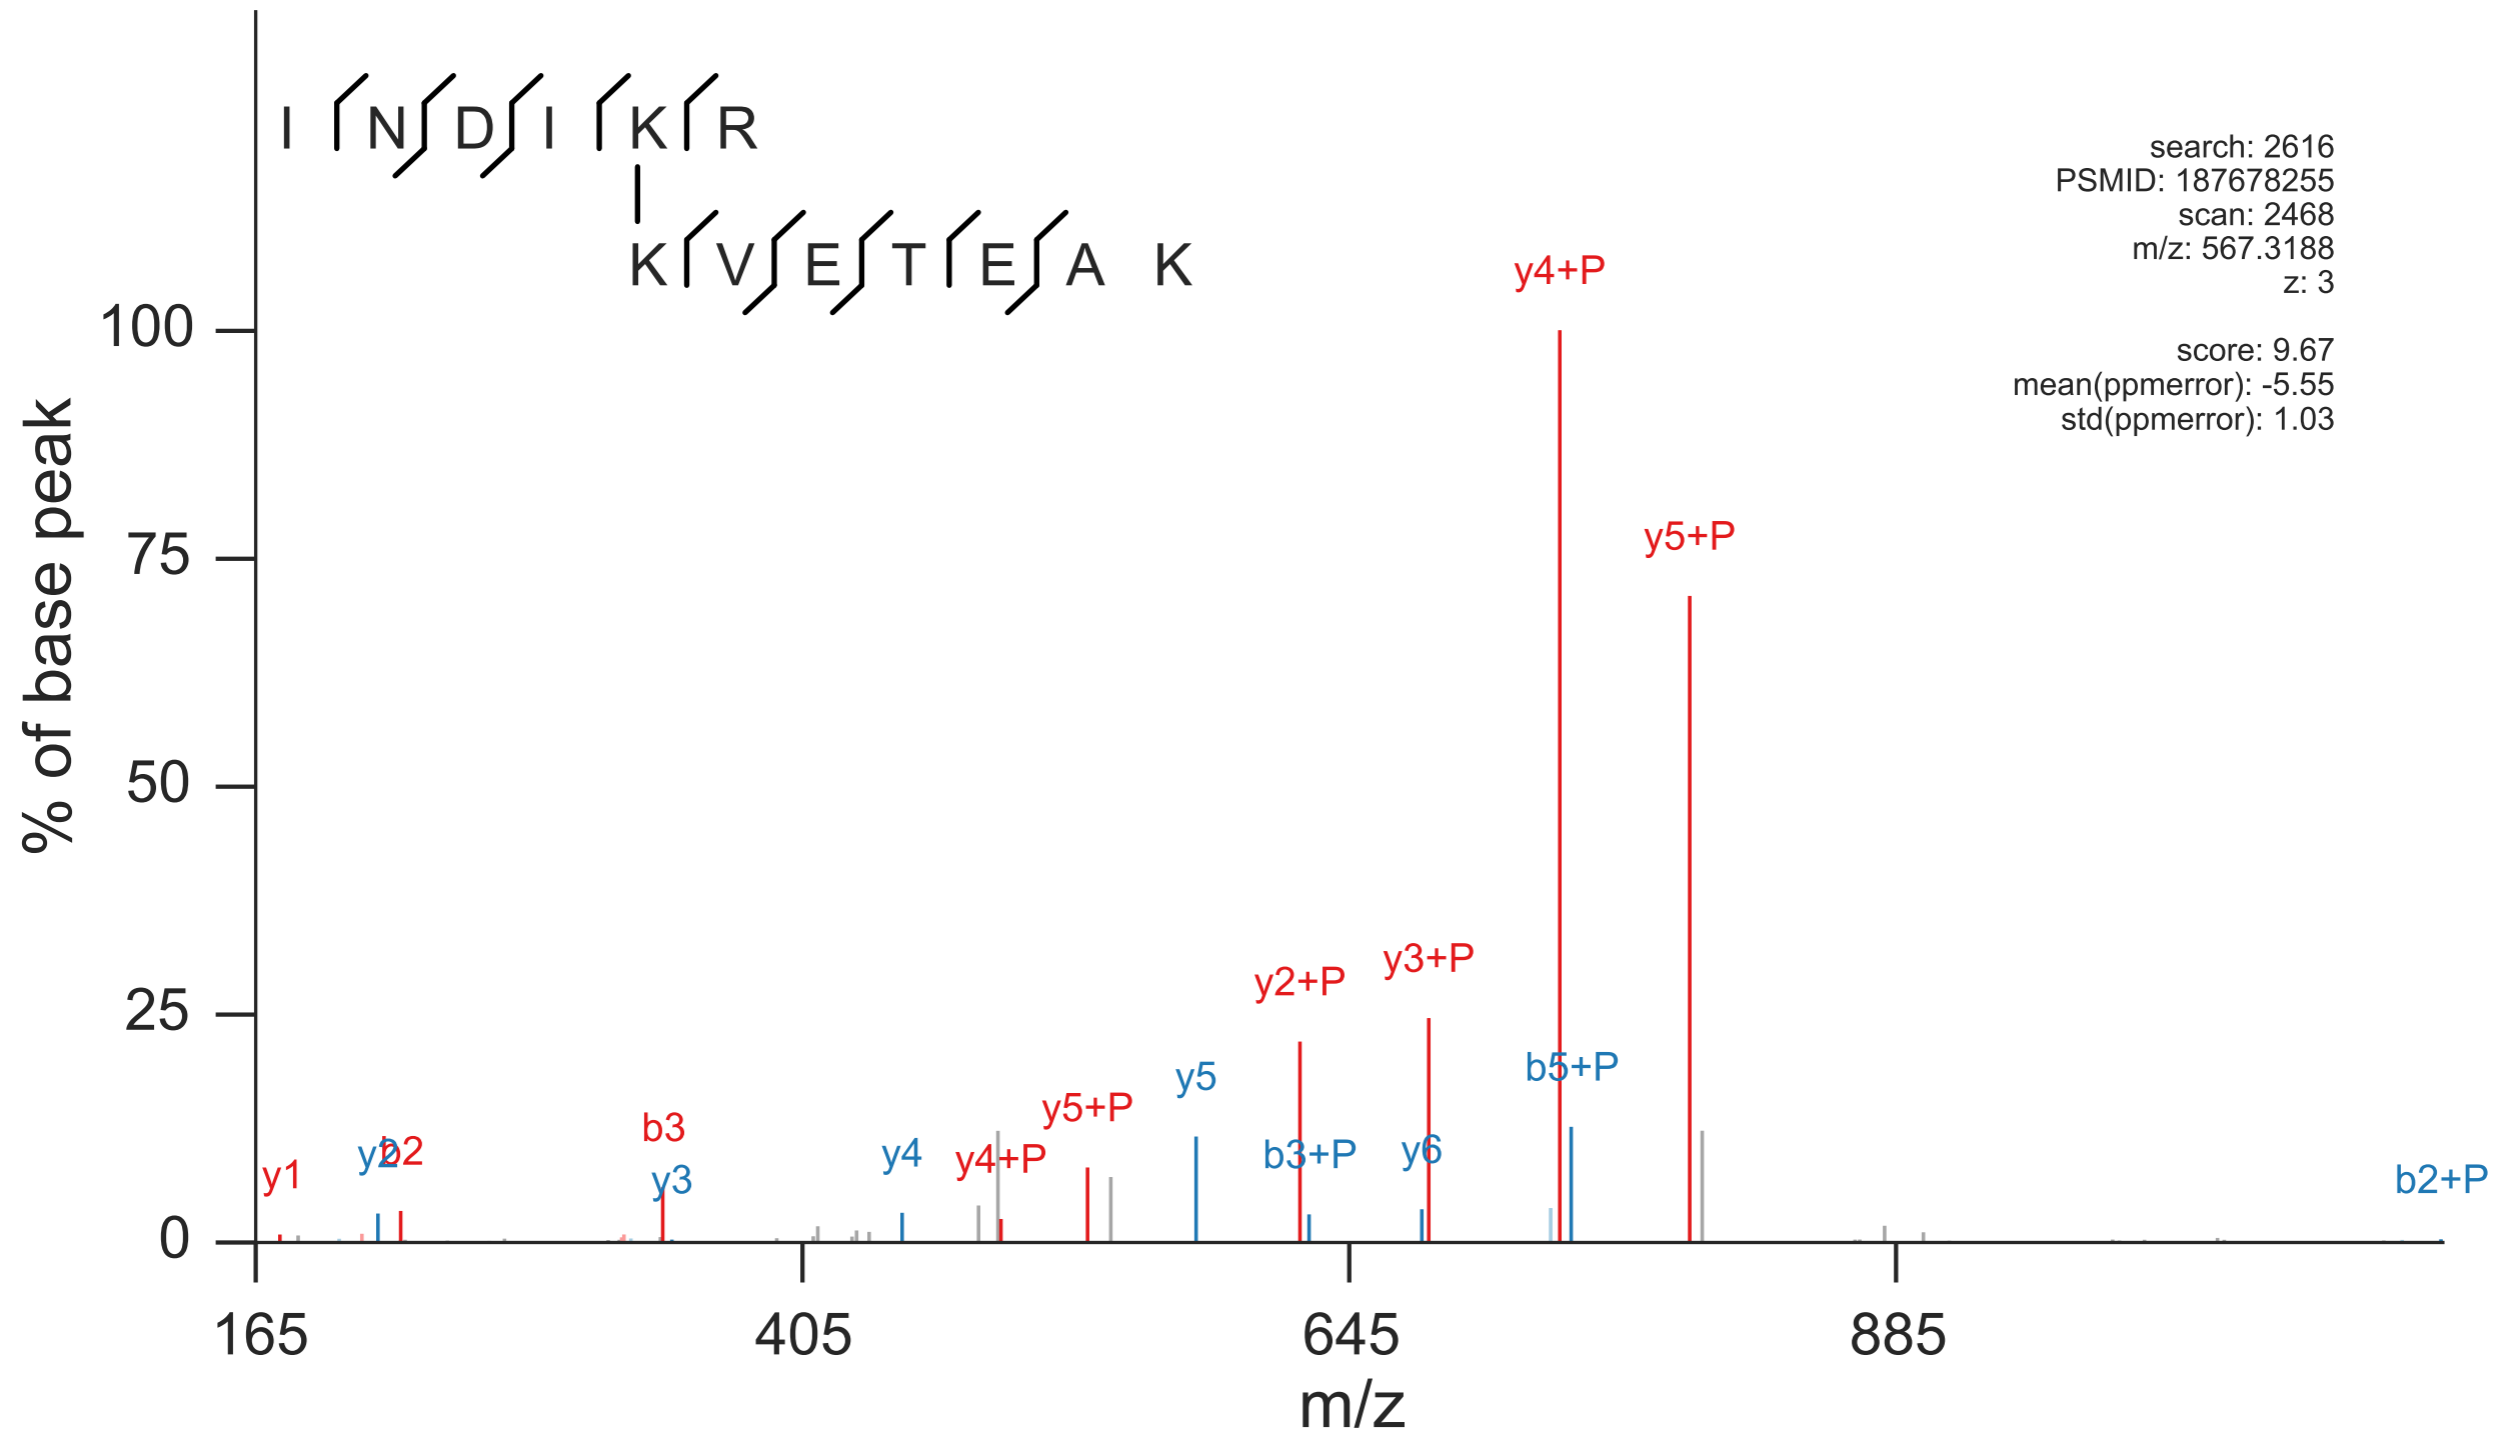

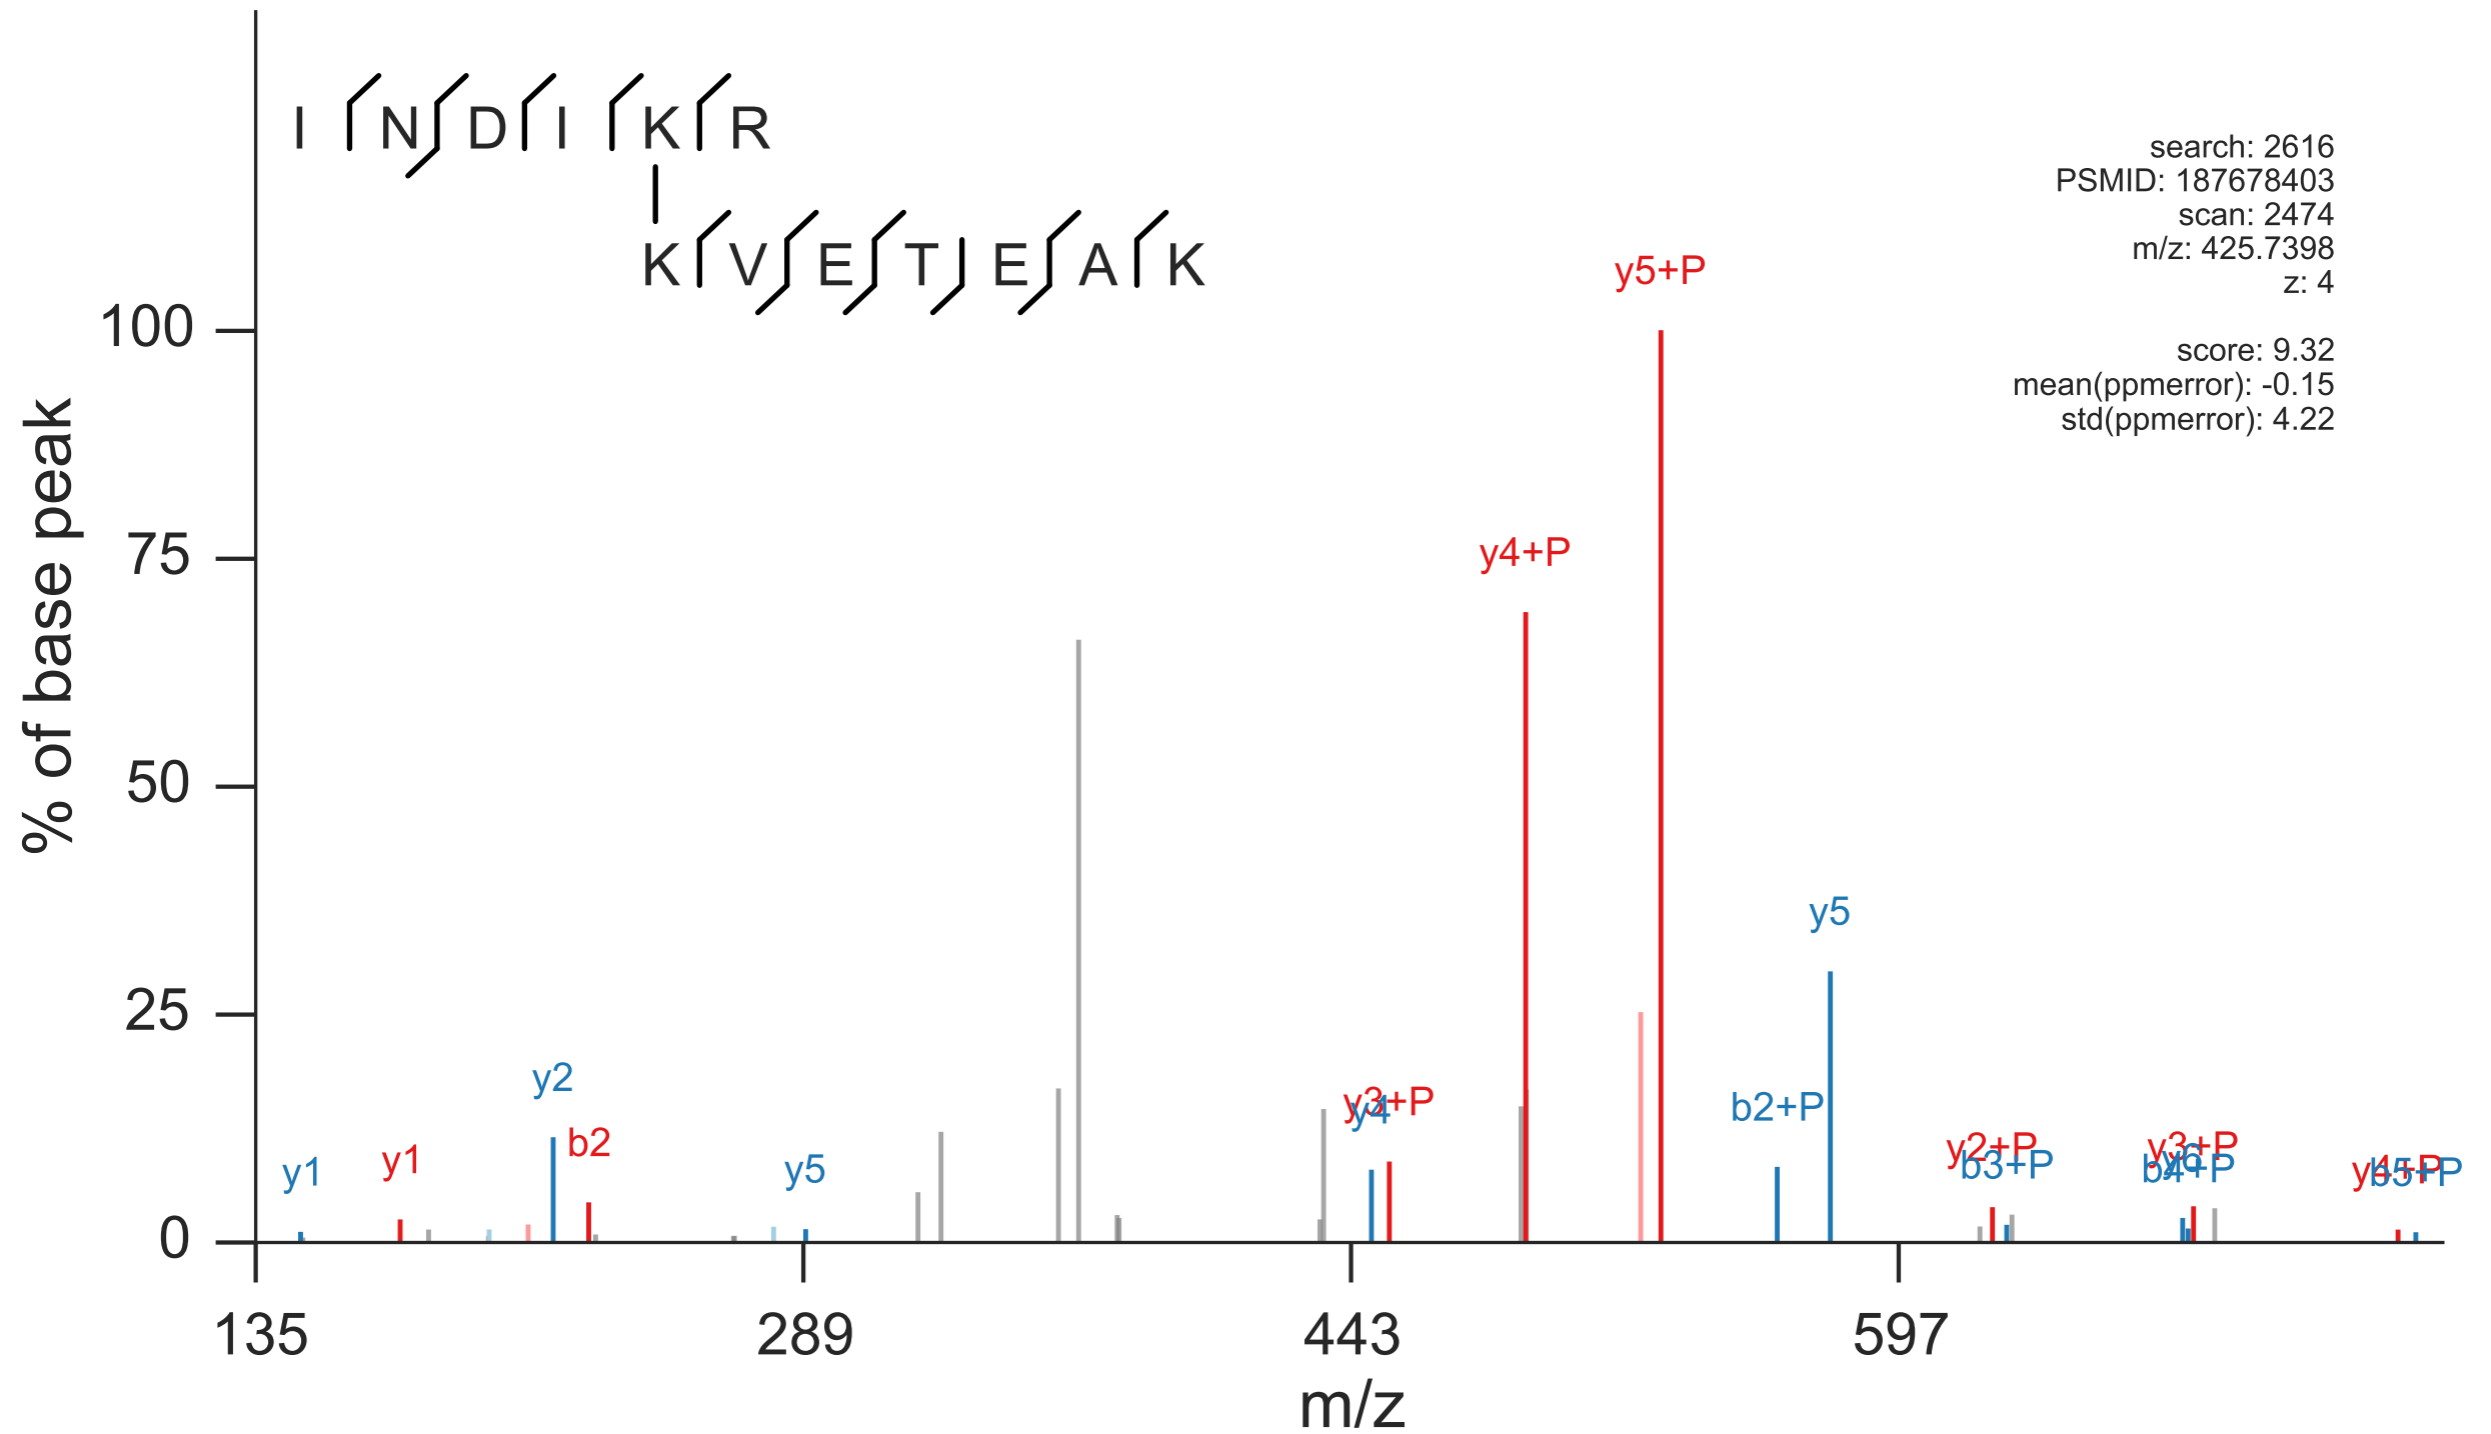

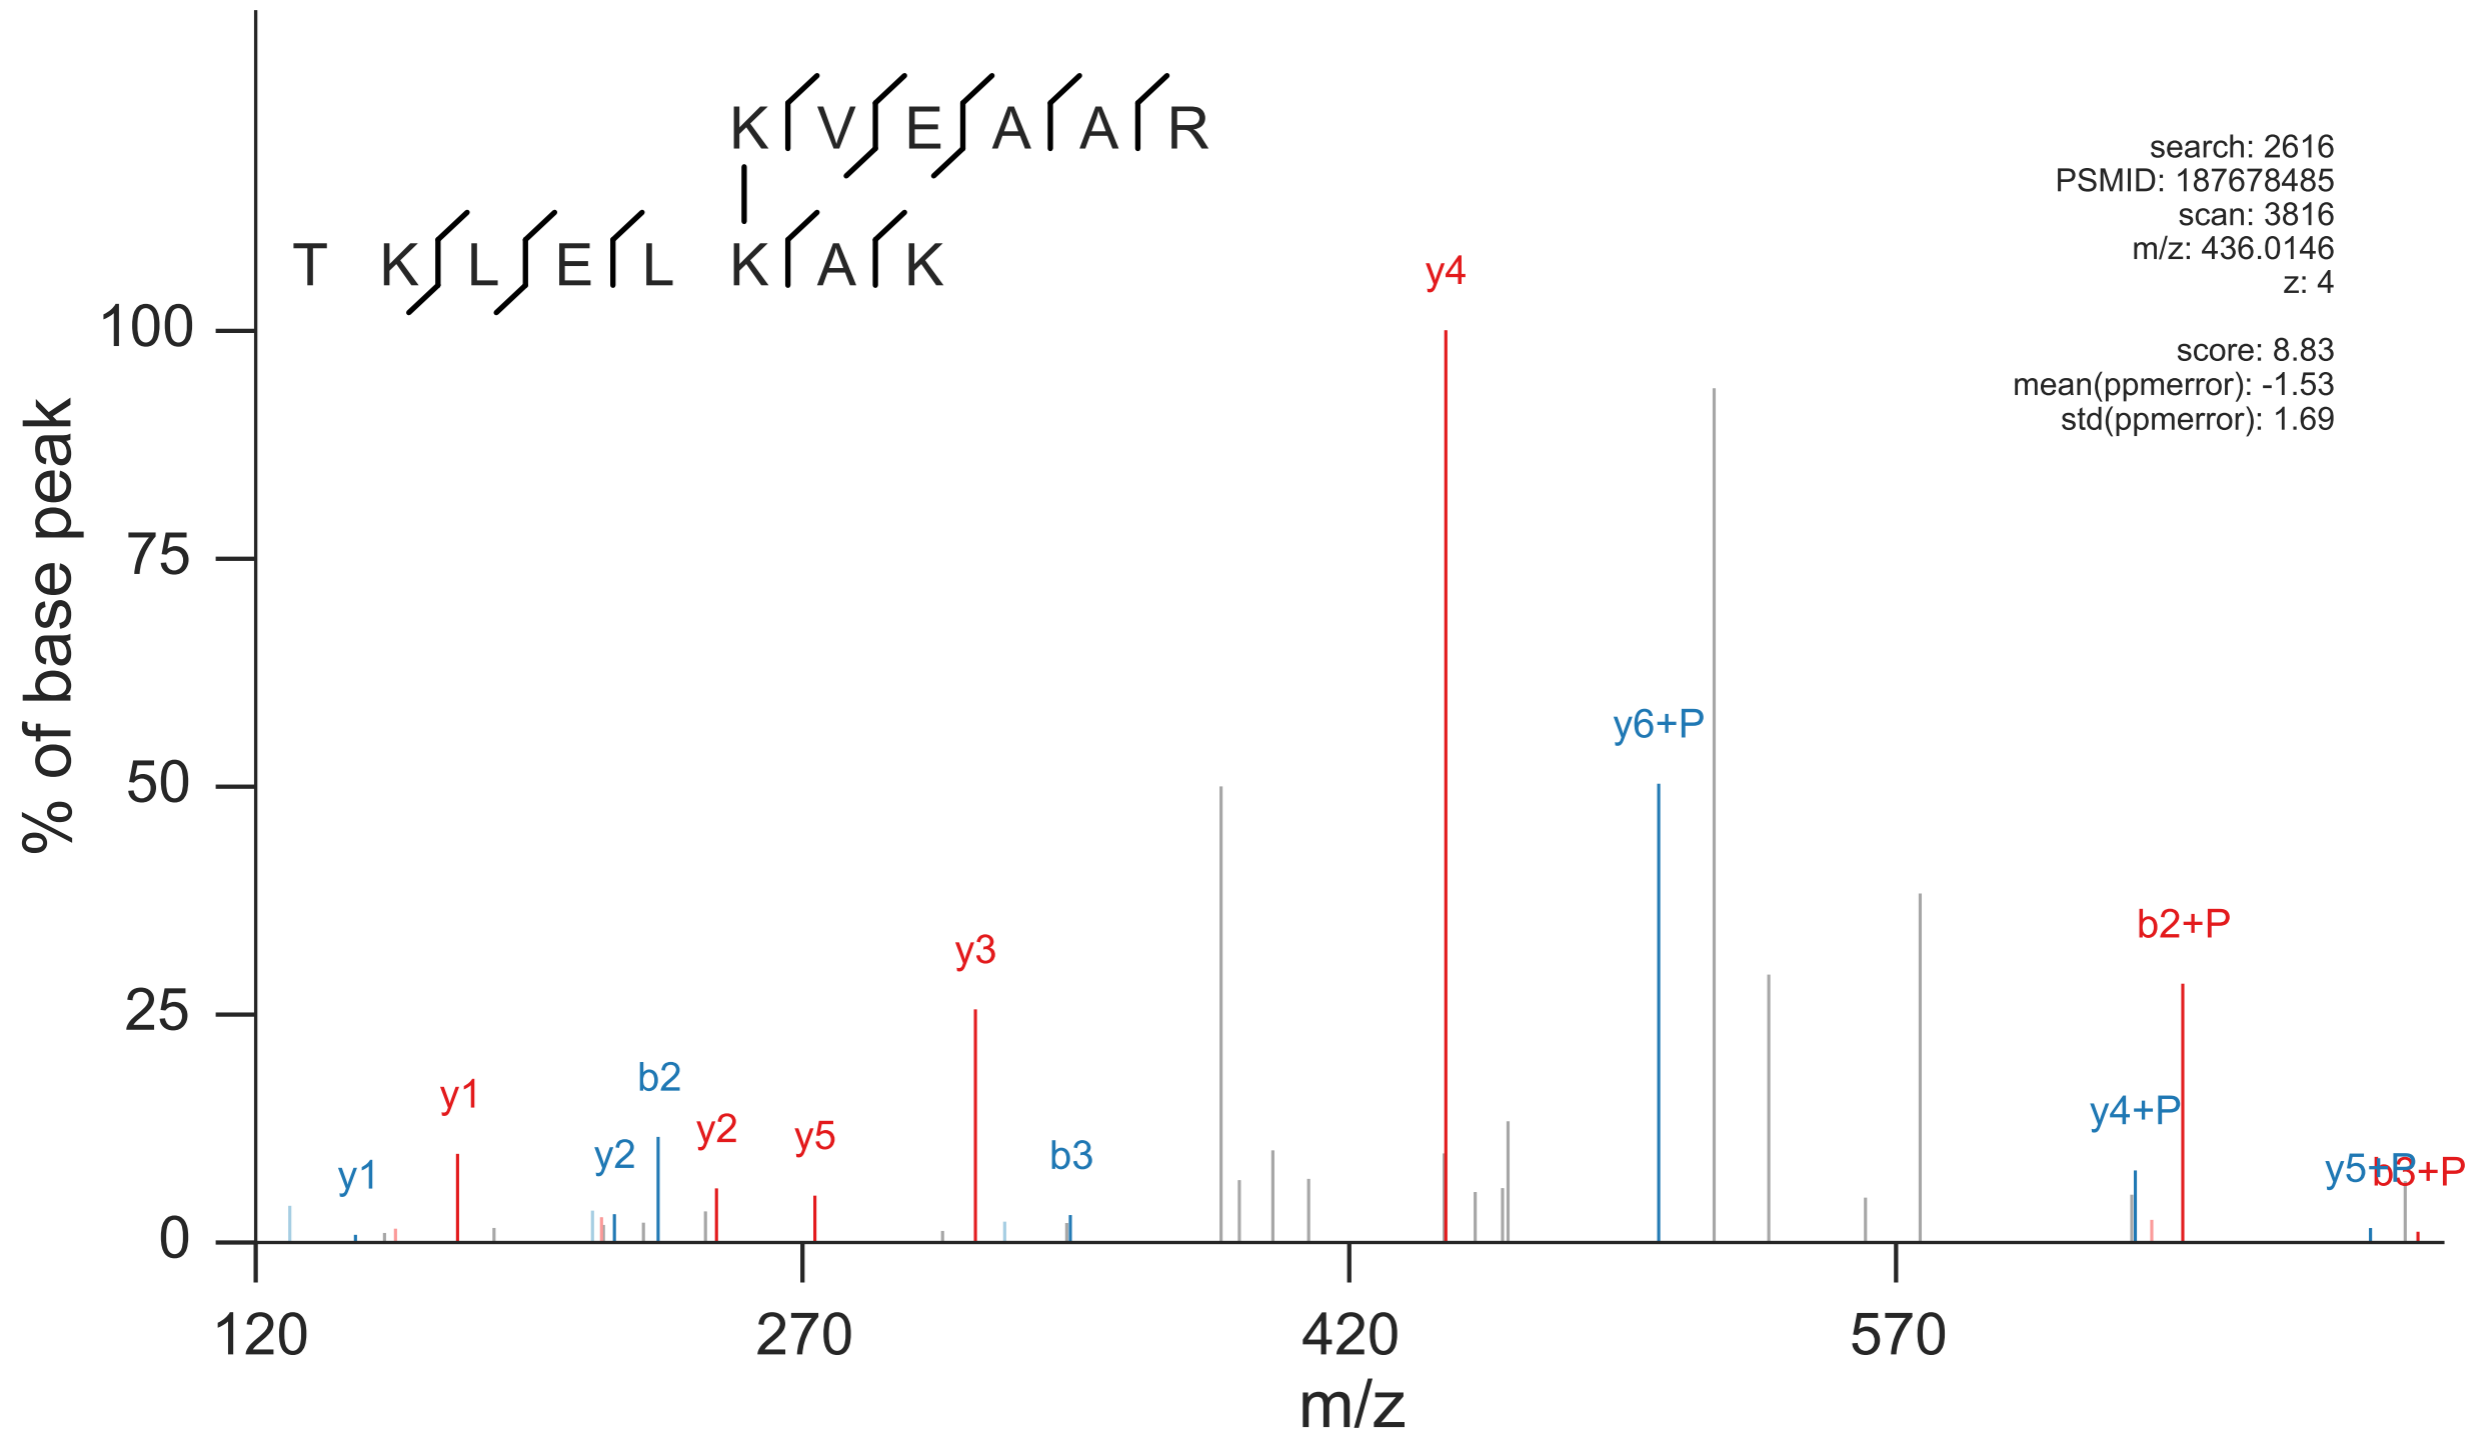

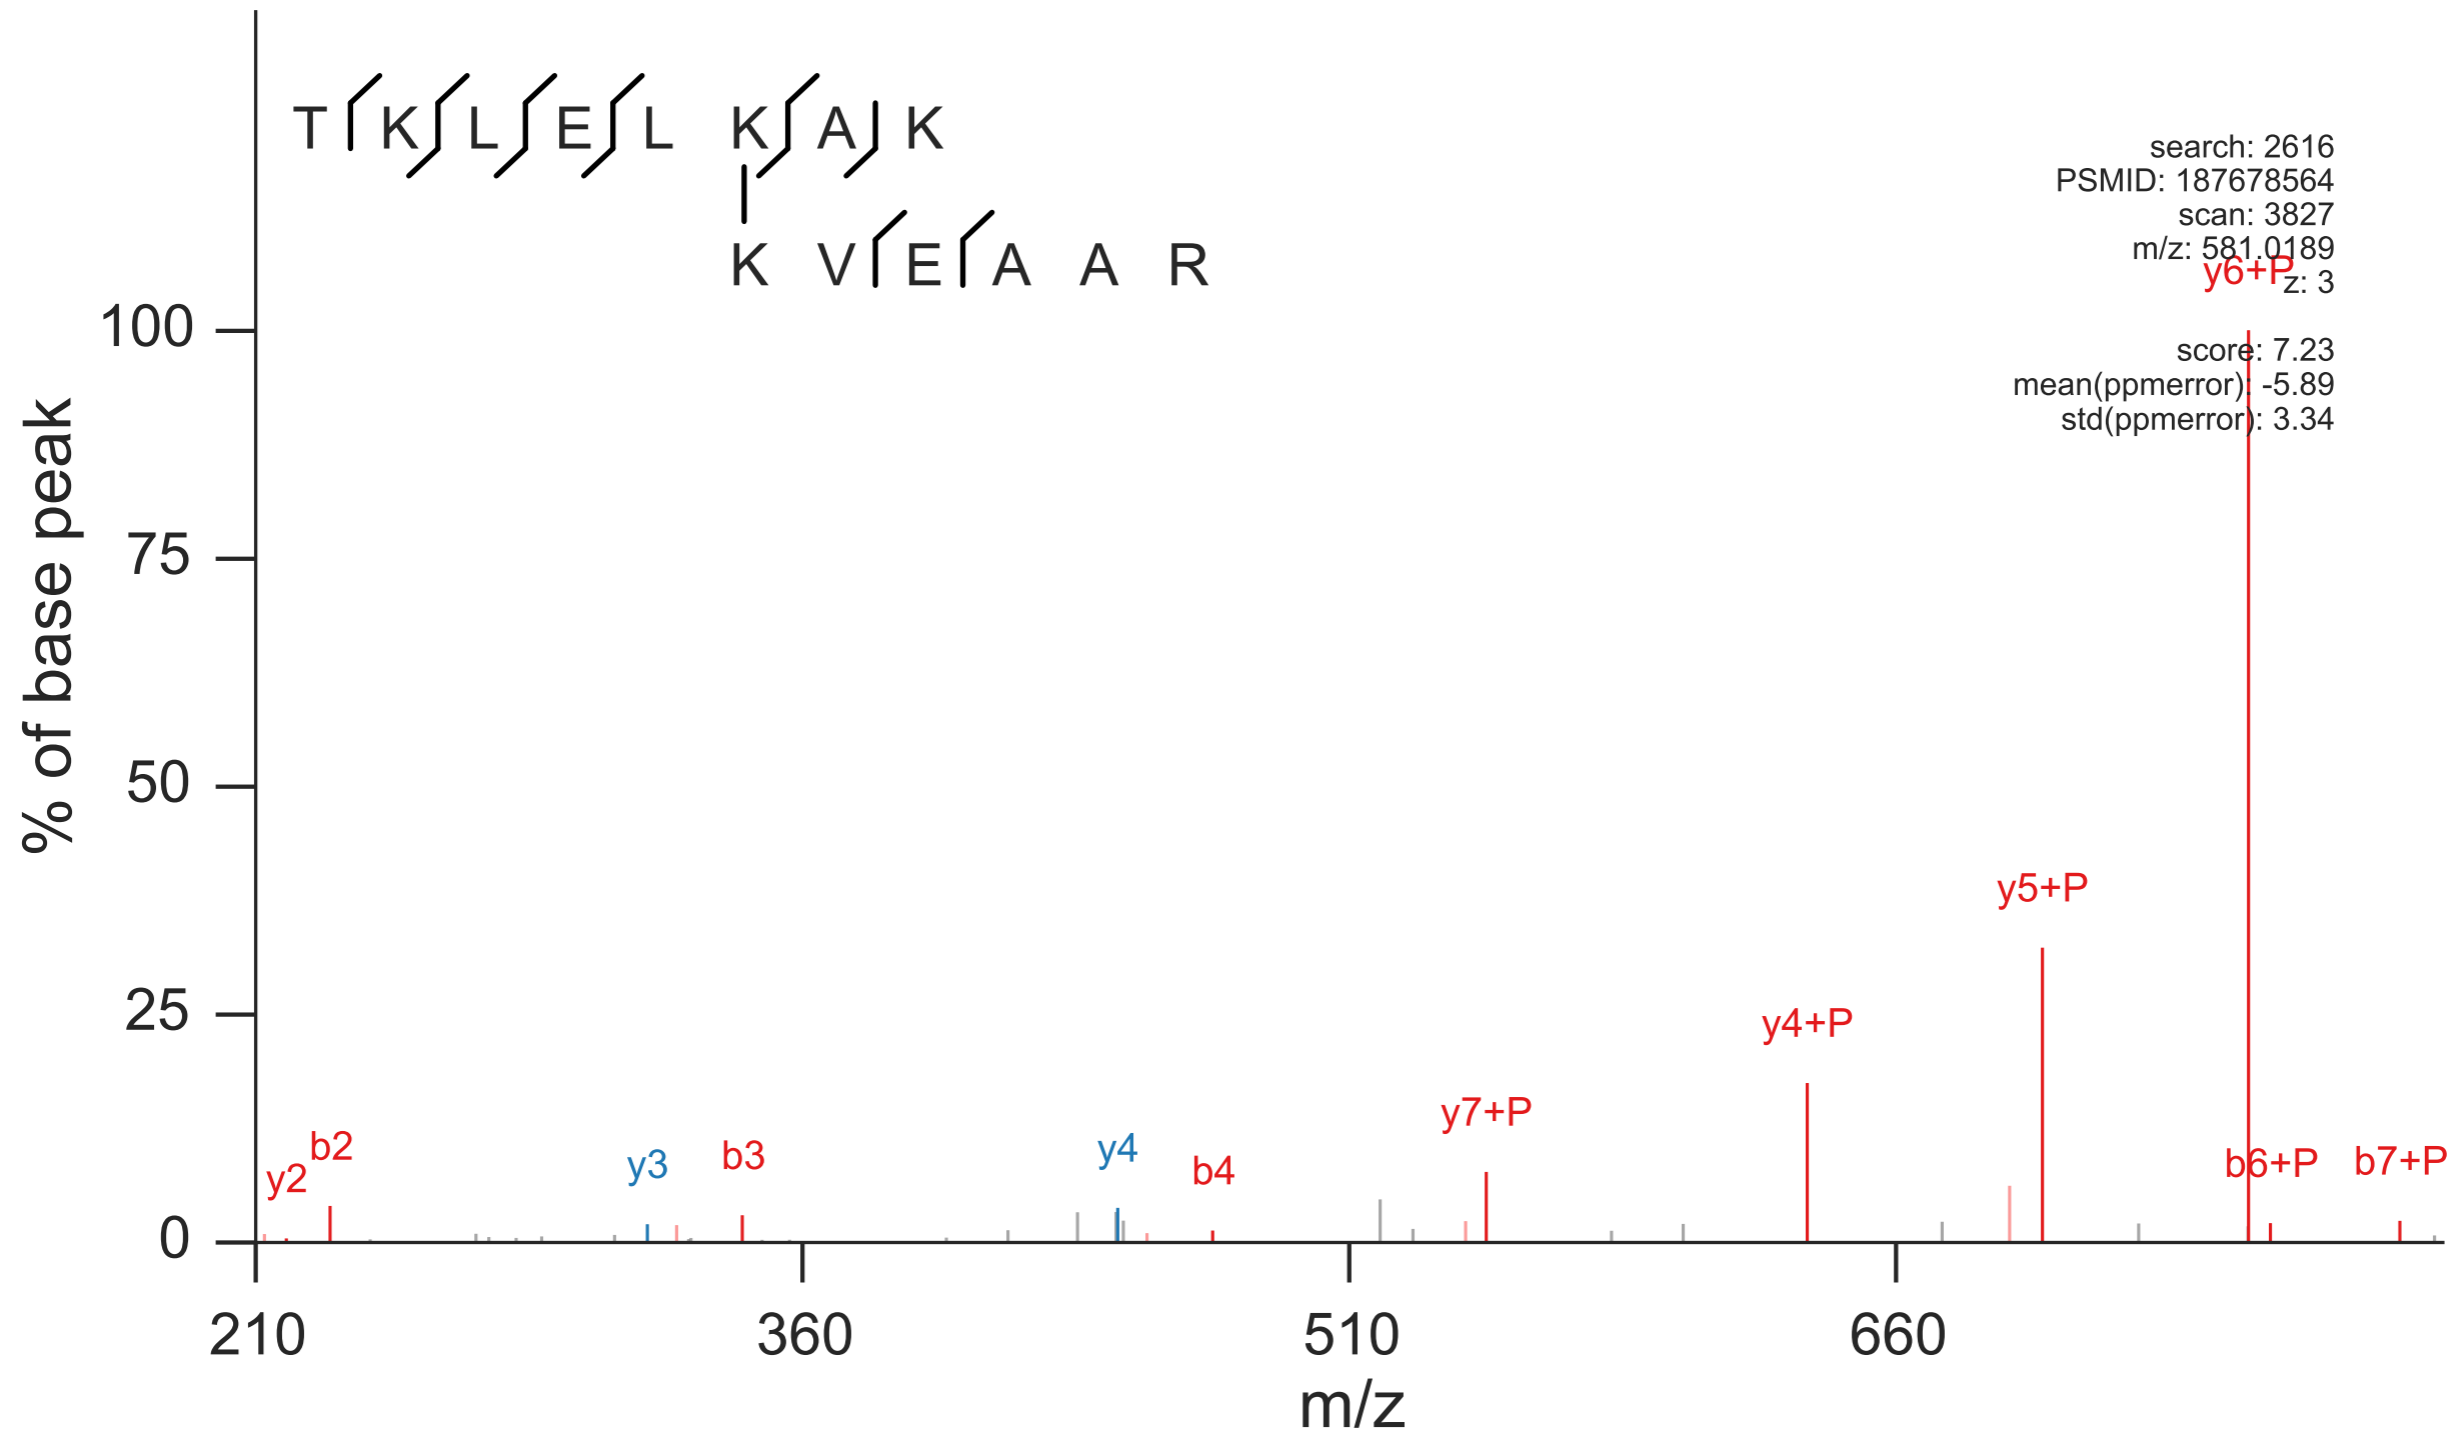

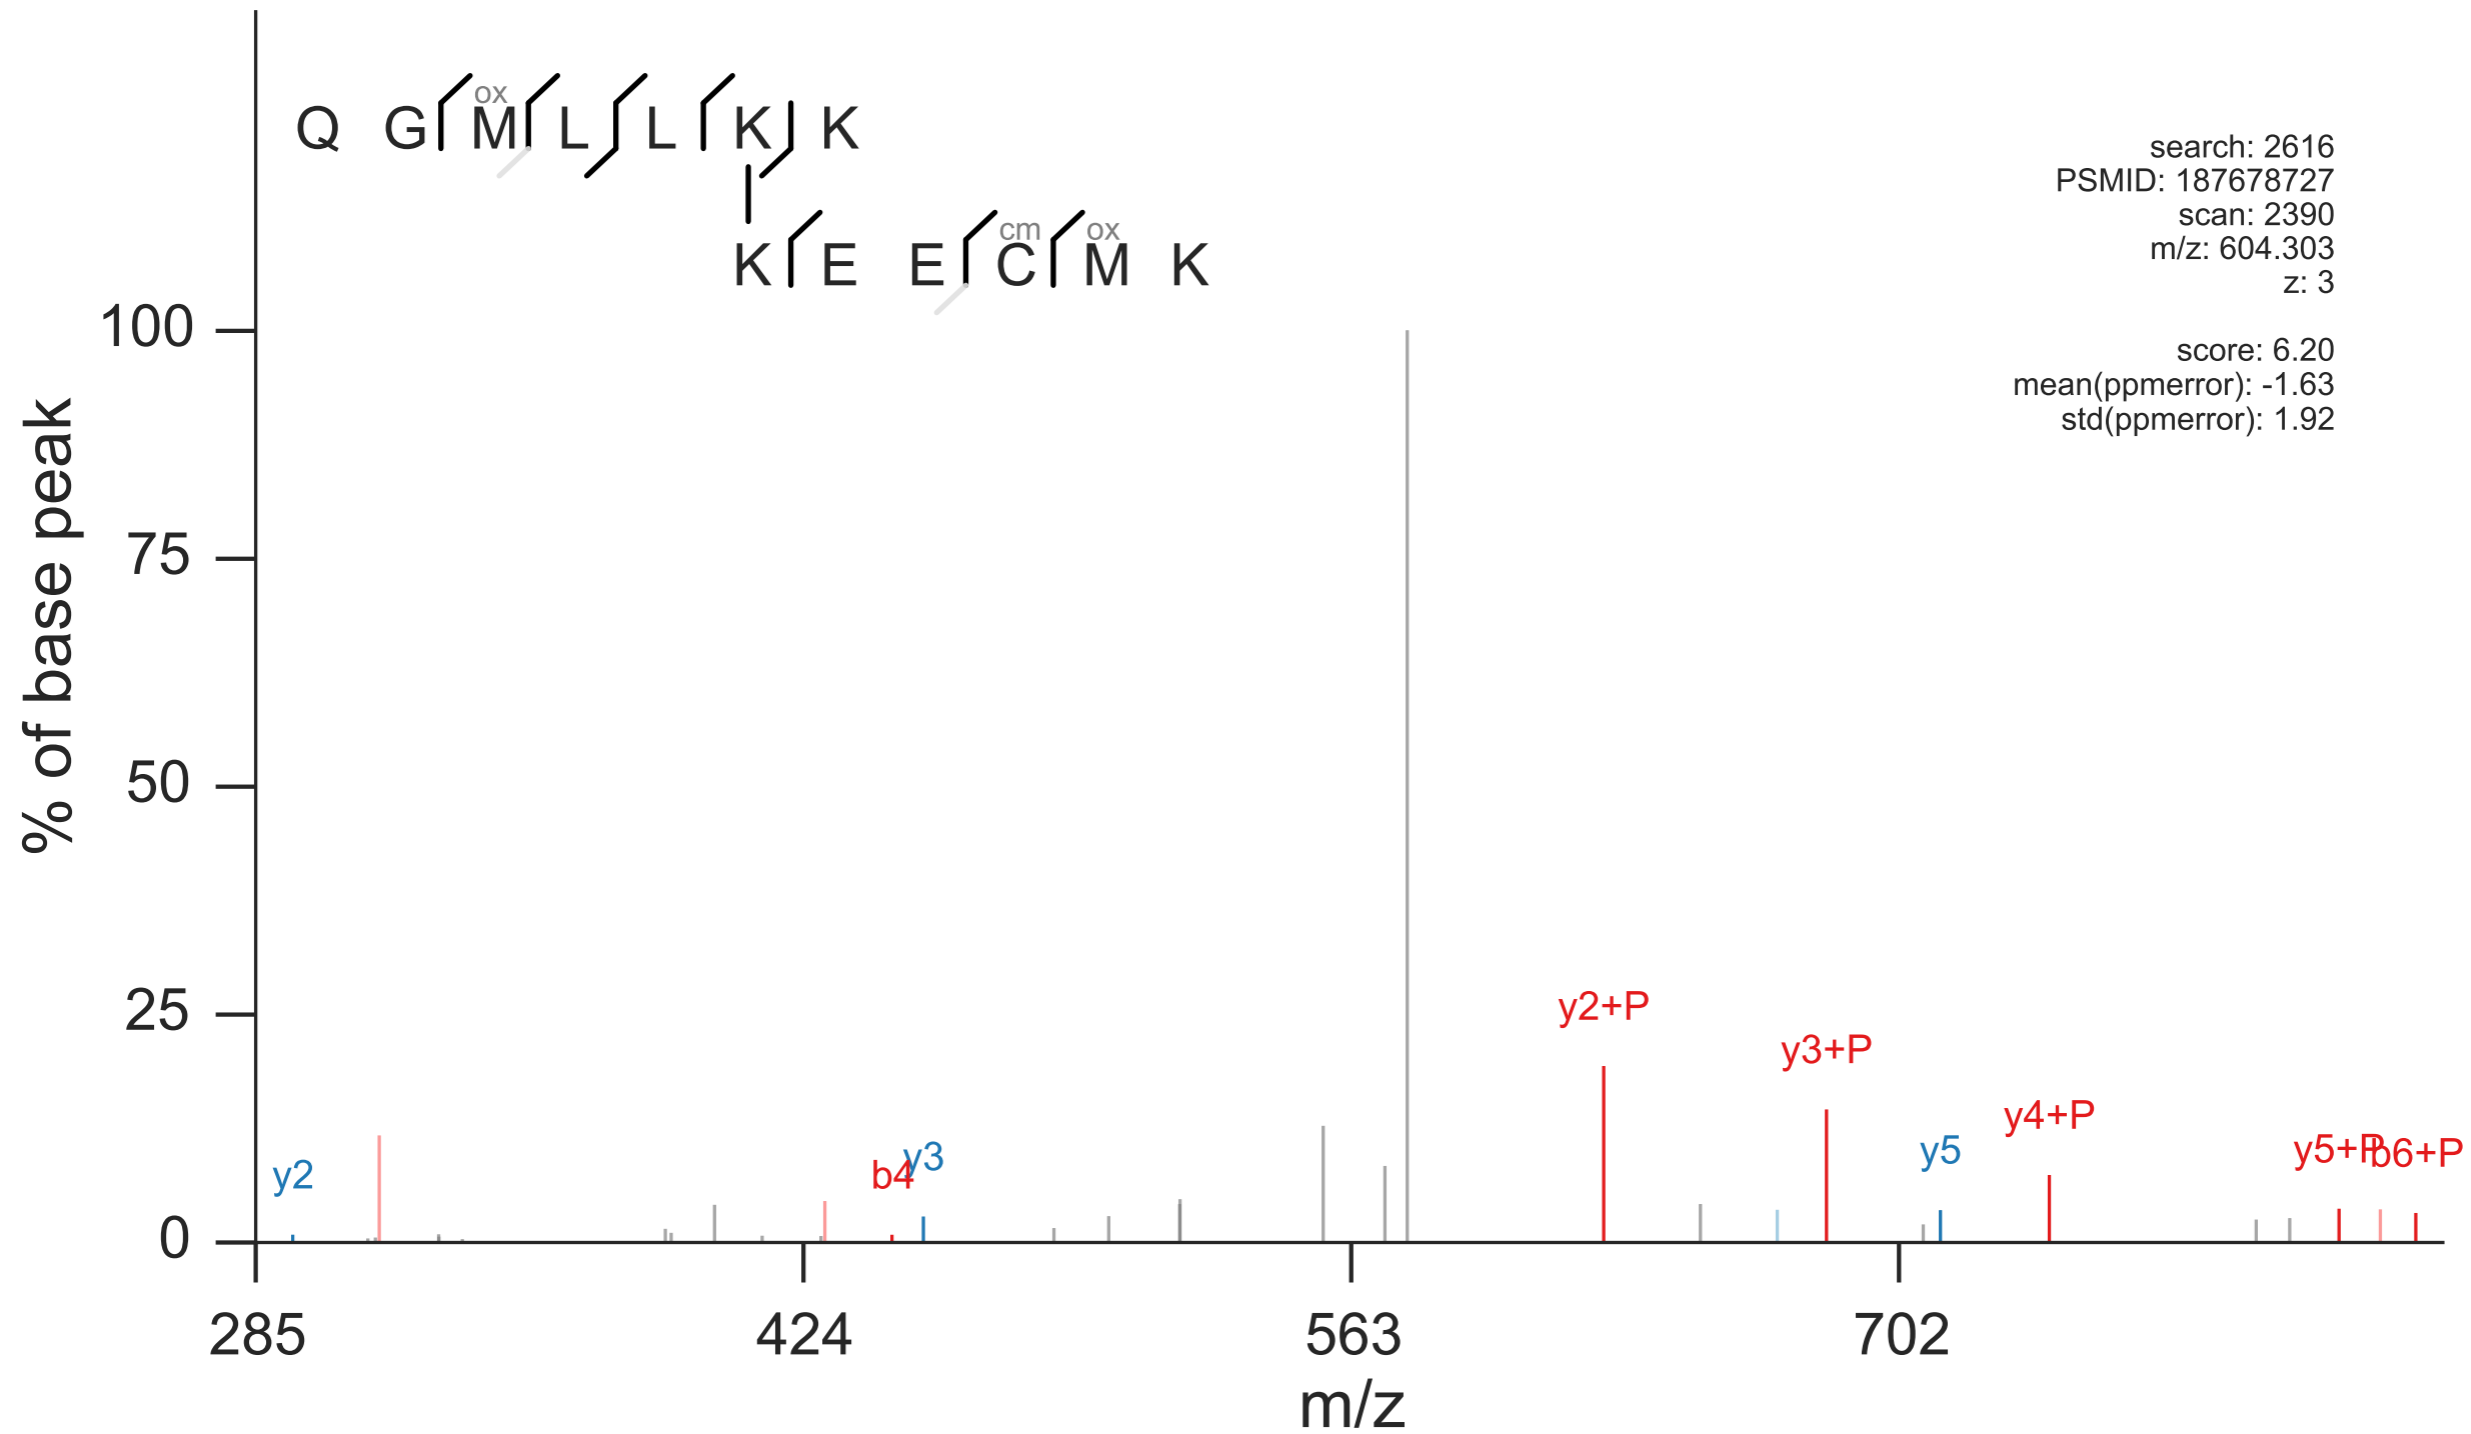

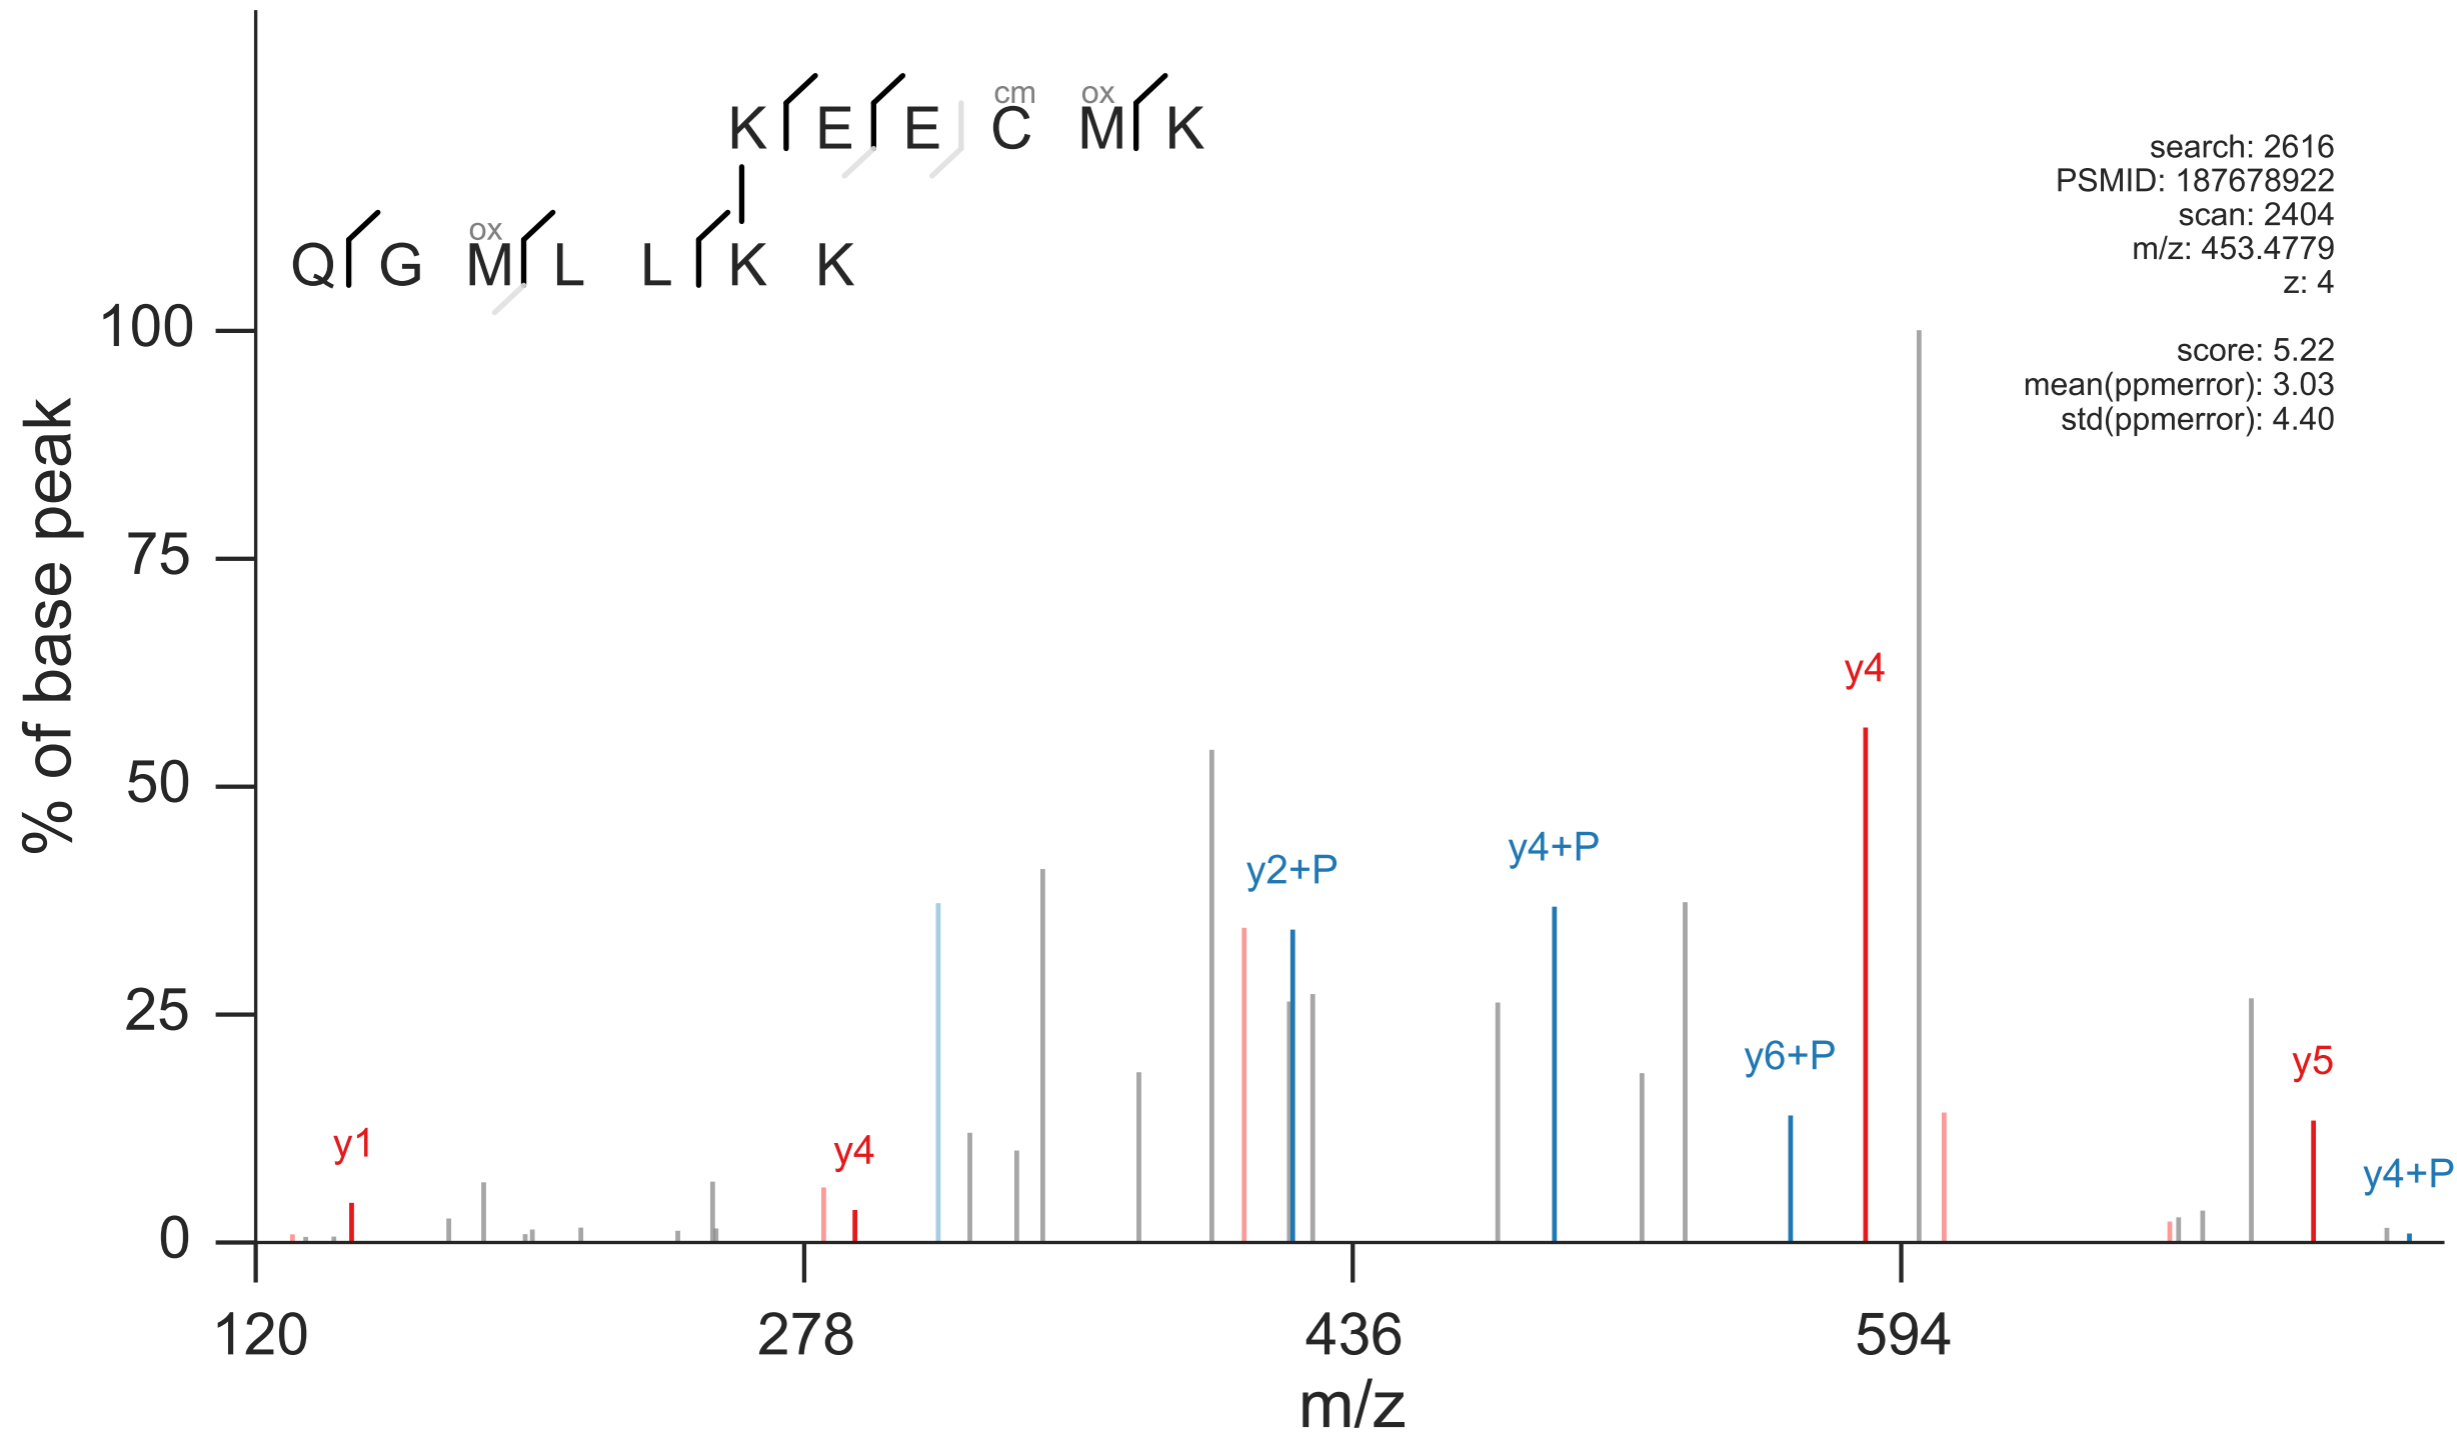

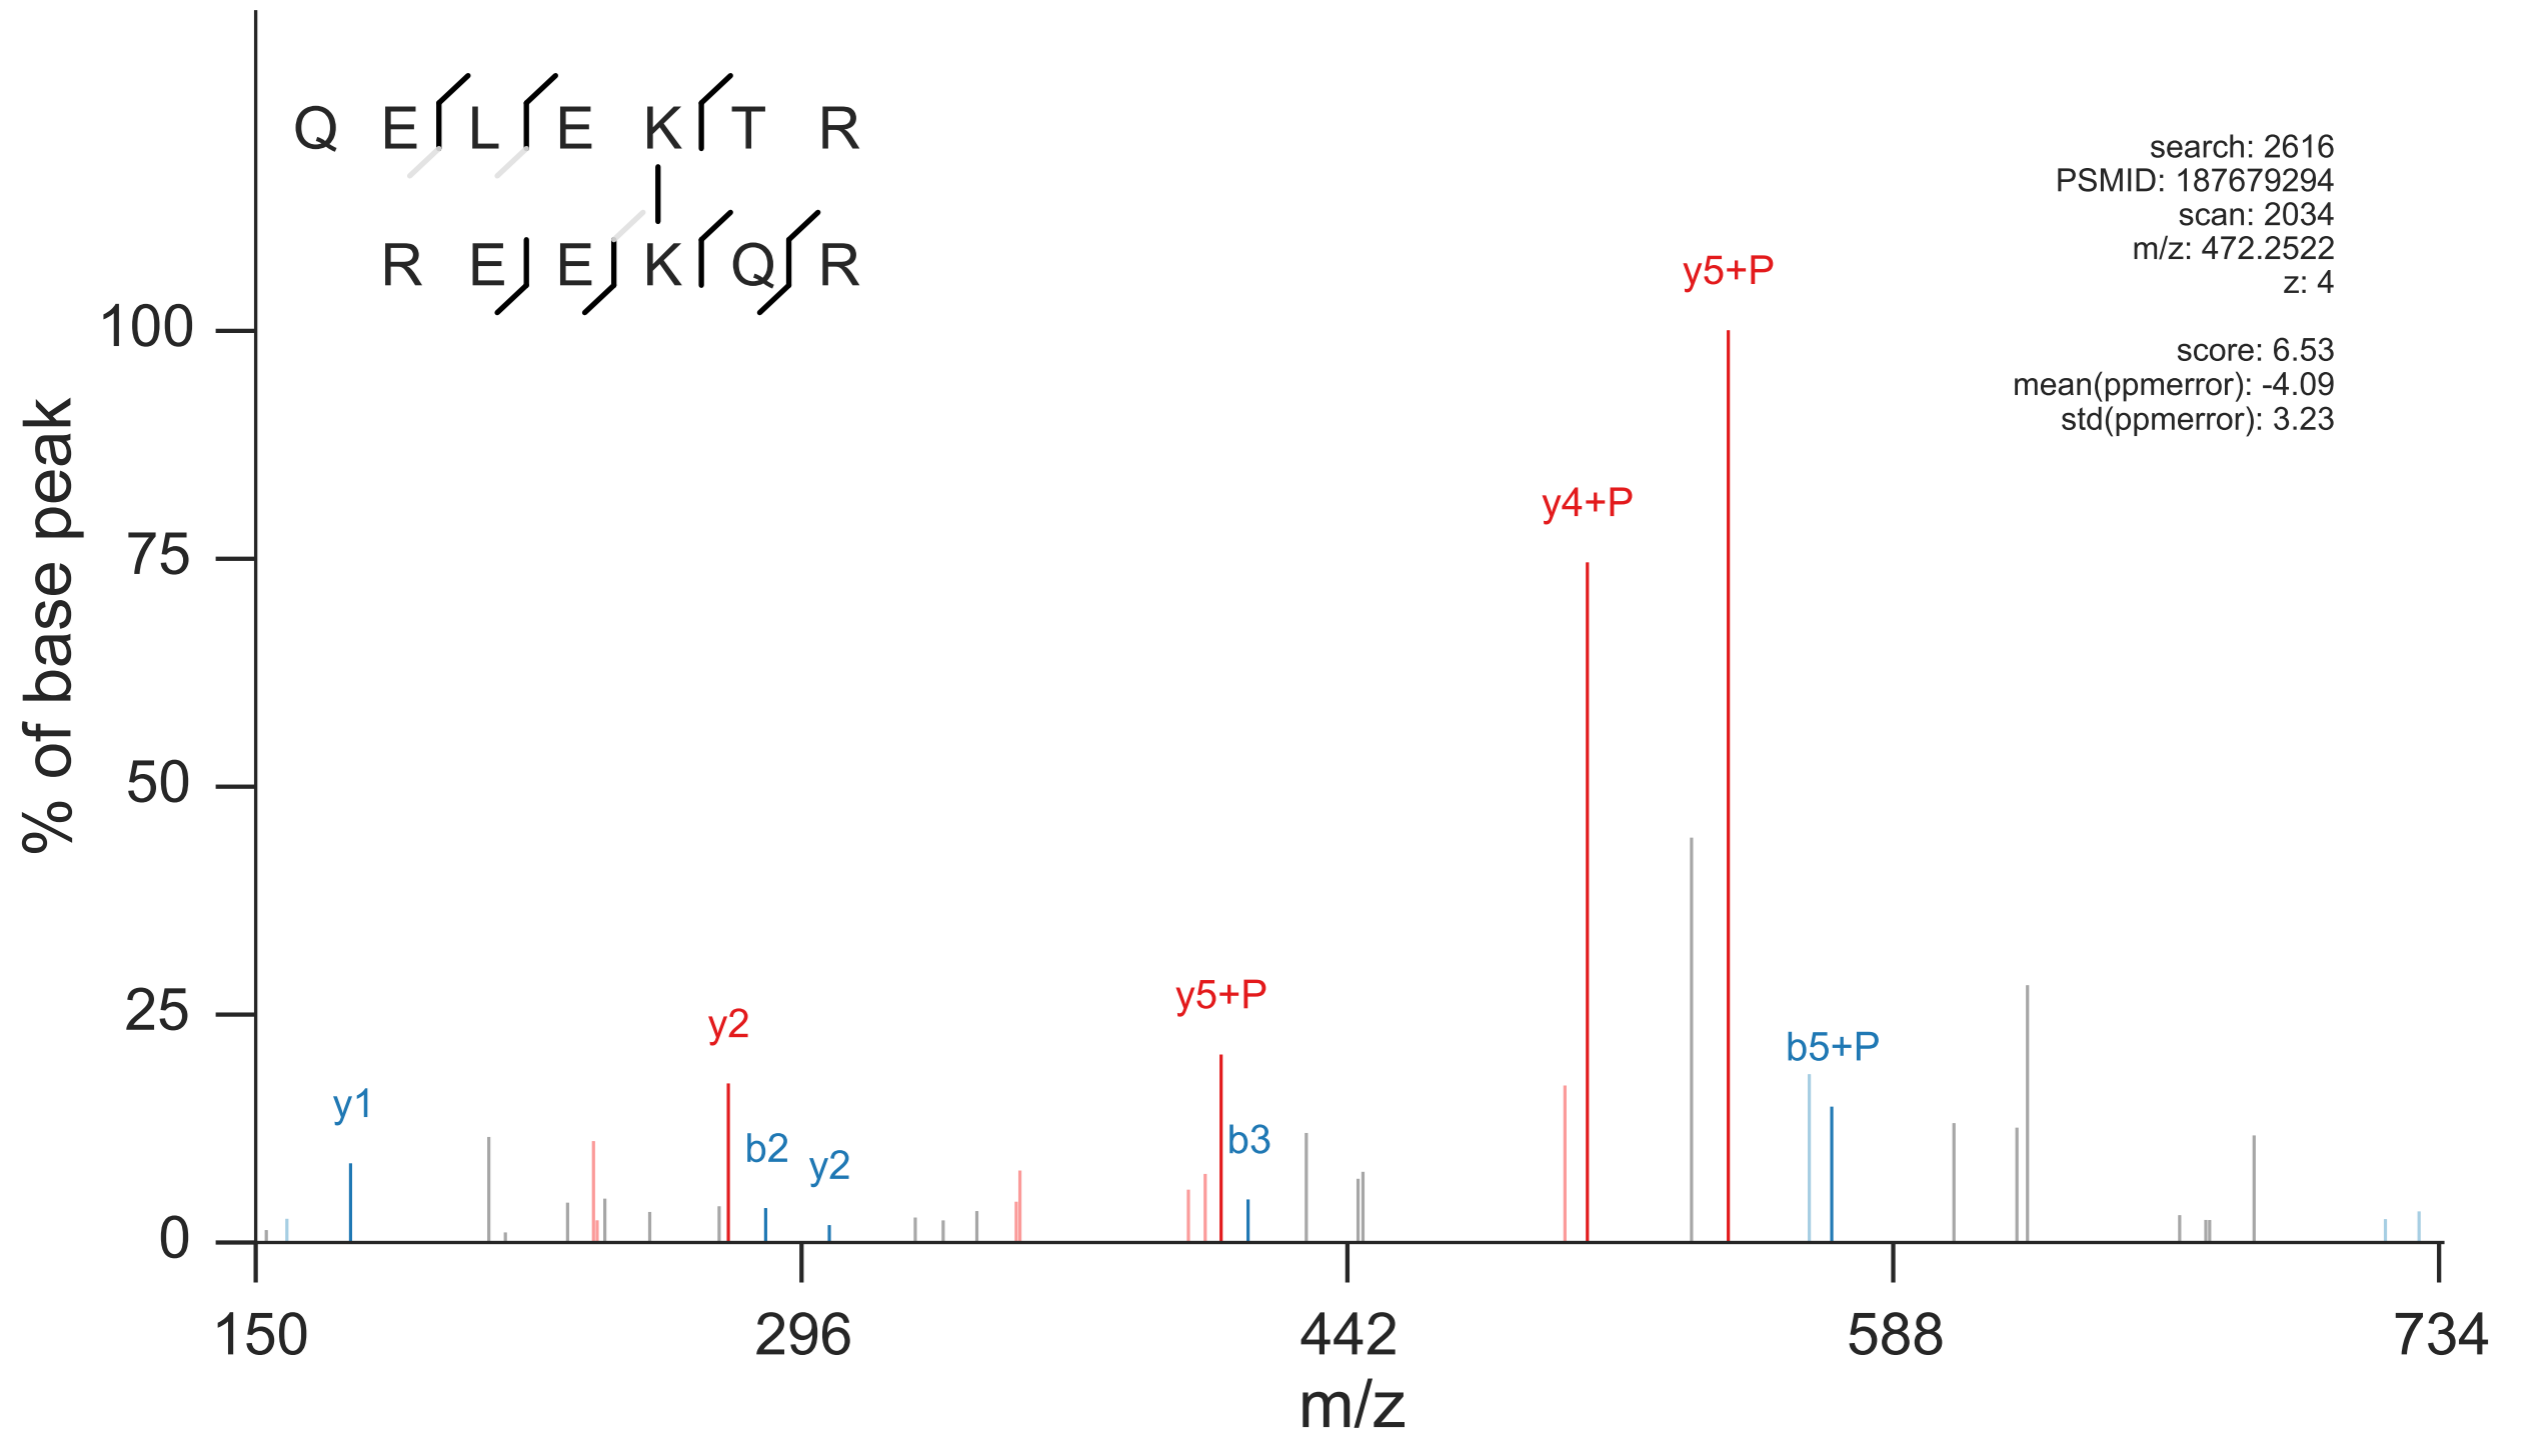



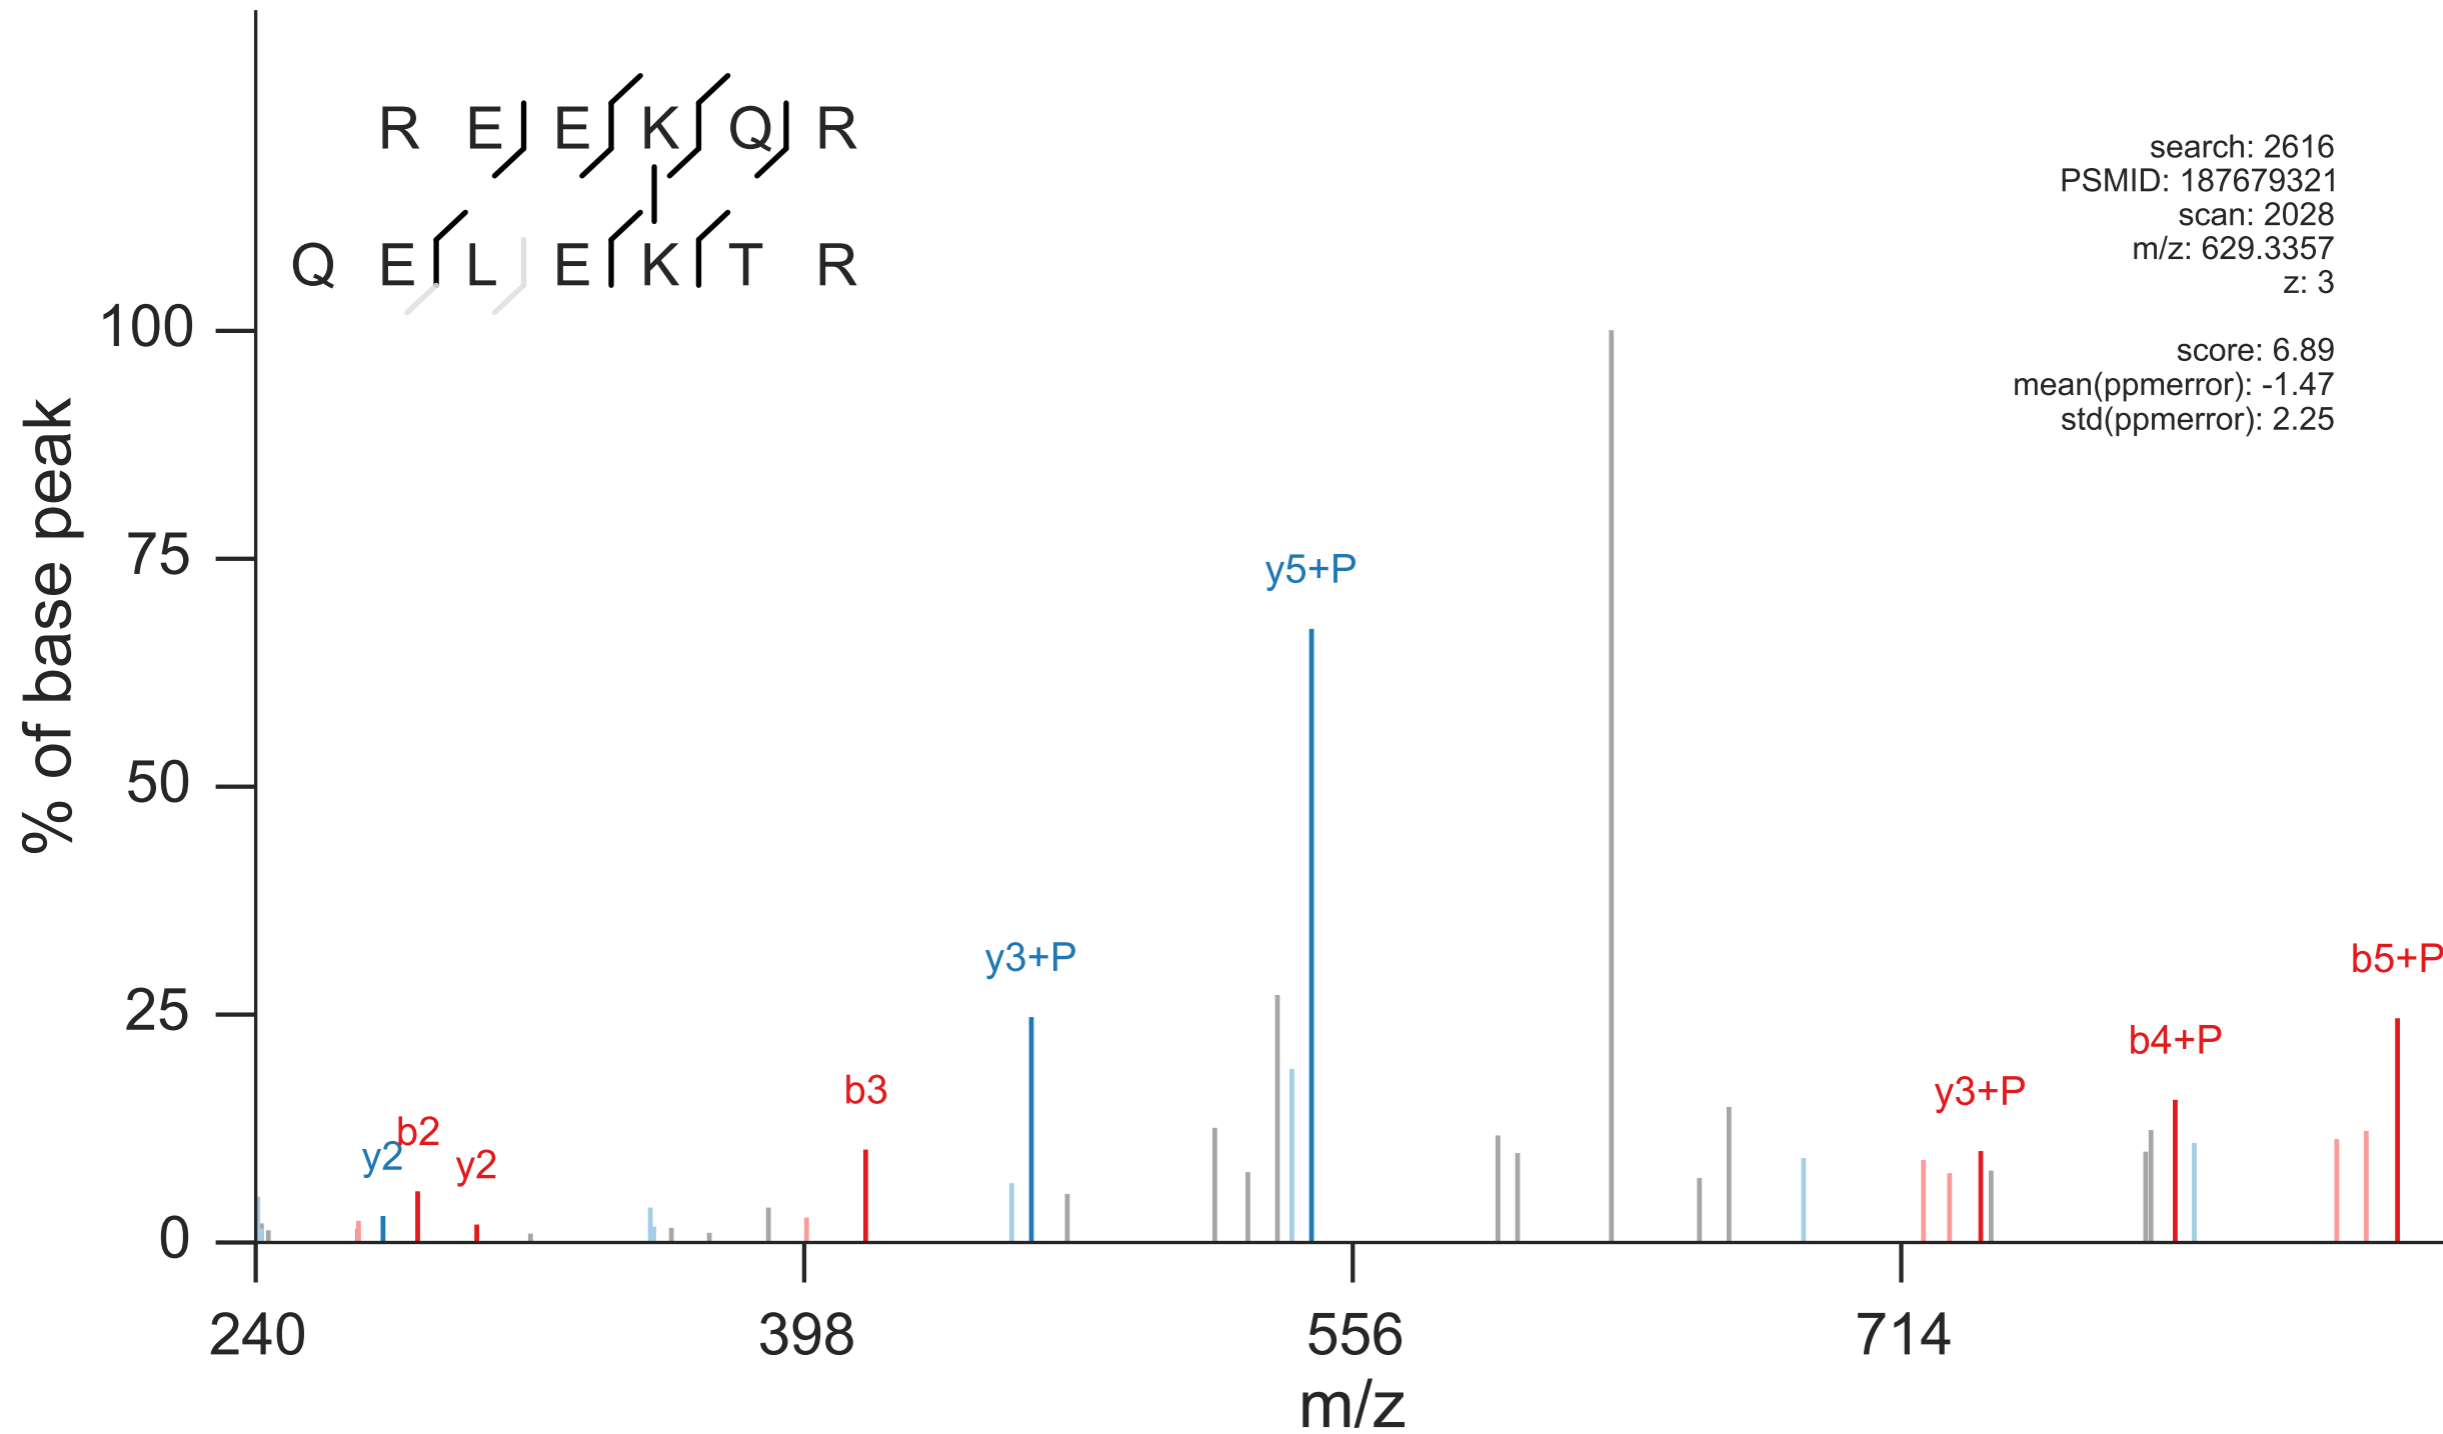

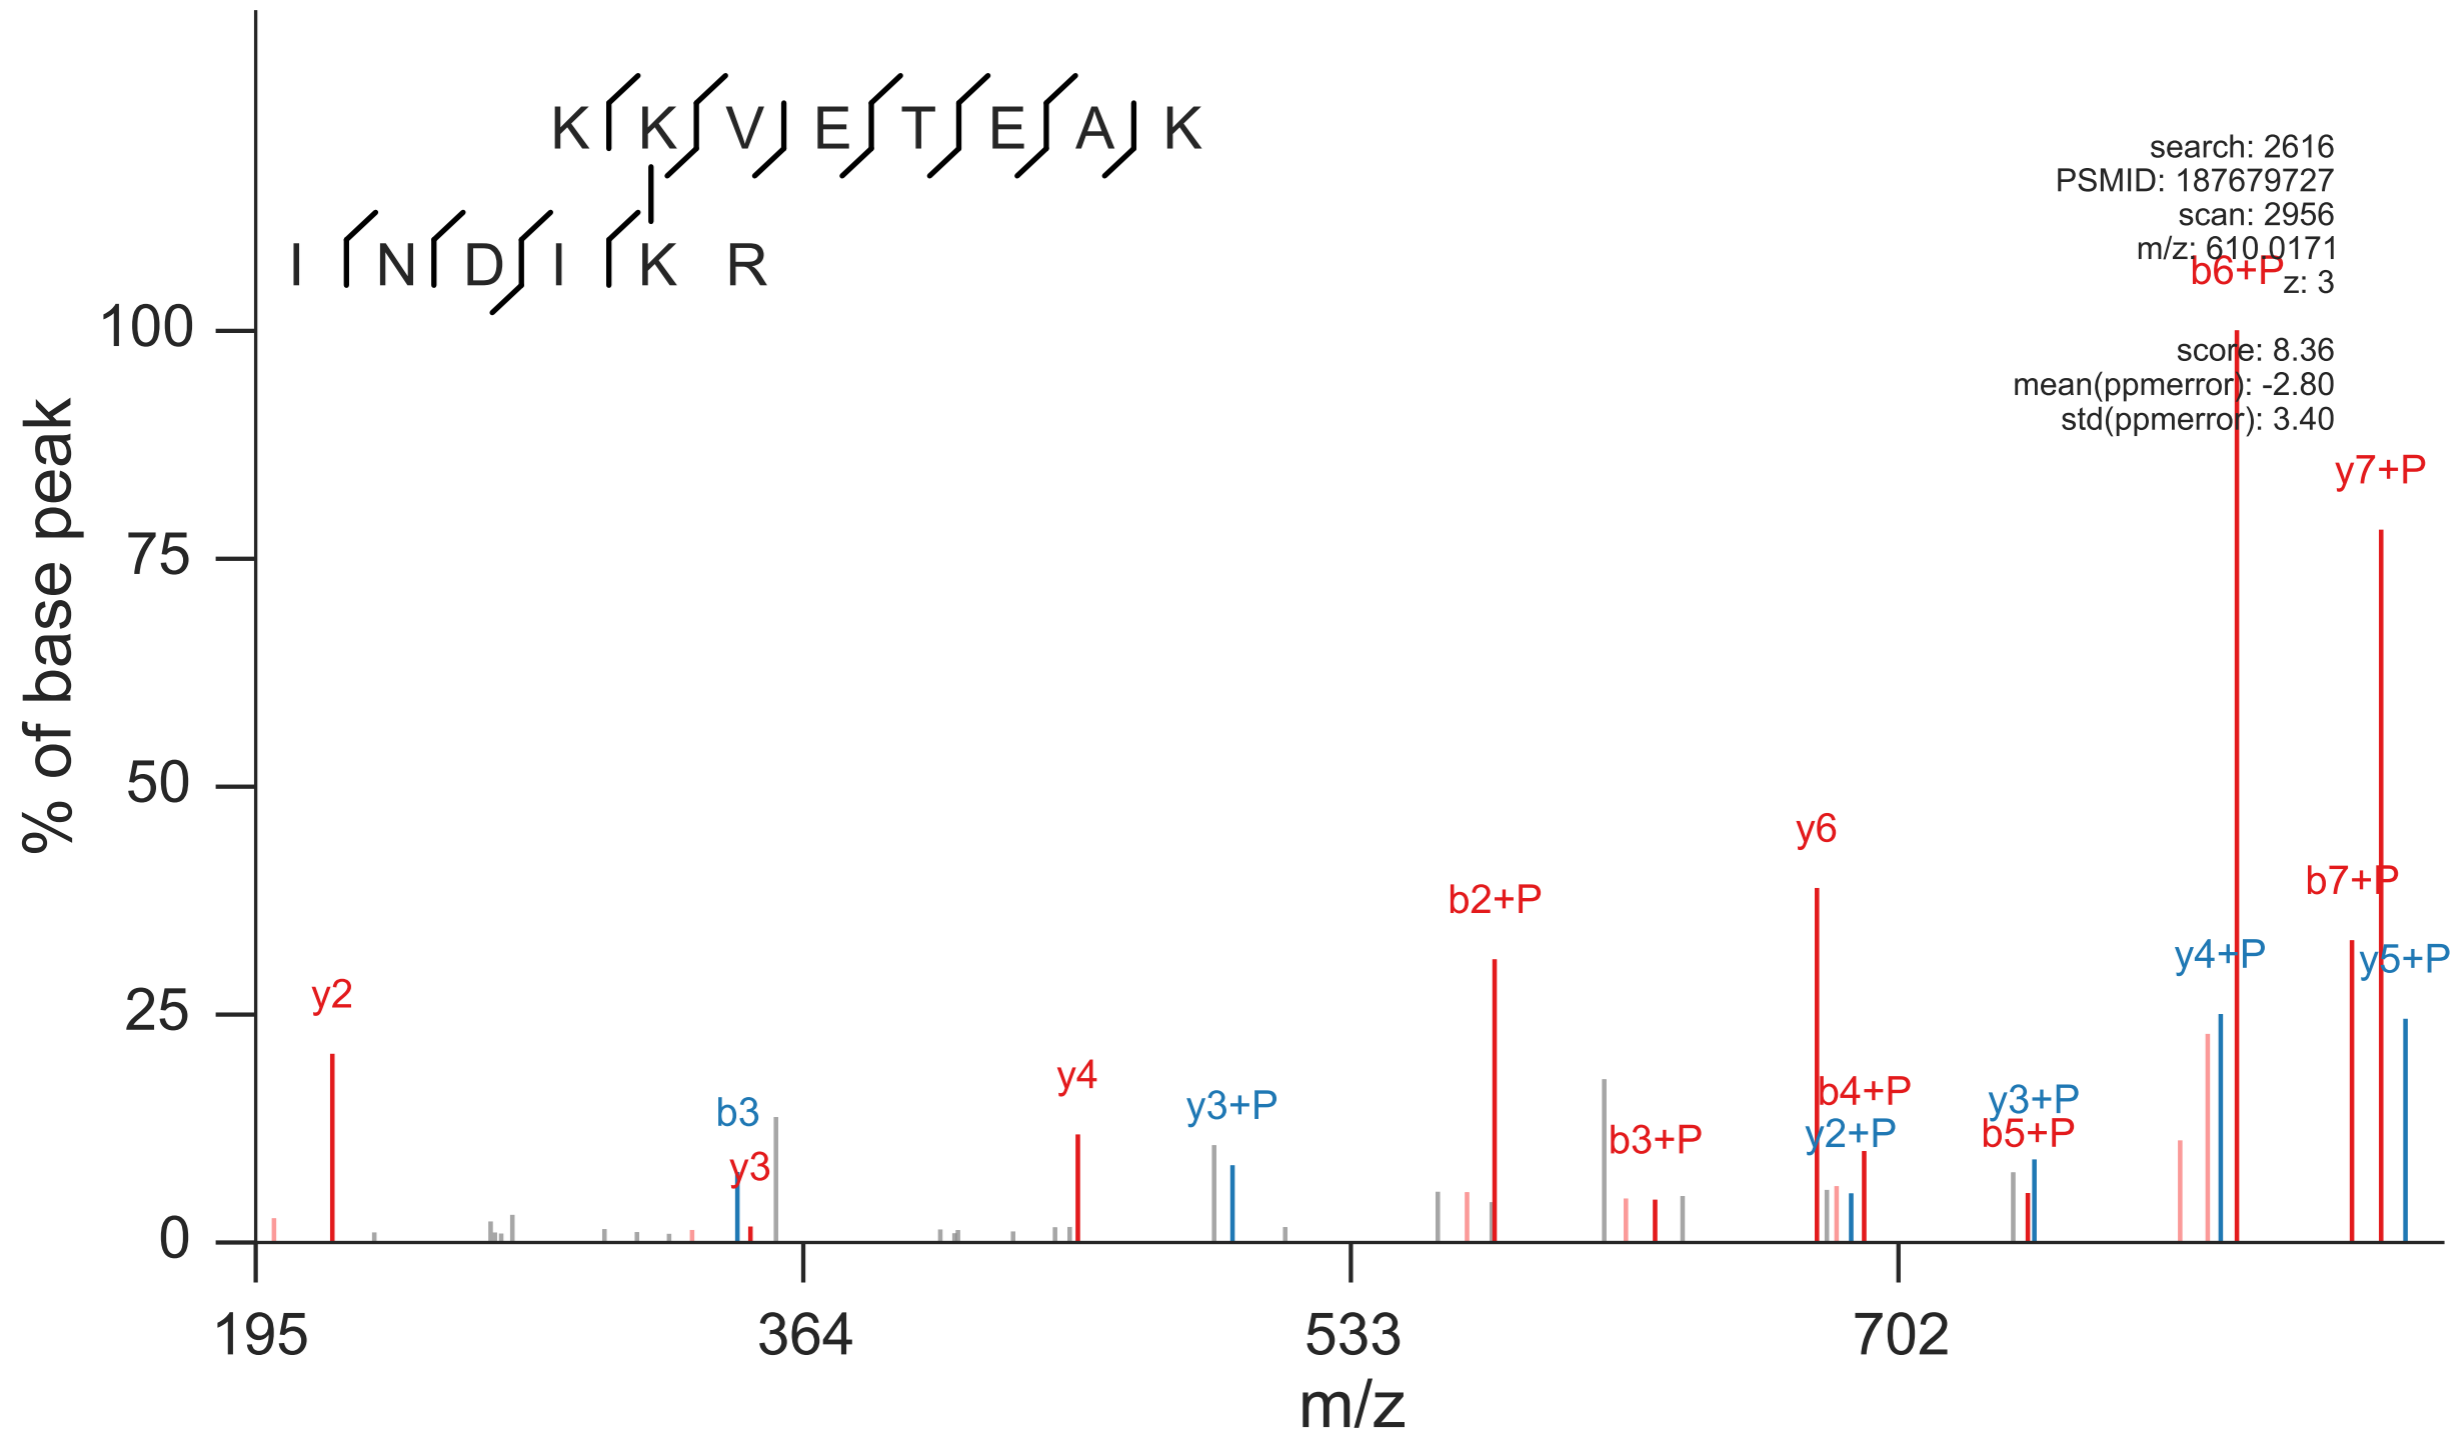

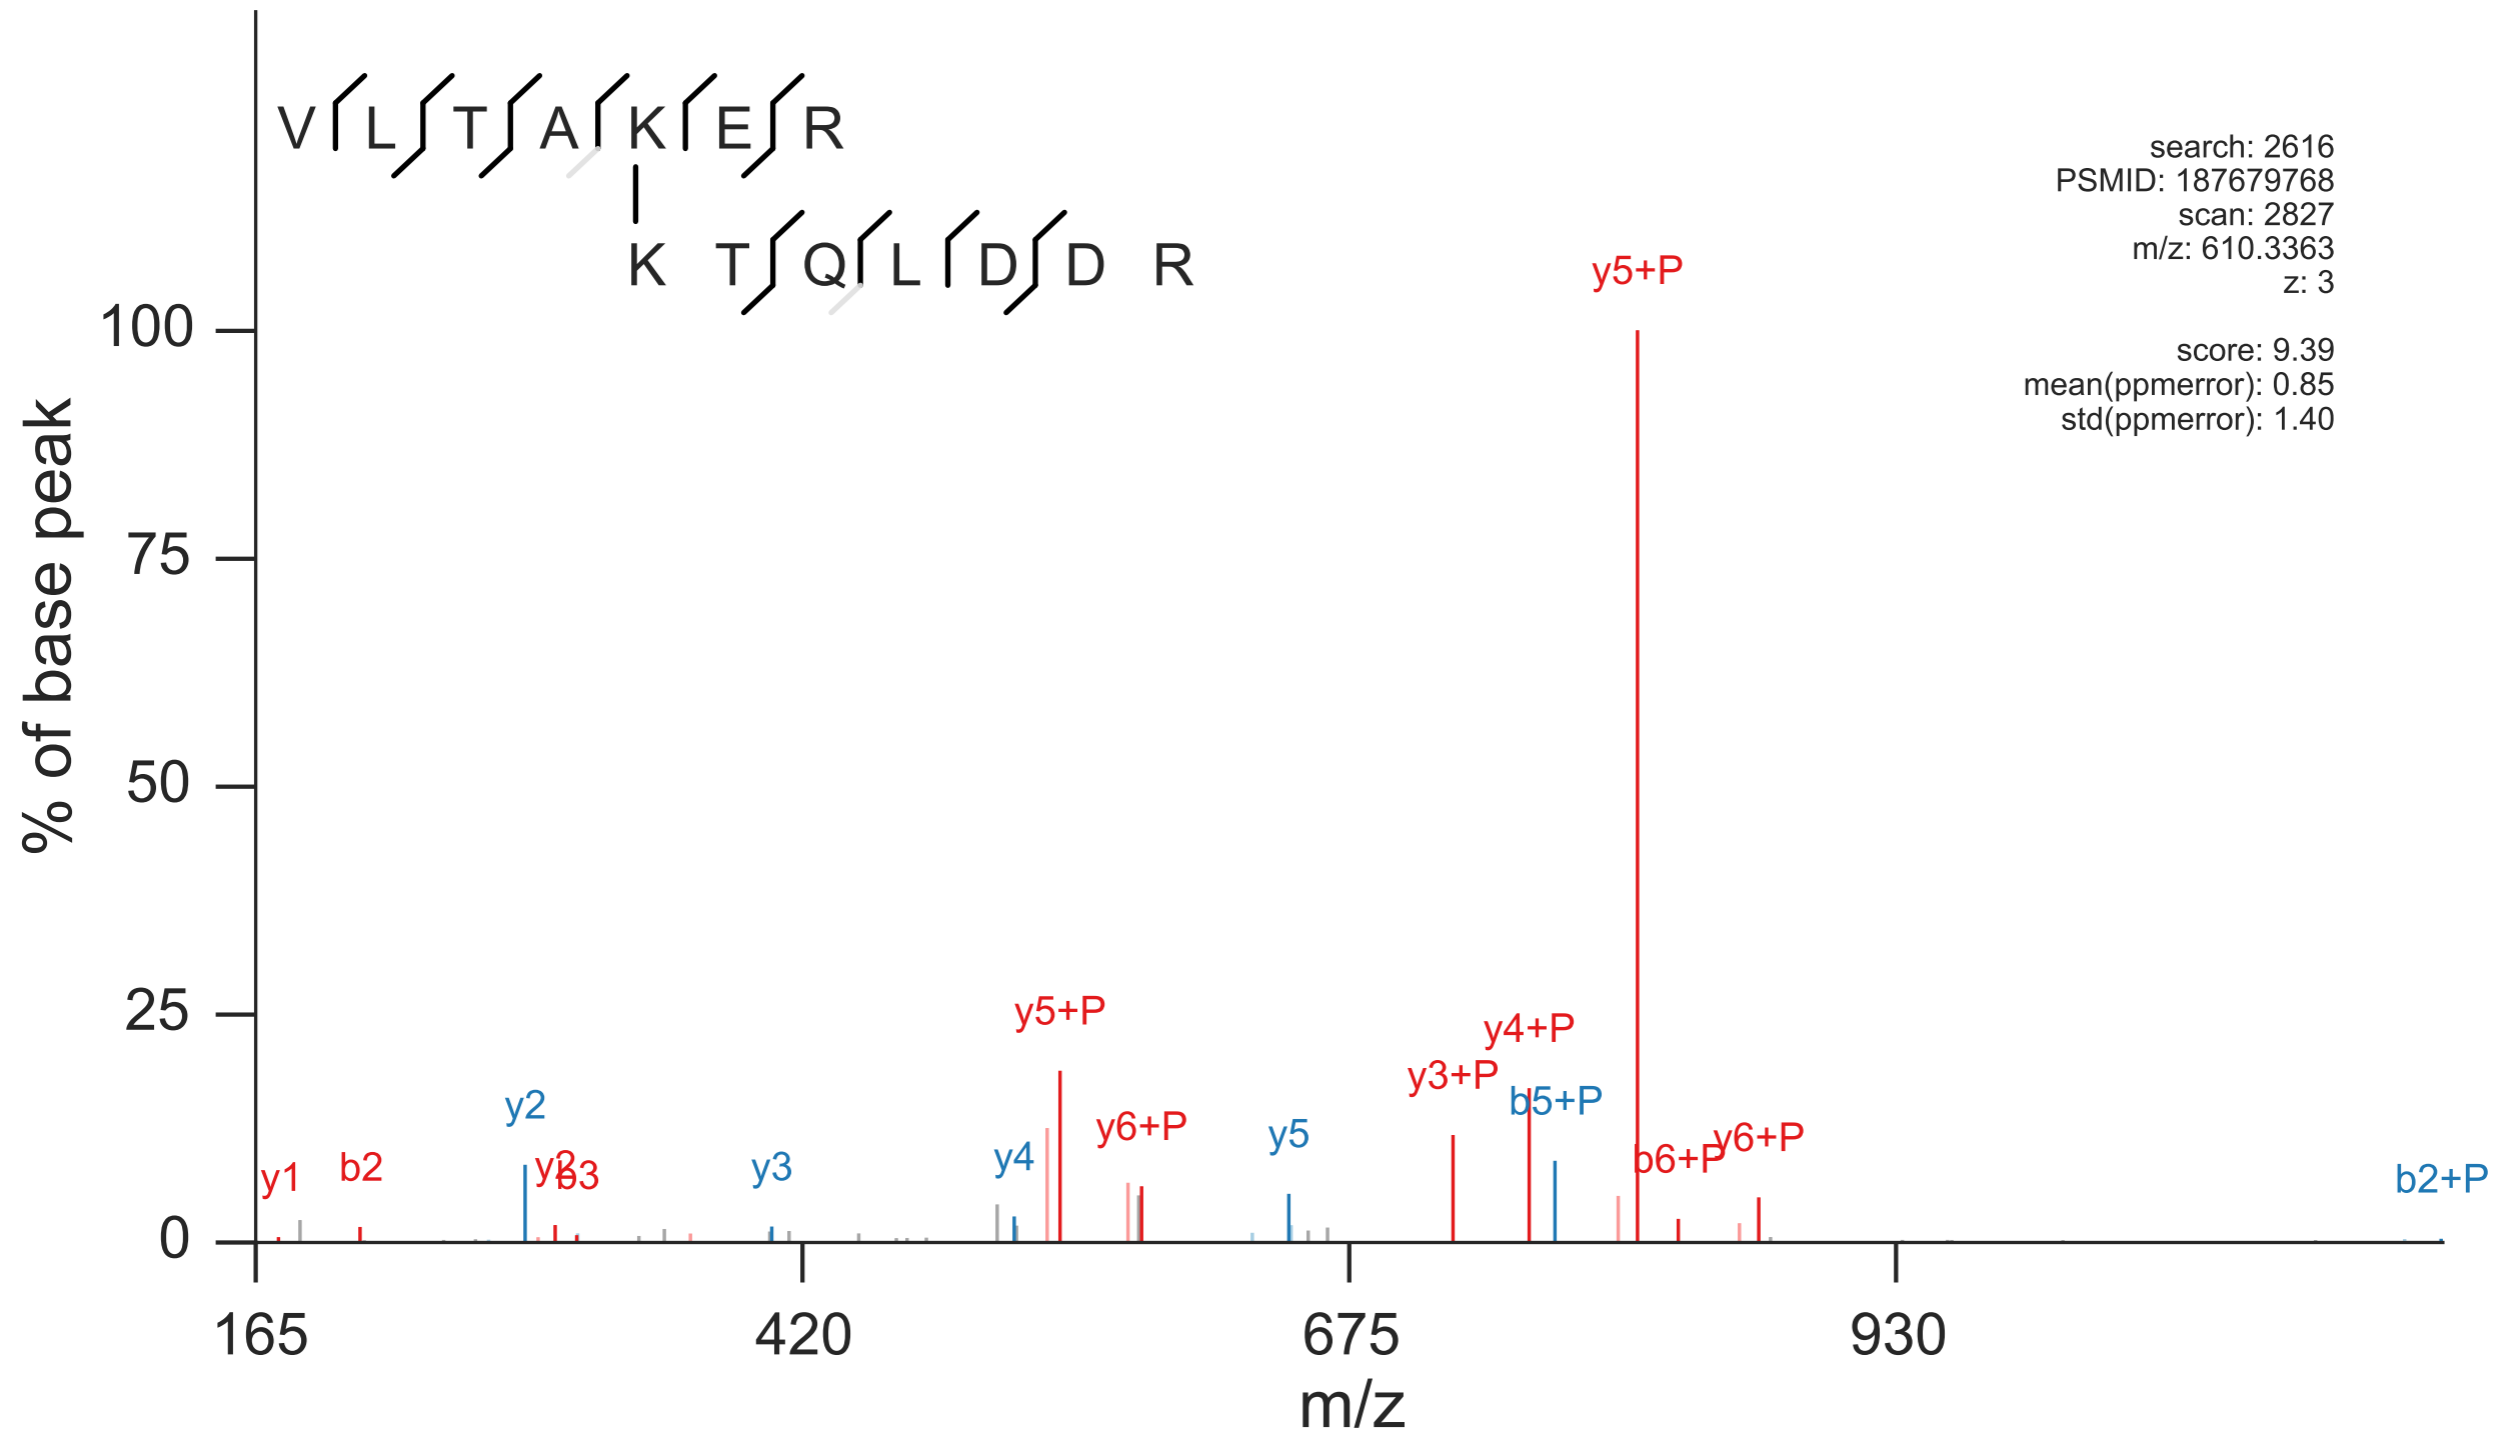

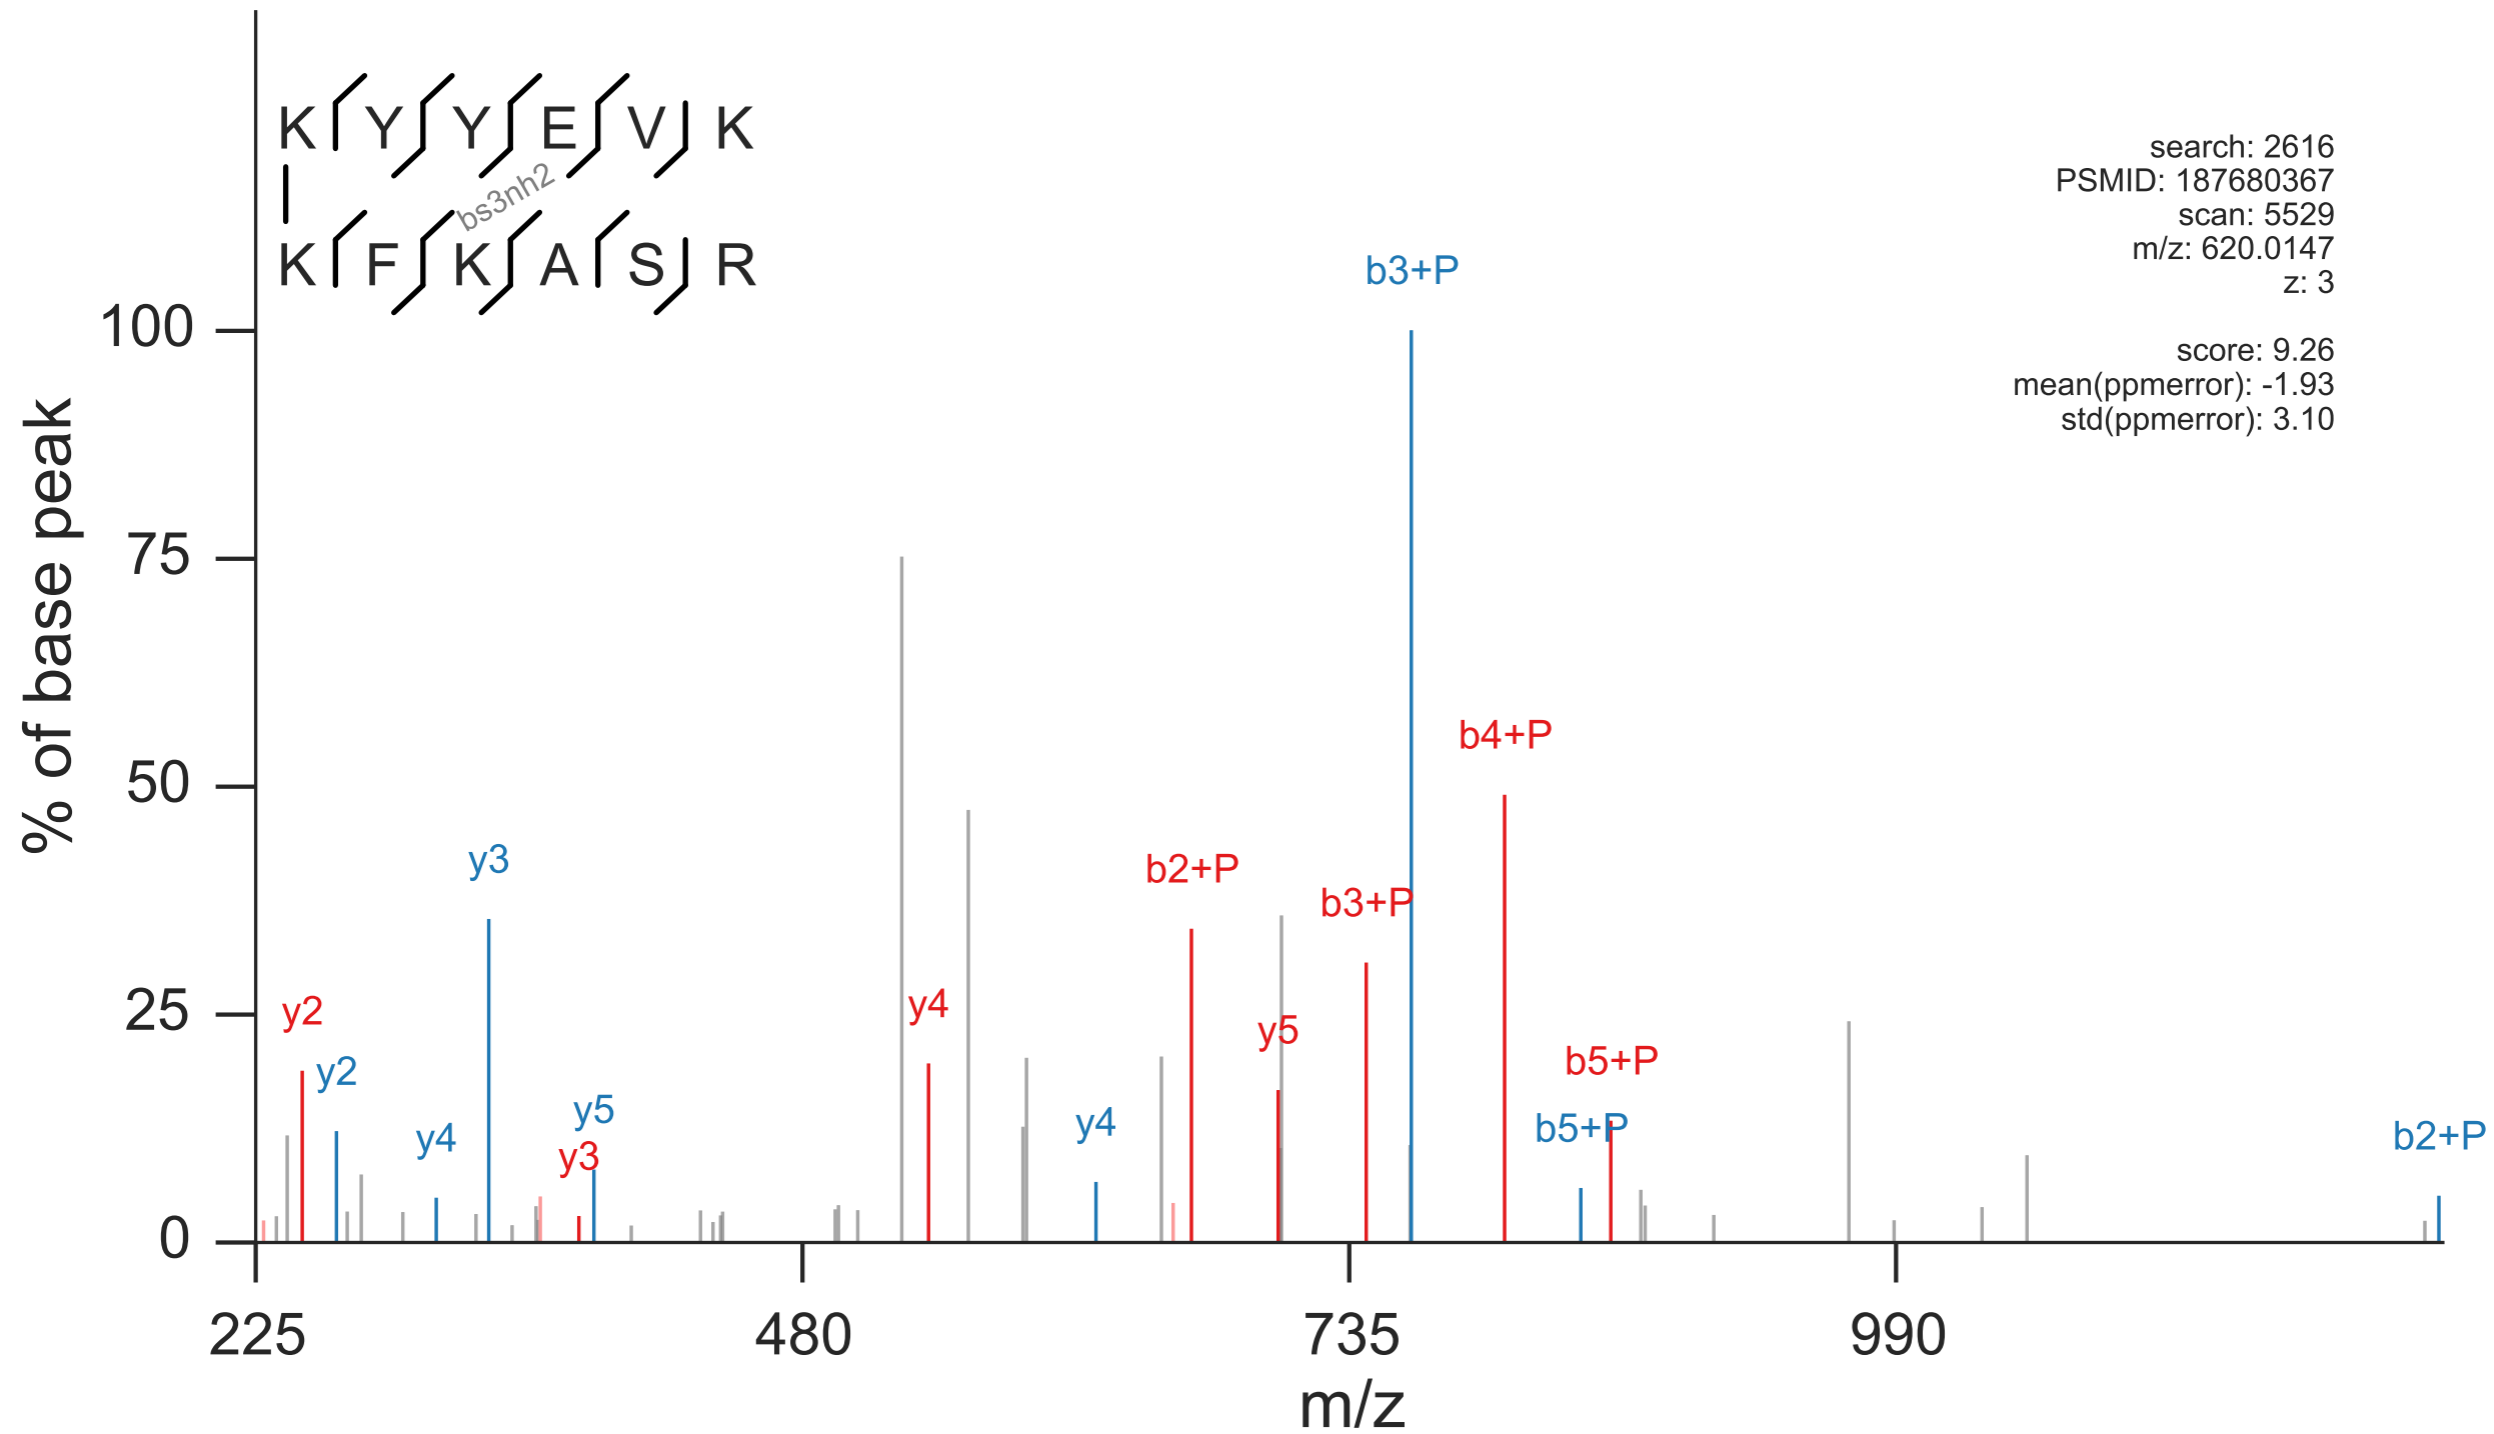

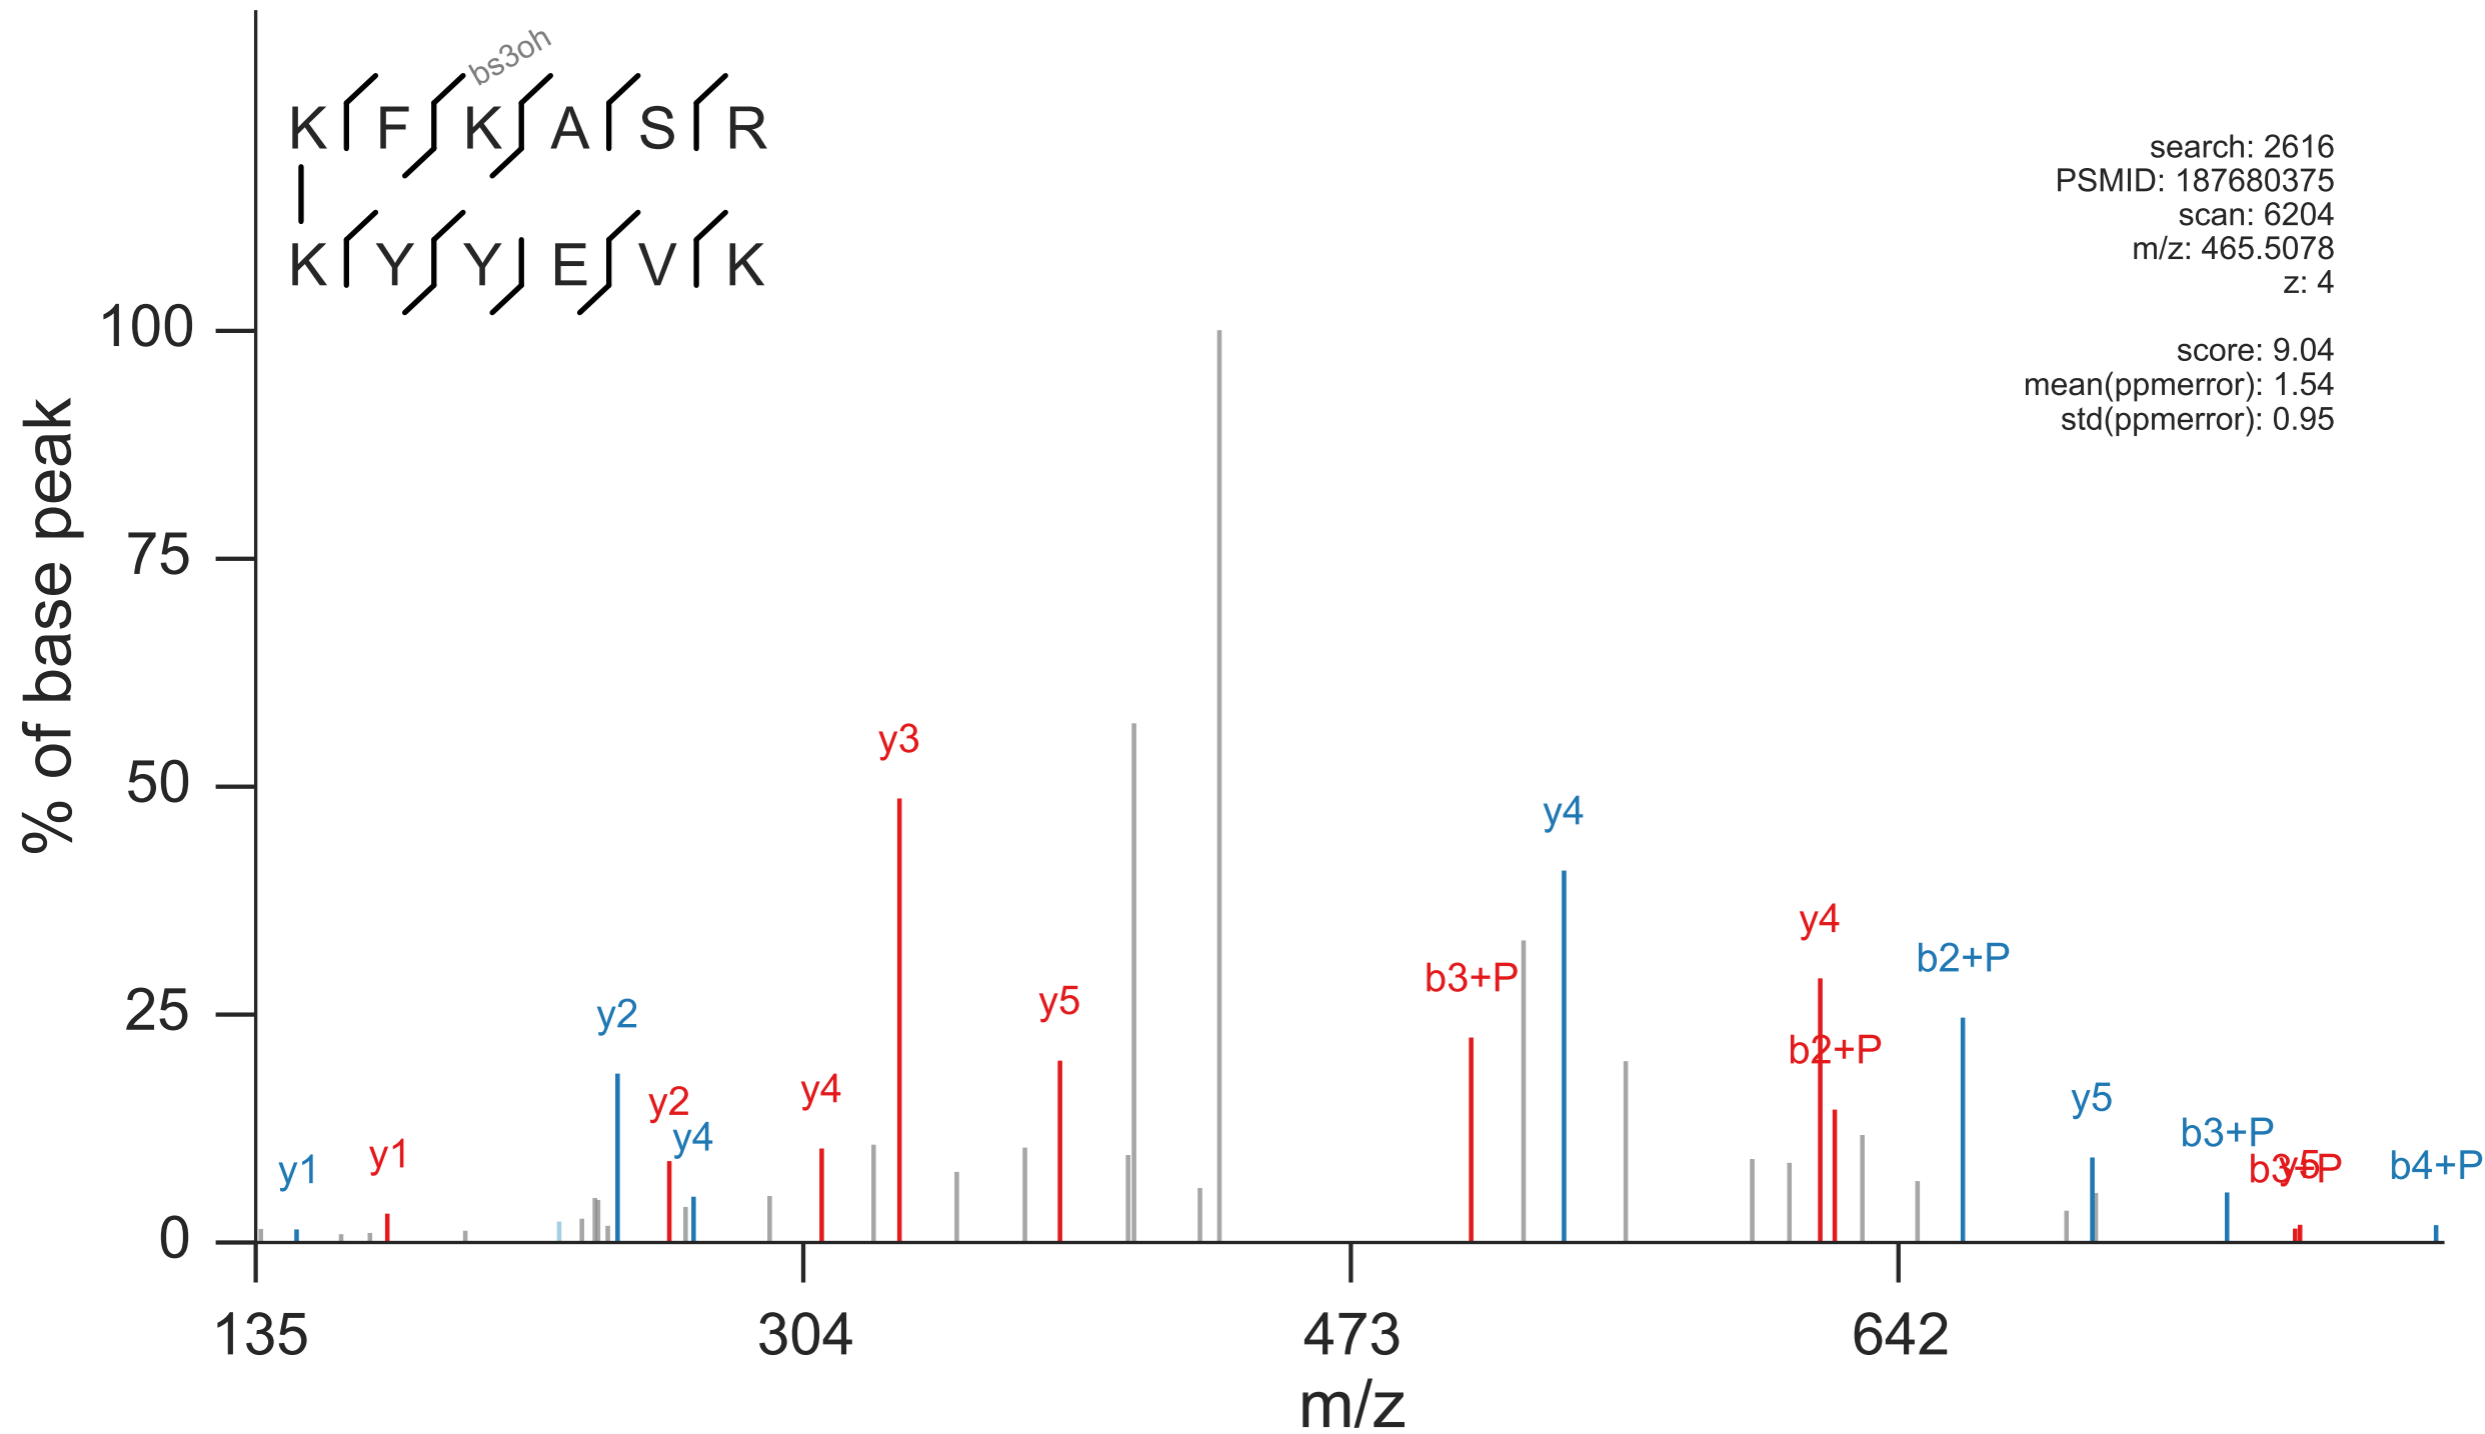

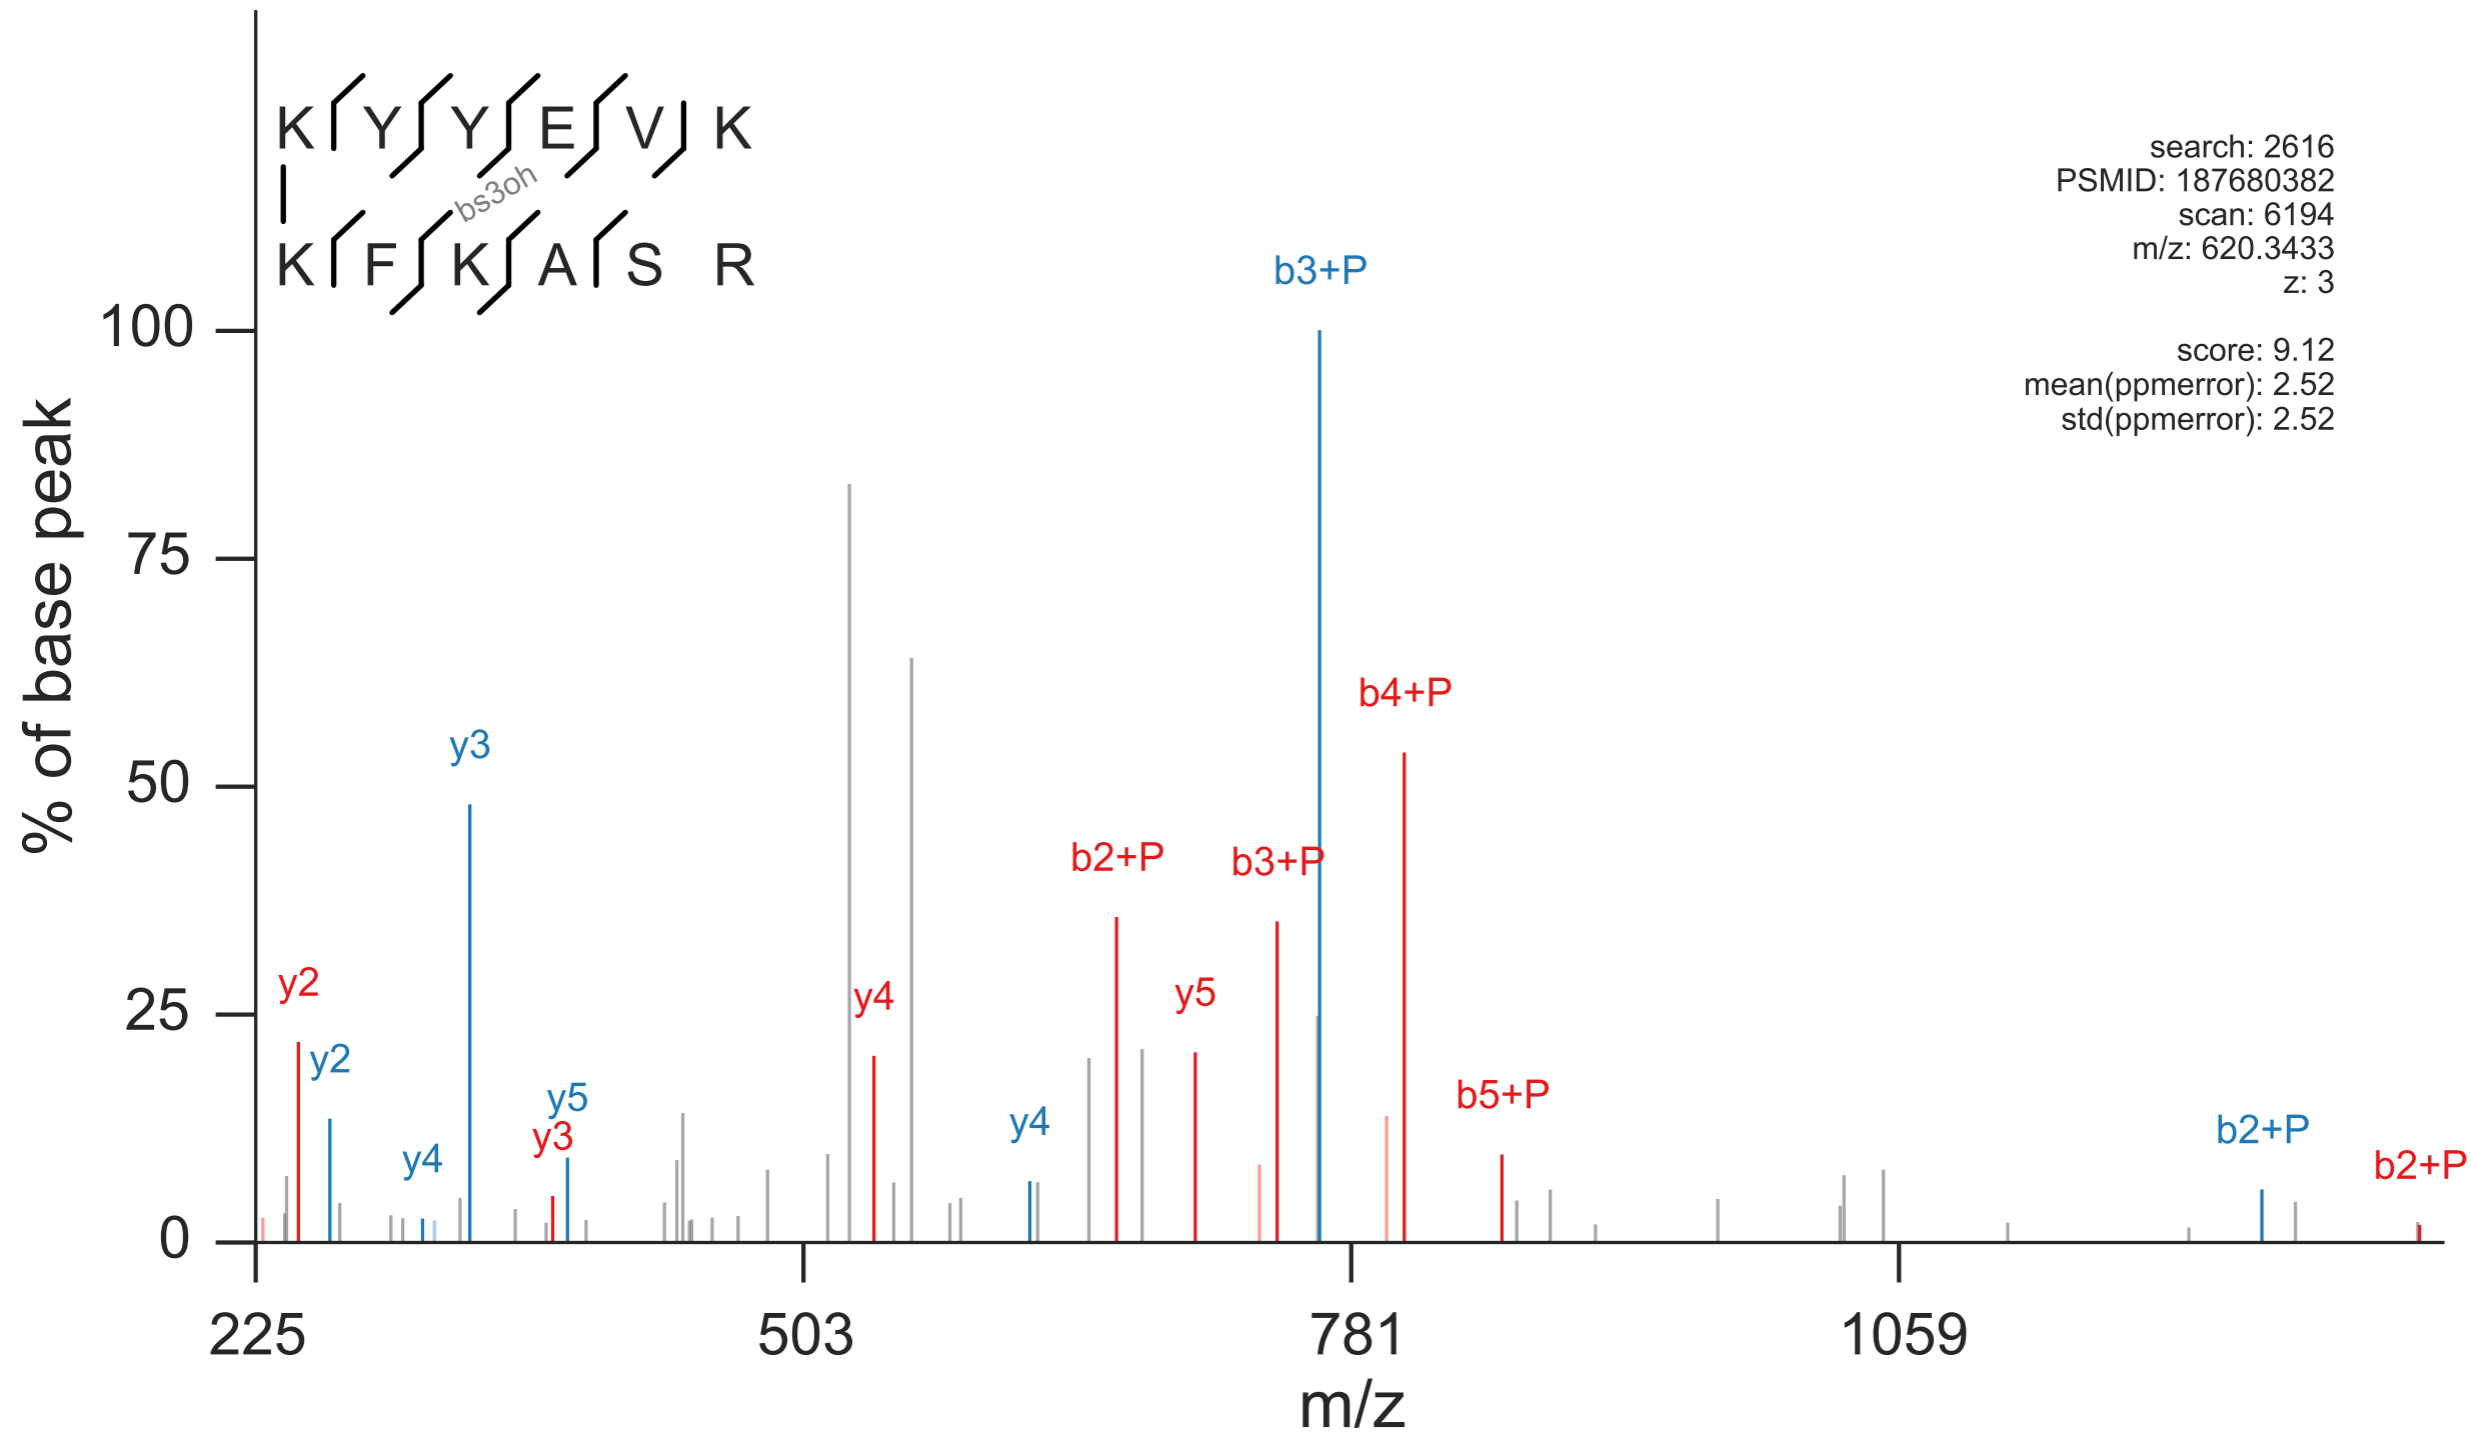

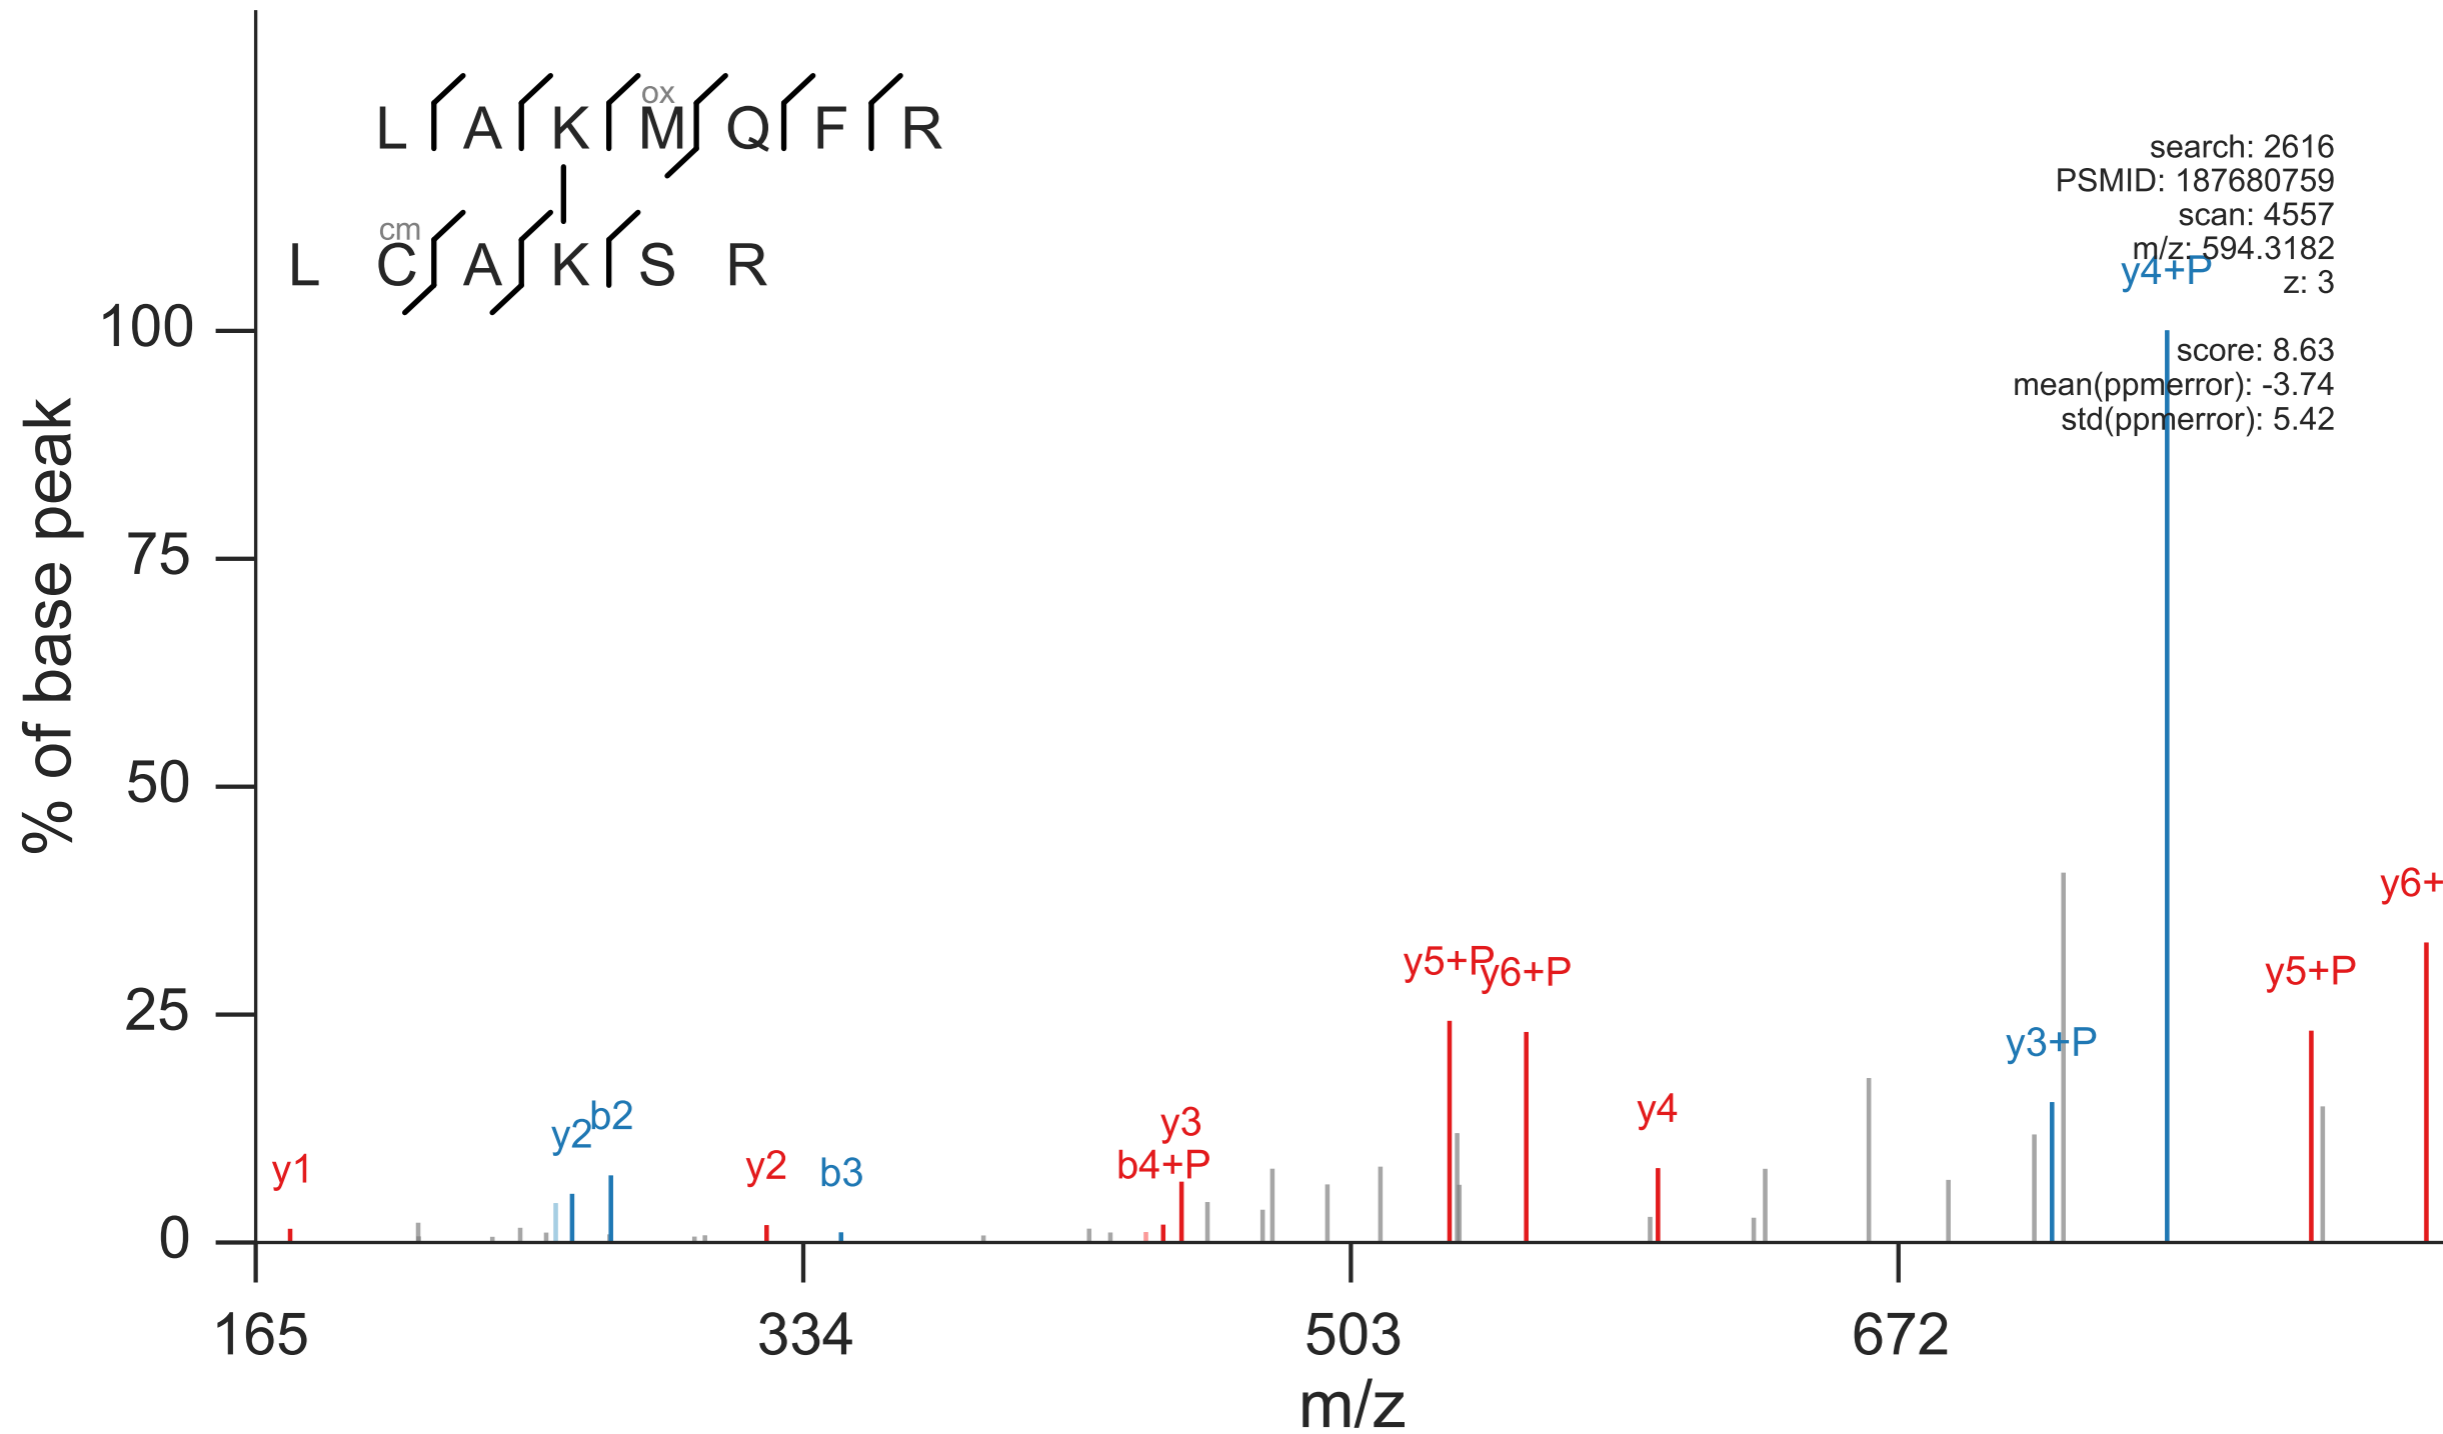

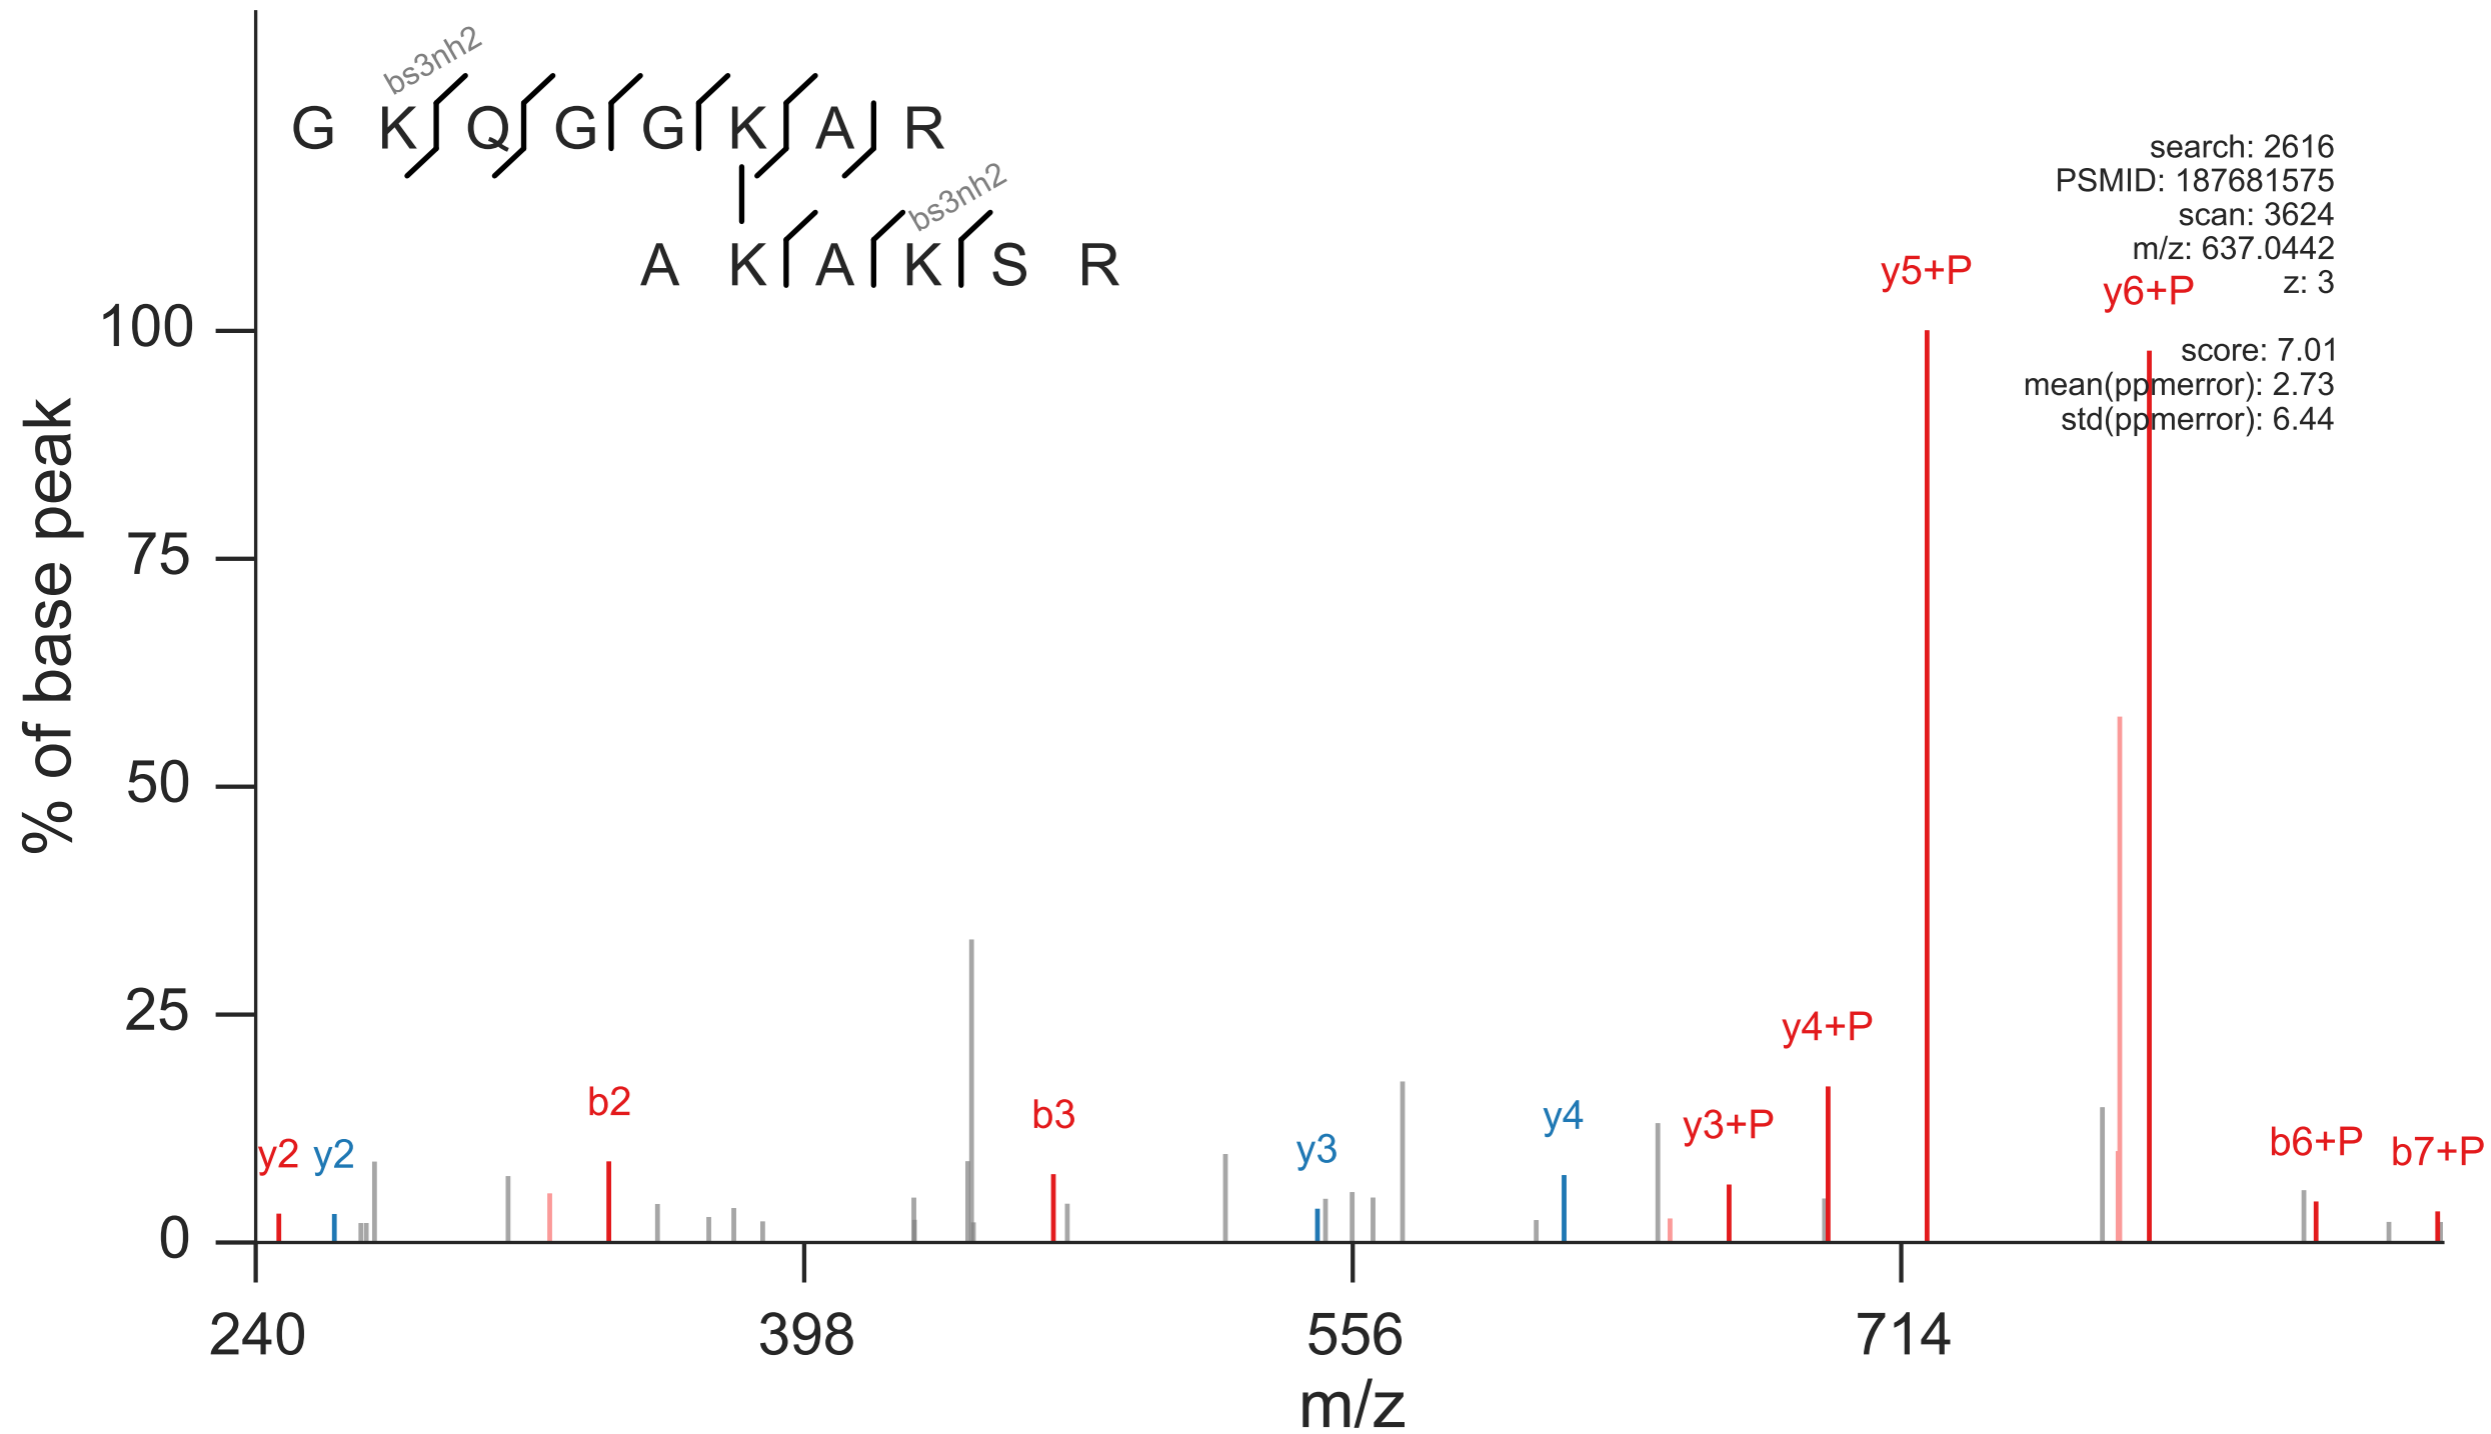



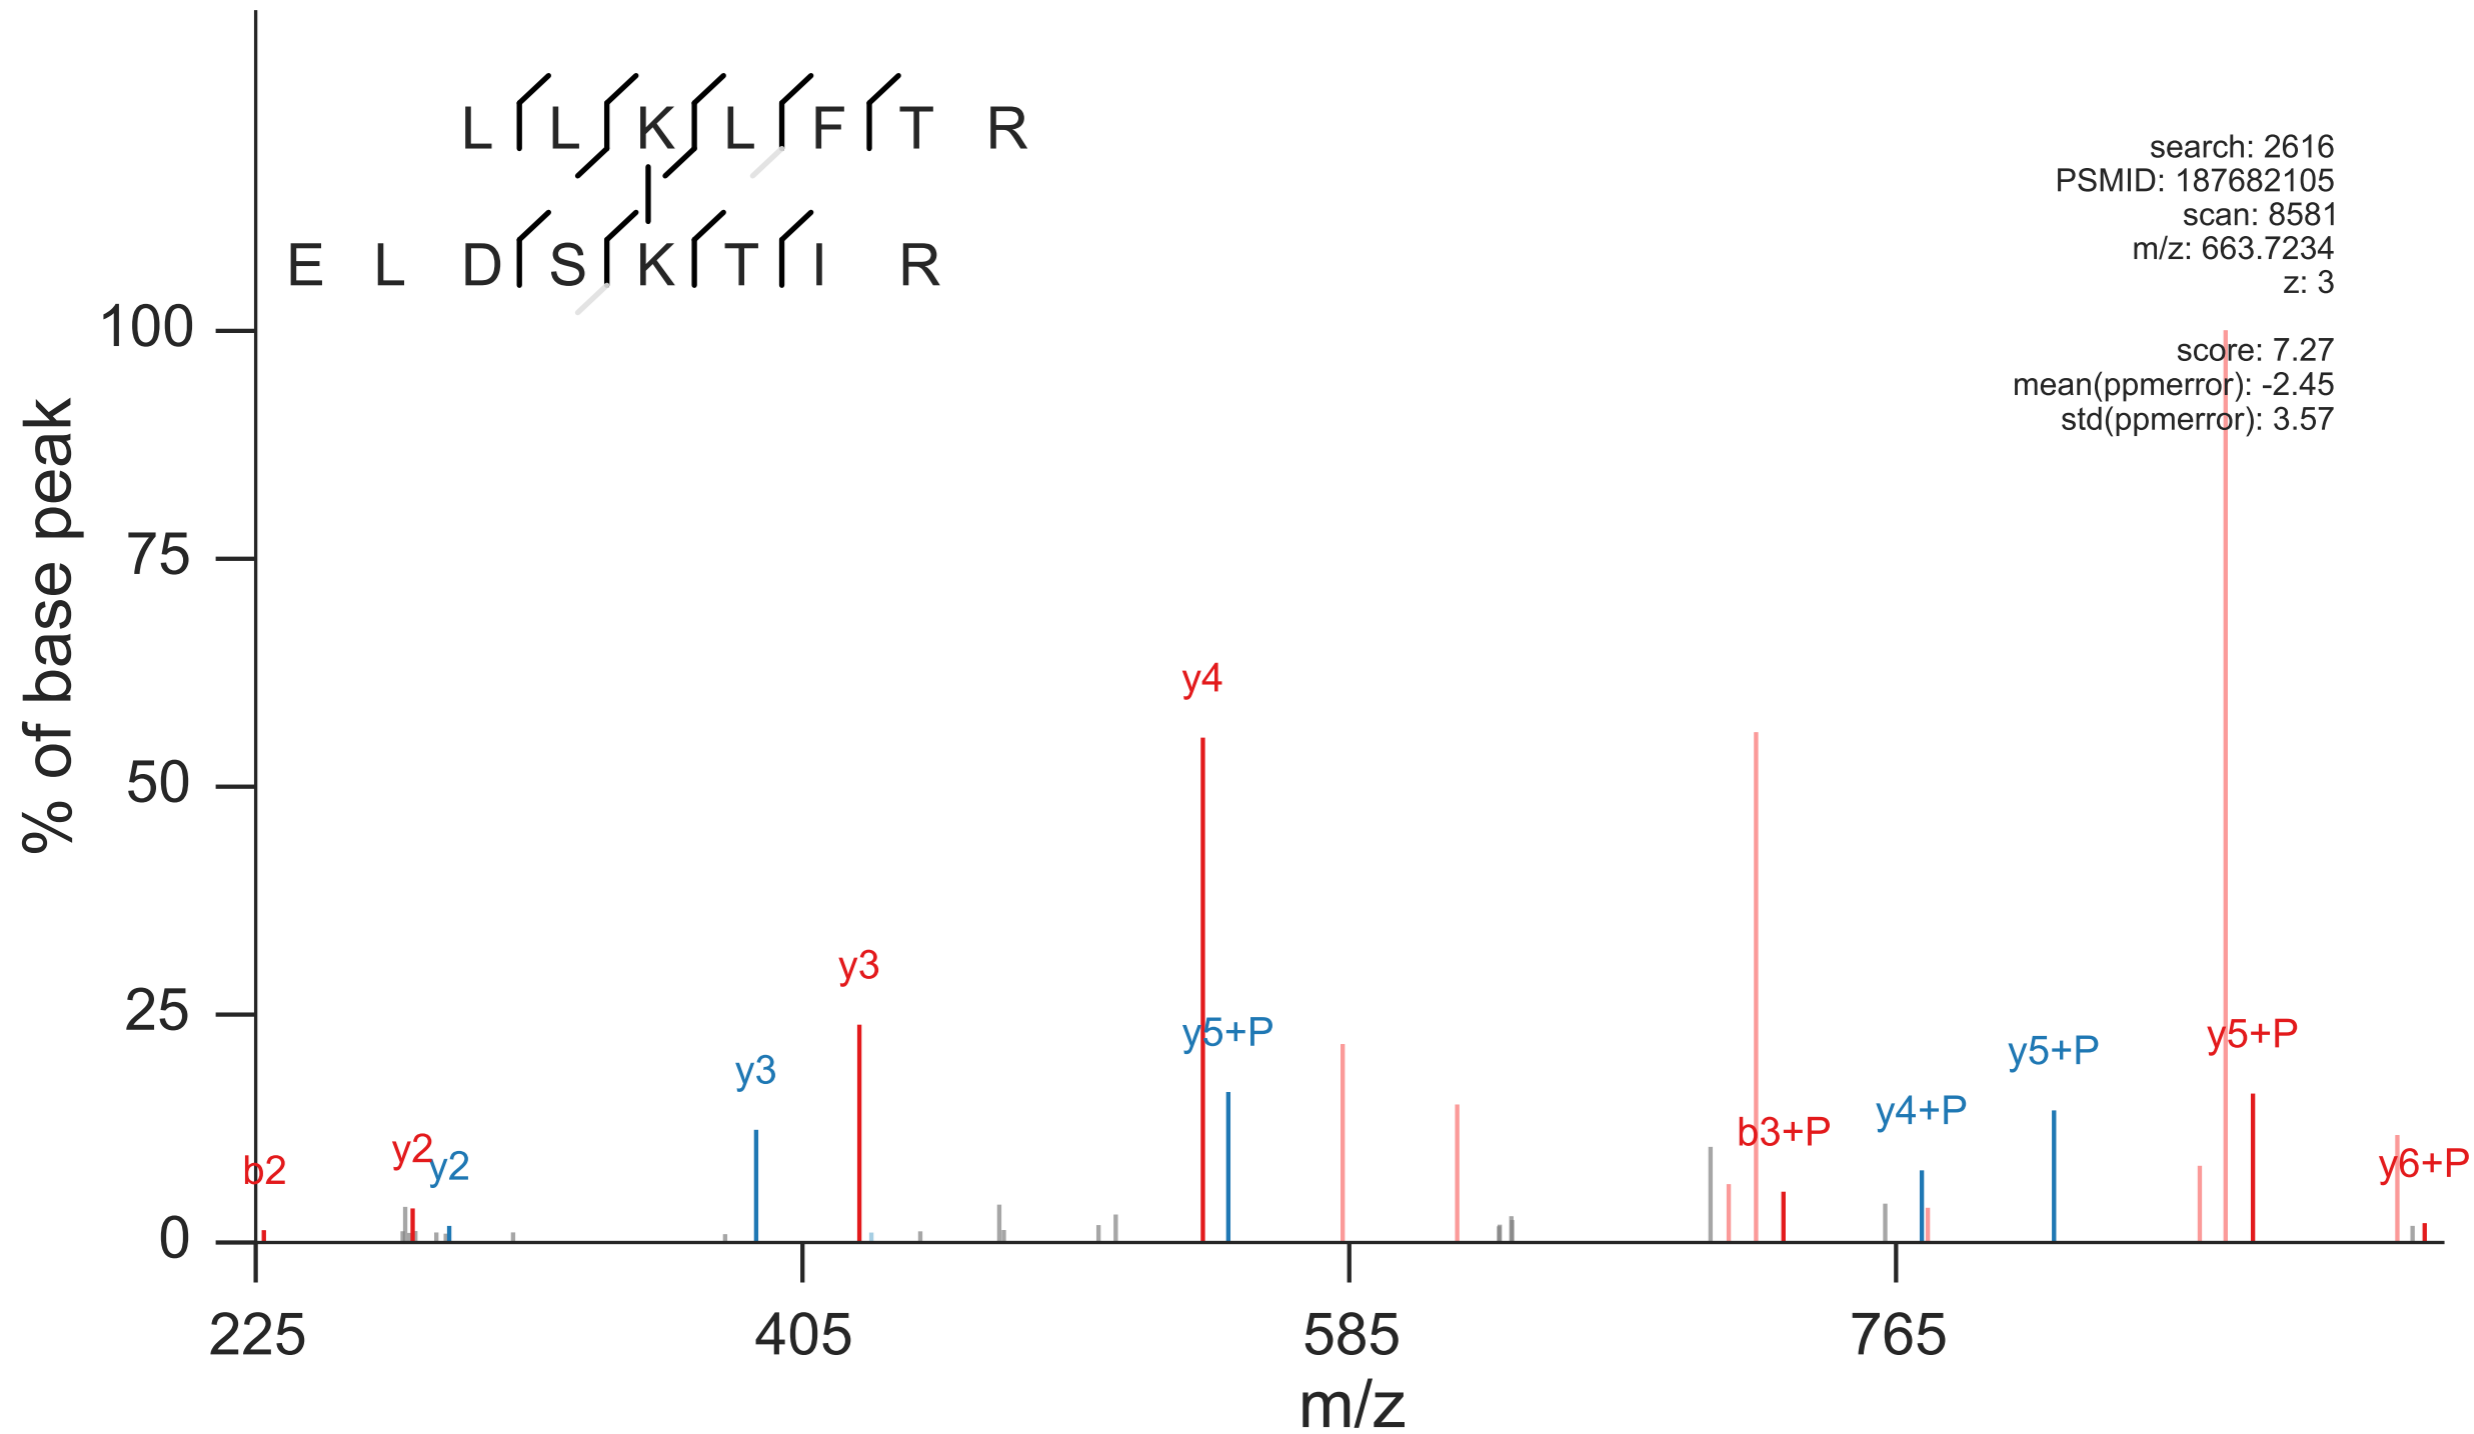

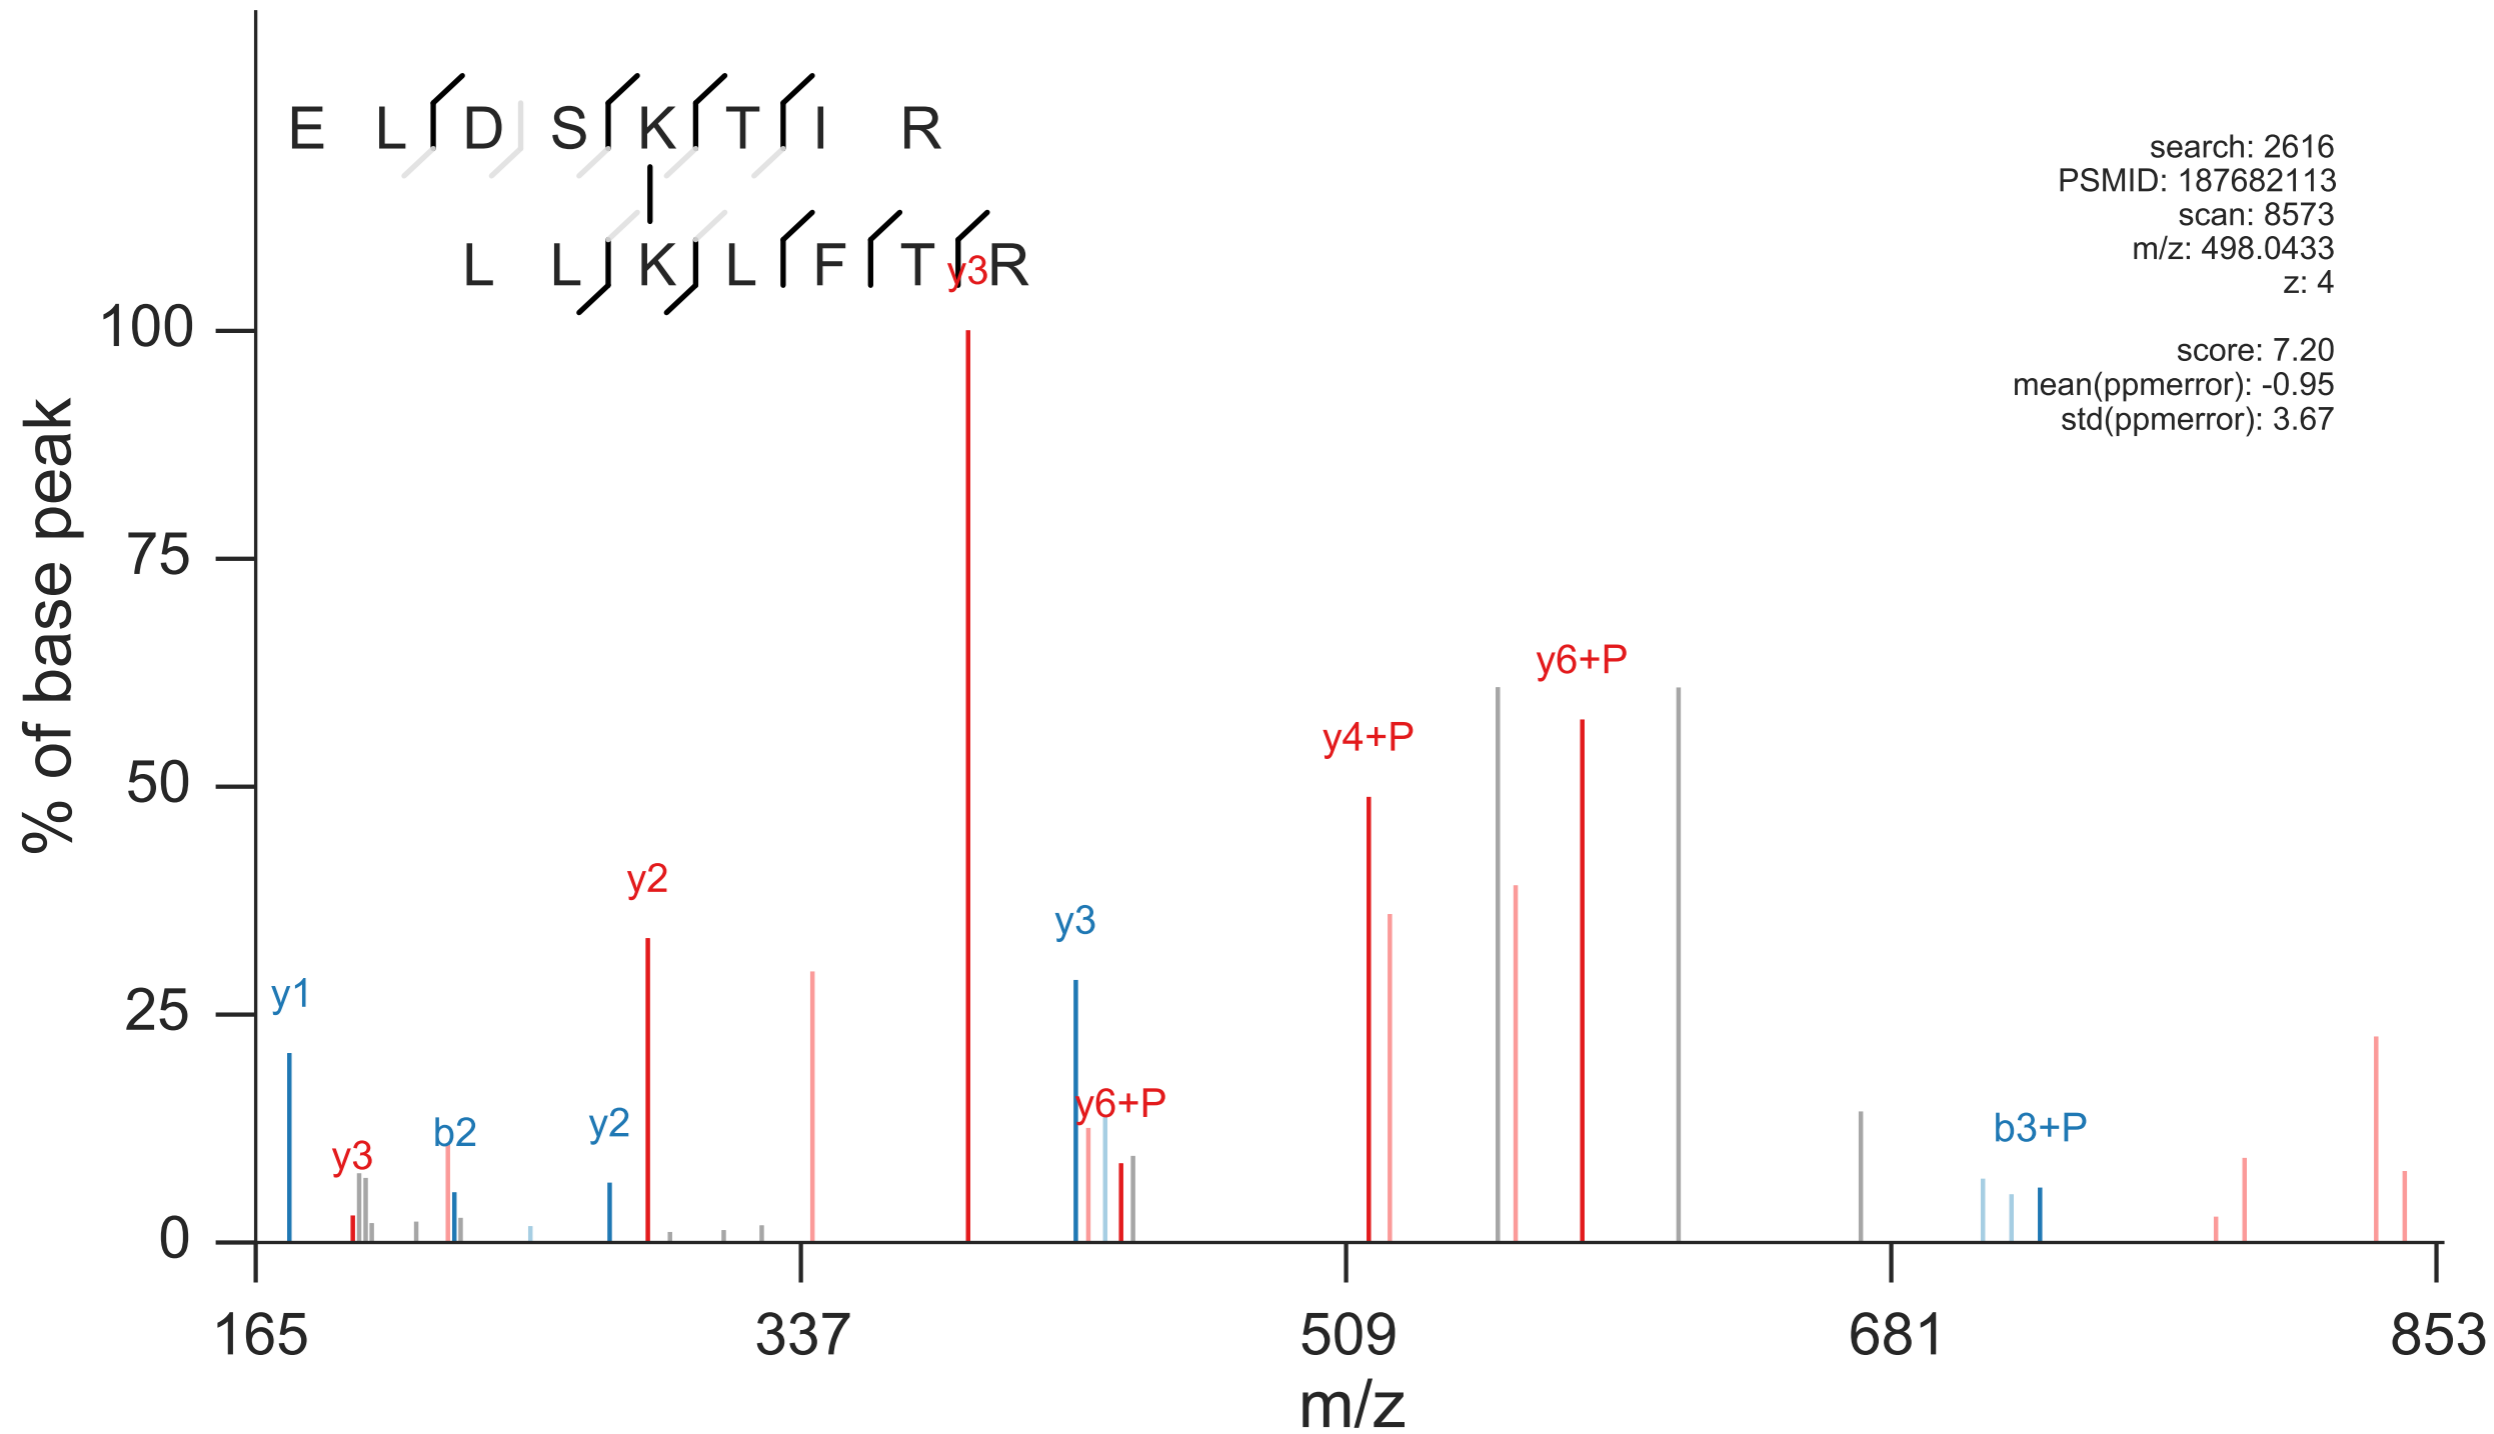

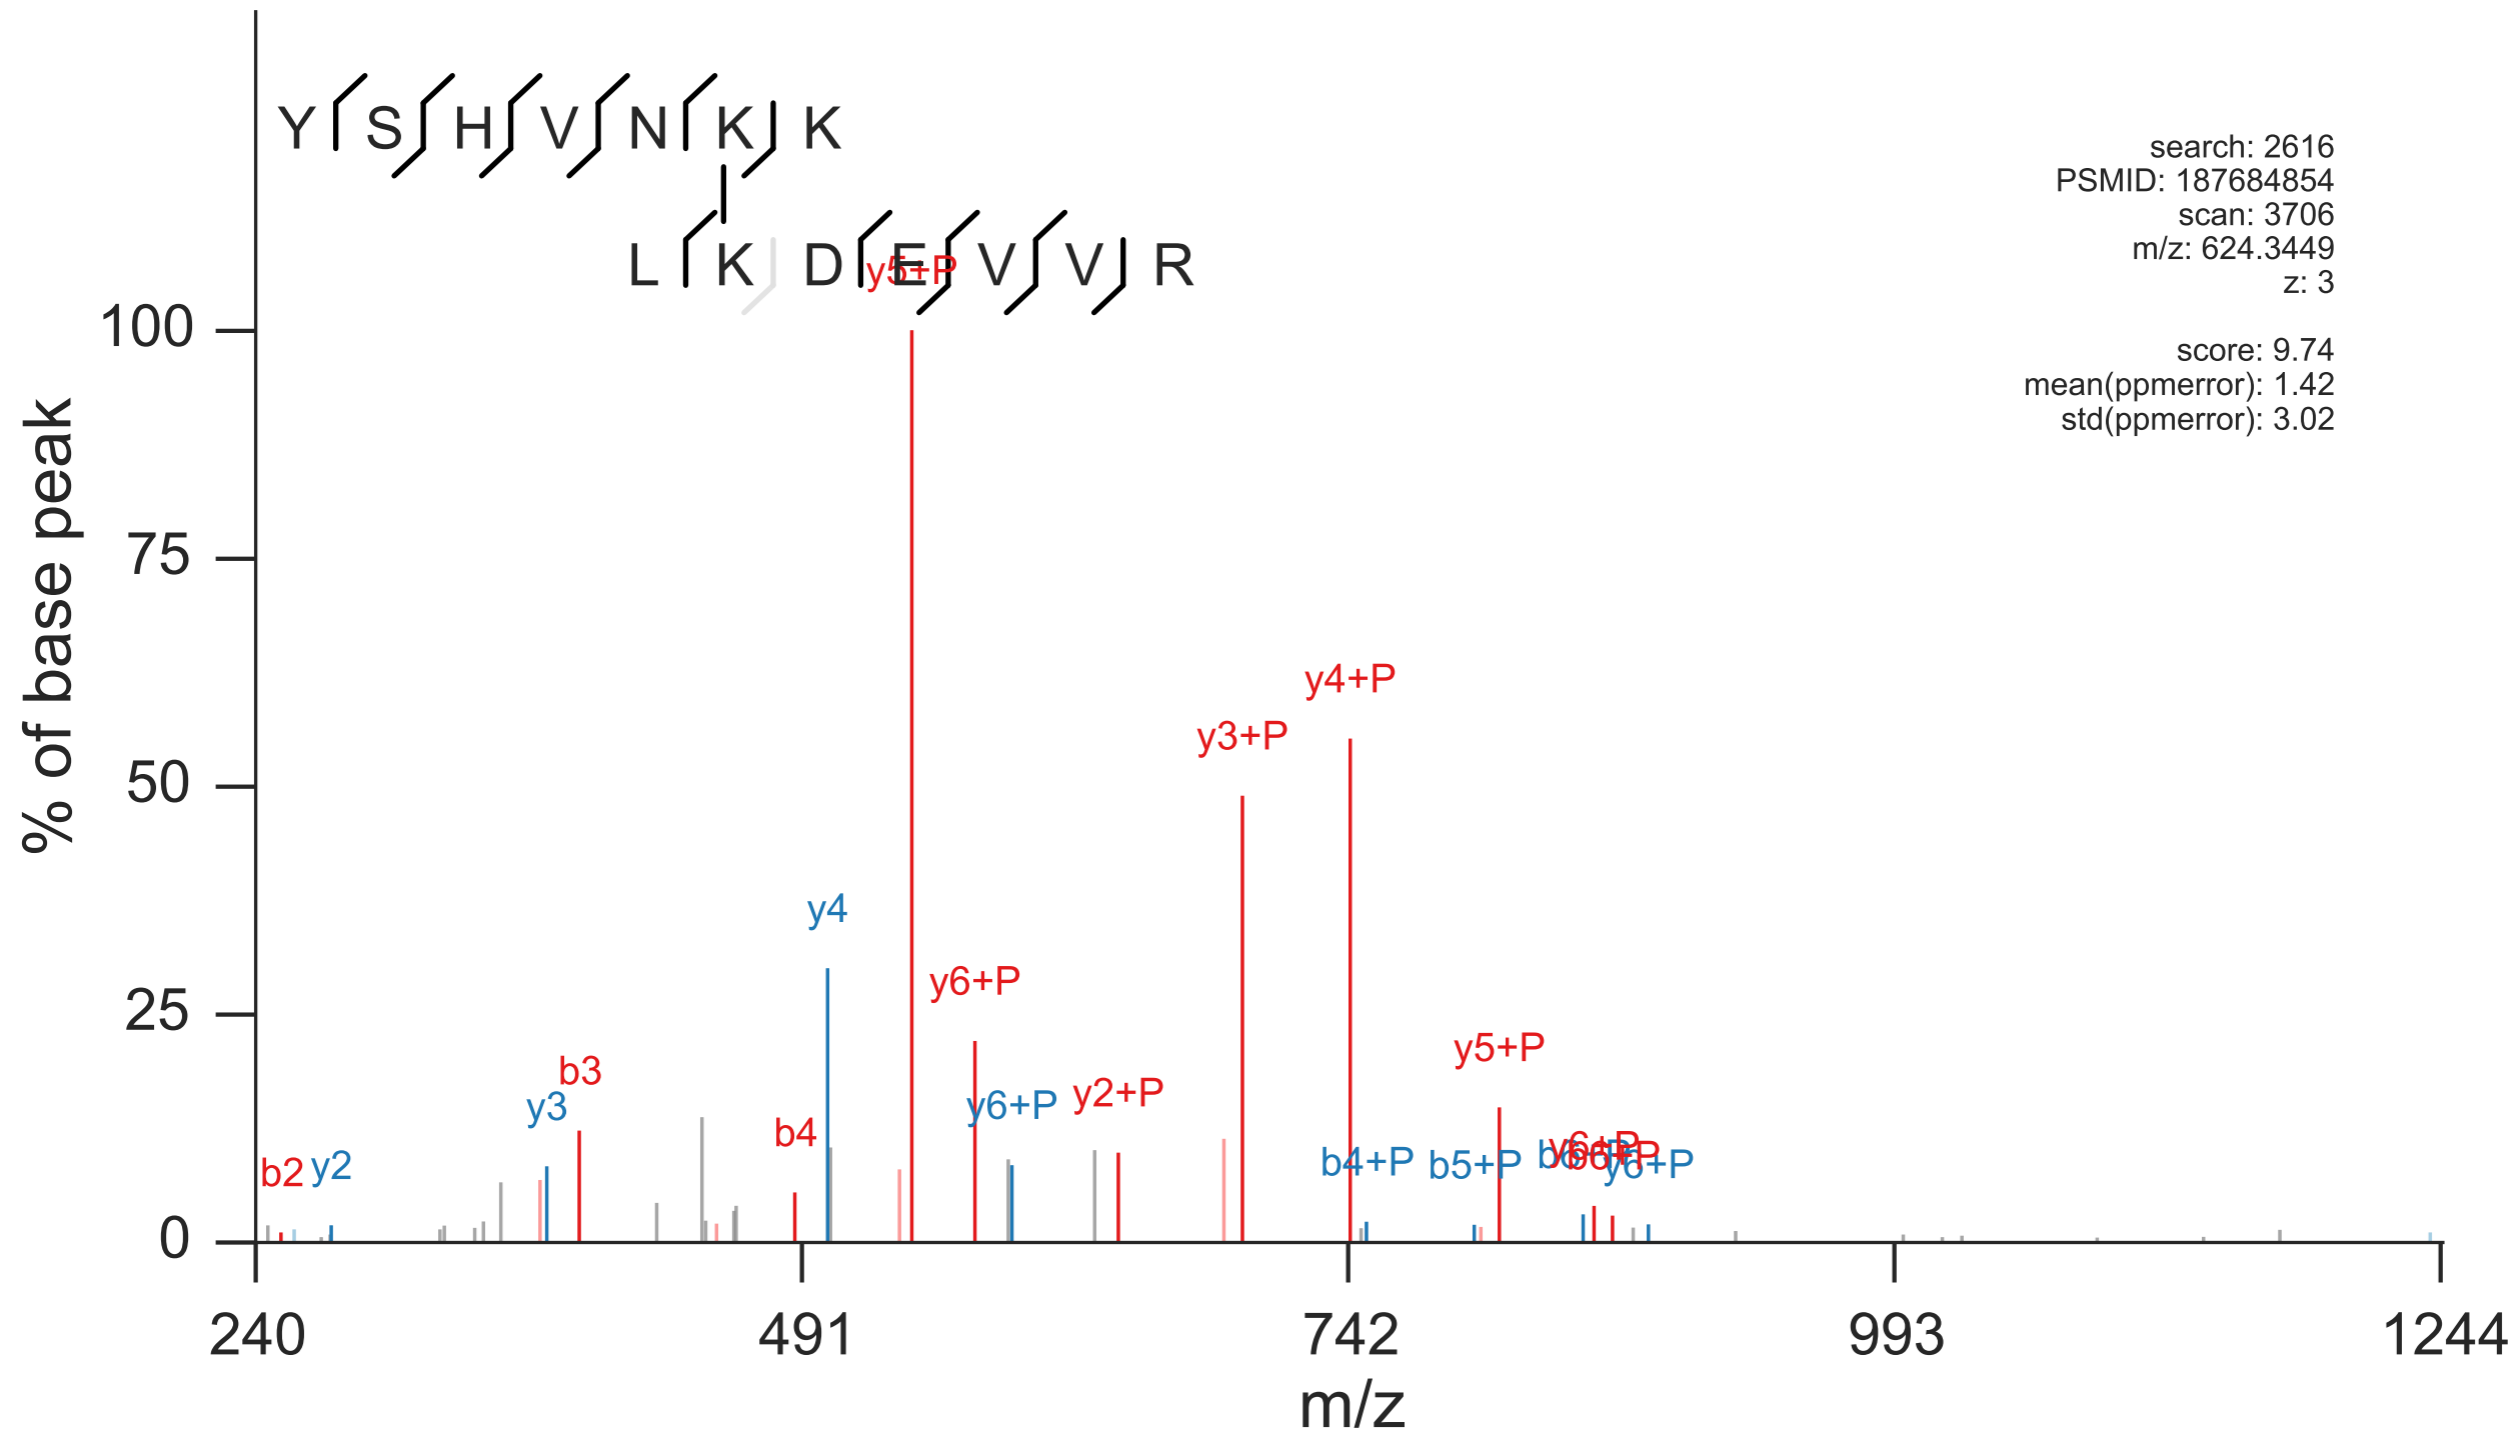

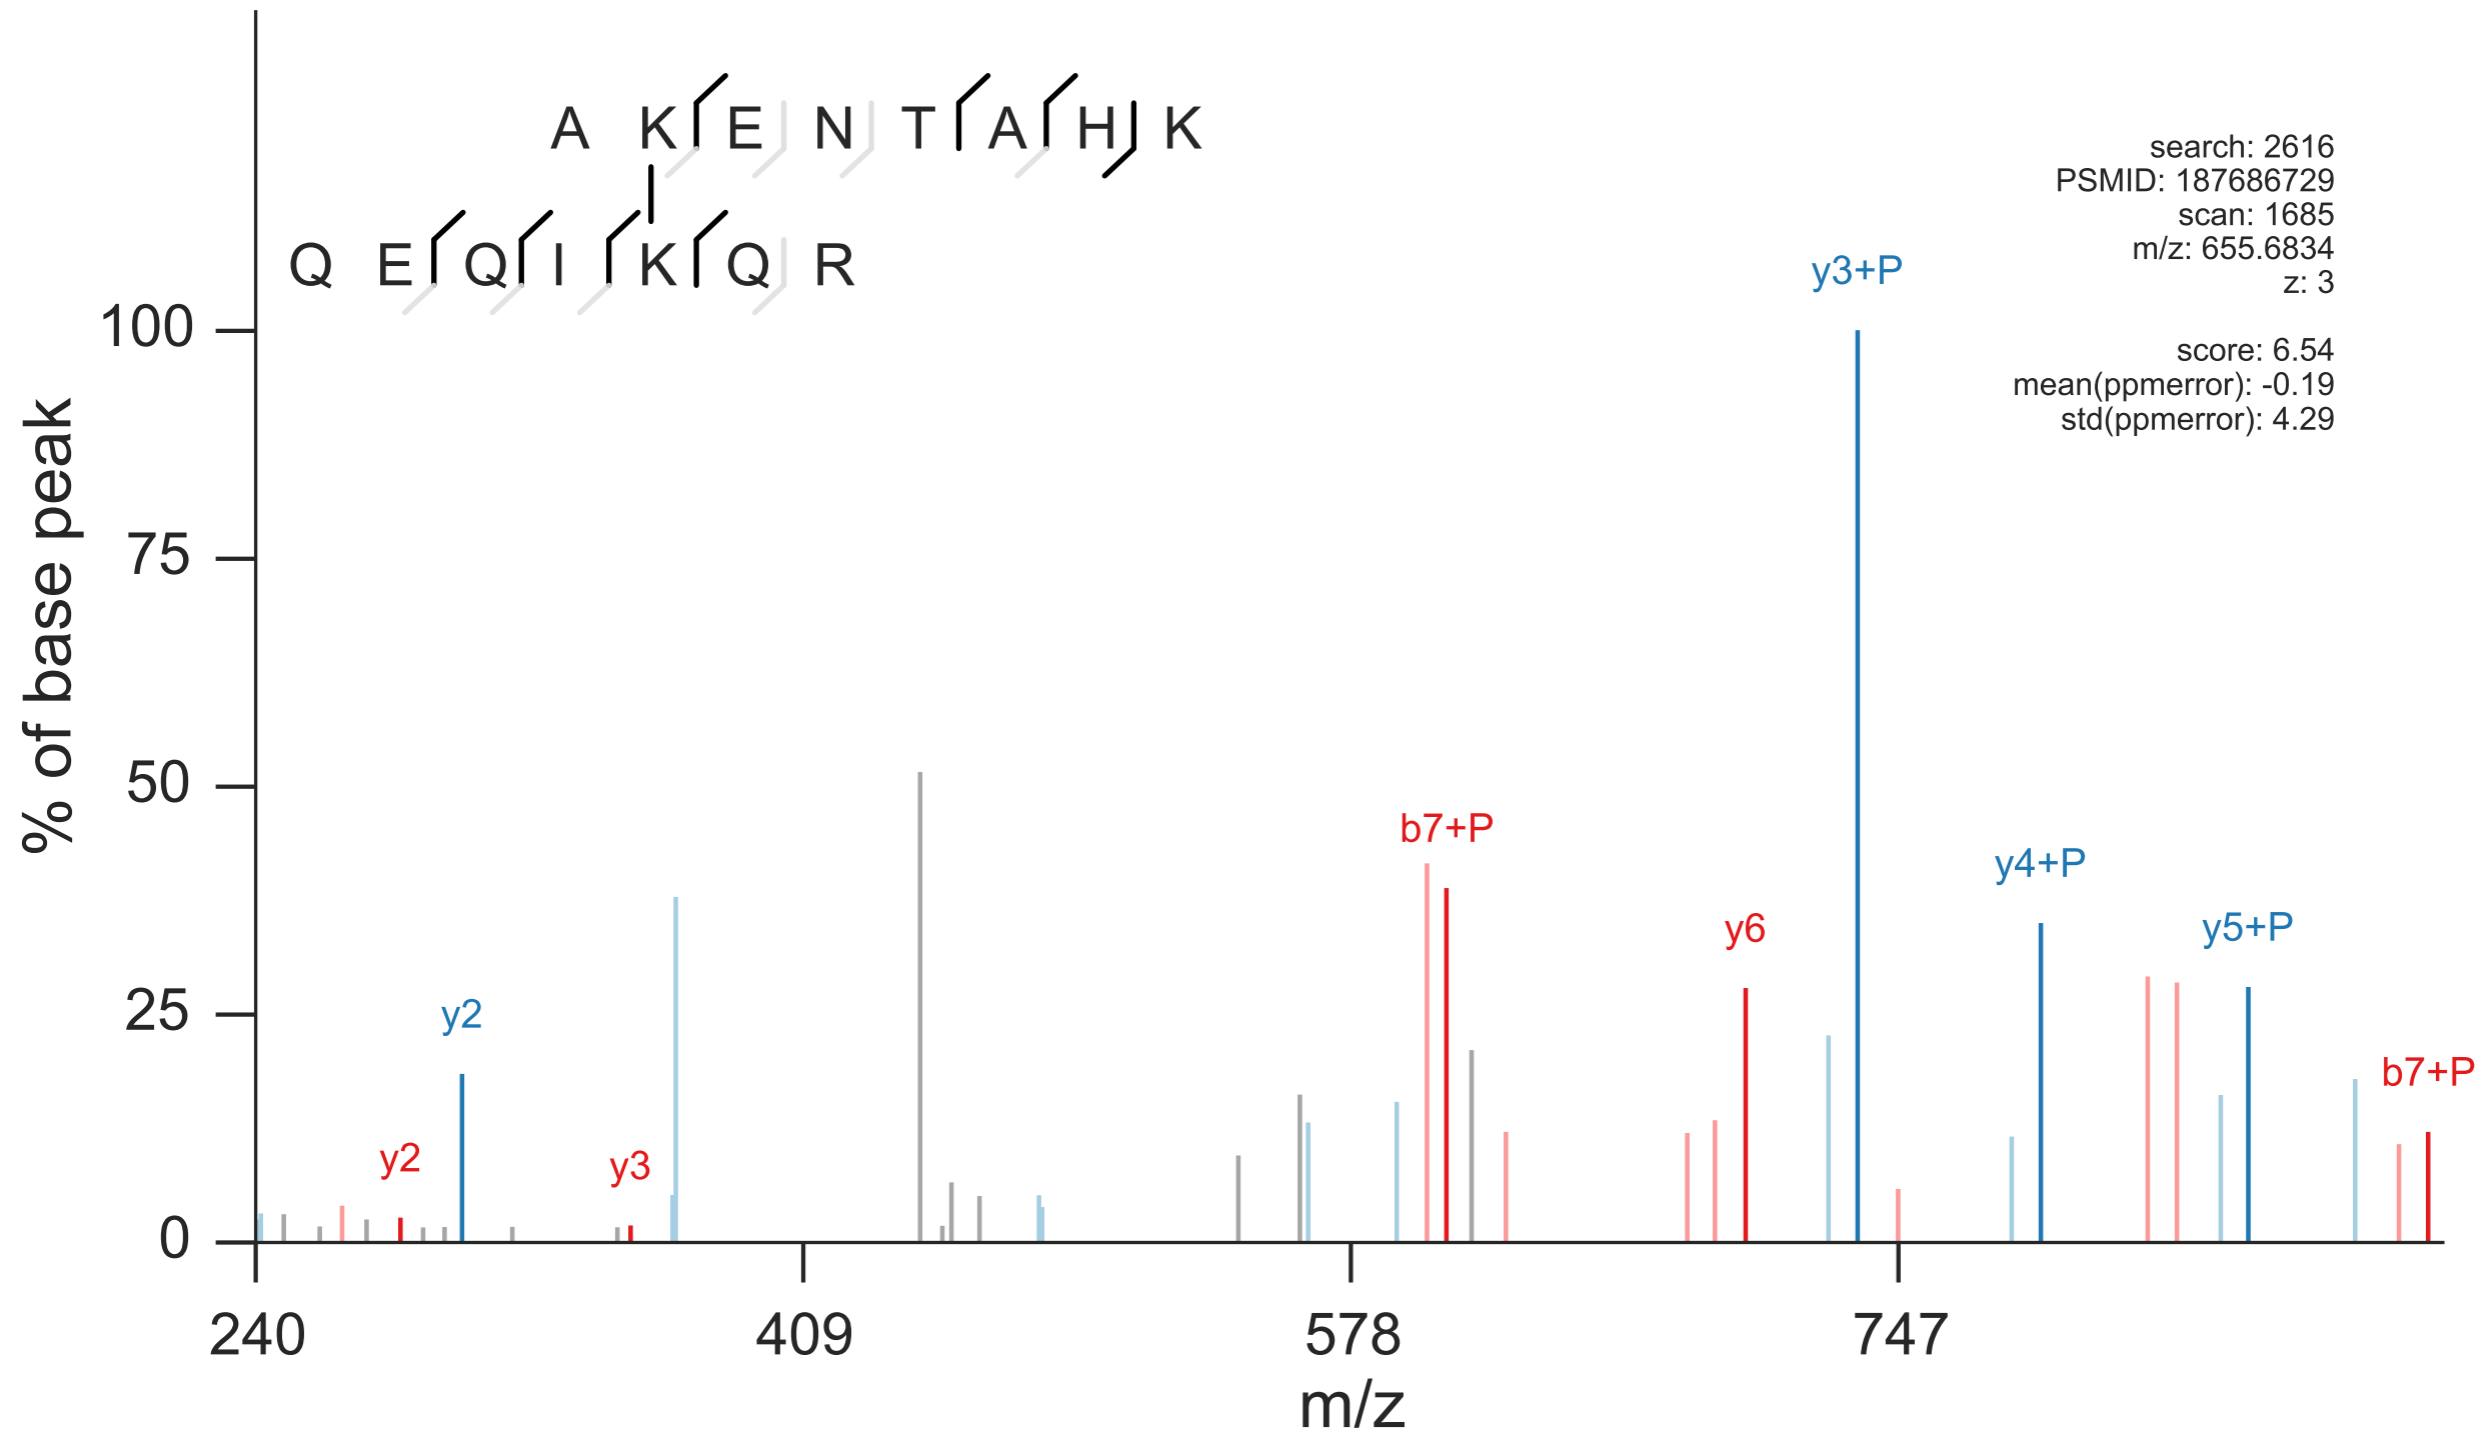

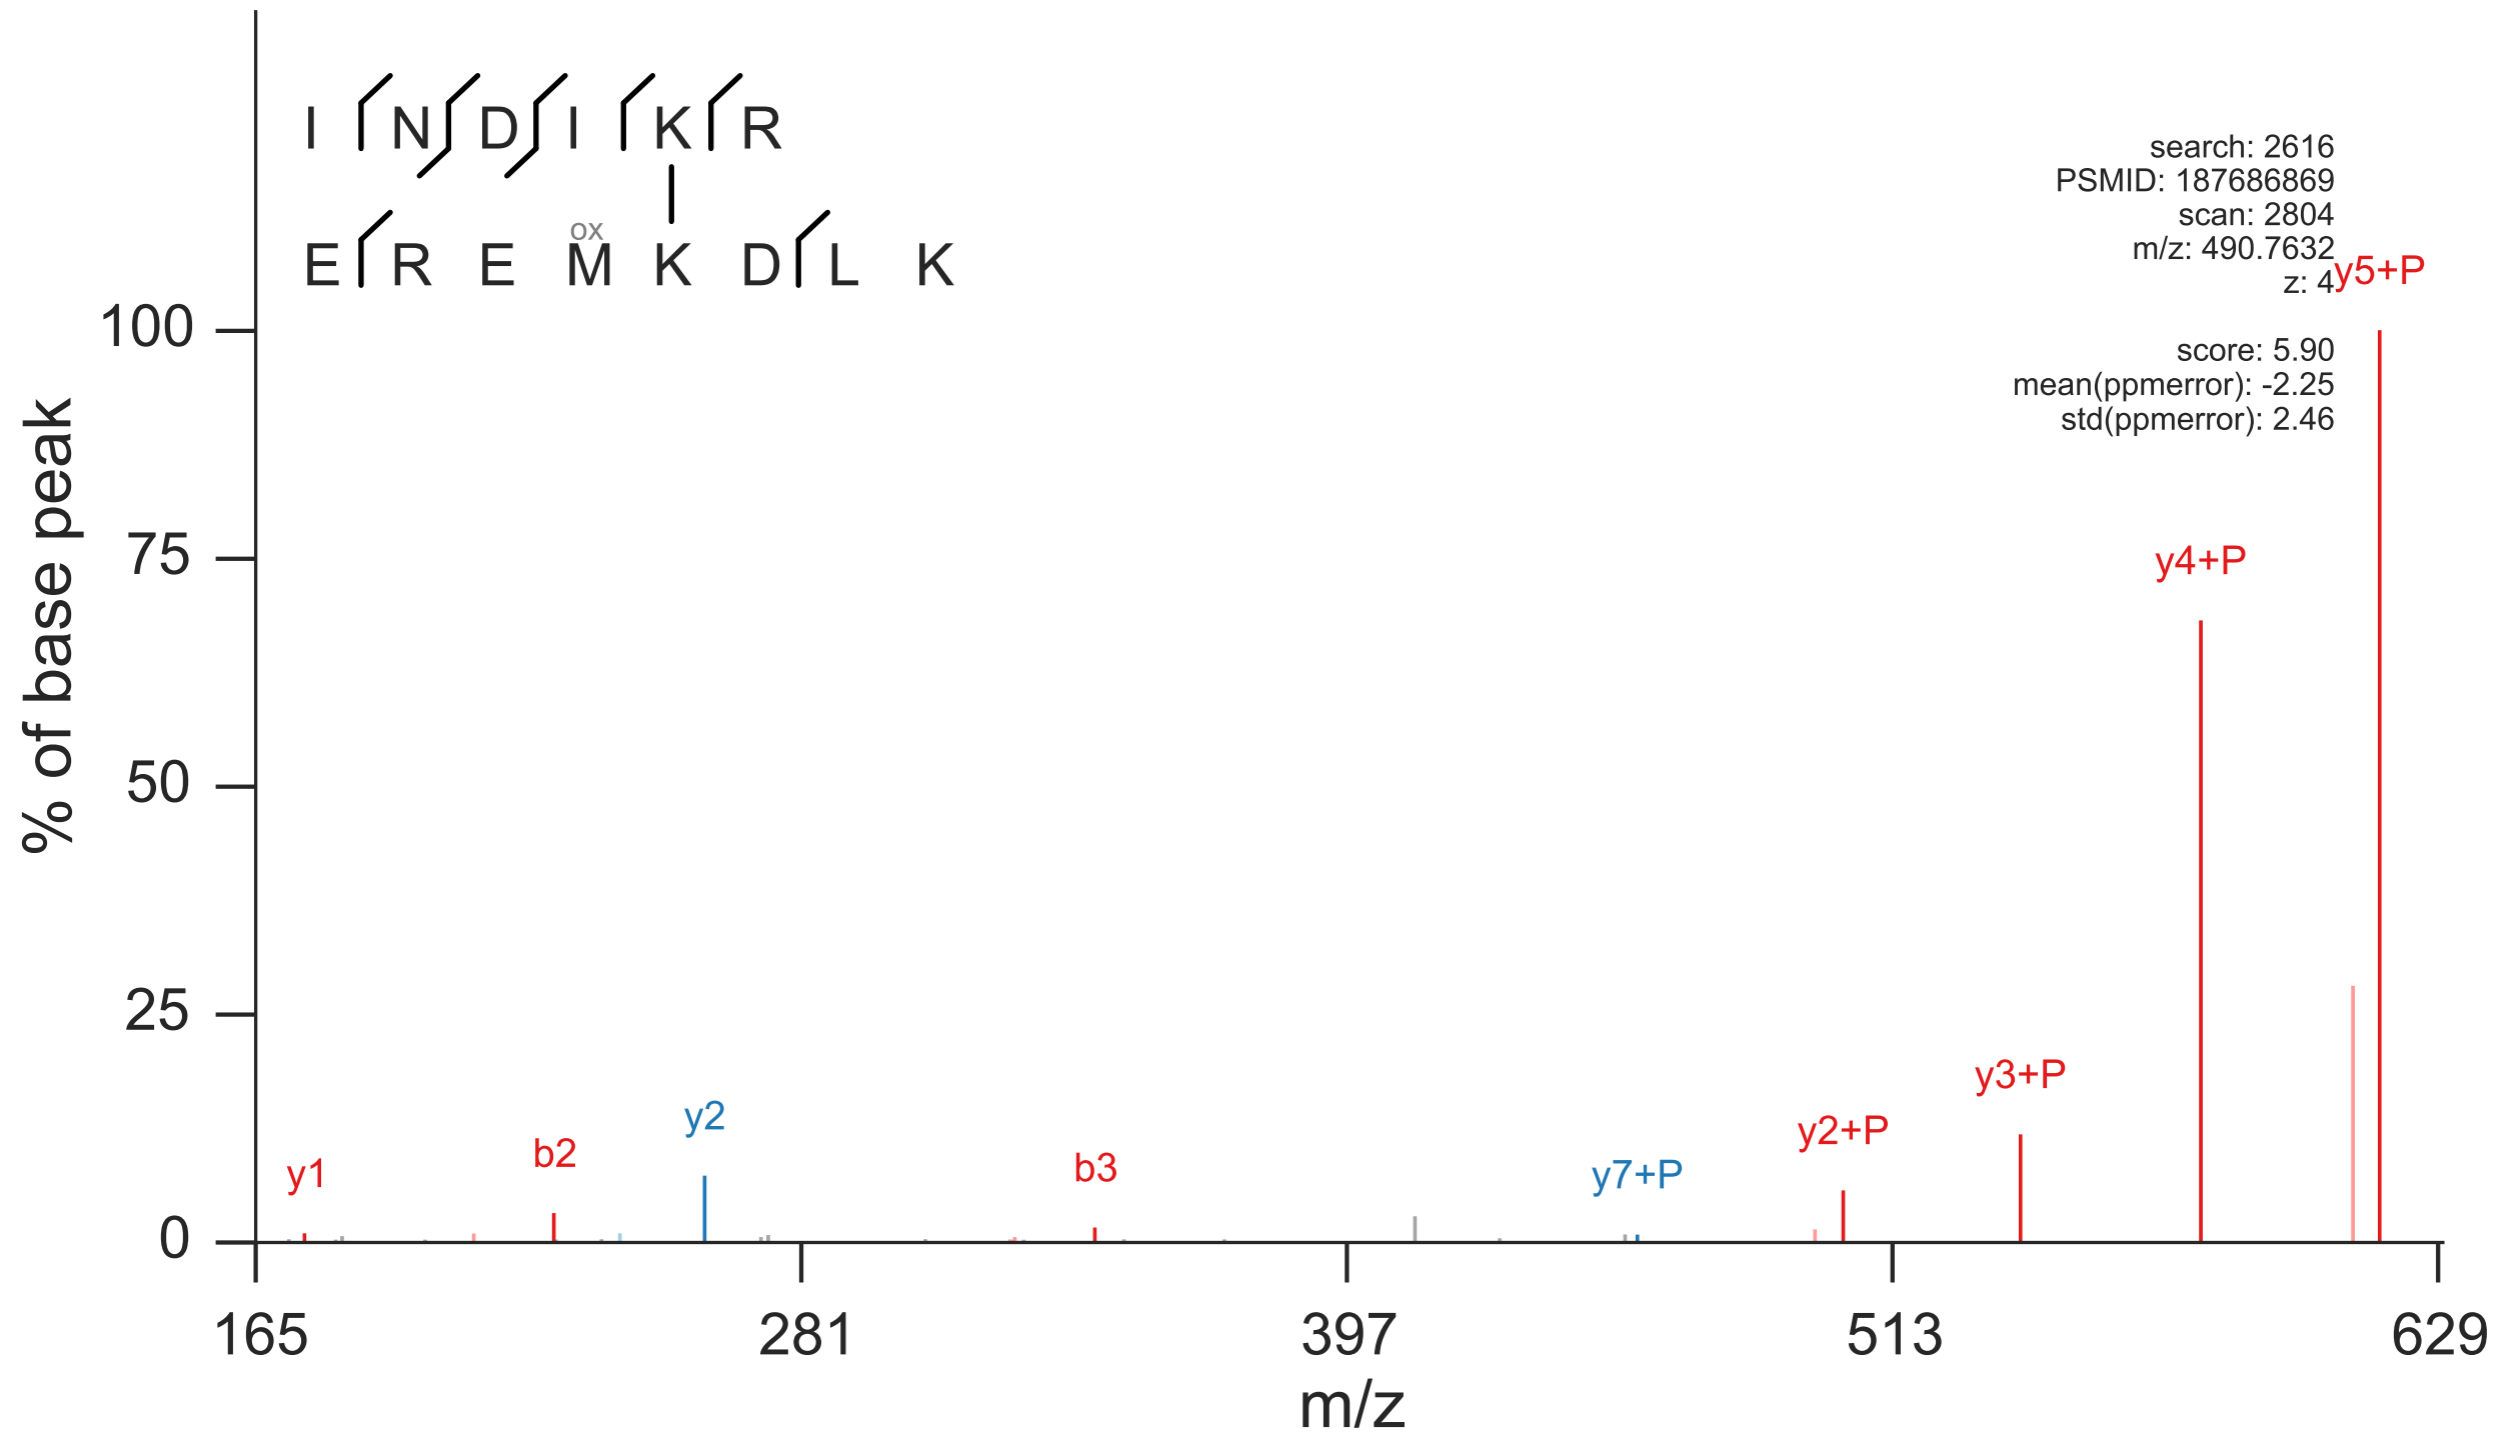

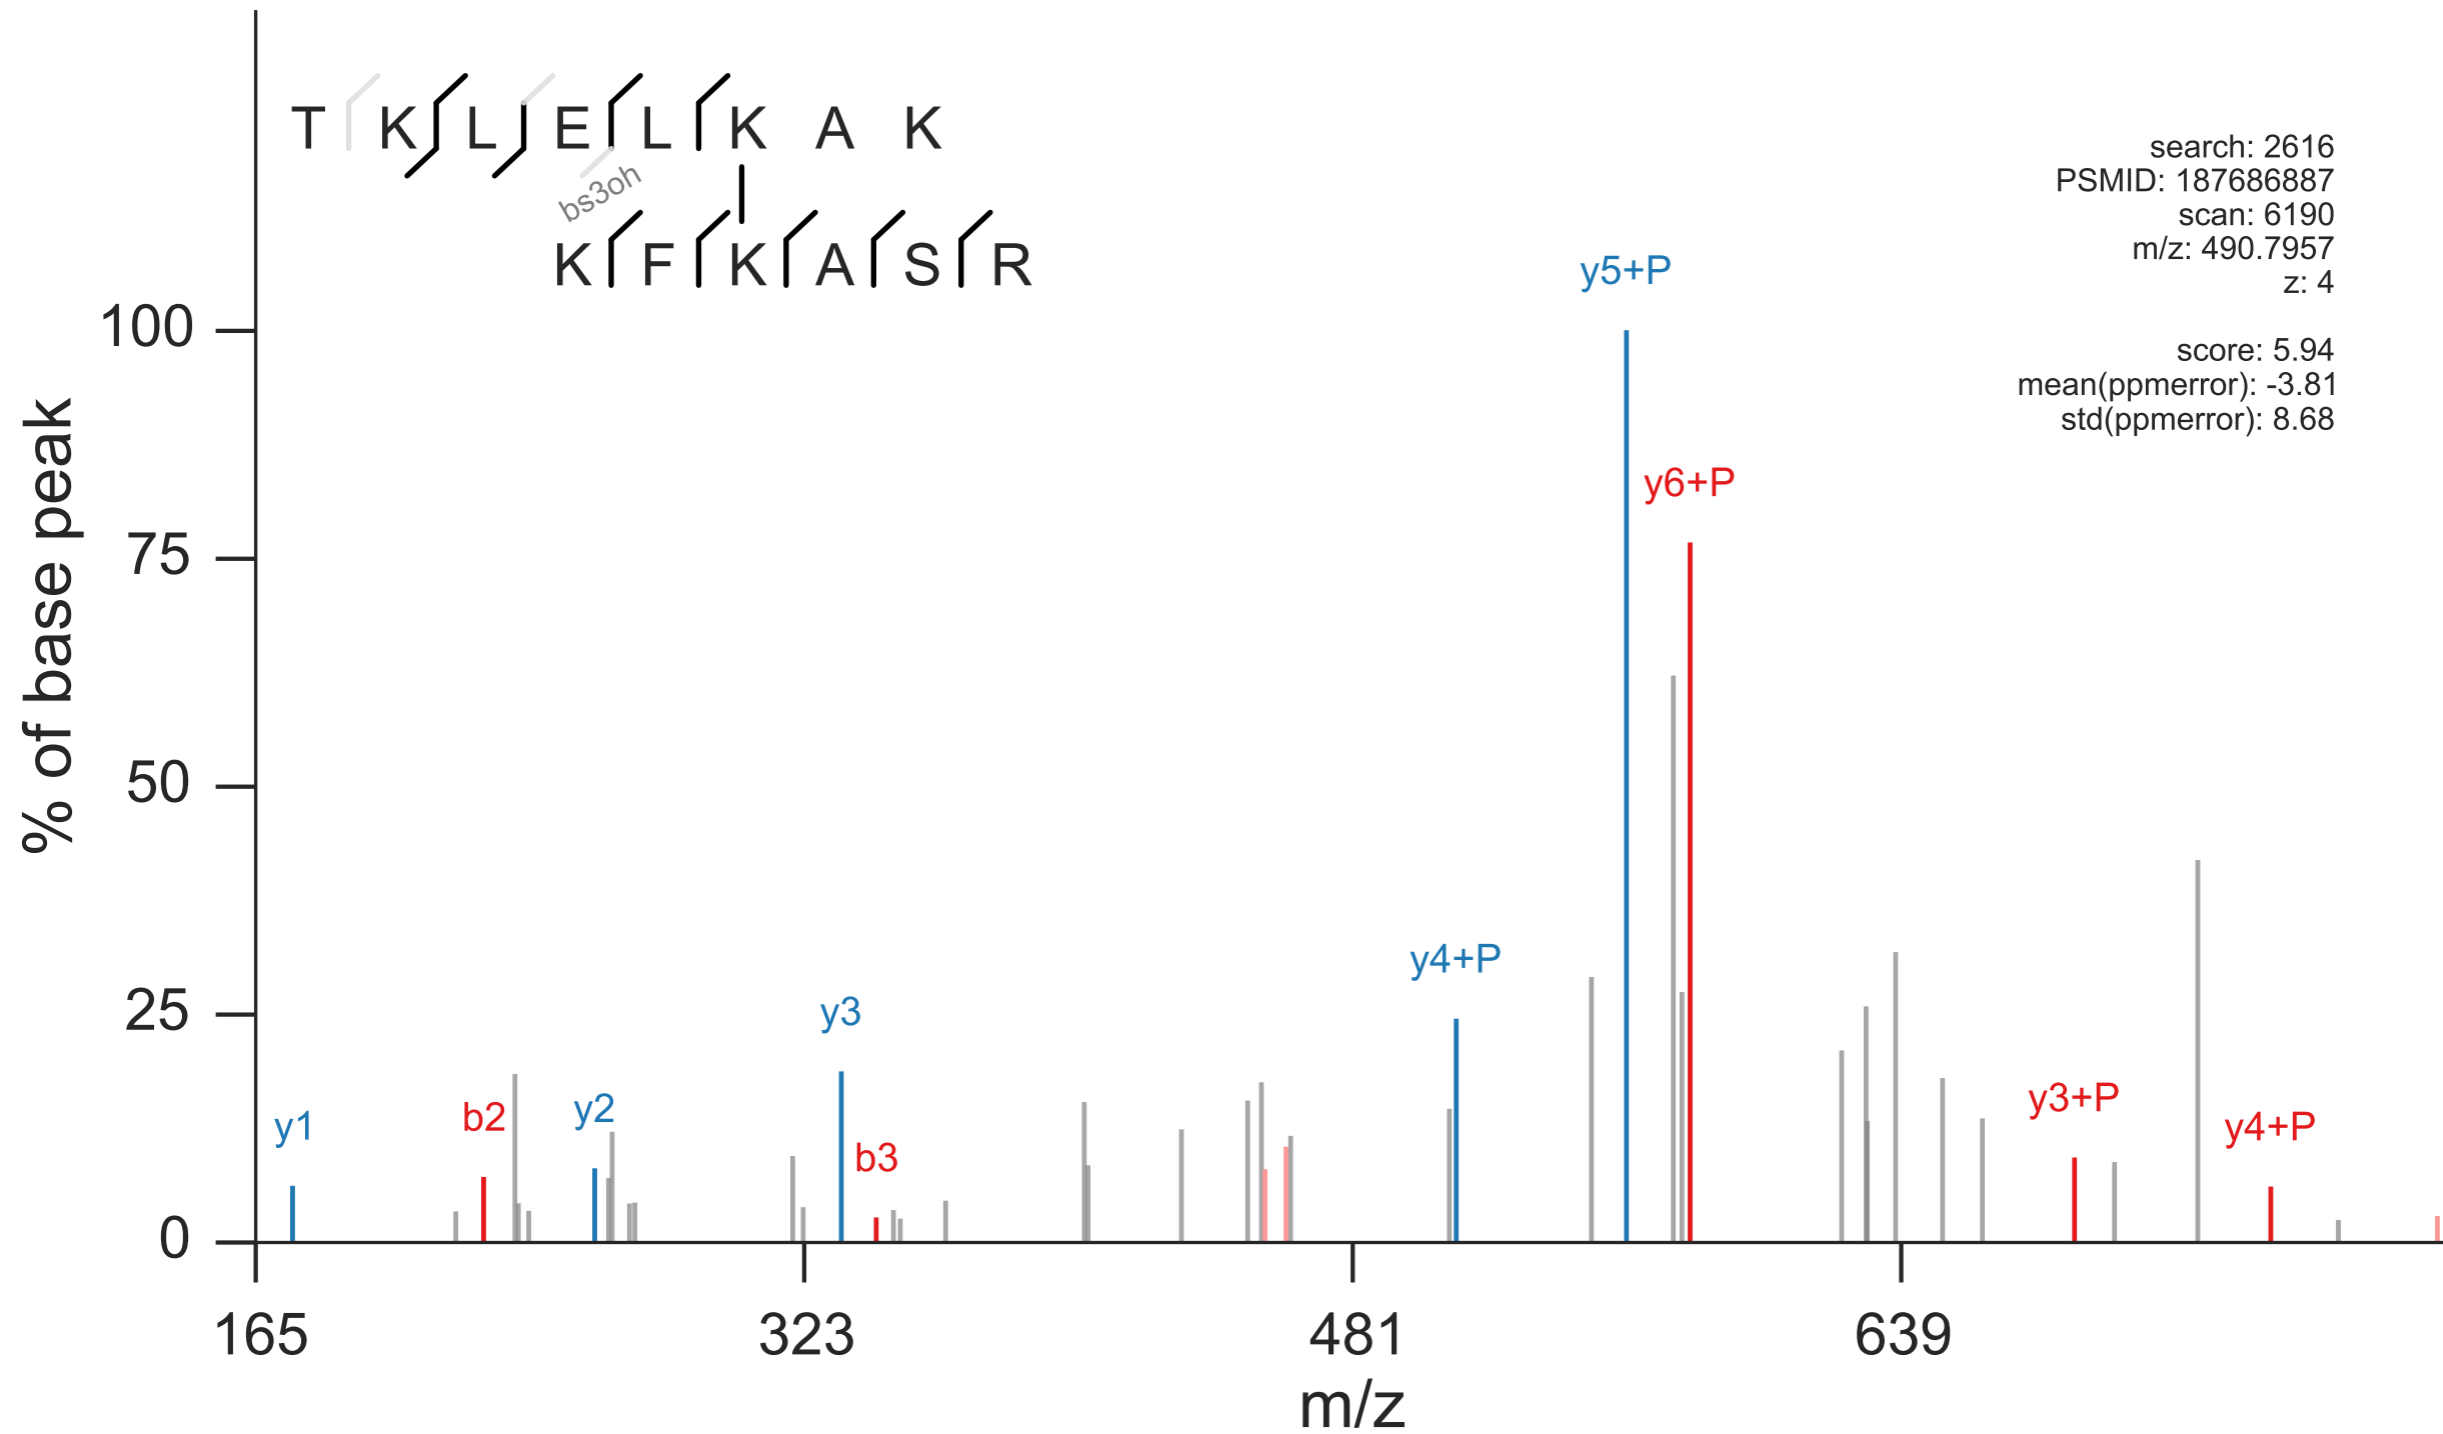

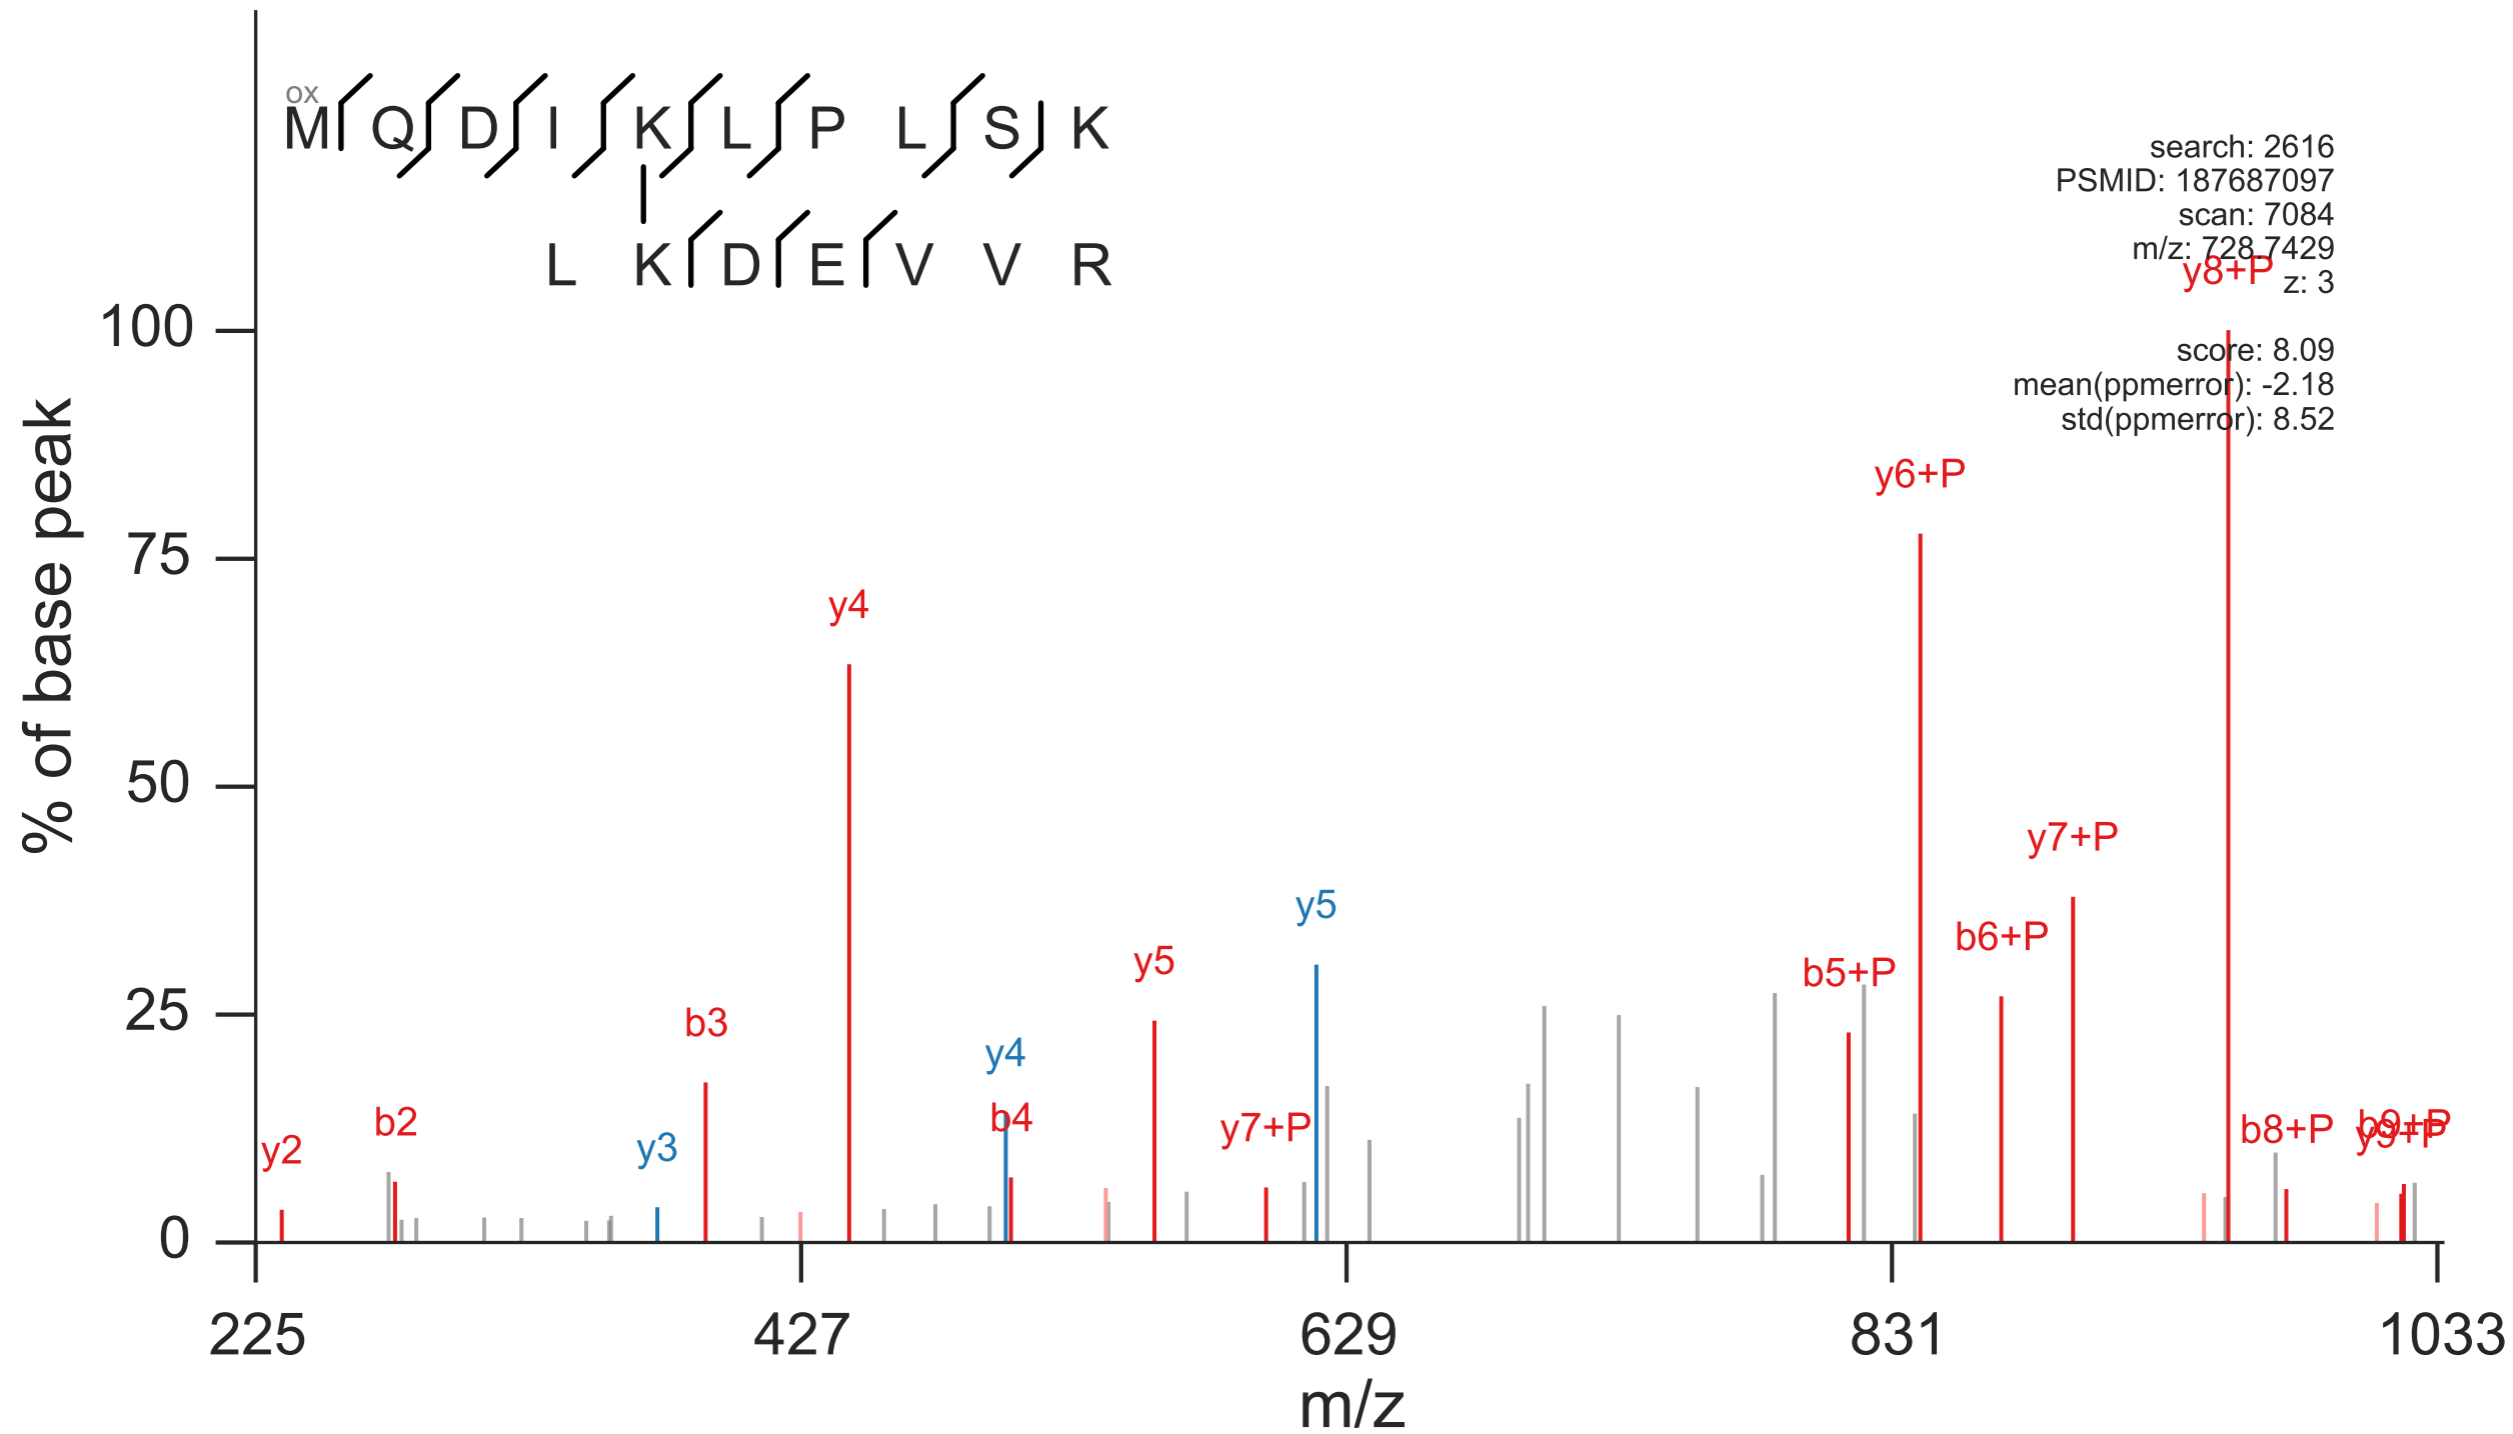

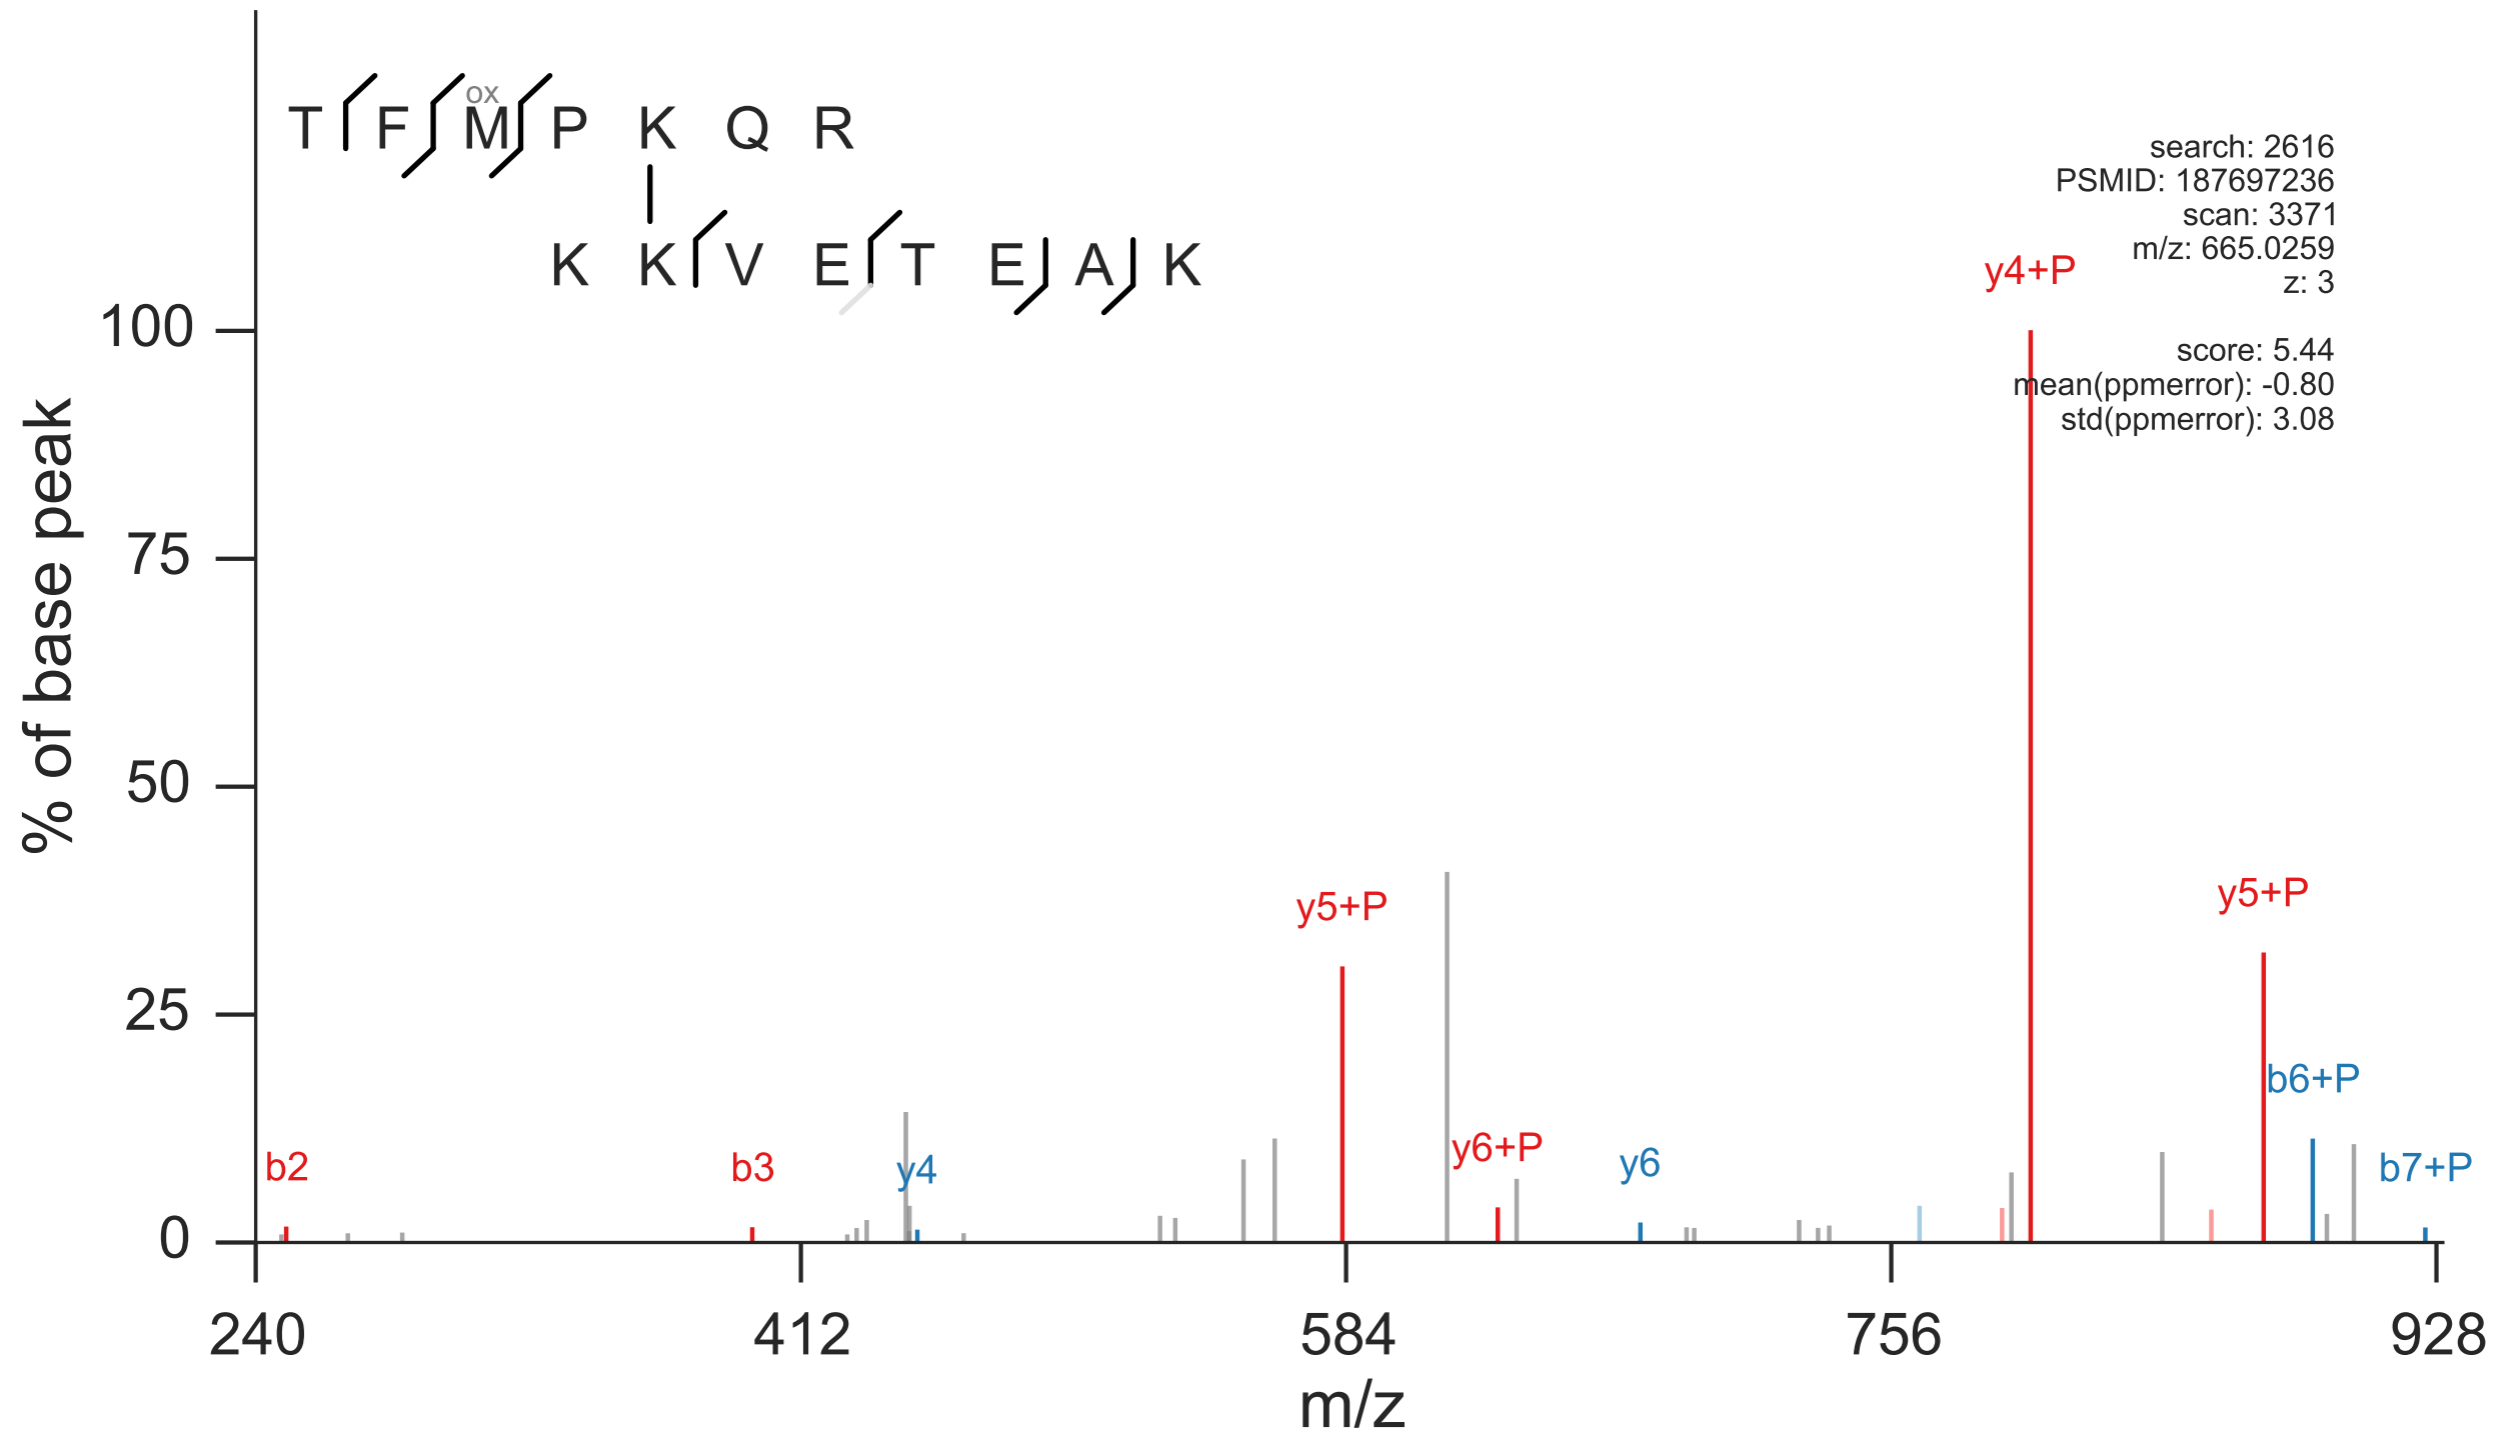



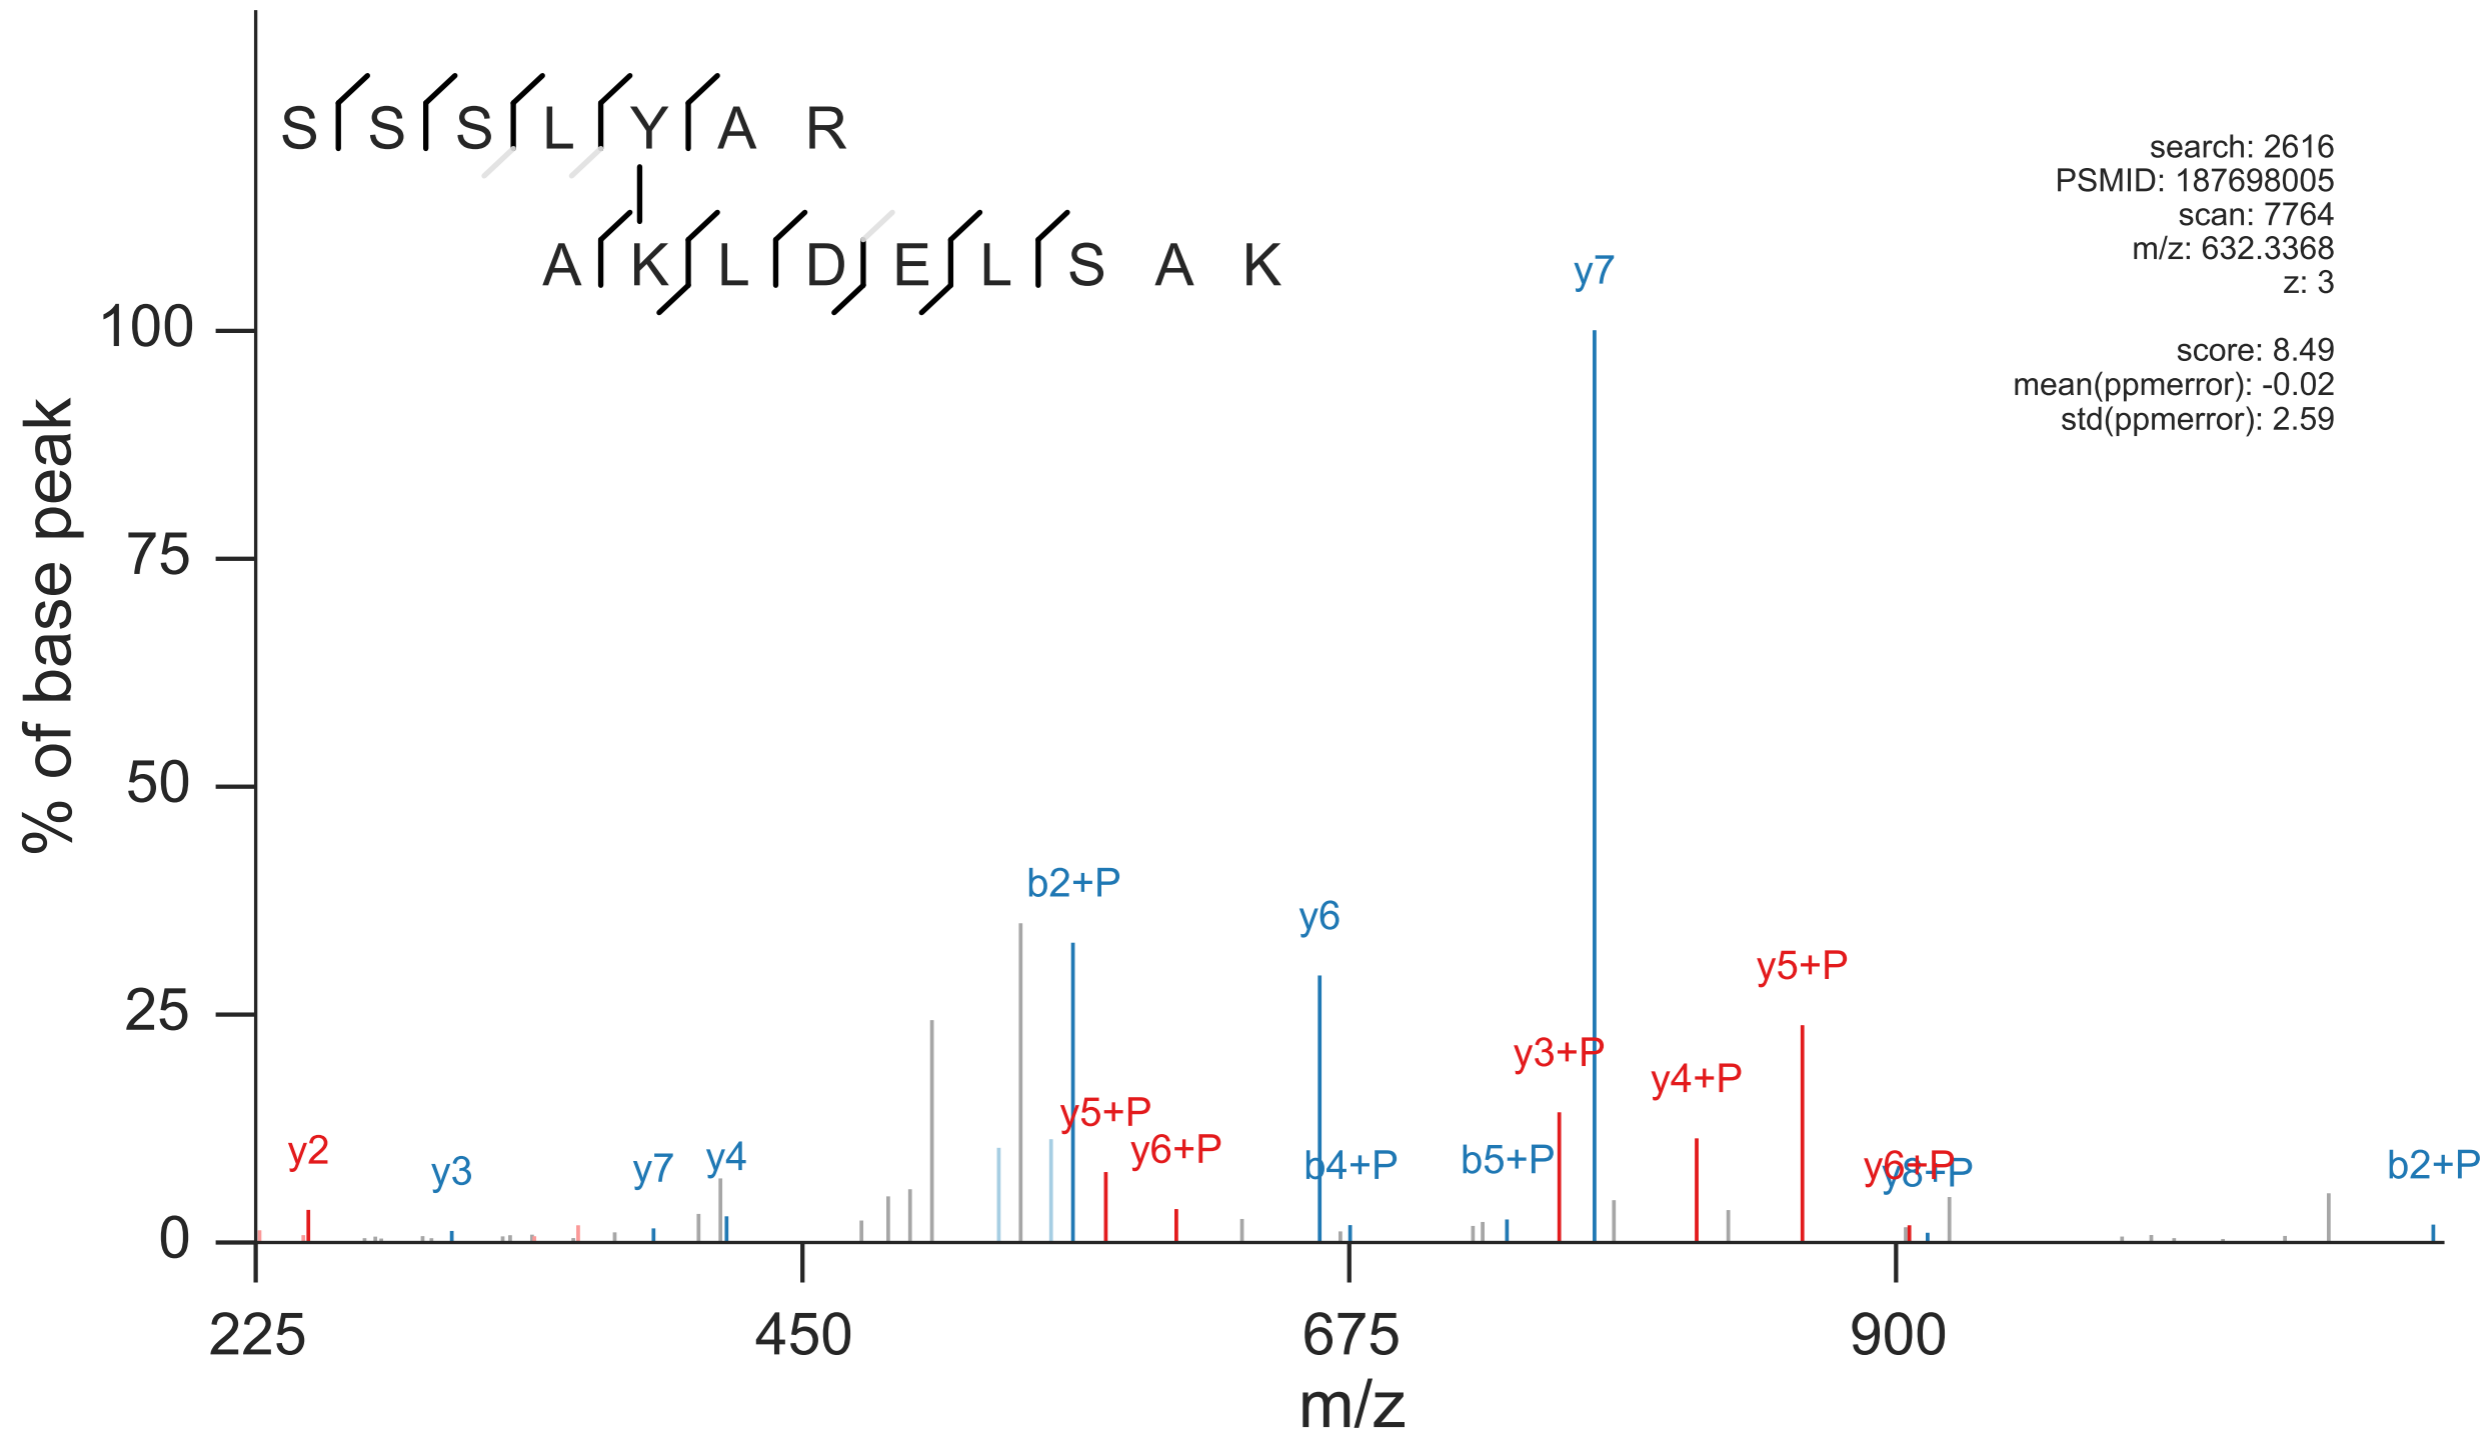

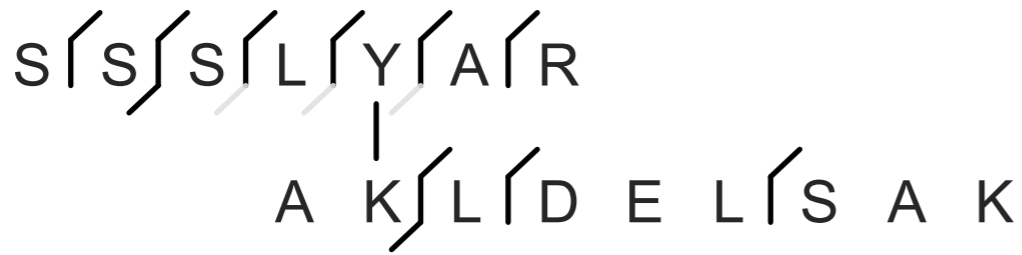

search: 2616  
 PSMID: 187698028  
 scan: 7767  
 m/z: 474.5033  
 z: 4  
  
 score: 7.28  
 mean(ppmerror): 3.38  
 std(ppmerror): 5.17

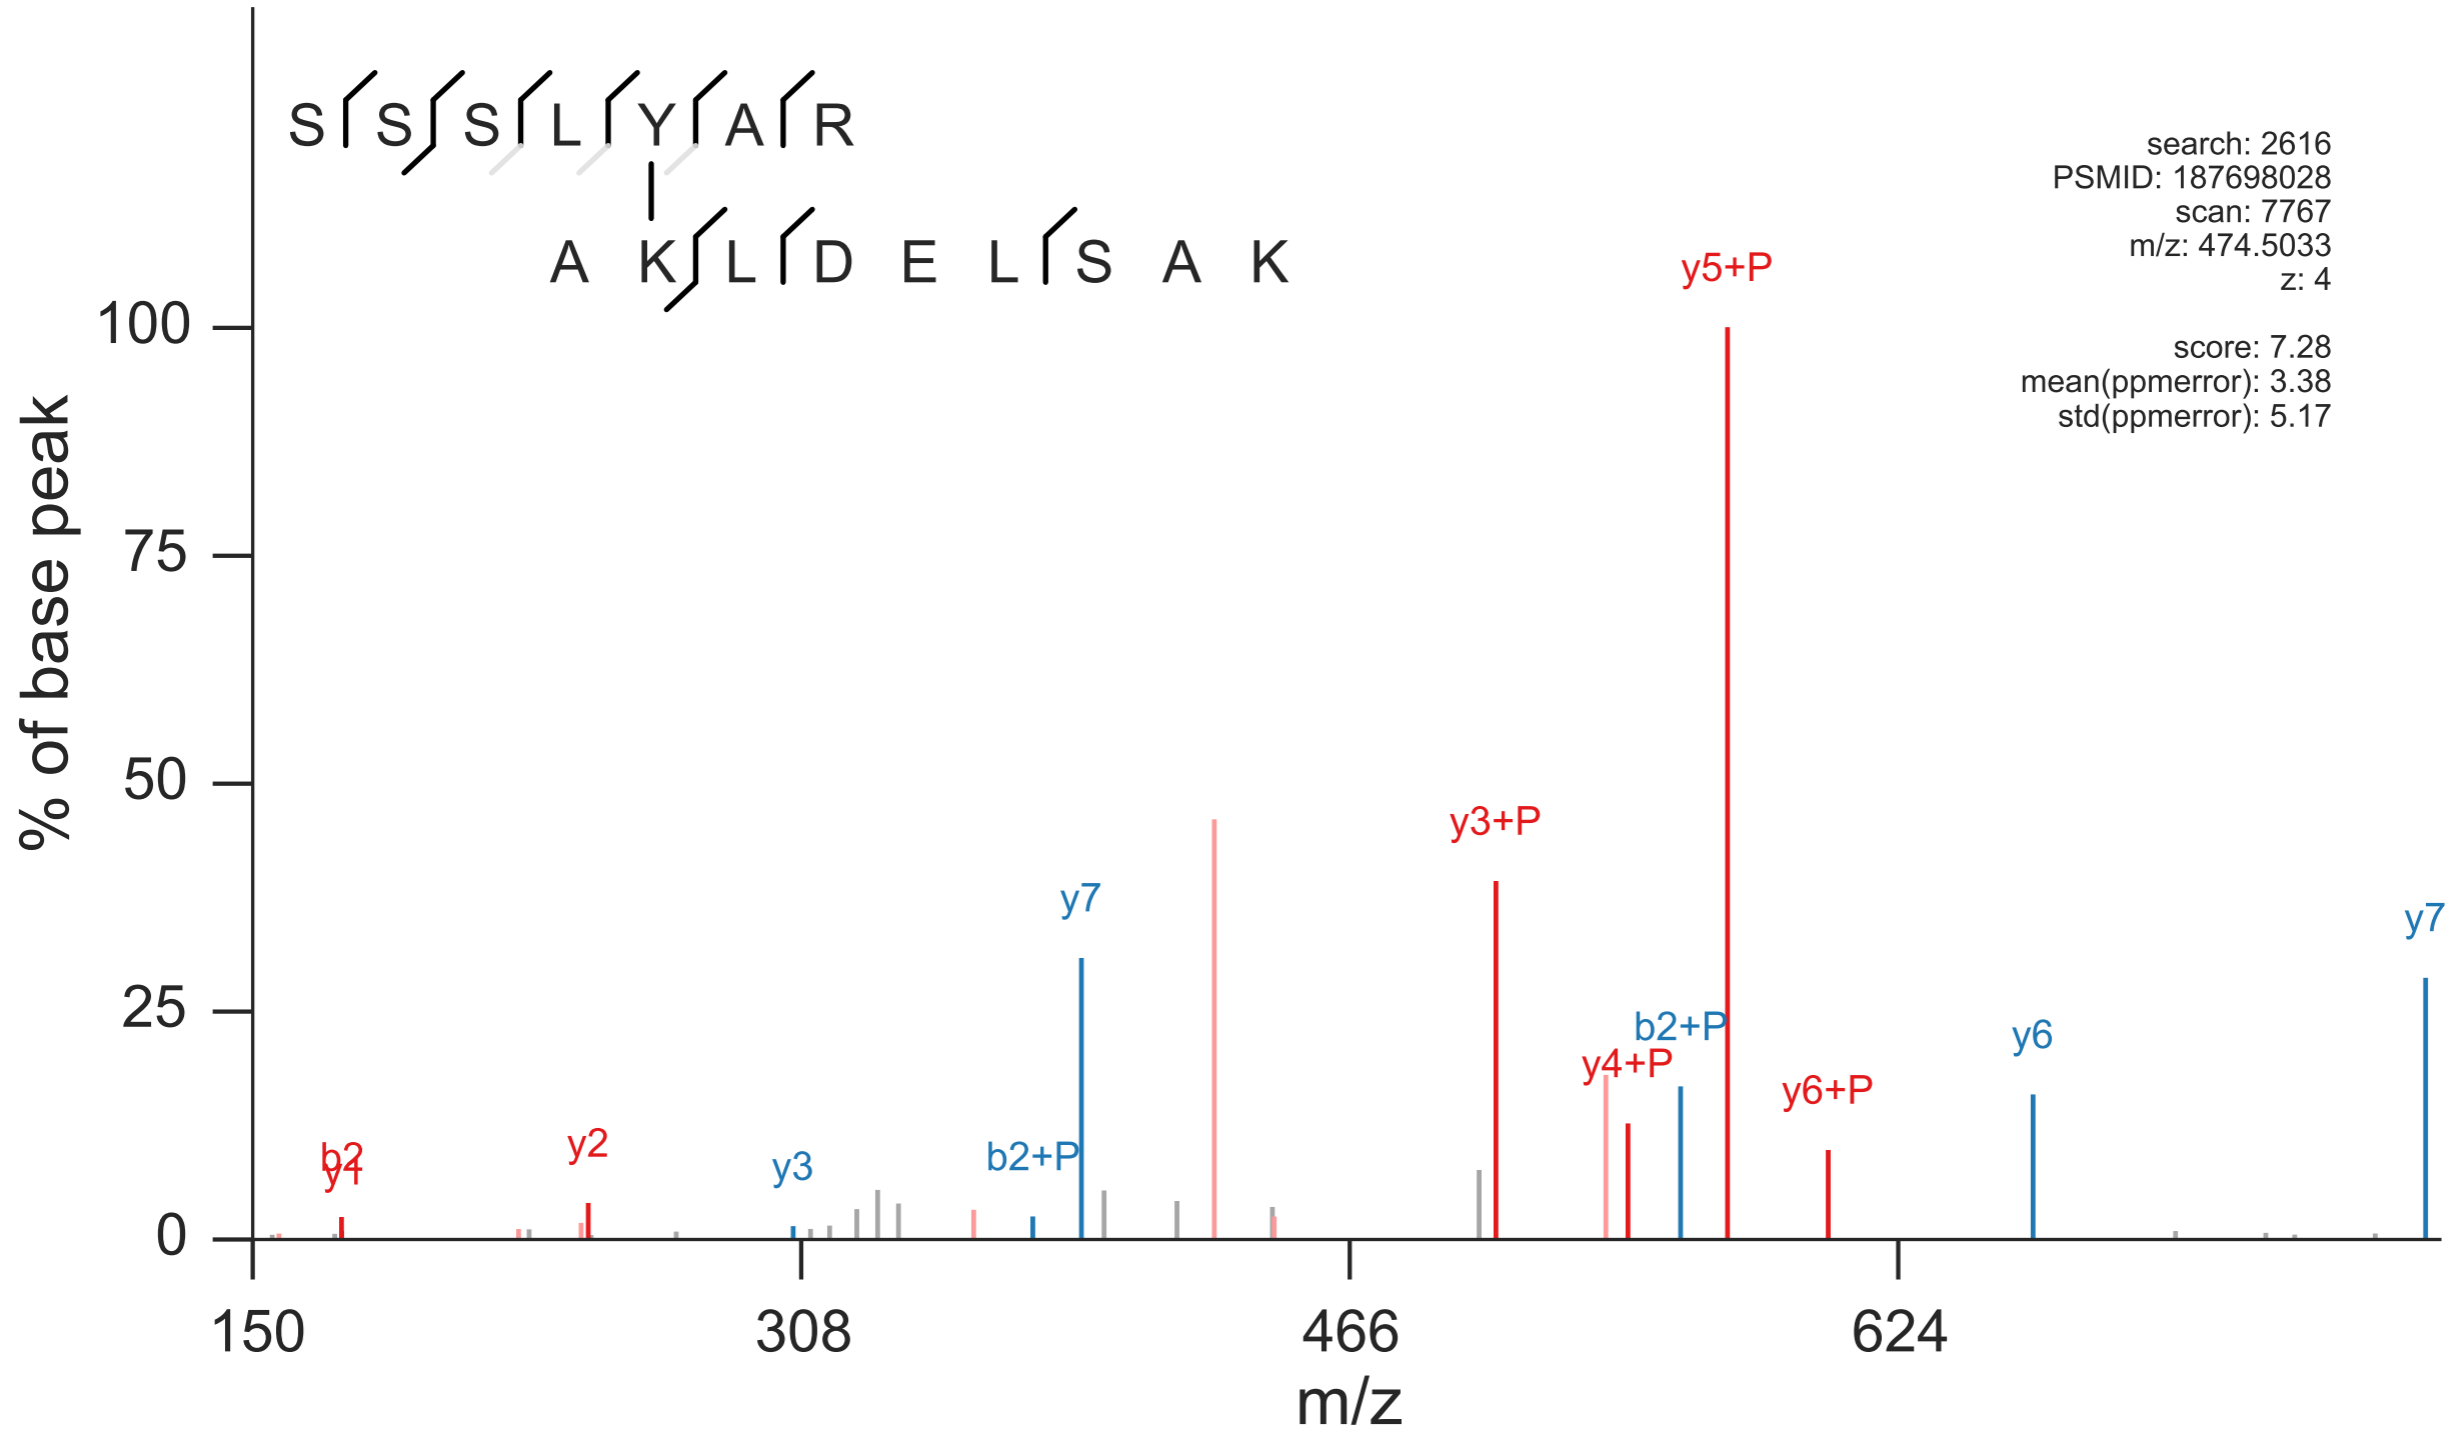

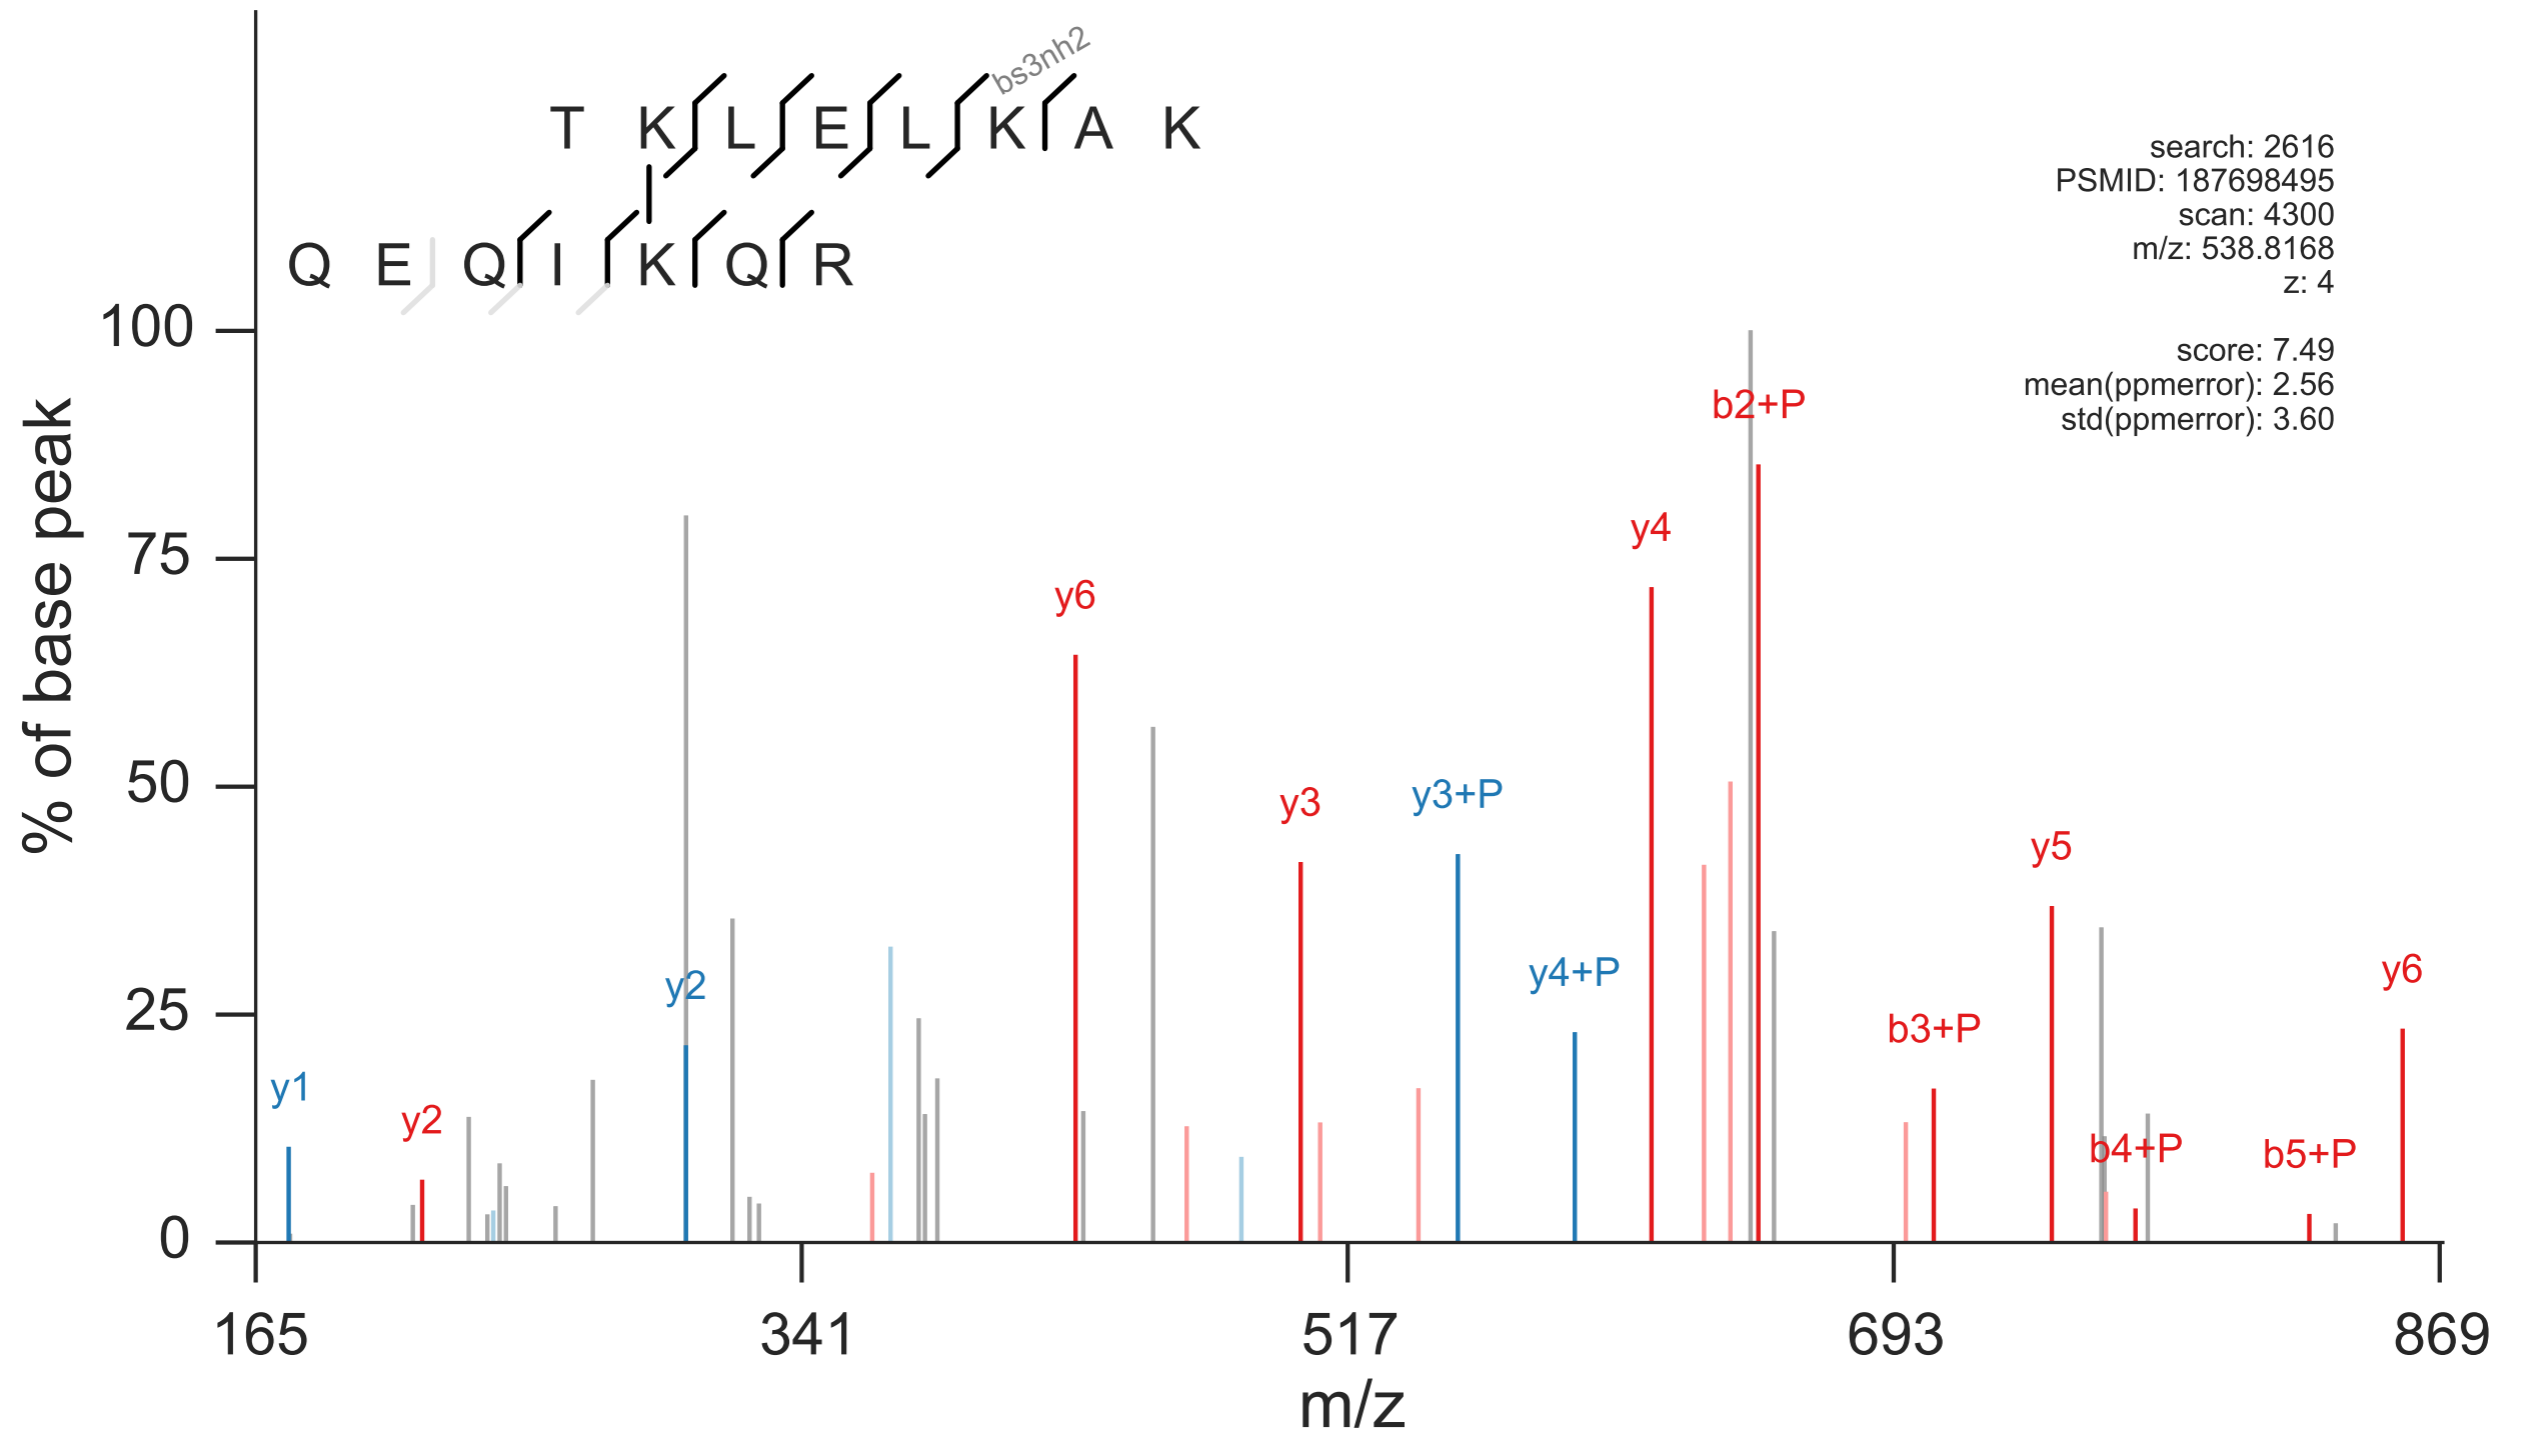

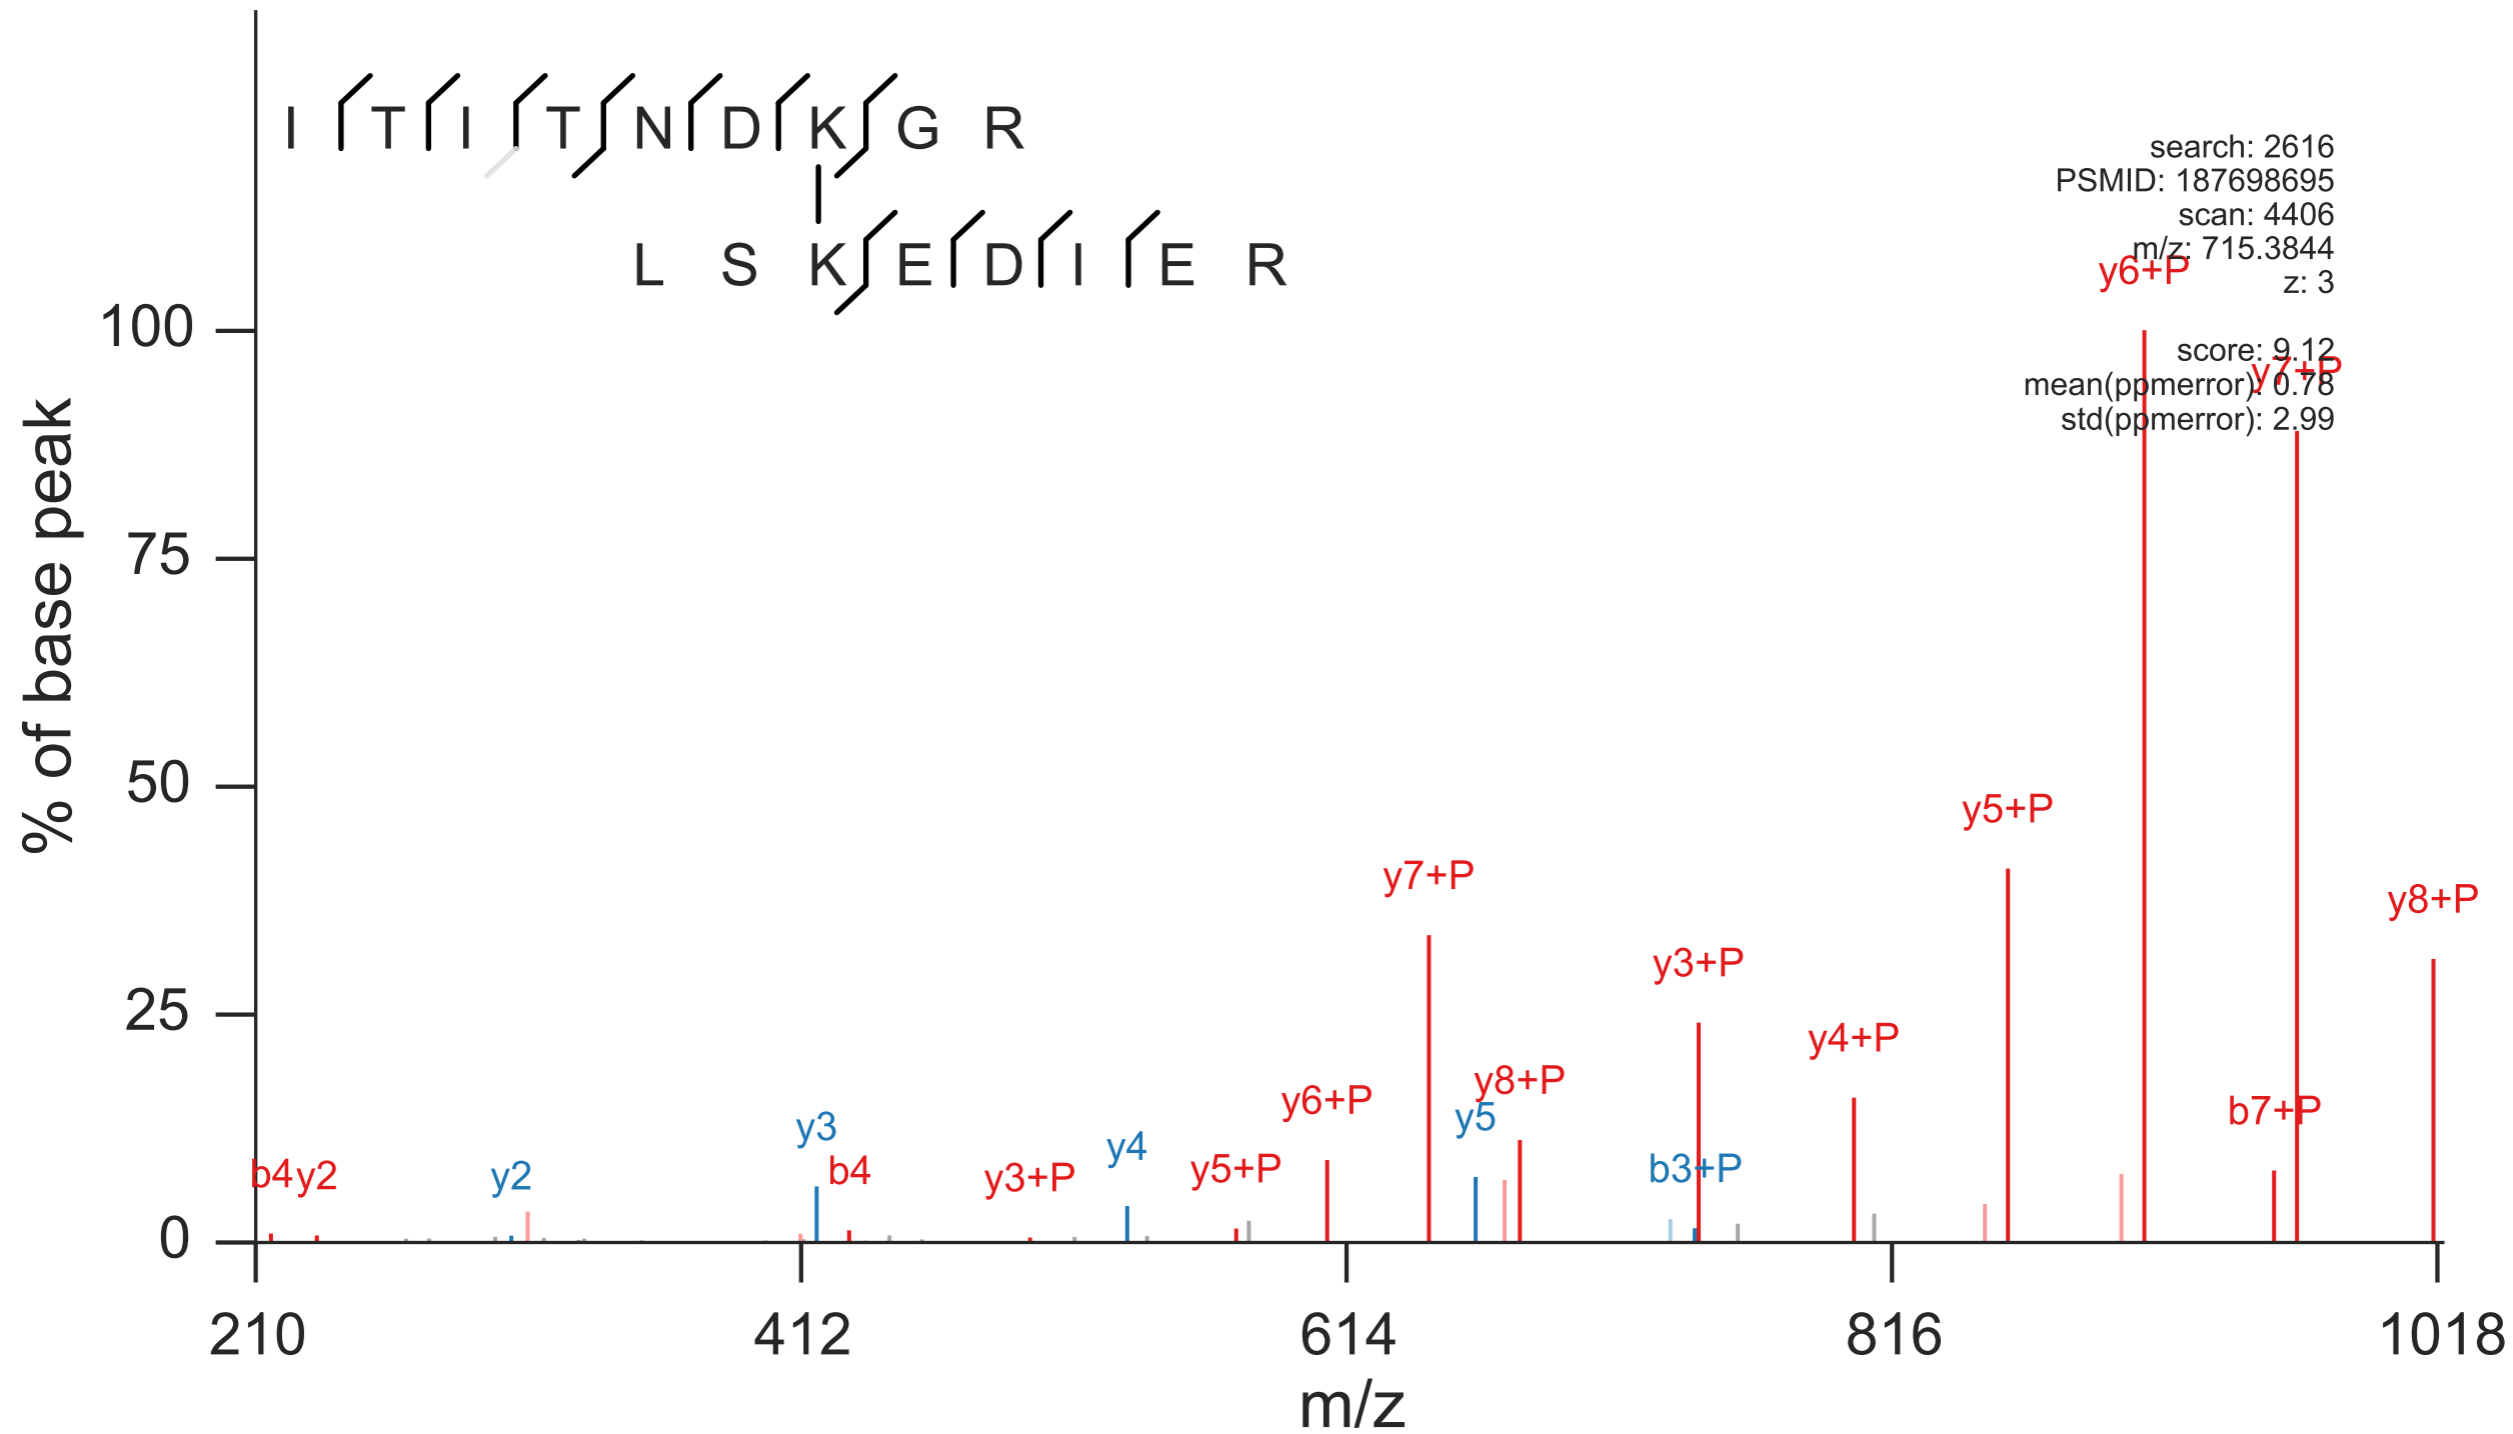

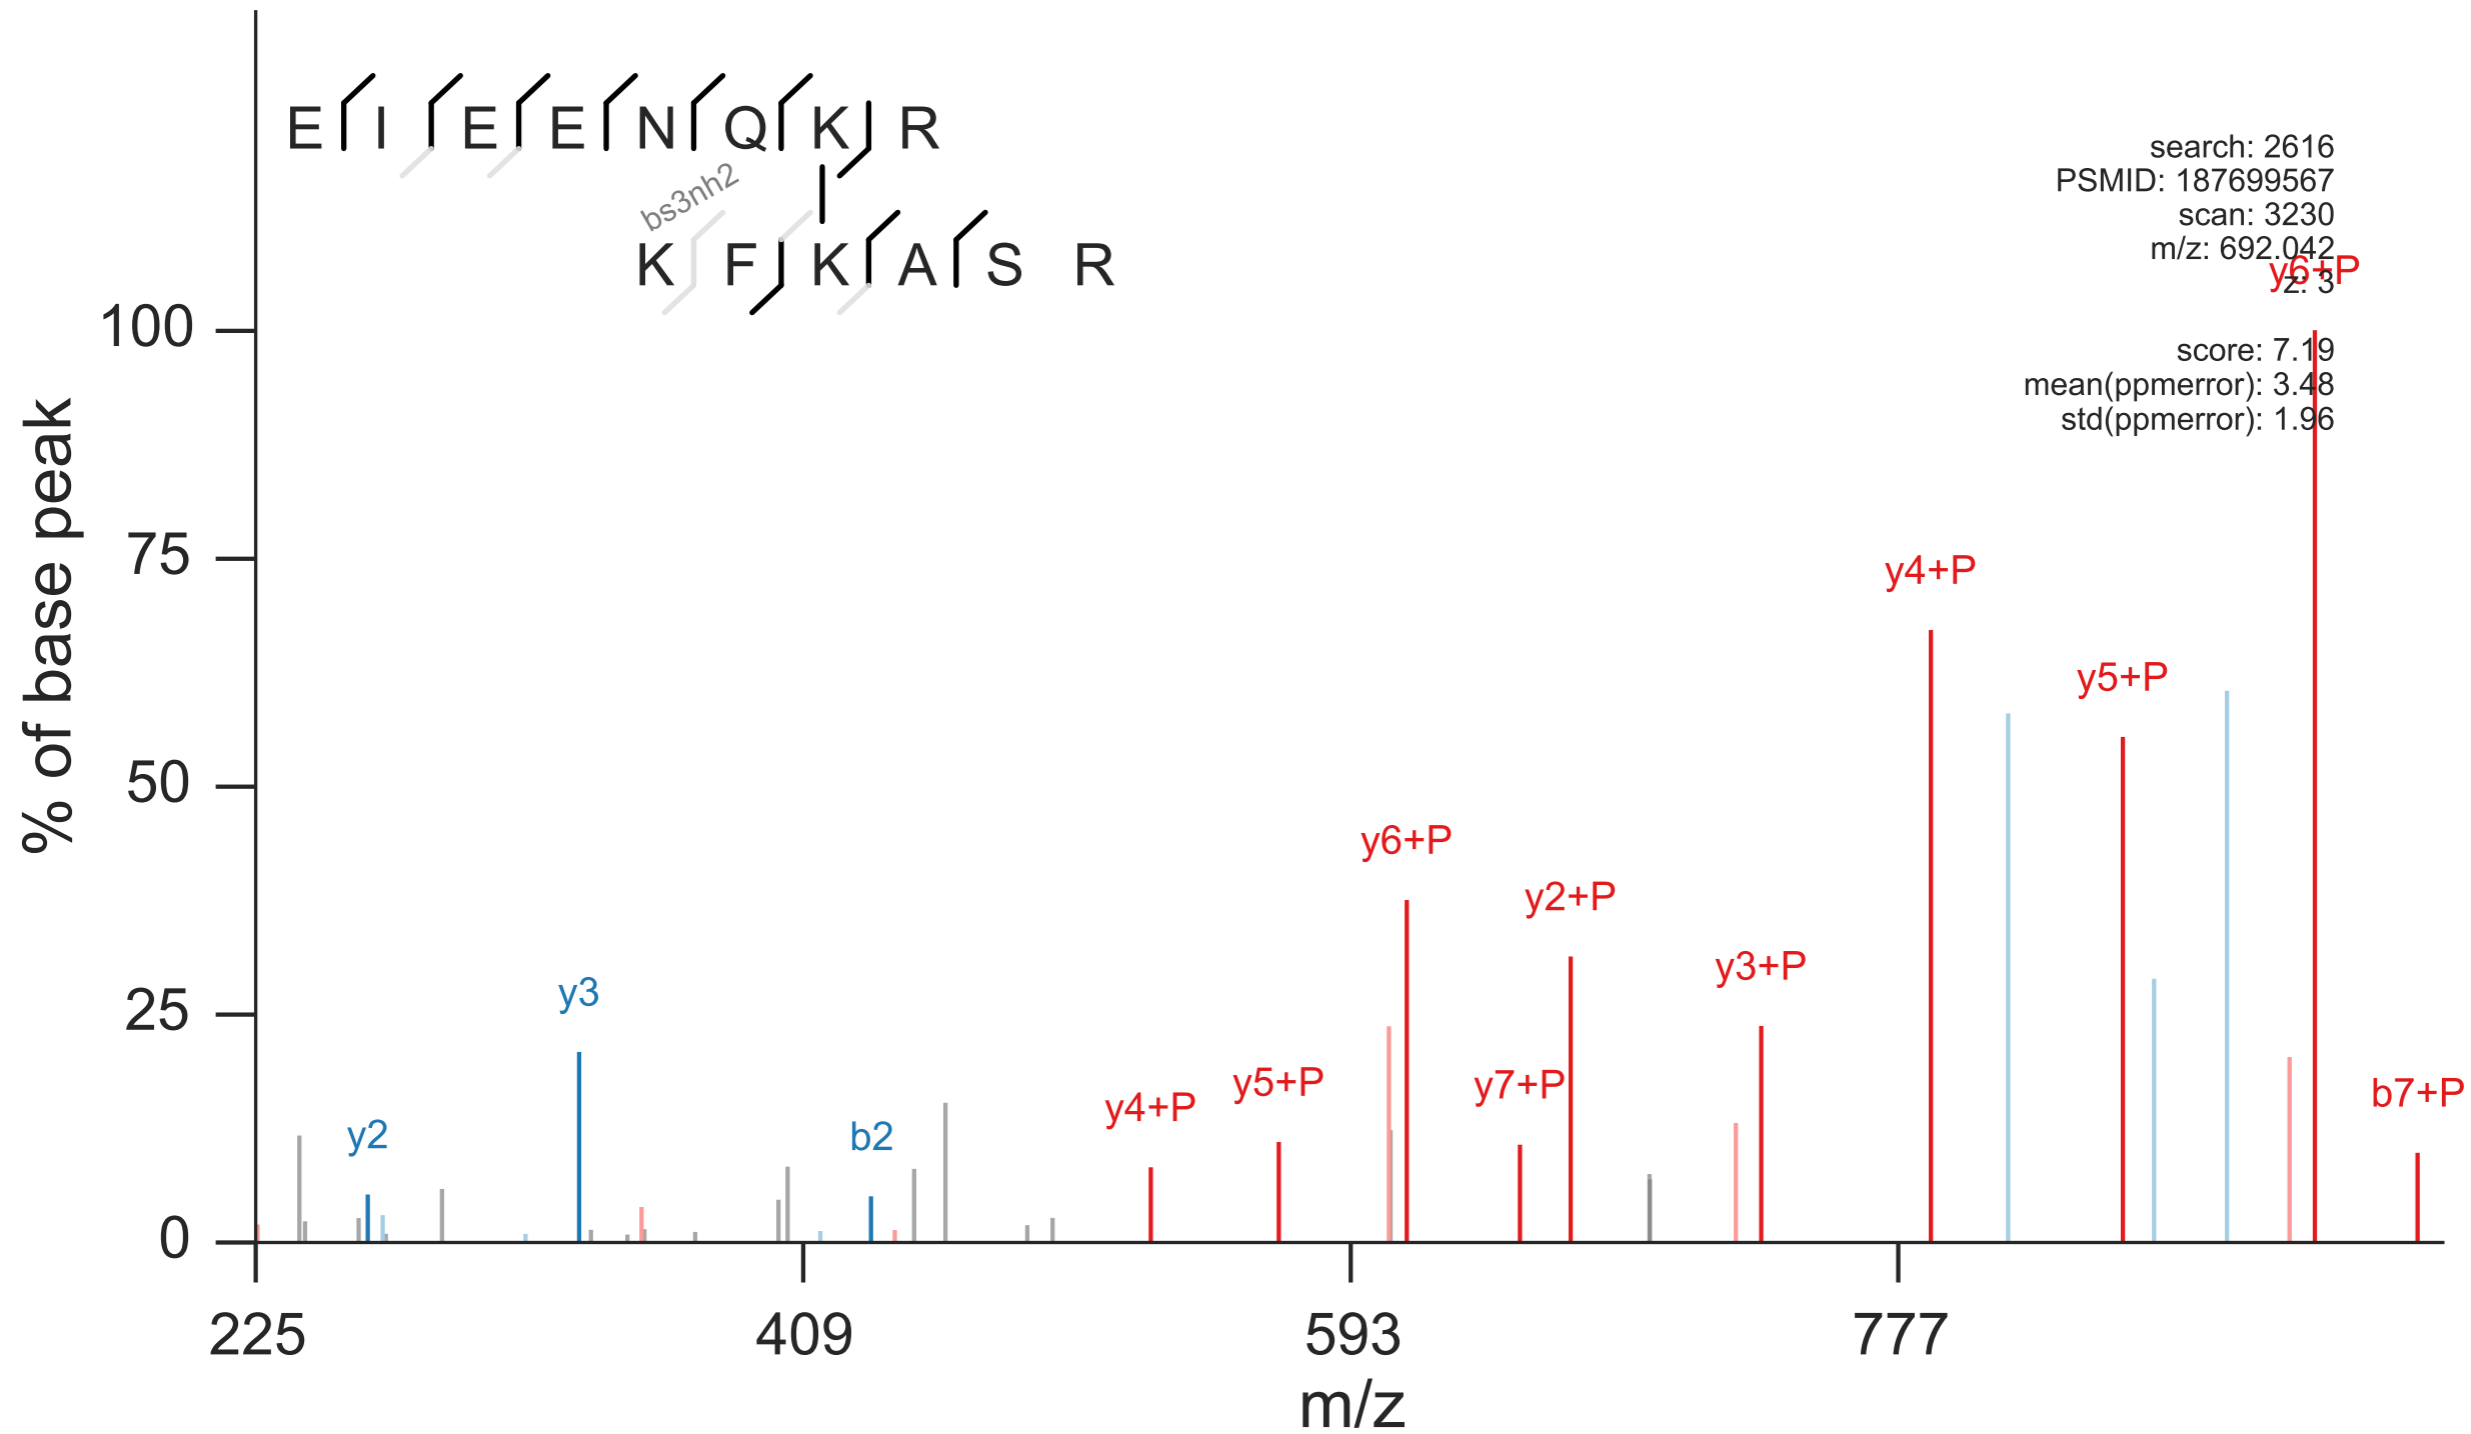

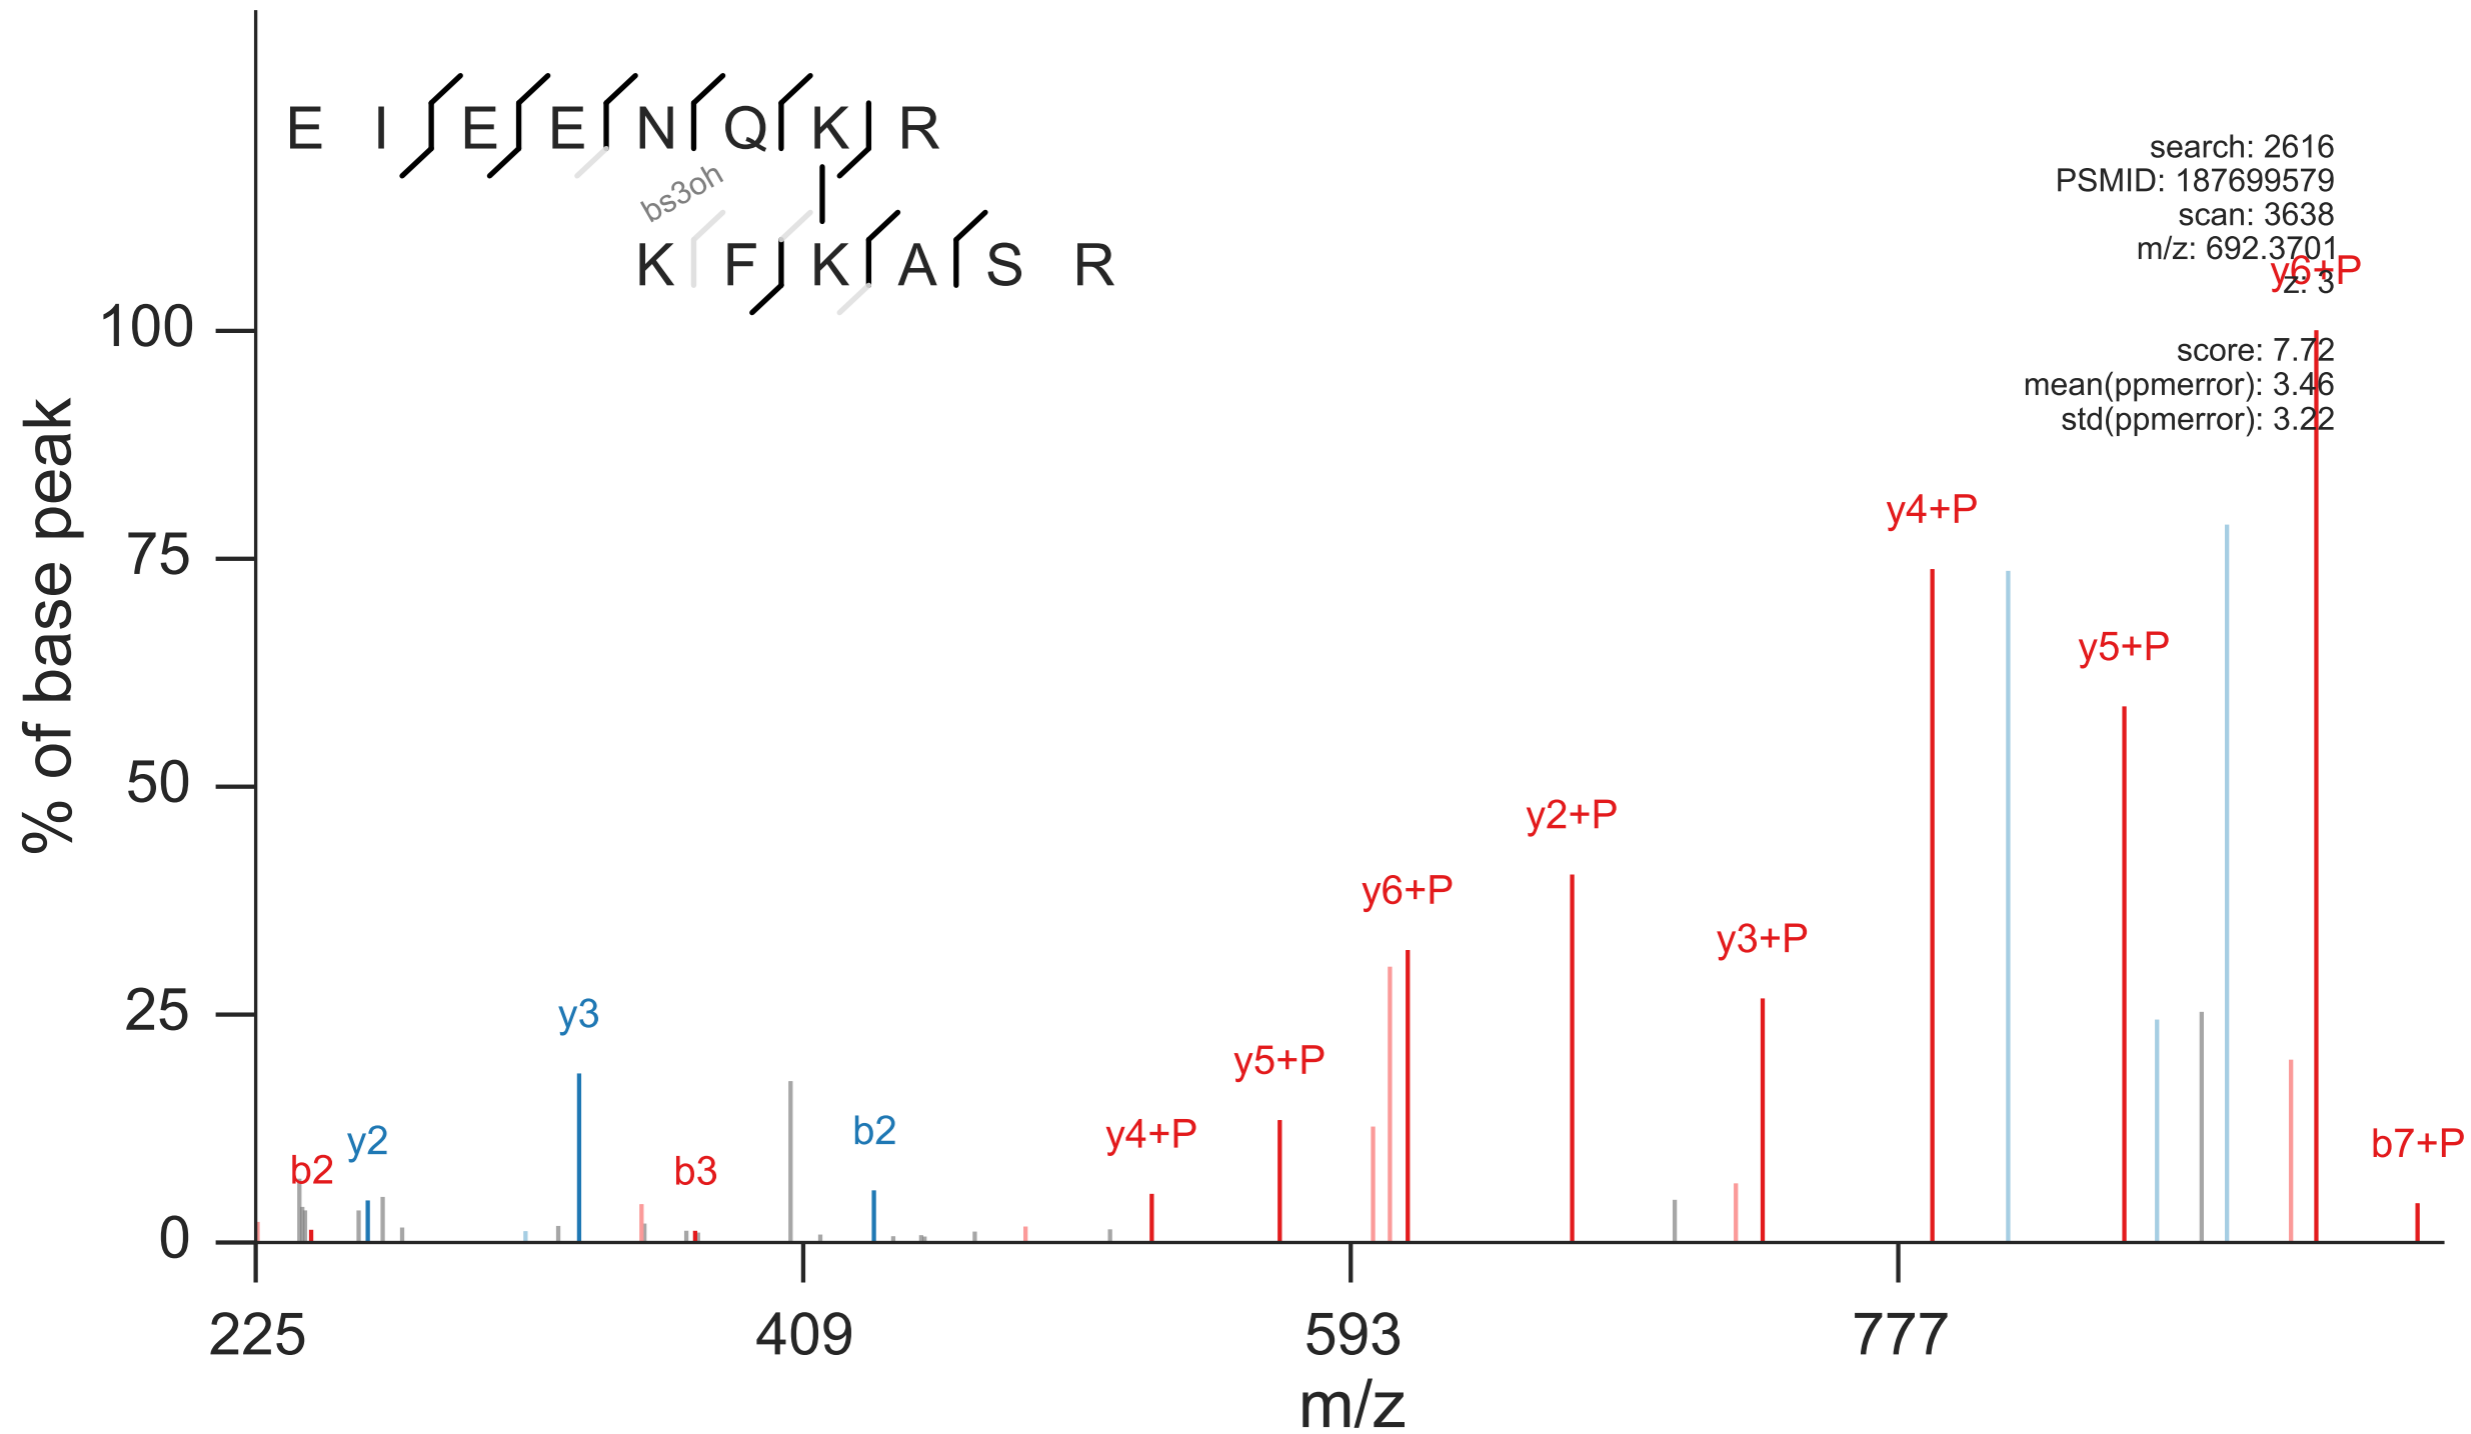

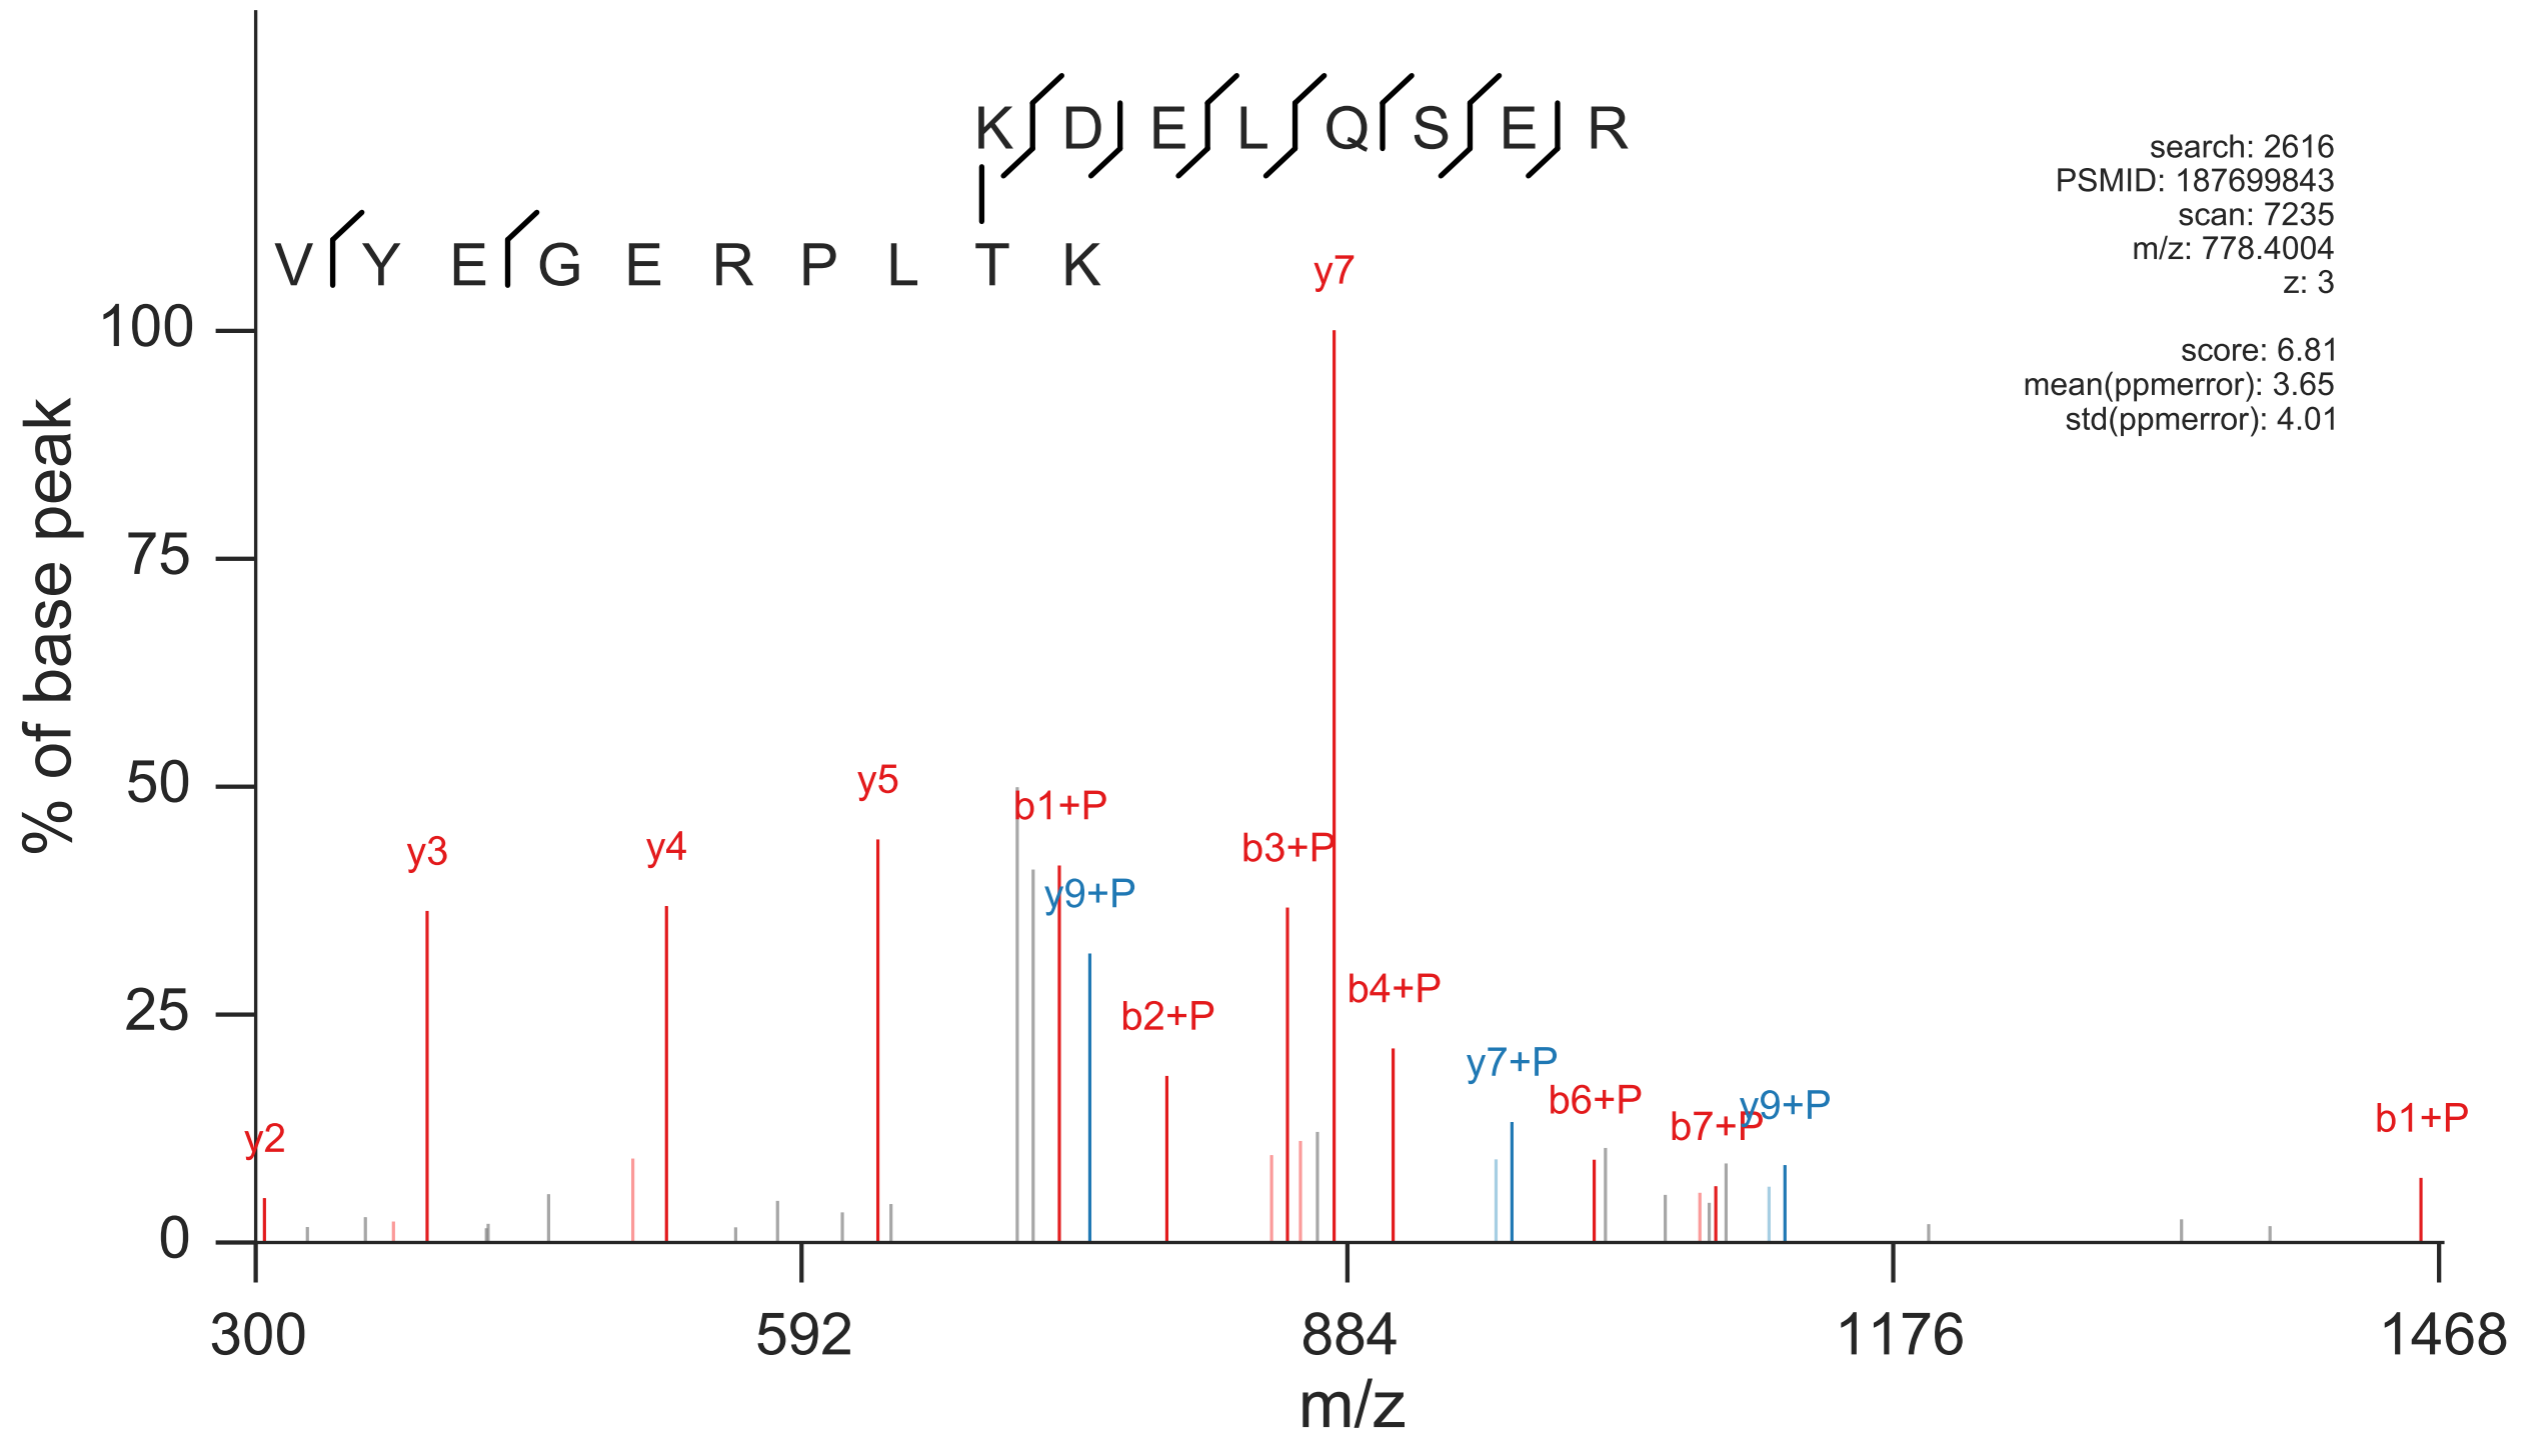

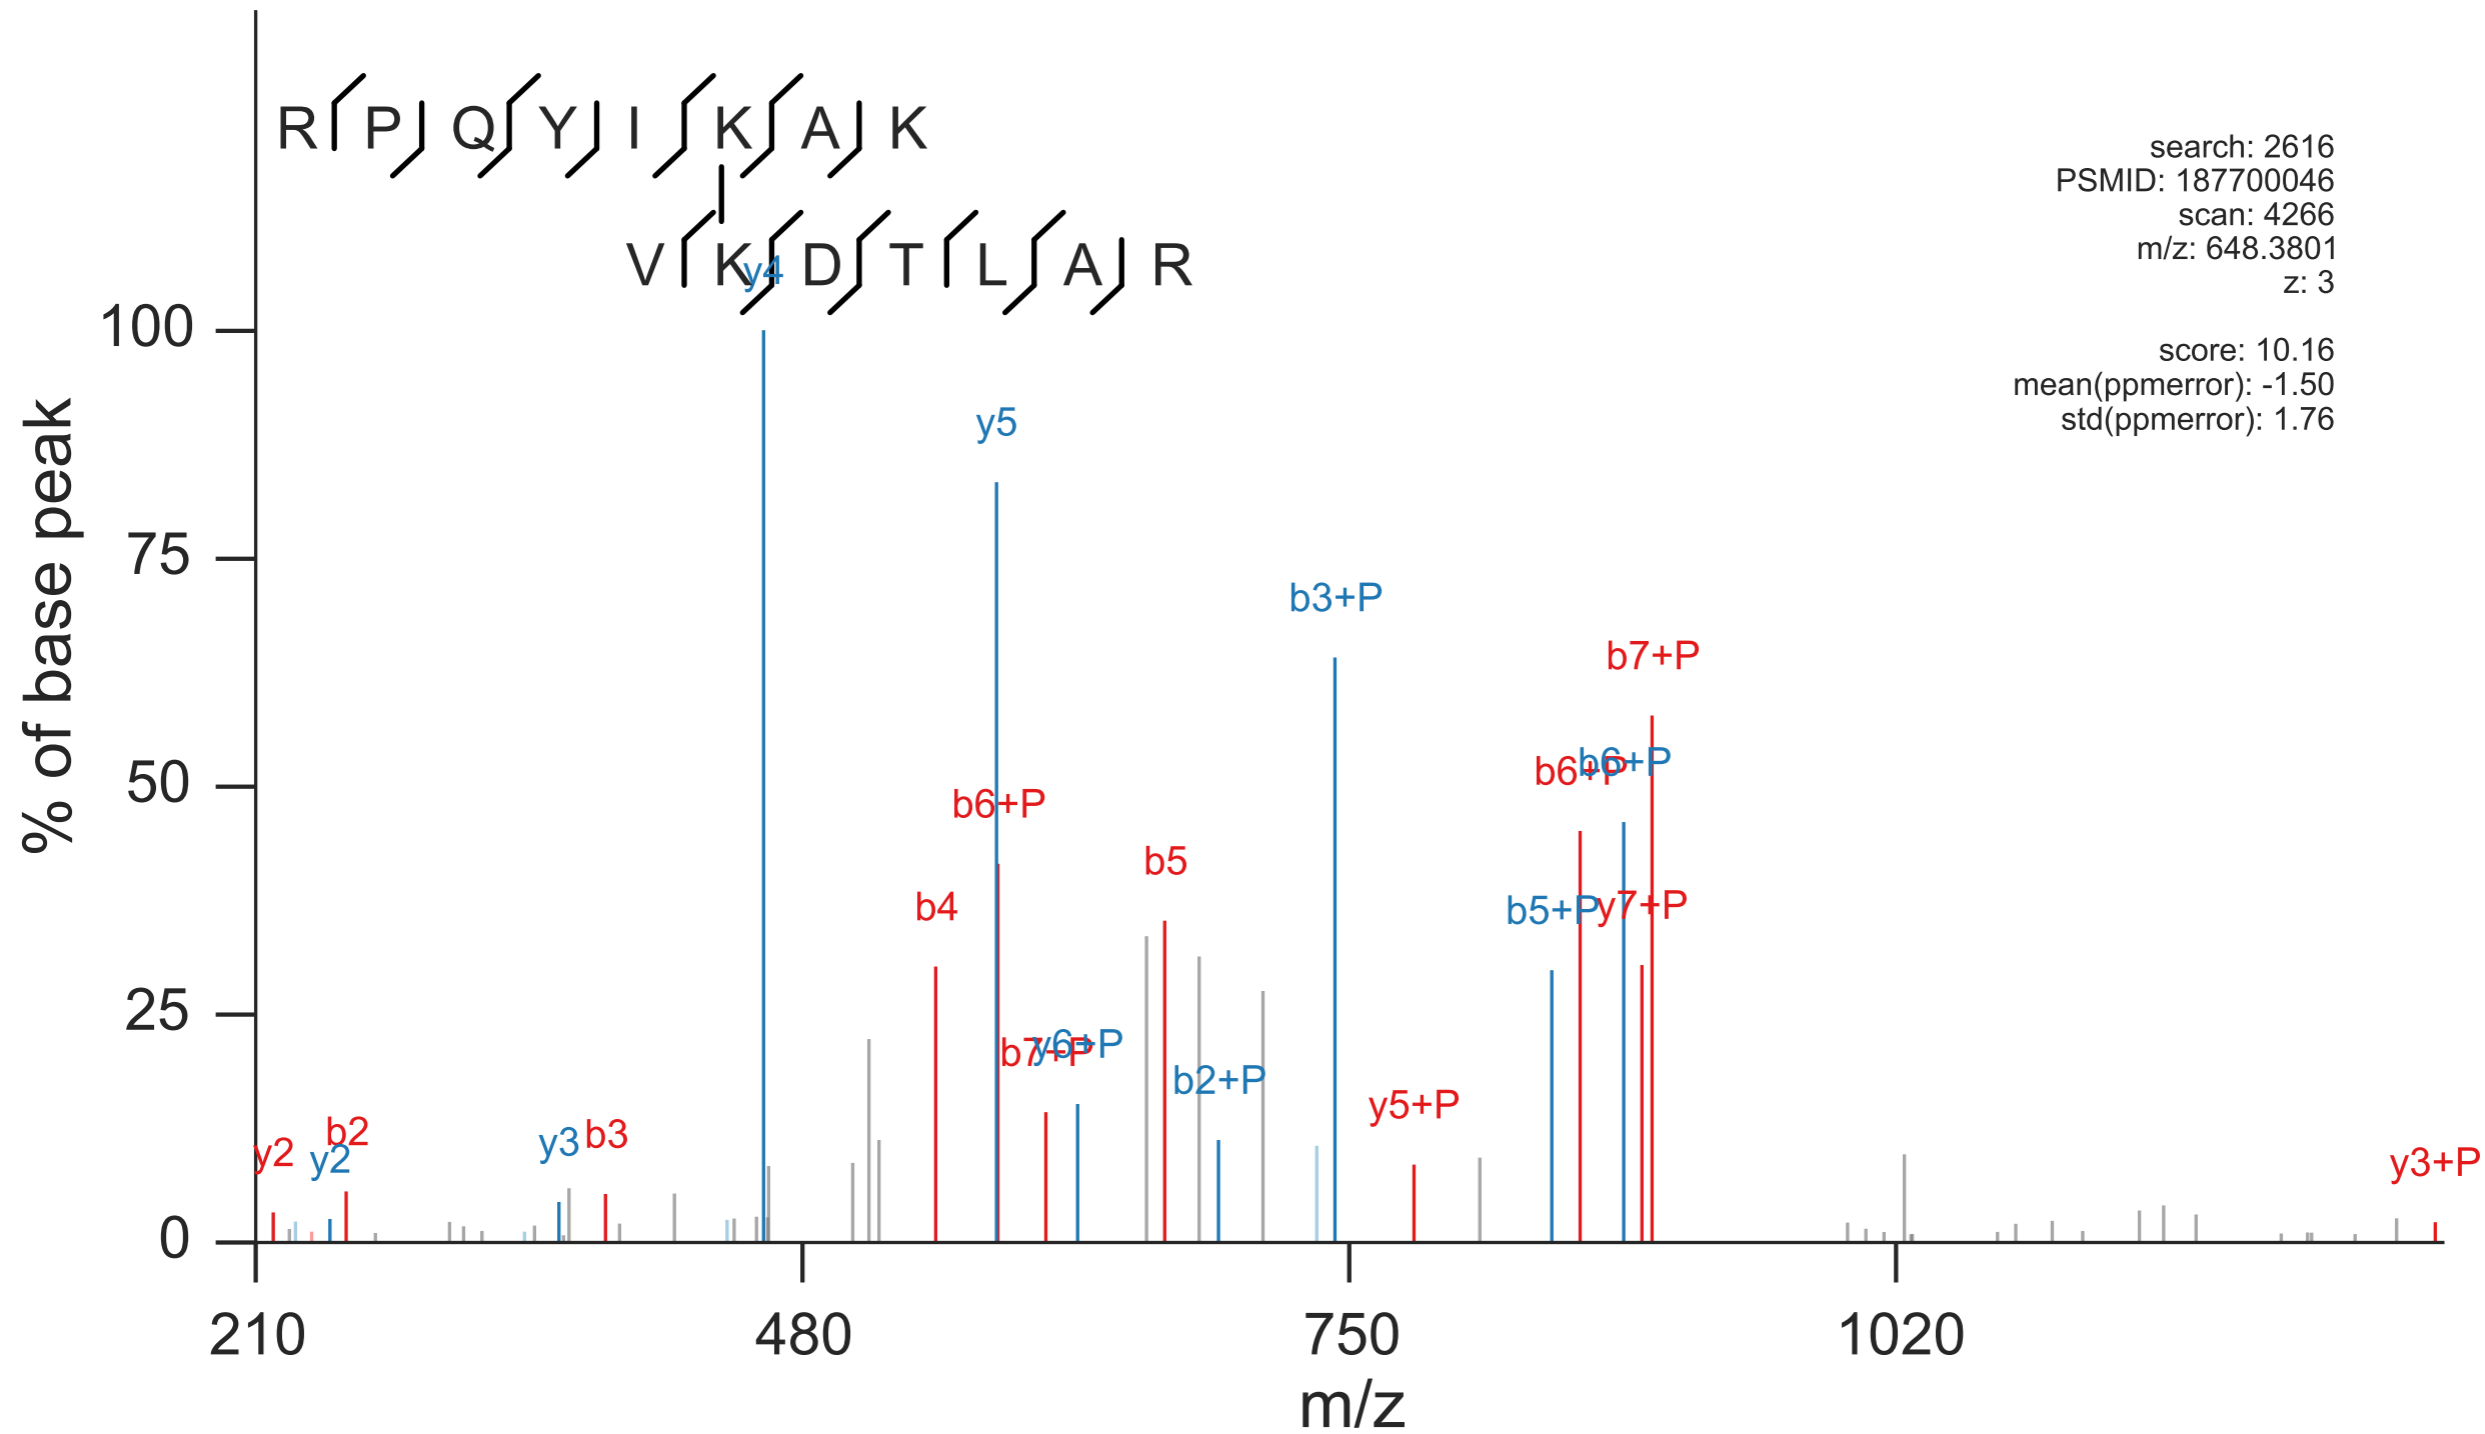



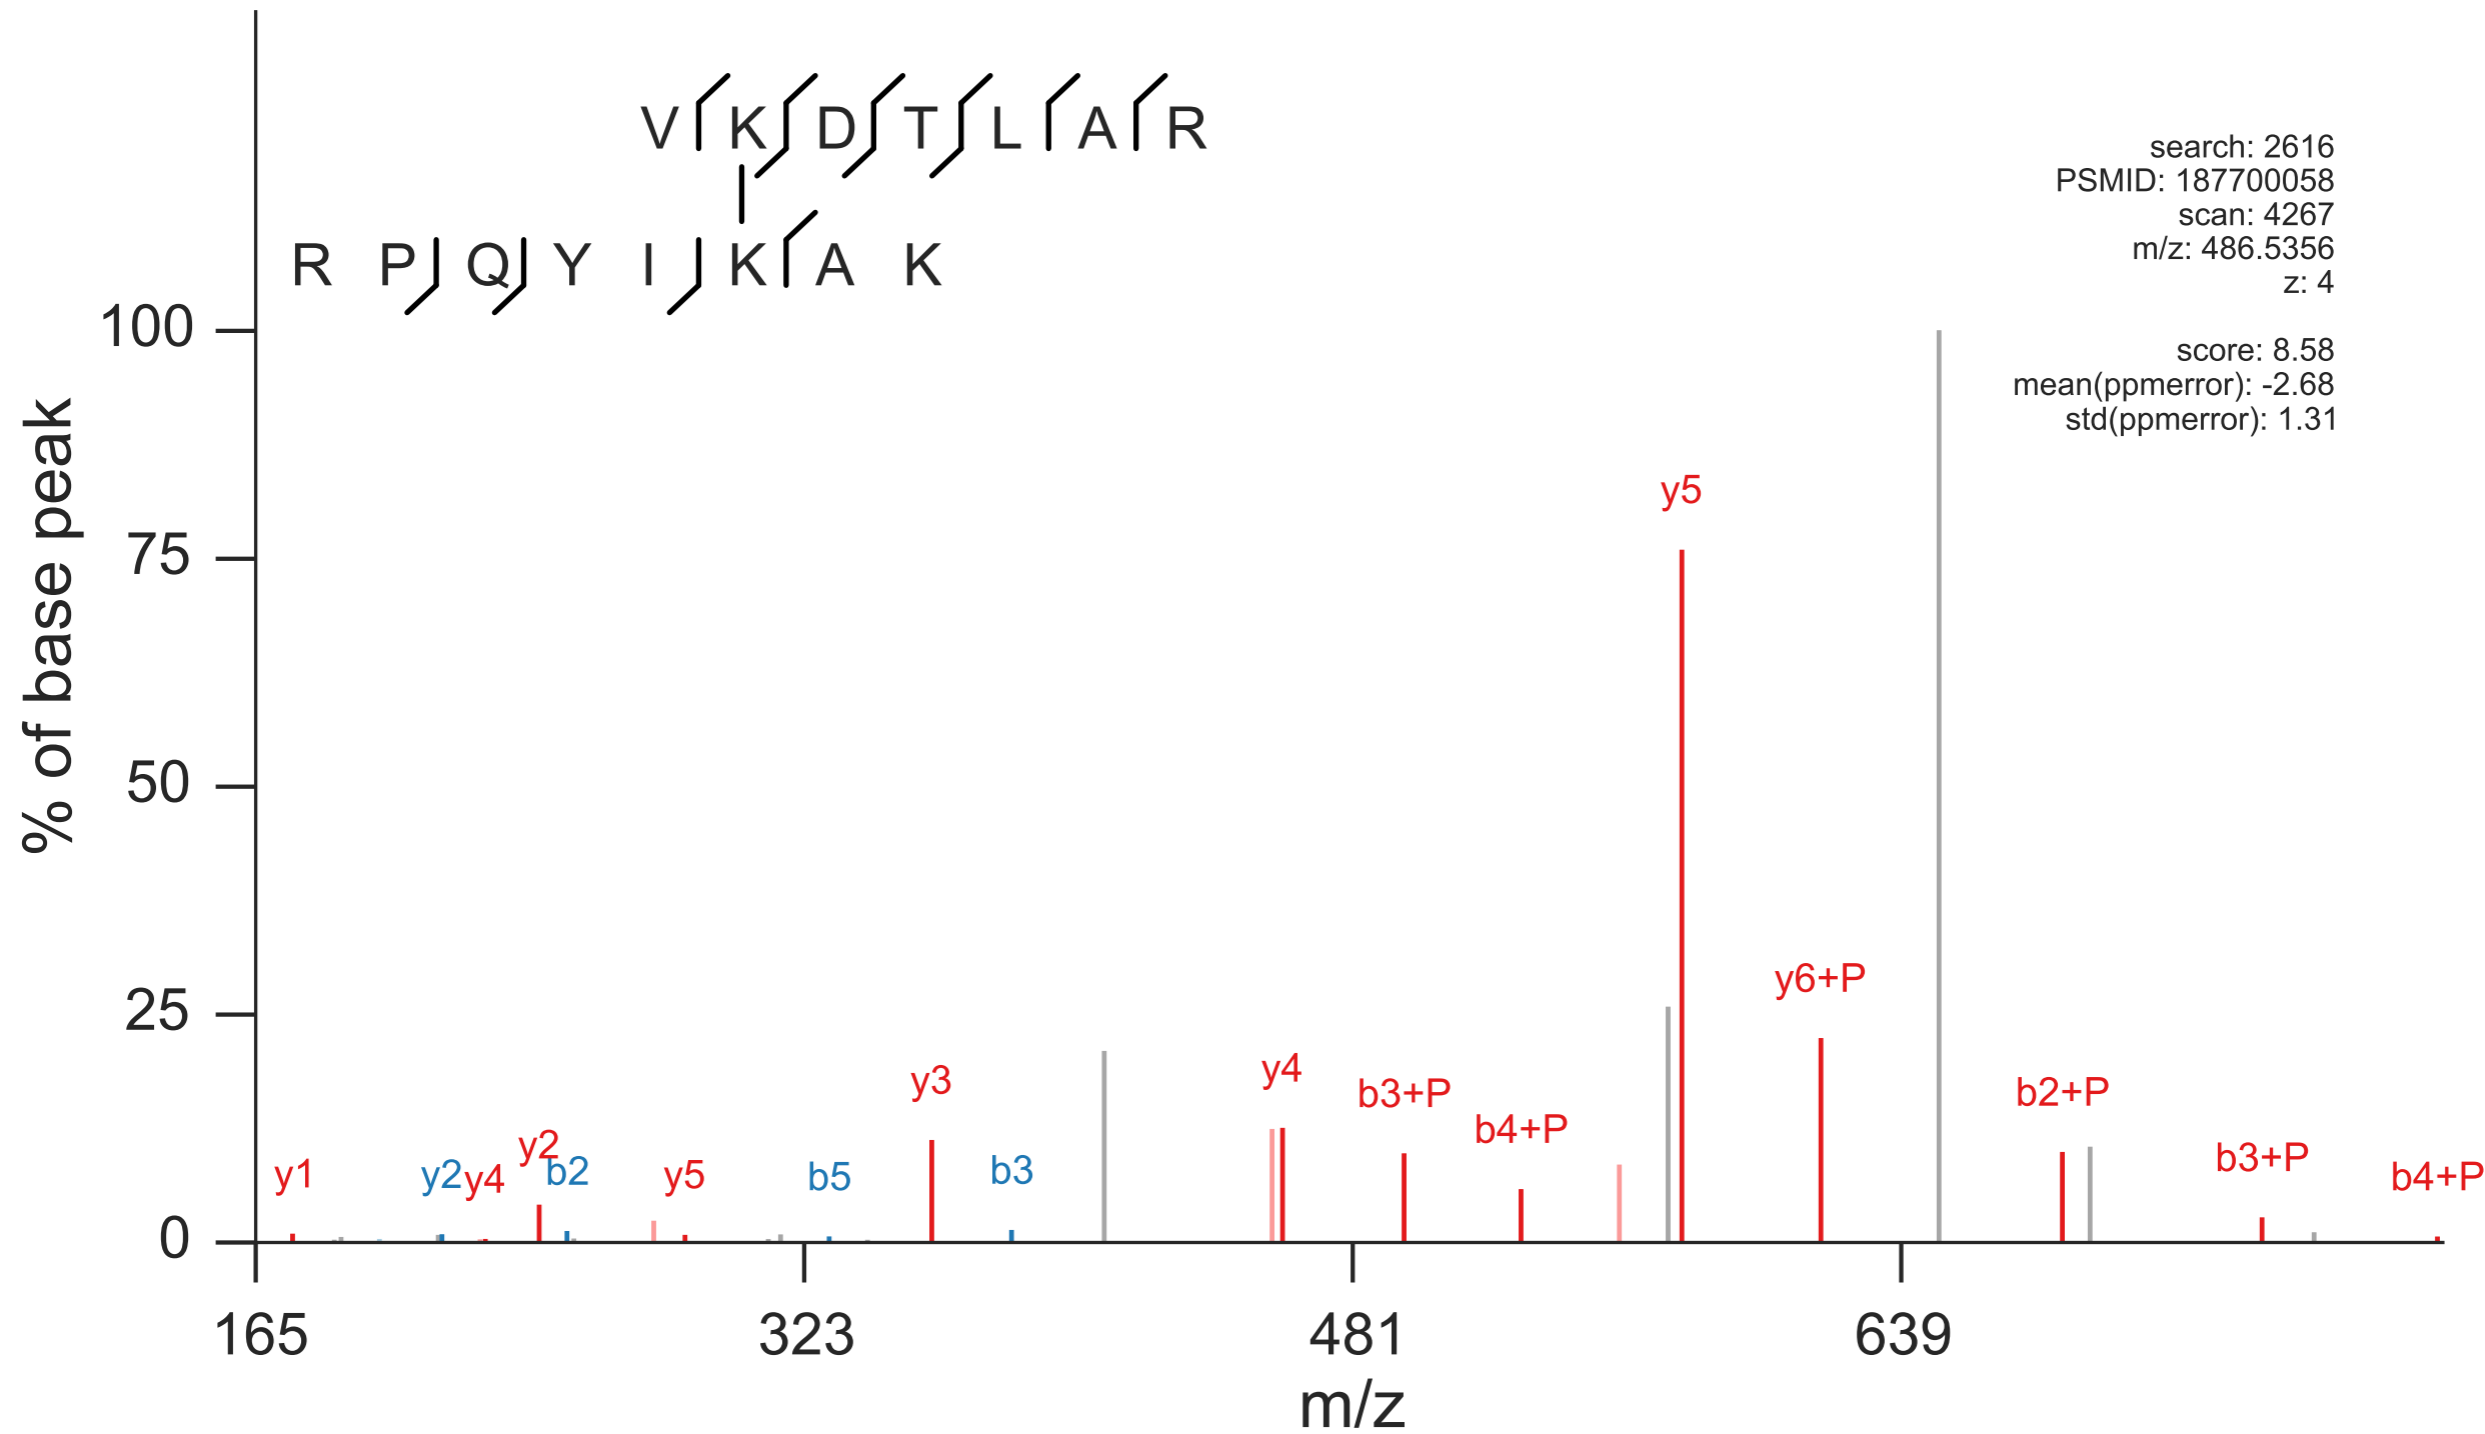

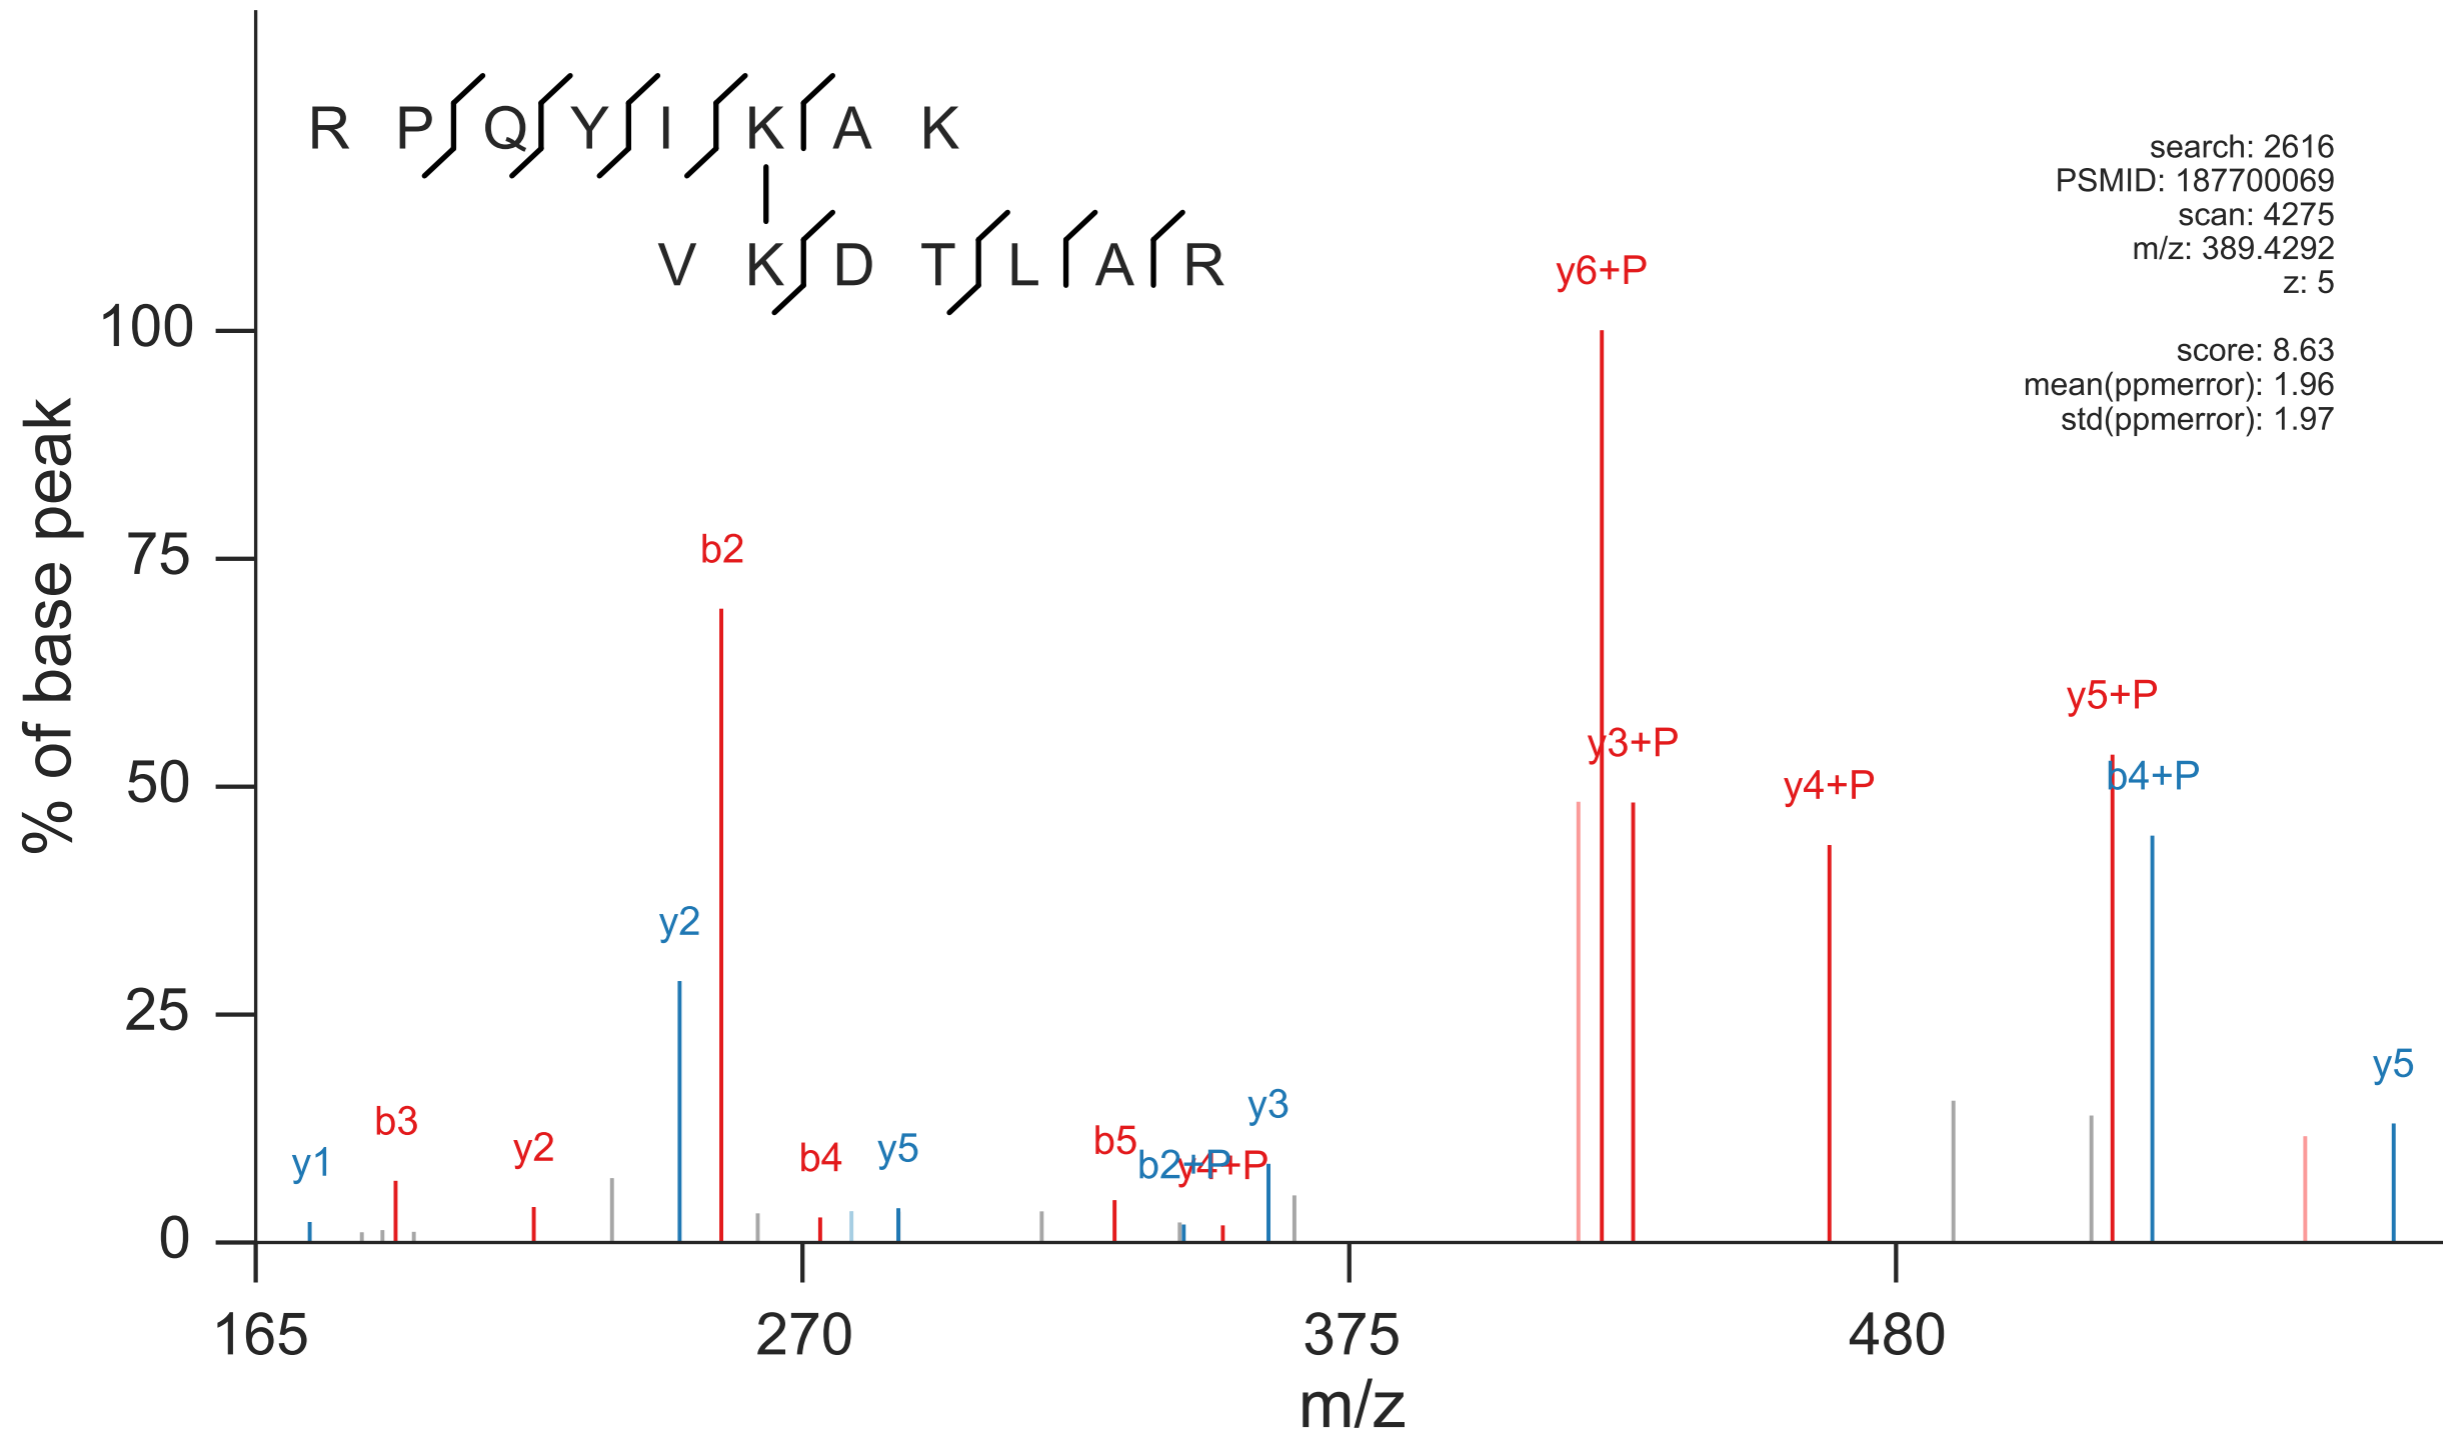

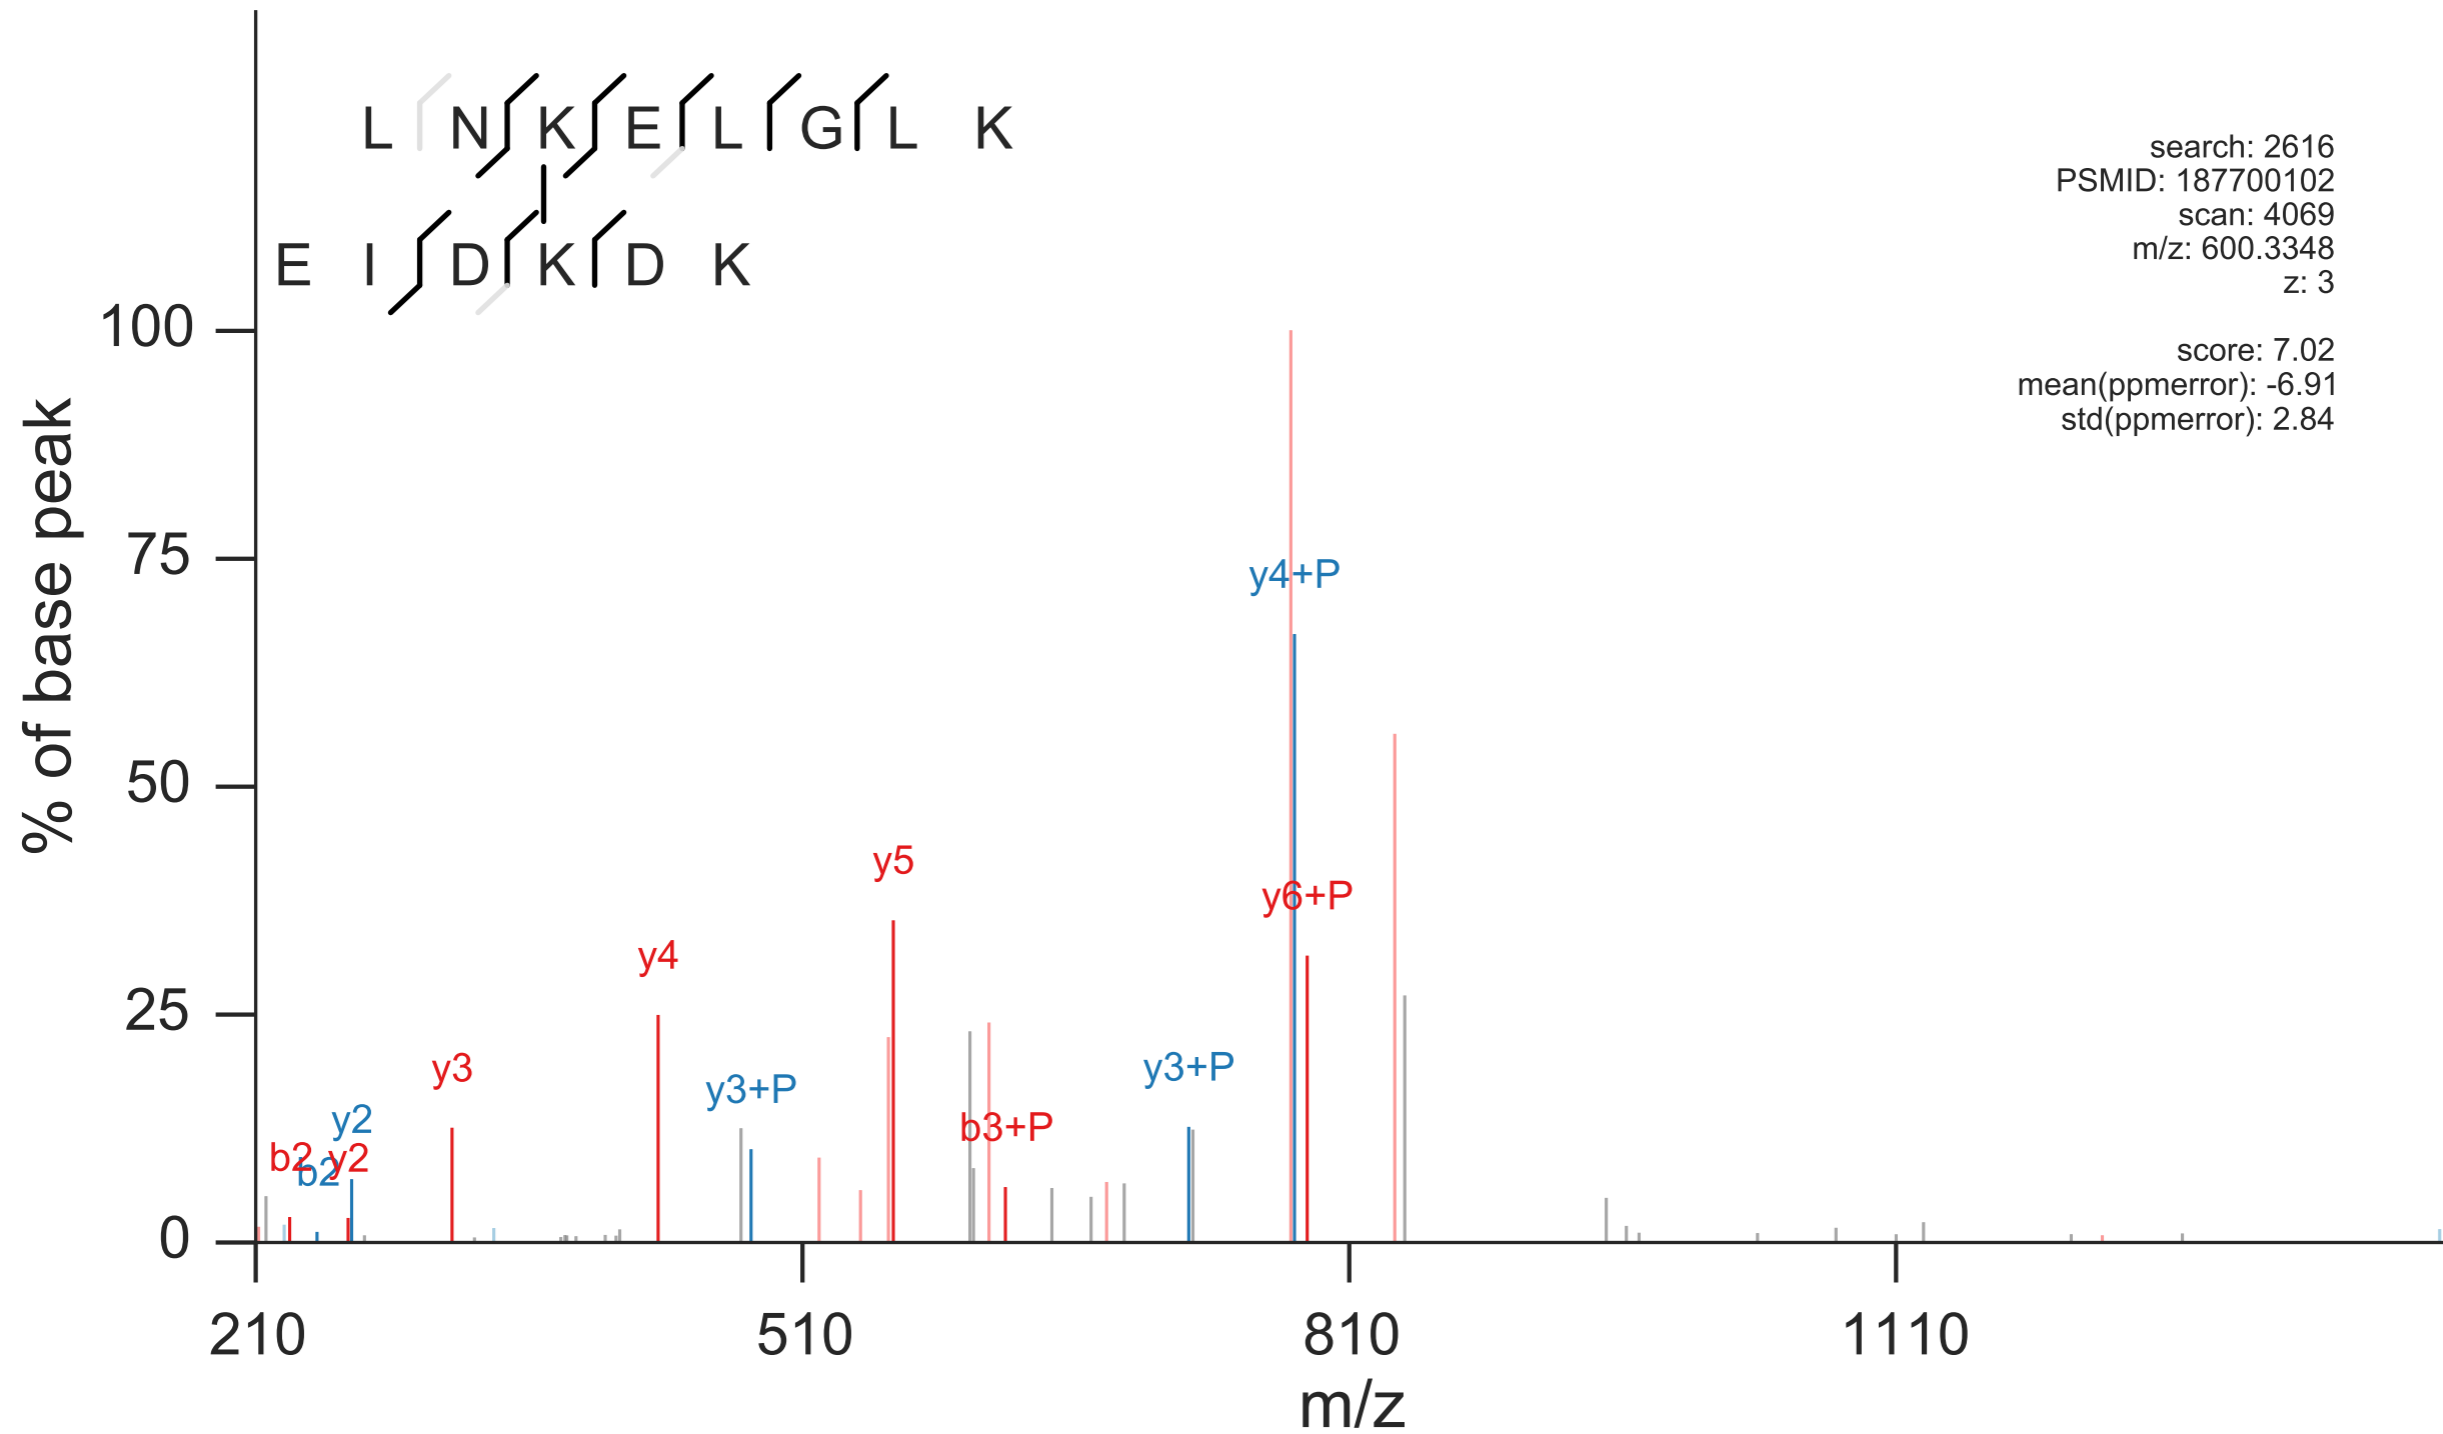

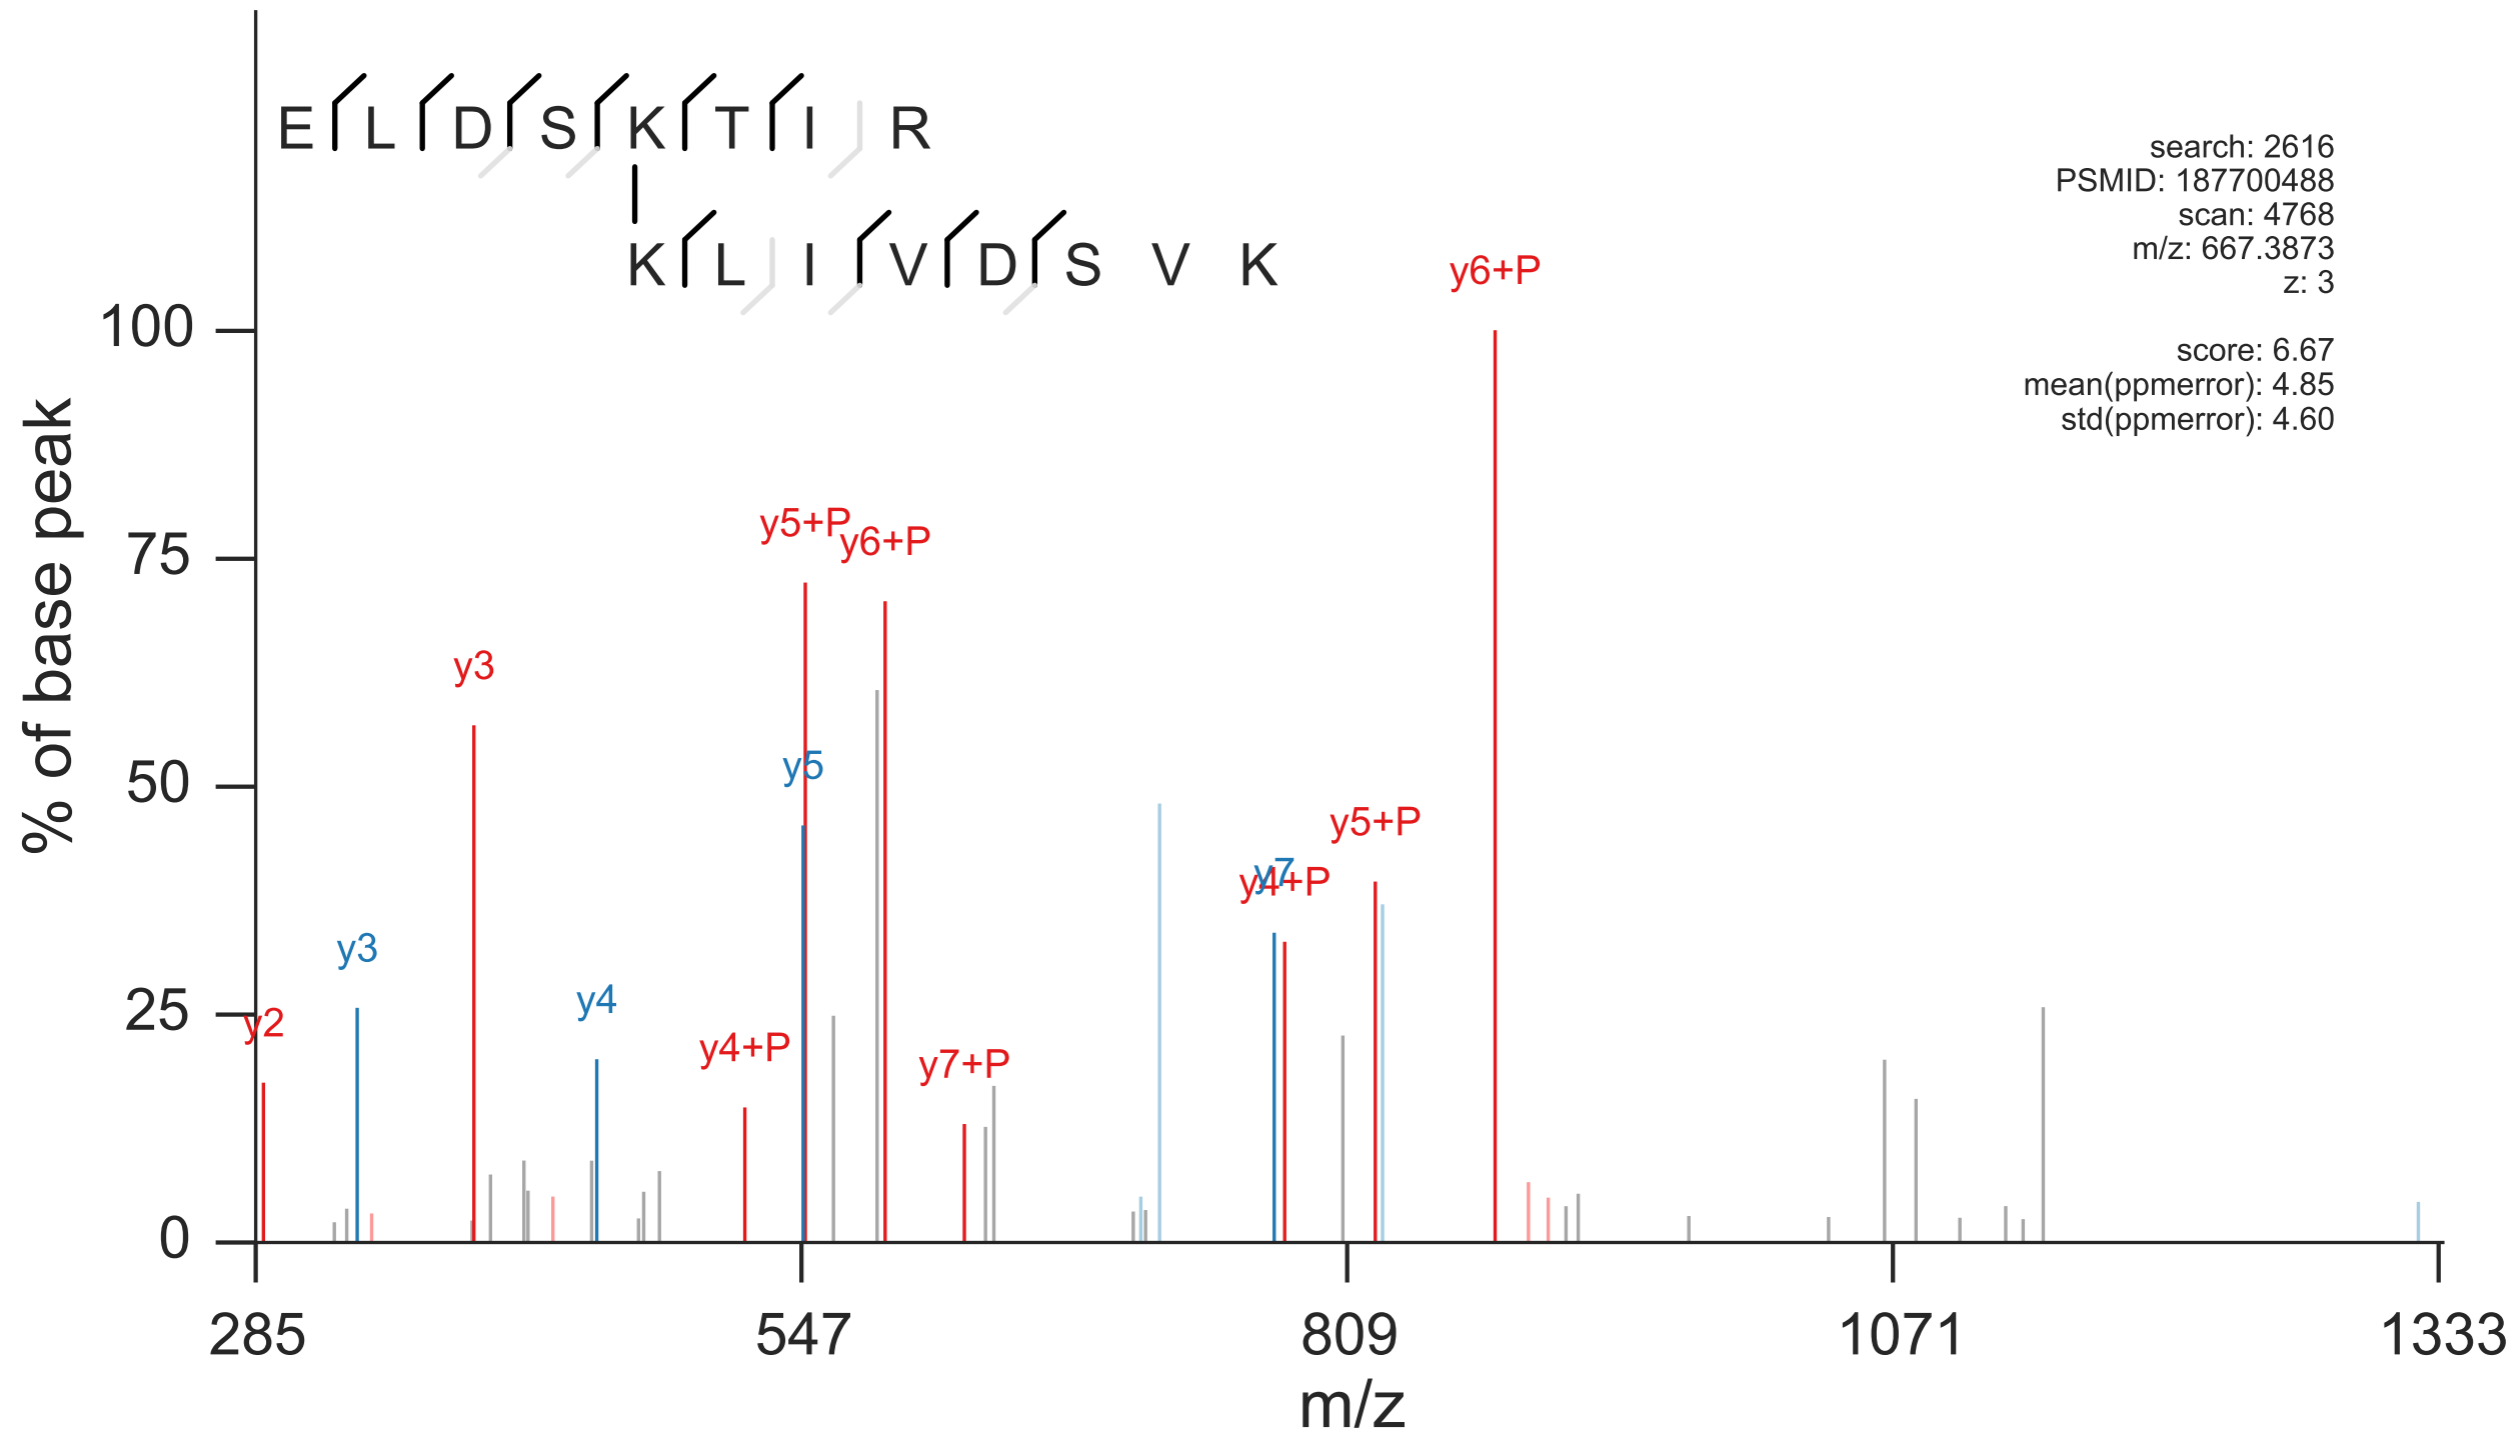

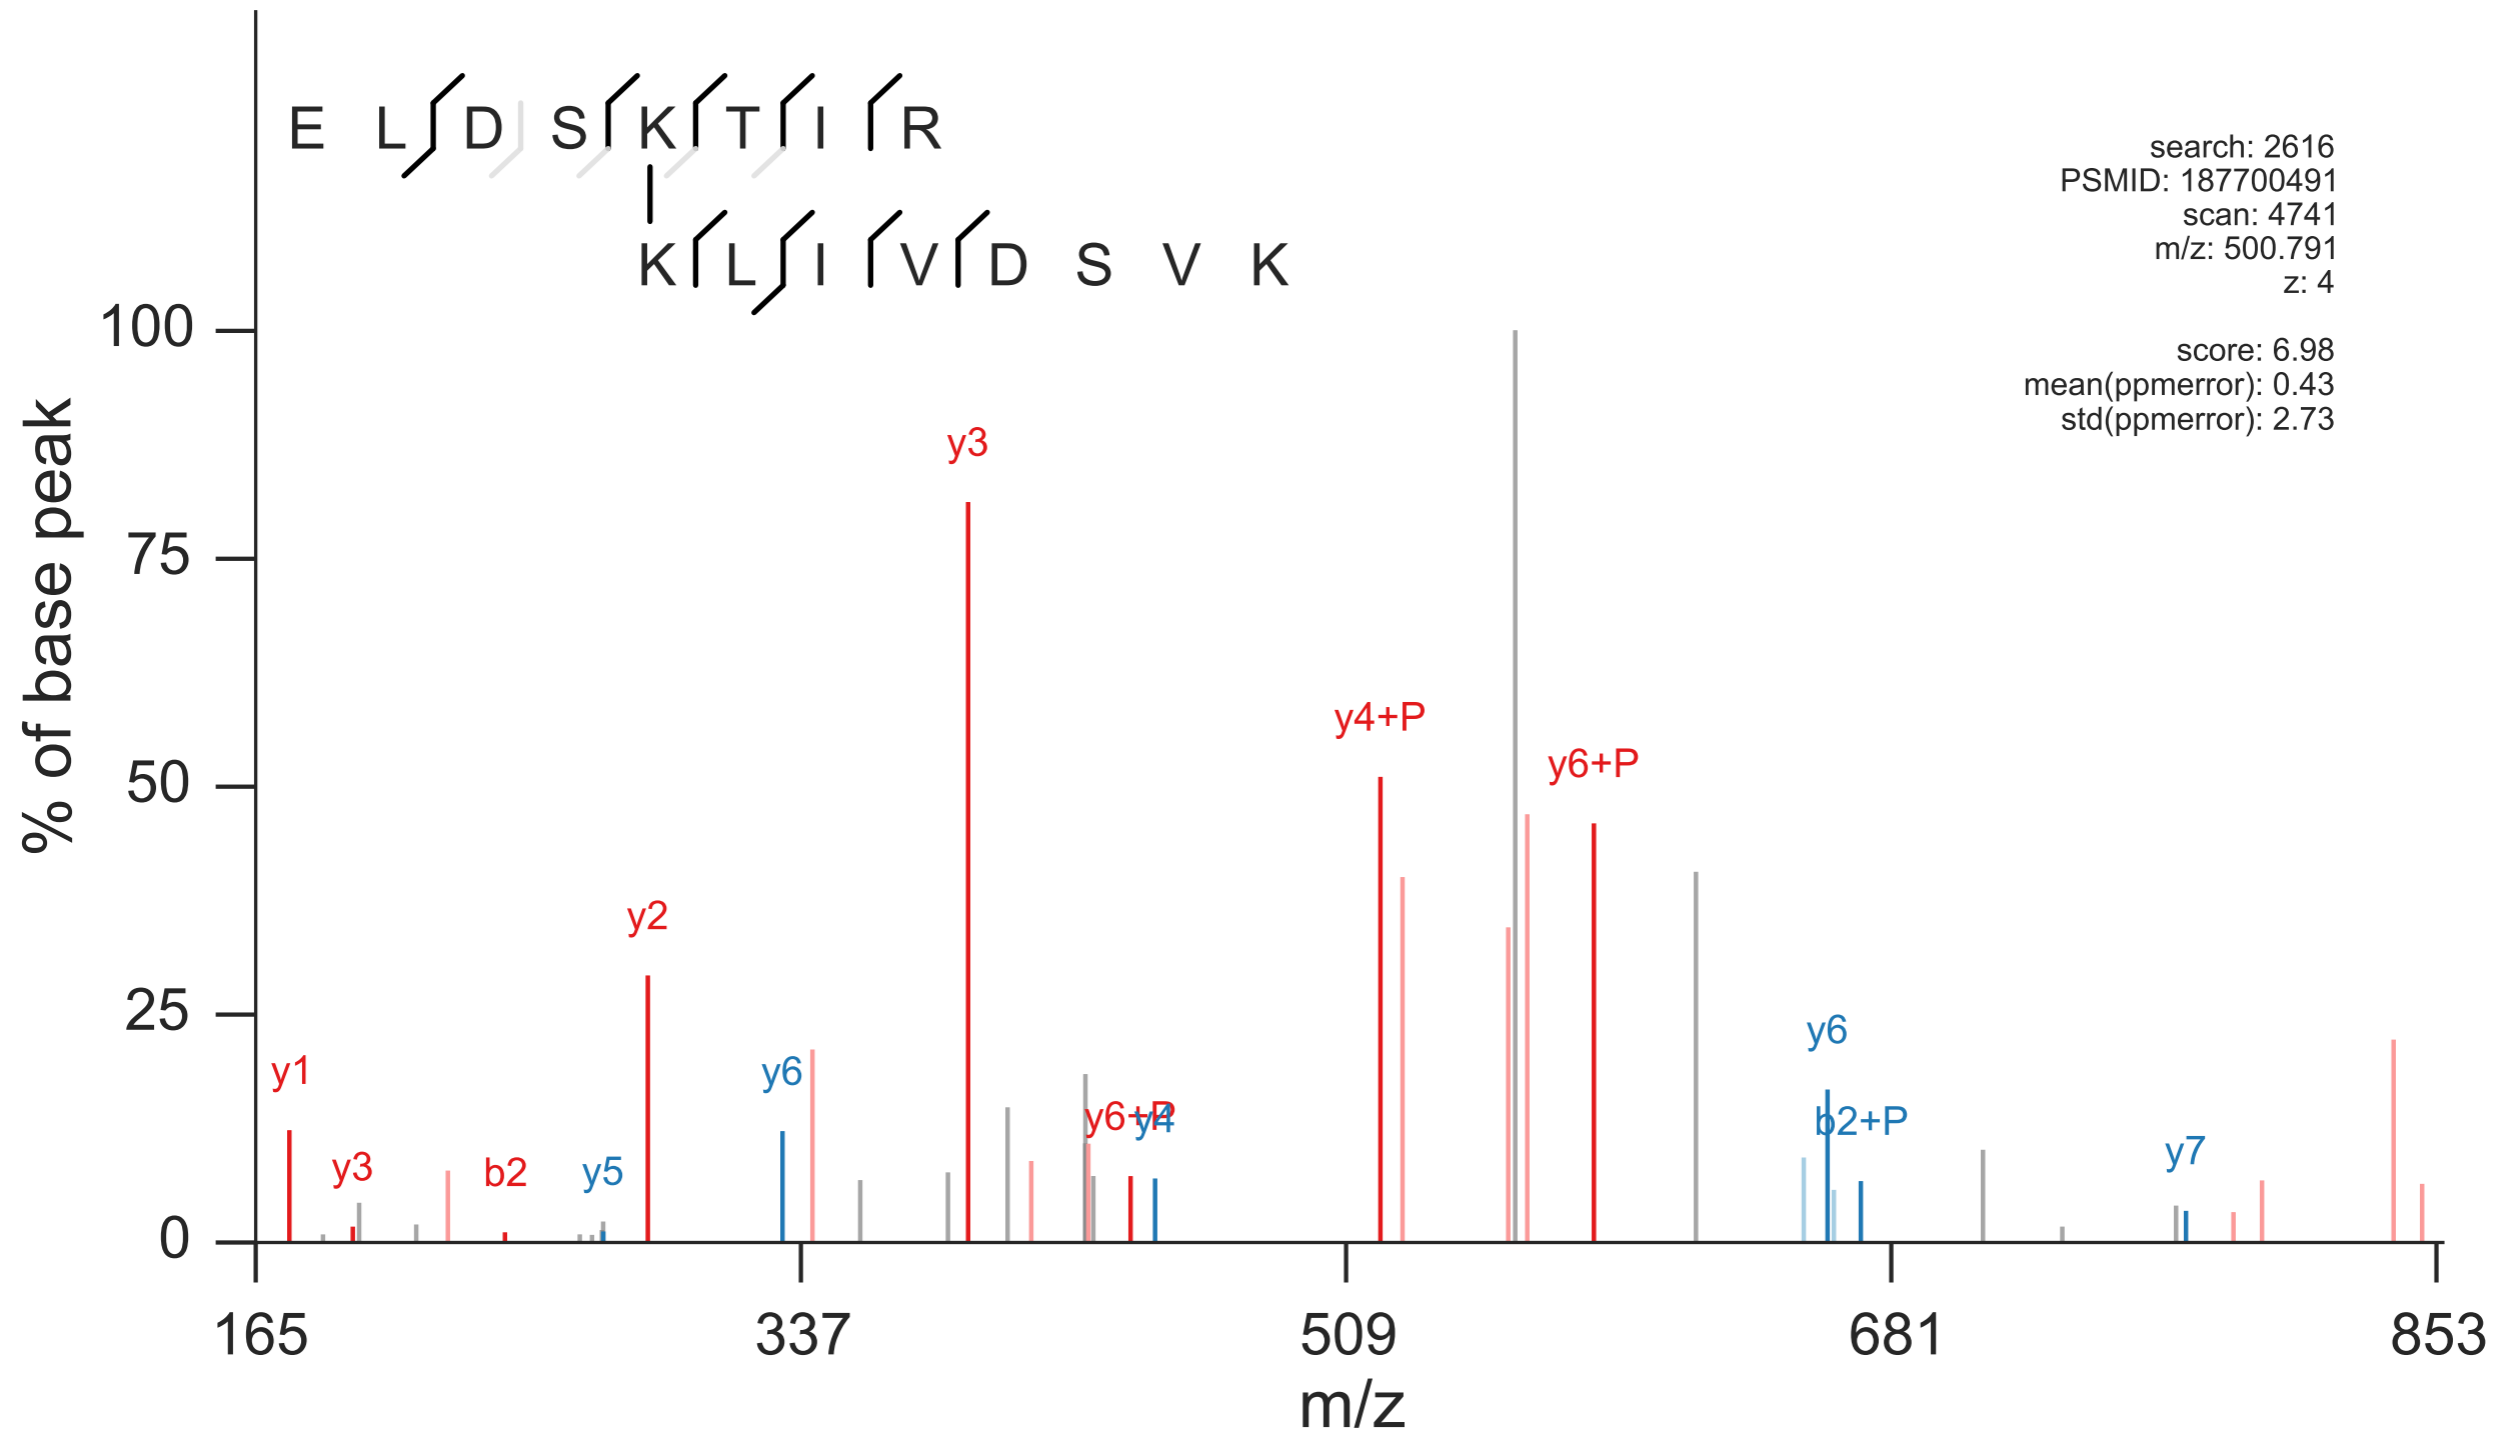

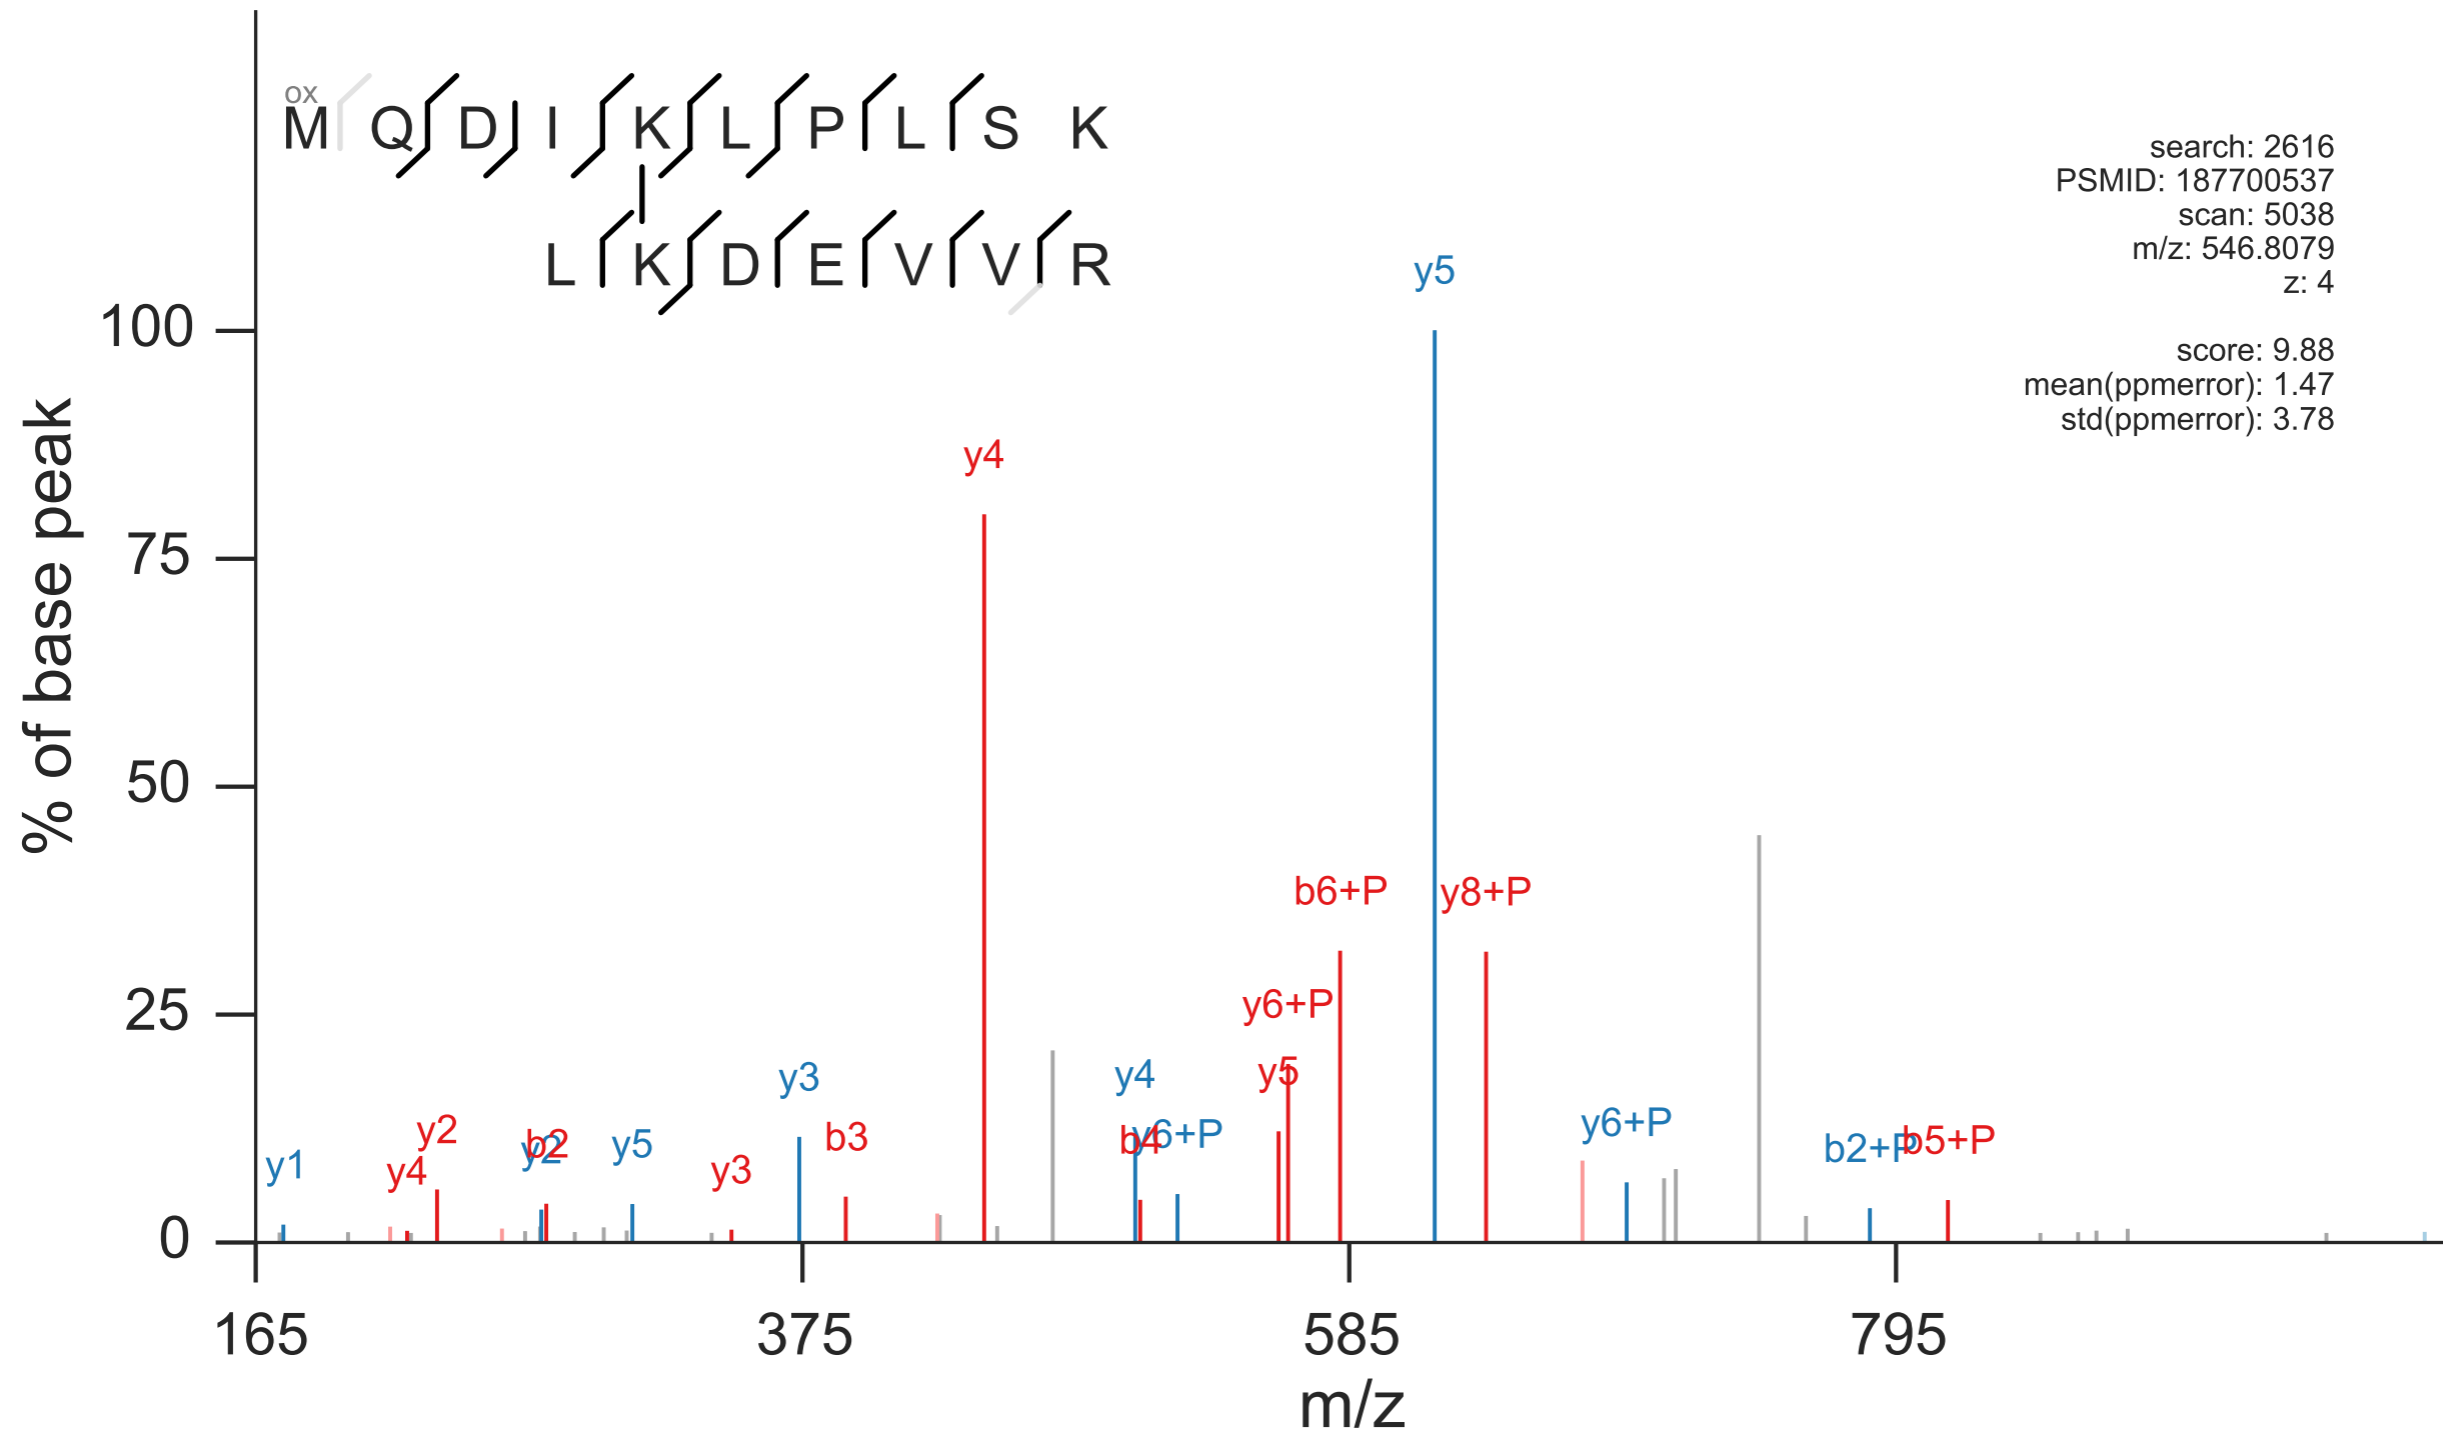

search: 2616  
 PSMID: 187700537  
 scan: 5038  
 m/z: 546.8079  
 z: 4

score: 9.88  
 mean(ppmerror): 1.47  
 std(ppmerror): 3.78

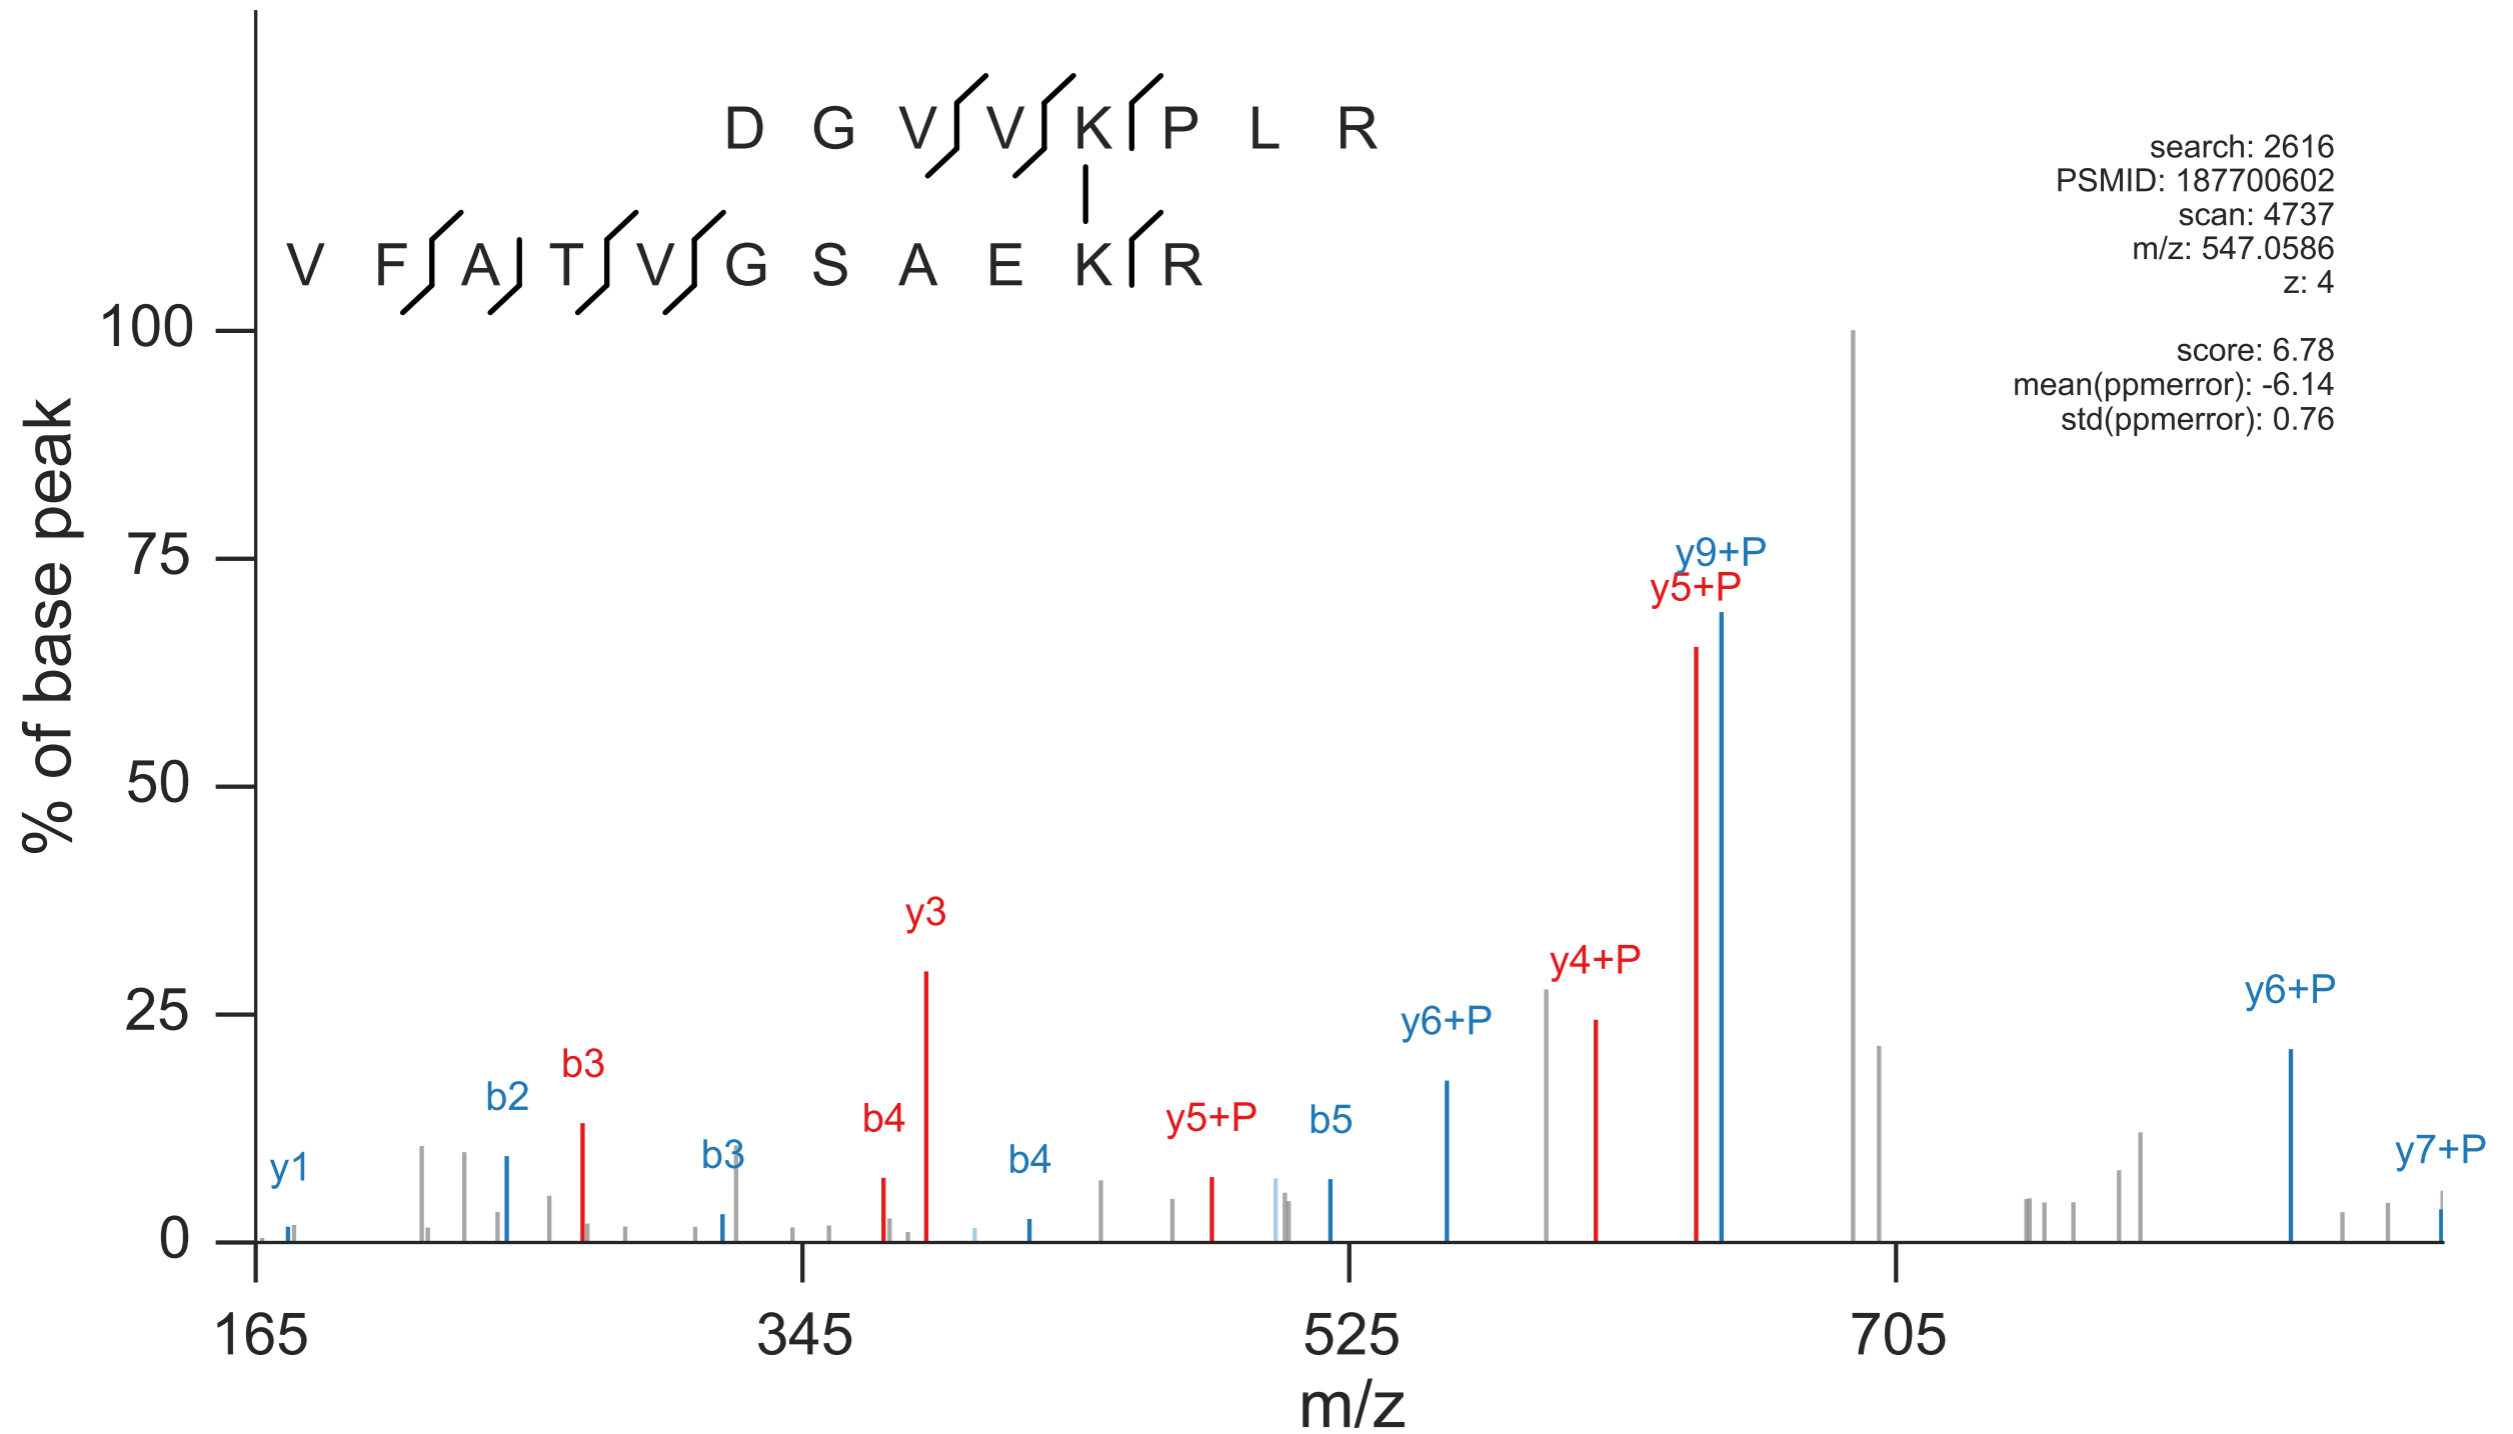

search: 2616  
 PSMID: 187700602  
 scan: 4737  
 m/z: 547.0586  
 z: 4

score: 6.78  
 mean(ppmerror): -6.14  
 std(ppmerror): 0.76

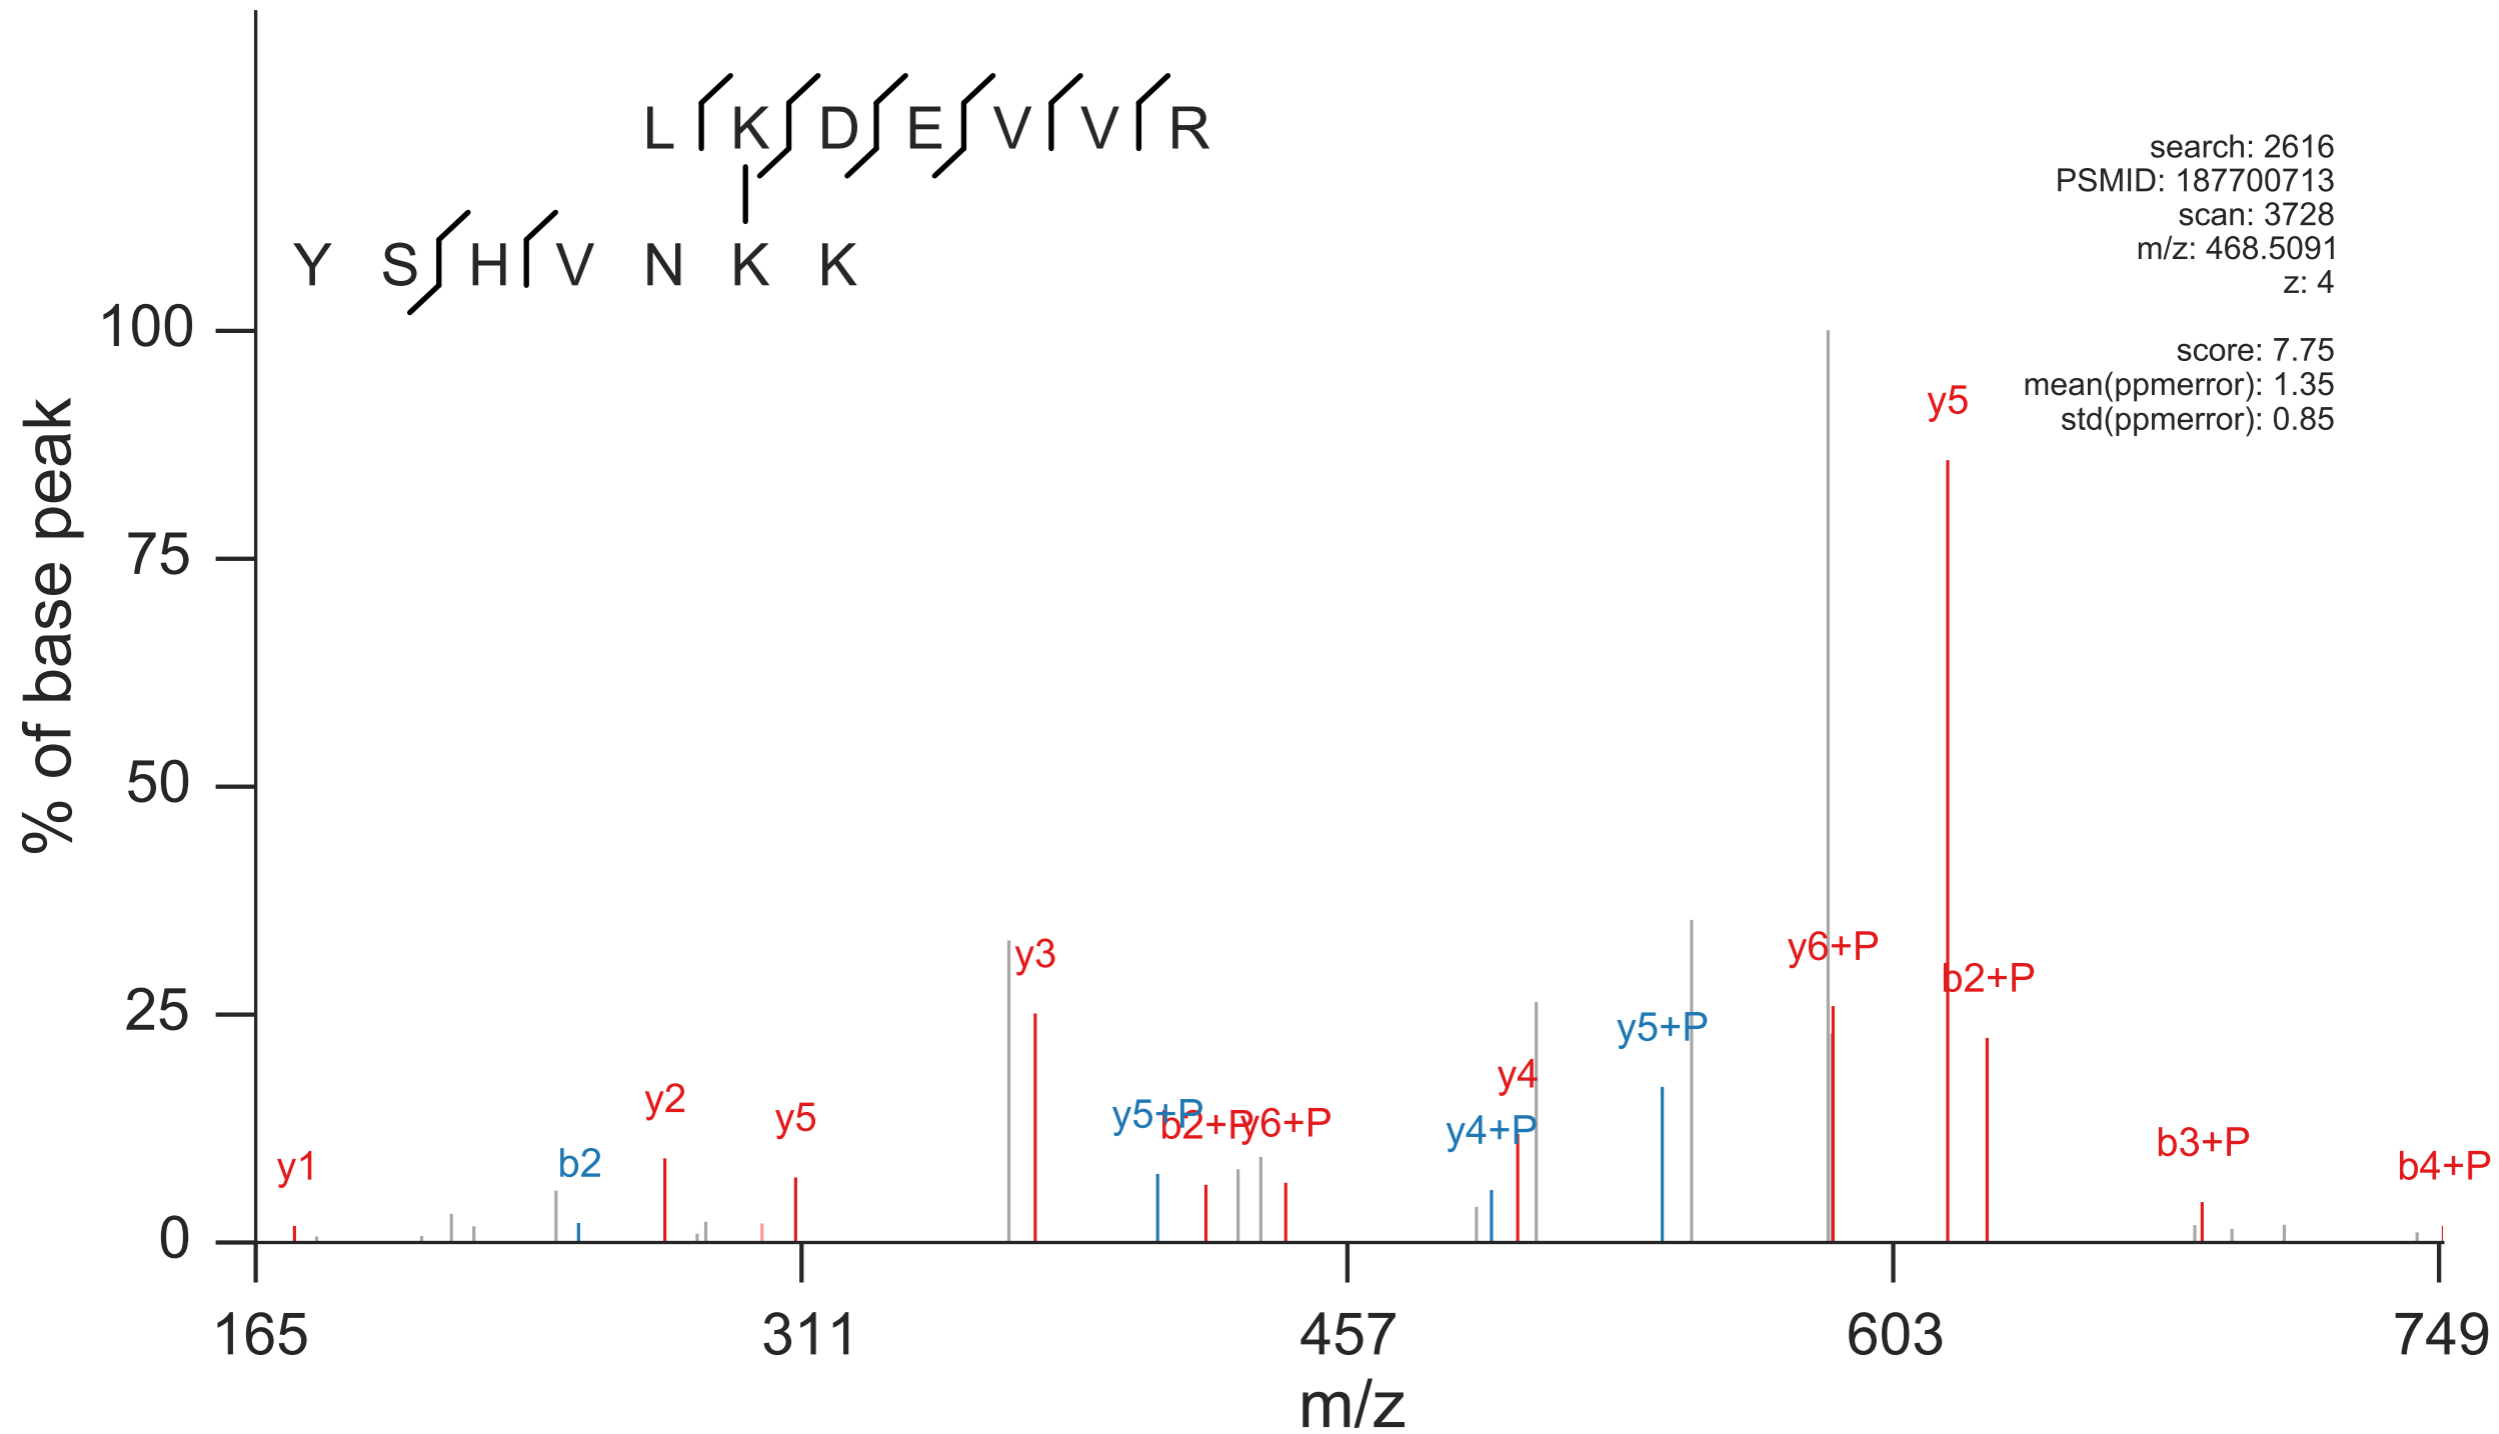



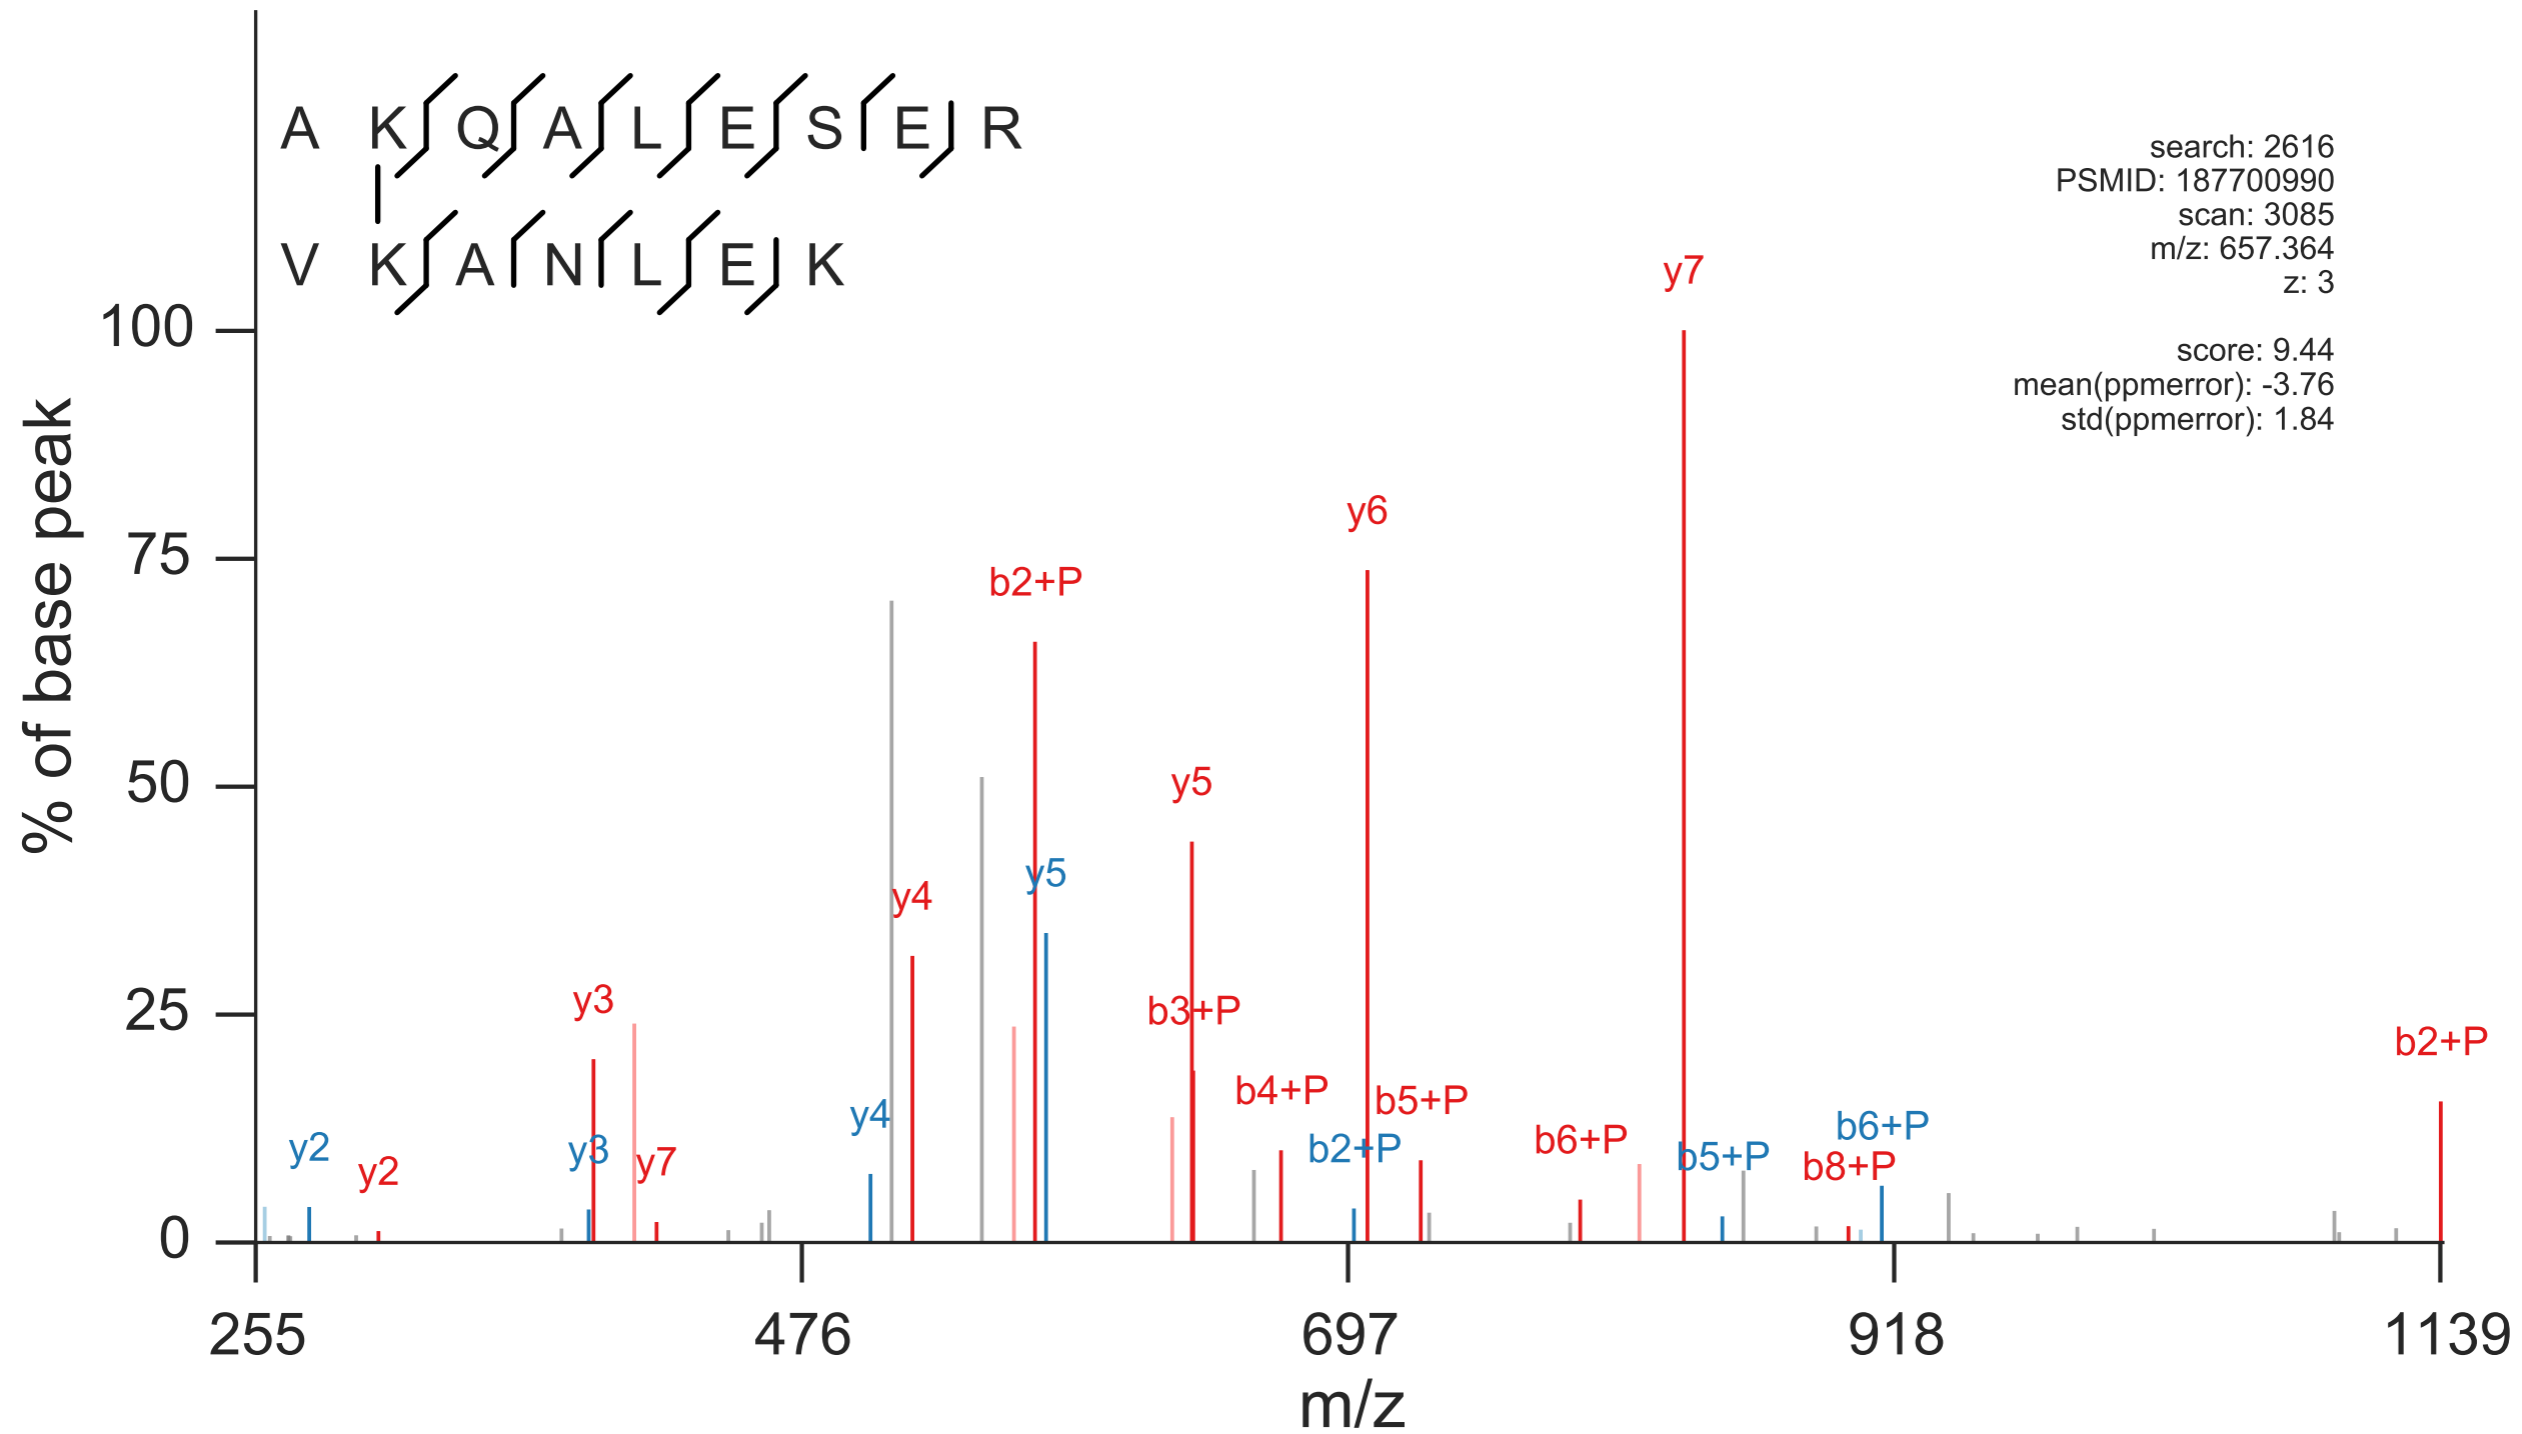

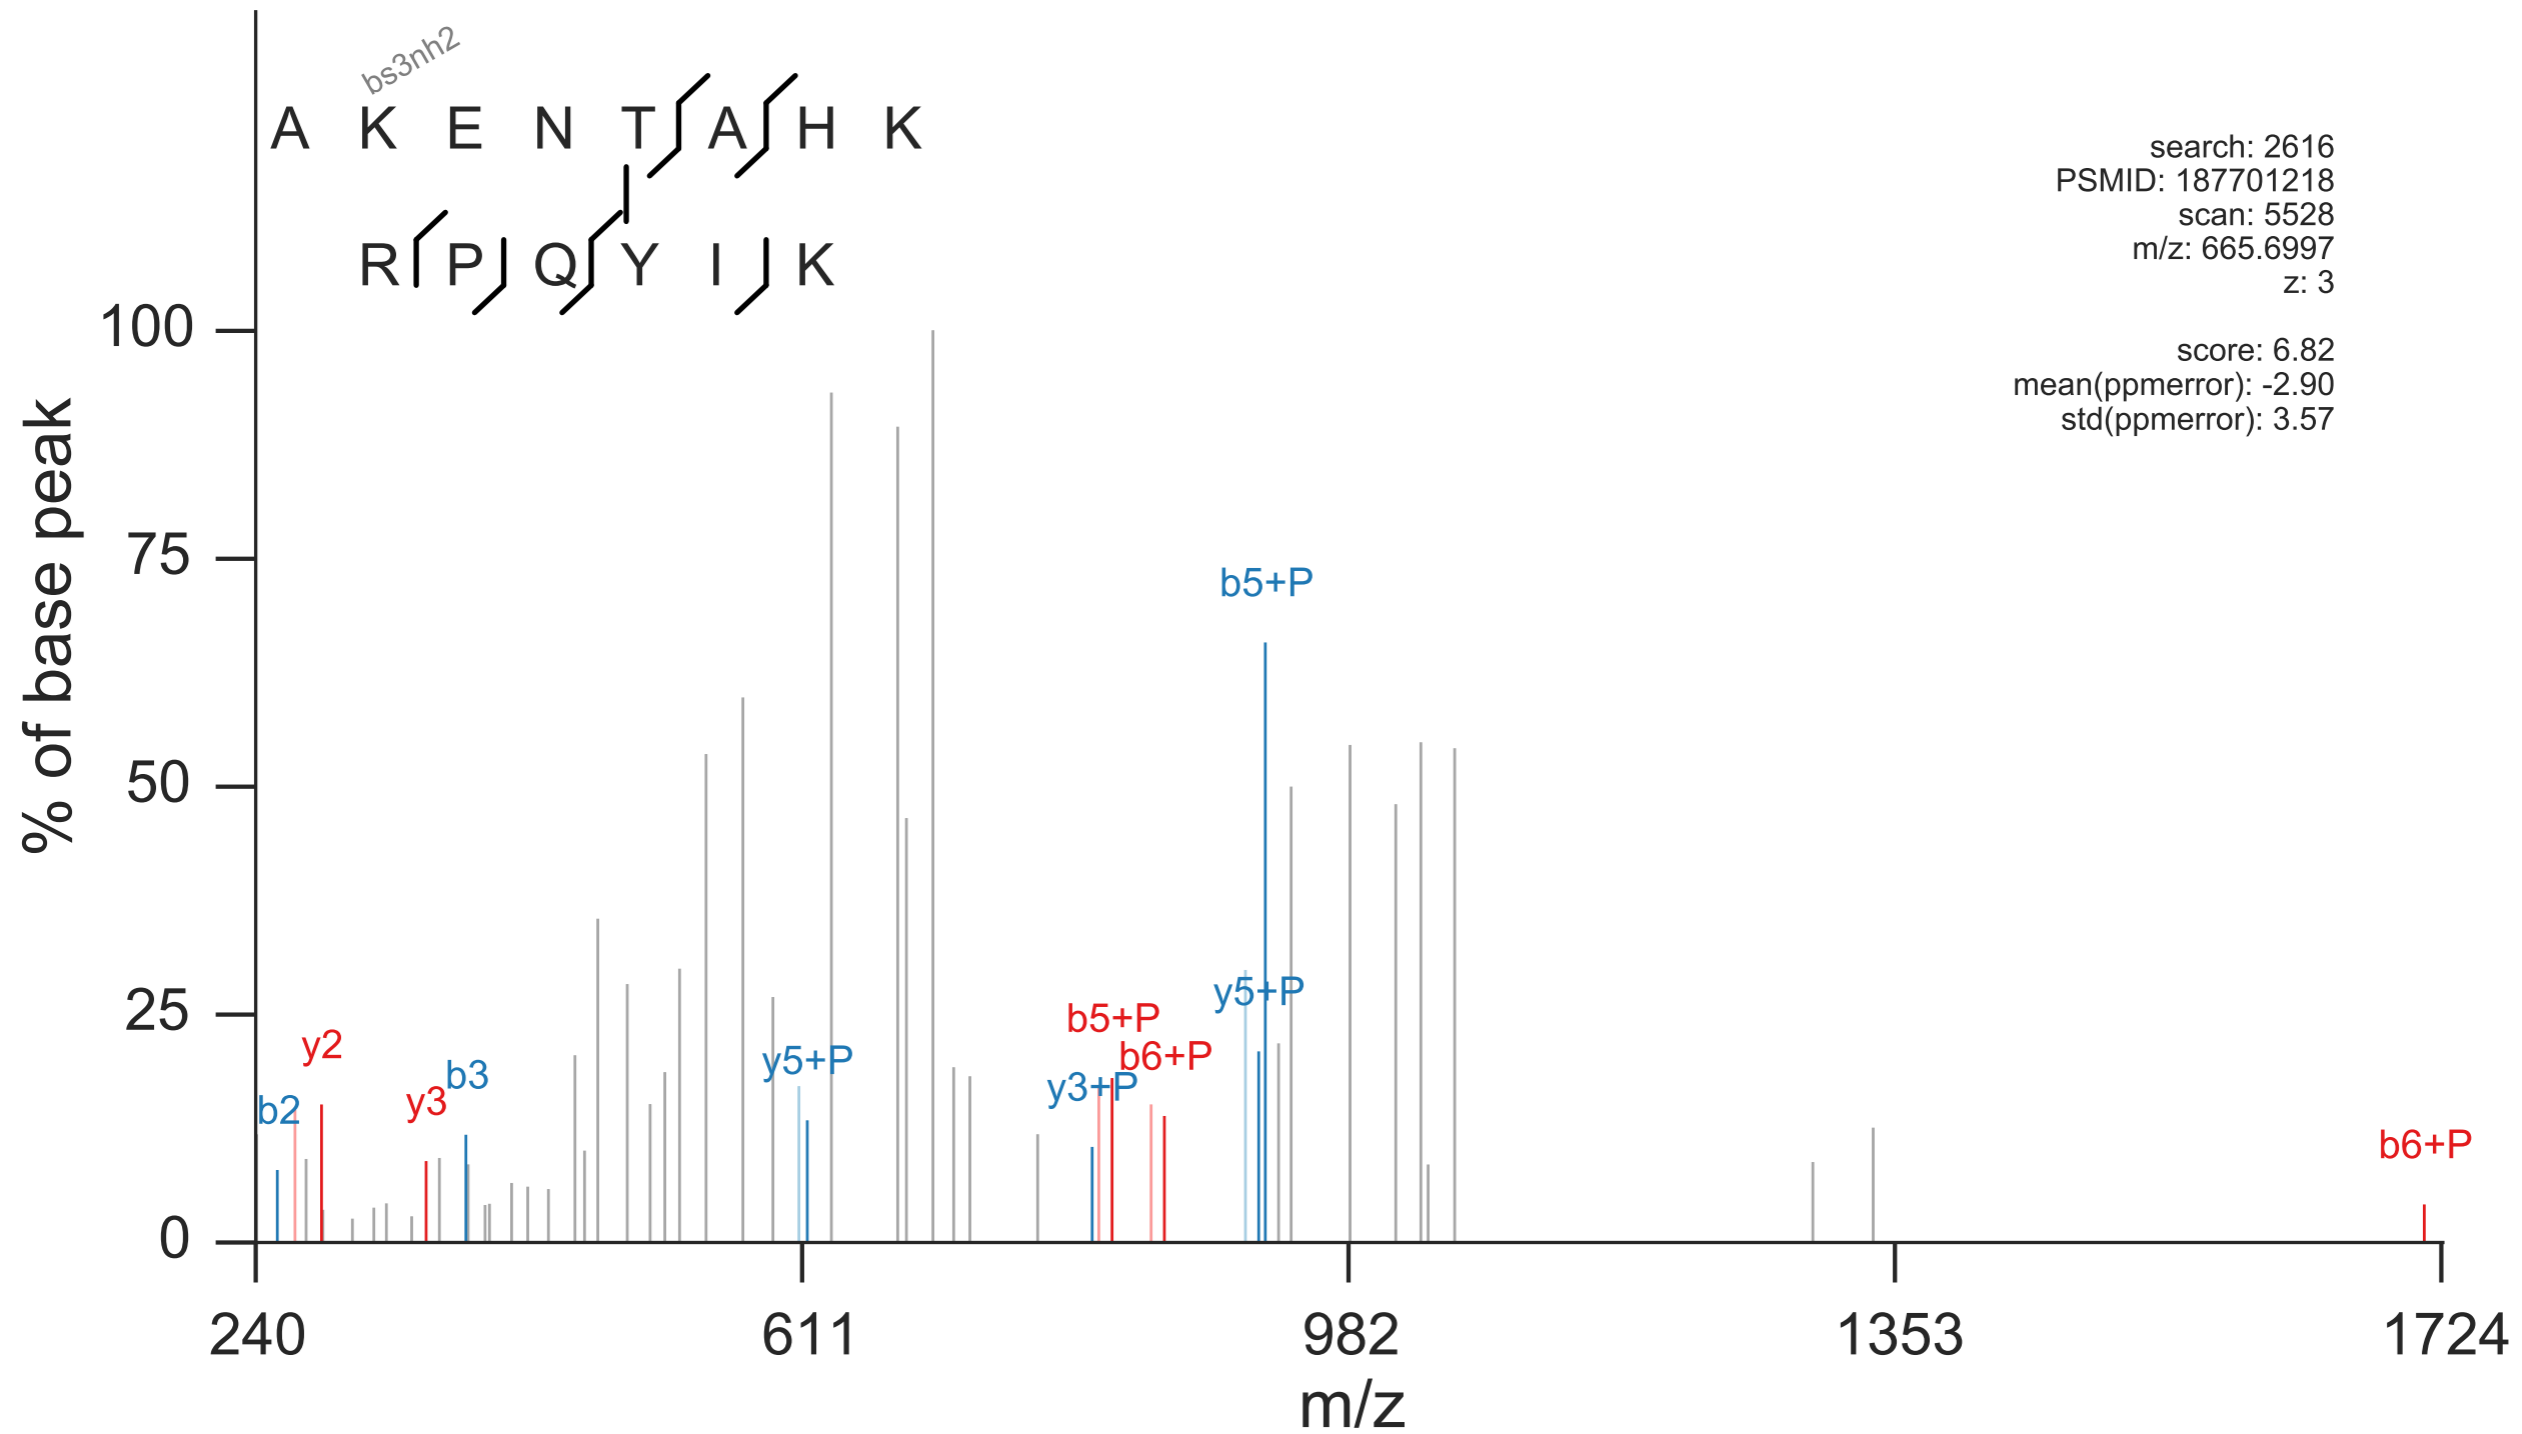

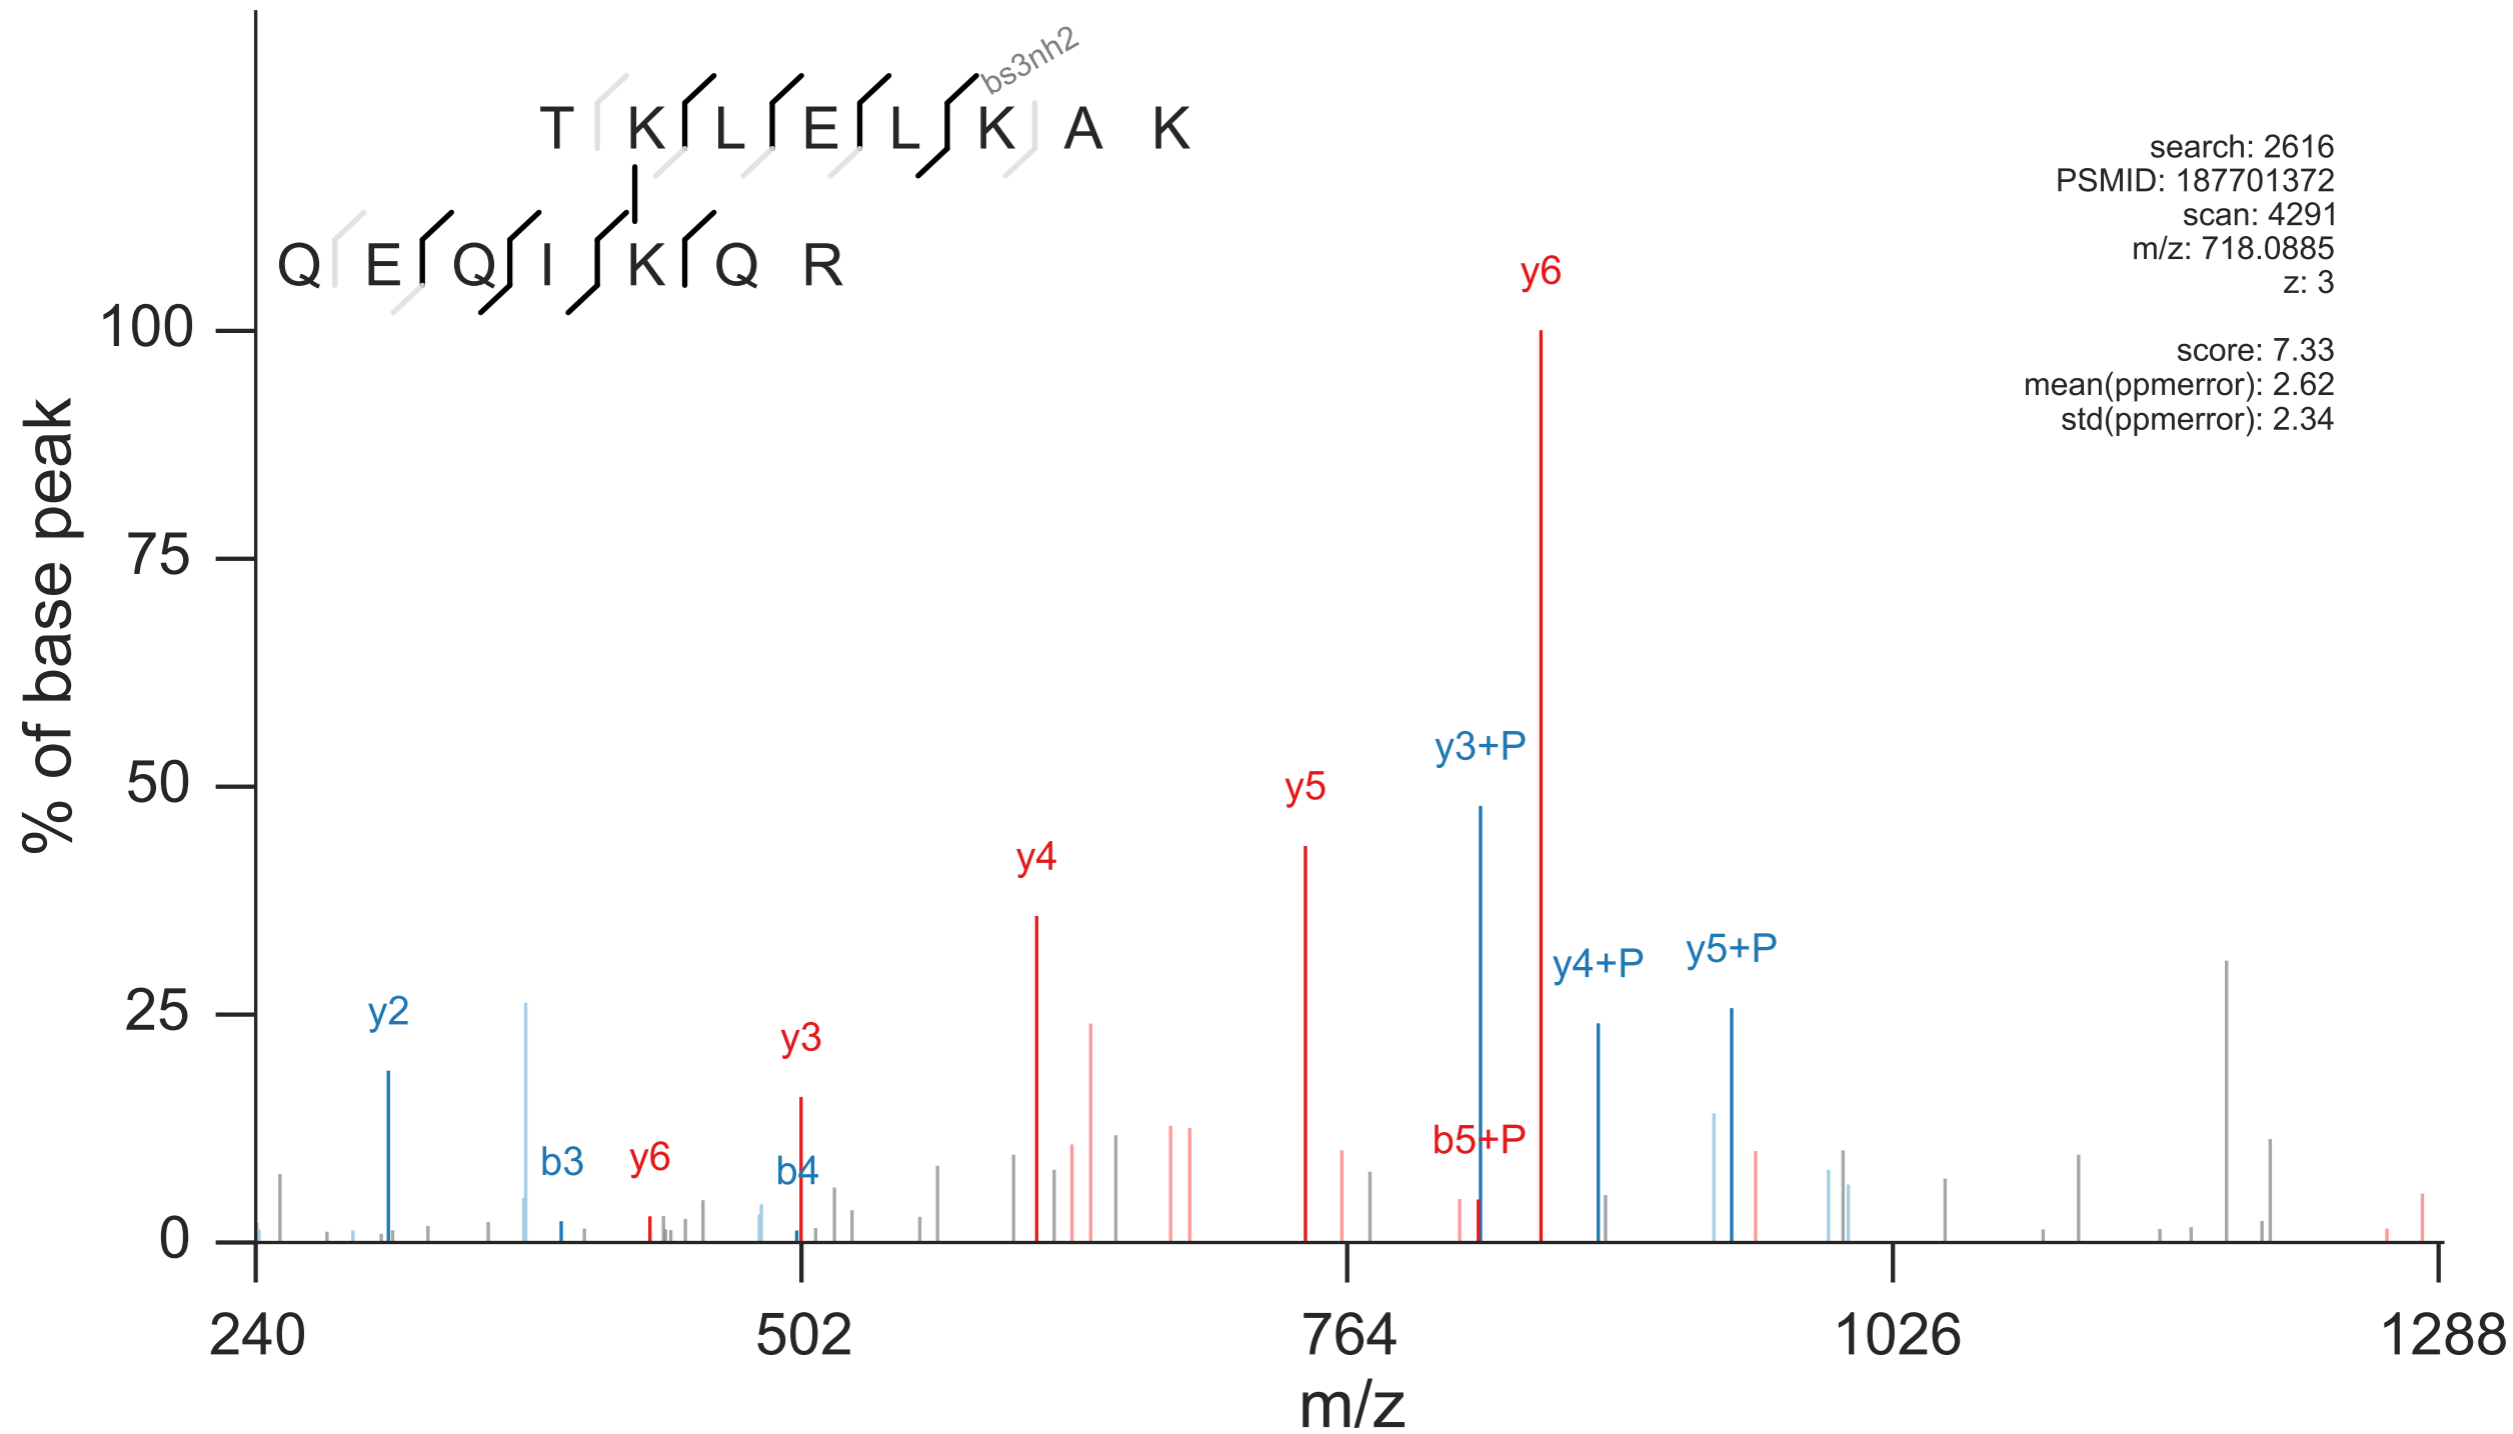

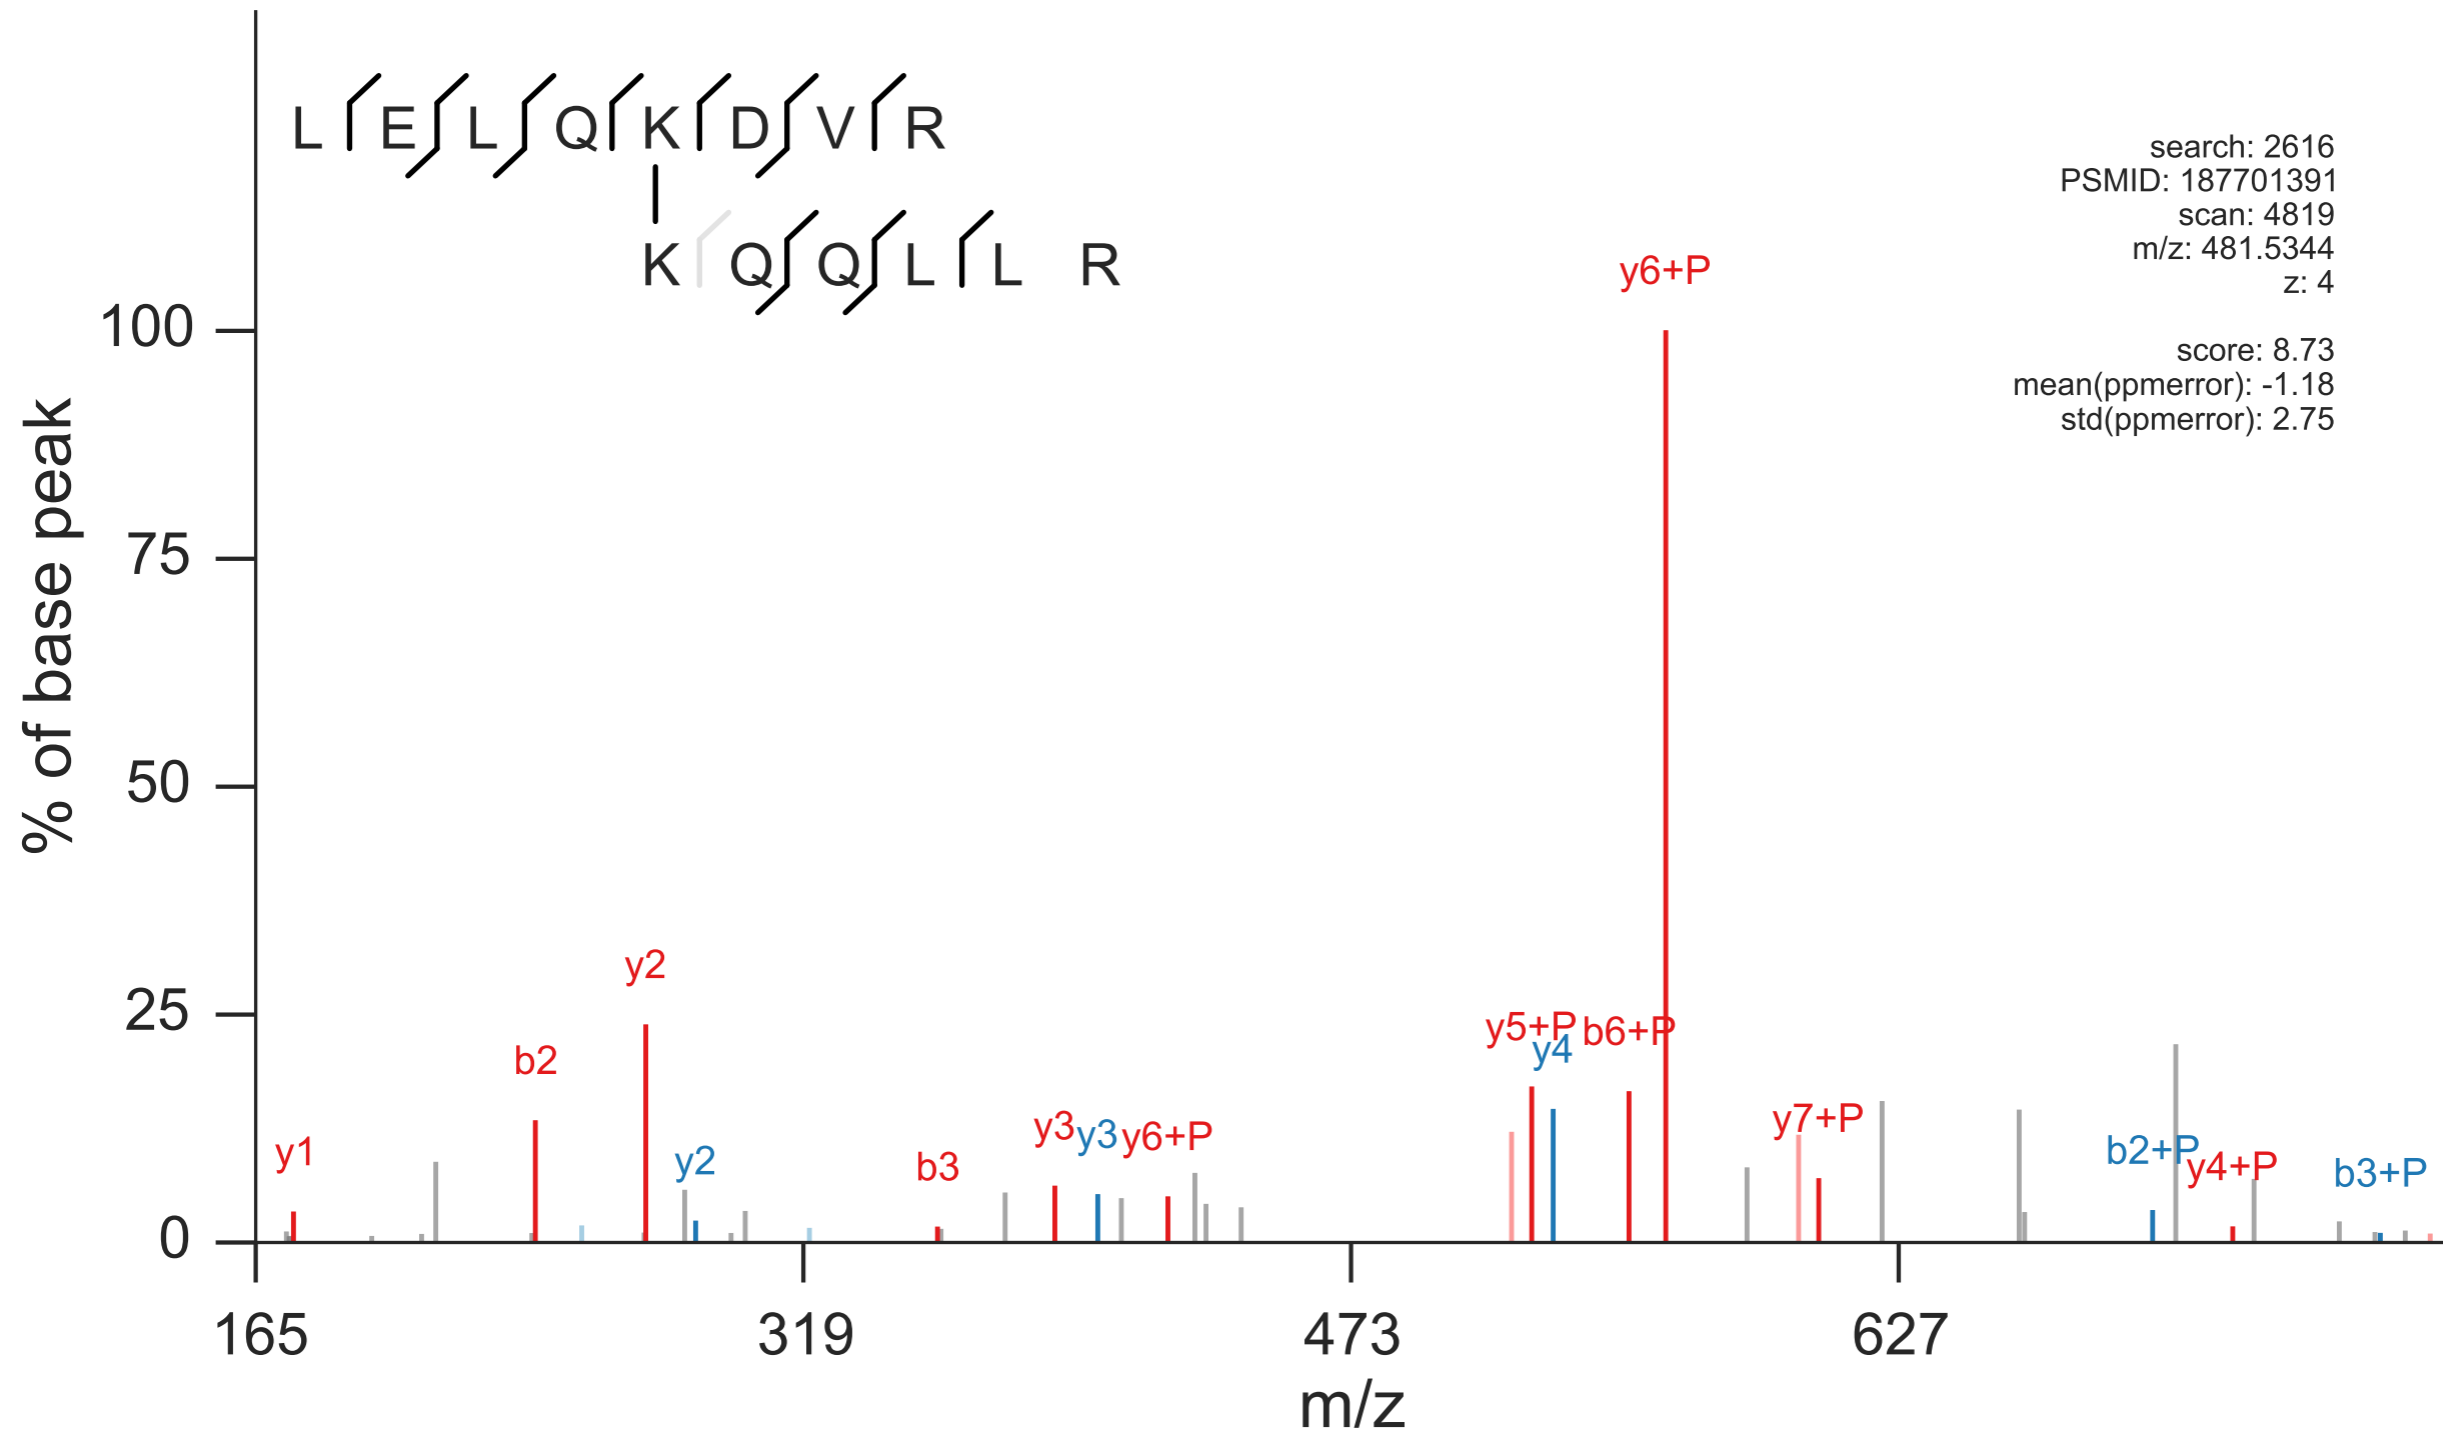

search: 2616  
 PSMID: 187701391  
 scan: 4819  
 m/z: 481.5344  
 z: 4

score: 8.73  
 mean(ppmerror): -1.18  
 std(ppmerror): 2.75

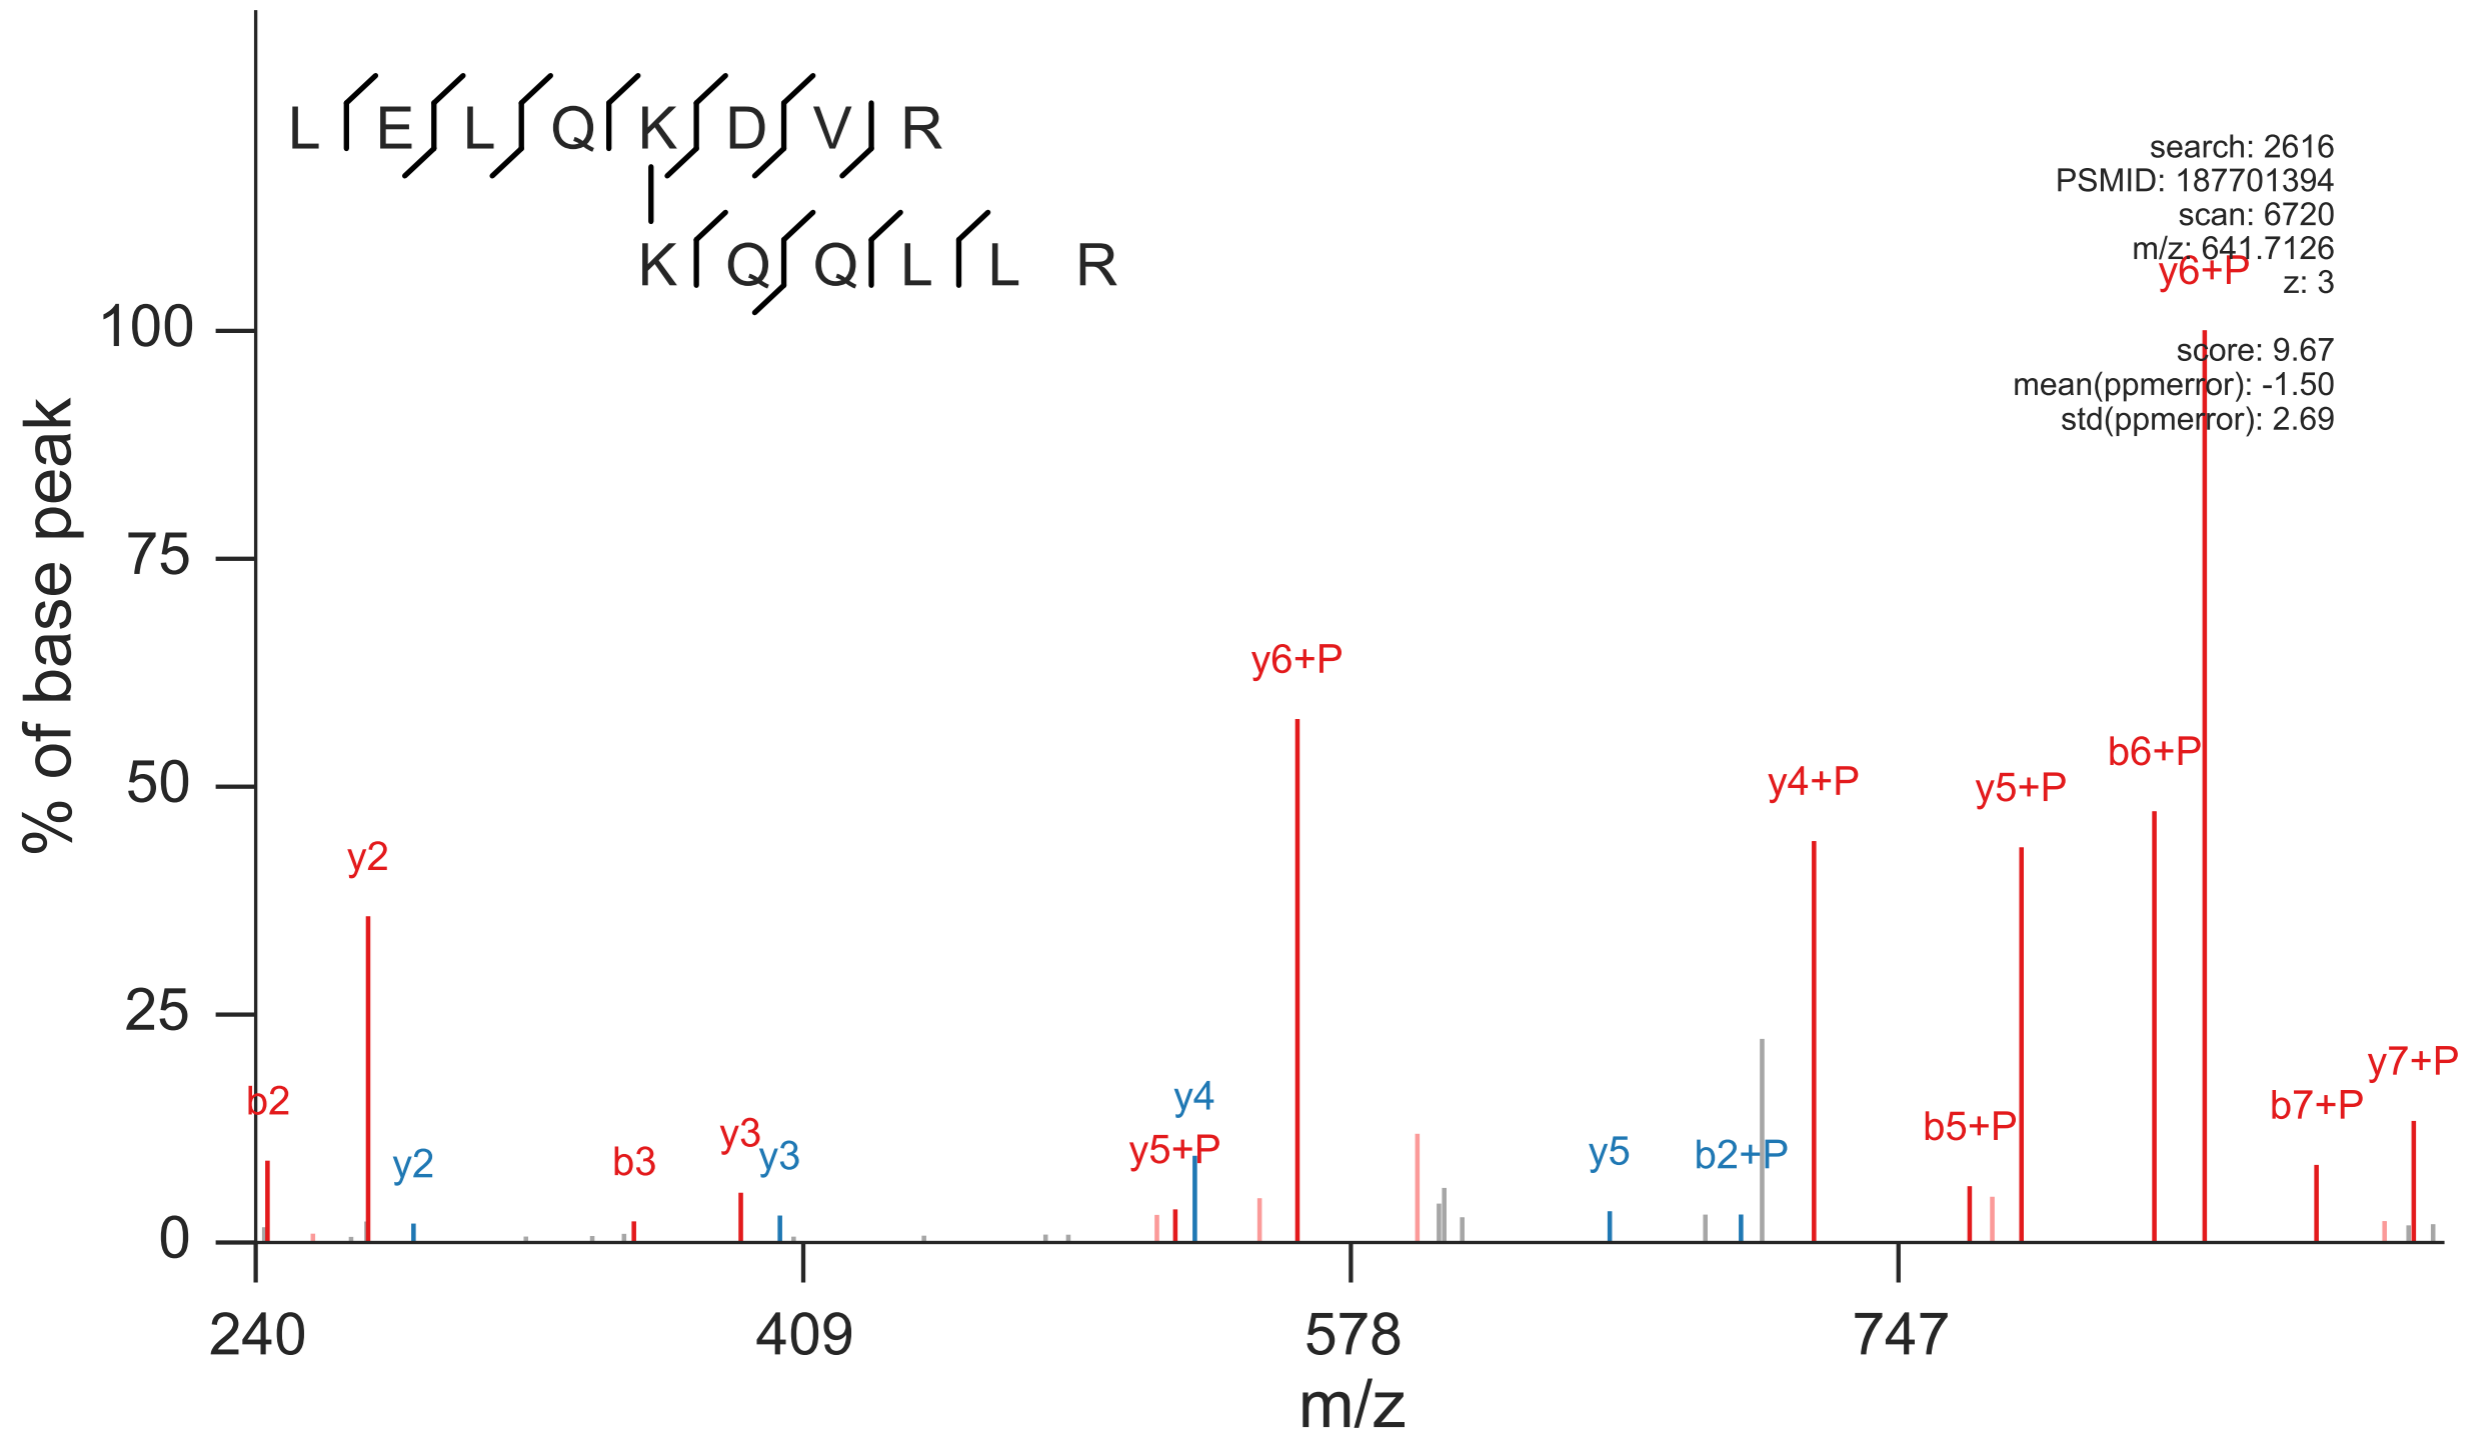

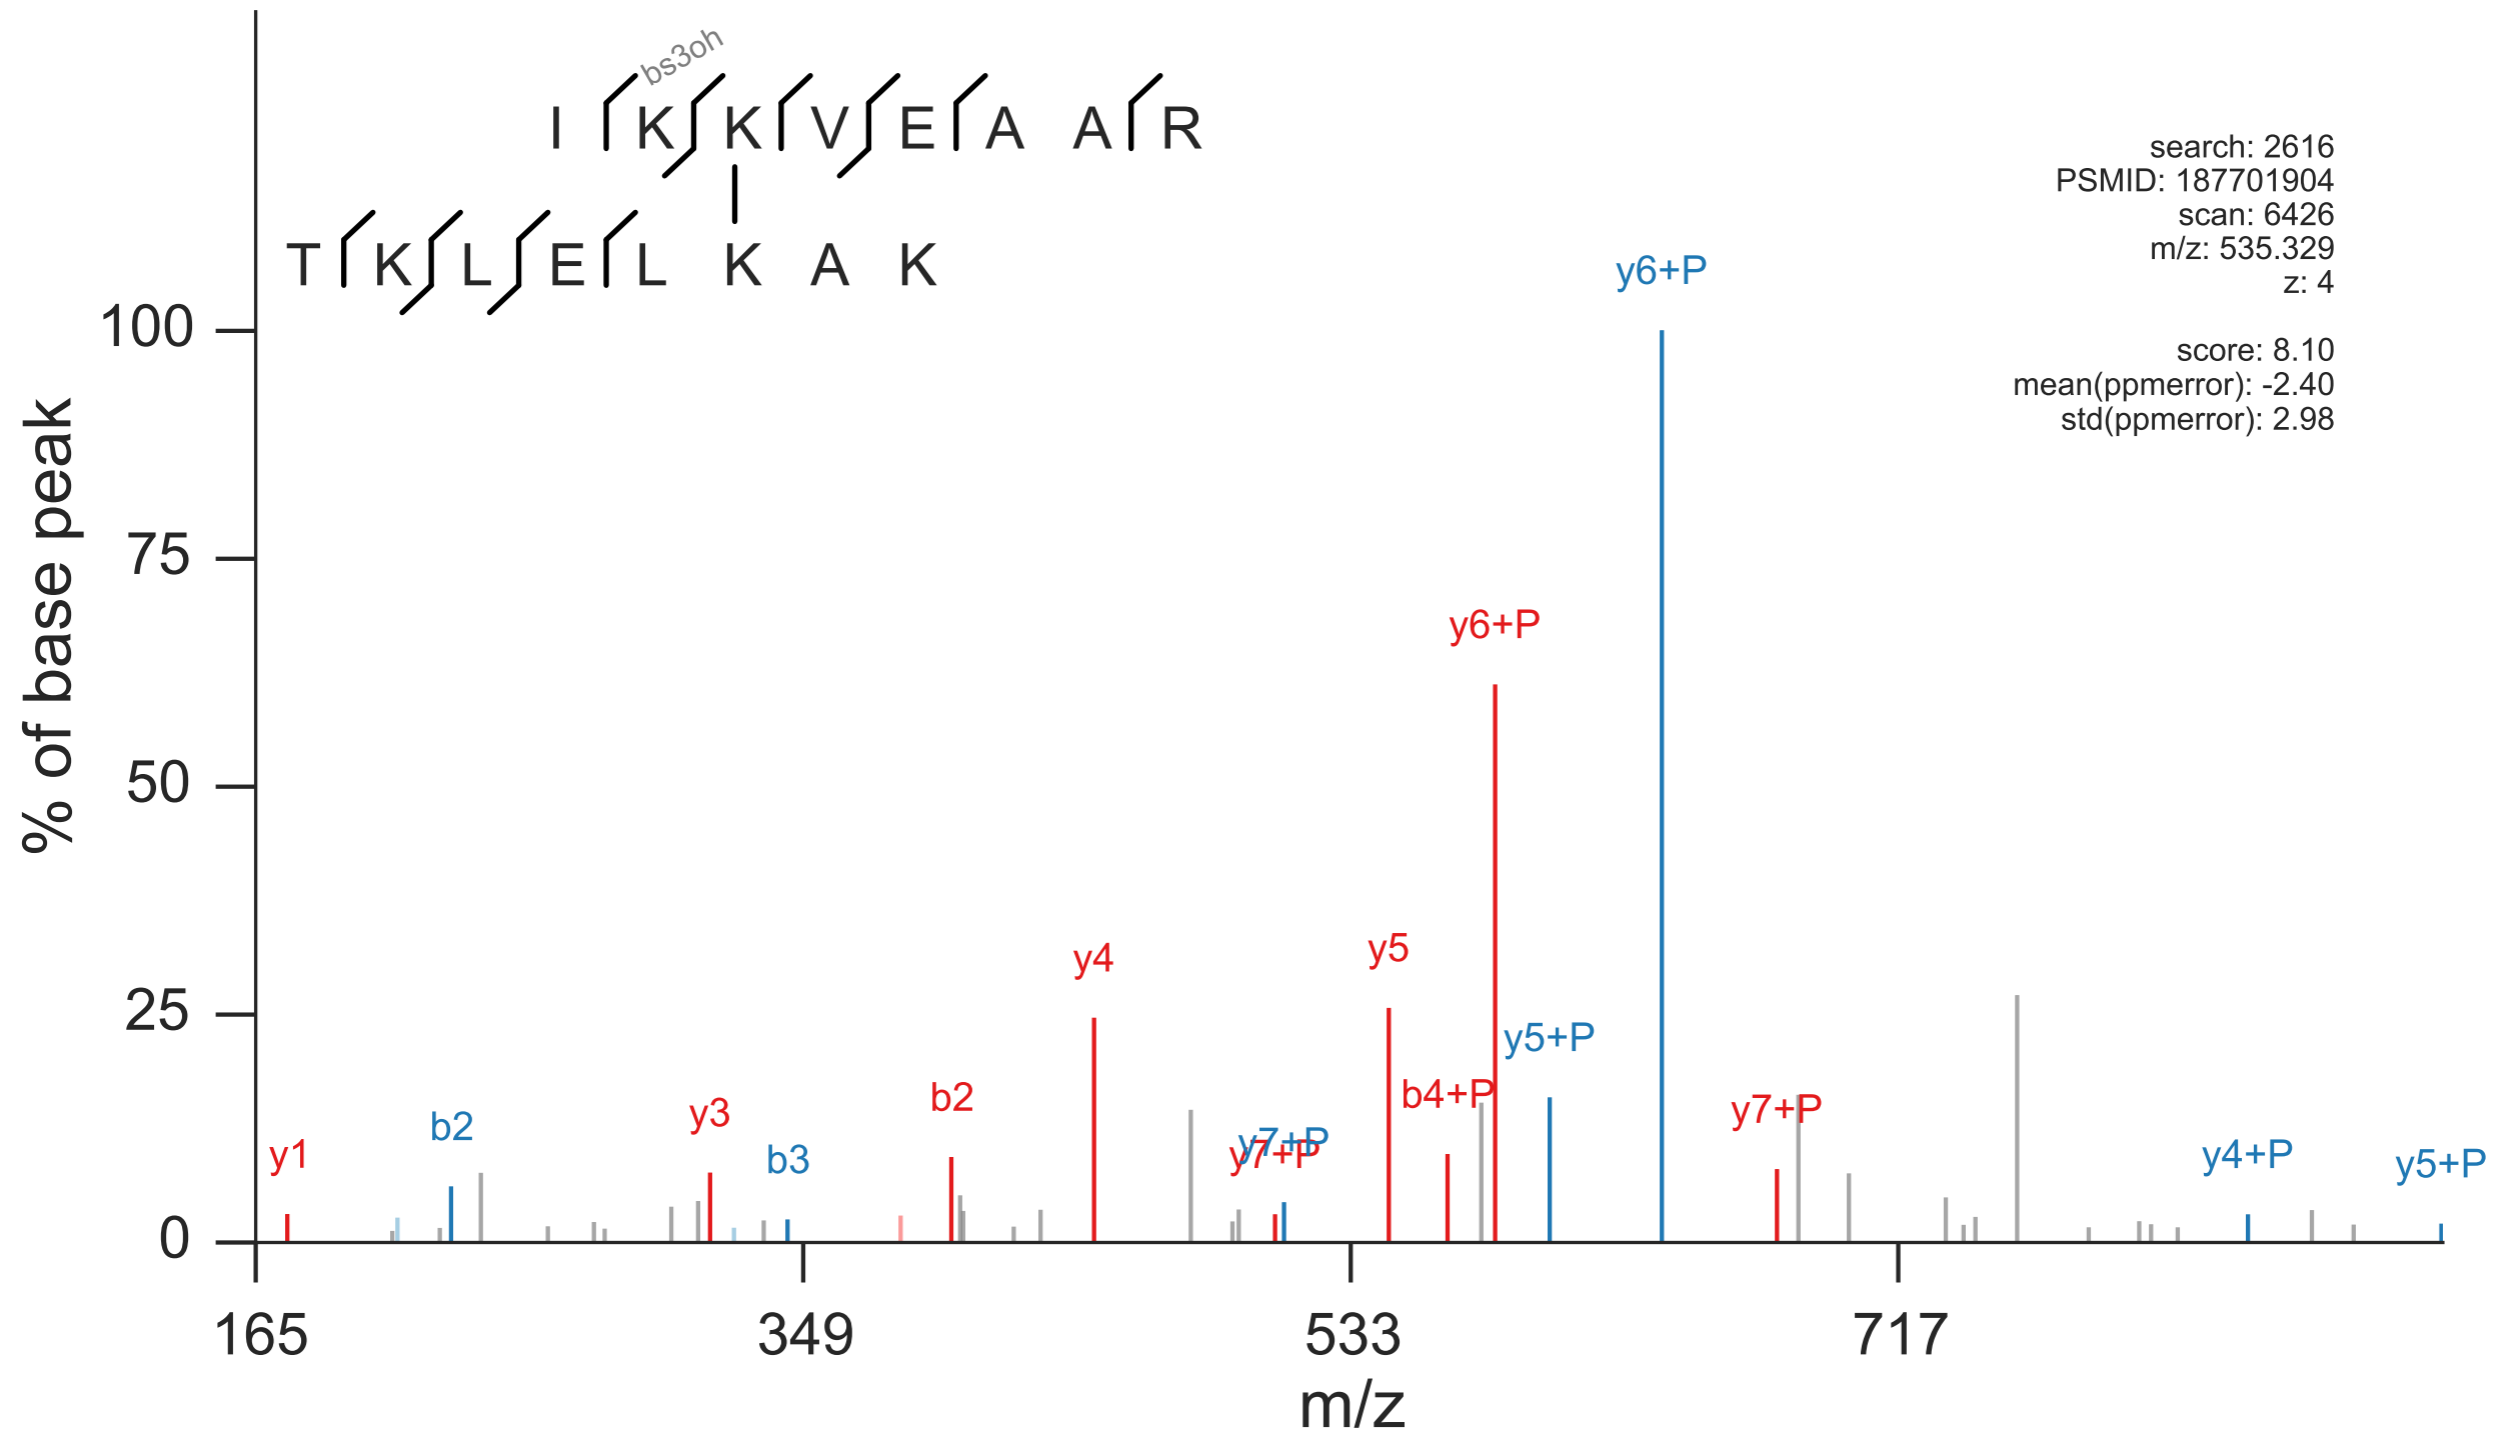

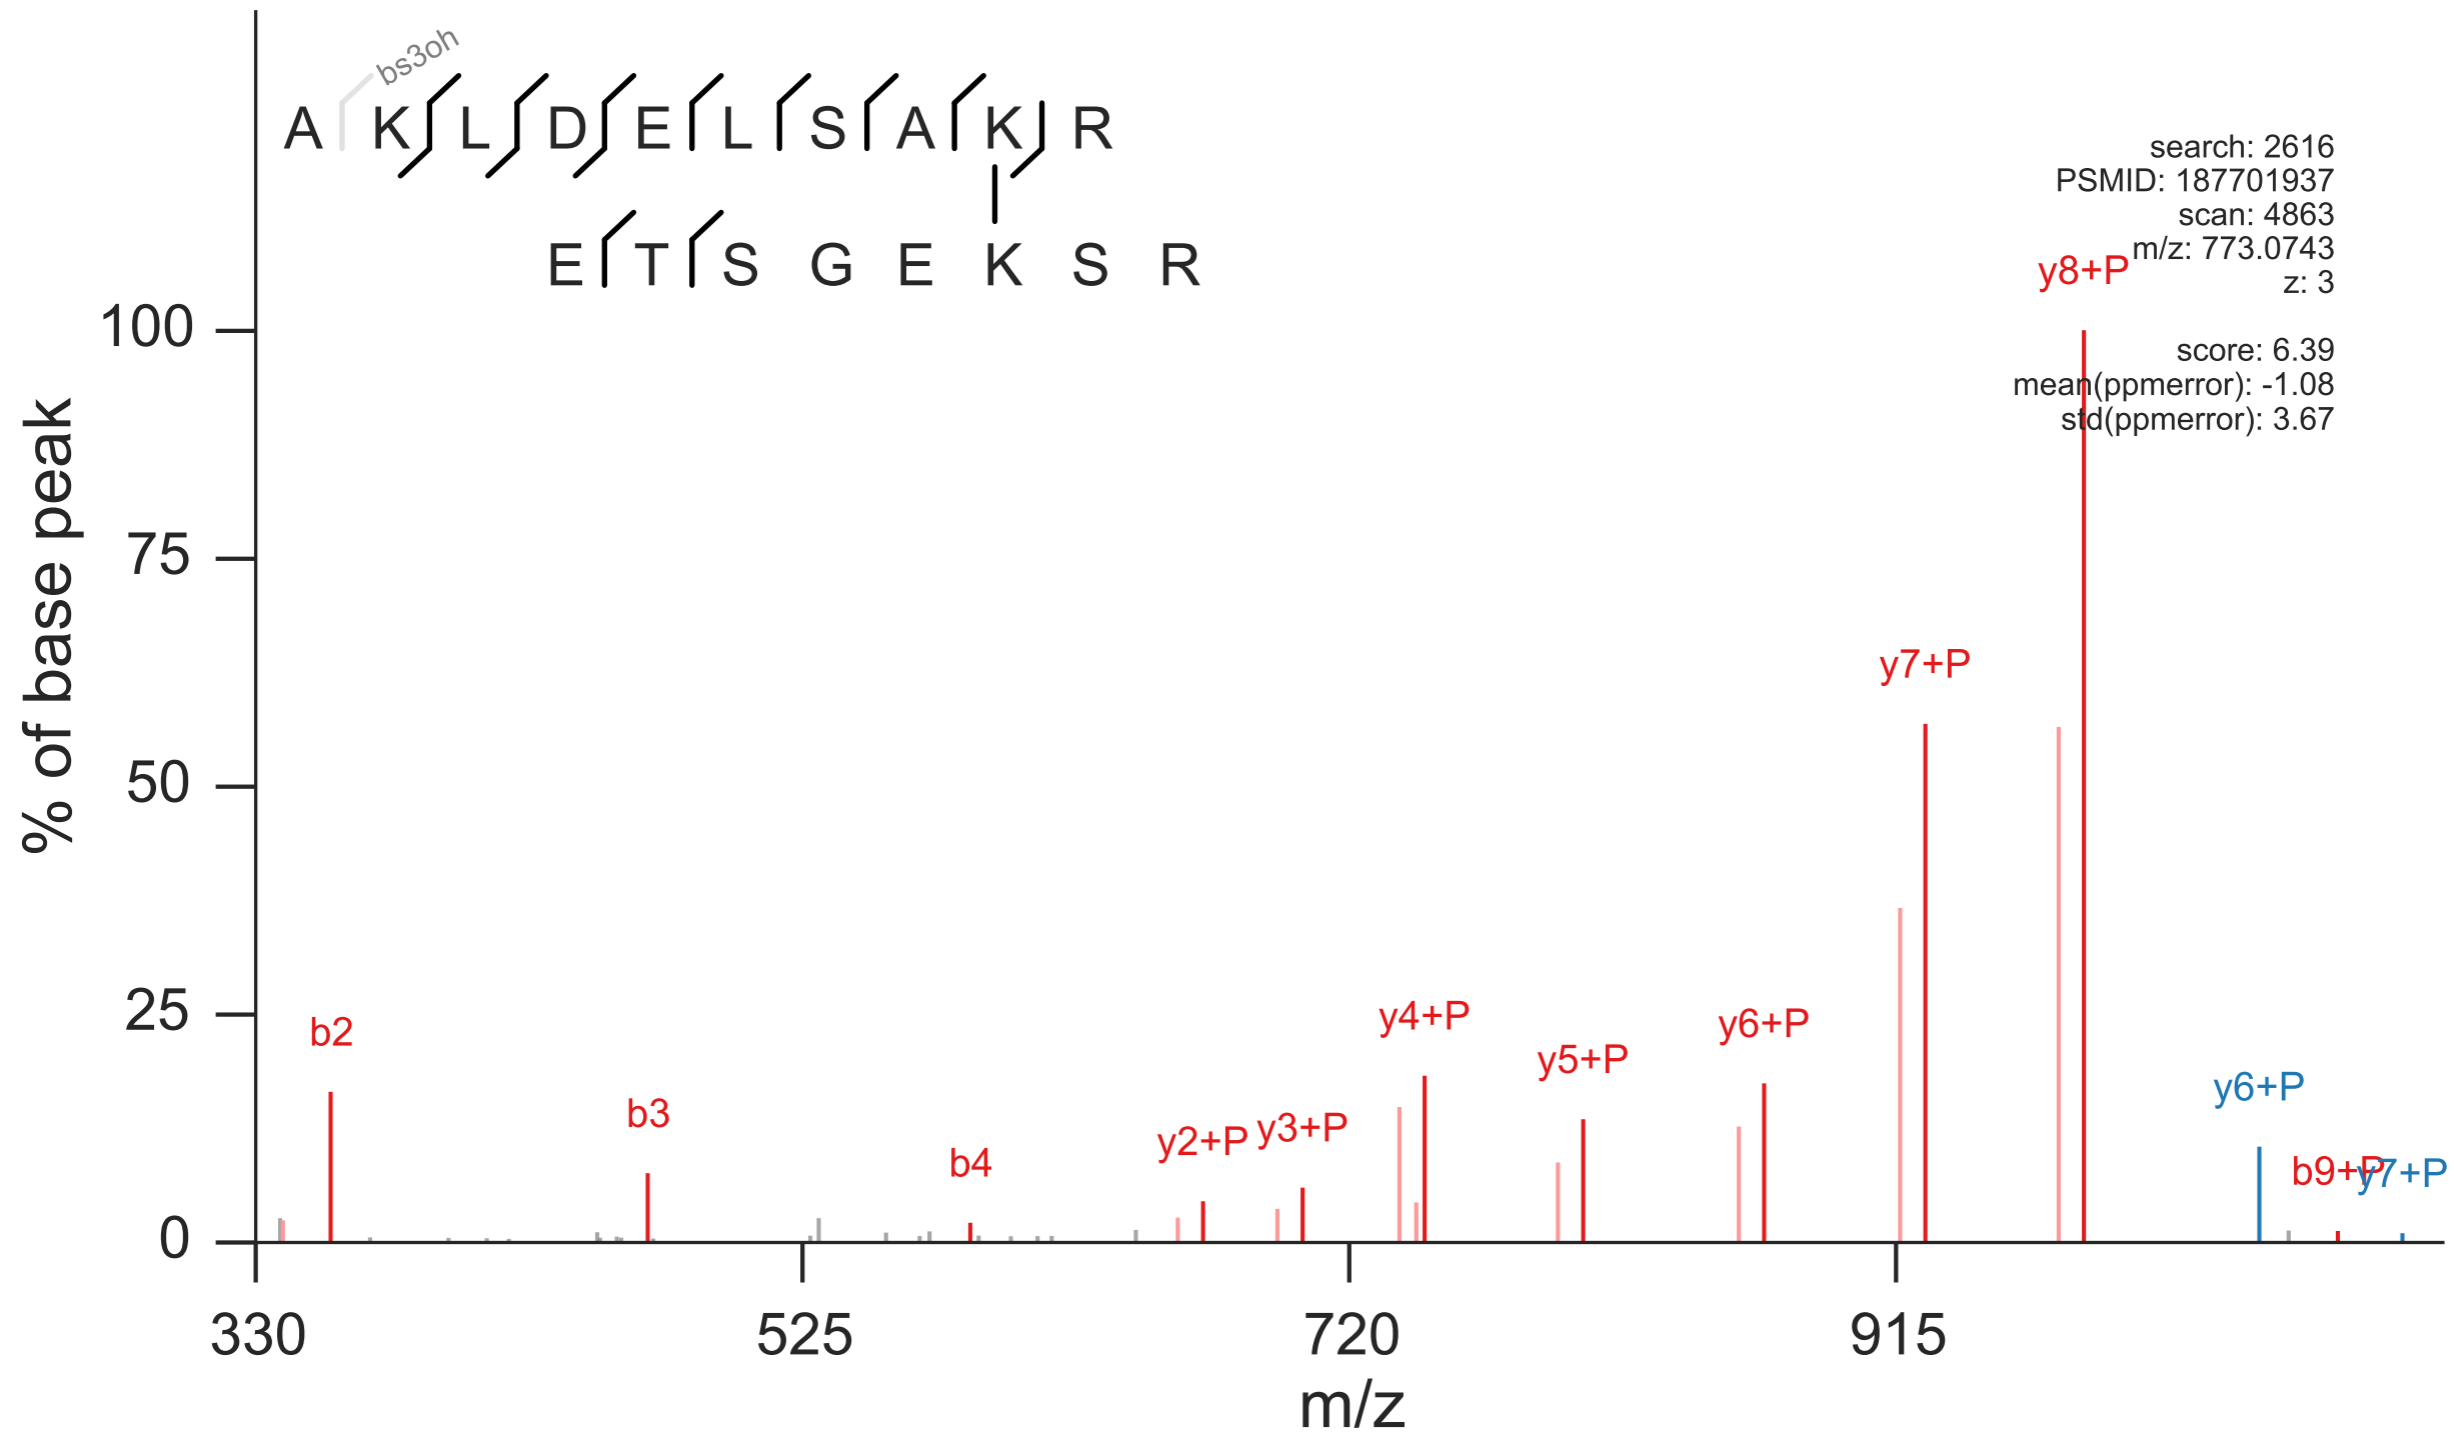

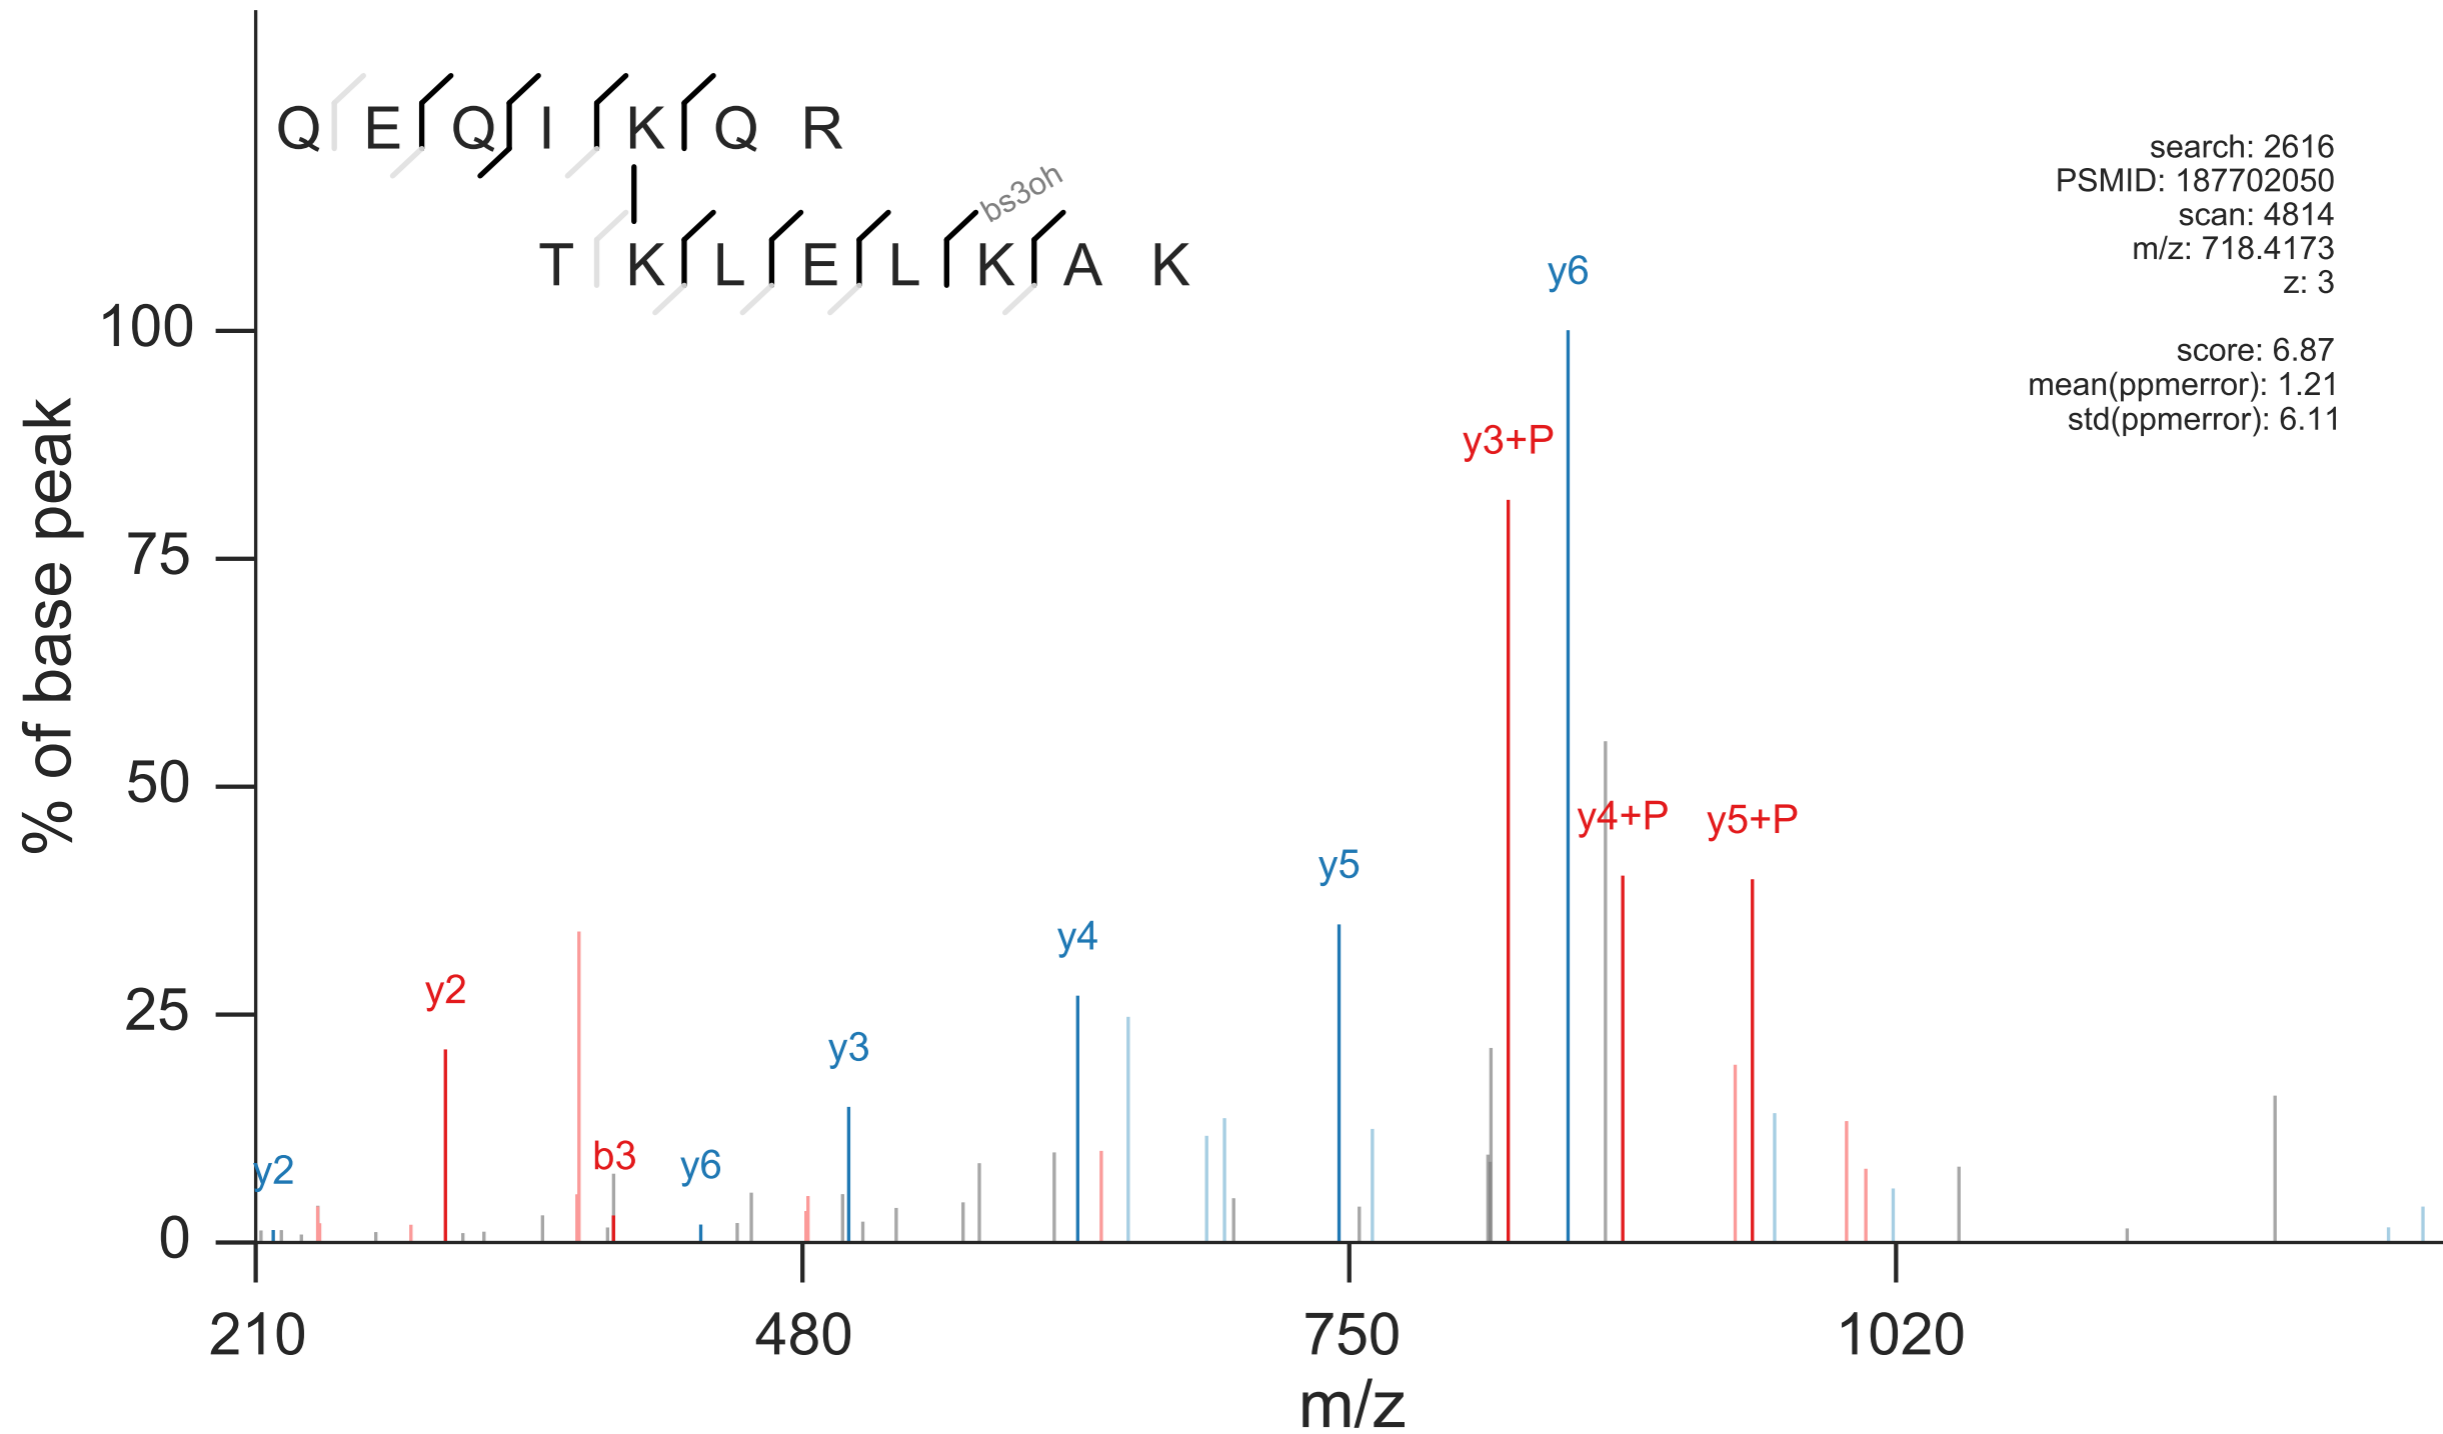



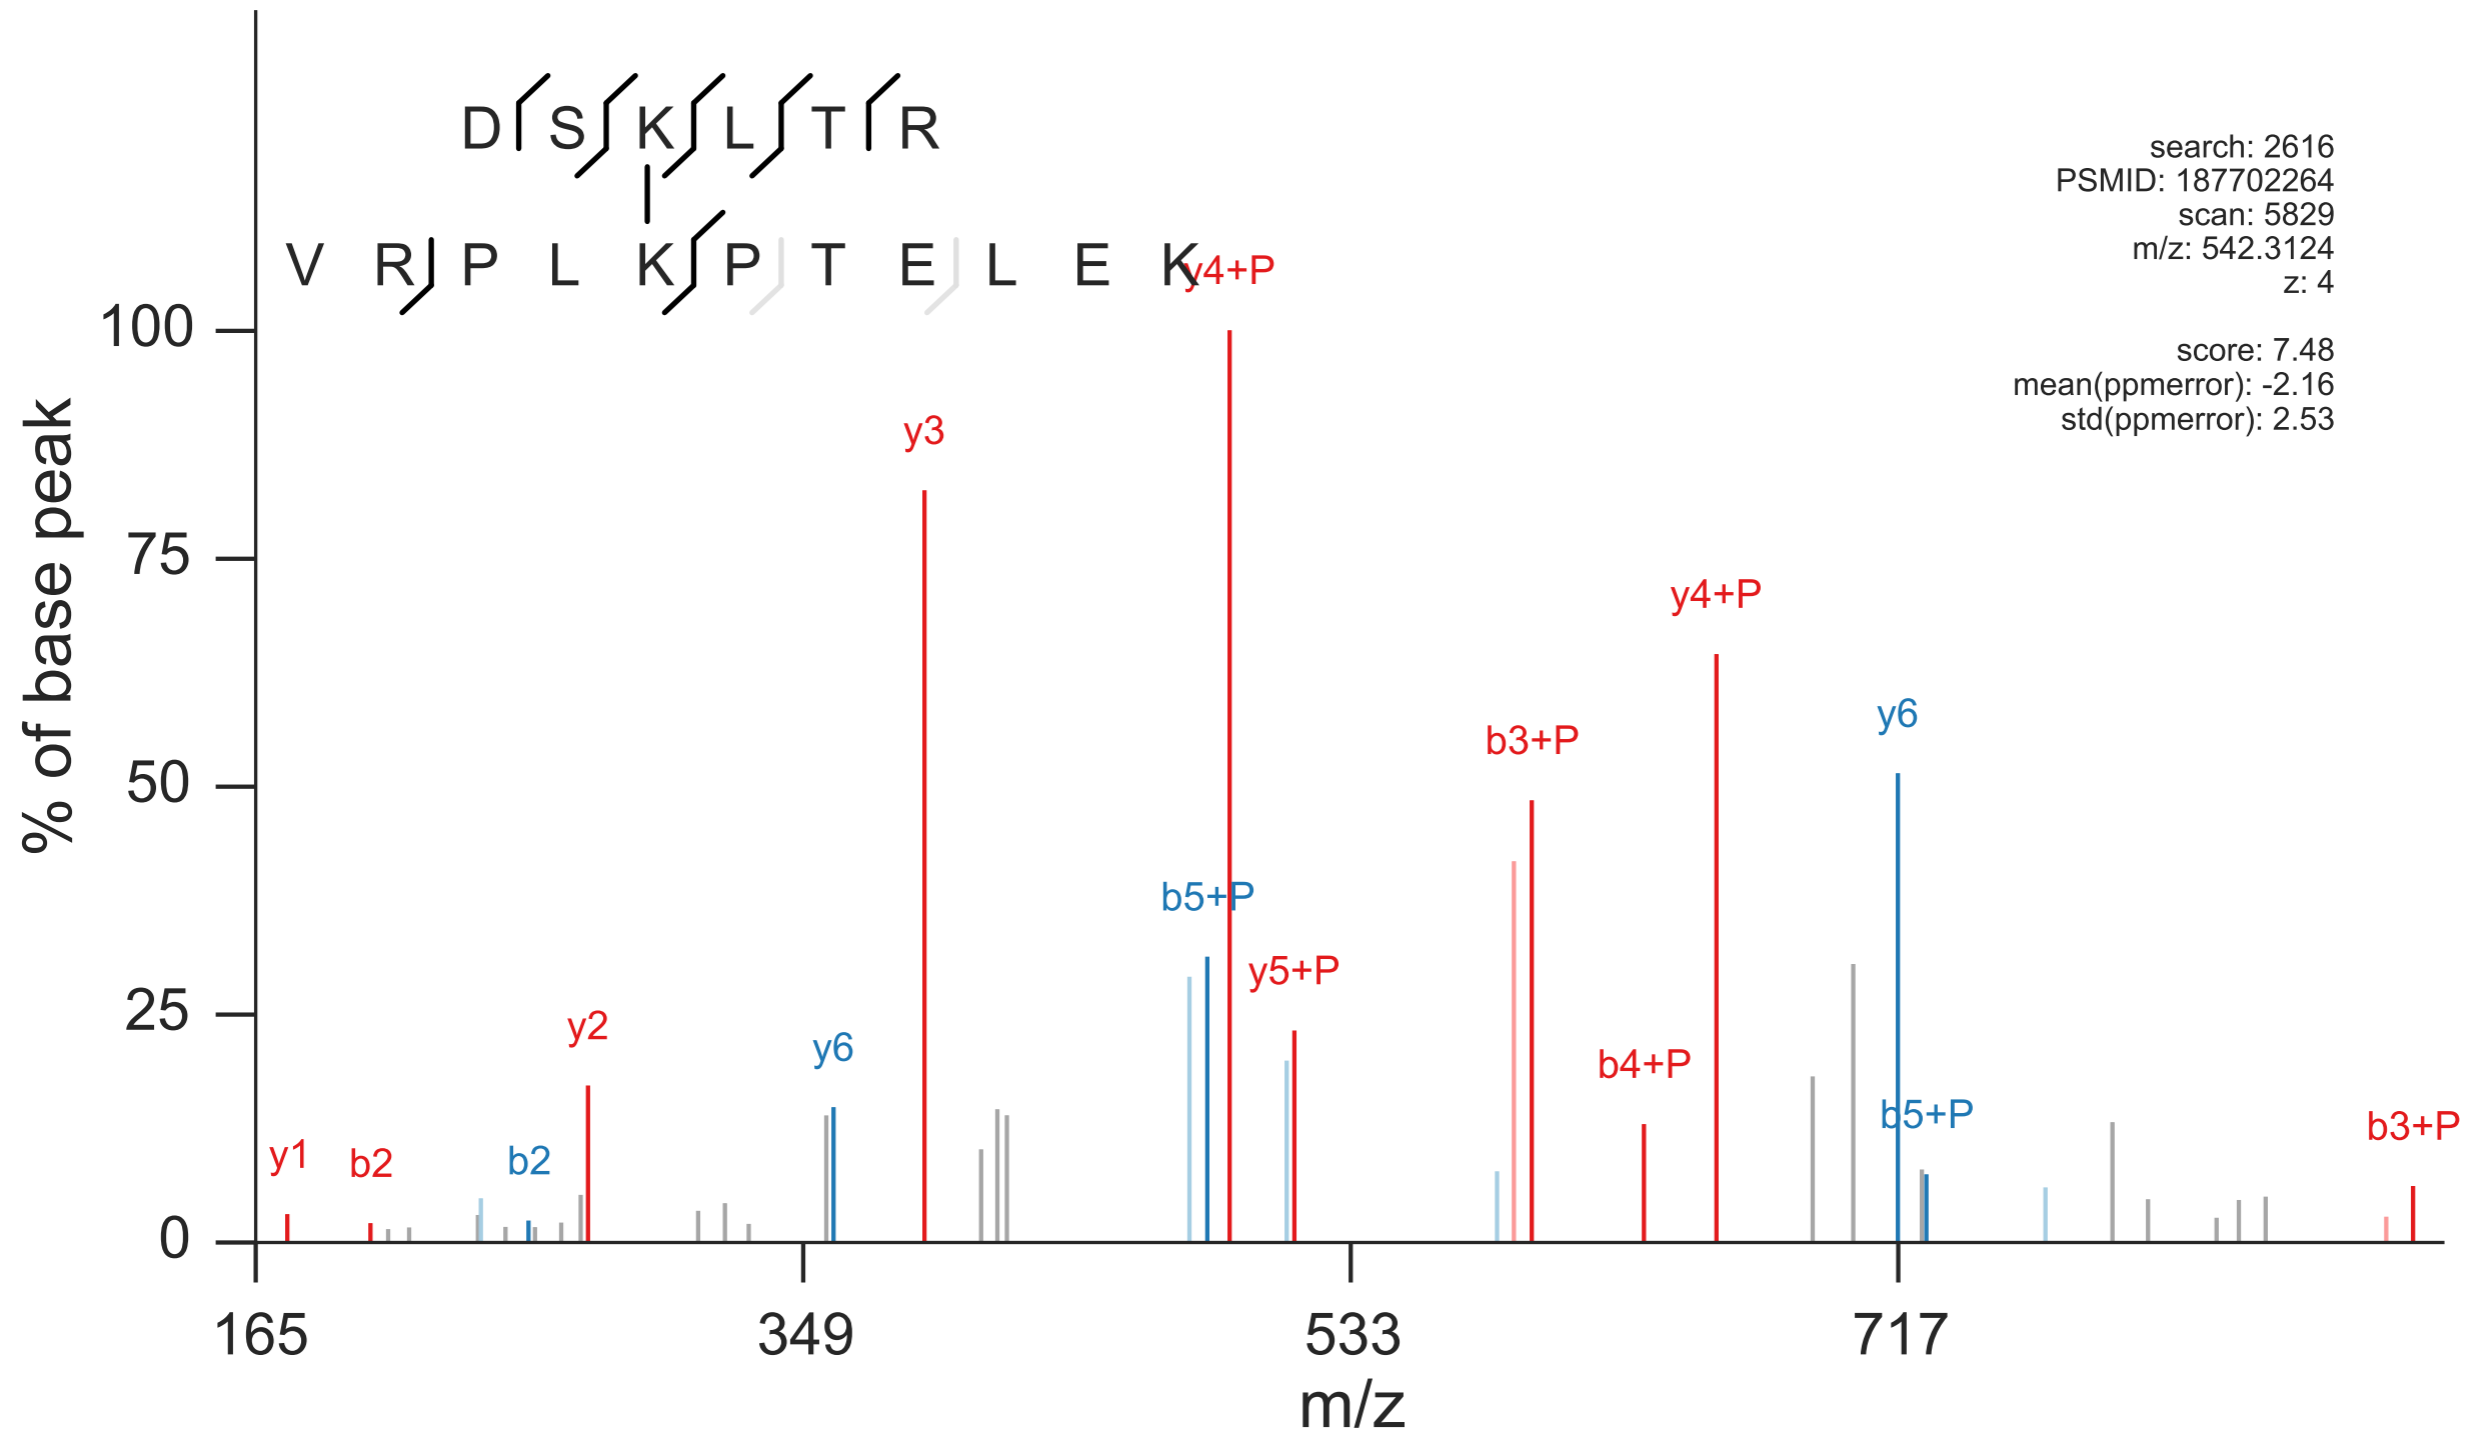

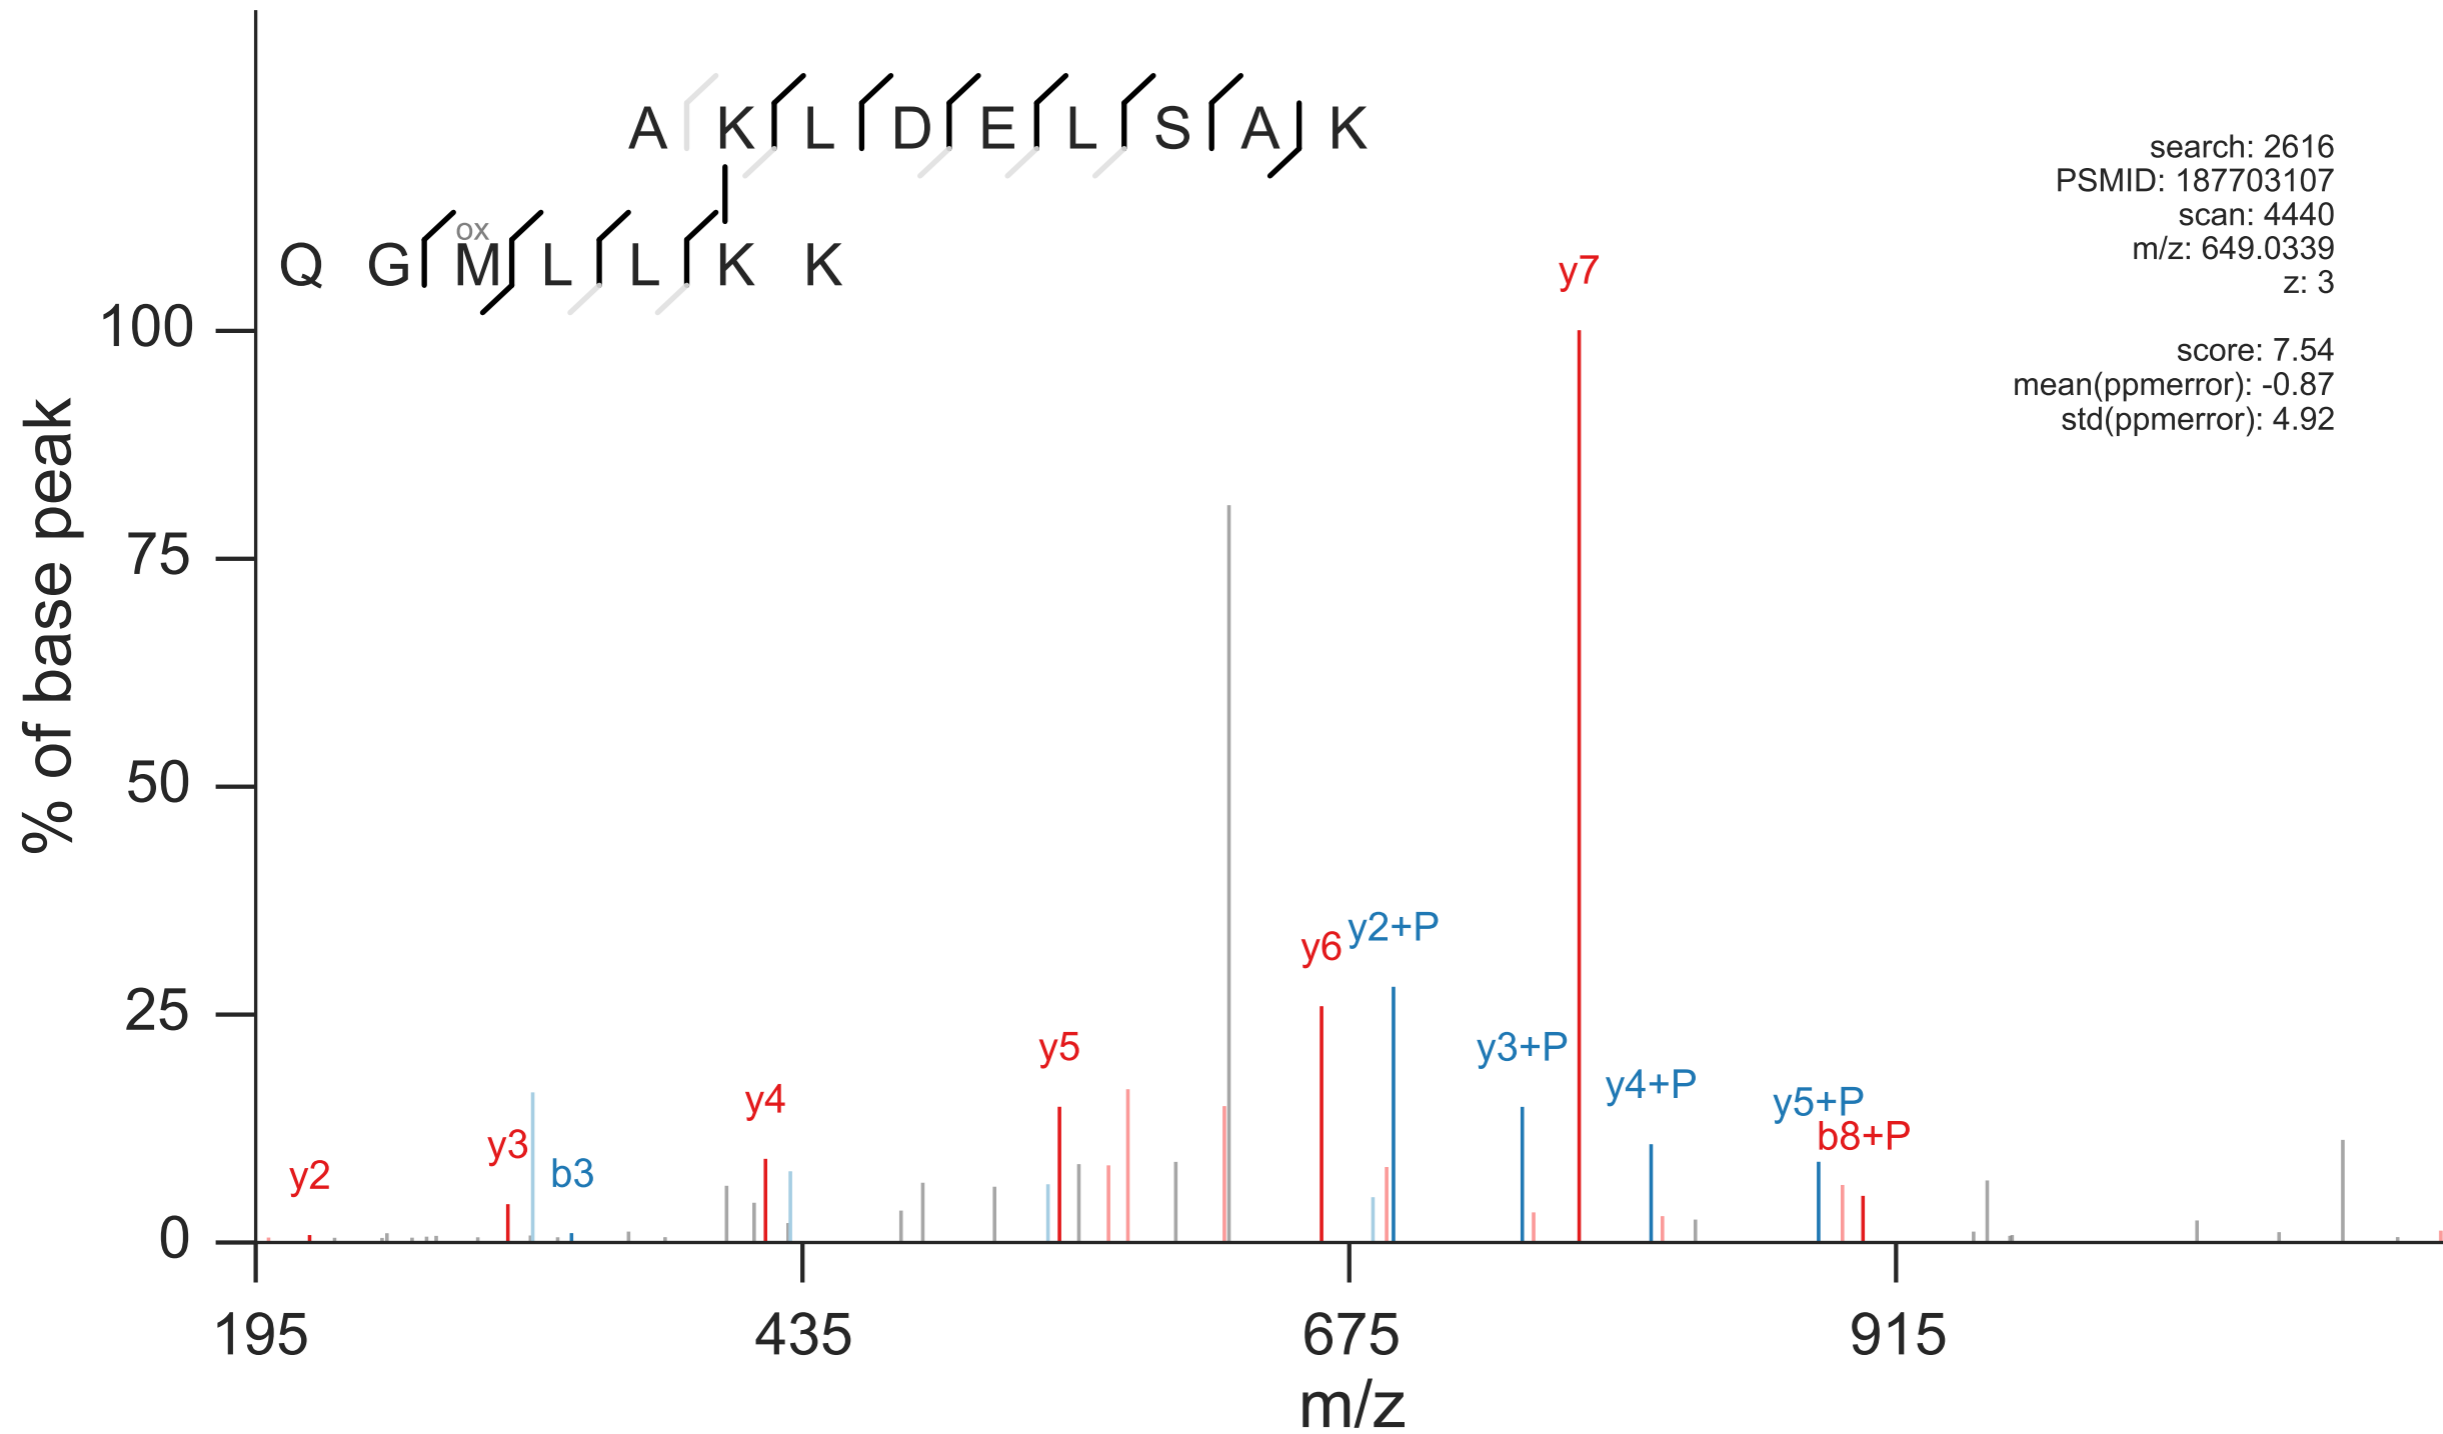

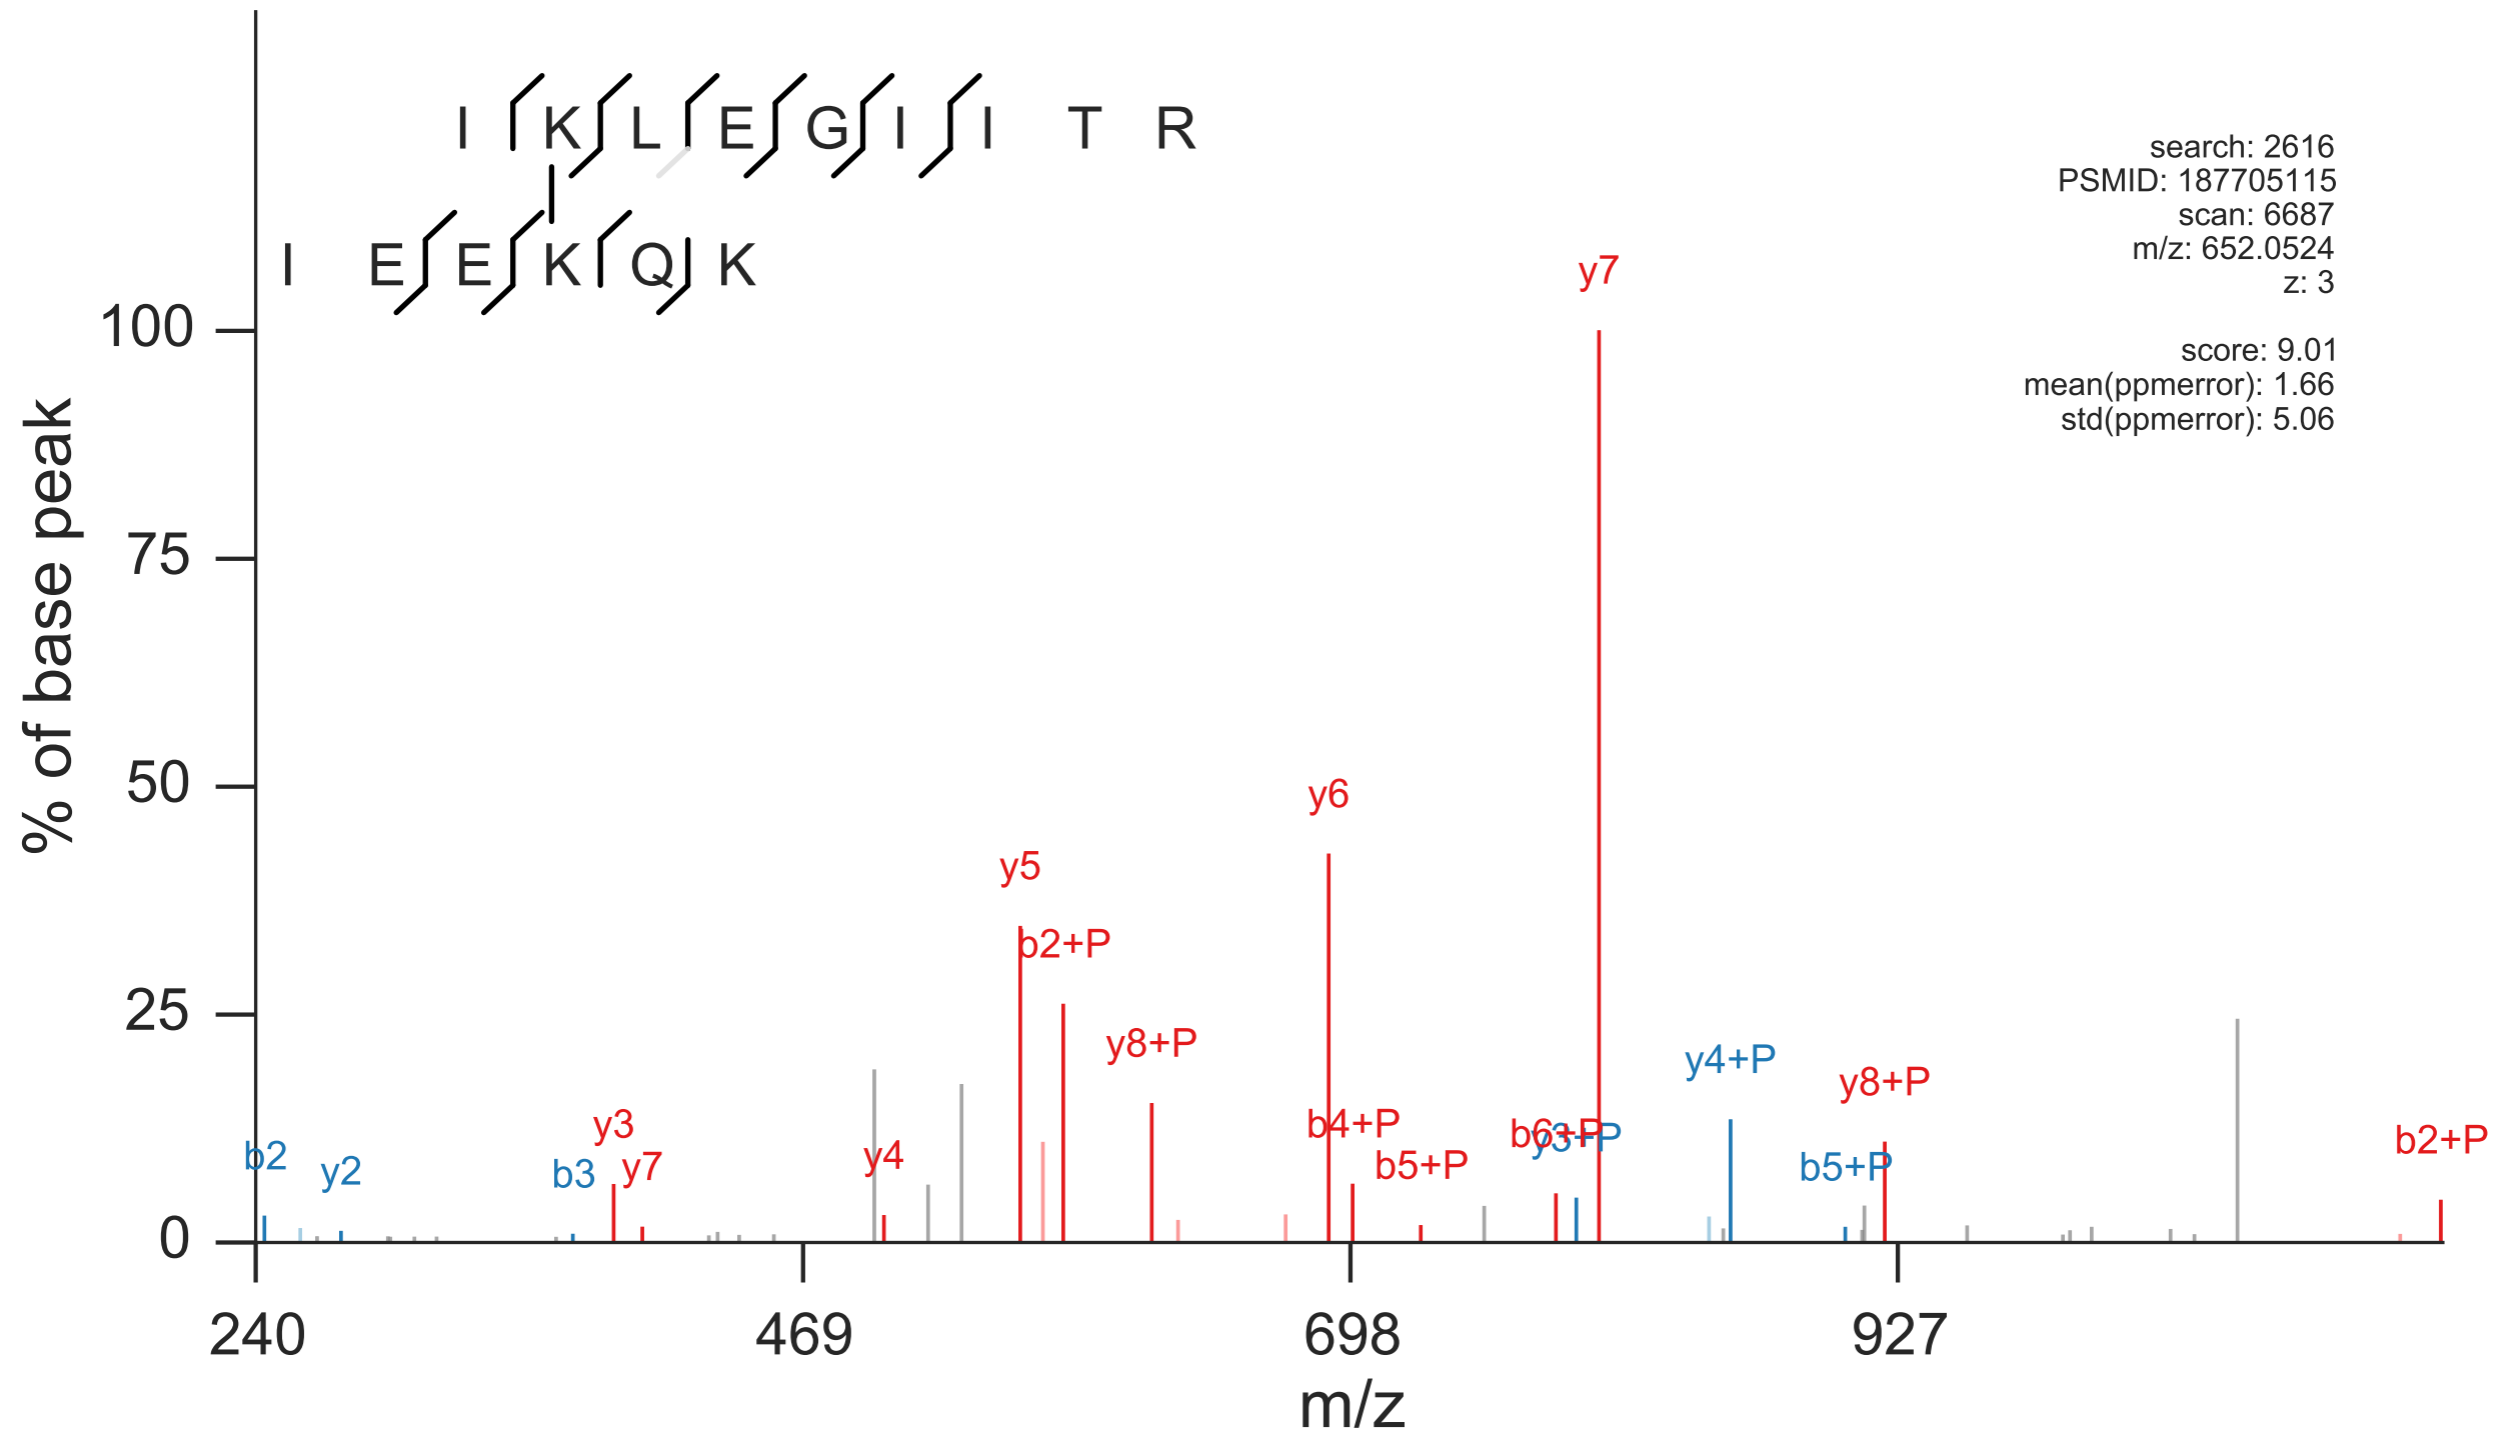

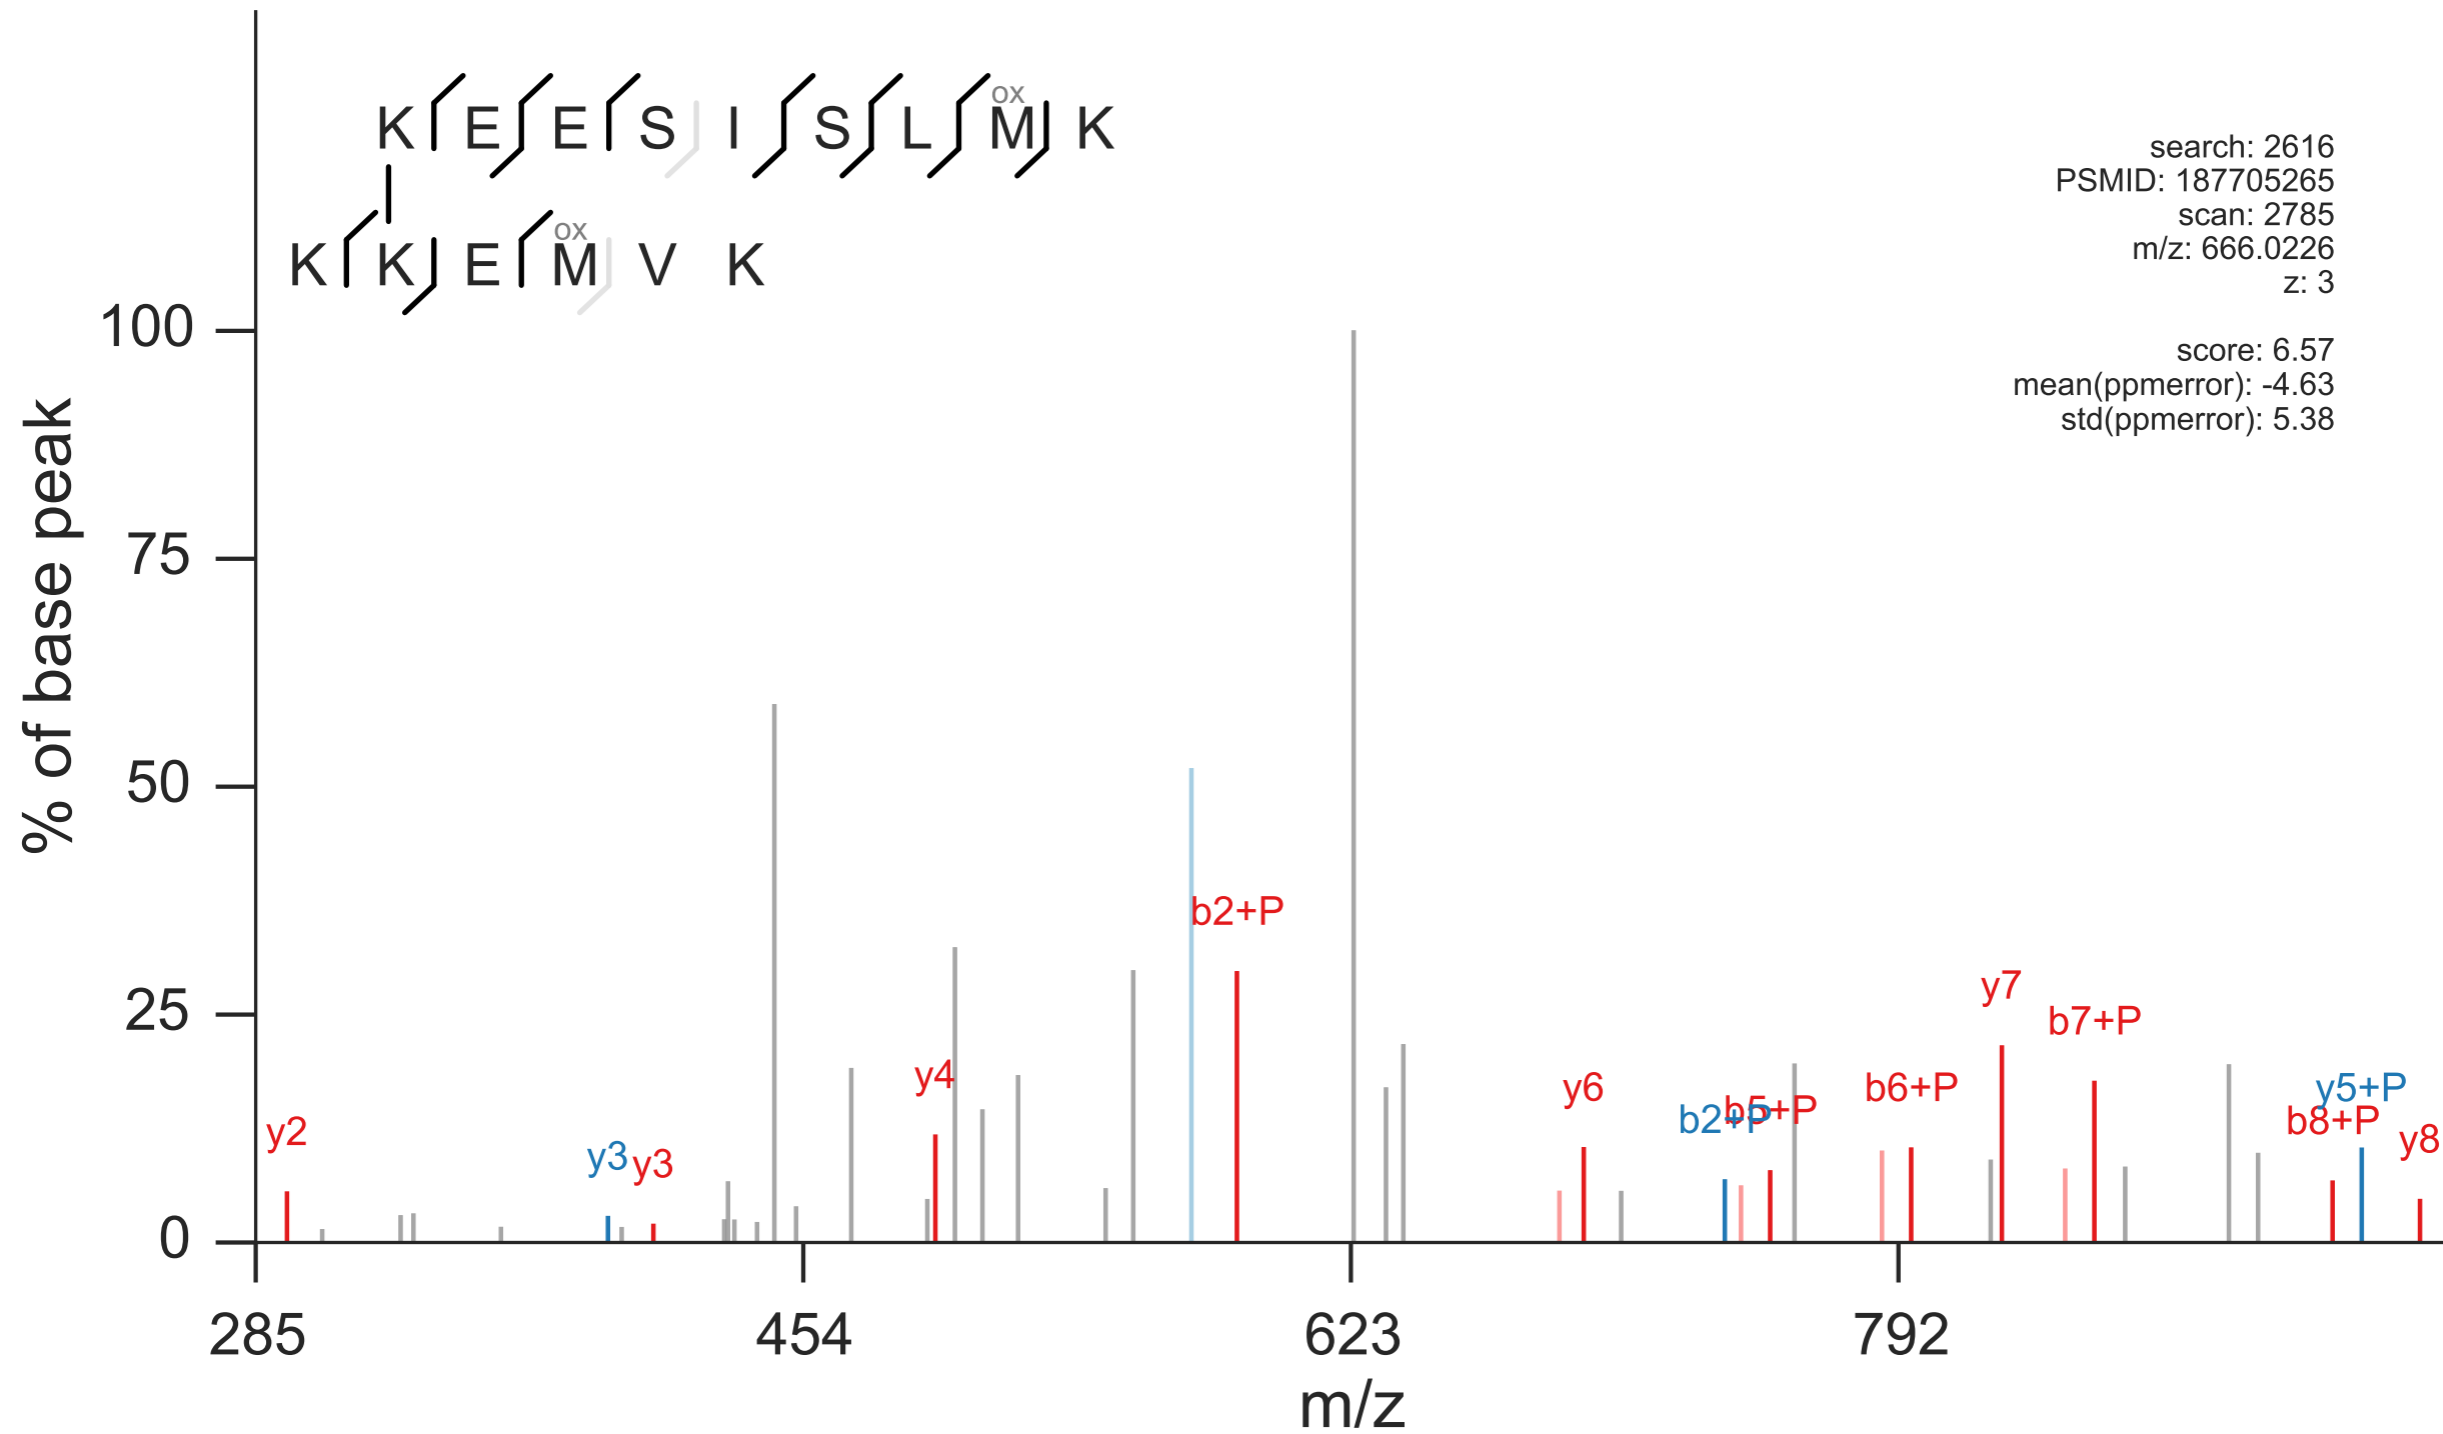

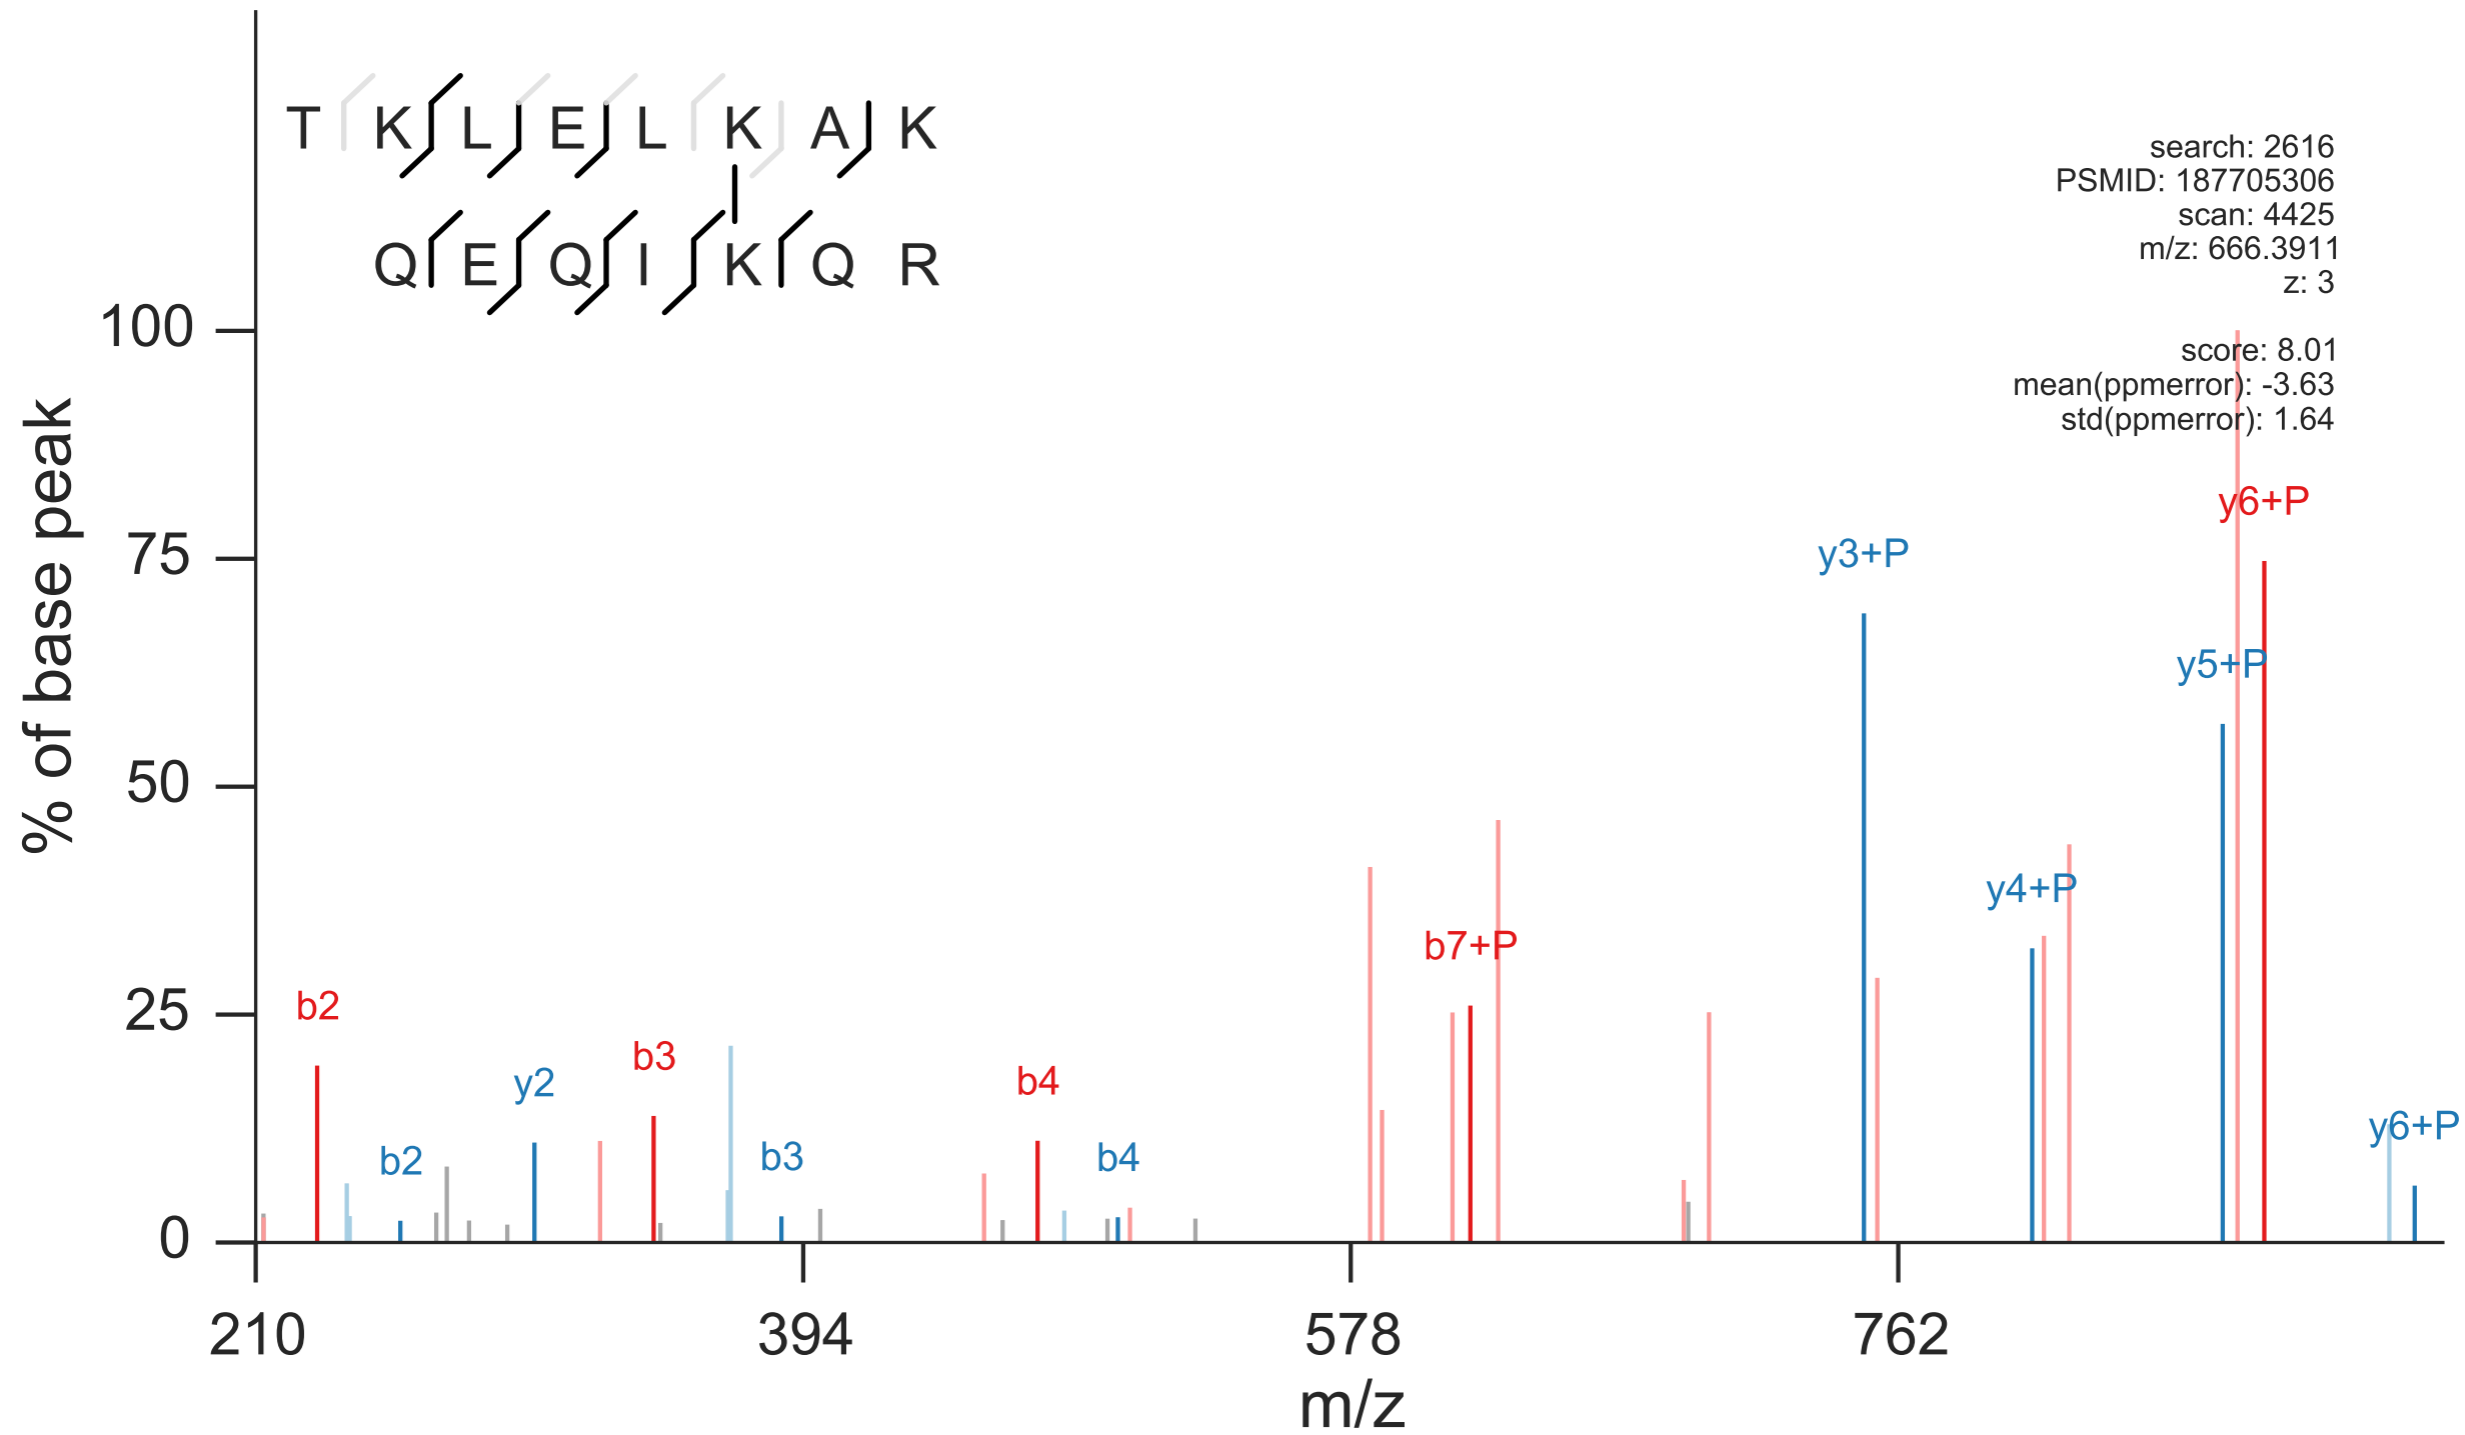

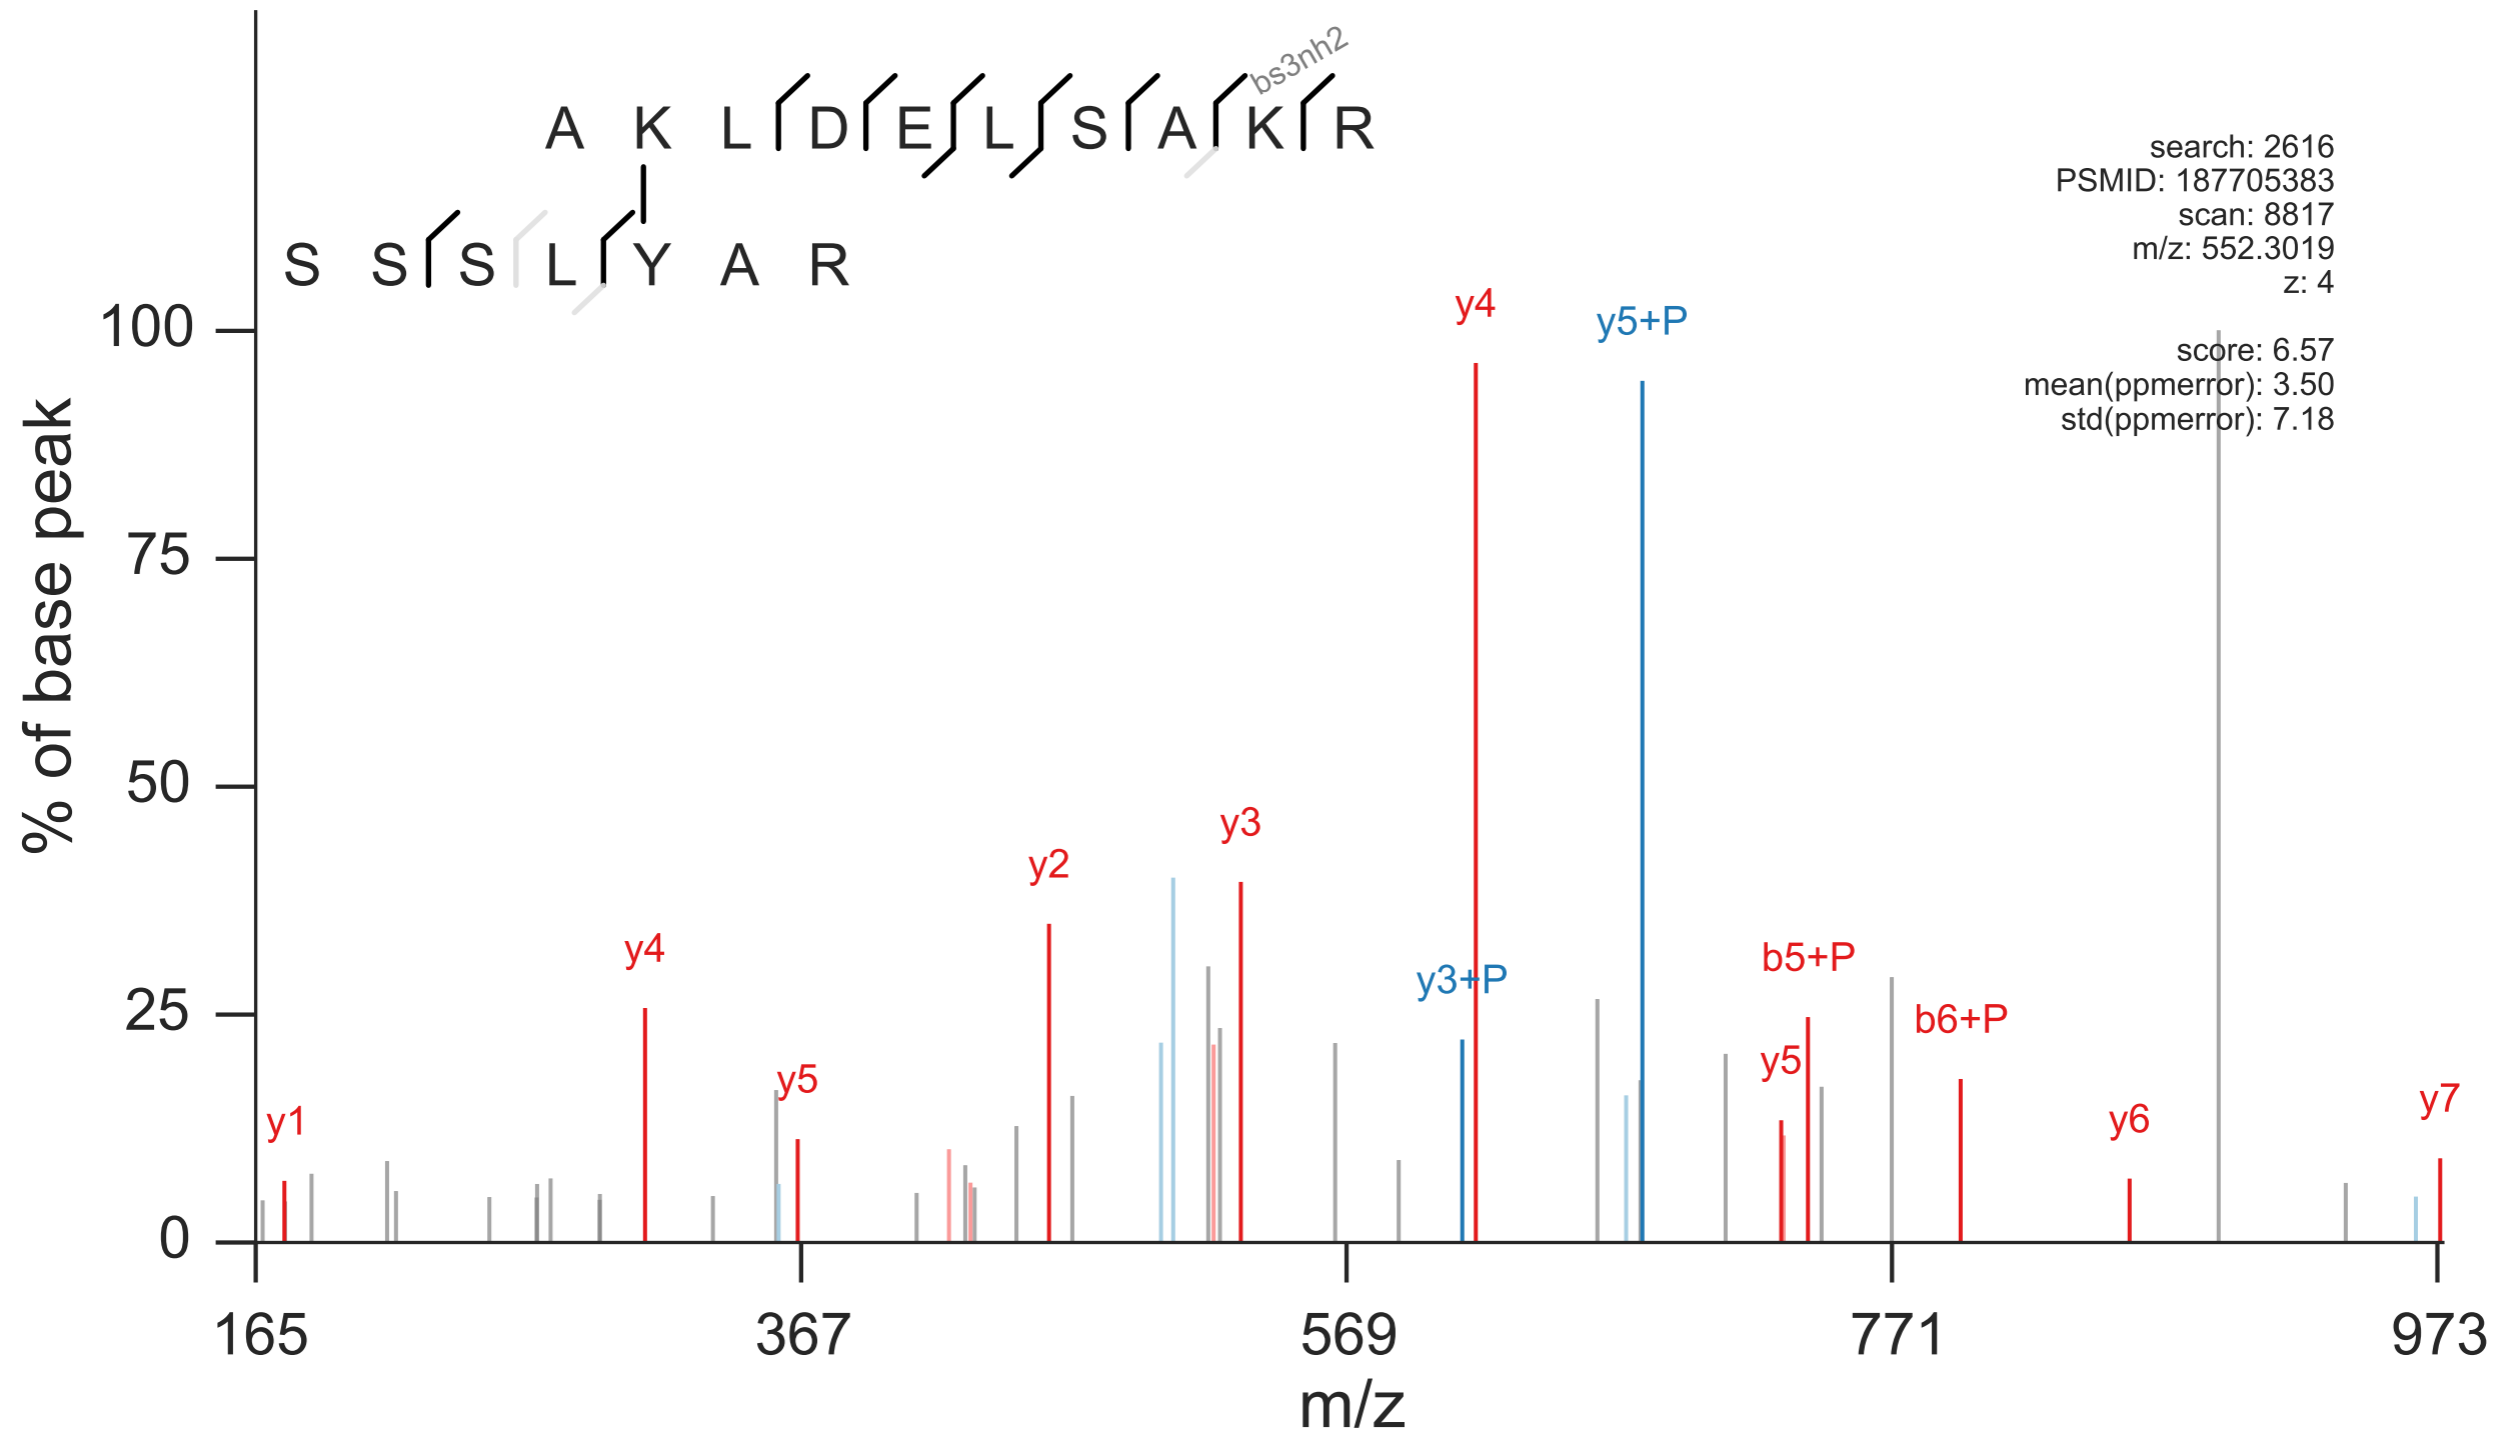

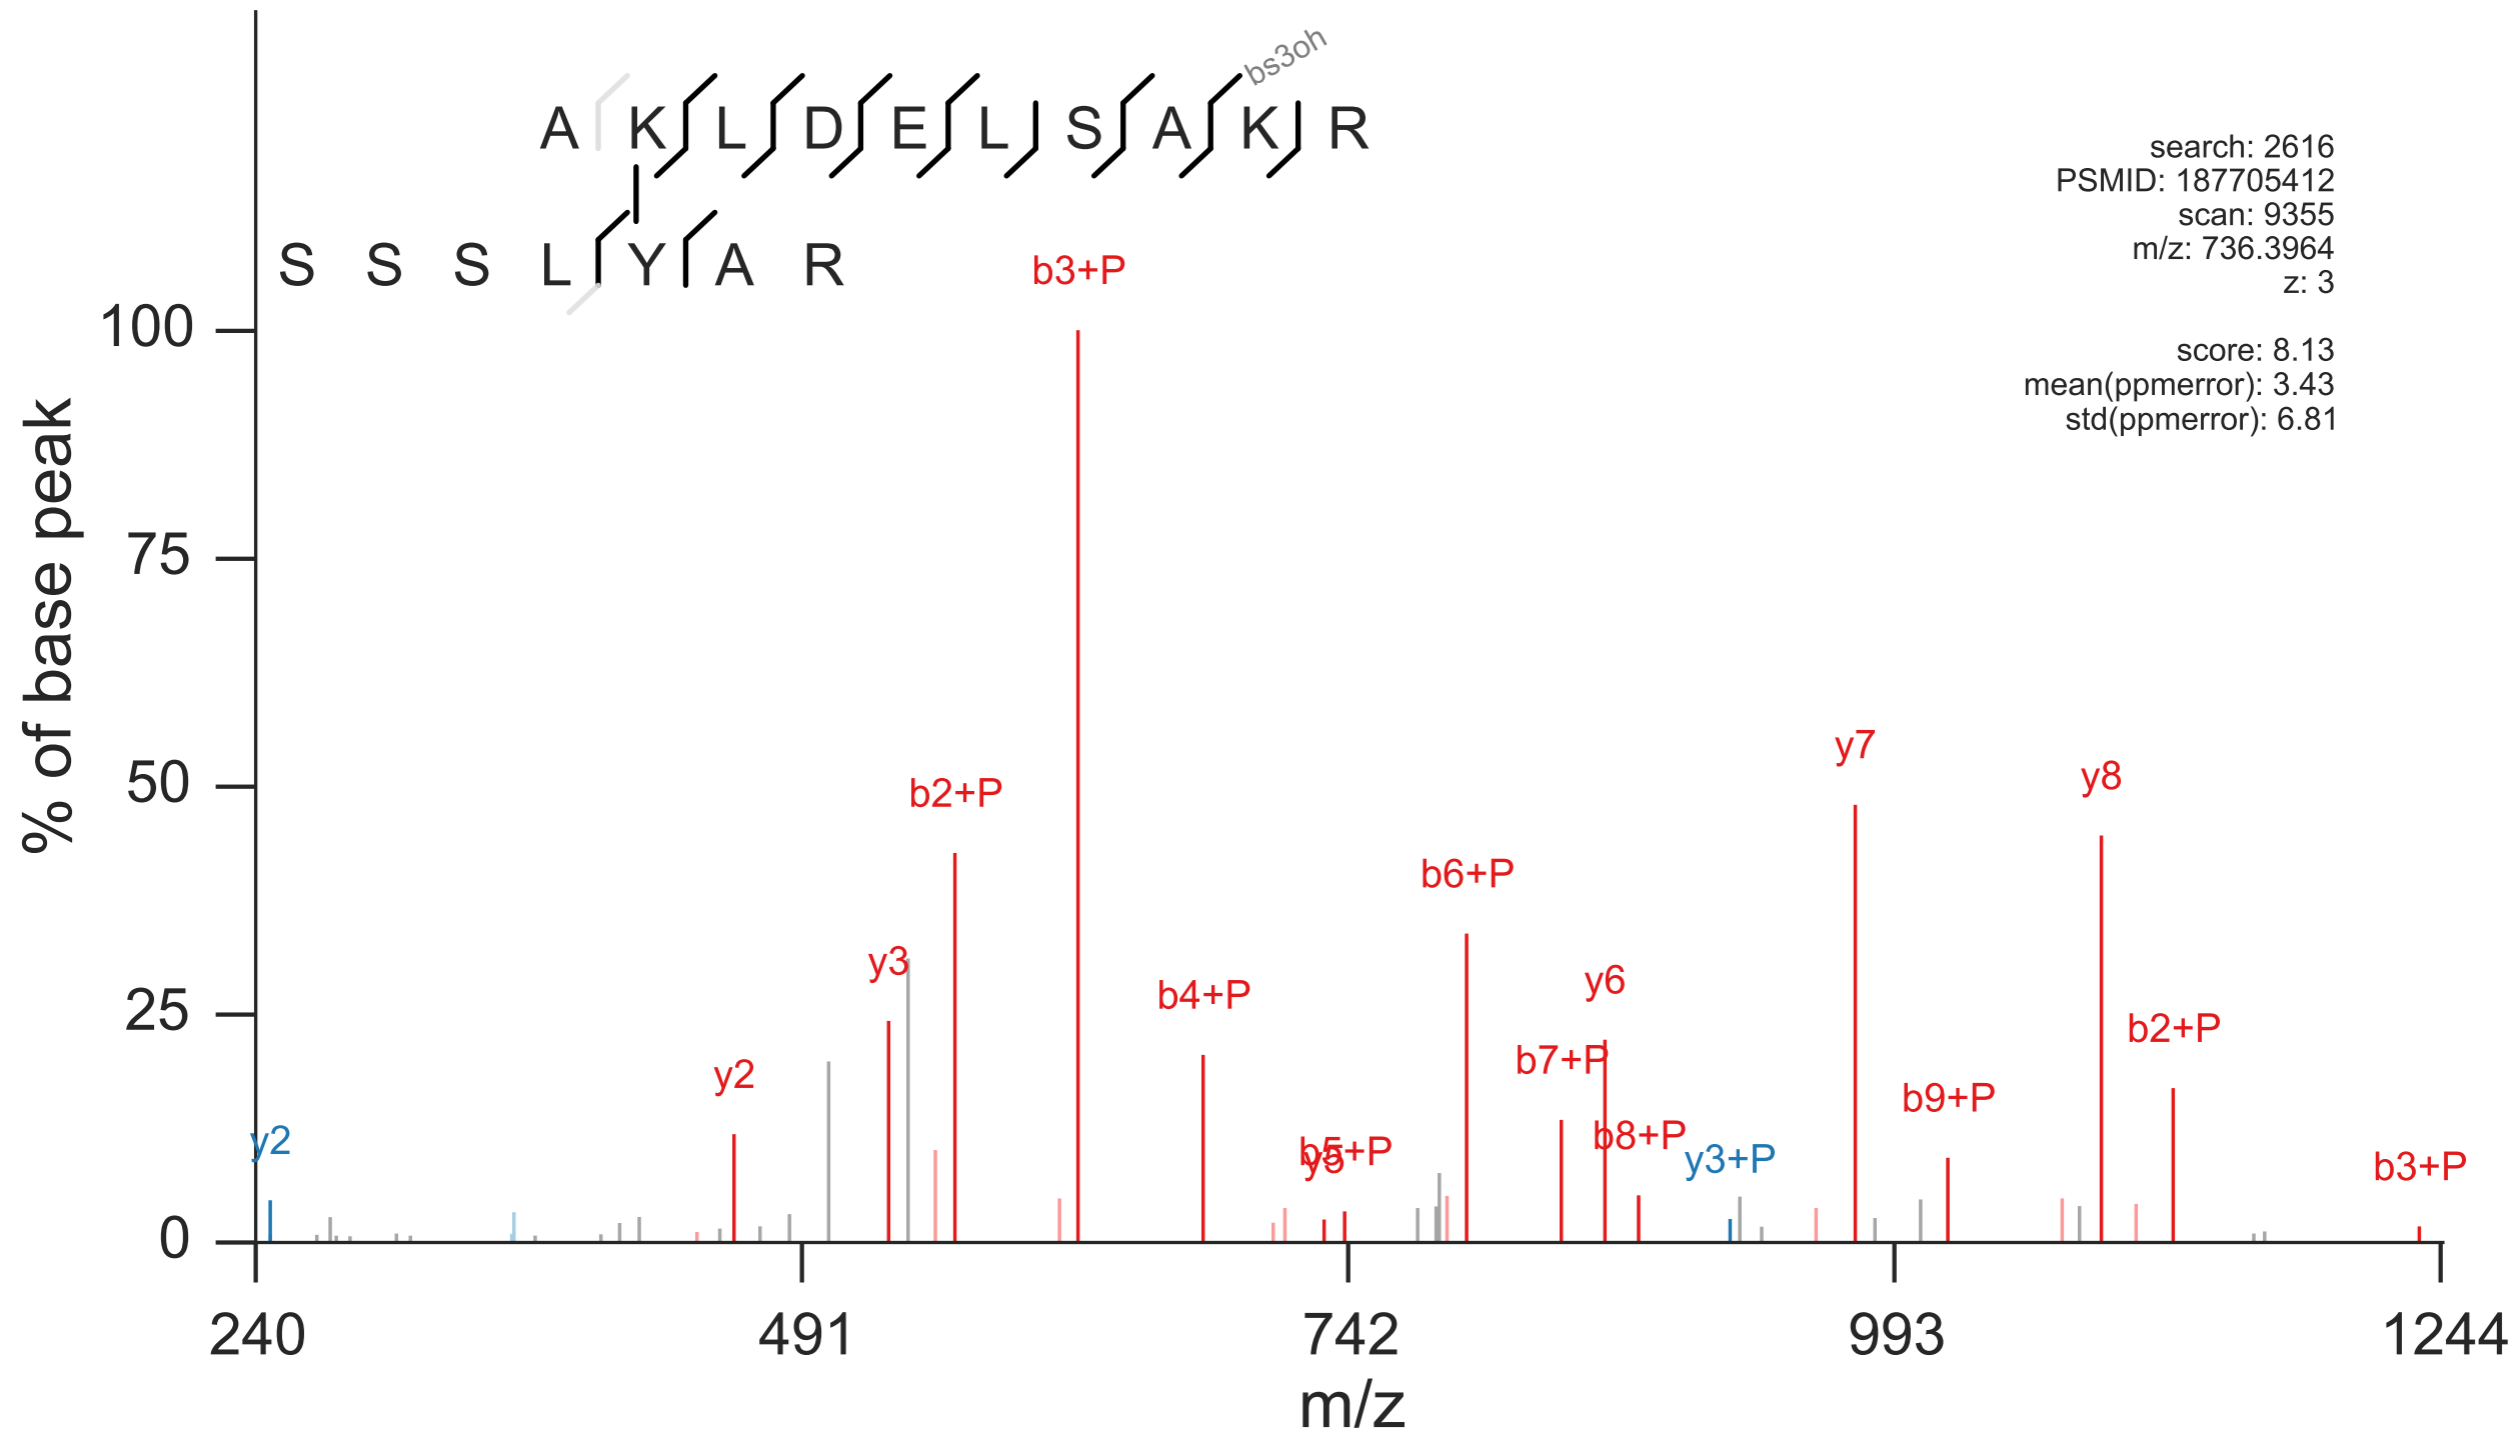

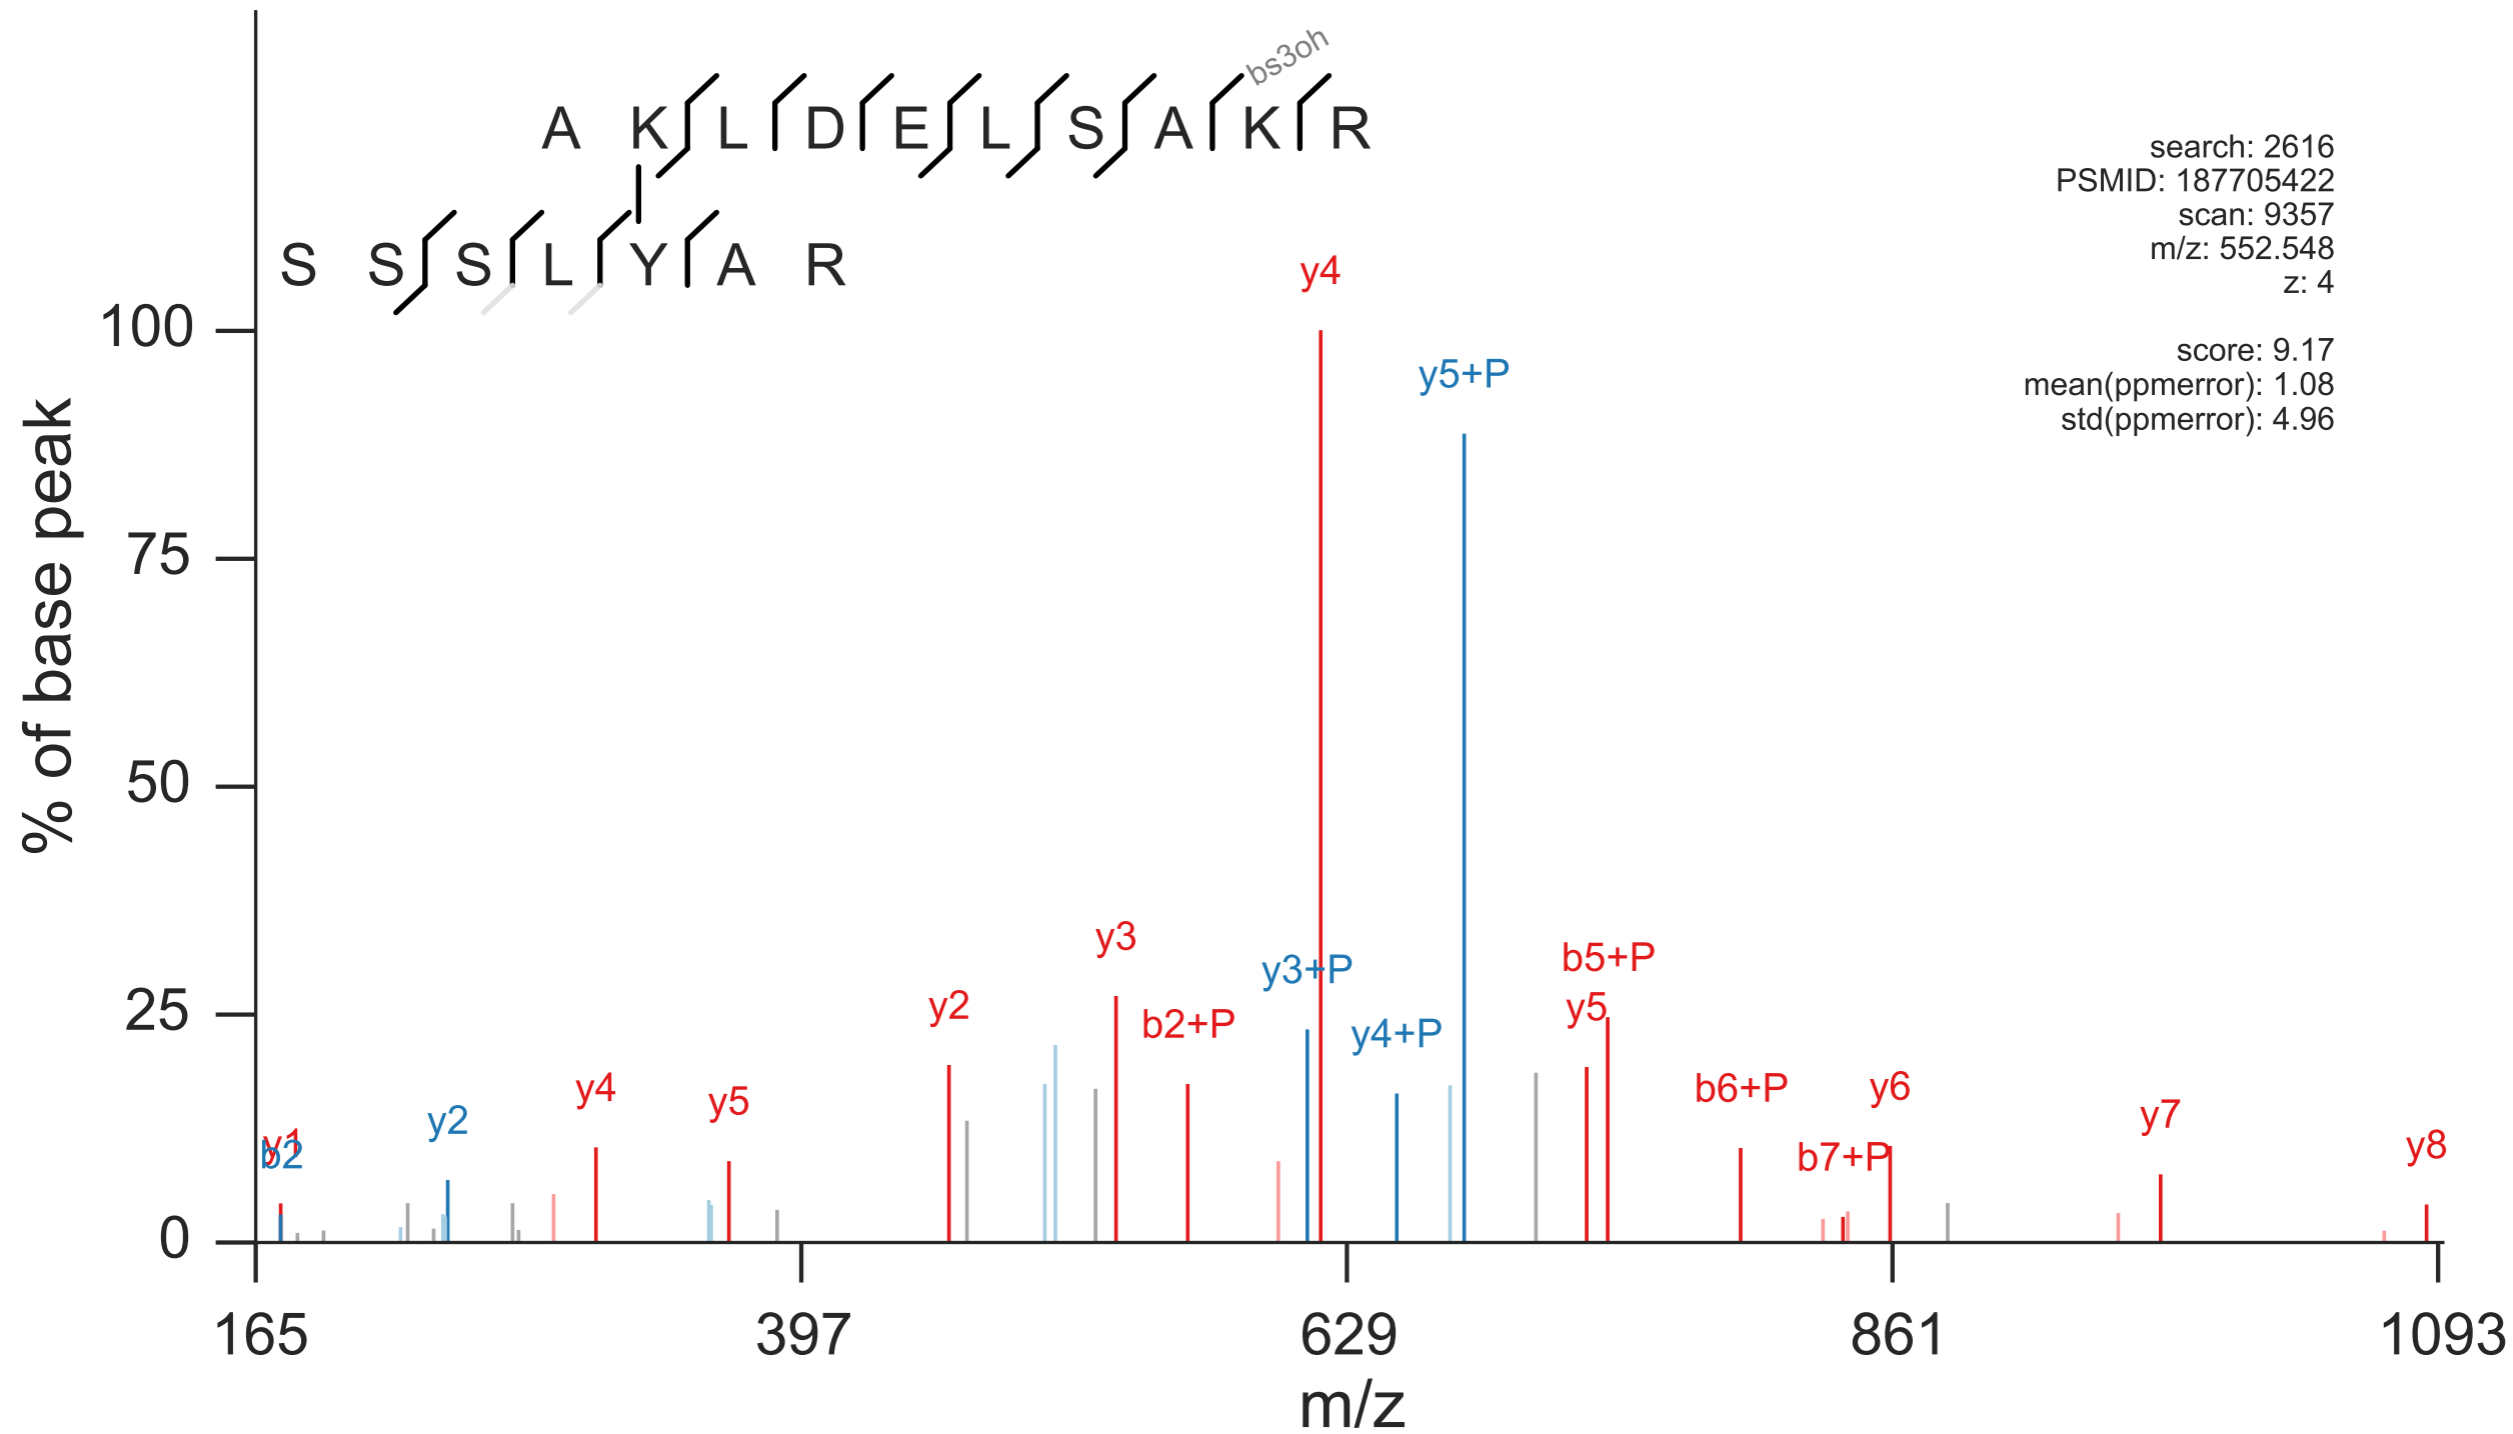

search: 2616  
 PSMID: 187705422  
 scan: 9357  
 m/z: 552.548  
 z: 4  
 score: 9.17  
 mean(ppmerror): 1.08  
 std(ppmerror): 4.96

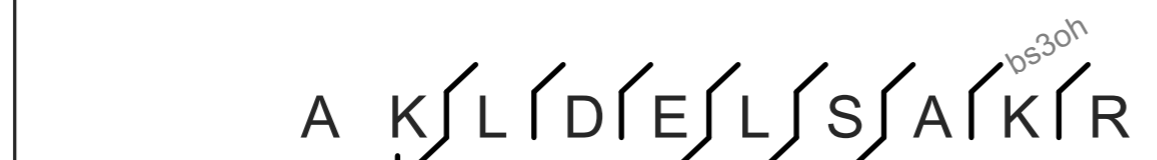



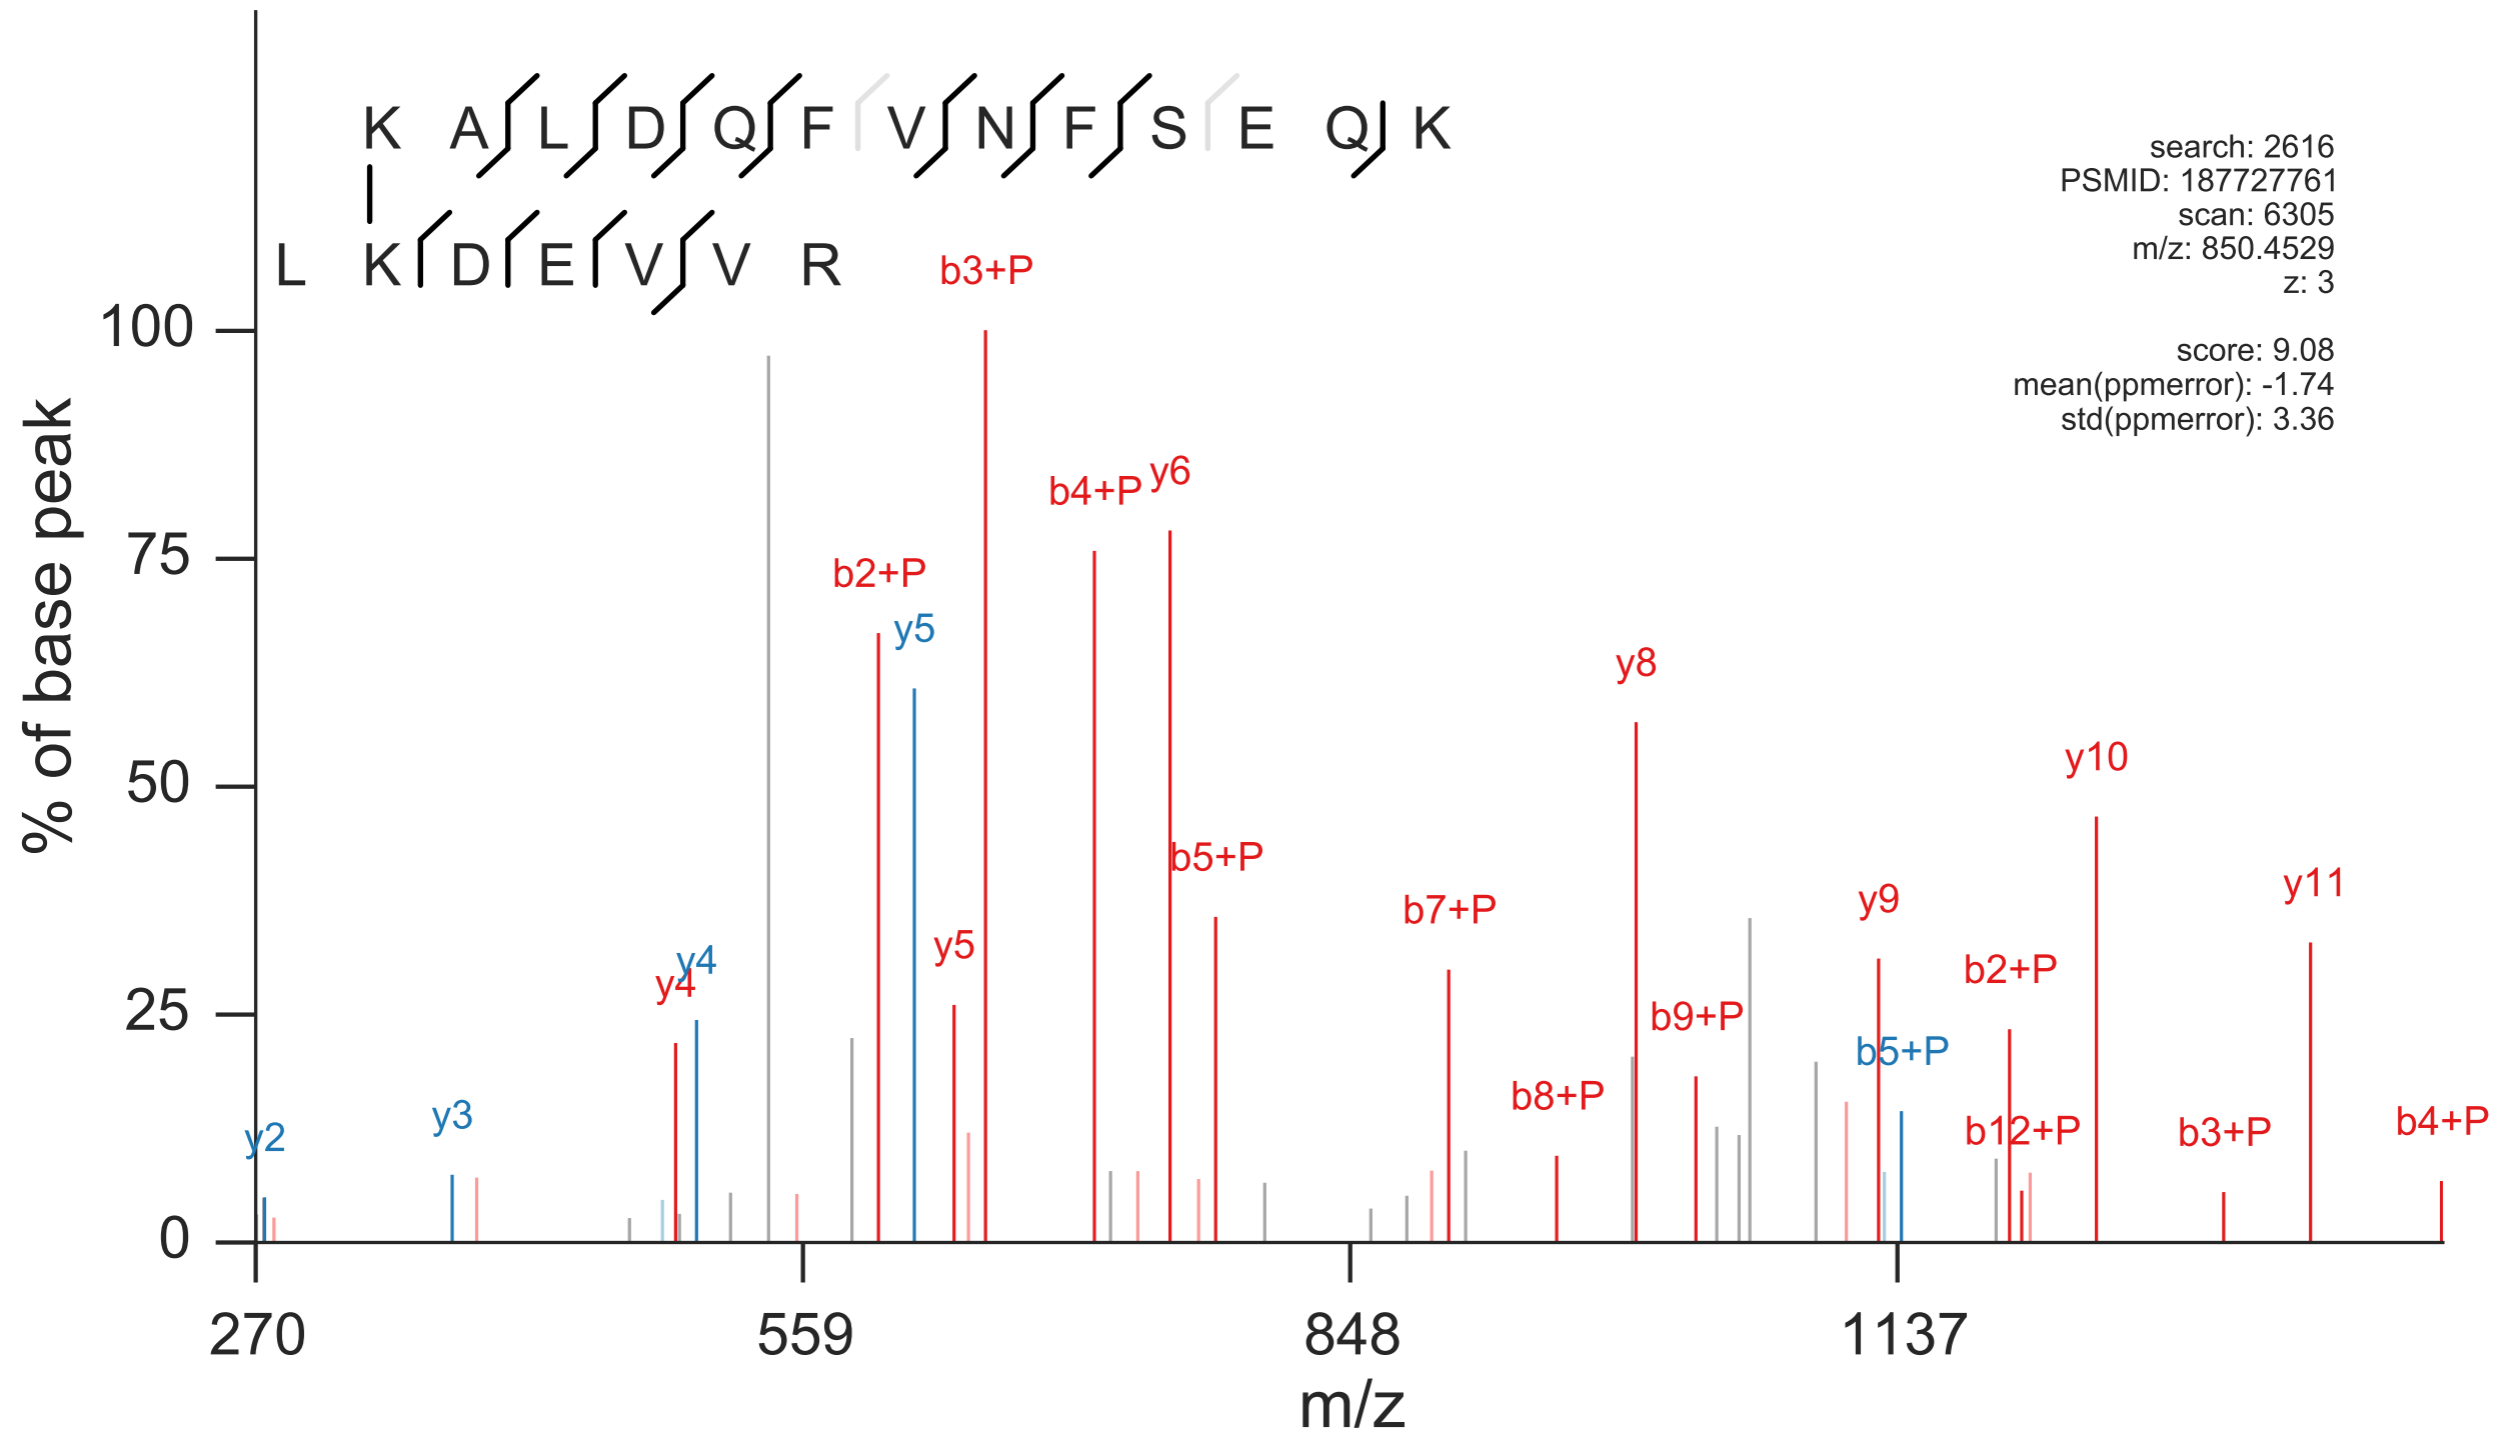

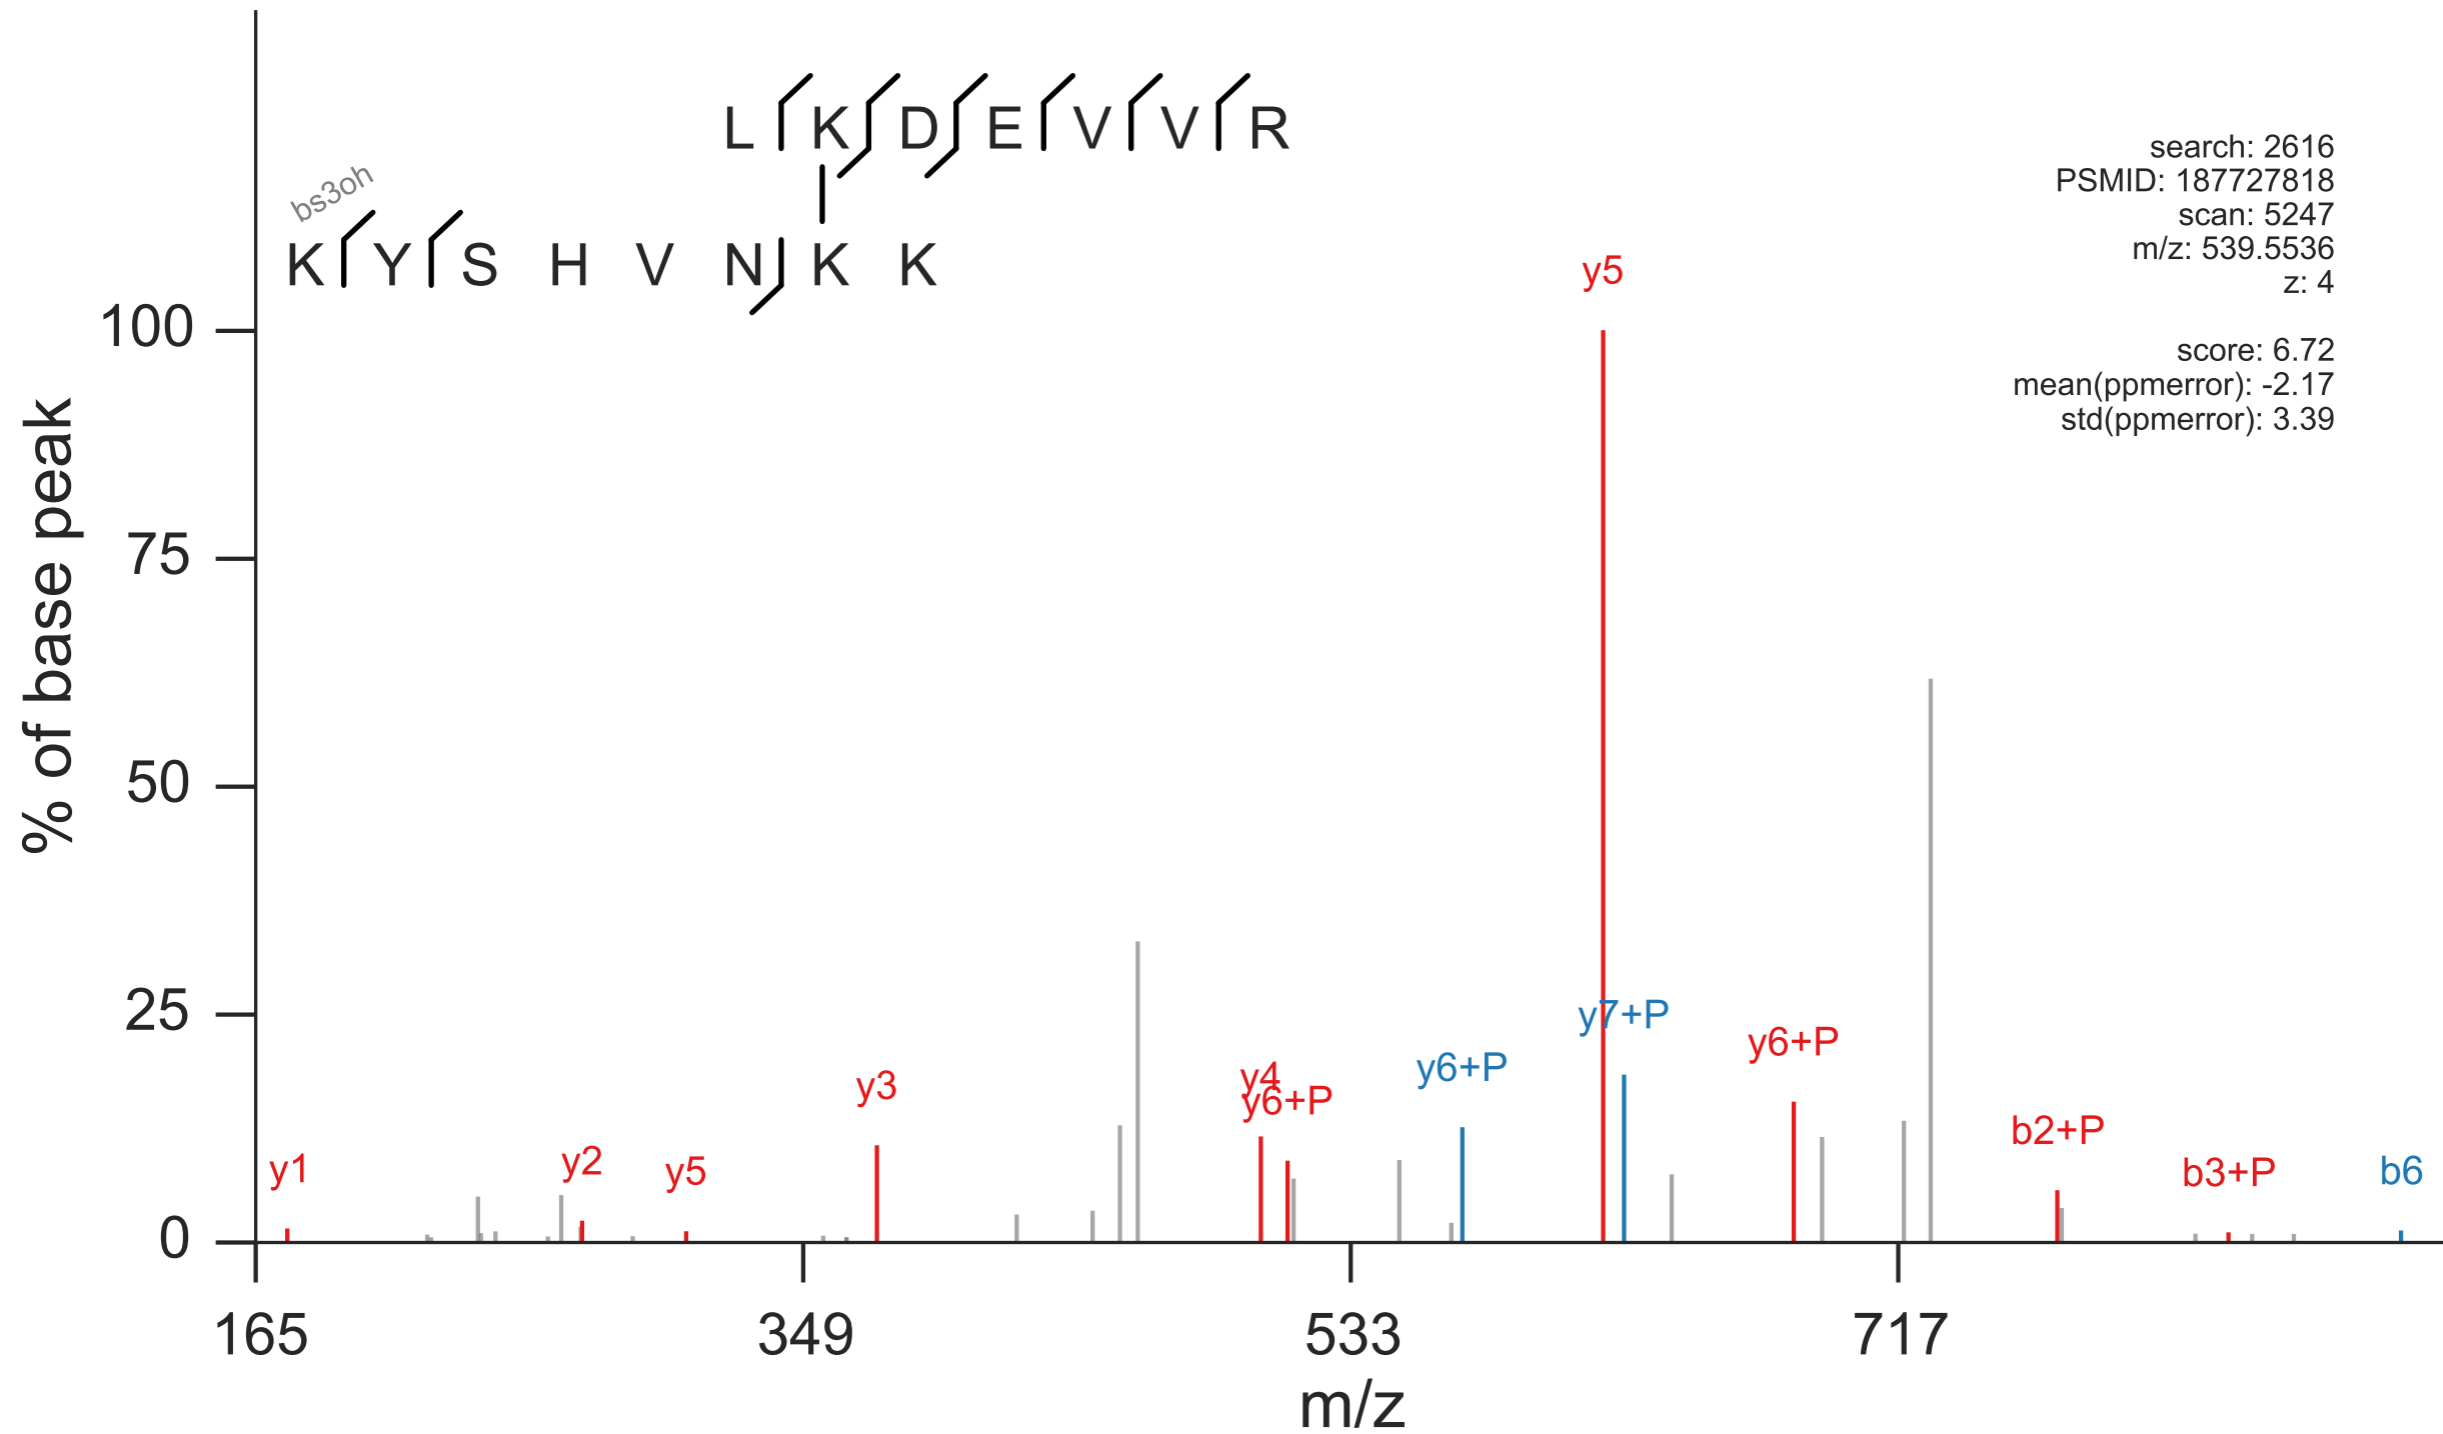

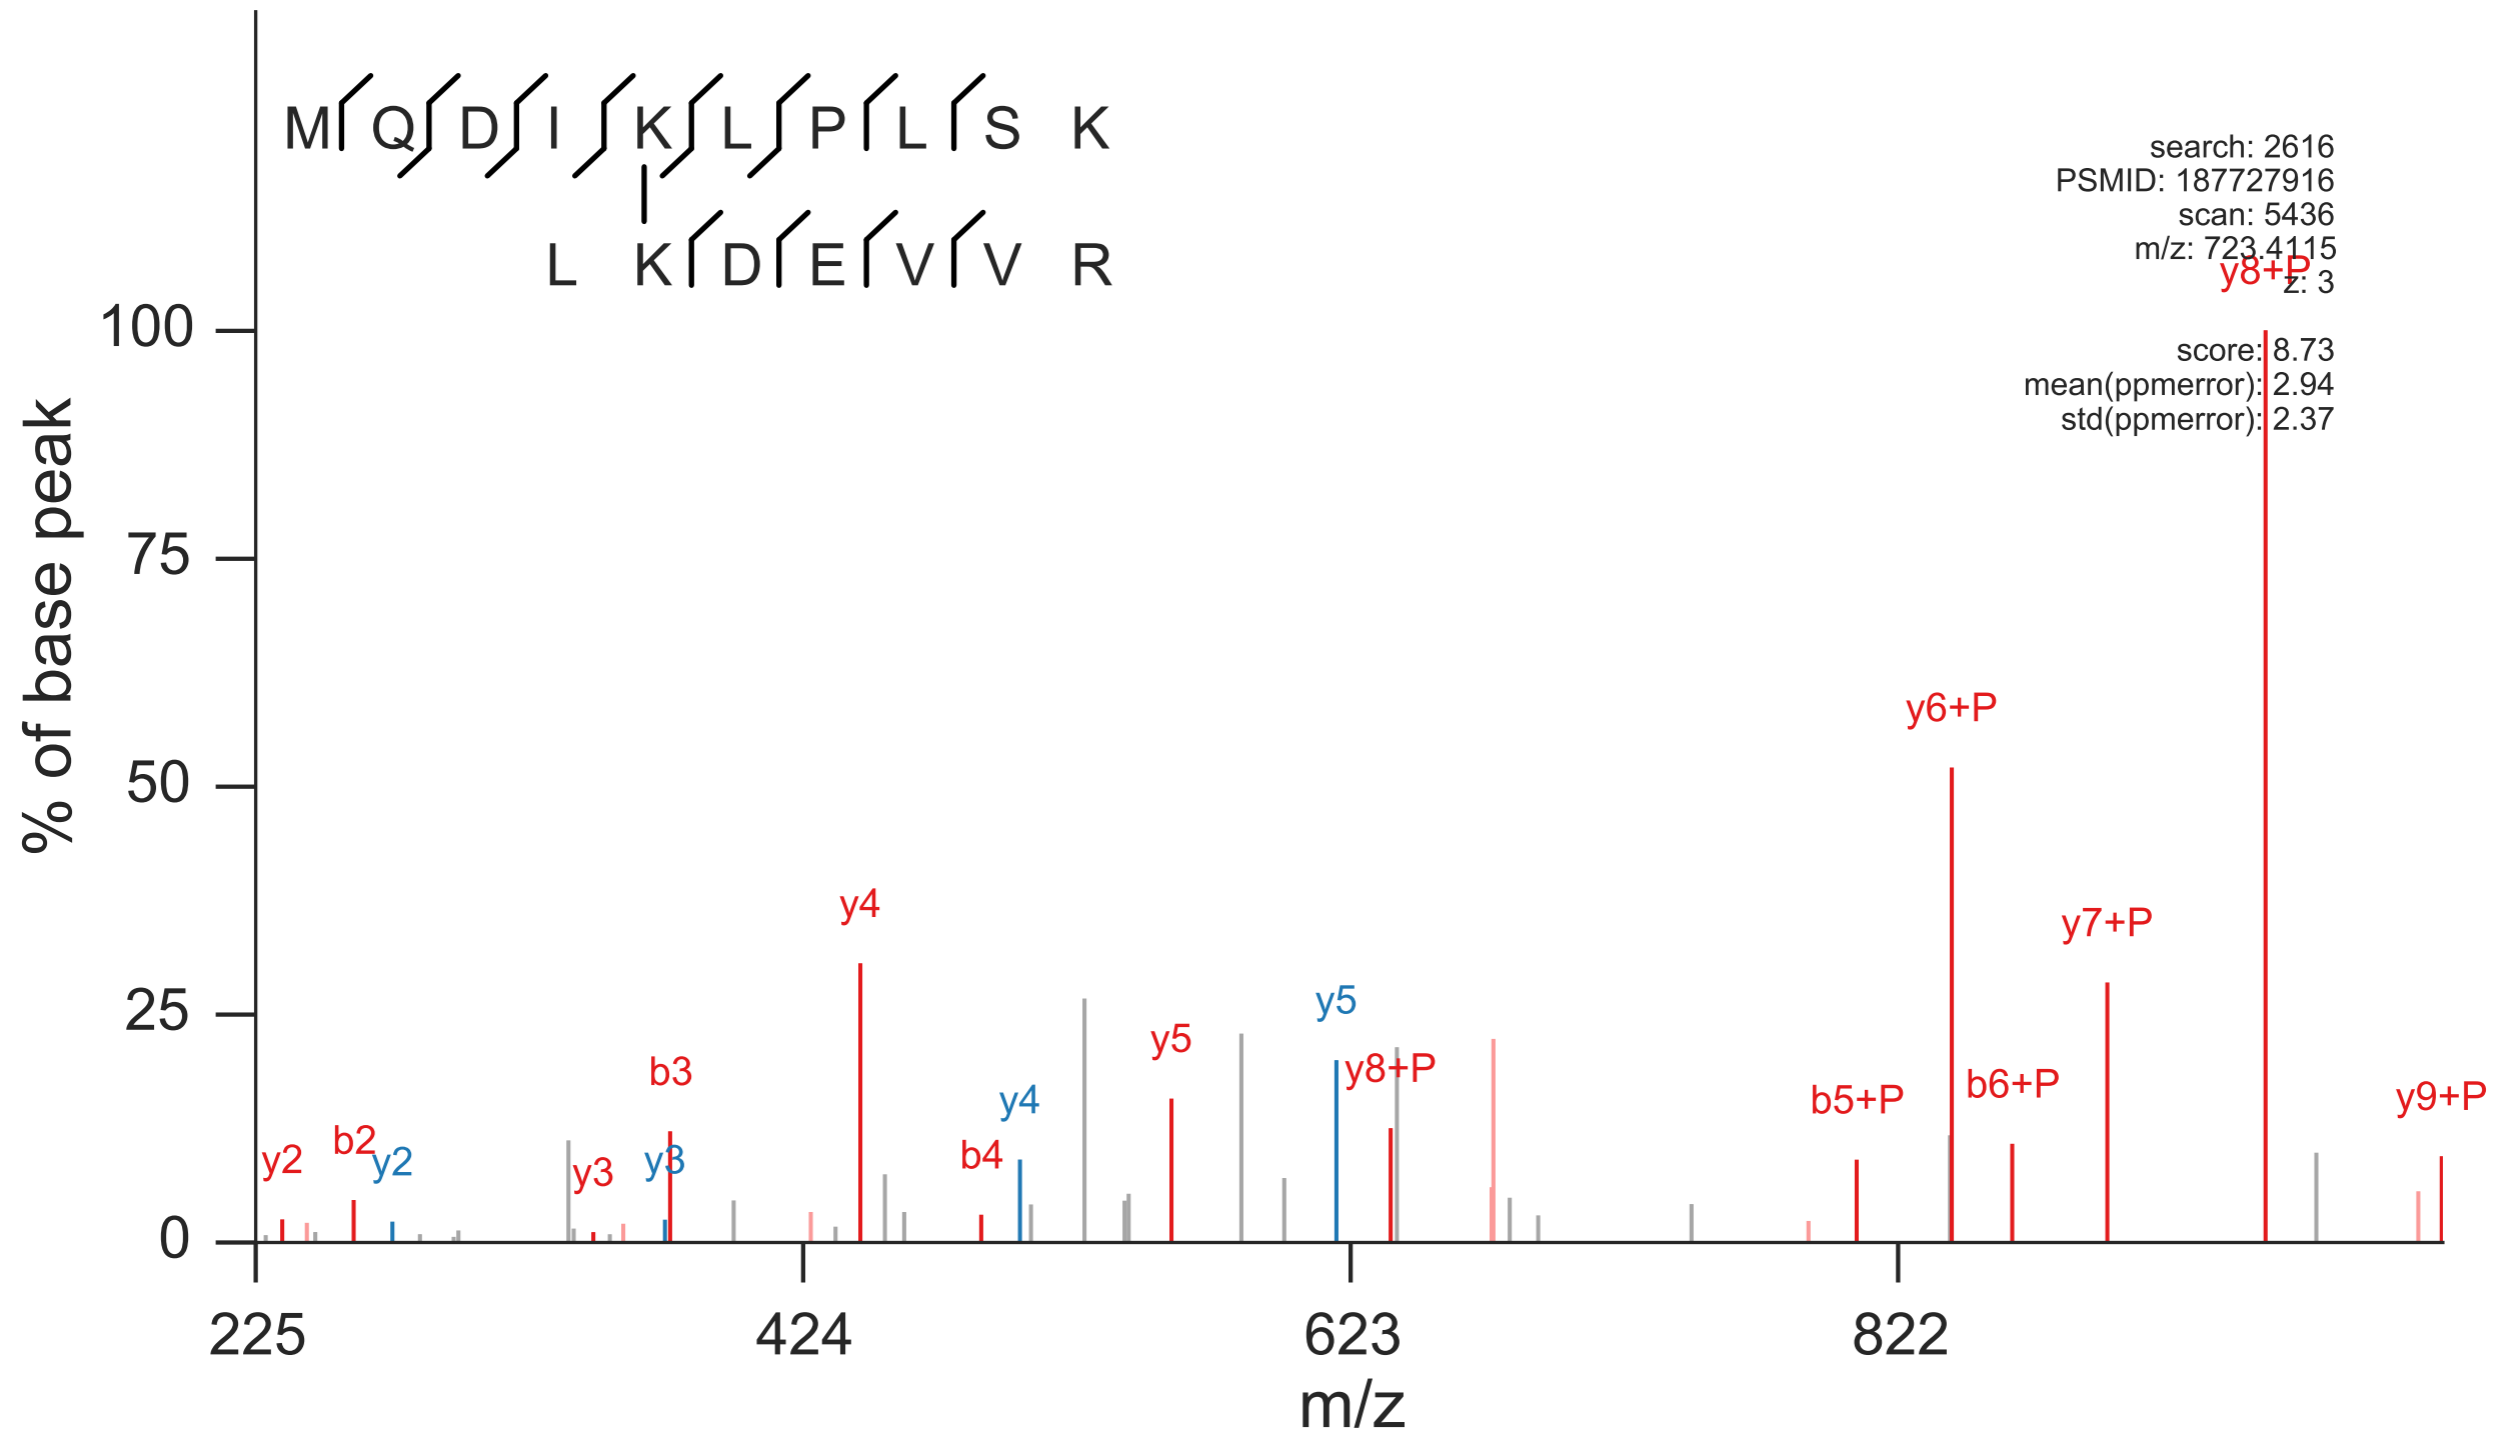

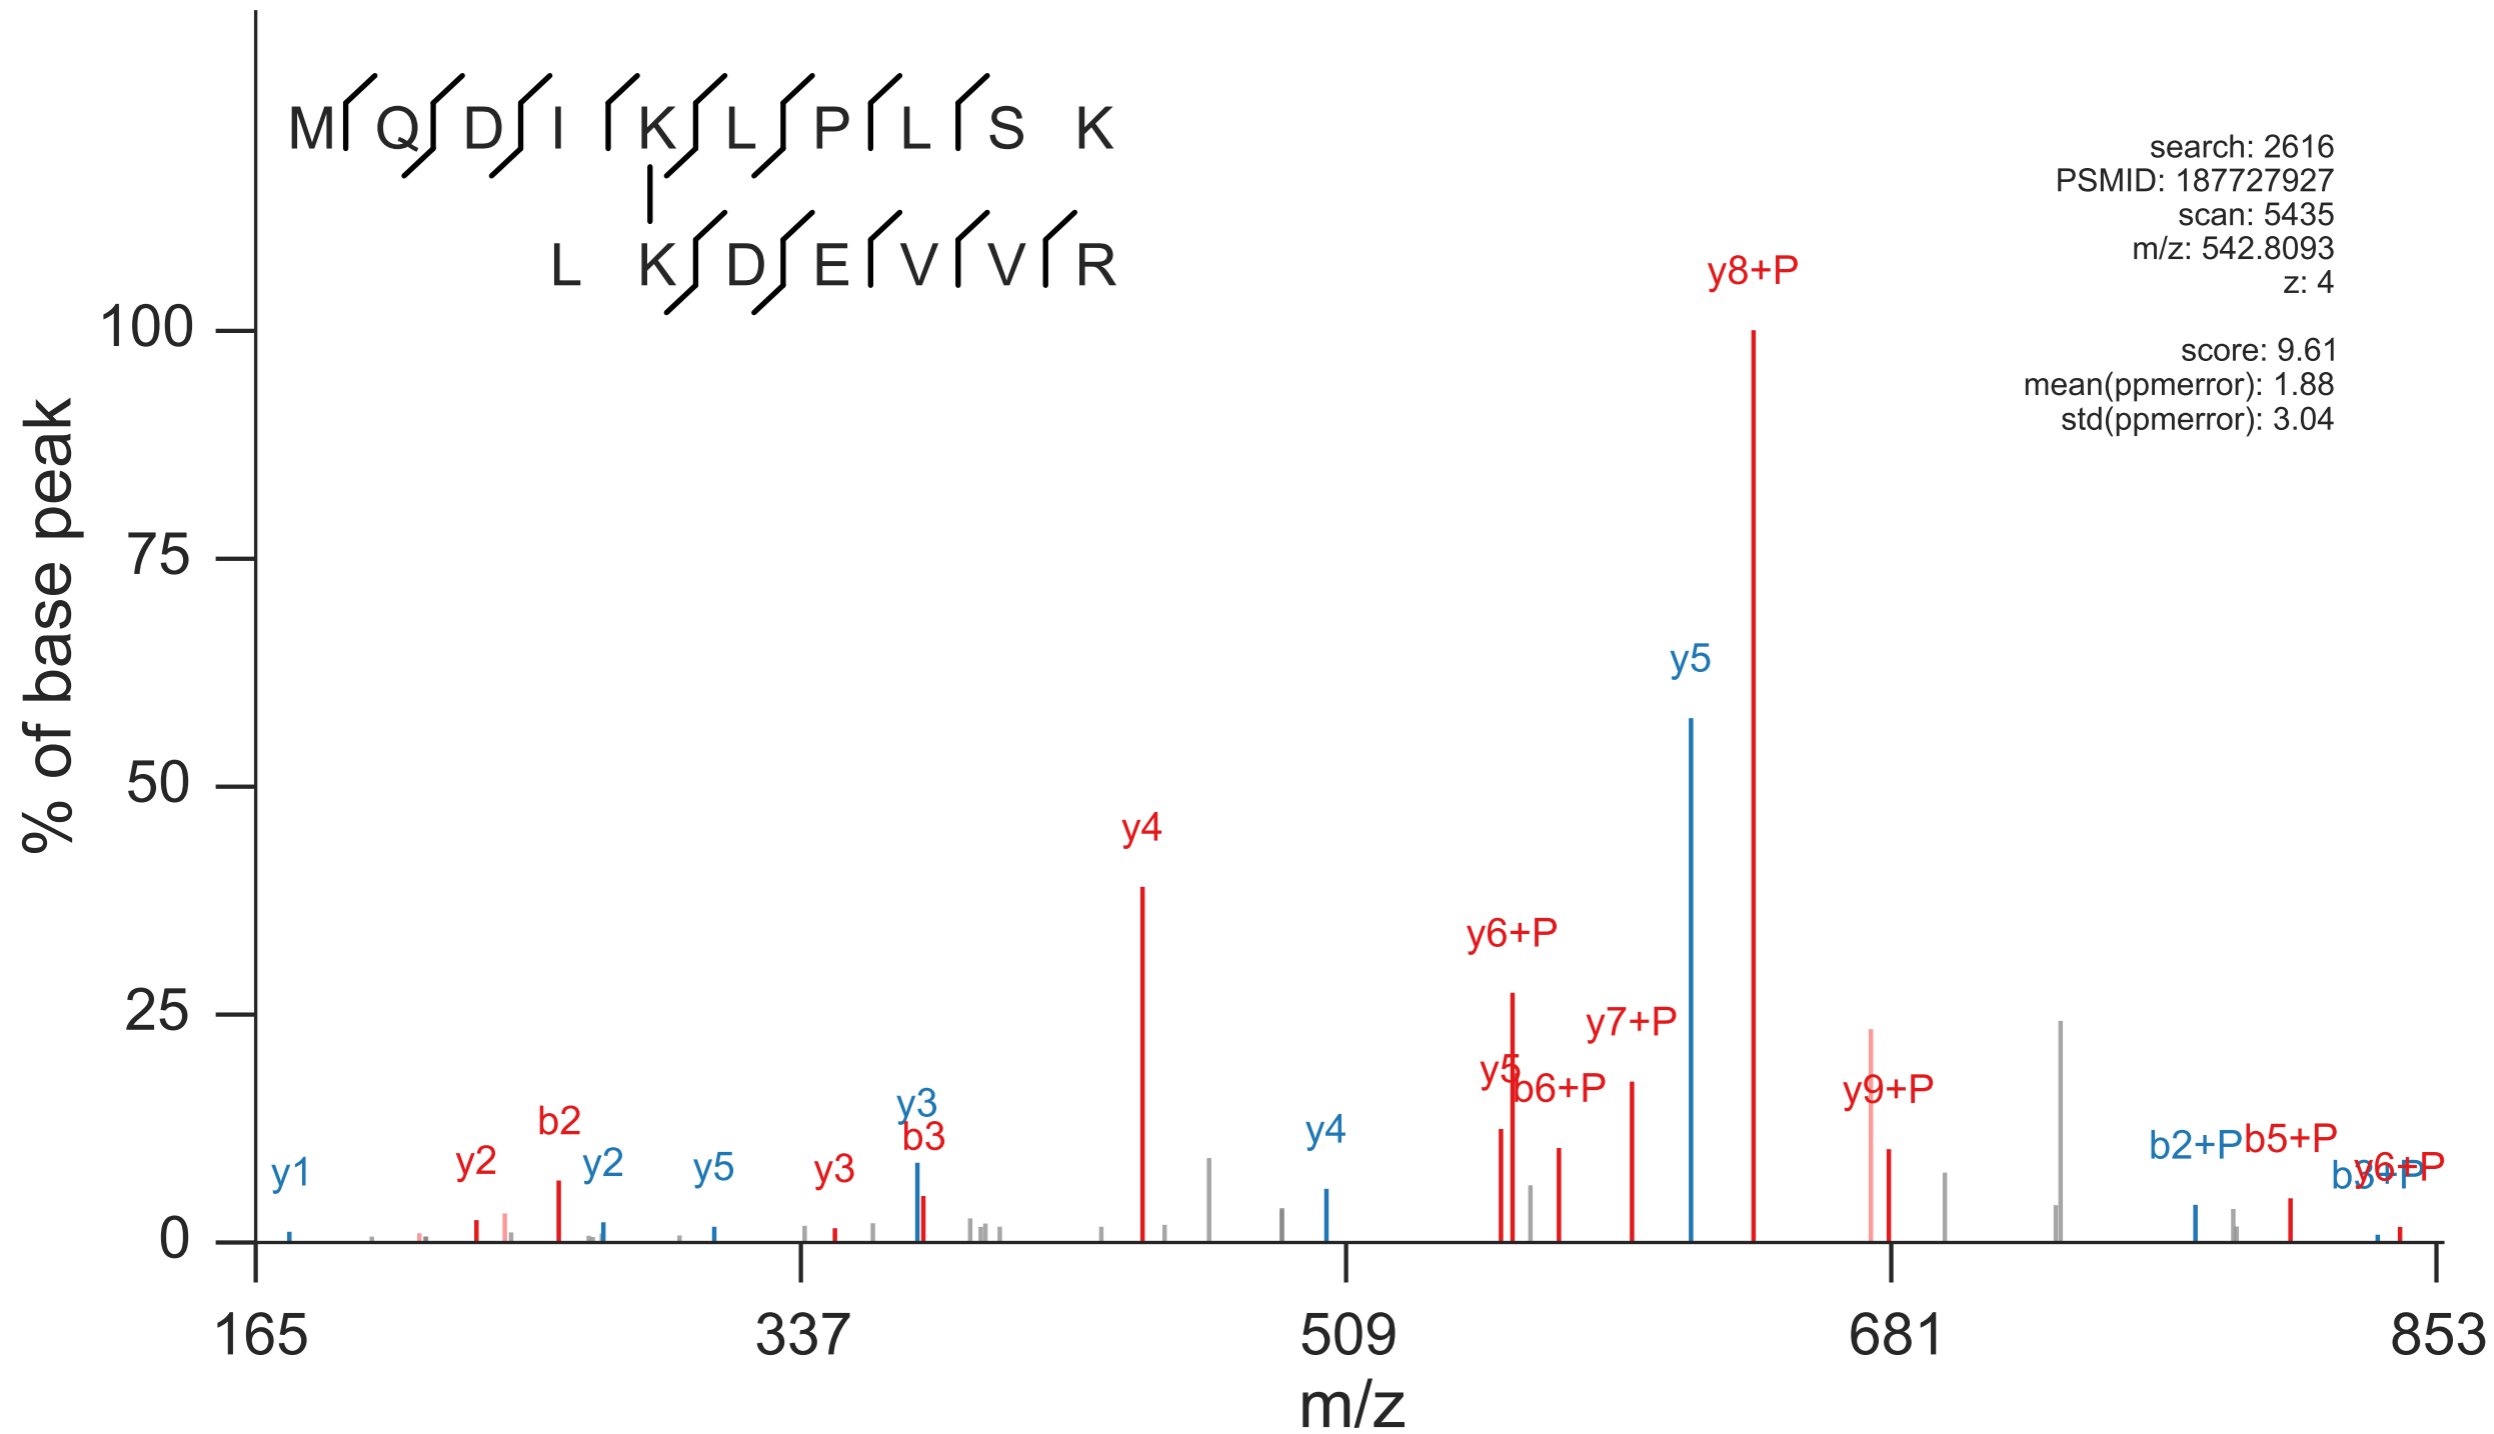

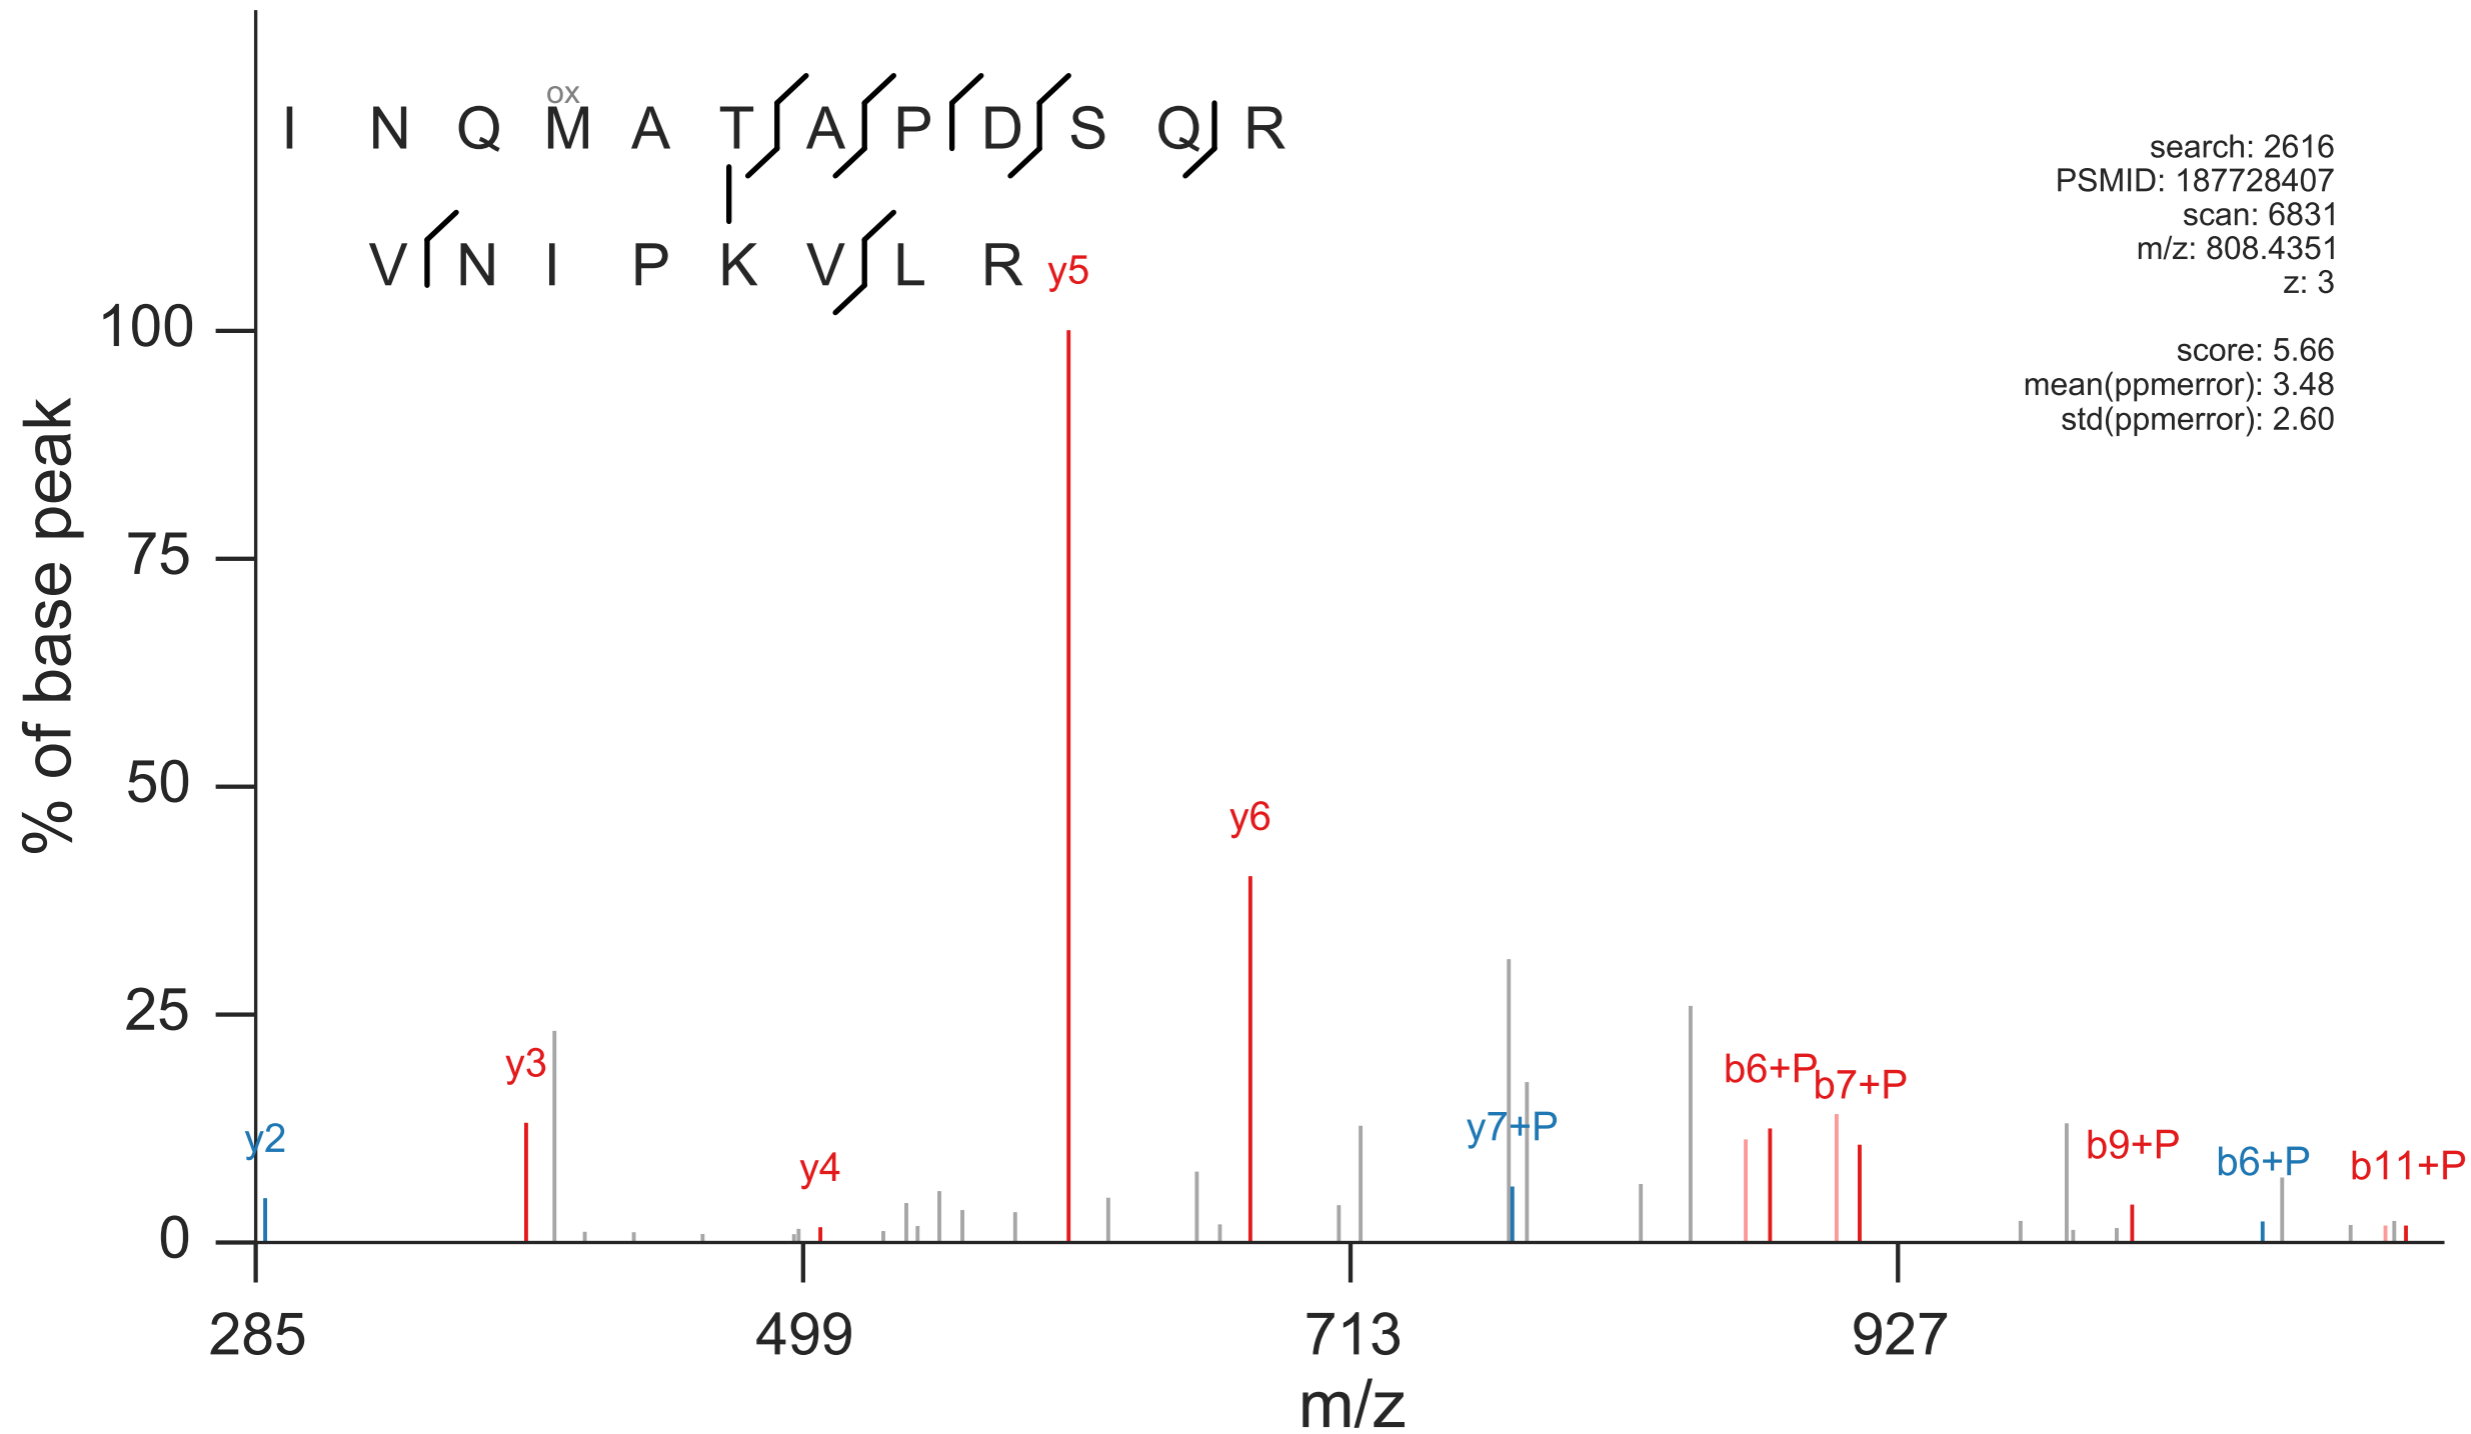

search: 2616  
 PSMID: 187728407  
 scan: 6831  
 m/z: 808.4351  
 z: 3

score: 5.66  
 mean(ppmerror): 3.48  
 std(ppmerror): 2.60

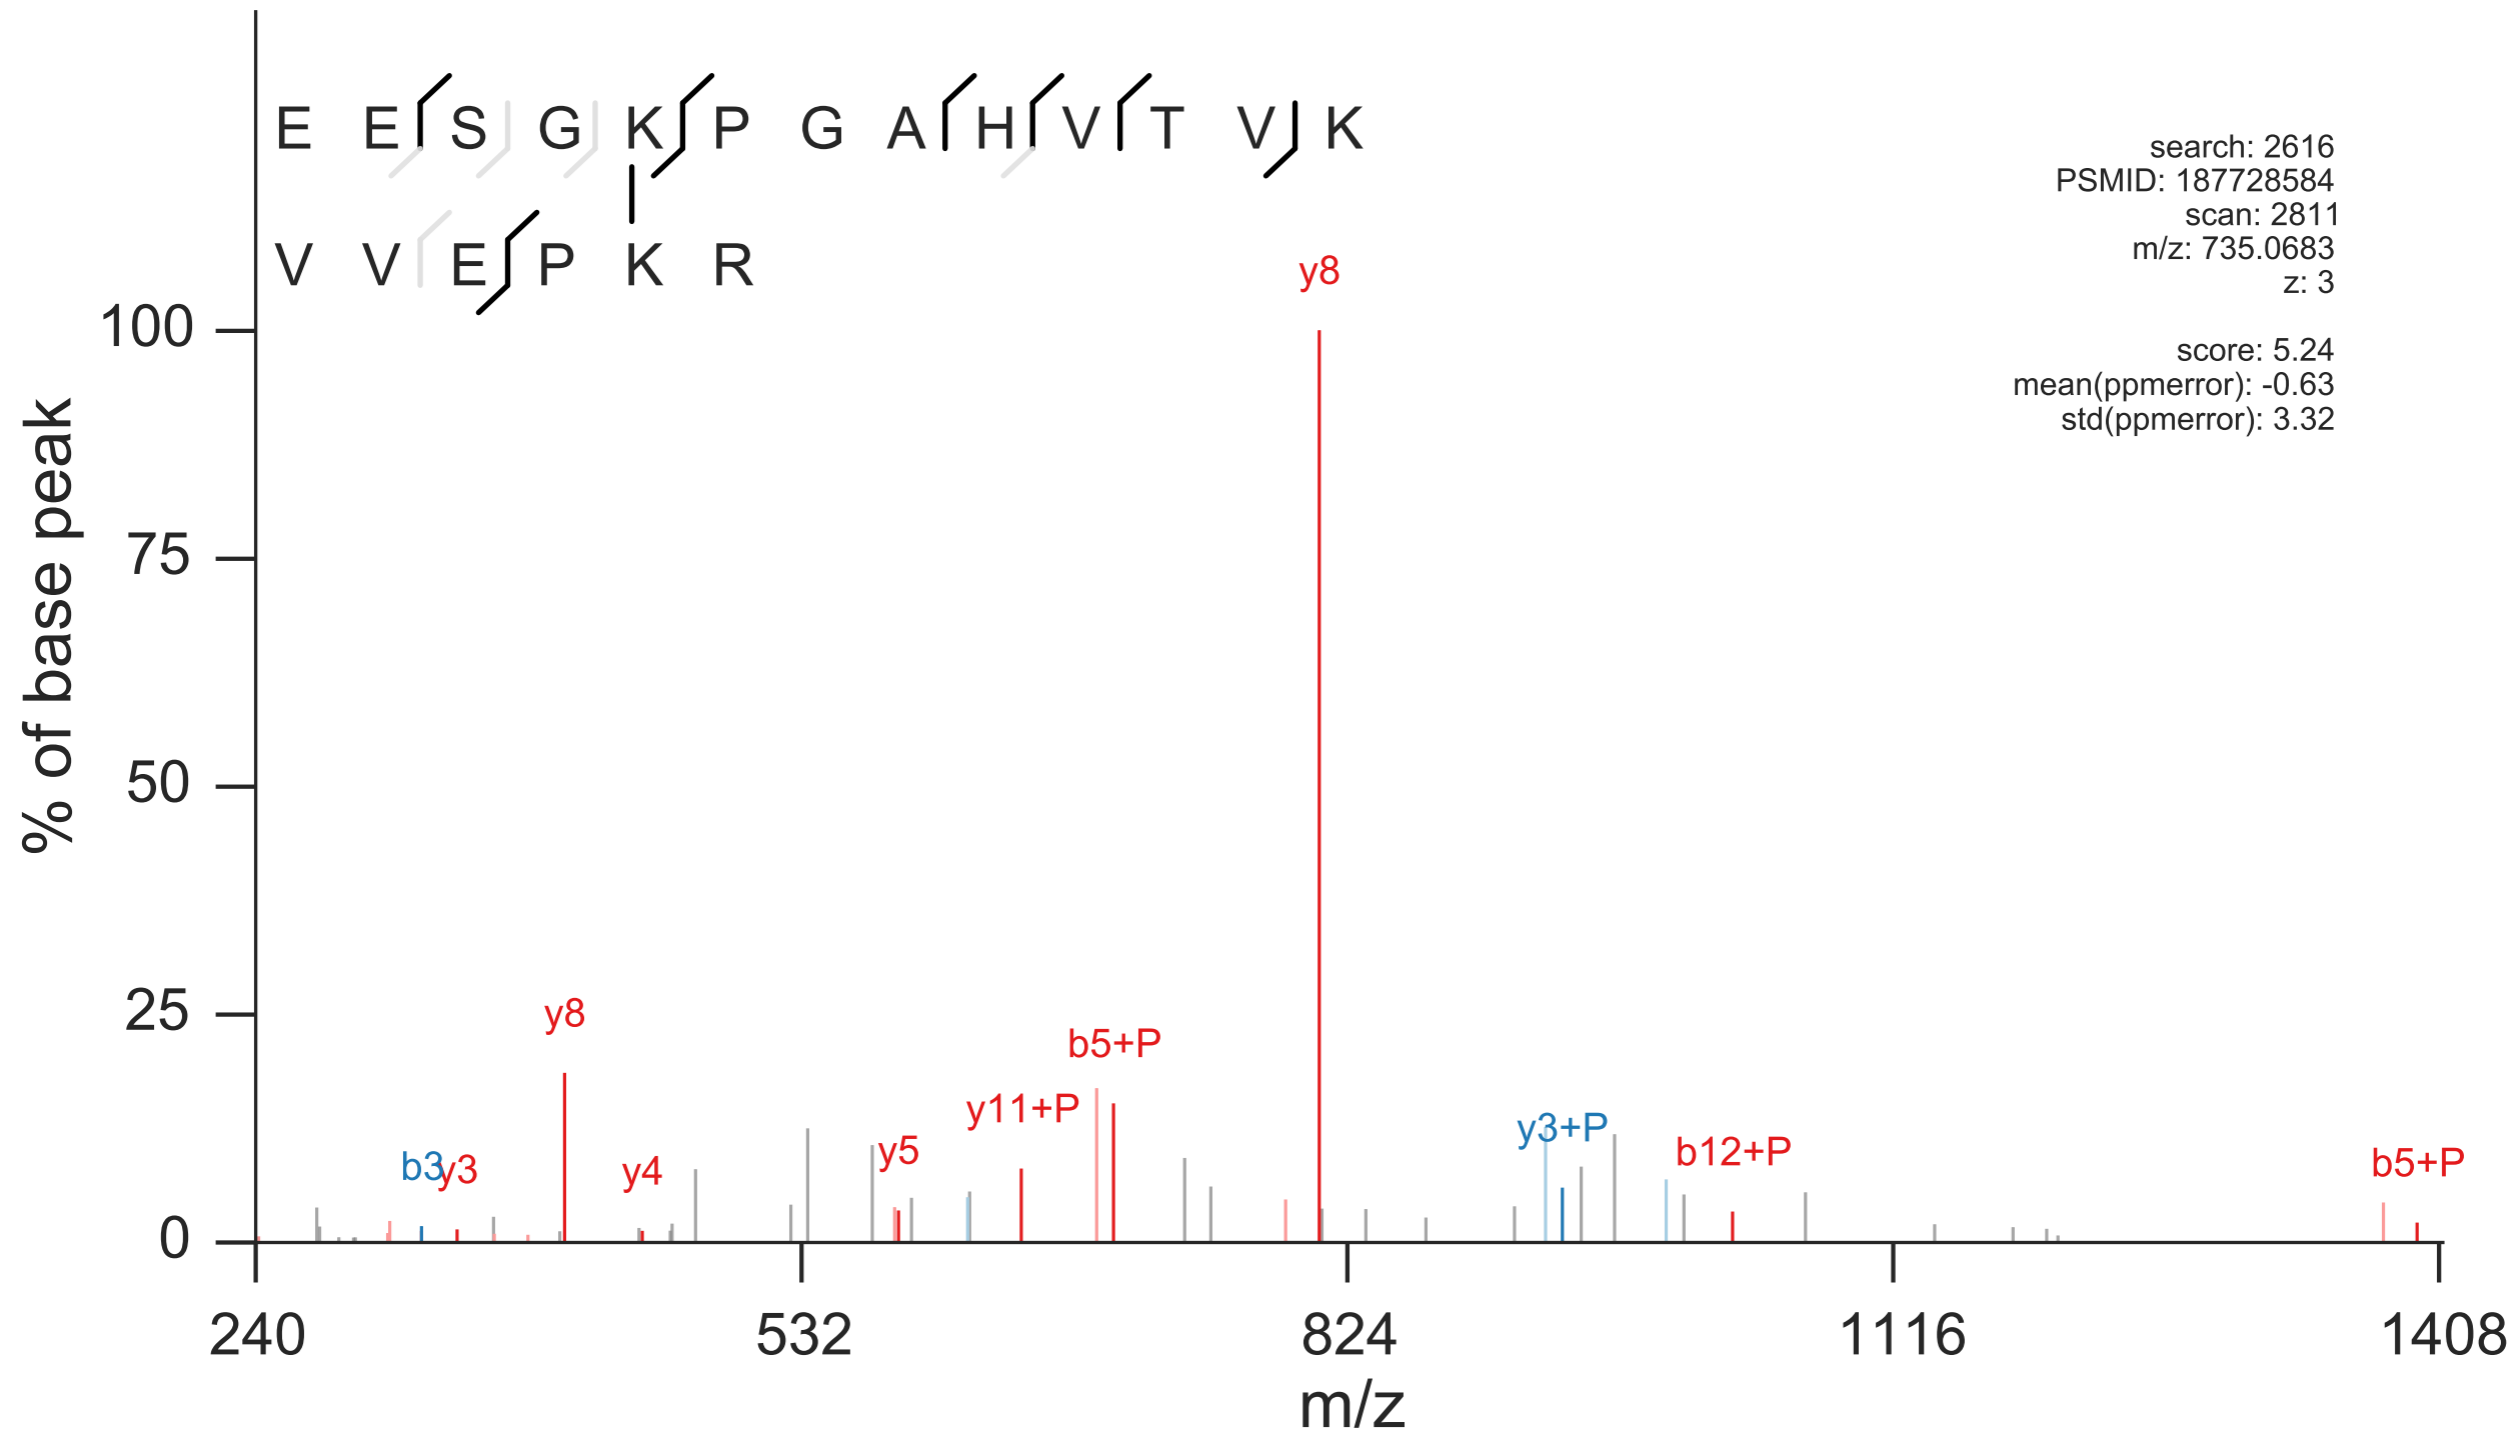

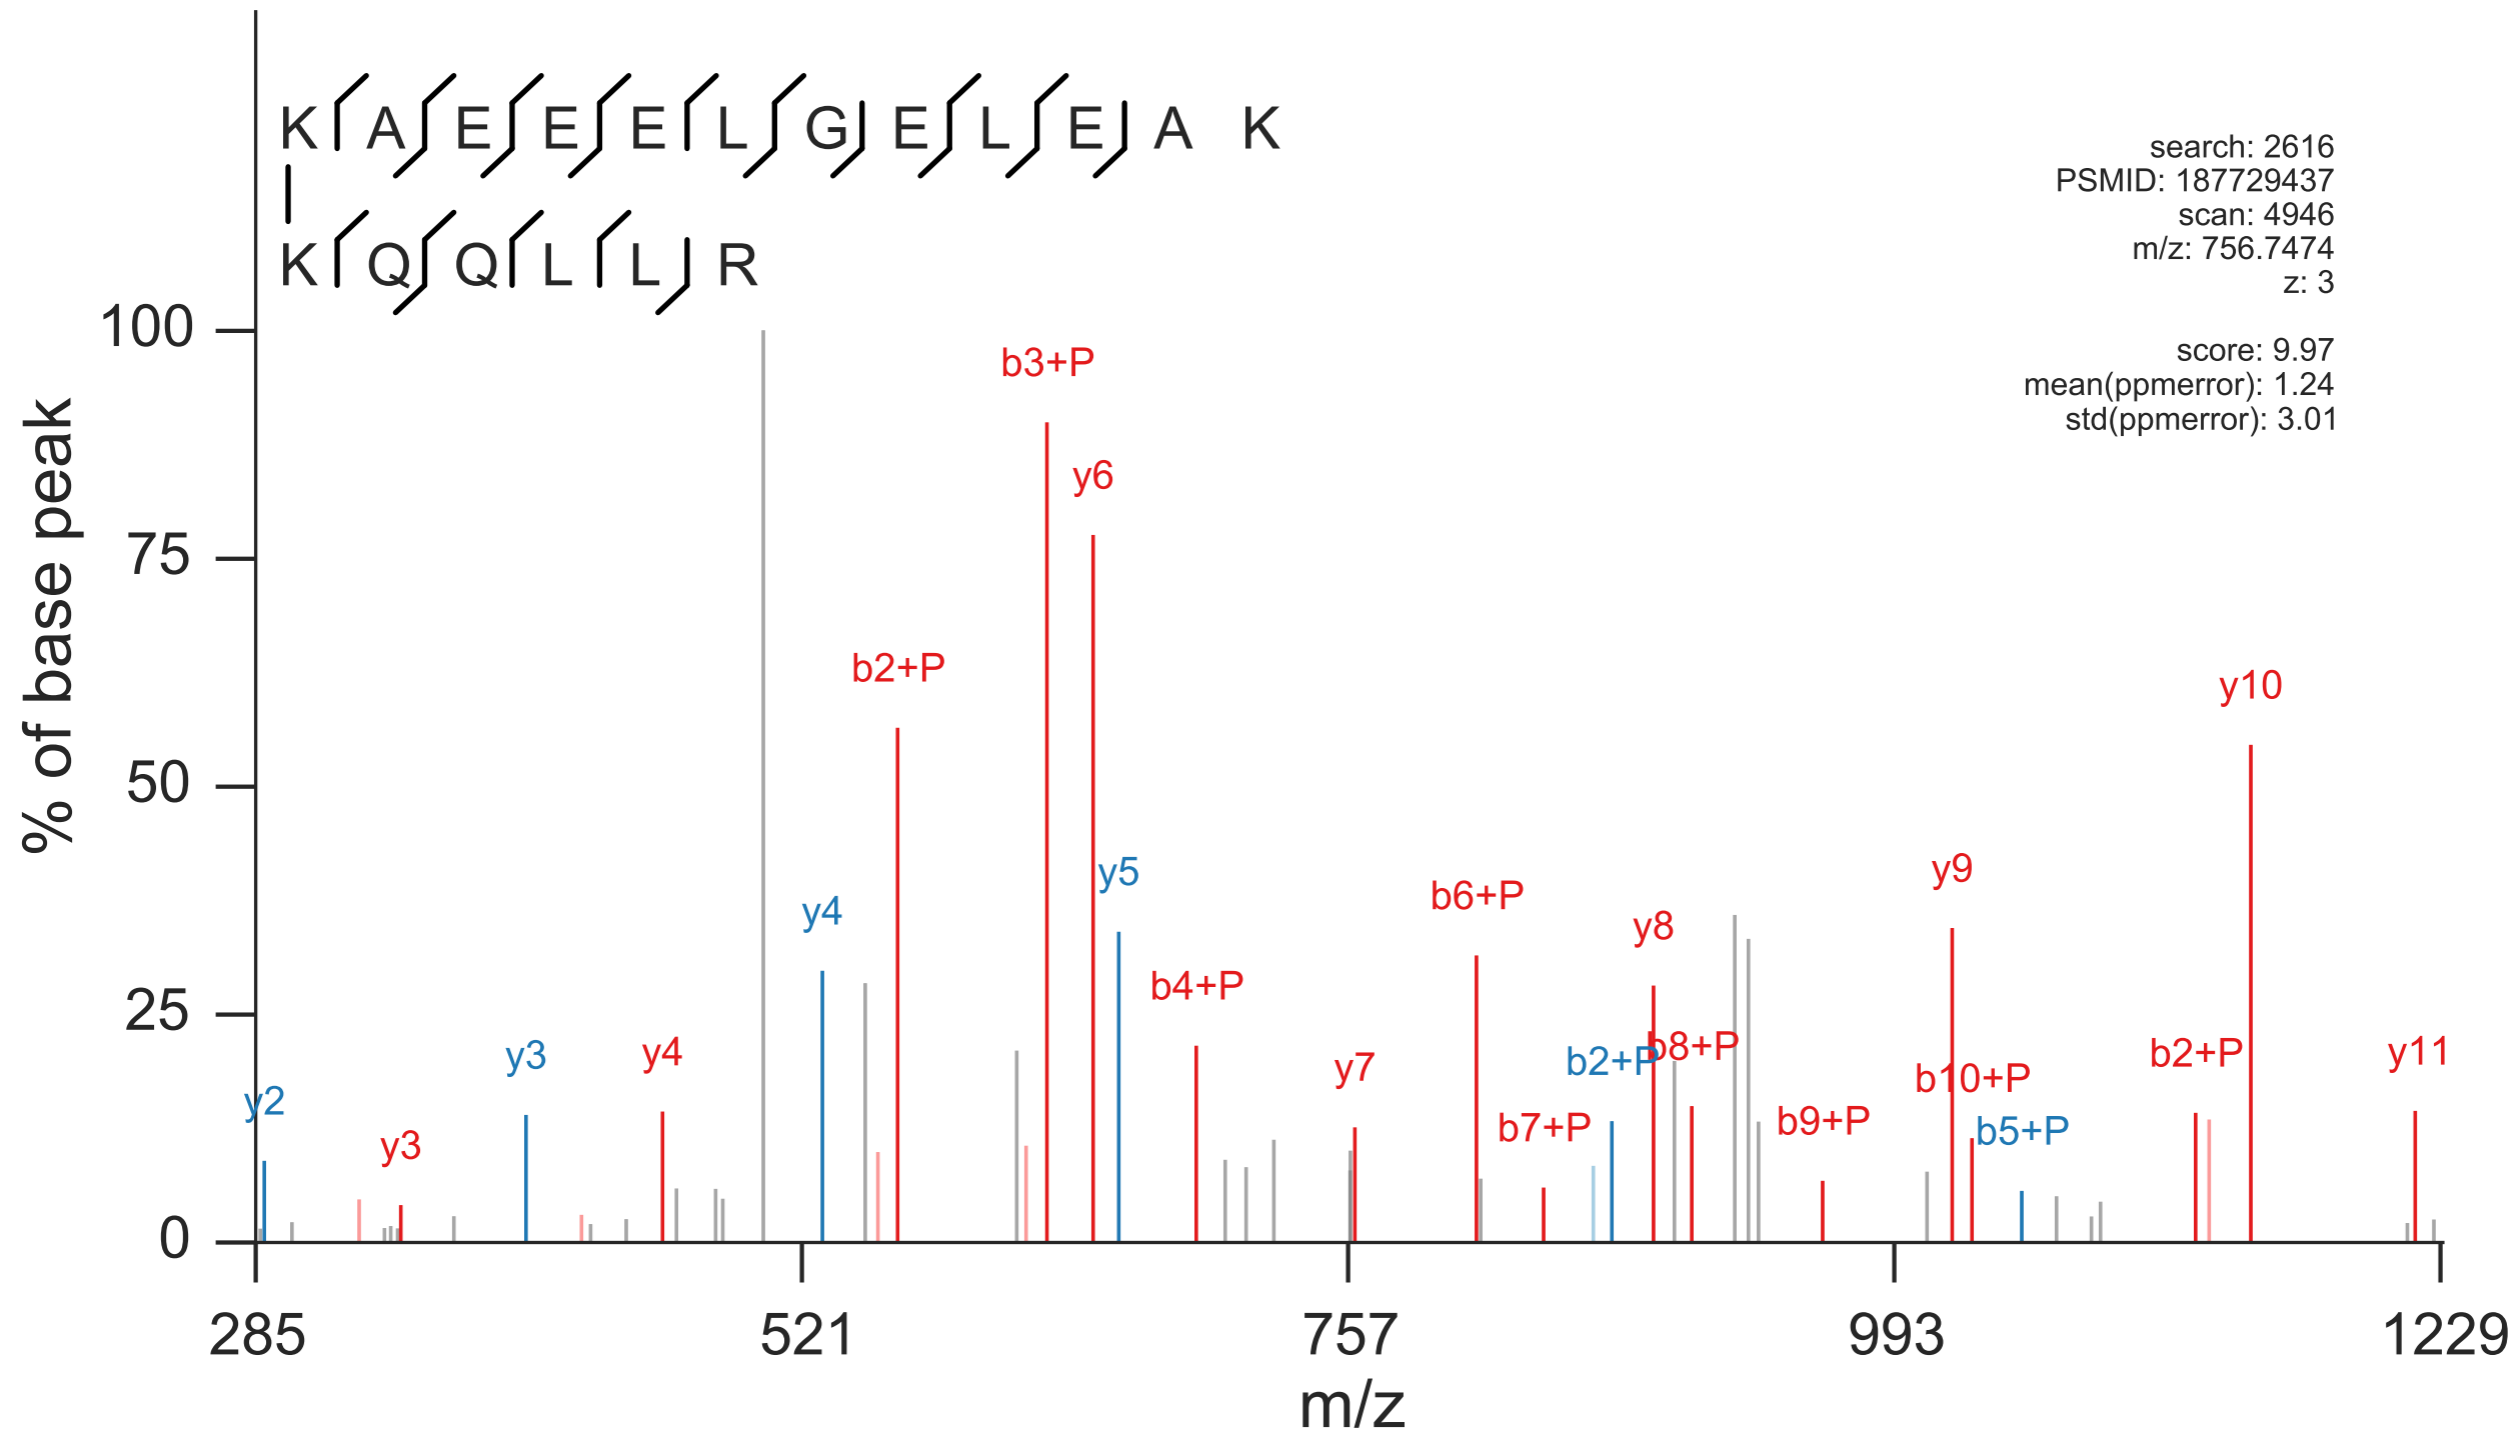

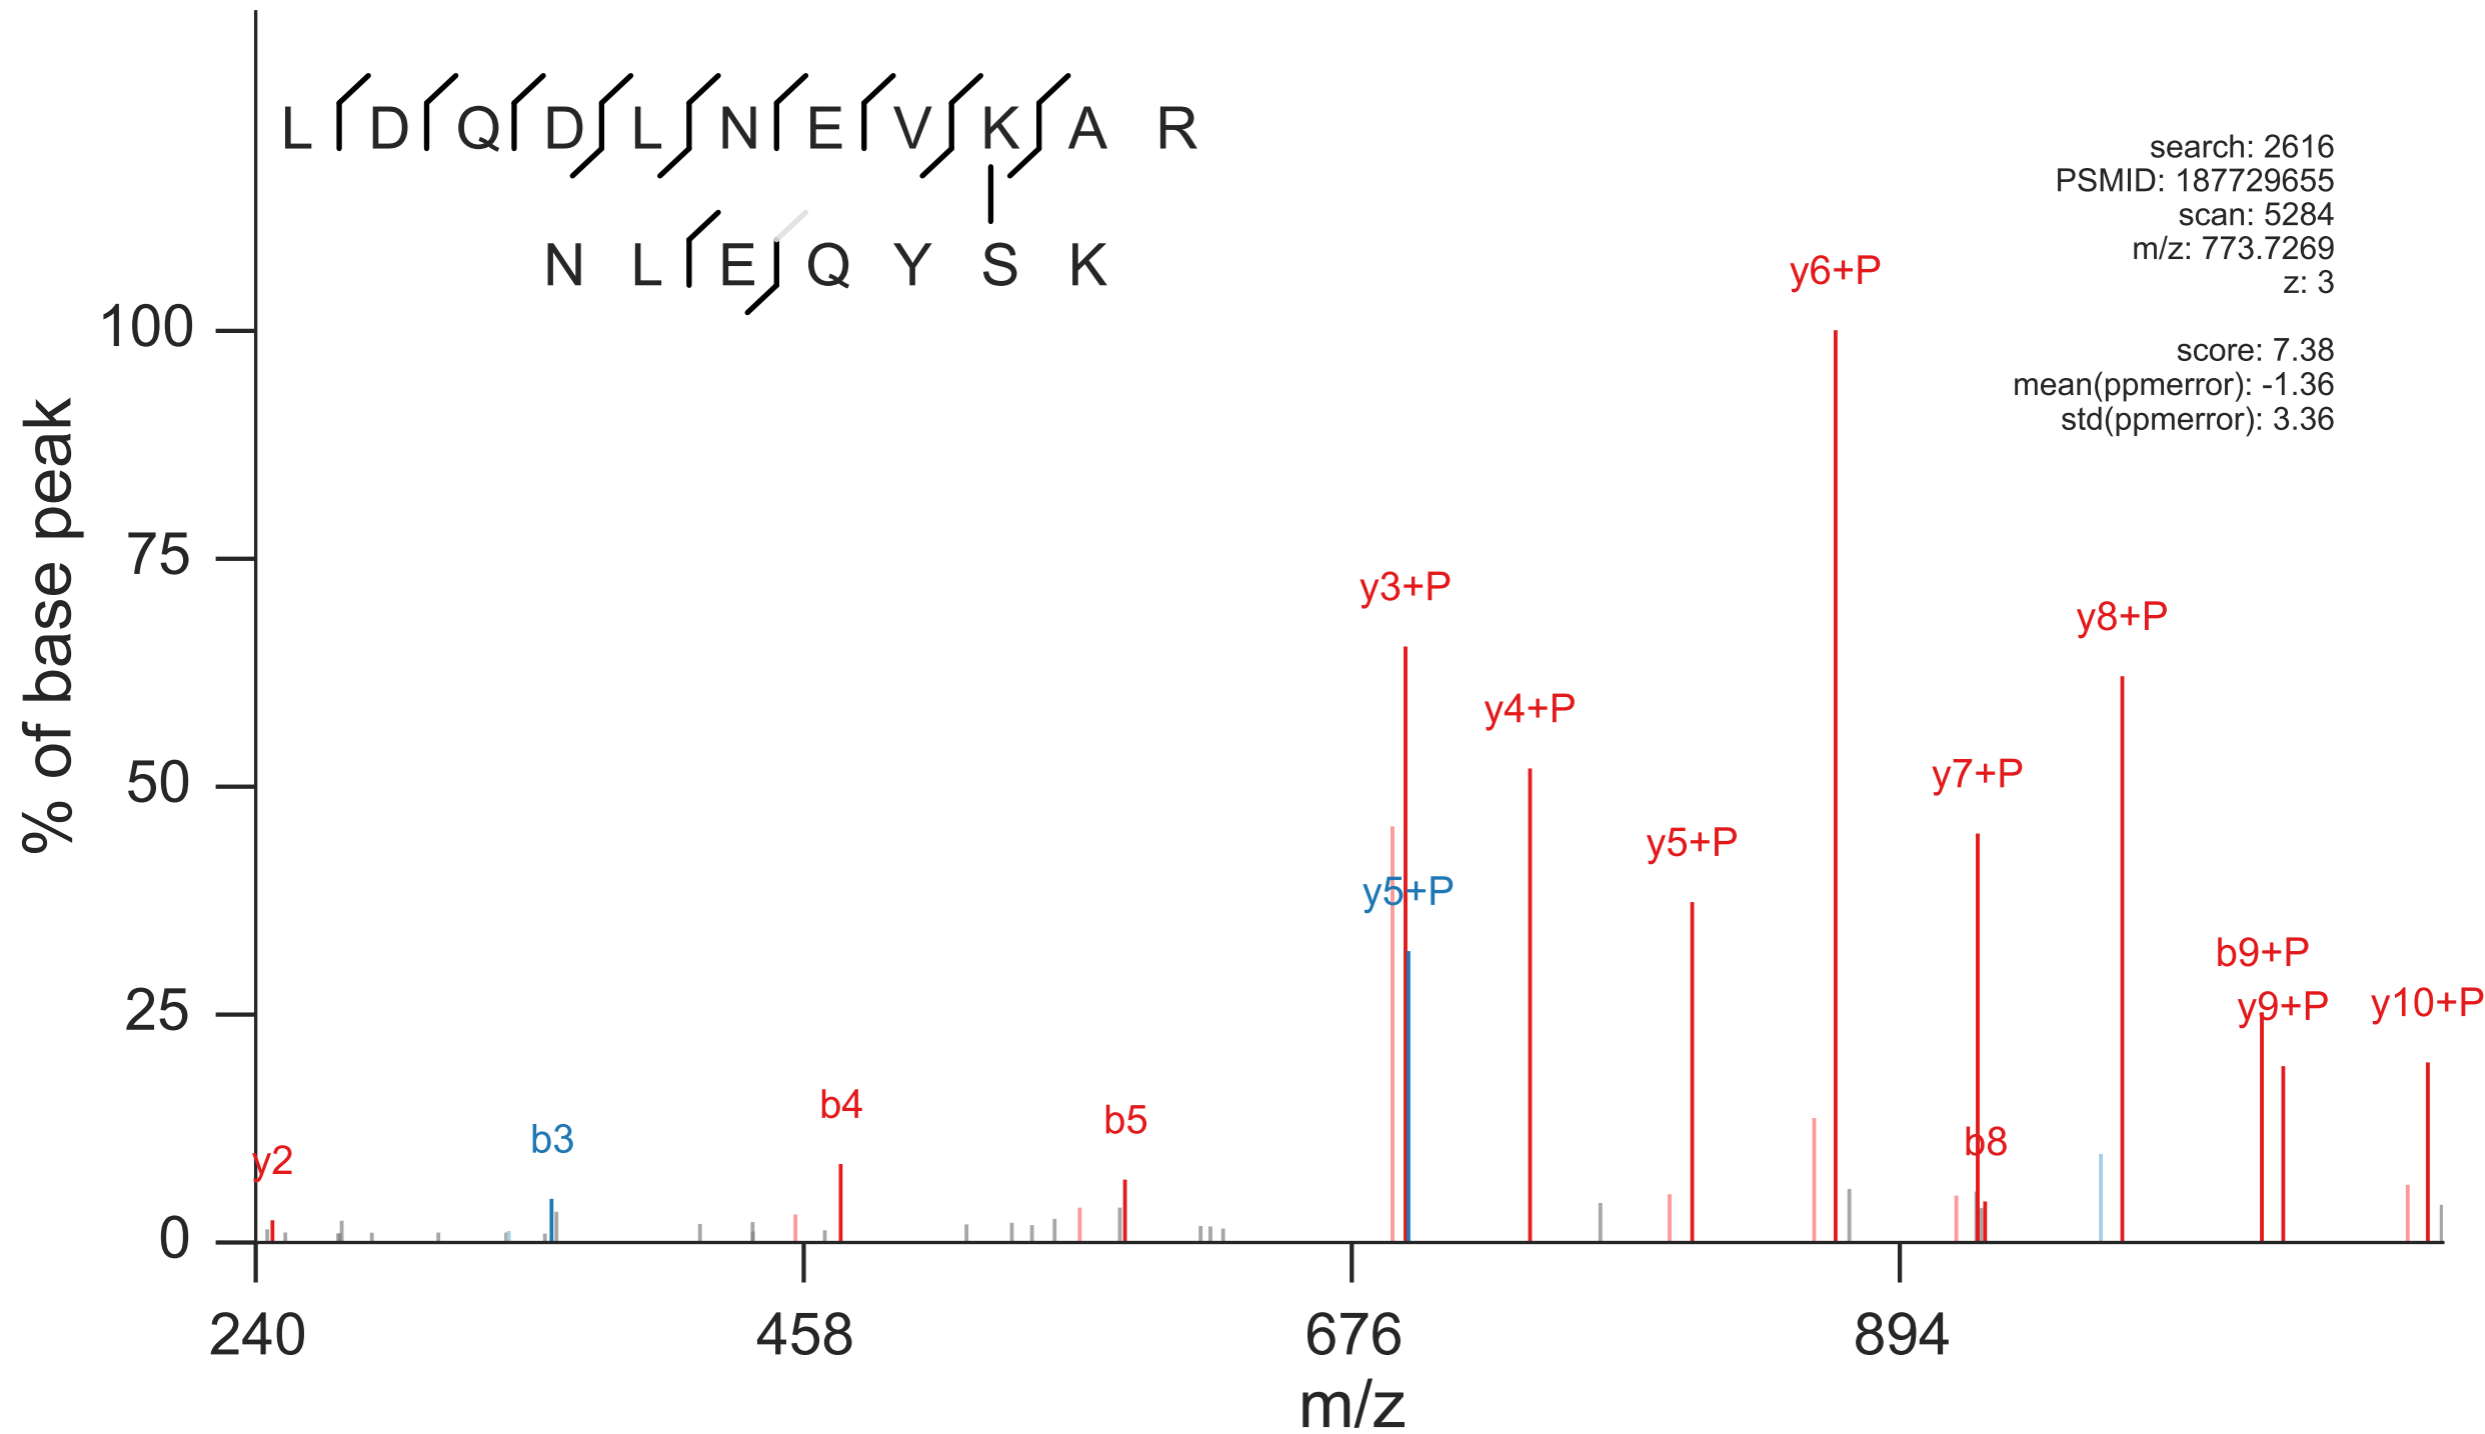



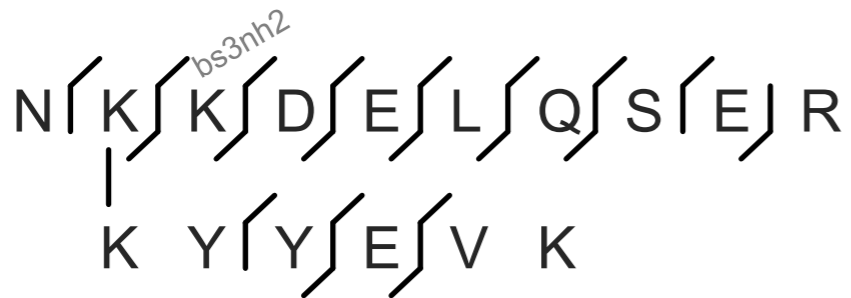

search: 2616  
 PSMID: 187729764  
 scan: 4598  
 m/z: 790.0784  
 z: 3  
  
 score: 9.52  
 mean(ppmerror): -3.25  
 std(ppmerror): 4.14

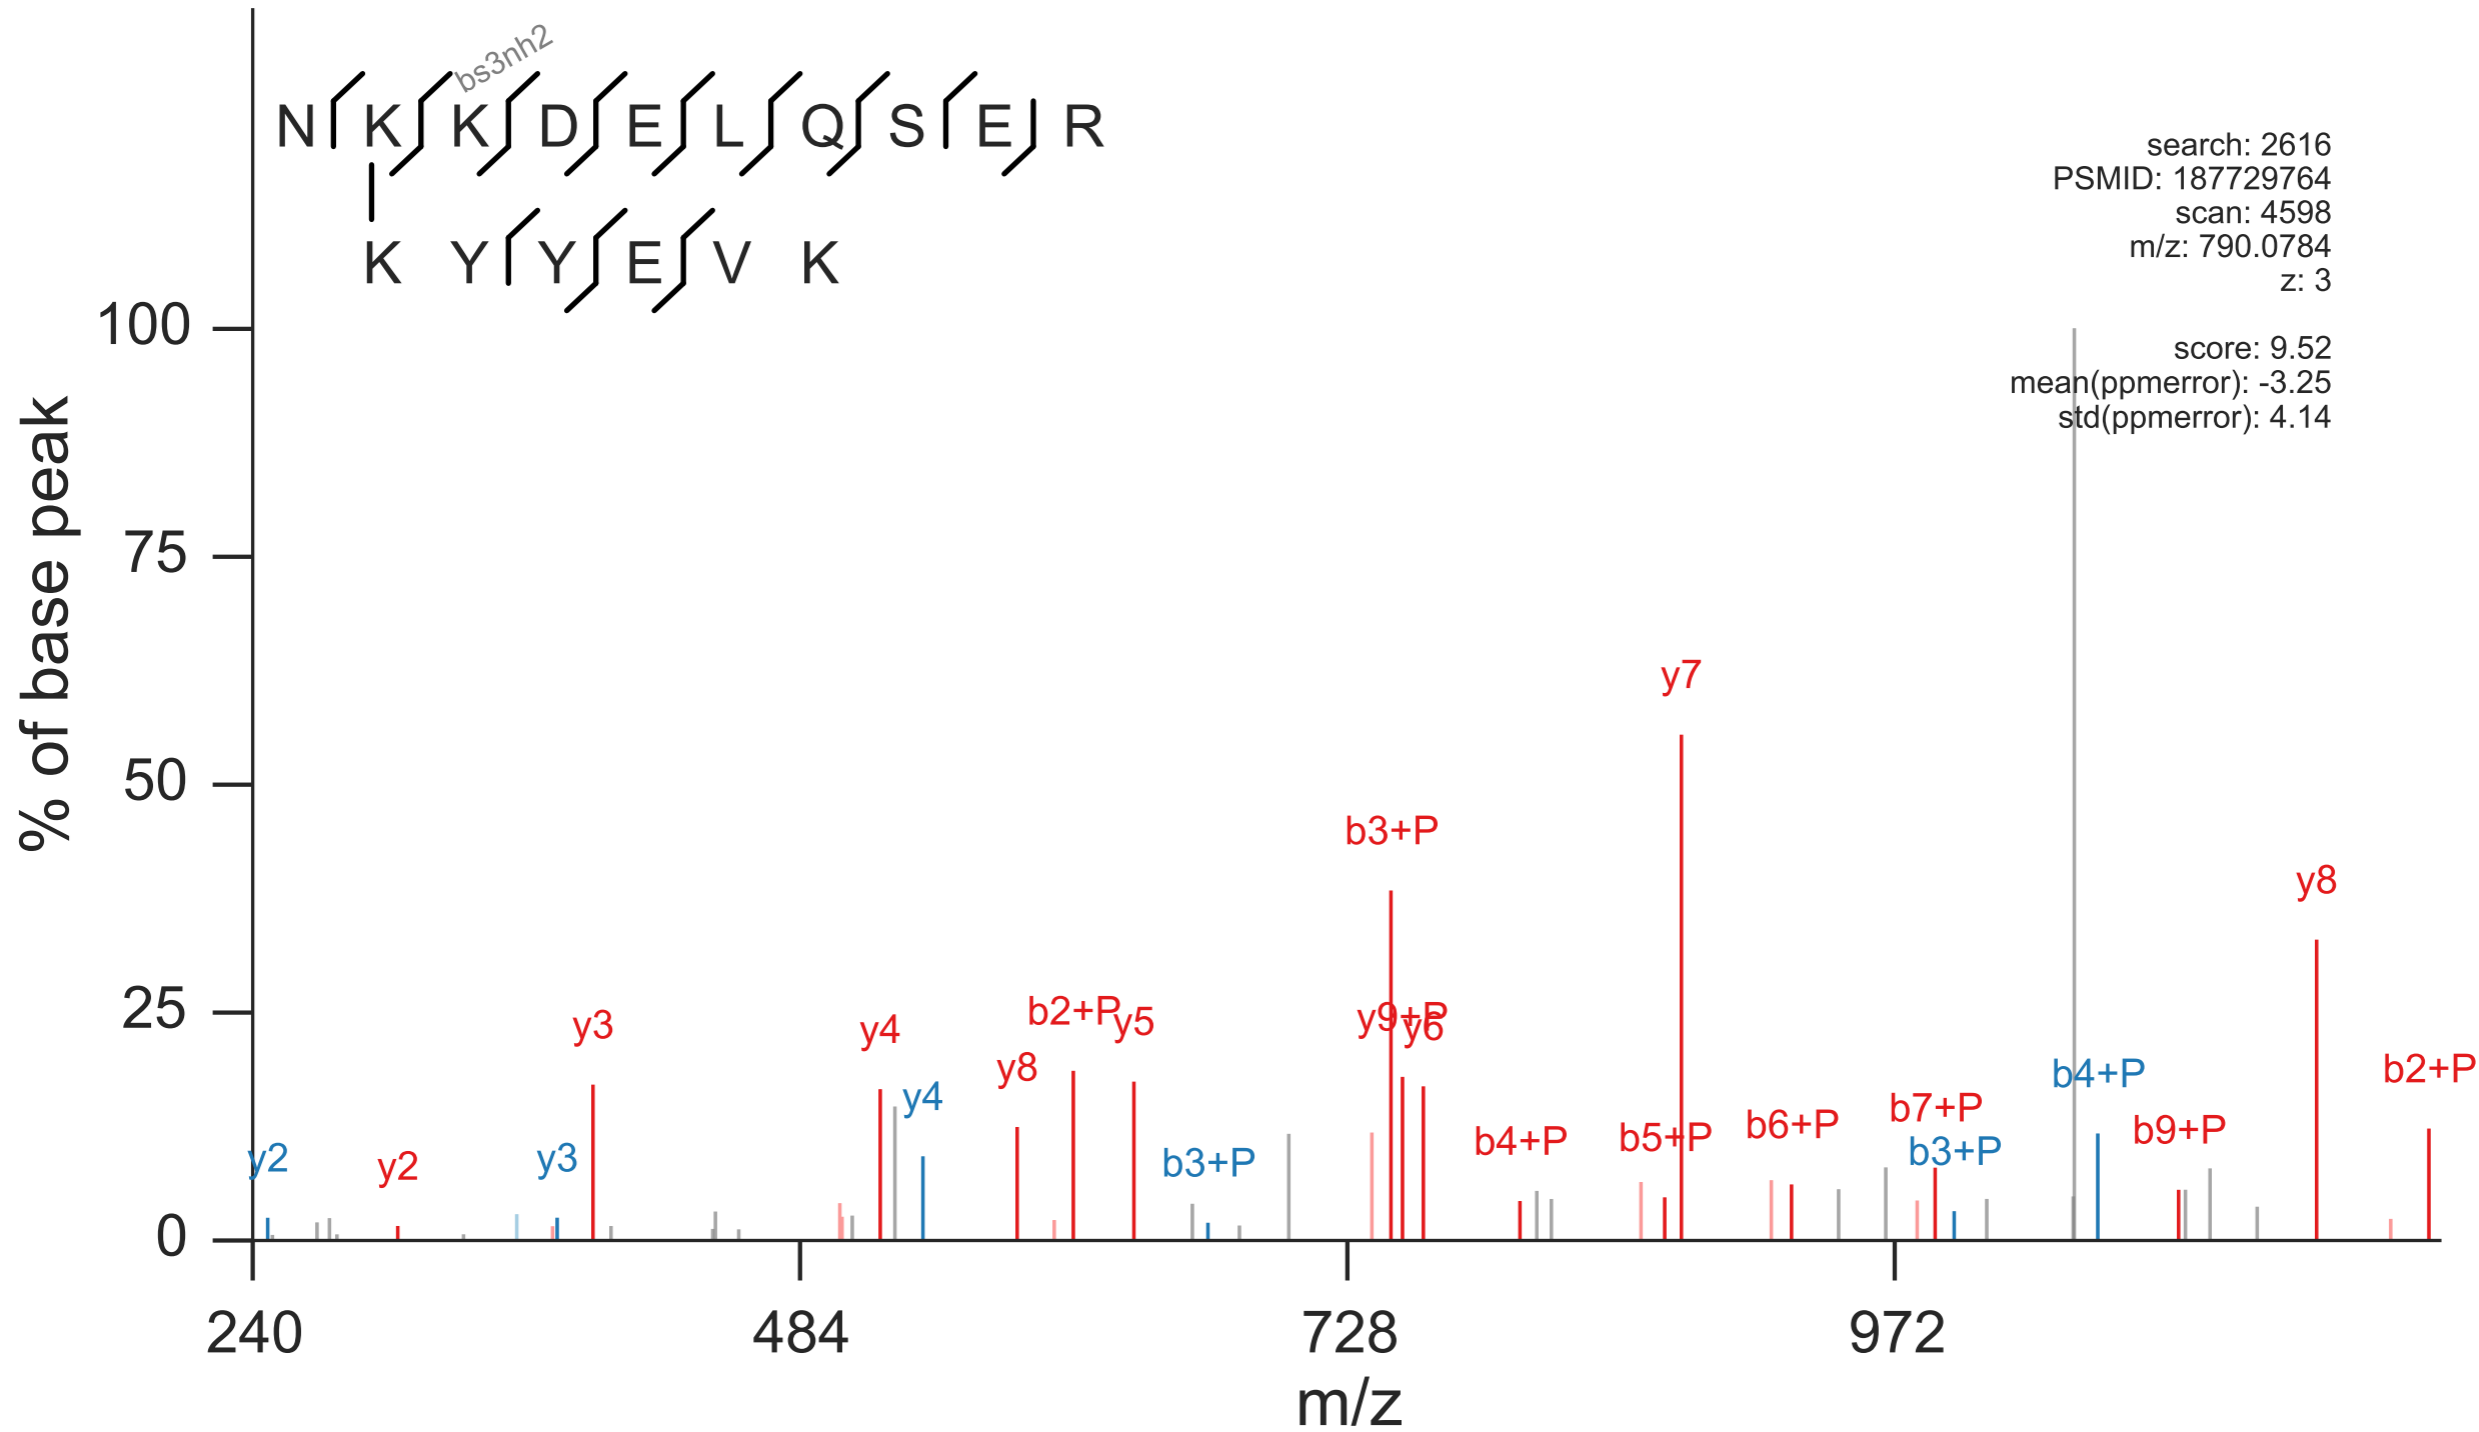

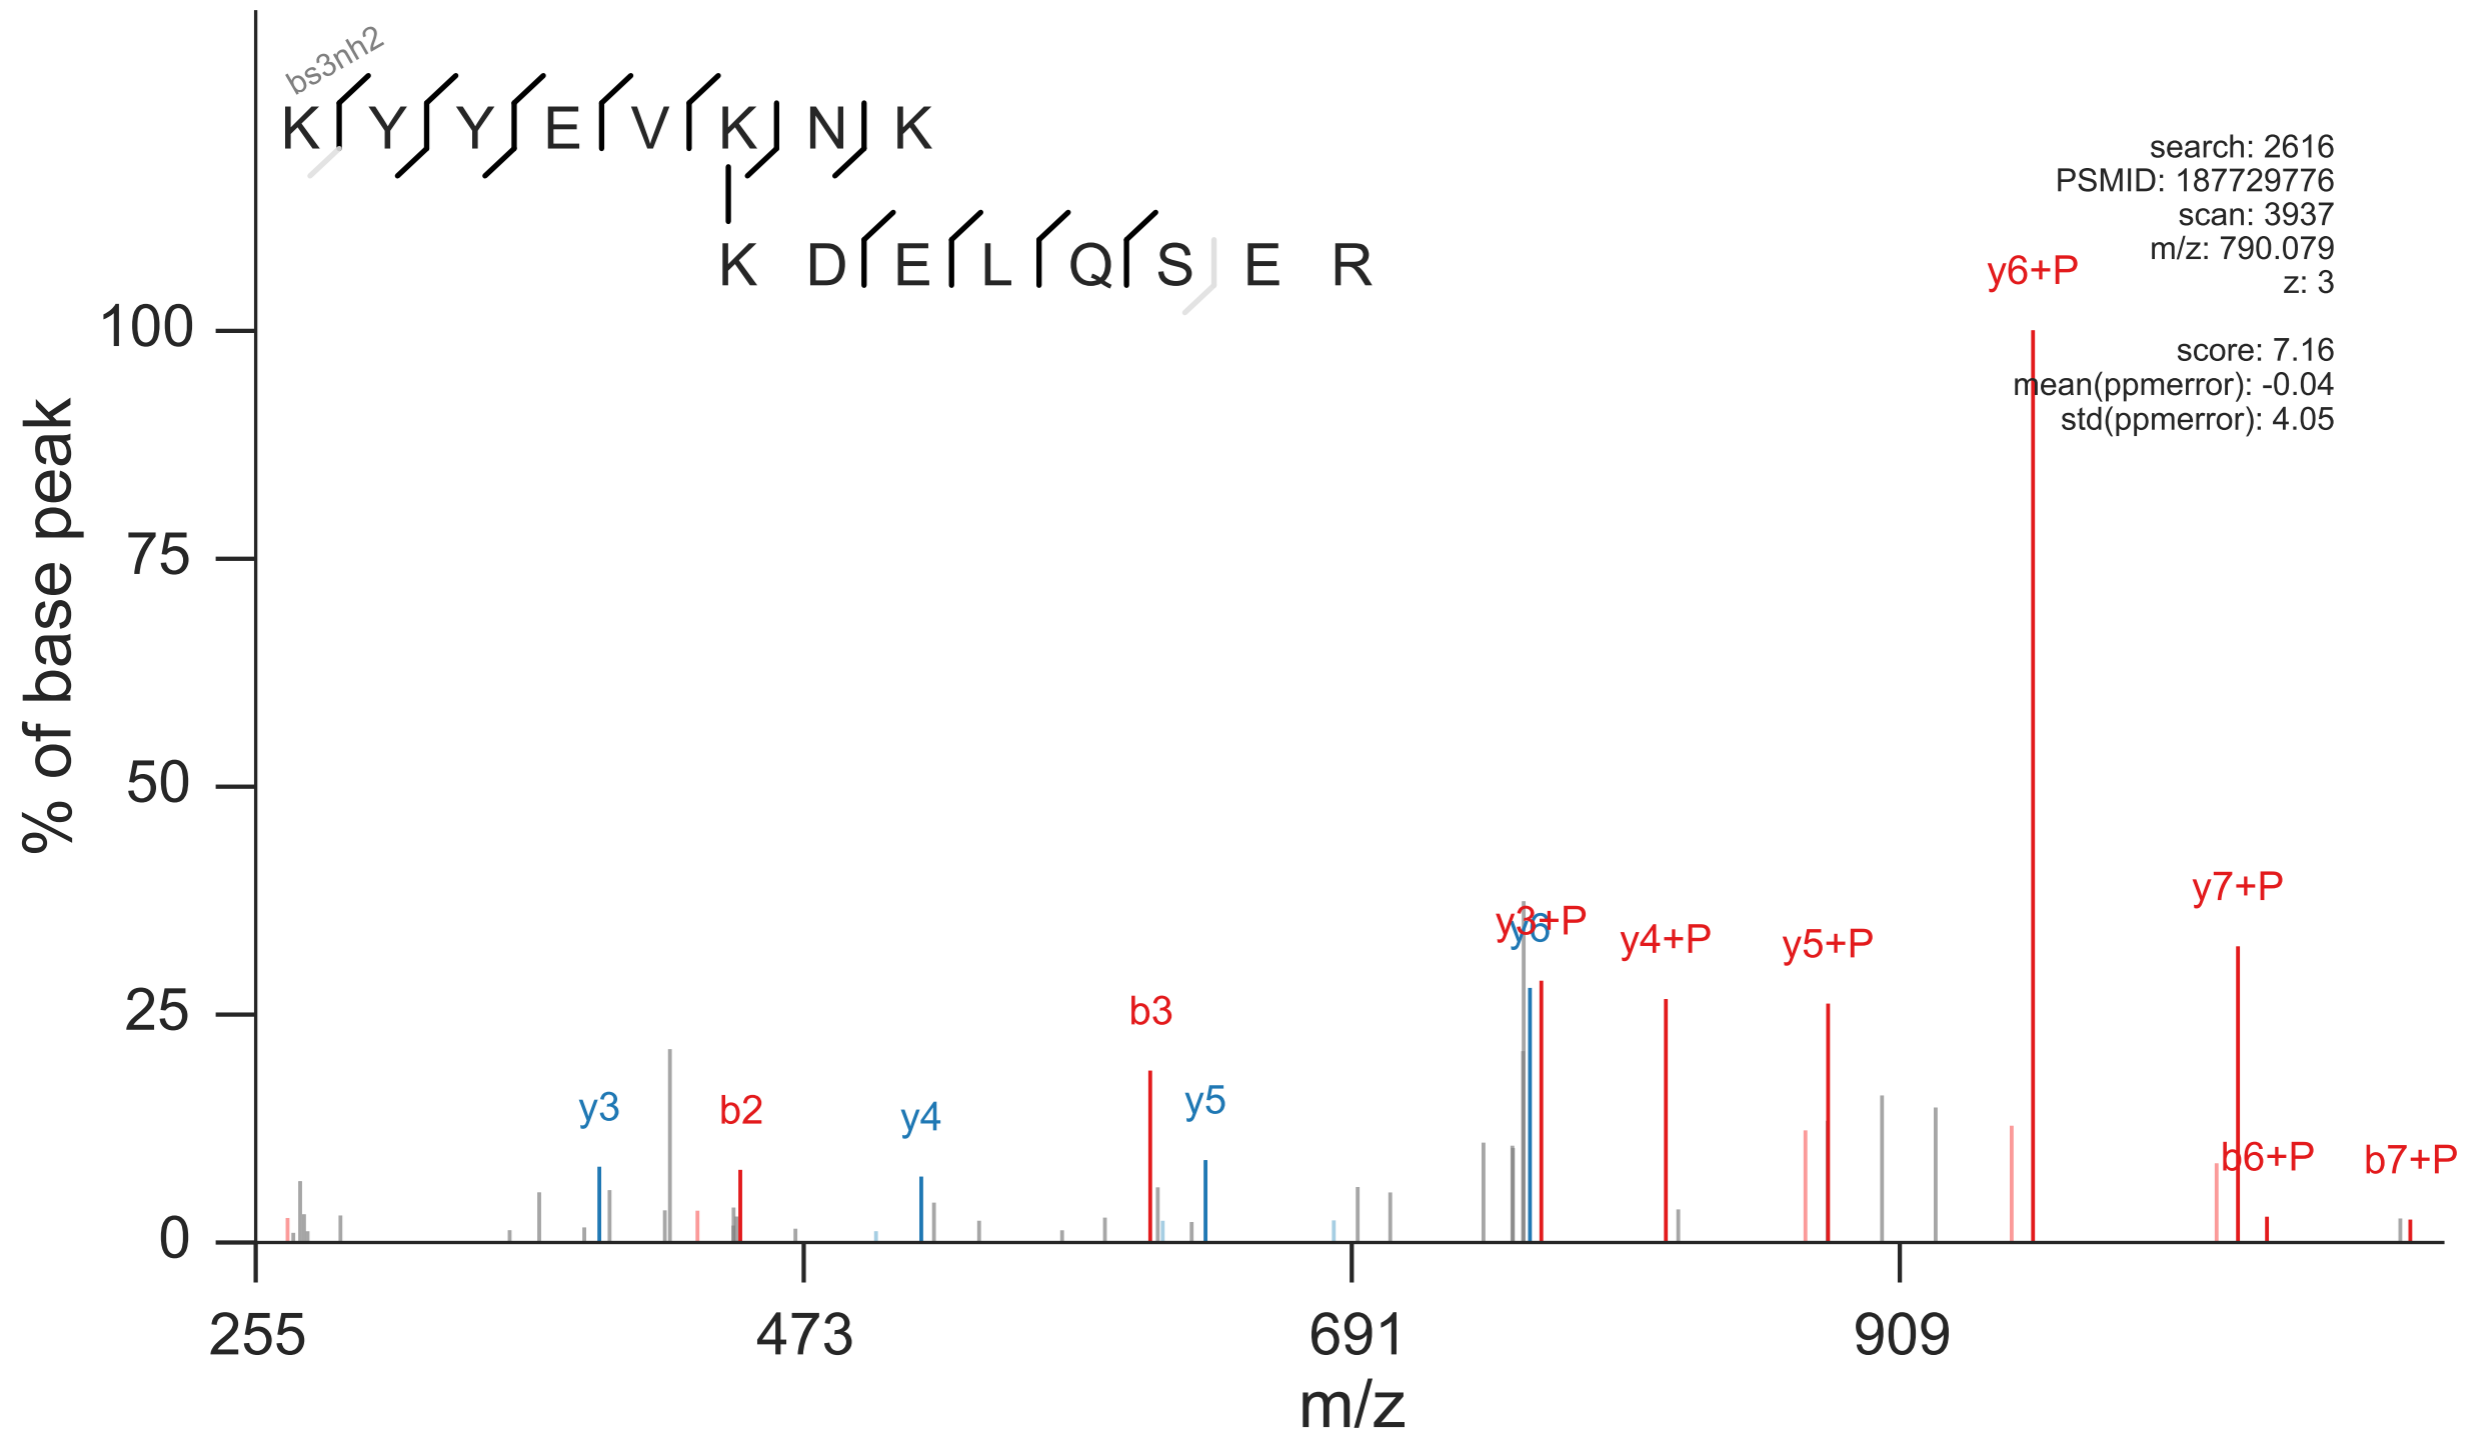

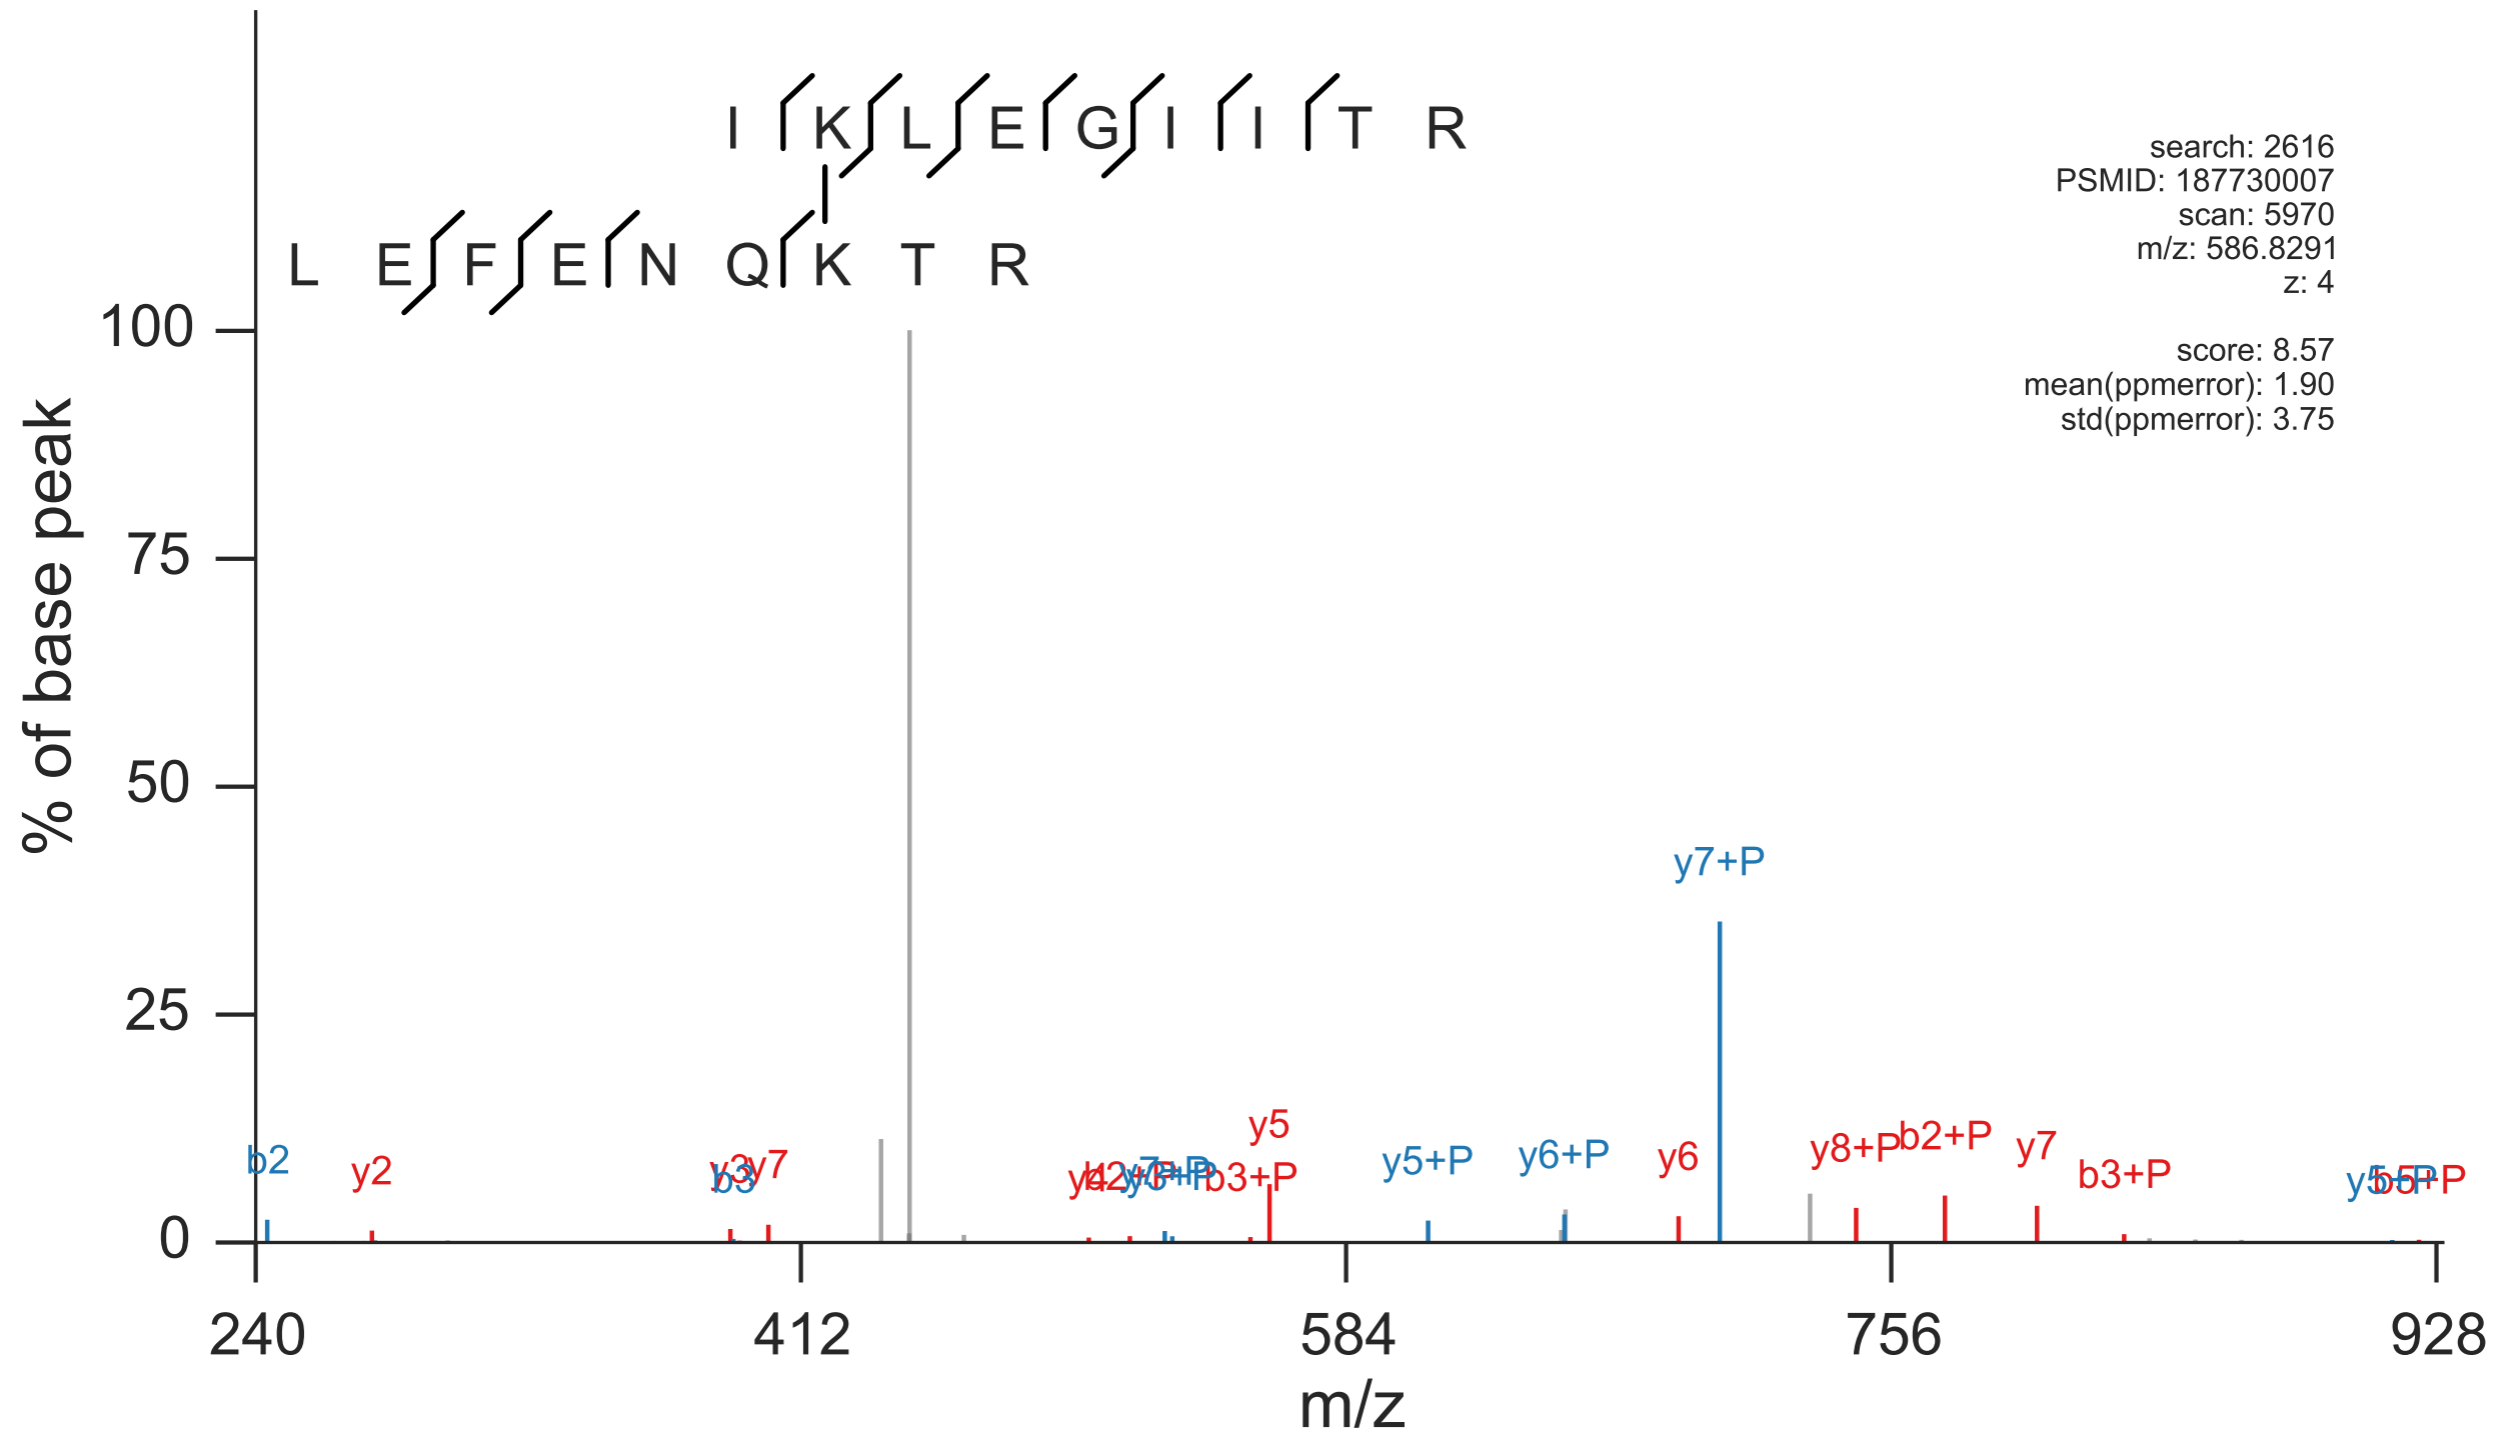

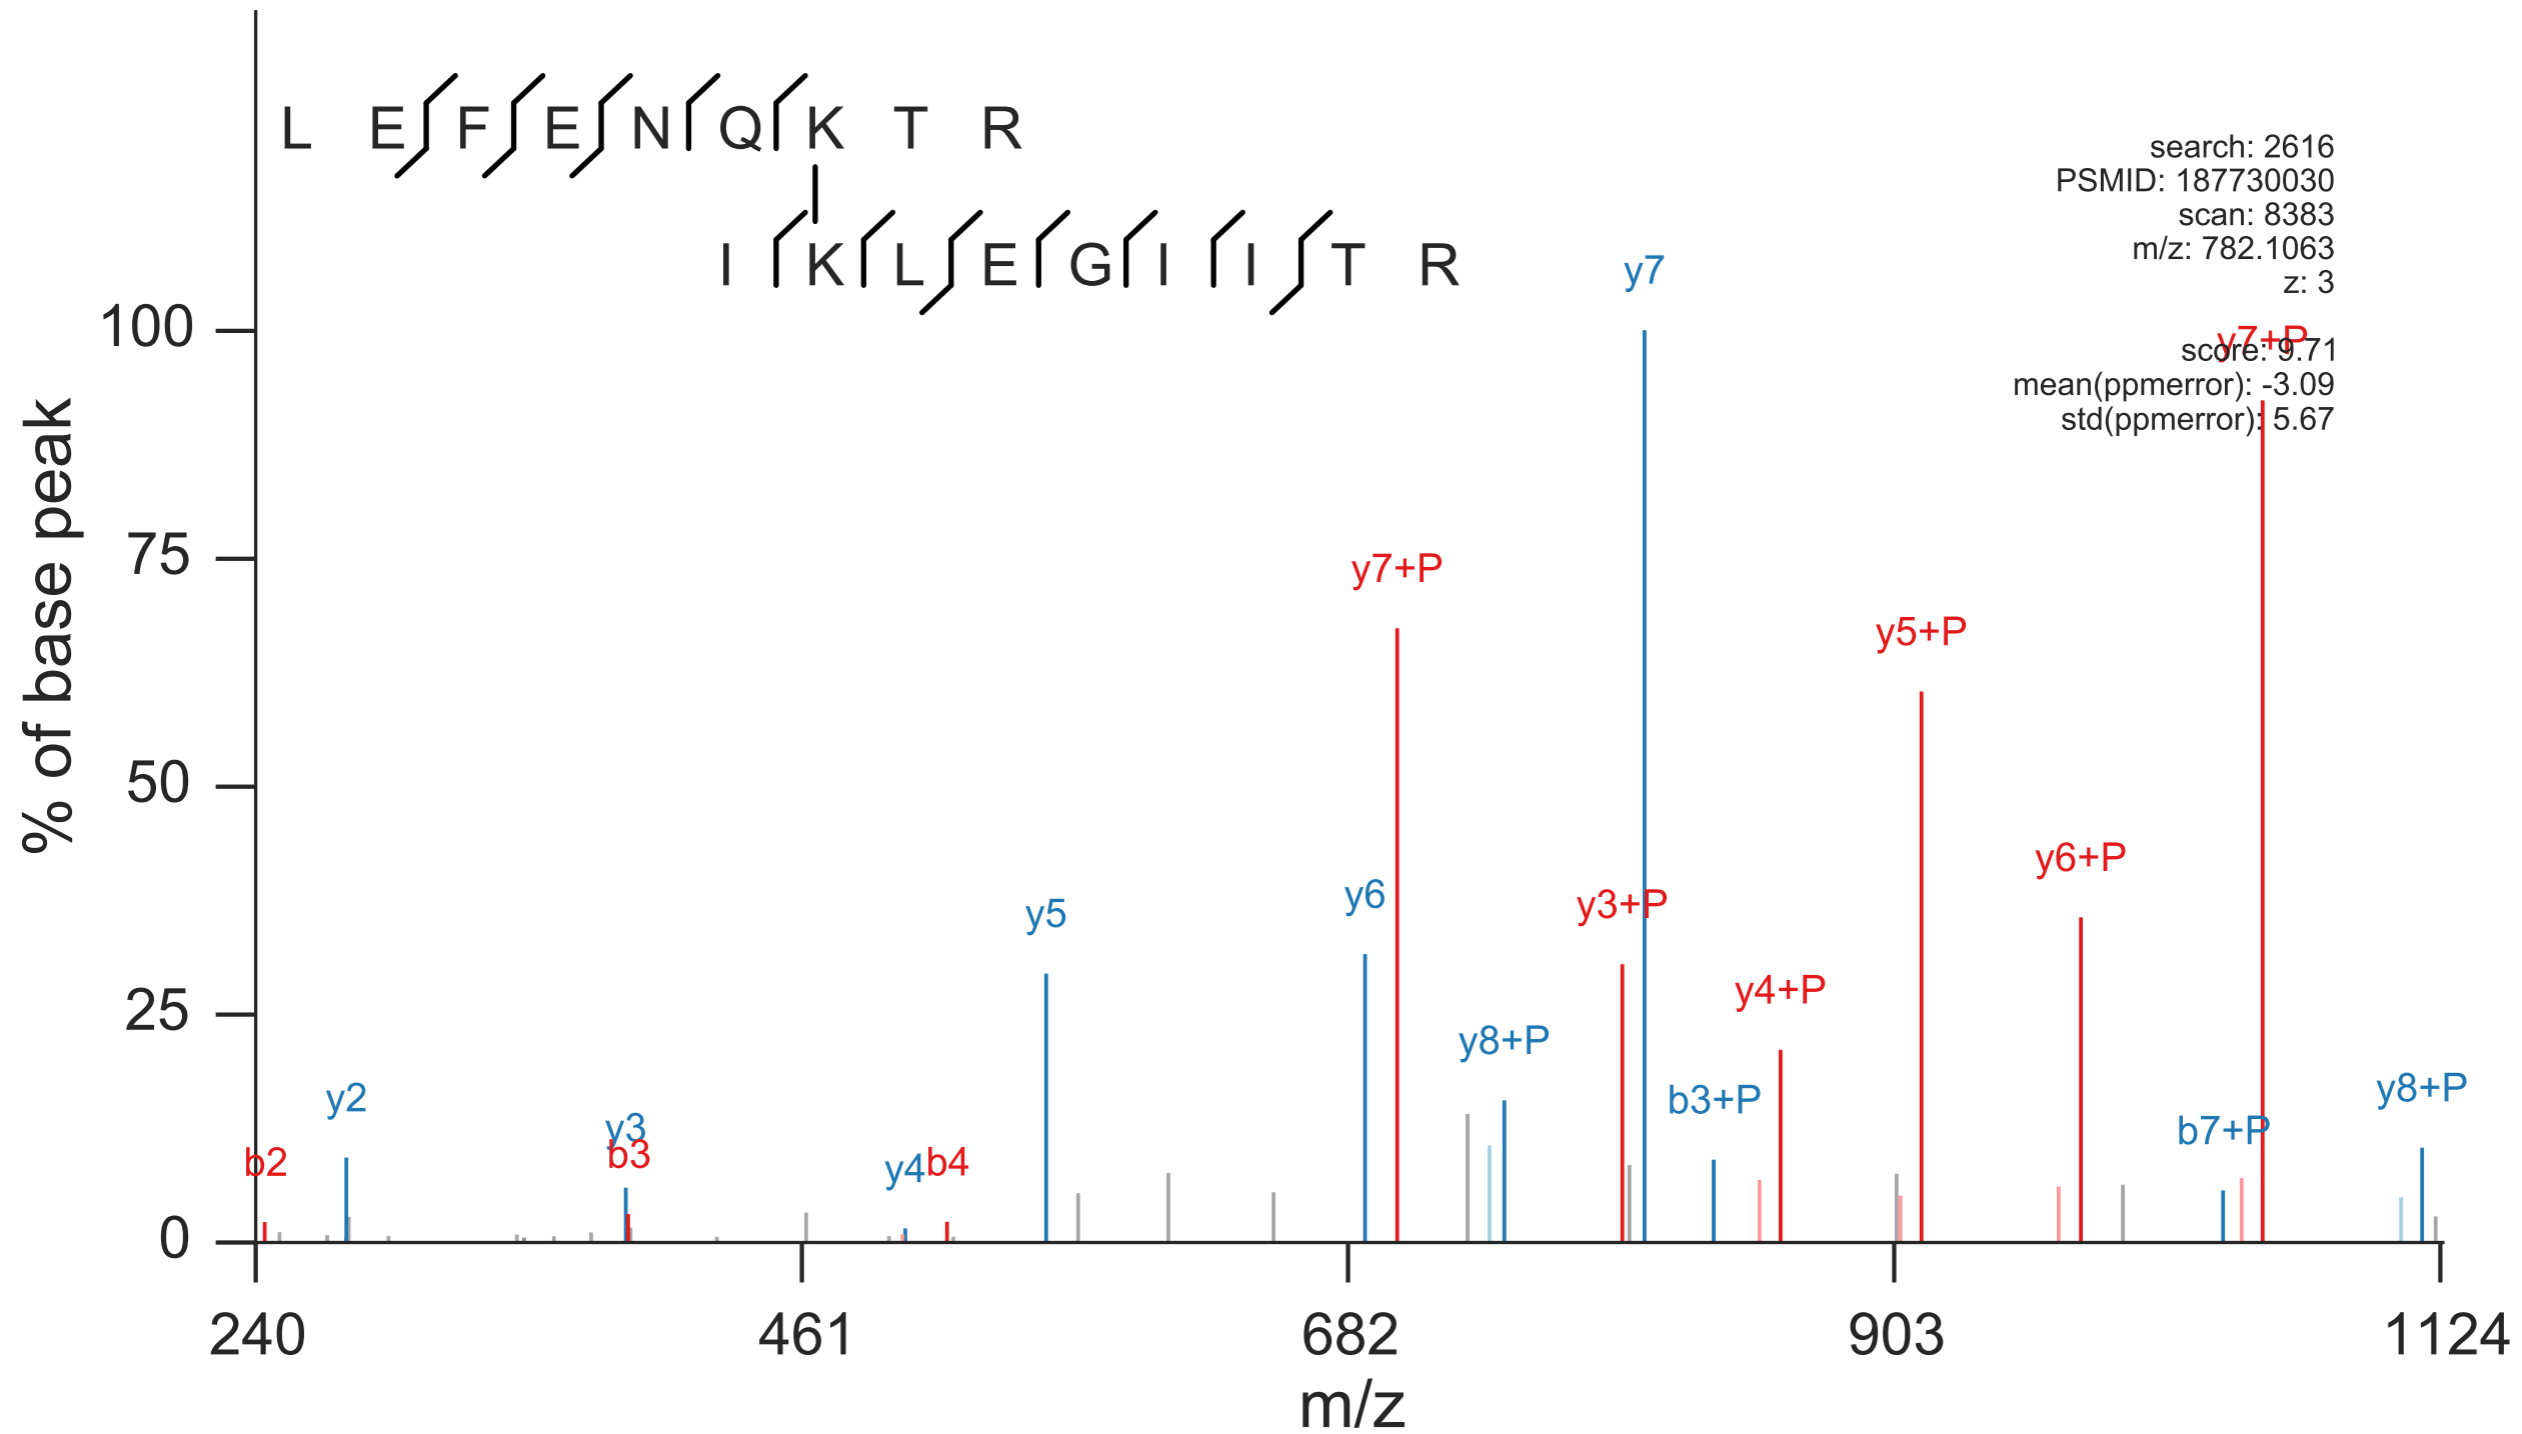

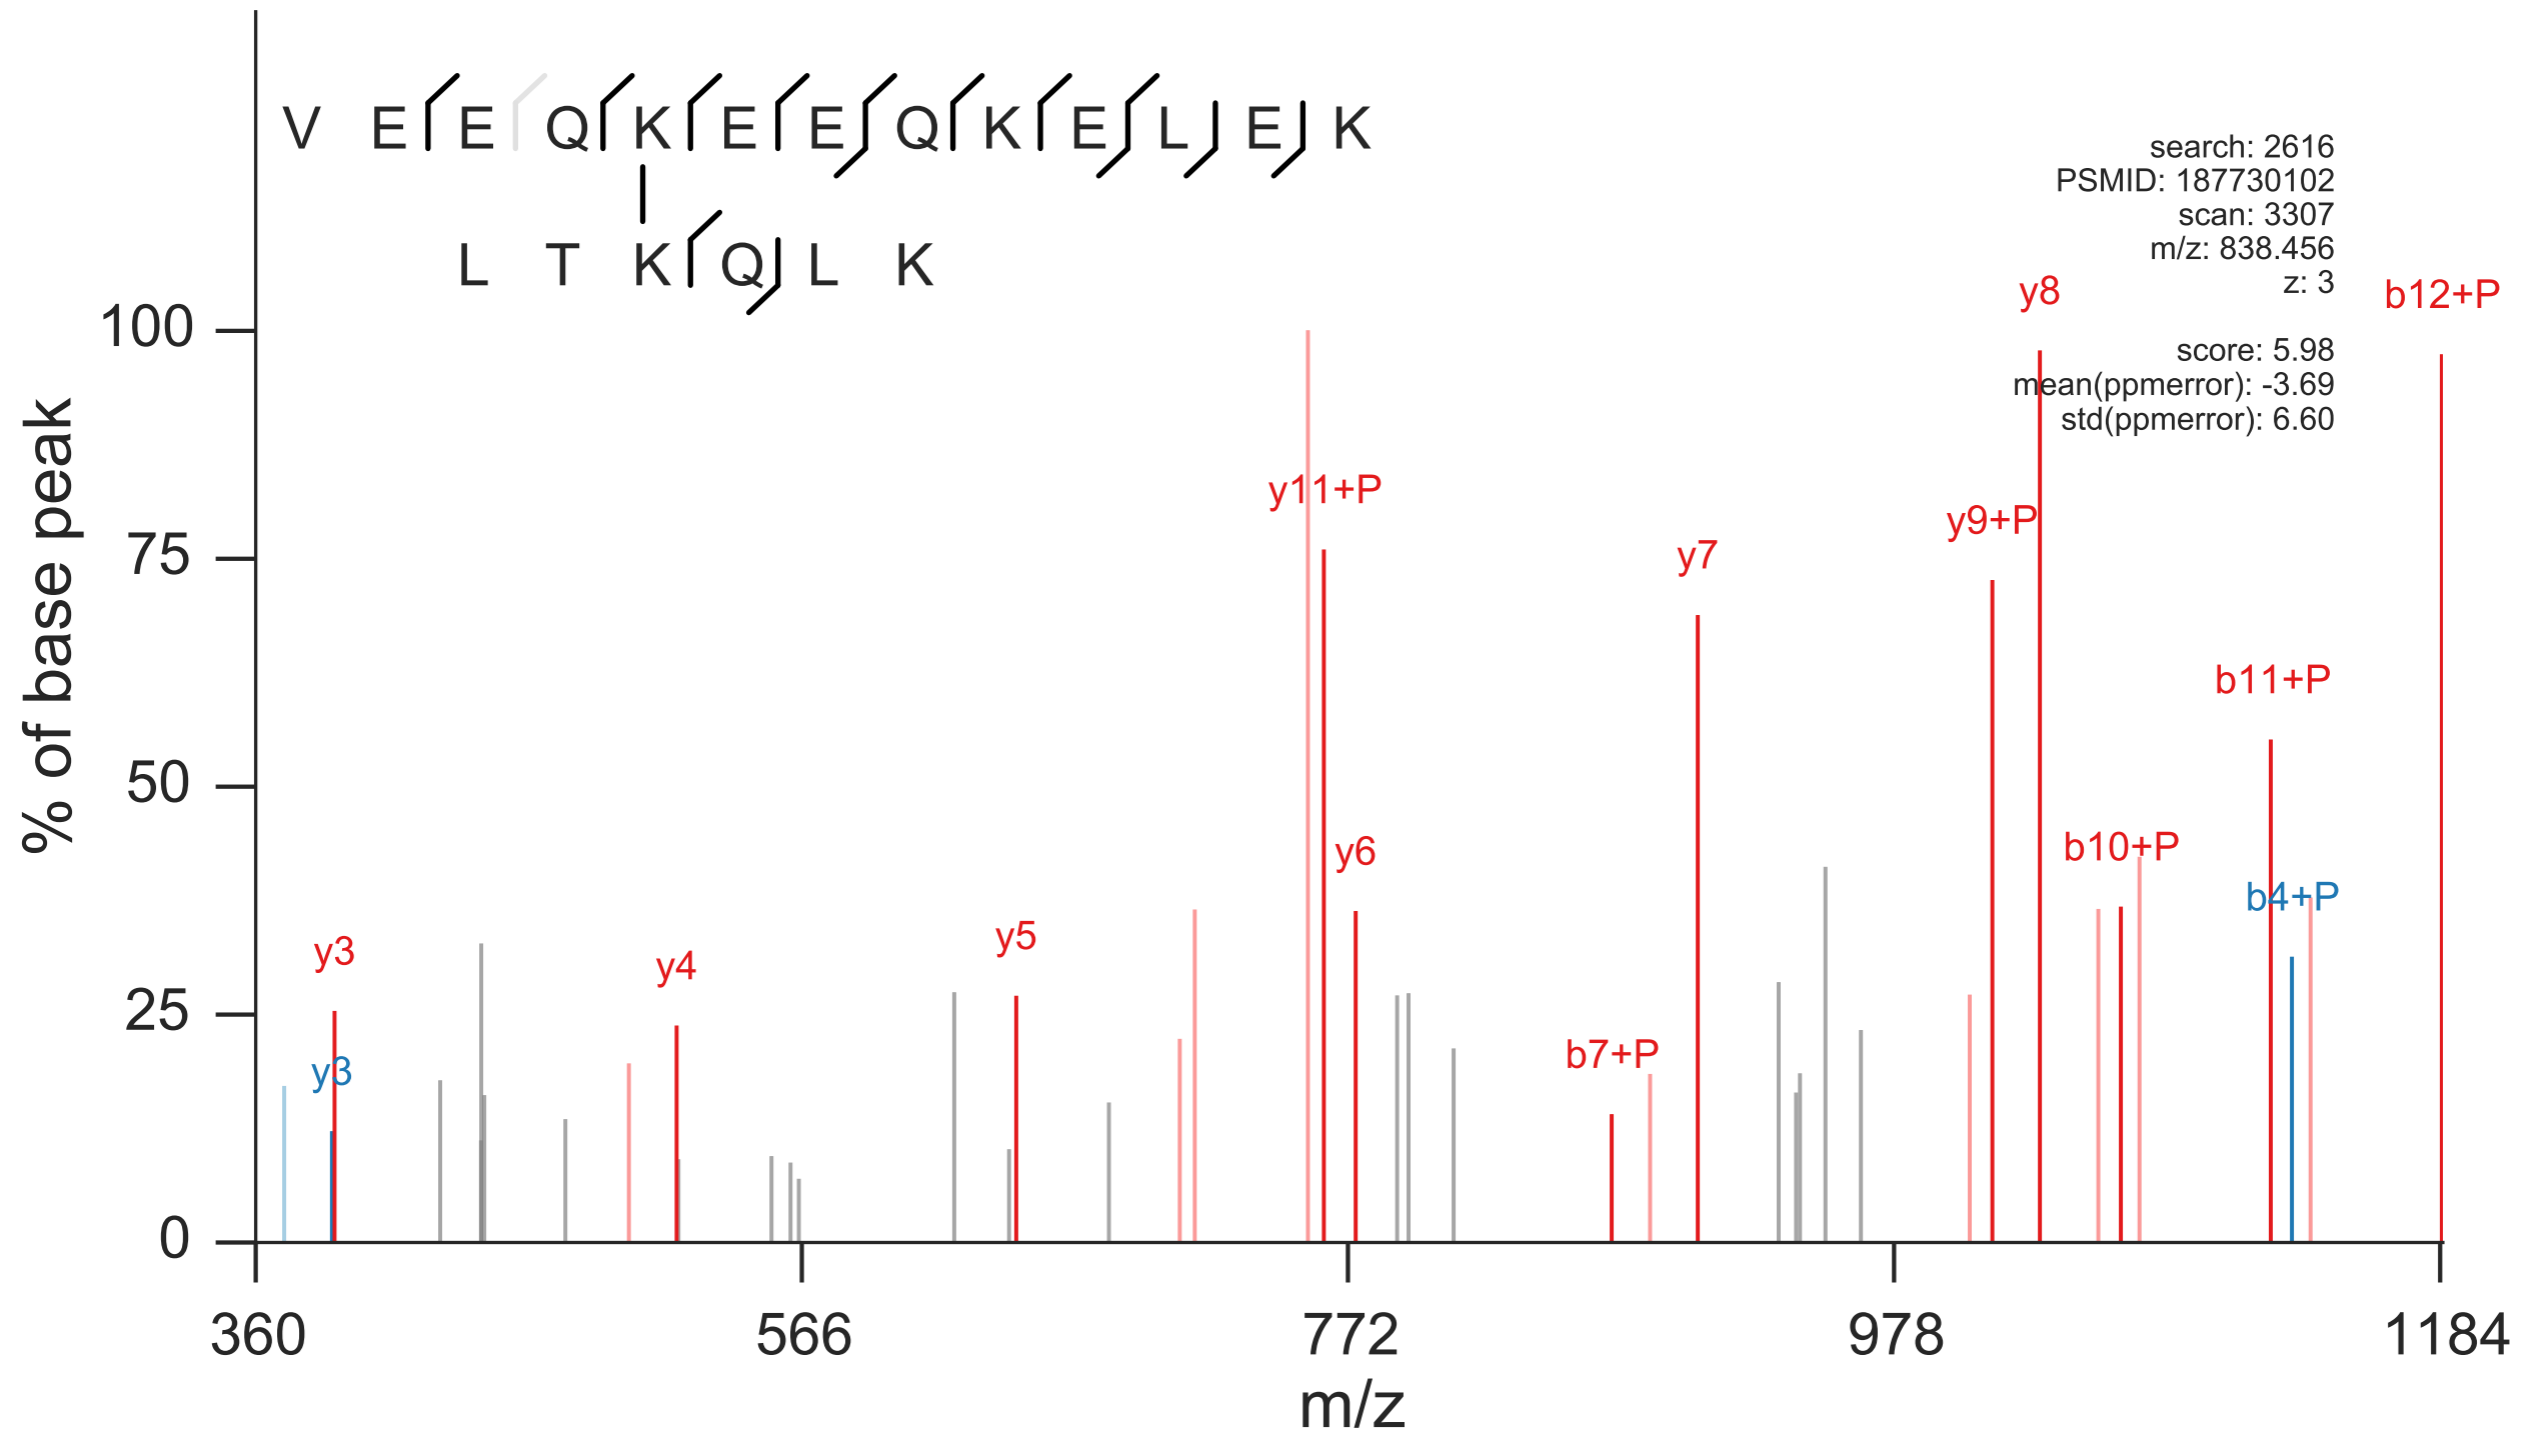

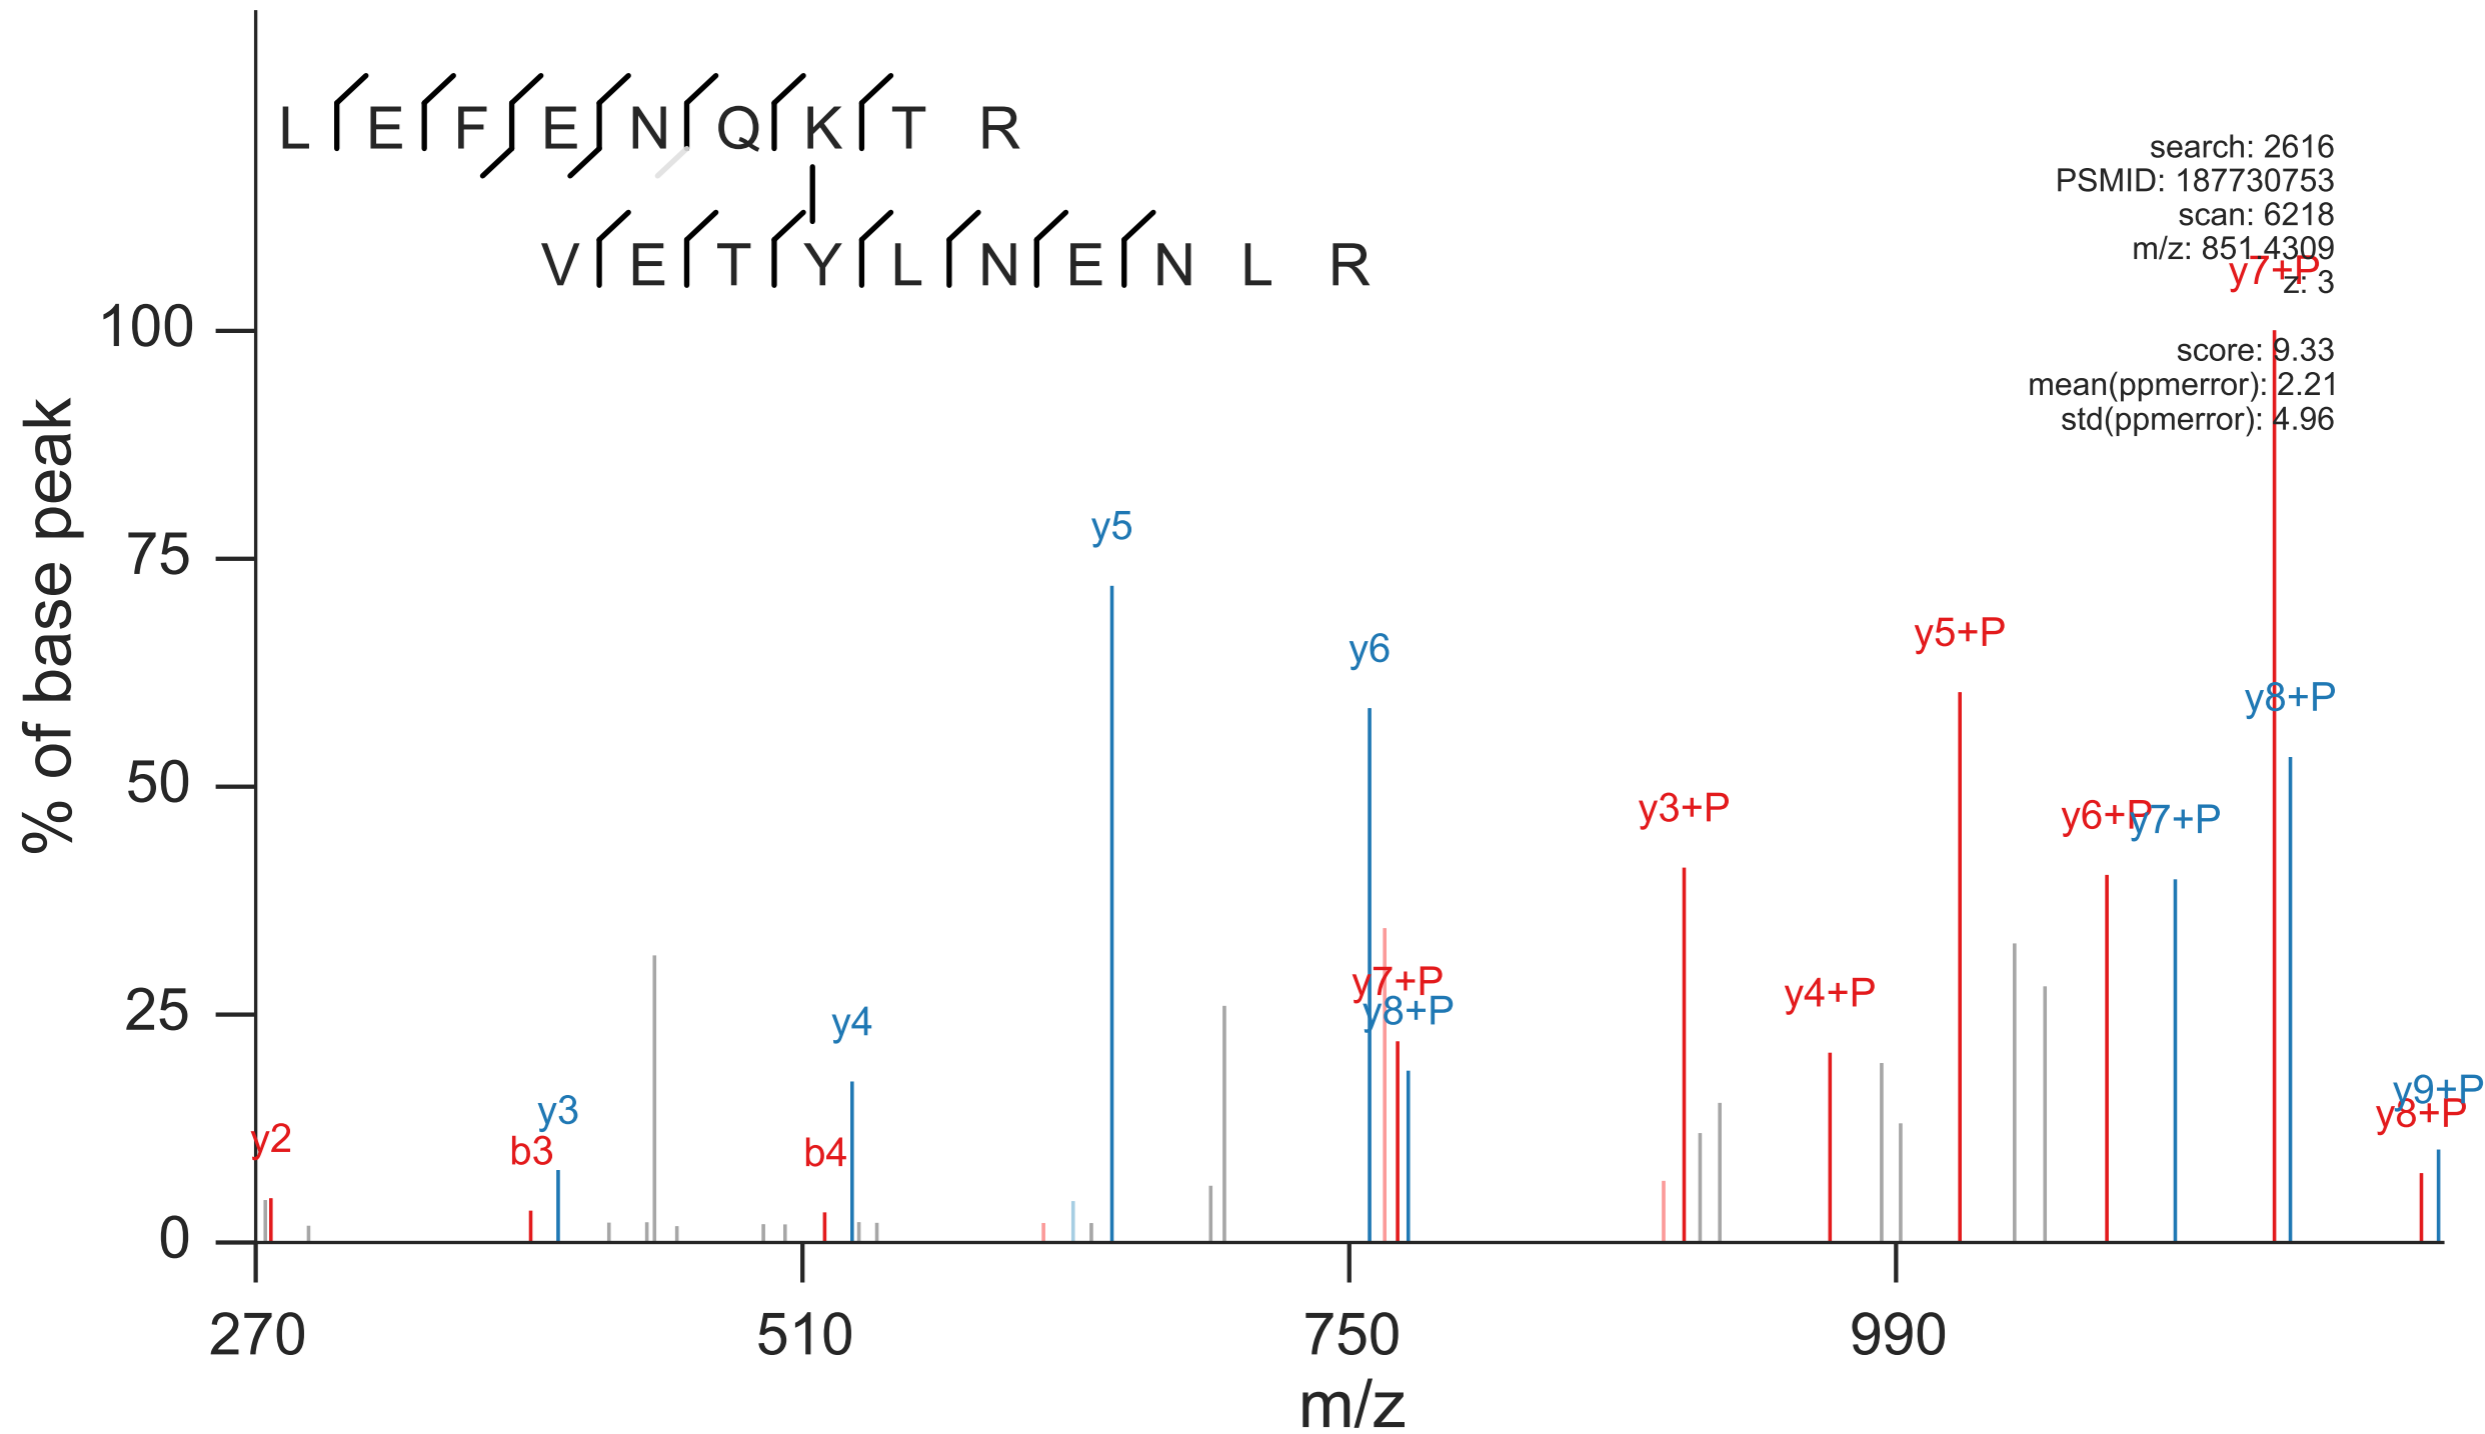

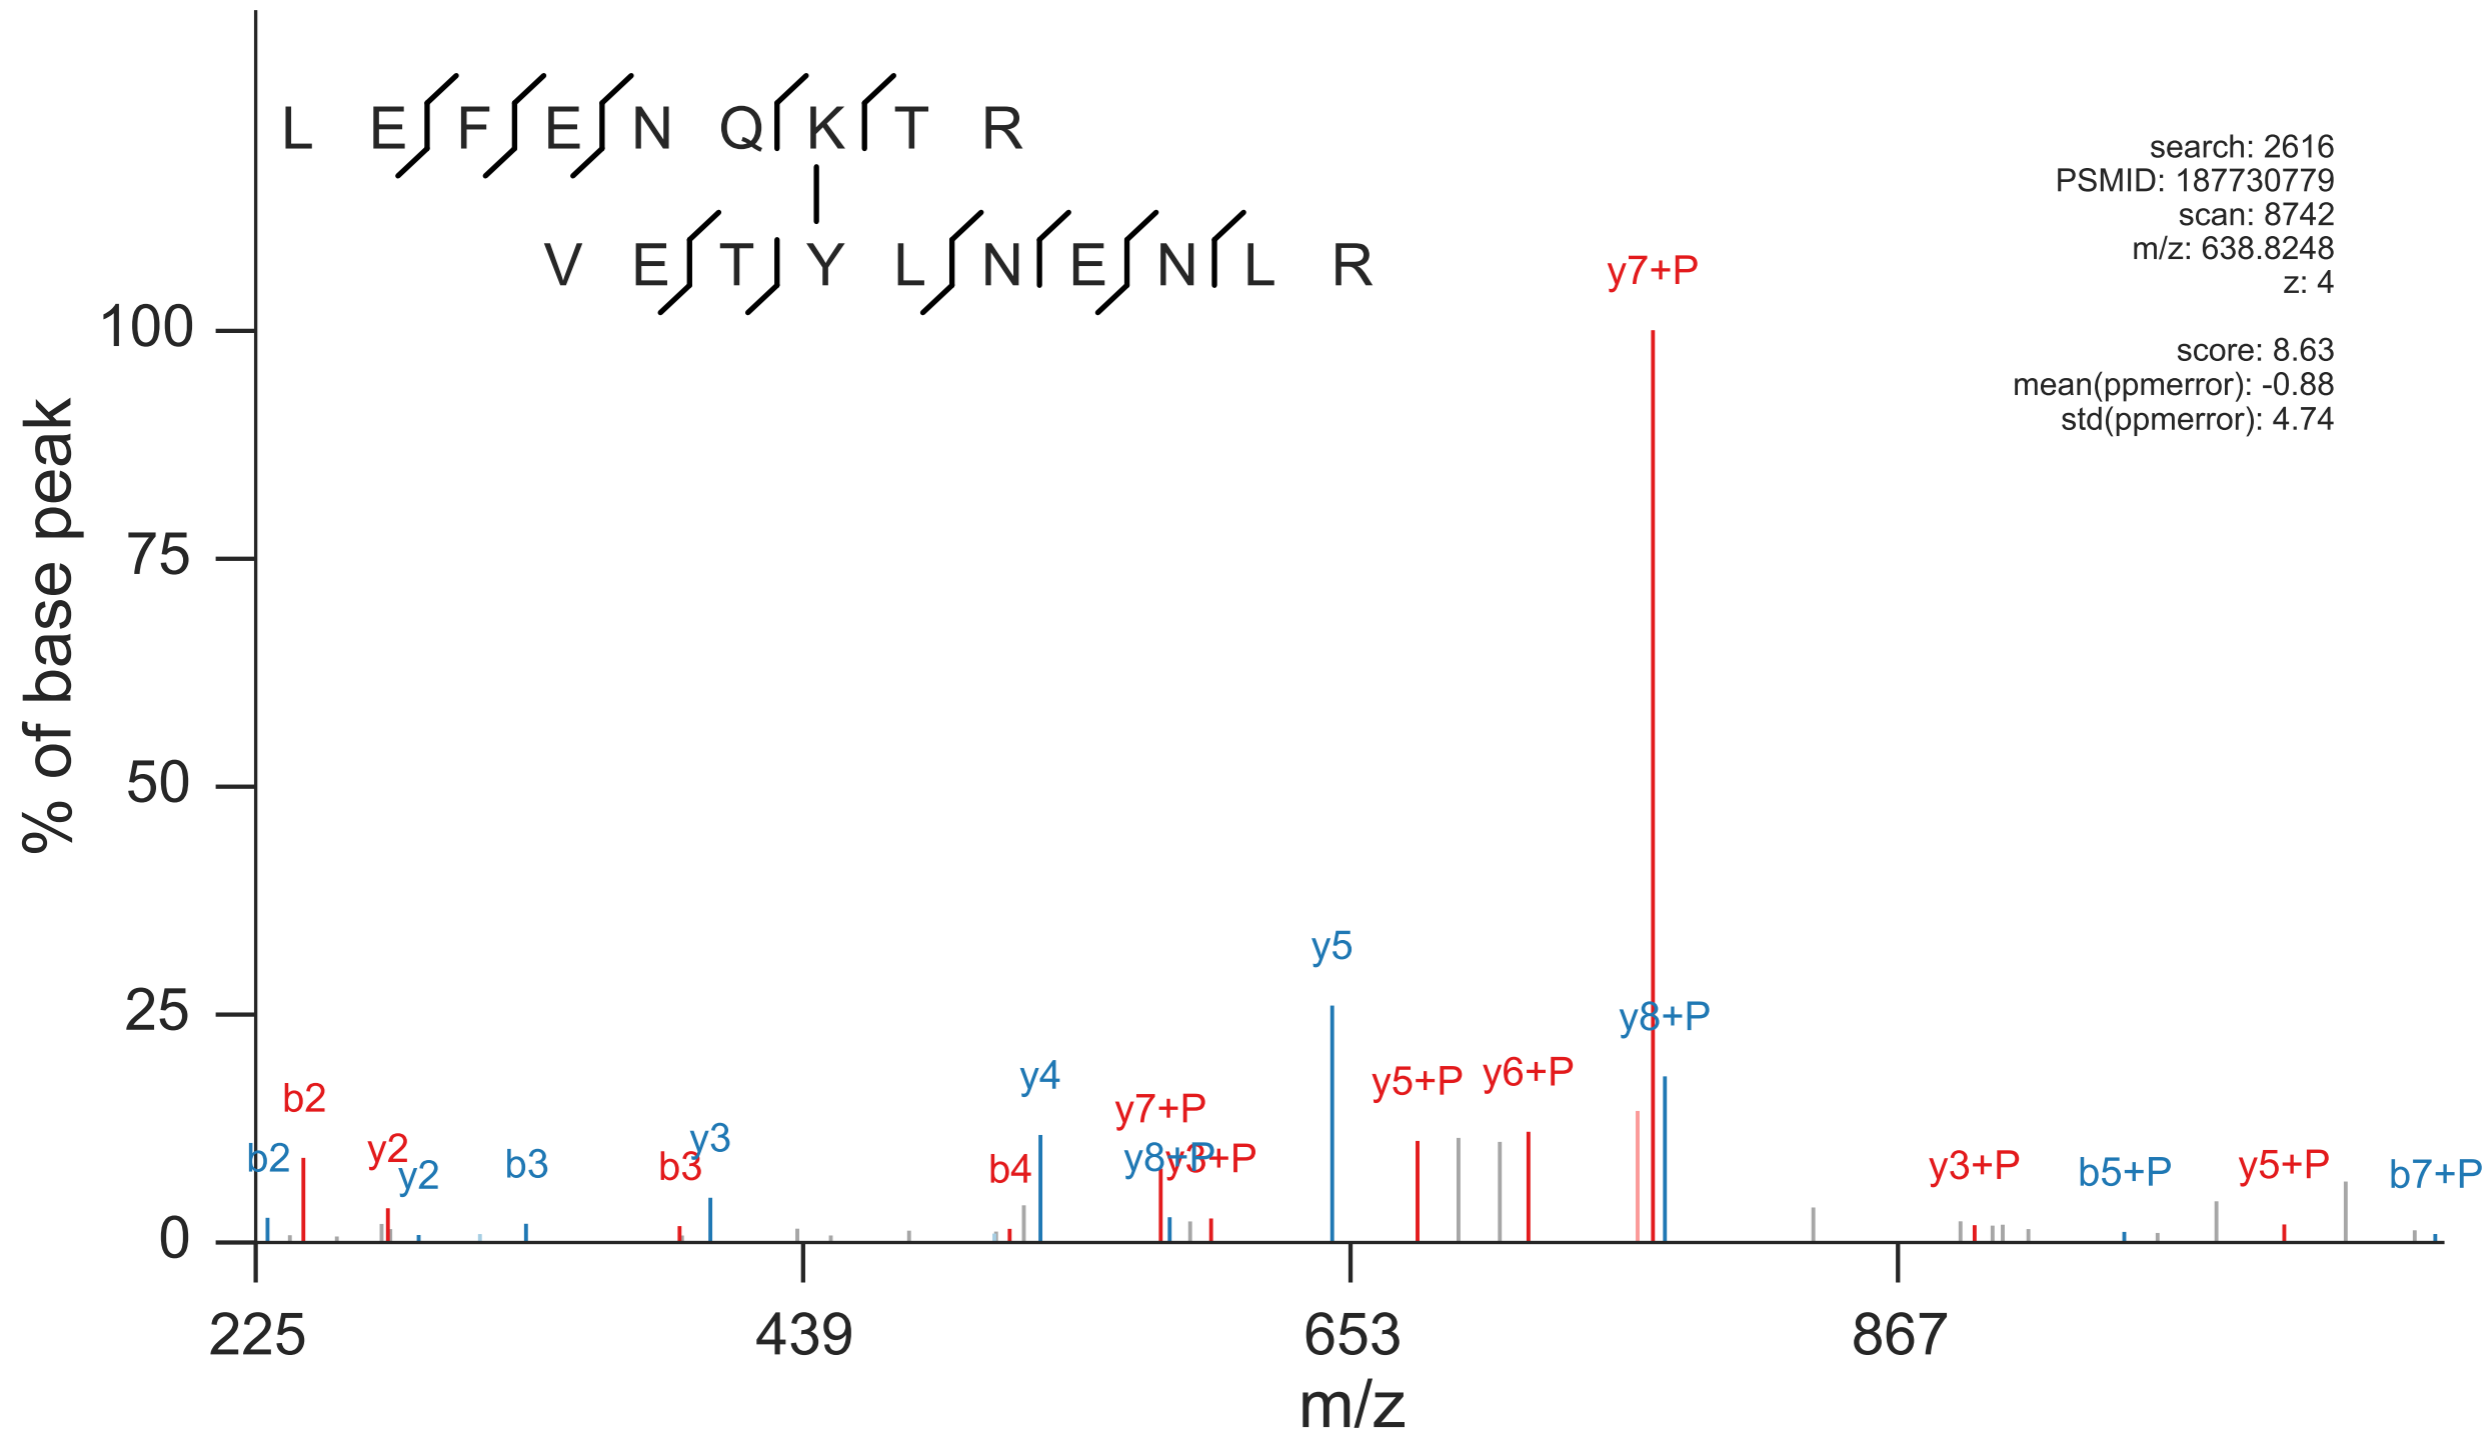

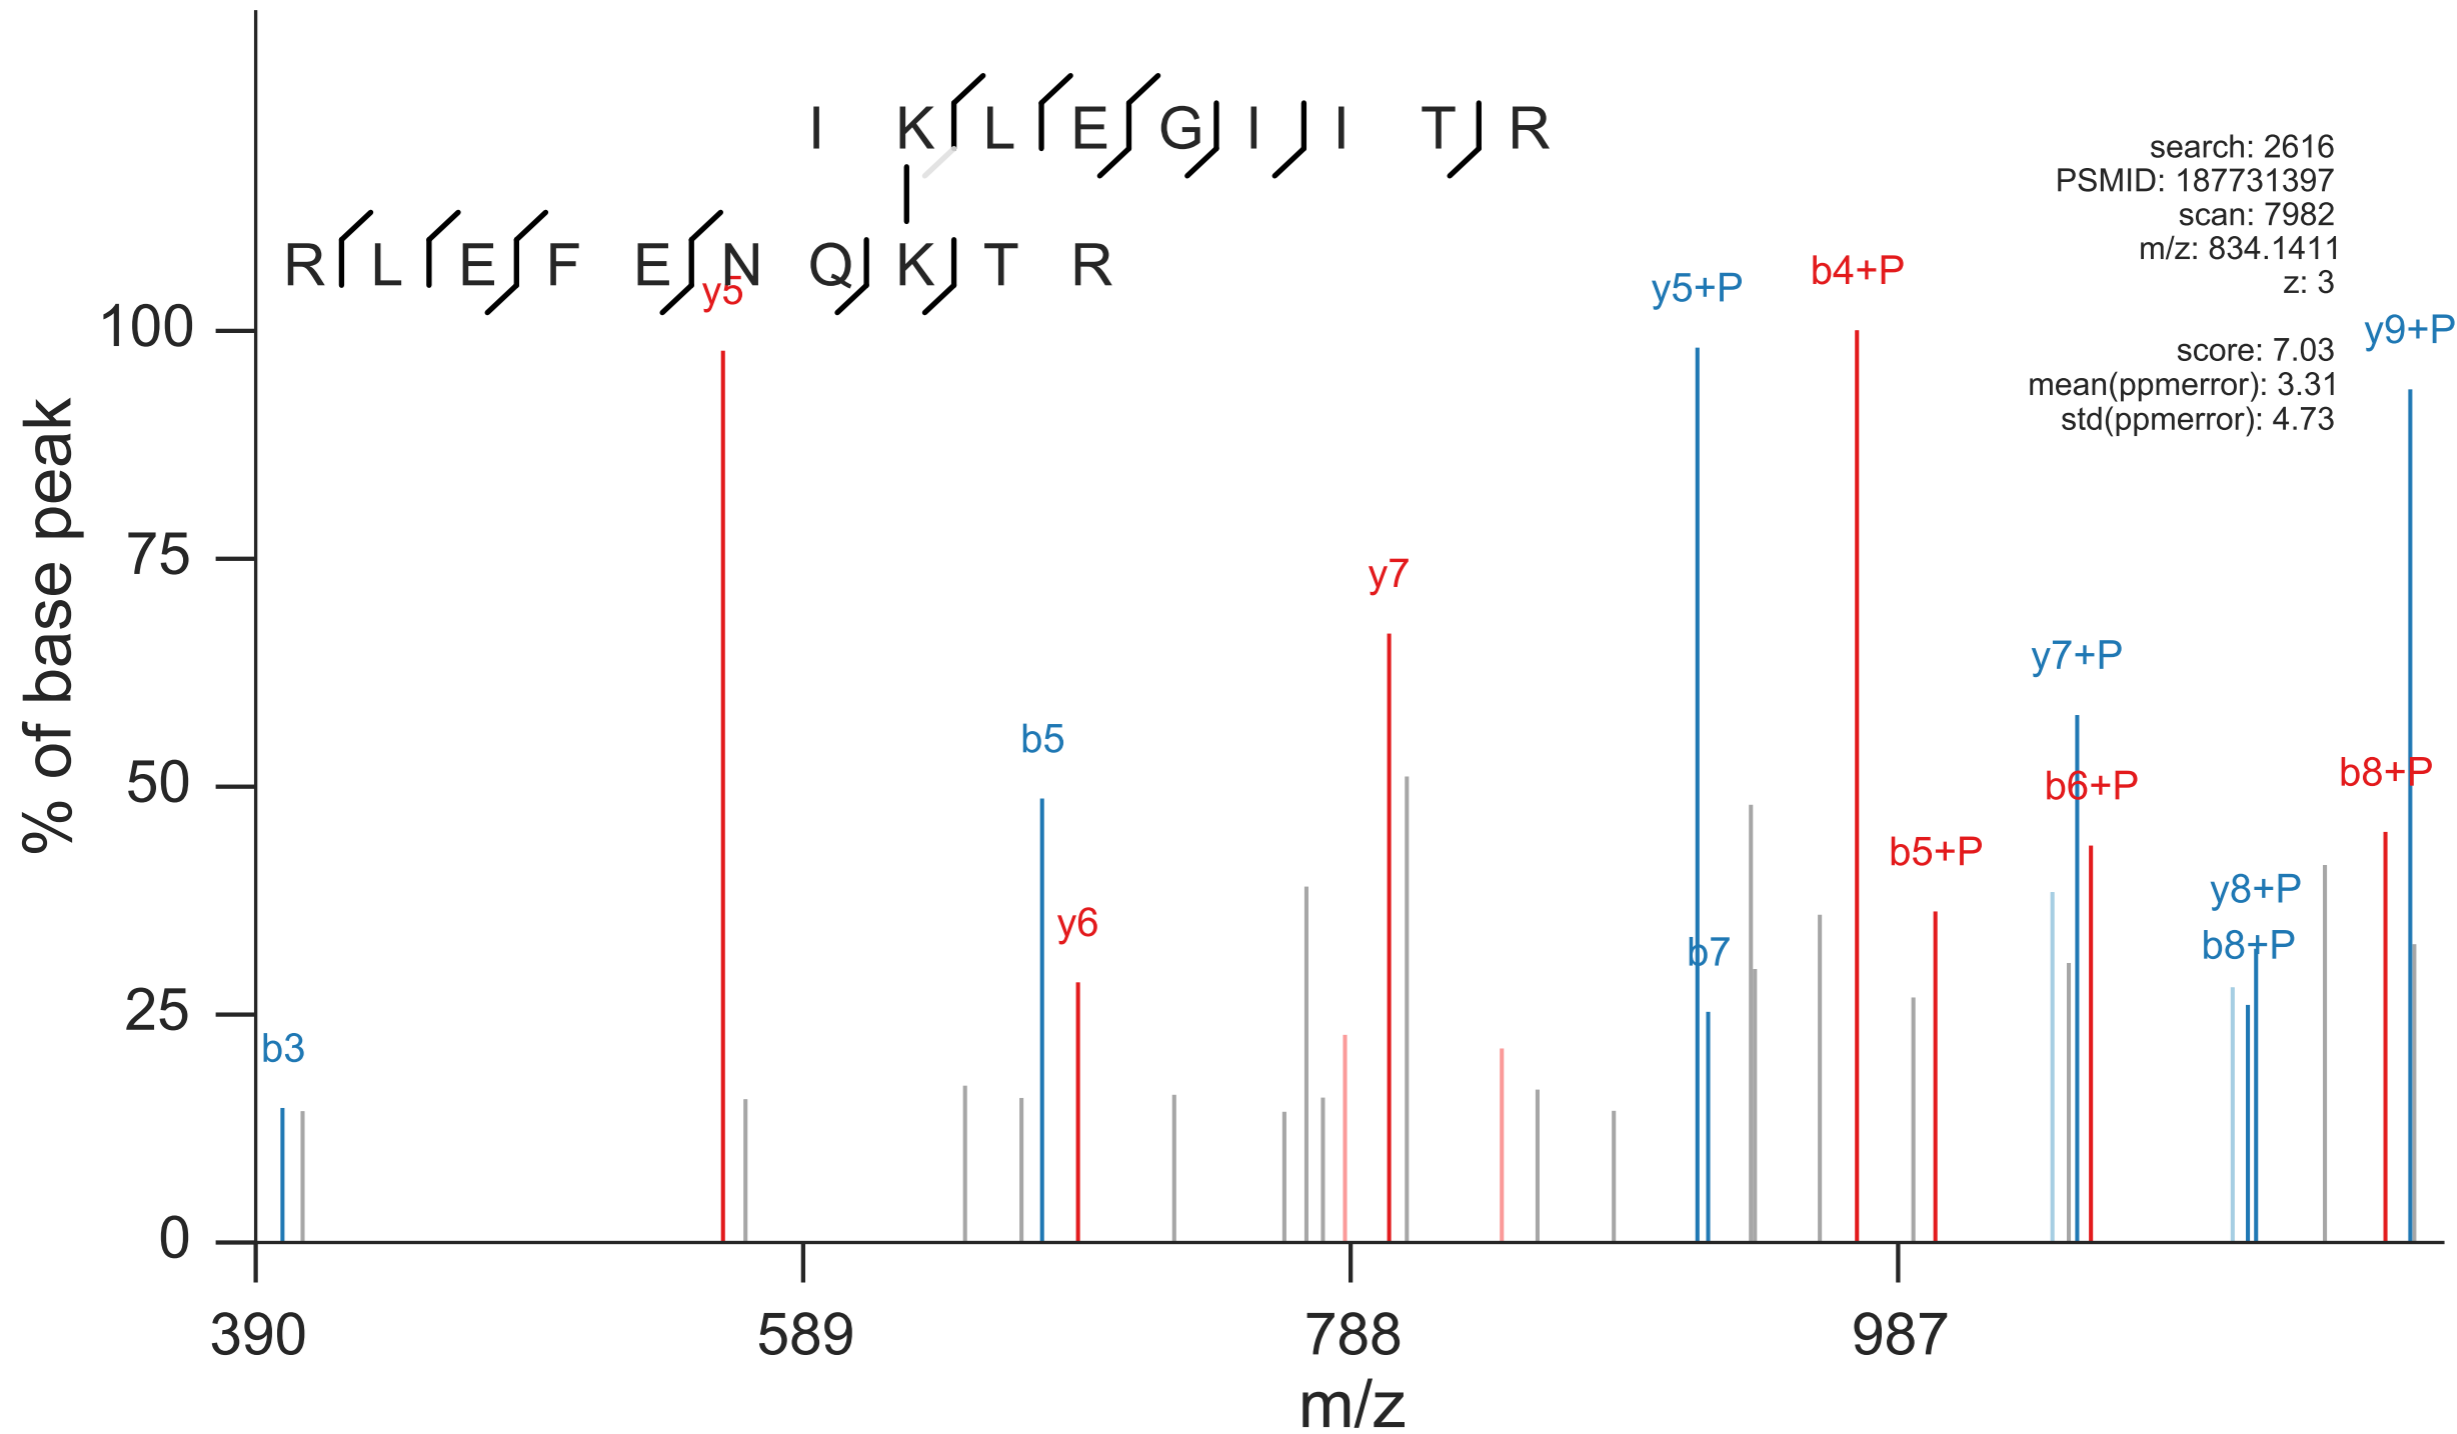



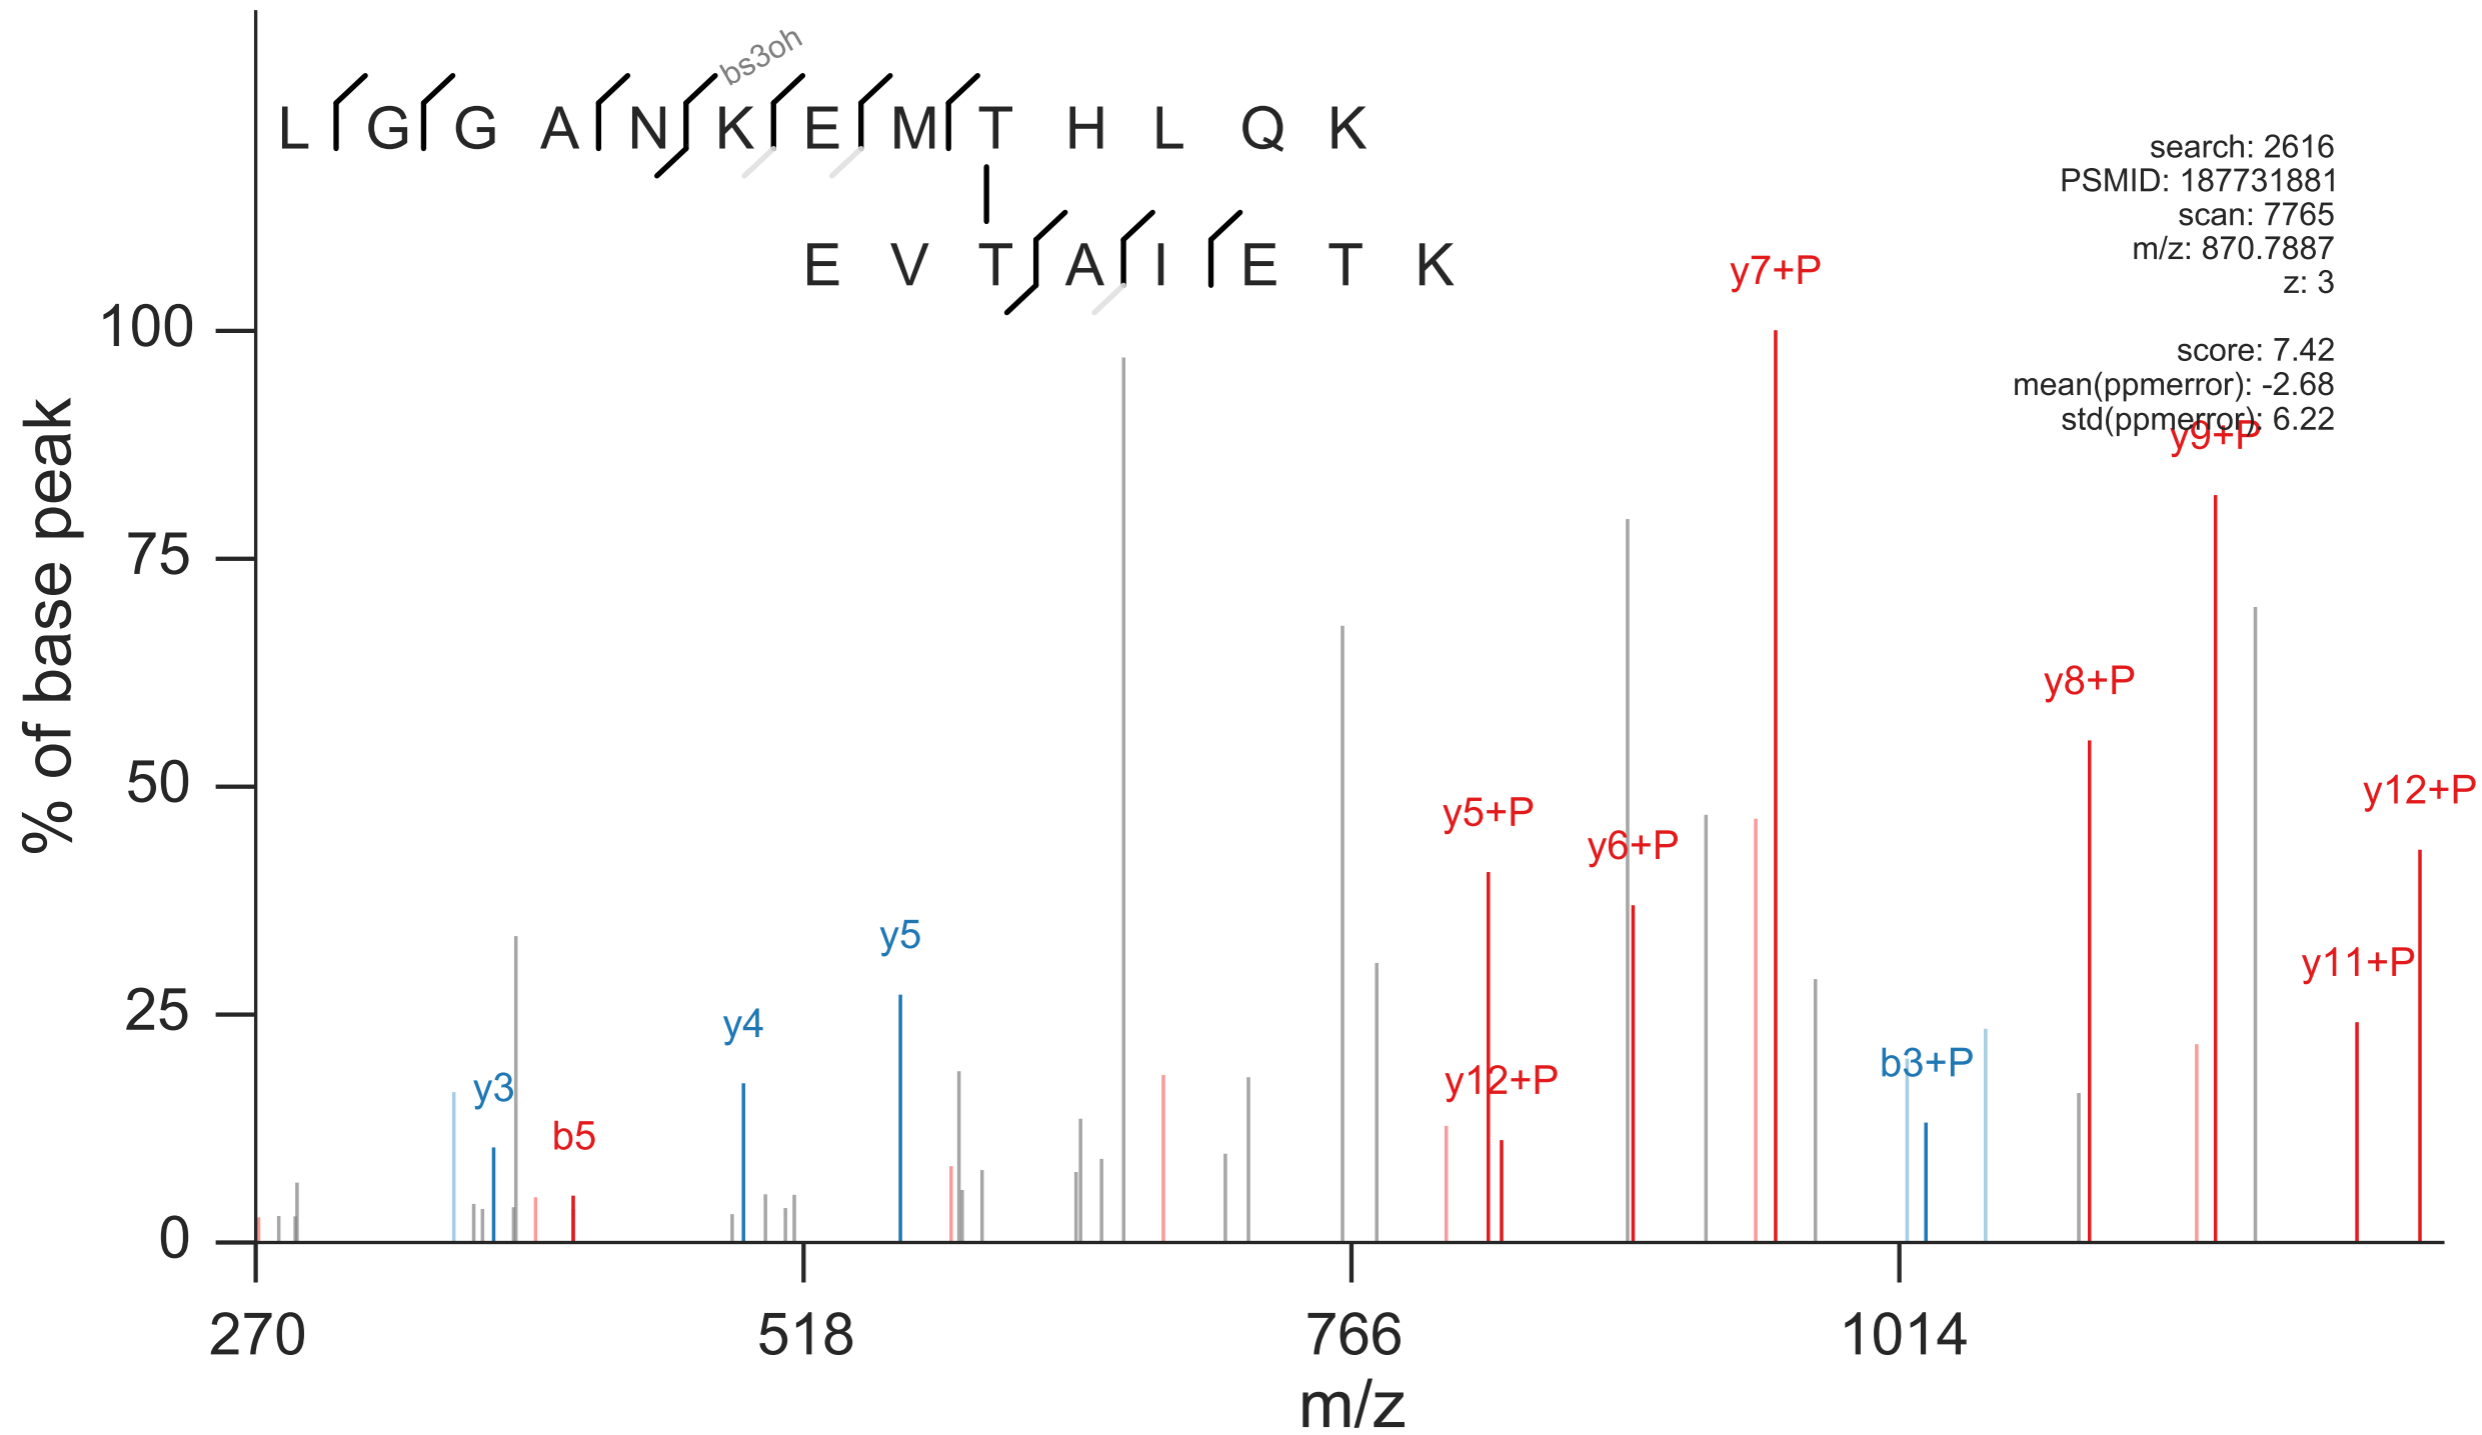

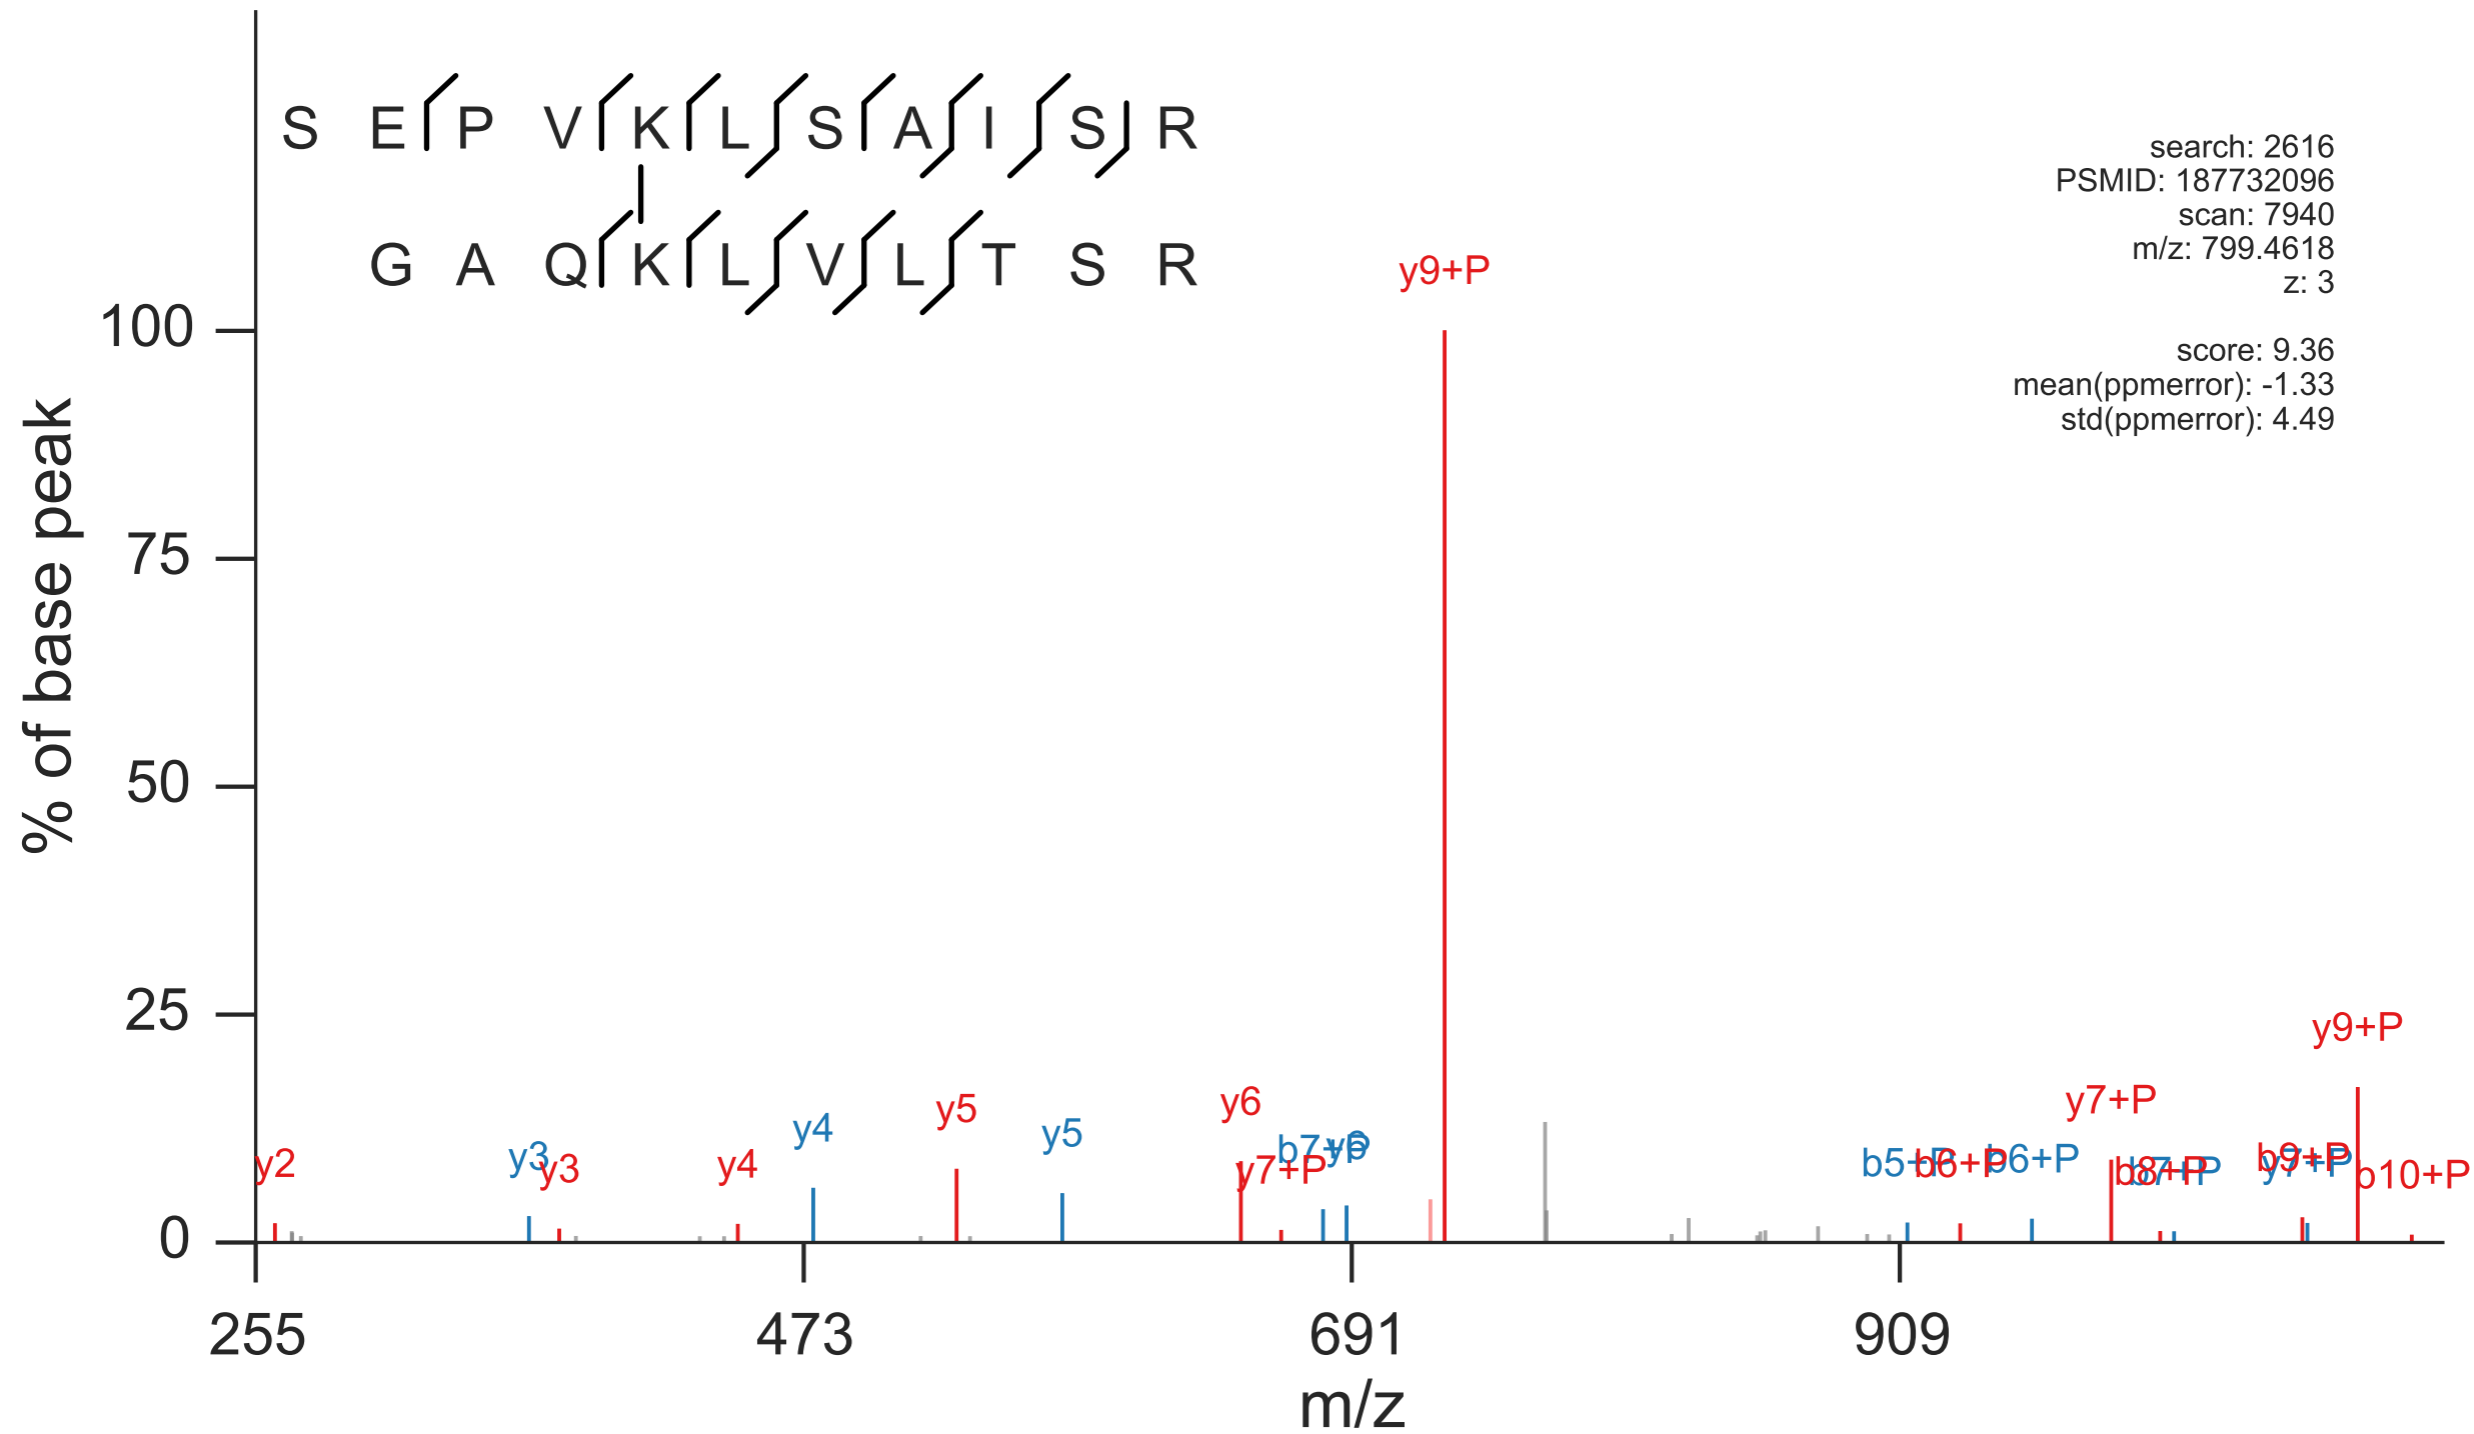

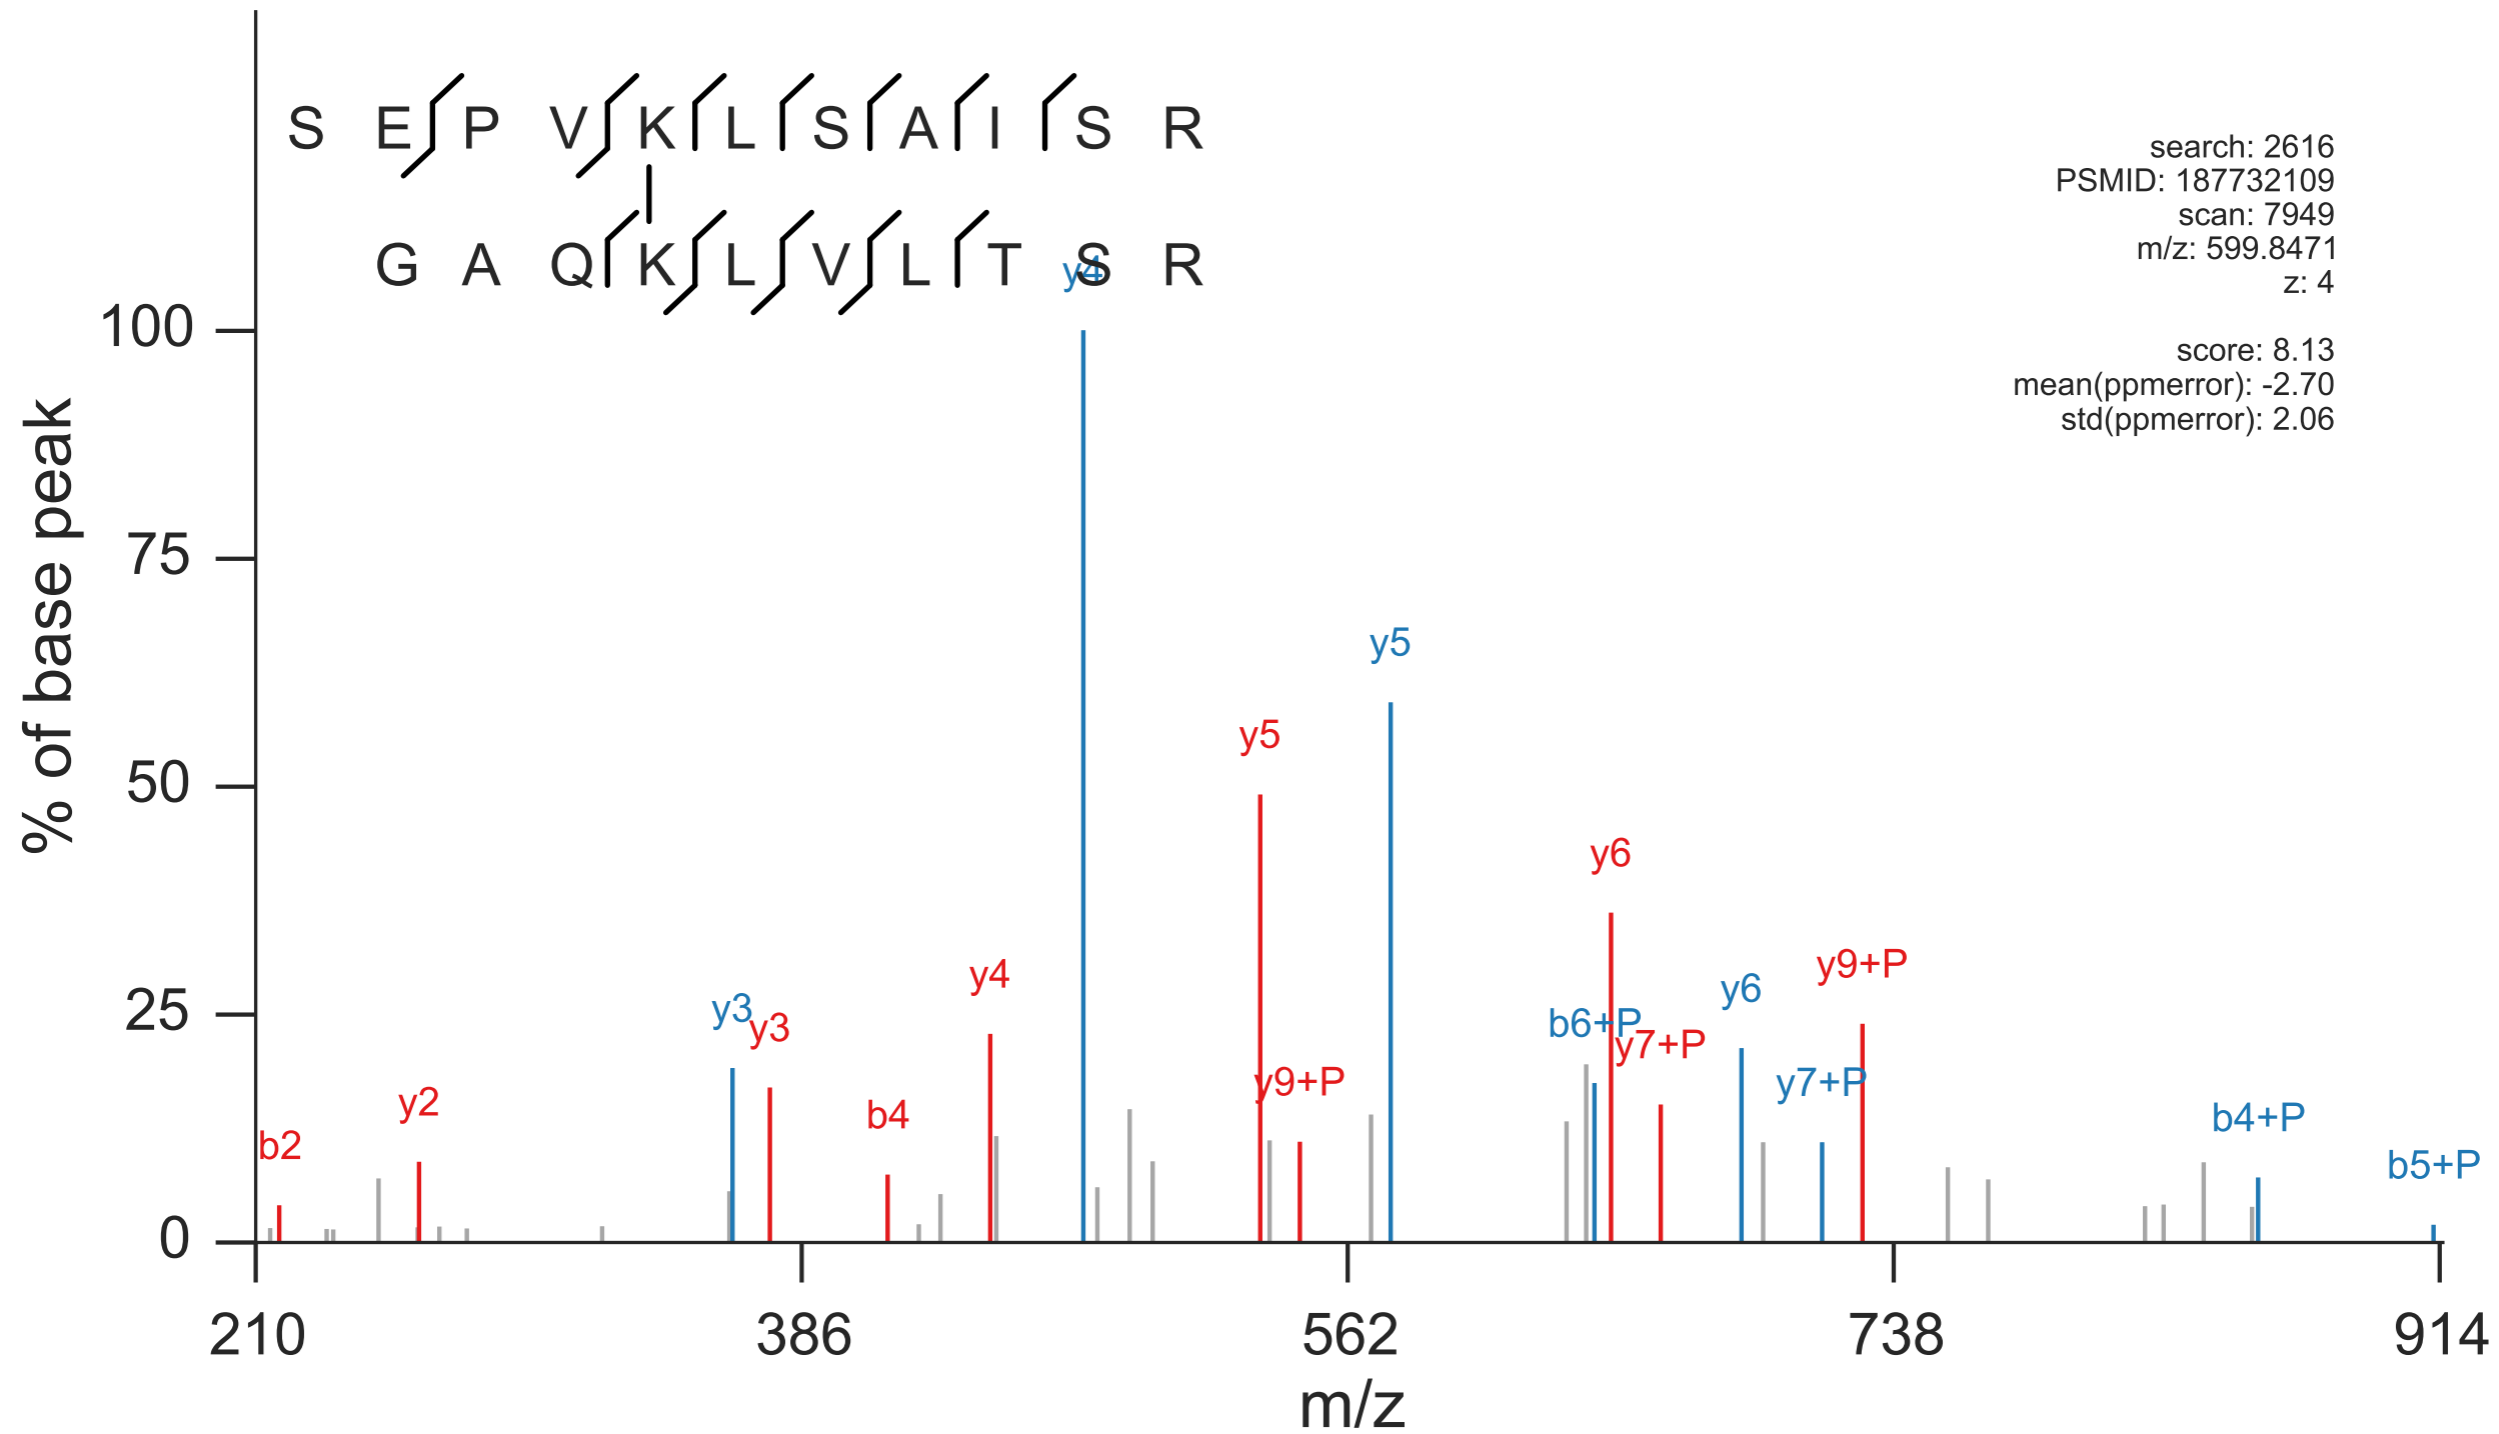

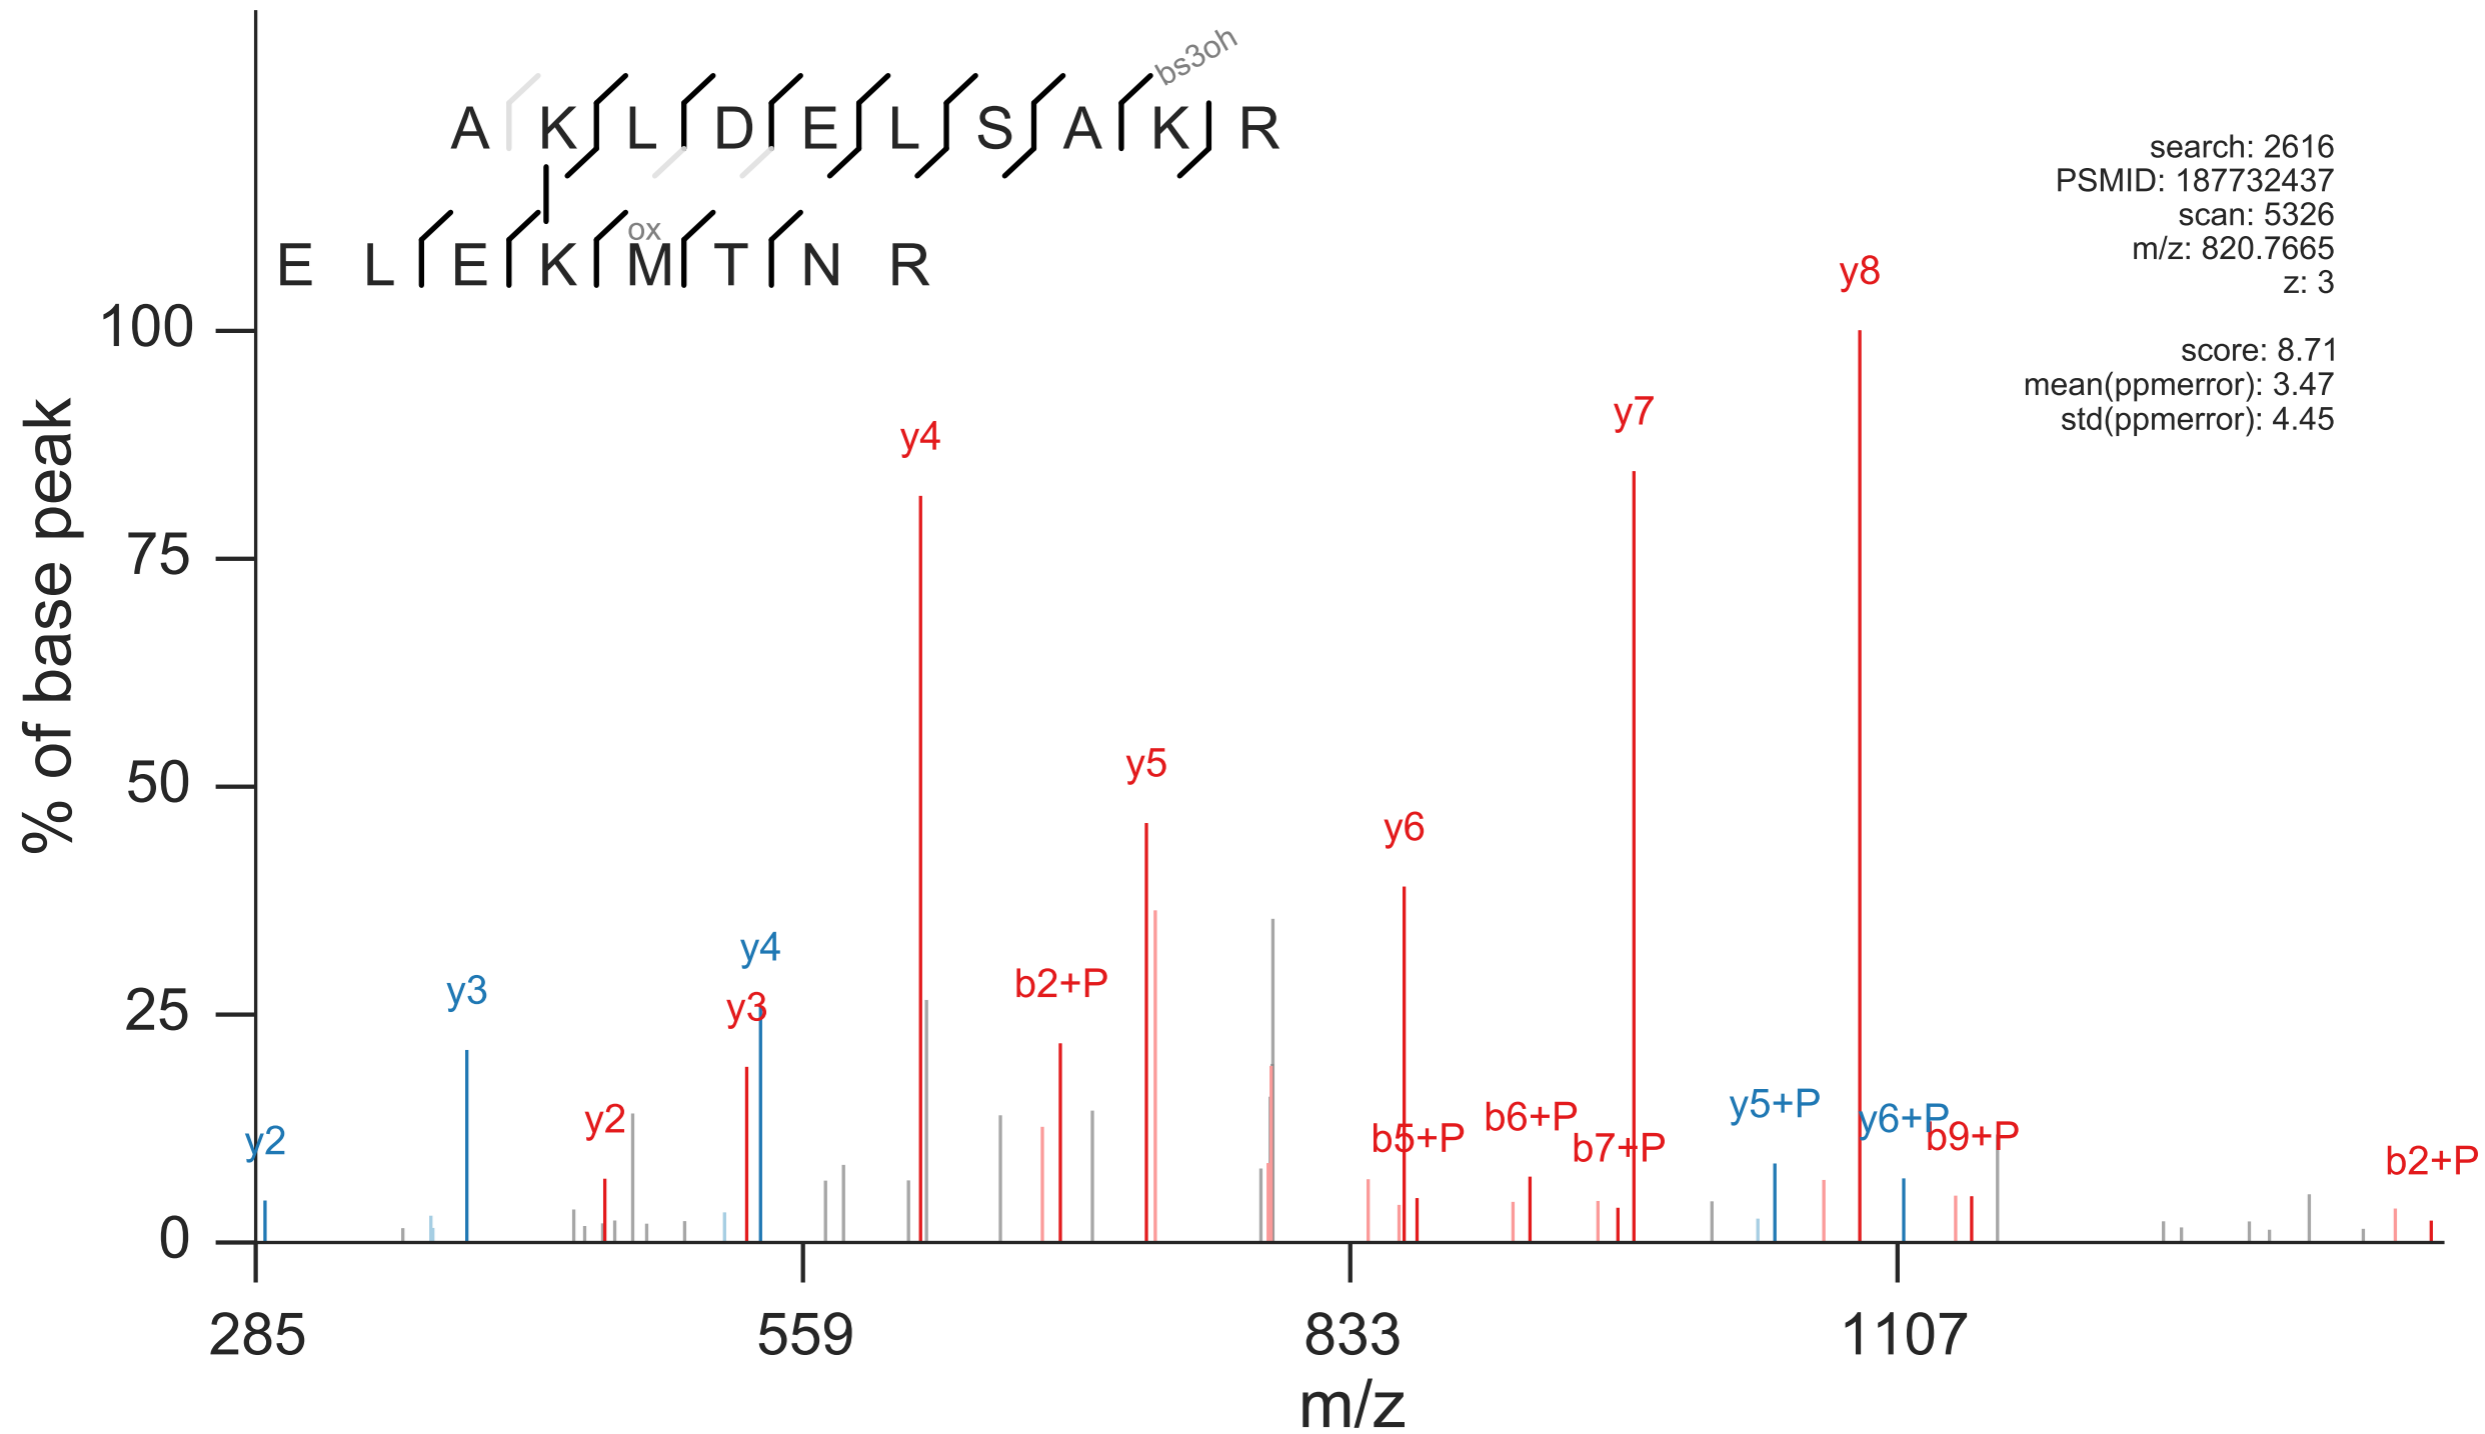

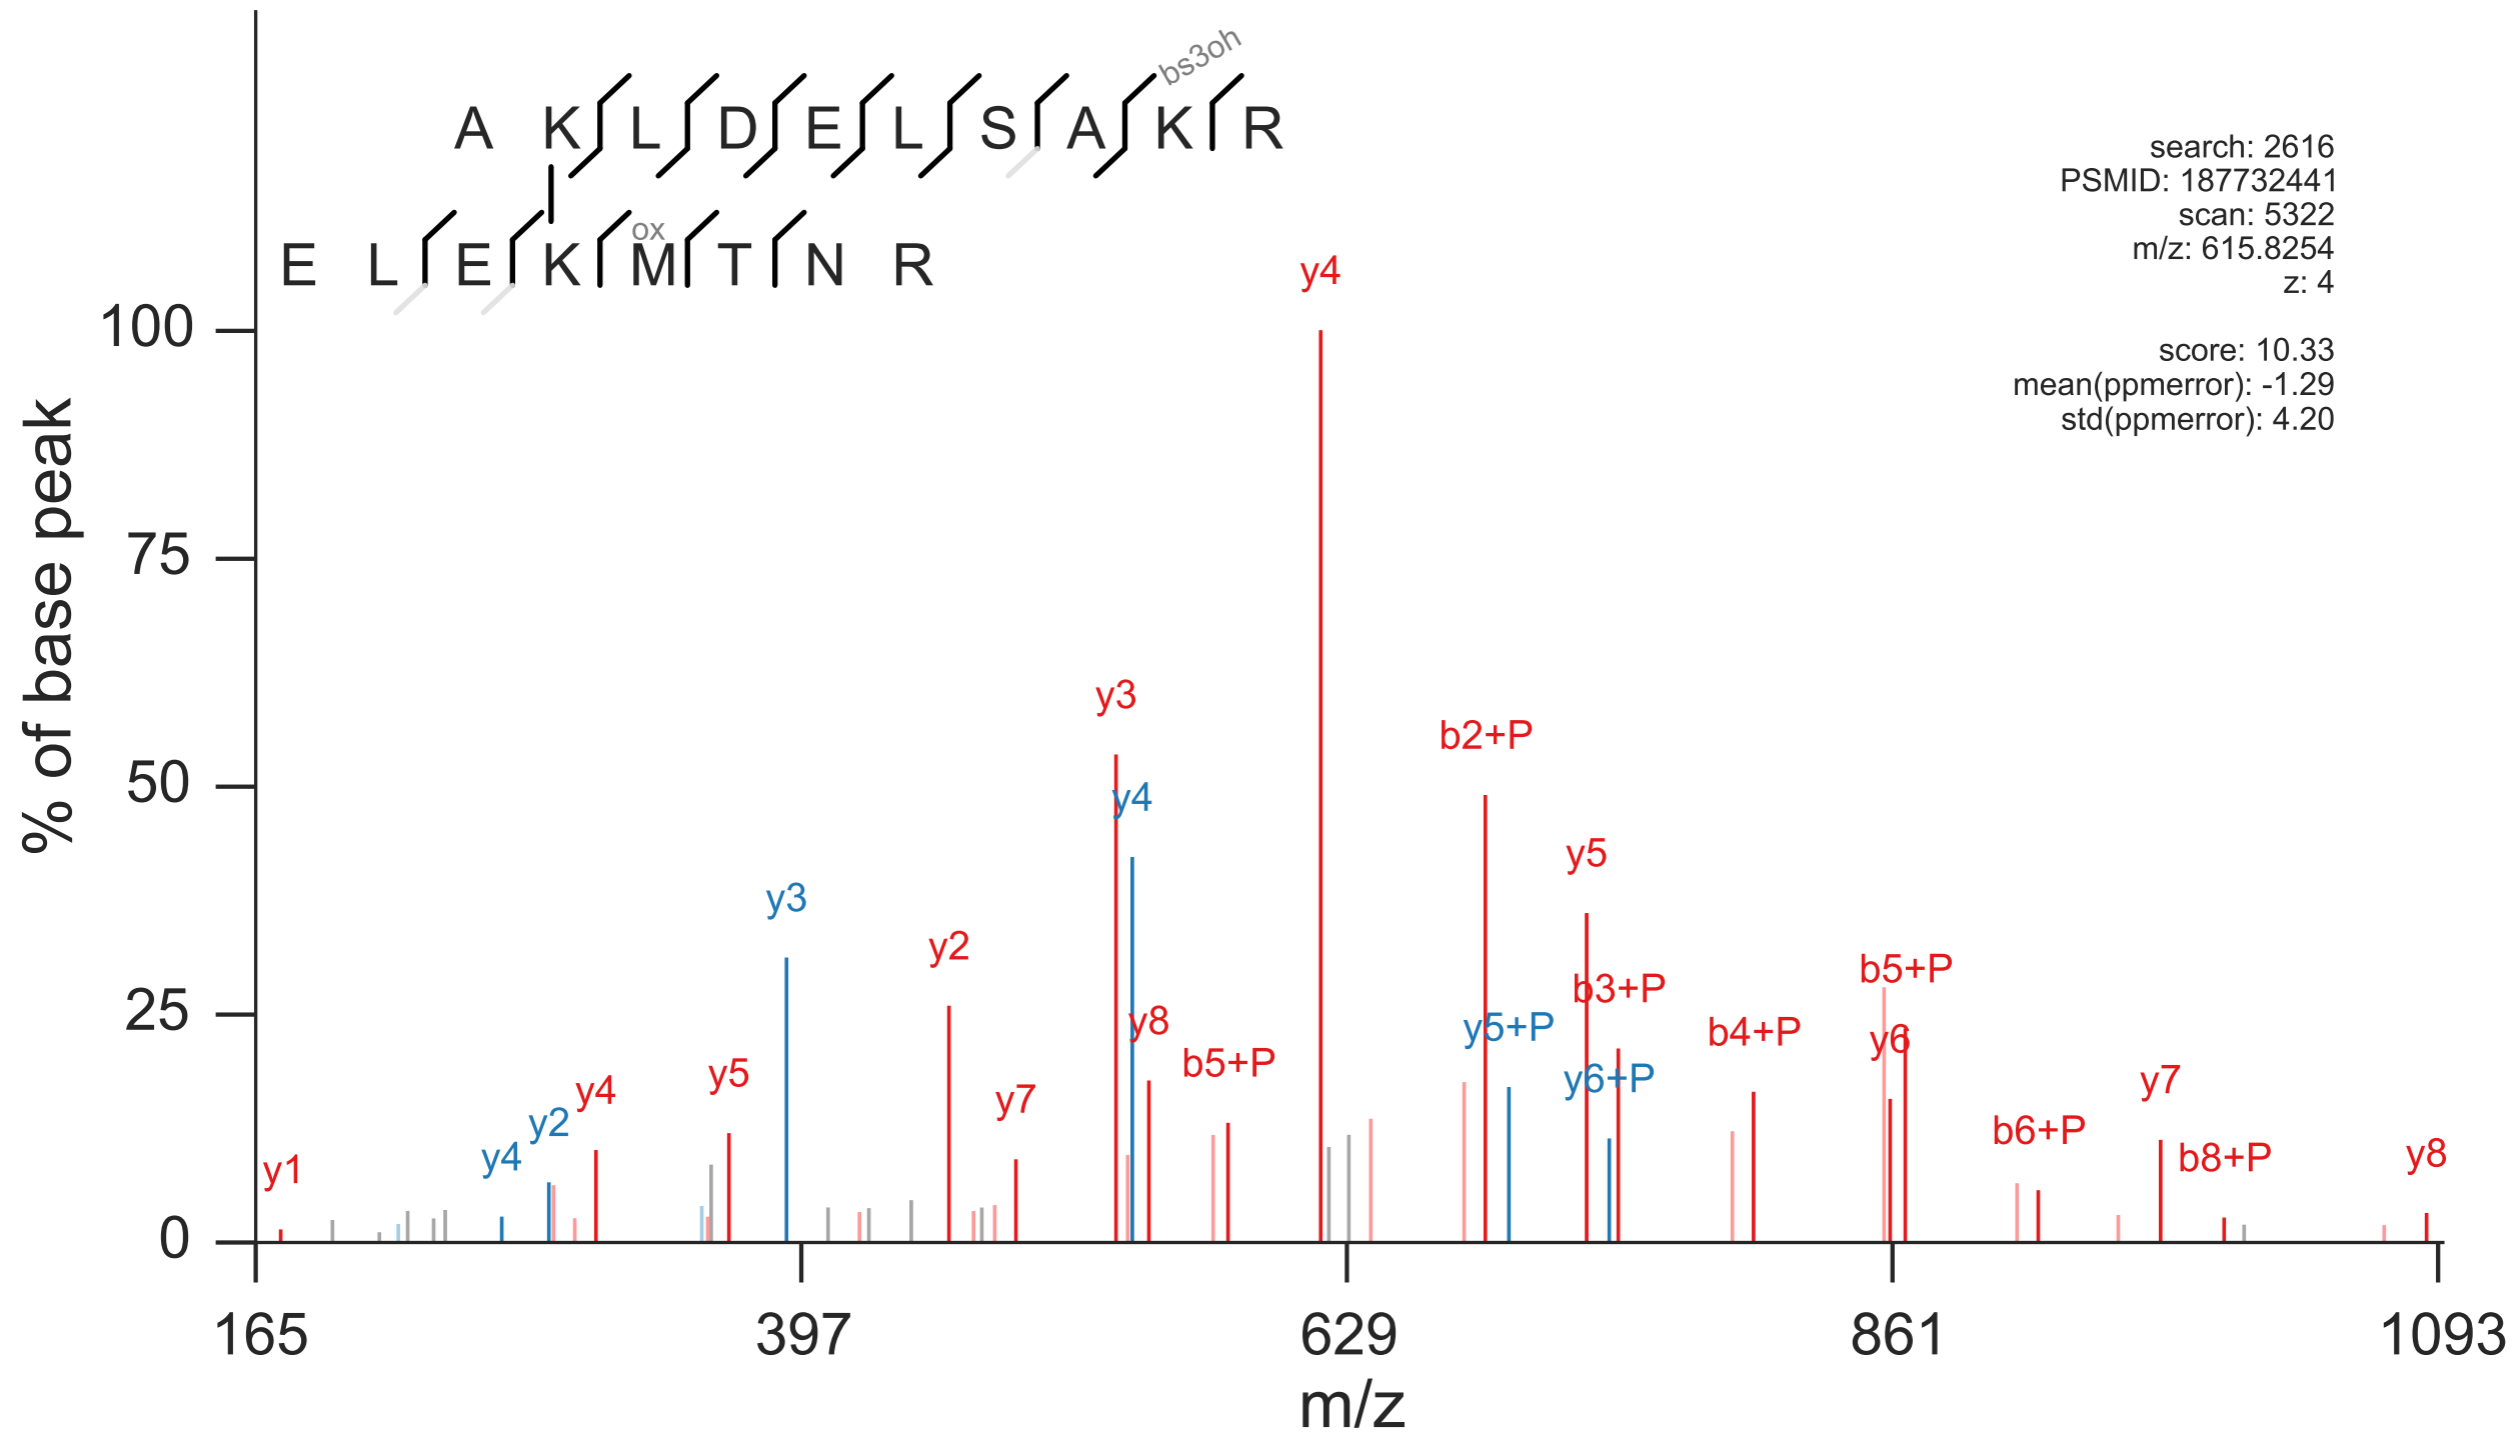

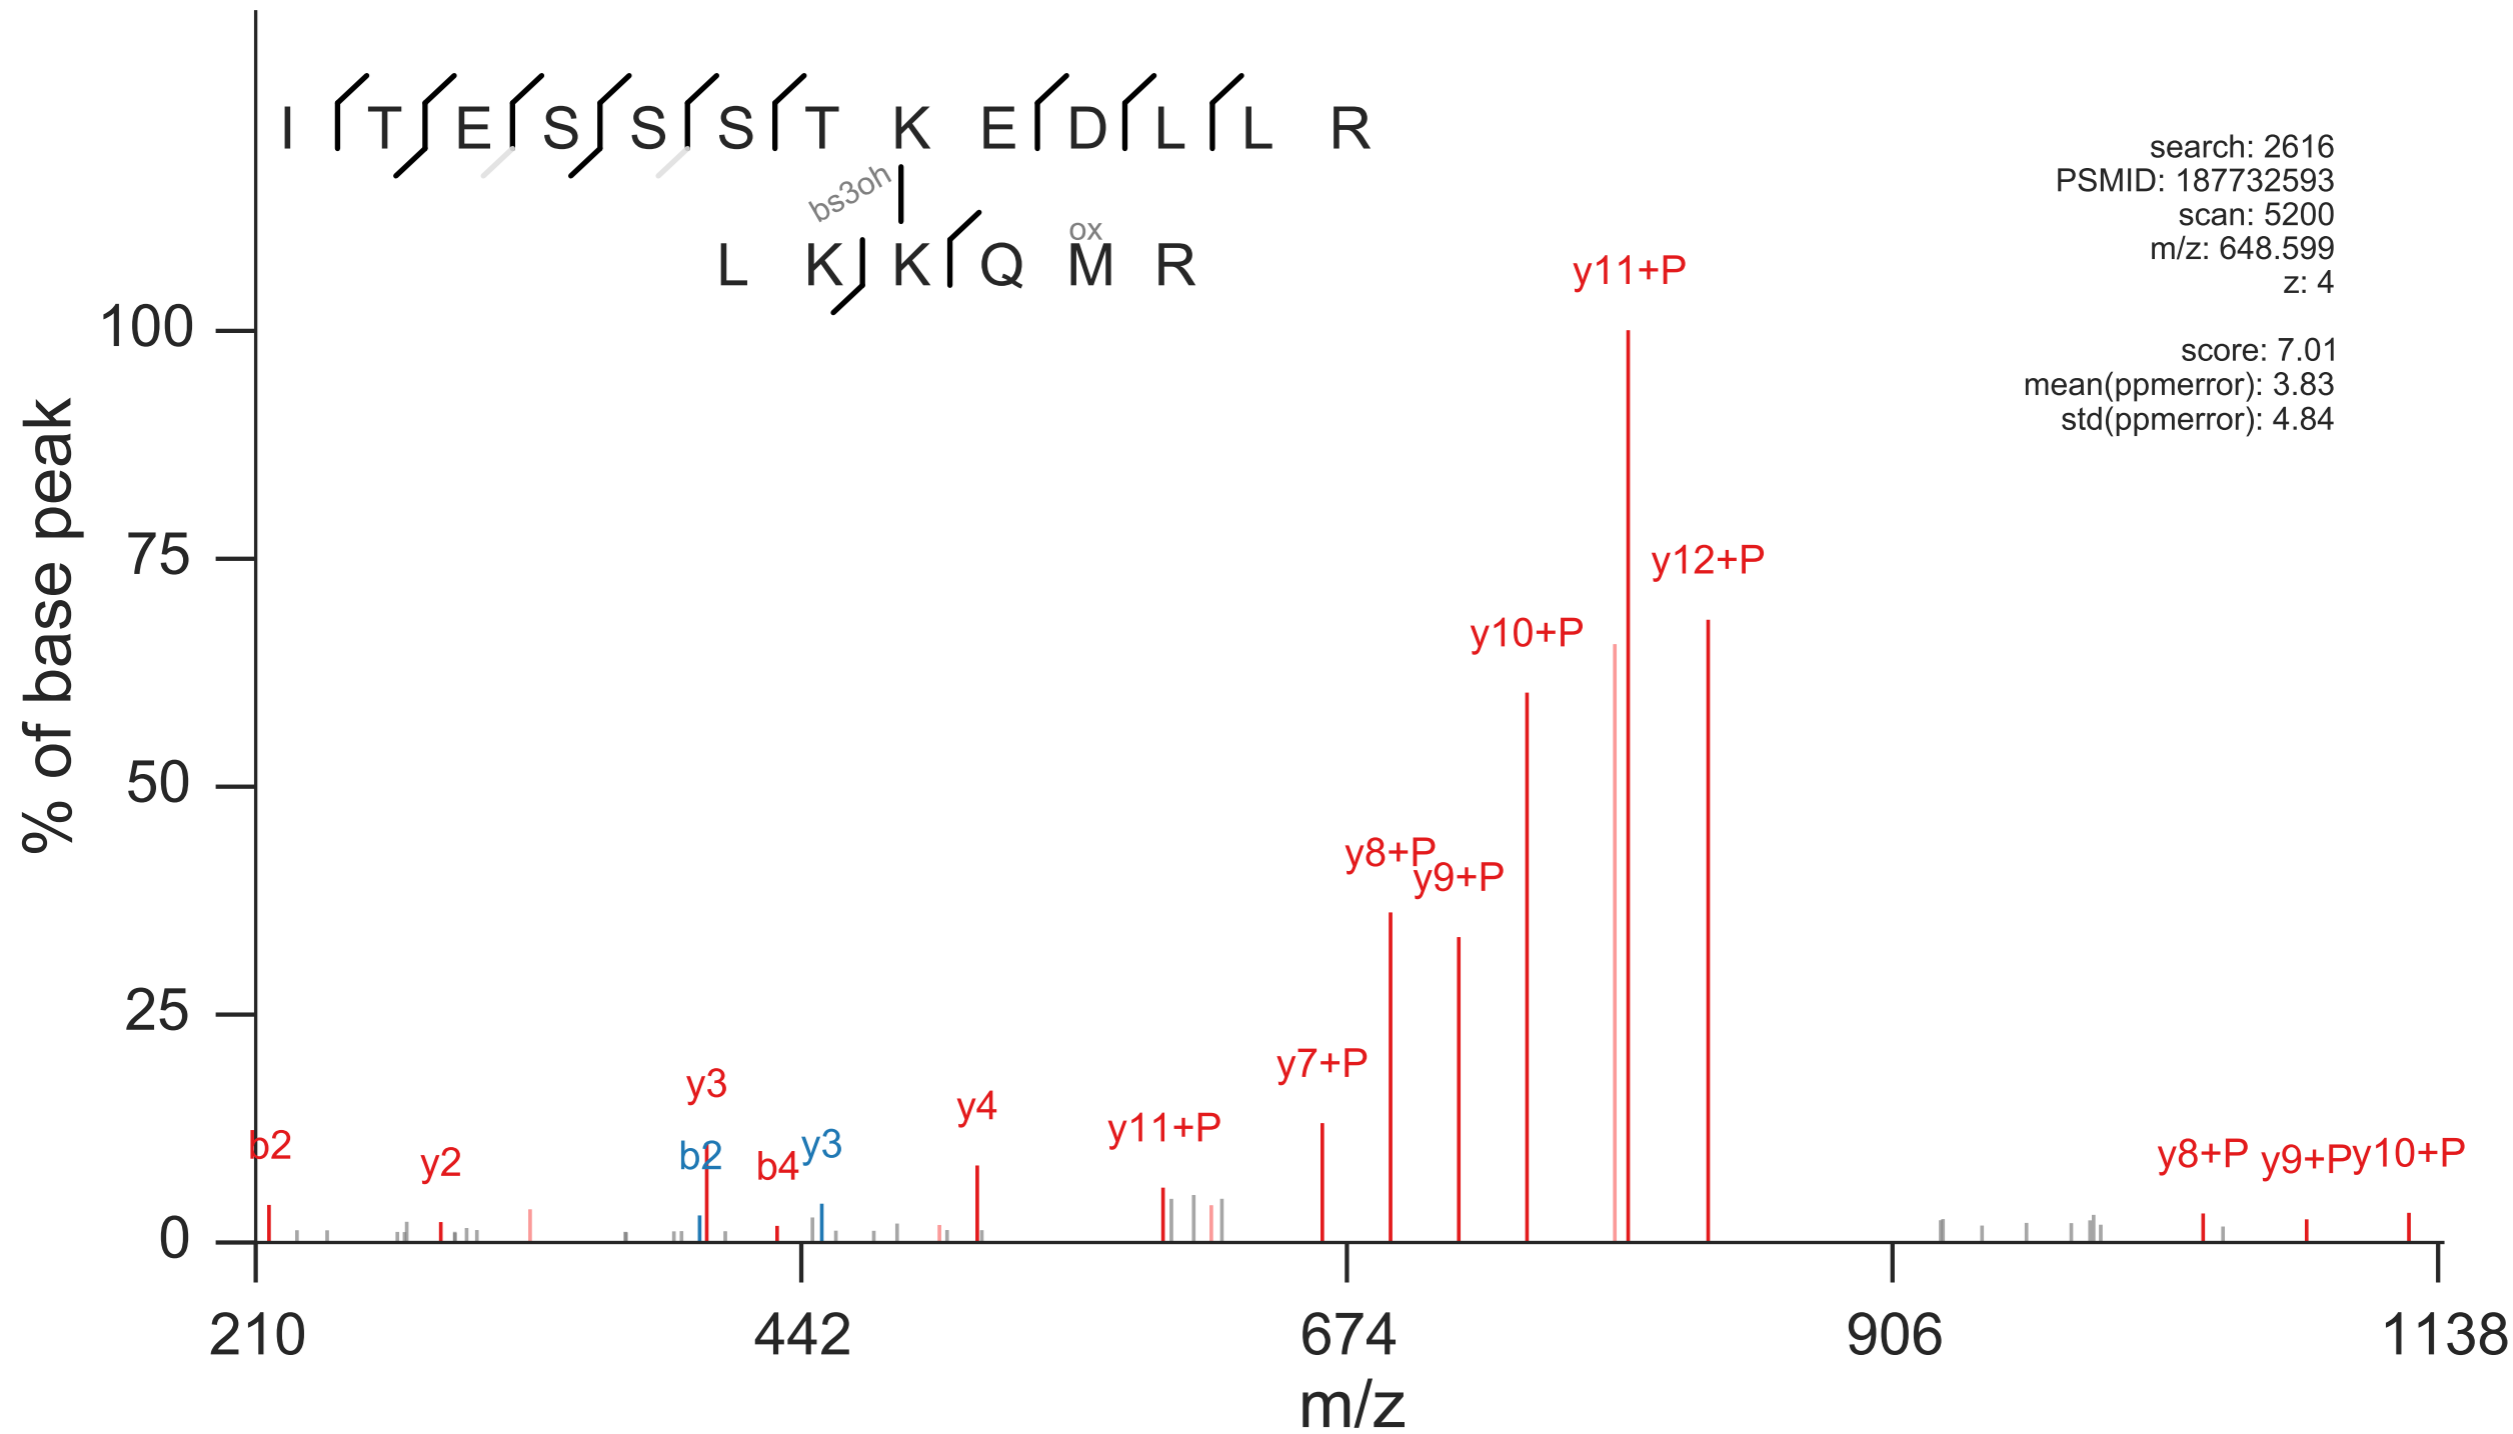

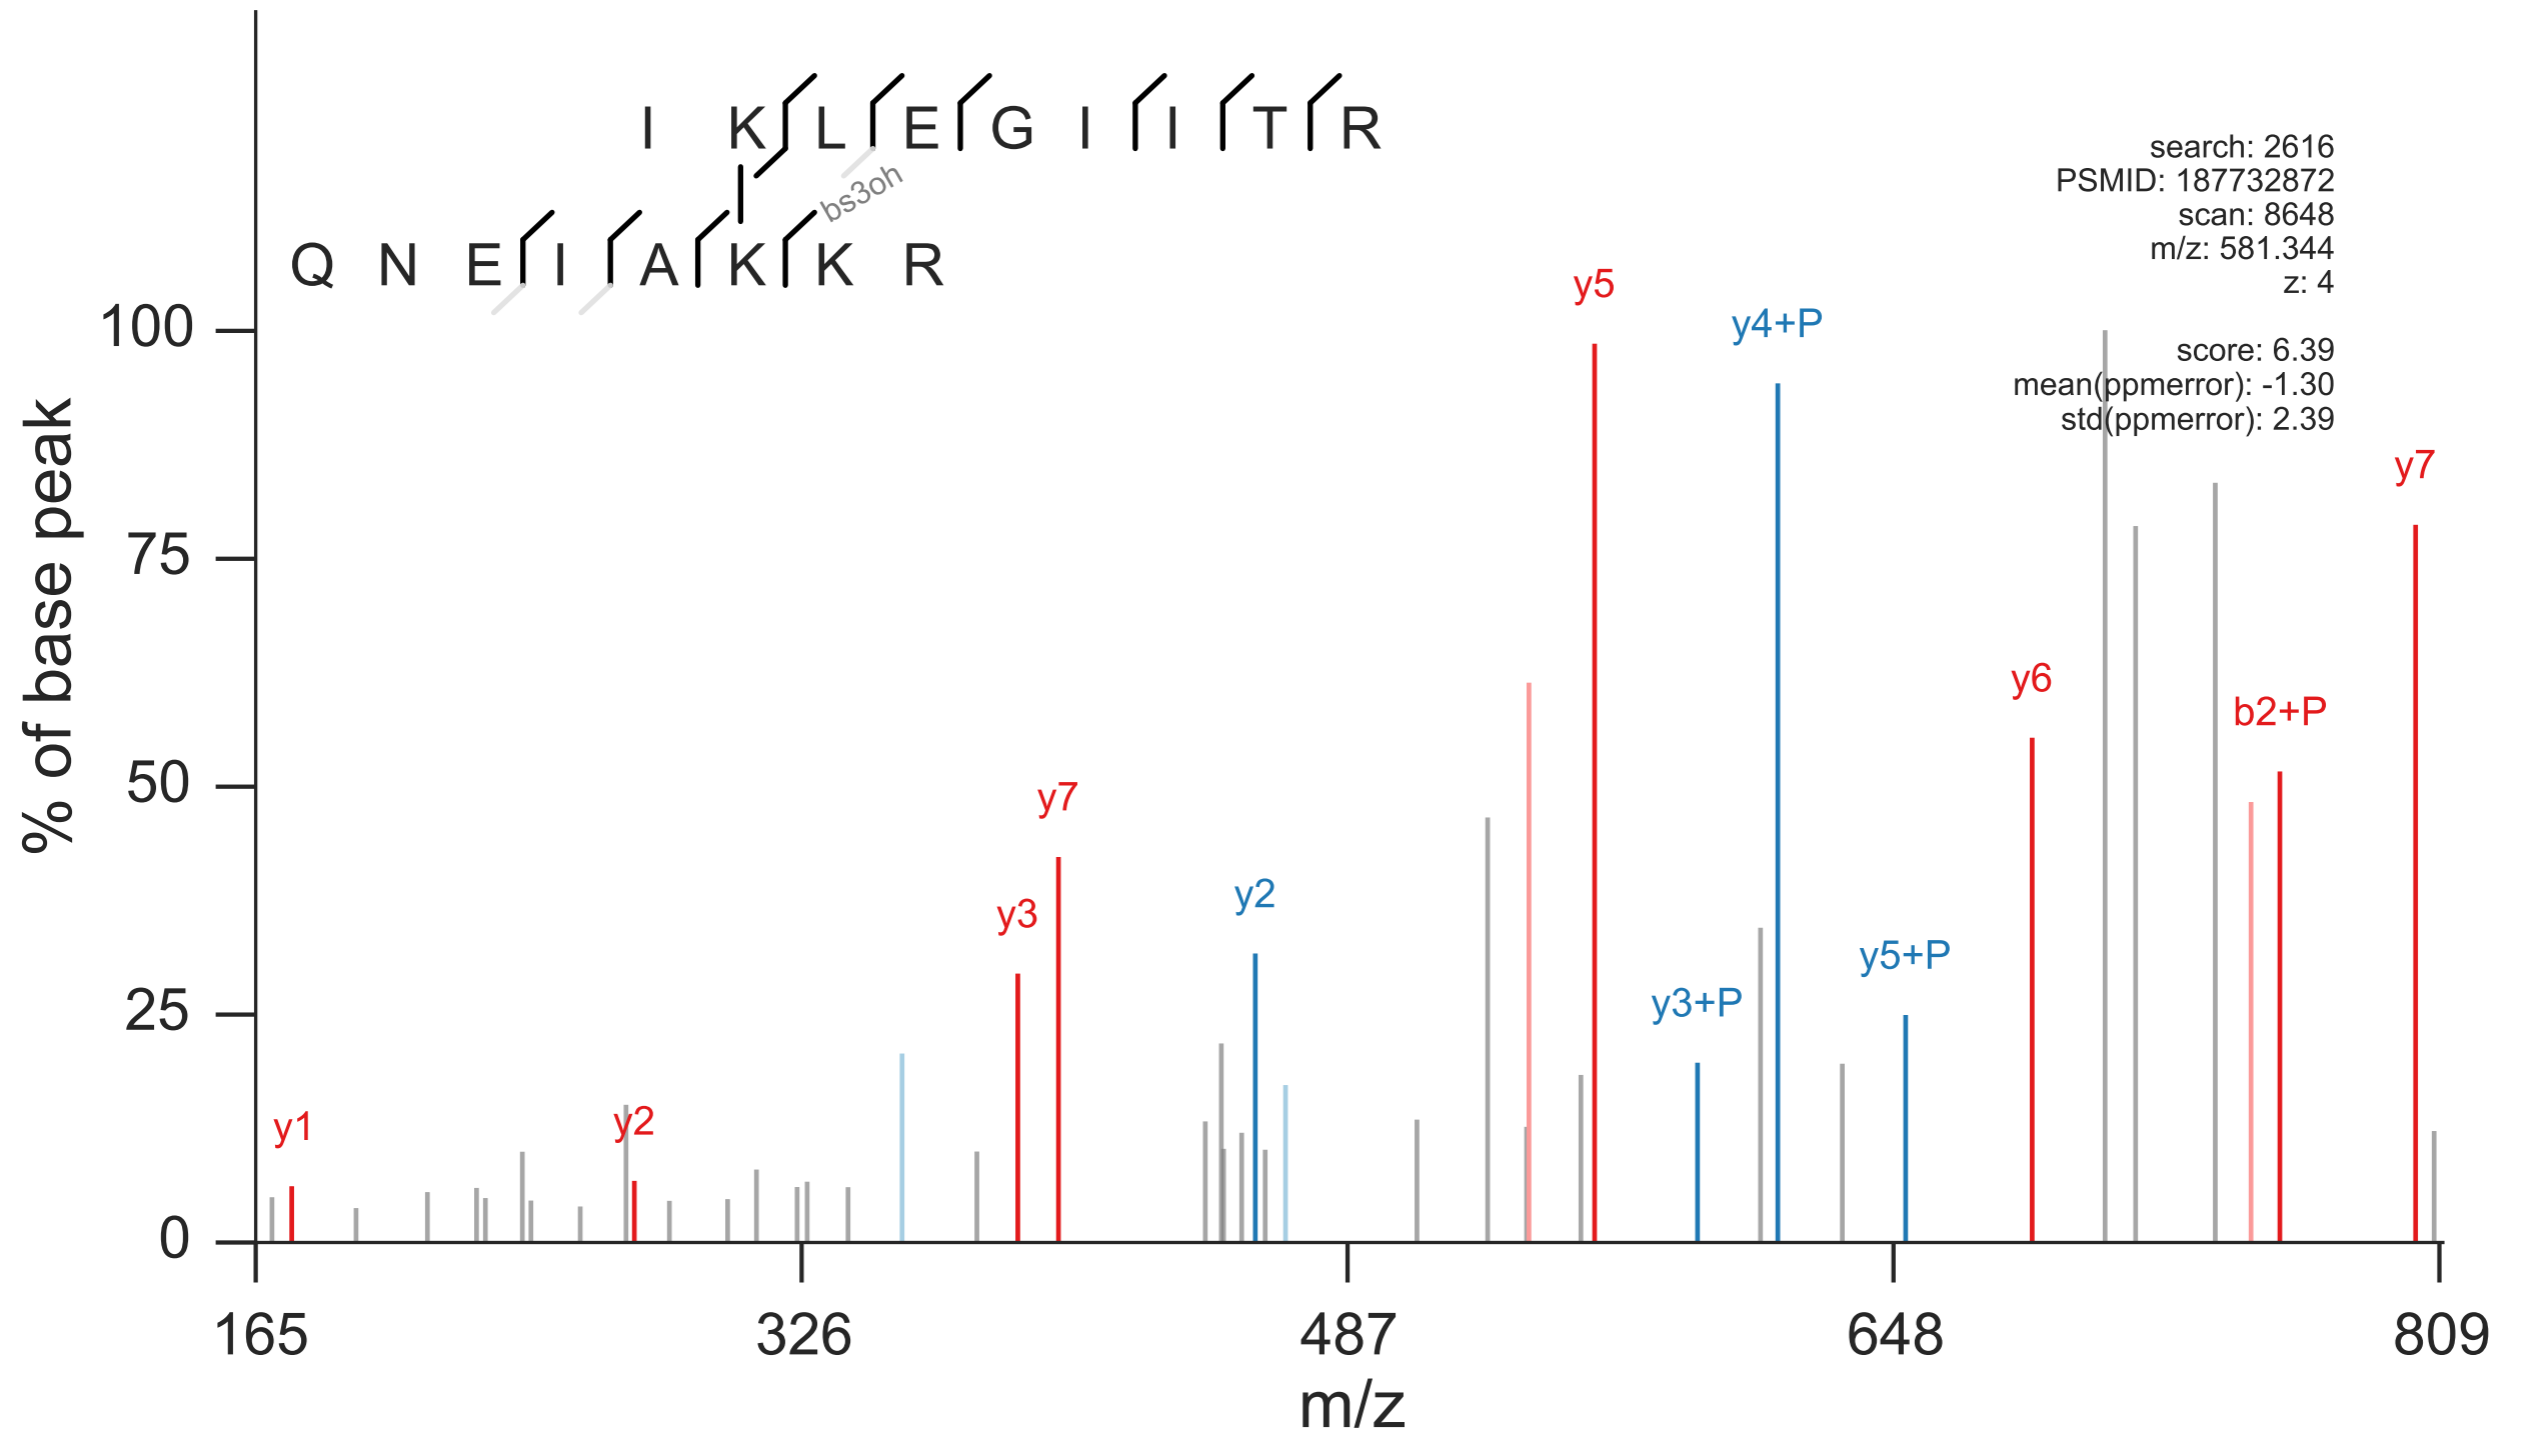

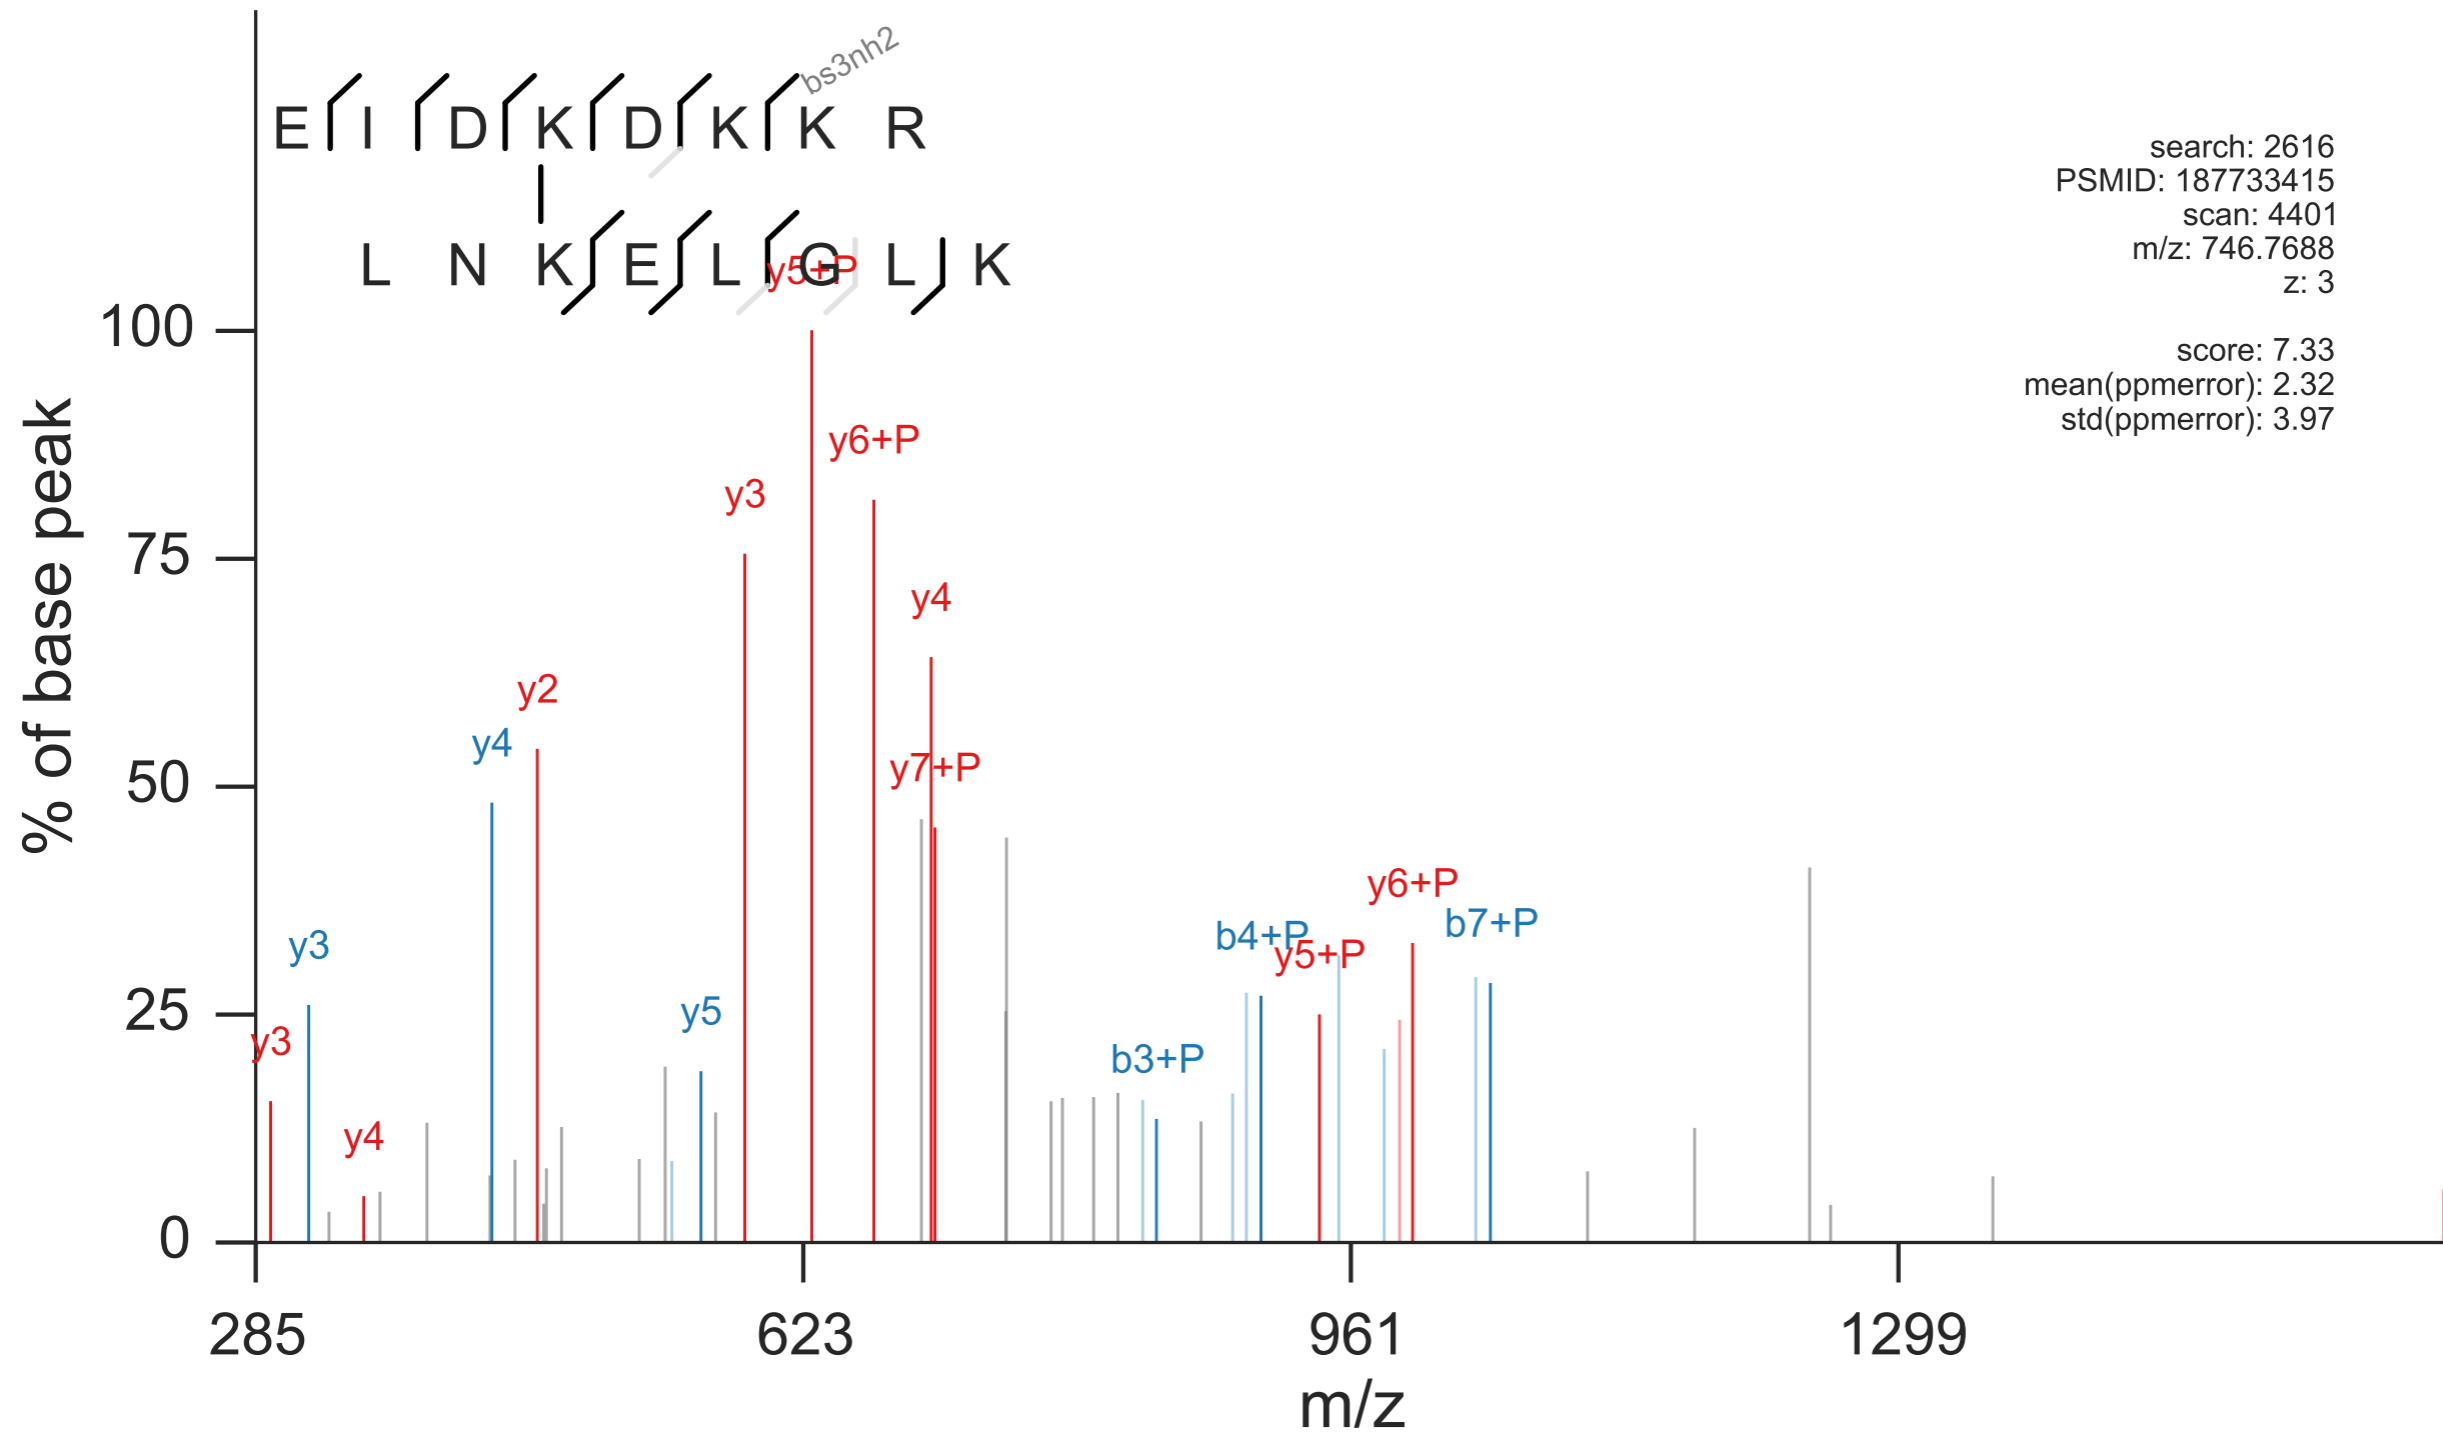



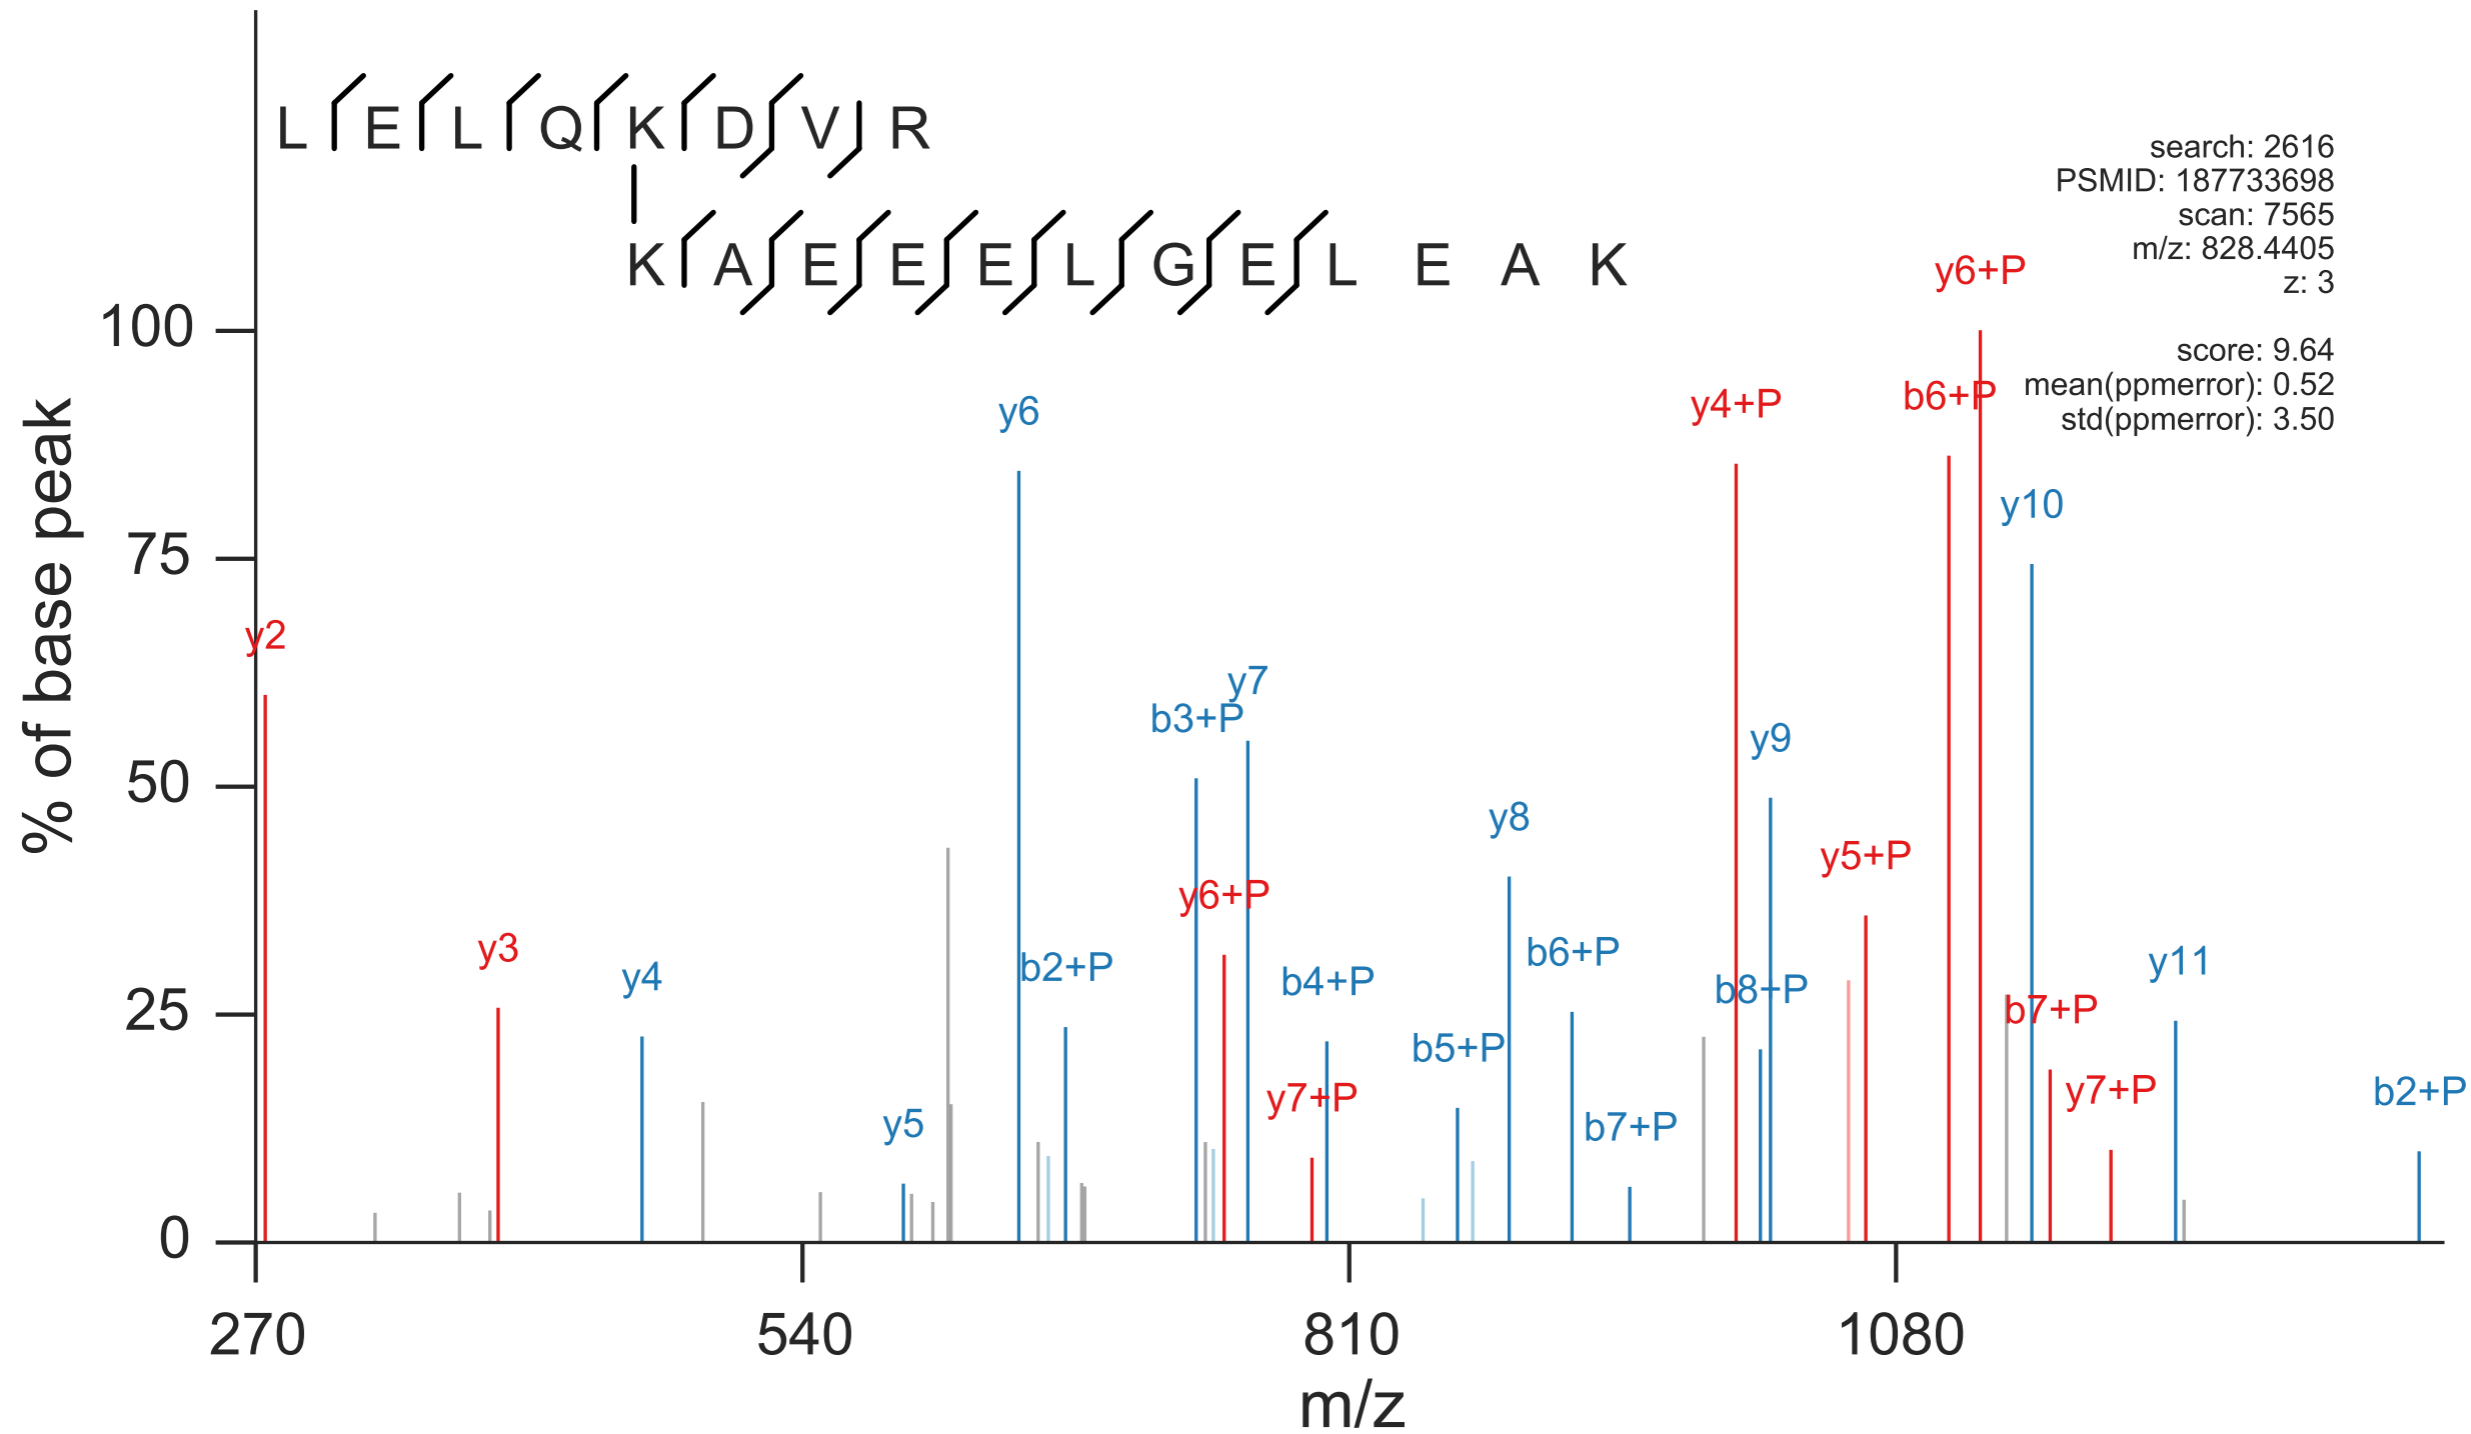

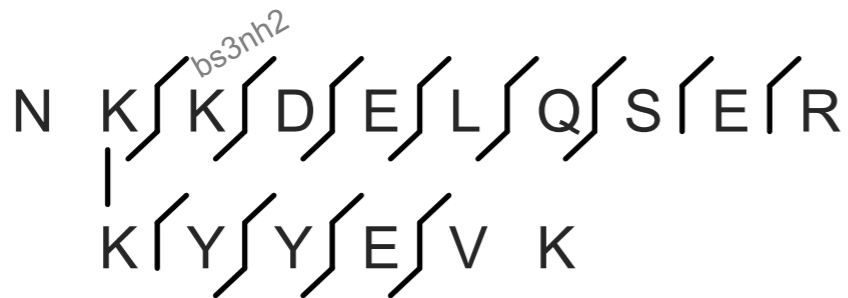

search: 2616  
 PSMID: 187733870  
 scan: 4599  
 m/z: 592.8098  
 z: 4  
  
 score: 10.18  
 mean(ppmerror): -2.46  
 std(ppmerror): 2.16

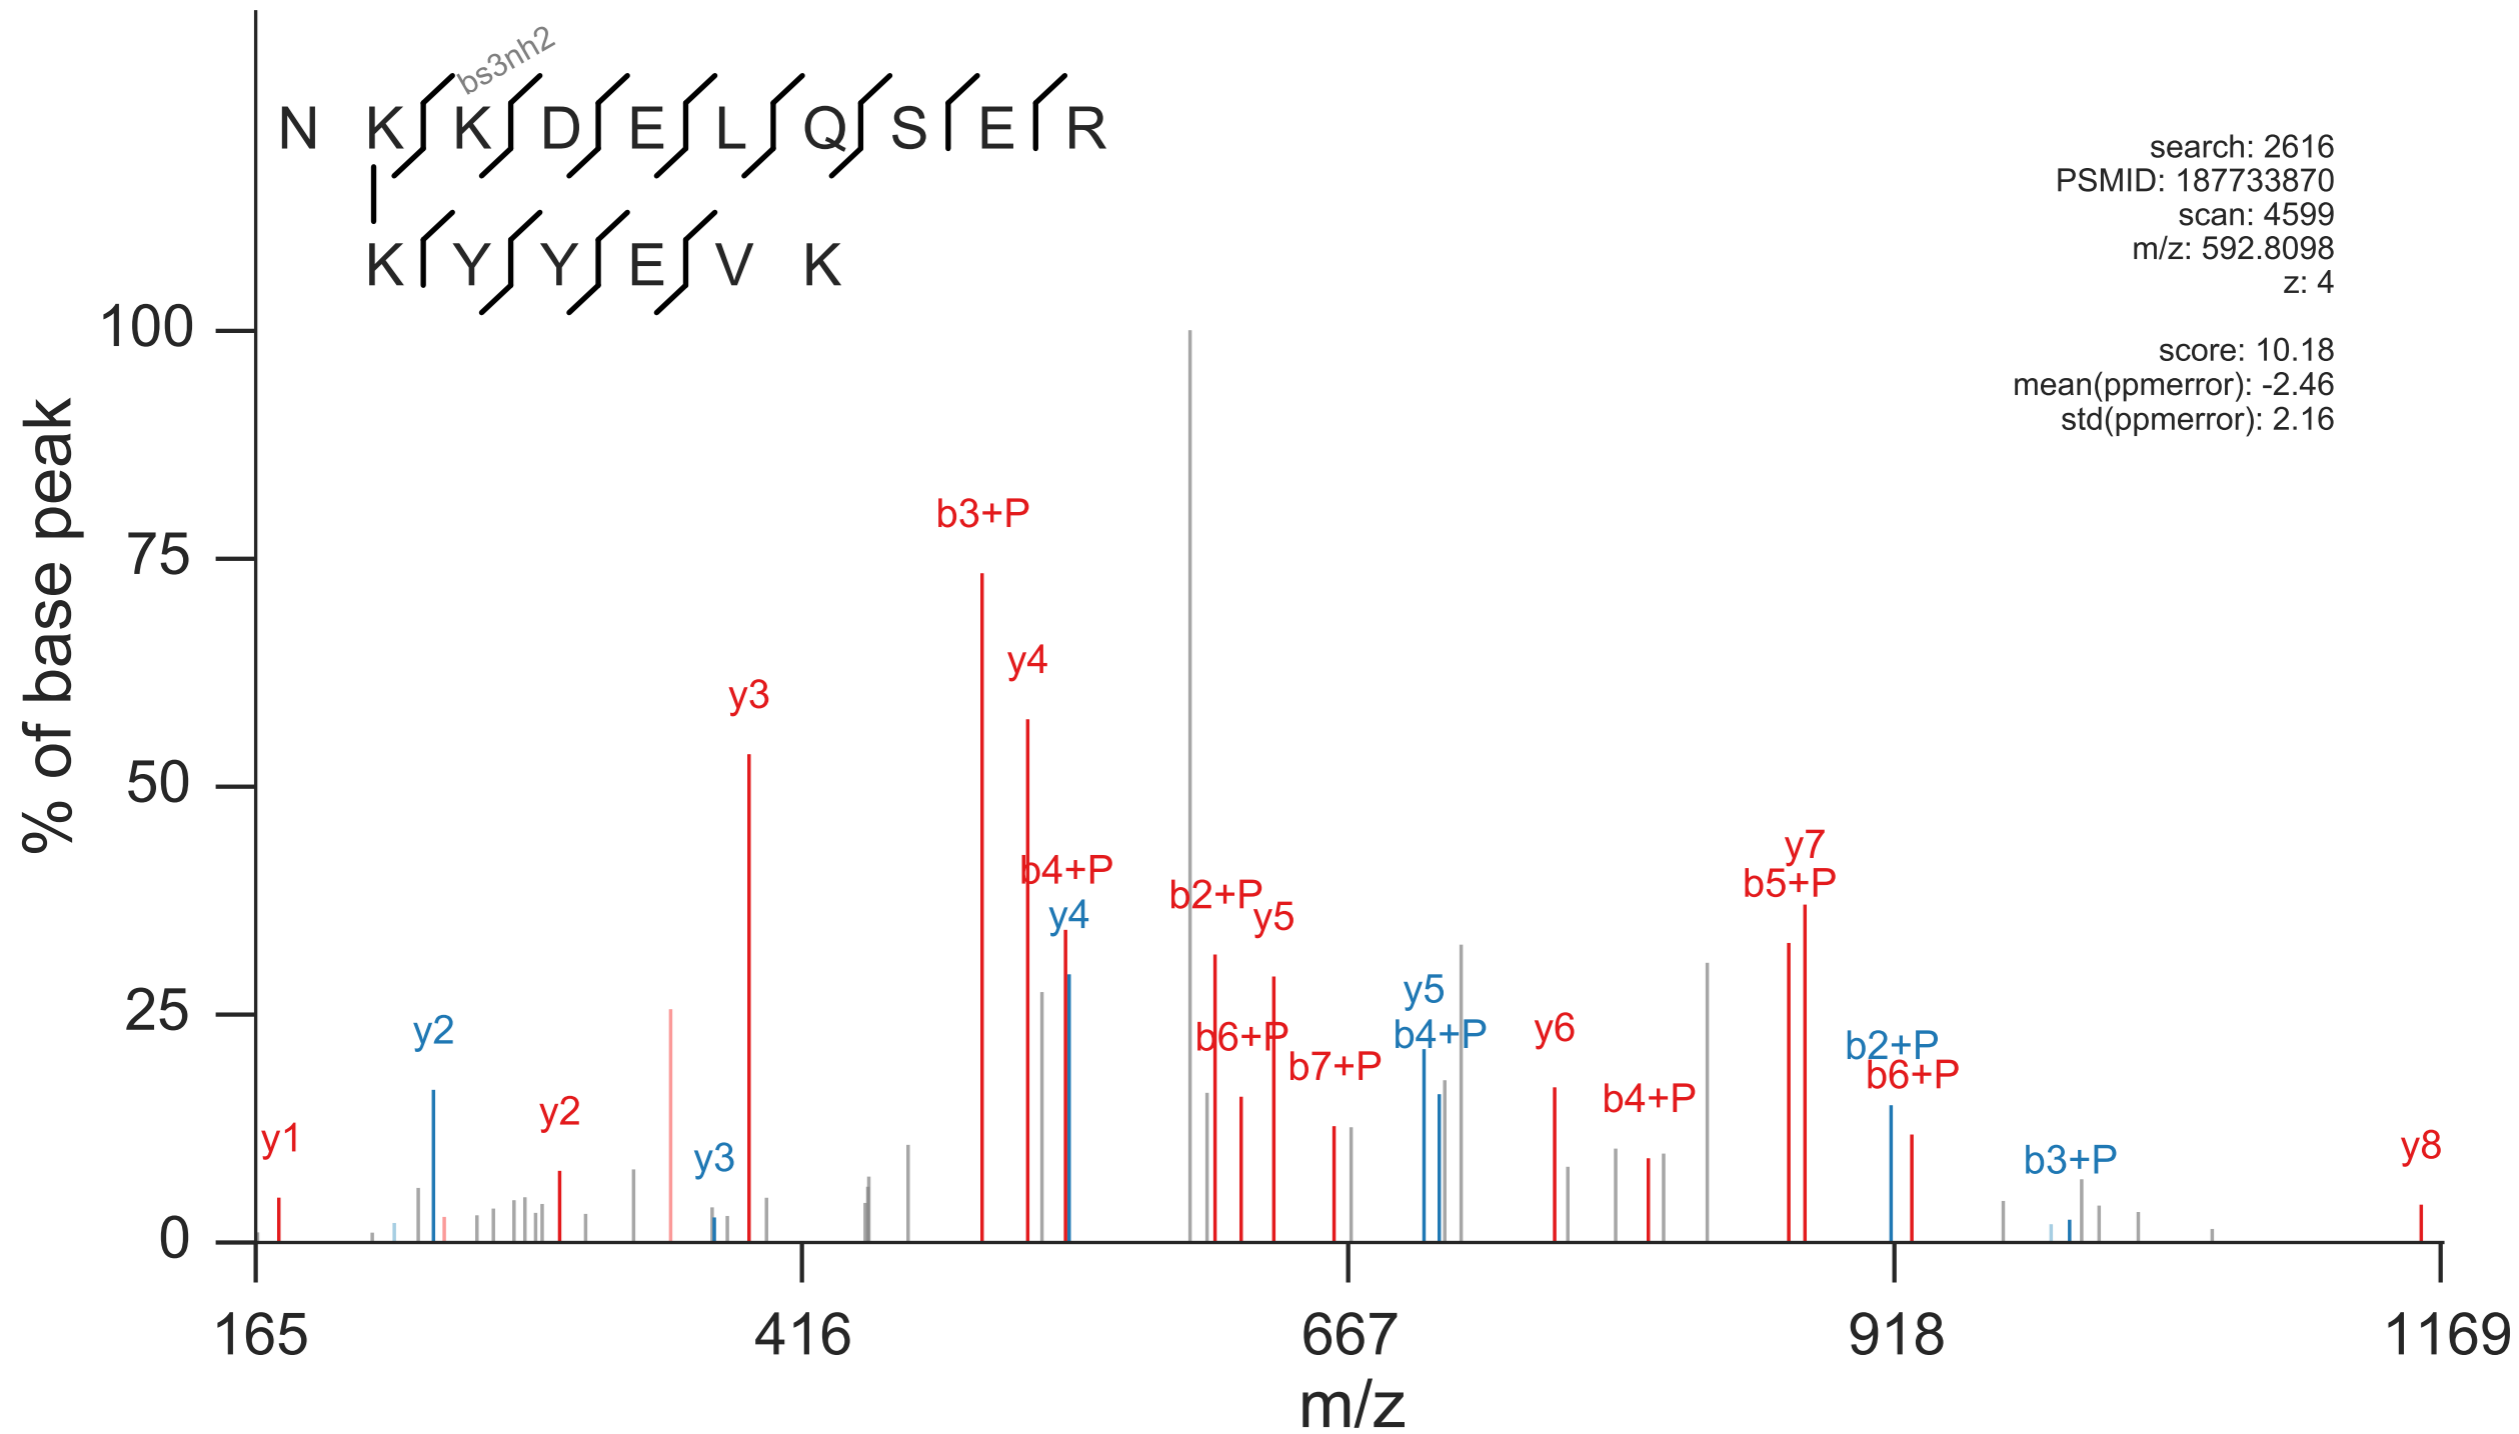

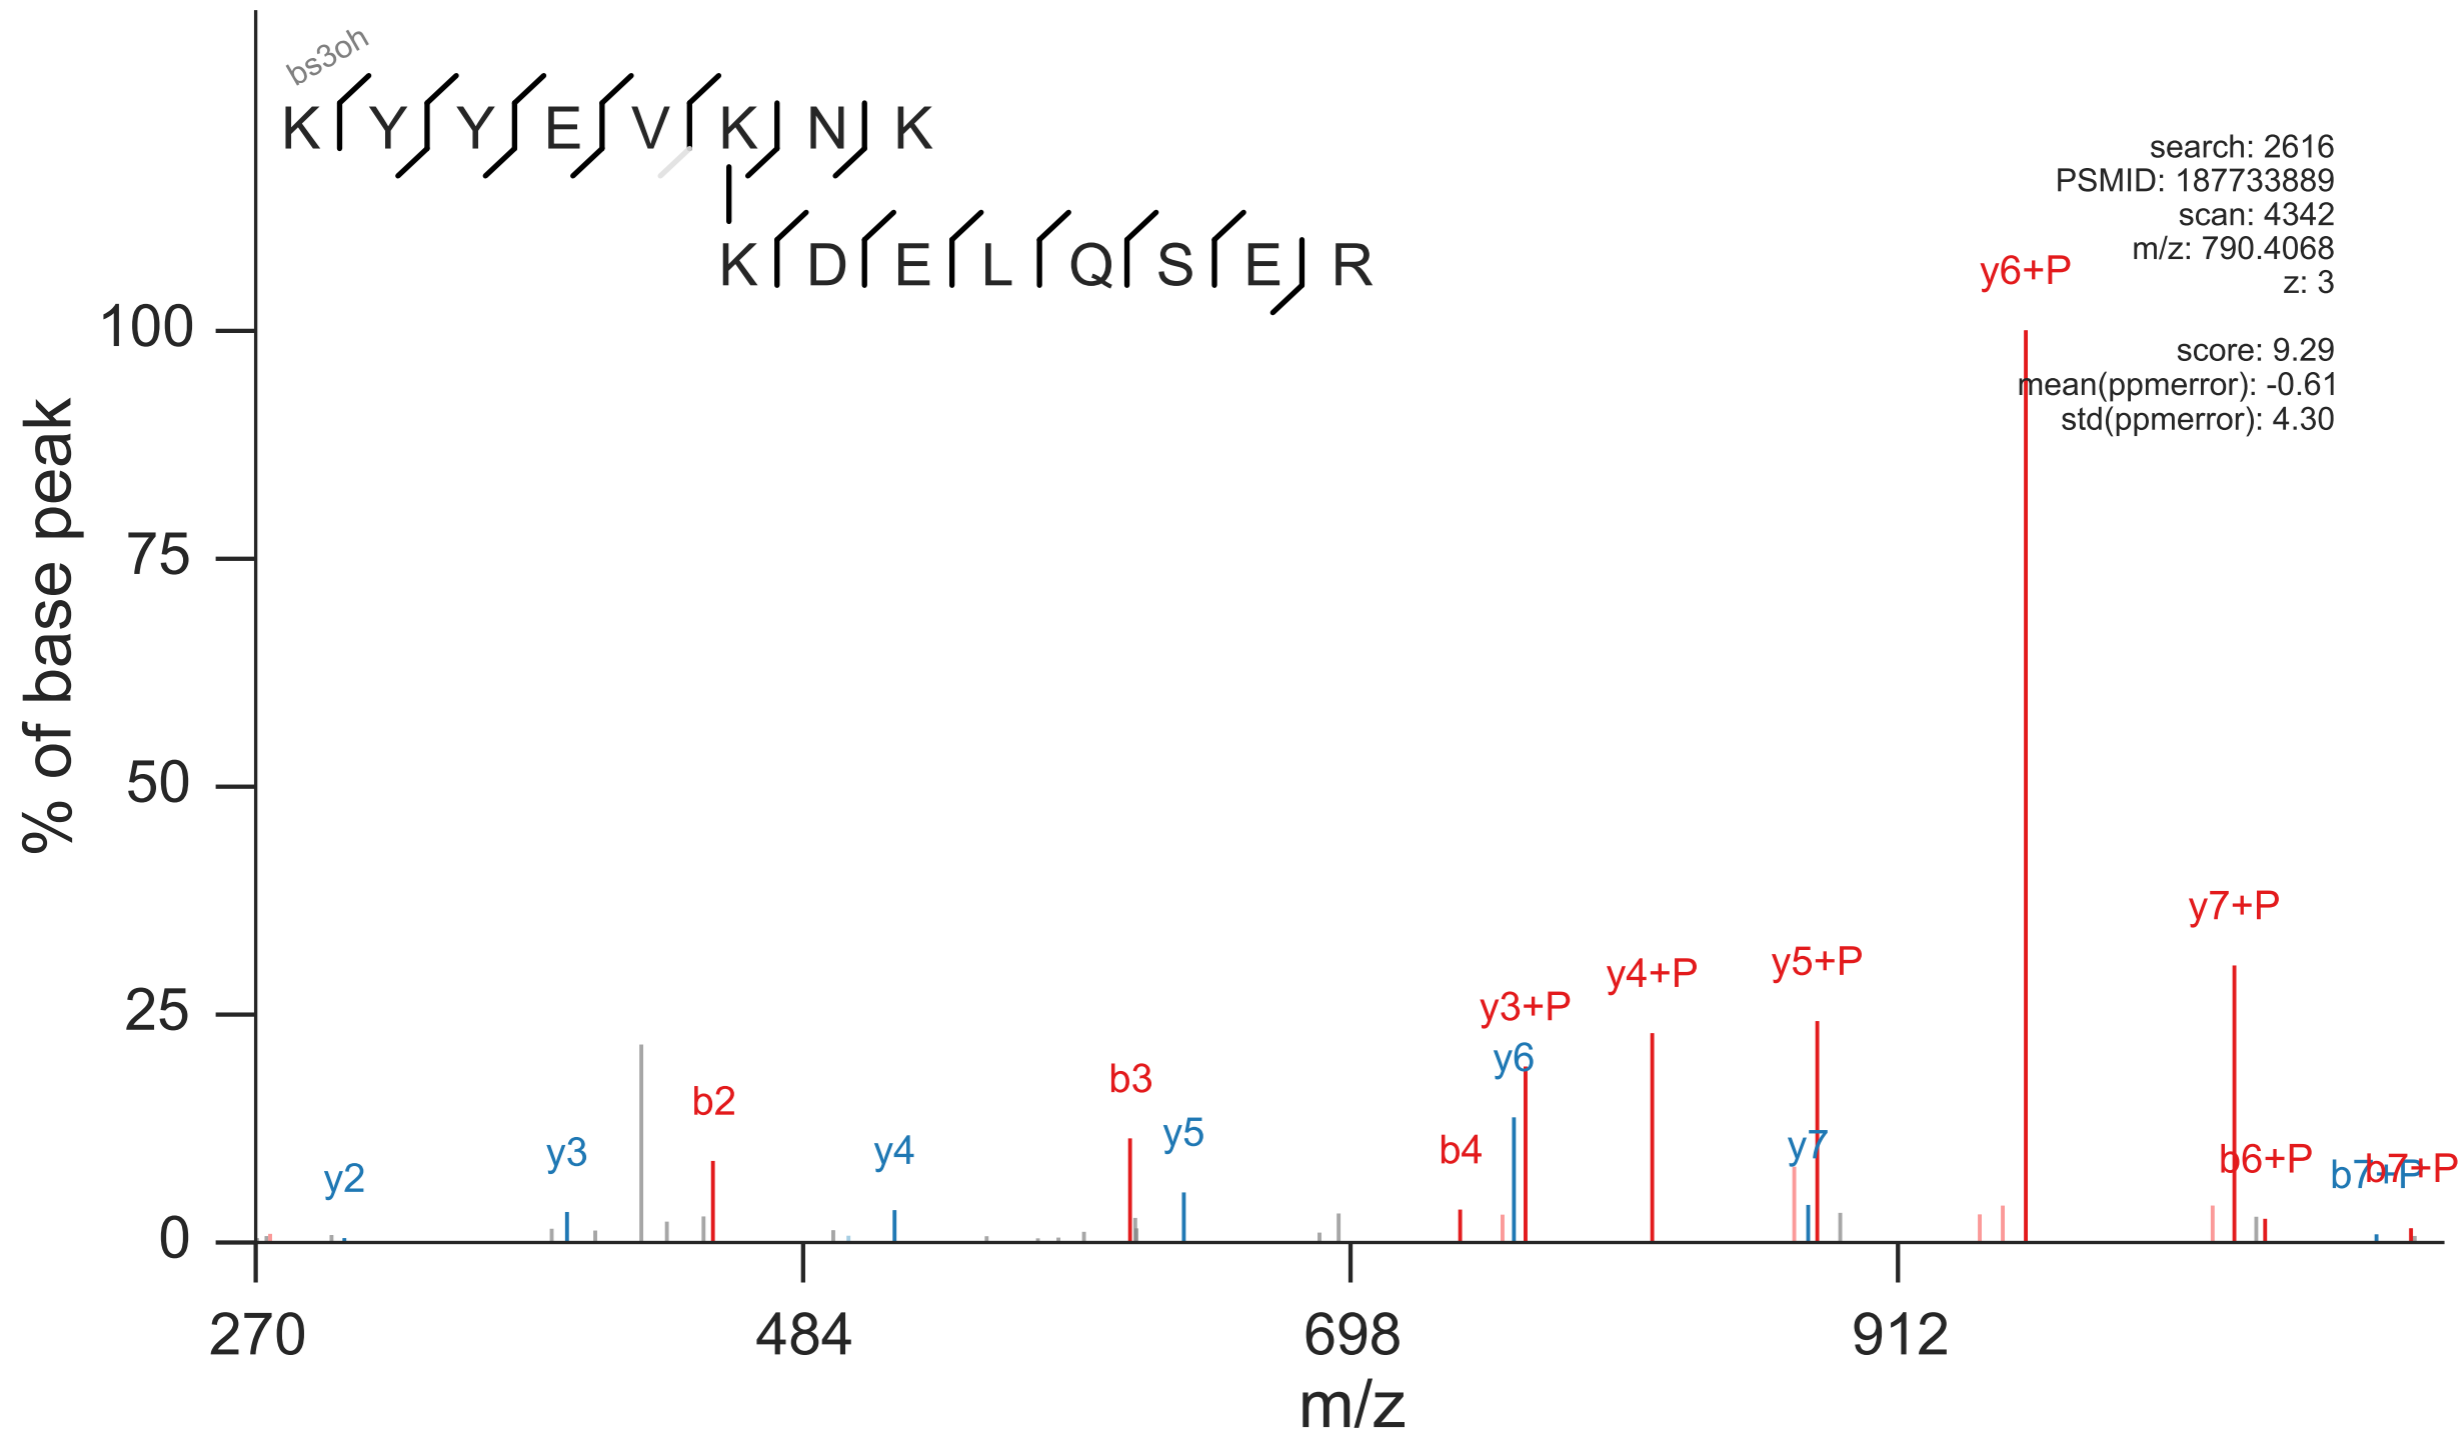

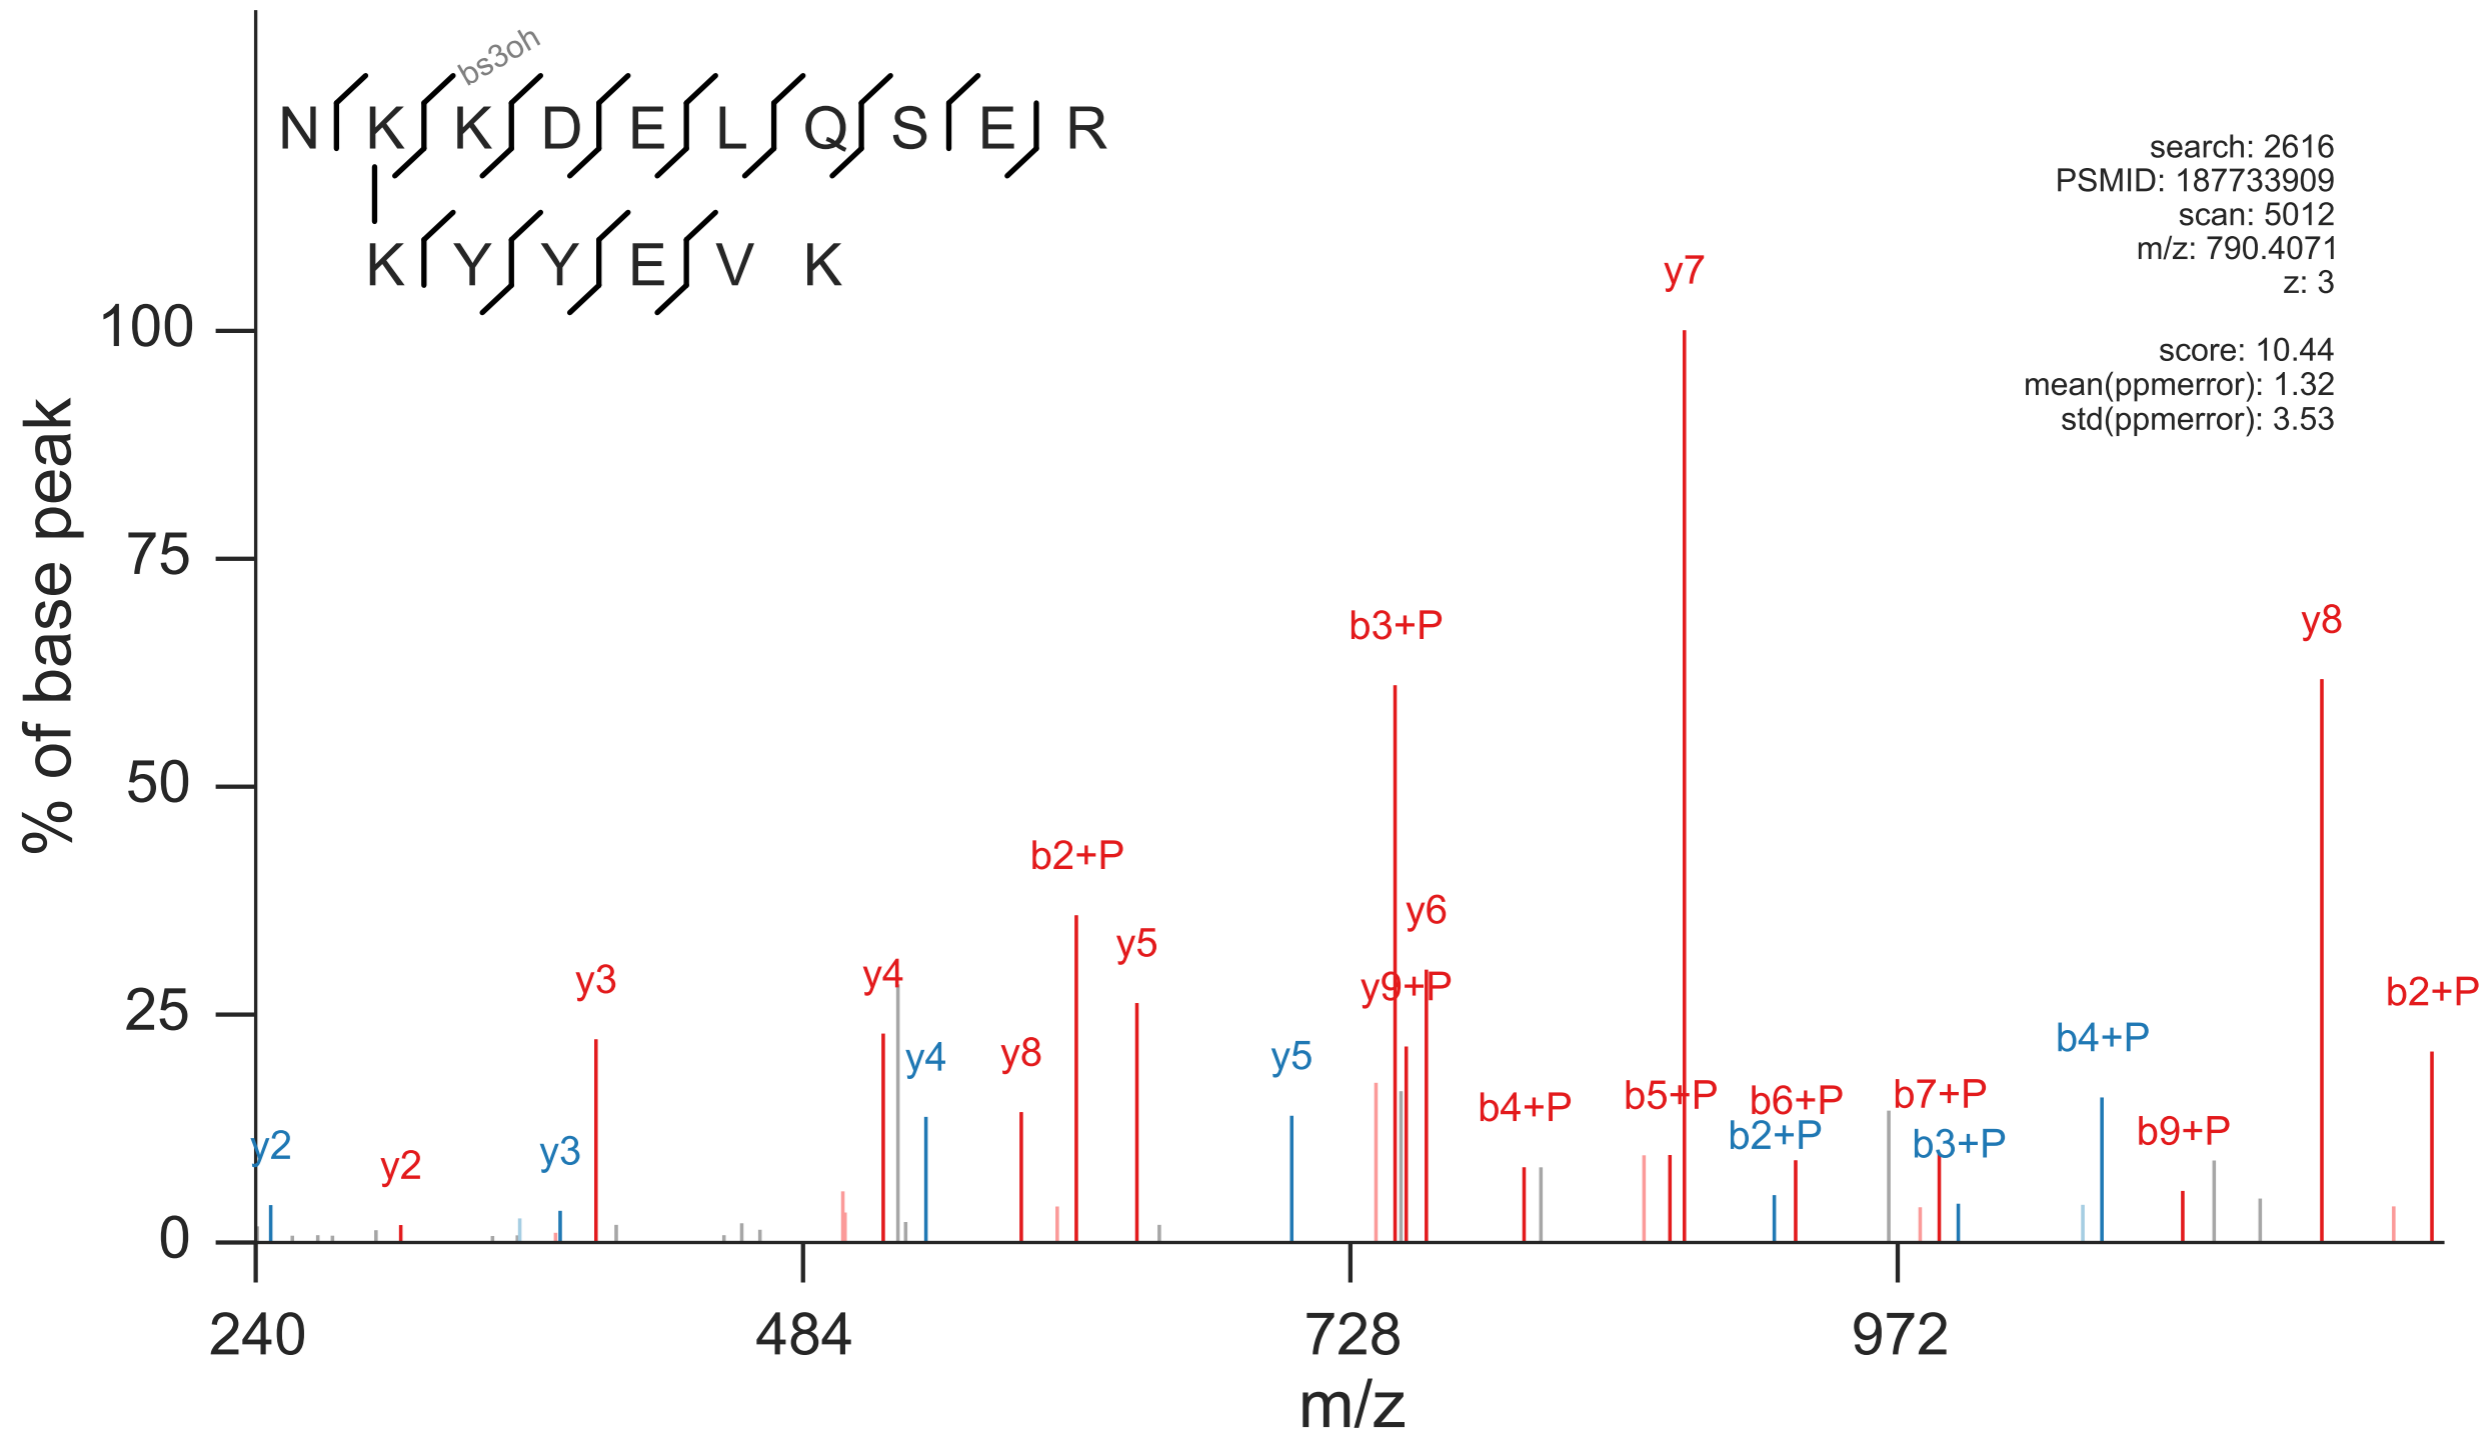

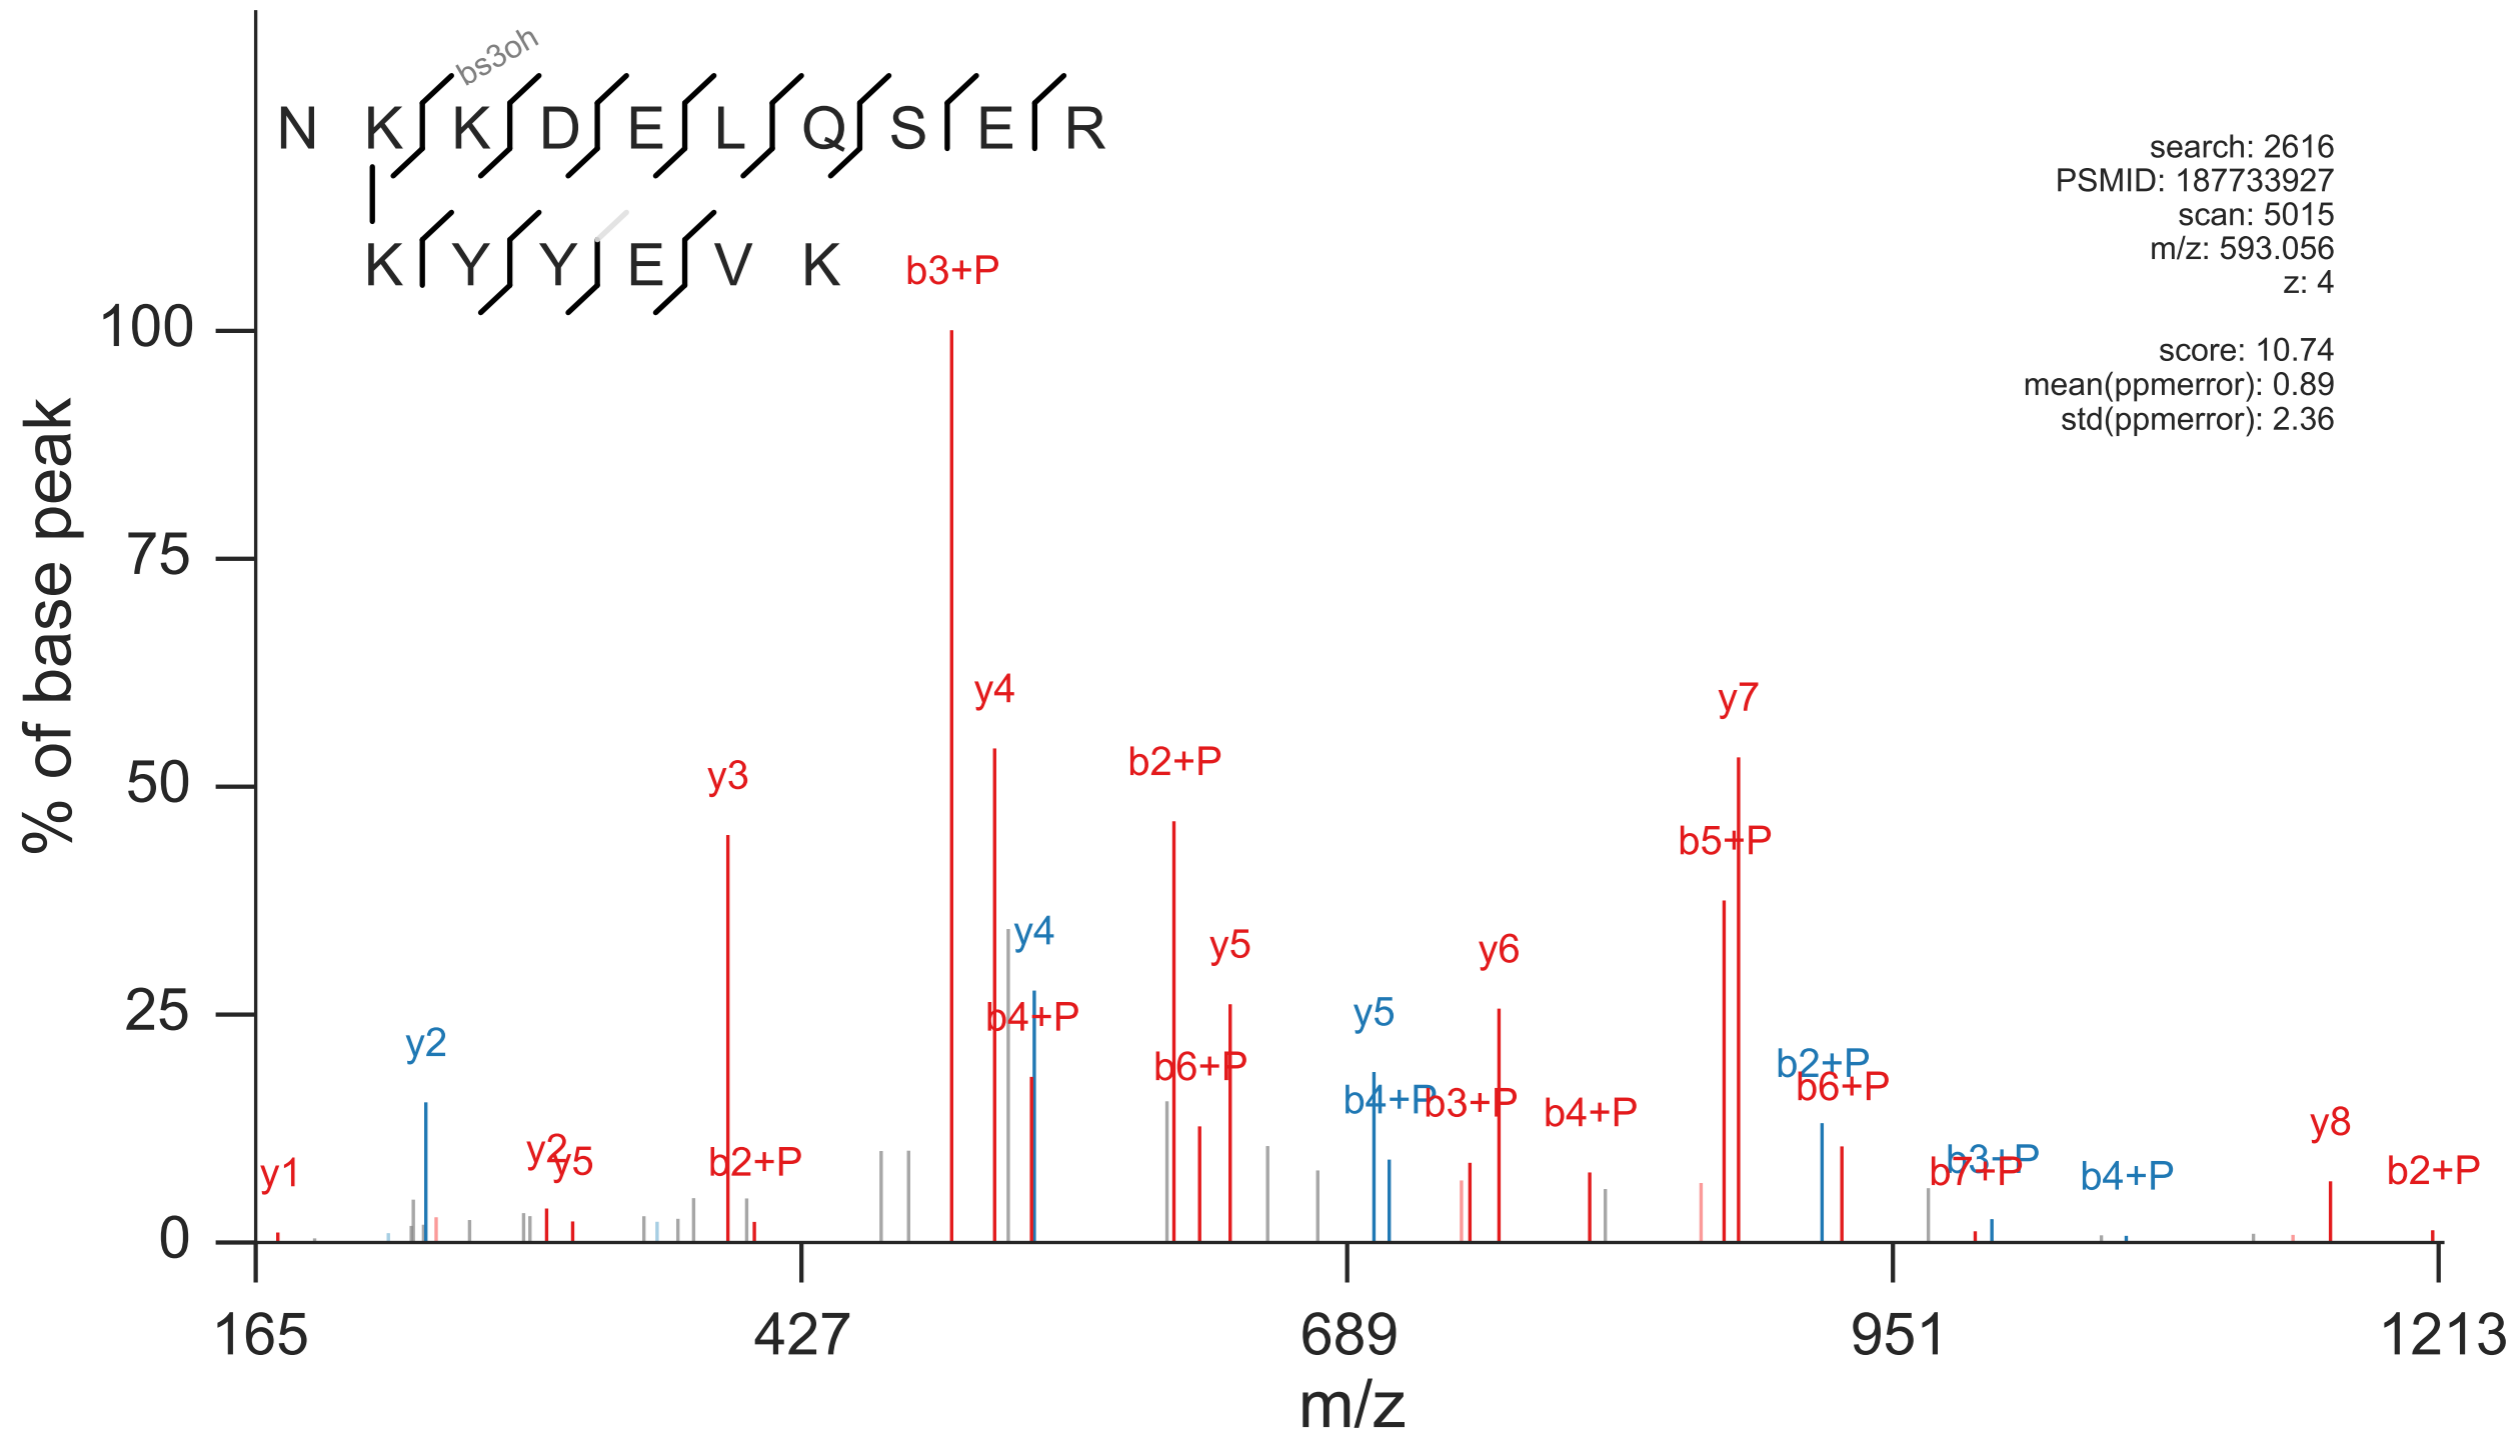

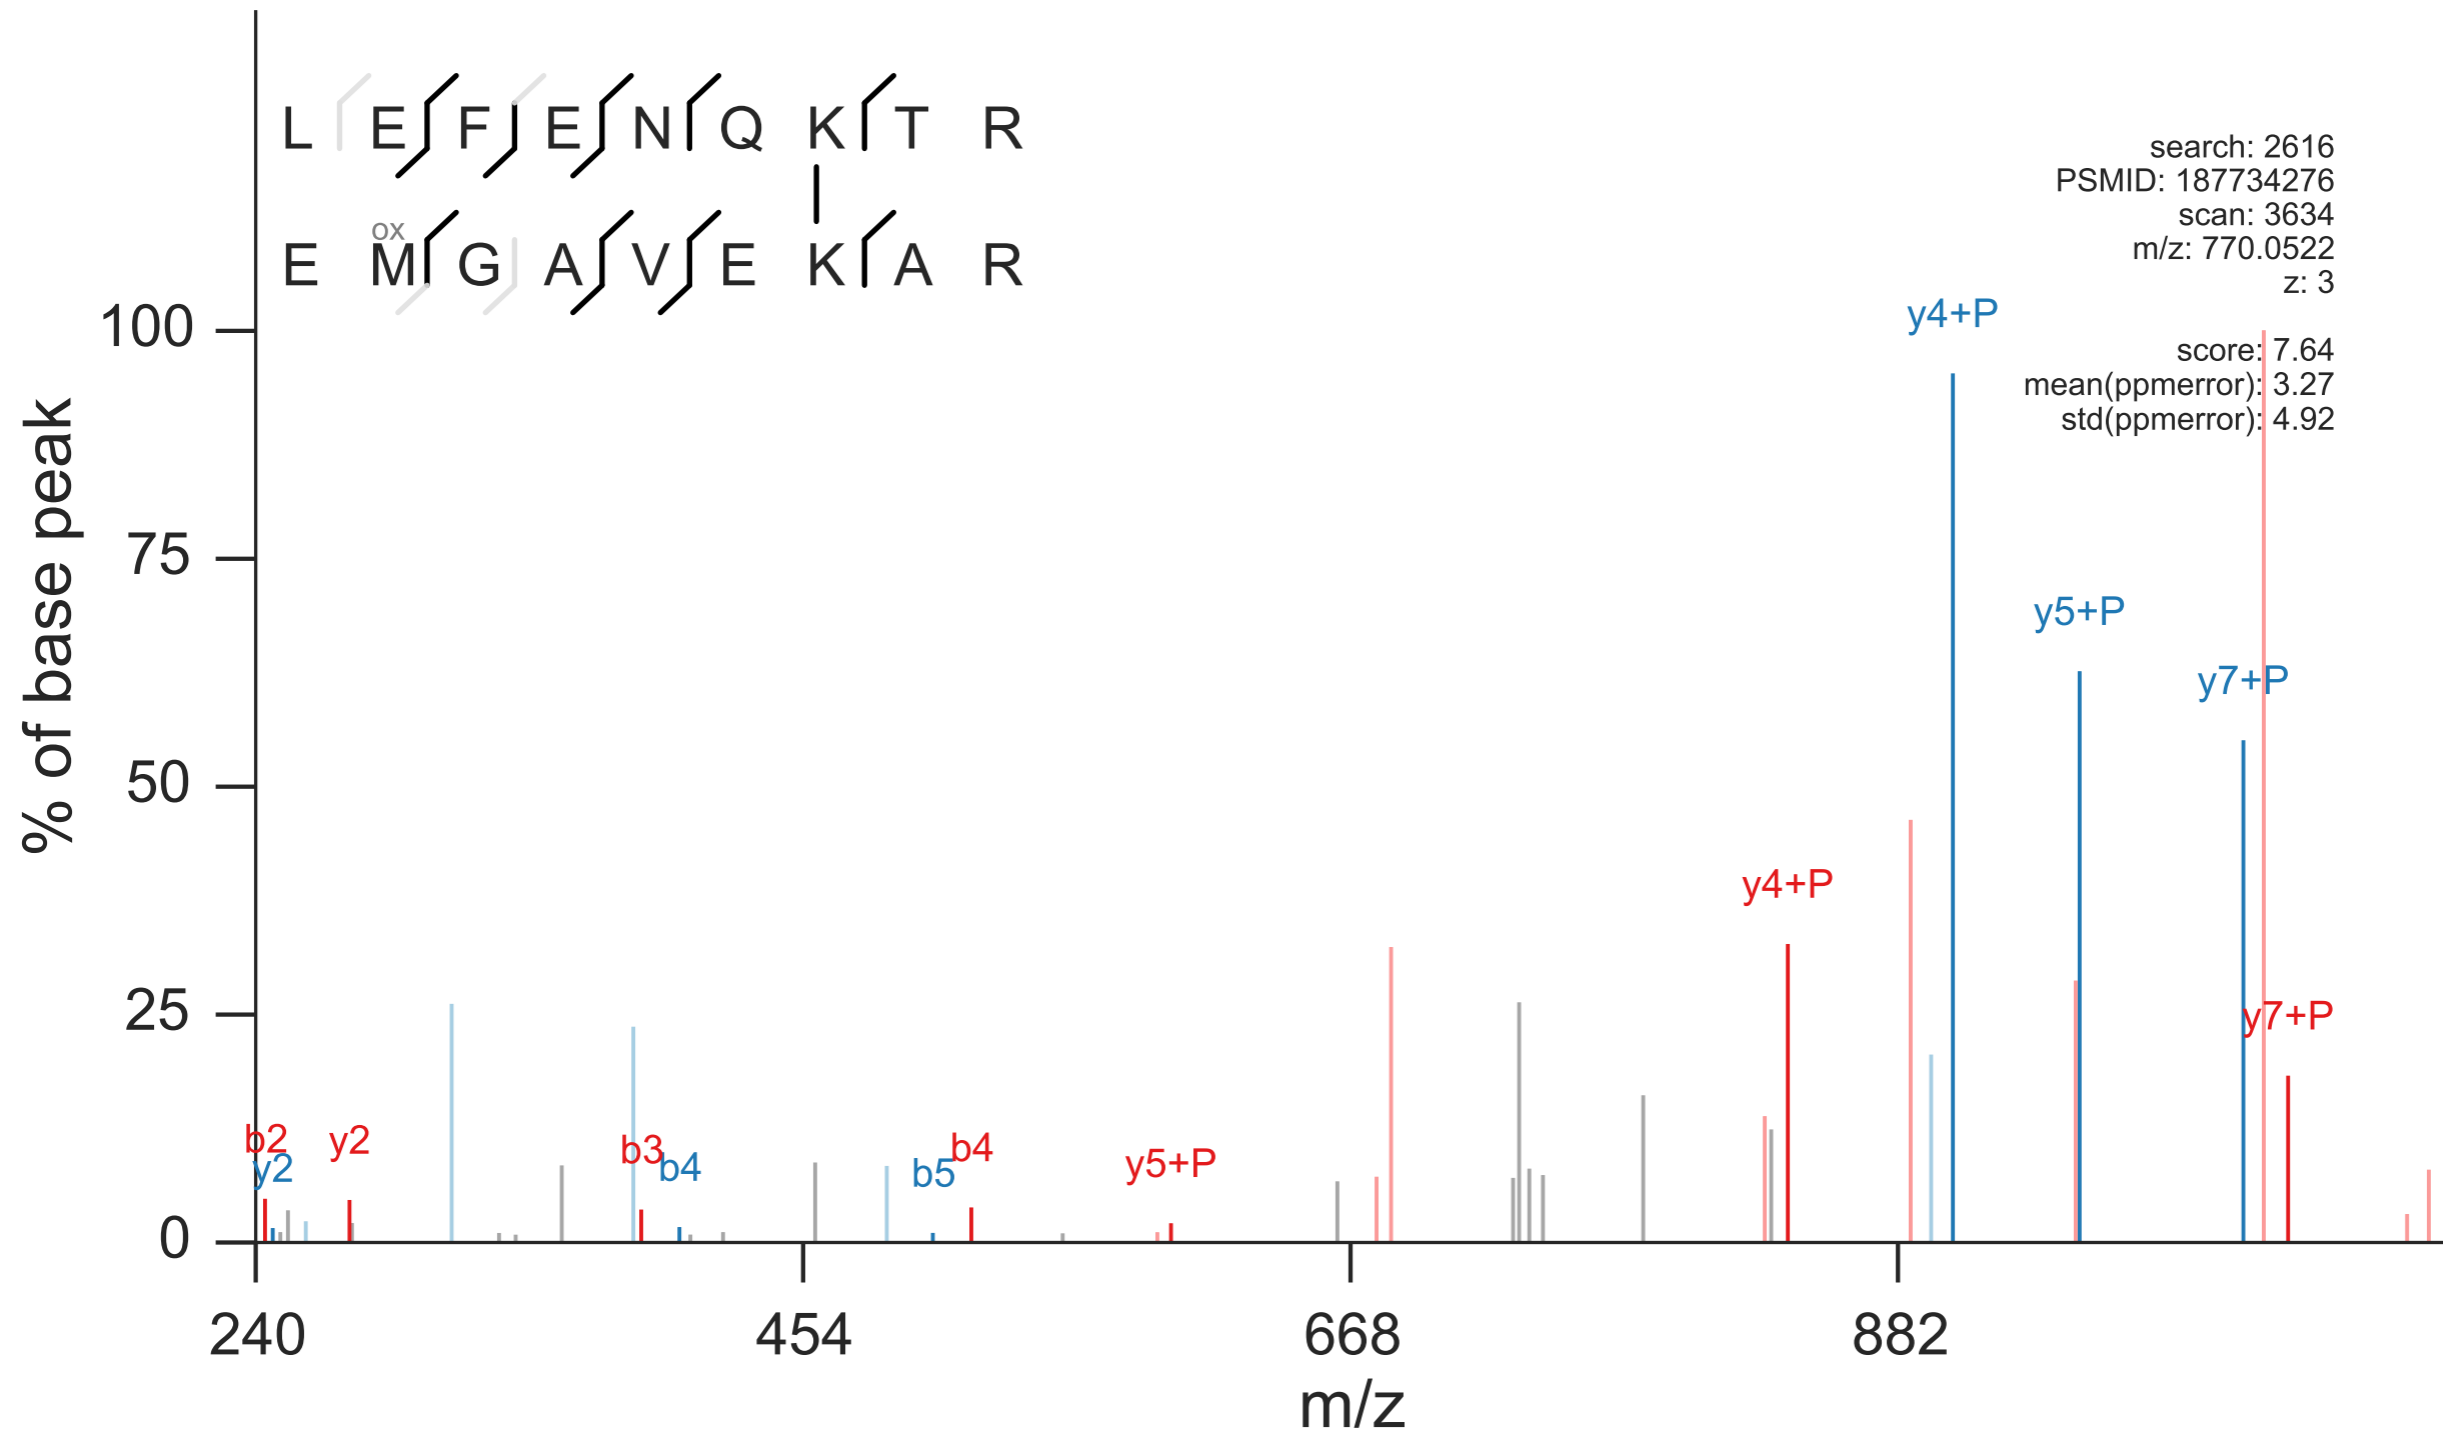

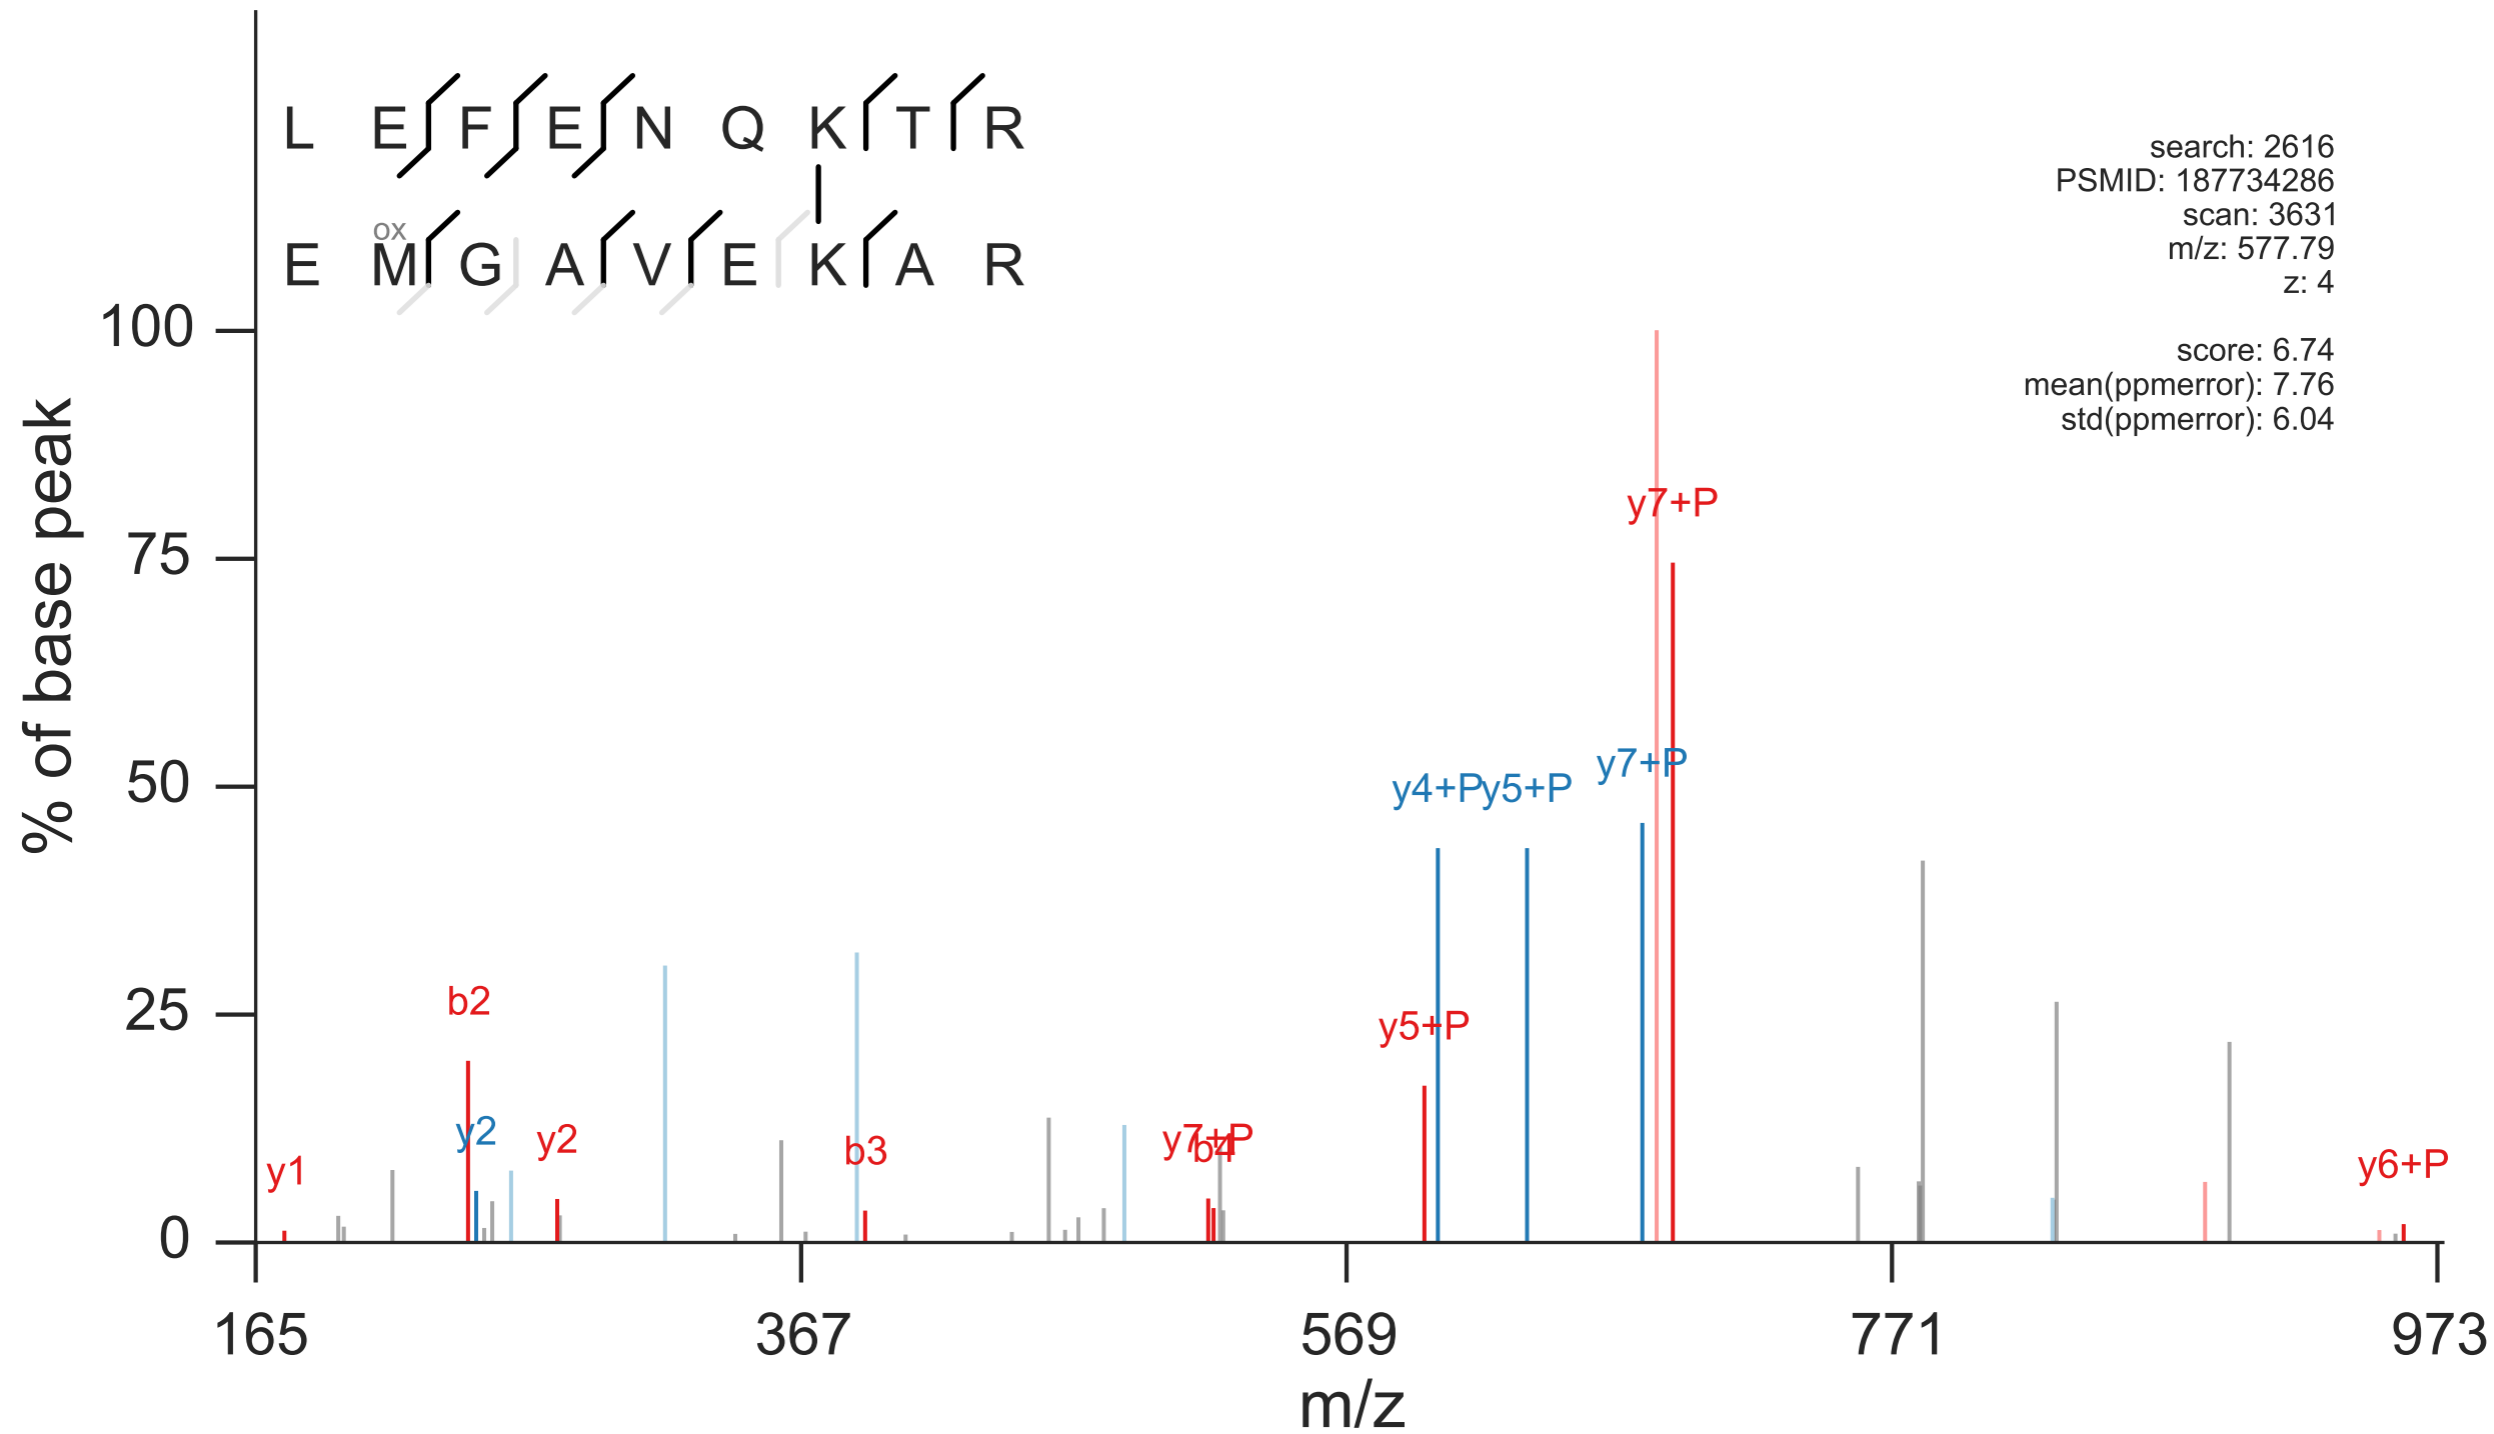

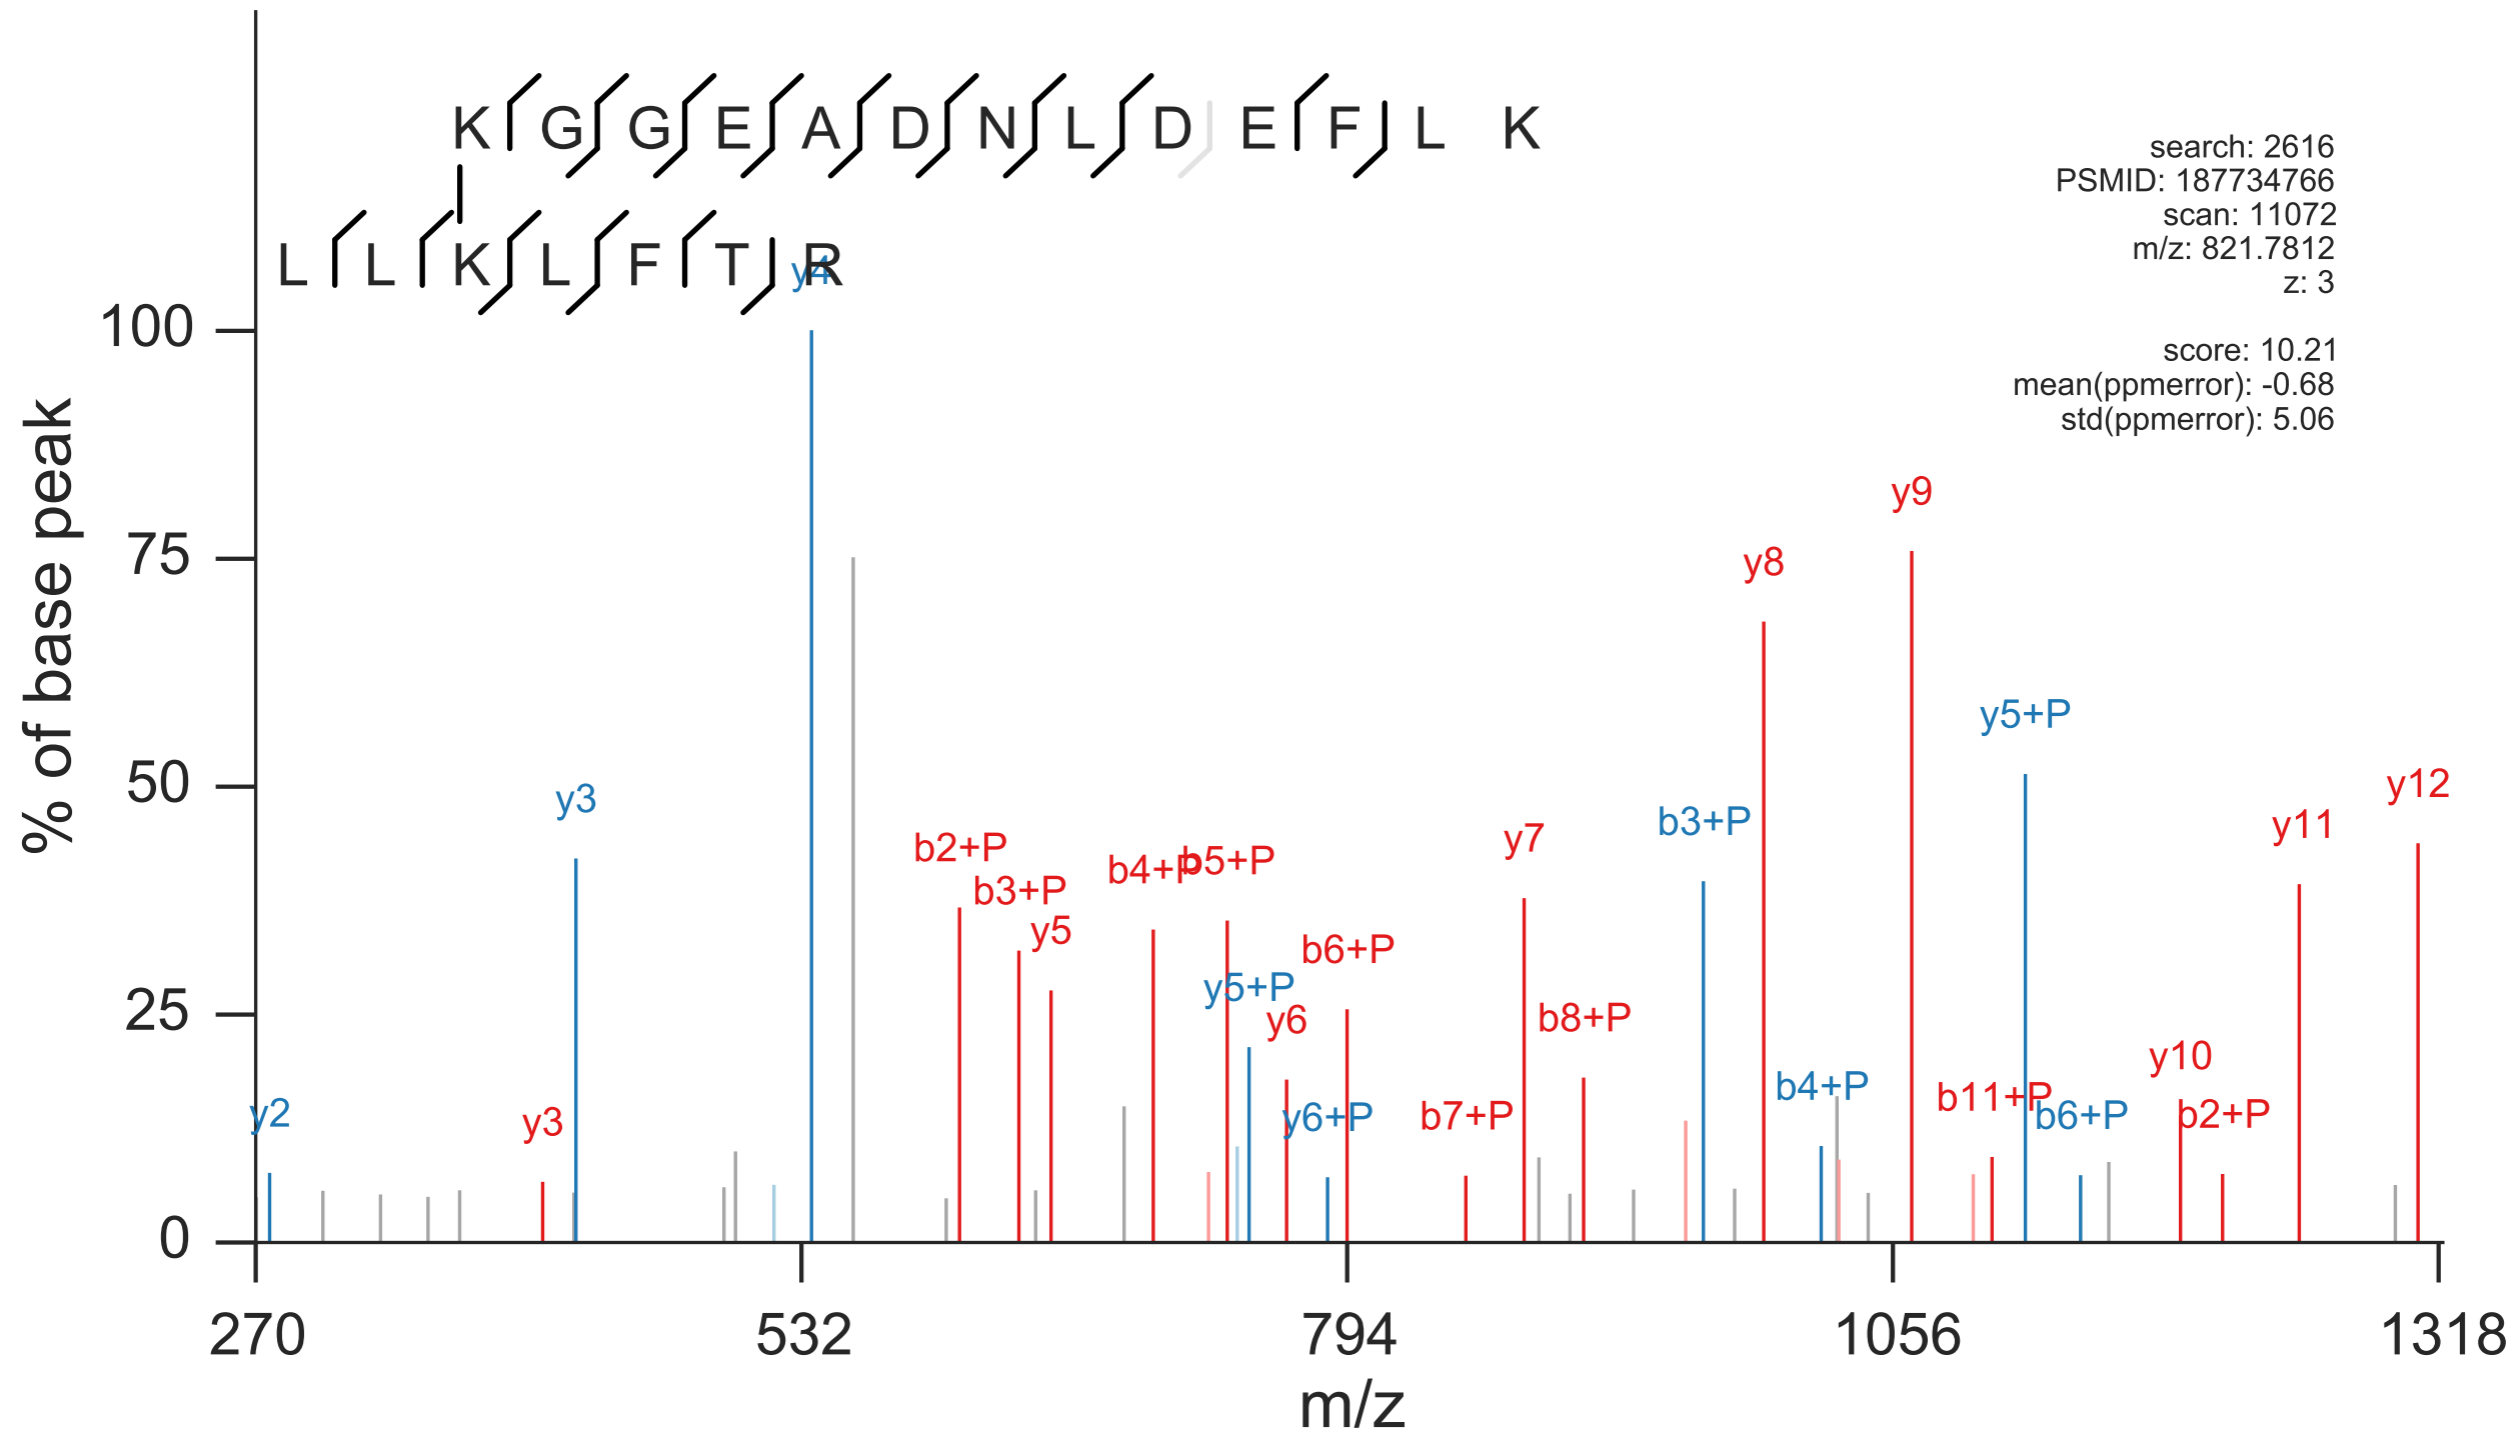



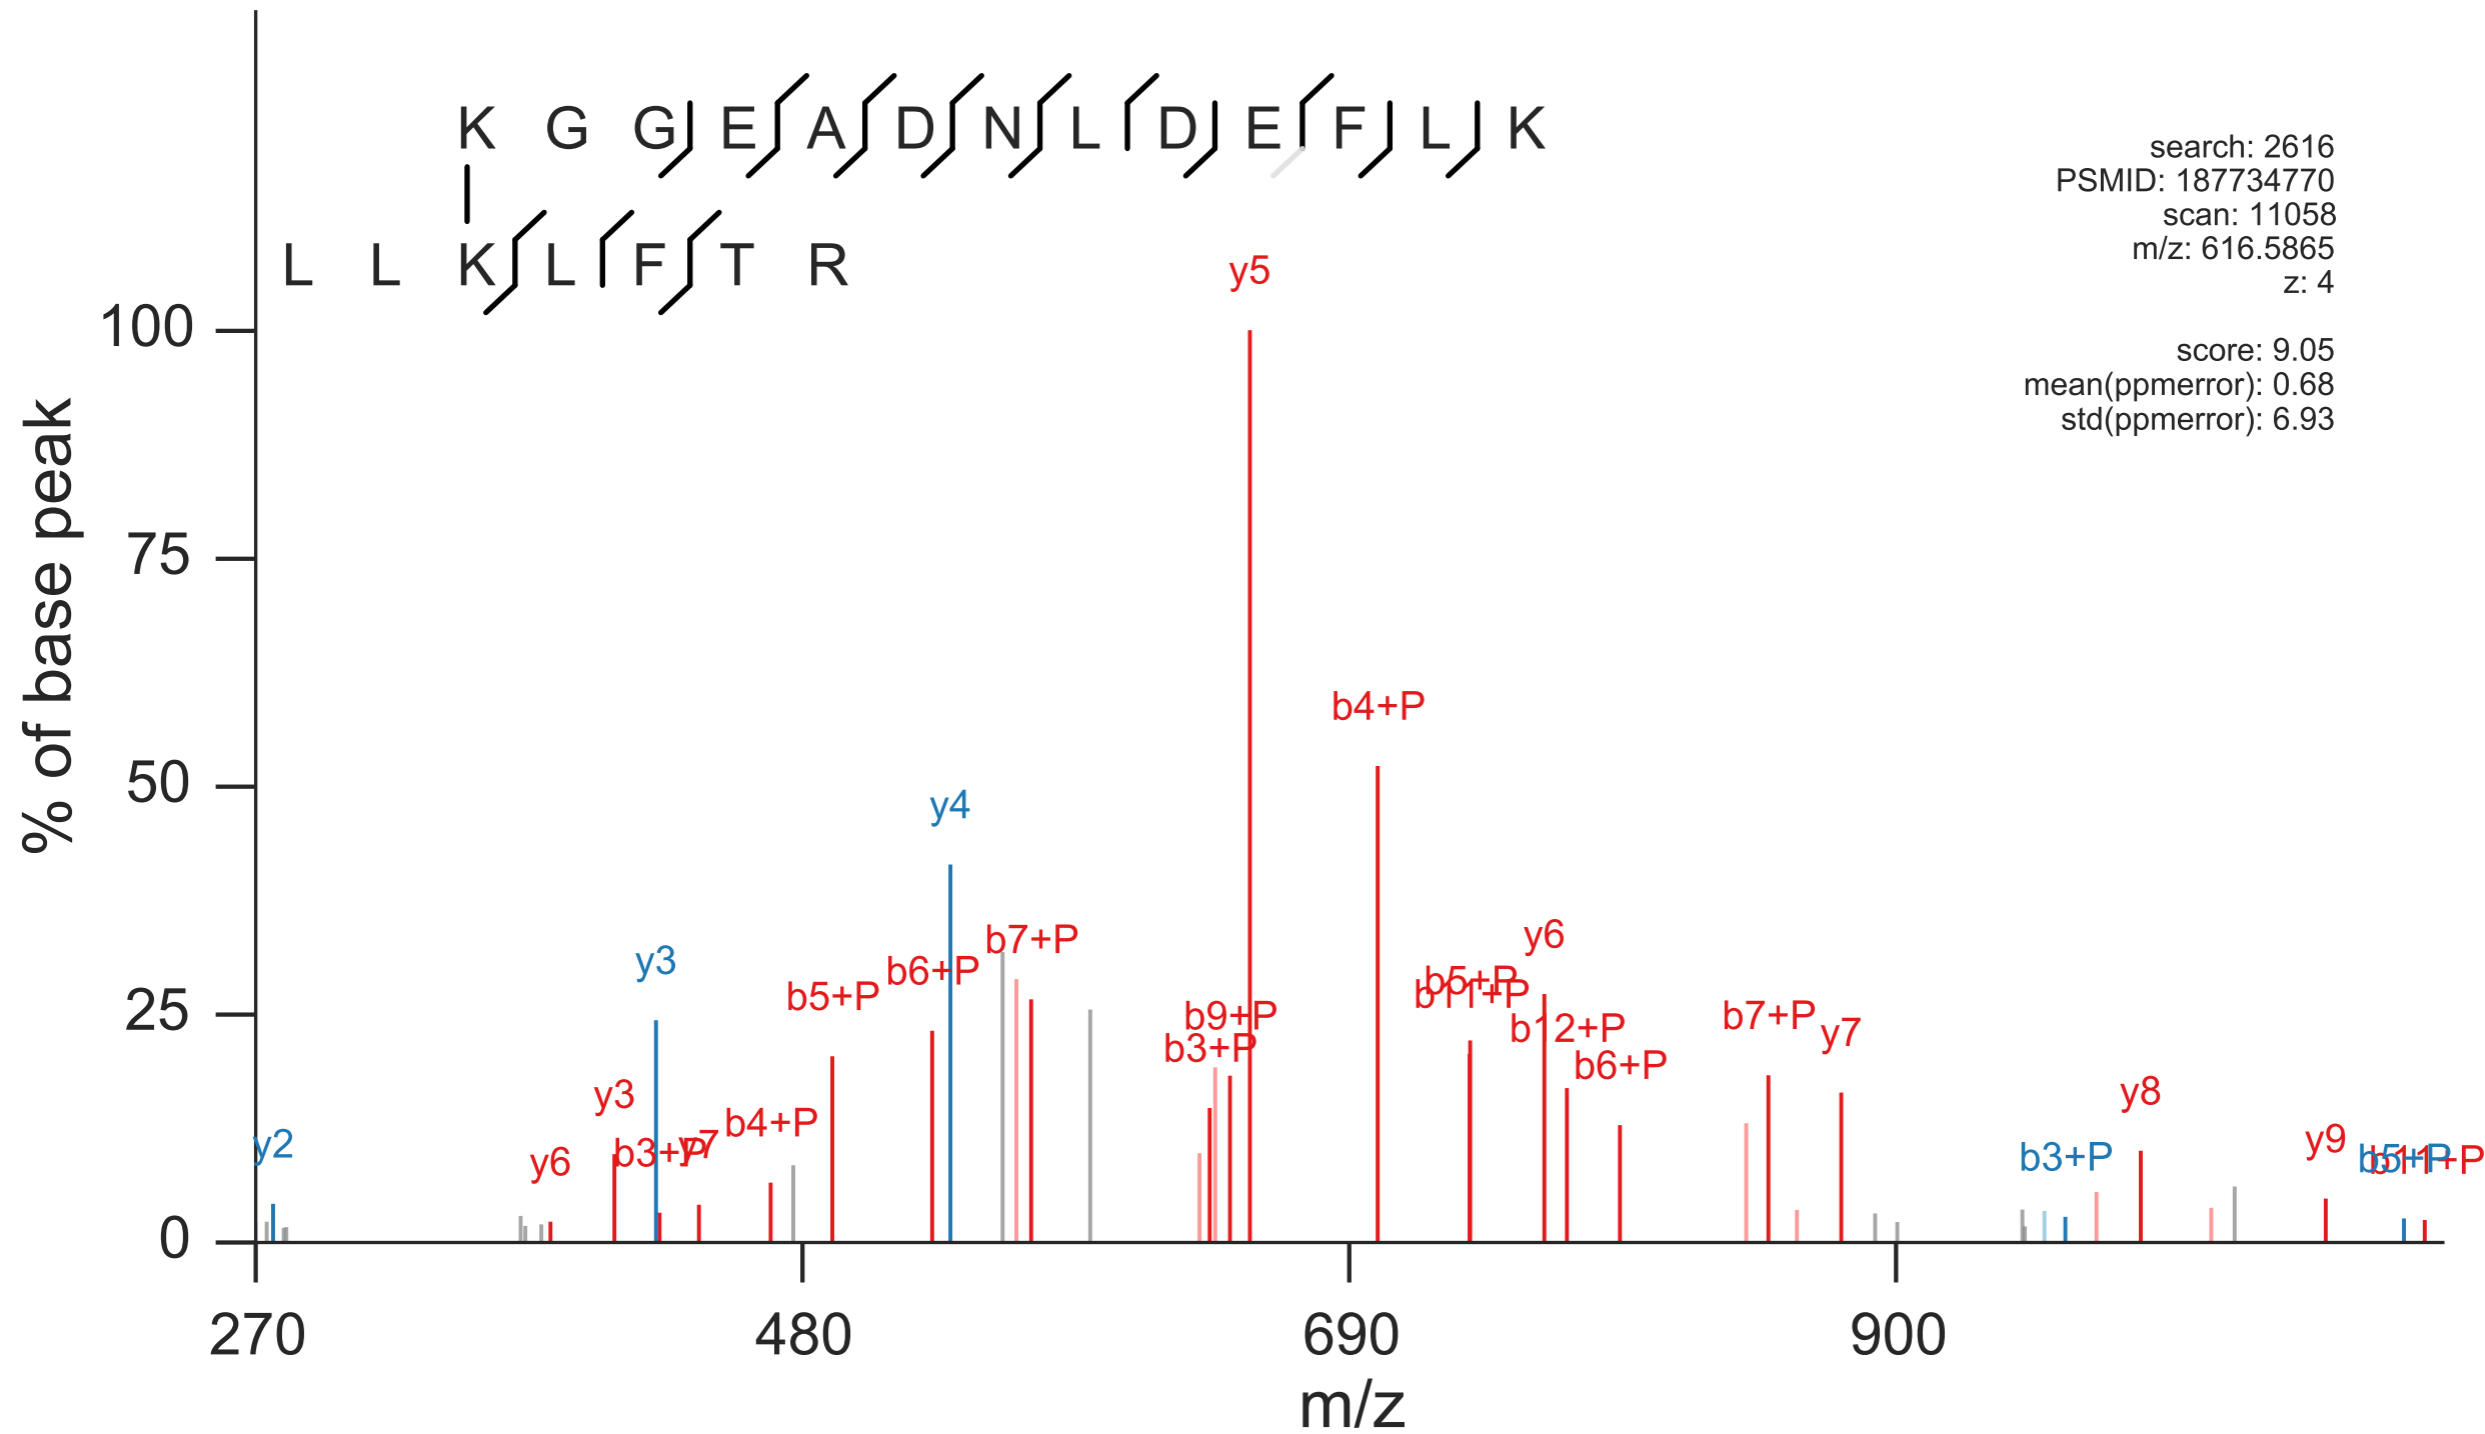

L L K L F T R  
 K G G E A D N L D E F L K

search: 2616  
 PSMID: 187734770  
 scan: 11058  
 m/z: 616.5865  
 z: 4  
 score: 9.05  
 mean(ppmerror): 0.68  
 std(ppmerror): 6.93

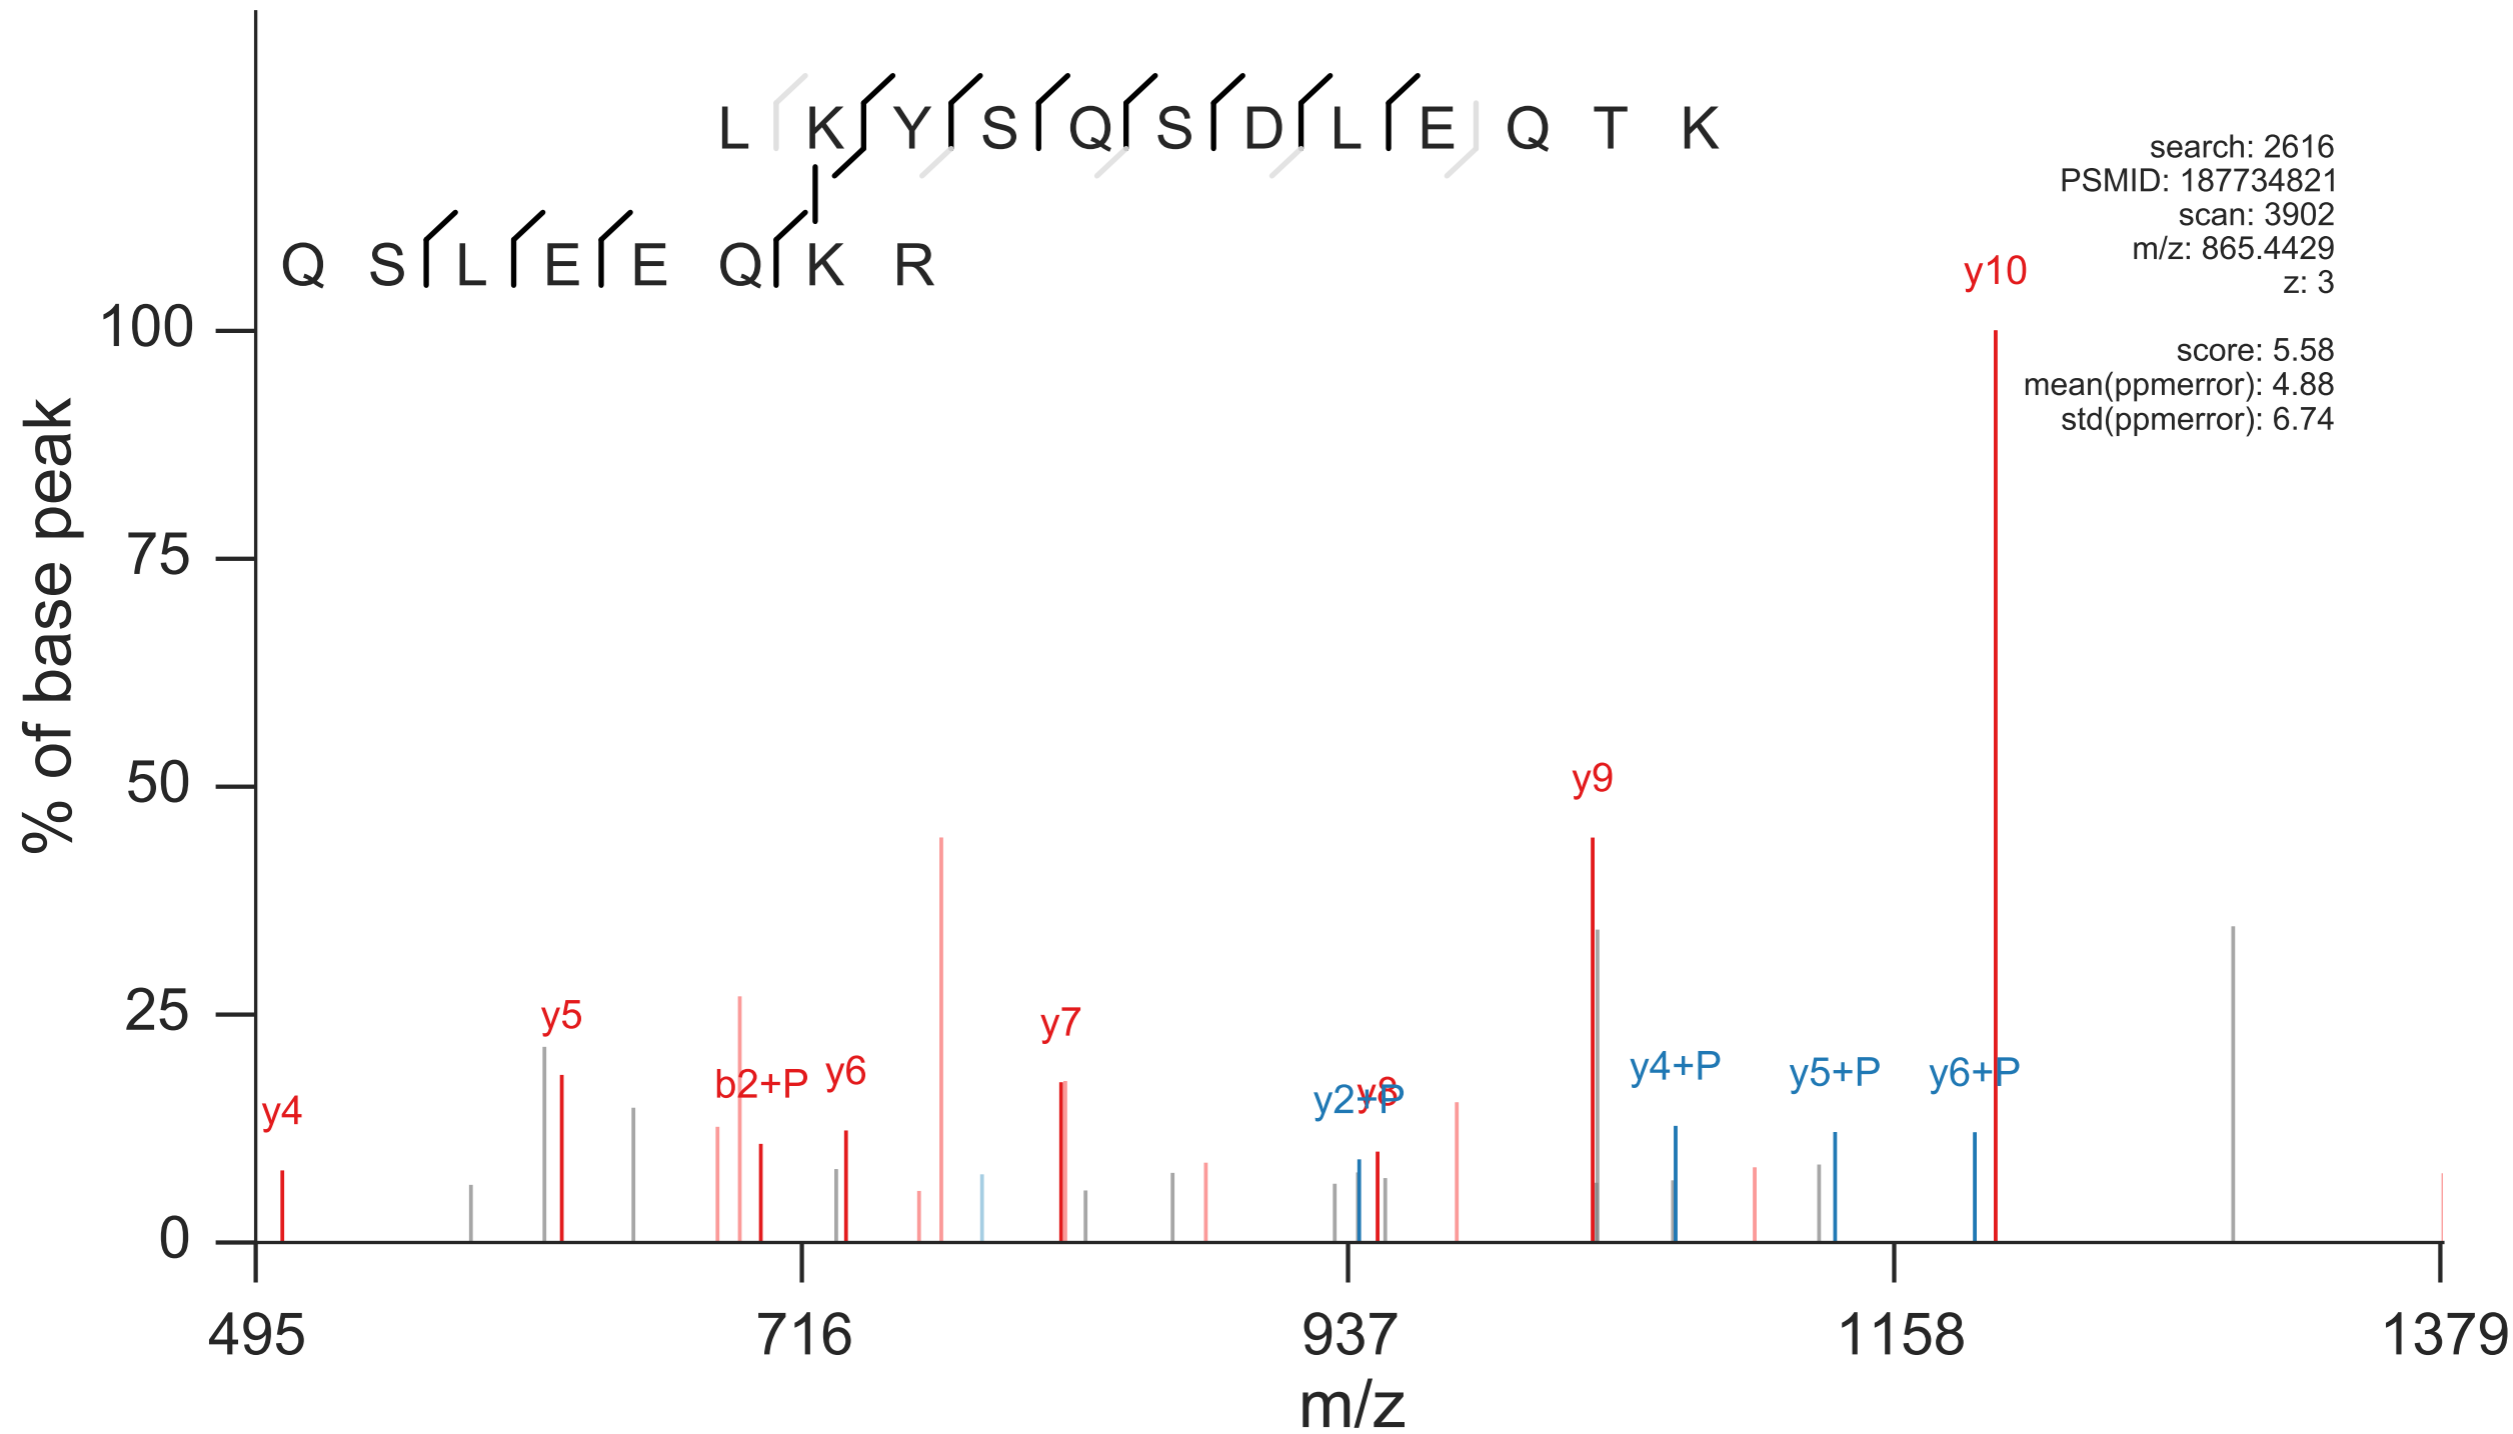

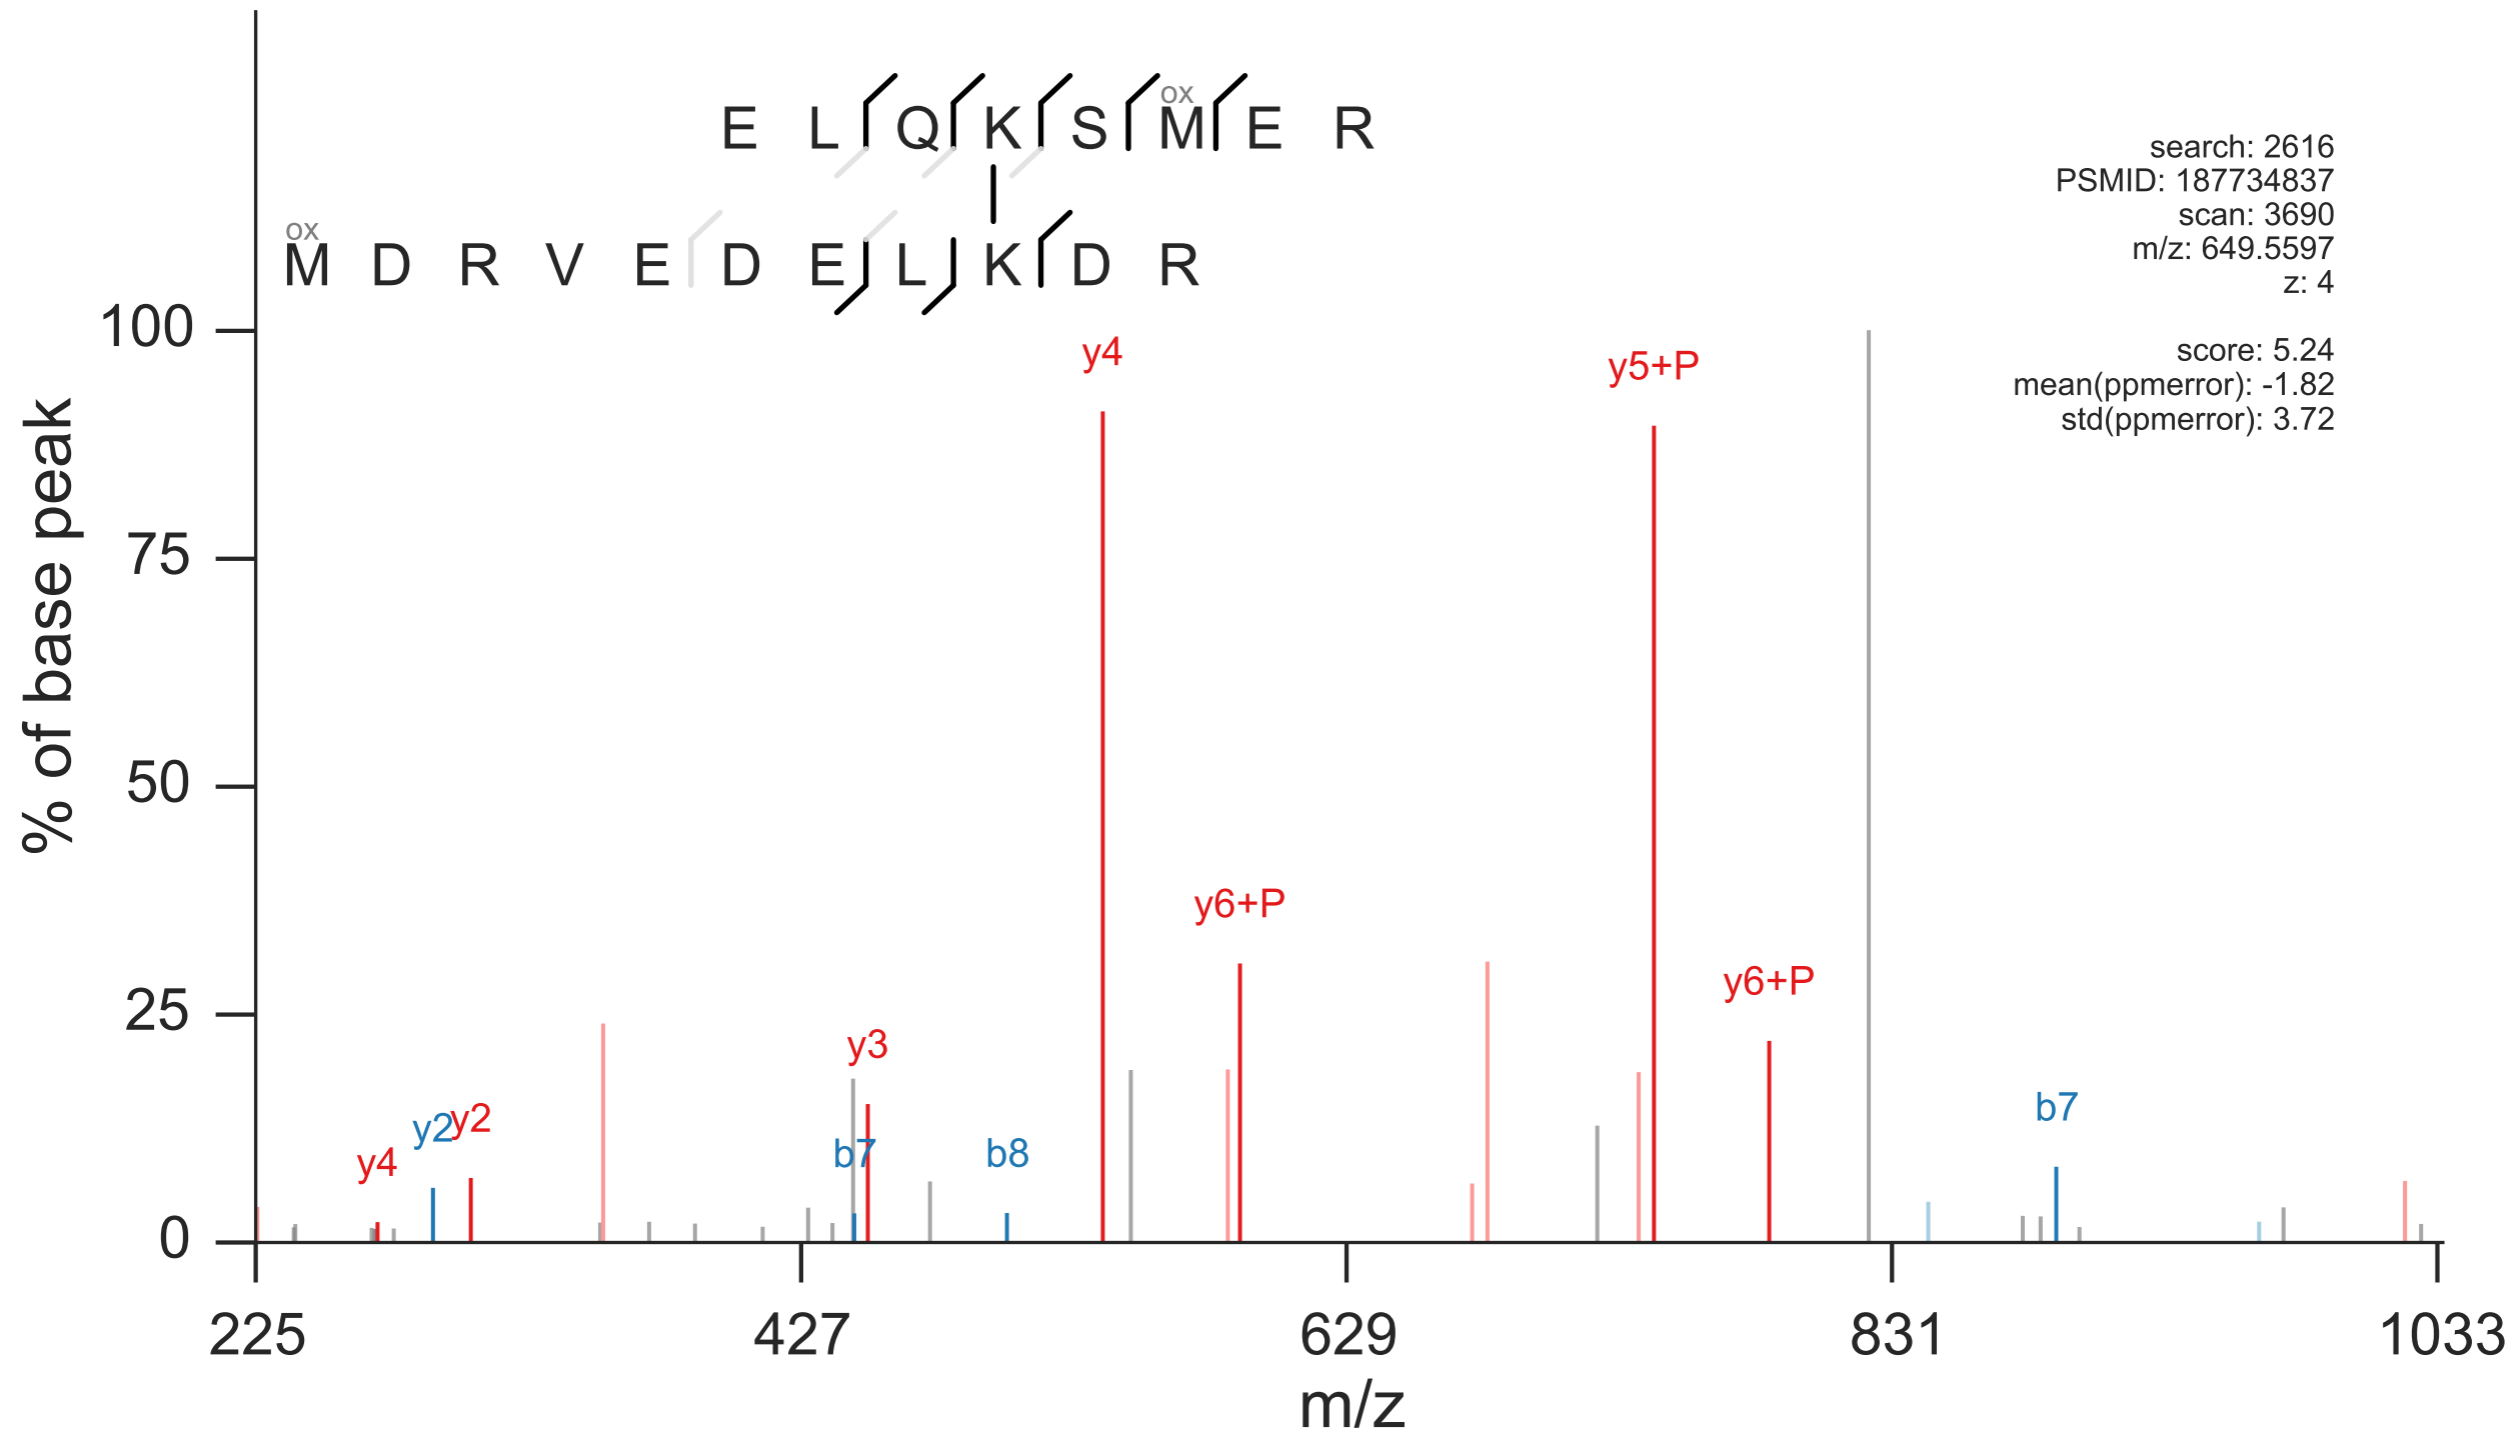

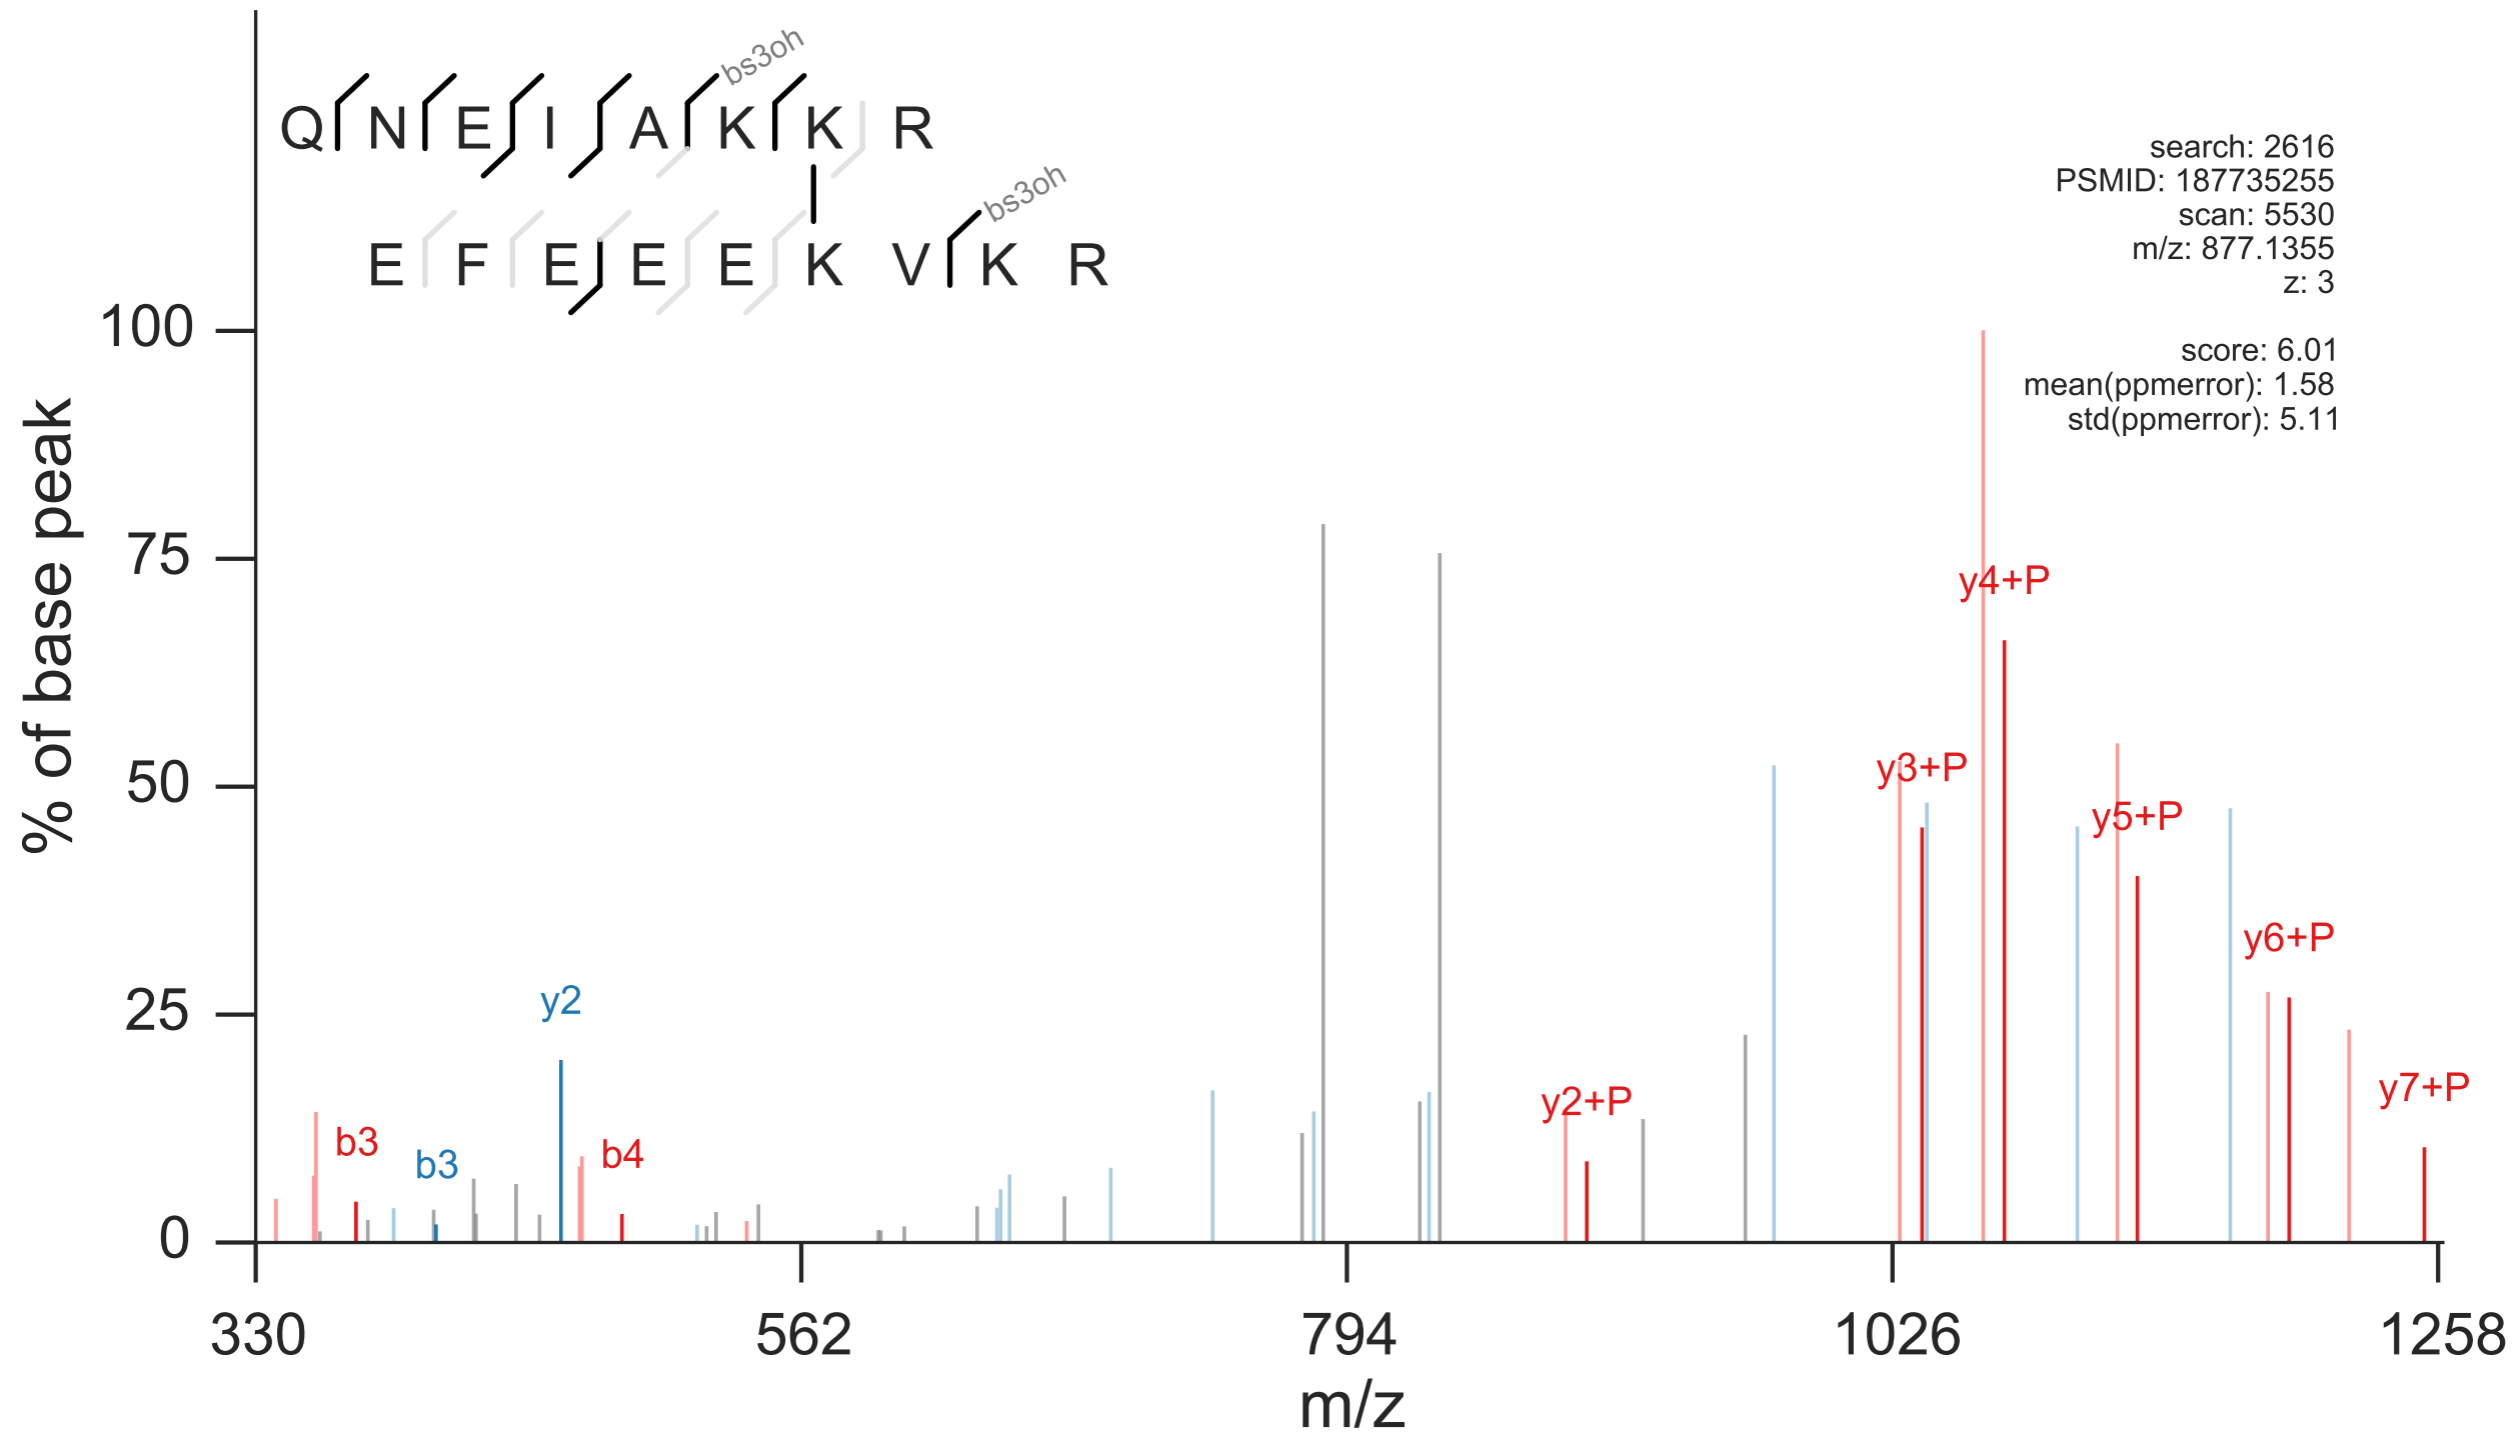

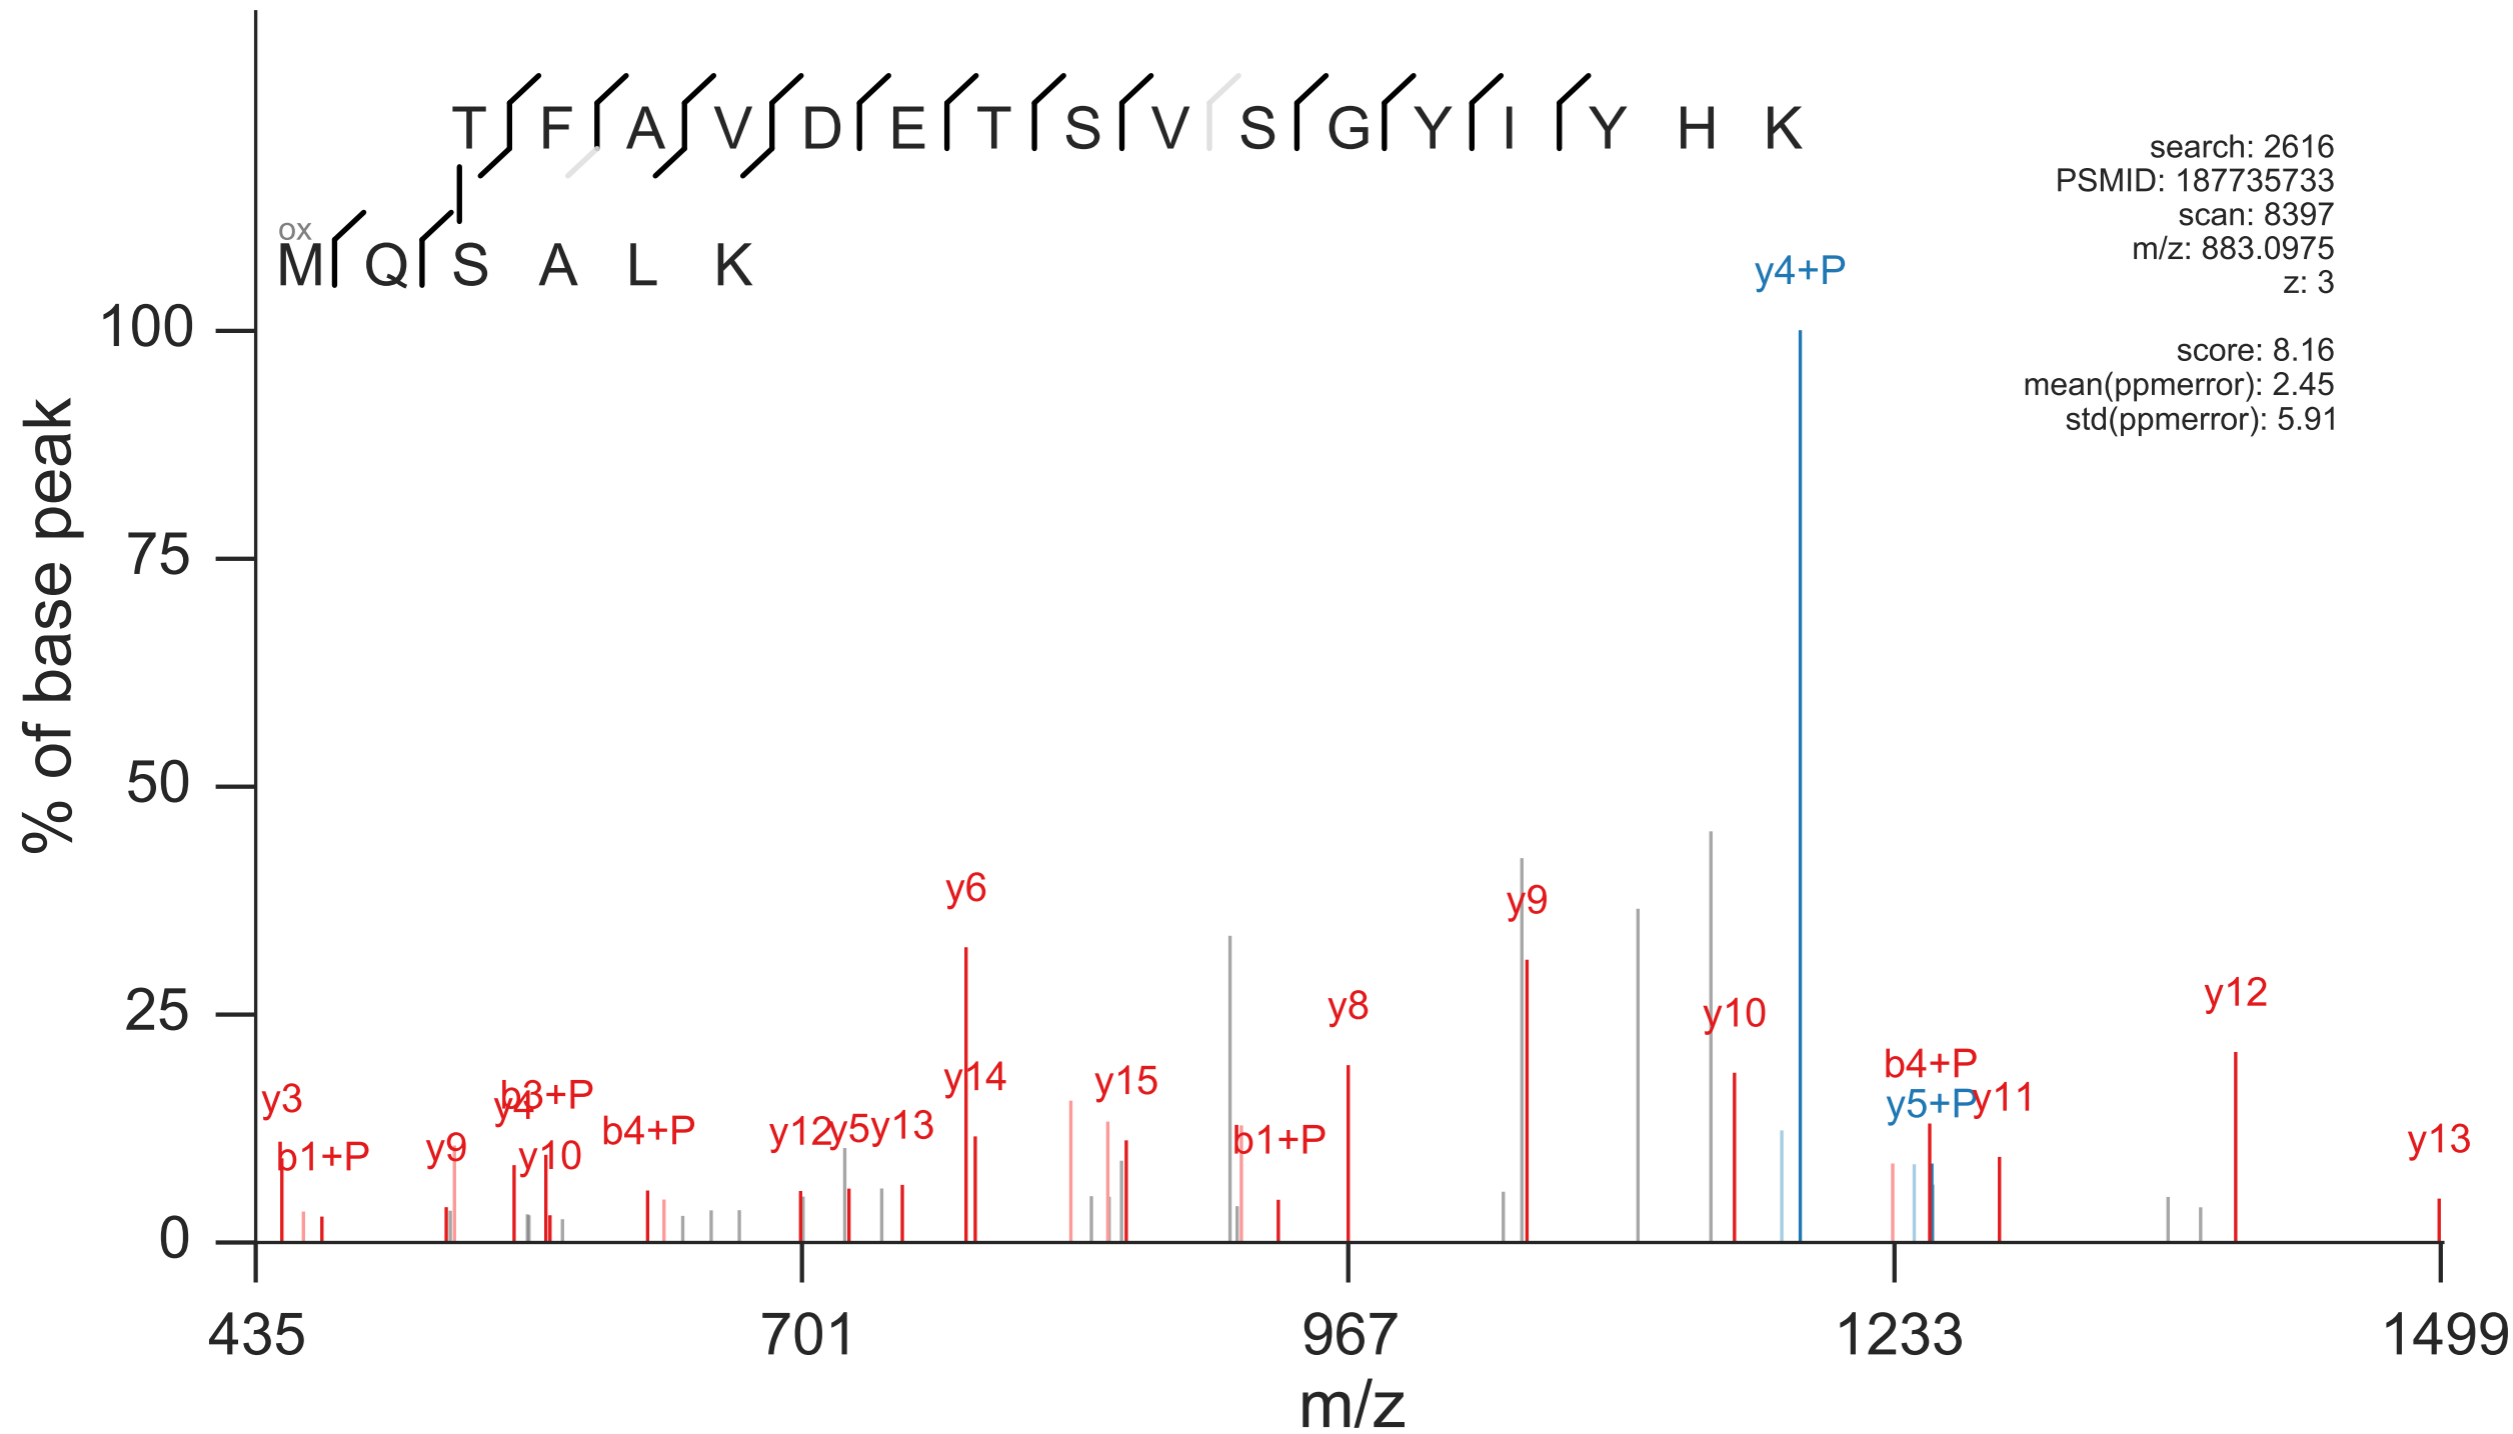

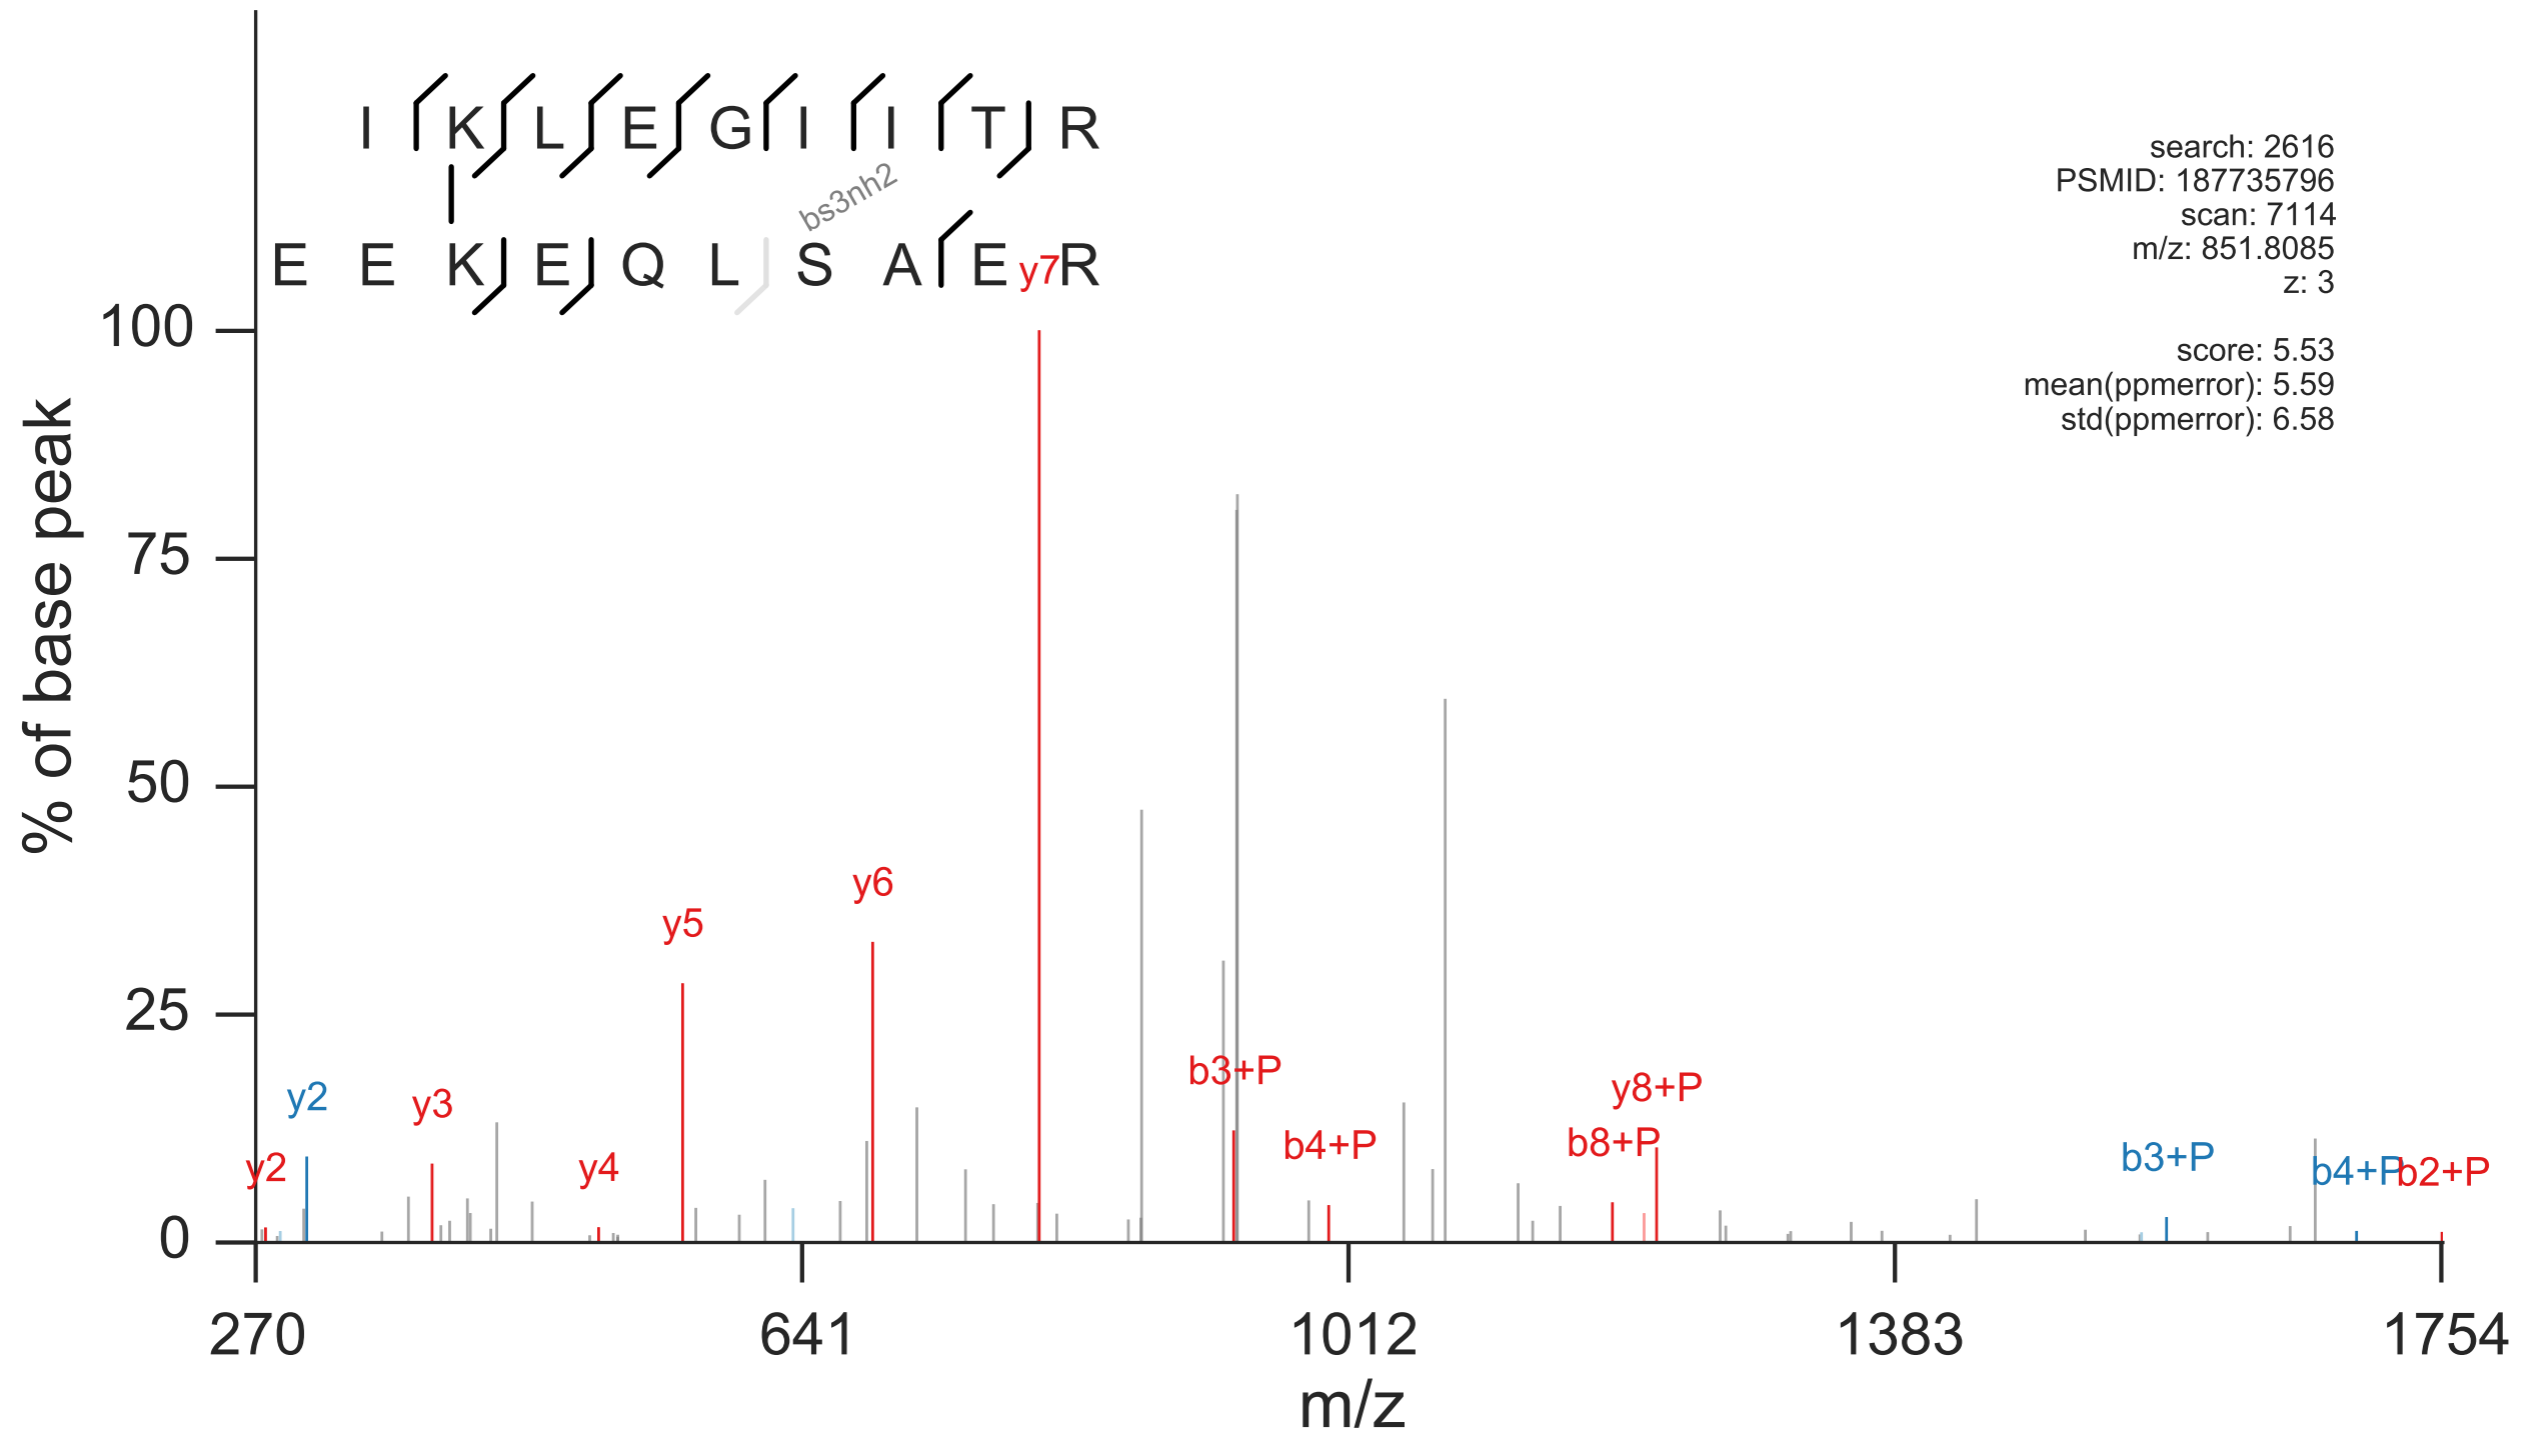

search: 2616  
 PSMID: 187735796  
 scan: 7114  
 m/z: 851.8085  
 z: 3  
  
 score: 5.53  
 mean(ppmerror): 5.59  
 std(ppmerror): 6.58

A L | E | E | A | I | E | Q | K | A | E | L | E | R  
 V N K | Q | F | R

search: 2616  
 PSMID: 187735868  
 scan: 6487  
 m/z: 853.1195  
 z: 3

score: 8.96  
 mean(ppmerror): 3.25  
 std(ppmerror): 3.67

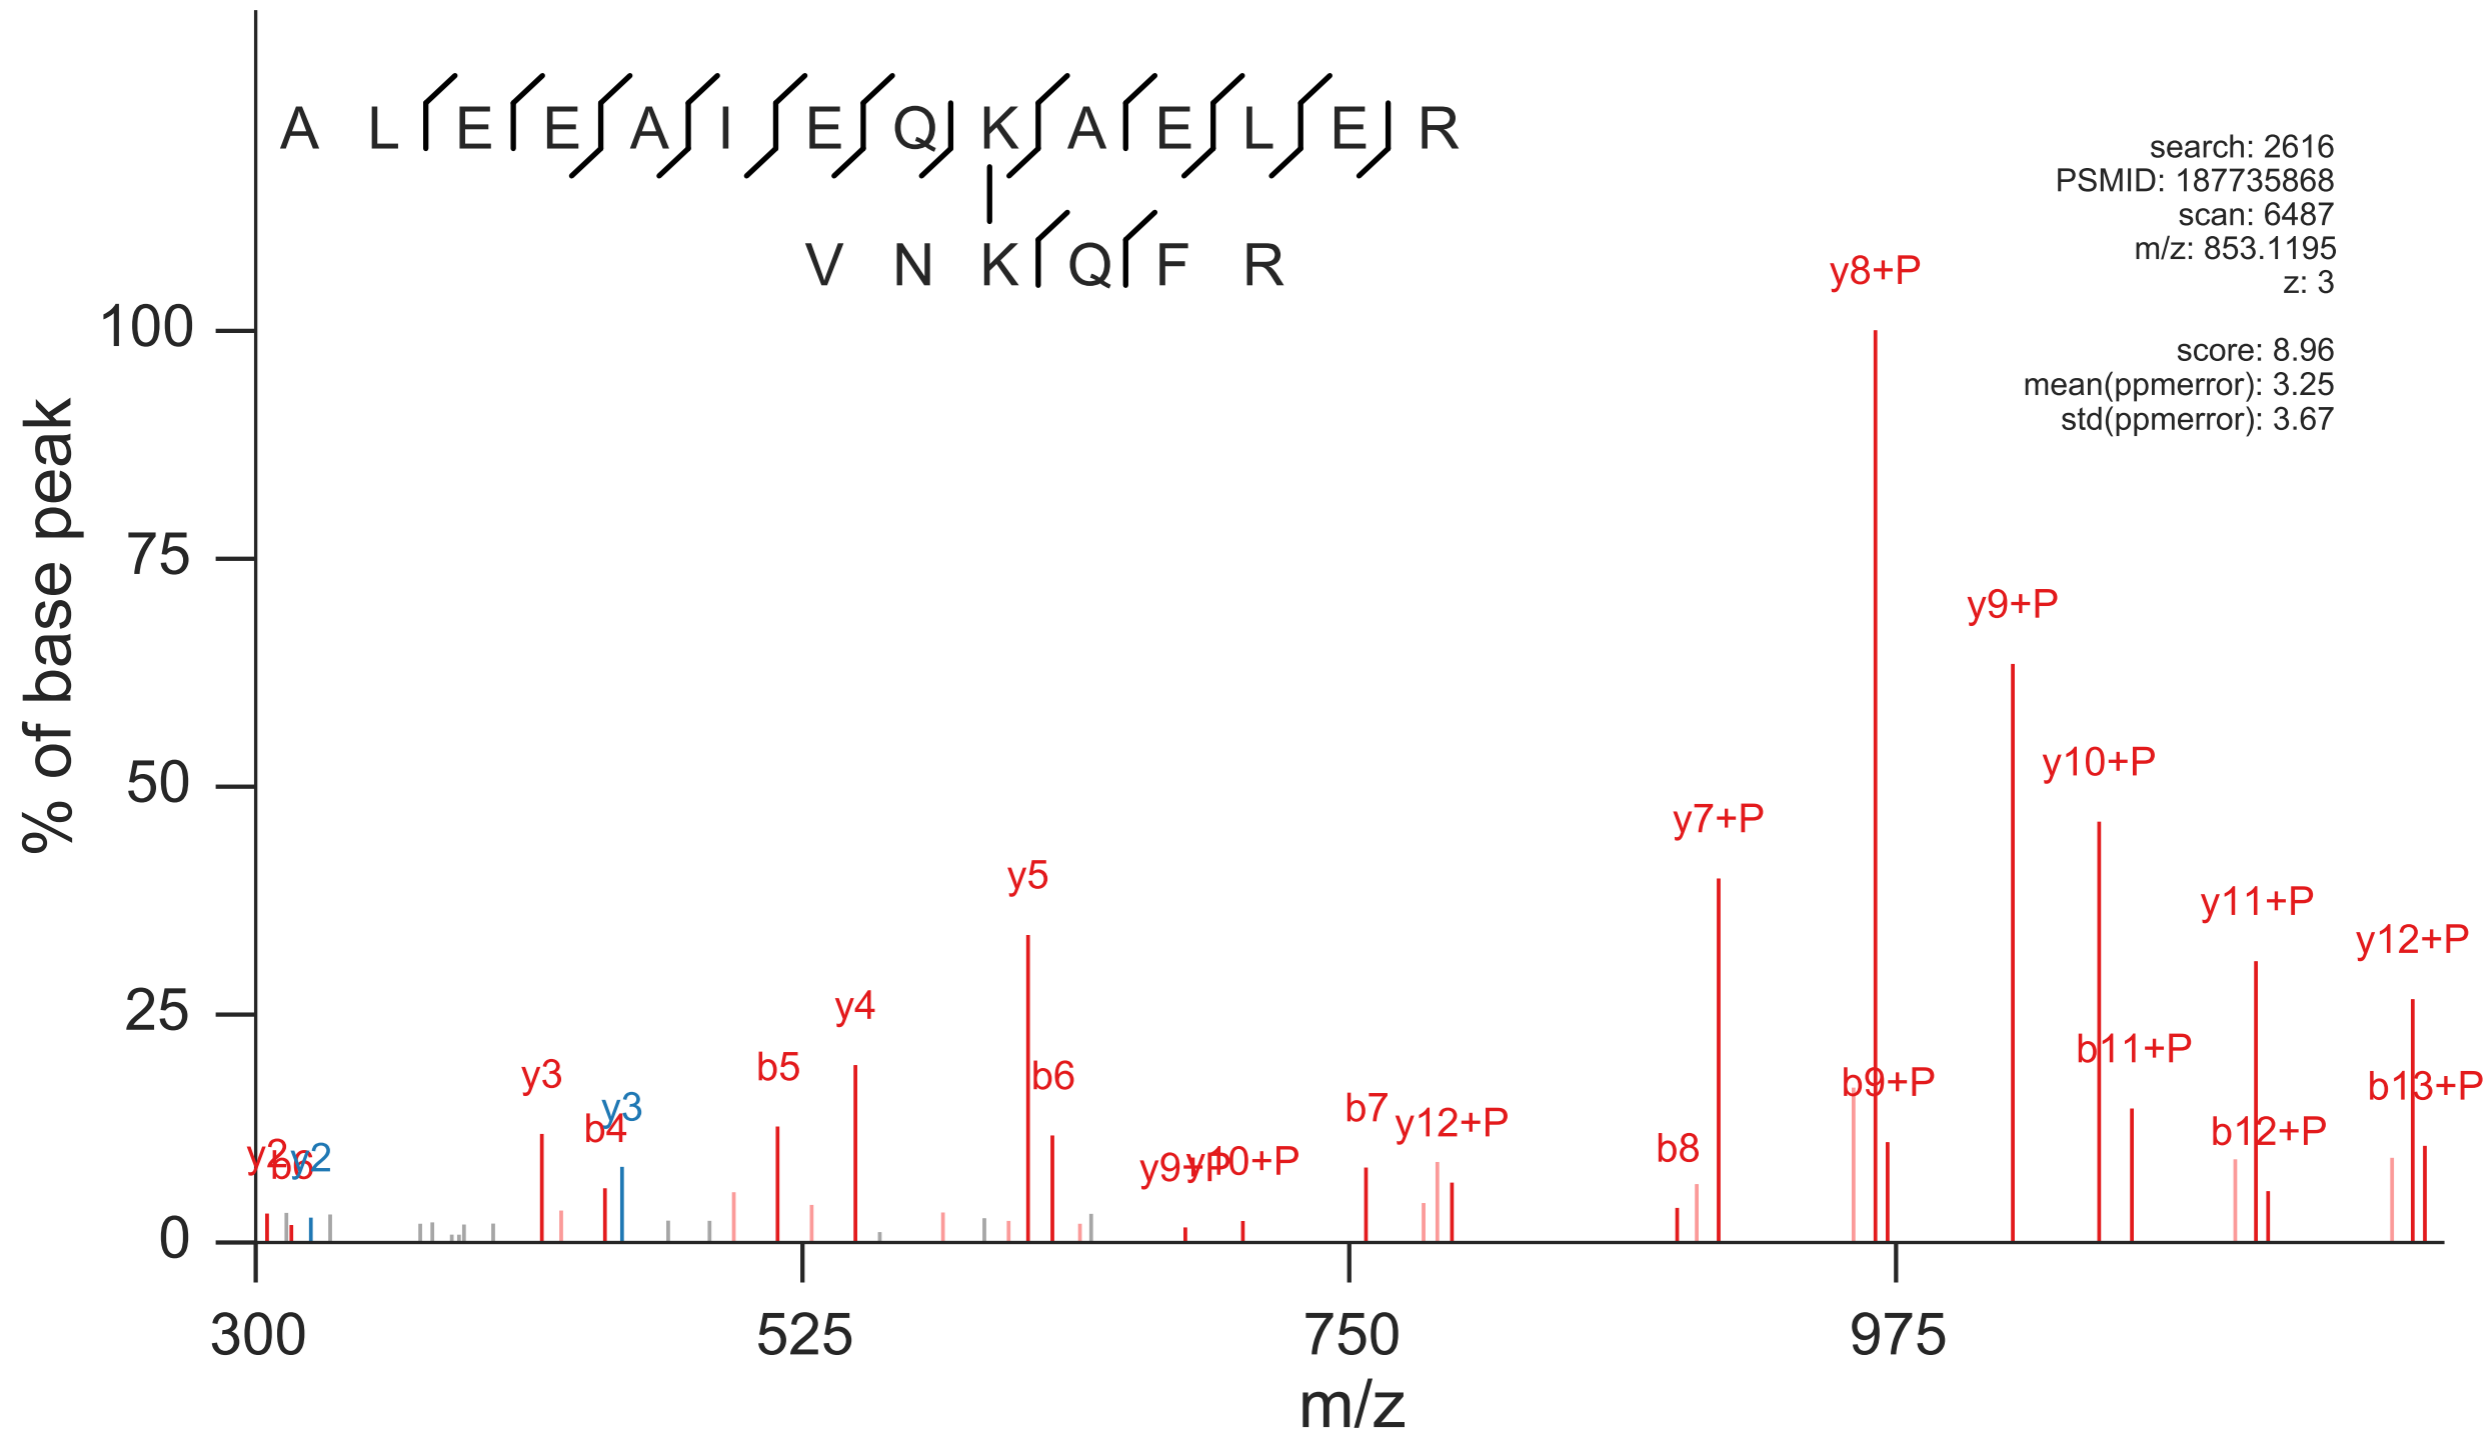

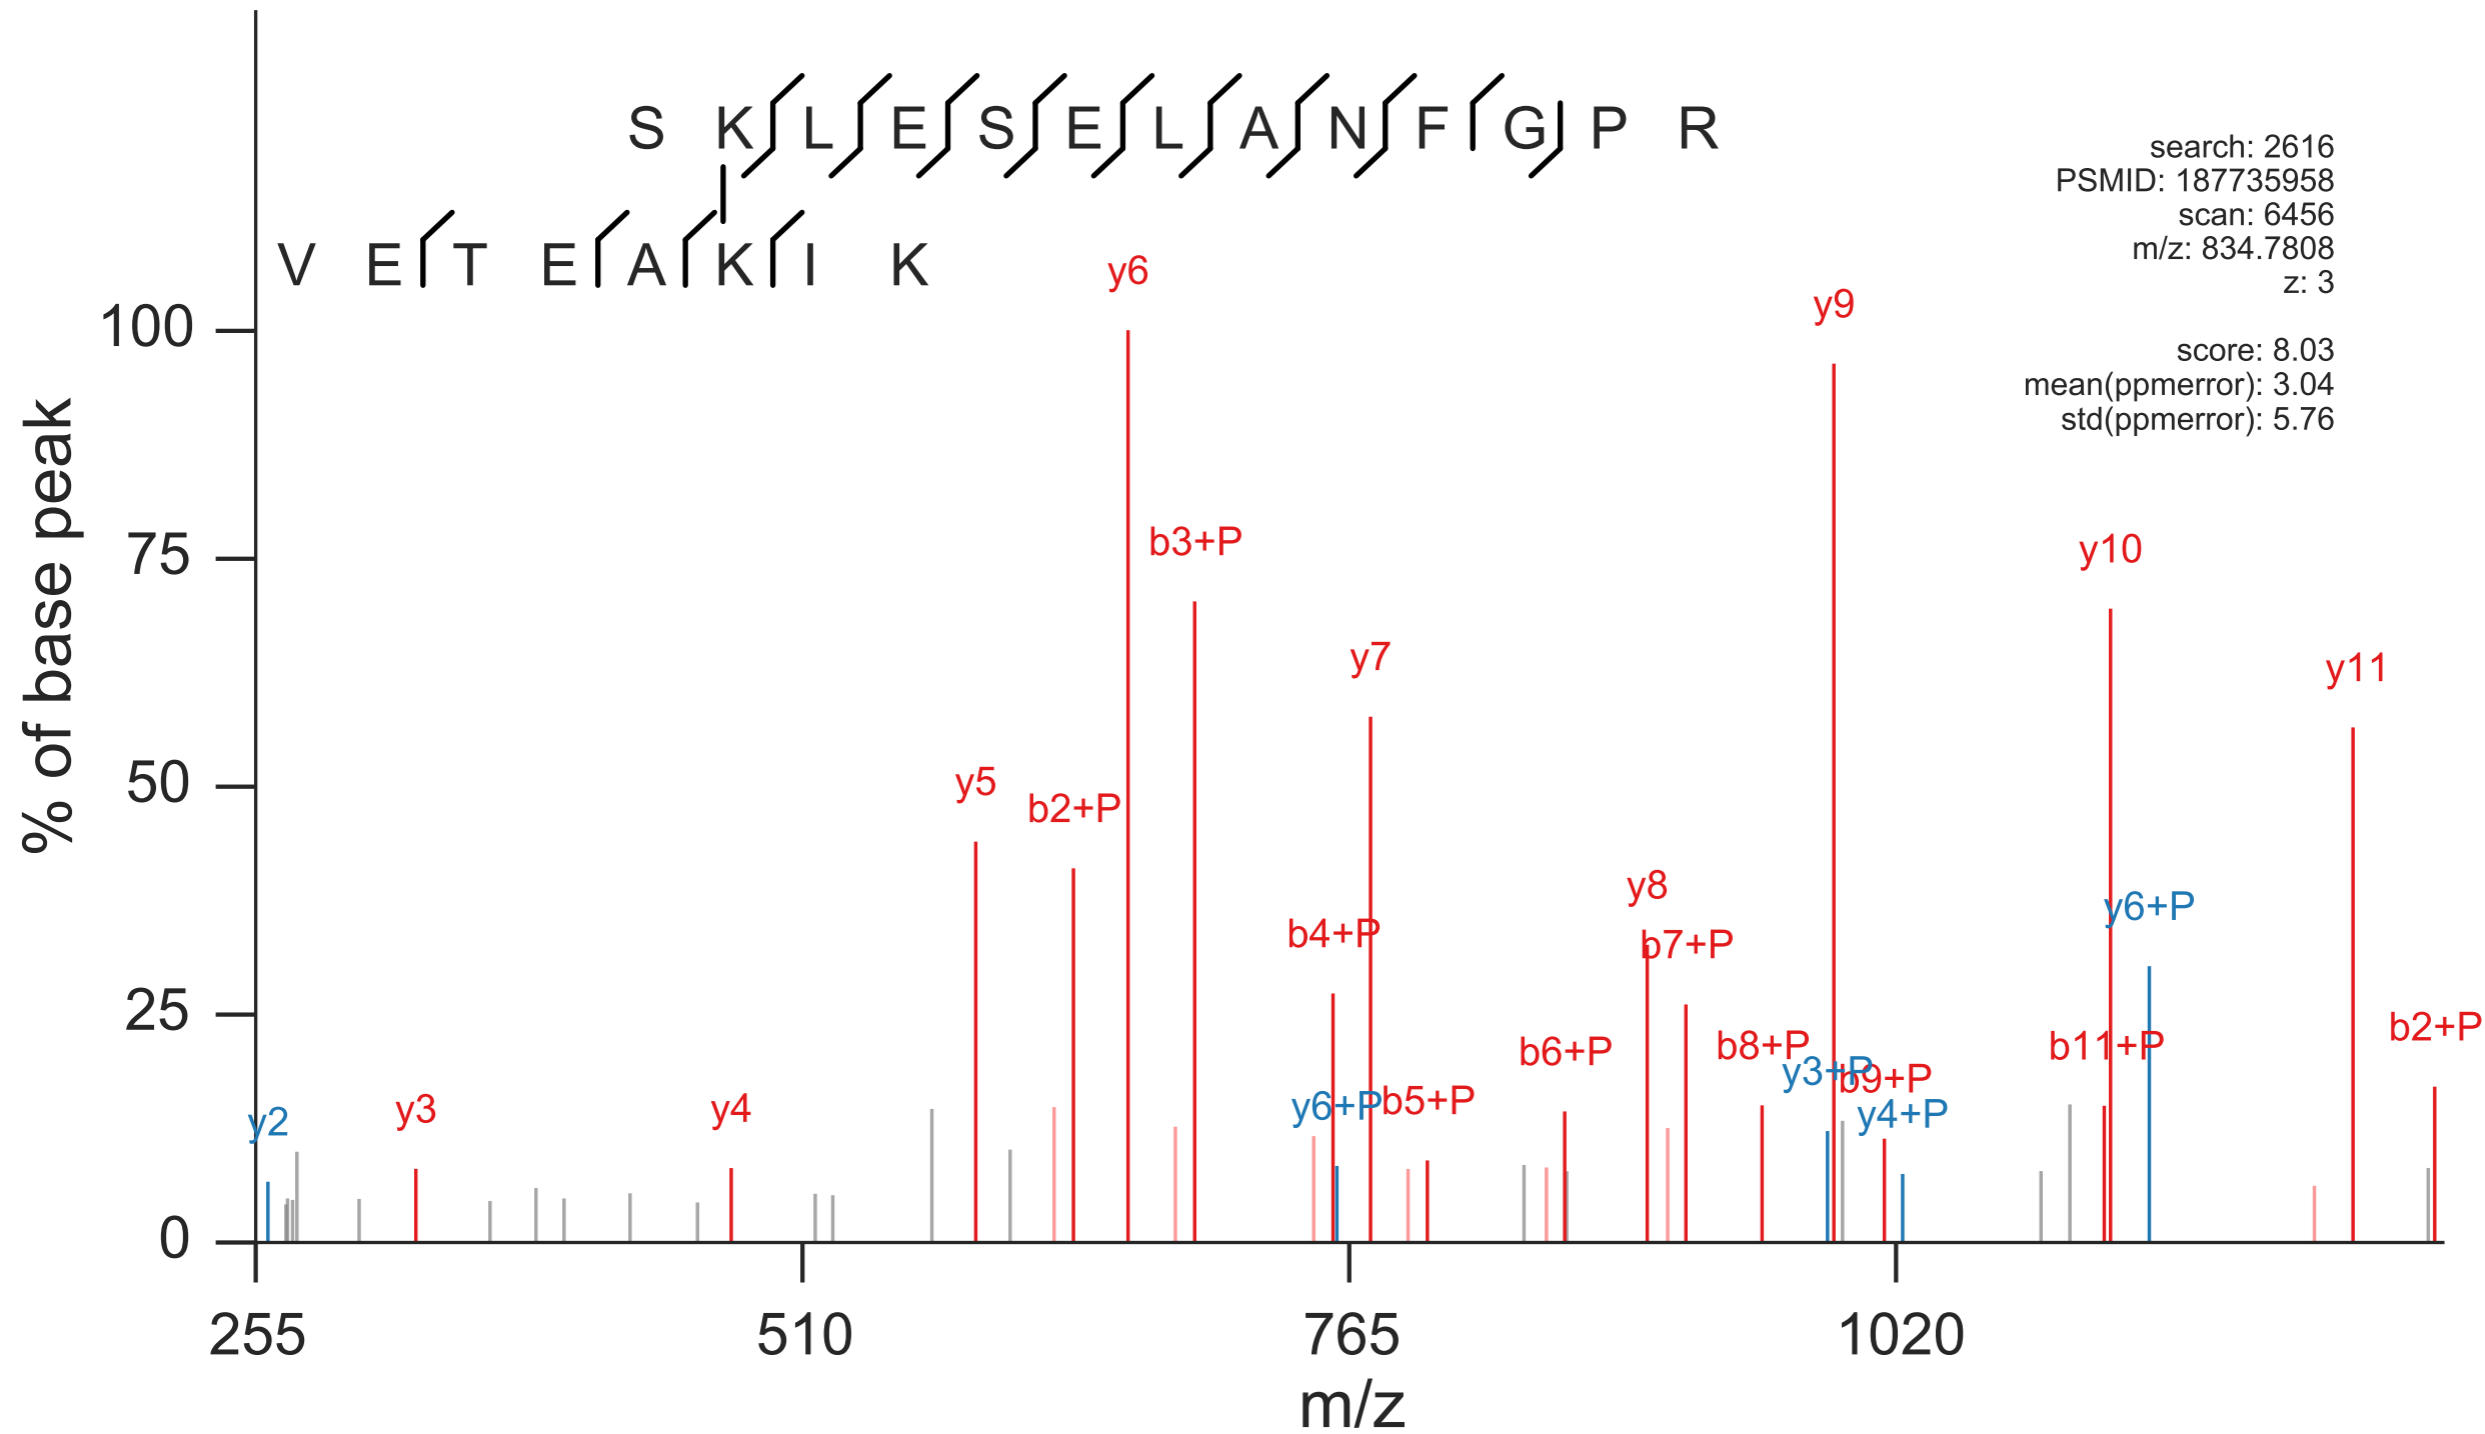

search: 2616  
 PSMID: 187735958  
 scan: 6456  
 m/z: 834.7808  
 z: 3  
 score: 8.03  
 mean(ppmerror): 3.04  
 std(ppmerror): 5.76



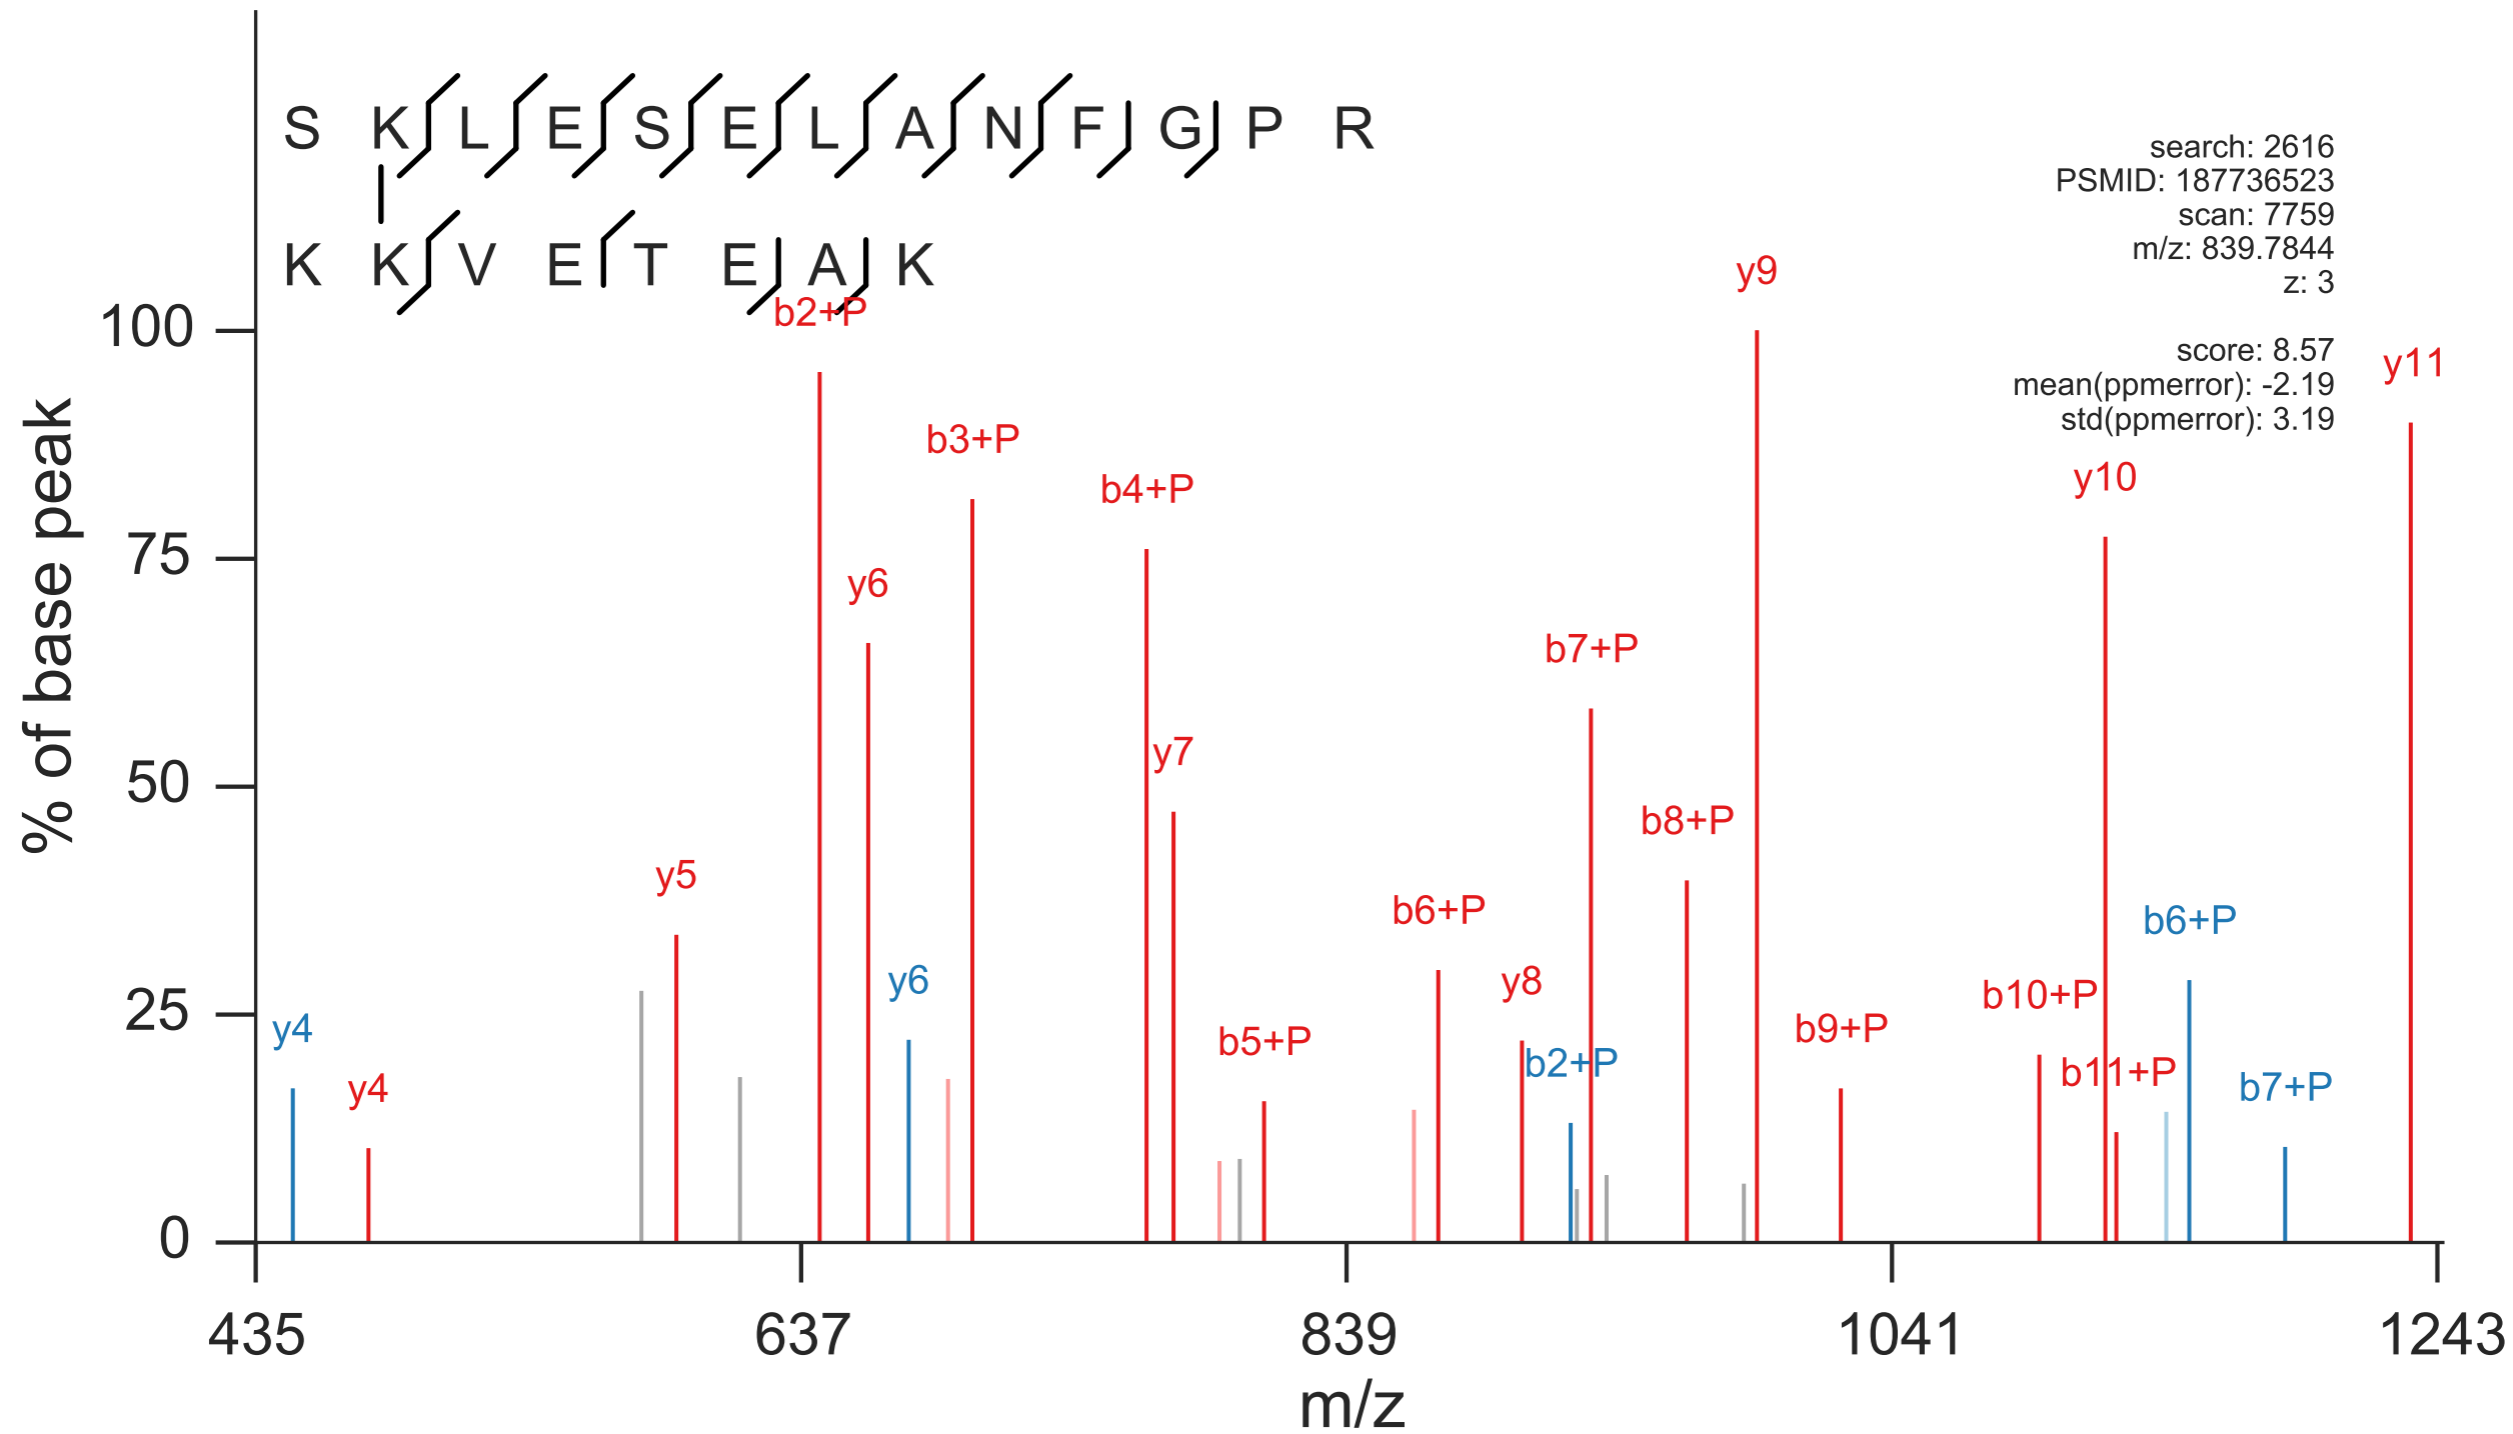

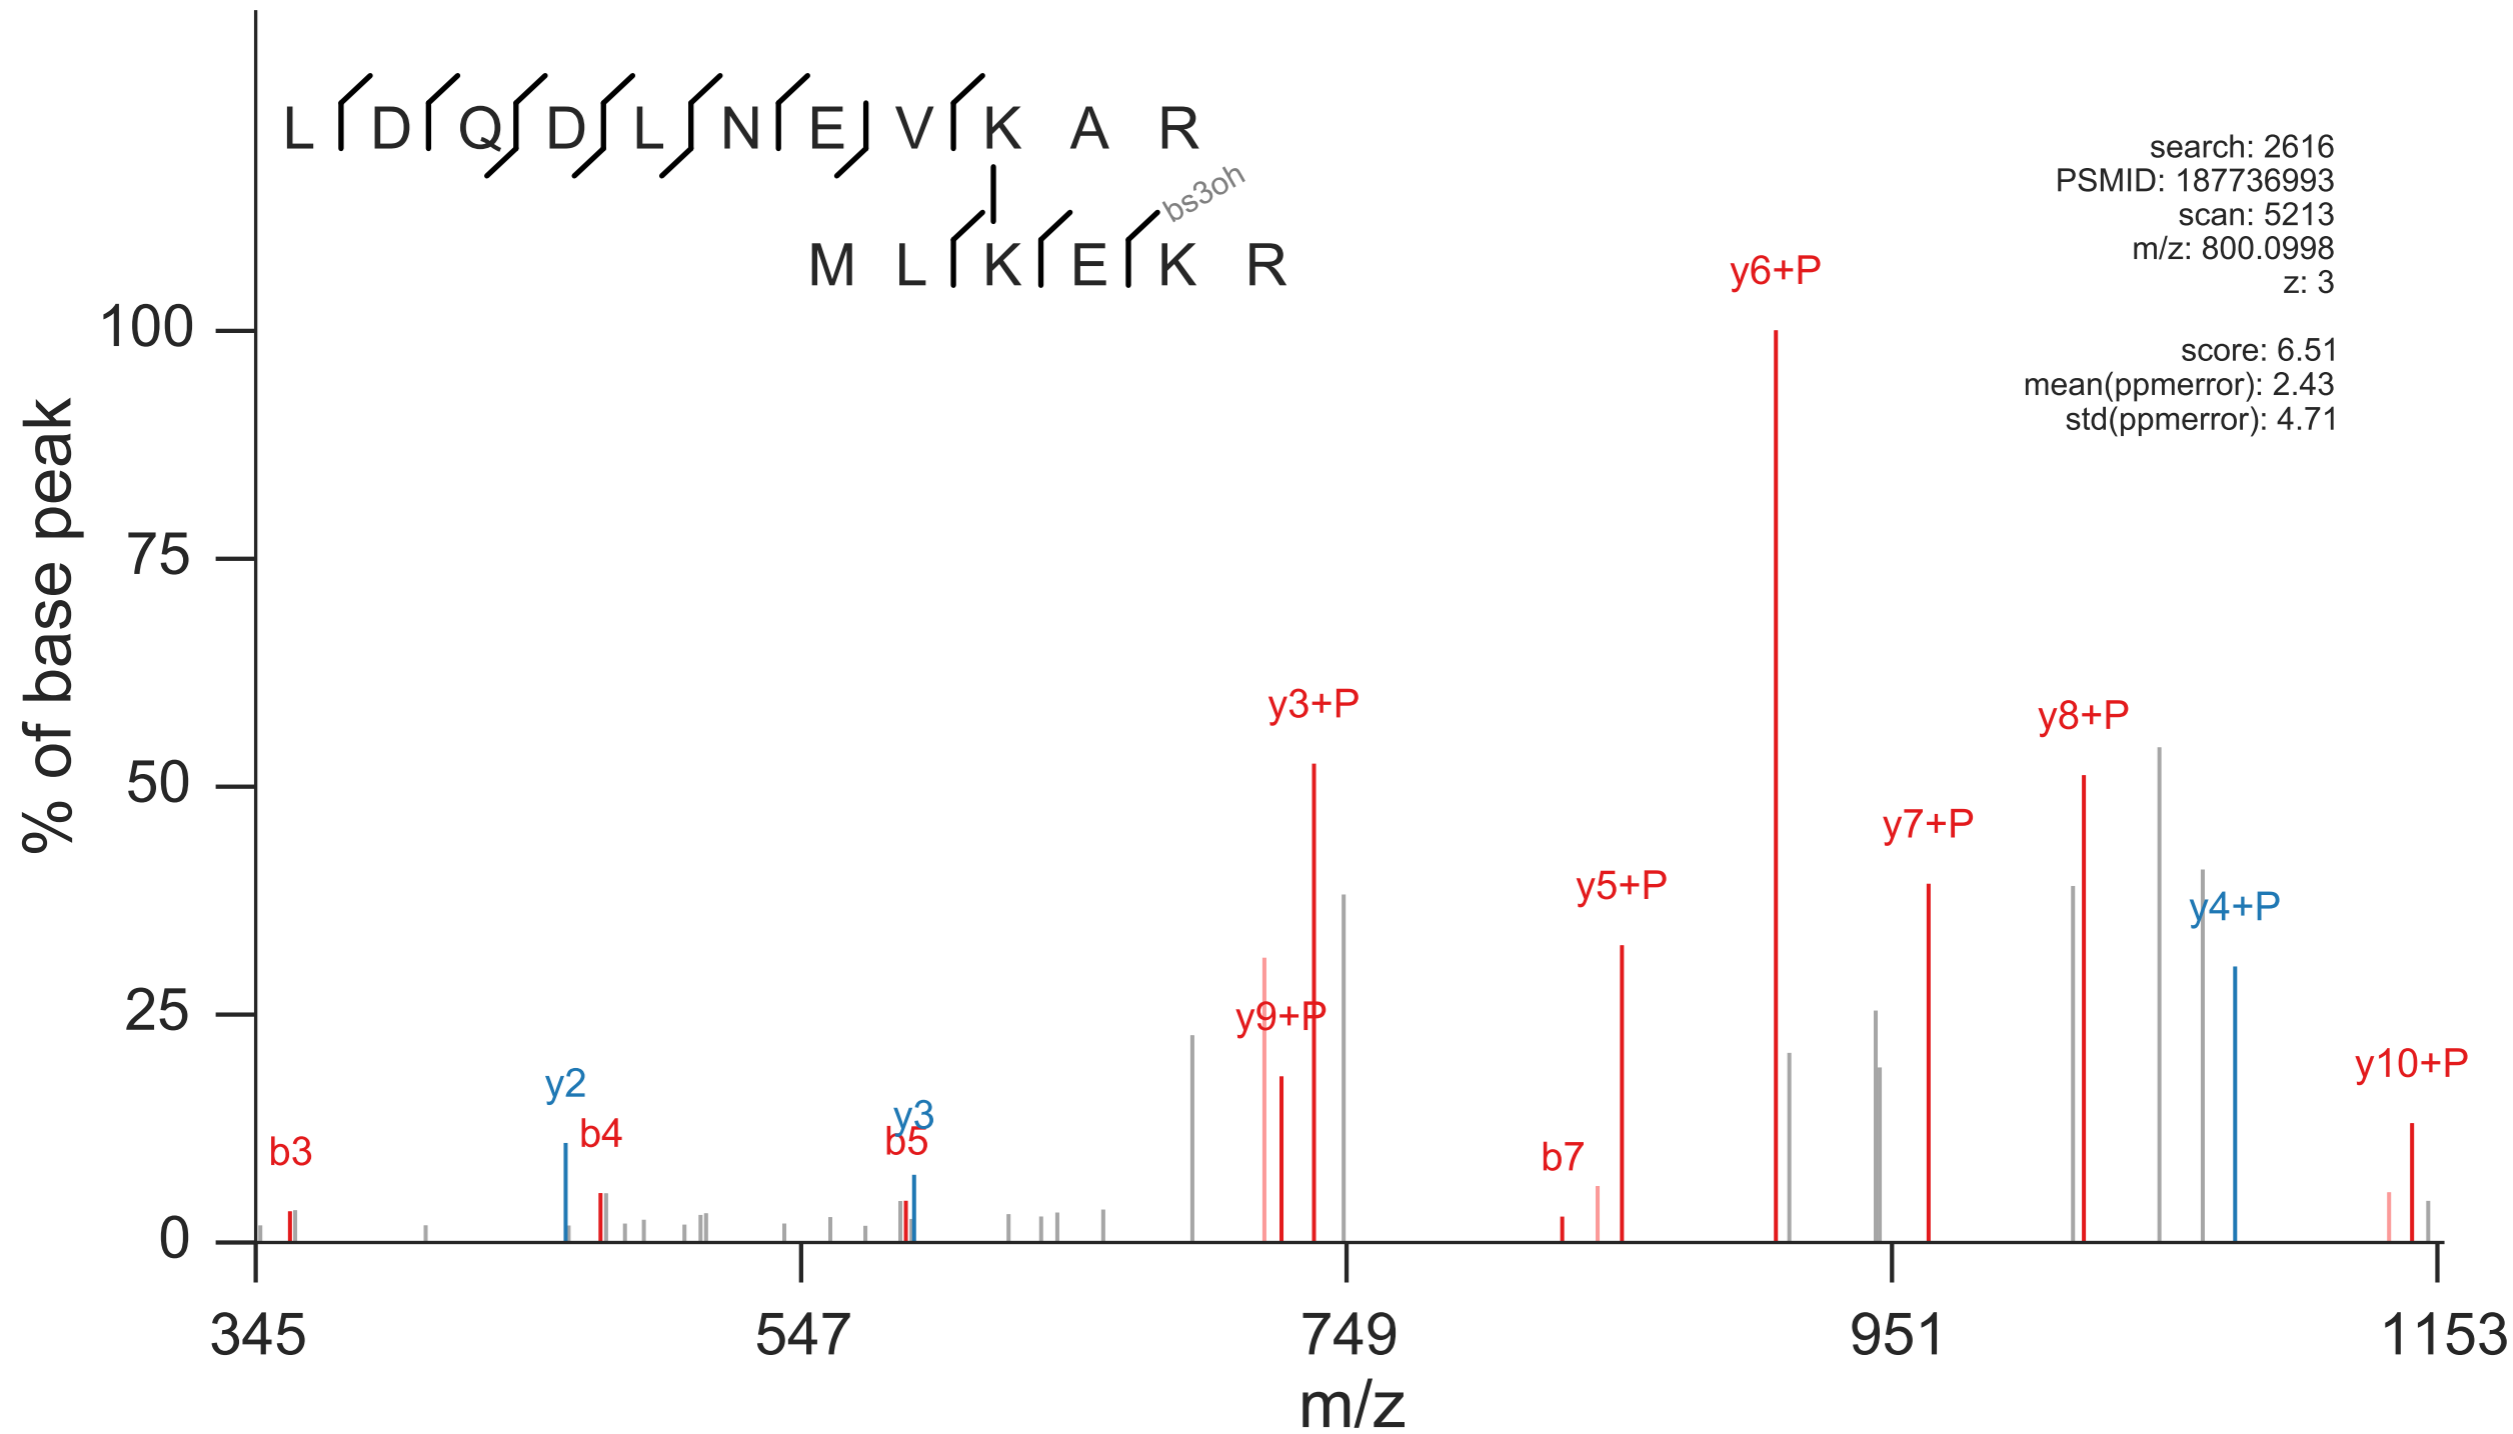

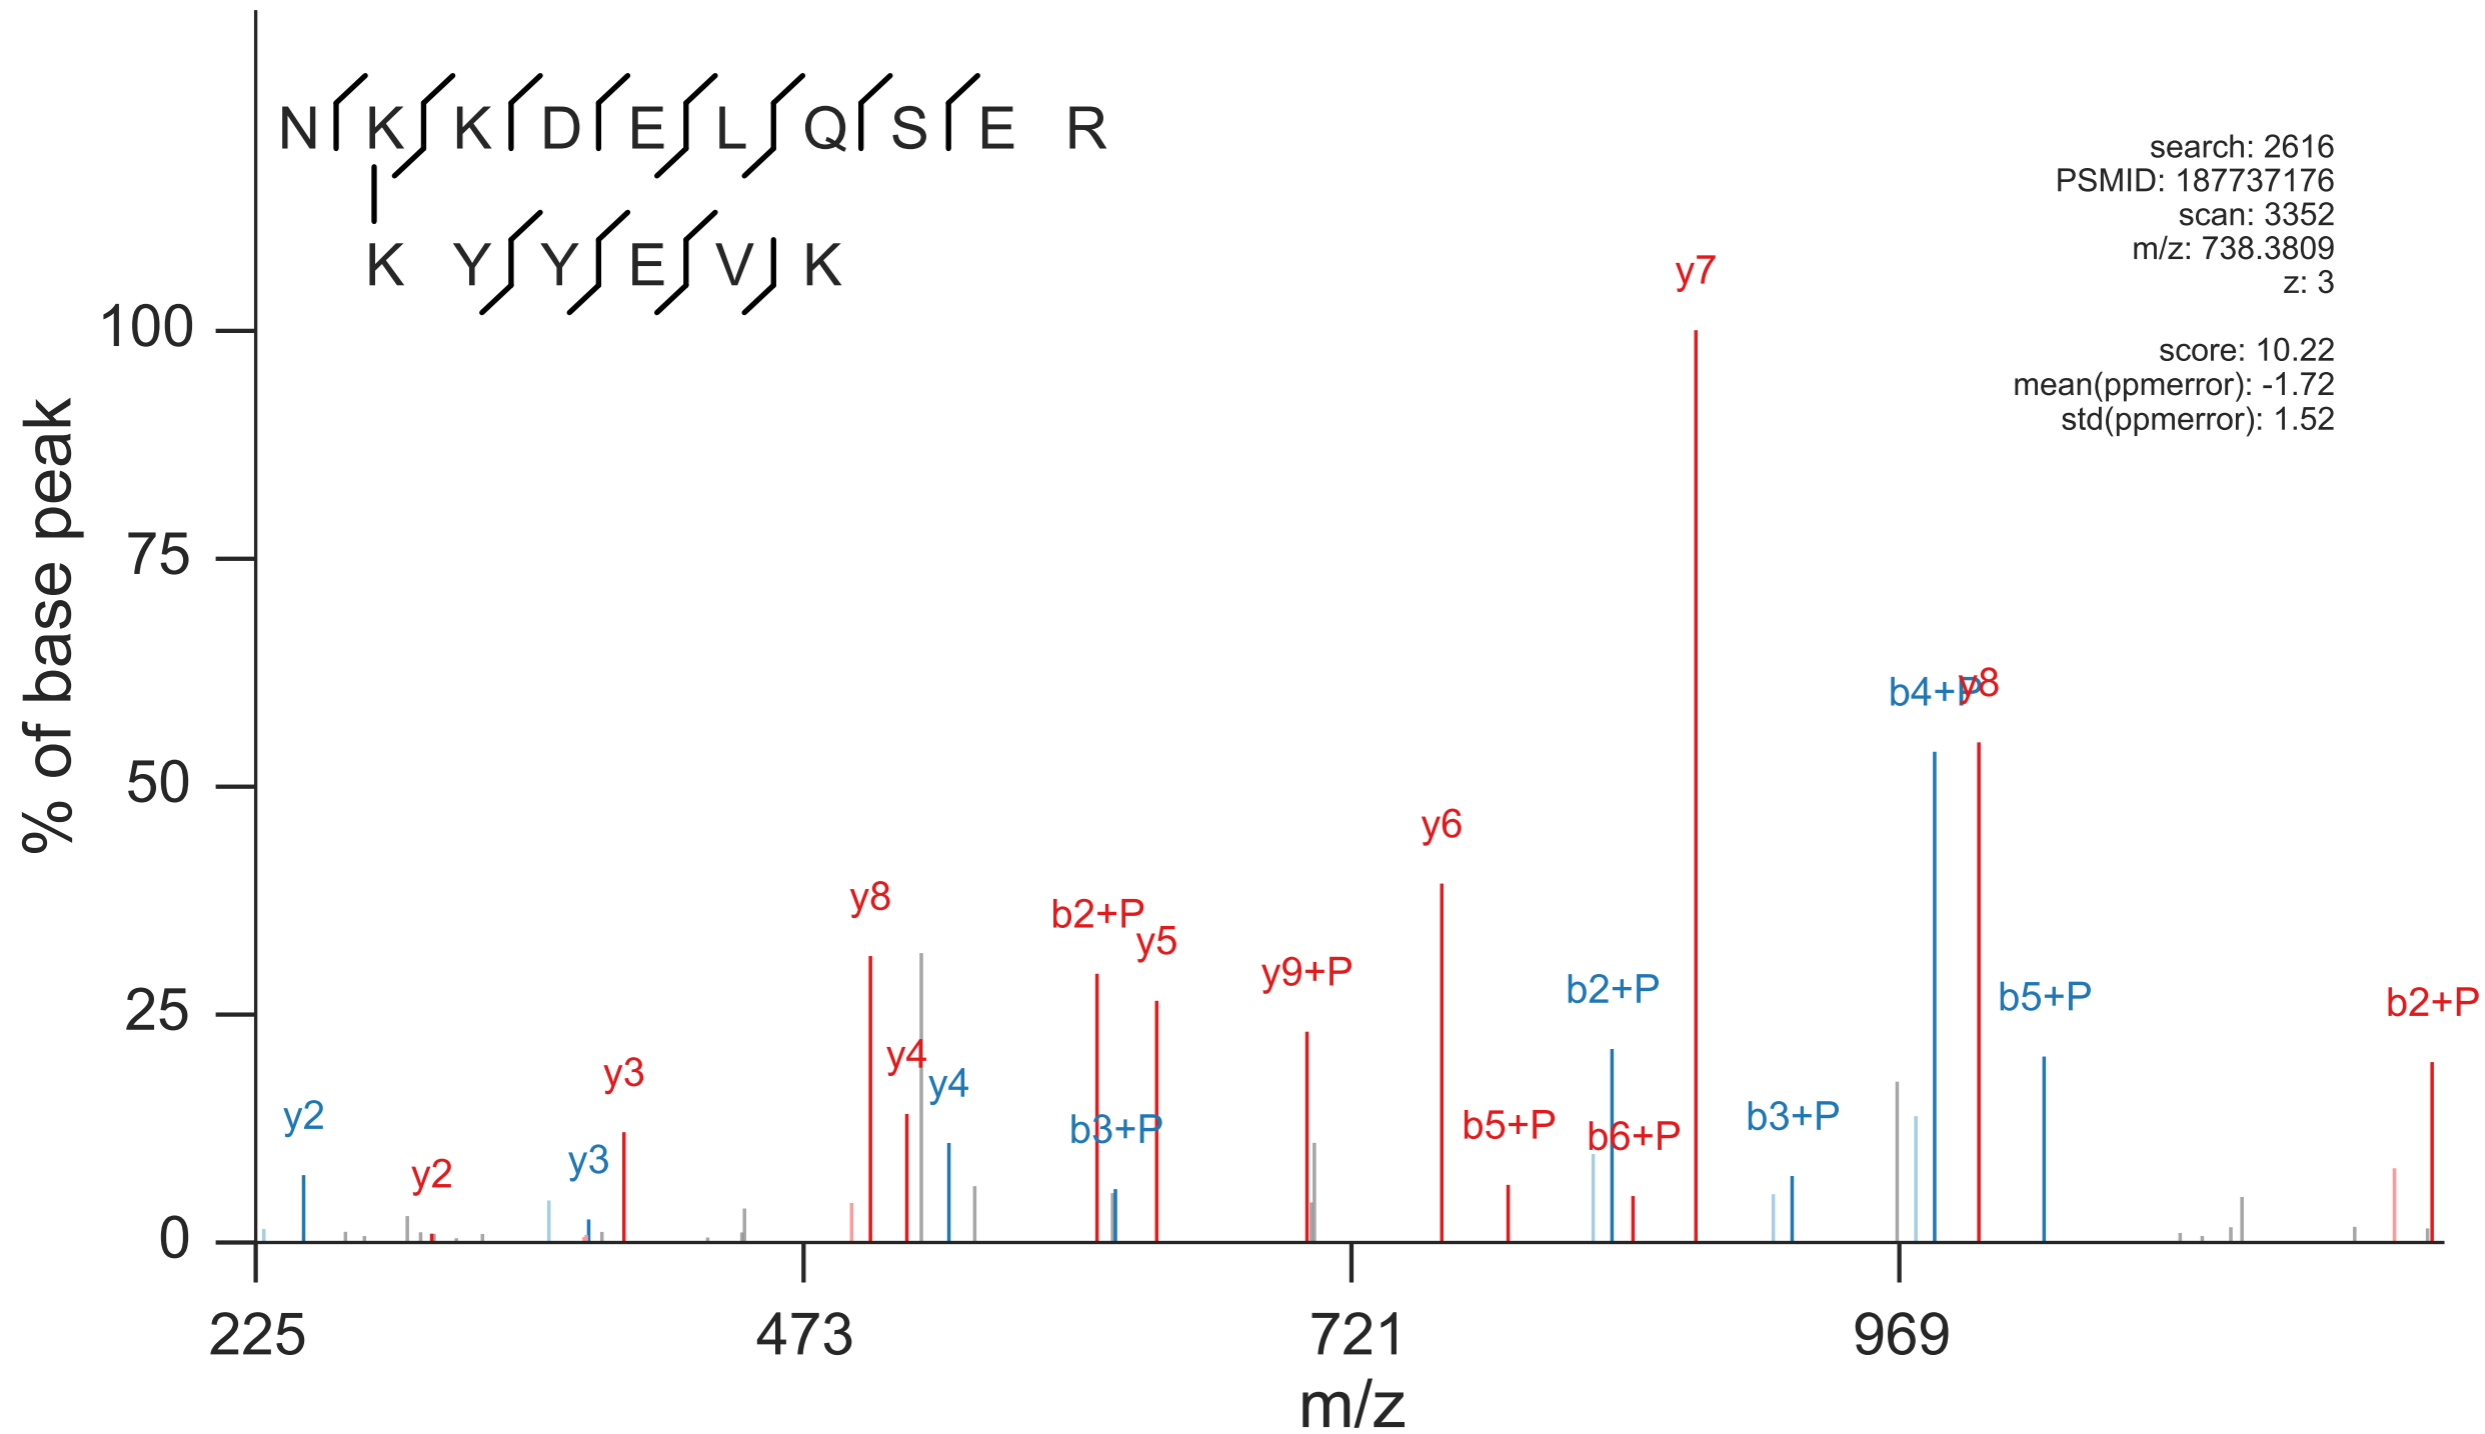

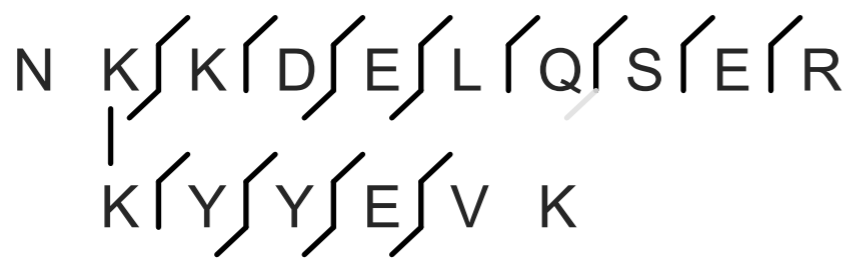

search: 2616  
 PSMD: 187737187  
 scan: 3355  
 m/z: 554.0364  
 z: 4

score: 10.26  
 mean(ppmerror): 1.61  
 b2+P std(ppmerror): 4.59

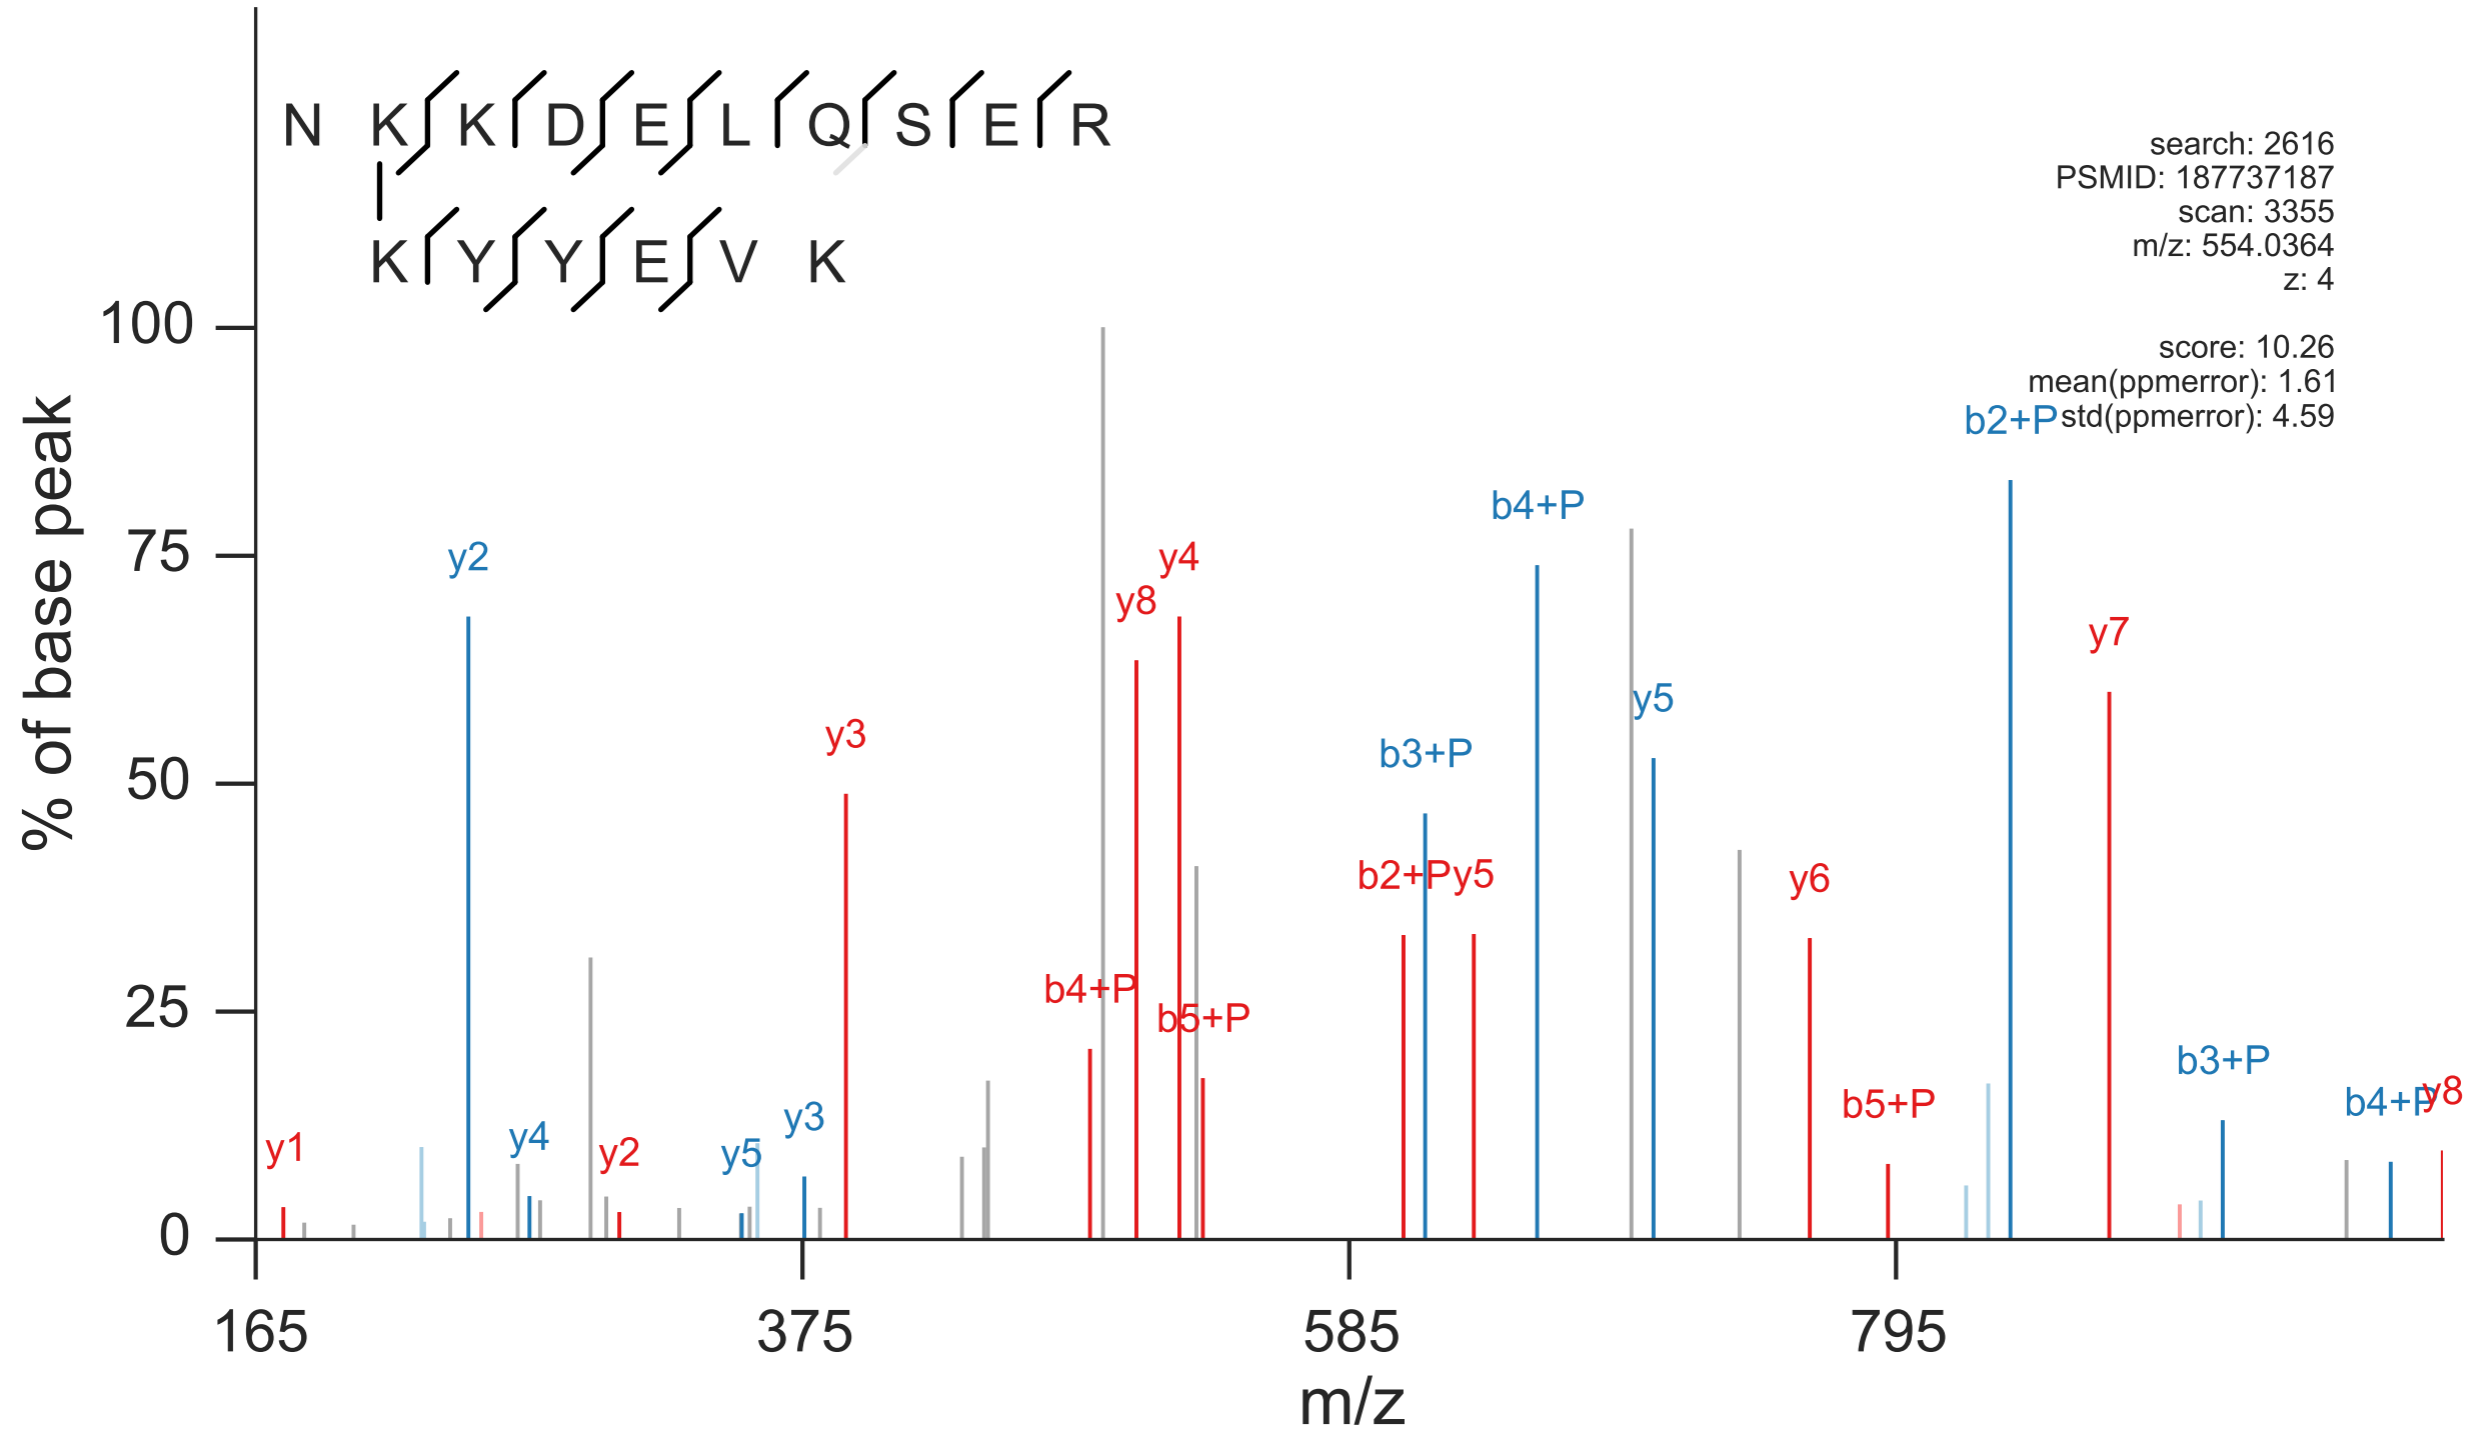

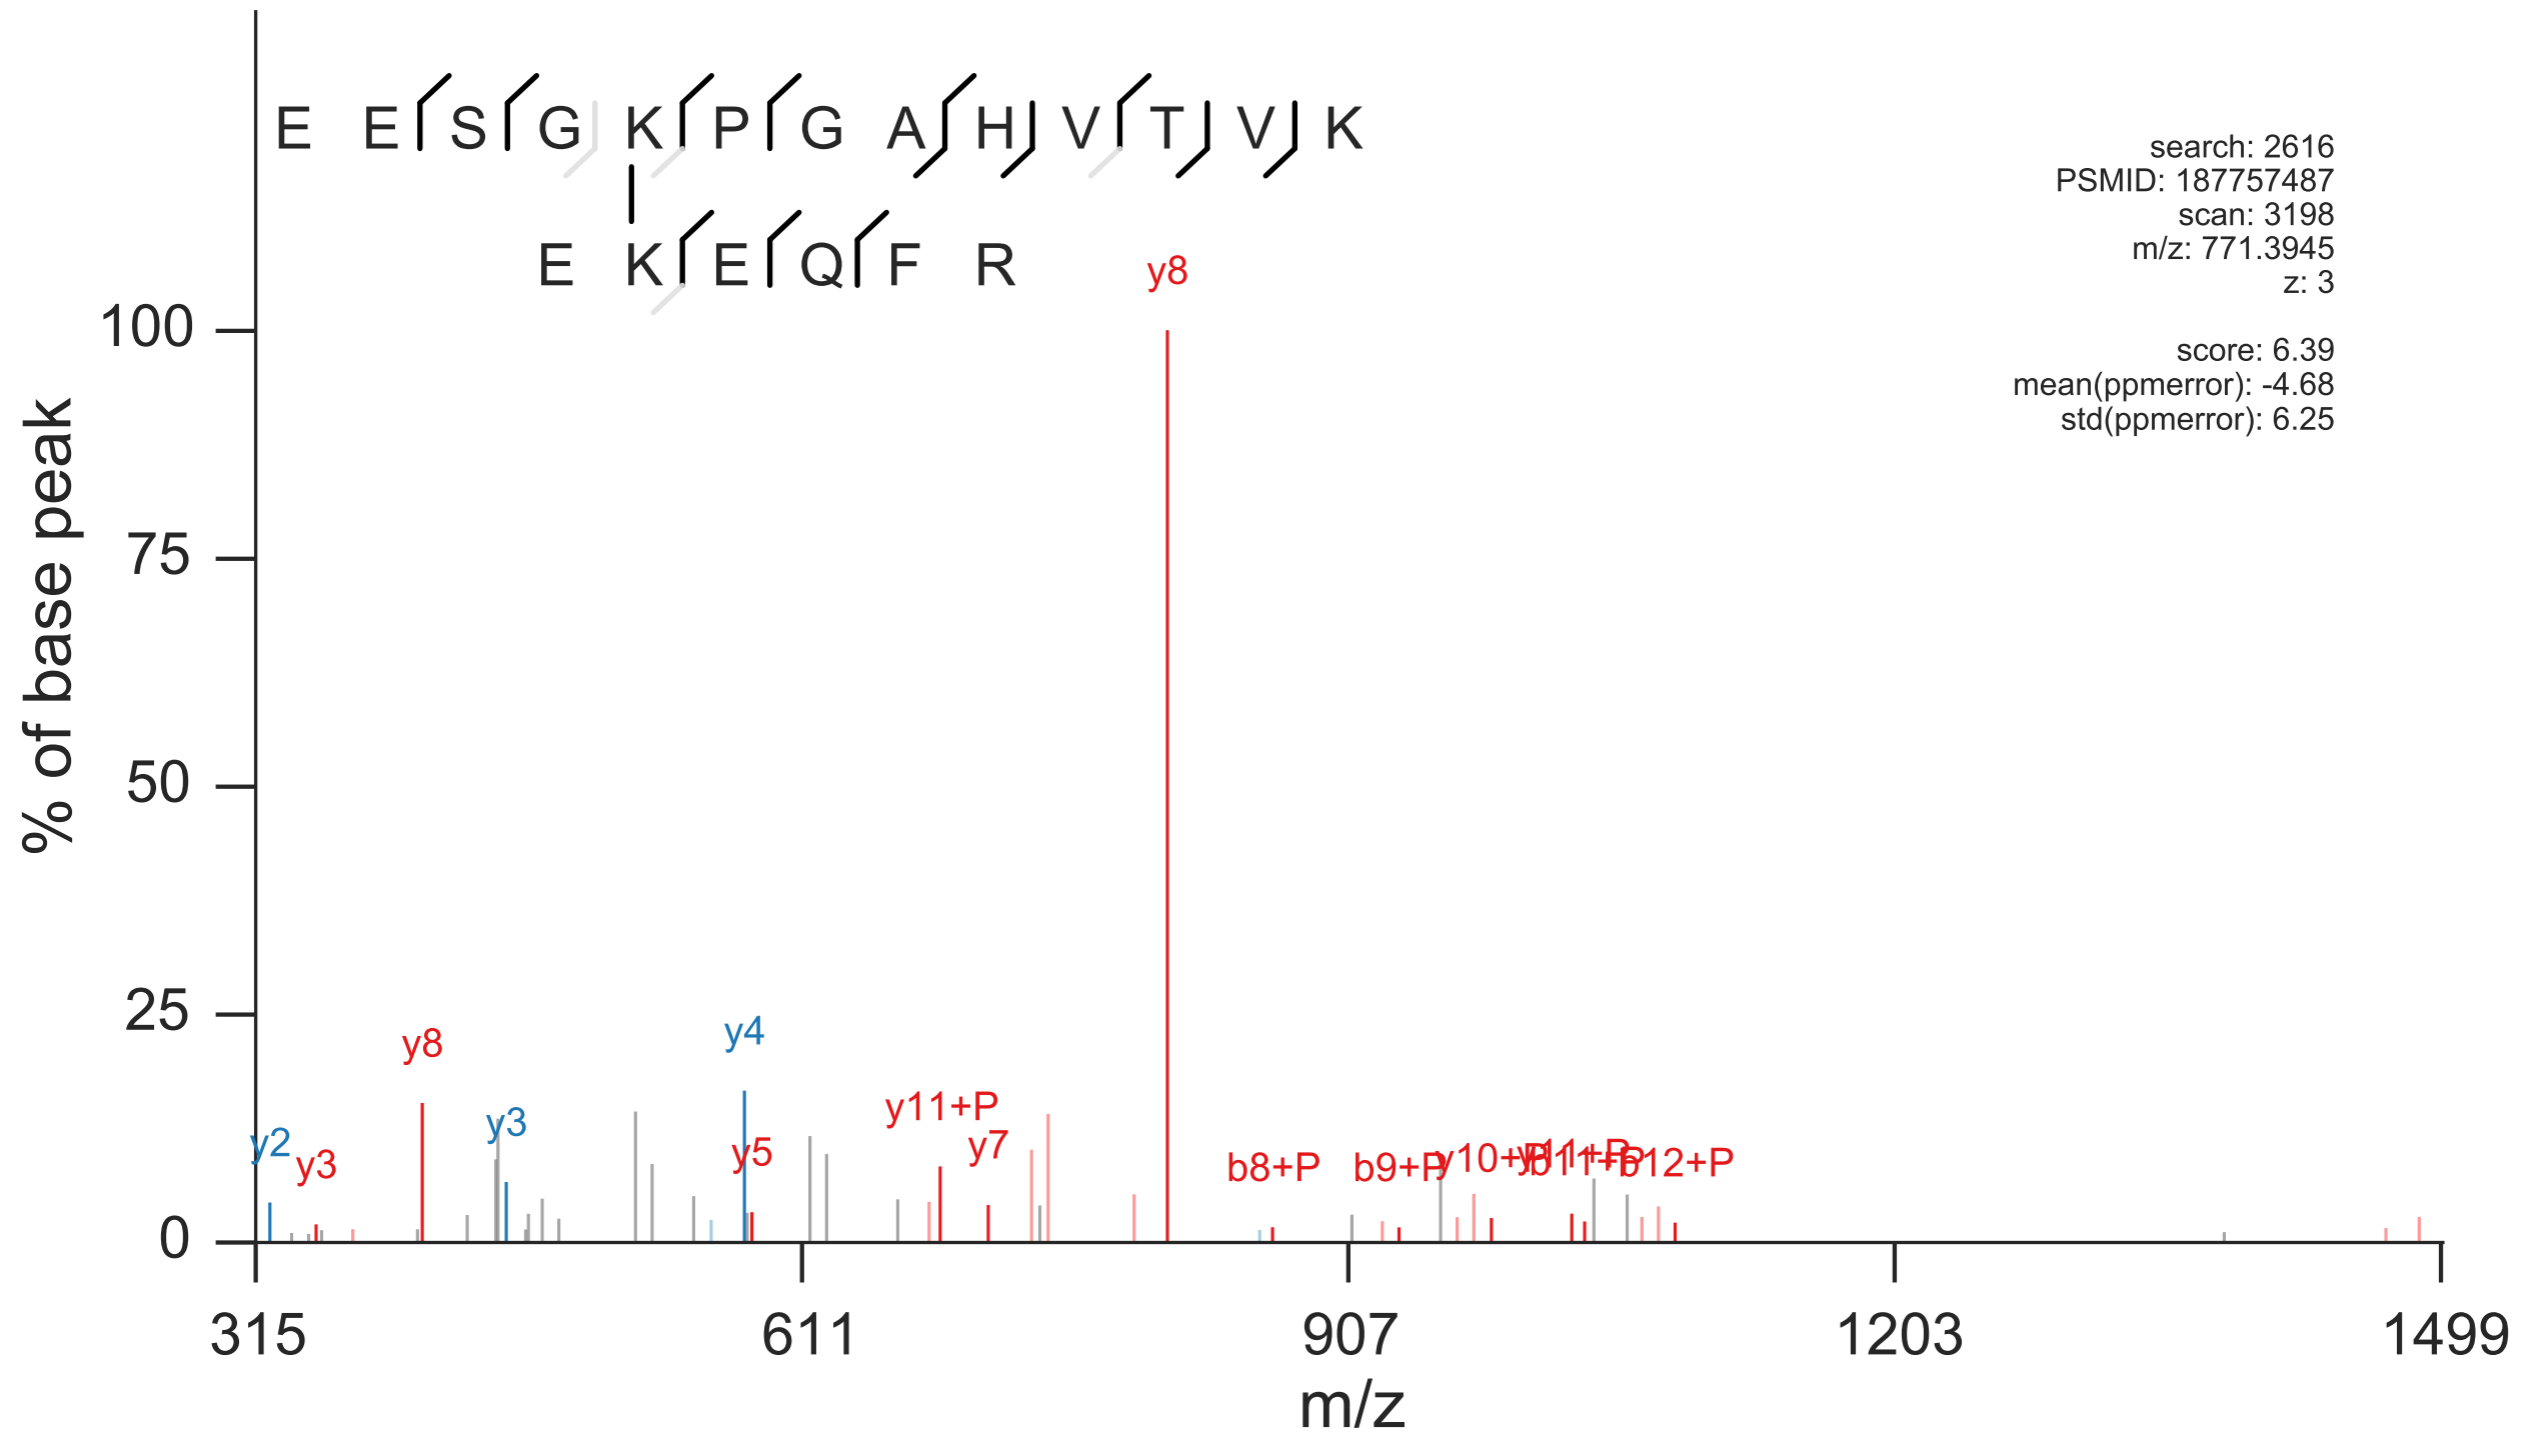

search: 2616  
 PSMID: 187757487  
 scan: 3198  
 m/z: 771.3945  
 z: 3

score: 6.39  
 mean(ppmerror): -4.68  
 std(ppmerror): 6.25

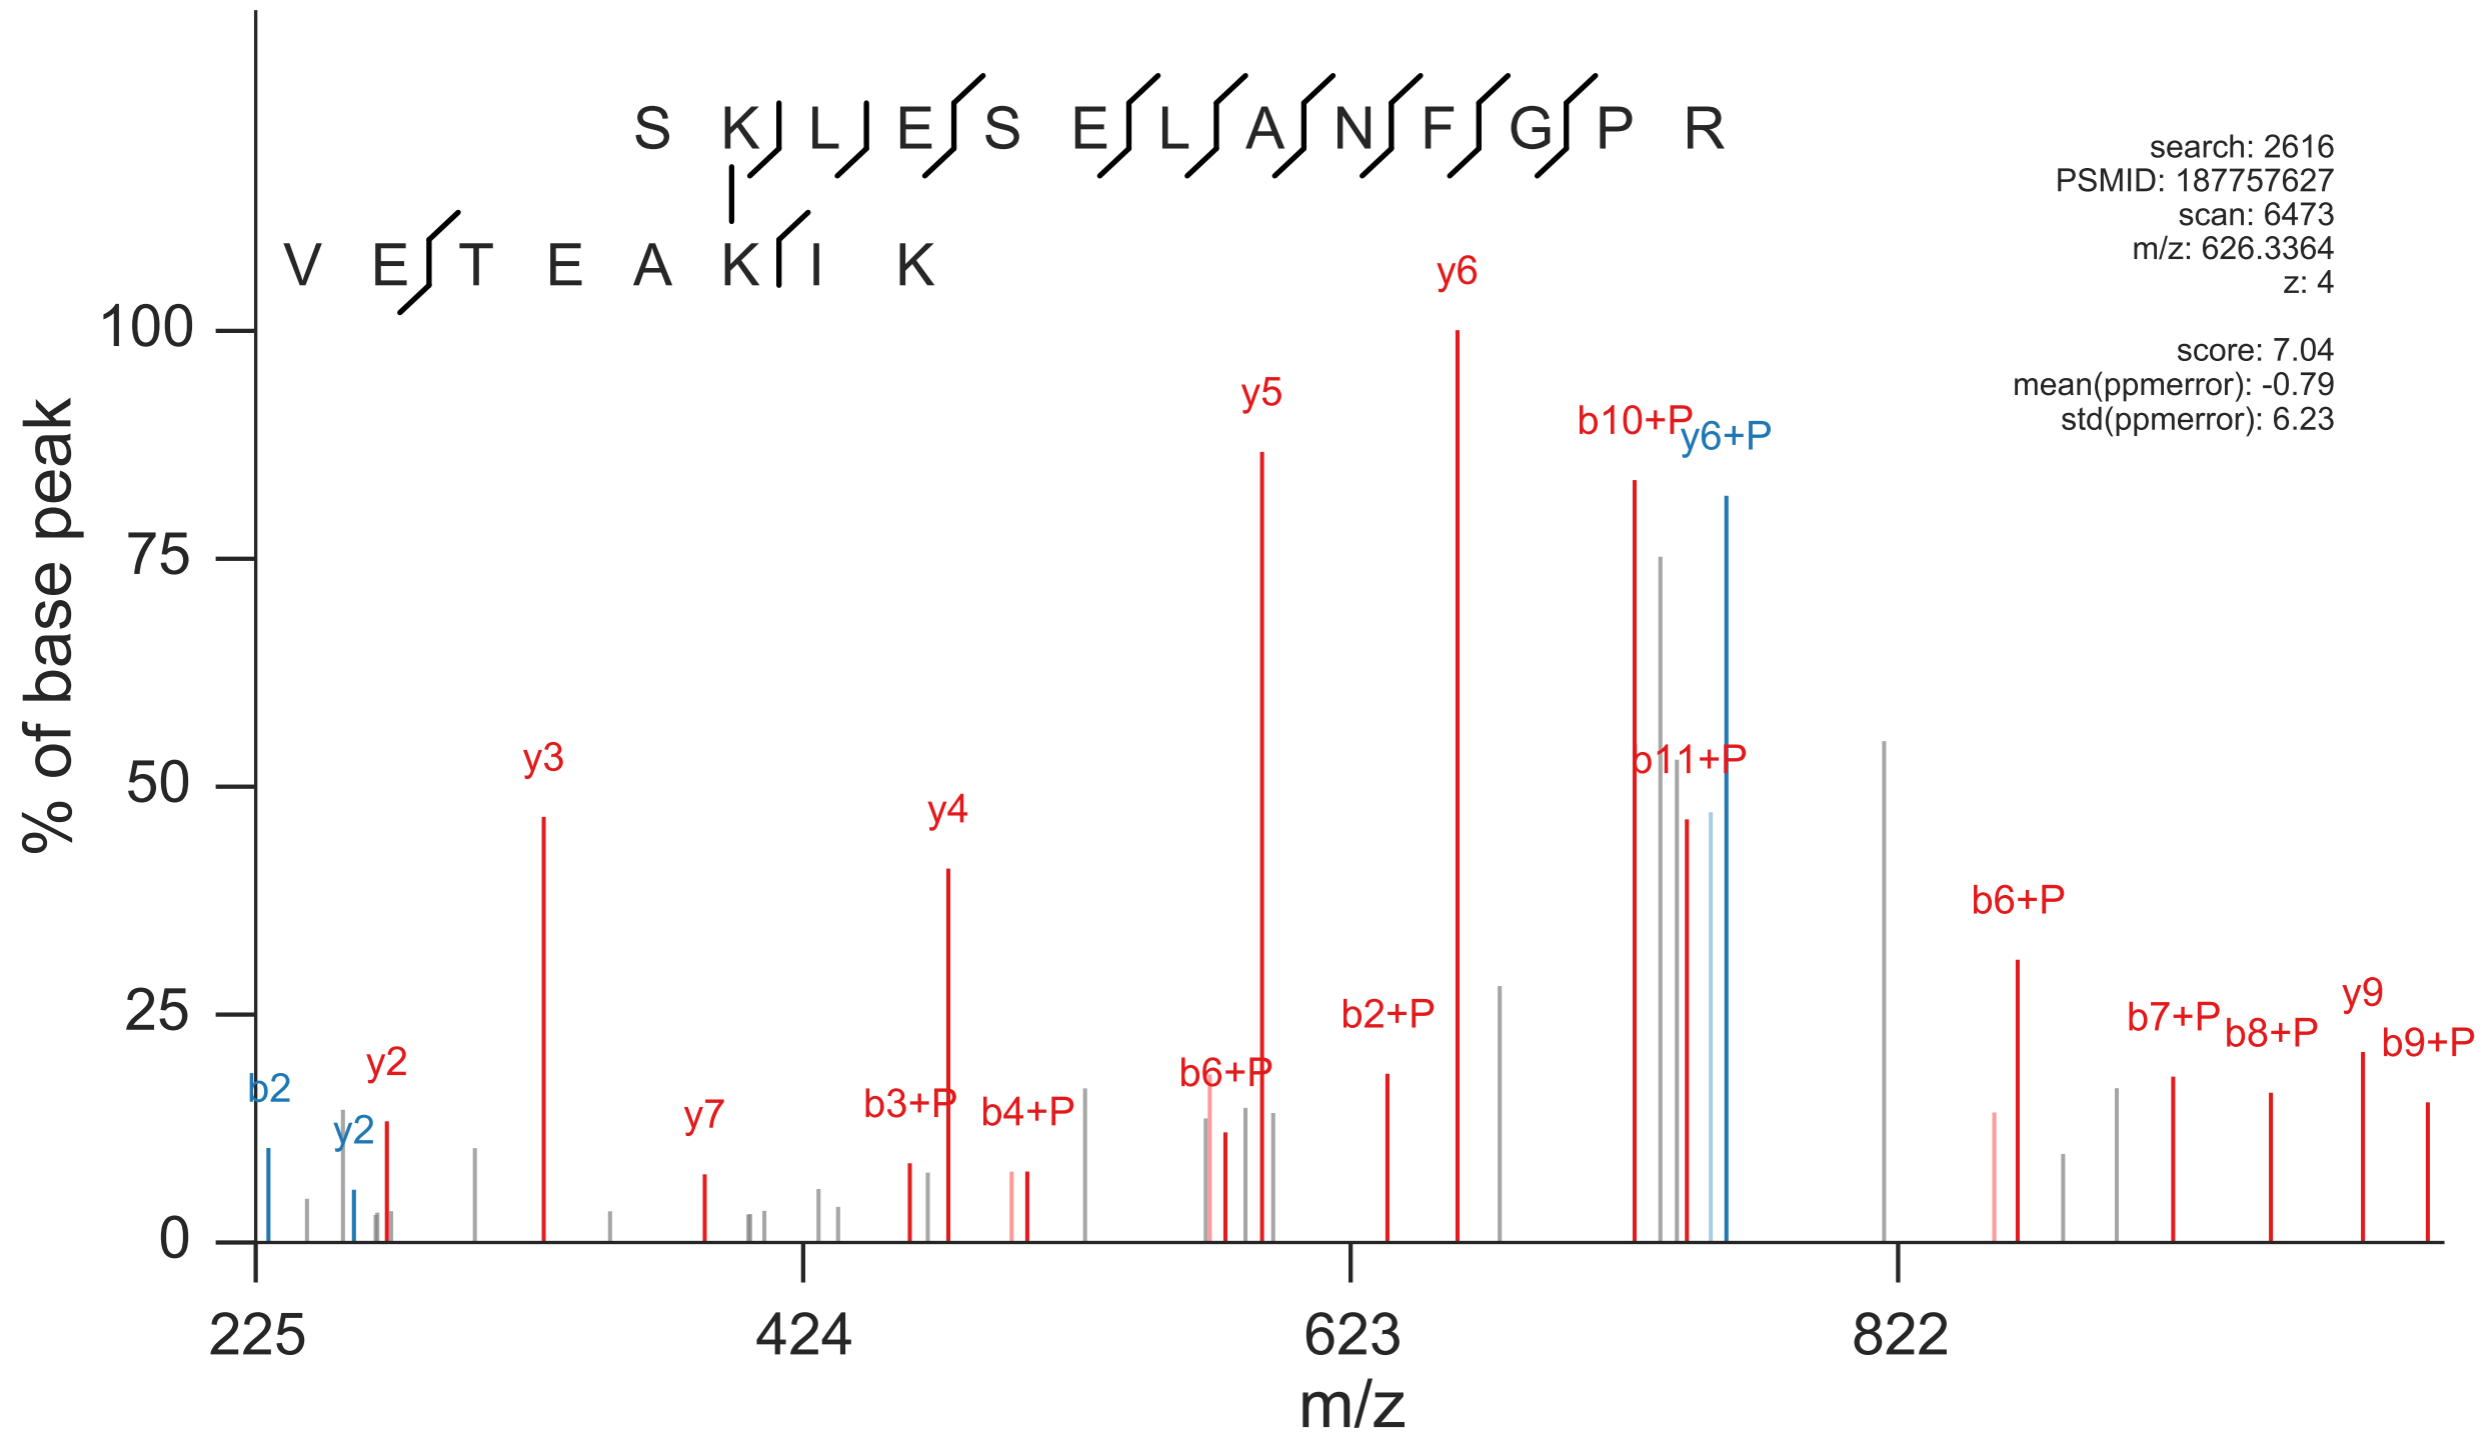

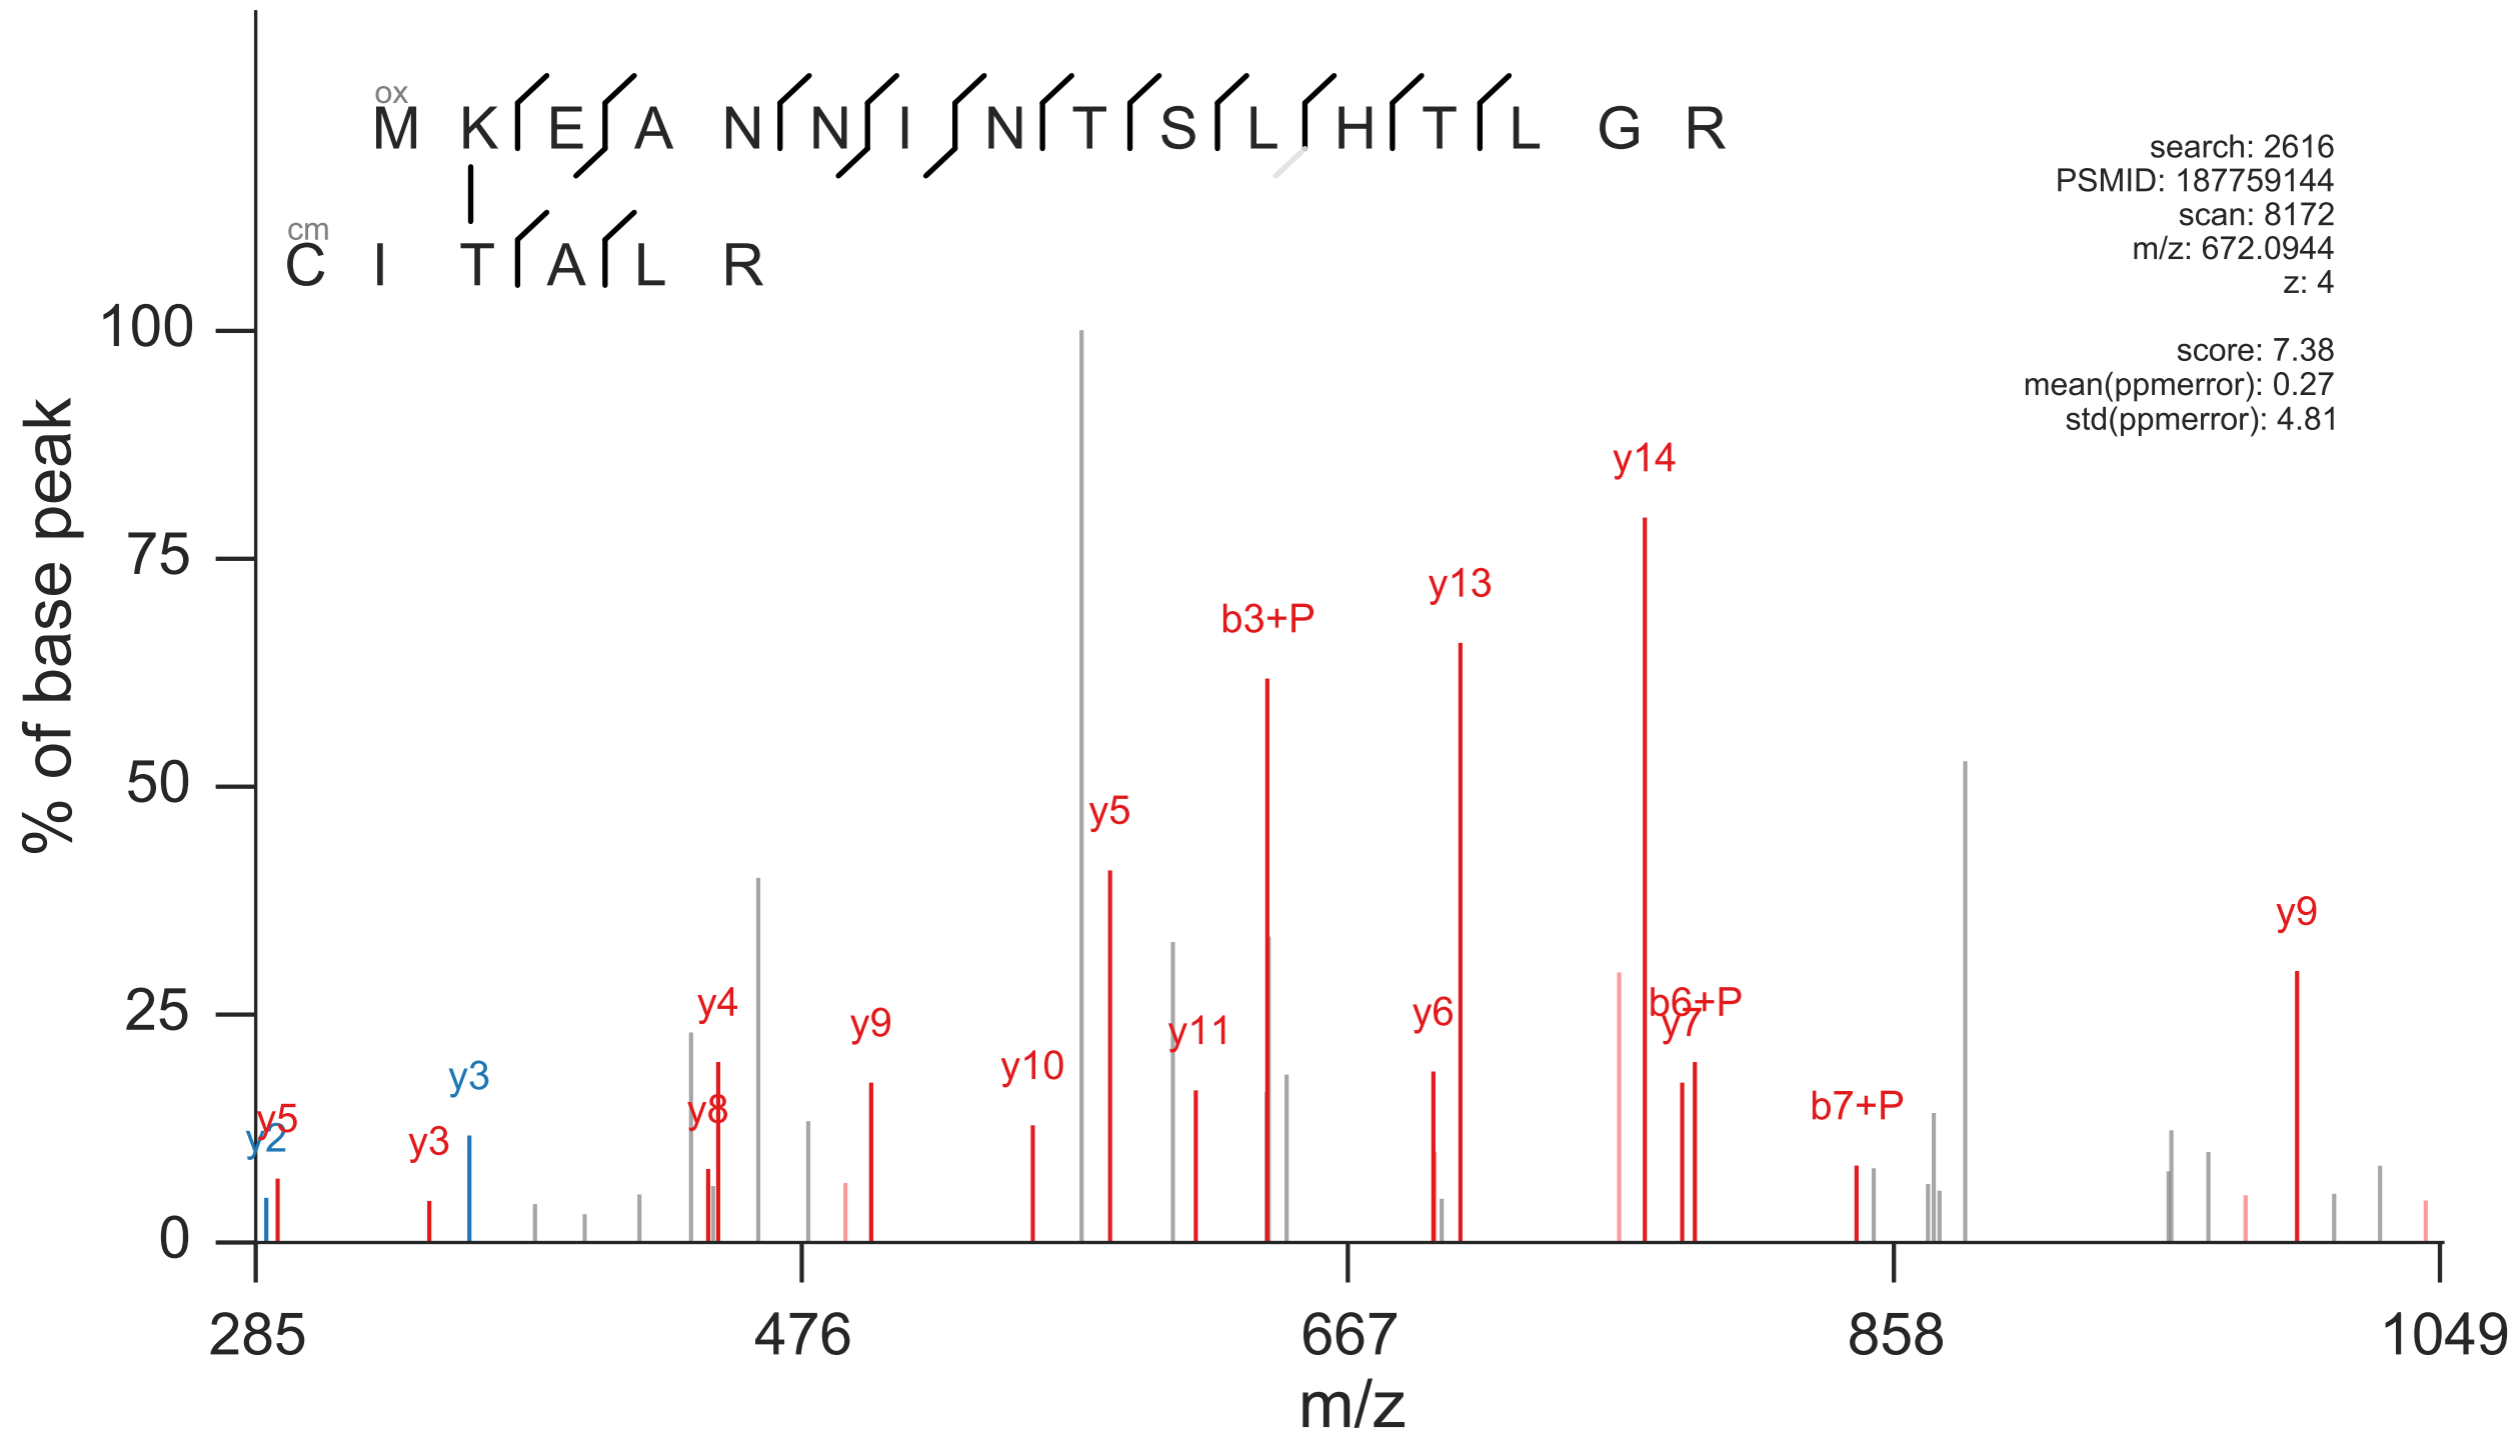

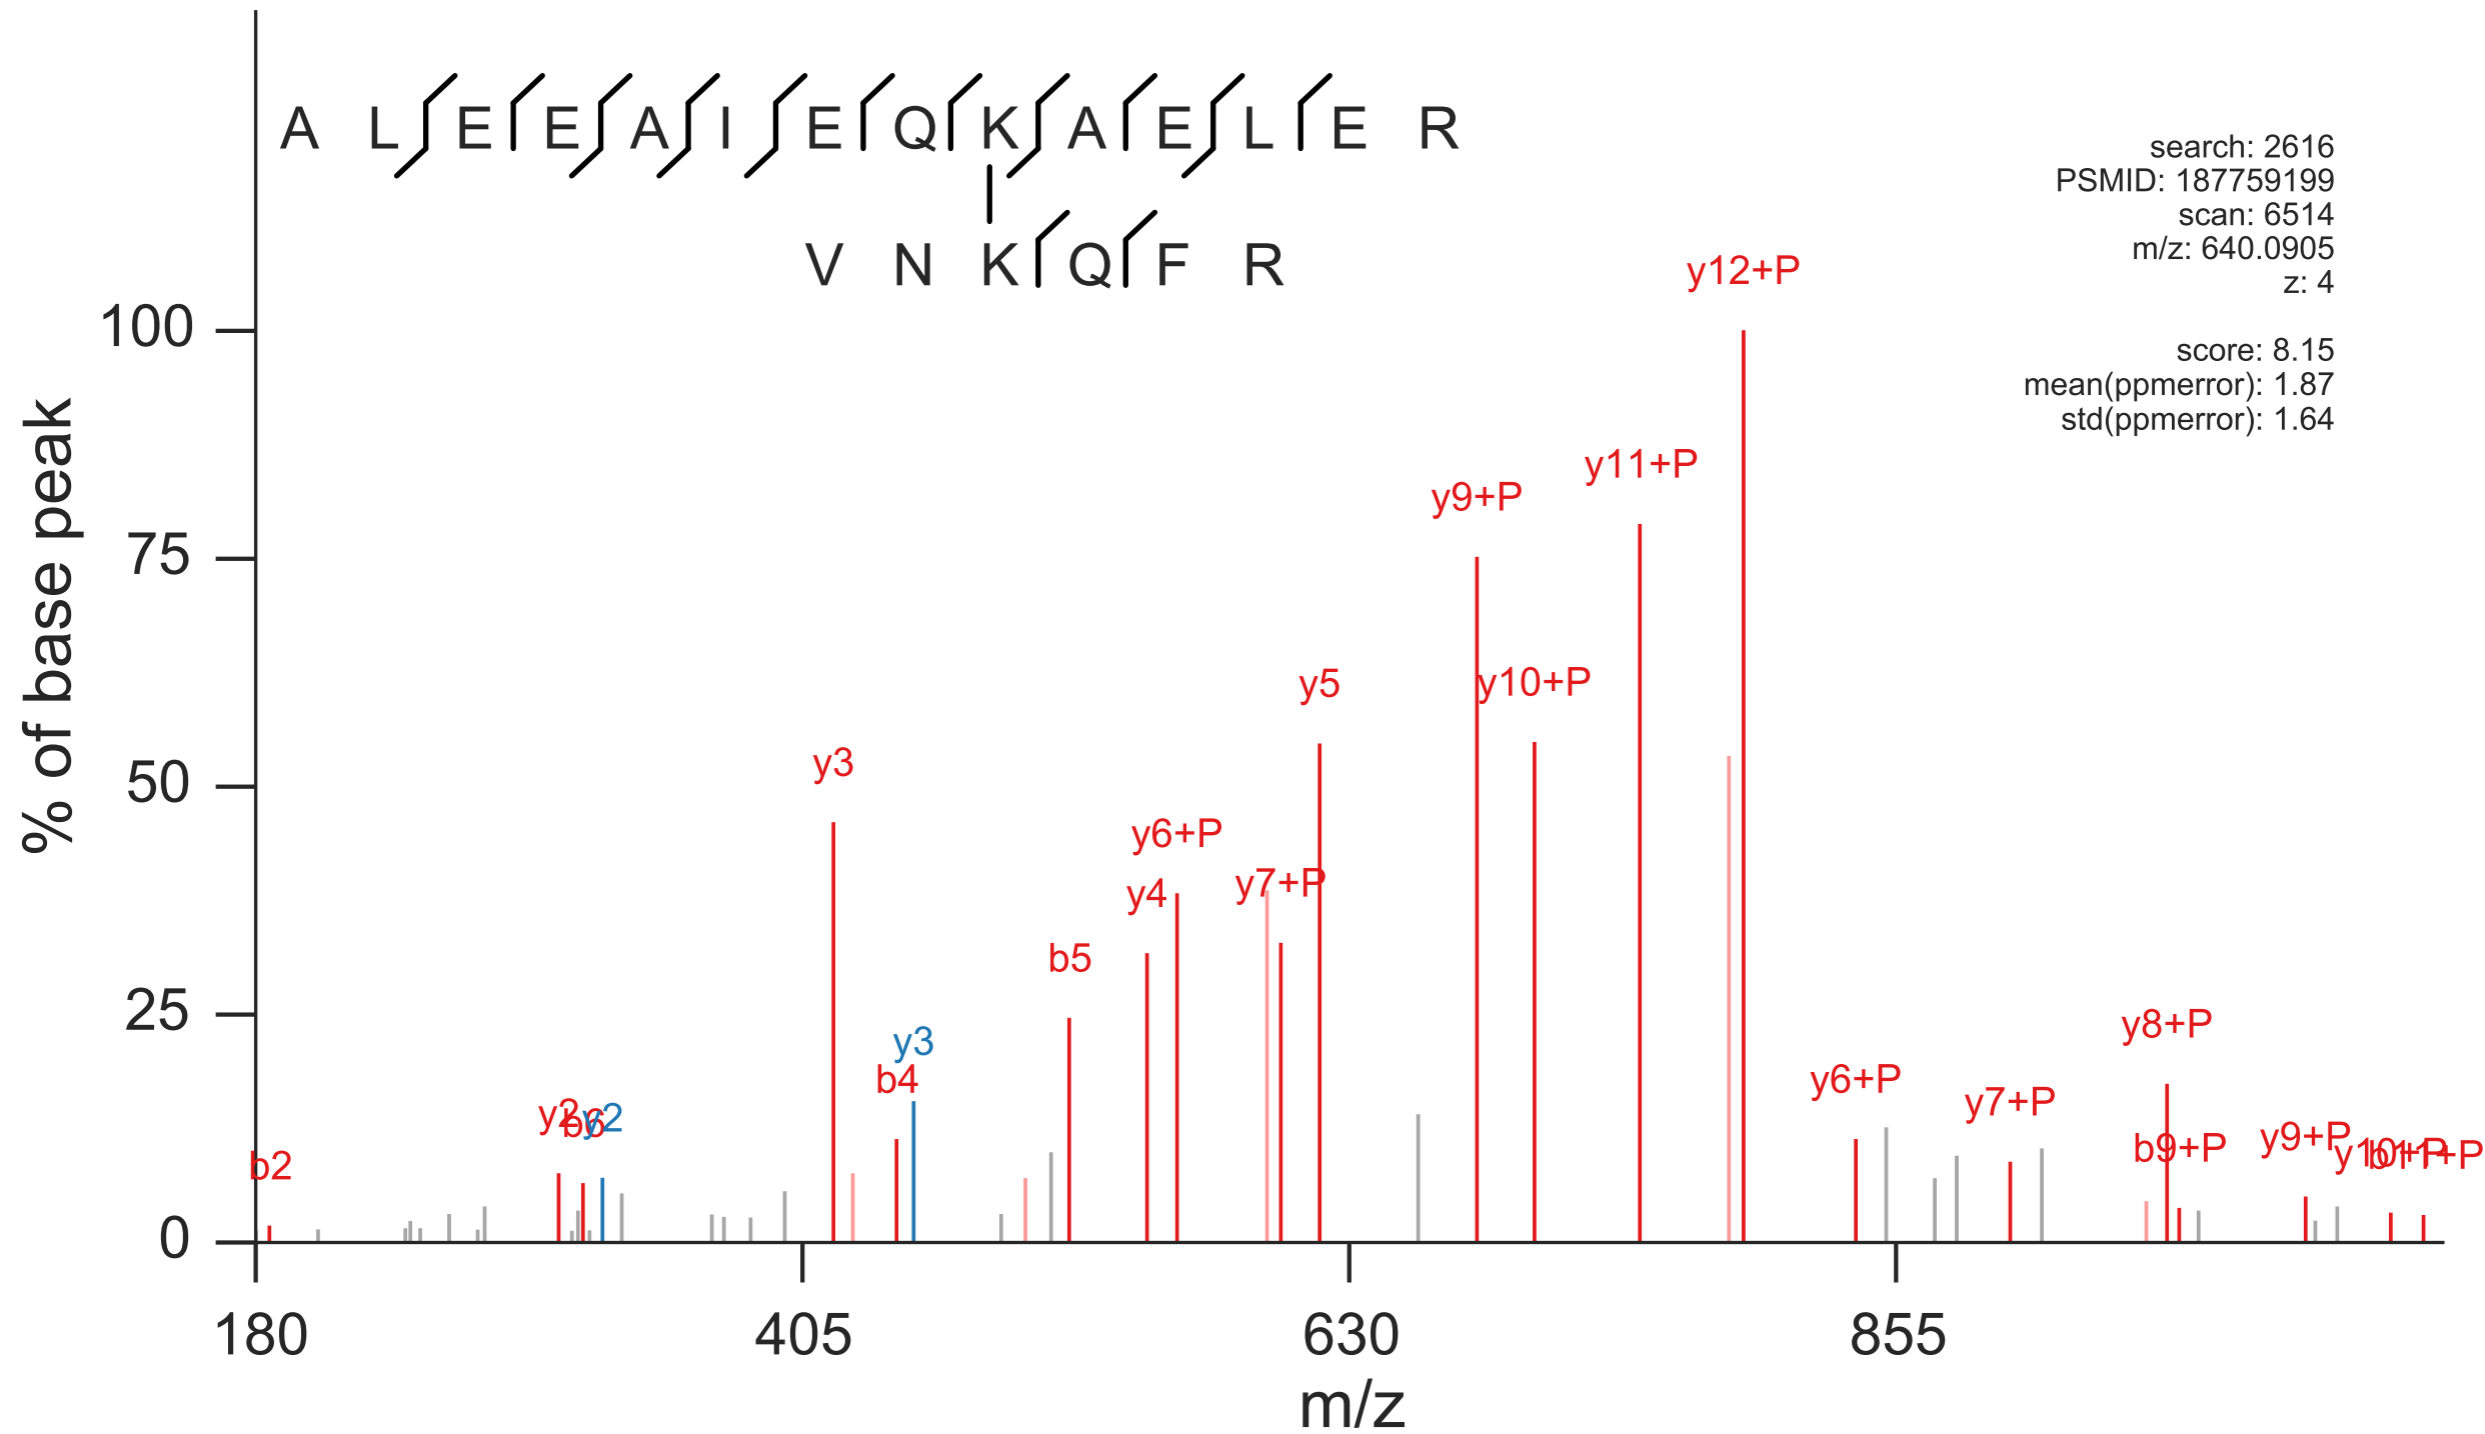



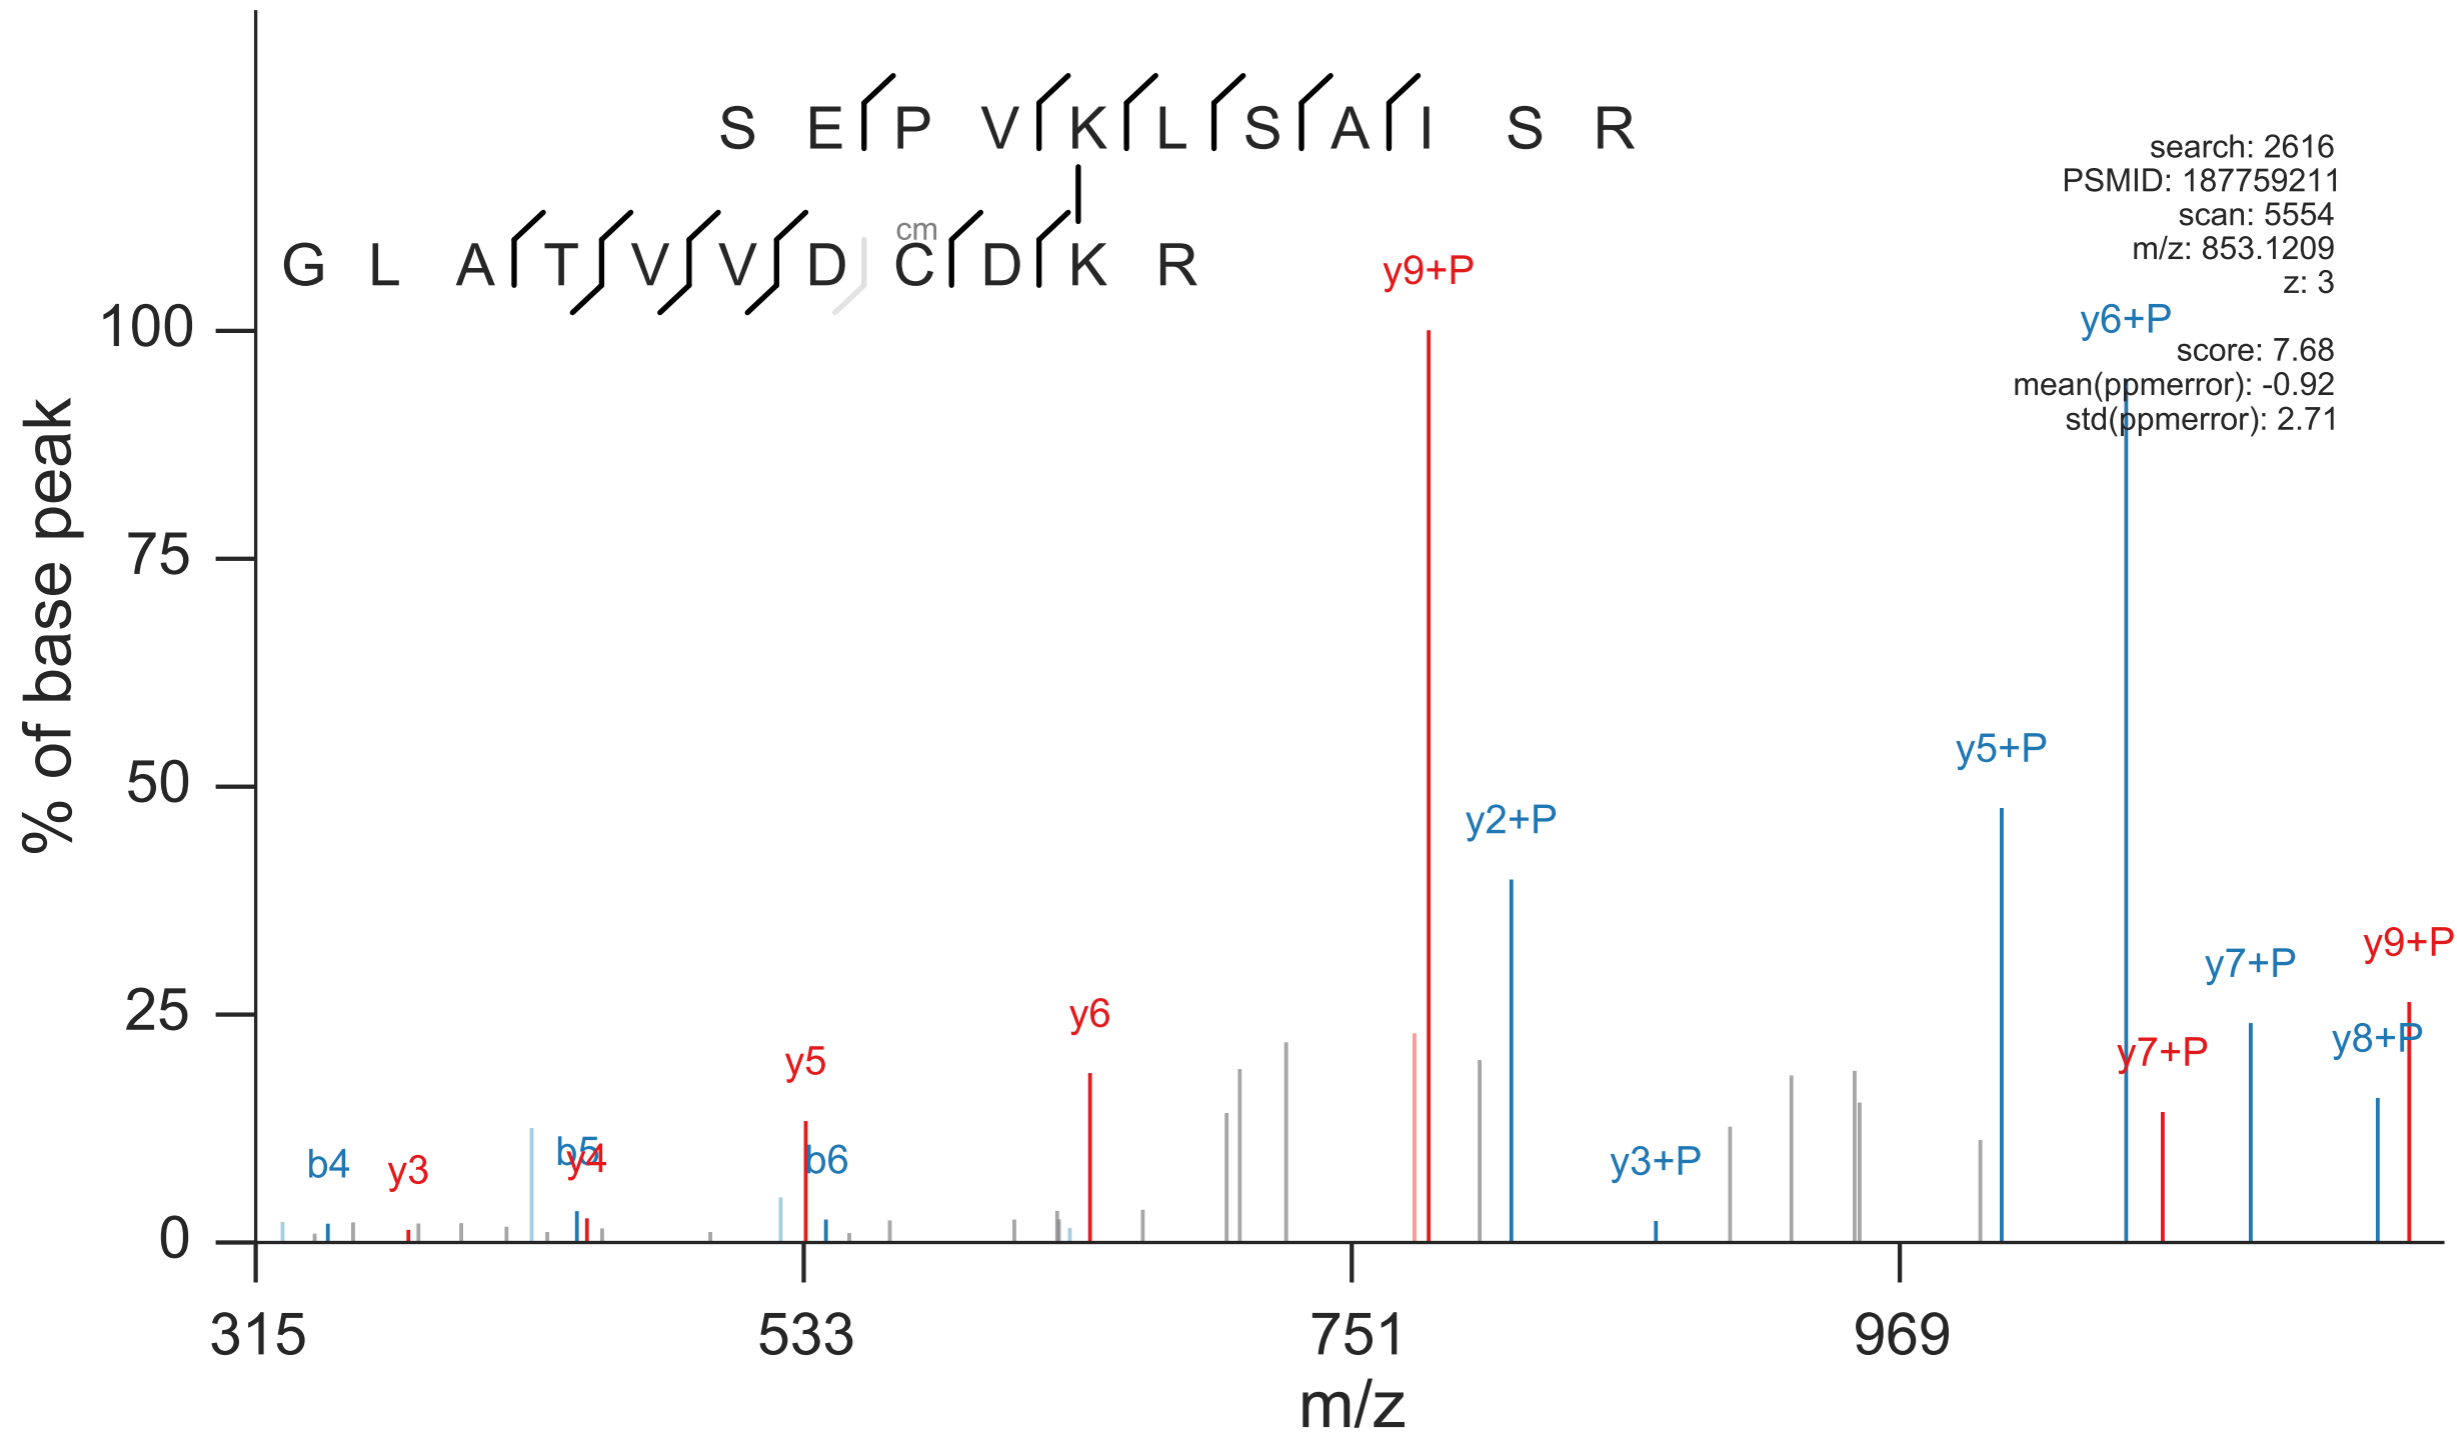

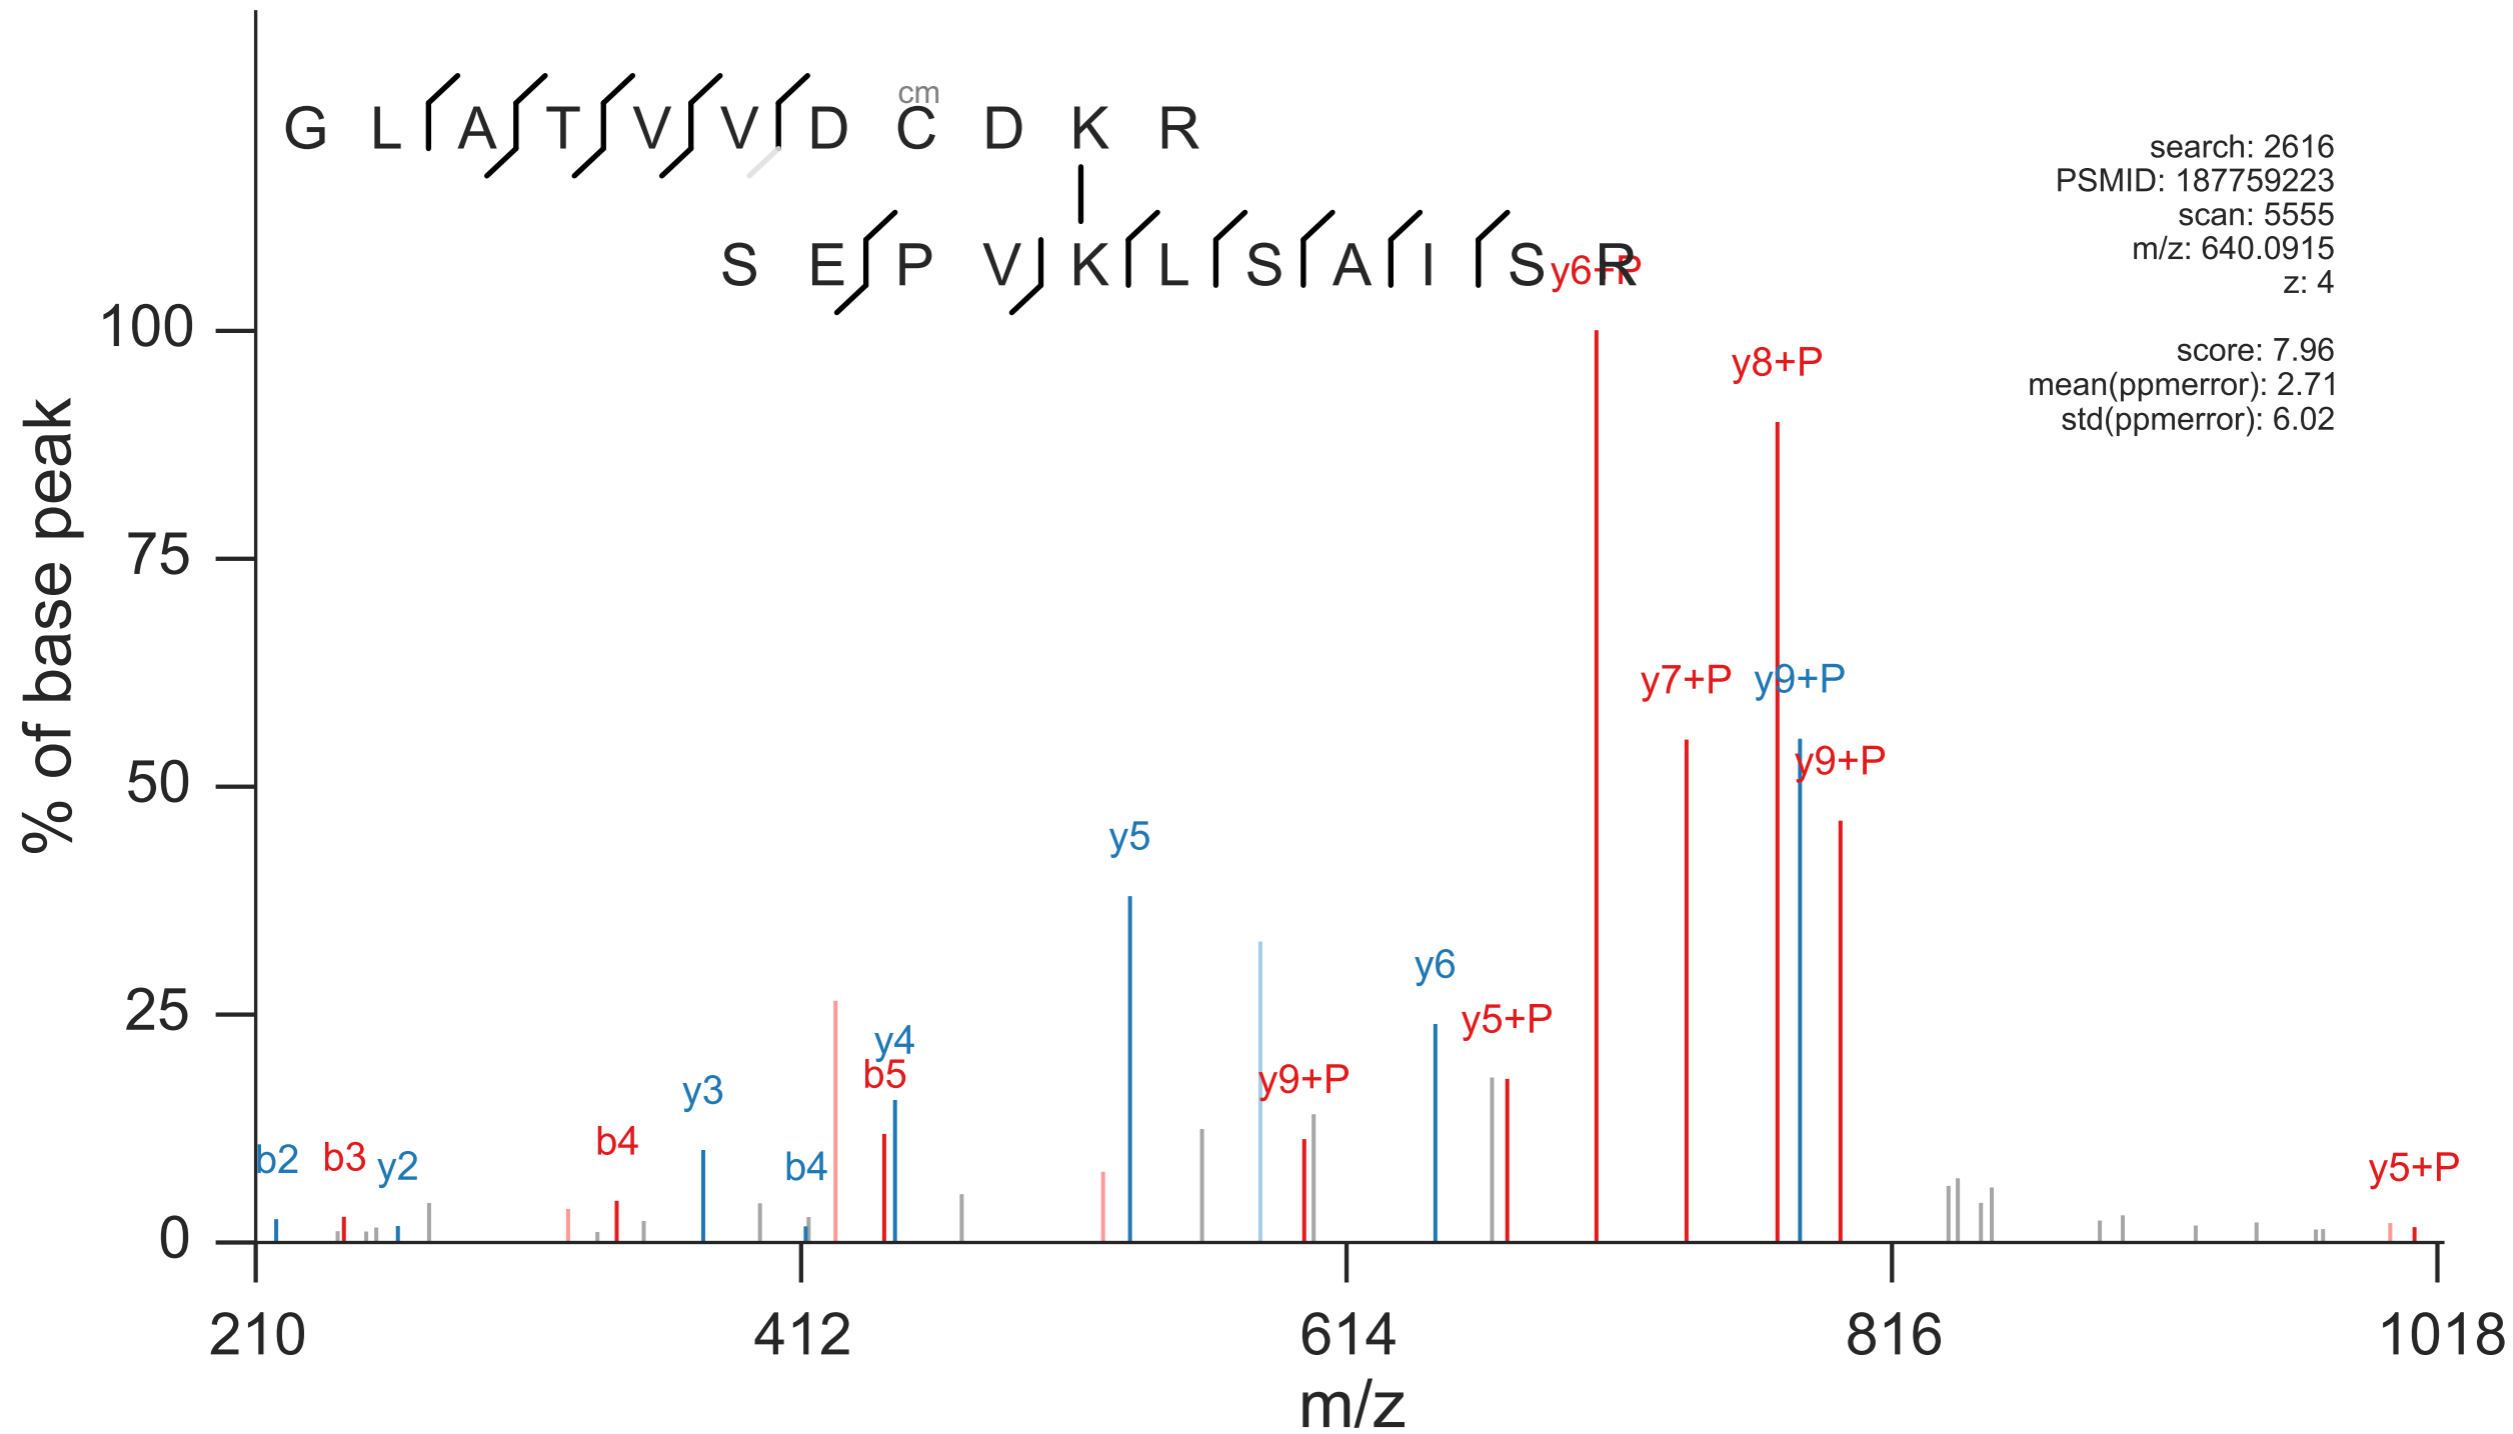

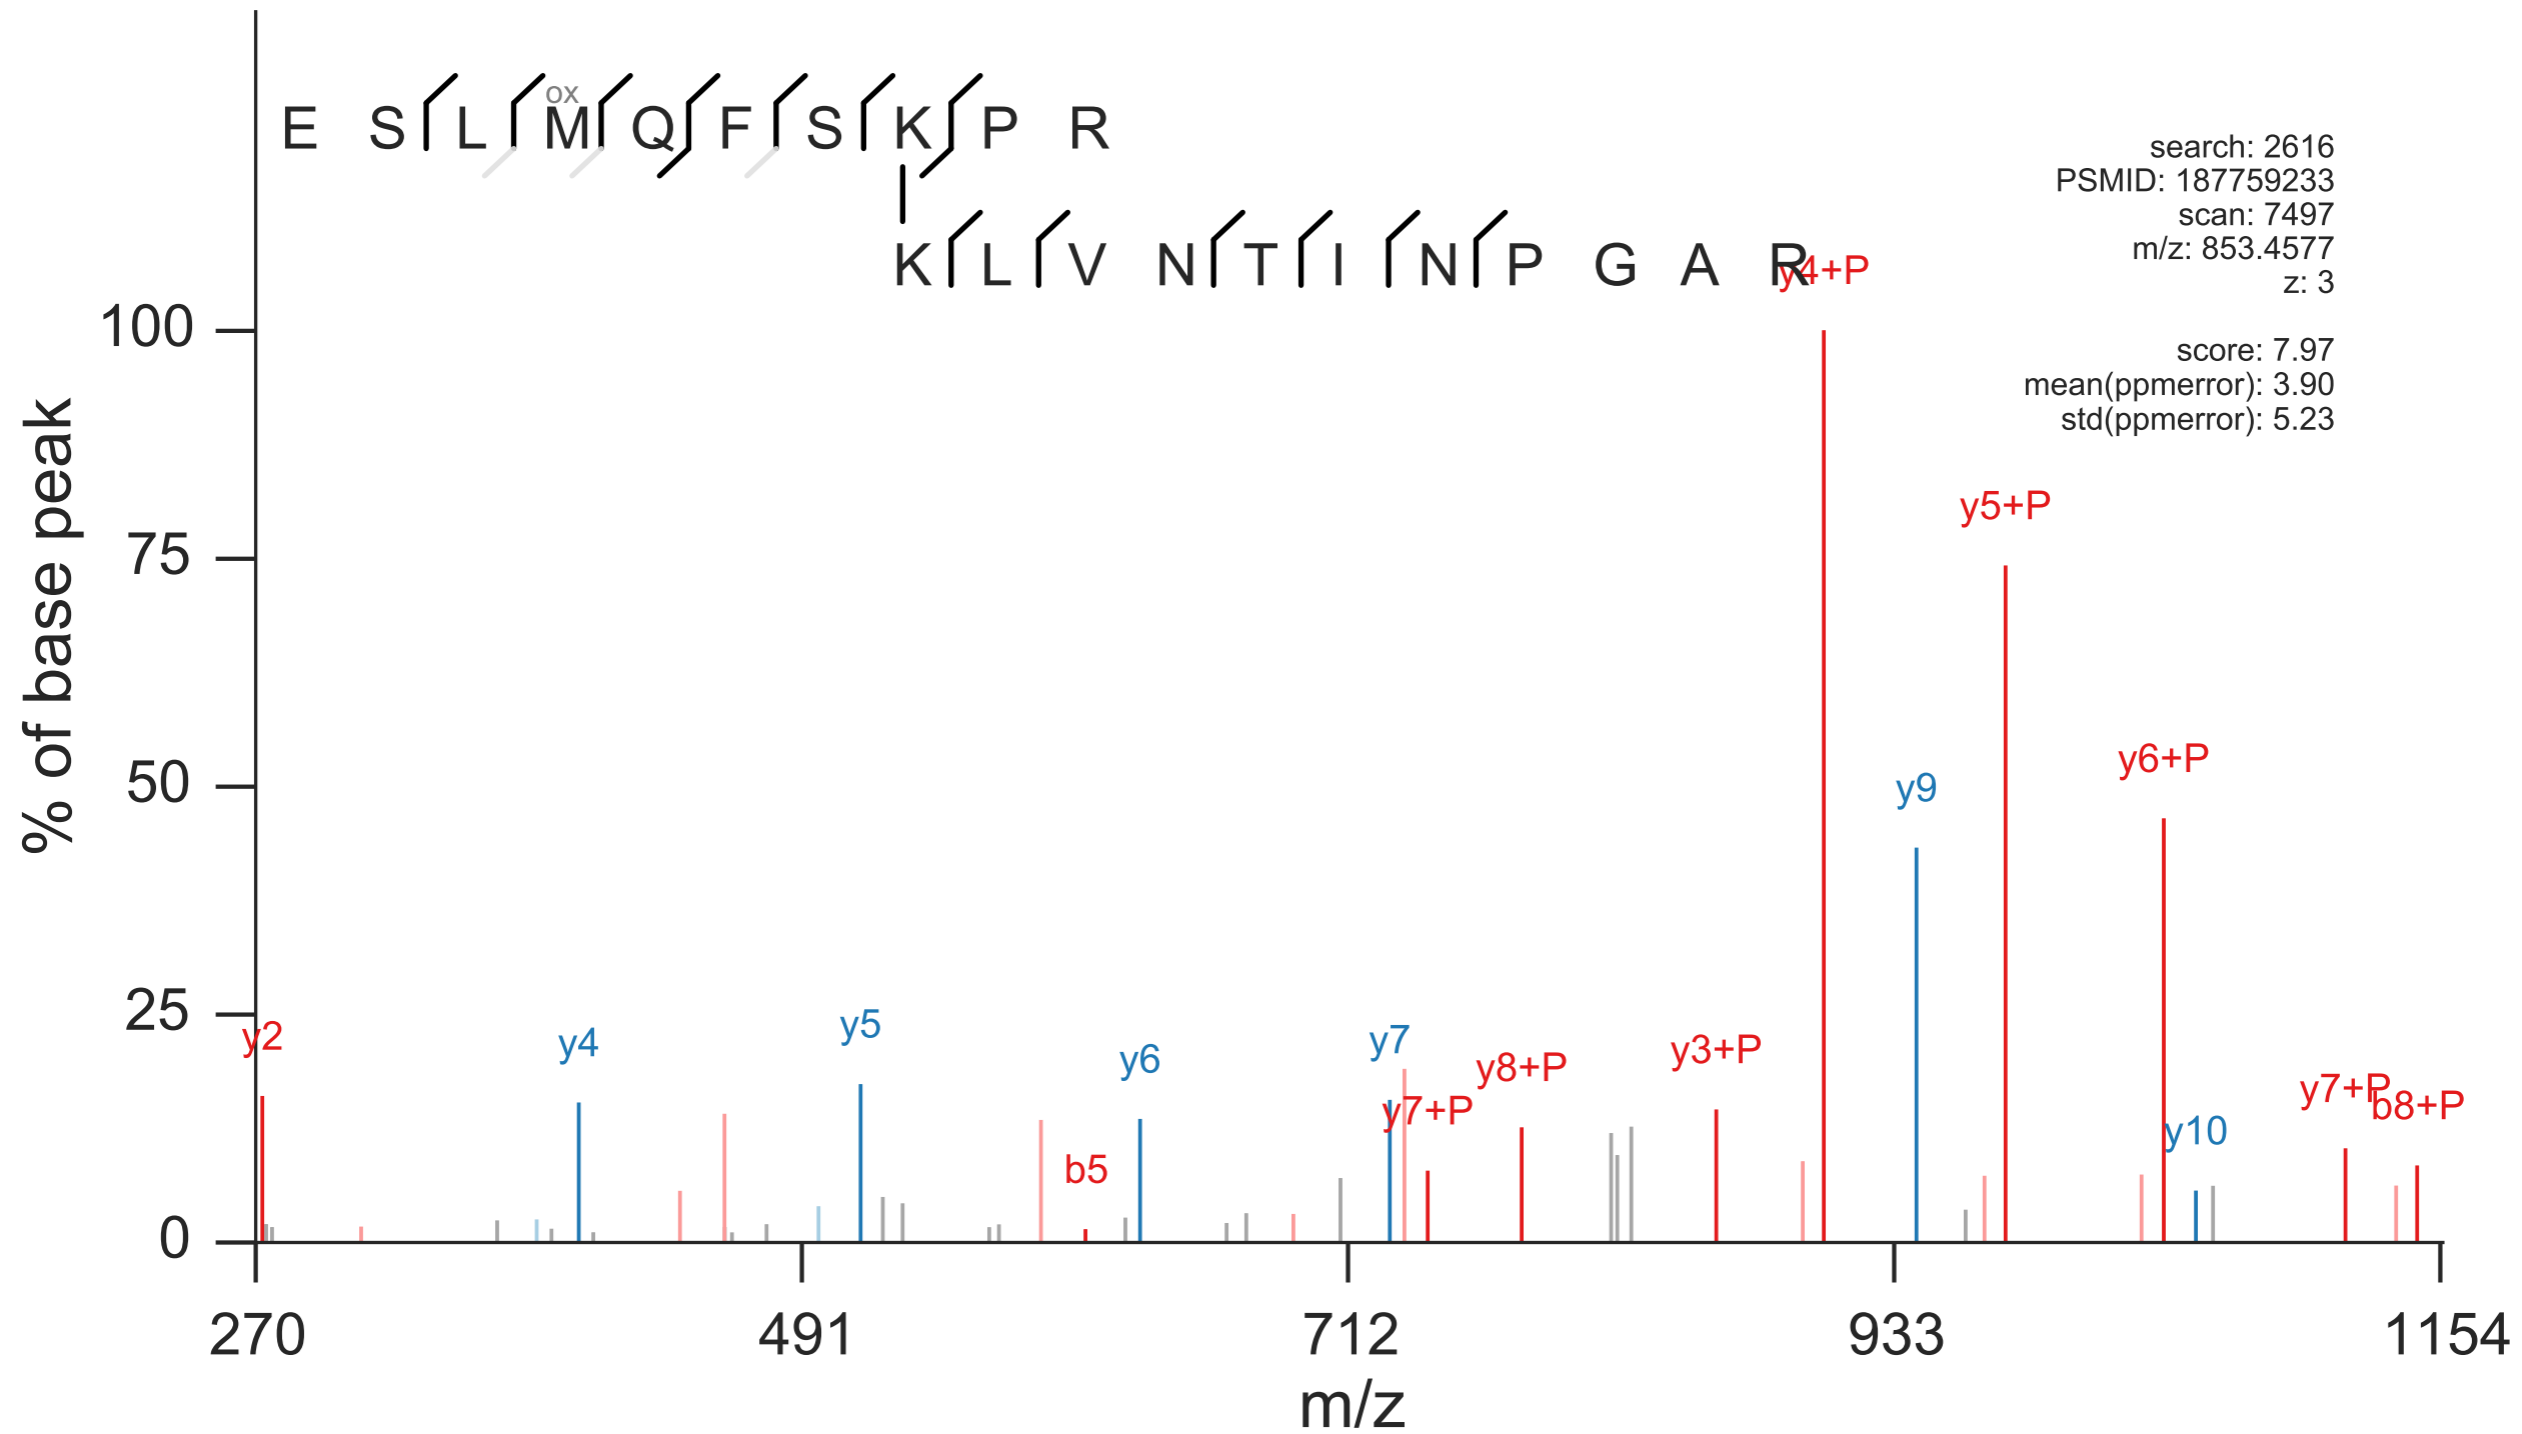

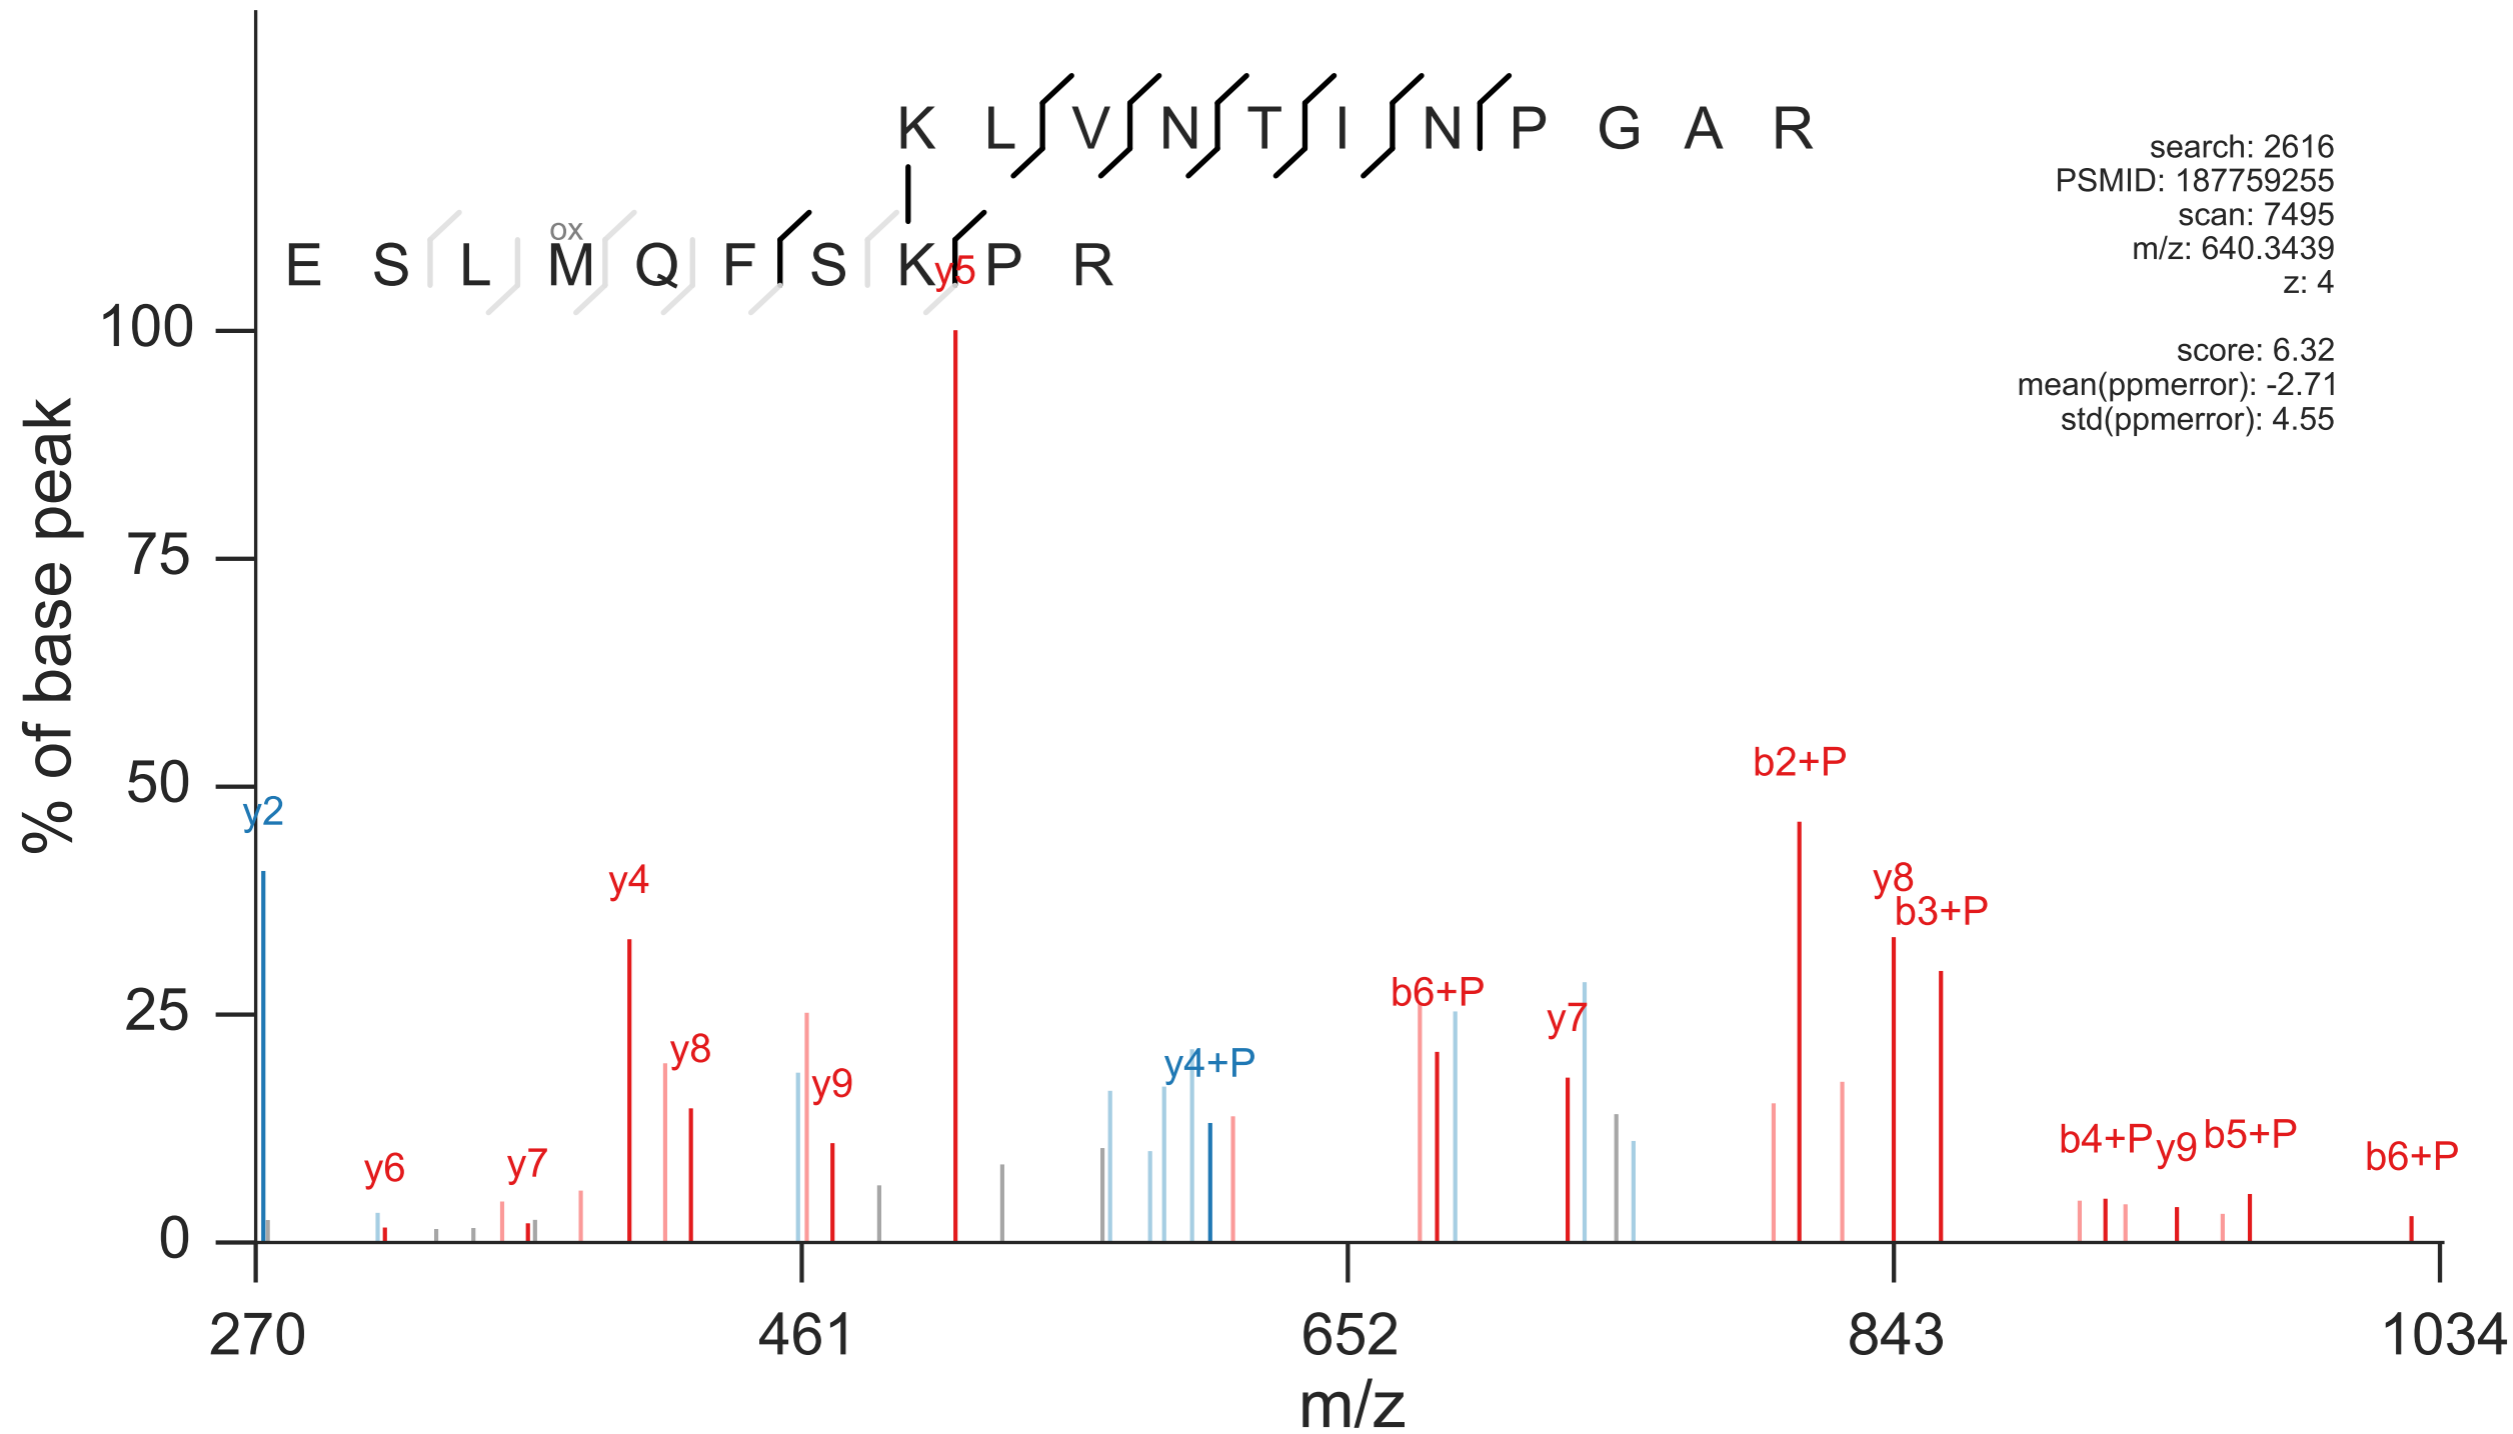

search: 2616  
 PSMID: 187759255  
 scan: 7495  
 m/z: 640.3439  
 z: 4  
 score: 6.32  
 mean(ppmerror): -2.71  
 std(ppmerror): 4.55

E S L M<sup>ox</sup> Q F S K P R  
 K L V N T I N P G A R

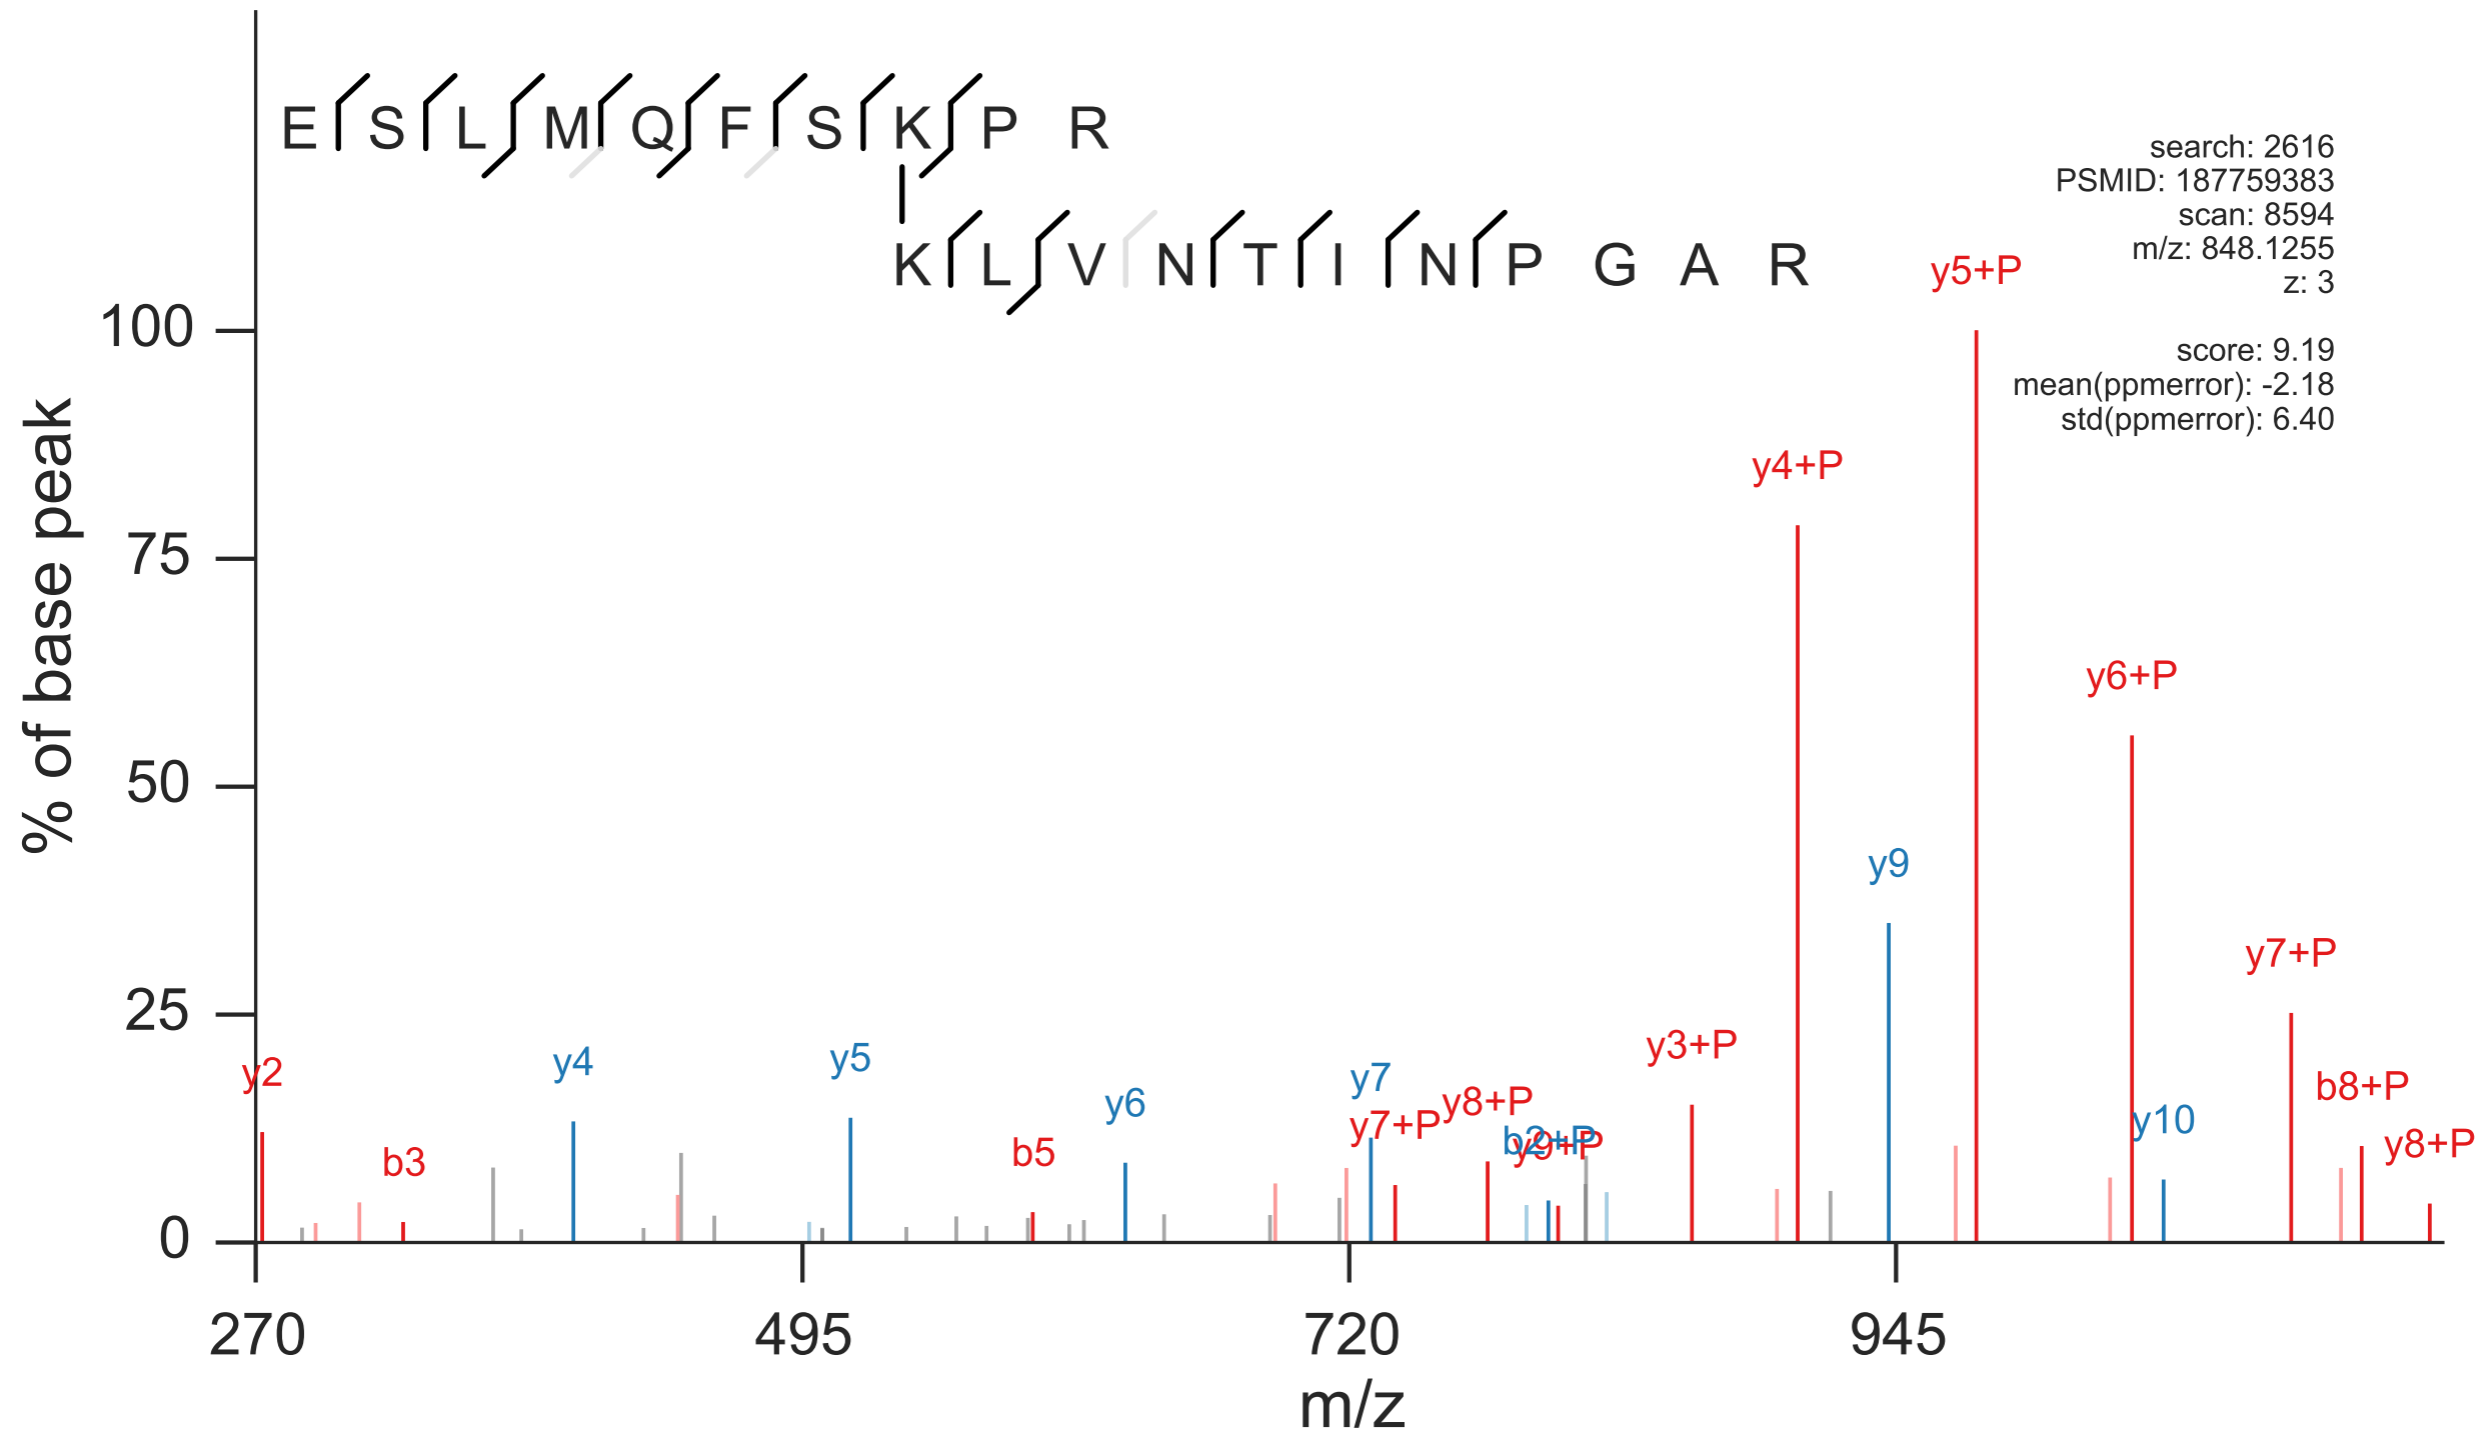

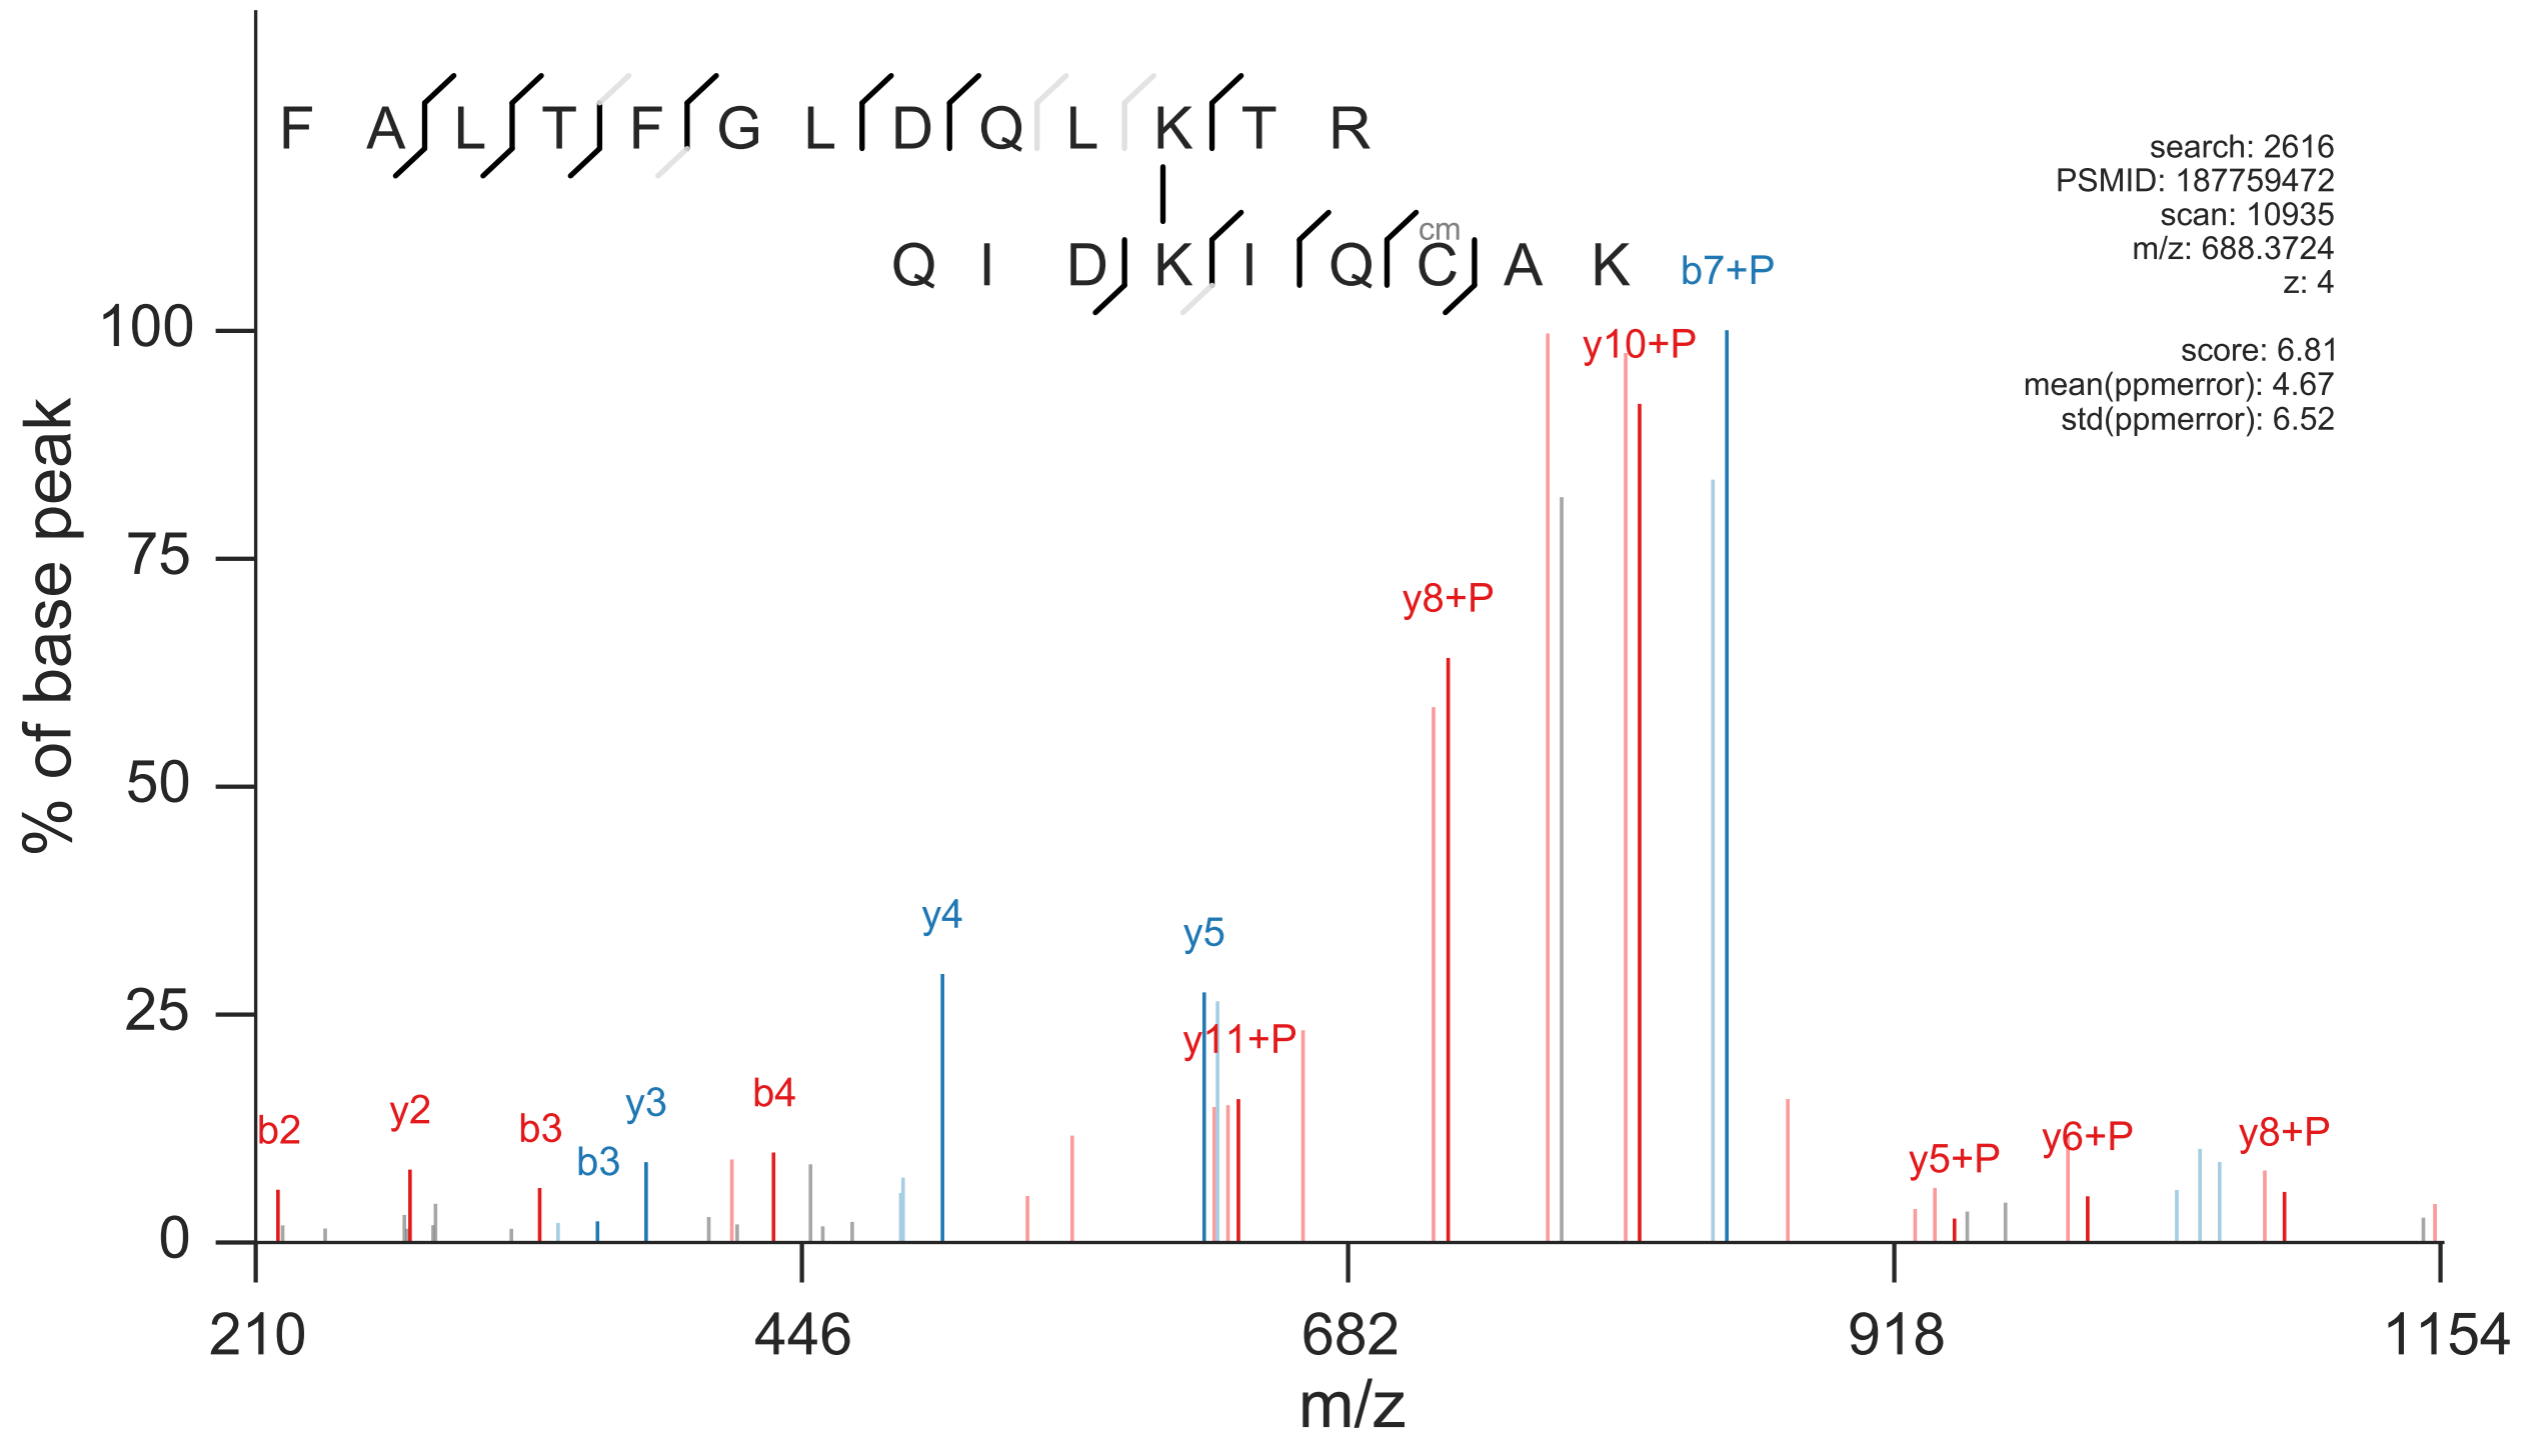

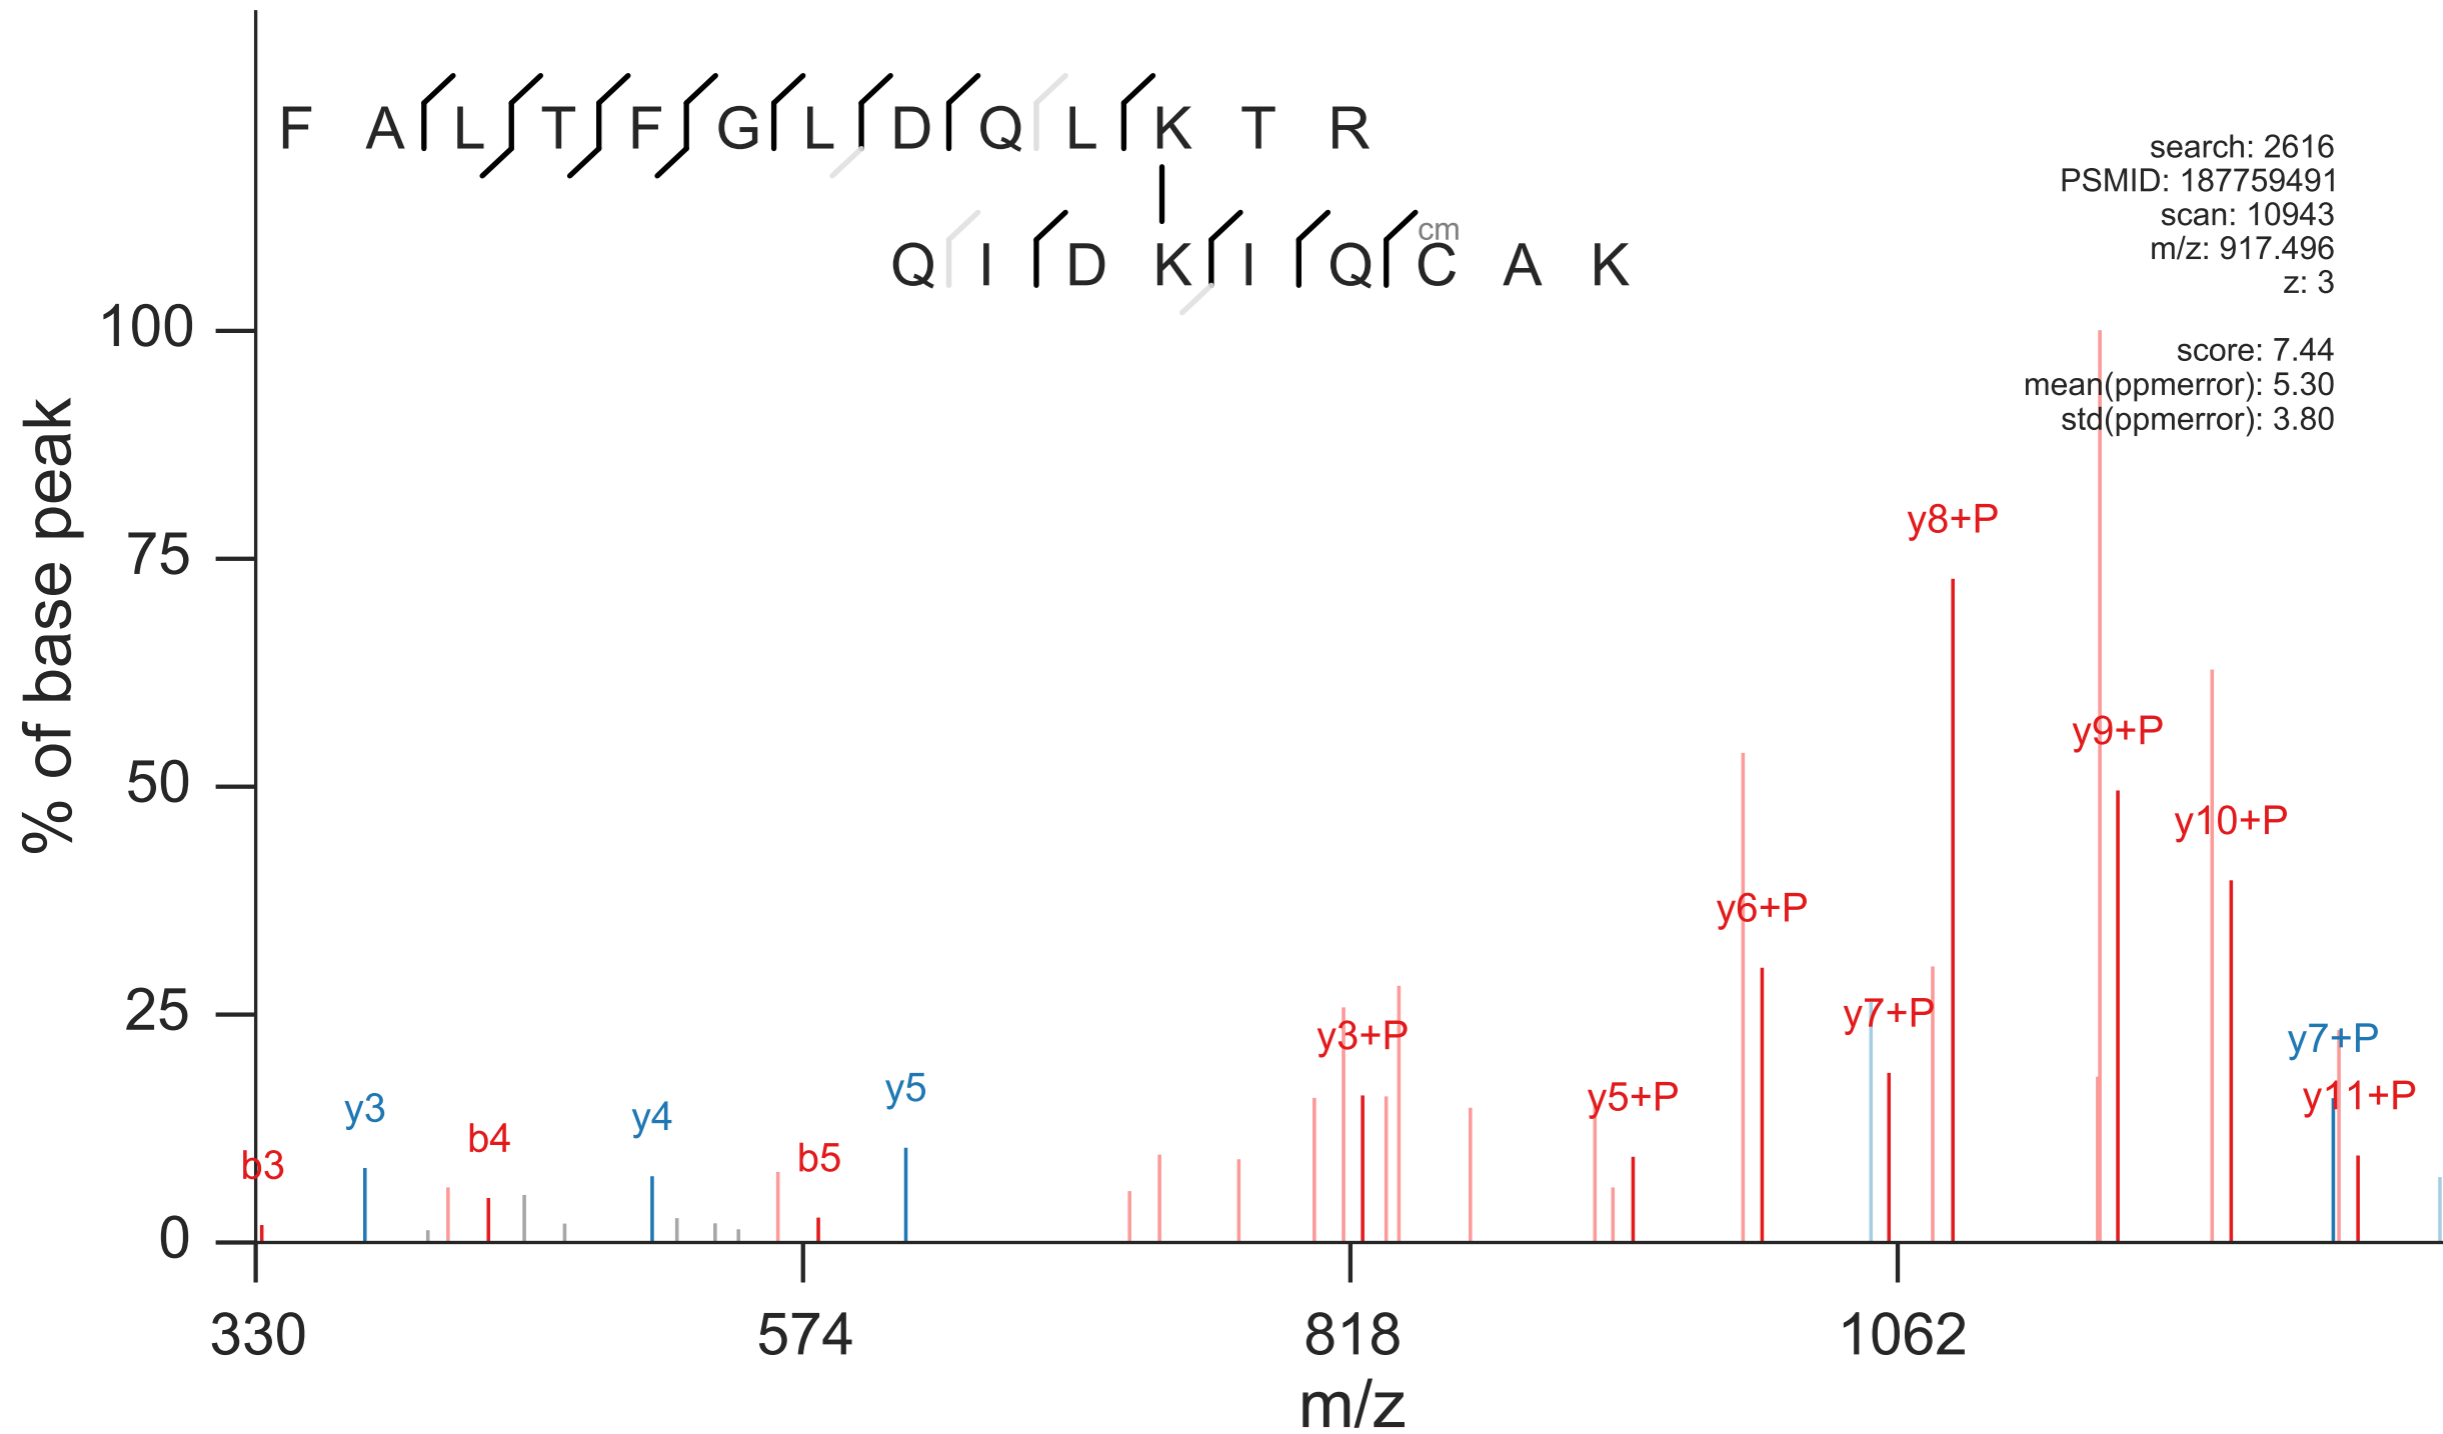

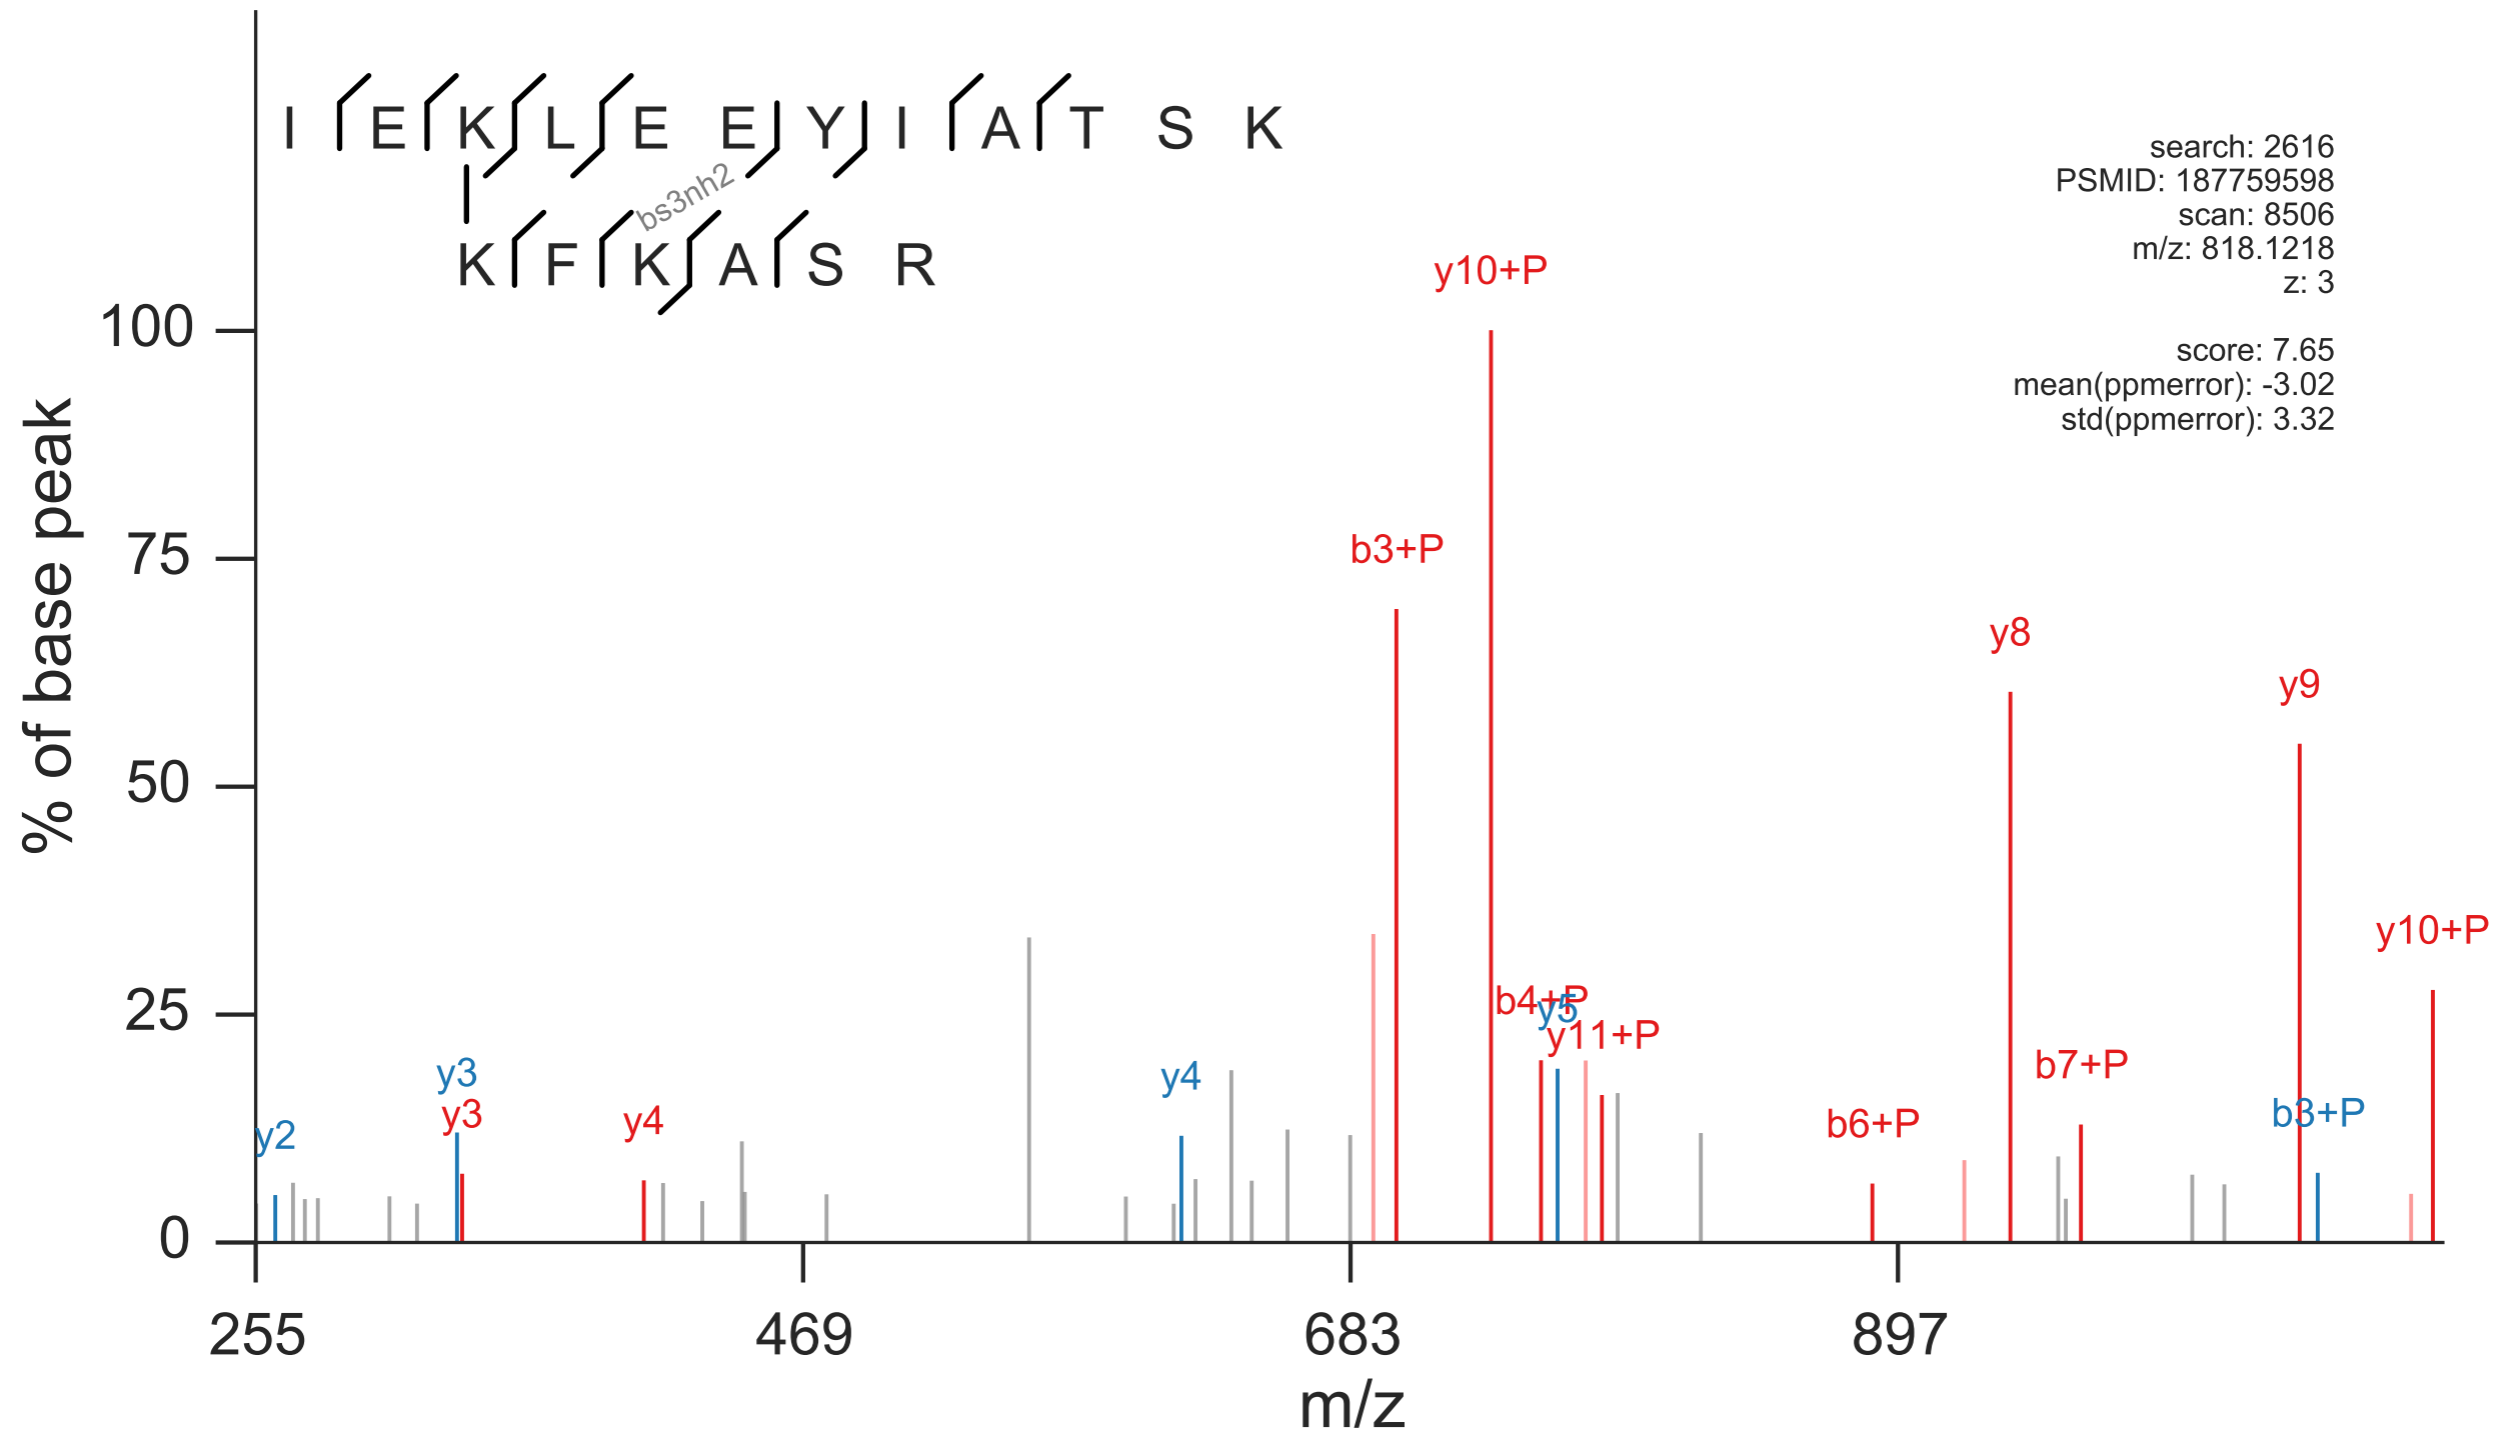



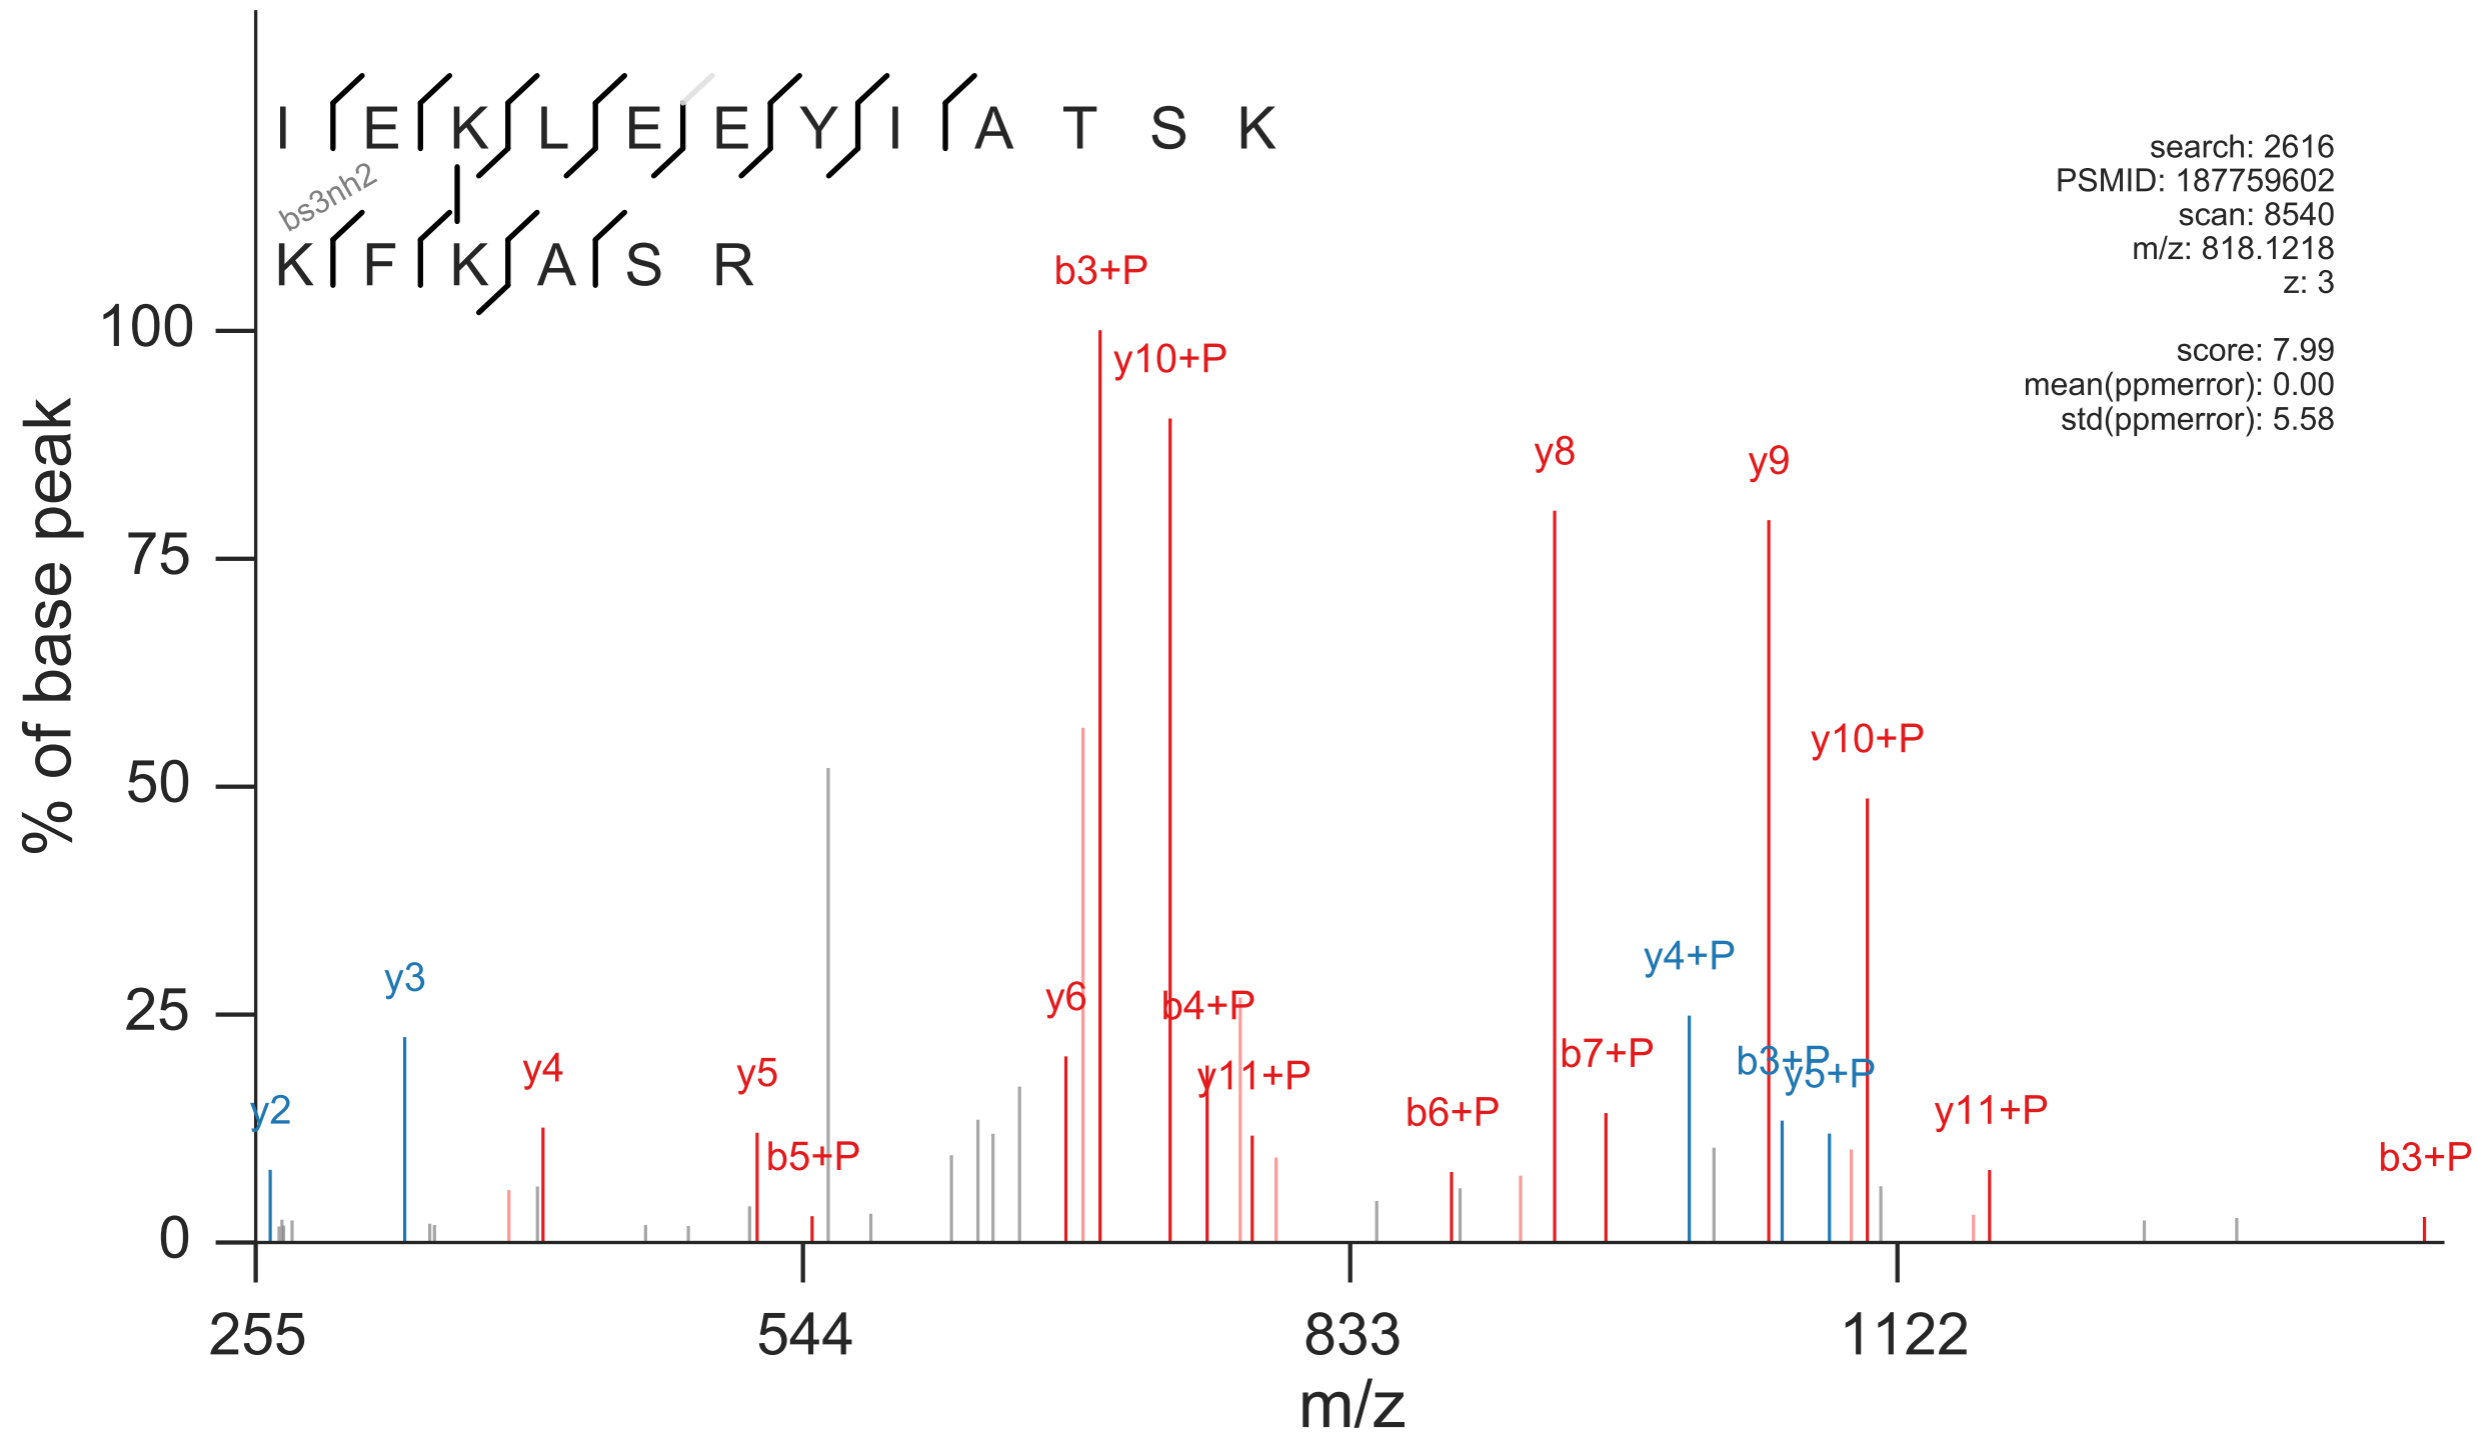

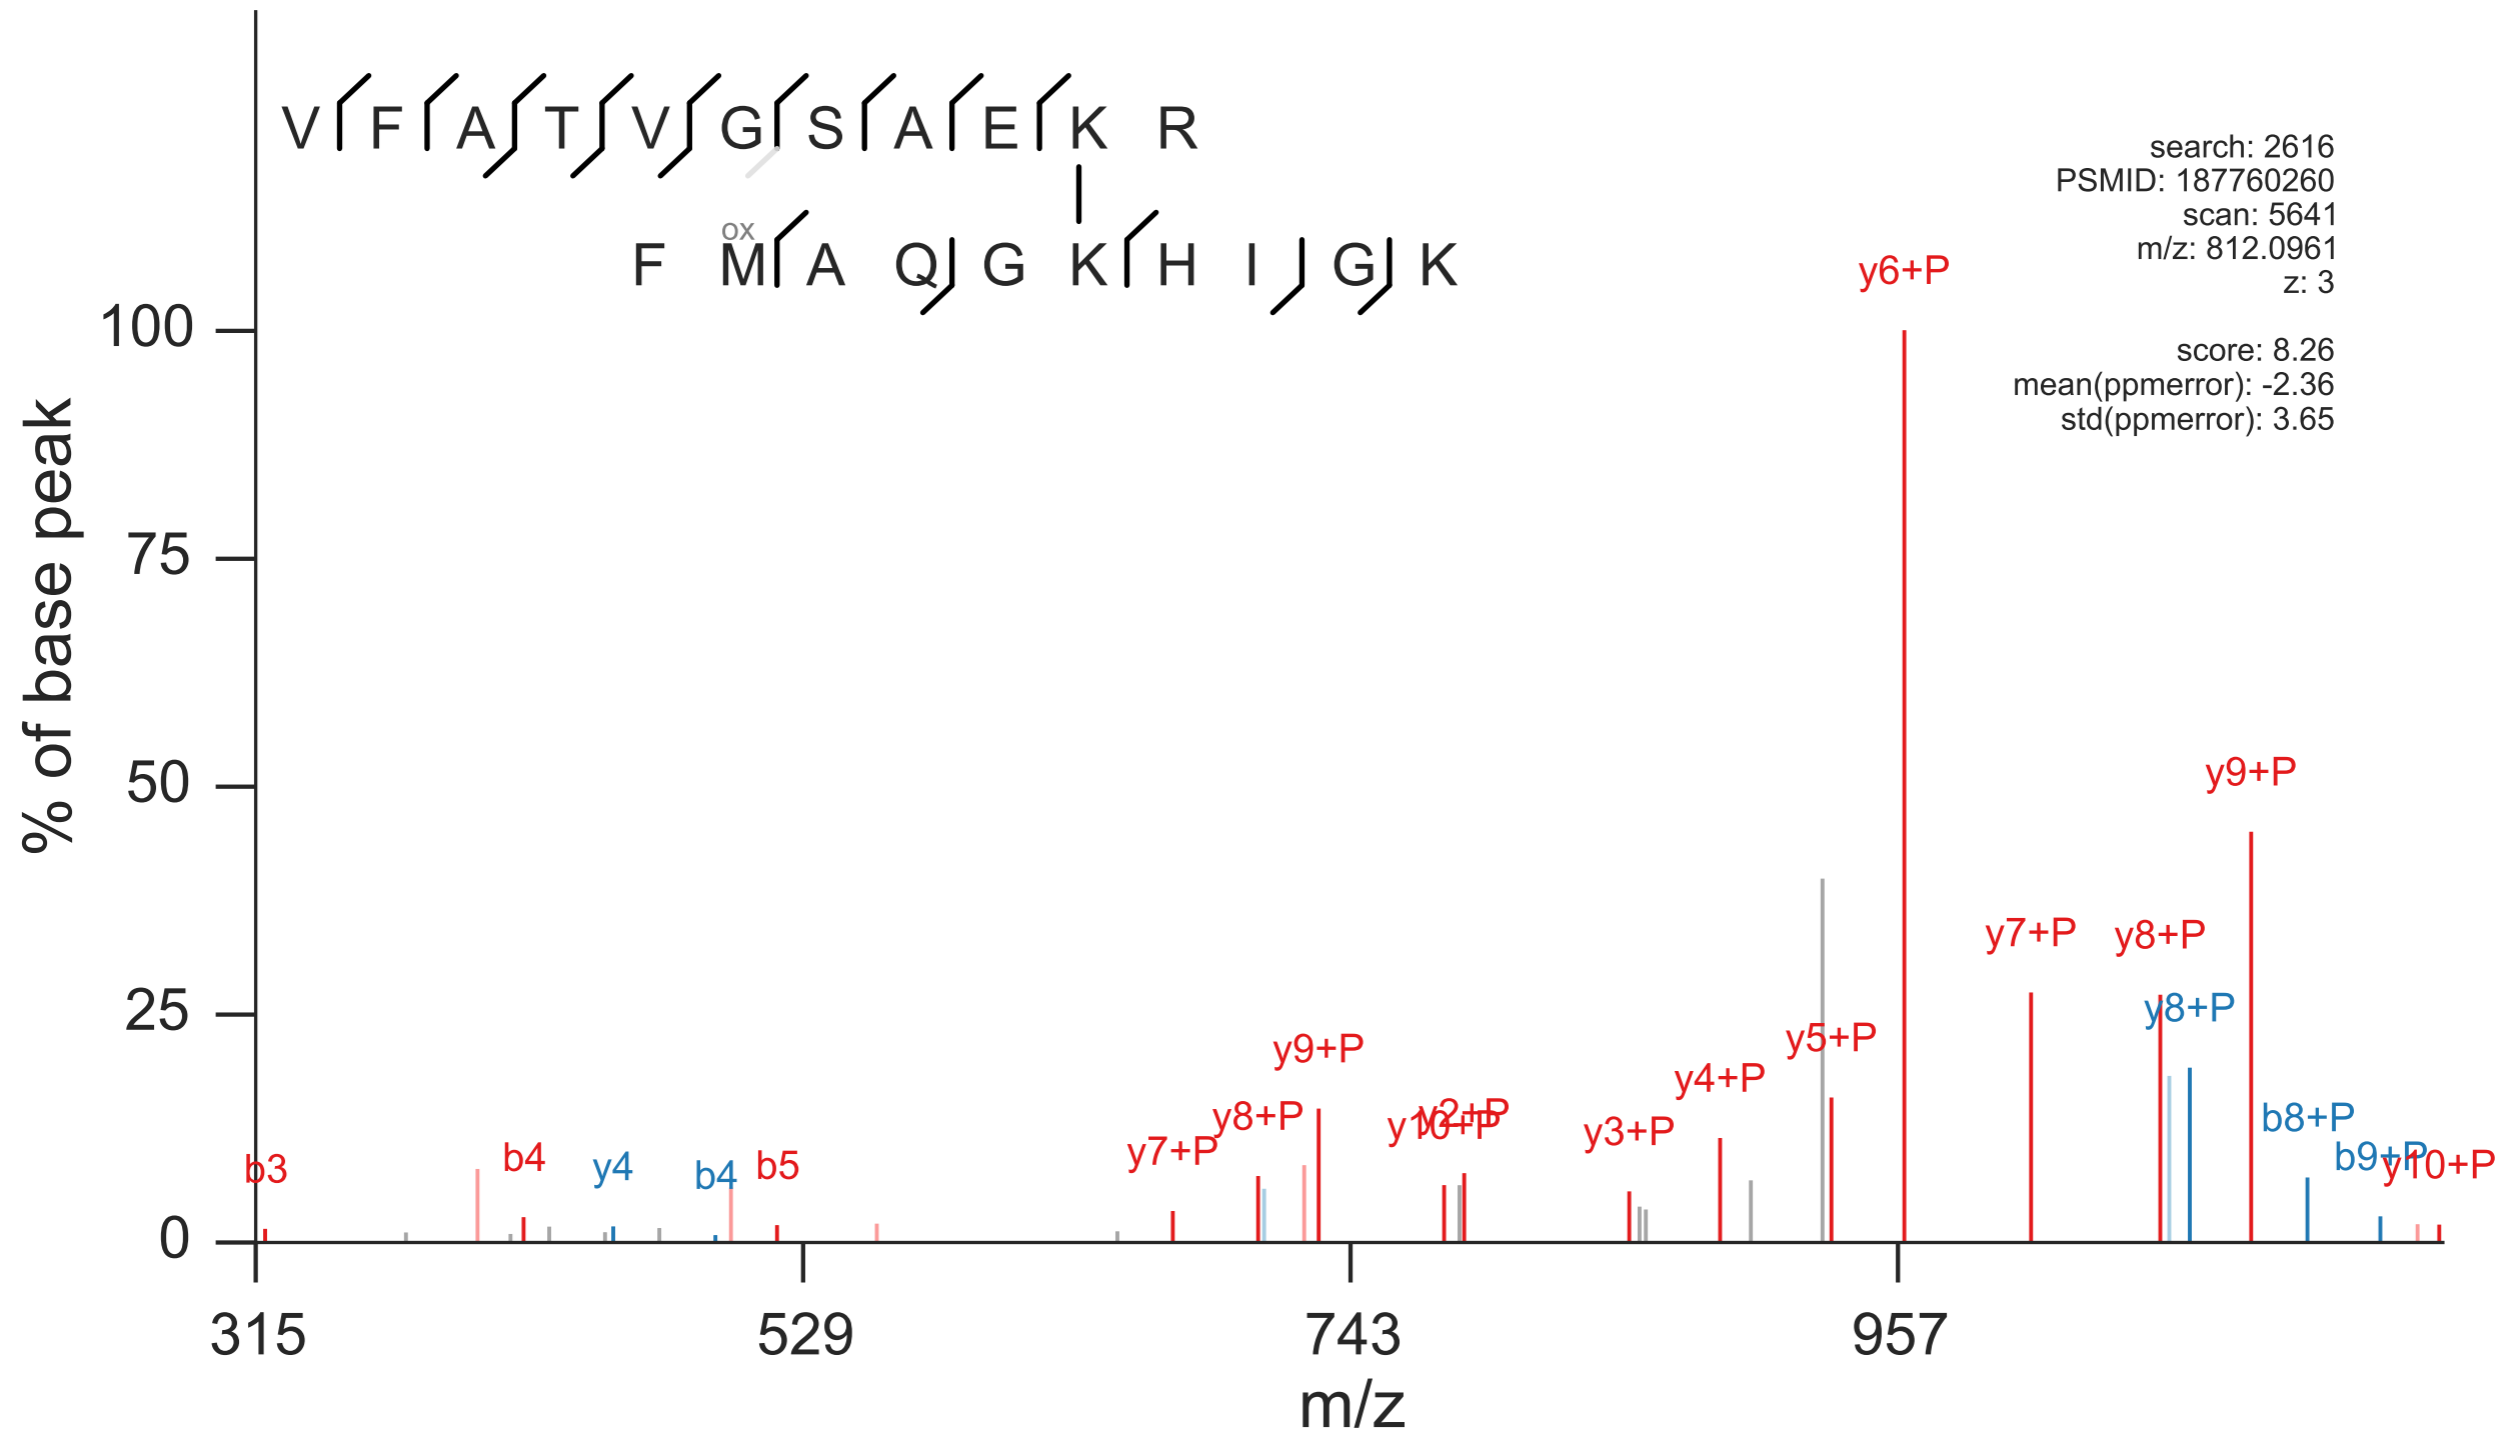

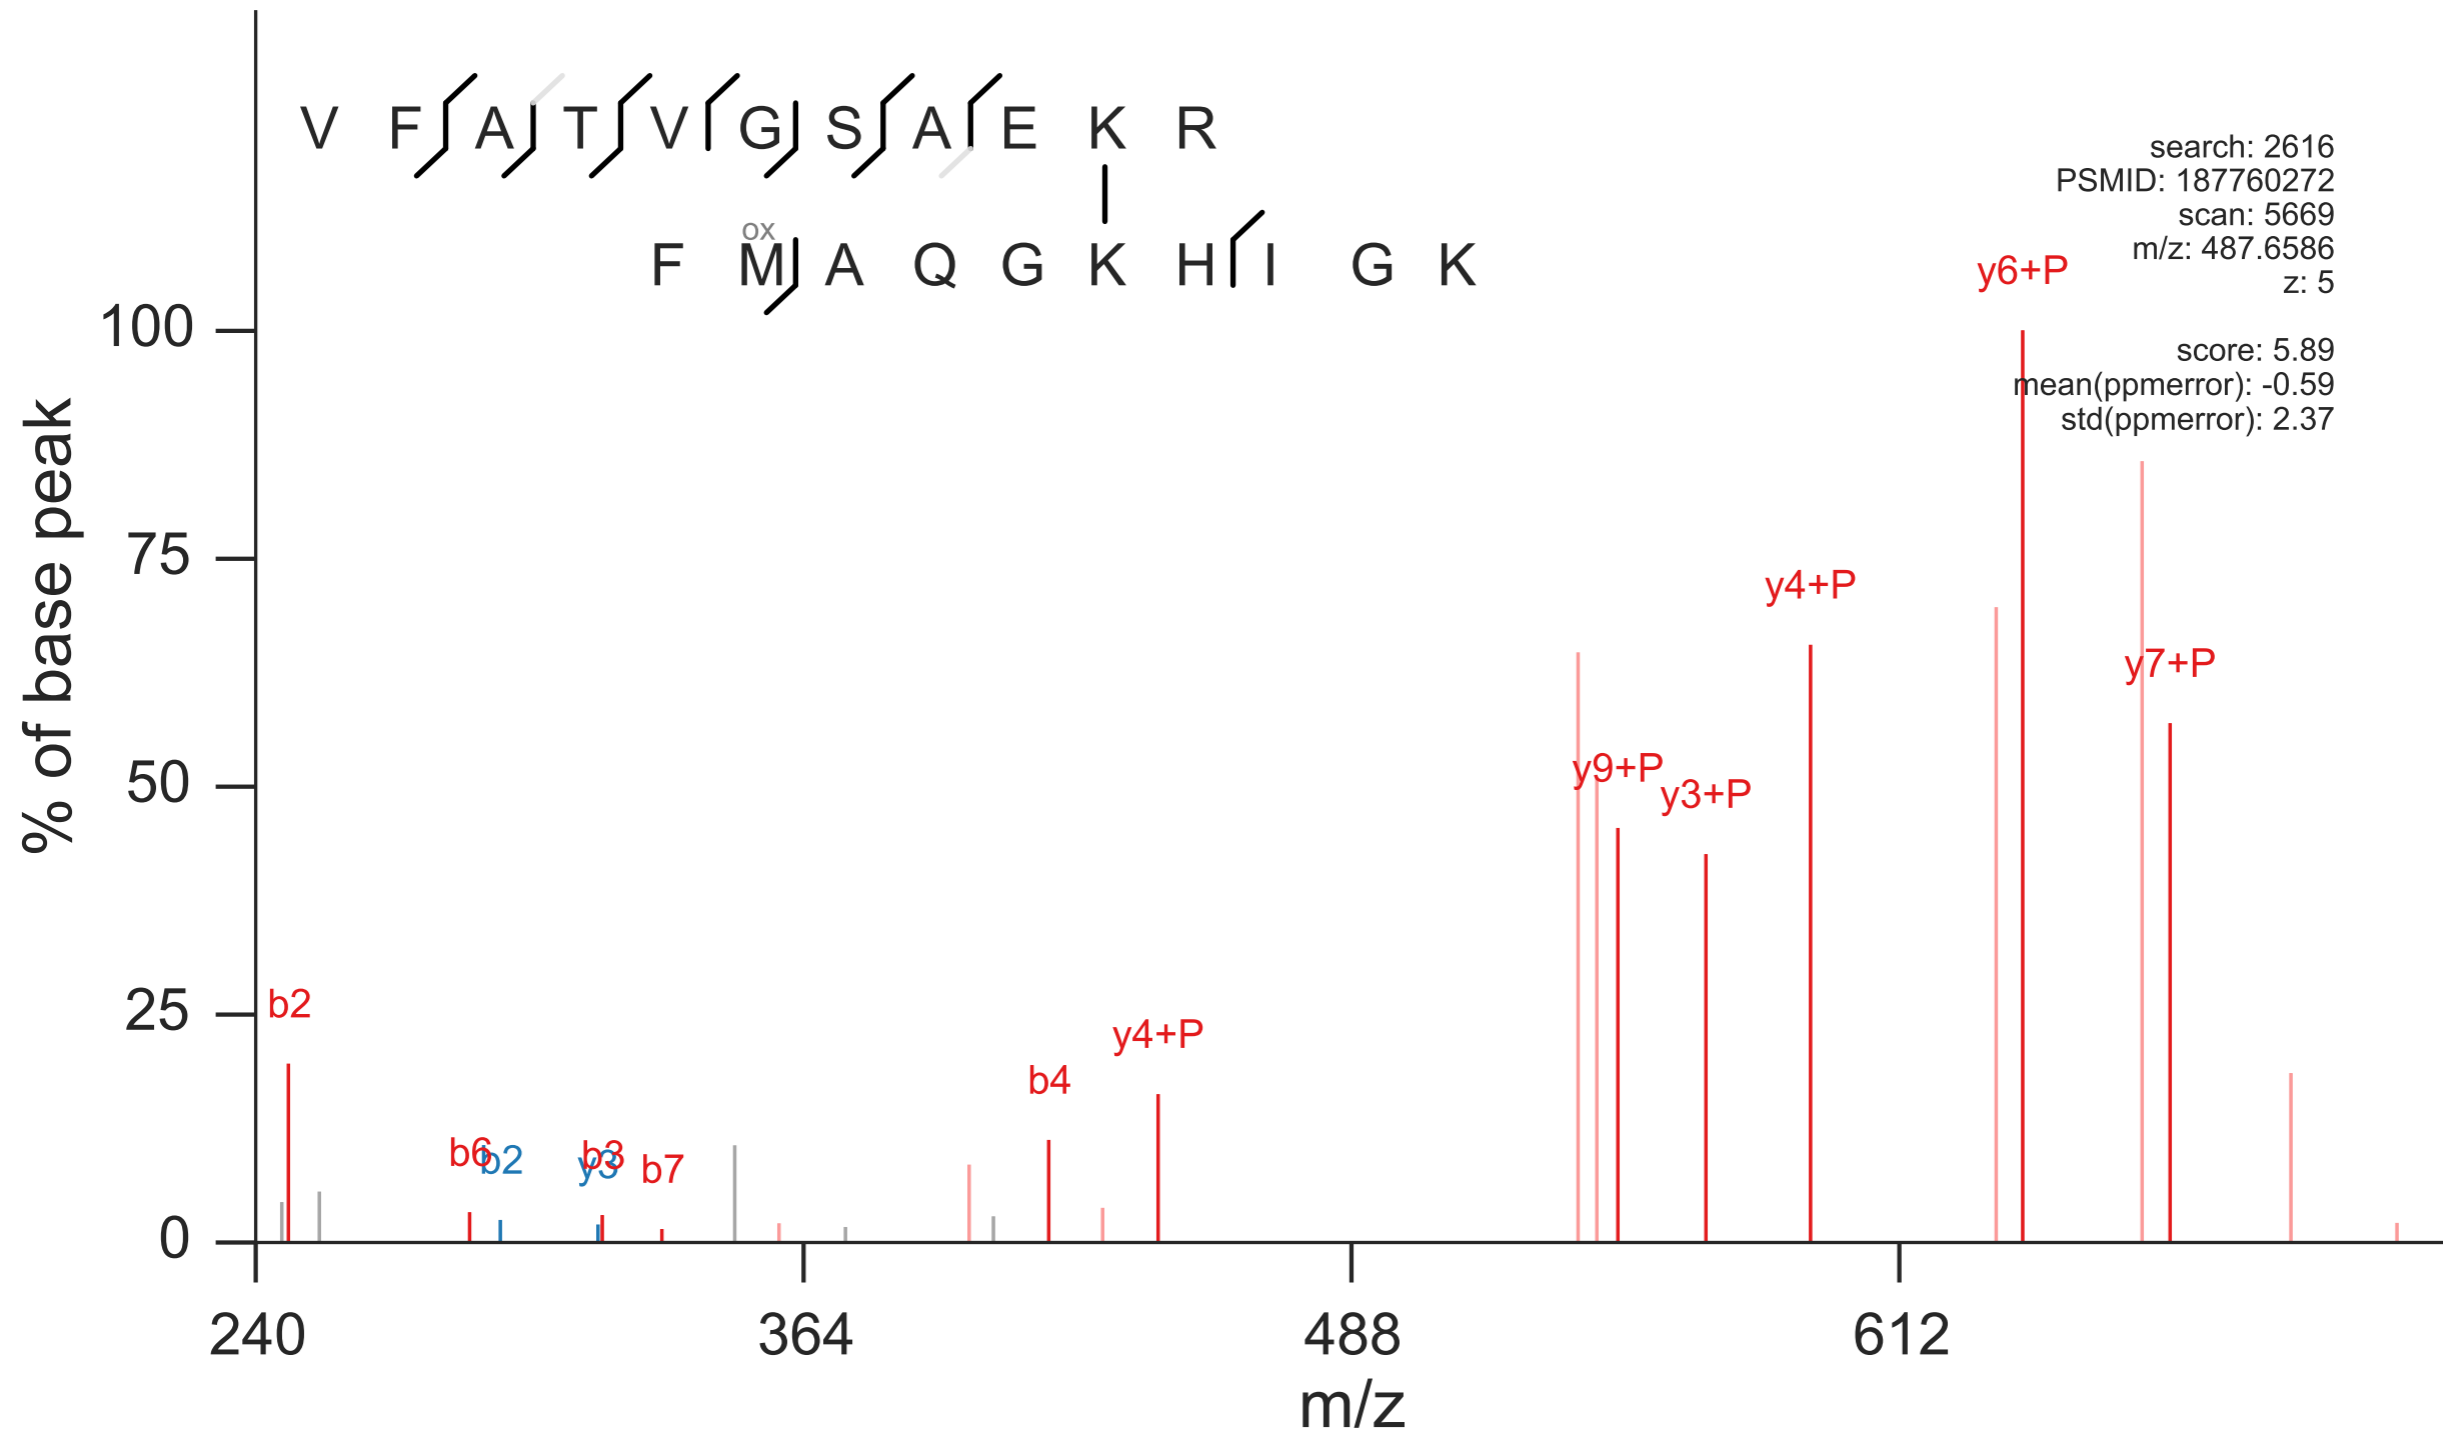

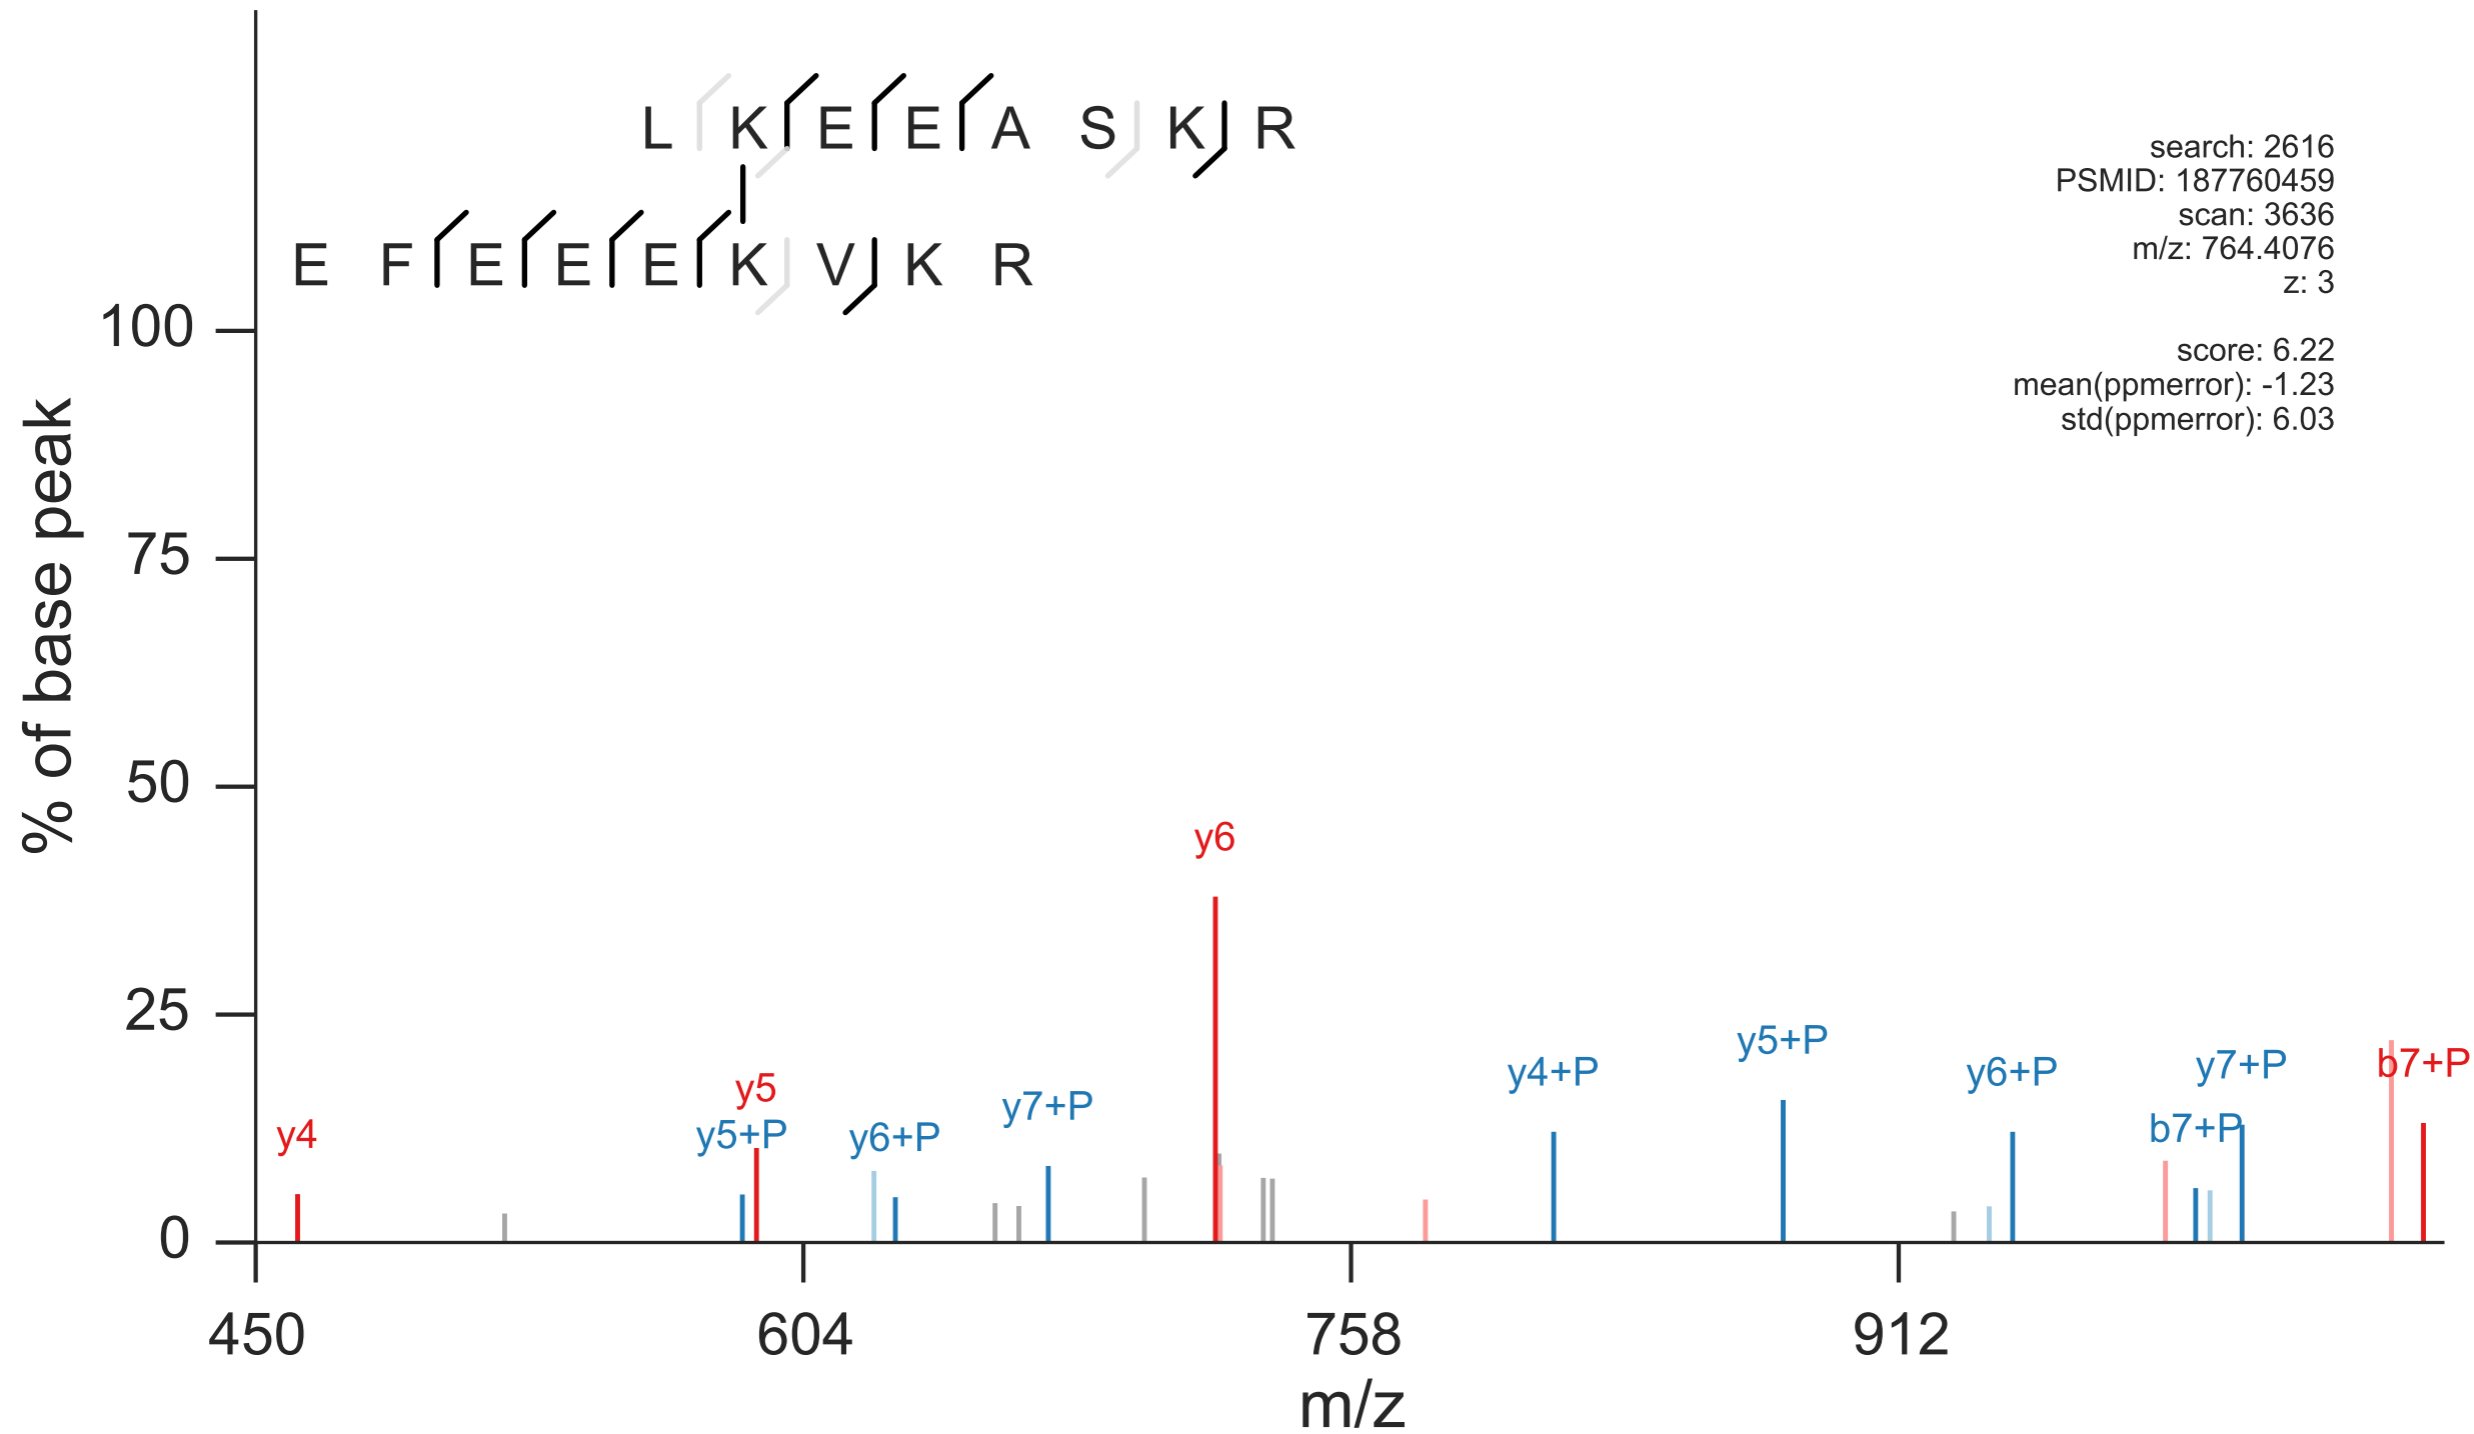

search: 2616  
PSMID: 187760459  
scan: 3636  
m/z: 764.4076  
z: 3  
score: 6.22  
mean(ppmerror): -1.23  
std(ppmerror): 6.03

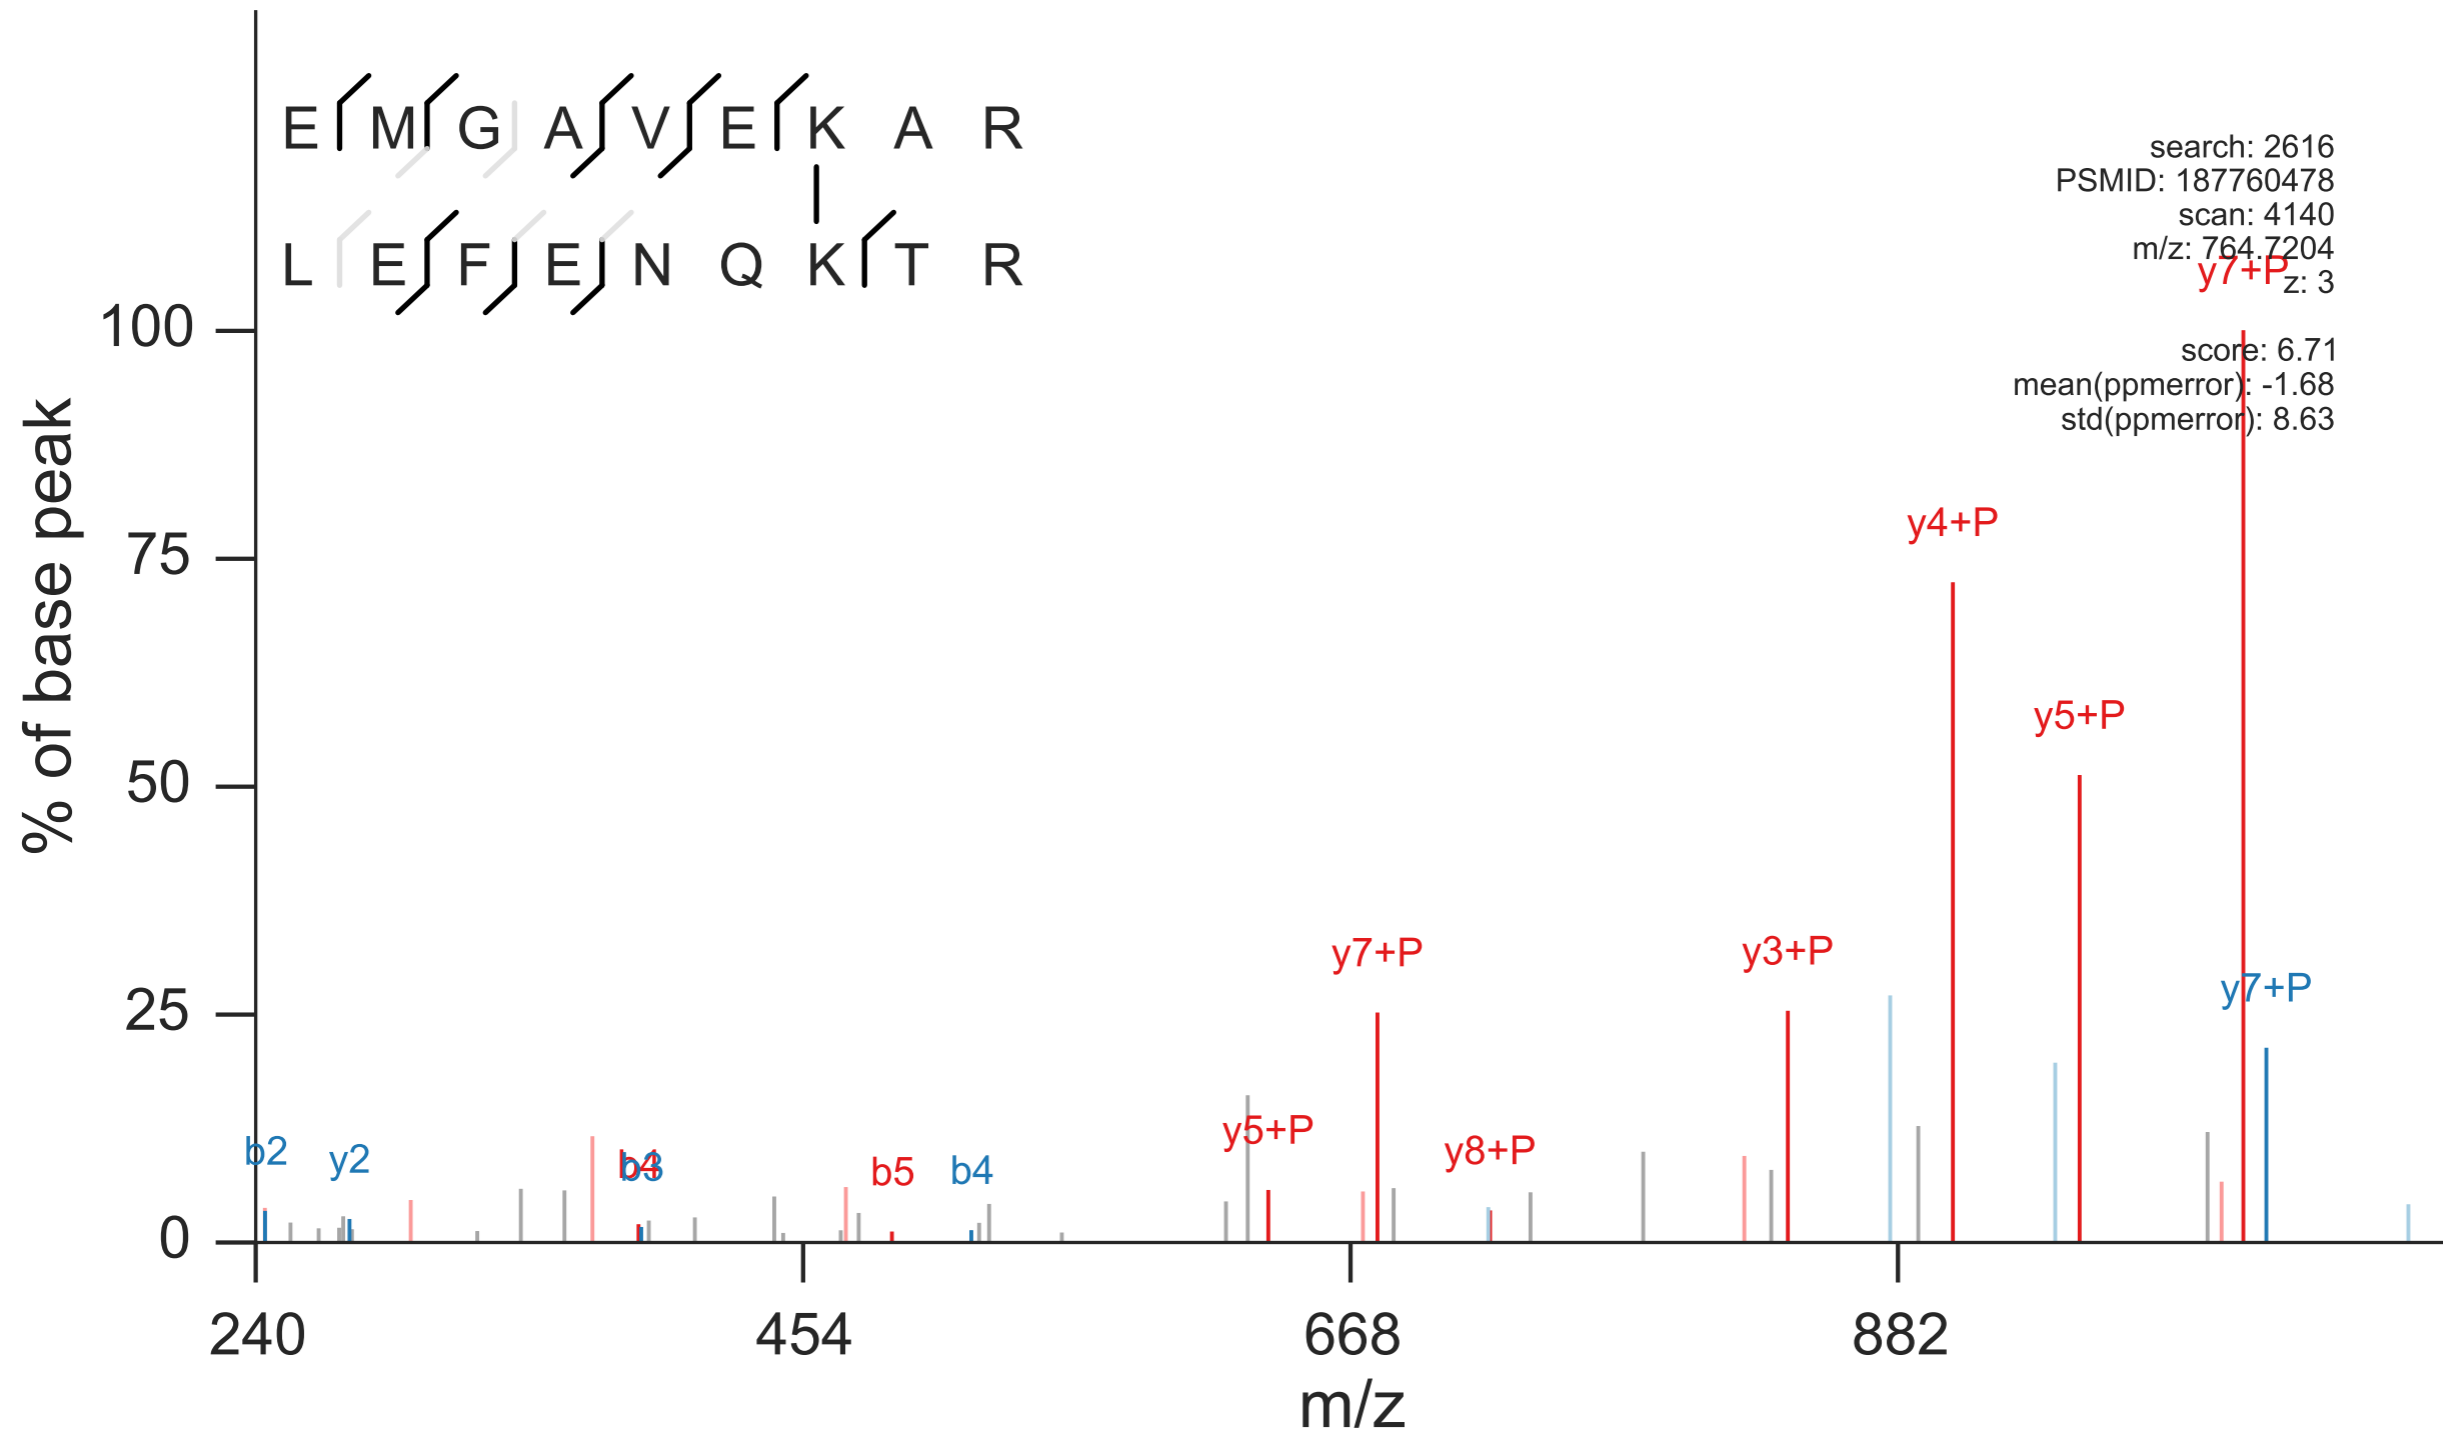

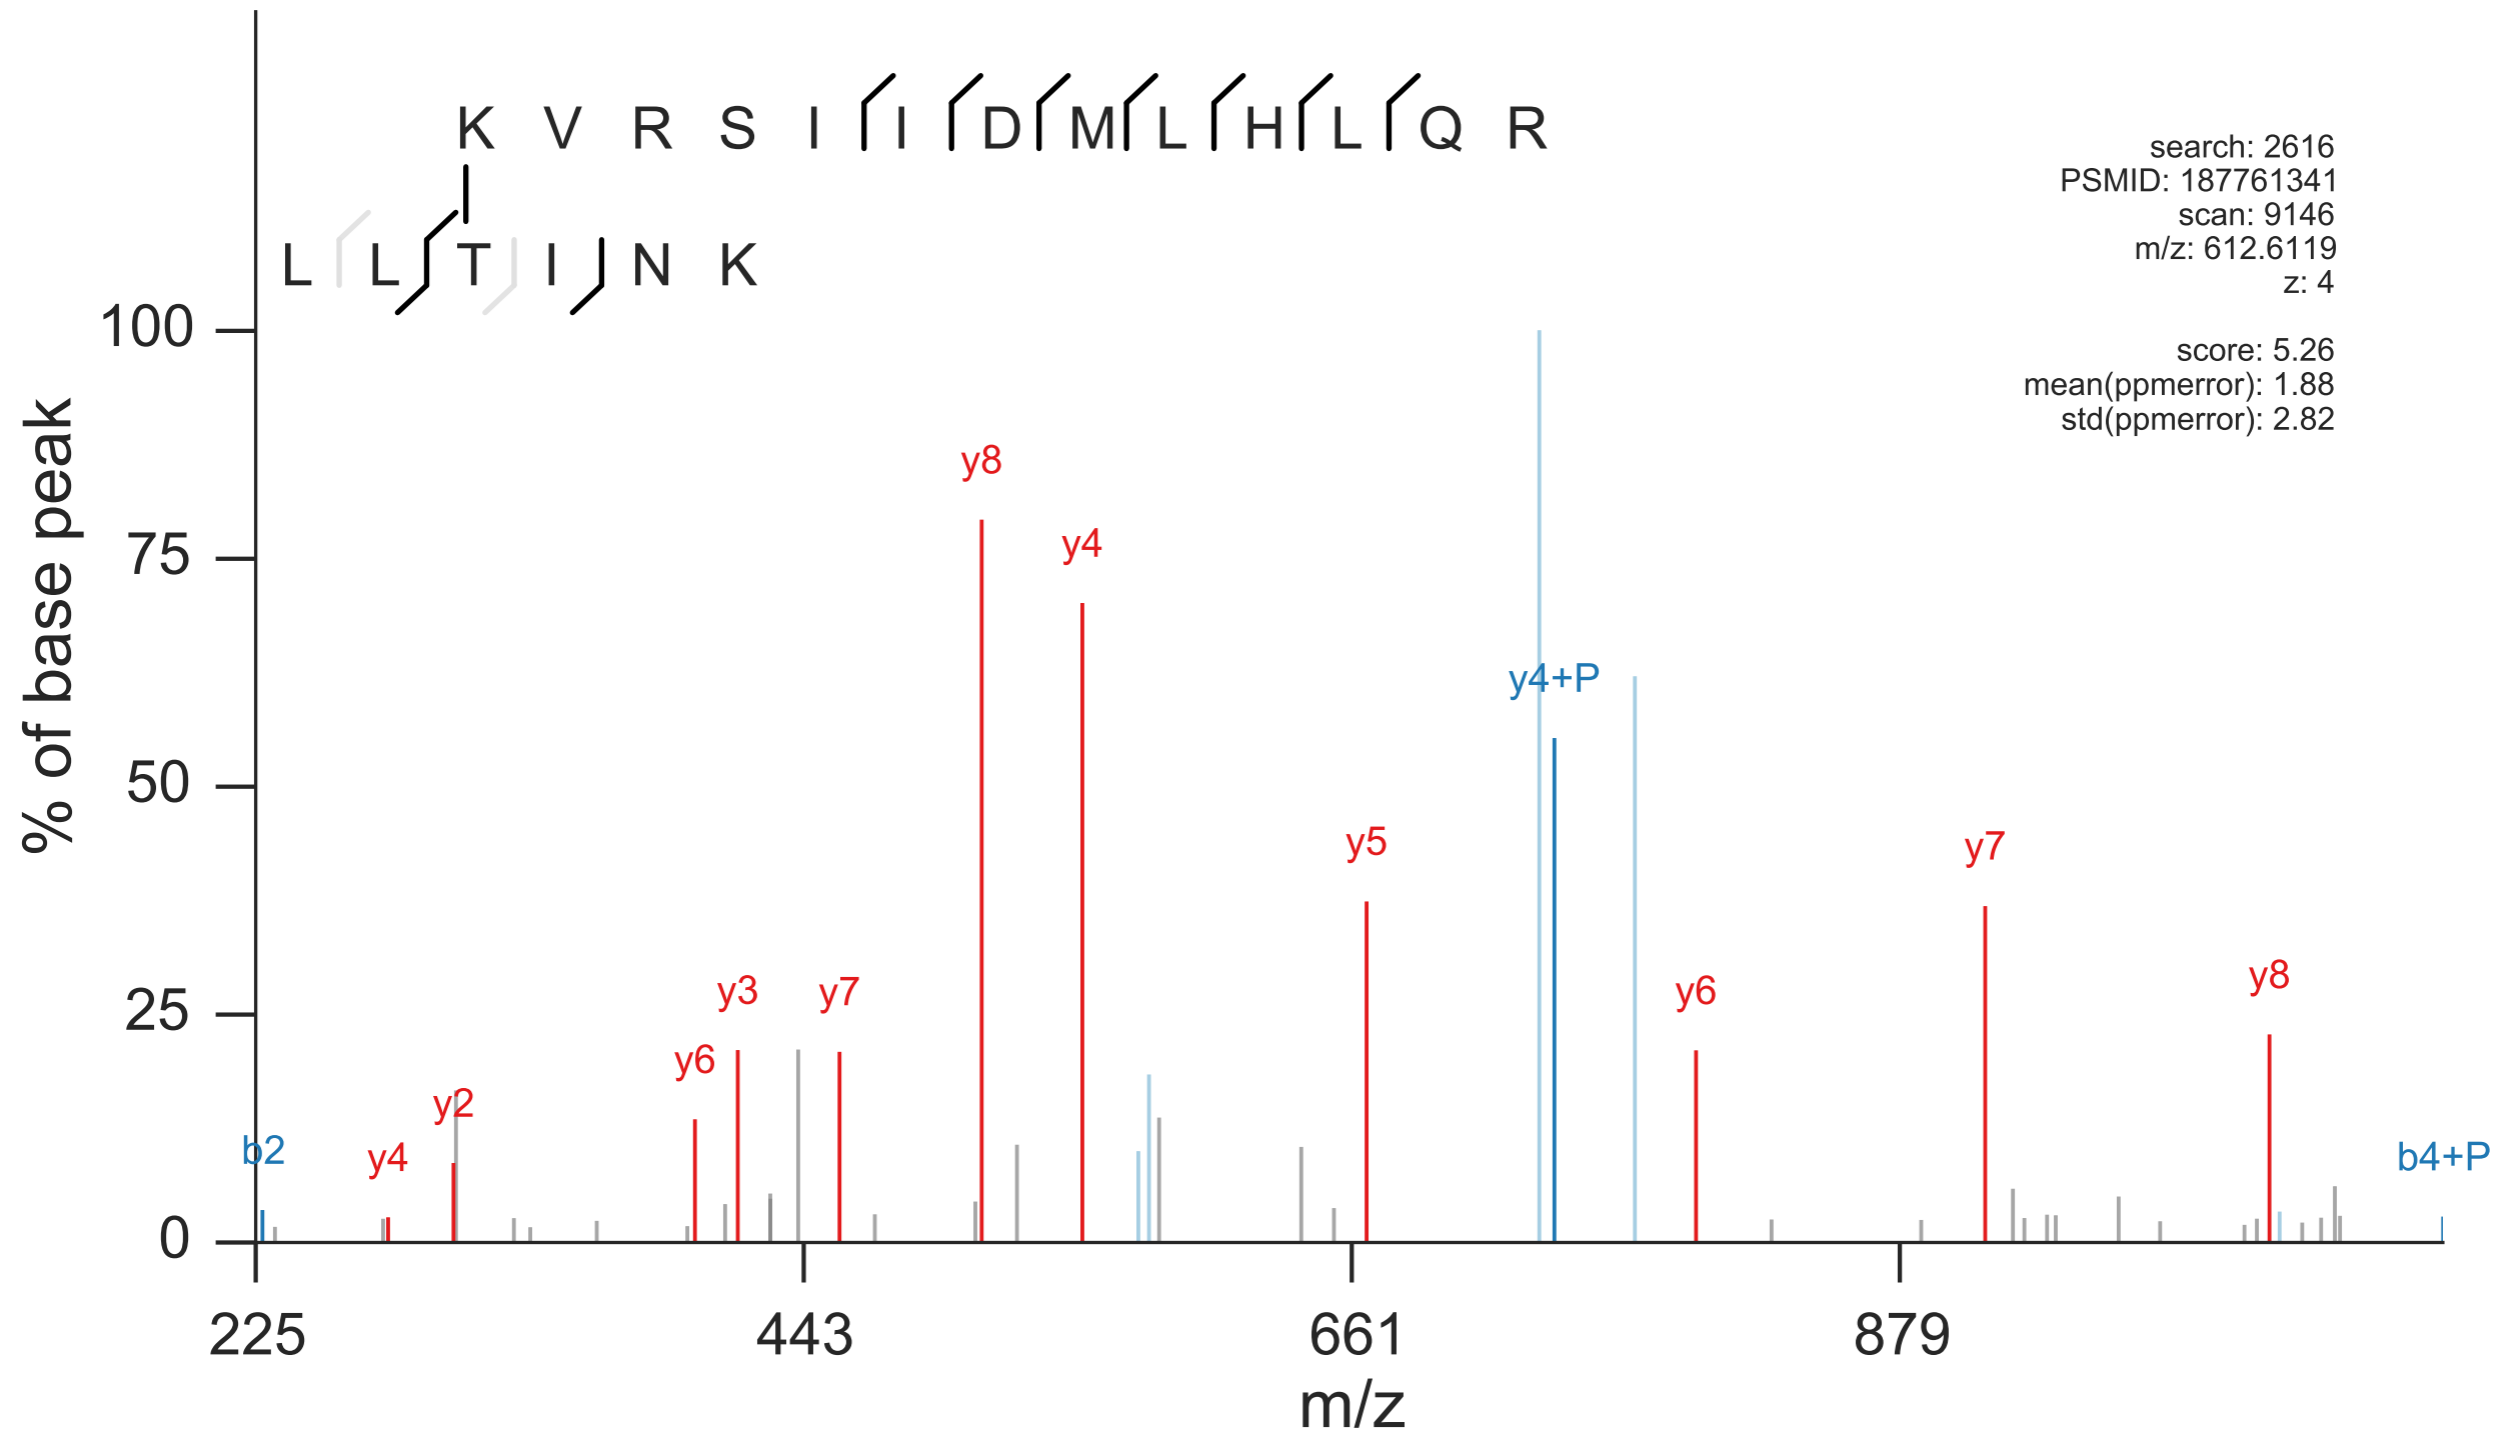

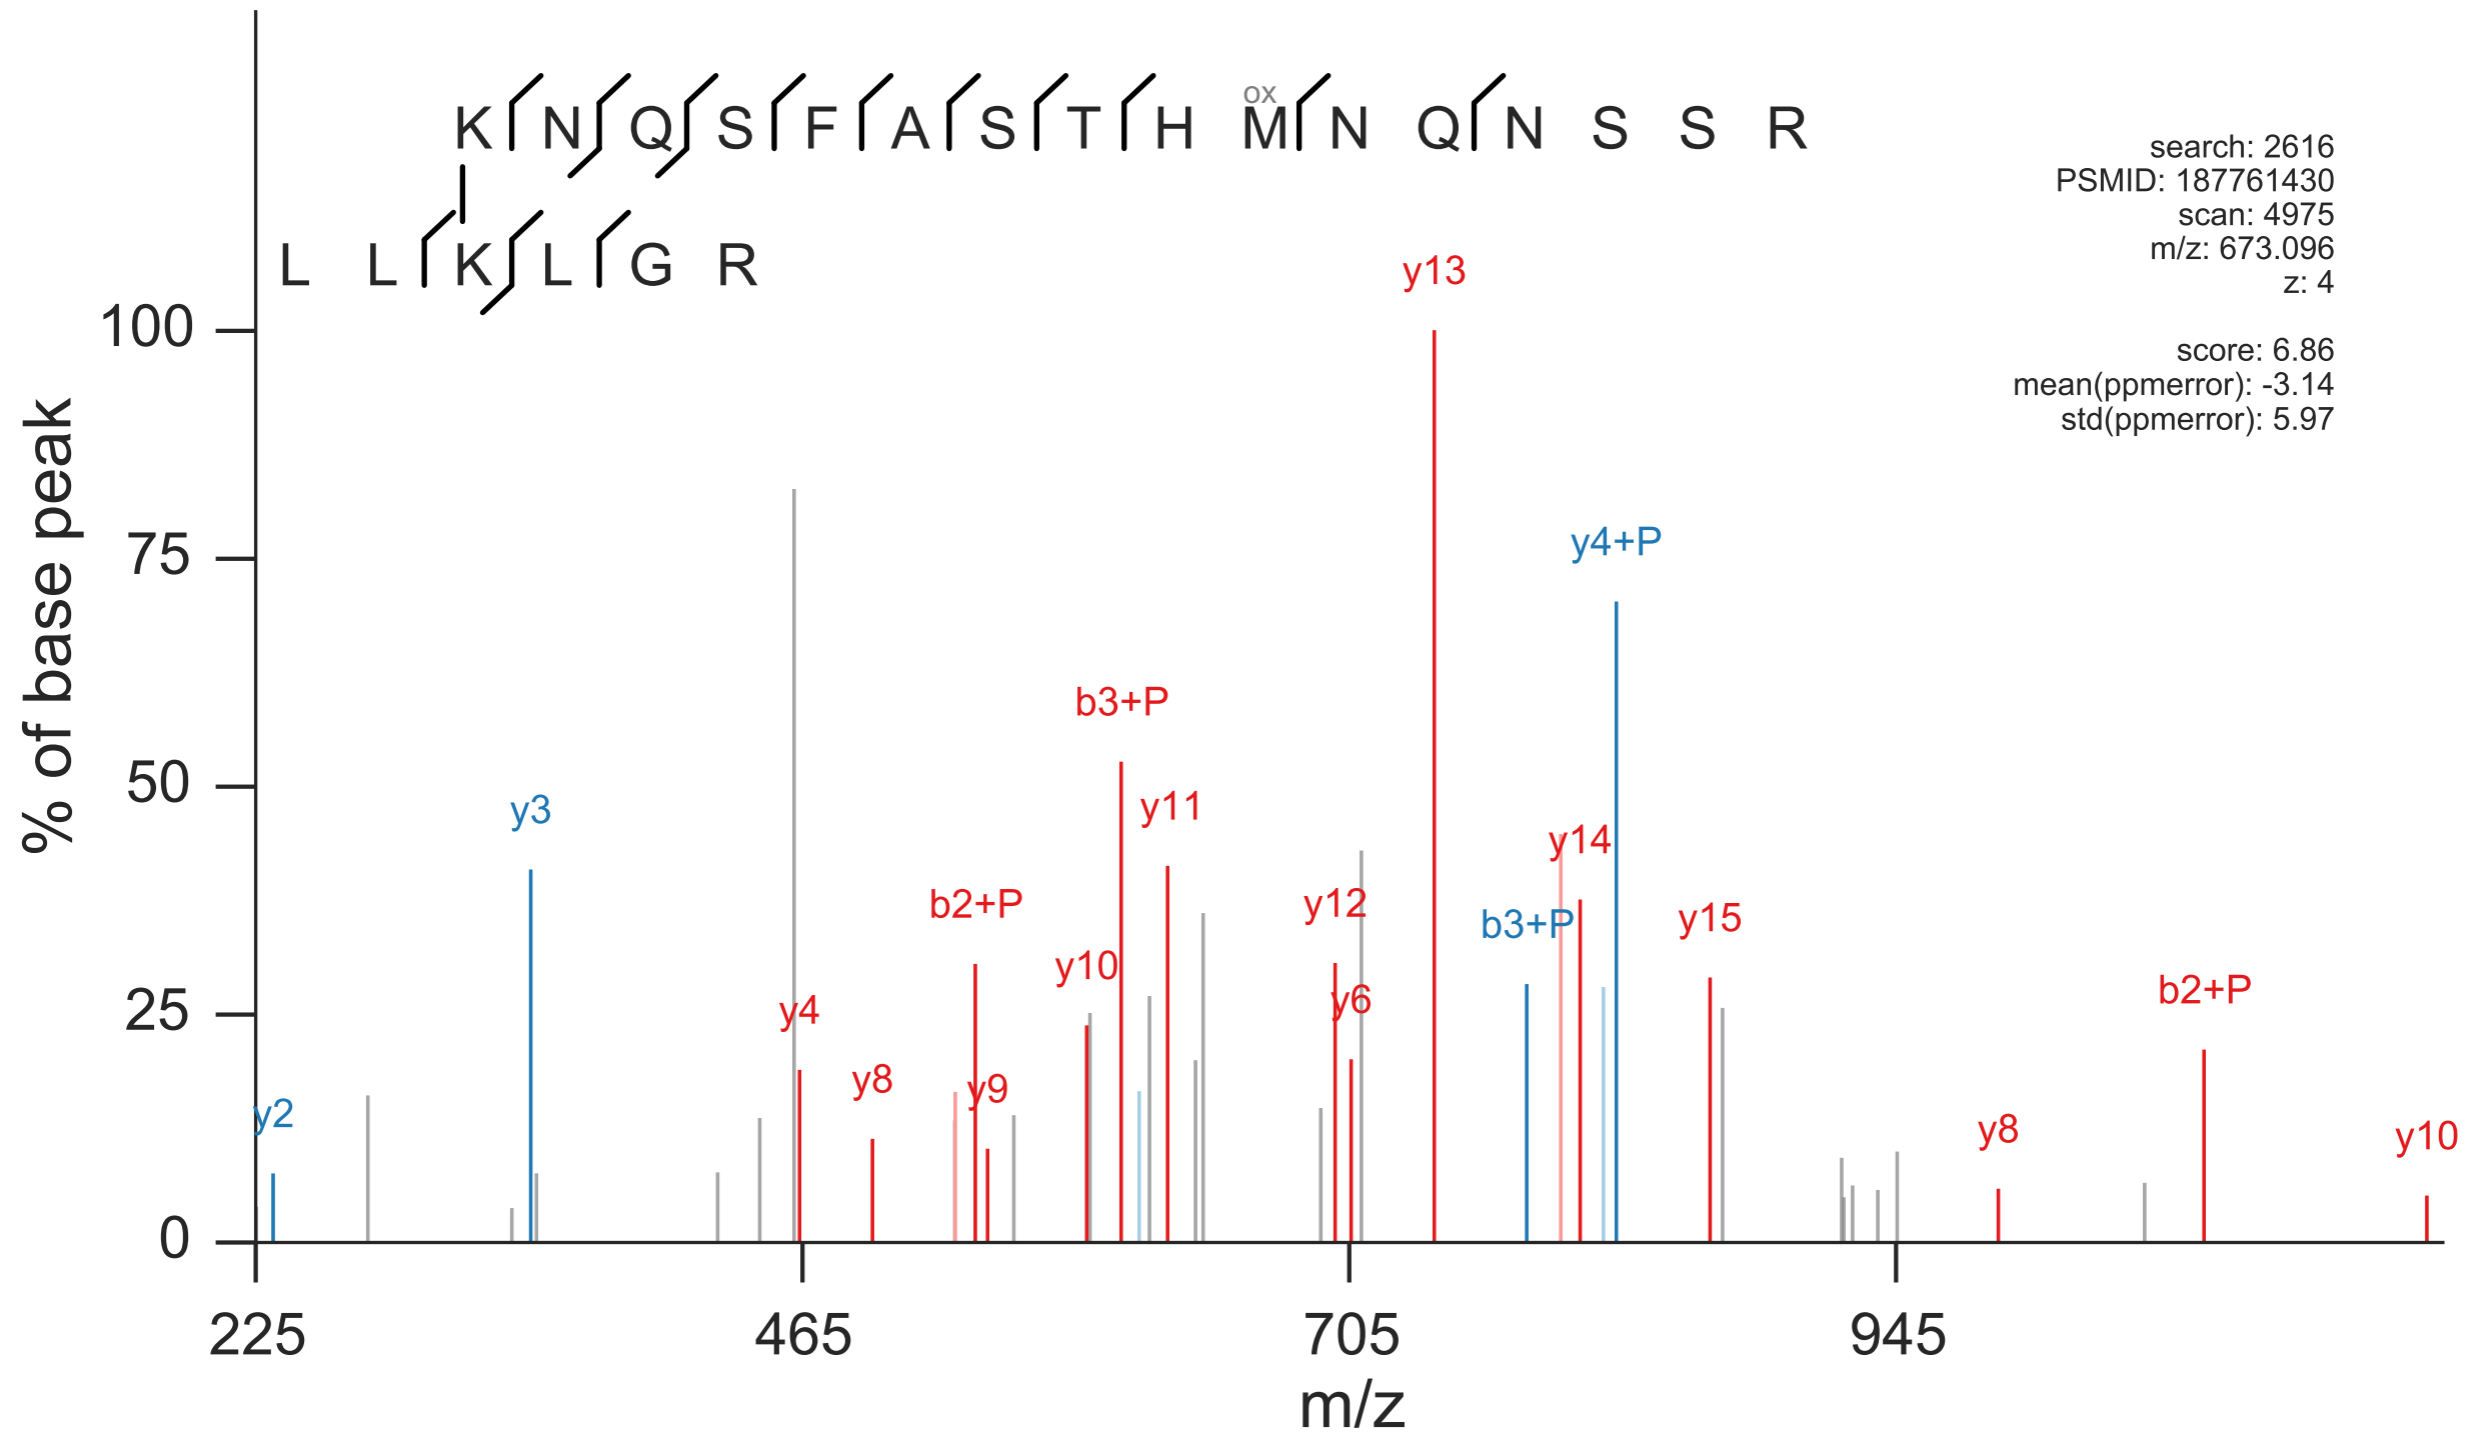

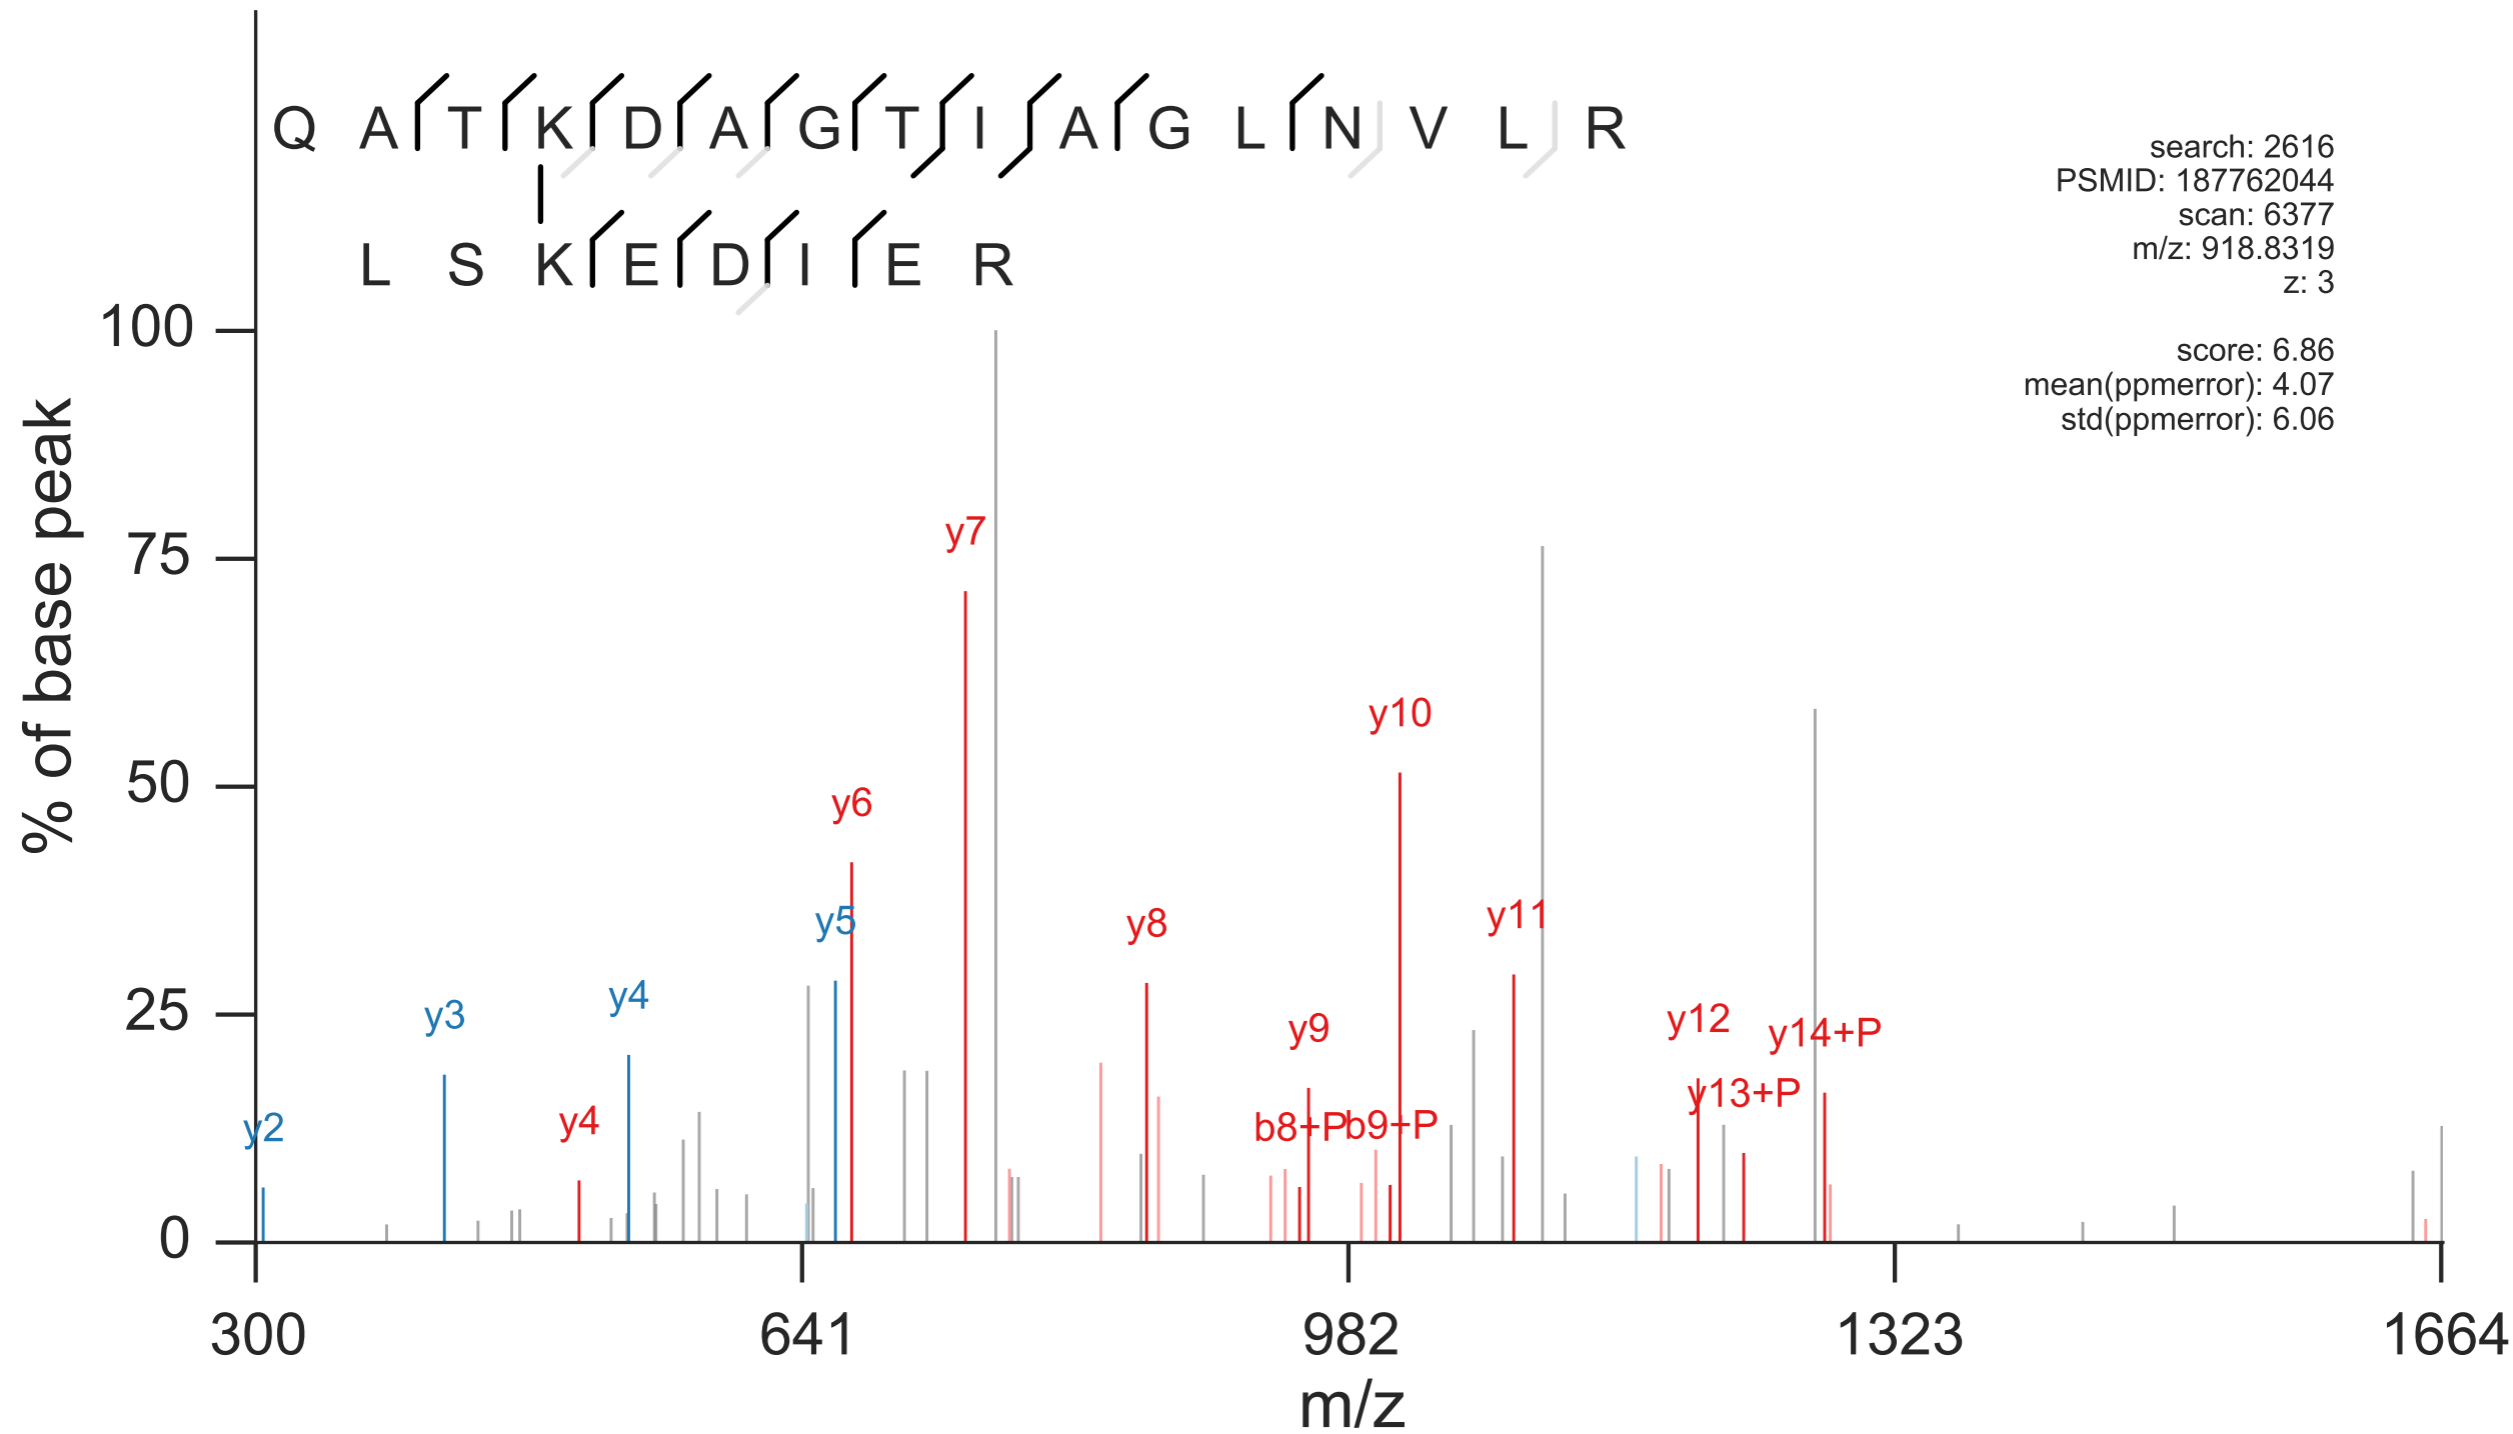



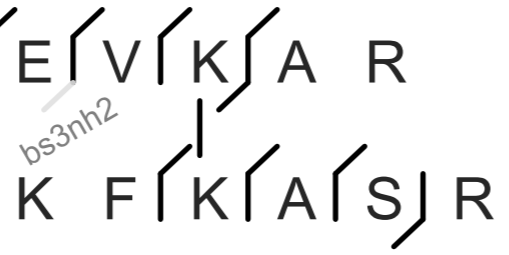

search: 2616  
 PSMID: 187762190  
 scan: 4512  
 m/z: 777.0948  
 z: 3  
  
 score: 8.58  
 mean(ppmerror): -5.64  
 std(ppmerror): 4.04

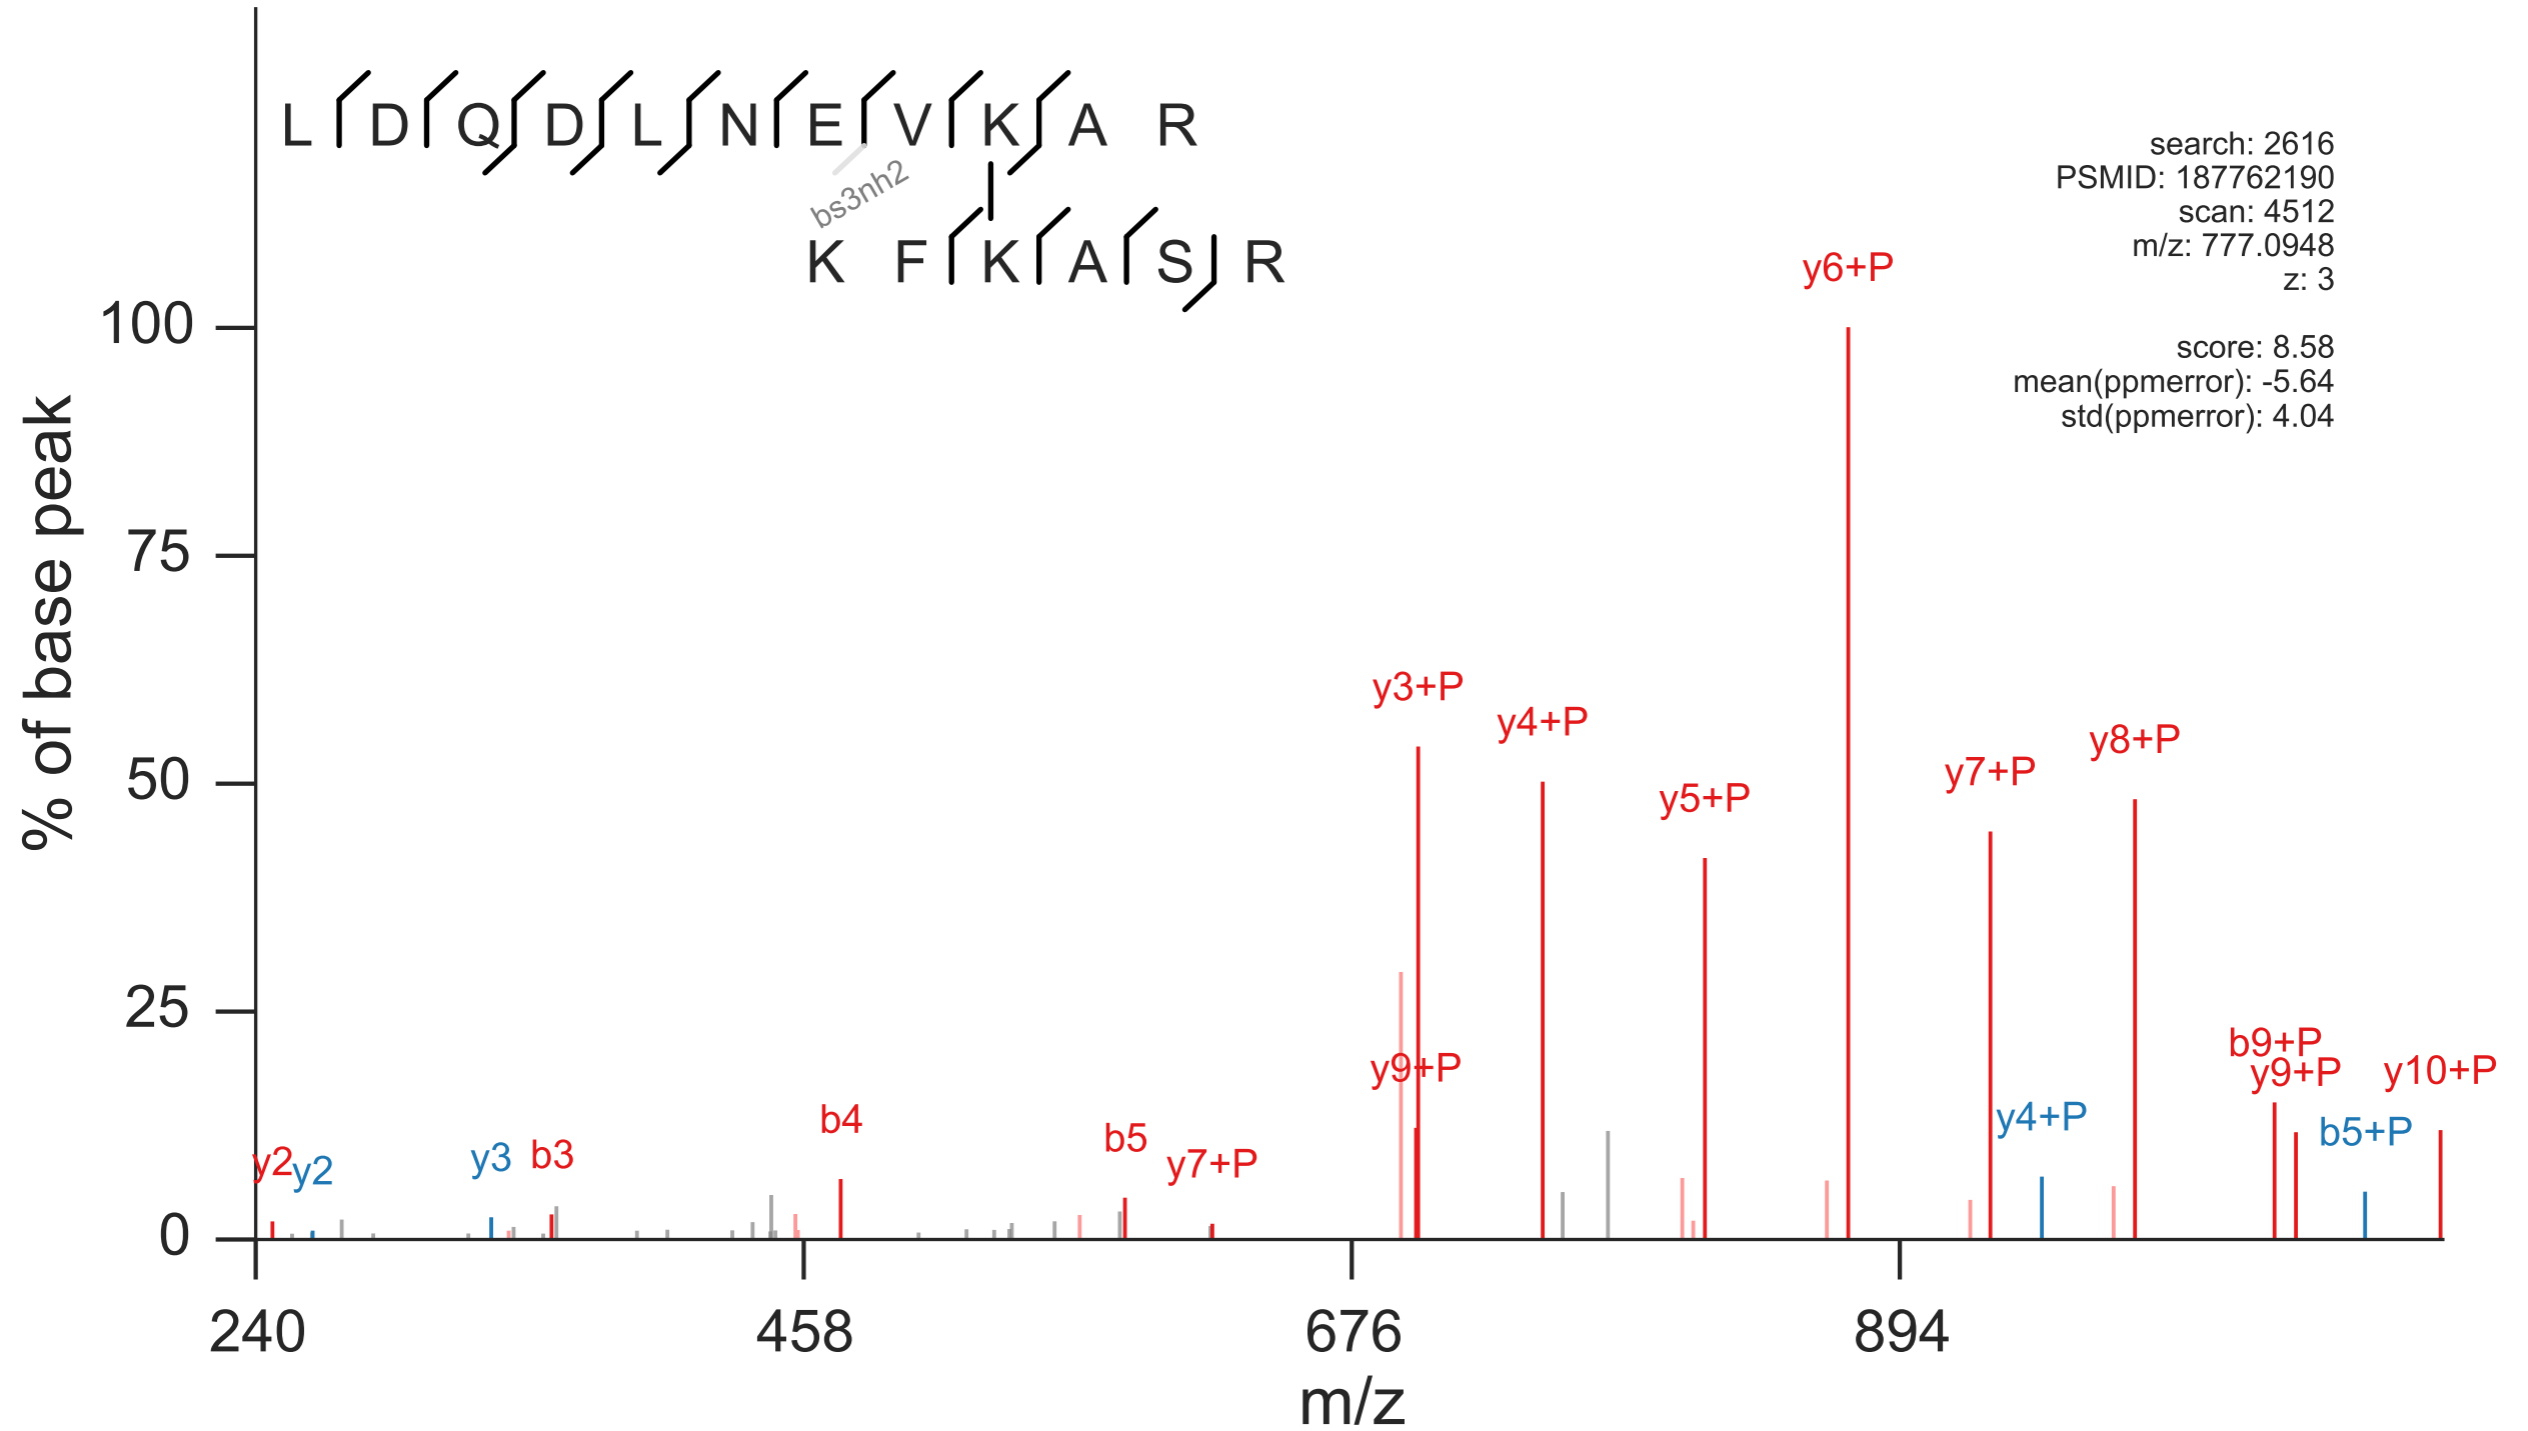

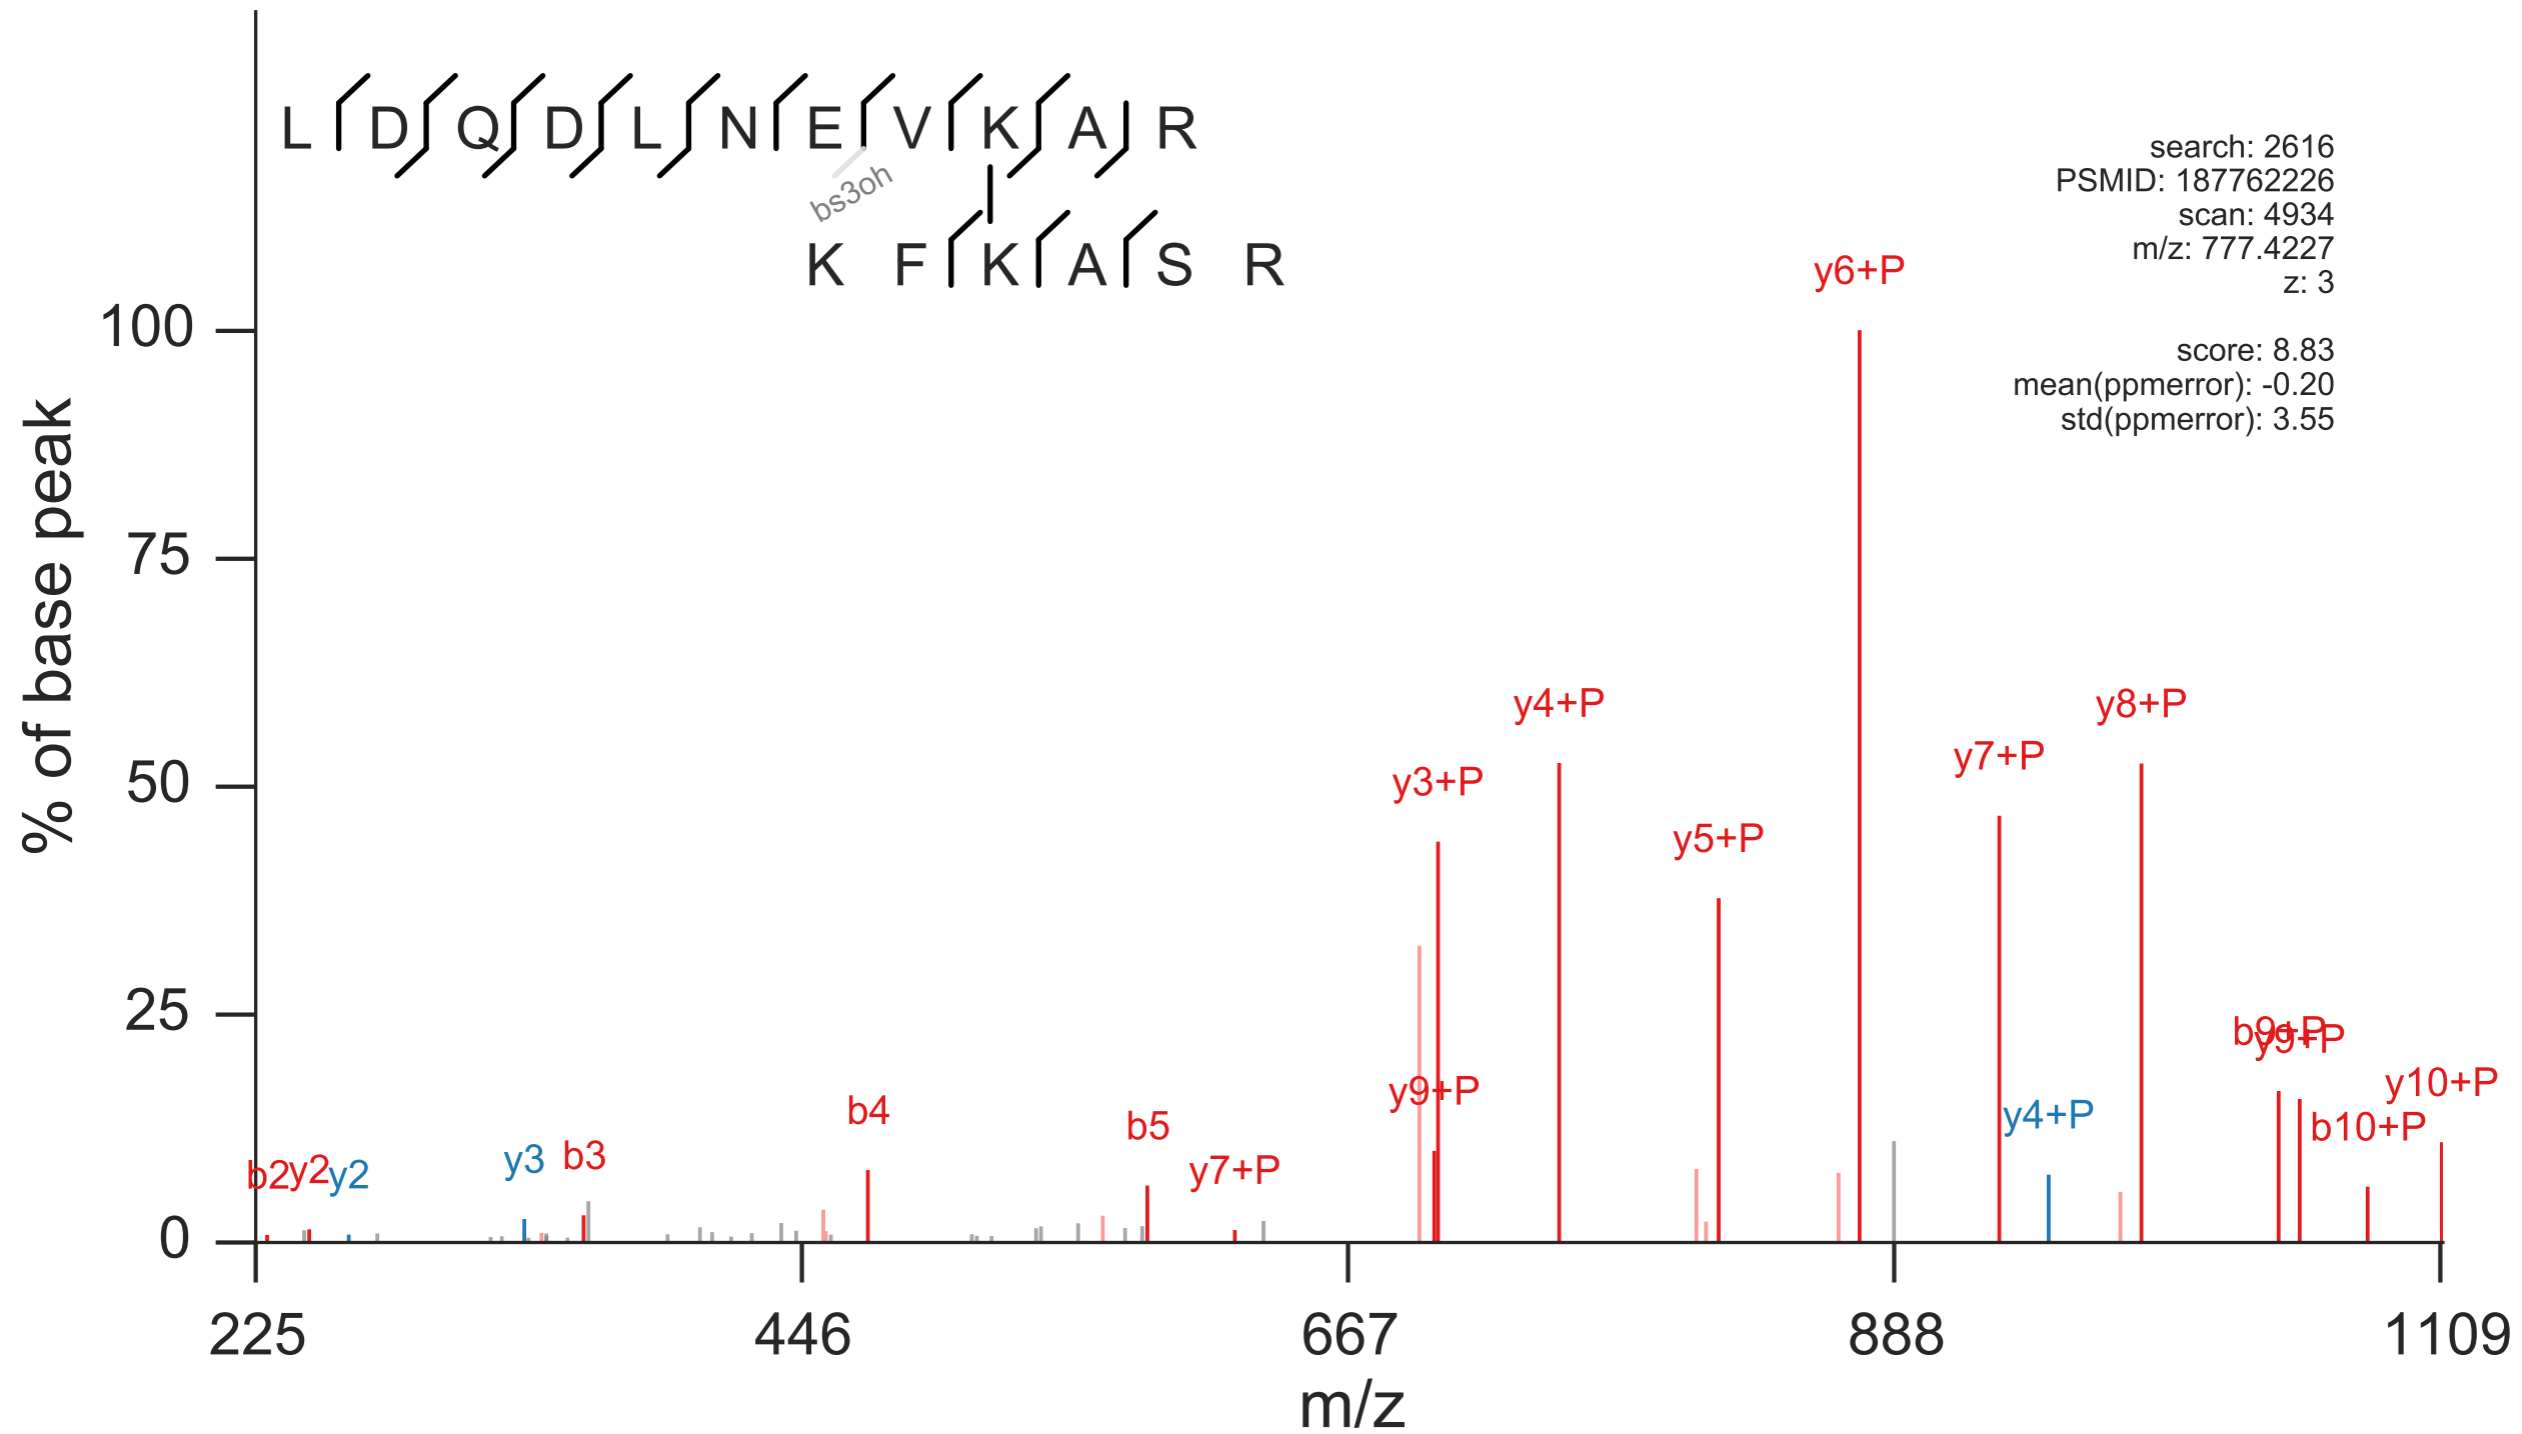

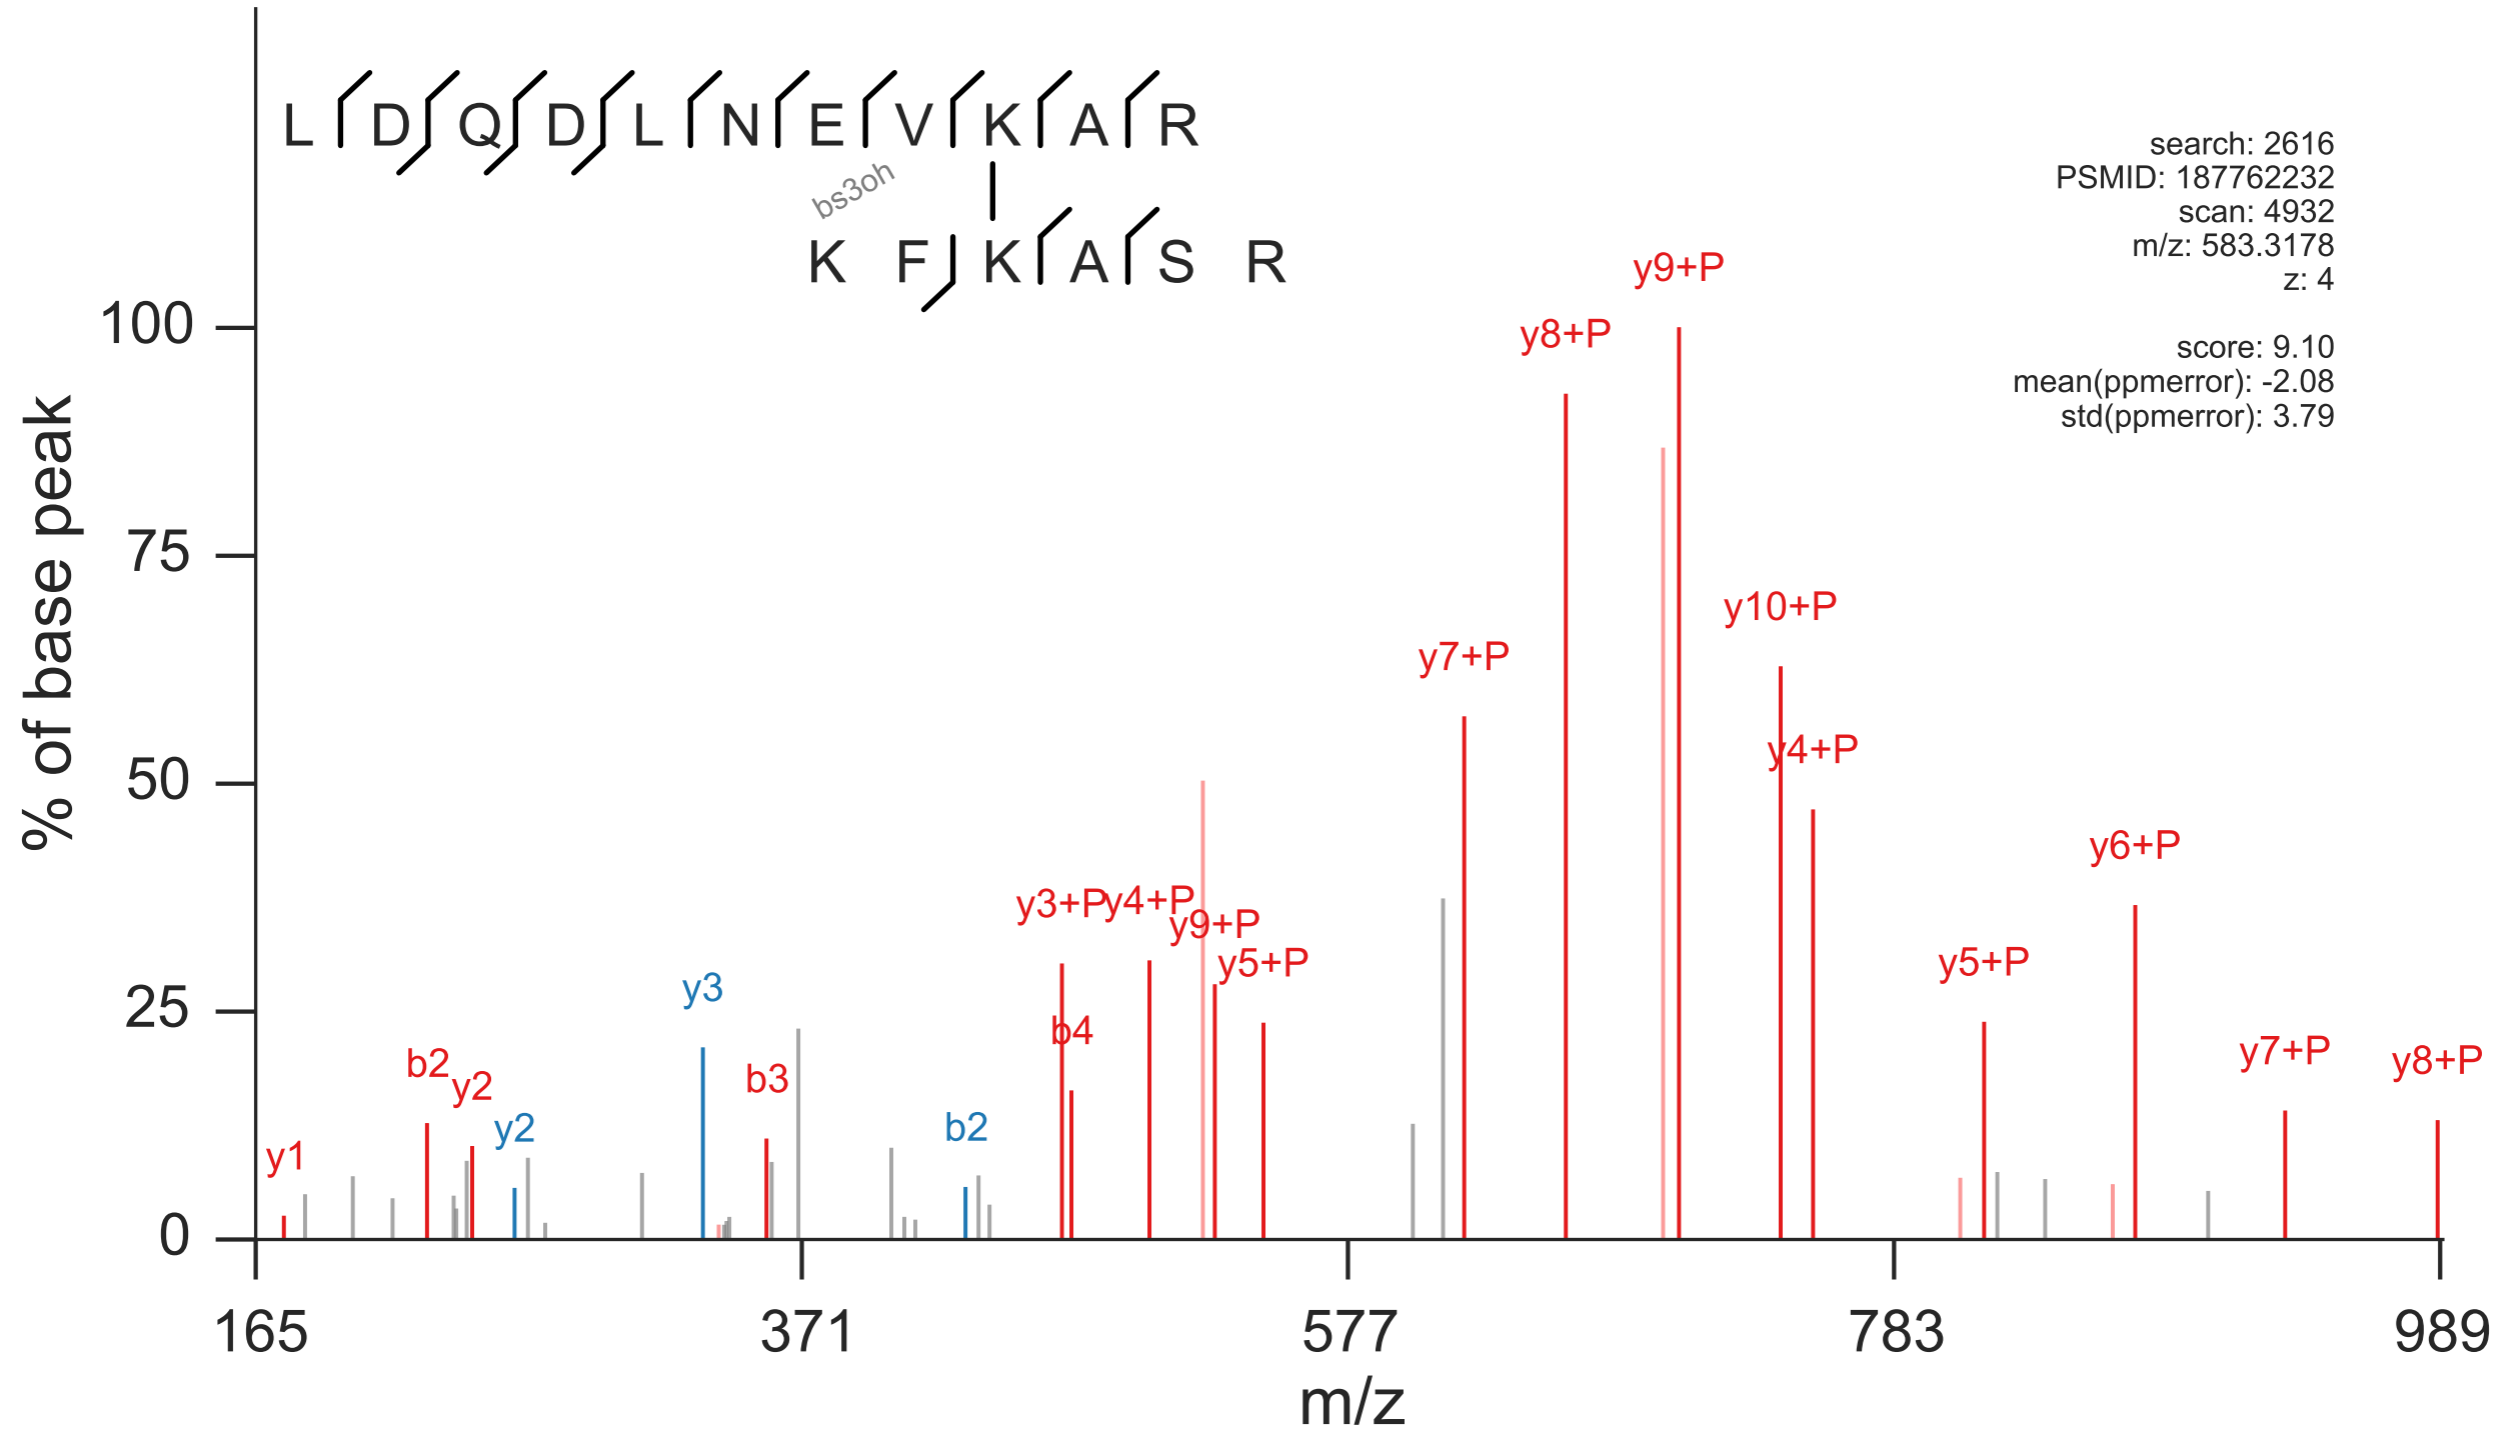

search: 2616  
 PSMID: 187762232  
 scan: 4932  
 m/z: 583.3178  
 z: 4  
 score: 9.10  
 mean(ppmerror): -2.08  
 std(ppmerror): 3.79

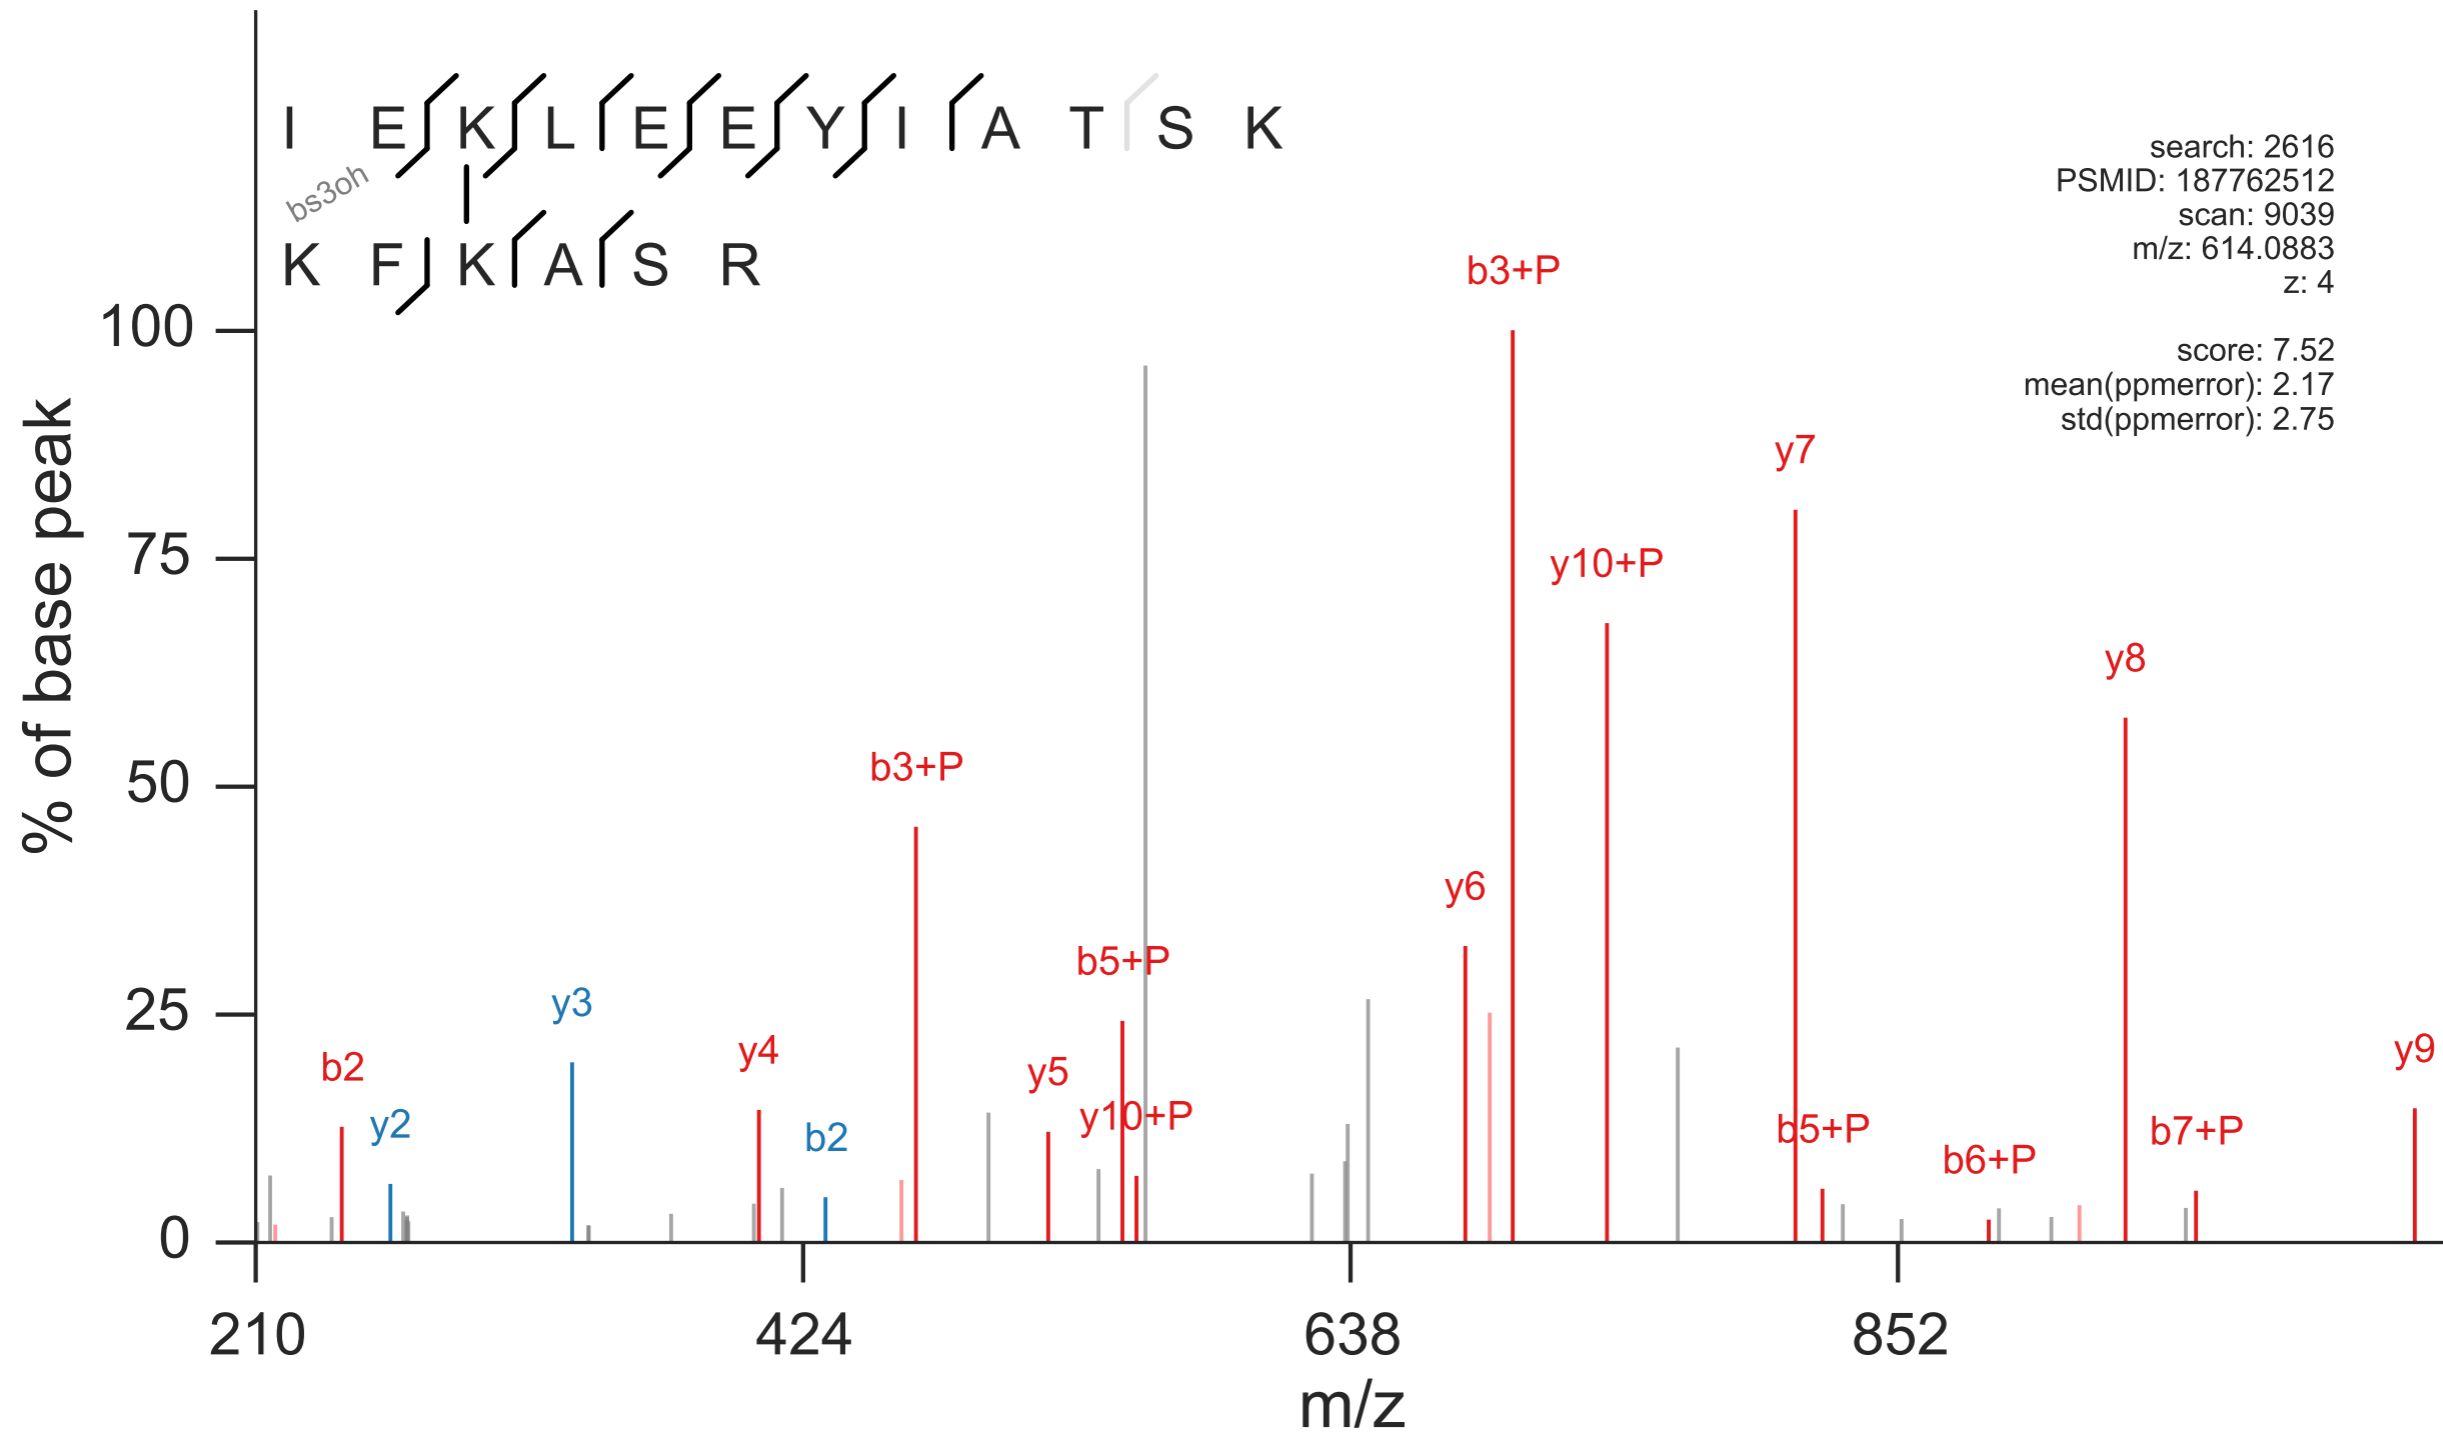

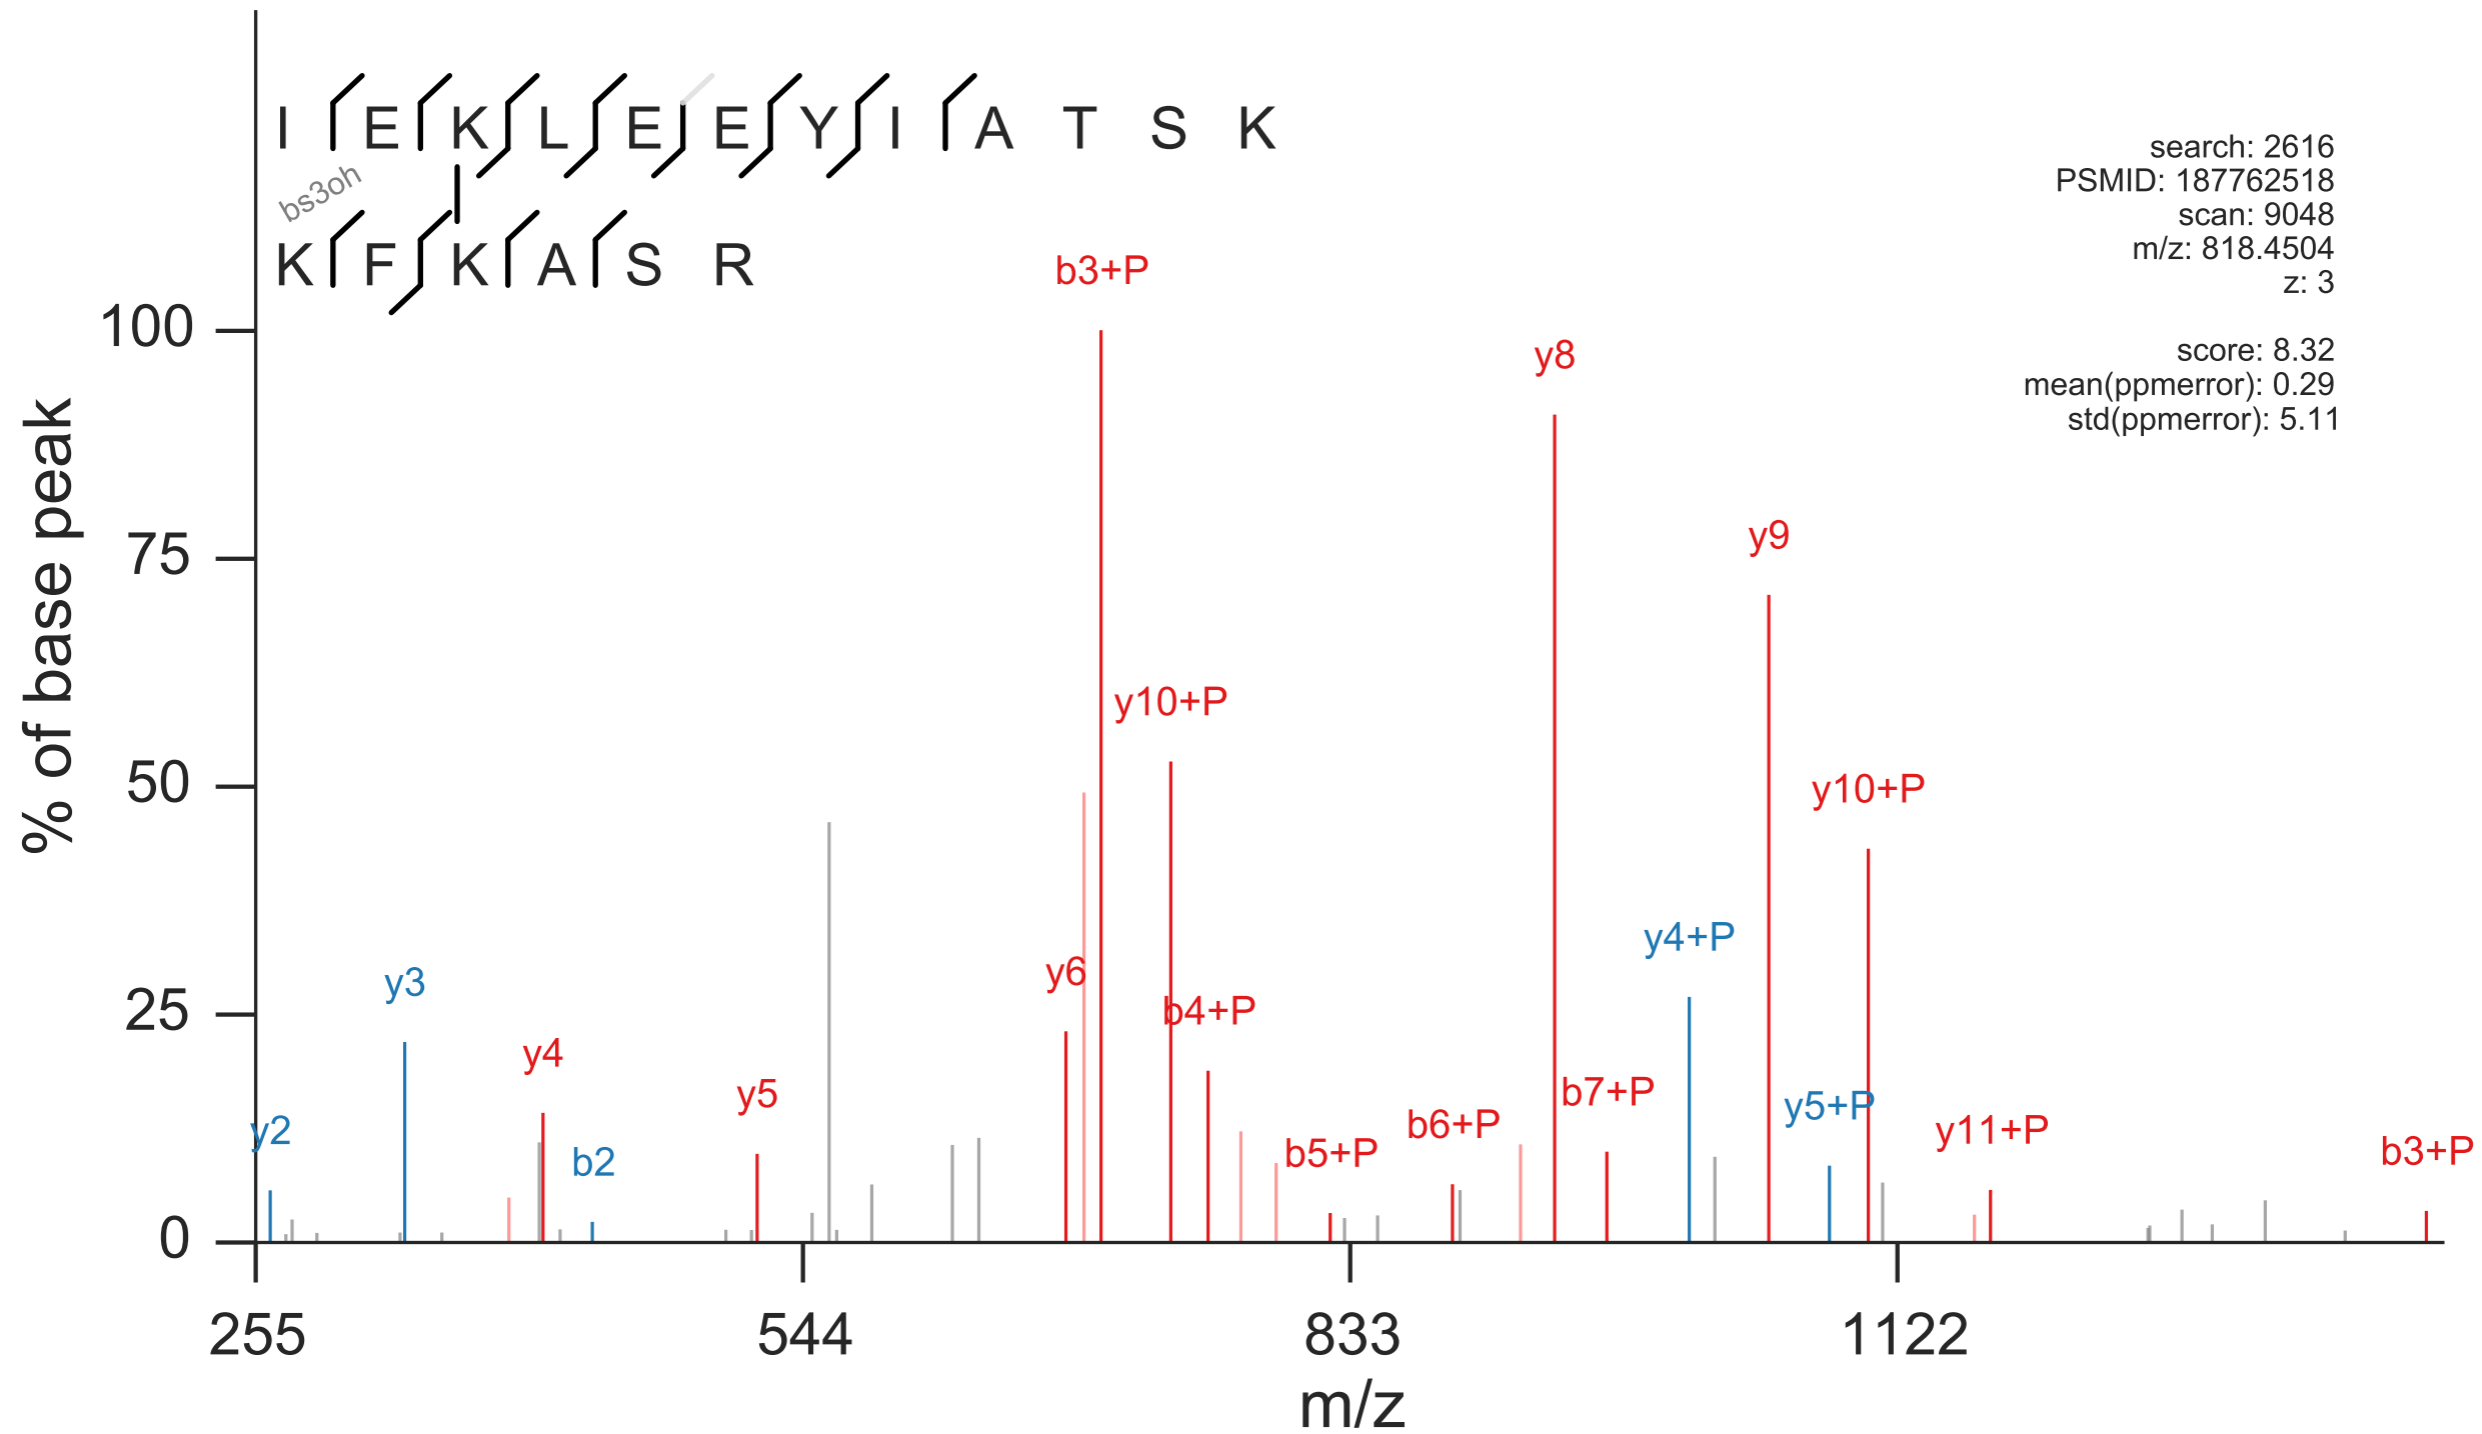

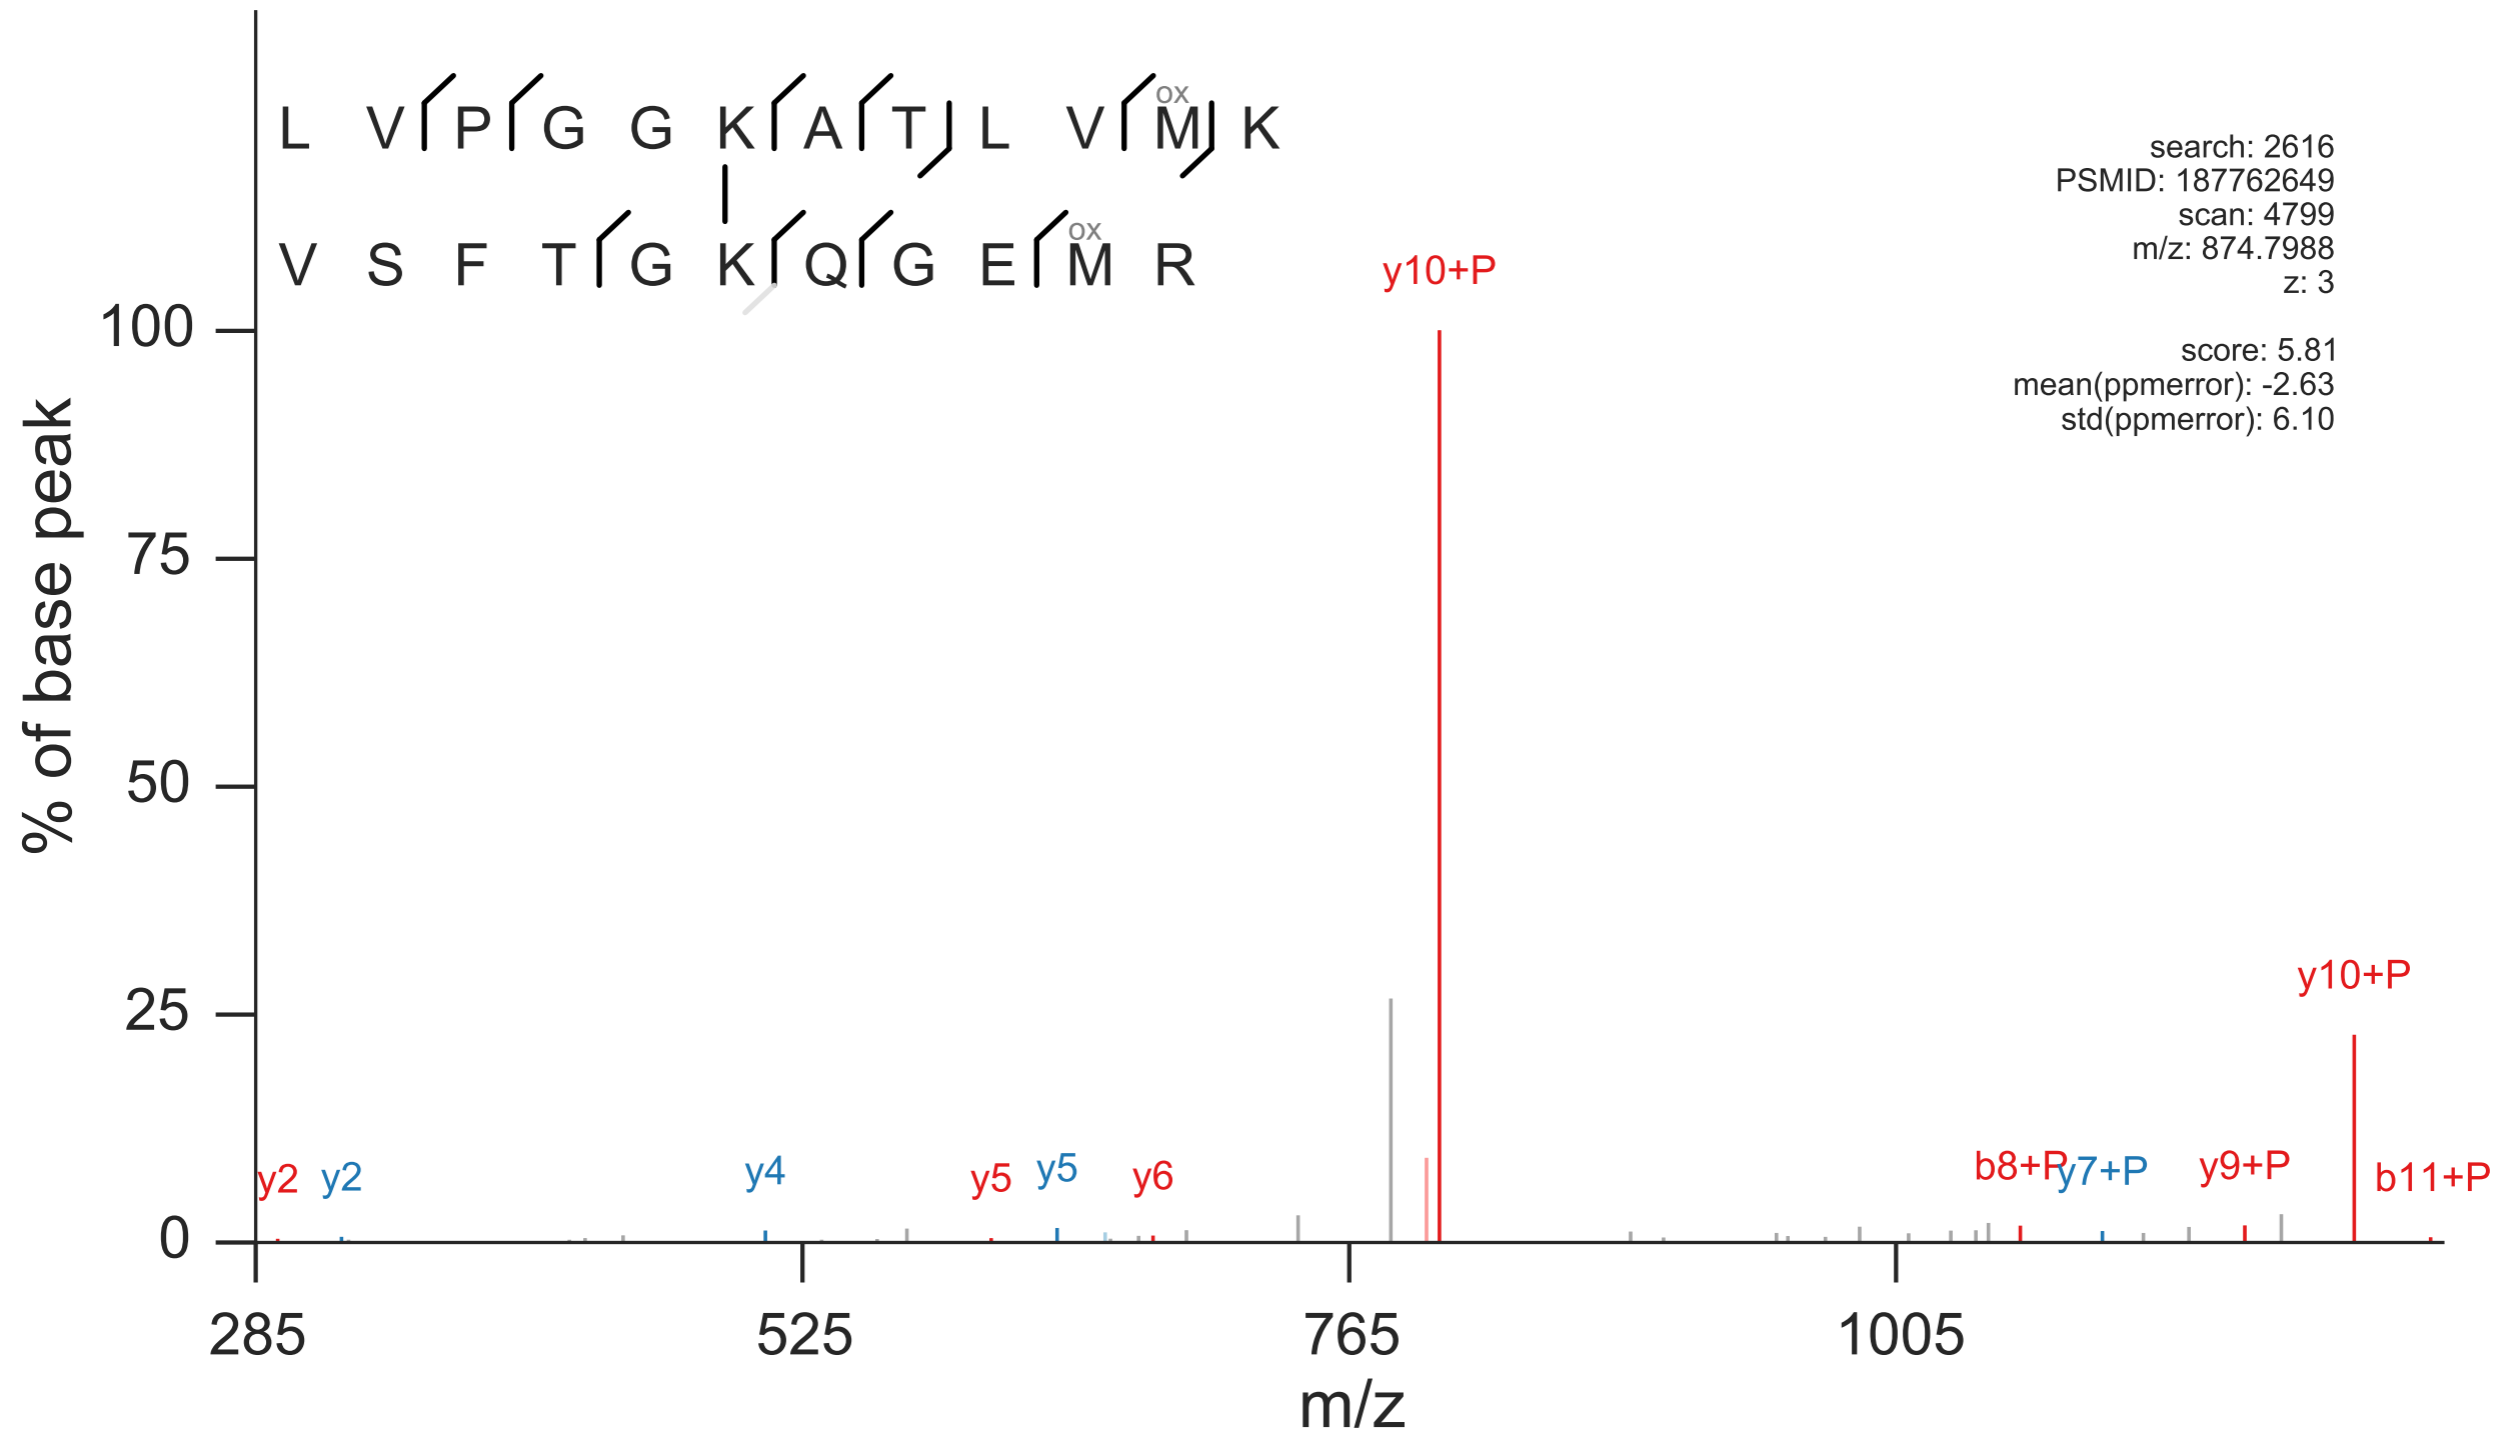

search: 2616  
 PSMID: 187762649  
 scan: 4799  
 m/z: 874.7988  
 z: 3

score: 5.81  
 mean(ppmerror): -2.63  
 std(ppmerror): 6.10

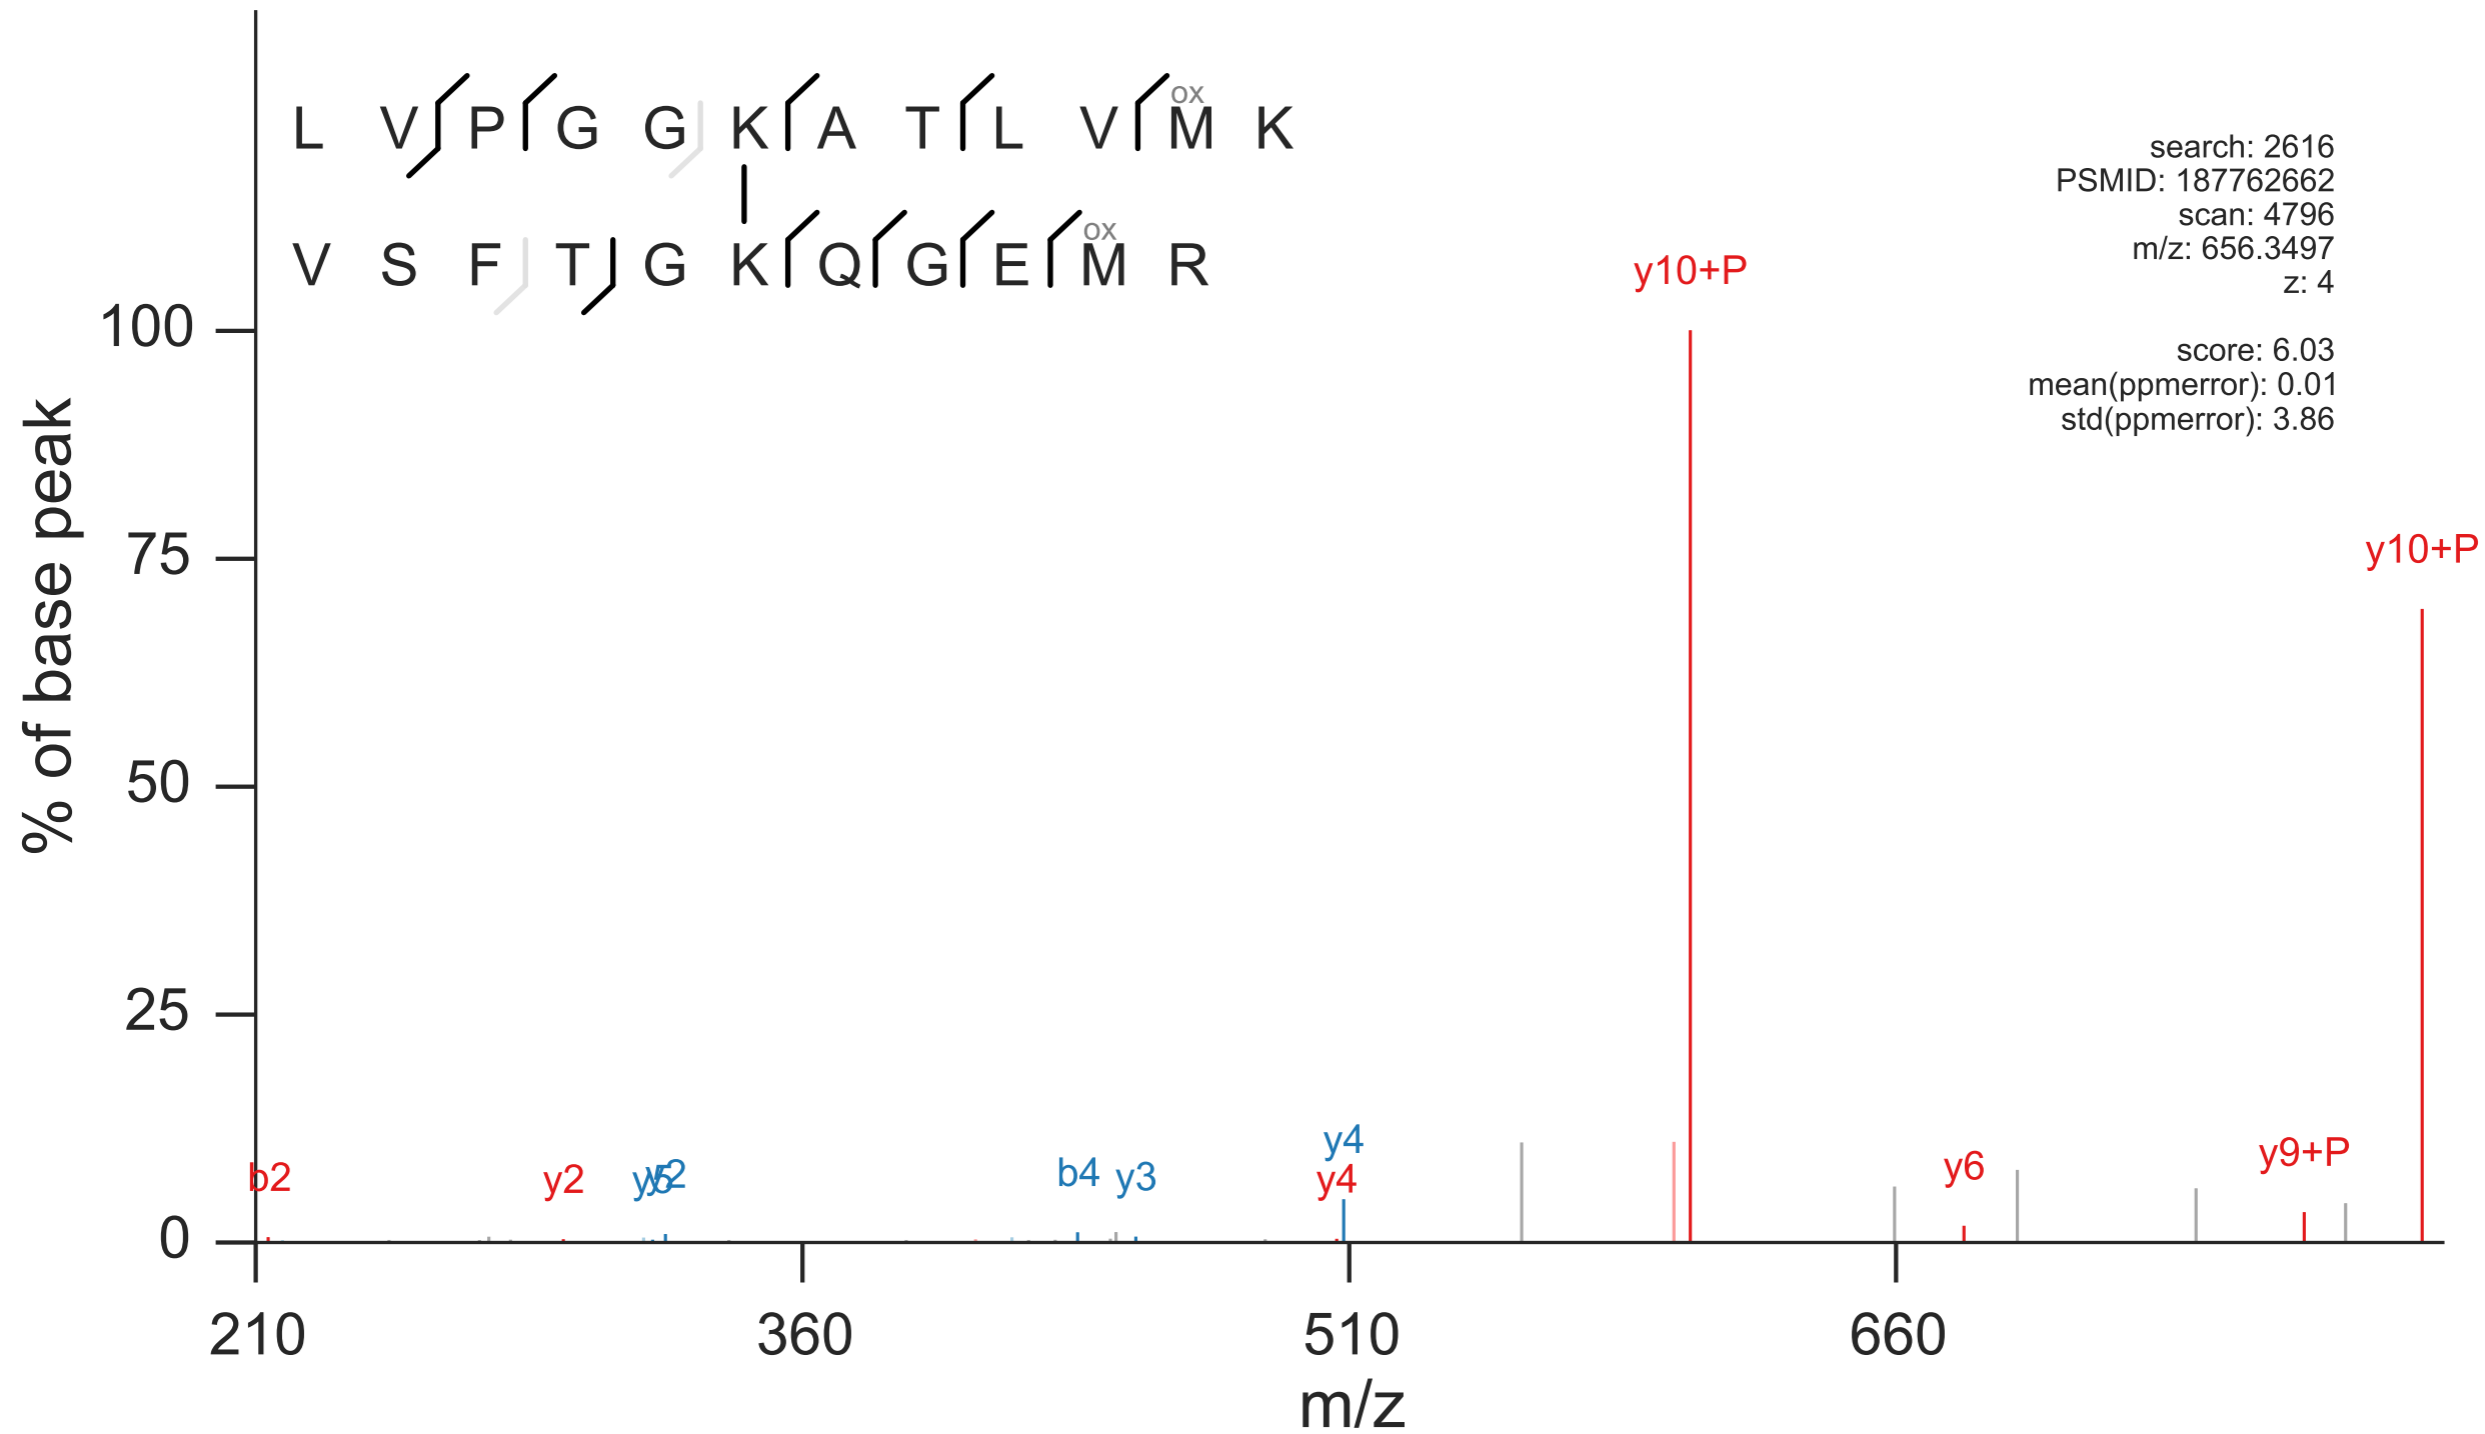

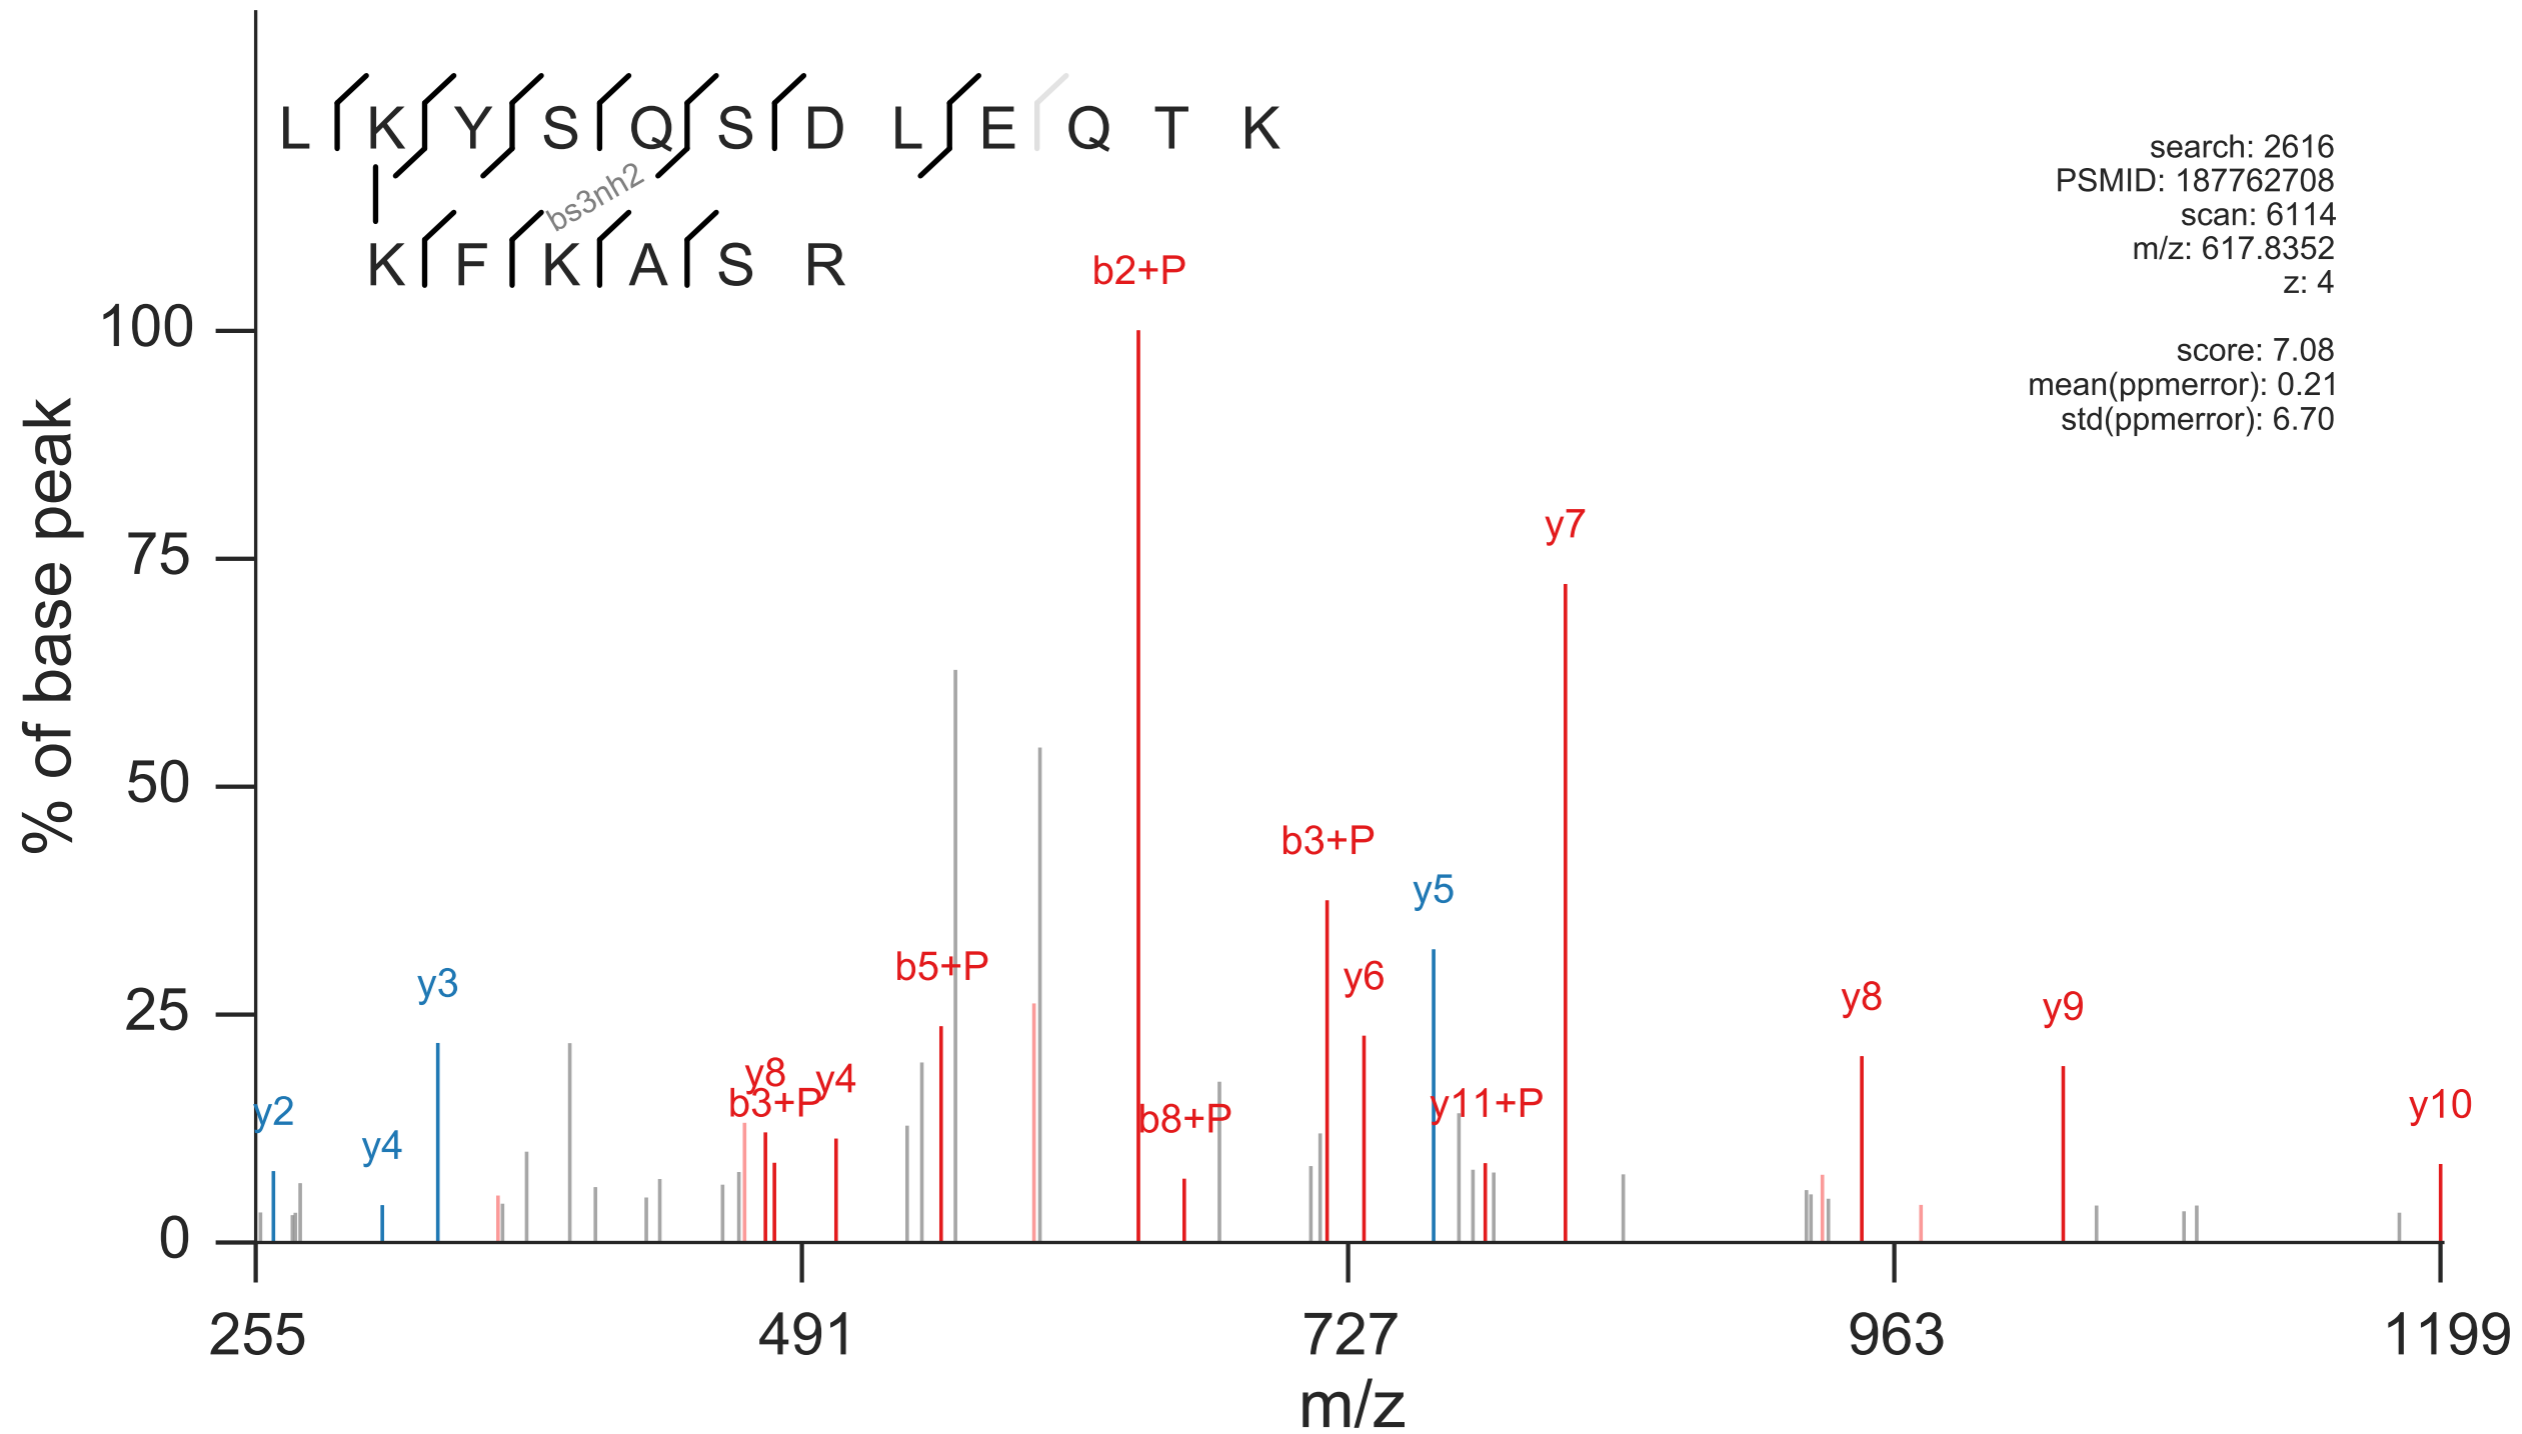



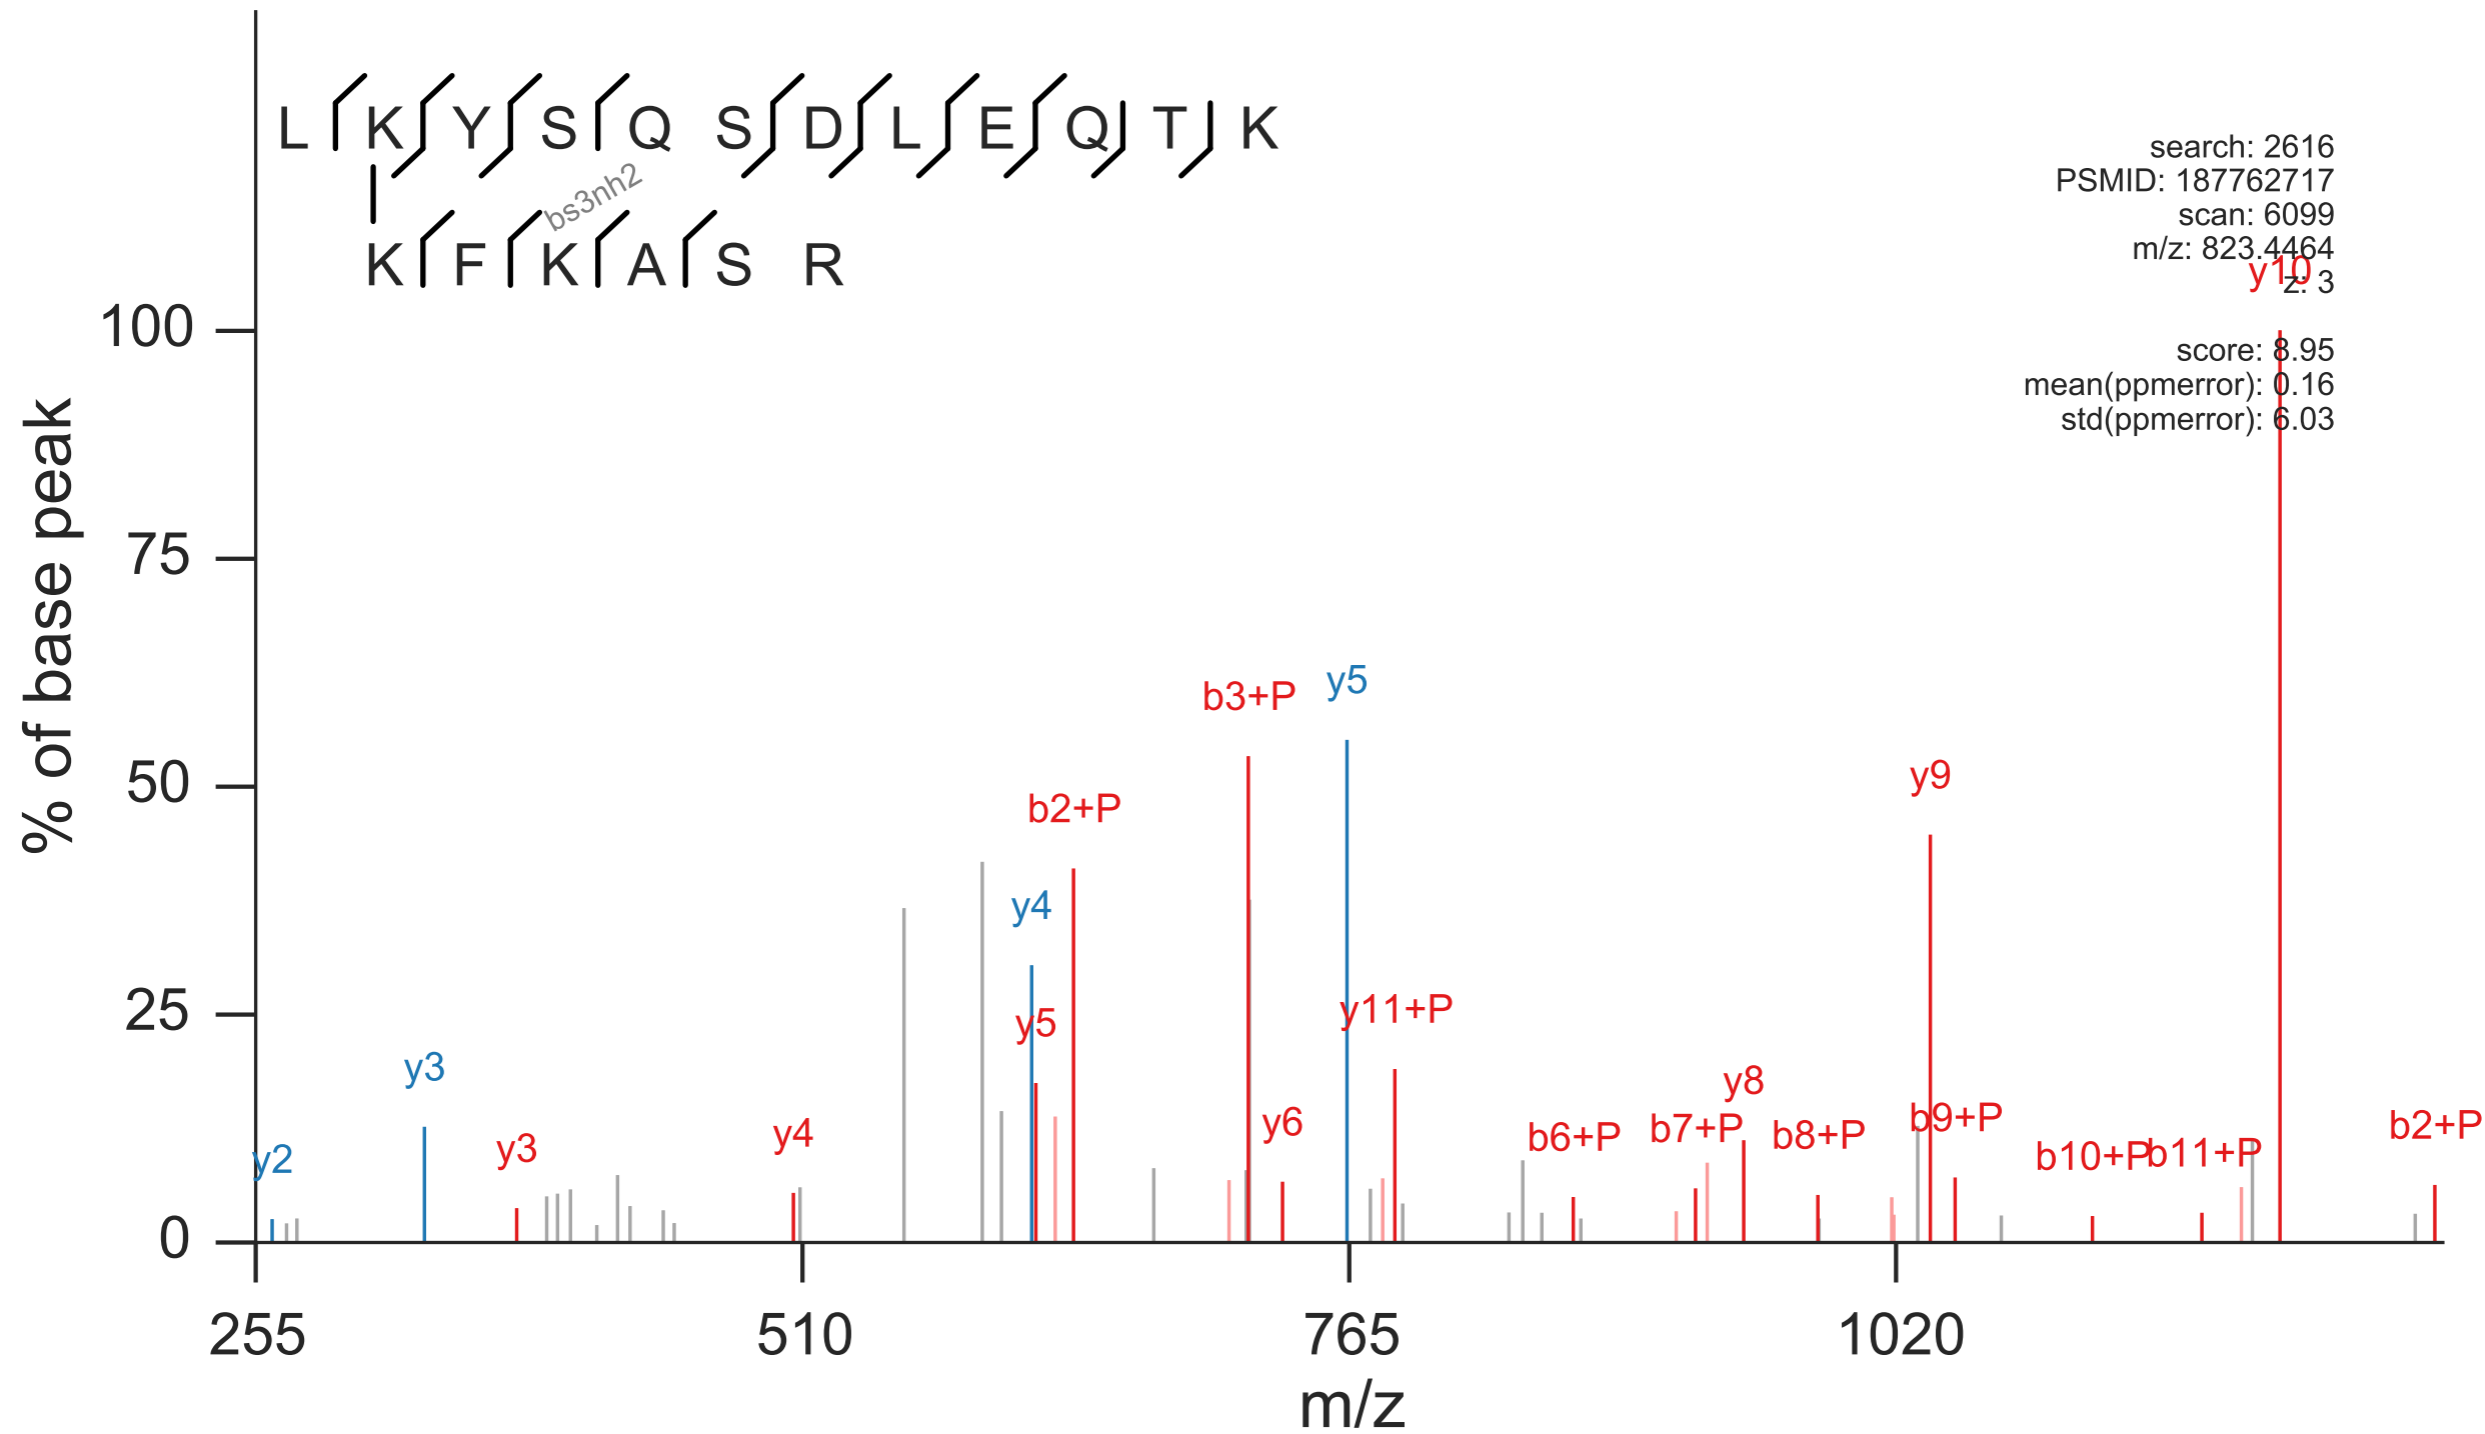

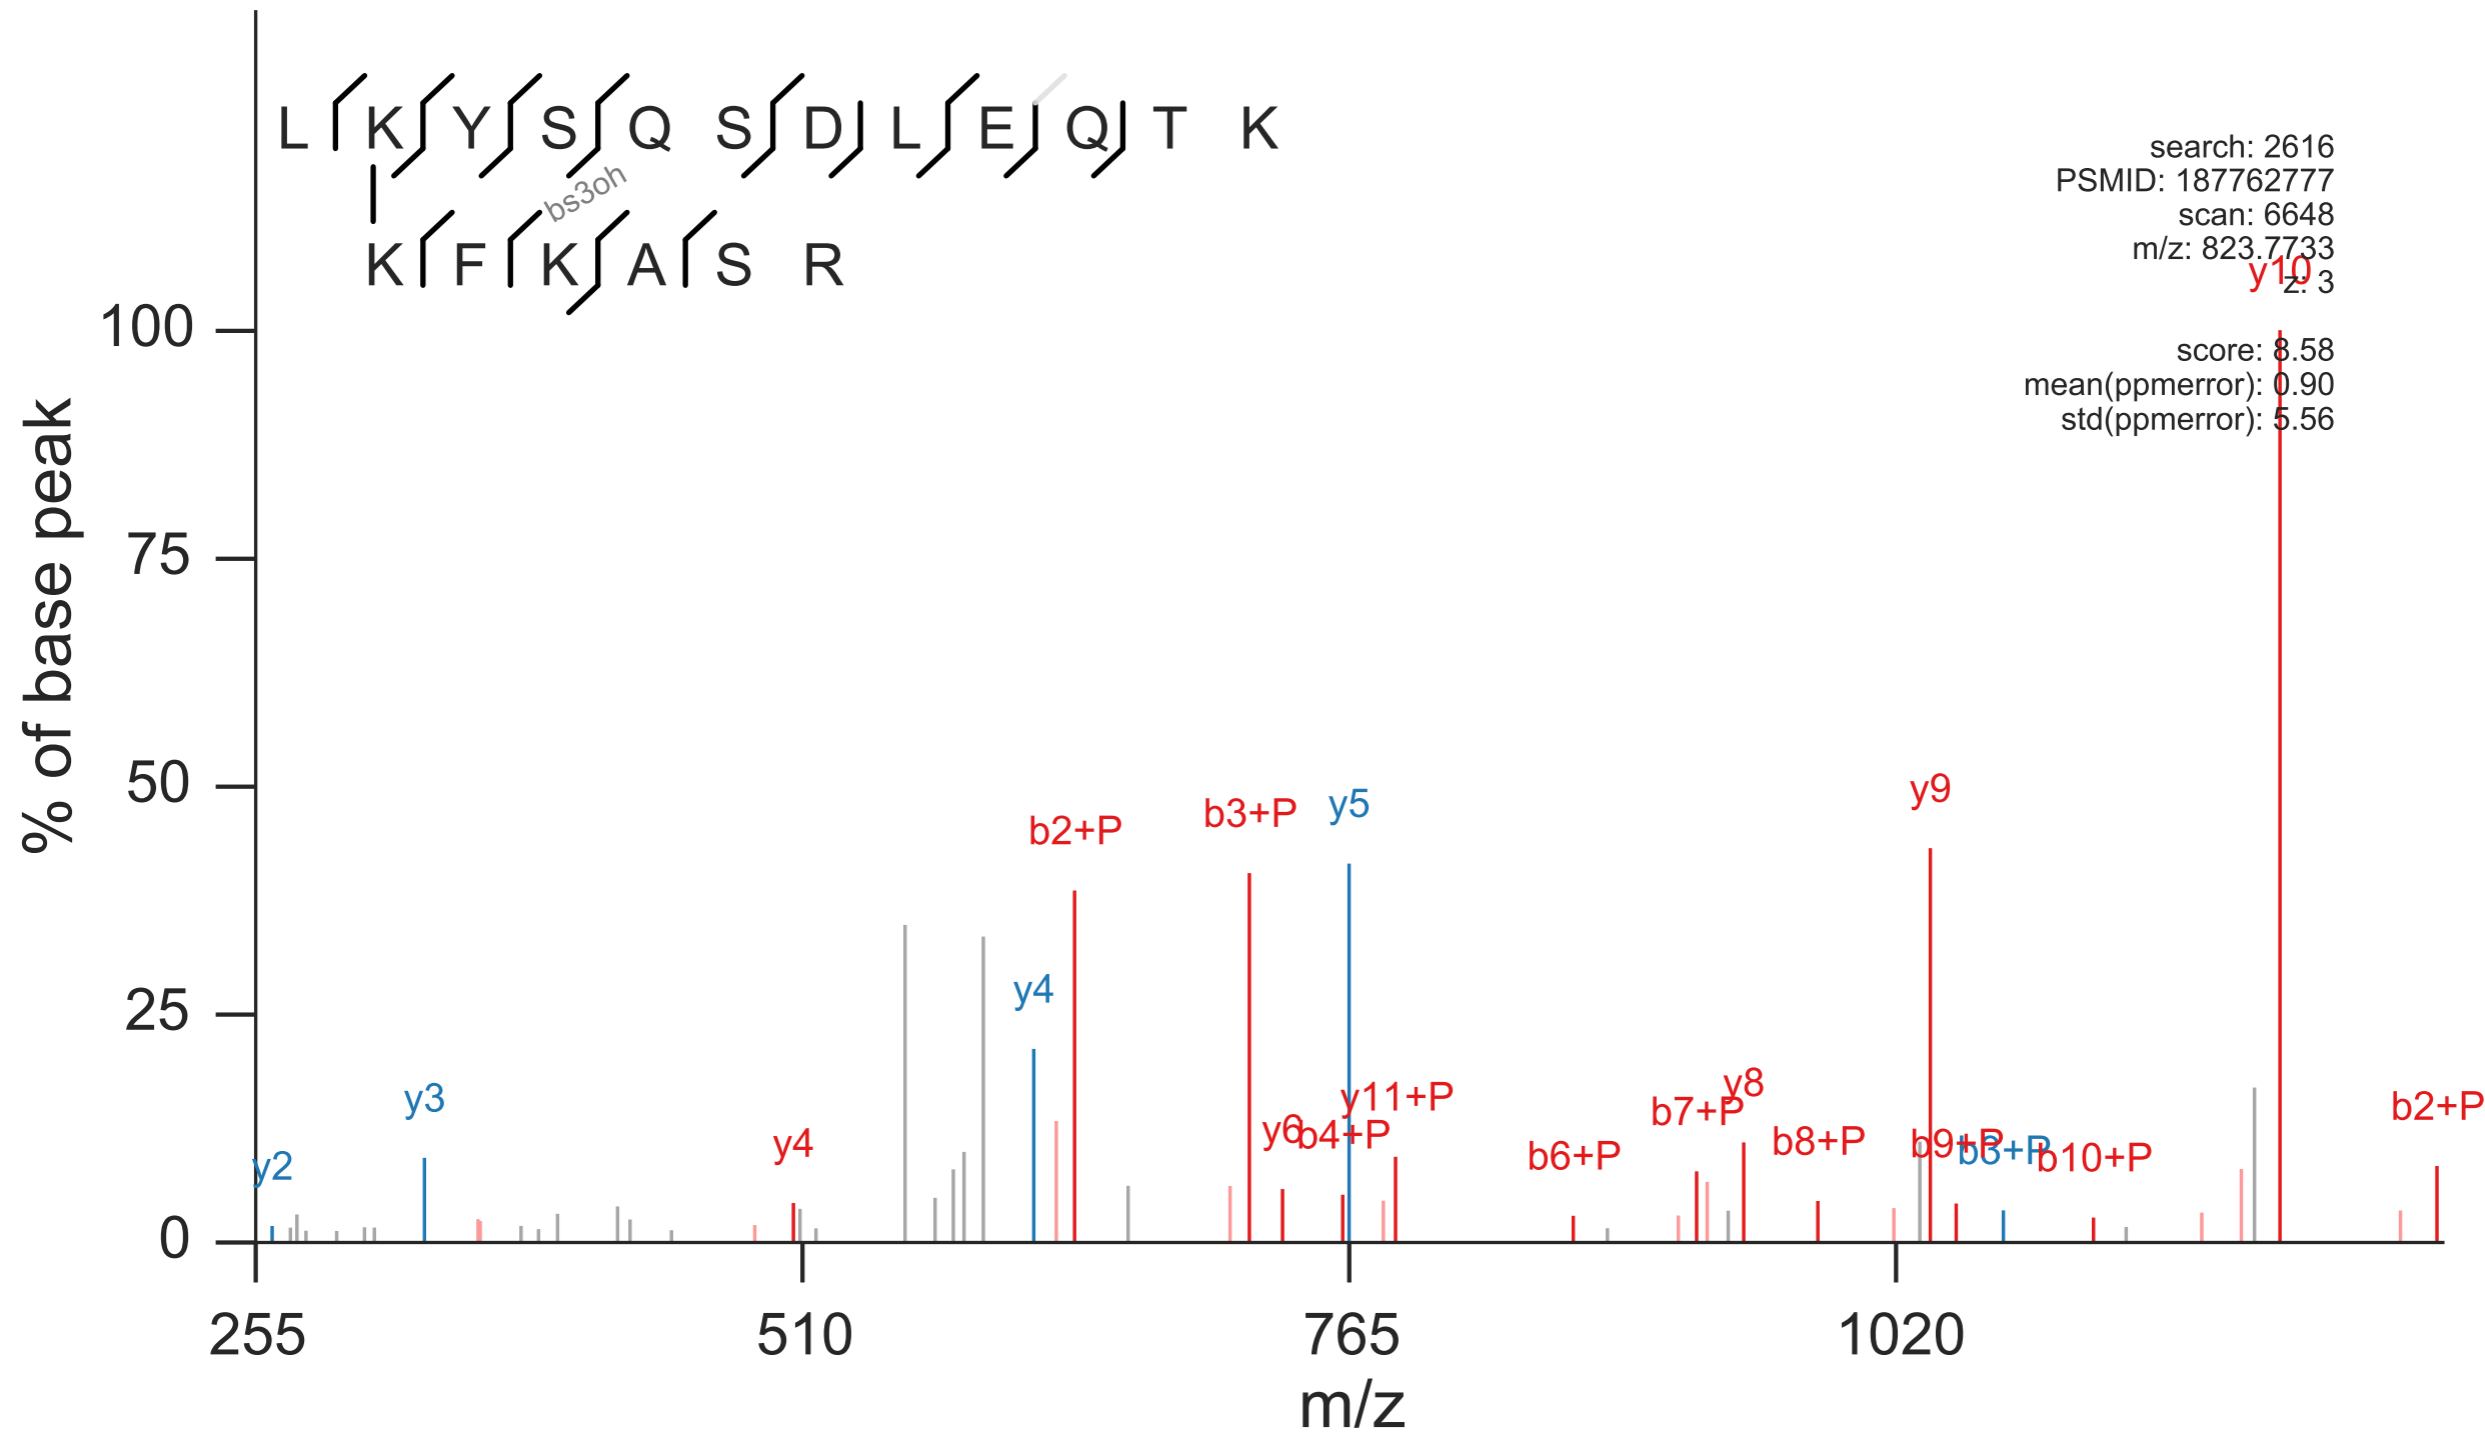

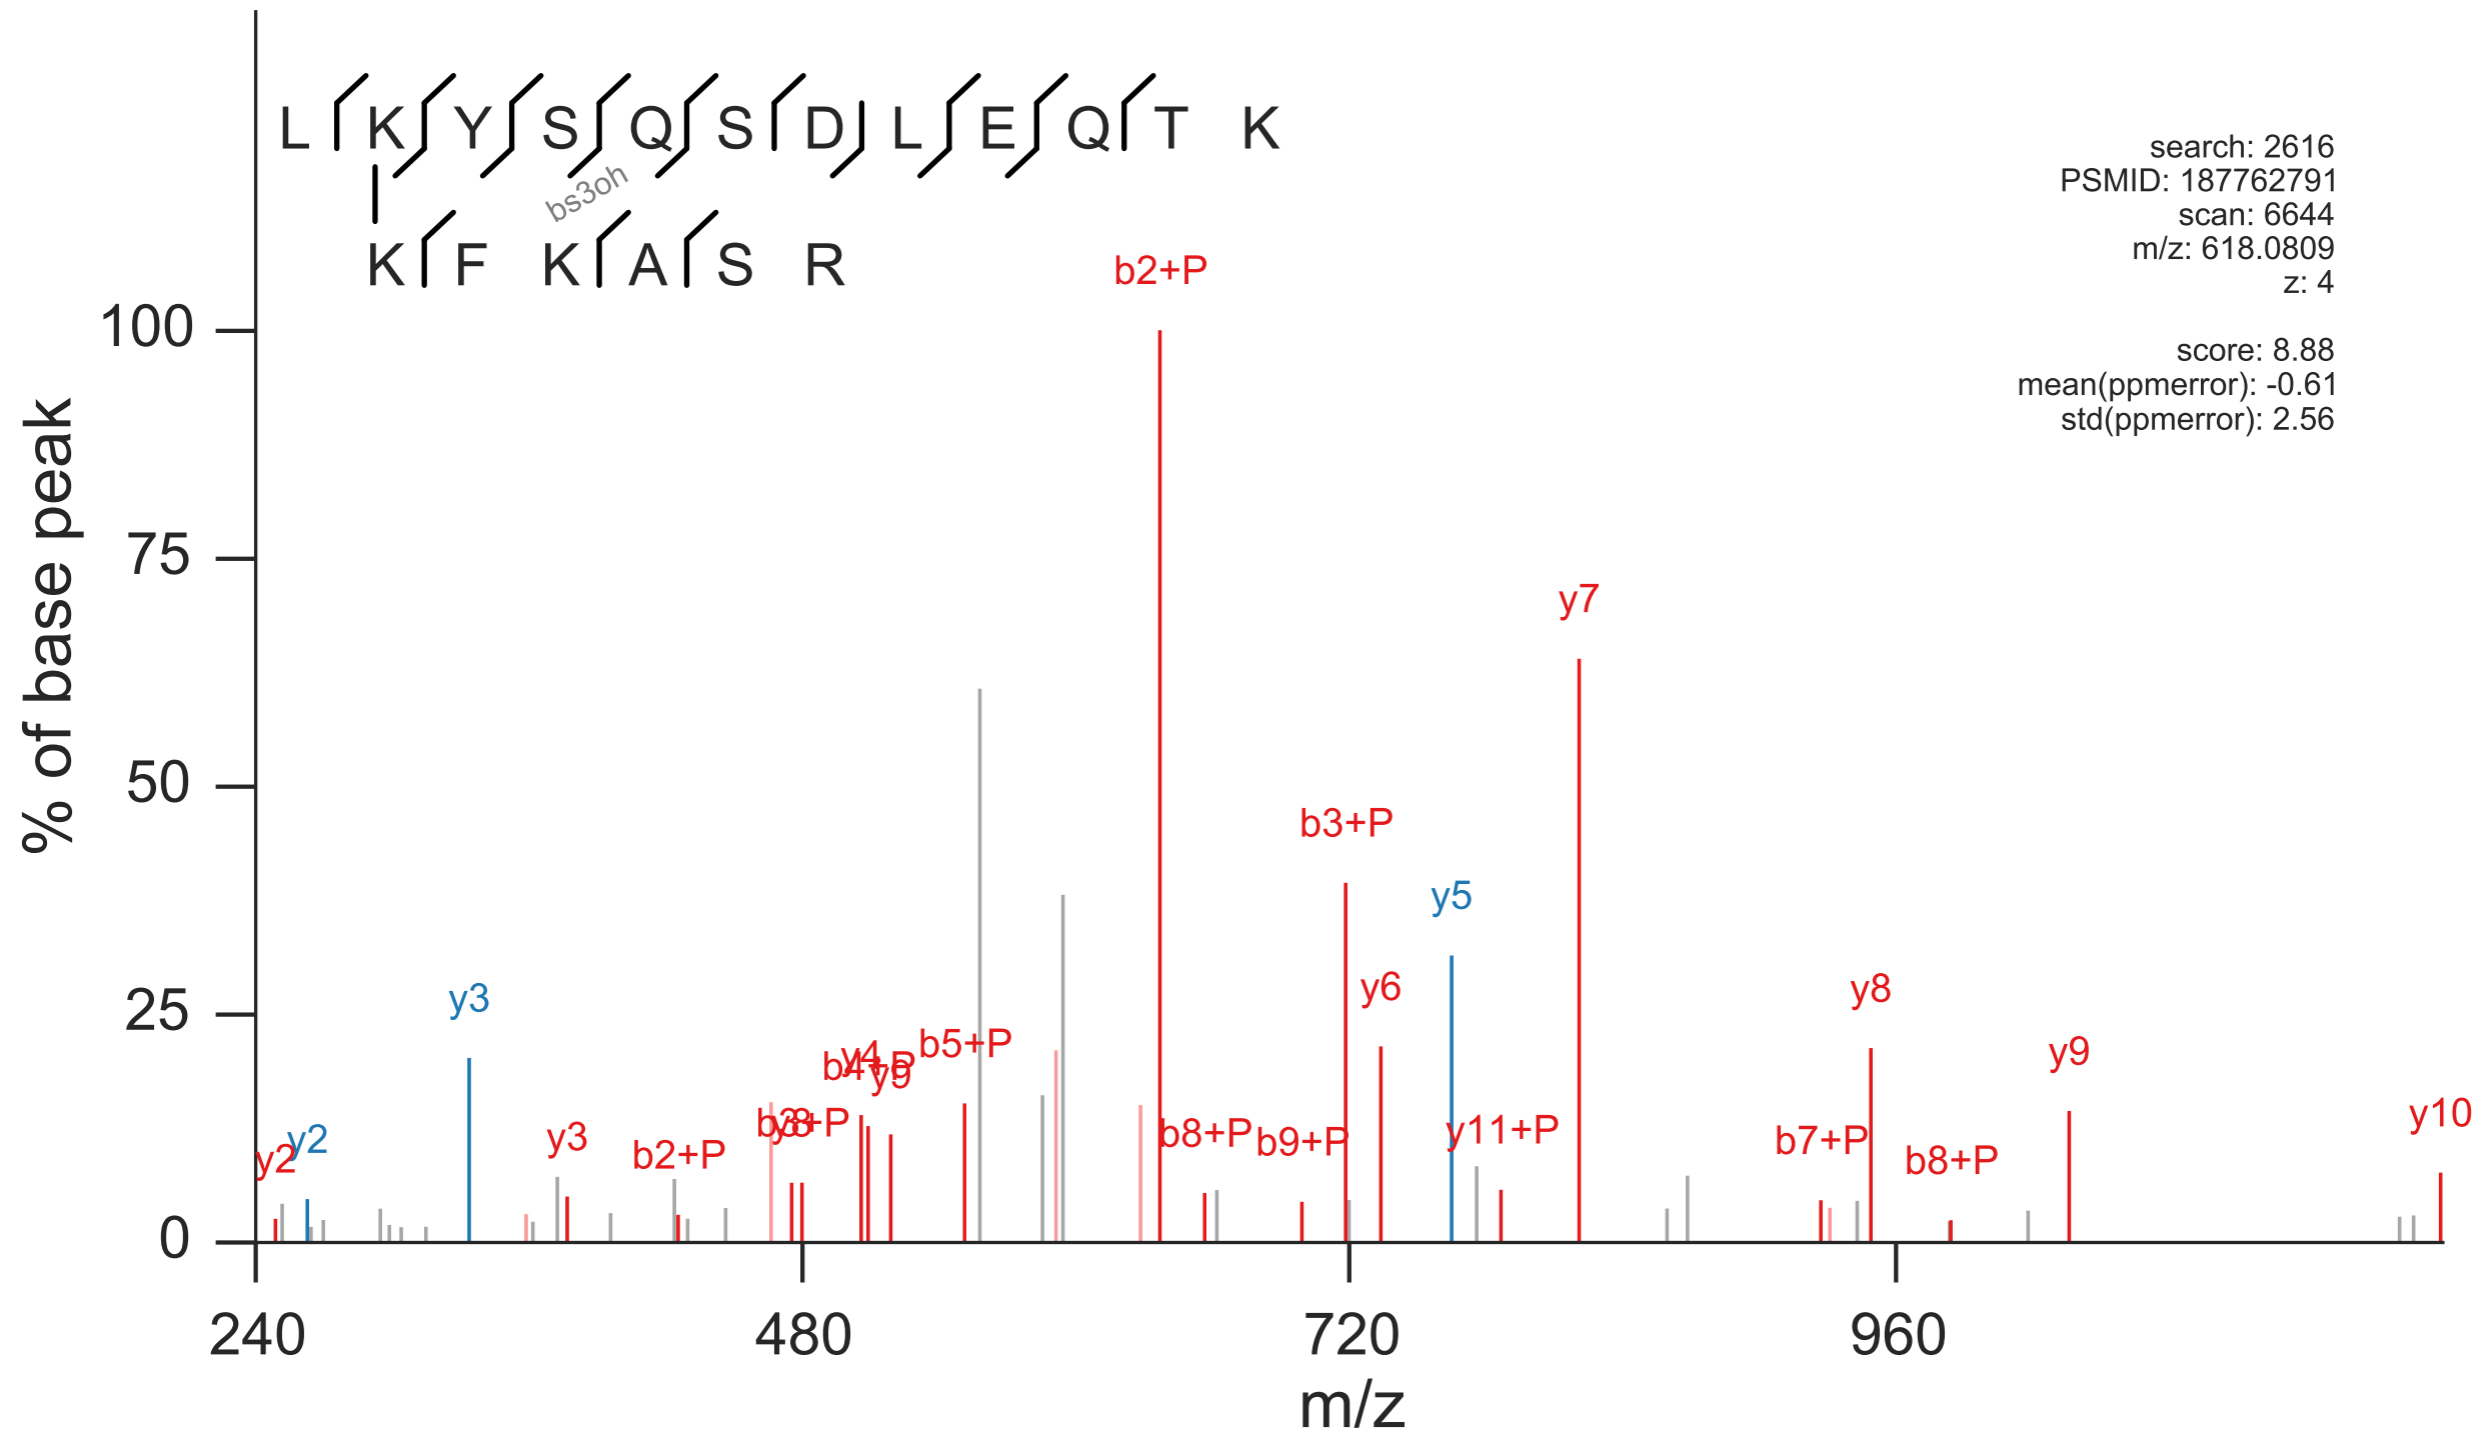

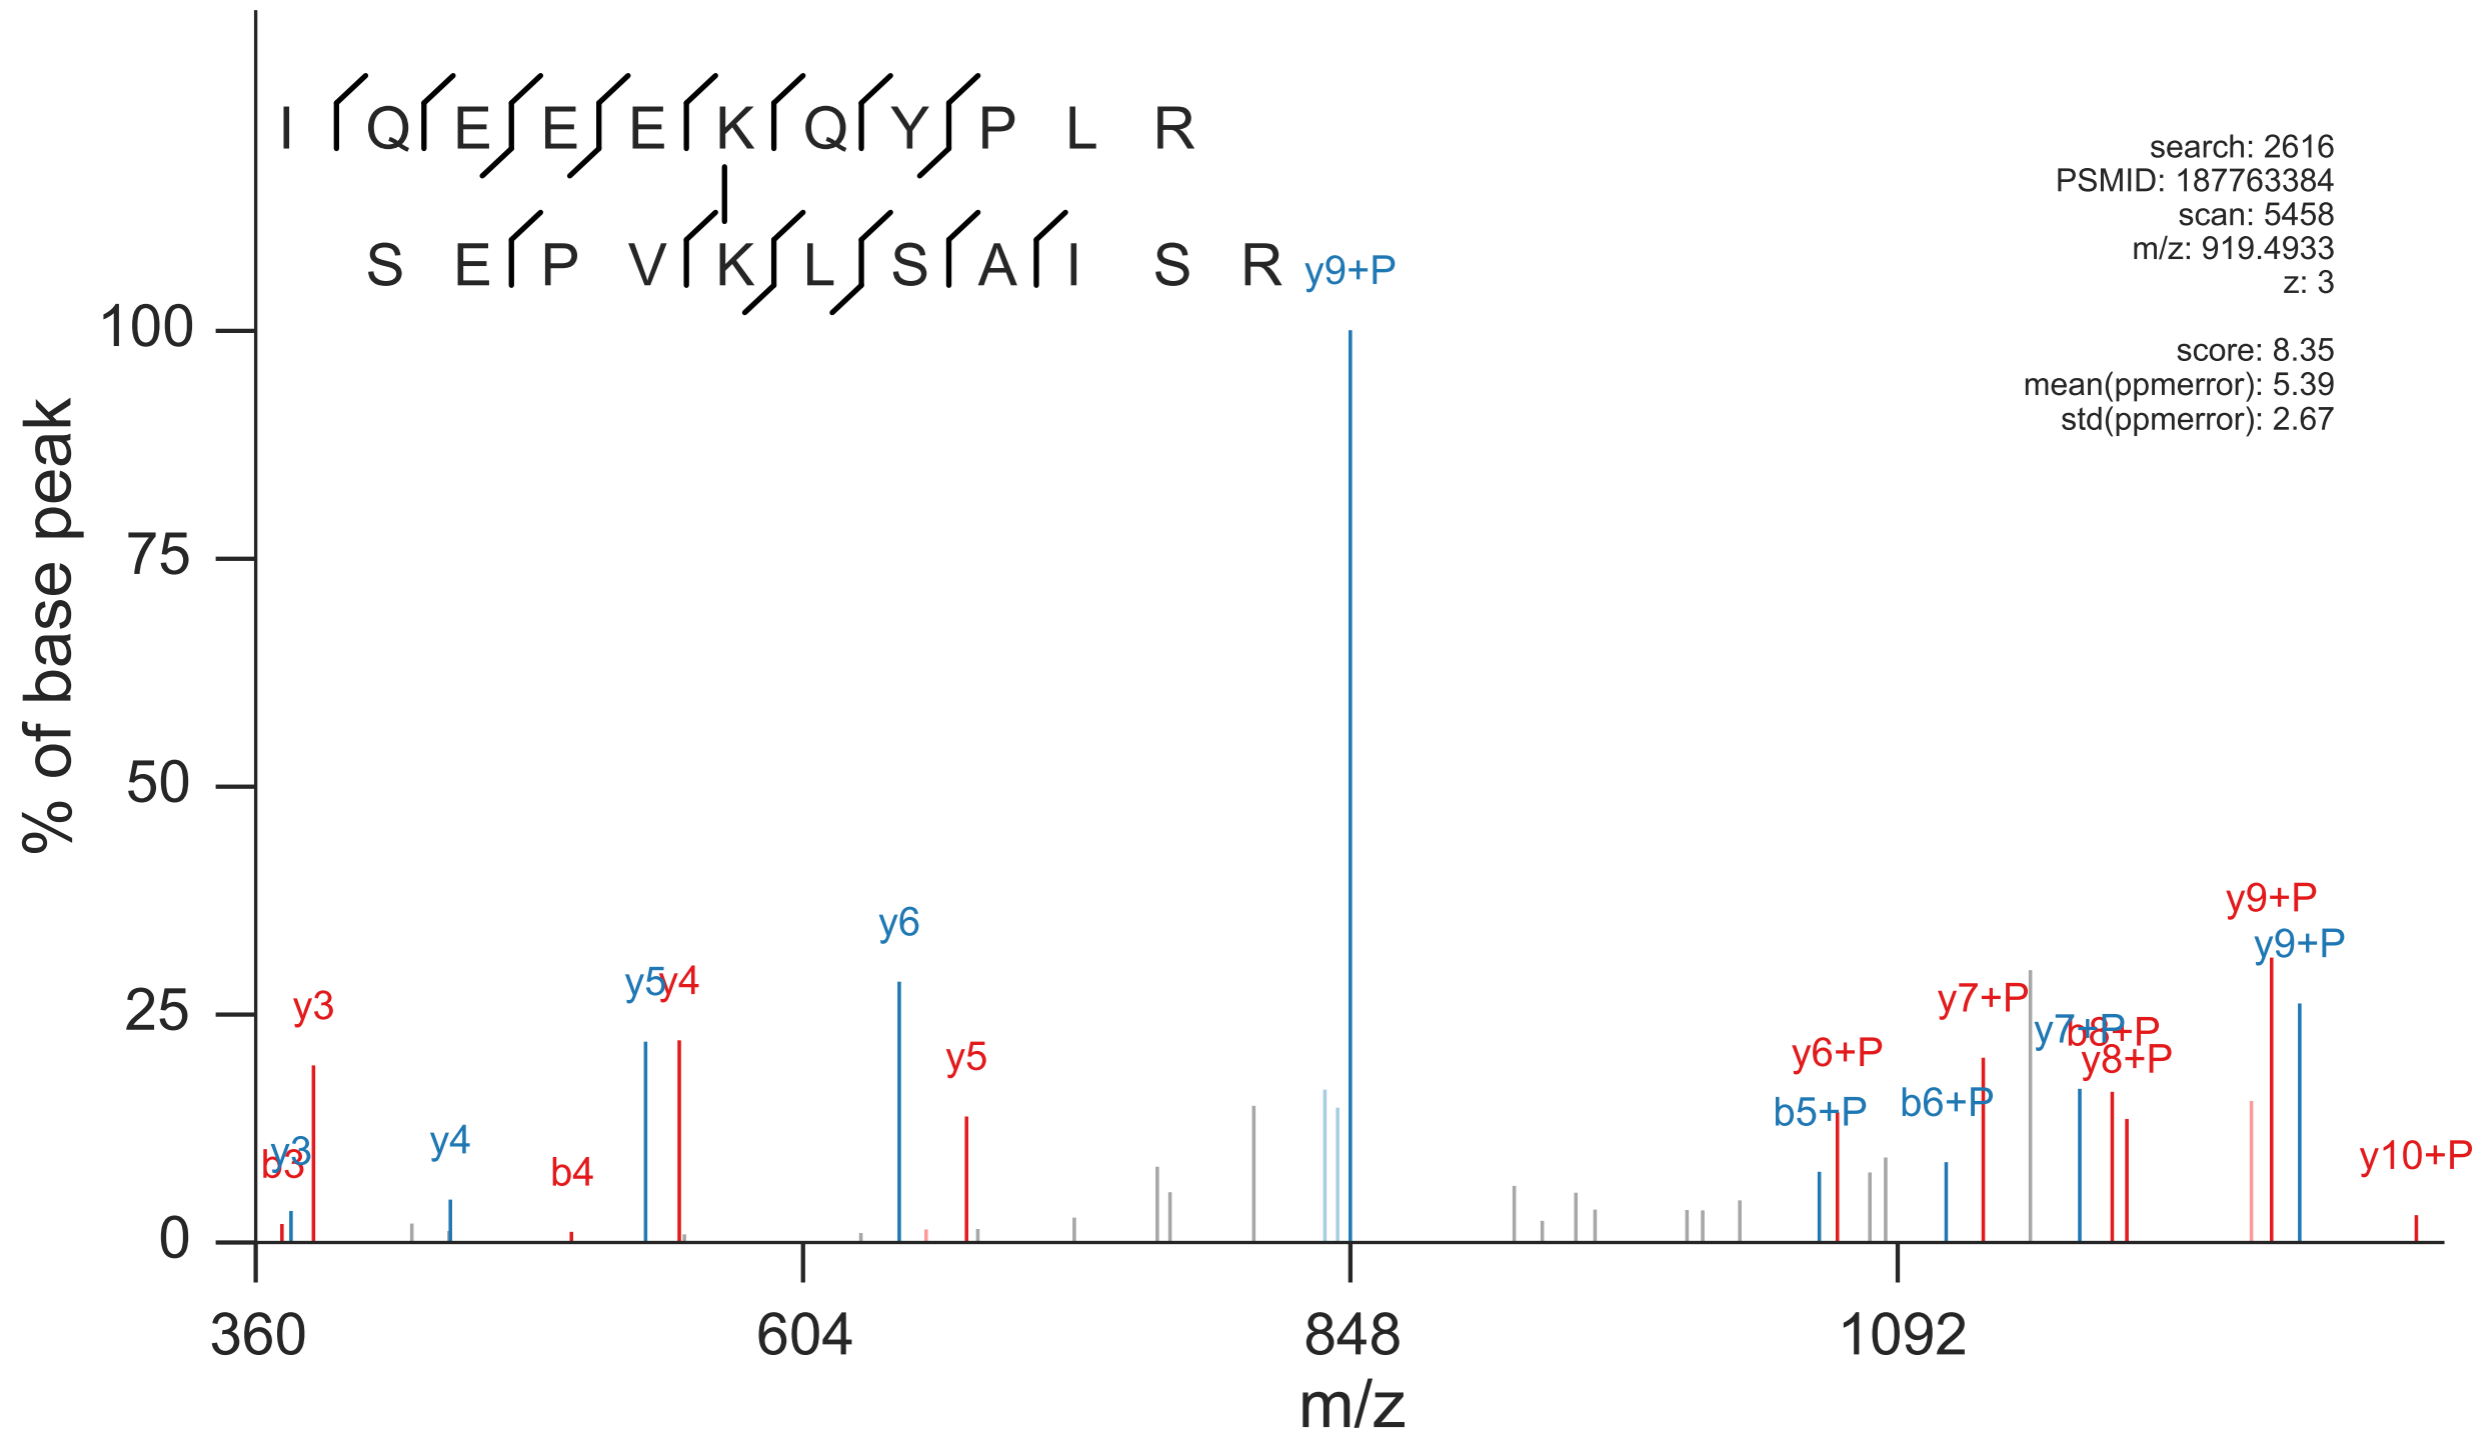

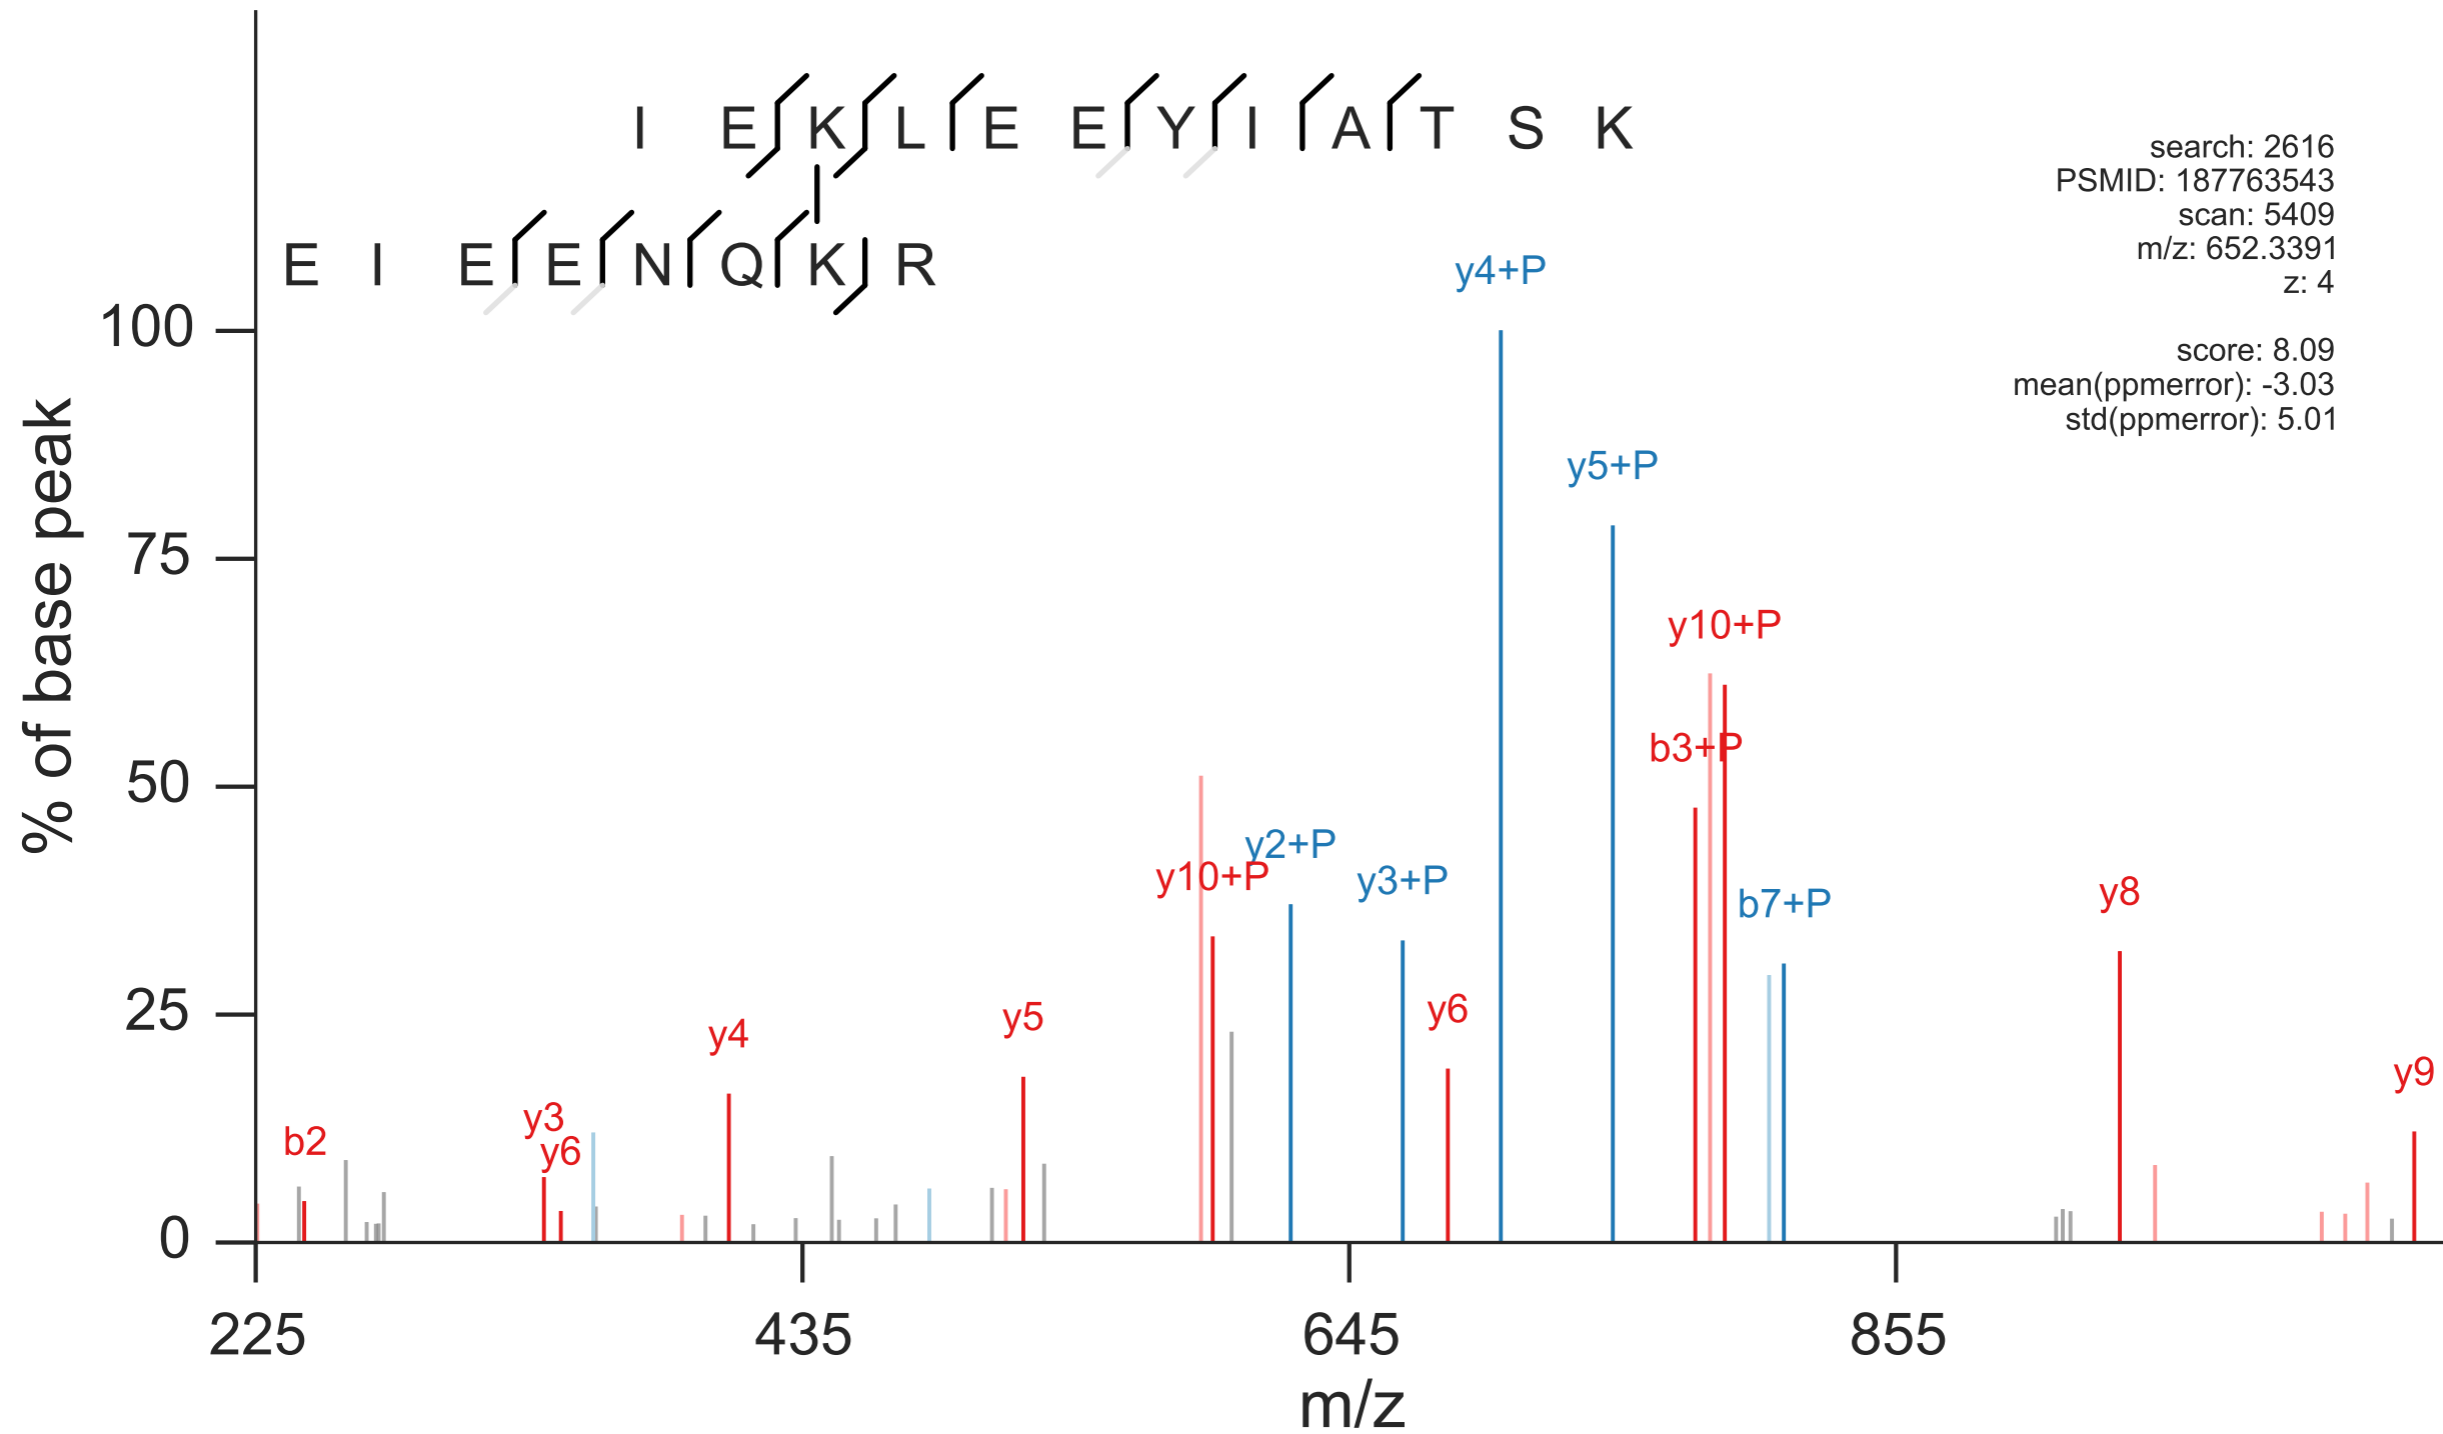

search: 2616  
 PSMID: 187763543  
 scan: 5409  
 m/z: 652.3391  
 z: 4  
 score: 8.09  
 mean(ppmerror): -3.03  
 std(ppmerror): 5.01

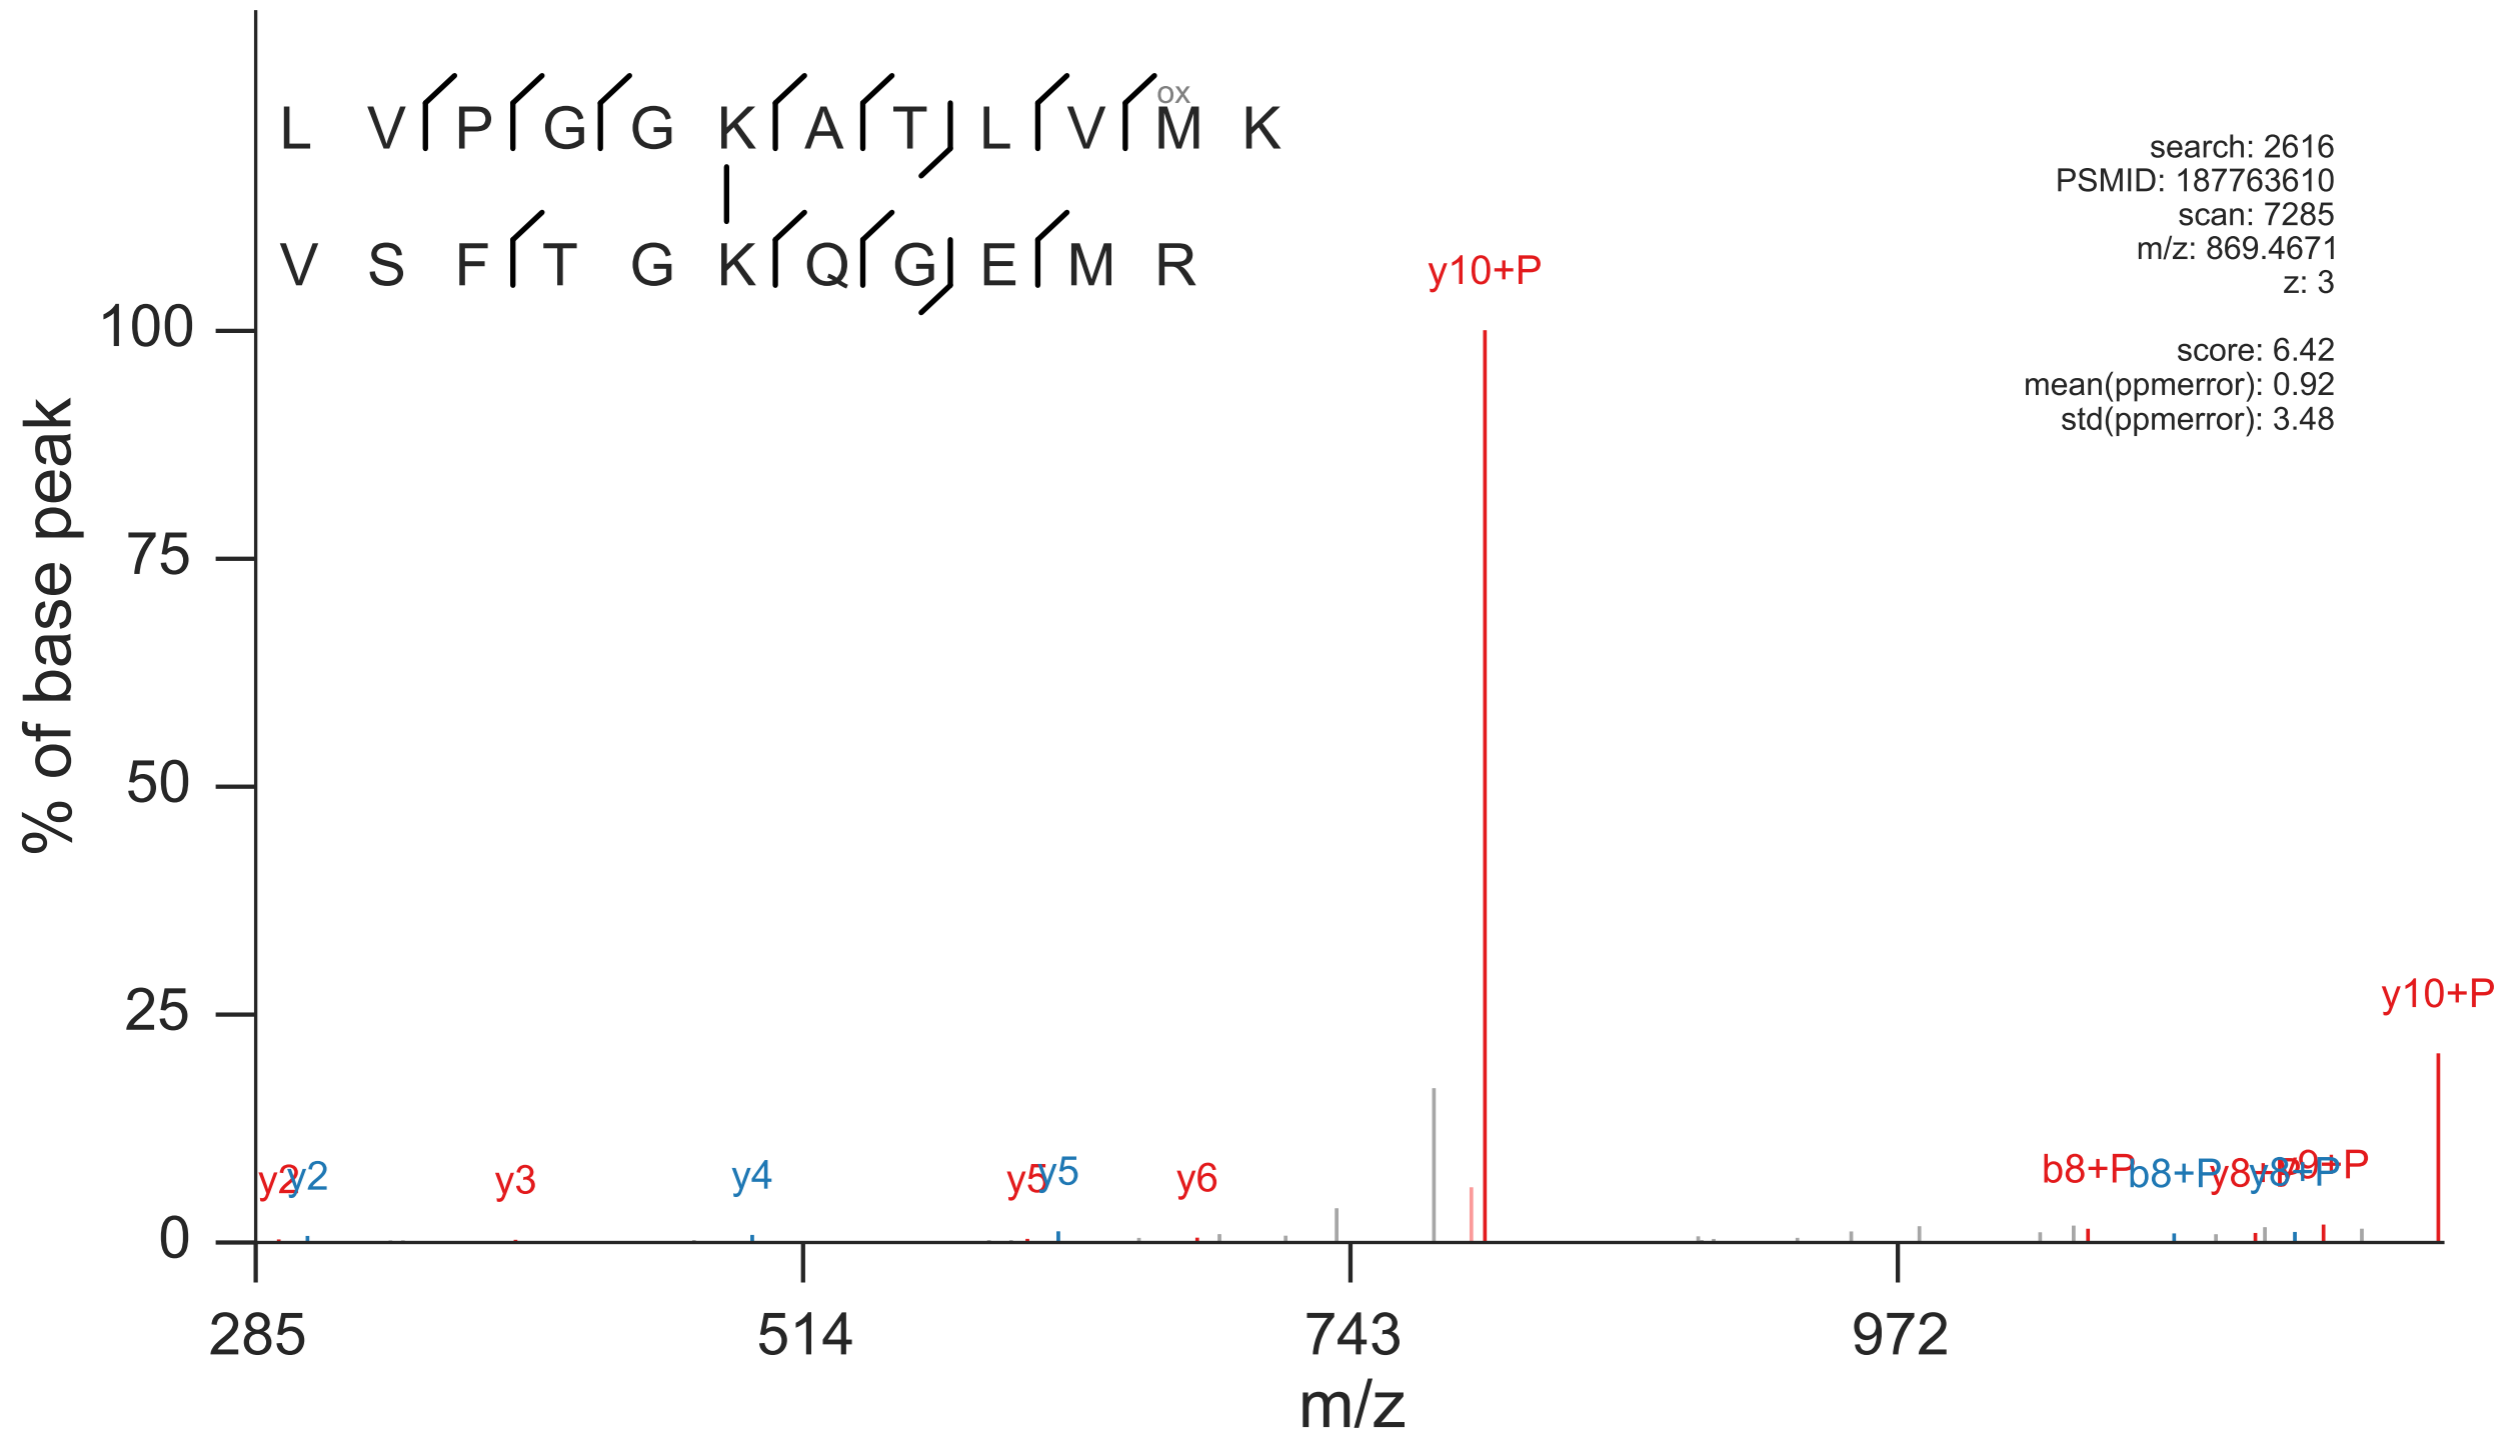

search: 2616  
 PSMID: 187763610  
 scan: 7285  
 m/z: 869.4671  
 z: 3

score: 6.42  
 mean(ppmerror): 0.92  
 std(ppmerror): 3.48

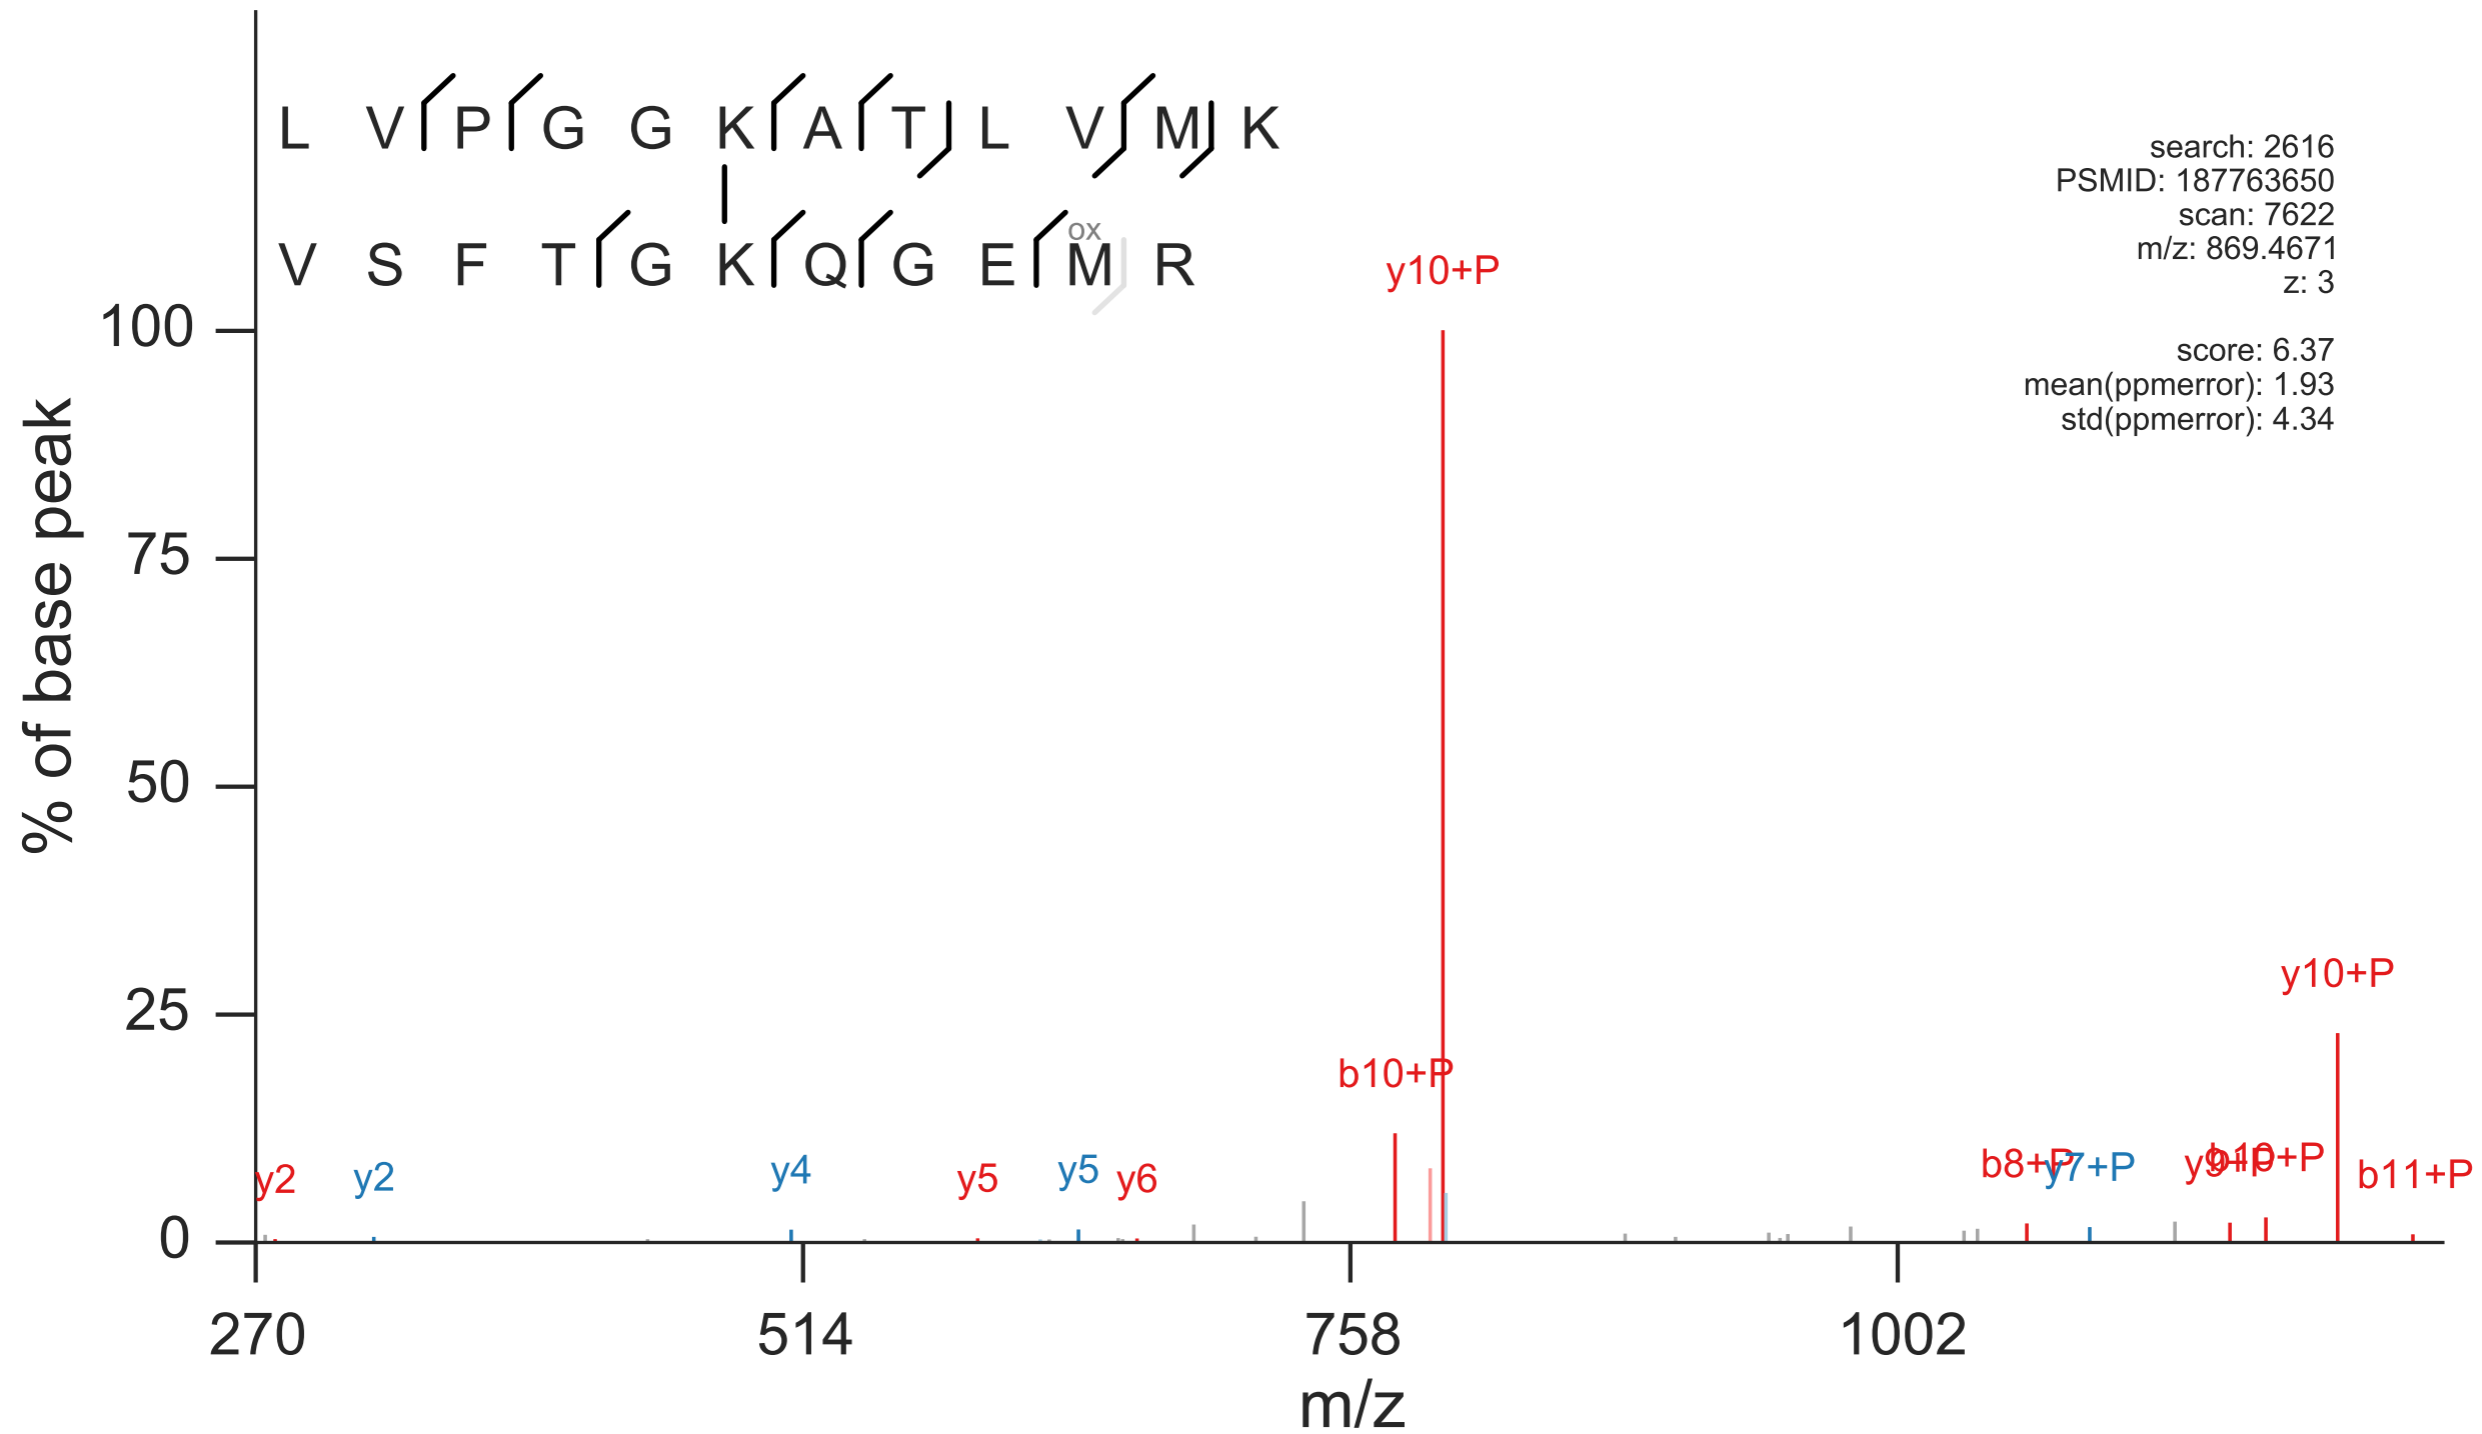

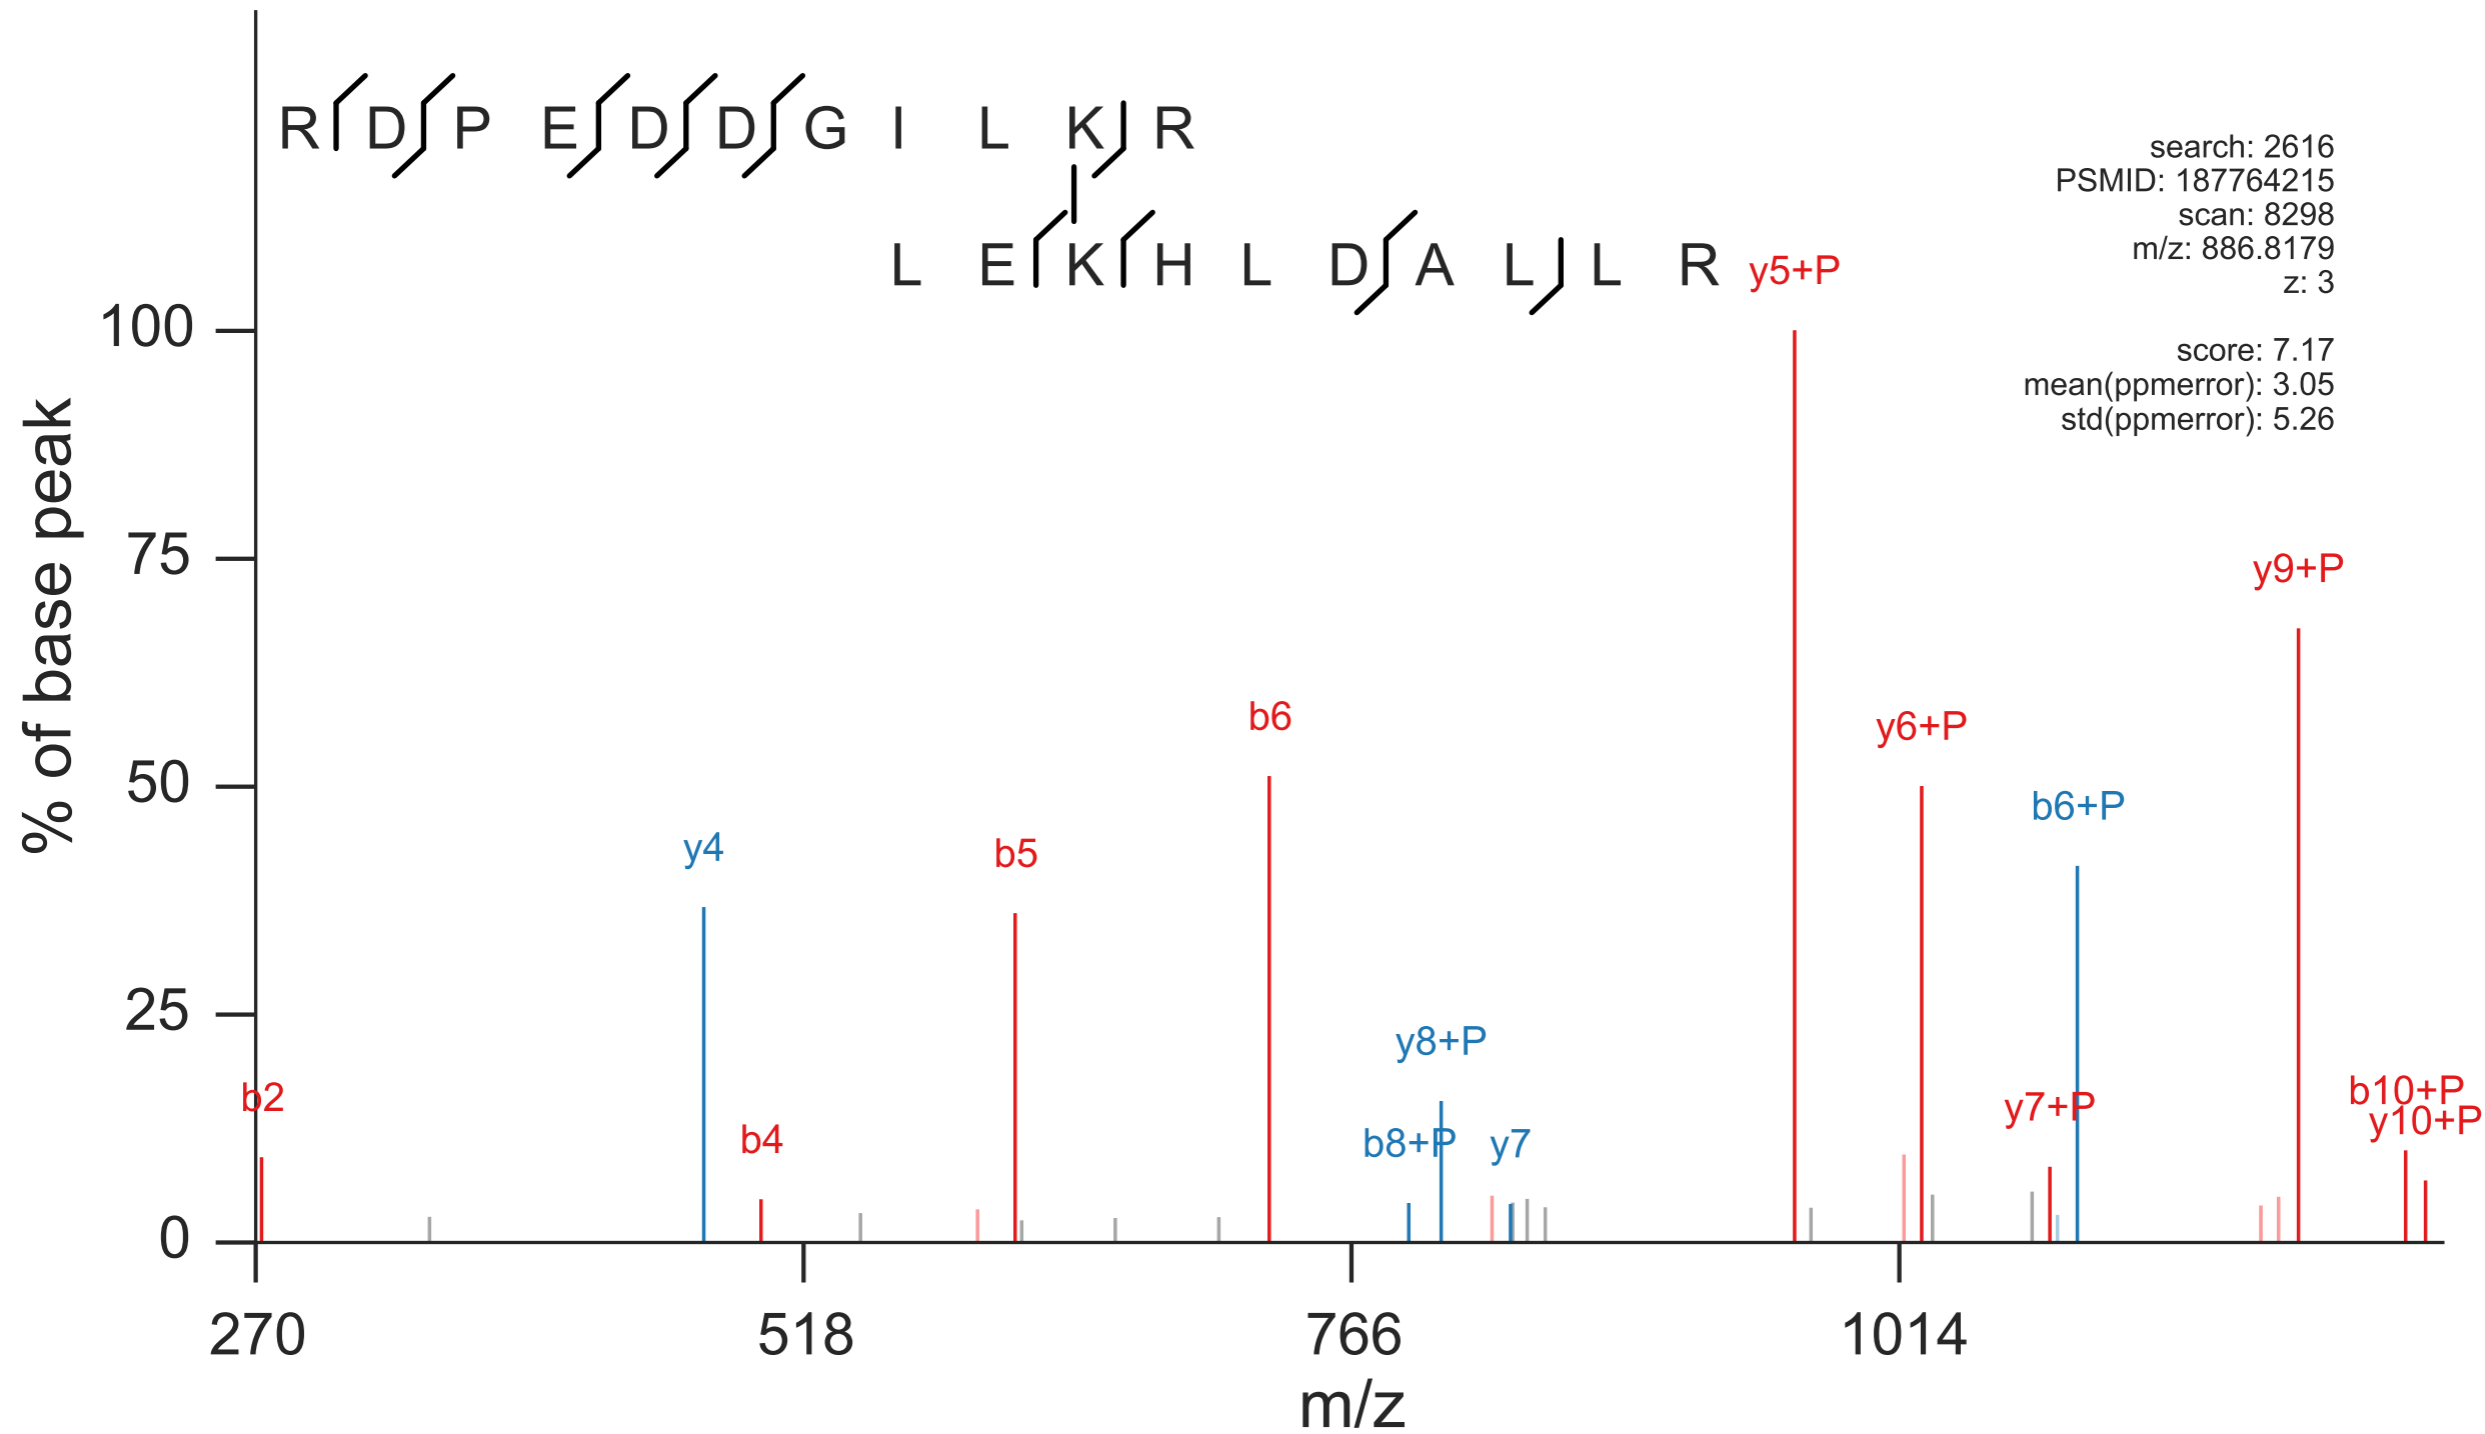



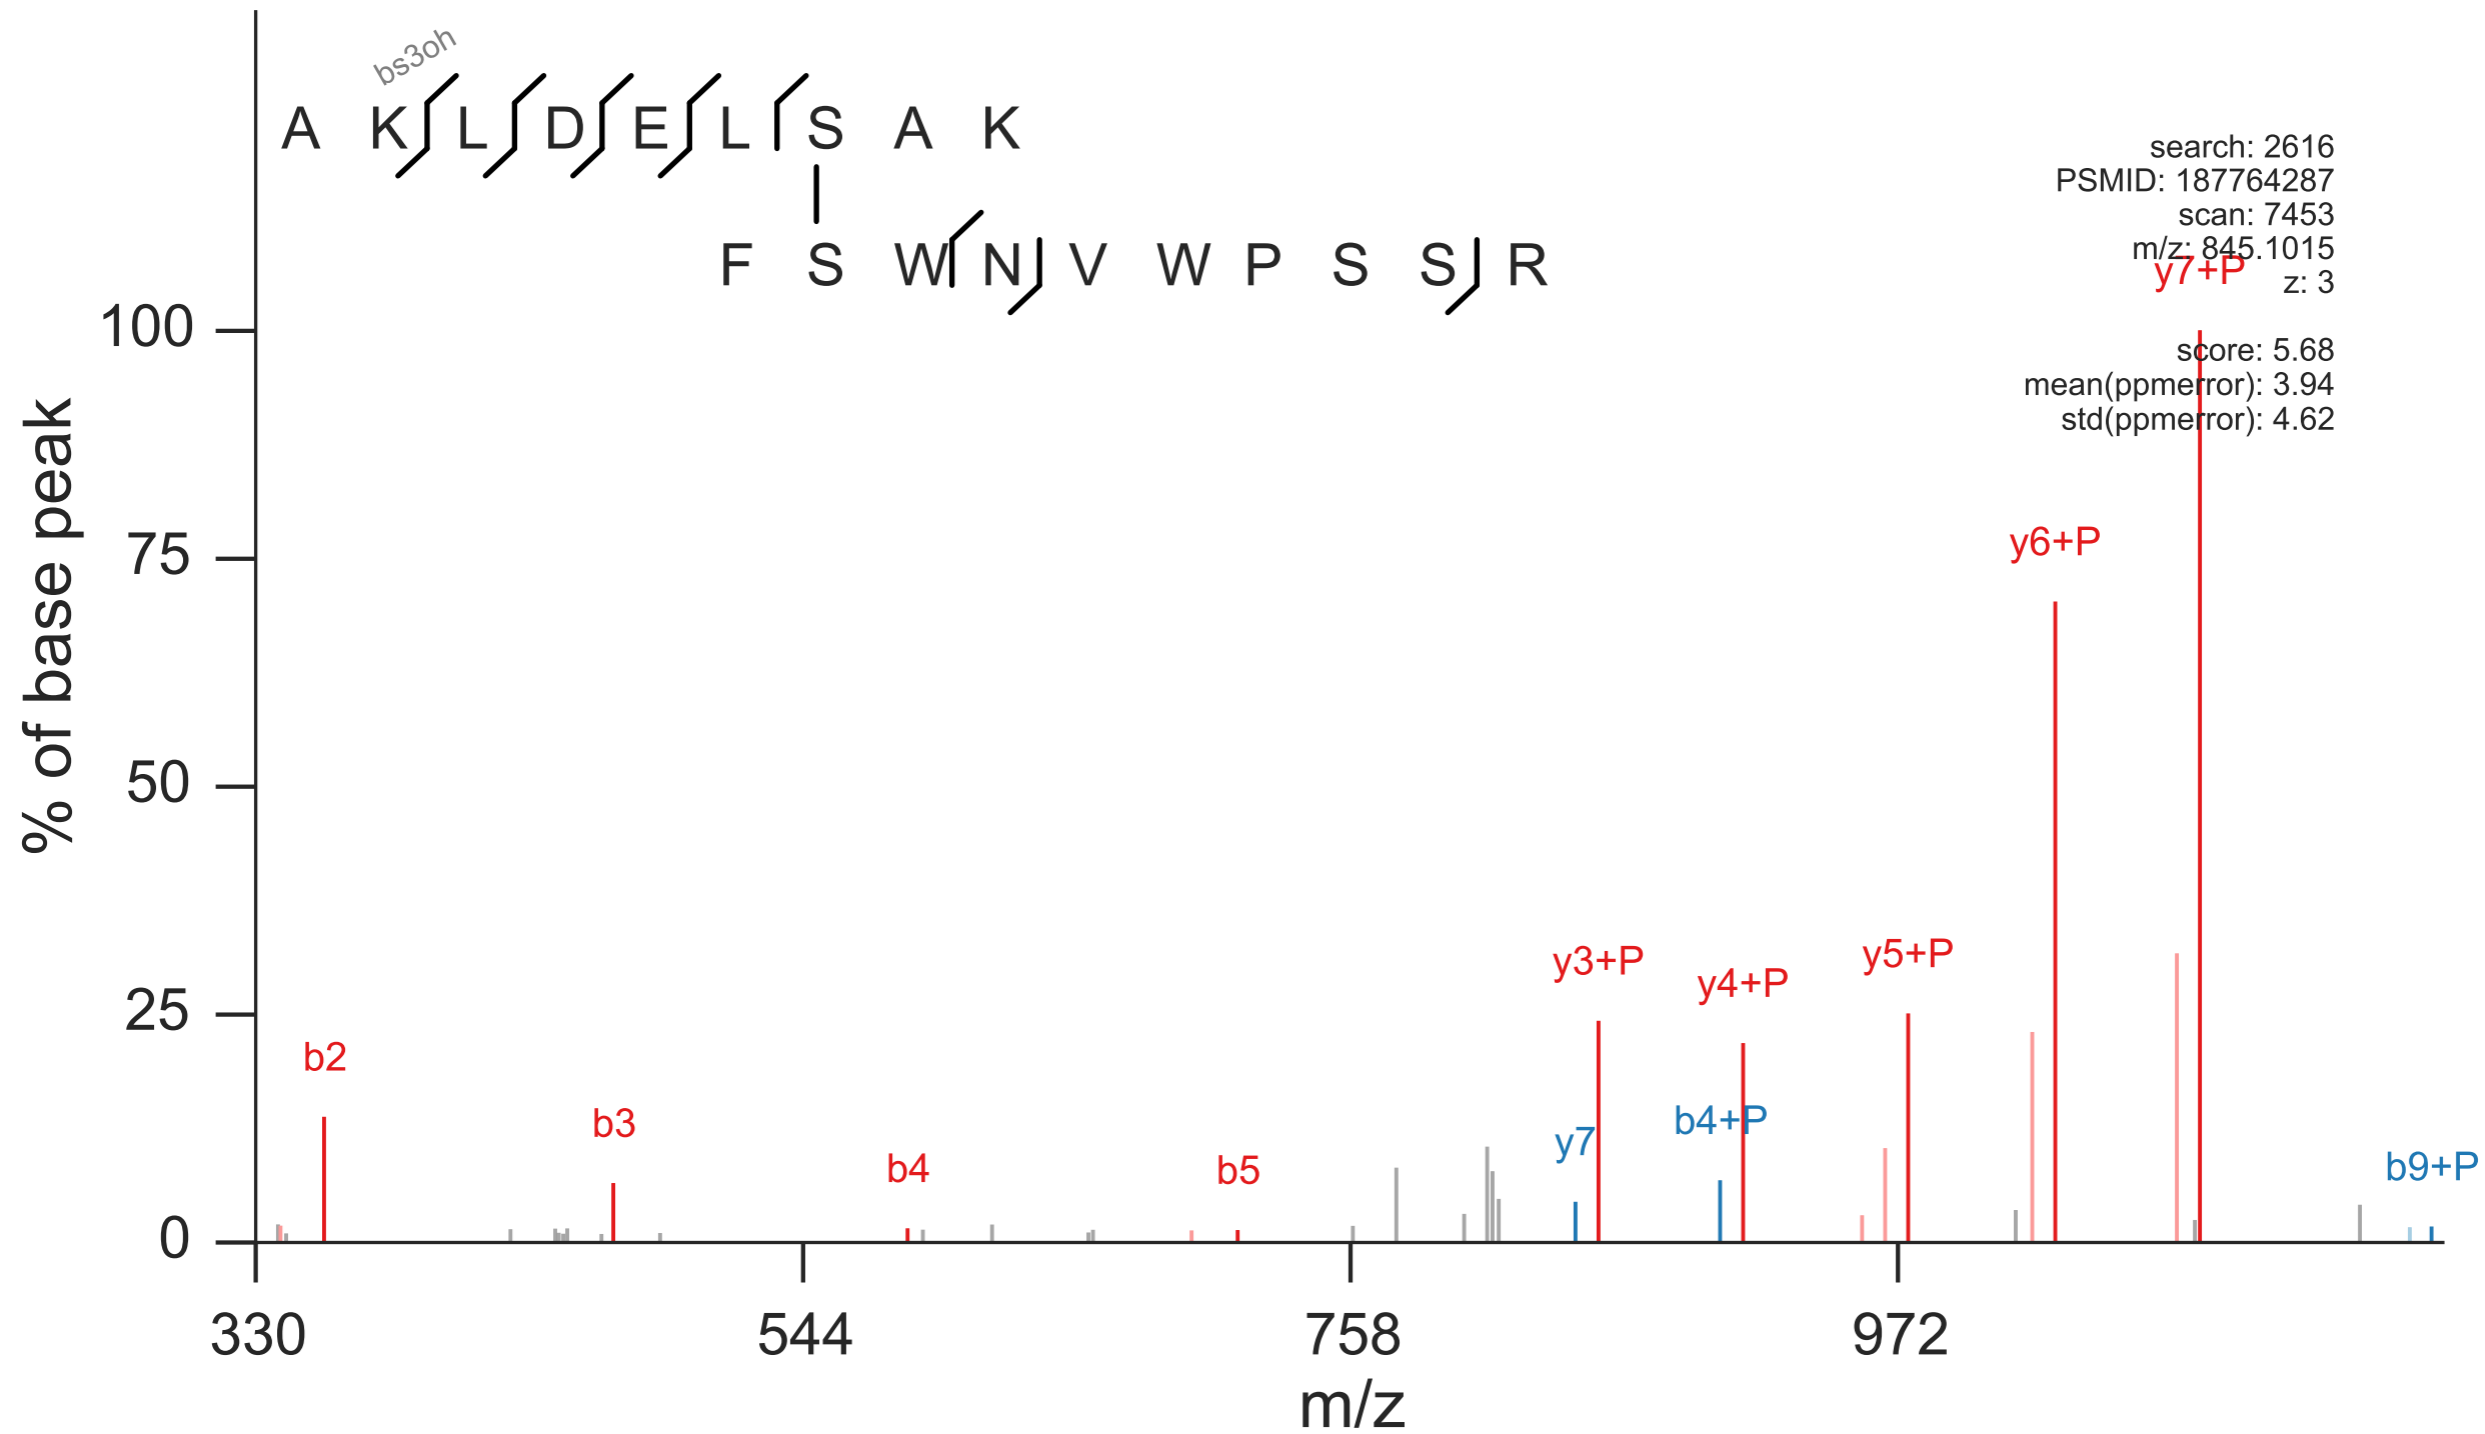

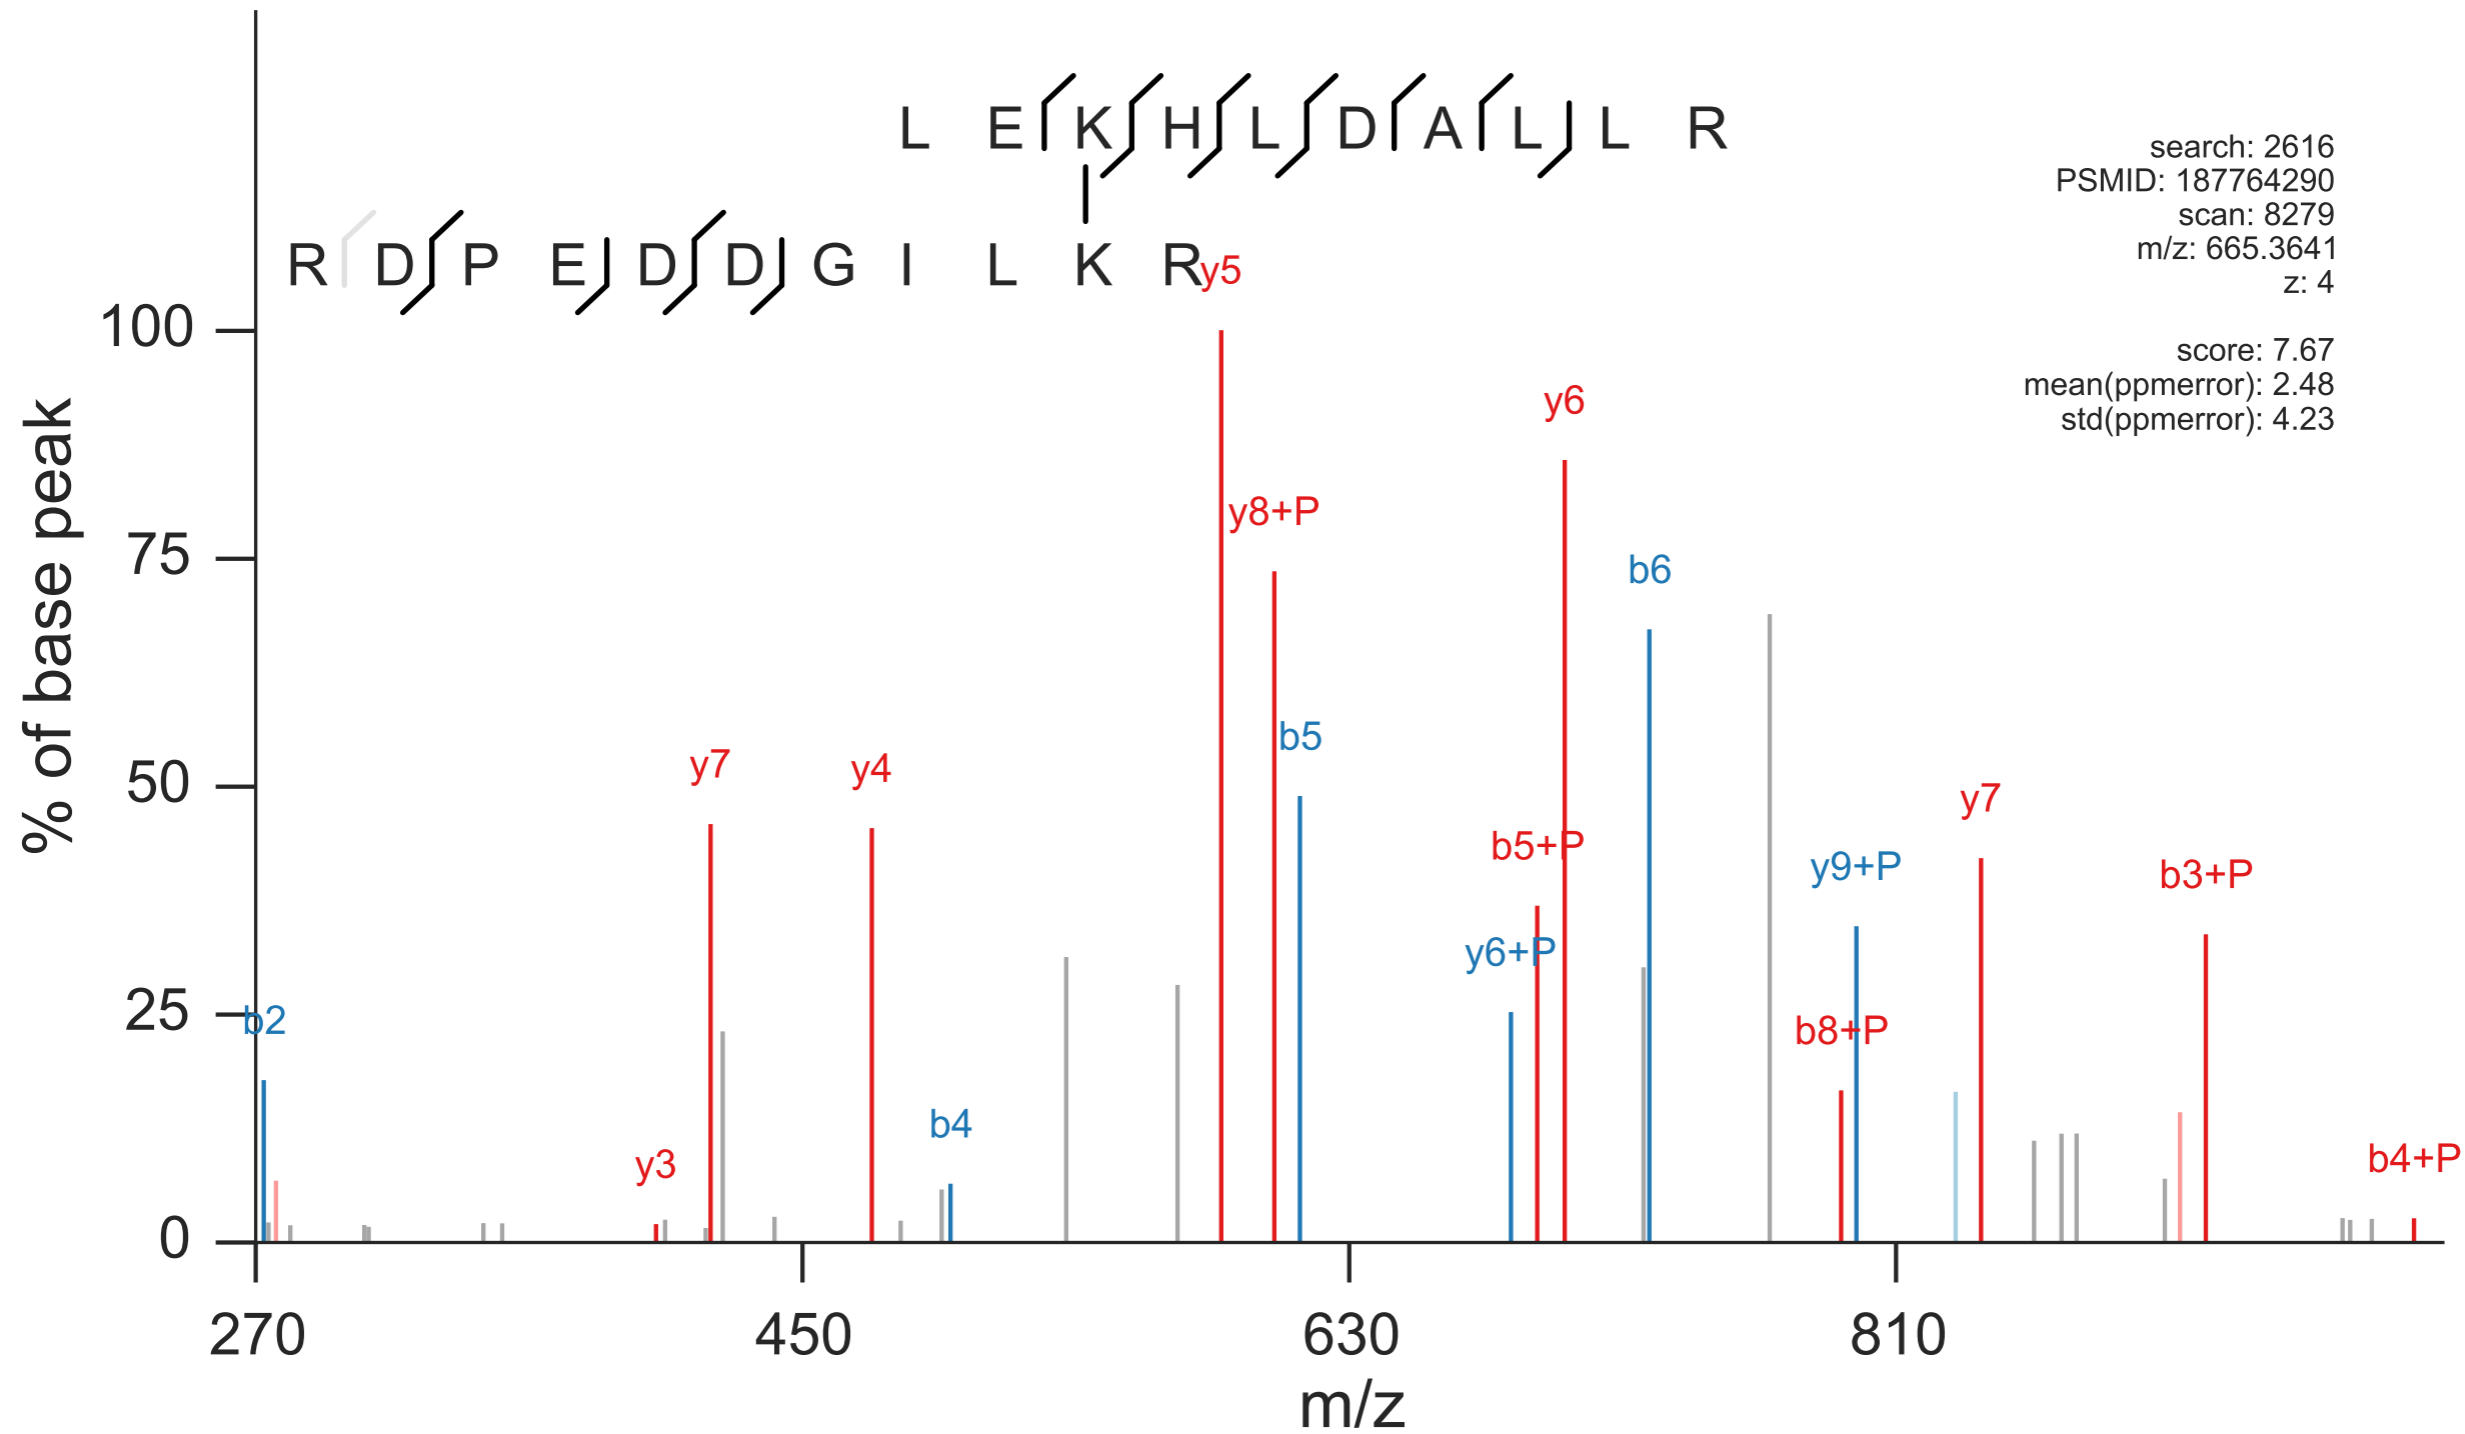

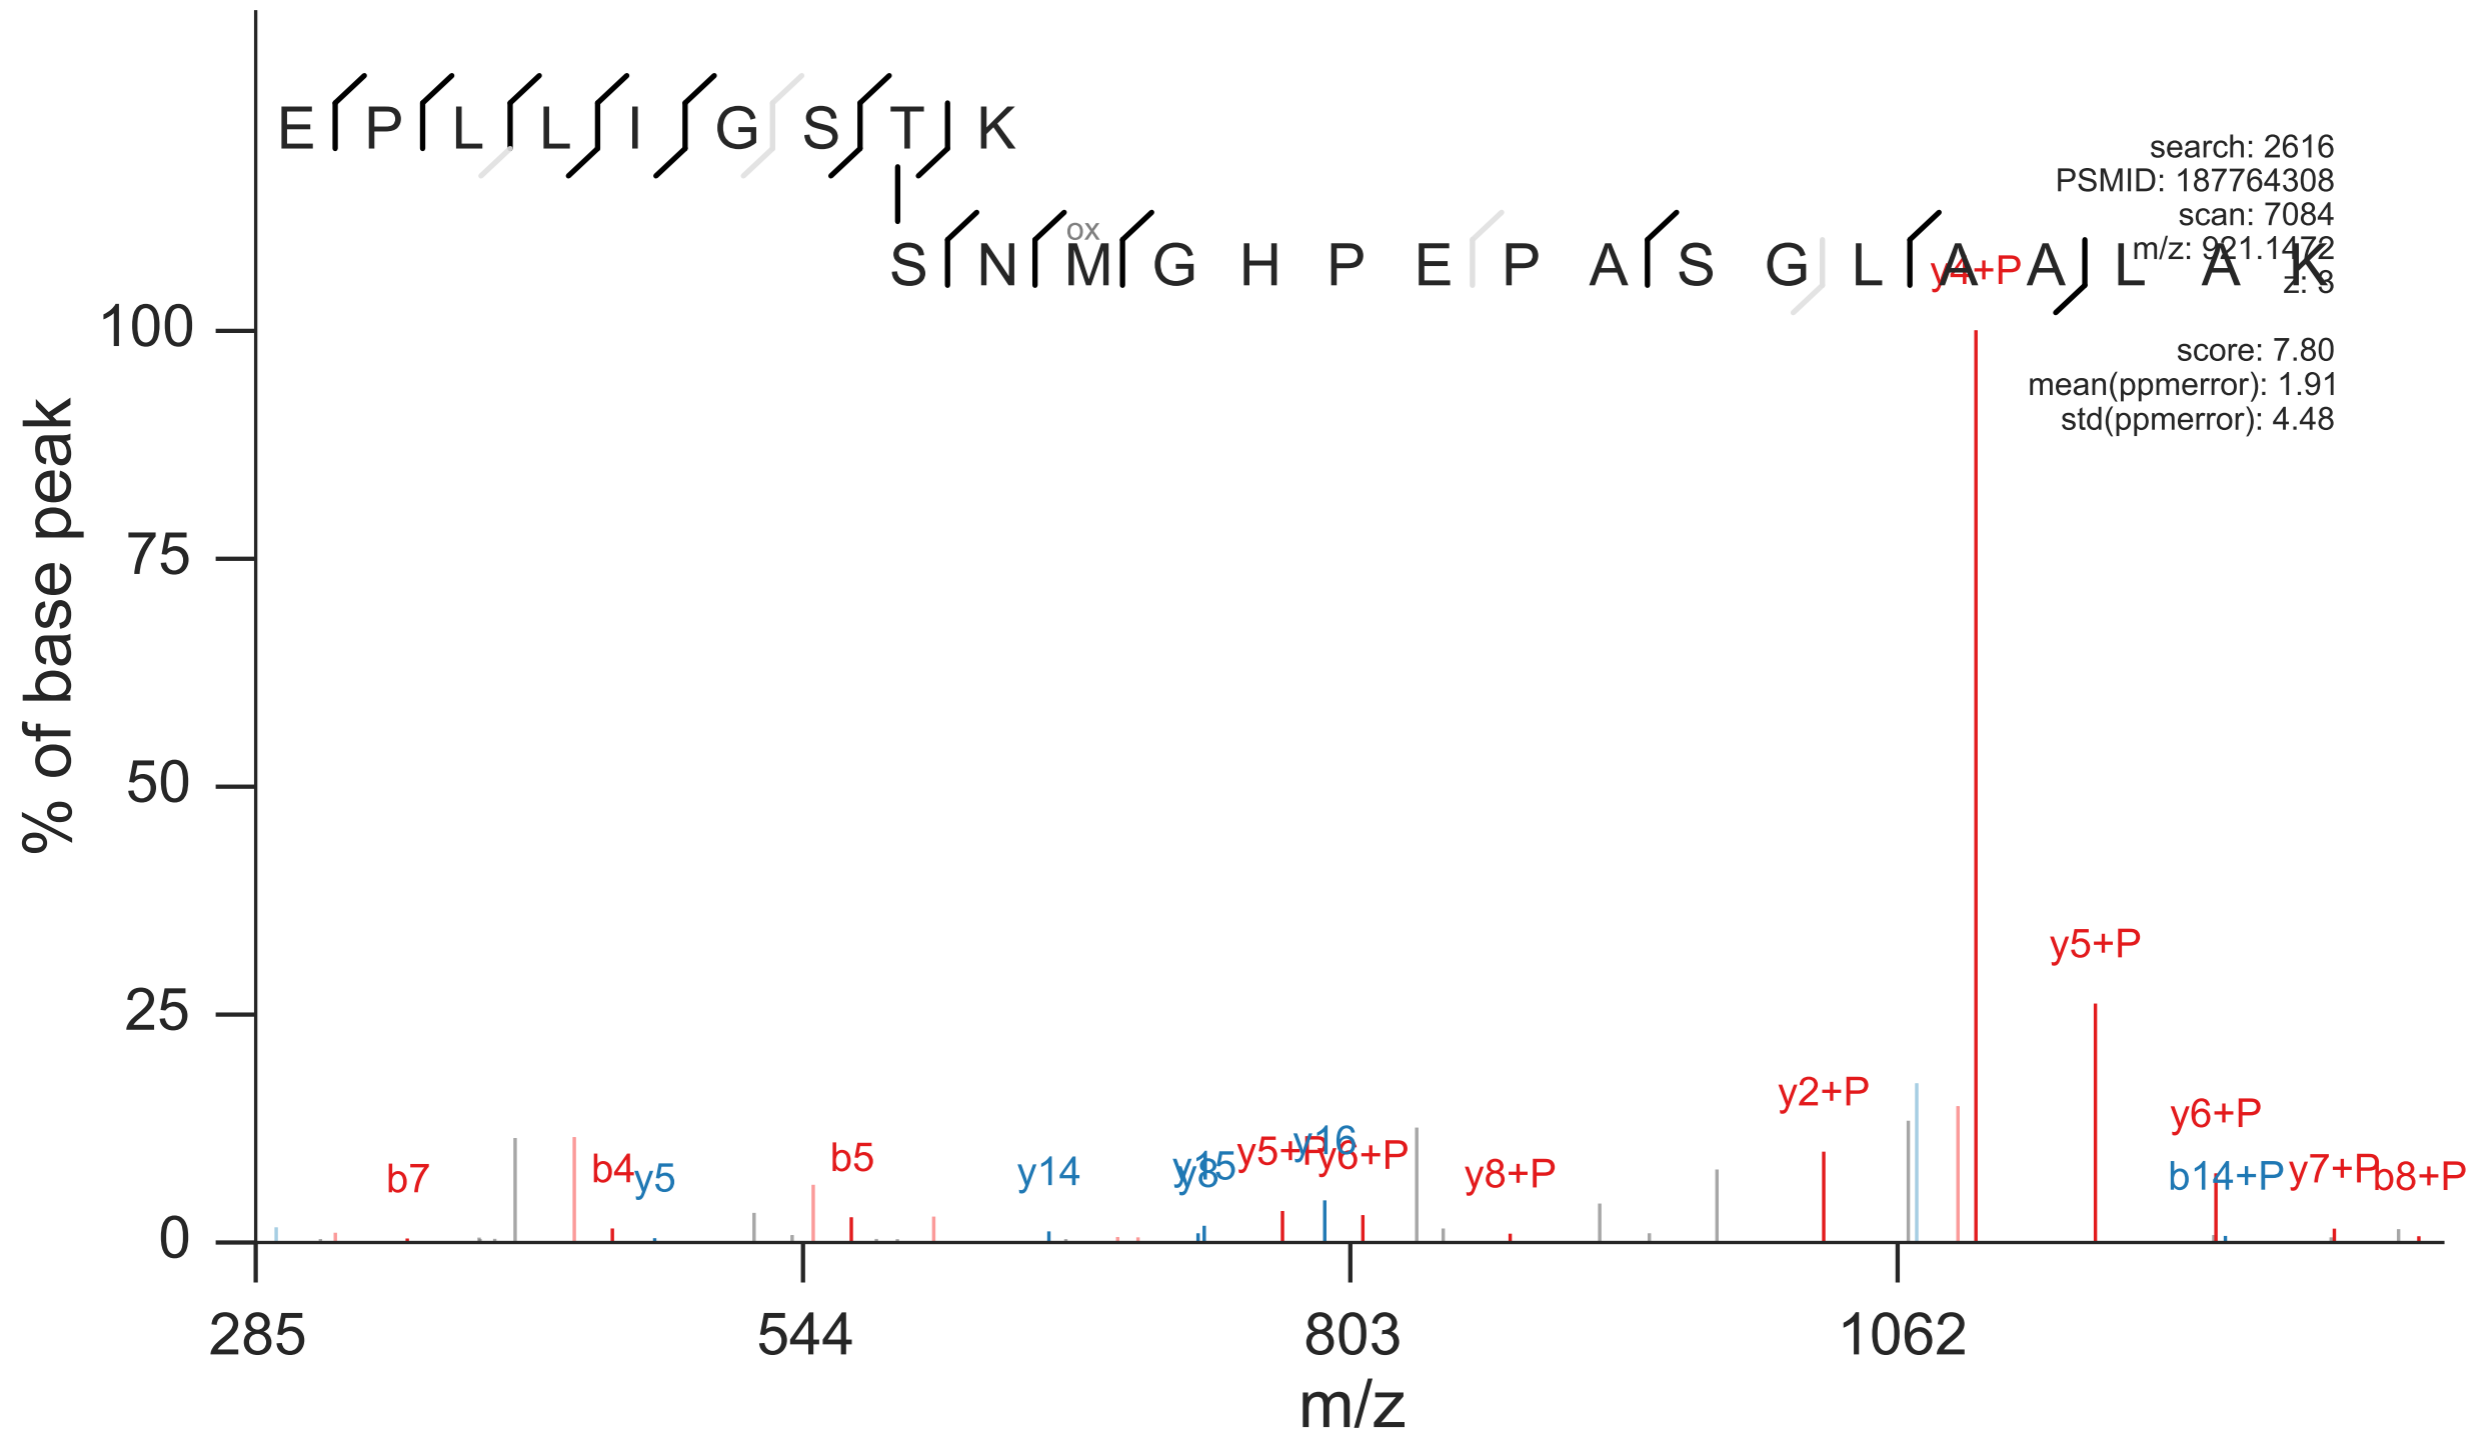

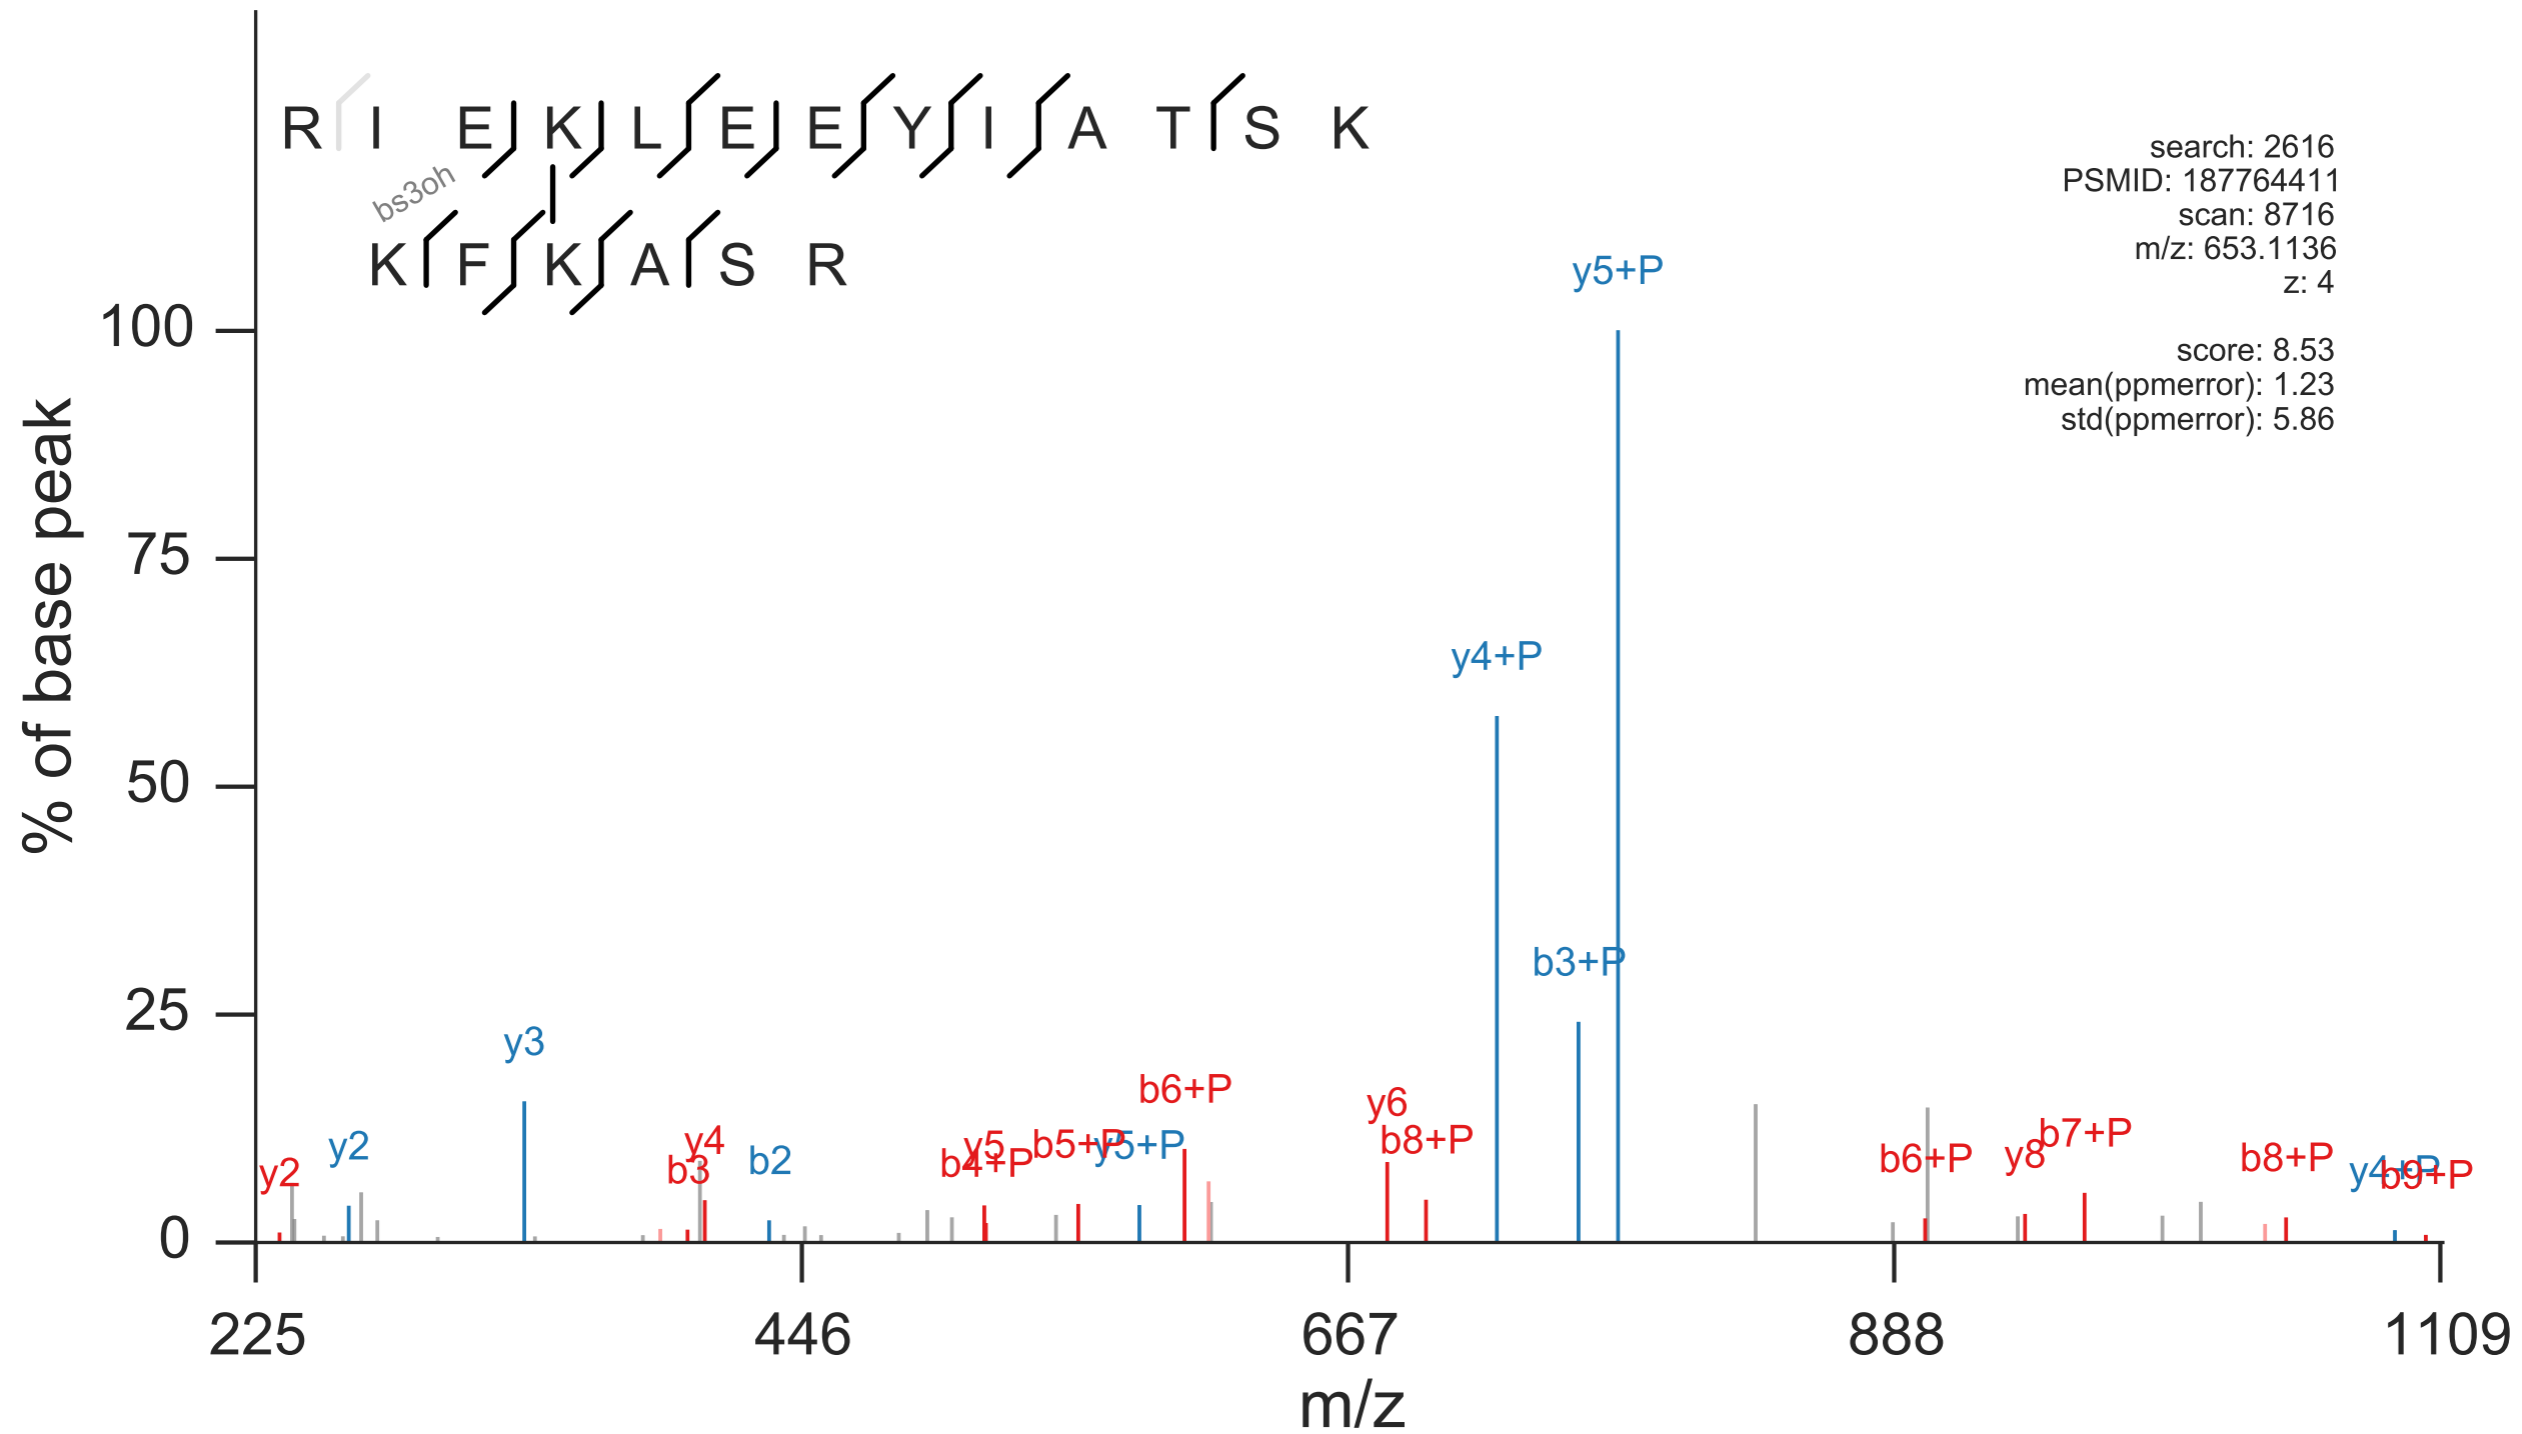

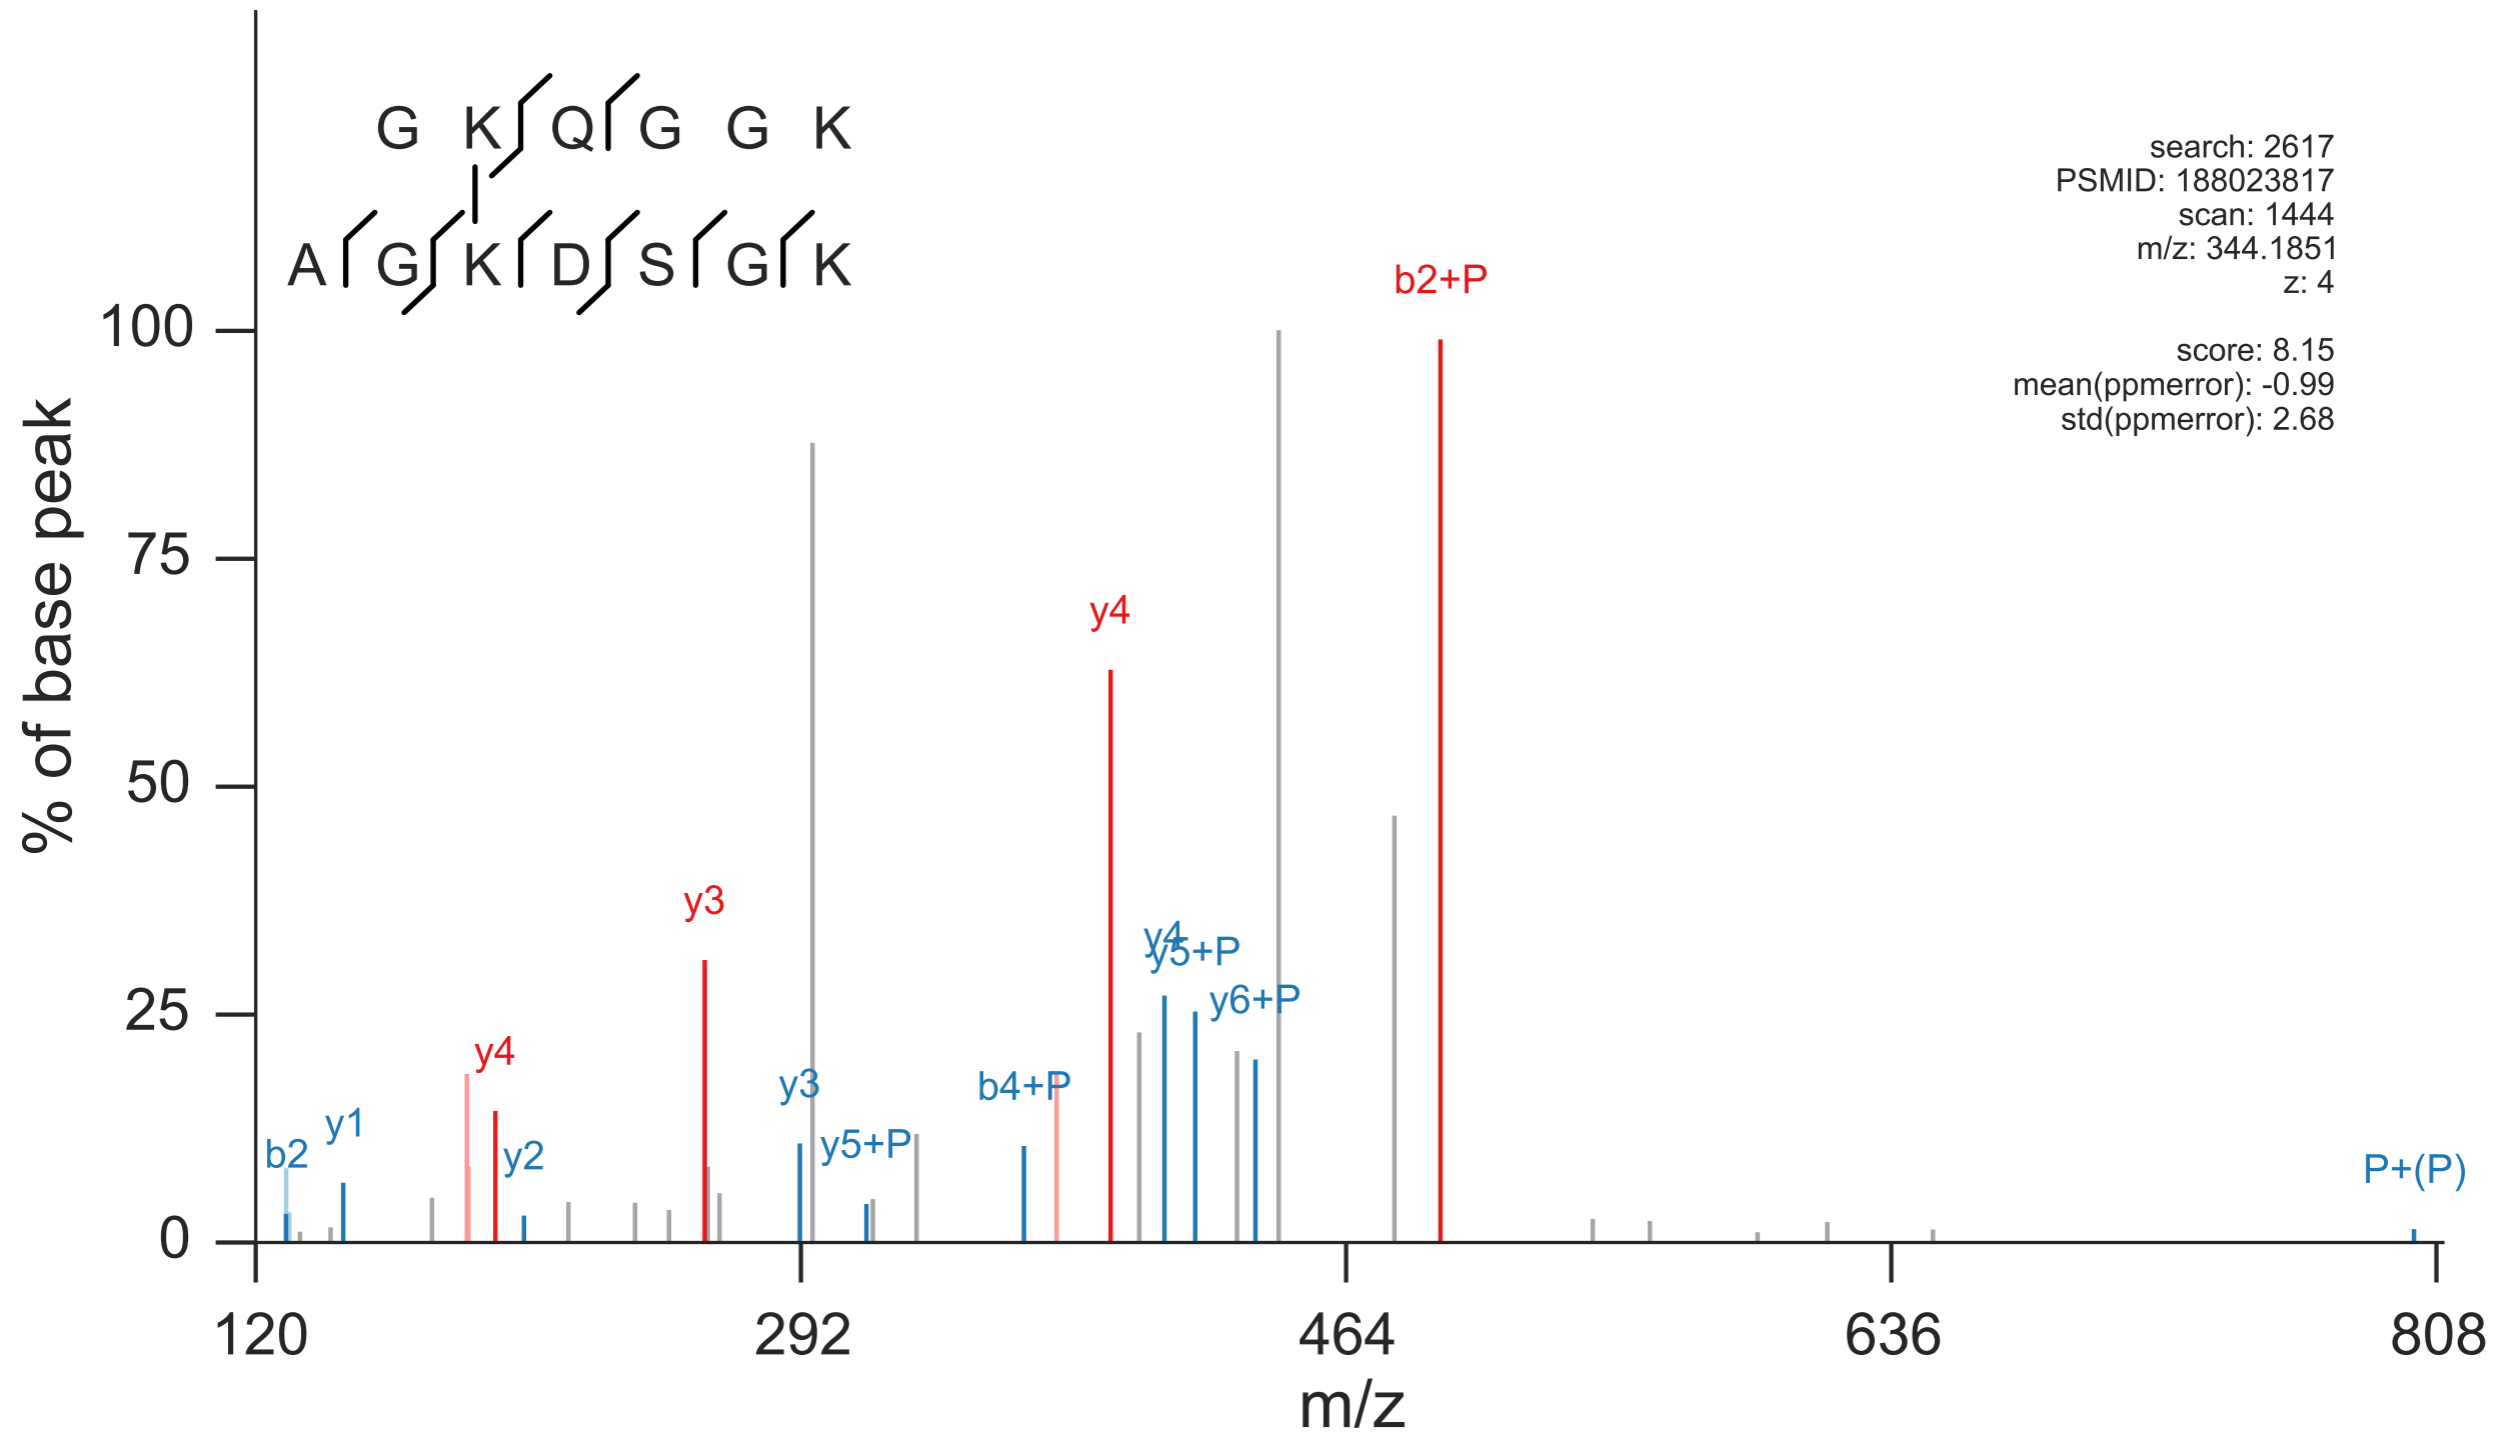

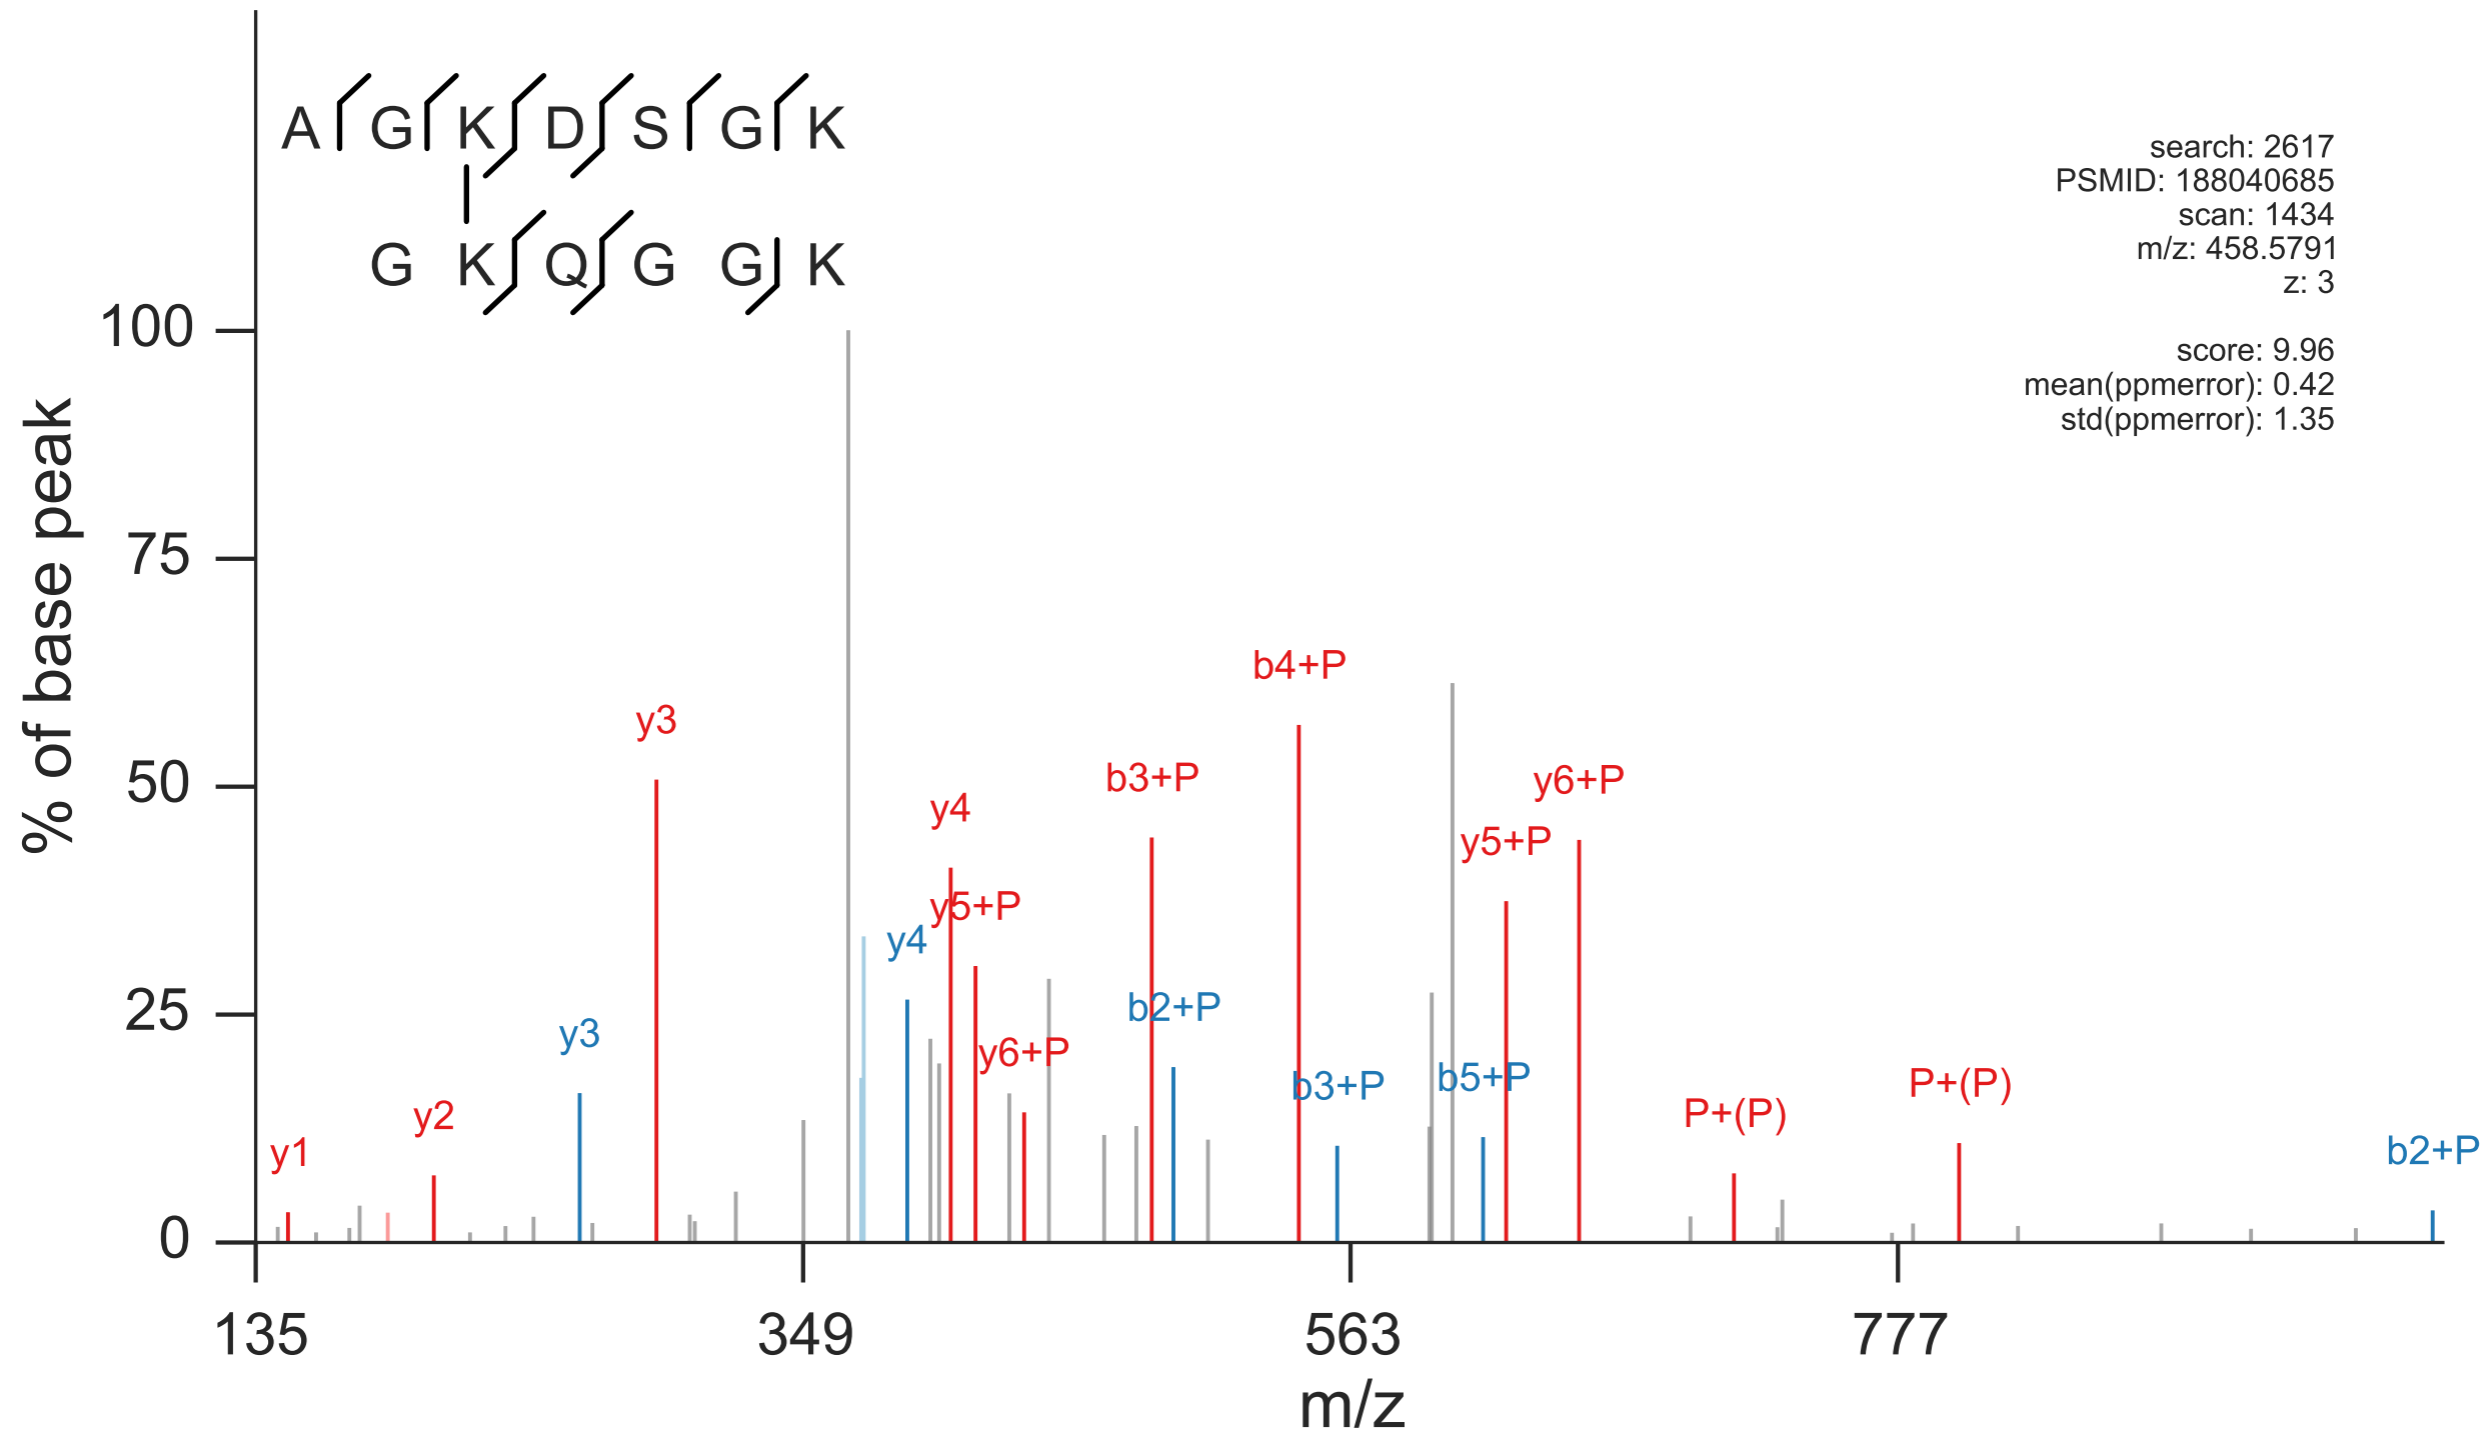

search: 2617  
 PSMID: 188040685  
 scan: 1434  
 m/z: 458.5791  
 z: 3

score: 9.96  
 mean(ppmerror): 0.42  
 std(ppmerror): 1.35

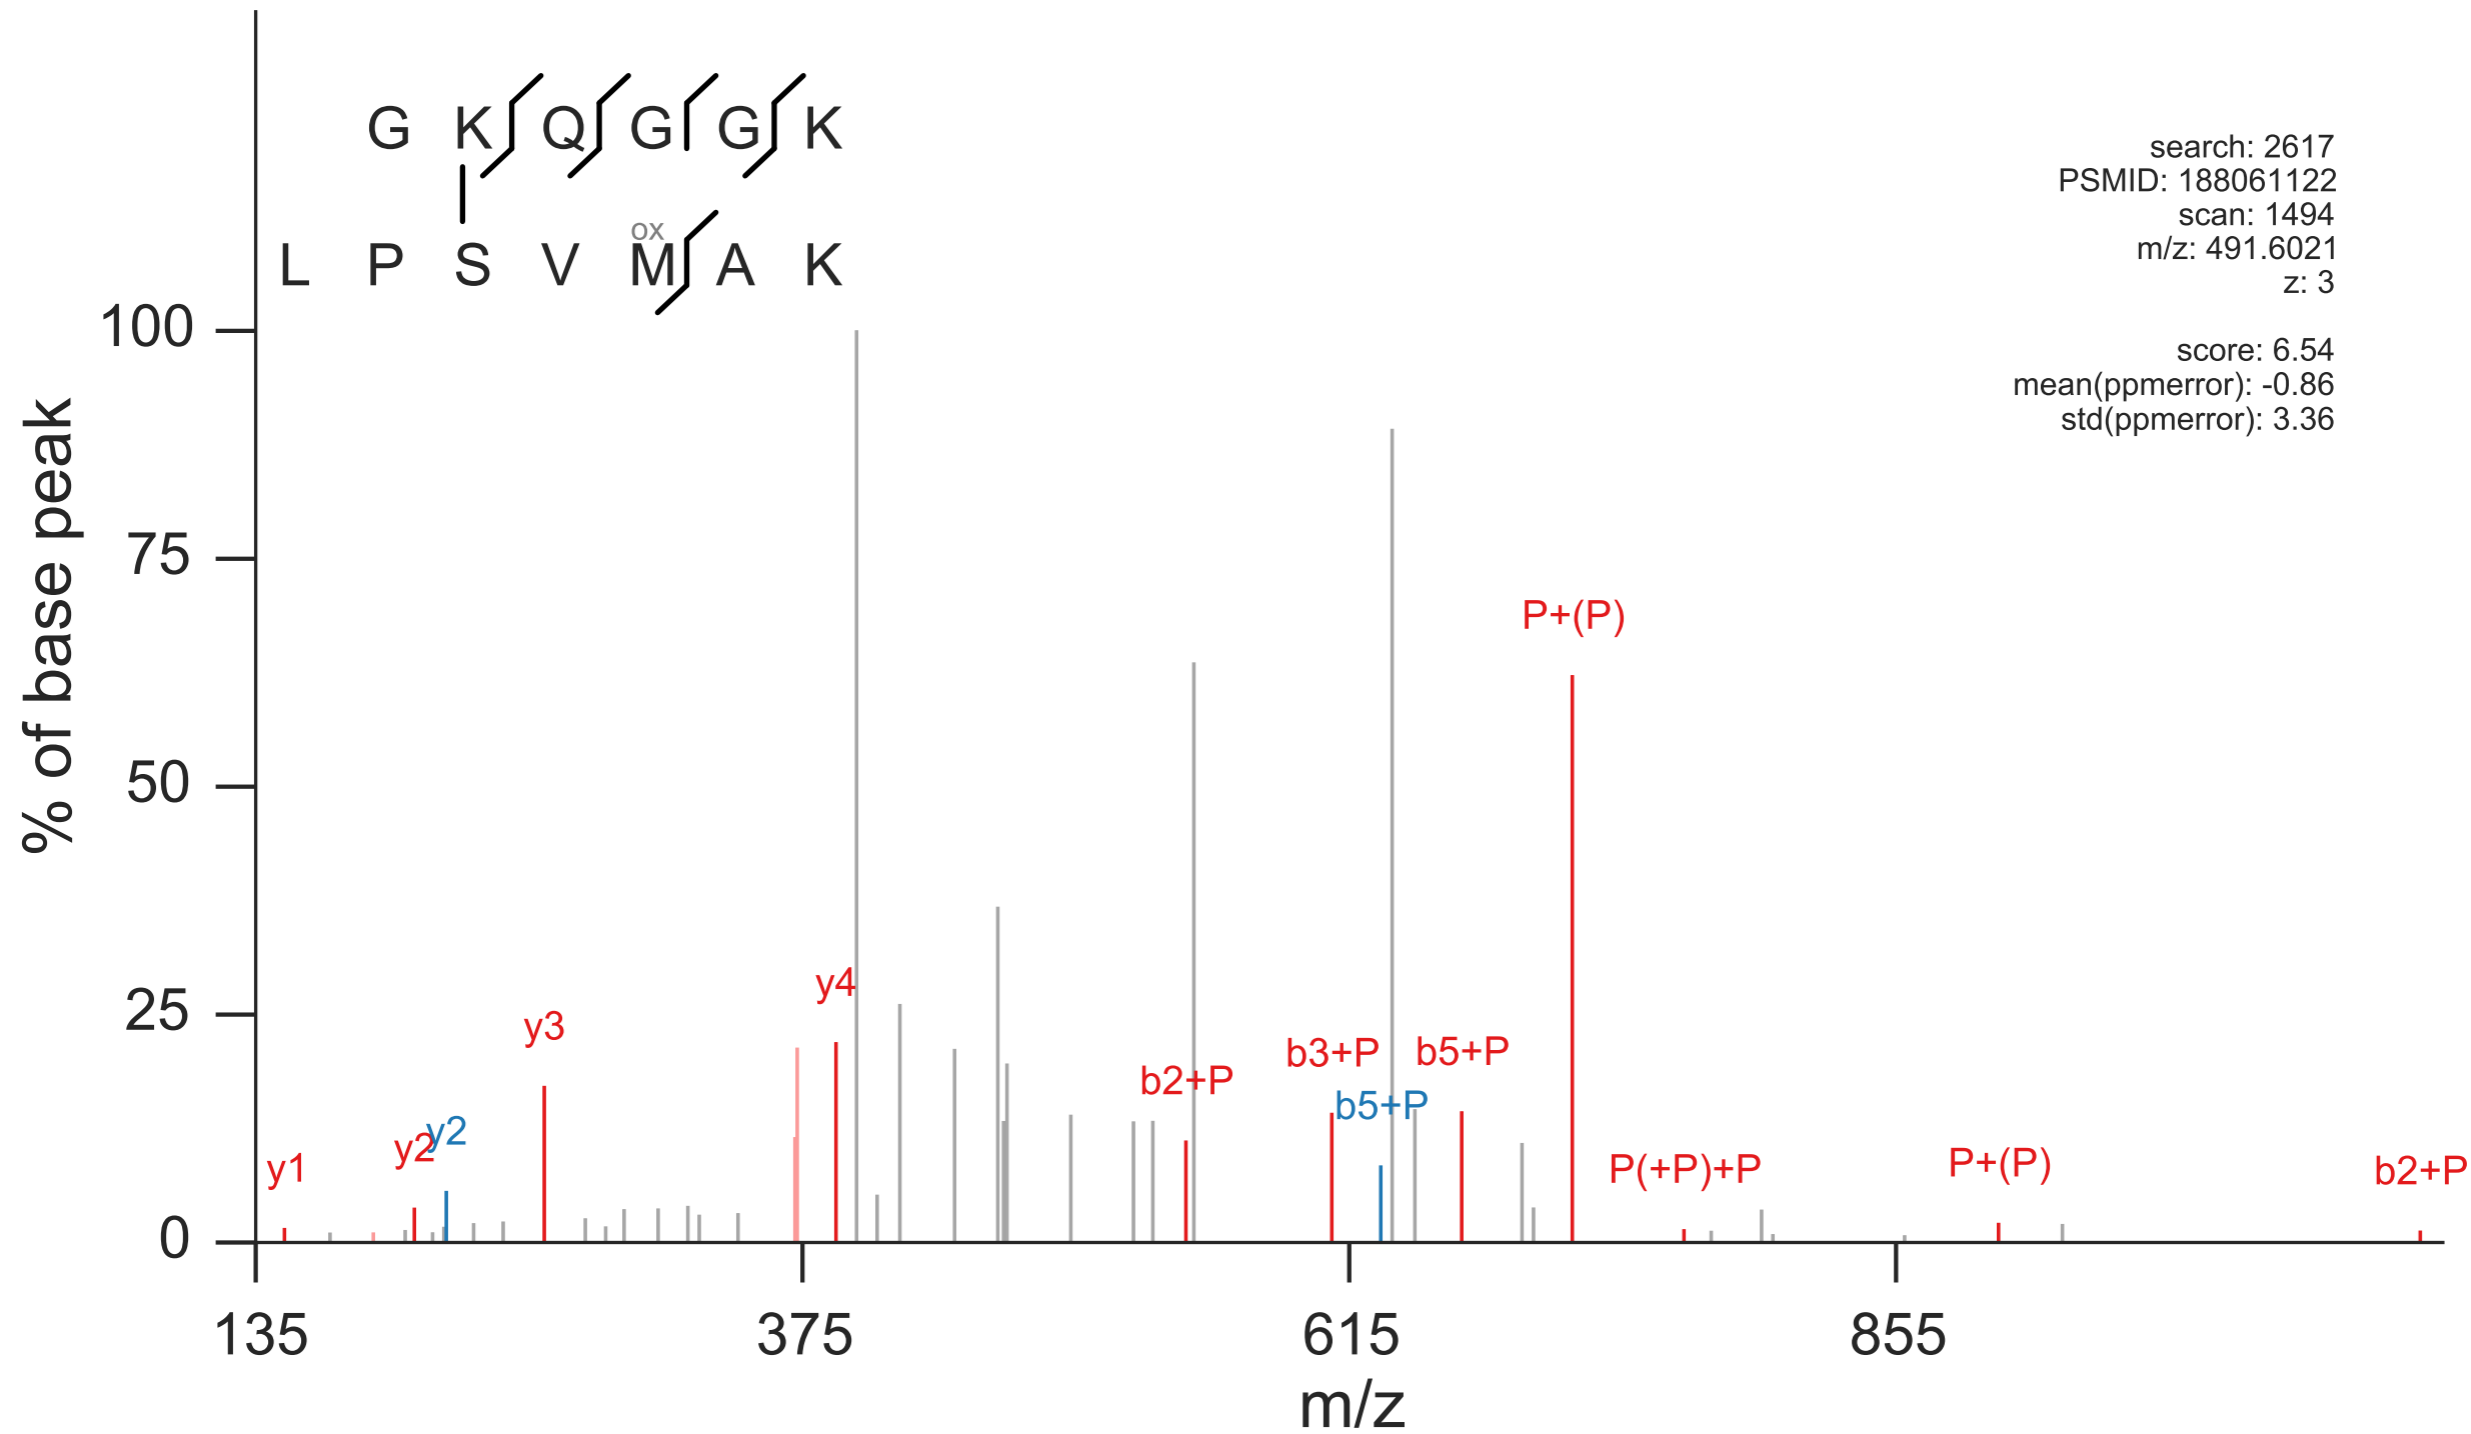

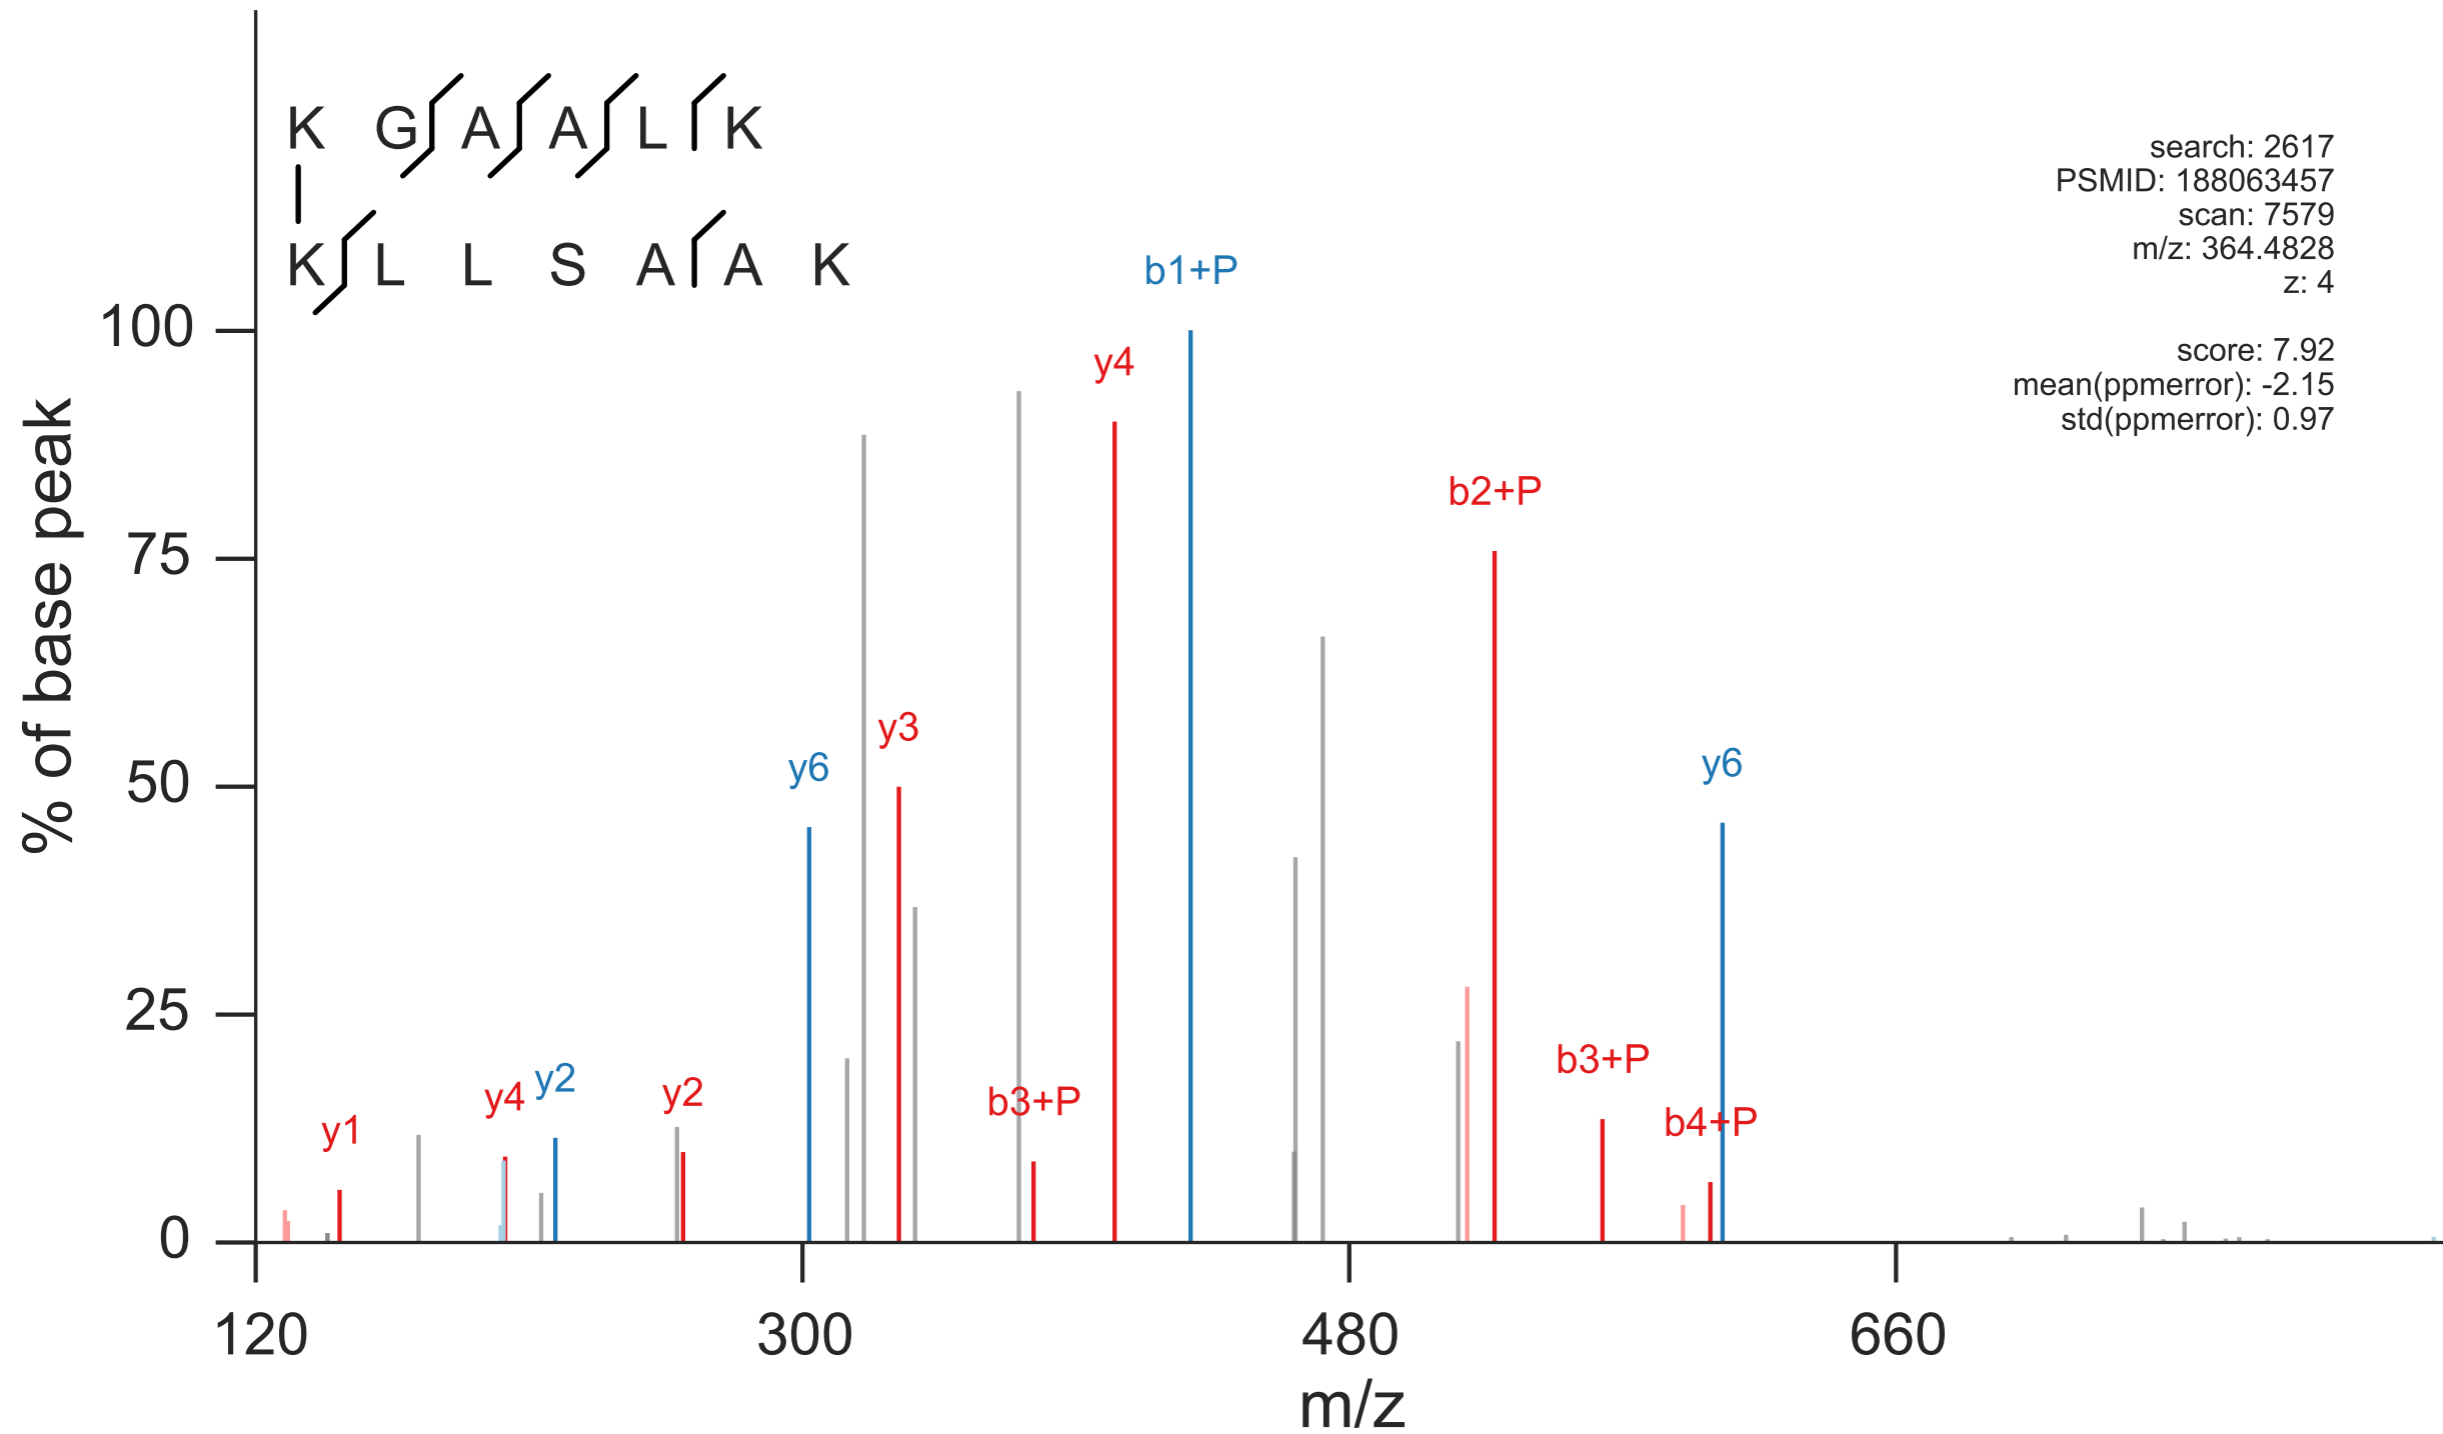



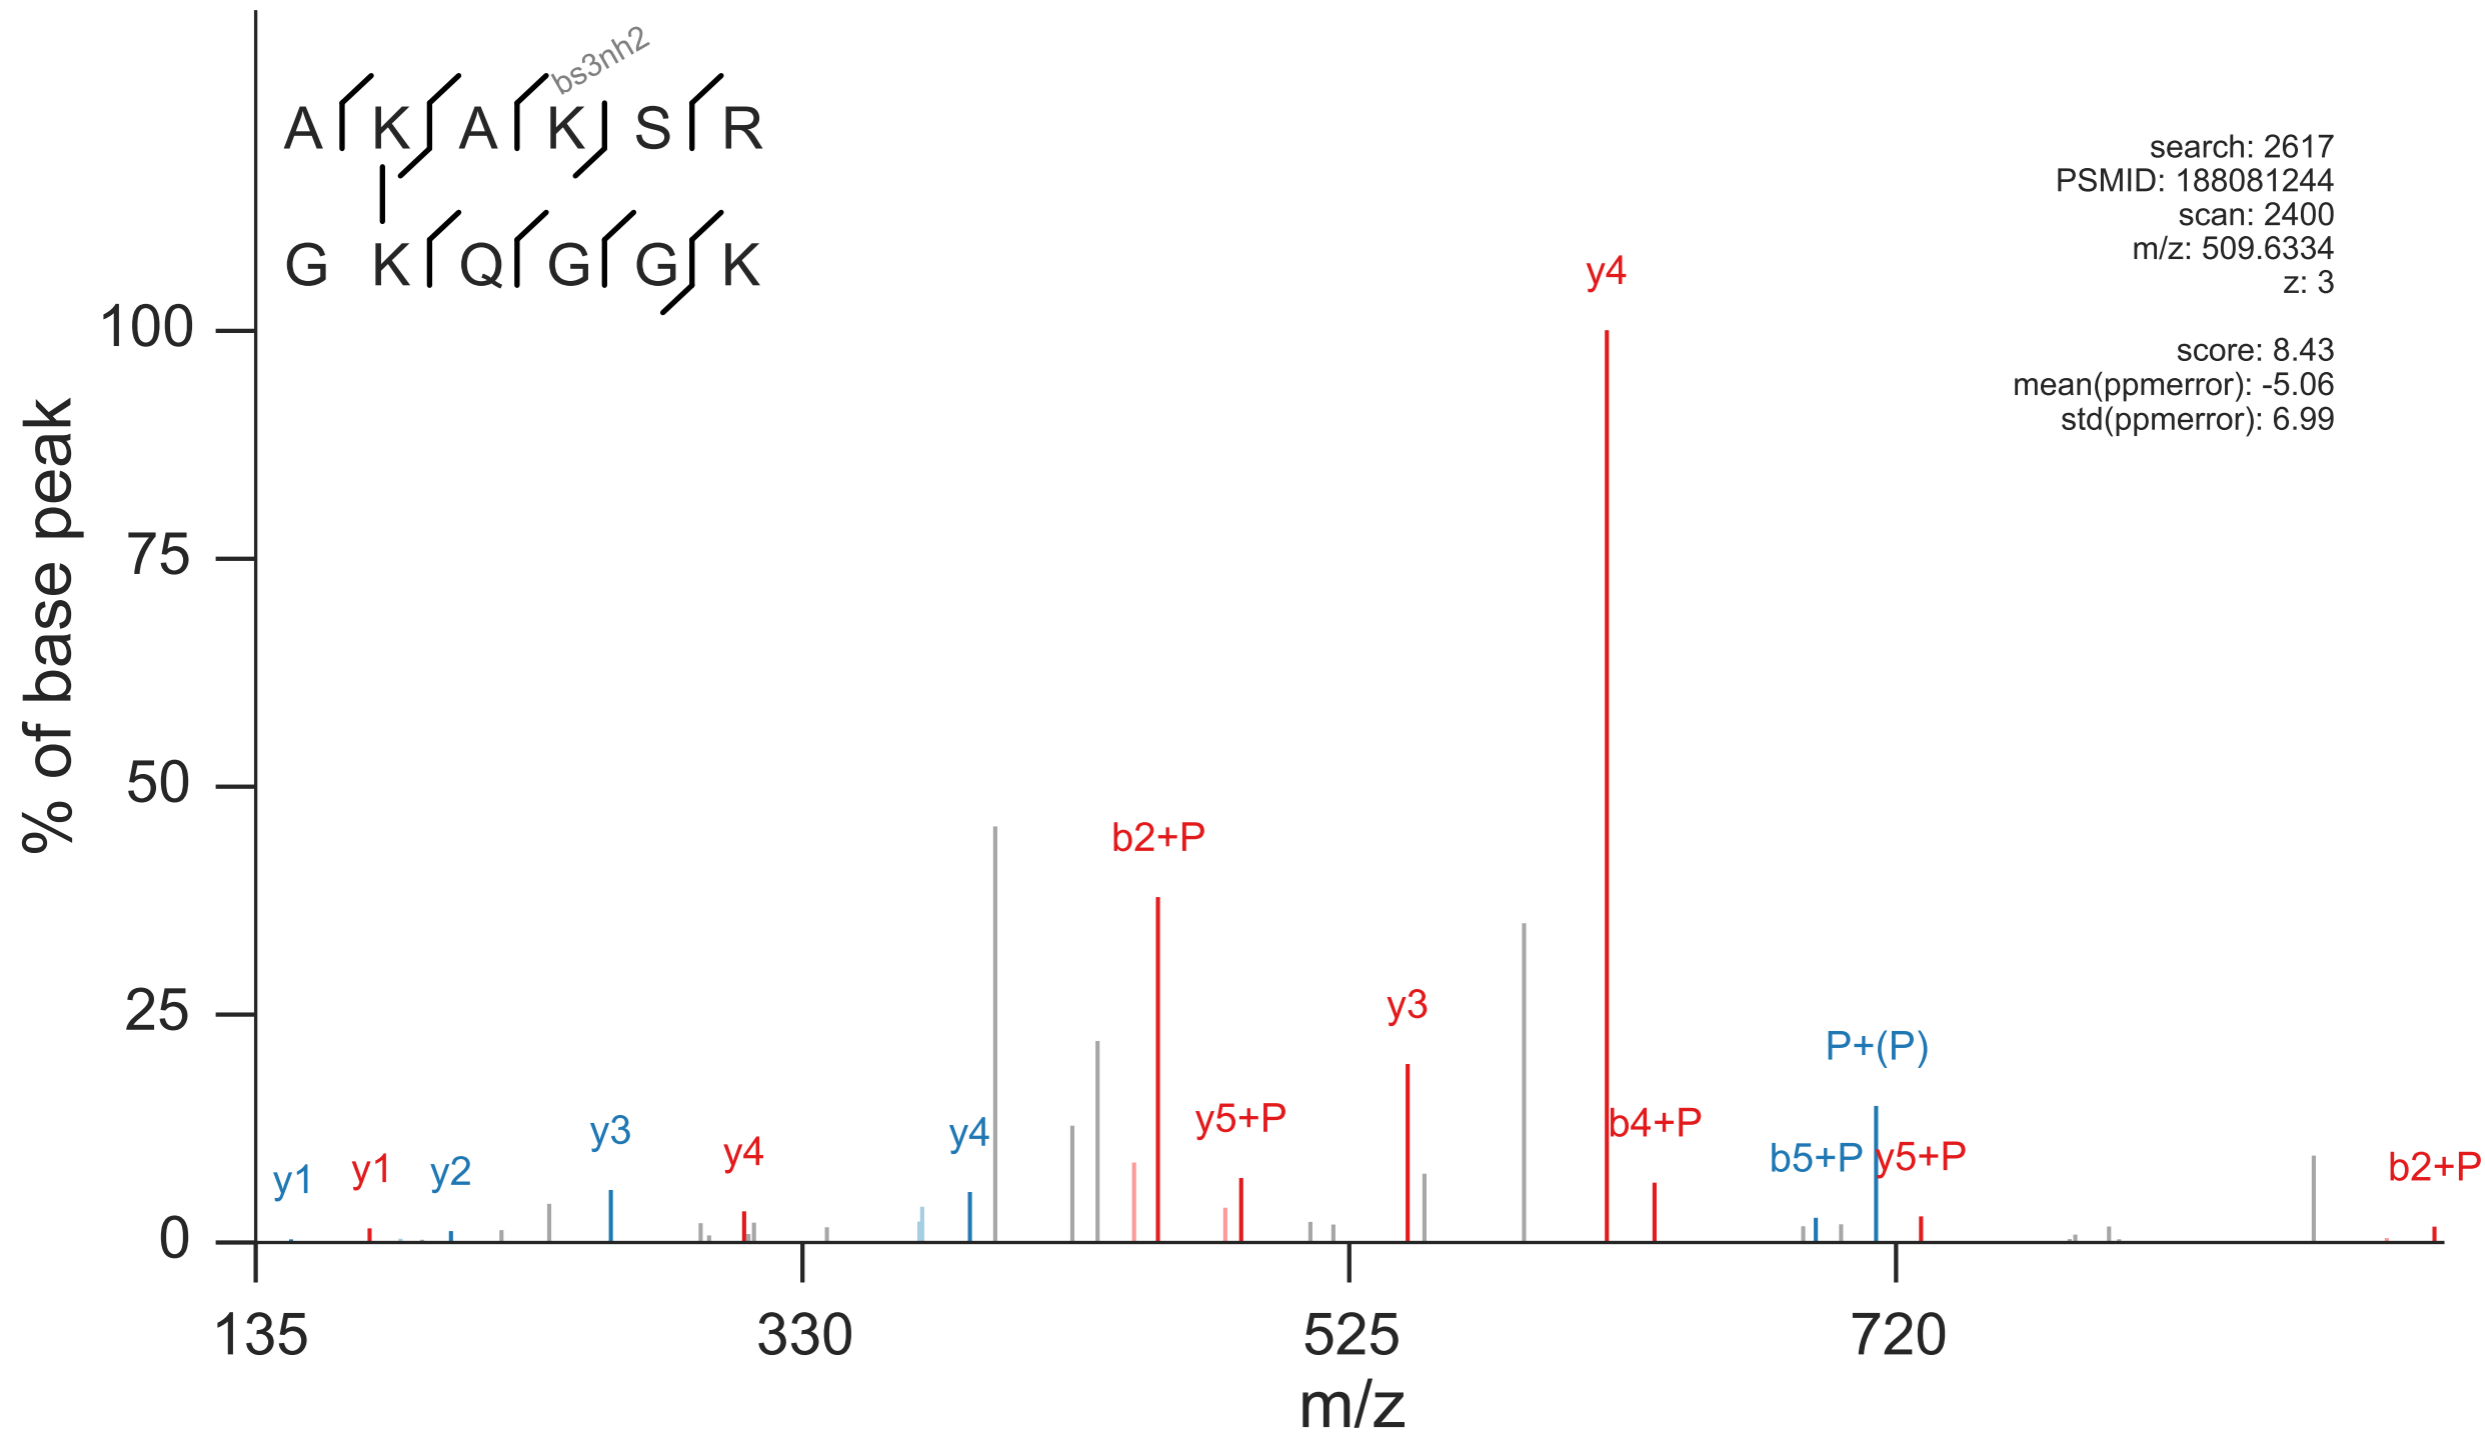

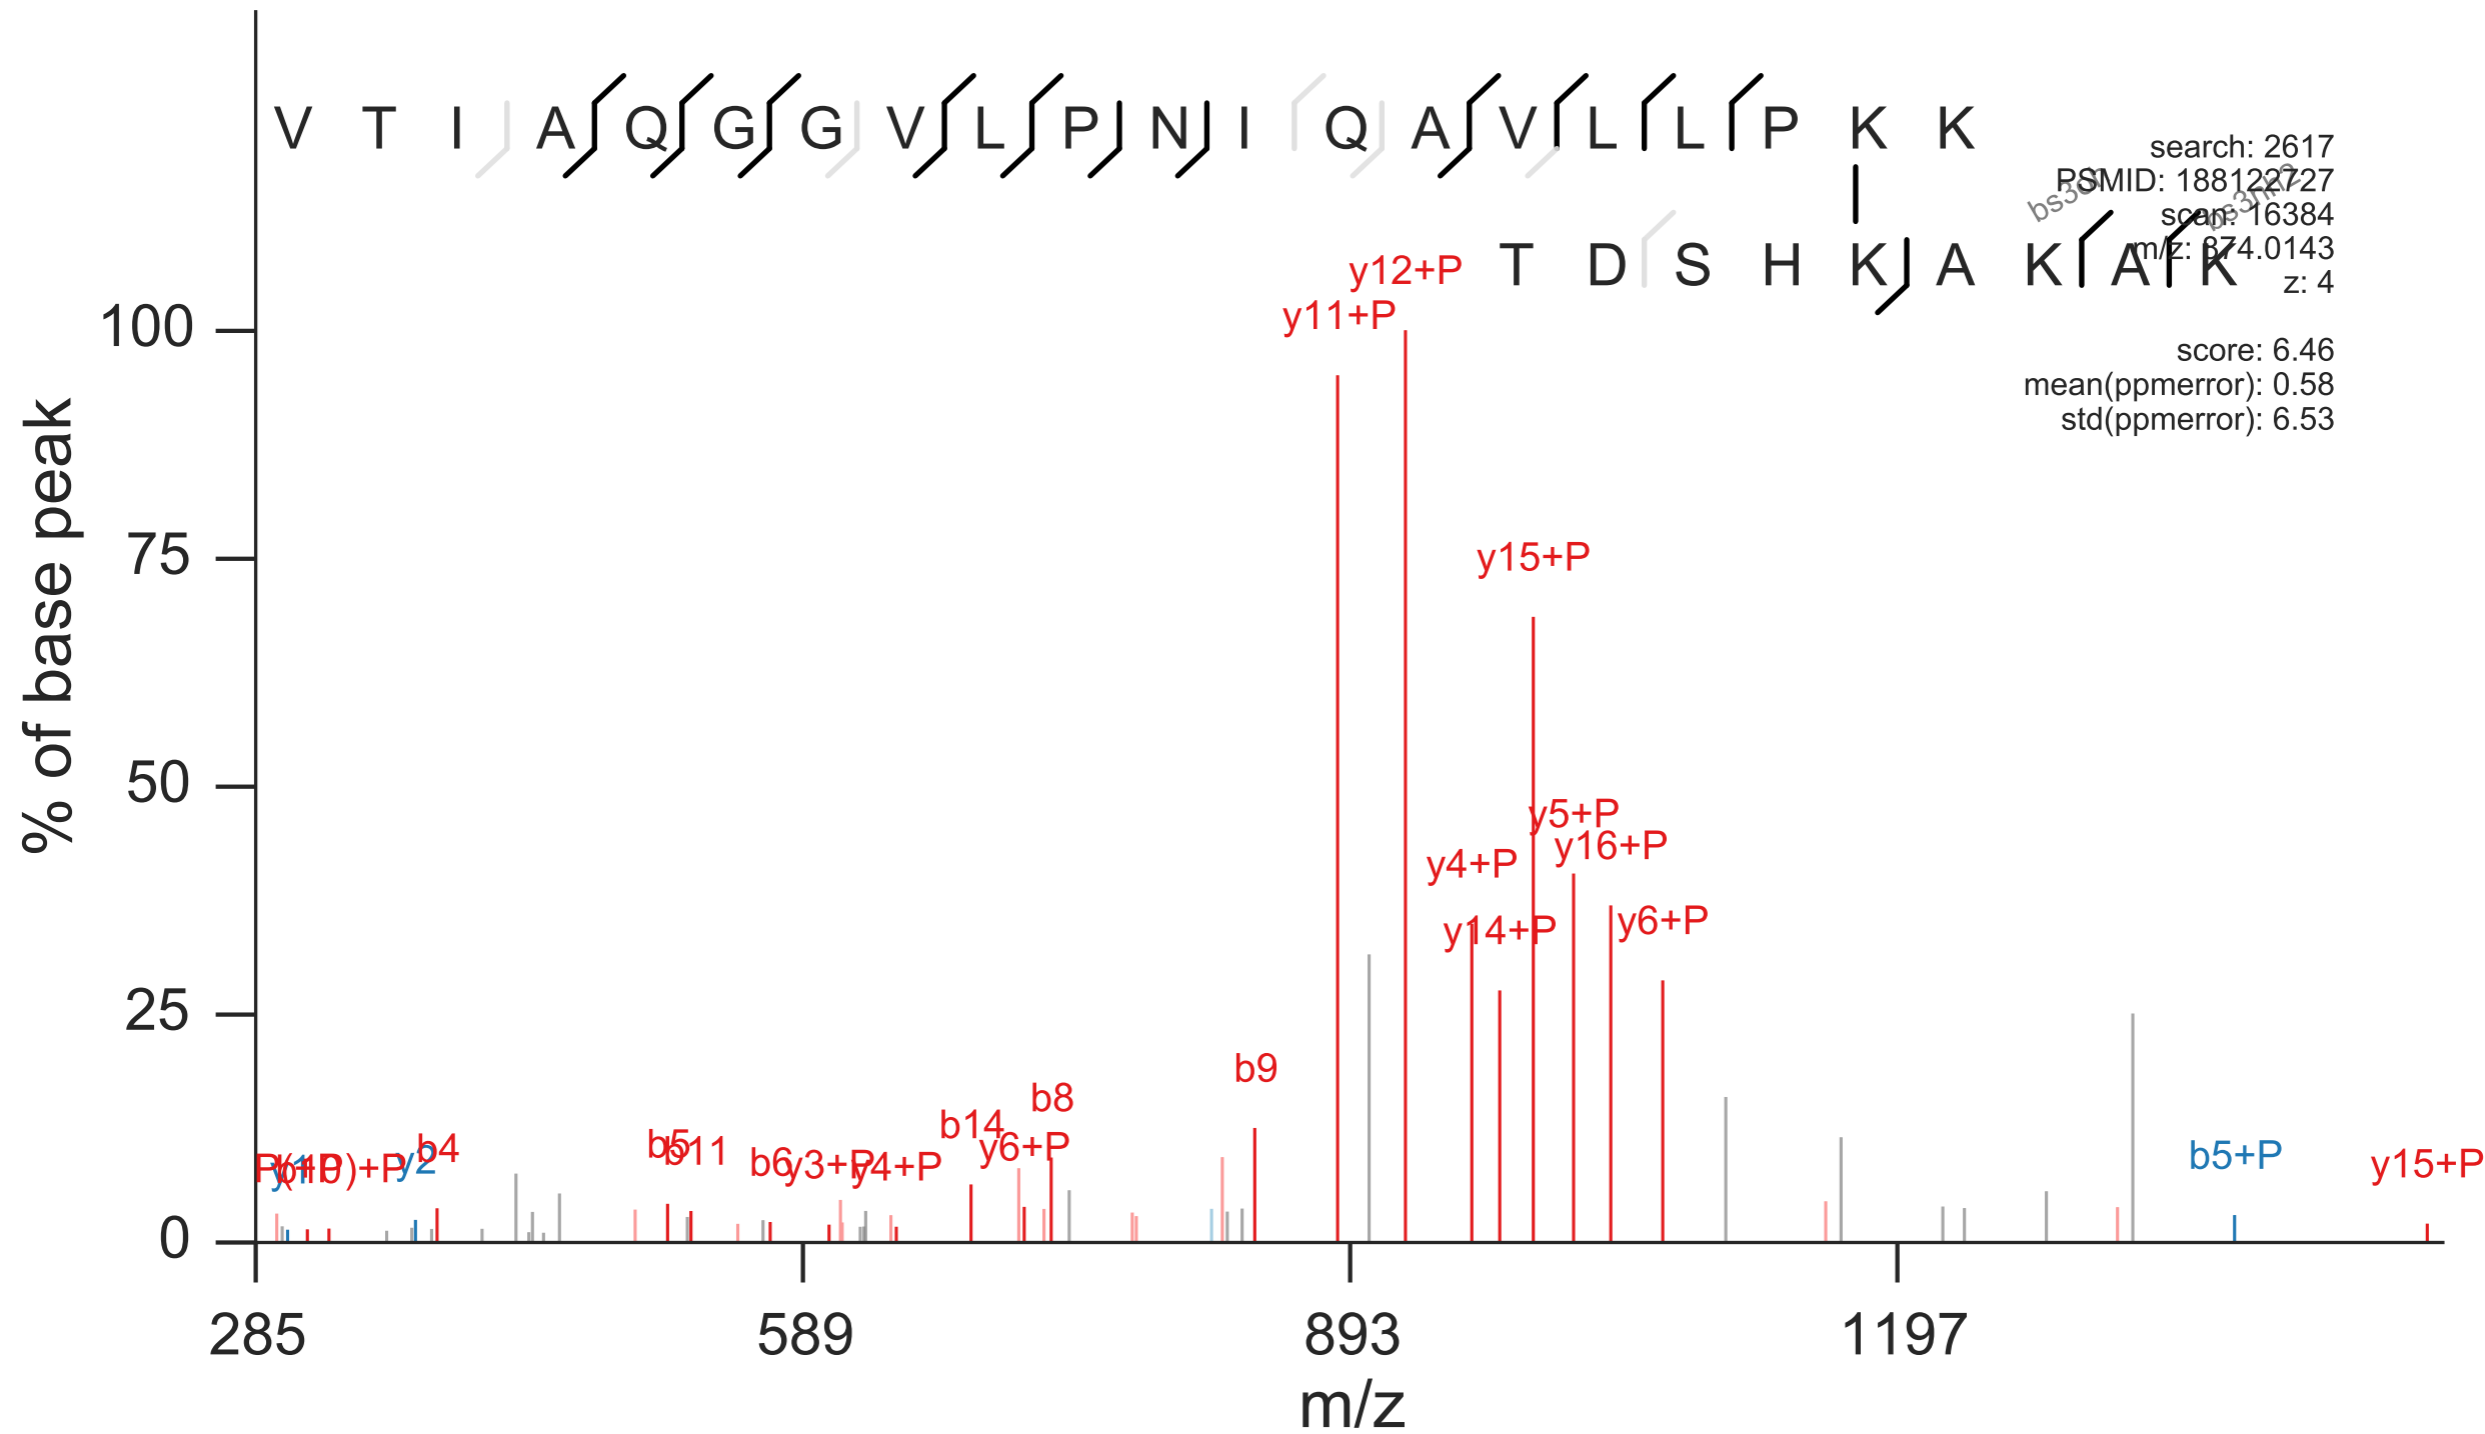

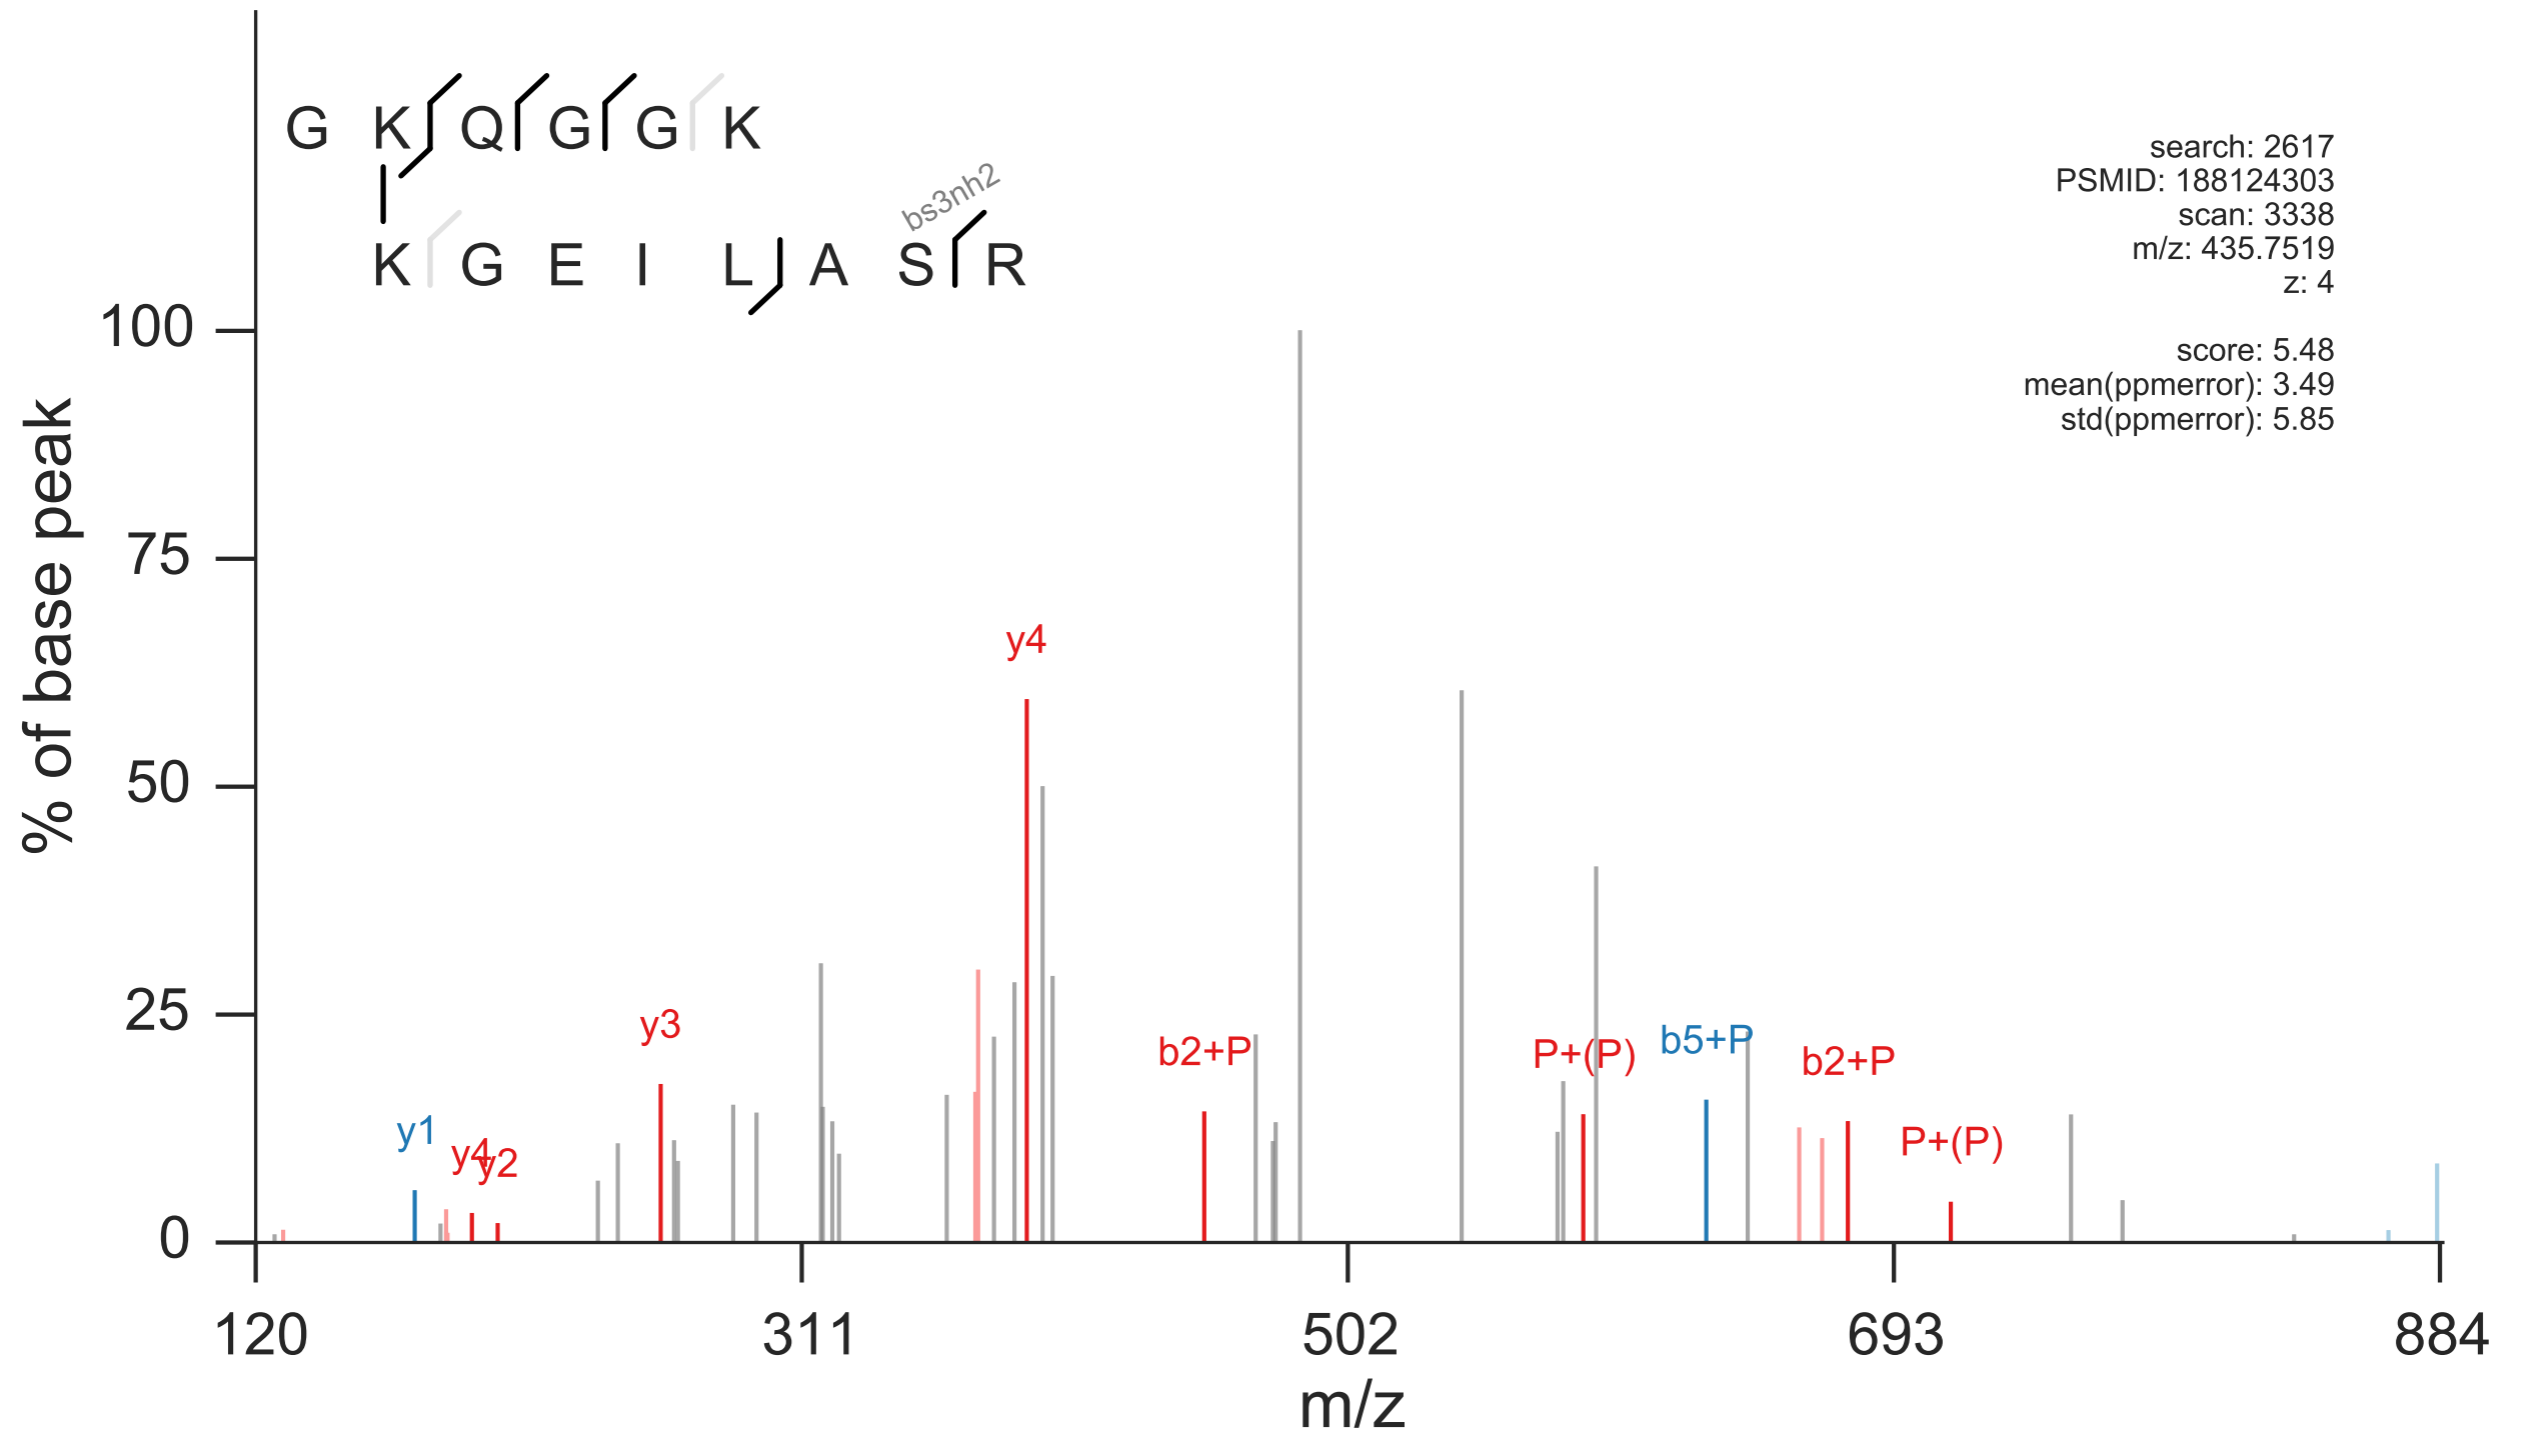

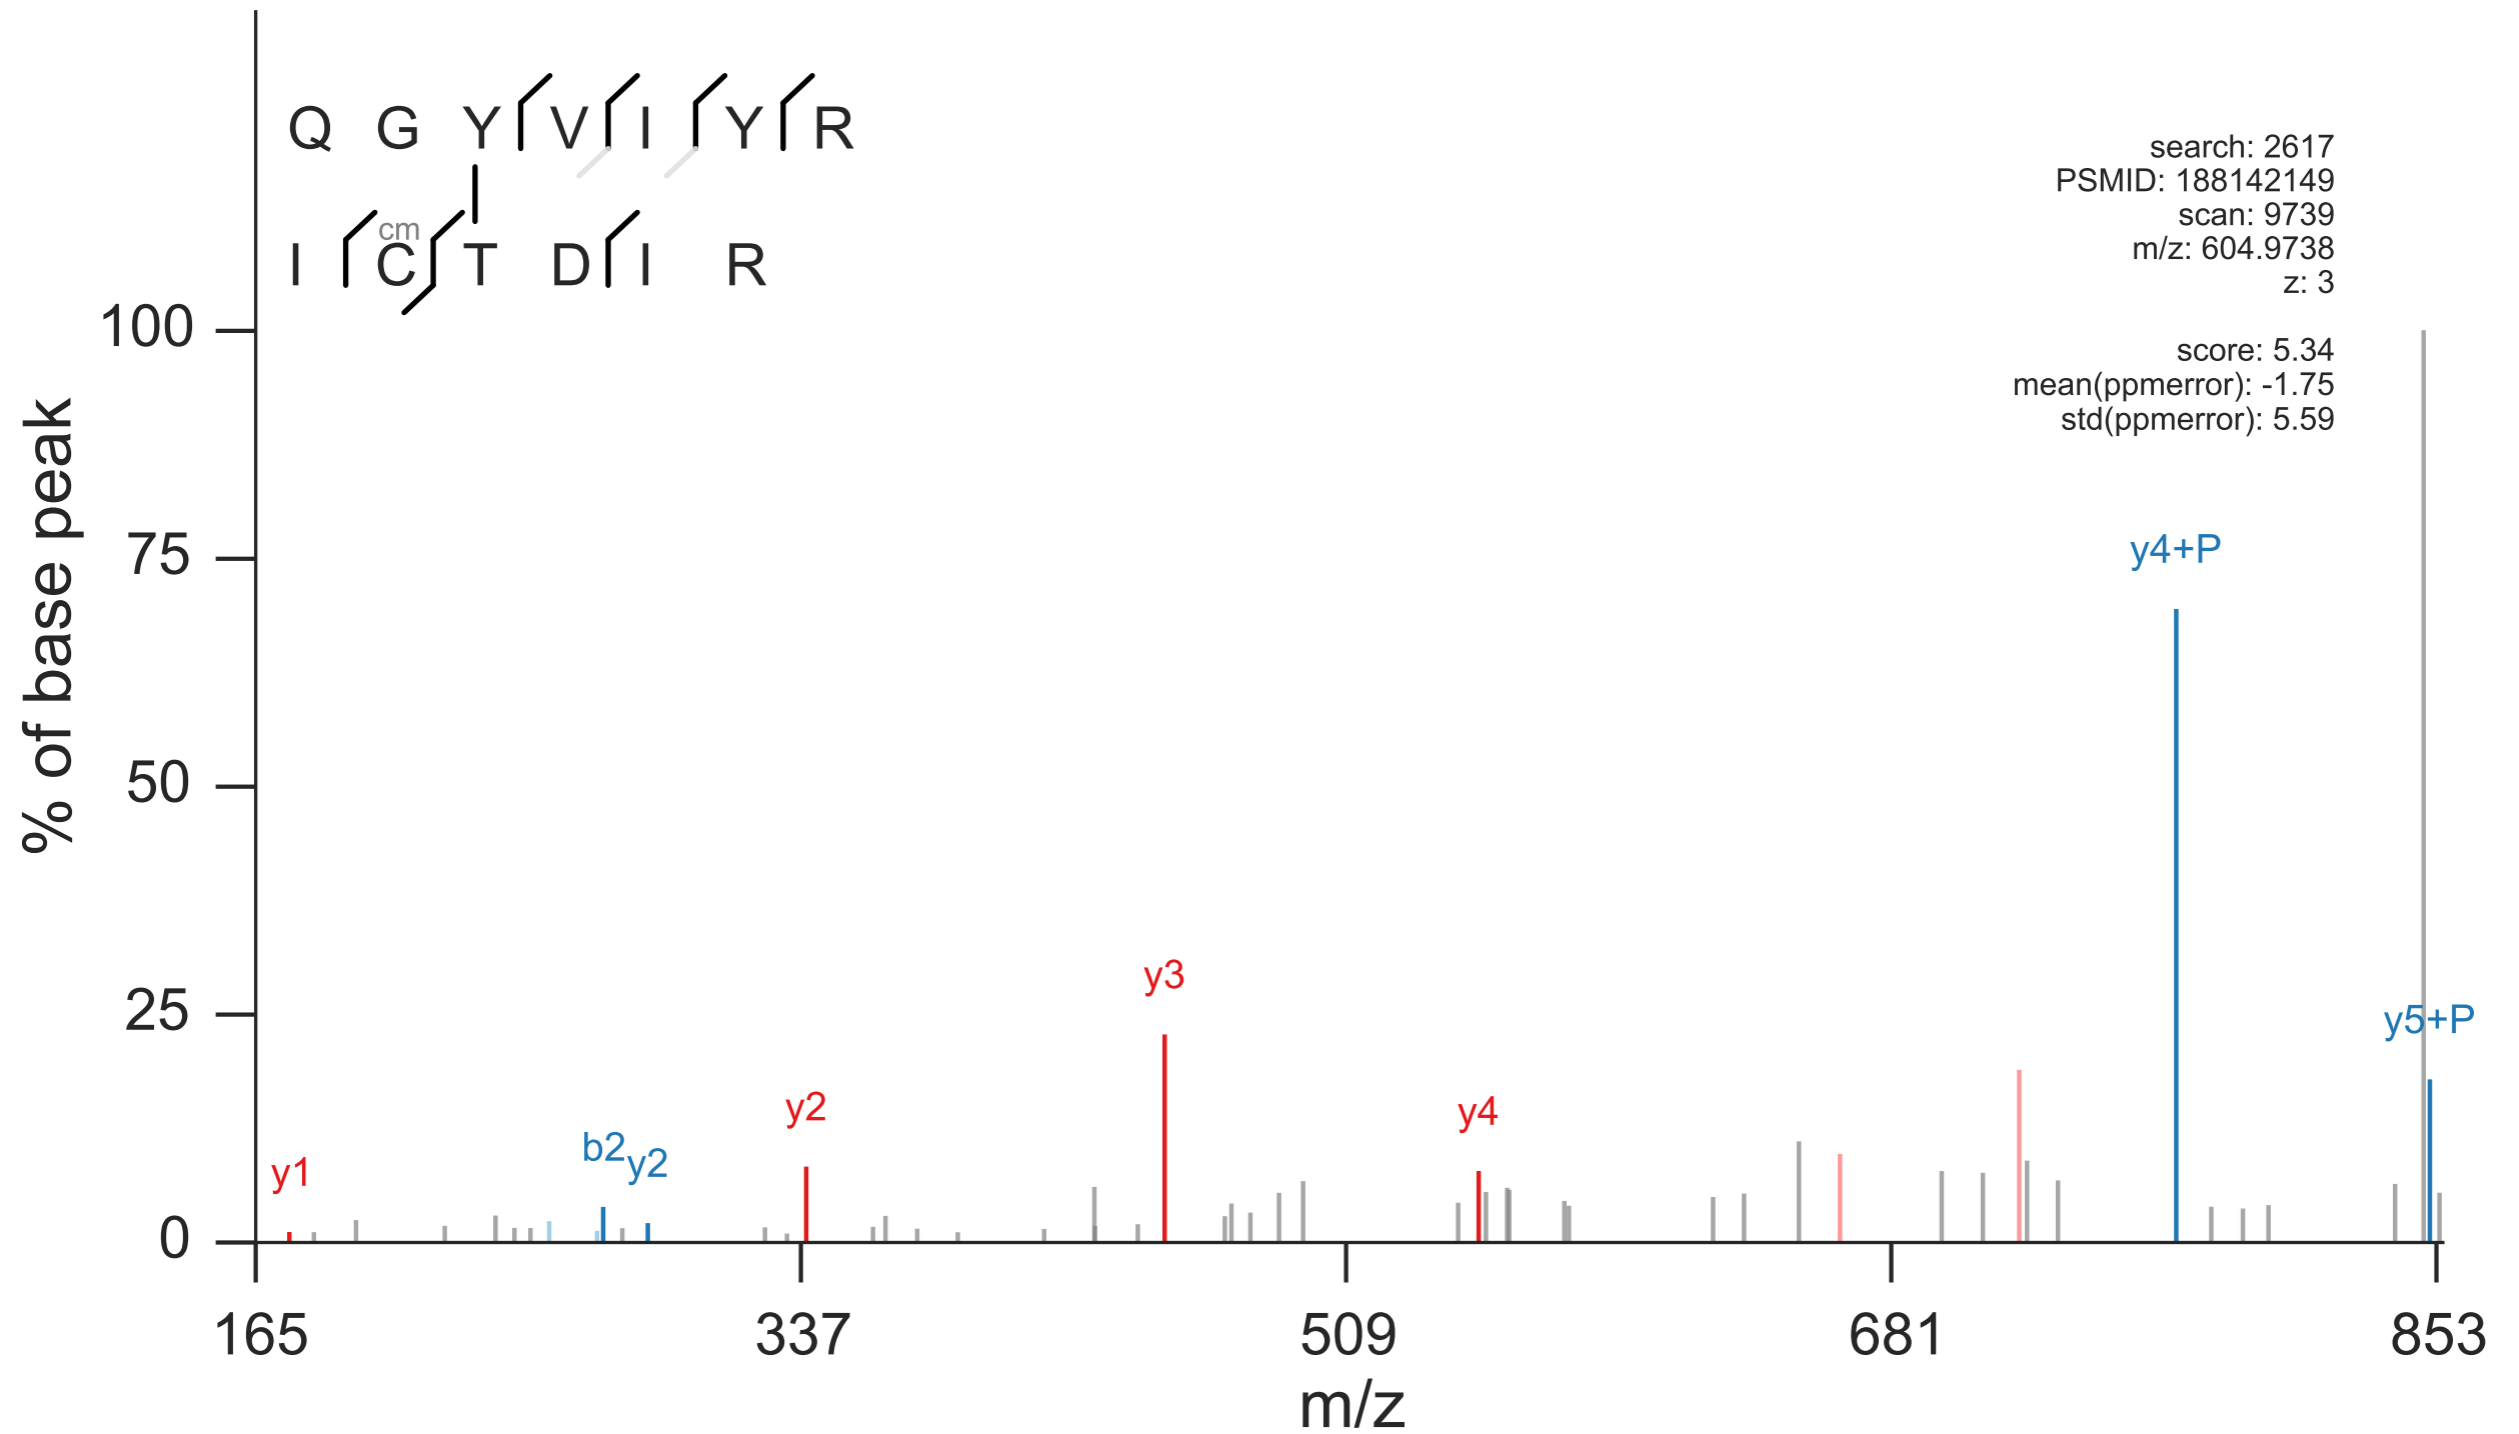

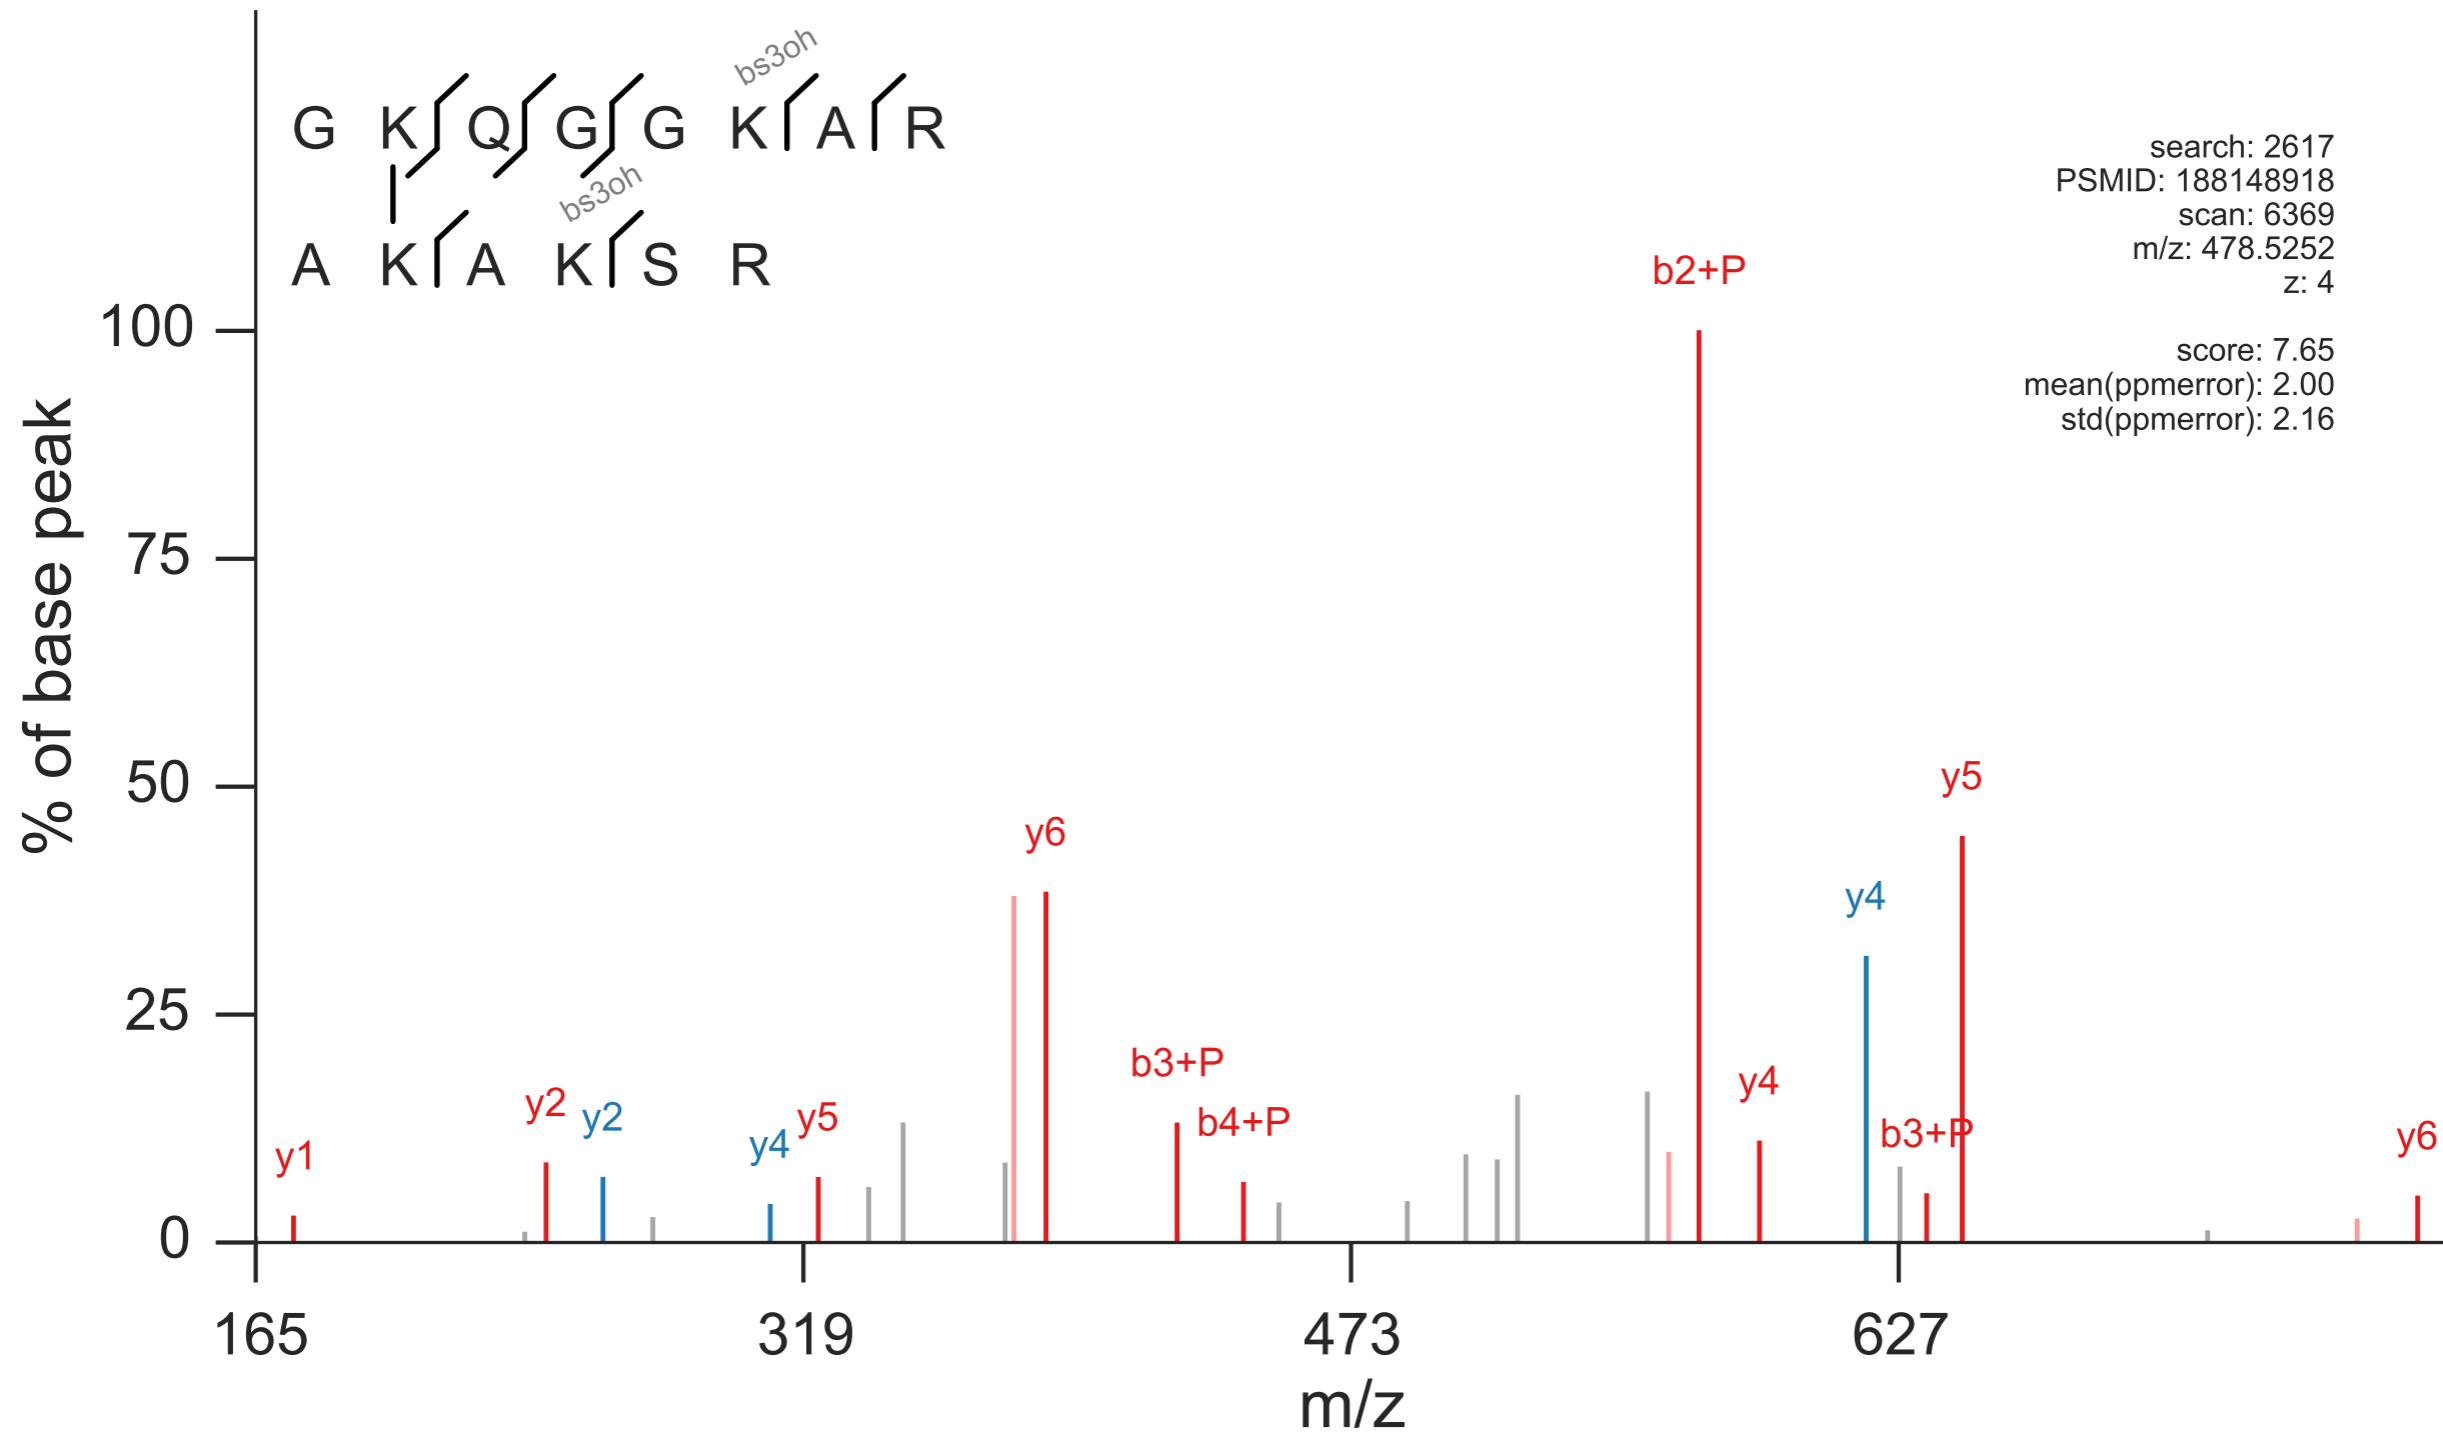

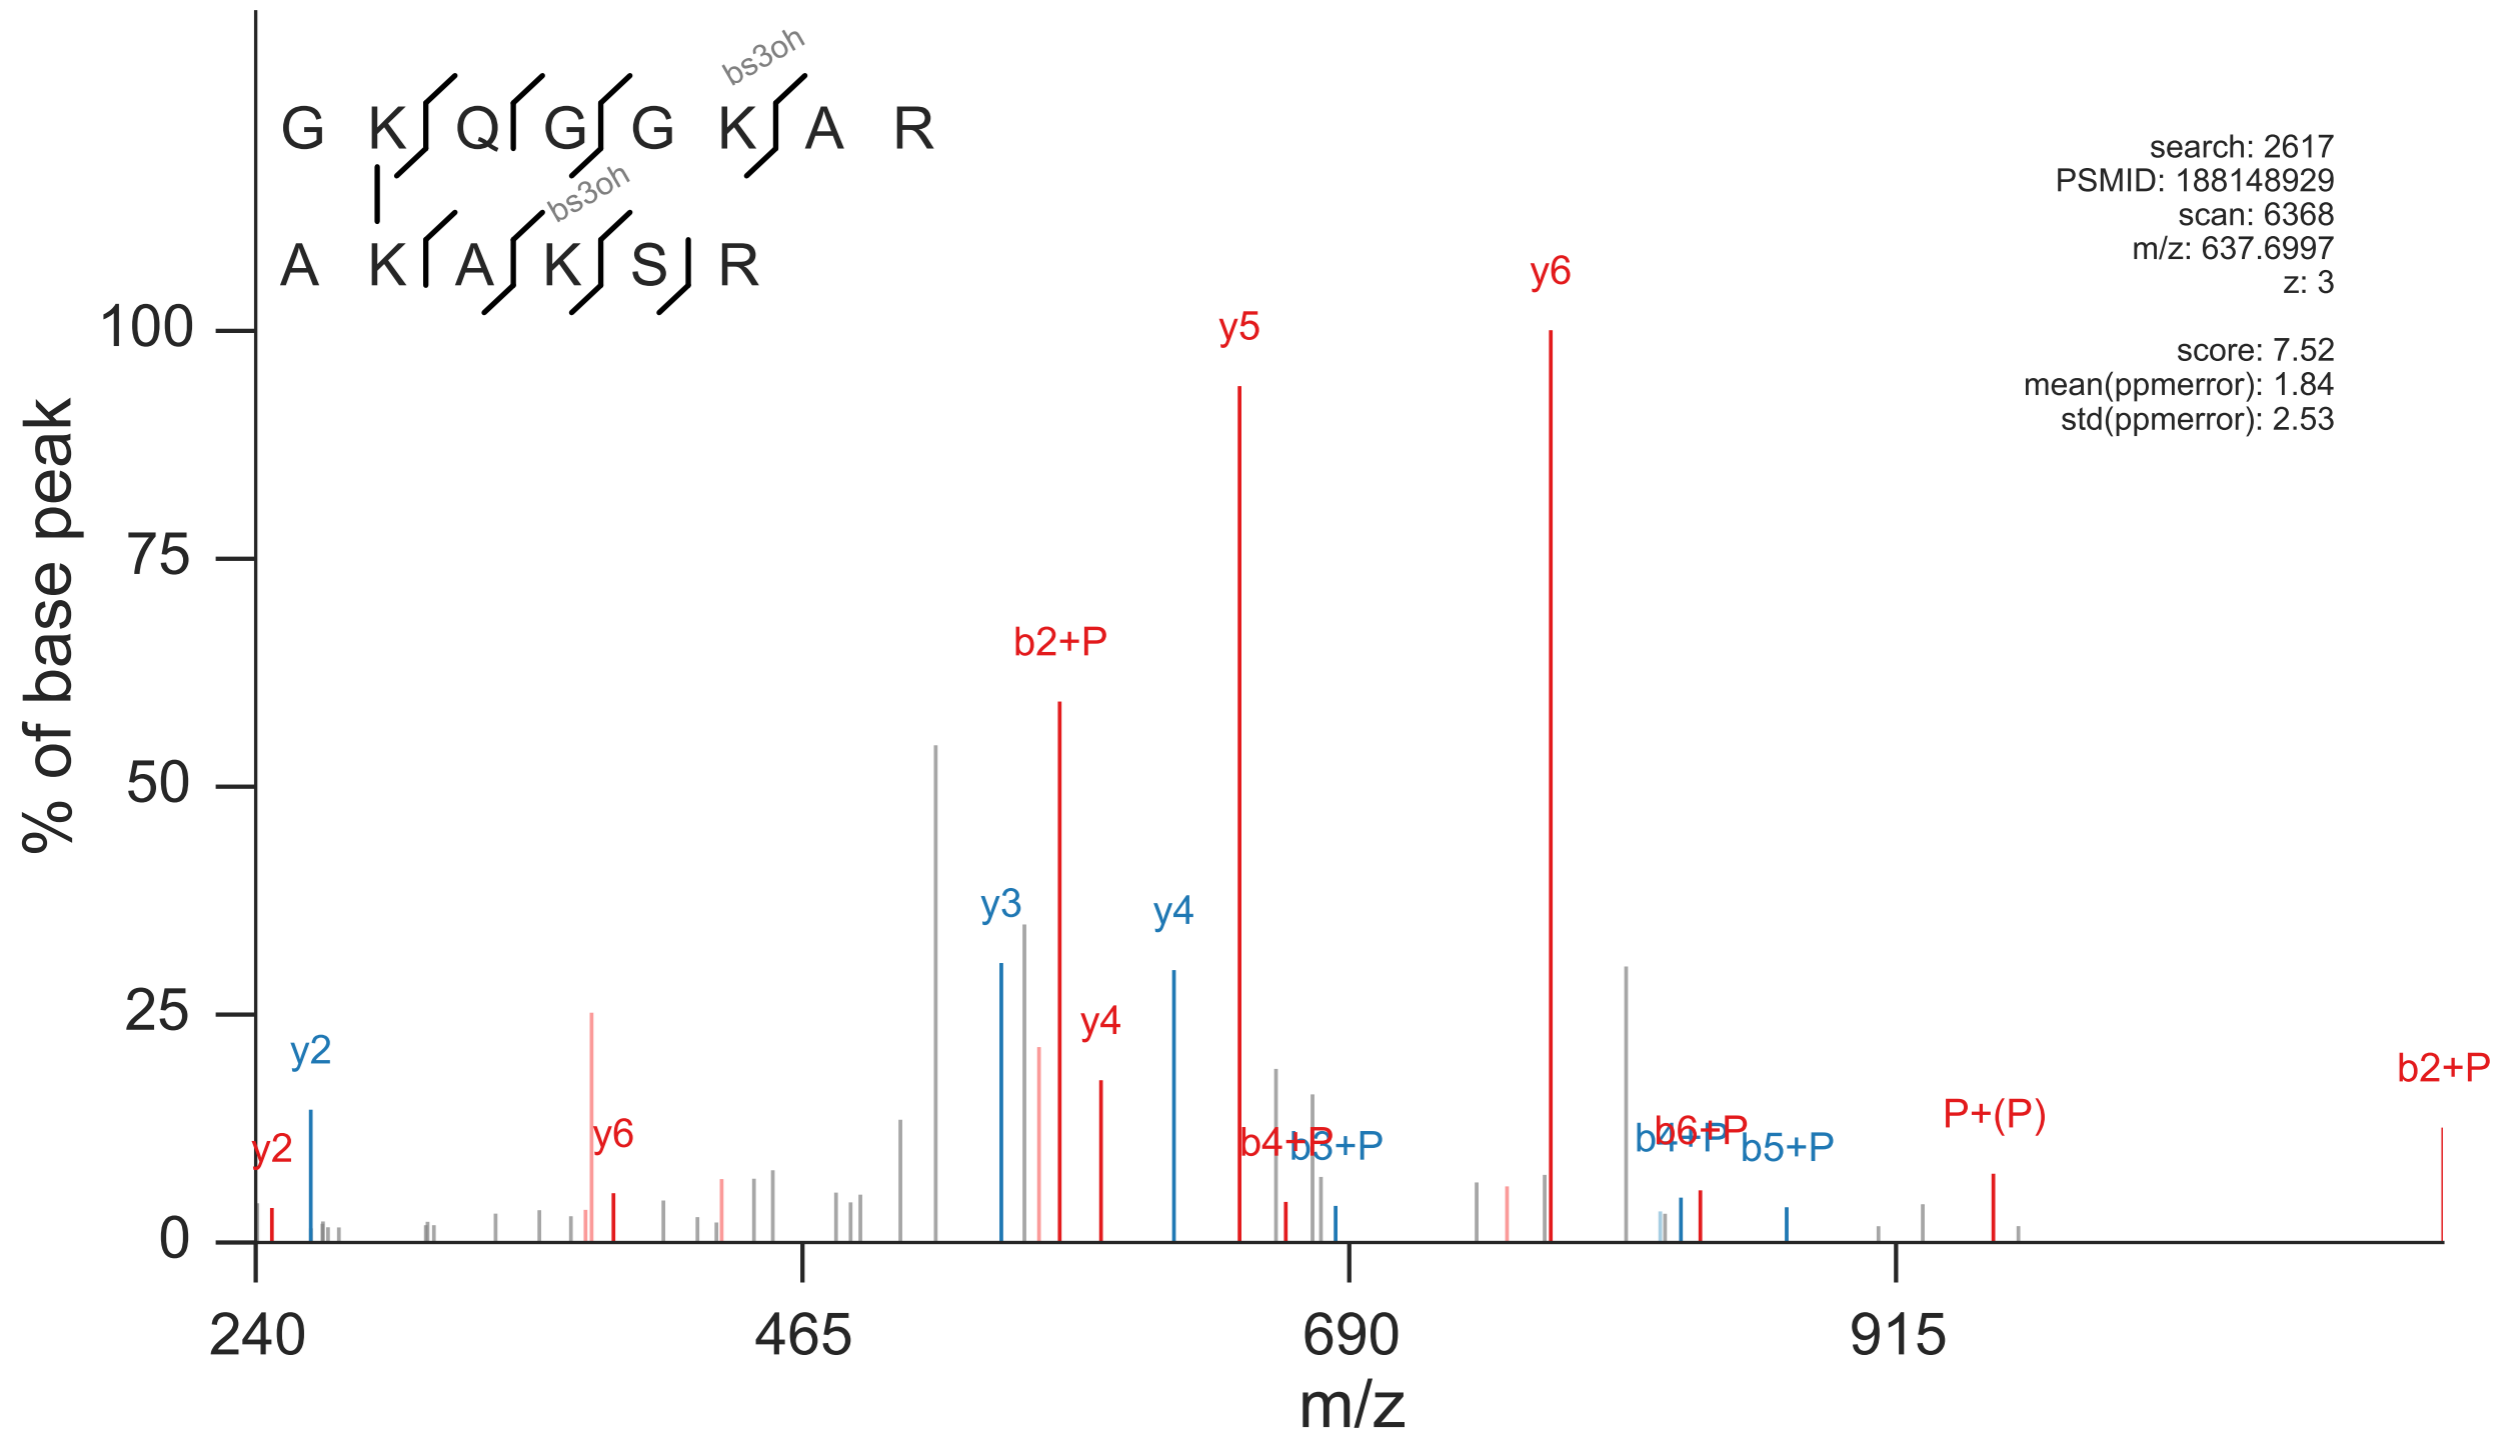

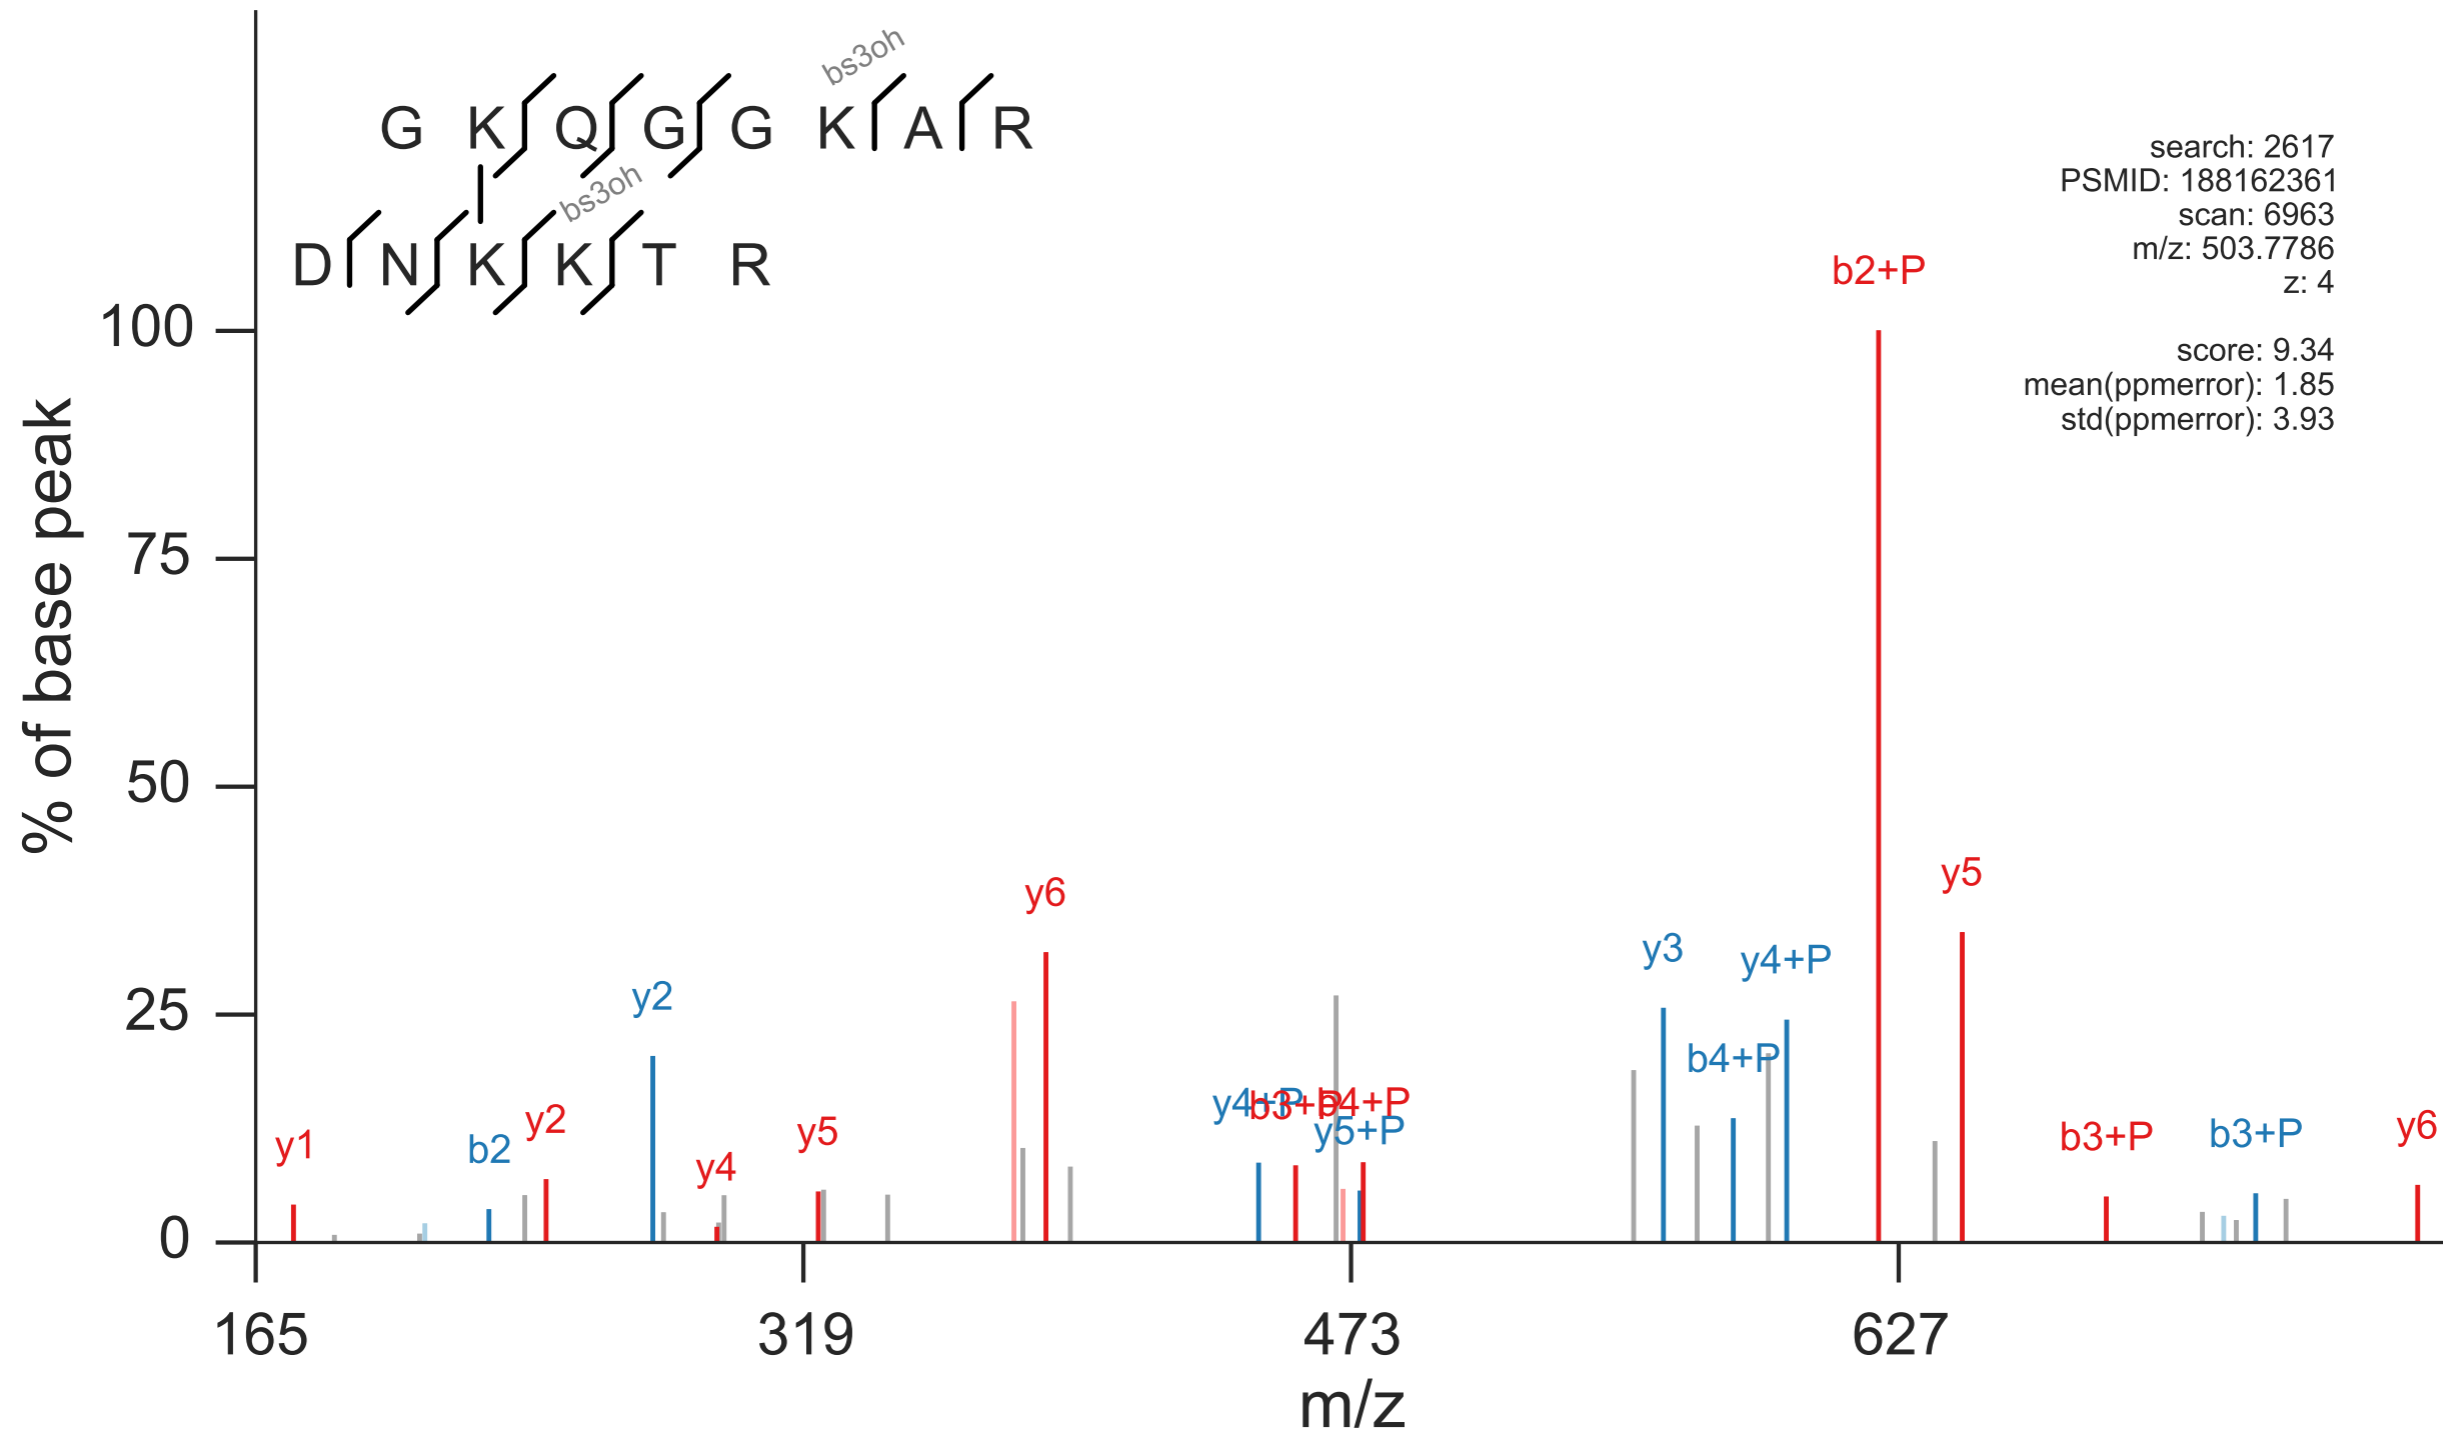

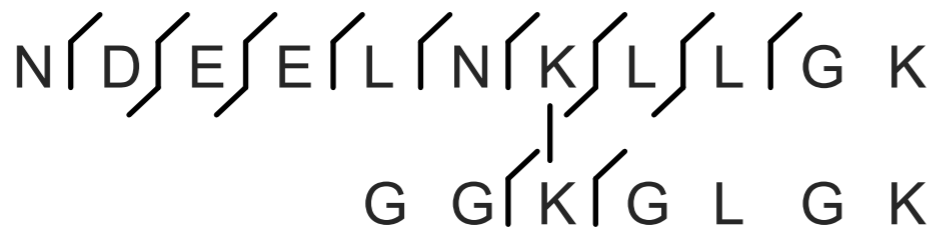

search: 2617  
 PSMID: 188166533  
 scan: 10092  
 m/z: 507.2794  
 z: 4

score: 8.87  
 mean(ppmerror): 1.66  
 std(ppmerror): 3.30

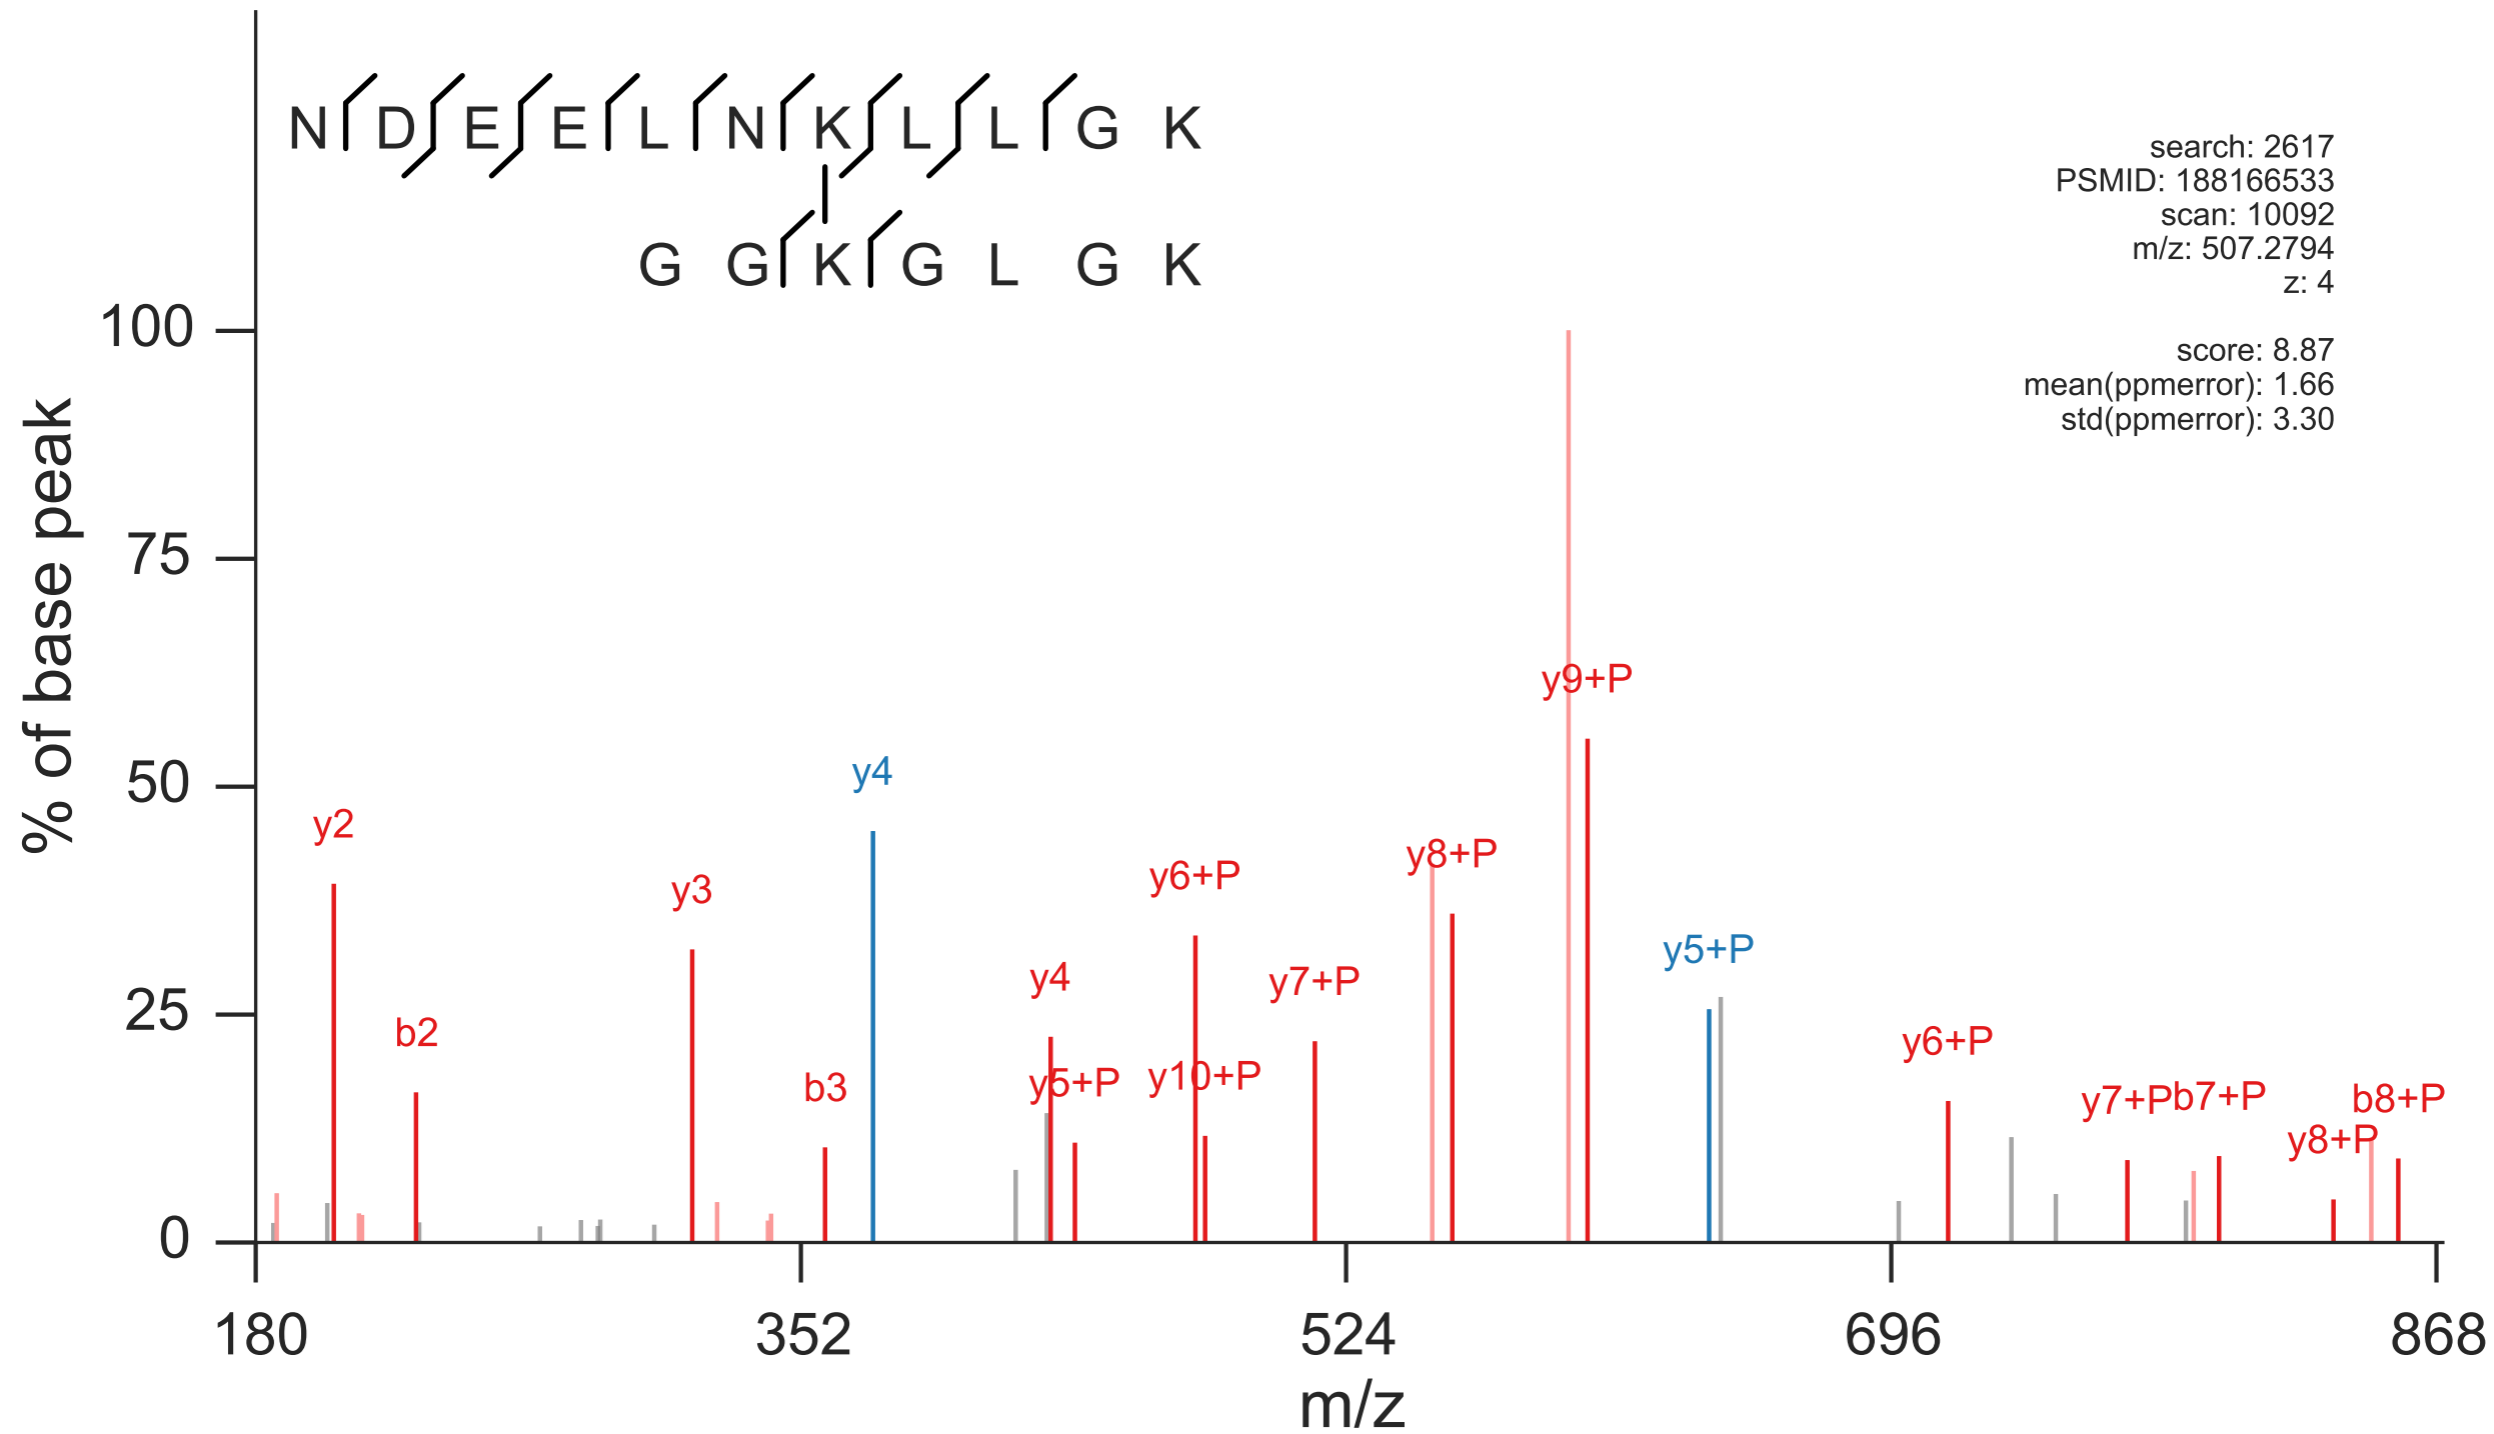



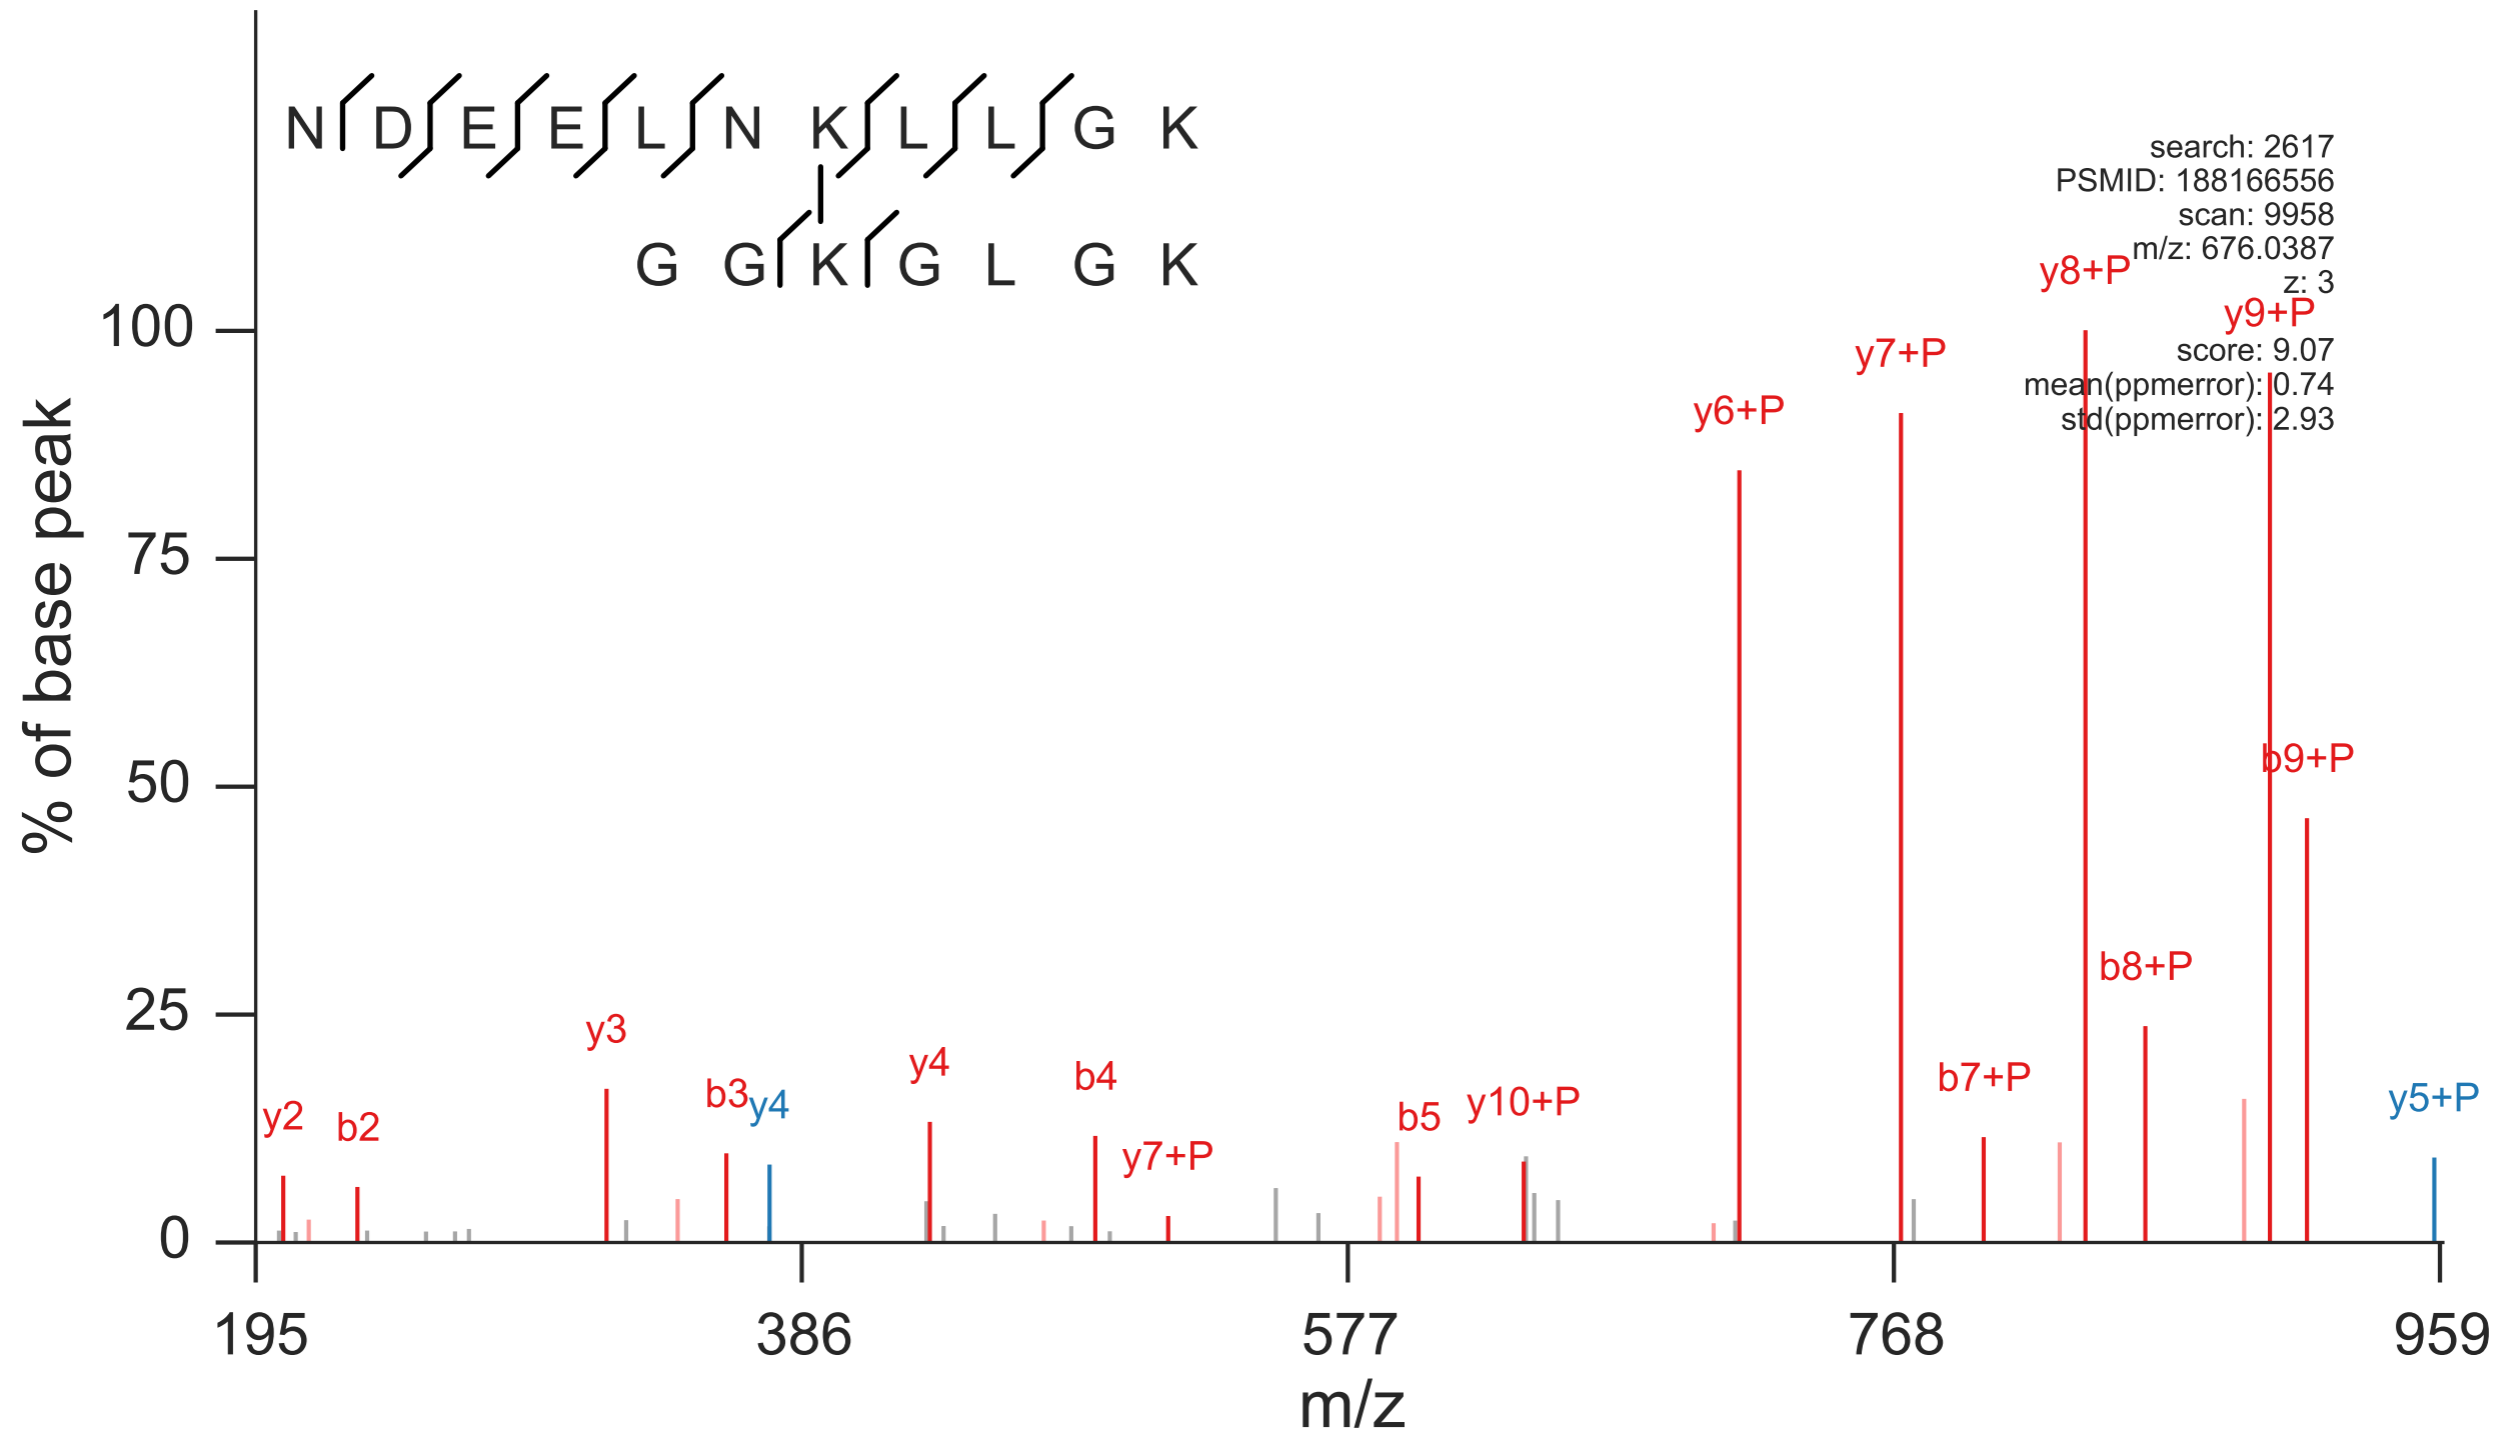

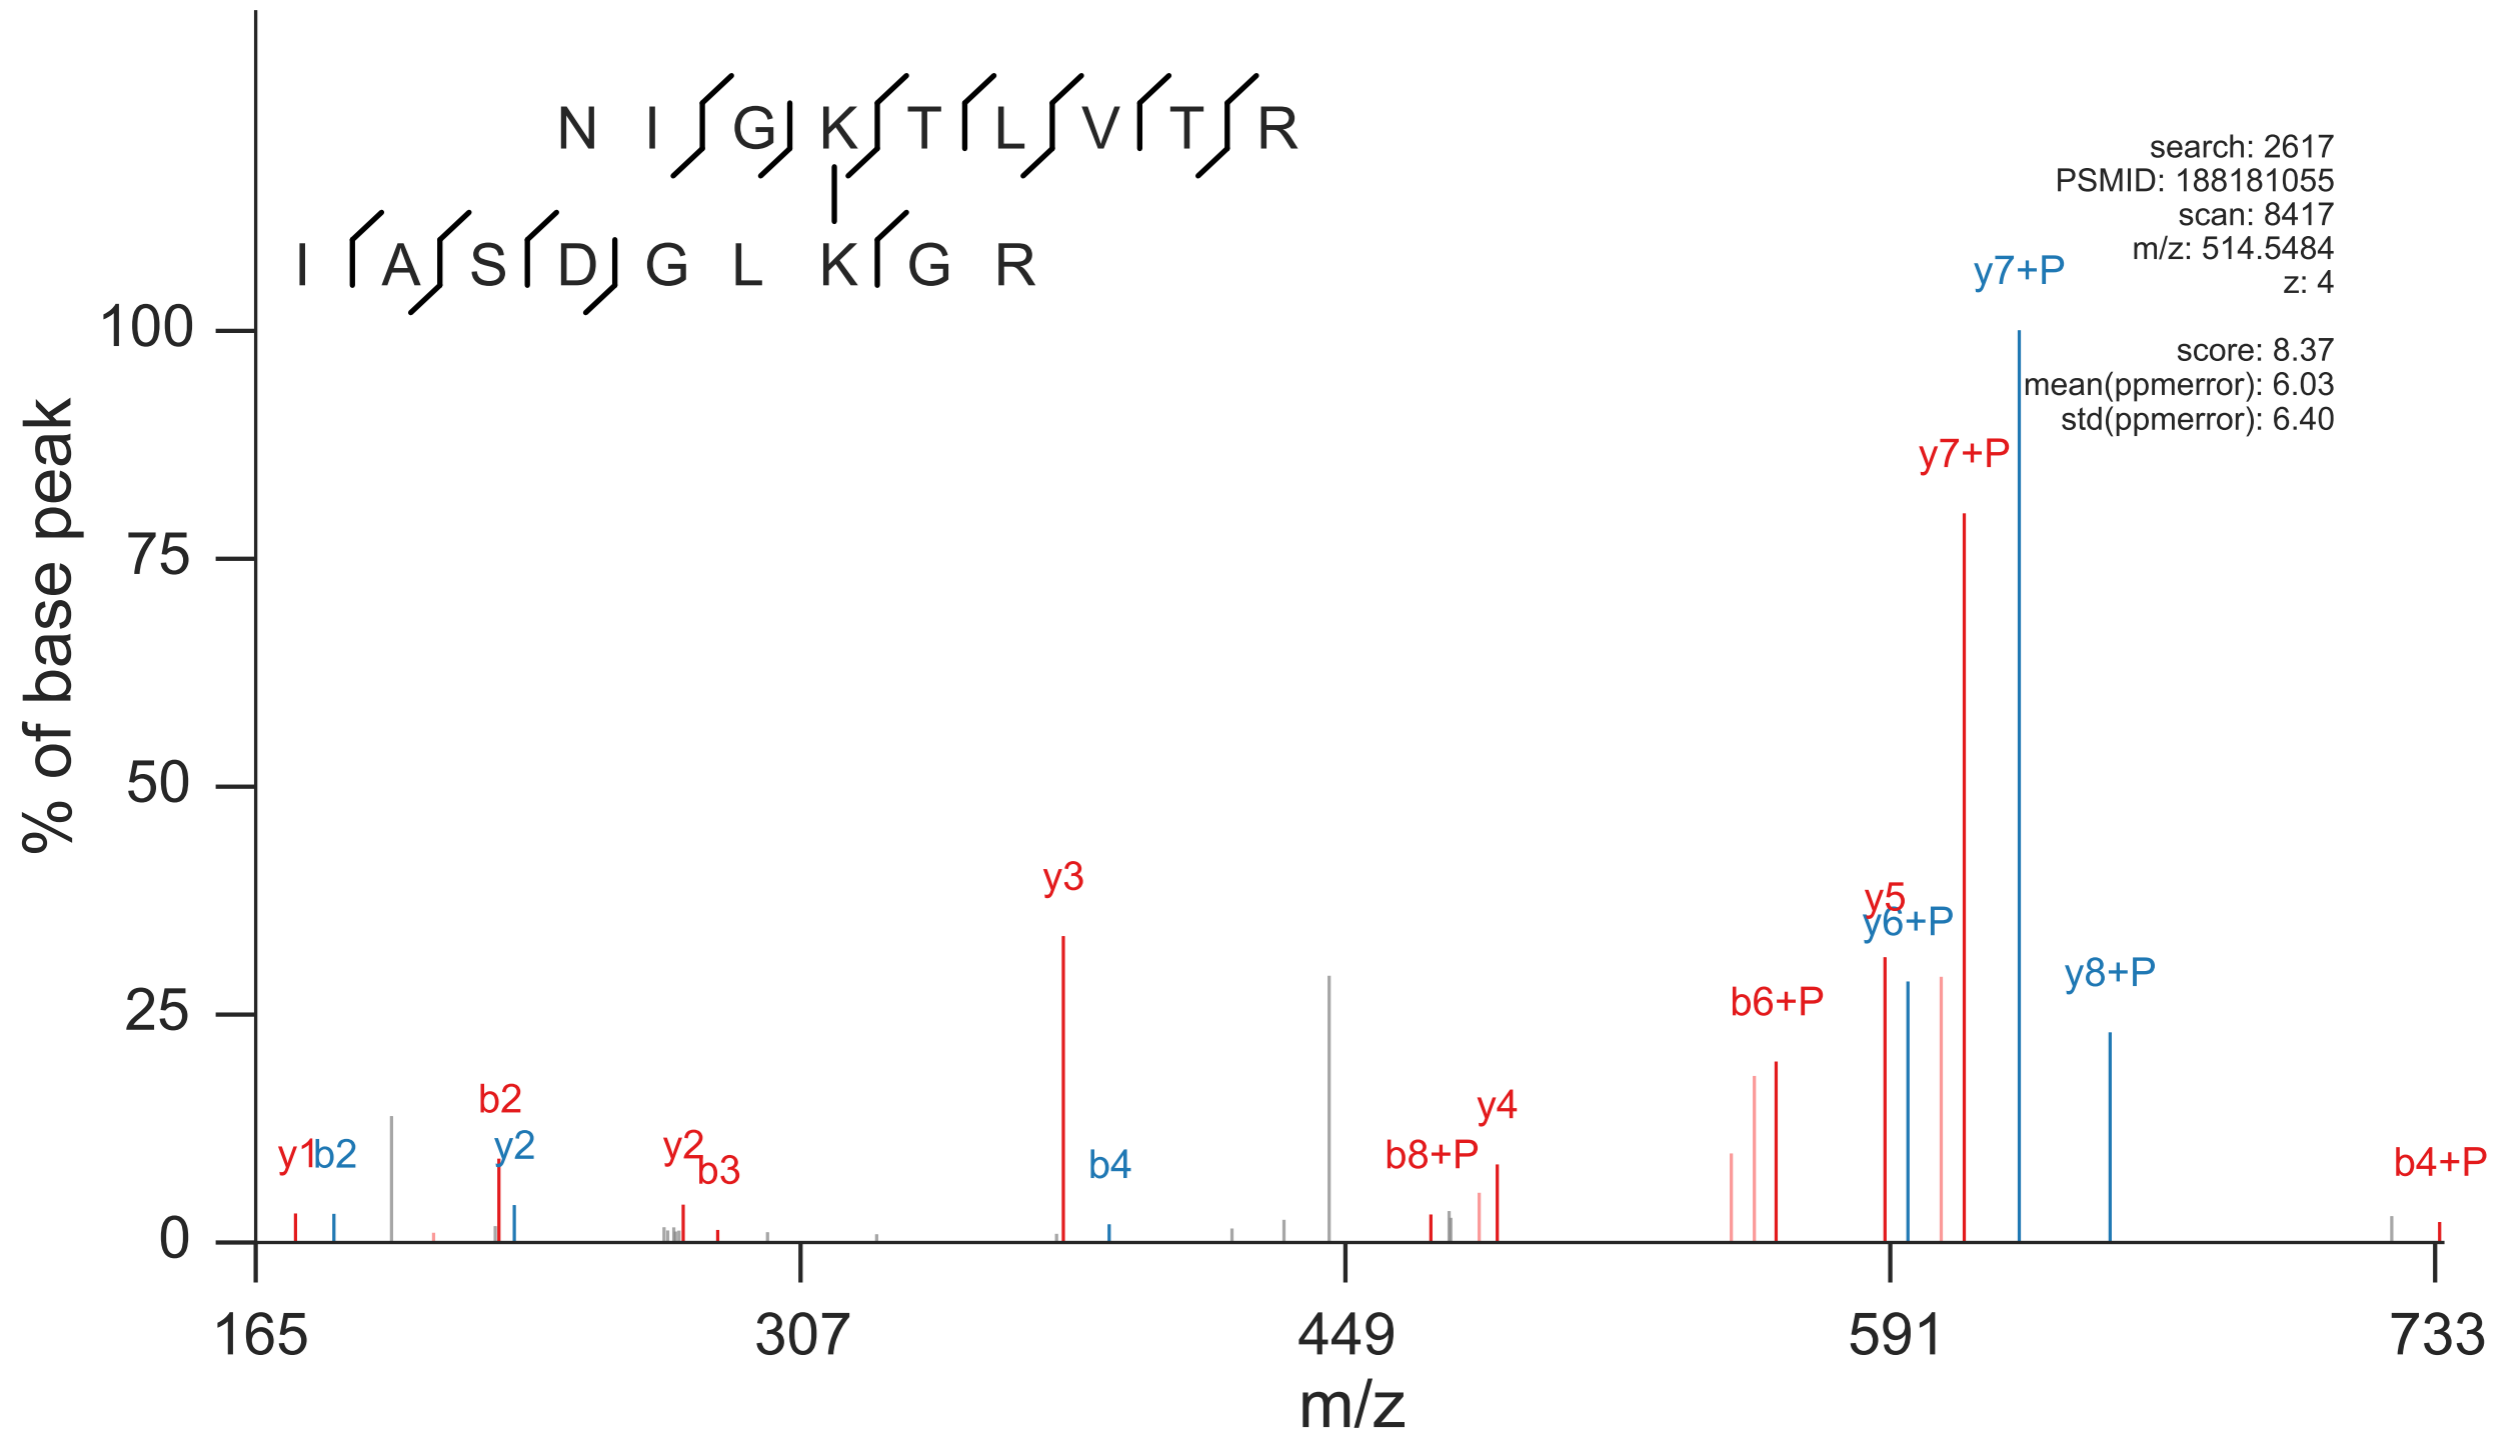

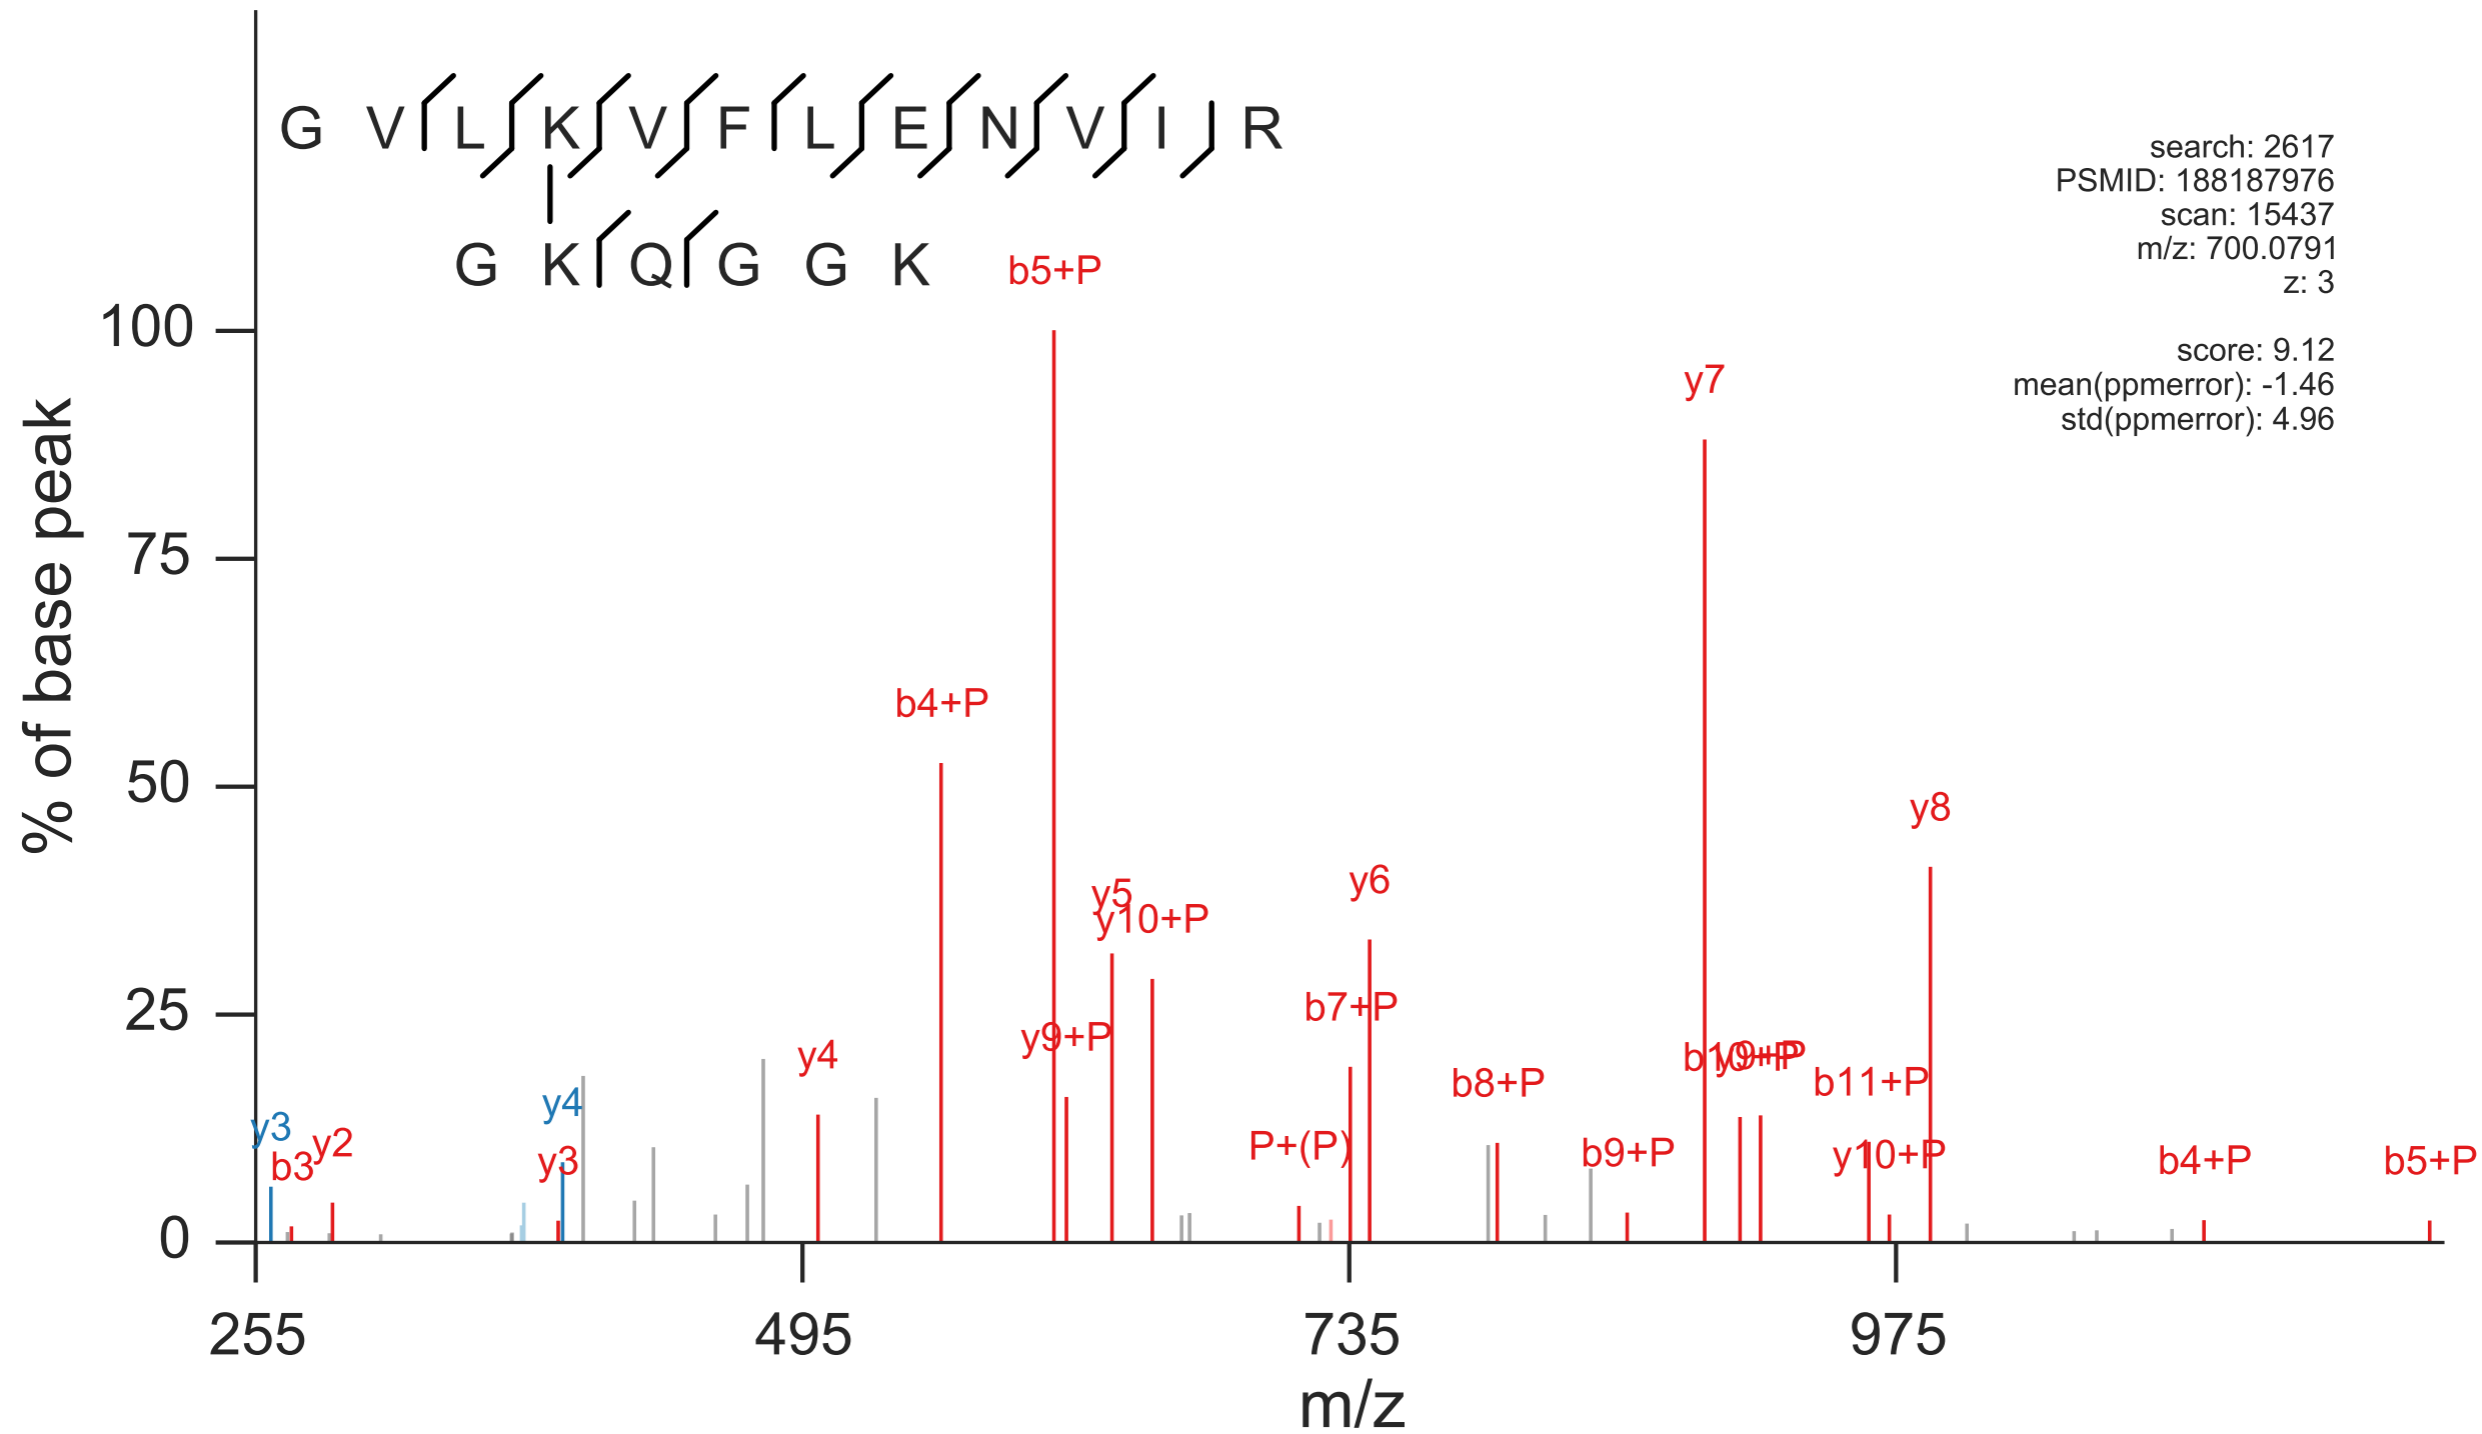

G V L K V F L E N V I R  
 G G K G L G K

search: 2617  
 PSMID: 188200079  
 scan: 17458  
 m/z: 714.0947  
 z: 3

score: 8.39  
 mean(ppmerror): 0.74  
 std(ppmerror): 3.26

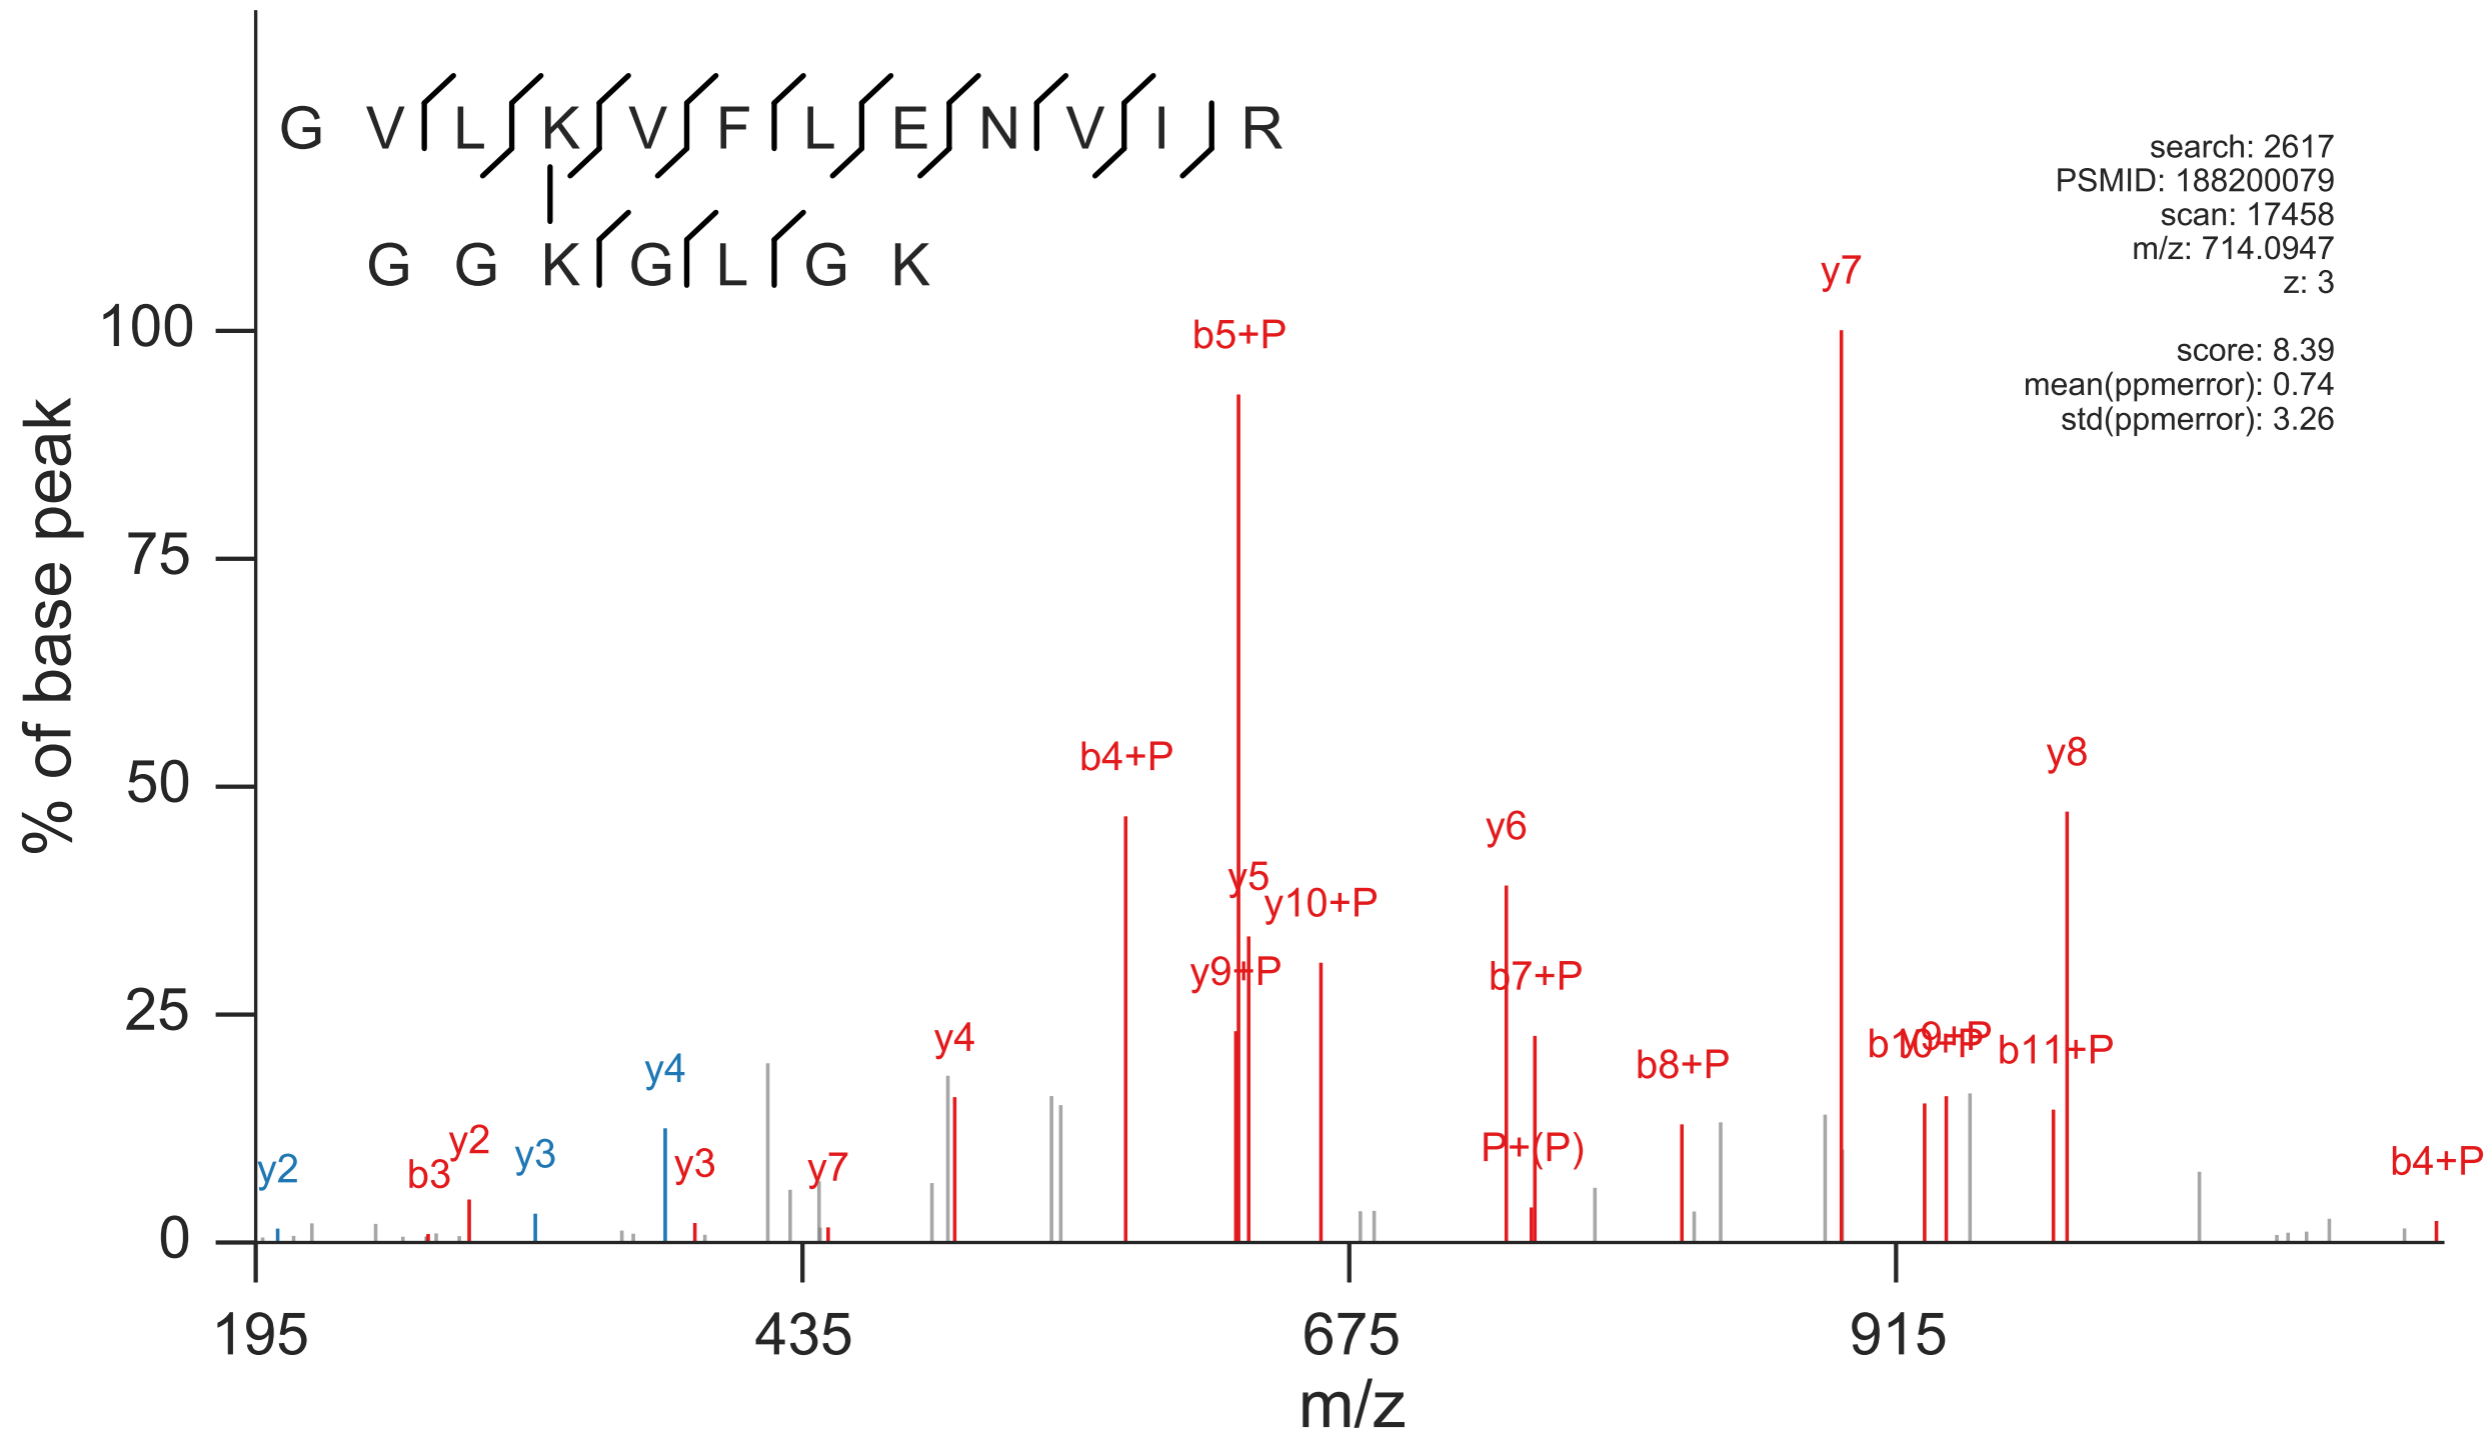

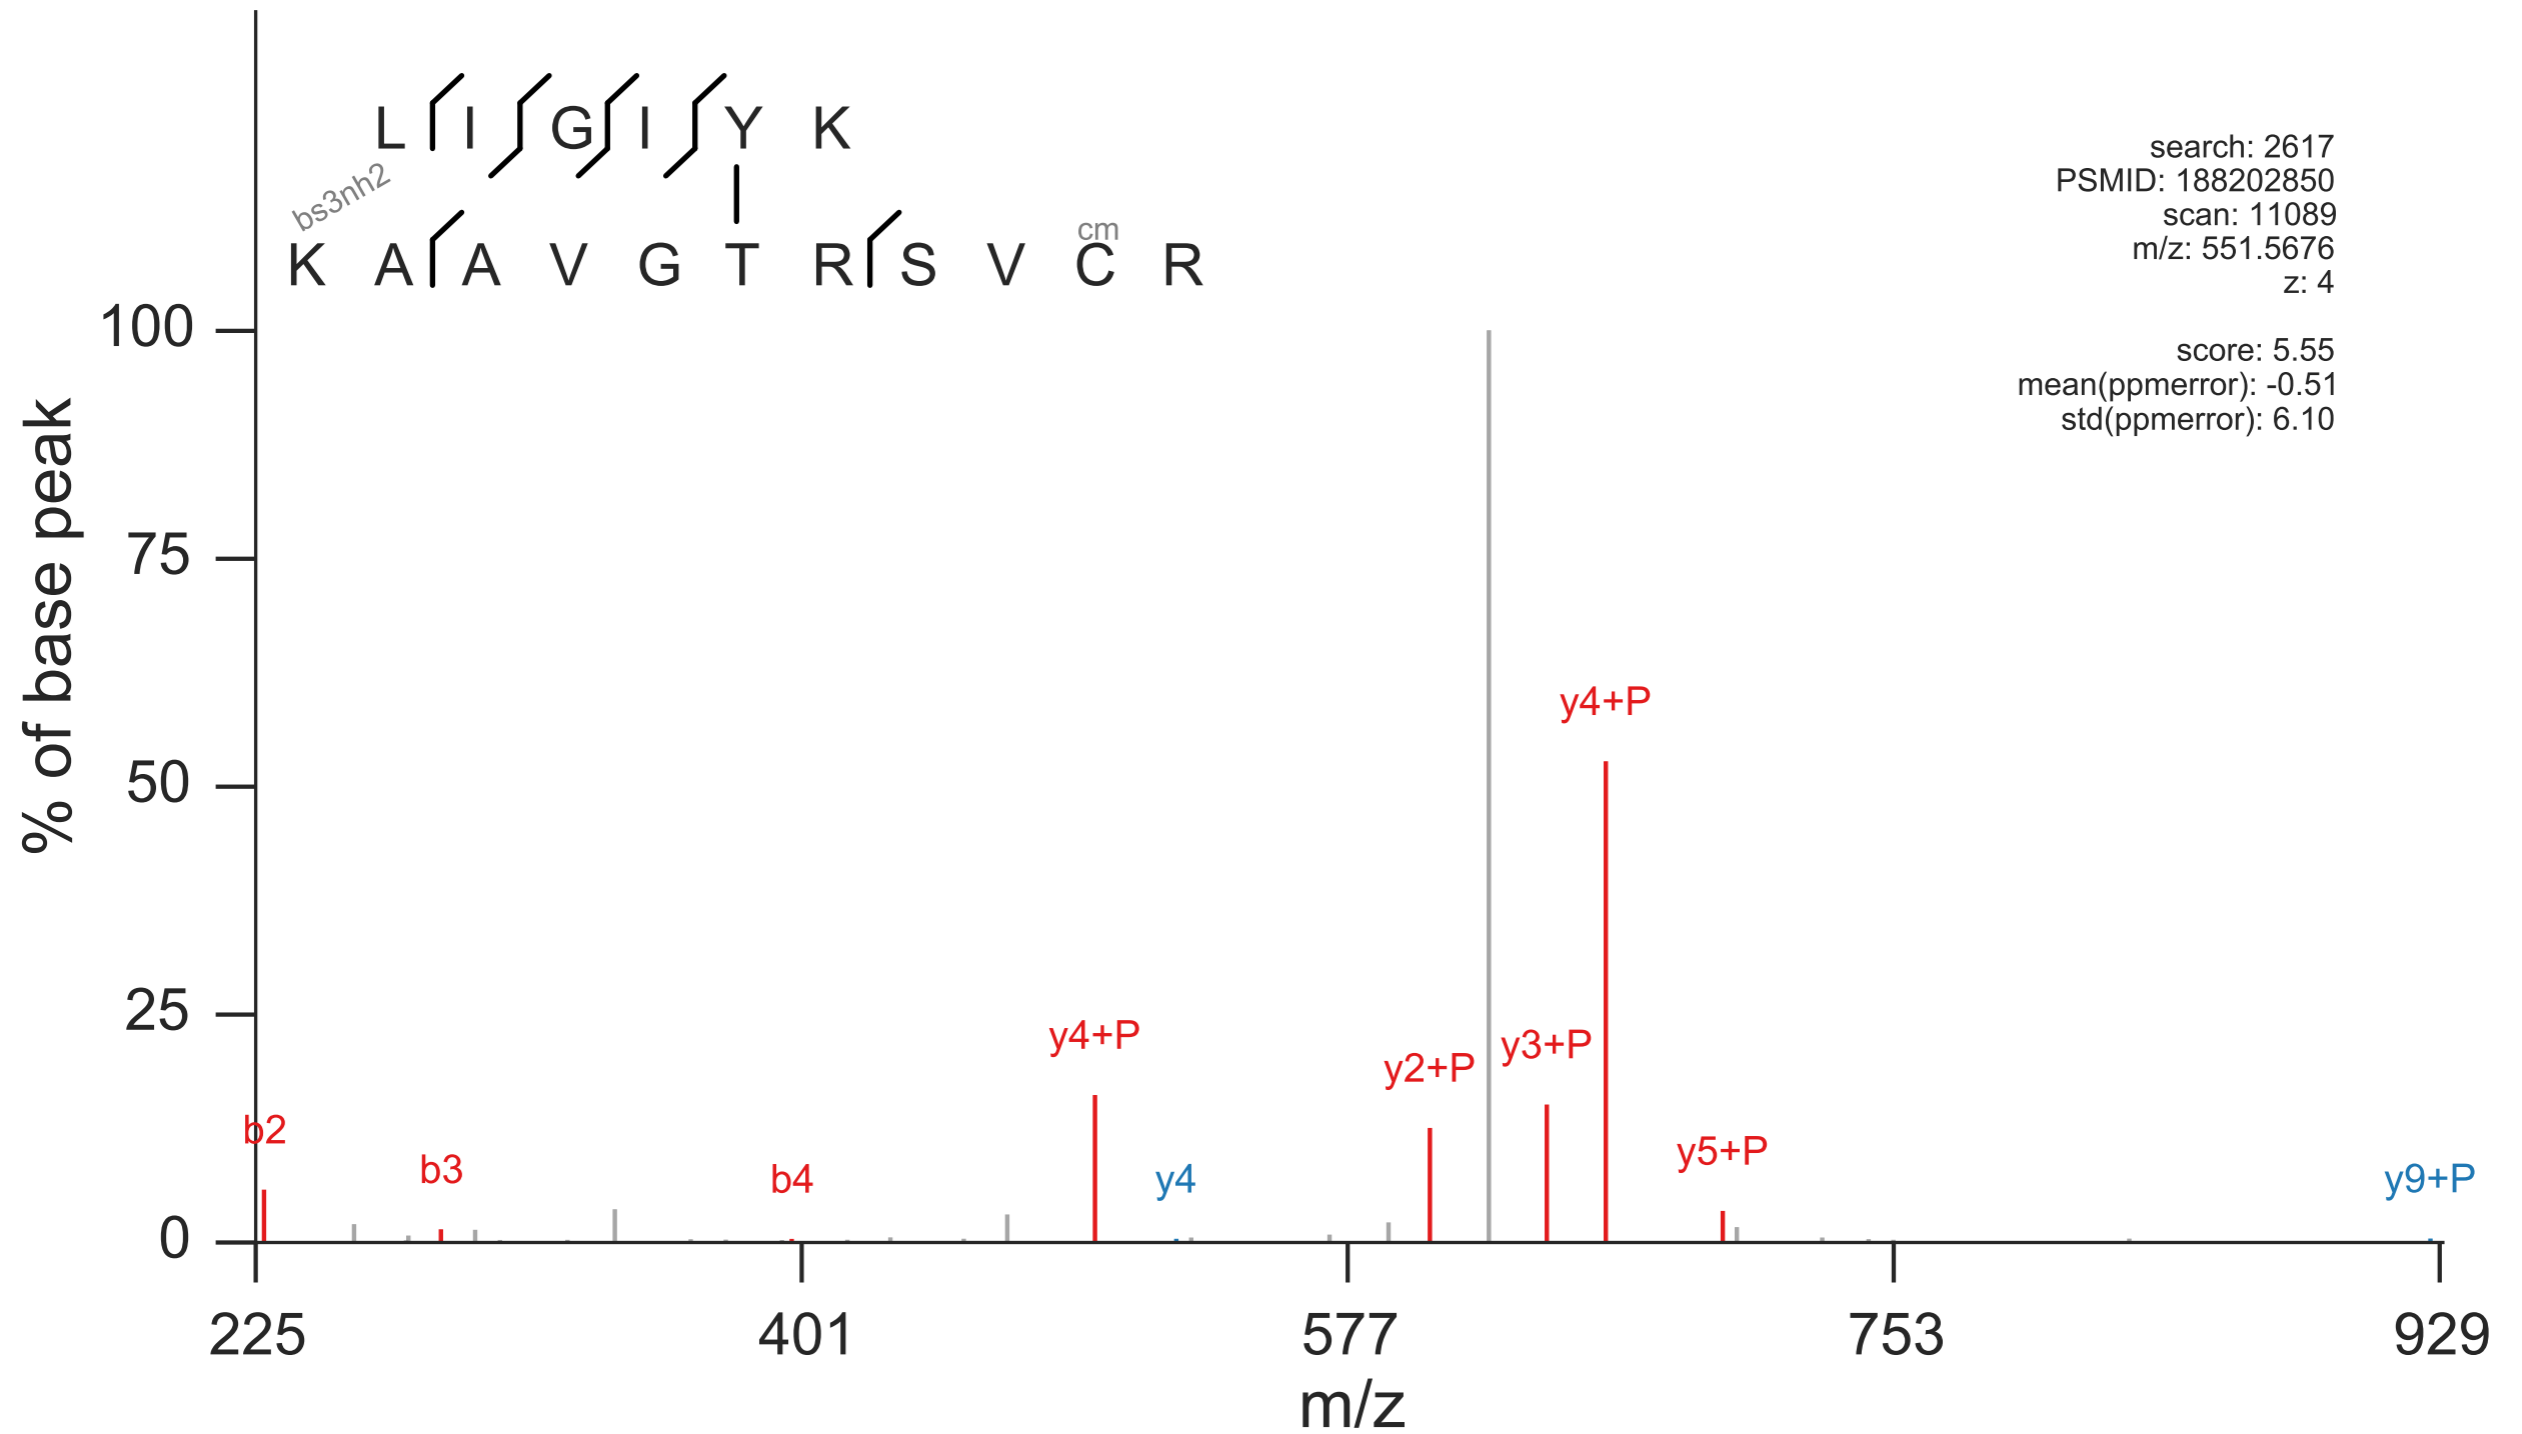

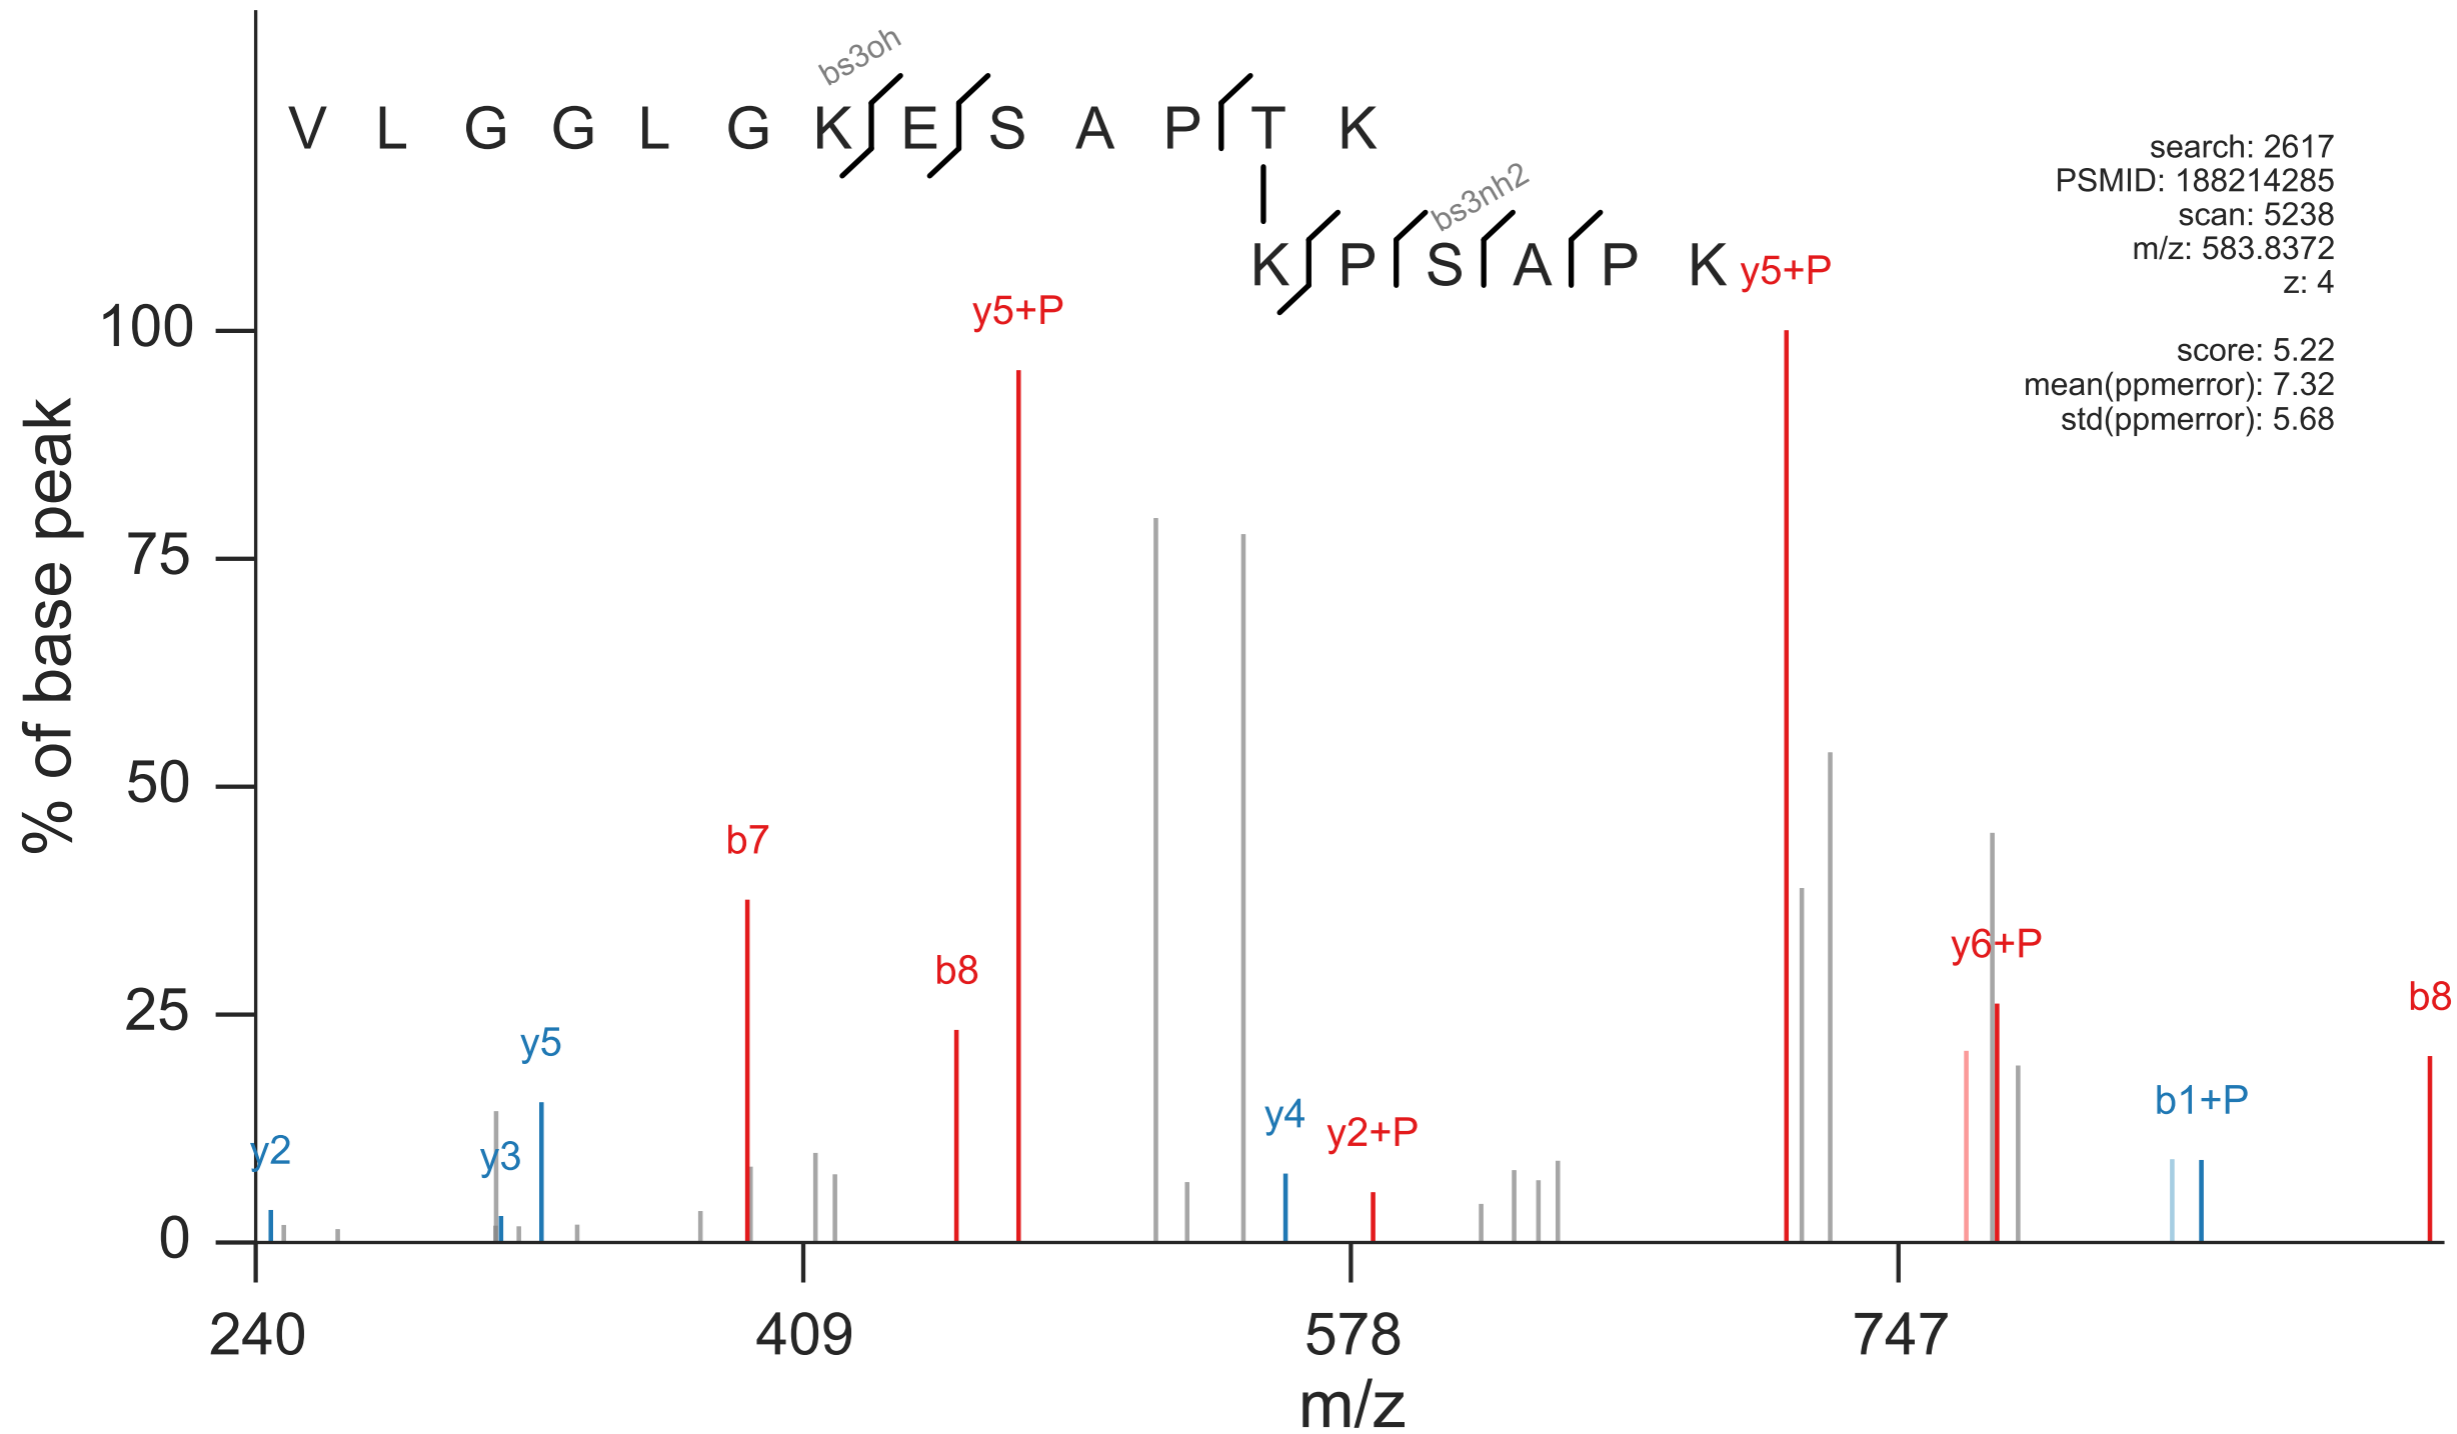

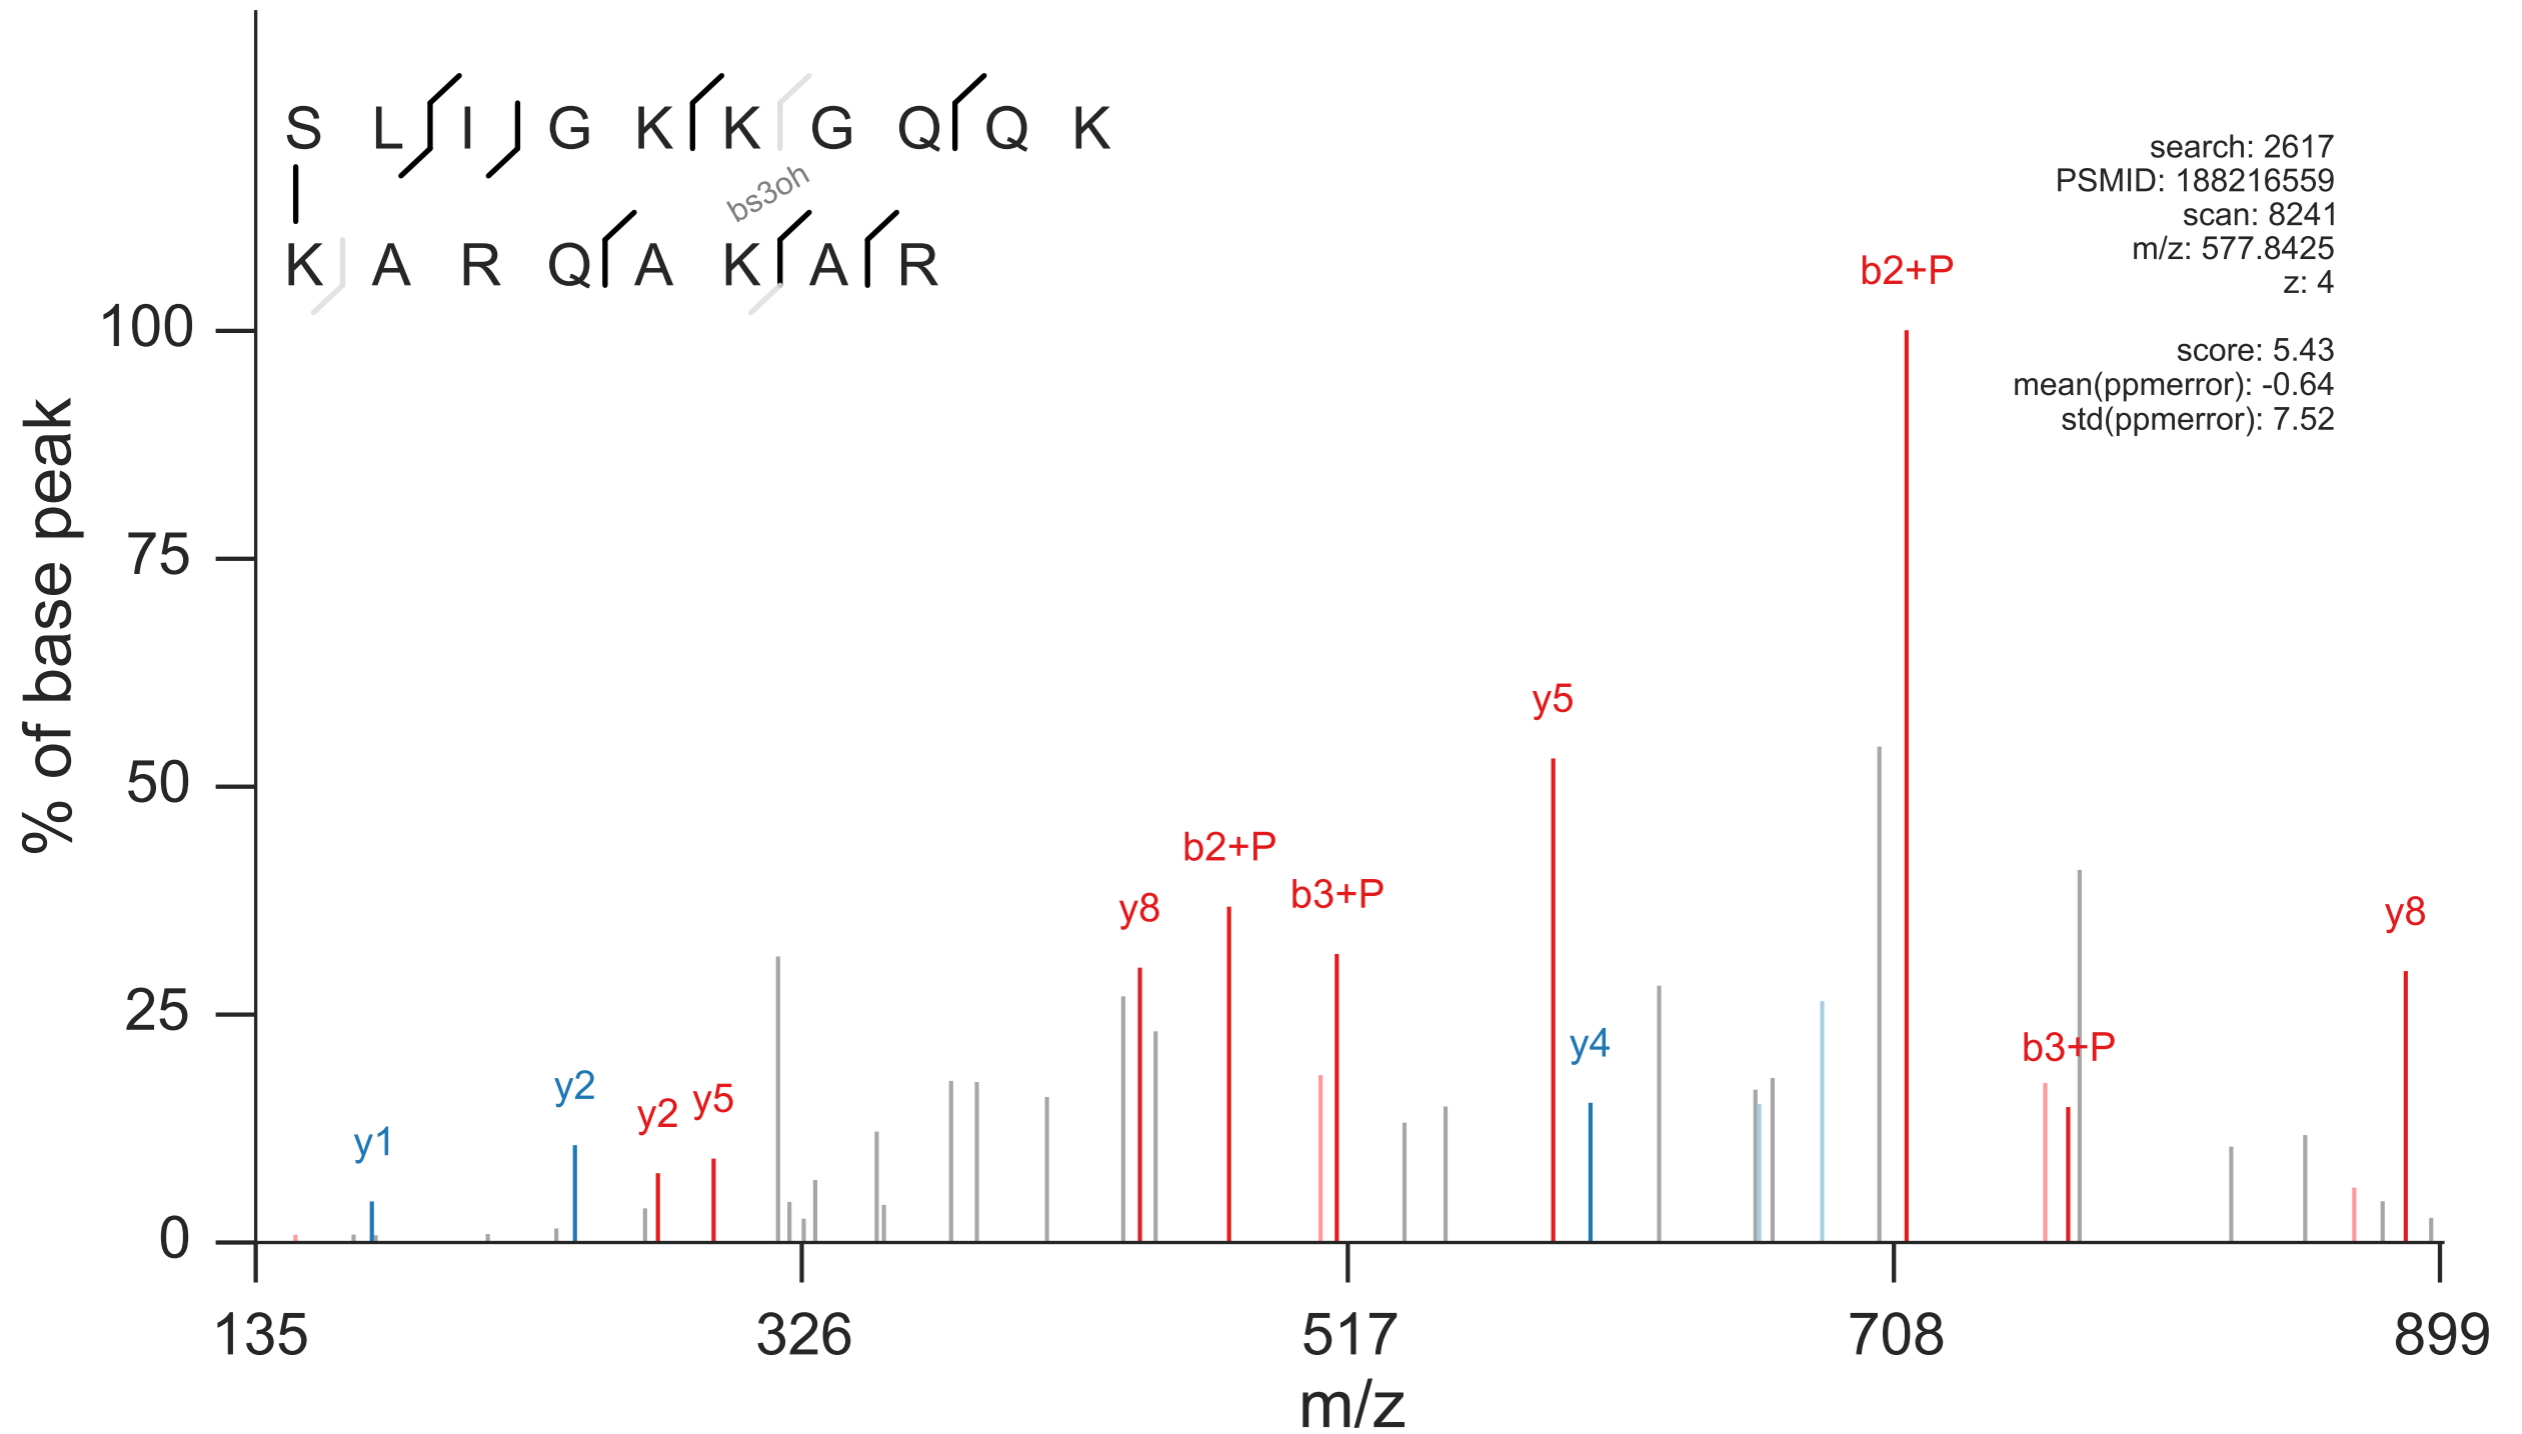

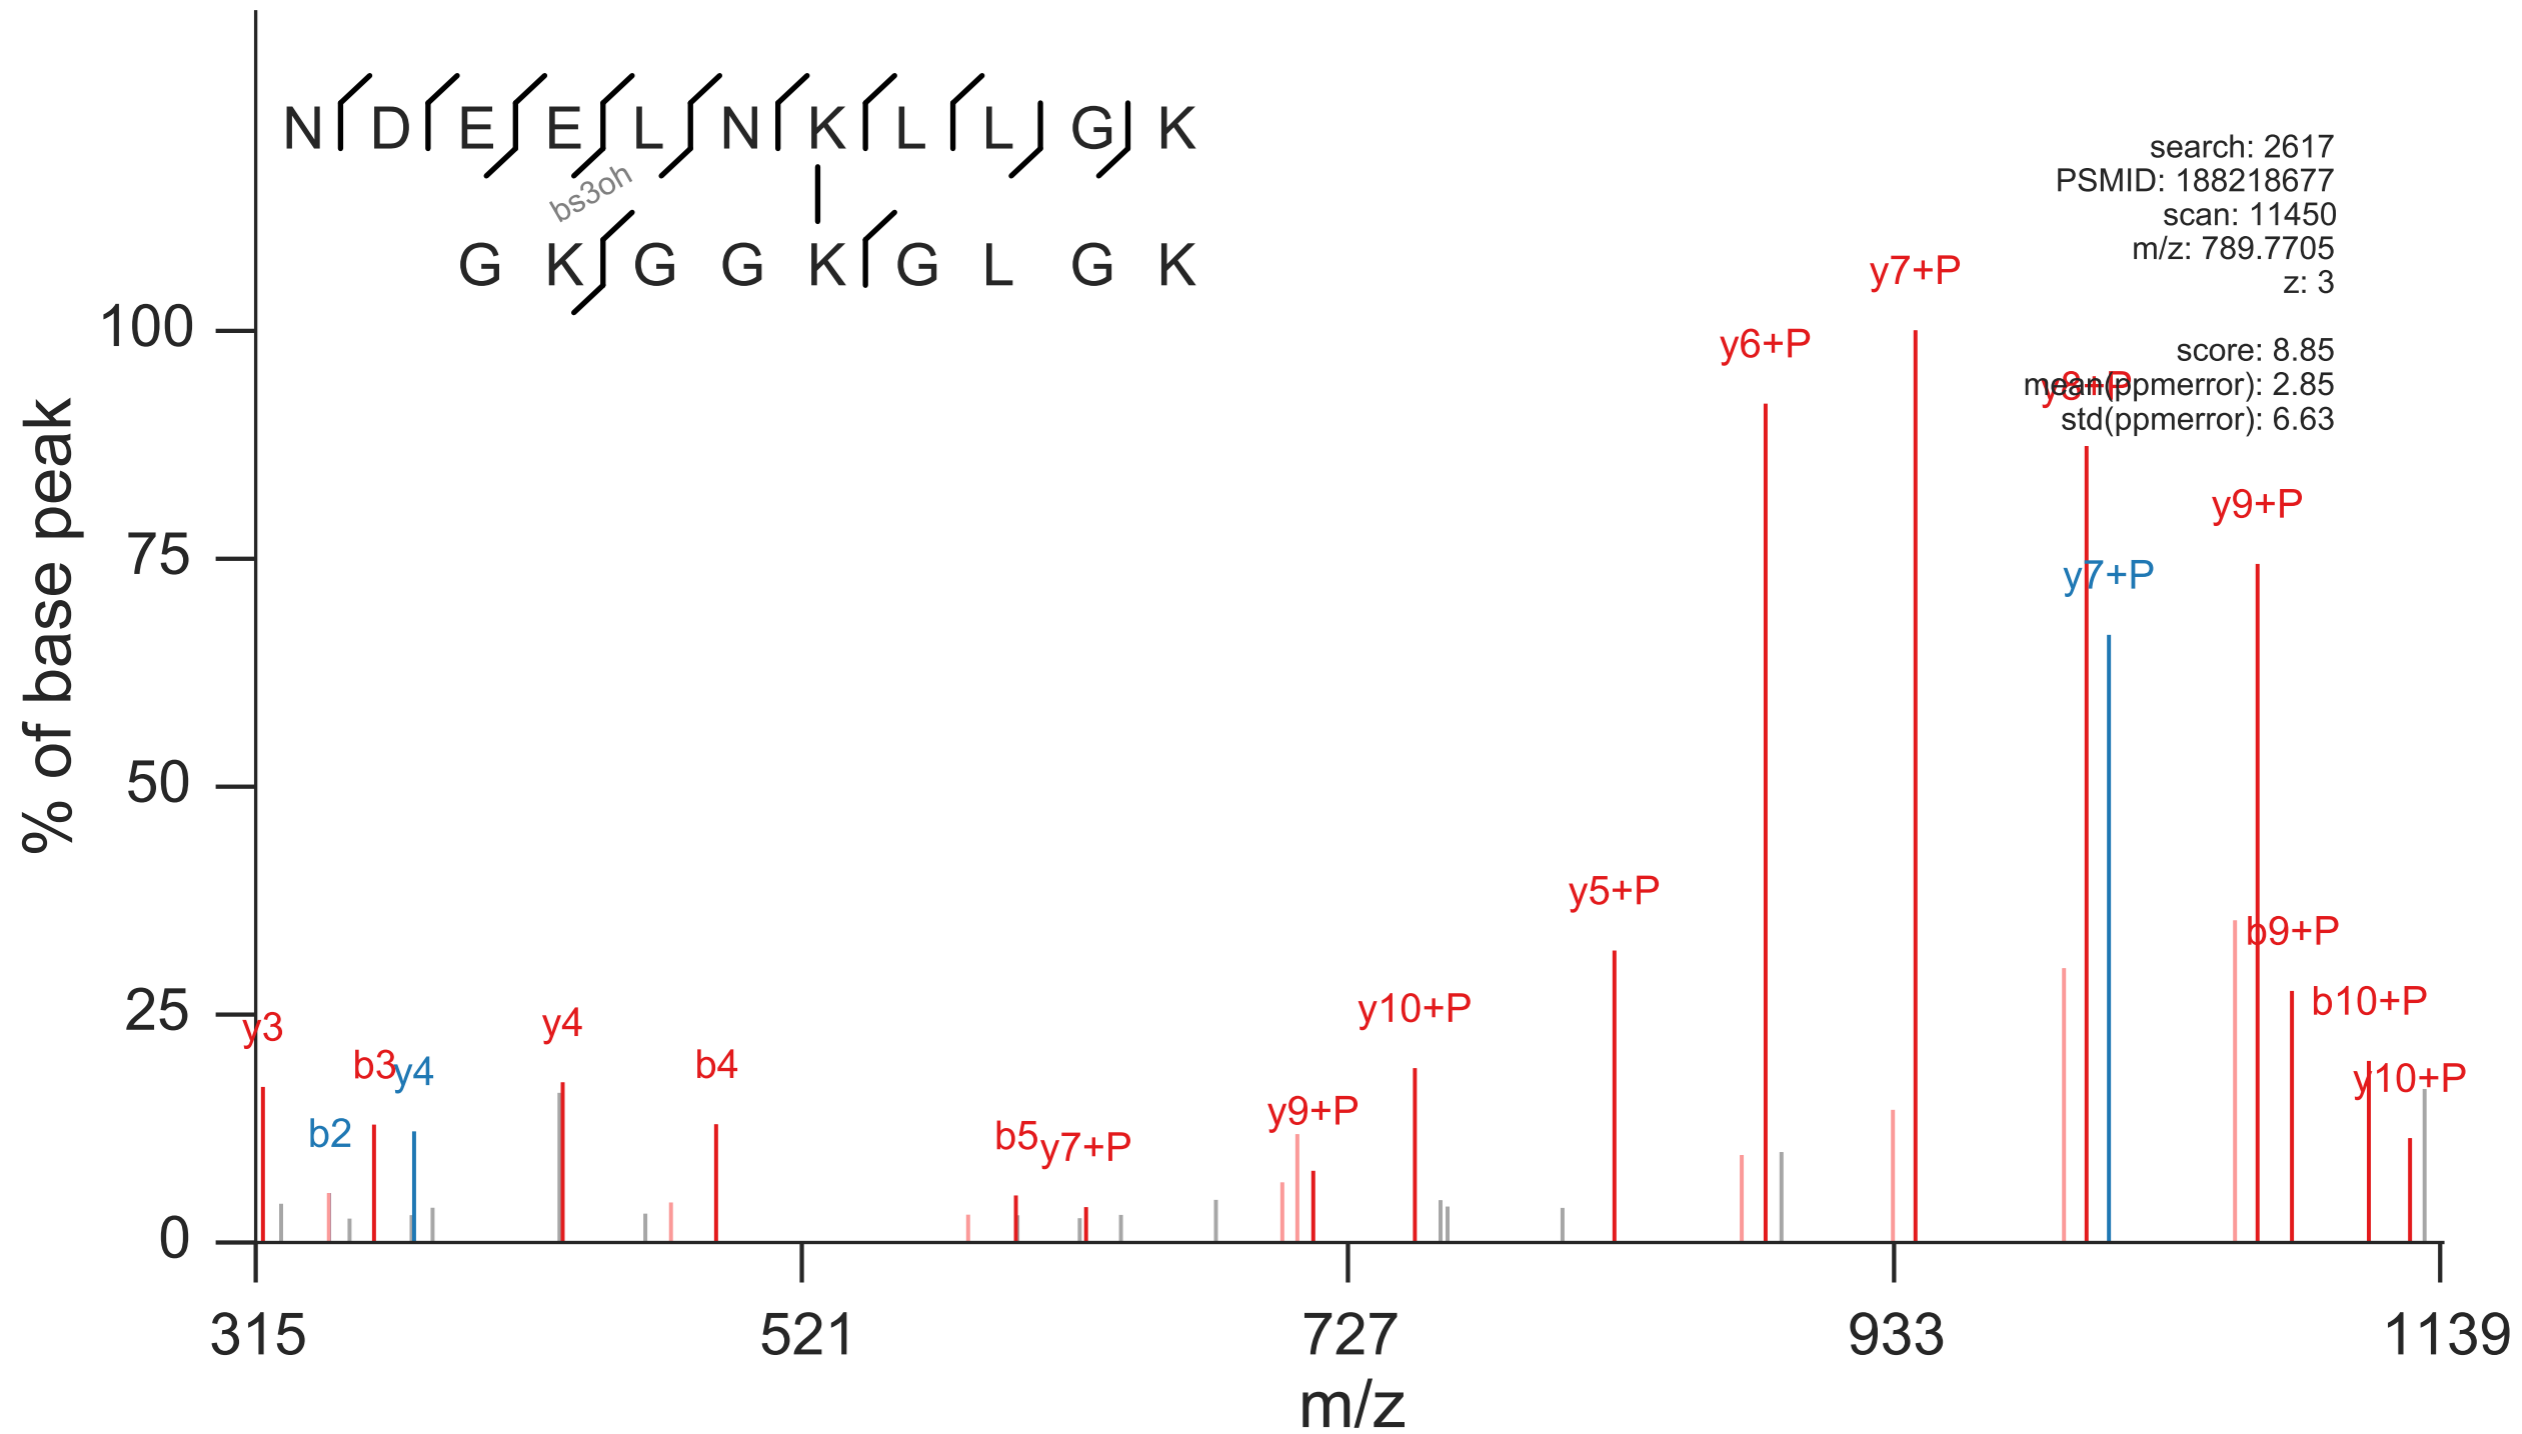



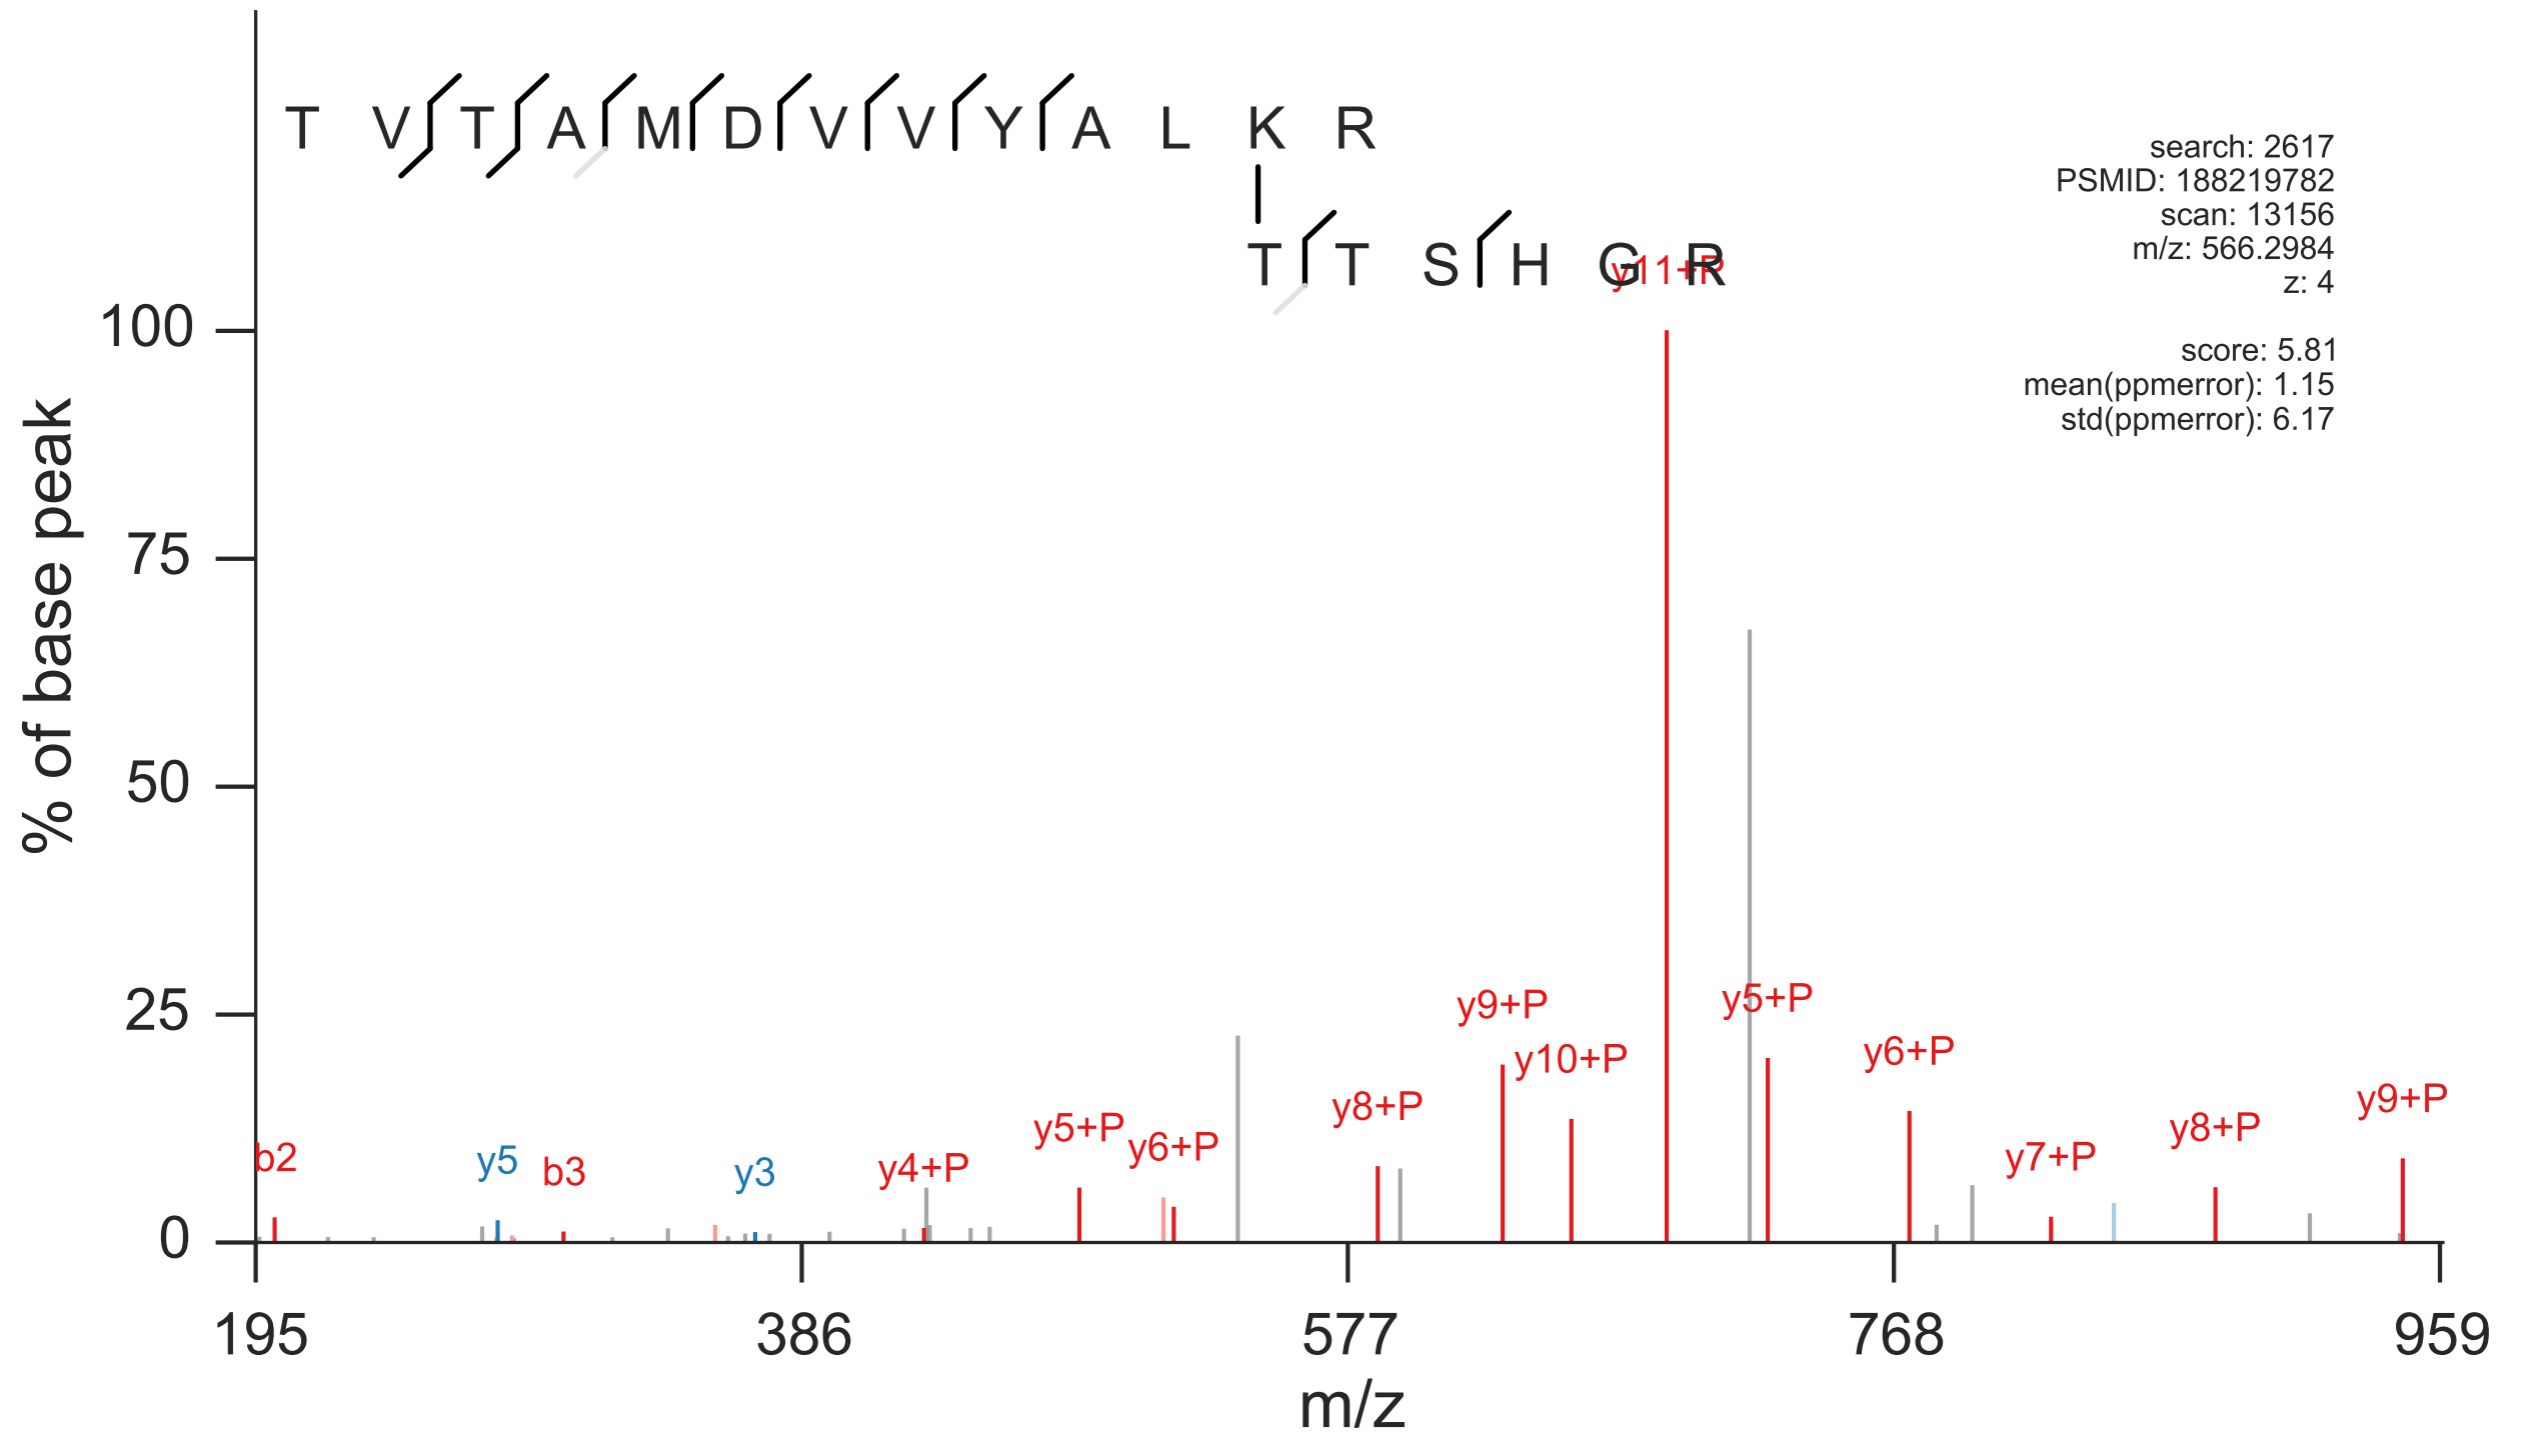

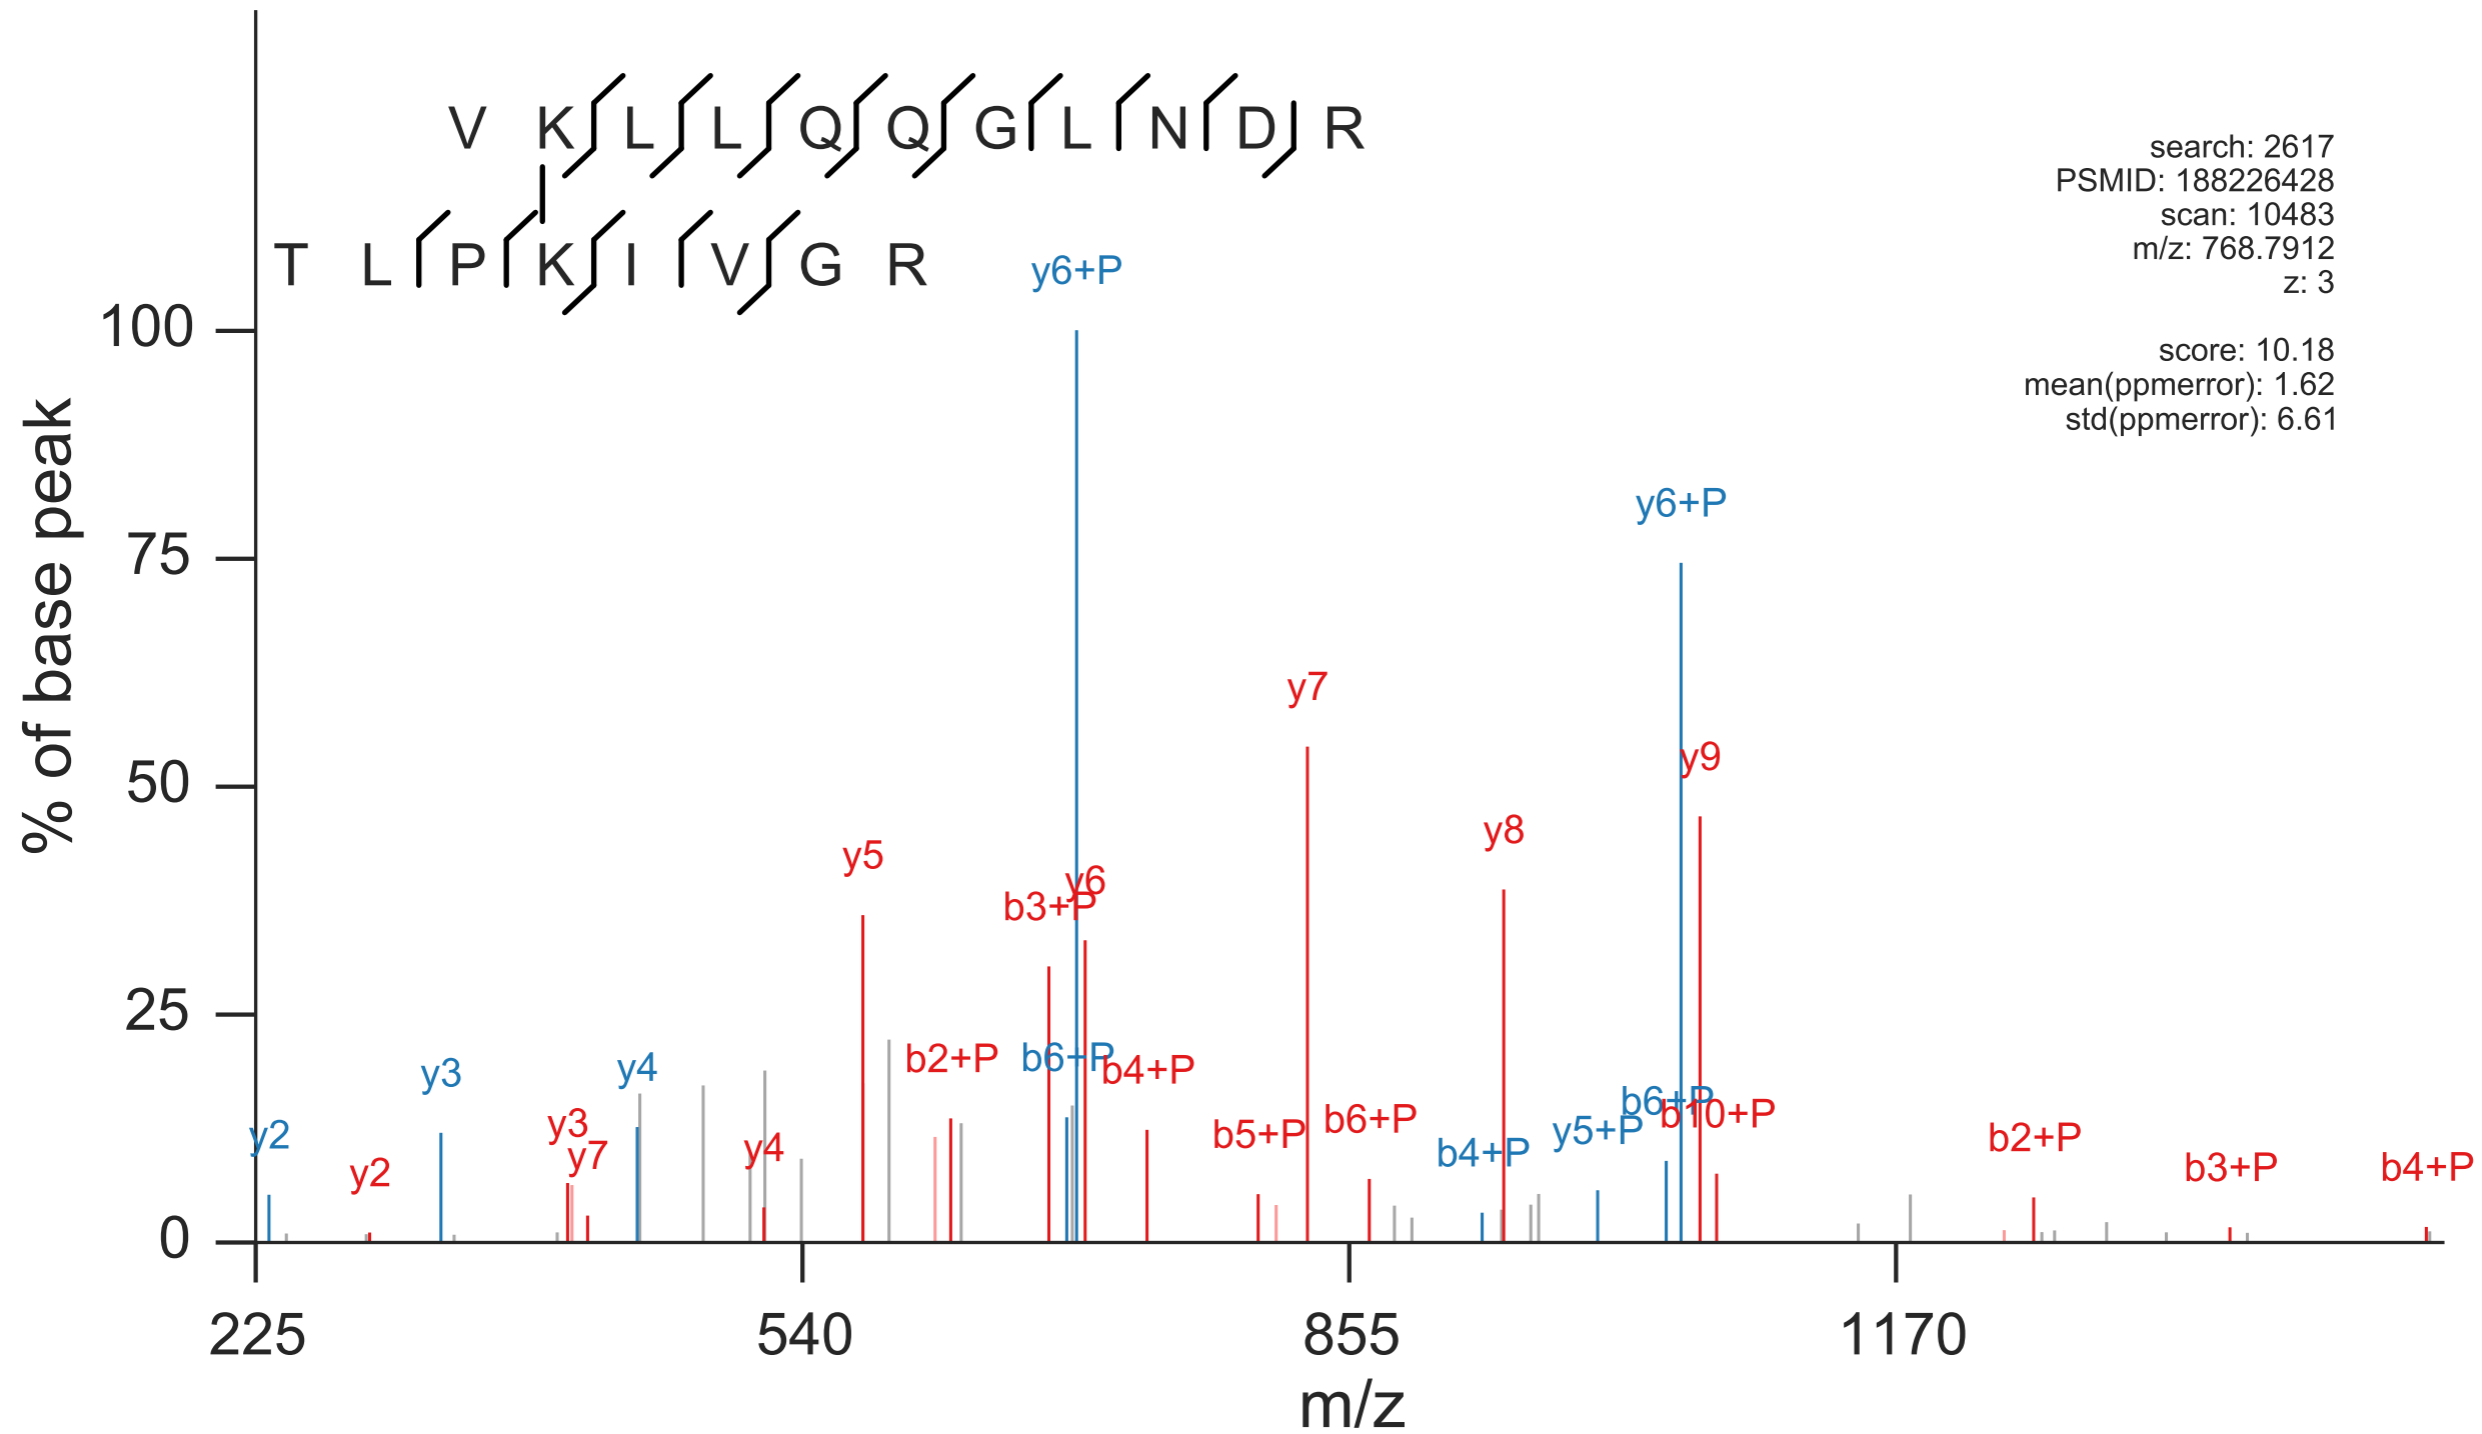

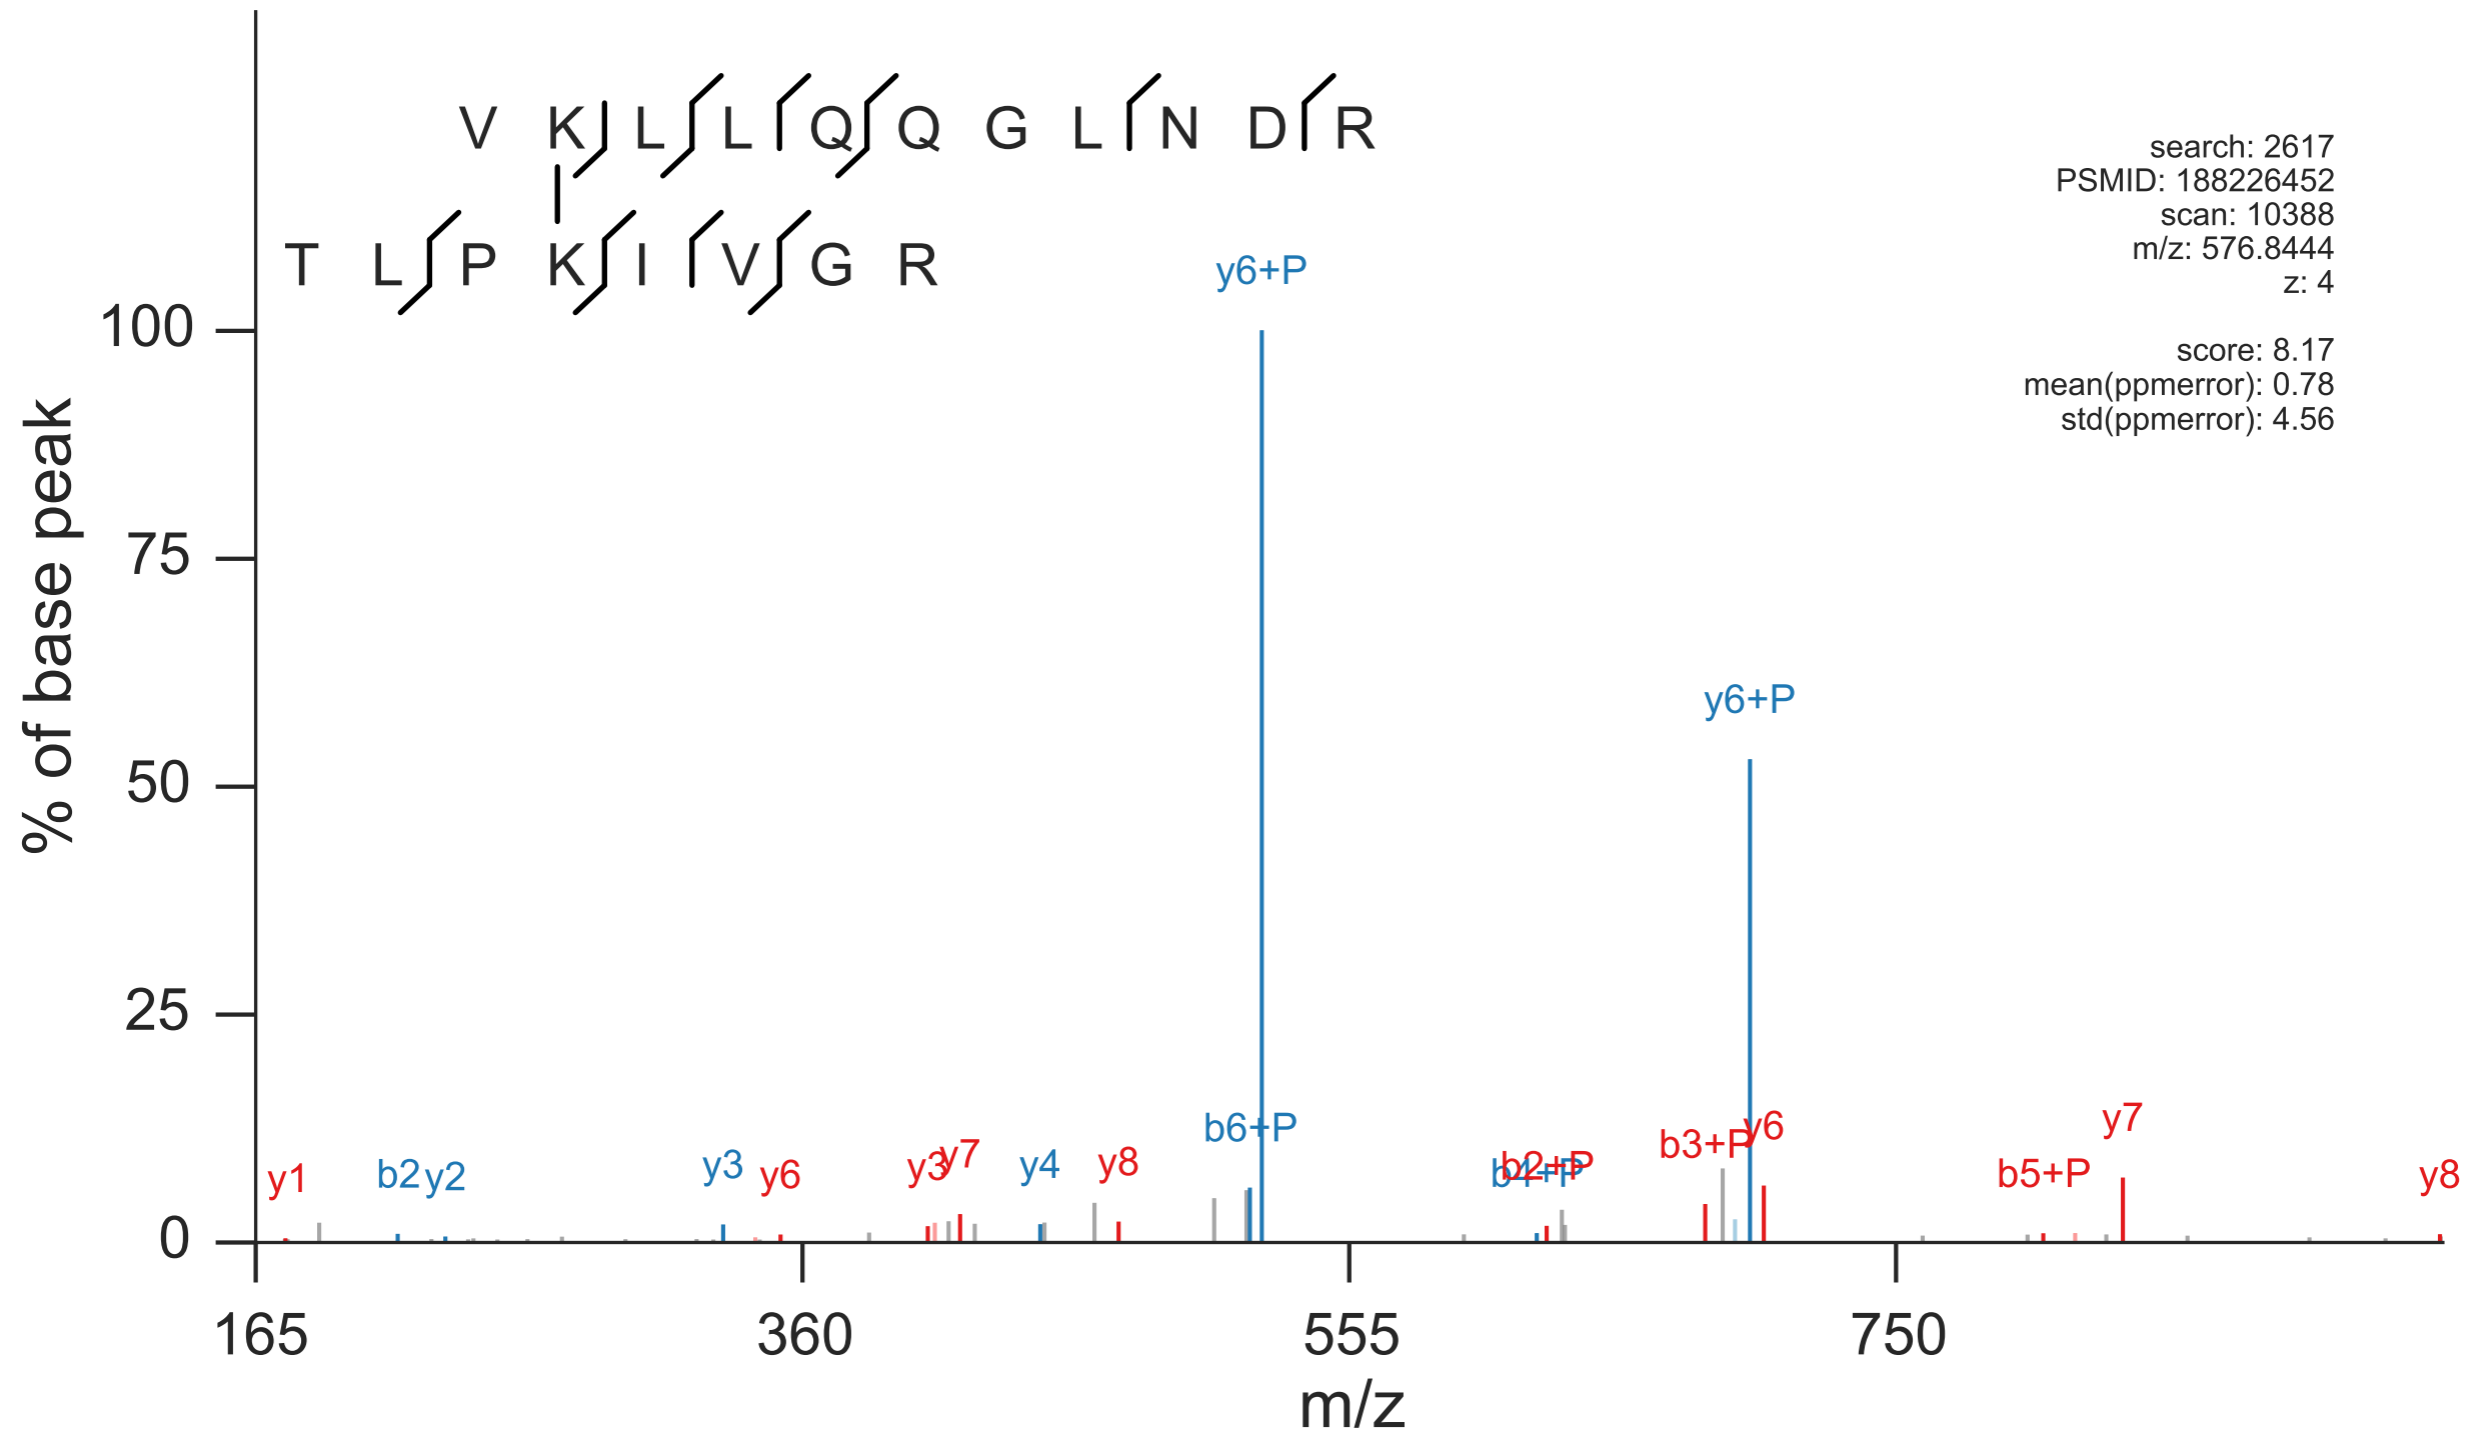

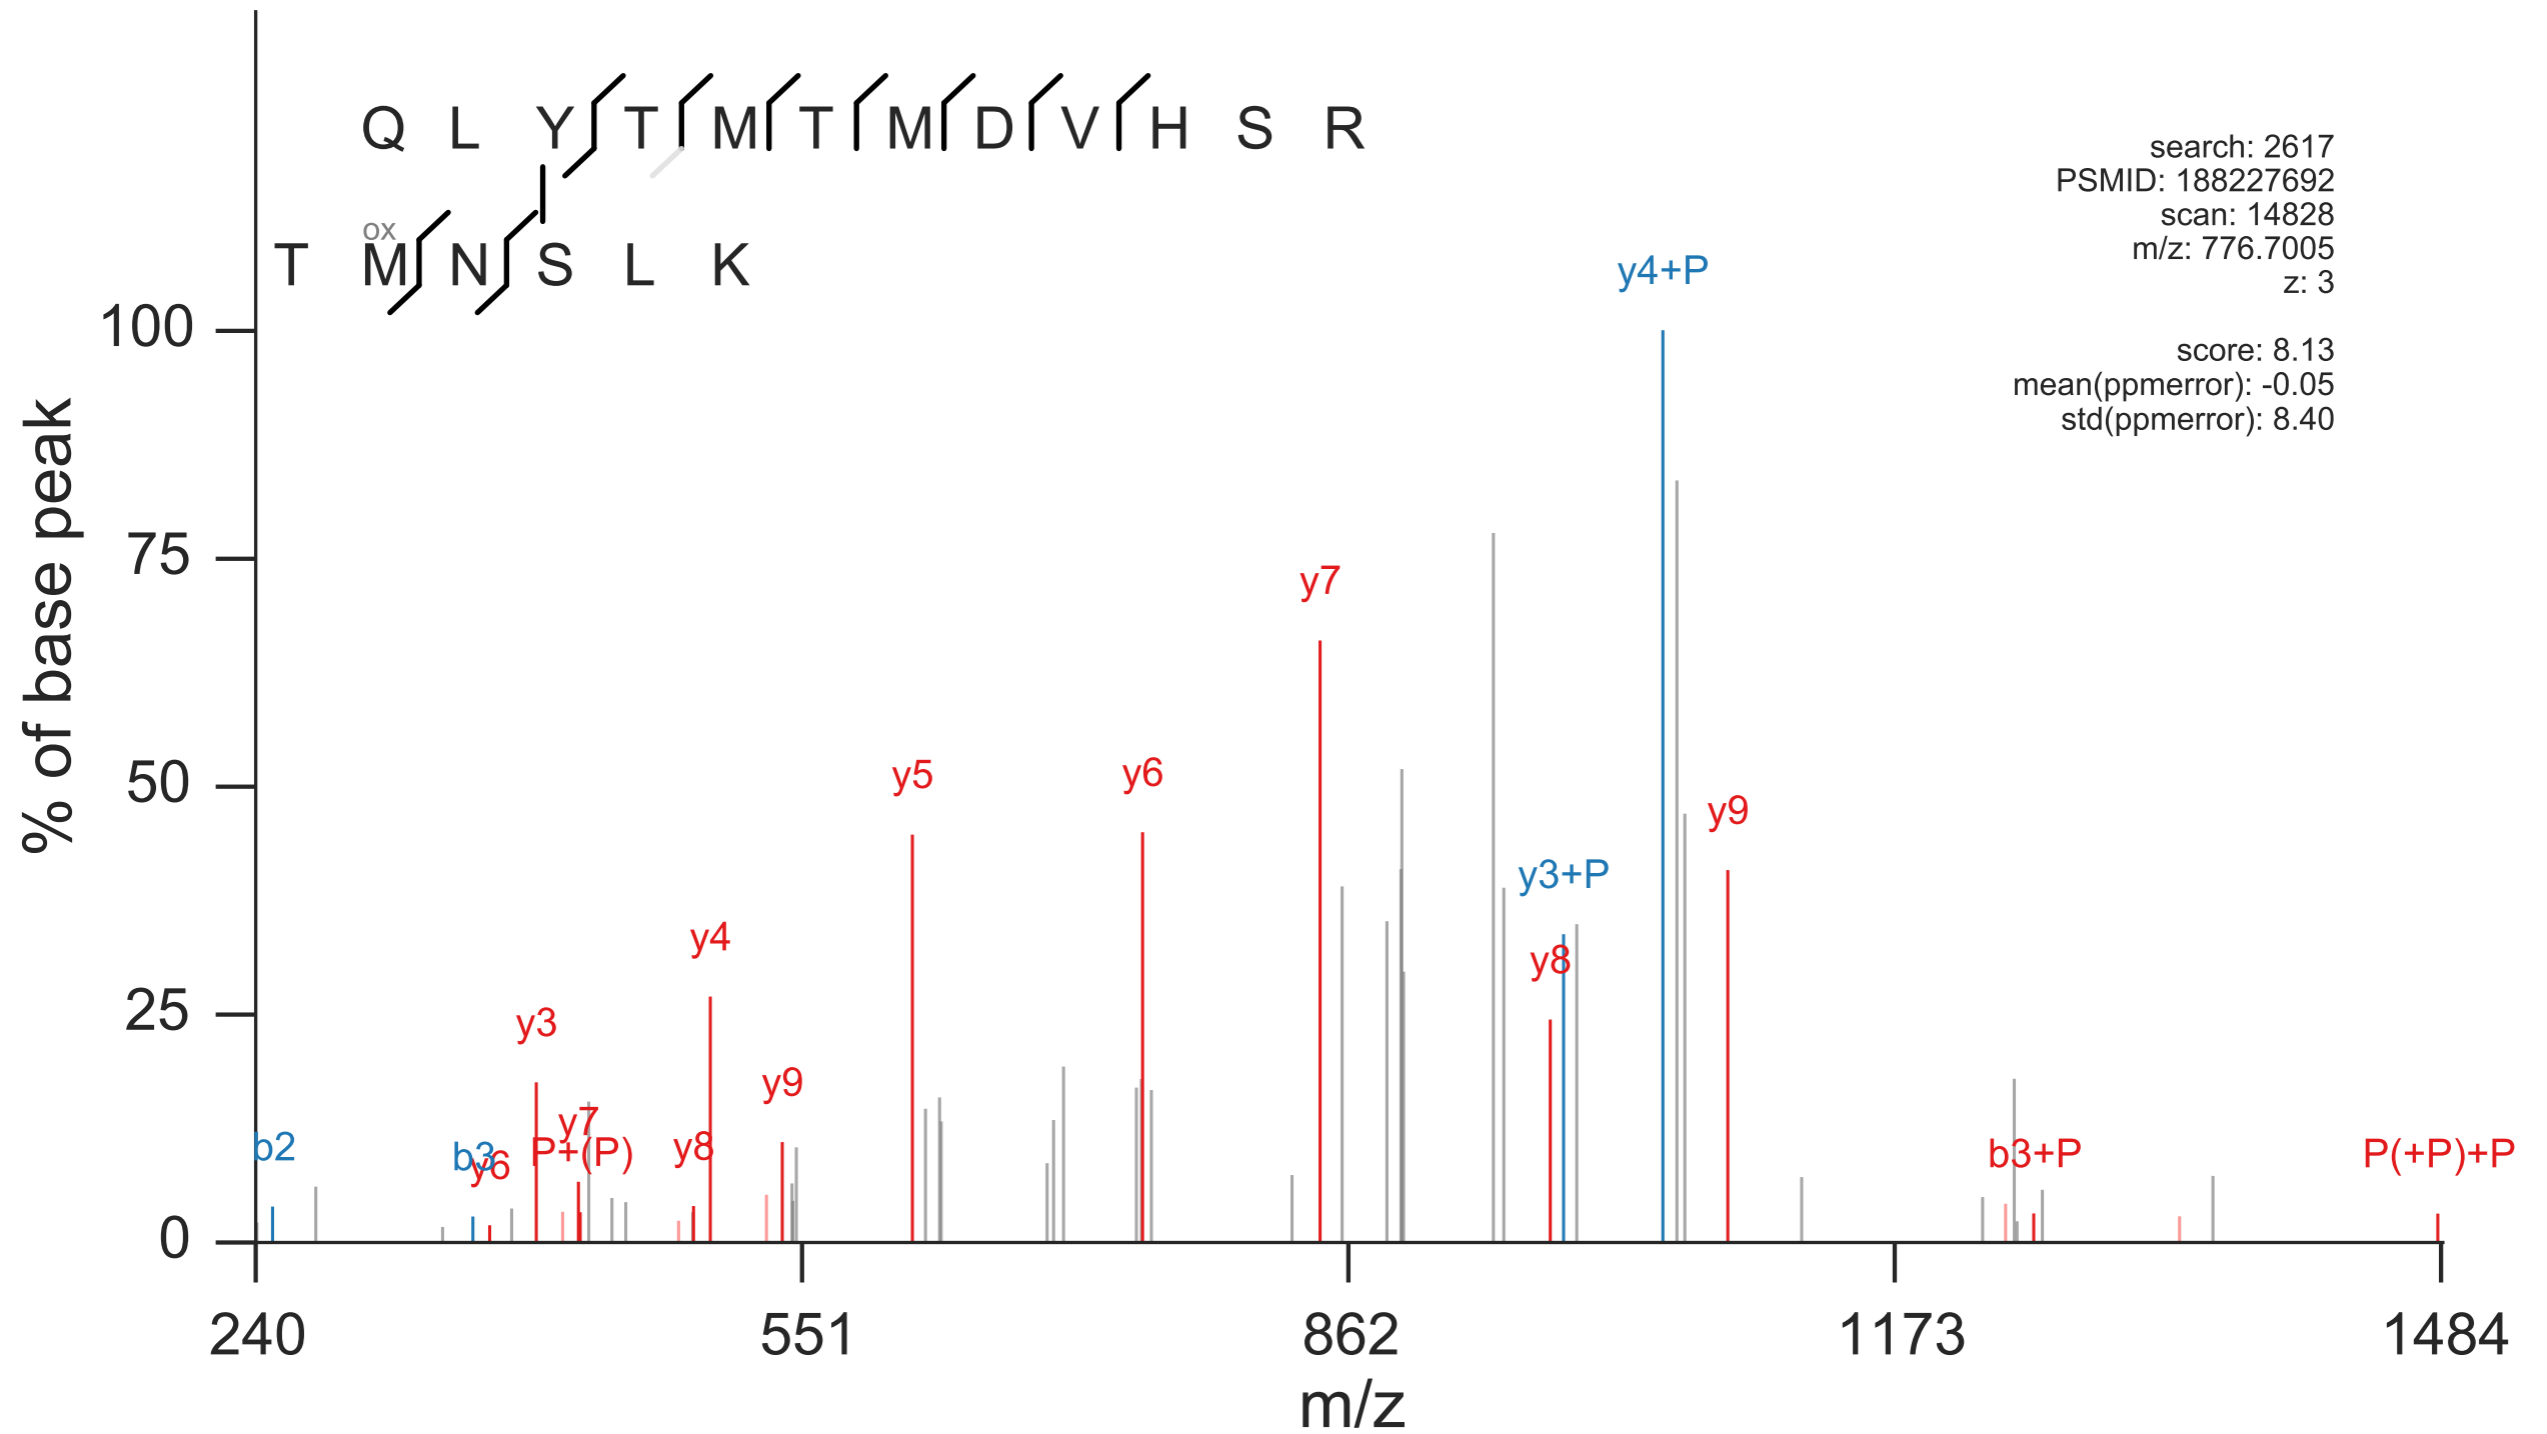

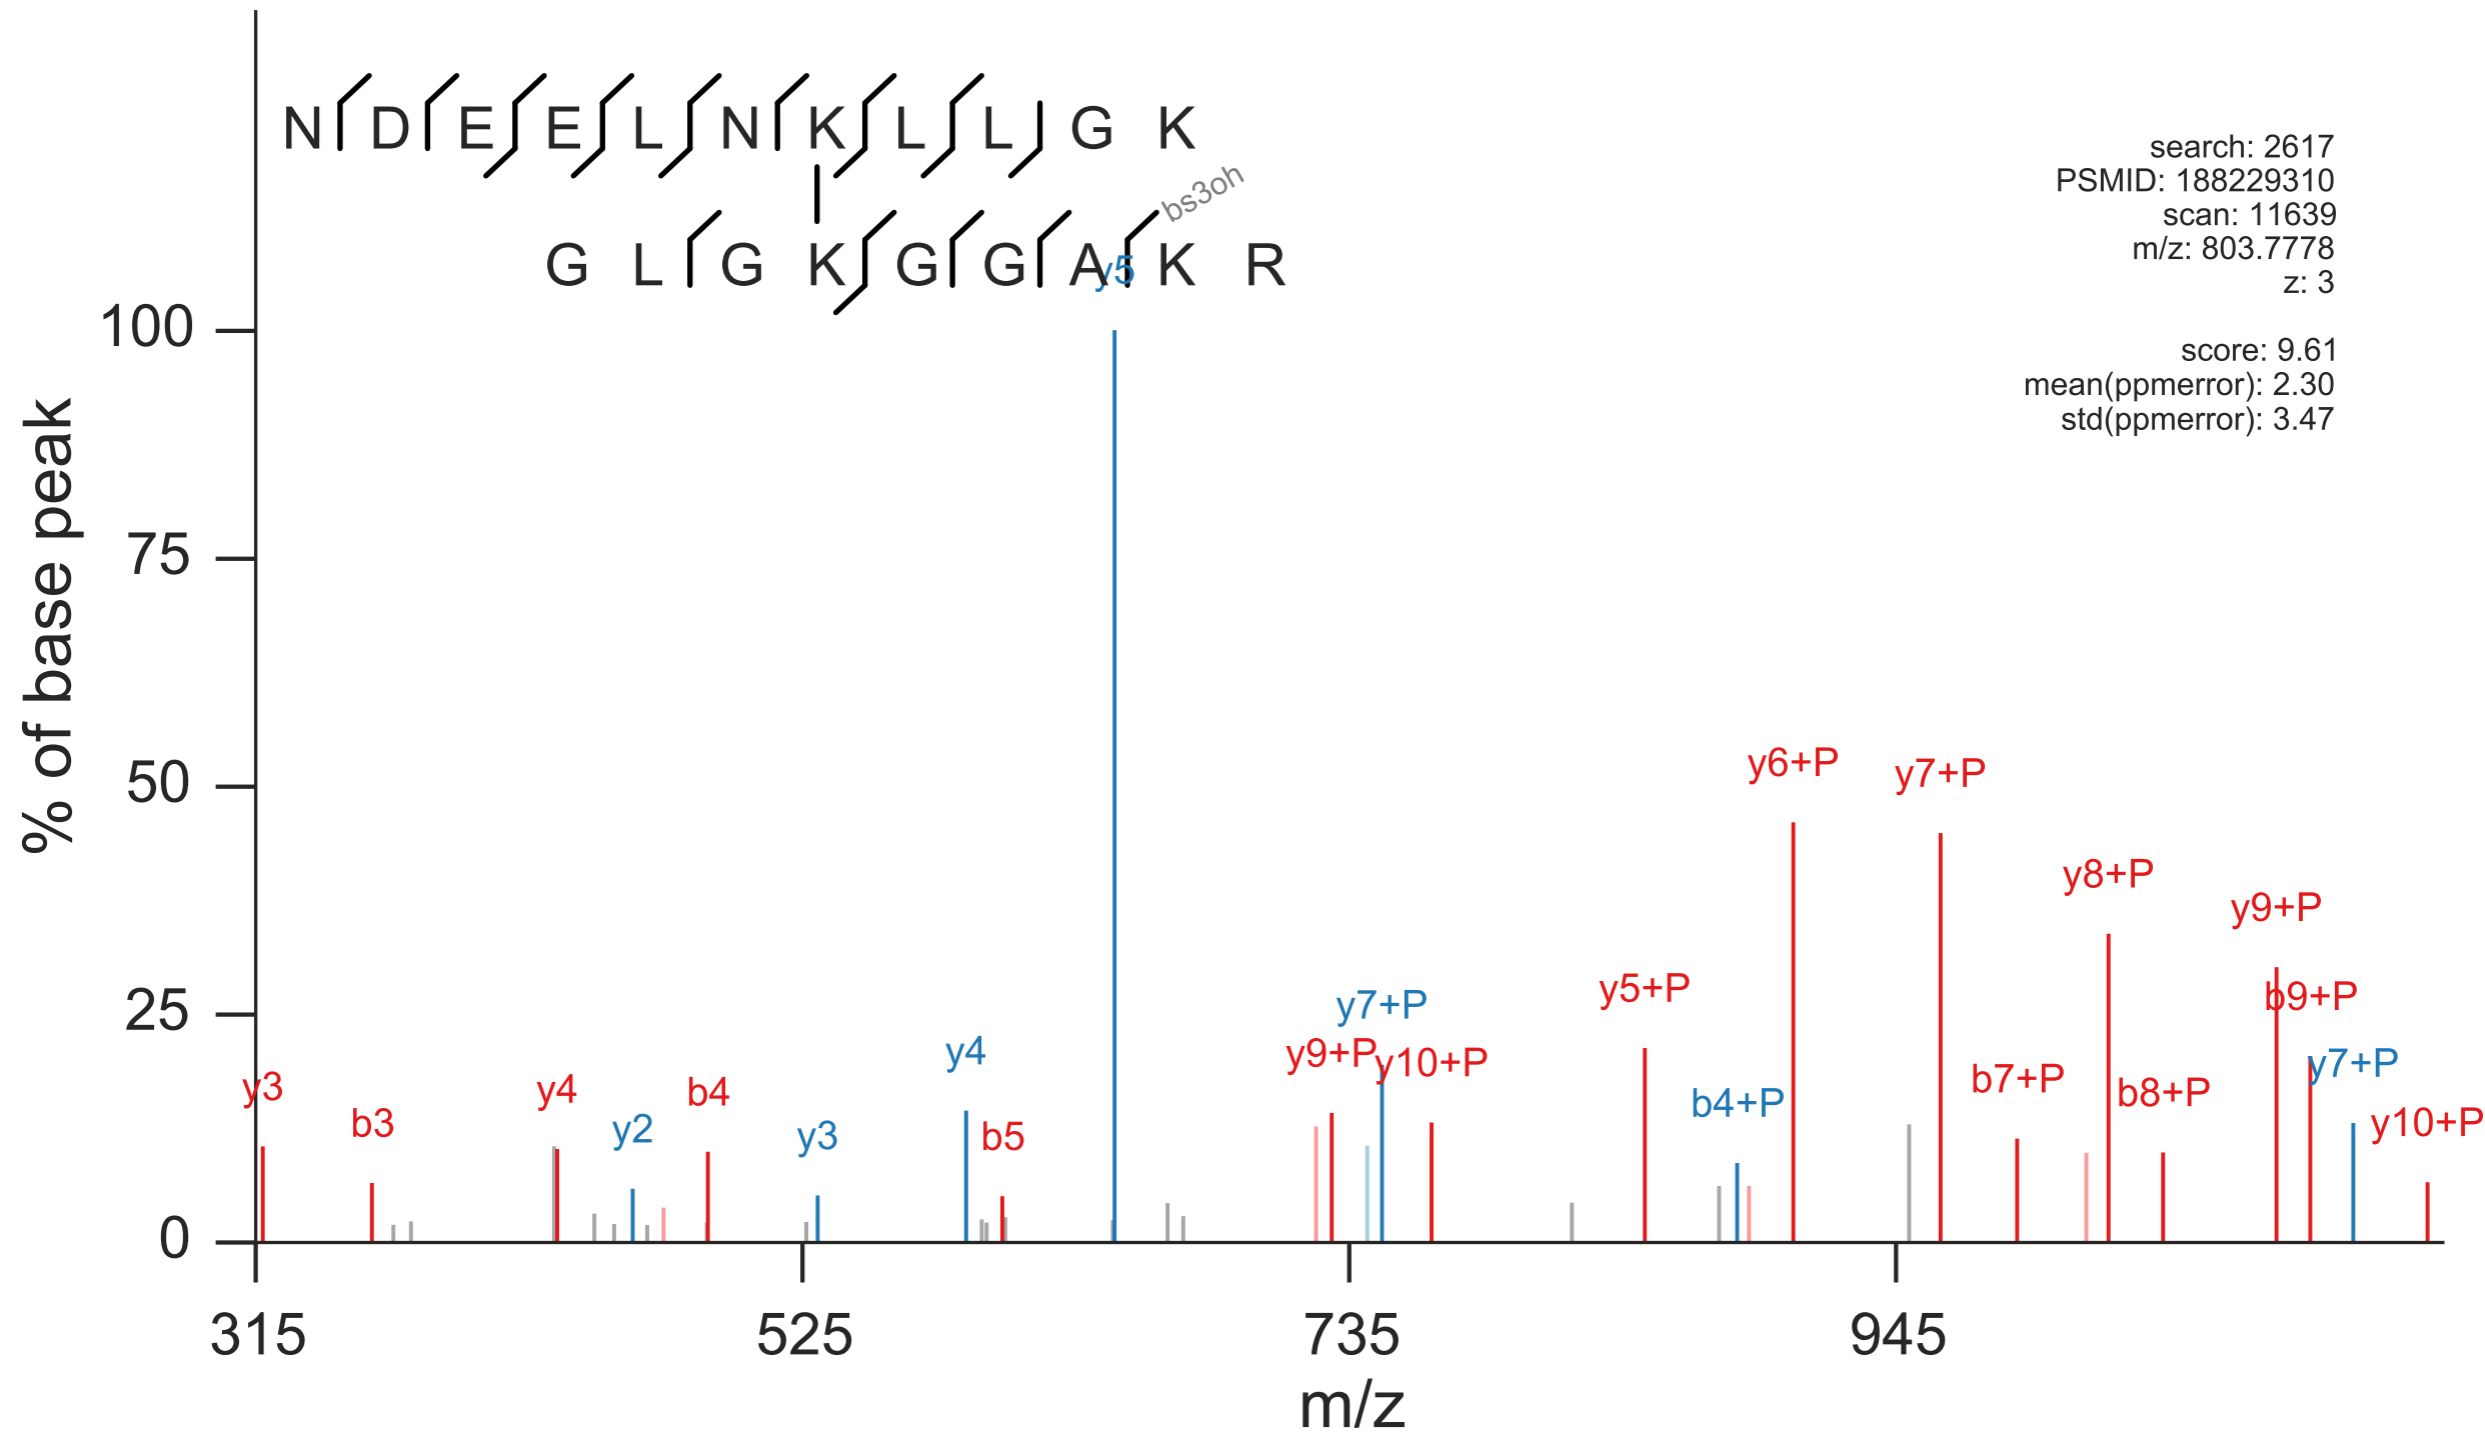

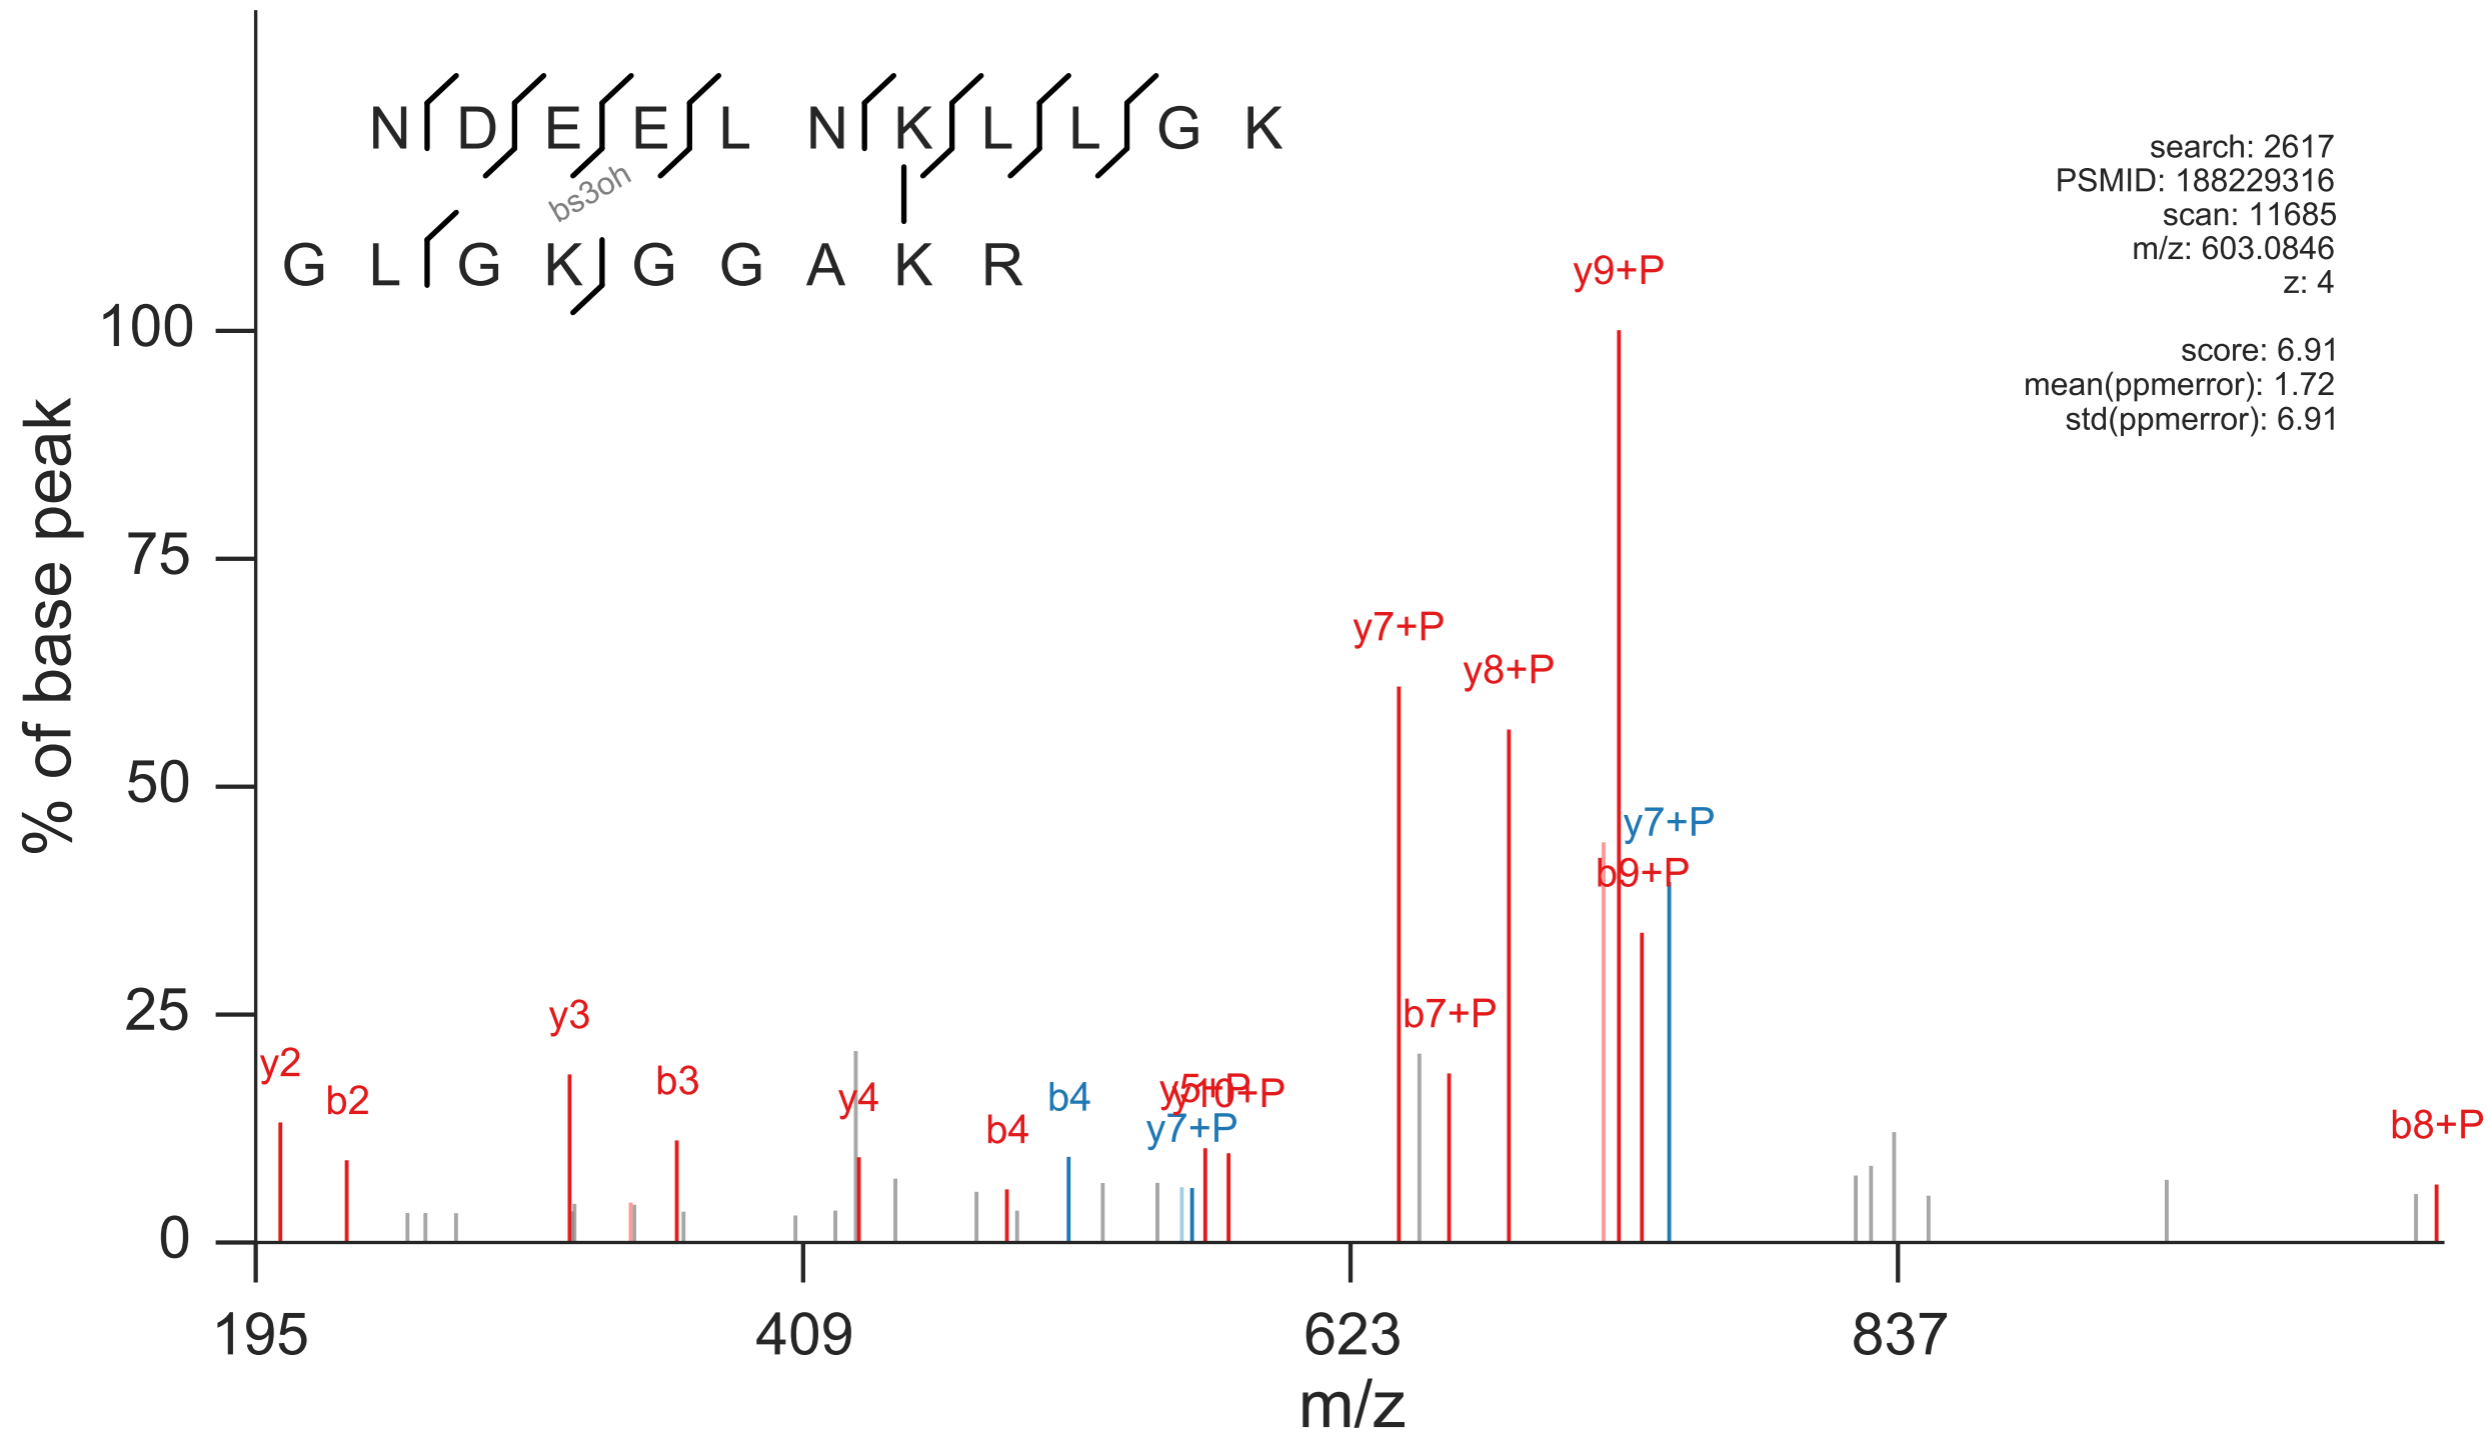

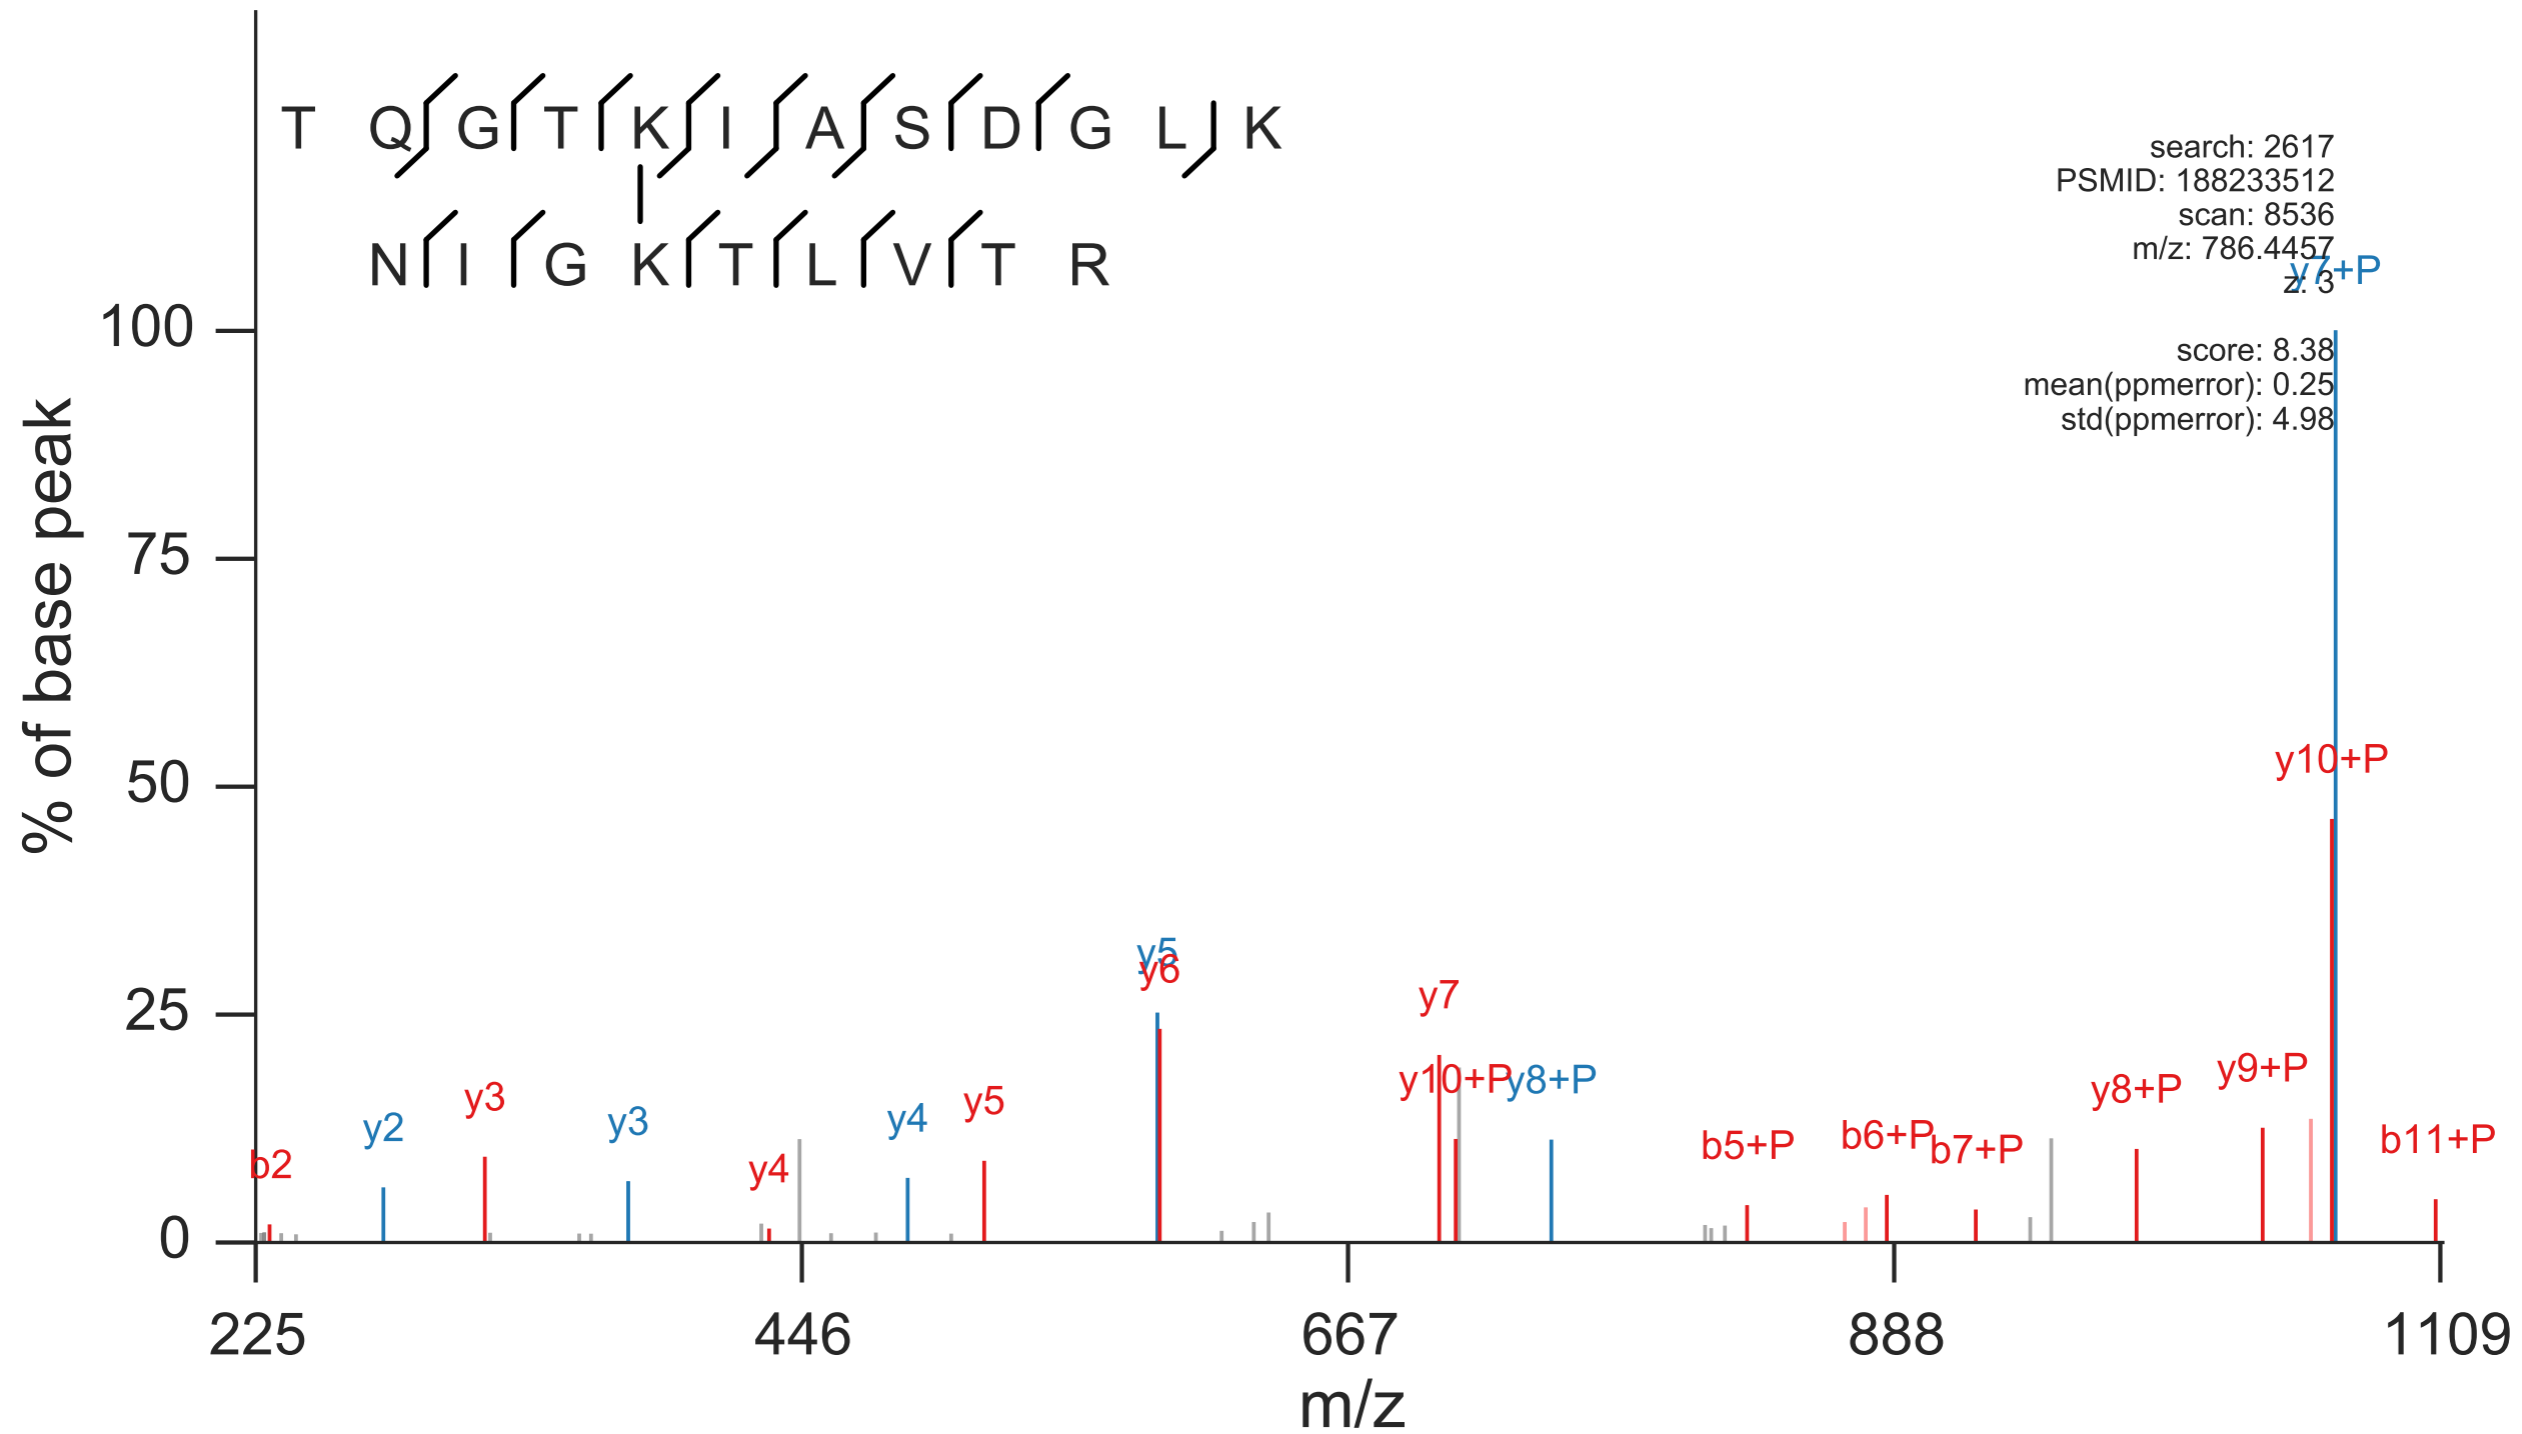

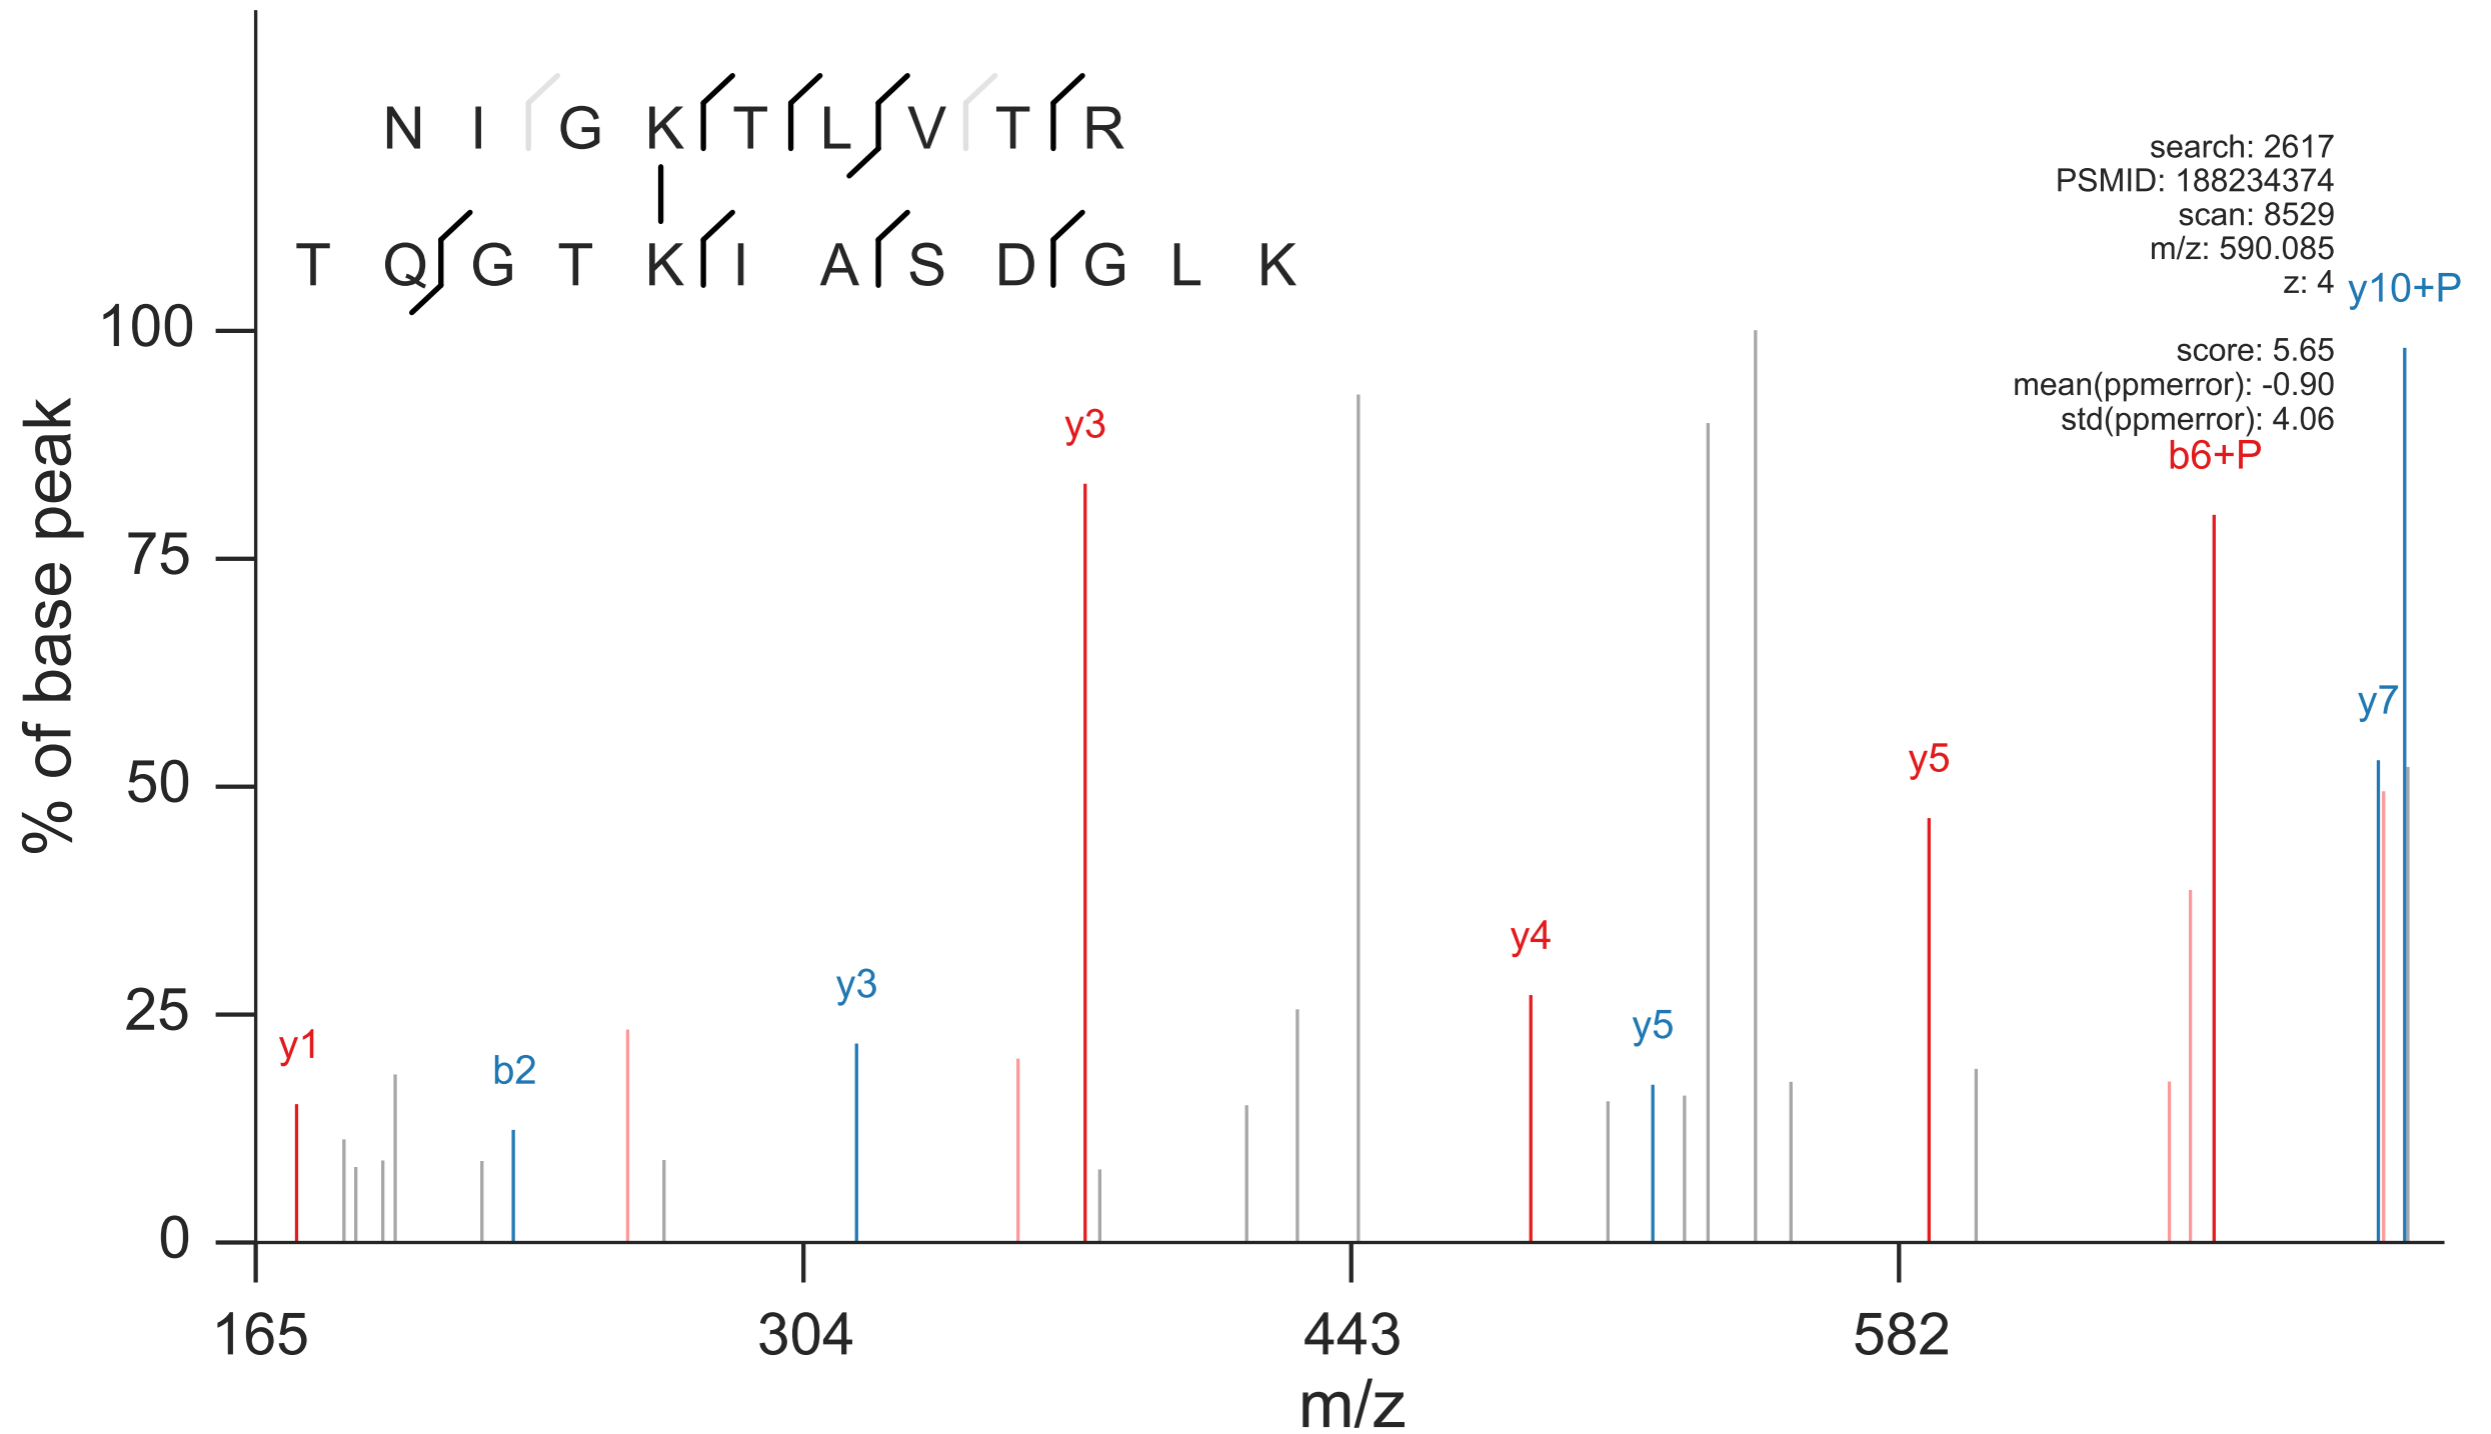



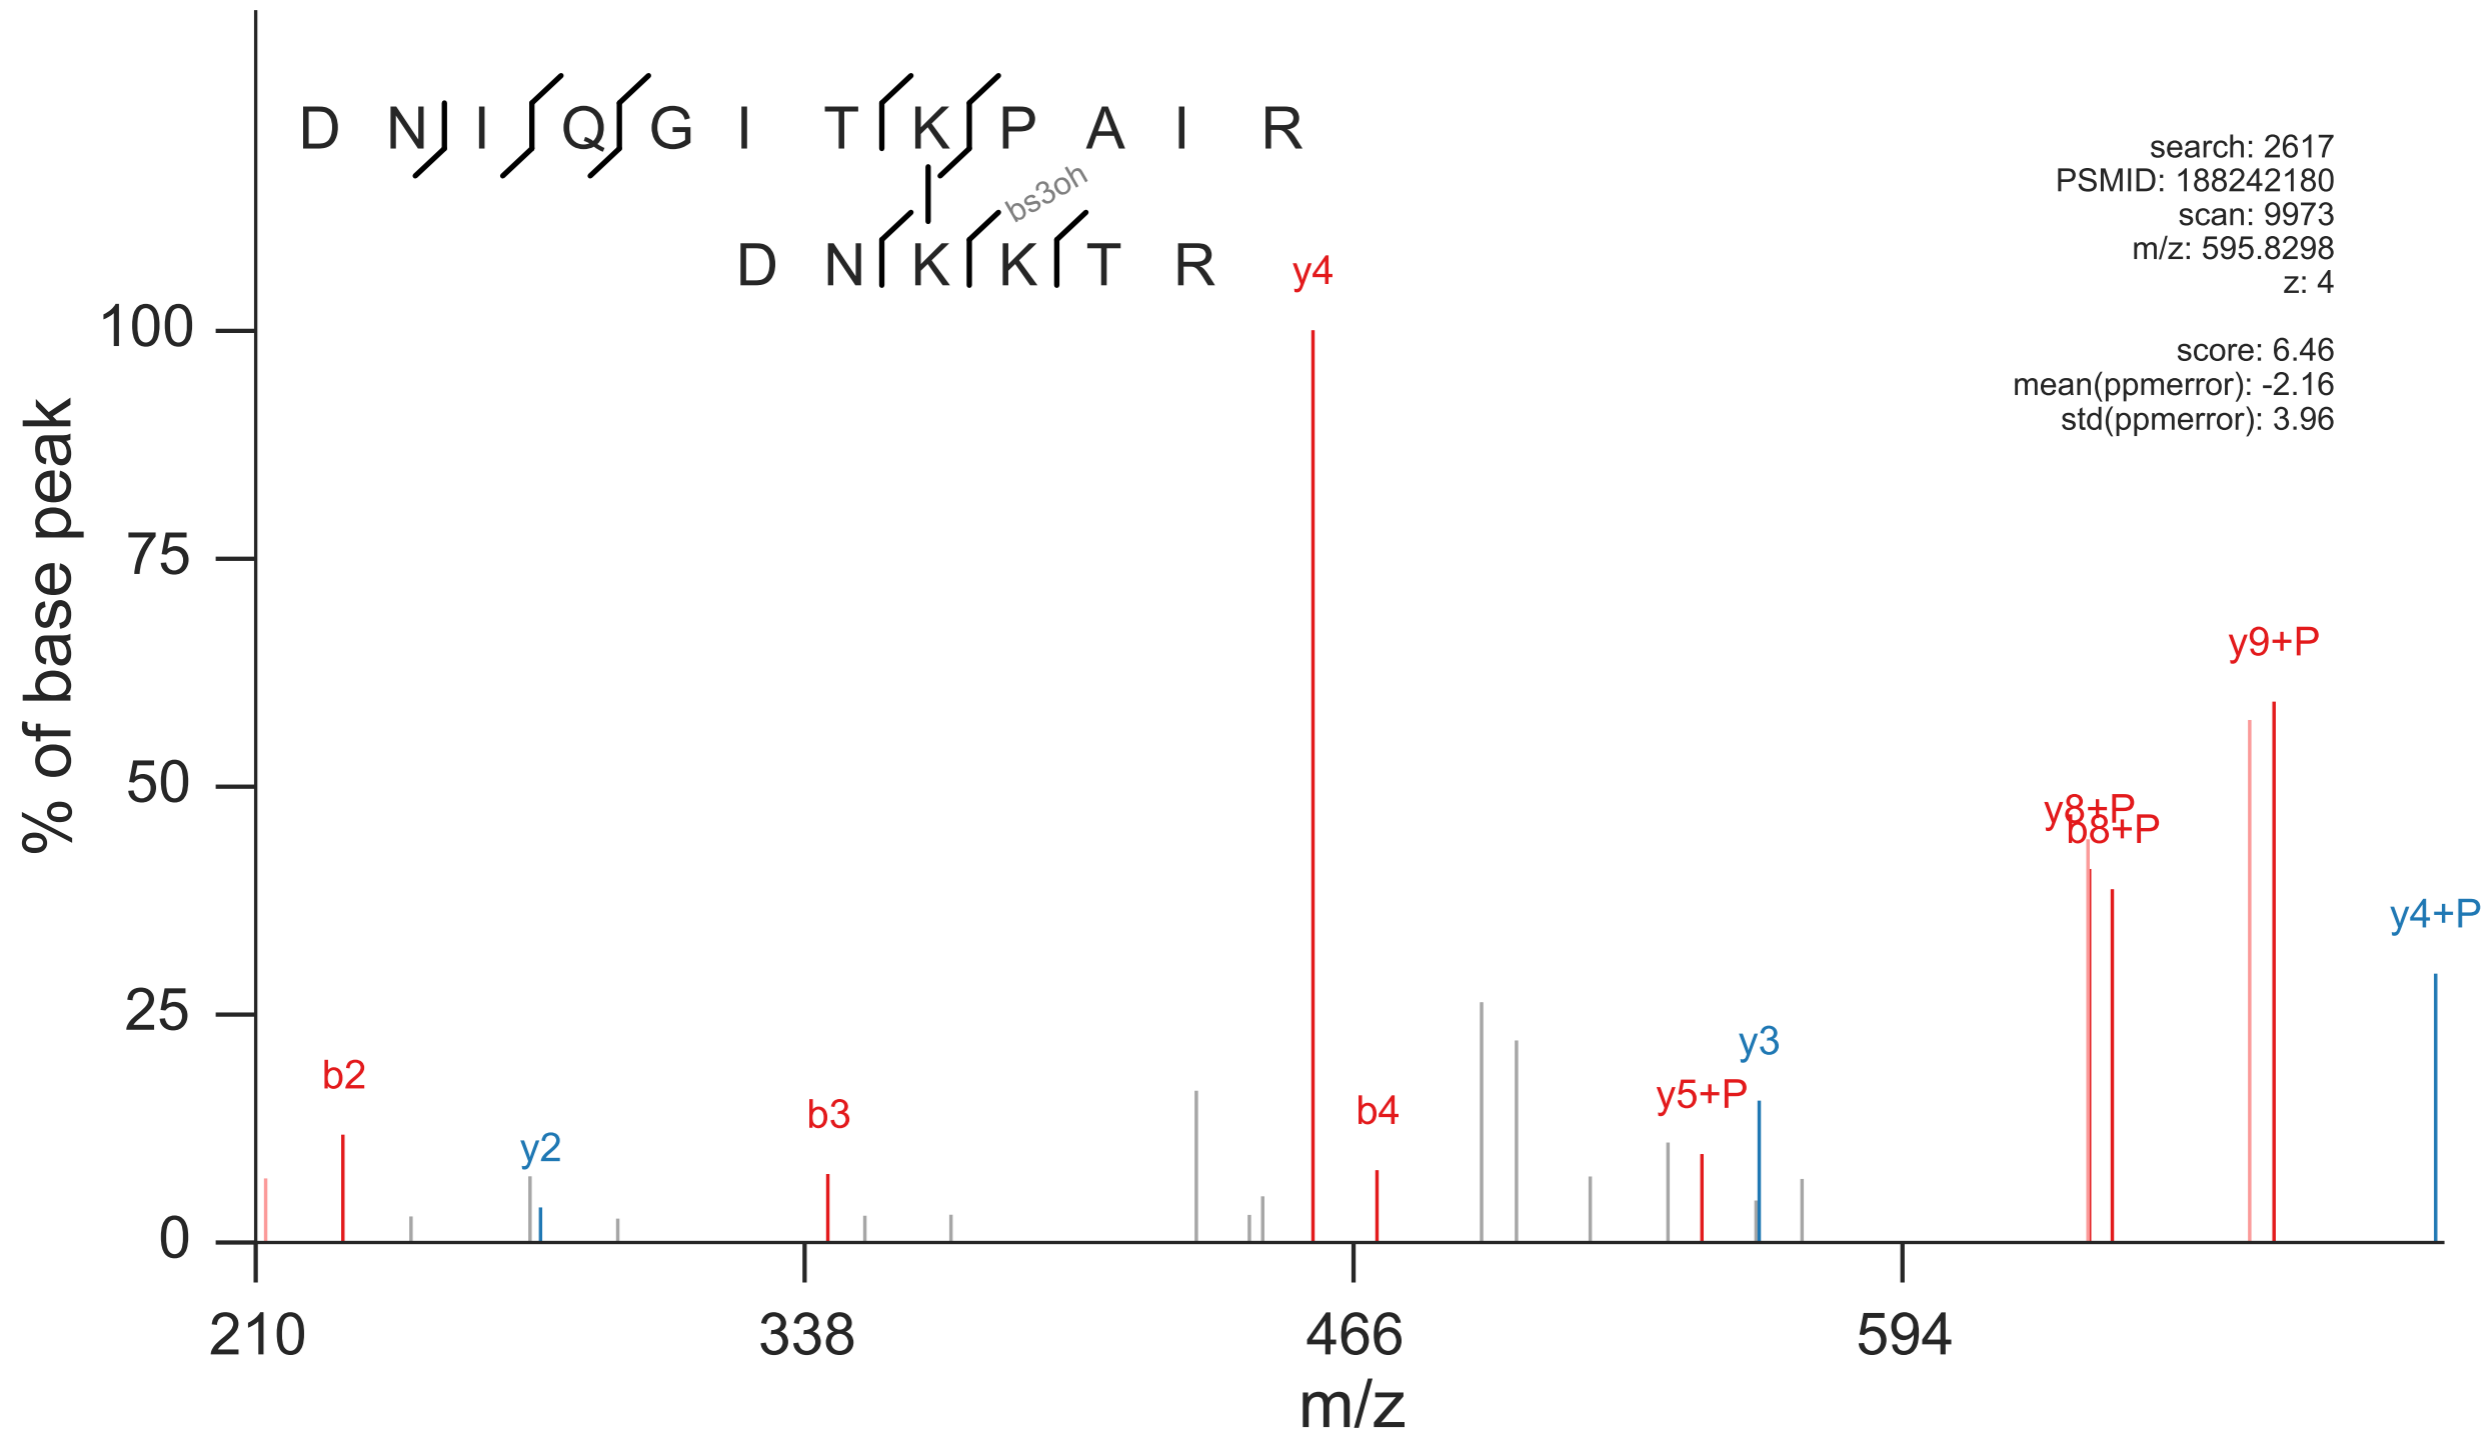

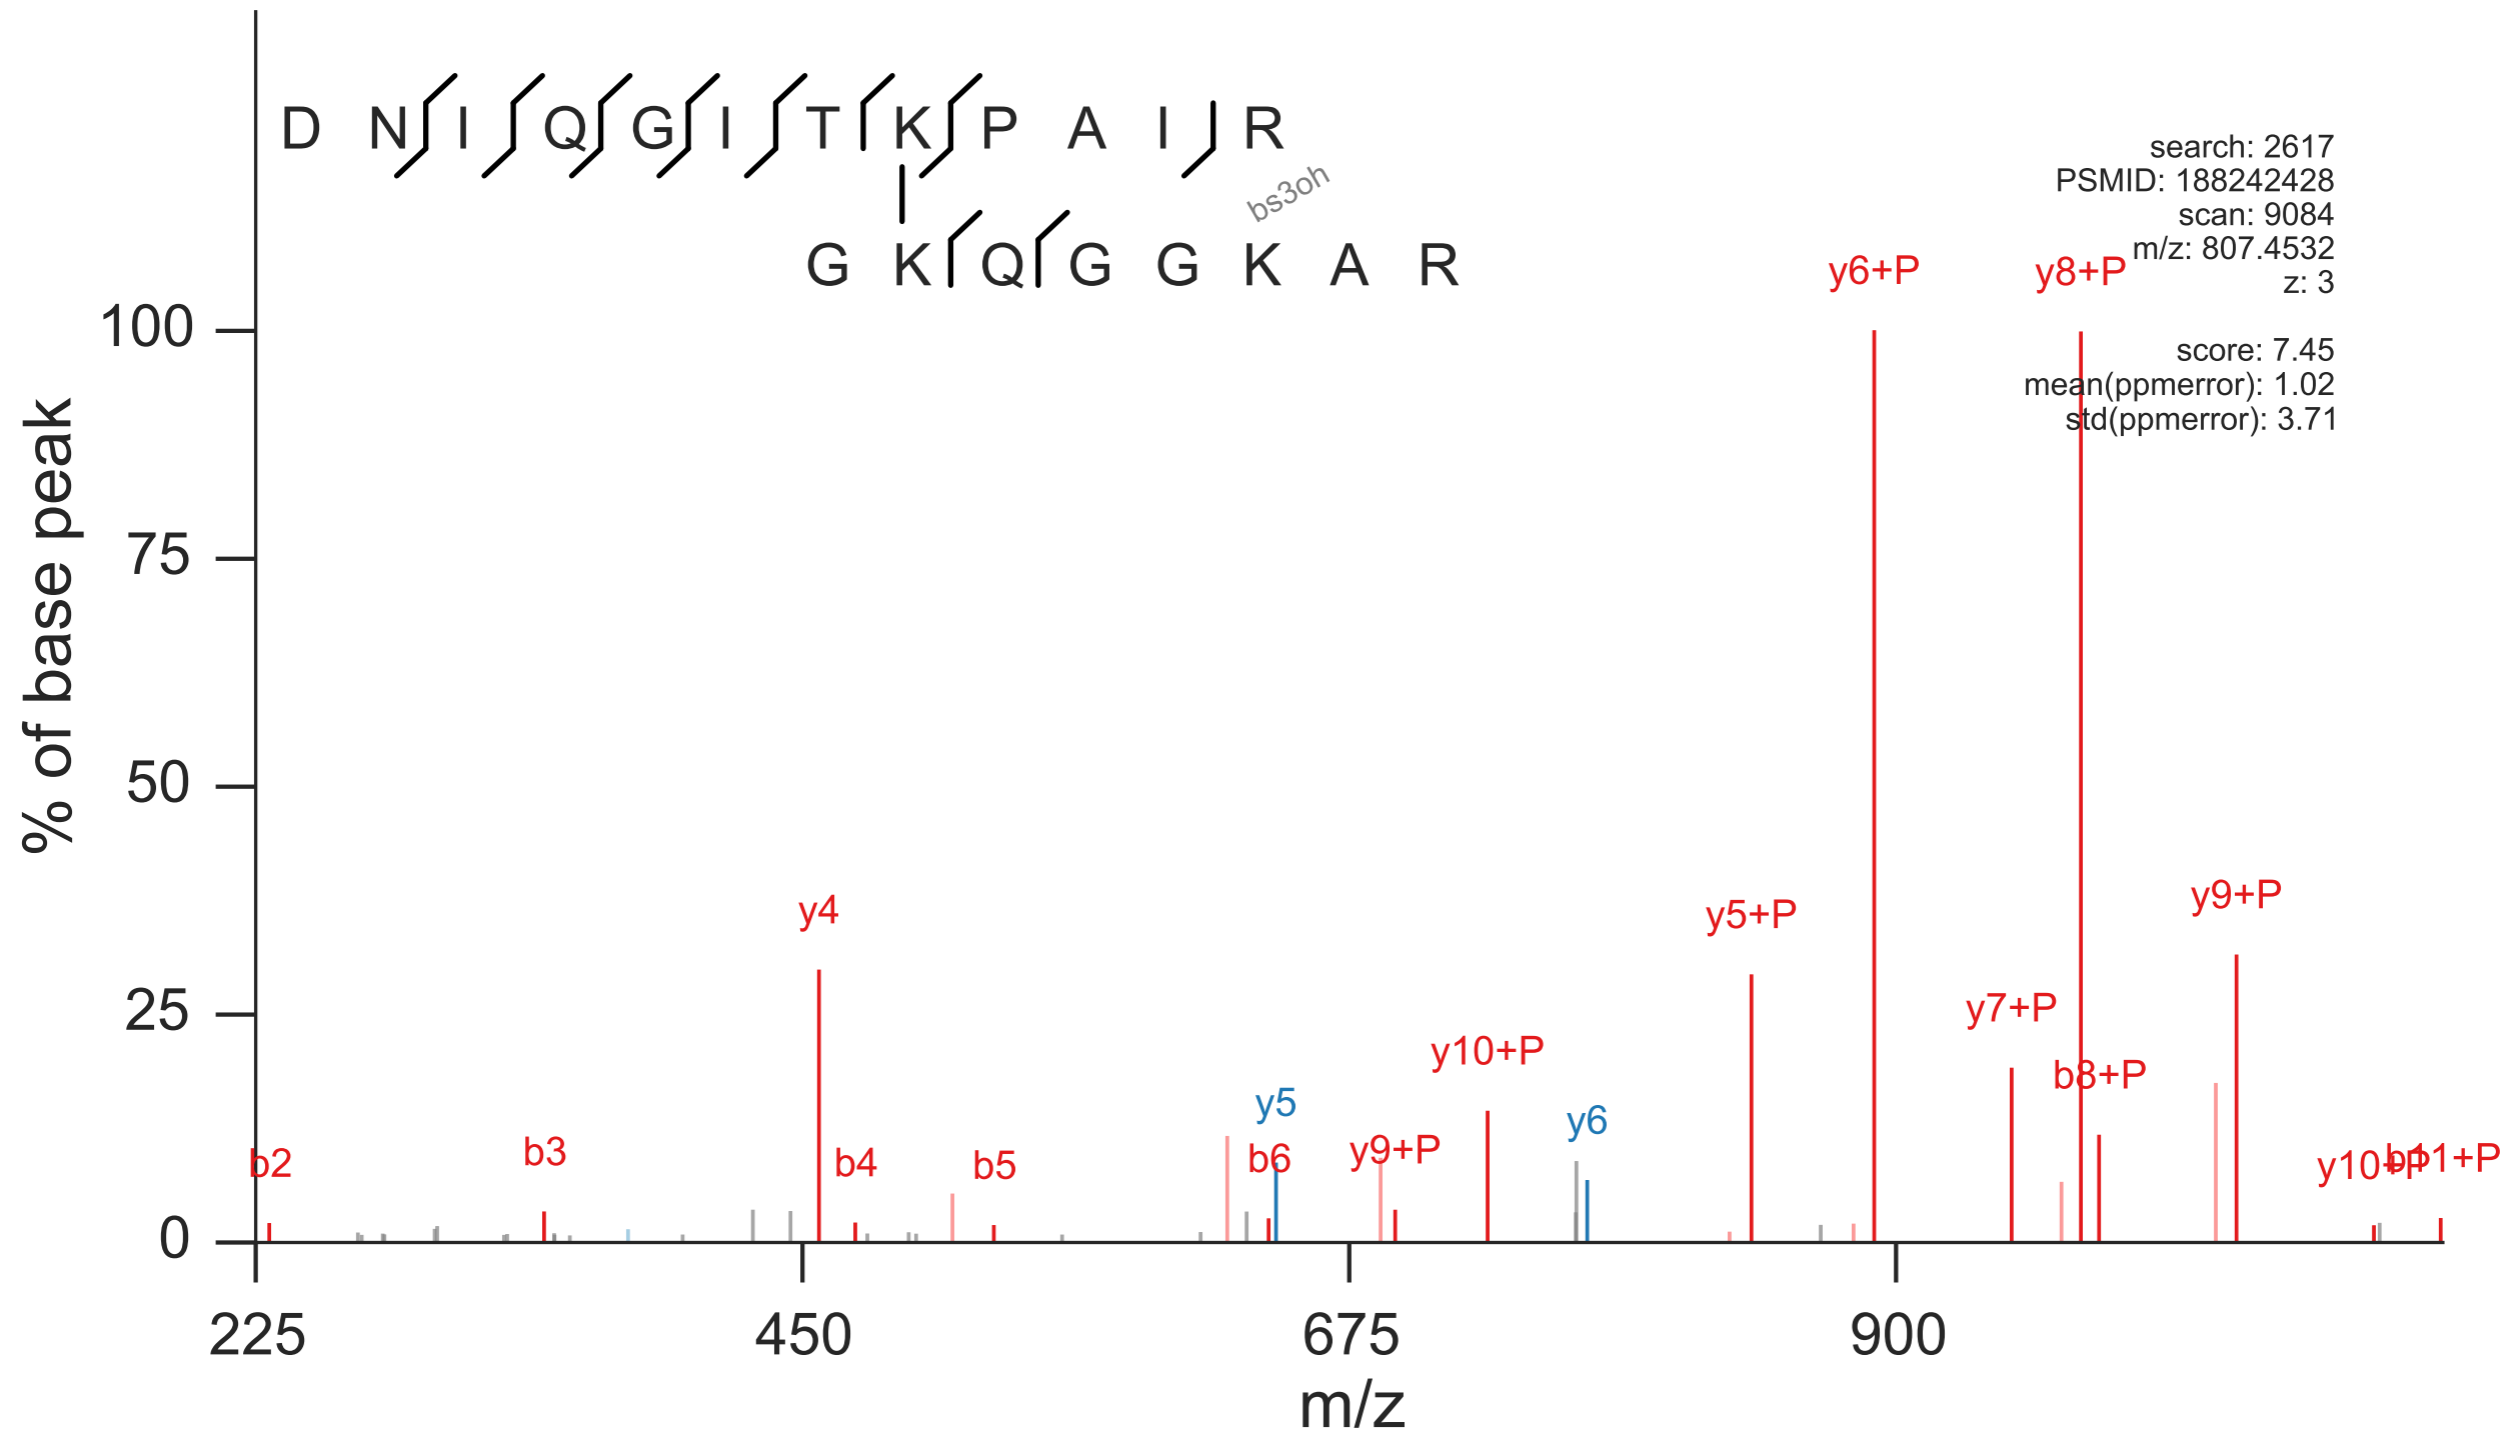

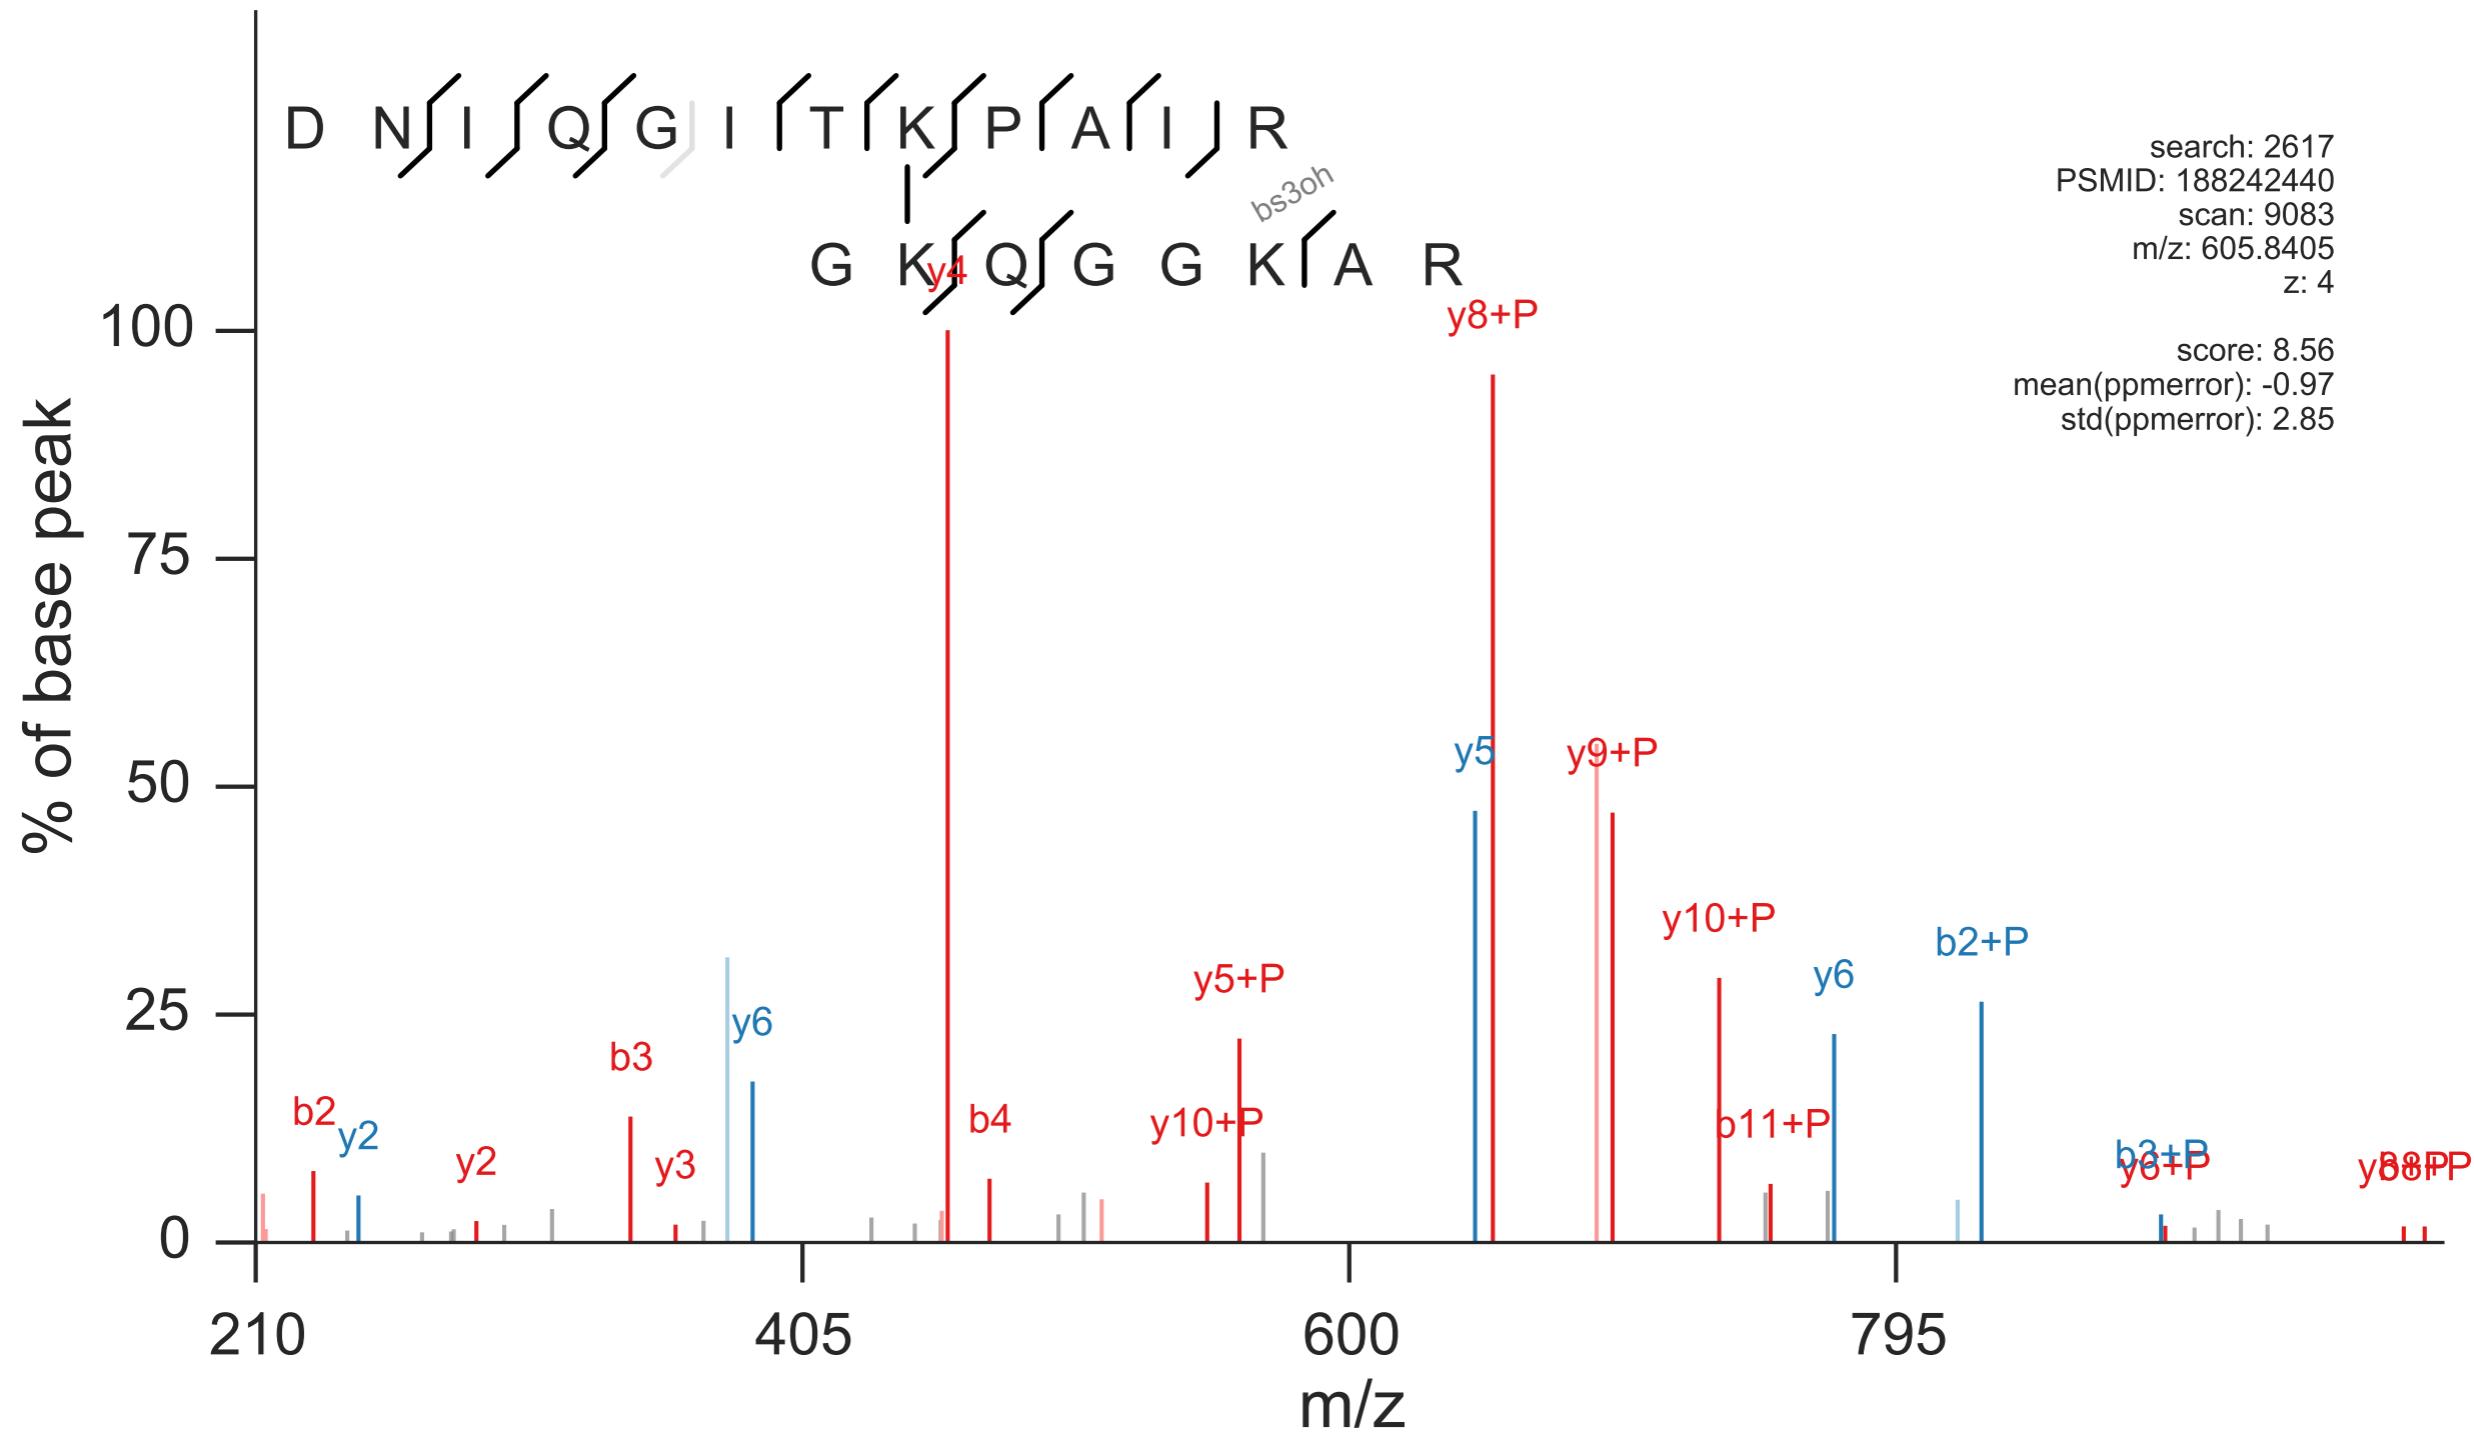

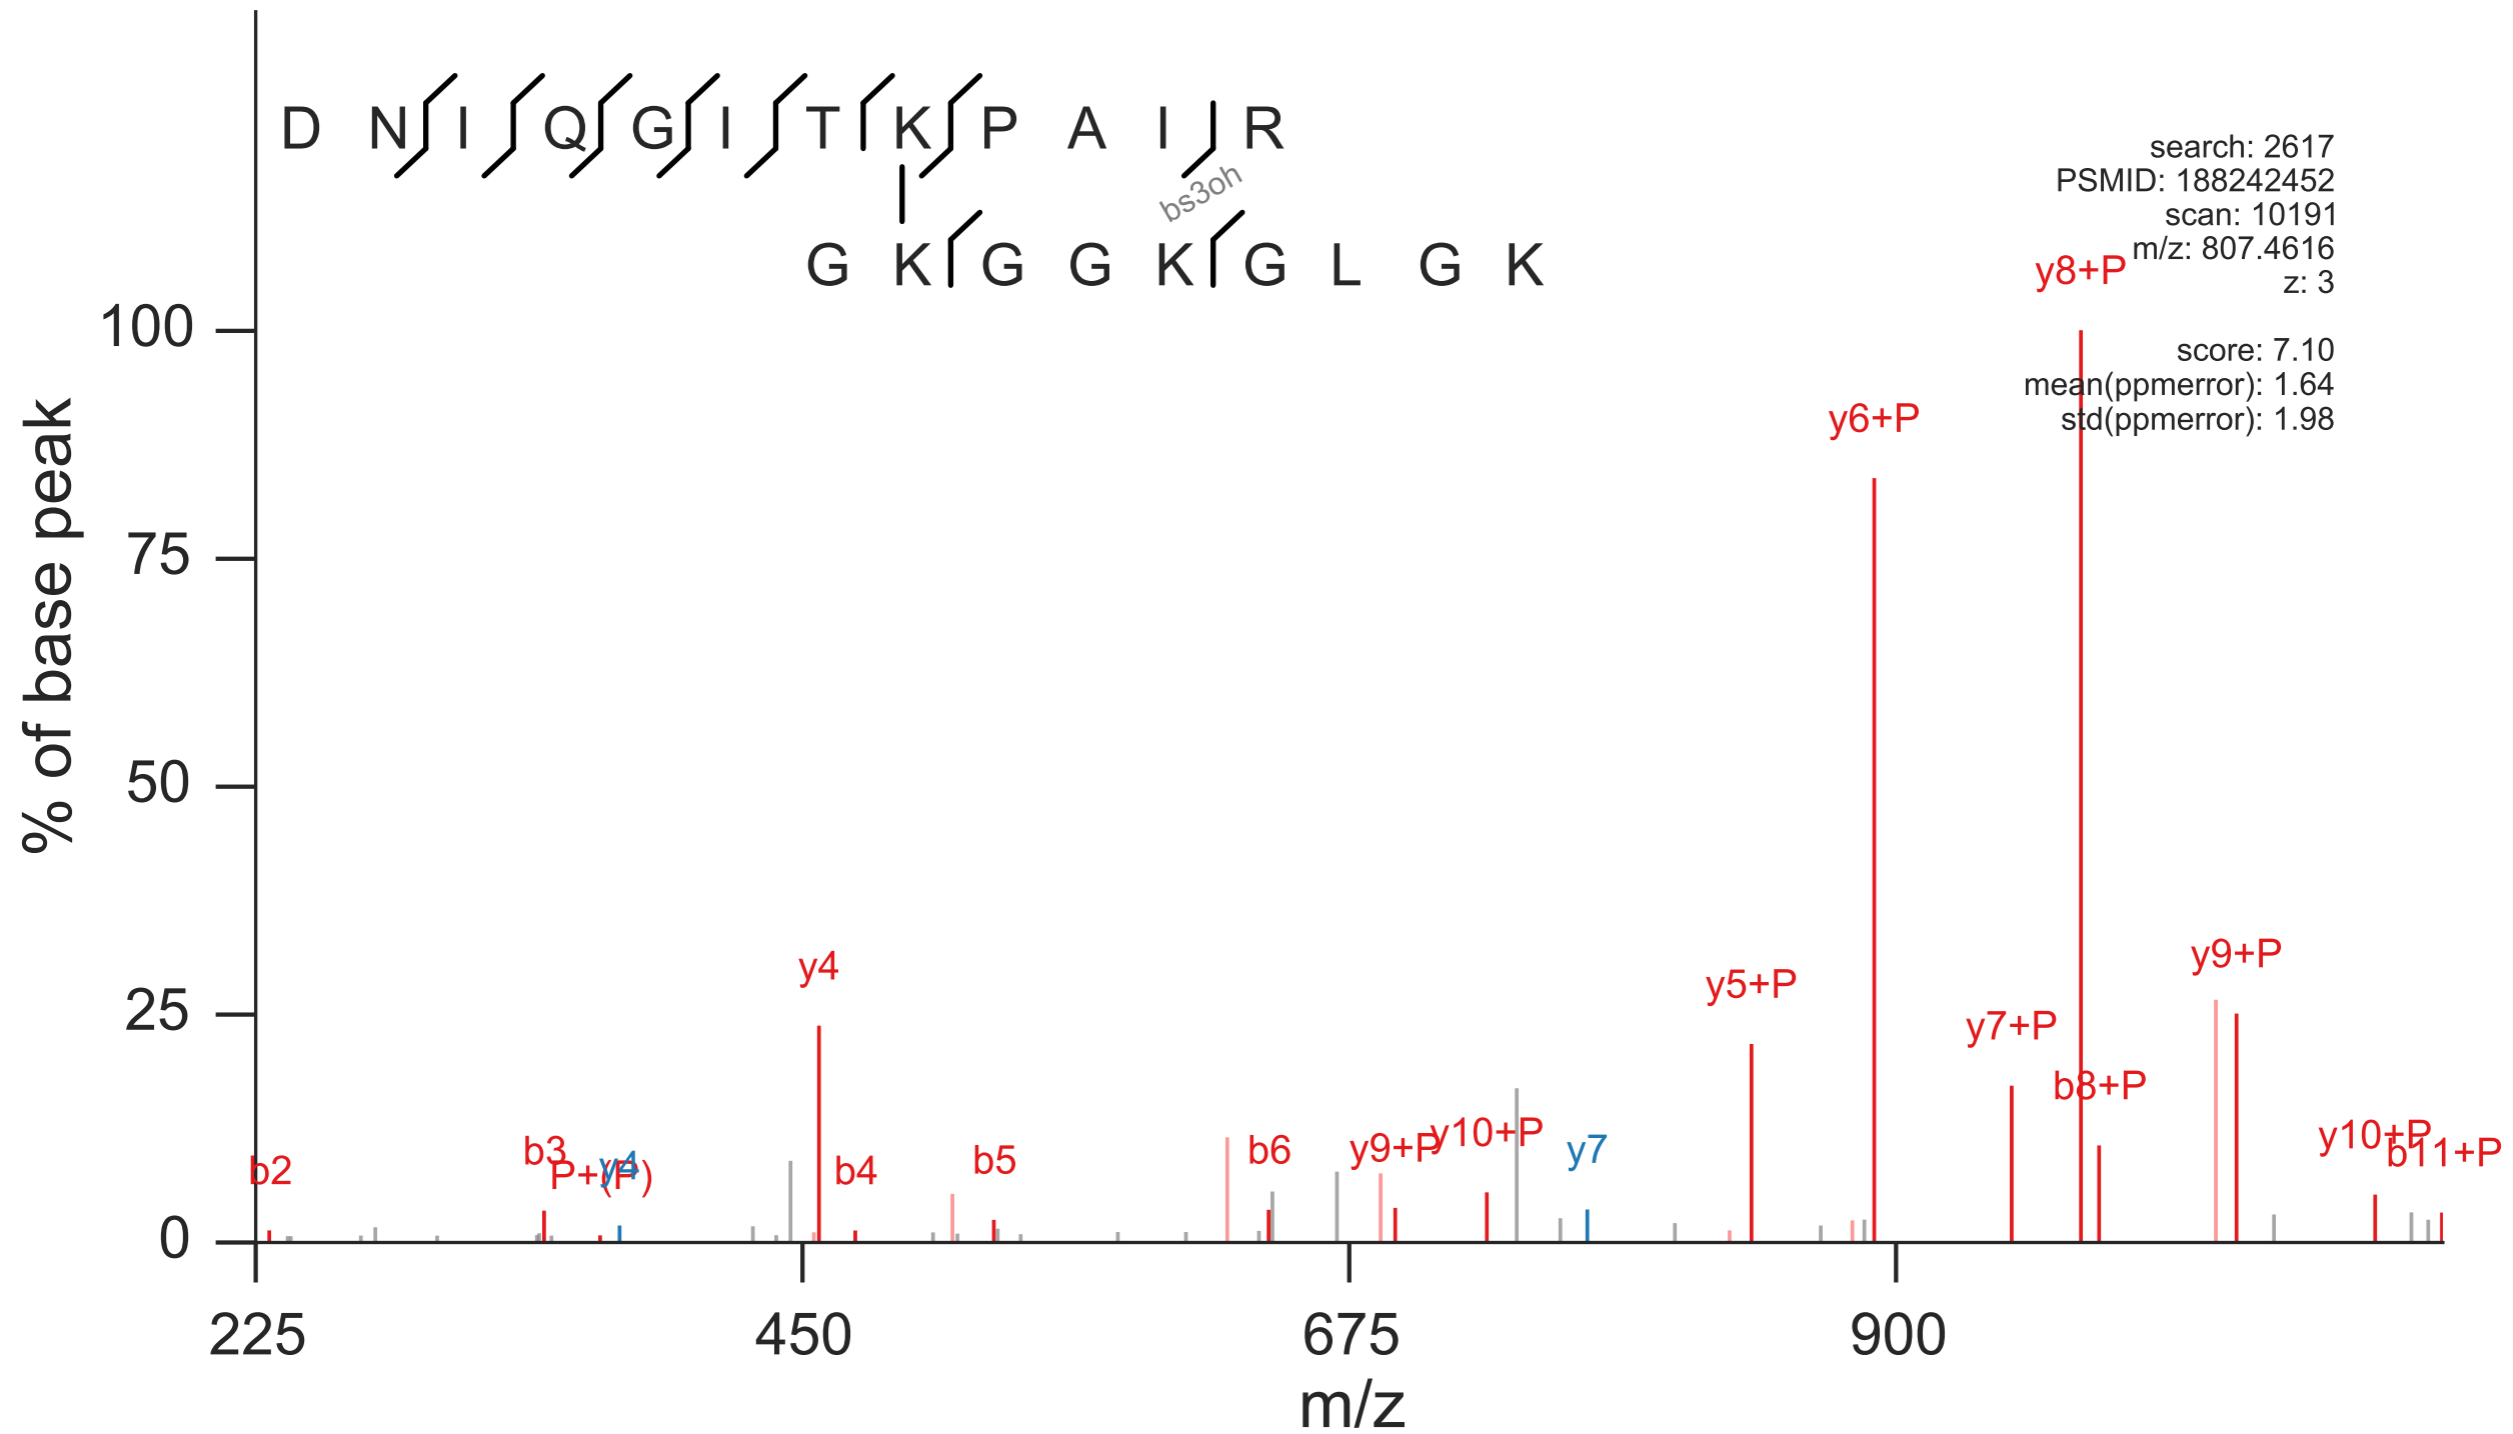

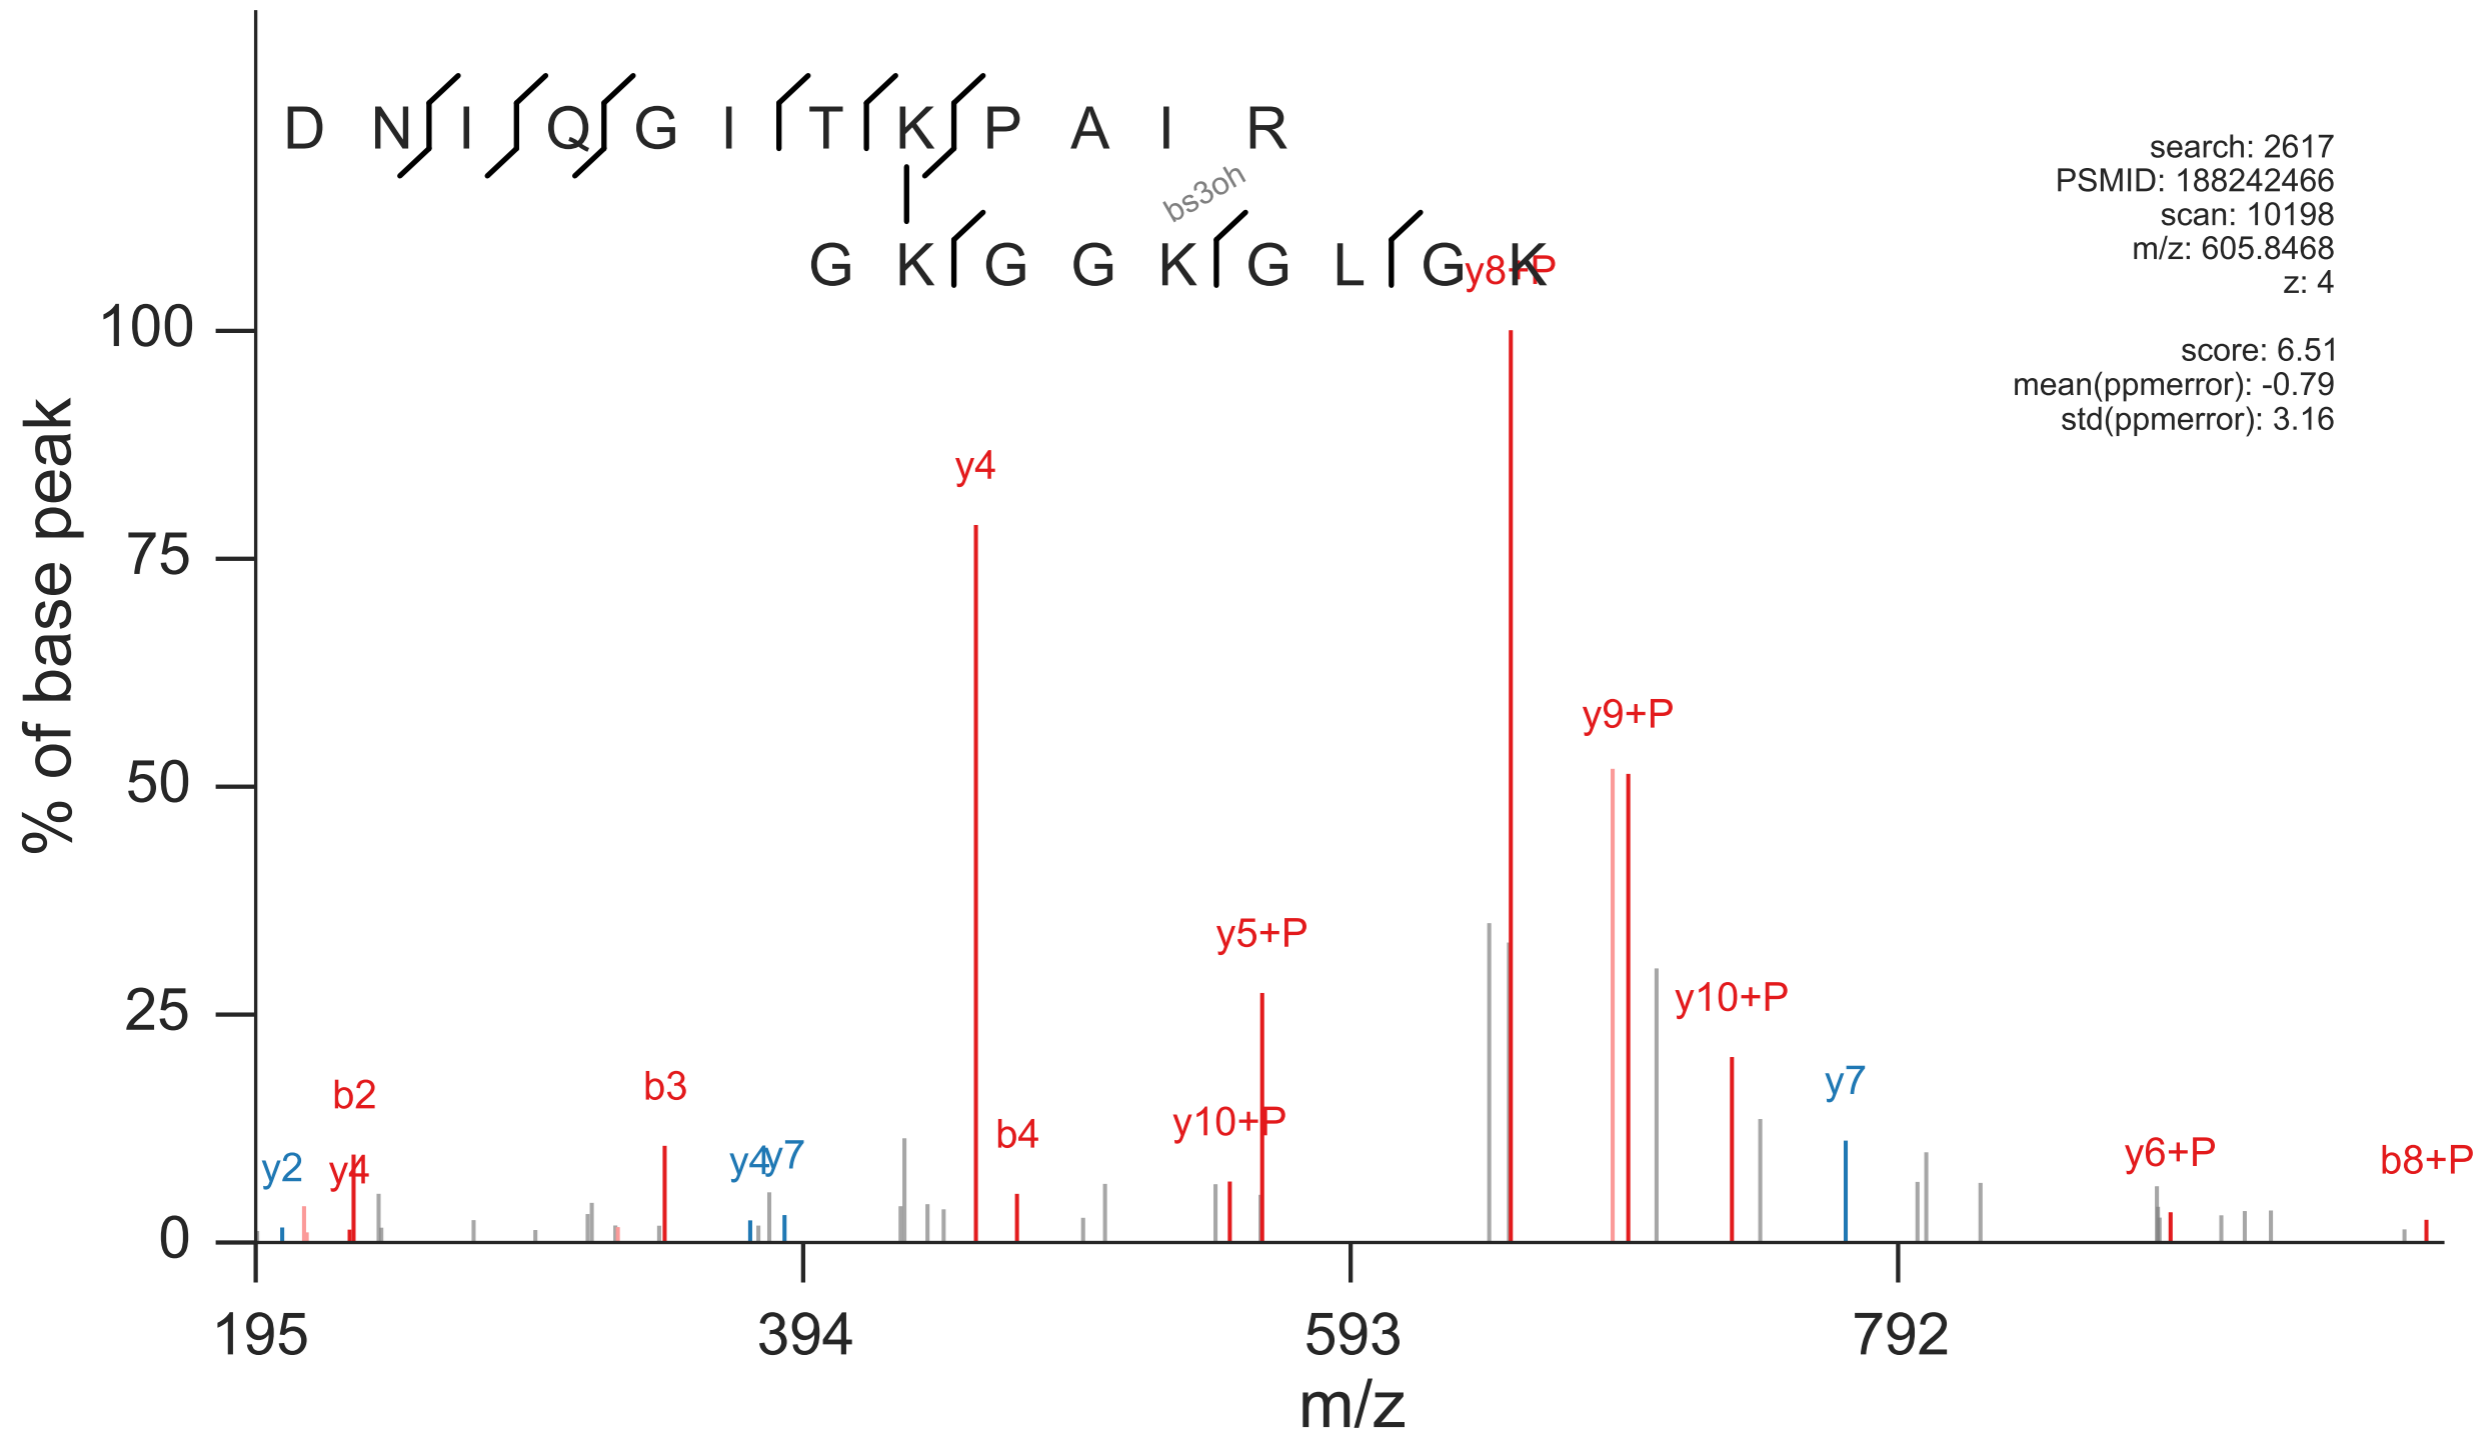

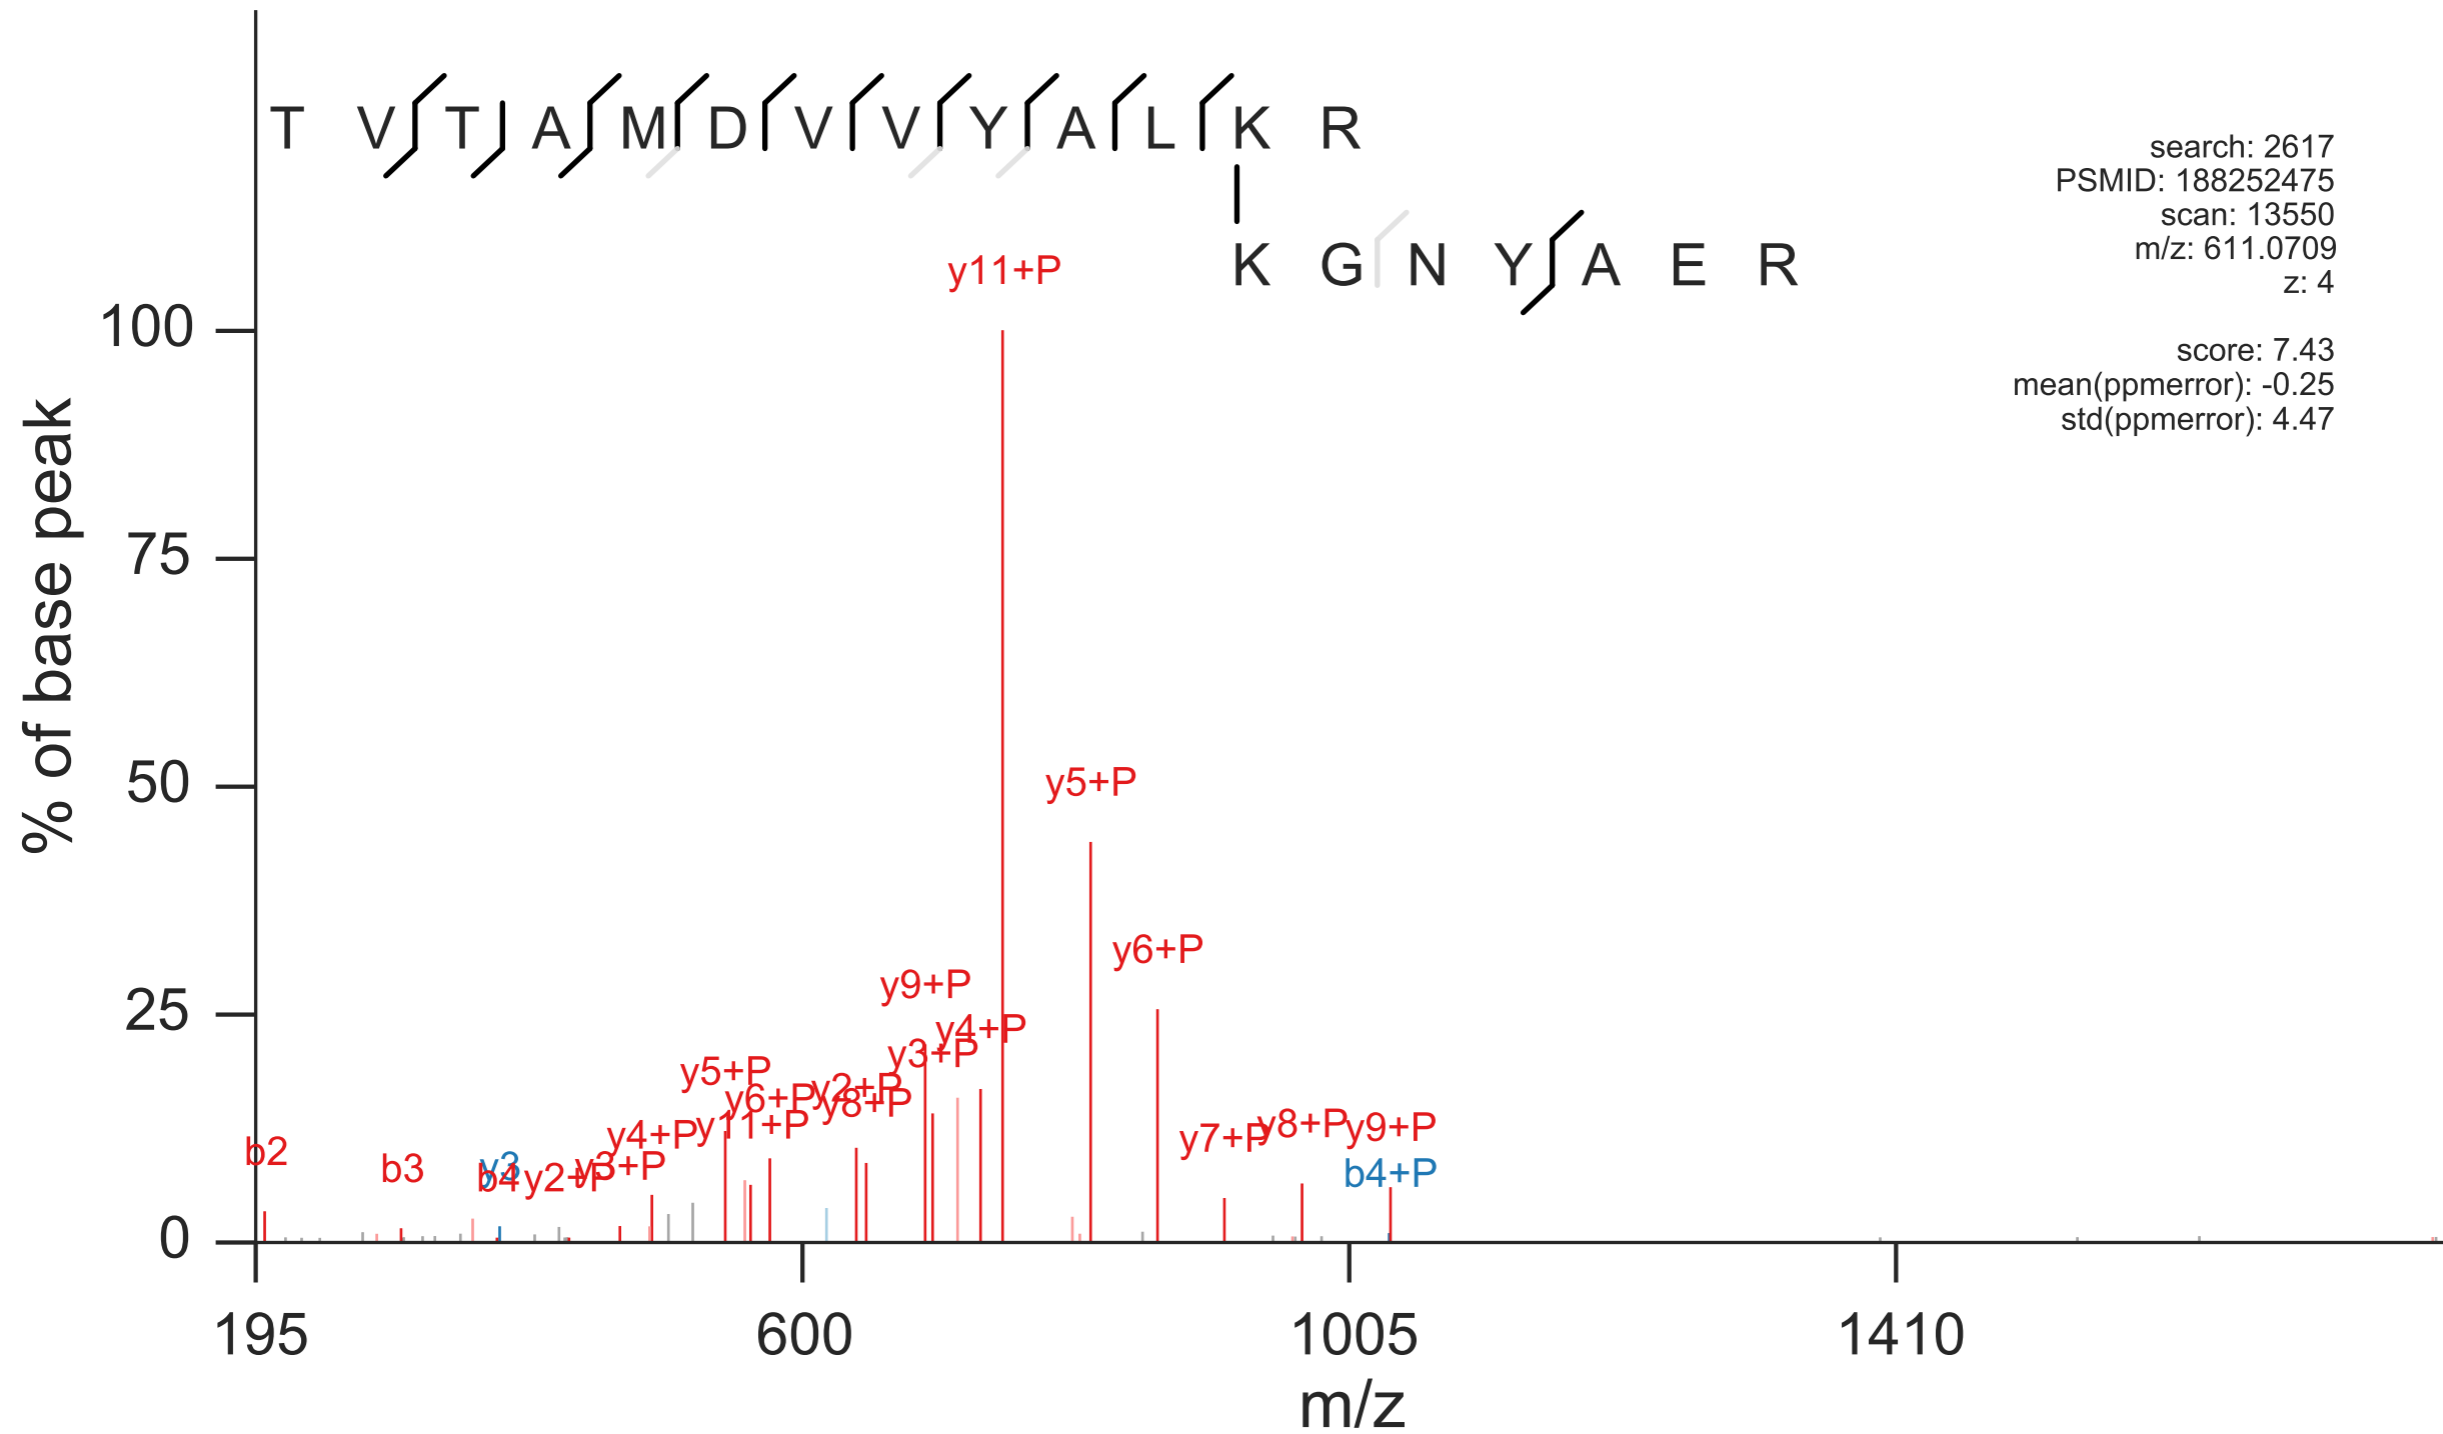

search: 2617  
 PSMID: 188252475  
 scan: 13550  
 m/z: 611.0709  
 z: 4

score: 7.43  
 mean(ppmerror): -0.25  
 std(ppmerror): 4.47

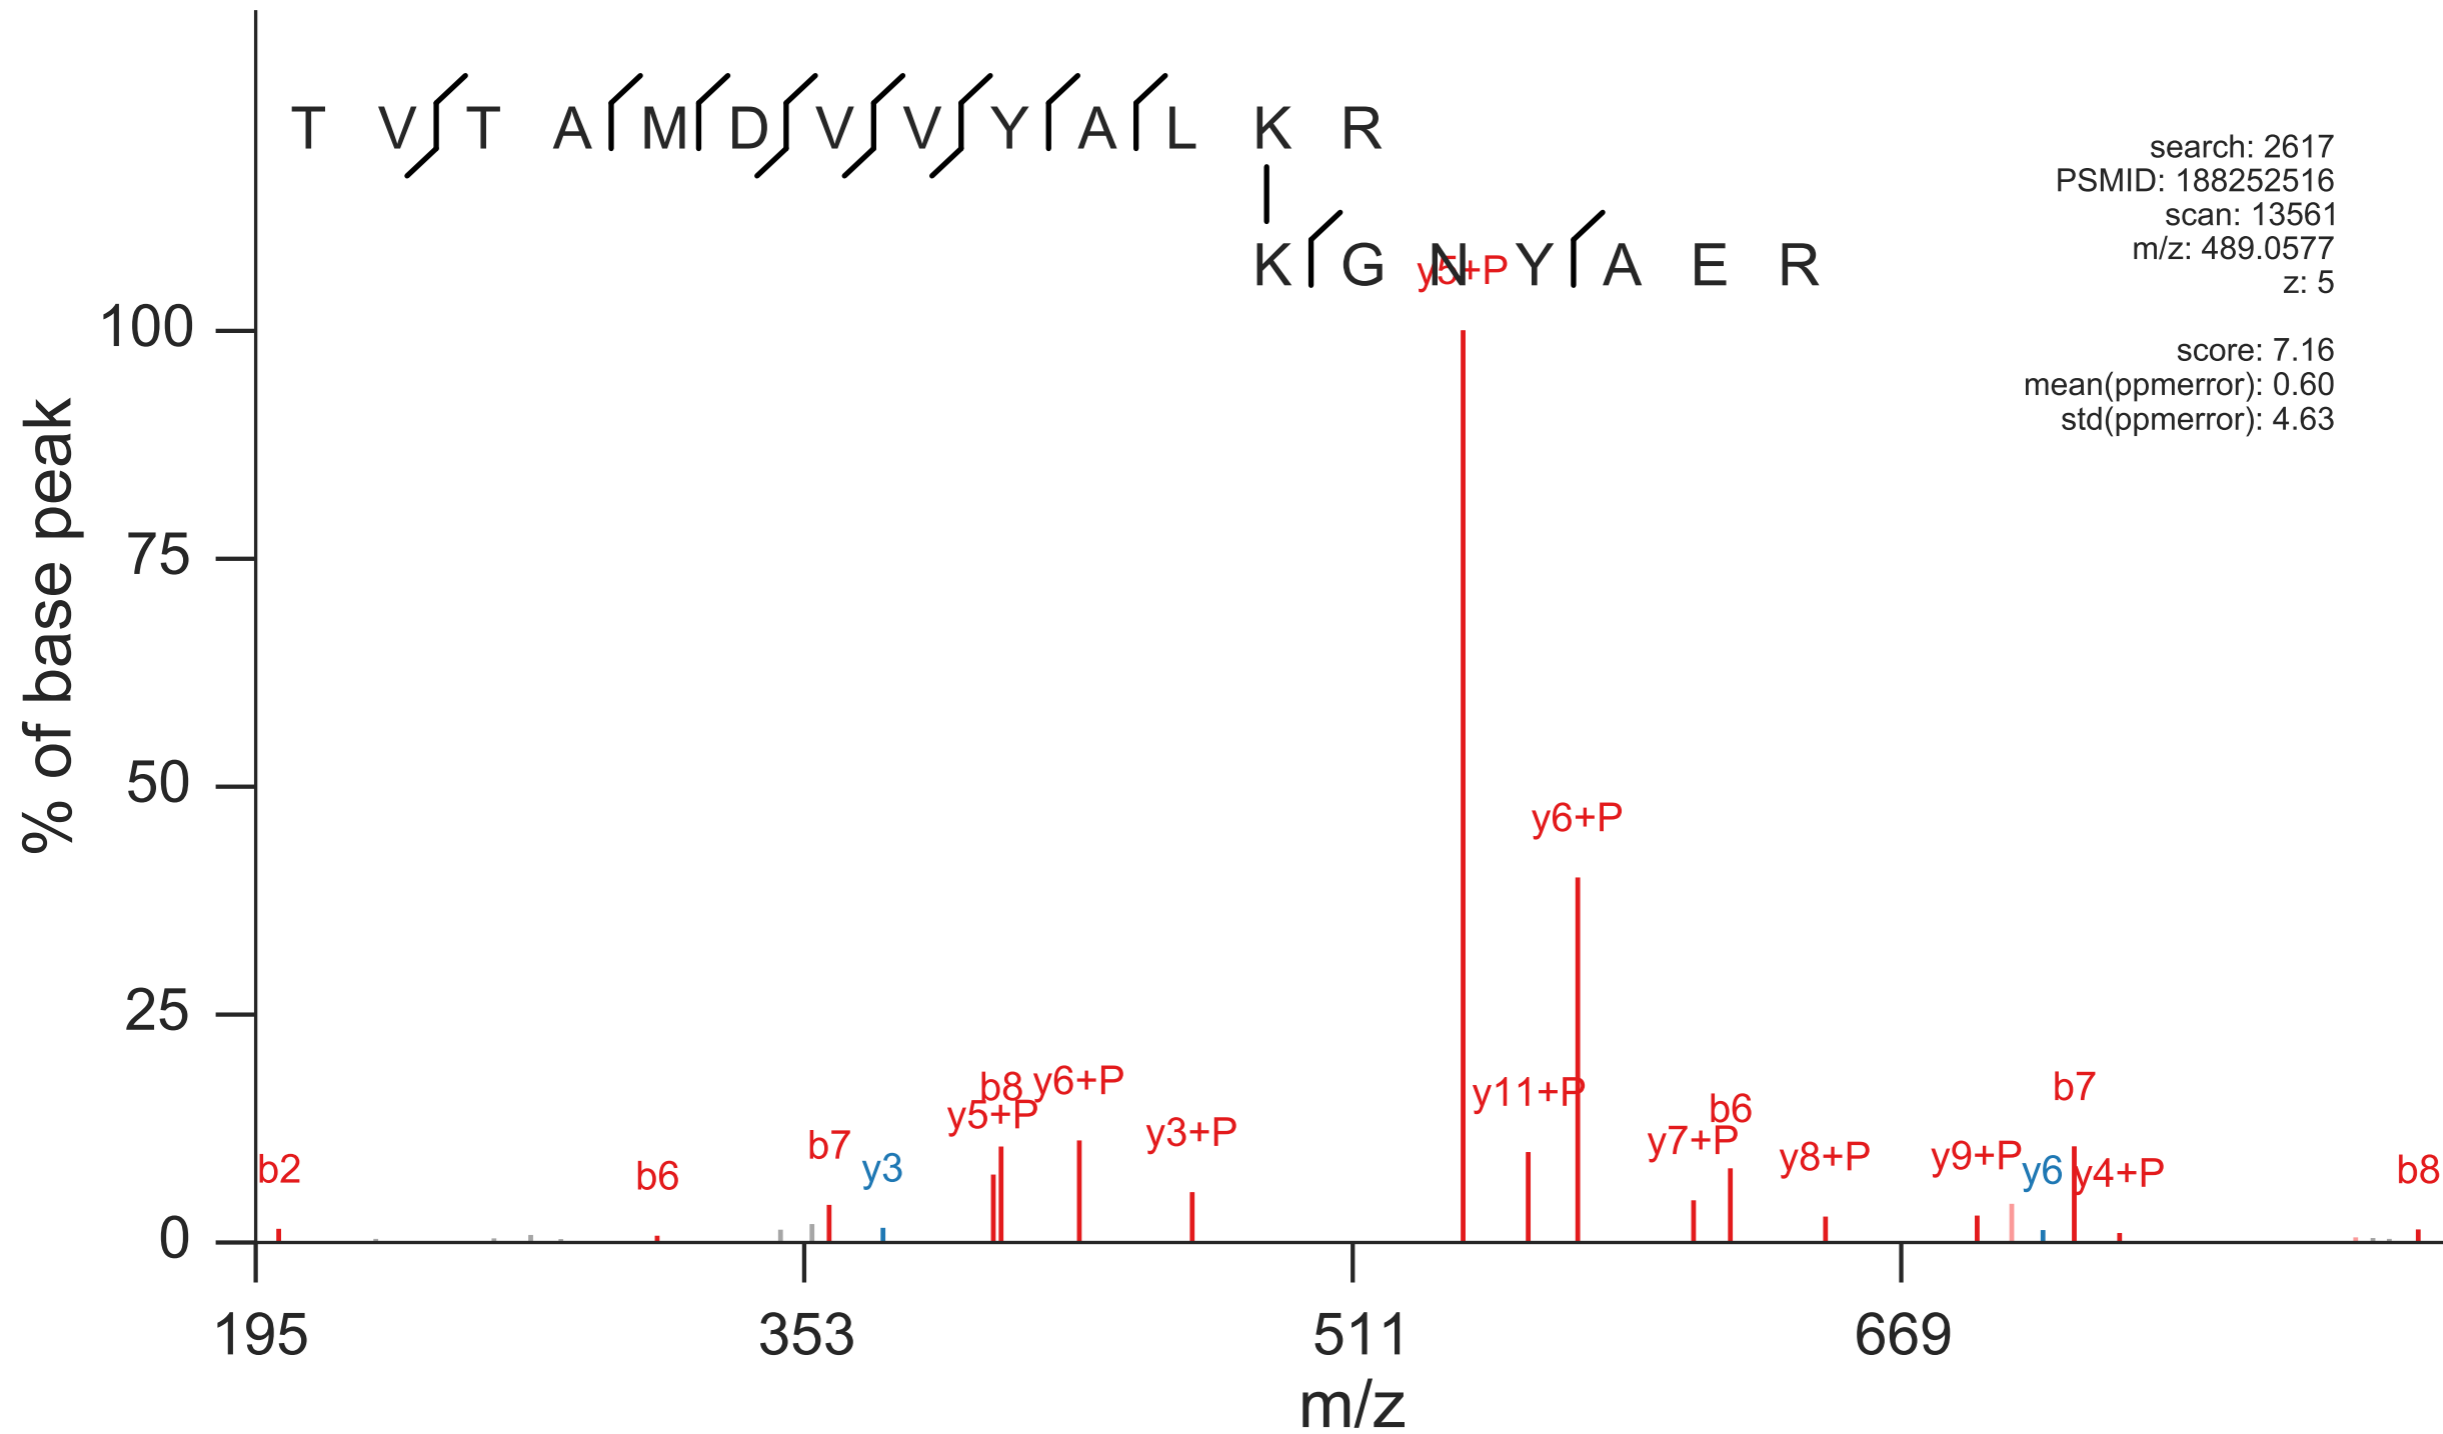

search: 2617  
 PSMID: 188252516  
 scan: 13561  
 m/z: 489.0577  
 z: 5

score: 7.16  
 mean(ppmerror): 0.60  
 std(ppmerror): 4.63

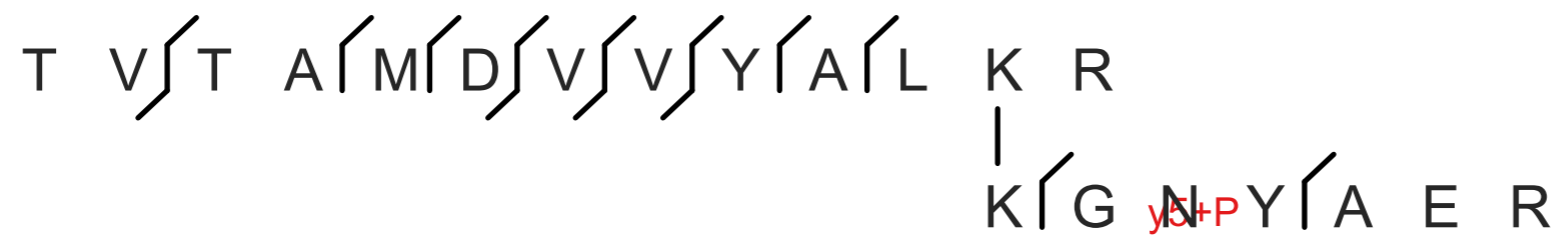

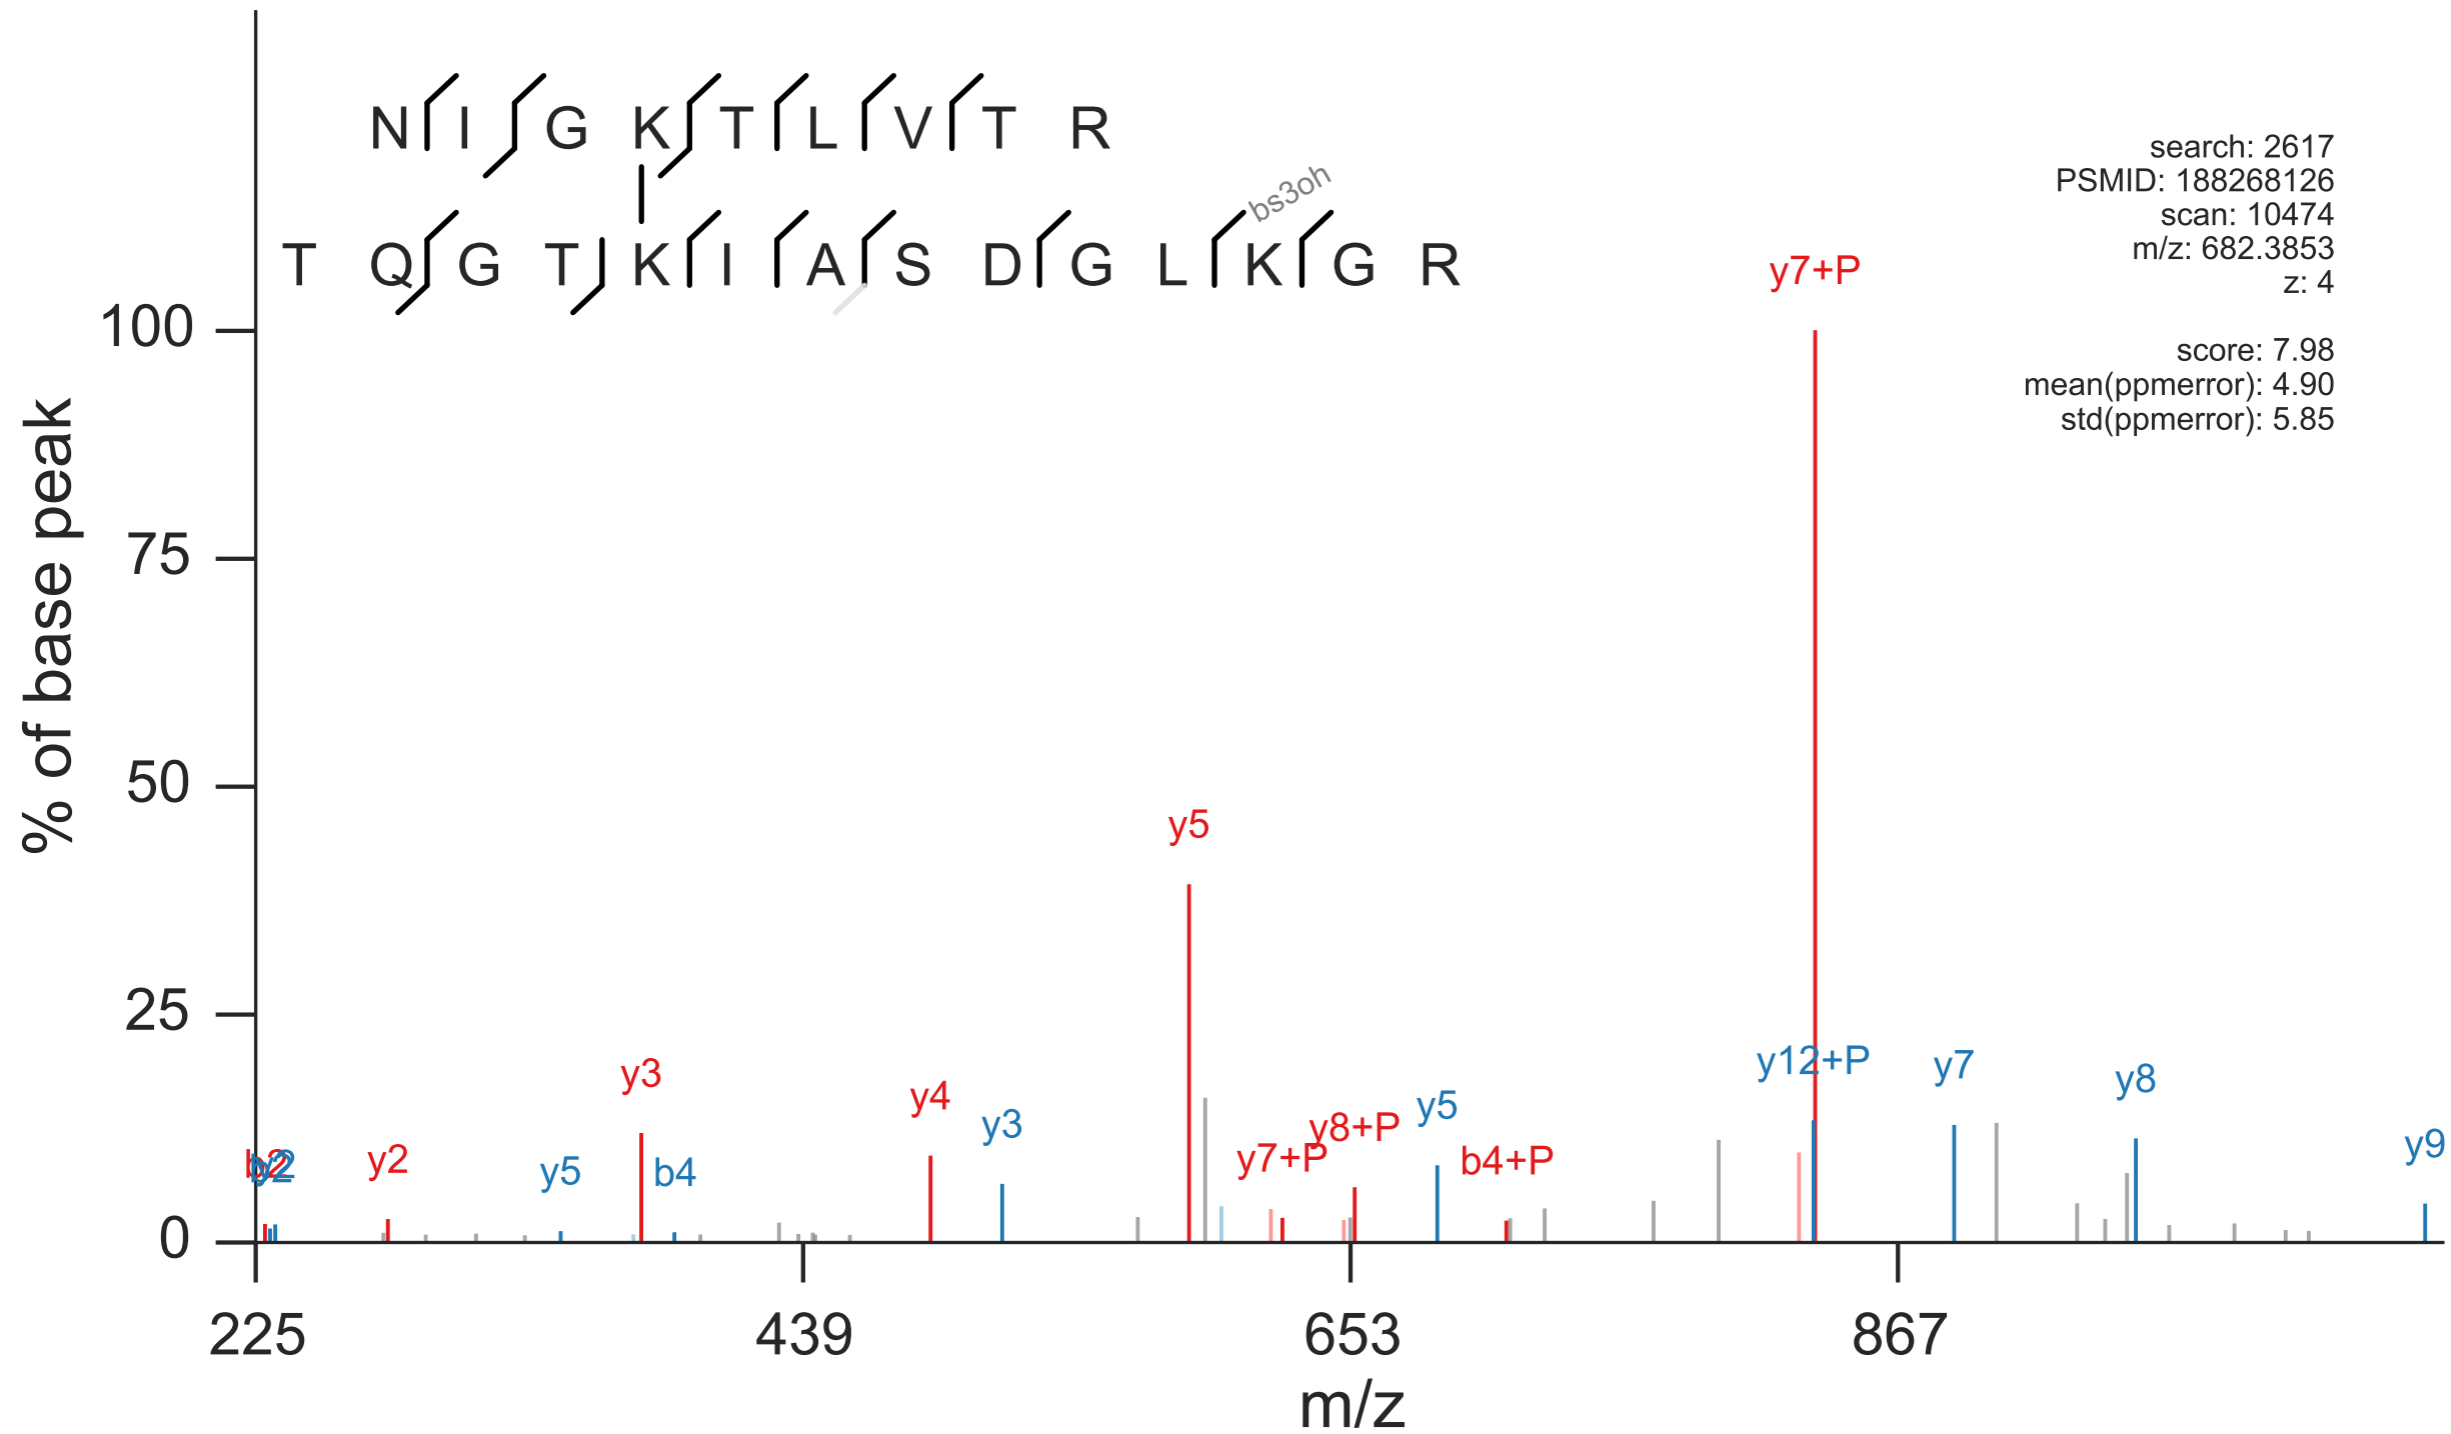

N I G K T L V T R  
 T Q G T K I A S D G L K G R

bs30h

search: 2617  
 PSMID: 188268126  
 scan: 10474  
 m/z: 682.3853  
 z: 4  
  
 score: 7.98  
 mean(ppmerror): 4.90  
 std(ppmerror): 5.85



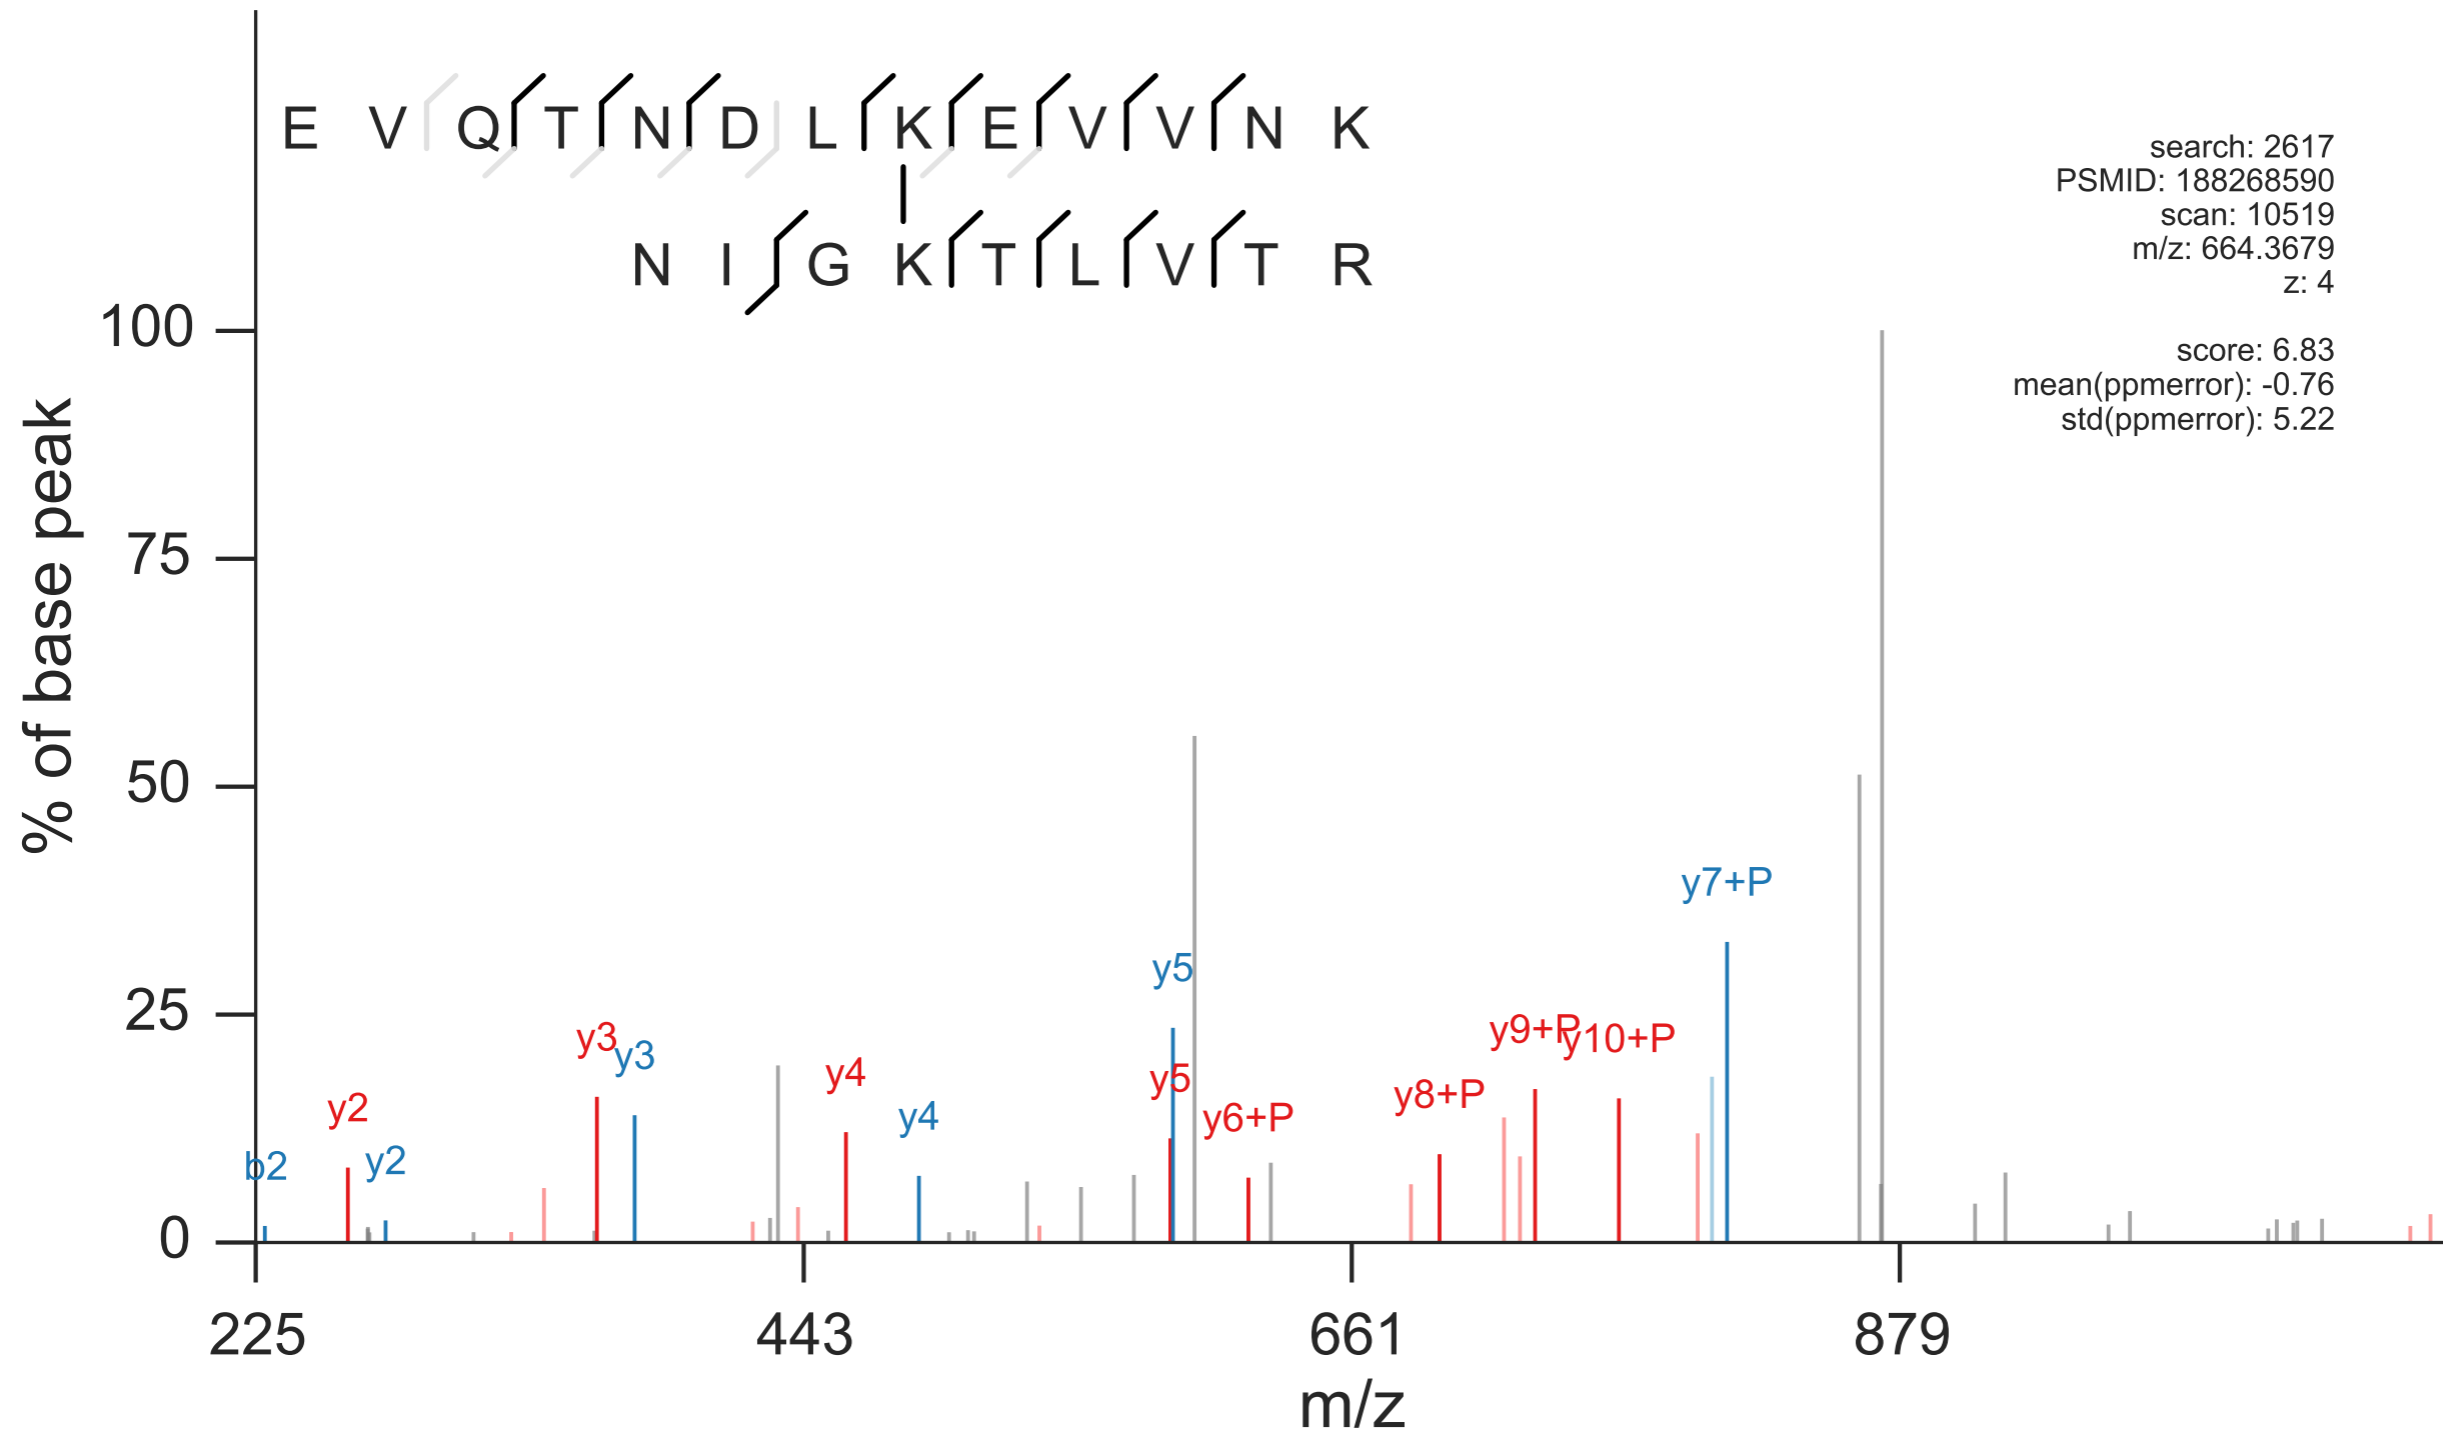

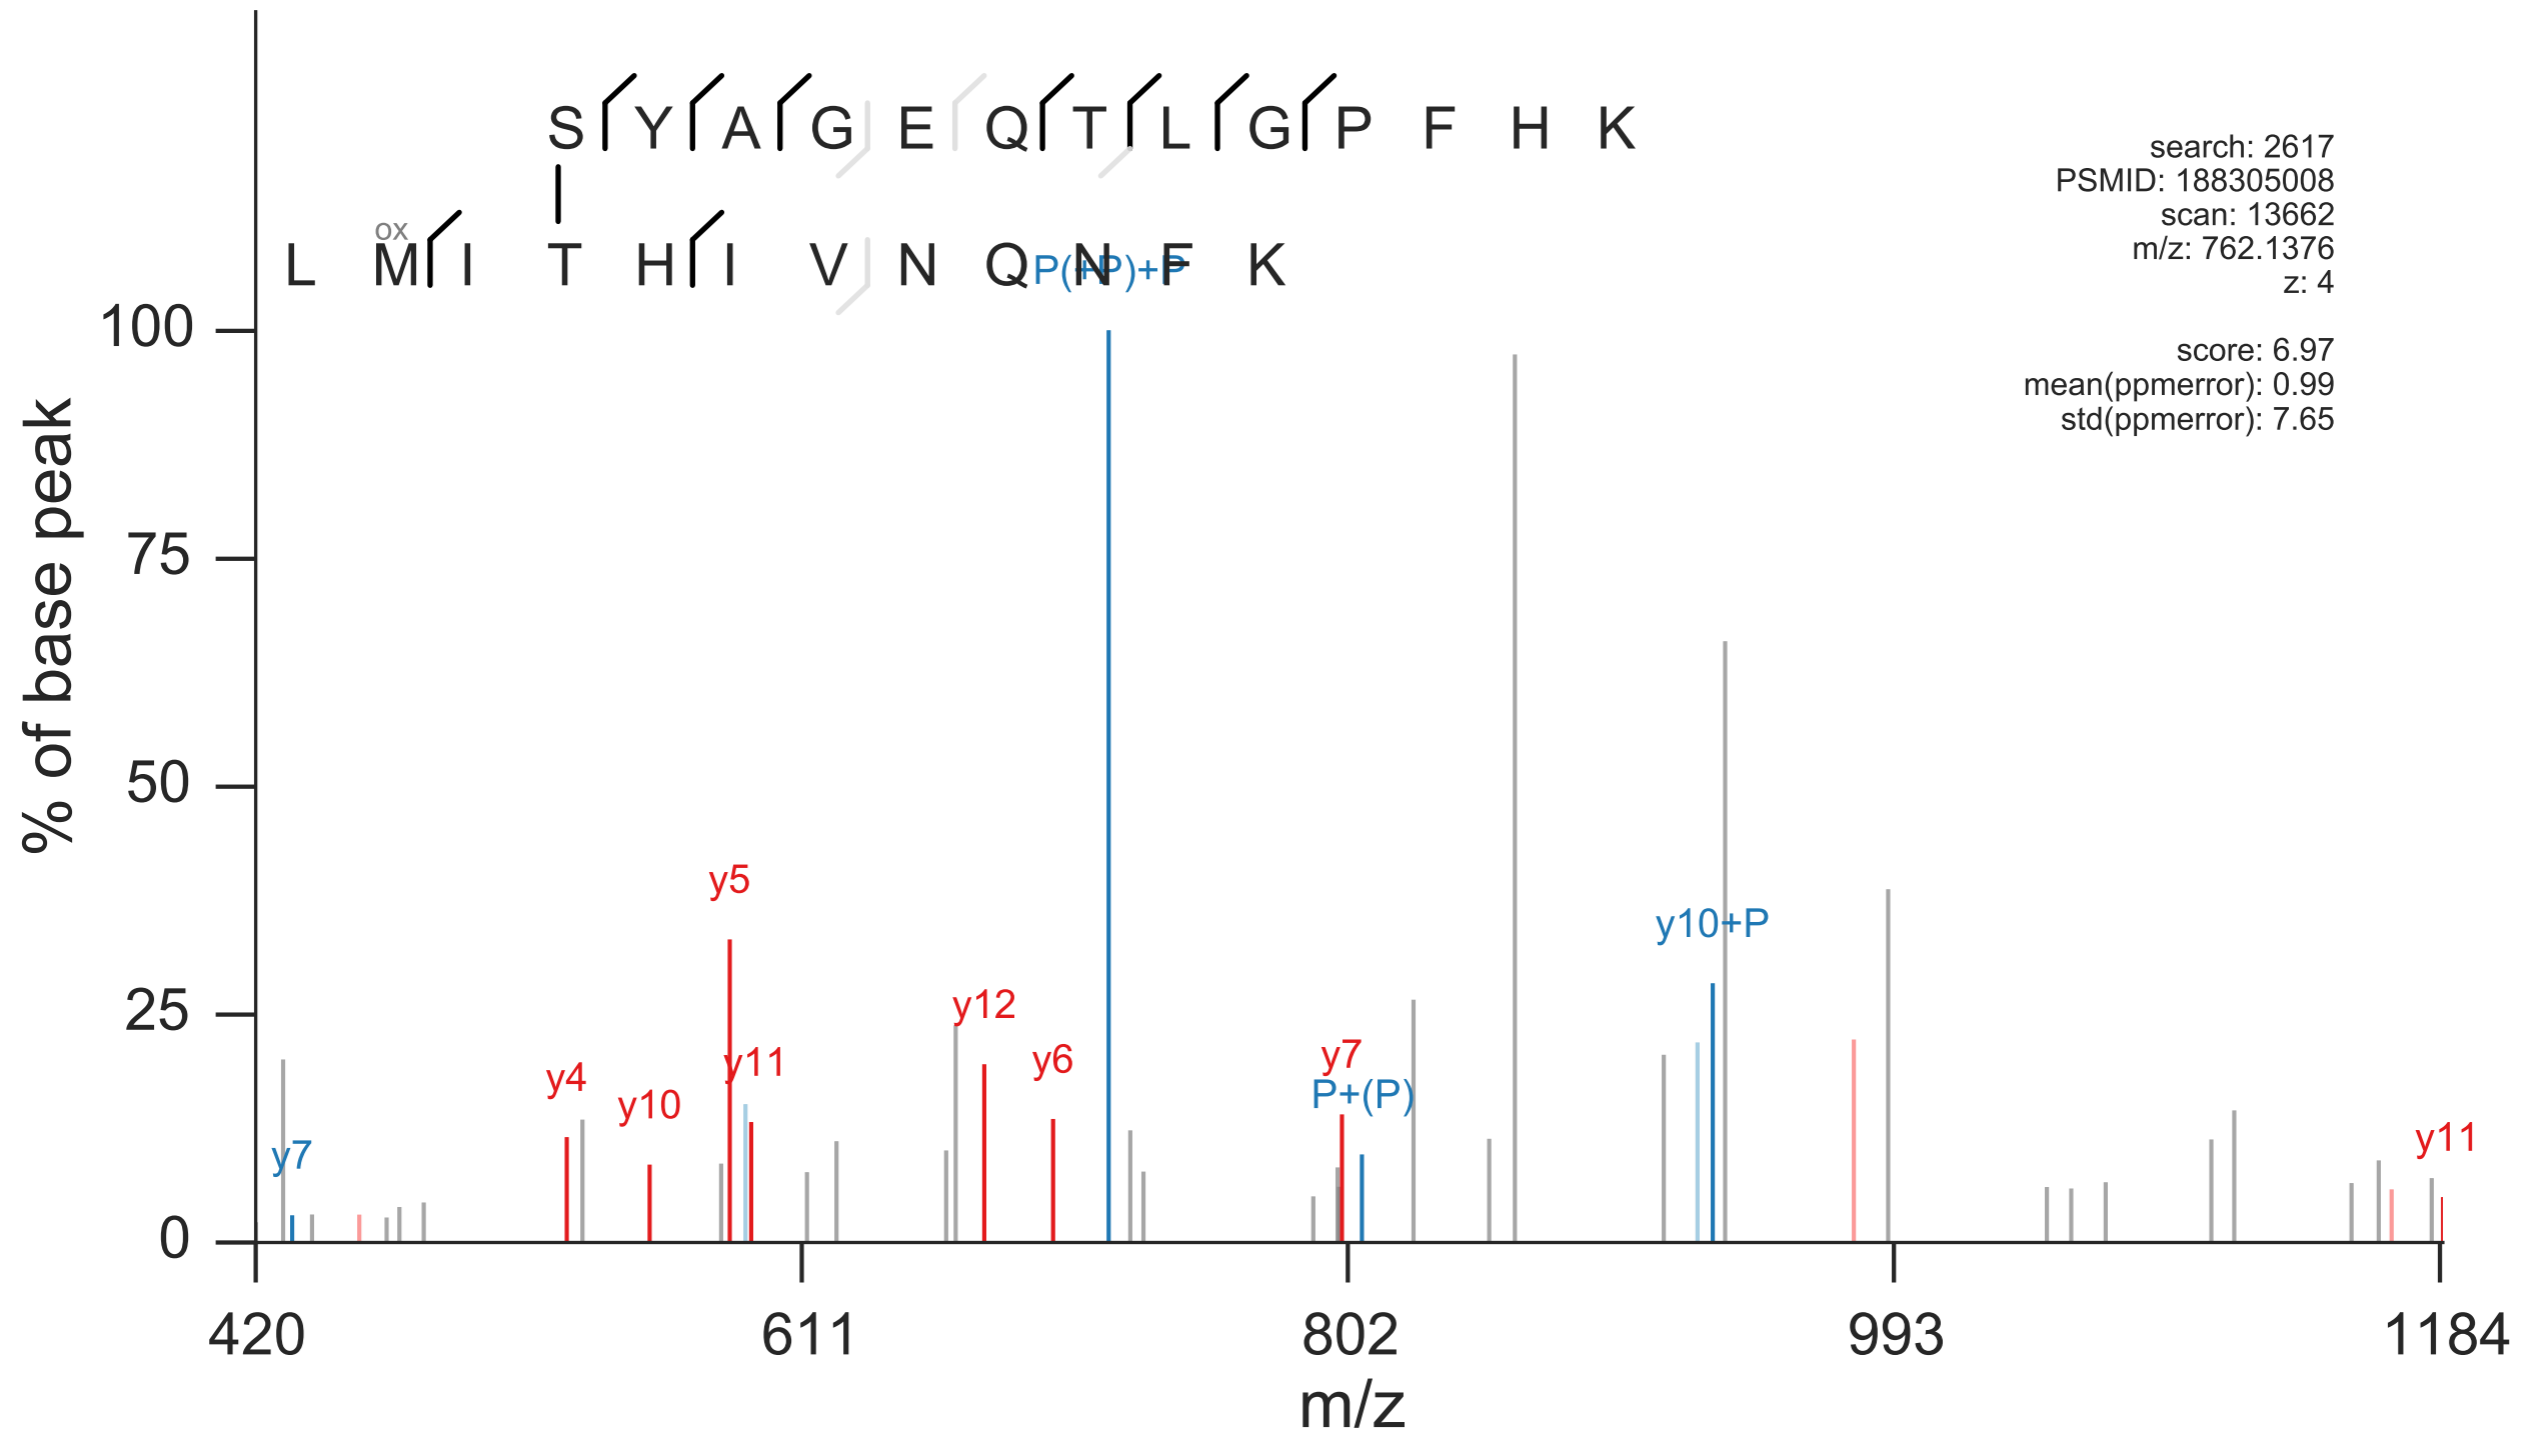

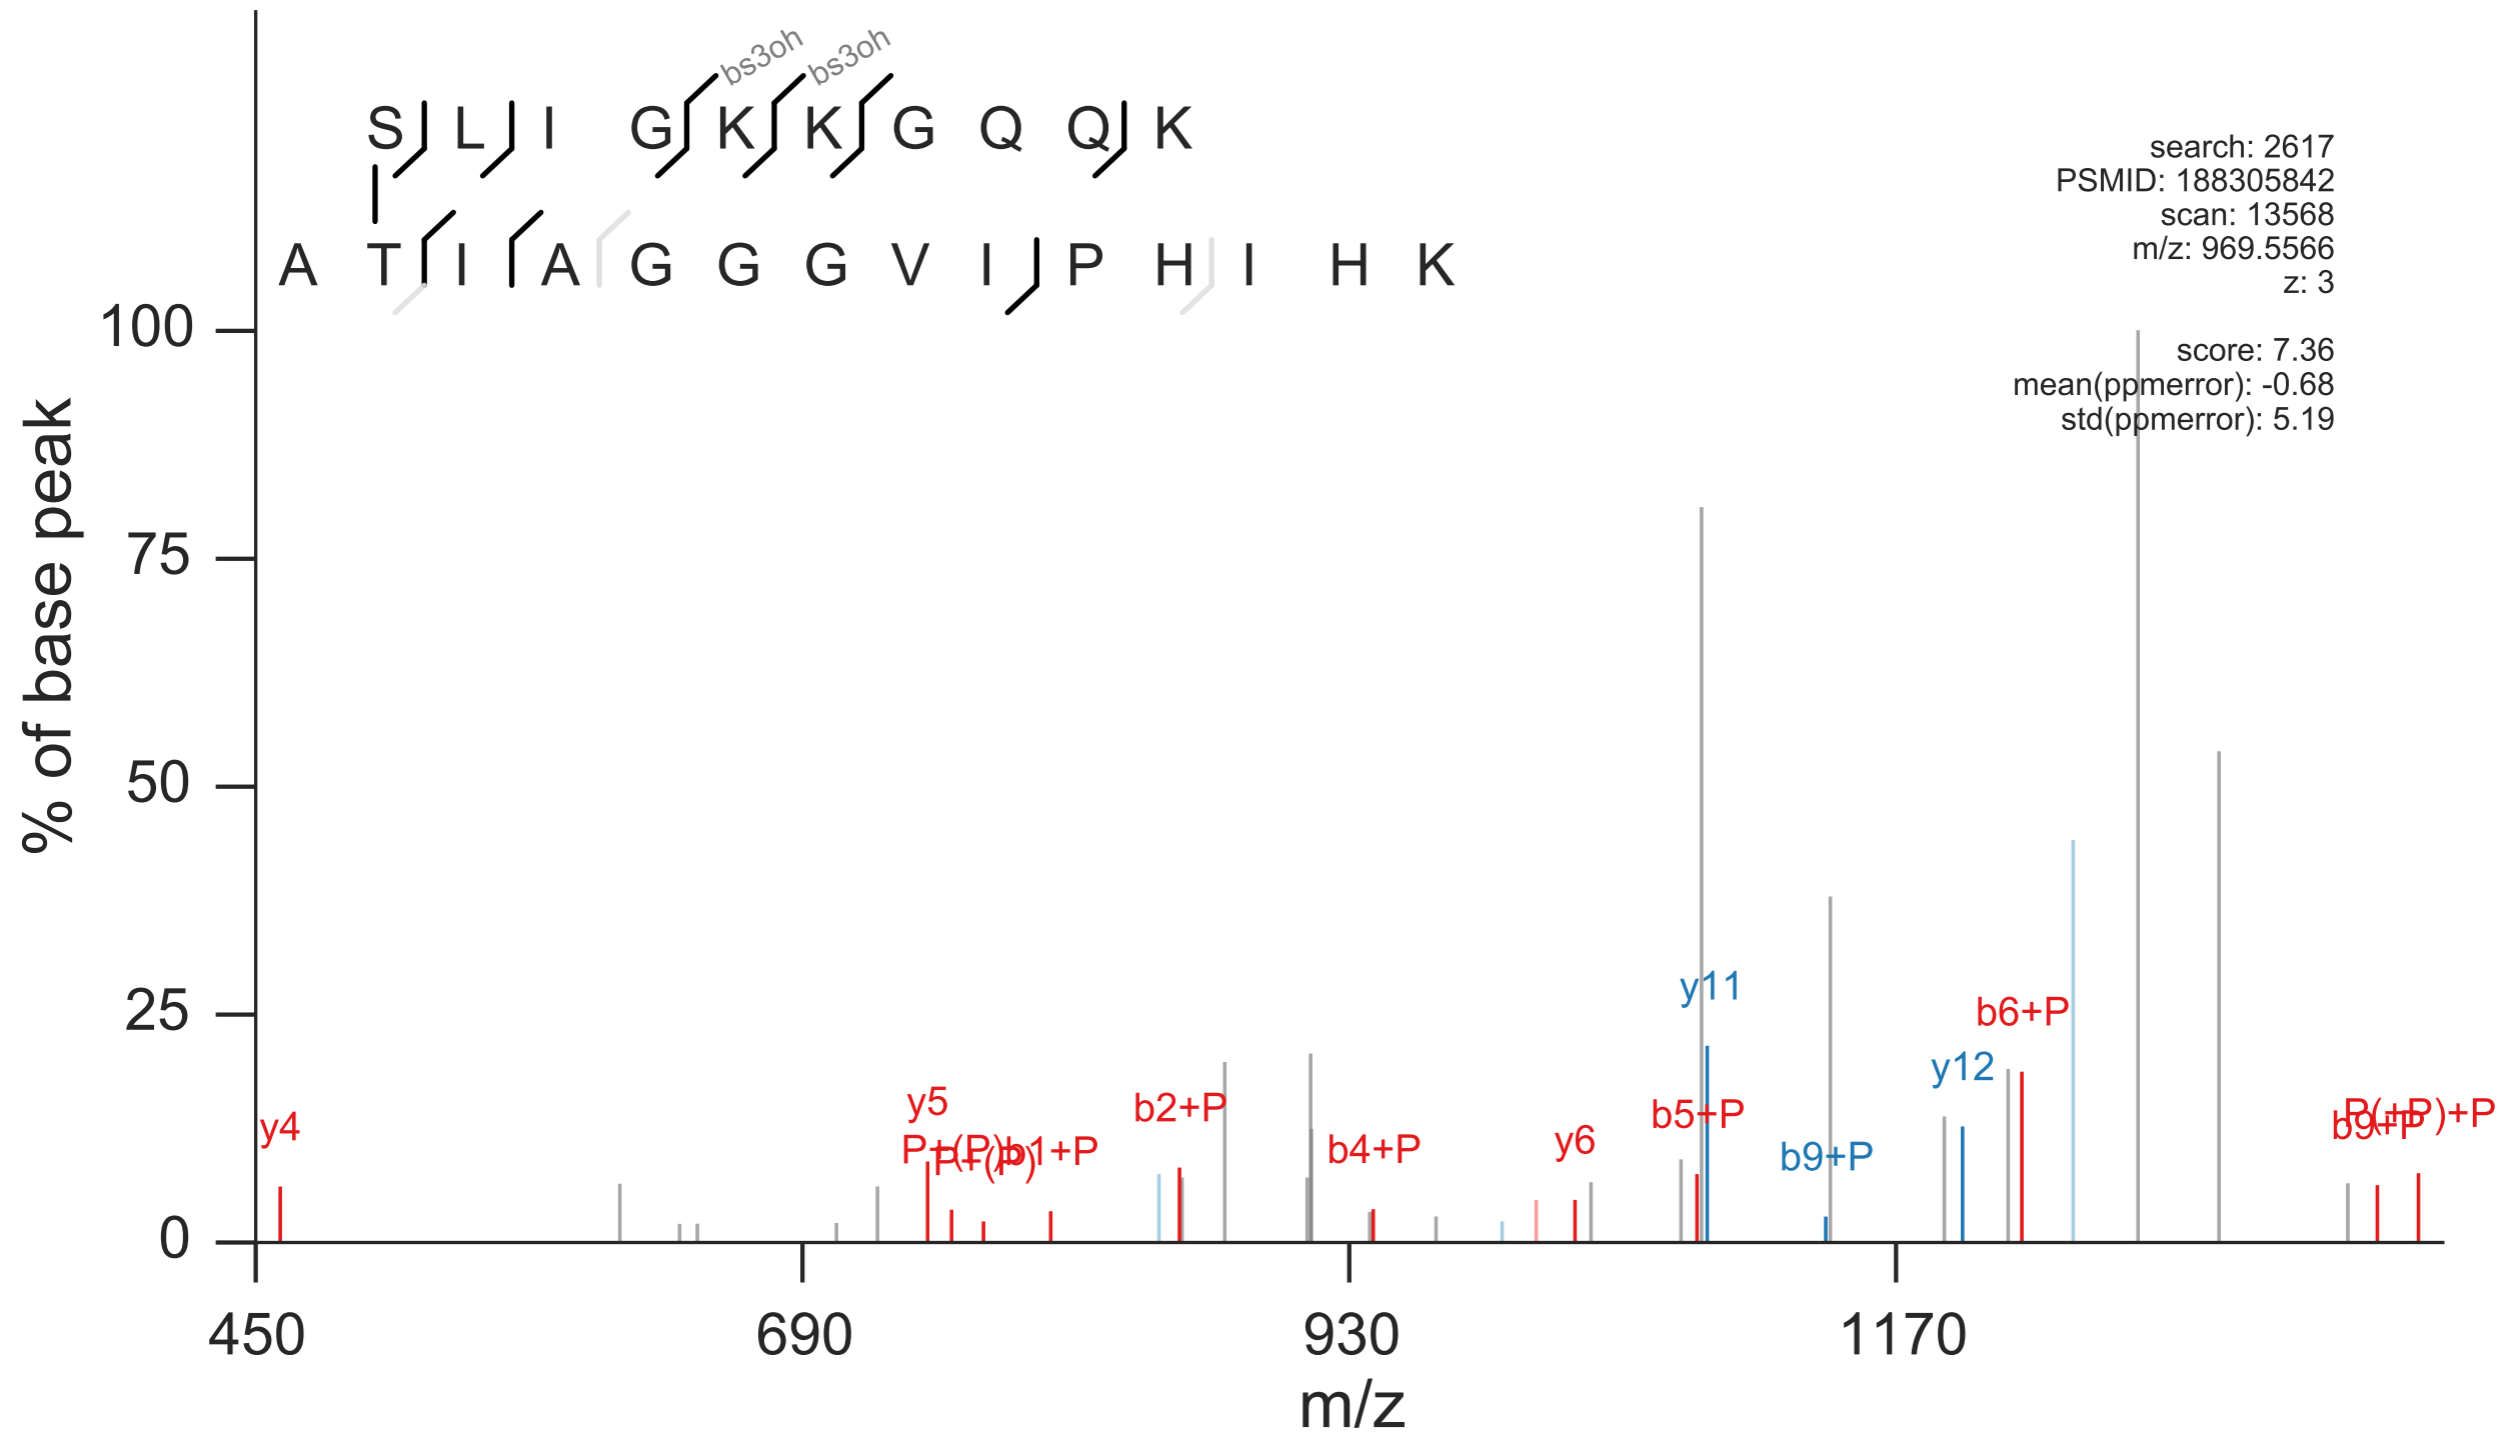

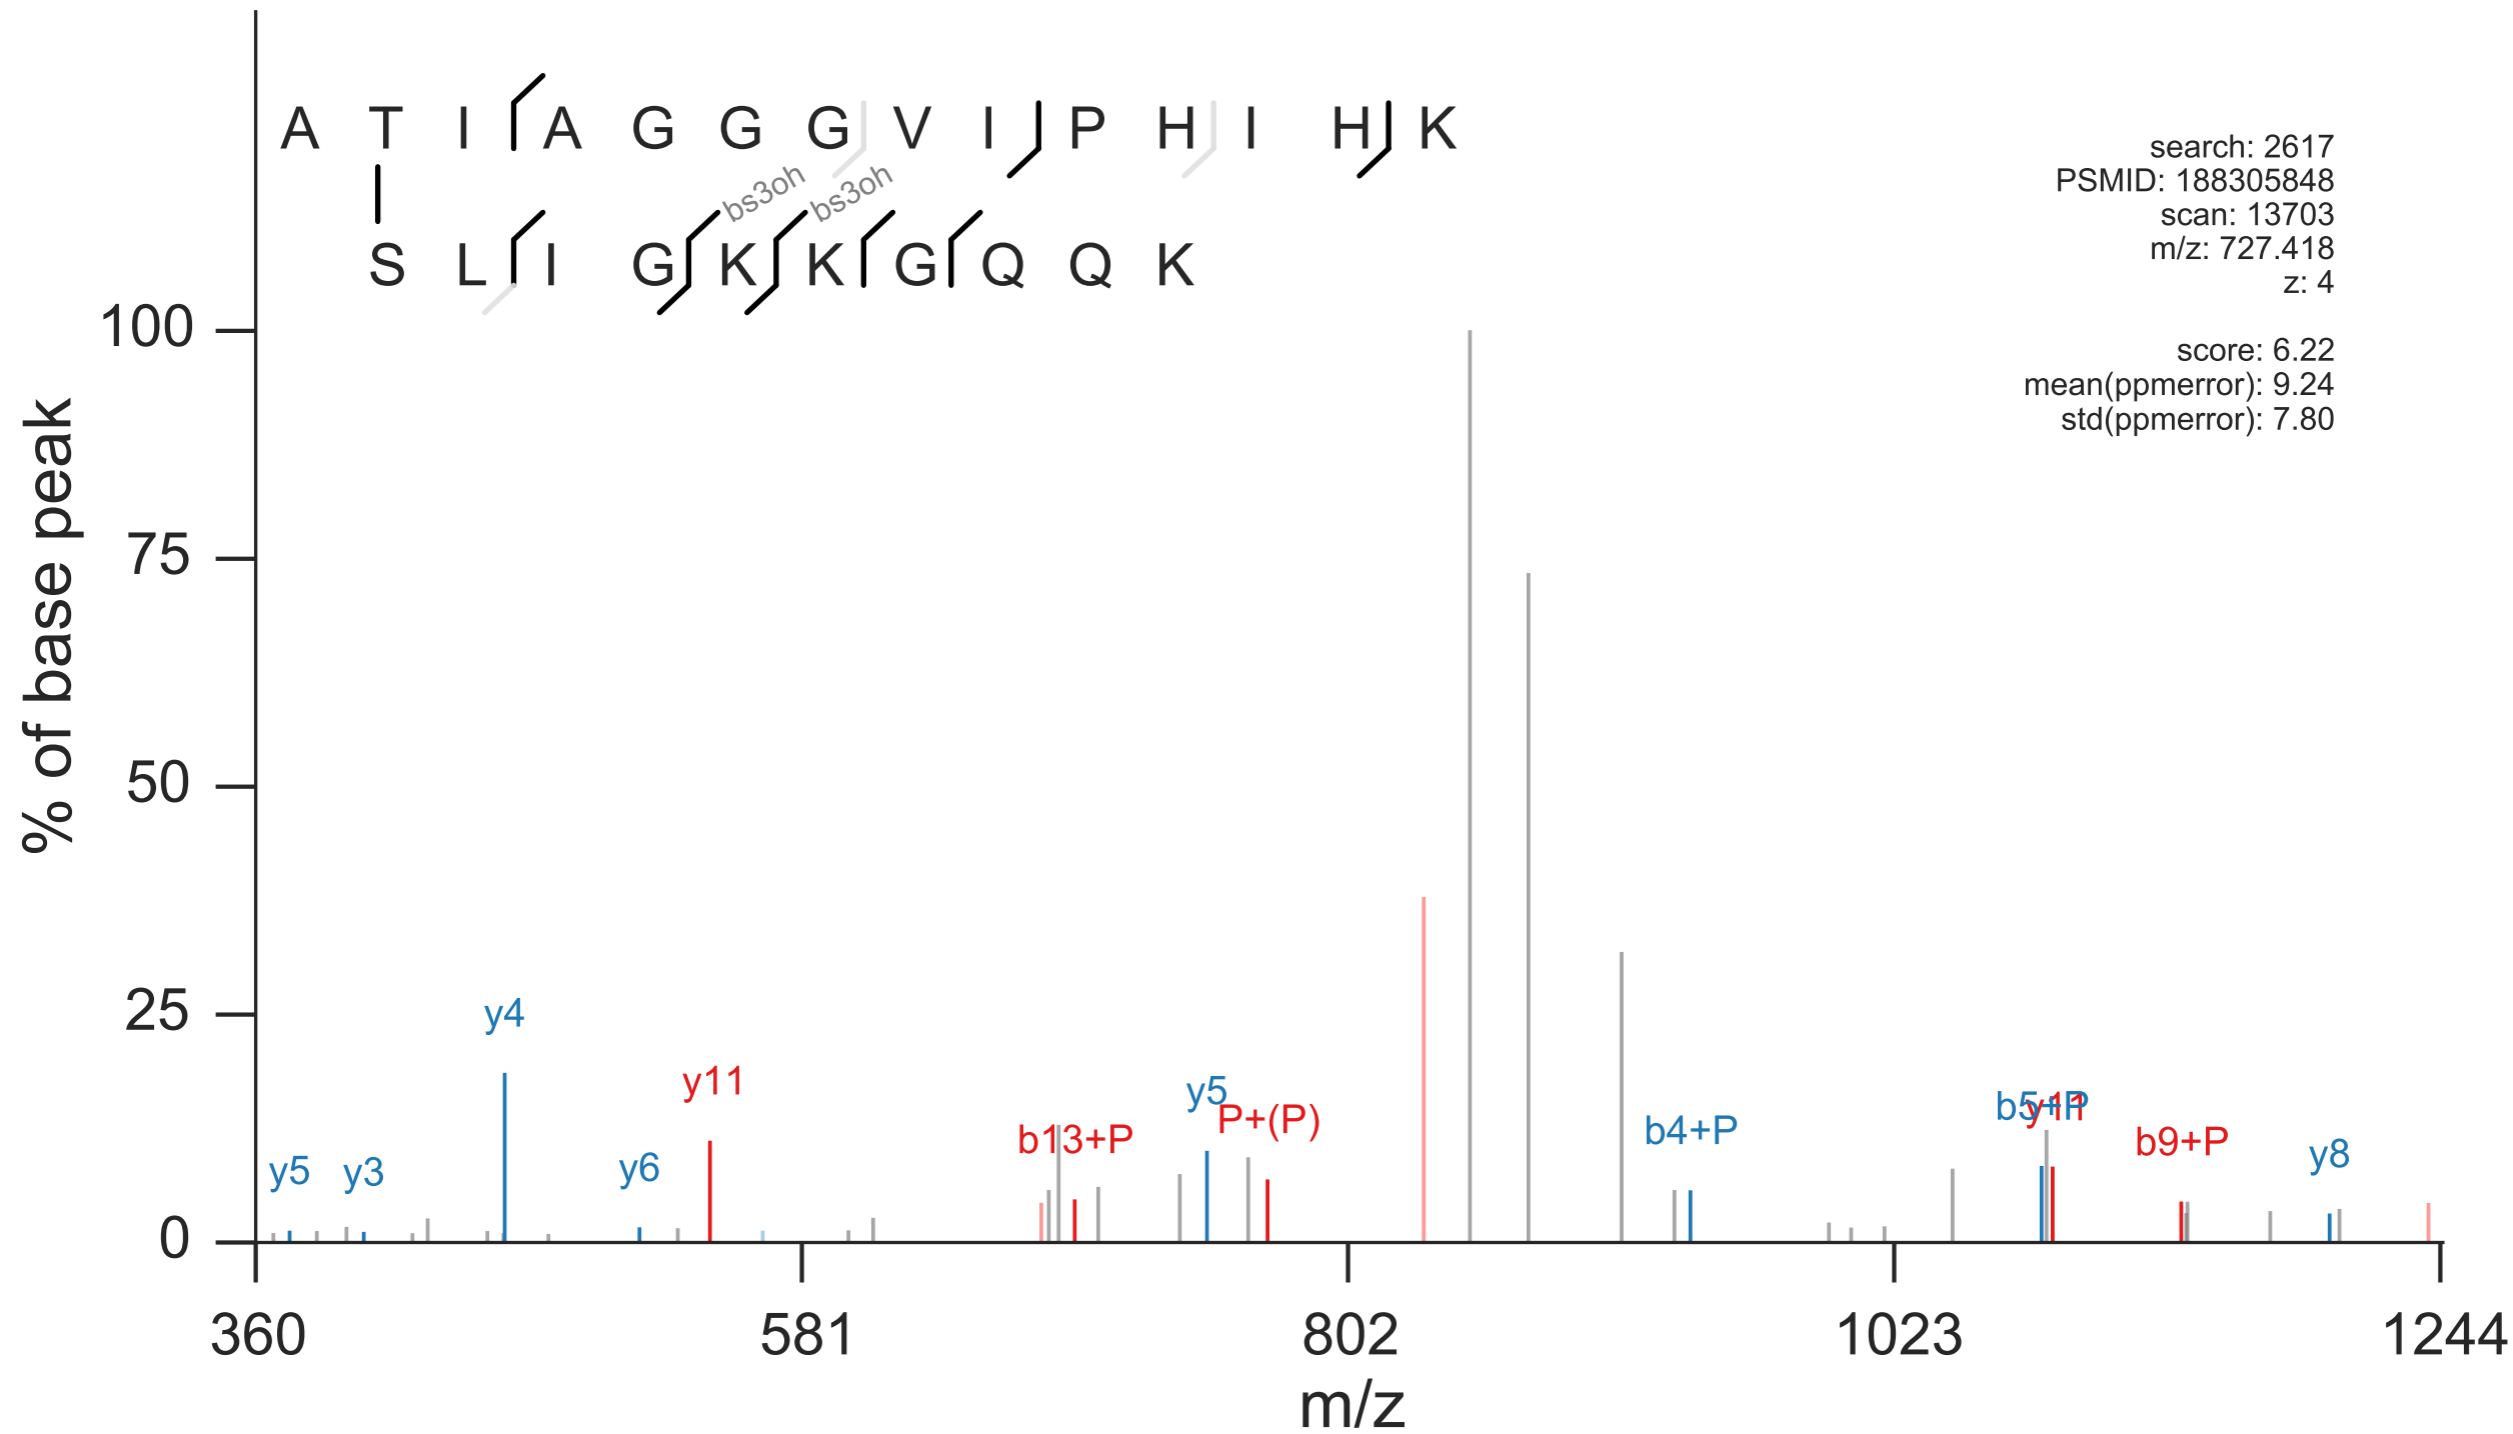

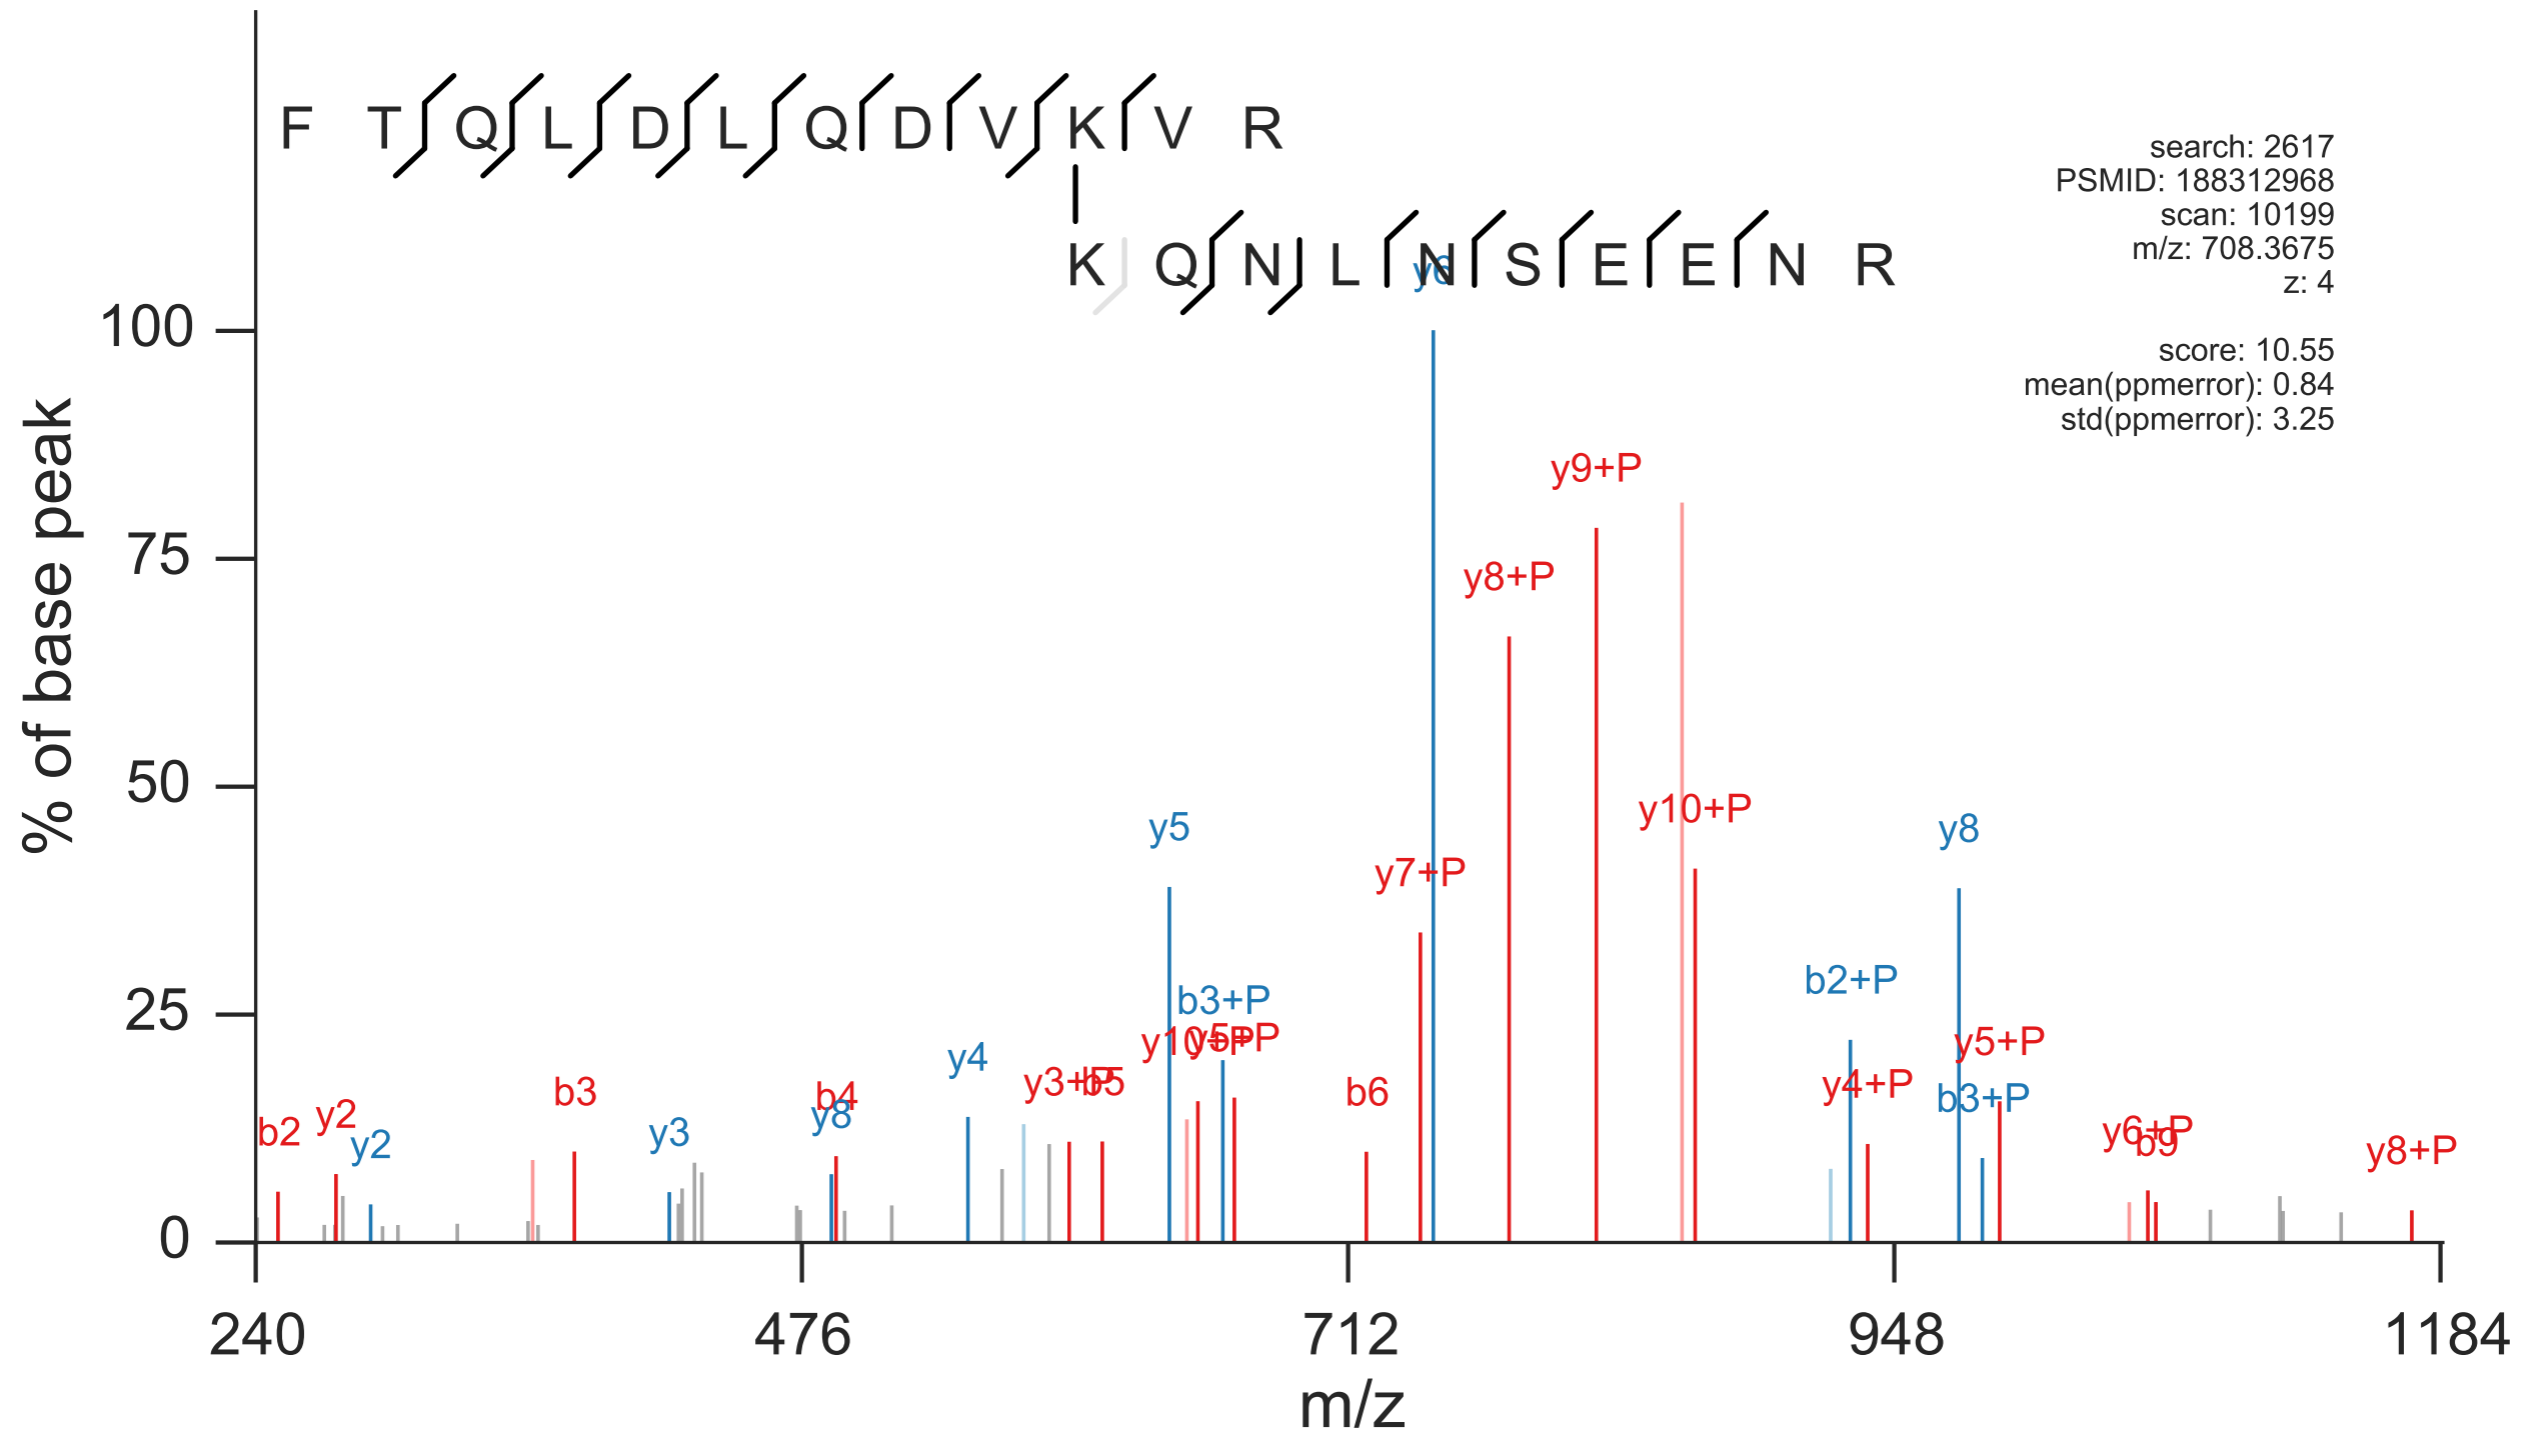

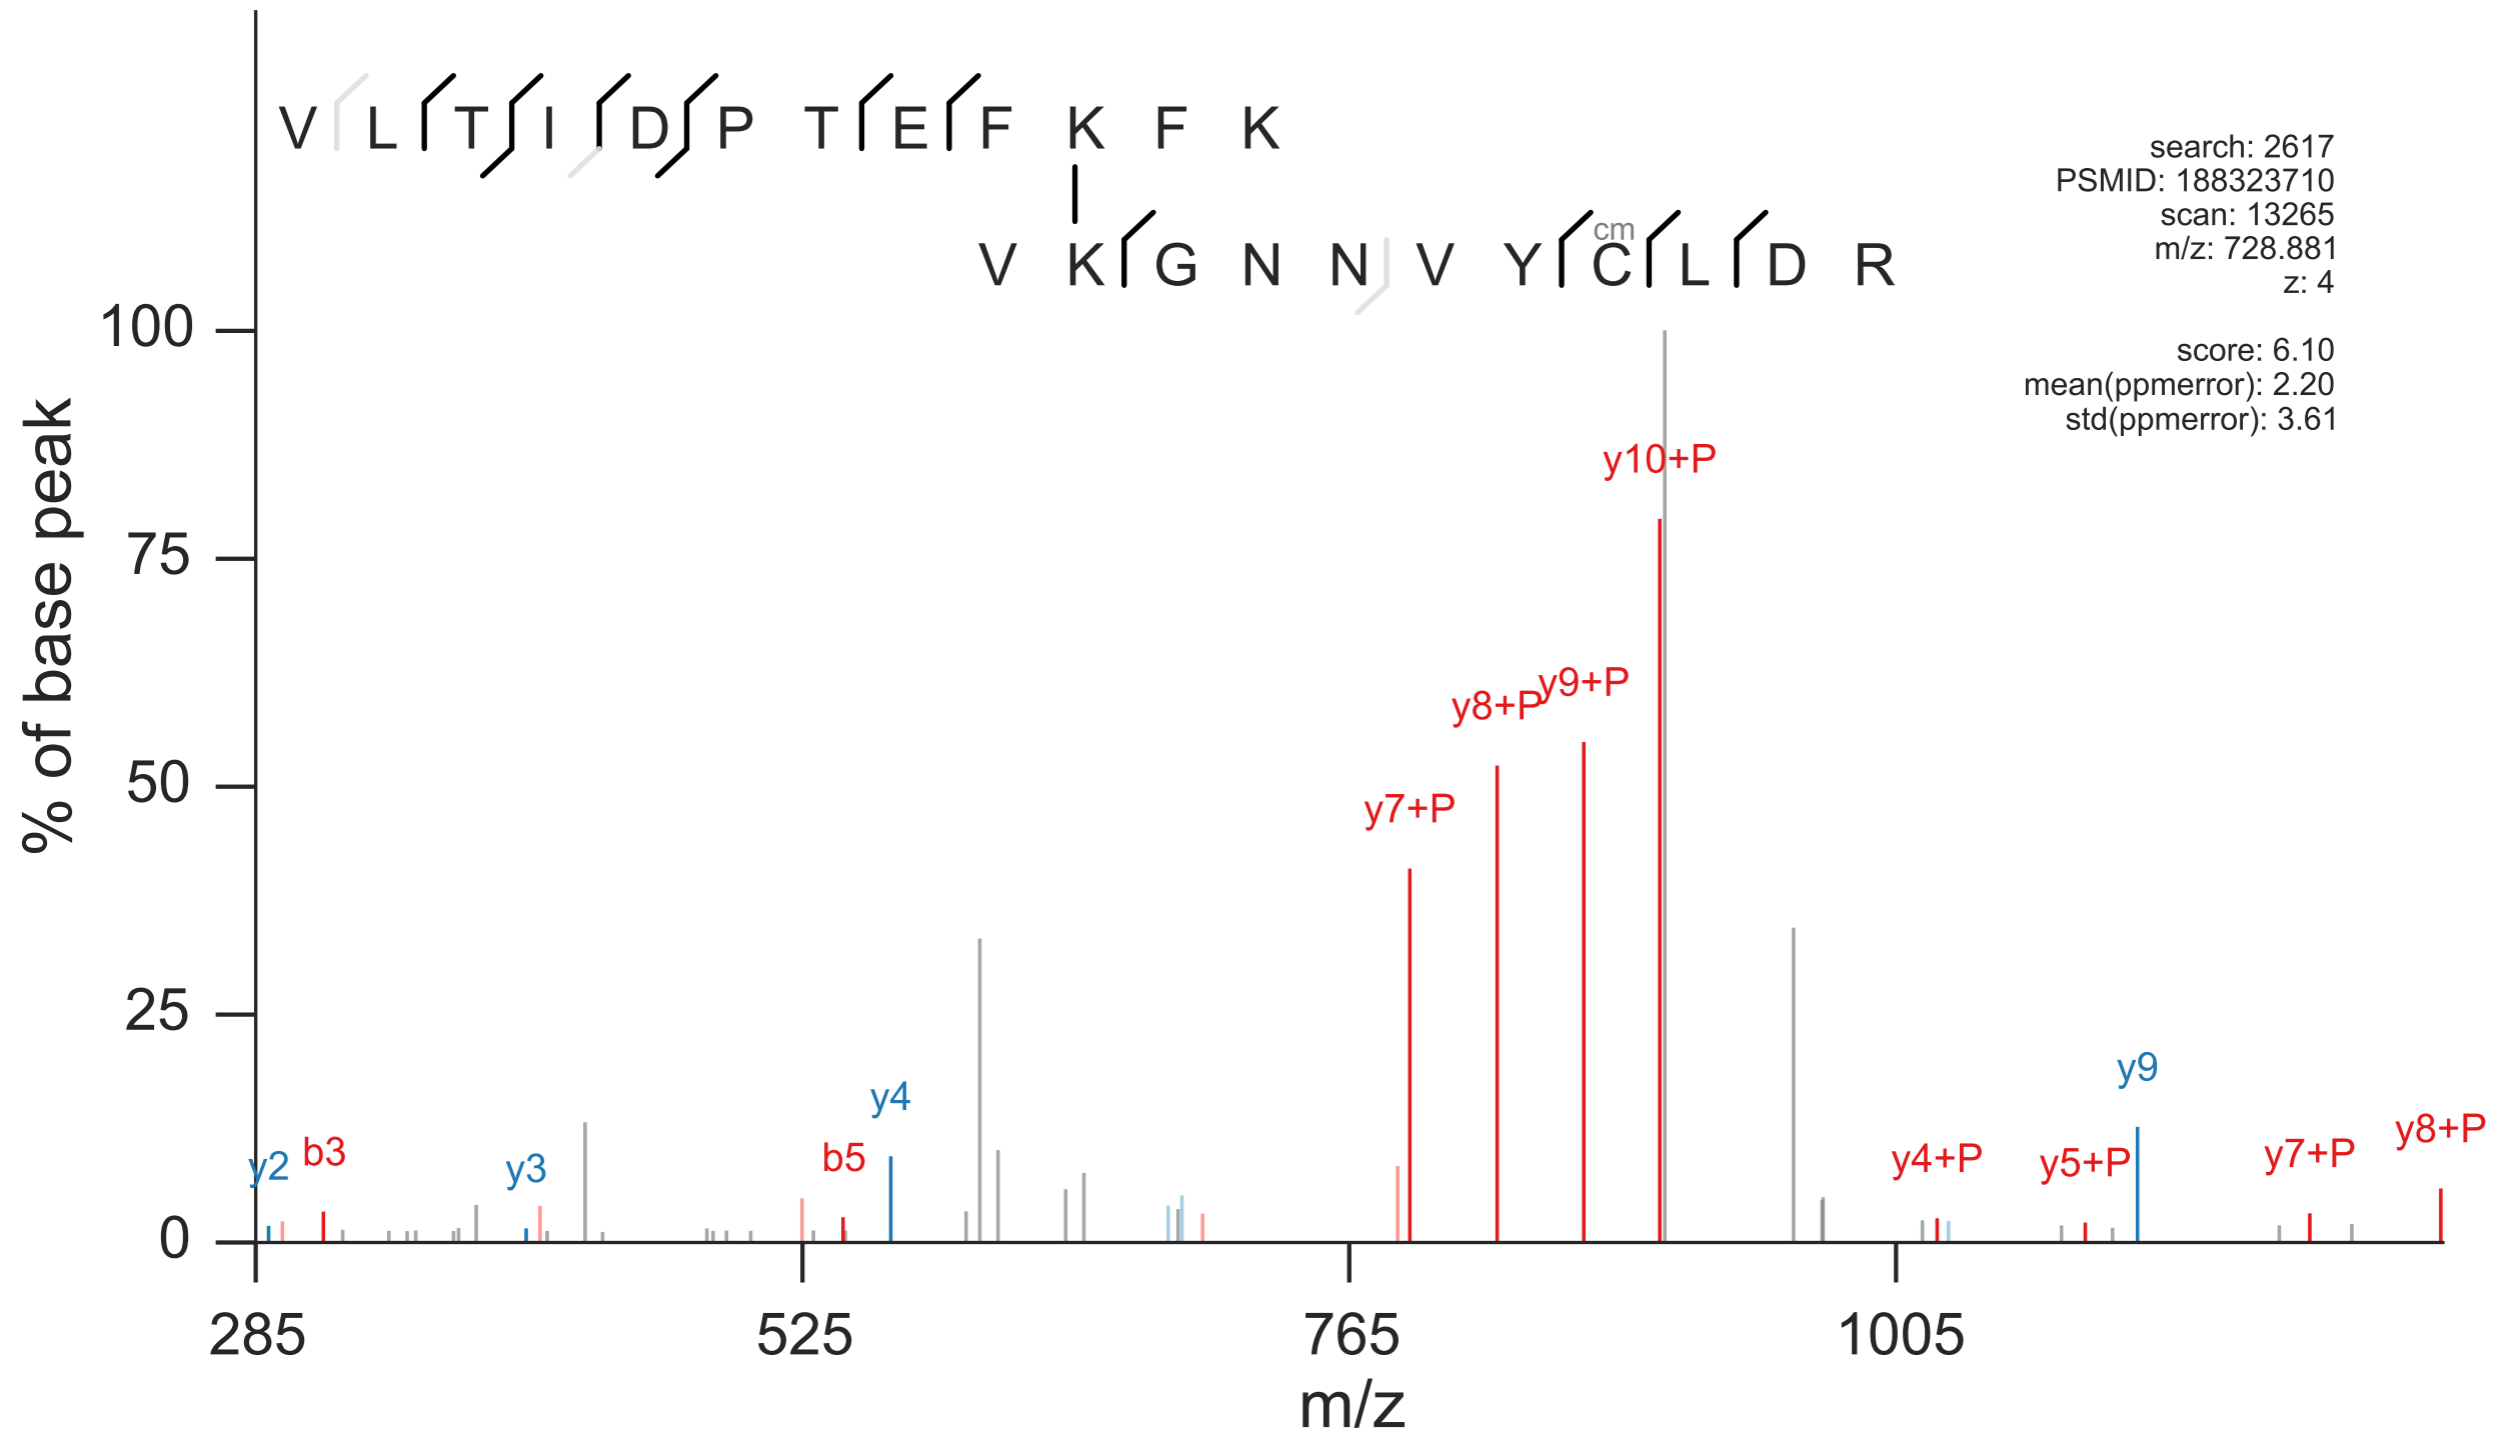

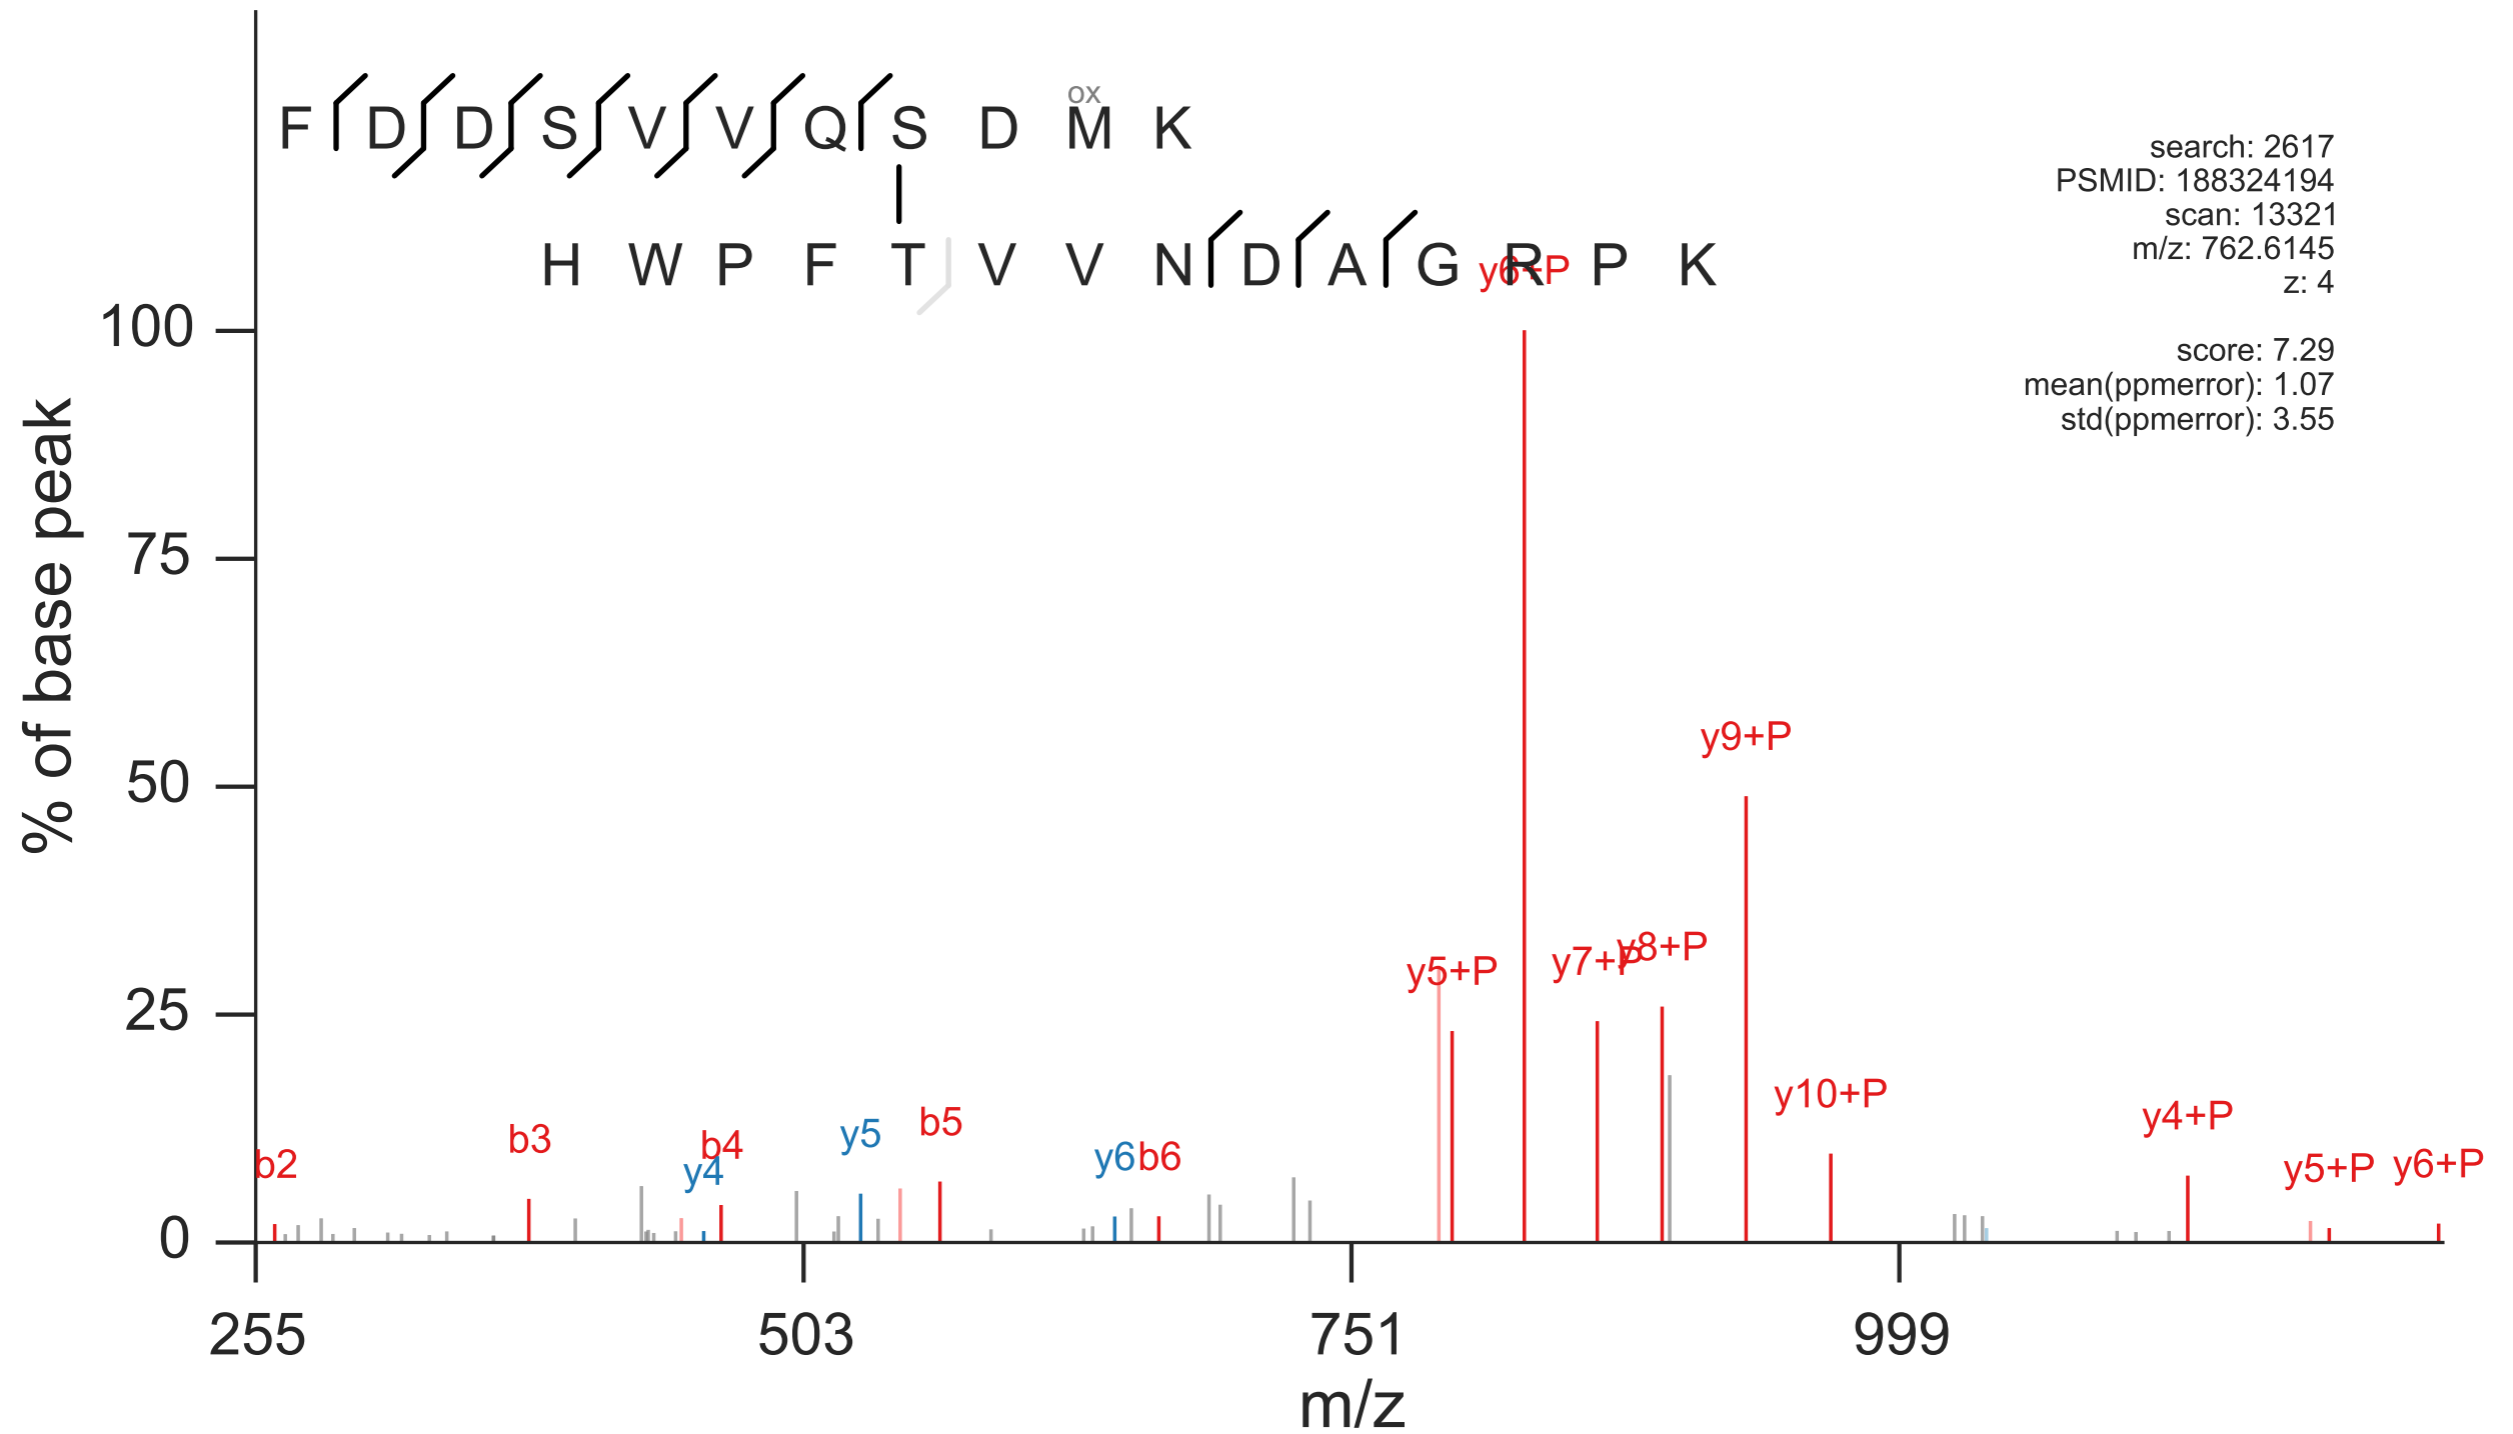

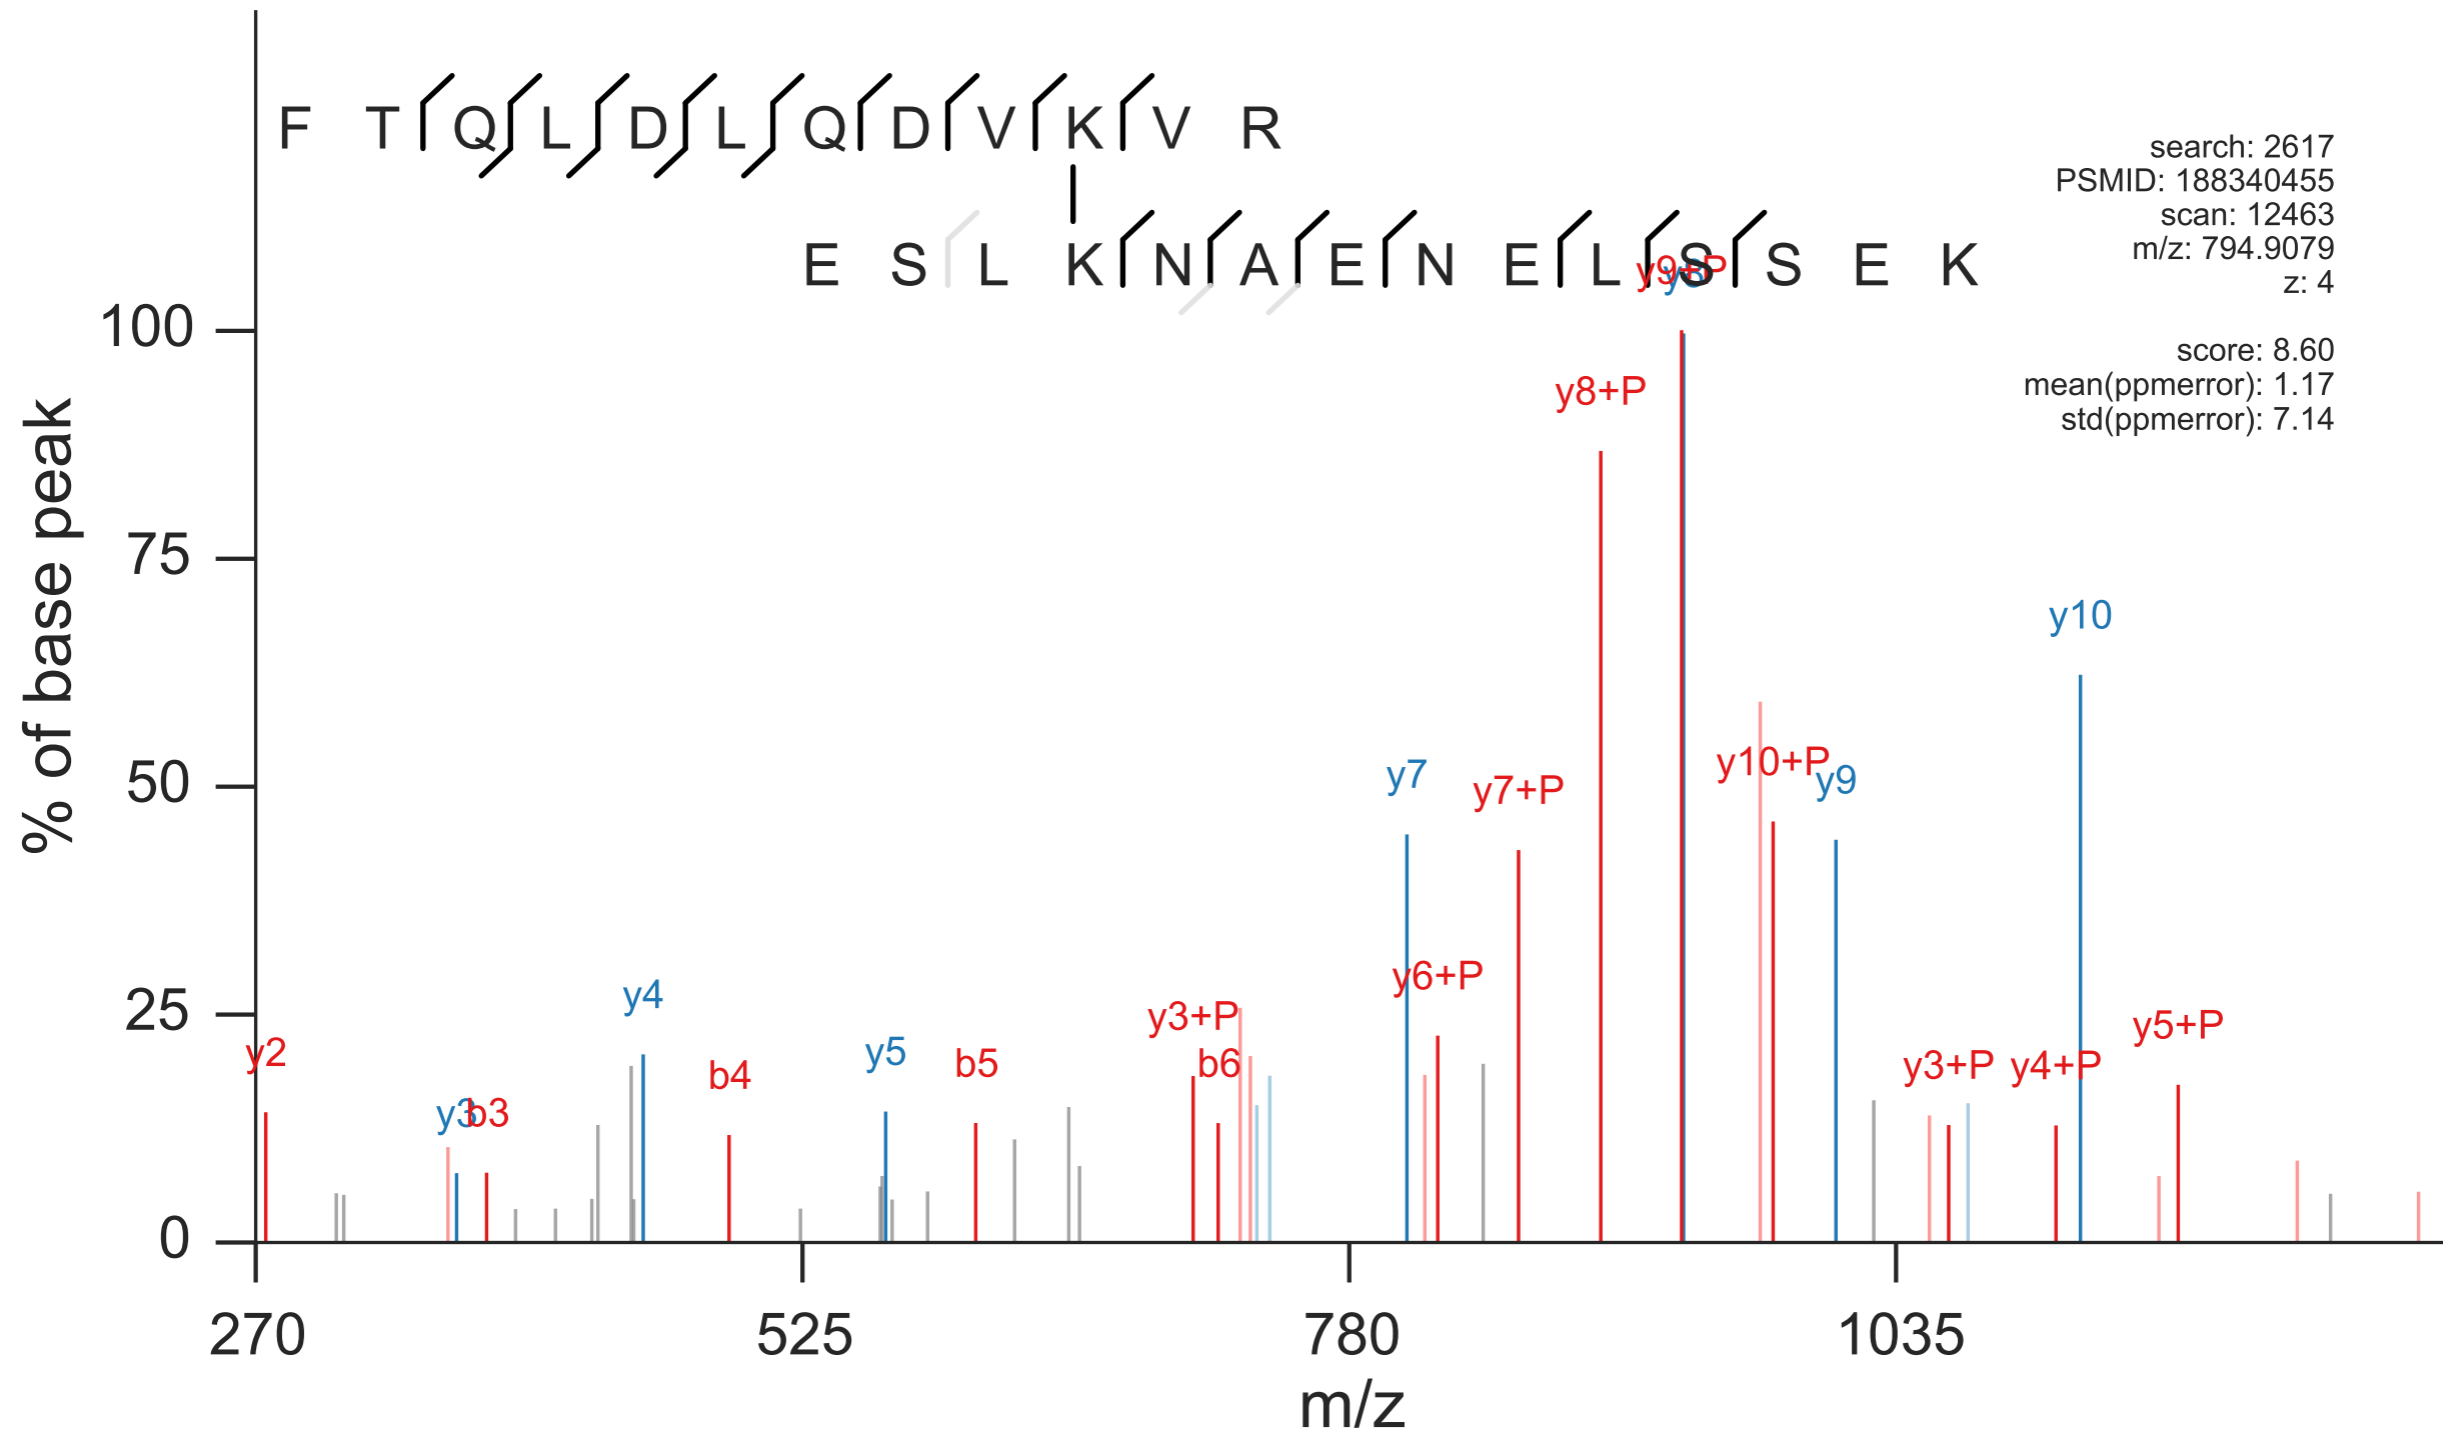



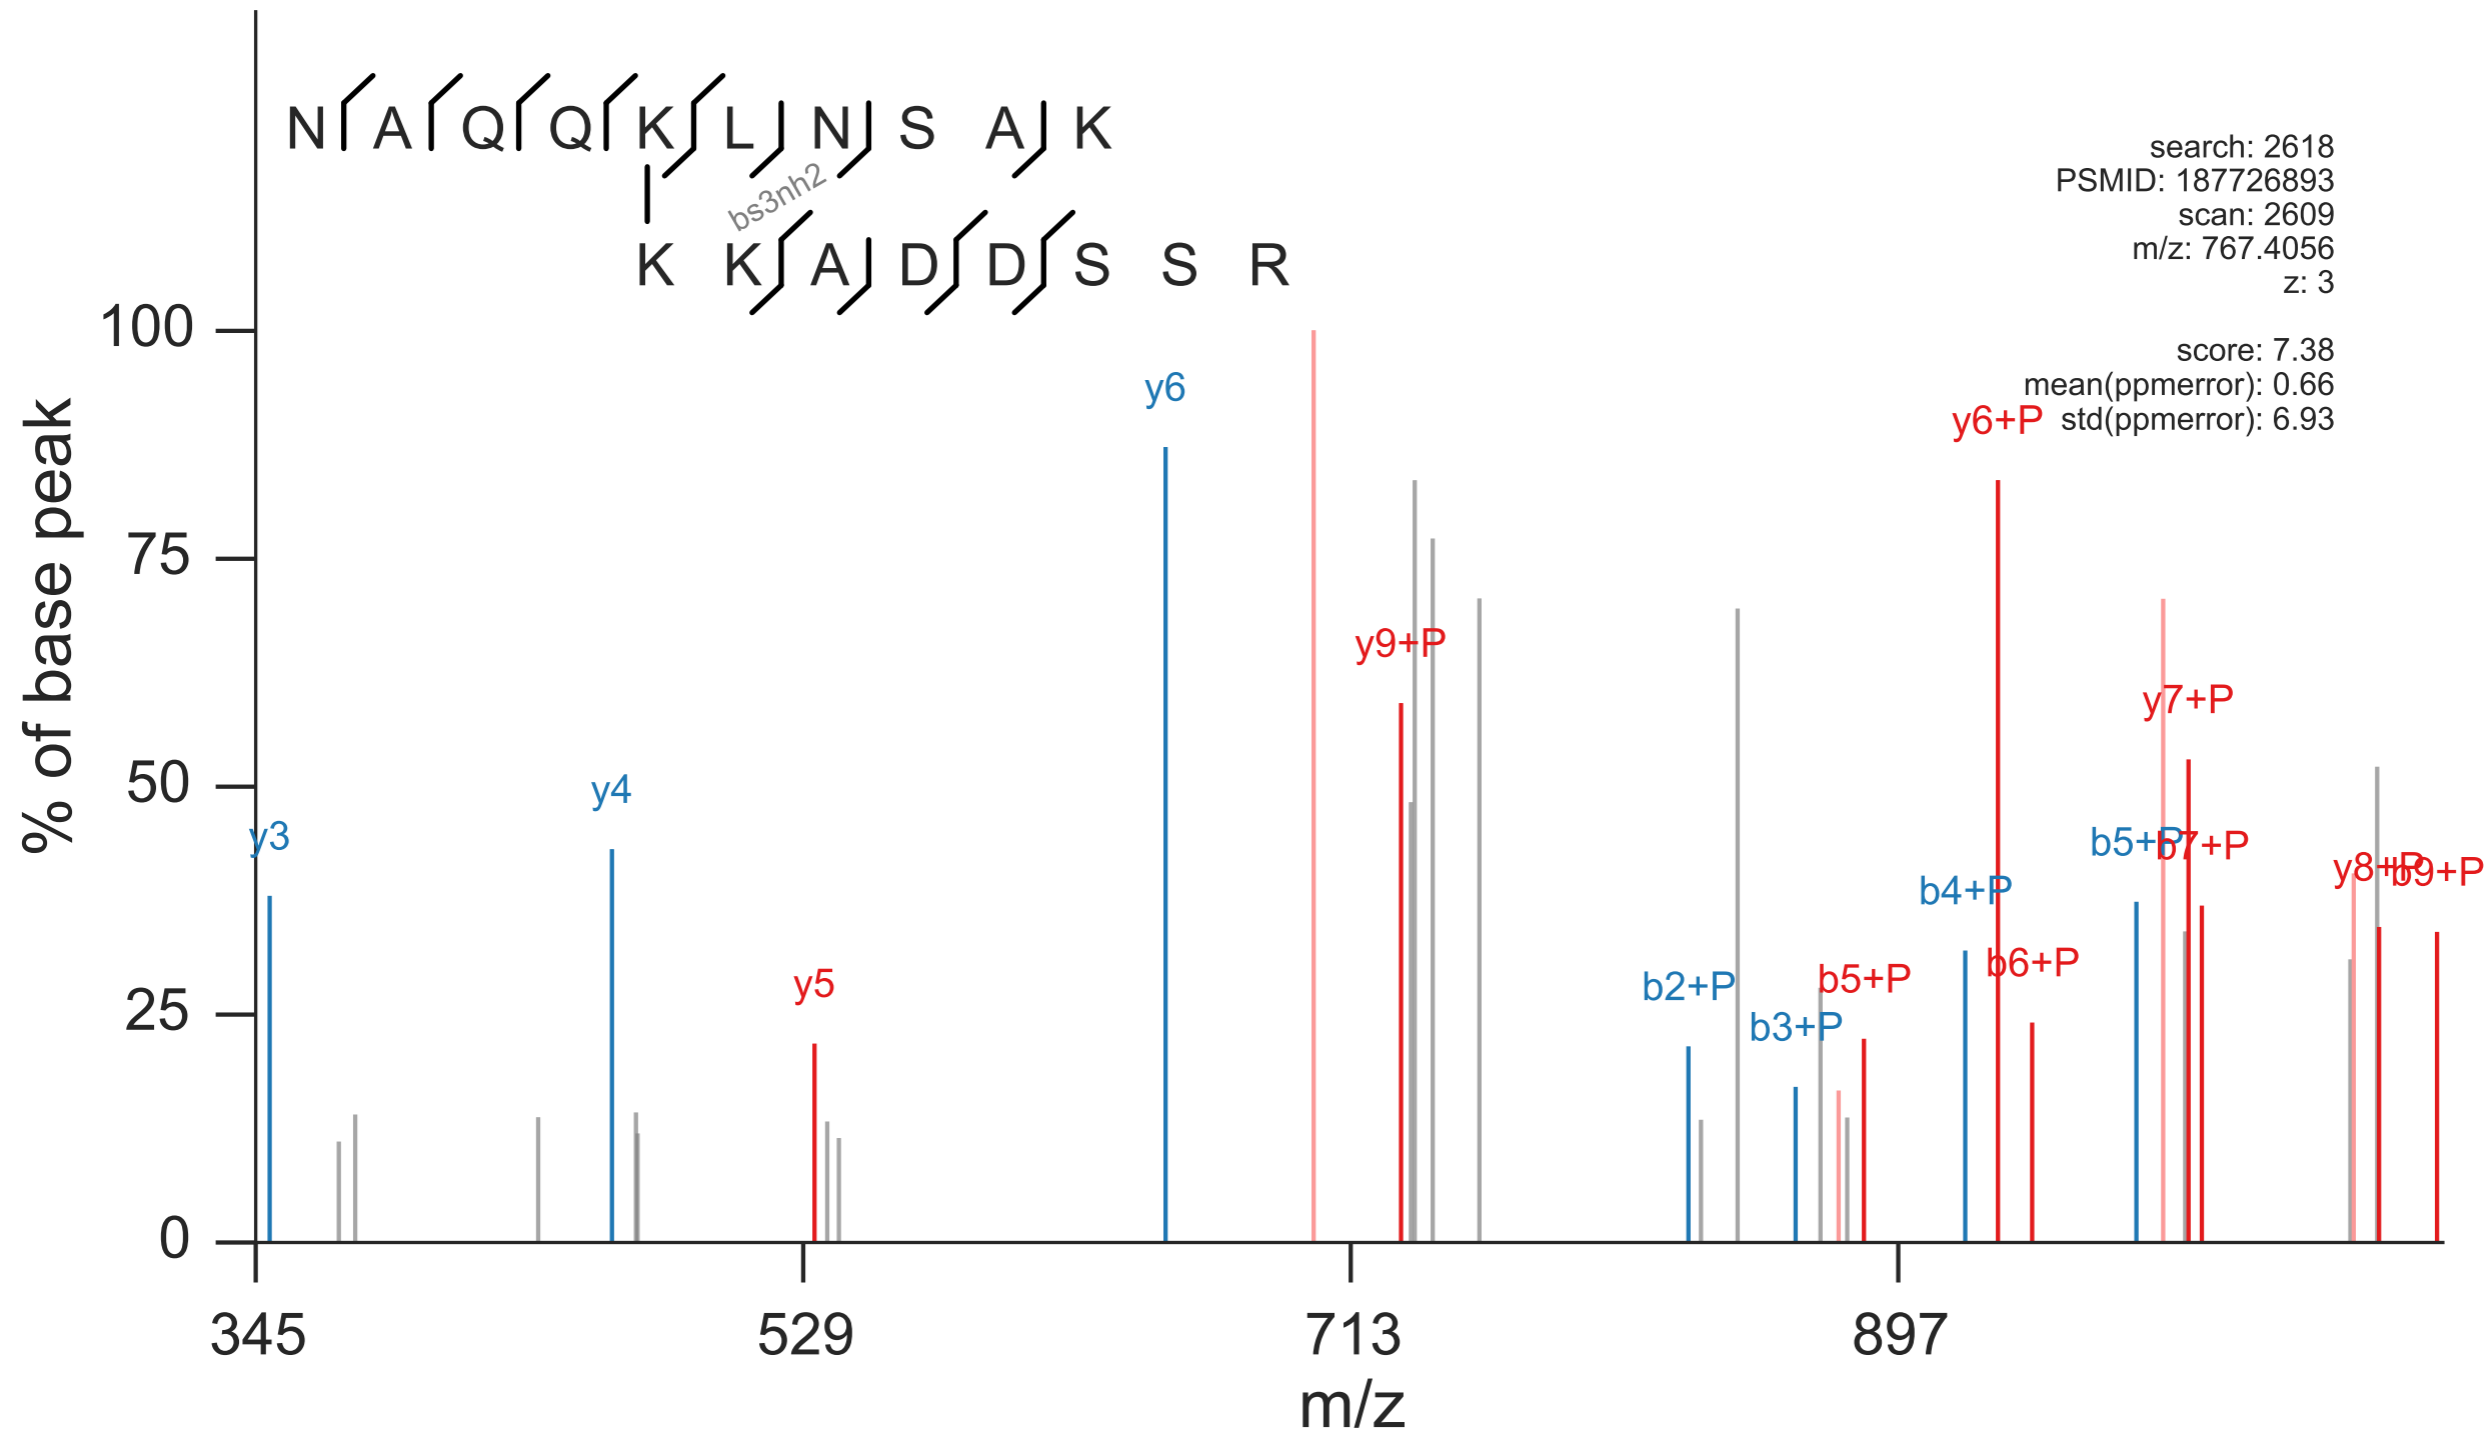

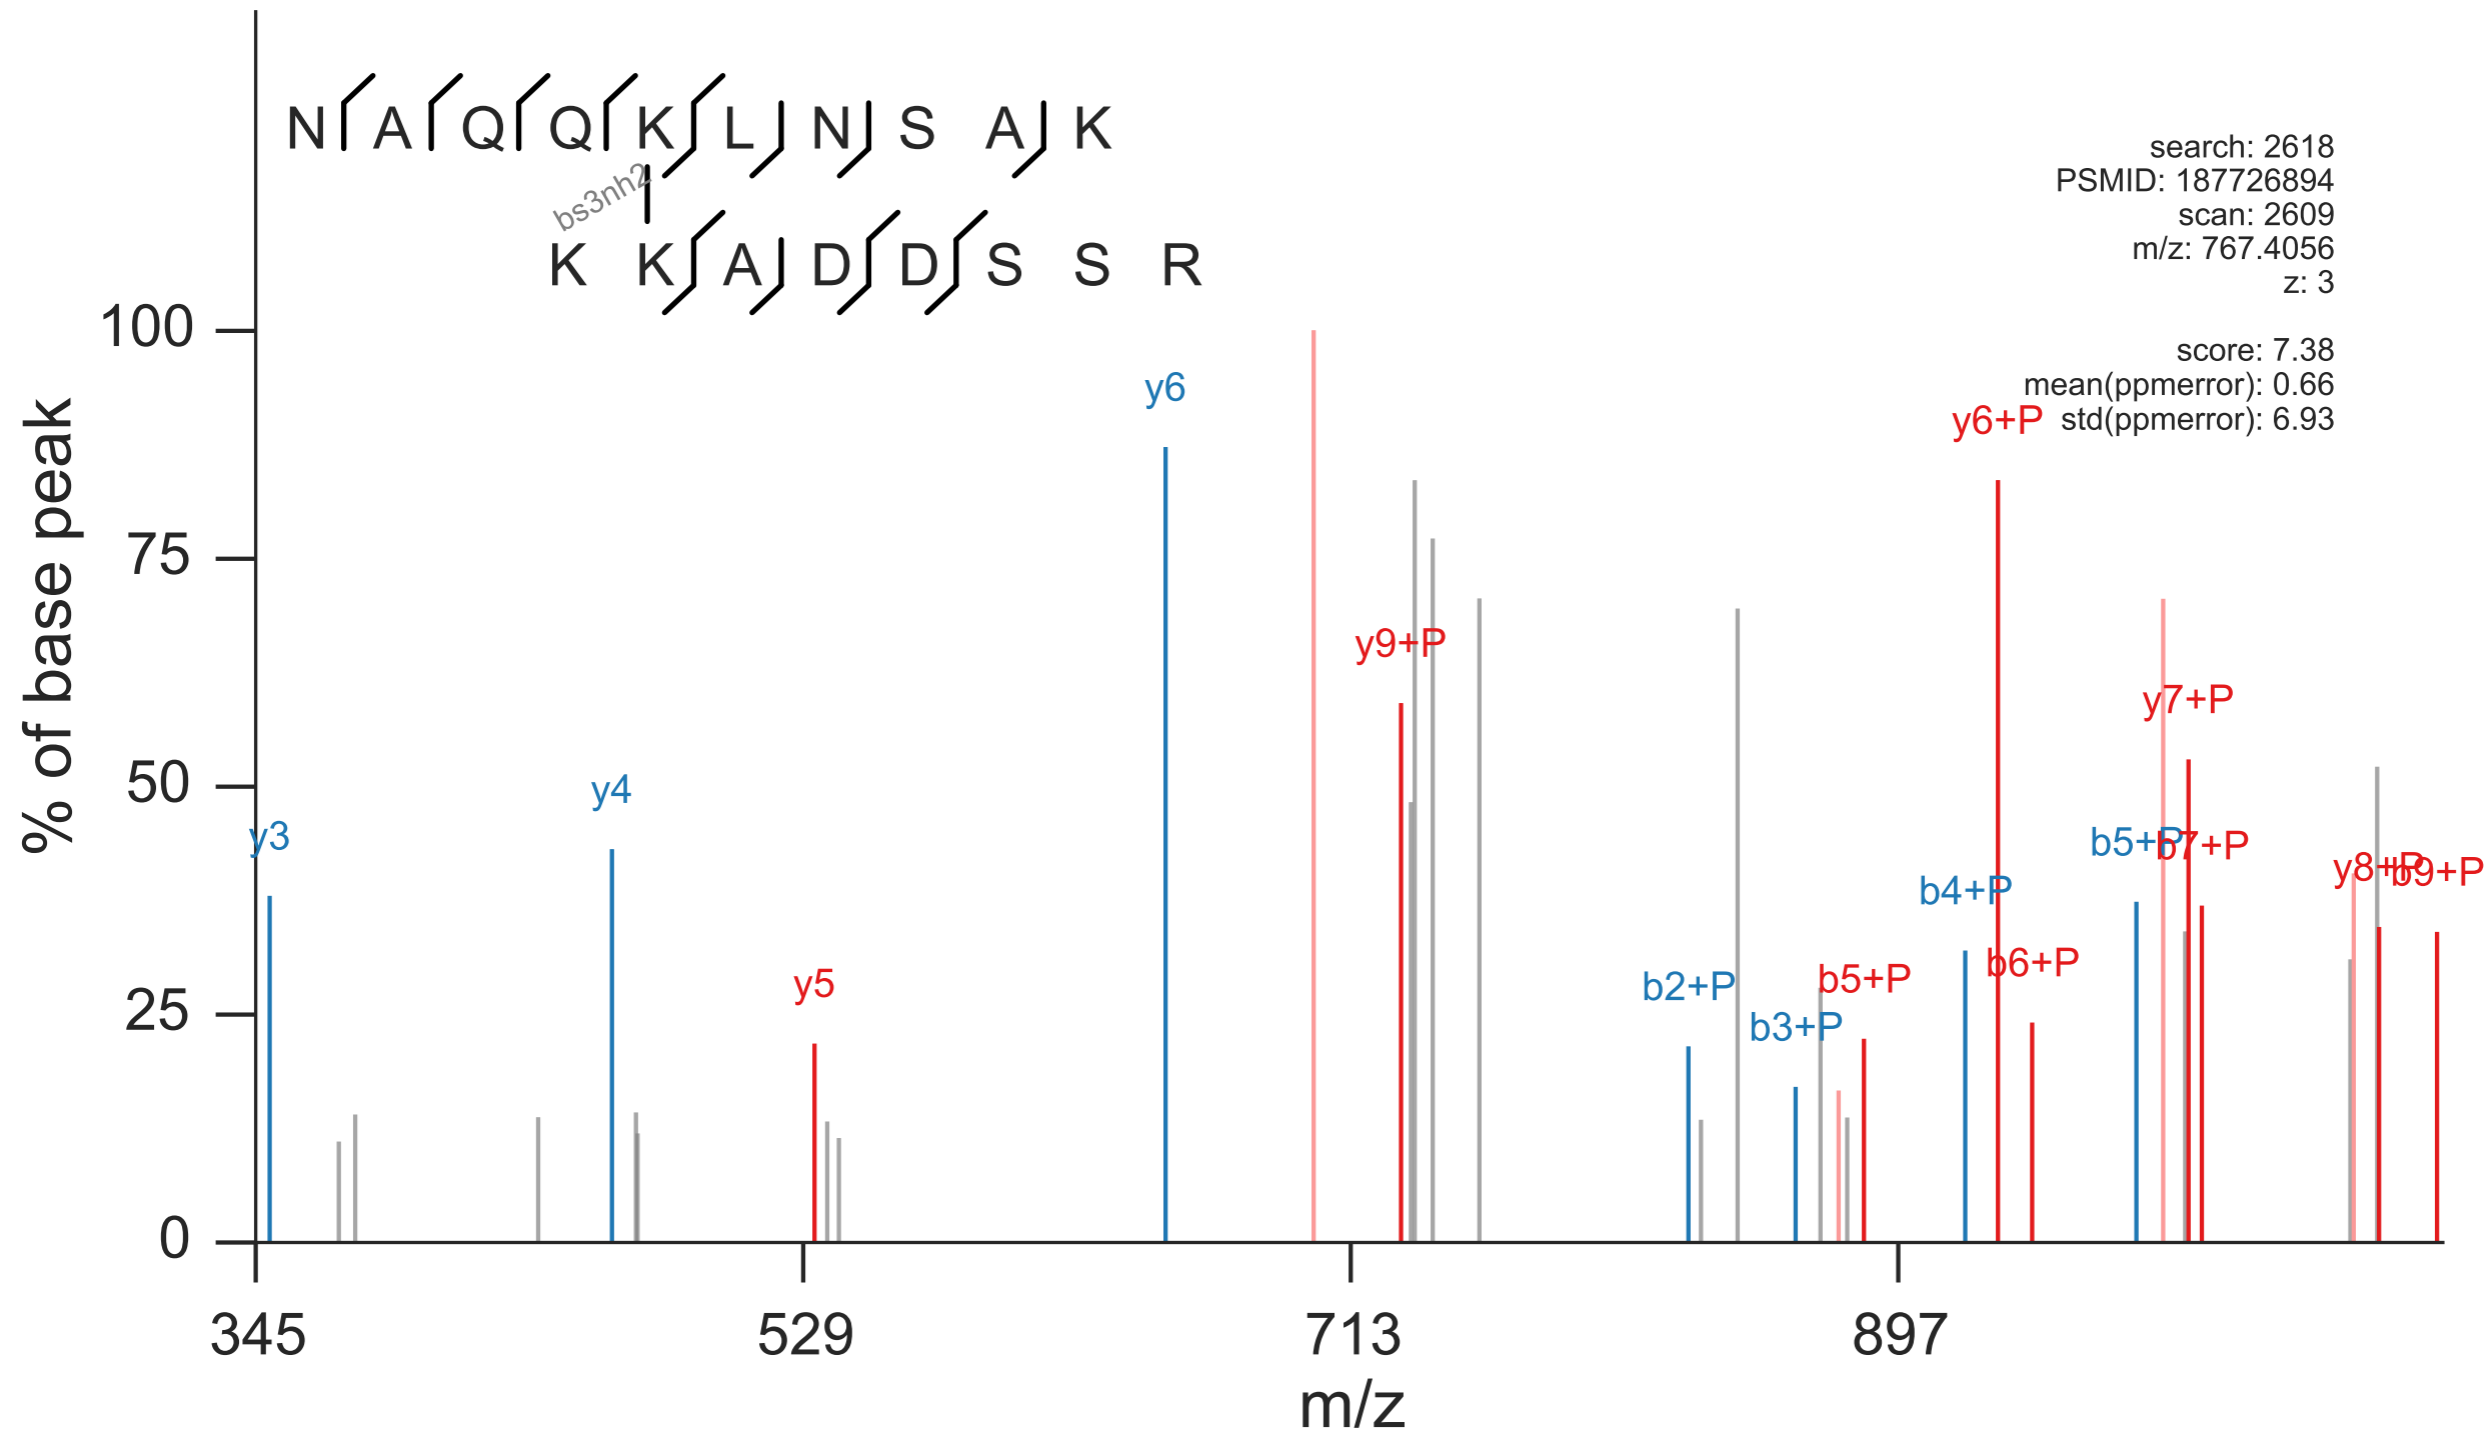

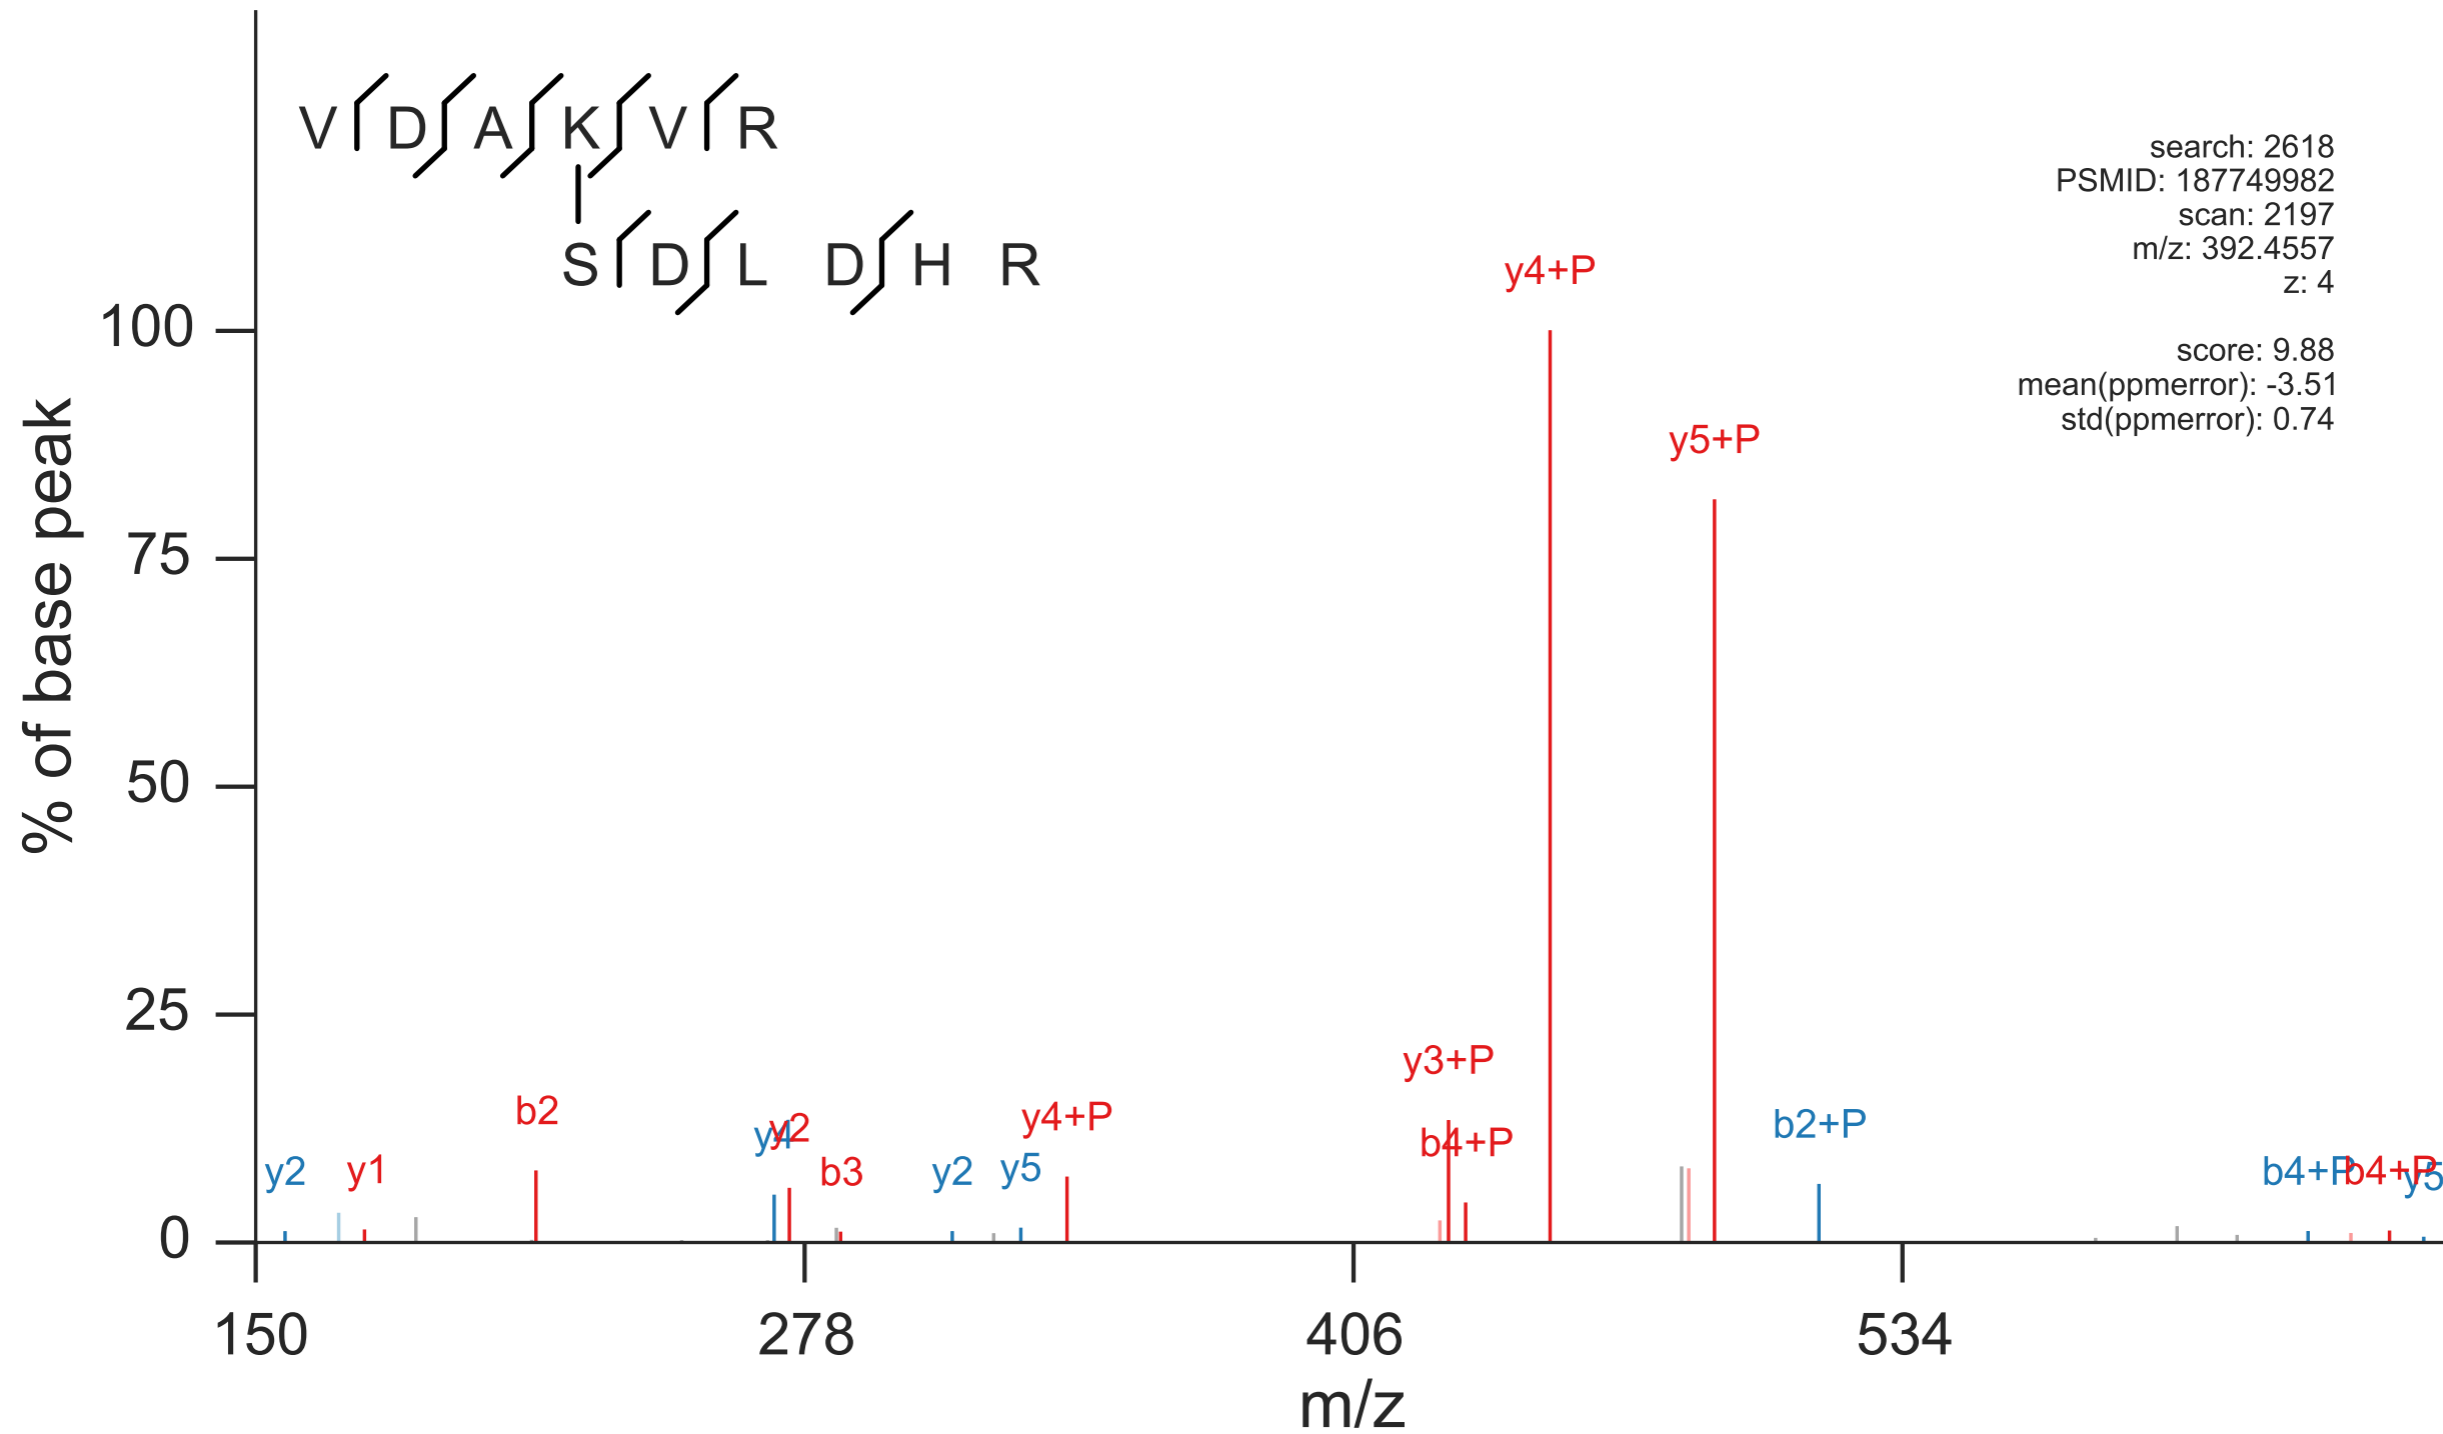

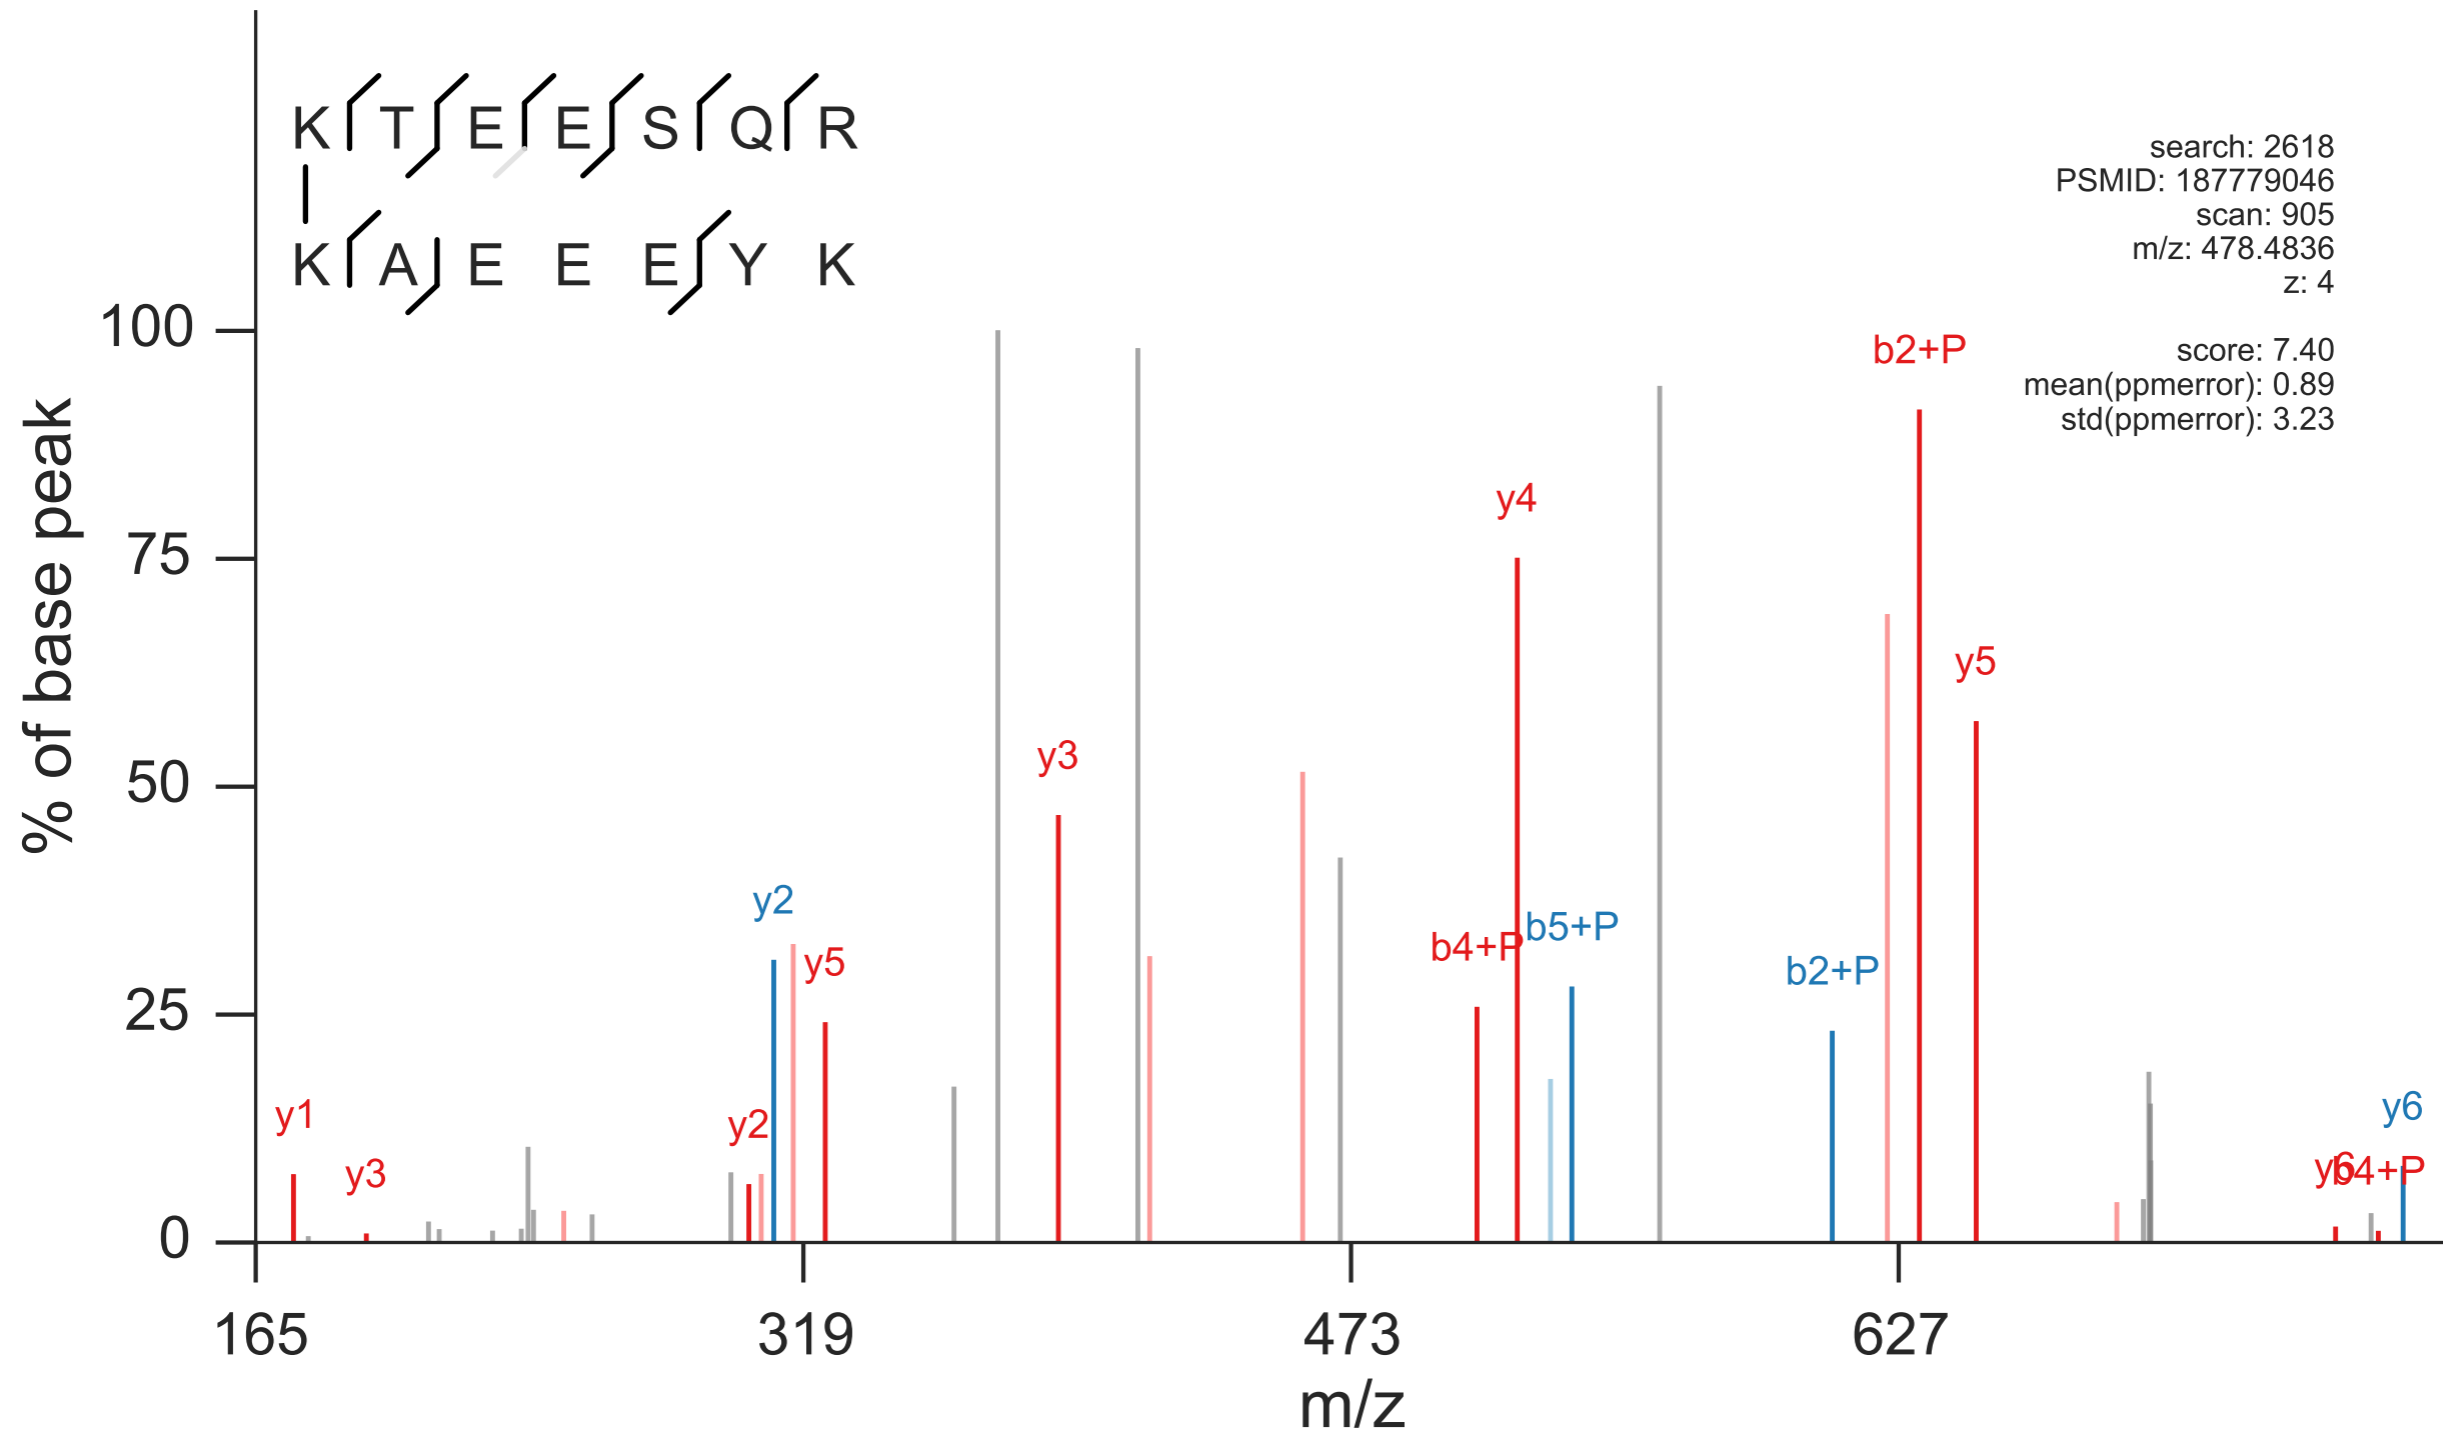

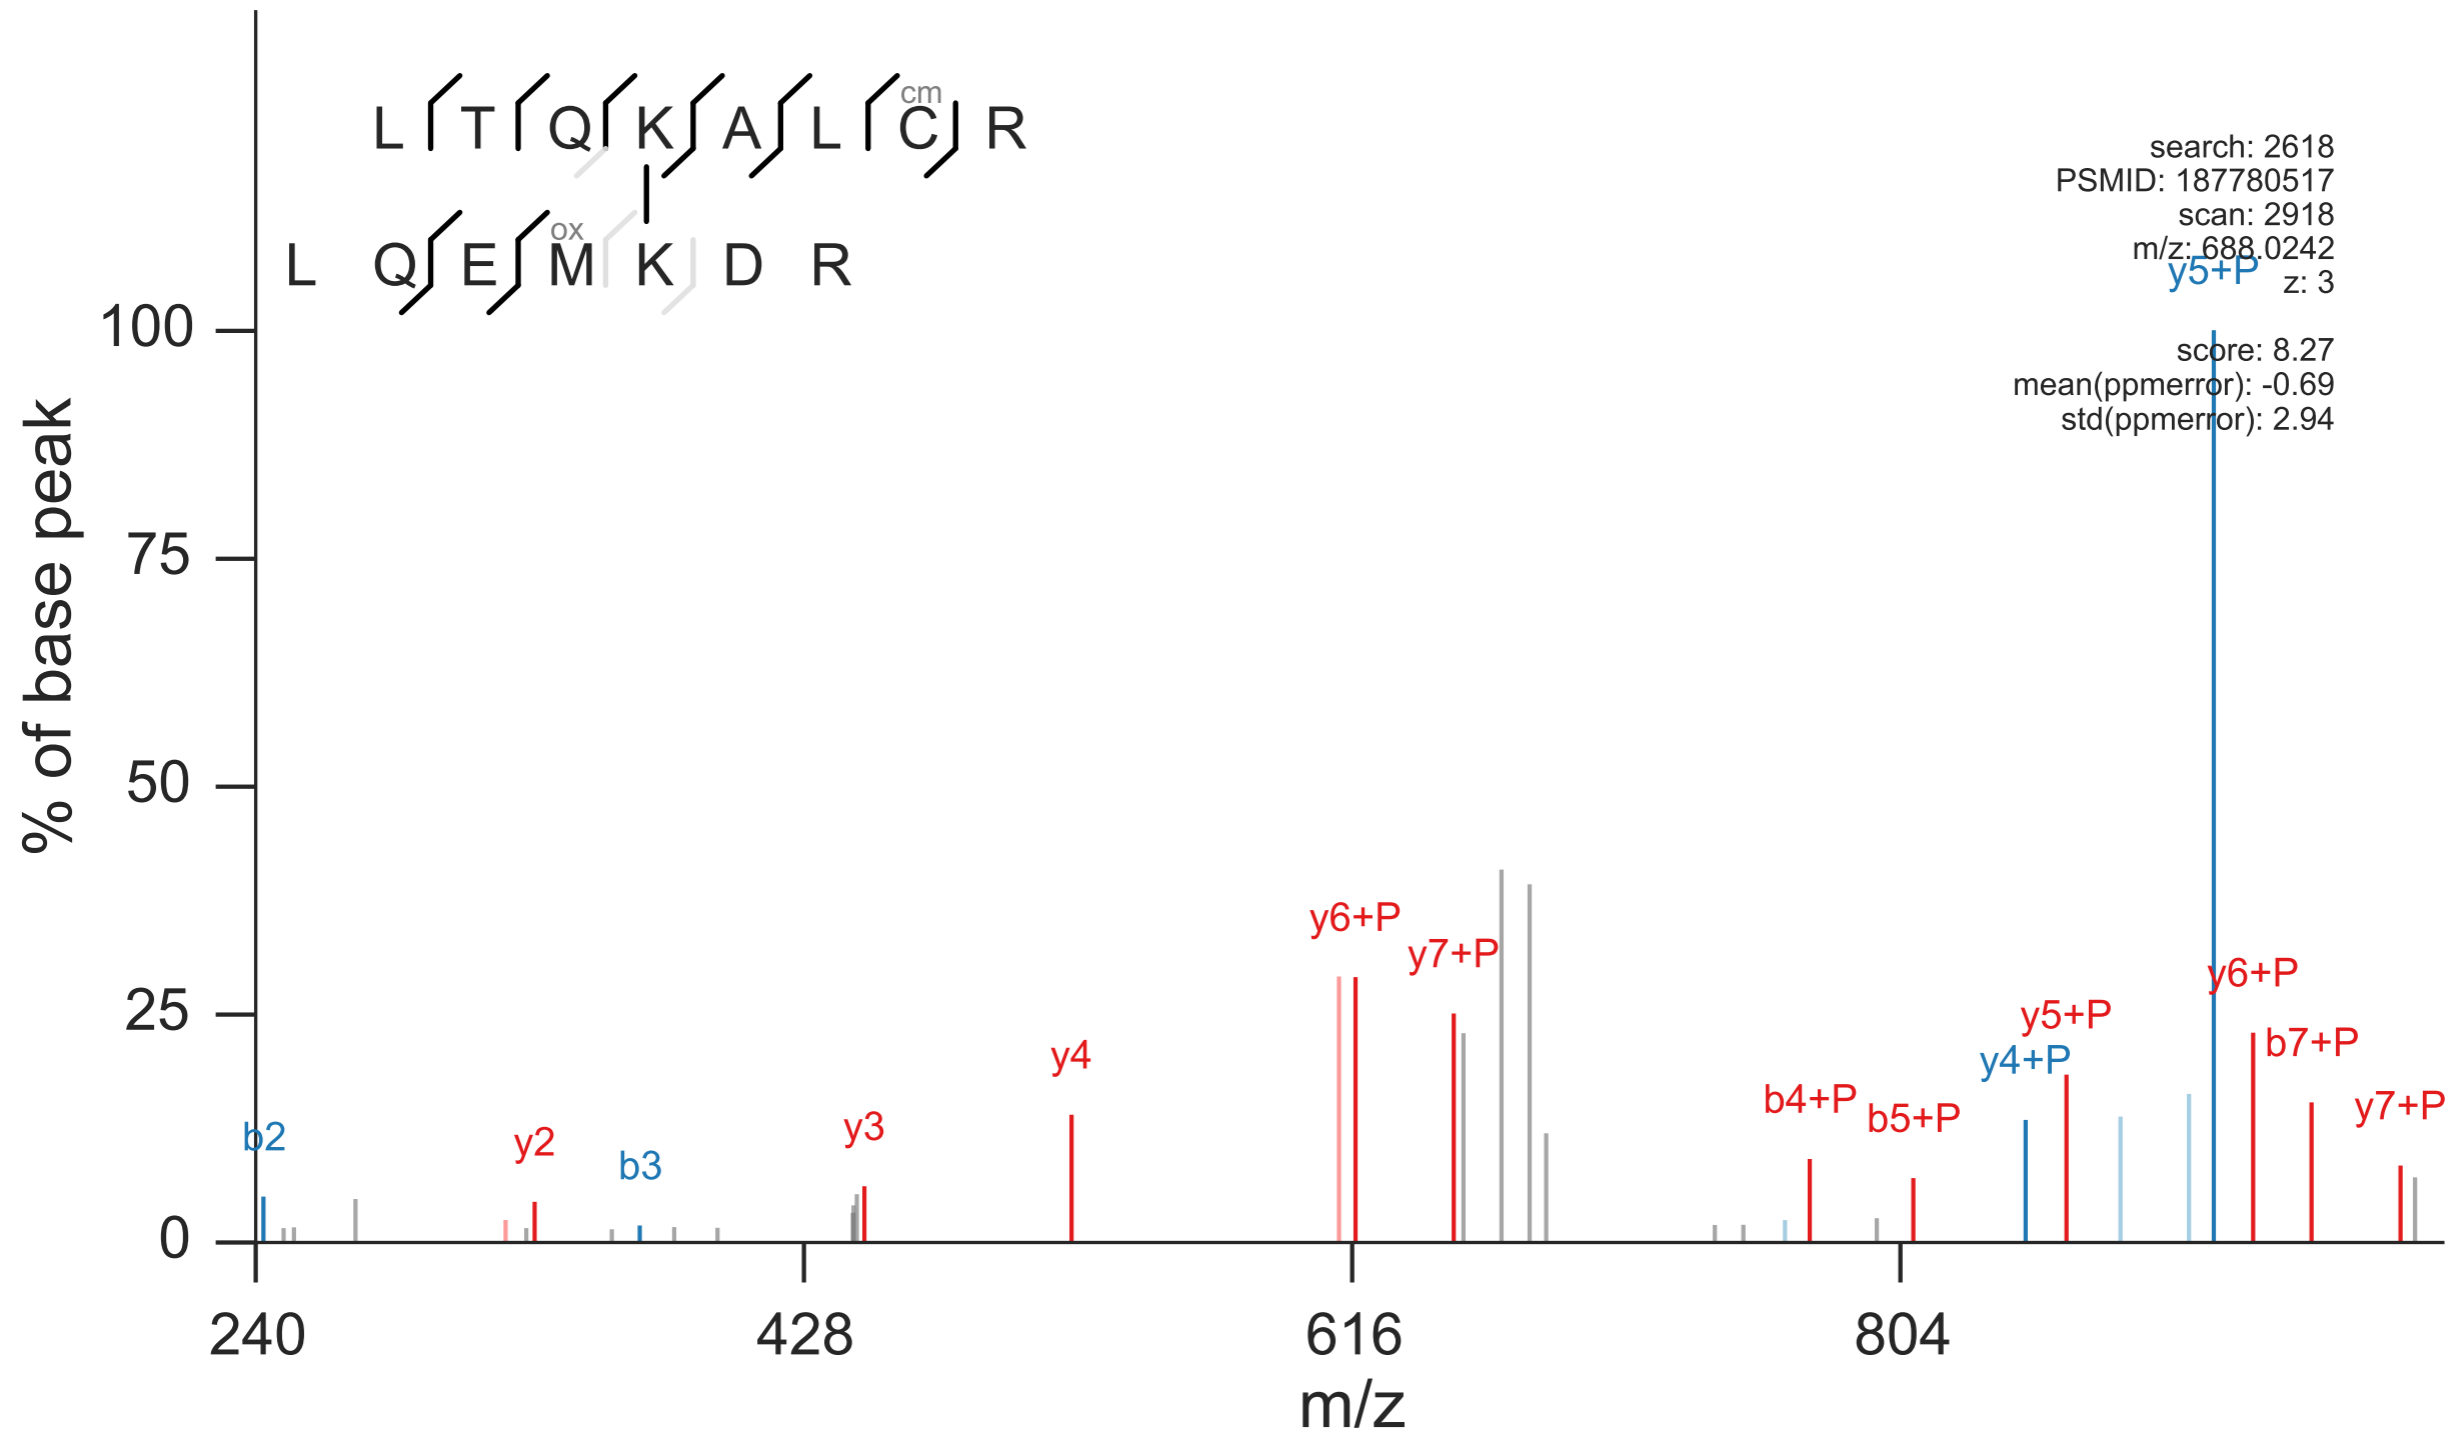

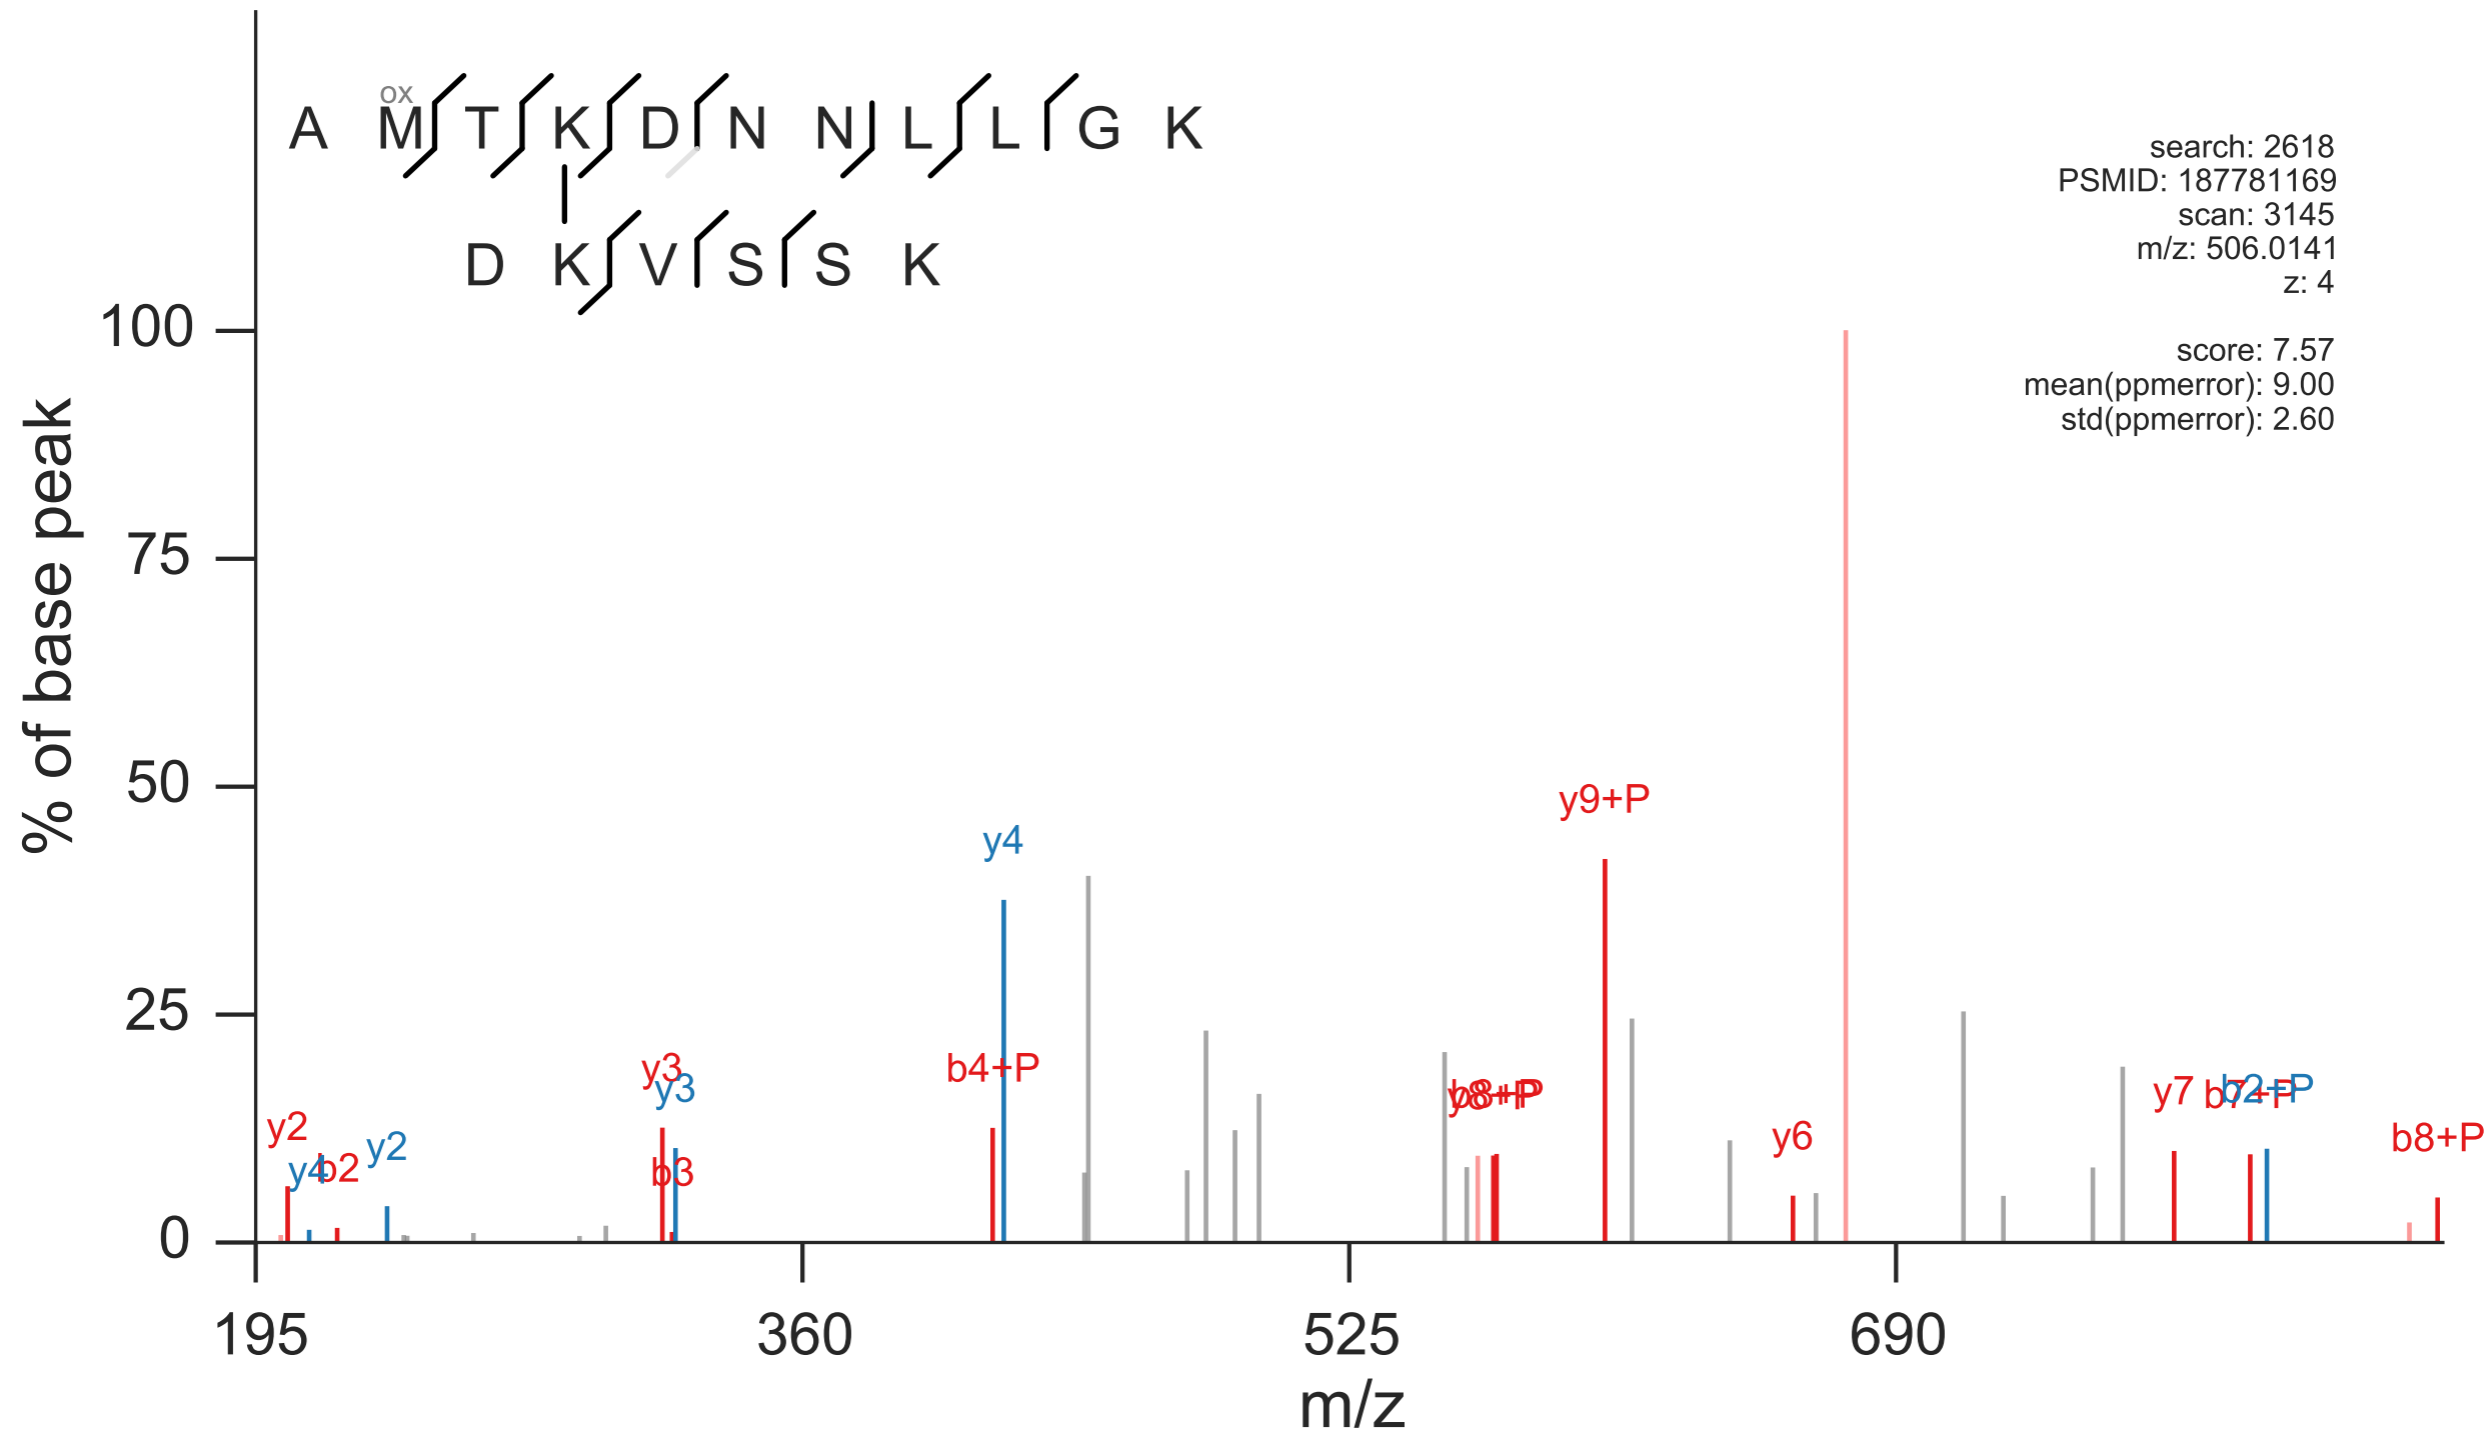

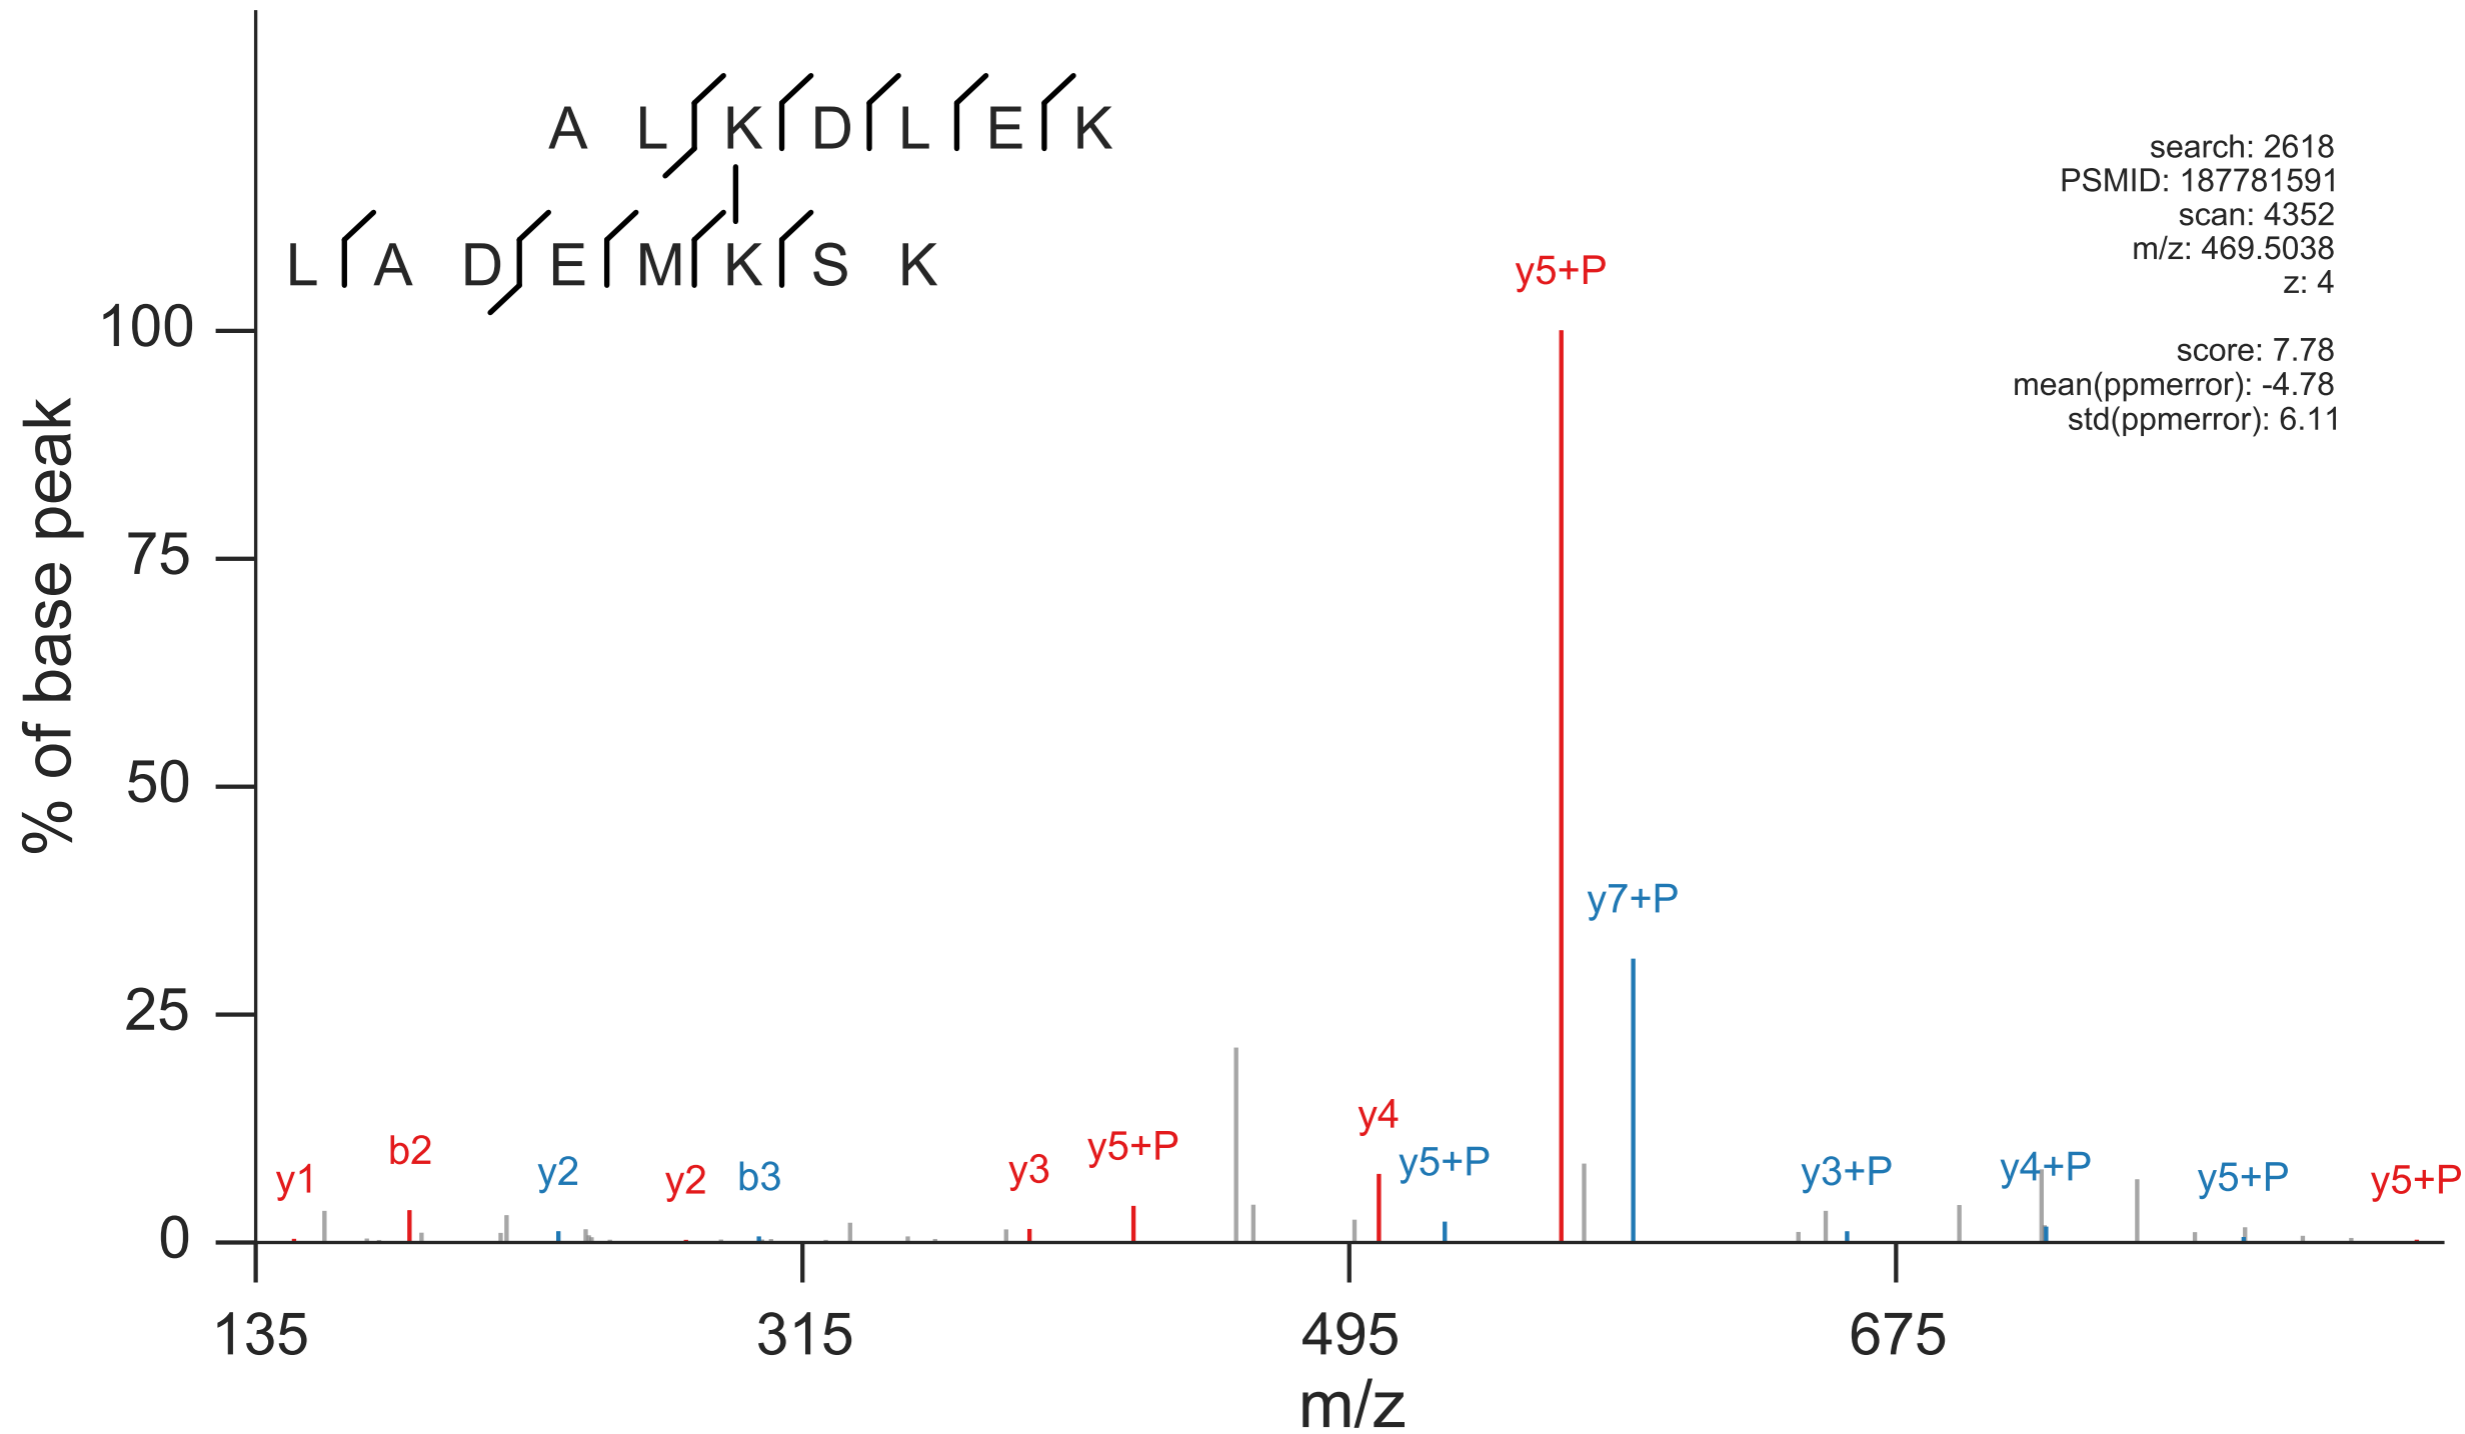

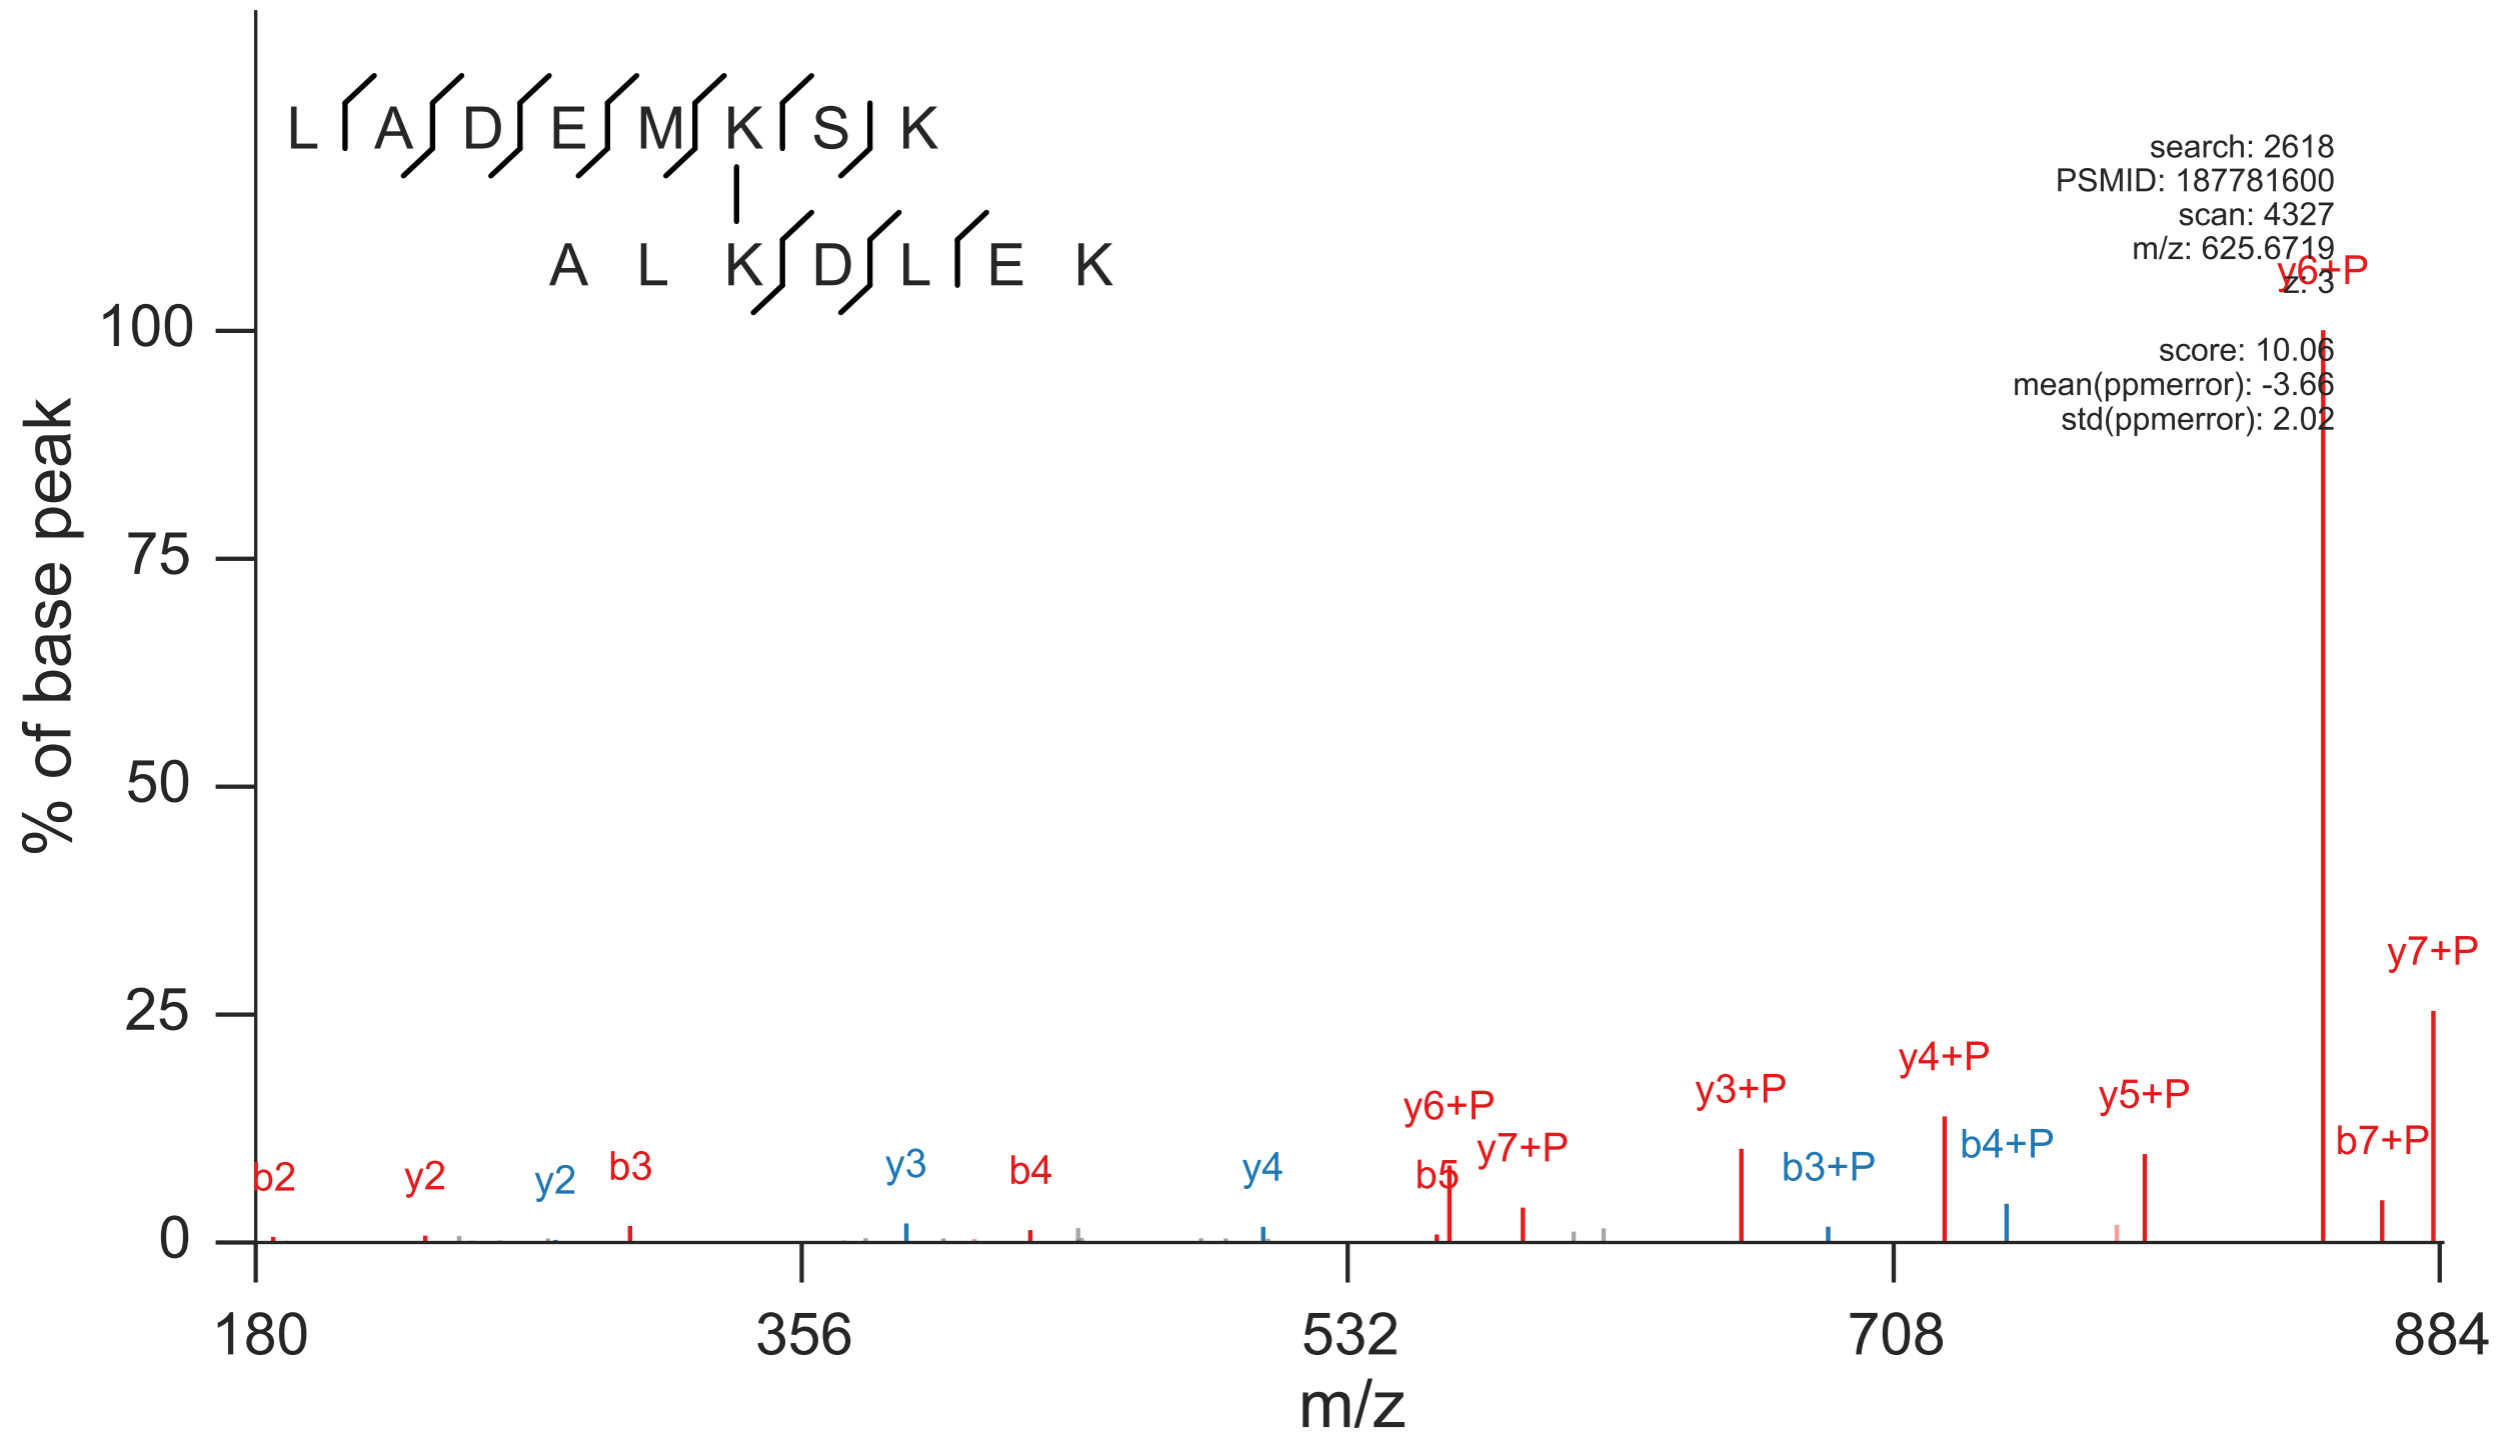



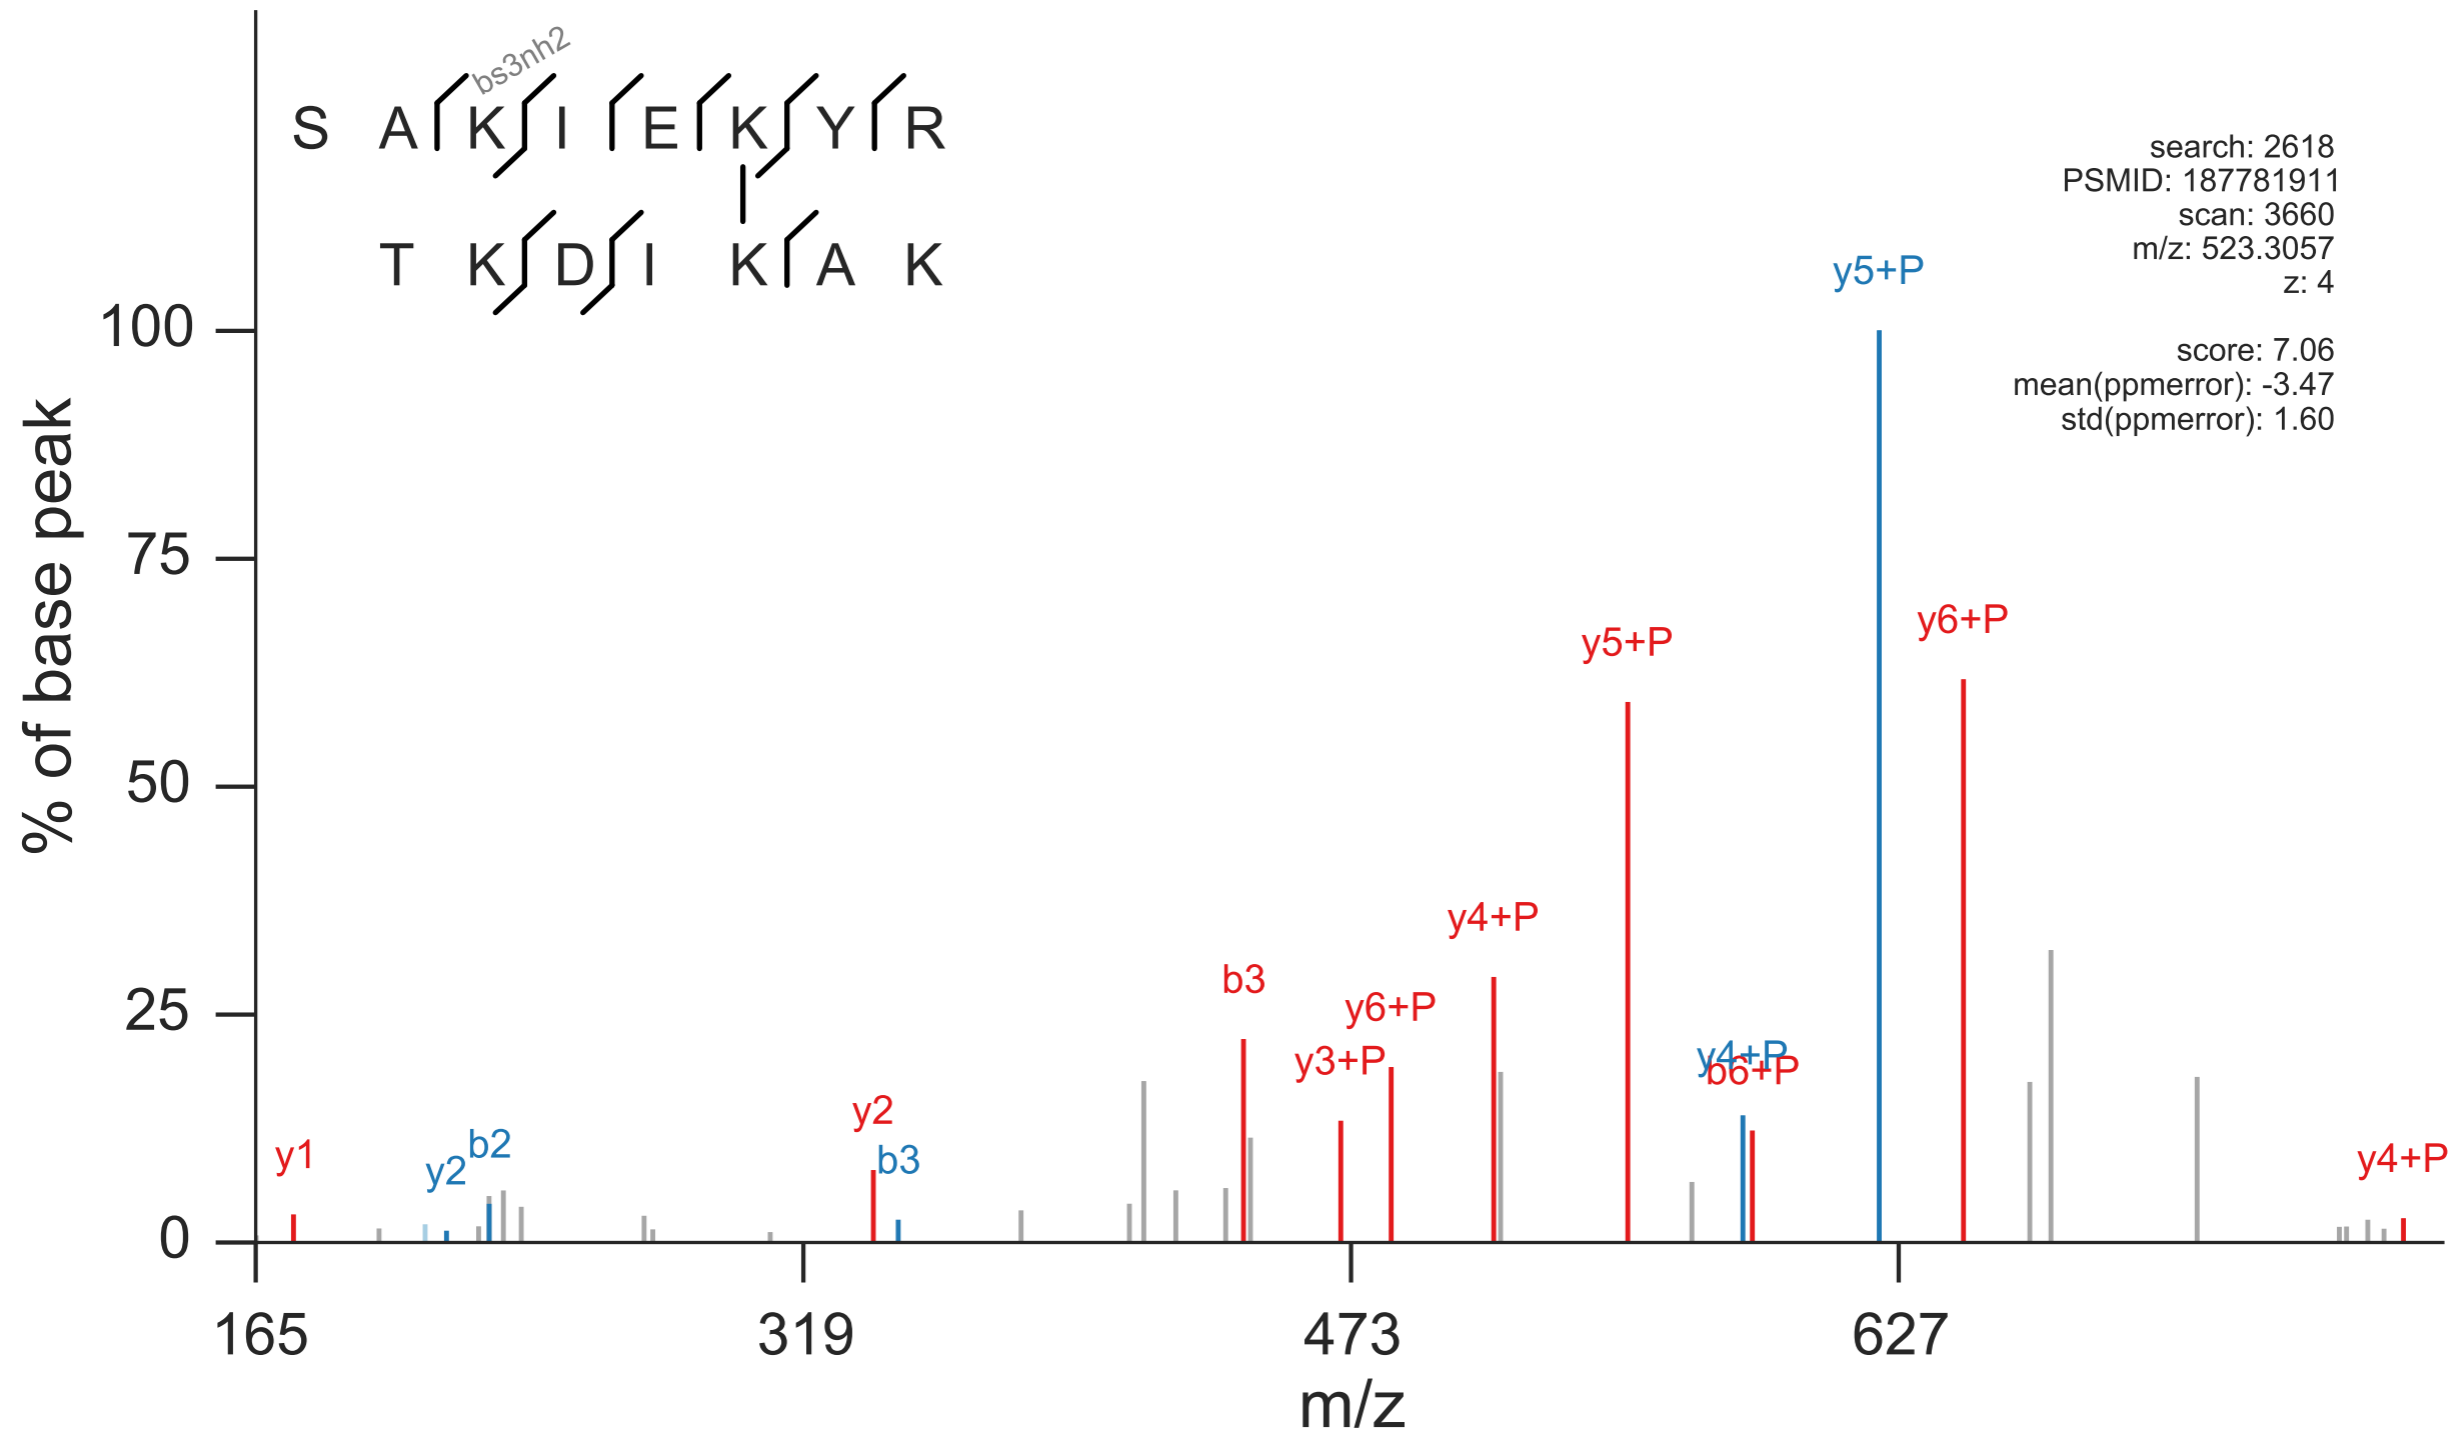

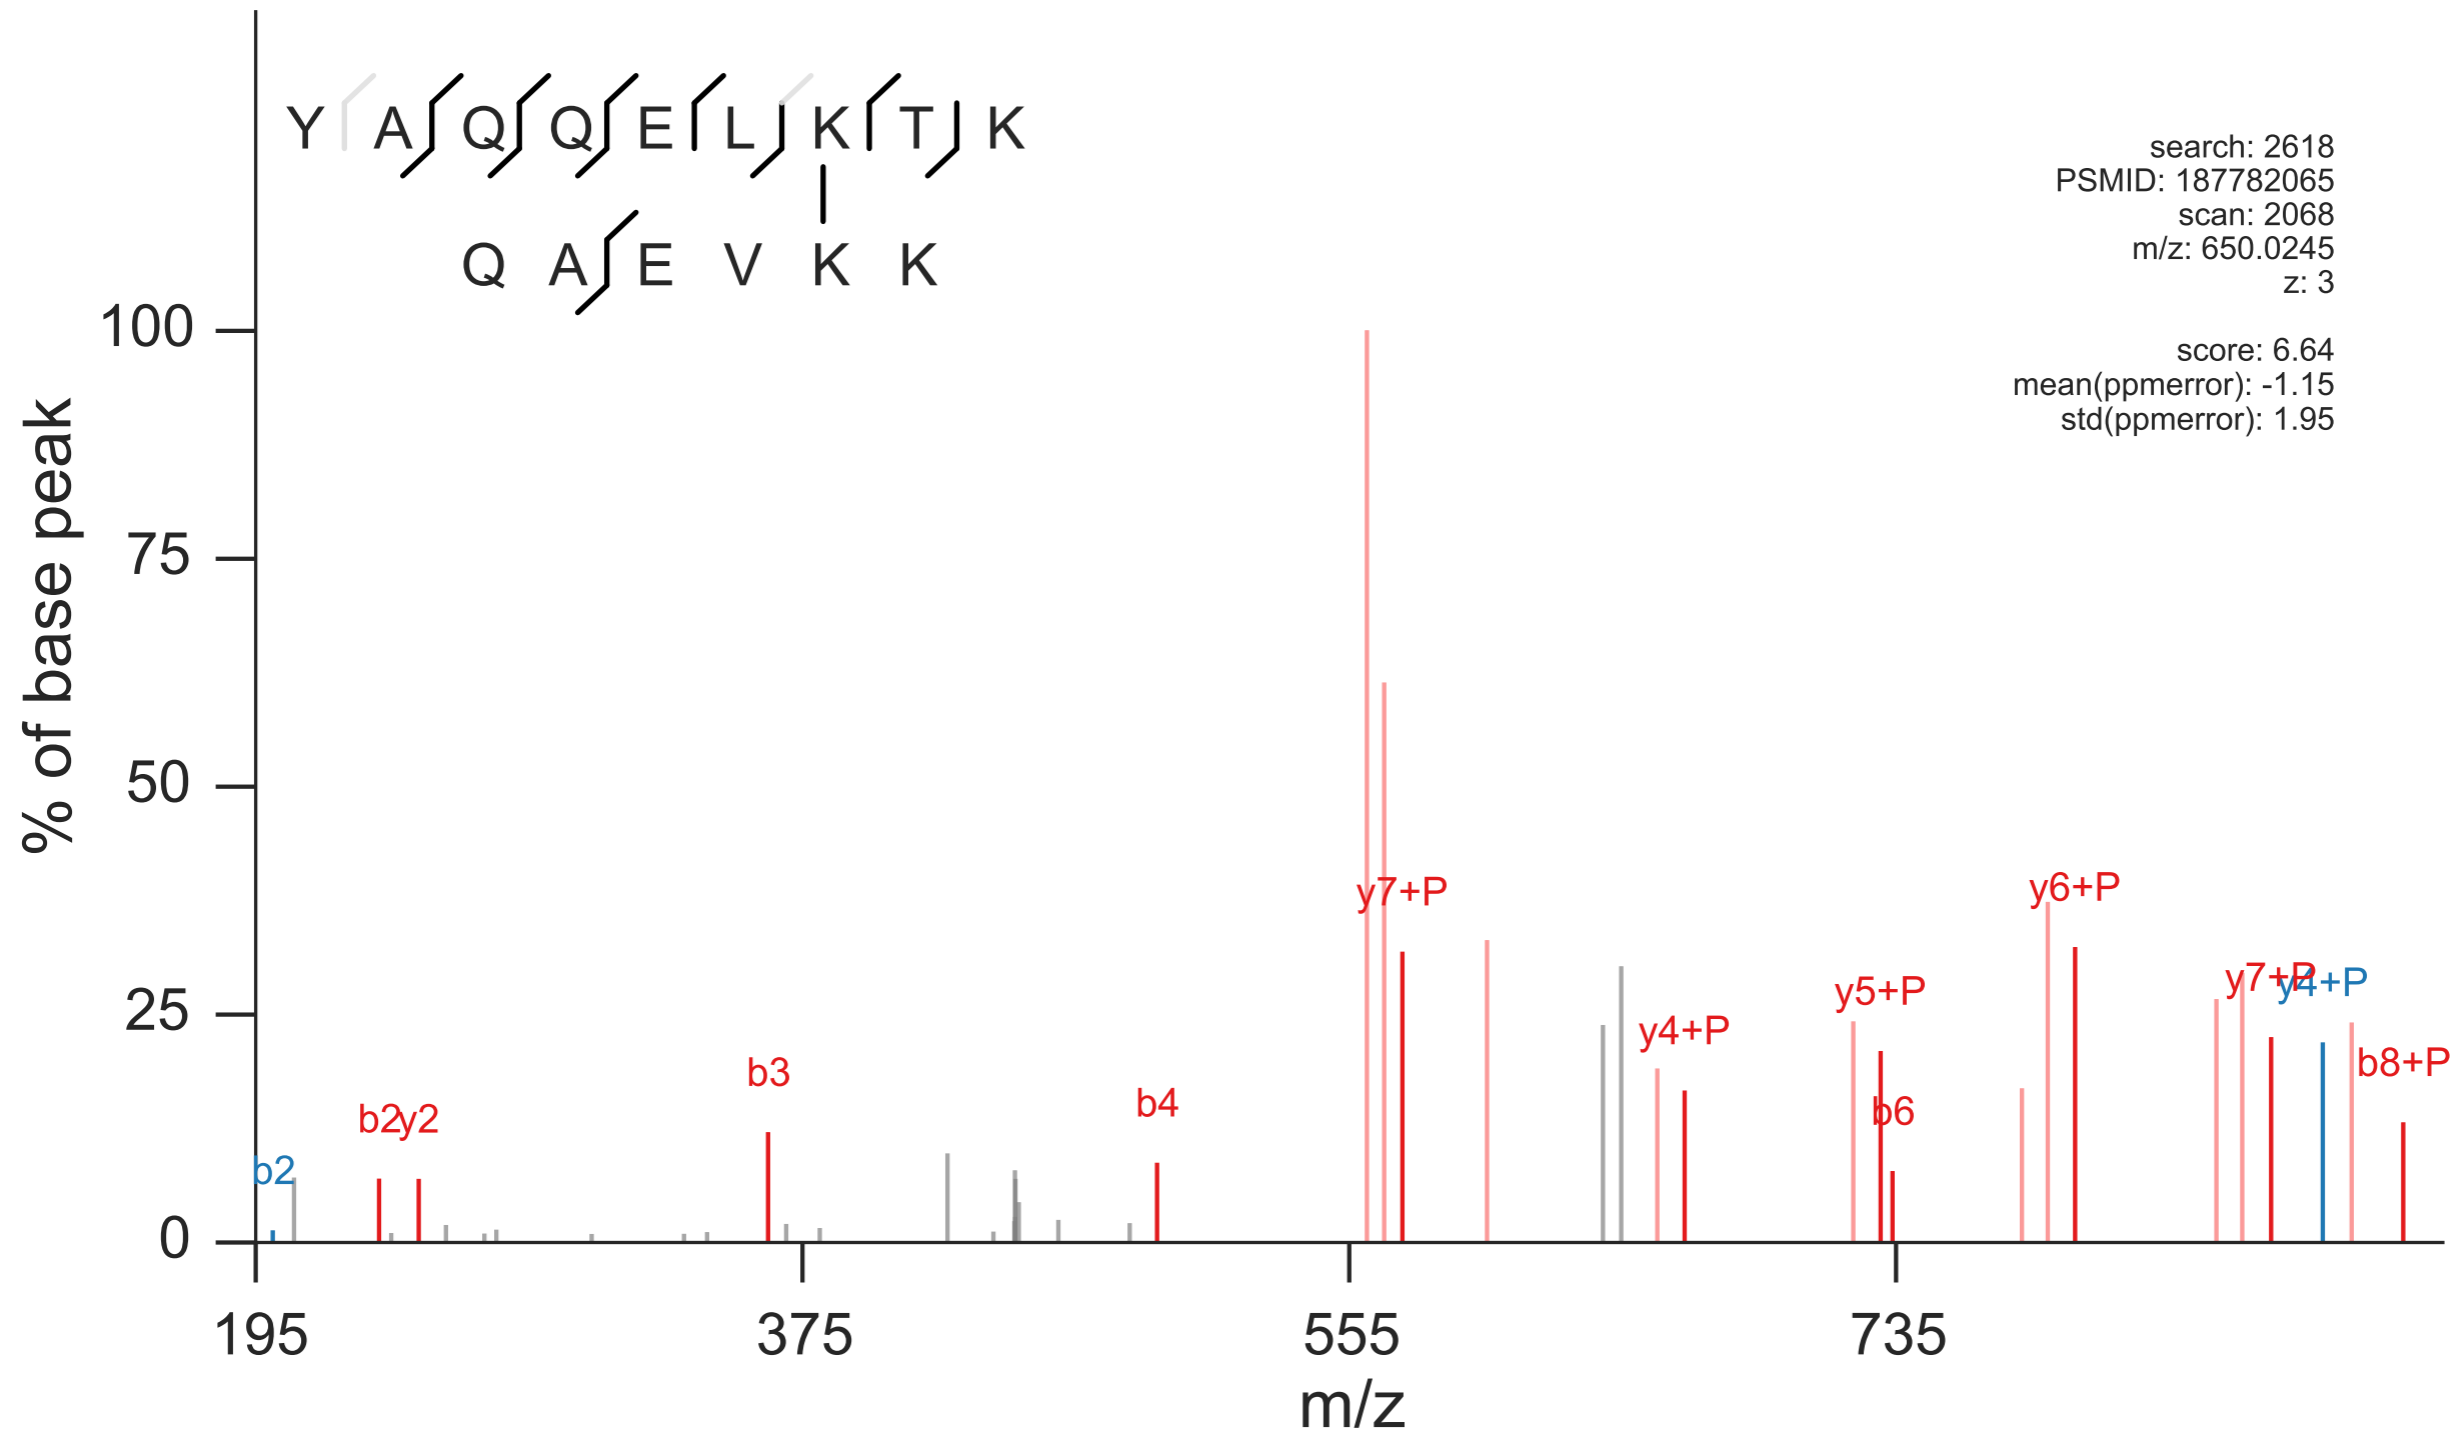

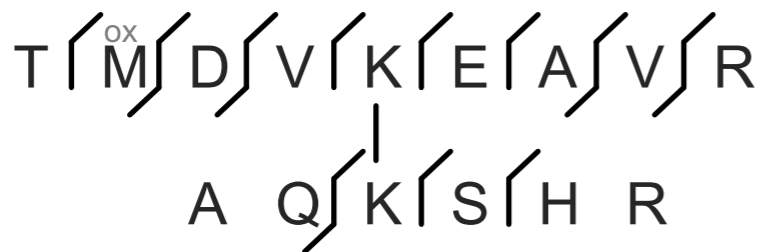

search: 2618  
 PSMID: 187783563  
 scan: 1582  
 m/z: 482.7508  
 z: 4  
 score: 9.35  
 mean(ppmerror): 0.72  
 std(ppmerror): 4.78

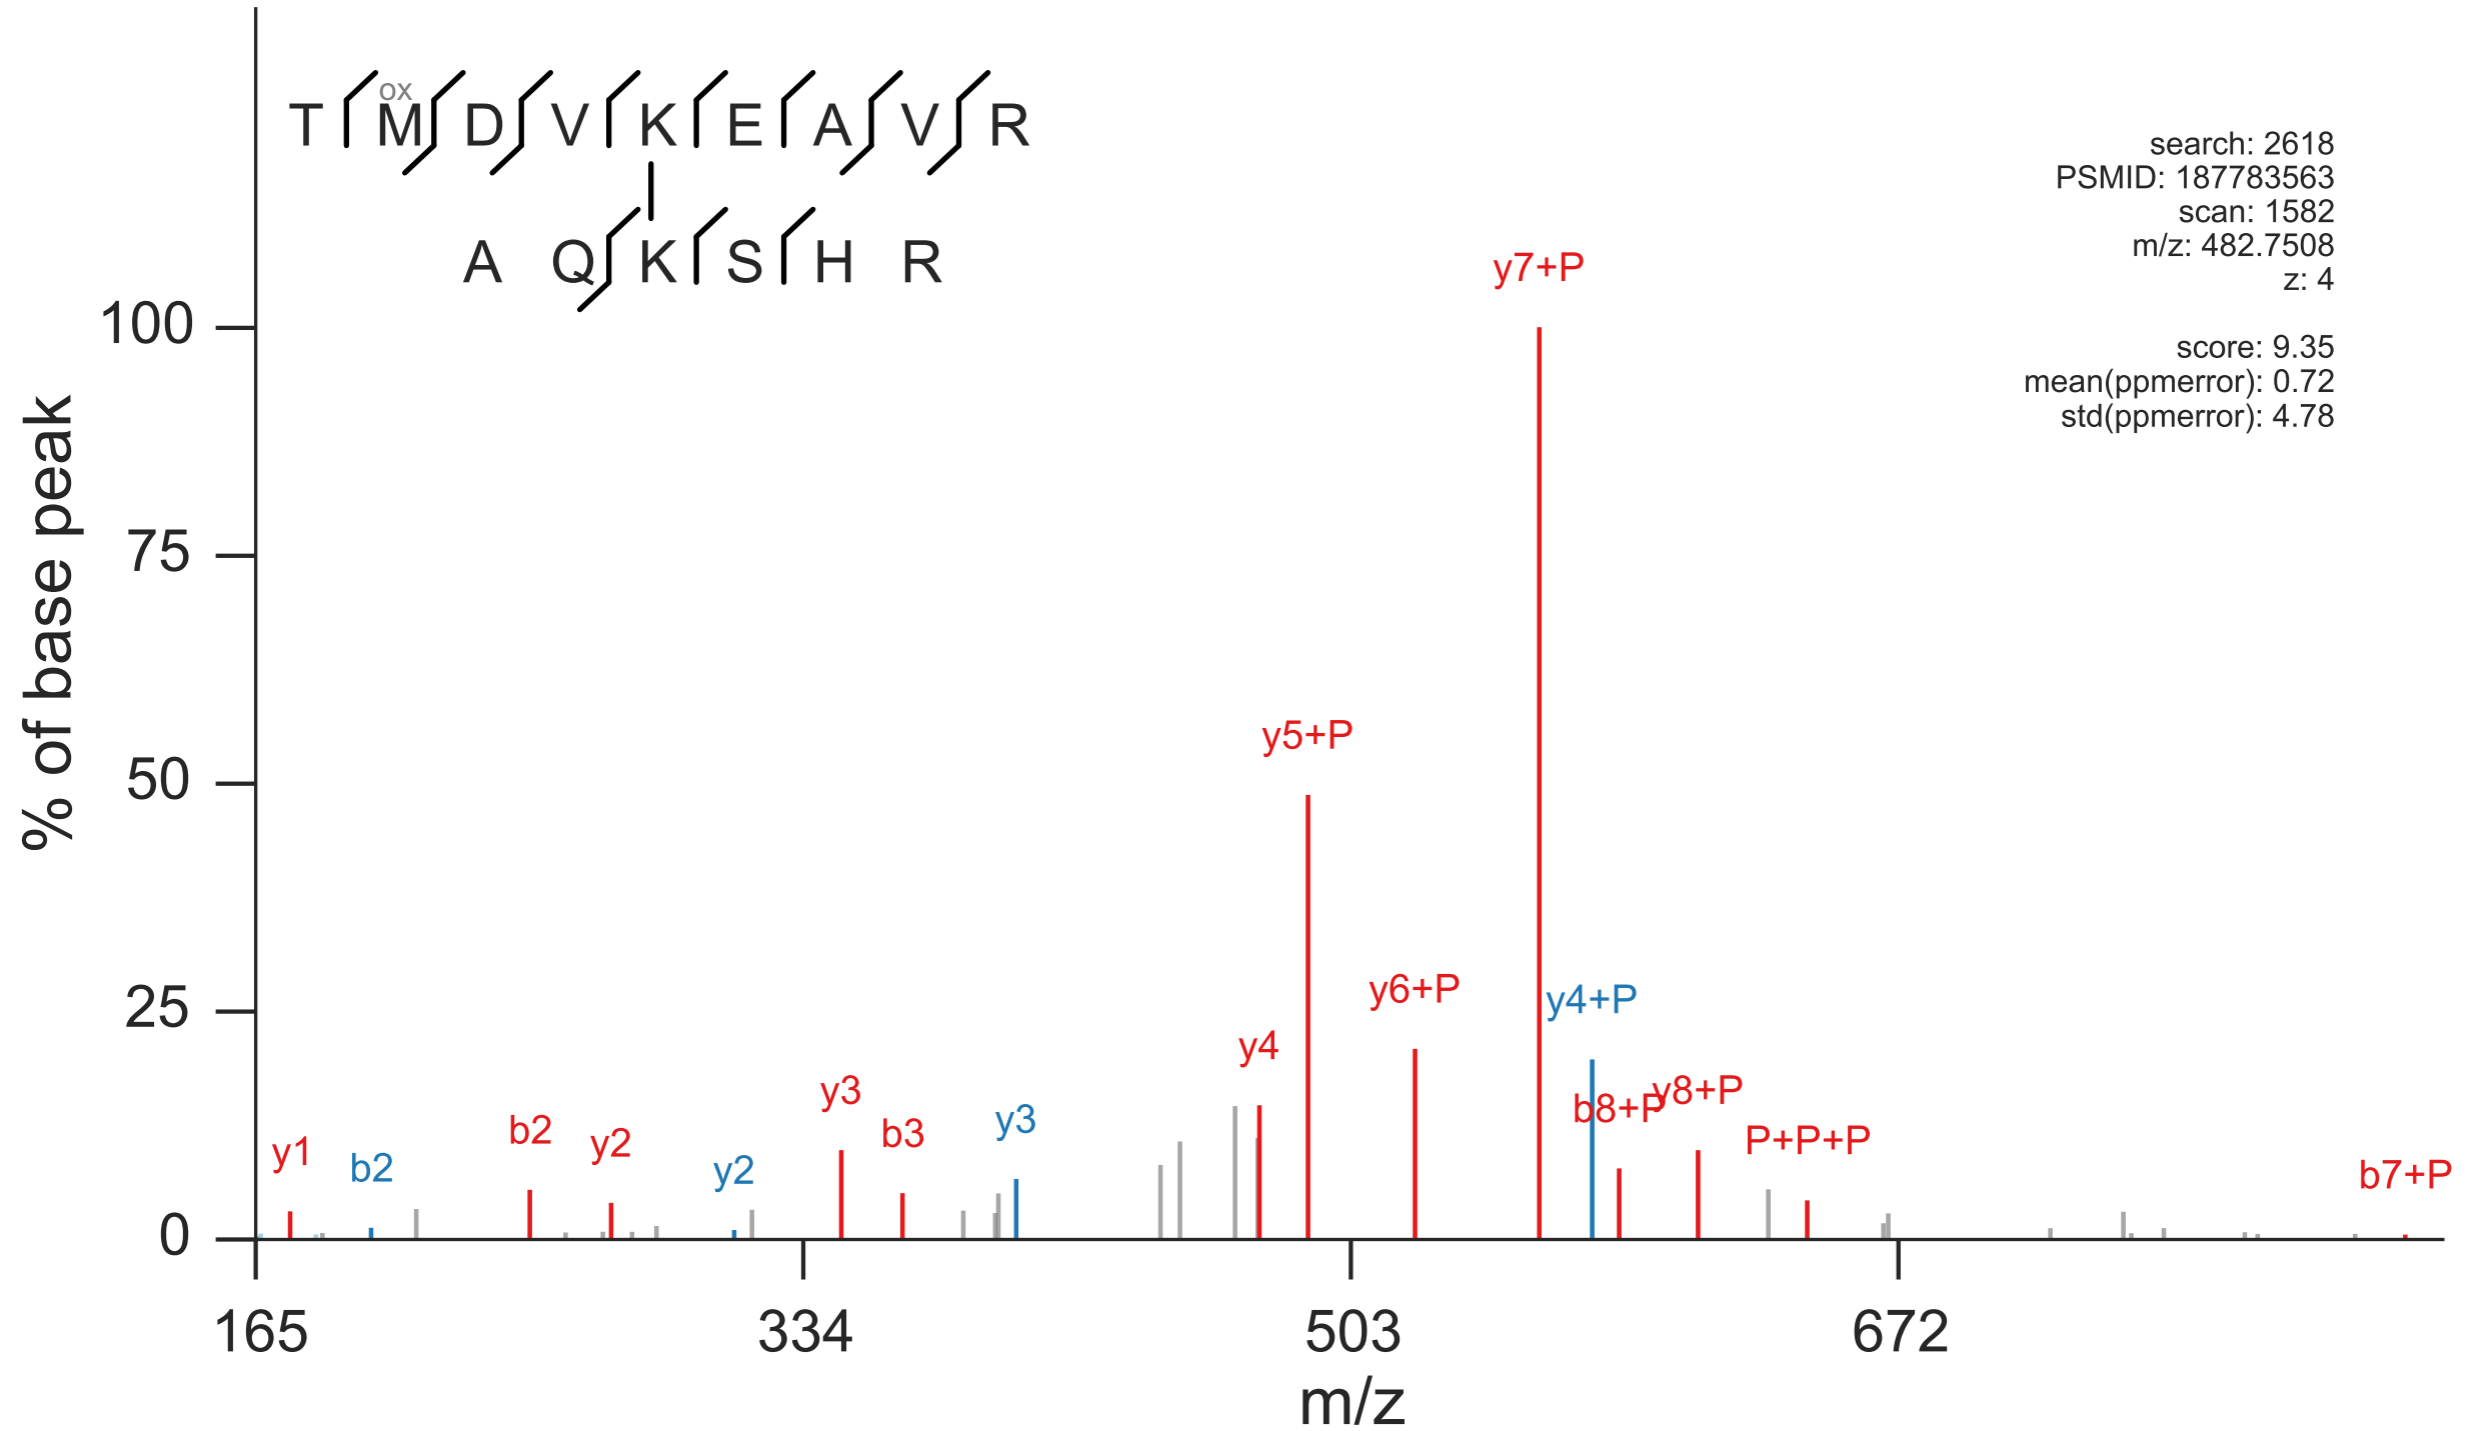

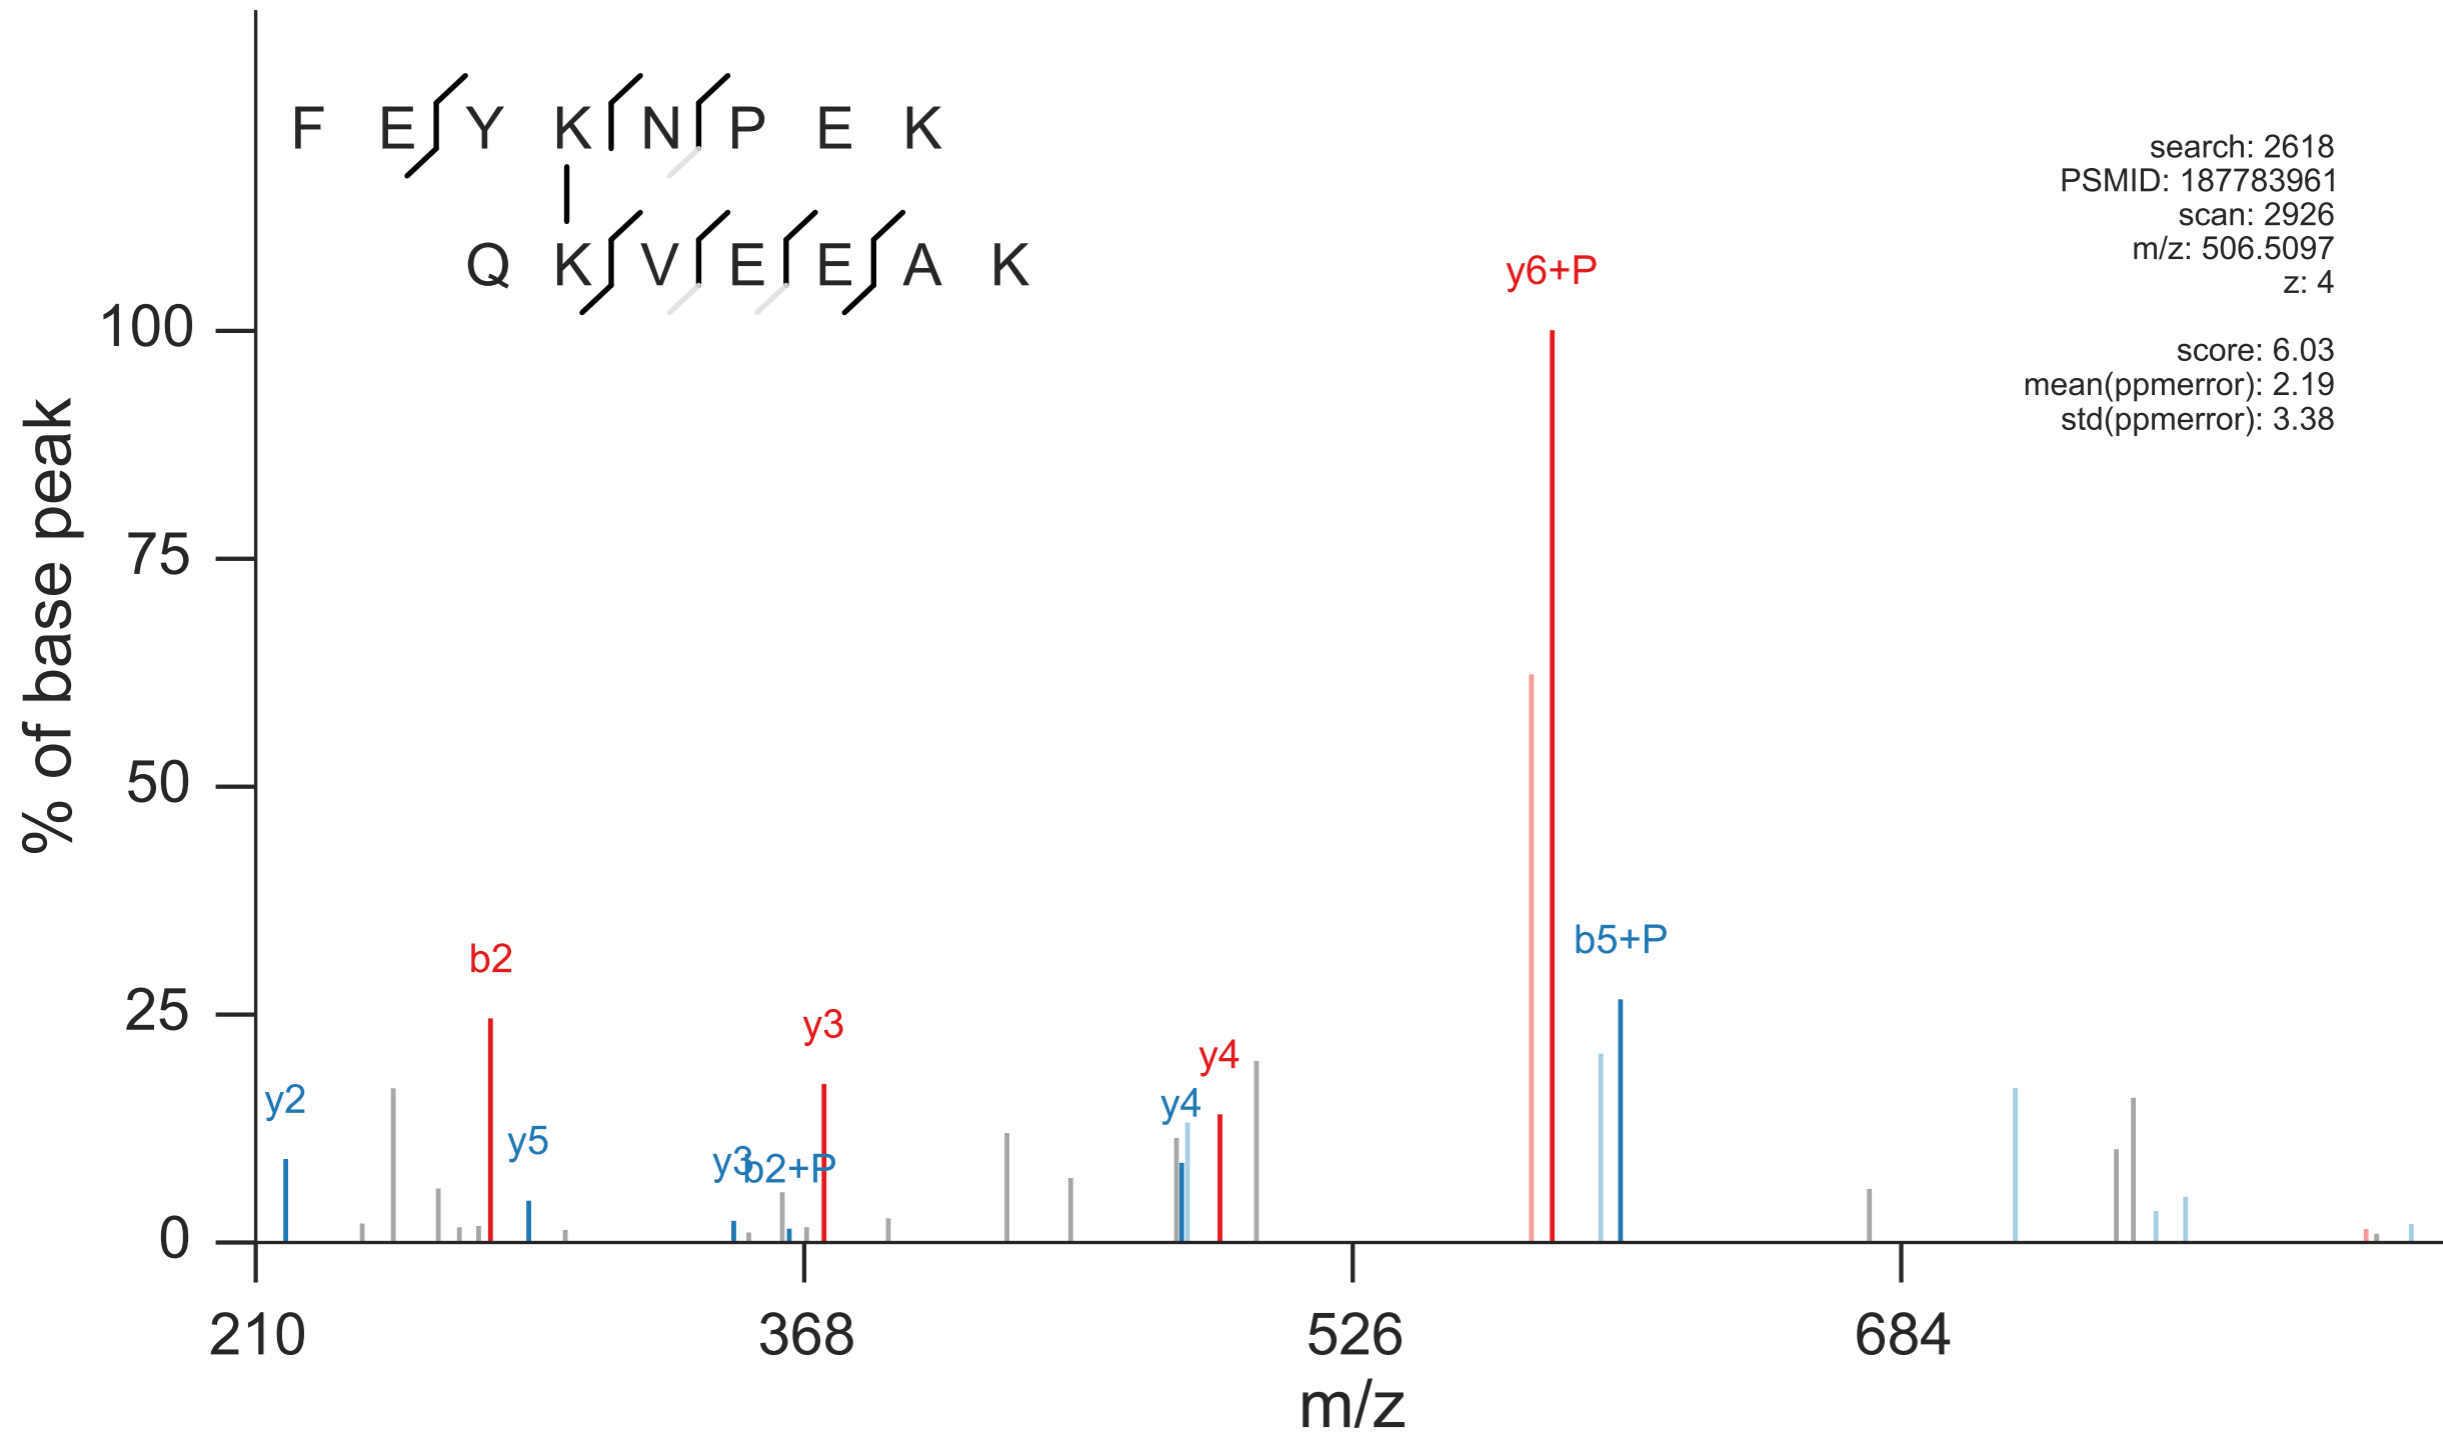

search: 2618  
 PSMID: 187783961  
 scan: 2926  
 m/z: 506.5097  
 z: 4  
 score: 6.03  
 mean(ppmerror): 2.19  
 std(ppmerror): 3.38

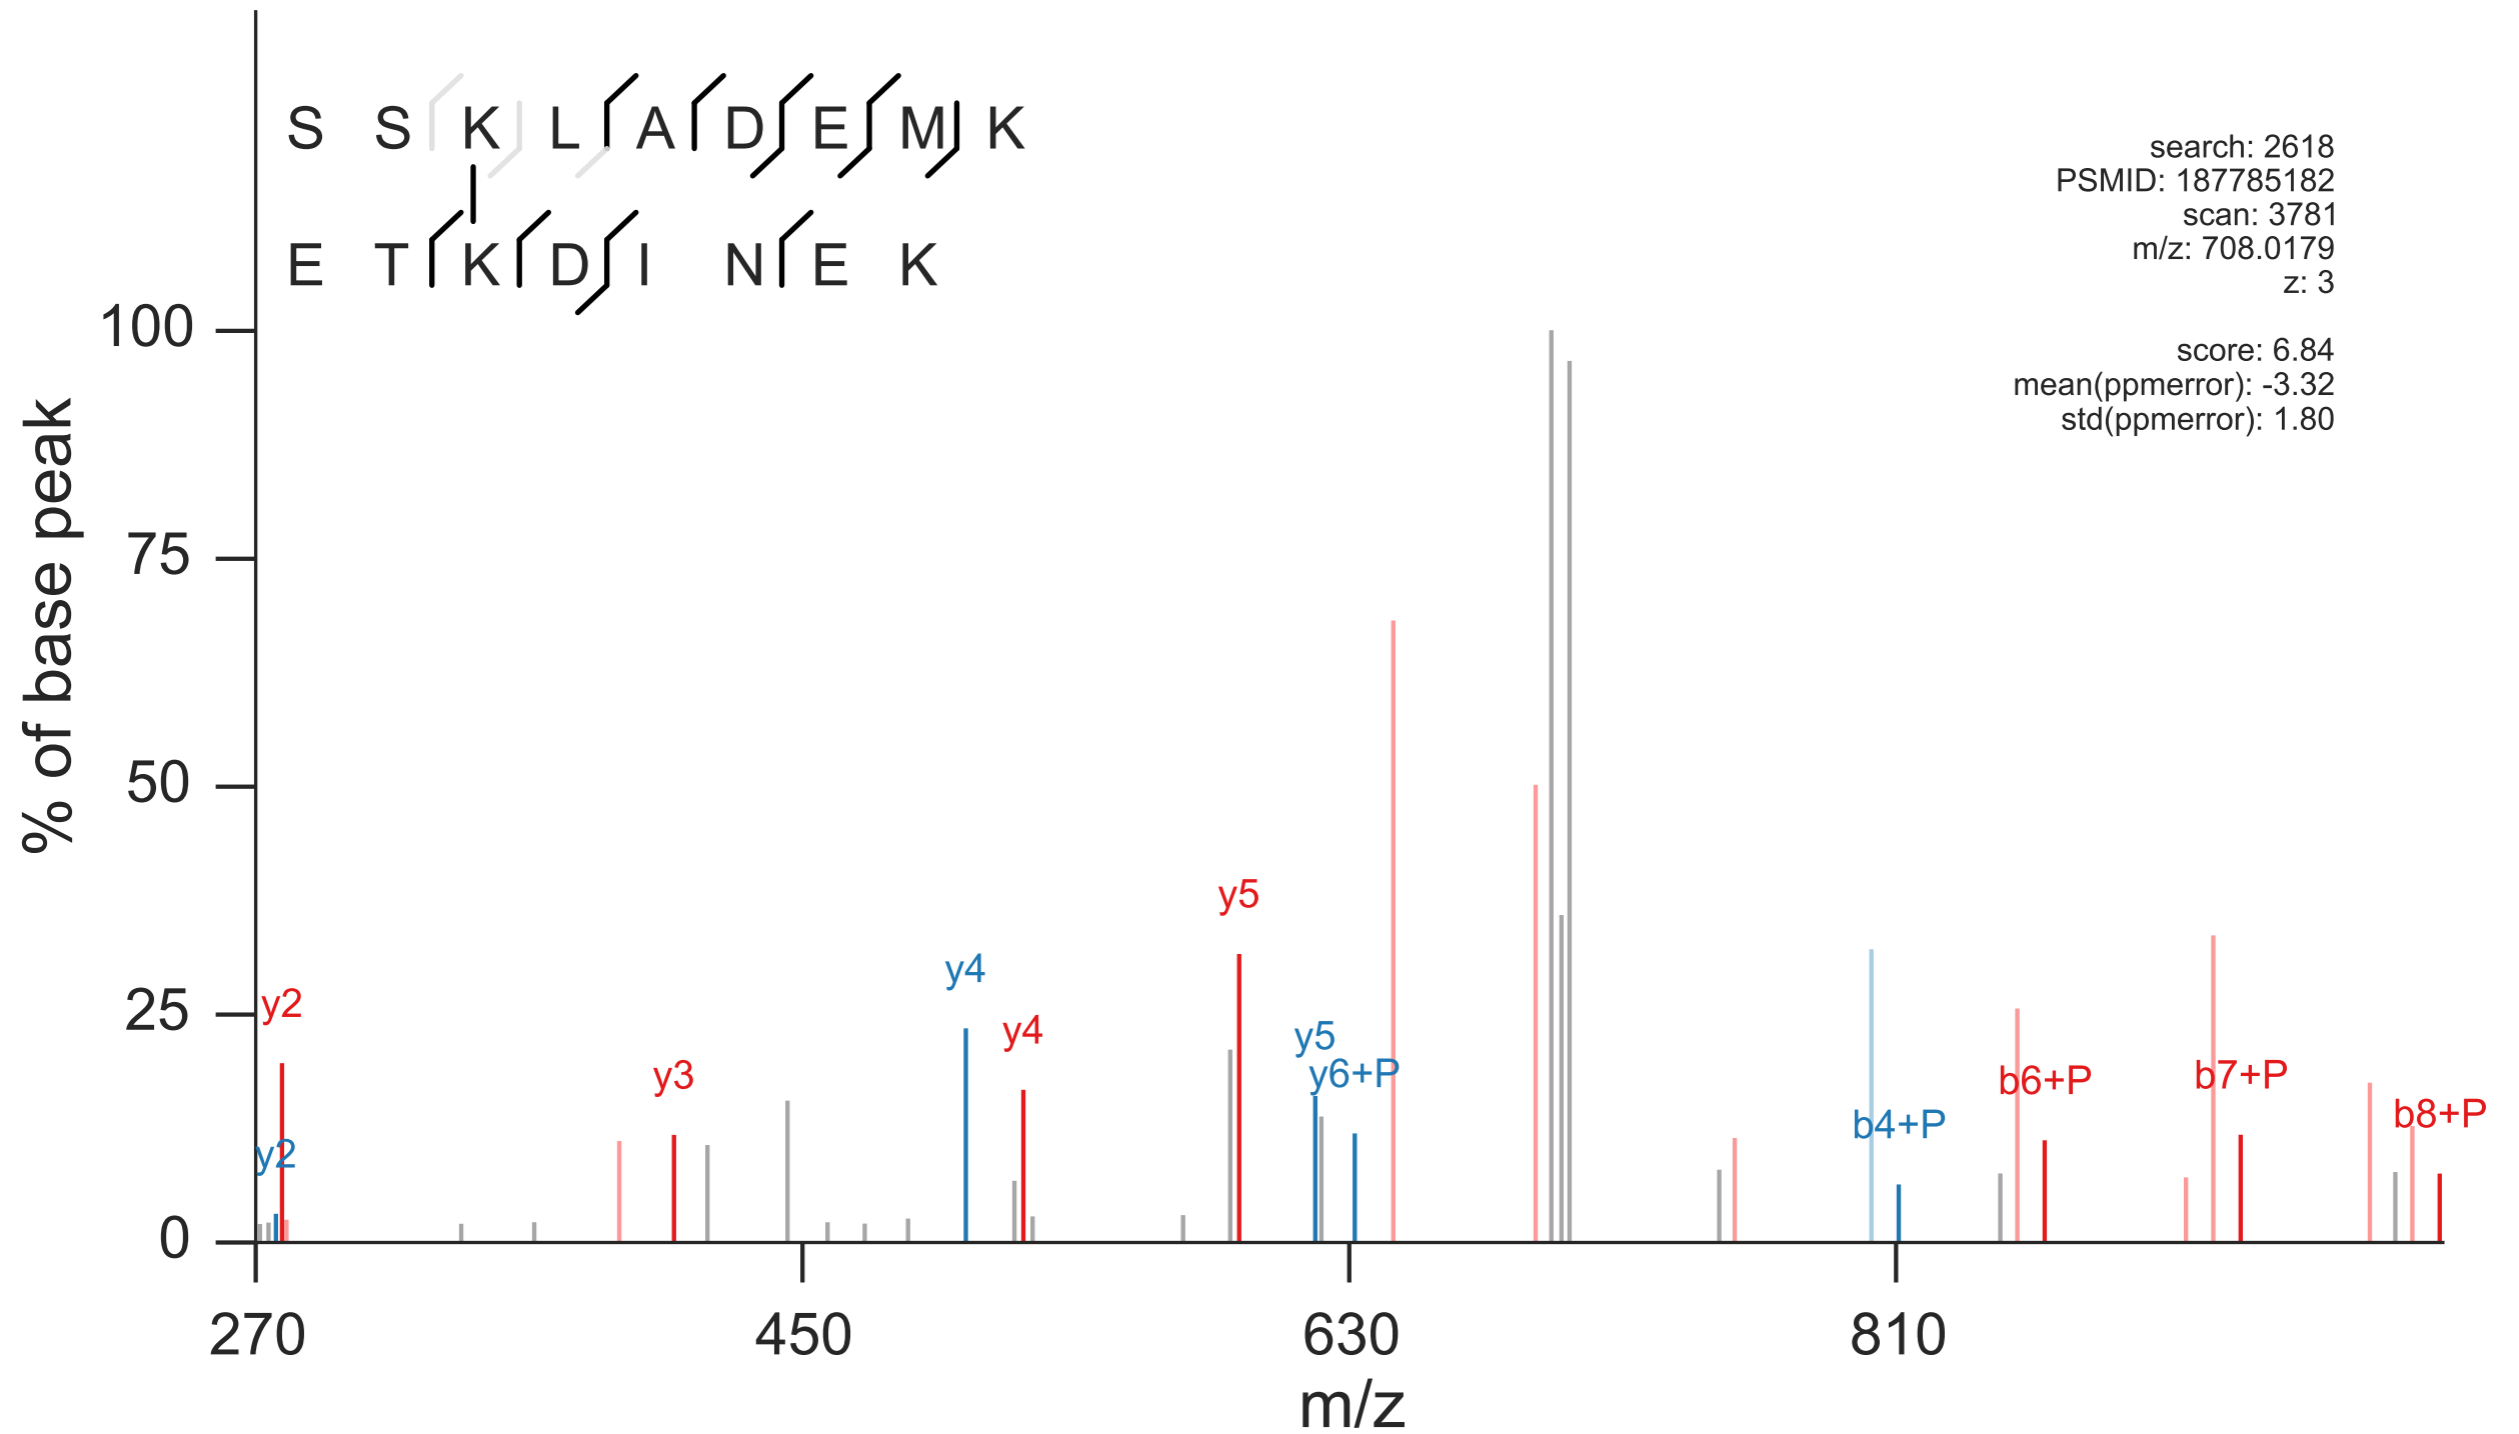

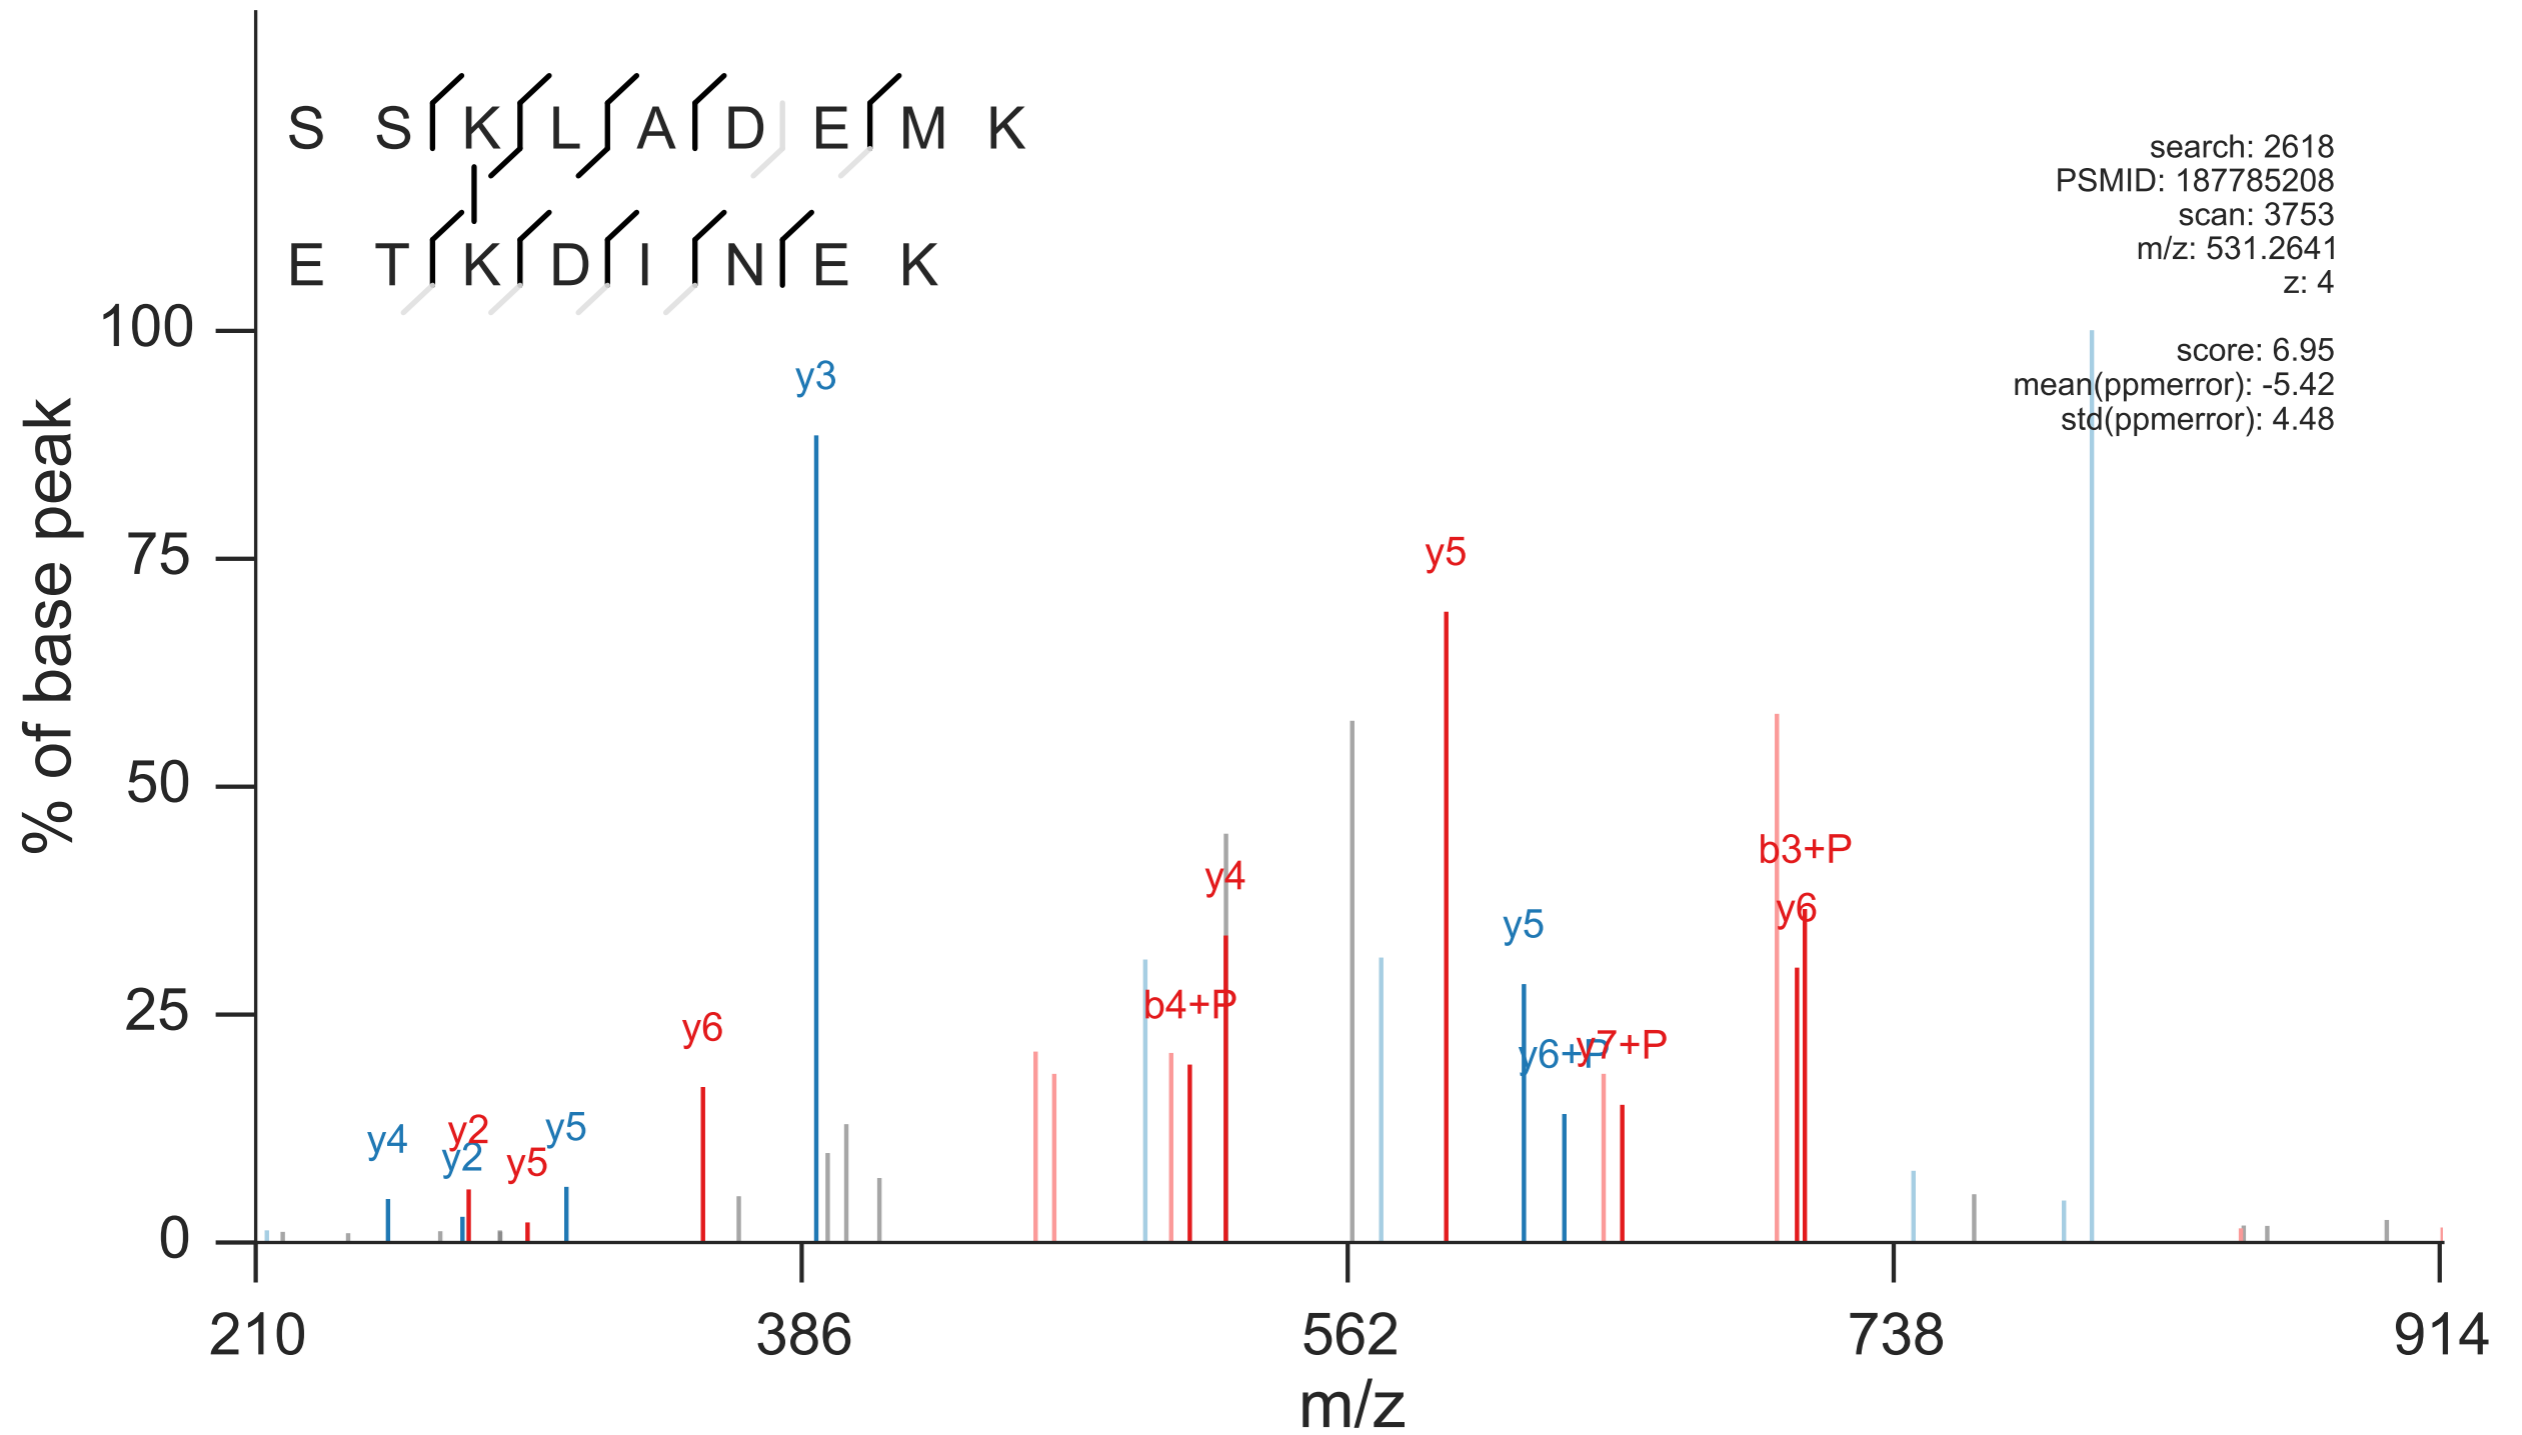

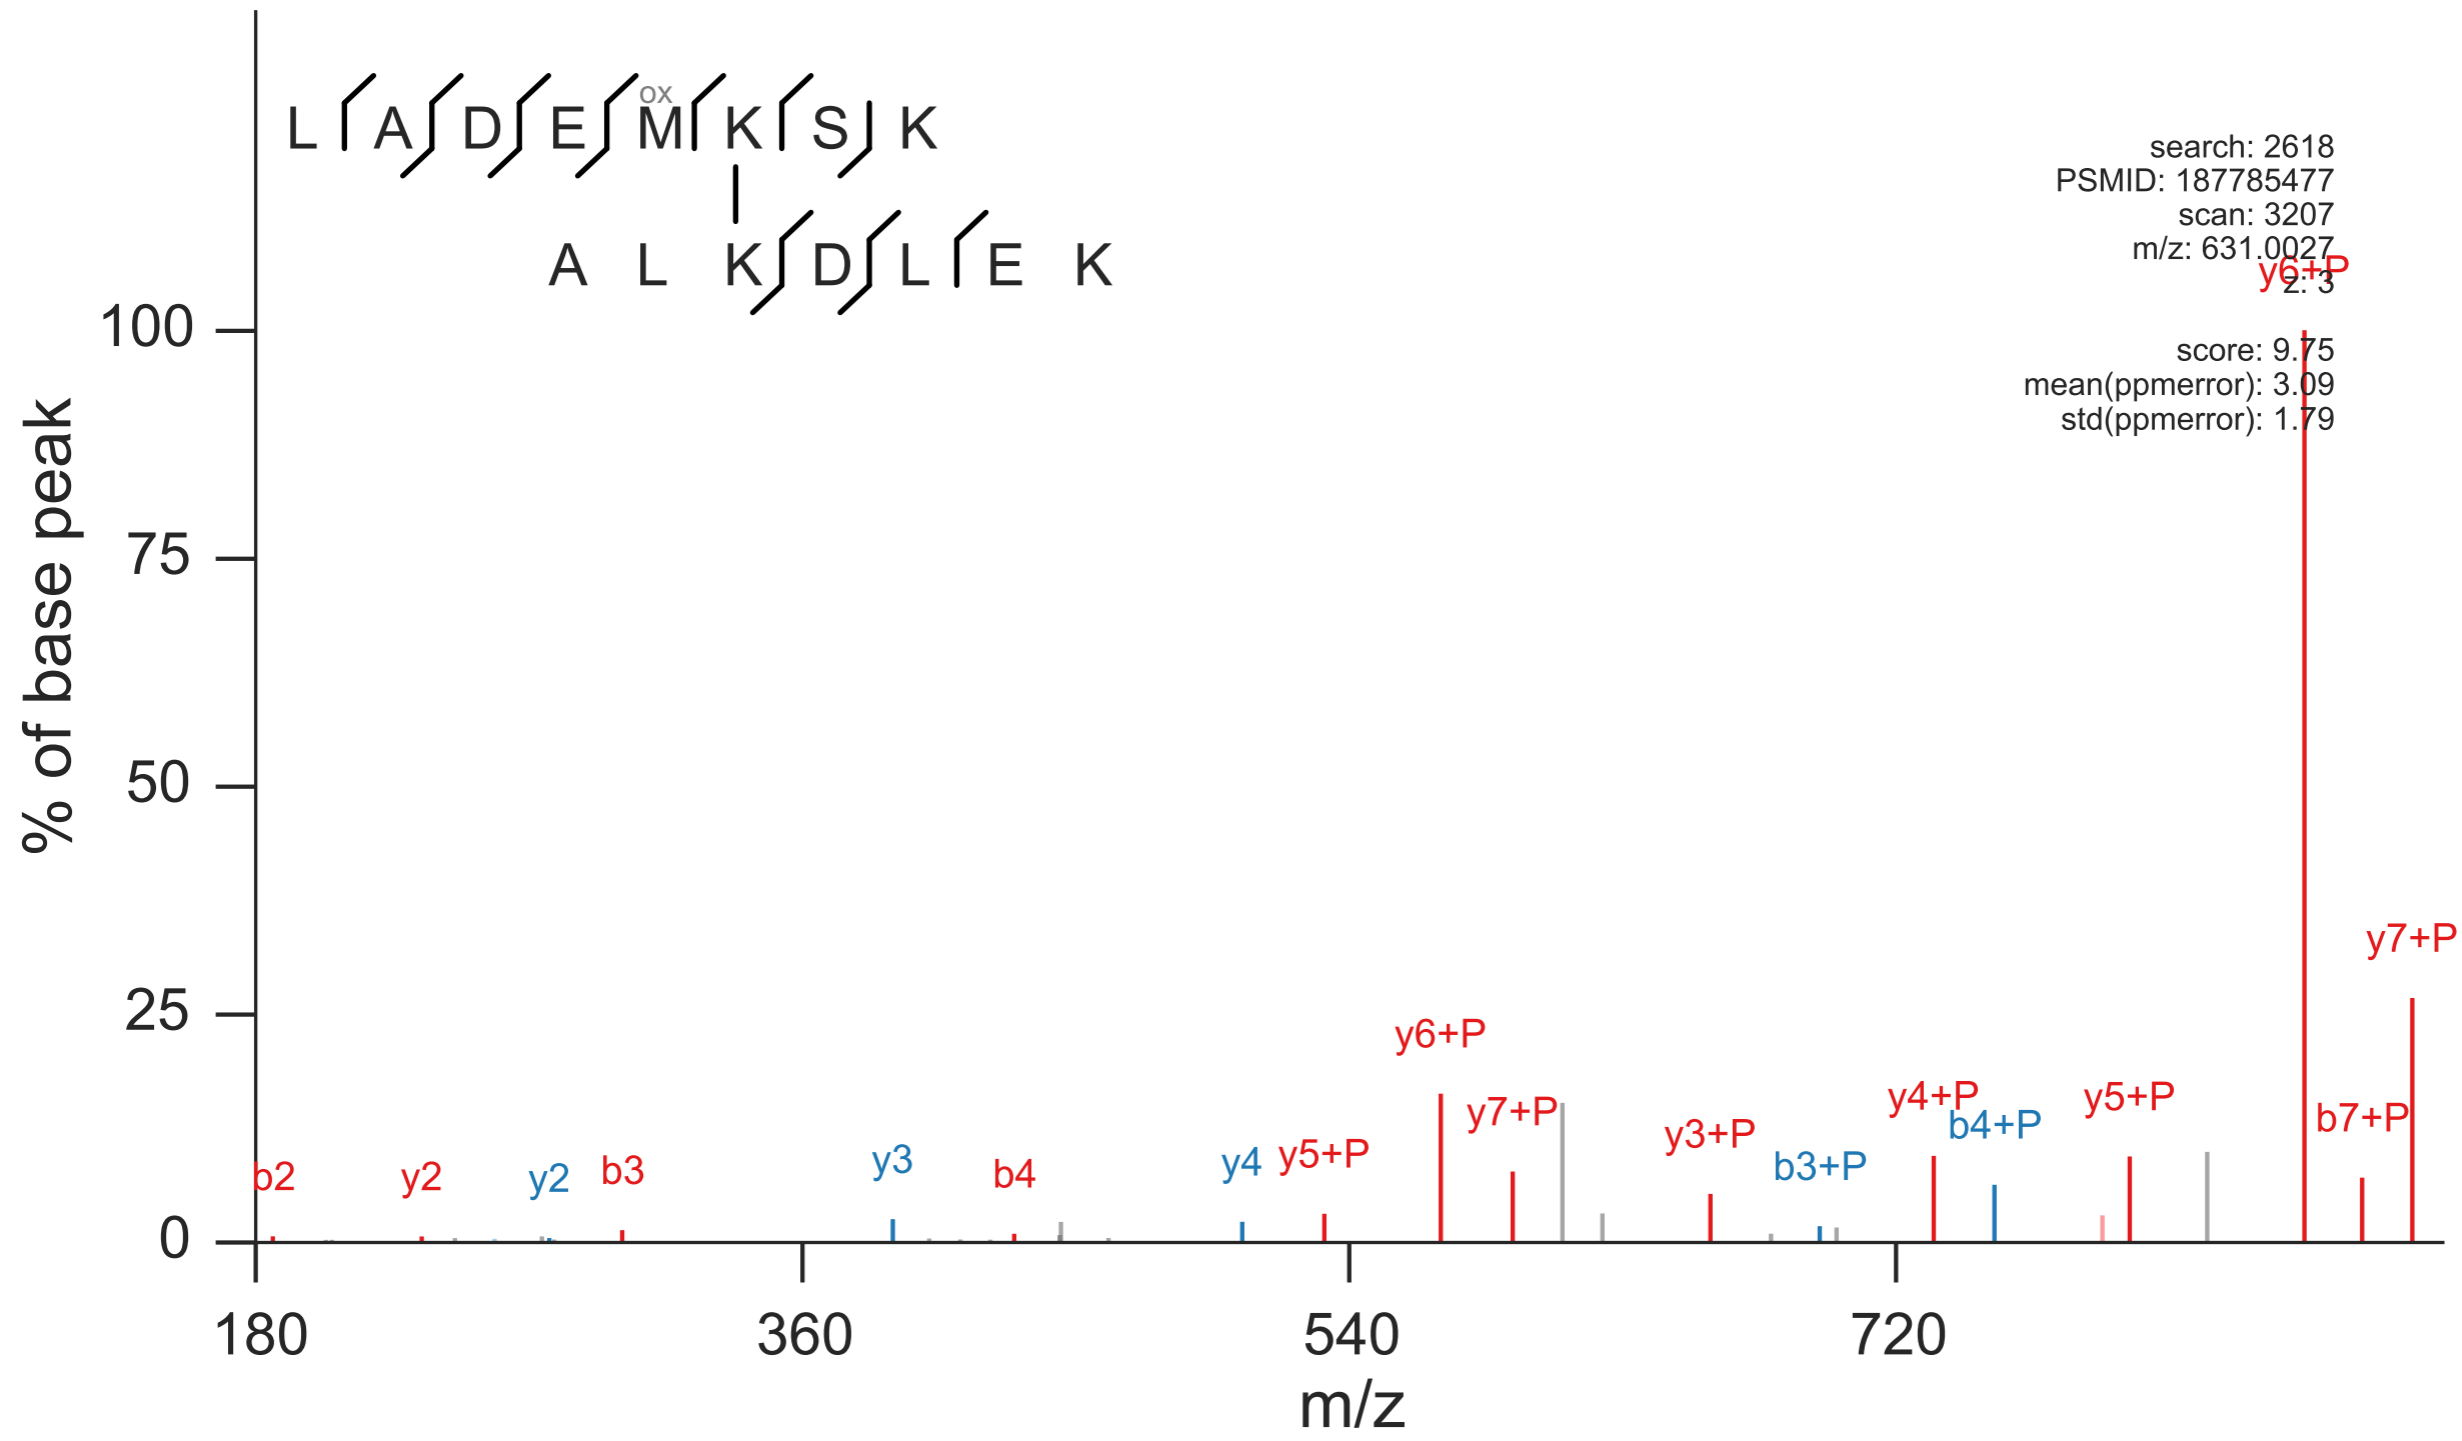

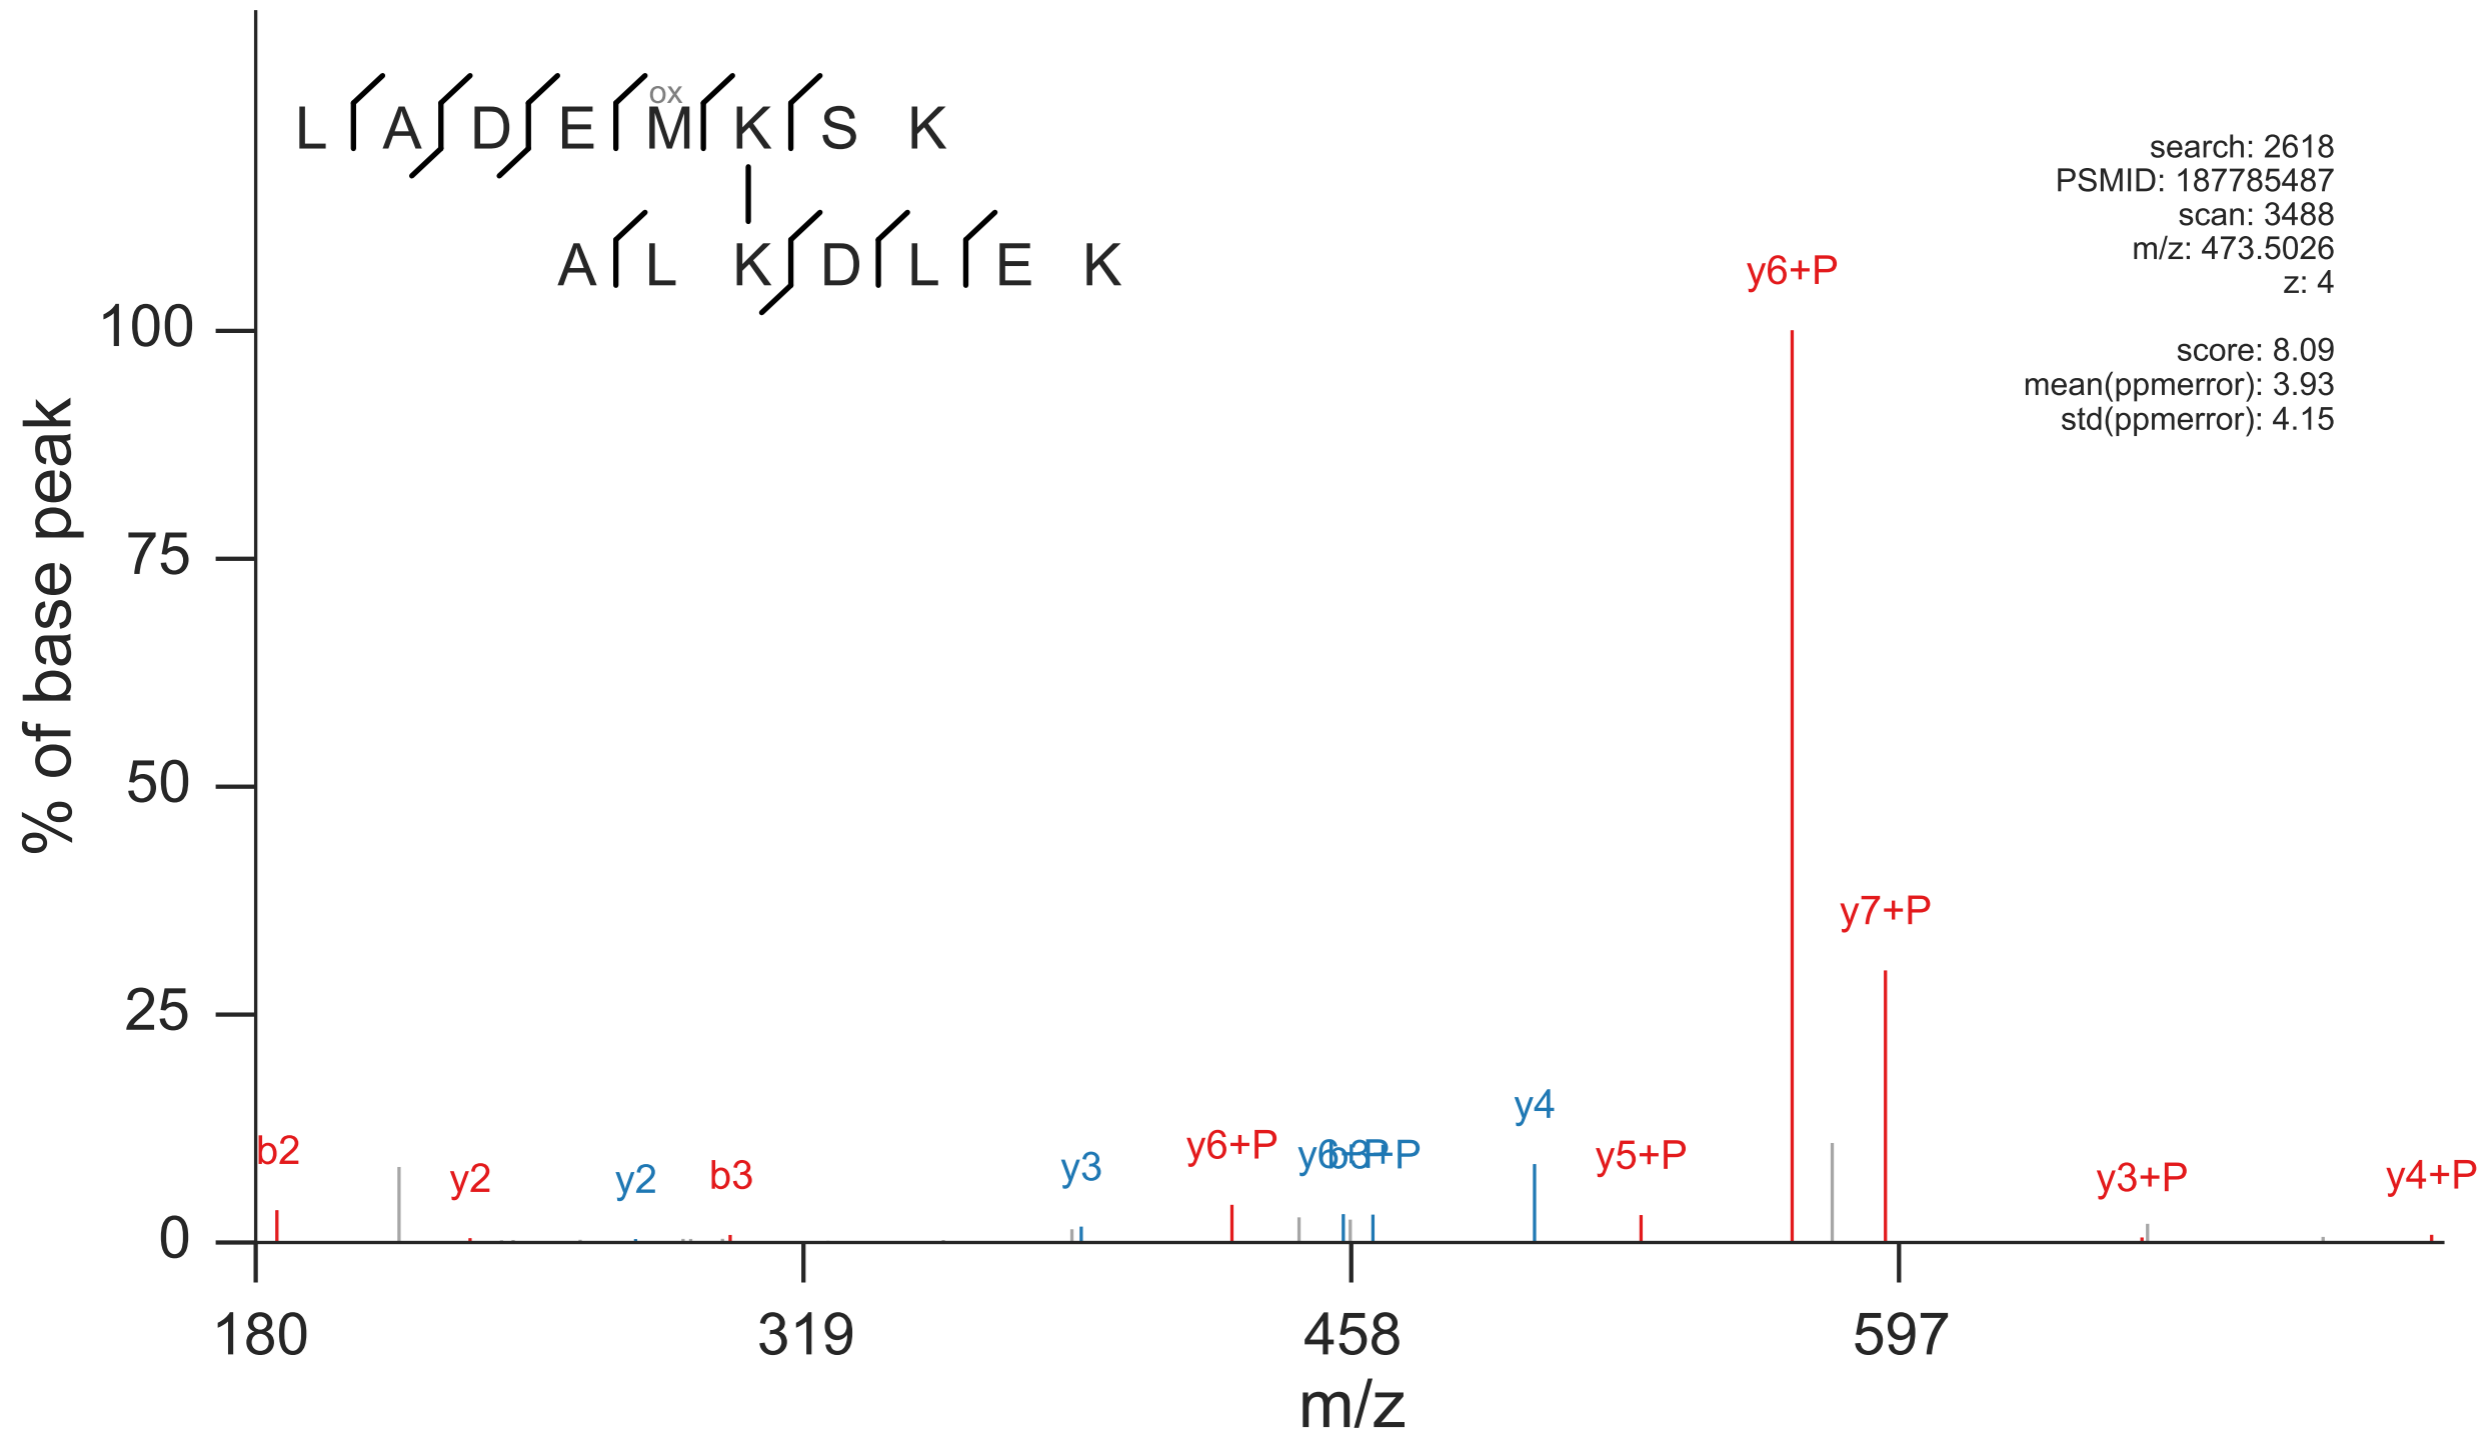



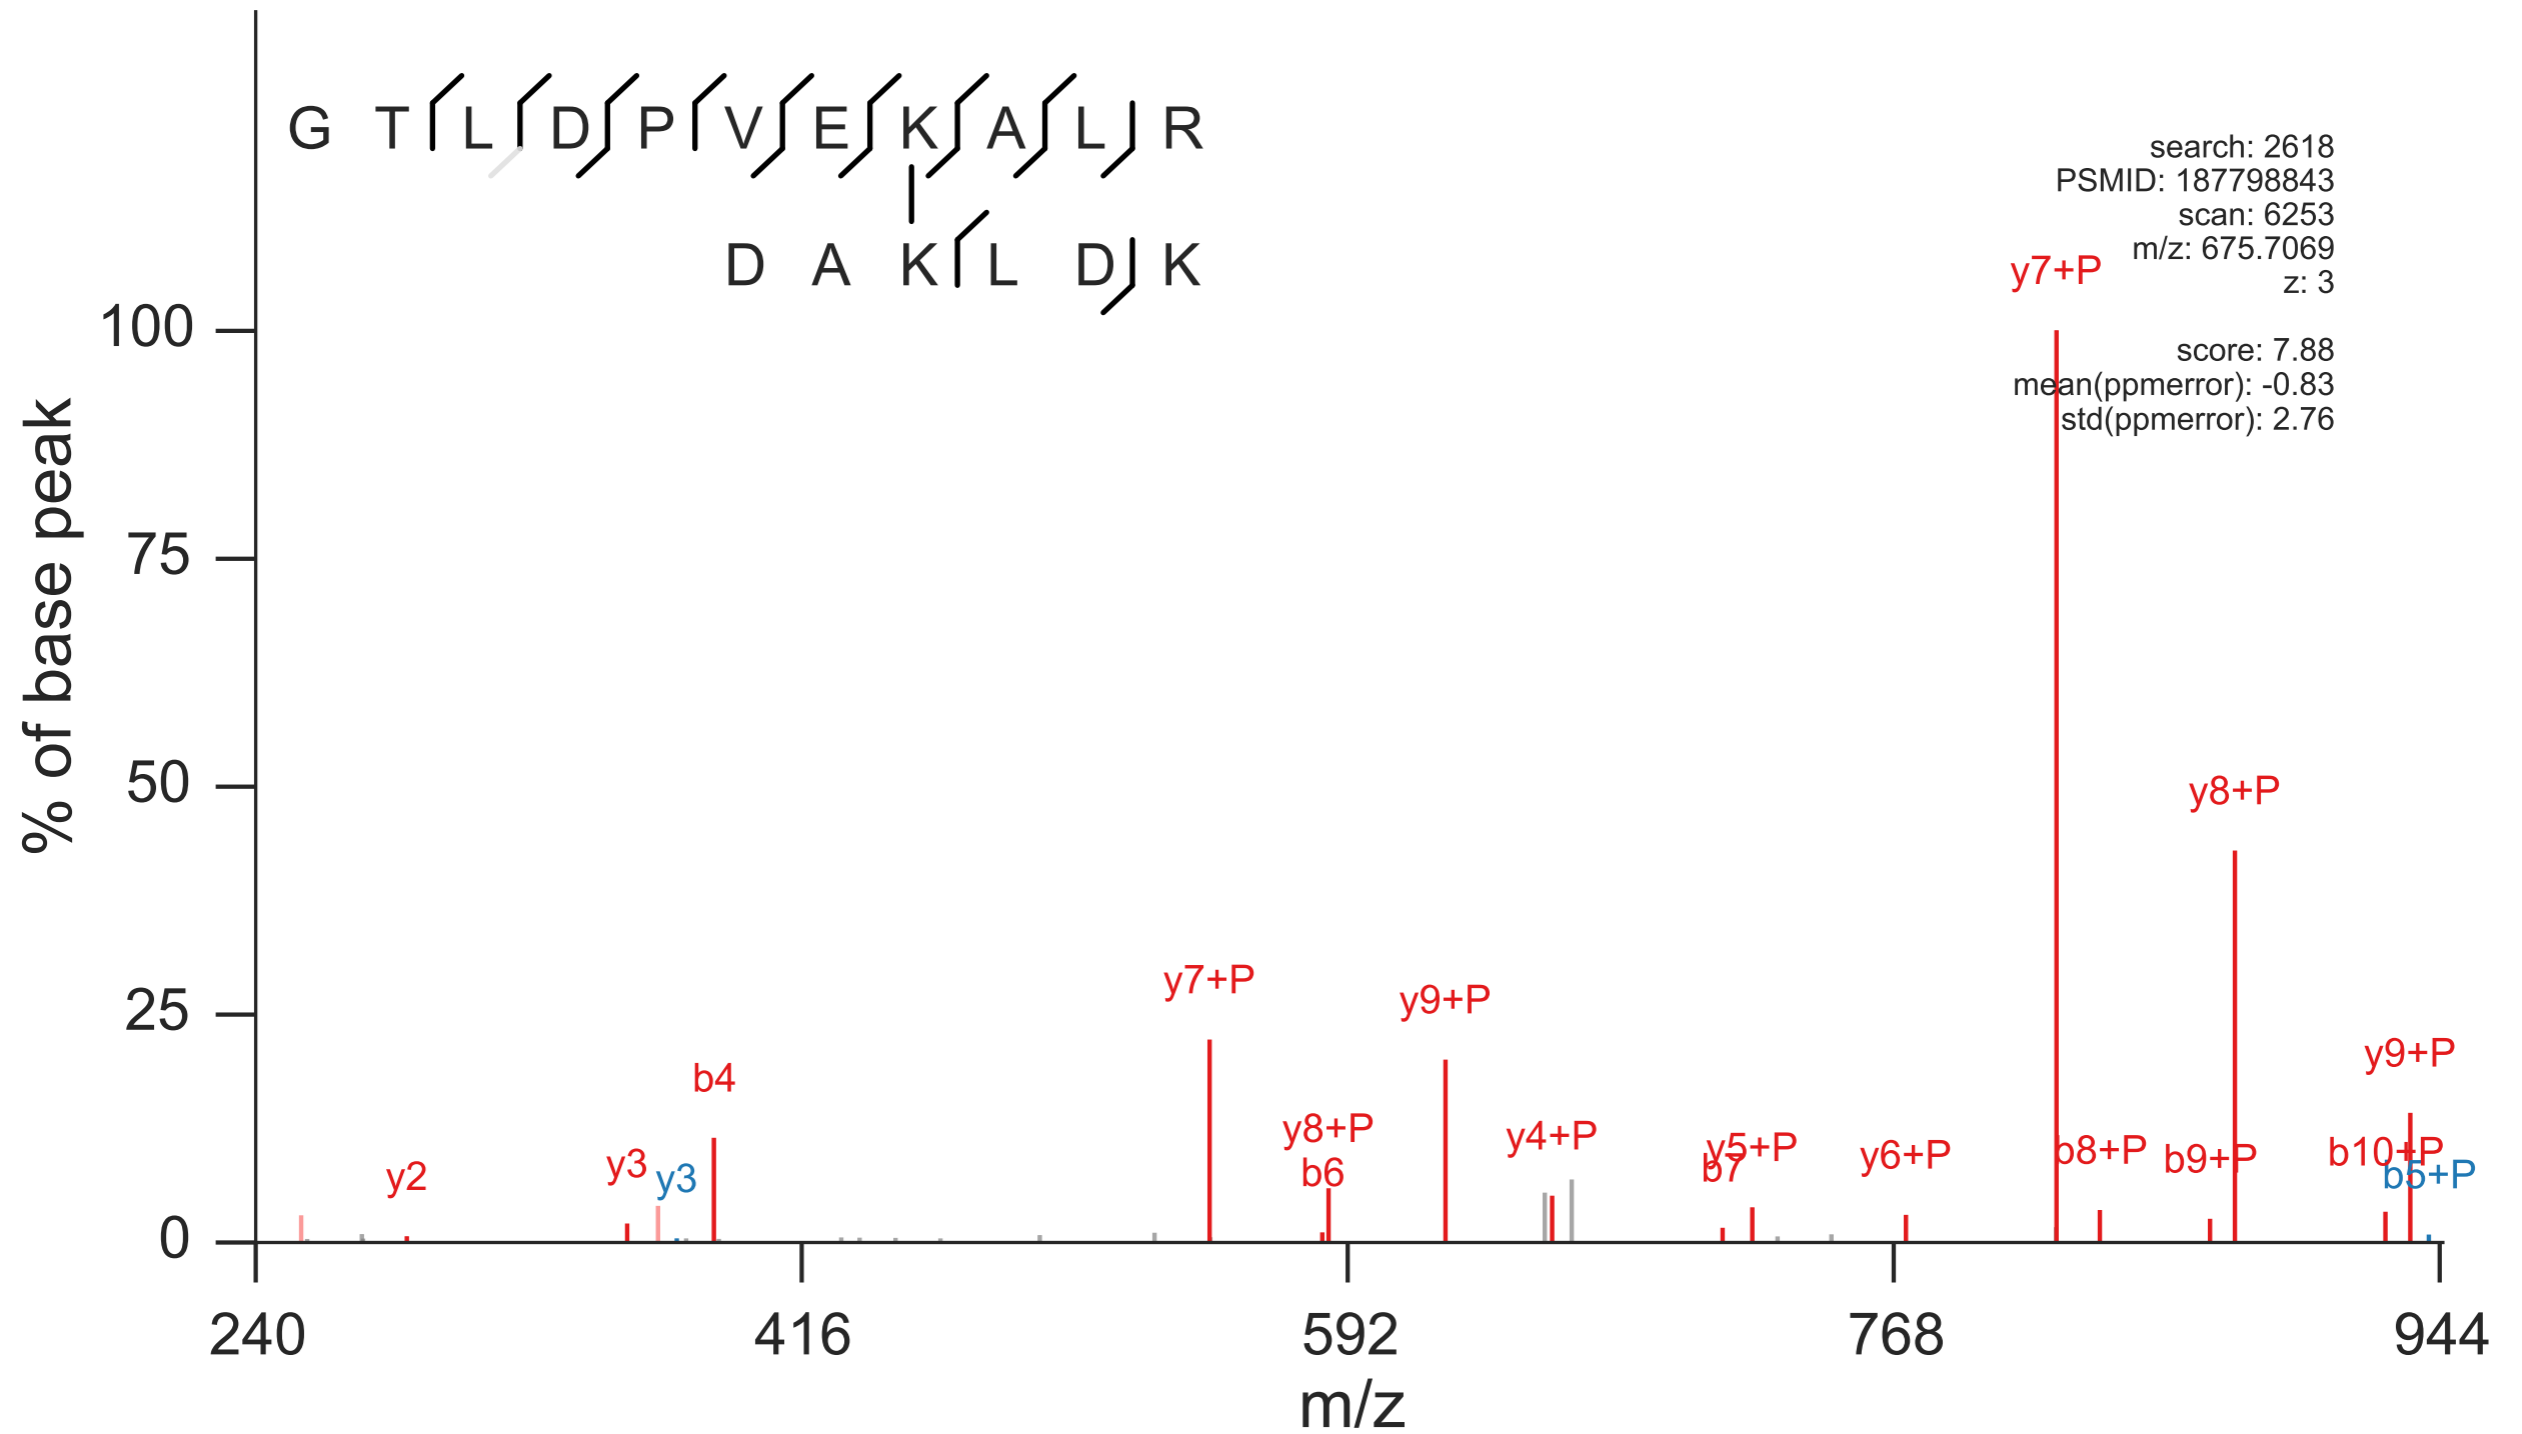

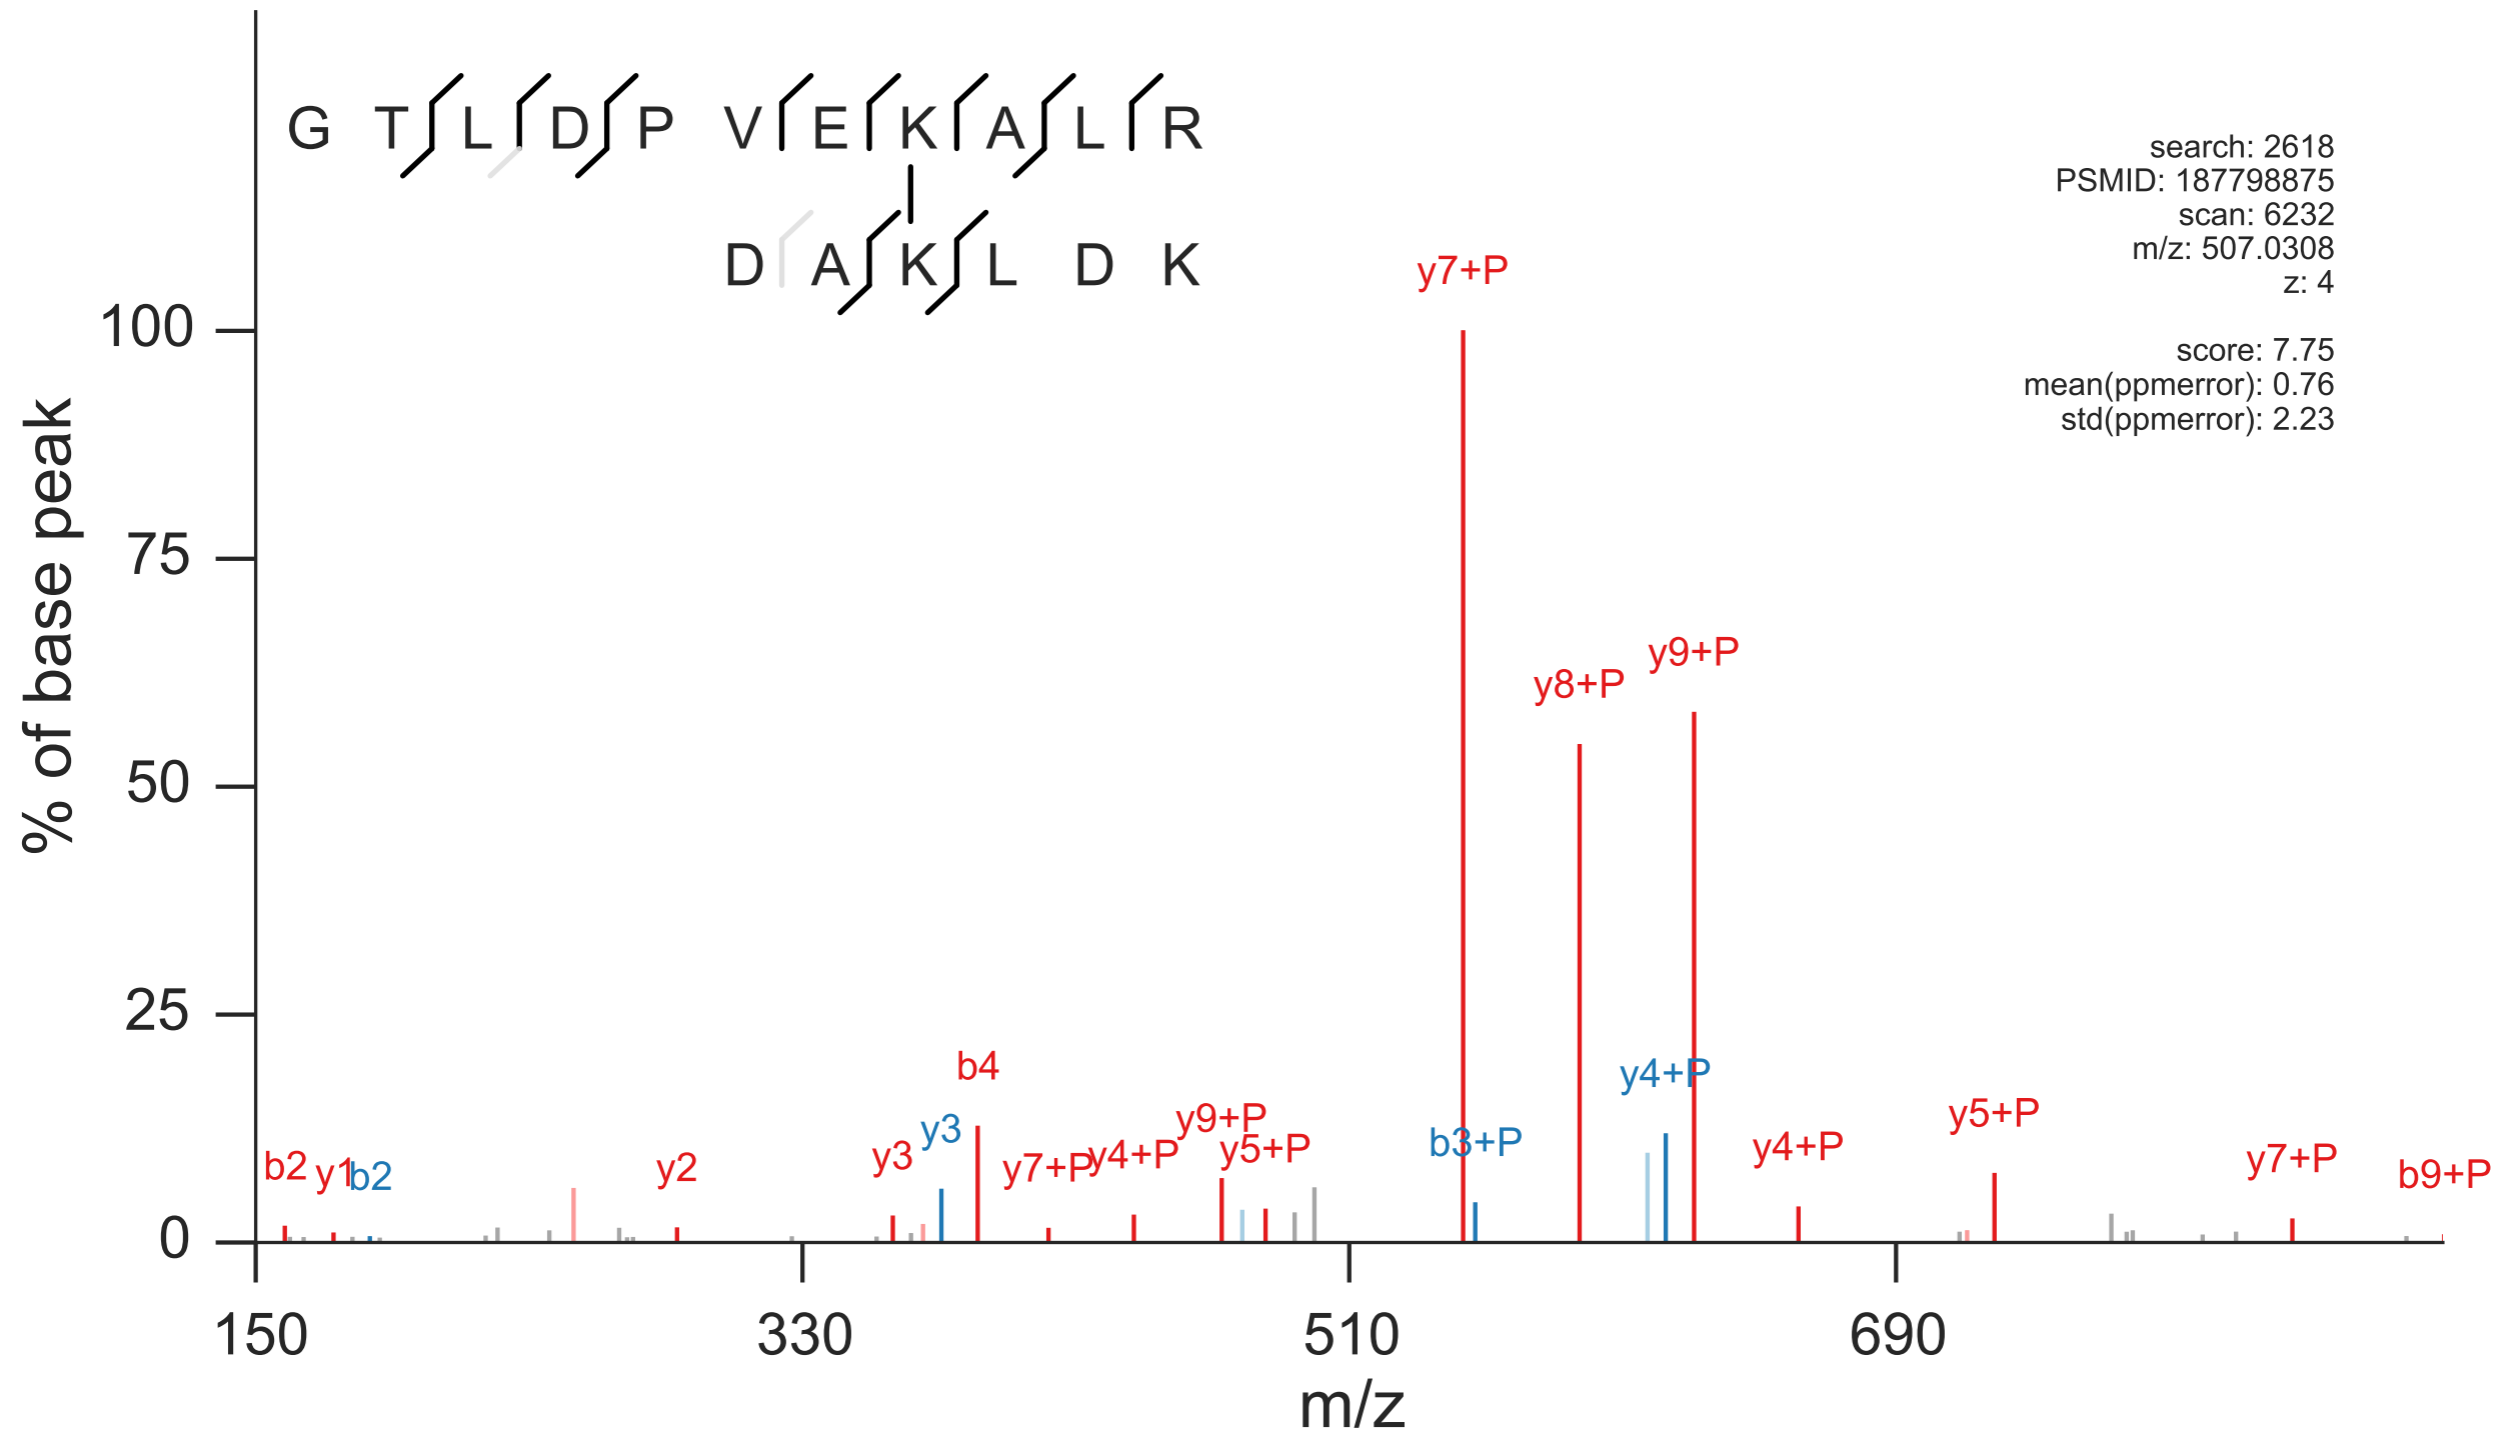

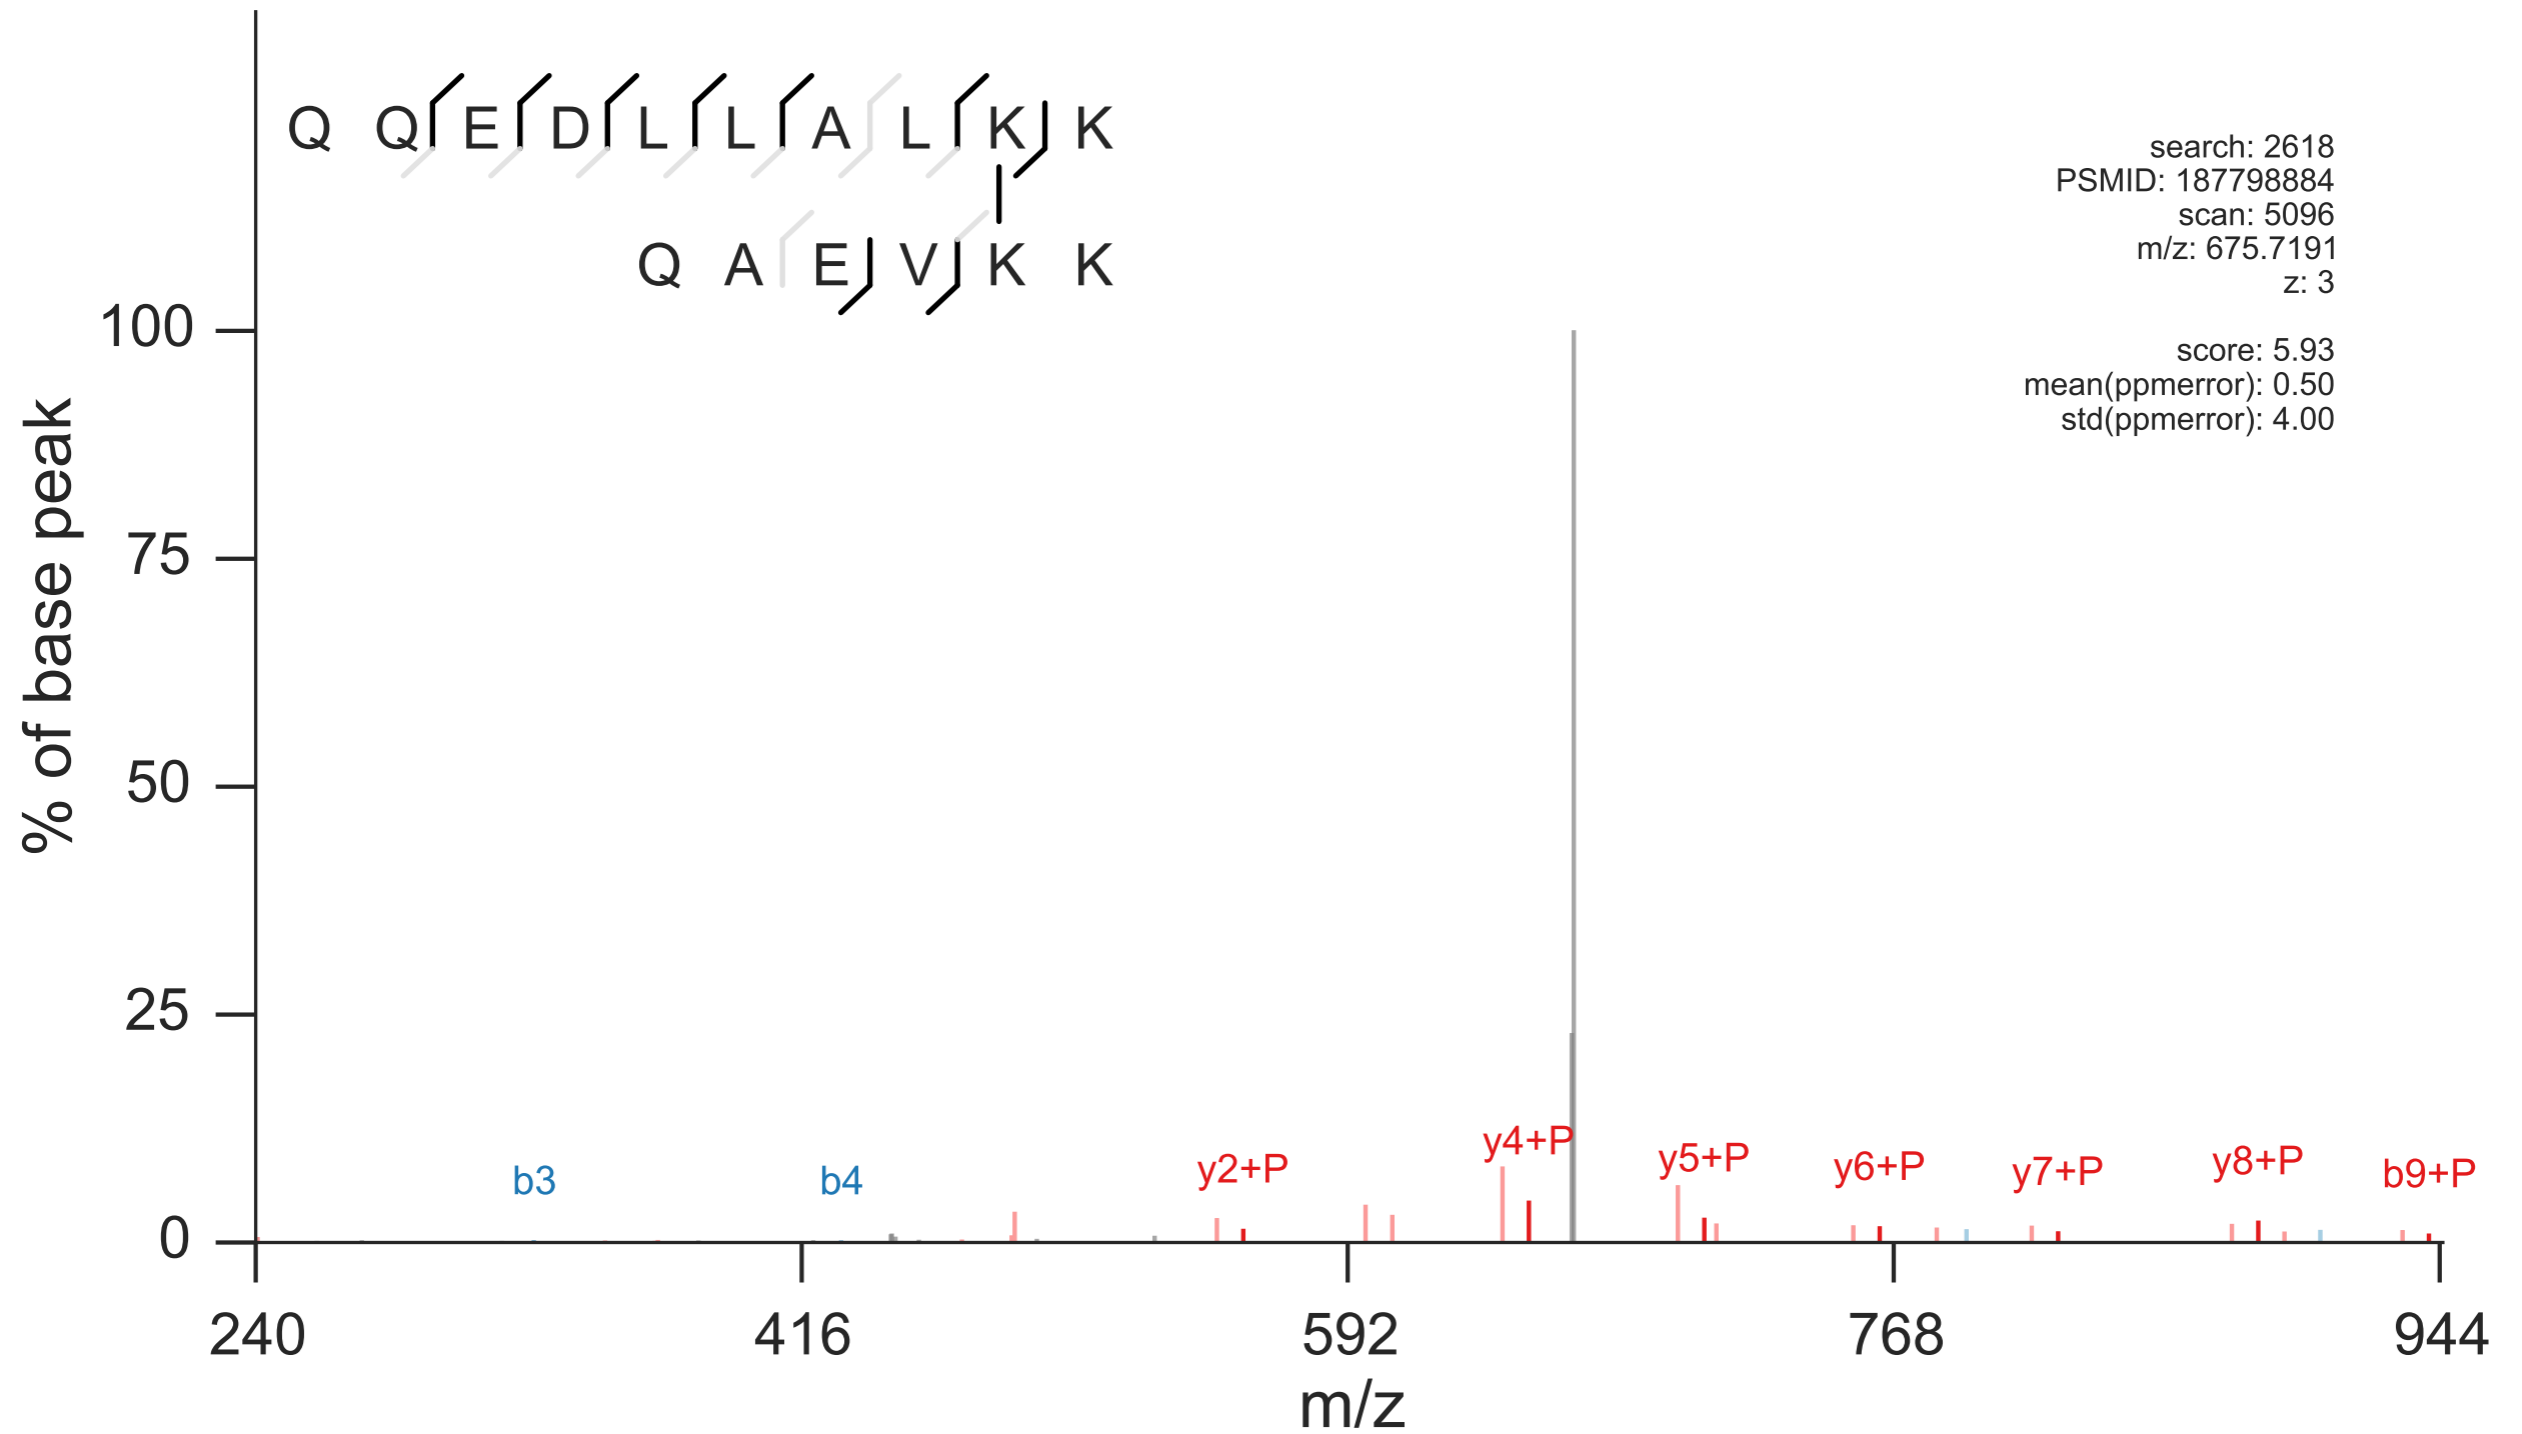

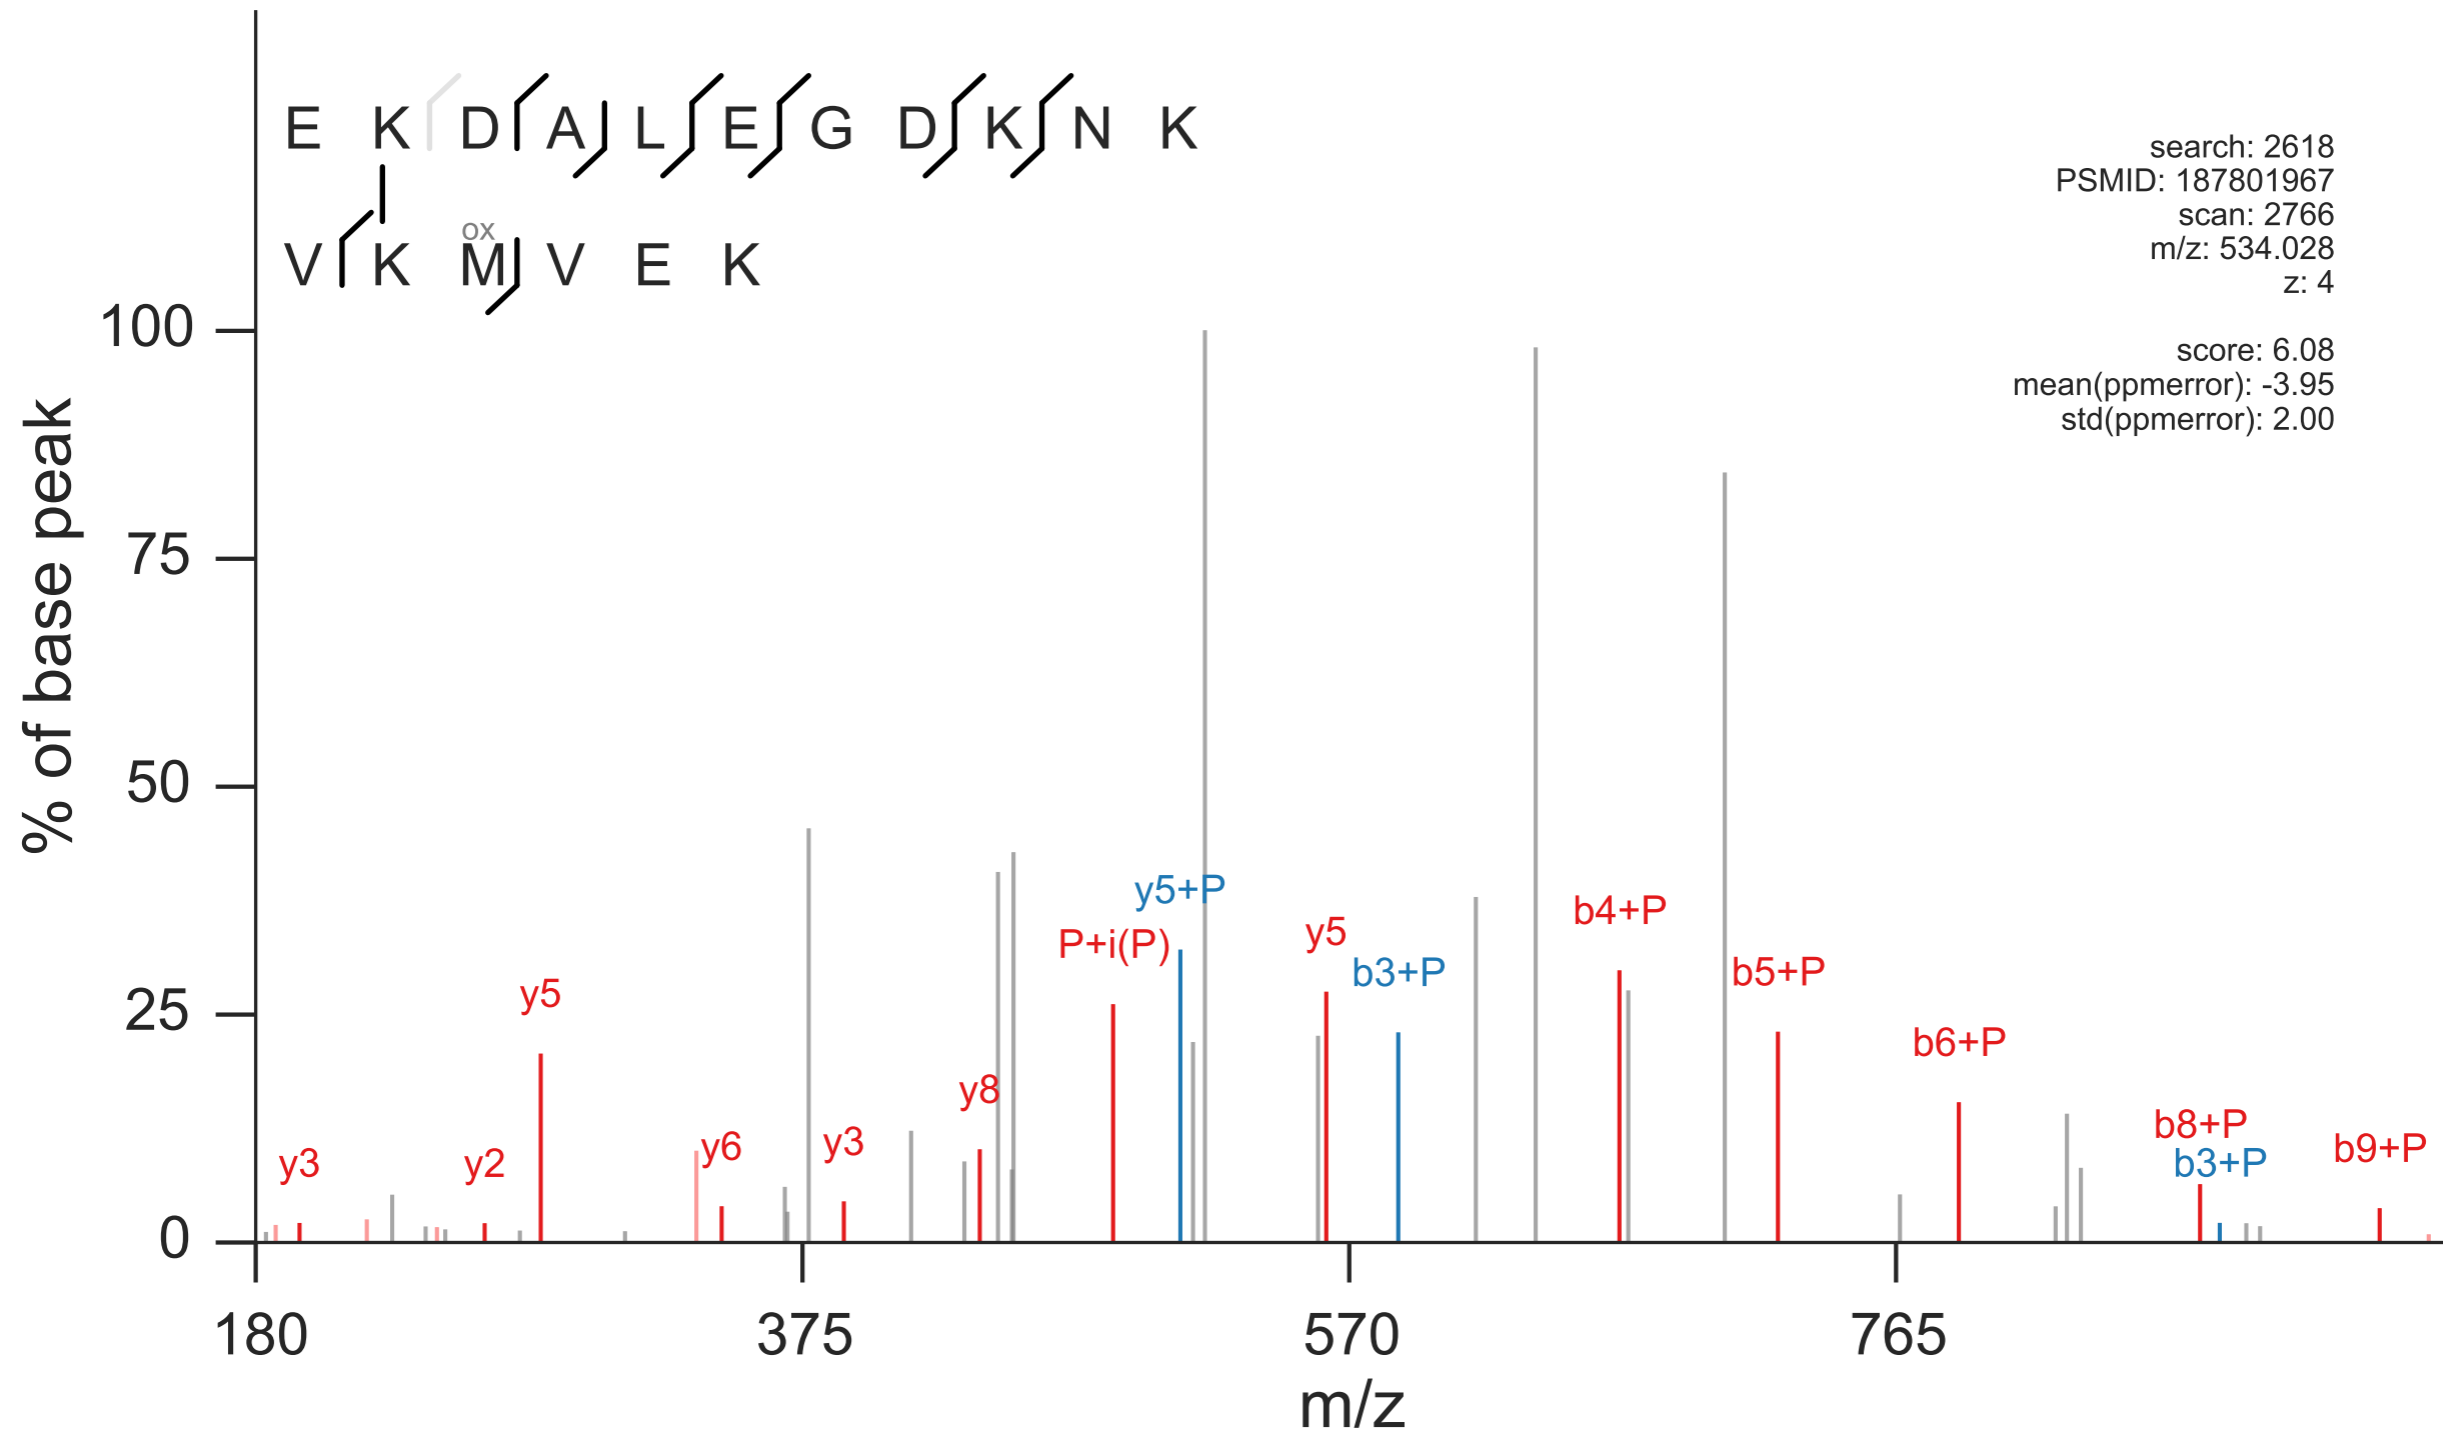

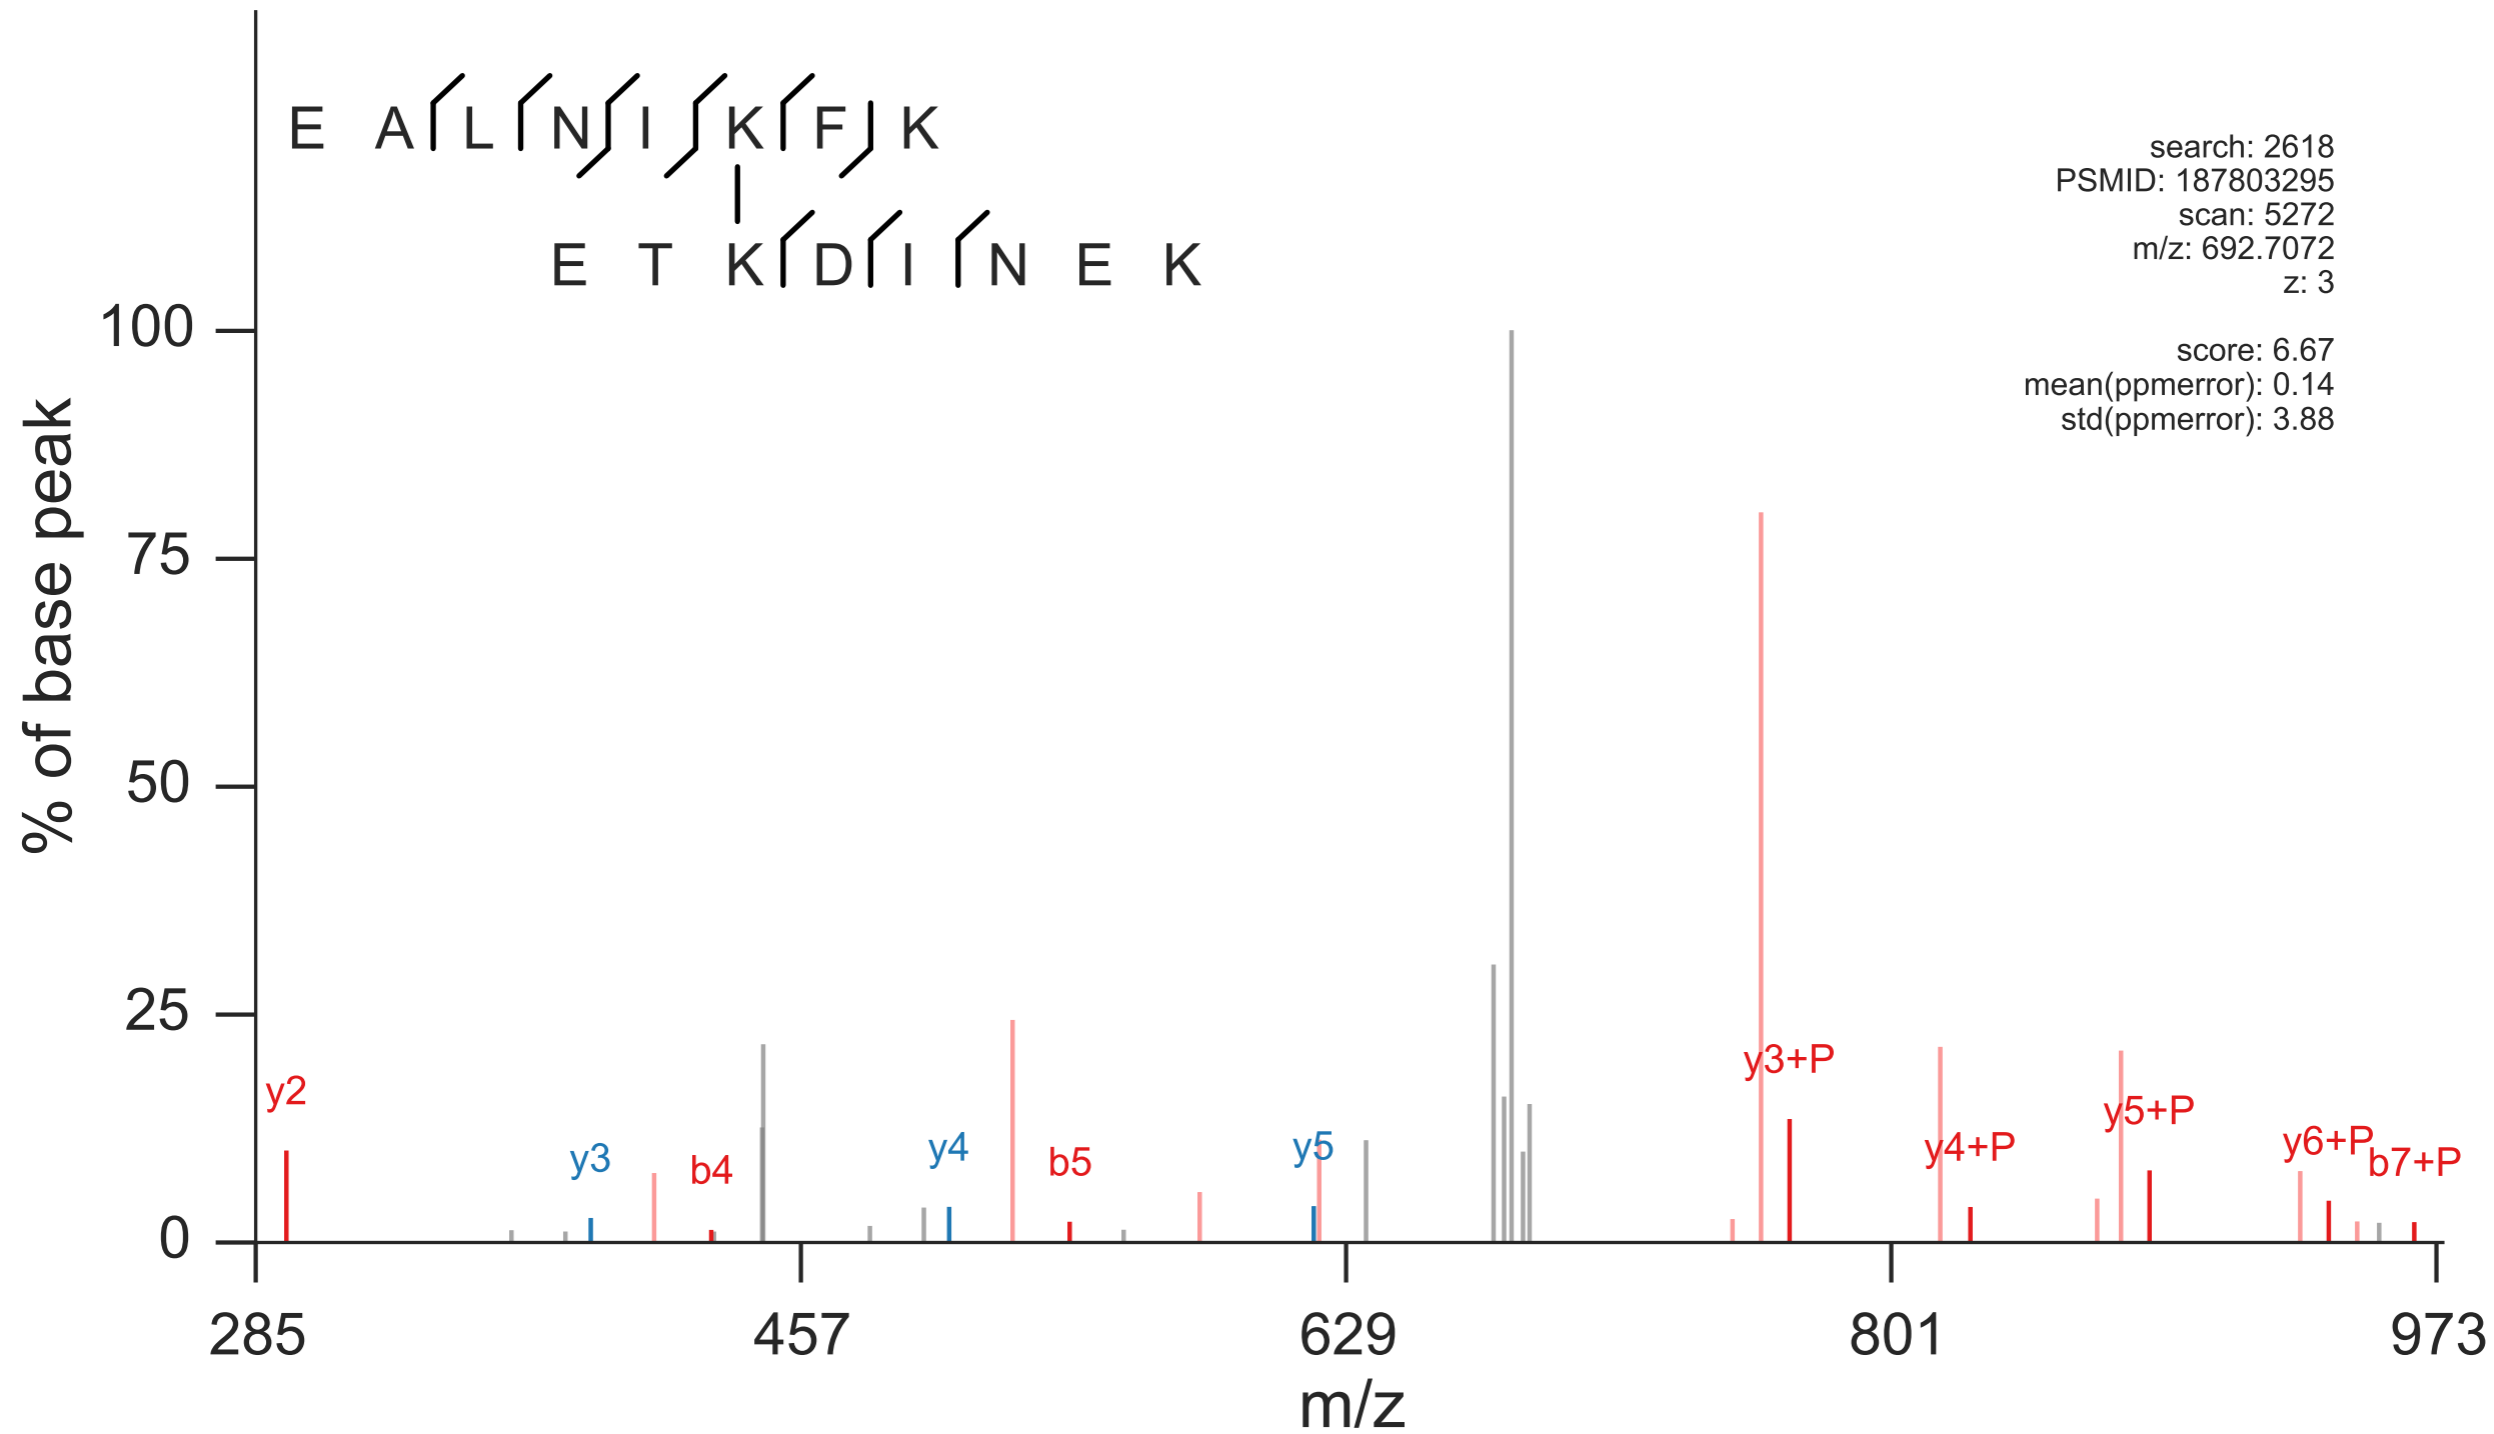

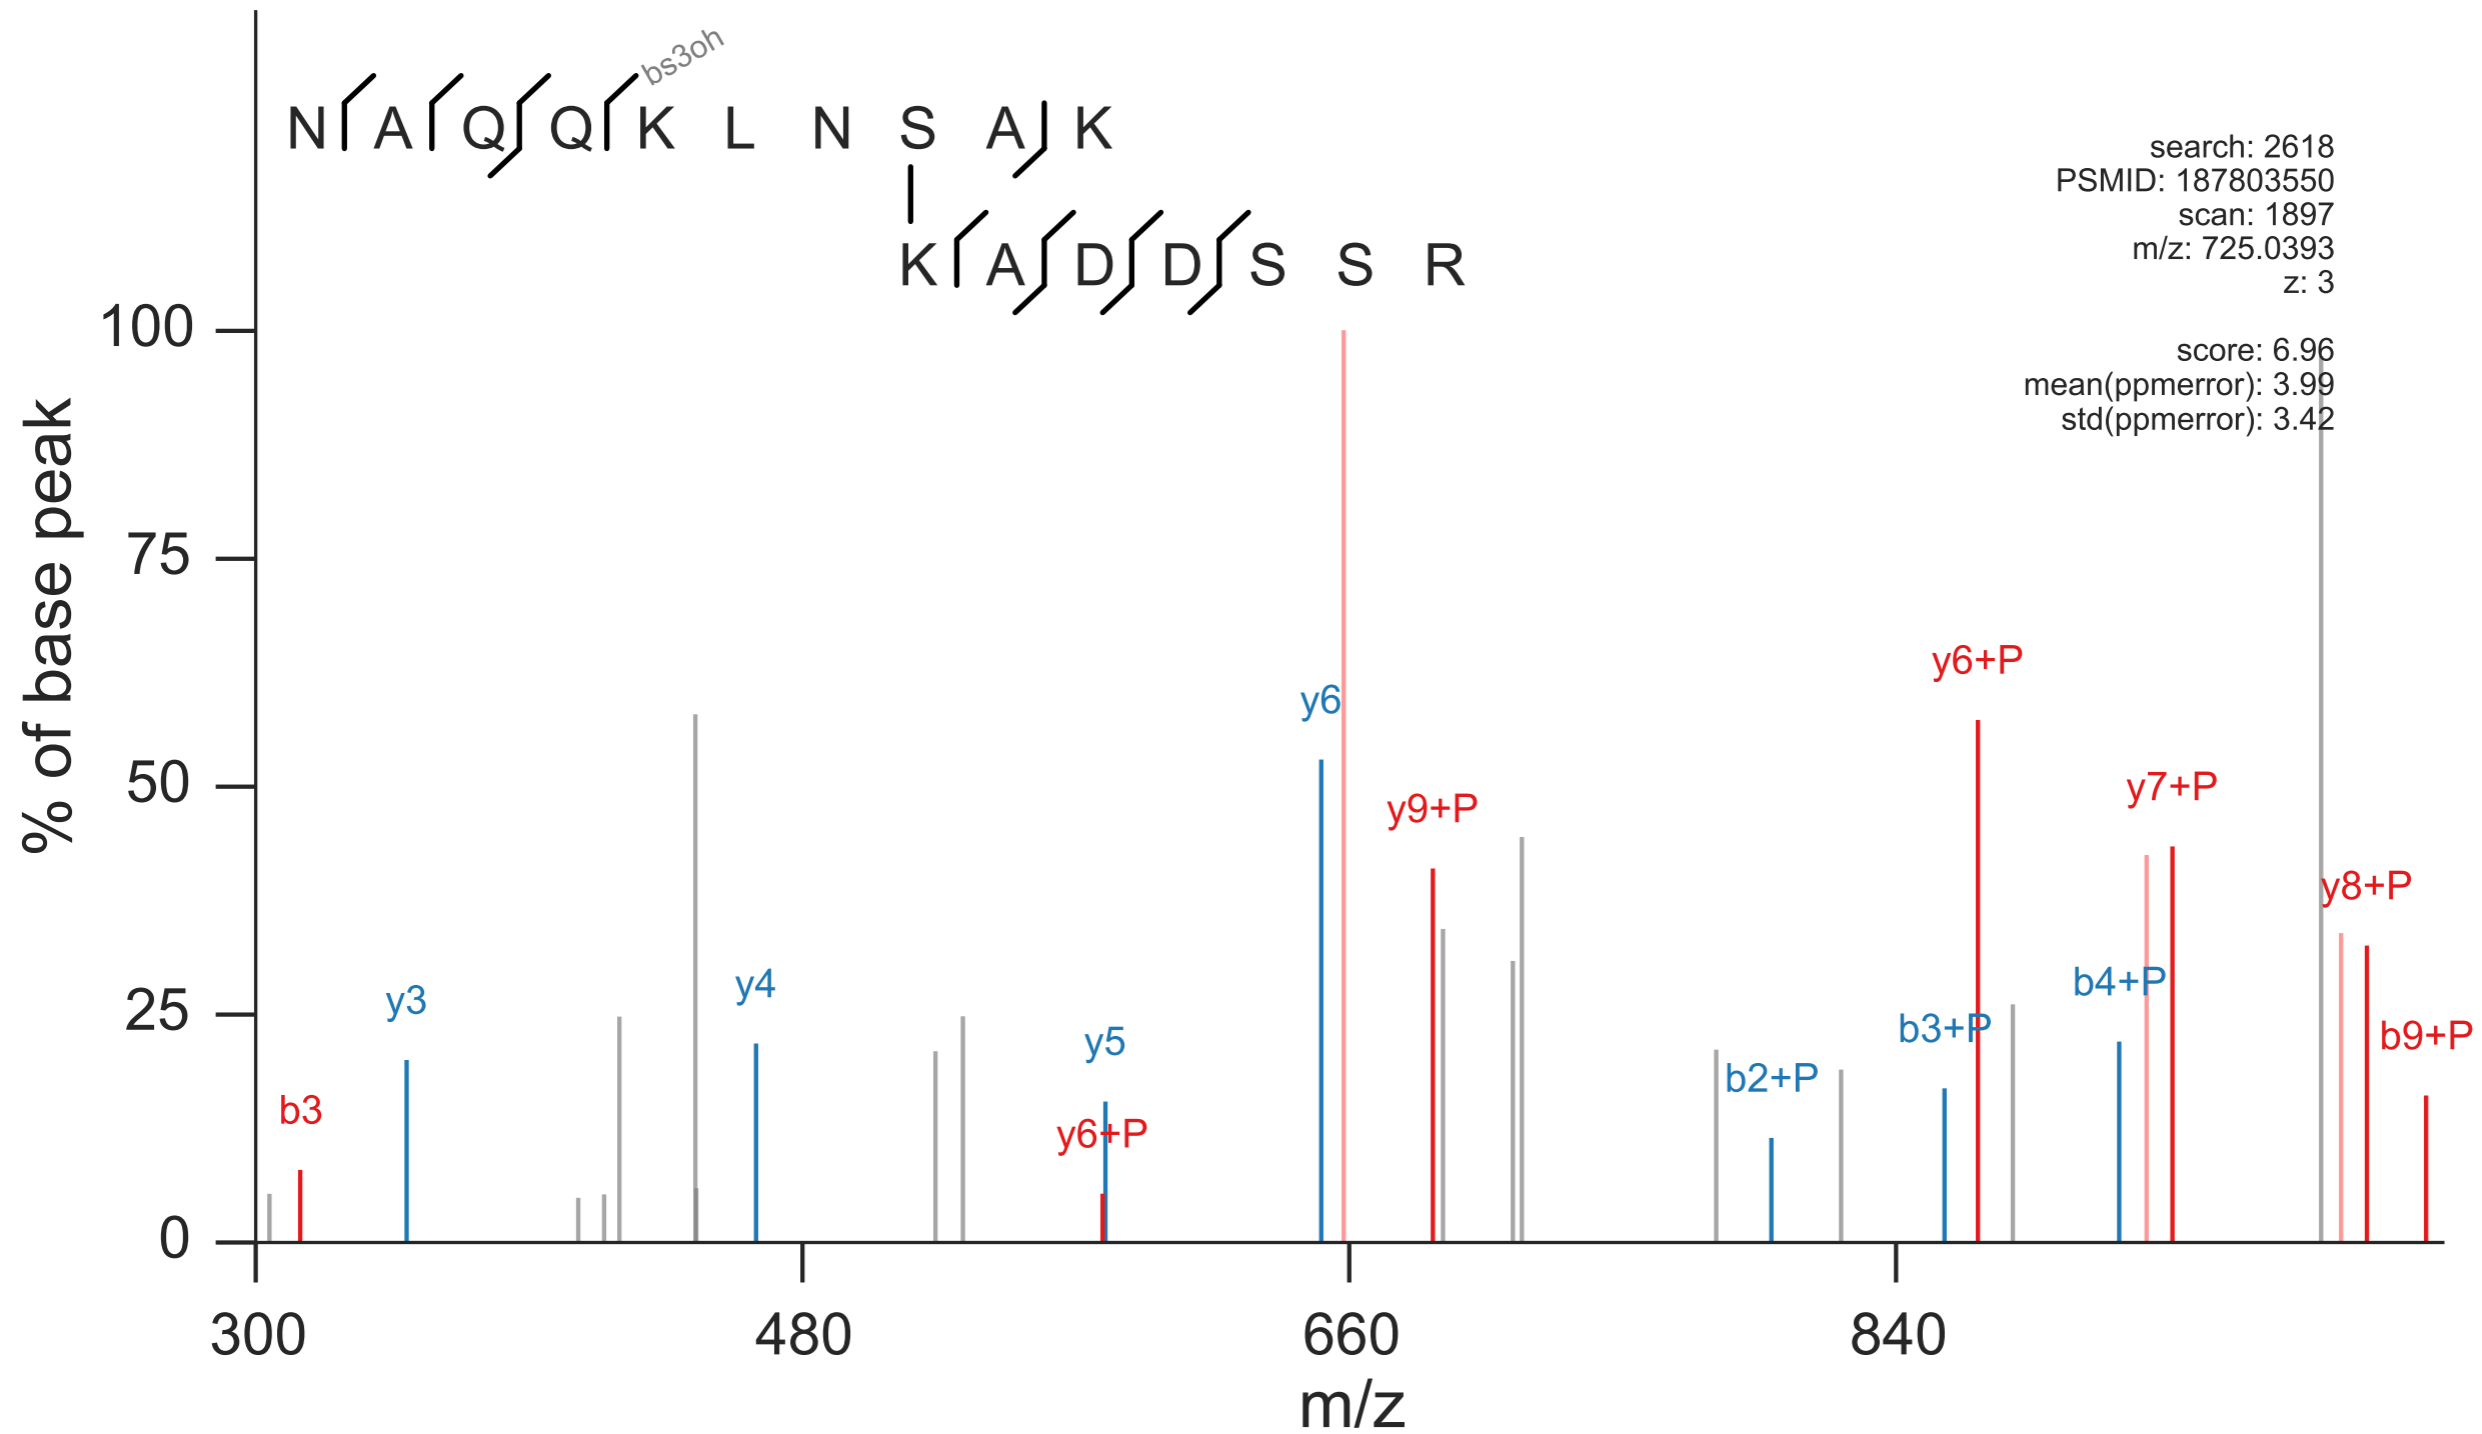

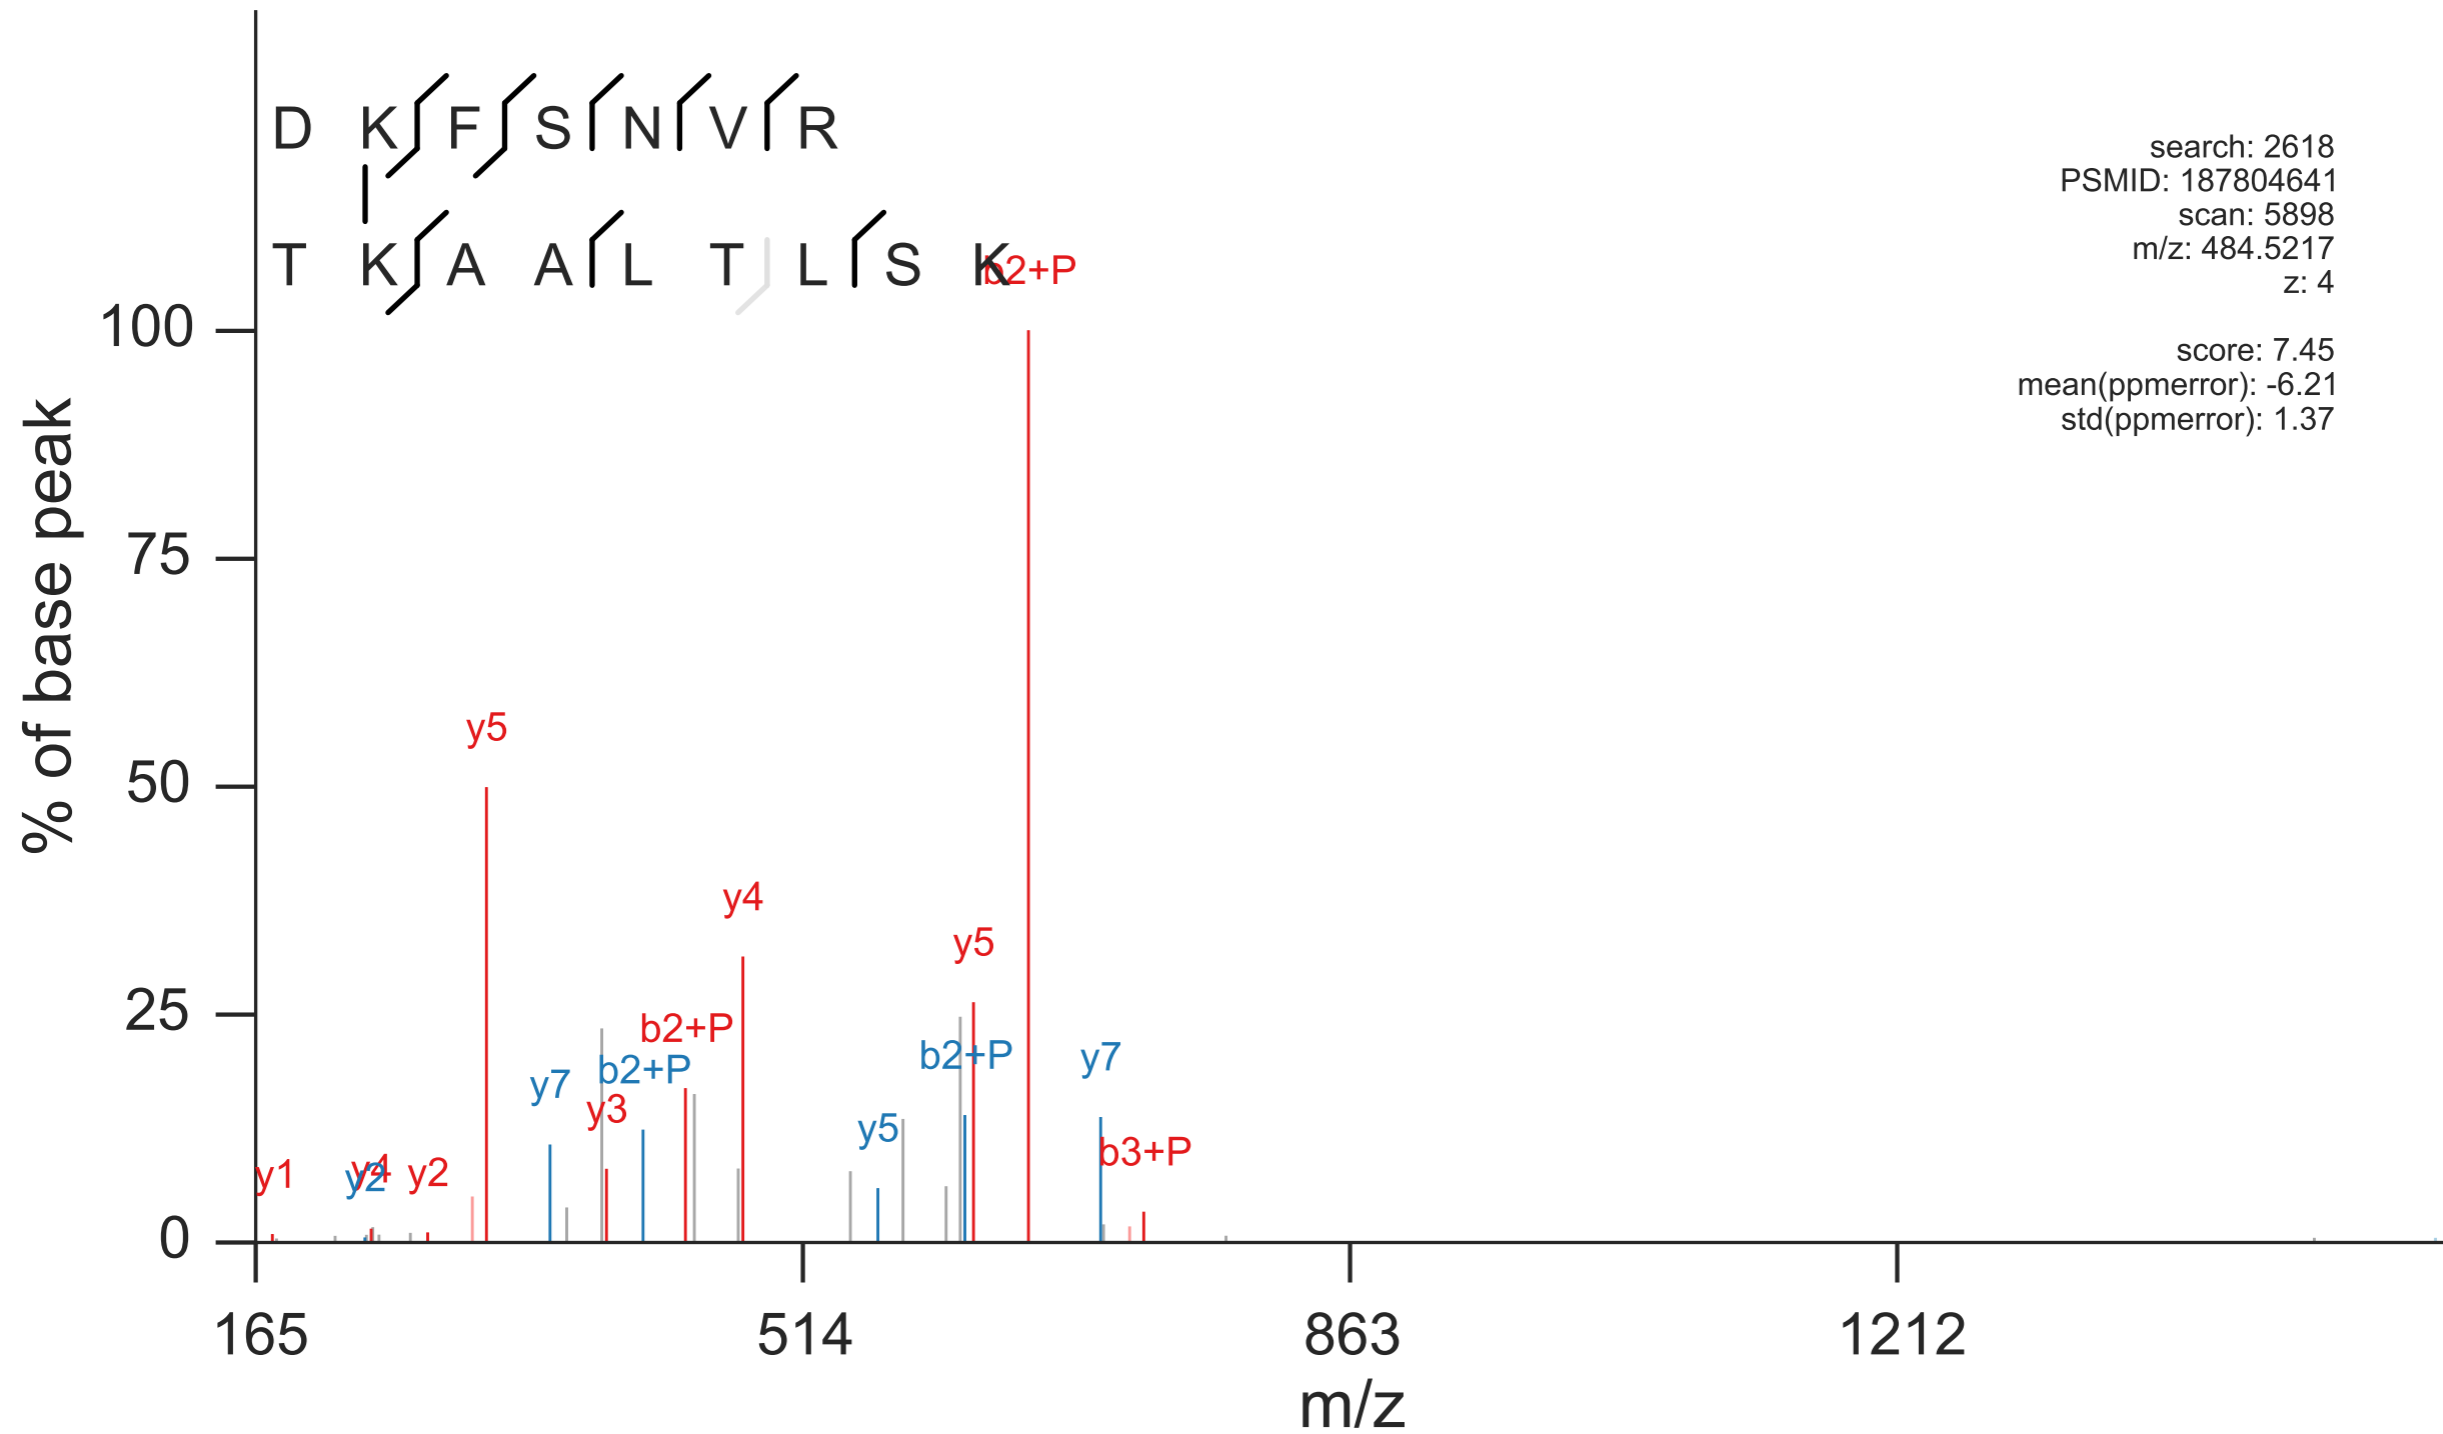

search: 2618  
 PSMID: 187804641  
 scan: 5898  
 m/z: 484.5217  
 z: 4  
  
 score: 7.45  
 mean(ppmerror): -6.21  
 std(ppmerror): 1.37

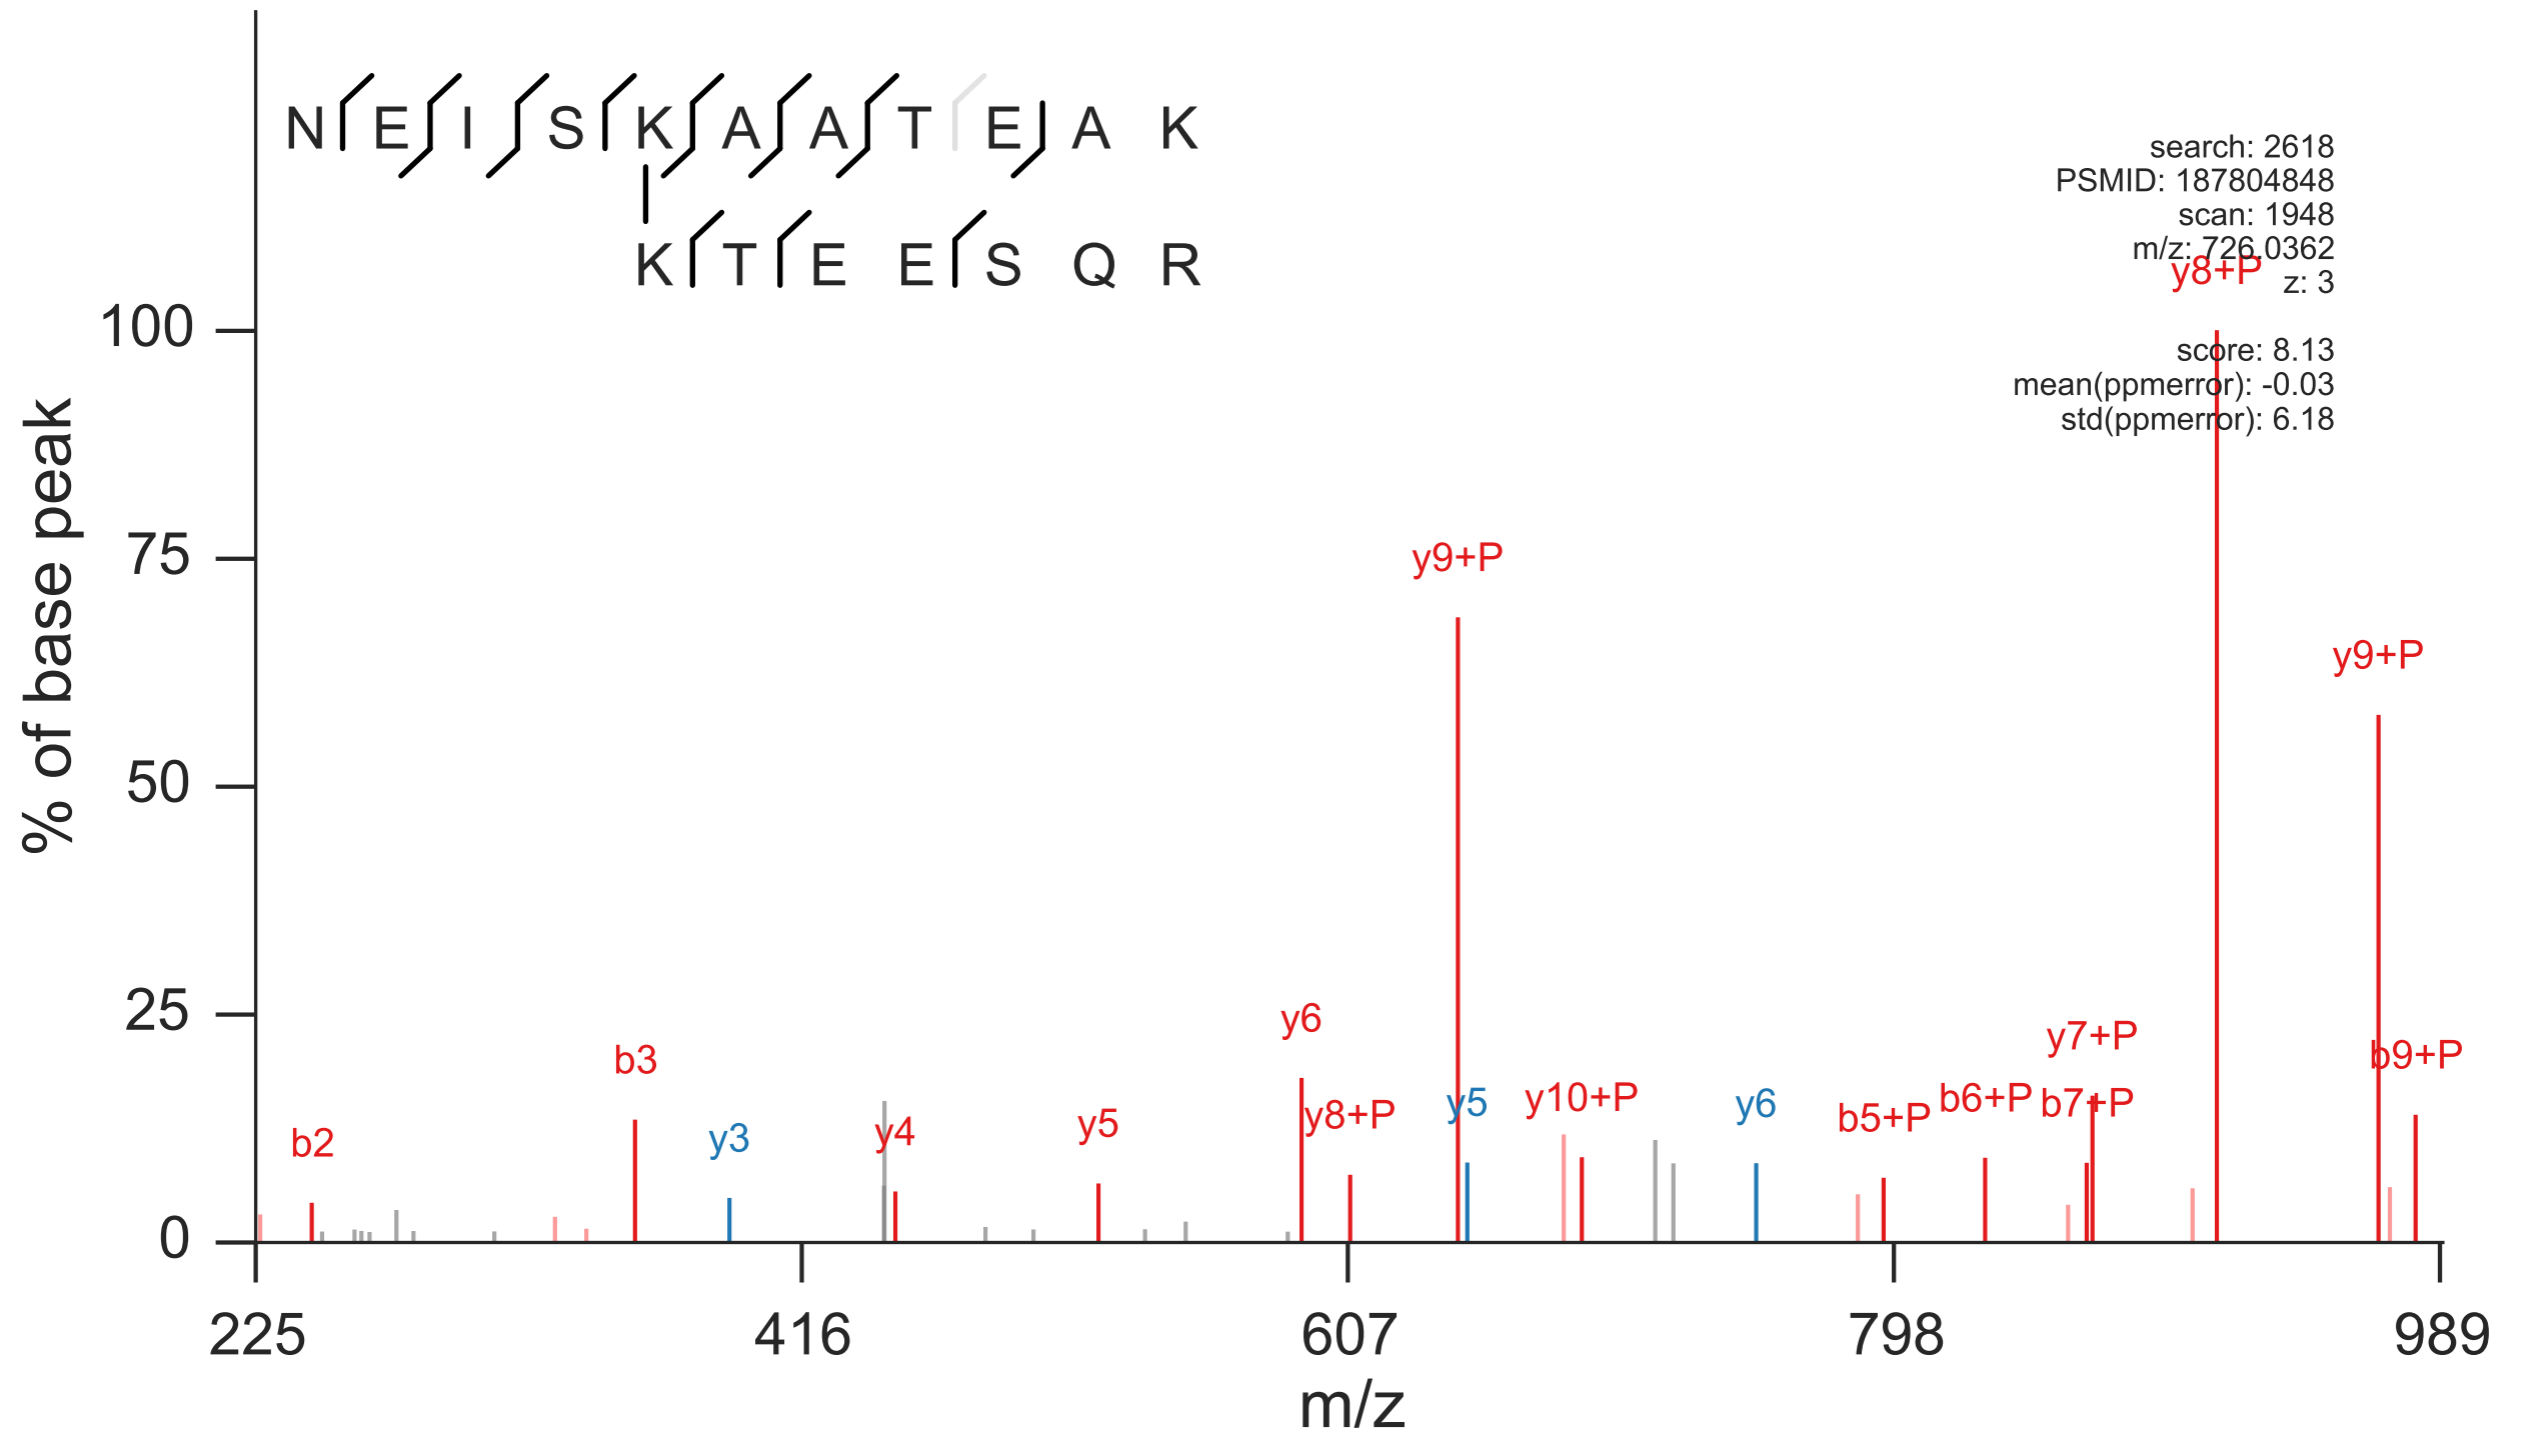



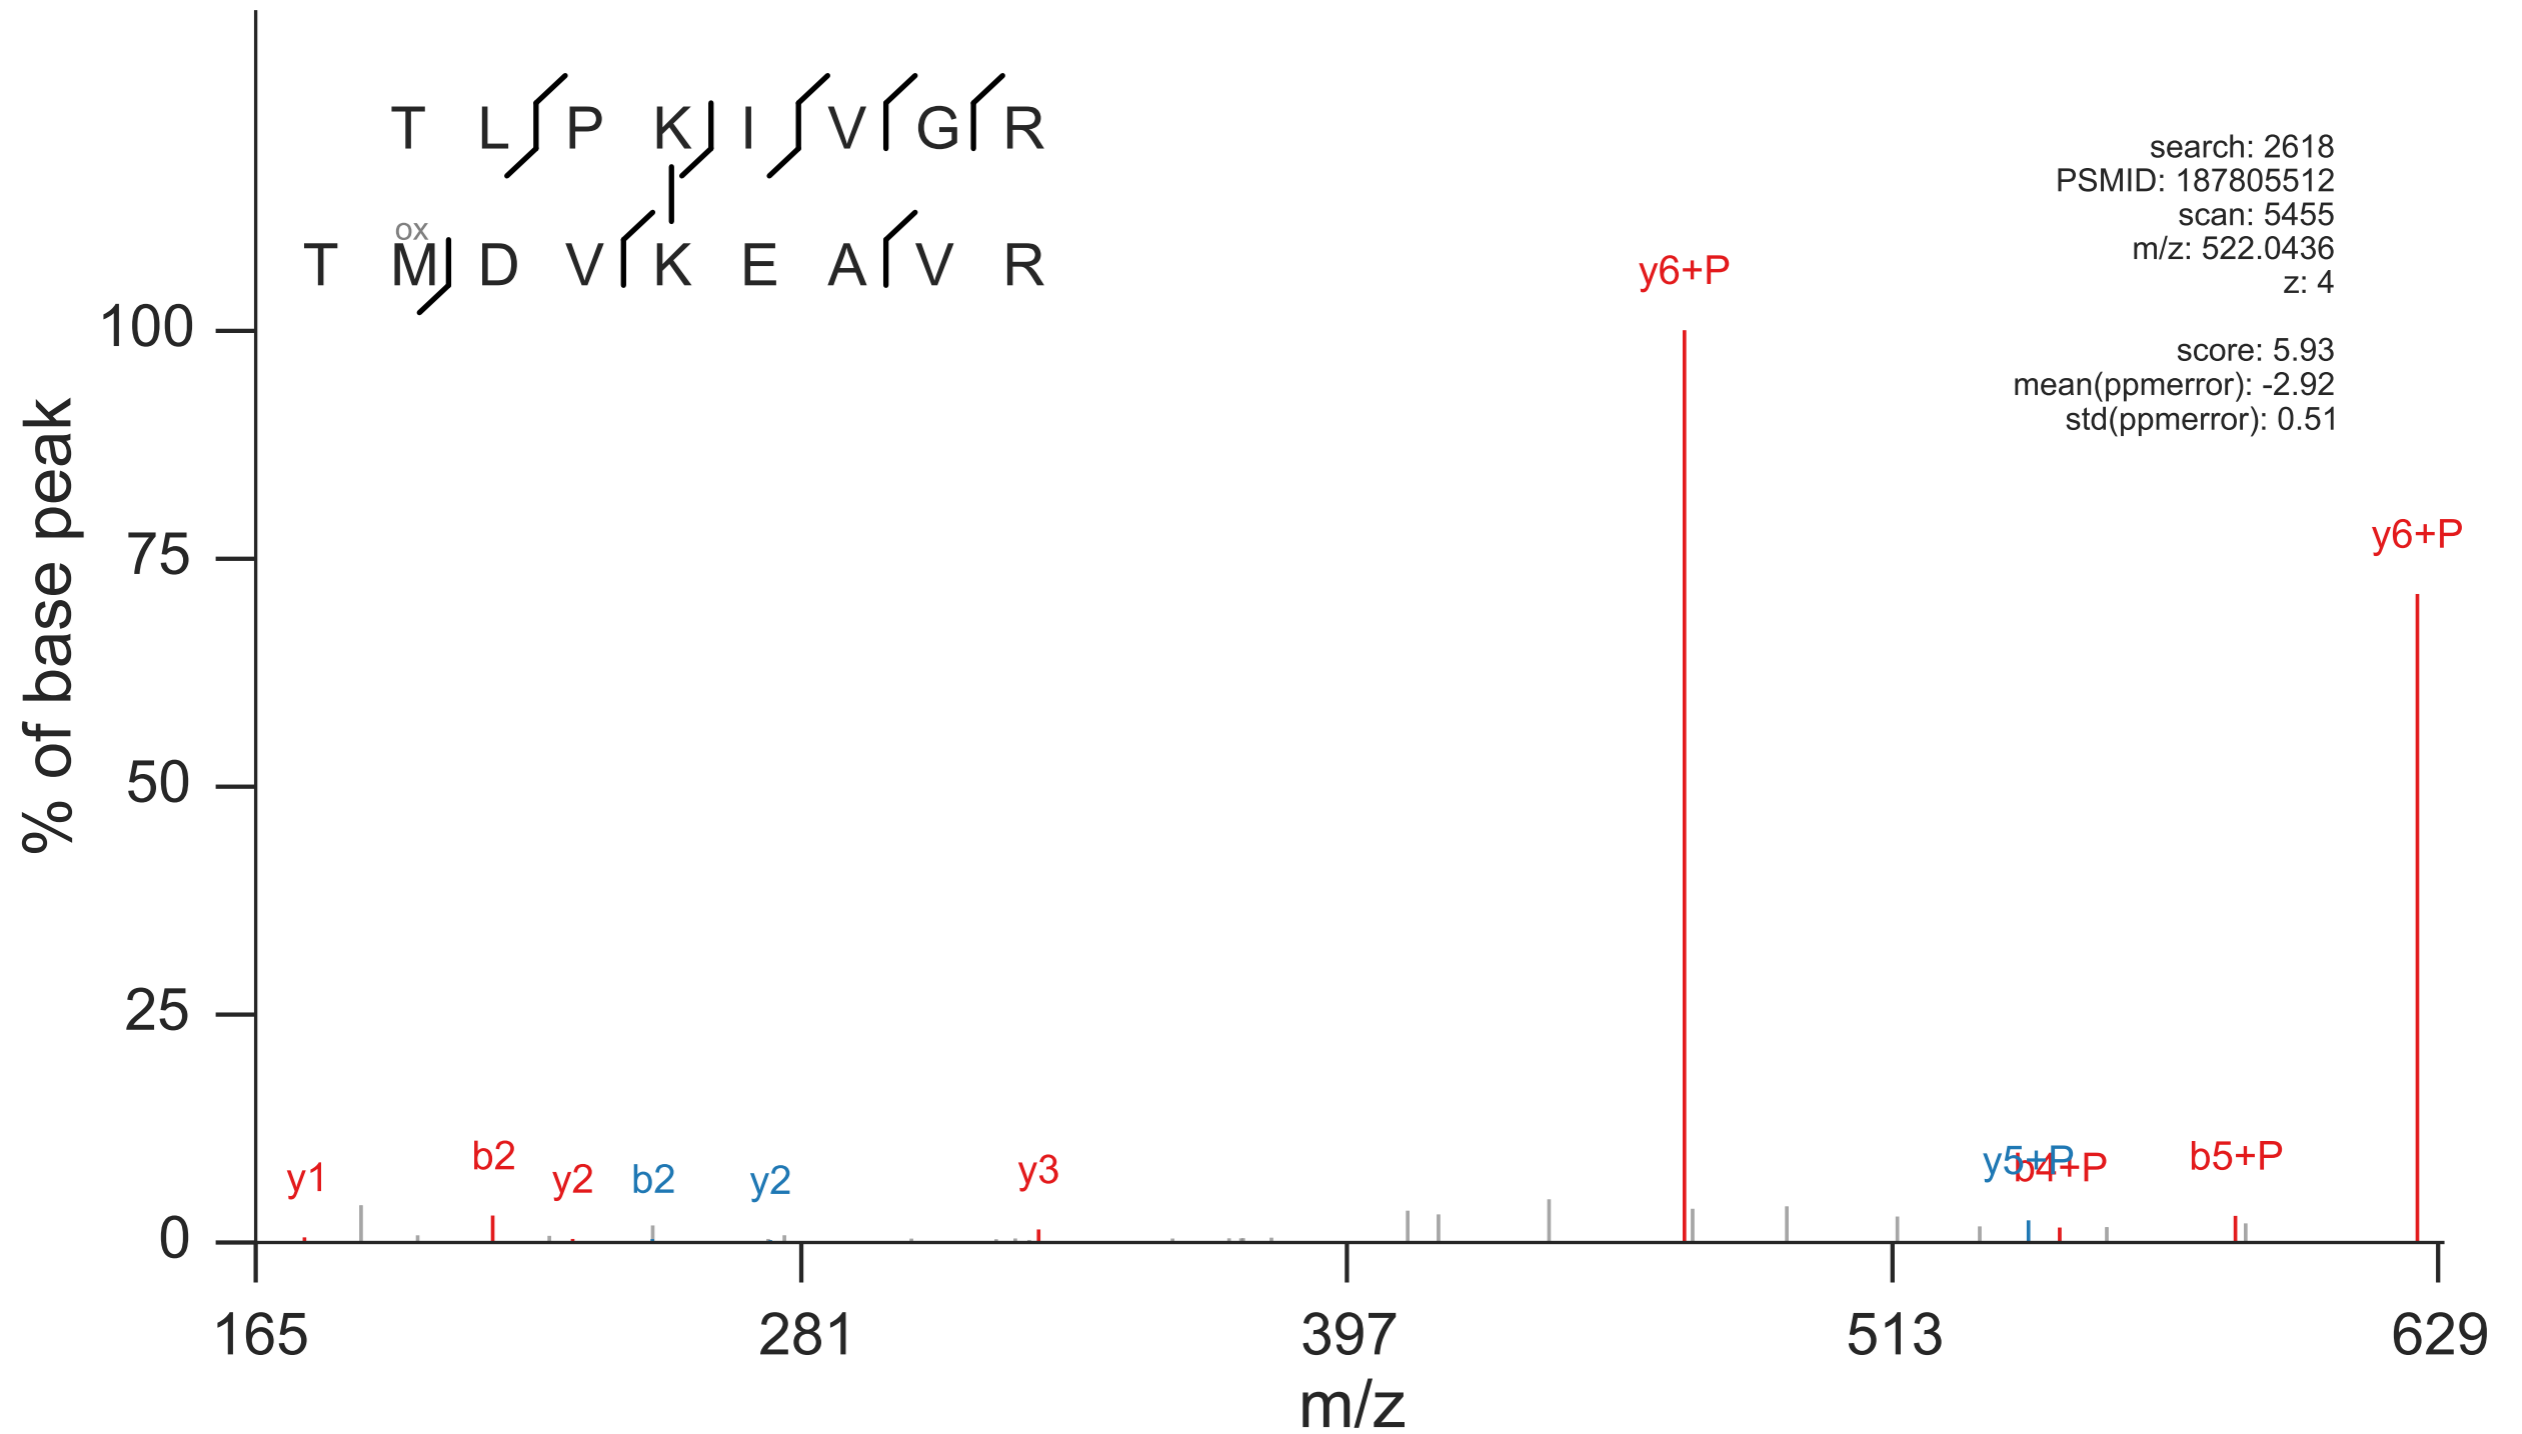

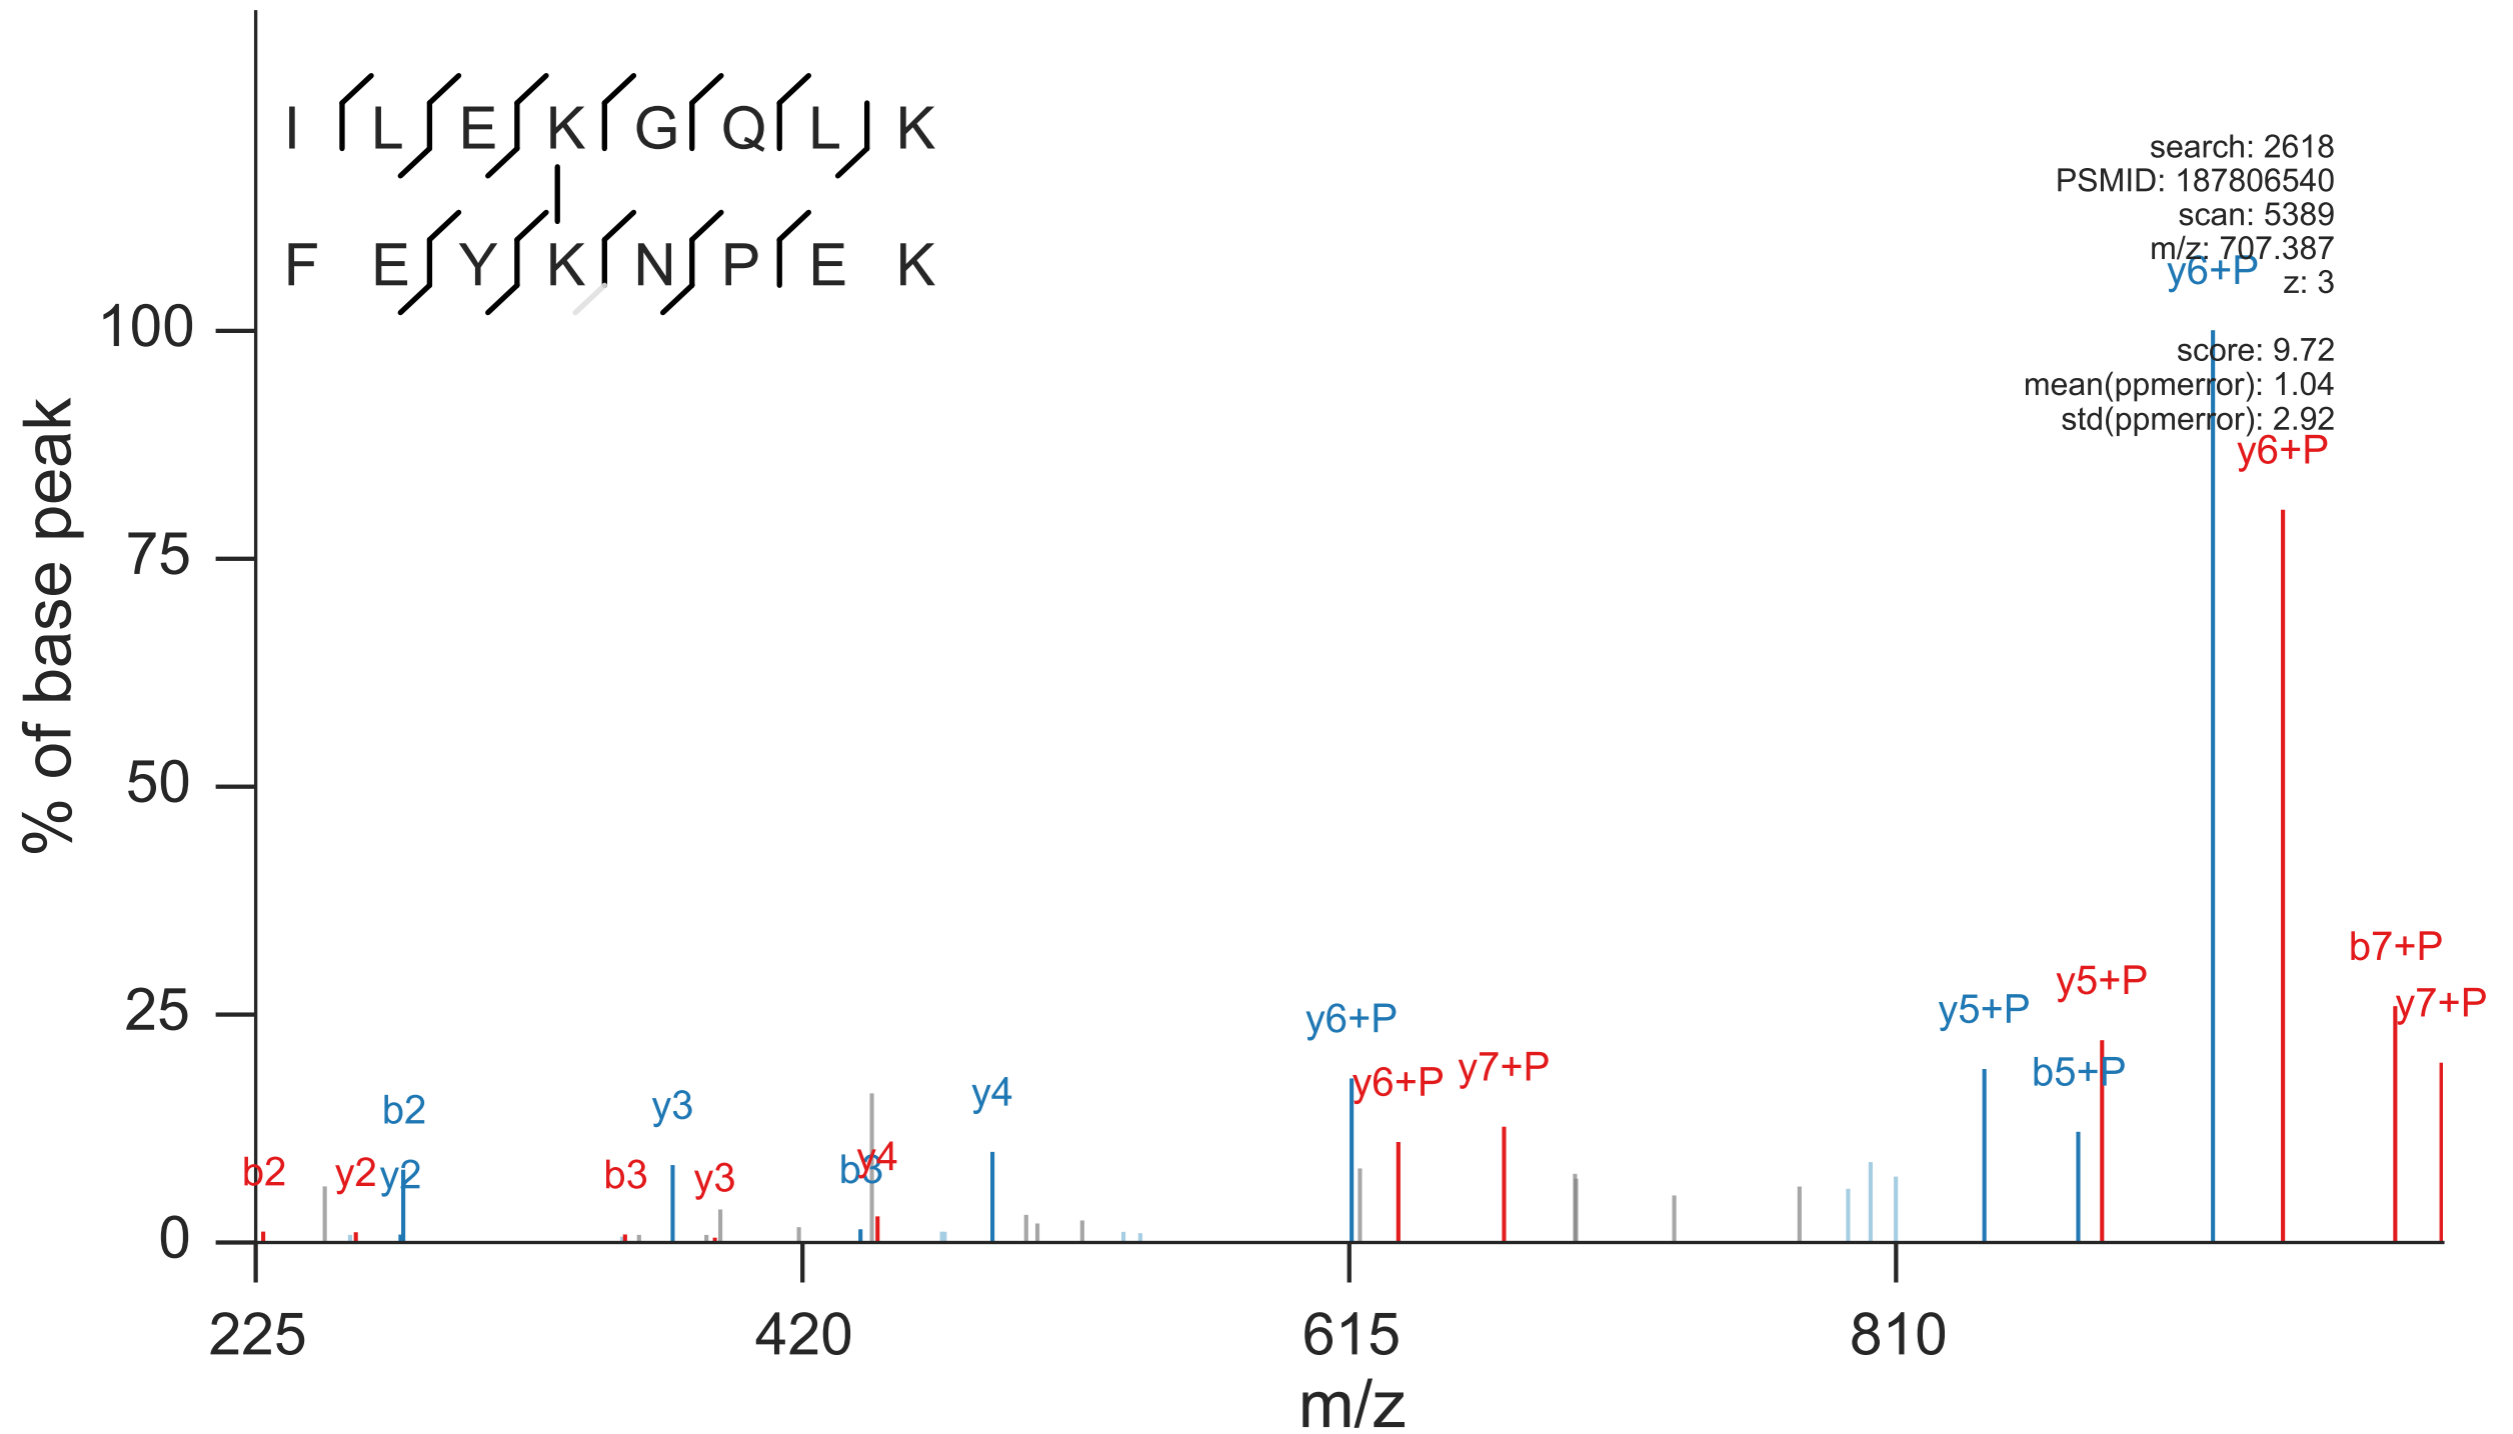

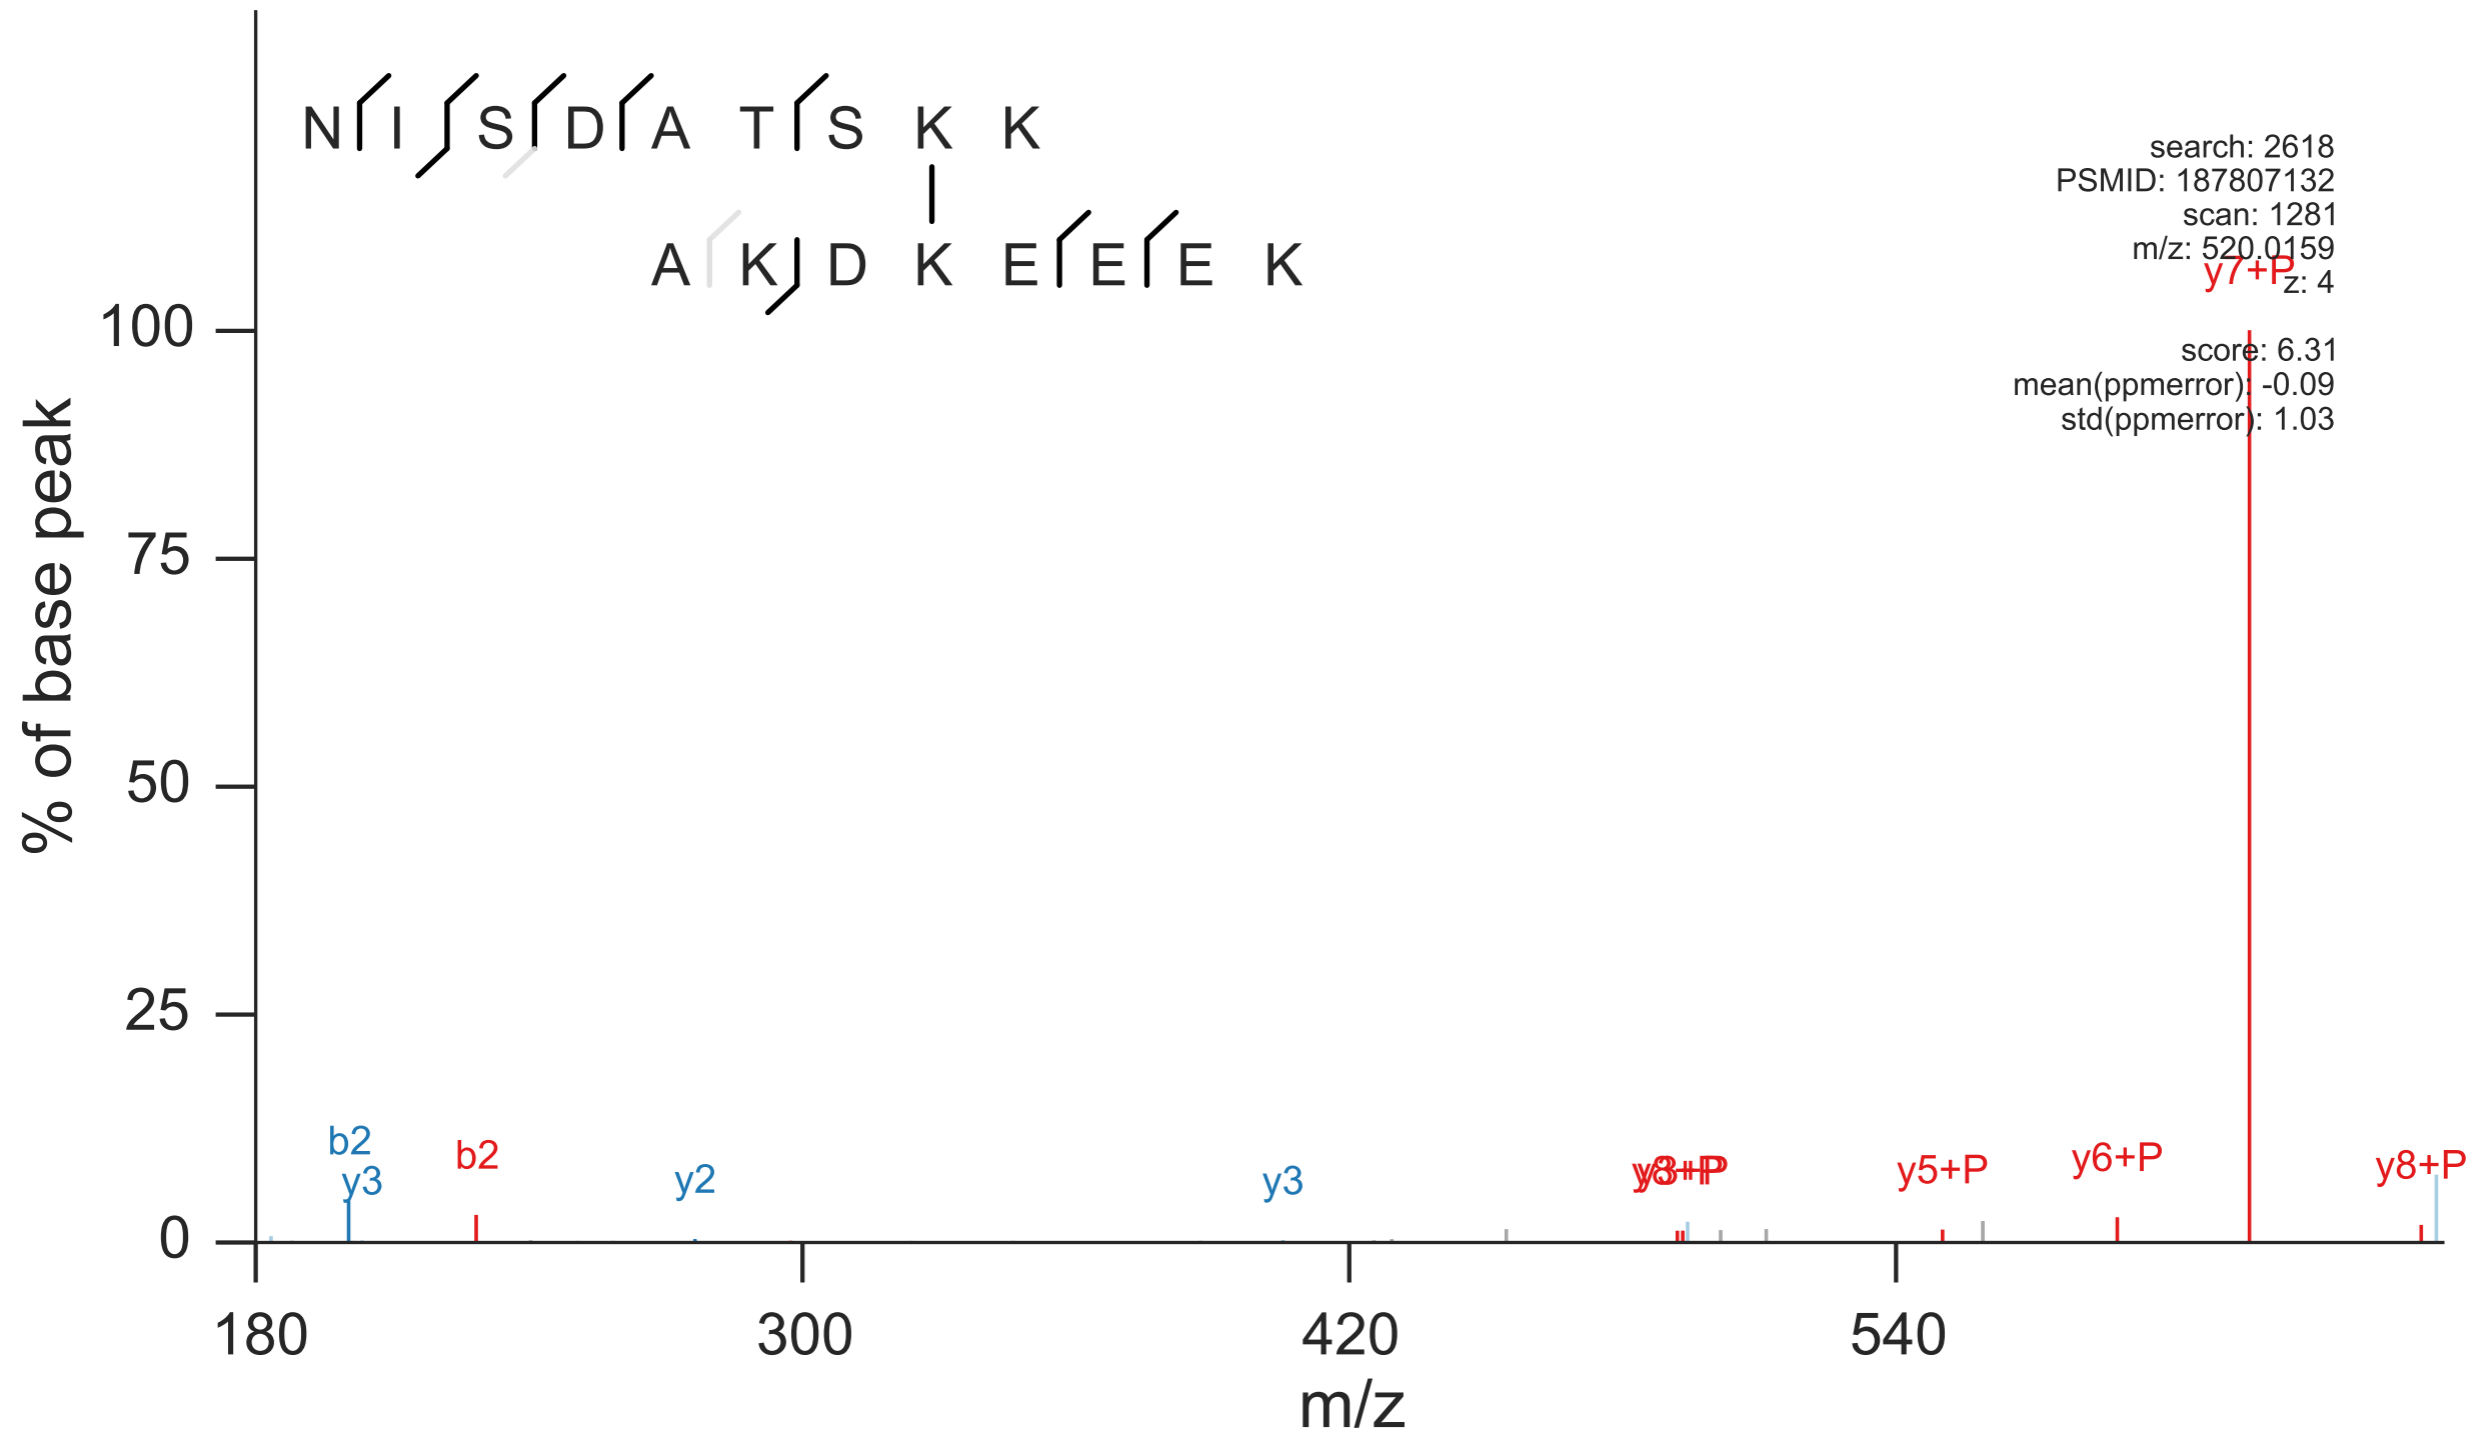

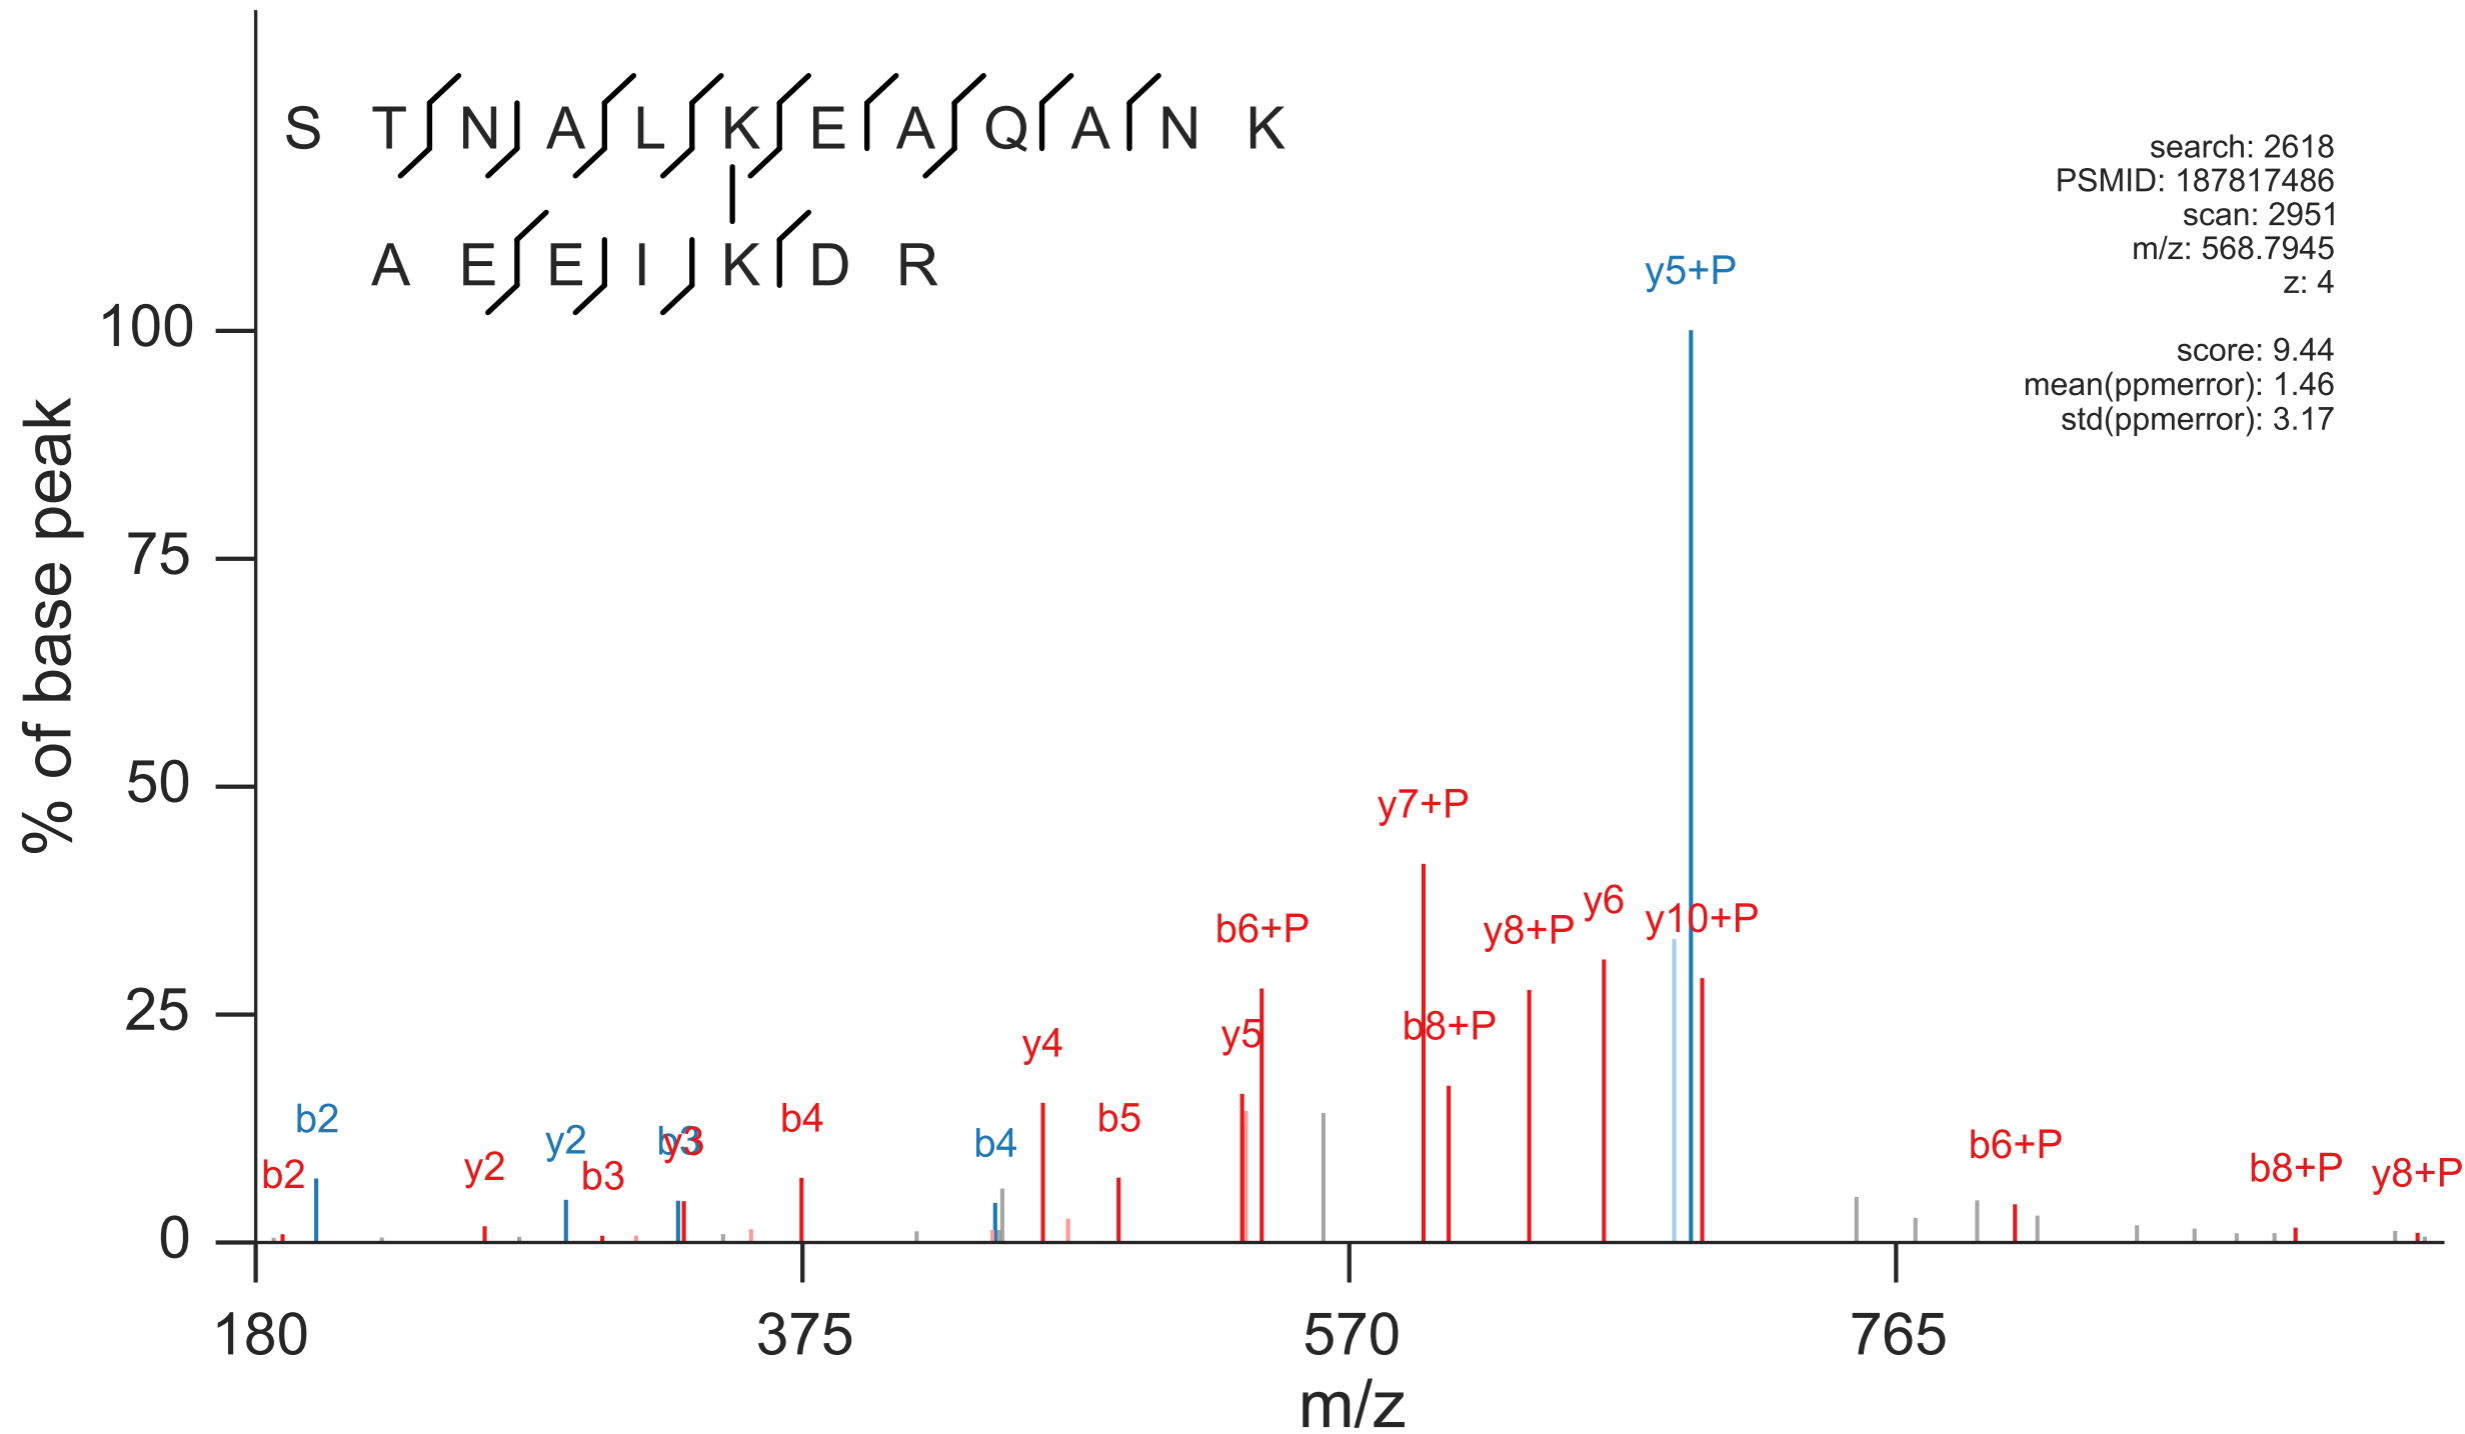

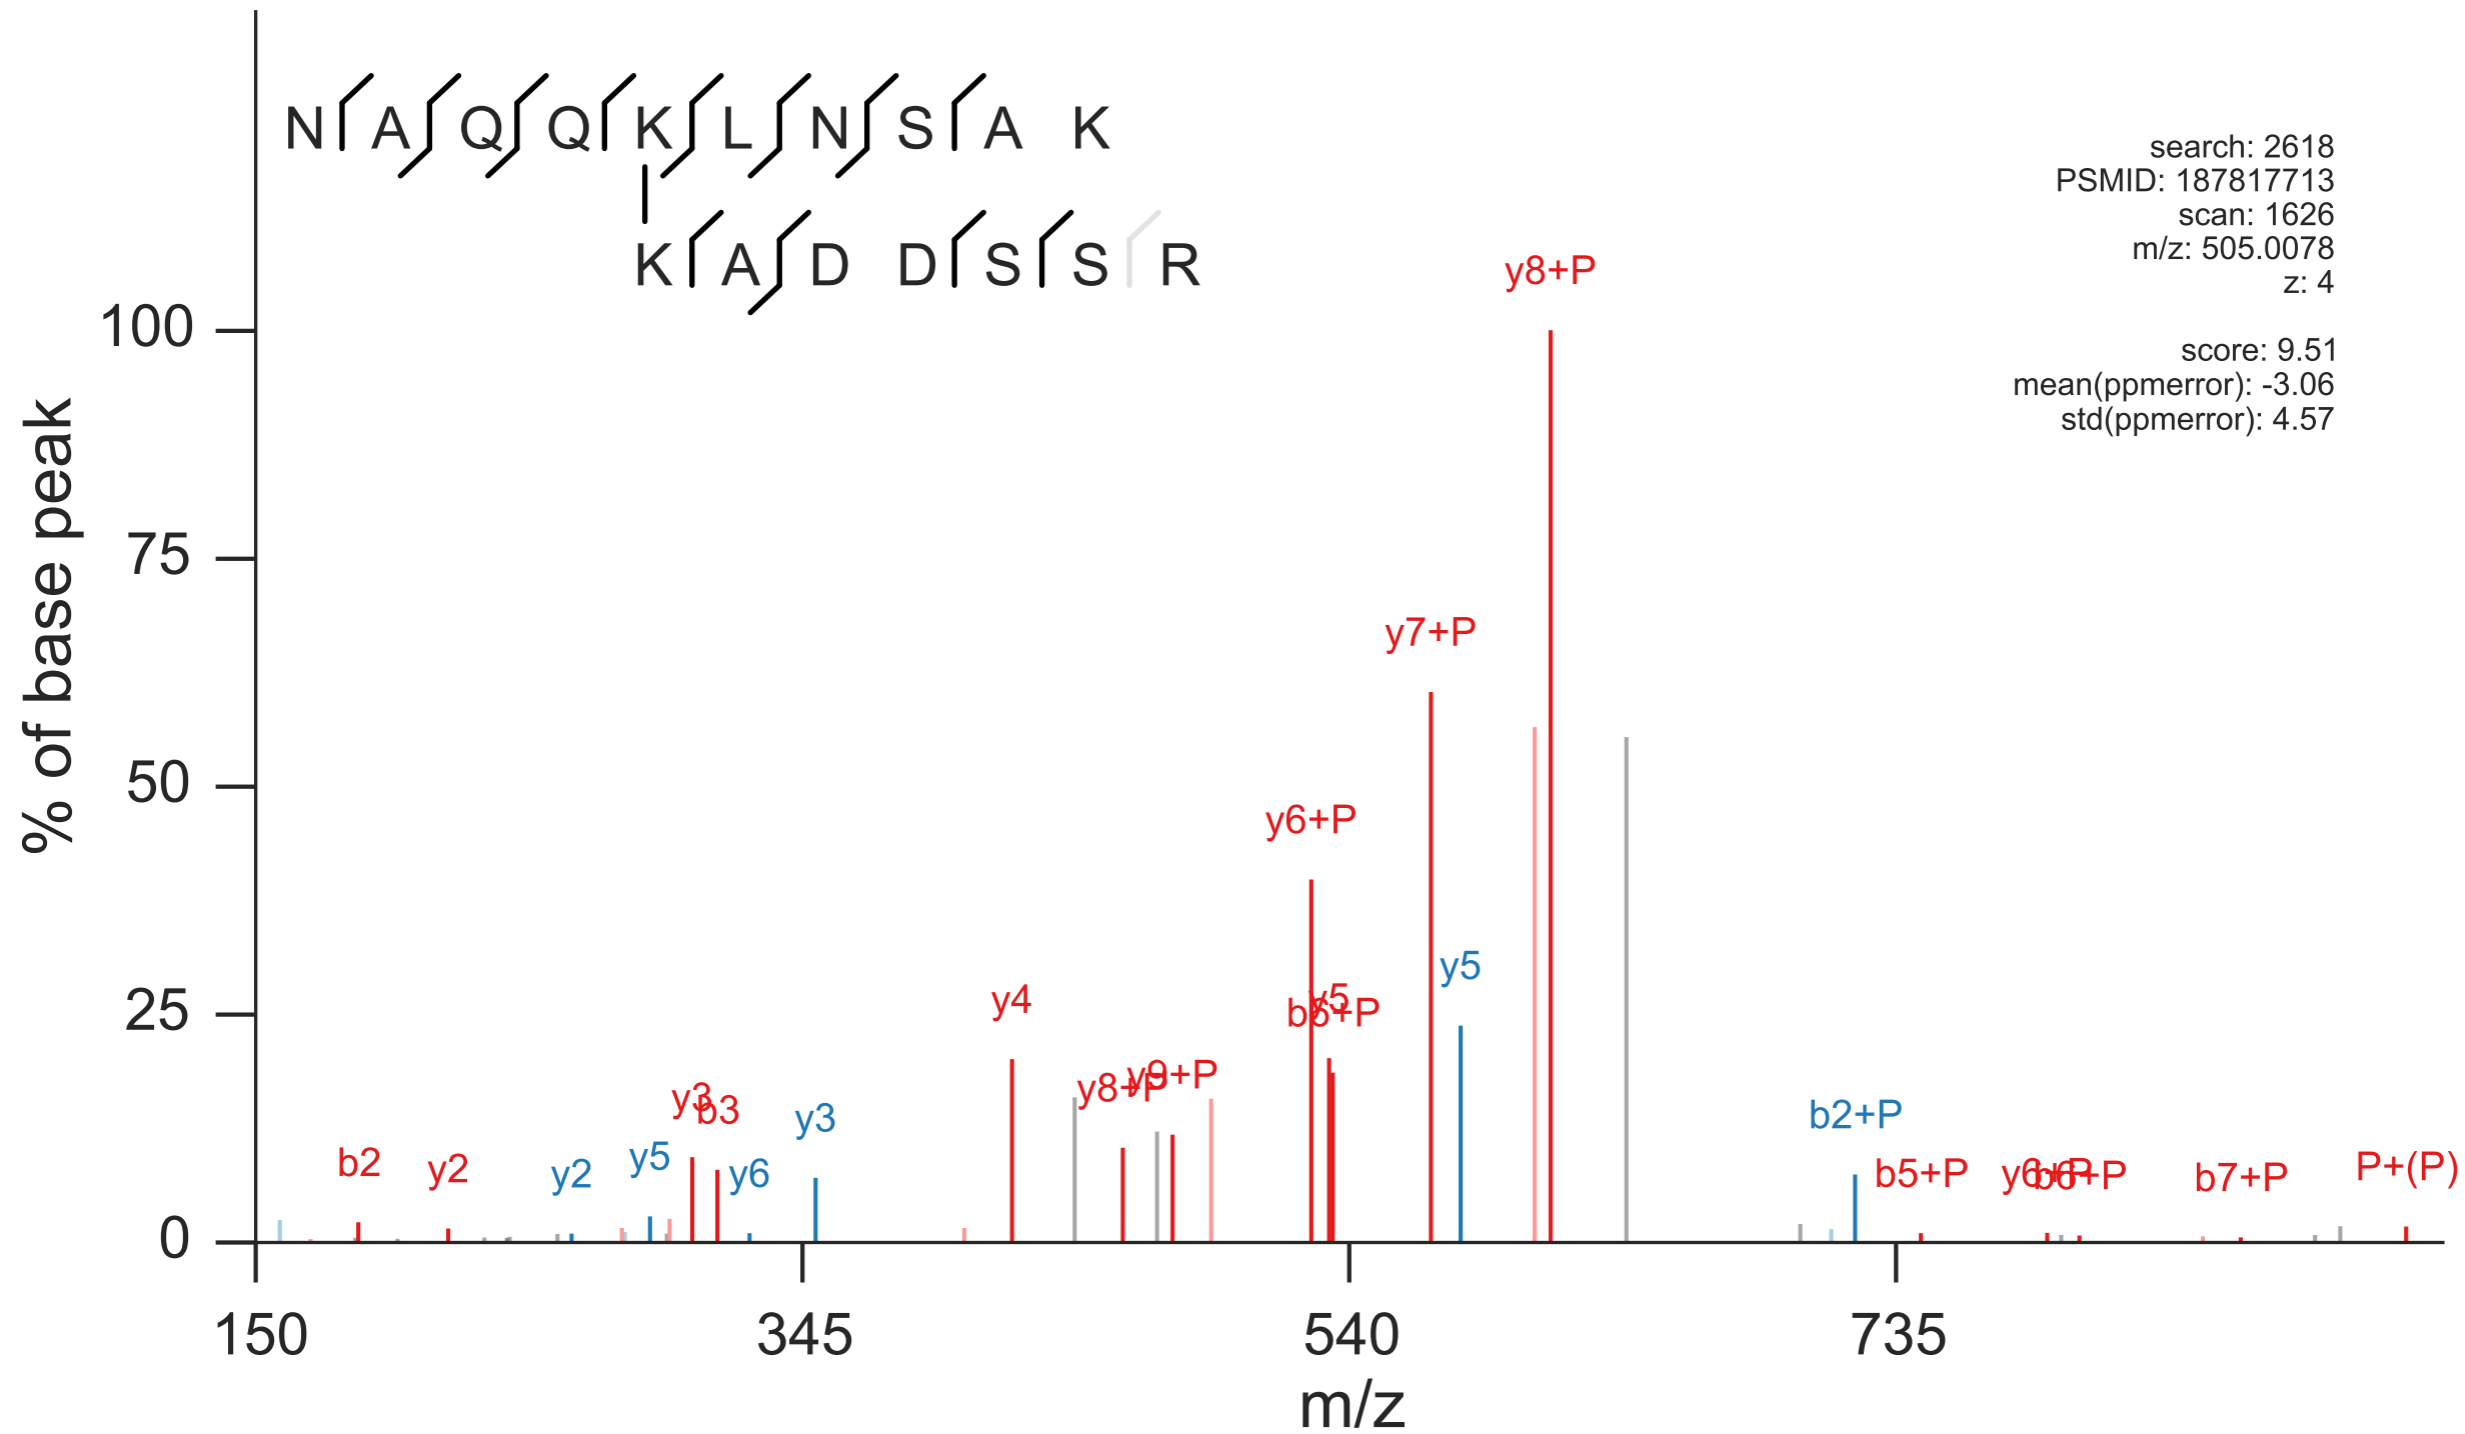

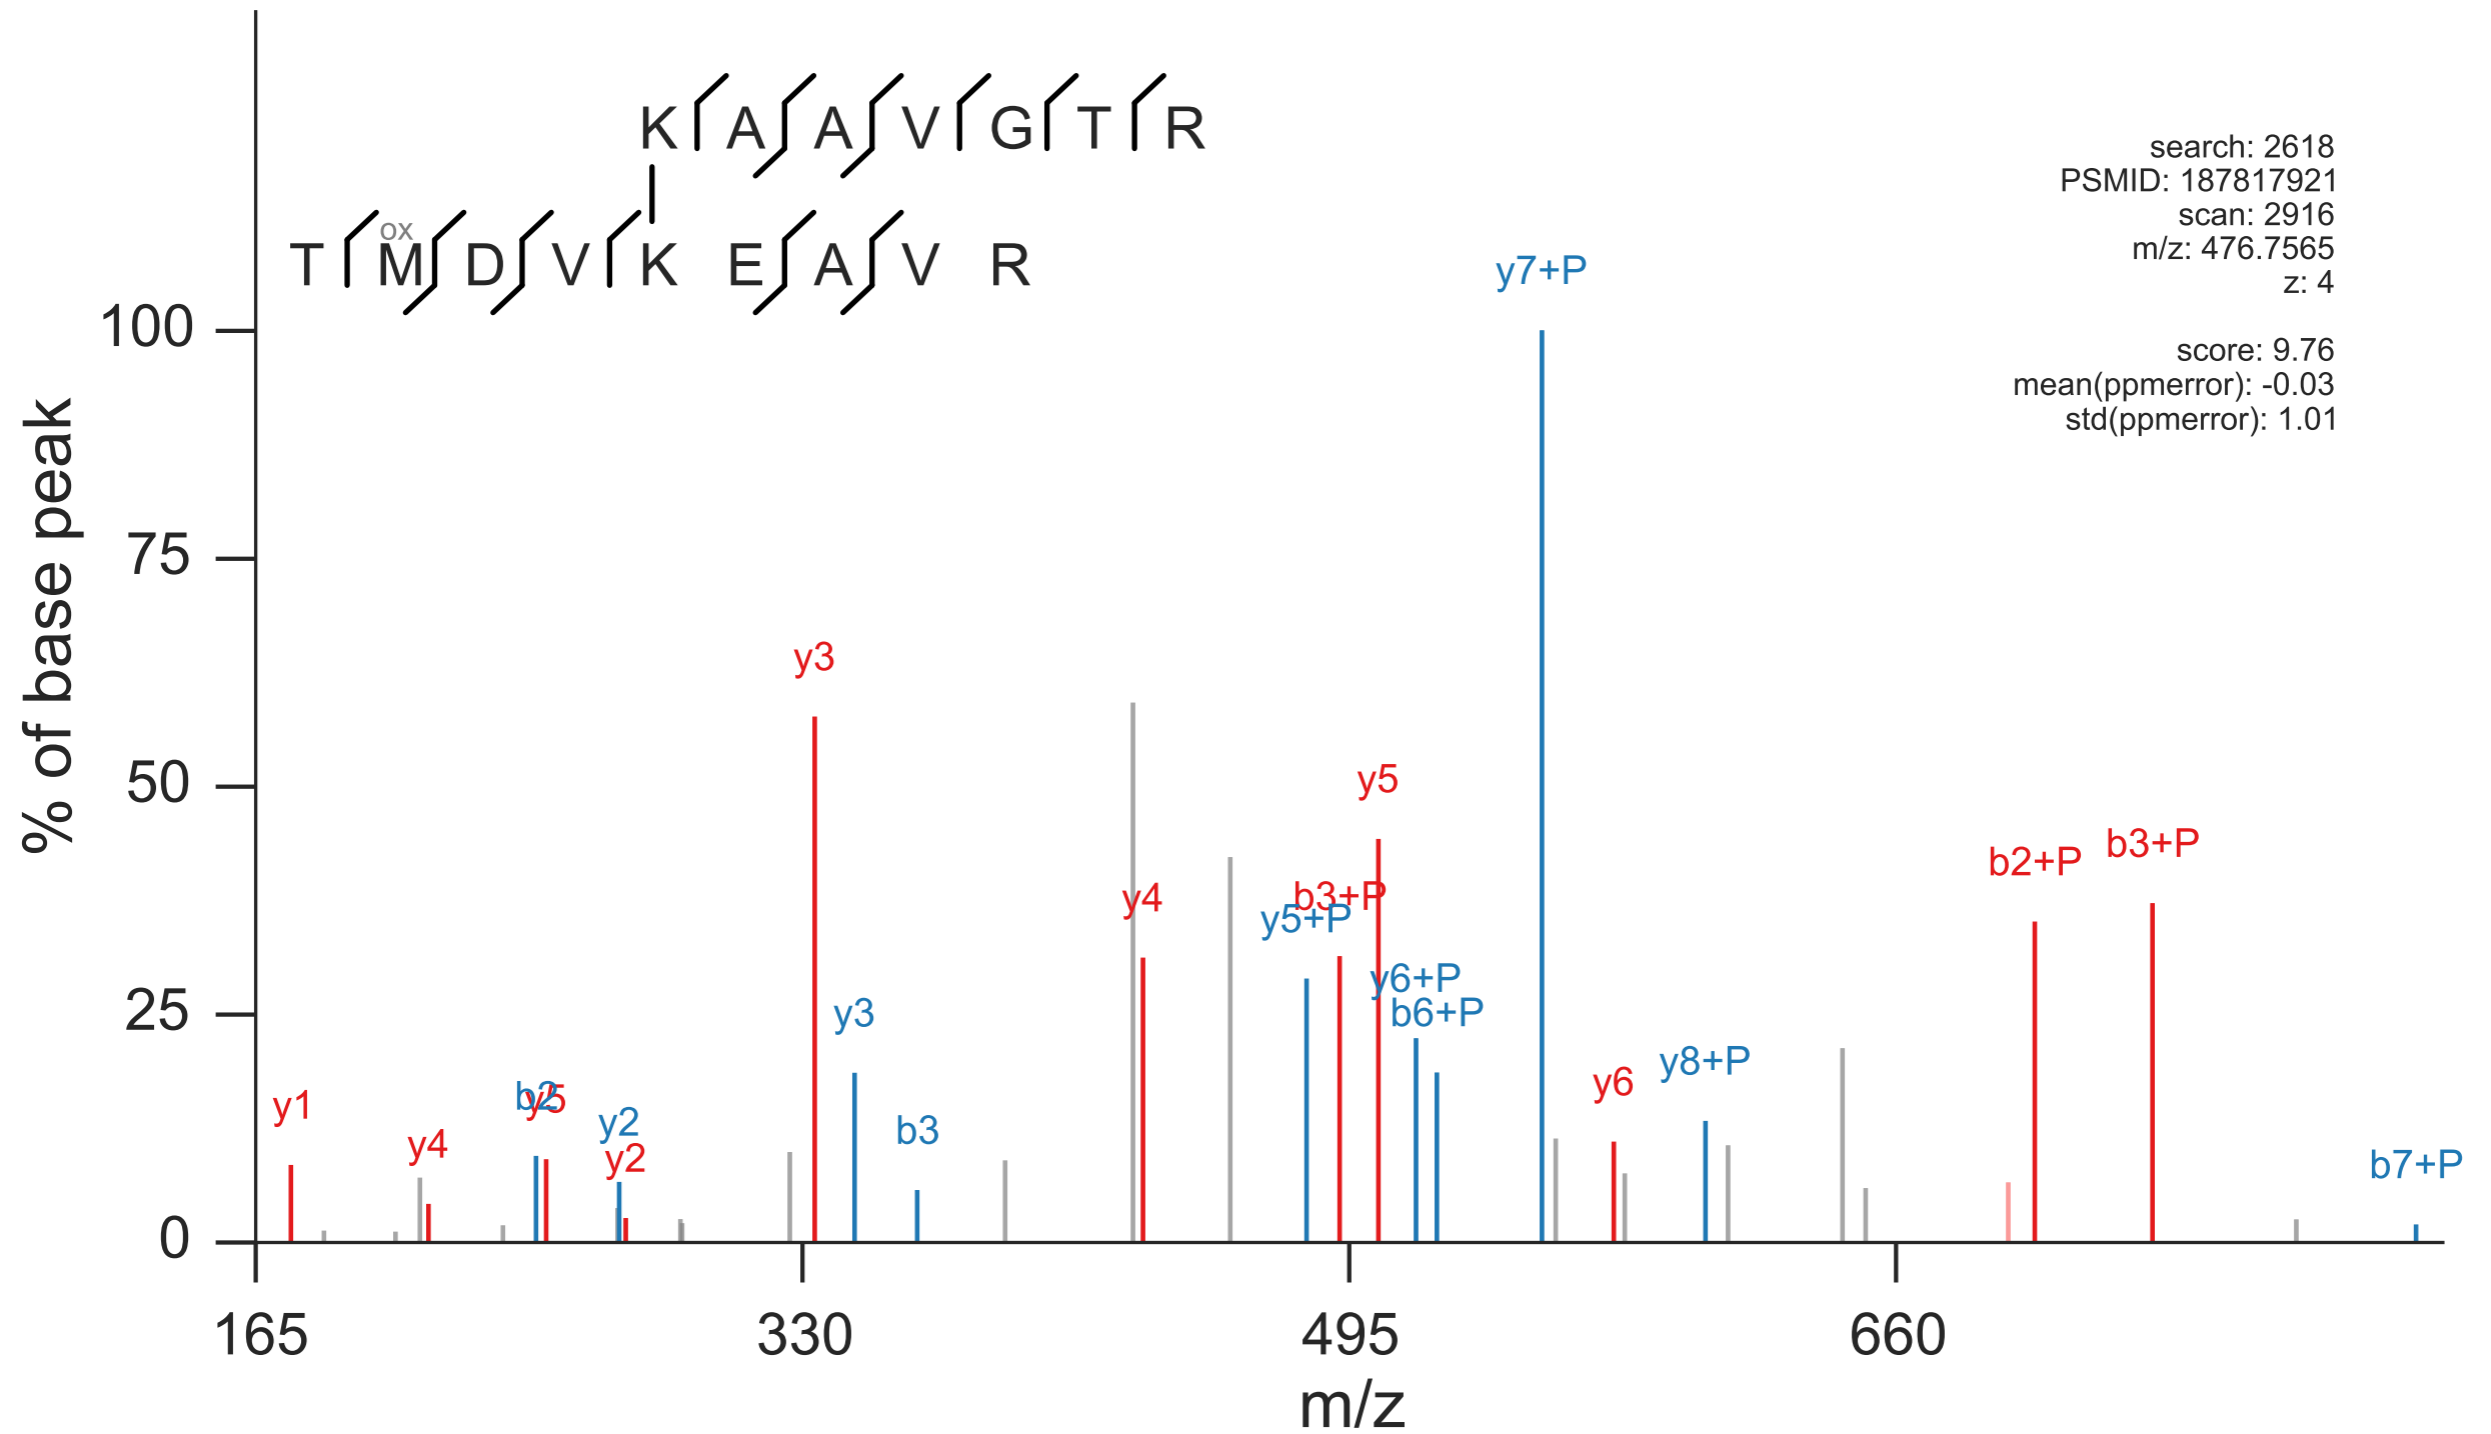

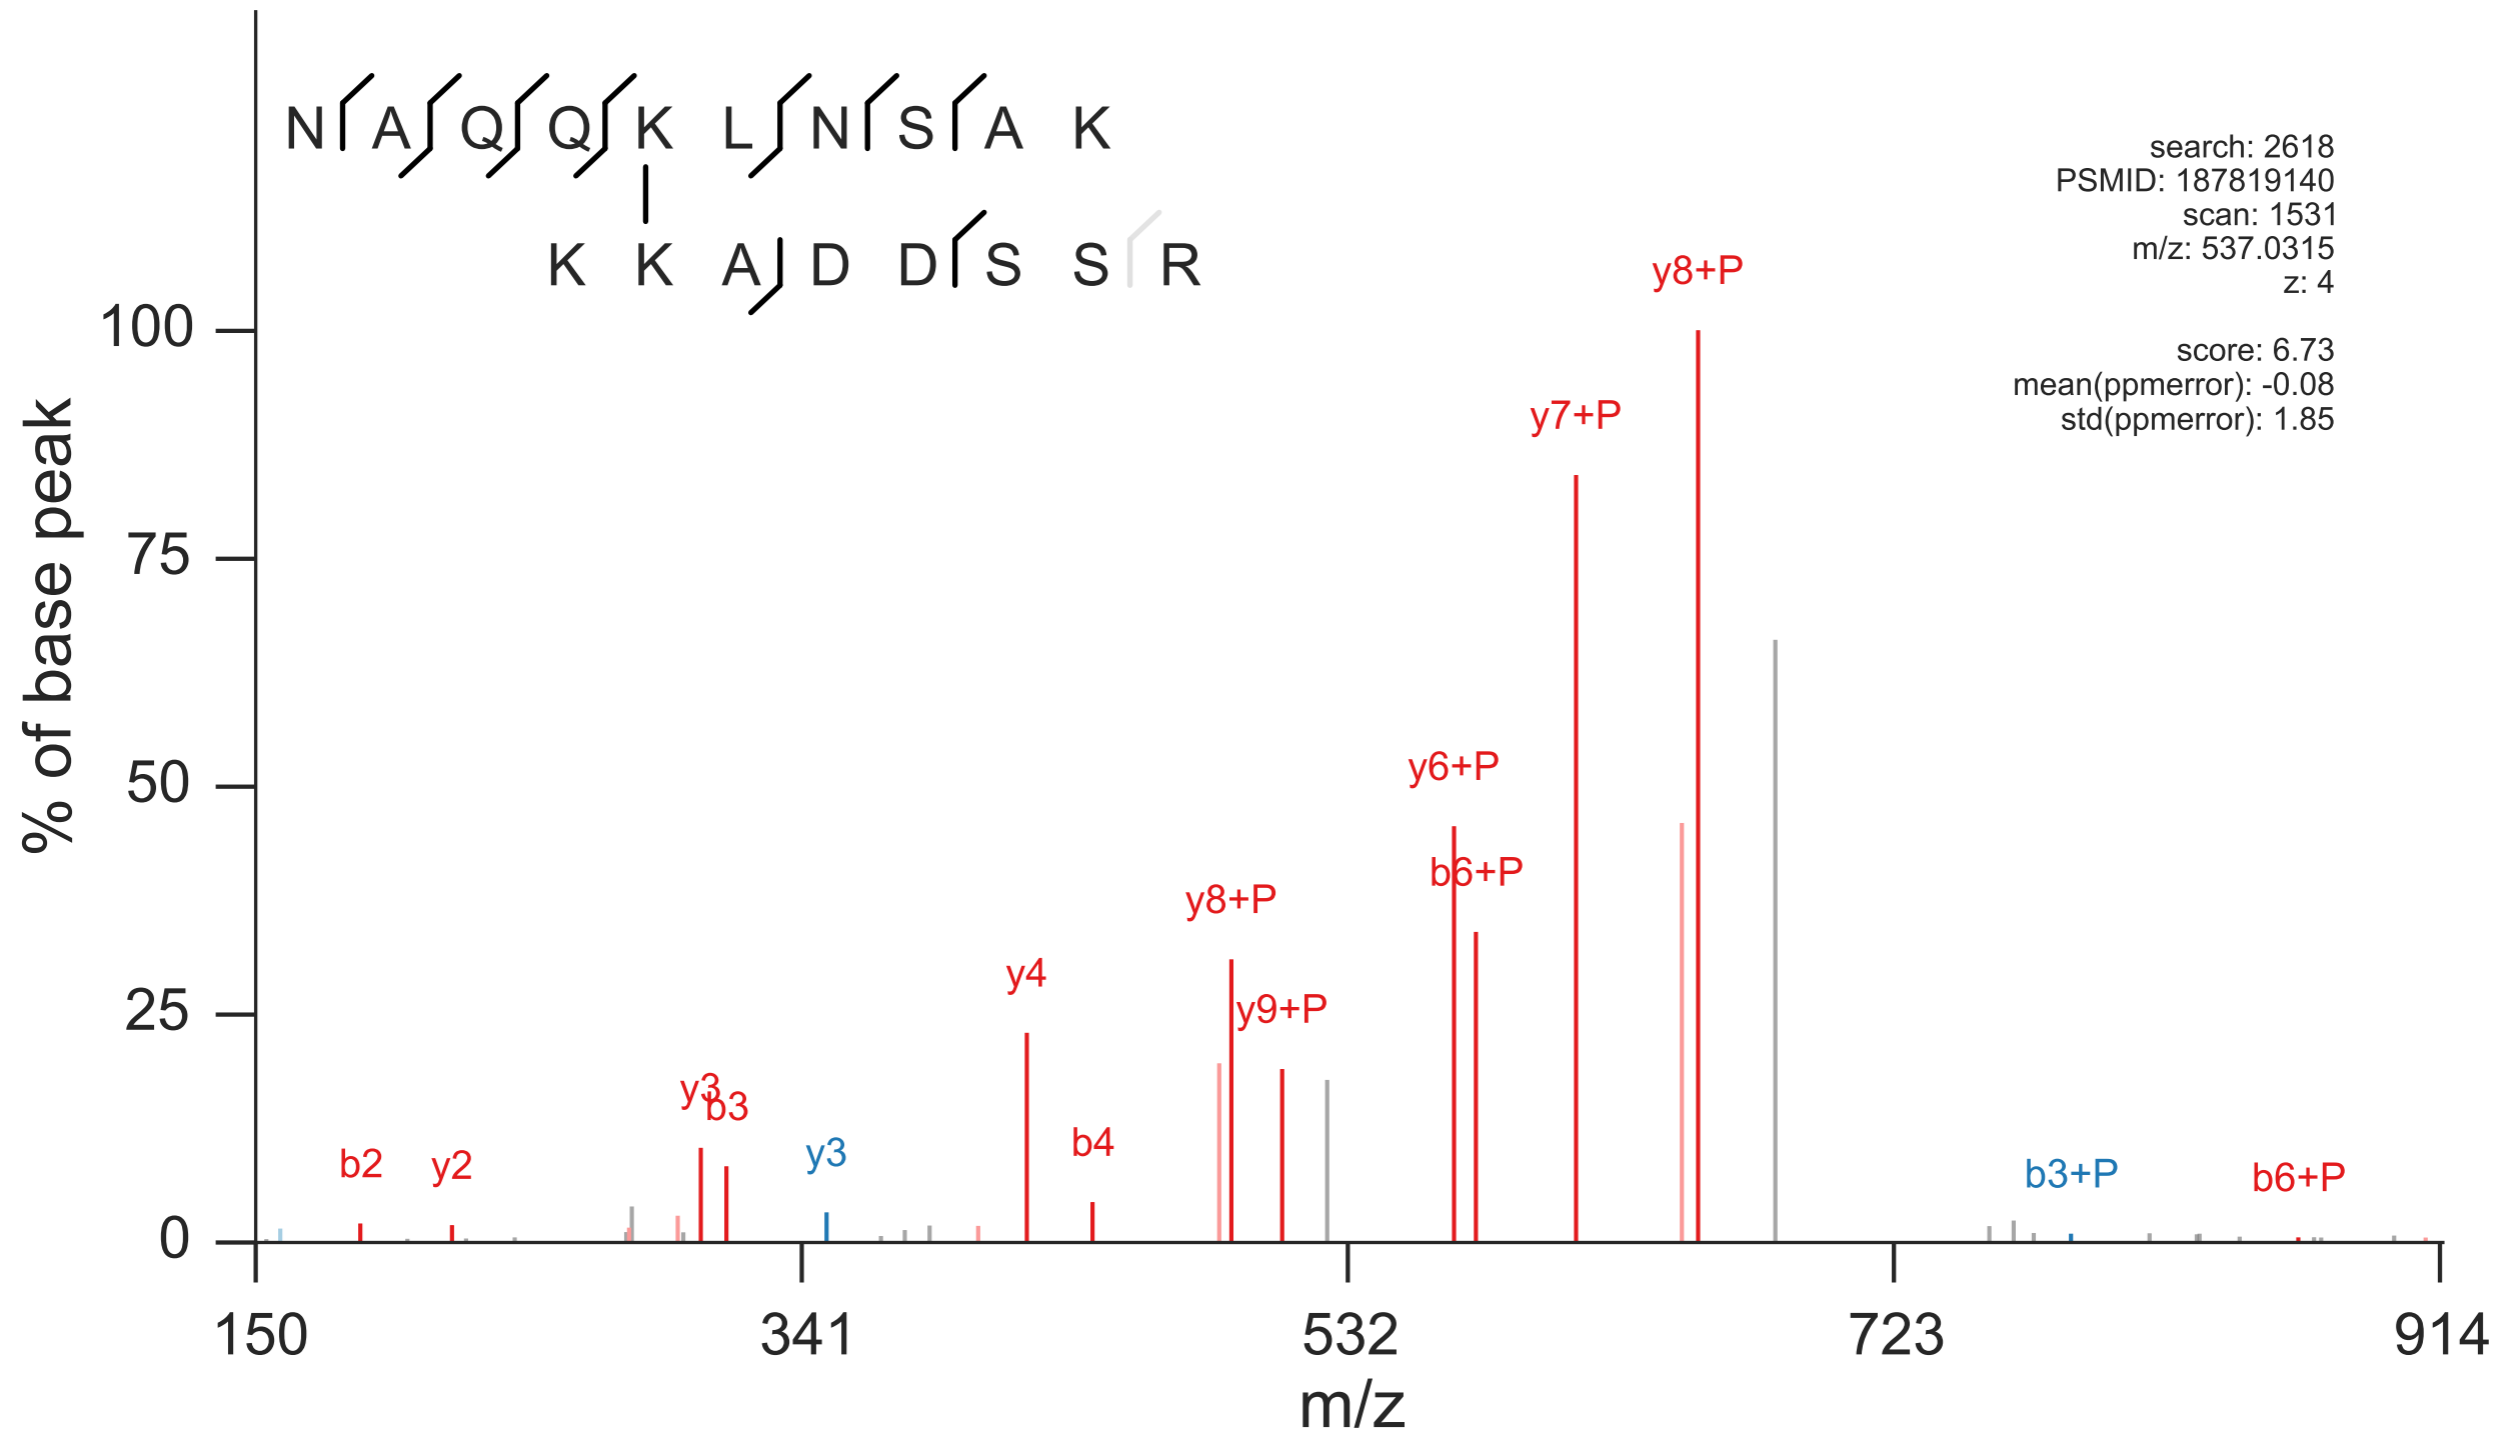

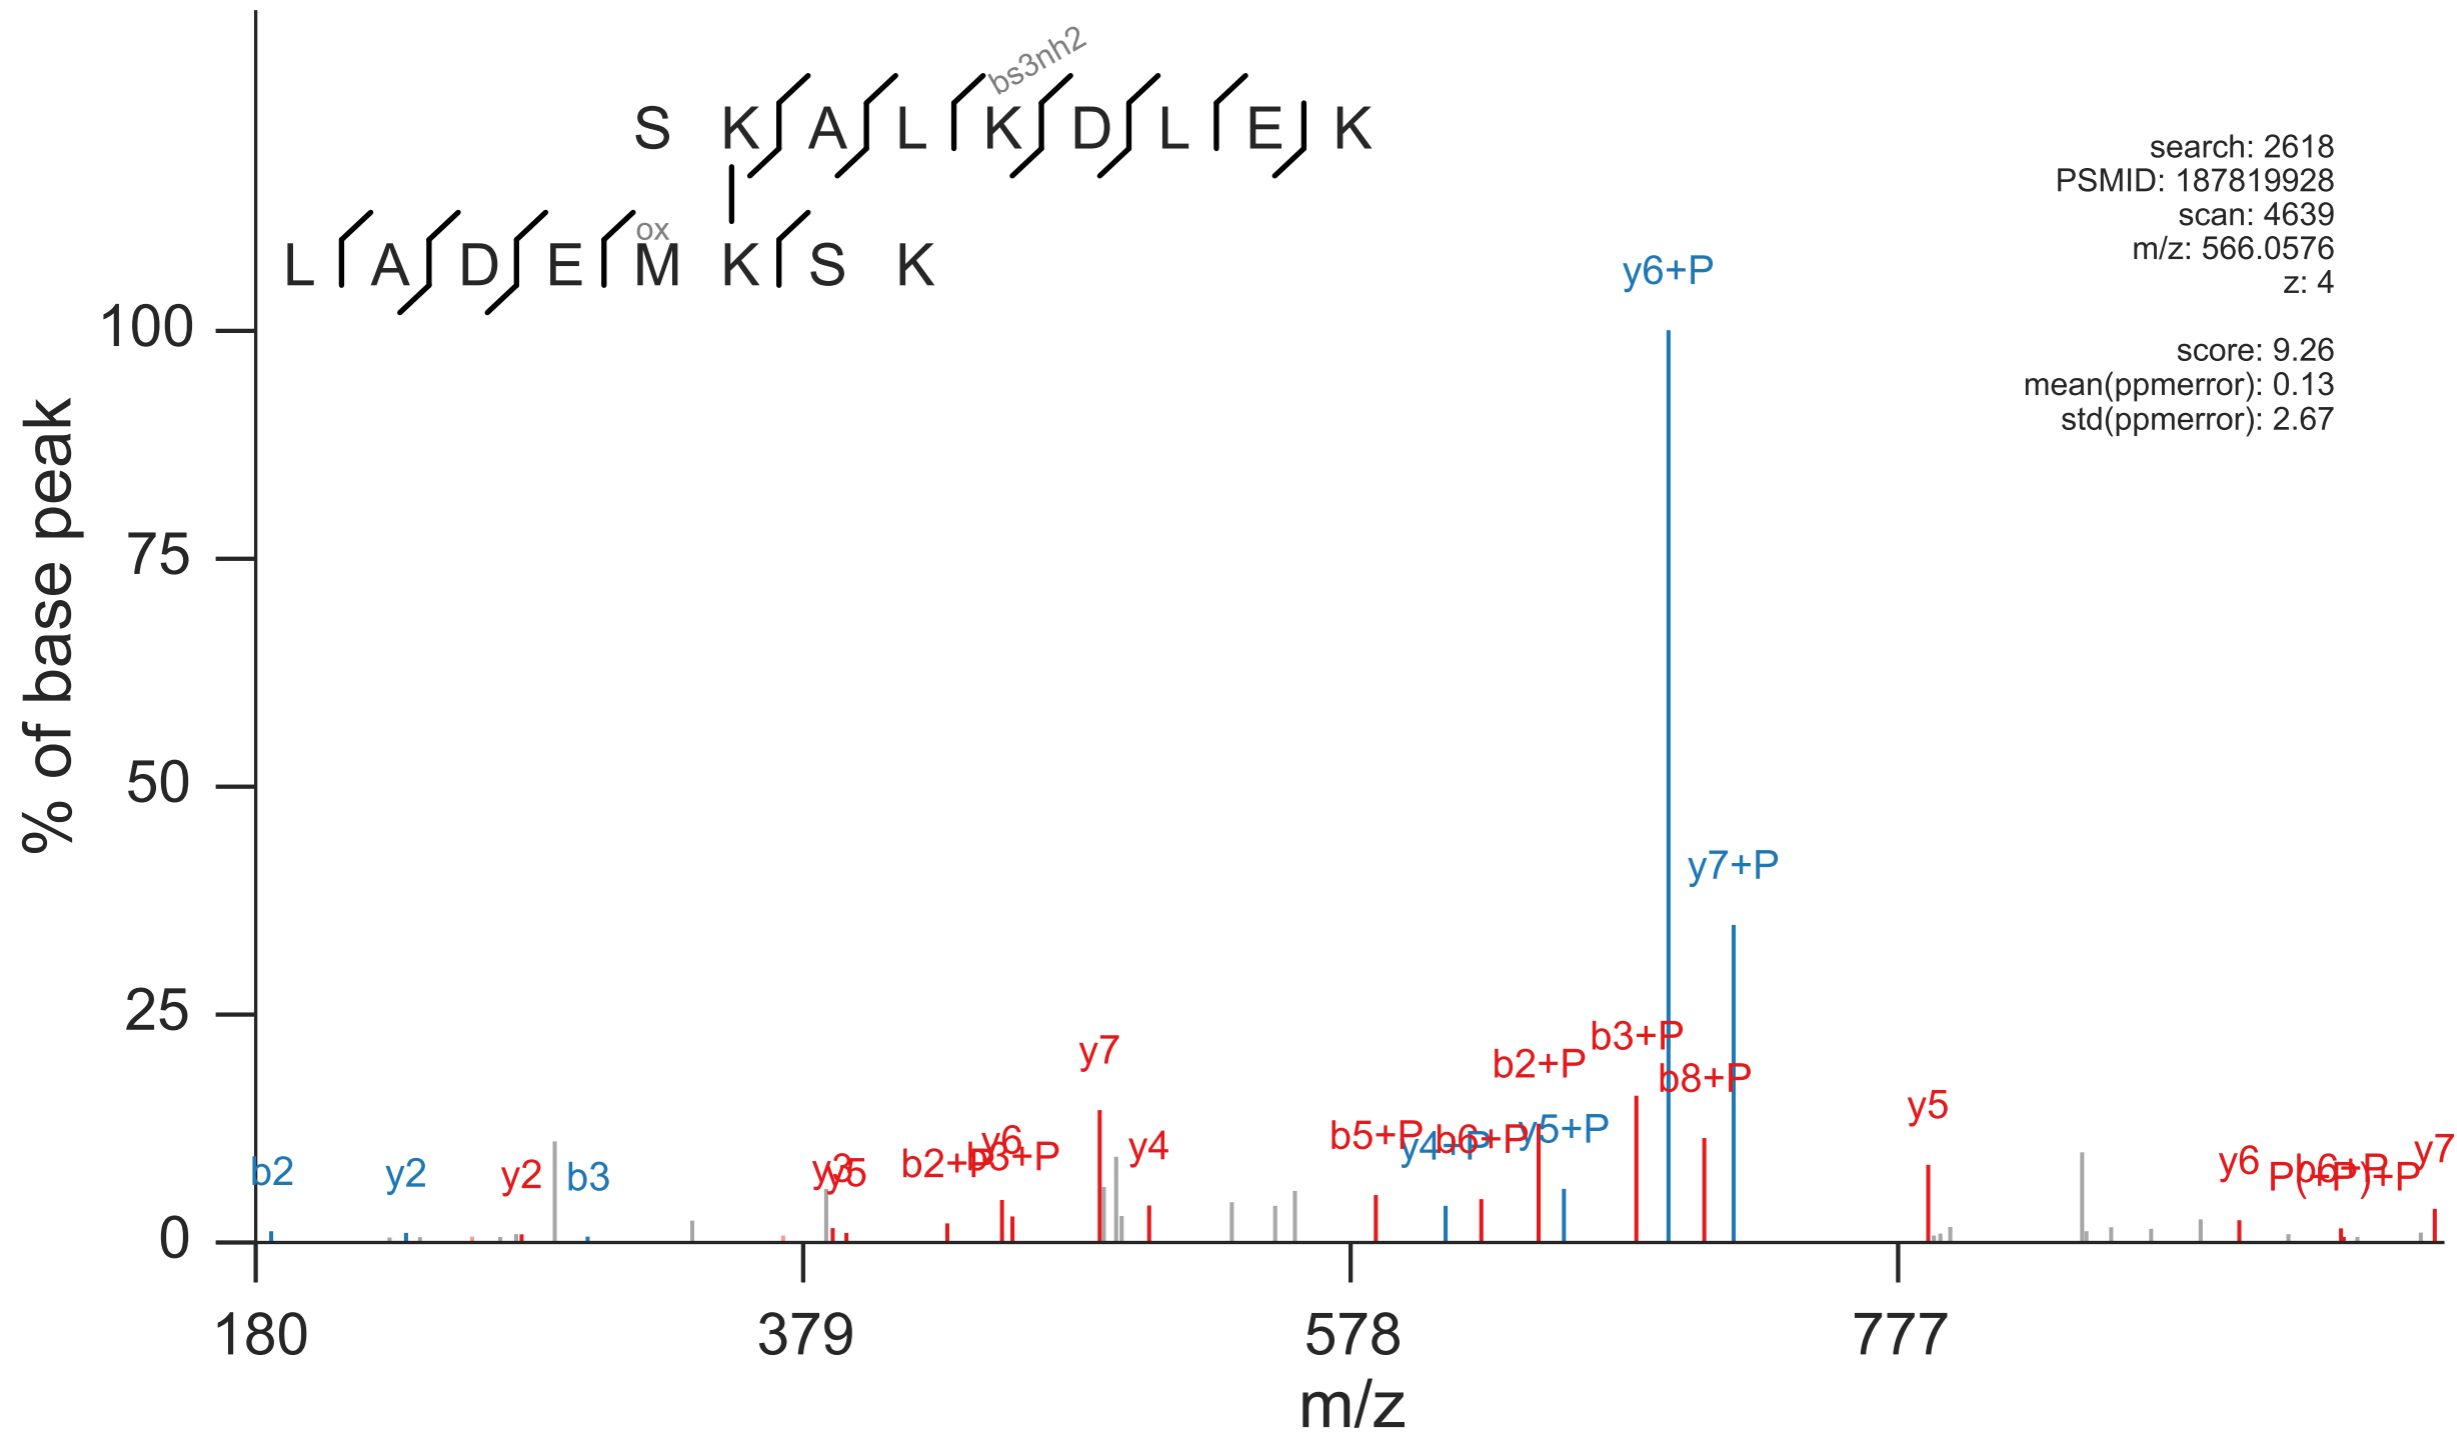



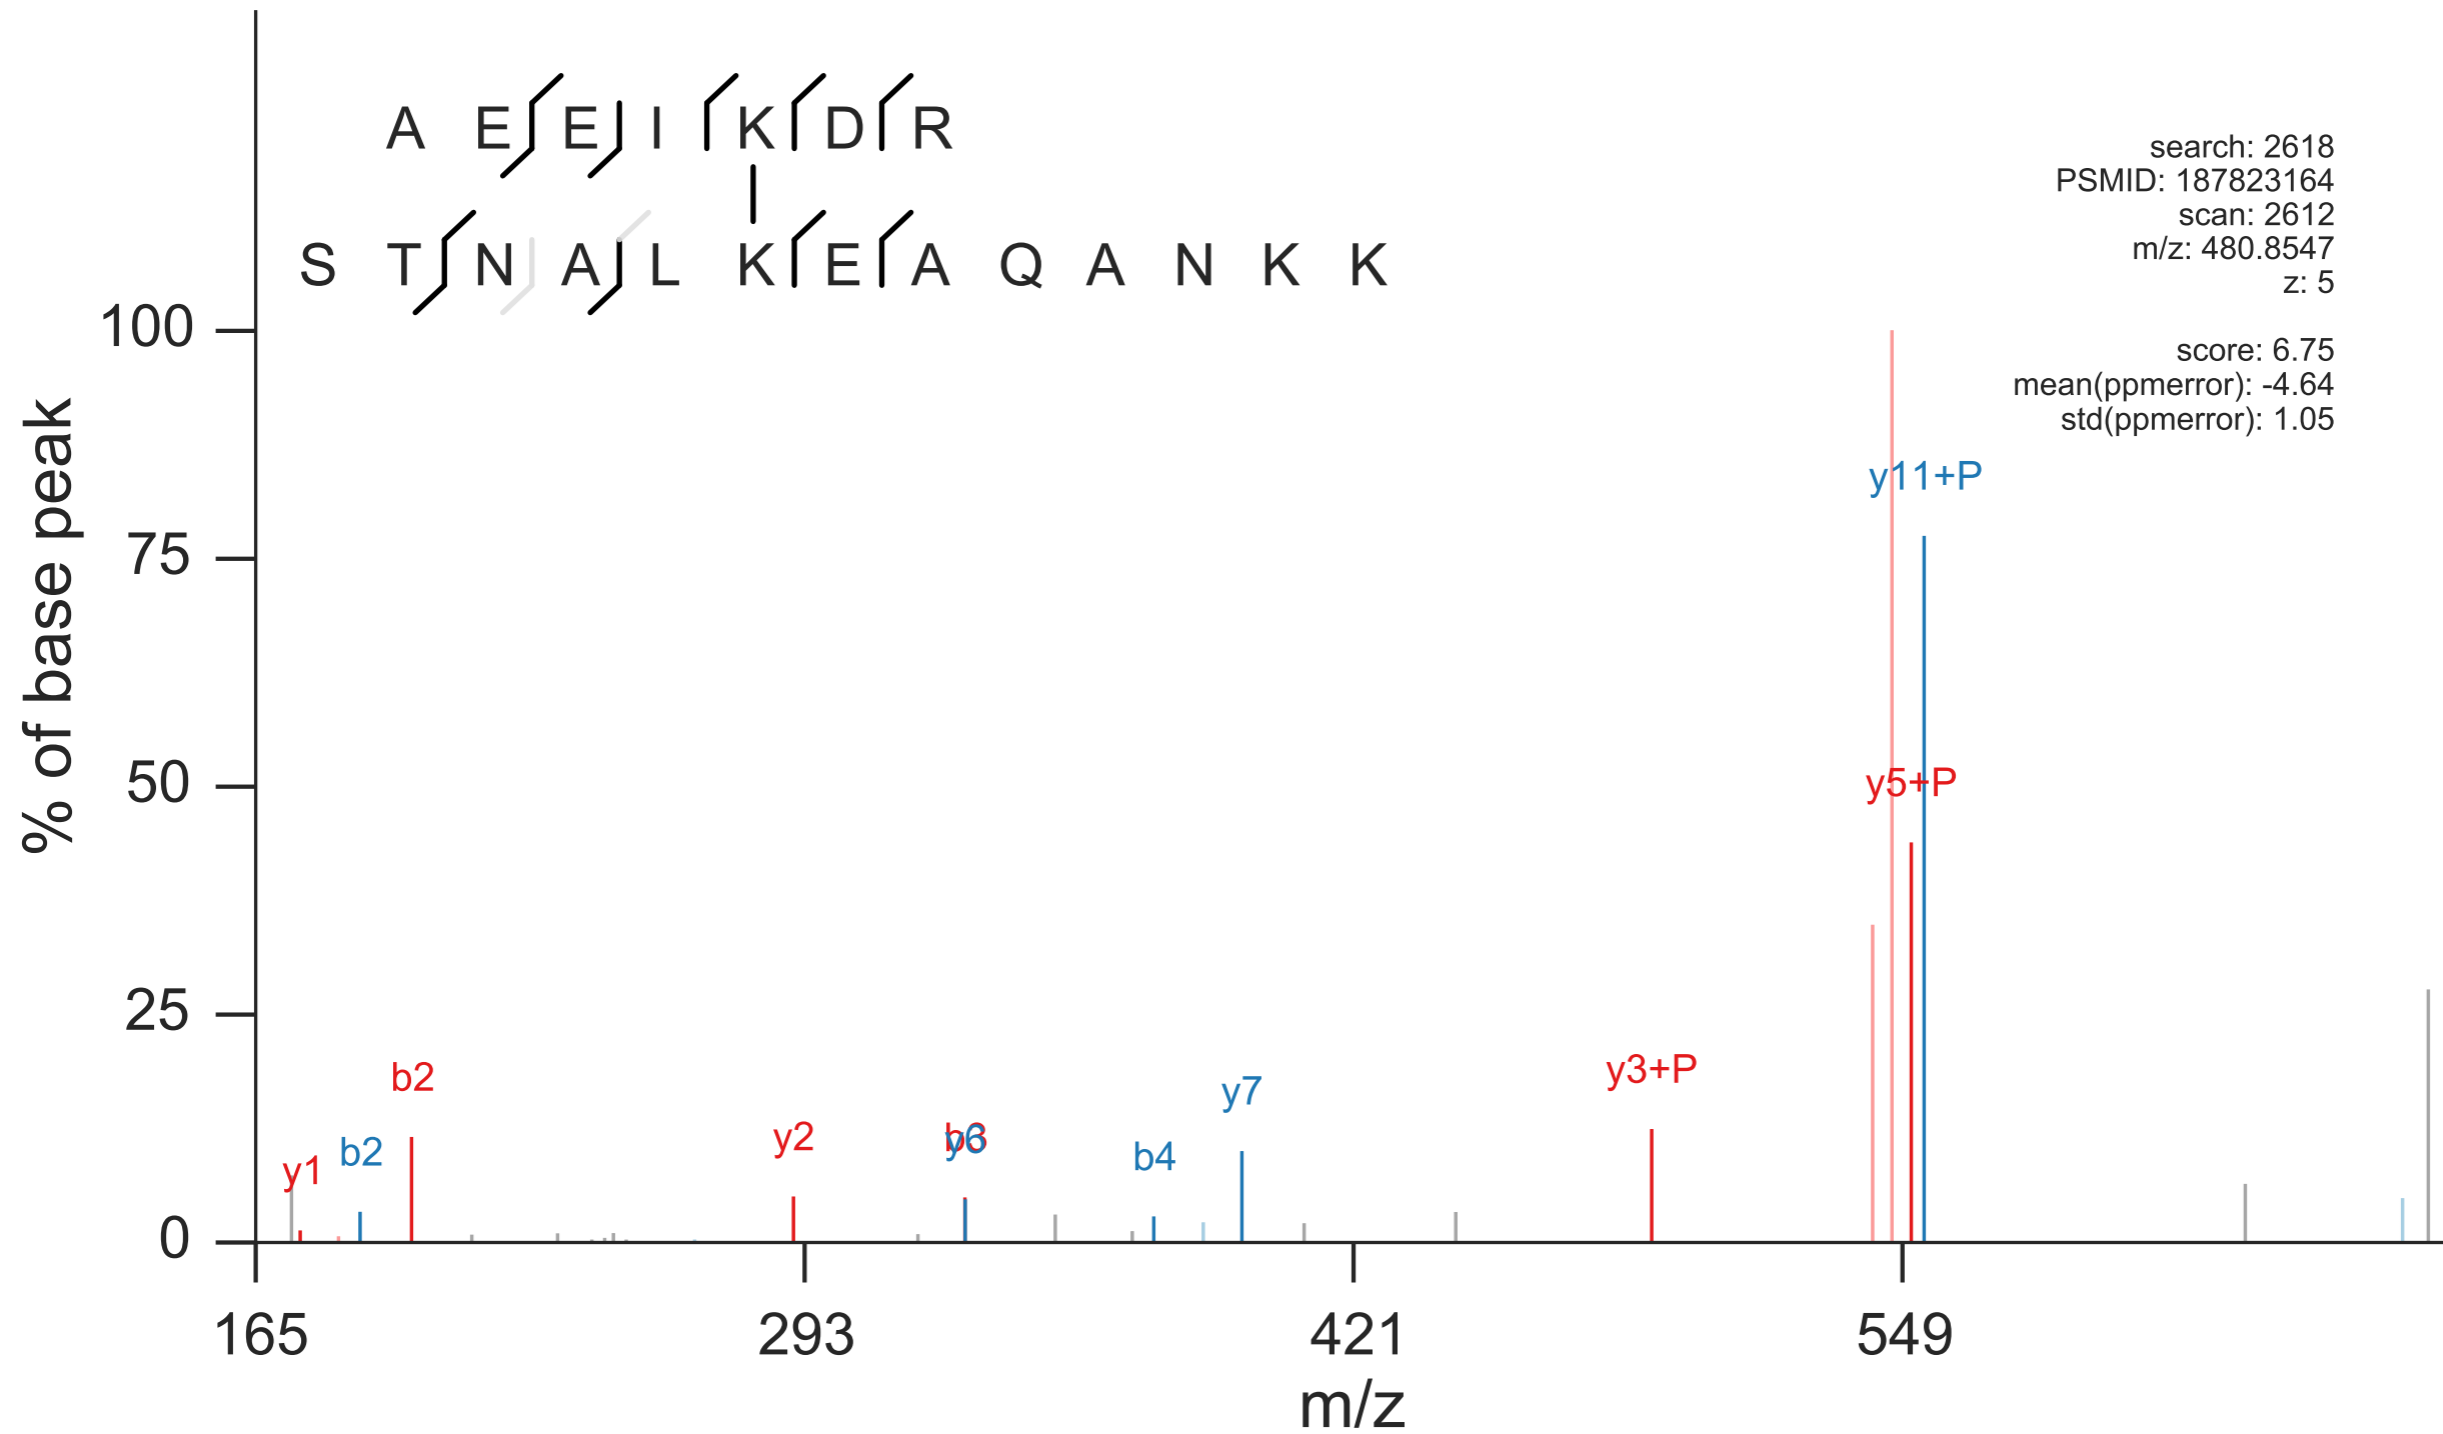

search: 2618  
 PSMID: 187823164  
 scan: 2612  
 m/z: 480.8547  
 z: 5  
  
 score: 6.75  
 mean(ppmerror): -4.64  
 std(ppmerror): 1.05

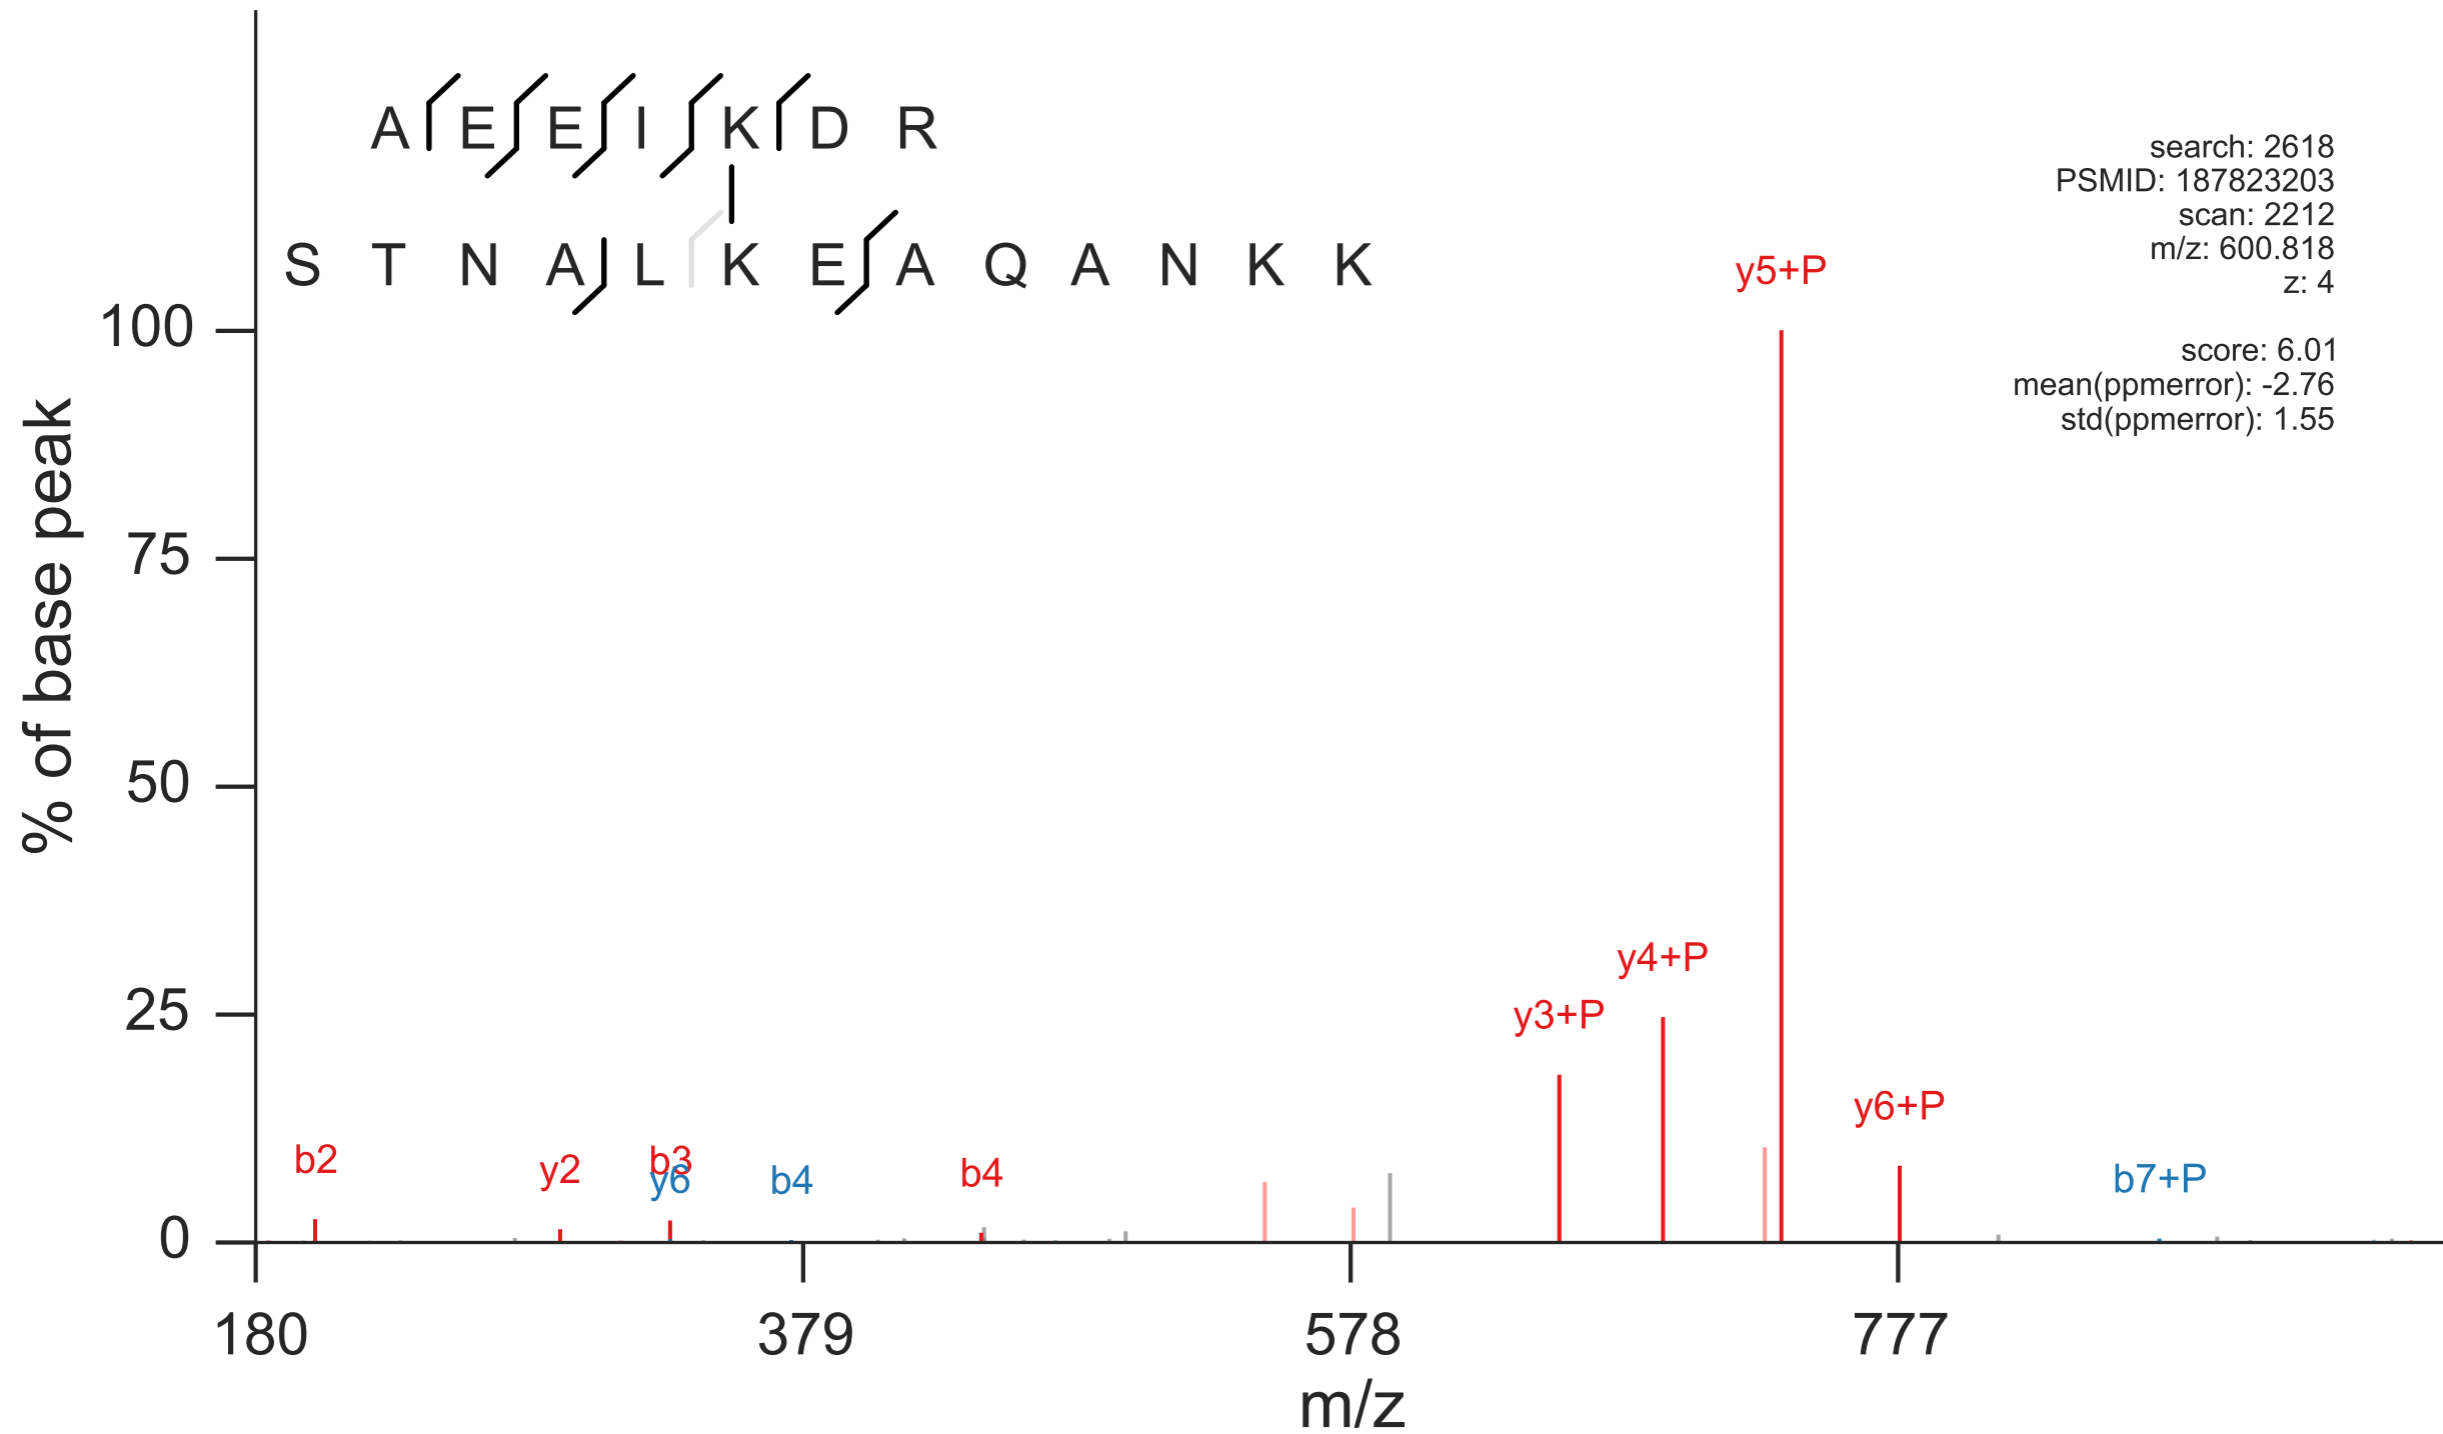

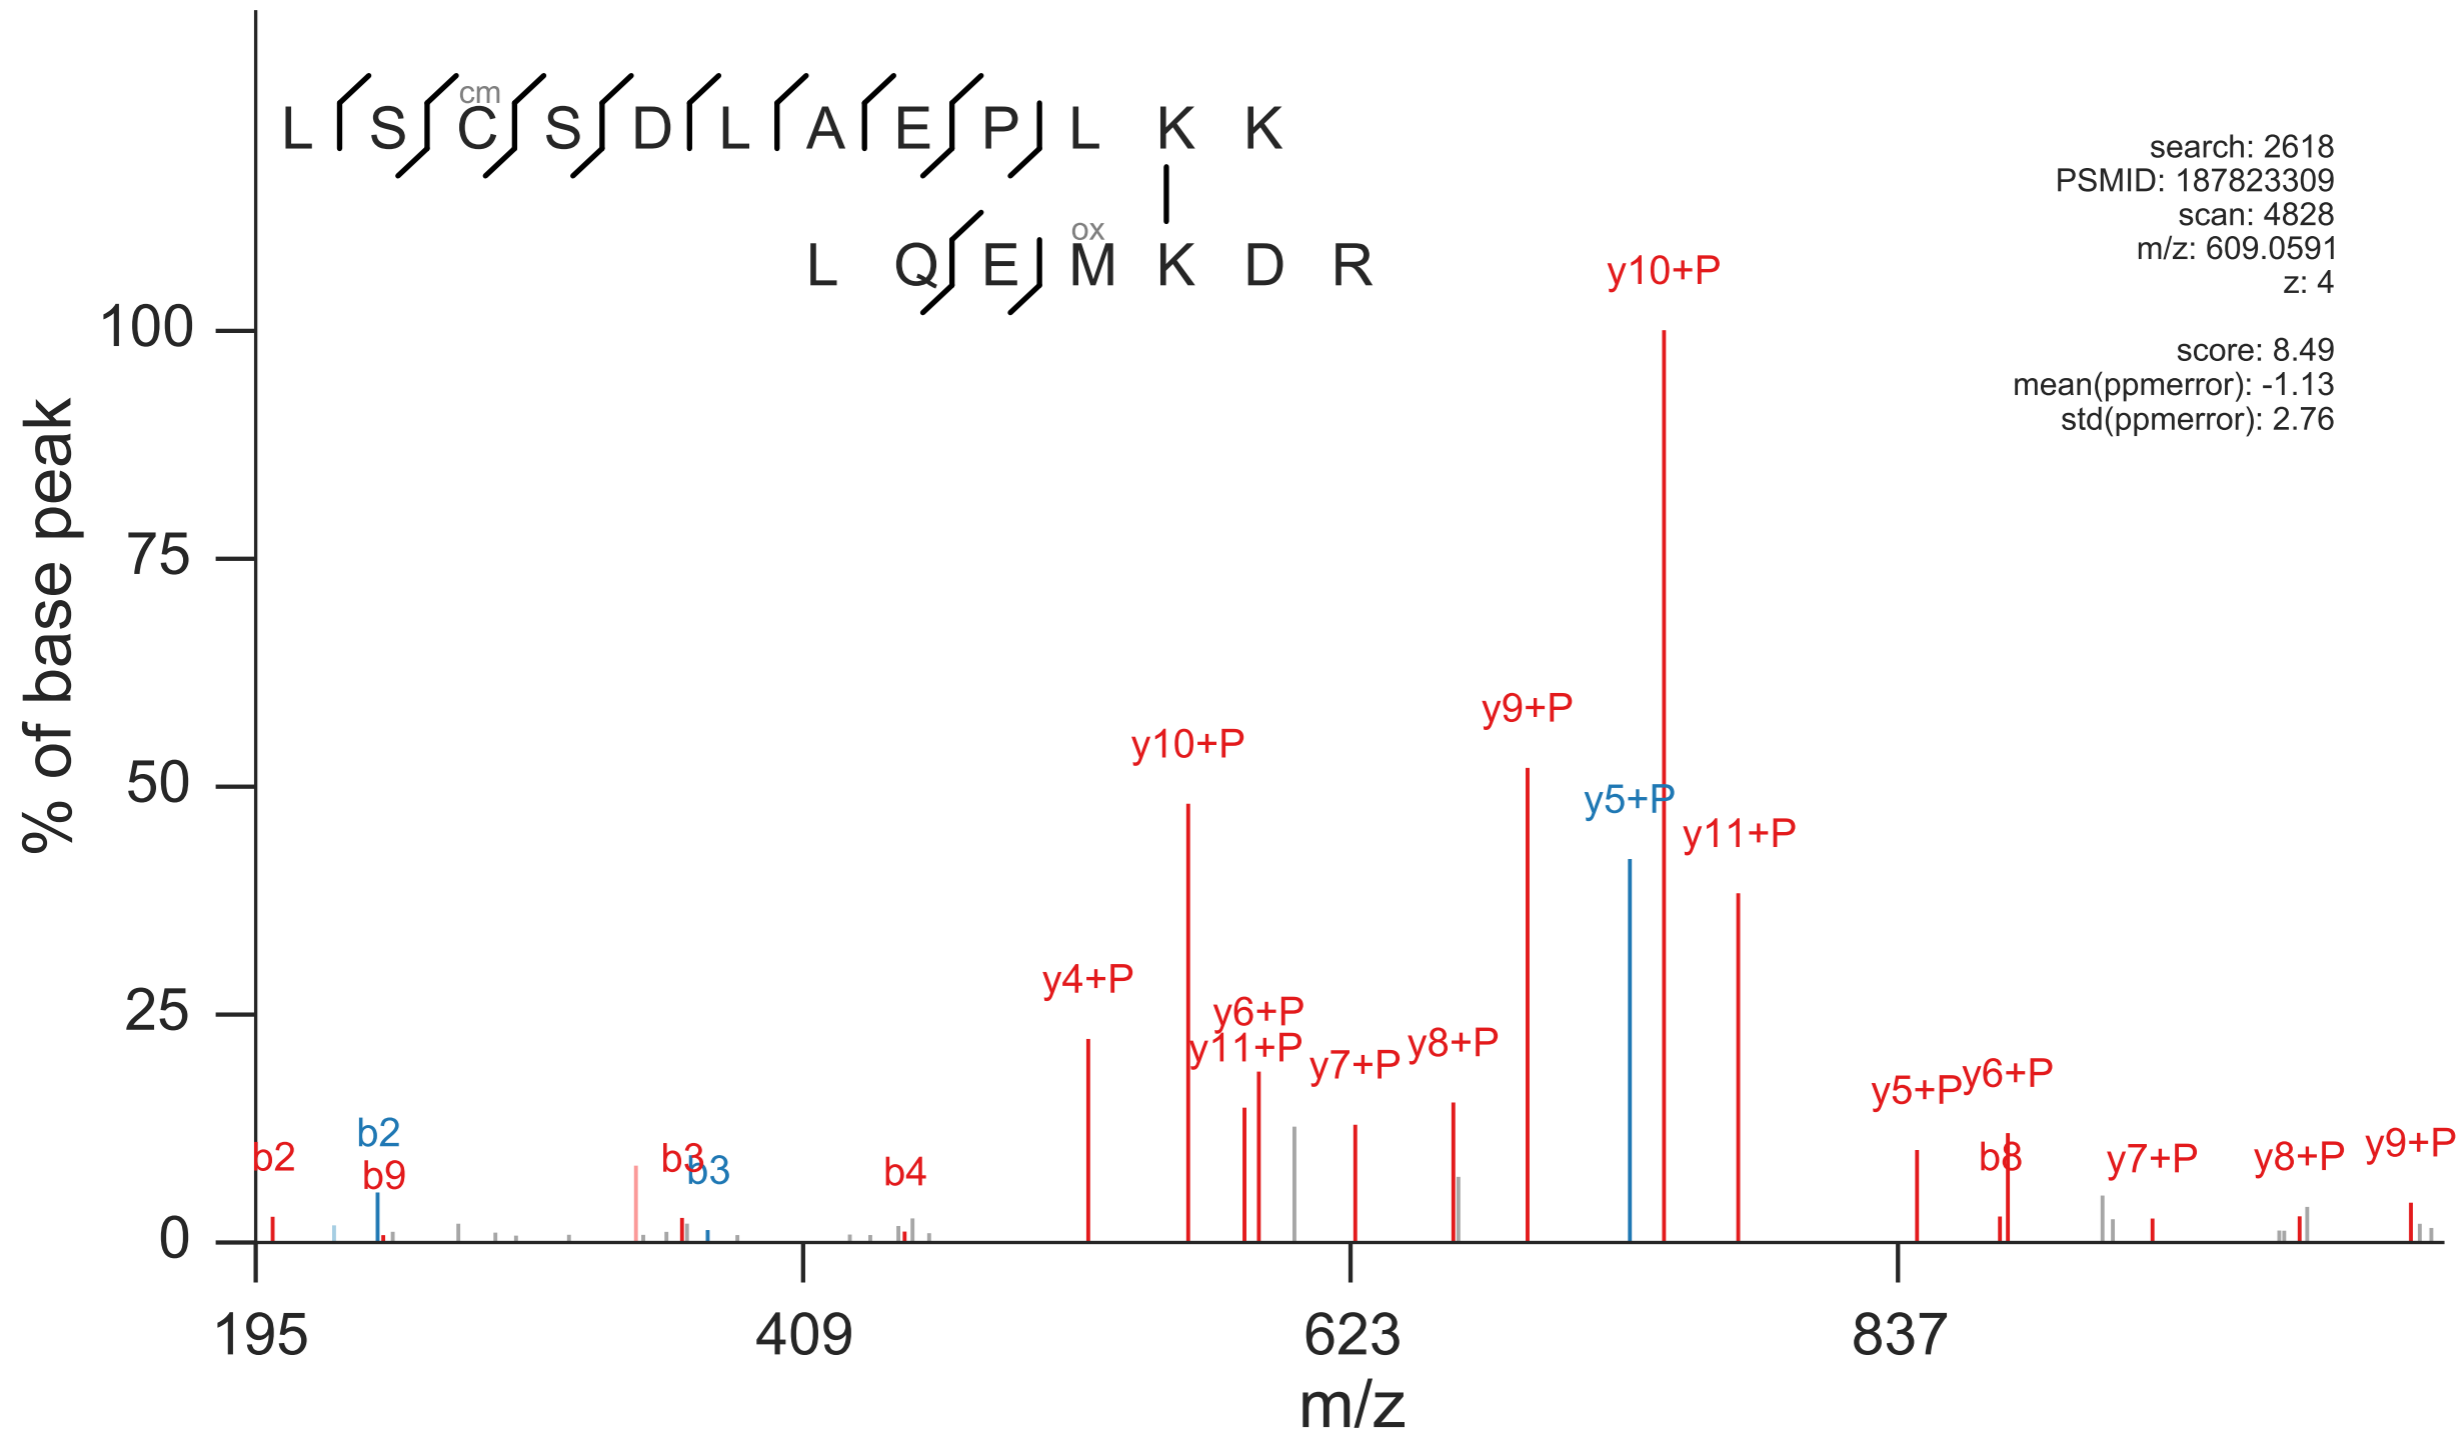

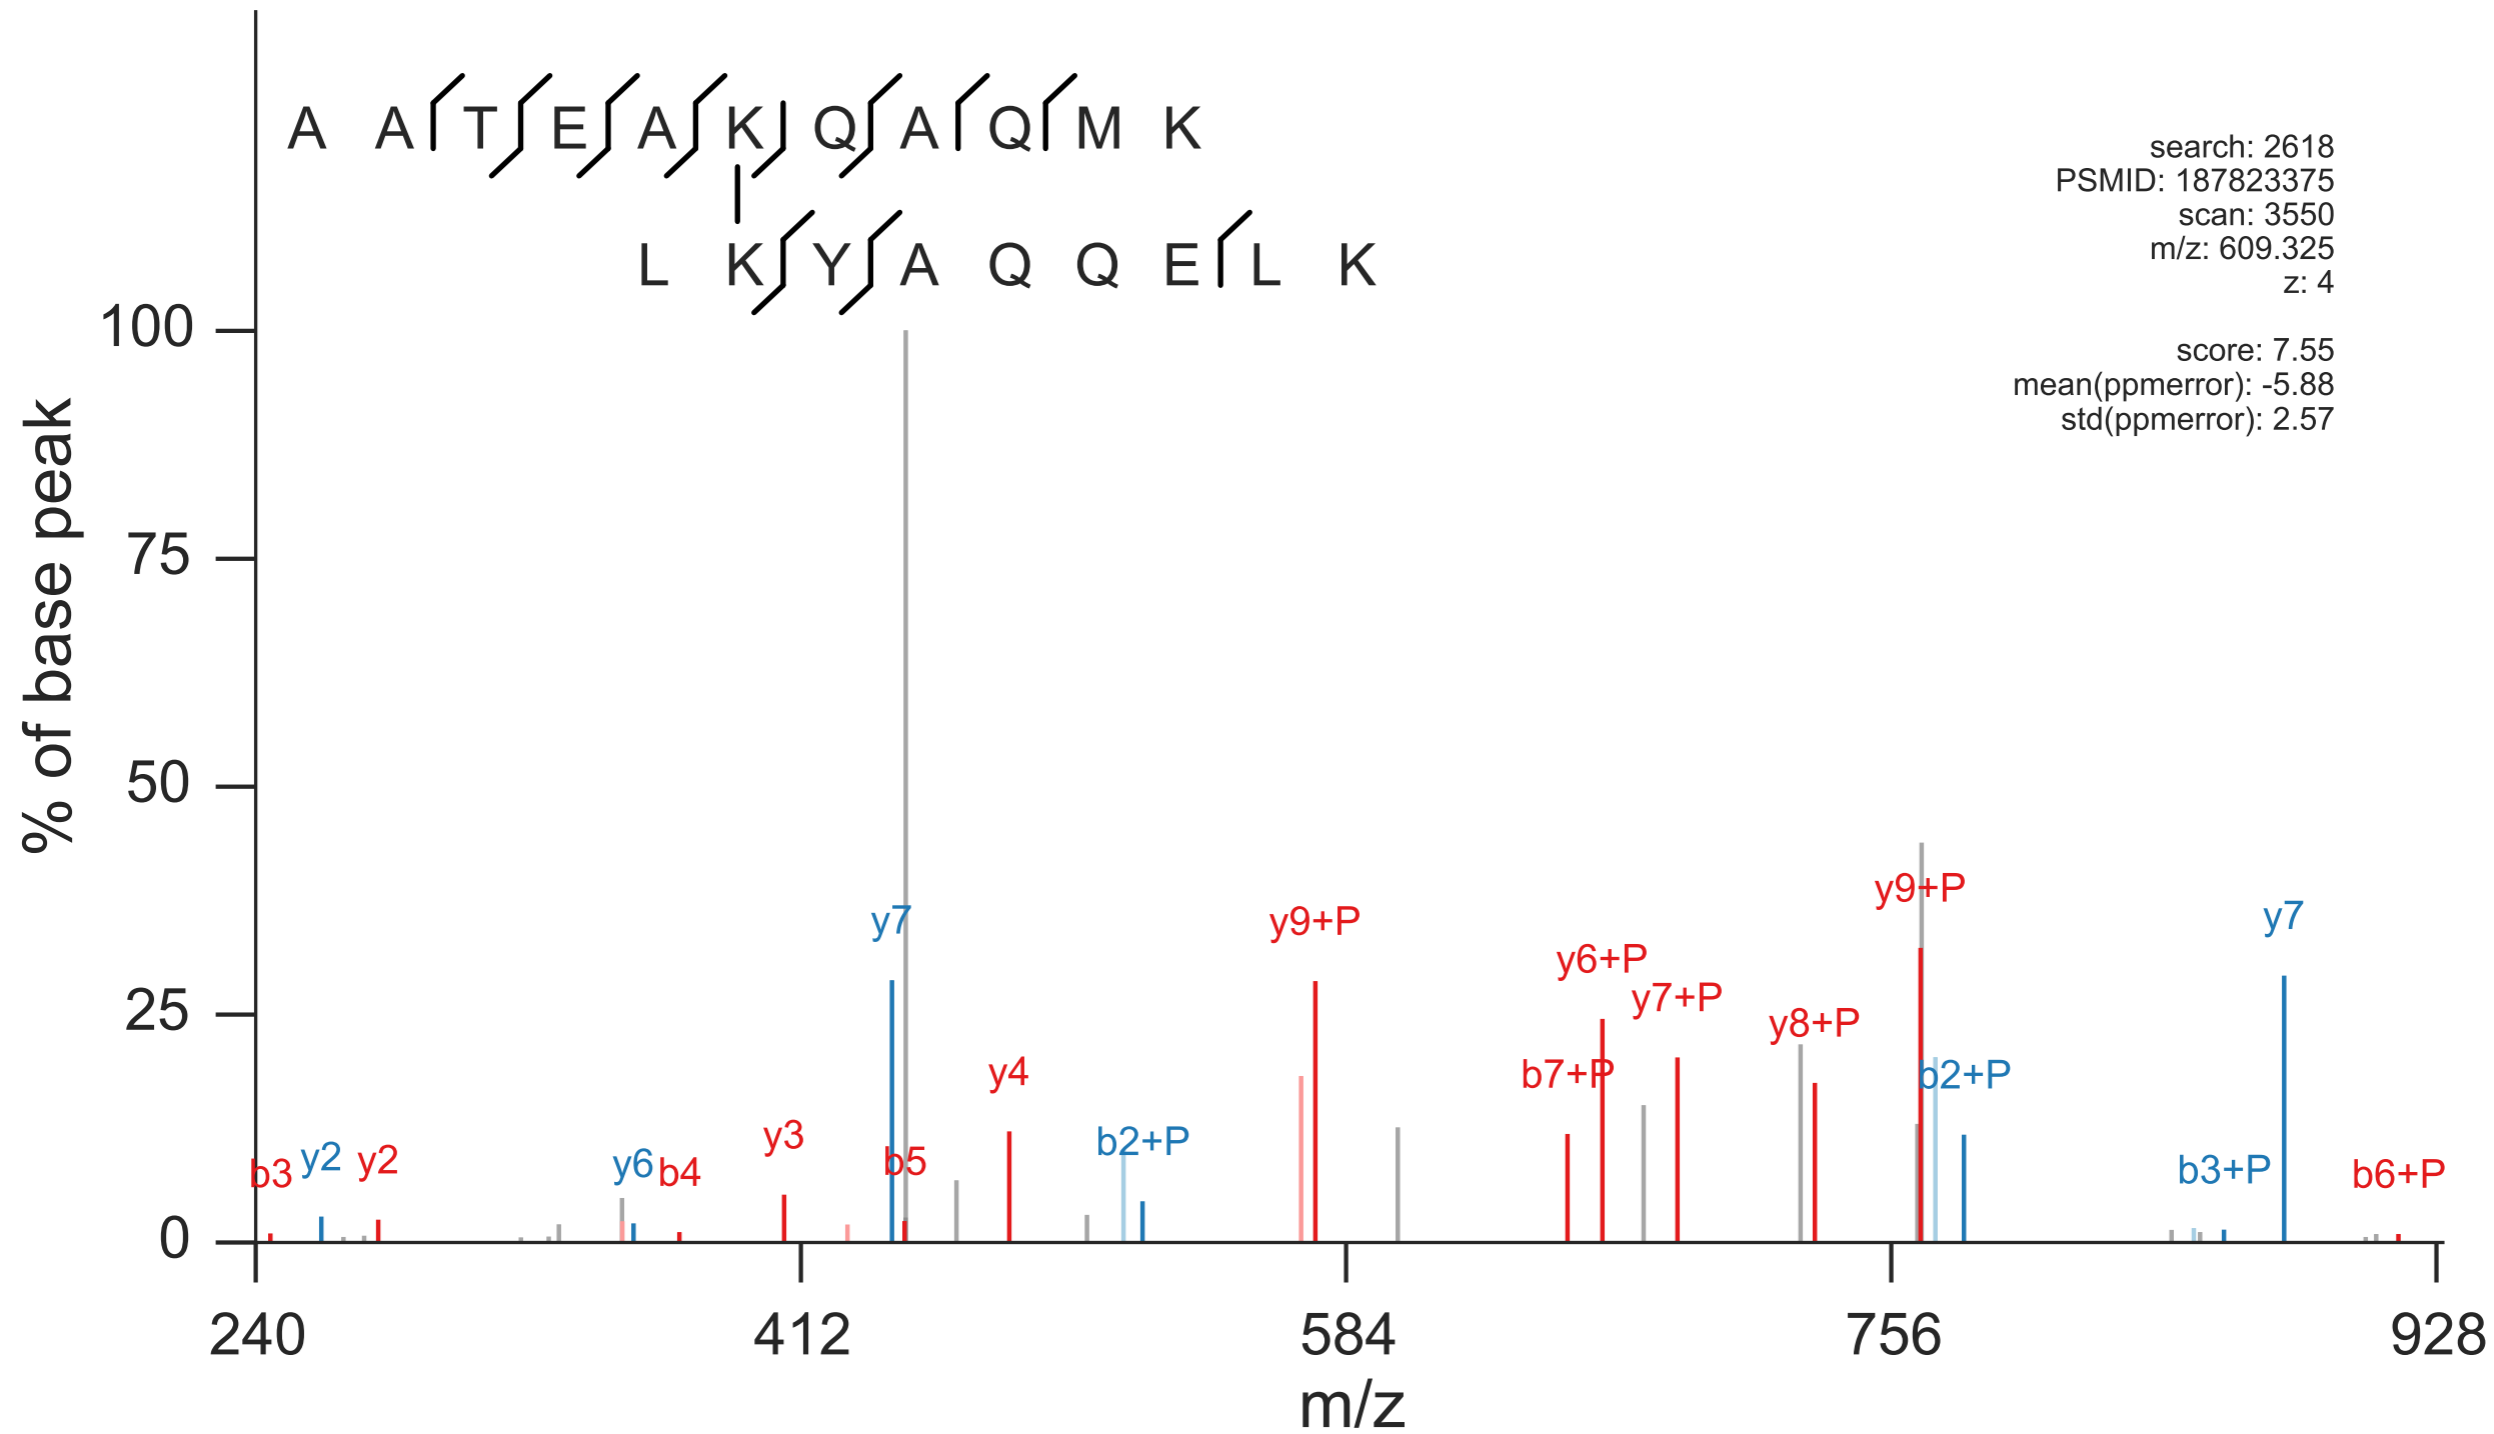

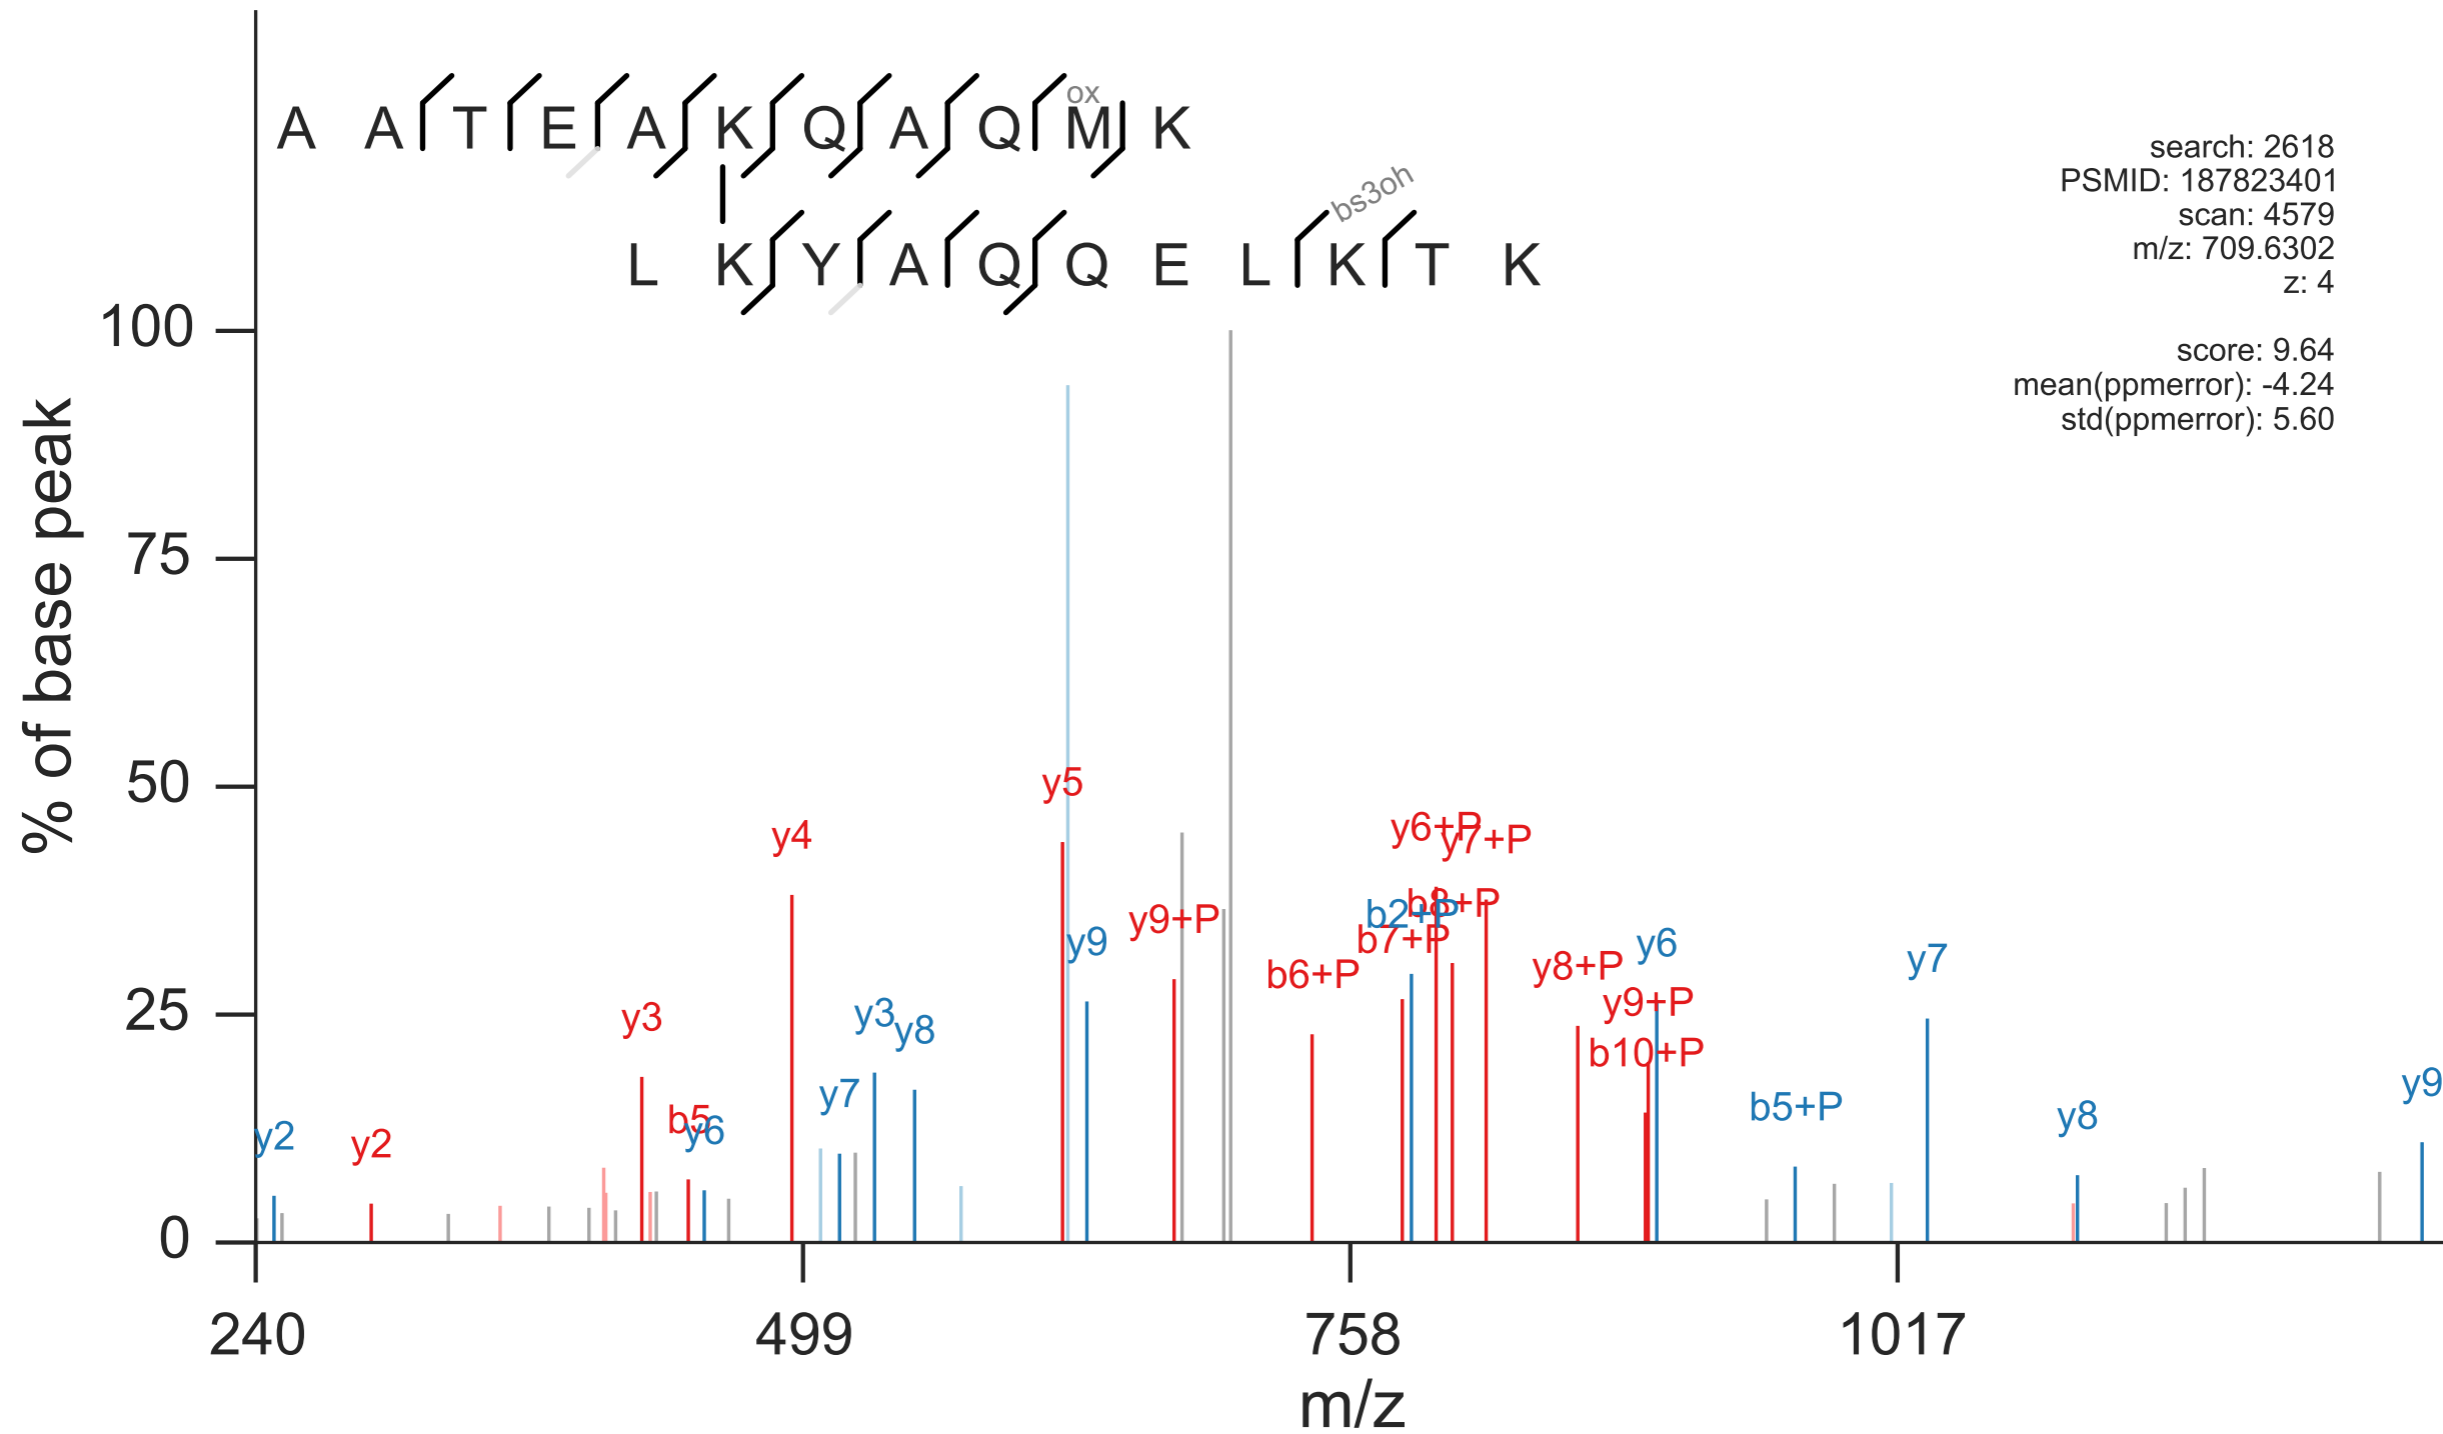

G|K|V|L|E|A|L|L|E|Q|K|R  
 |  
 V L|E|D|S D L|K K

search: 2619  
 PSMID: 188010975  
 scan: 7444  
 m/z: 514.2913  
 z: 5  
 score: 5.96  
 mean(ppmerror): -4.29  
 std(ppmerror): 2.14

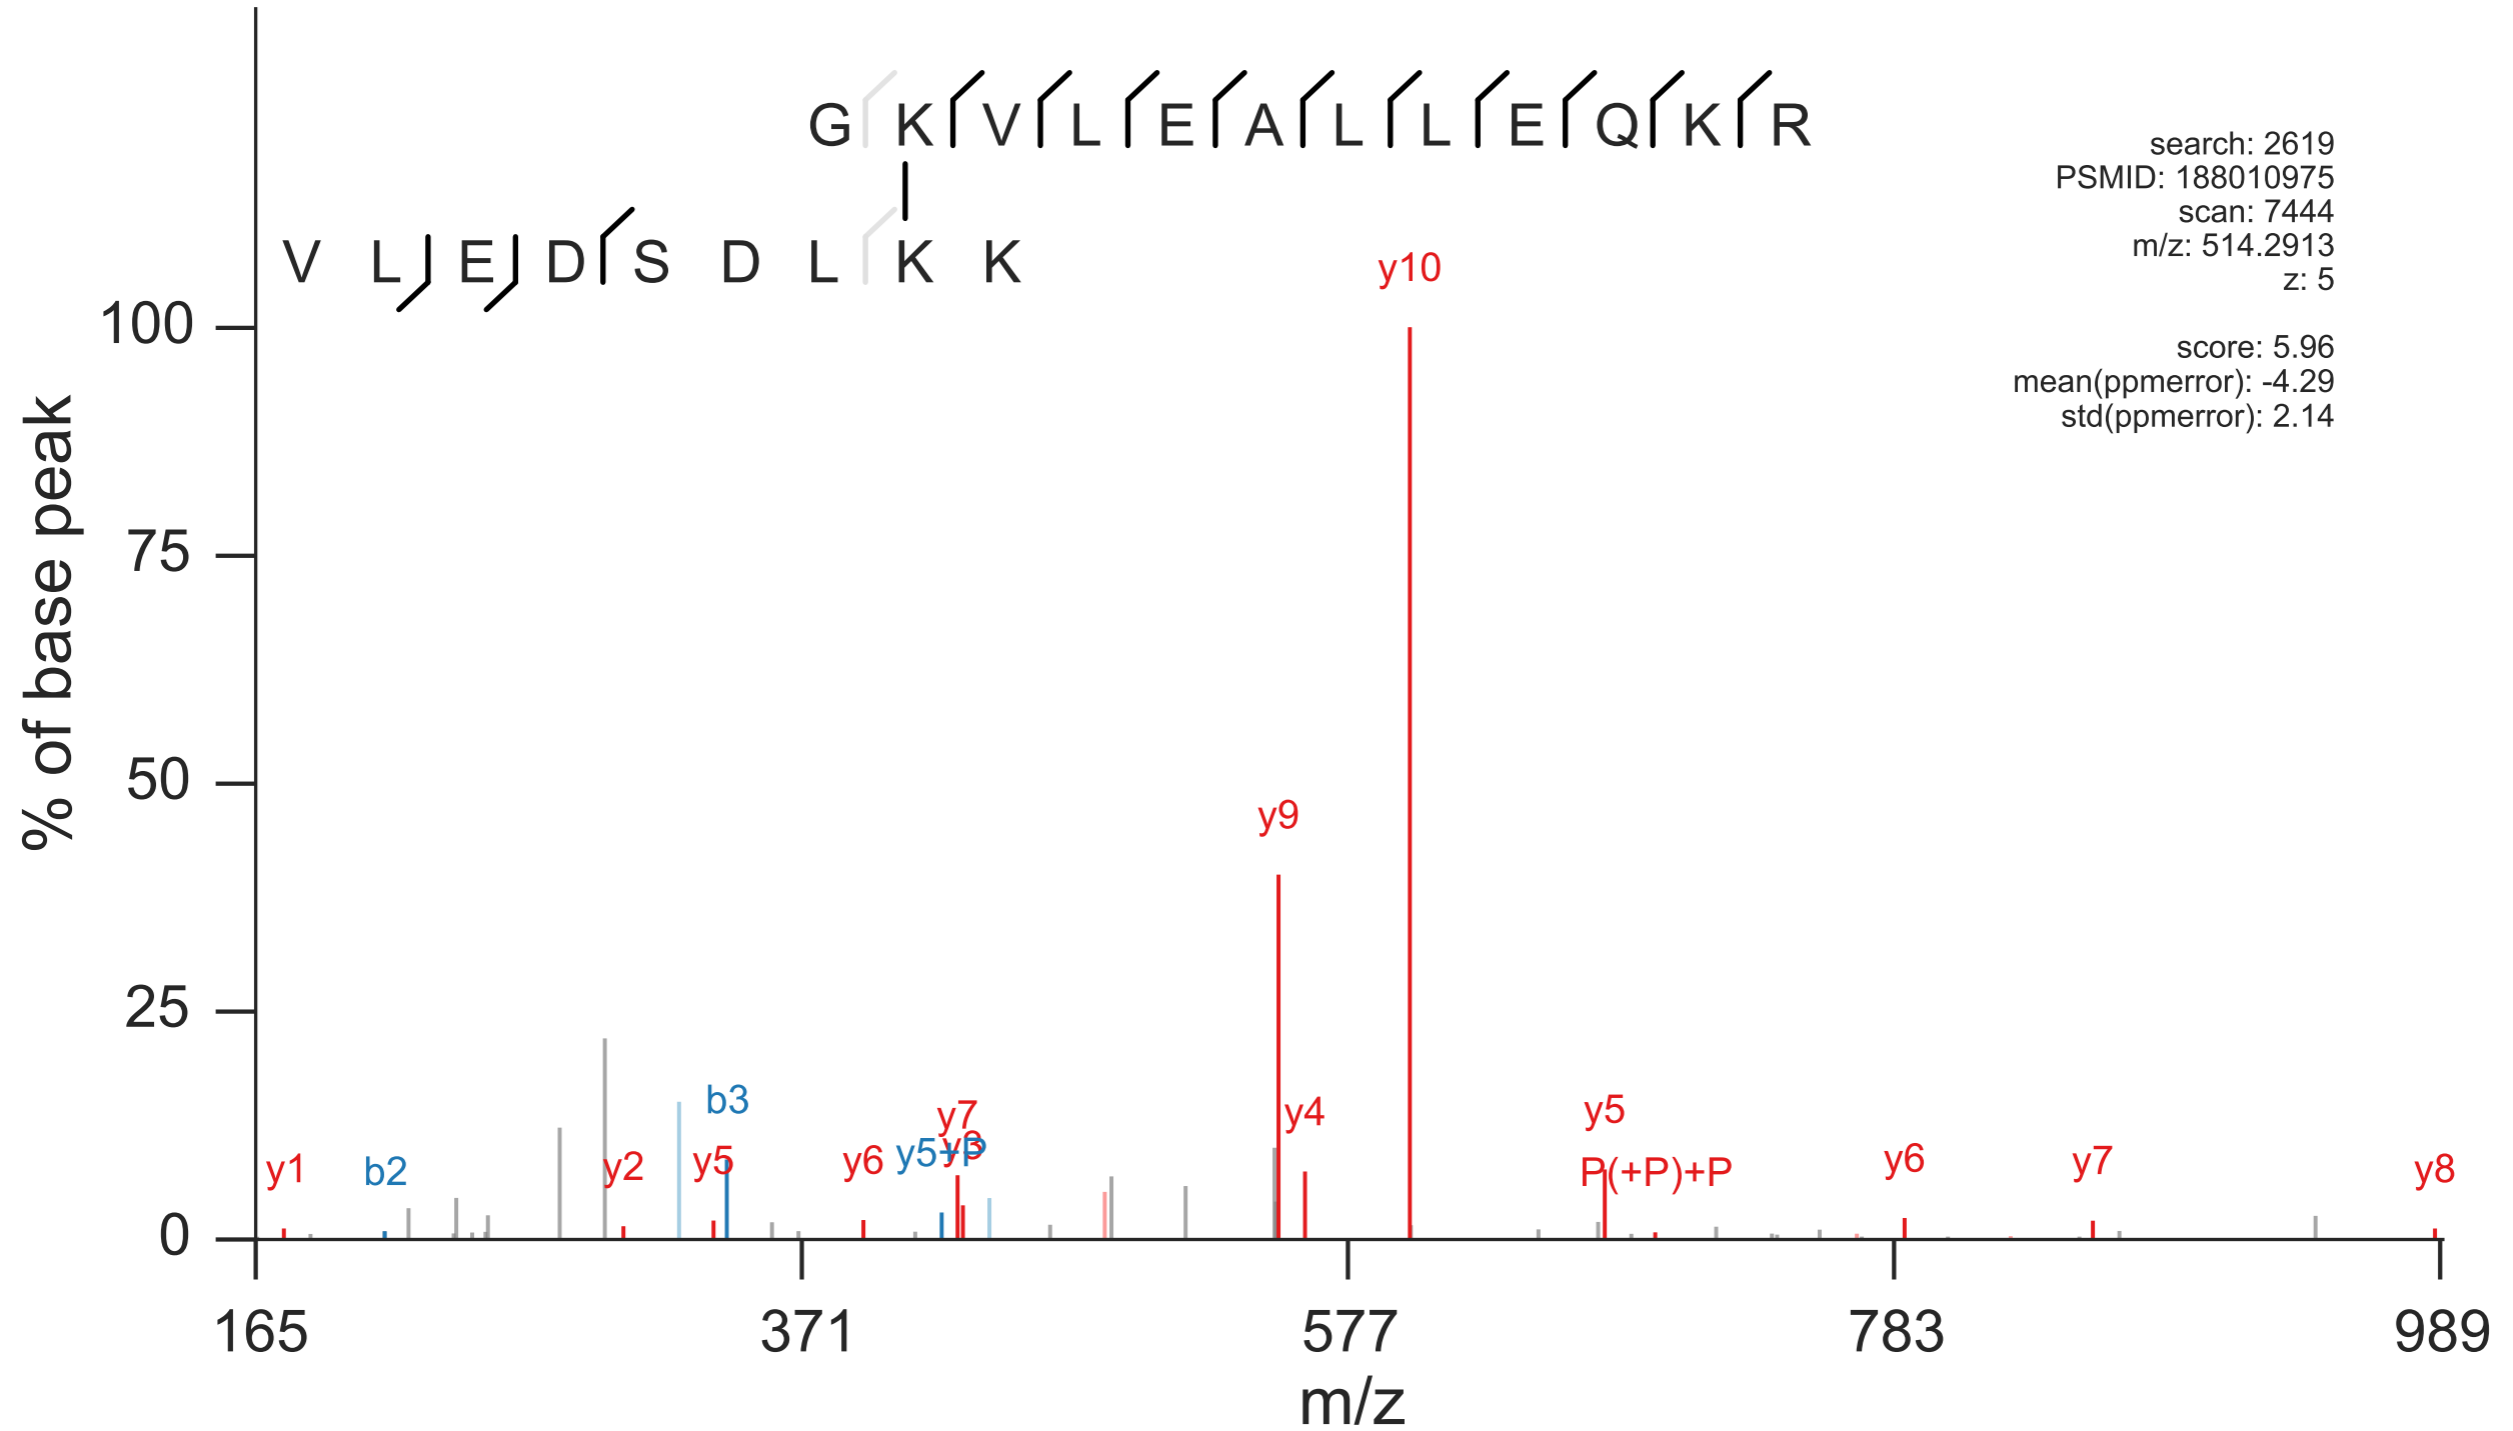

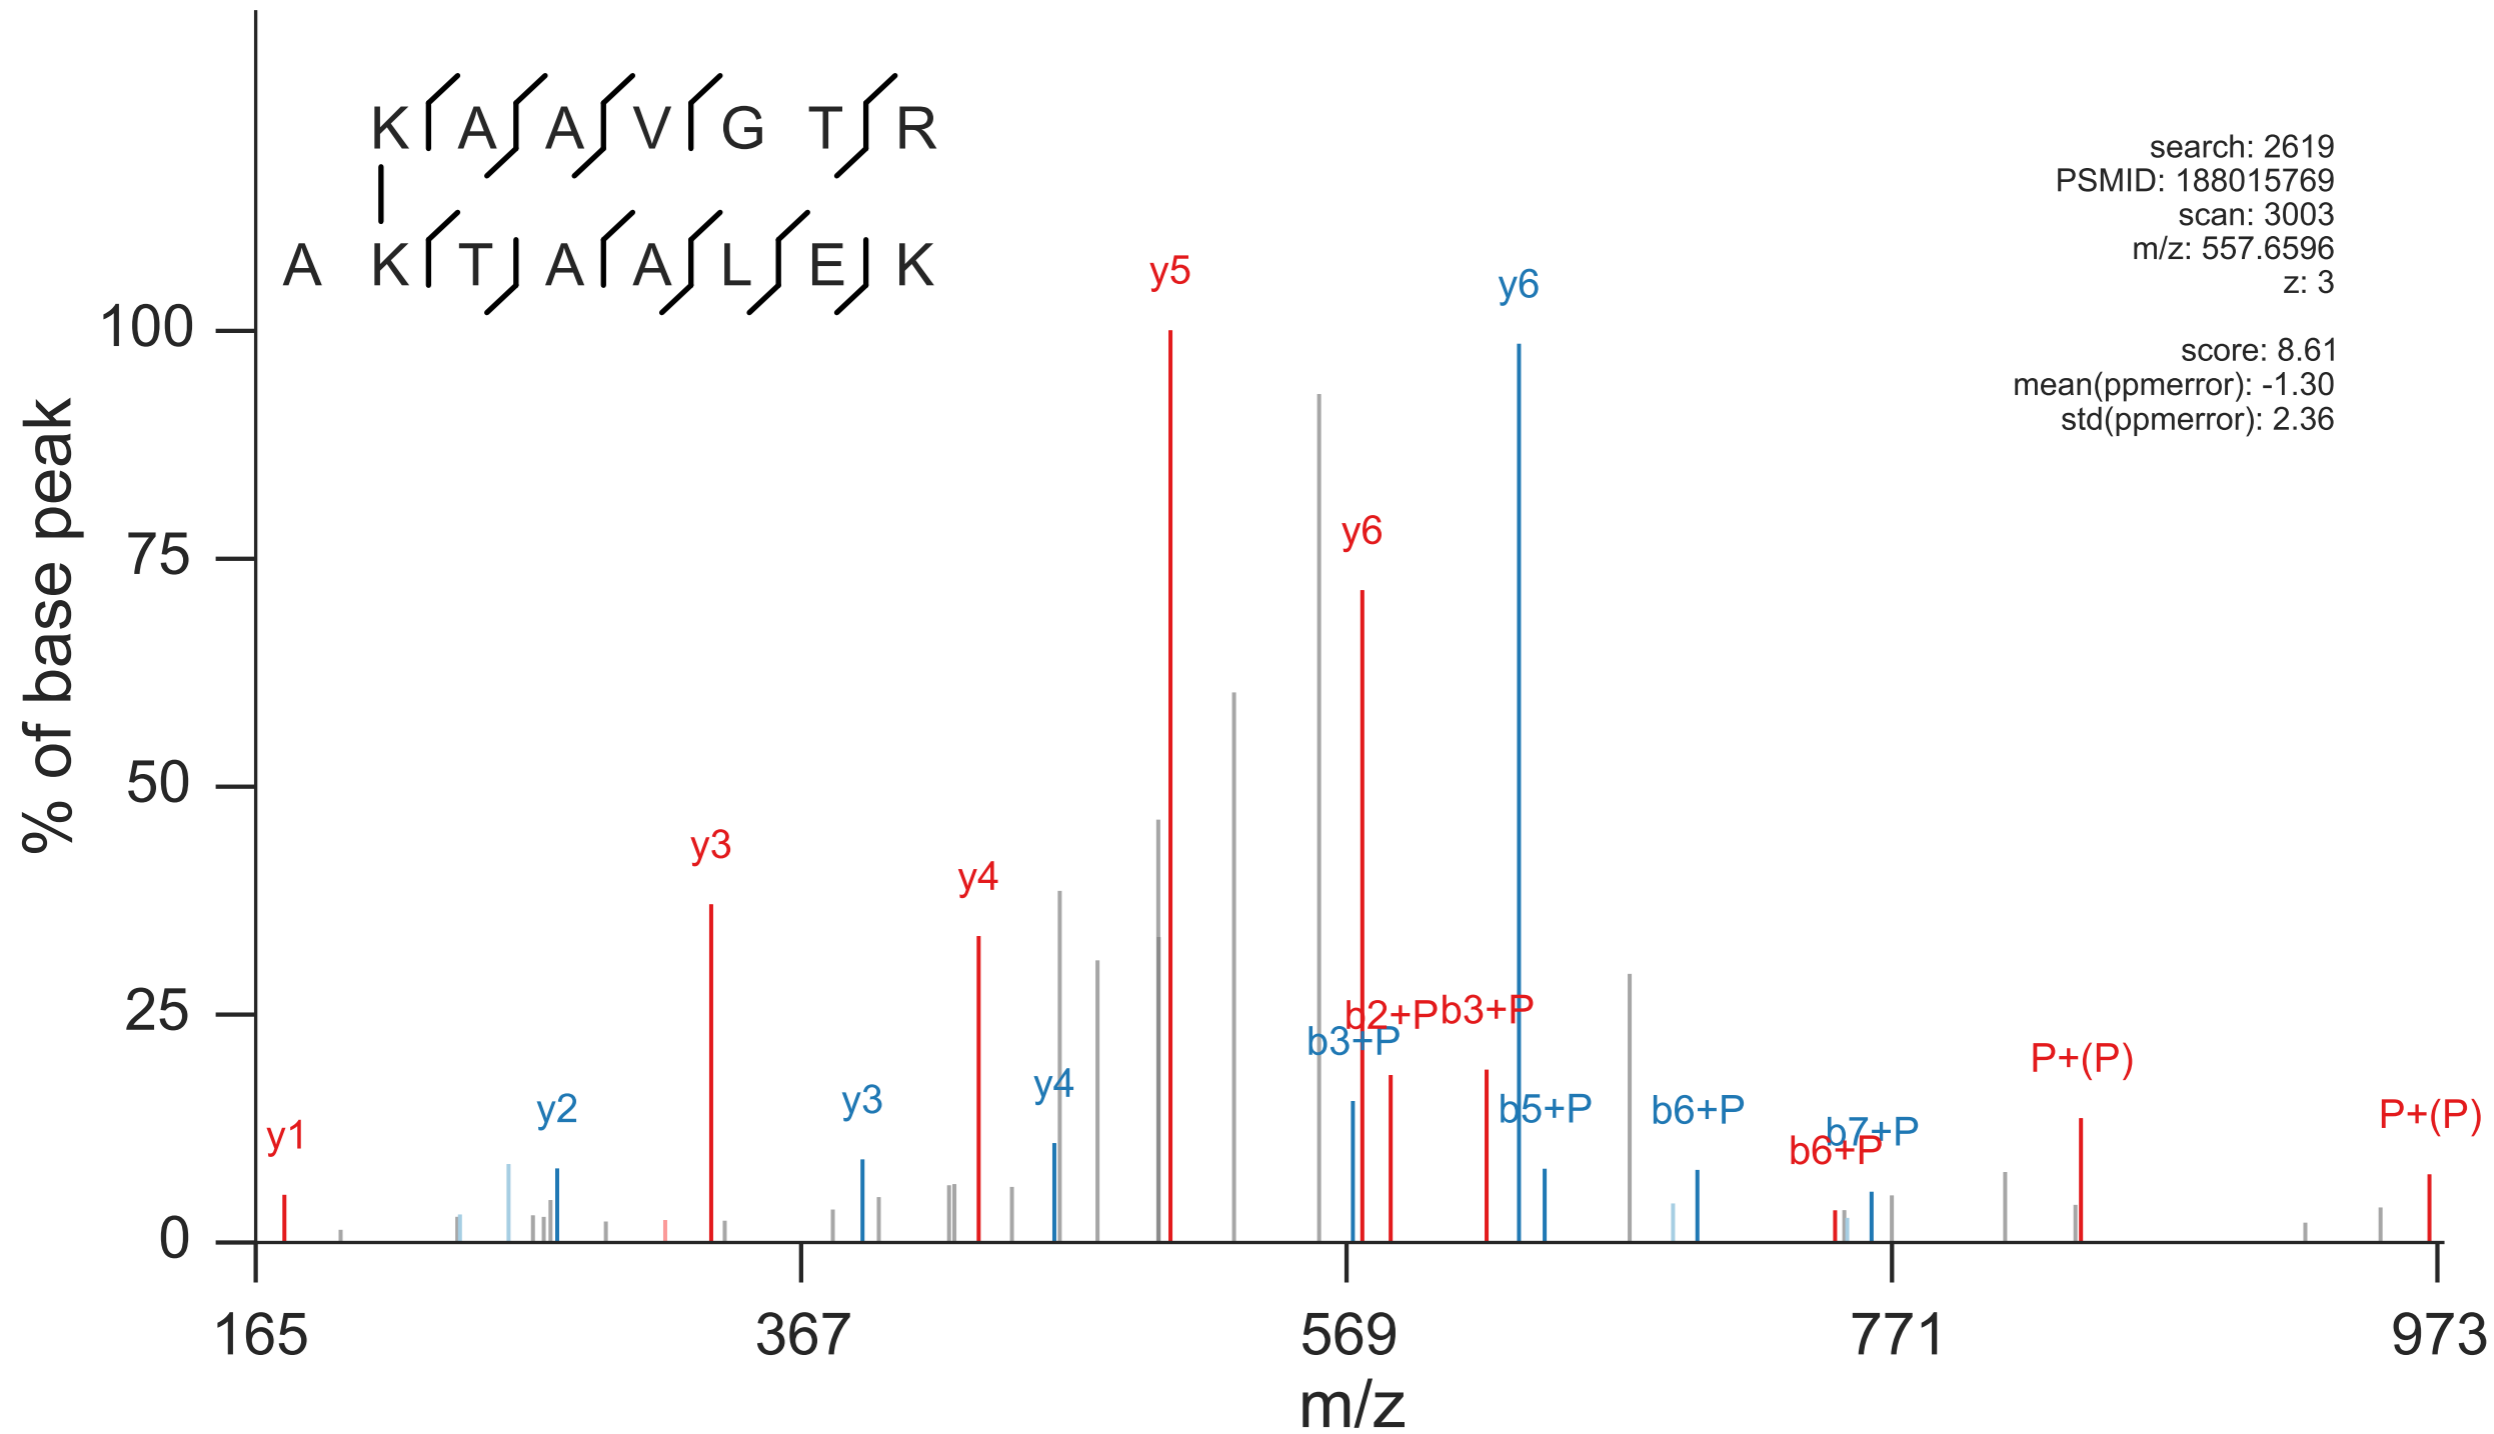

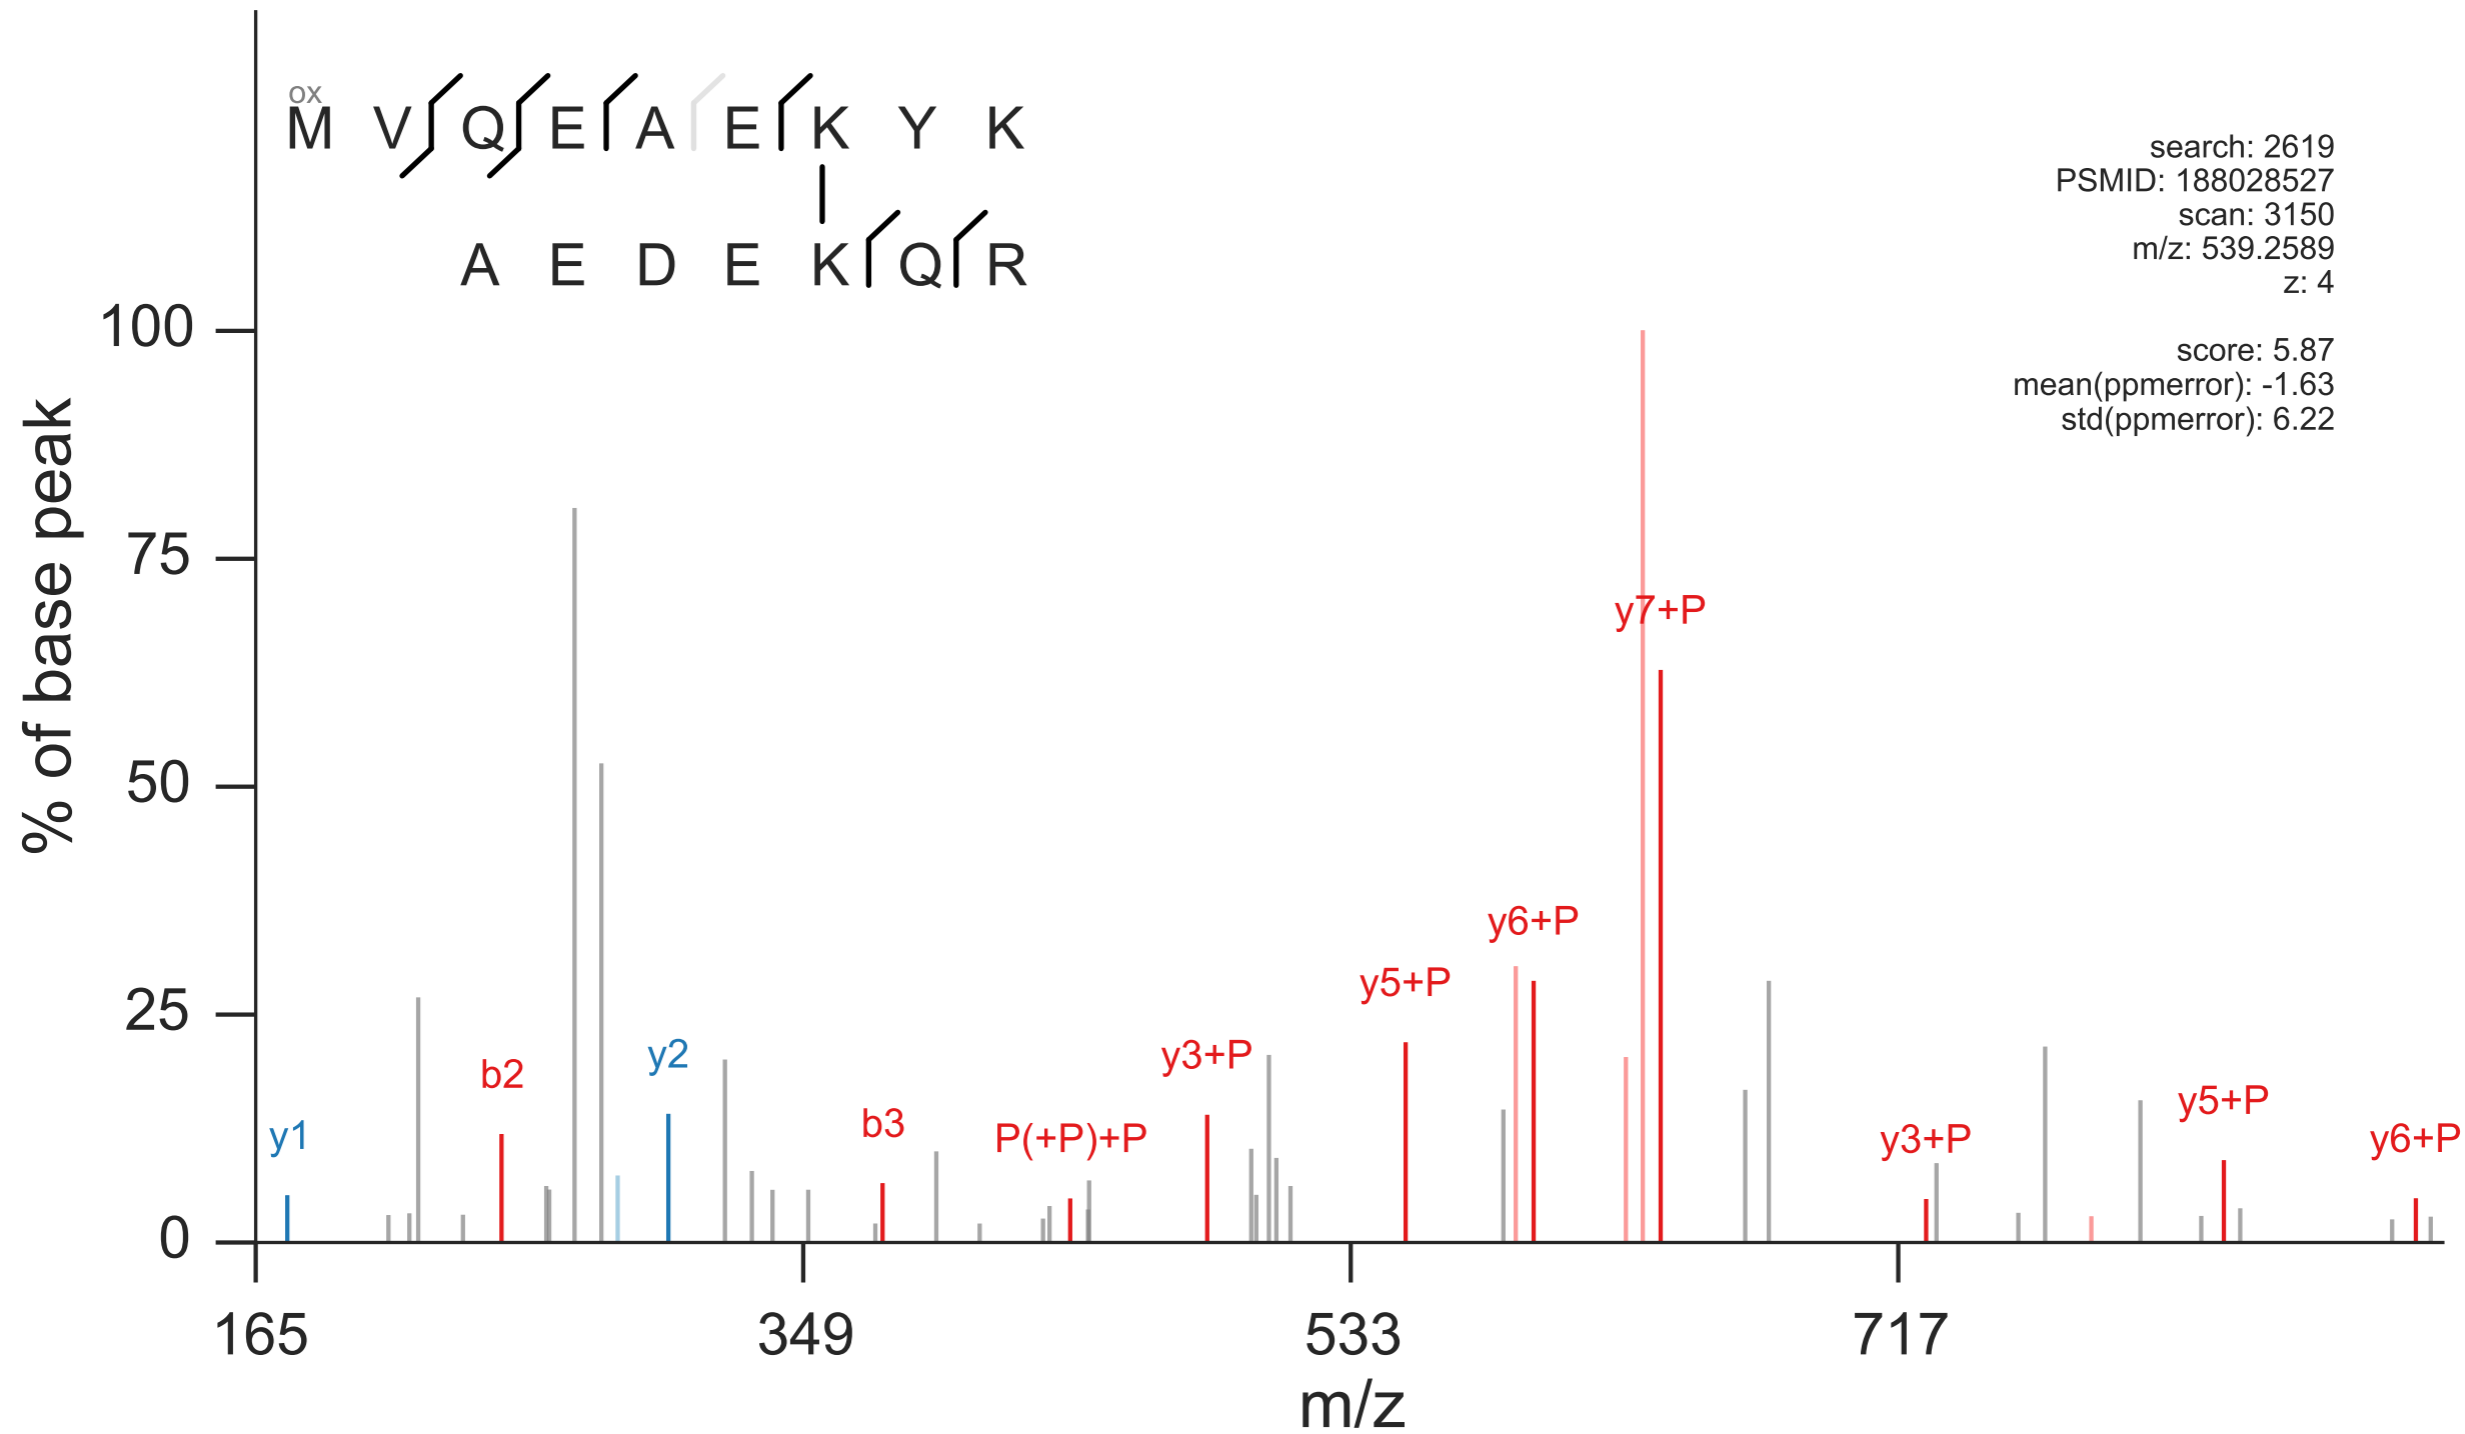



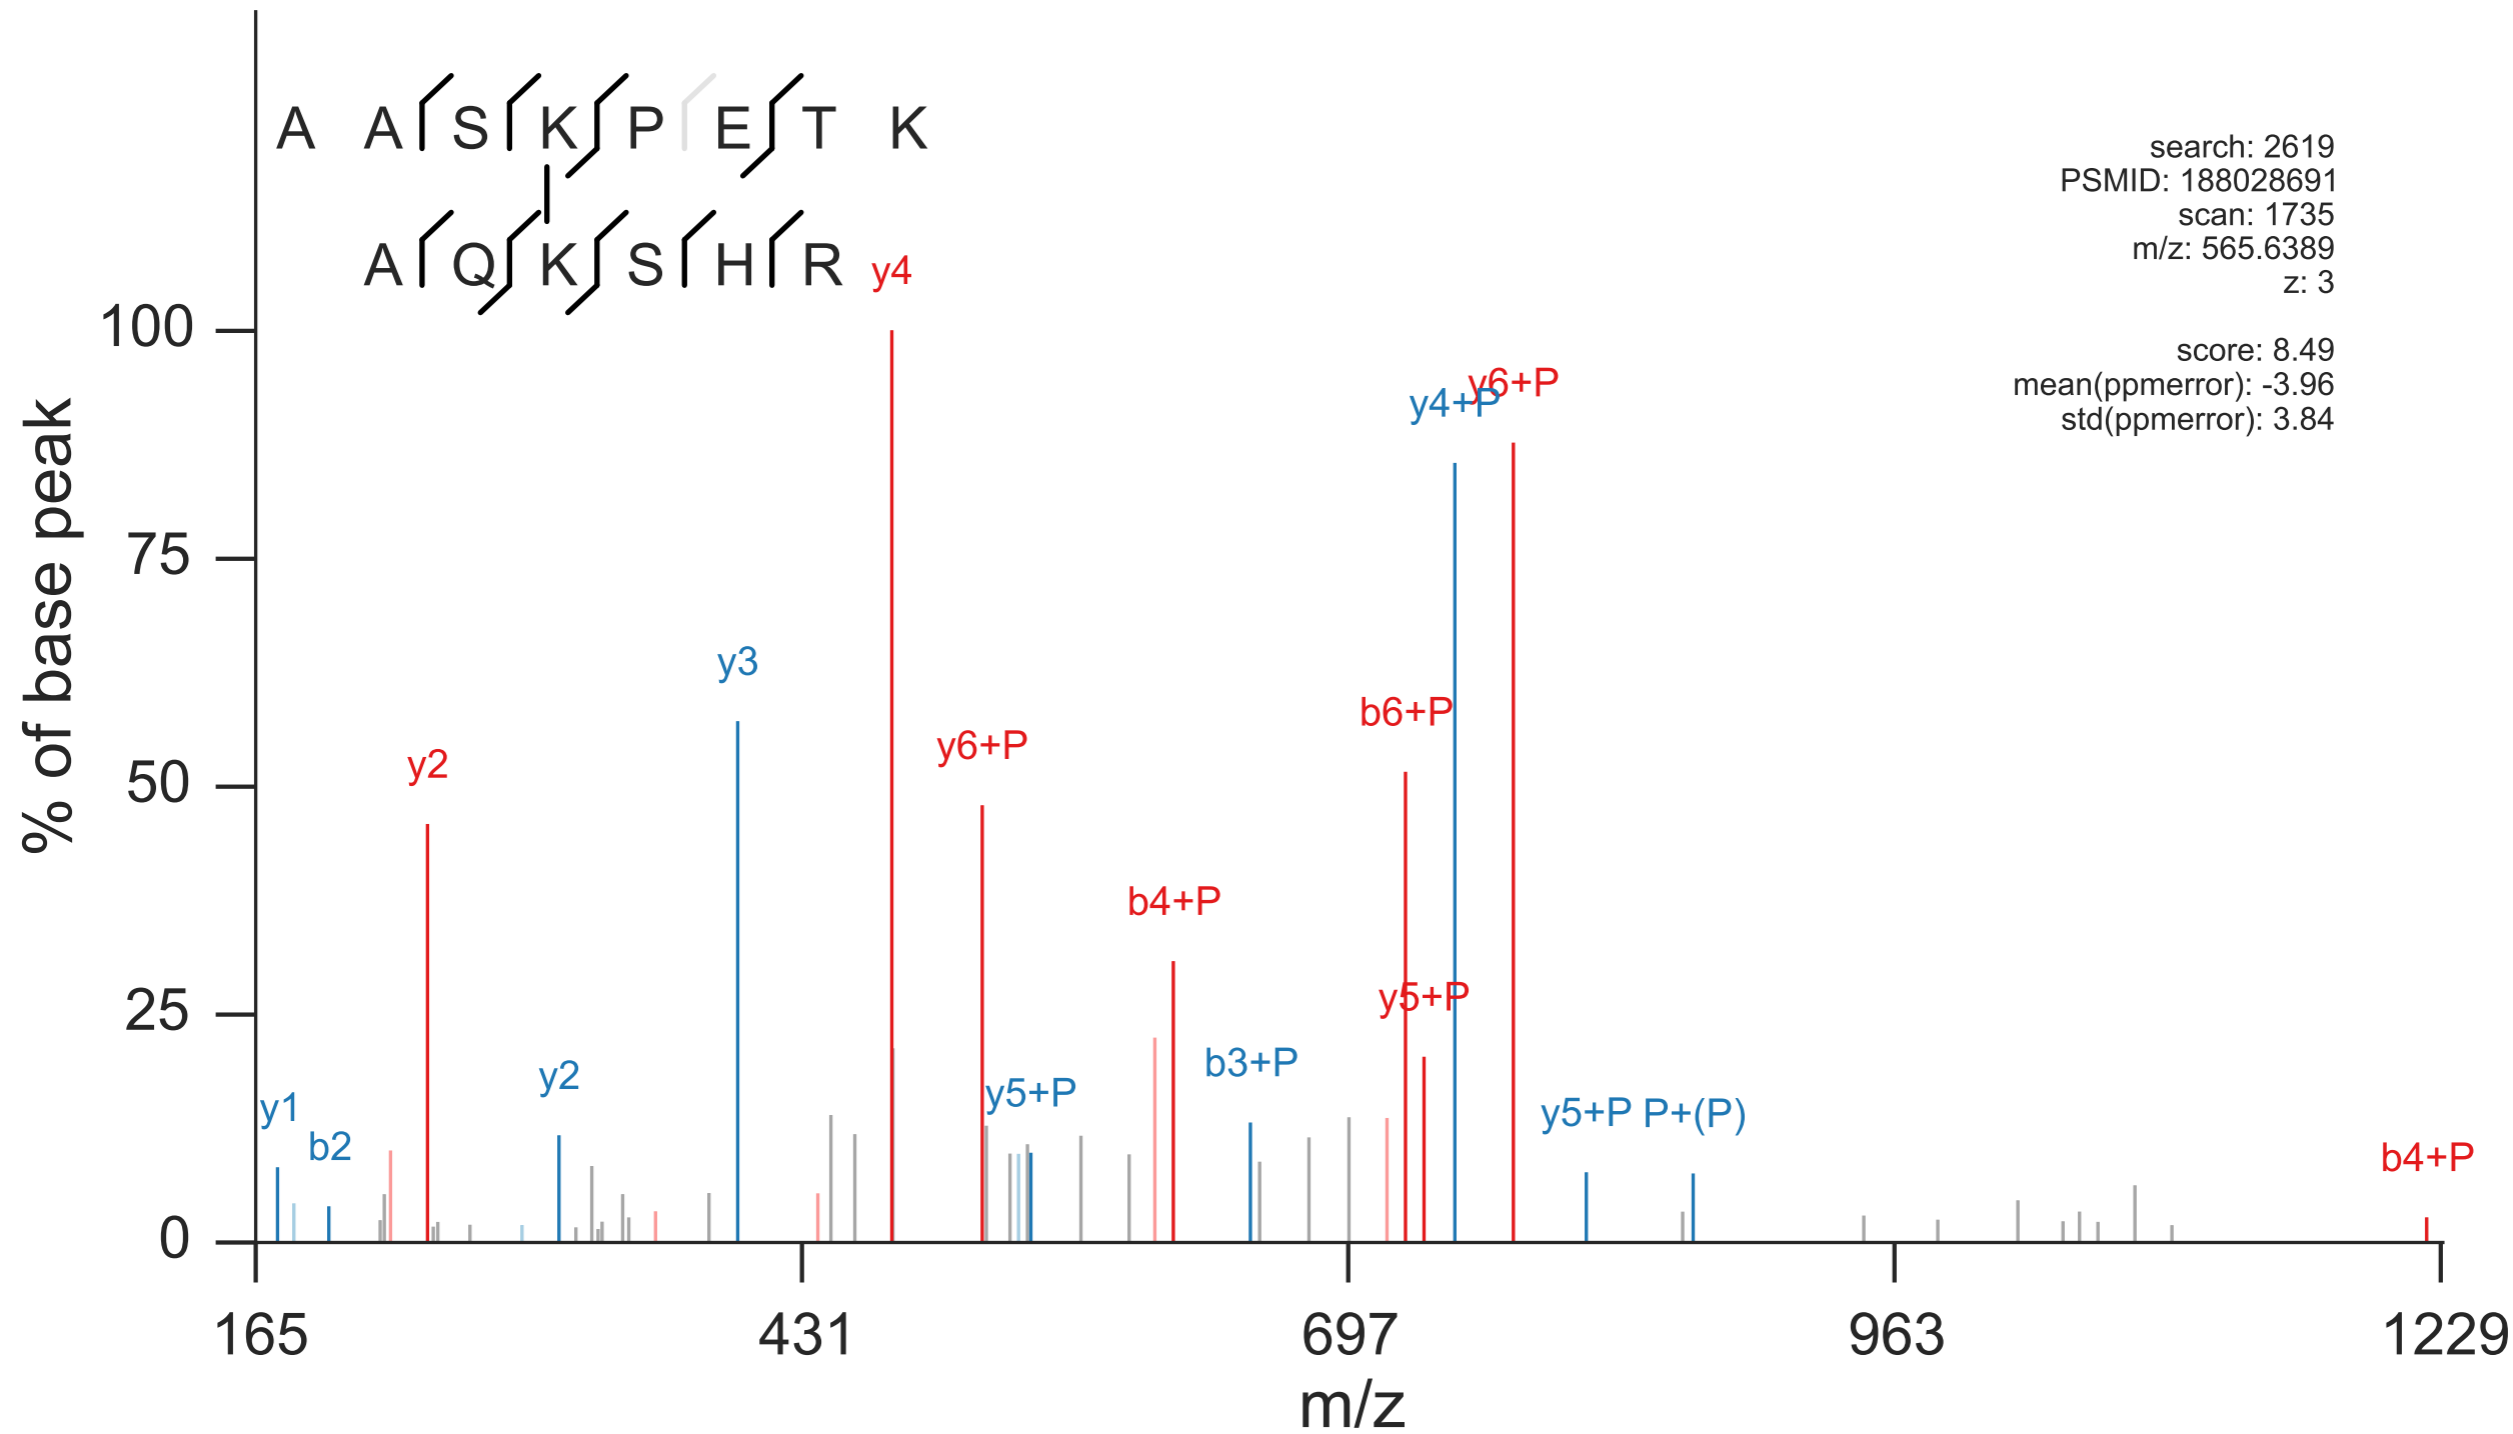

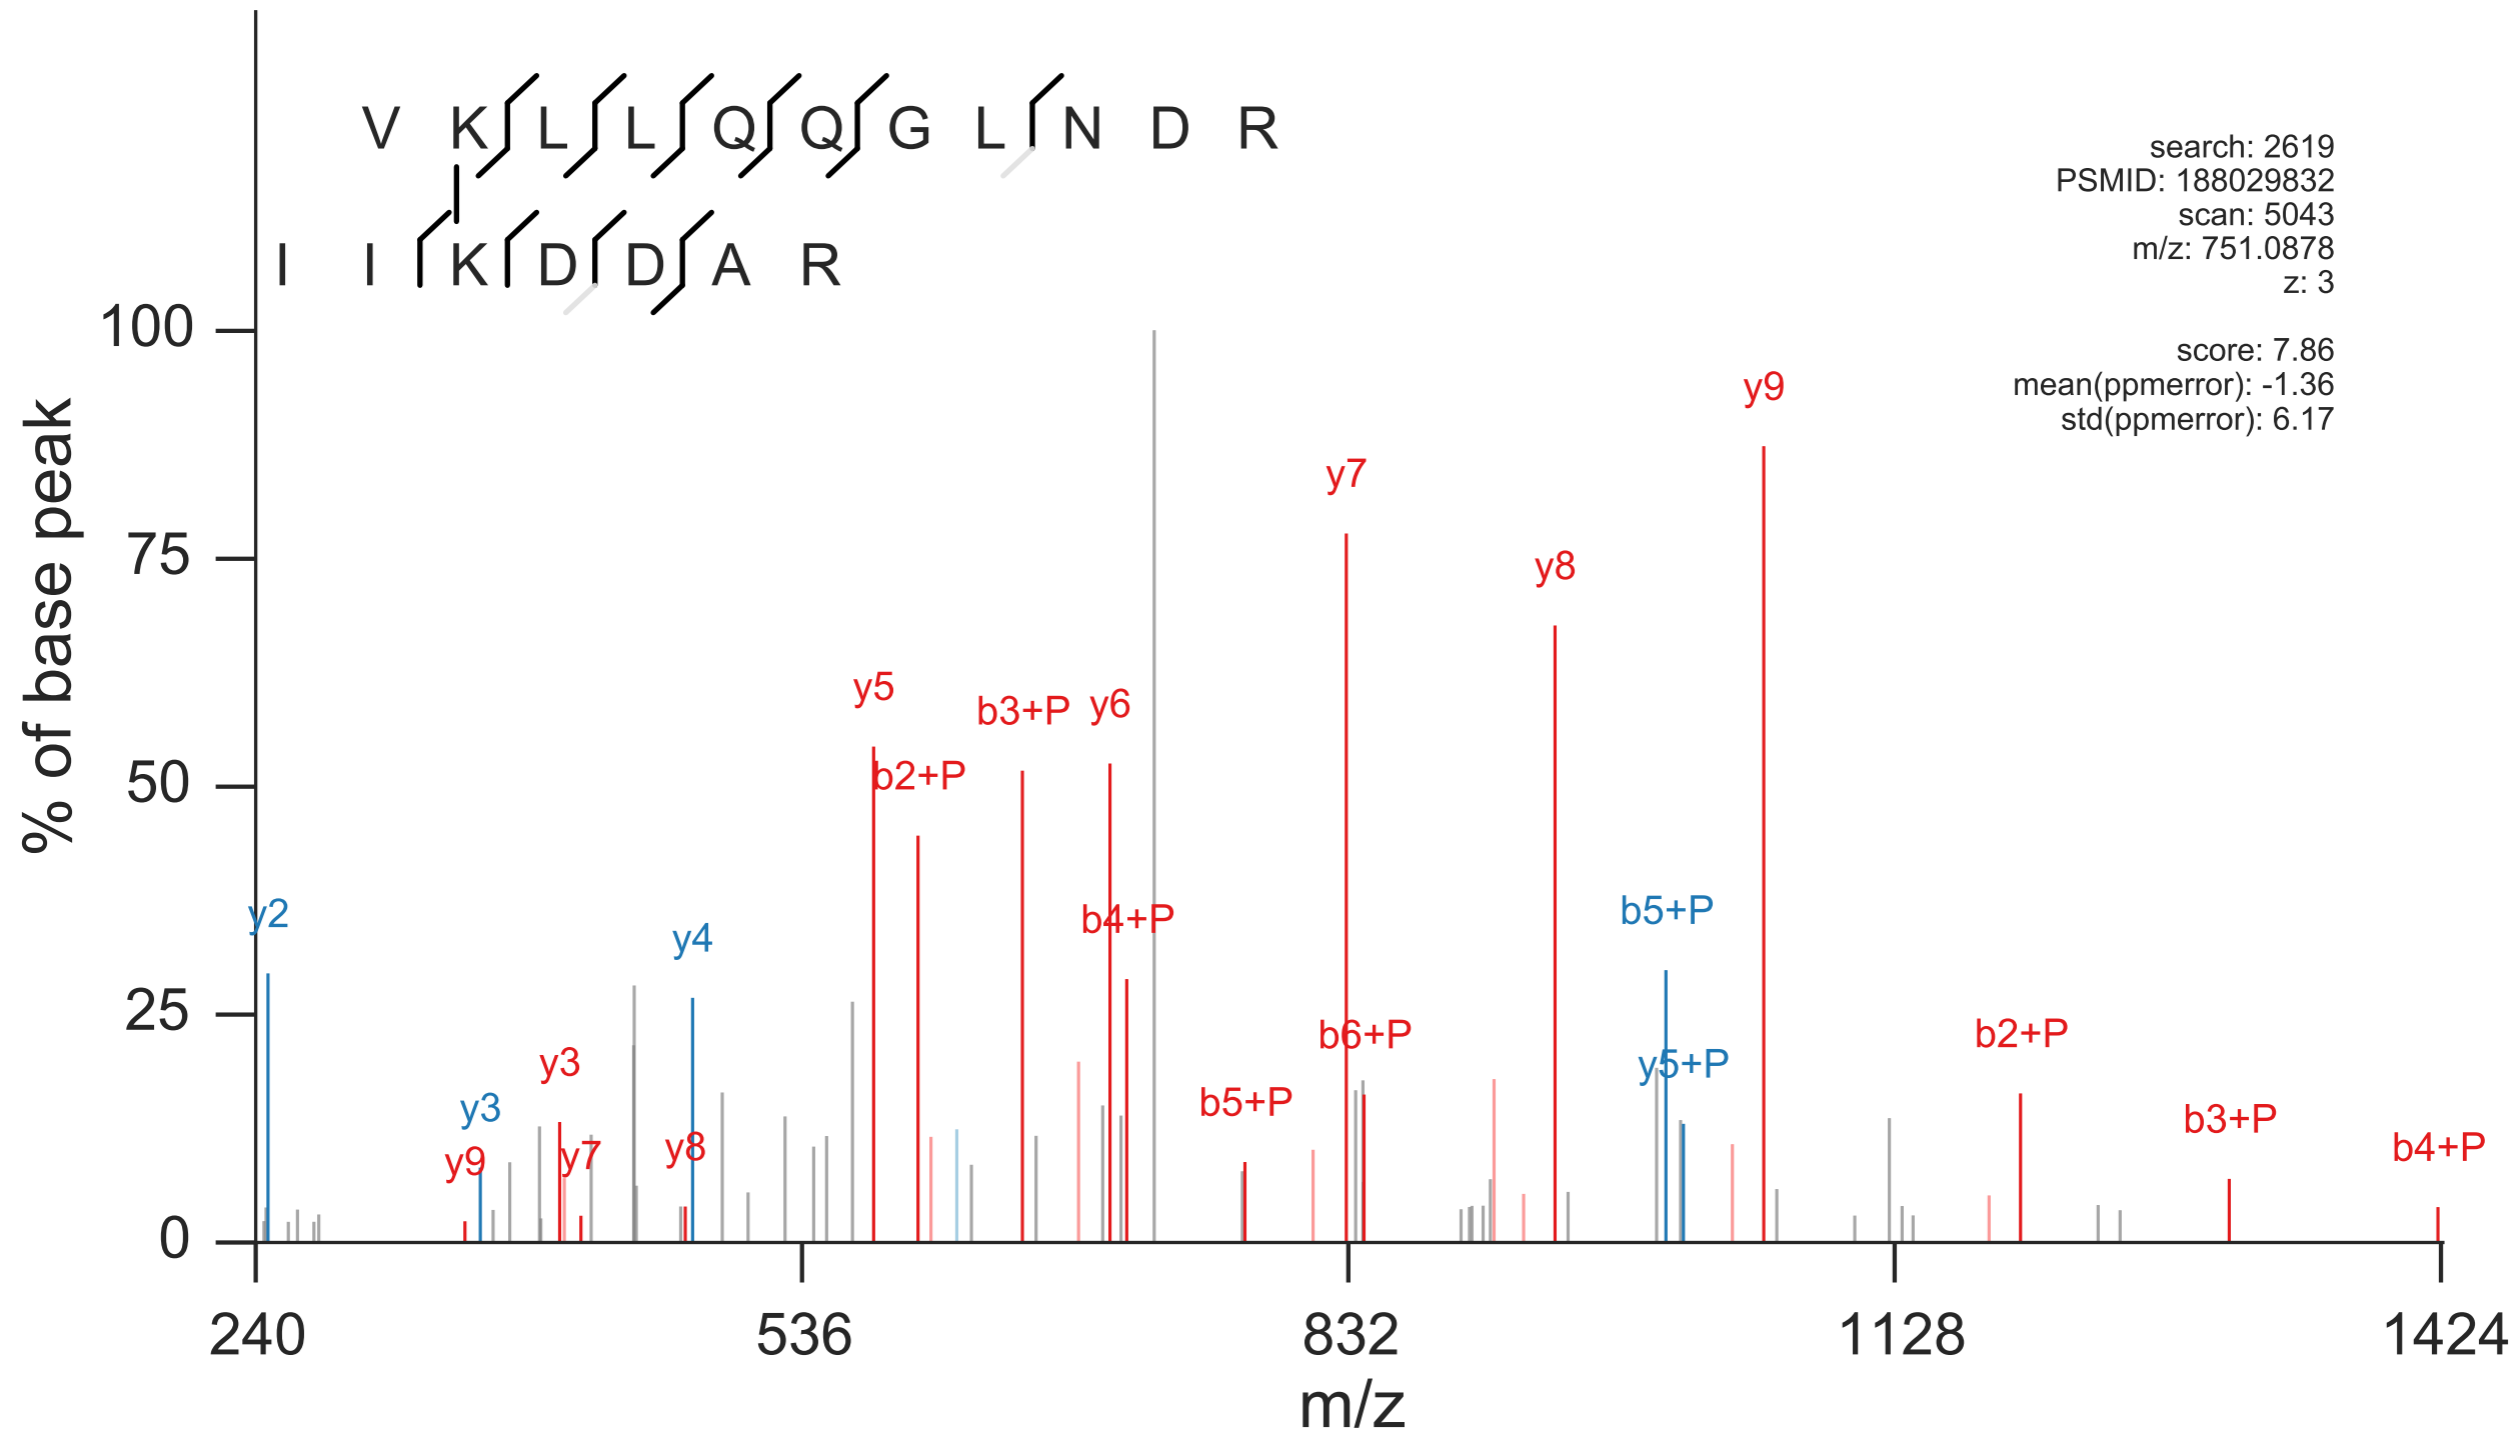

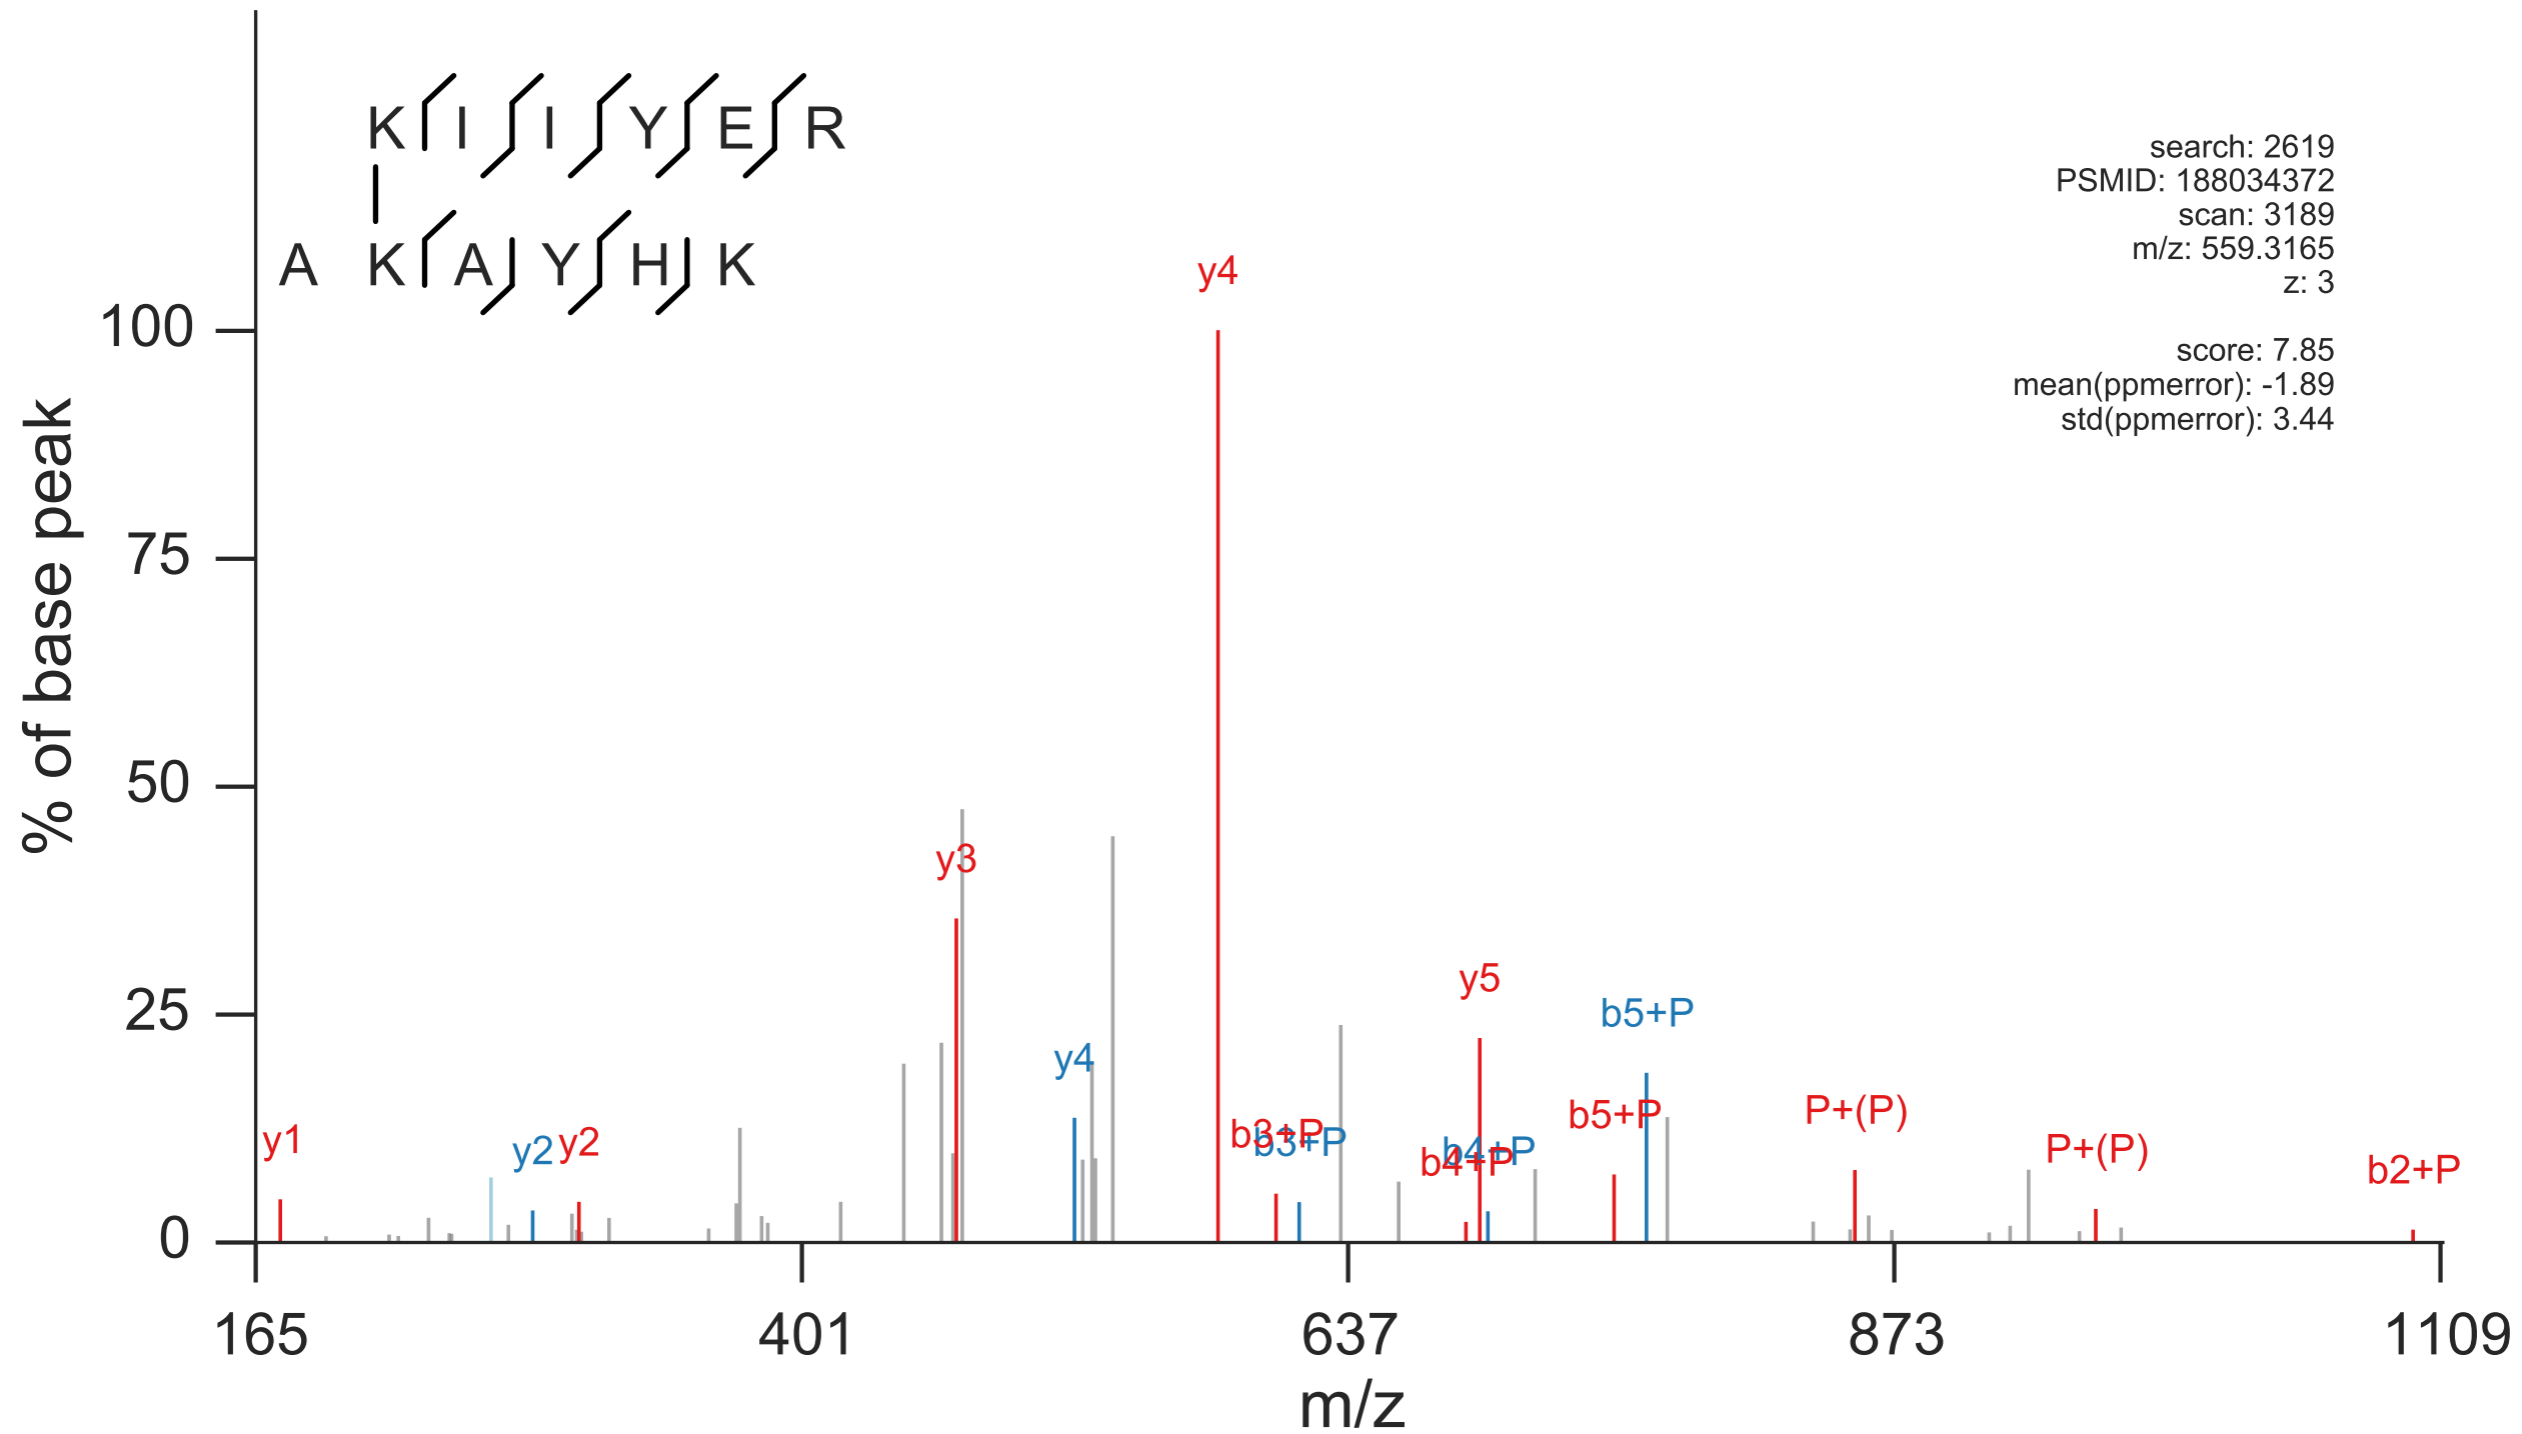

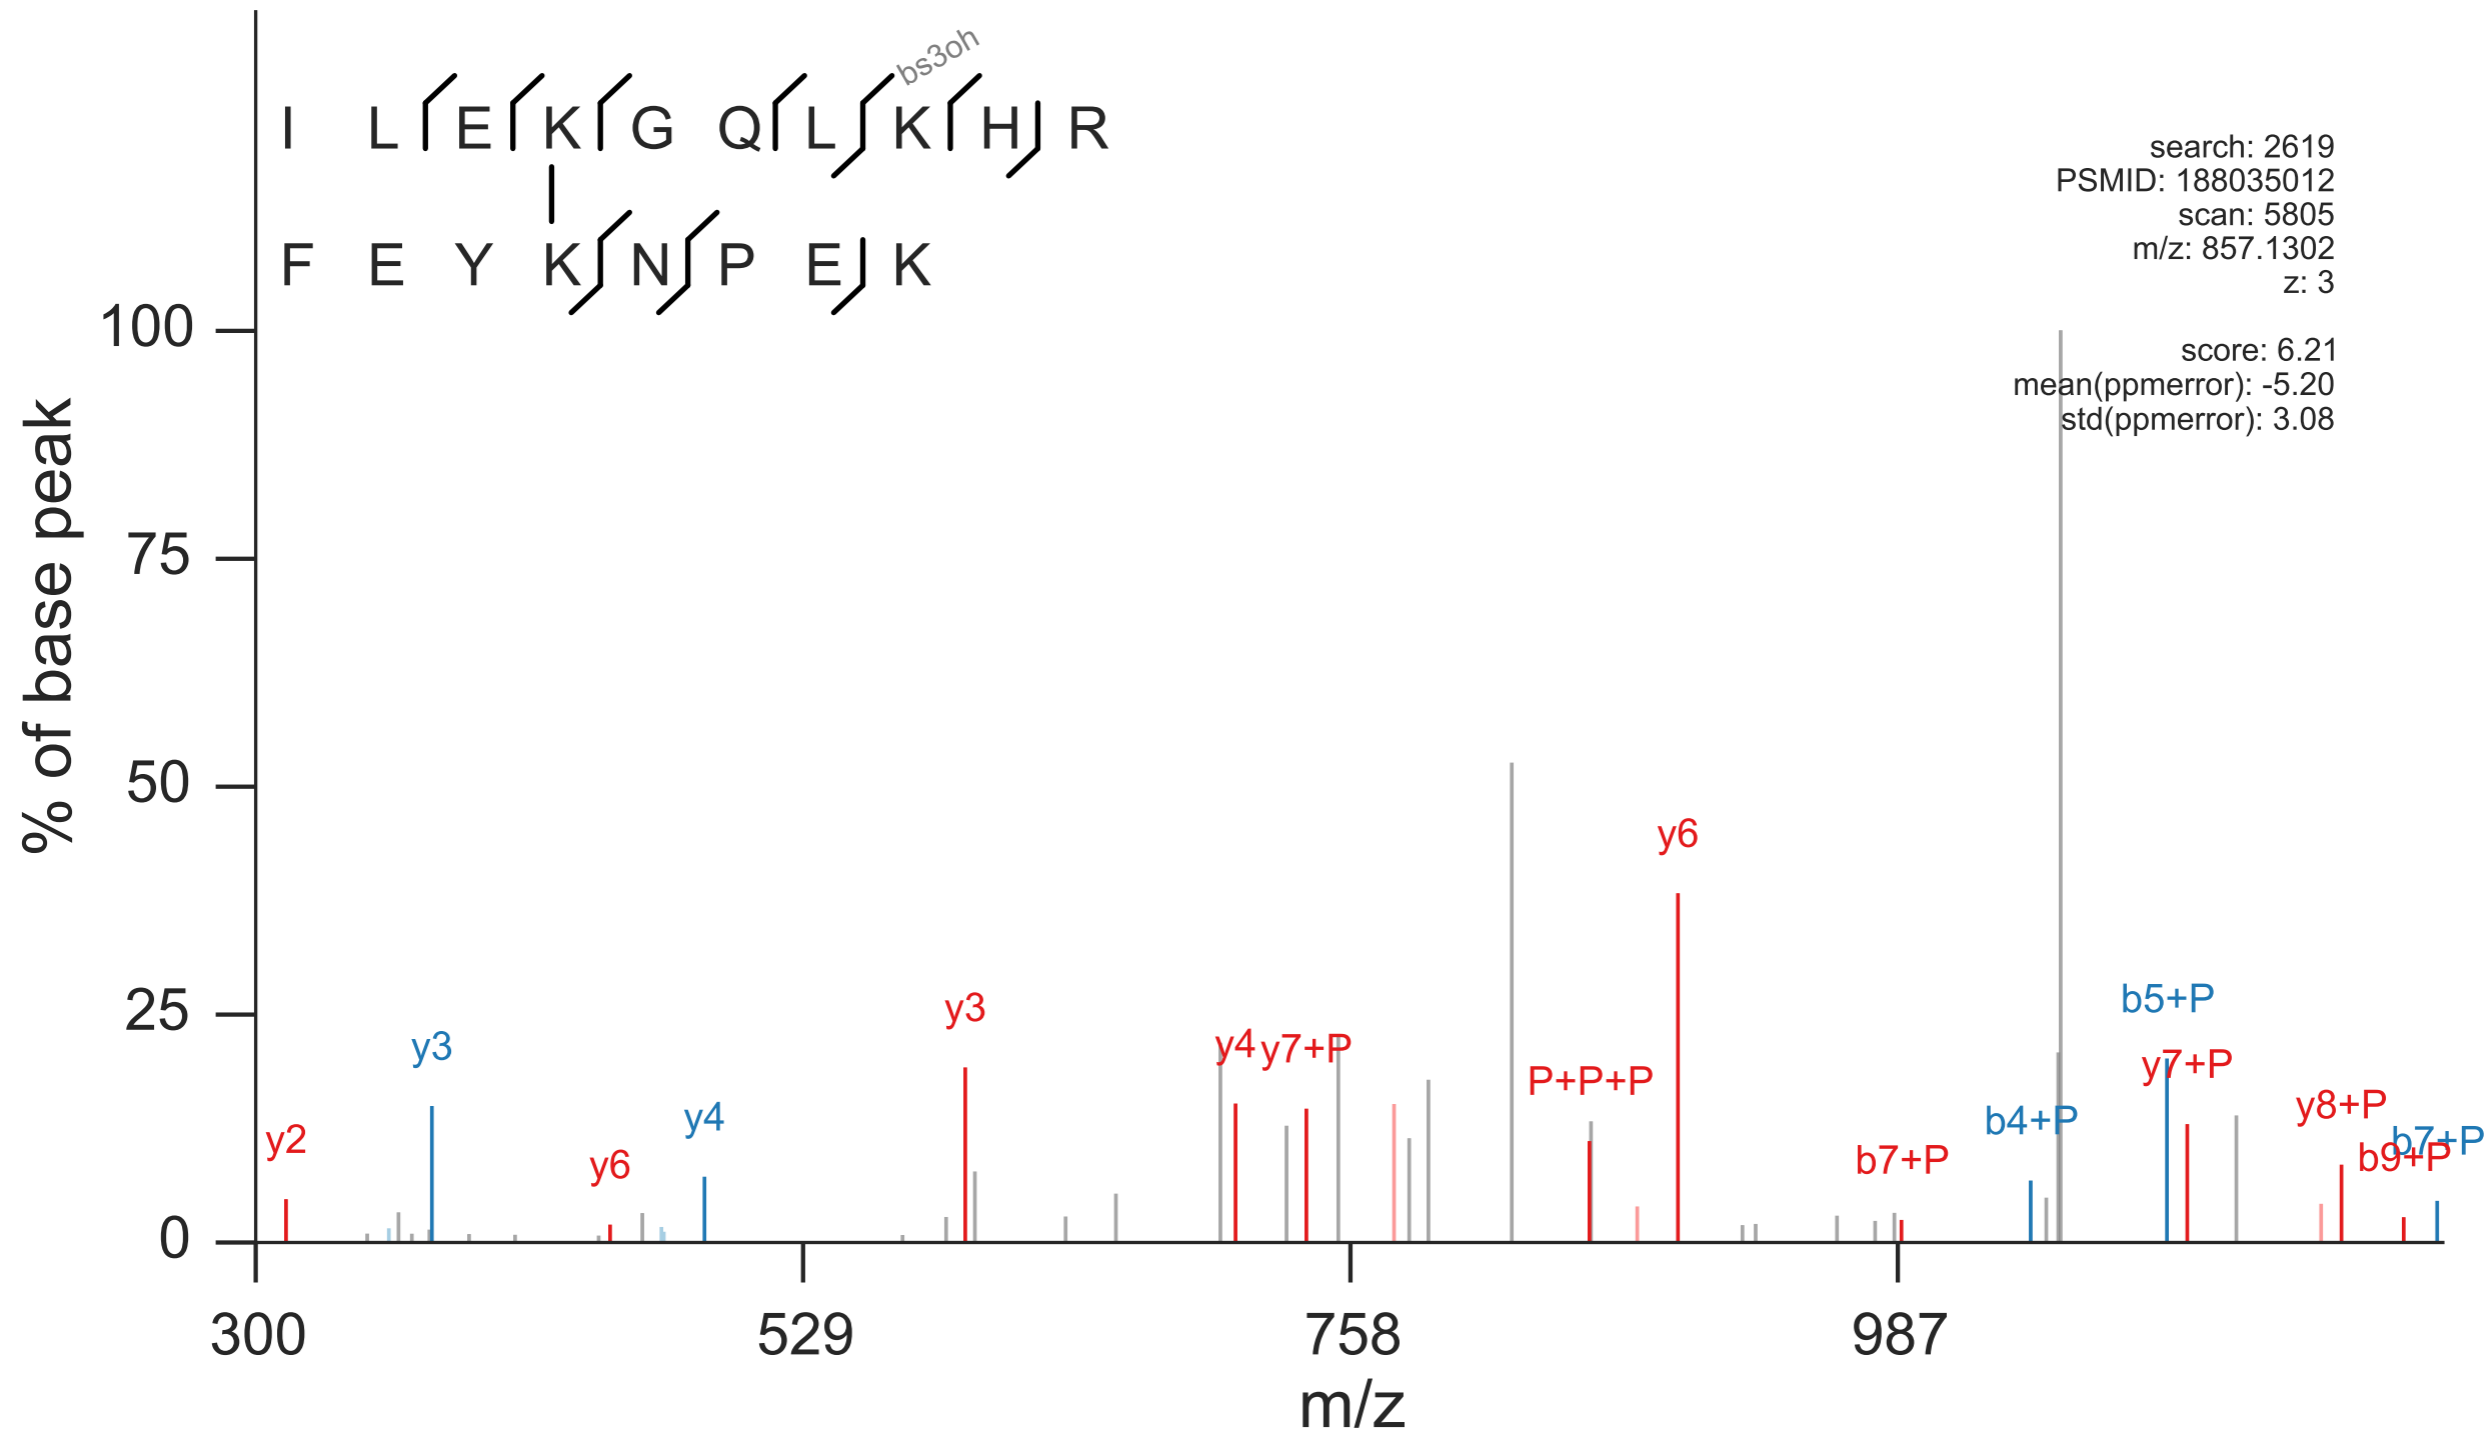

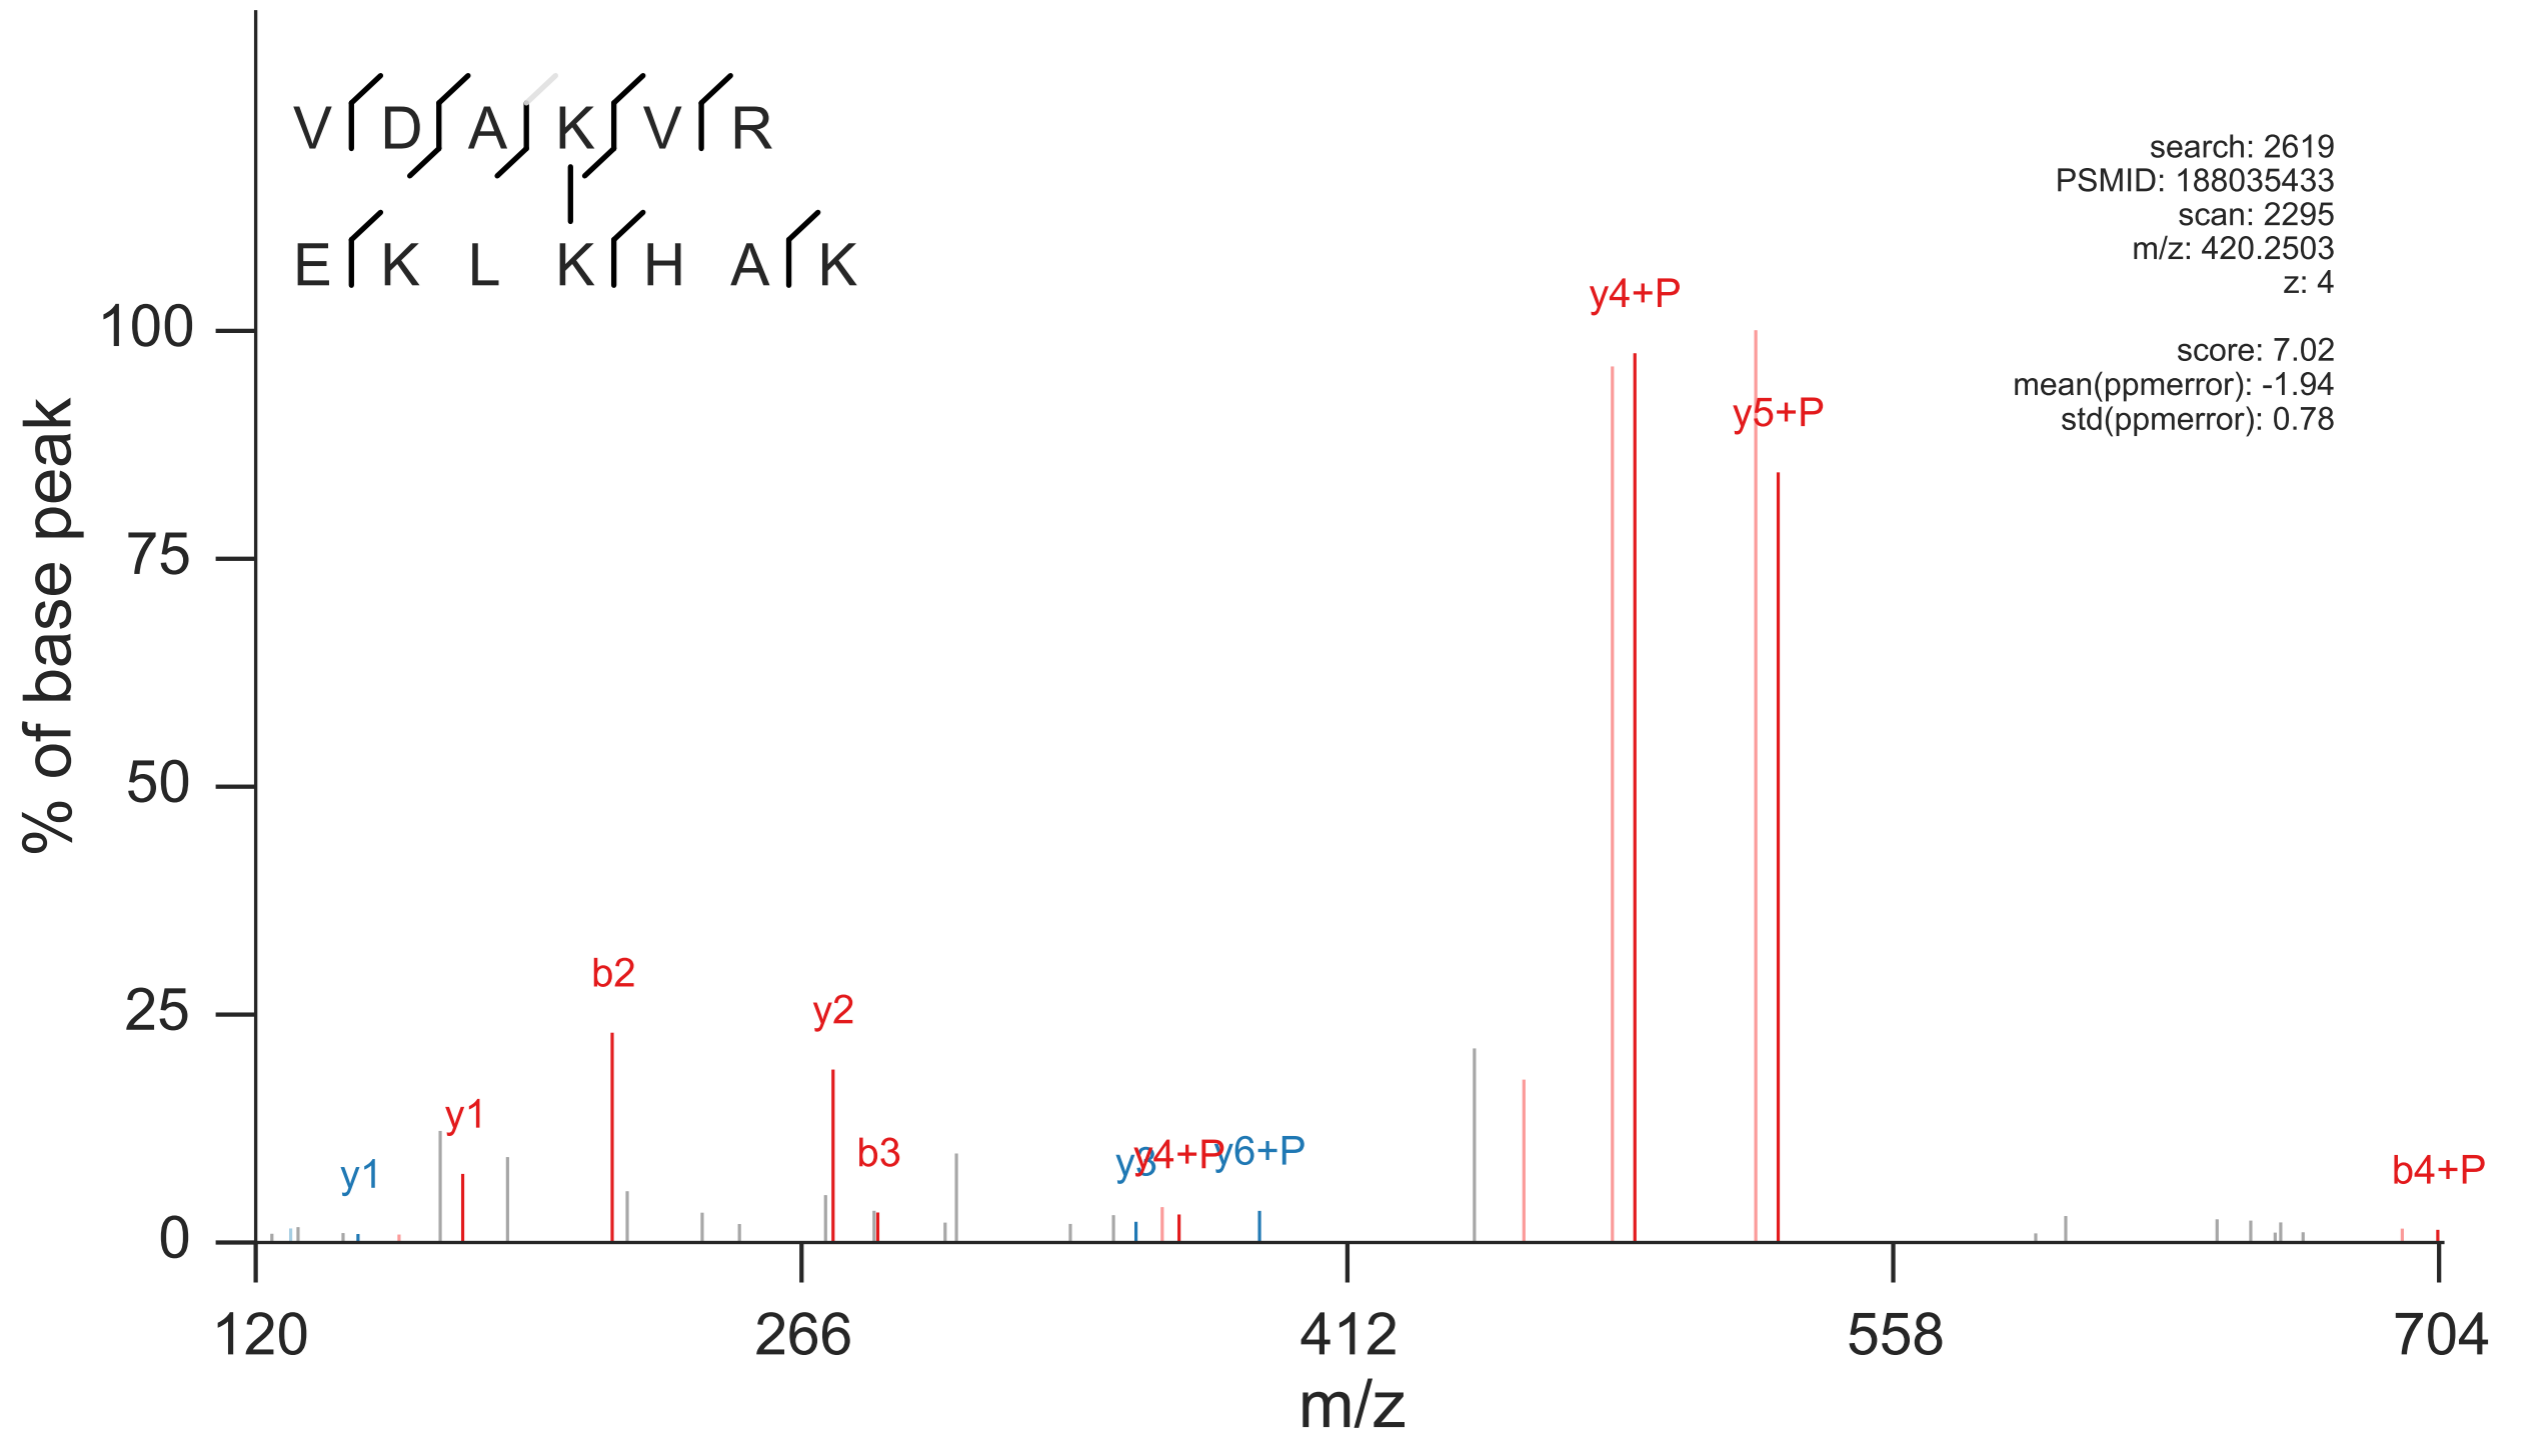

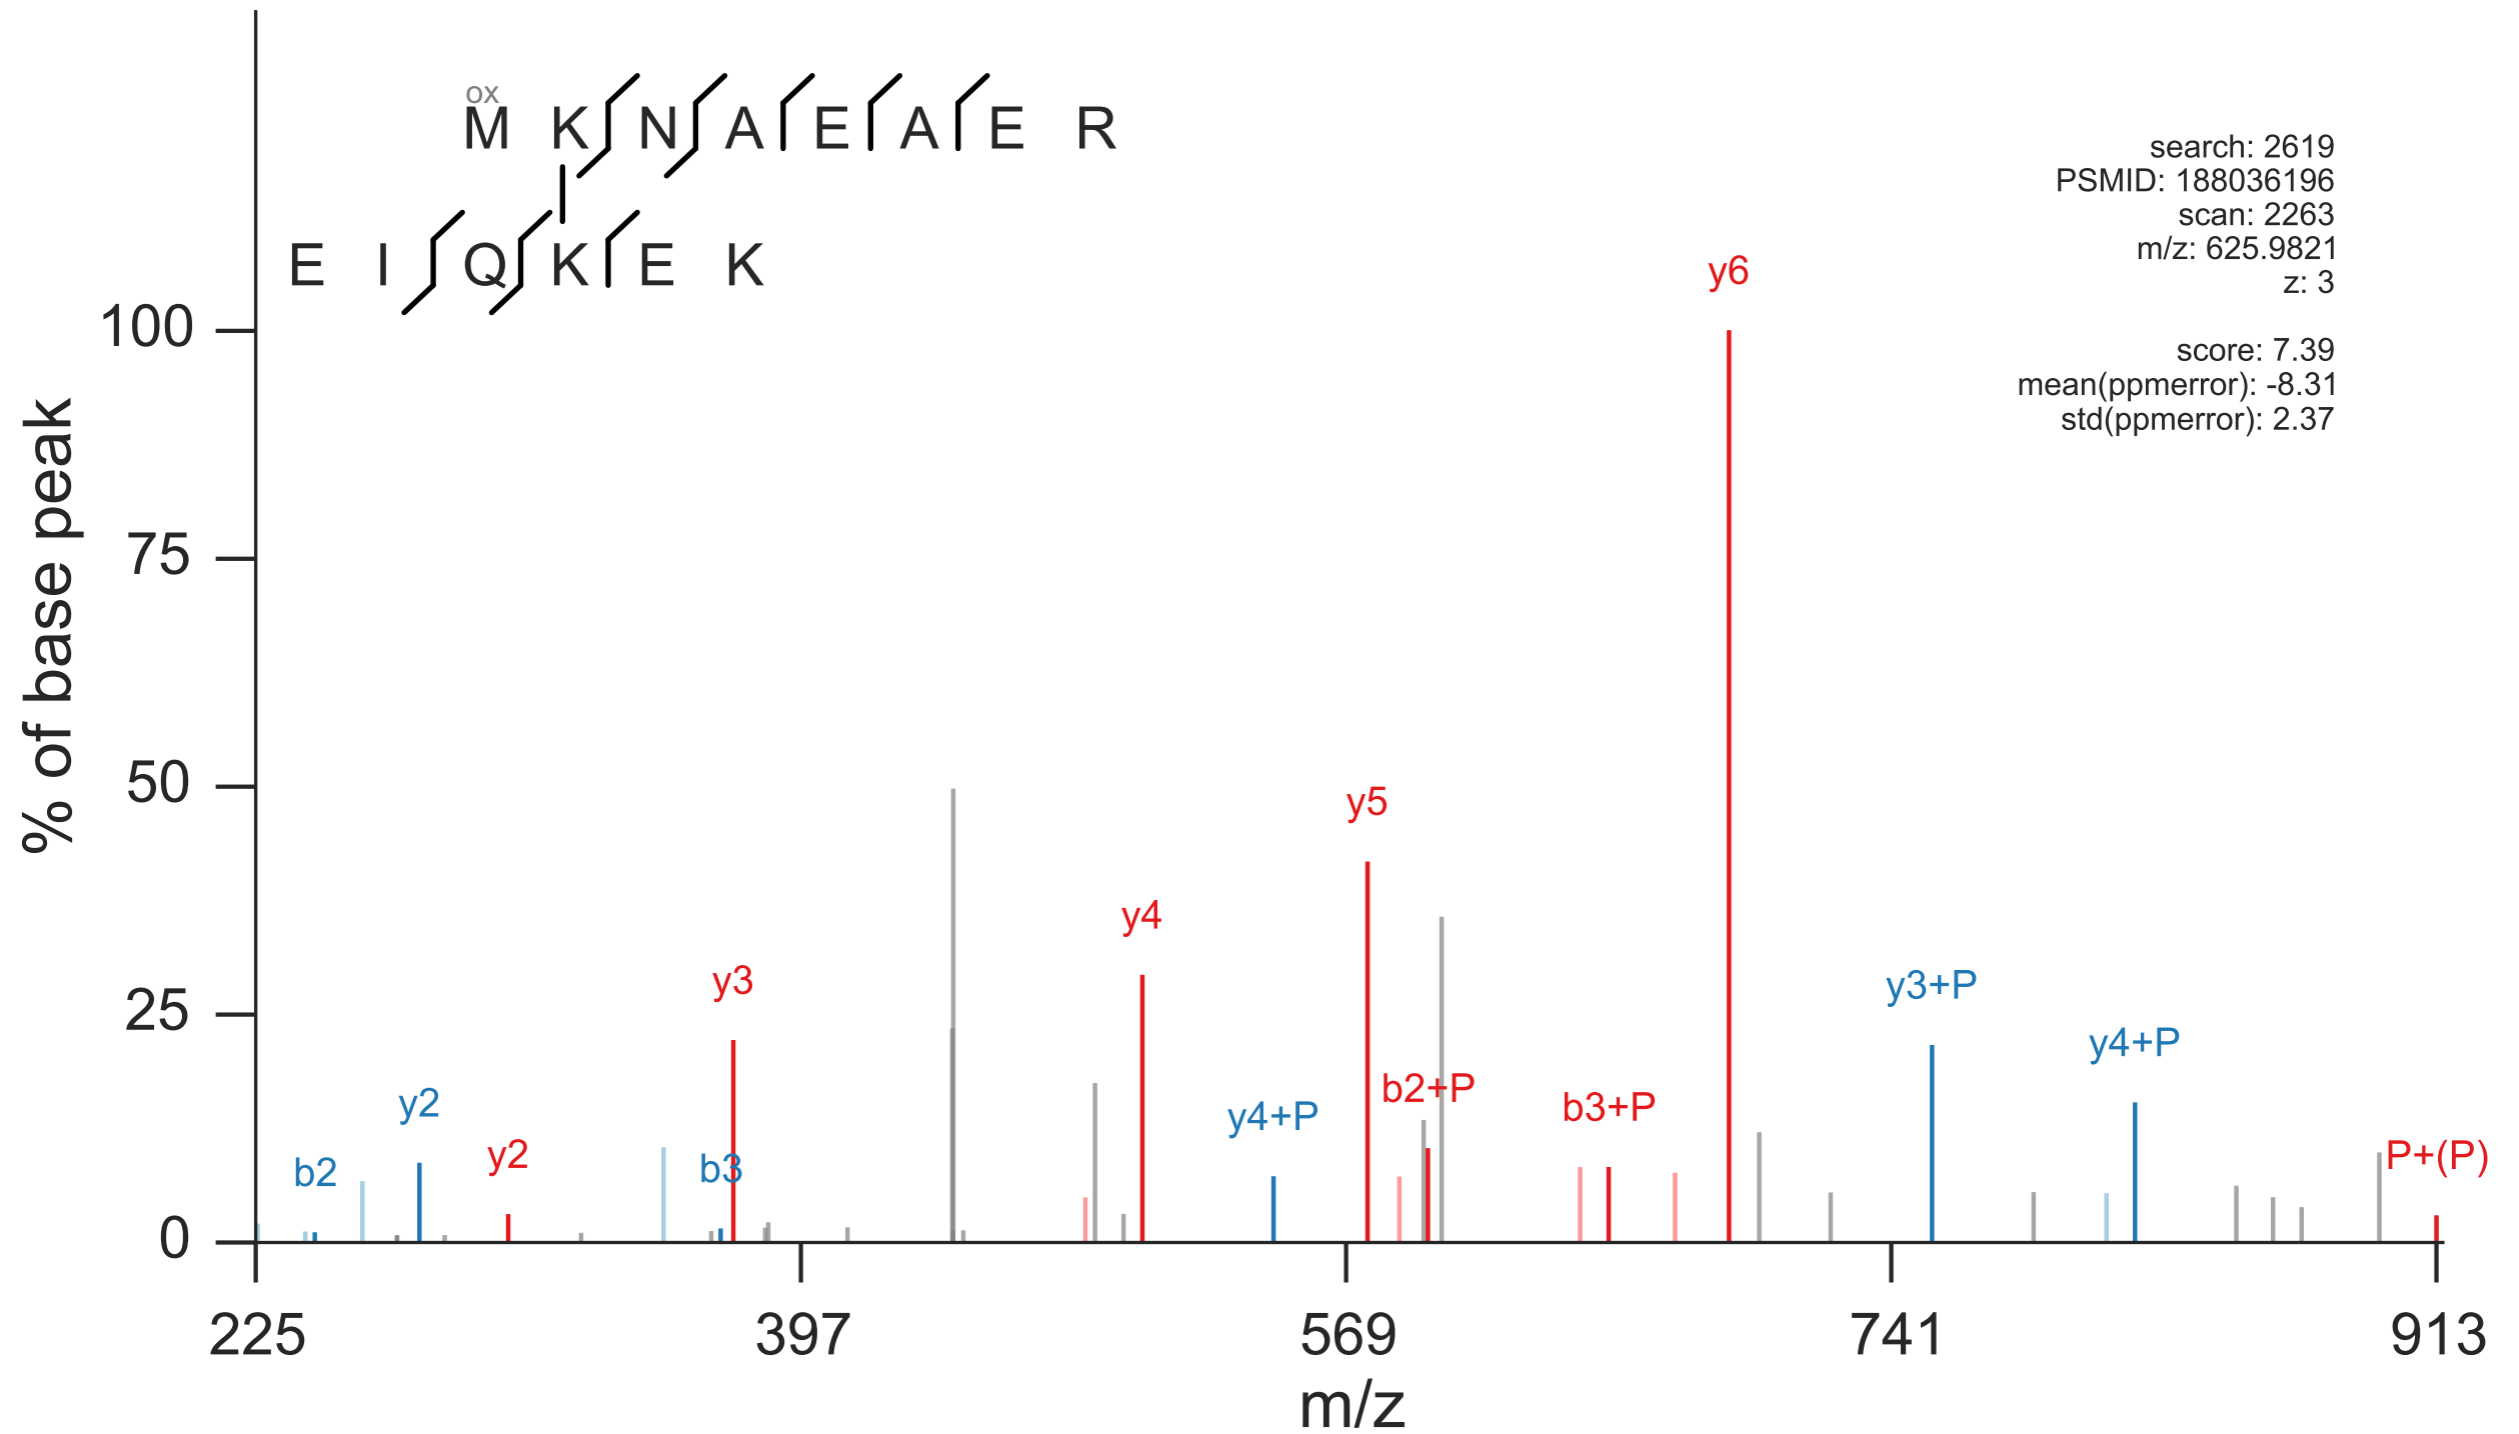

T | S | T | A | A | H | Q | K | G | R  
 G E K | L | N | R

search: 2619  
 PSMID: 188036989  
 scan: 2185  
 m/z: 637.3394  
 z: 3  
 score: 7.33  
 mean(ppmerror): 4.81  
 std(ppmerror): 4.73

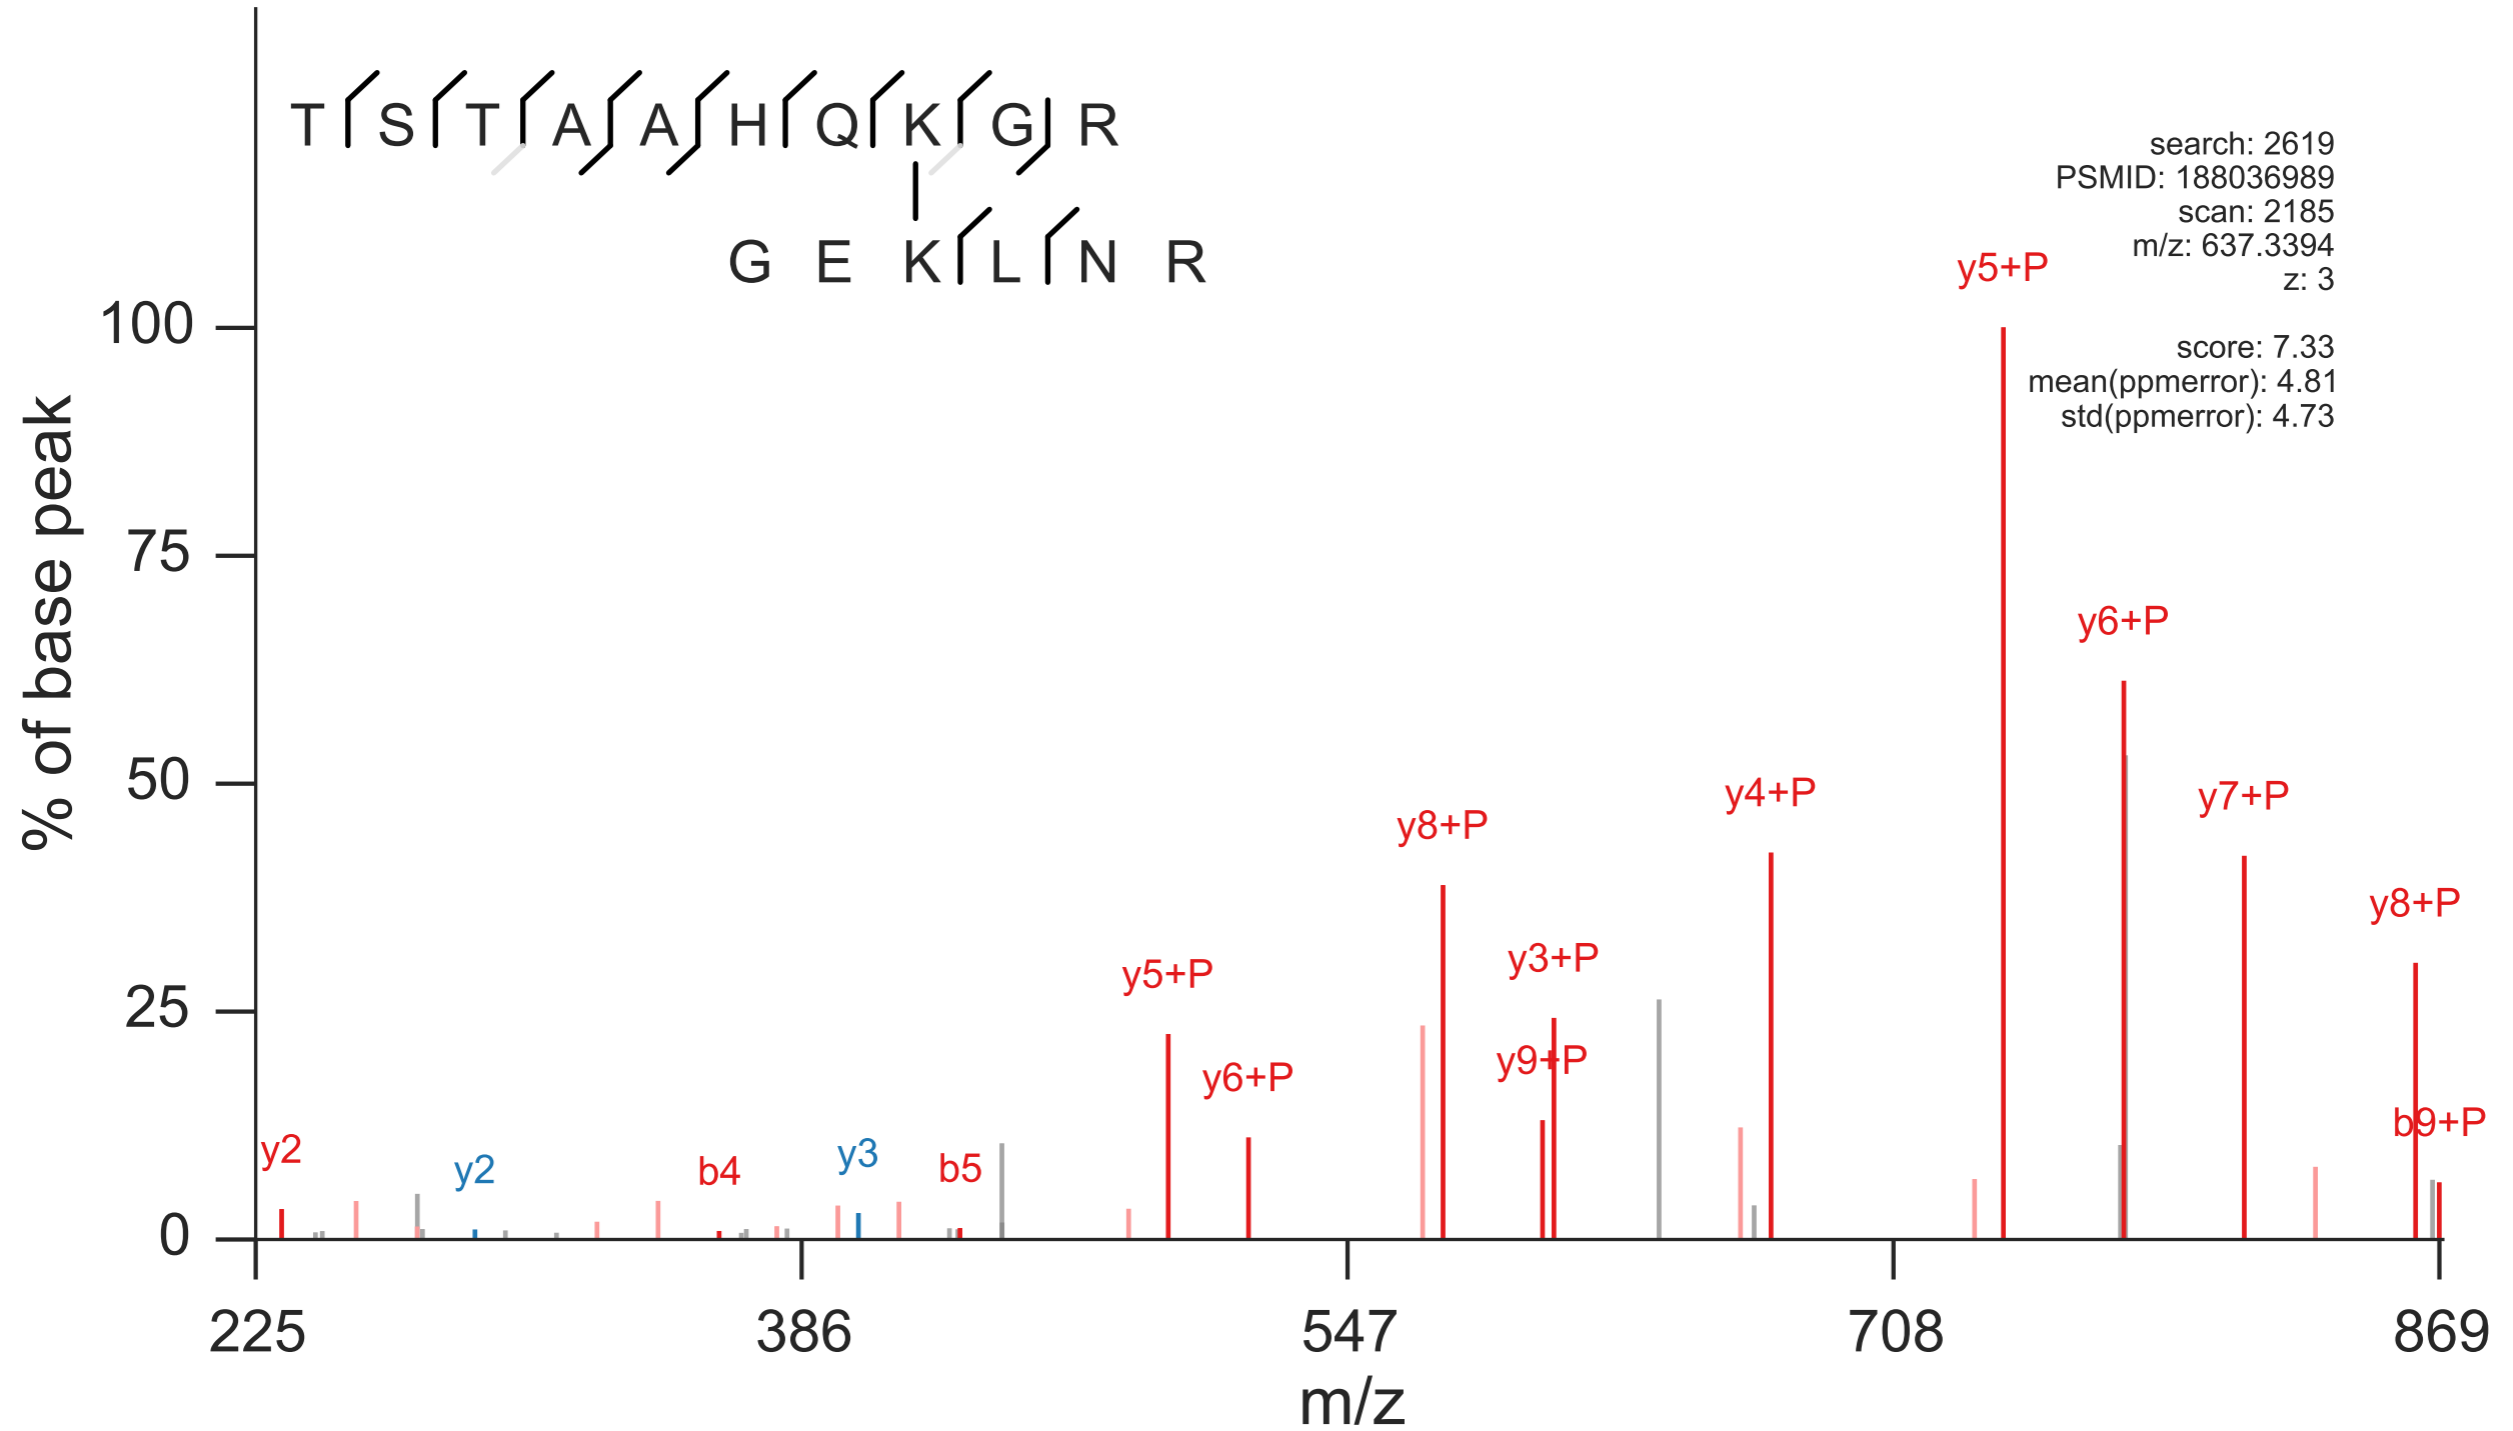

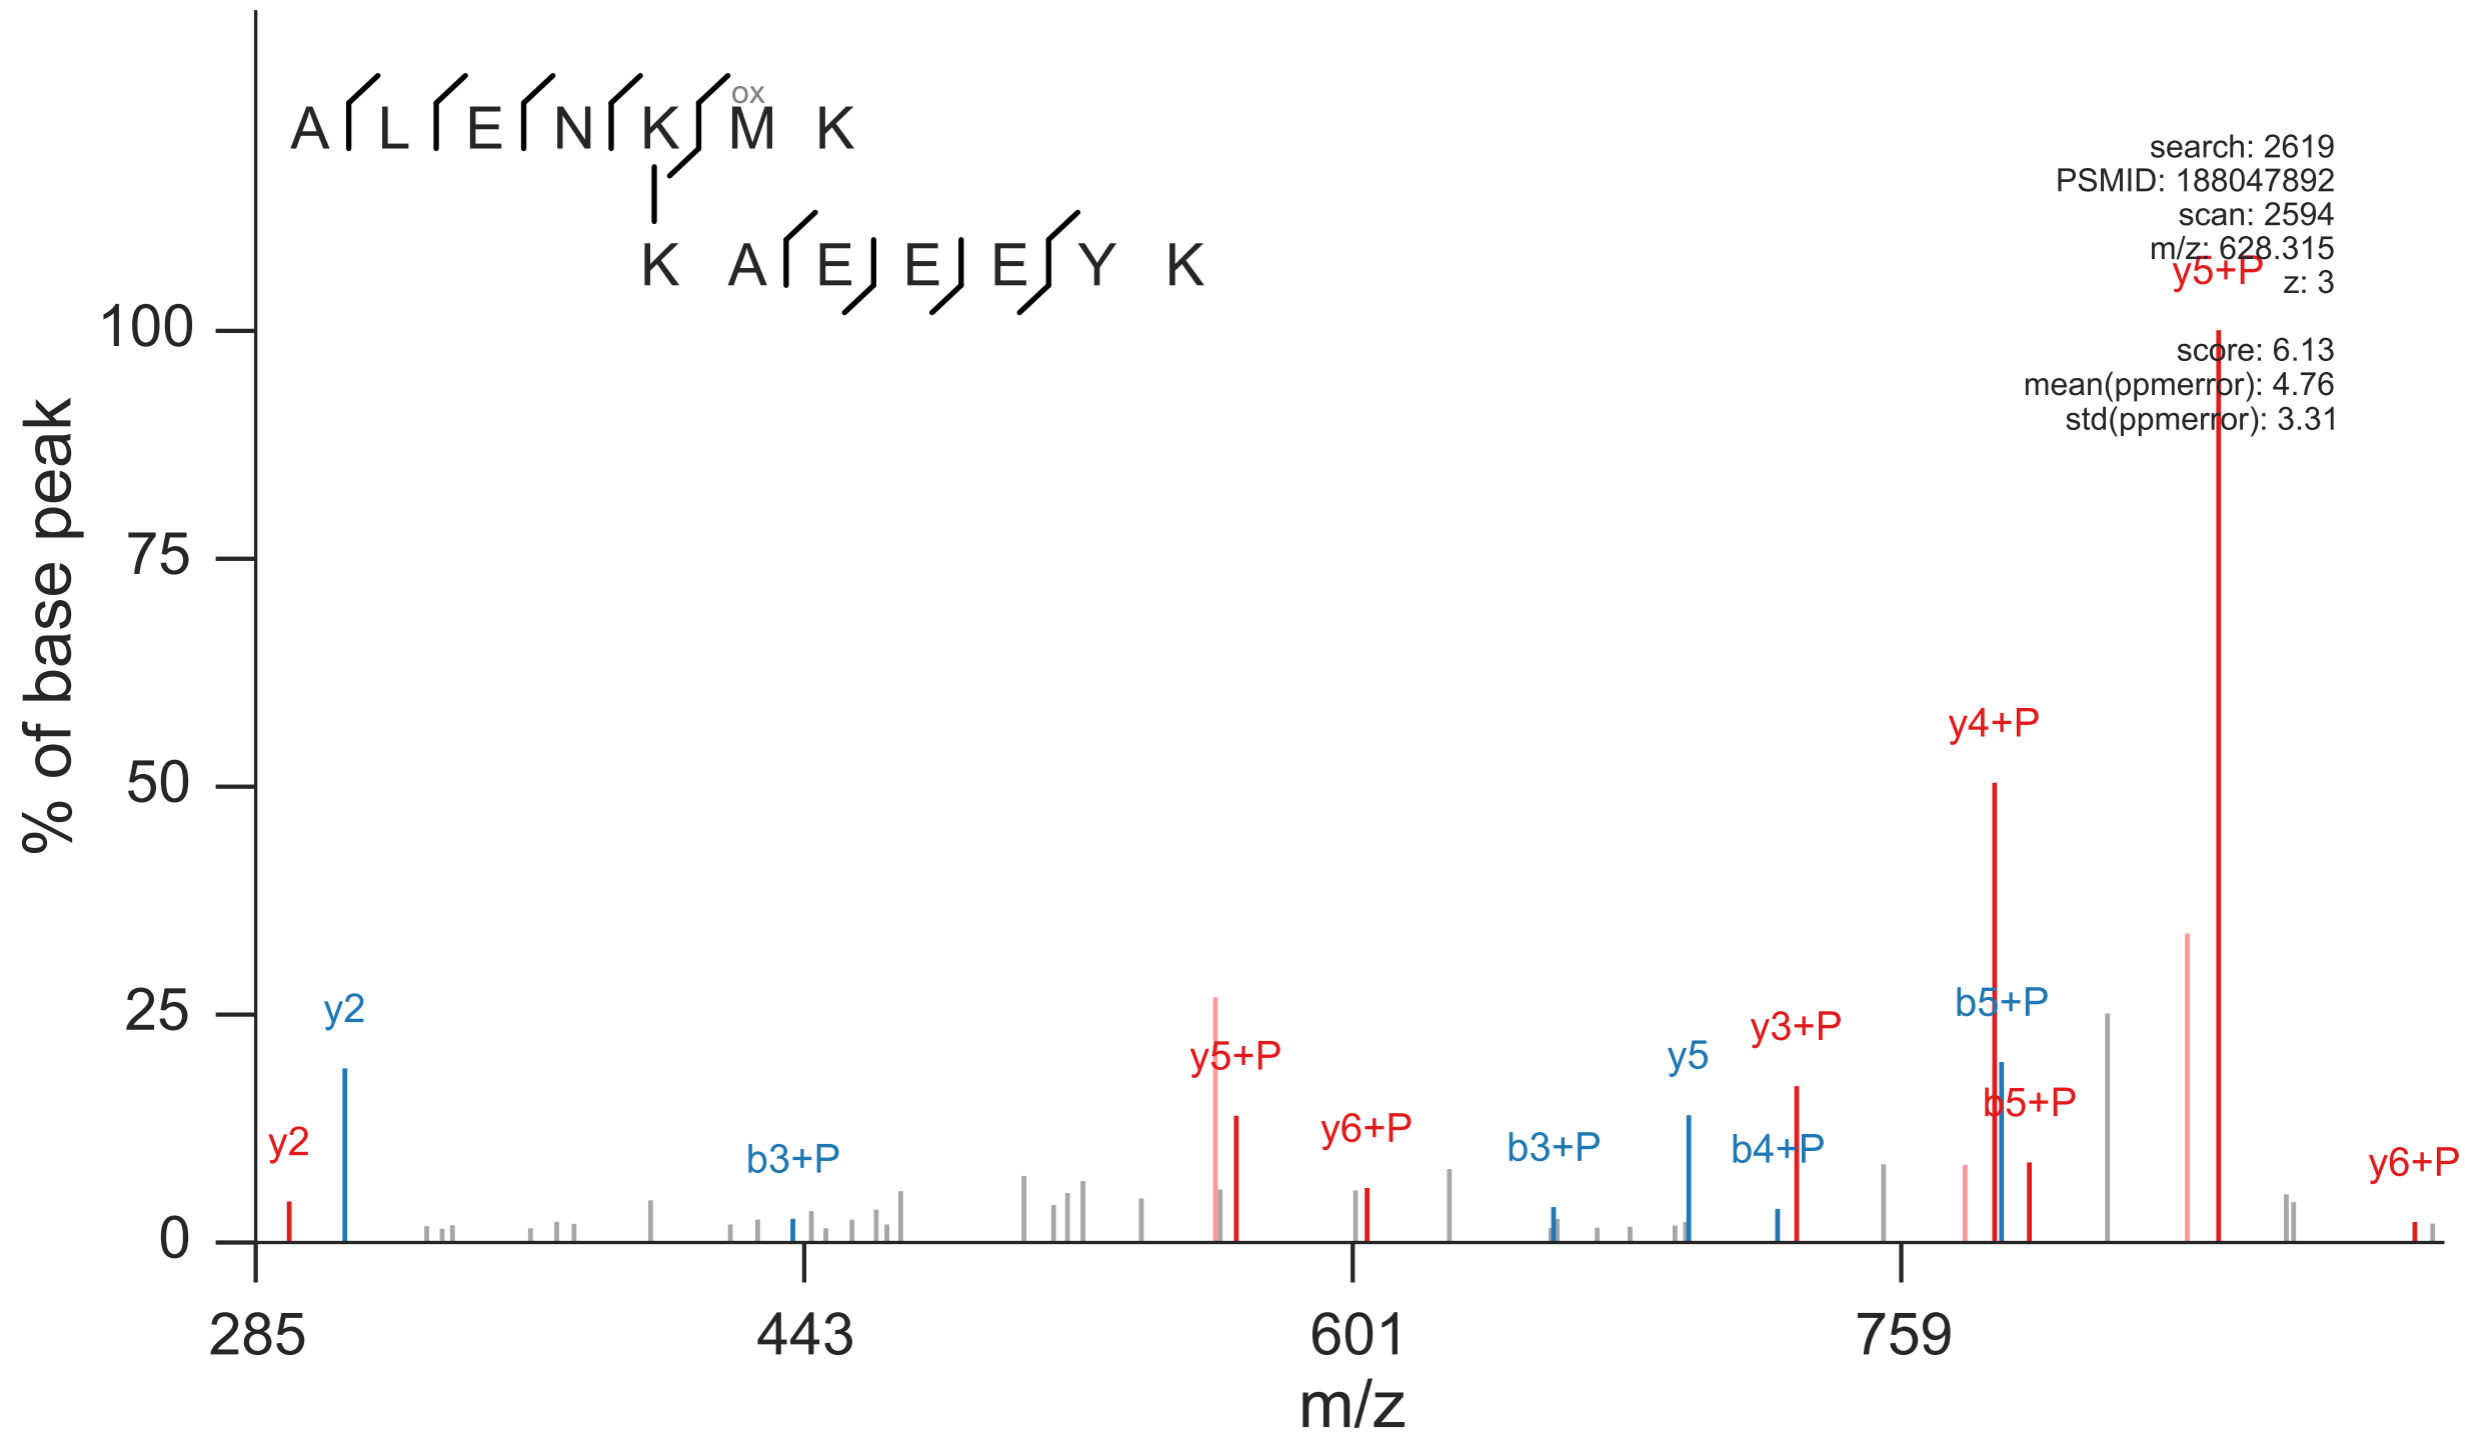



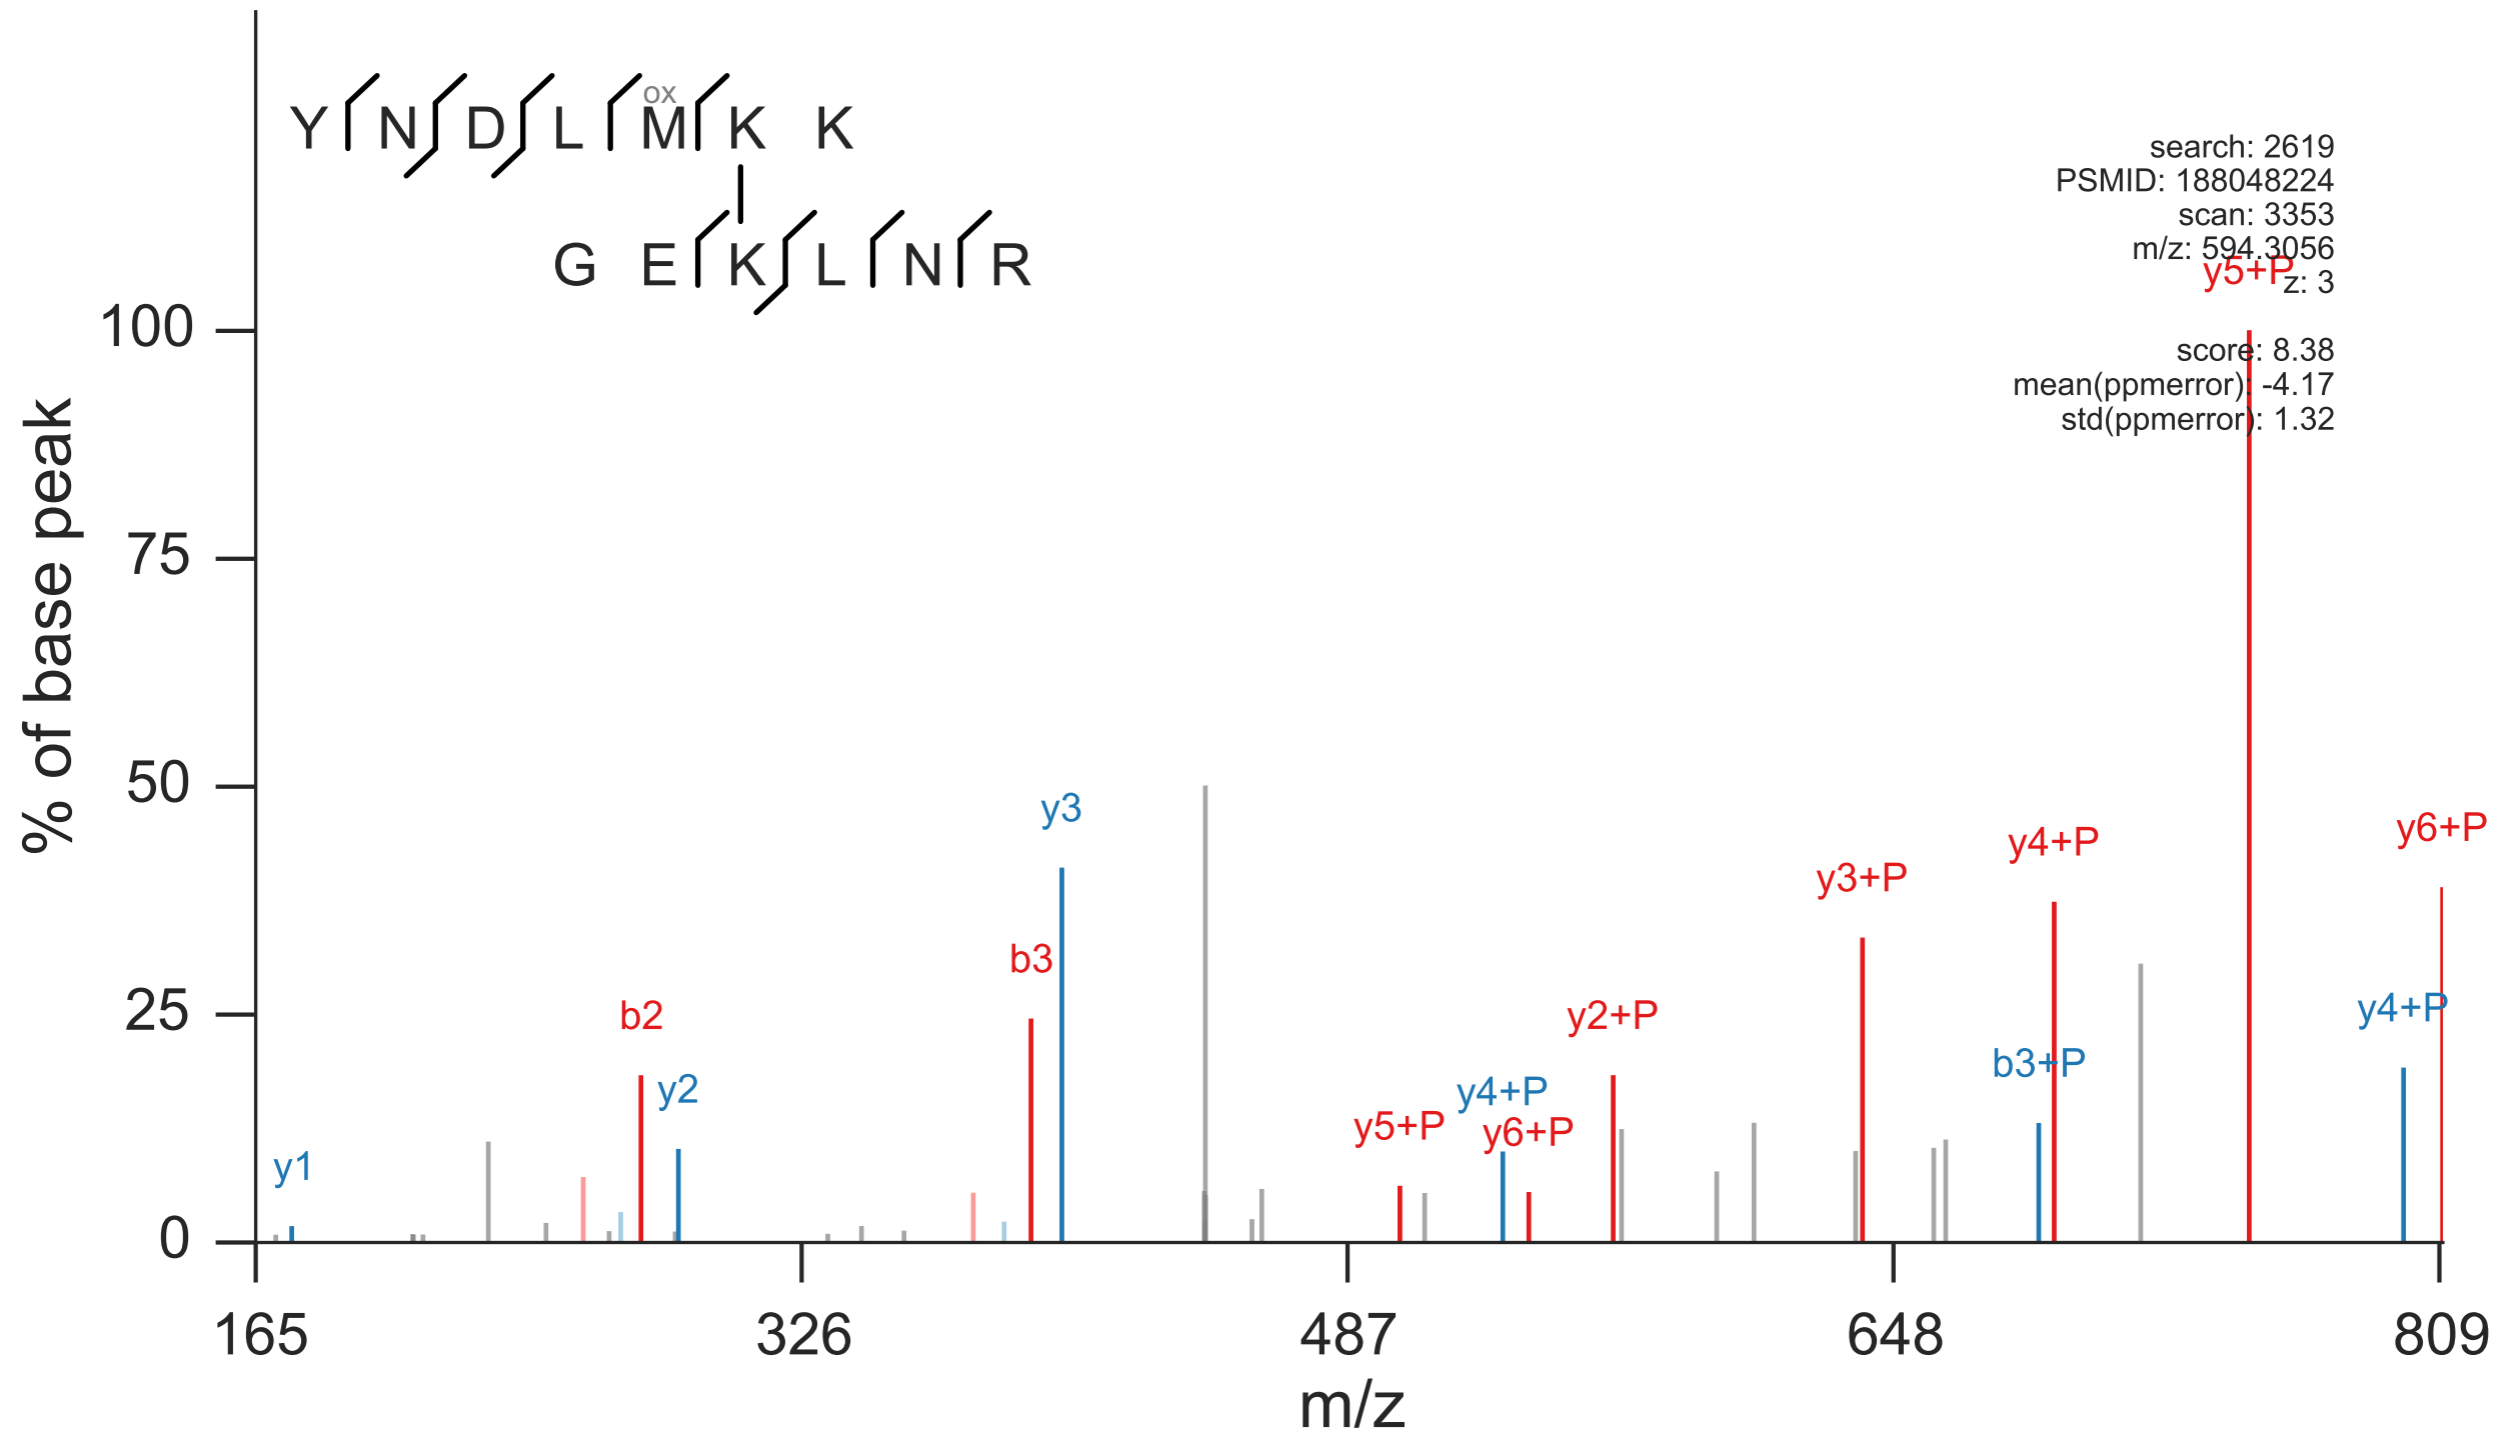

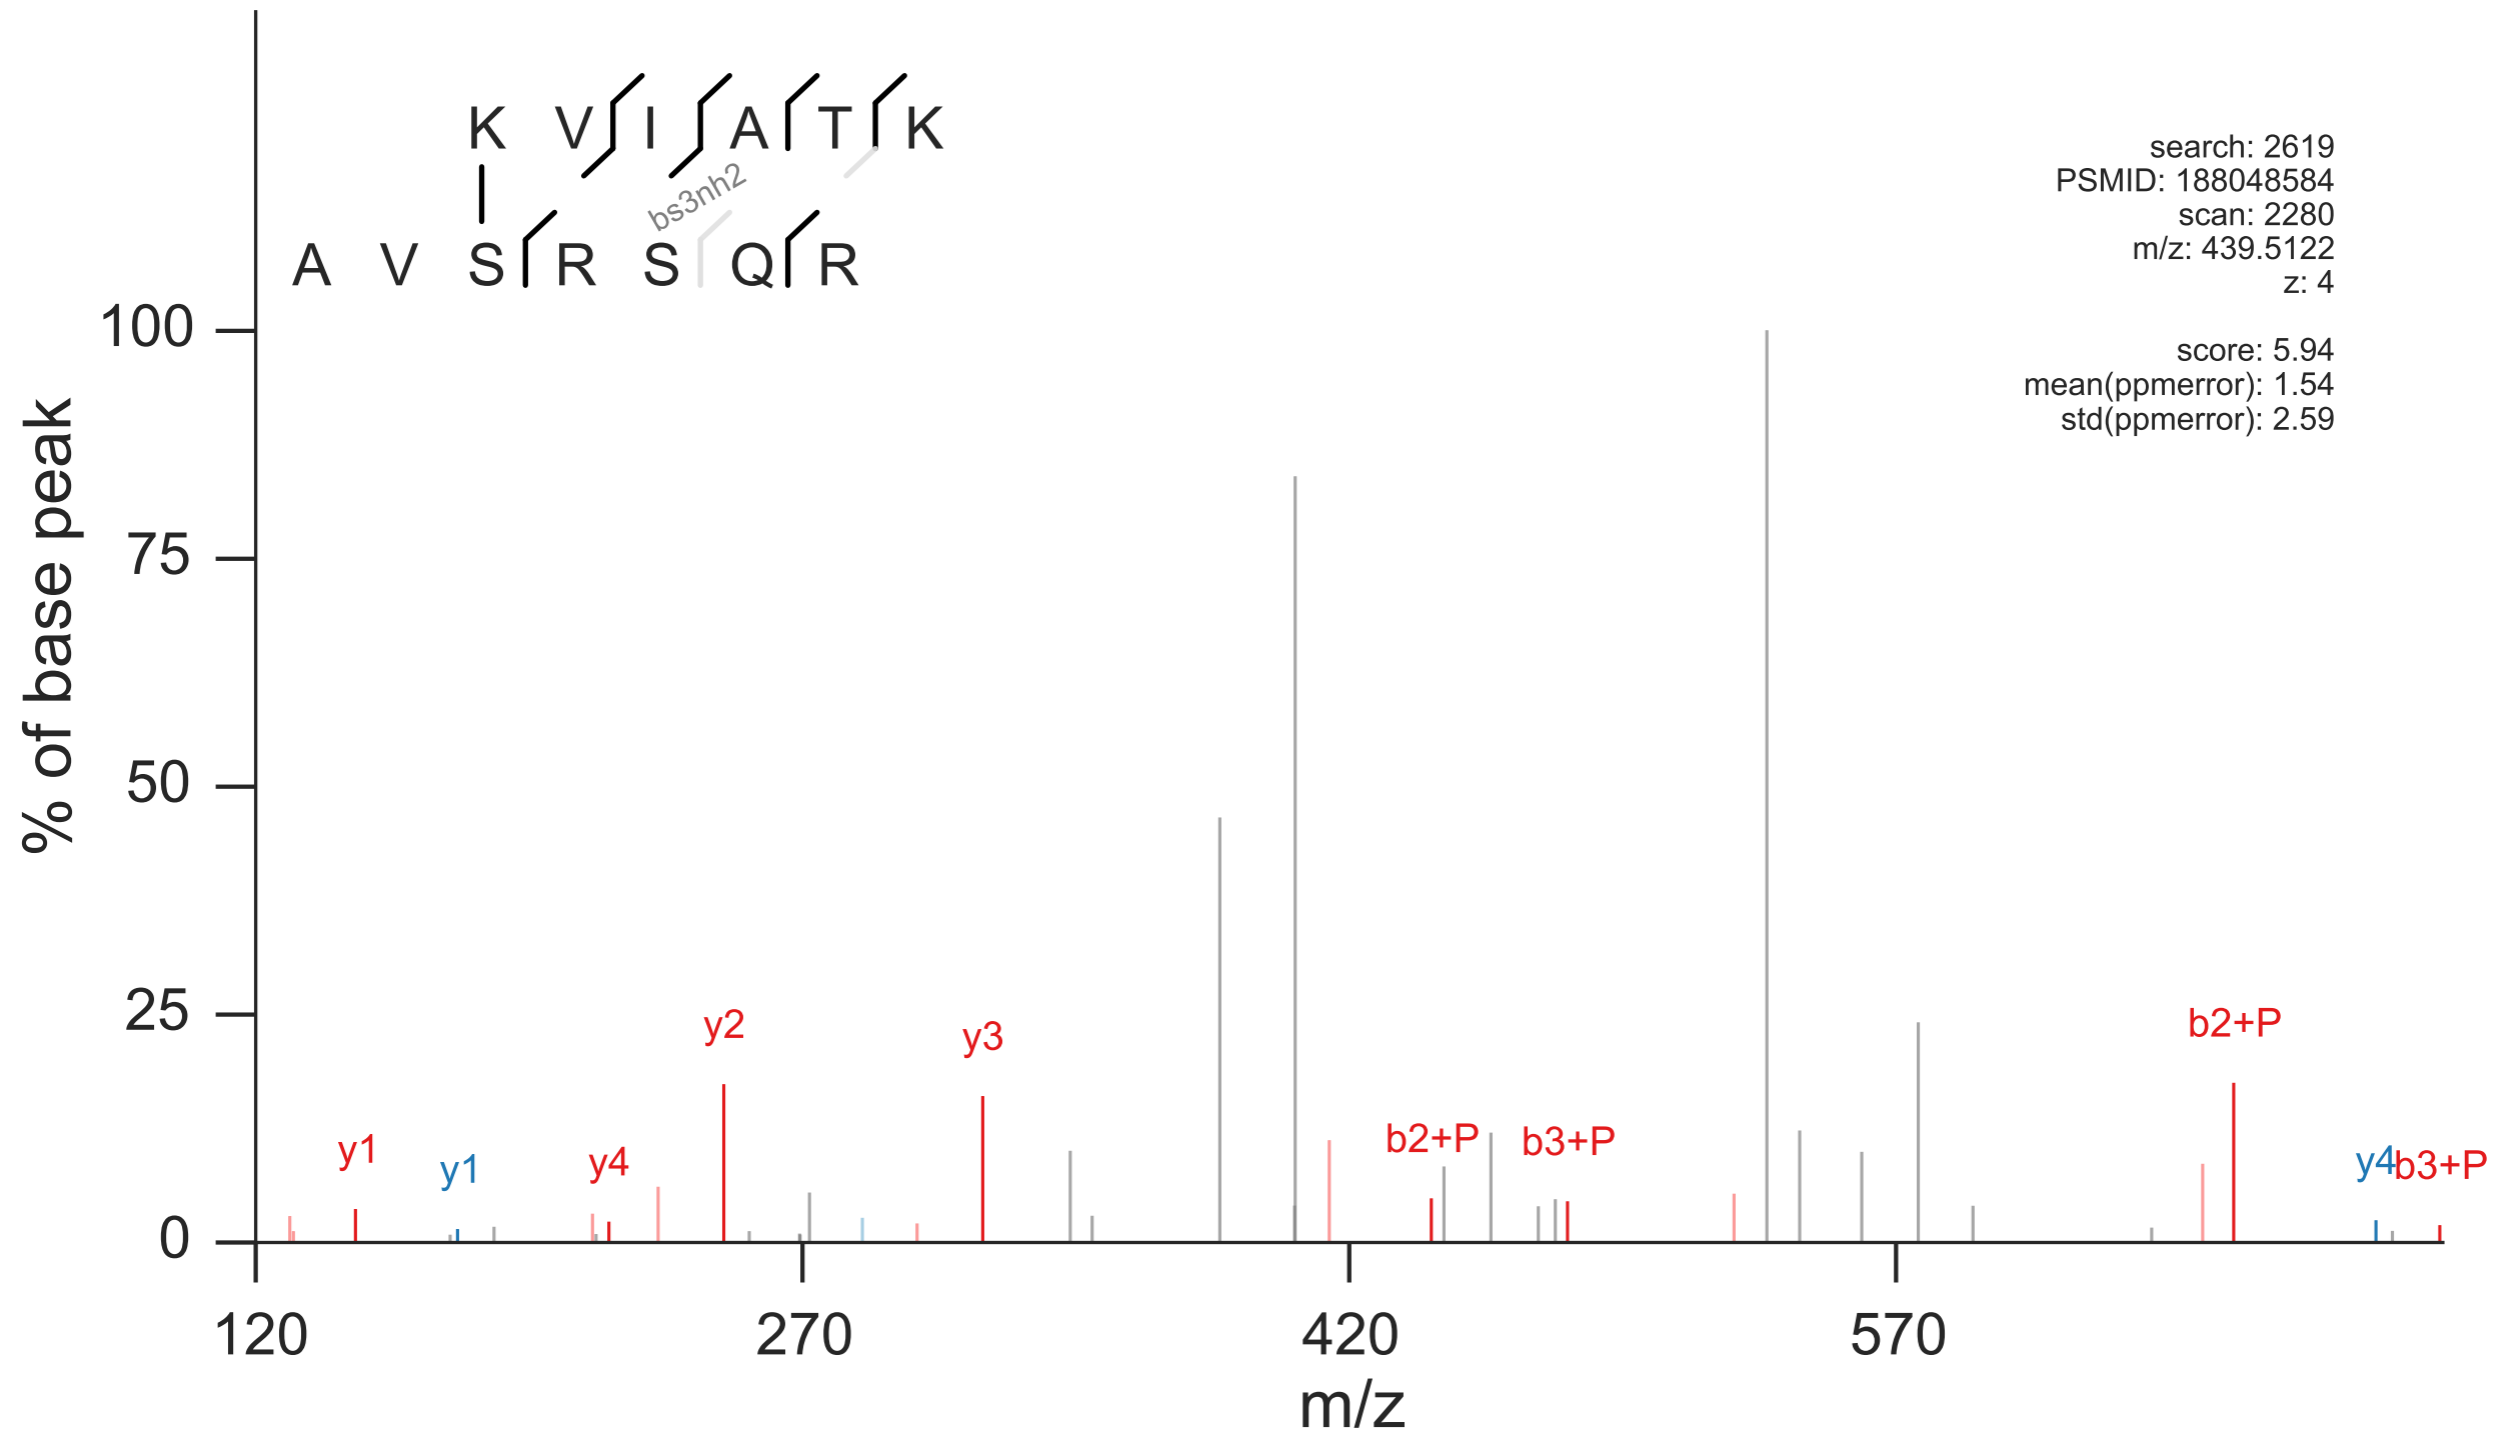

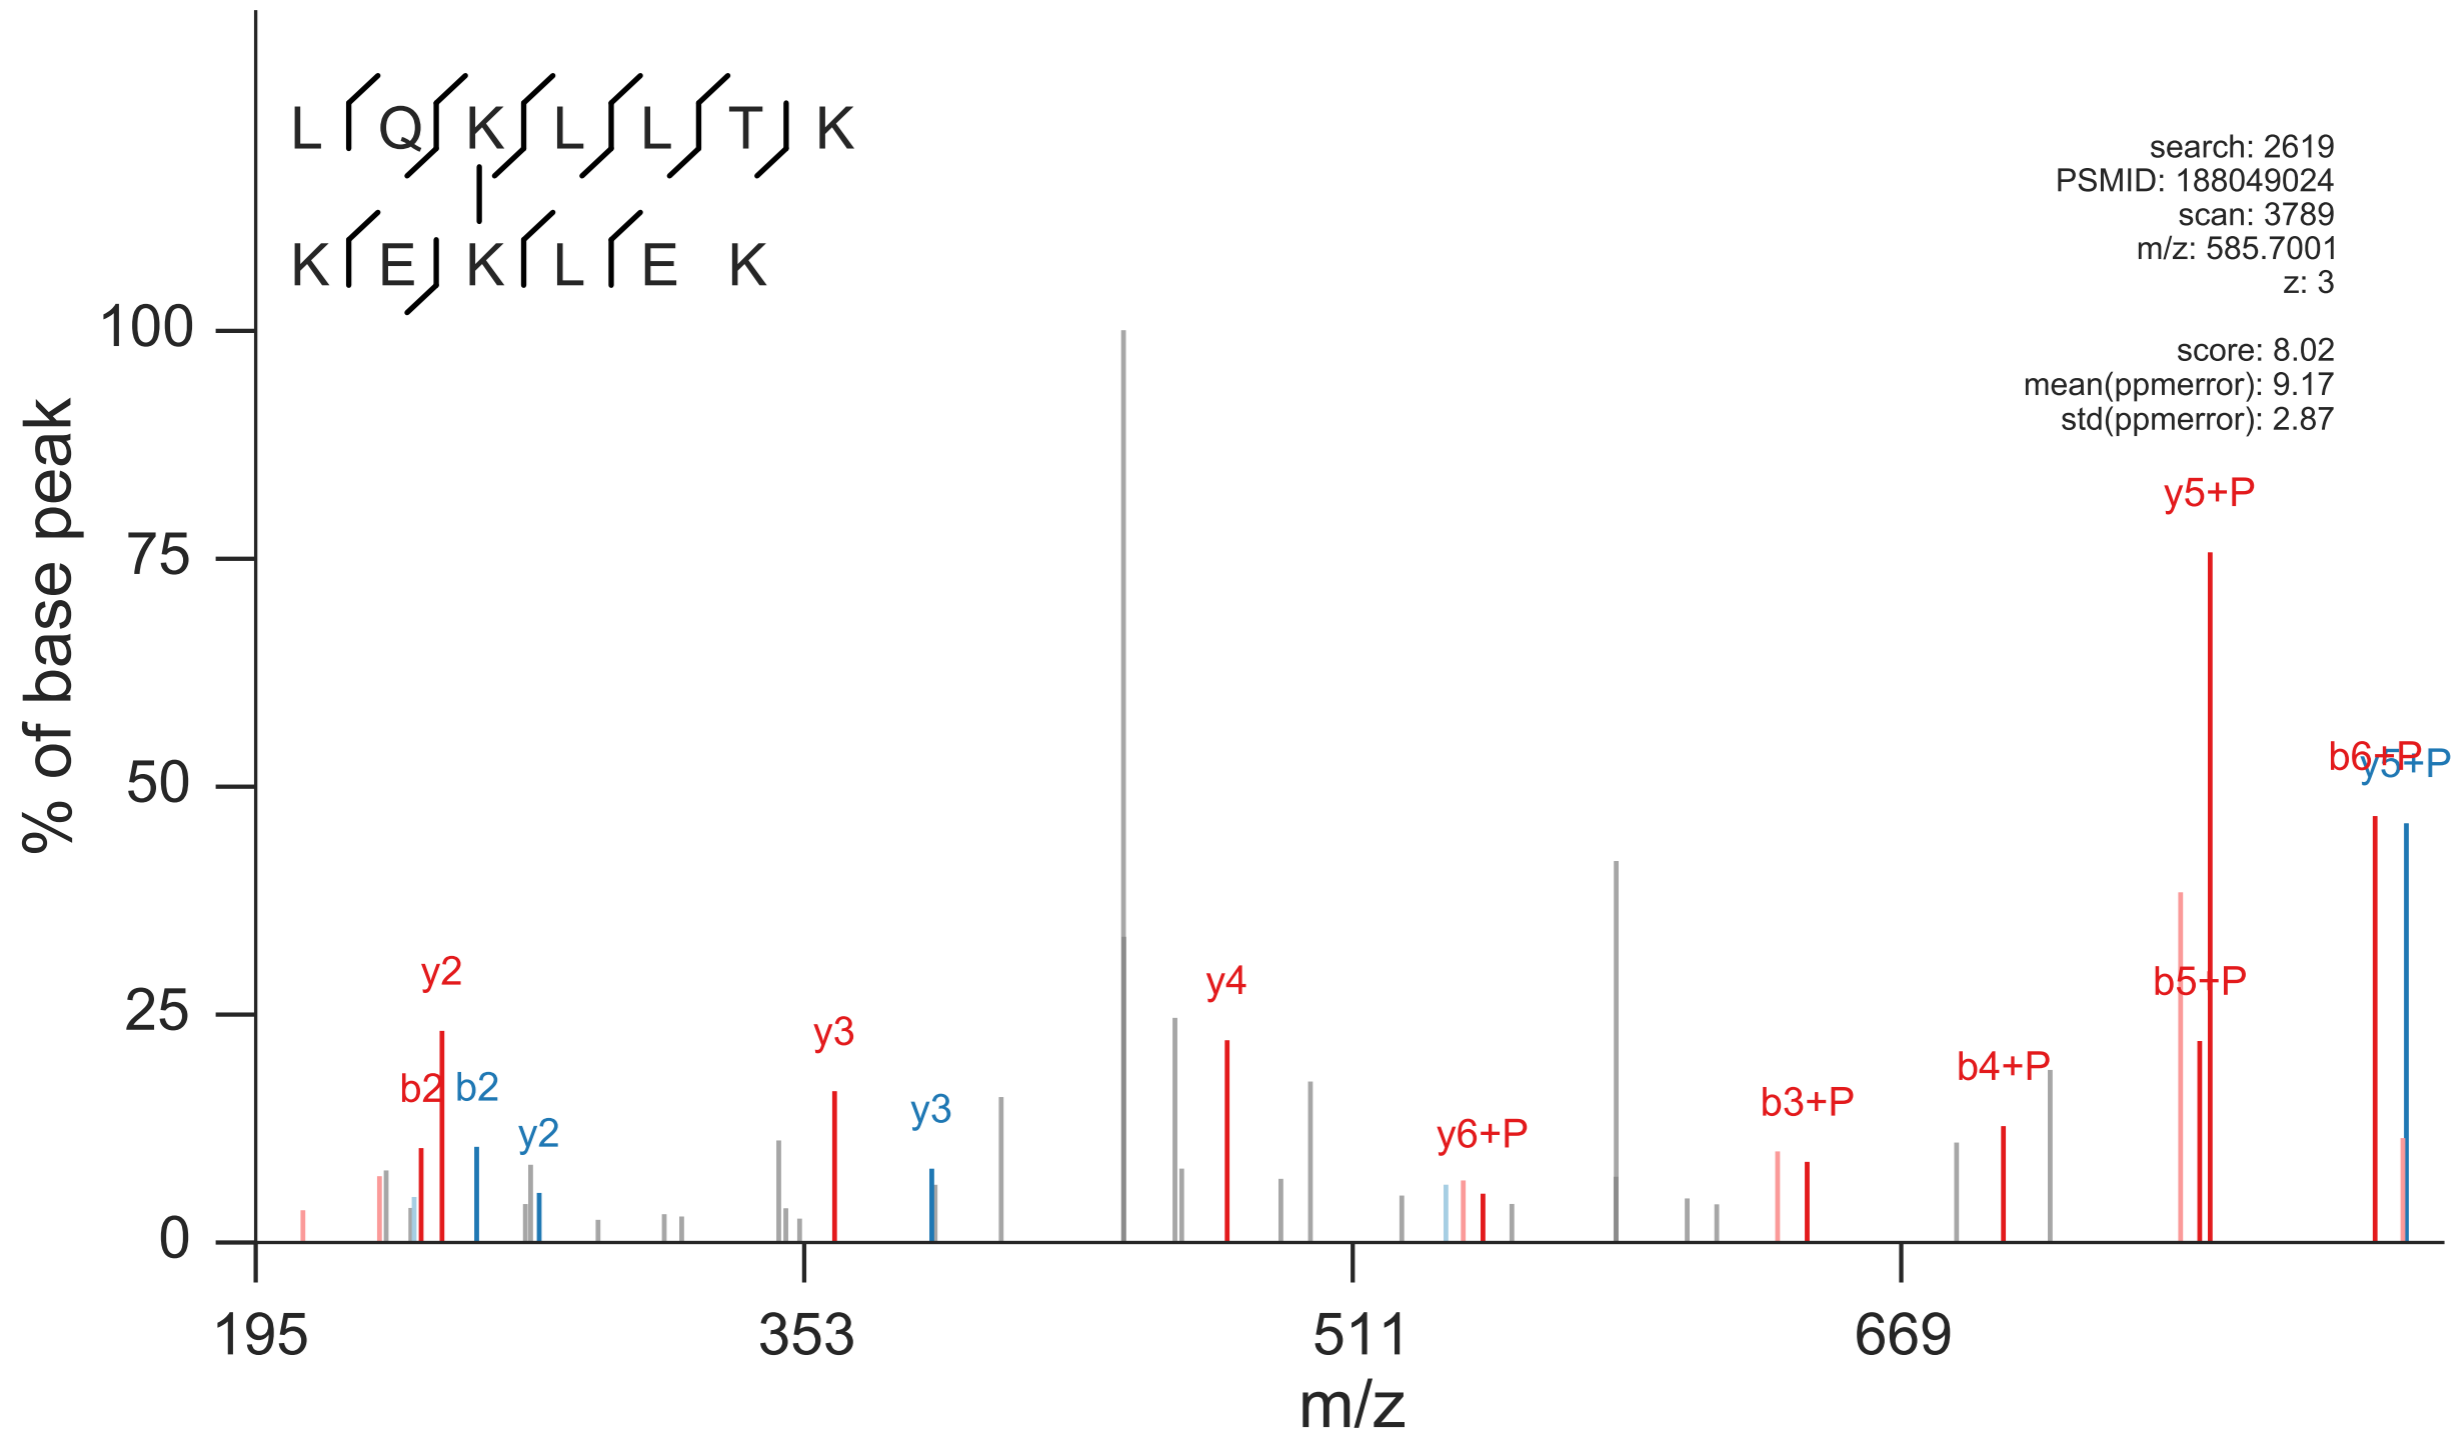

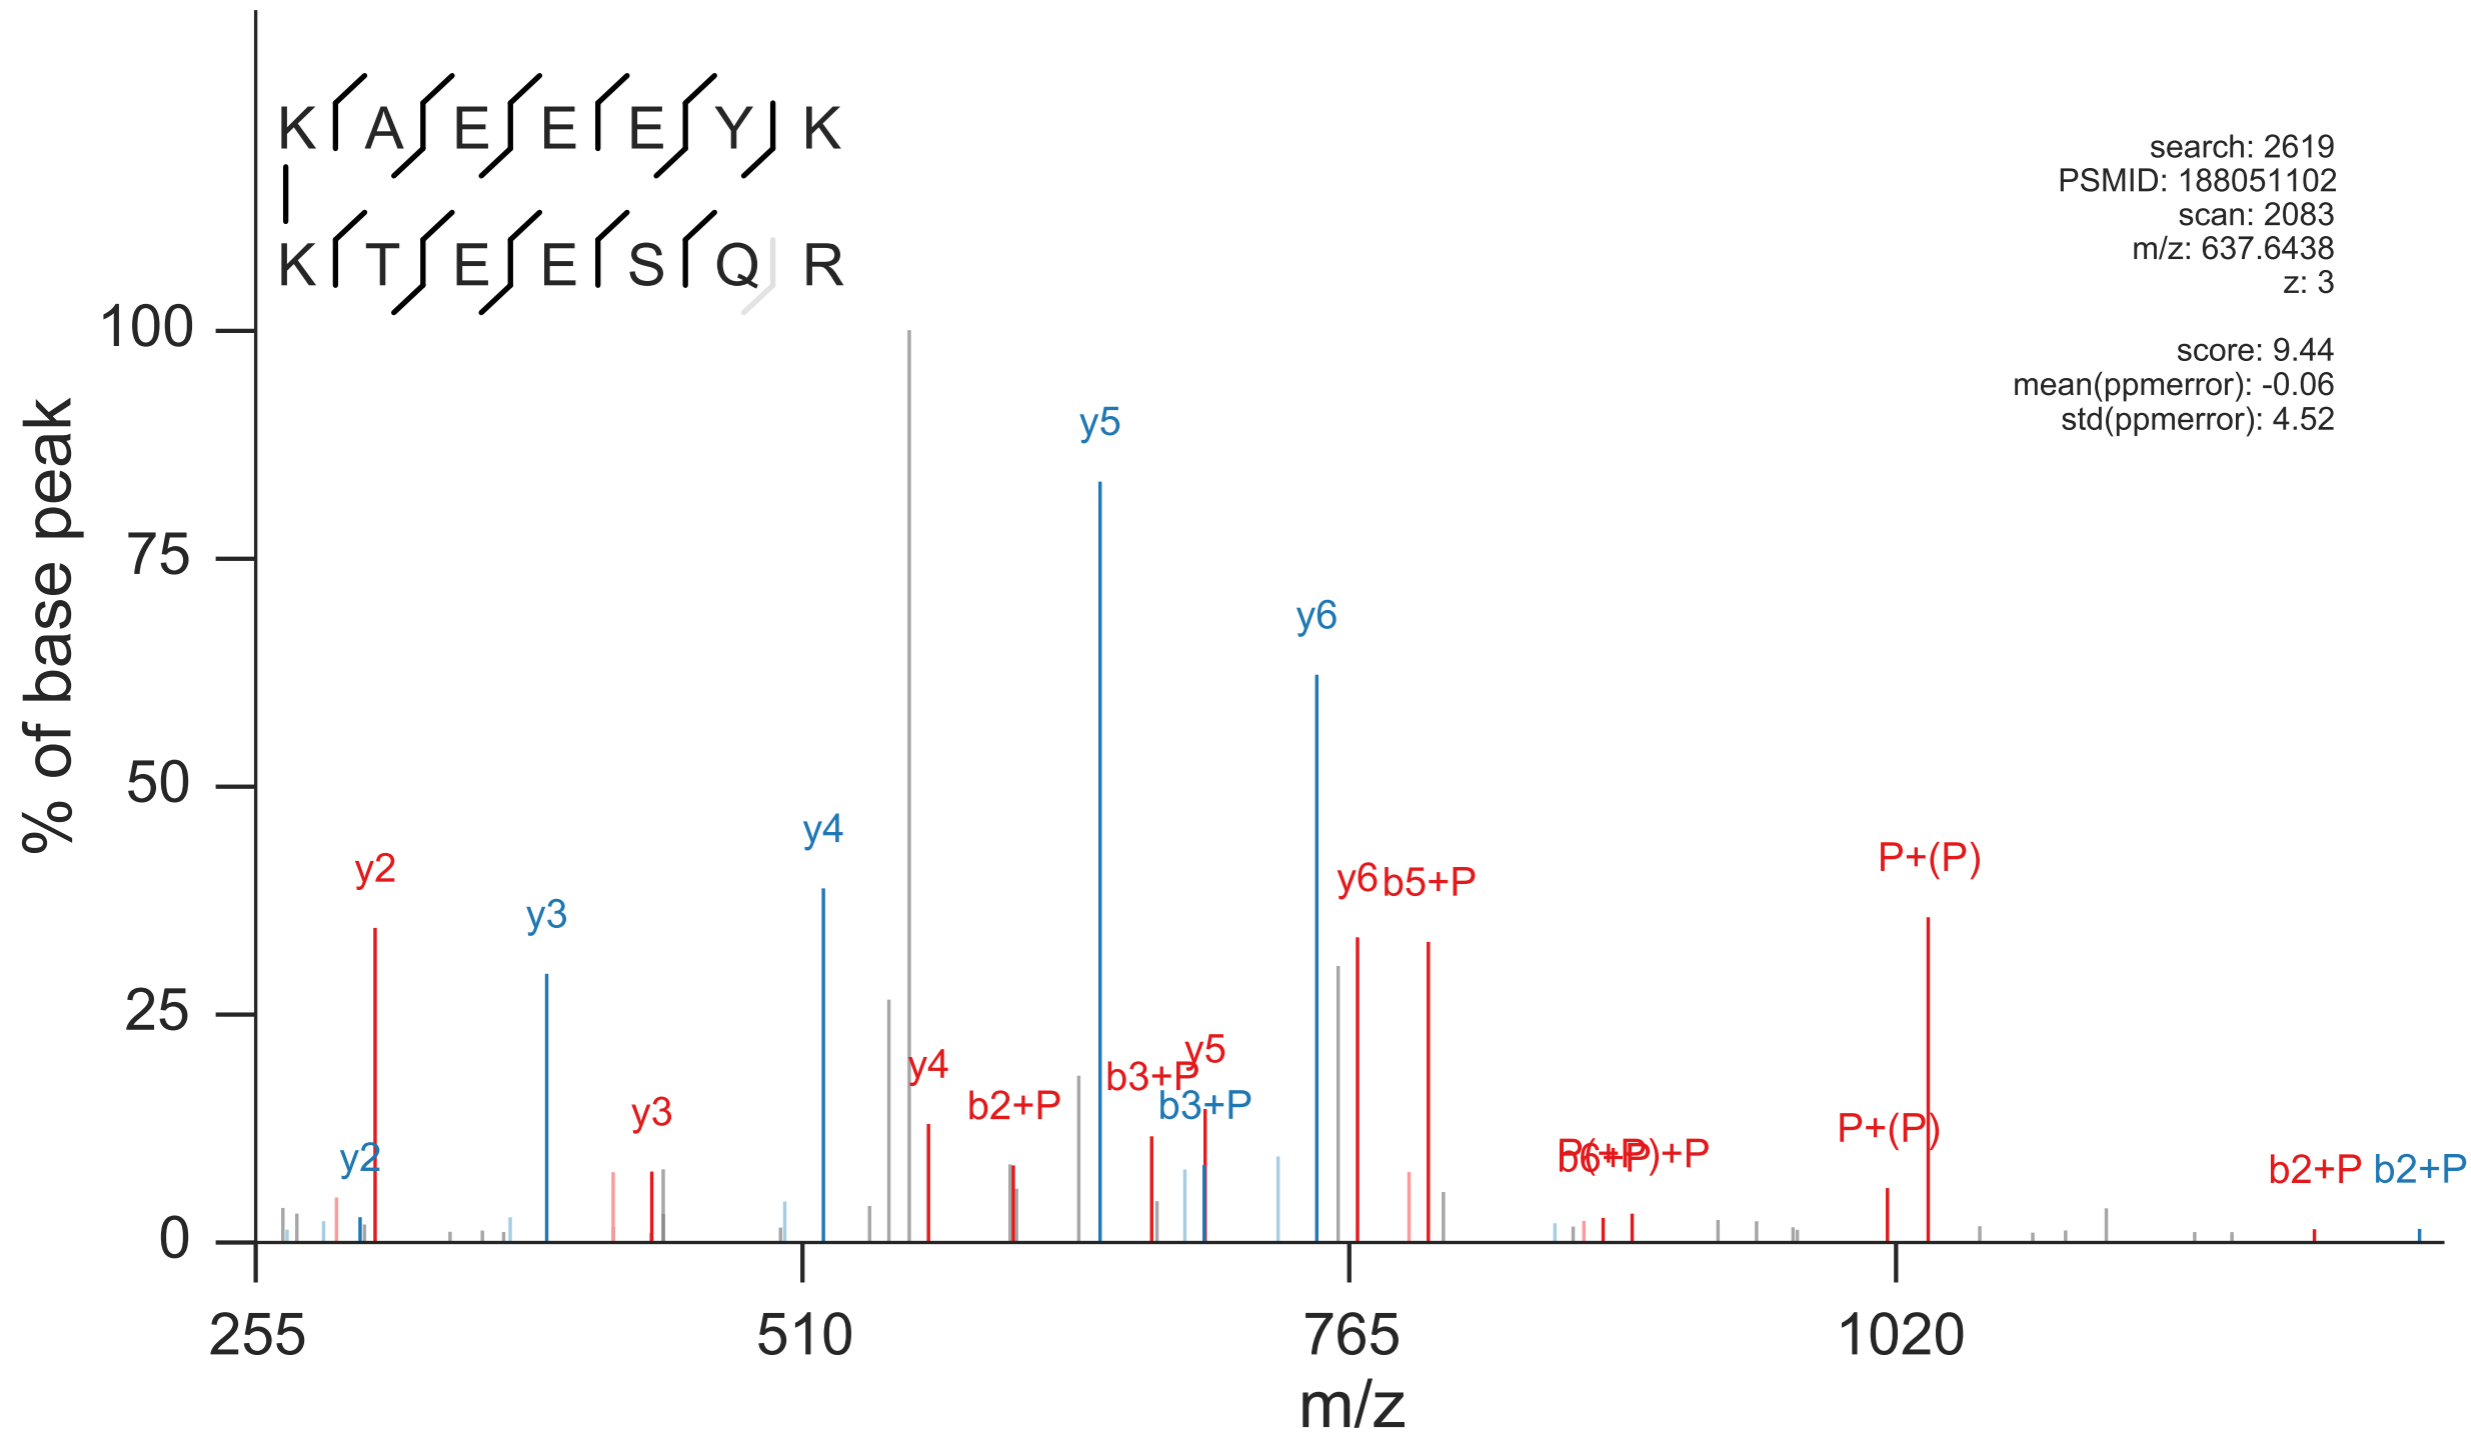

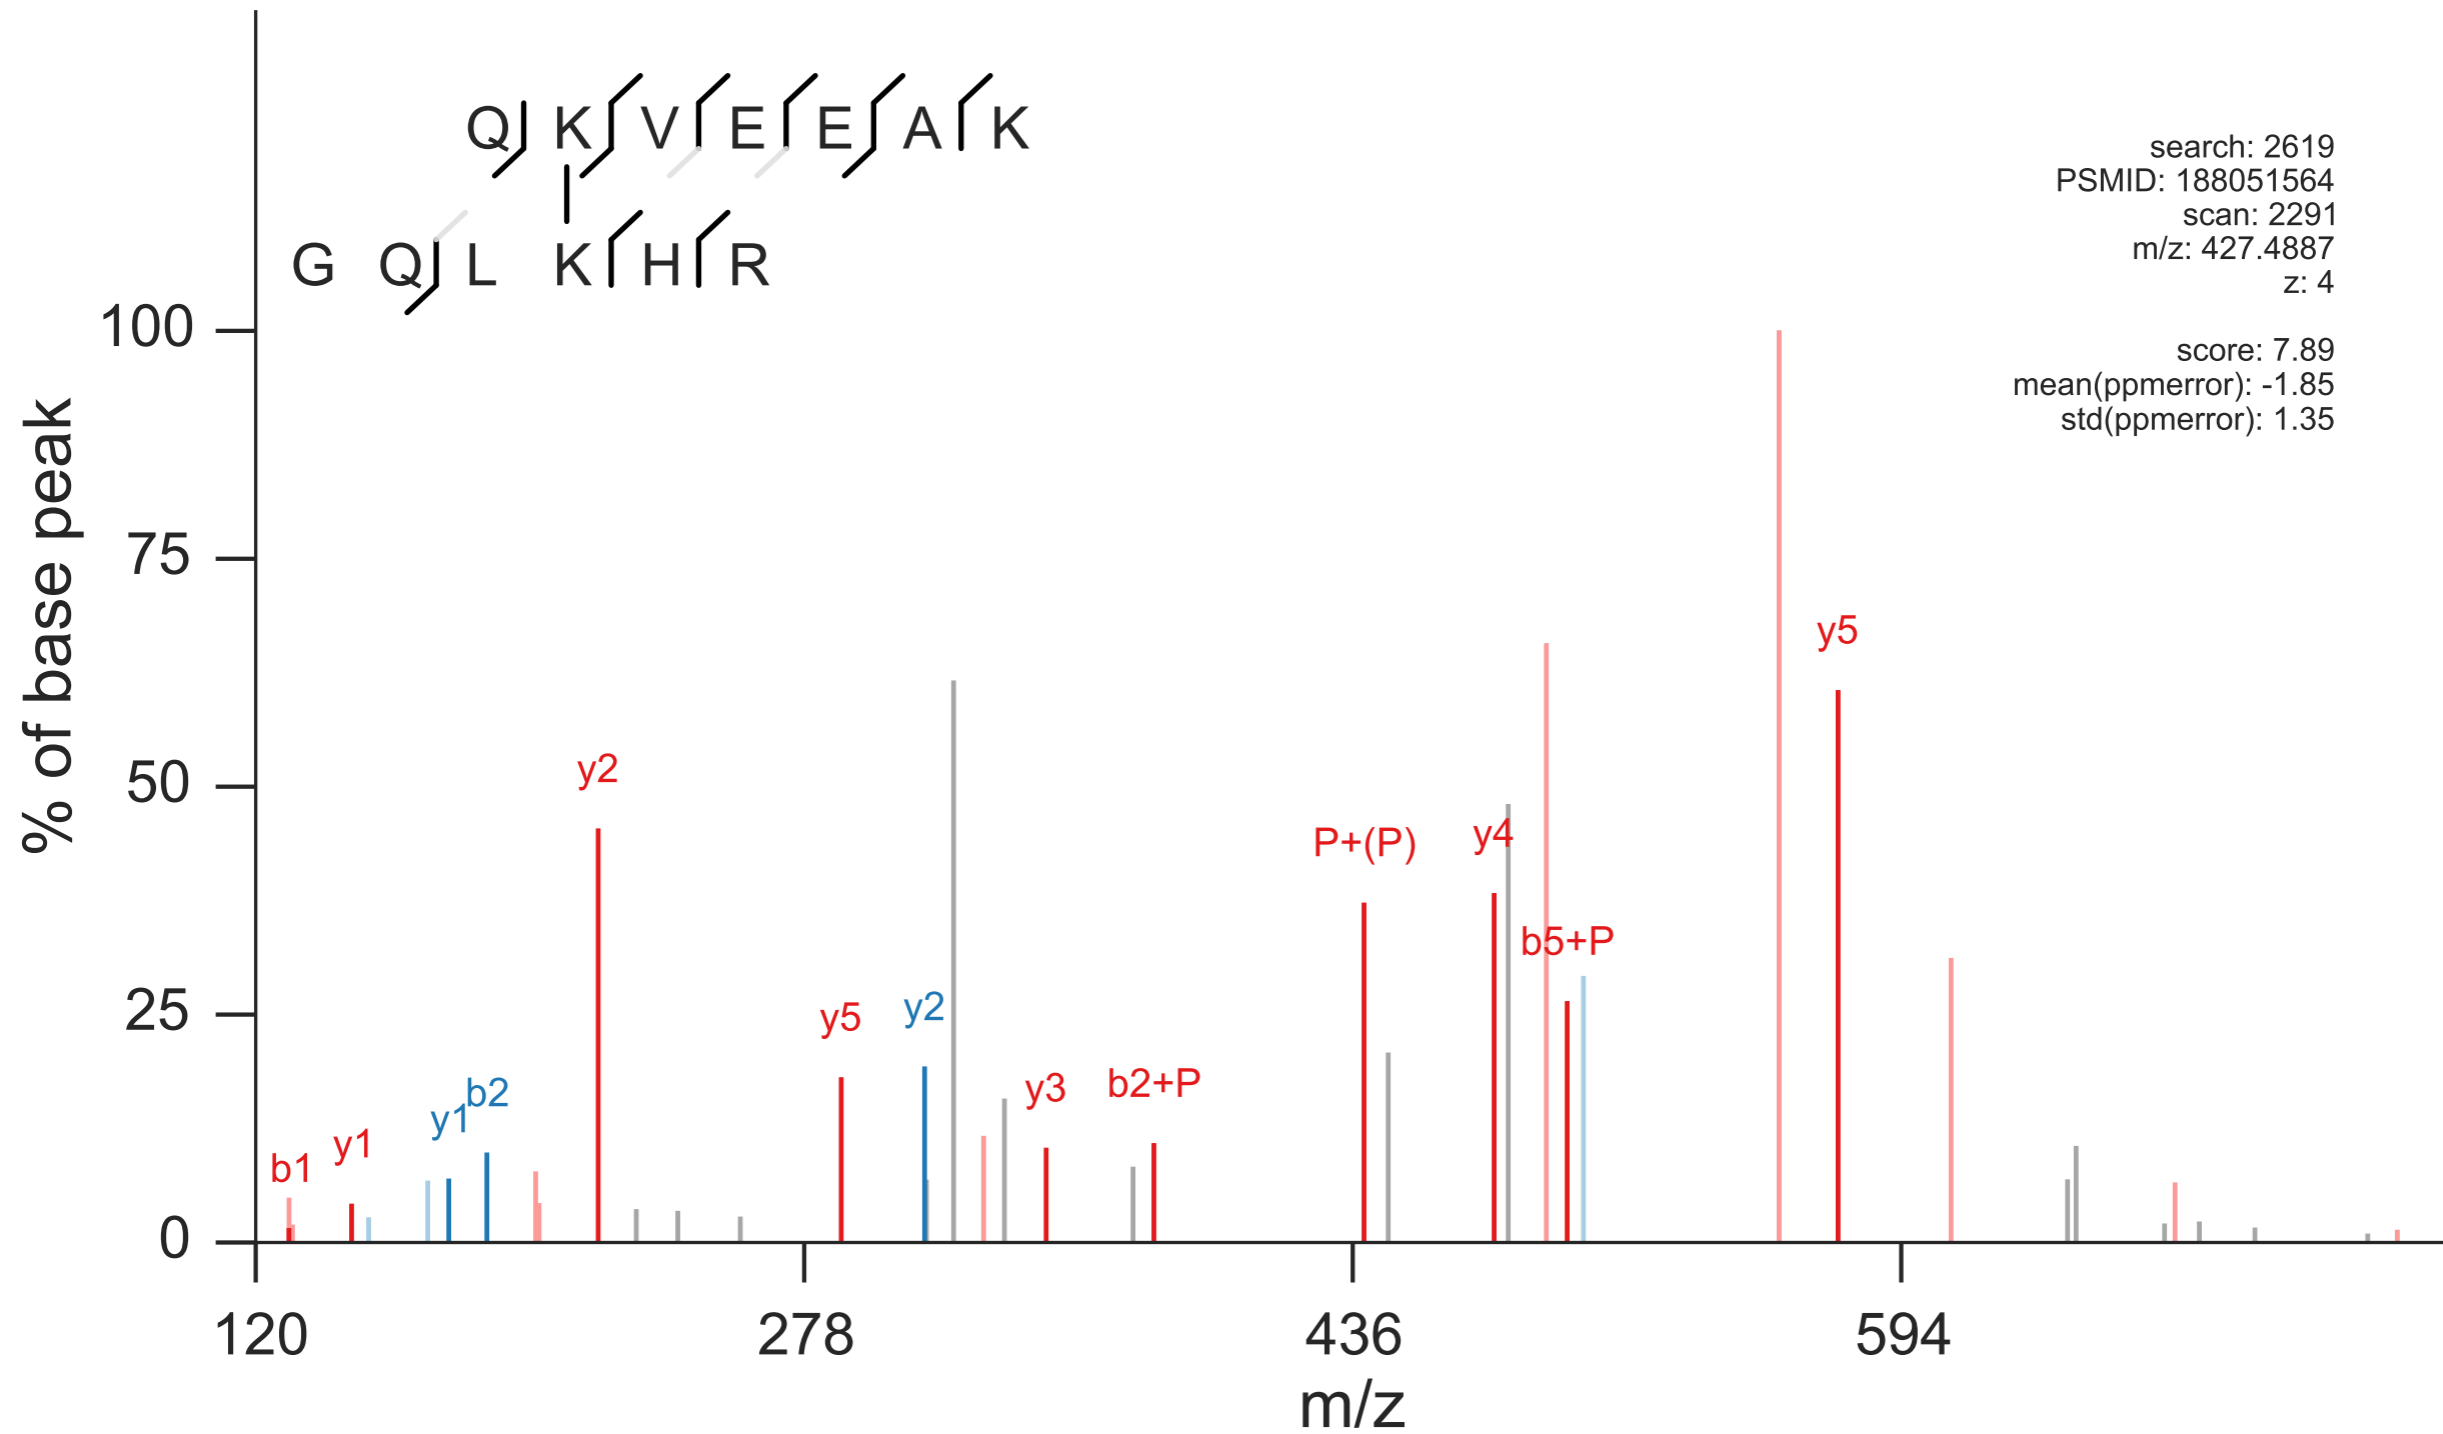

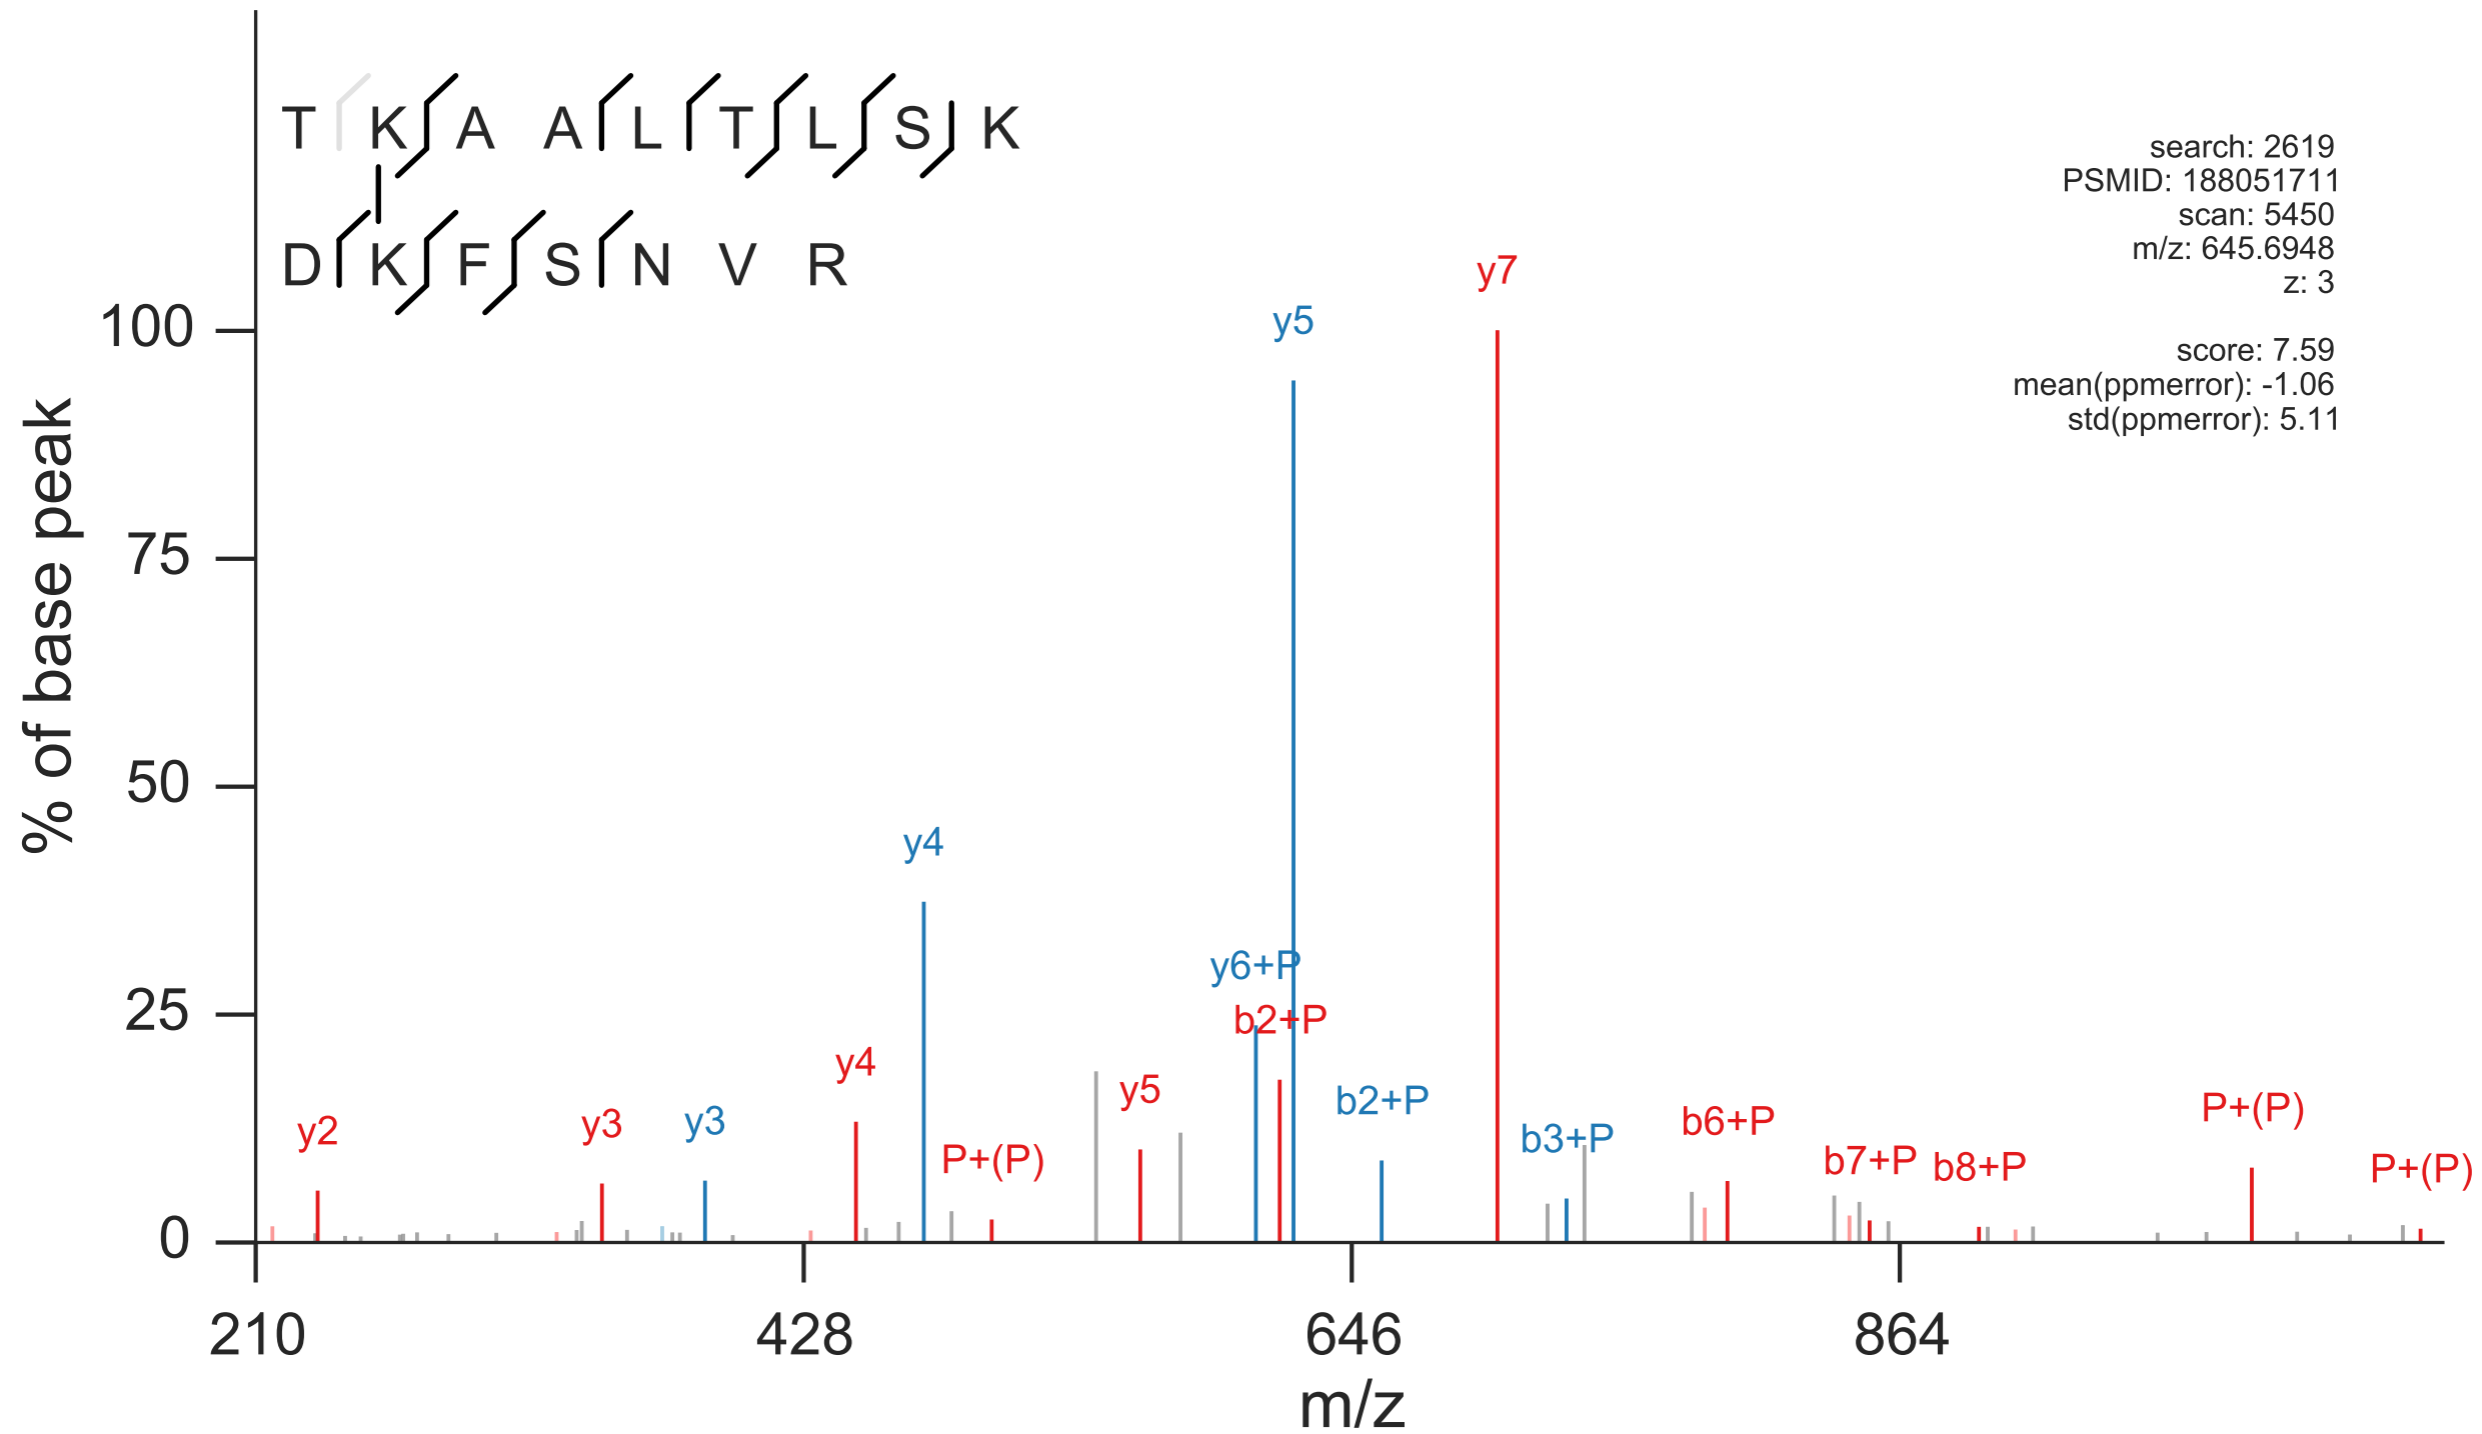

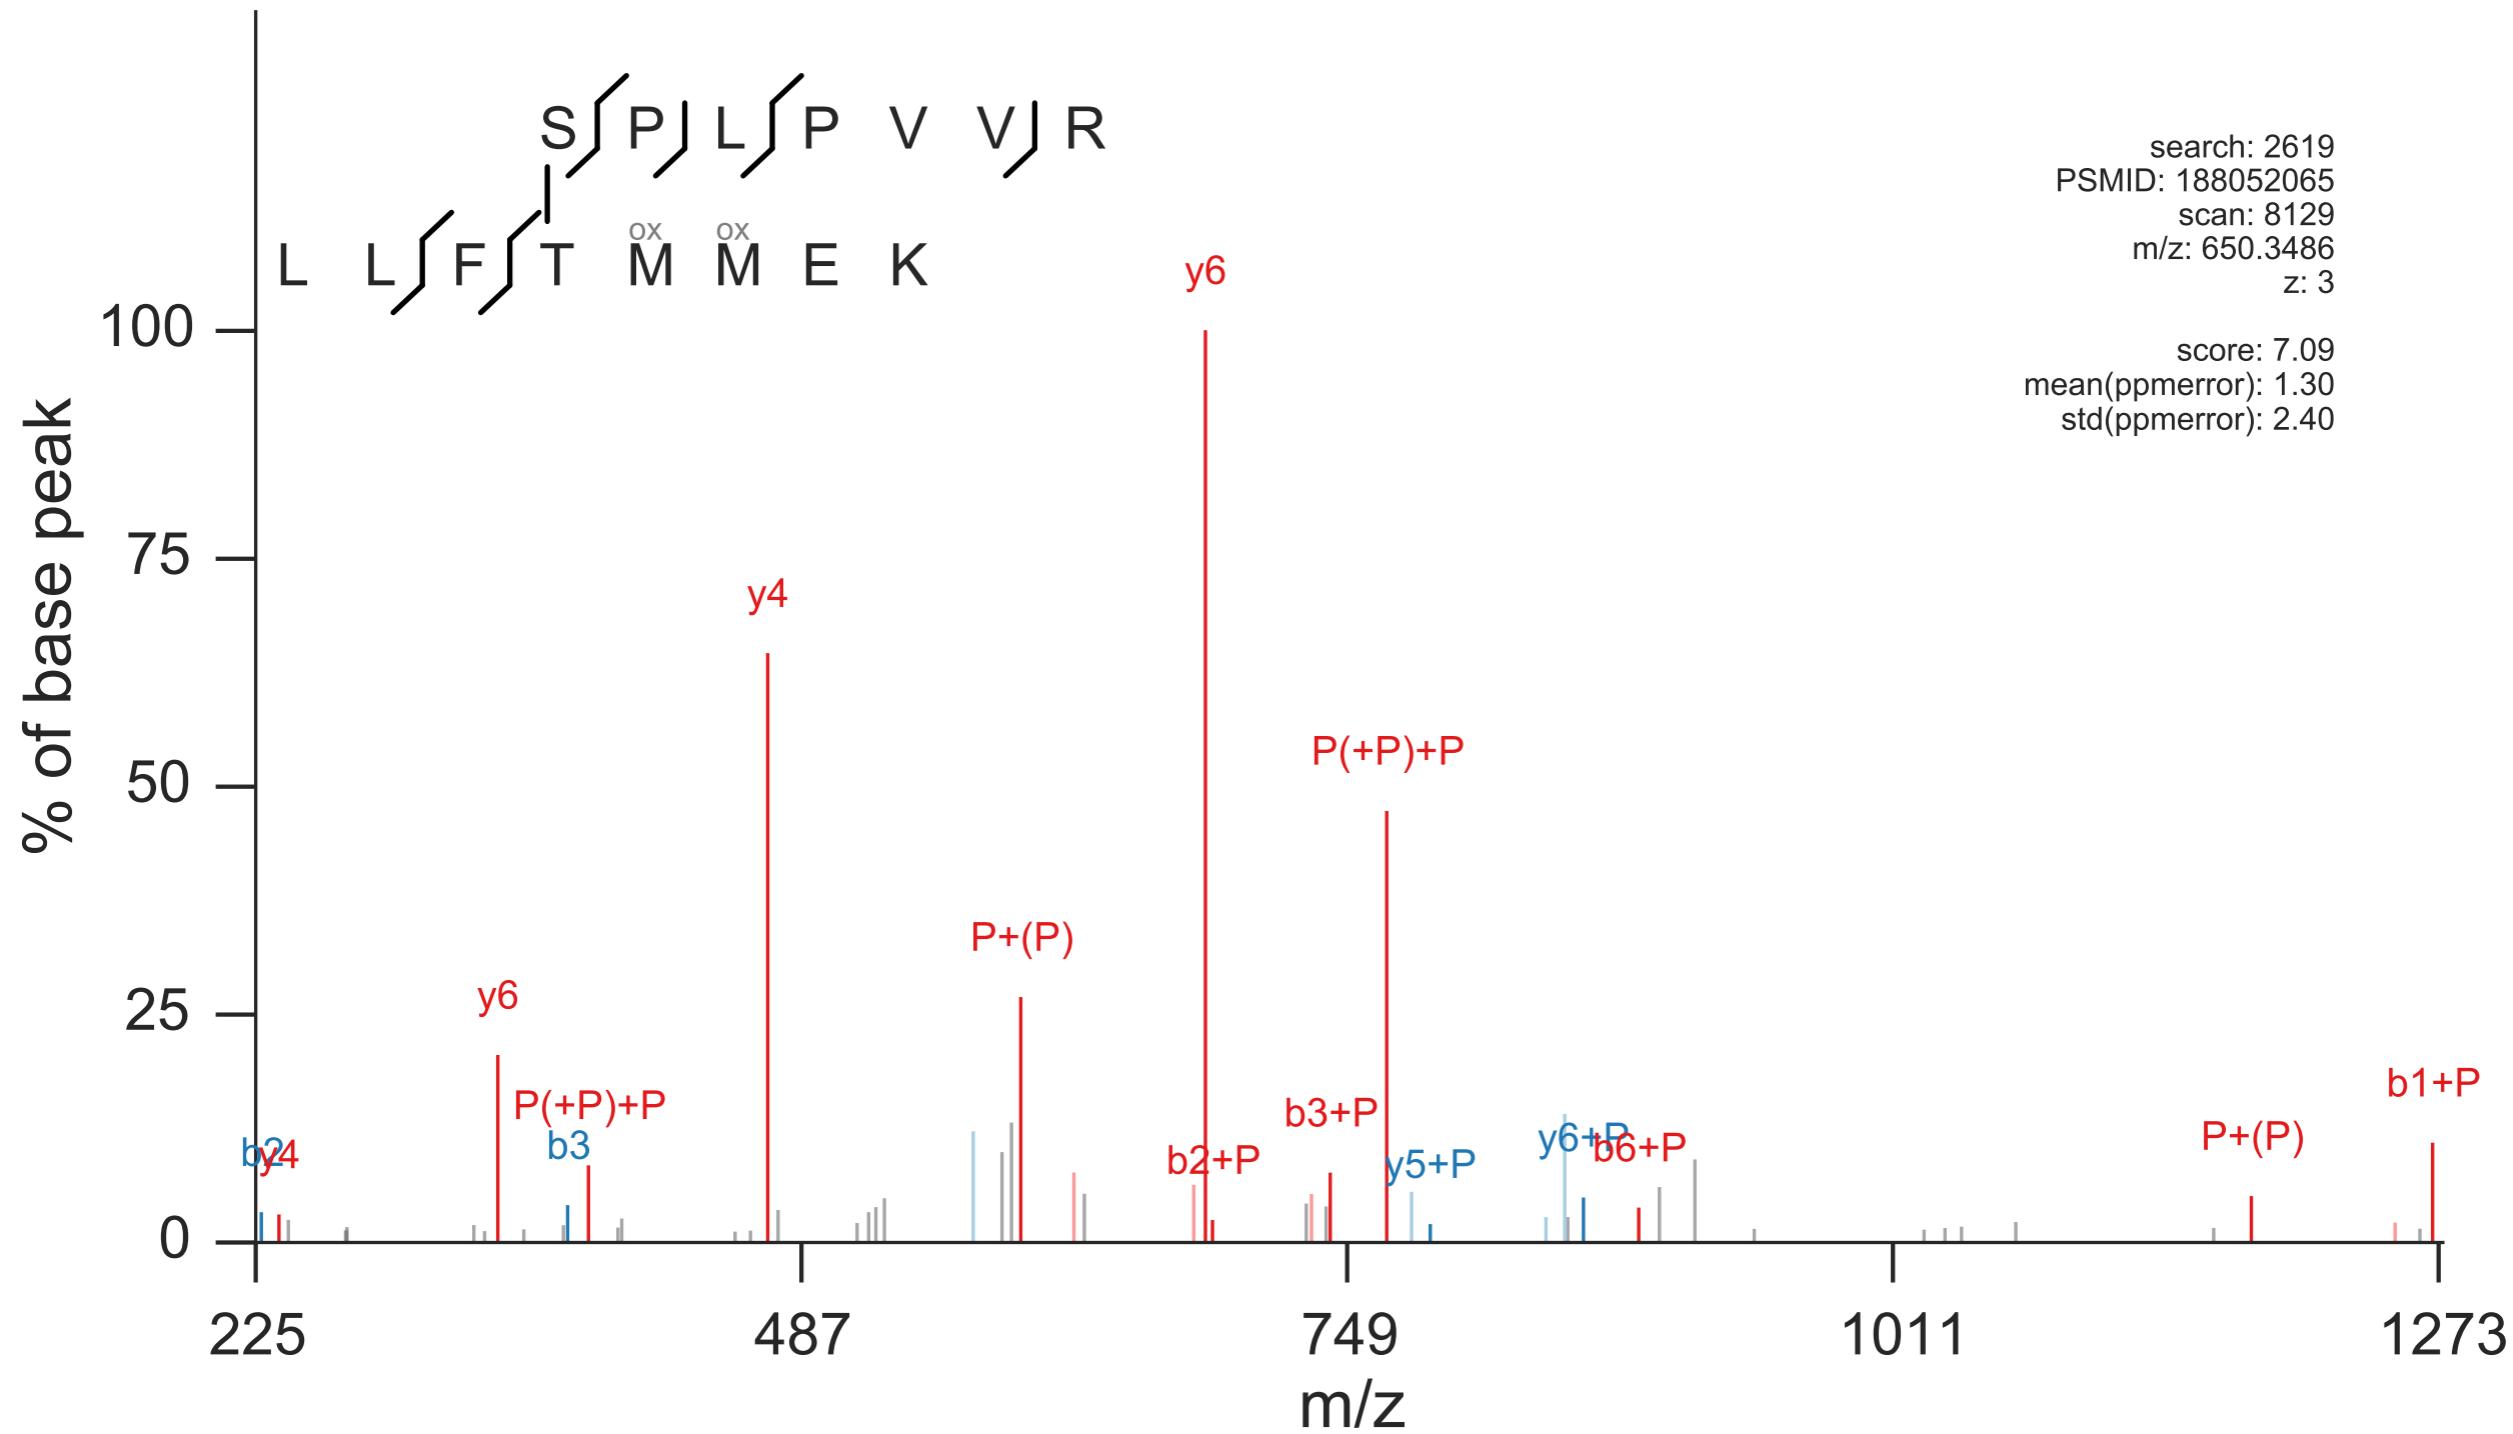

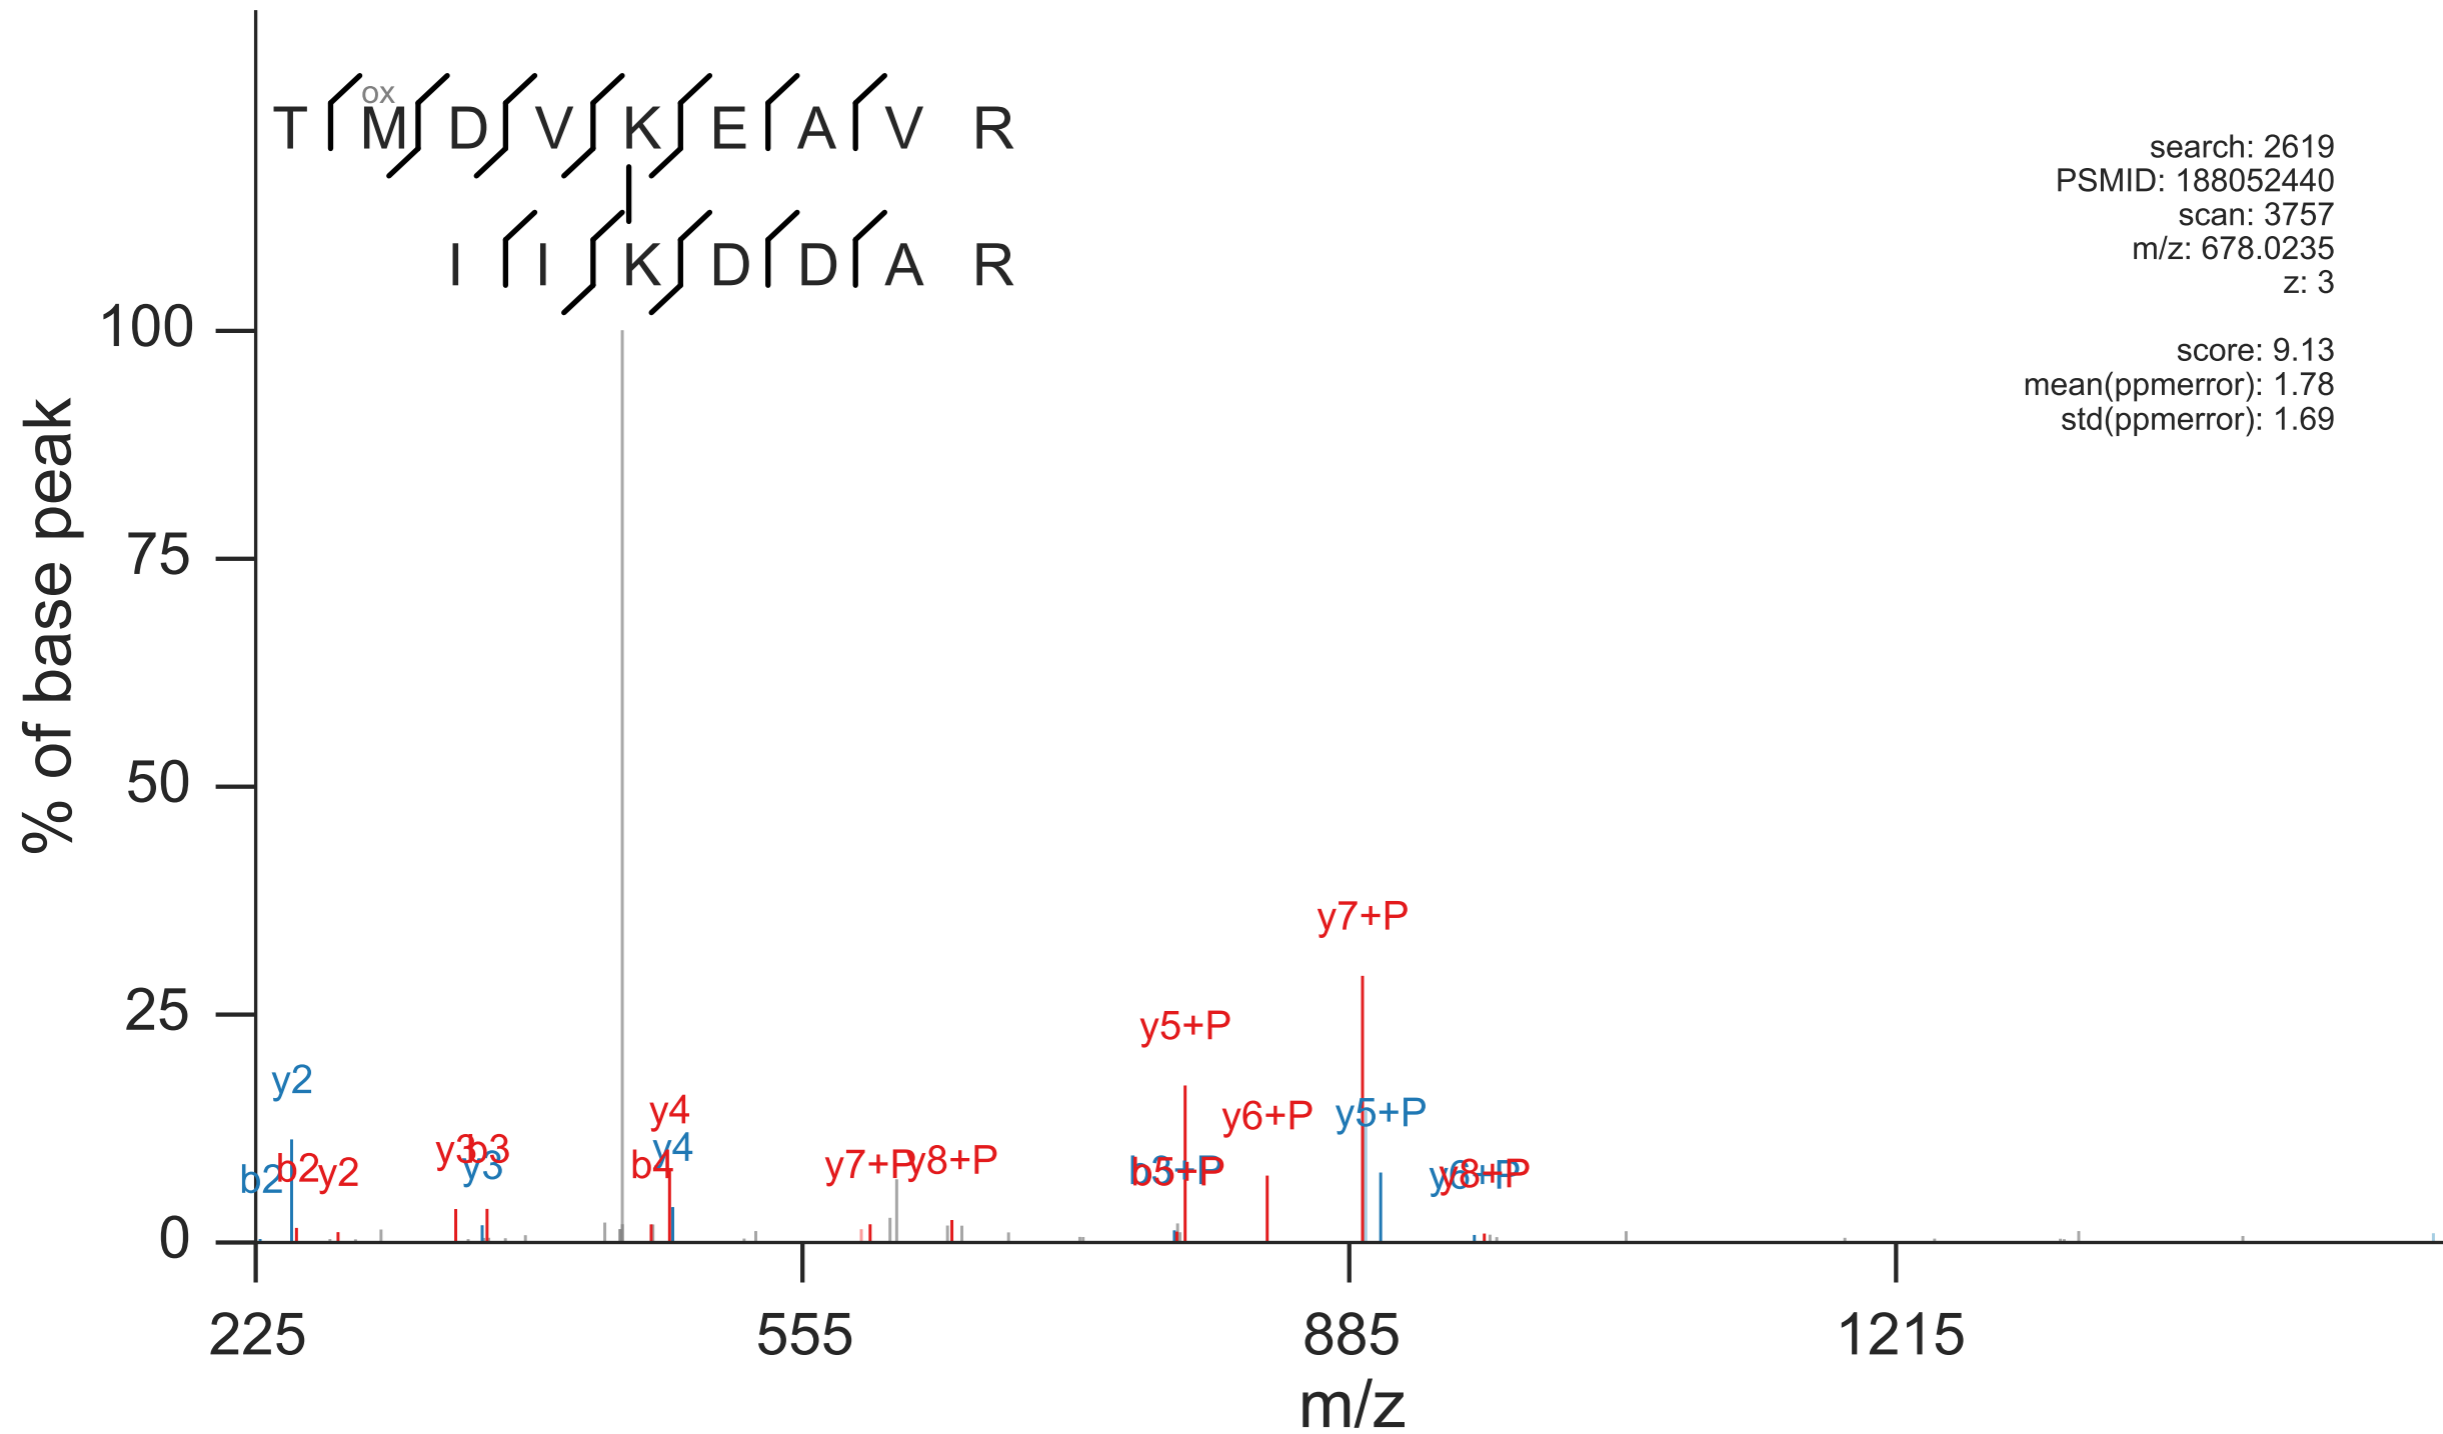

search: 2619  
 PSMID: 188052440  
 scan: 3757  
 m/z: 678.0235  
 z: 3  
  
 score: 9.13  
 mean(ppmerror): 1.78  
 std(ppmerror): 1.69

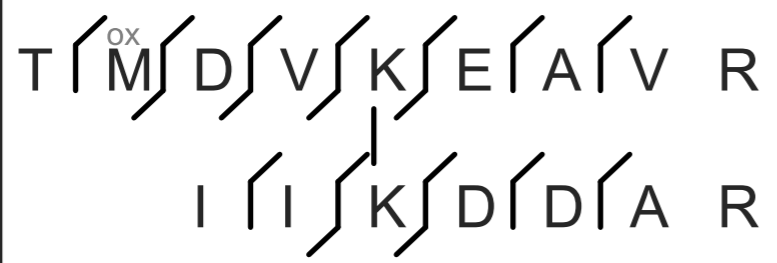



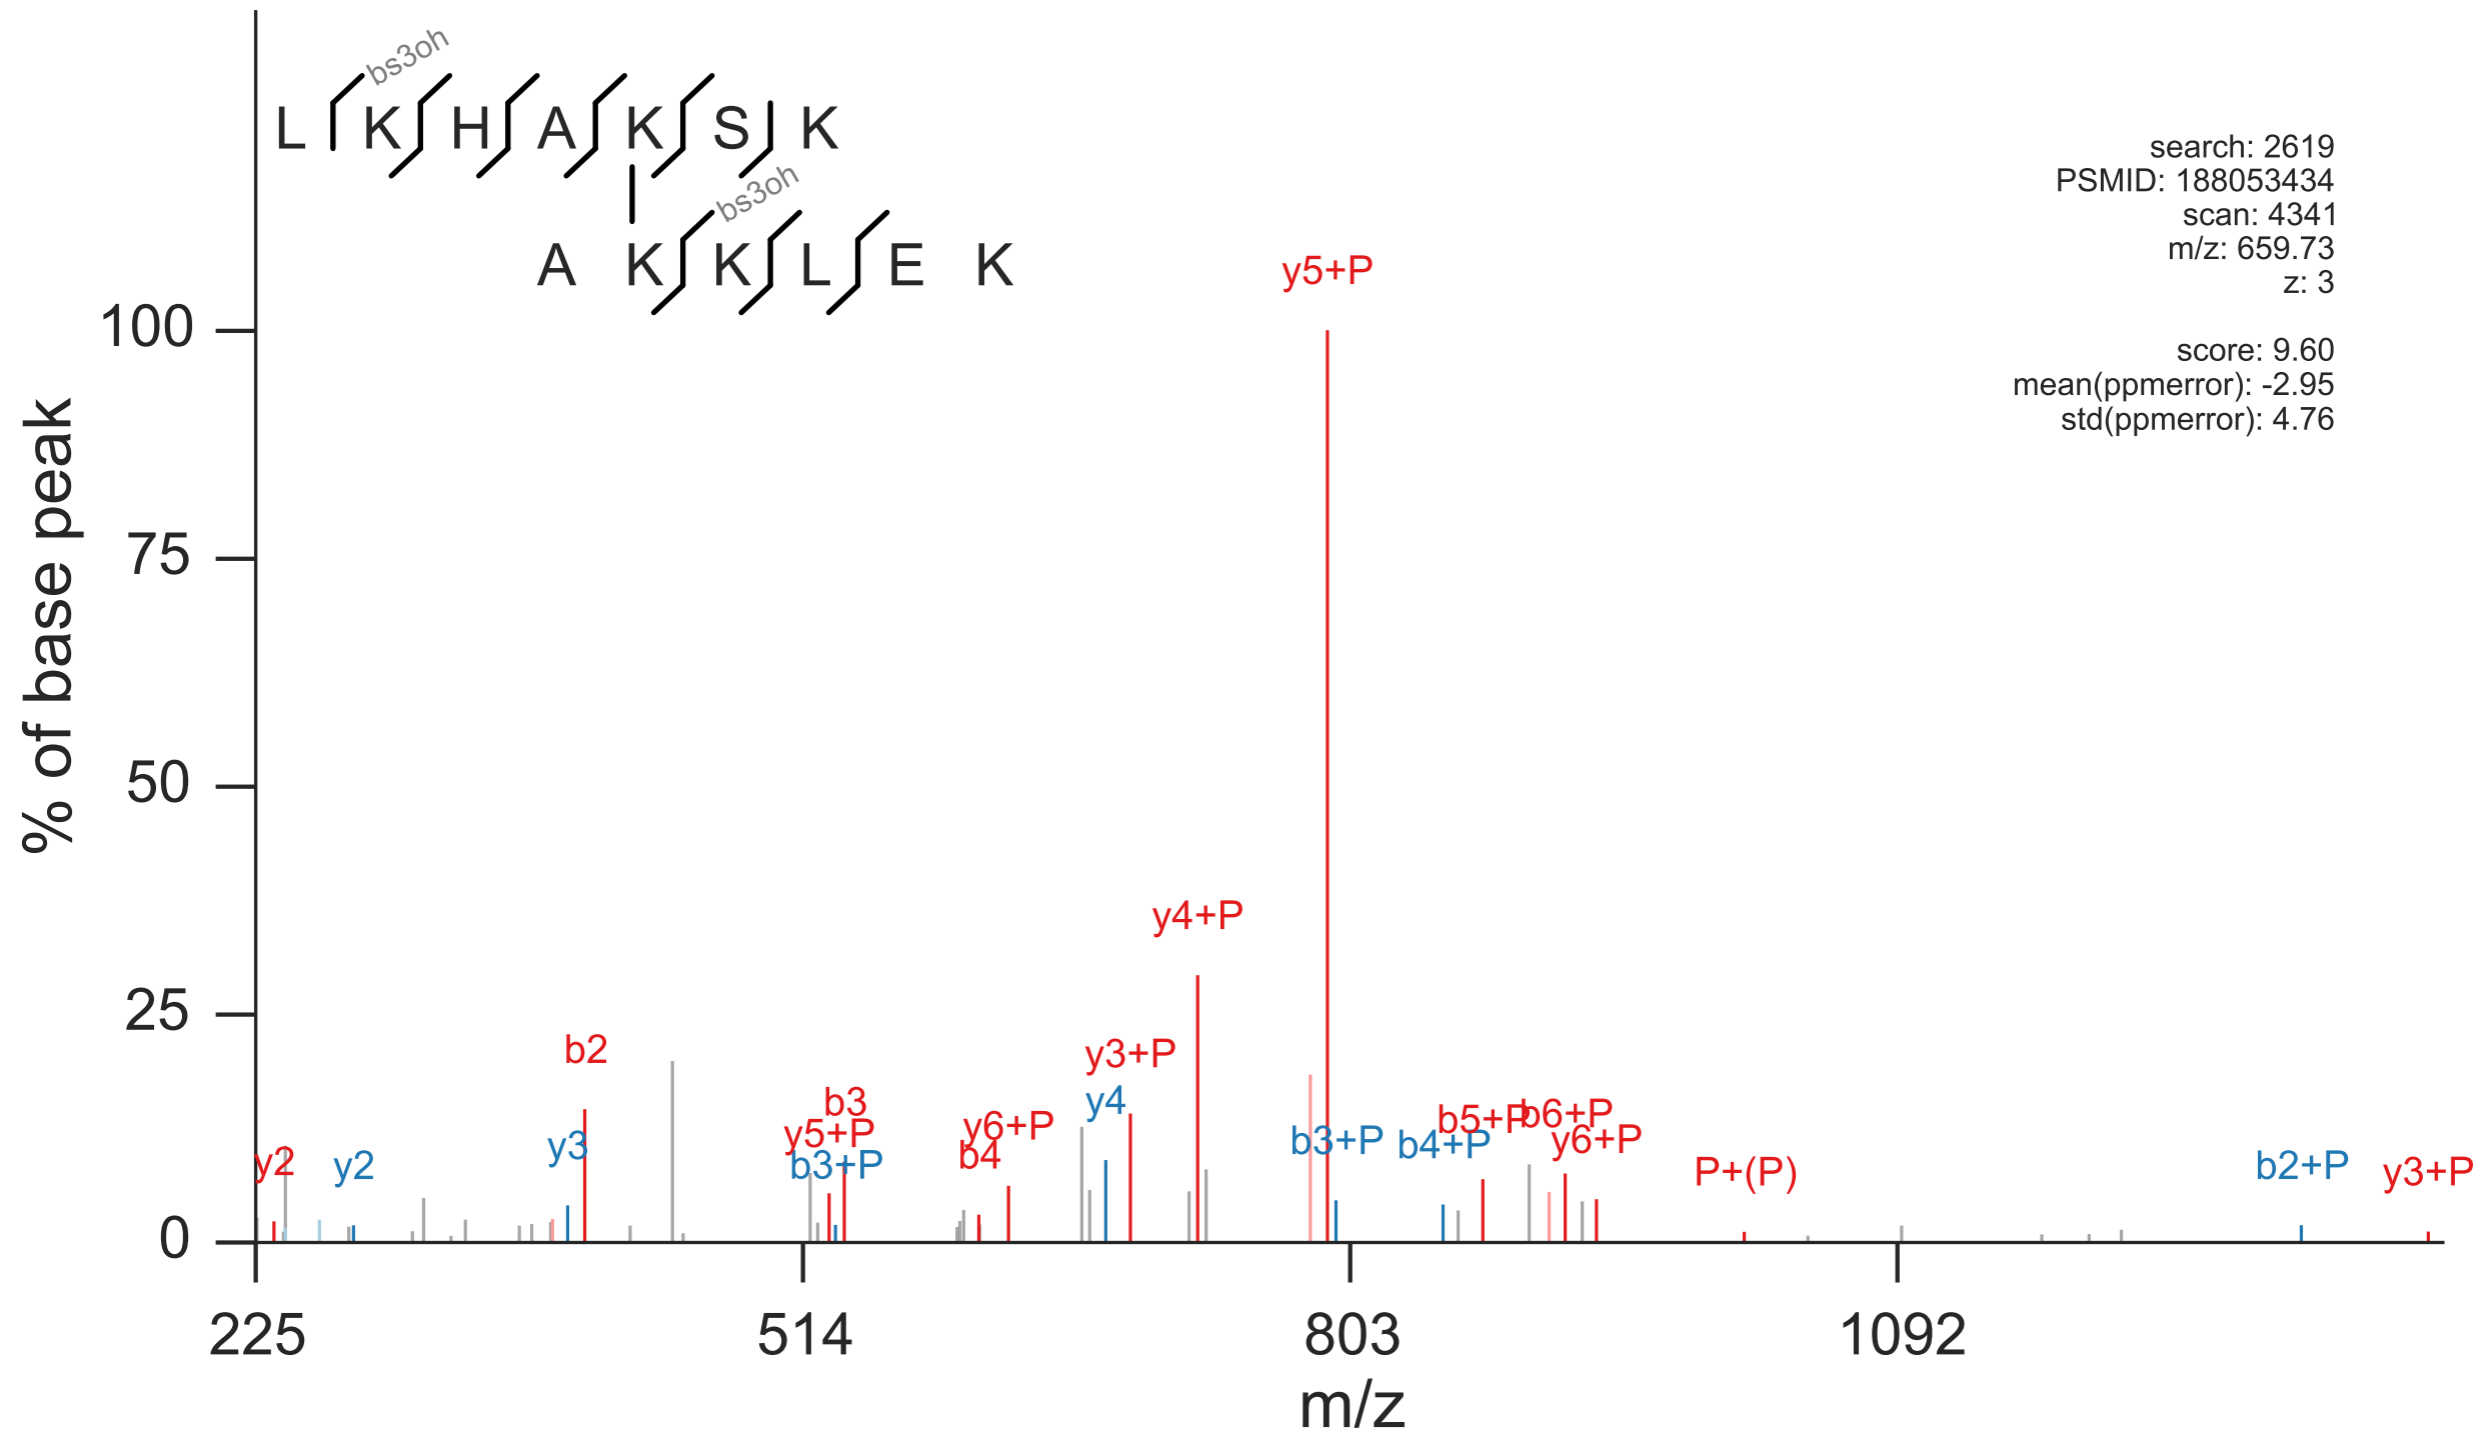

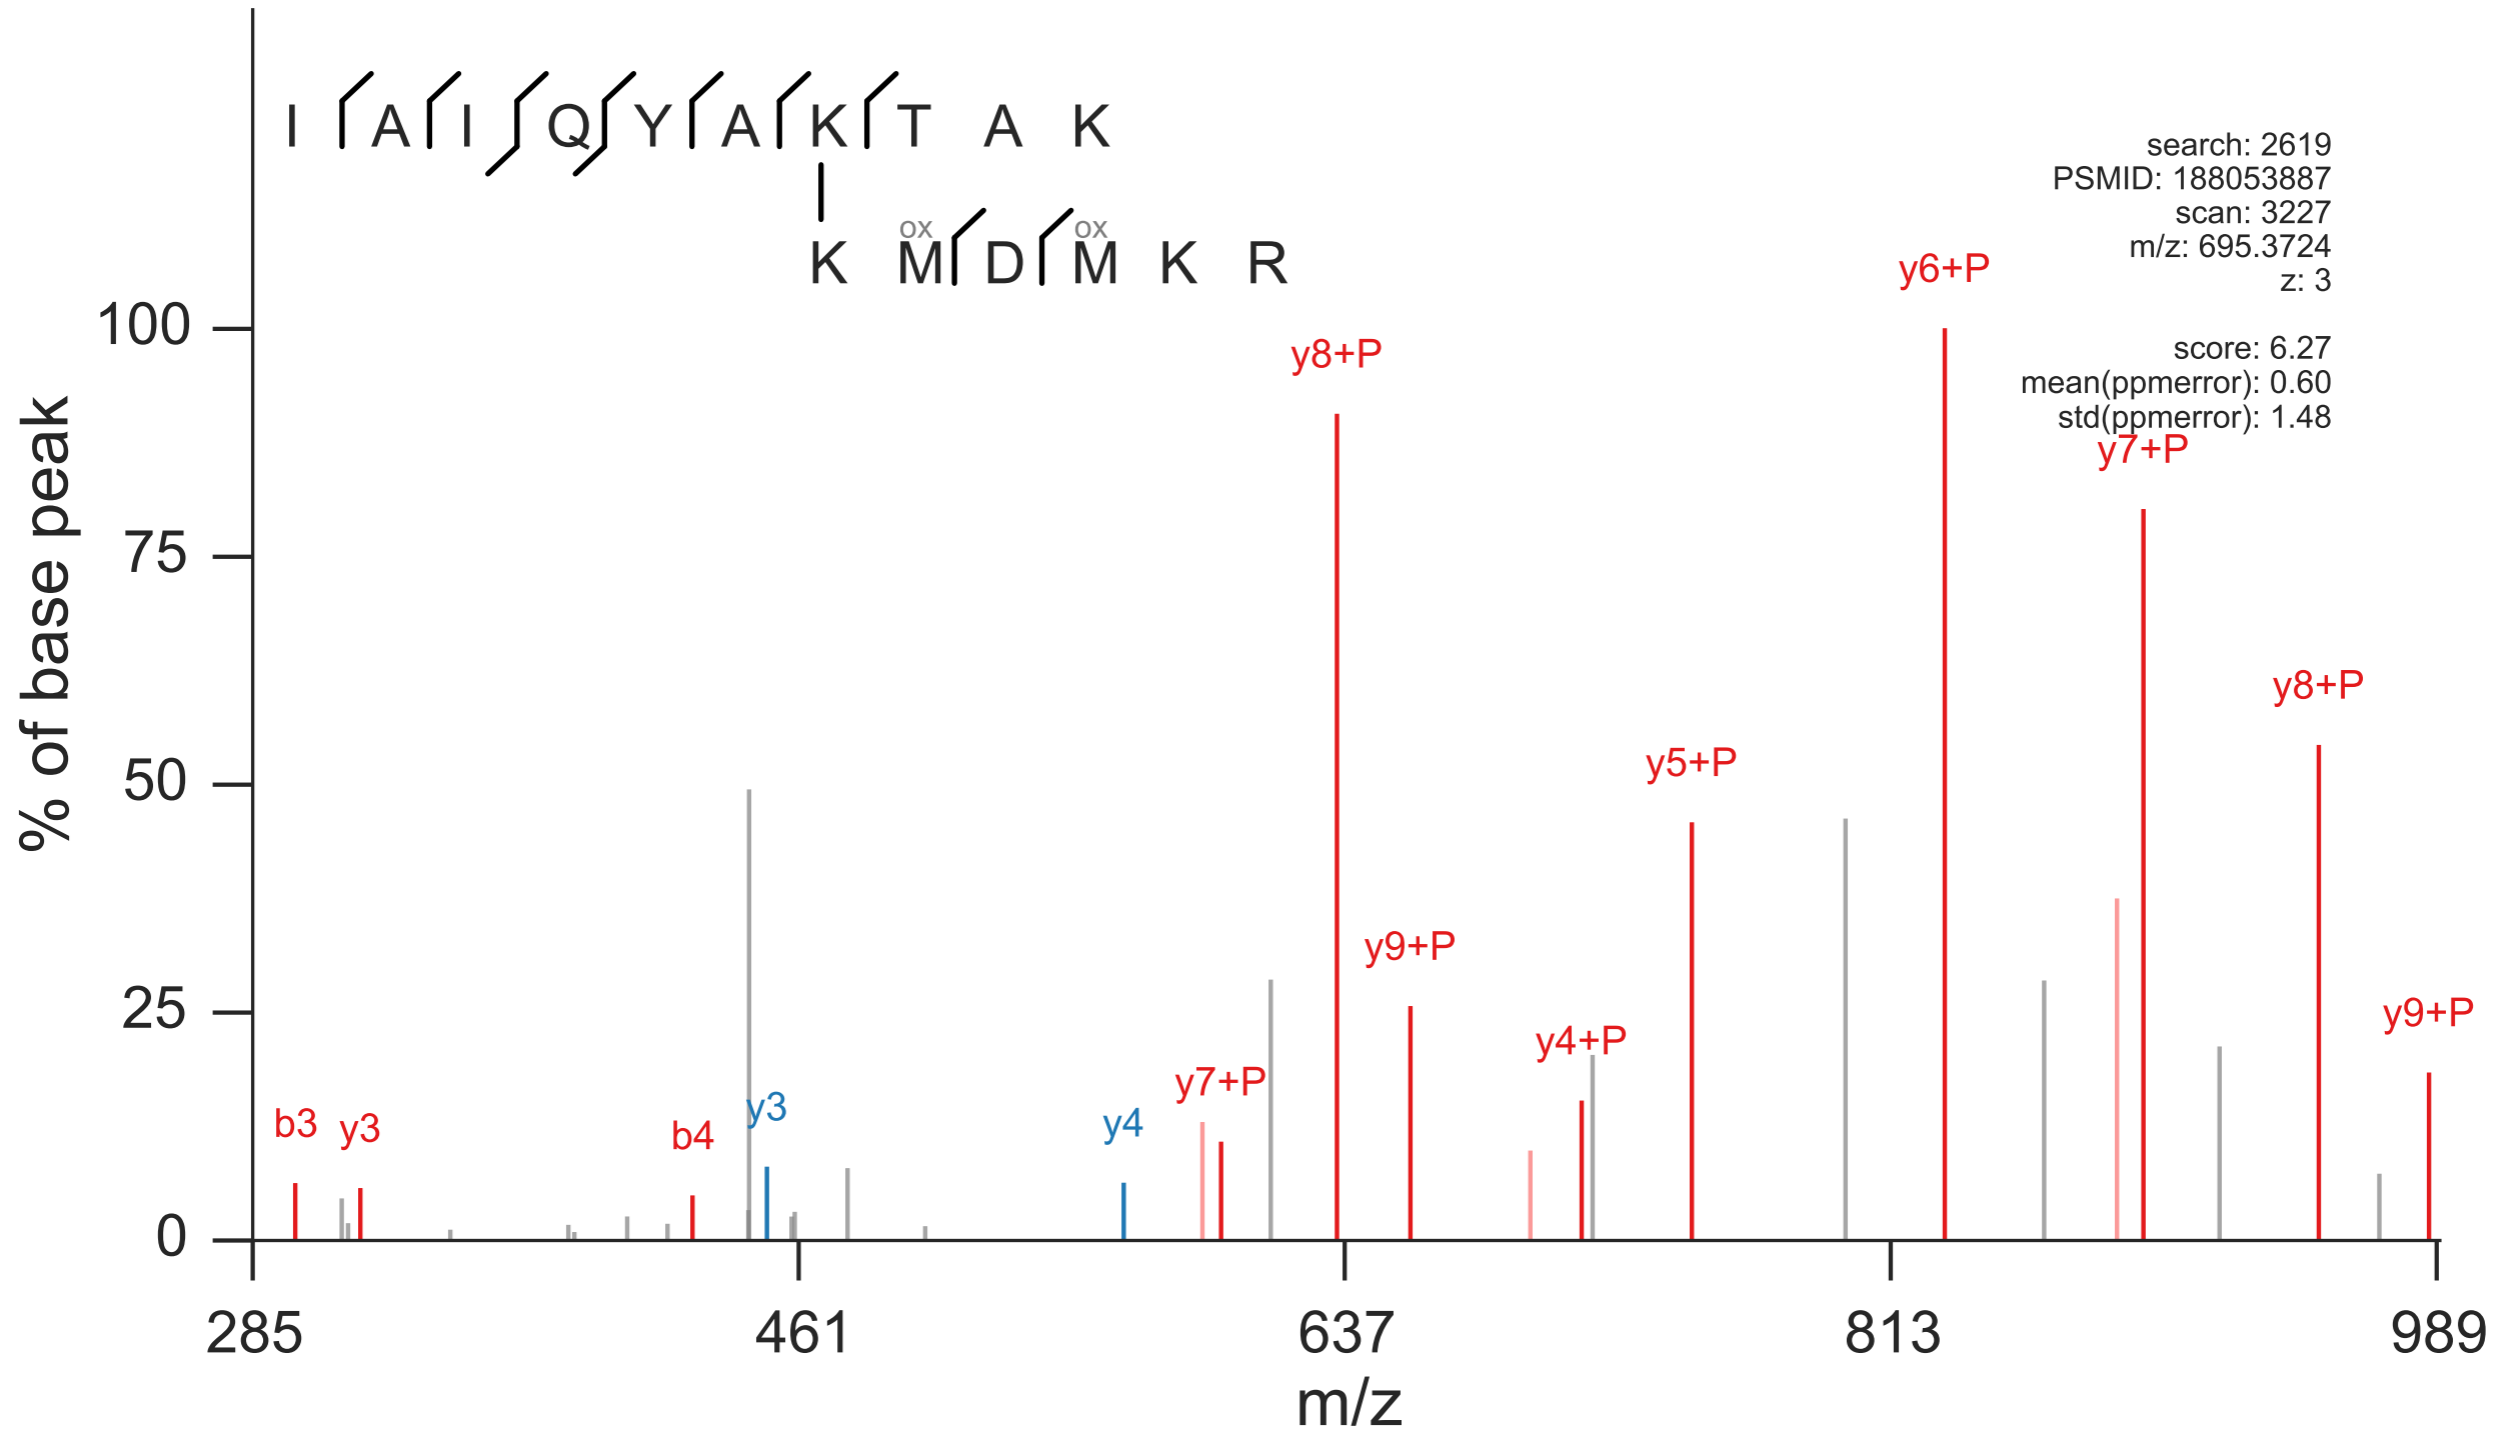

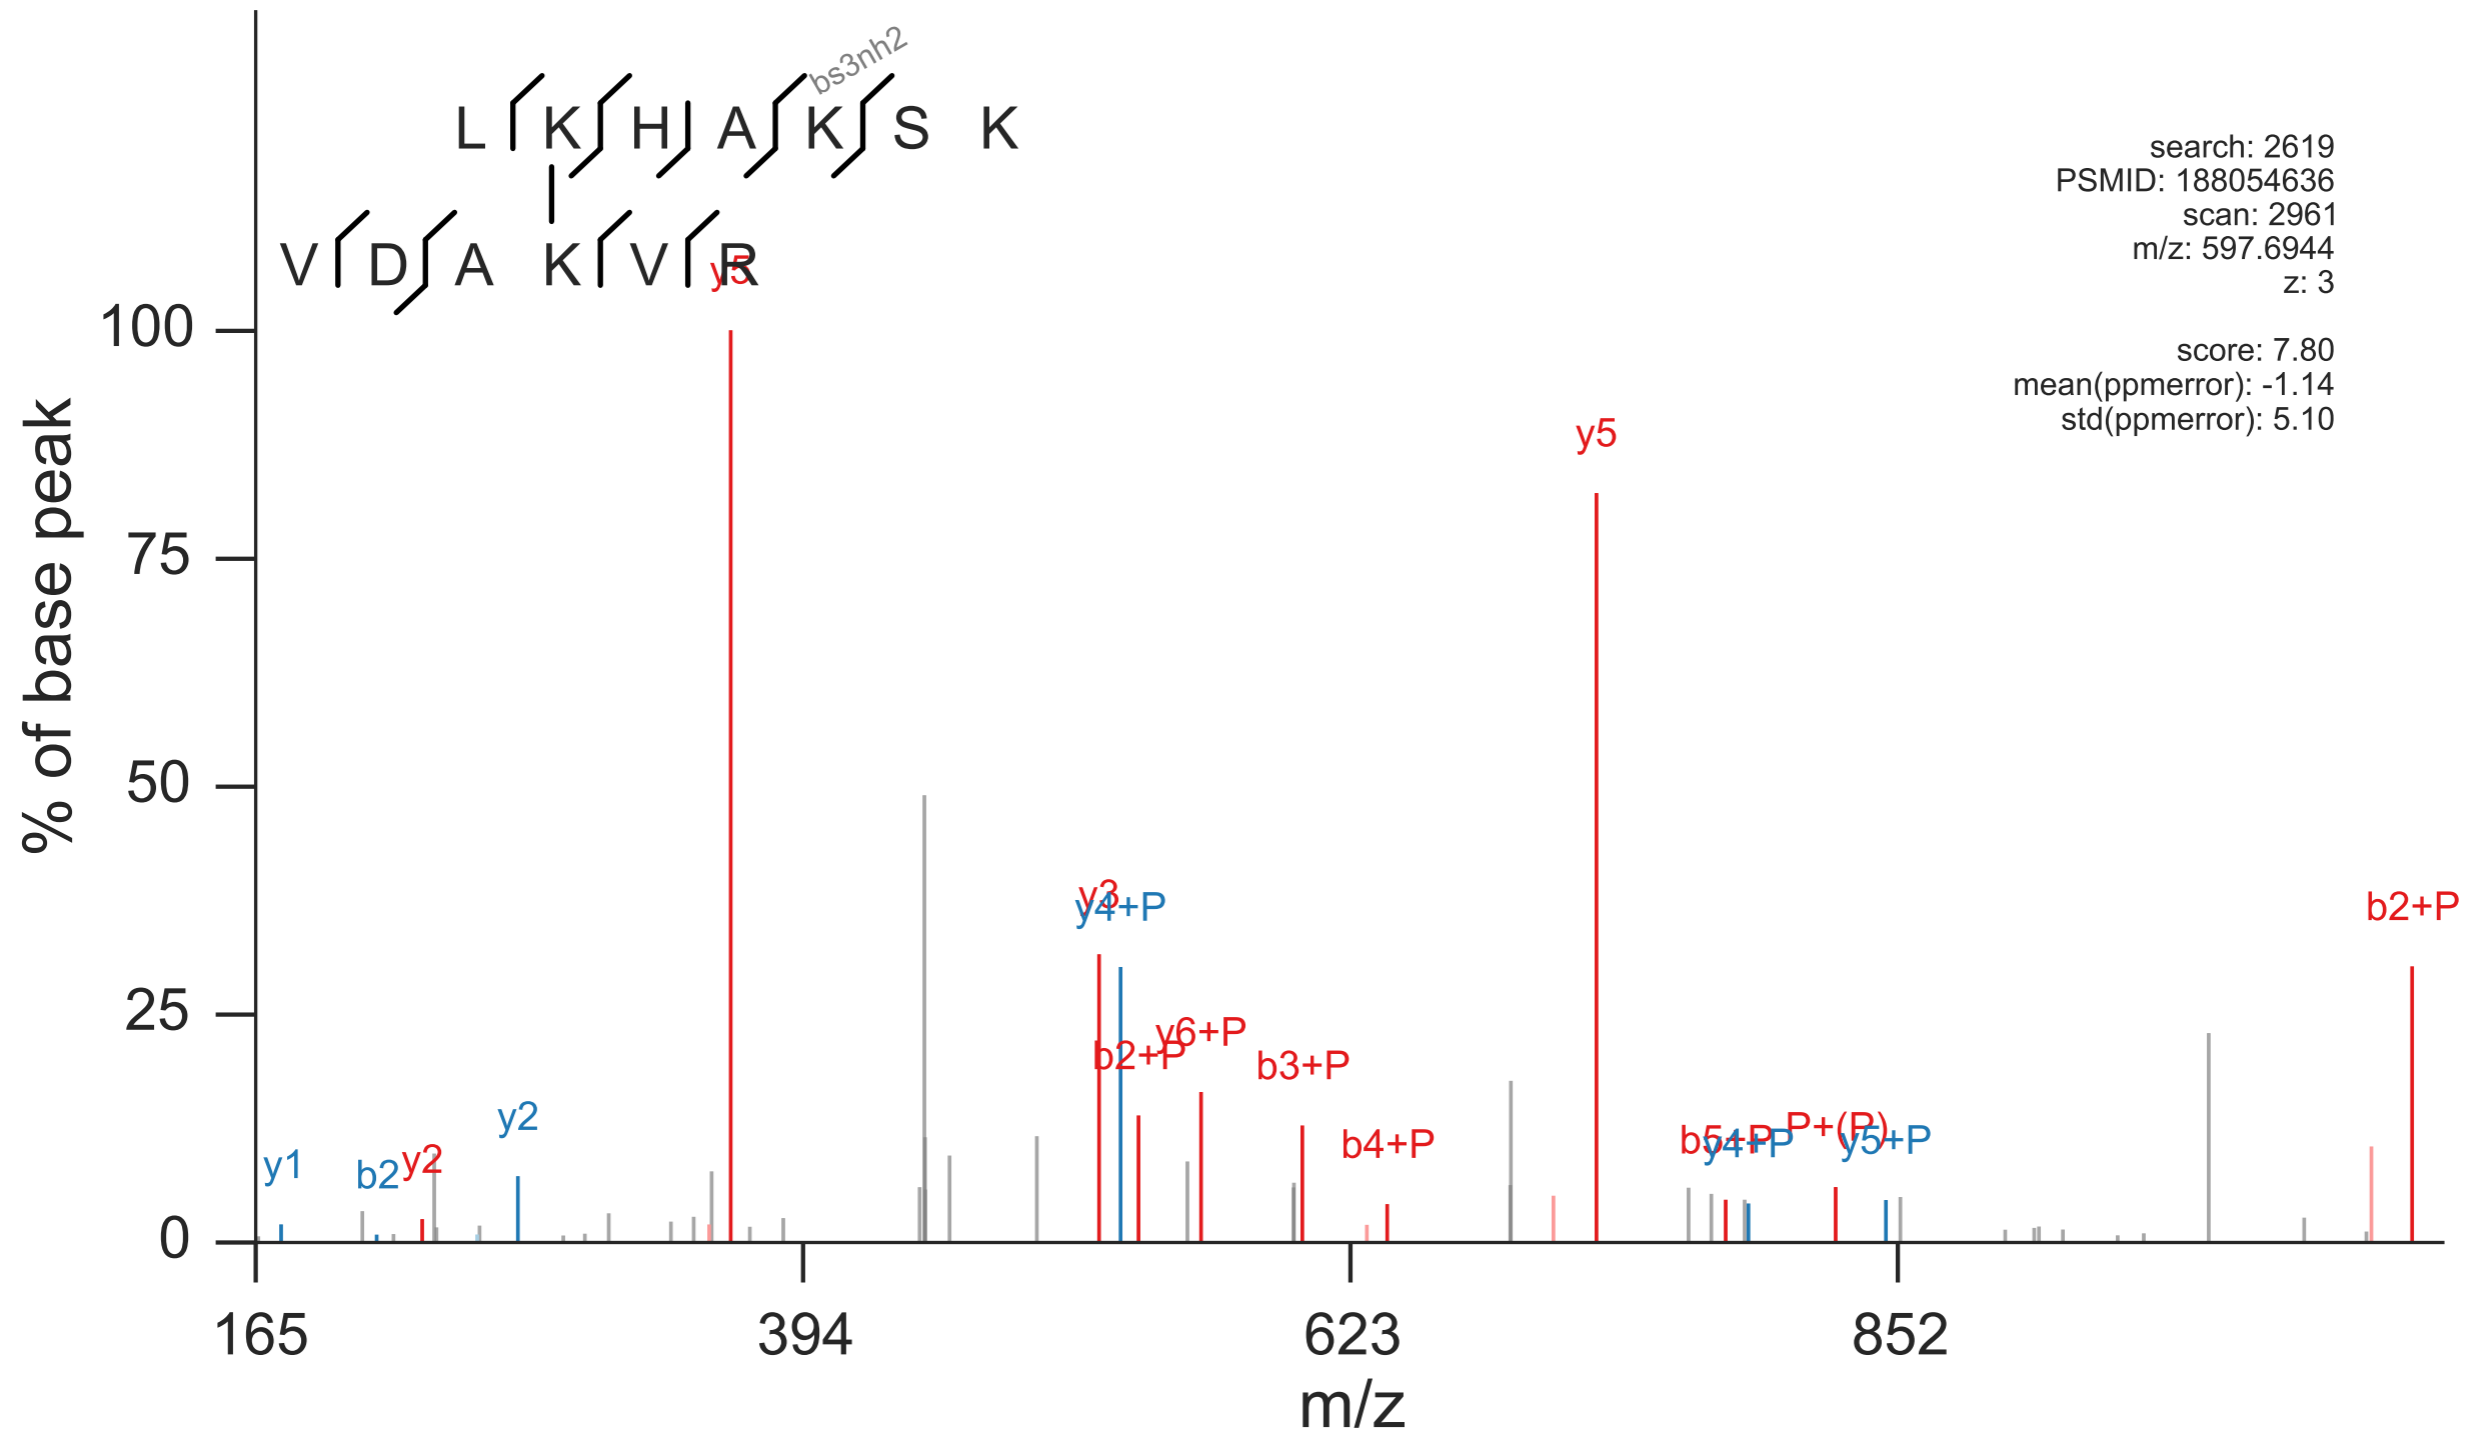

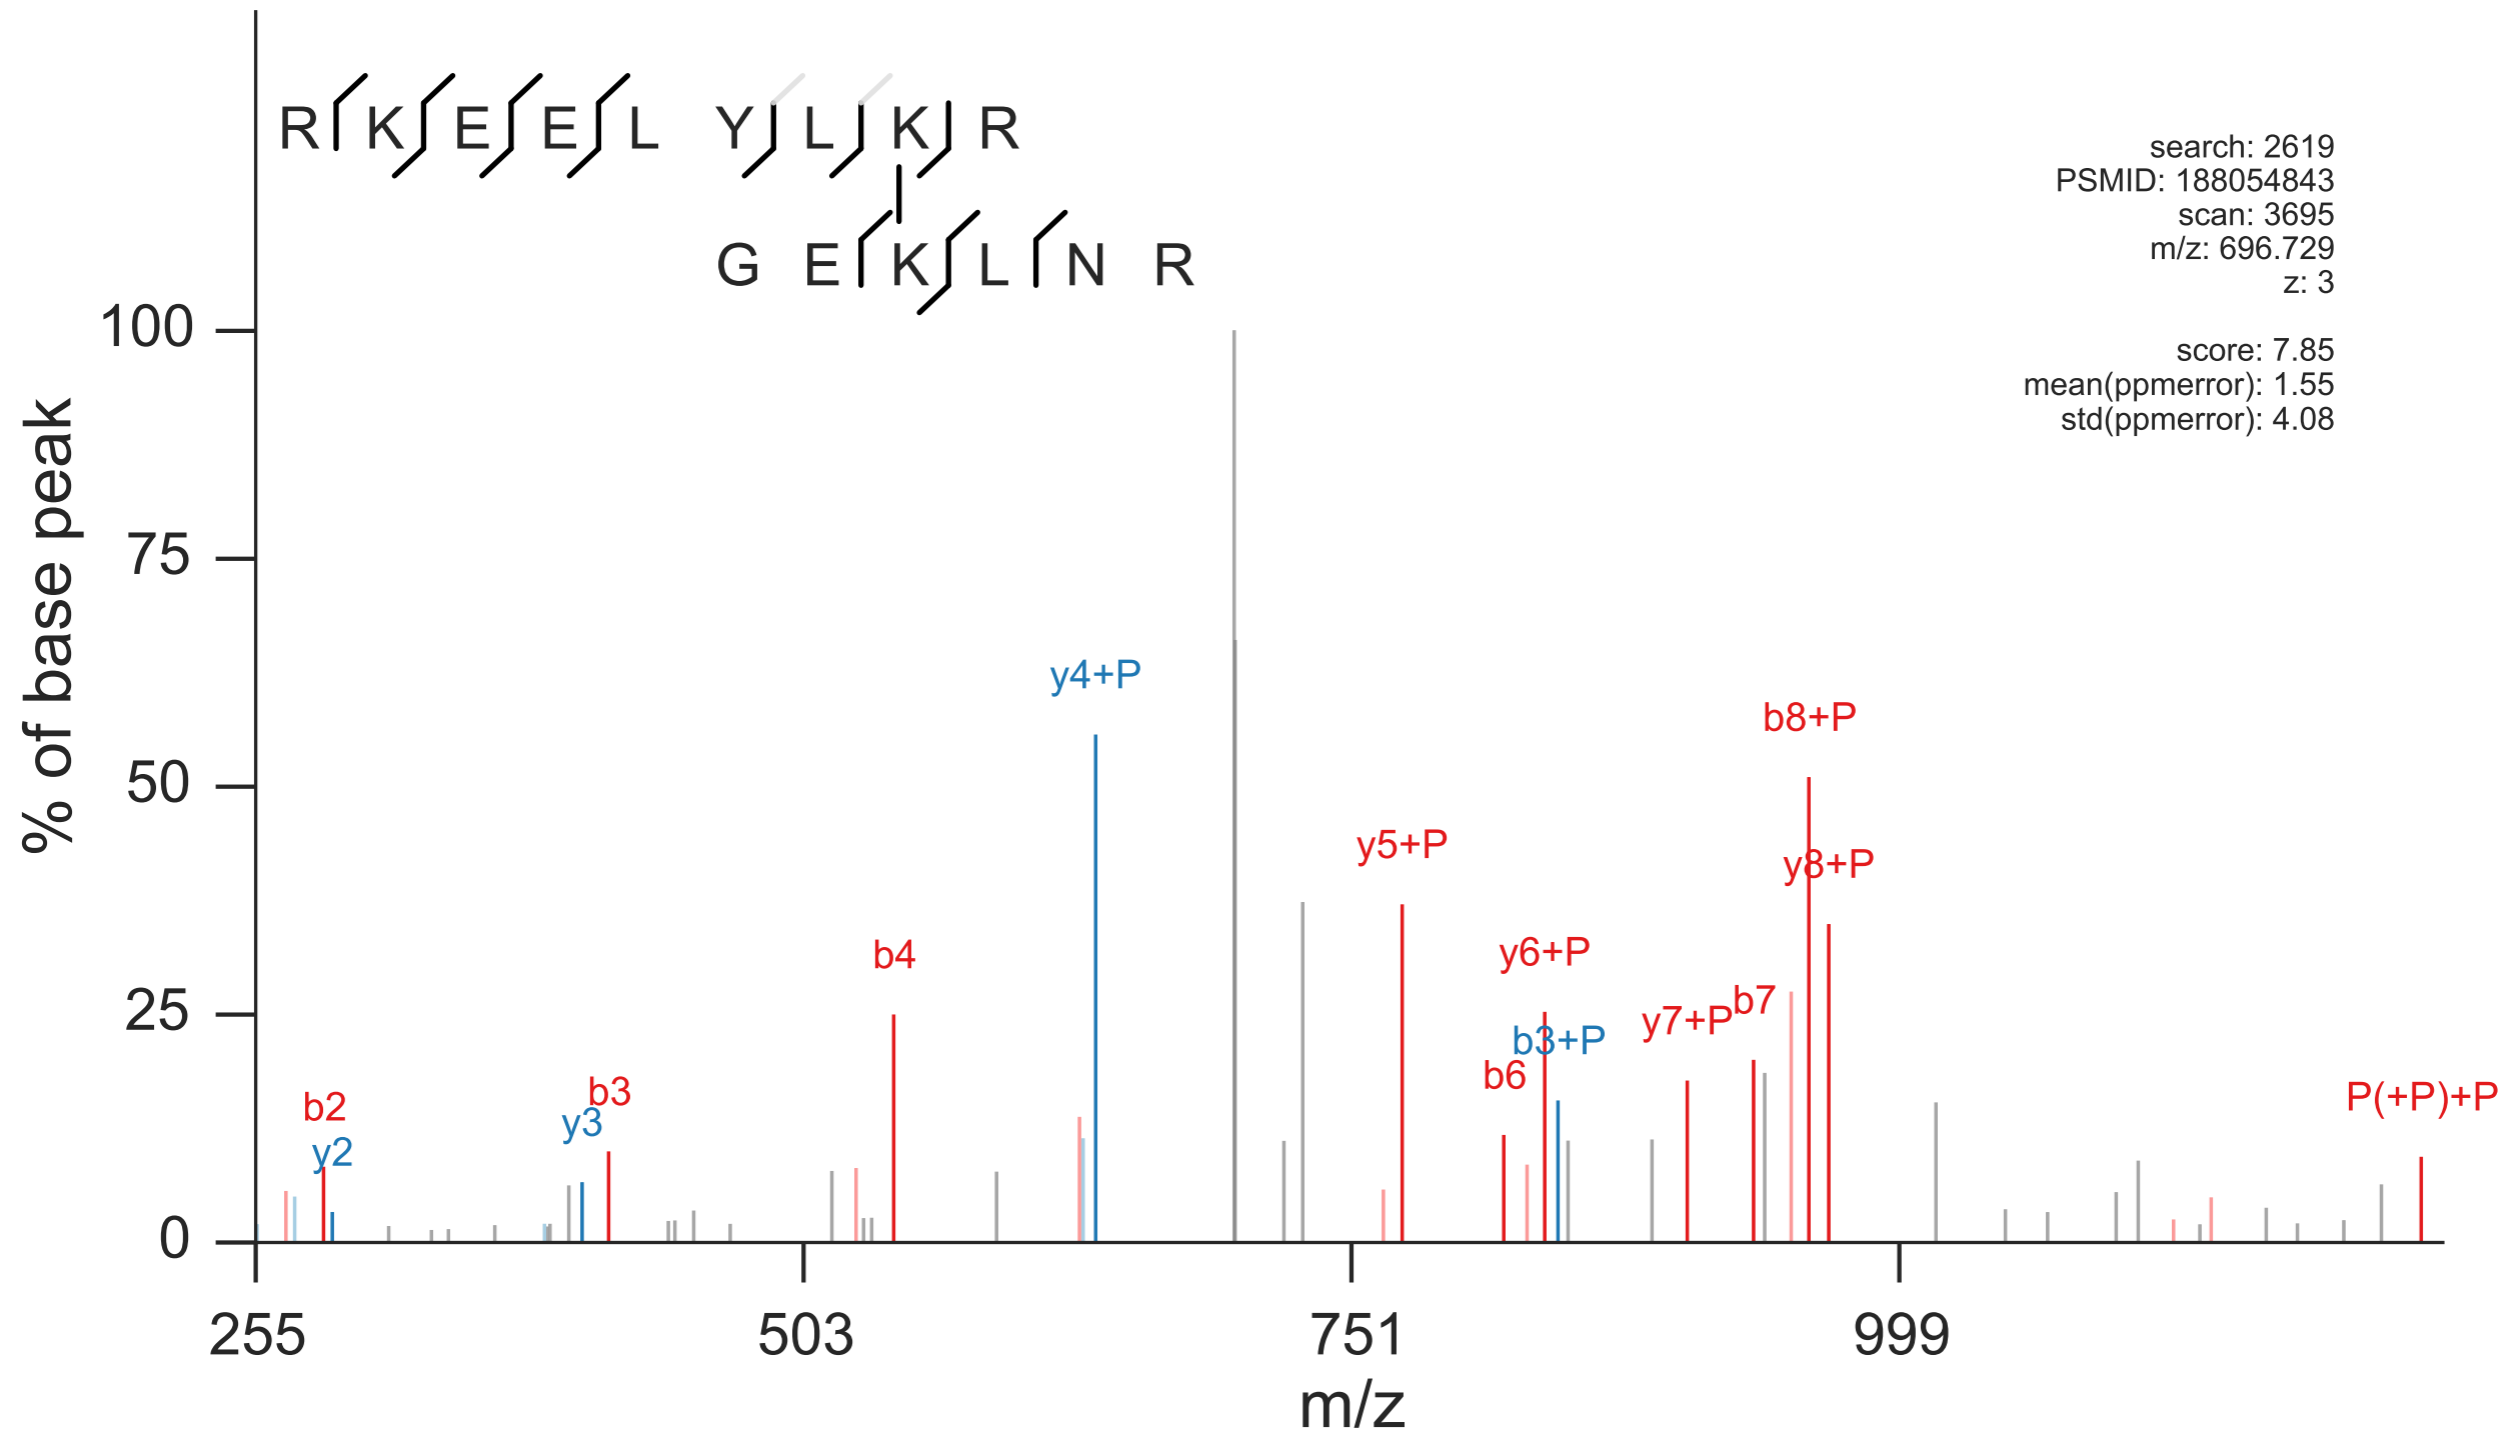

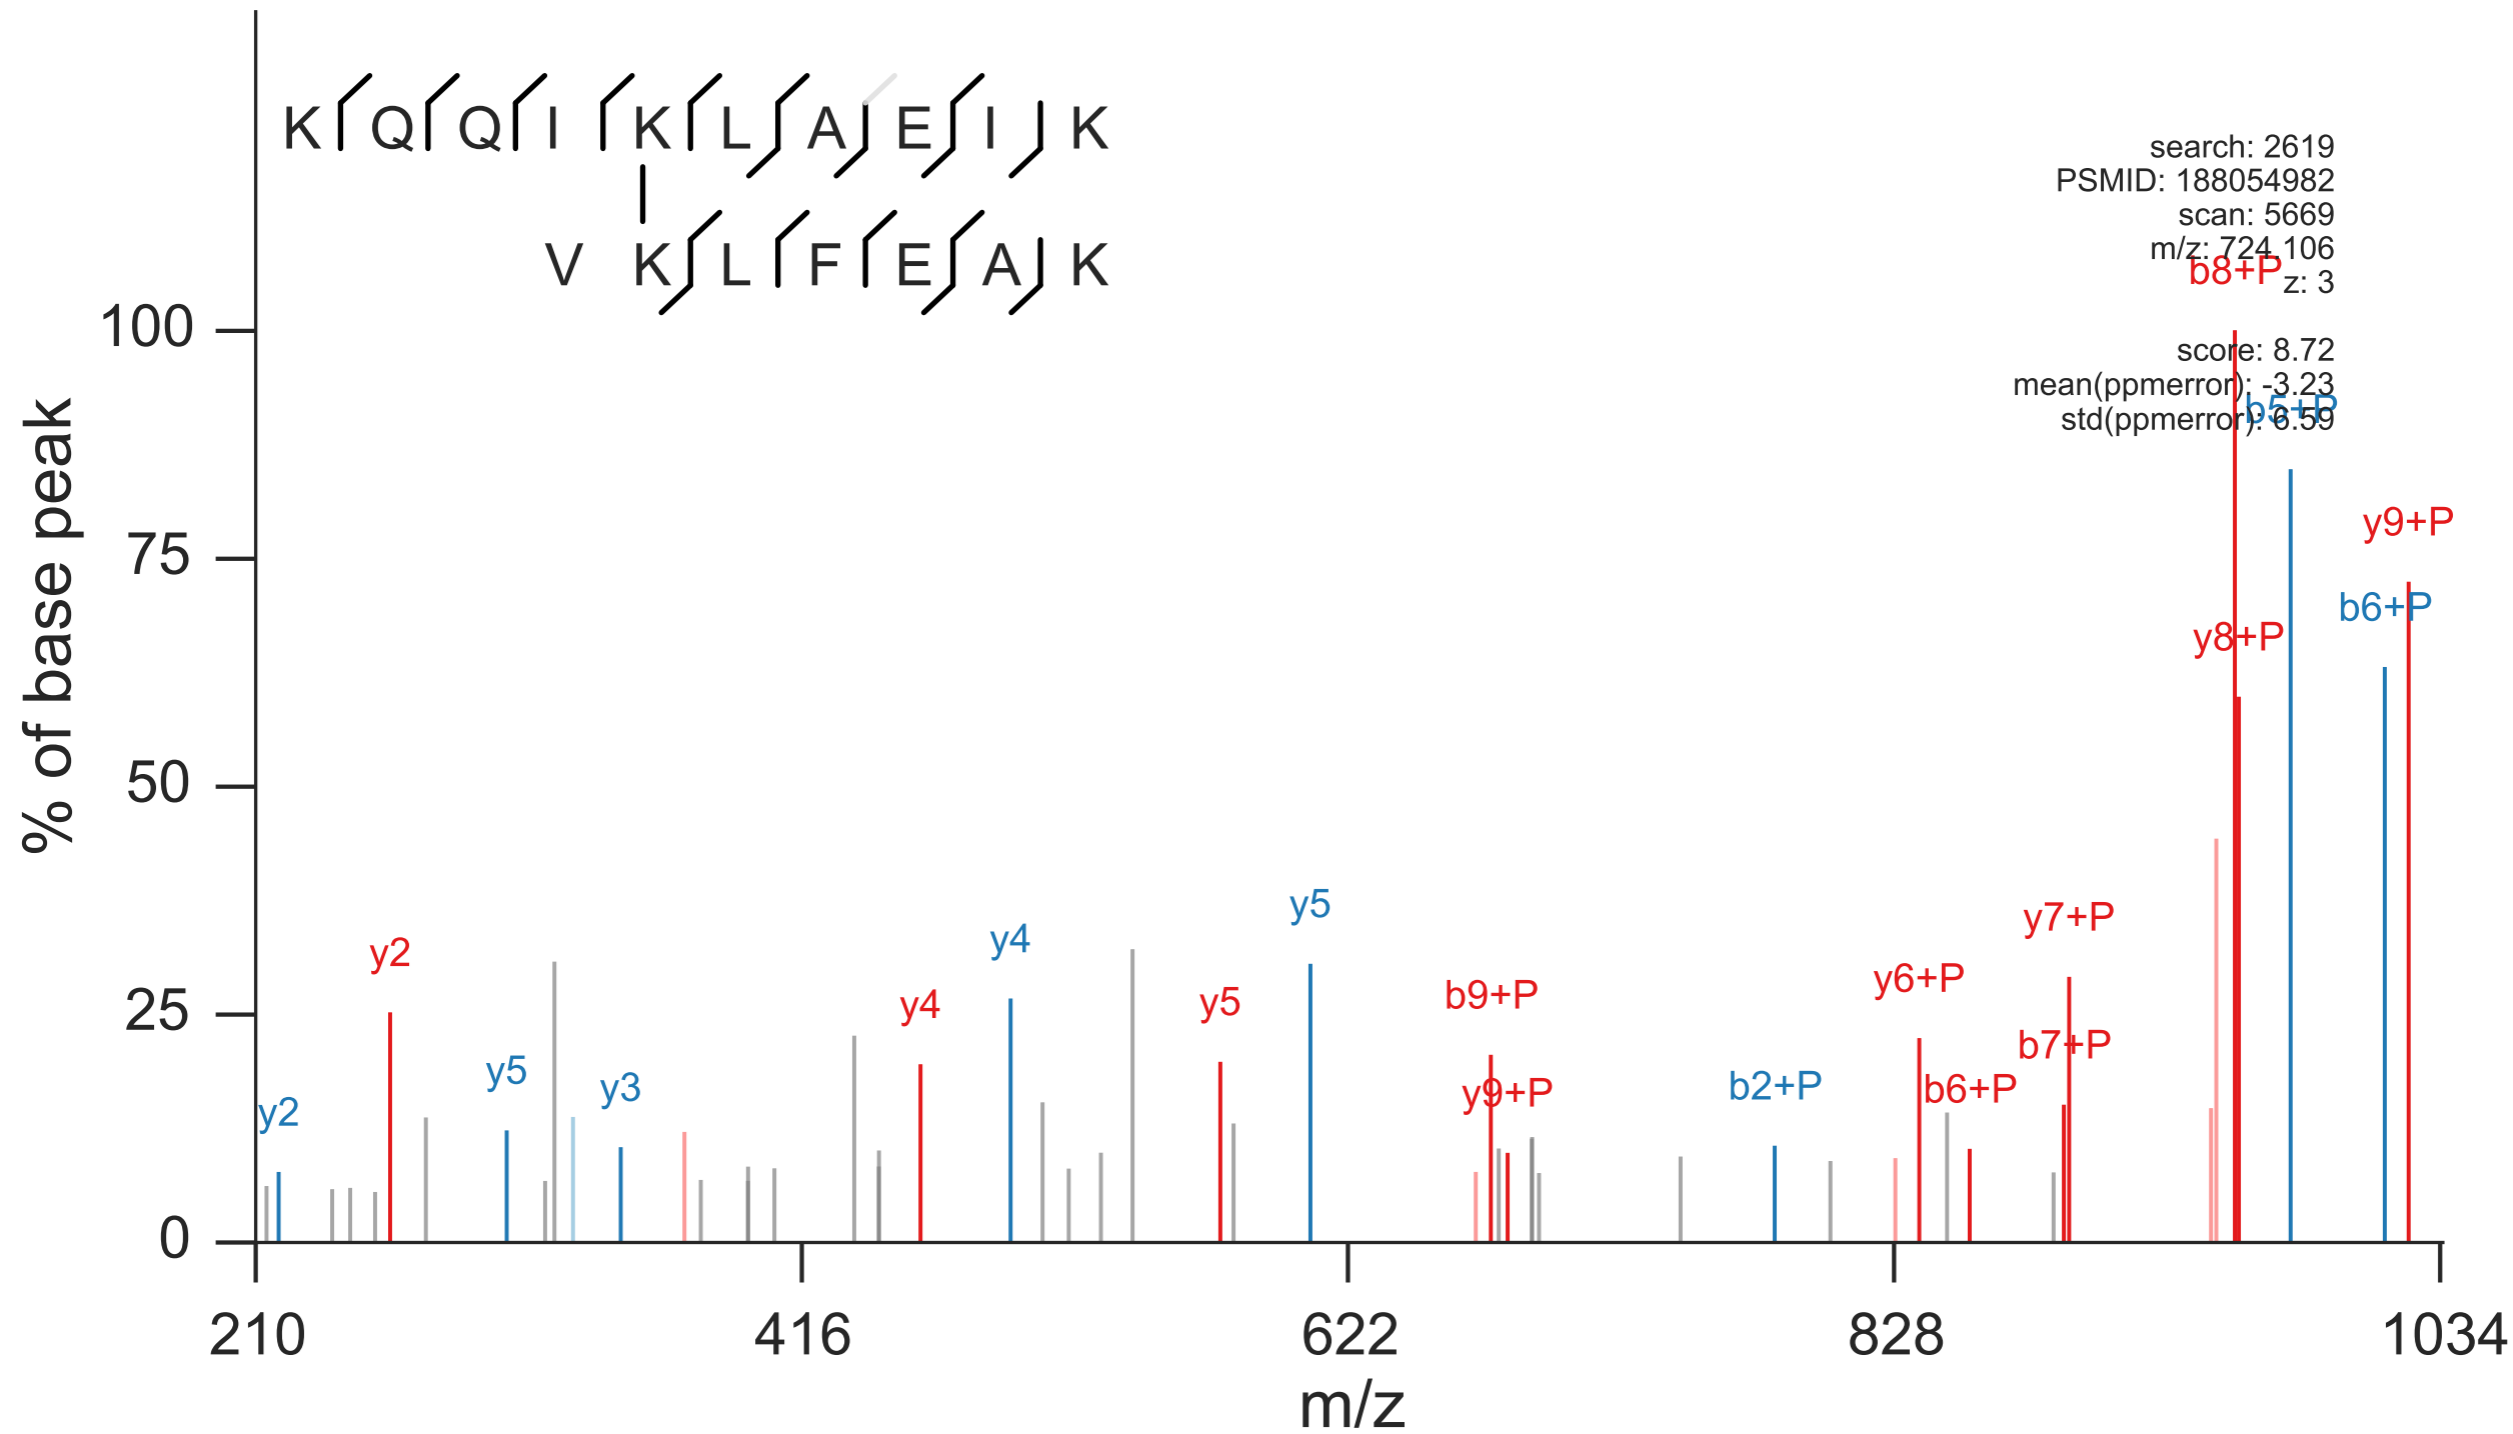

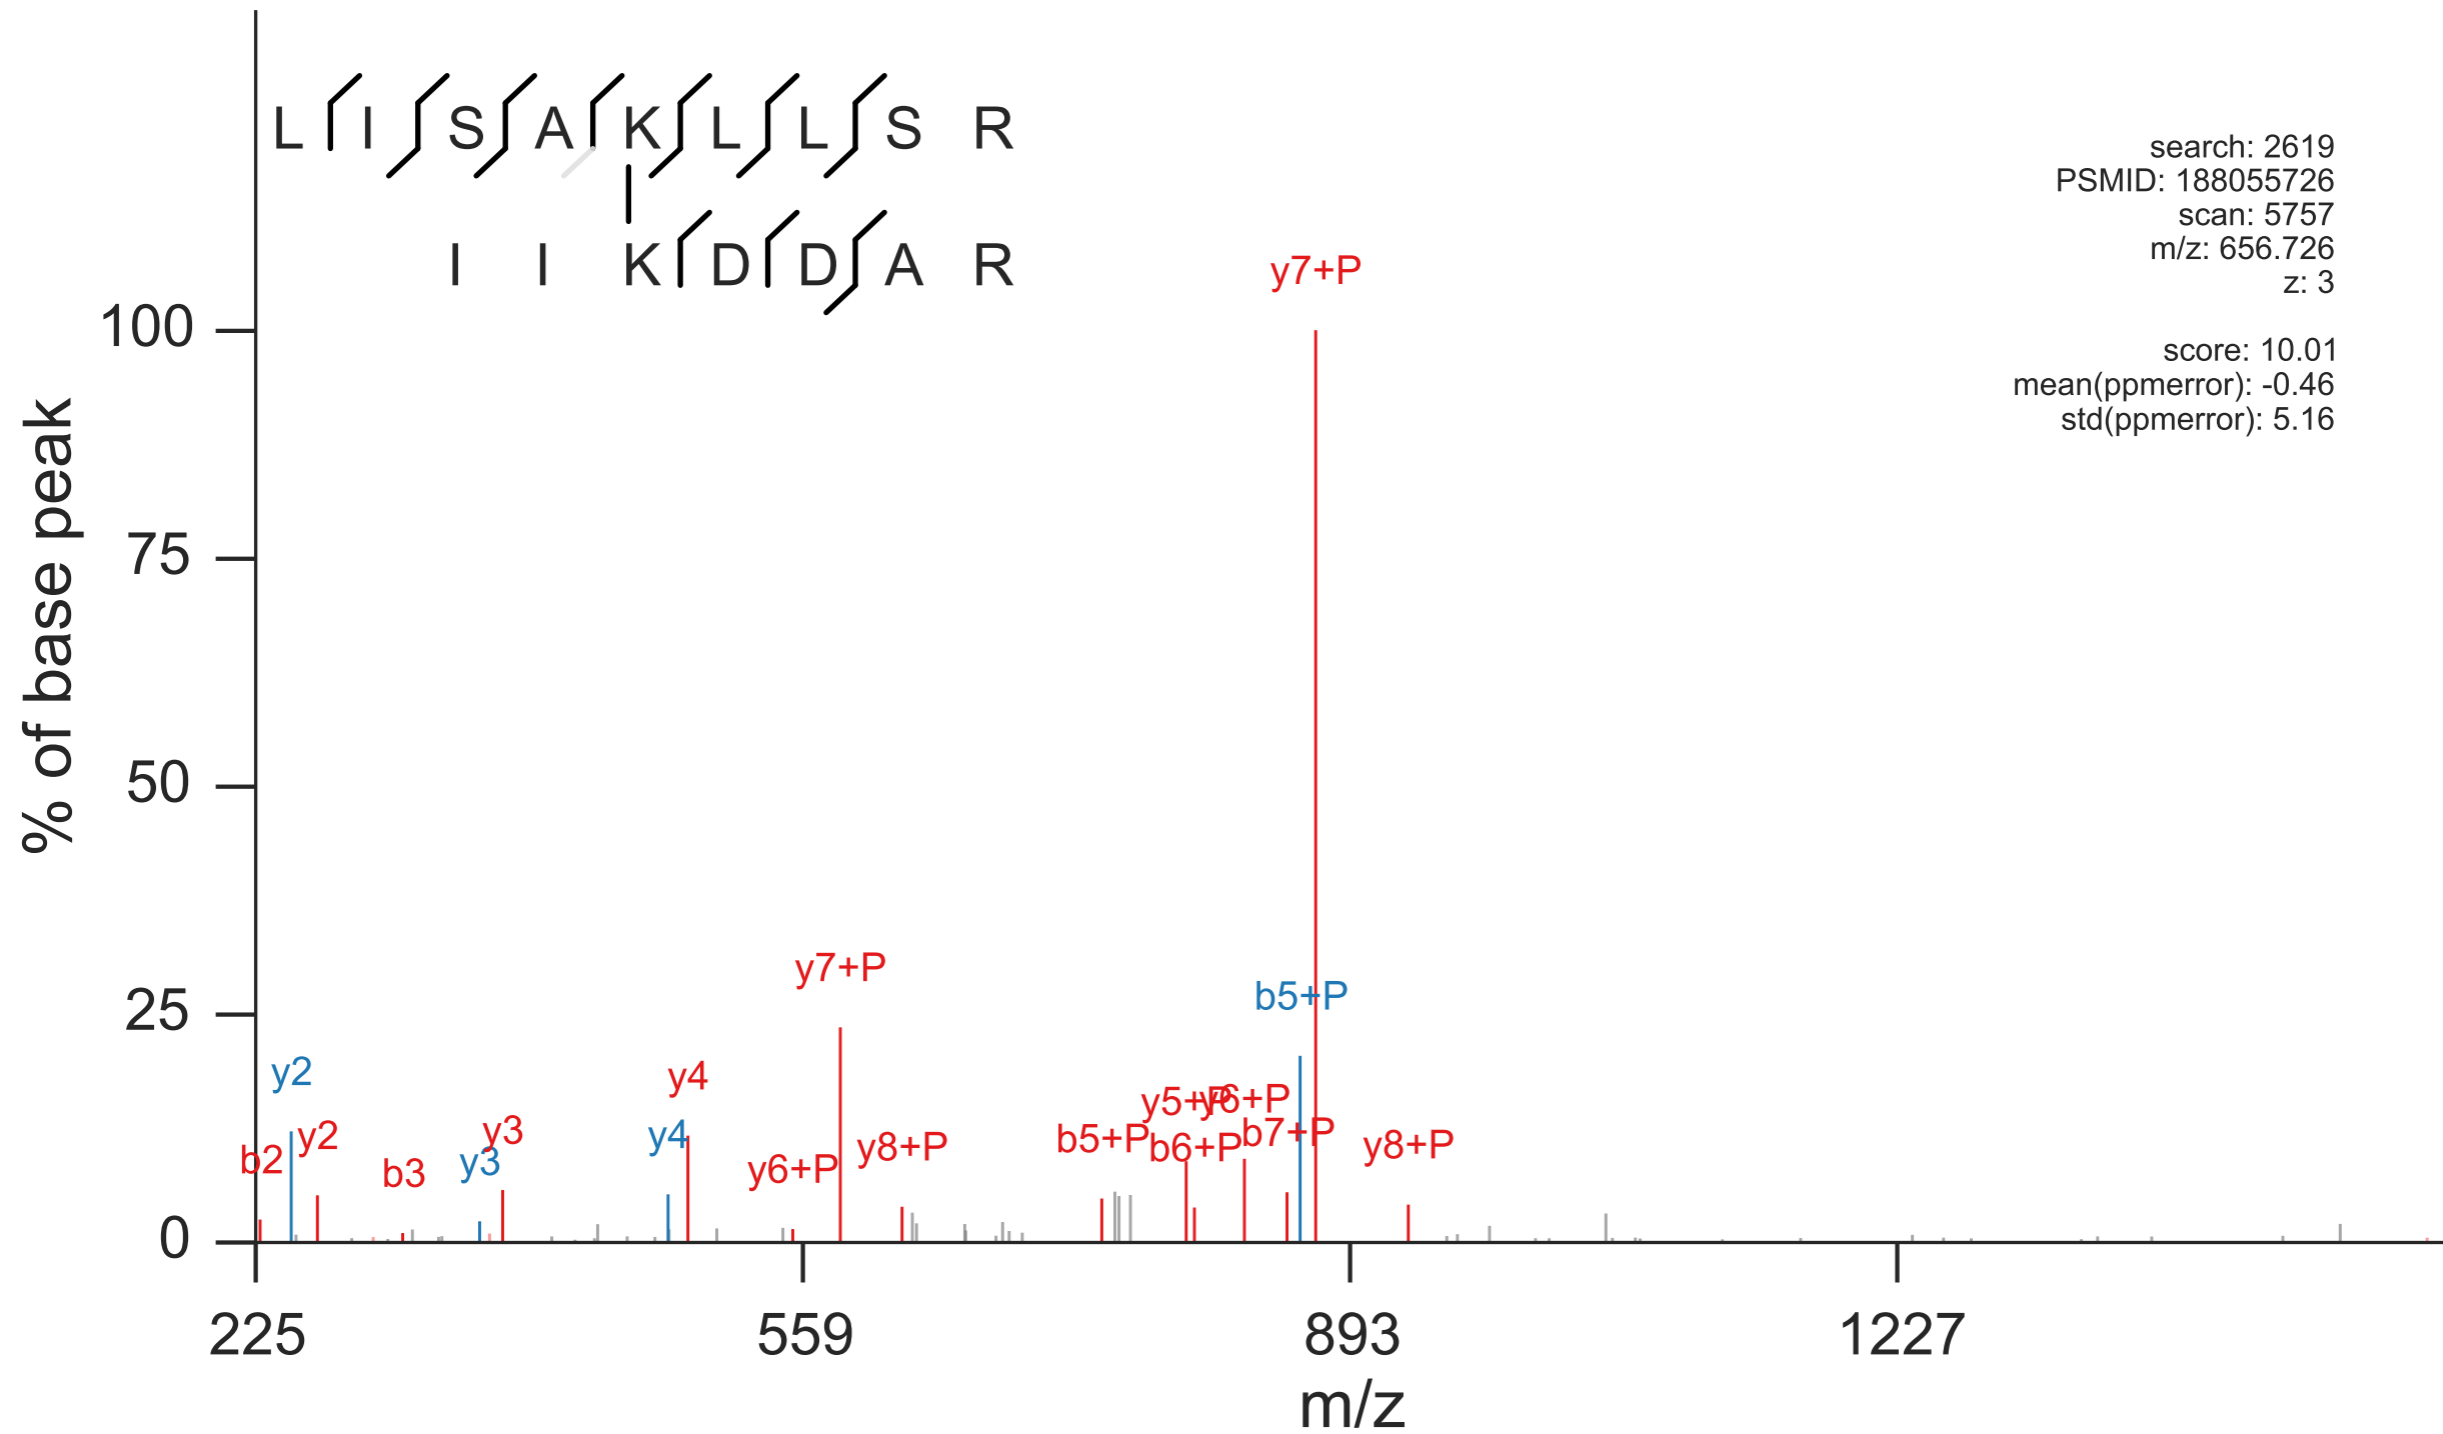

search: 2619  
 PSMID: 188055726  
 scan: 5757  
 m/z: 656.726  
 z: 3

score: 10.01  
 mean(ppmerror): -0.46  
 std(ppmerror): 5.16

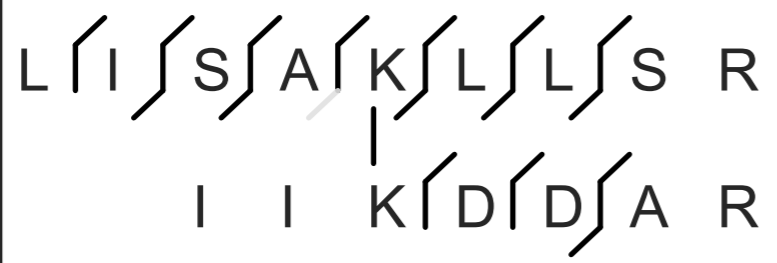

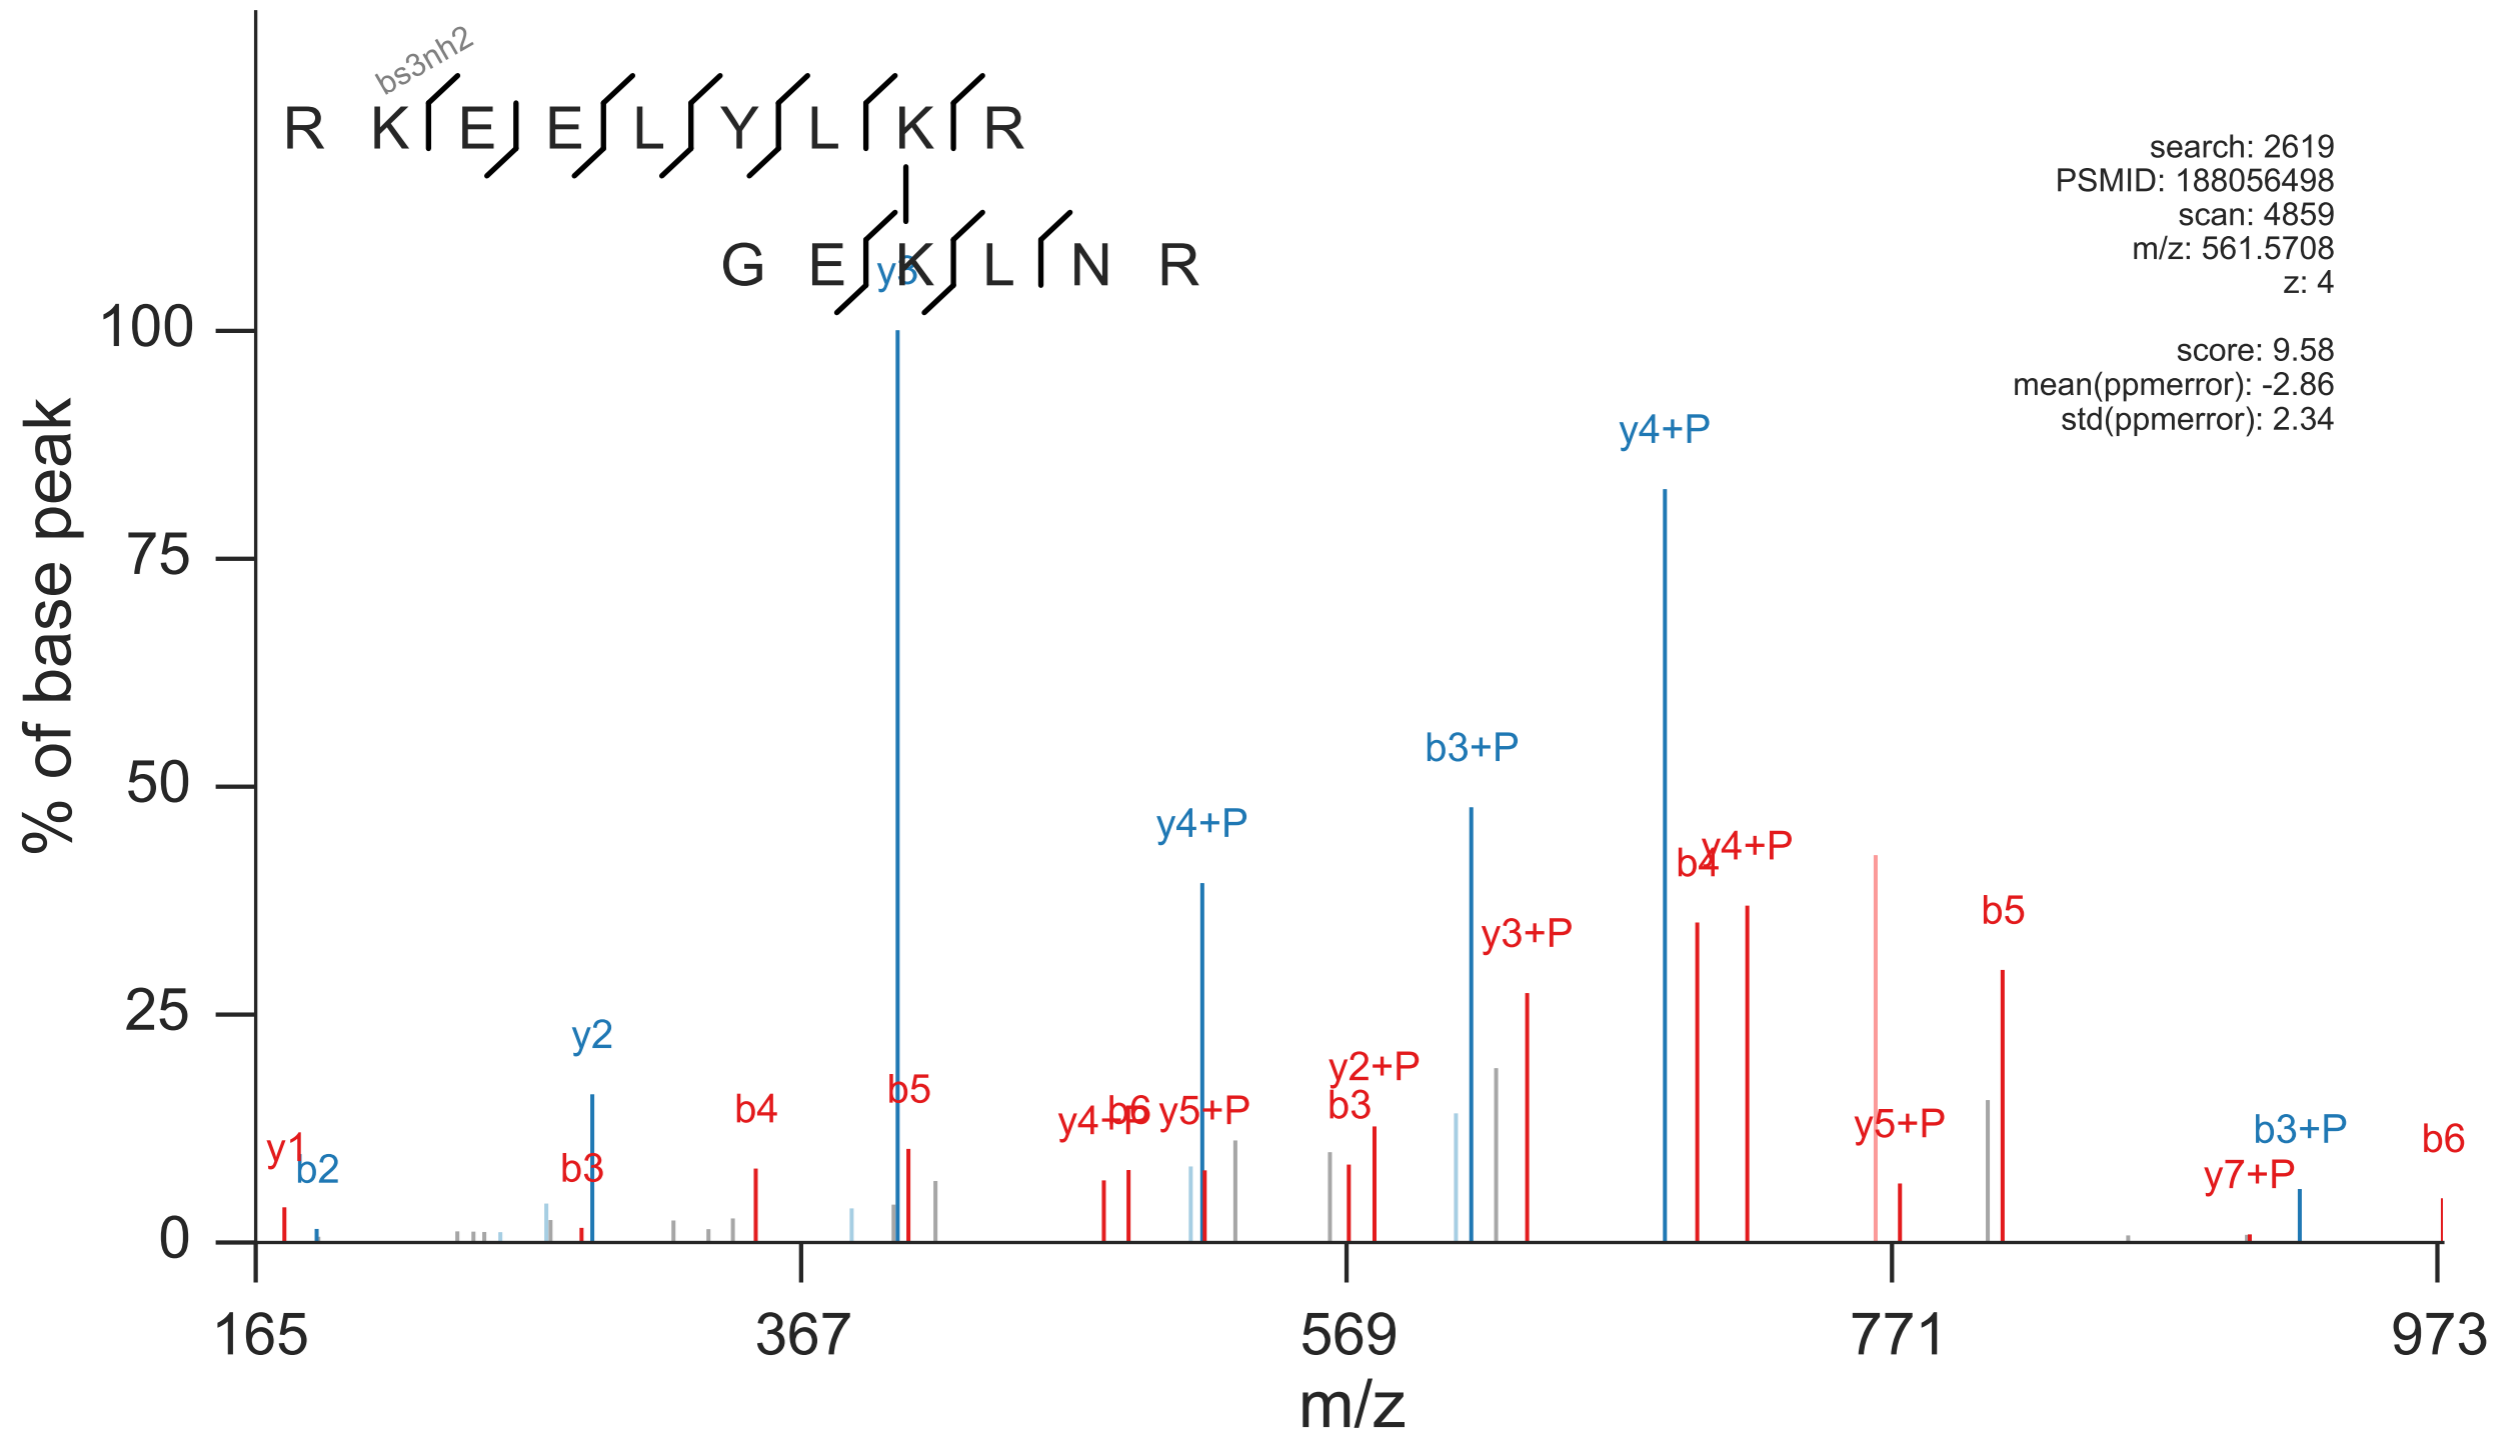

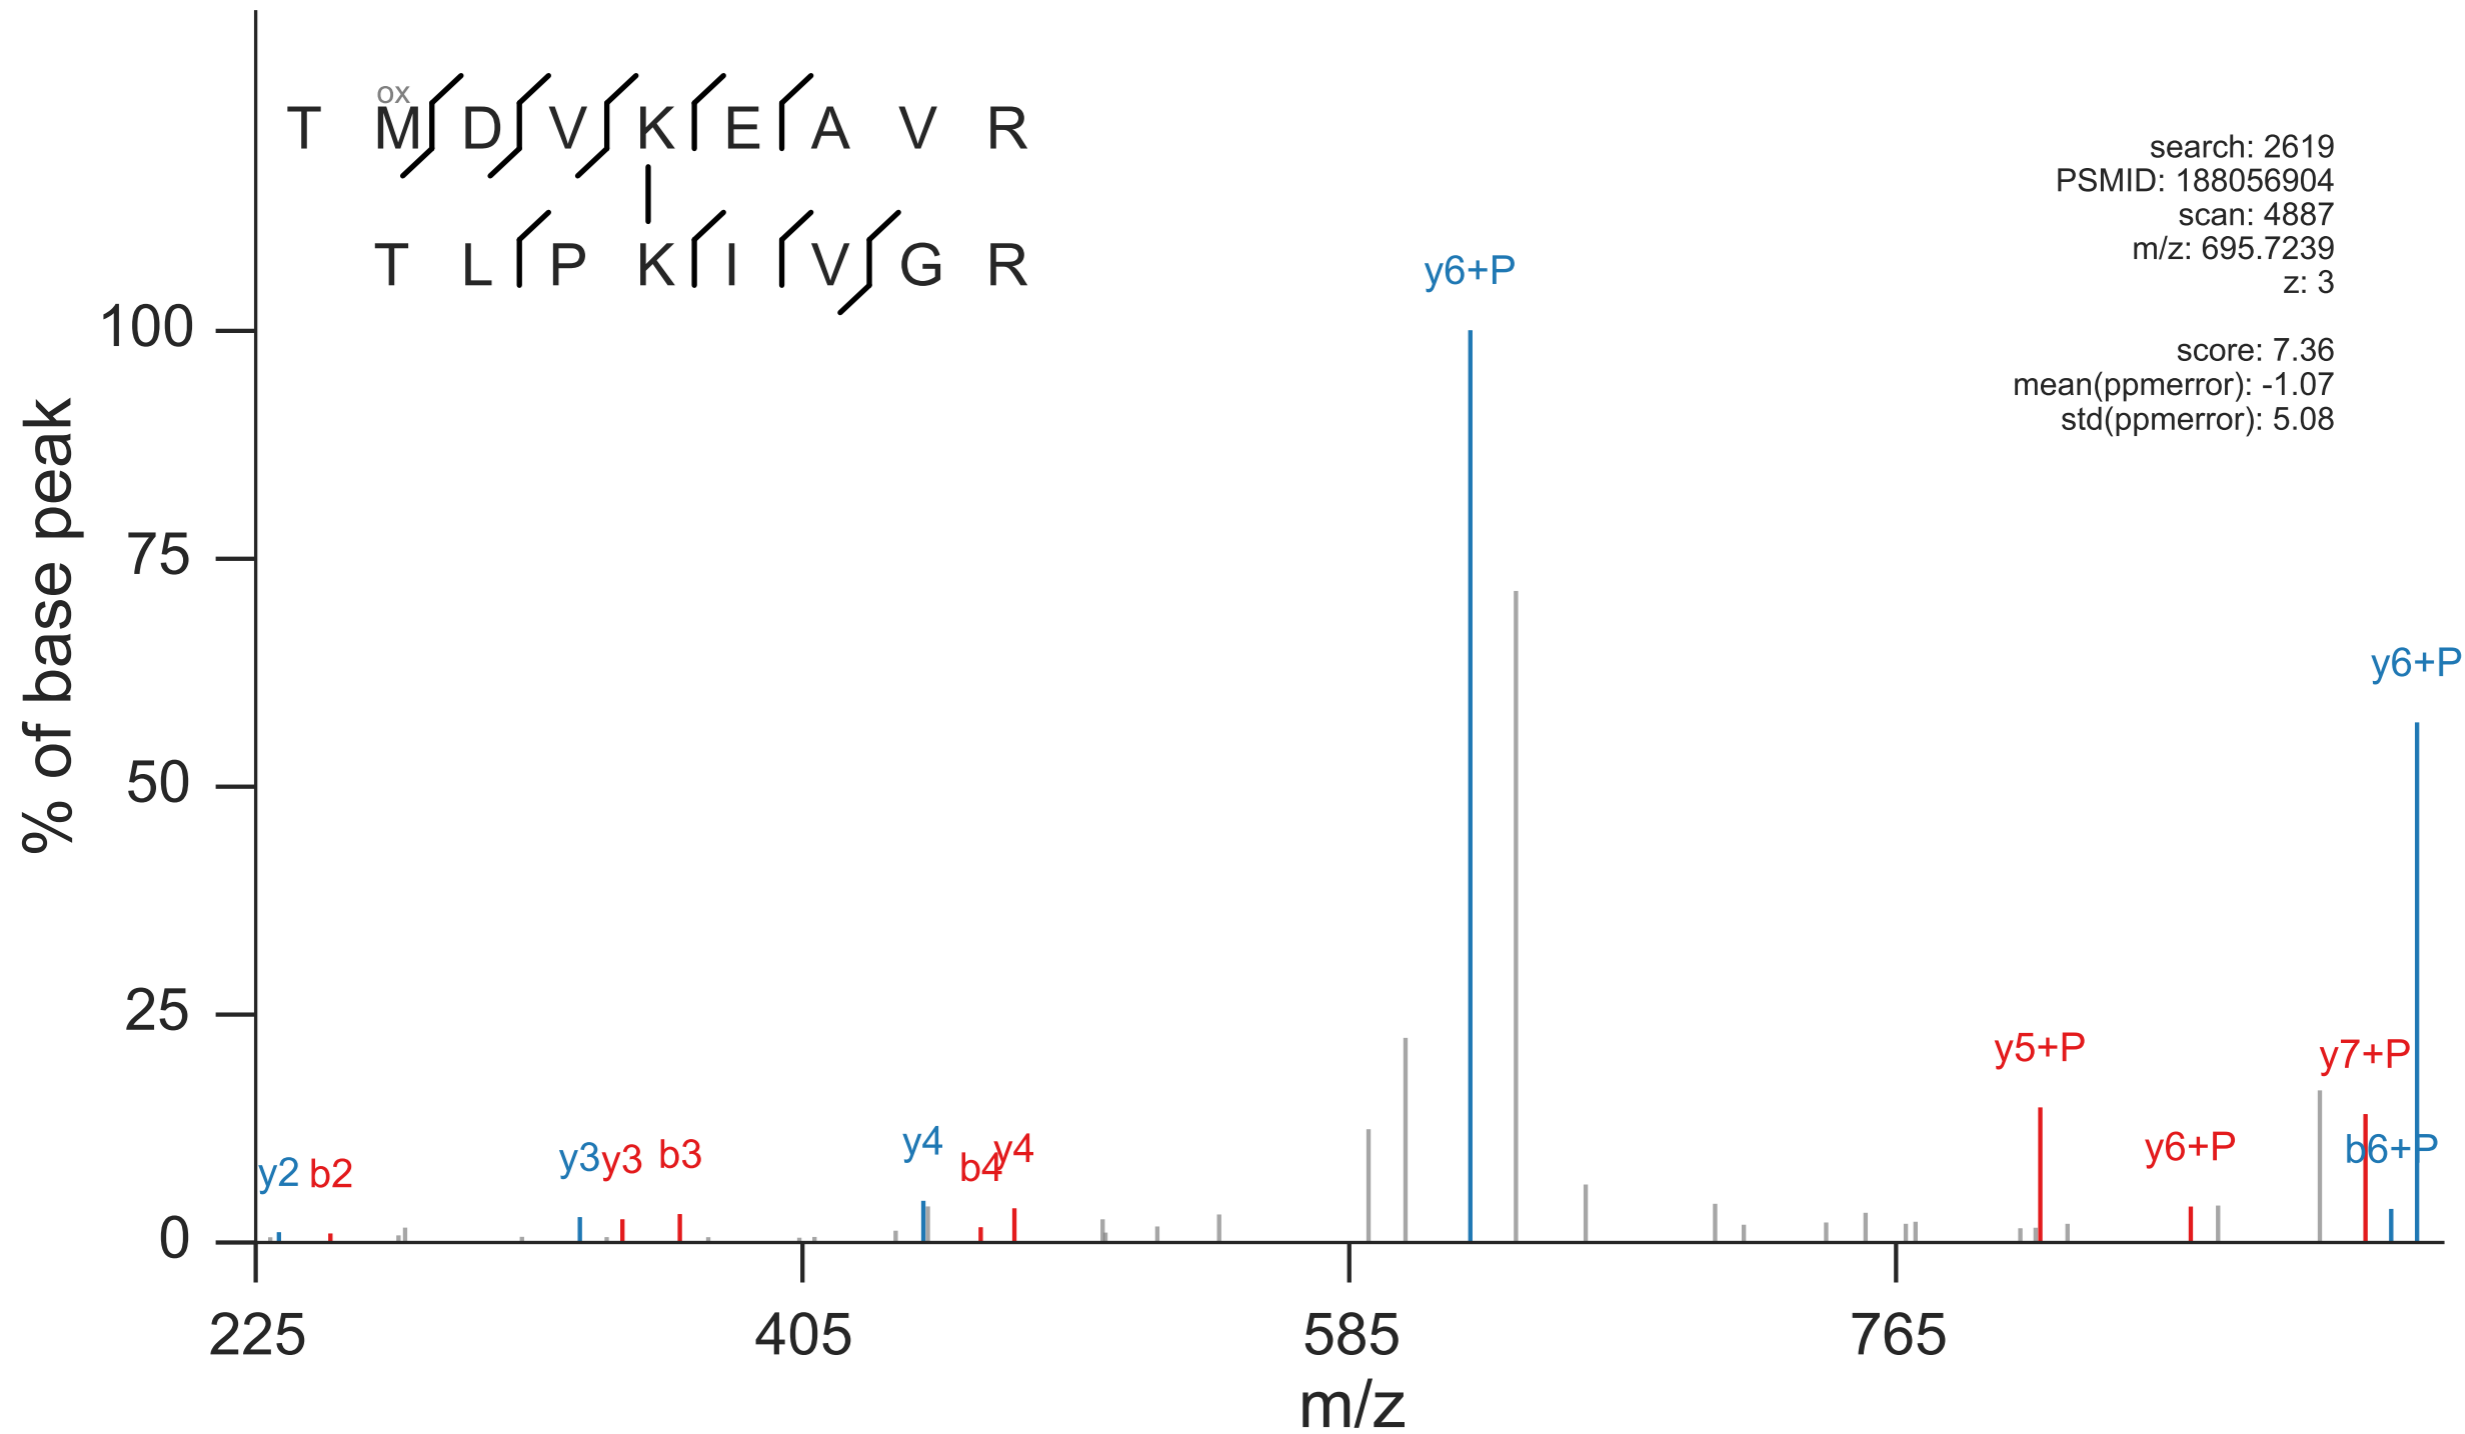



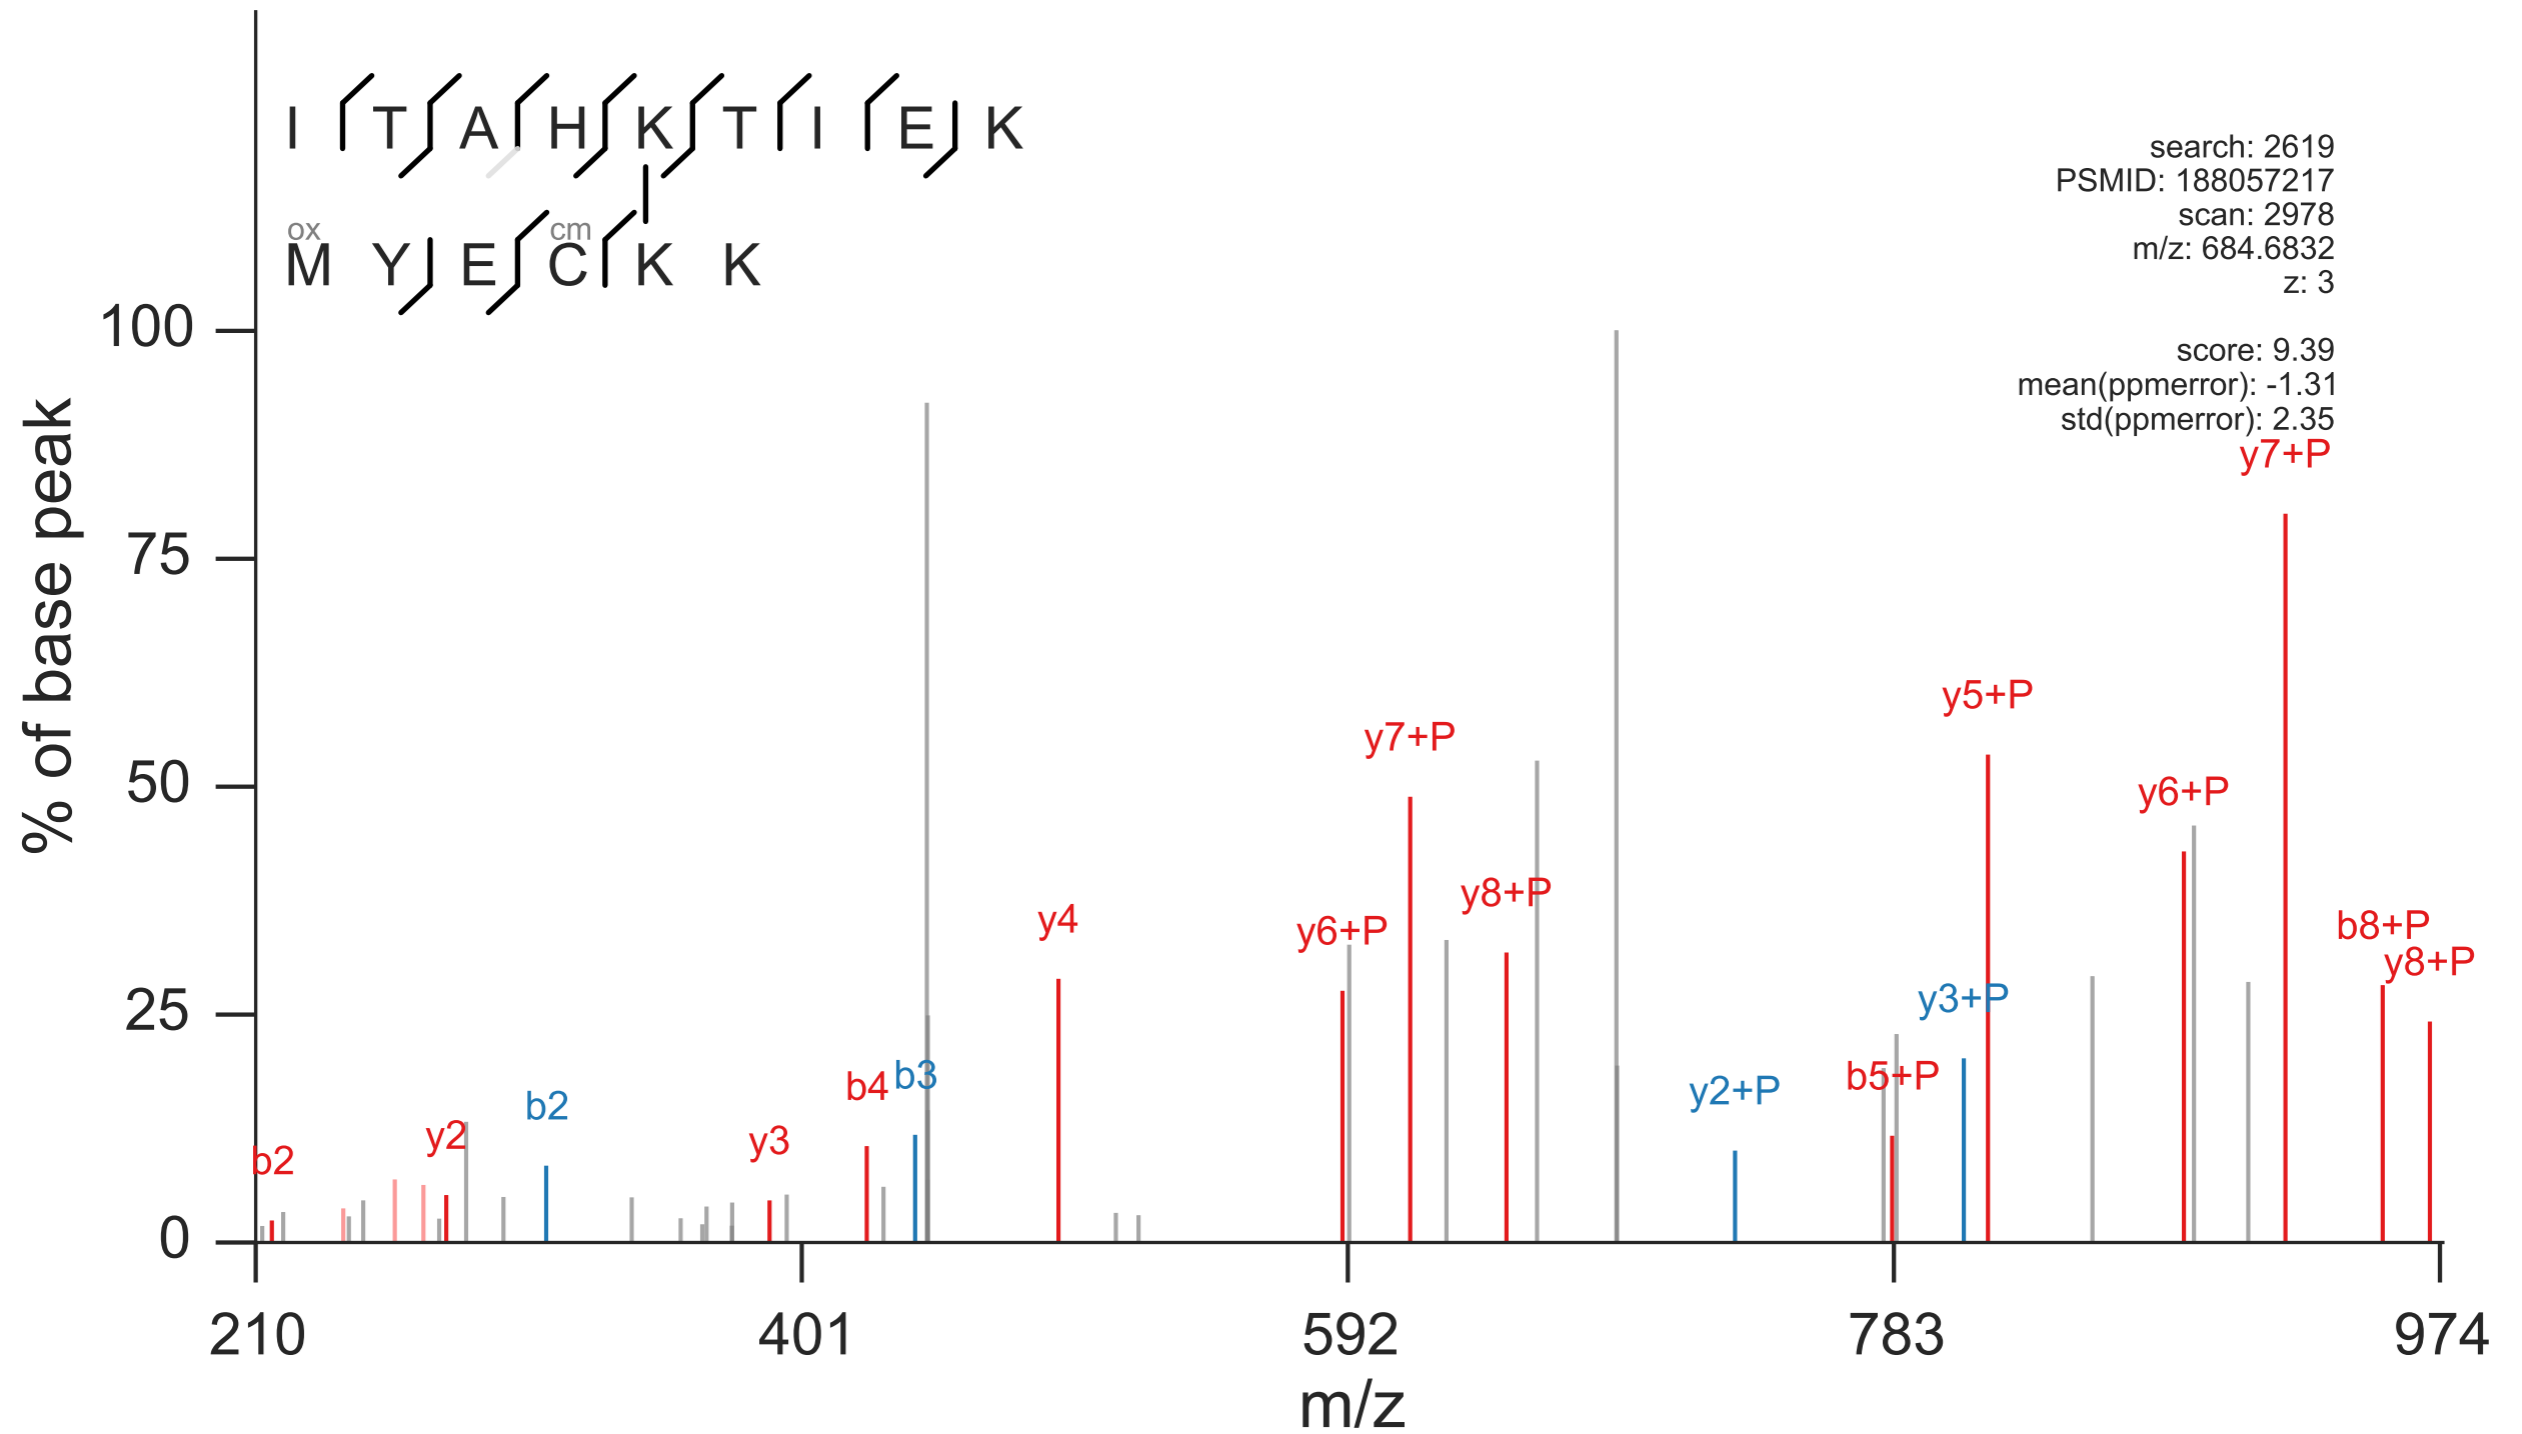

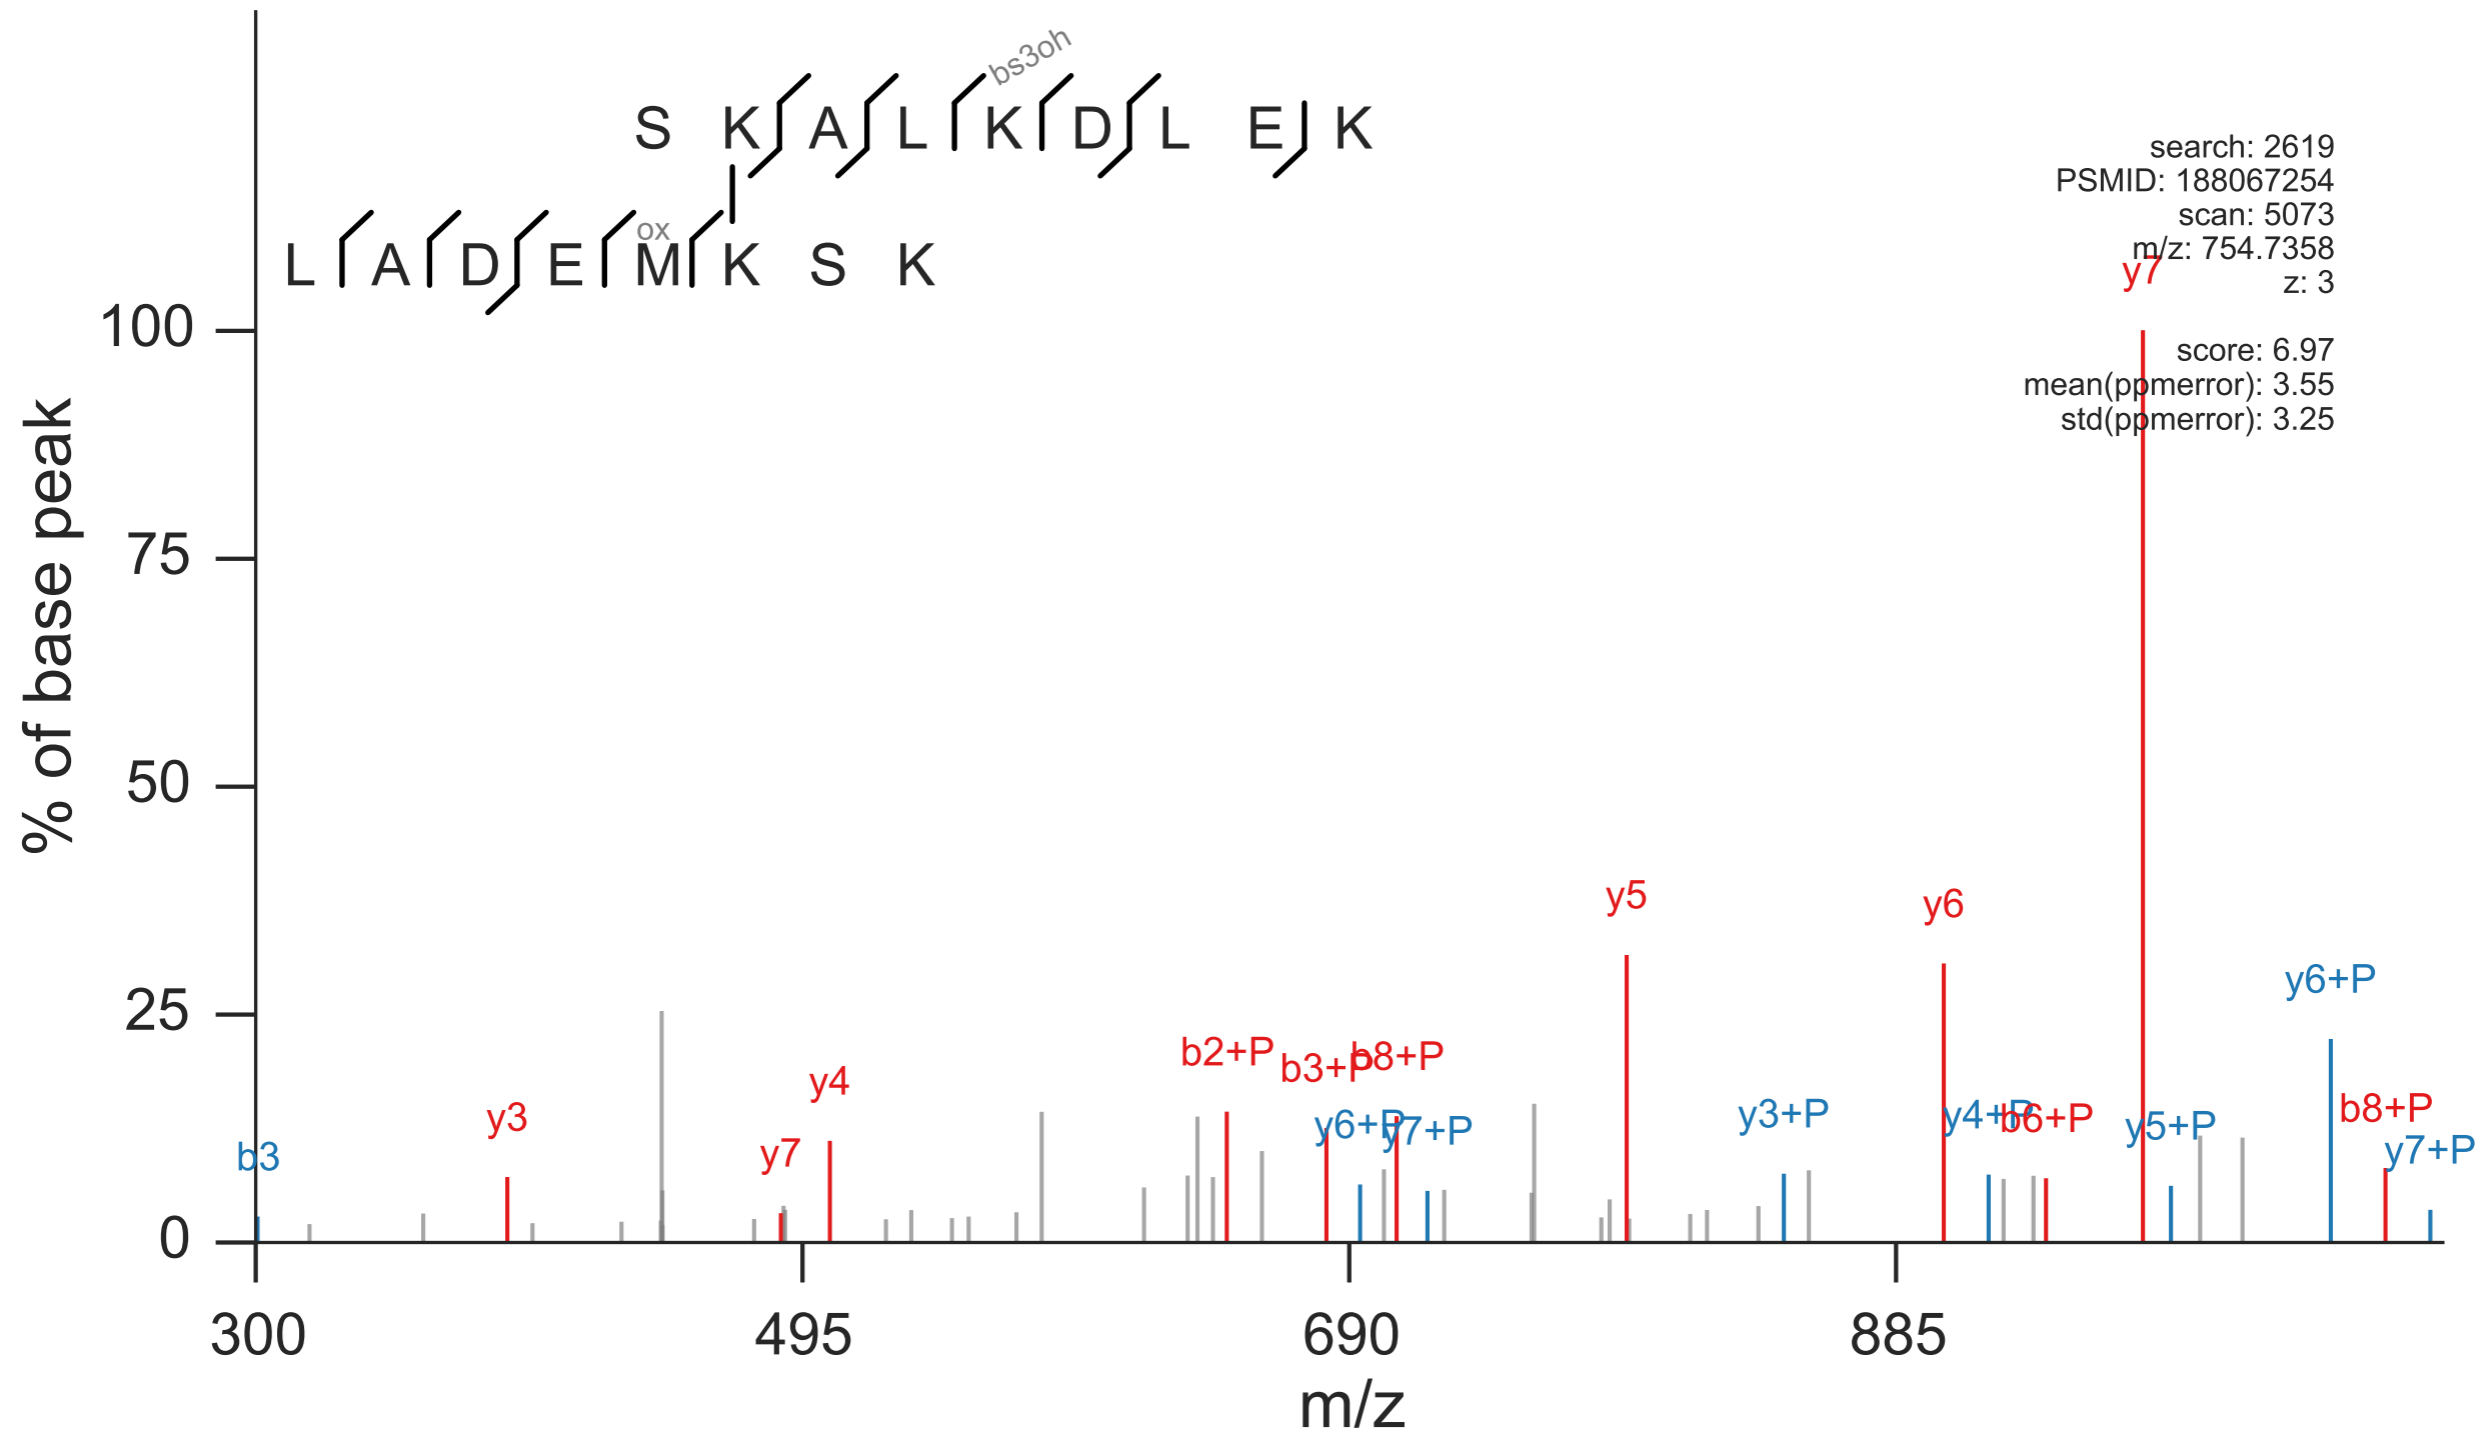

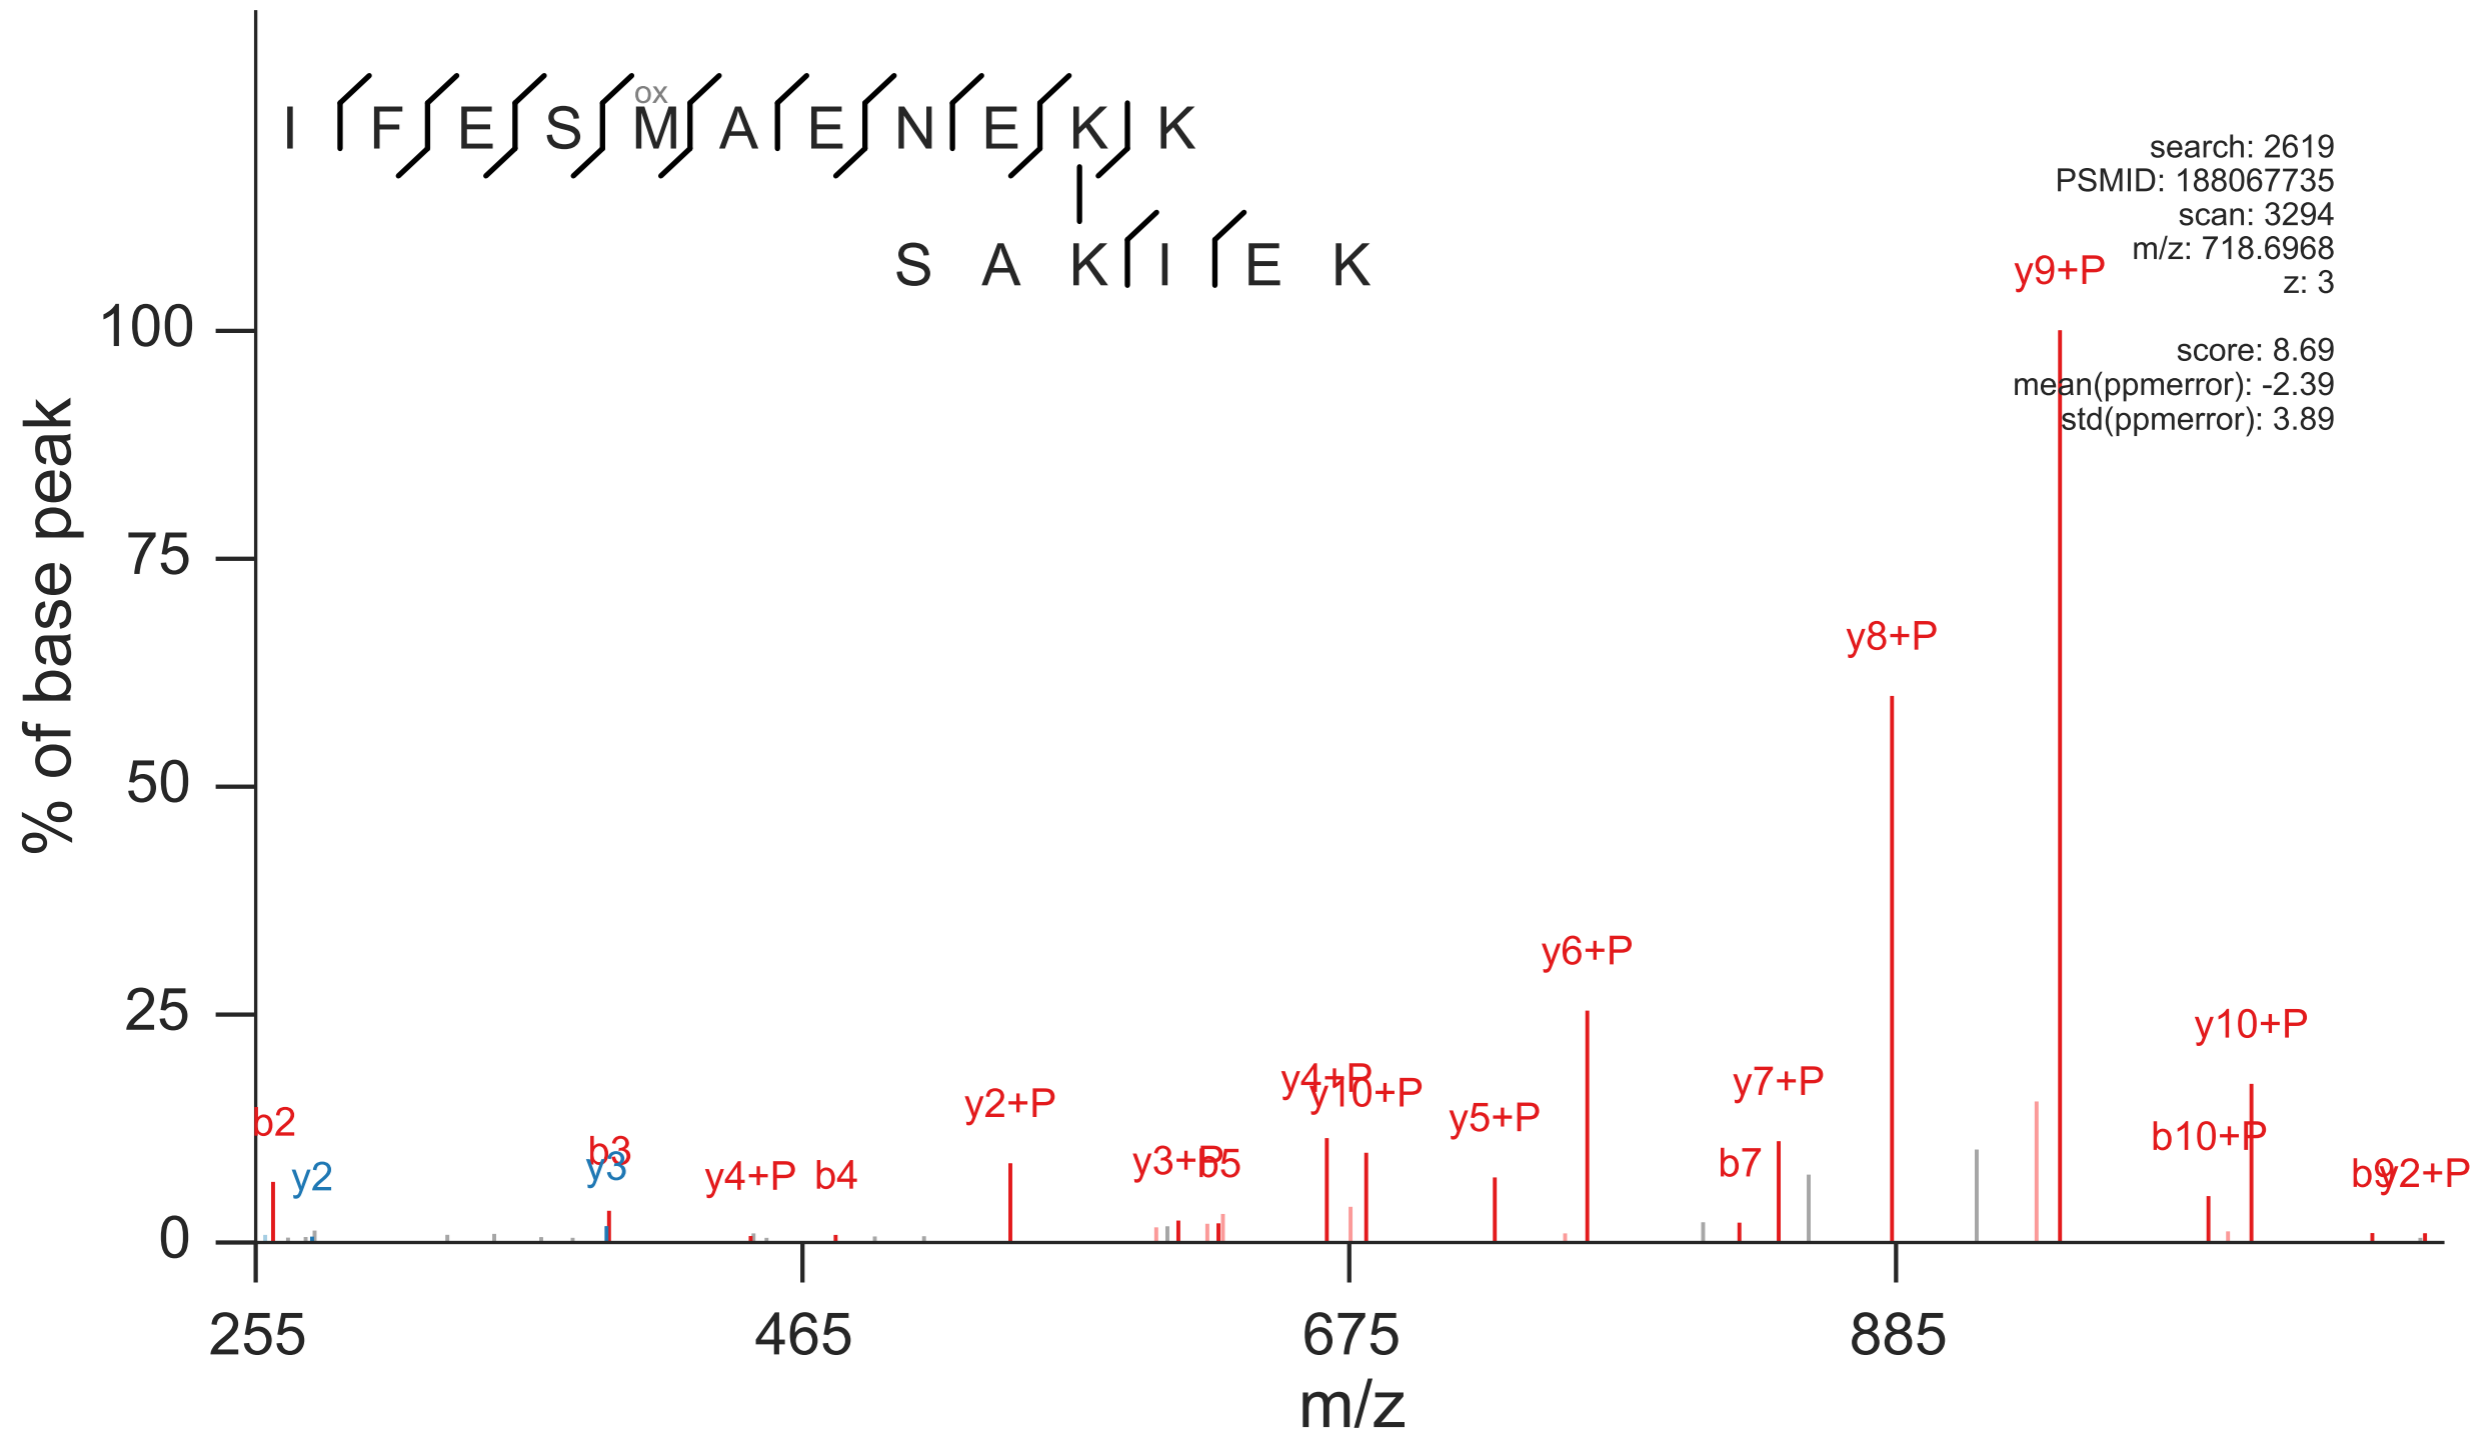

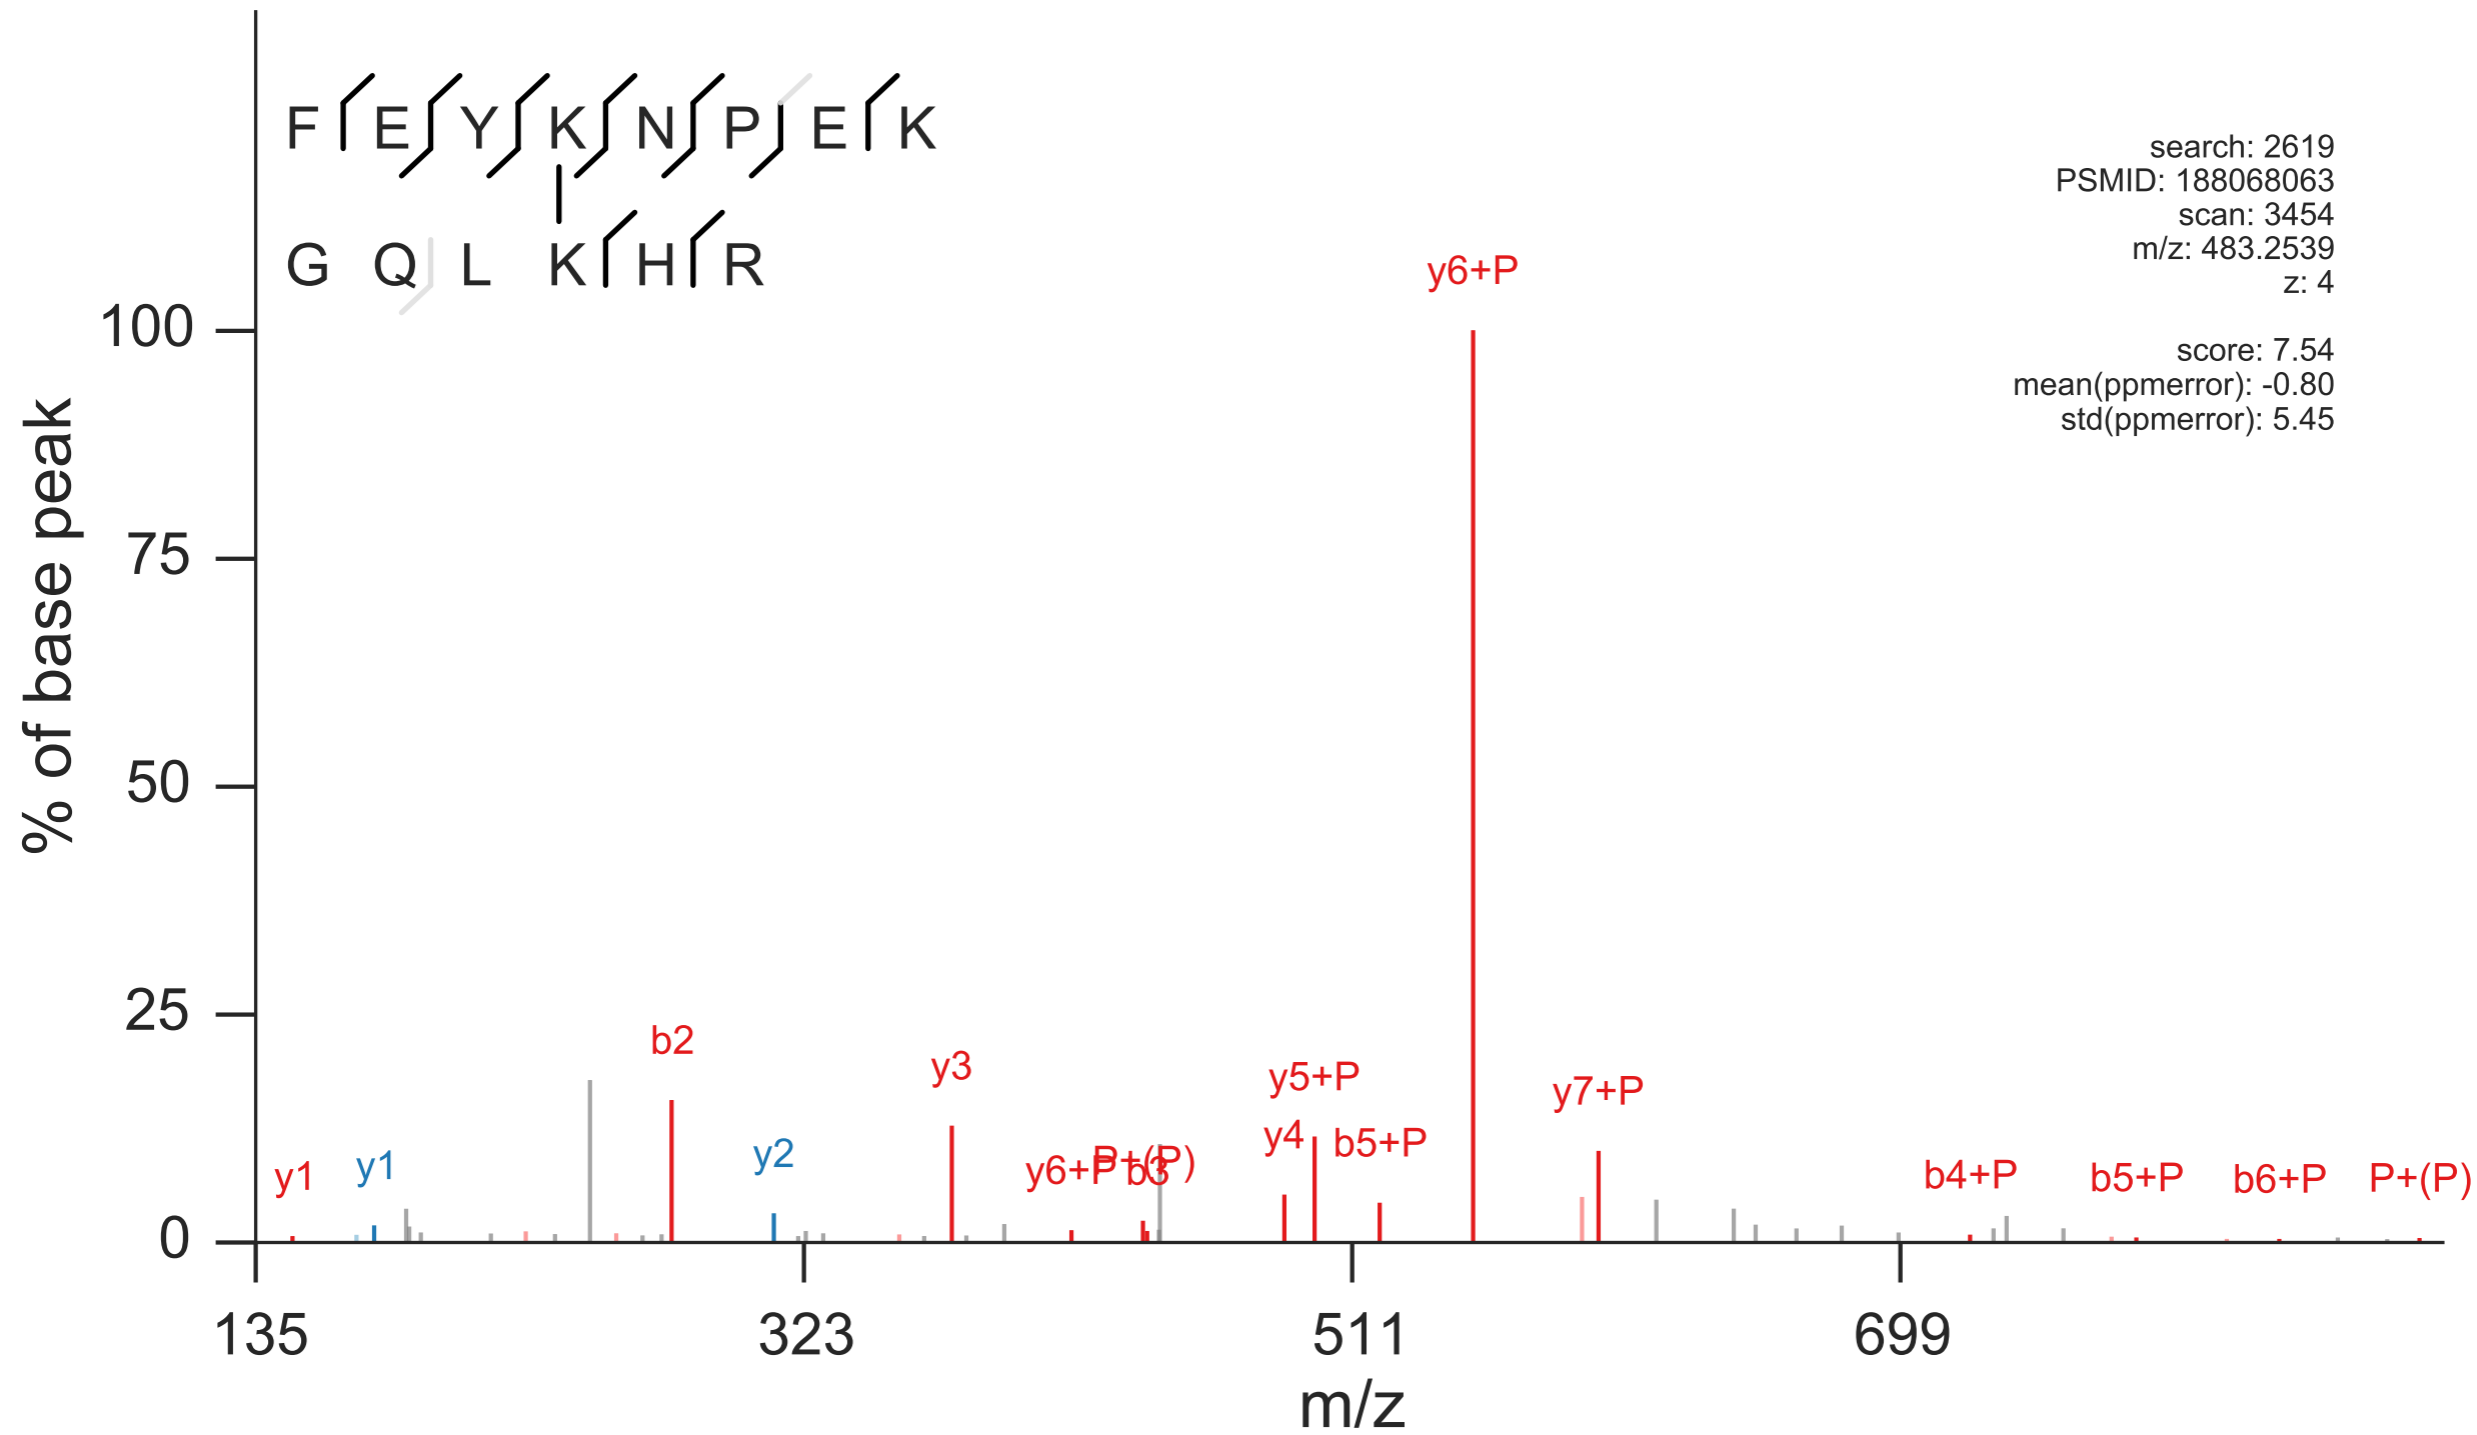

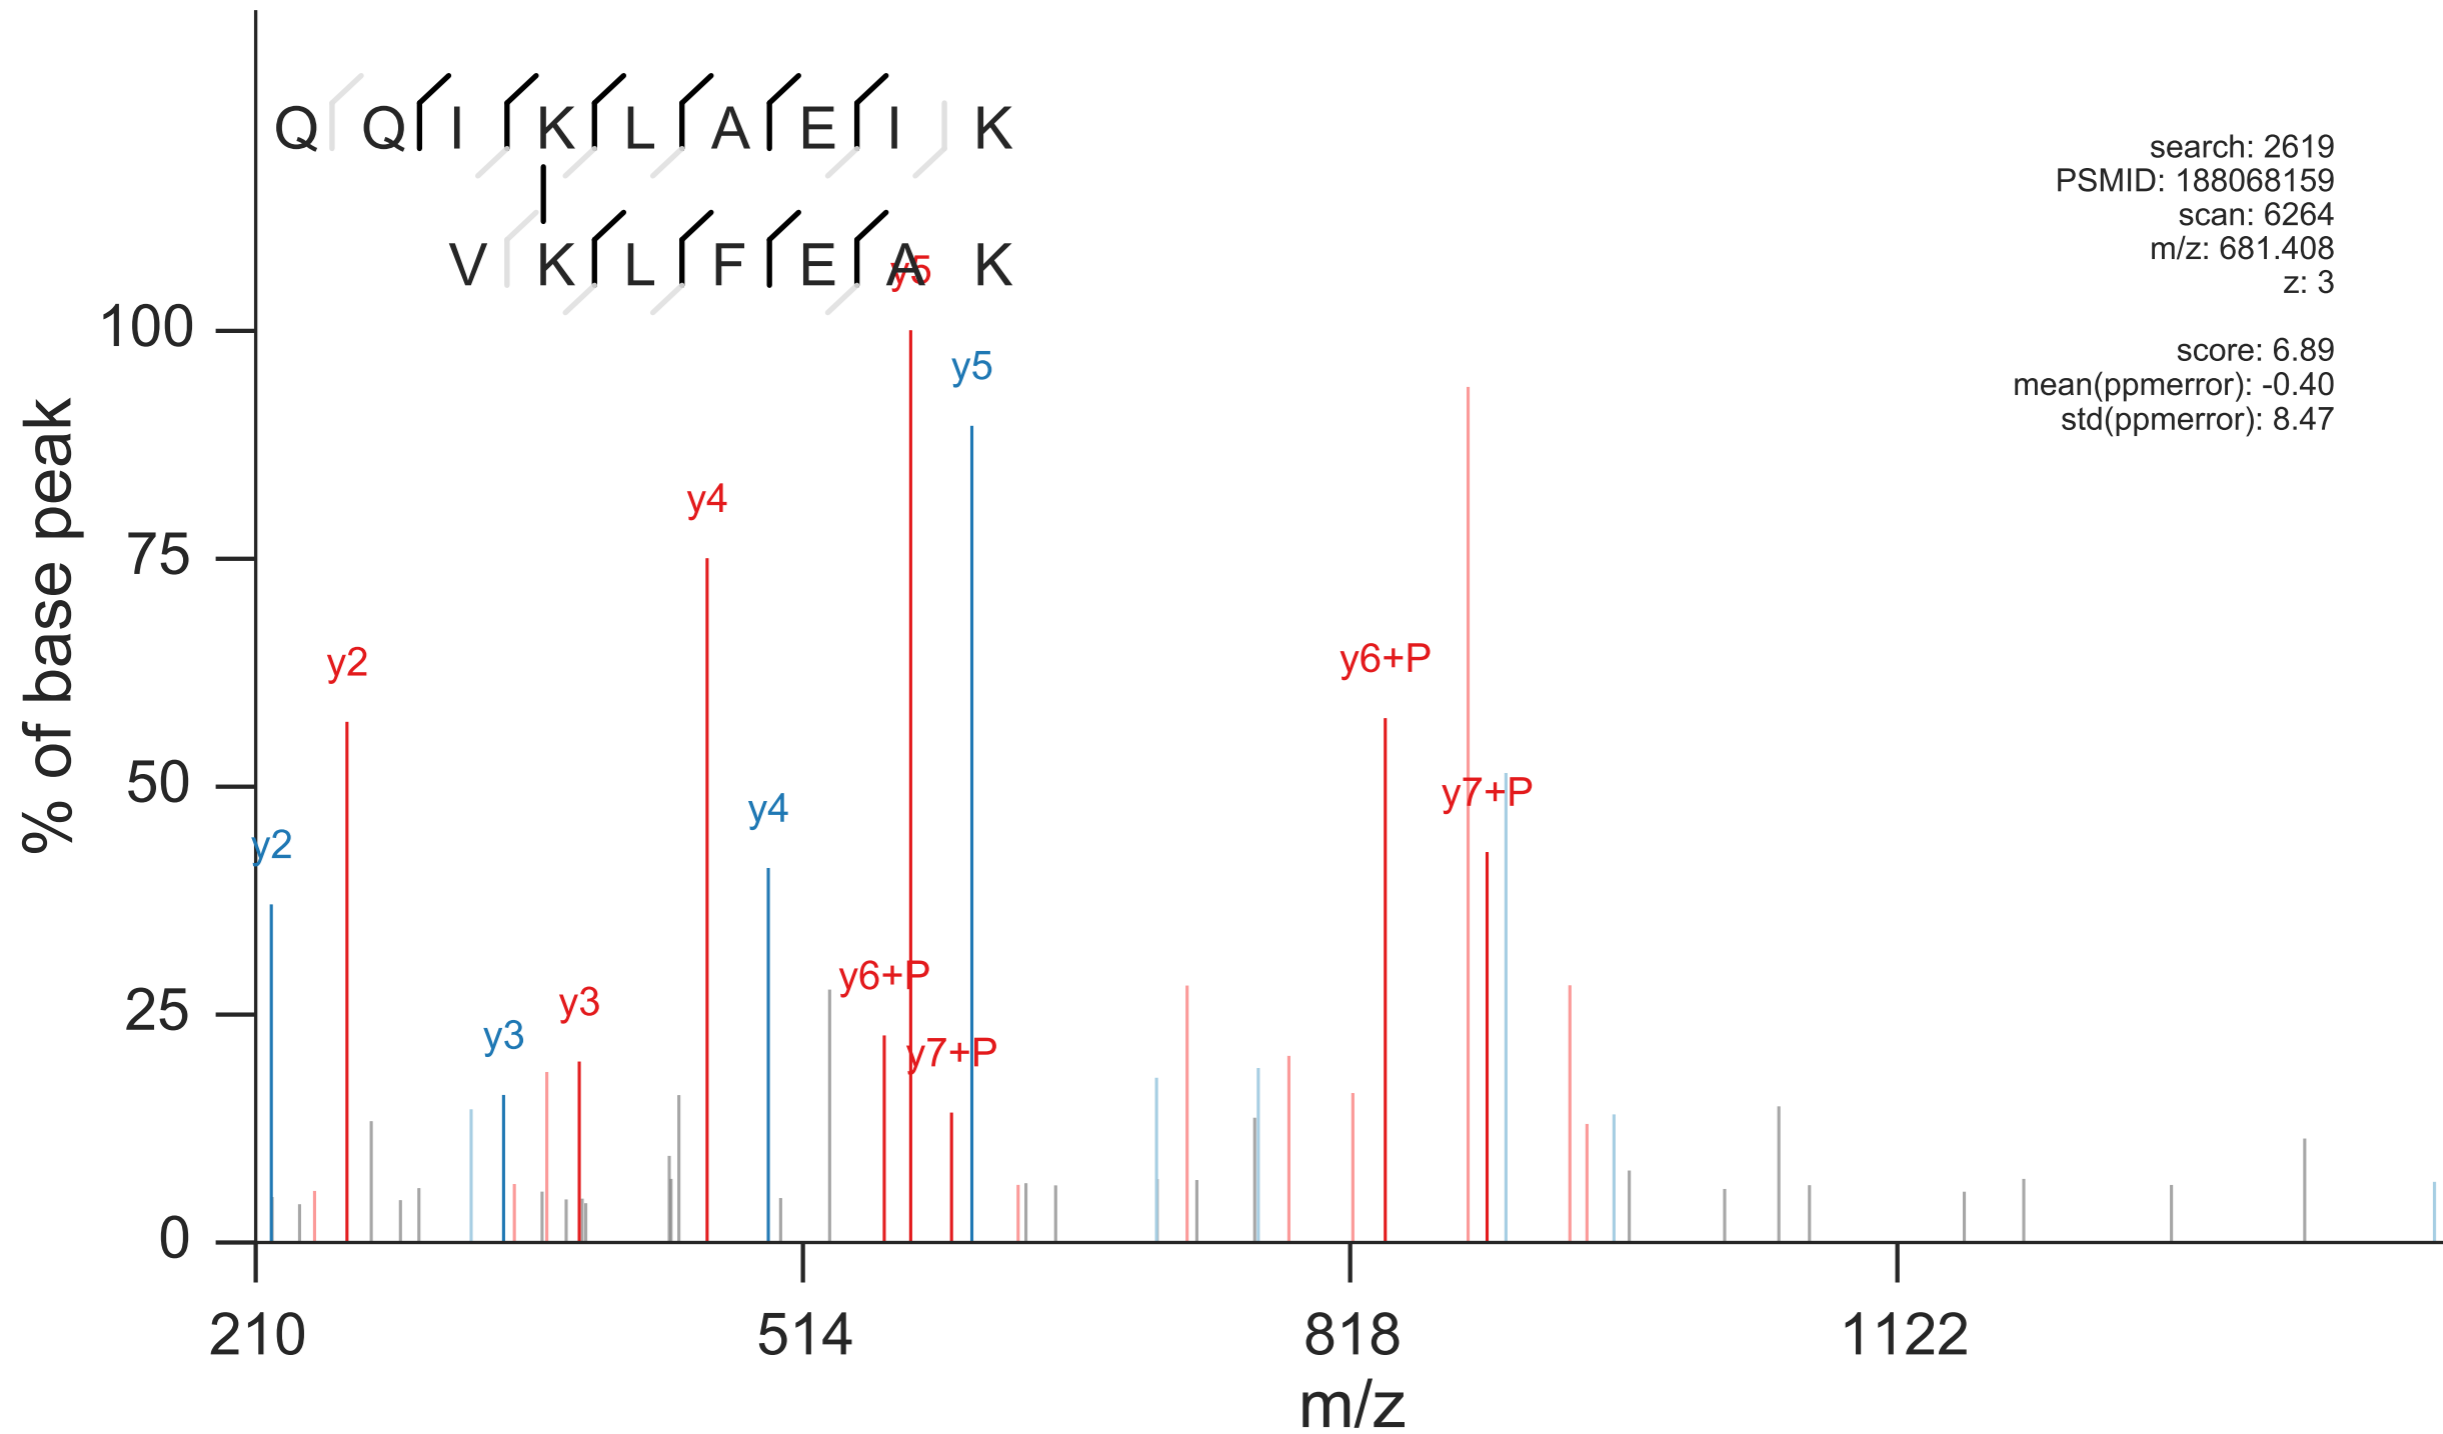

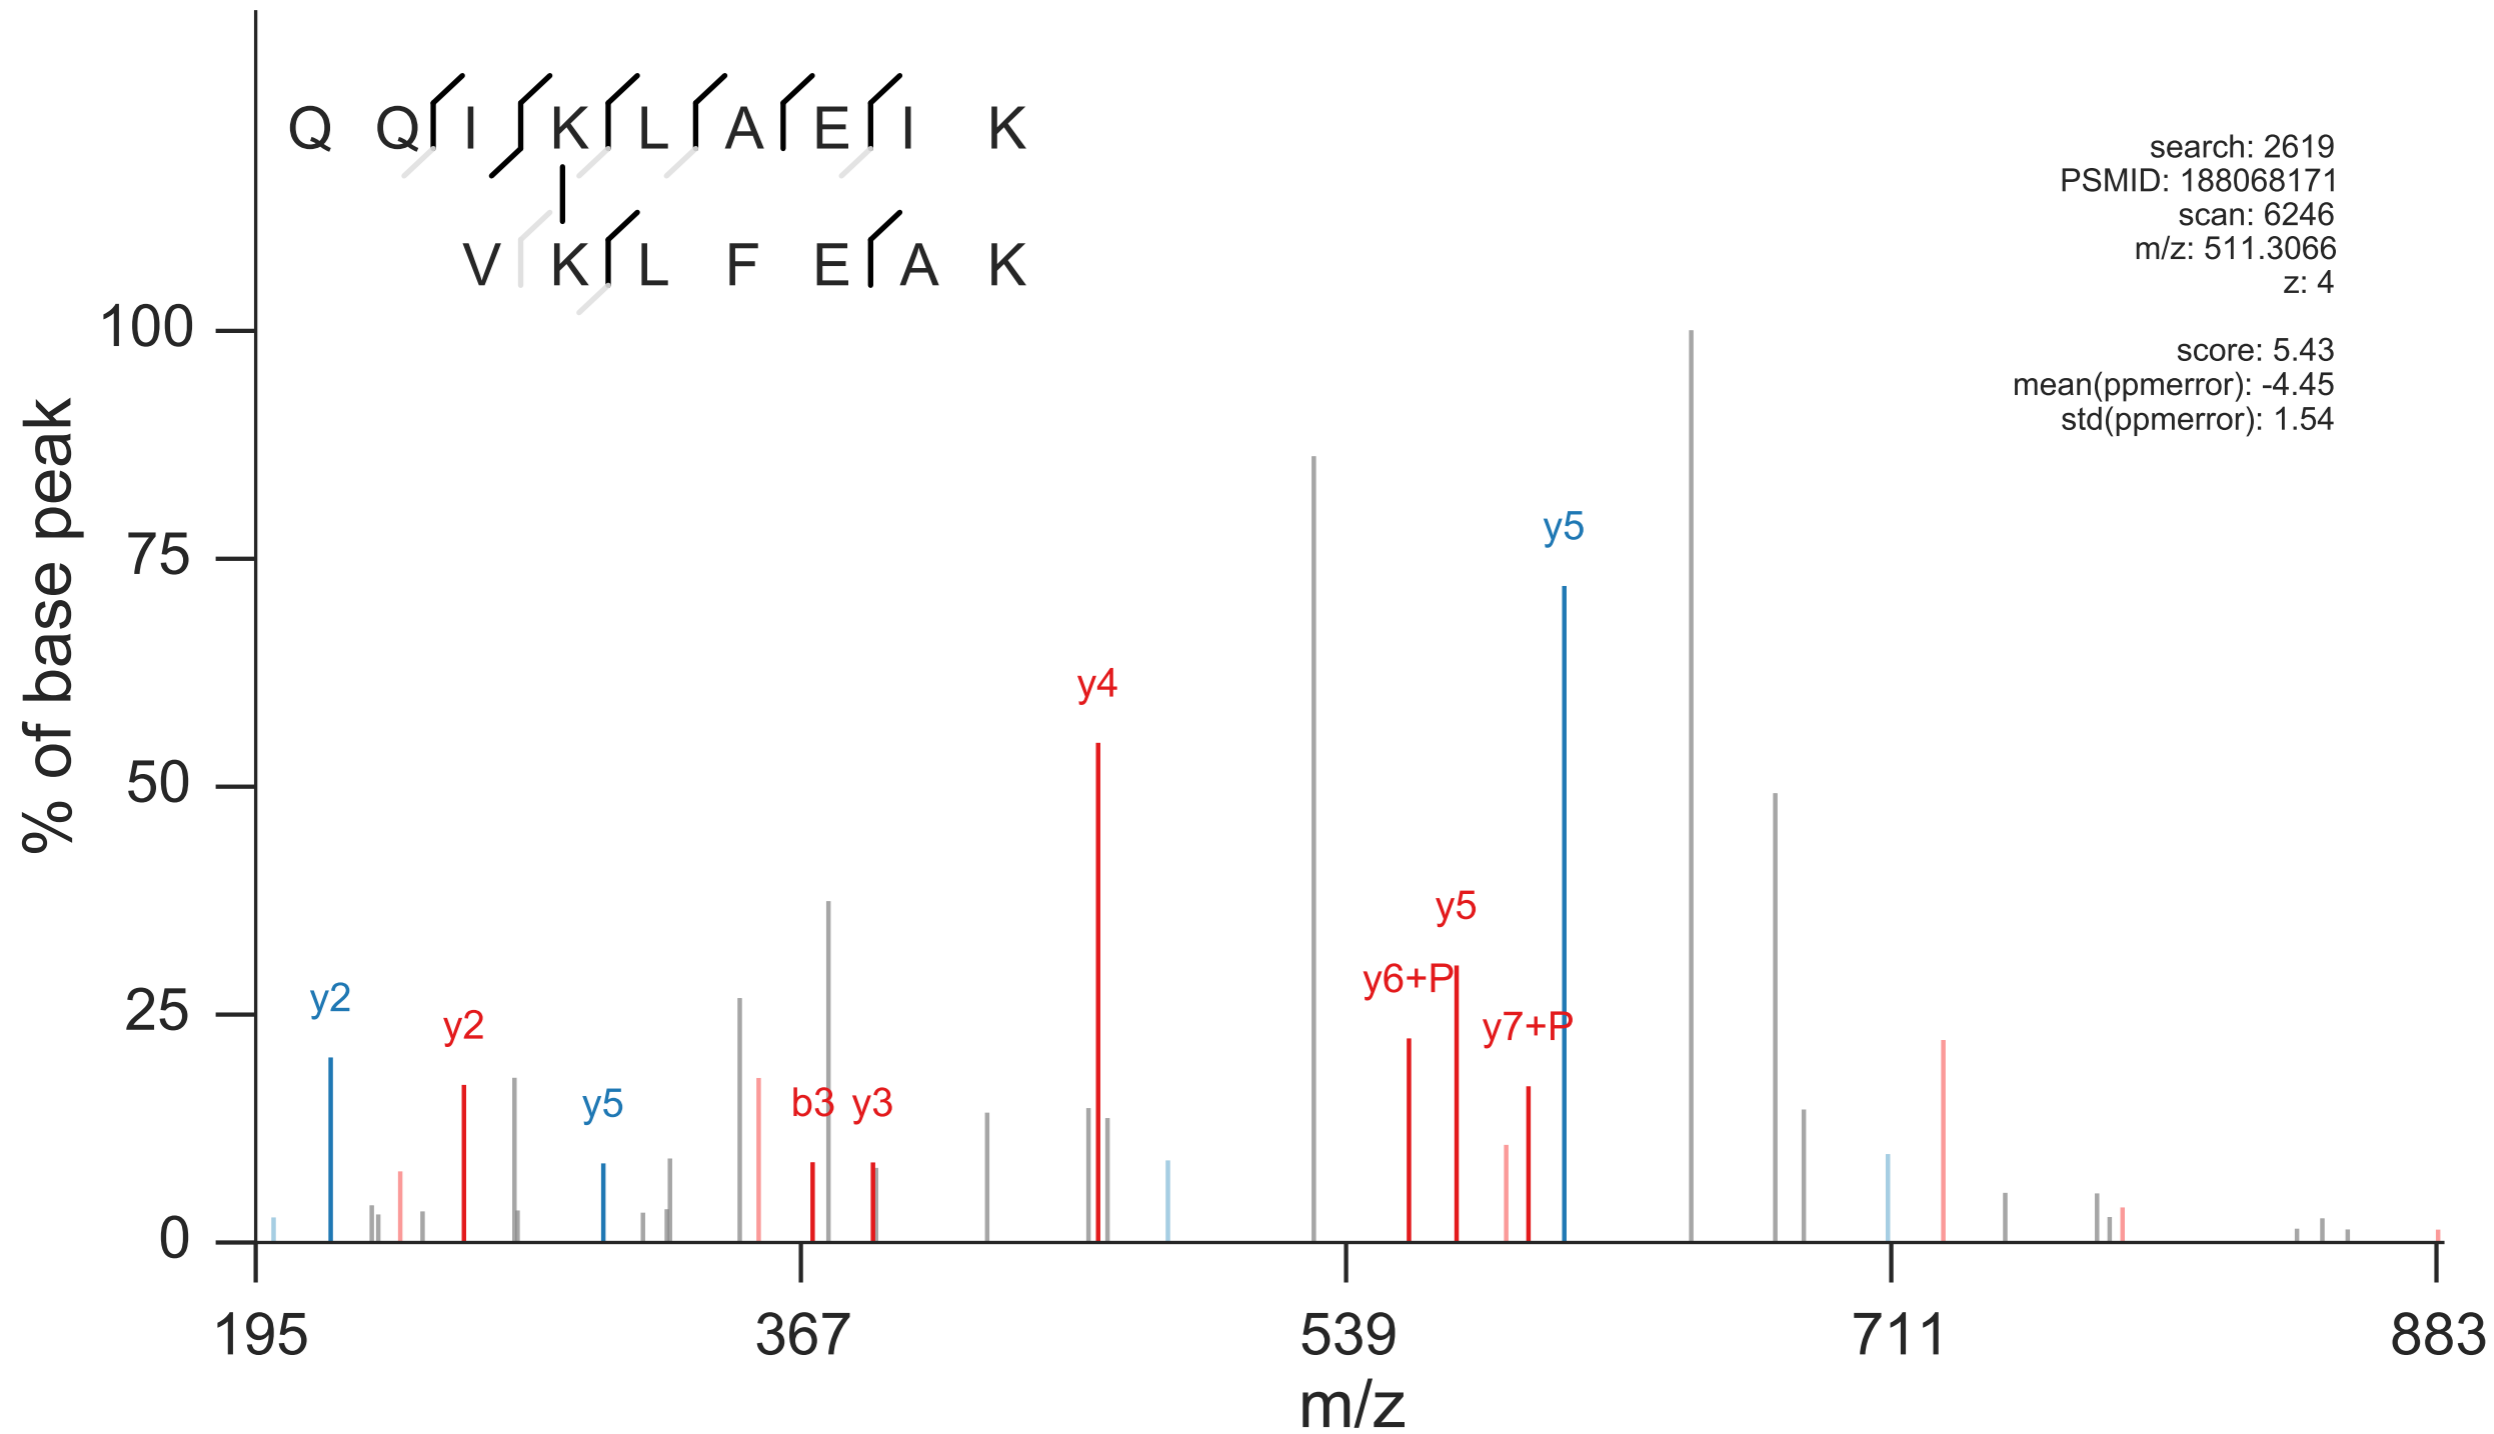

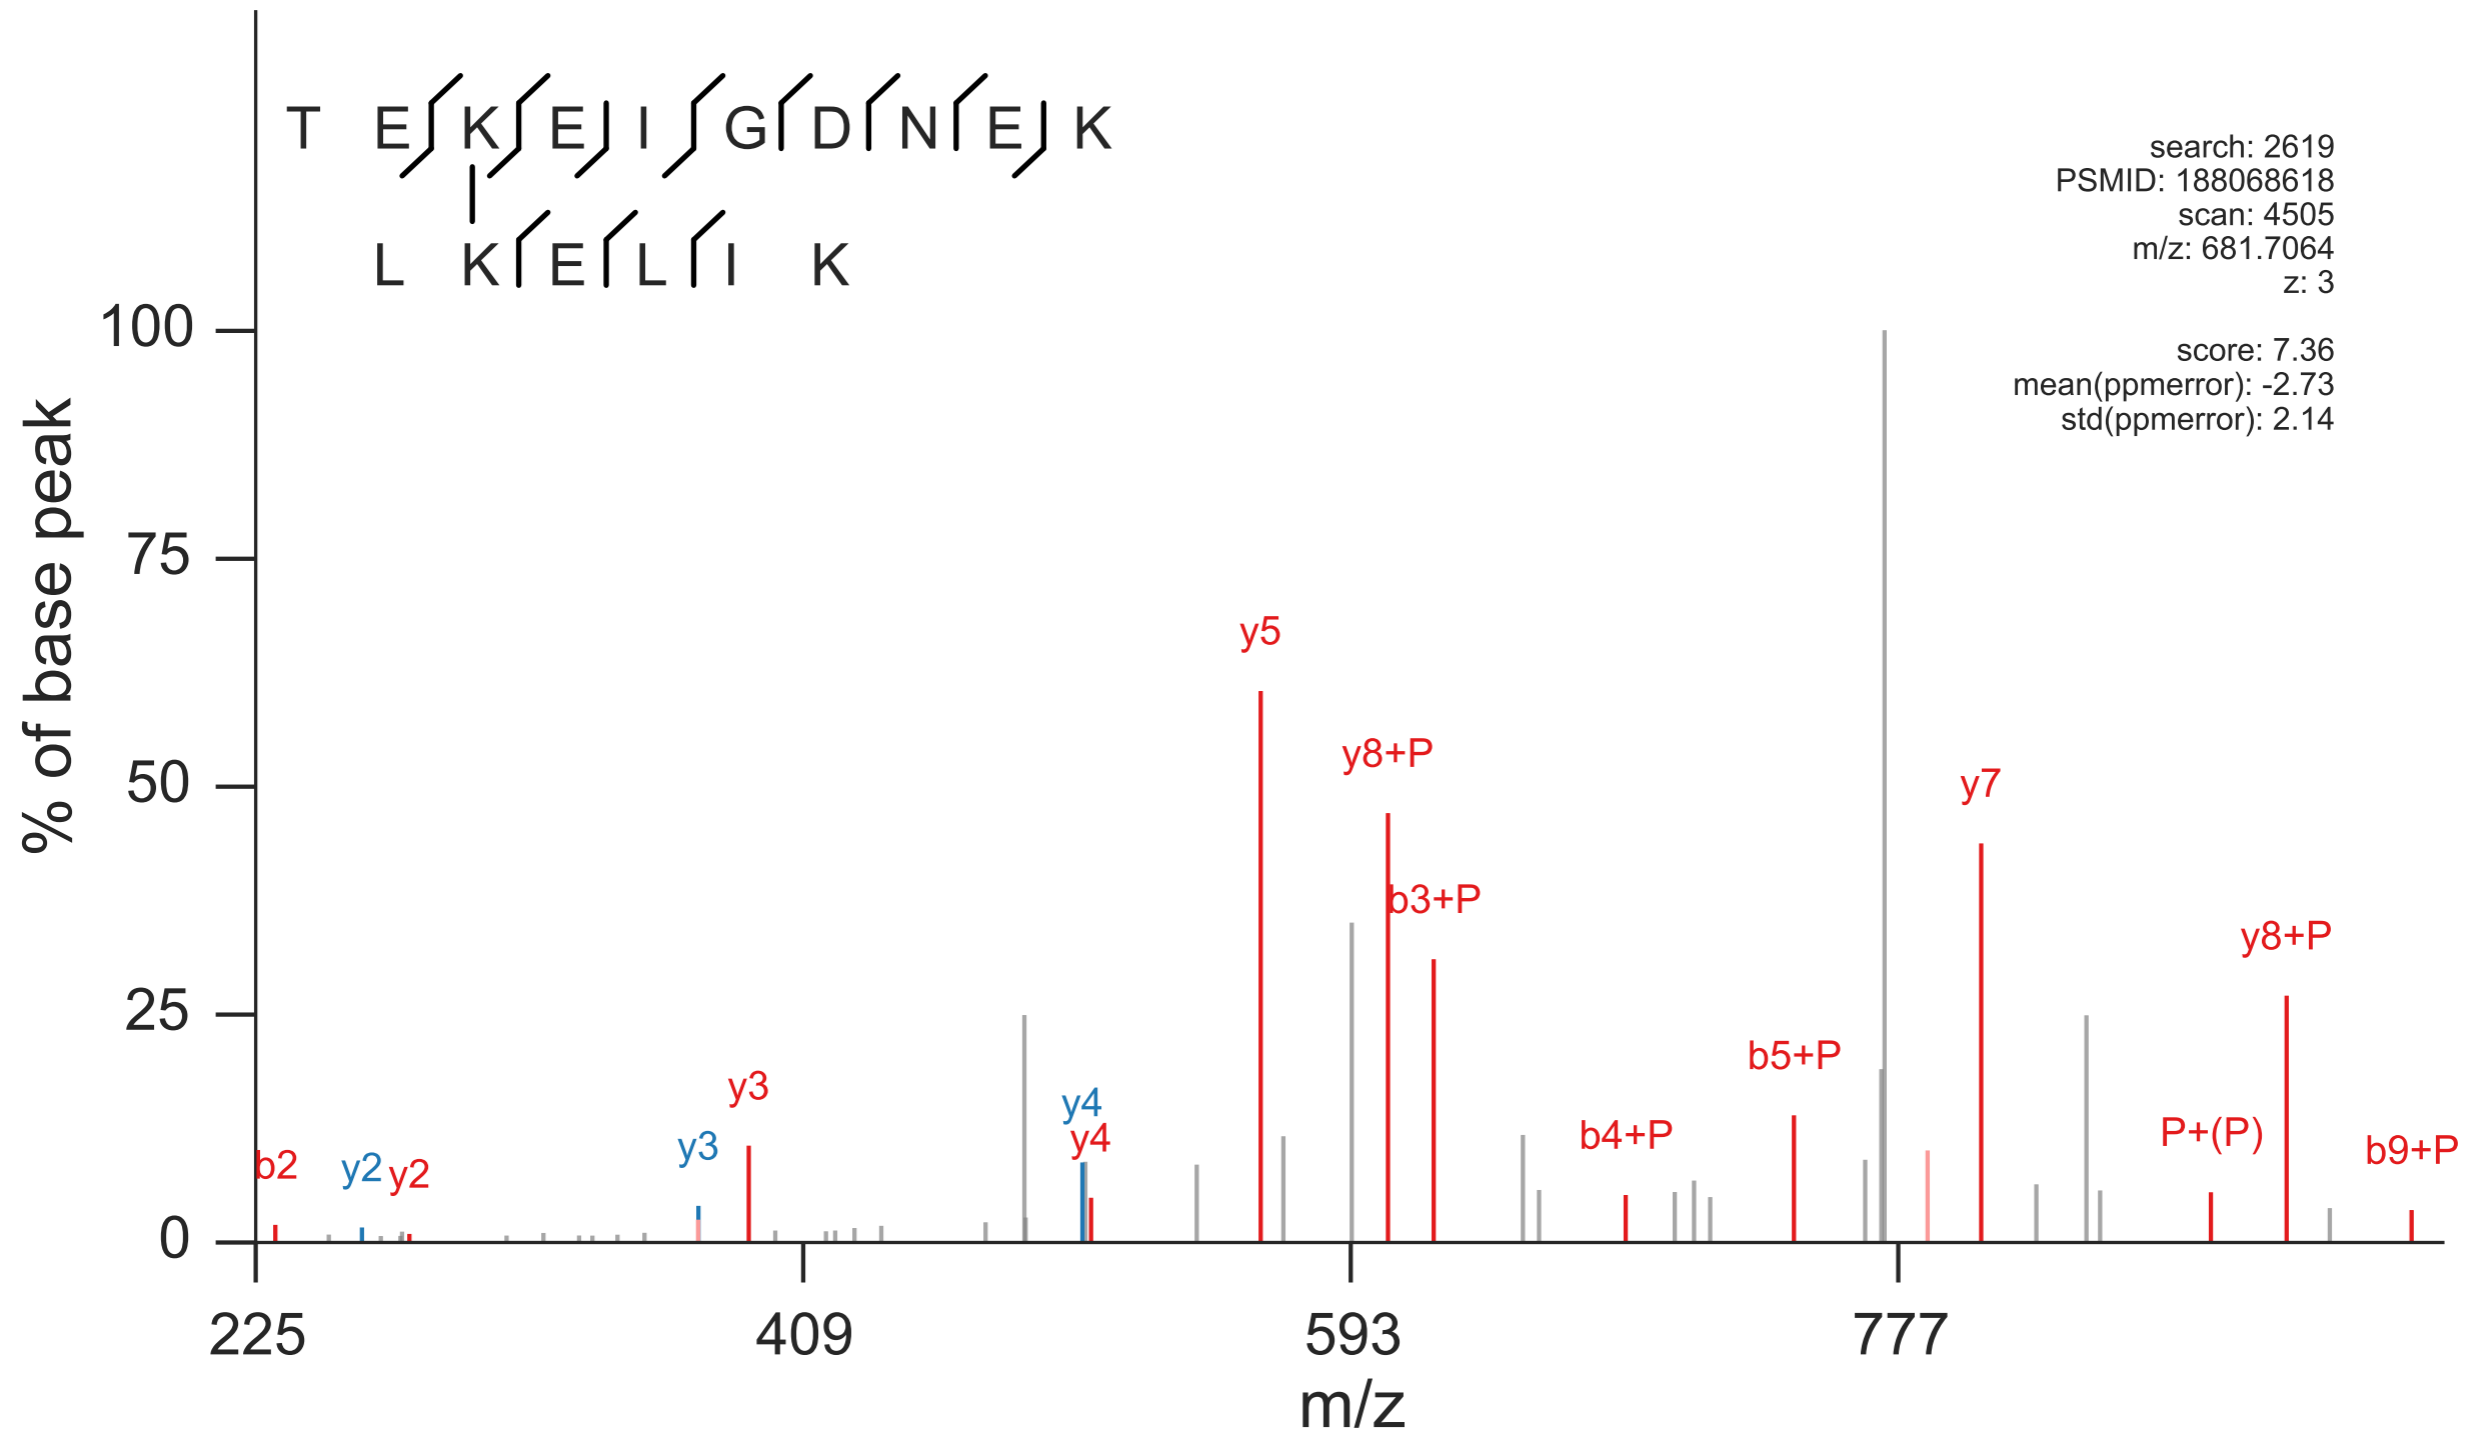

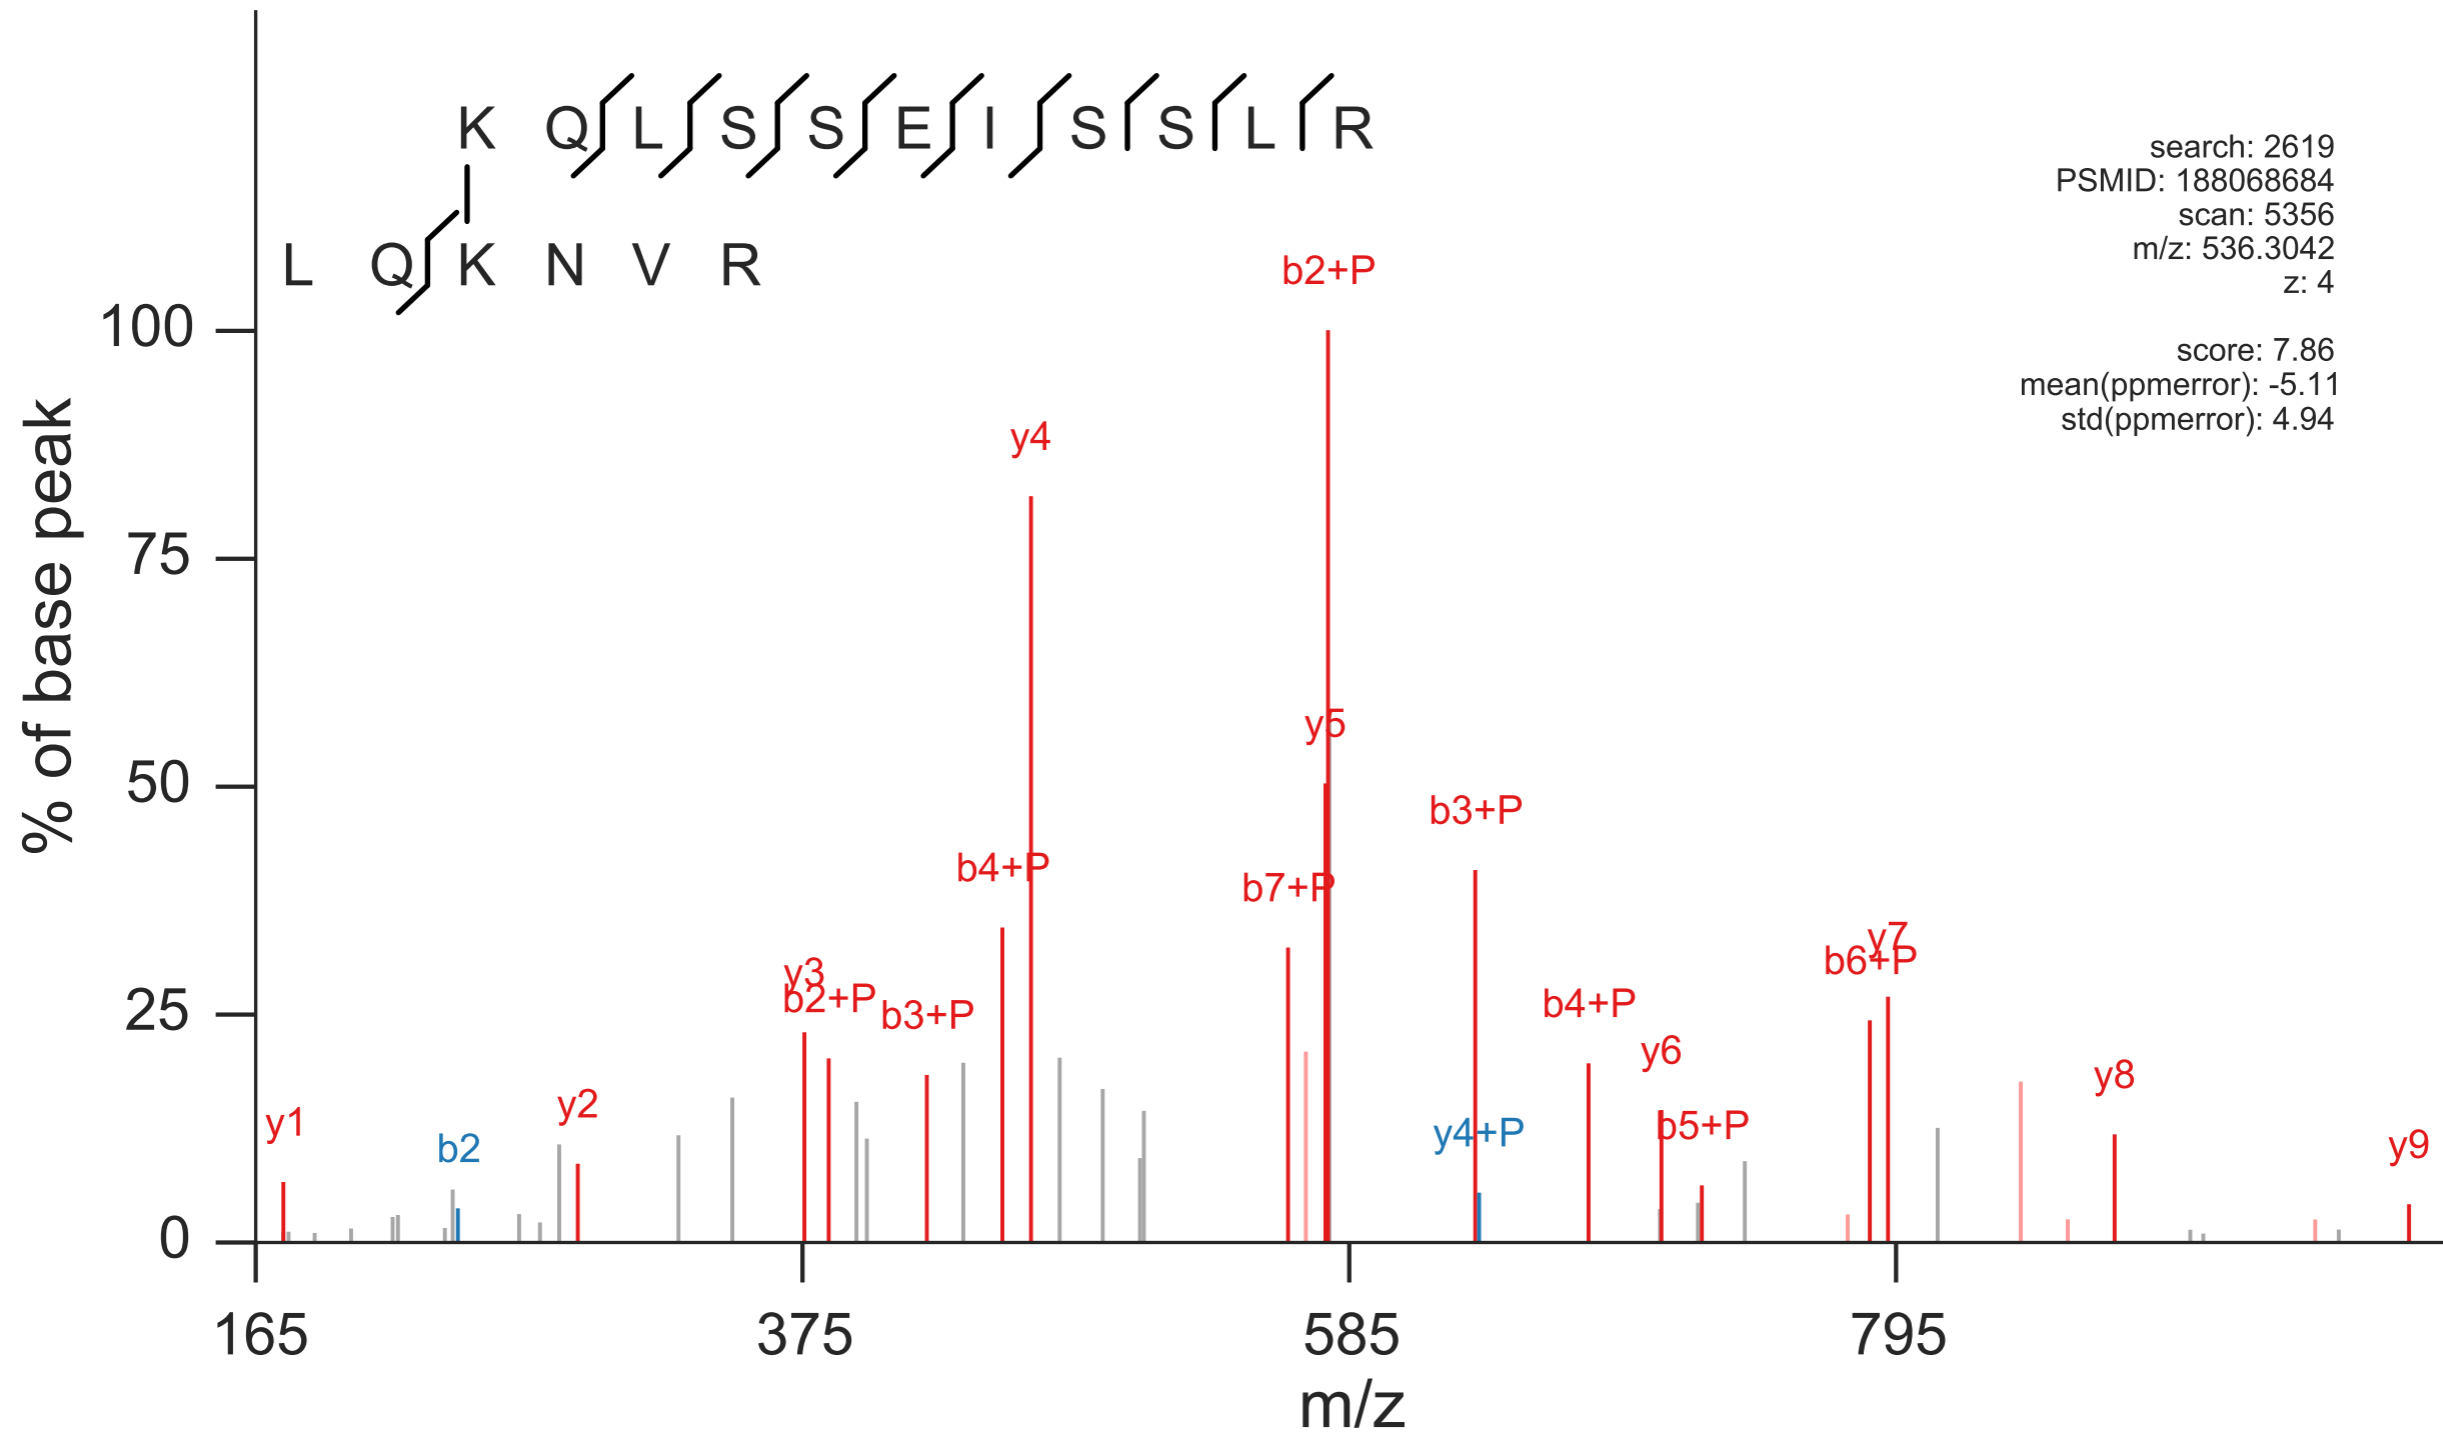



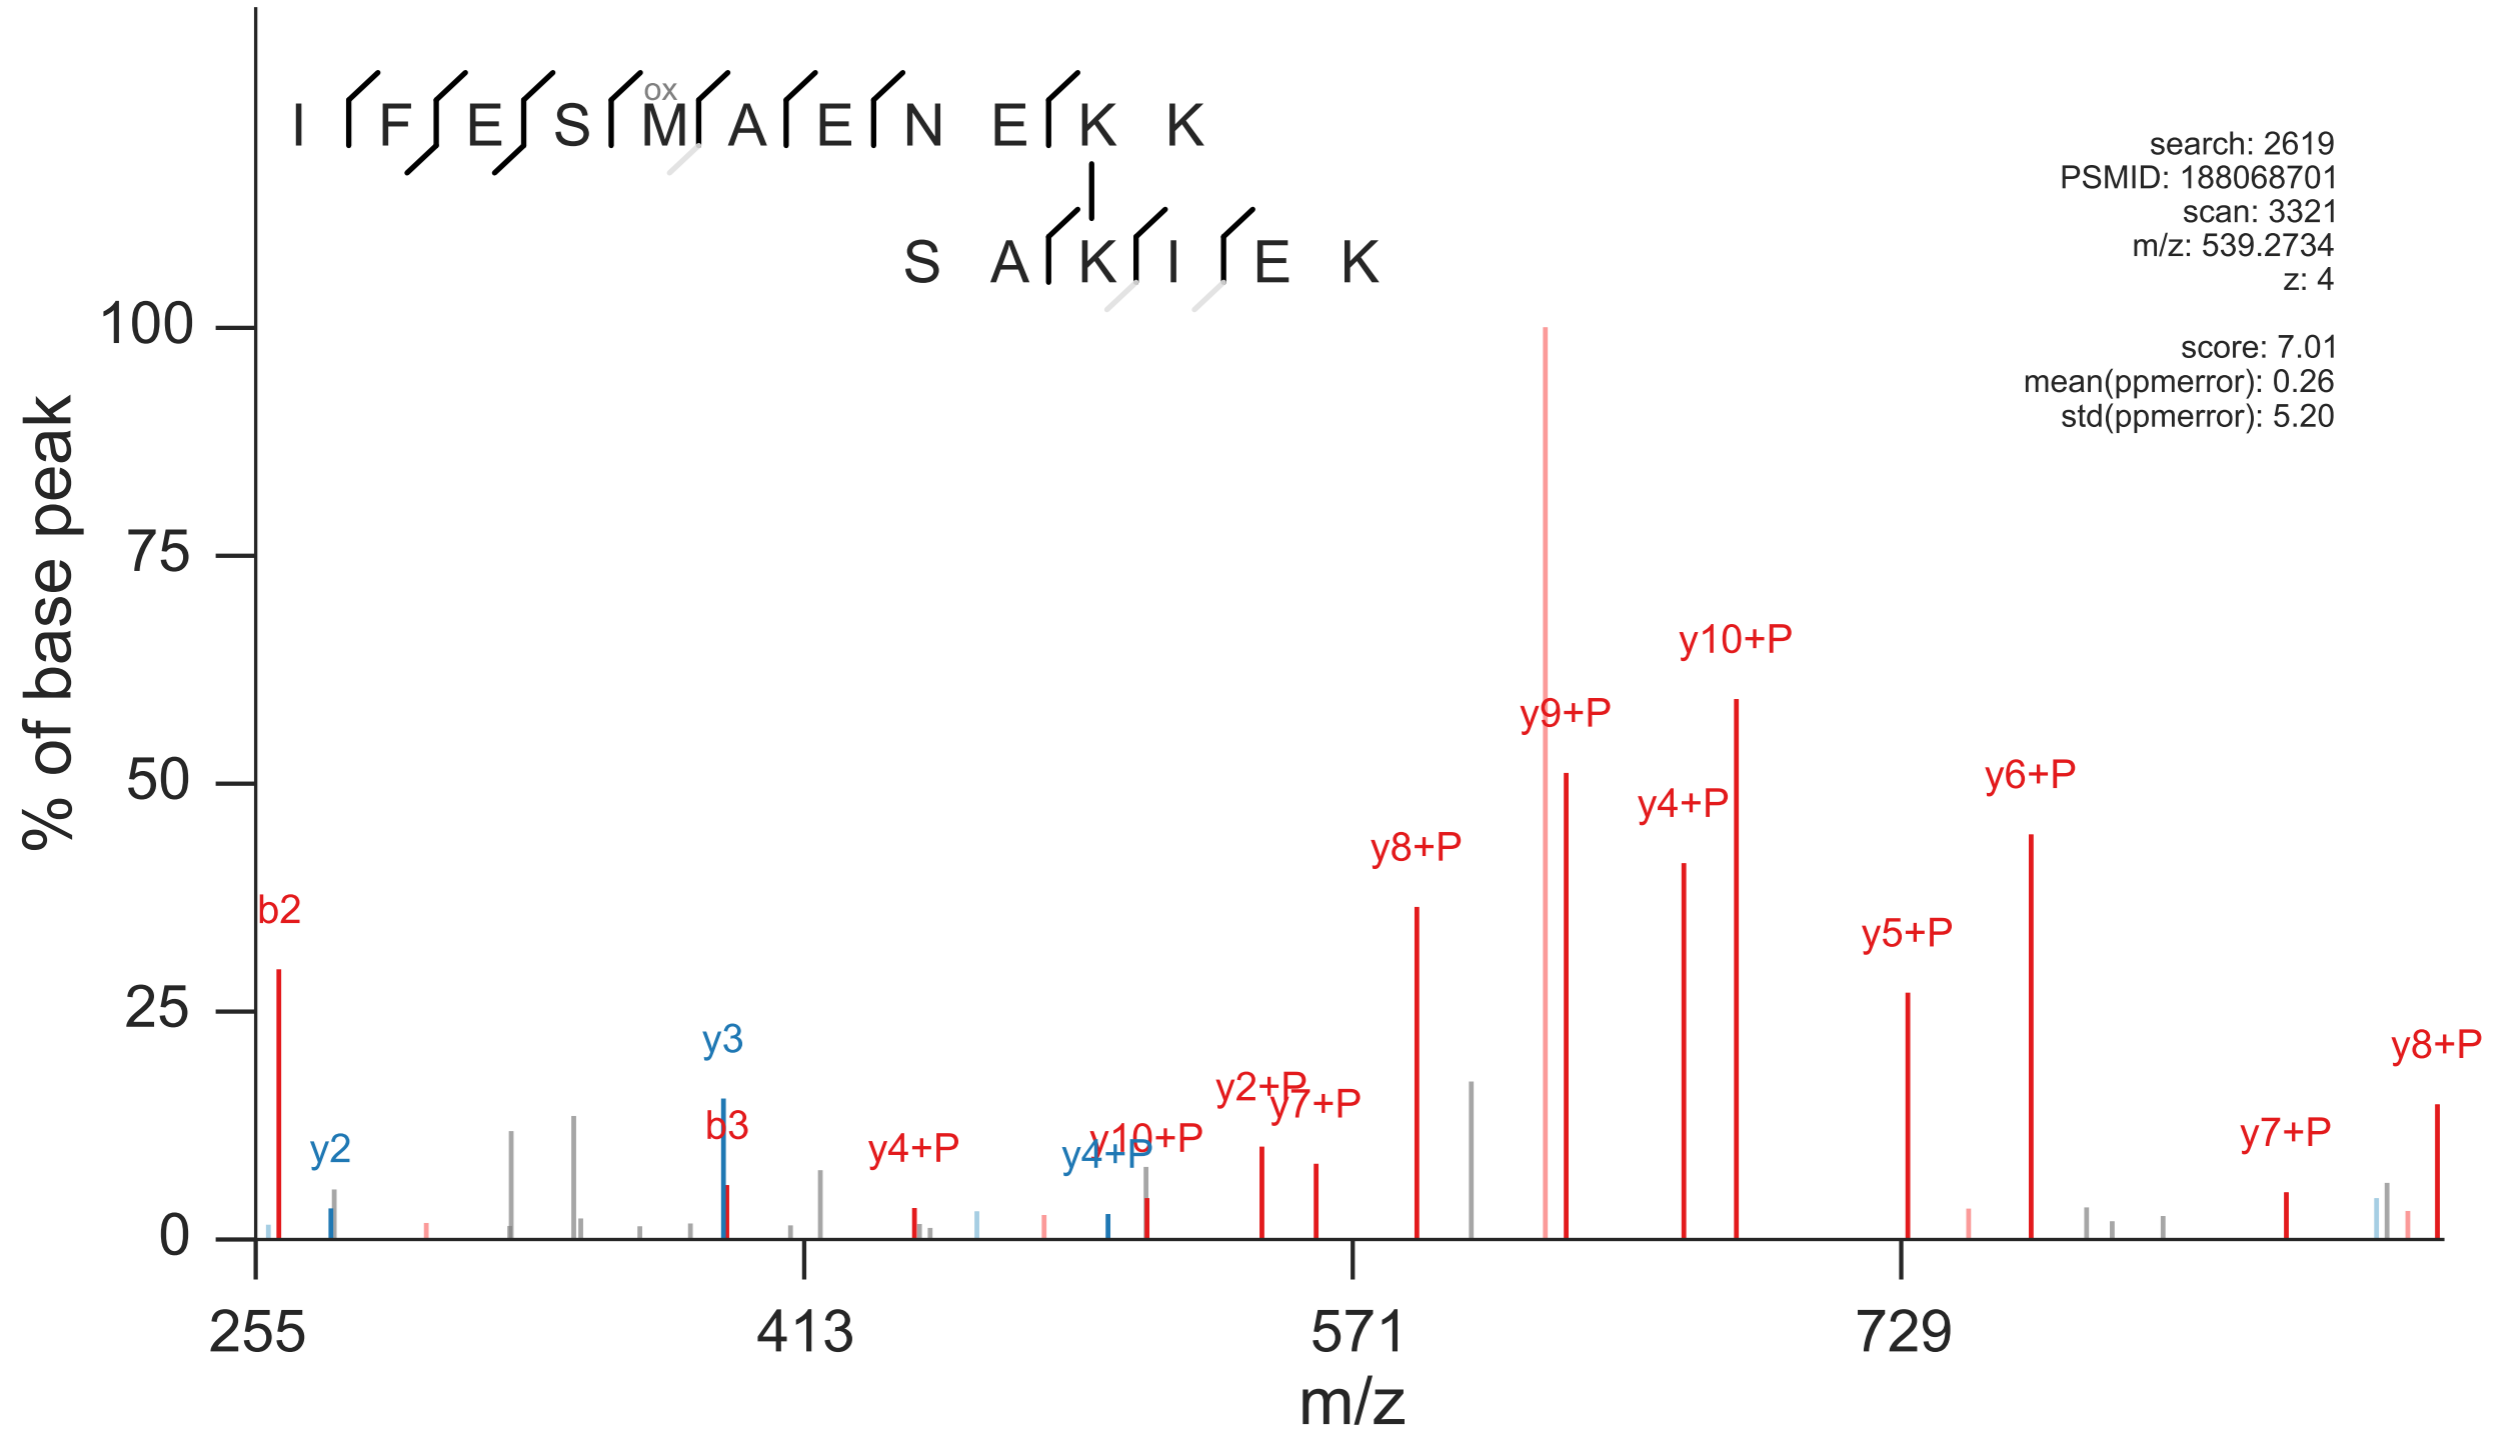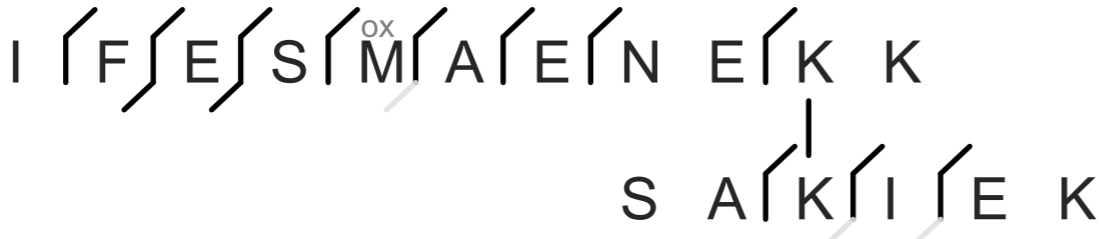

search: 2619  
 PSMID: 188068701  
 scan: 3321  
 m/z: 539.2734  
 z: 4  
 score: 7.01  
 mean(ppmerror): 0.26  
 std(ppmerror): 5.20

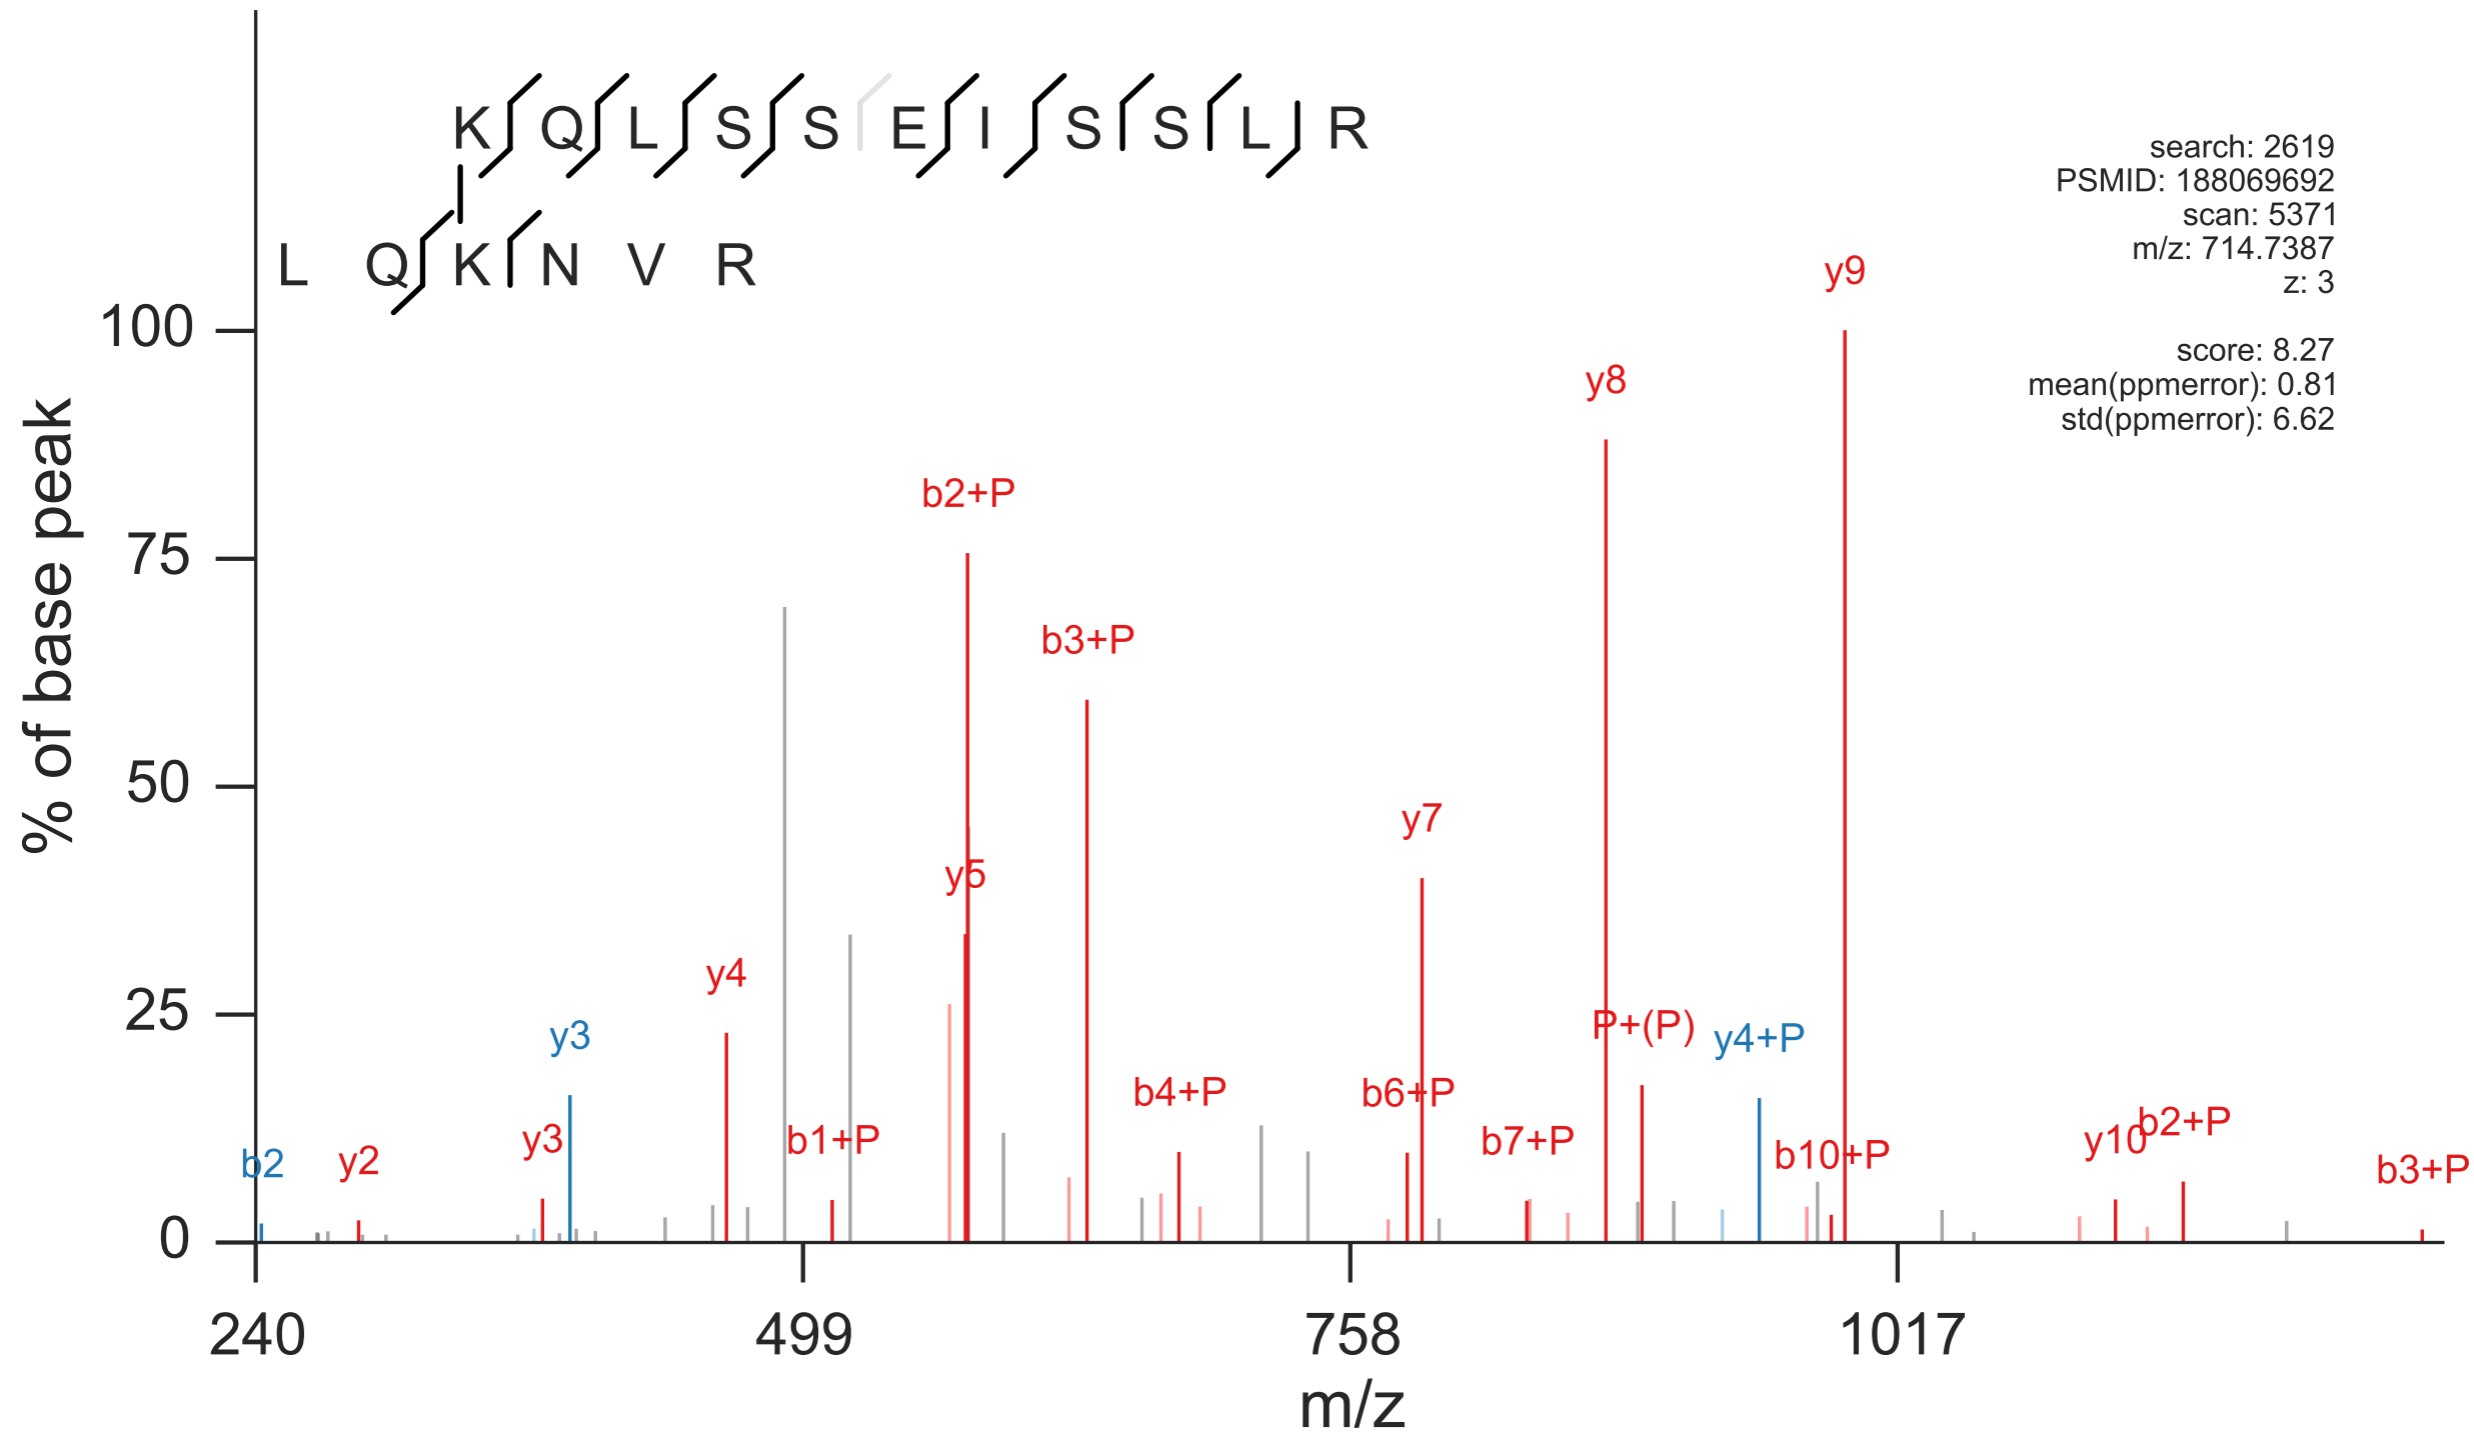

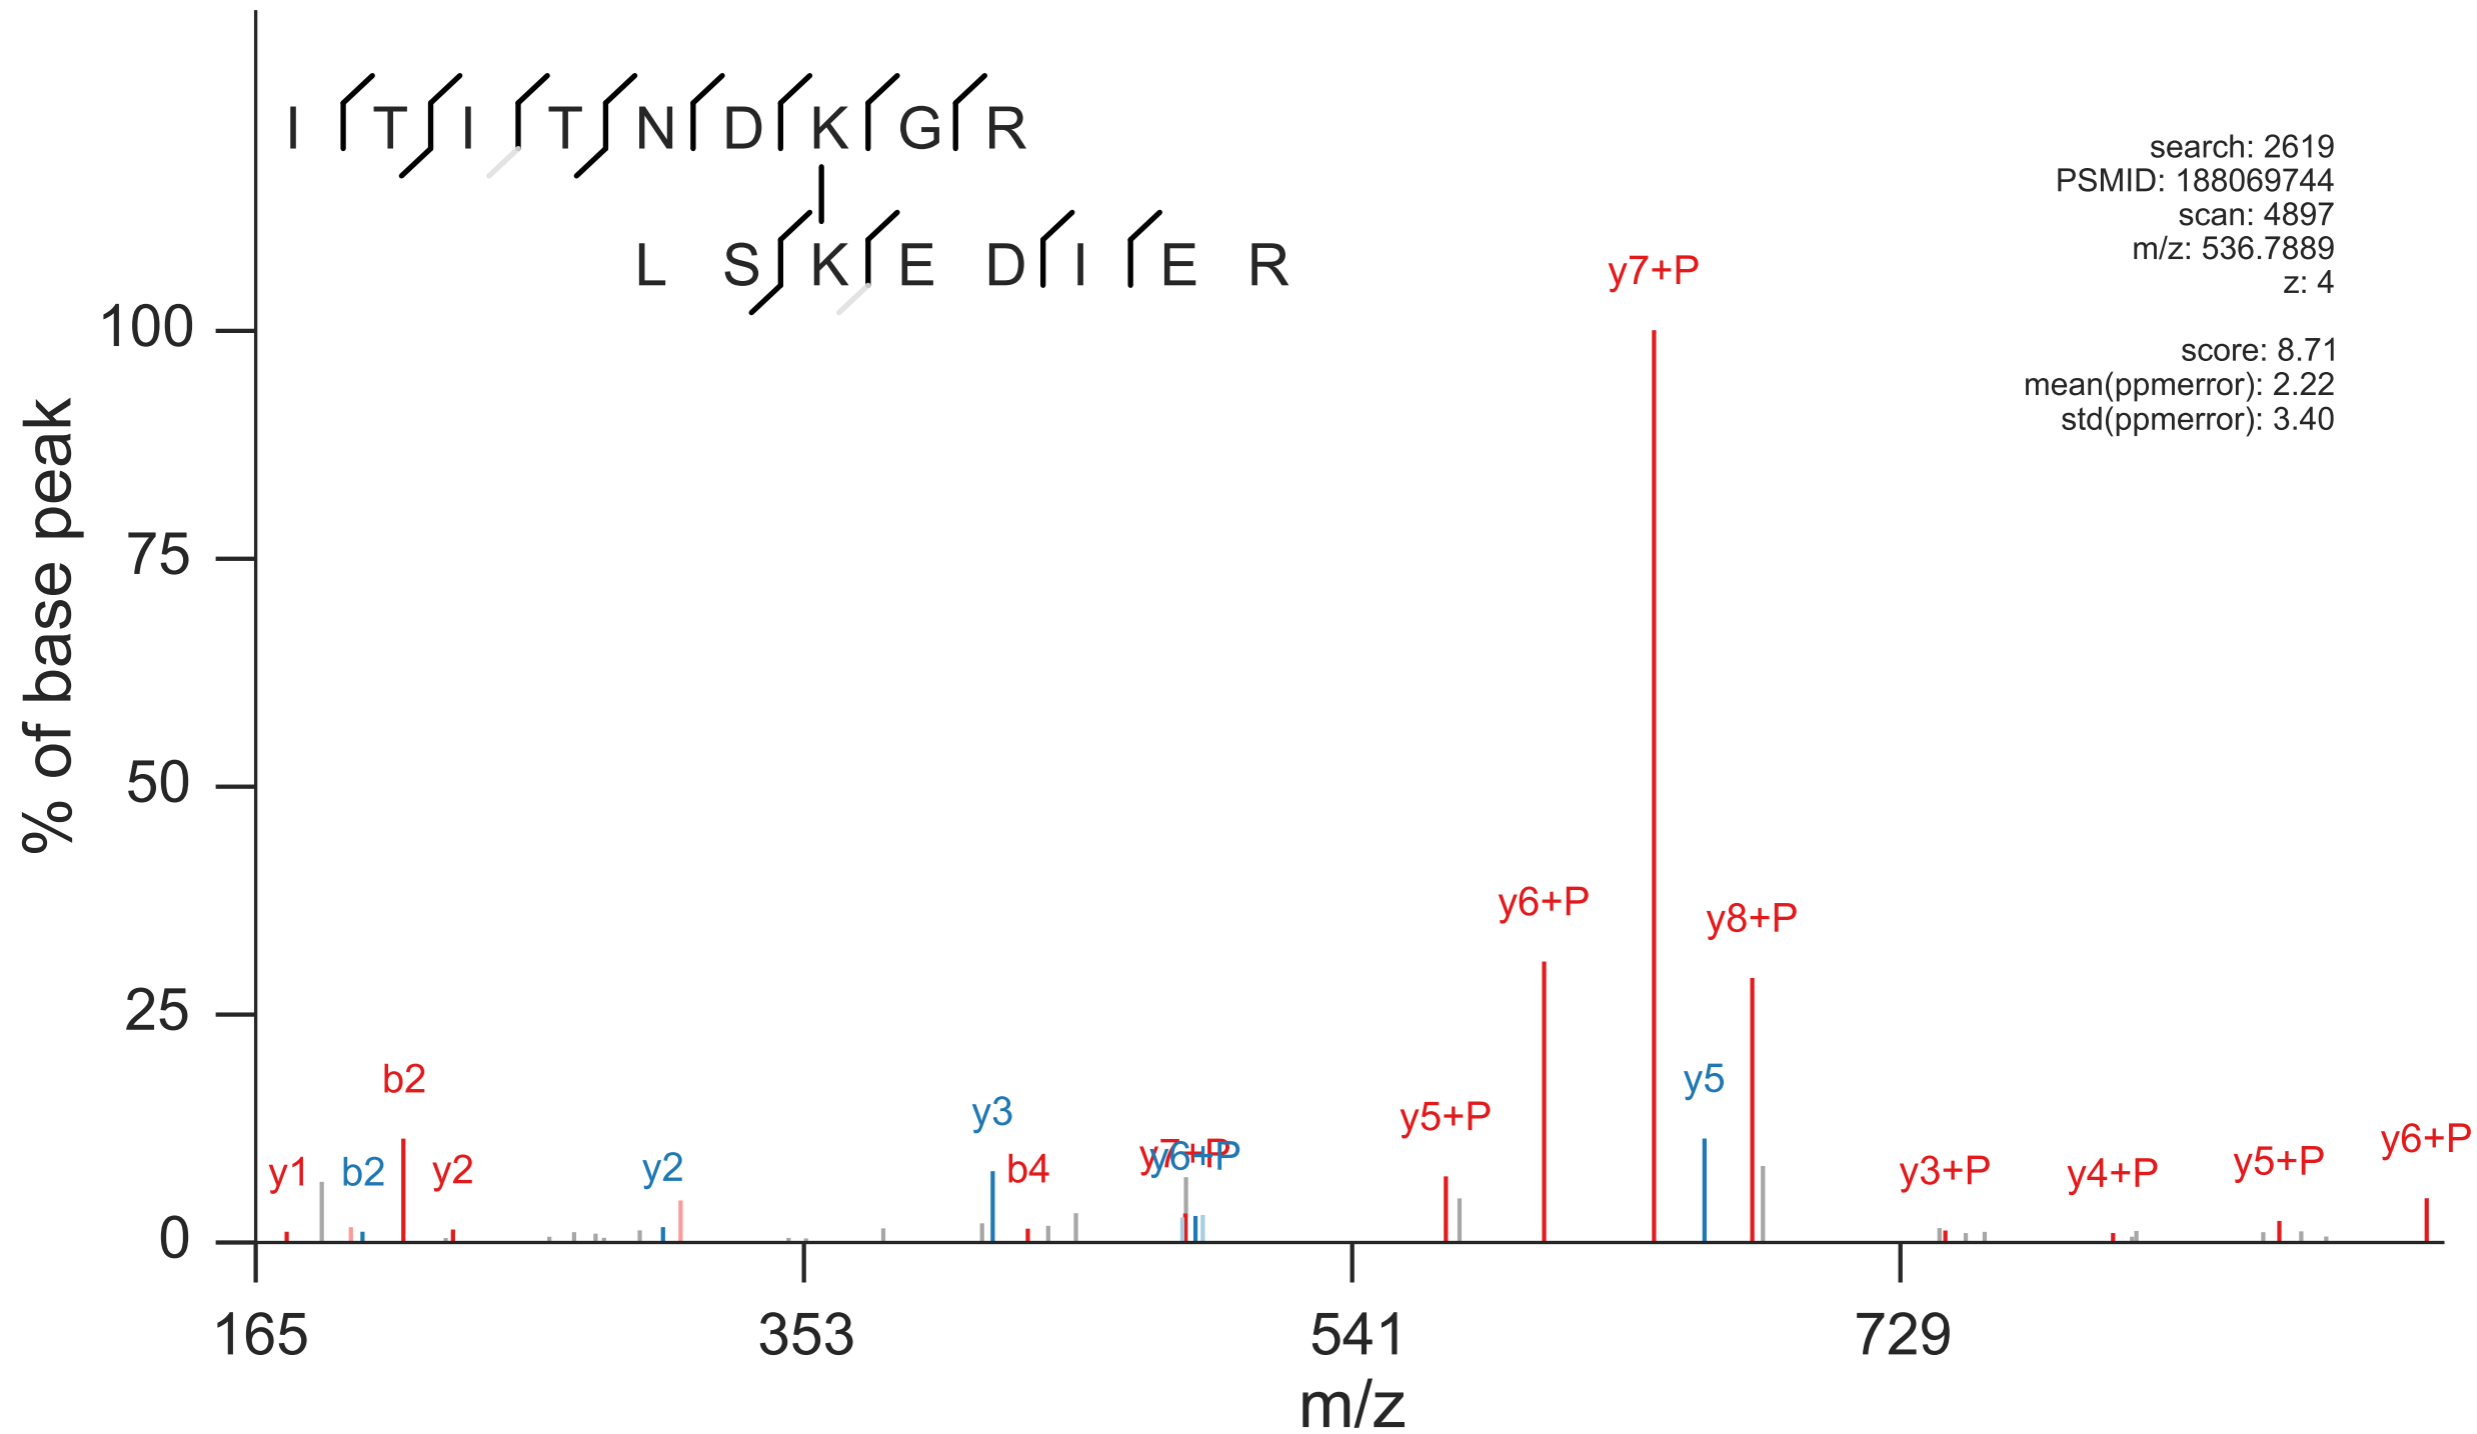

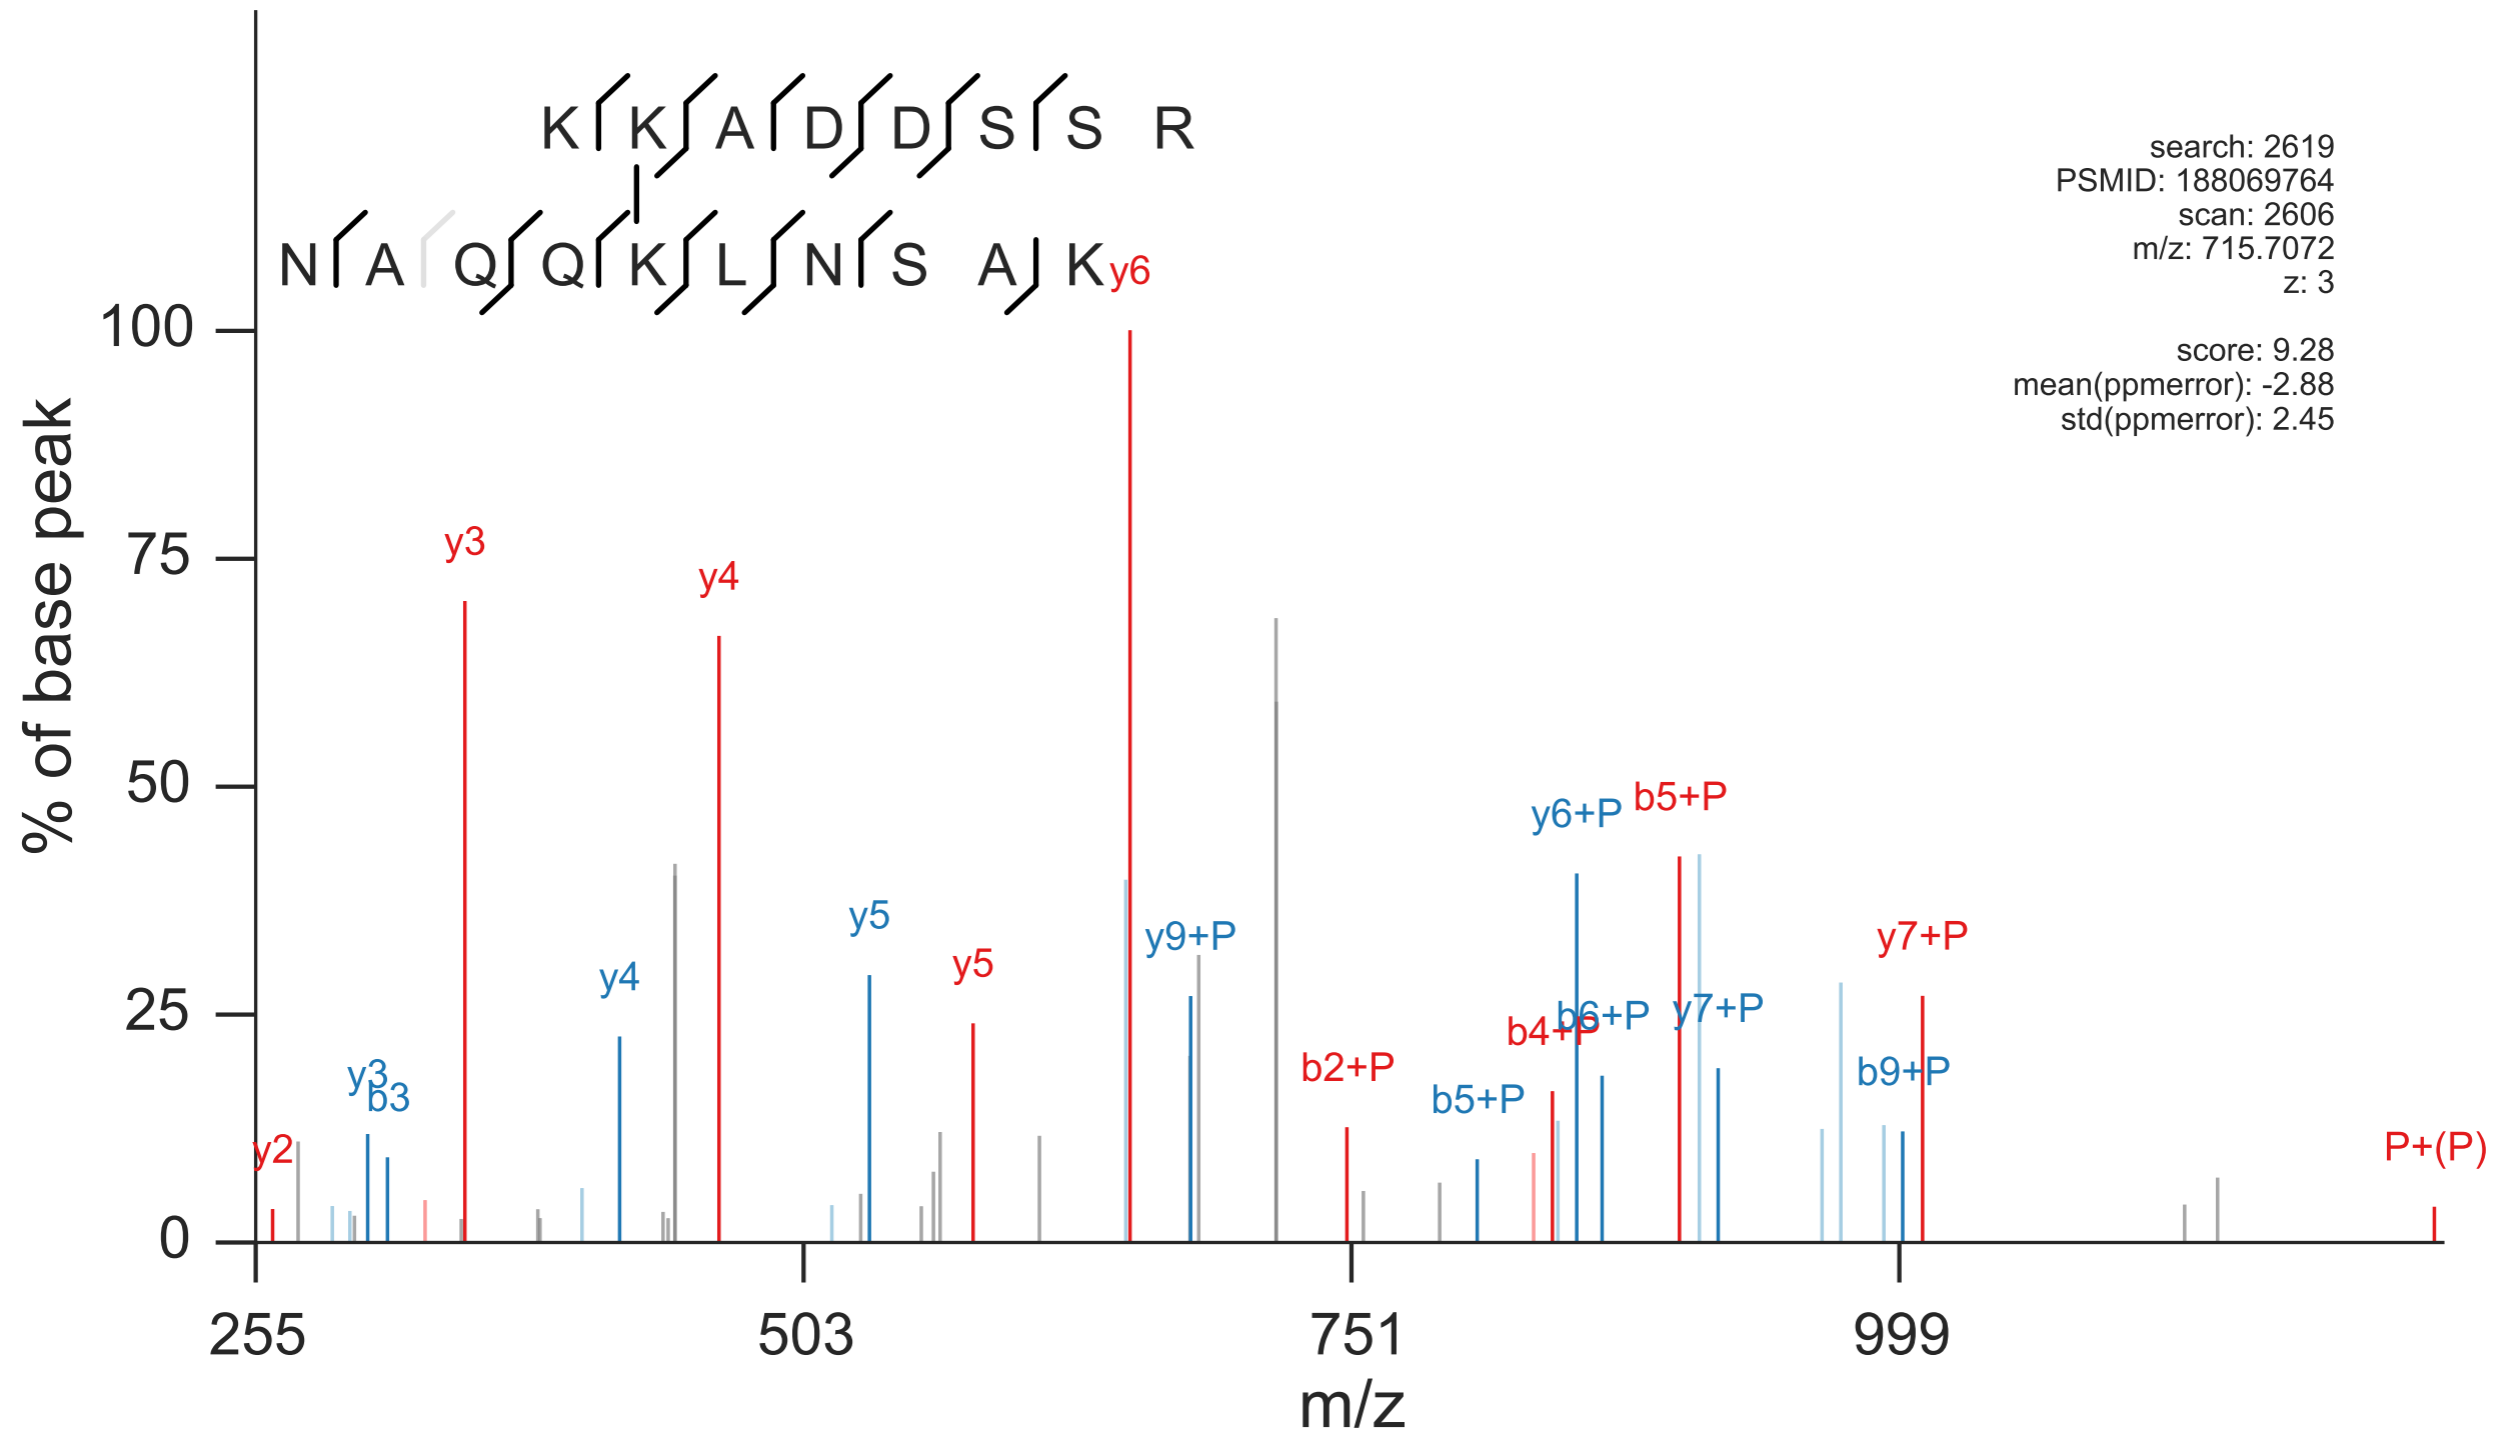

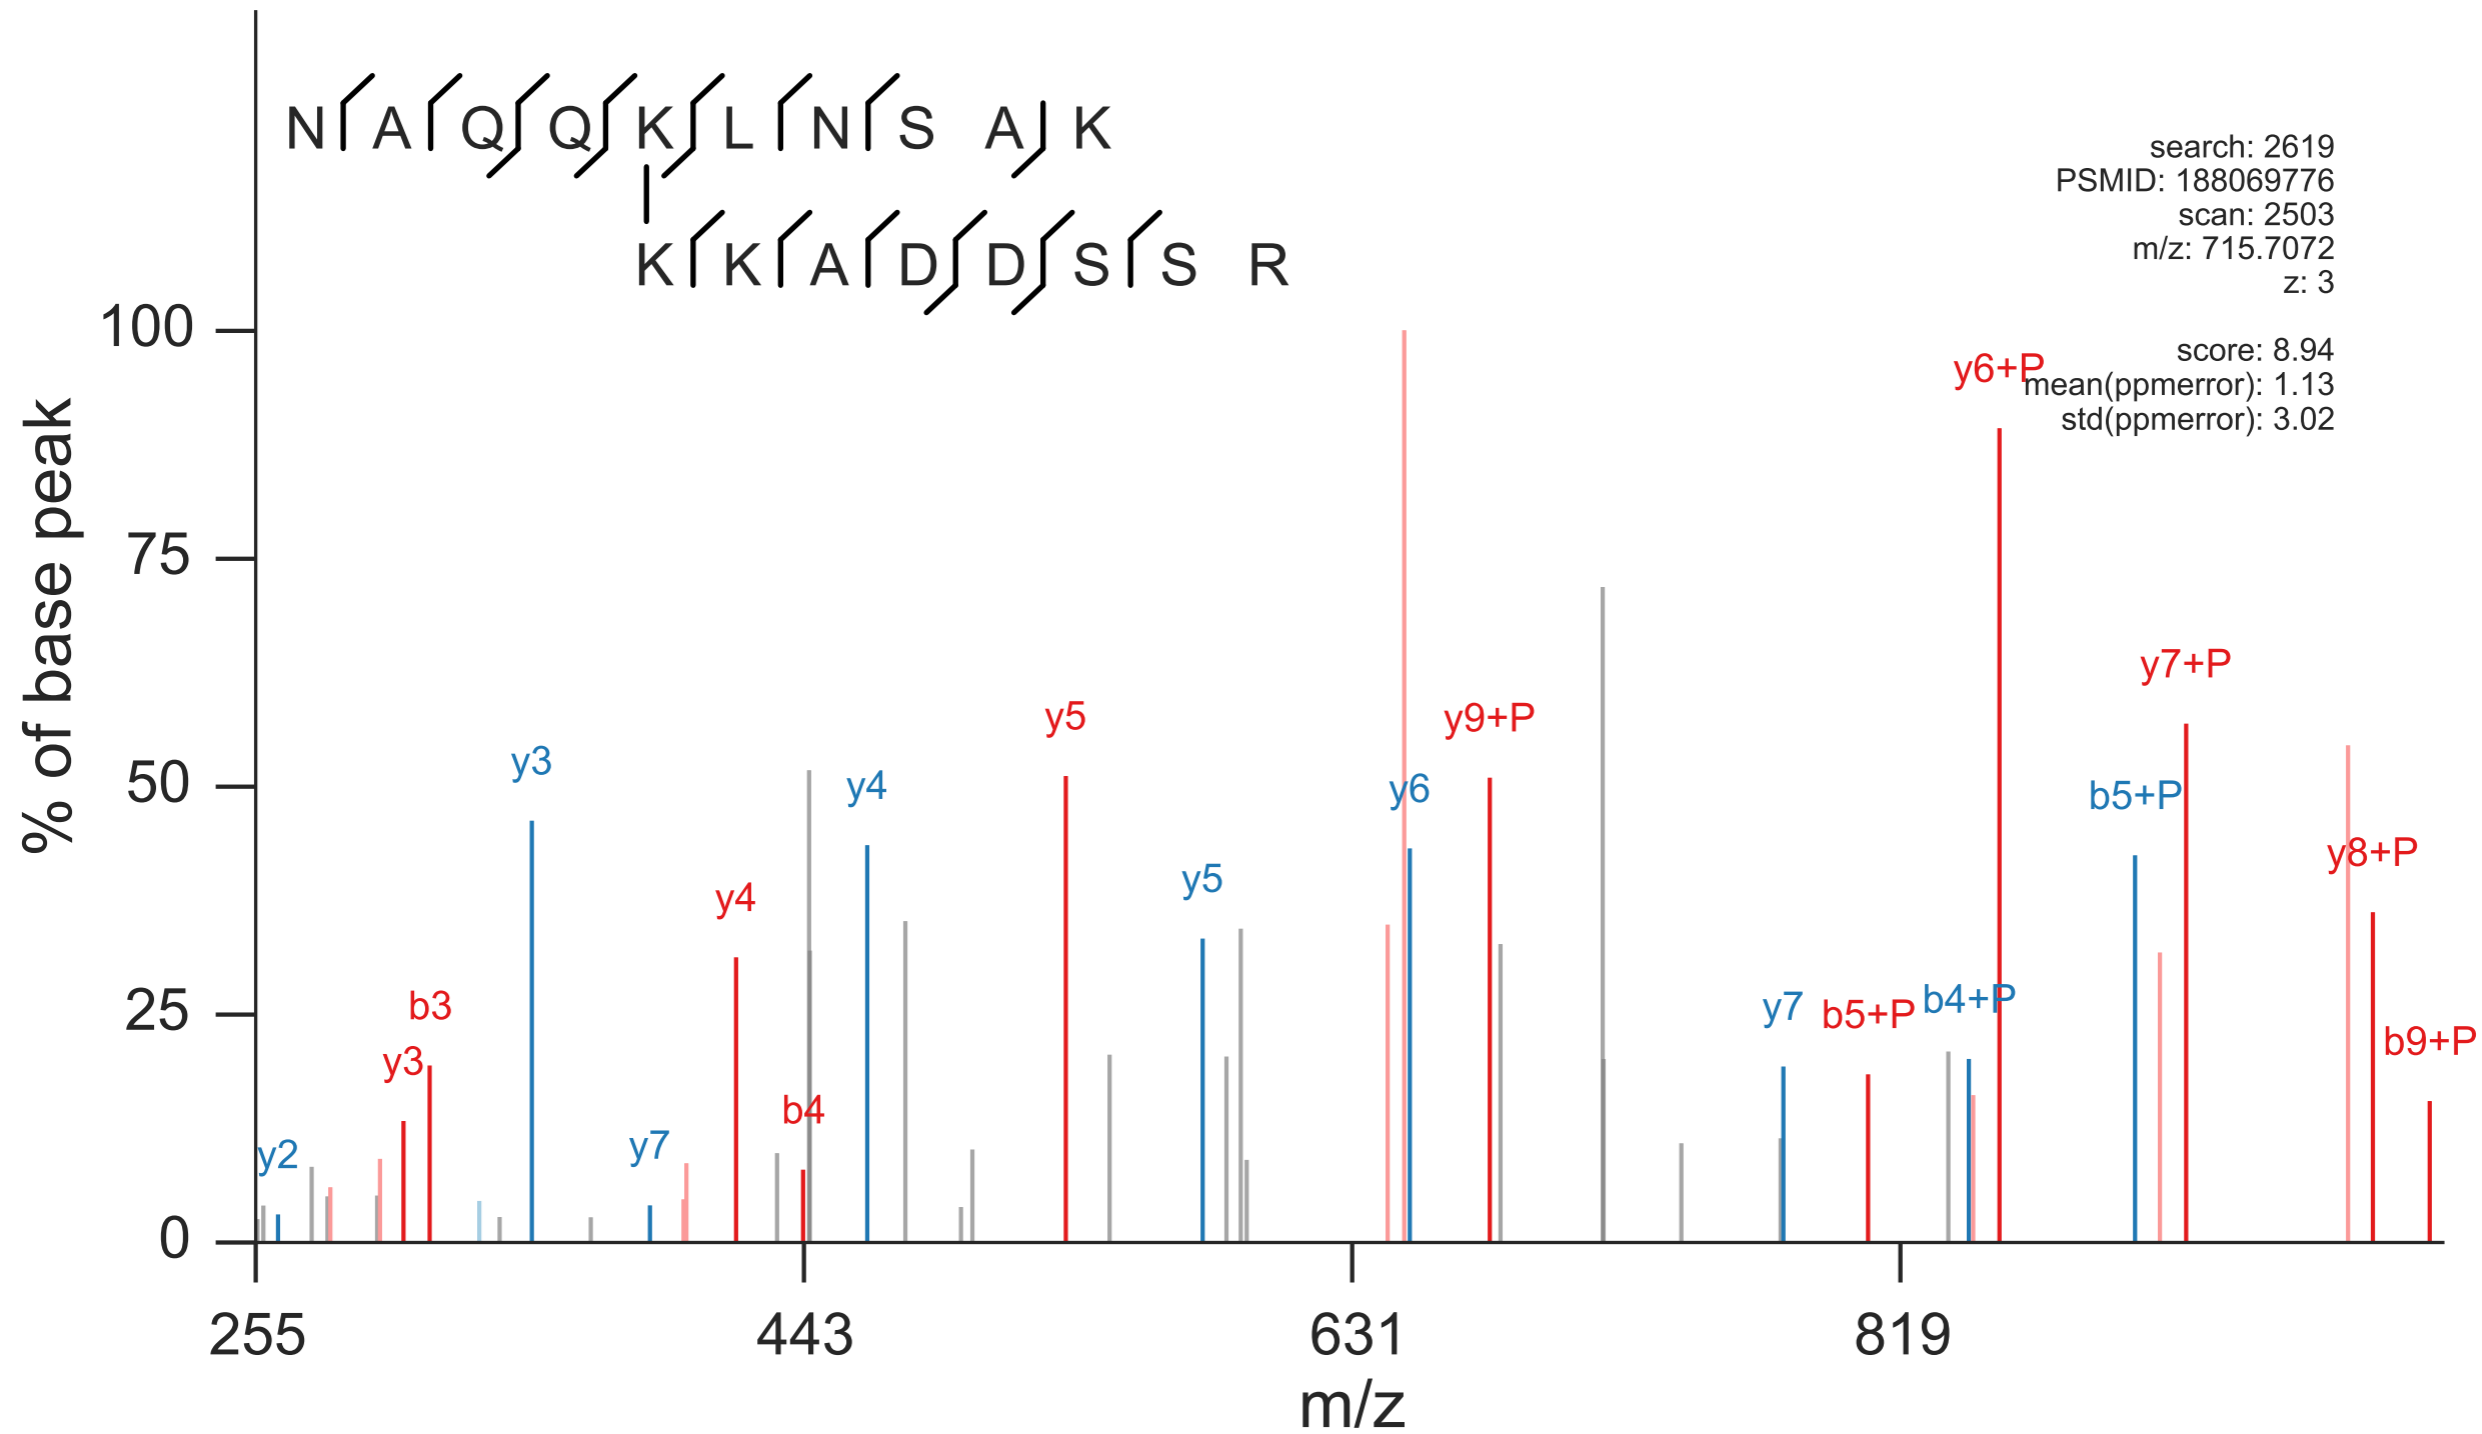

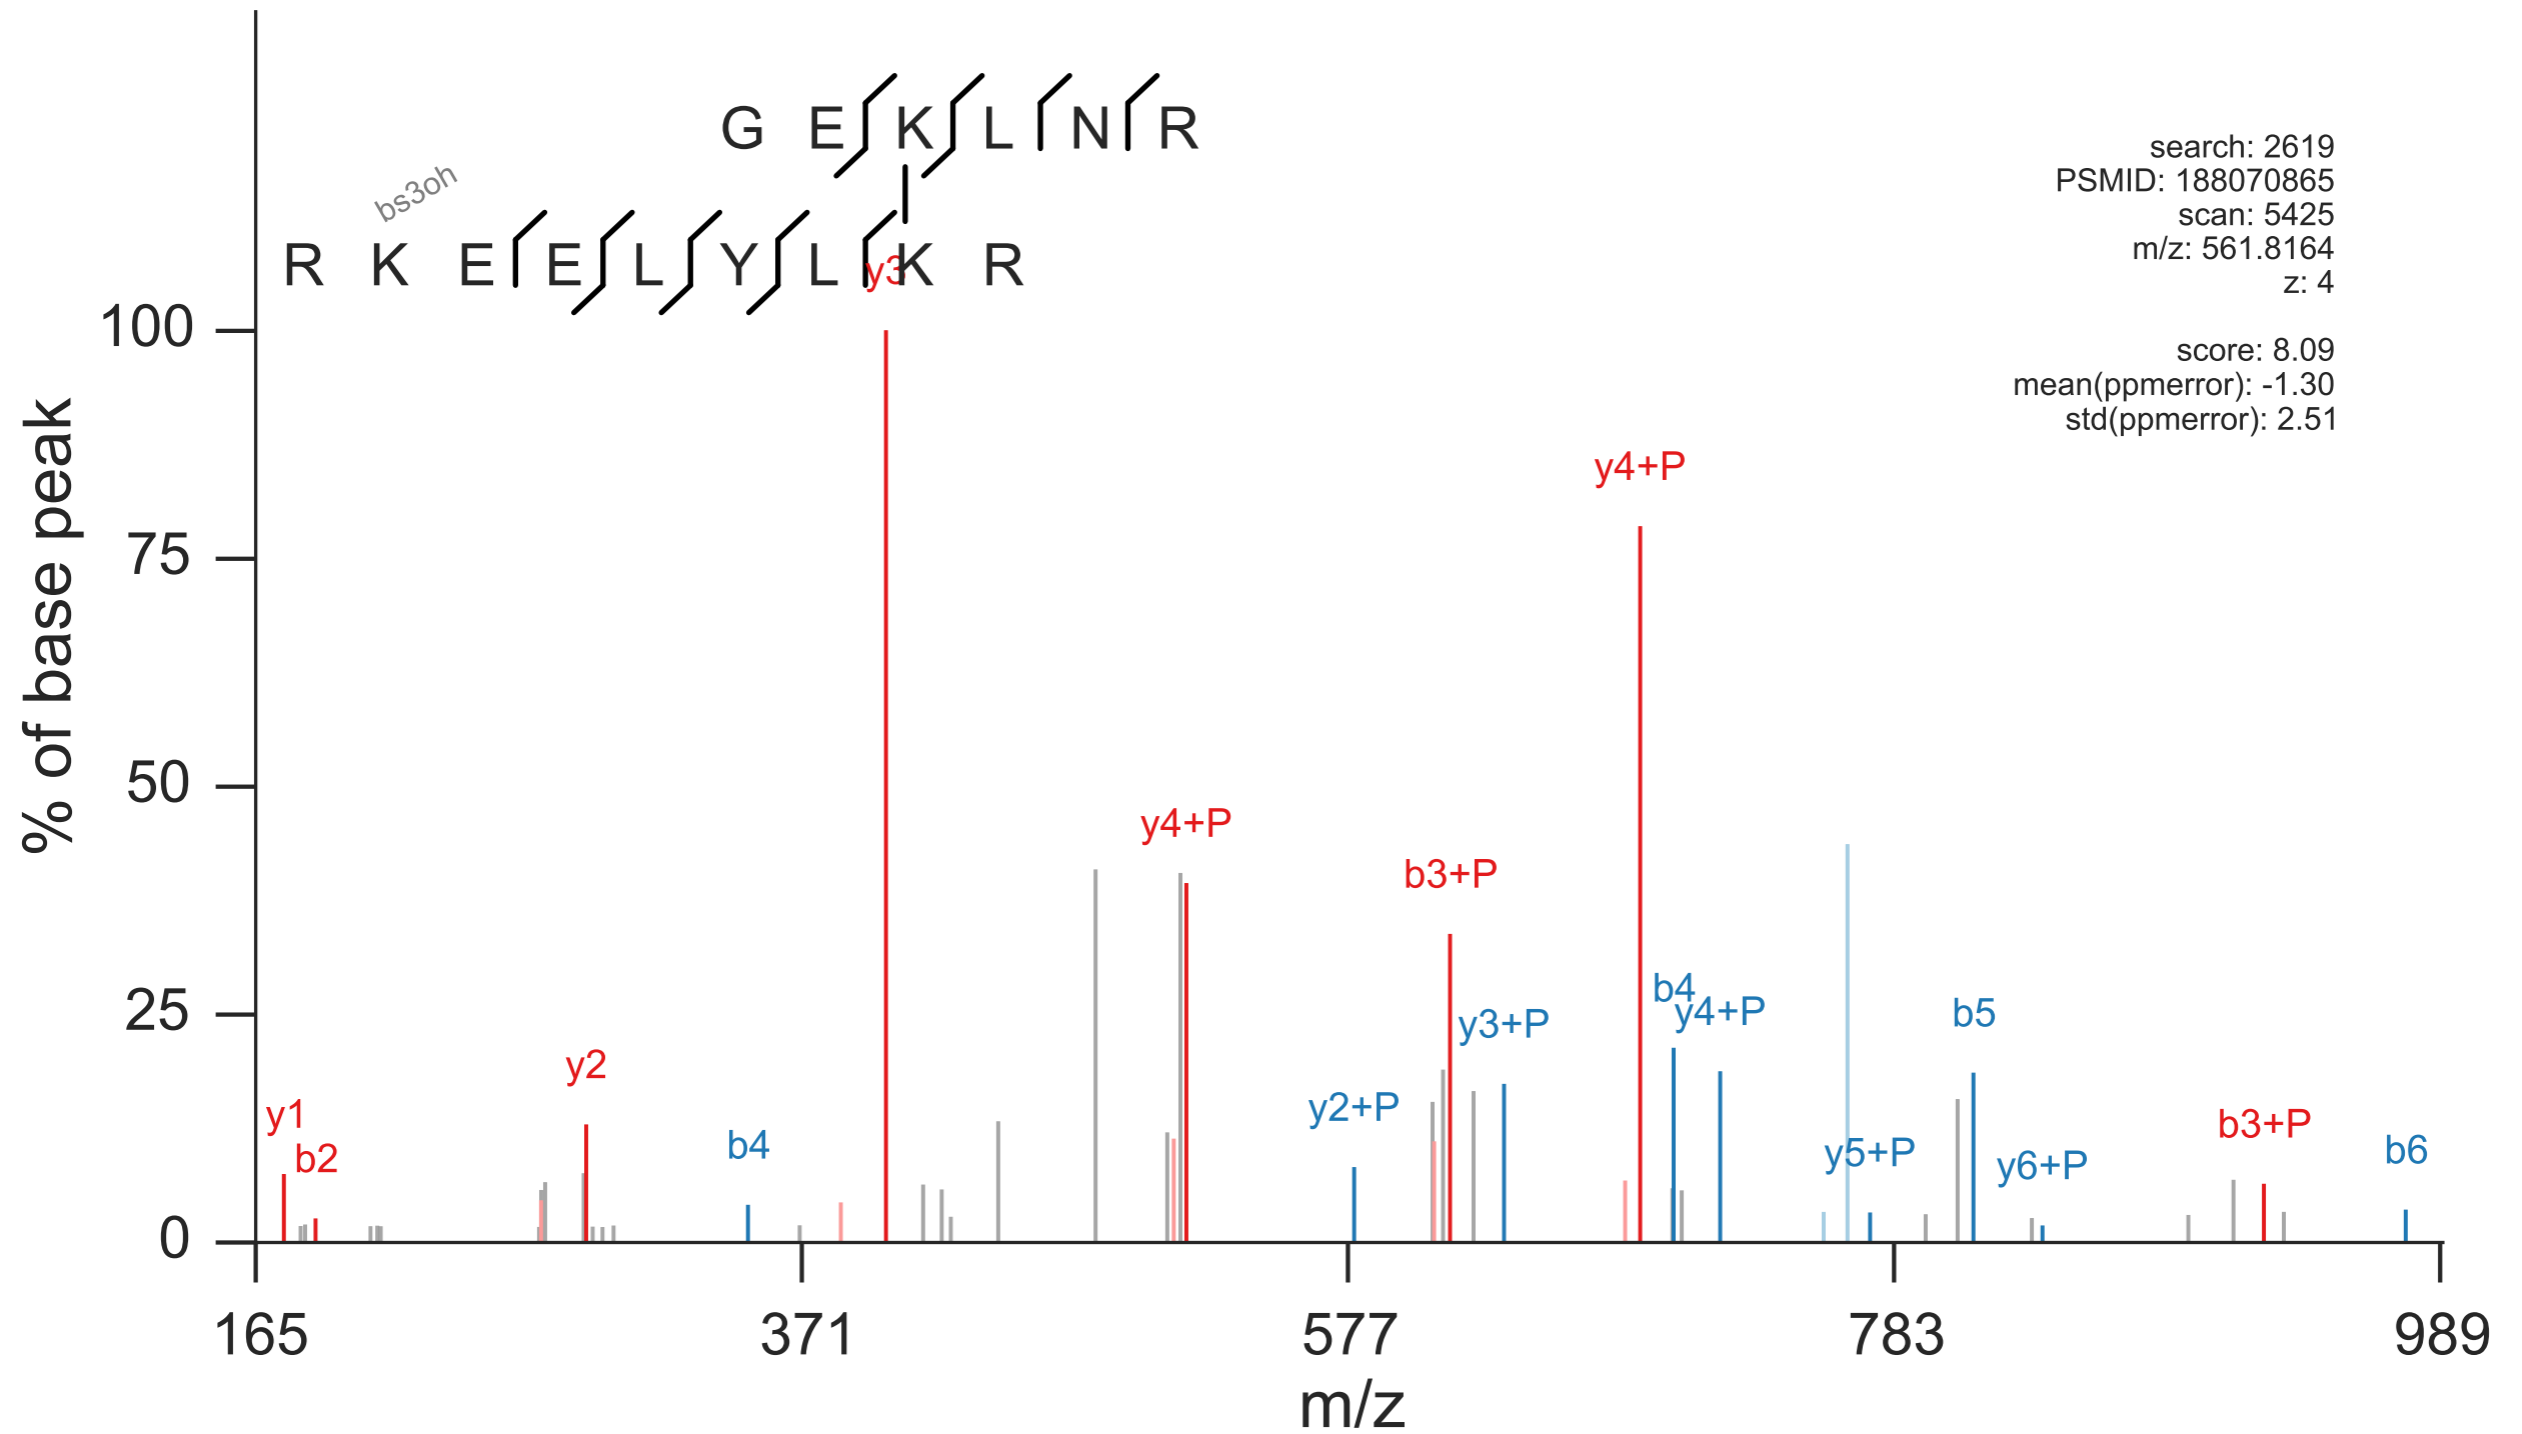

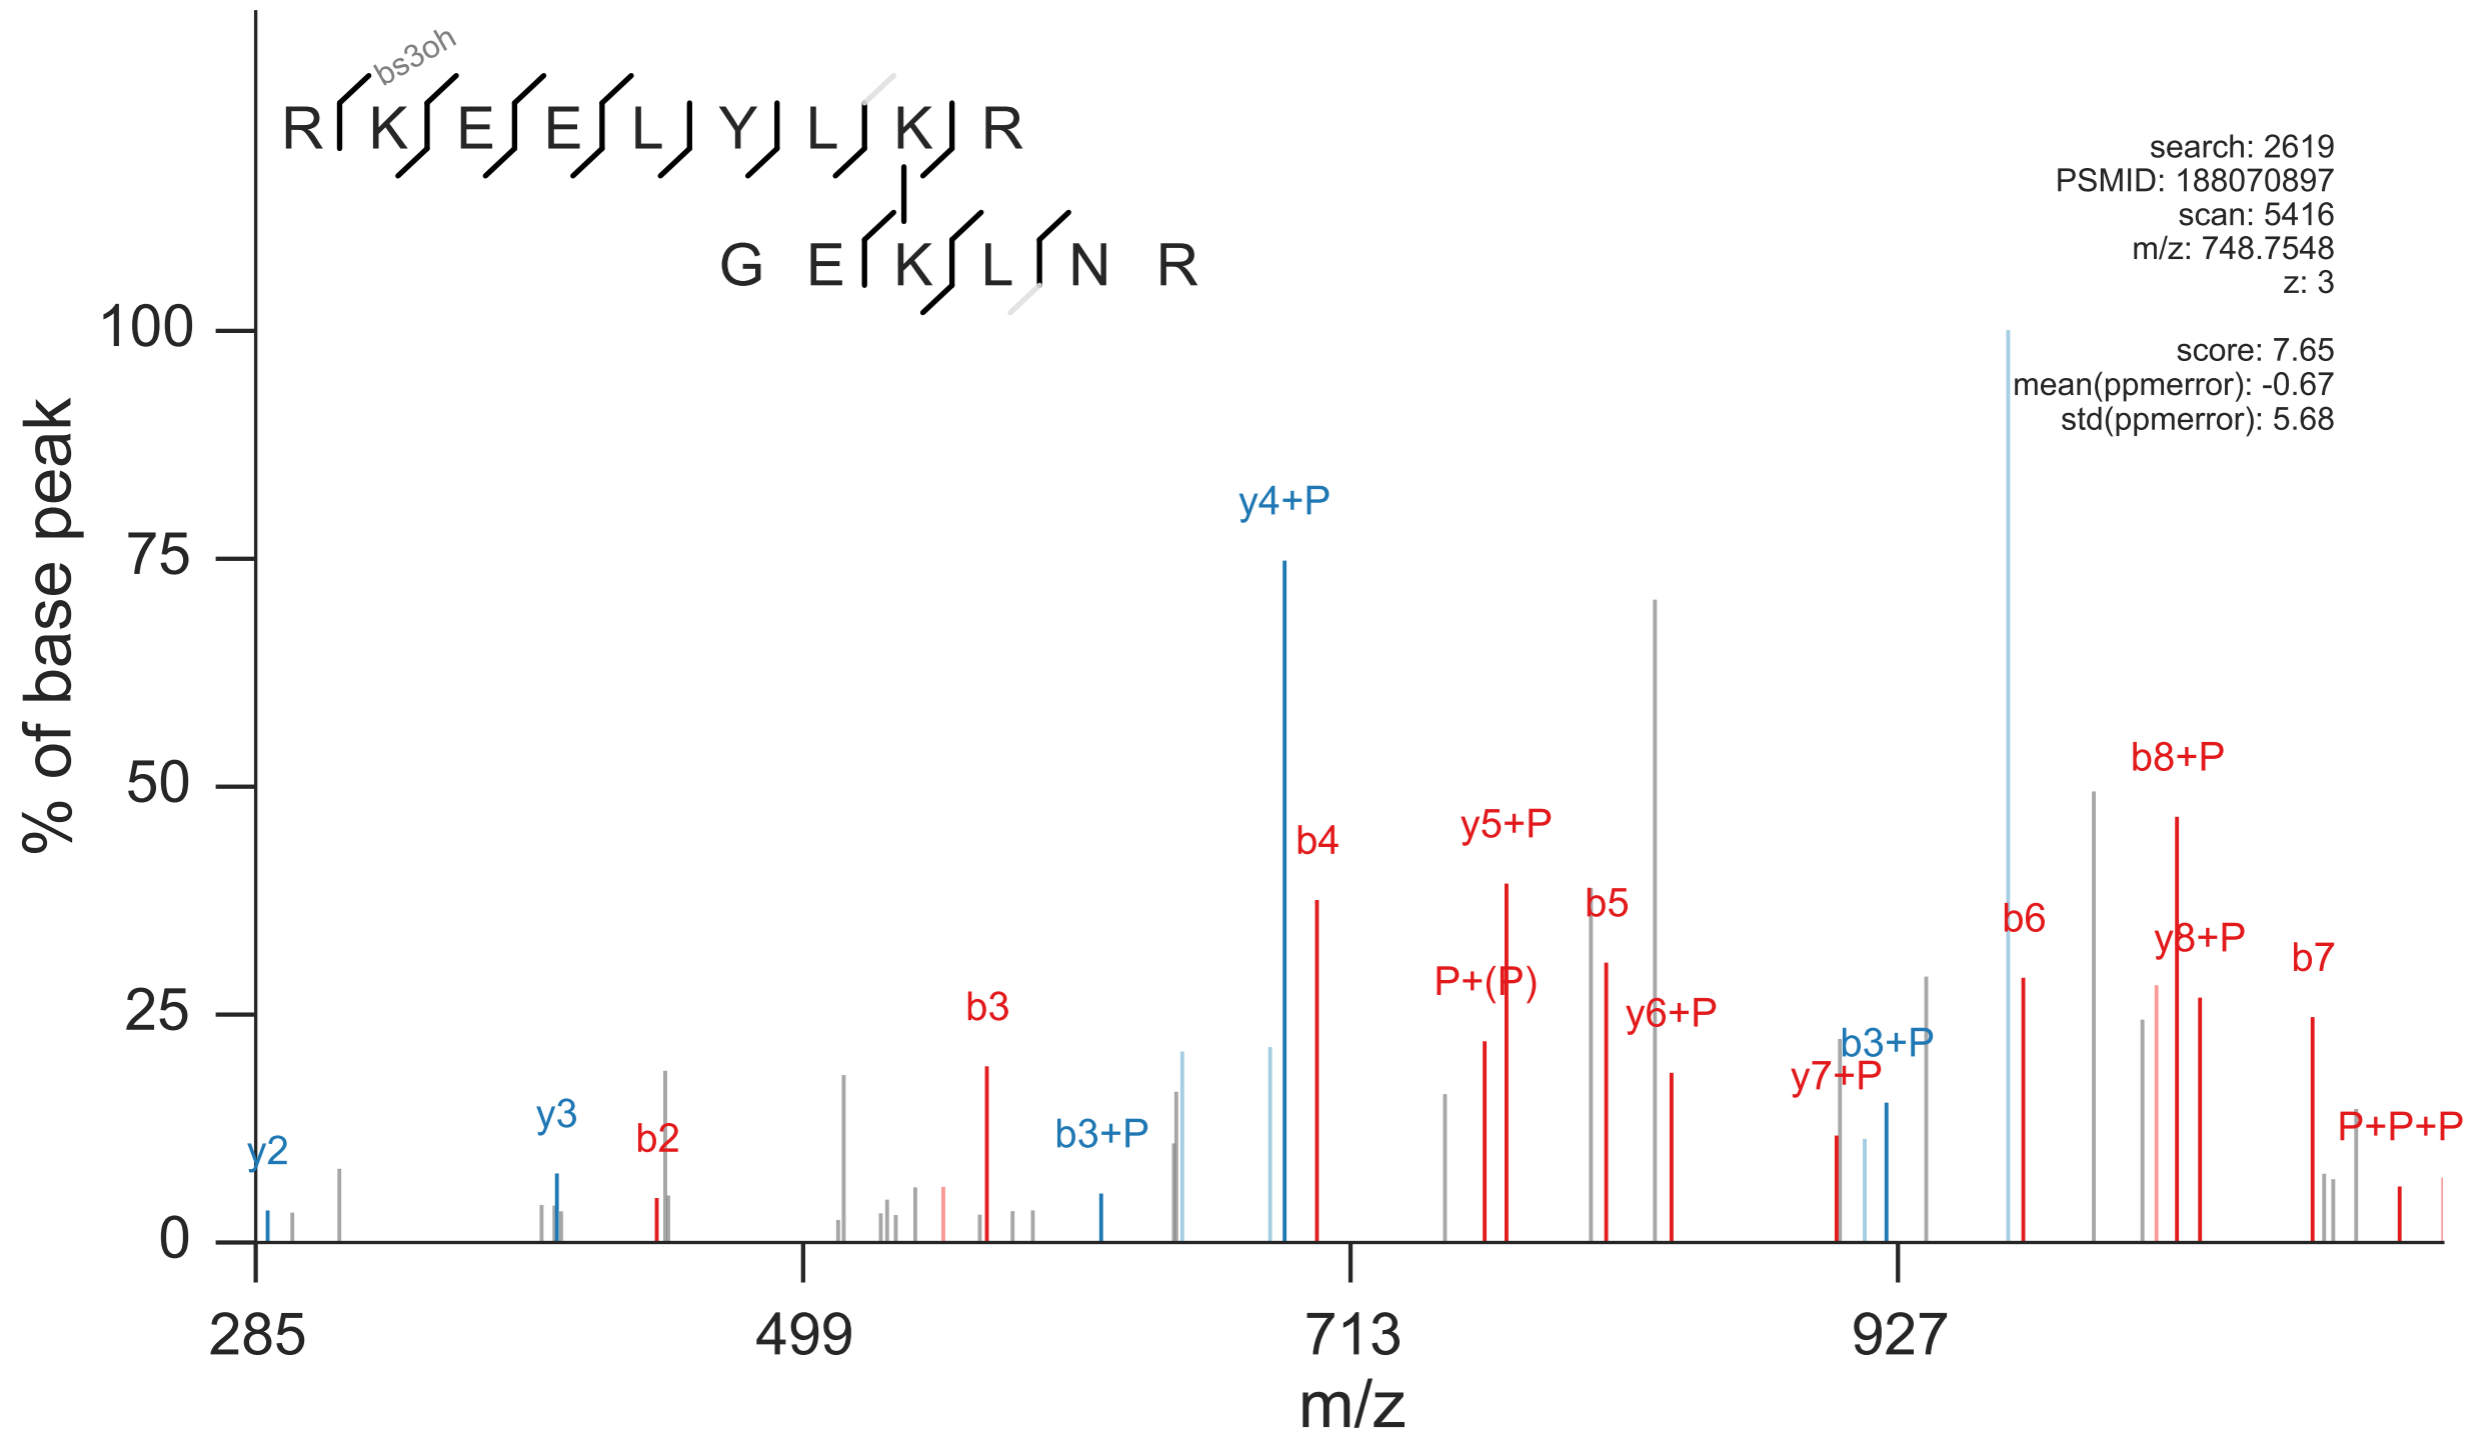

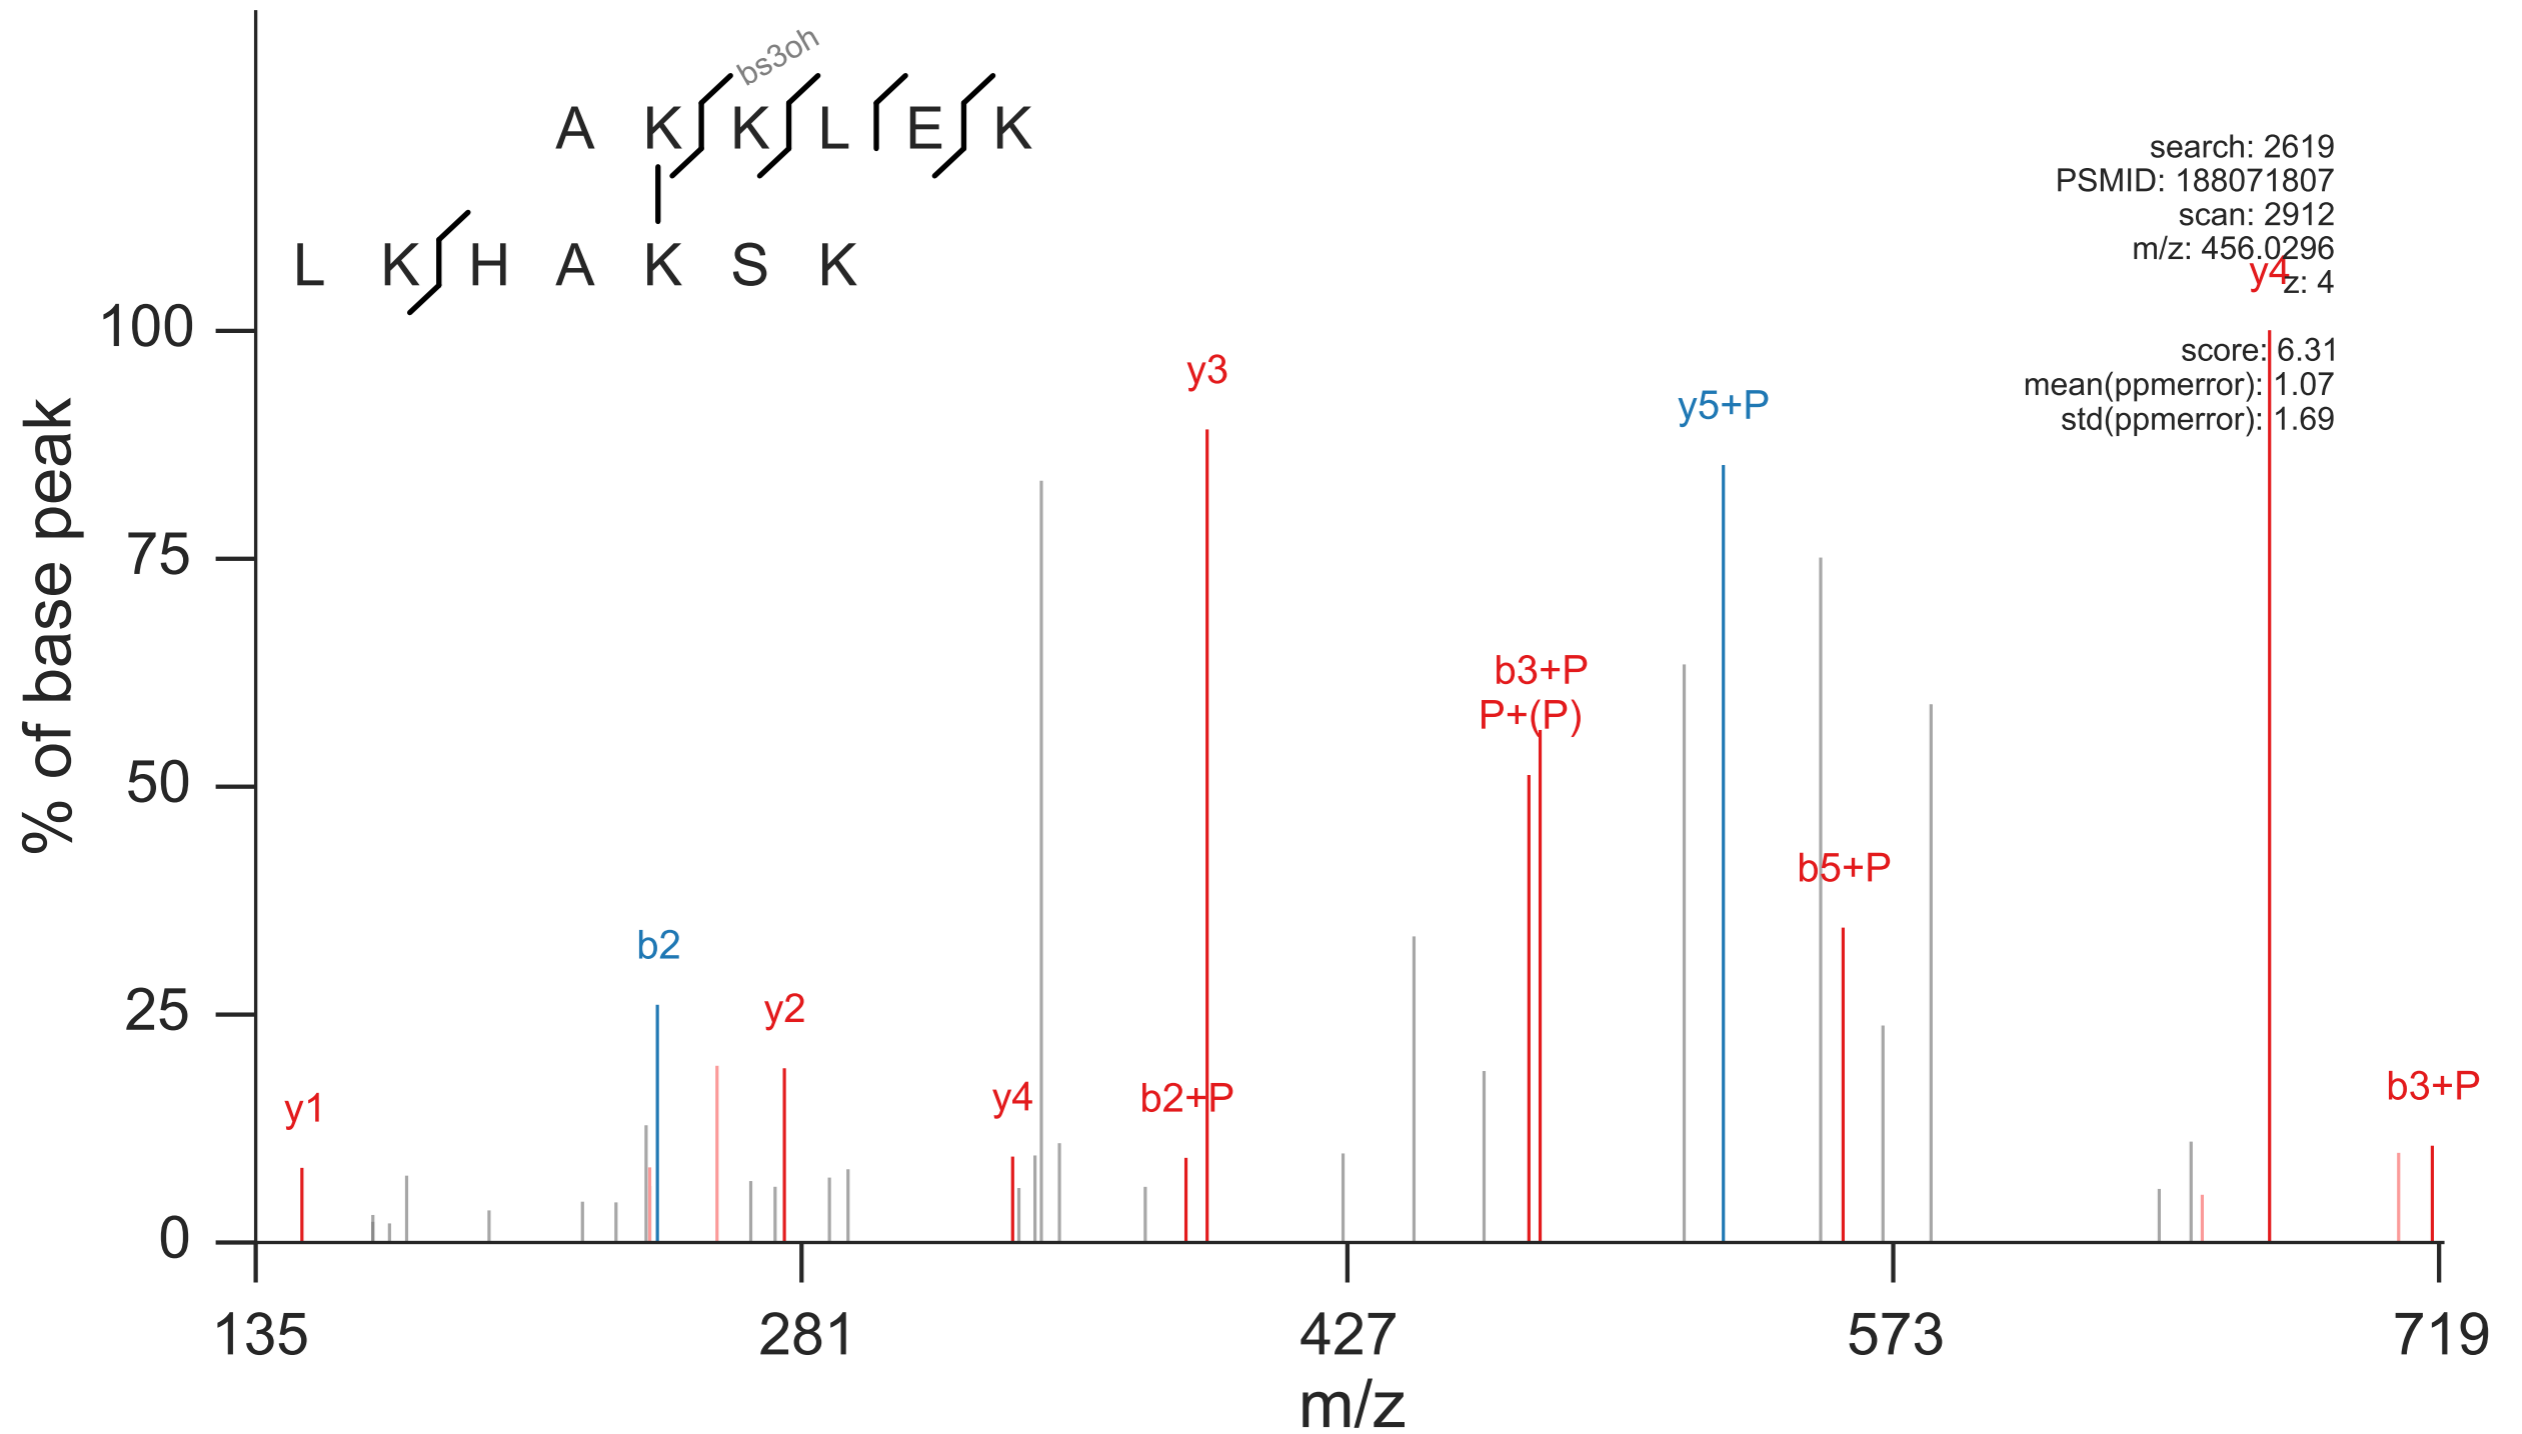



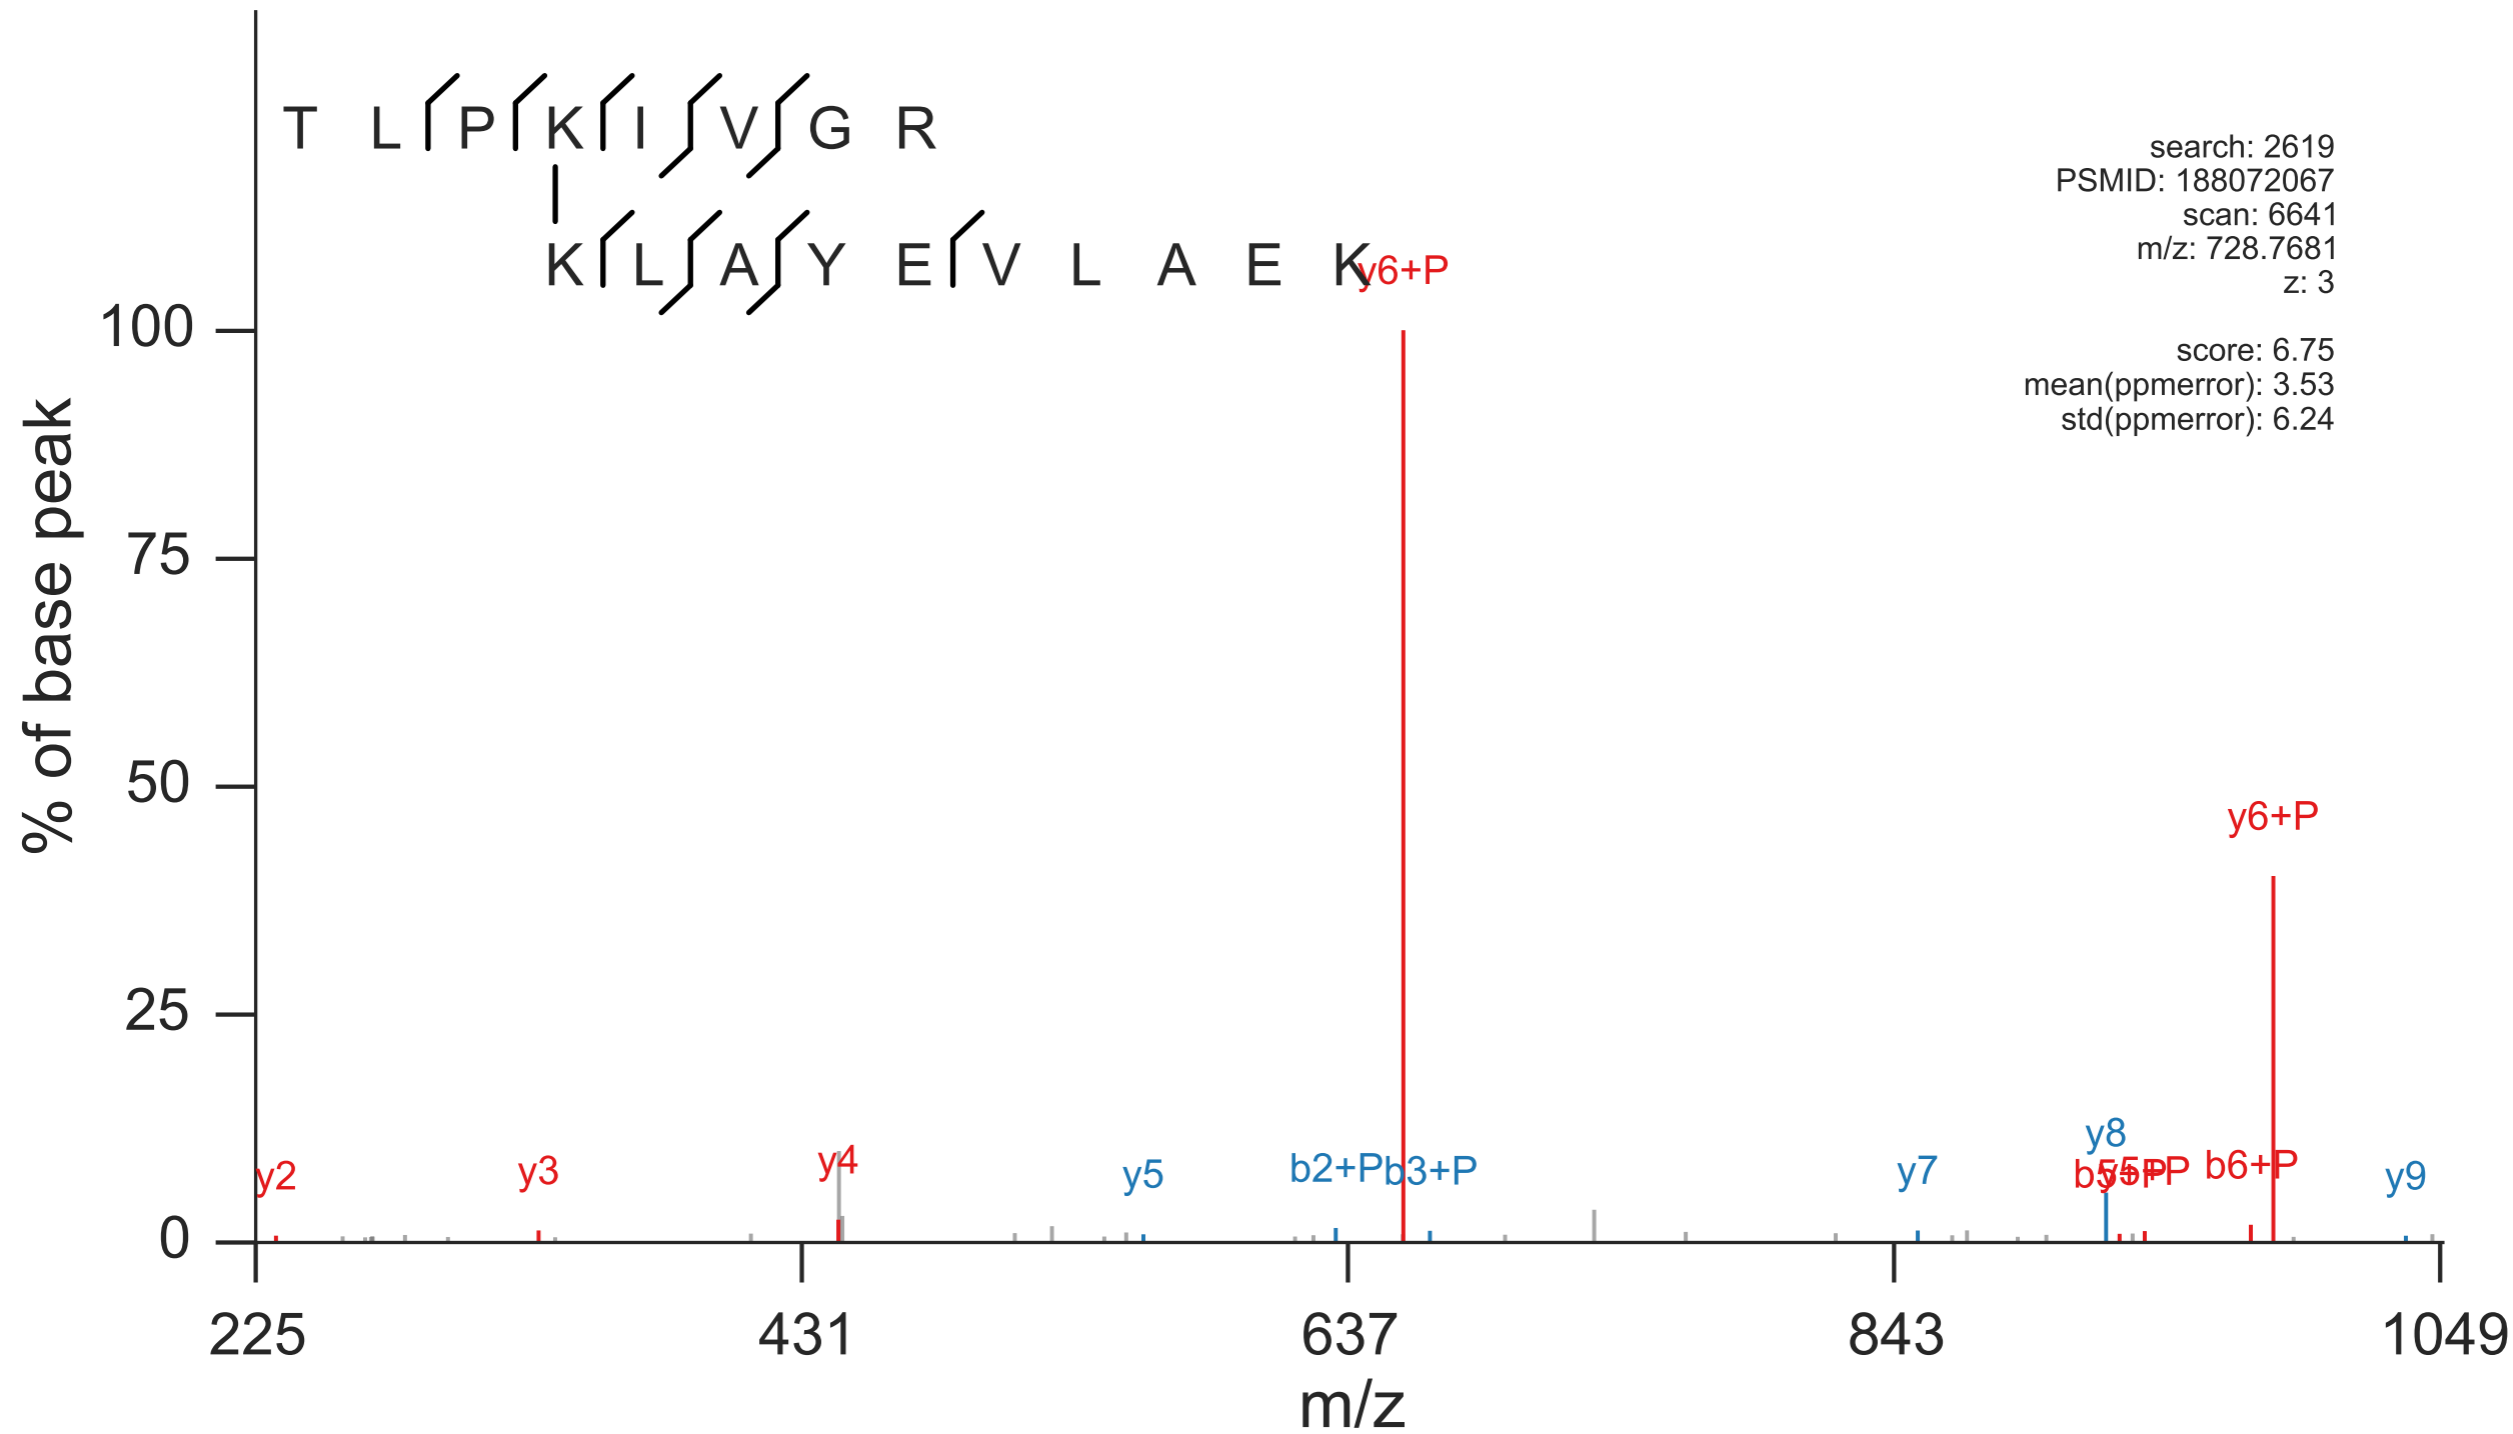

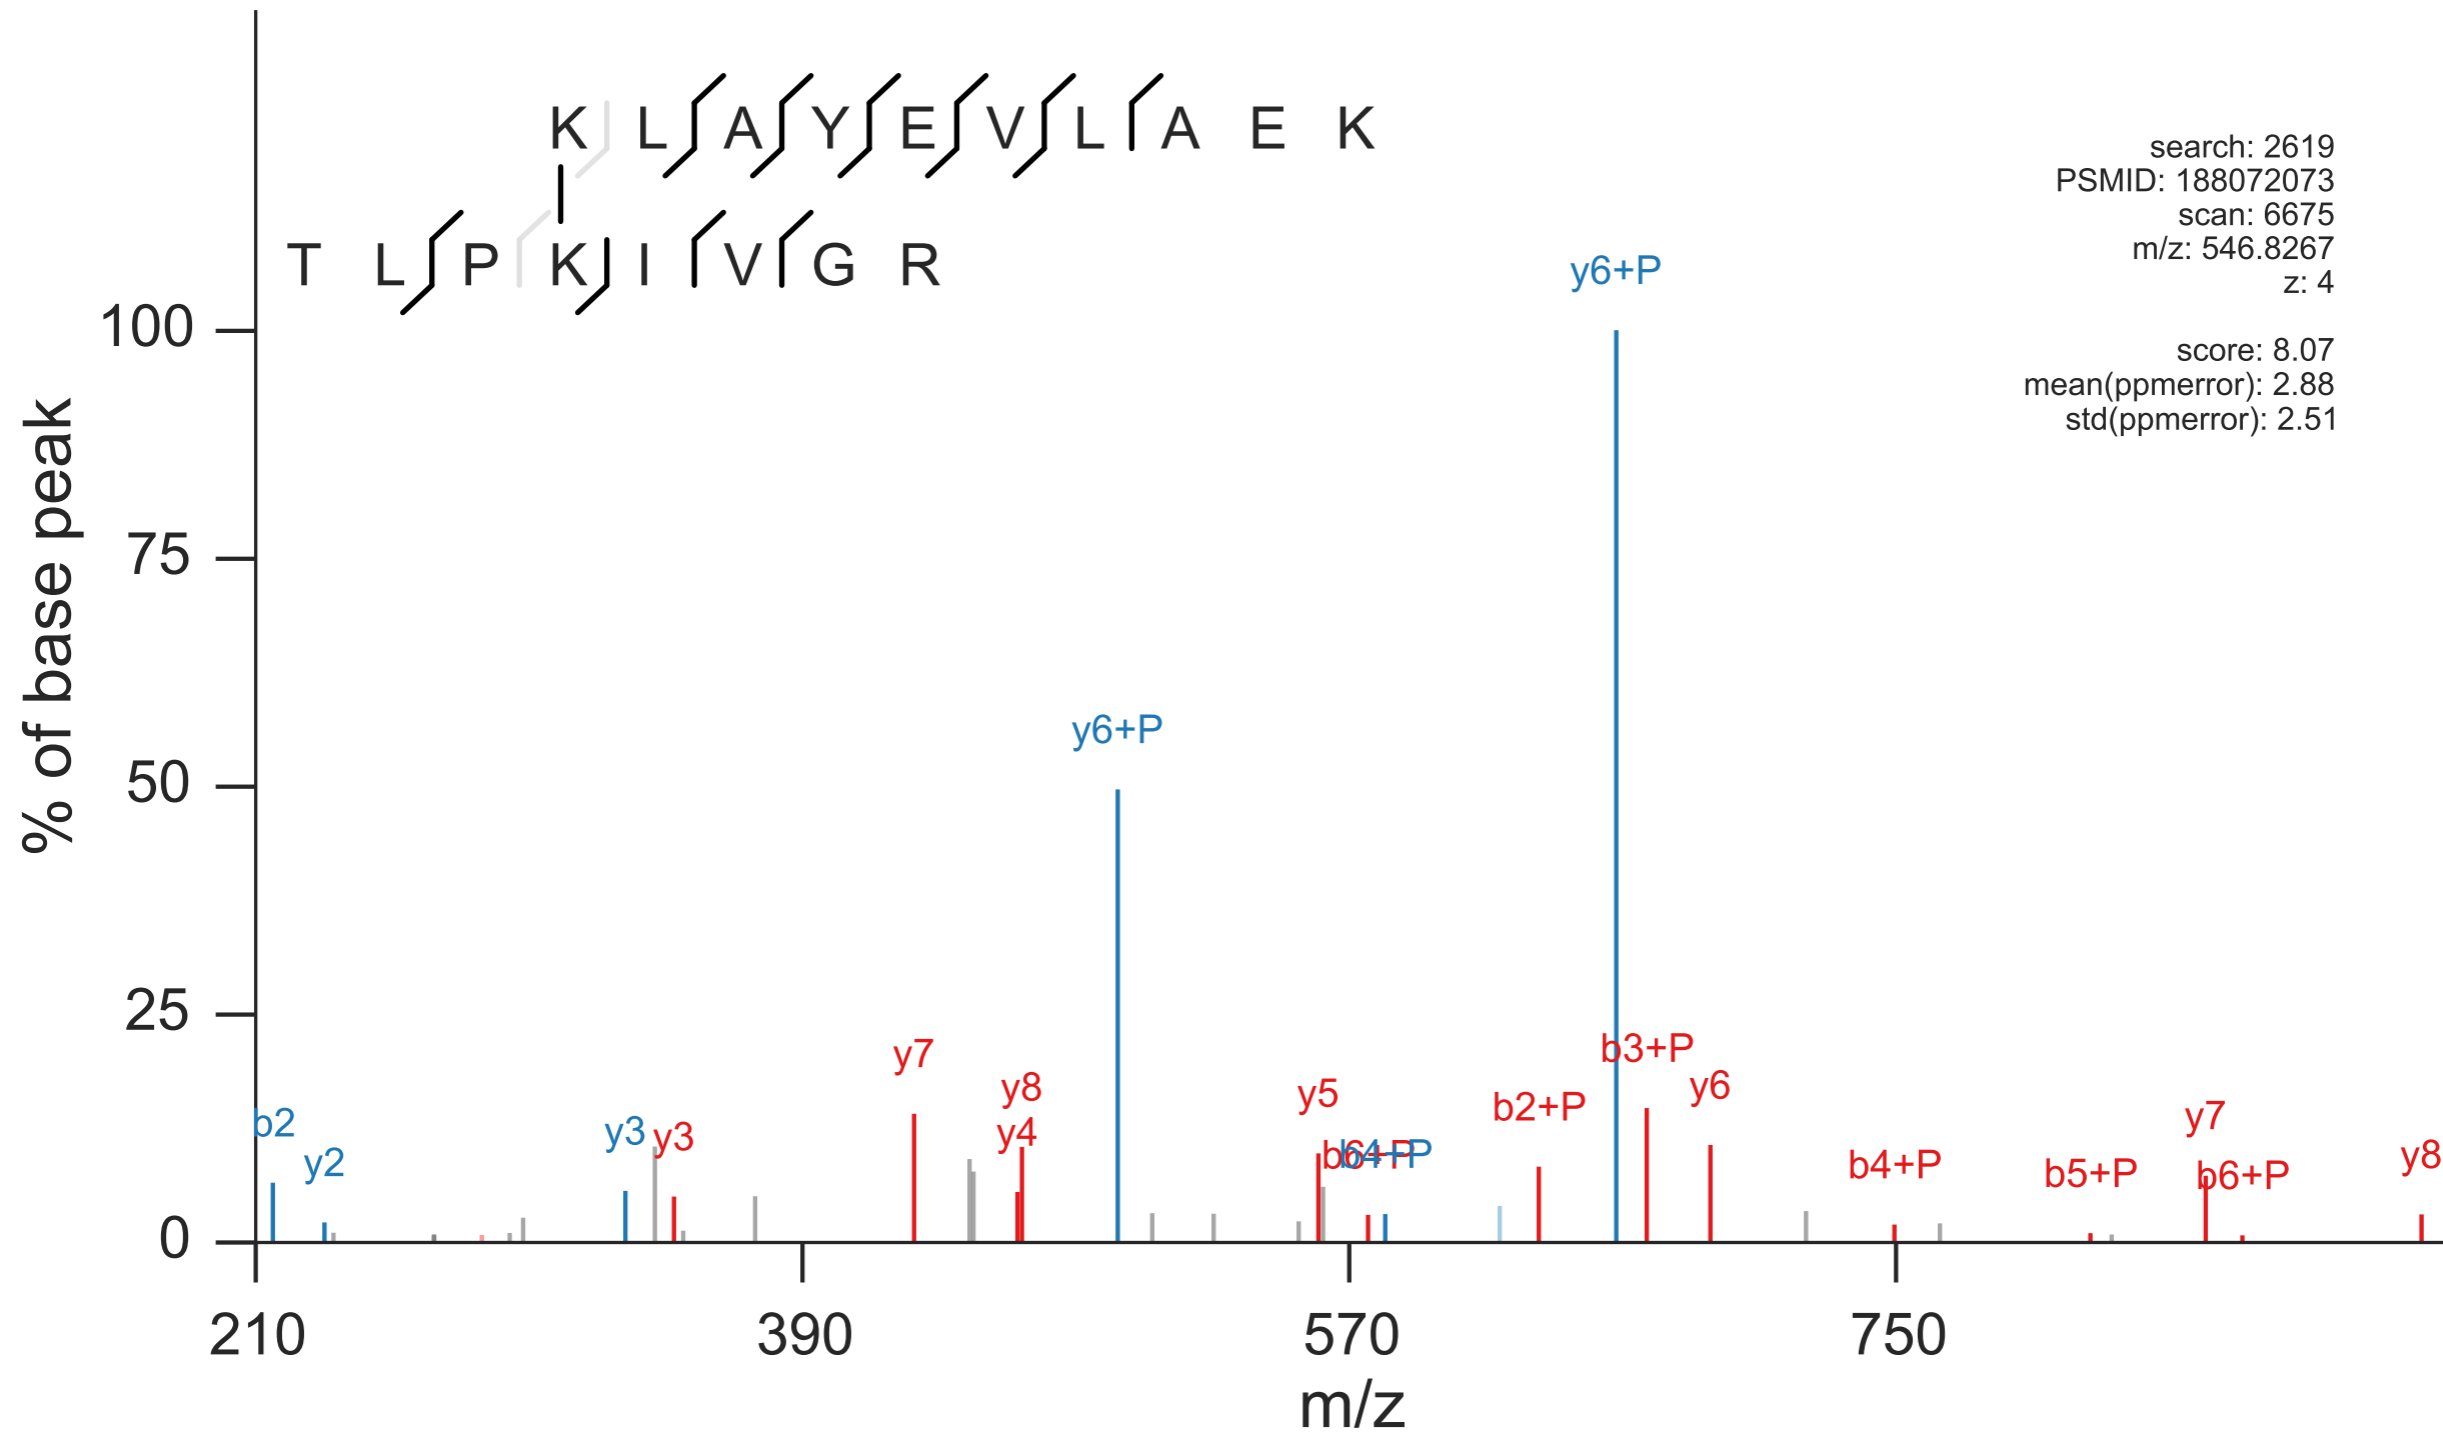

search: 2619  
 PSMID: 188072073  
 scan: 6675  
 m/z: 546.8267  
 z: 4

score: 8.07  
 mean(ppmerror): 2.88  
 std(ppmerror): 2.51

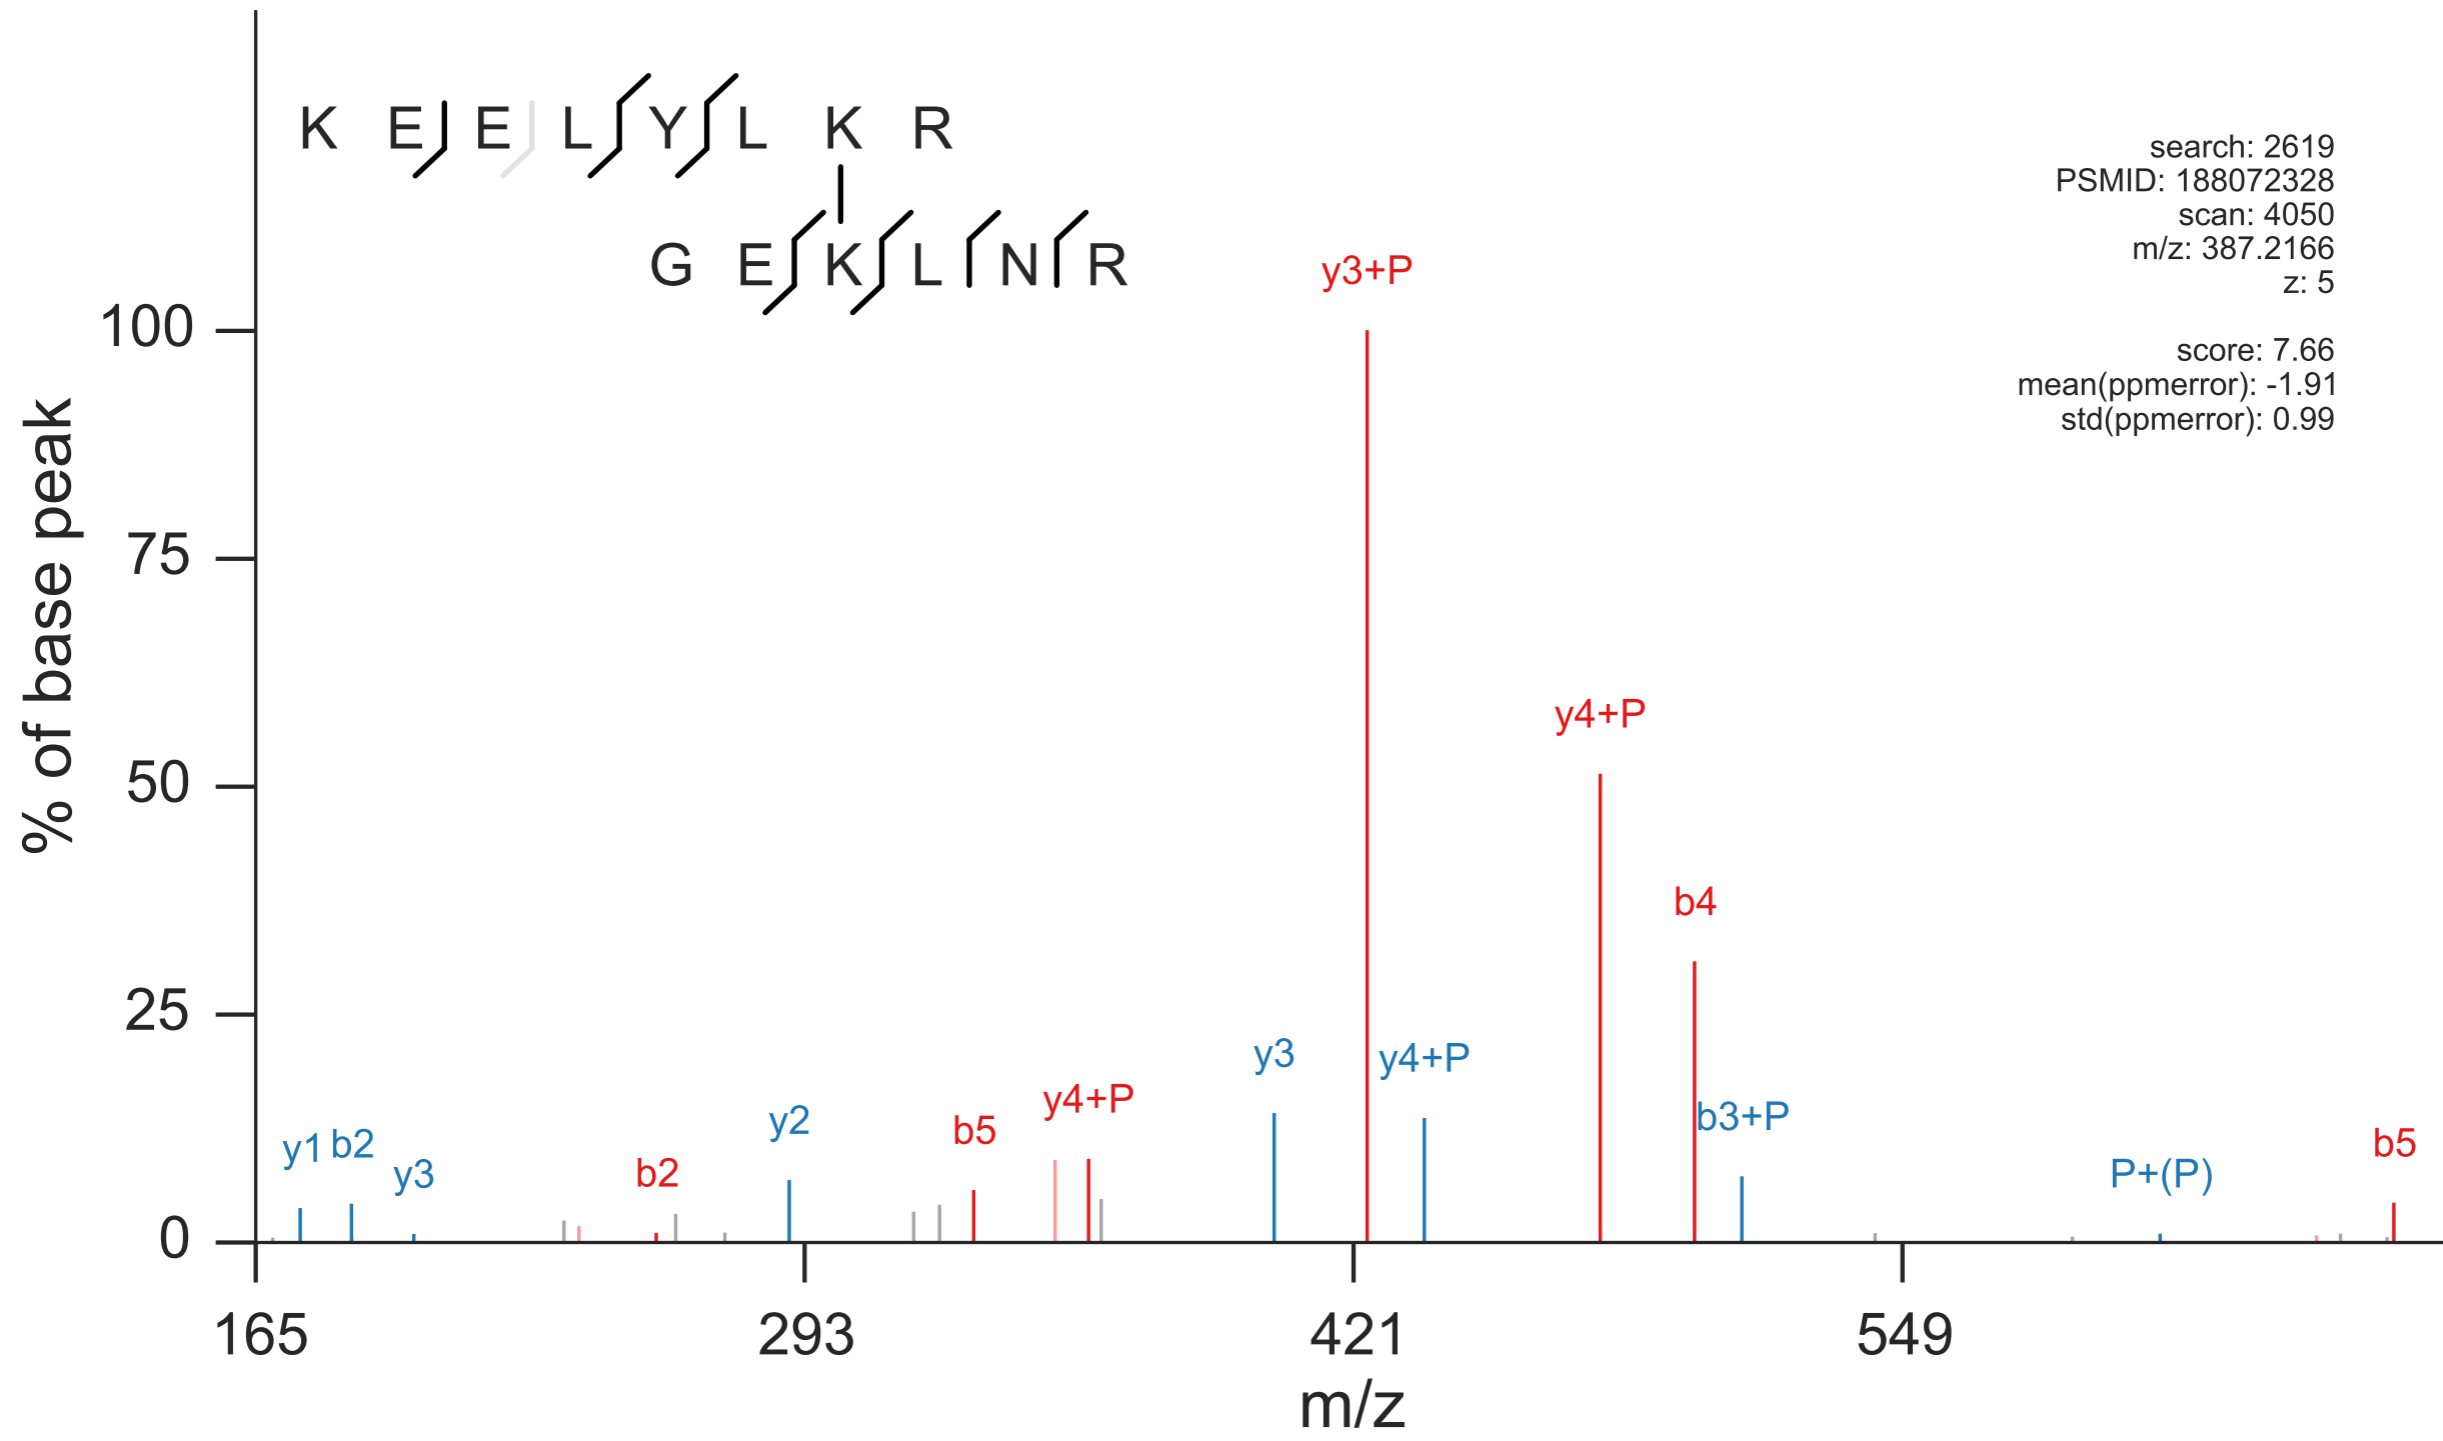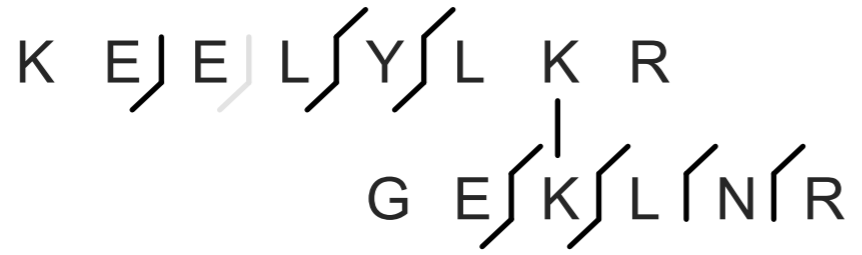

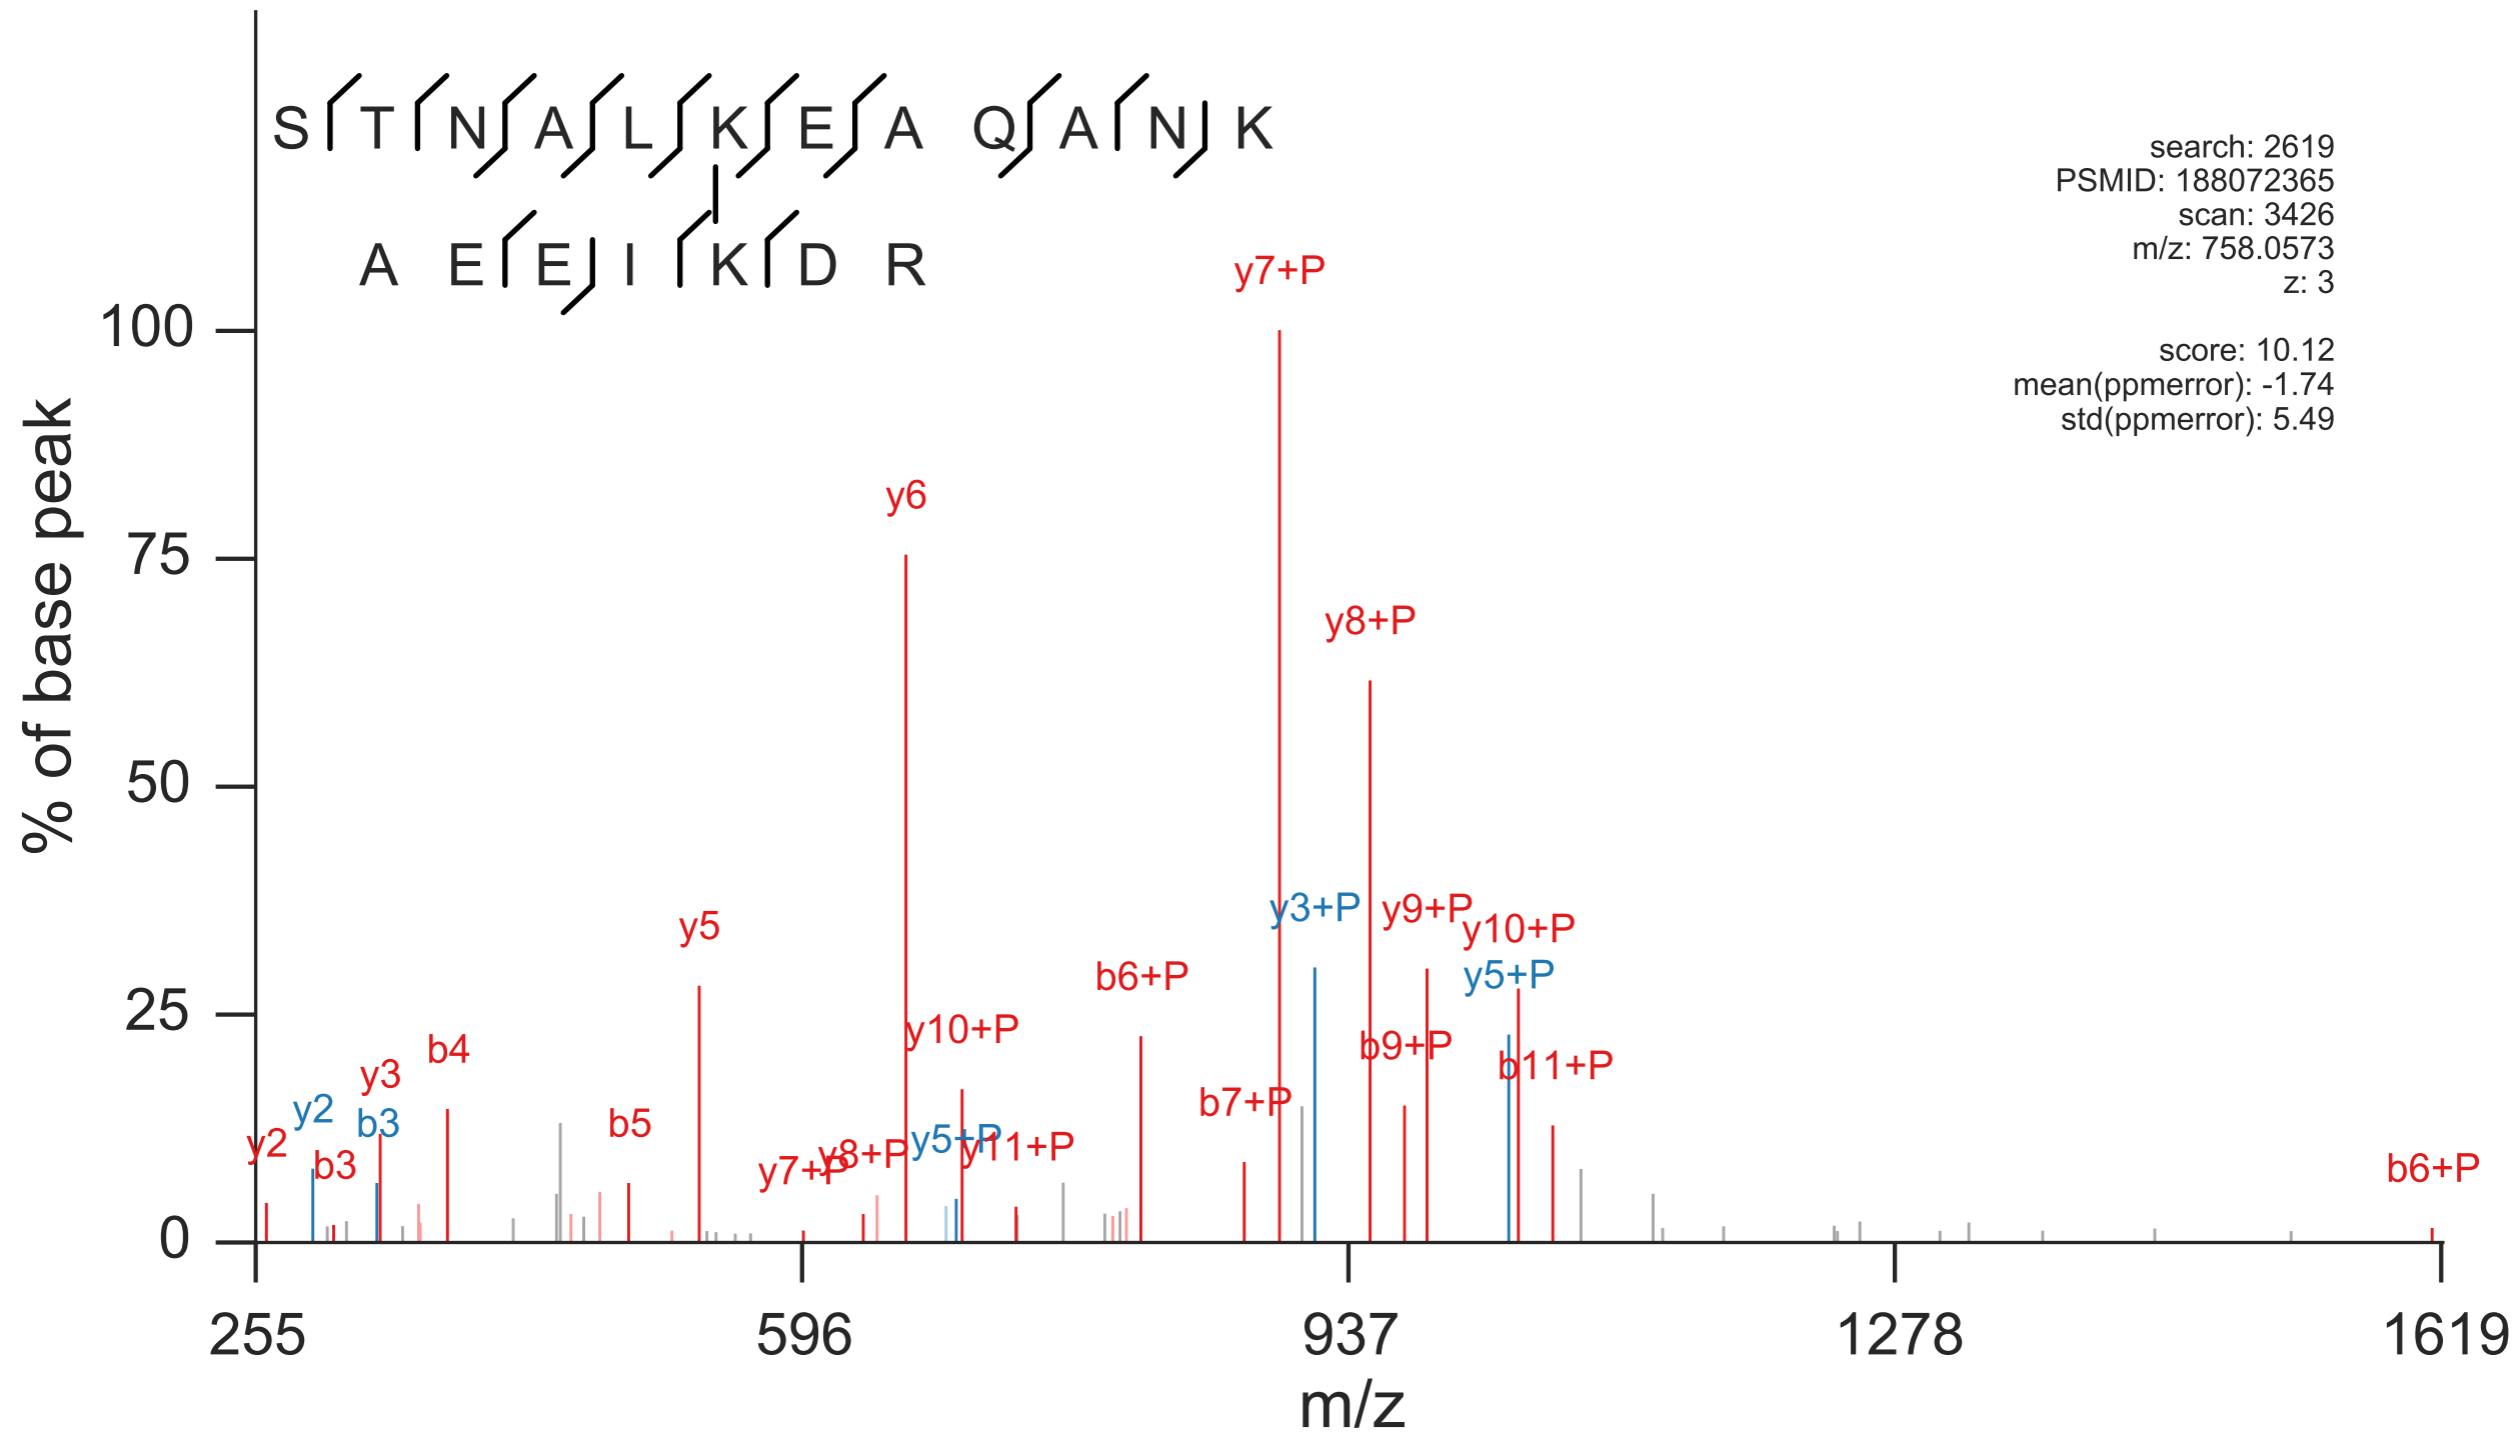

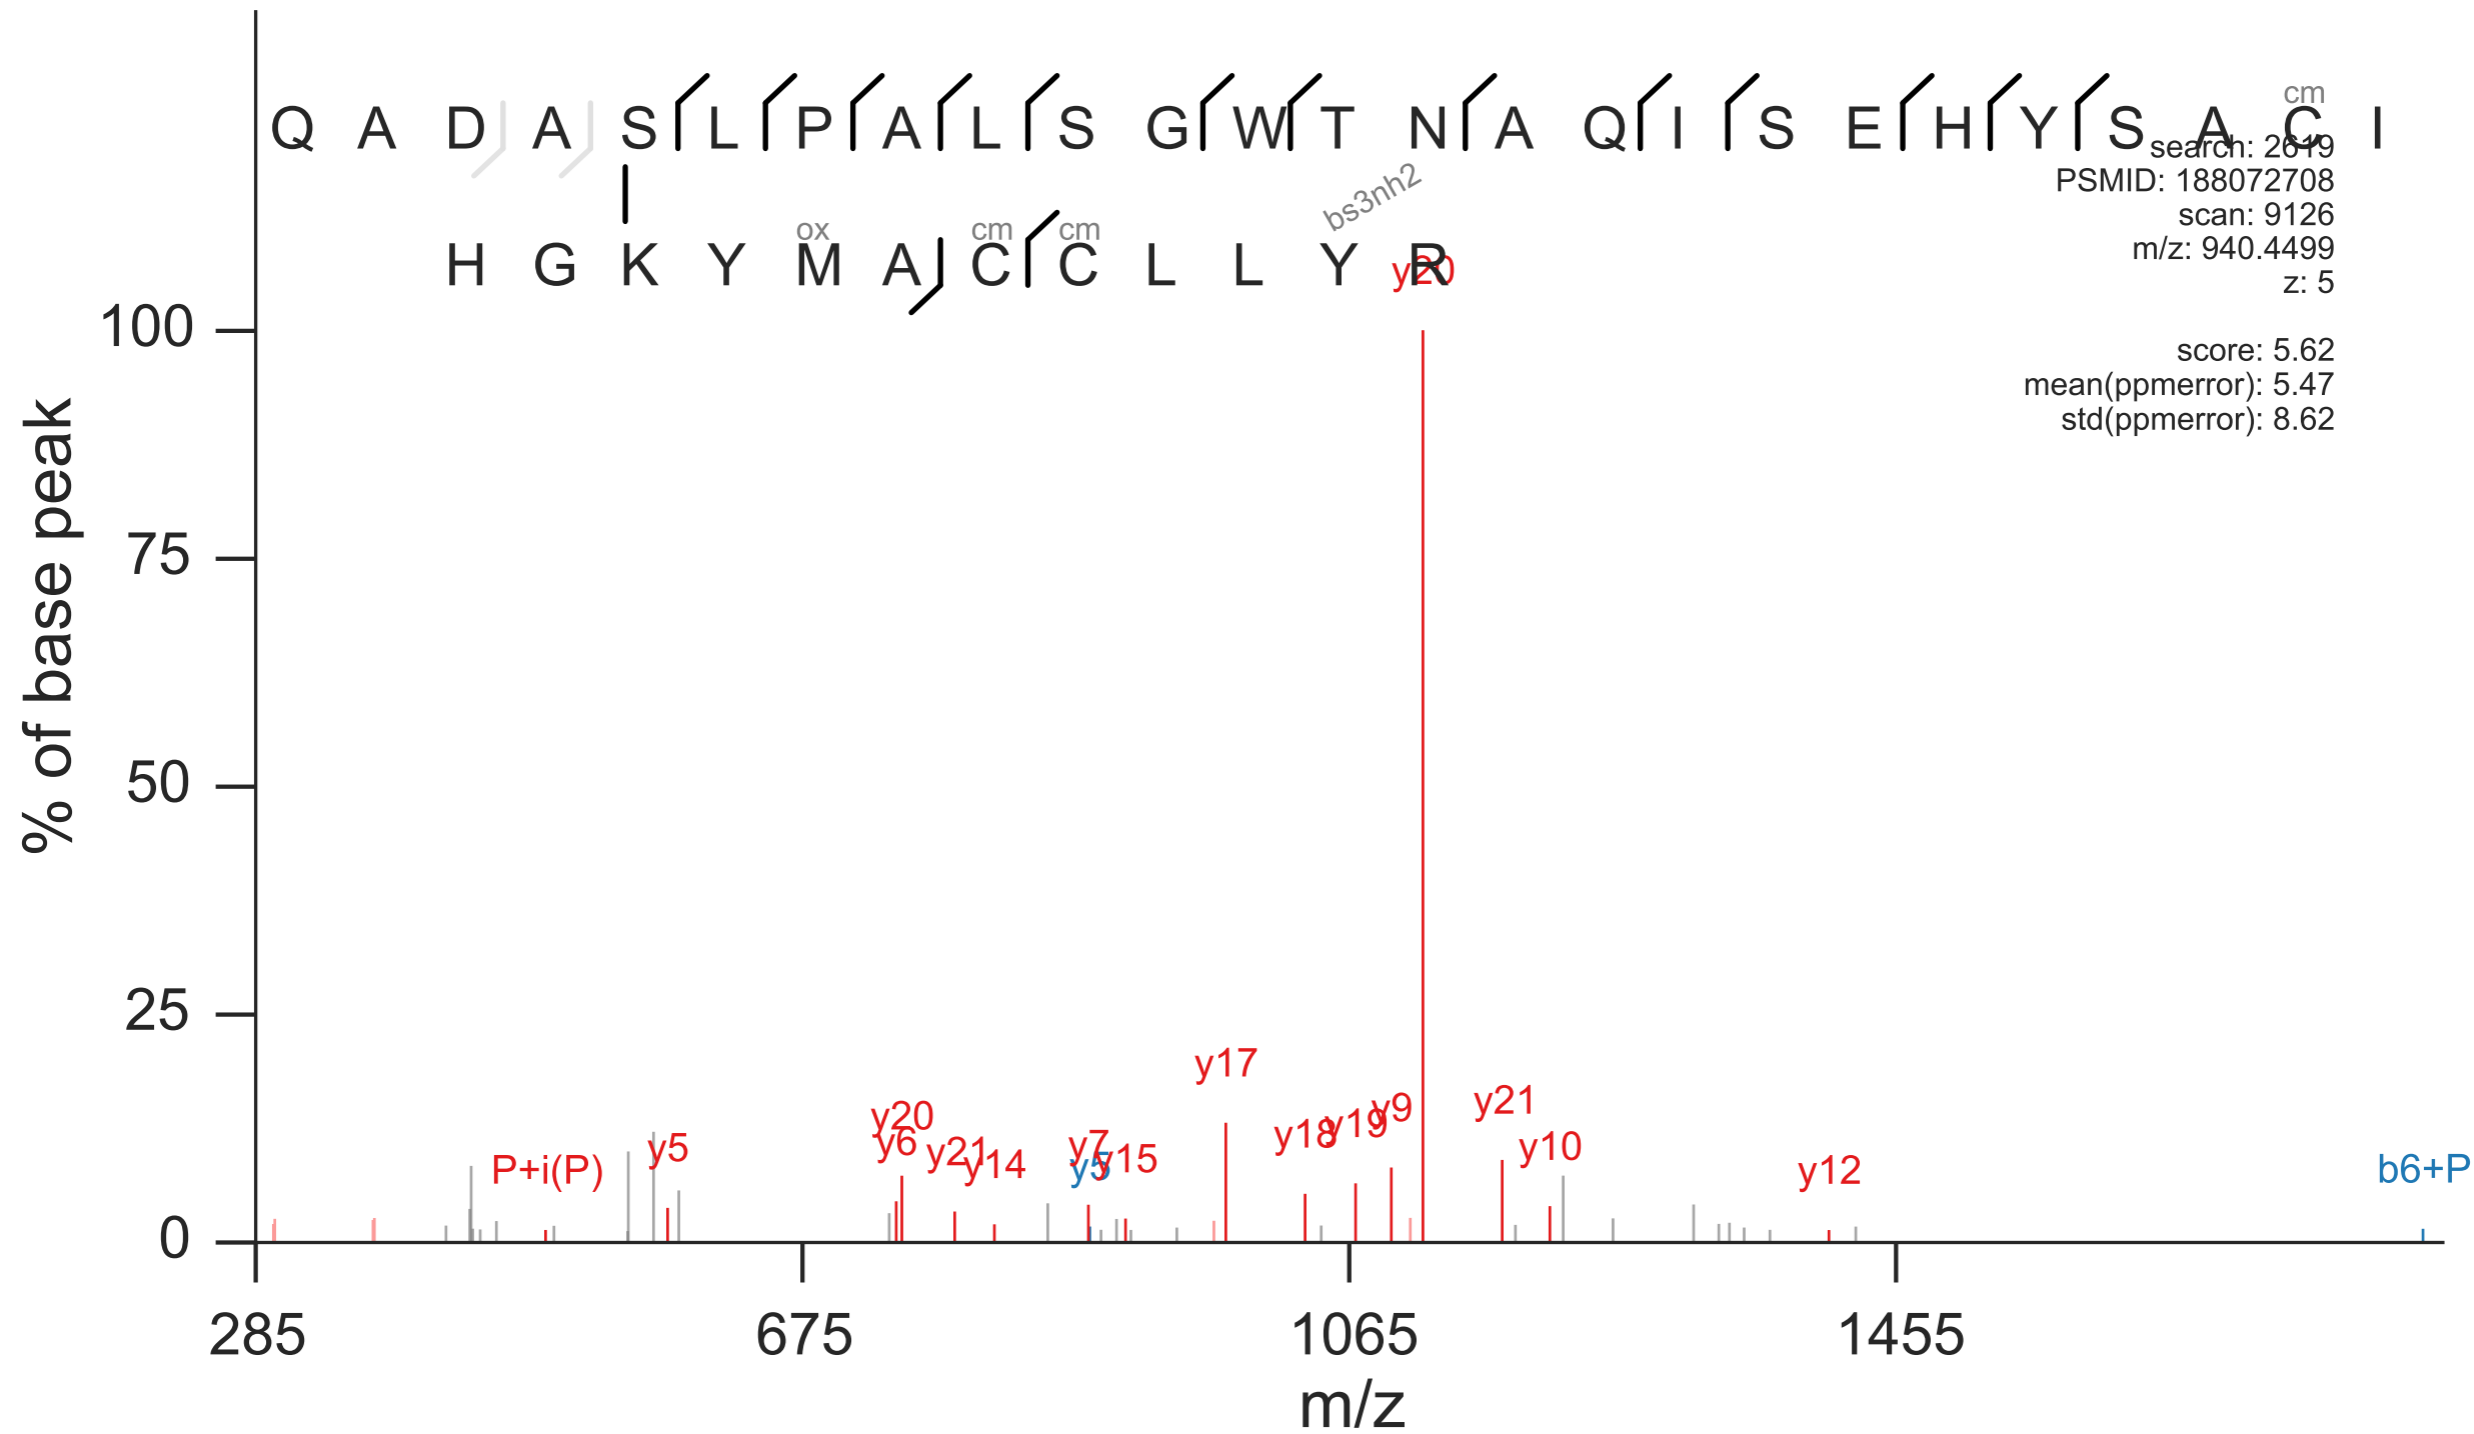

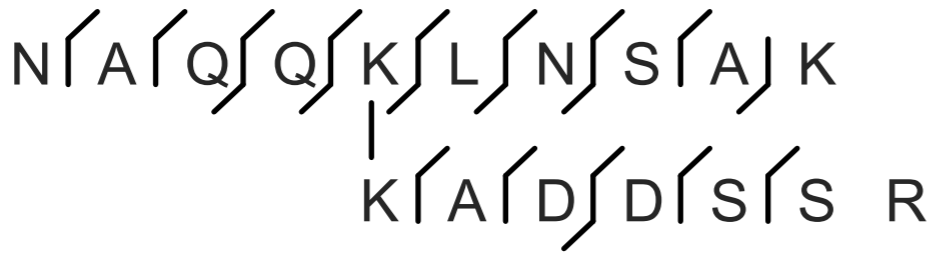

search: 2619  
 PSMID: 188072816  
 scan: 2554  
 m/z: 673.0093  
 z: 3

score: 9.88  
 mean(ppmerror): -0.24  
 std(ppmerror): 4.81

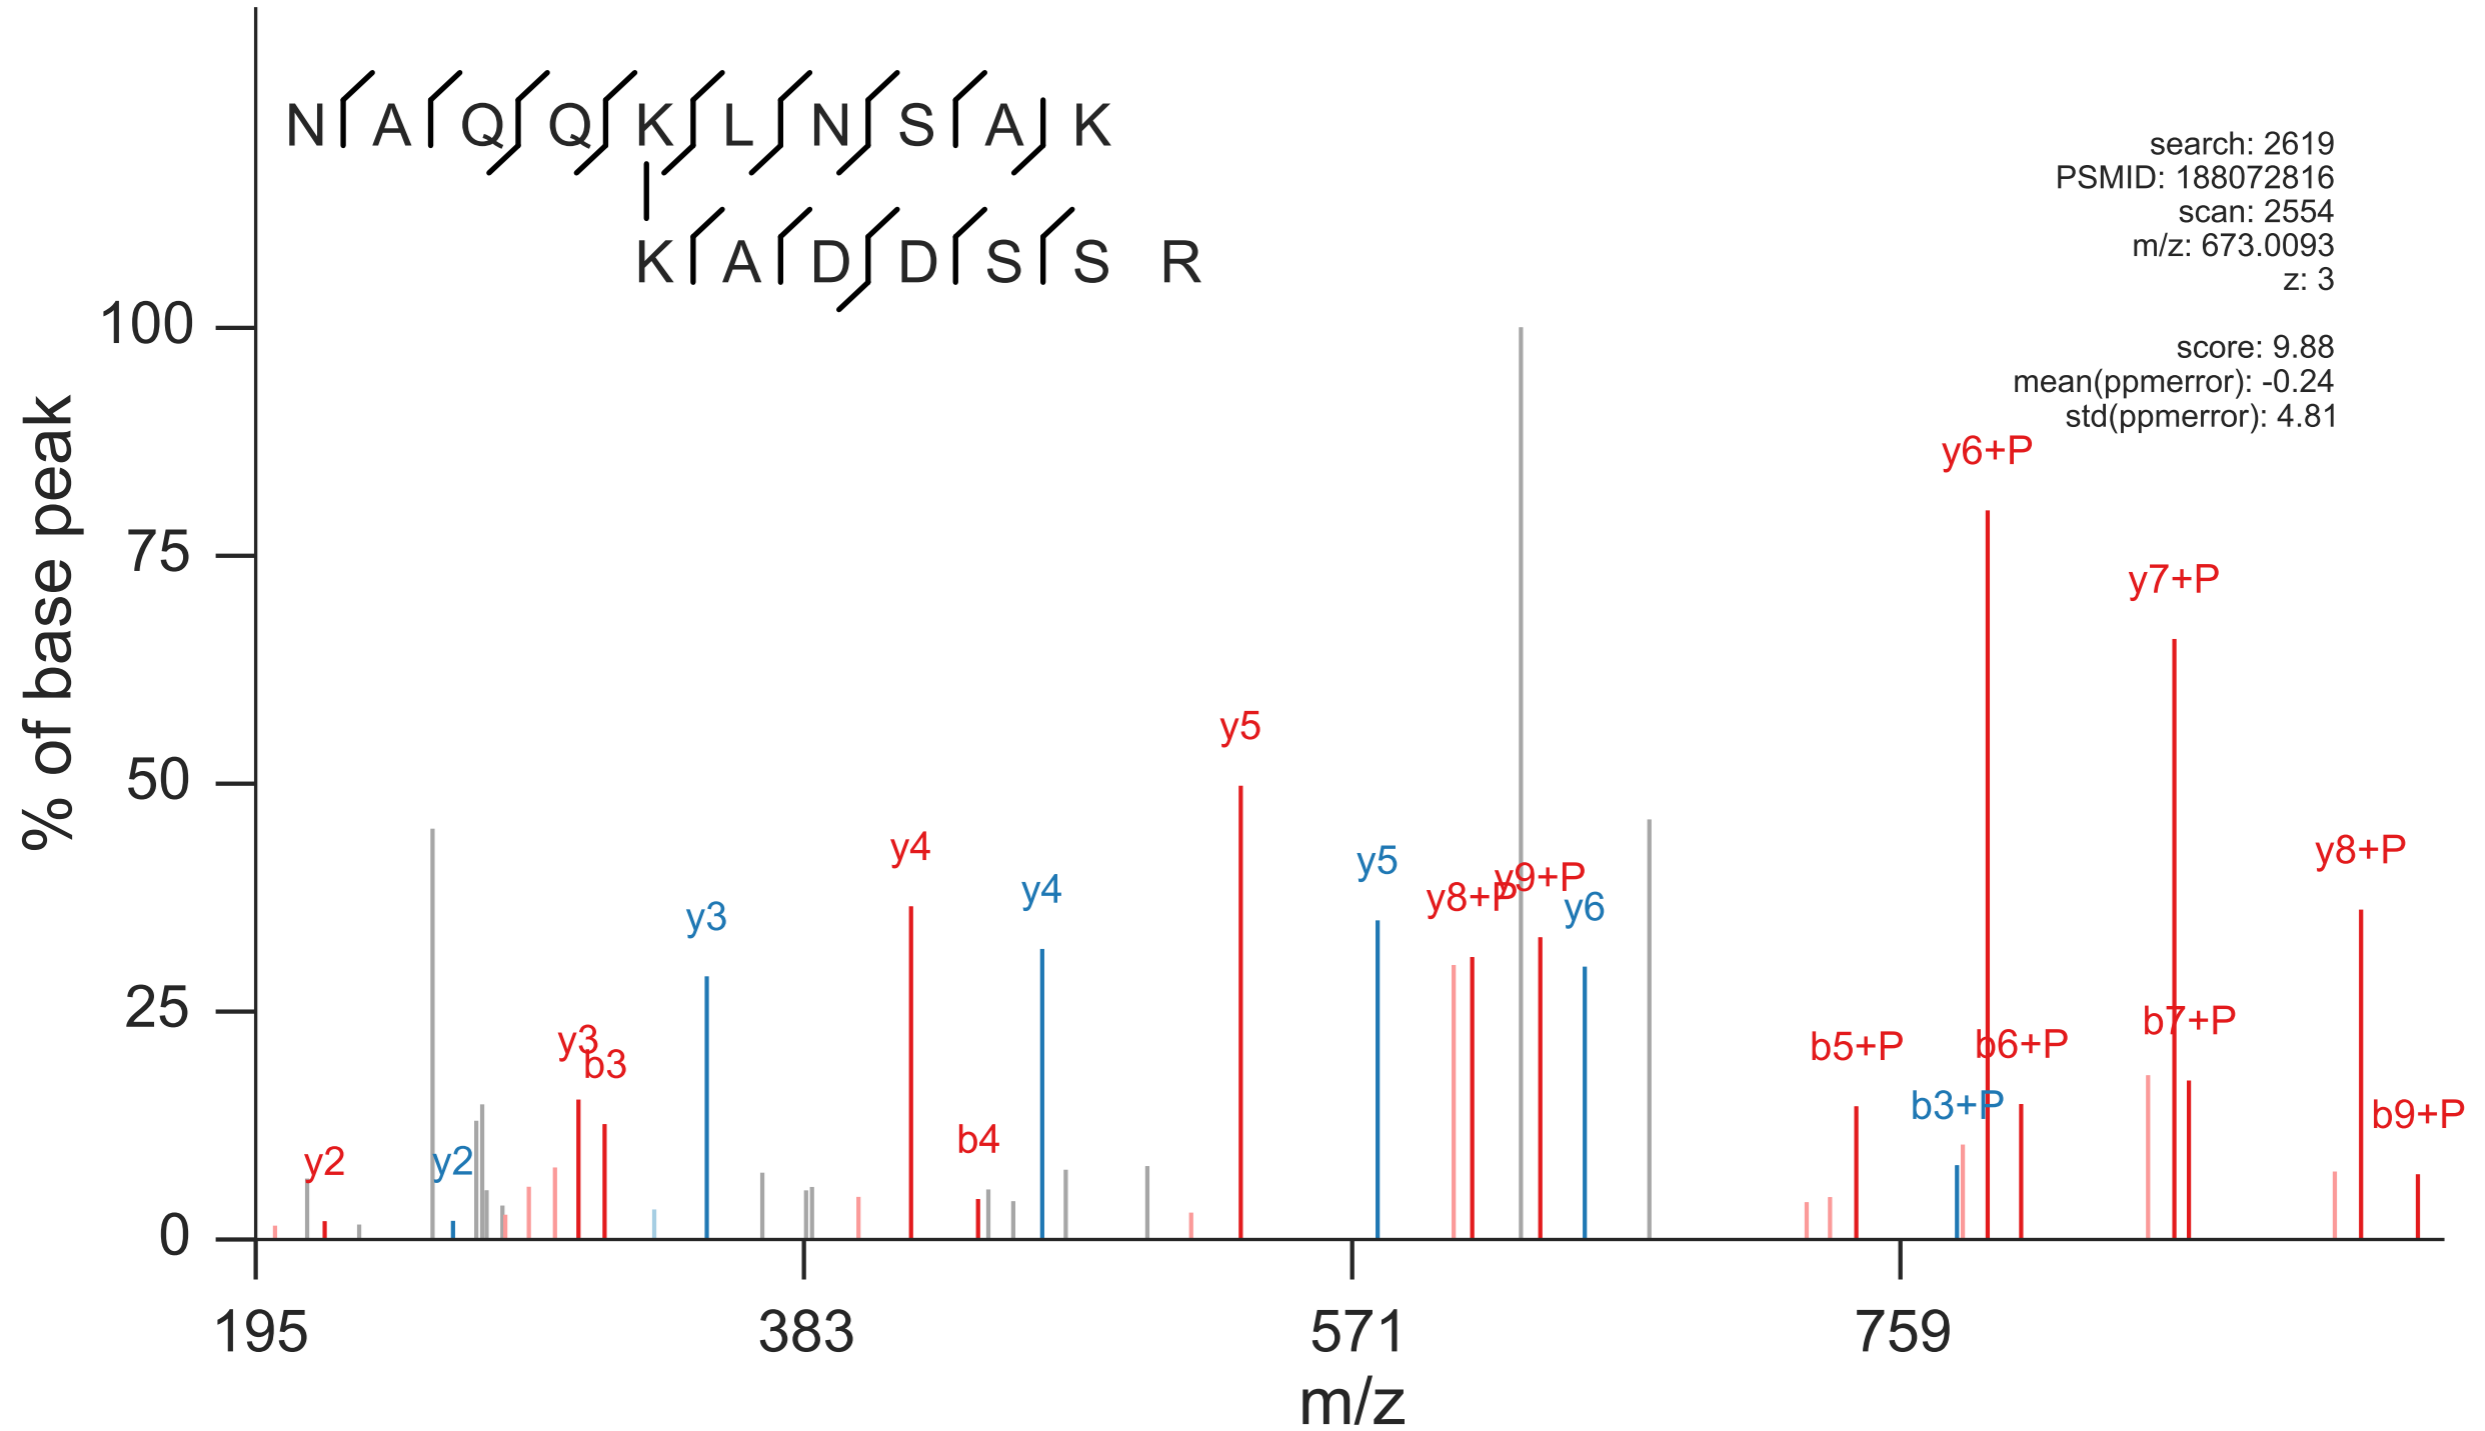

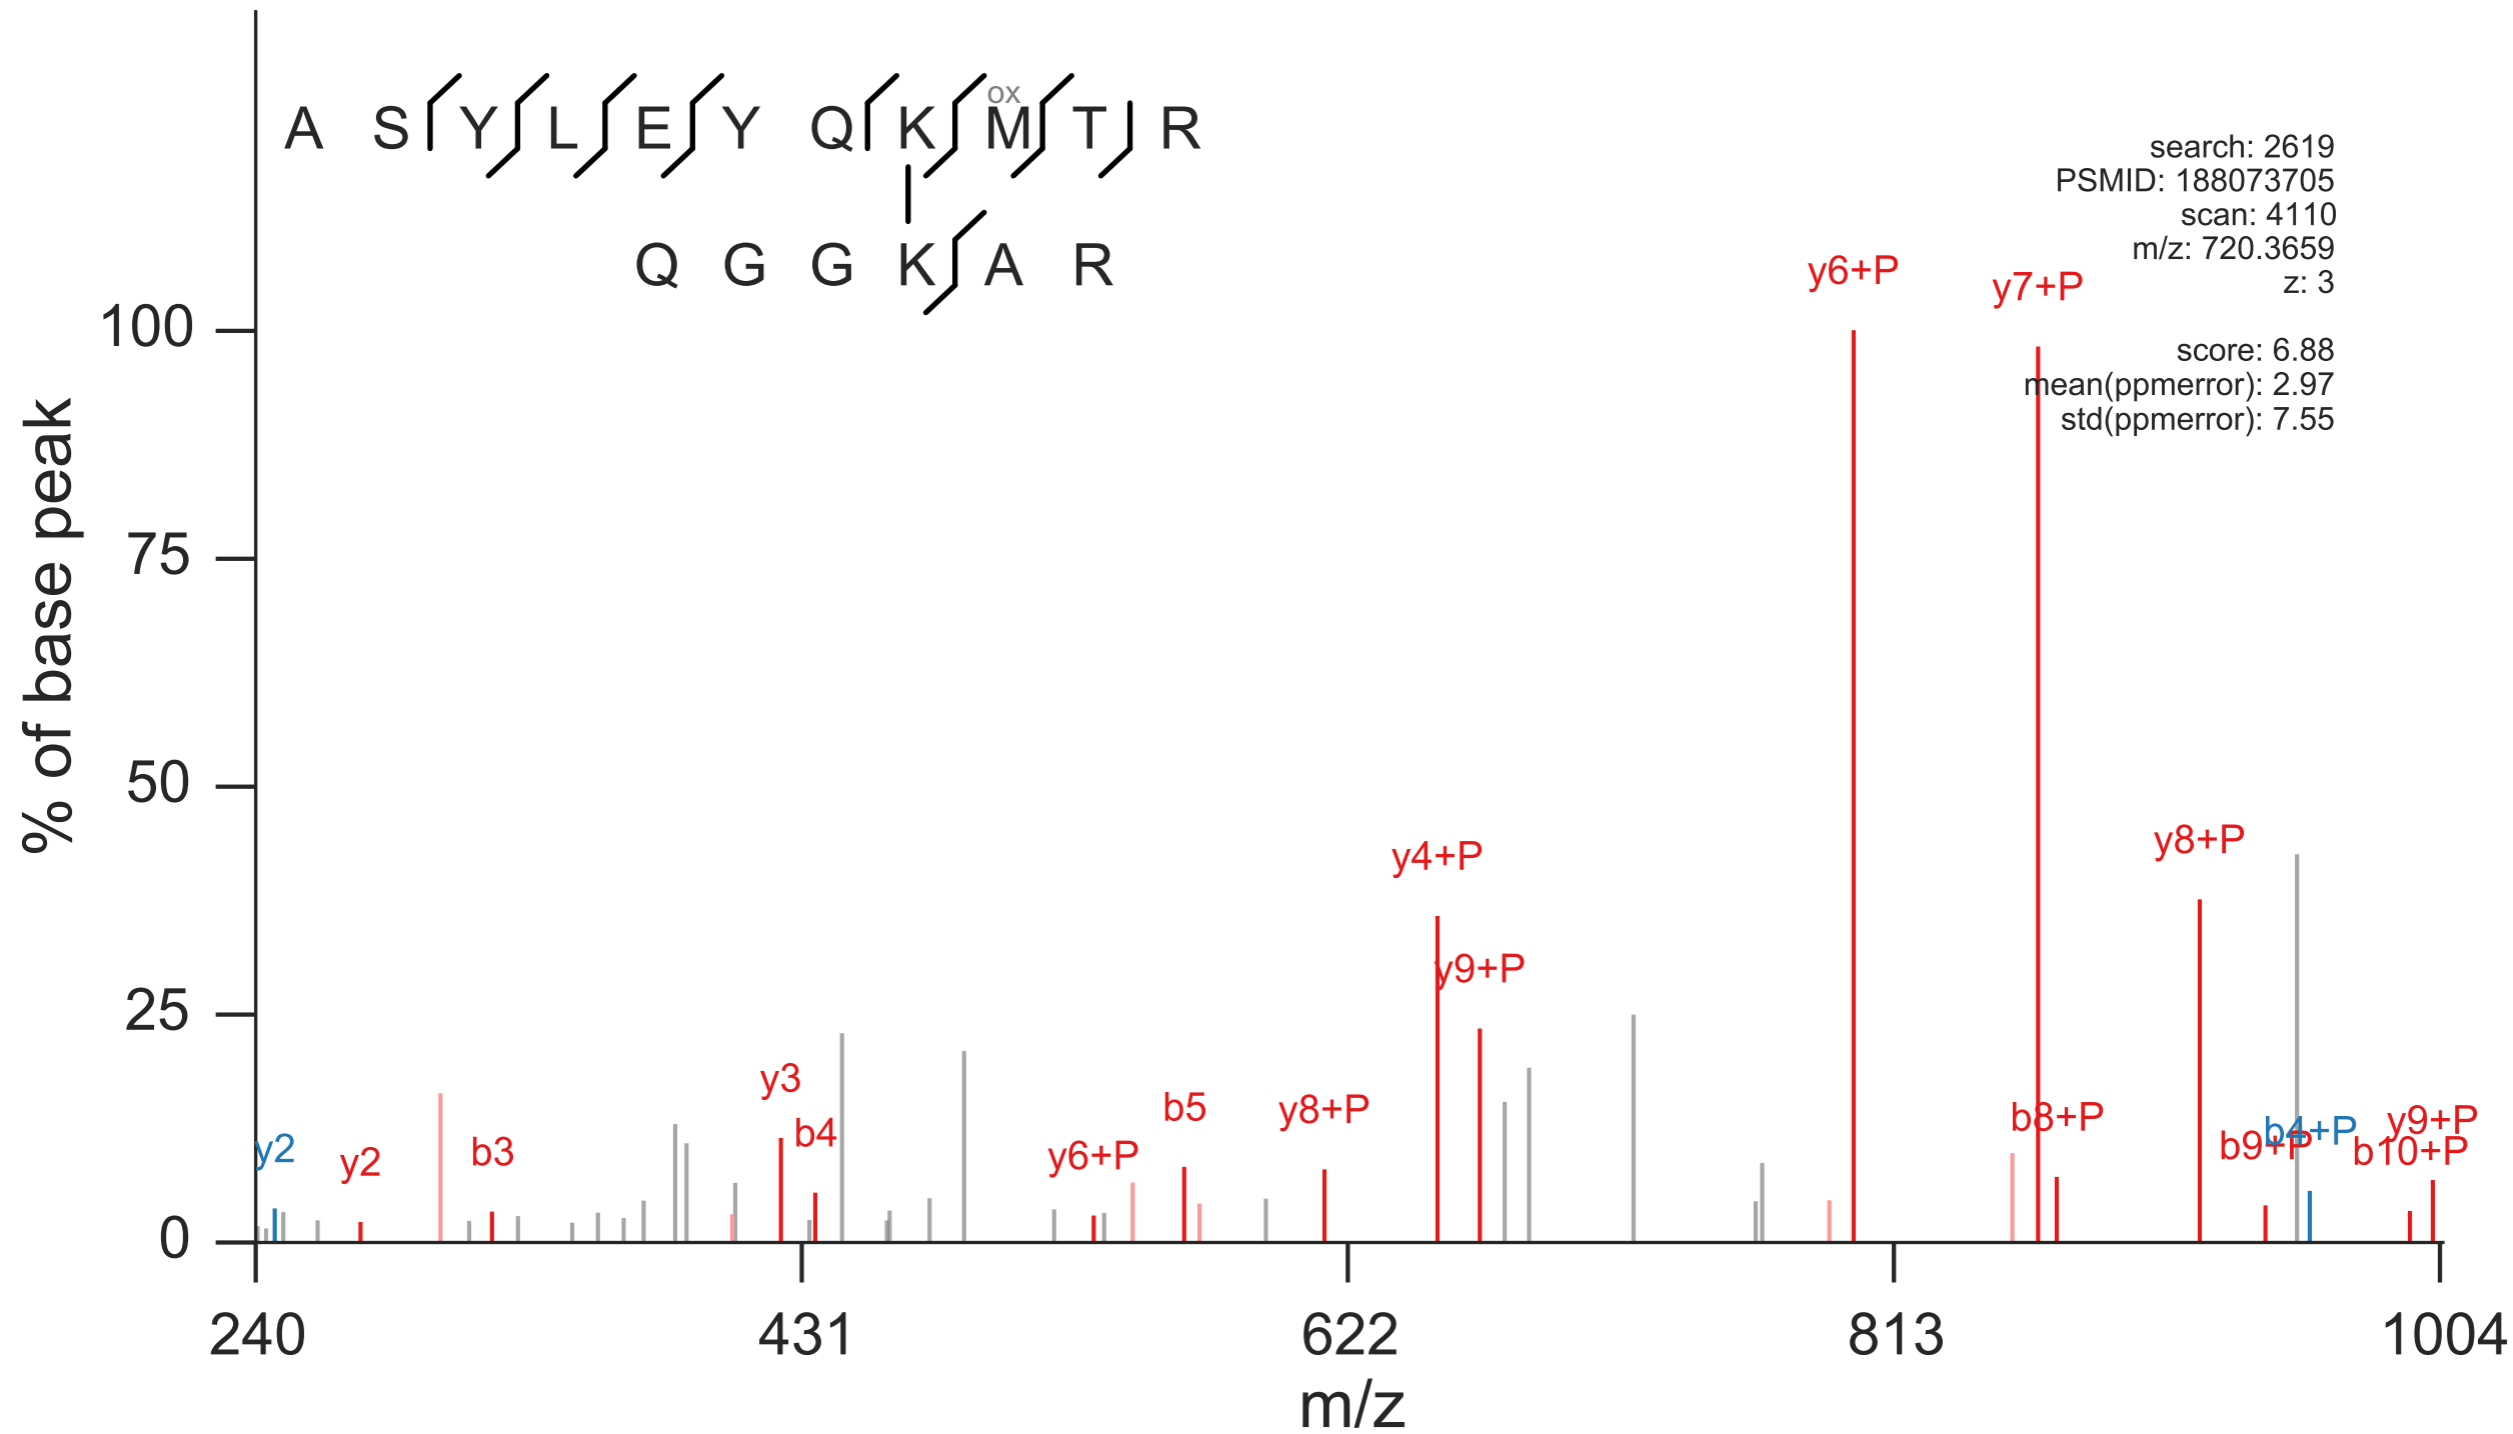

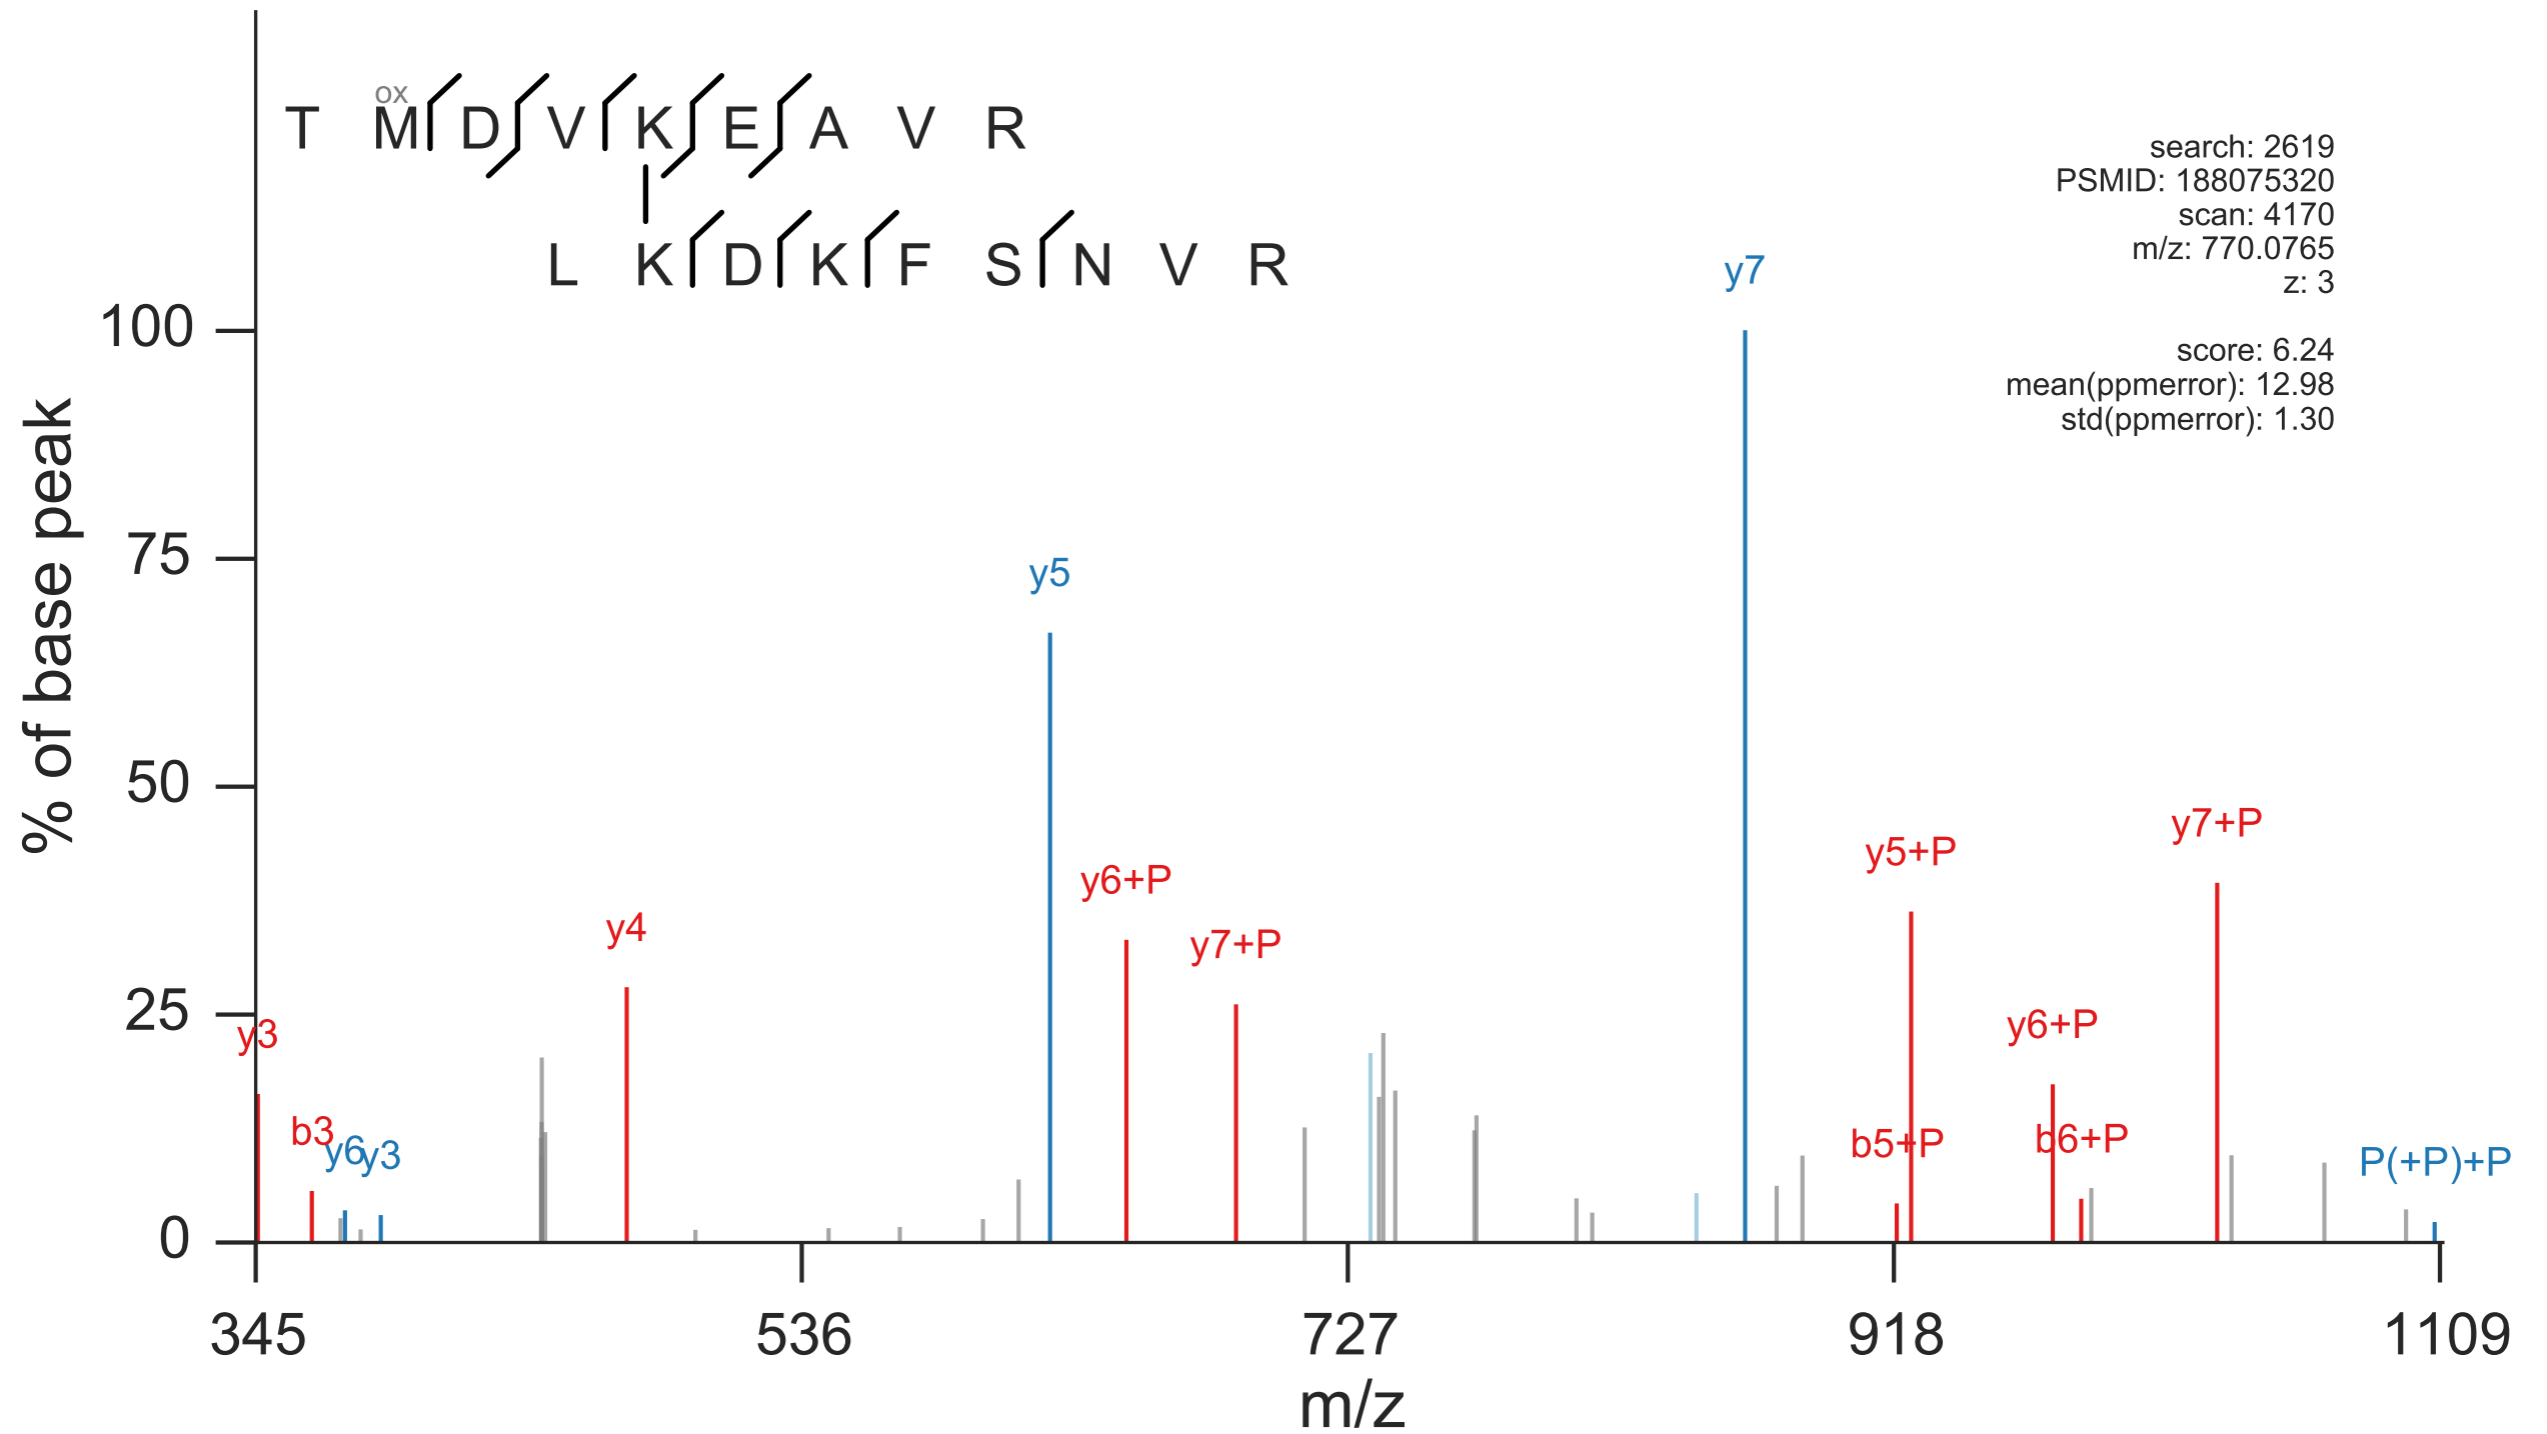



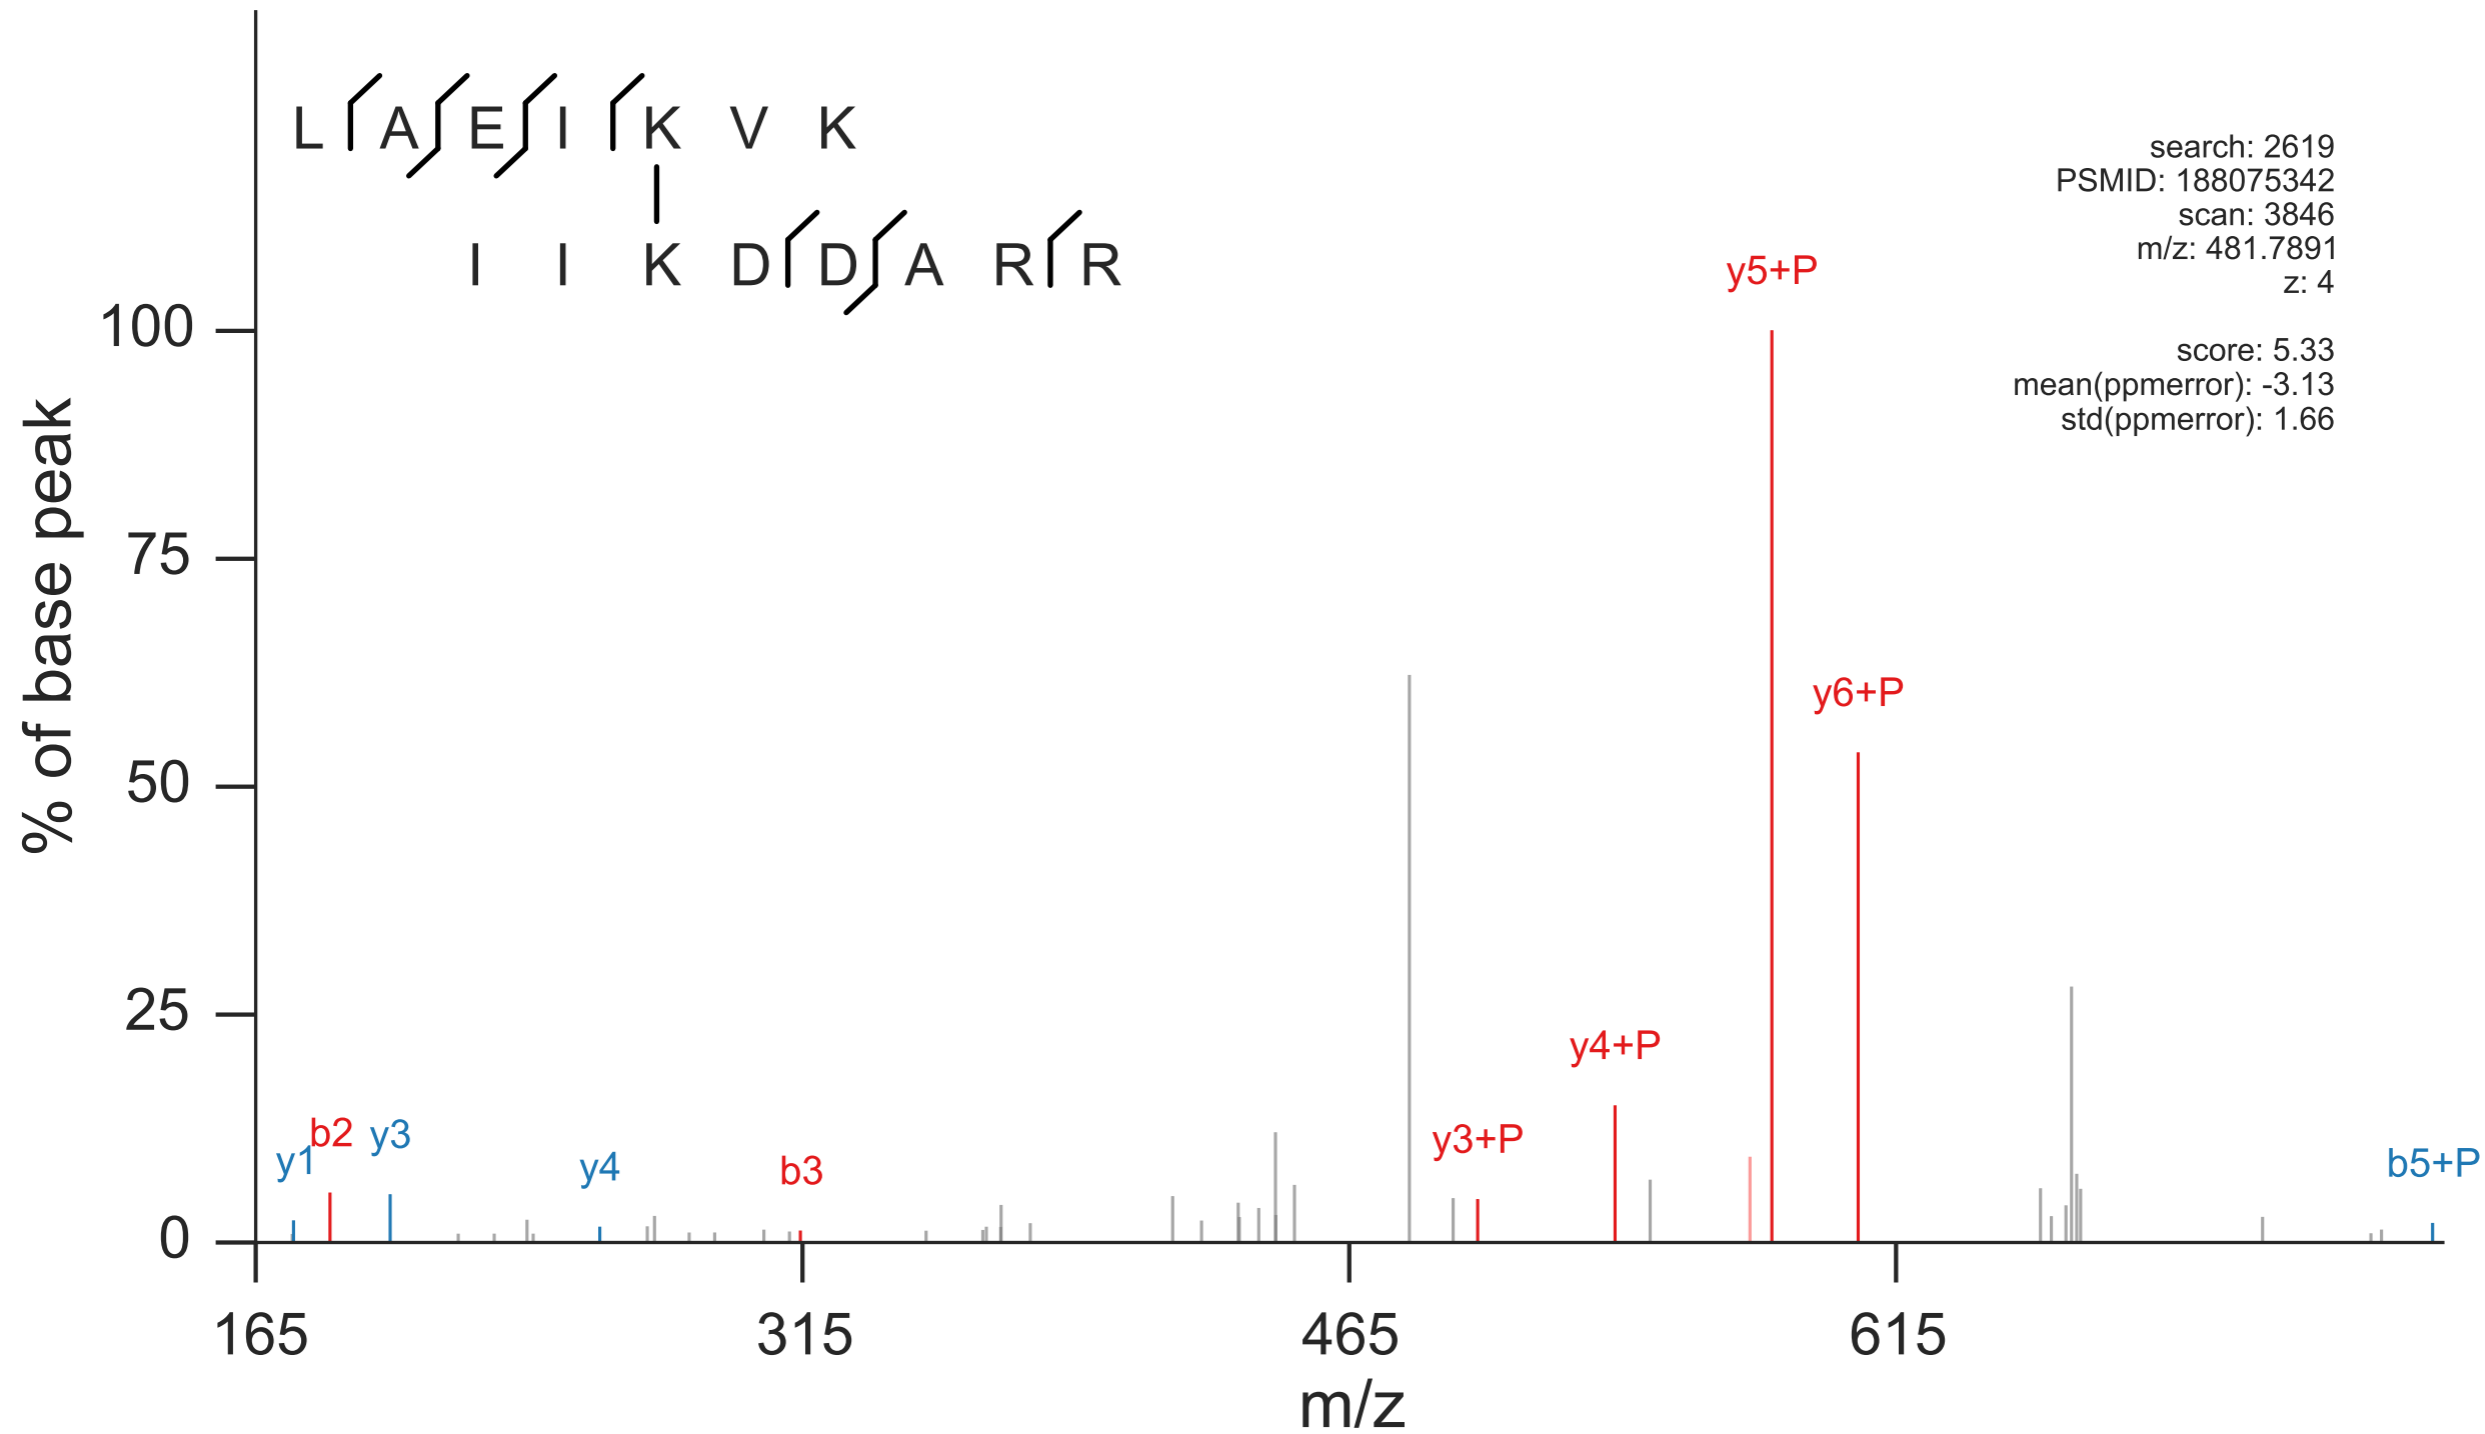

search: 2619  
PSMID: 188075342  
scan: 3846  
m/z: 481.7891  
z: 4  
score: 5.33  
mean(ppmerror): -3.13  
std(ppmerror): 1.66

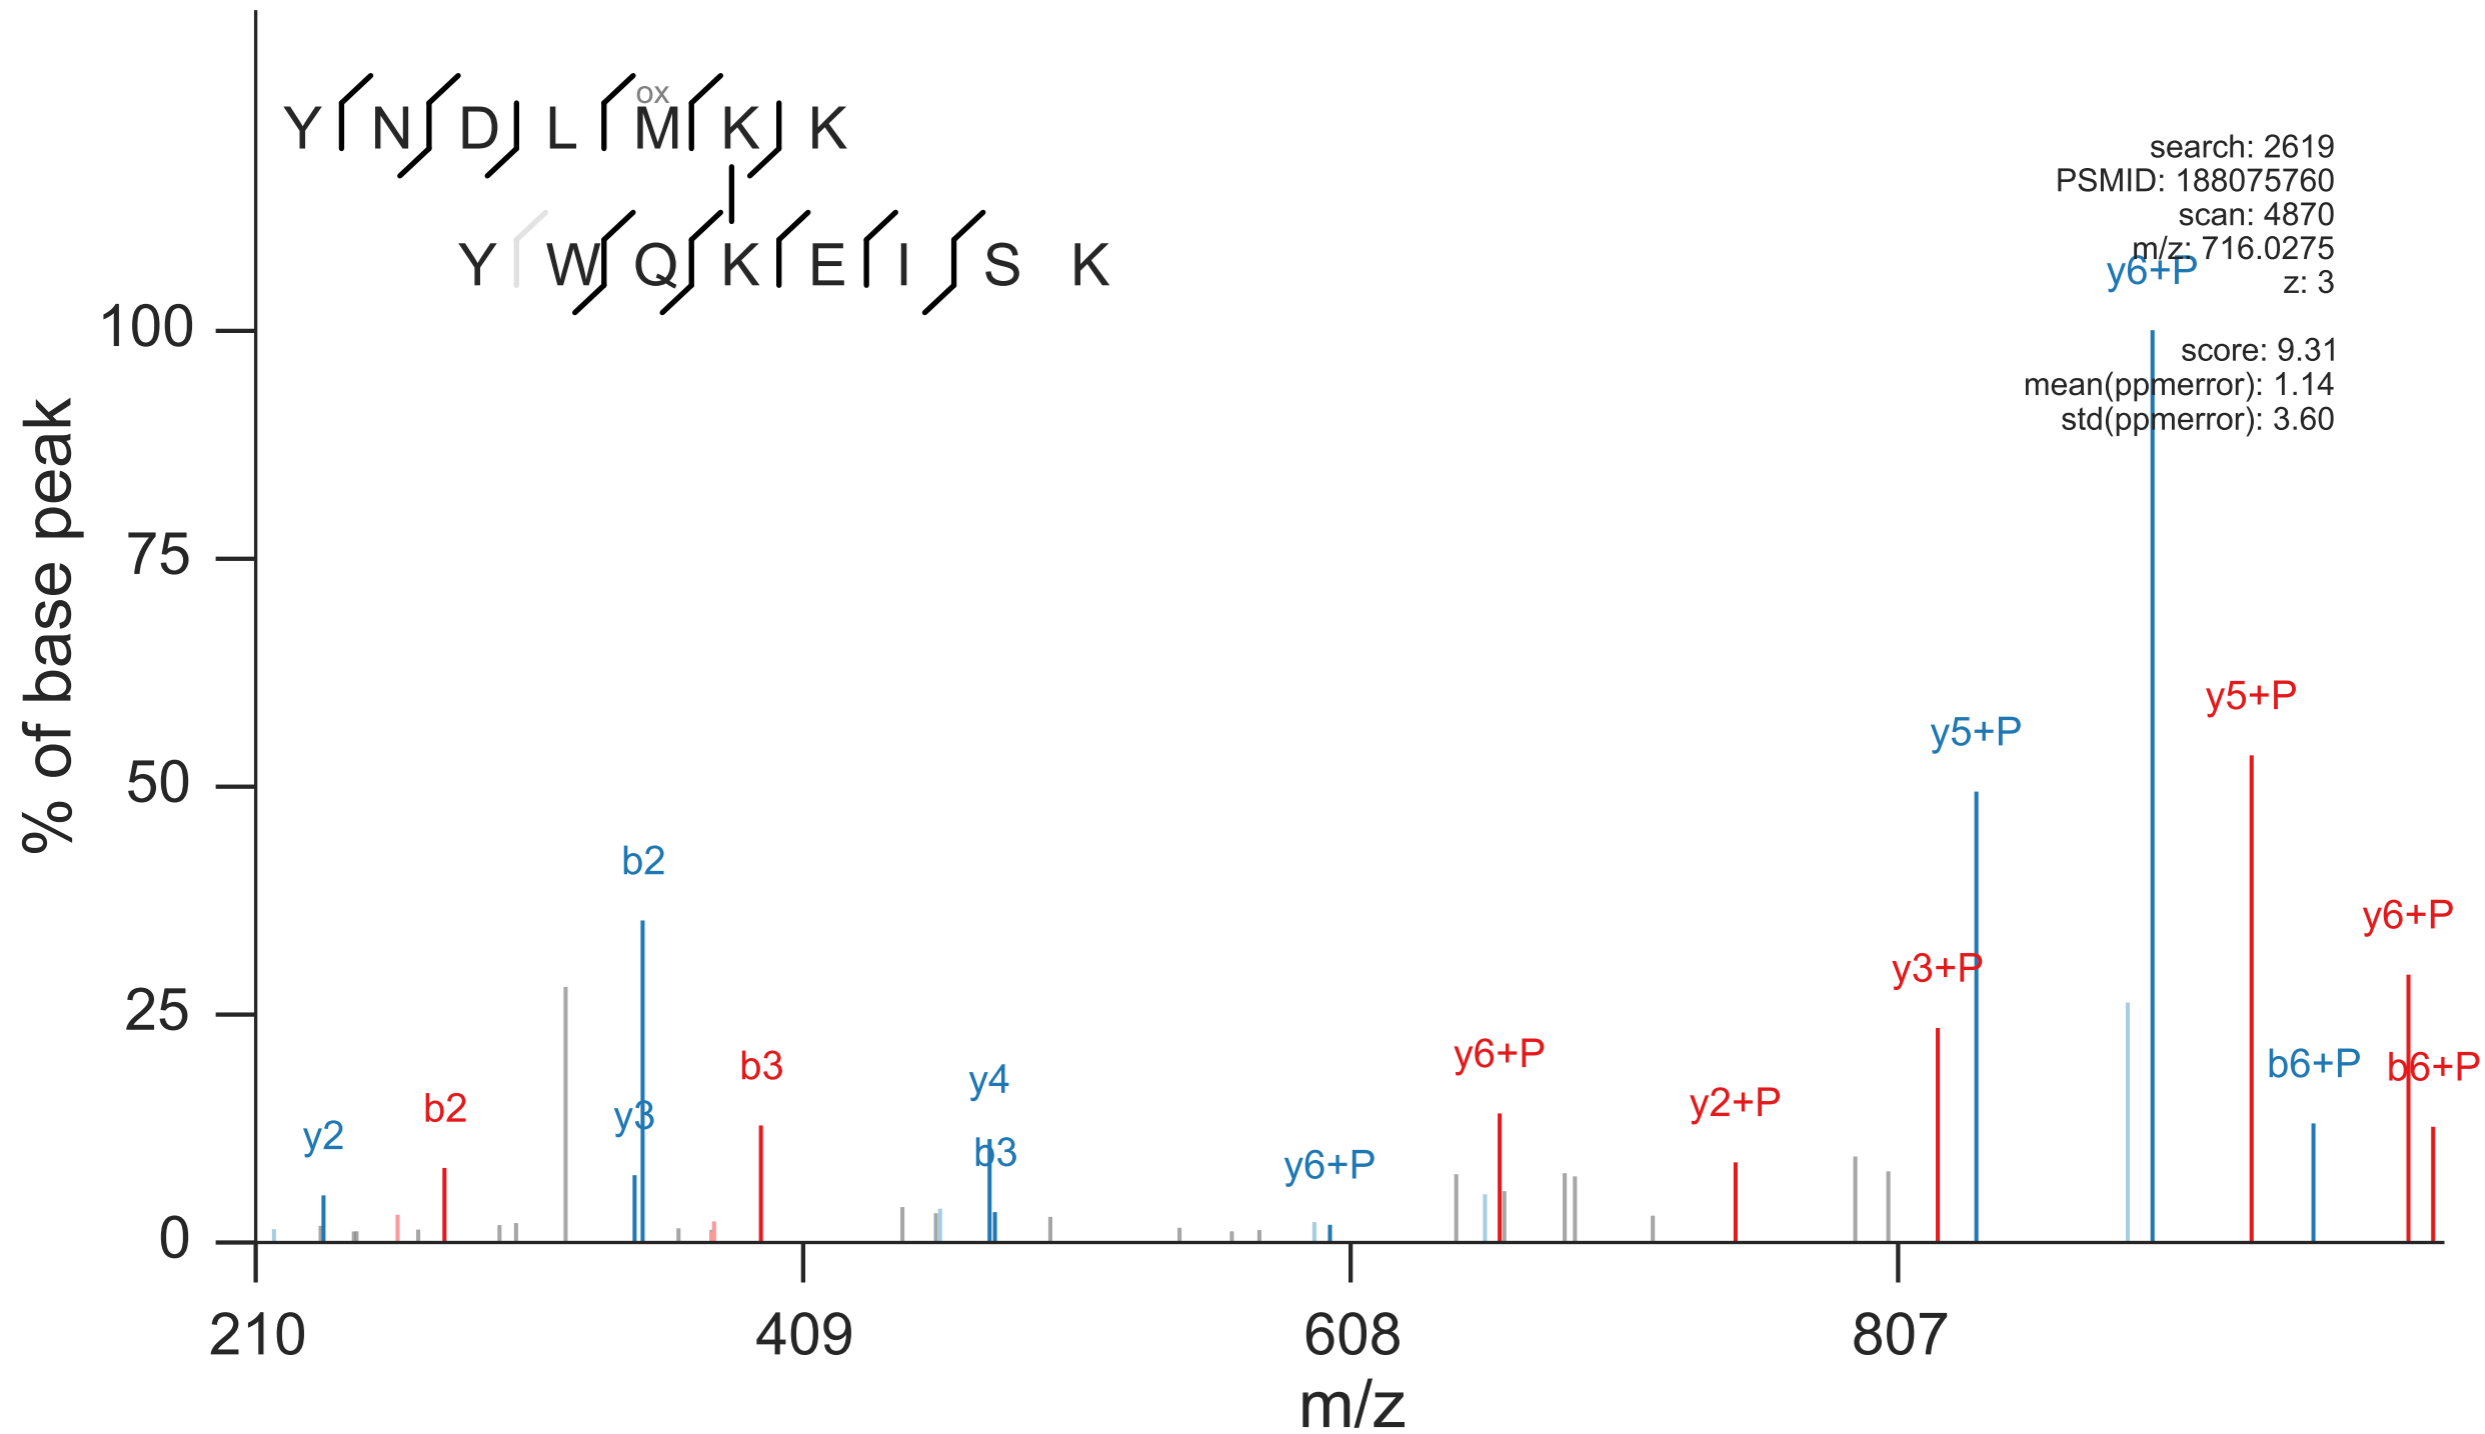

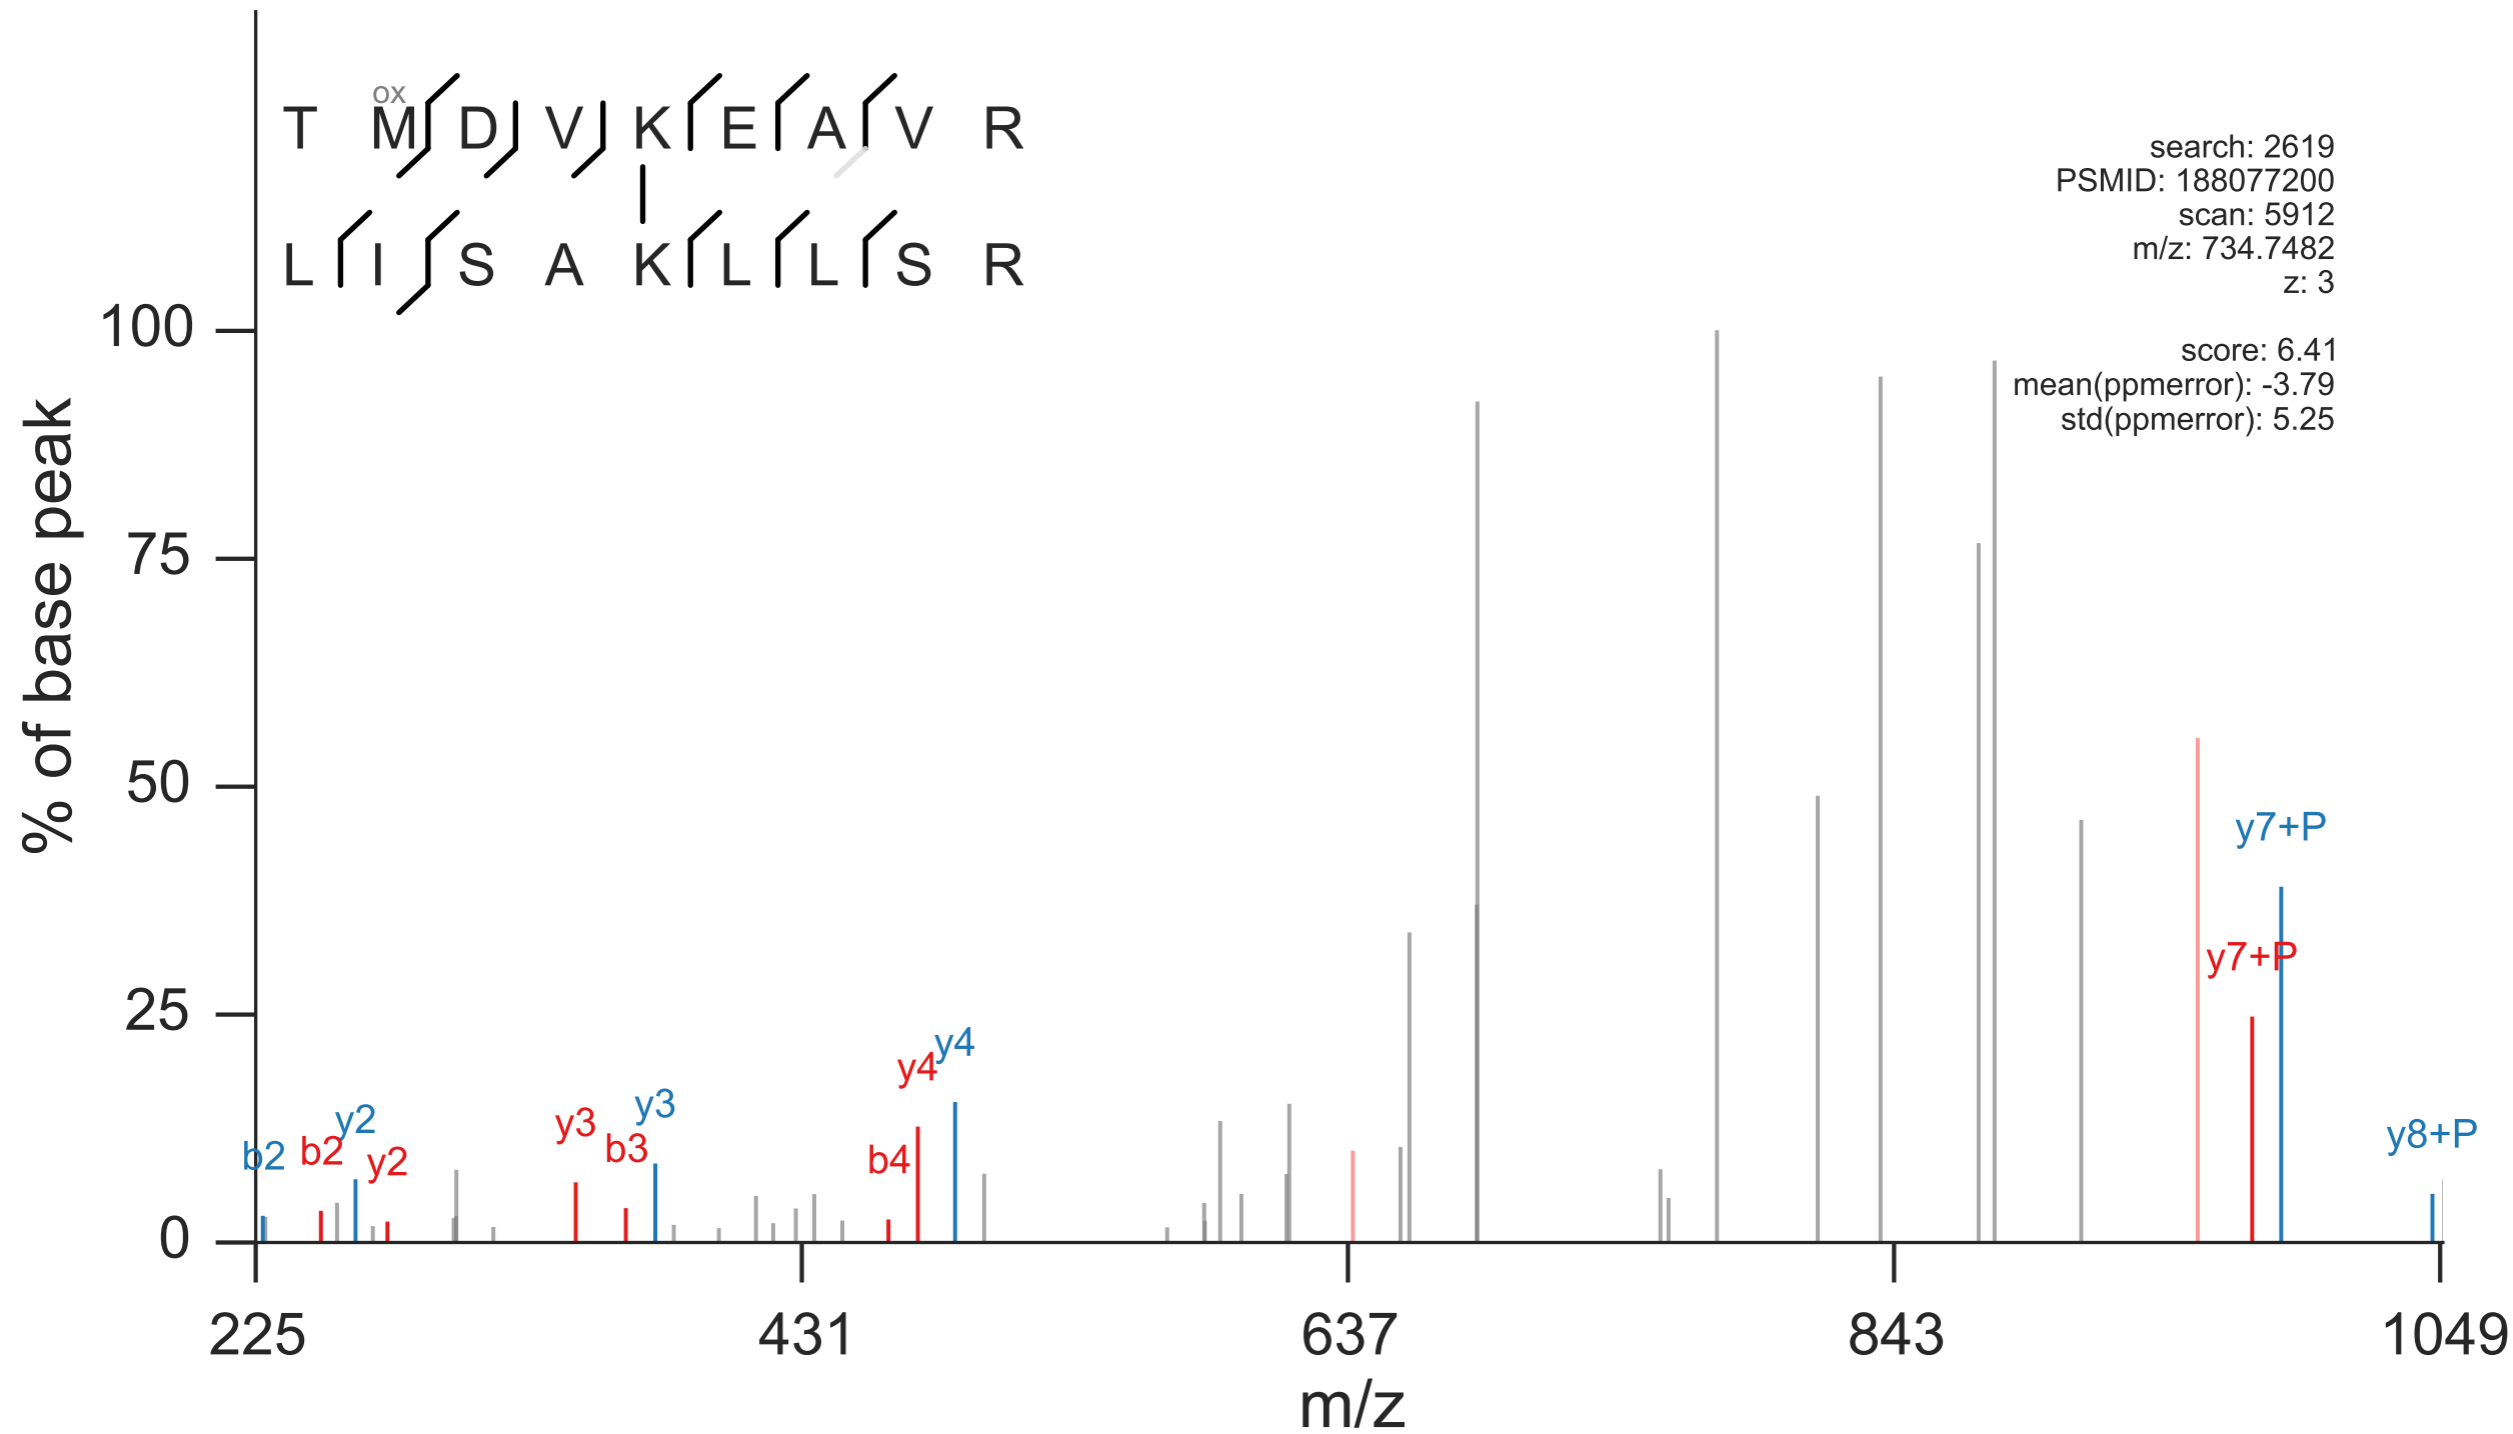

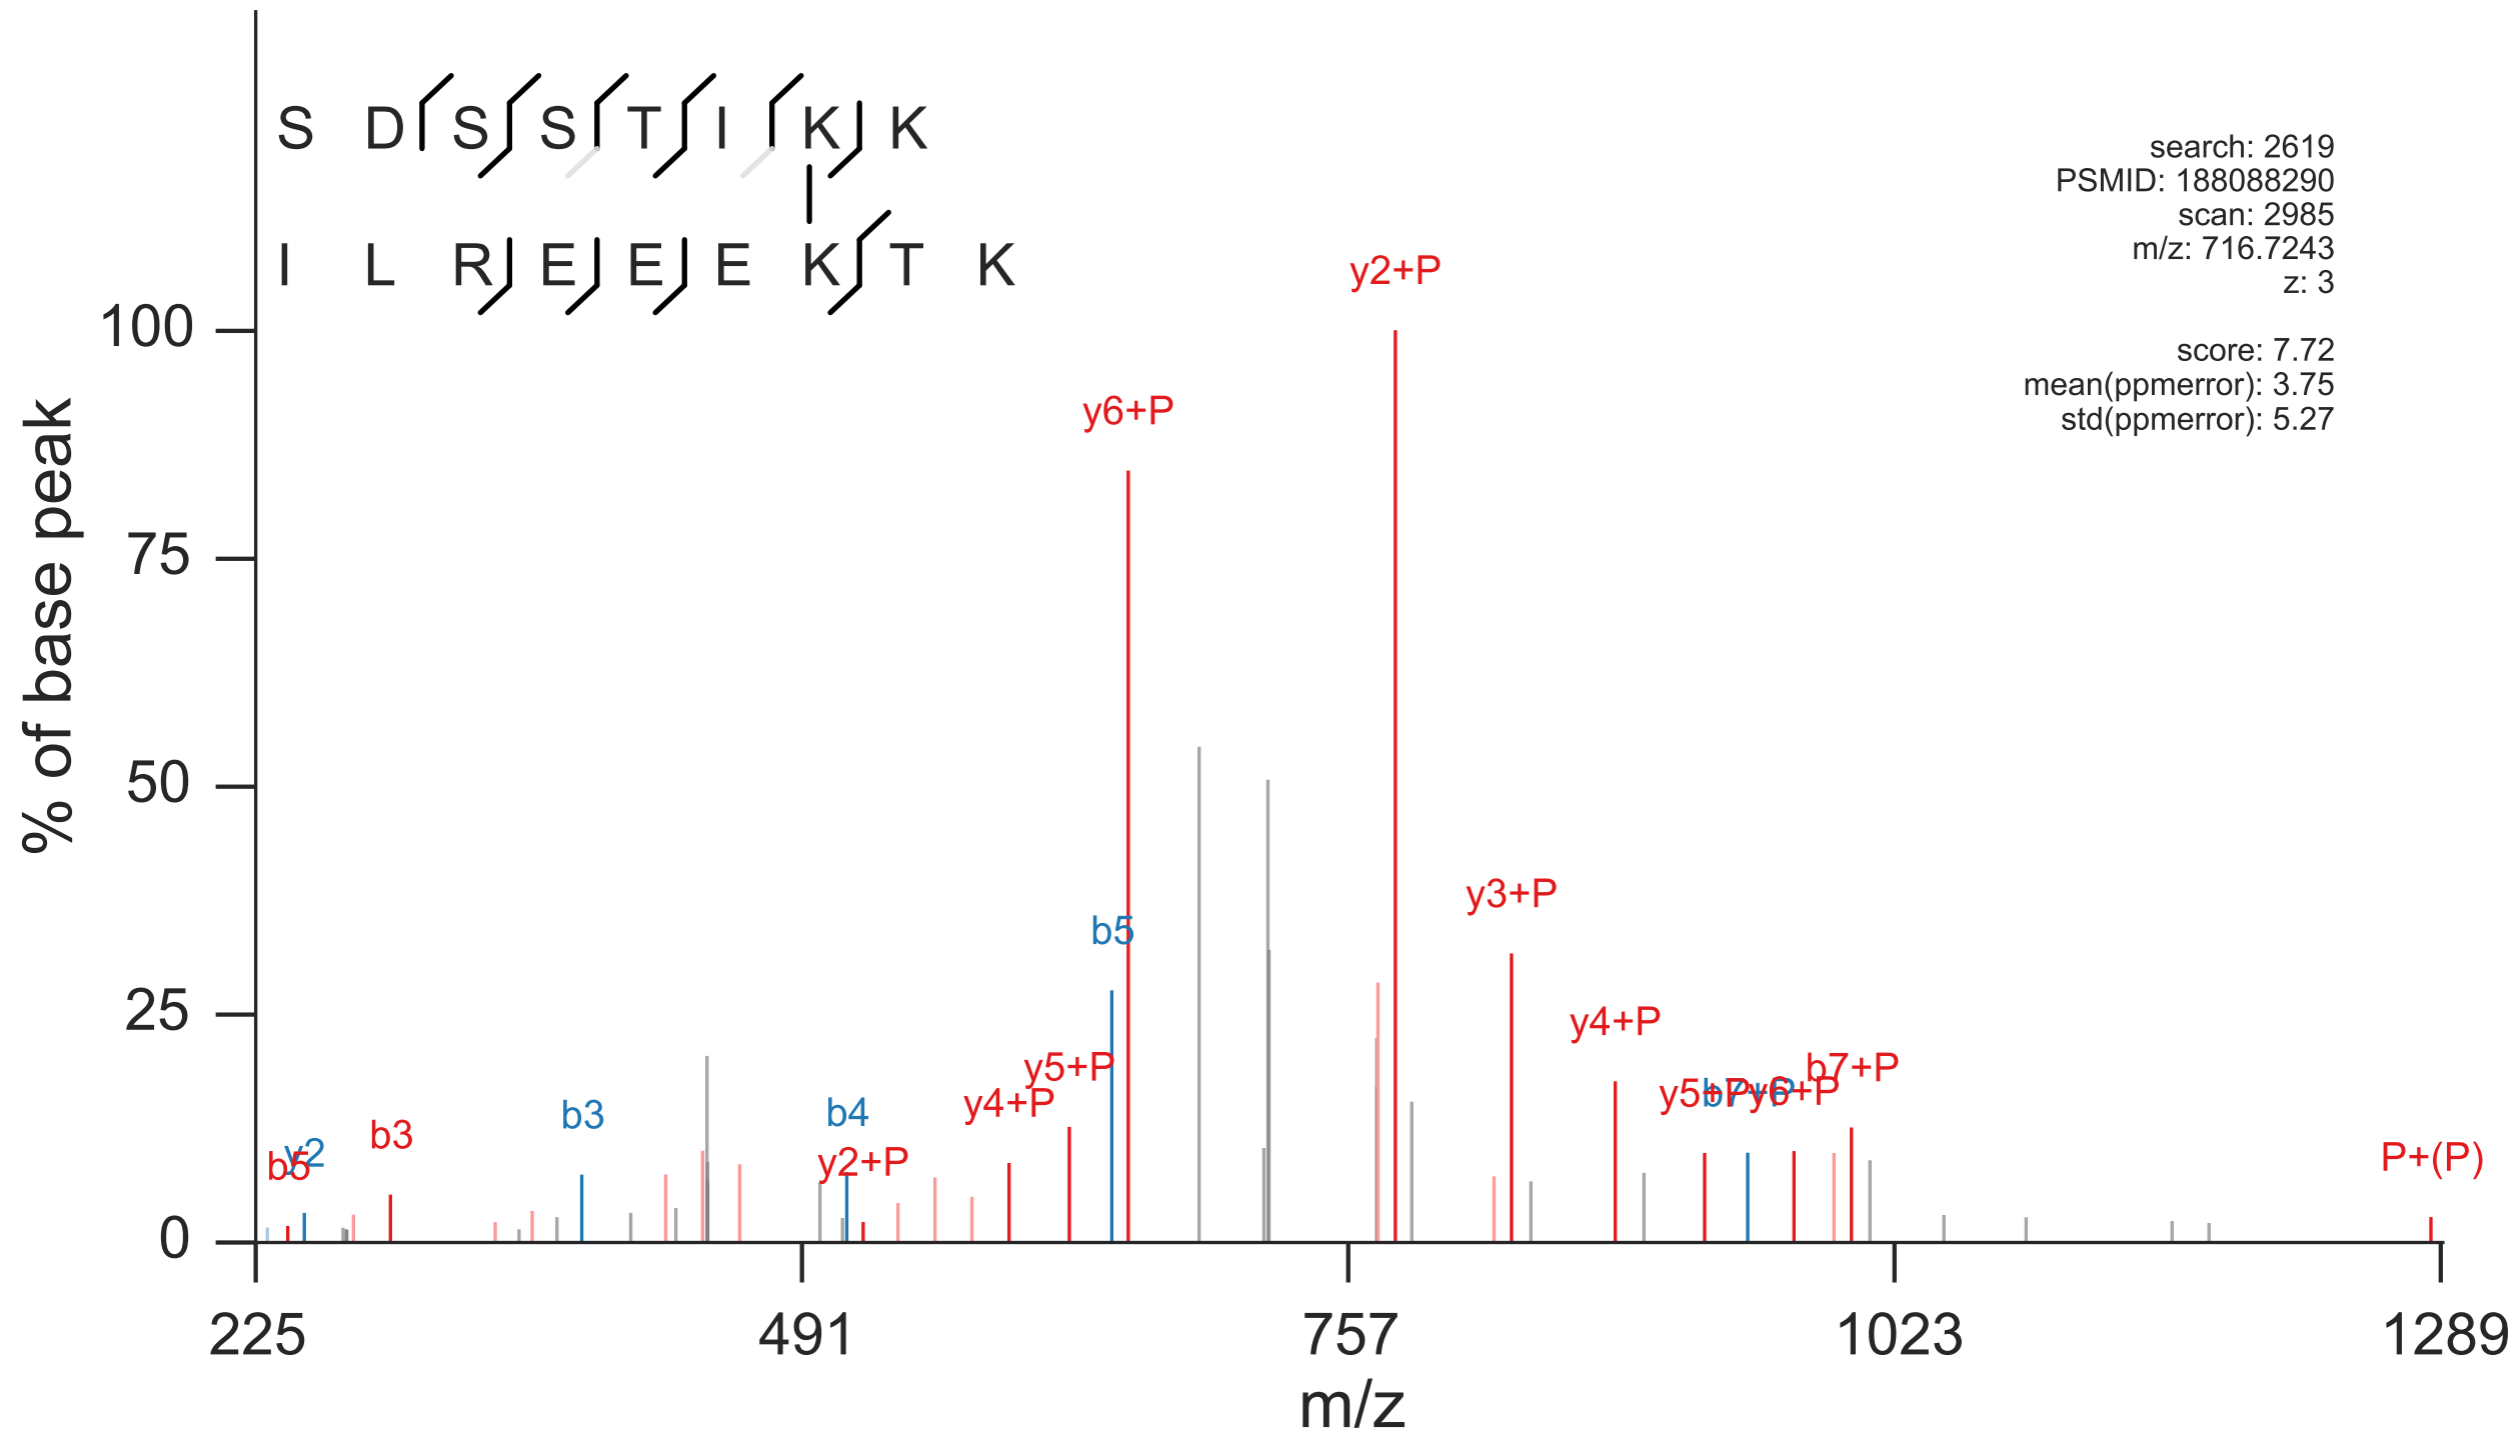

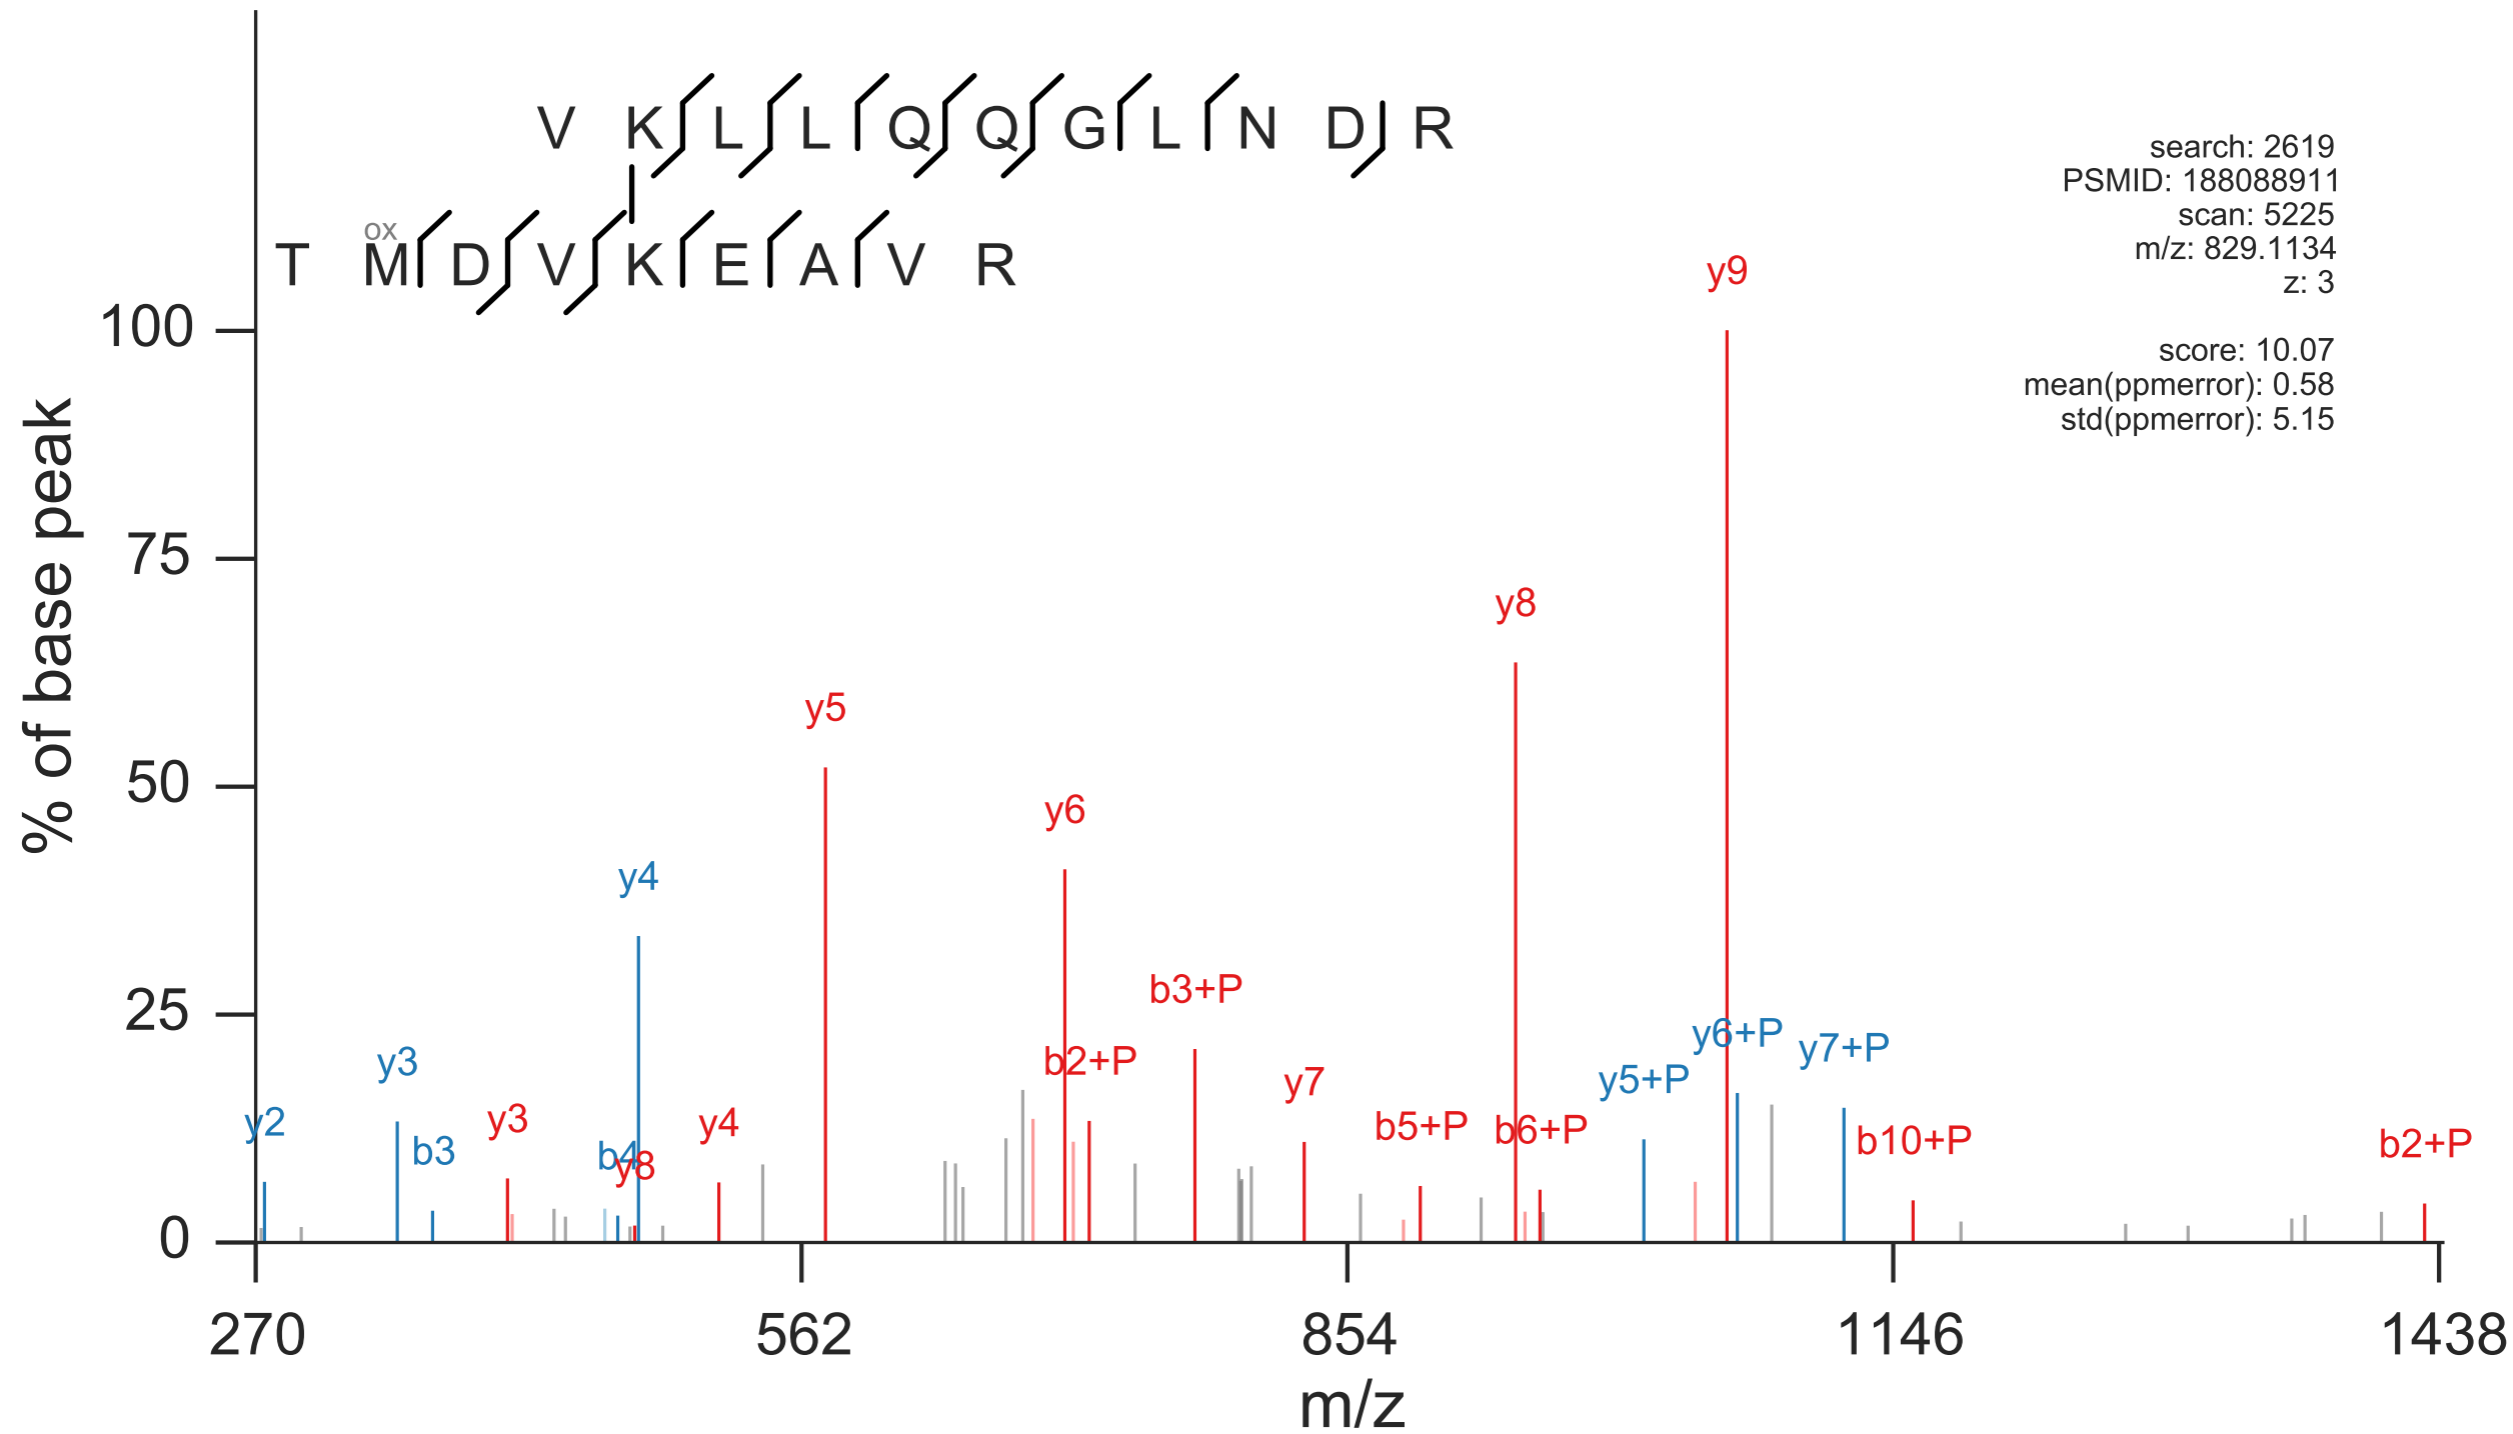

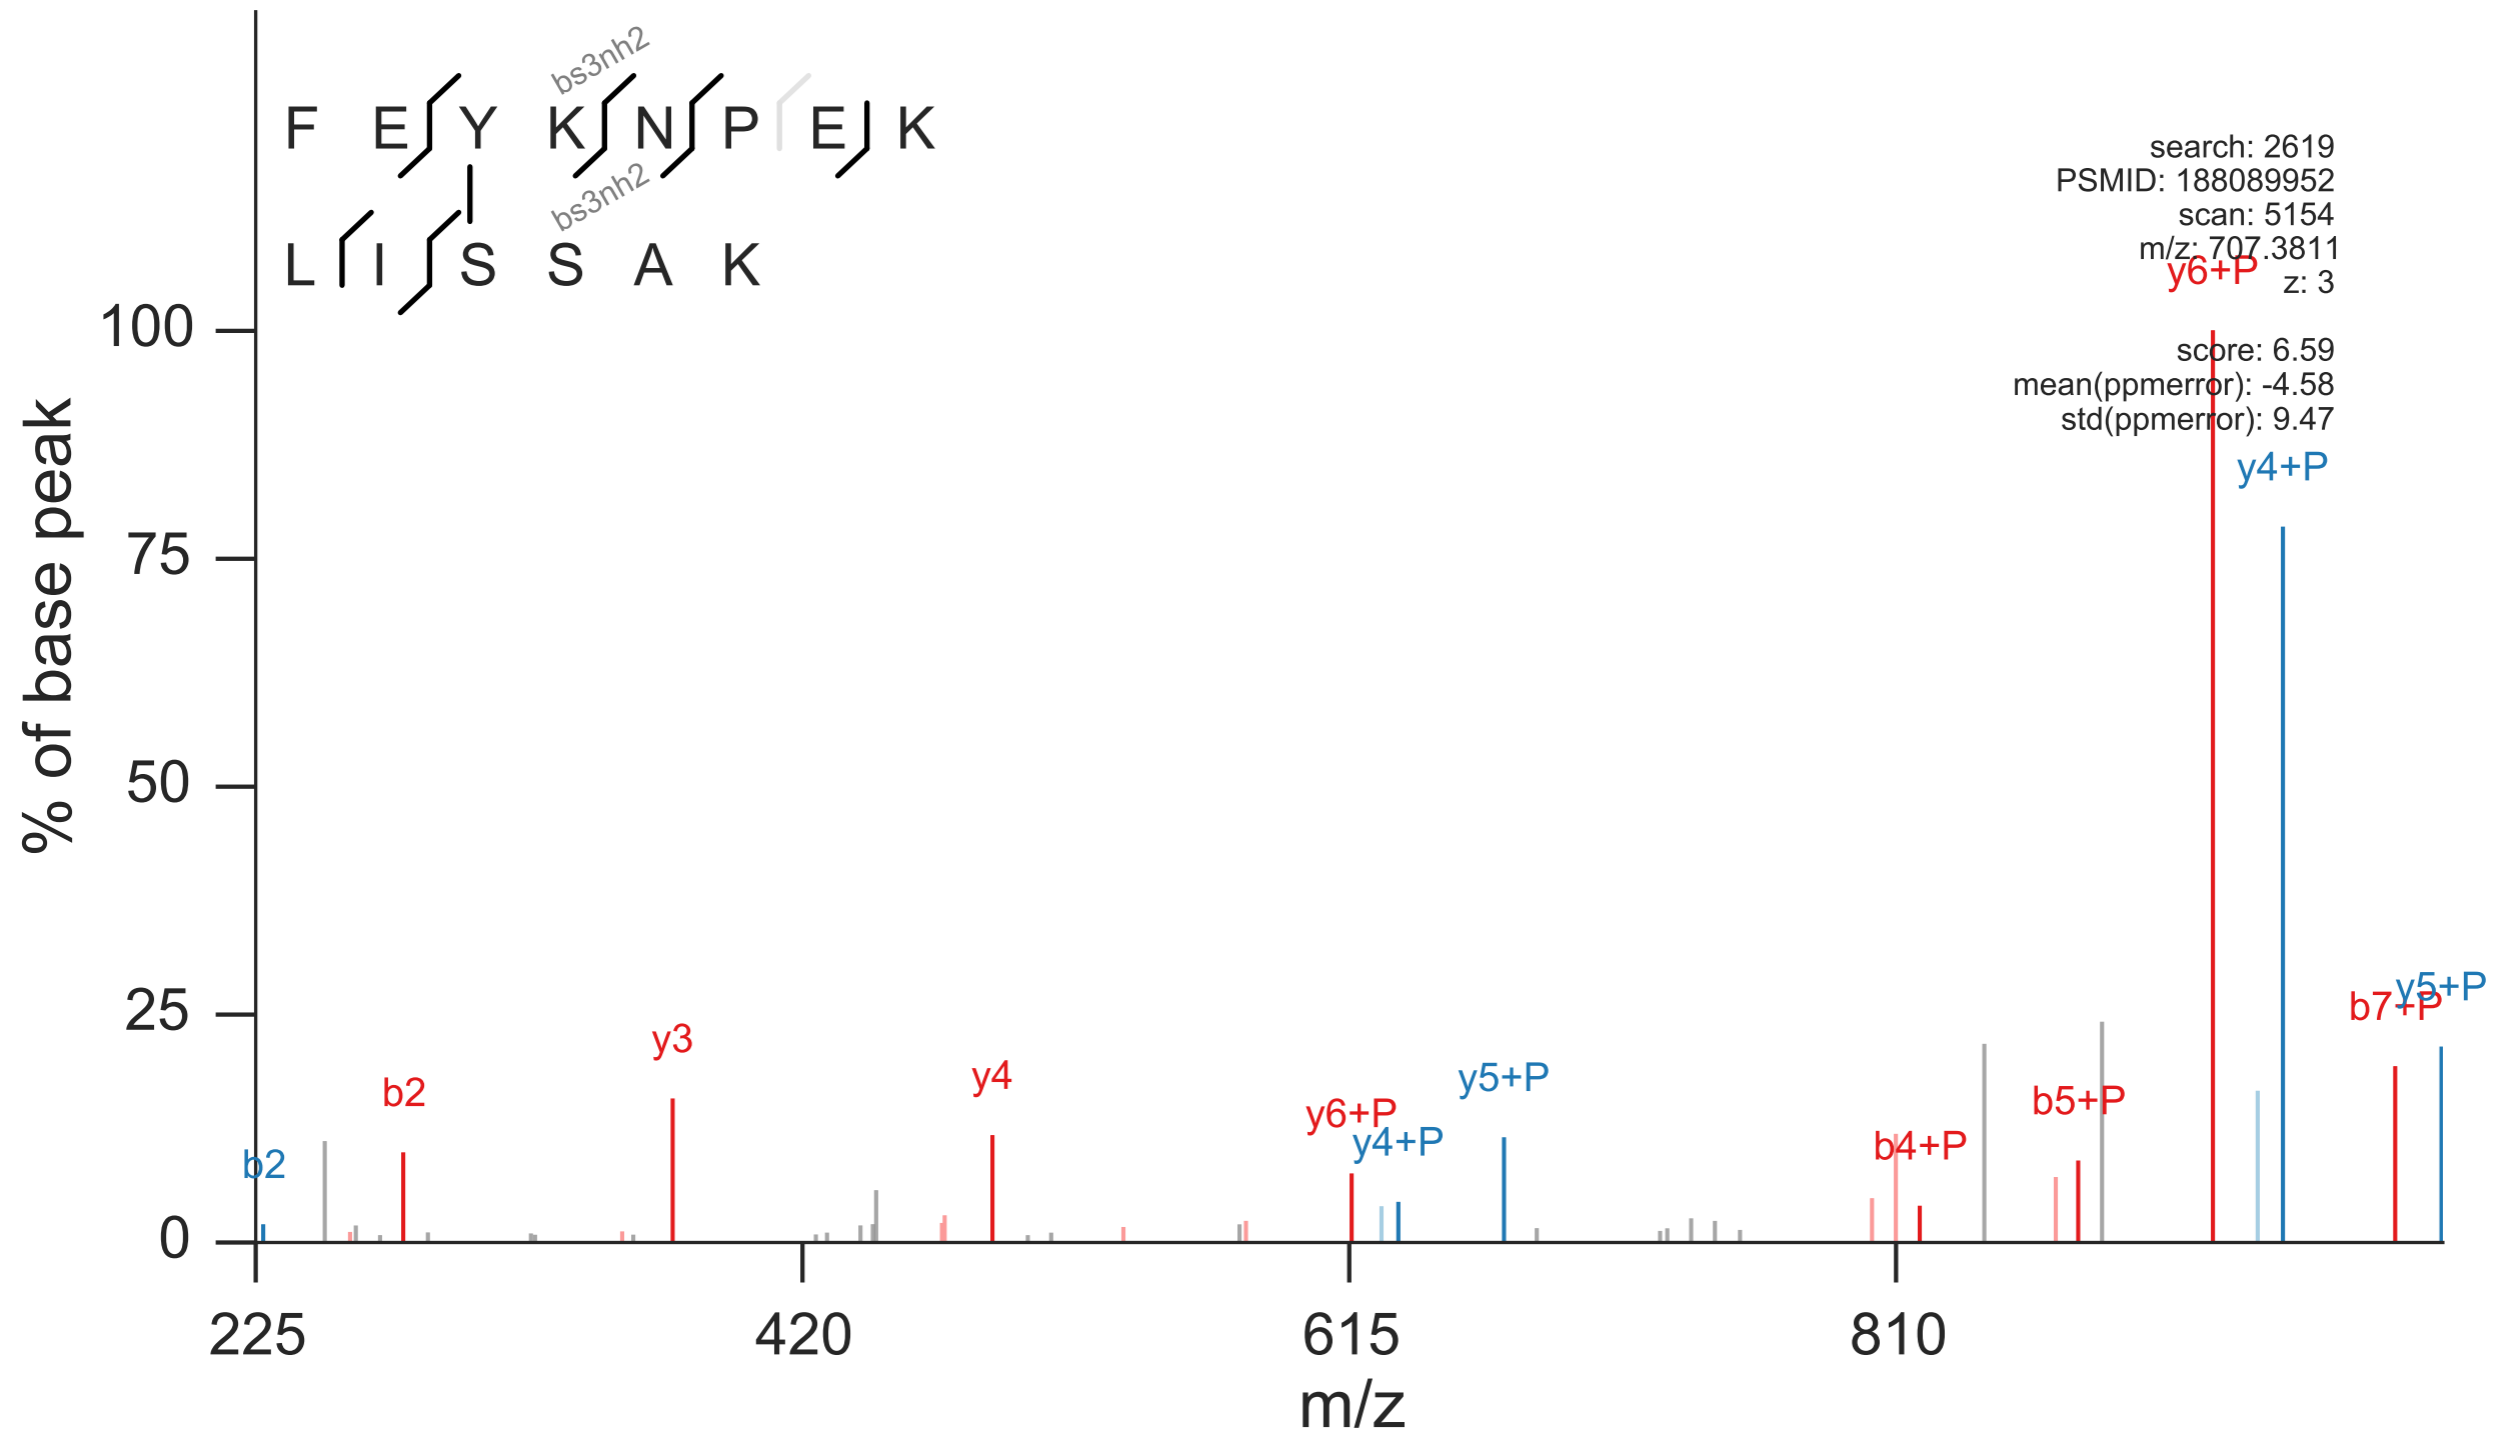

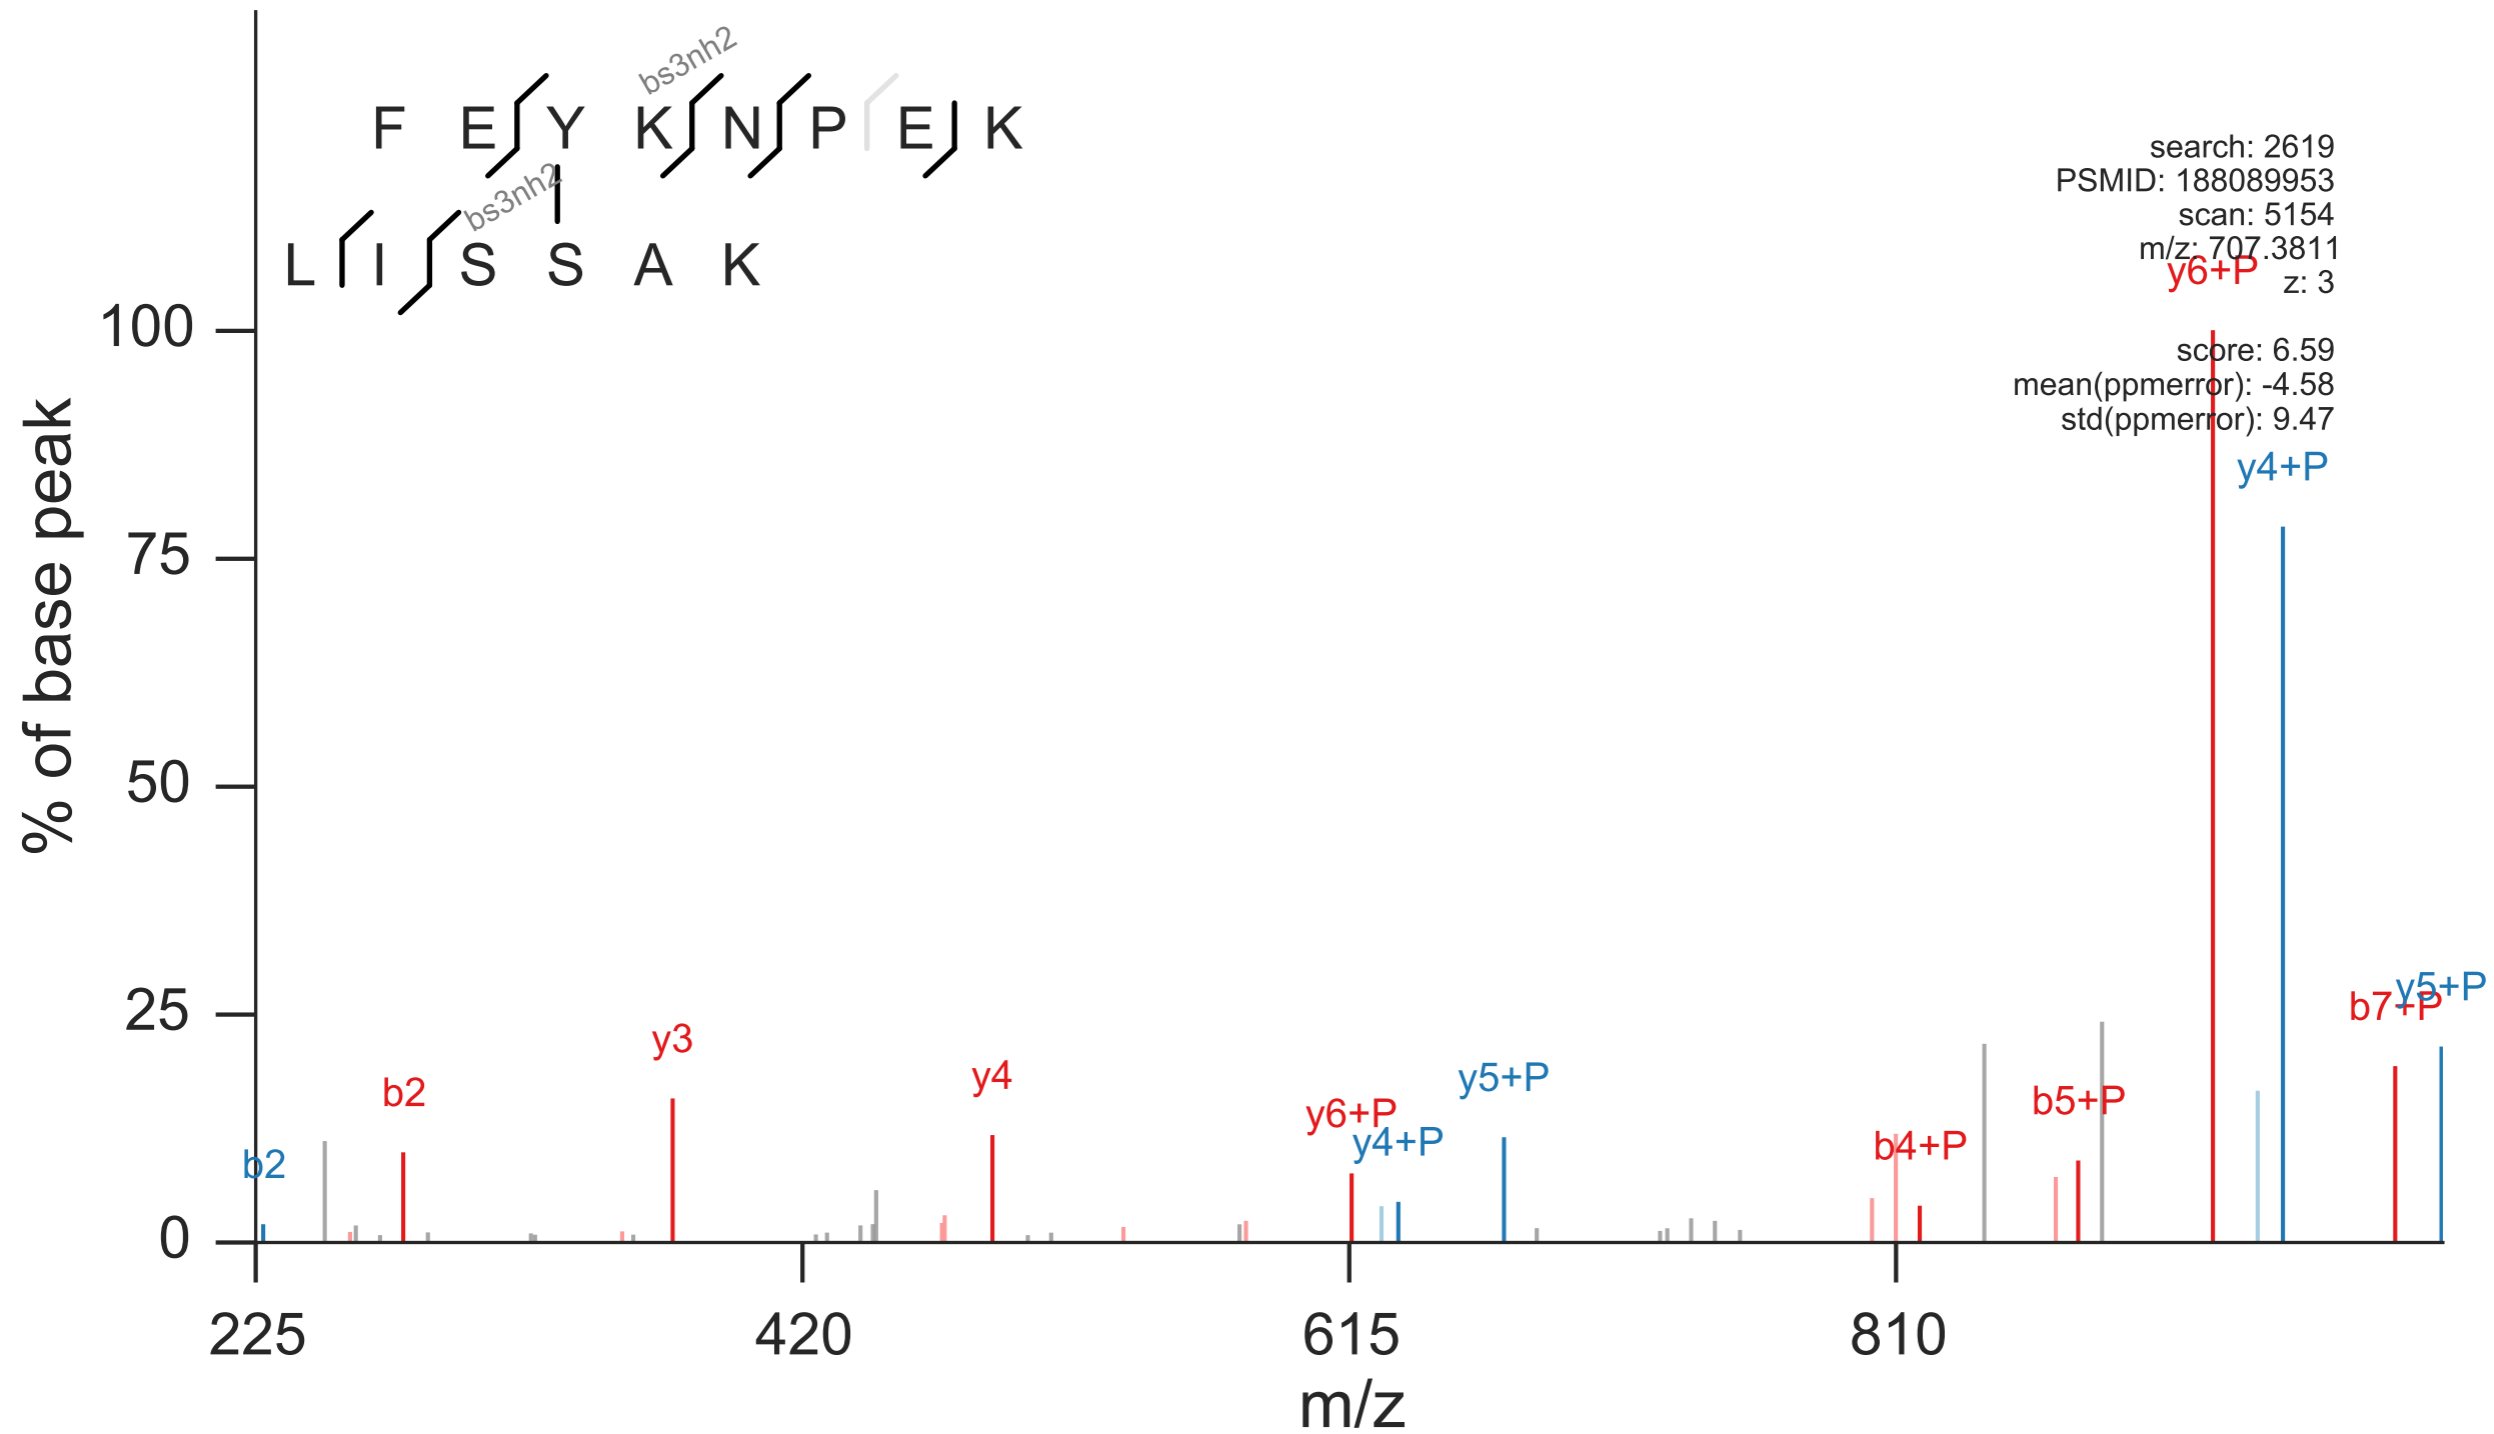

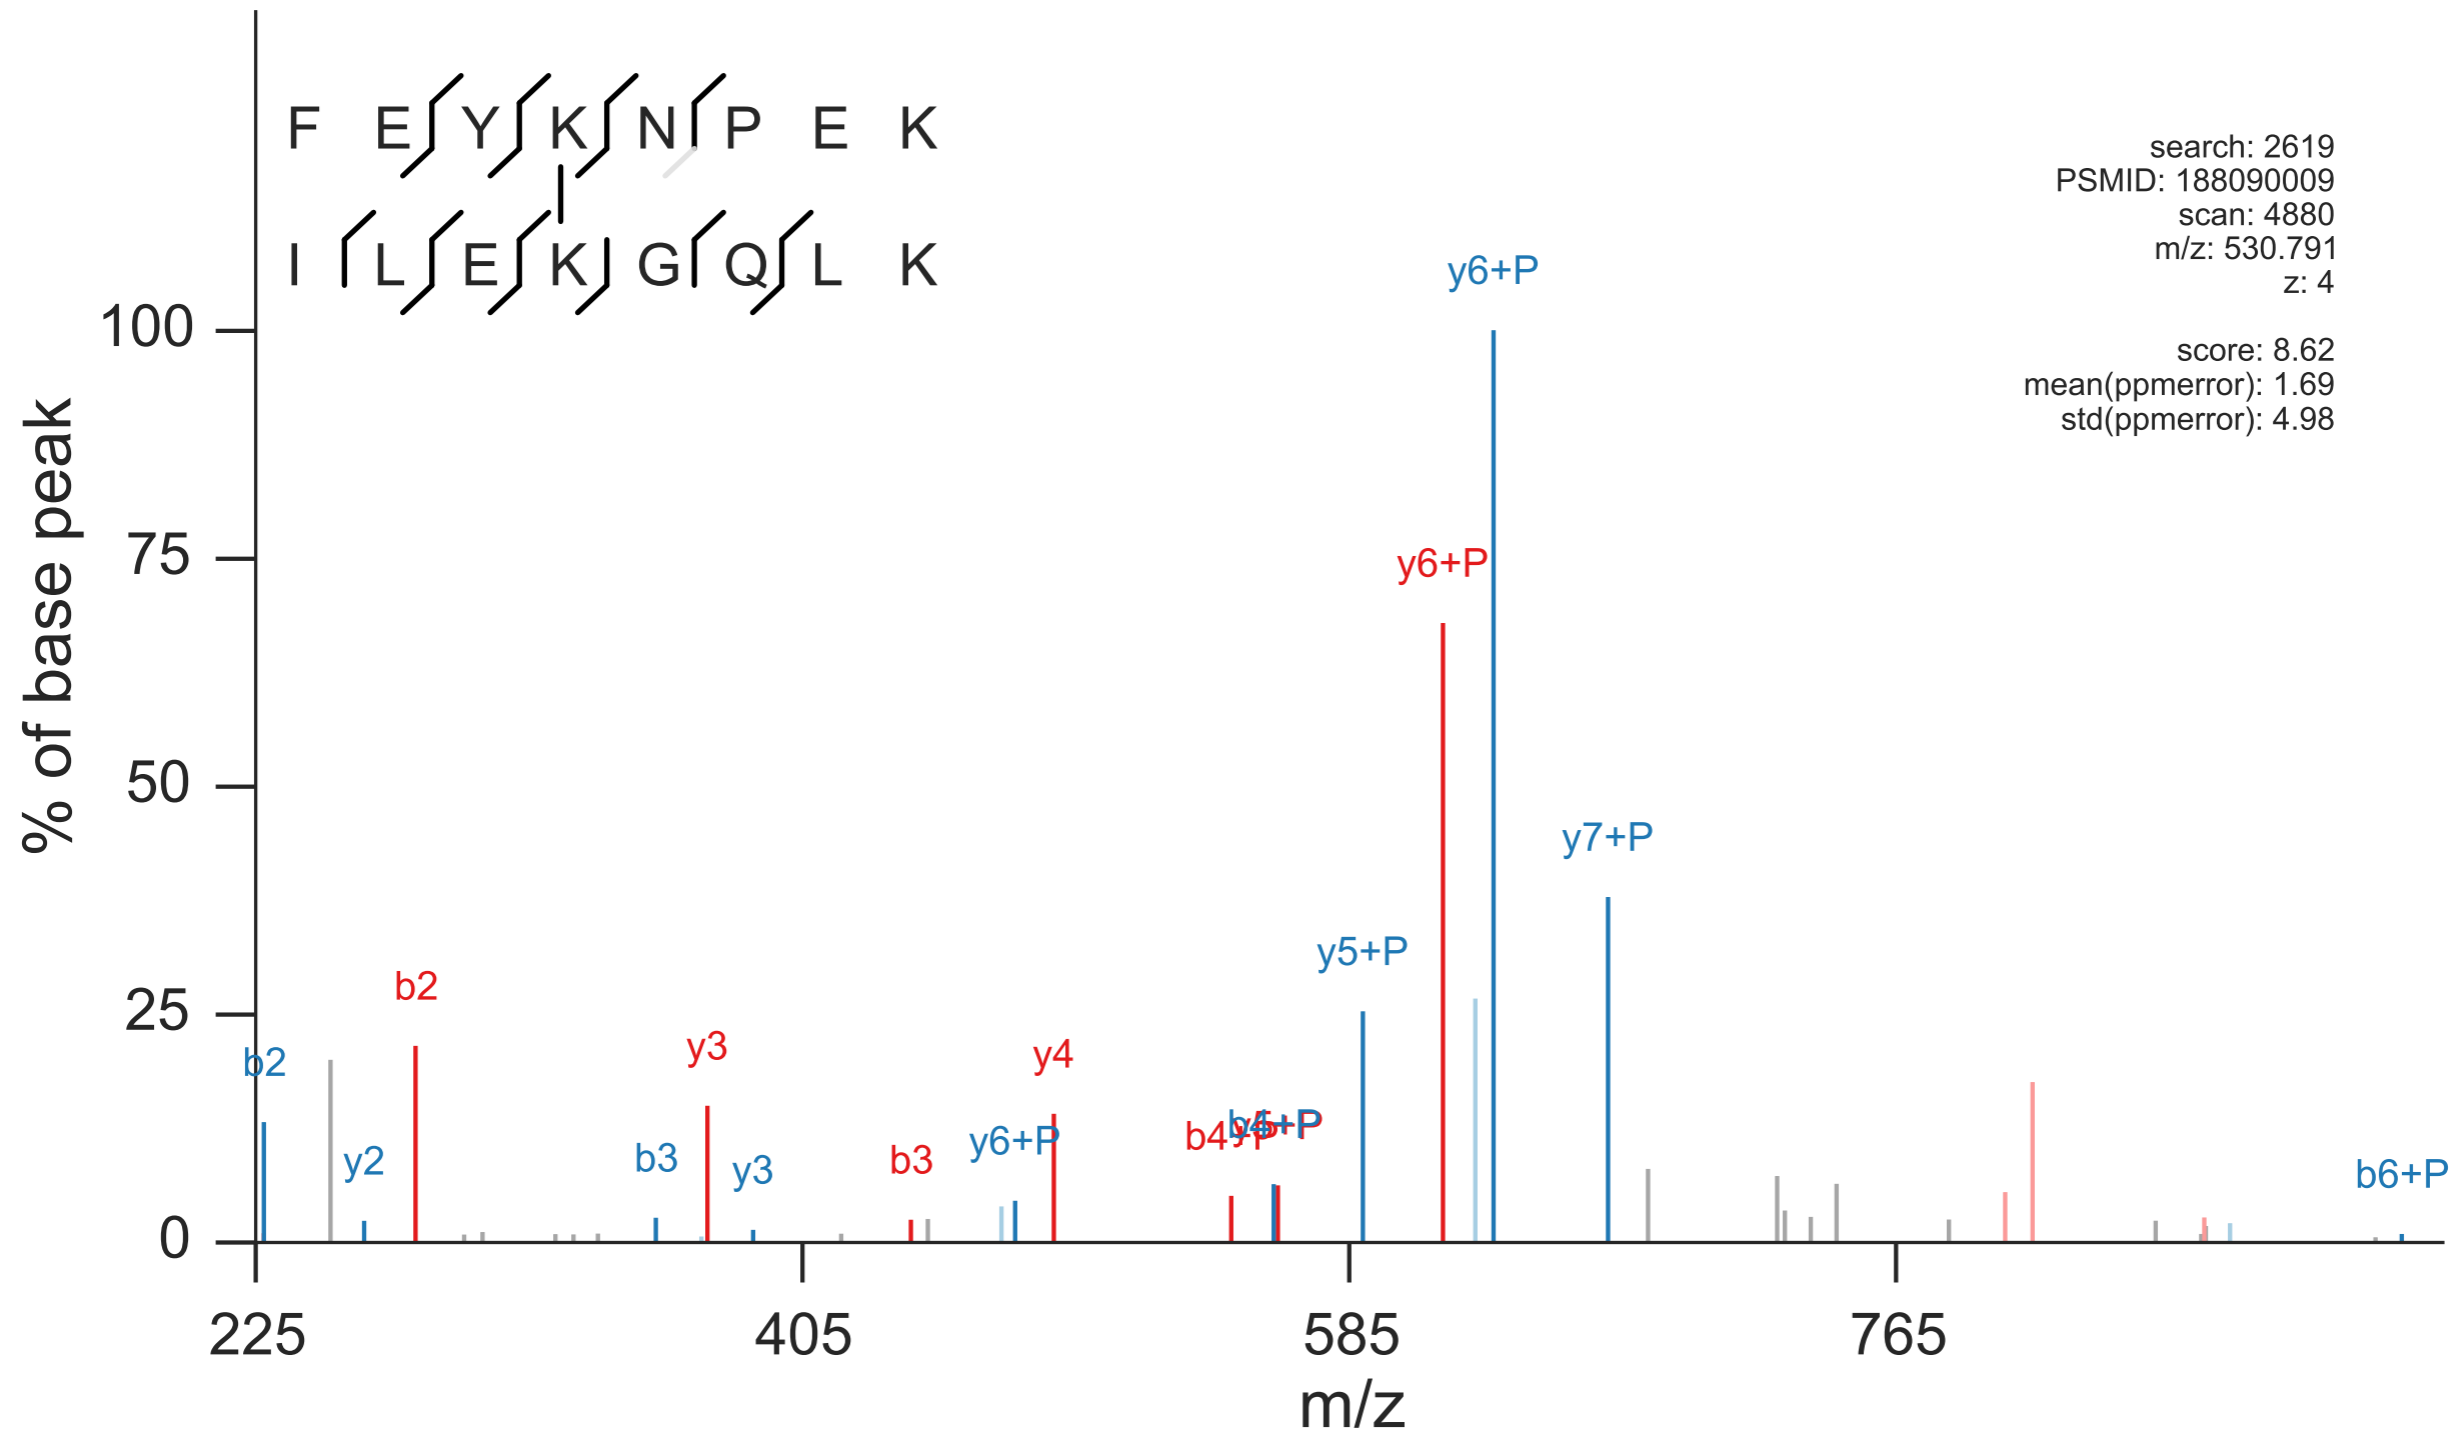



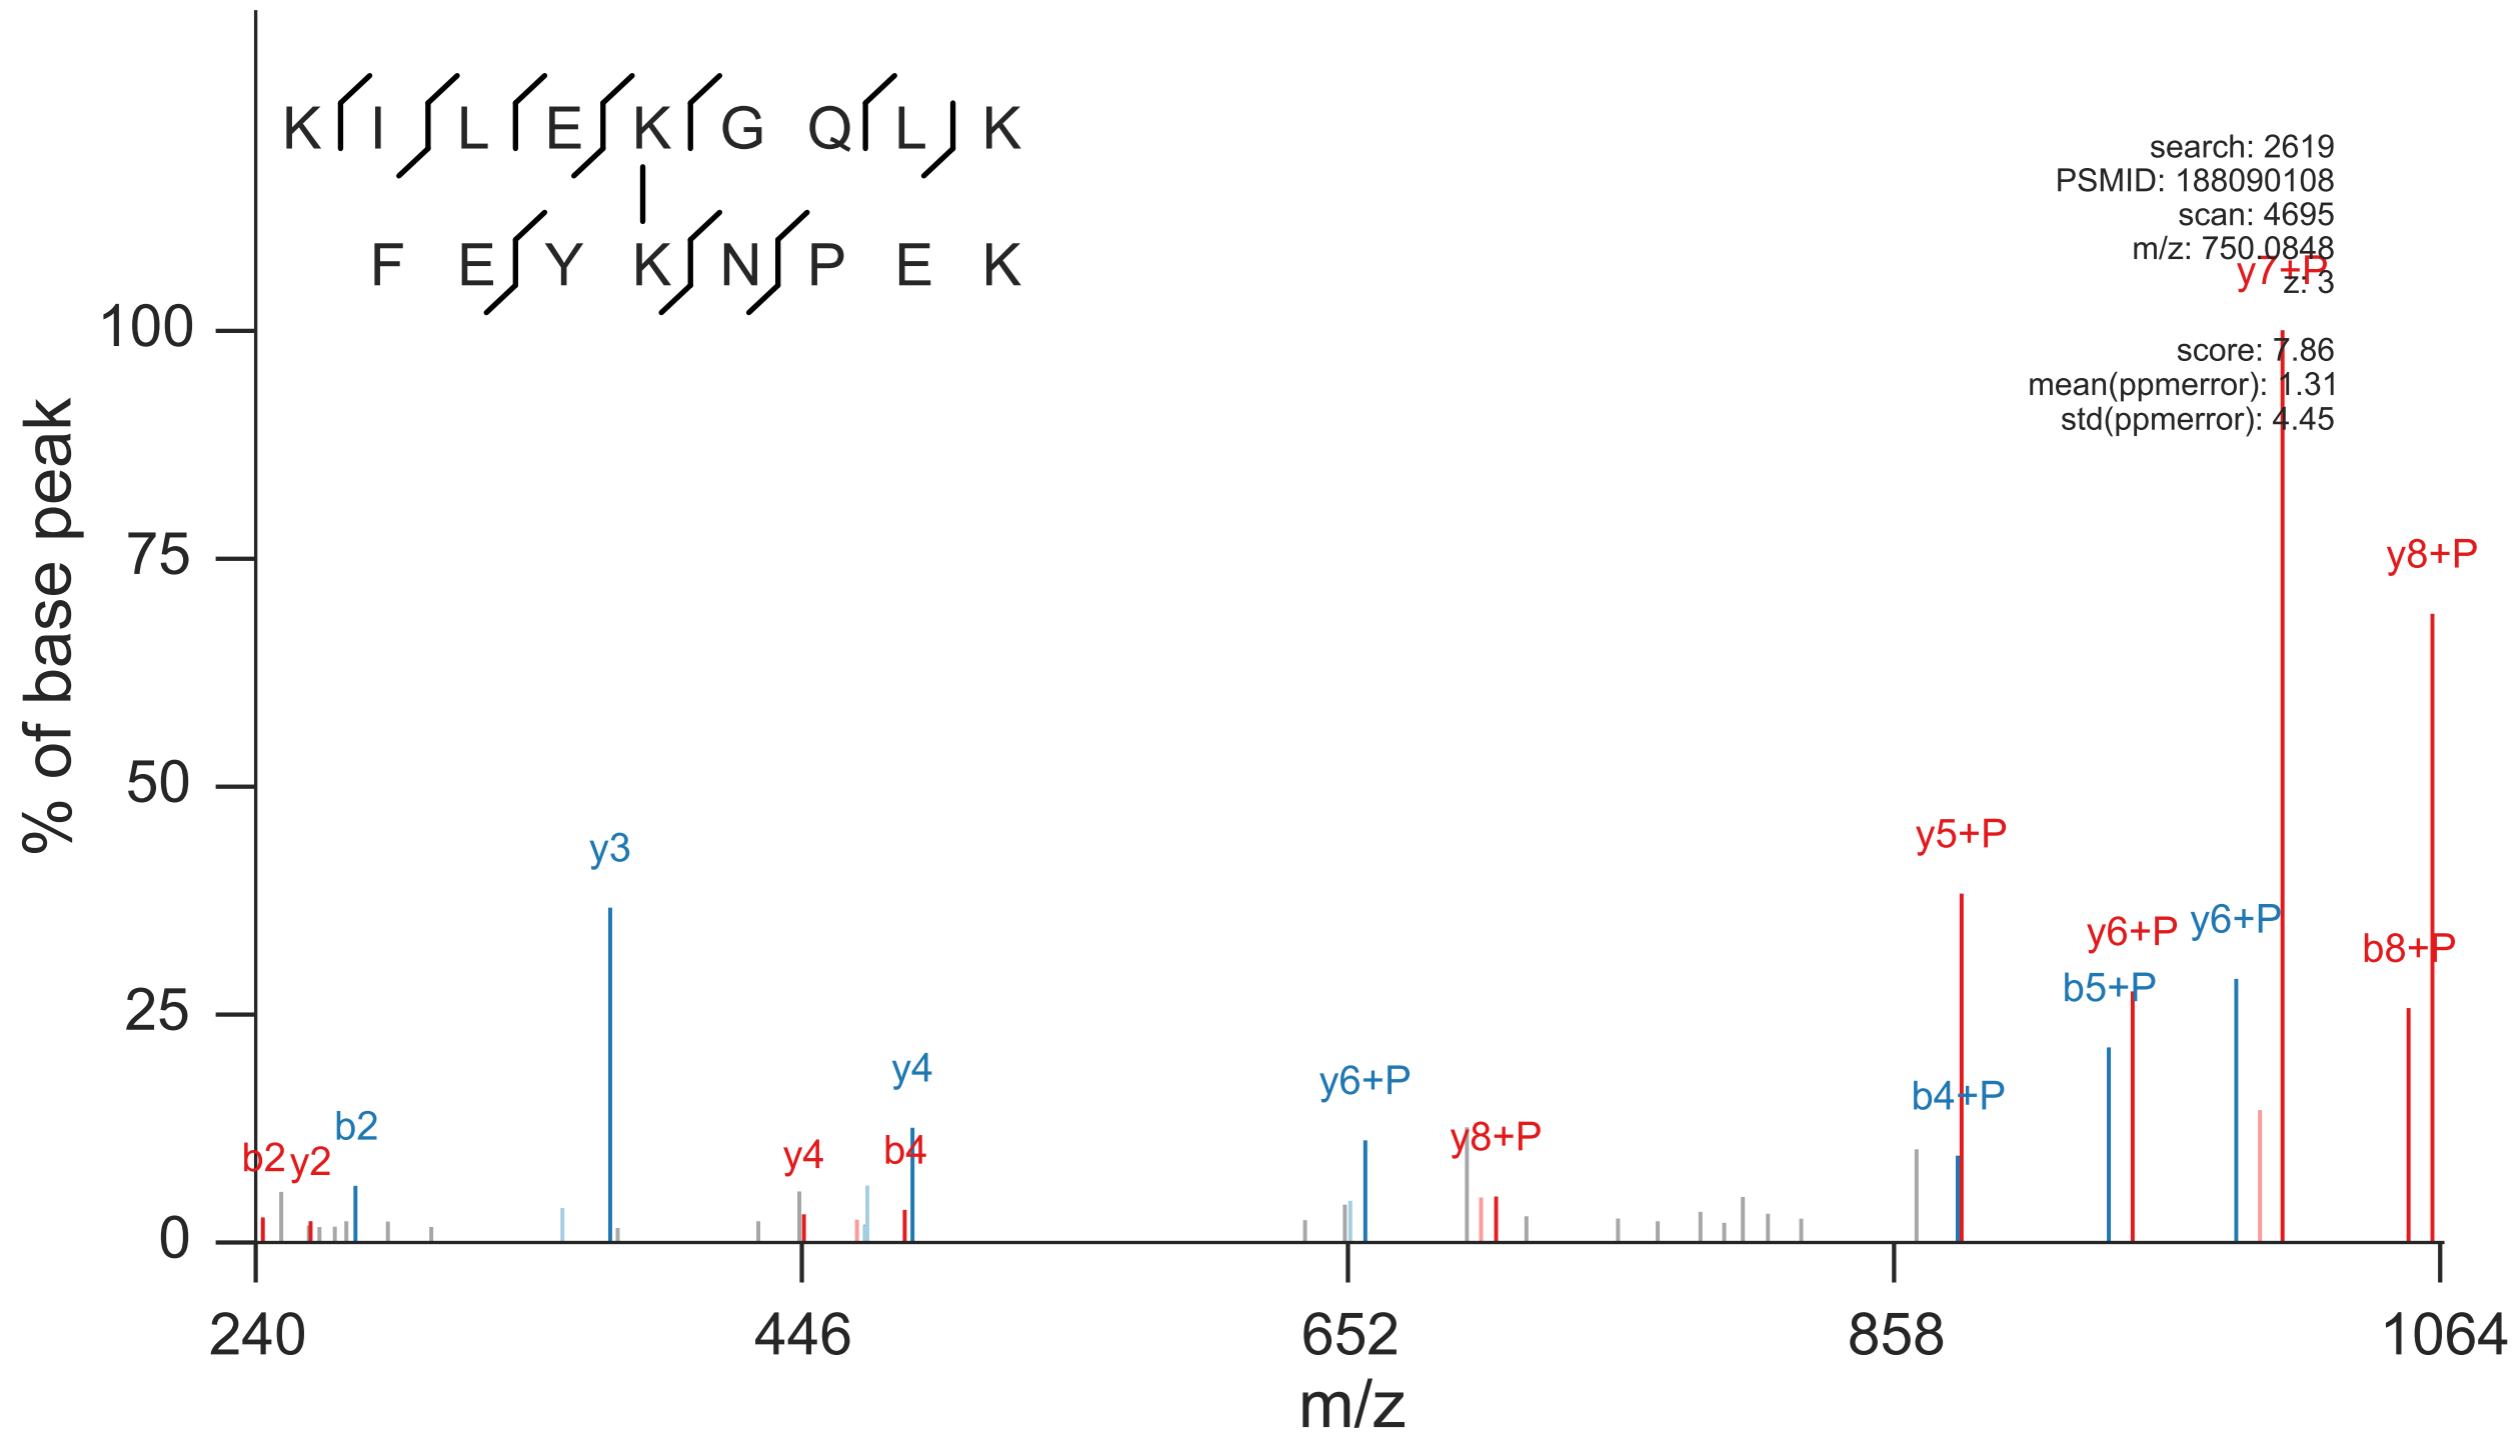

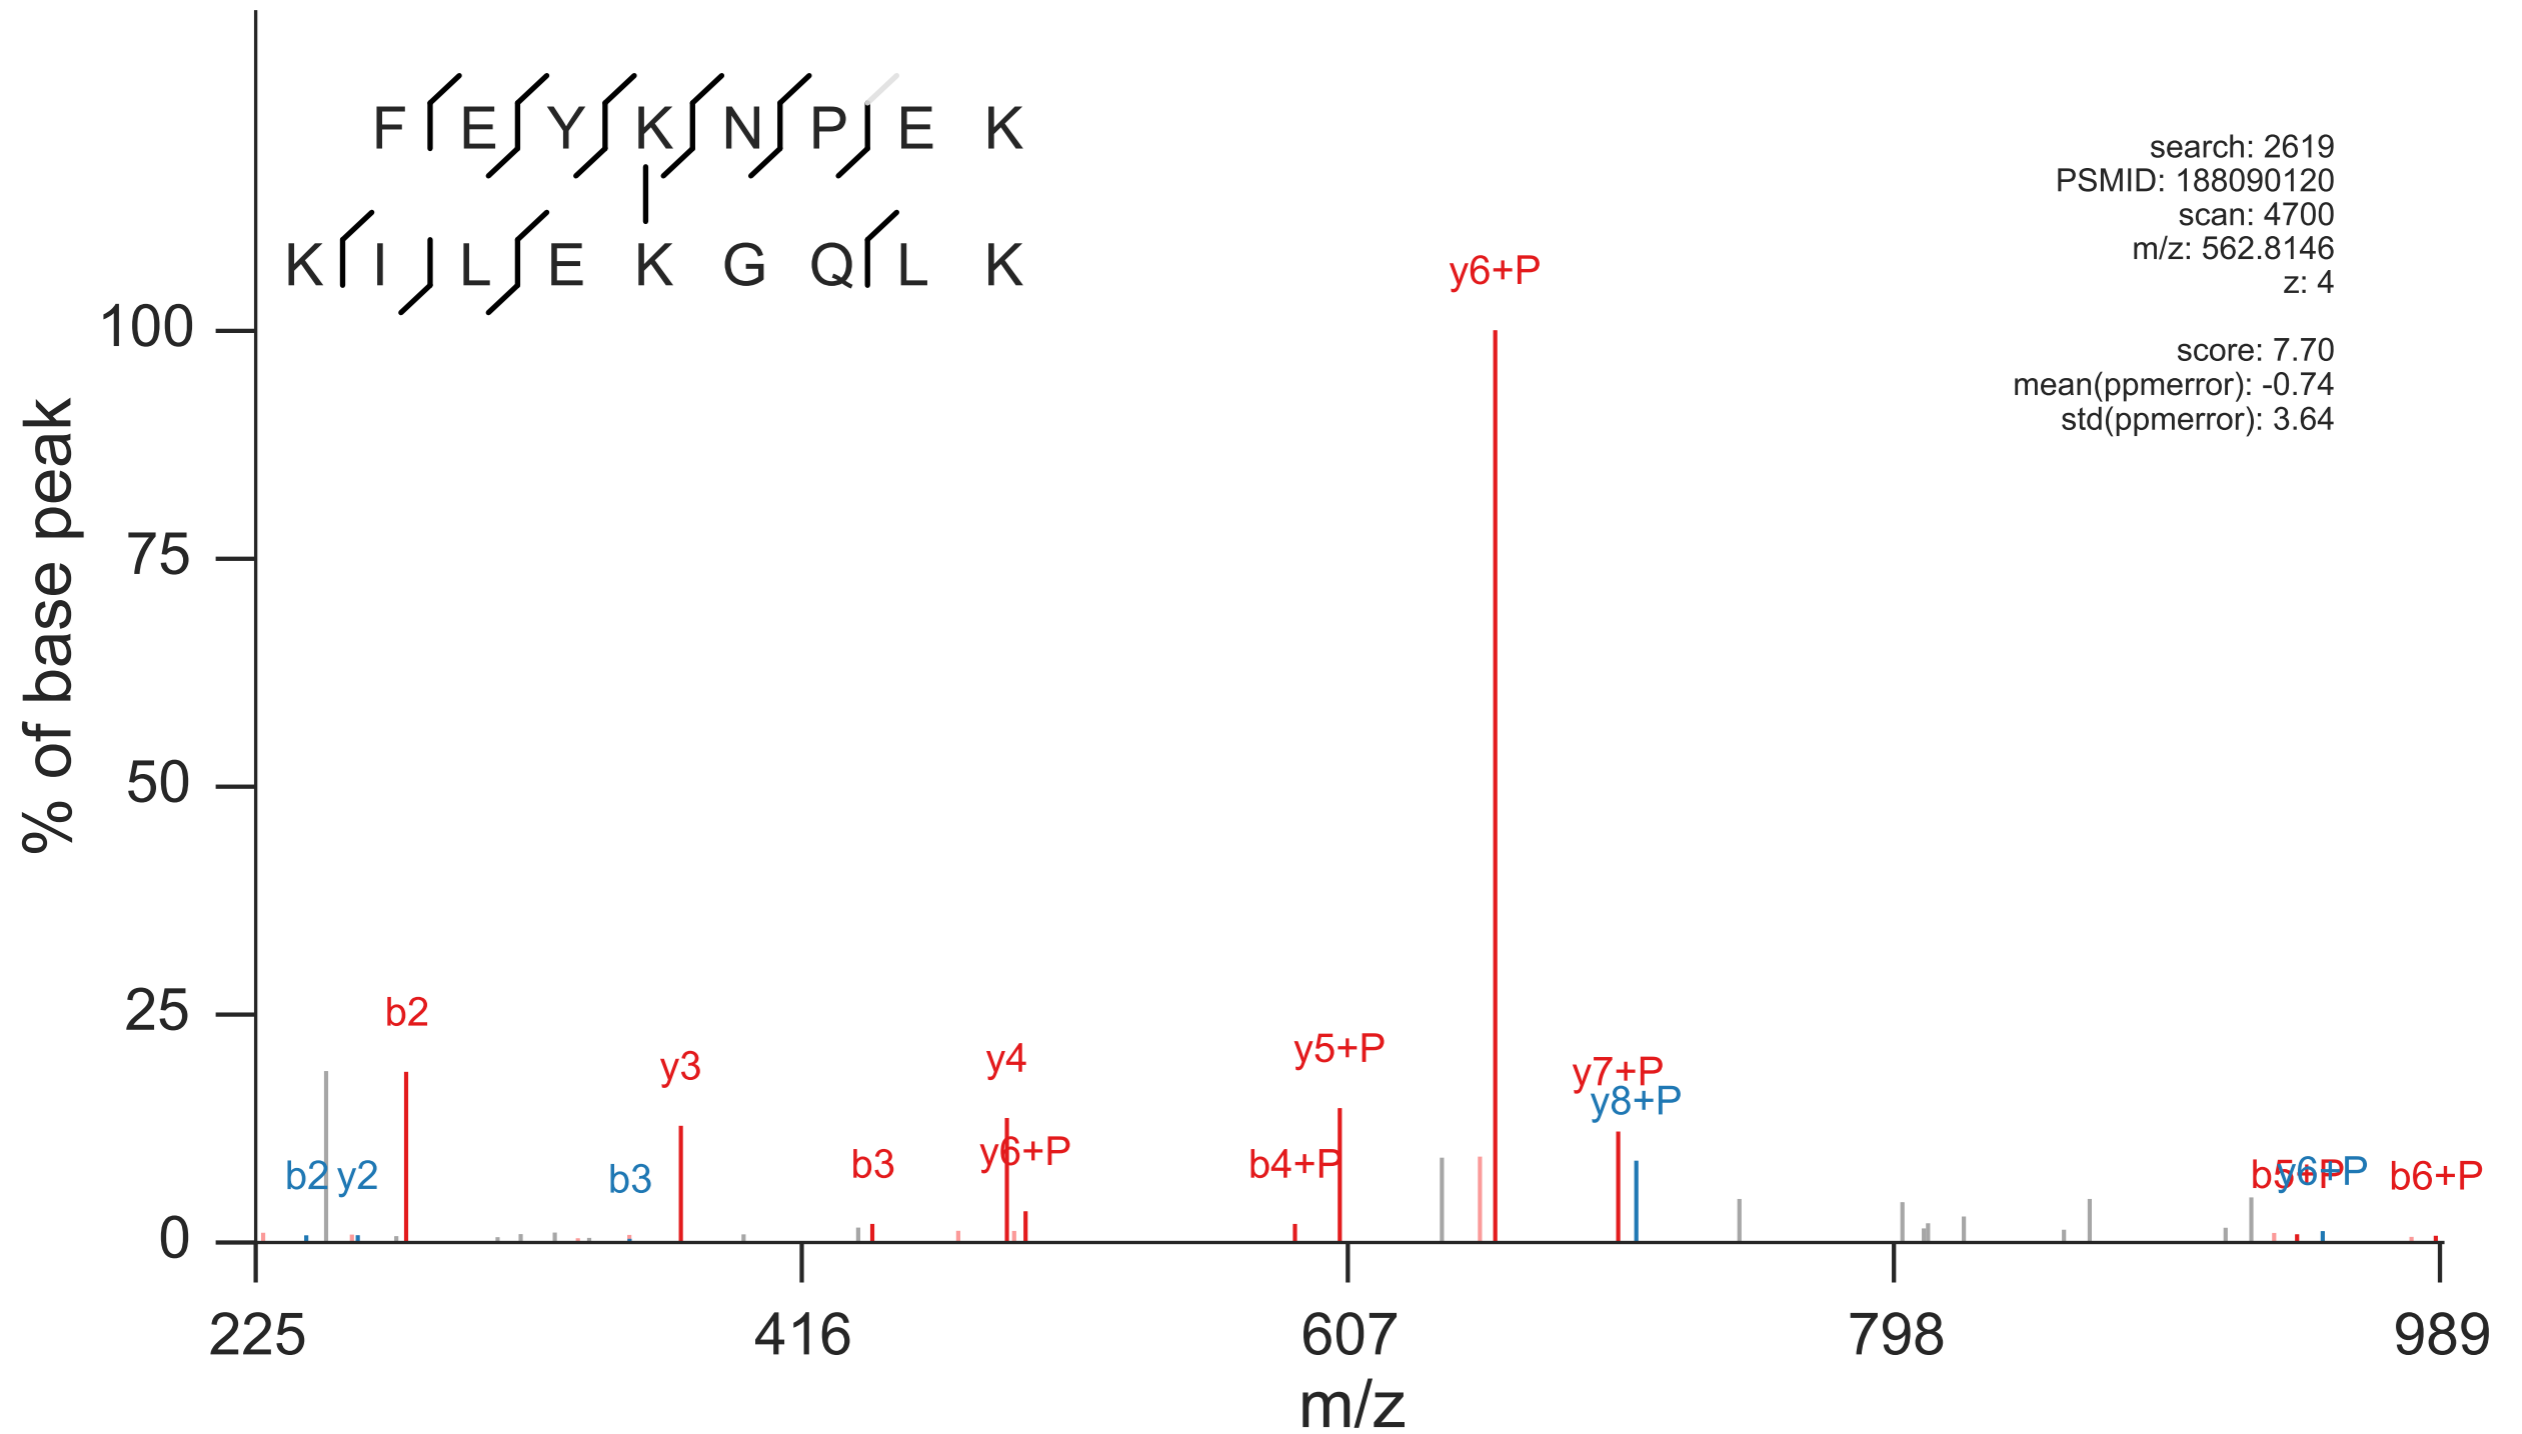

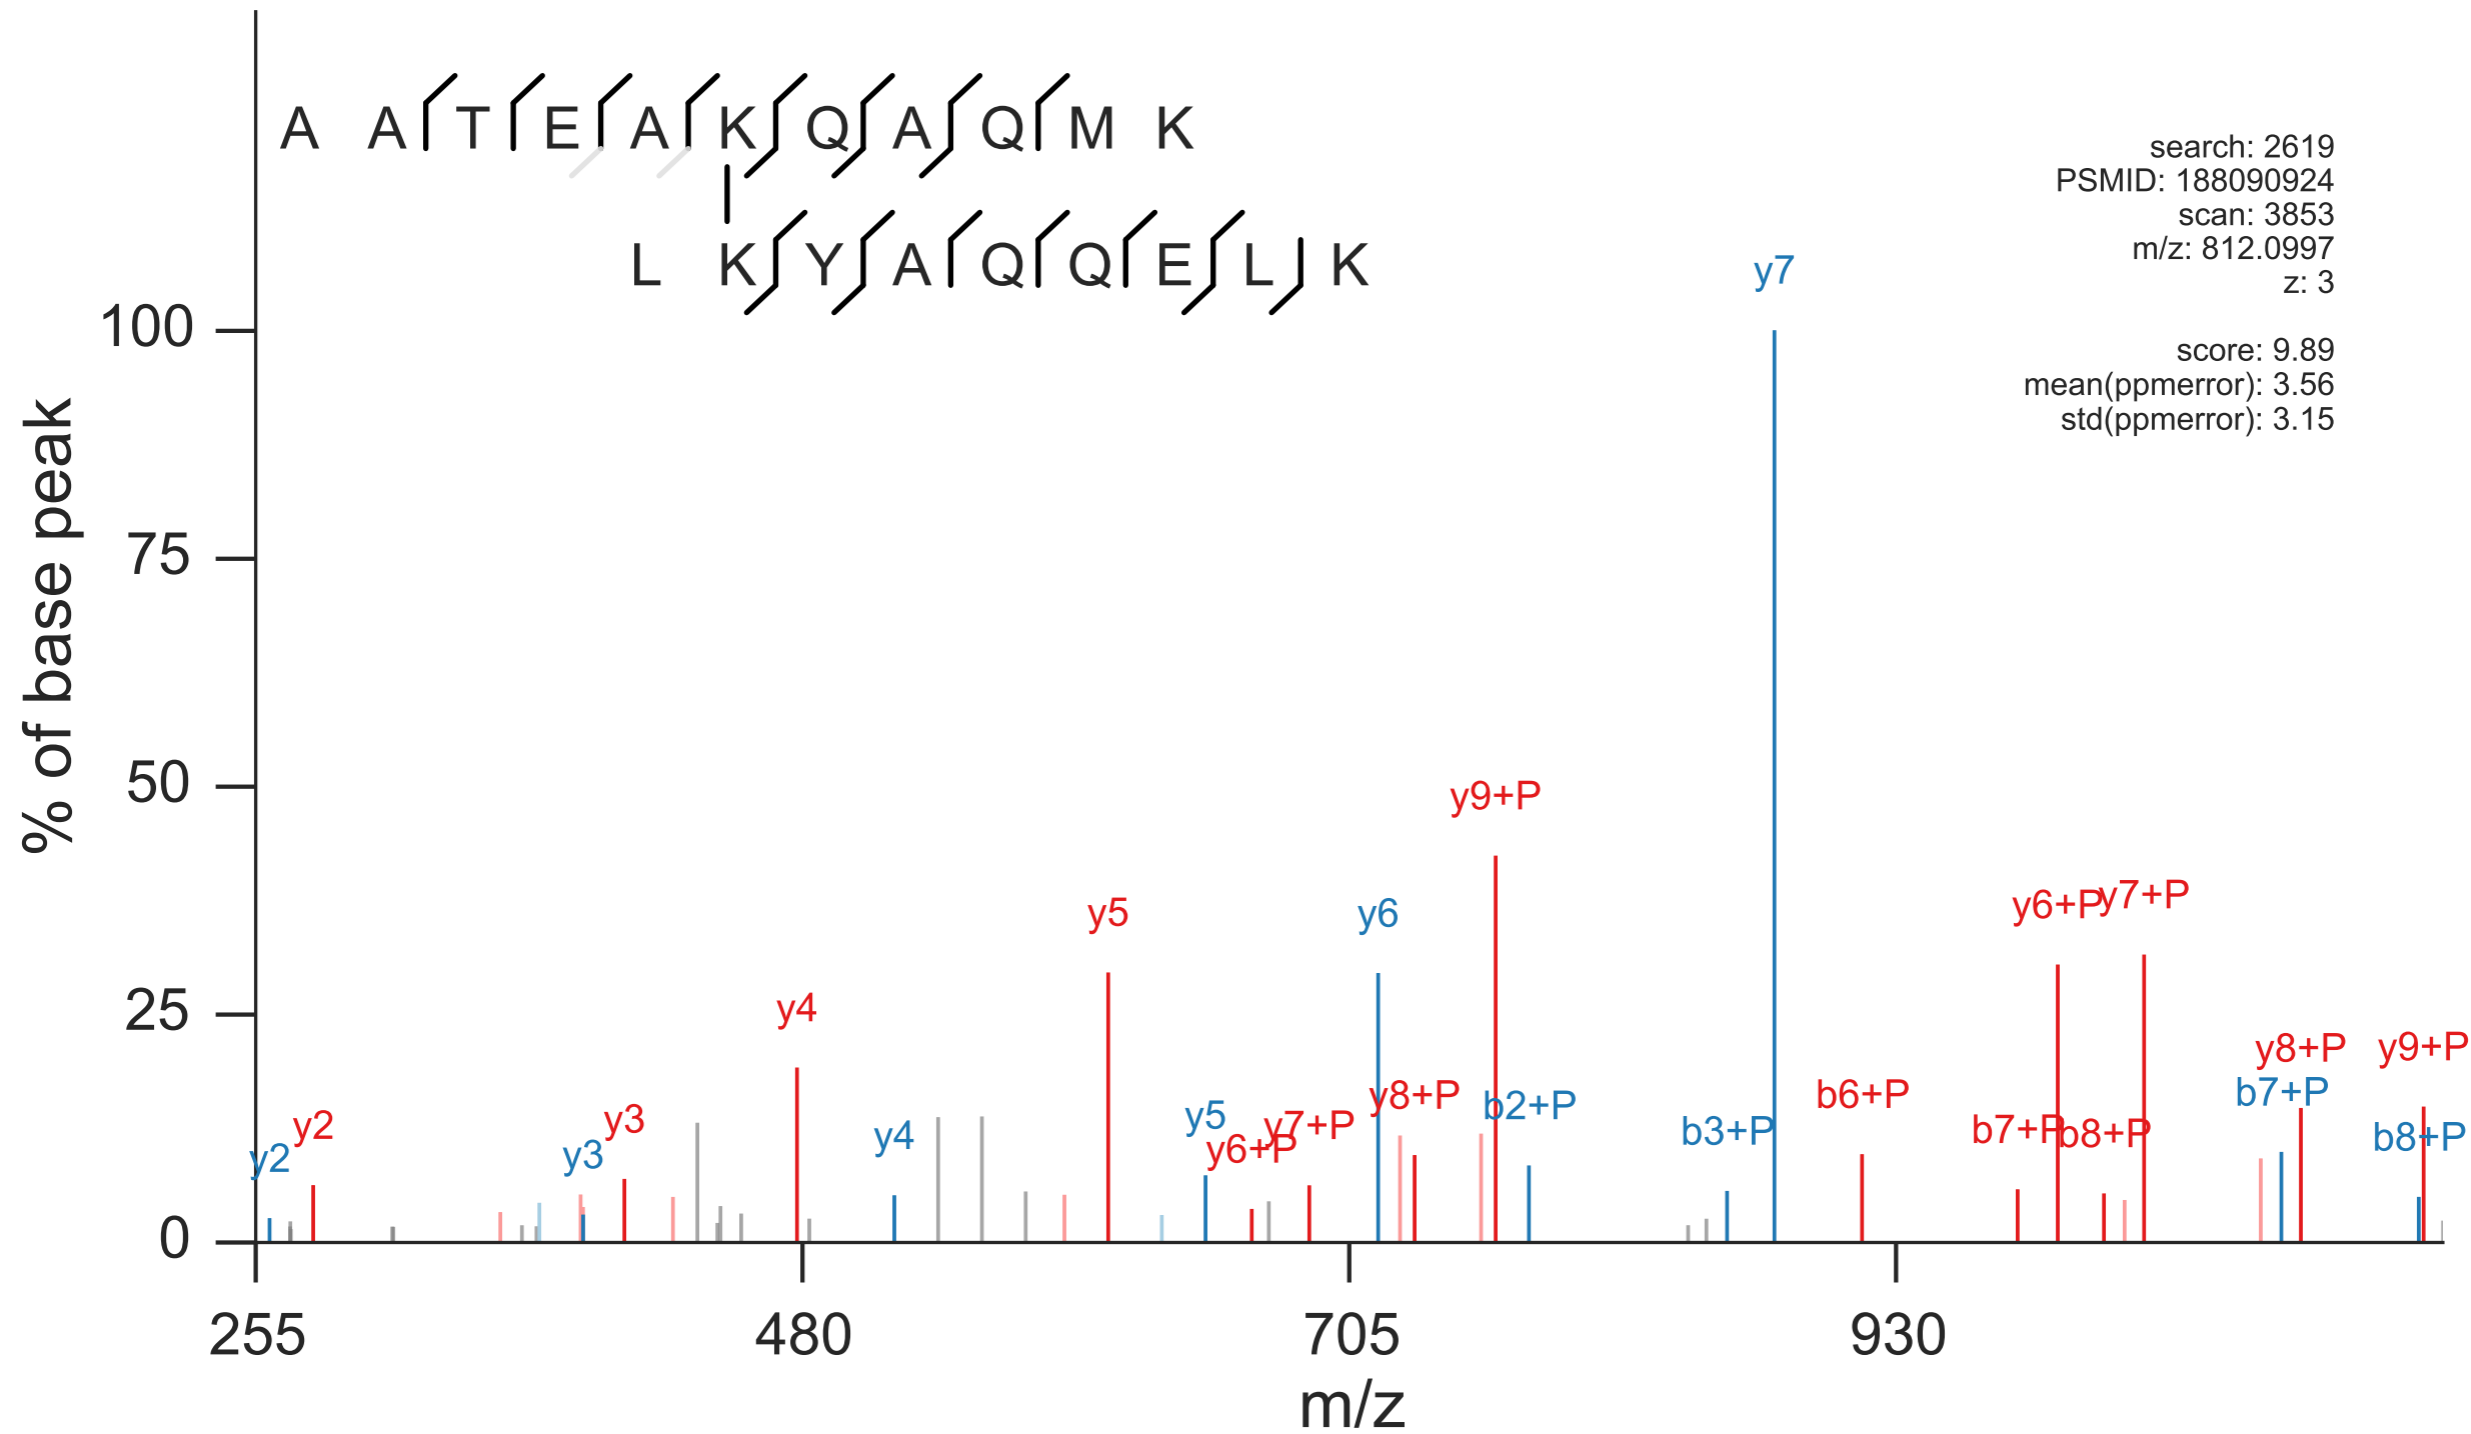

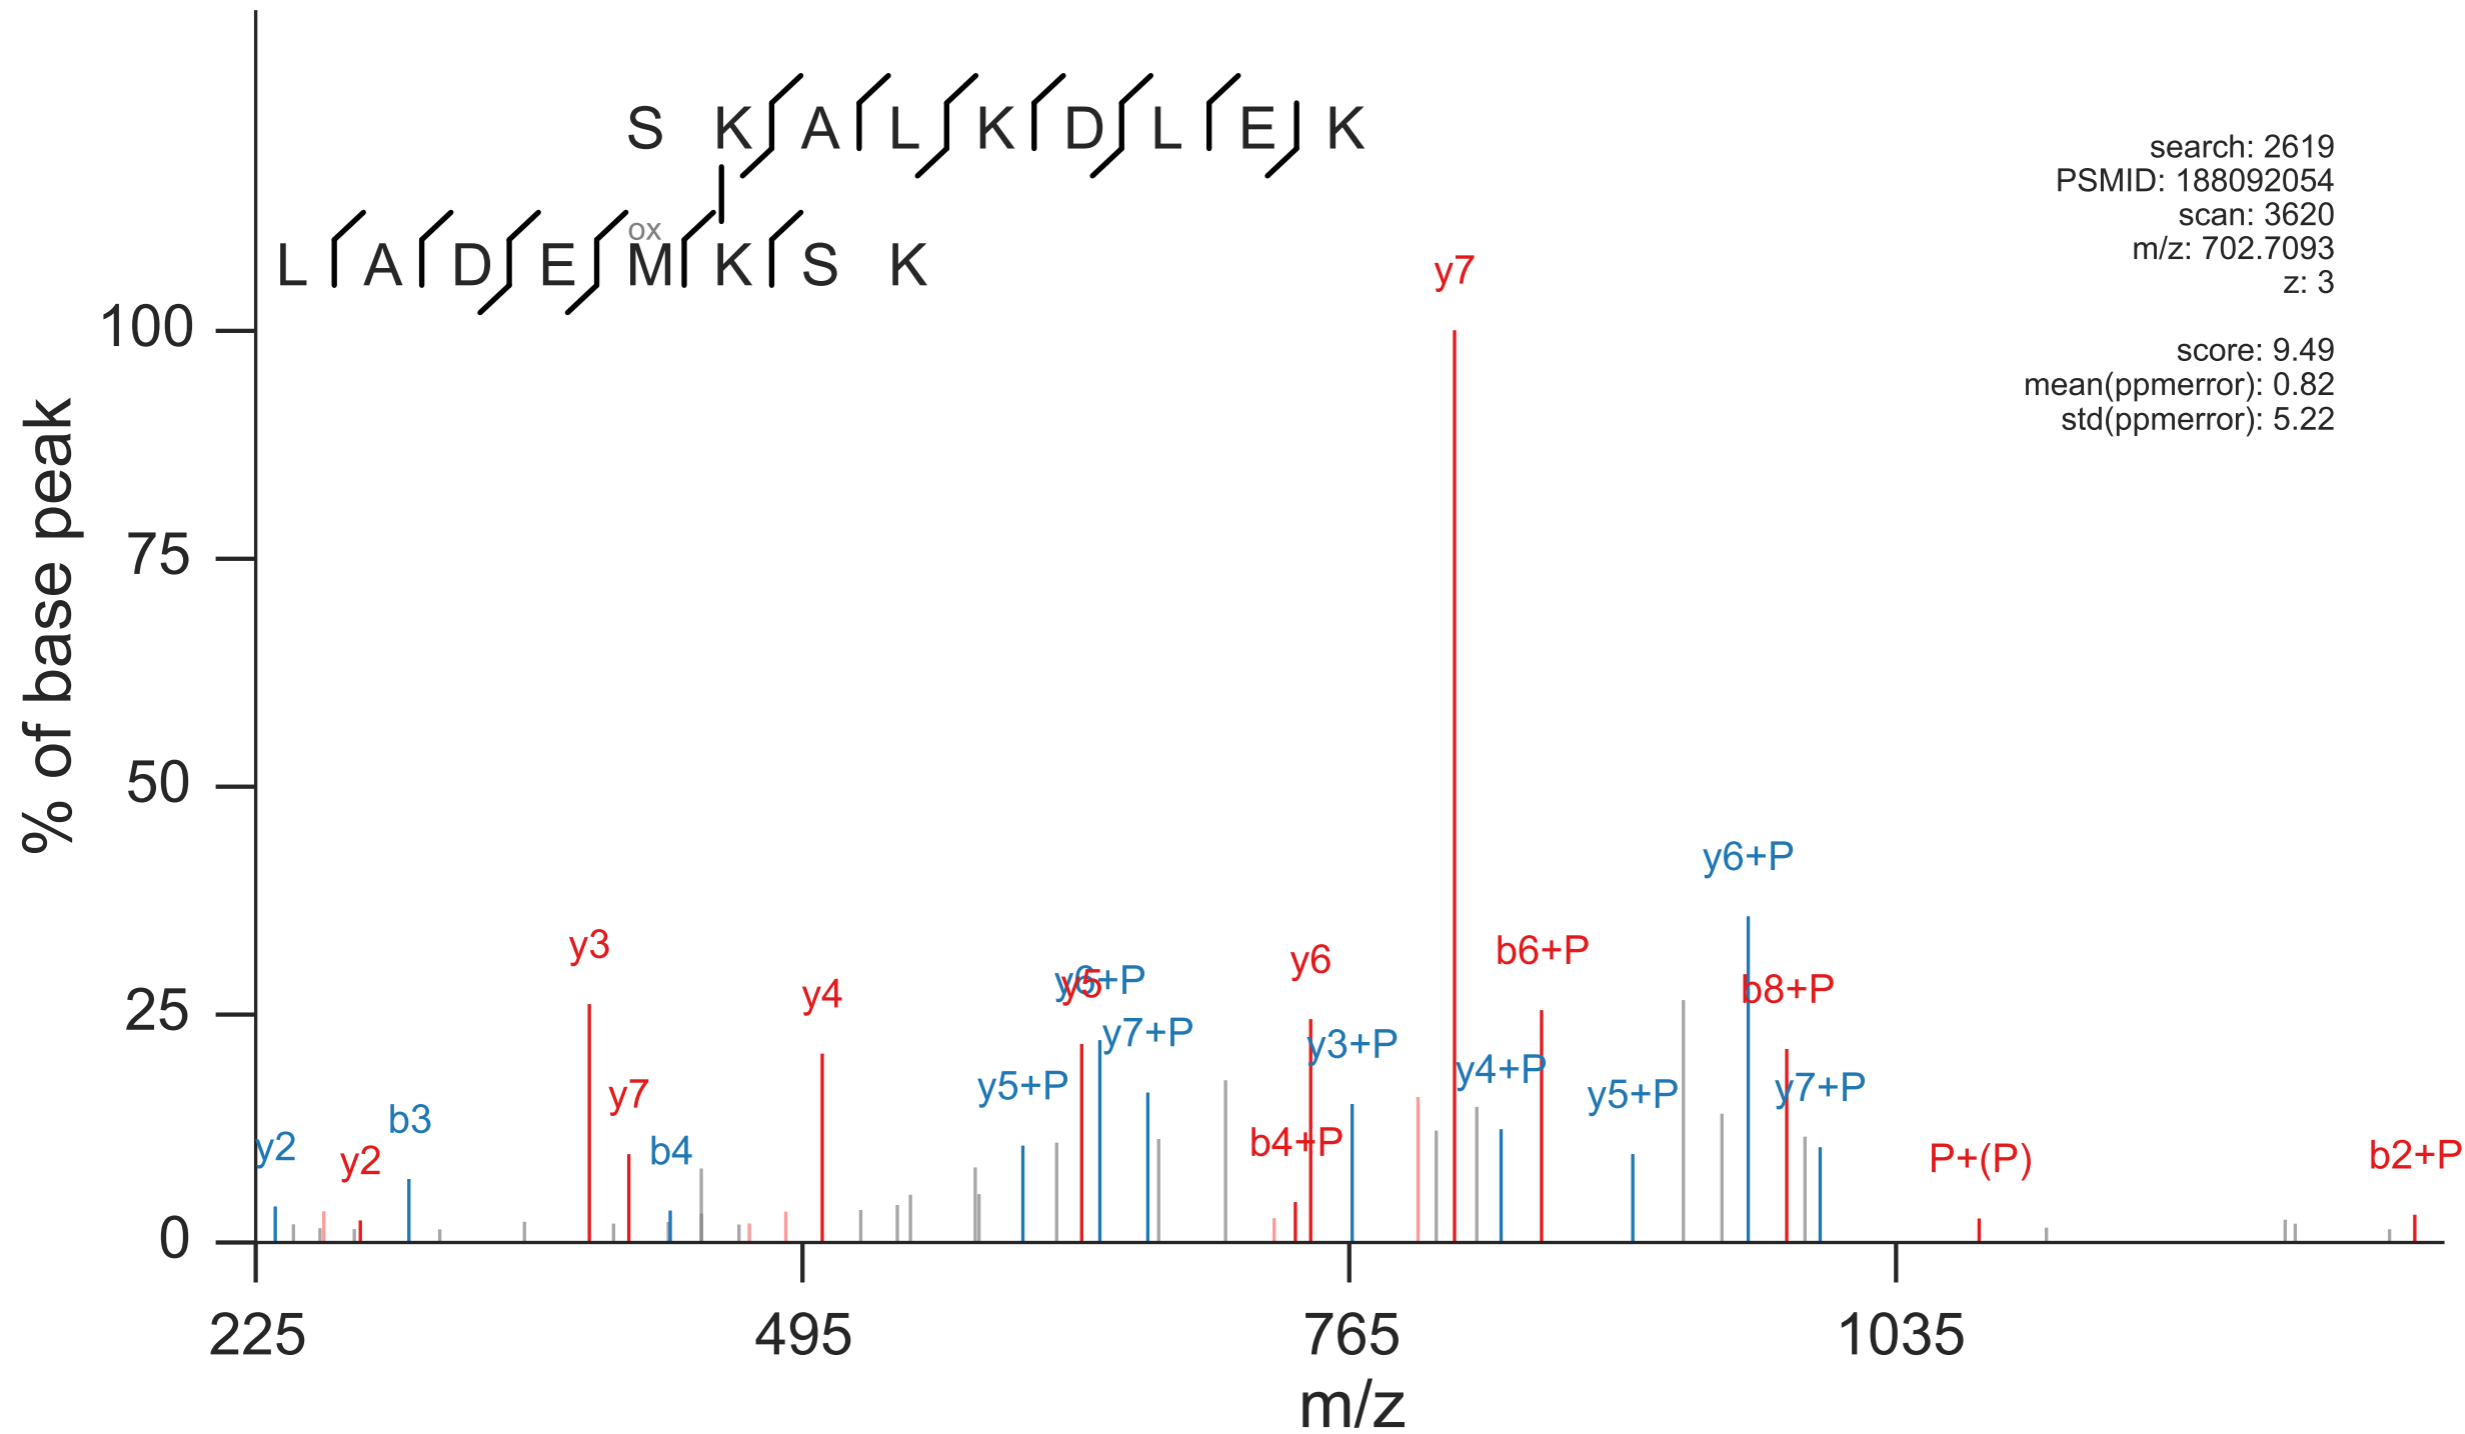

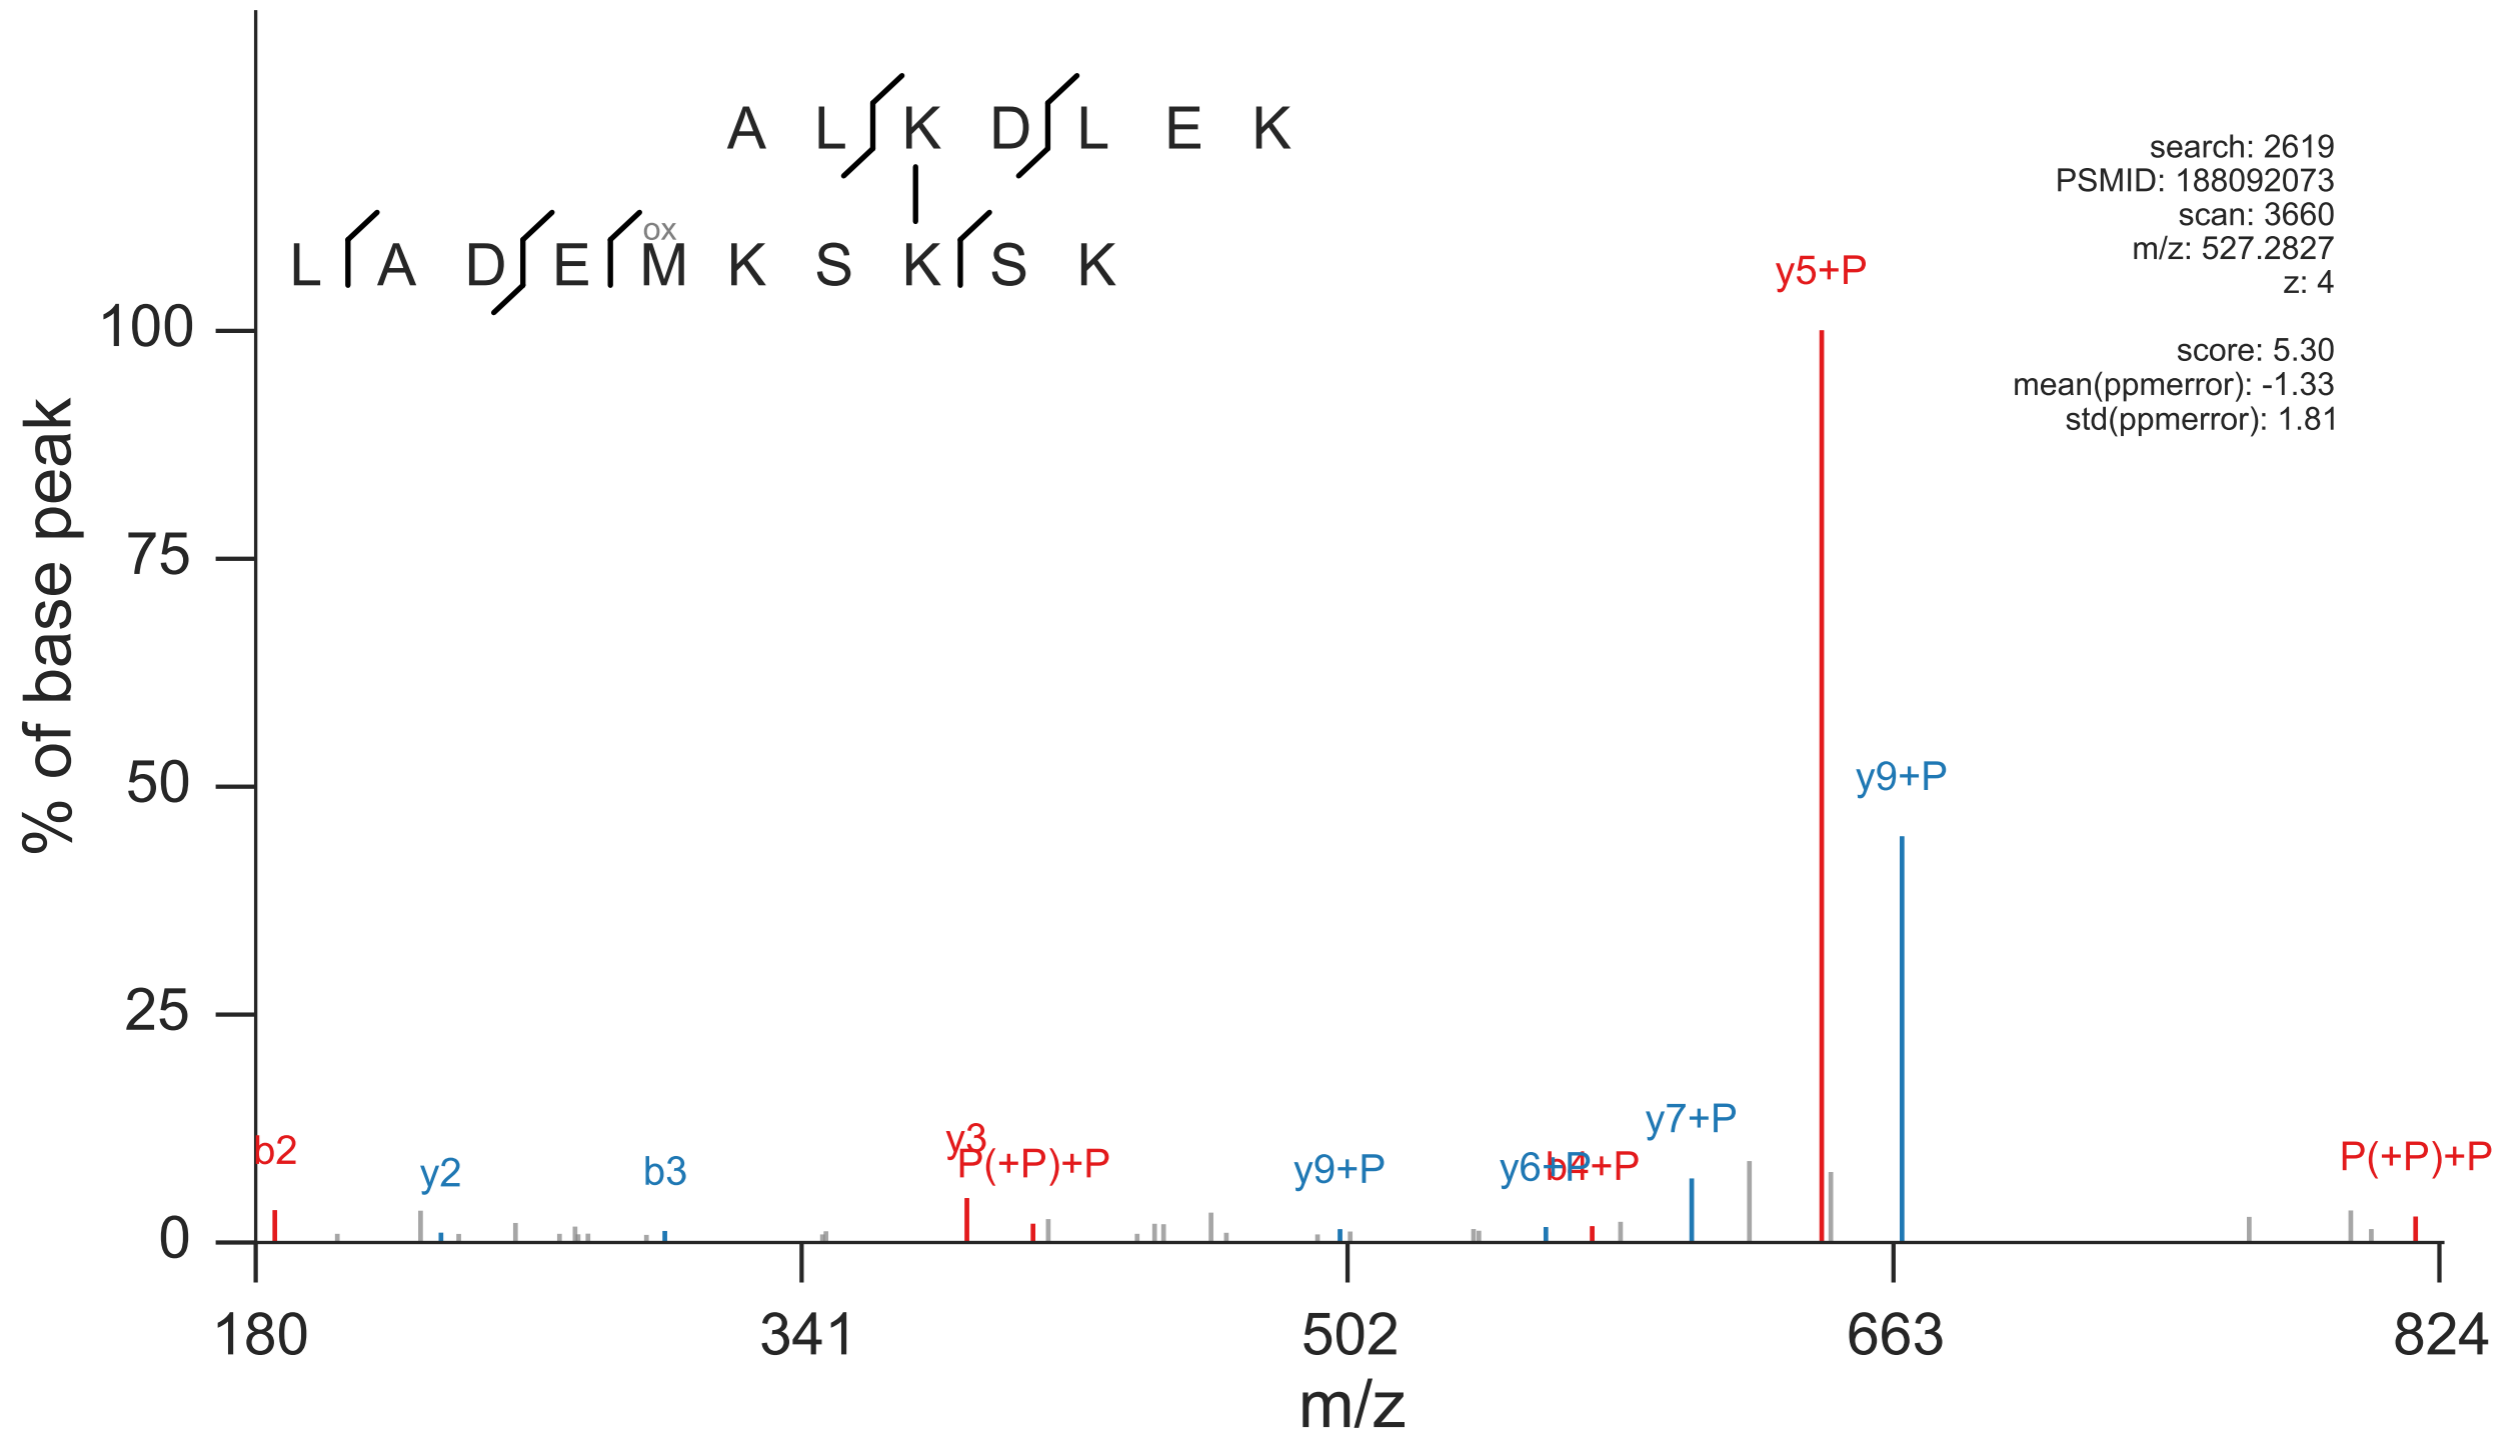

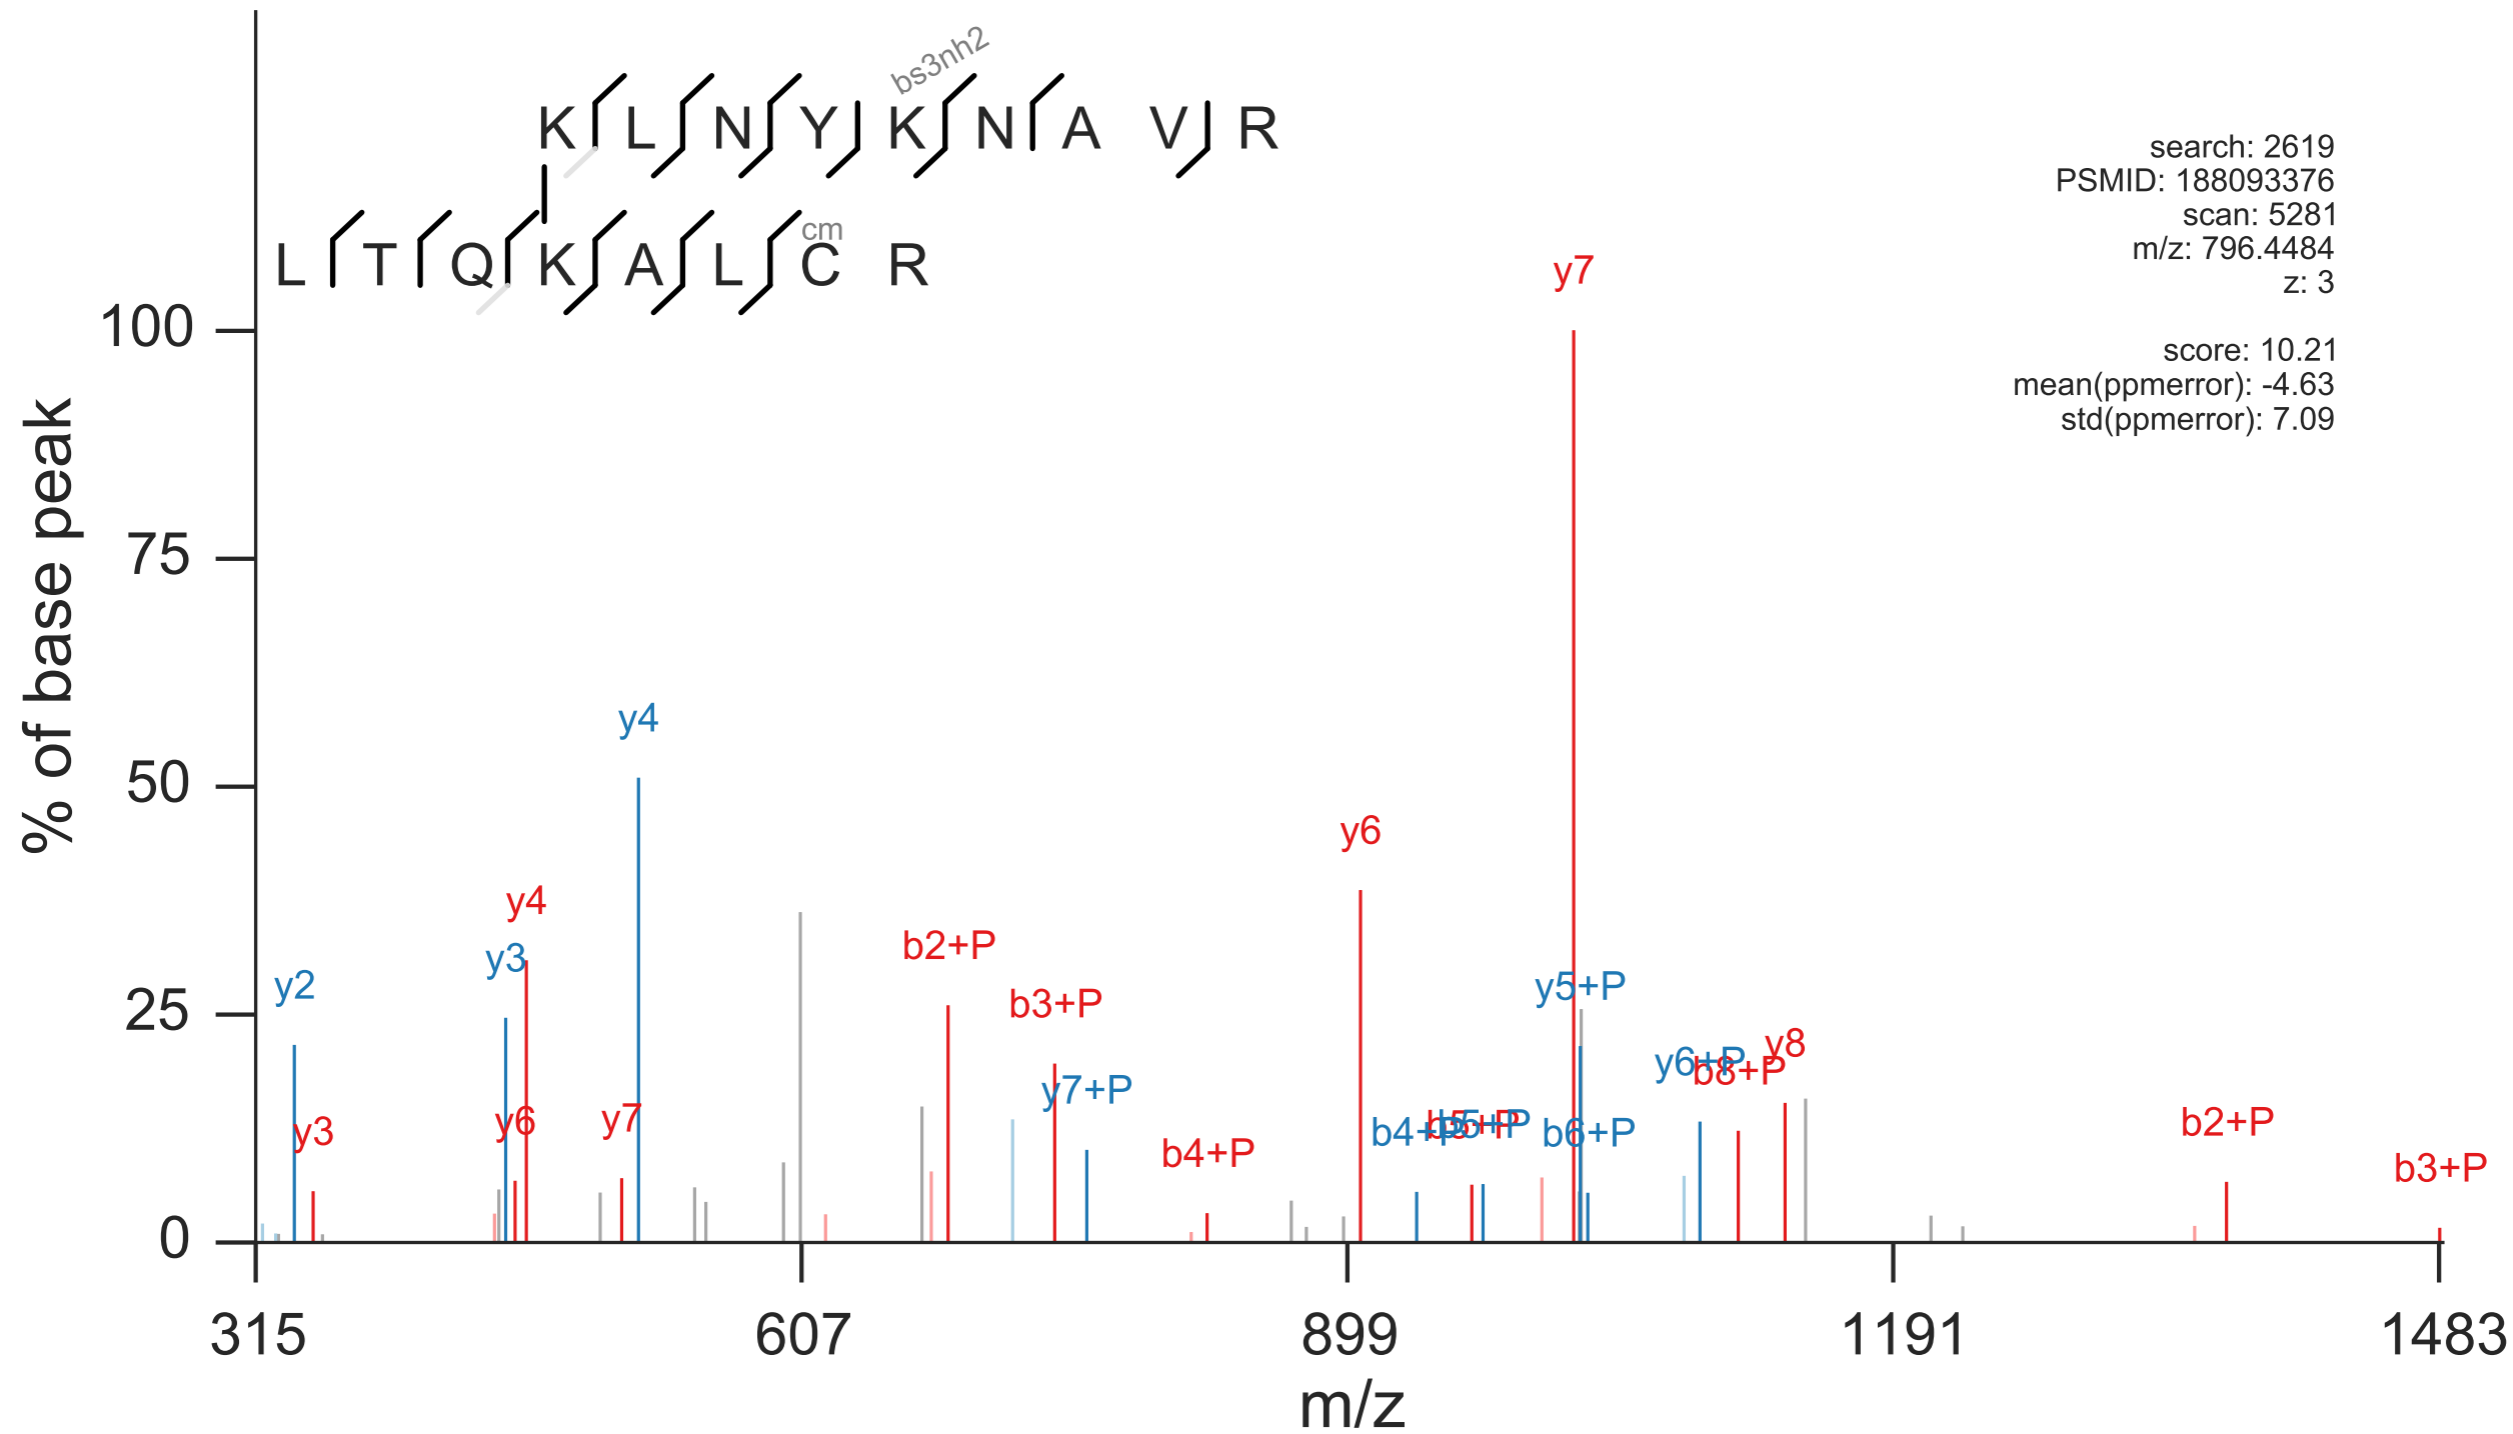

search: 2619  
PSMID: 188093376  
scan: 5281  
m/z: 796.4484  
z: 3  
  
score: 10.21  
mean(ppmerror): -4.63  
std(ppmerror): 7.09

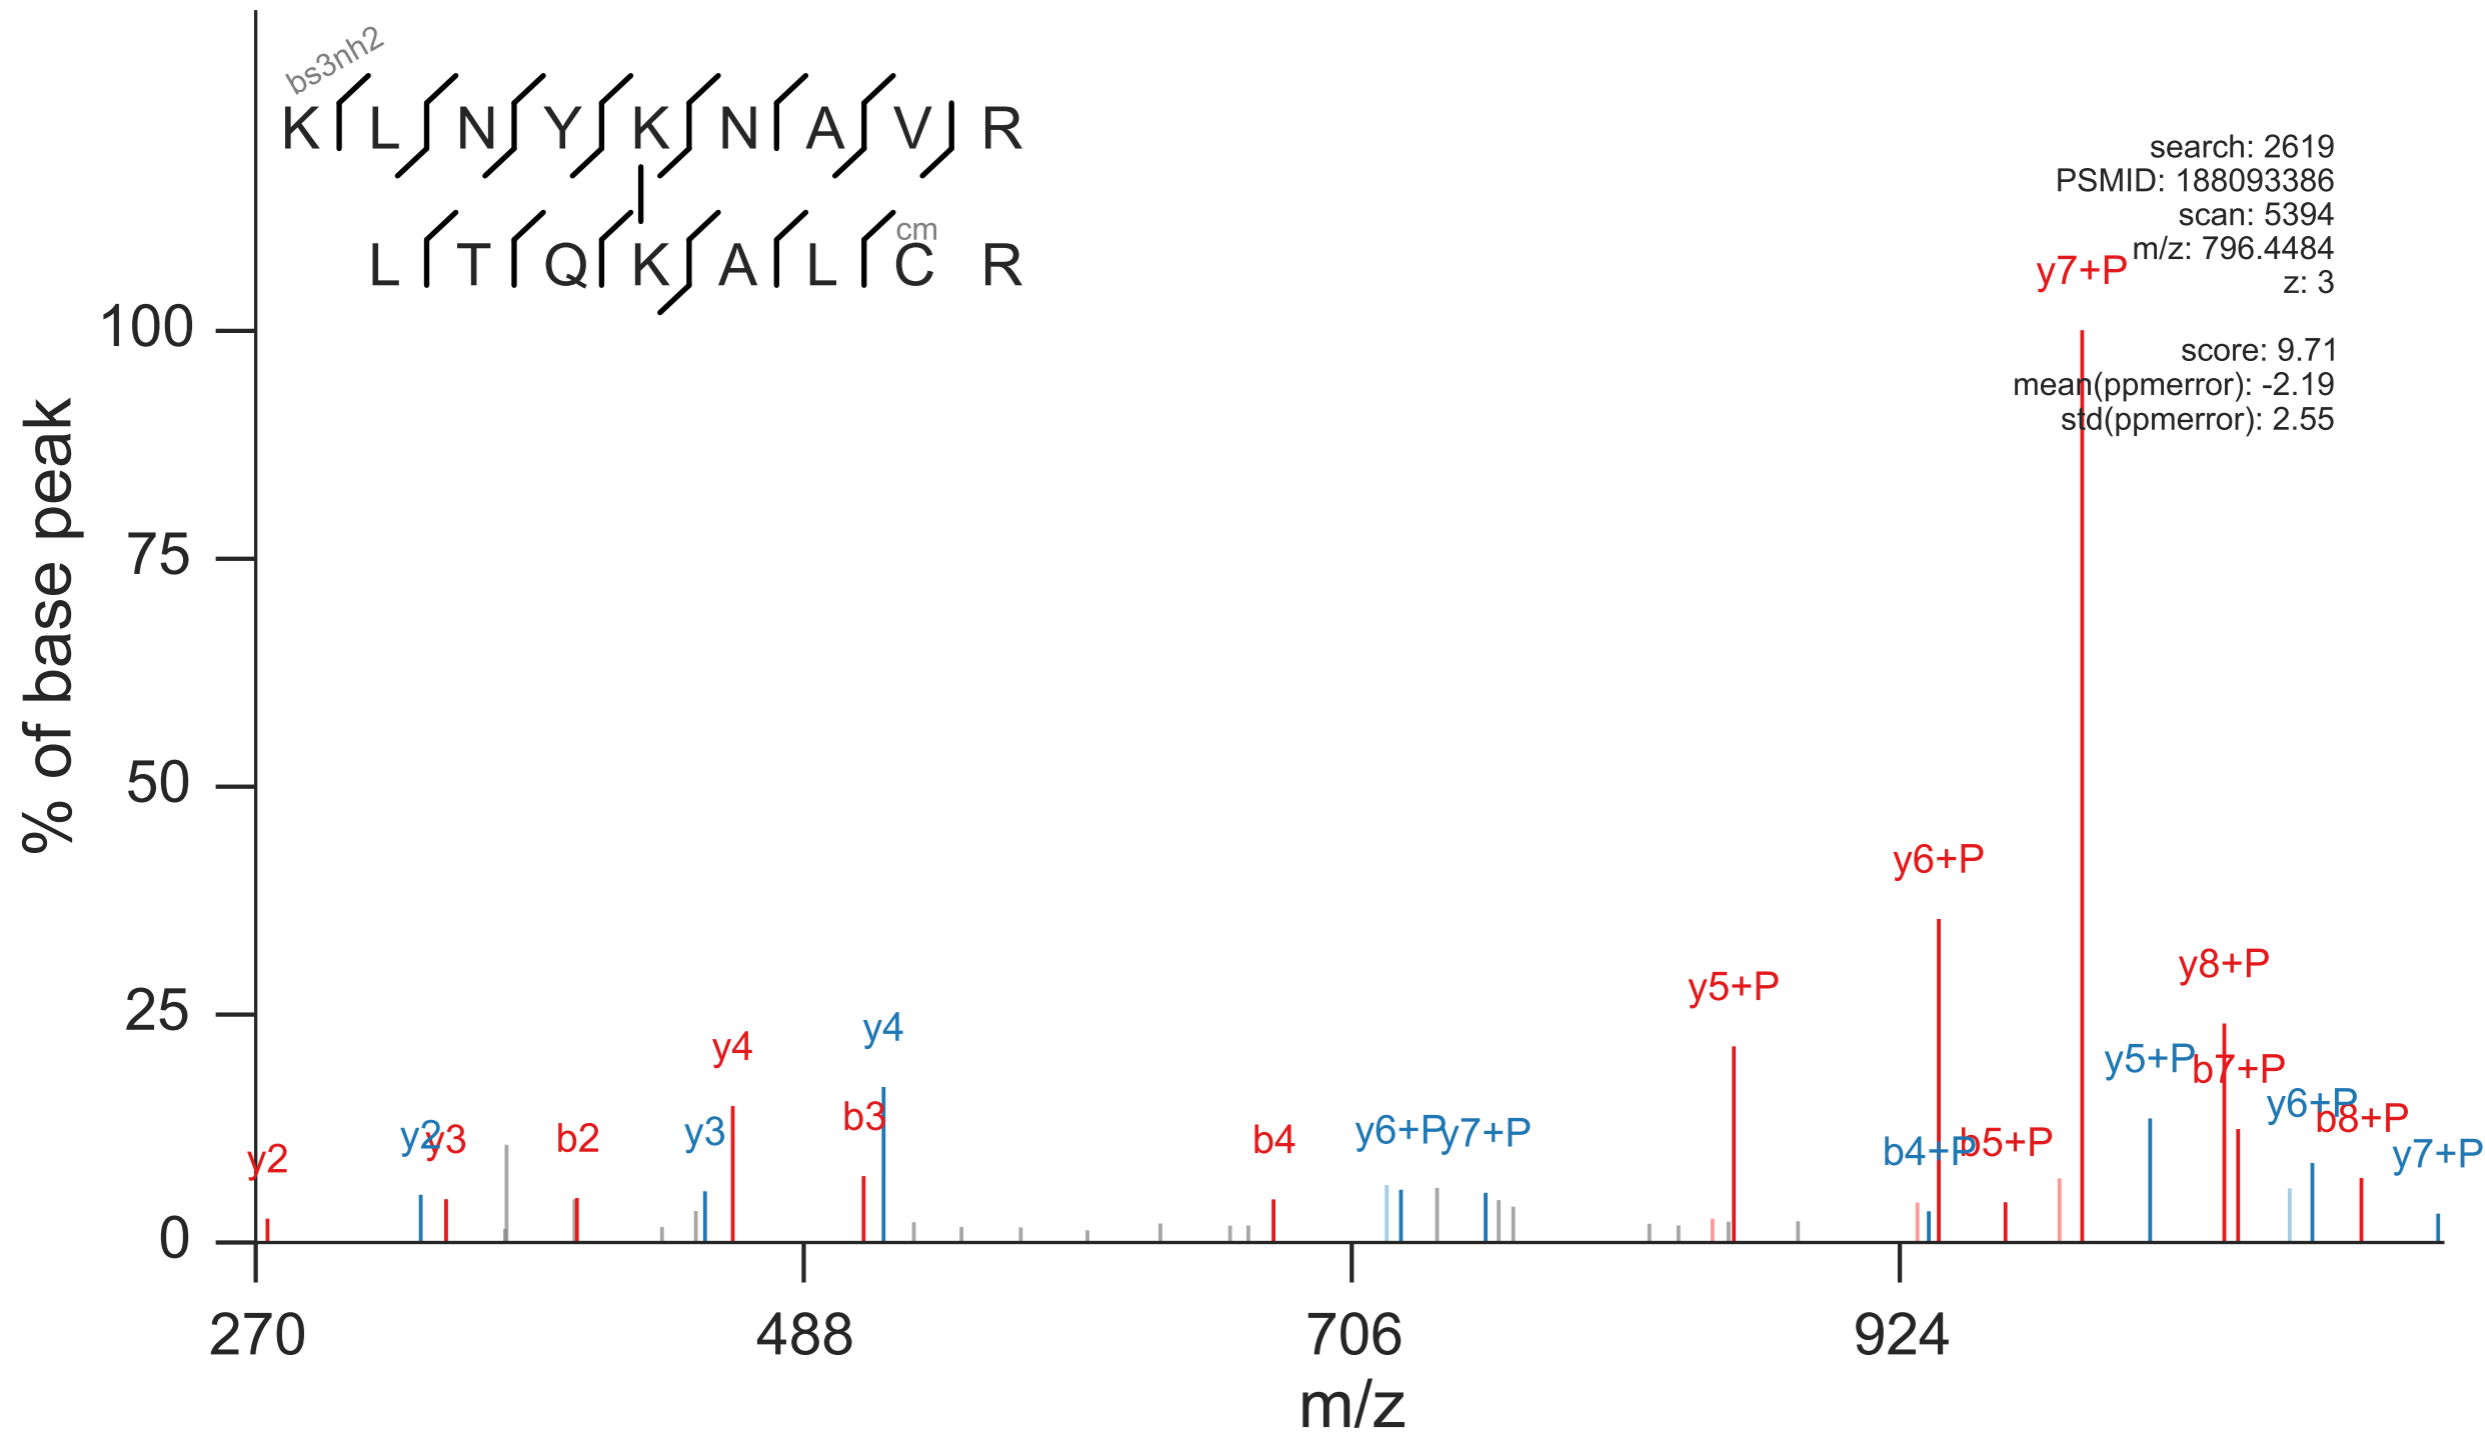

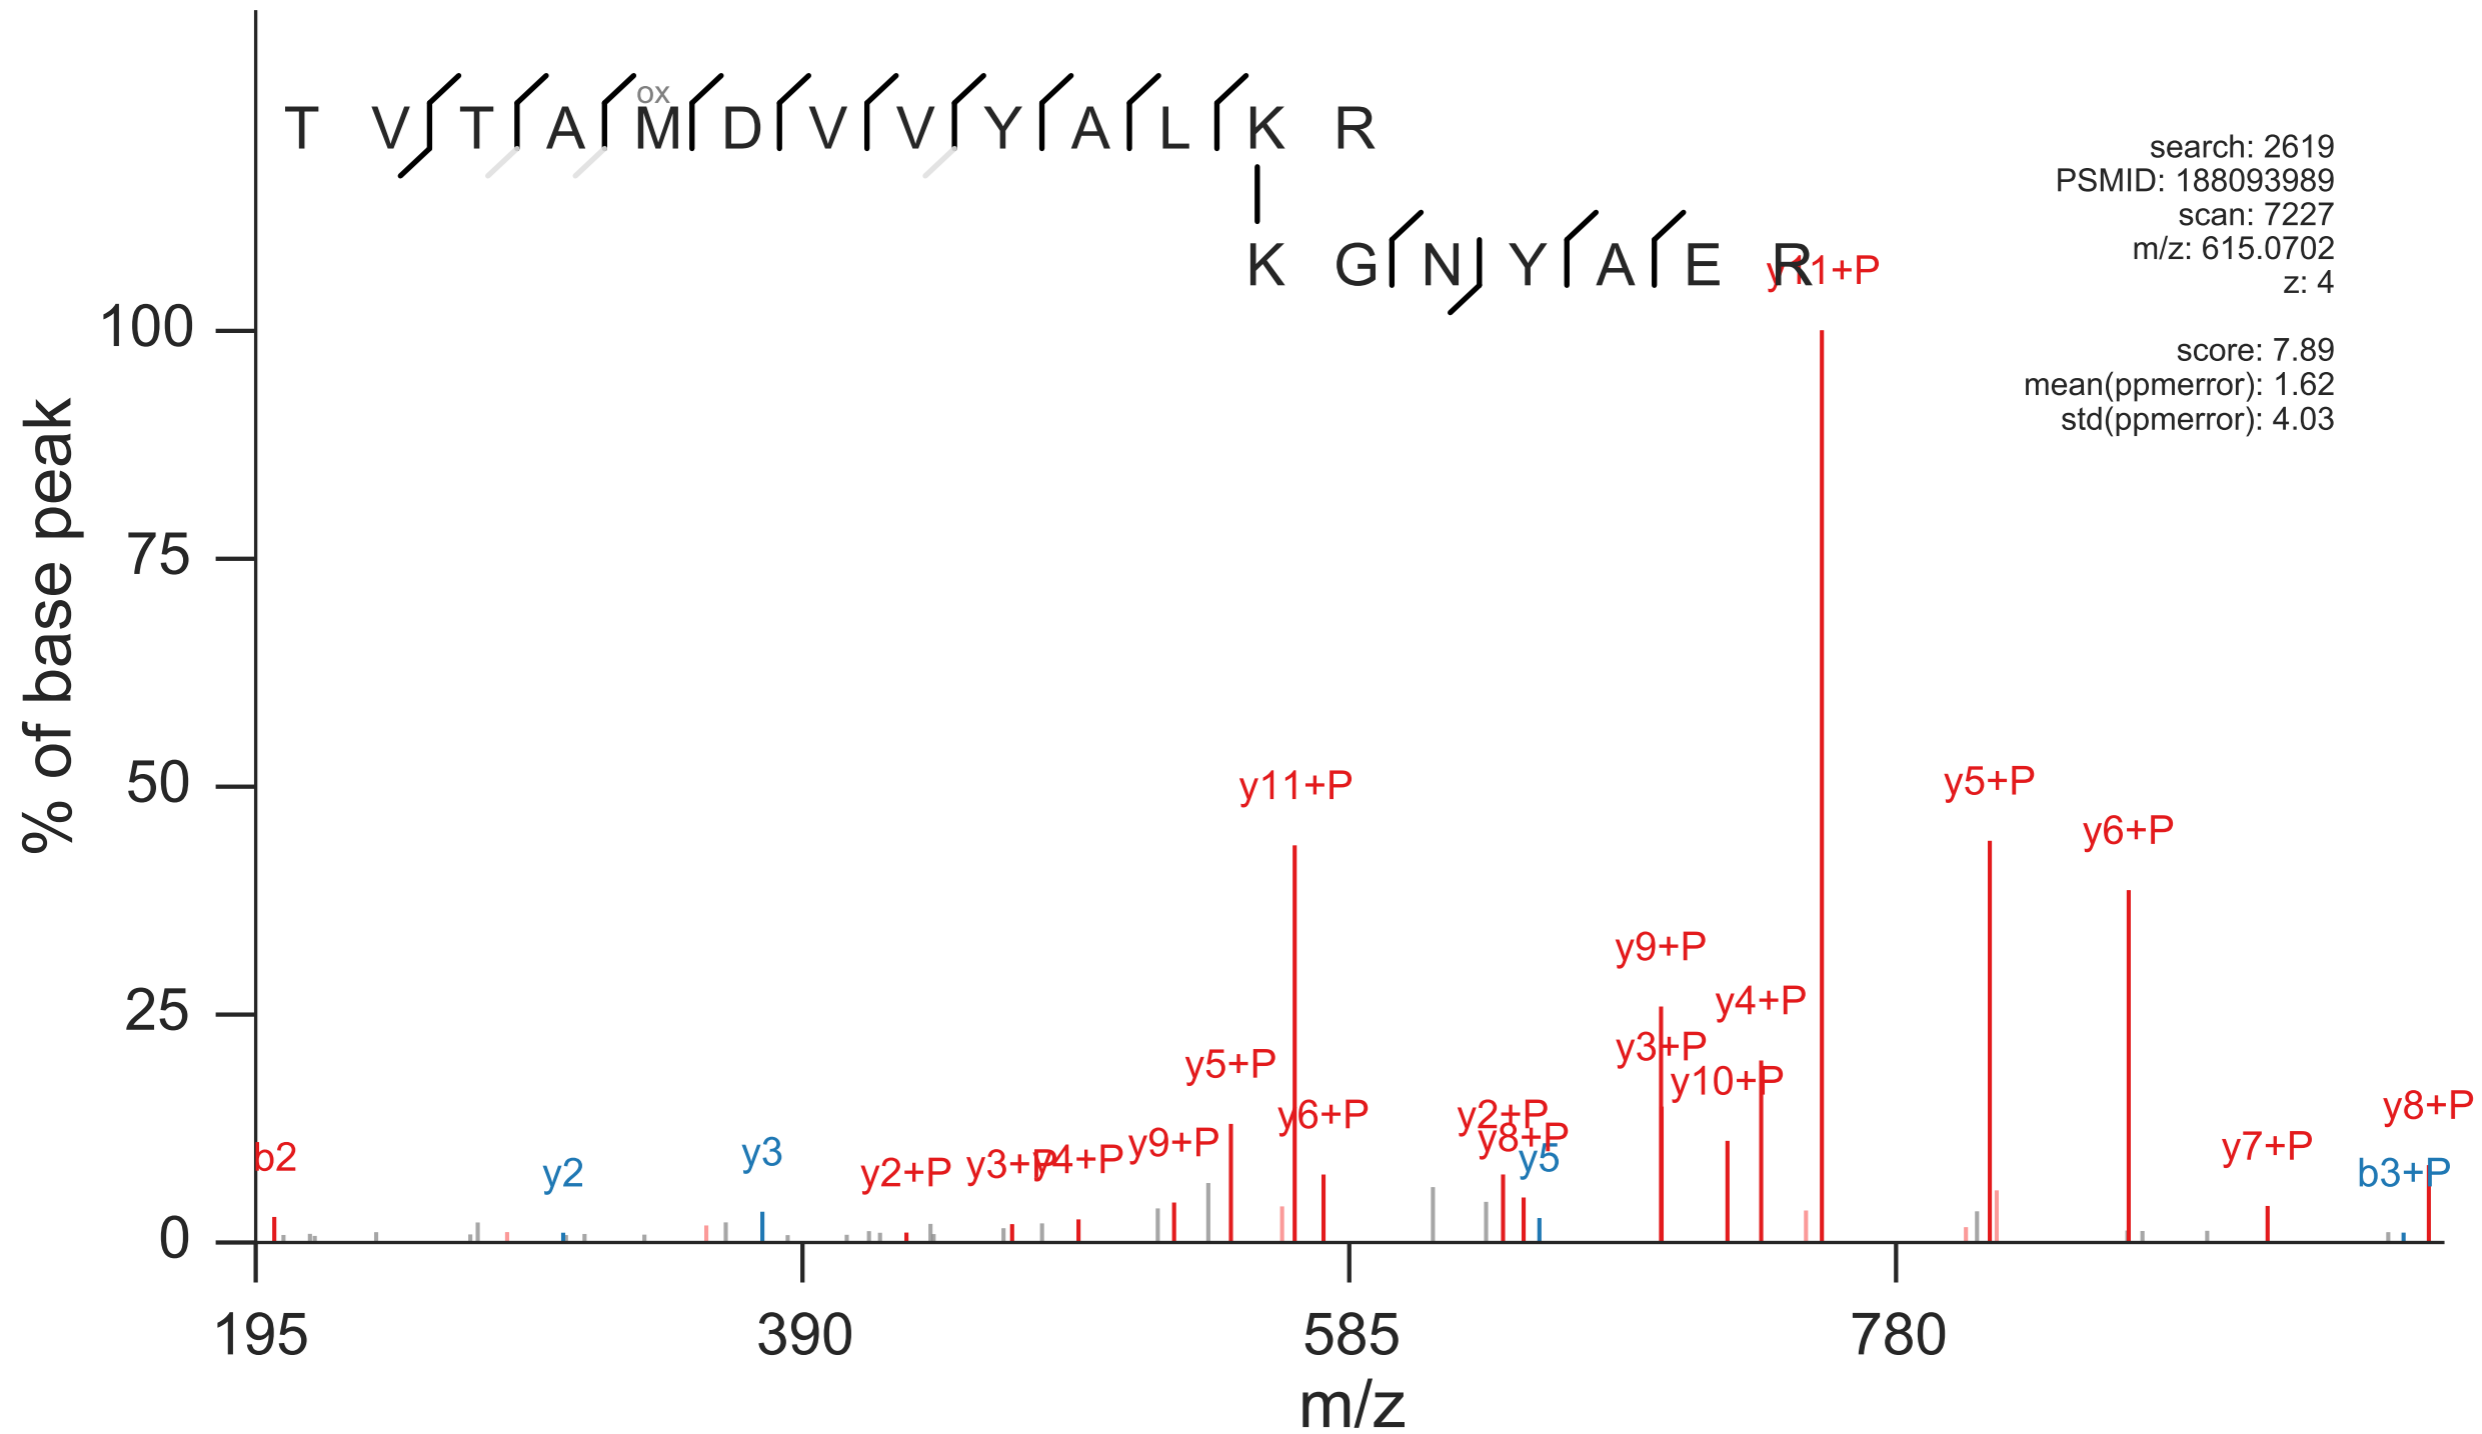



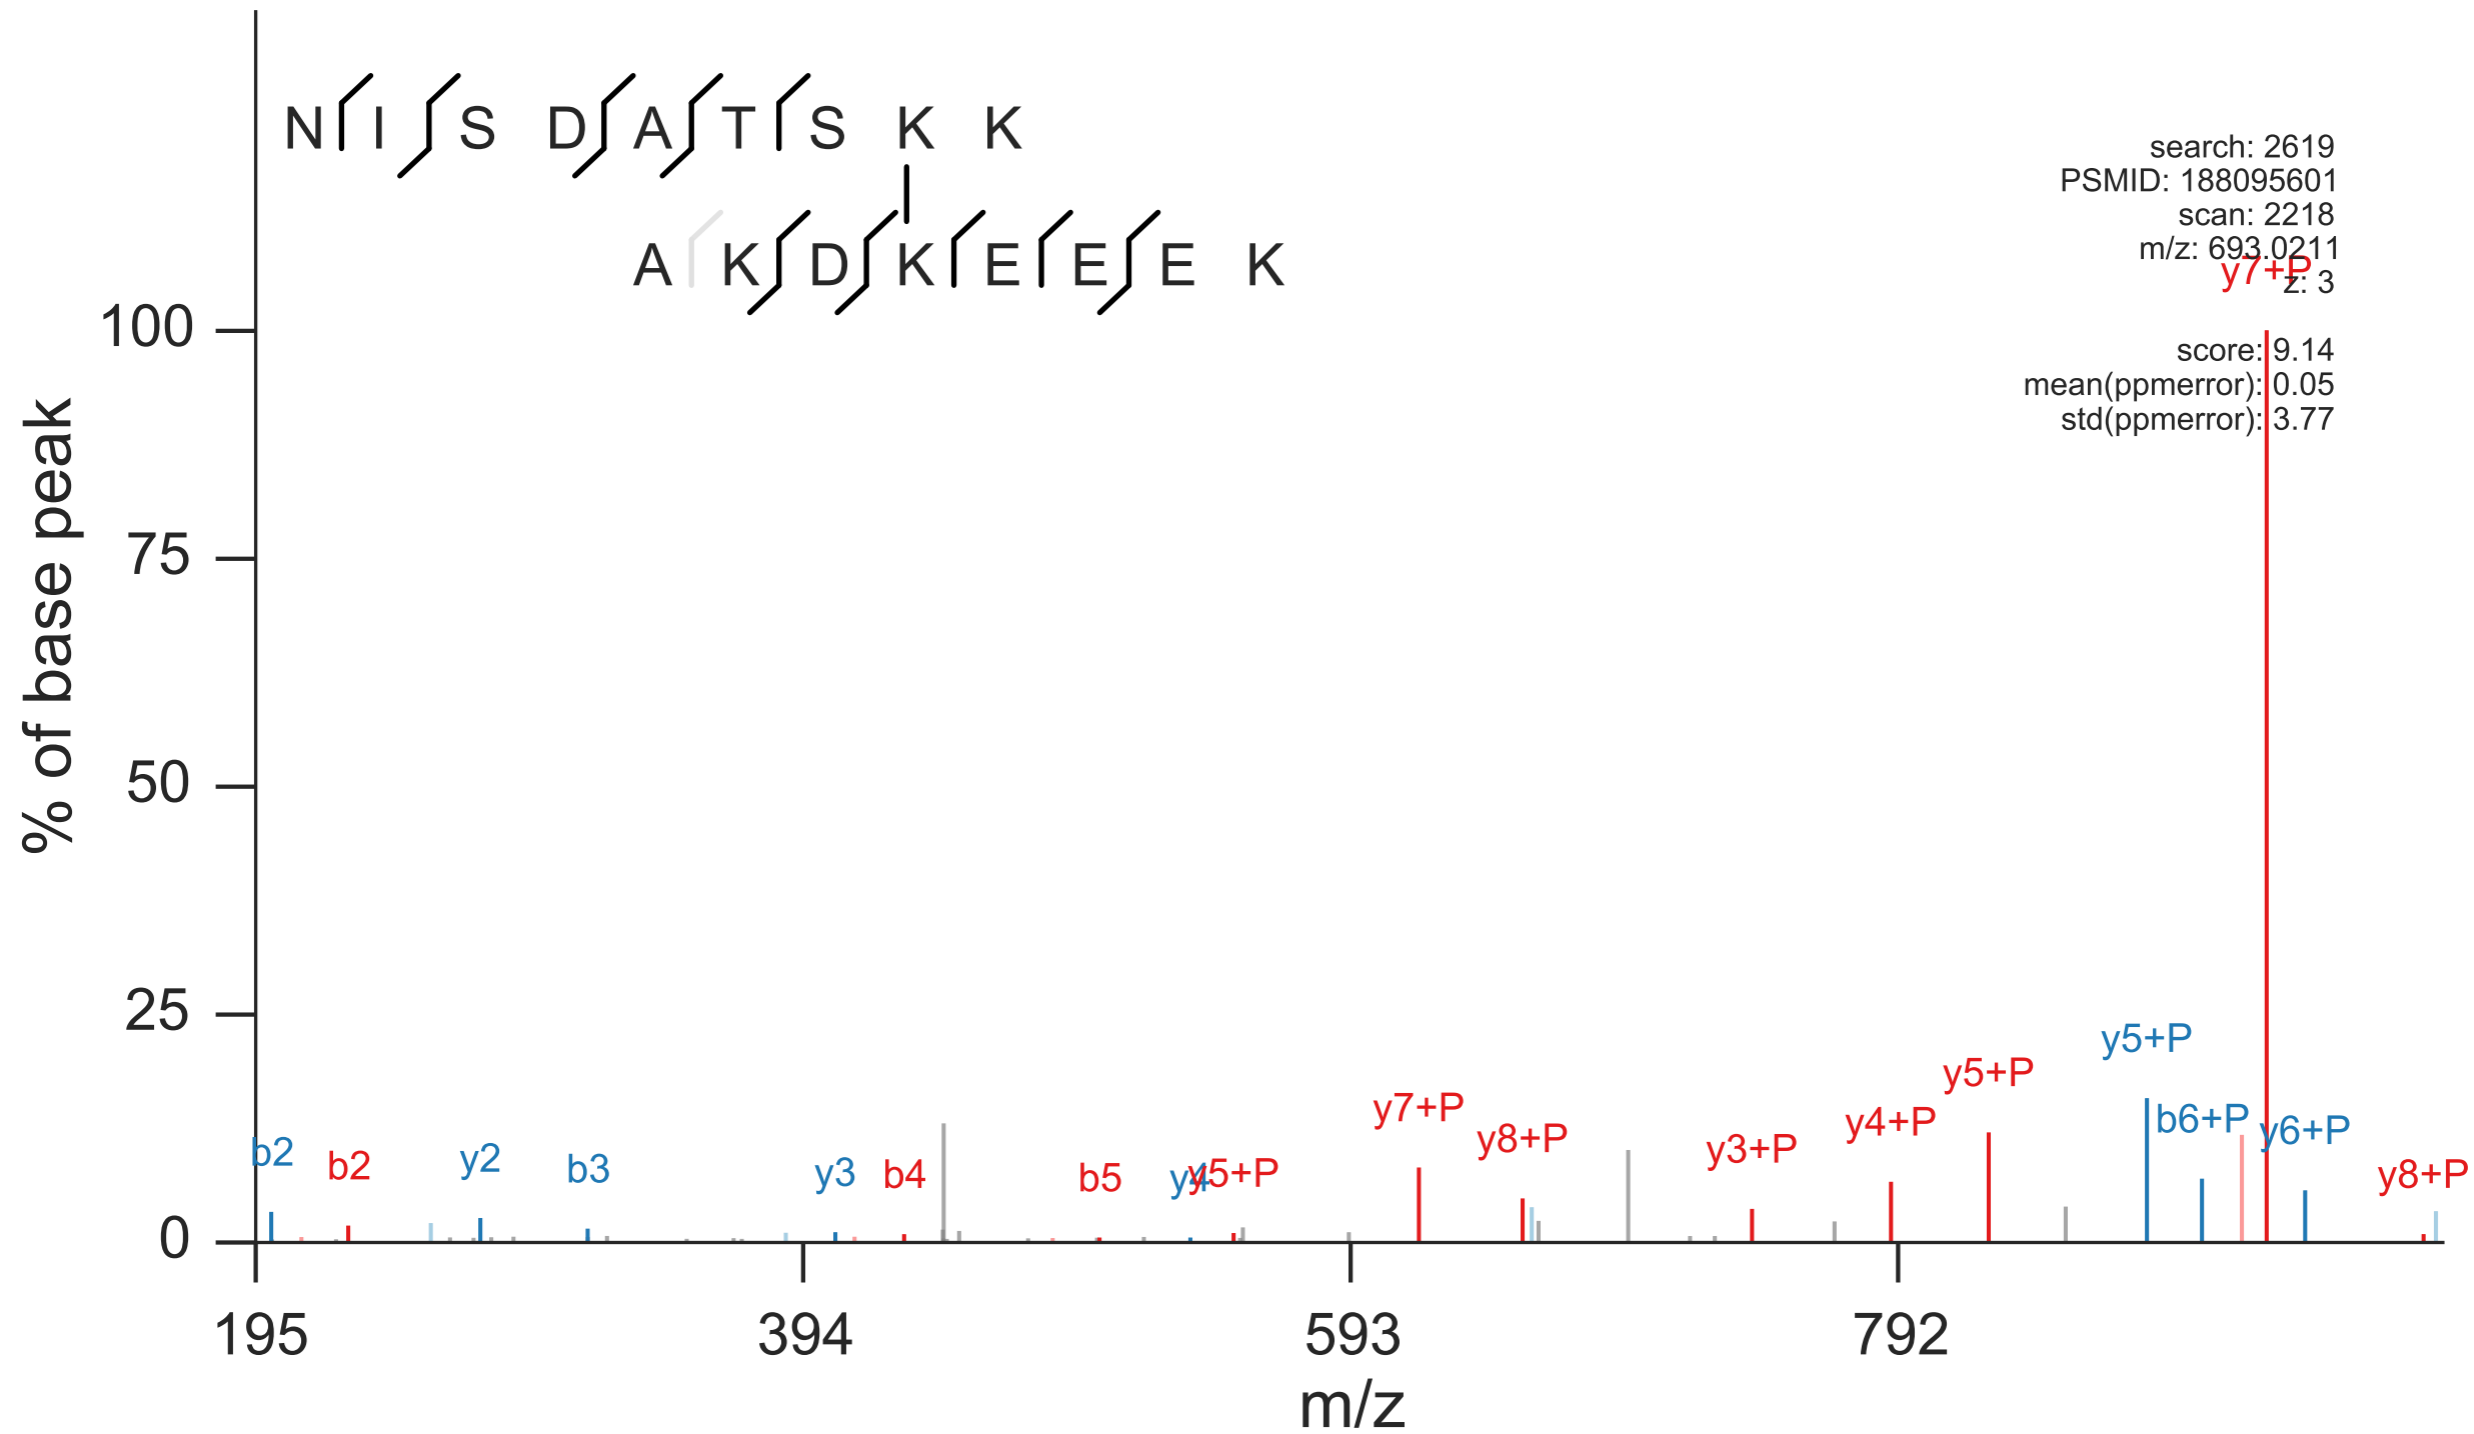

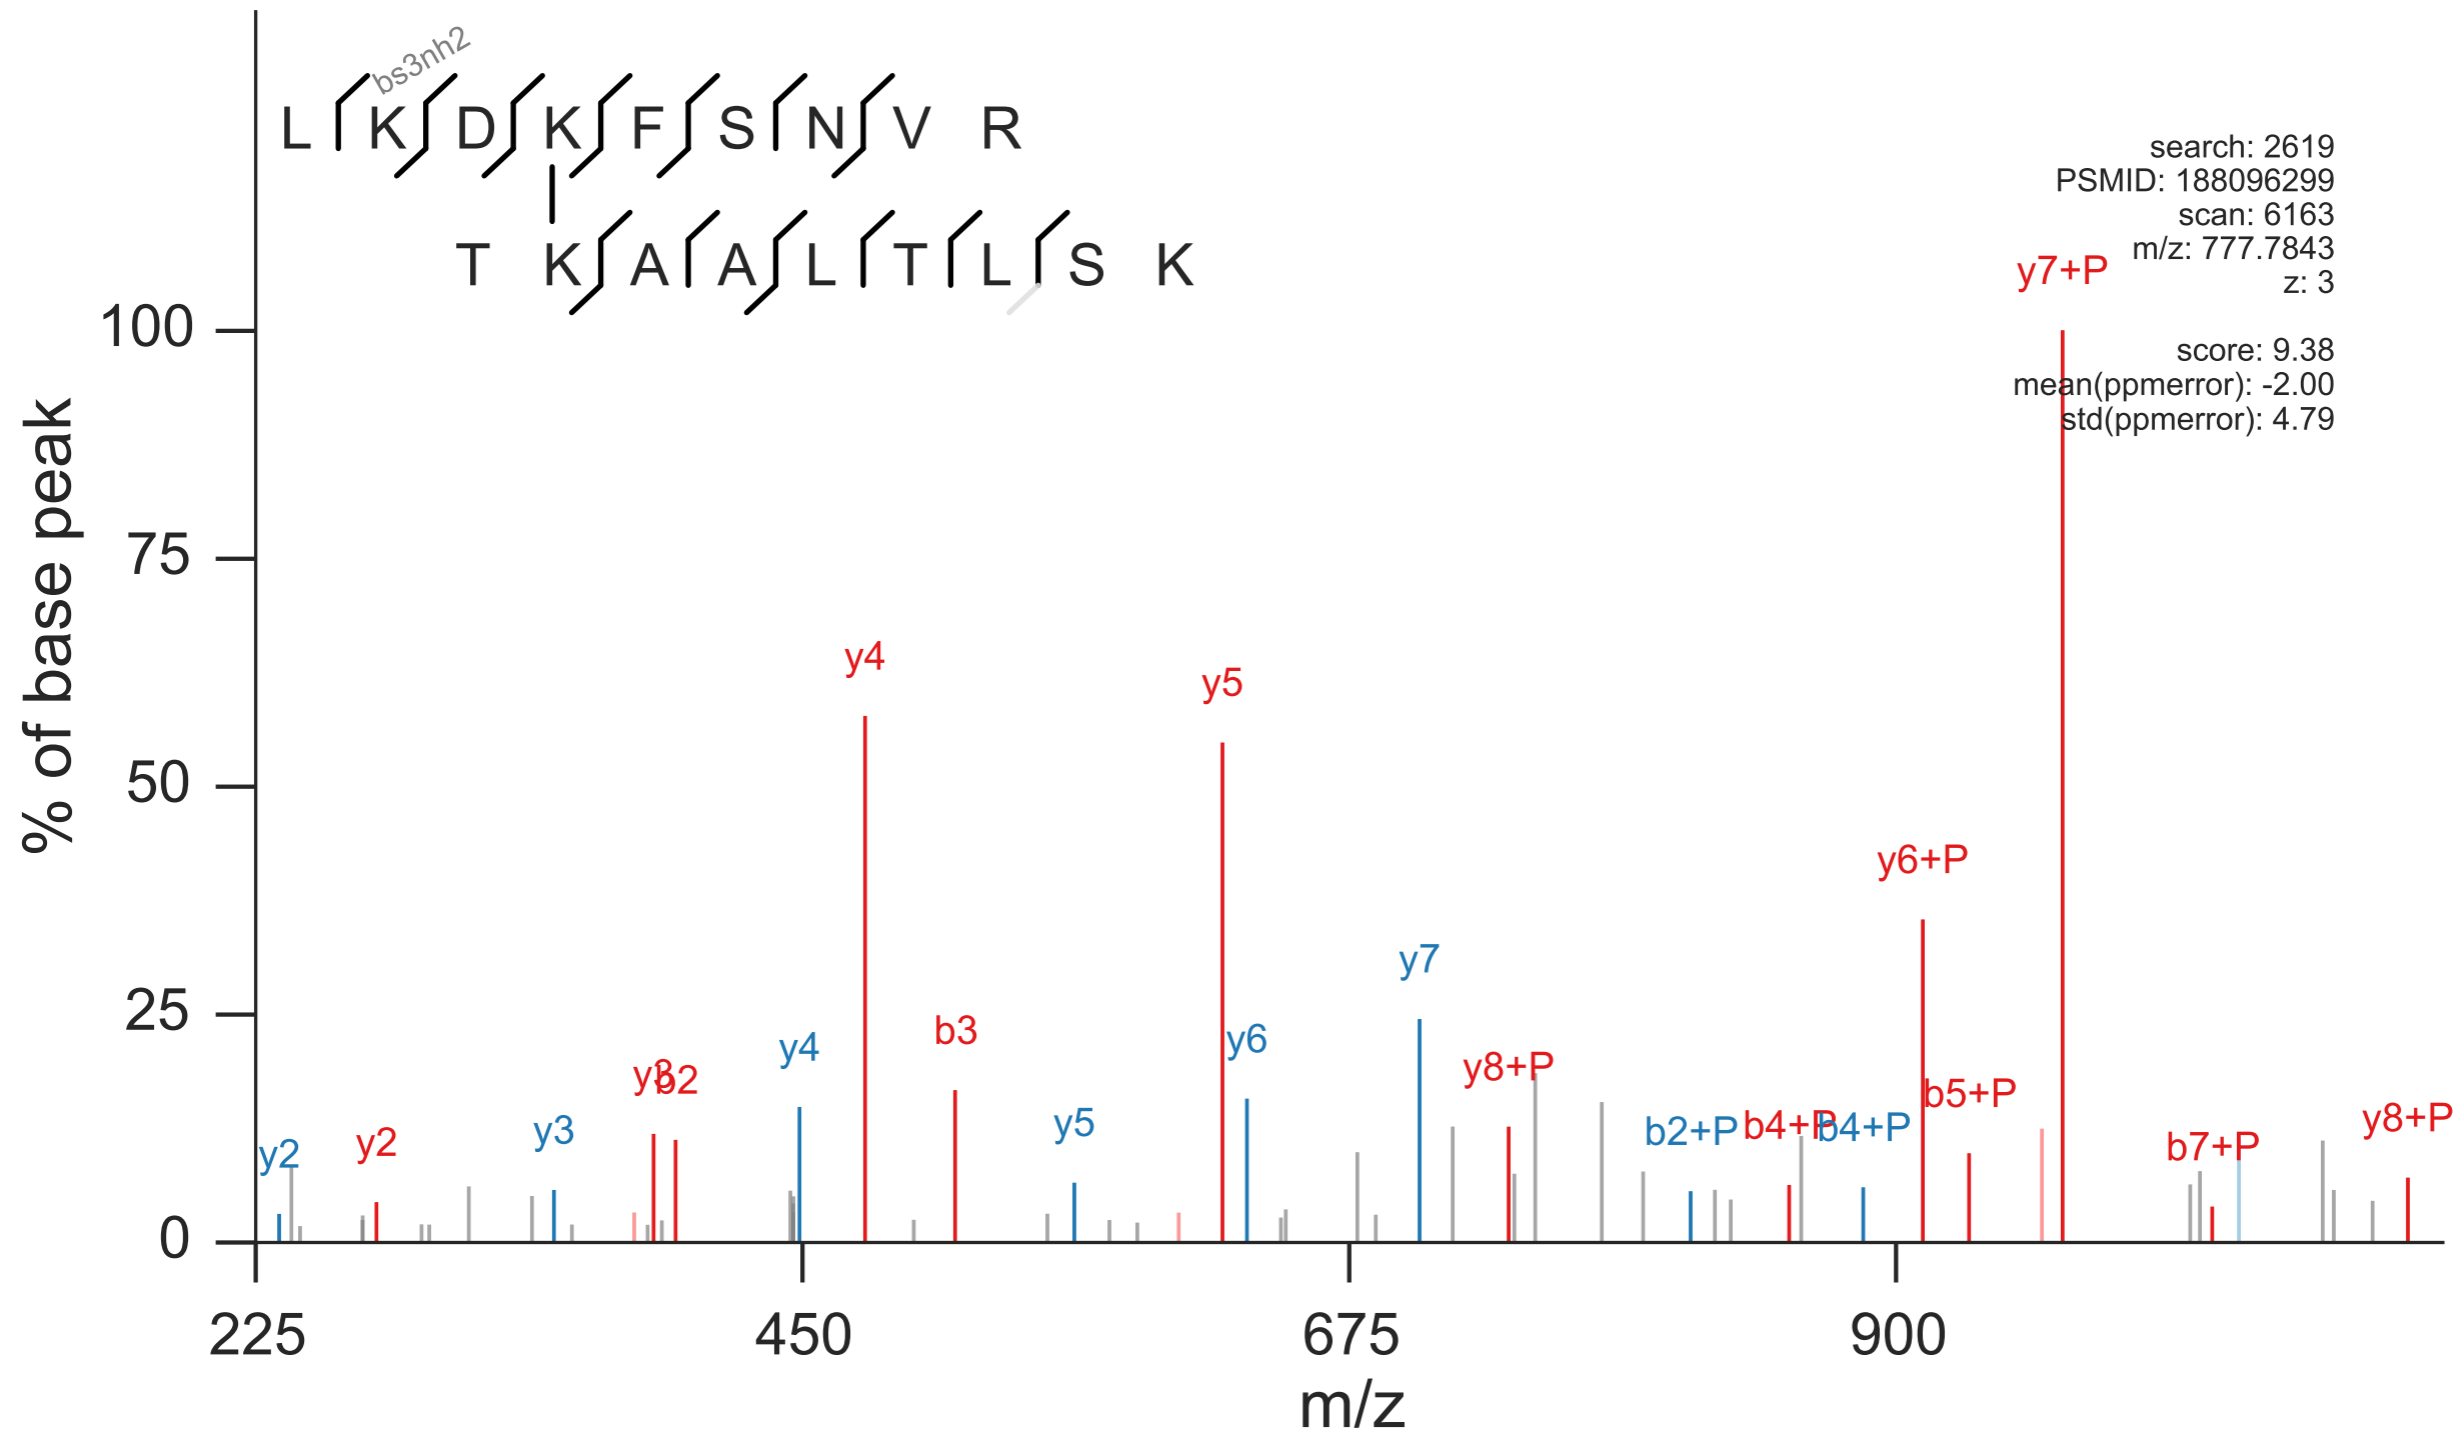

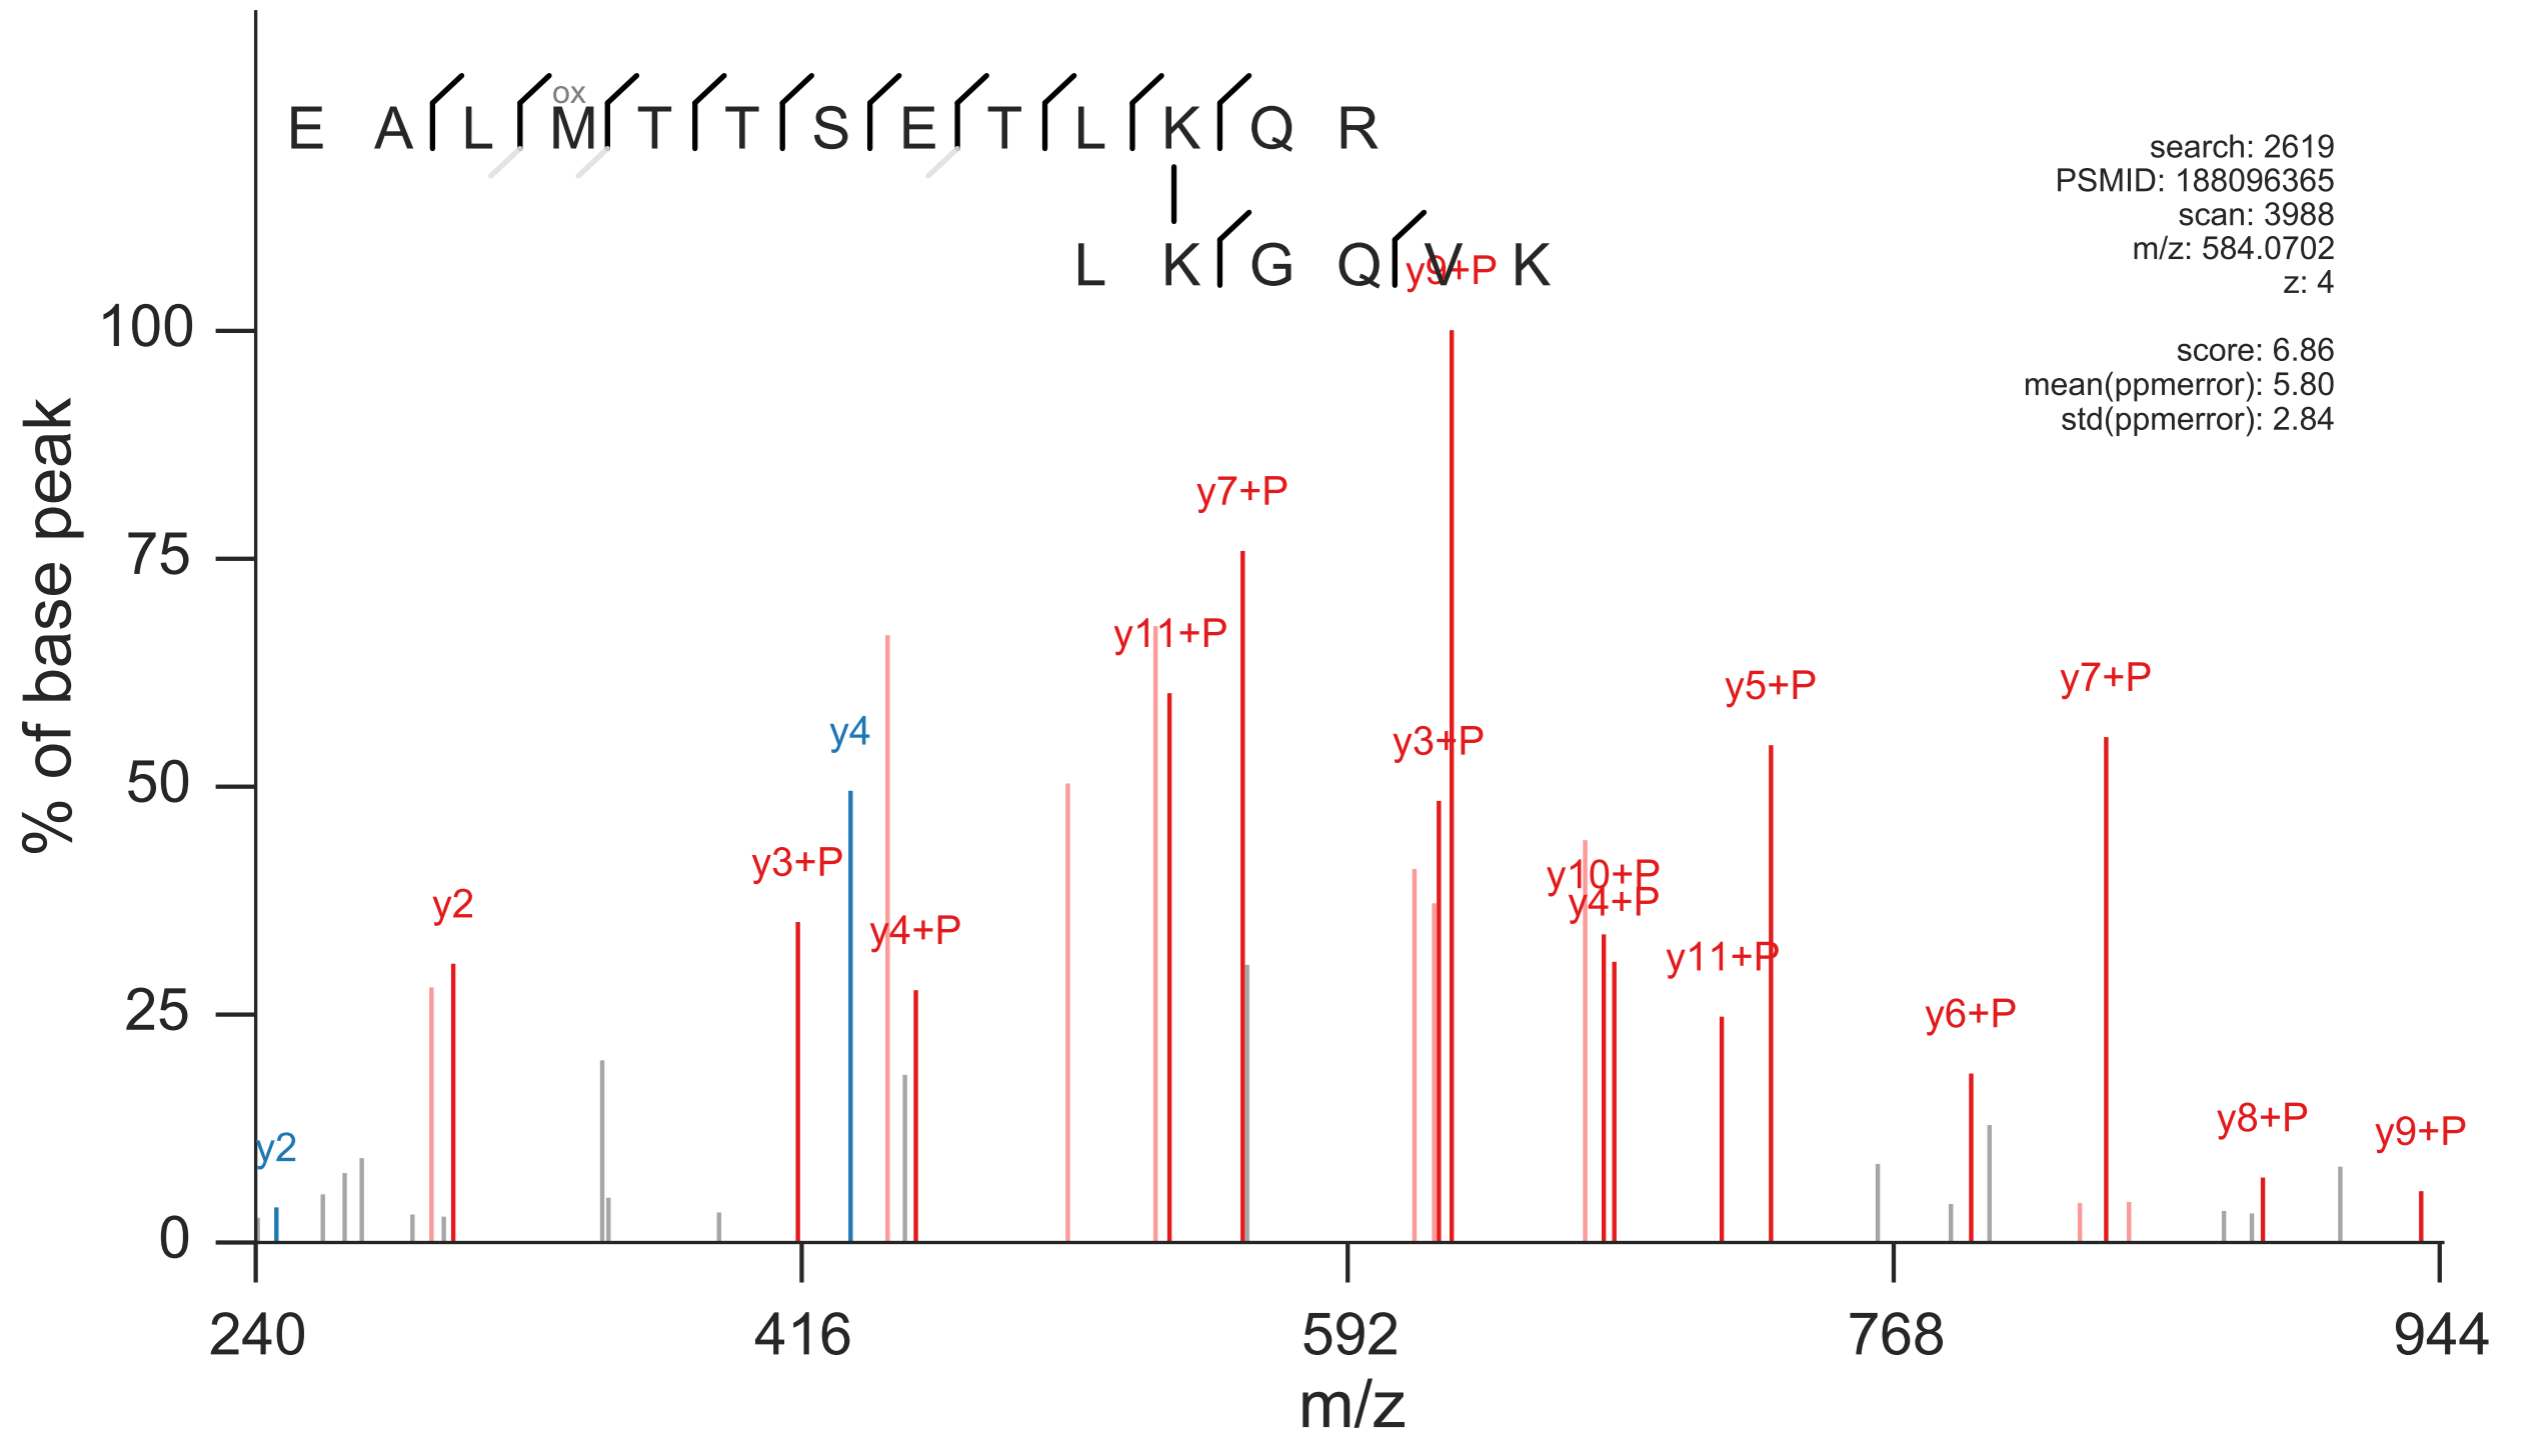

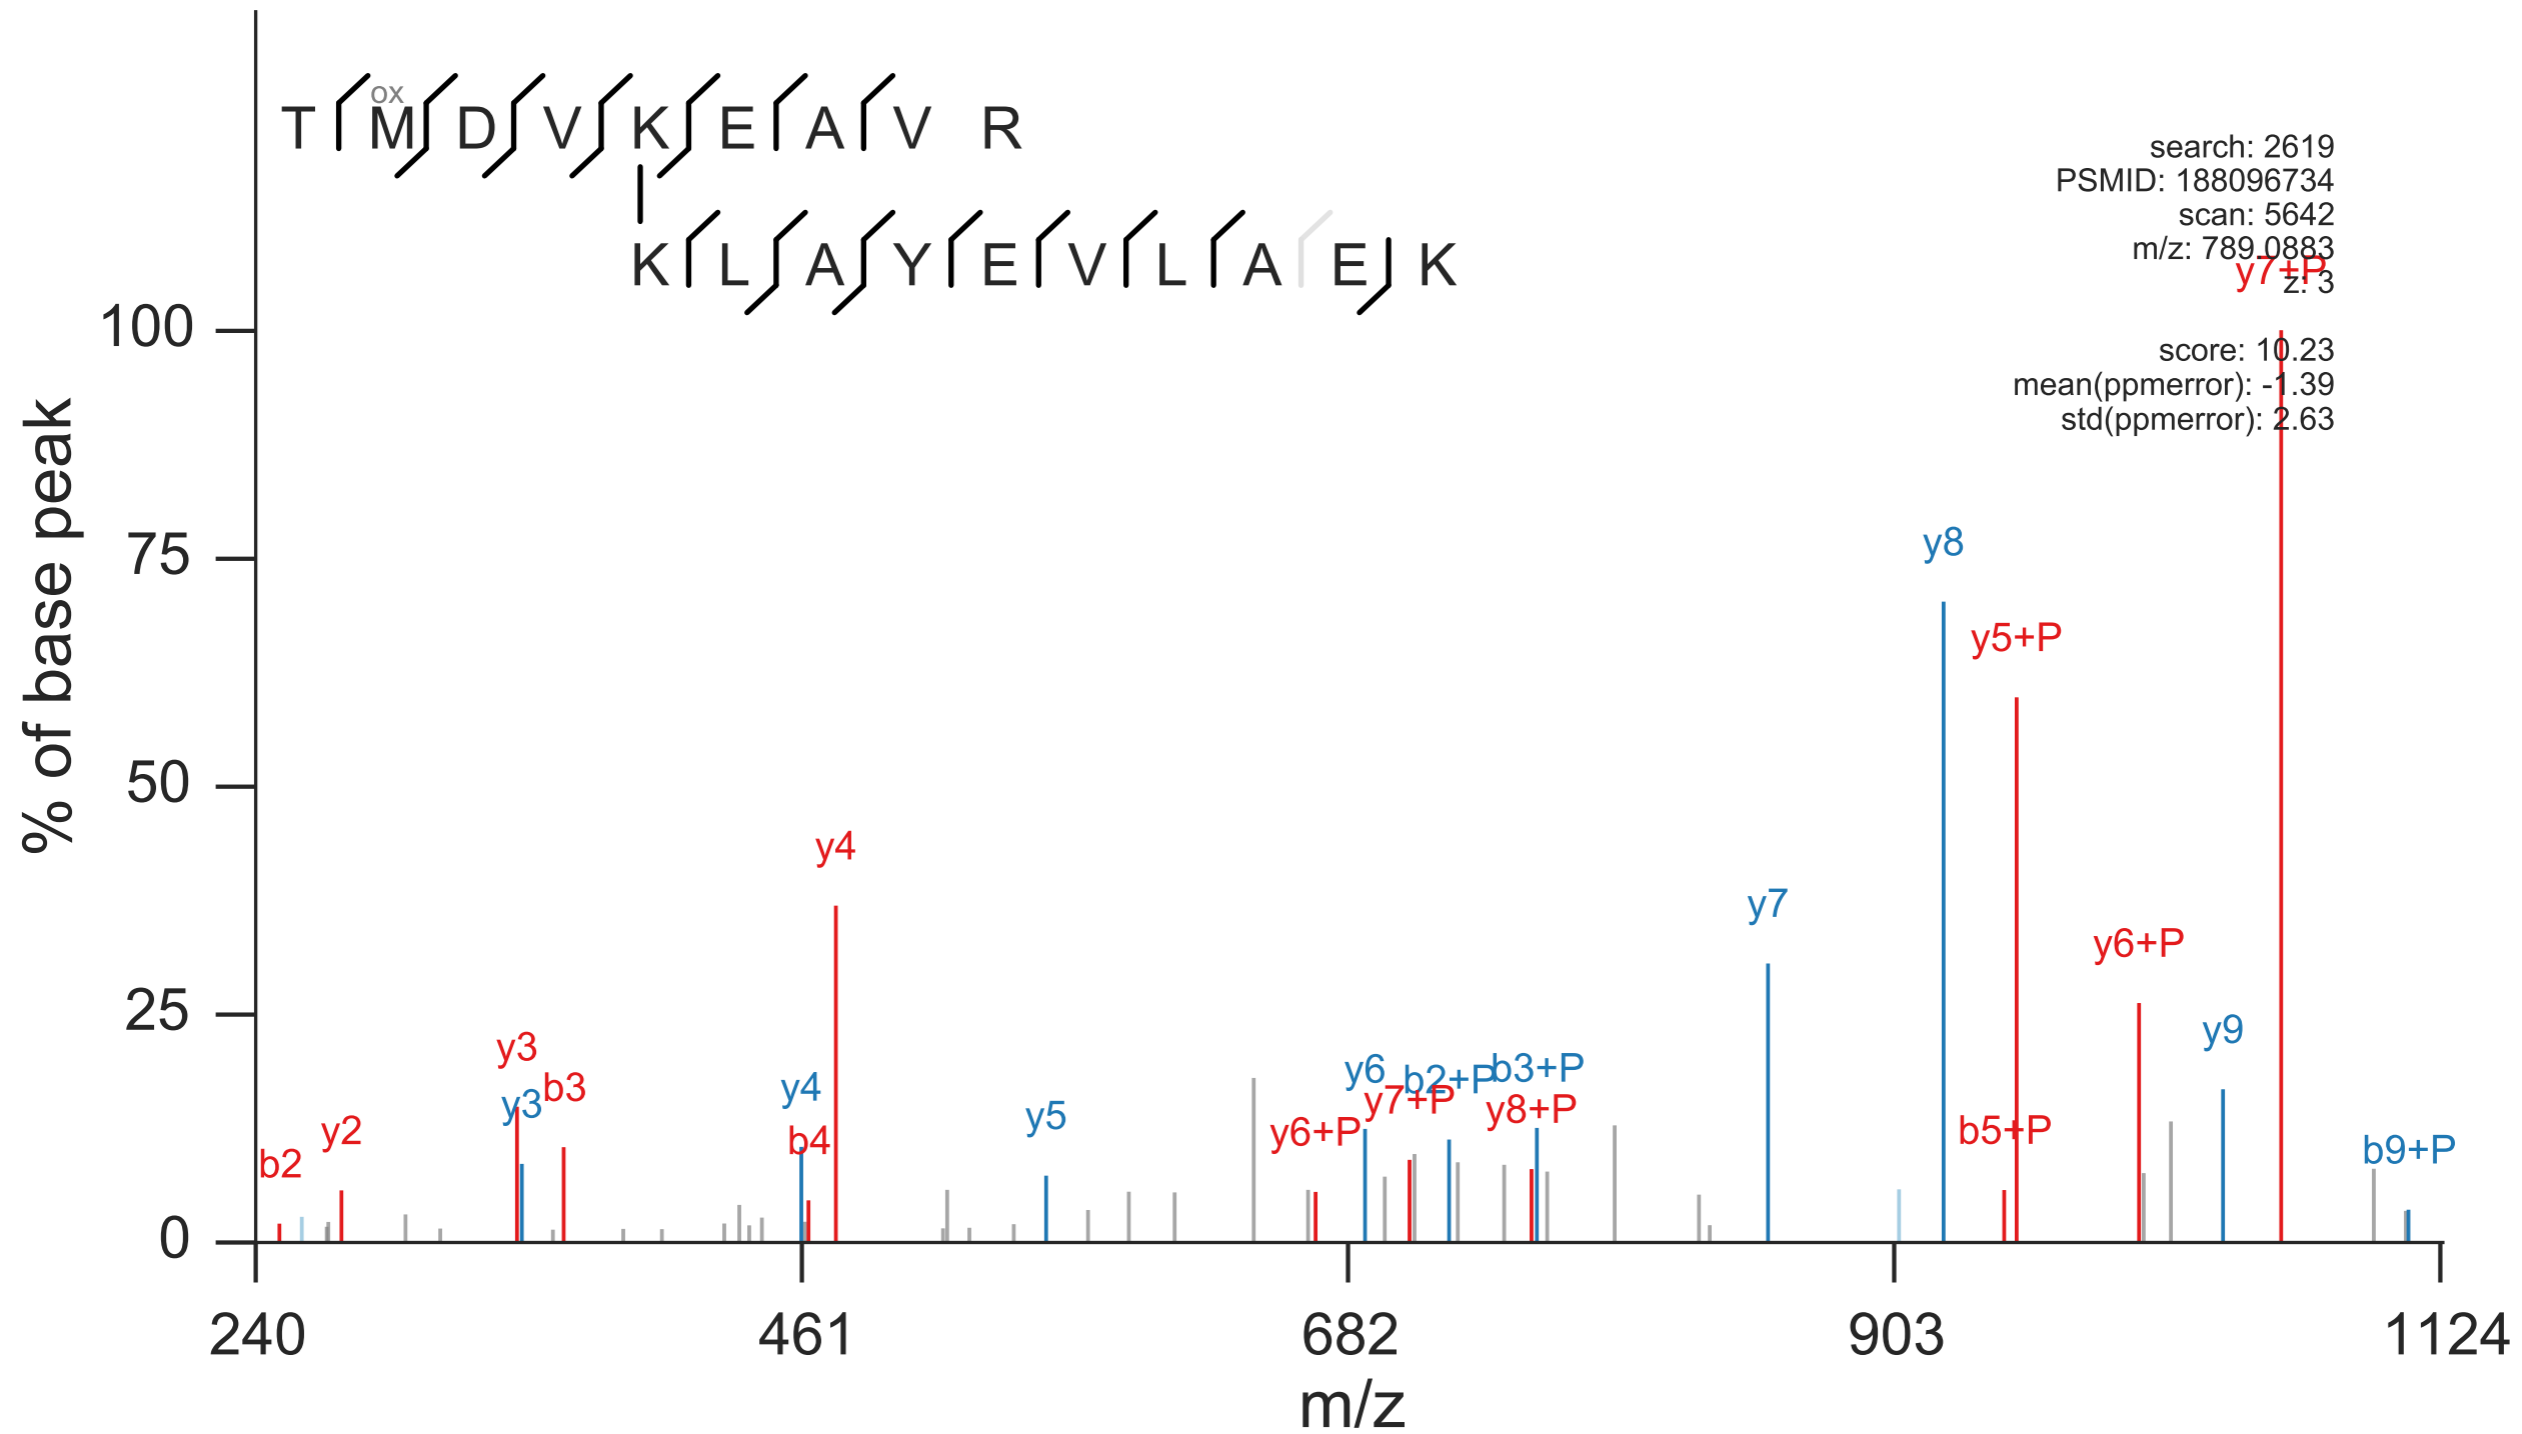

S T K T S T A A H Q K G R  
 G E K L N R

bs3nh2

search: 2619  
 PSMID: 188107381  
 scan: 3011  
 m/z: 596.0725  
 z: 4

score: 6.24  
 mean(ppmerror): -0.22  
 std(ppmerror): 6.95

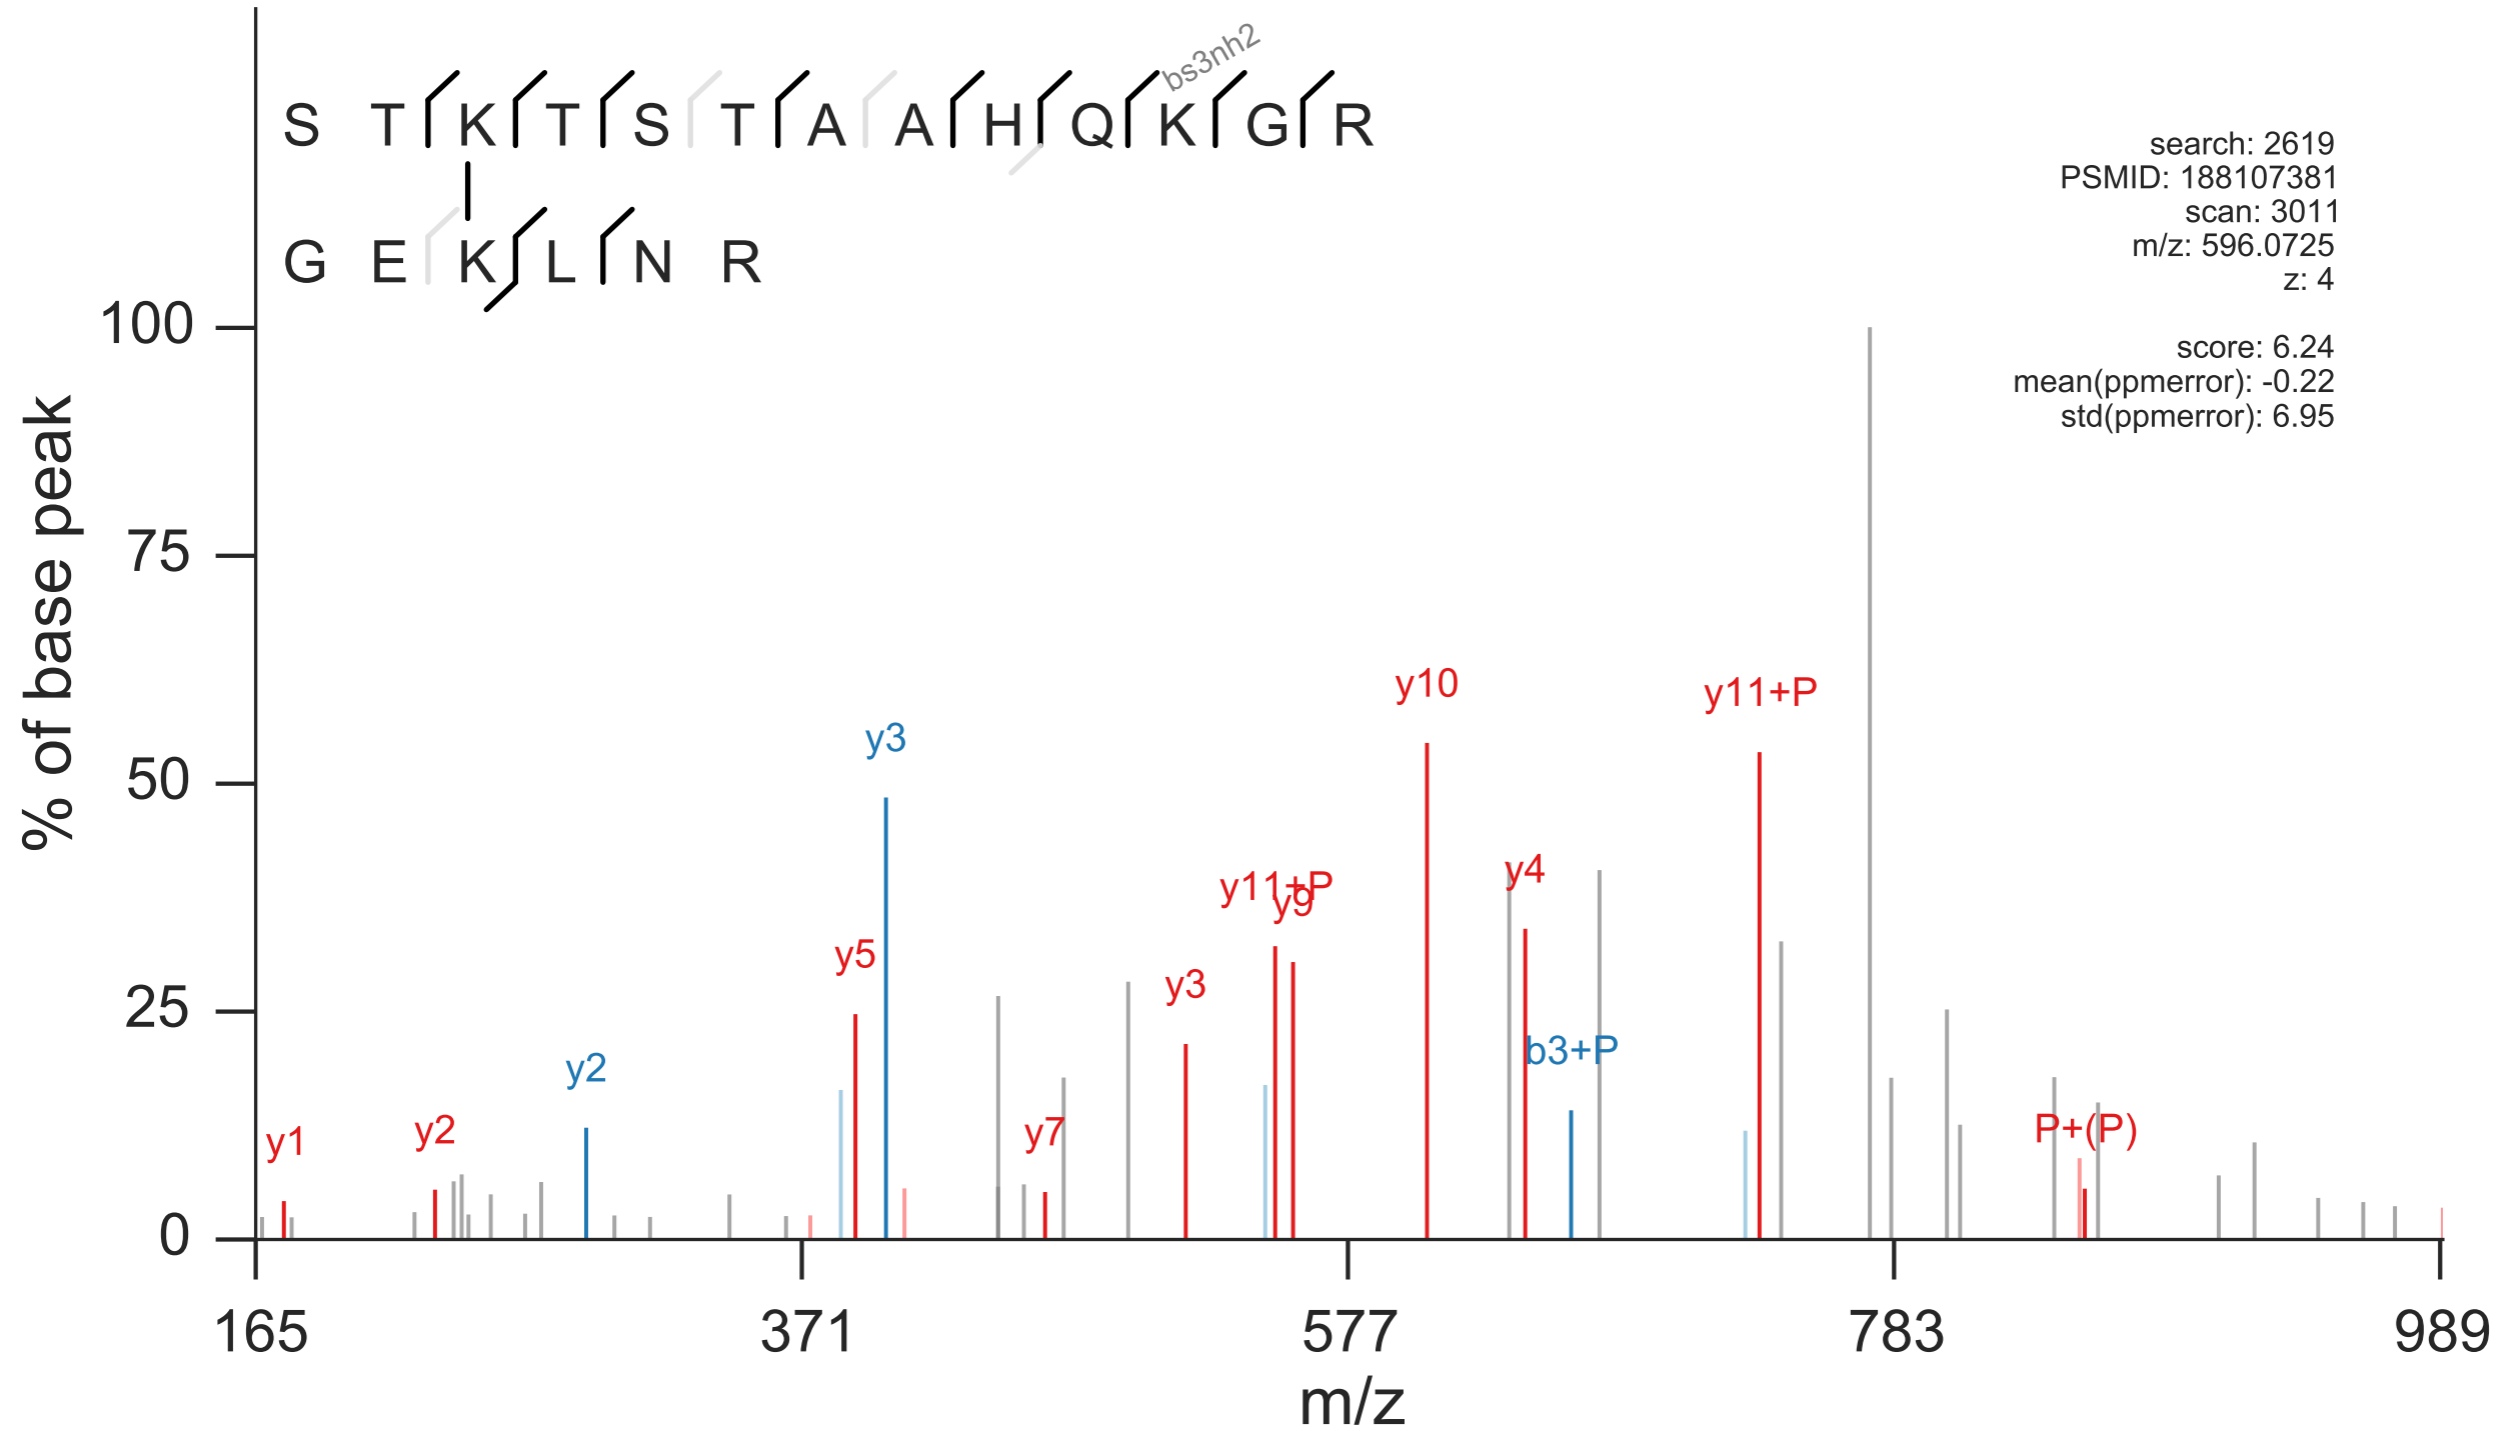

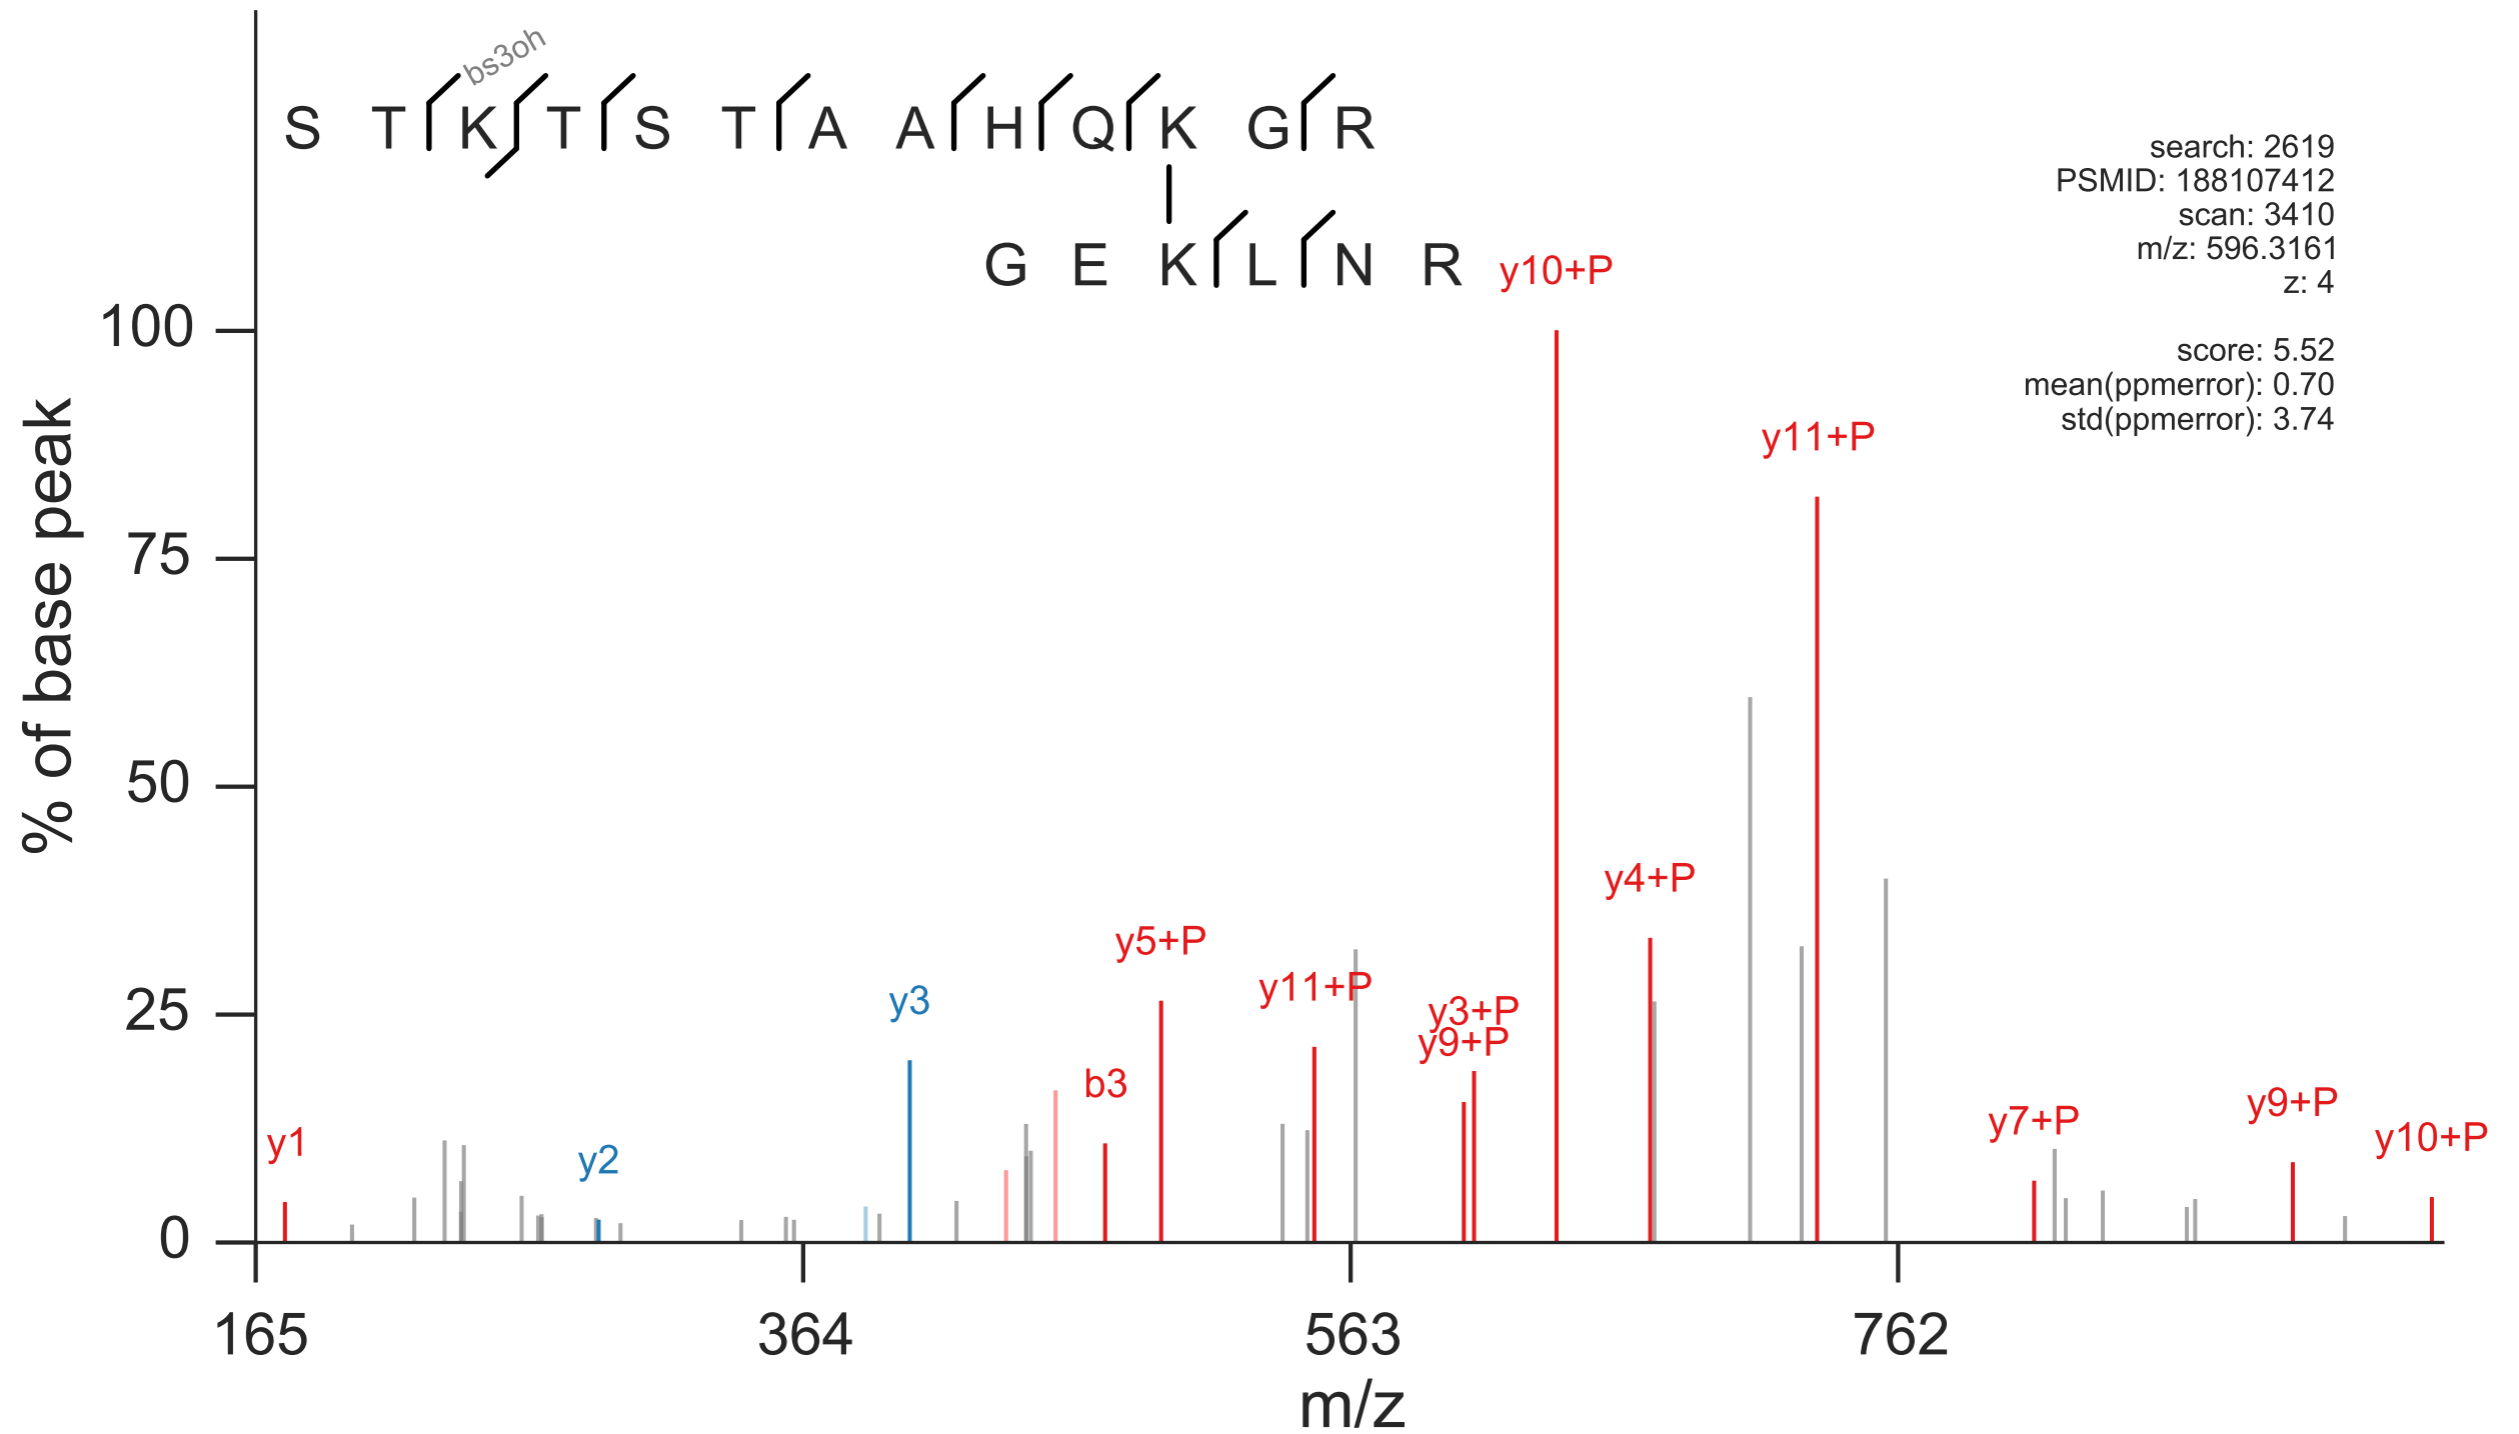

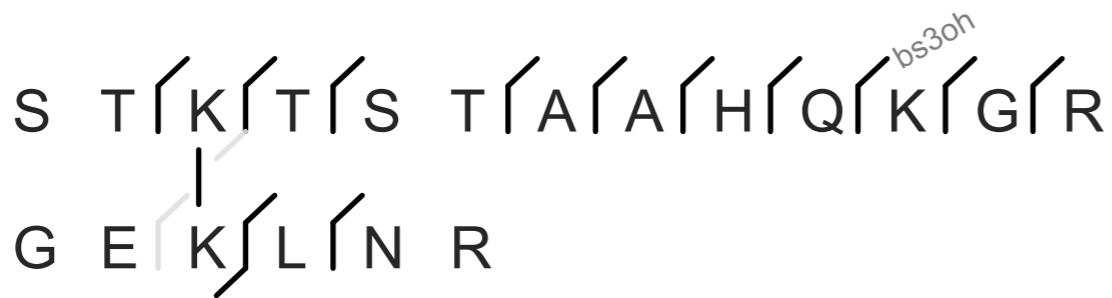

search: 2619  
 PSMID: 188107422  
 scan: 3370  
 m/z: 596.3161  
 z: 4

score: 6.81  
 mean(ppmerror): -0.82  
 std(ppmerror): 4.86

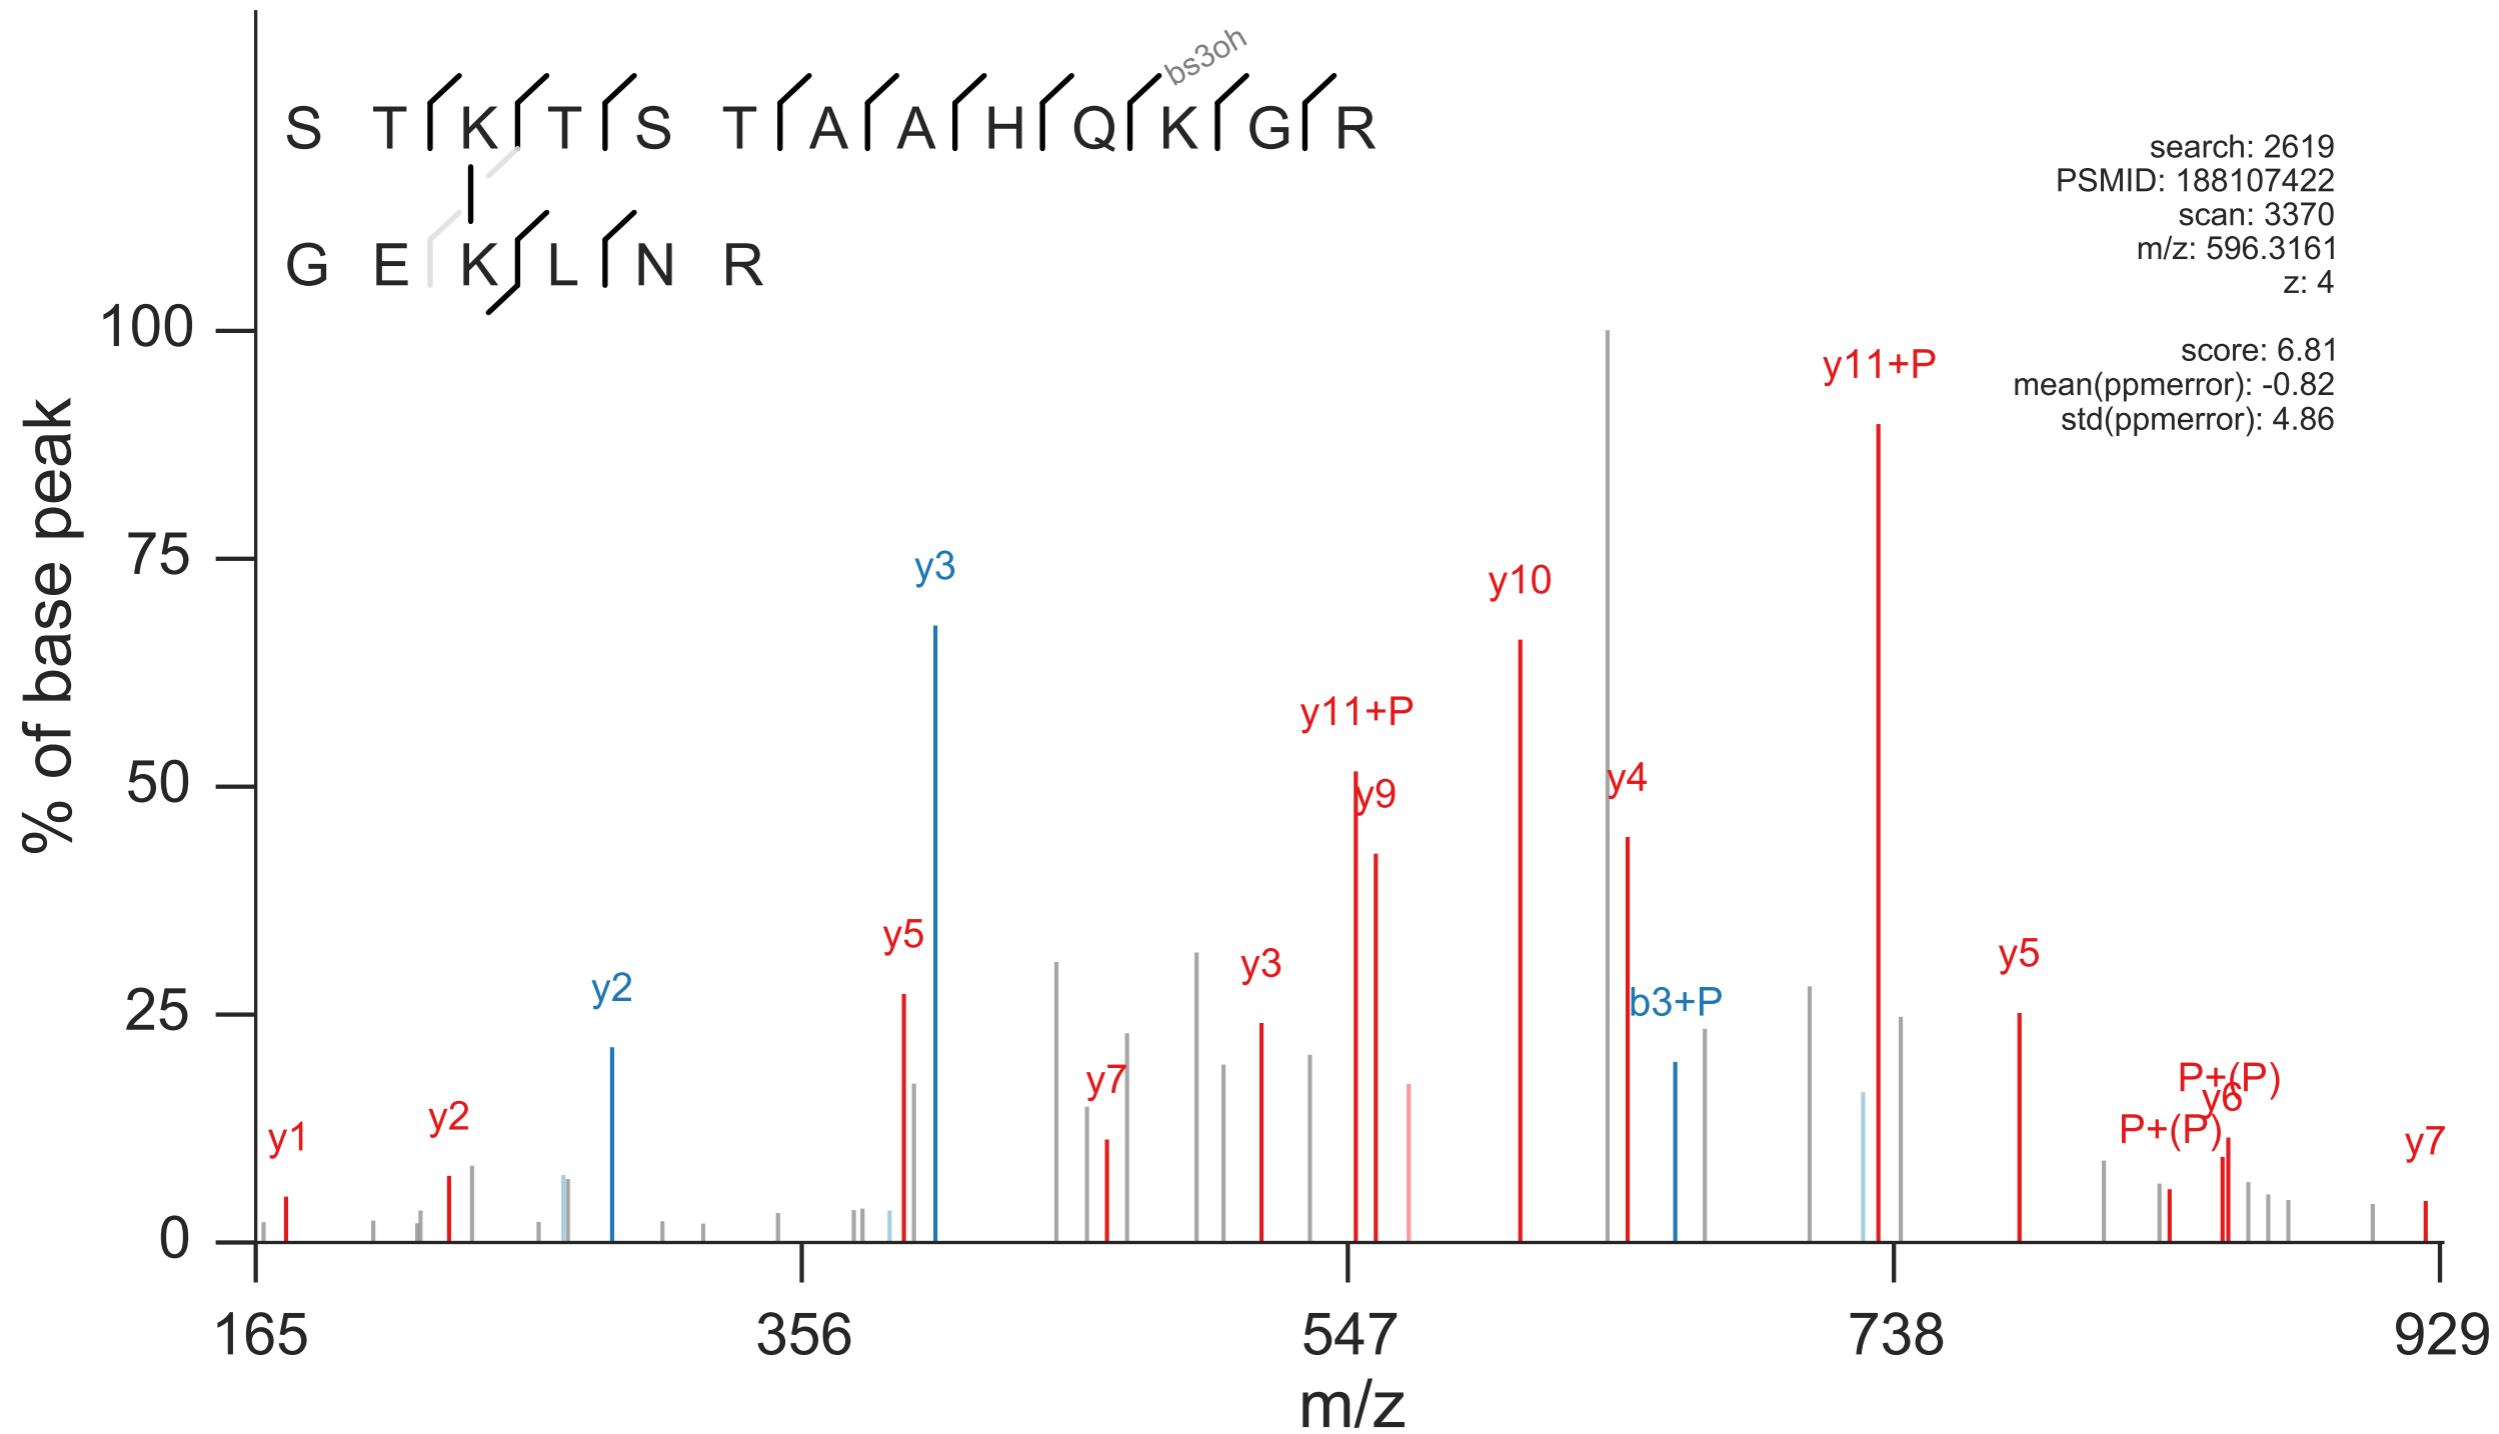

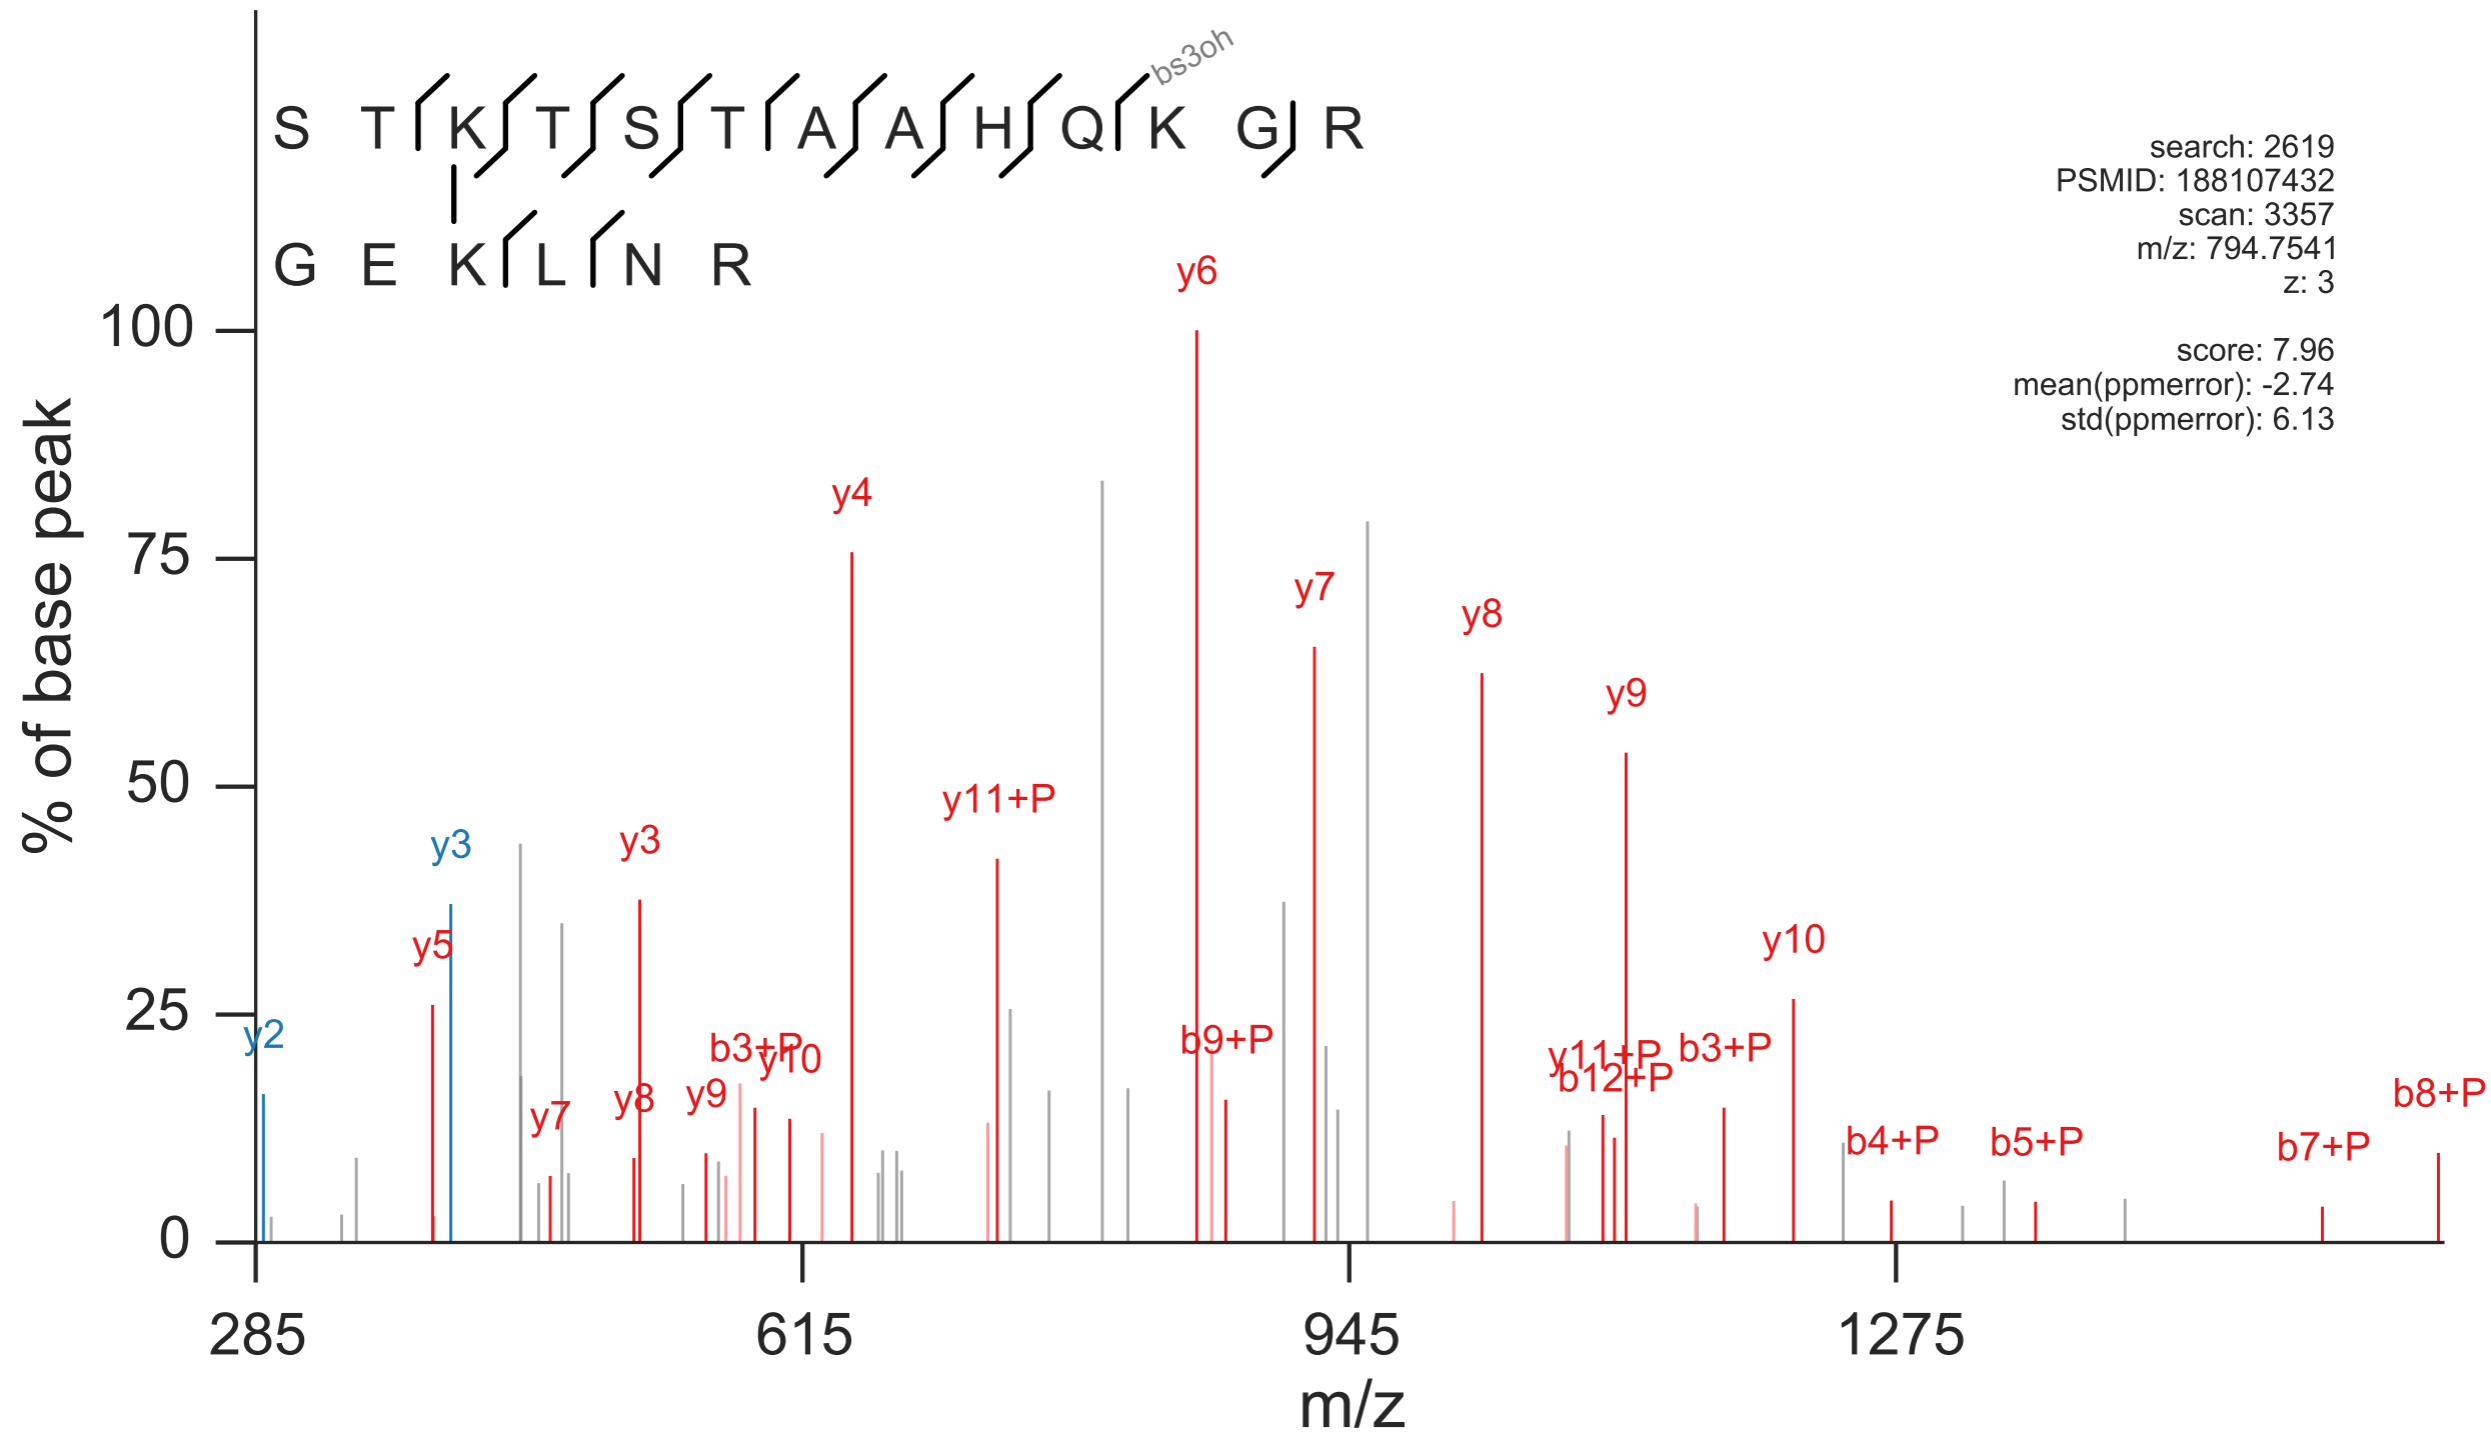



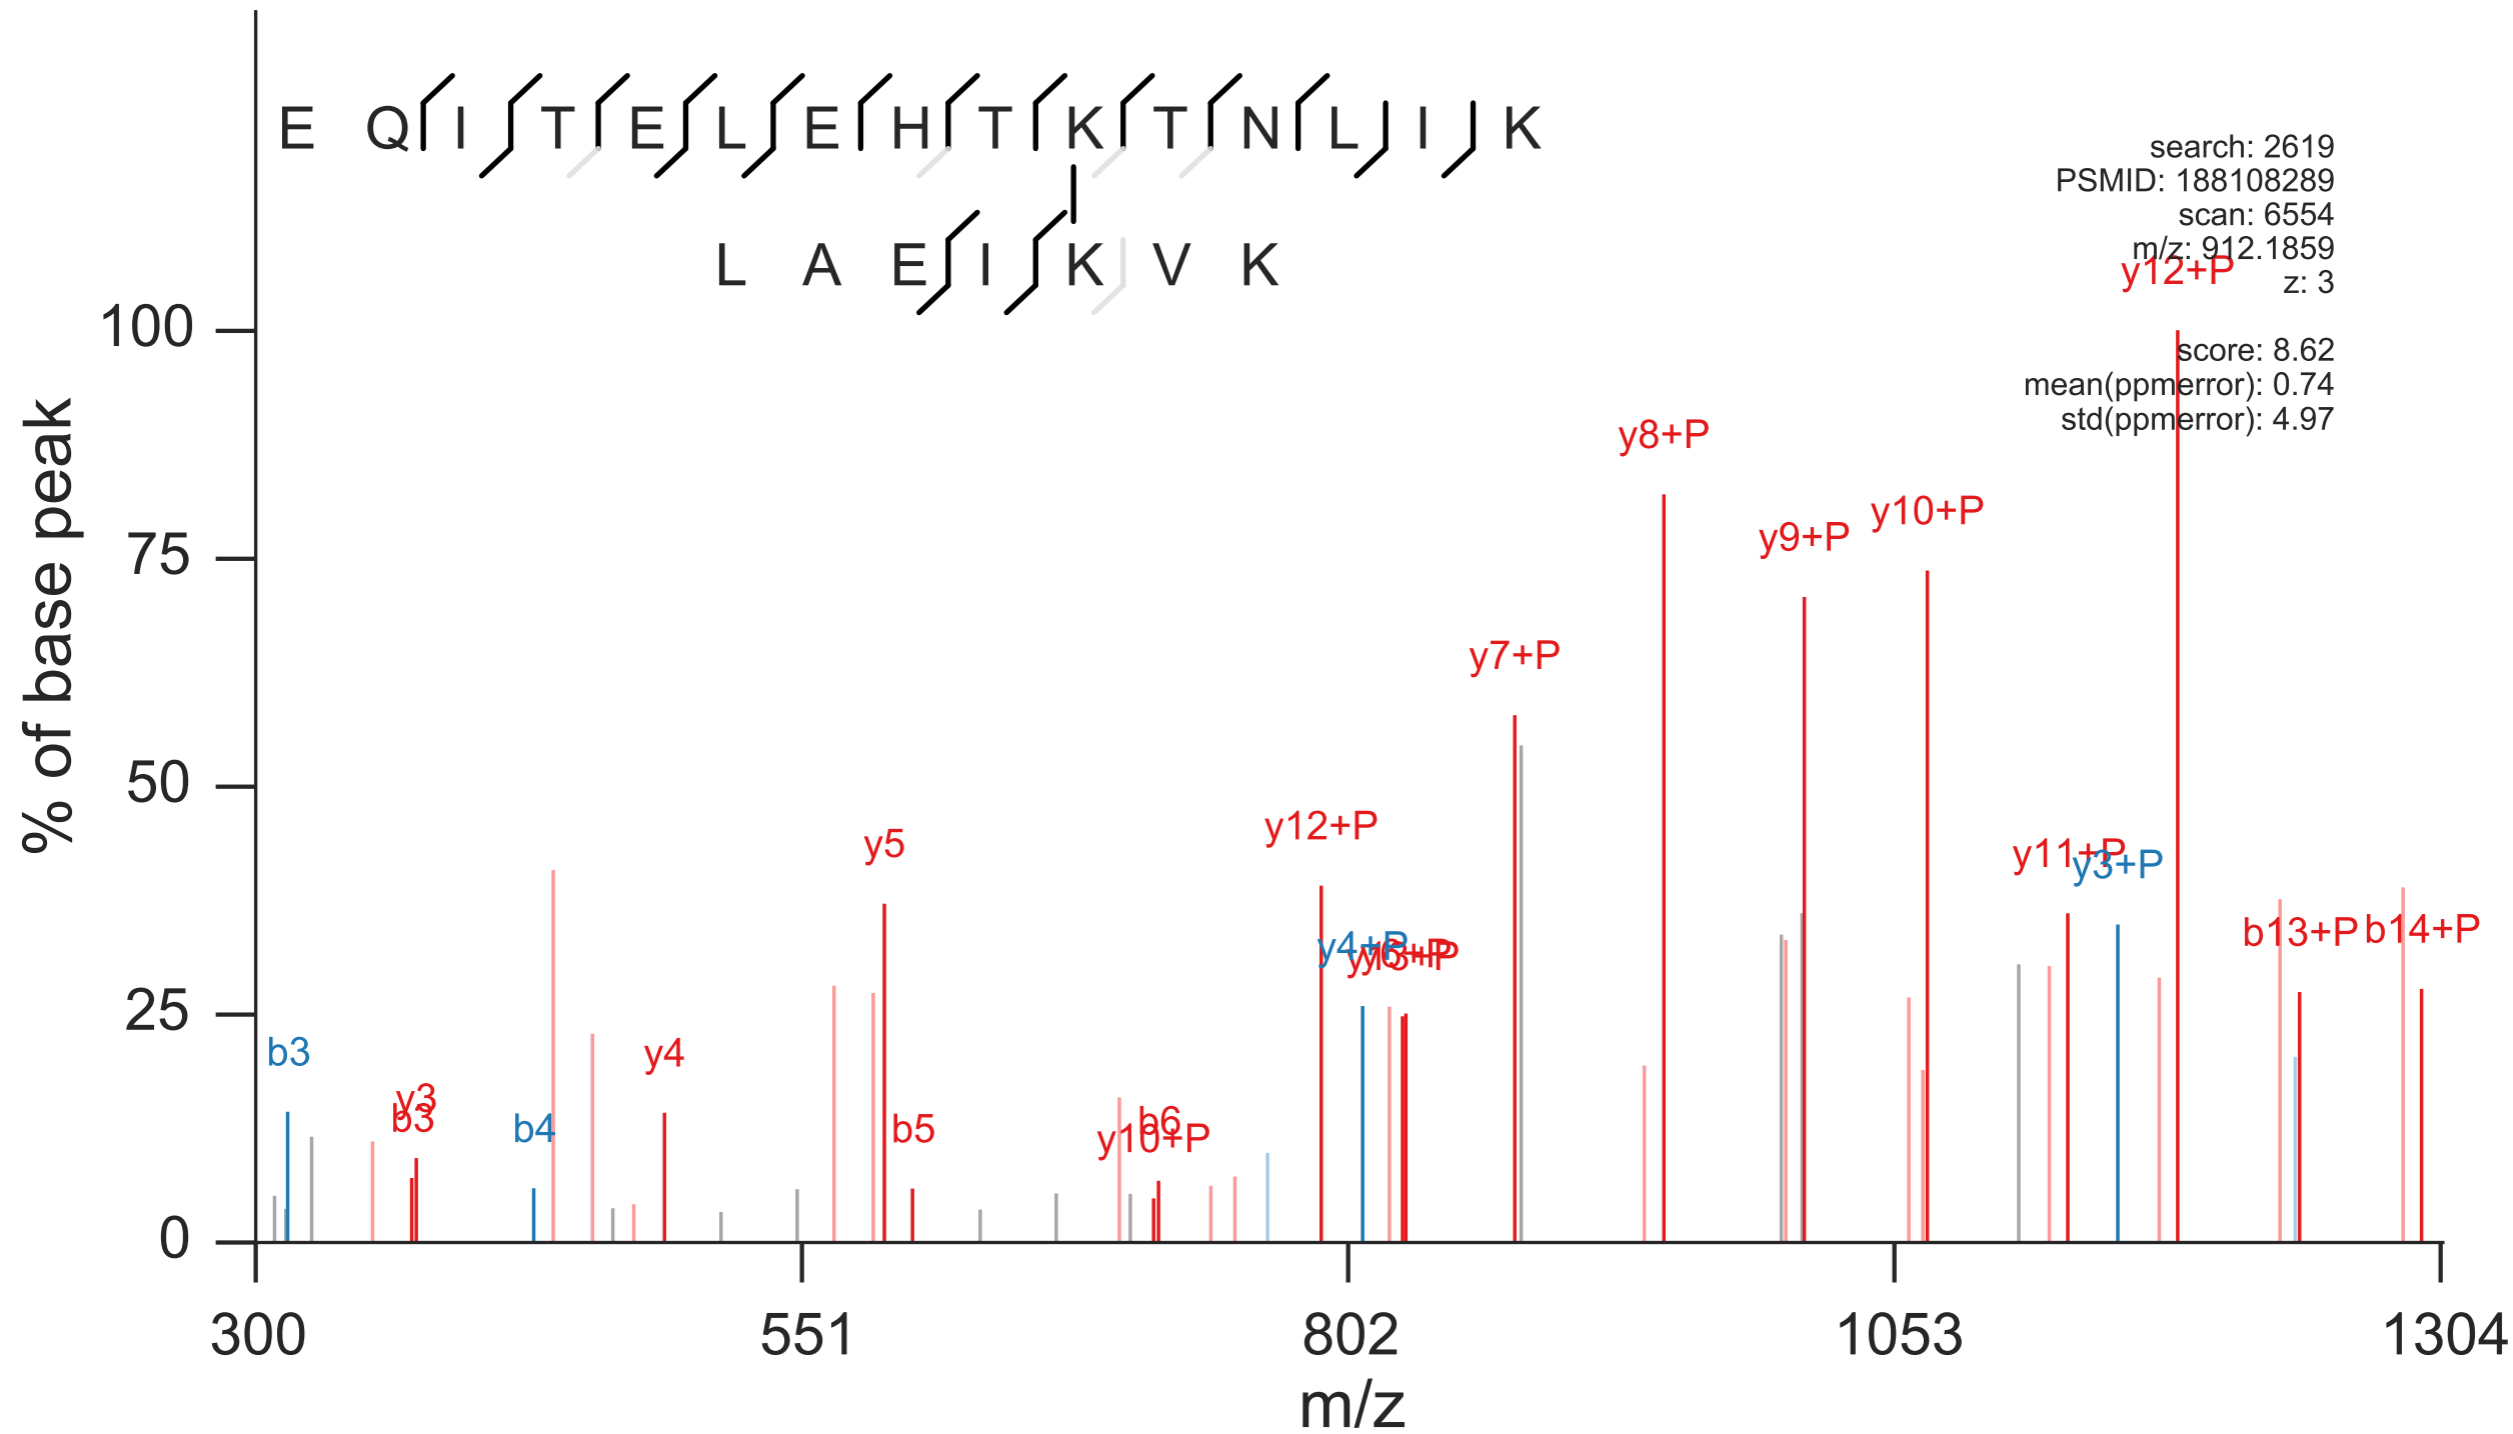

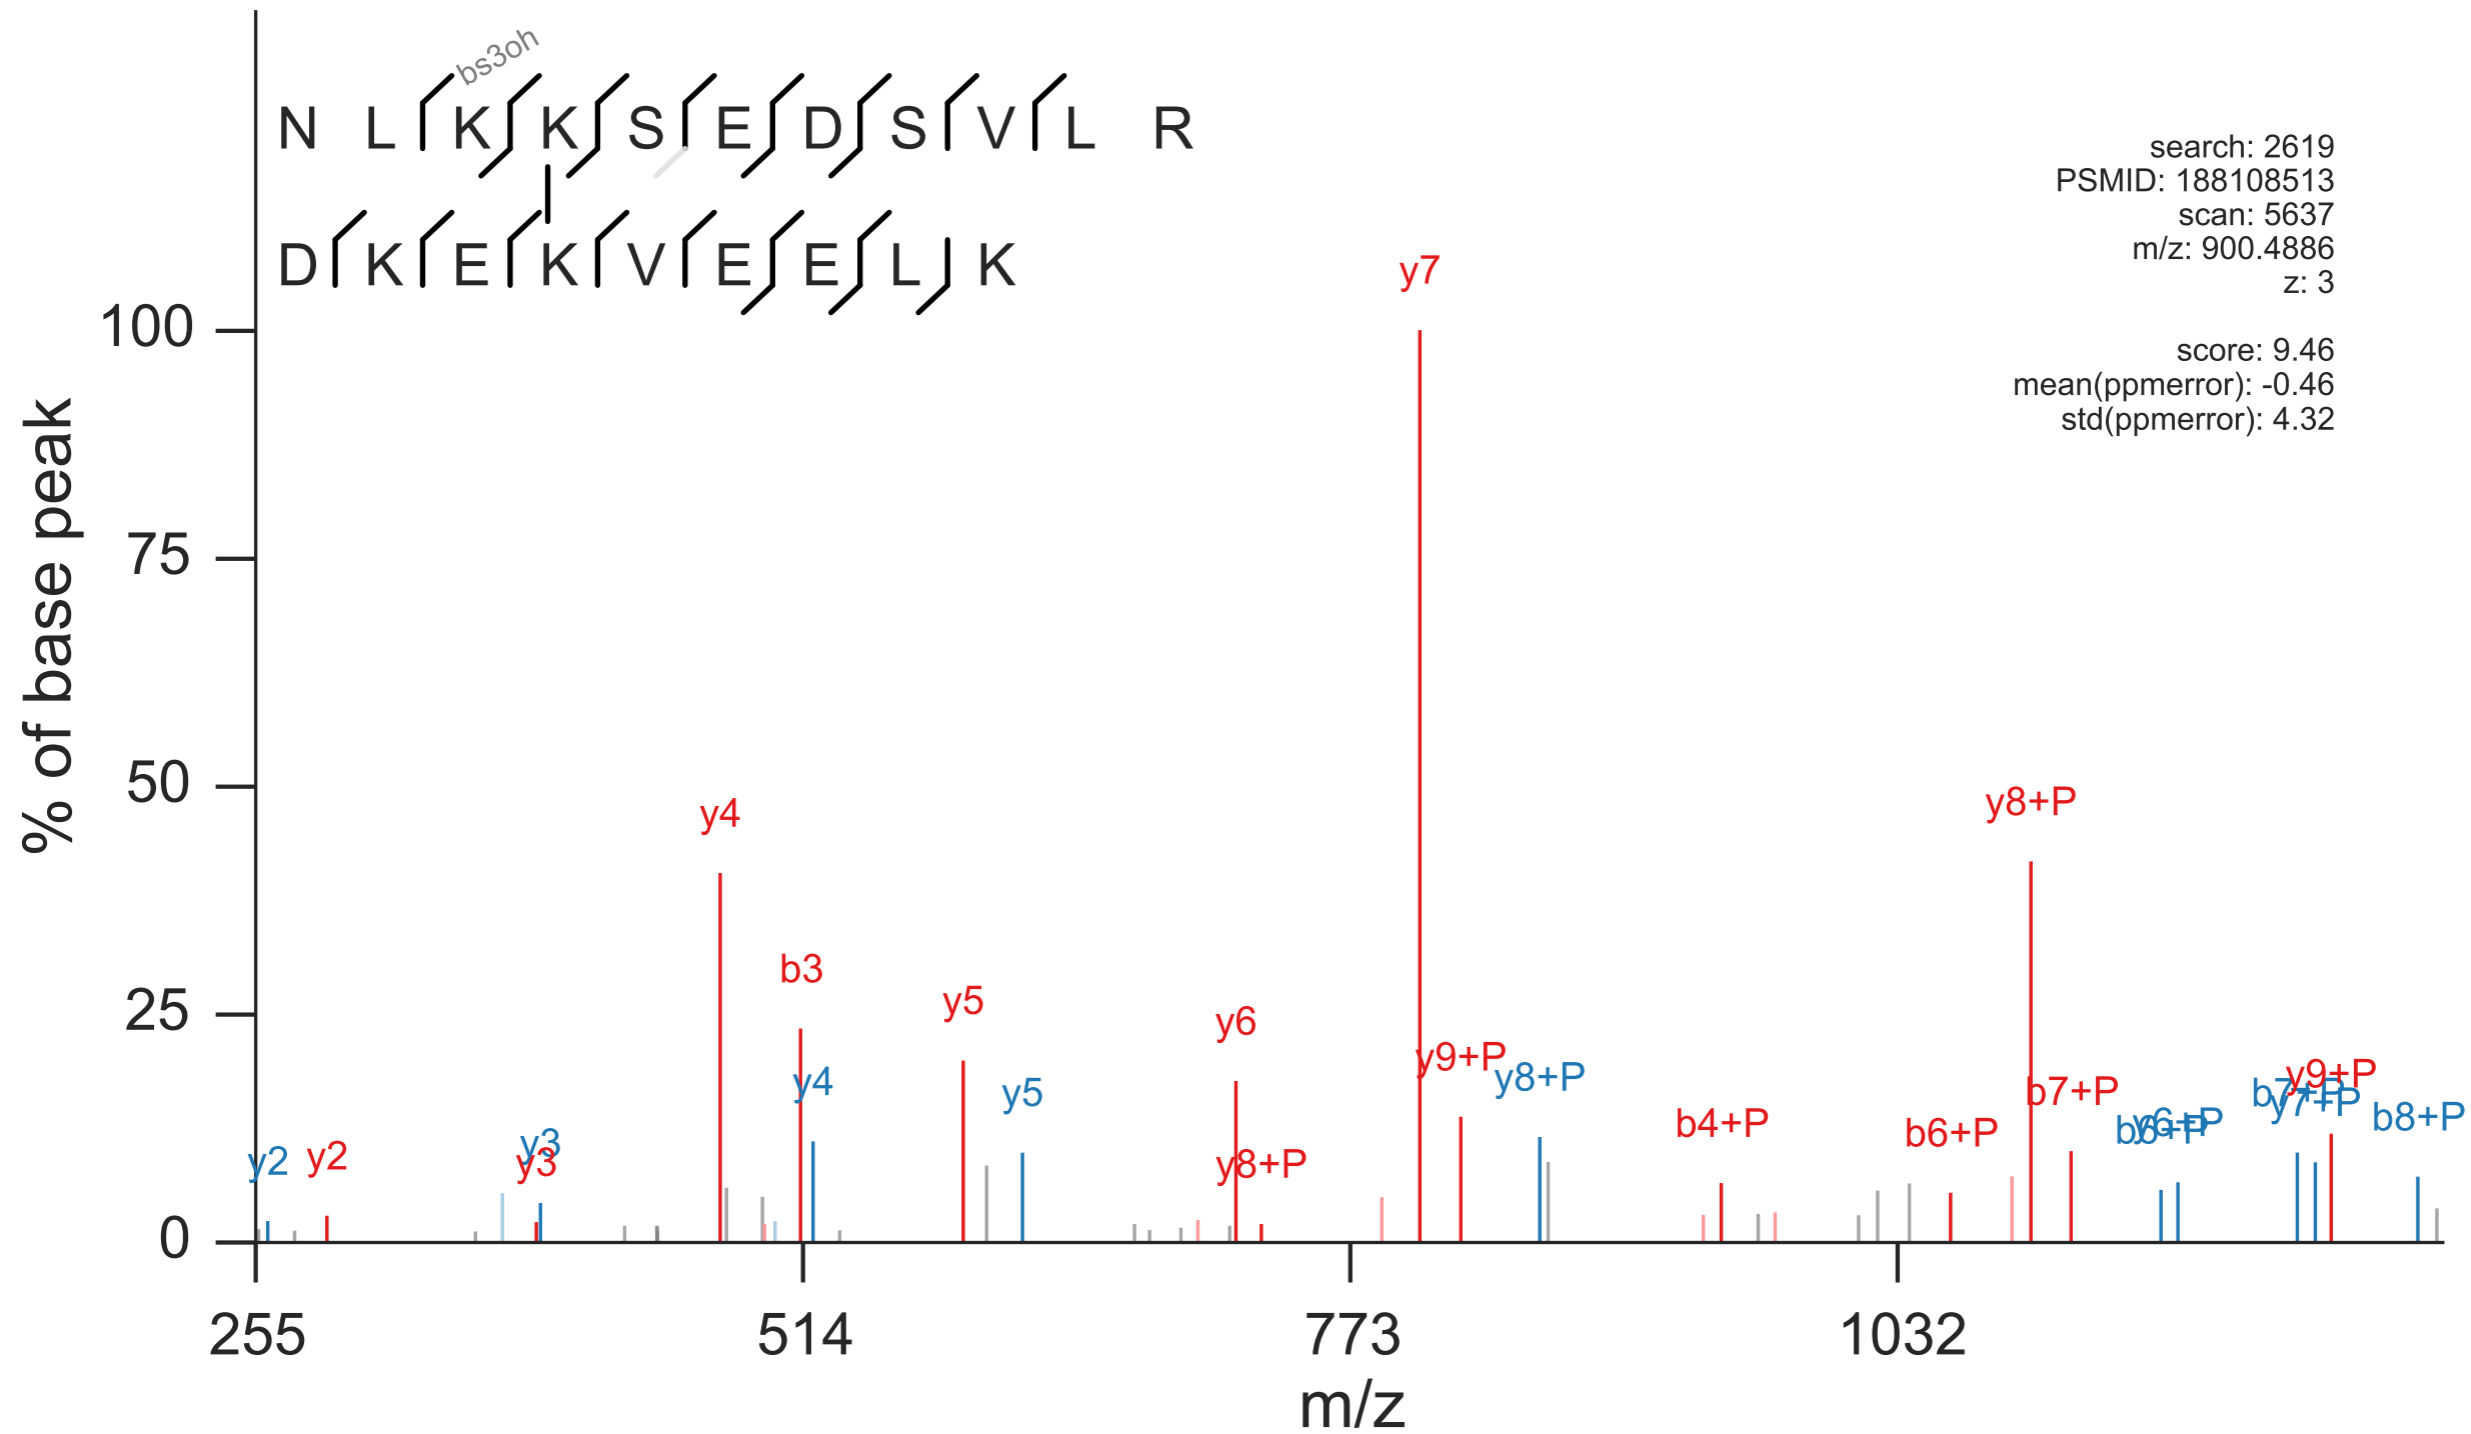

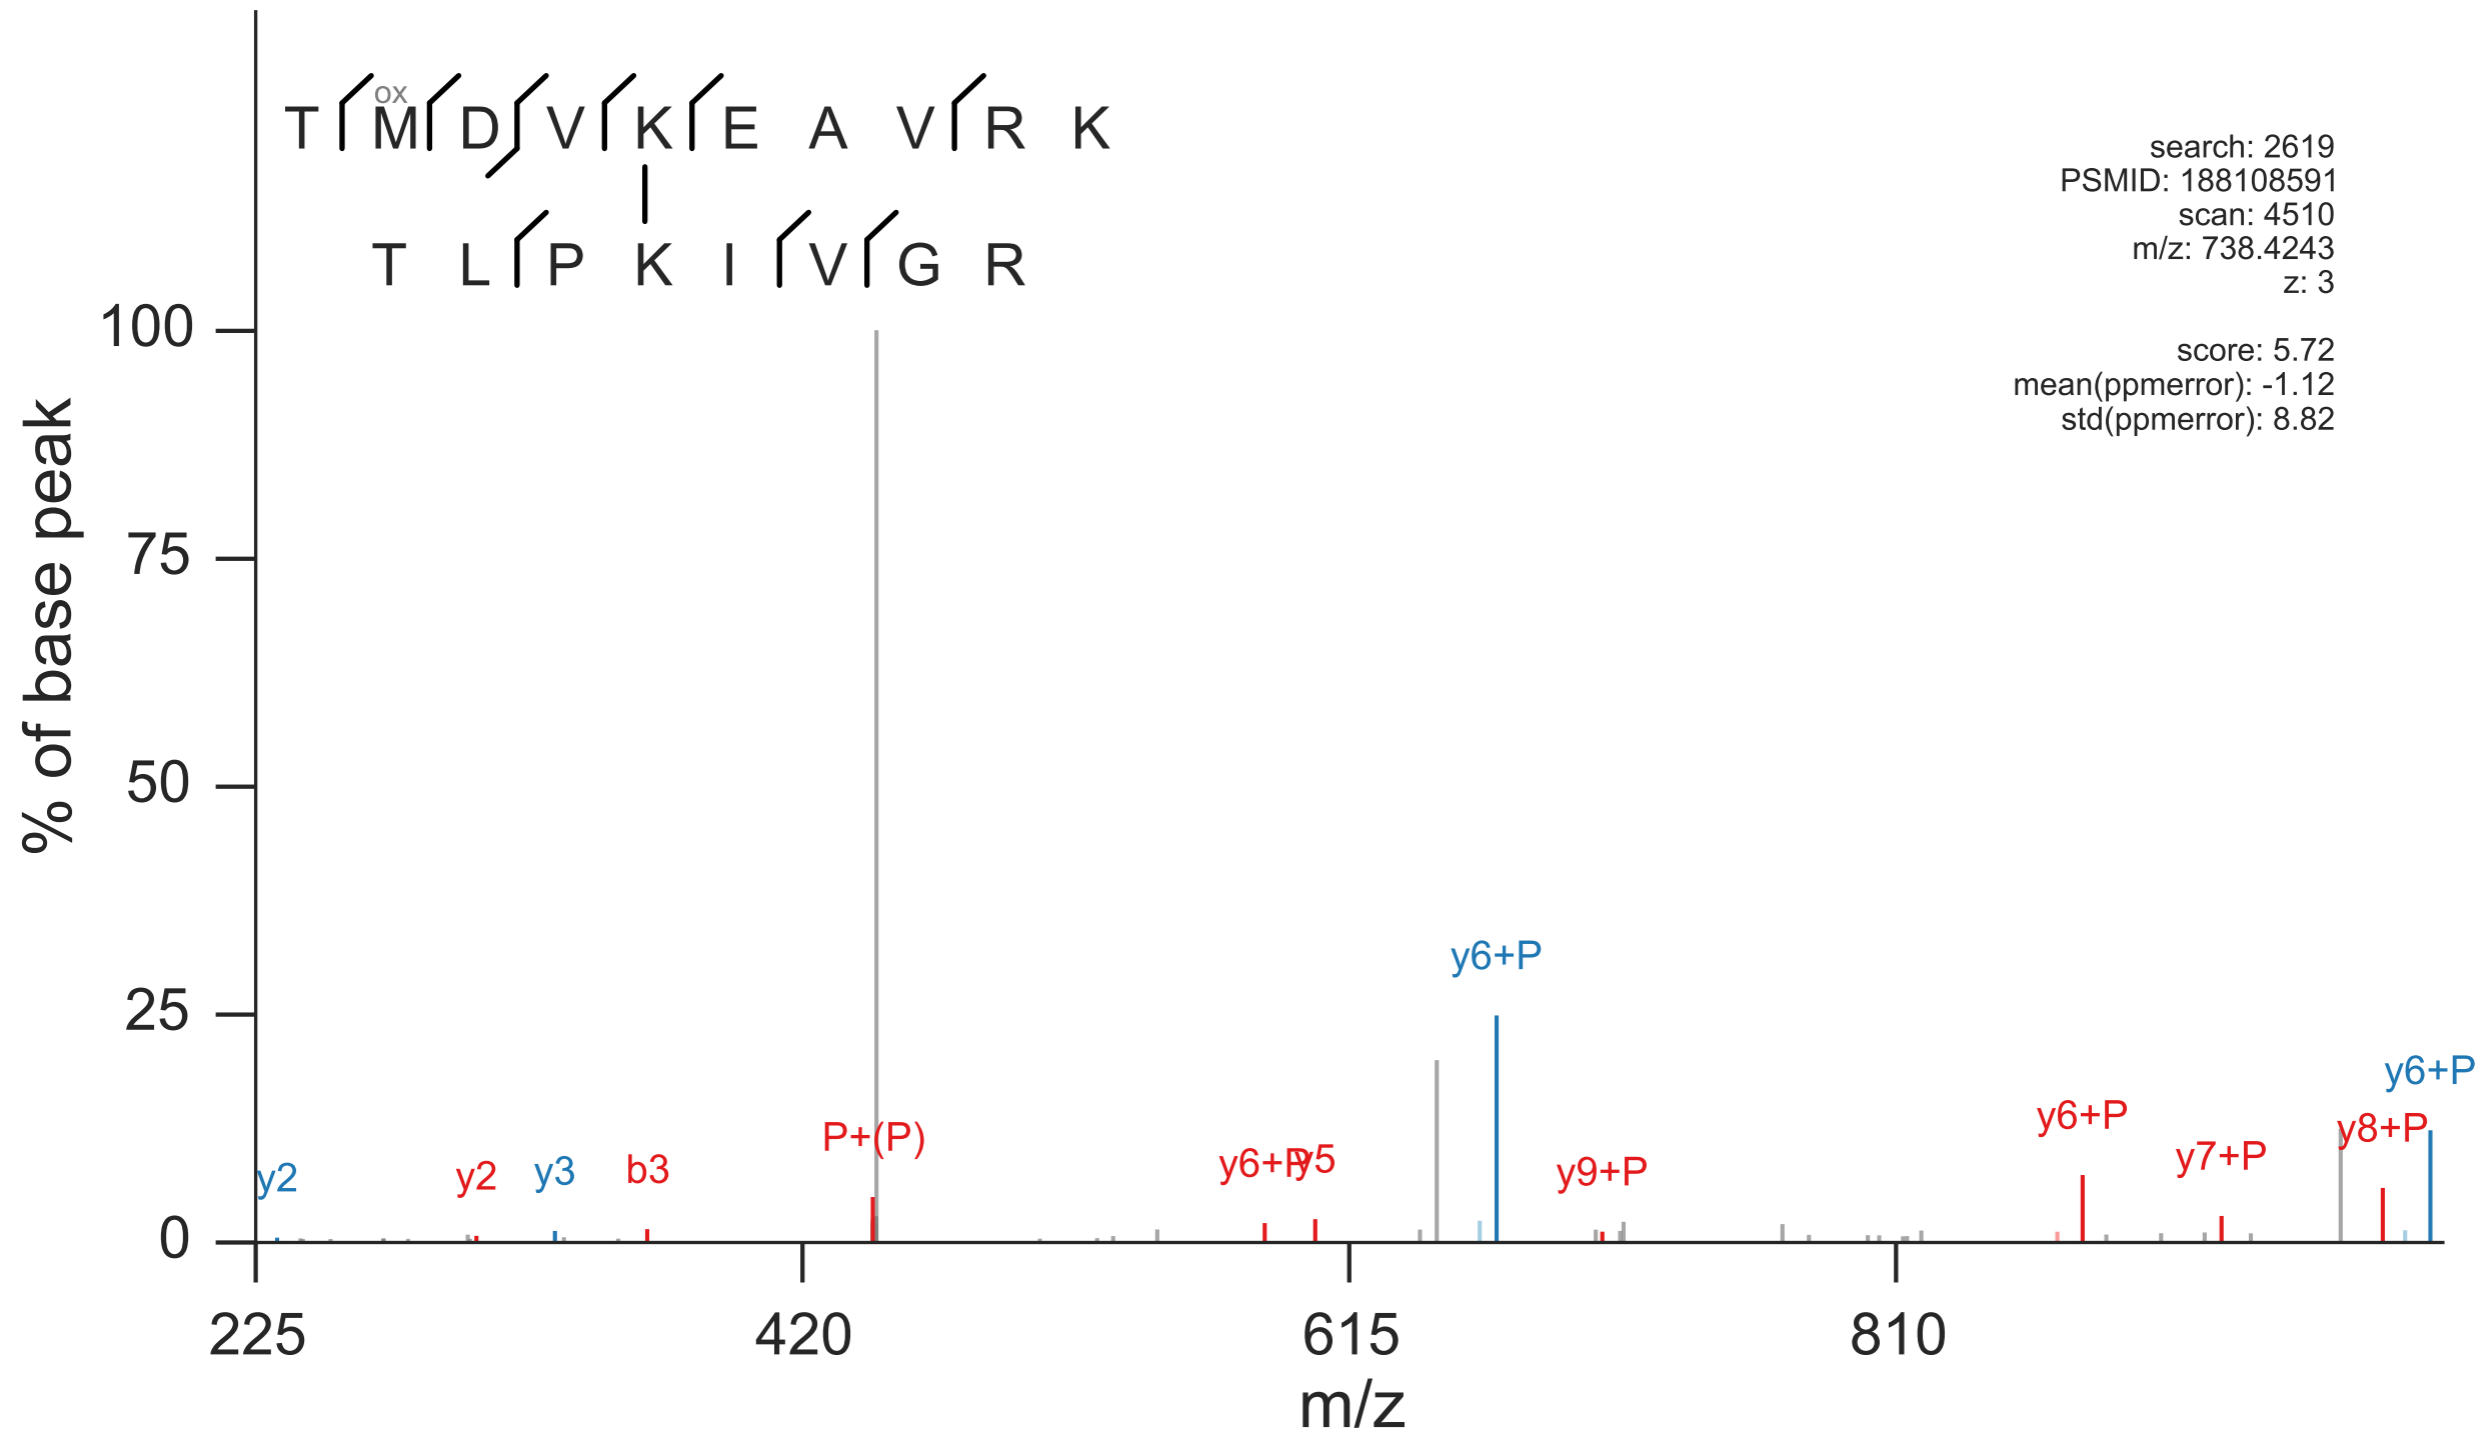

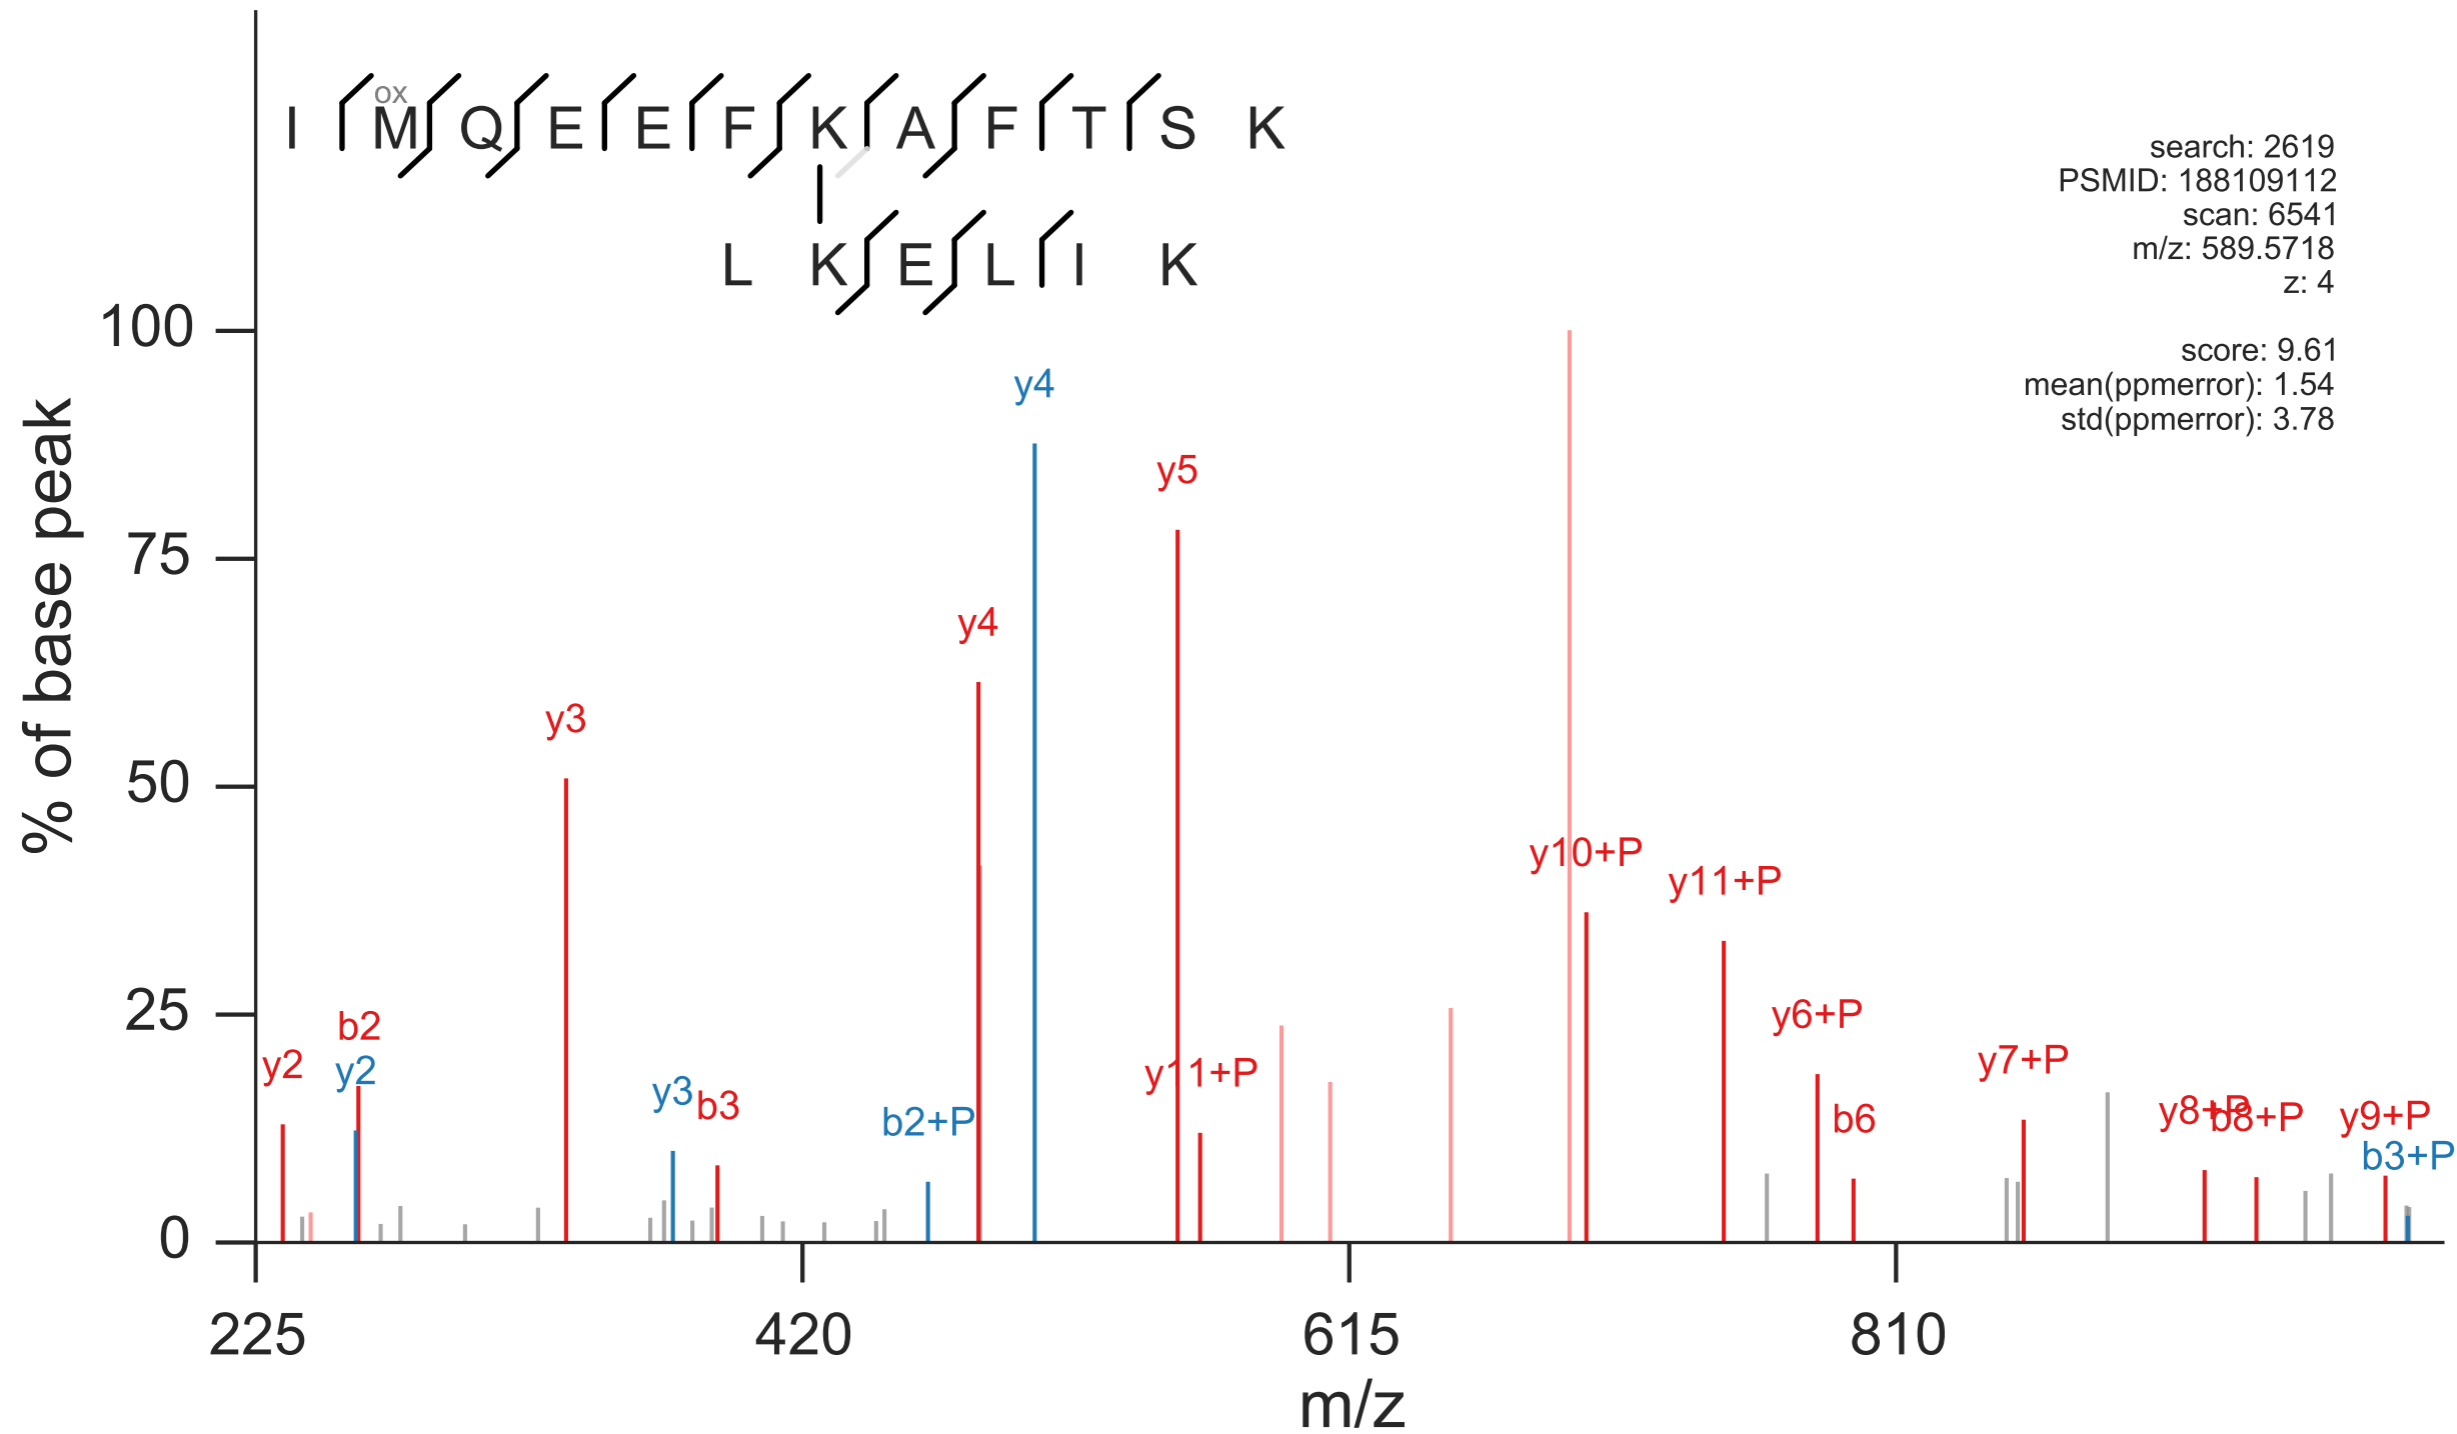

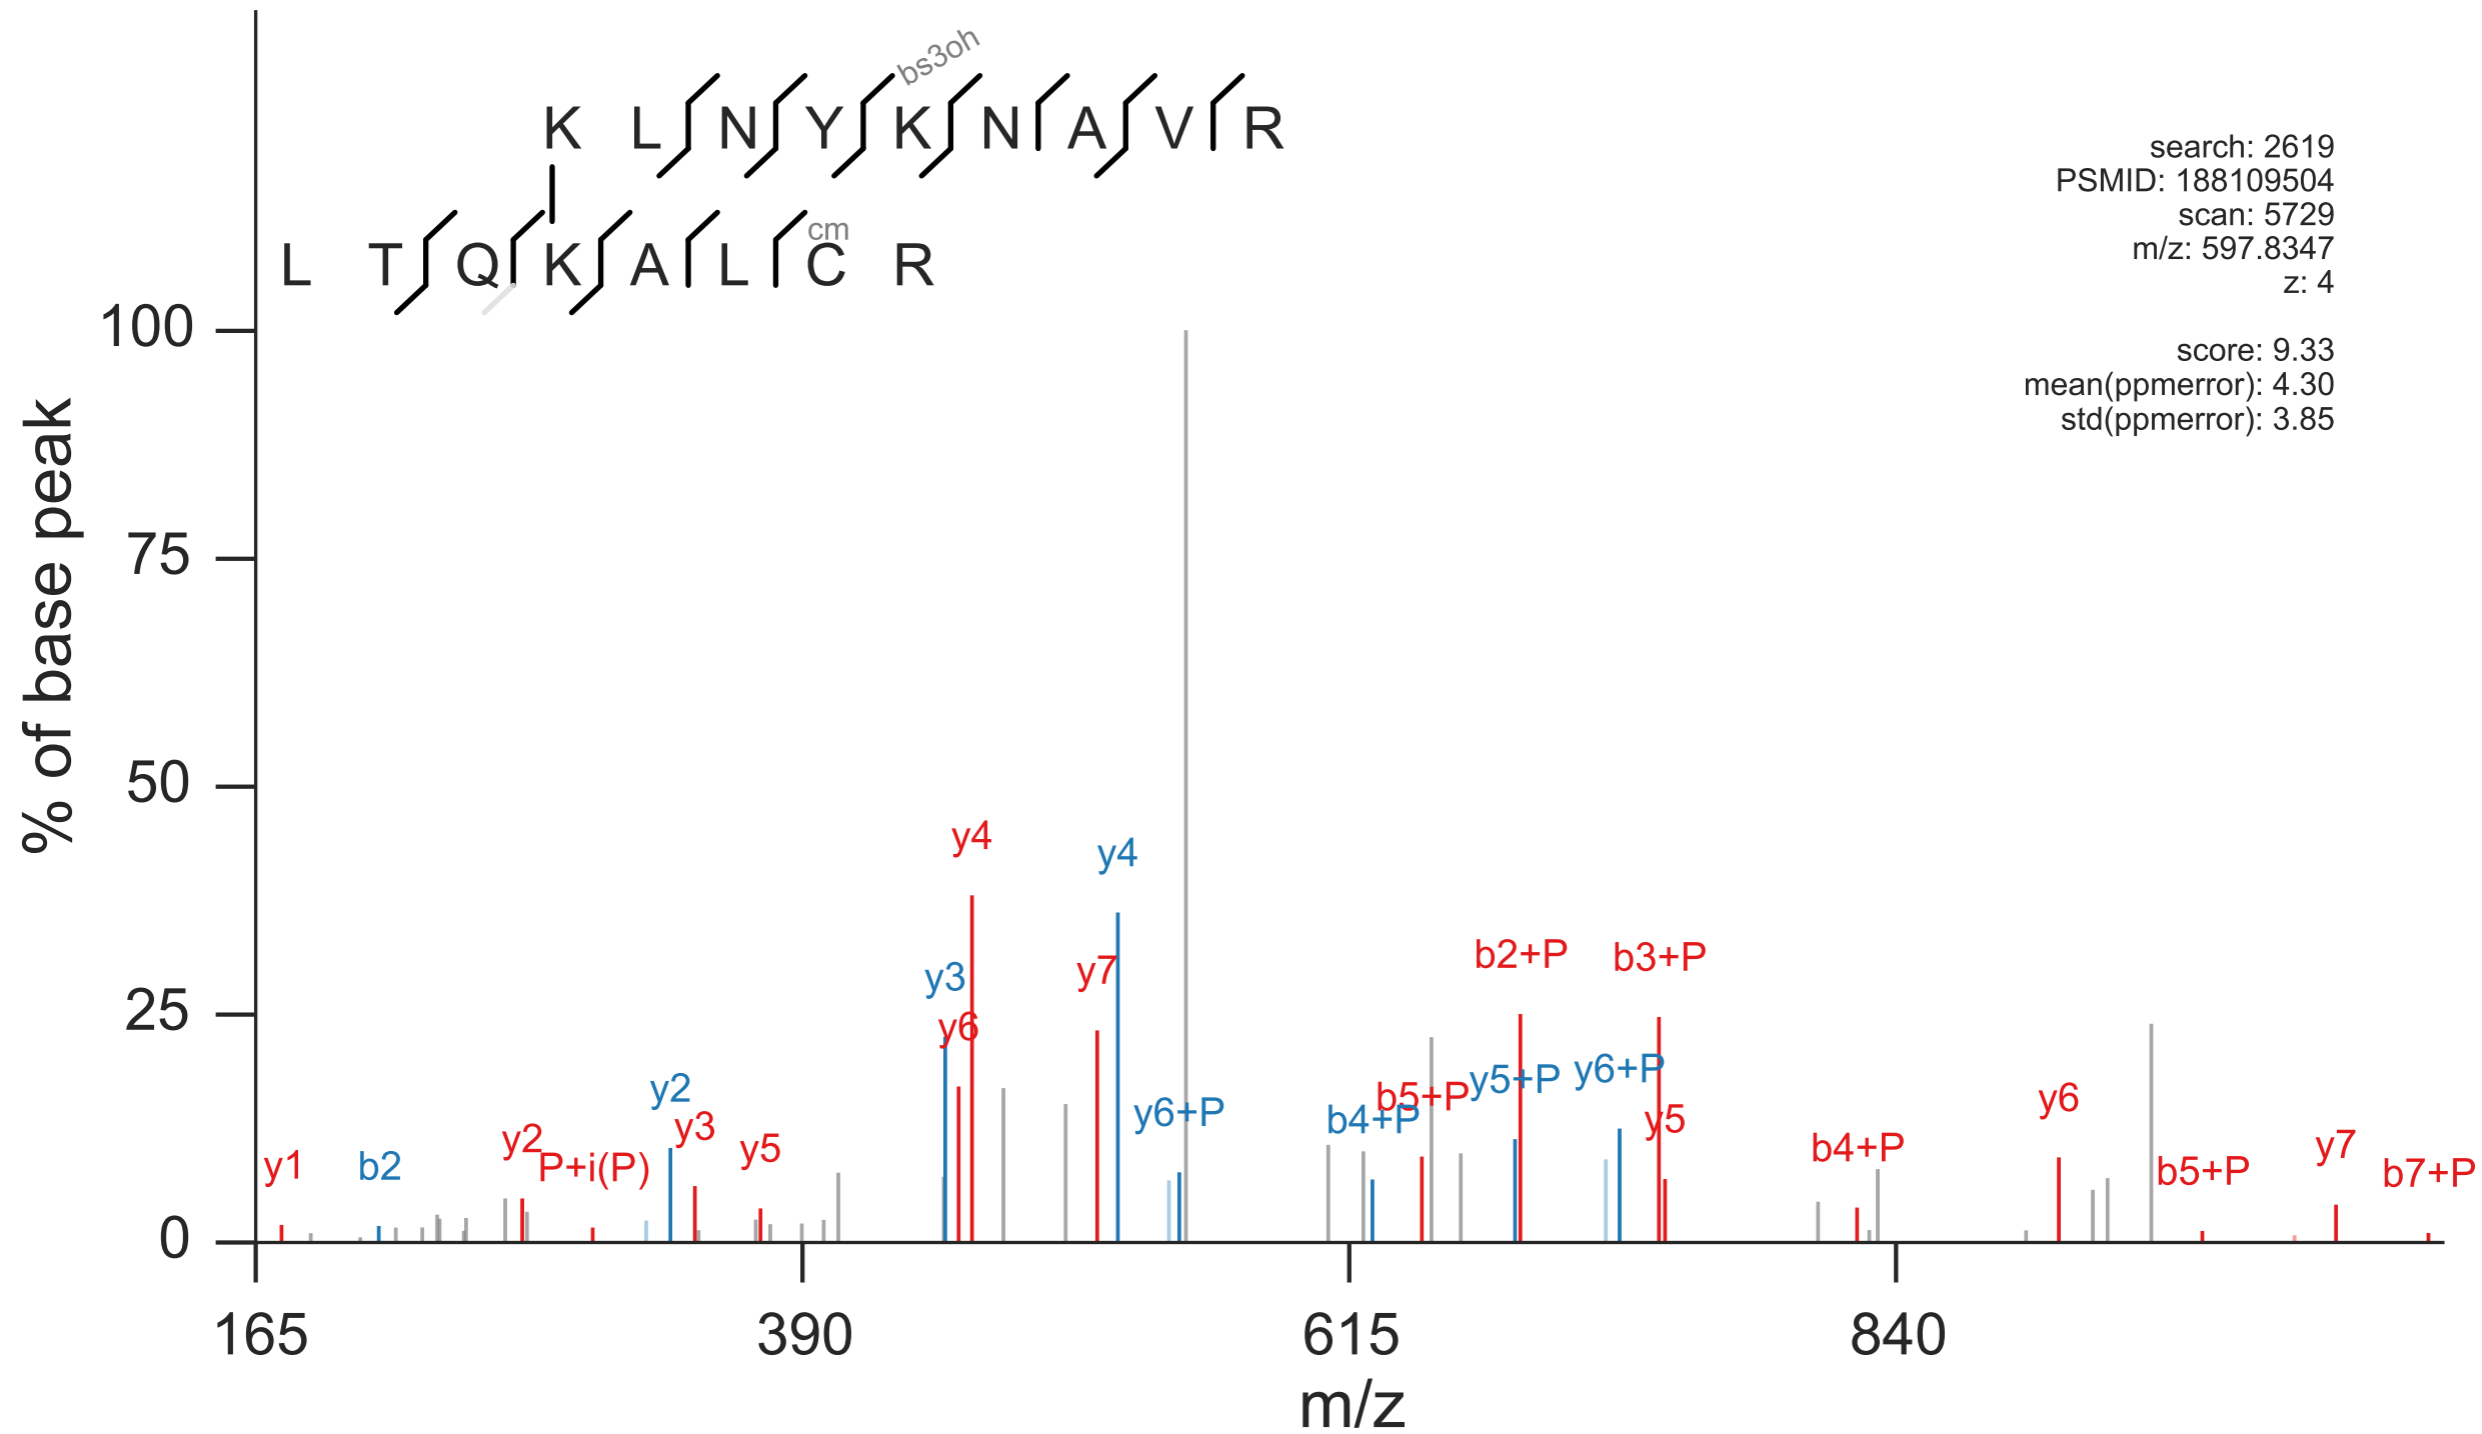

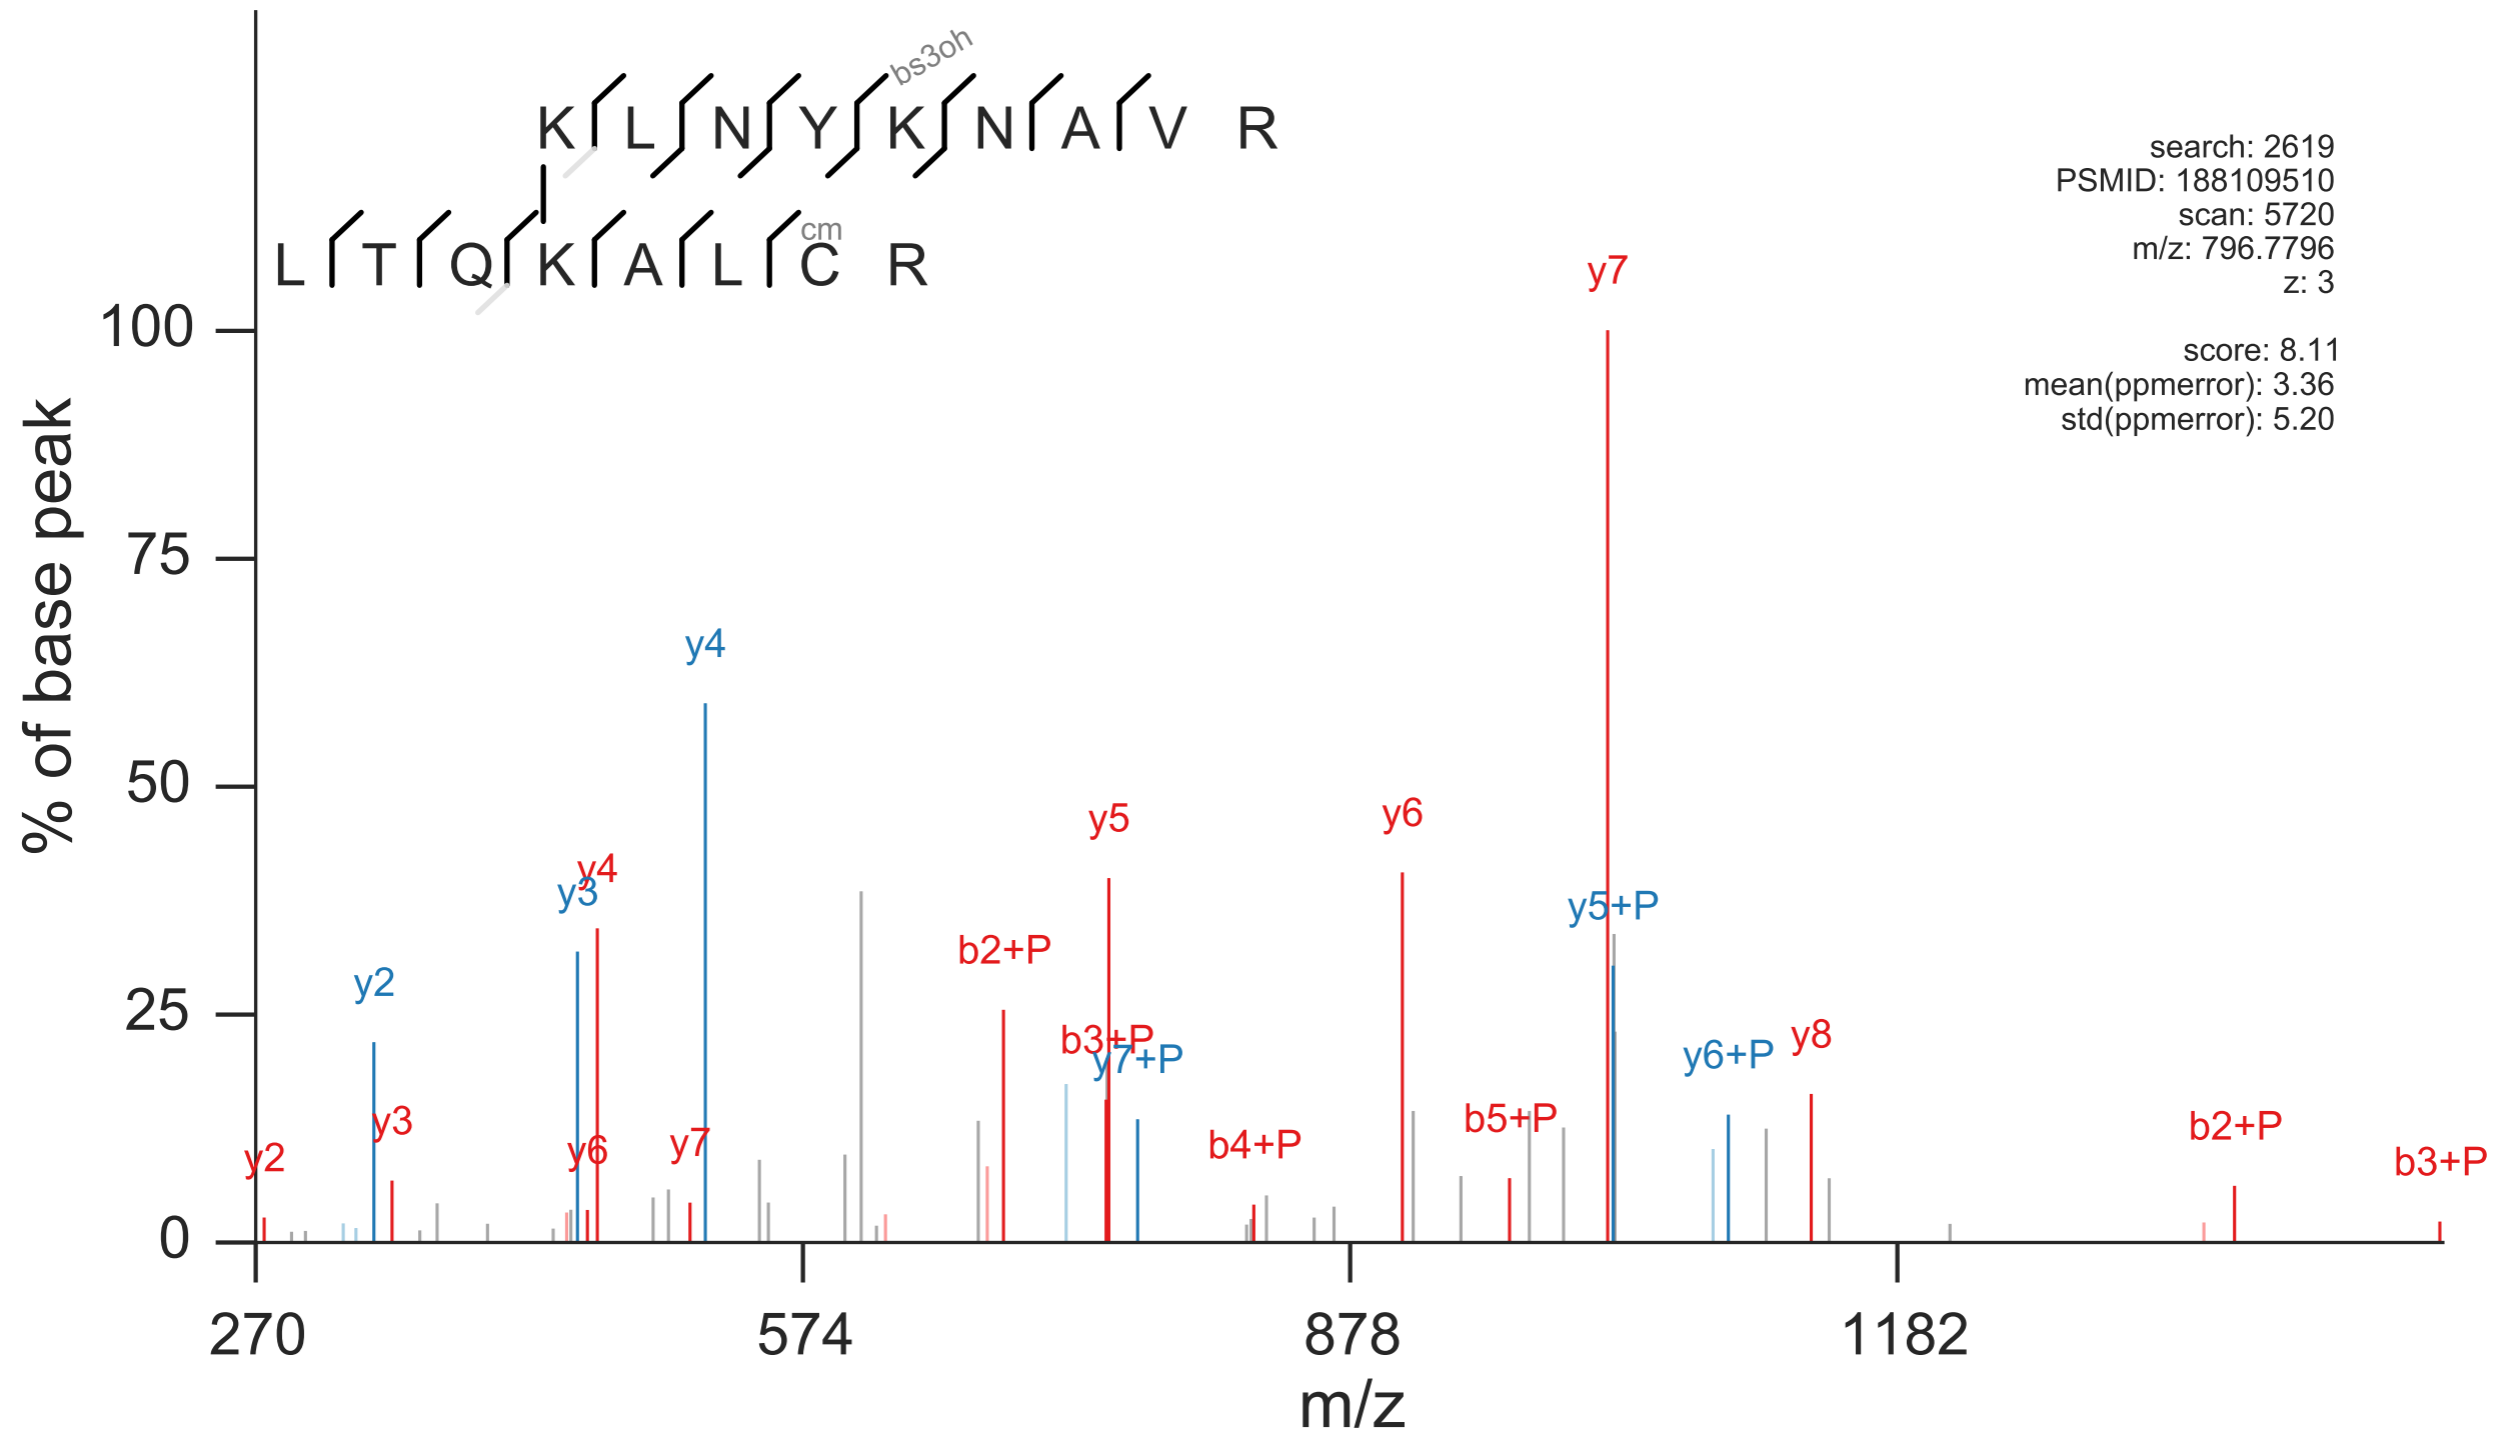

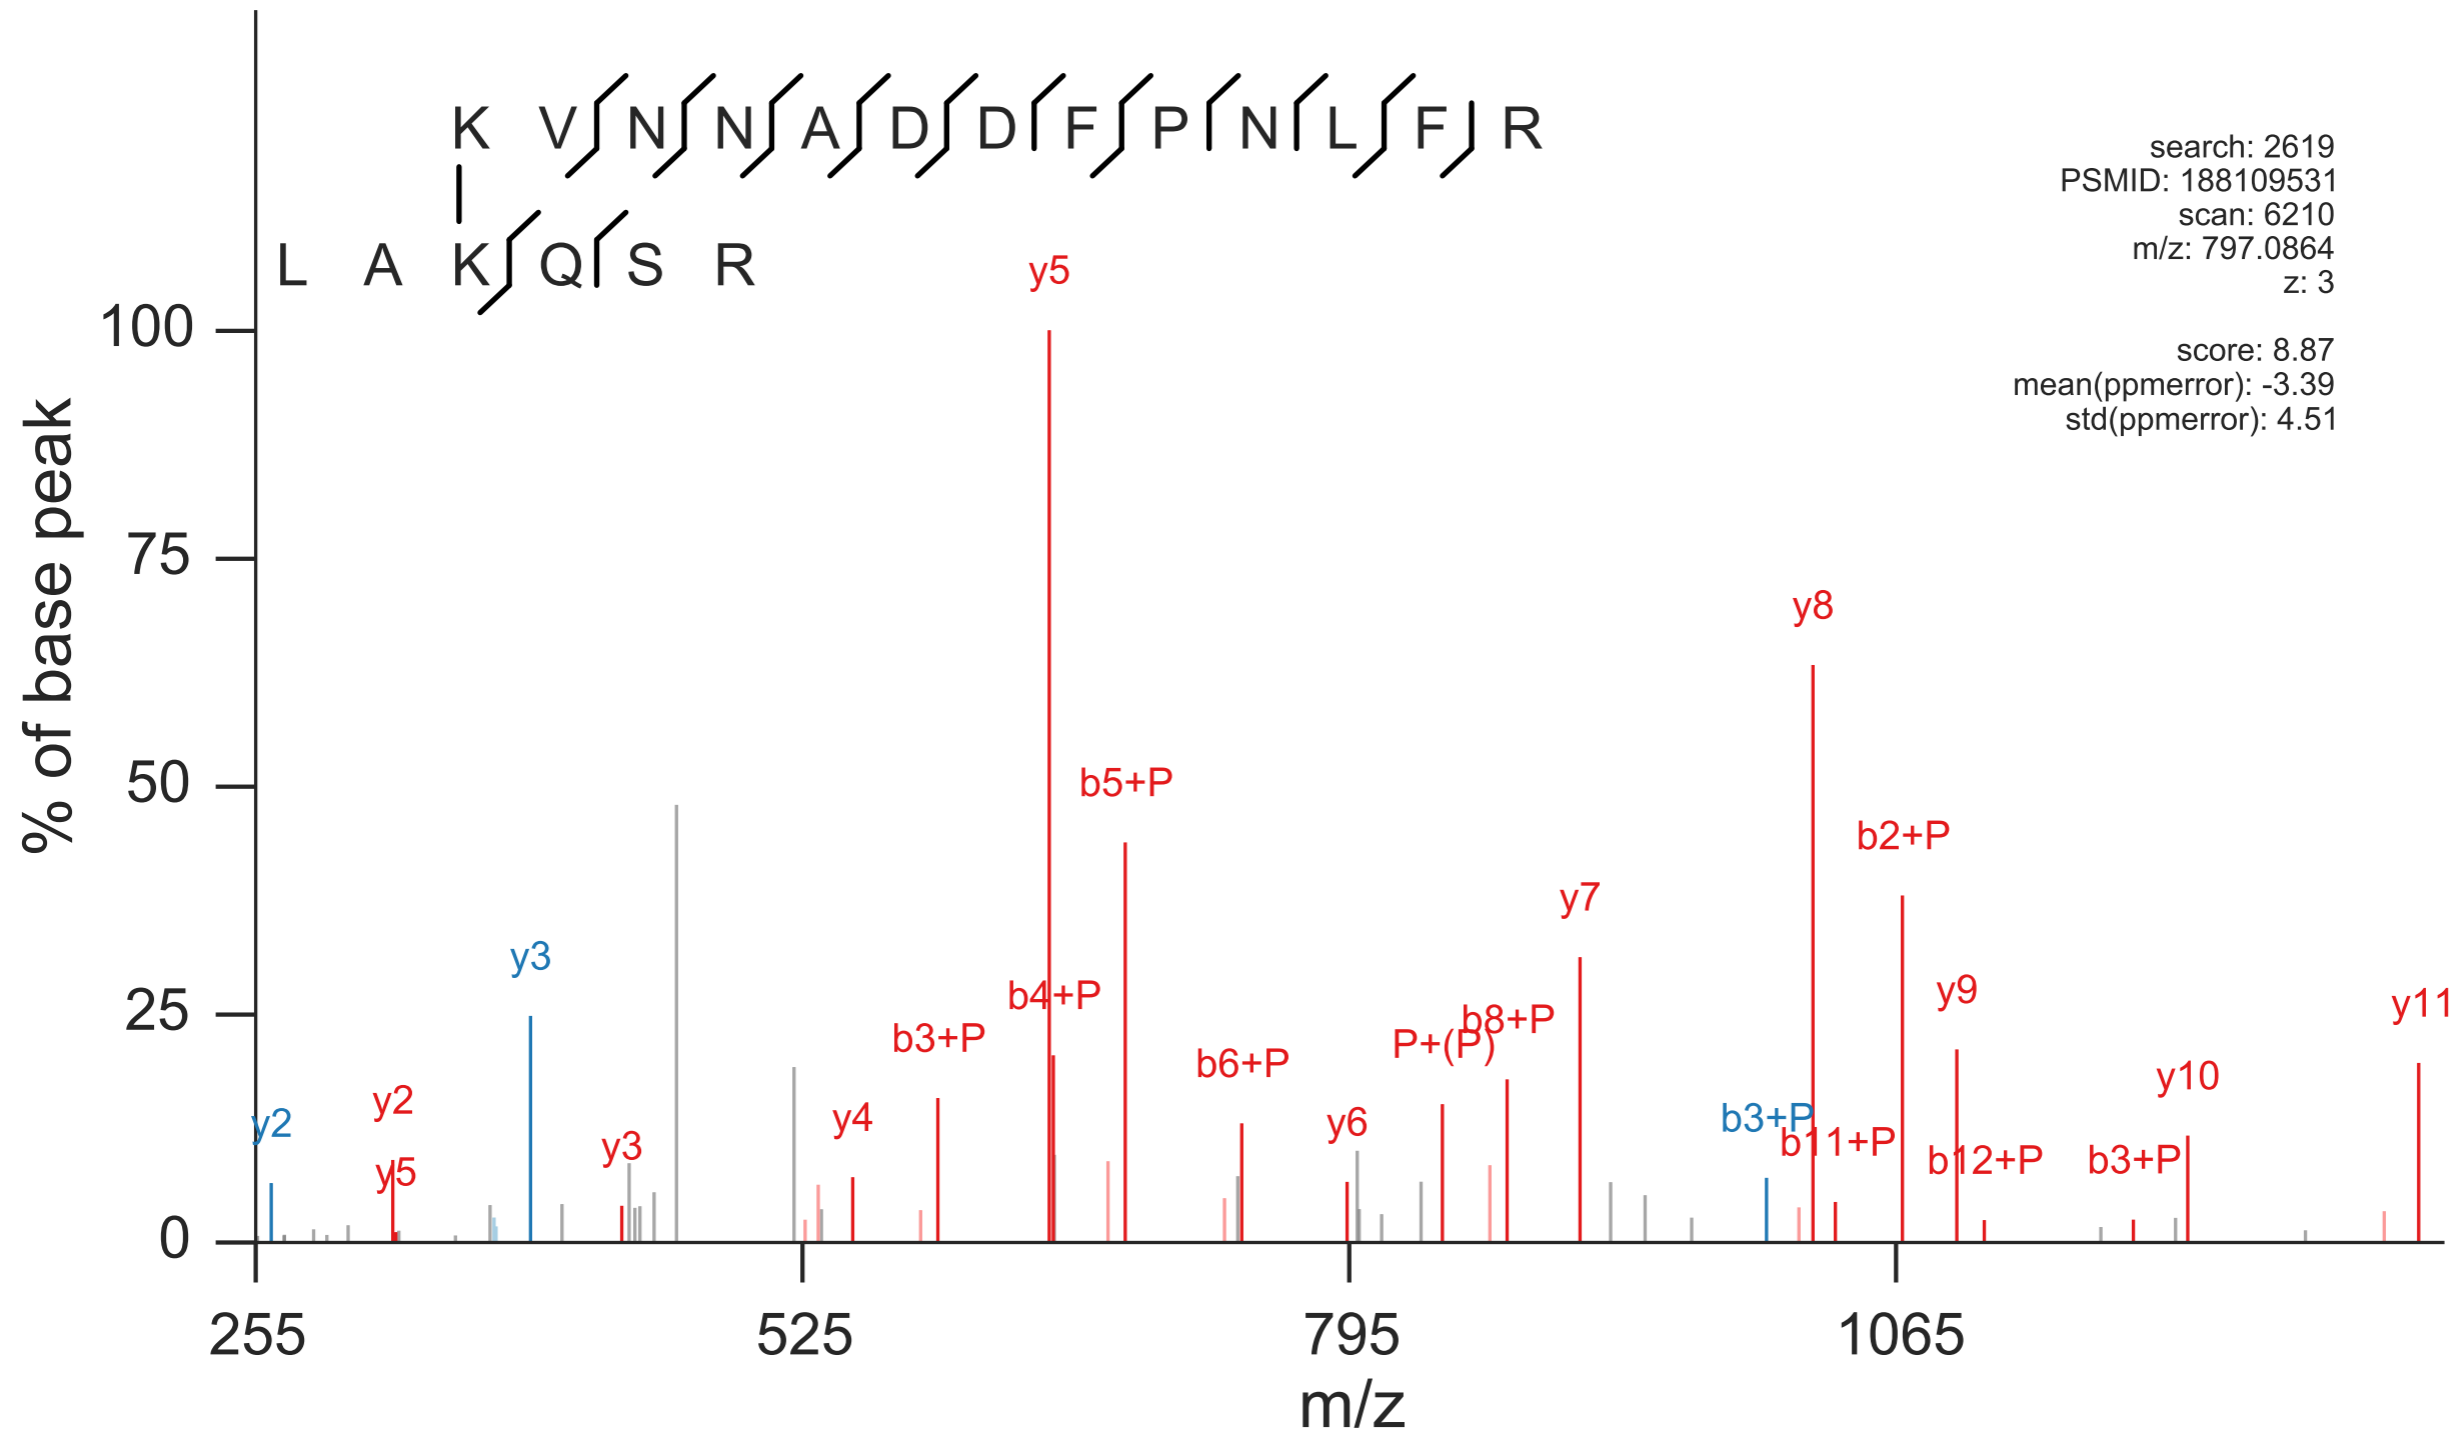

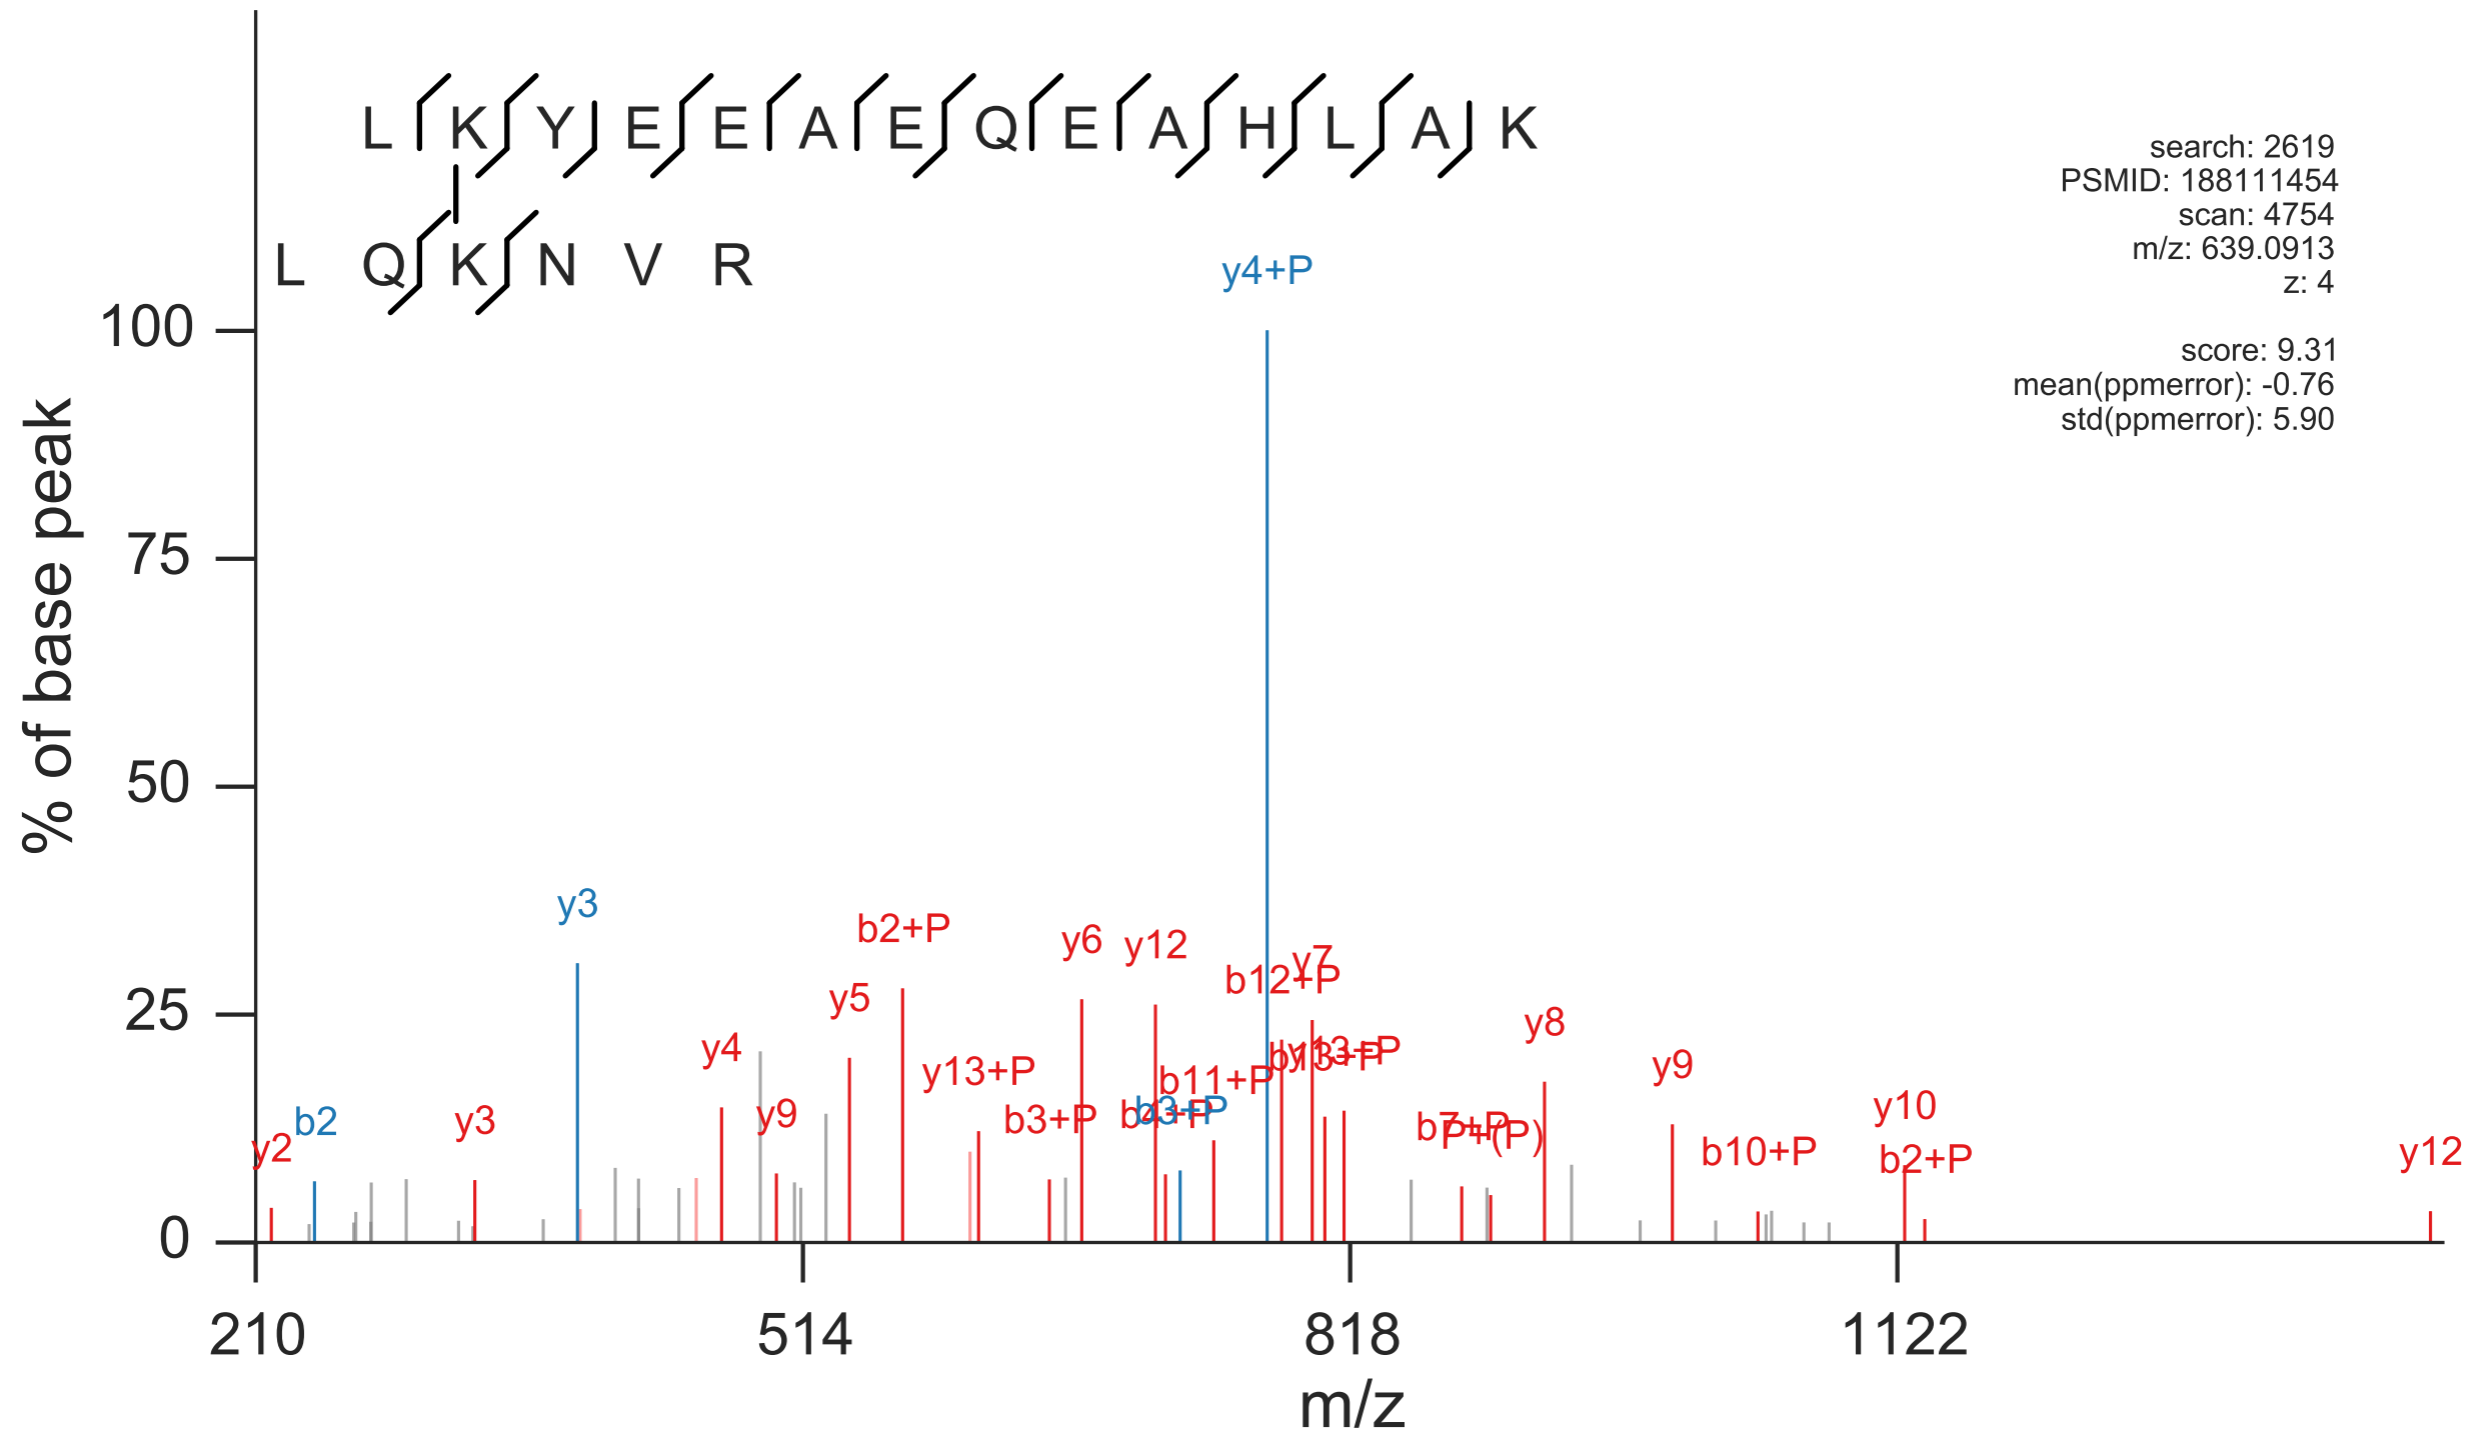

search: 2619  
 PSMID: 188111454  
 scan: 4754  
 m/z: 639.0913  
 z: 4

score: 9.31  
 mean(ppmerror): -0.76  
 std(ppmerror): 5.90



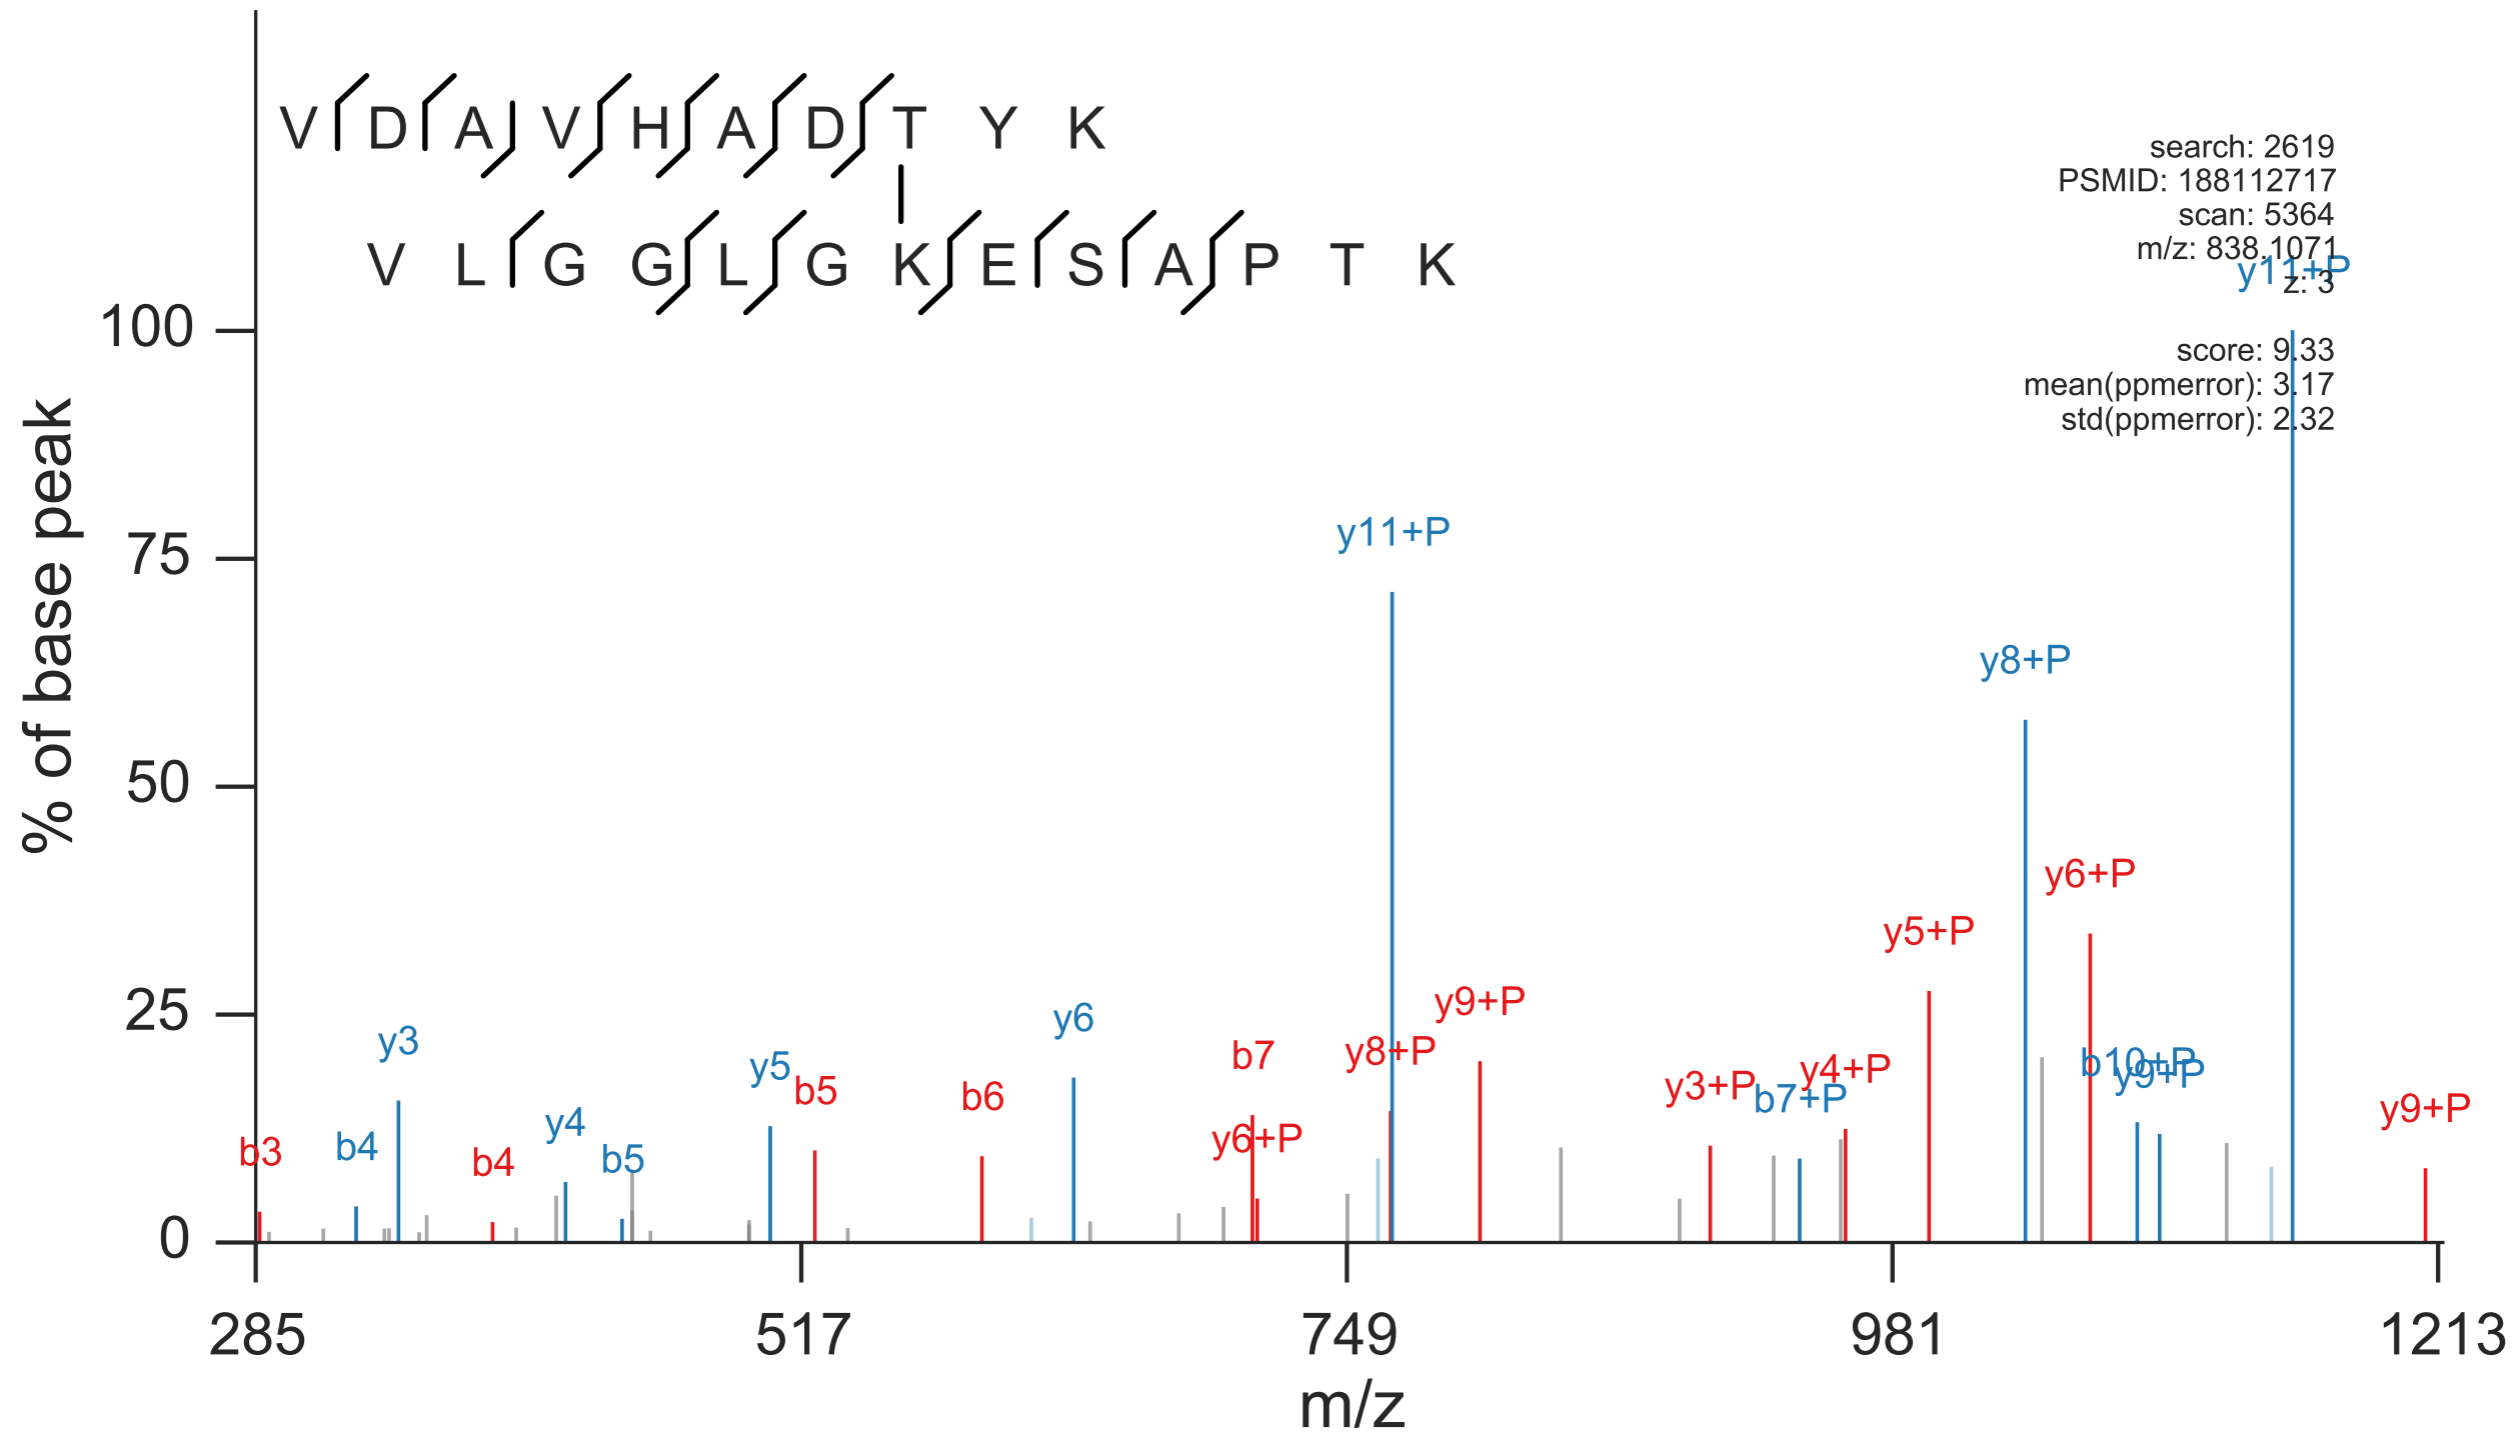

V | S E | Q | A | G K | M<sup>ox</sup> | E | S | E | V | K | R  
 E | K | E | G K | E | K

search: 2619  
 PSMID: 188112754  
 scan: 2094  
 m/z: 860.0997  
 z: 3

score: 6.82  
 mean(ppmerror): -0.61  
 std(ppmerror): 6.64

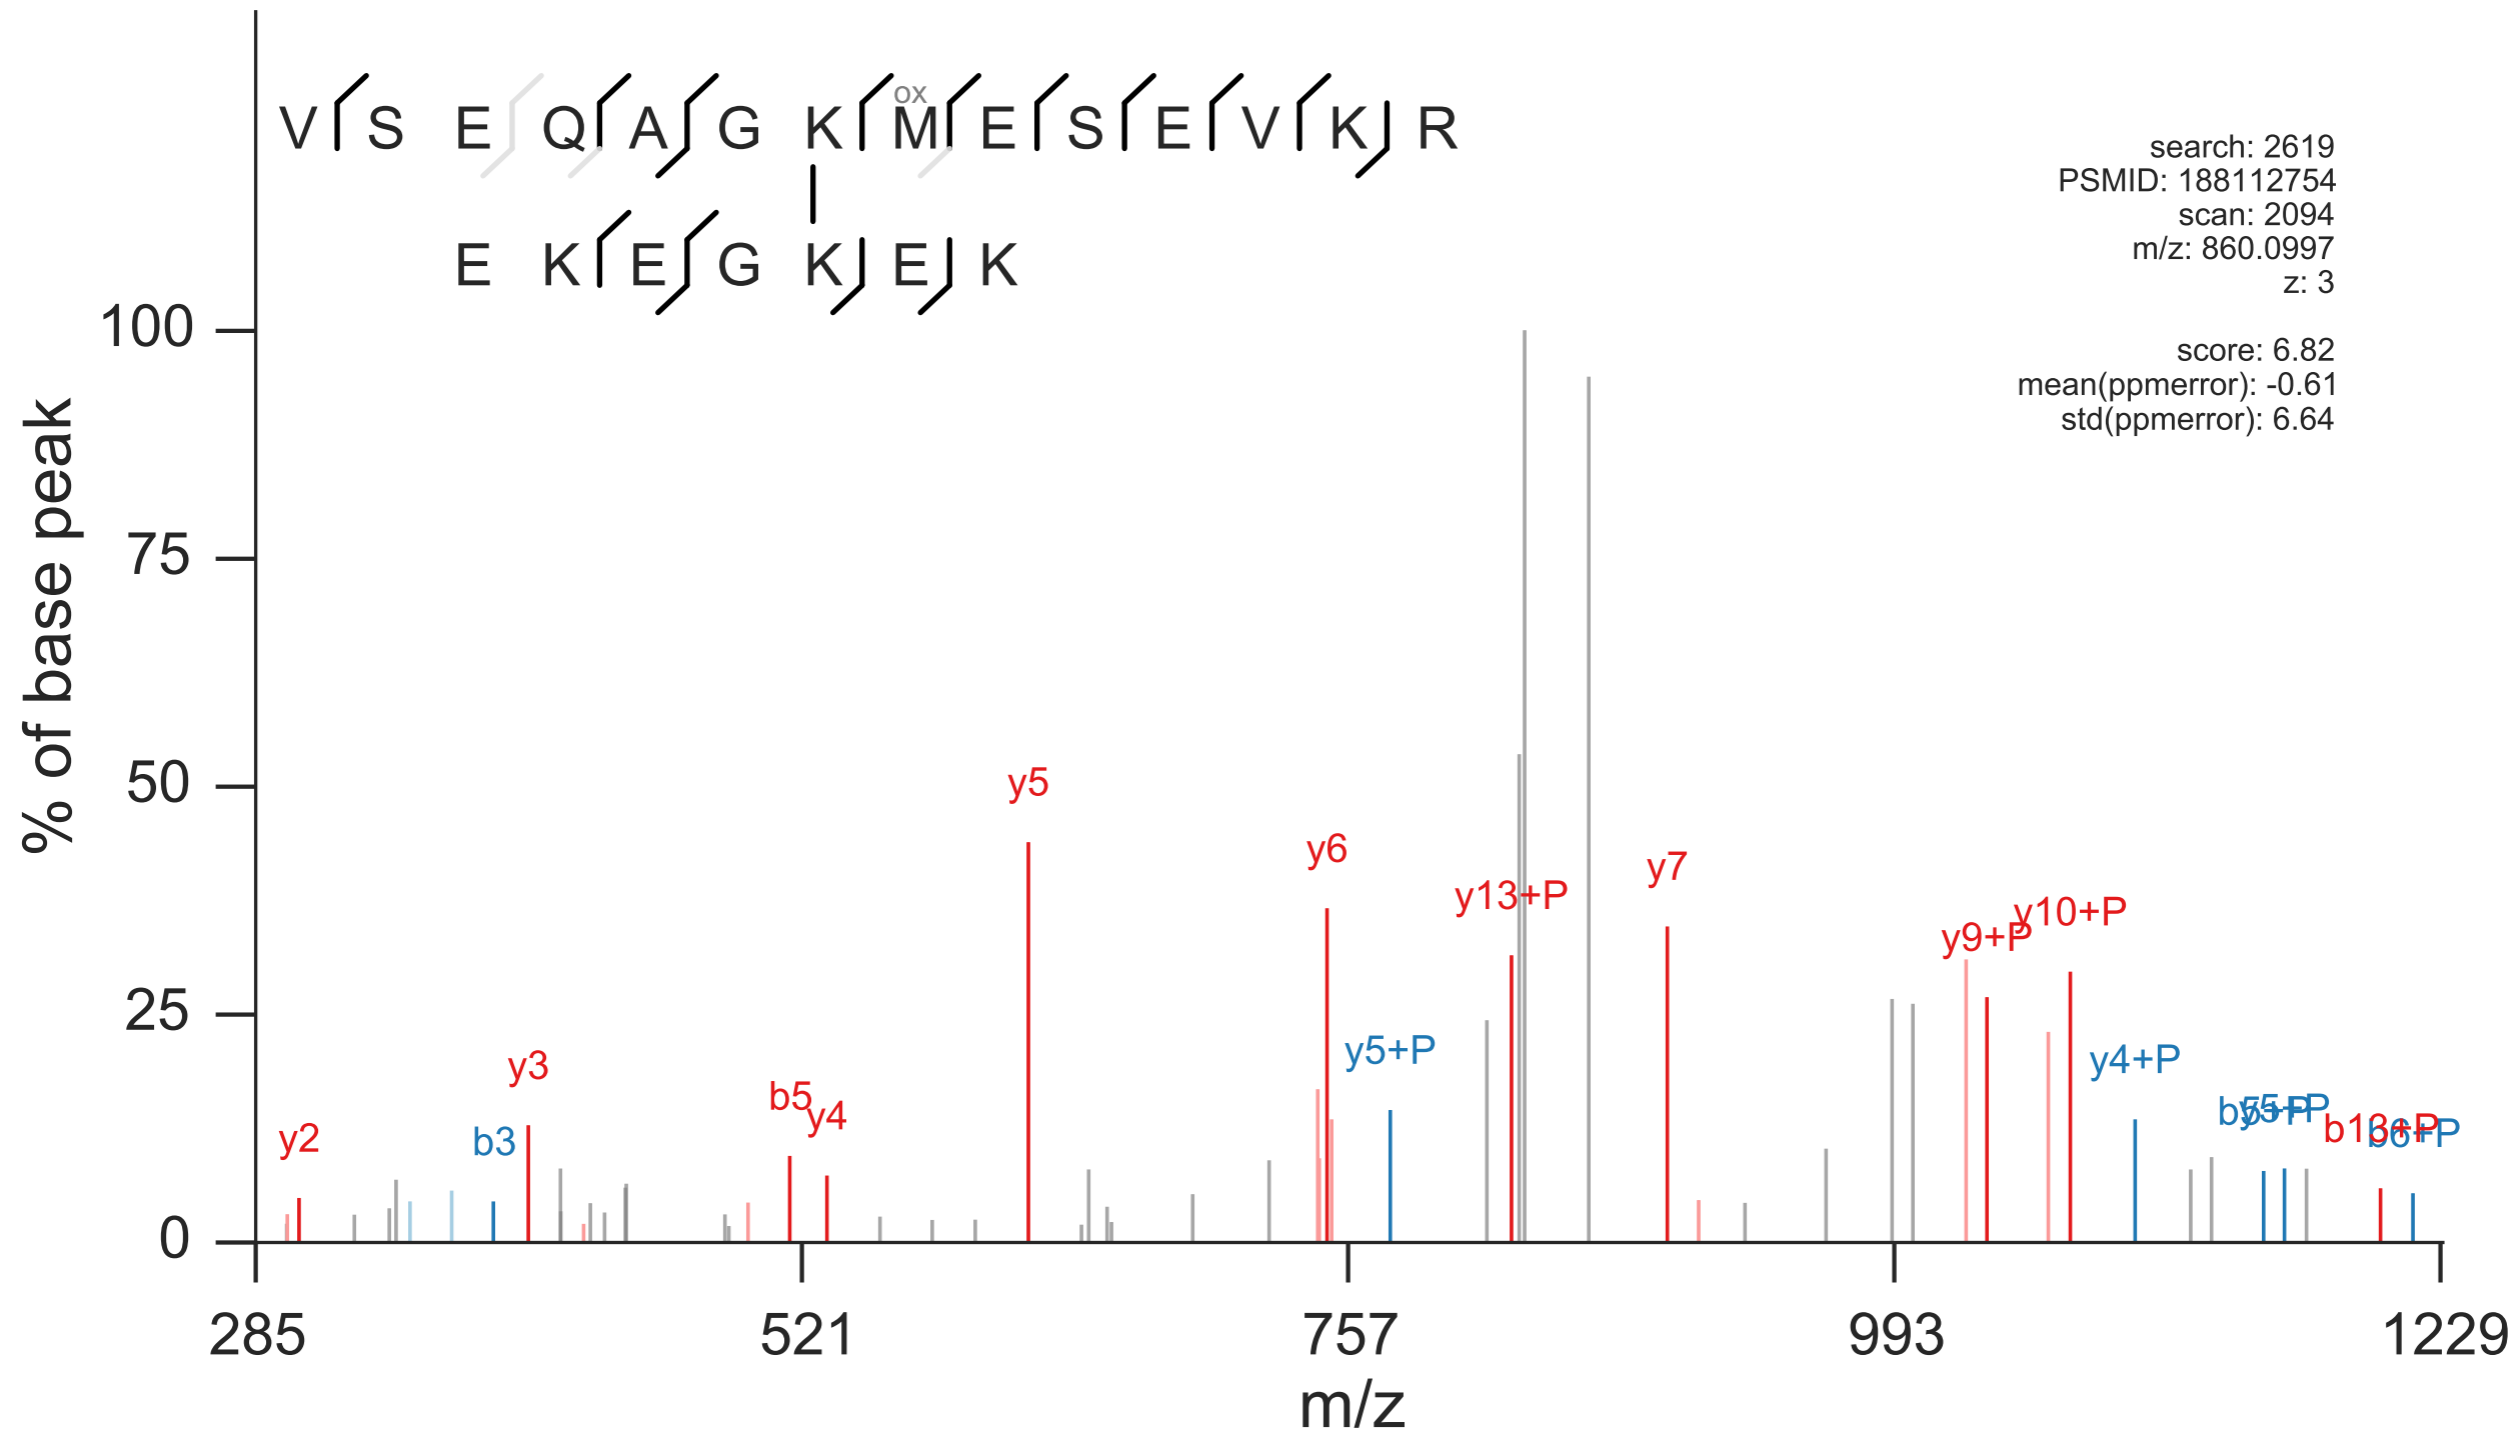

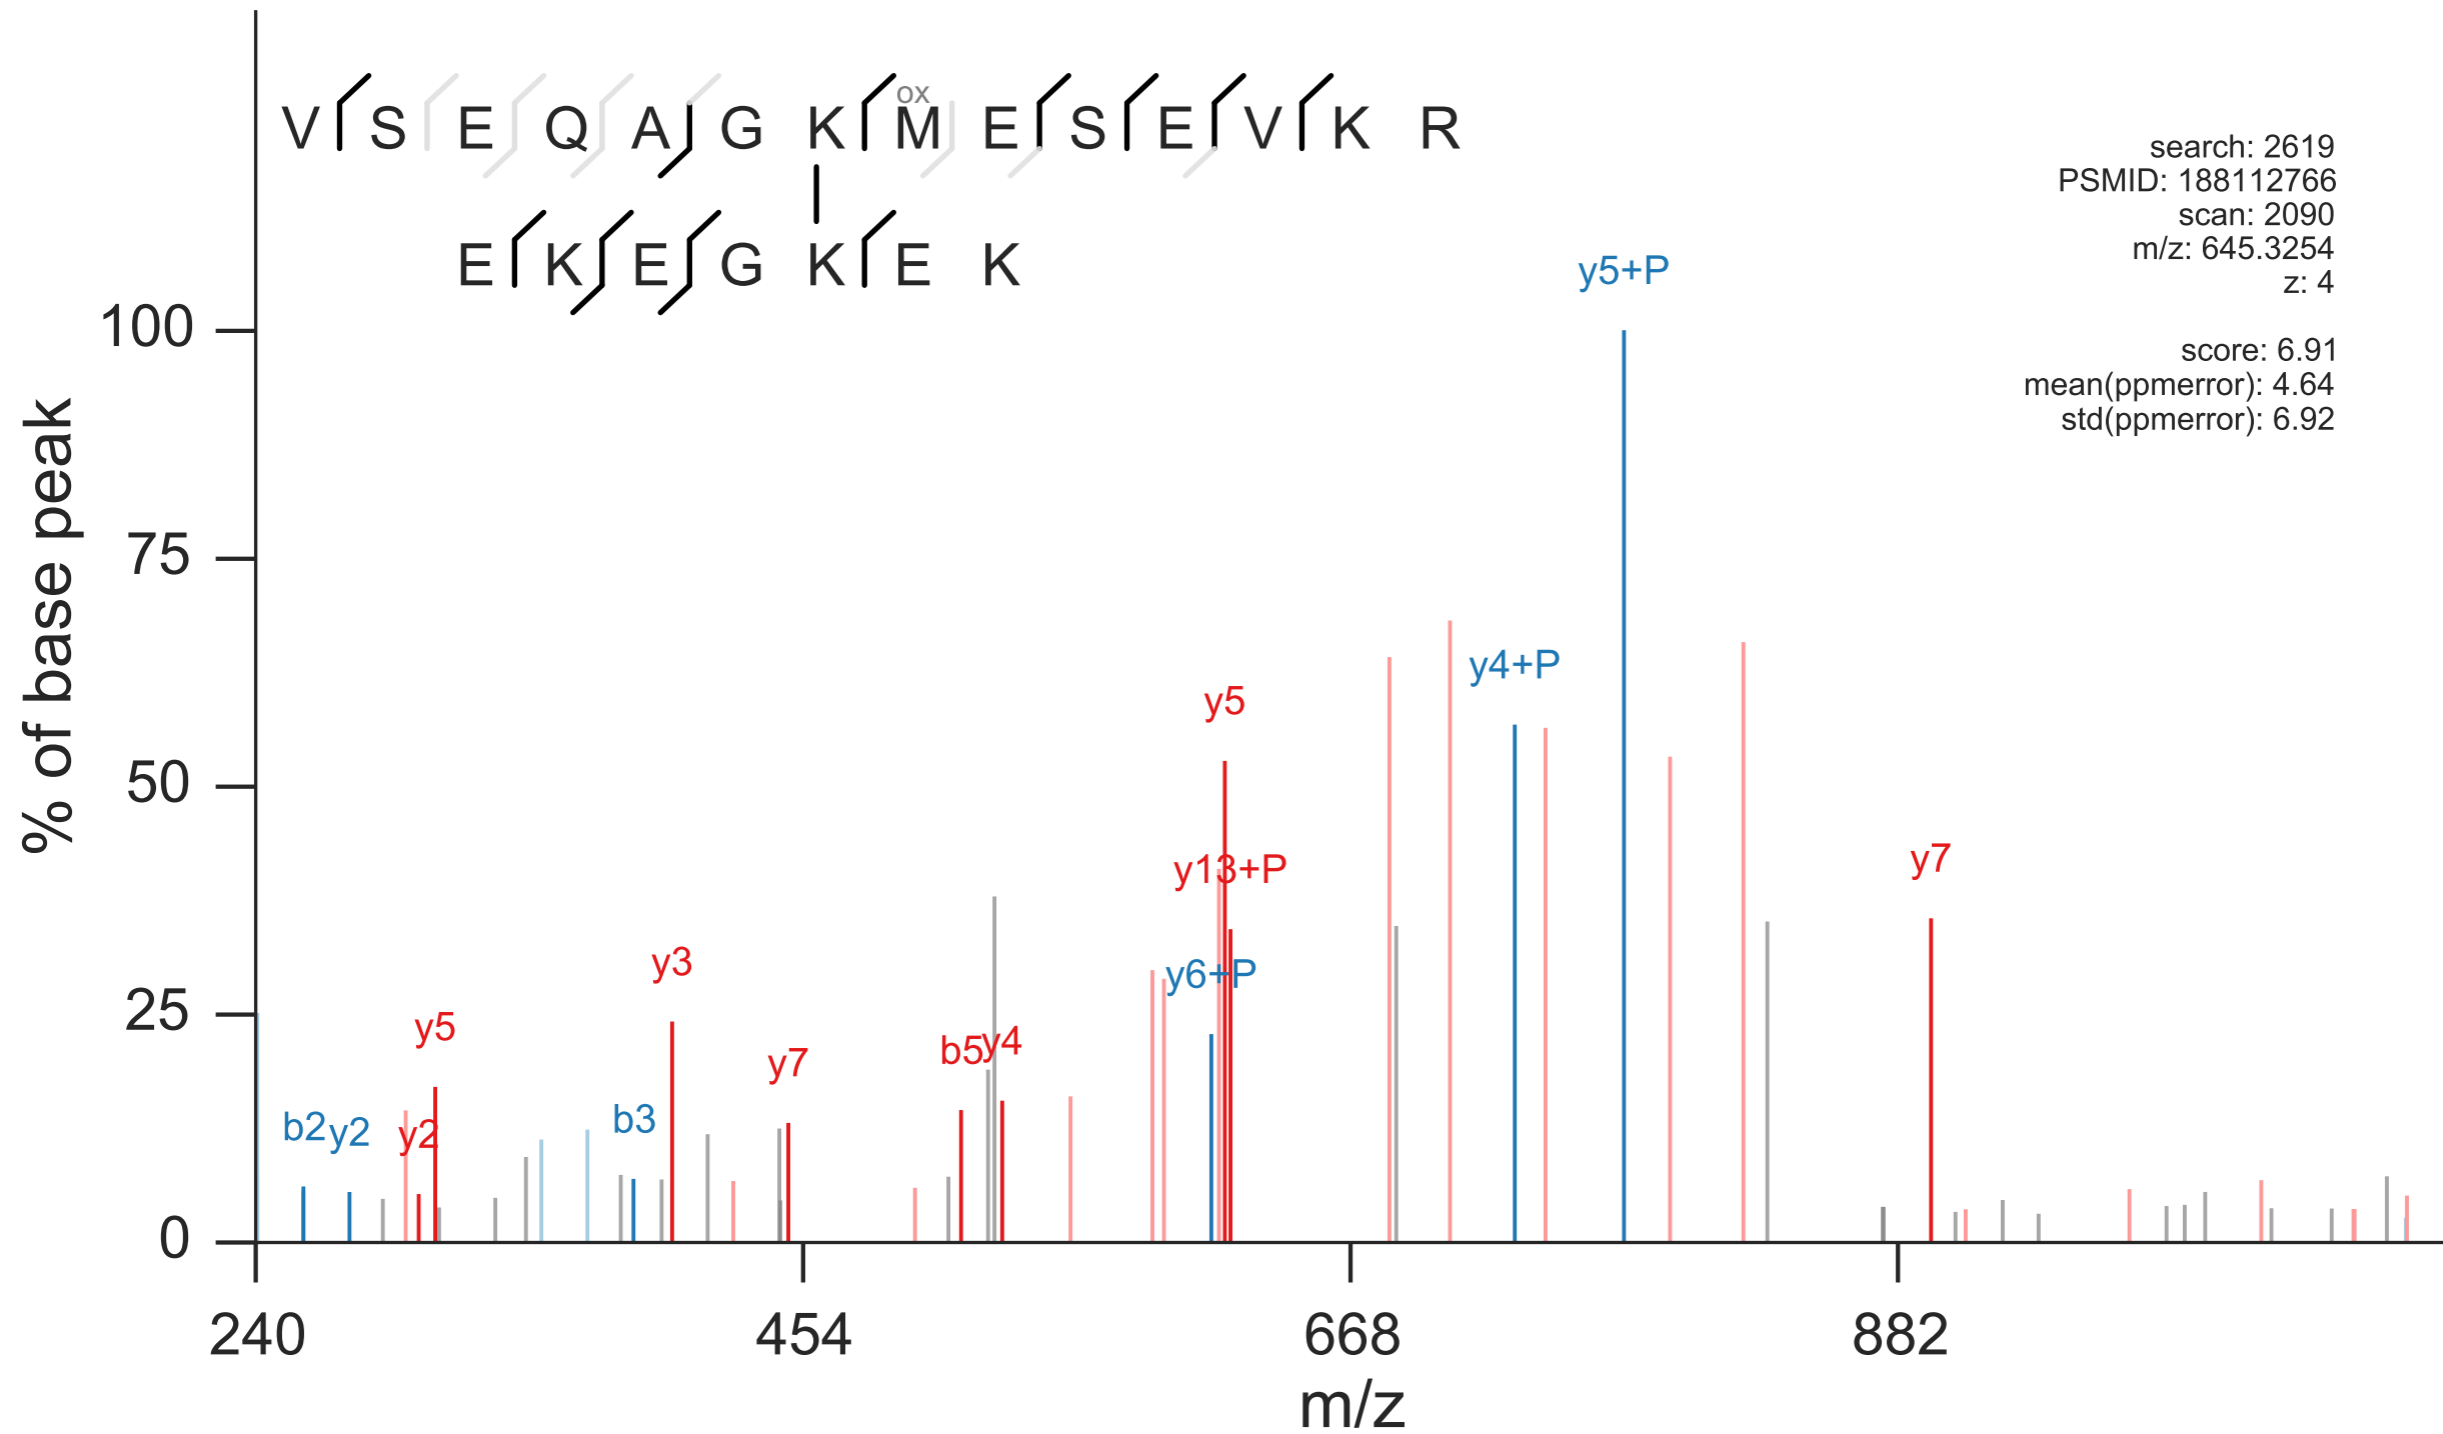

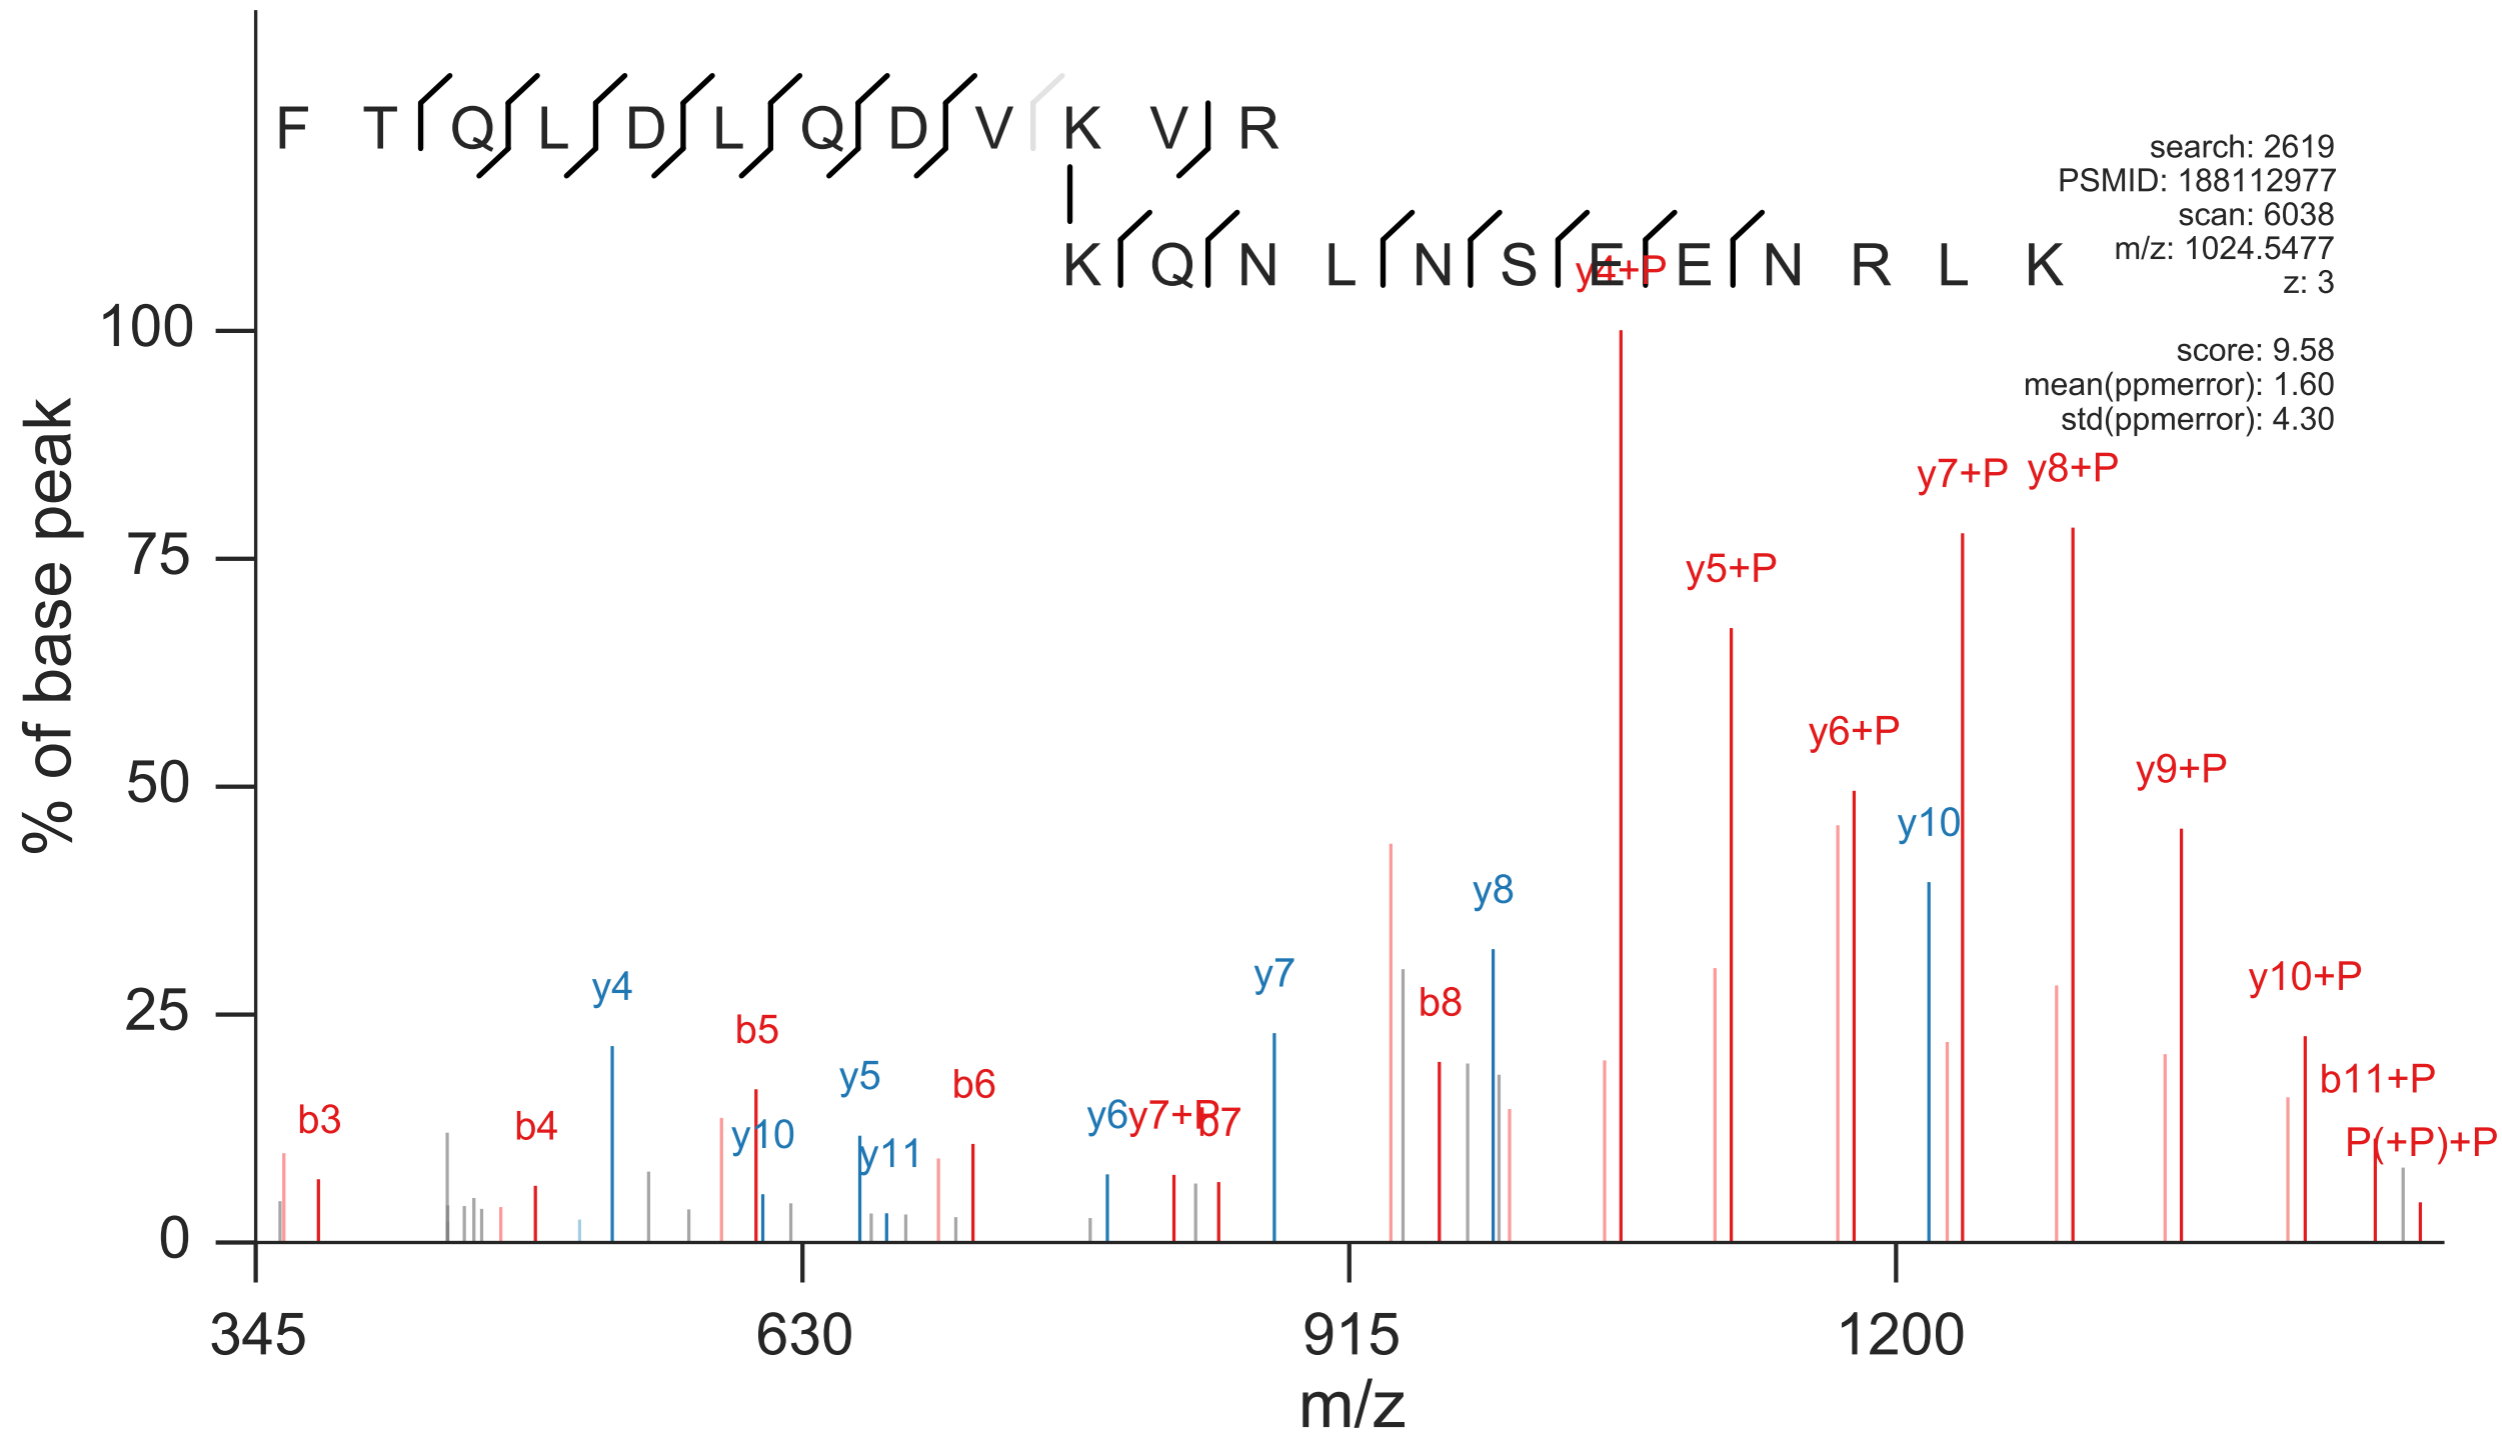

L | K | Q | V | M<sup>ox</sup> | S | S | L | Q | E | E | T | R  
 |  
 K | K | A | D | D | S | S | R

search: 2619  
 PSMID: 188114051  
 scan: 3281  
 m/z: 870.1064  
 z: 3  
  
 score: 11.13  
 mean(ppmerror): -0.43  
 std(ppmerror): 4.08

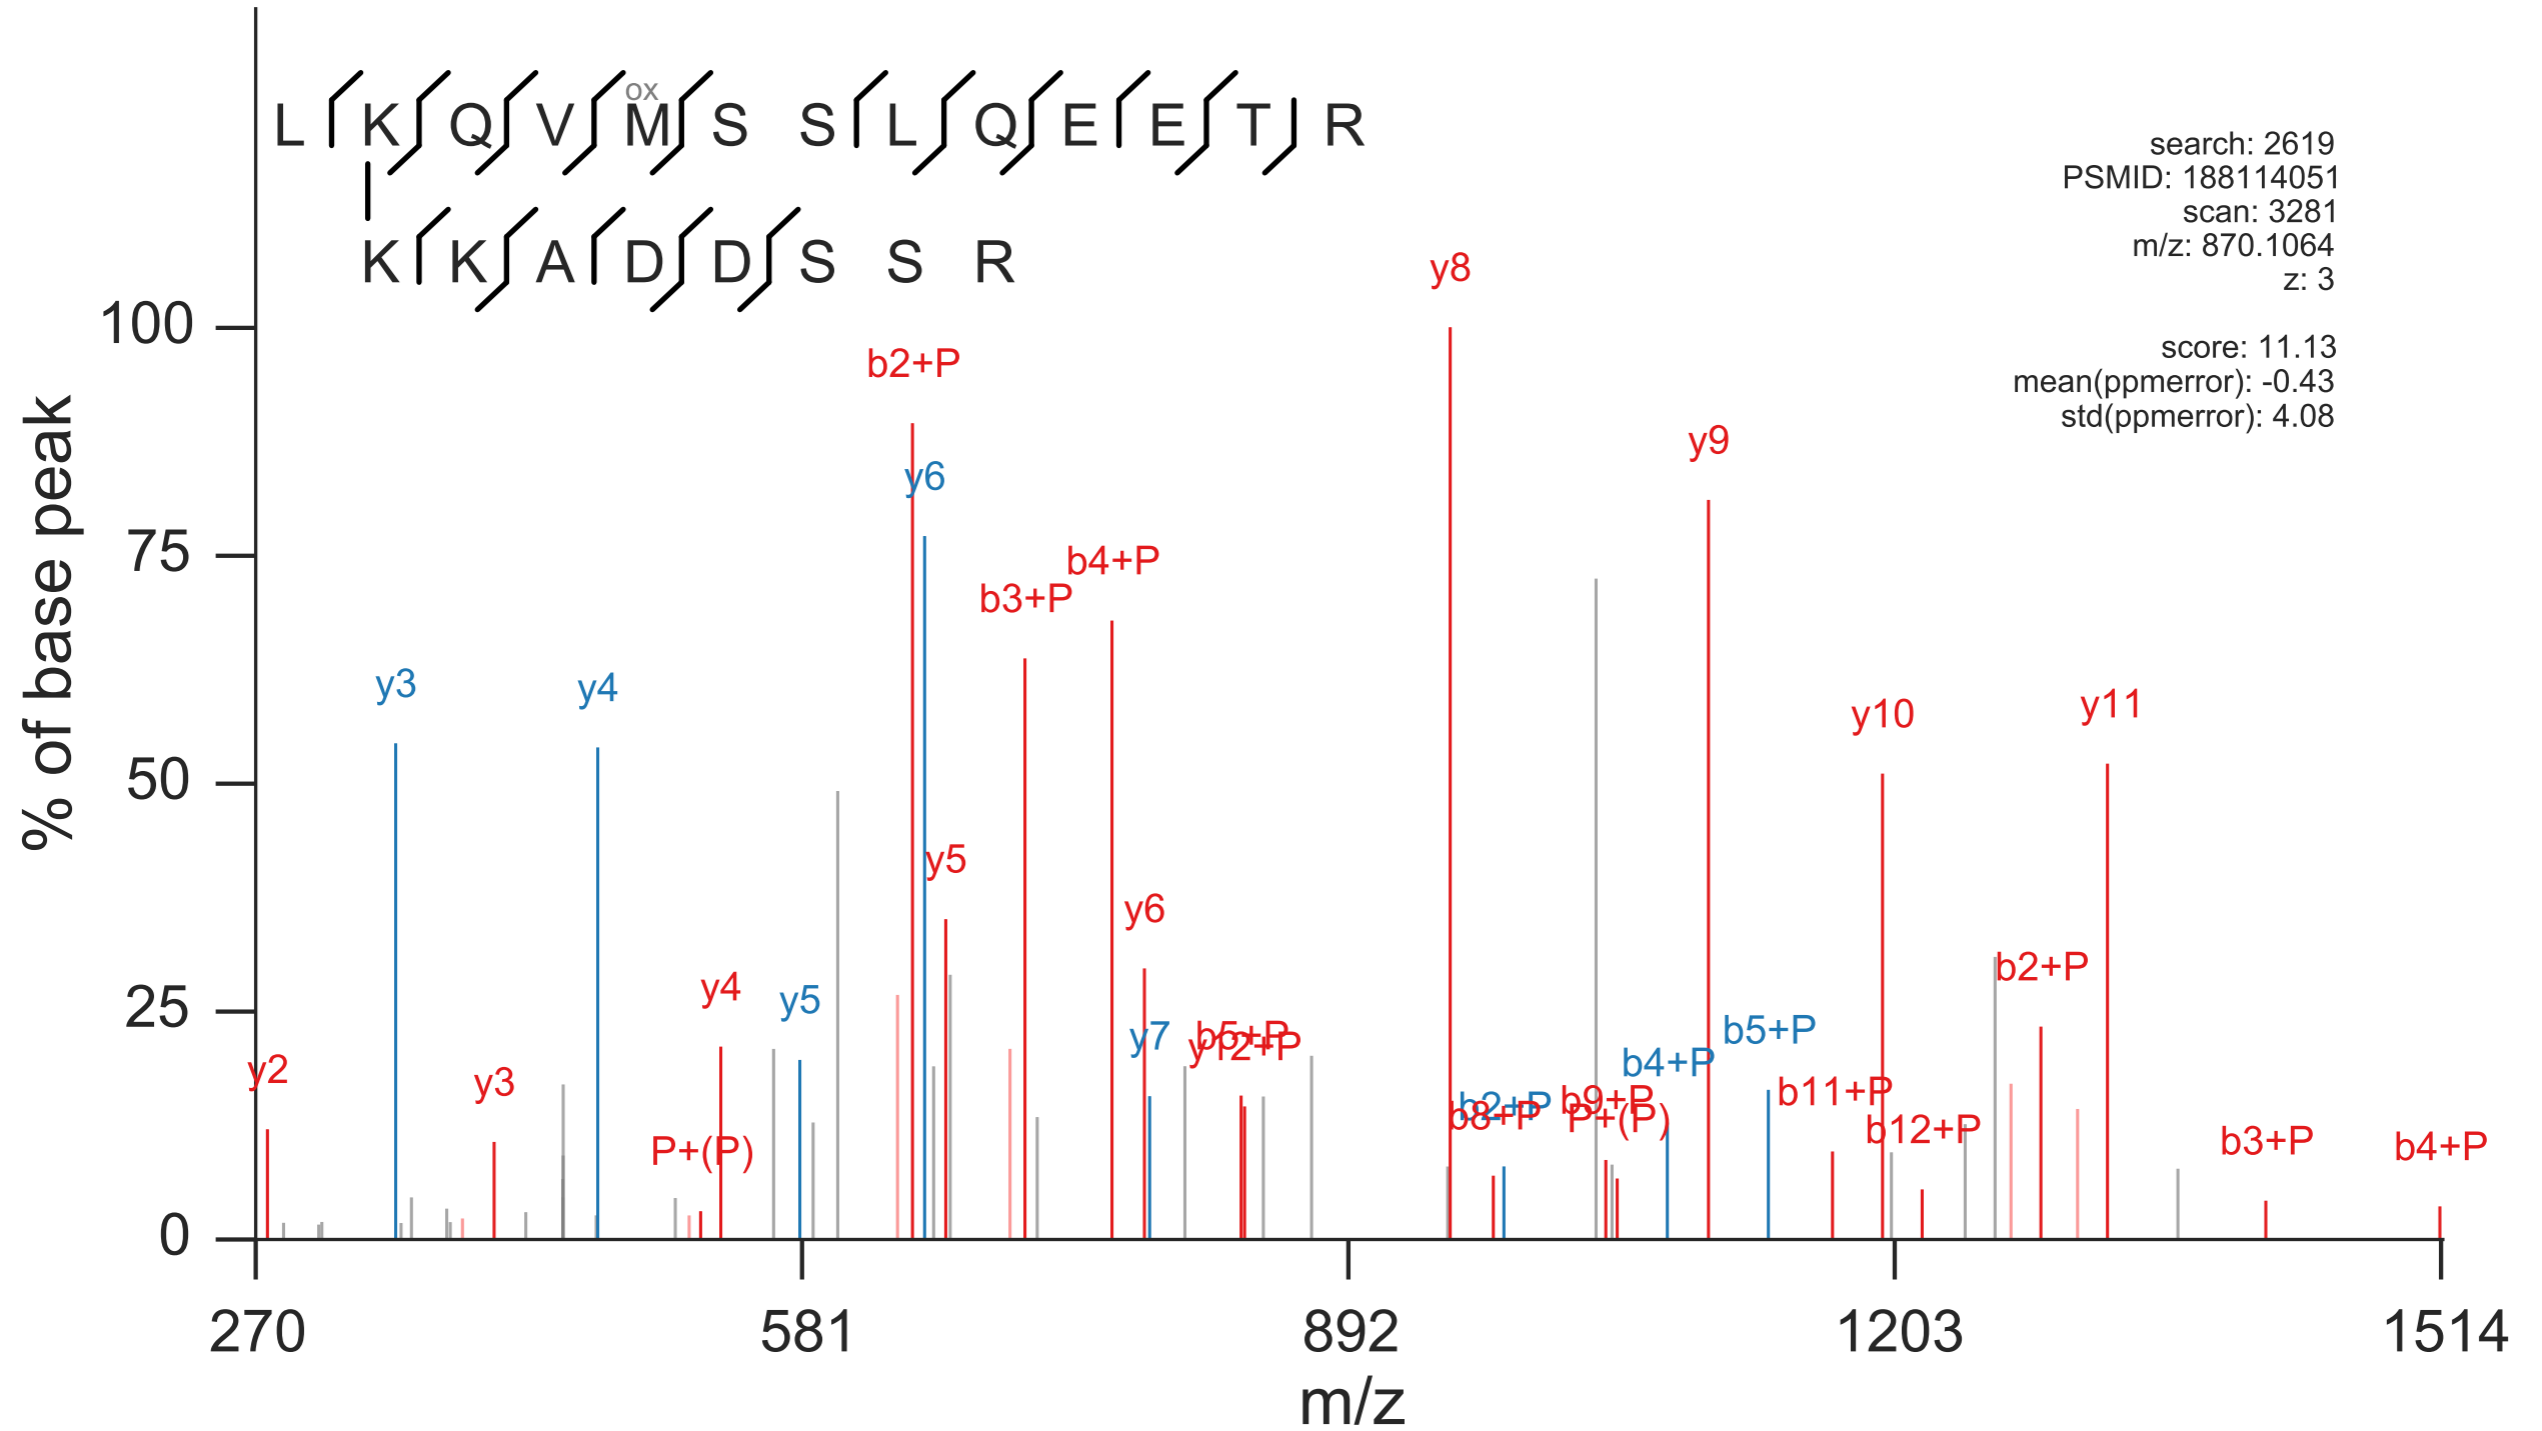

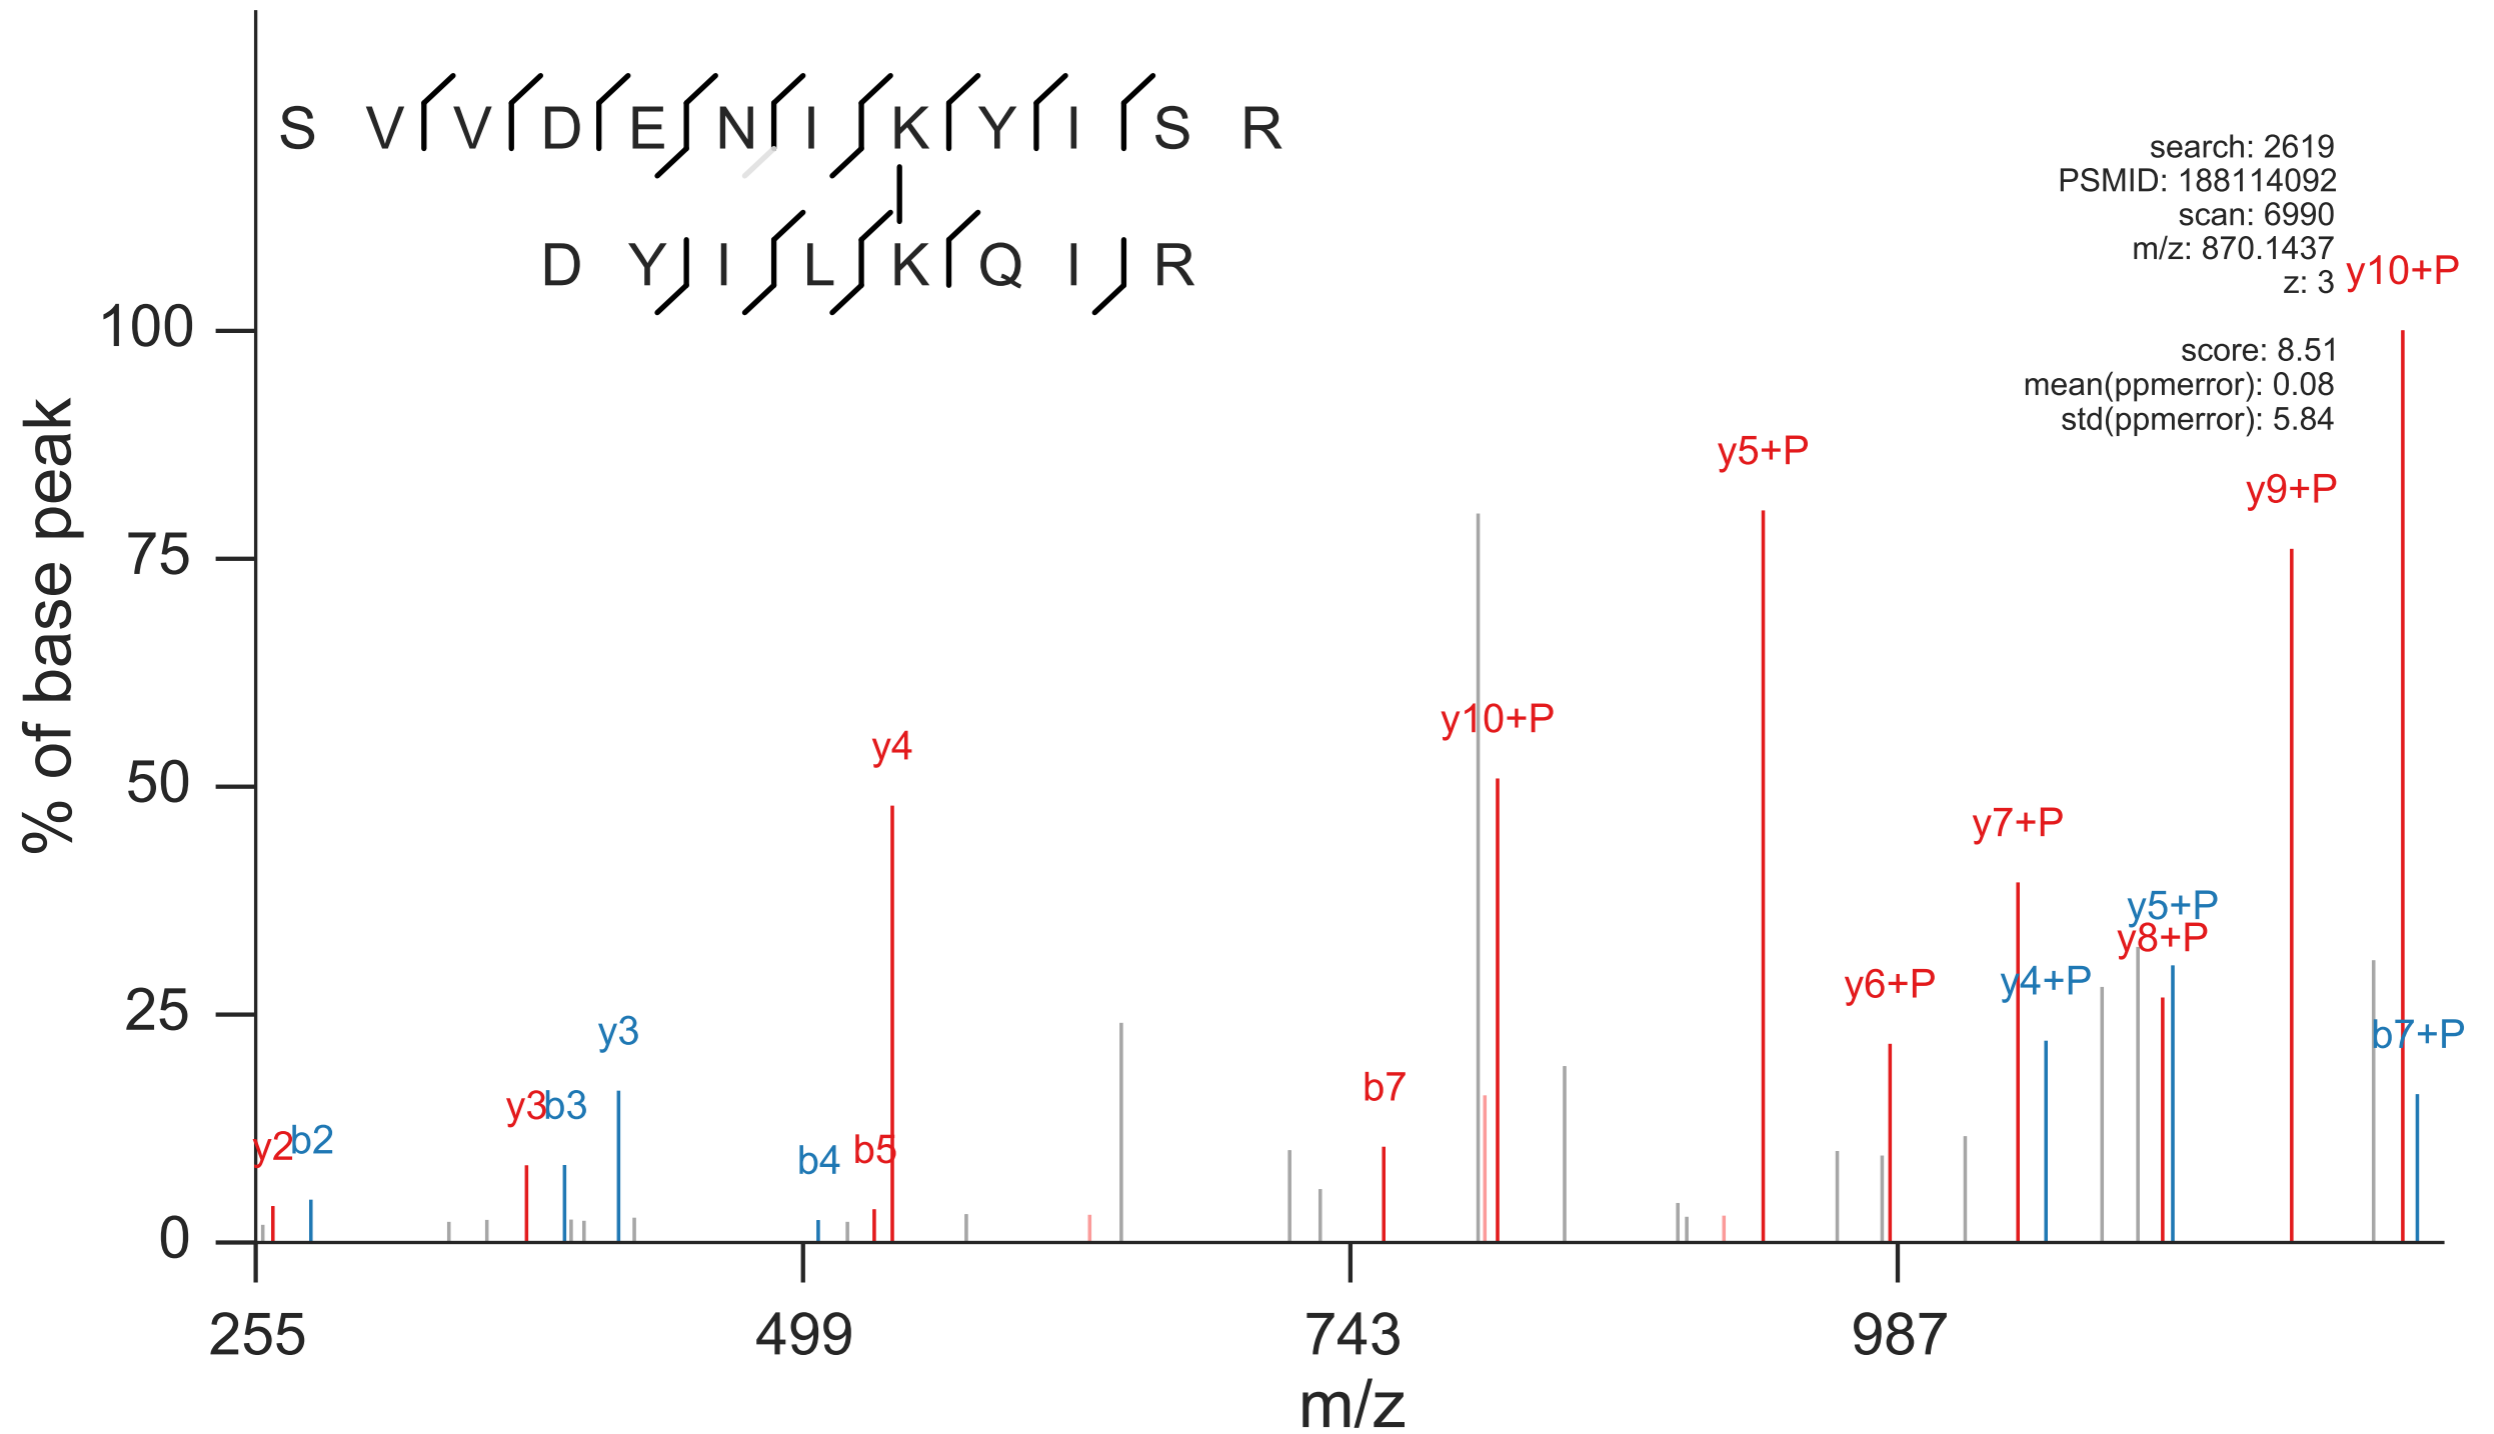

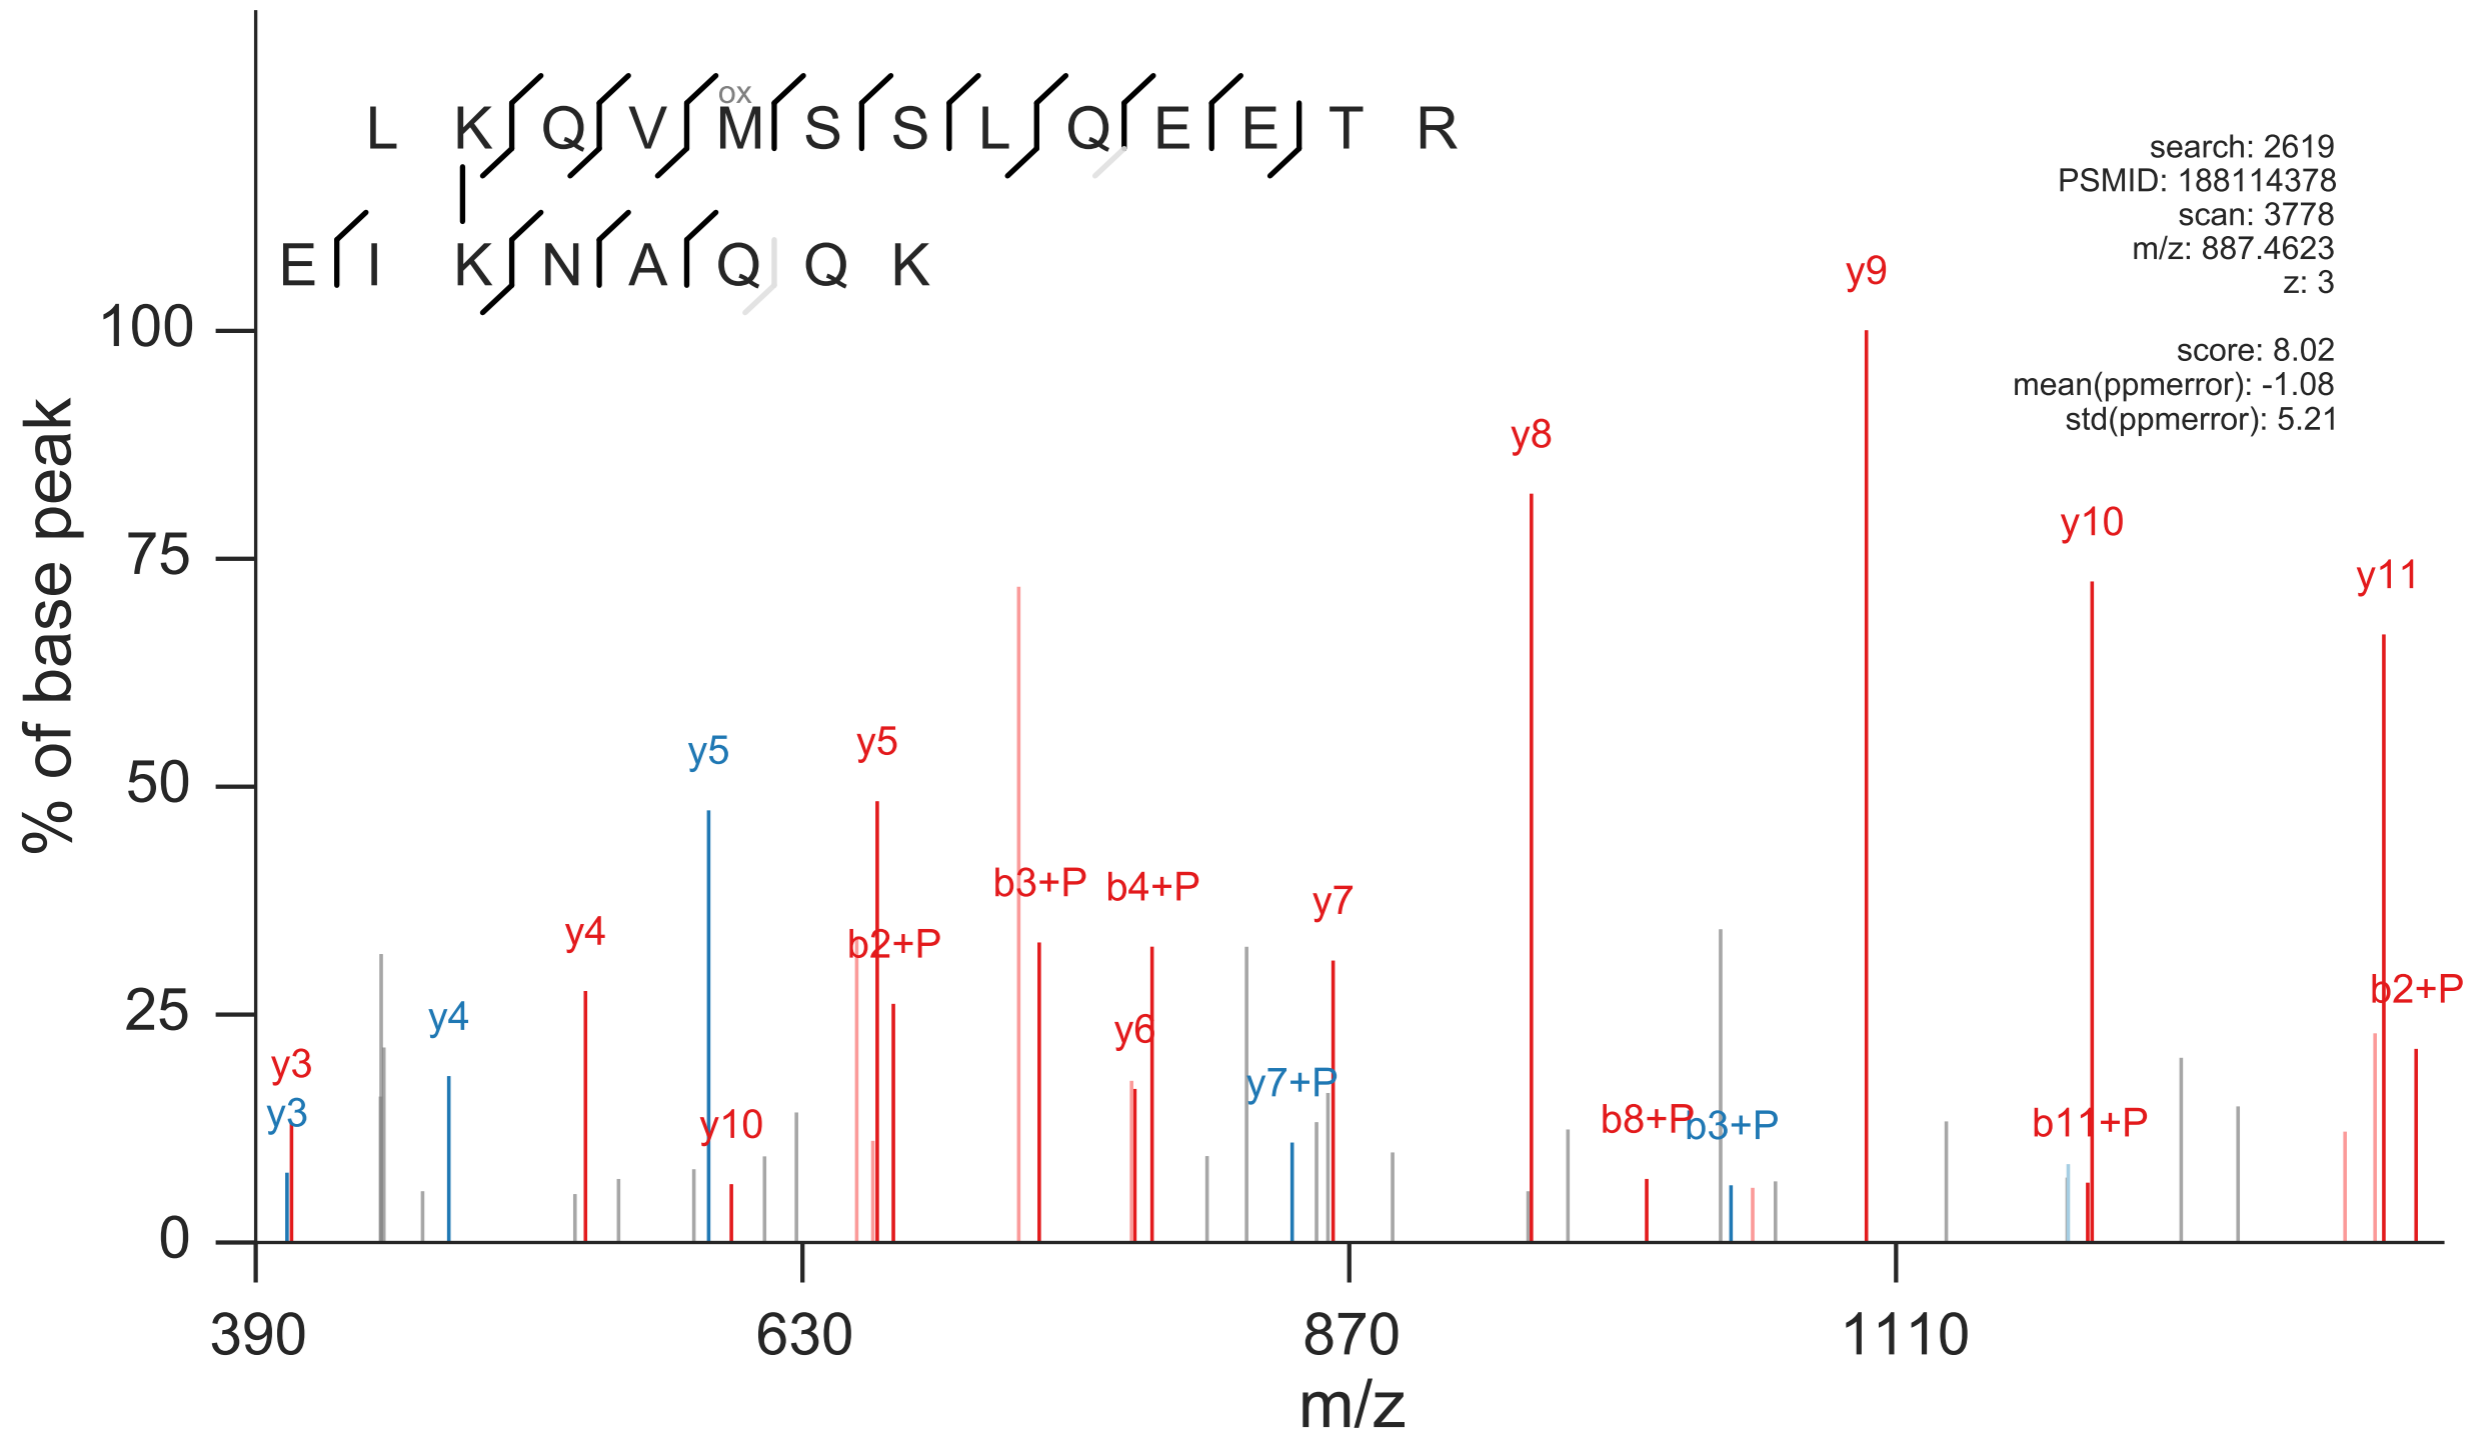

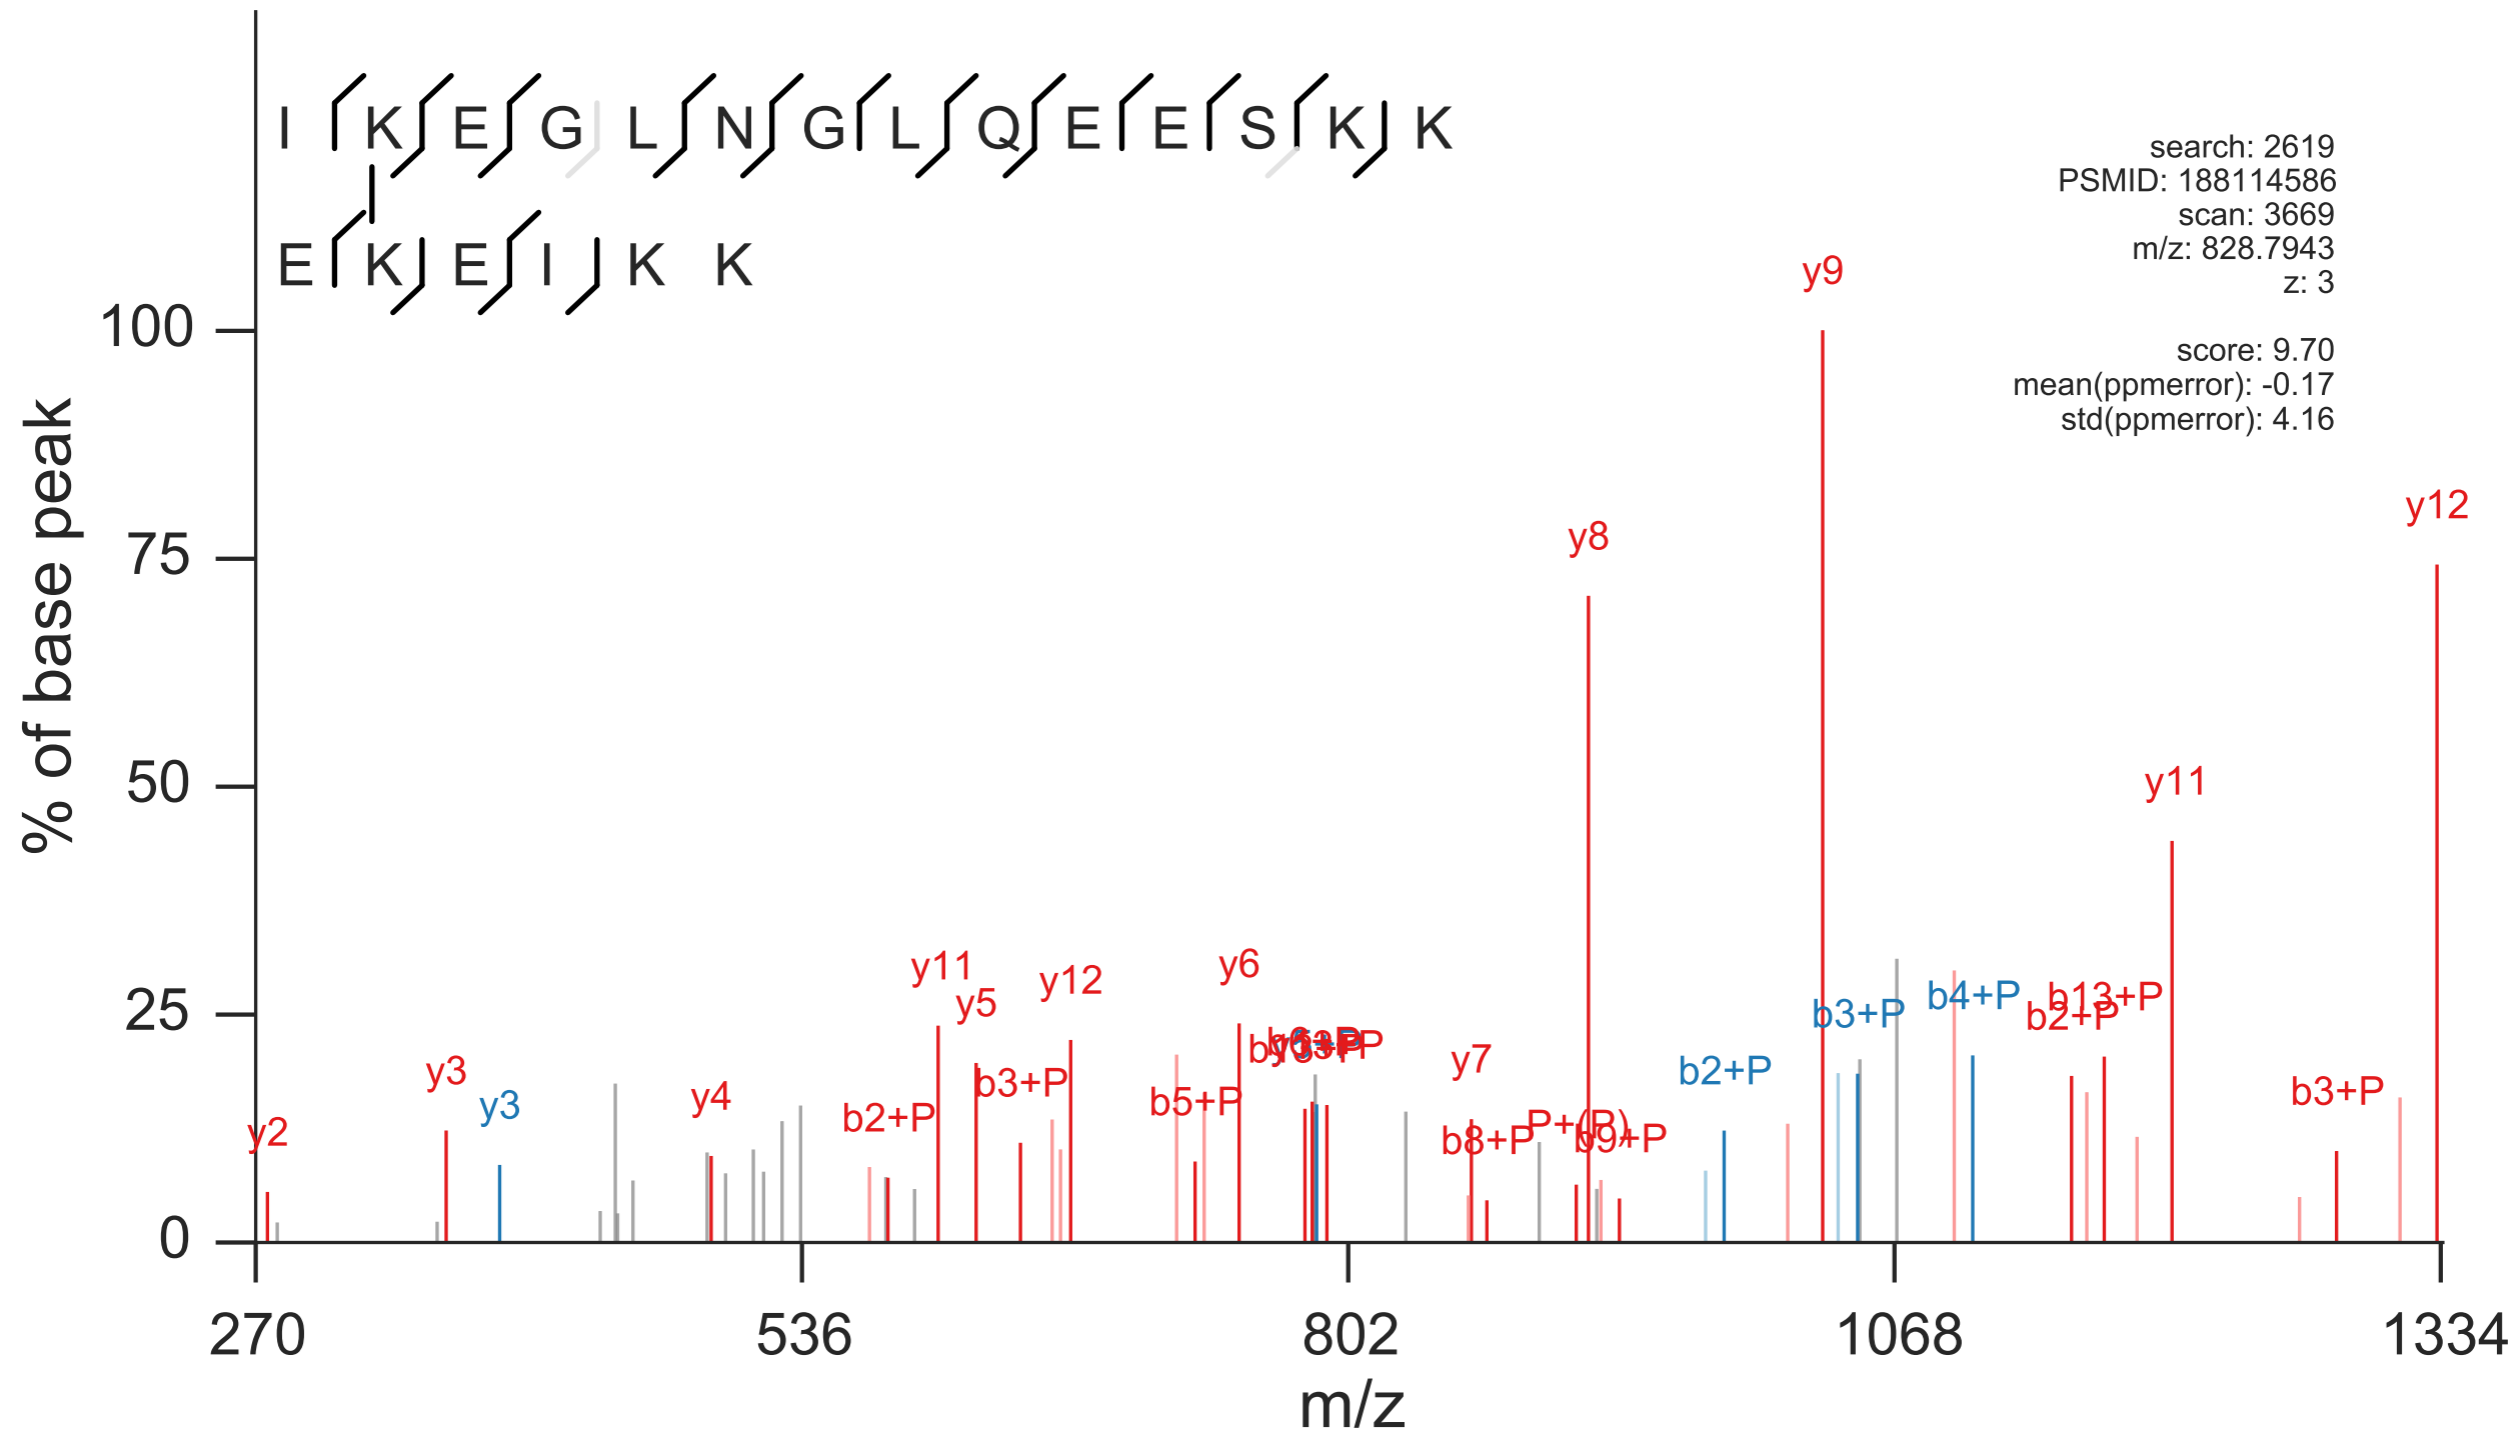



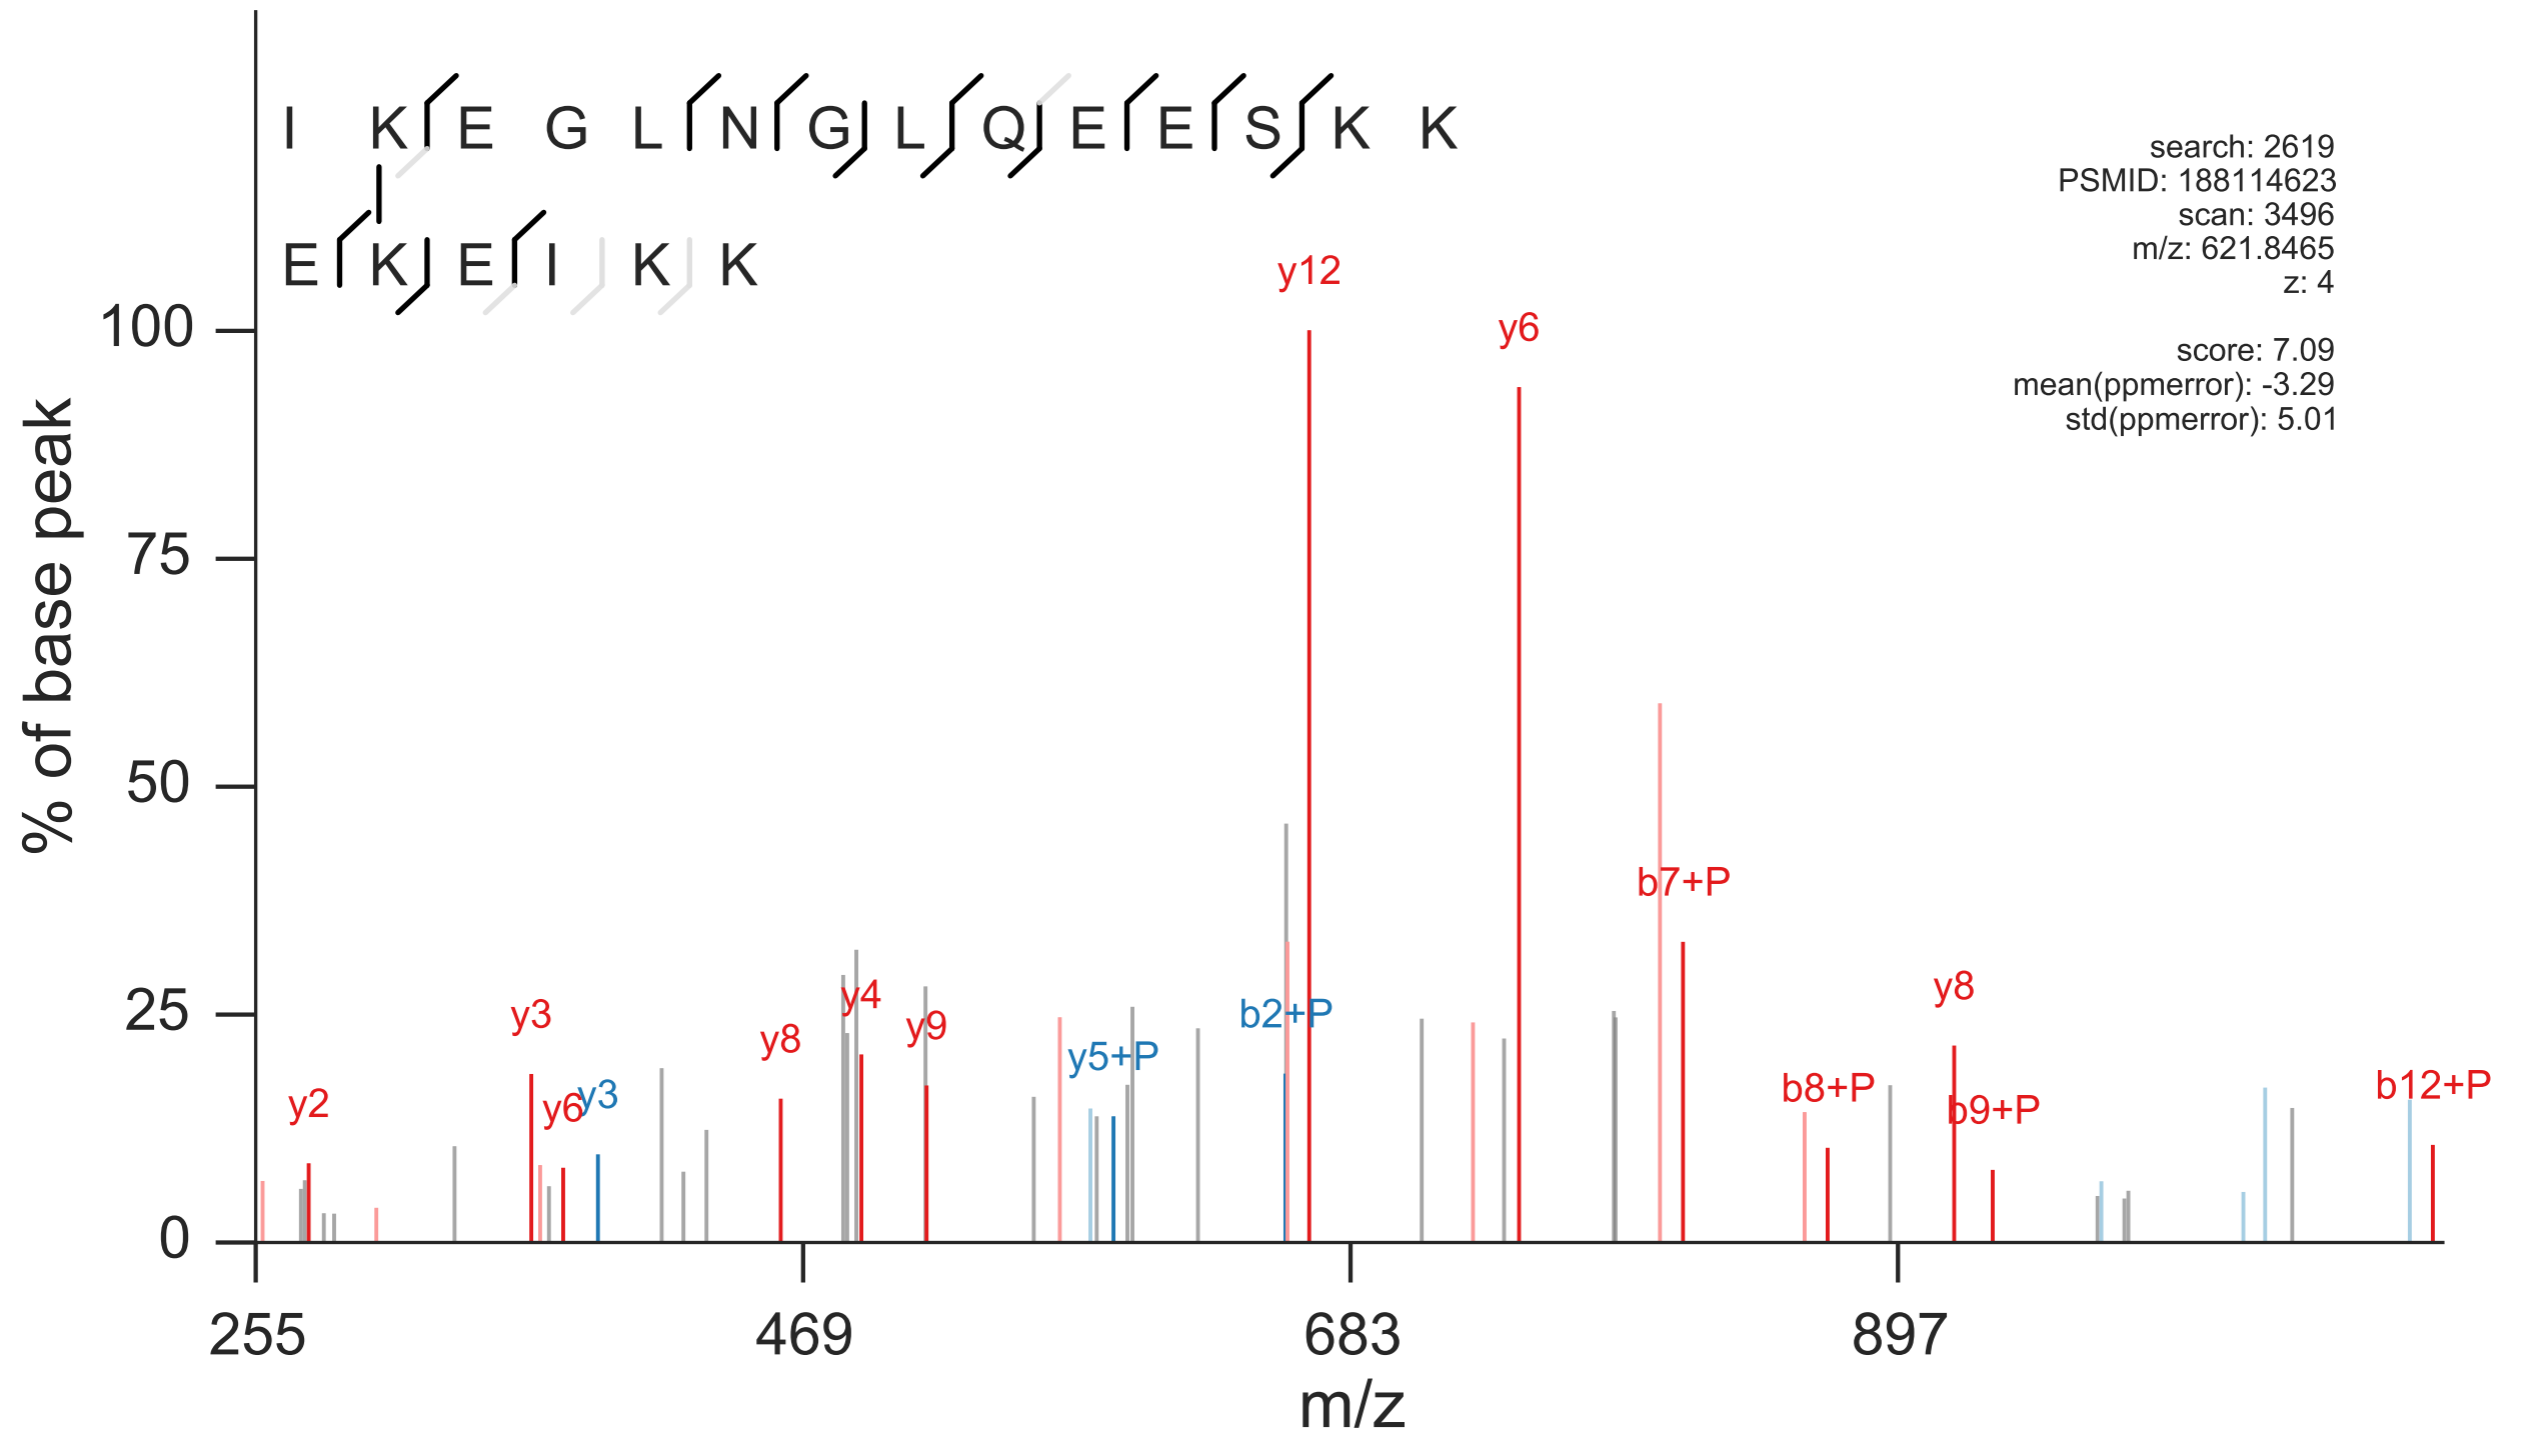

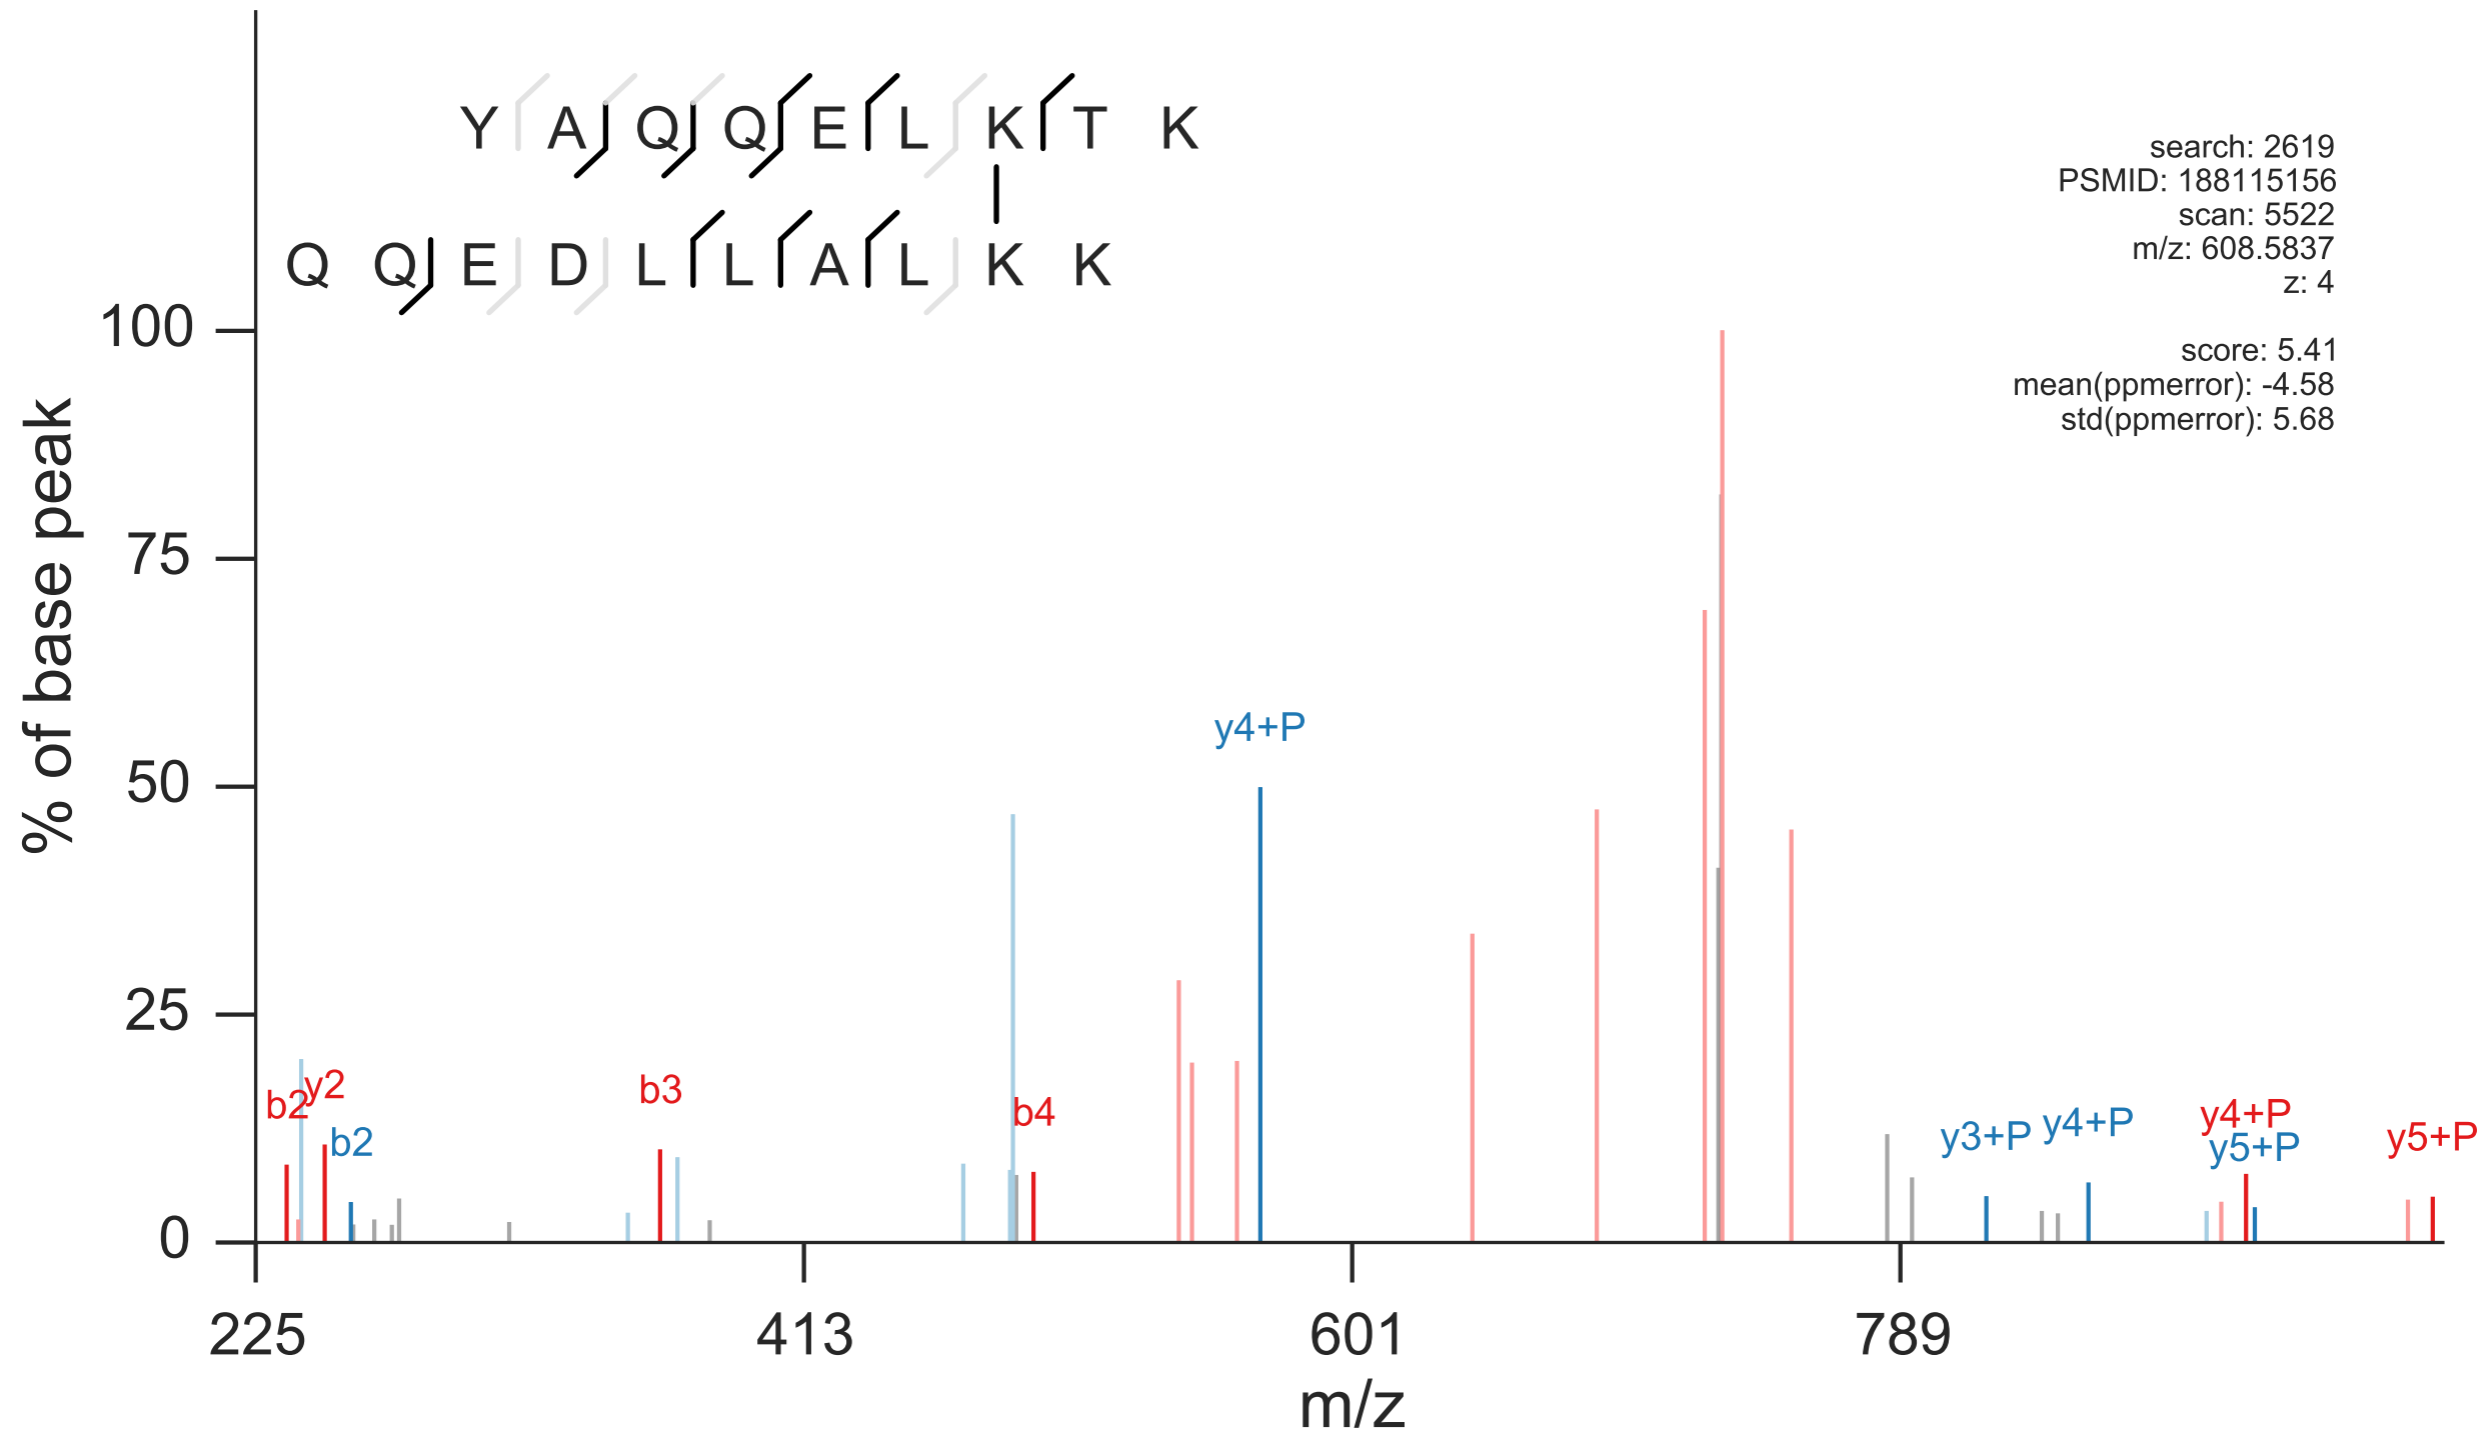

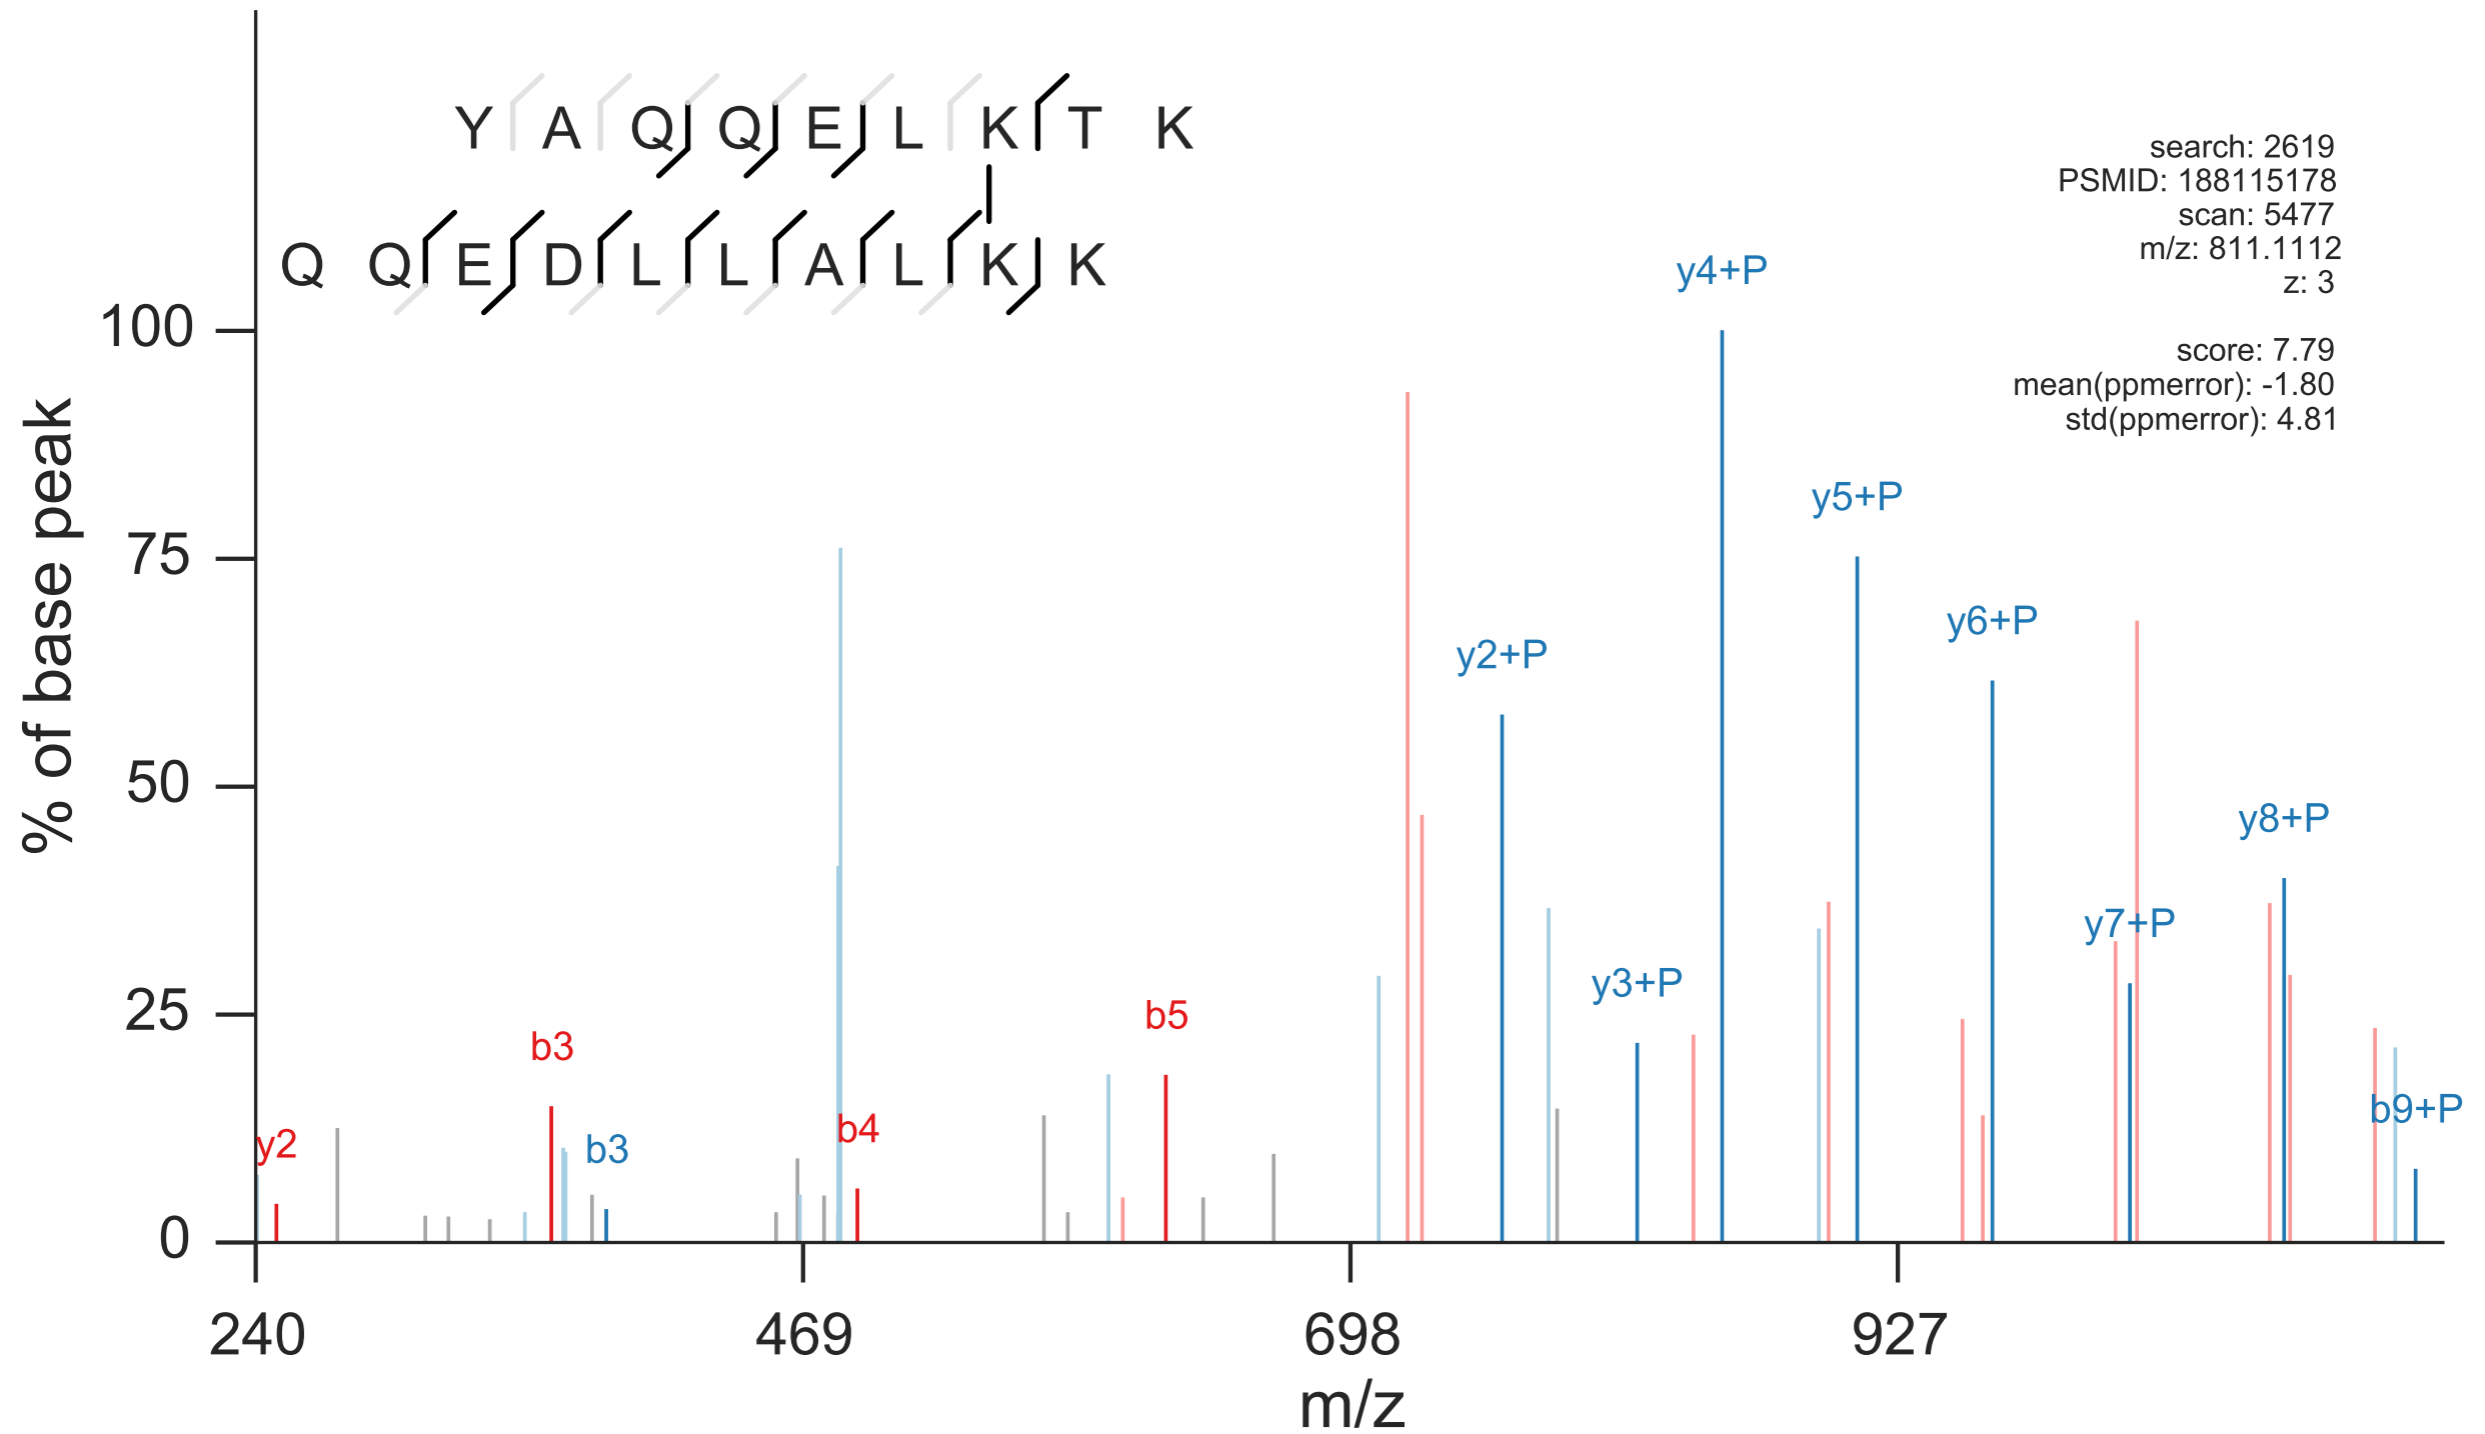

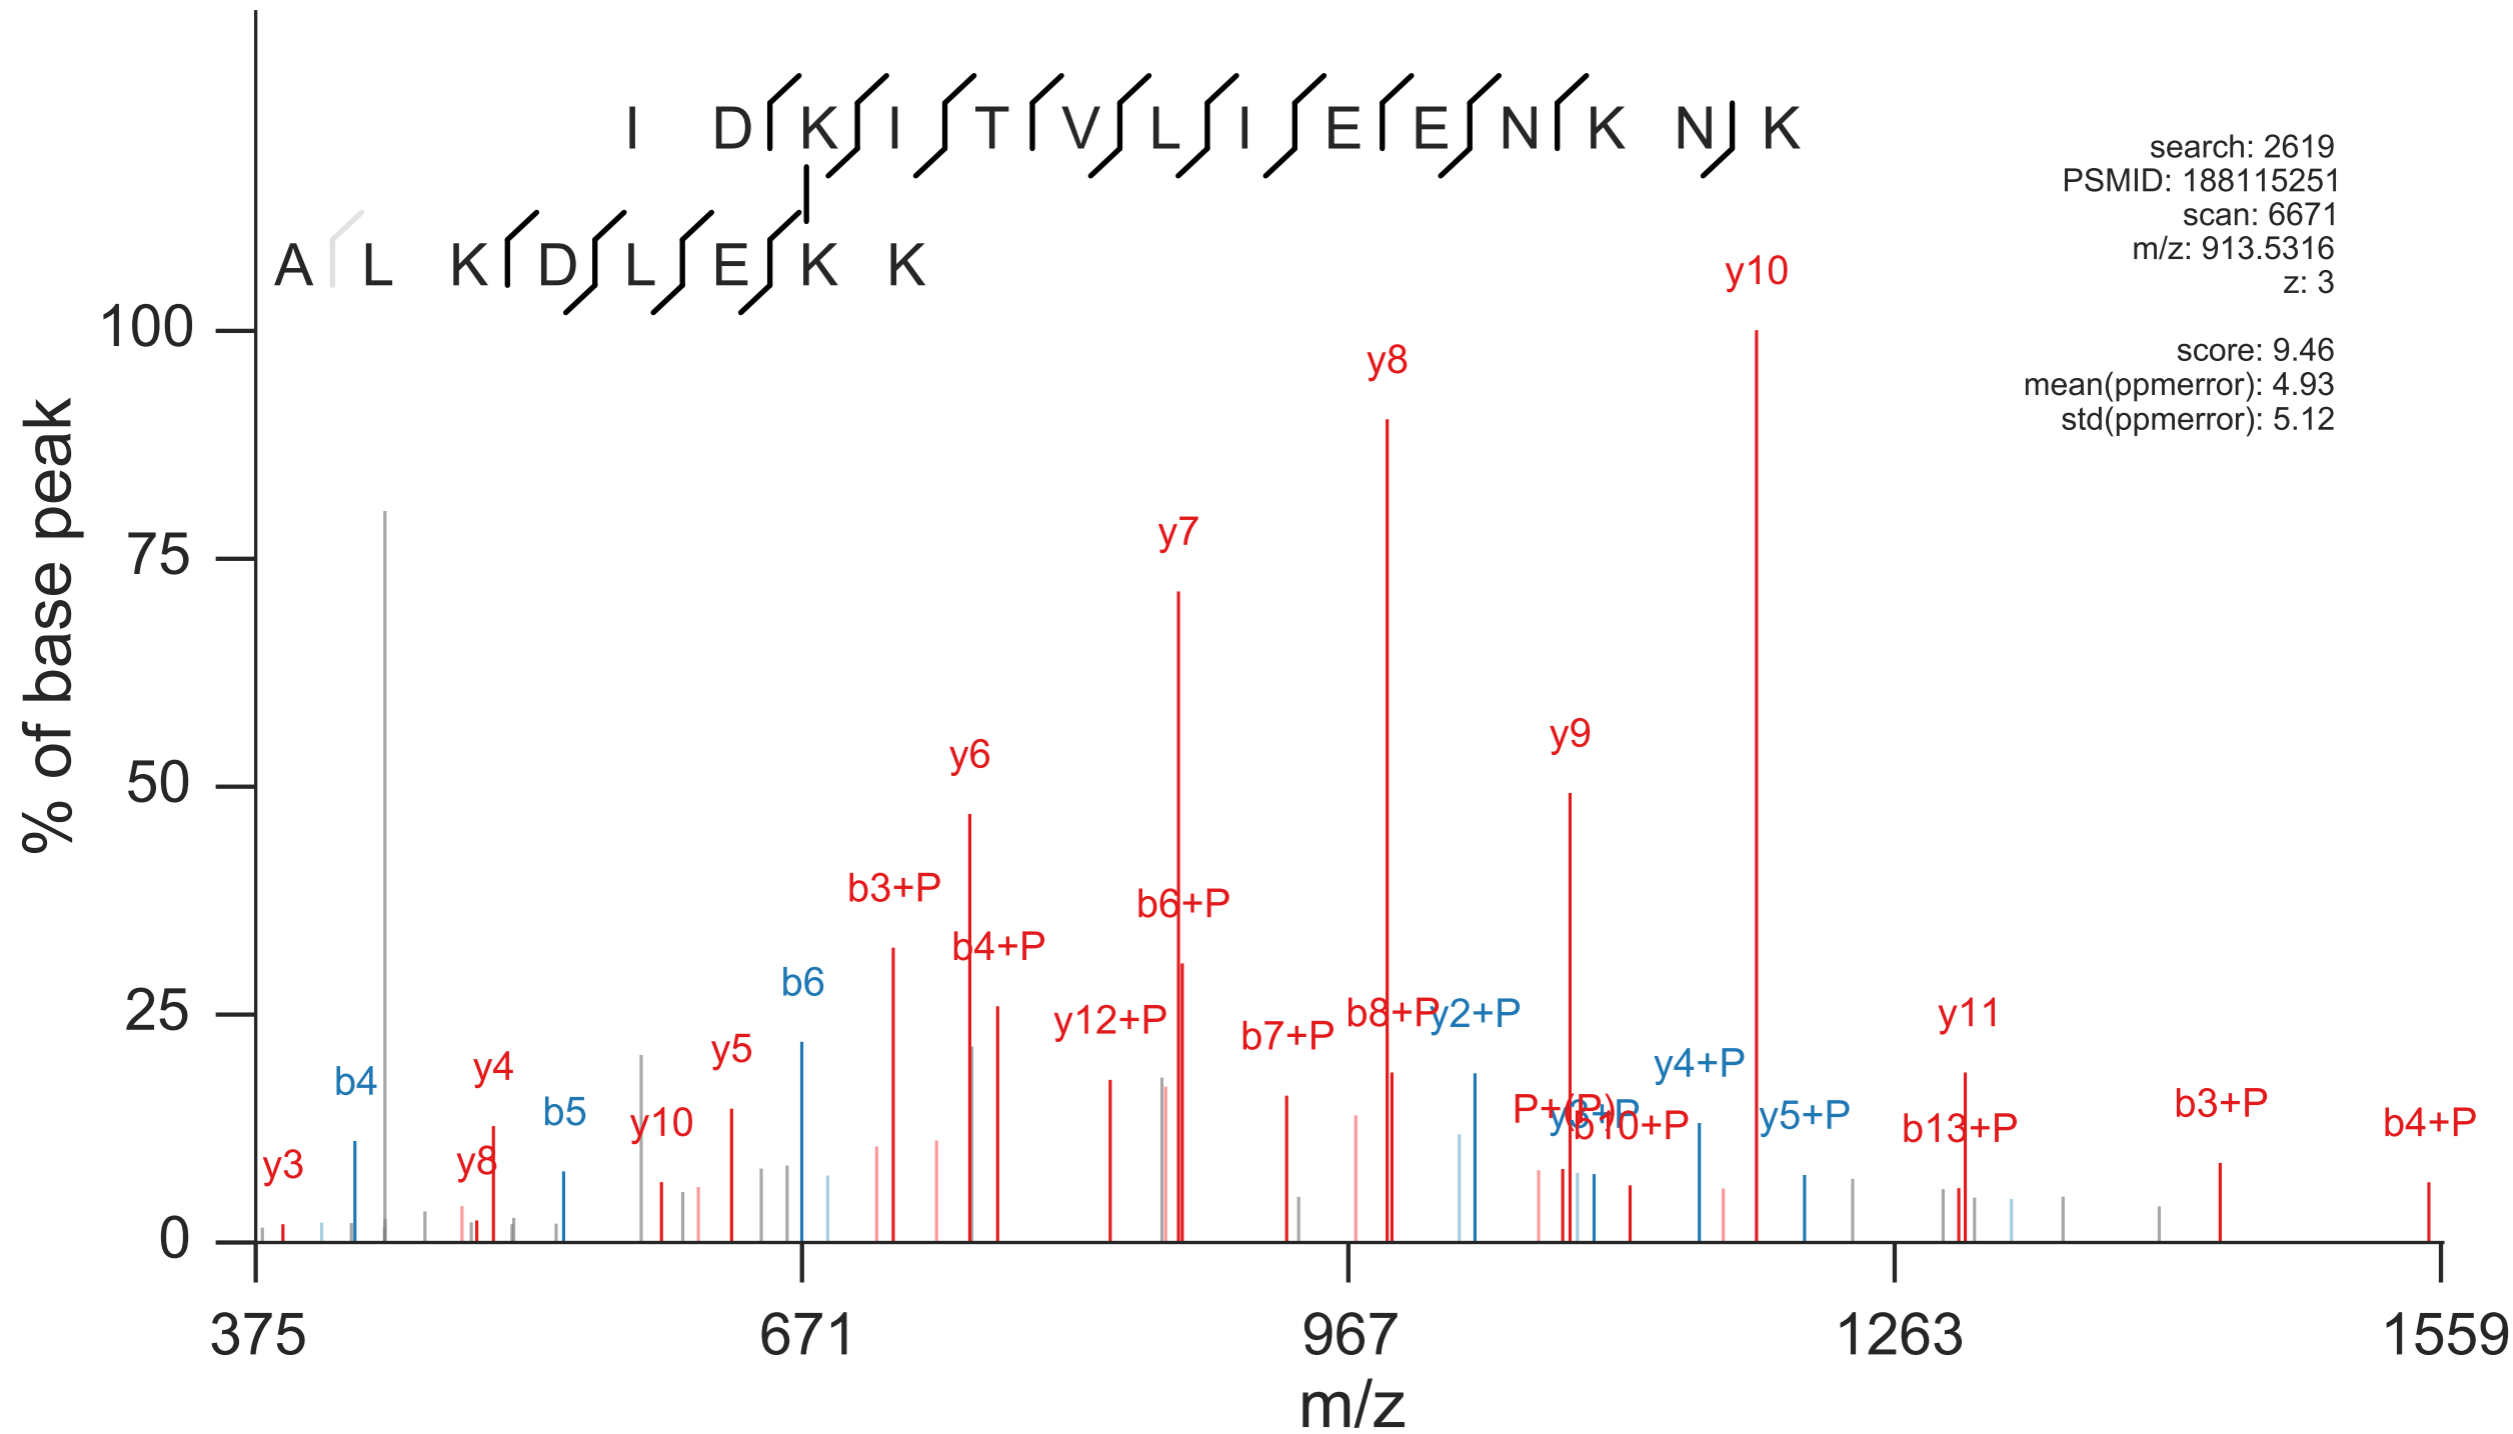

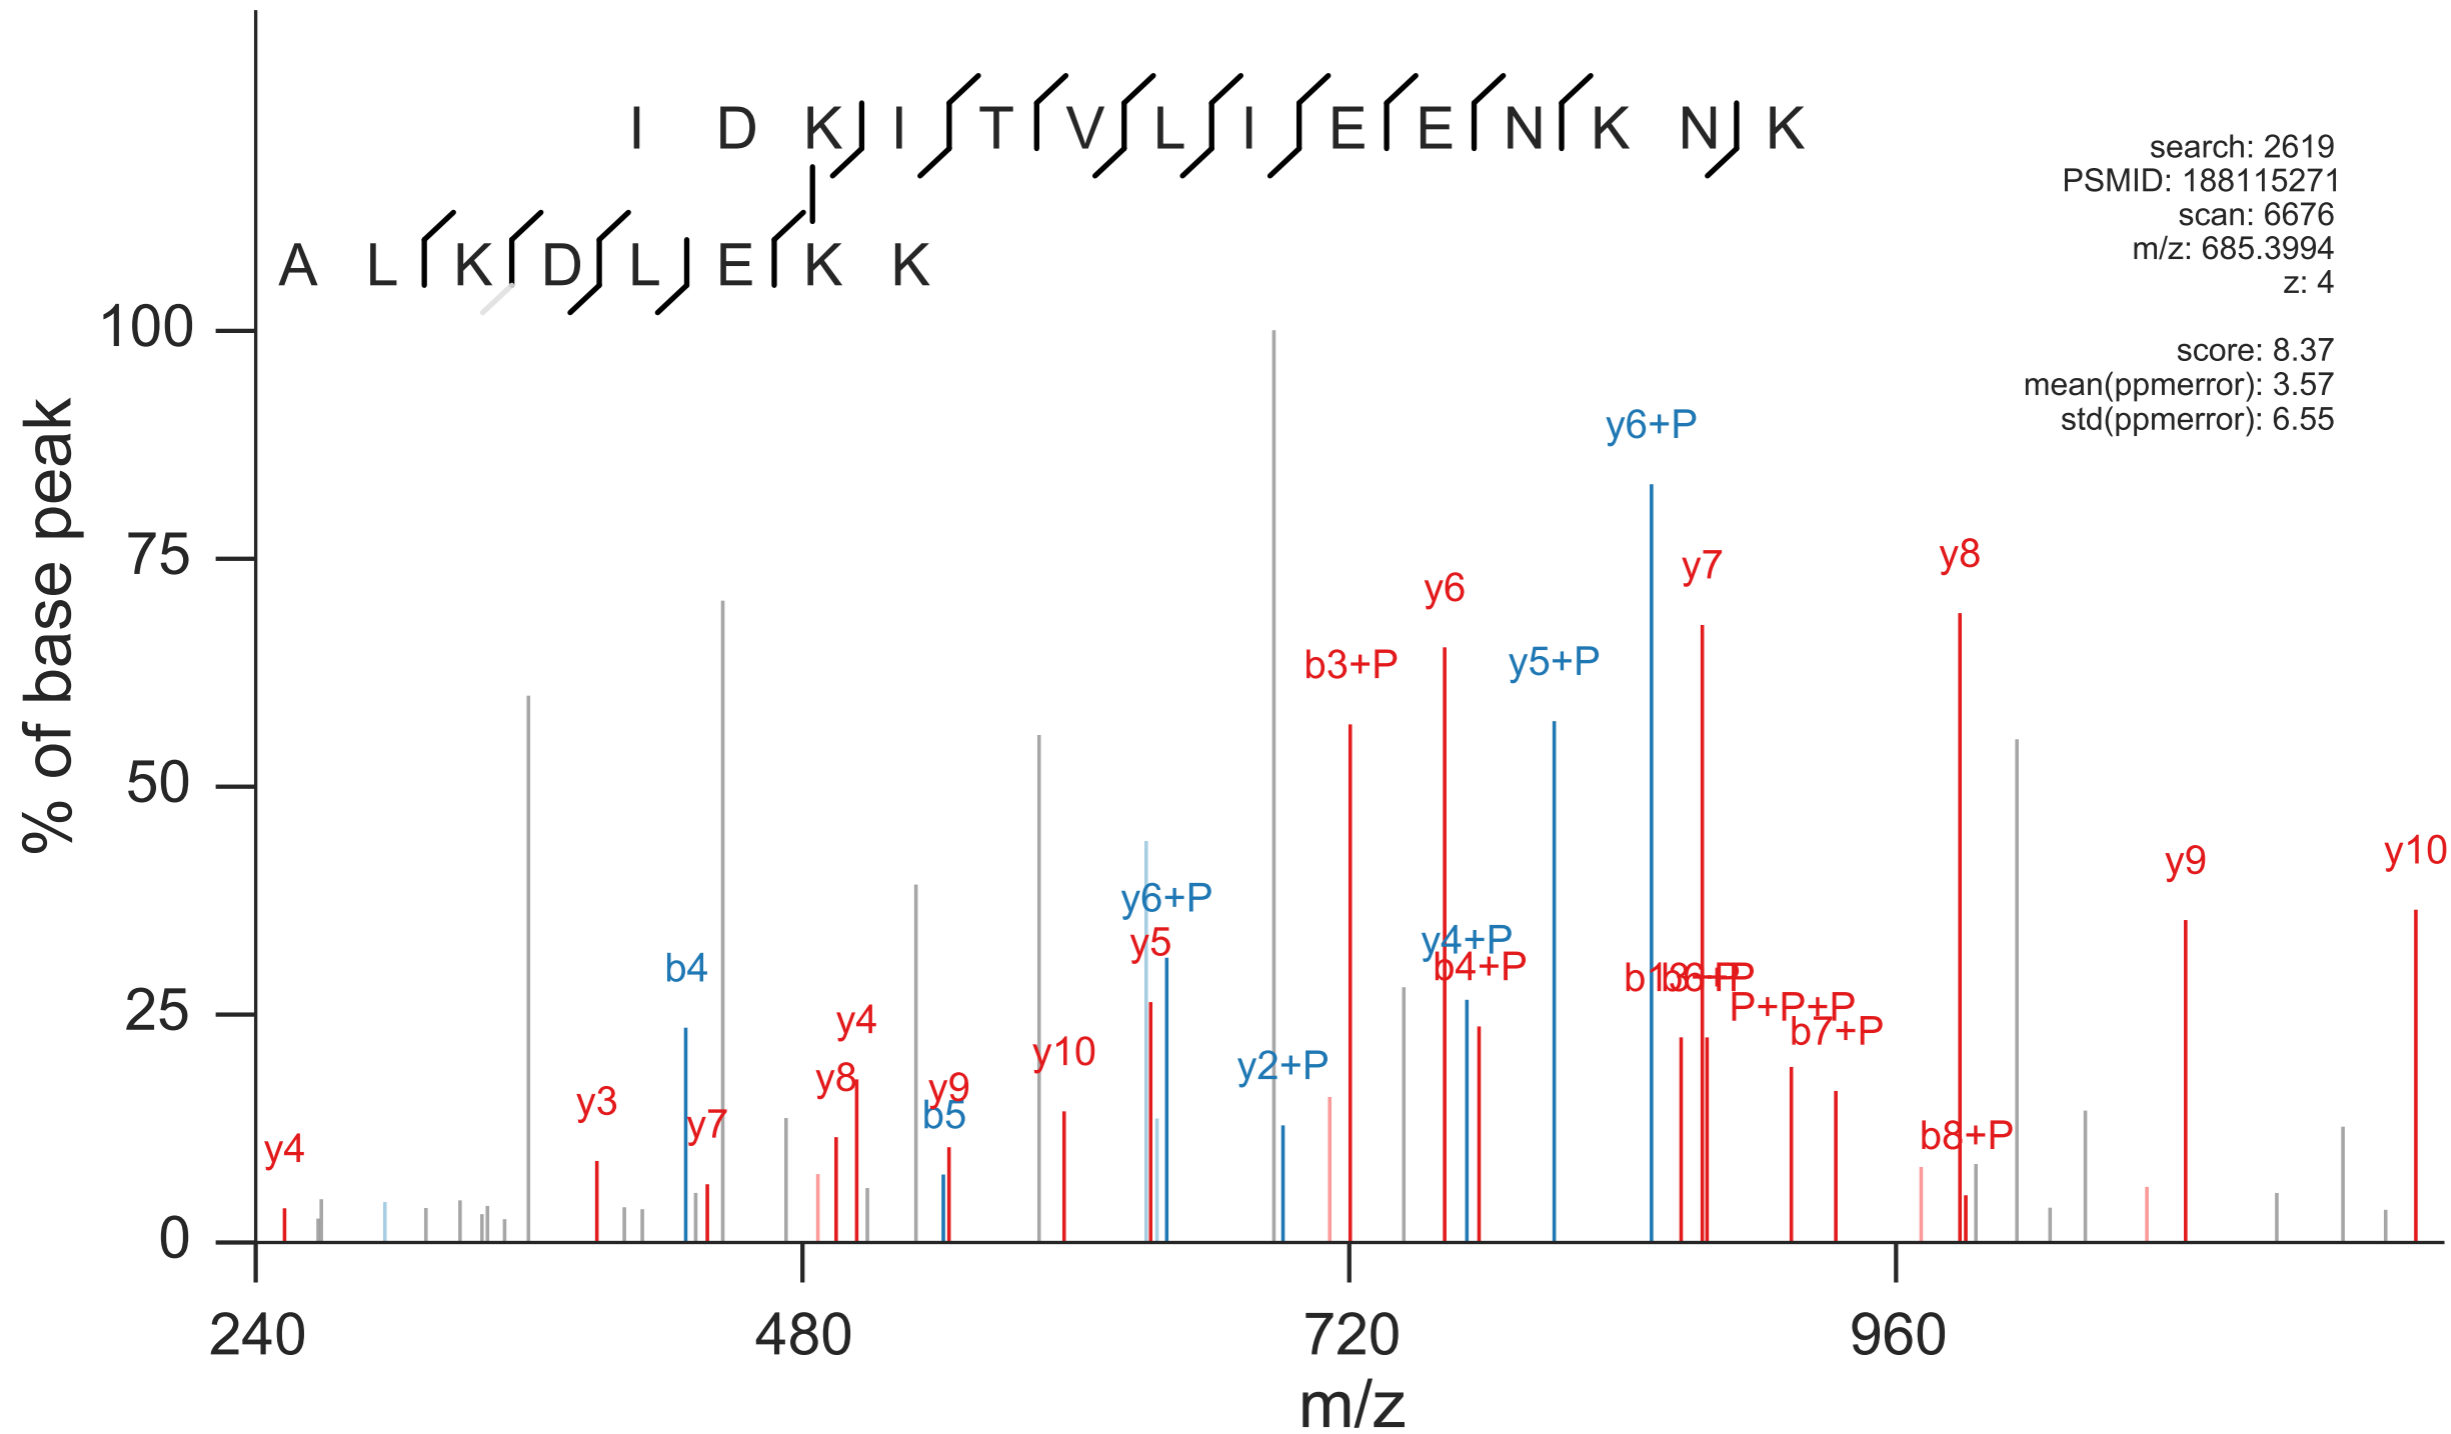

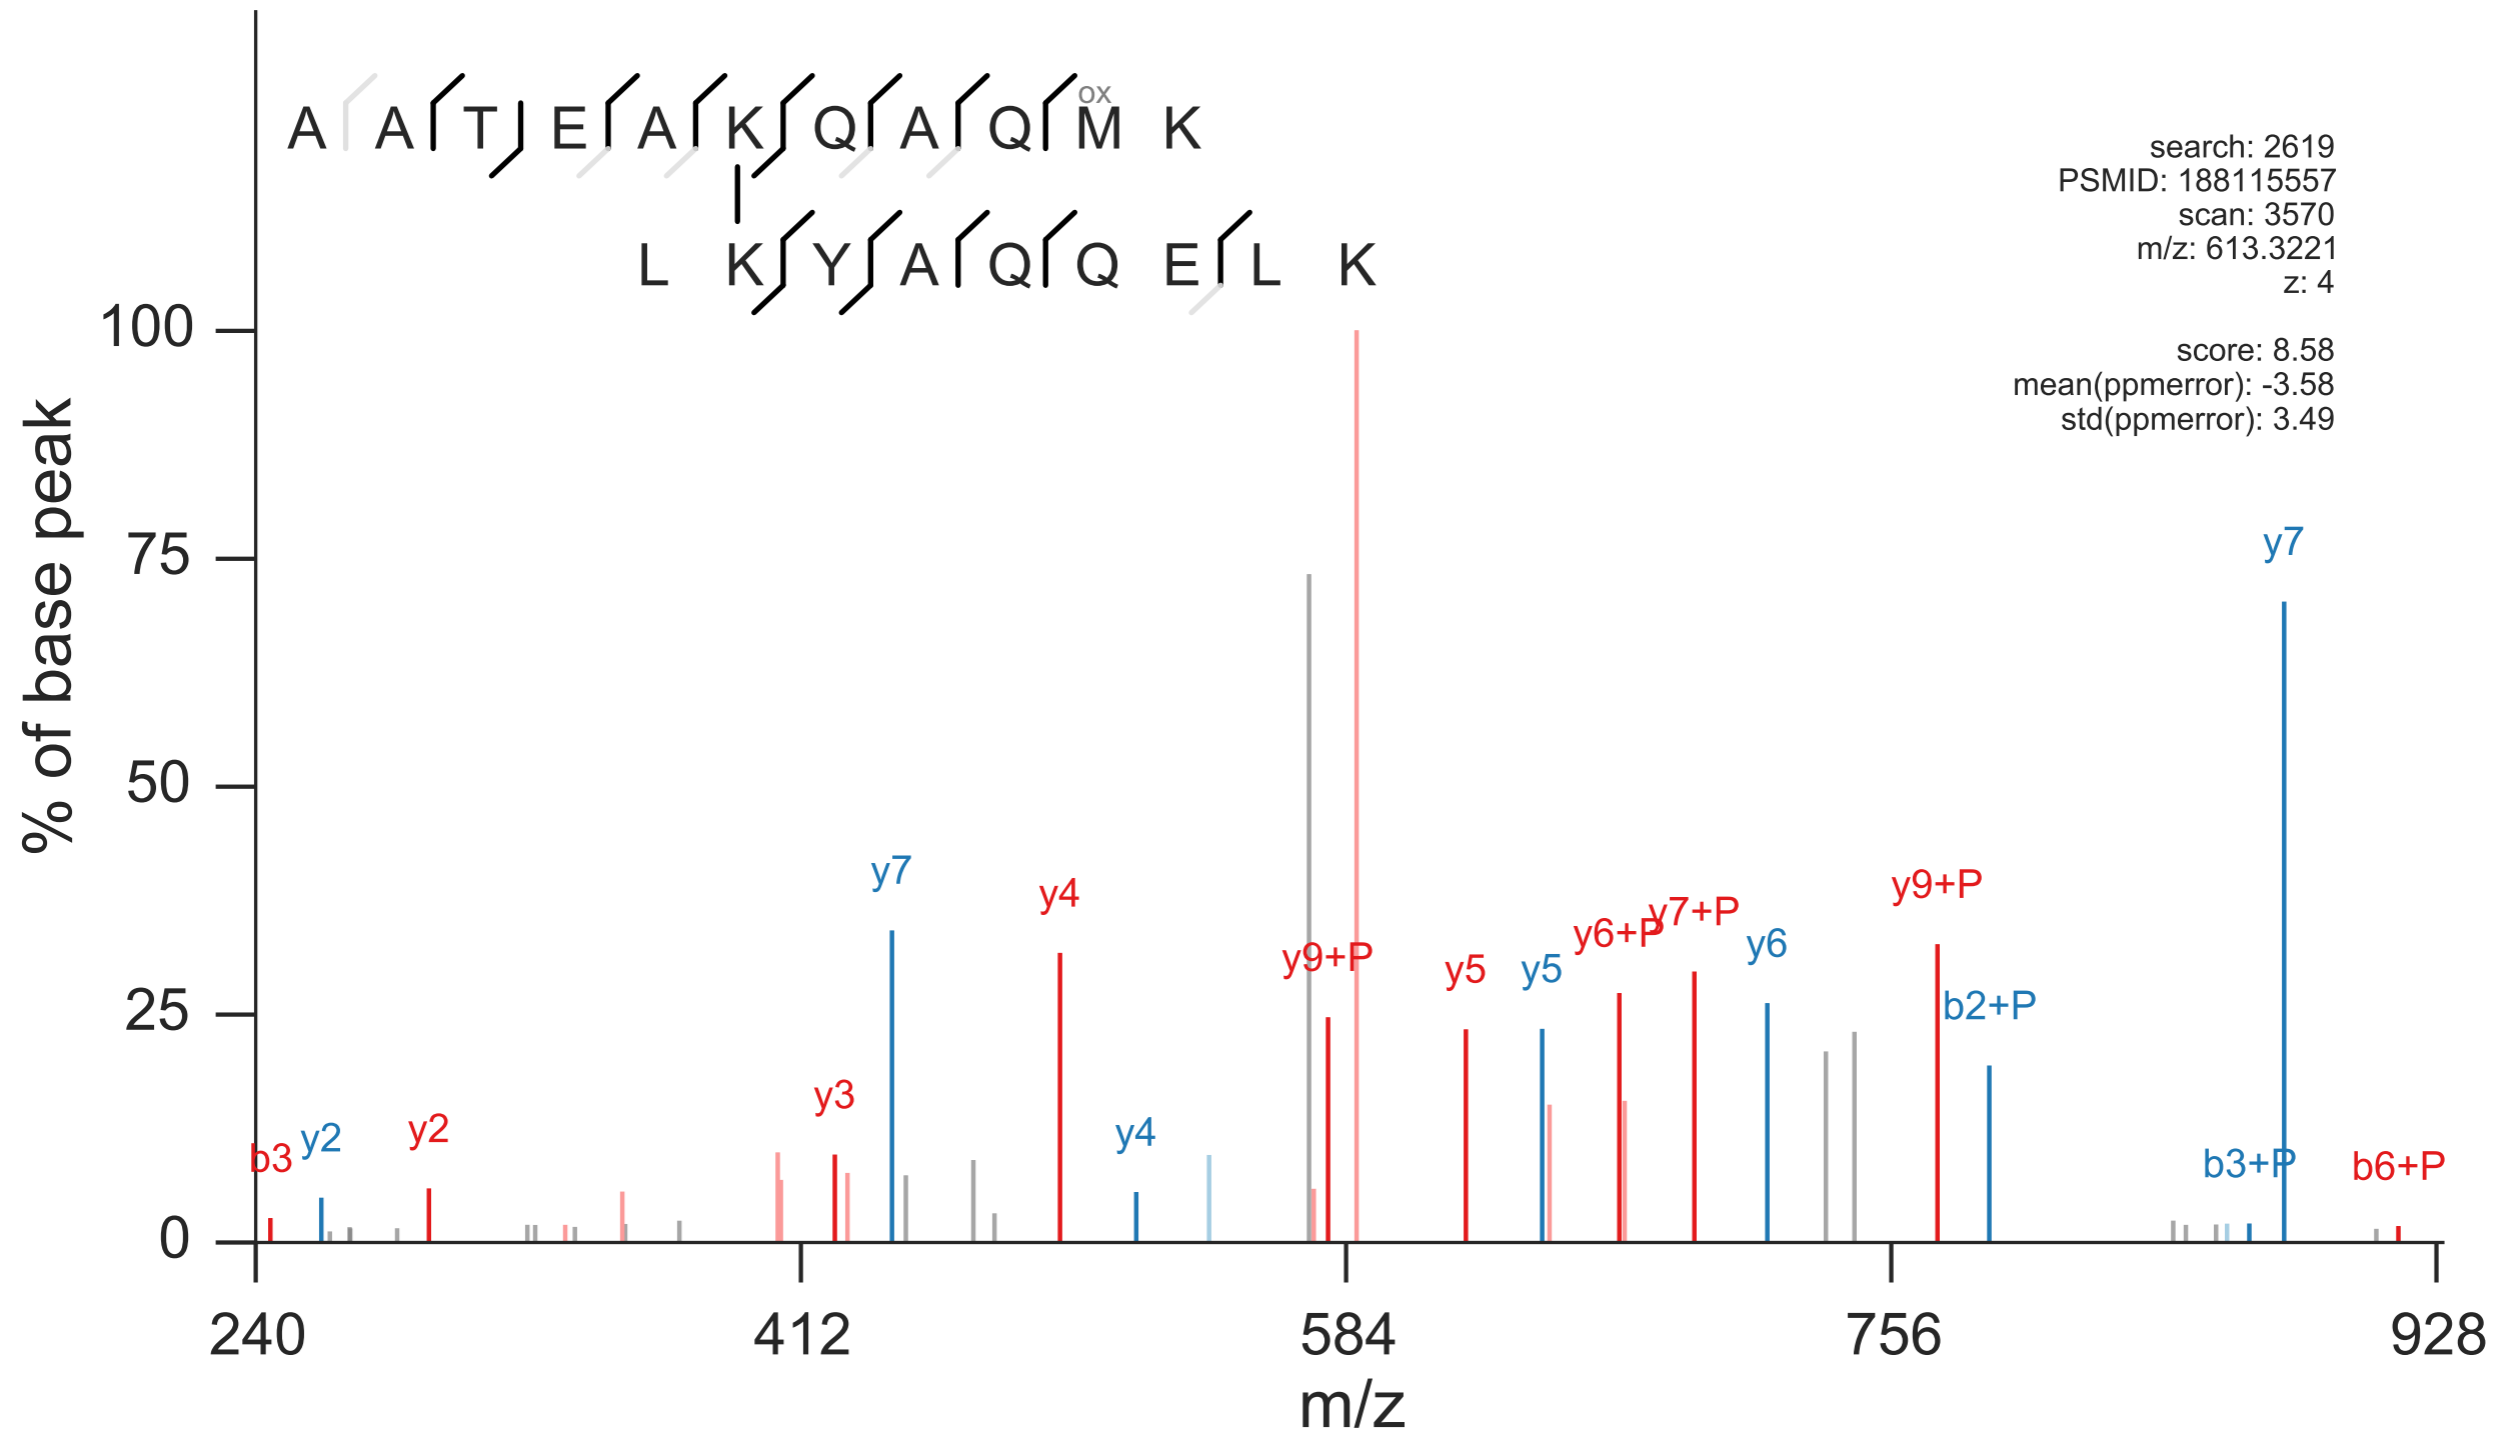

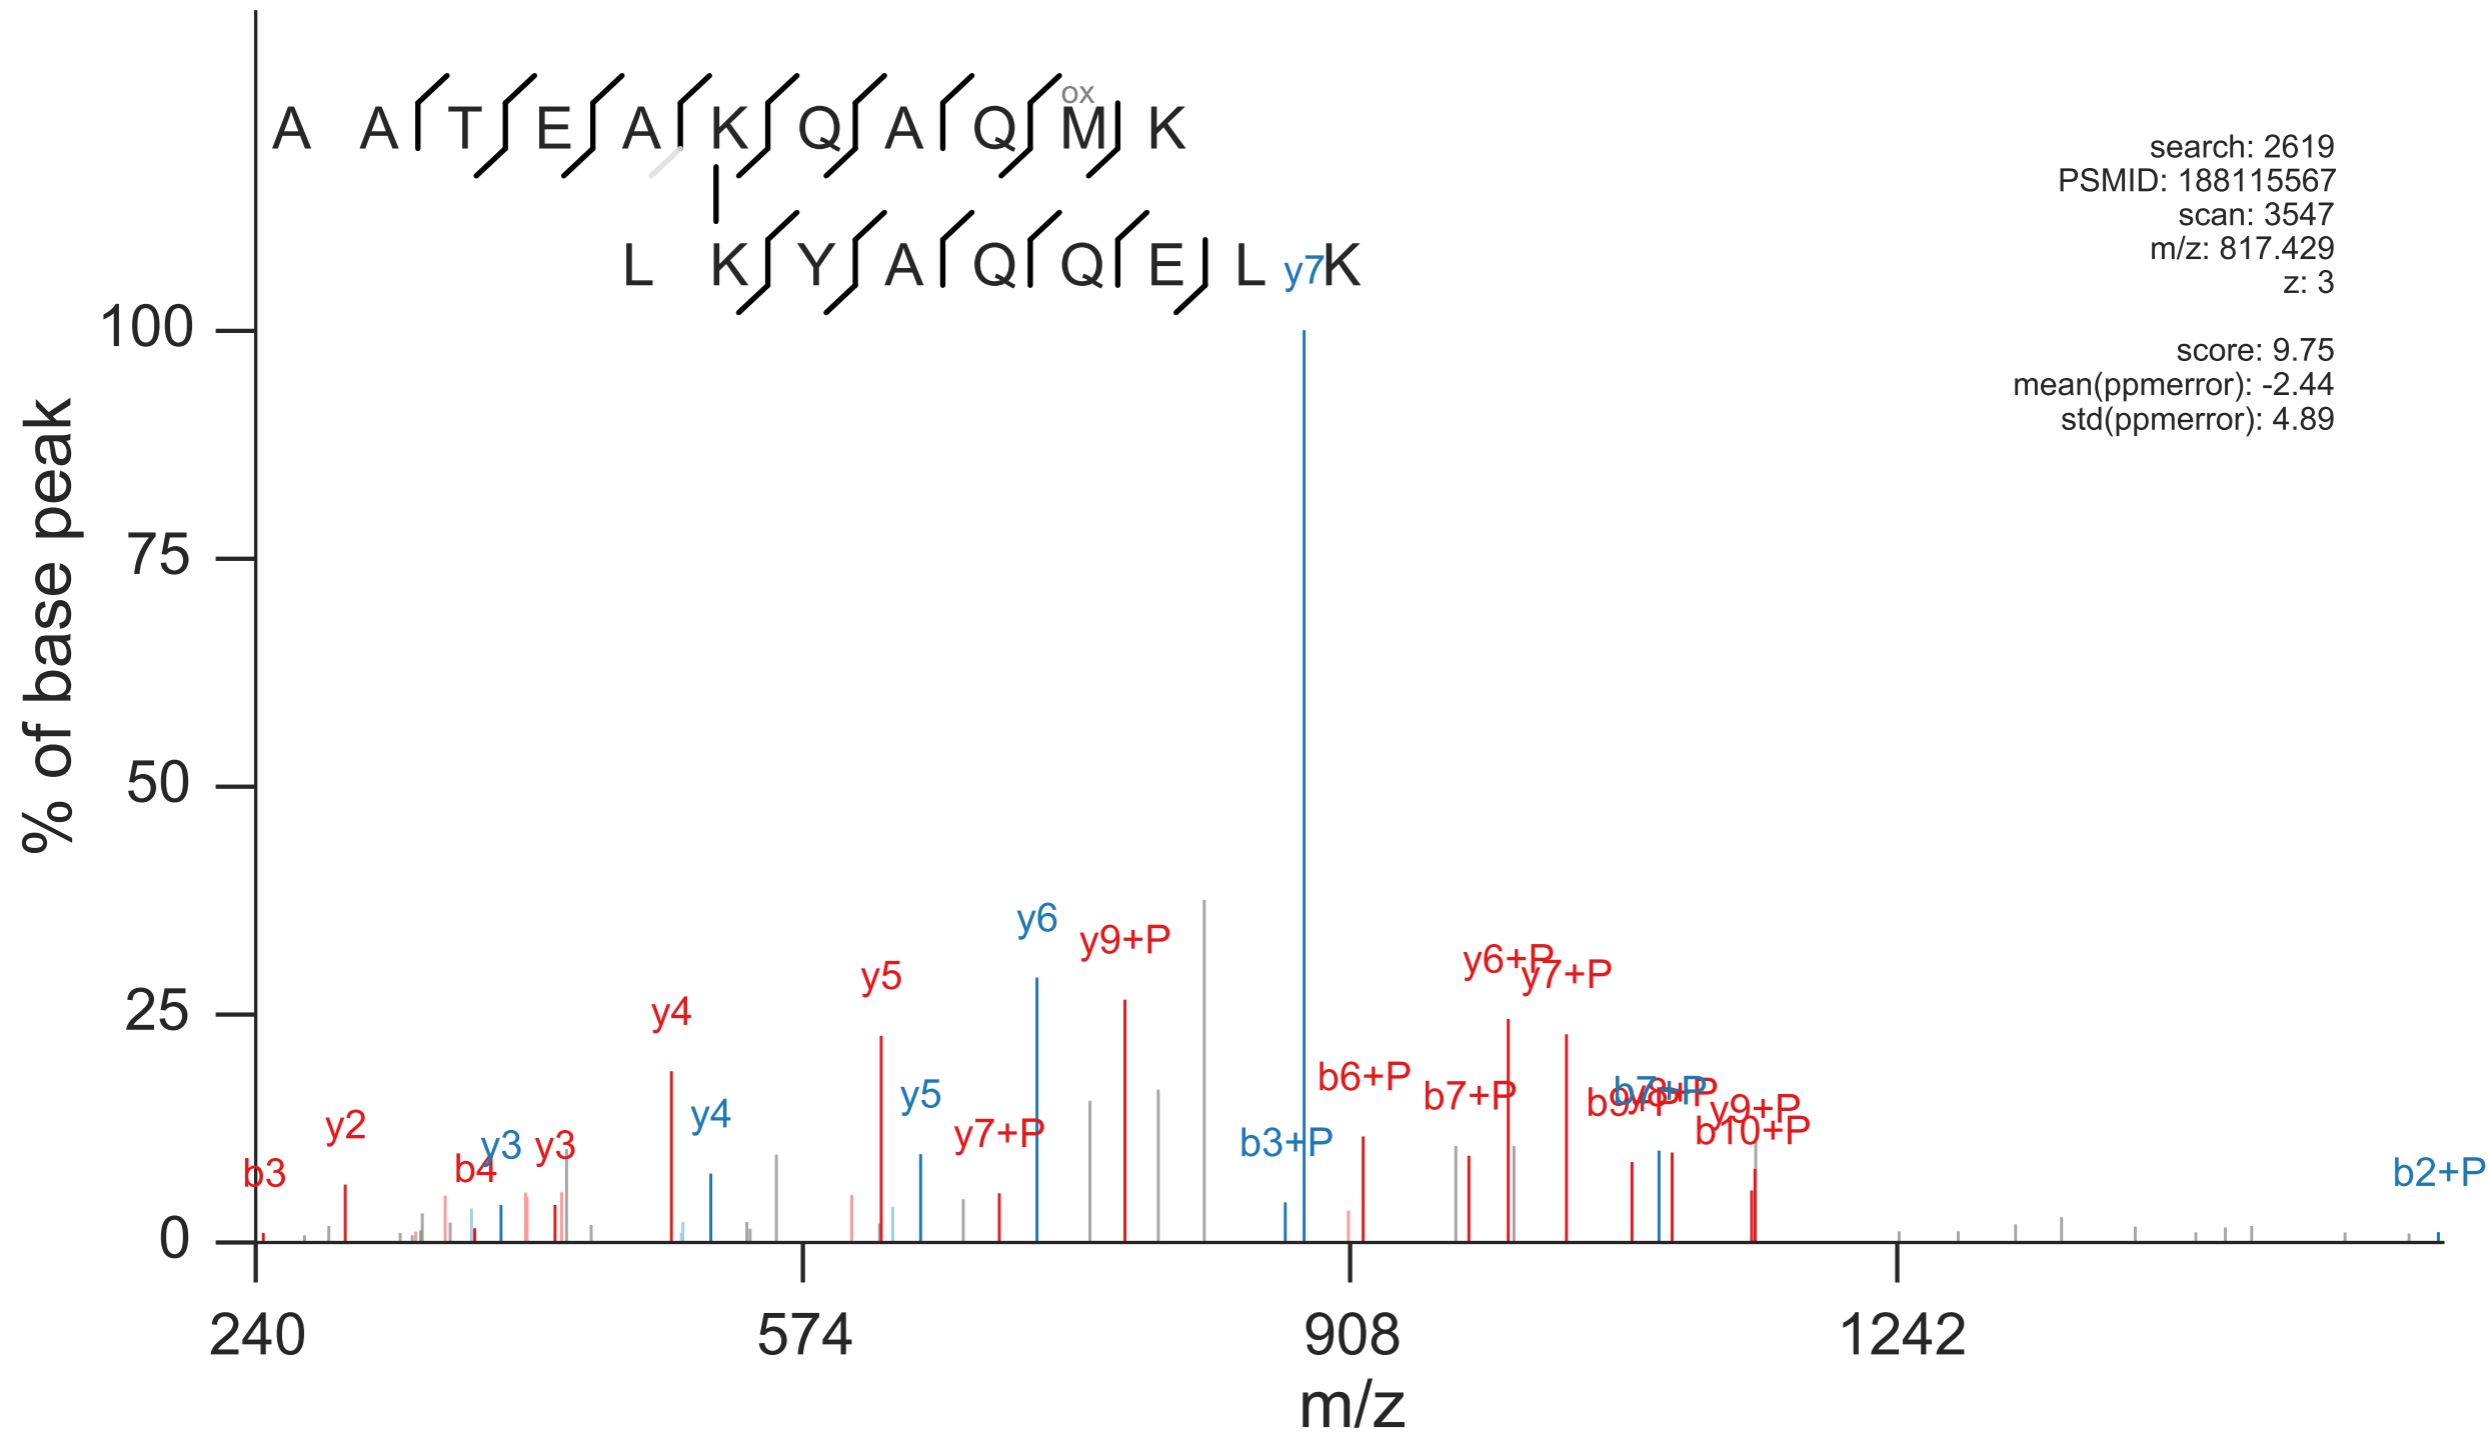

search: 2619  
 PSMID: 188115567  
 scan: 3547  
 m/z: 817.429  
 z: 3

score: 9.75  
 mean(ppmerror): -2.44  
 std(ppmerror): 4.89

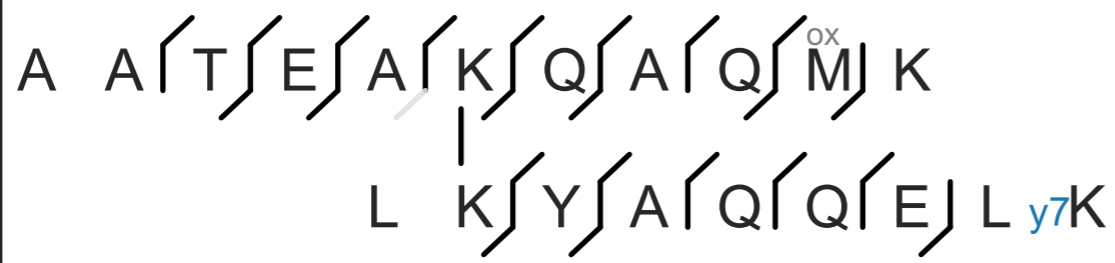

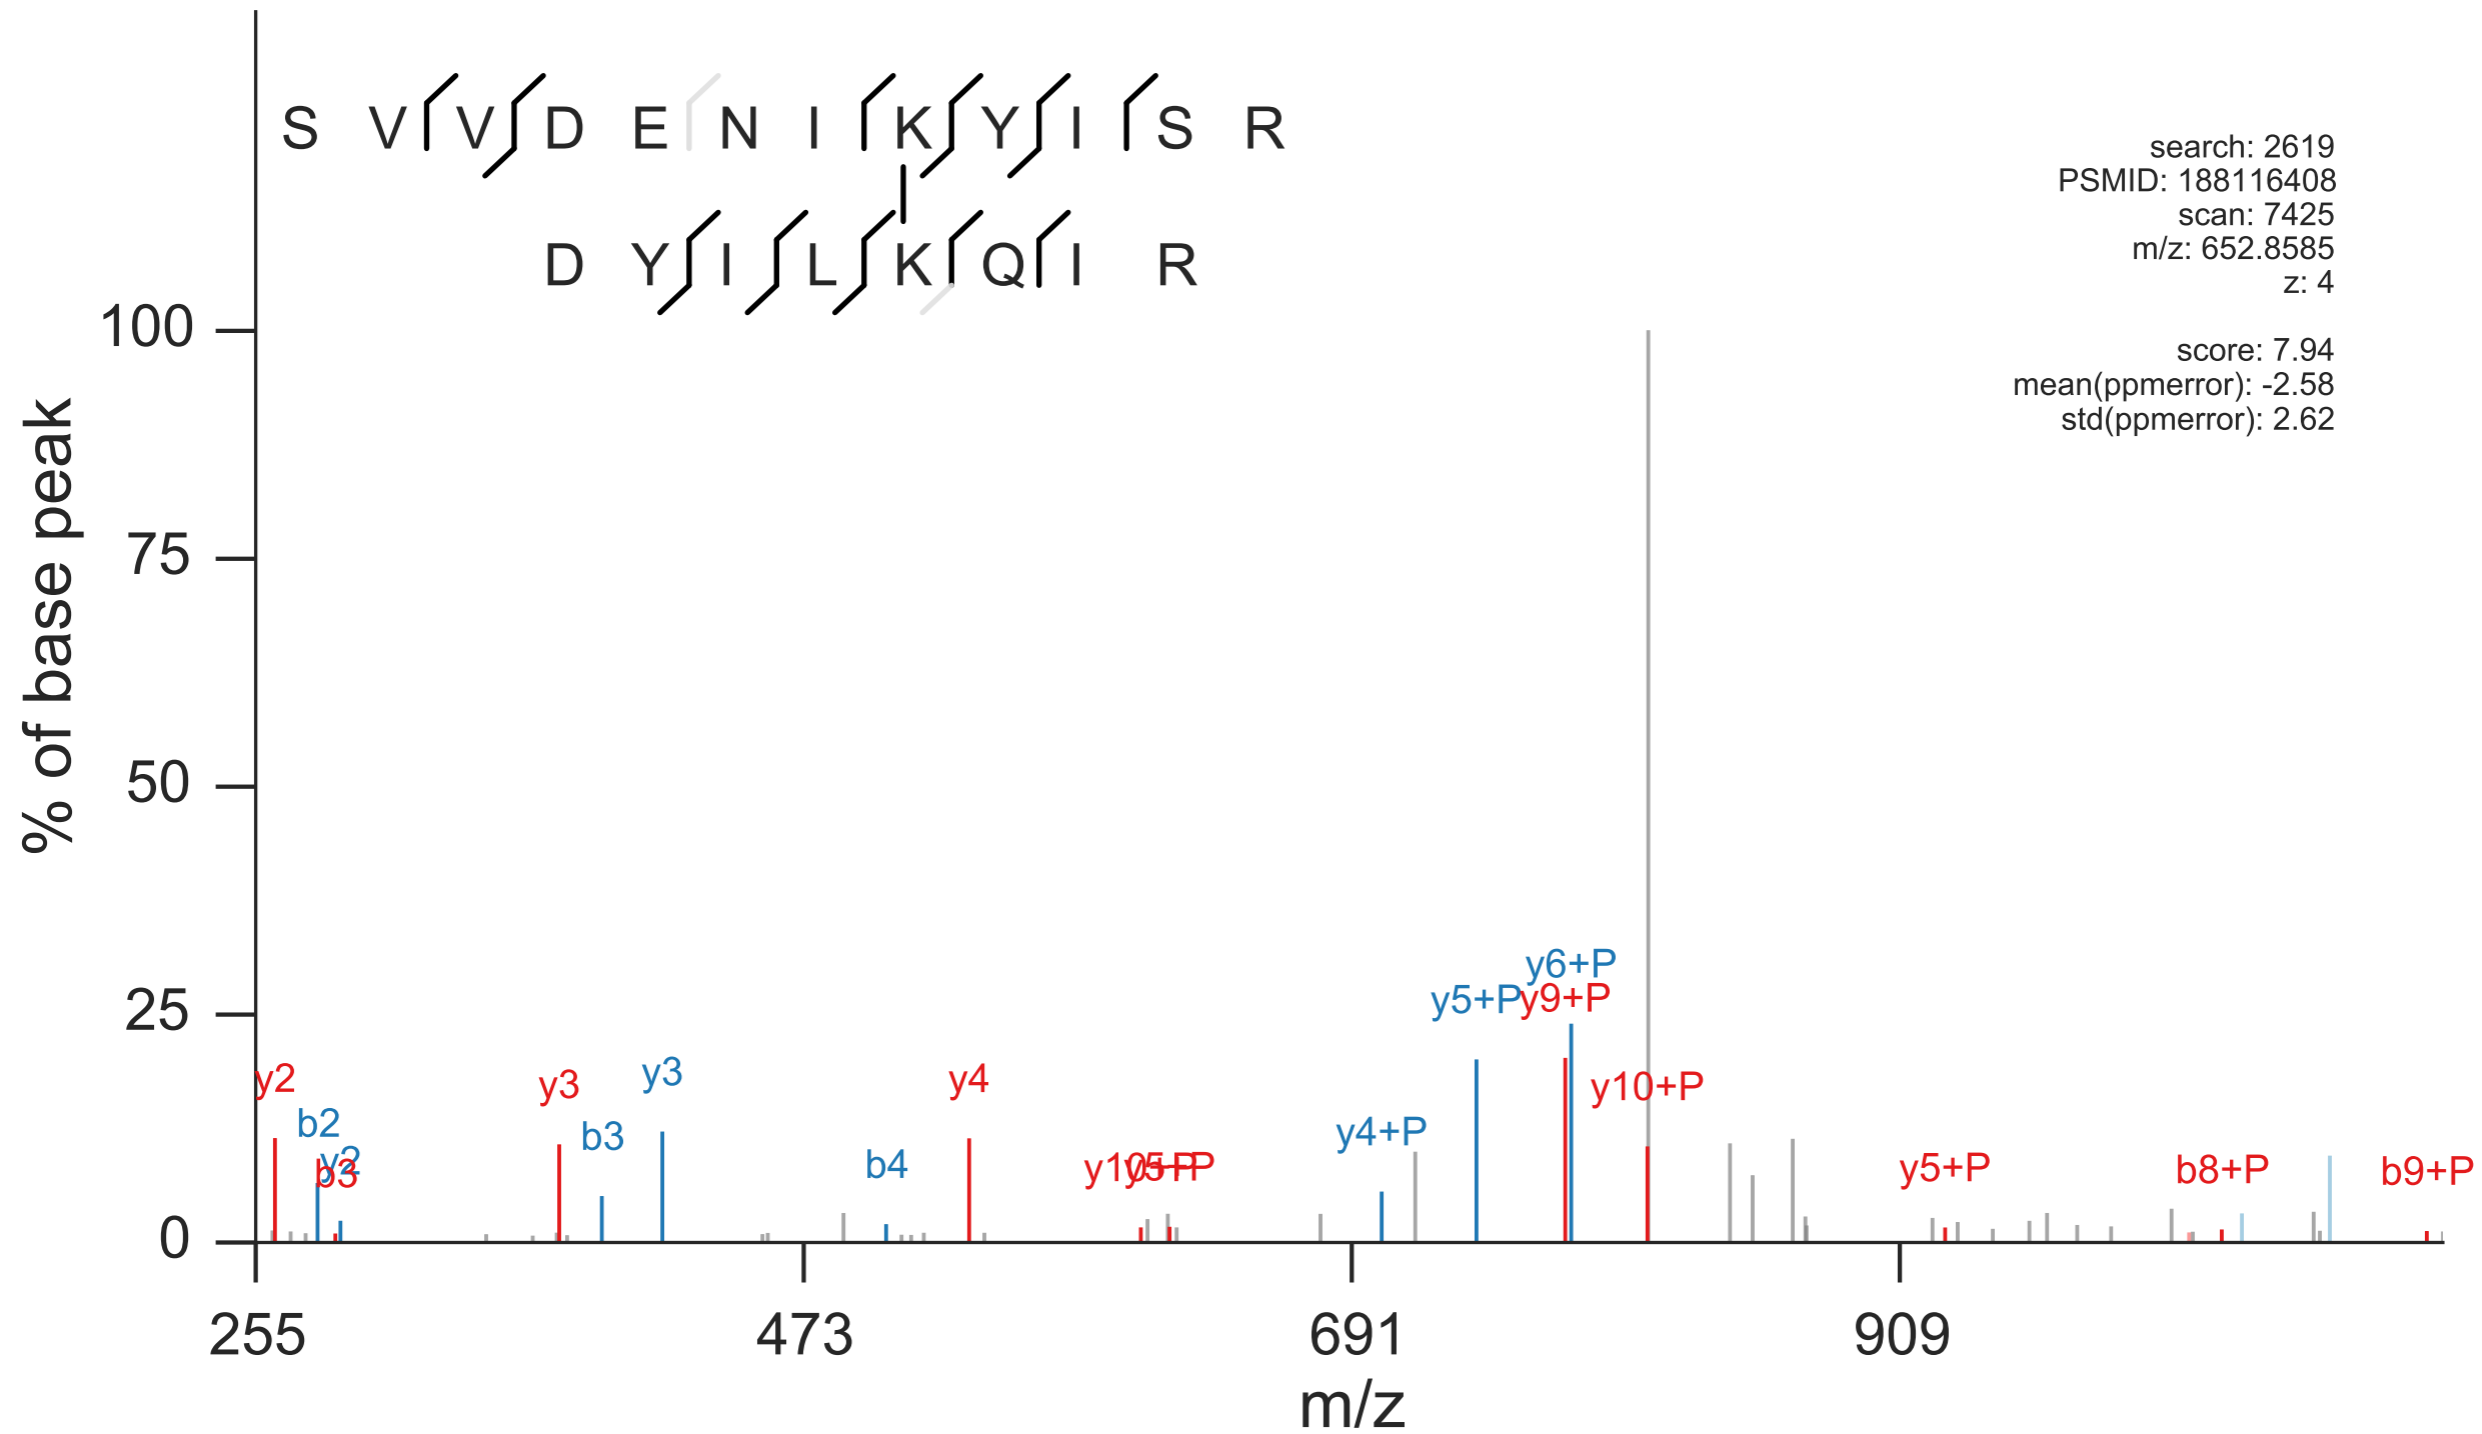



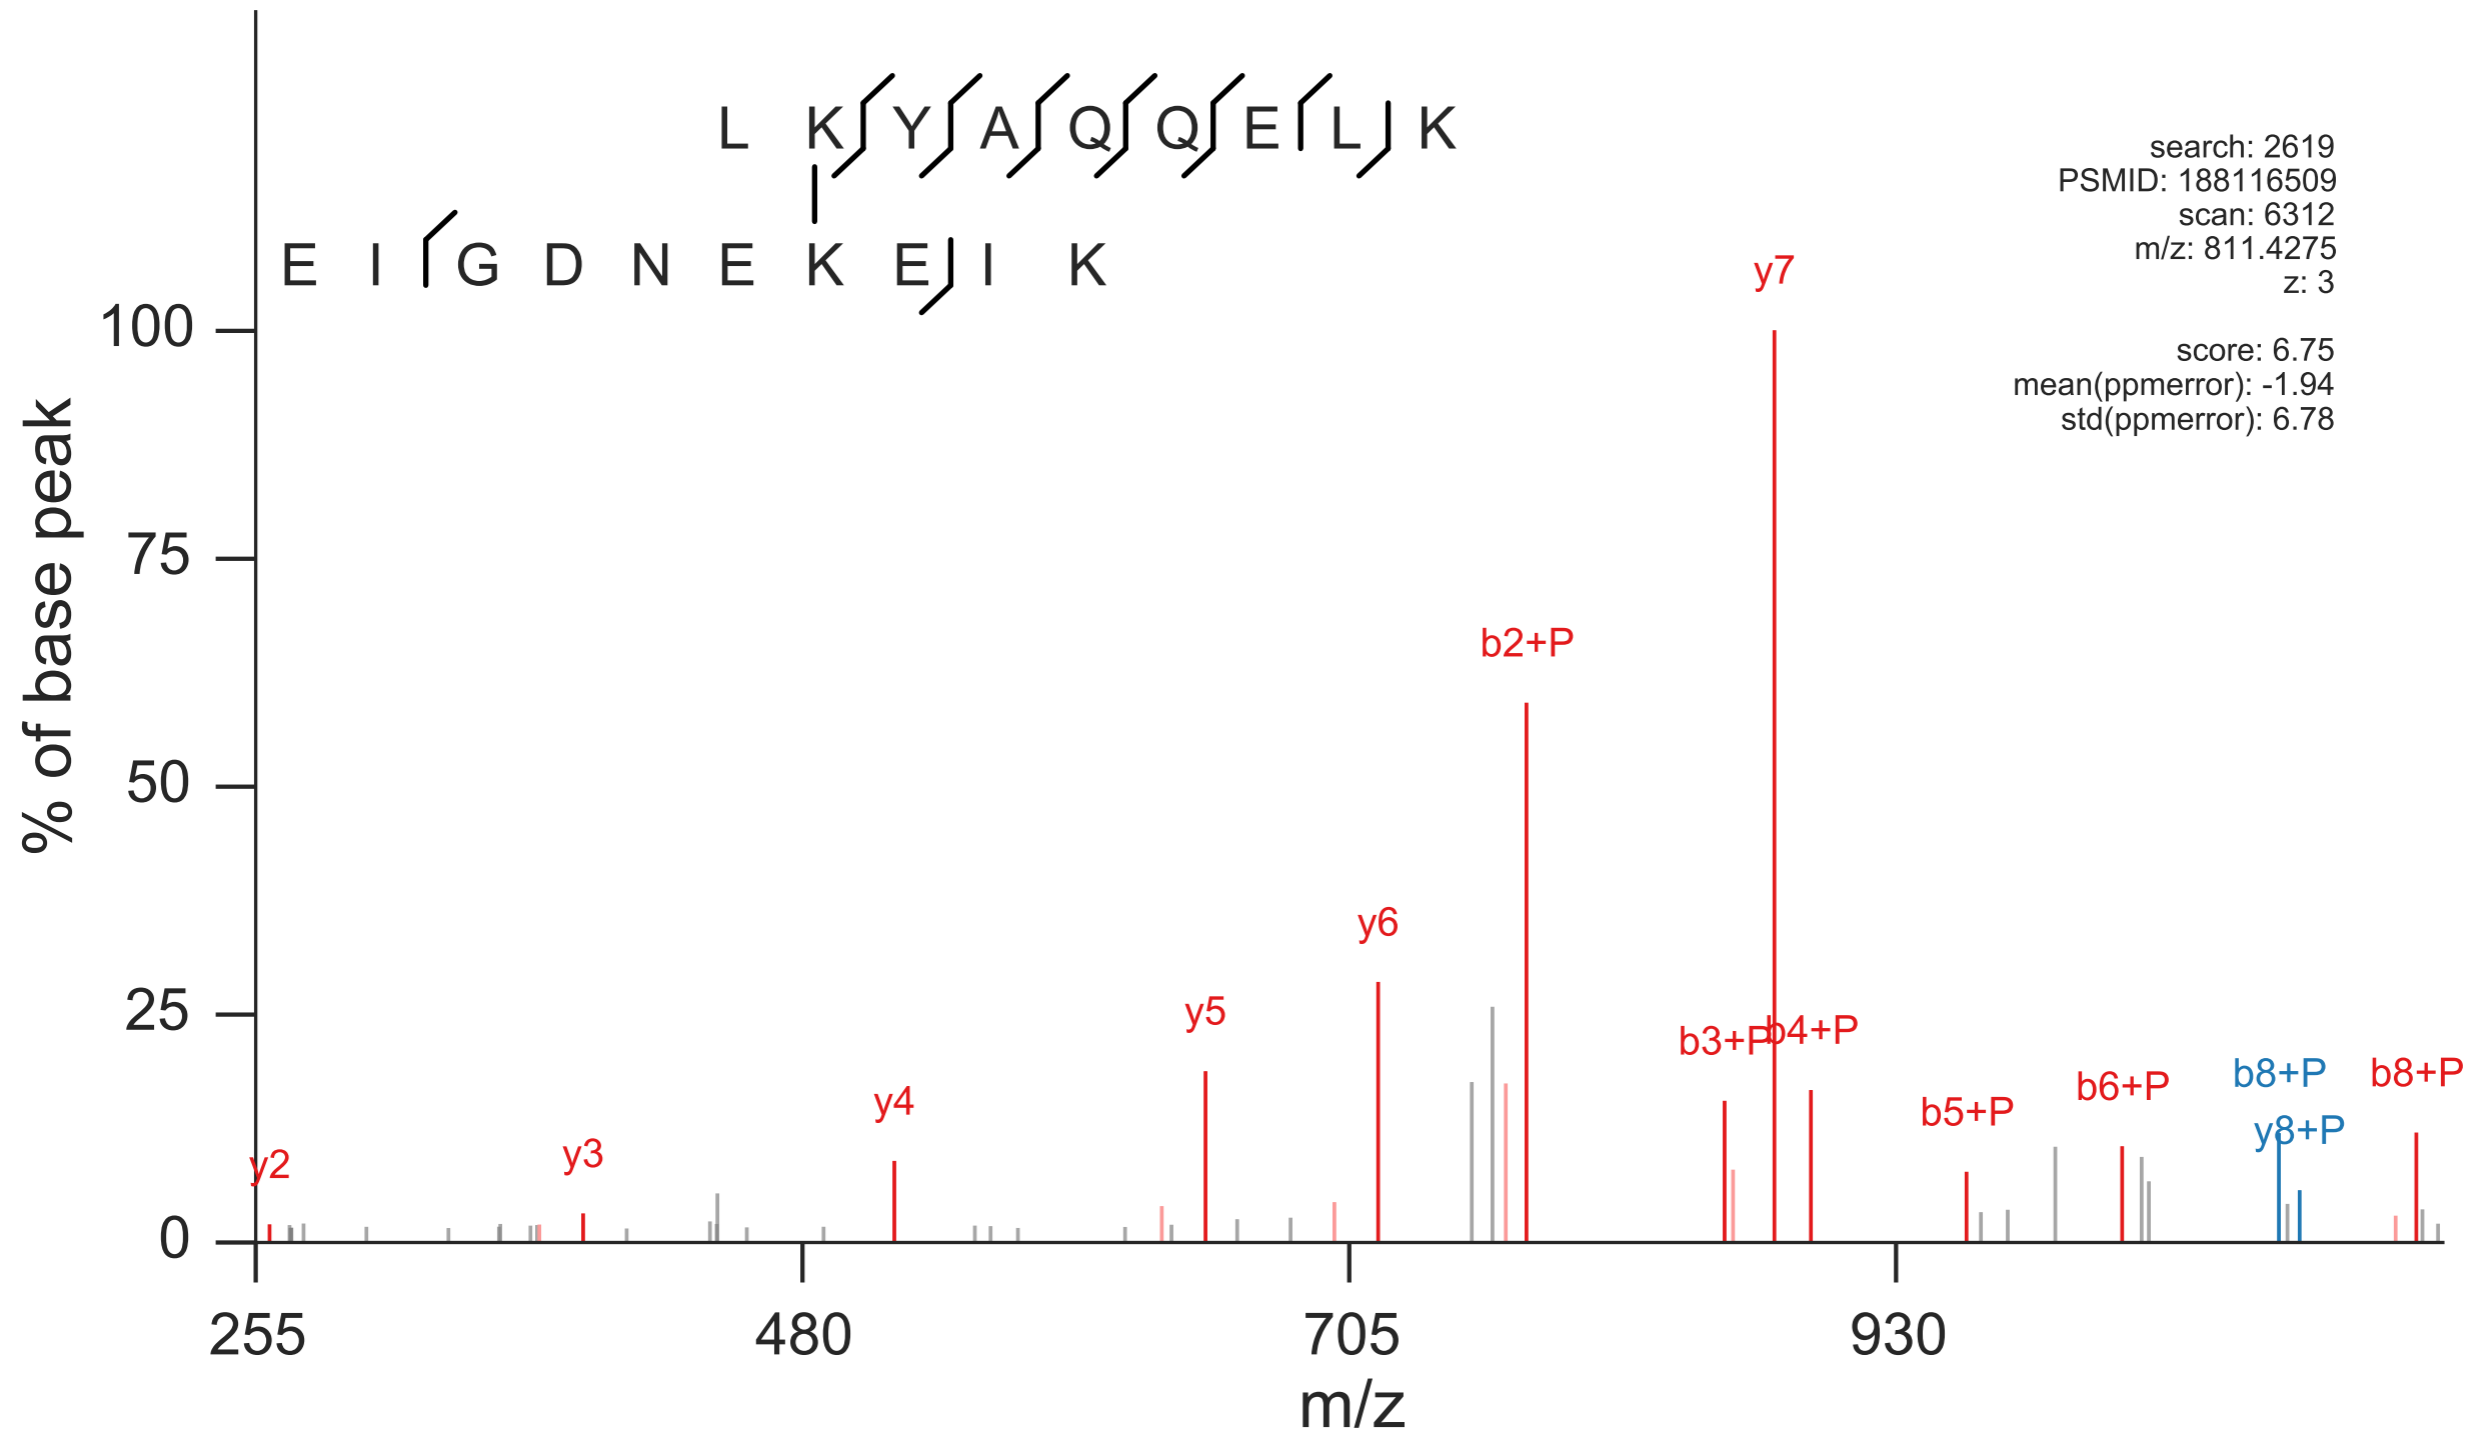

search: 2619  
 PSMID: 188116509  
 scan: 6312  
 m/z: 811.4275  
 z: 3

score: 6.75  
 mean(ppmerror): -1.94  
 std(ppmerror): 6.78

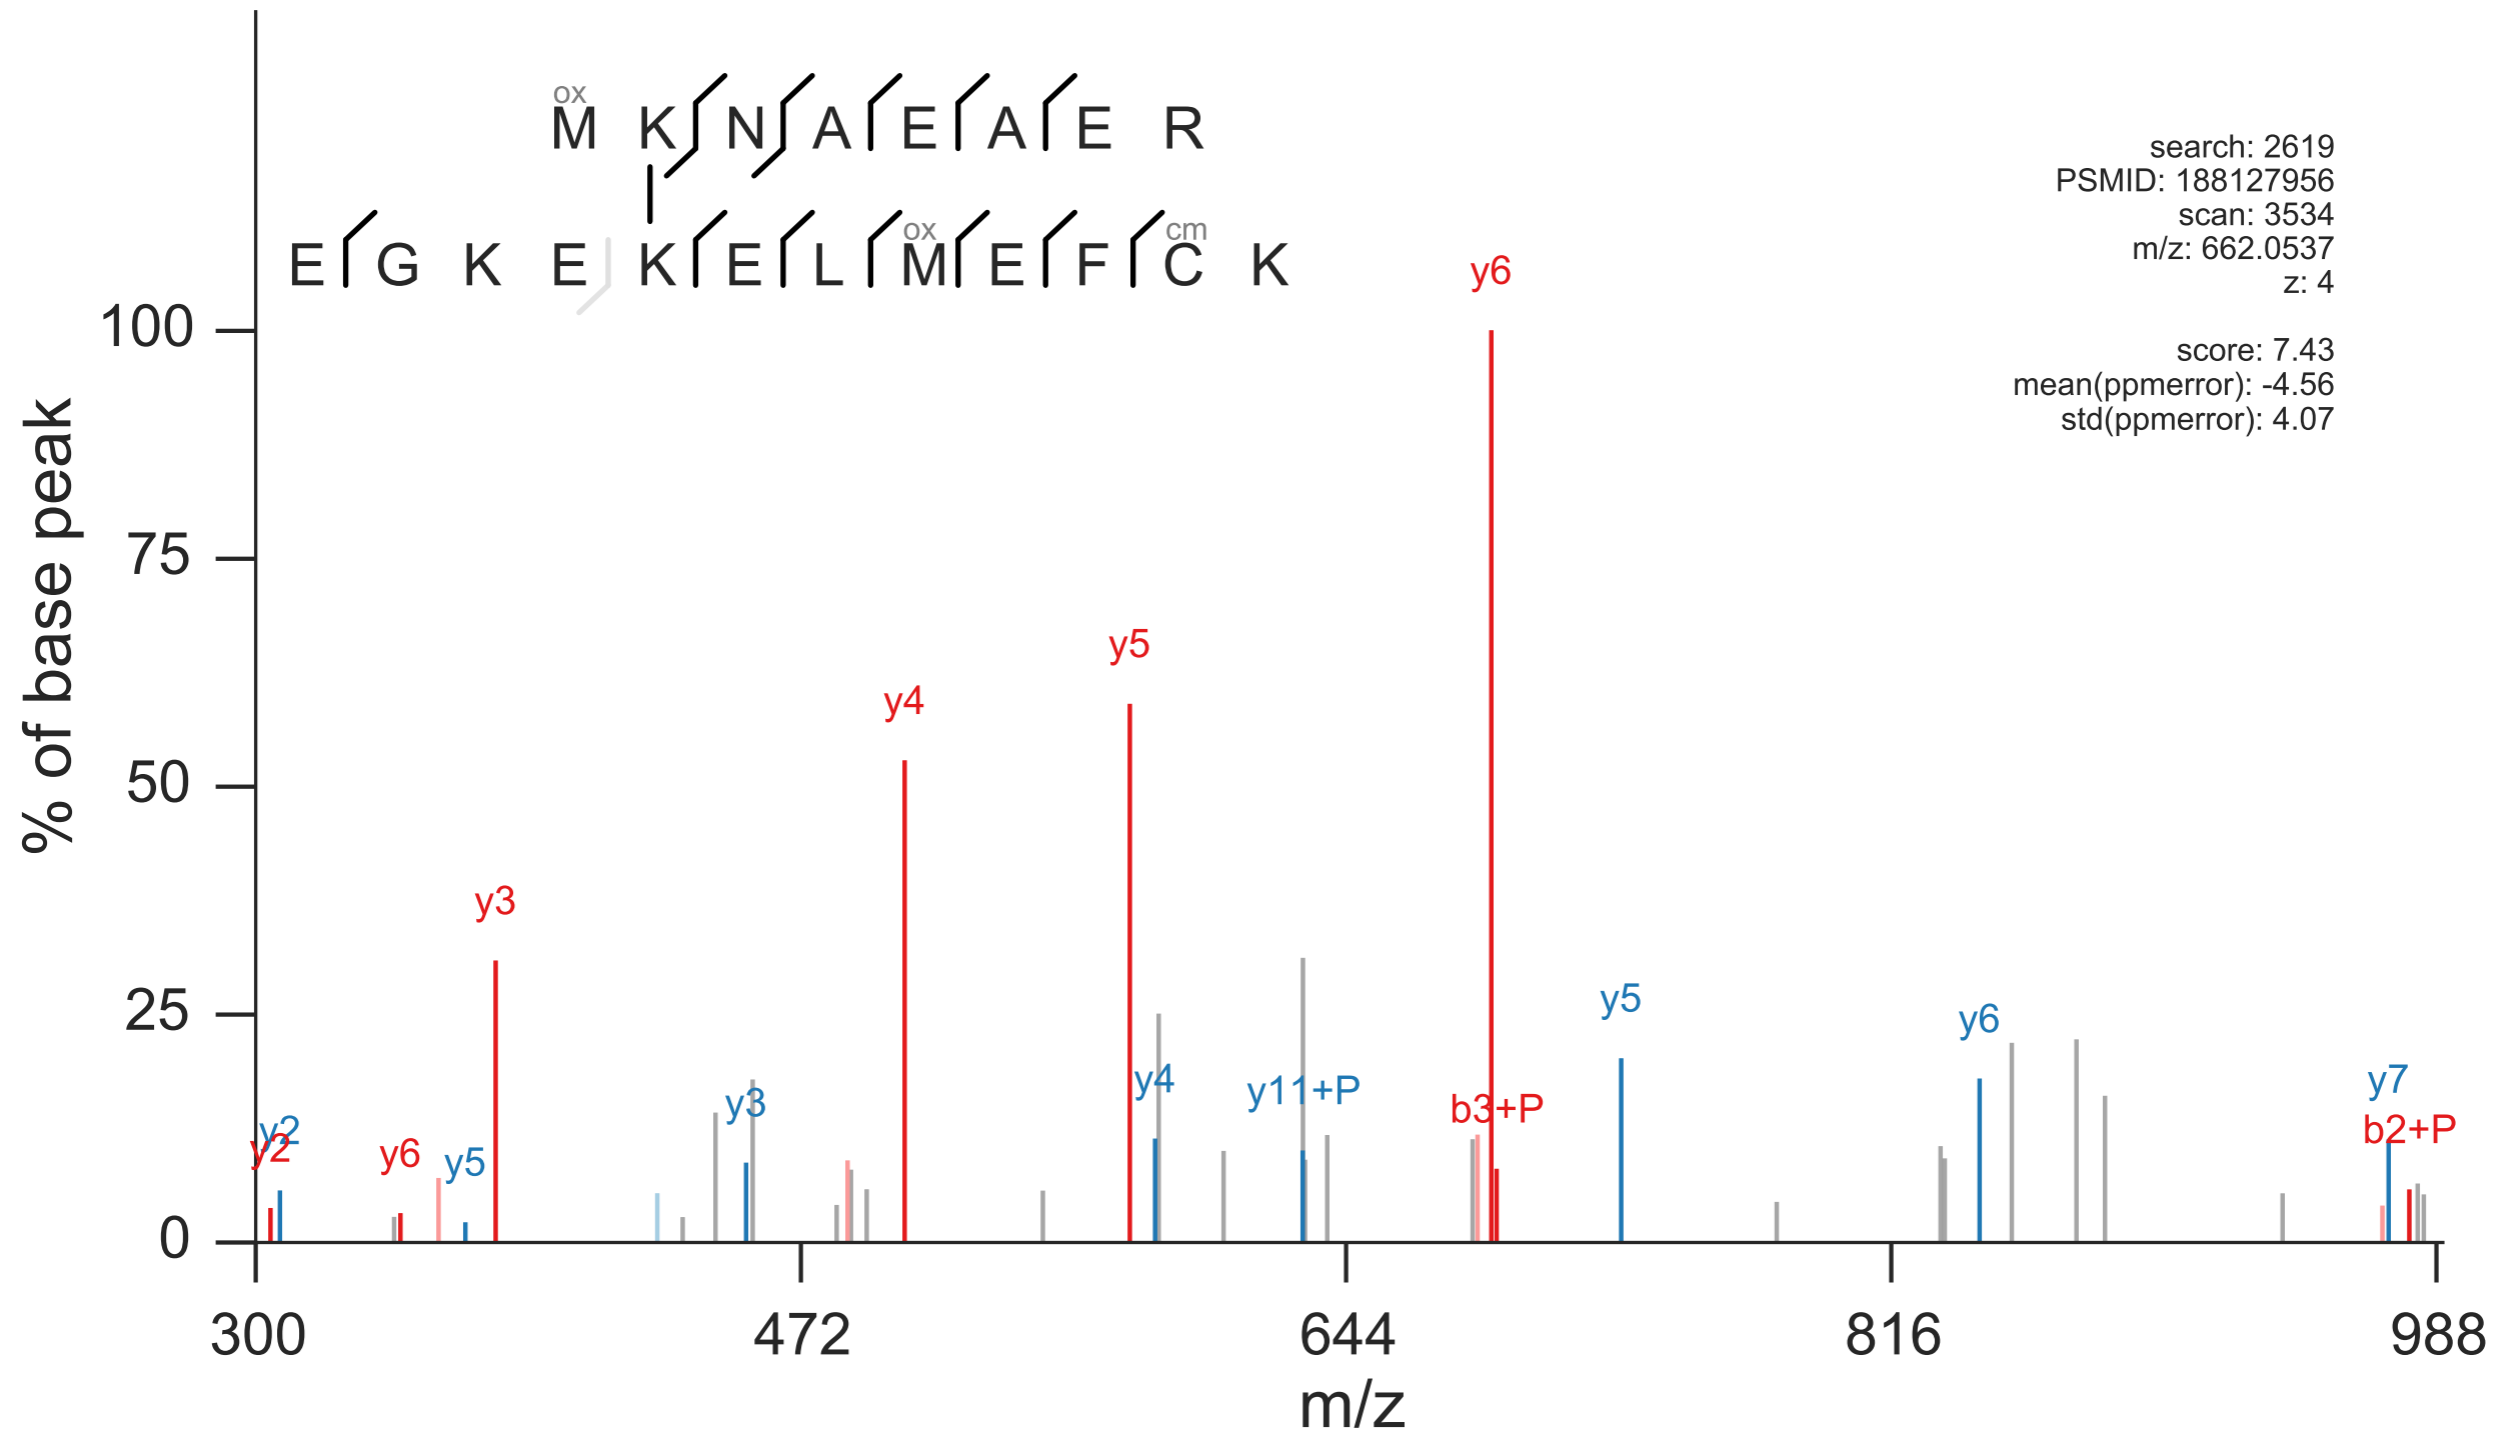

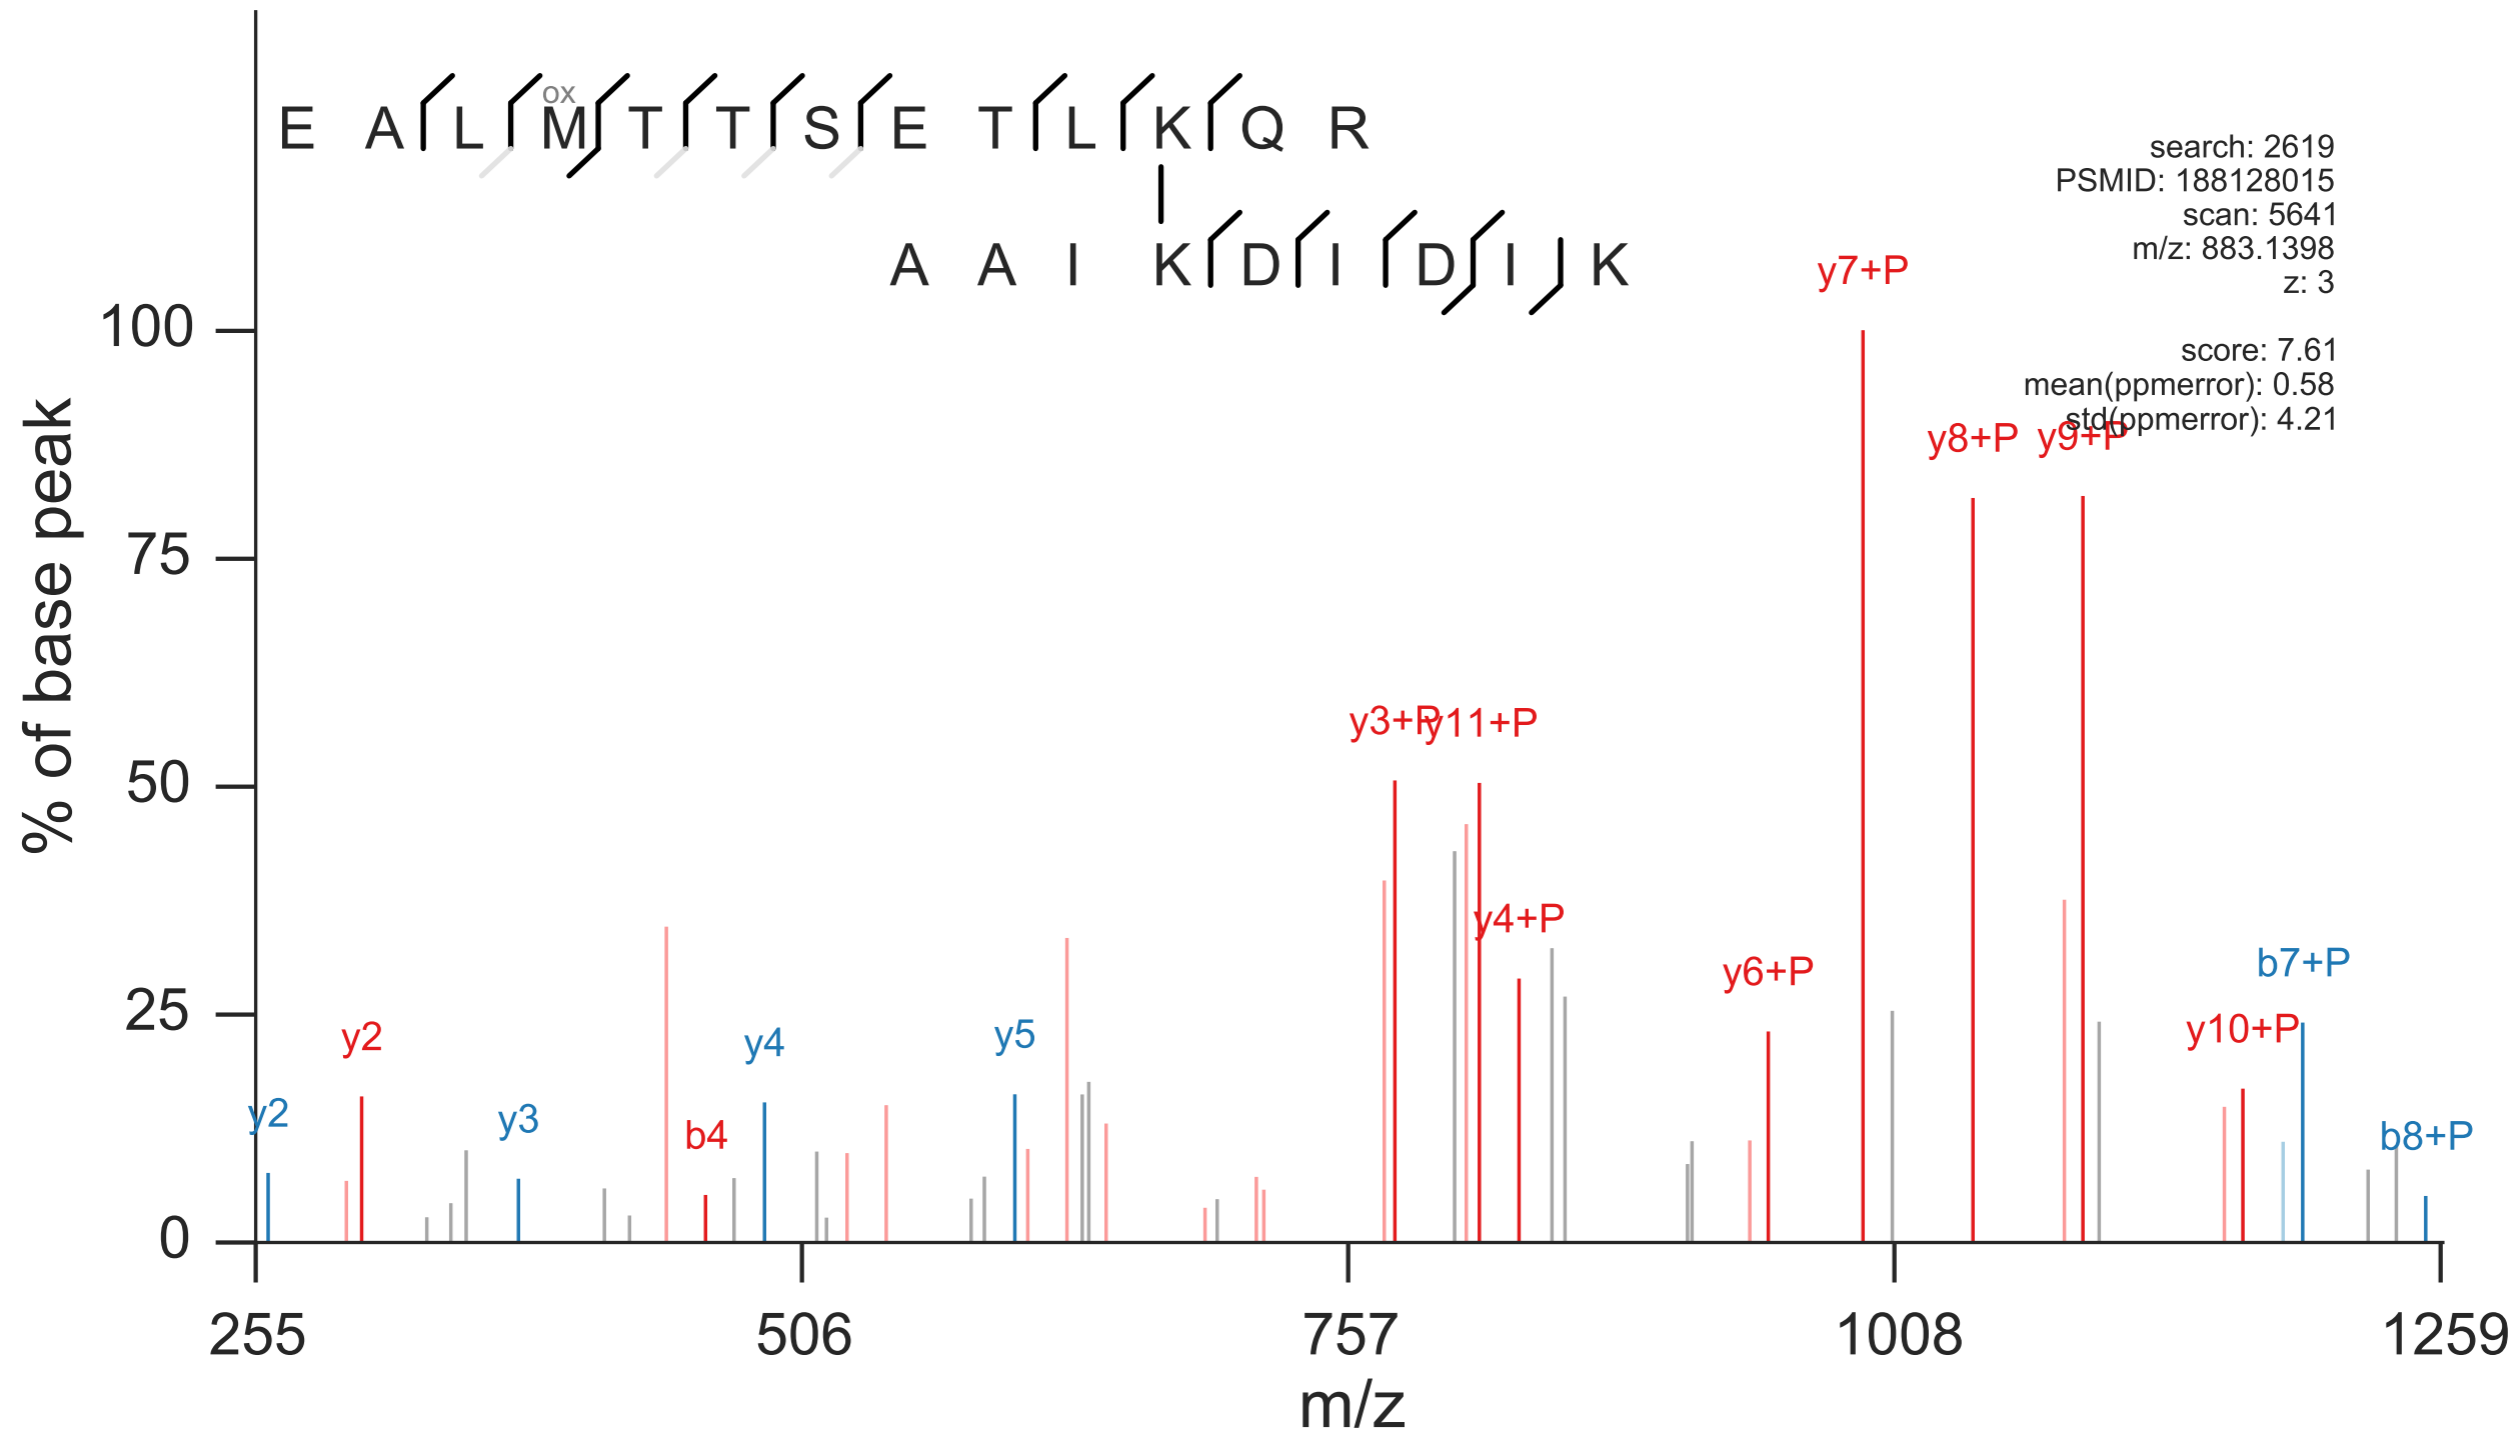

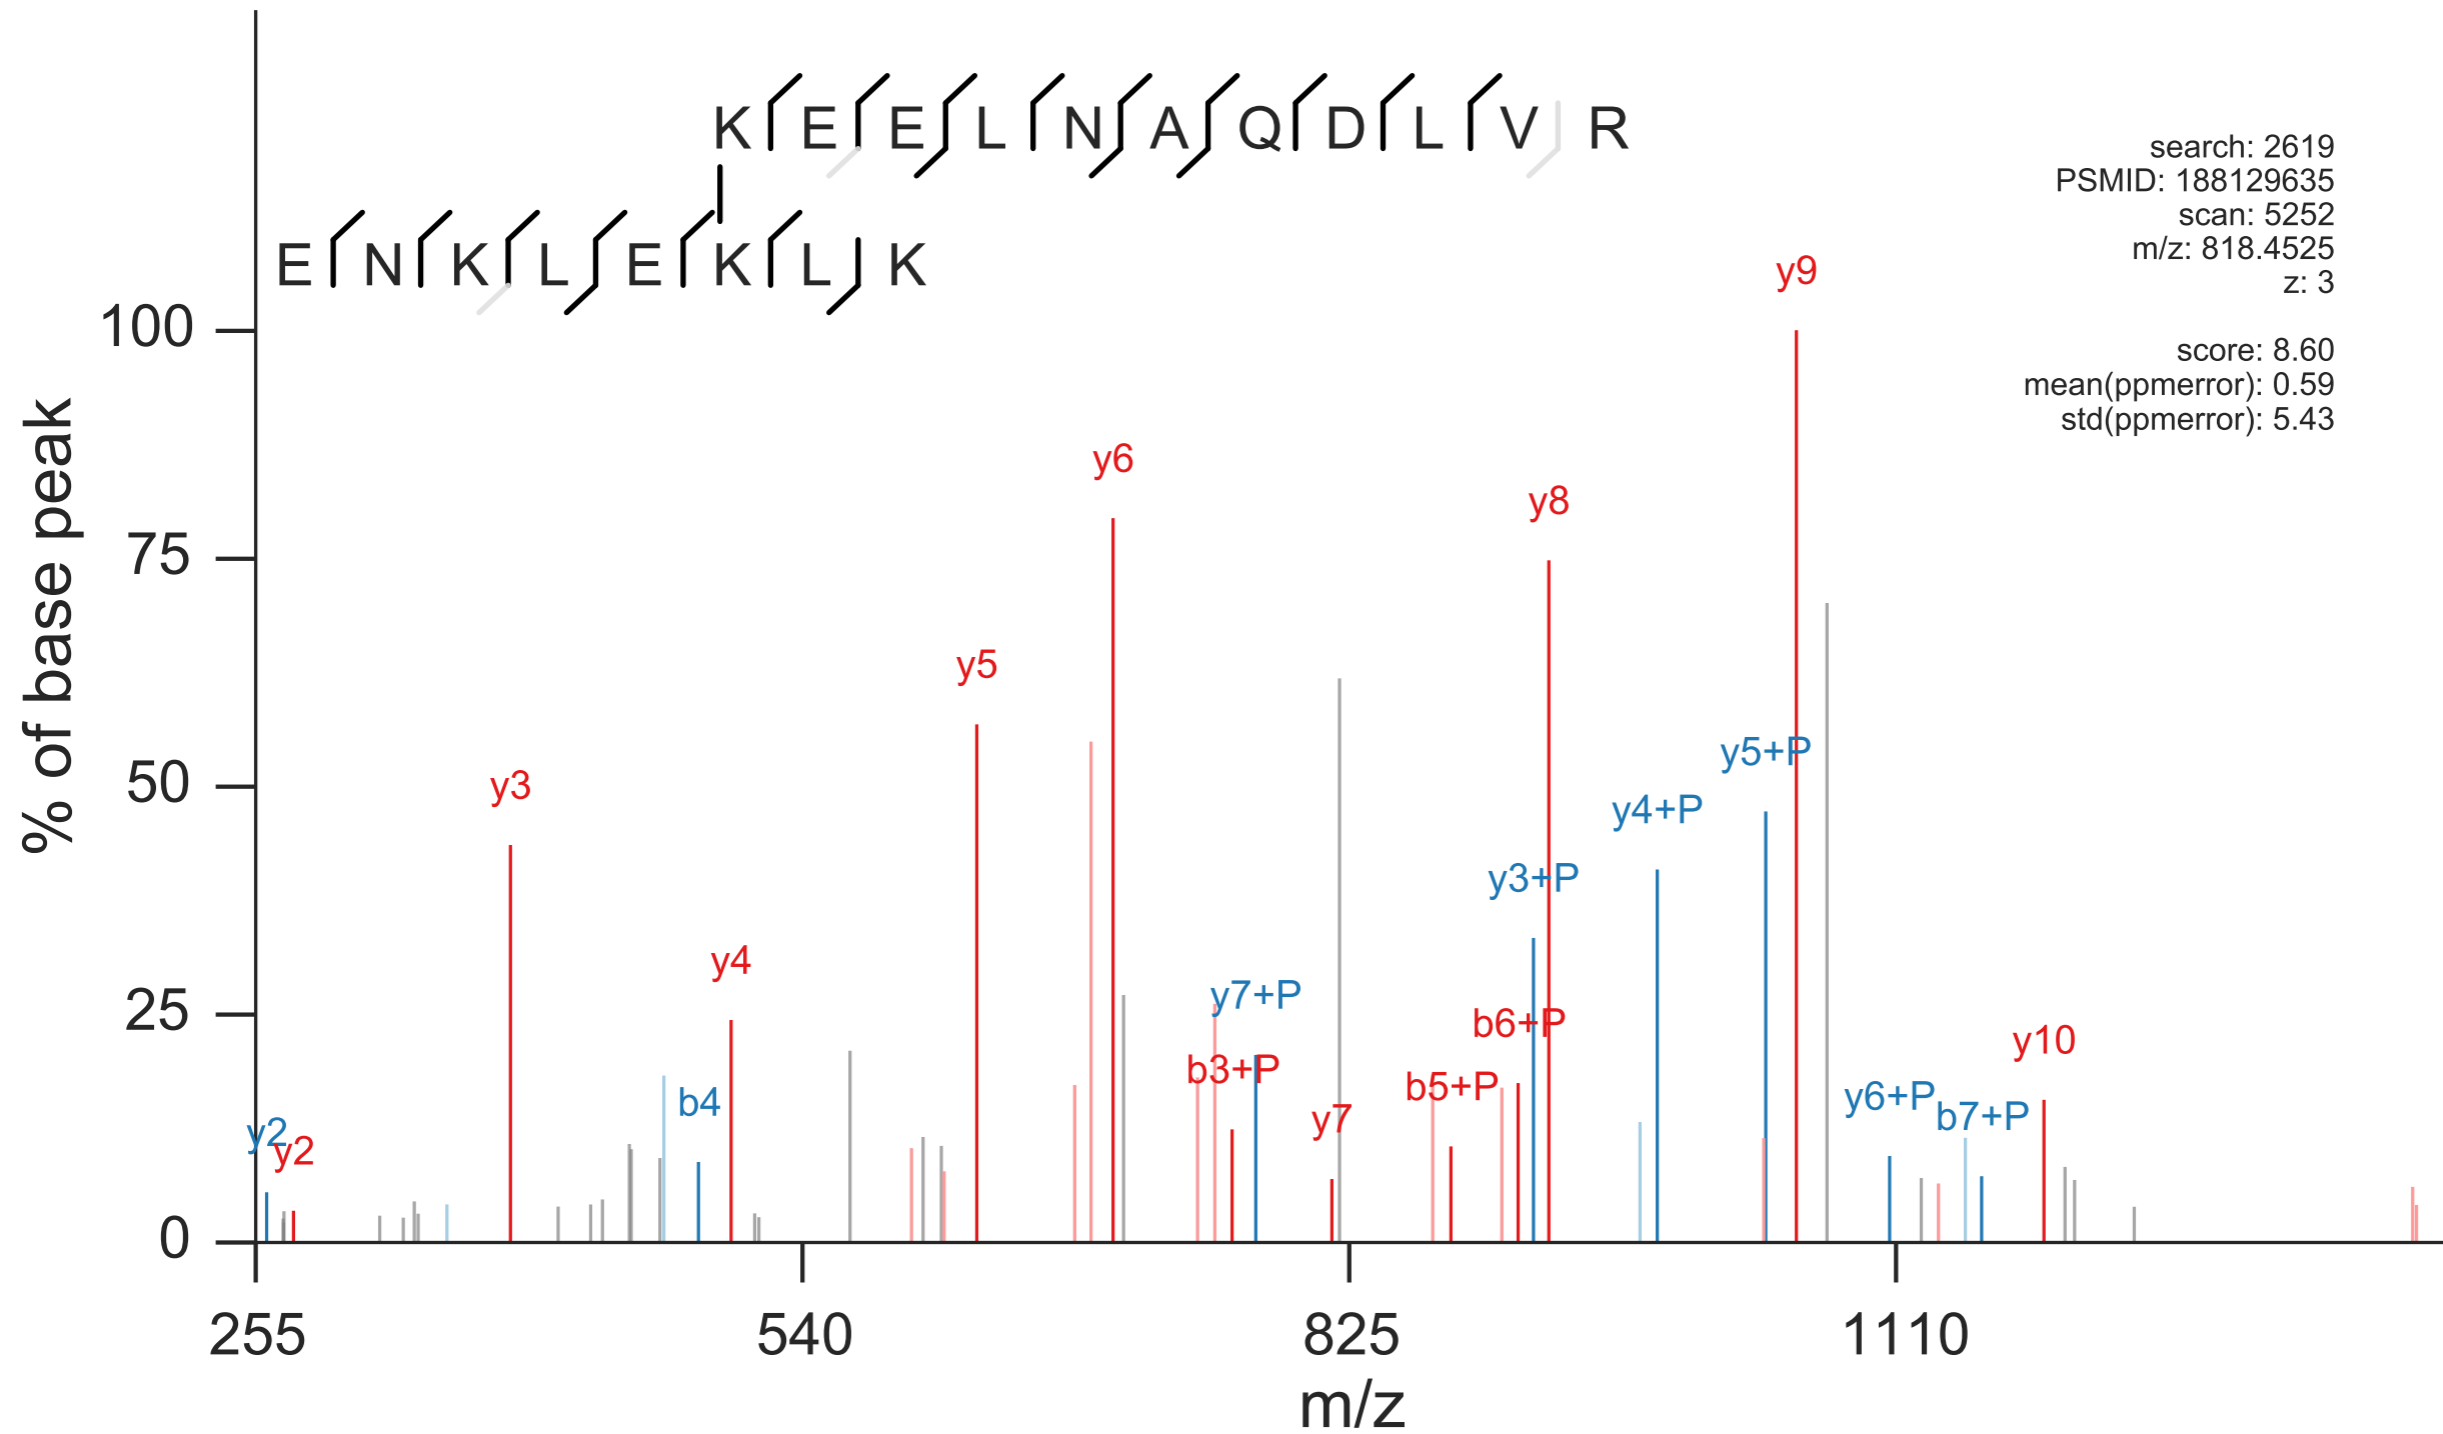

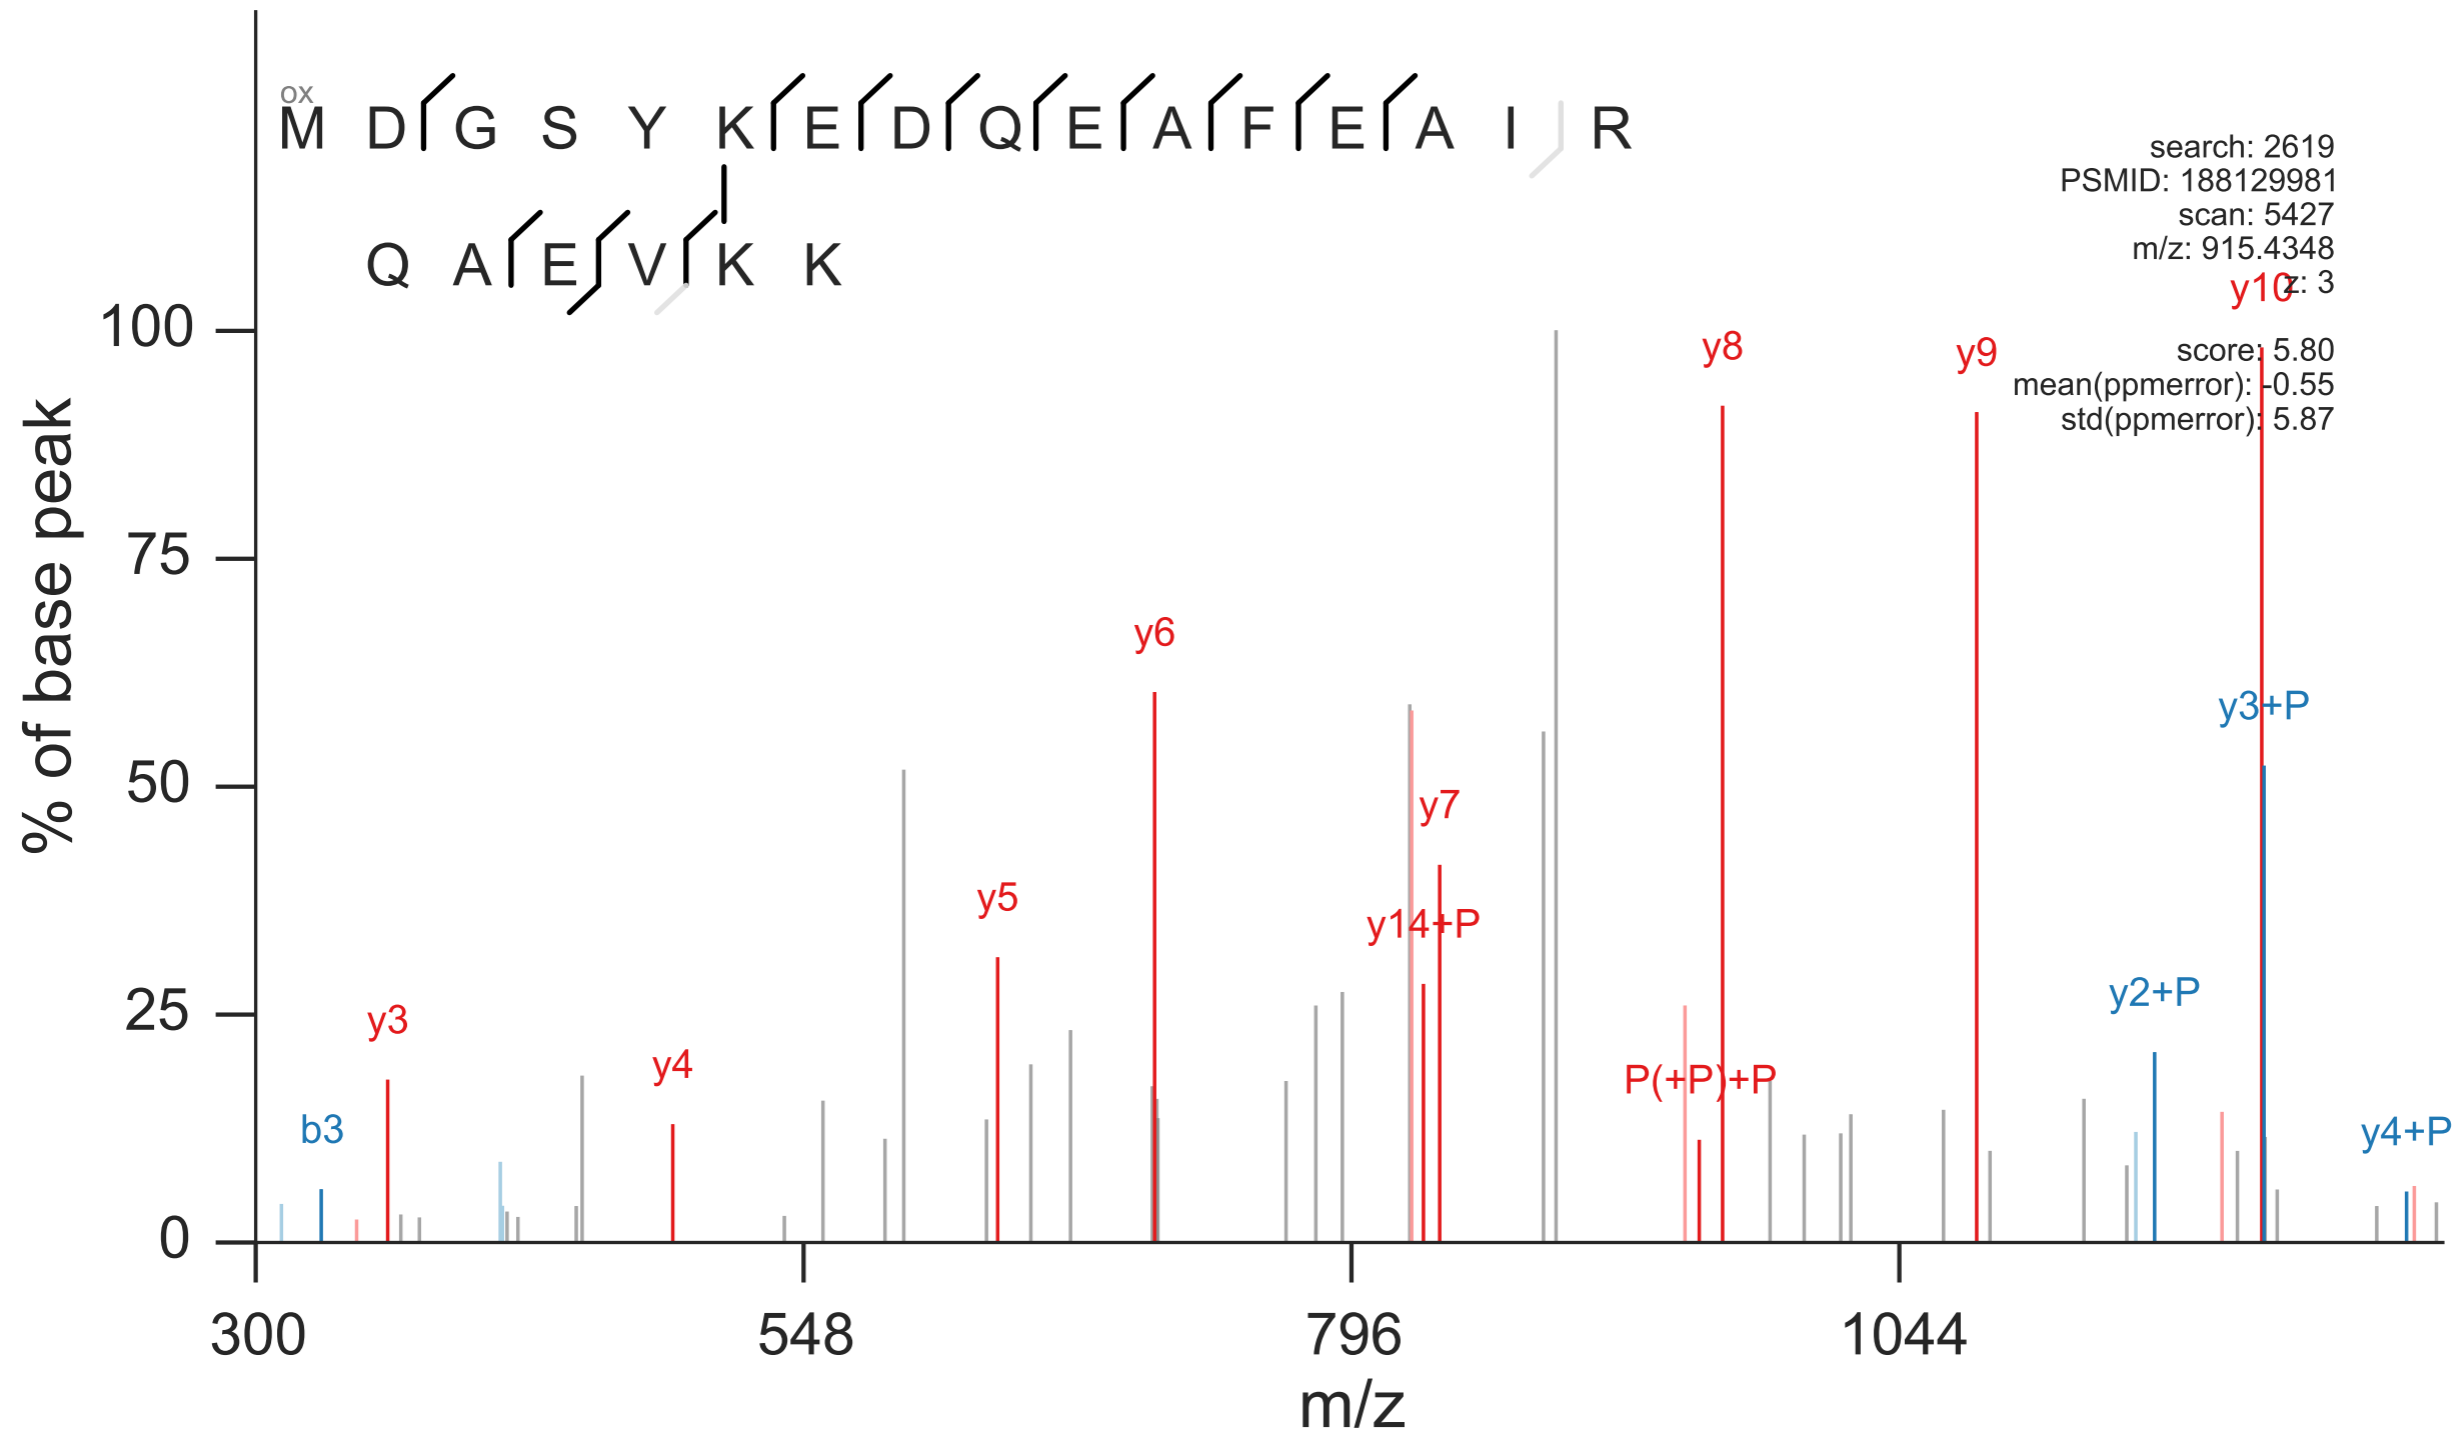

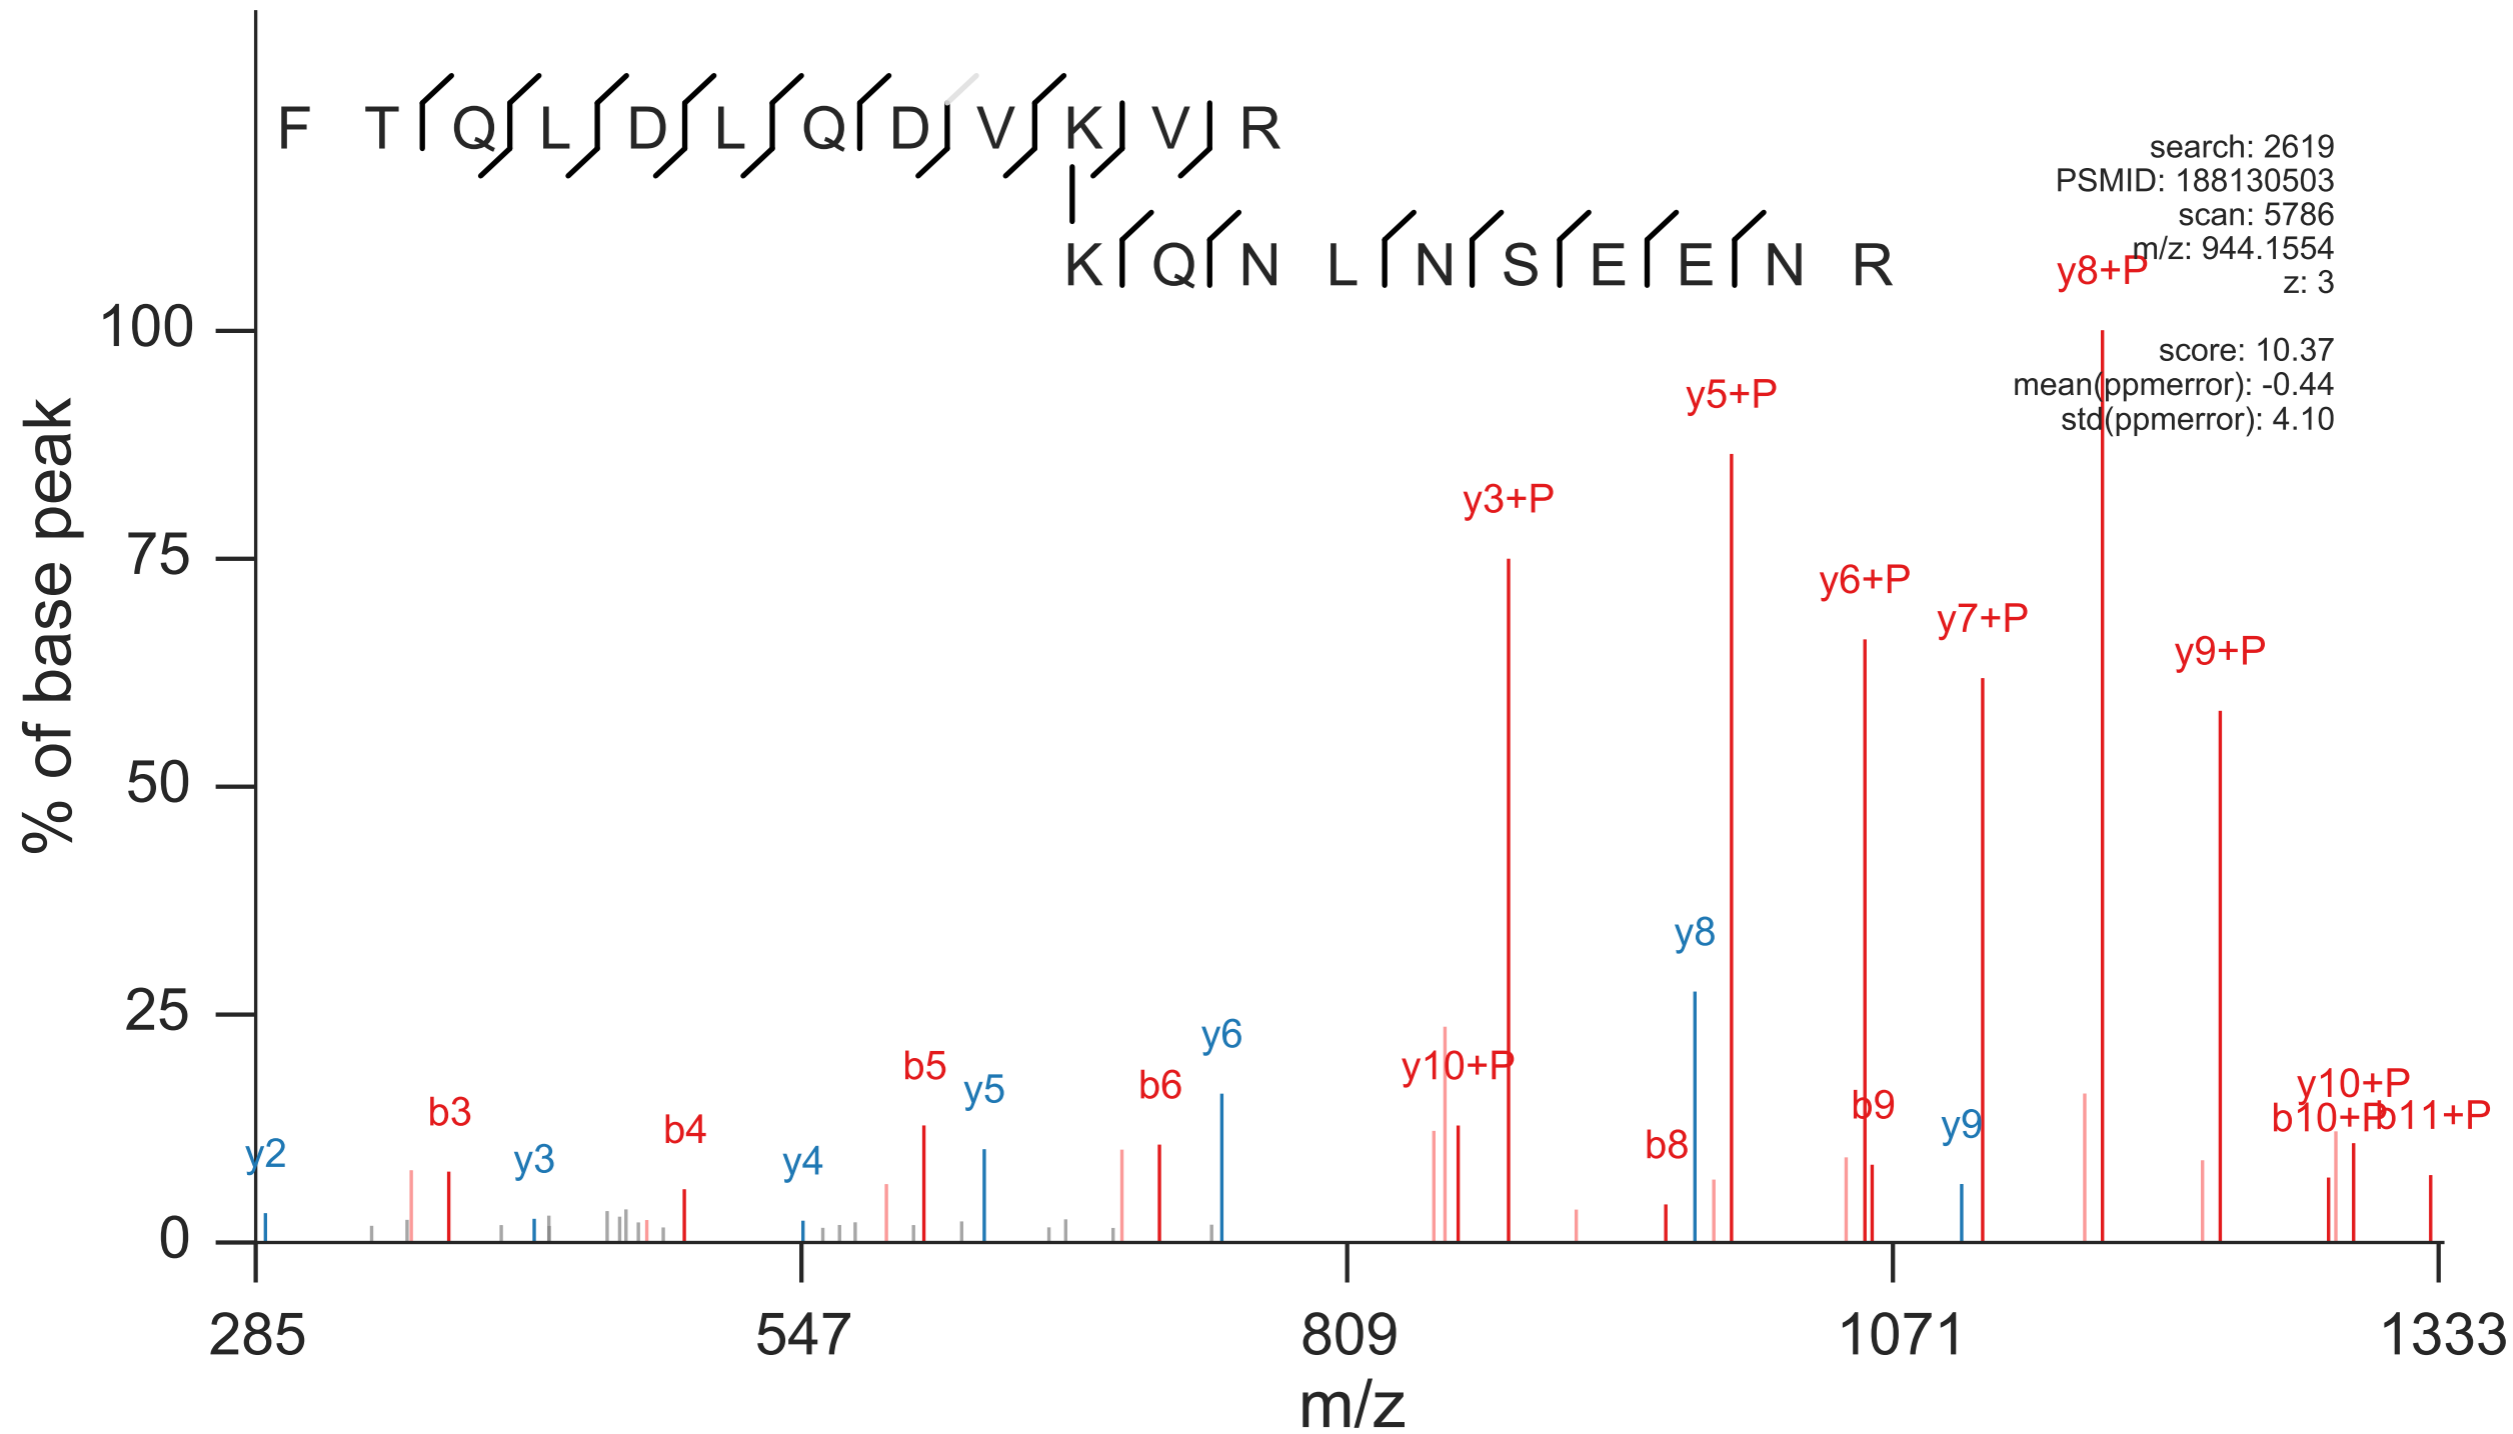

Supplement: 10.1074_M115.049296_mcp.M115.049296-3.pdf [file 10.1074_M115.049296_mcp.M115.049296-3.pdf]
